# Supplementary material for: The unintended consequences of inconsistent closure policies and mobility restrictions during epidemics
Source: PubMed Central journal article supplement (PMC11116187; doi:10.1186/s44263-023-00028-z), 2023-12-04

# **Additional File 2:**

## **The unintended consequences of inconsistent closure policies and mobility restrictions during epidemics**

**Benjamin M. Althouse<sup>1,2</sup>, Brendan Wallace<sup>3</sup>, B. K. M. Case<sup>4,5</sup>, Samuel V. Scarpino<sup>5,6,7,8,9</sup>, Antoine Allard<sup>5,10,11</sup>, Andrew M. Berdahl<sup>12</sup>, Easton R. White<sup>13,14</sup>, and Laurent Hébert-Dufresne<sup>4,5,10,\*</sup>**

<sup>1</sup>University of Washington, Seattle, WA 98105

<sup>2</sup>New Mexico State University, Las Cruces, NM 88003

<sup>3</sup>Department of Applied Mathematics, University of Washington, Seattle, WA 98195, USA

<sup>4</sup>Department of Computer Science, University of Vermont, Burlington, VT 05405, USA

<sup>5</sup>Vermont Complex Systems Center, University of Vermont, Burlington, VT 05405, USA

<sup>6</sup>Institute for Experiential AI, Northeastern University, Boston, Massachusetts, USA

<sup>7</sup>Department of Health Sciences, Northeastern University, Boston, MA, USA

<sup>8</sup>Khoury College of Computer Sciences, Northeastern University, Boston, MA, USA

<sup>9</sup>Santa Fe Institute, Santa Fe, NM, USA

<sup>10</sup>Département de physique, de génie physique et d'optique, Université Laval, Québec (Québec), Canada G1V 0A6

<sup>11</sup>Centre interdisciplinaire en modélisation mathématique, Université Laval, Québec (Québec), Canada G1V 0A6

<sup>12</sup>School of Aquatic & Fishery Sciences, University of Washington, Seattle, WA 98195, USA

<sup>13</sup>Department of Biological Sciences, University of New Hampshire, Durham, NH, 03824, USA

<sup>14</sup>Gund Institute for Environment, University of Vermont, Burlington, VT 05405, USA

\*laurent.hebert-dufresne@uvm.edu

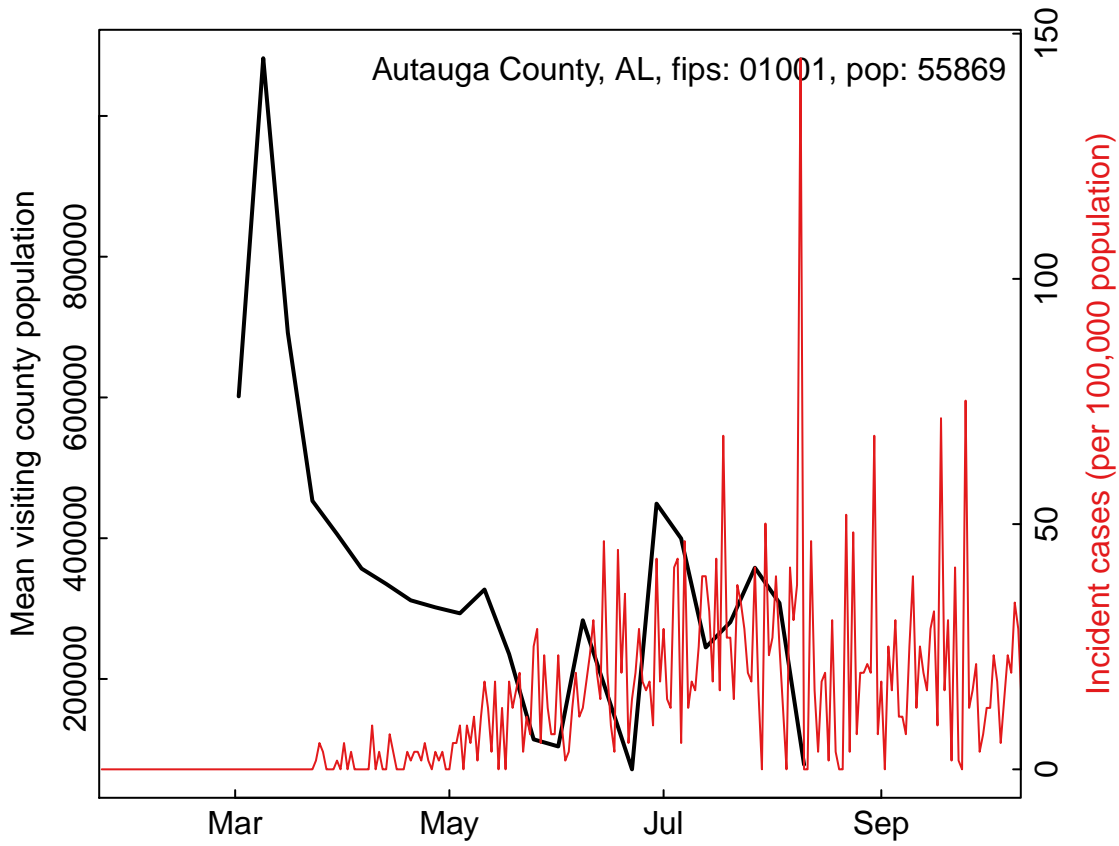

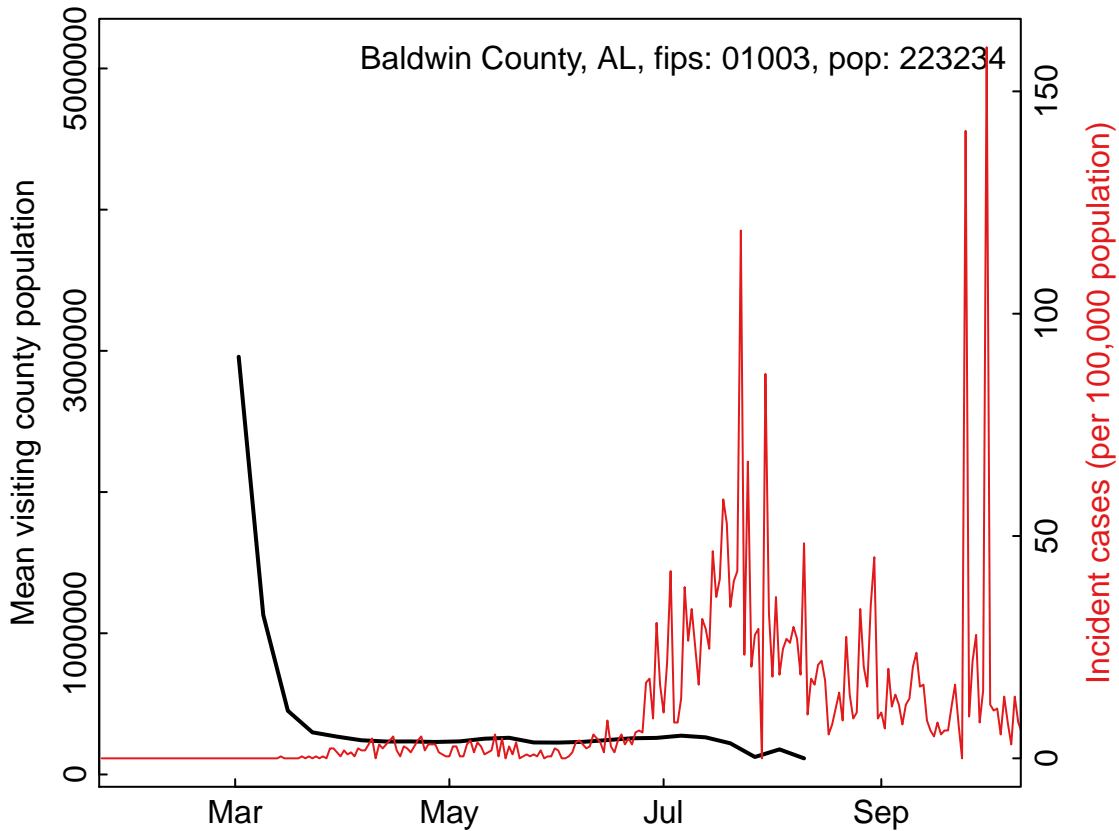

Barbour County, AL, fips: 01005, pop: 24686

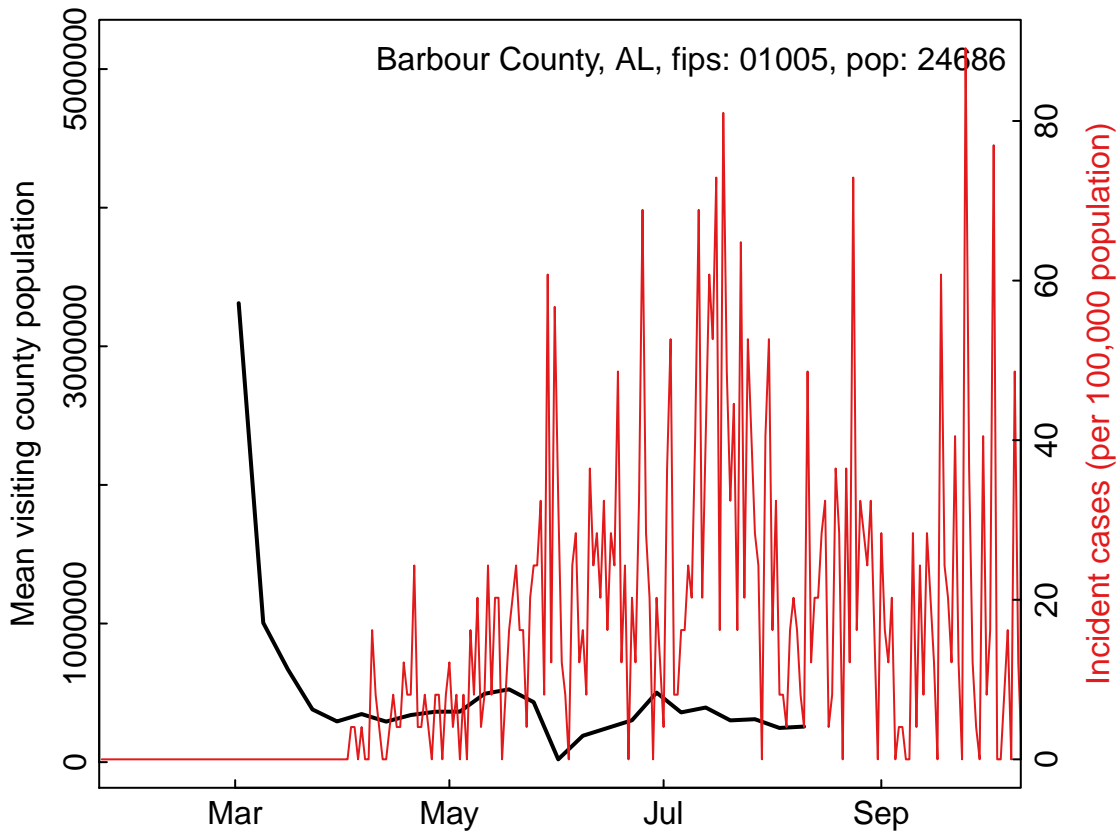

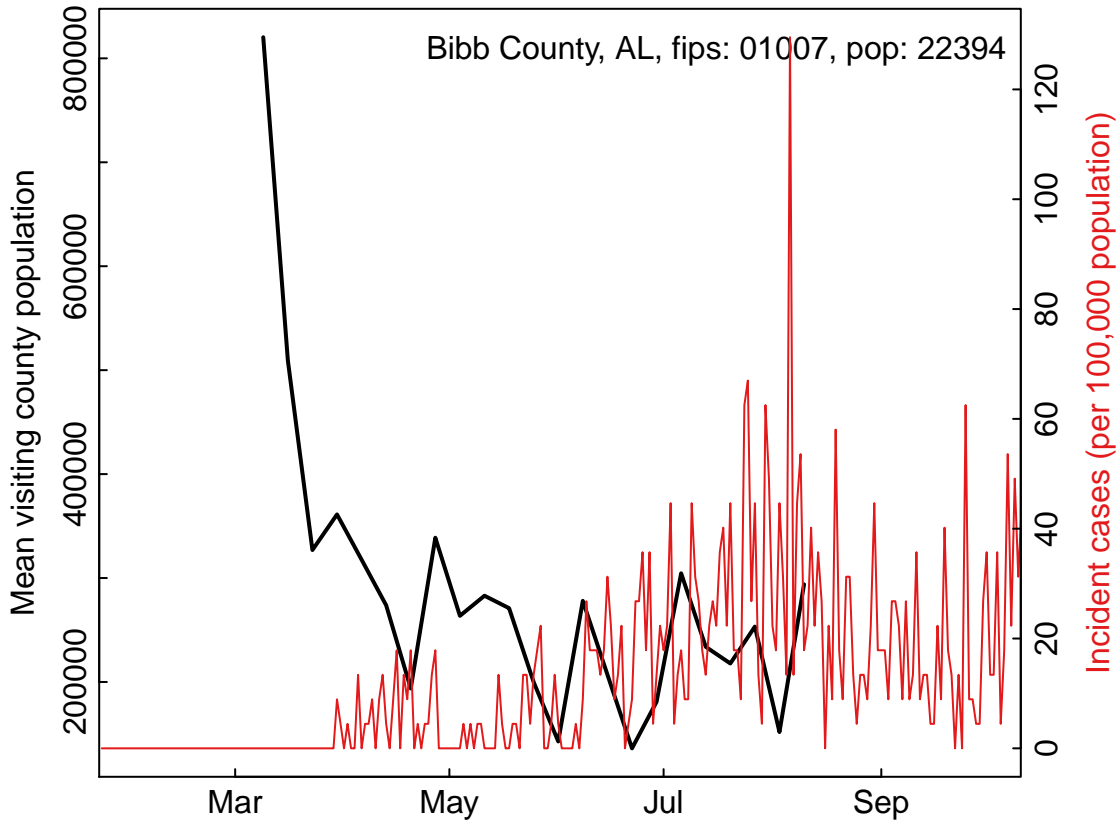

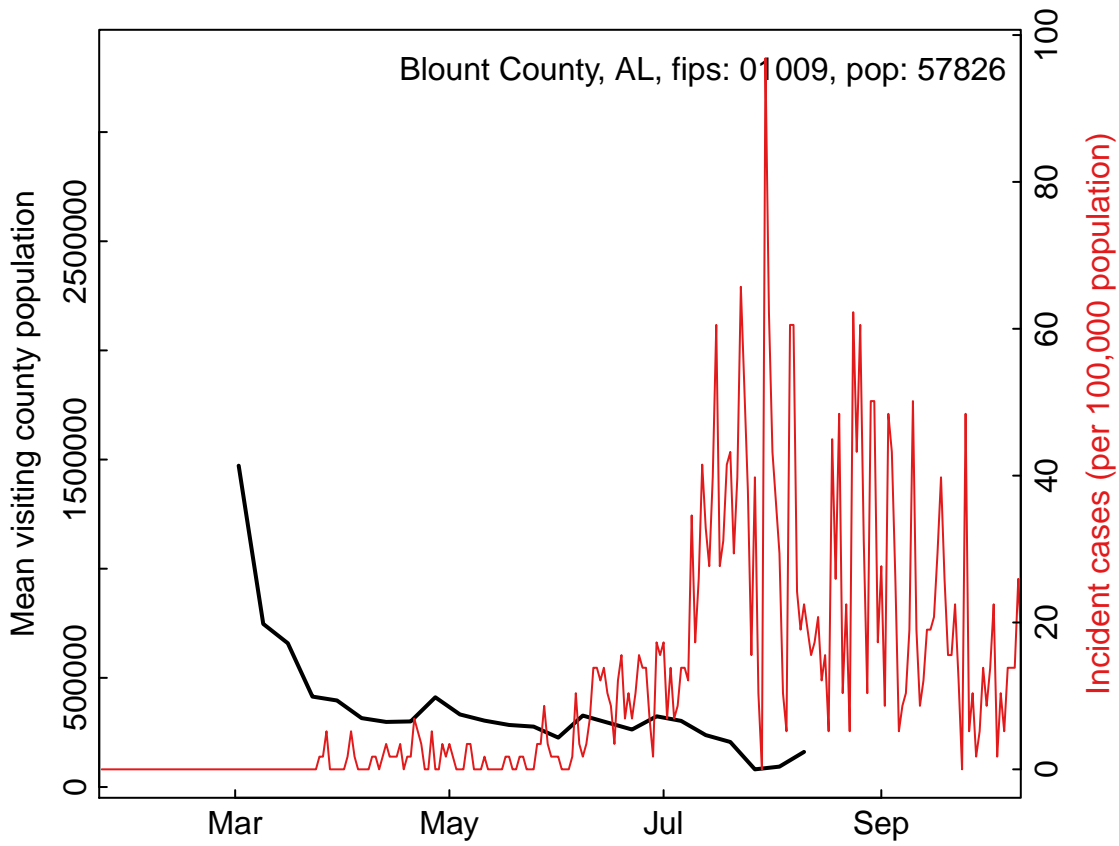

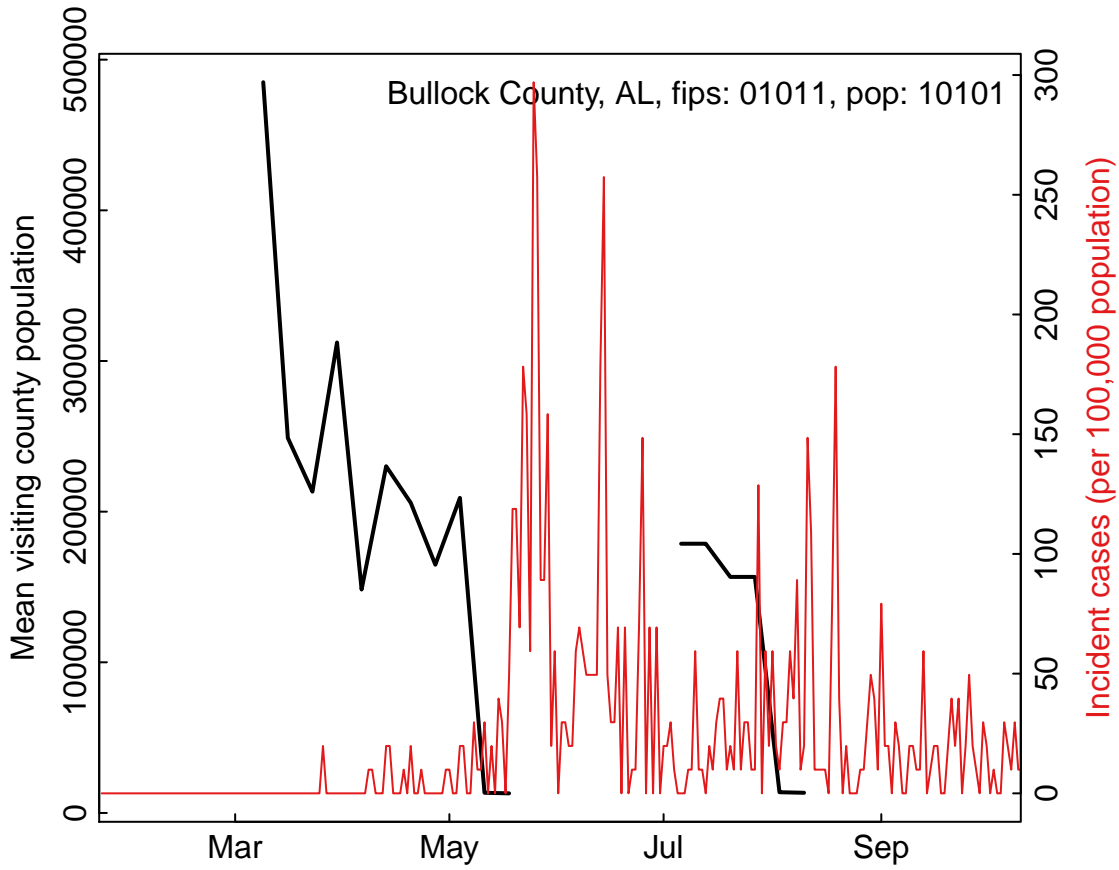

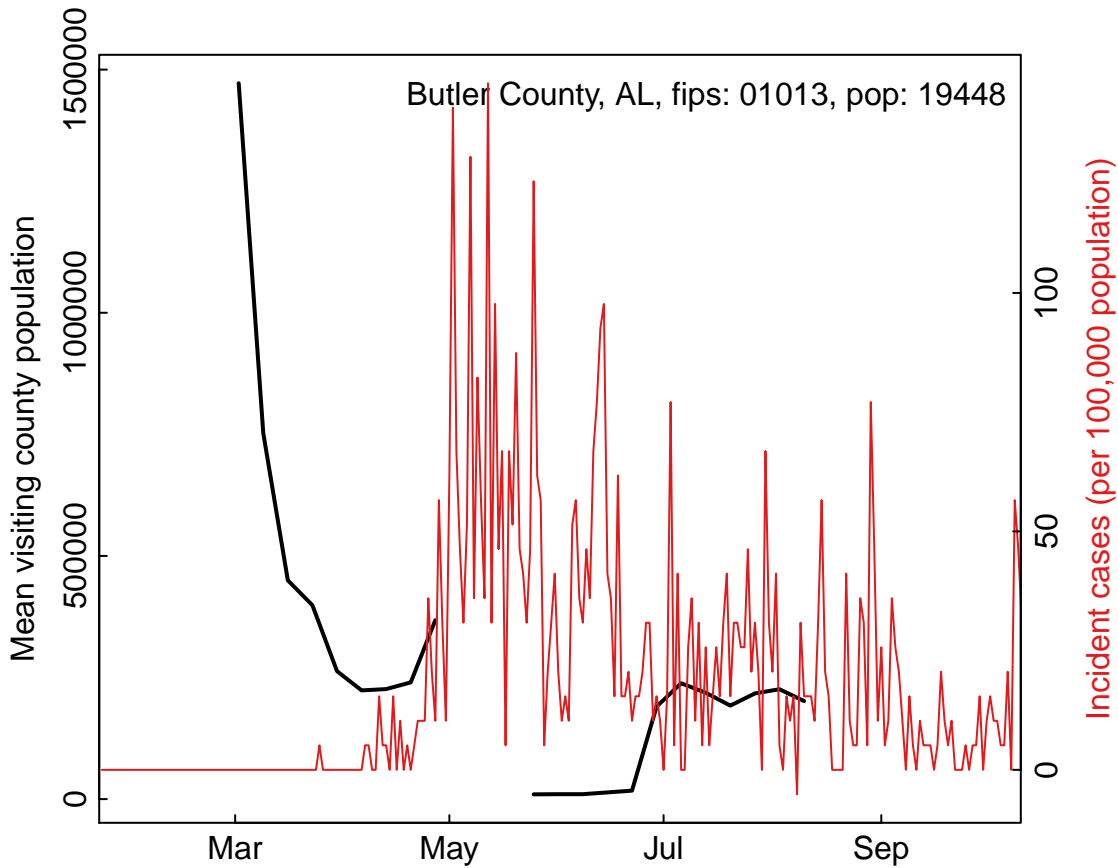



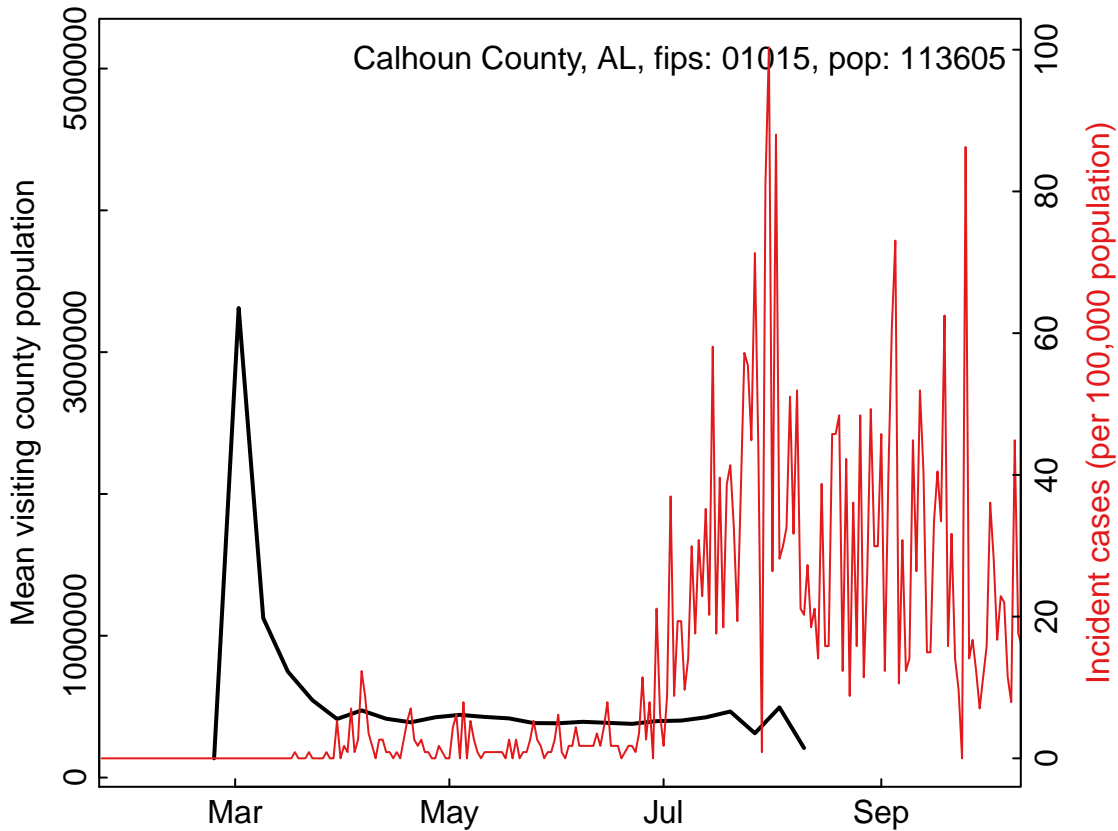

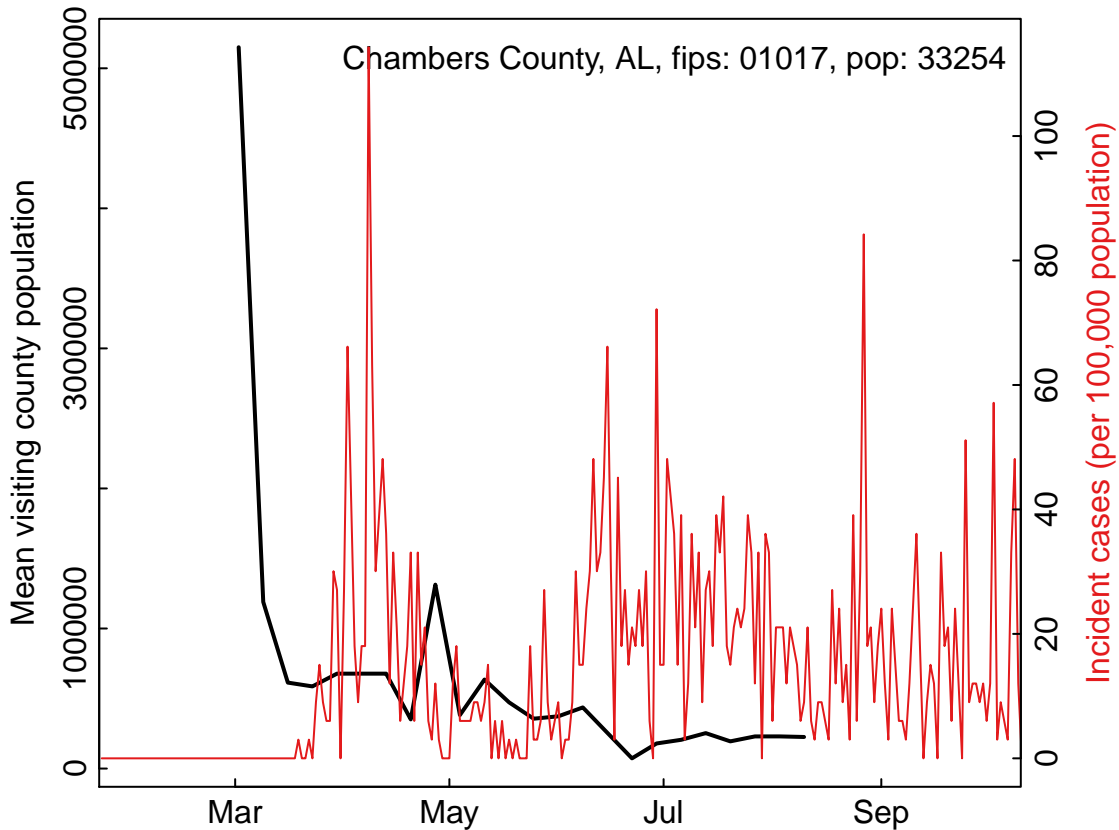

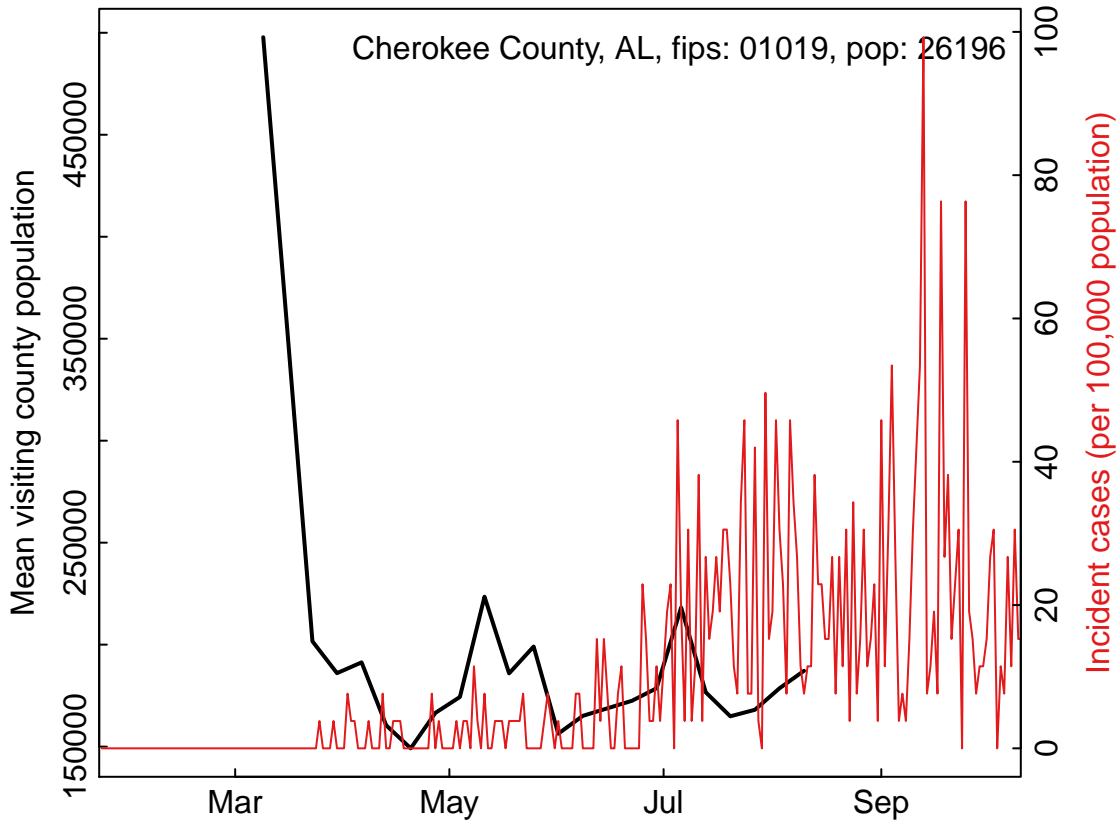

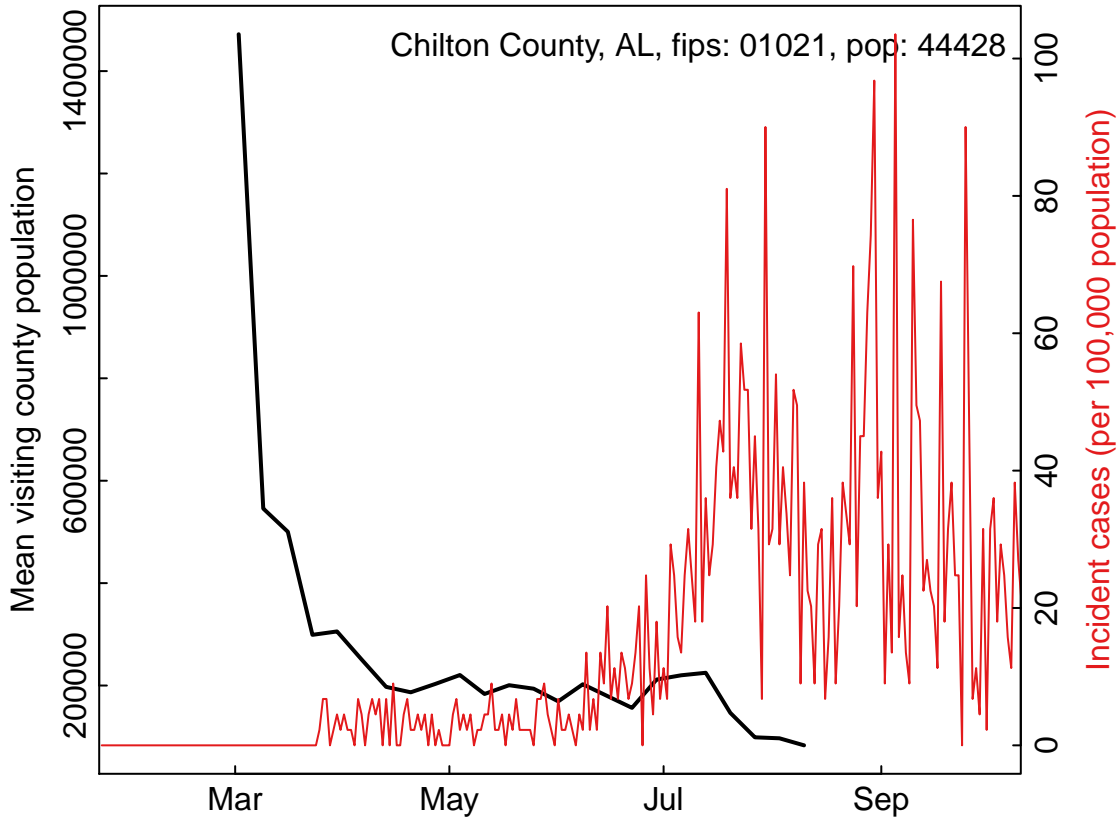

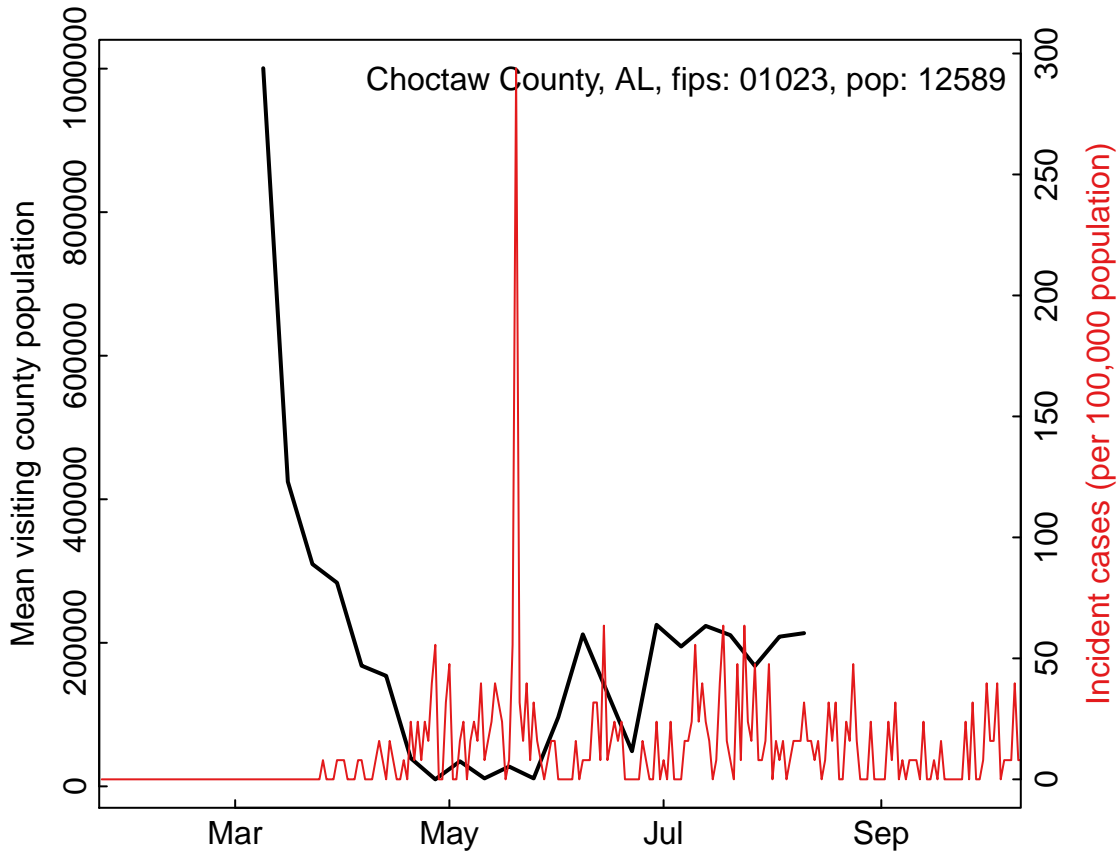

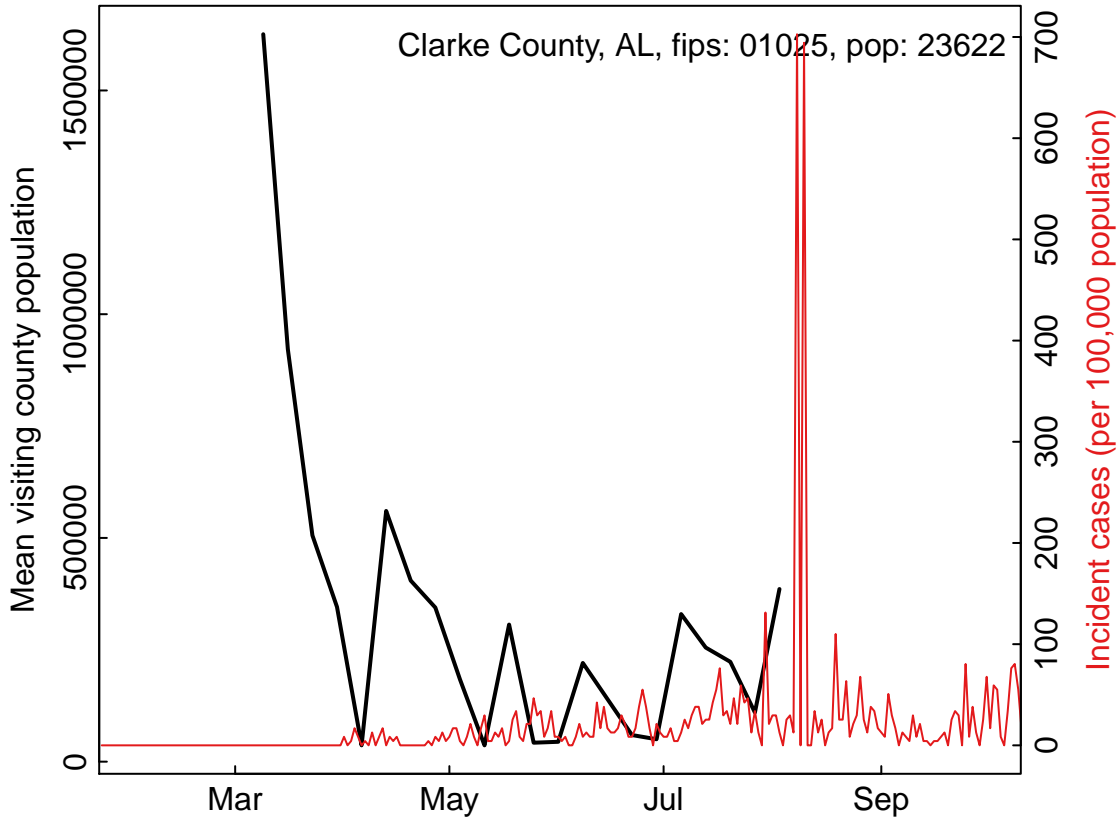

Clay County, AL, fips: 01027, pop: 13235

Mean visiting county population

Incident cases (per 100,000 population)

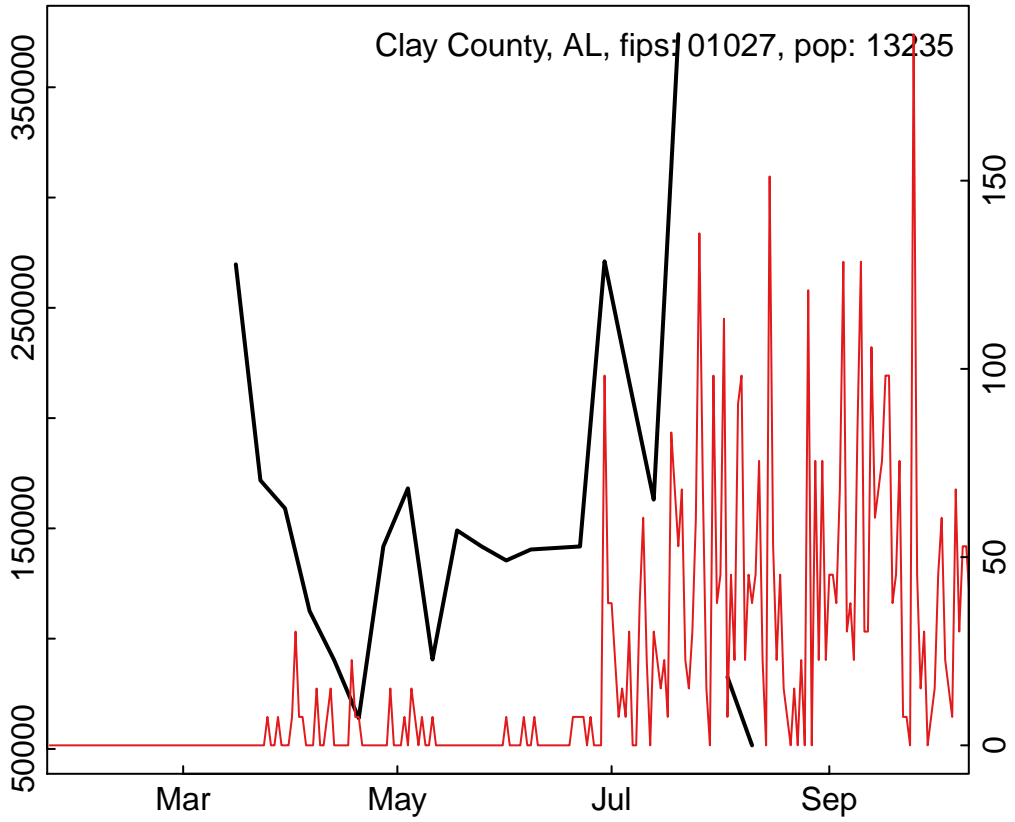

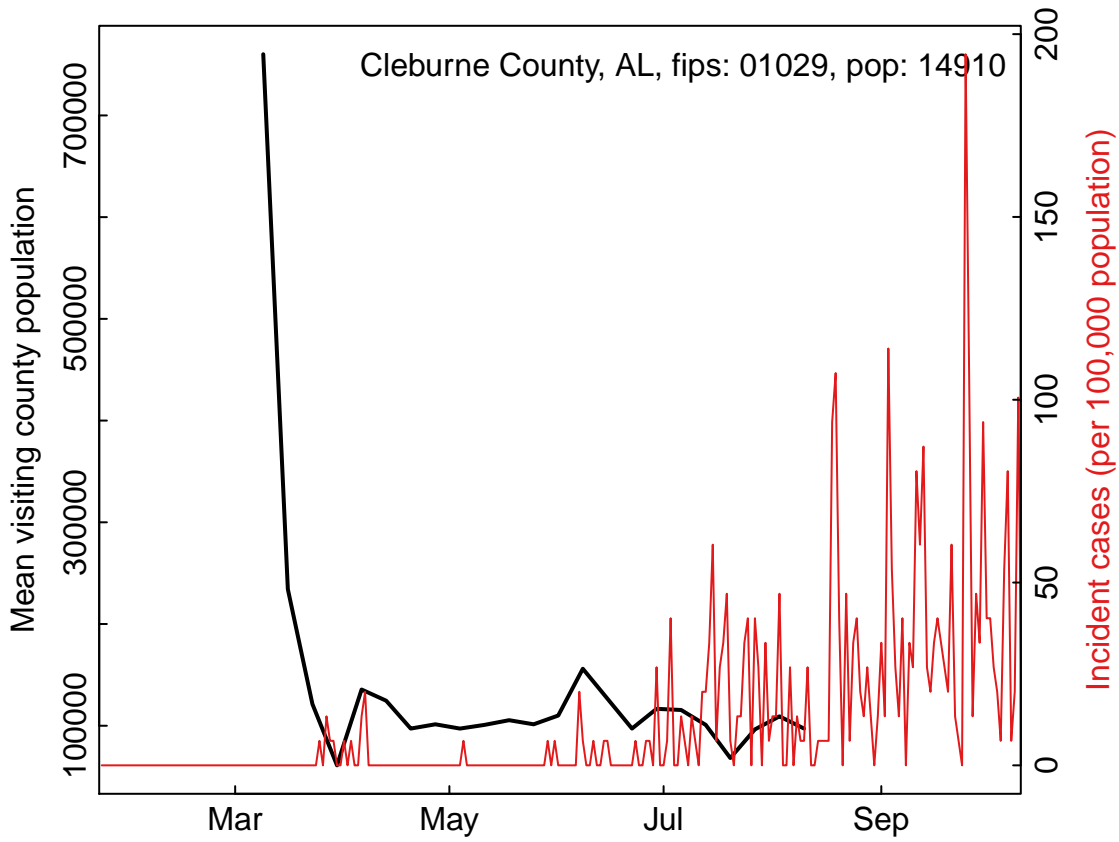



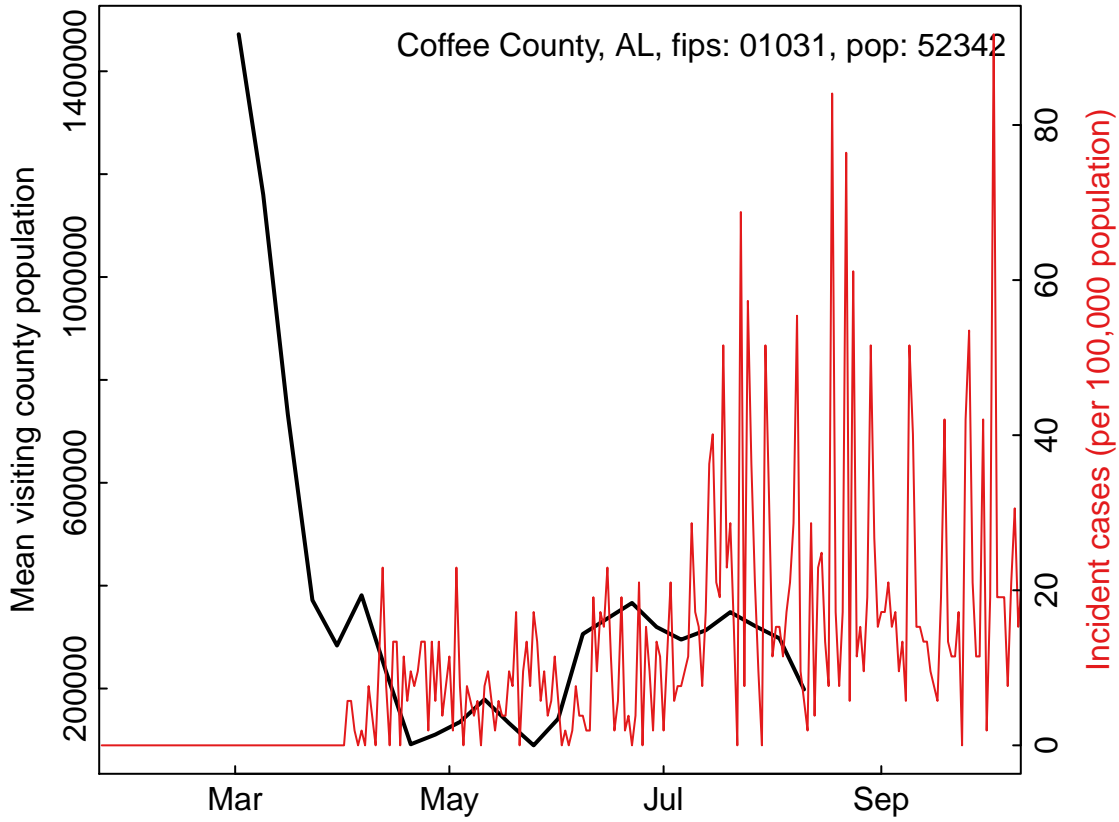

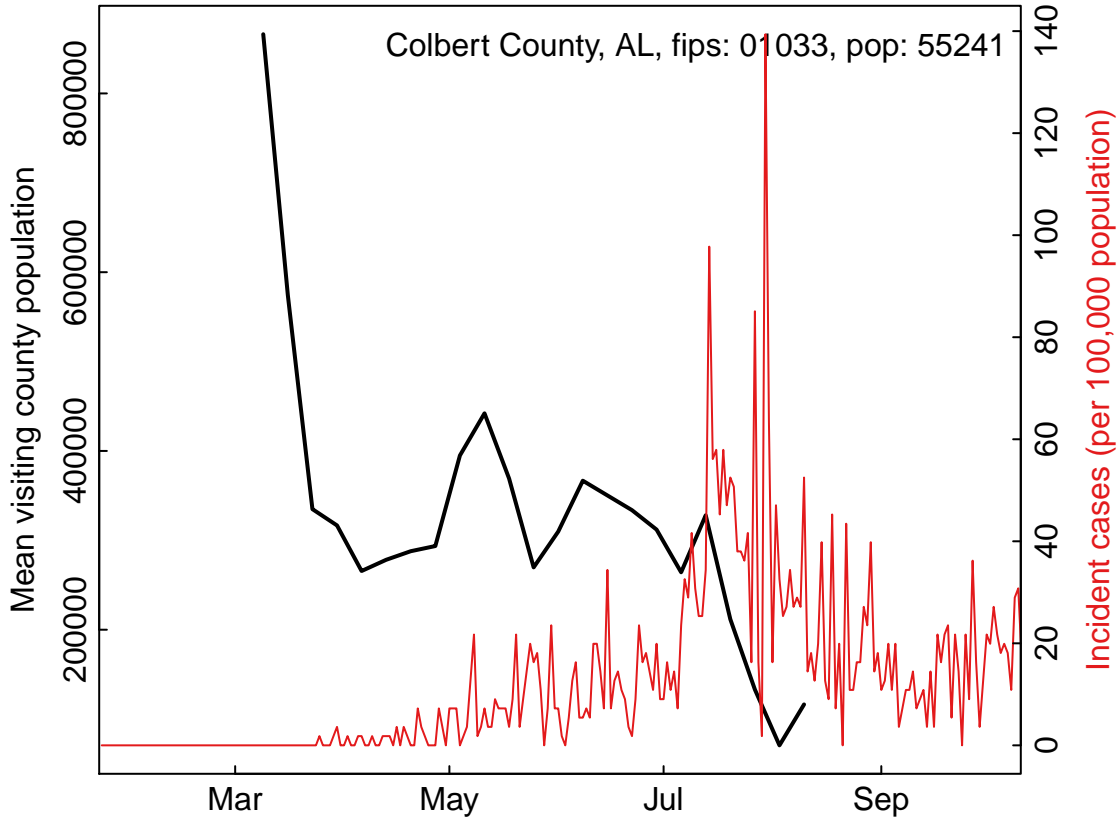

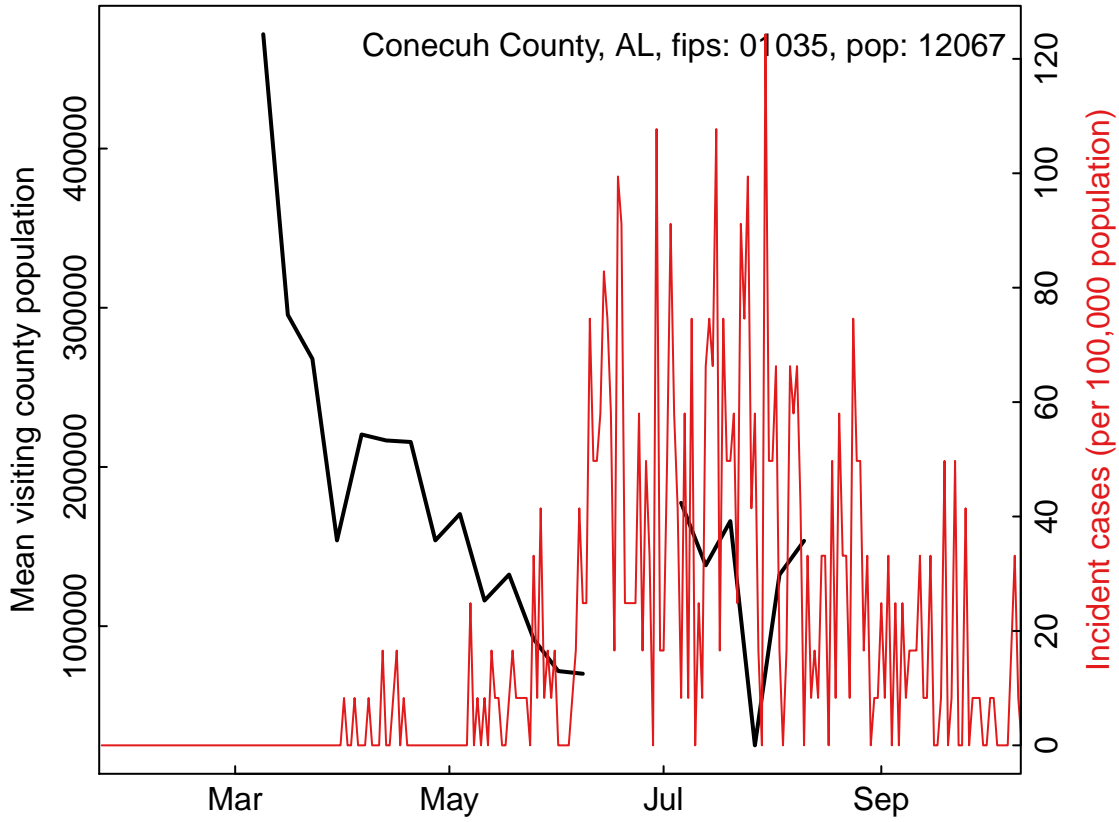

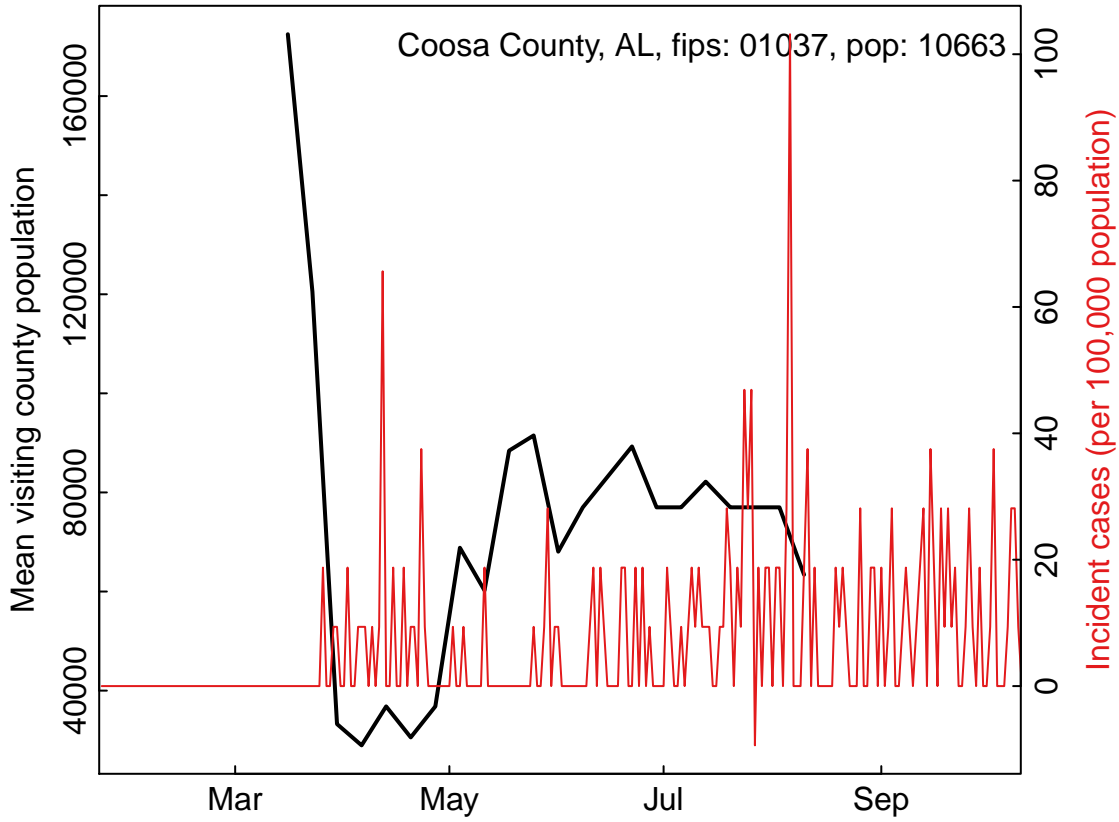

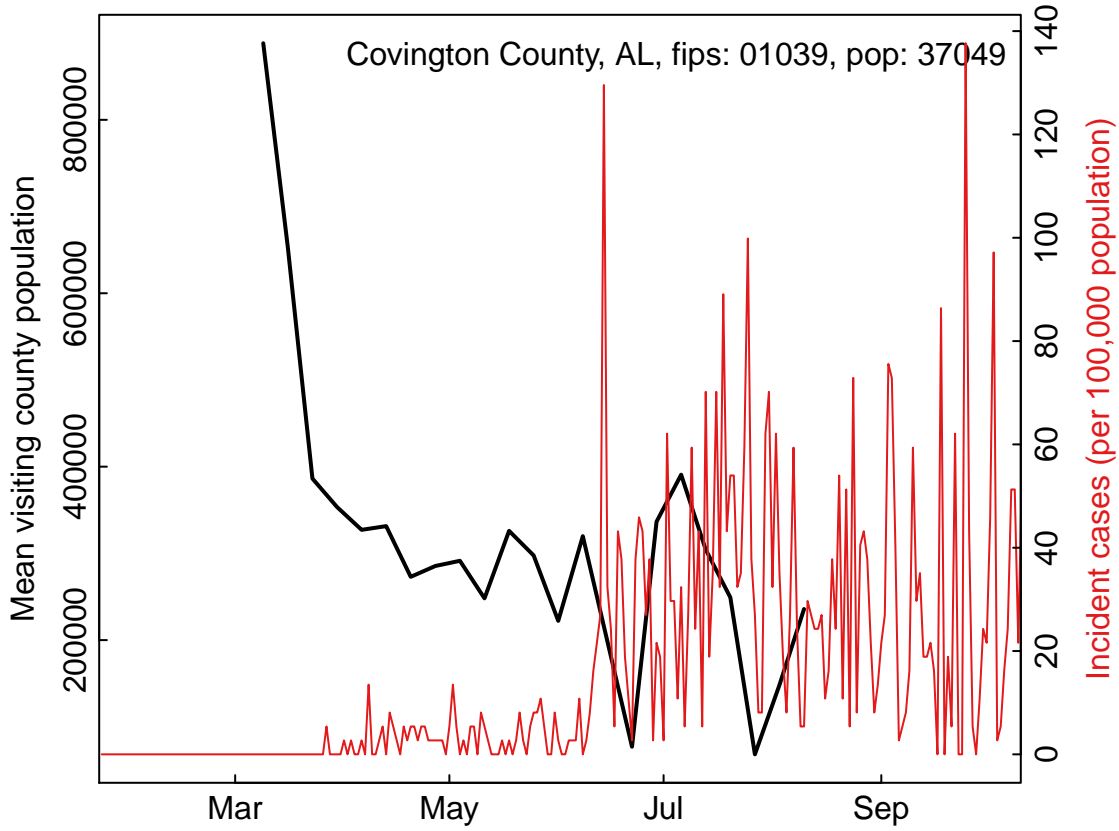

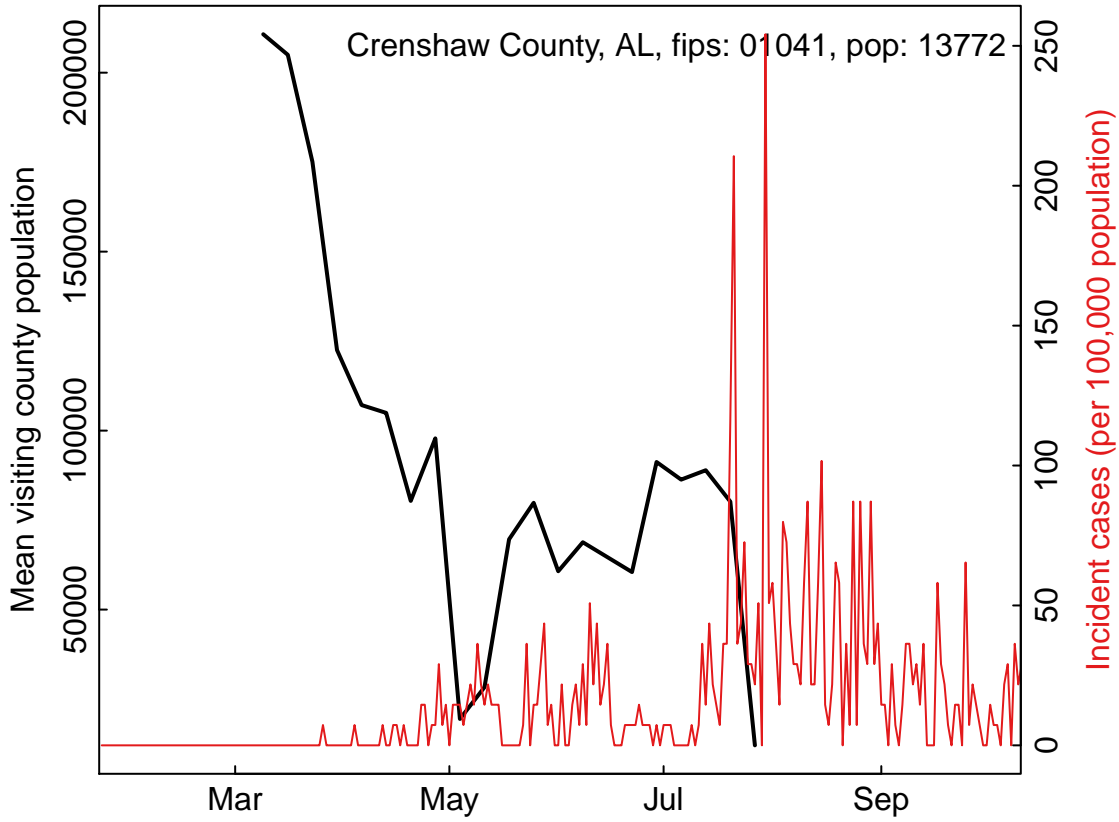

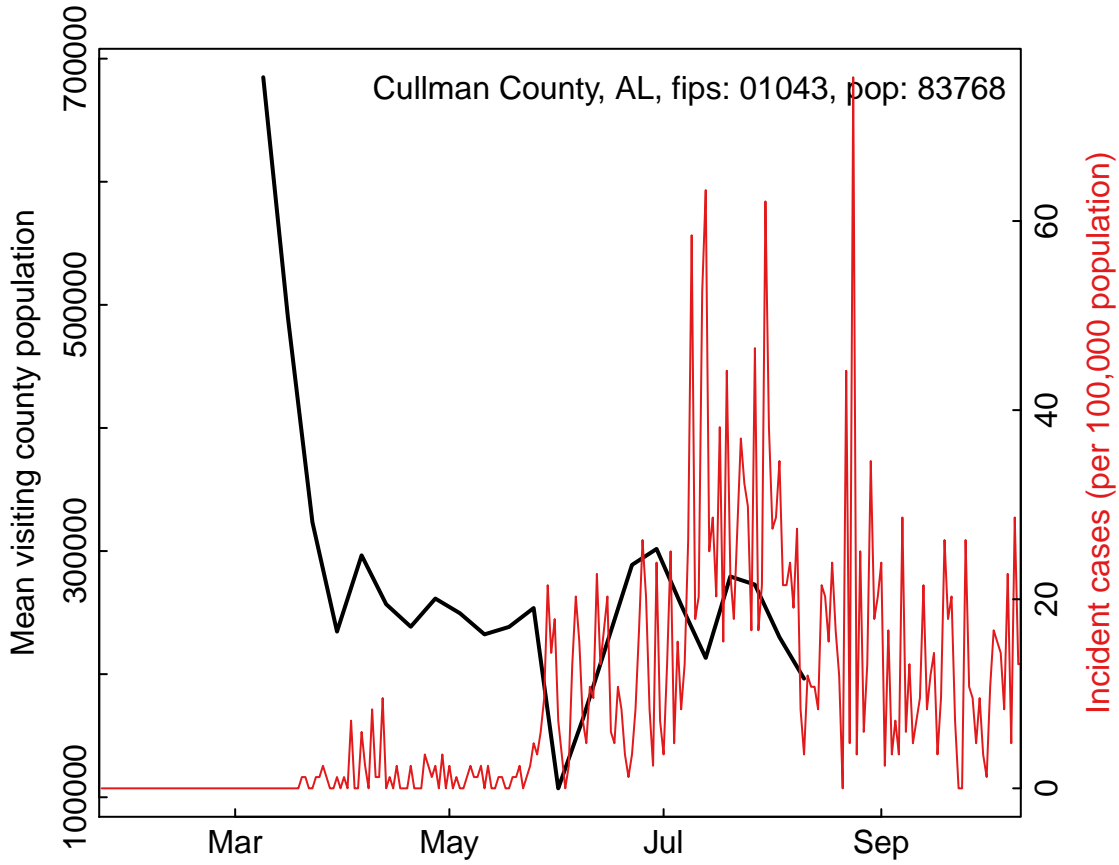

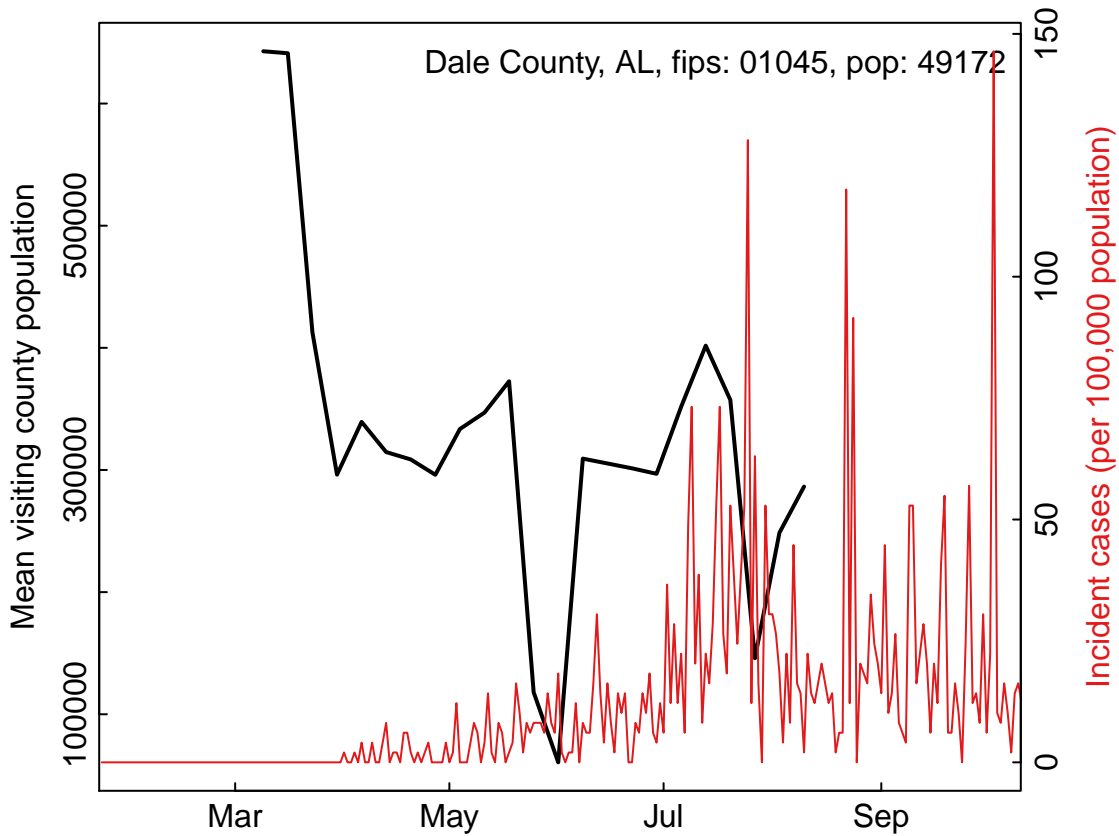



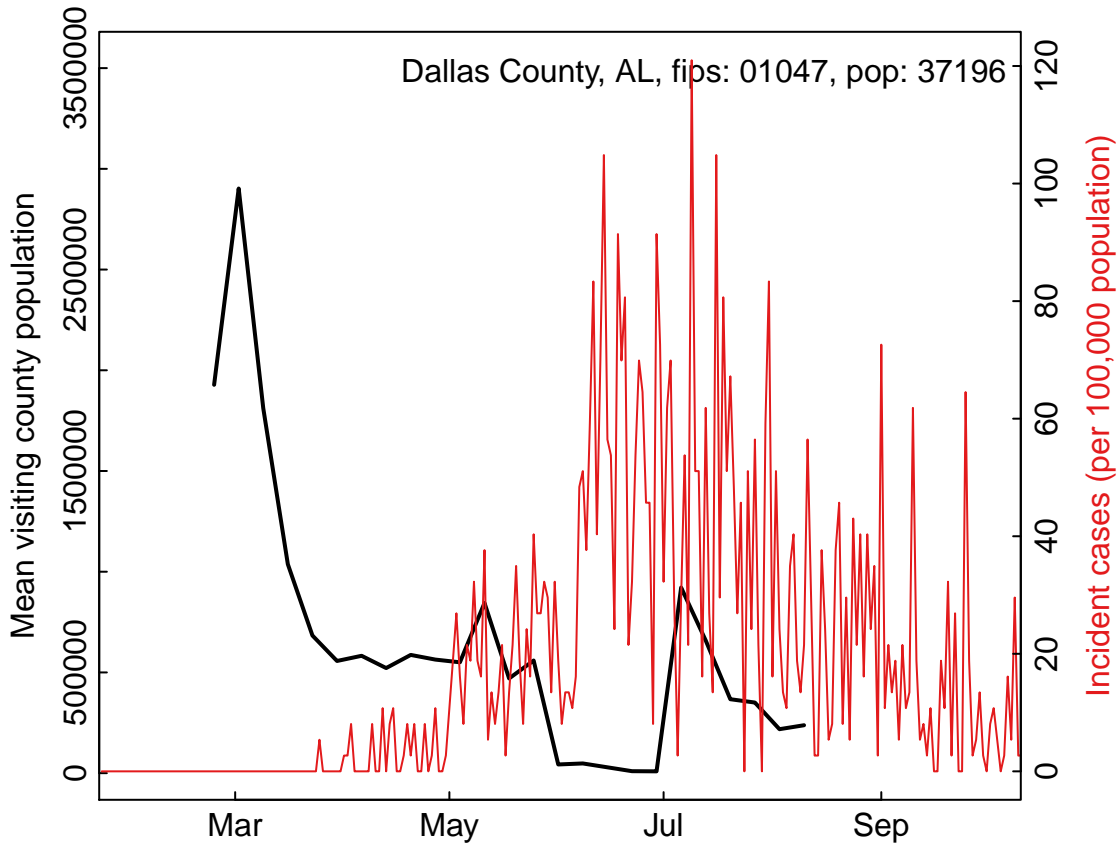

DeKalb County, AL, fips: 01049, pop: 71513

Mean visiting county population

100000  
300000  
500000  
700000

Mar

May

Jul

Sep

0  
50  
100  
150

Incident cases (per 100,000 population)

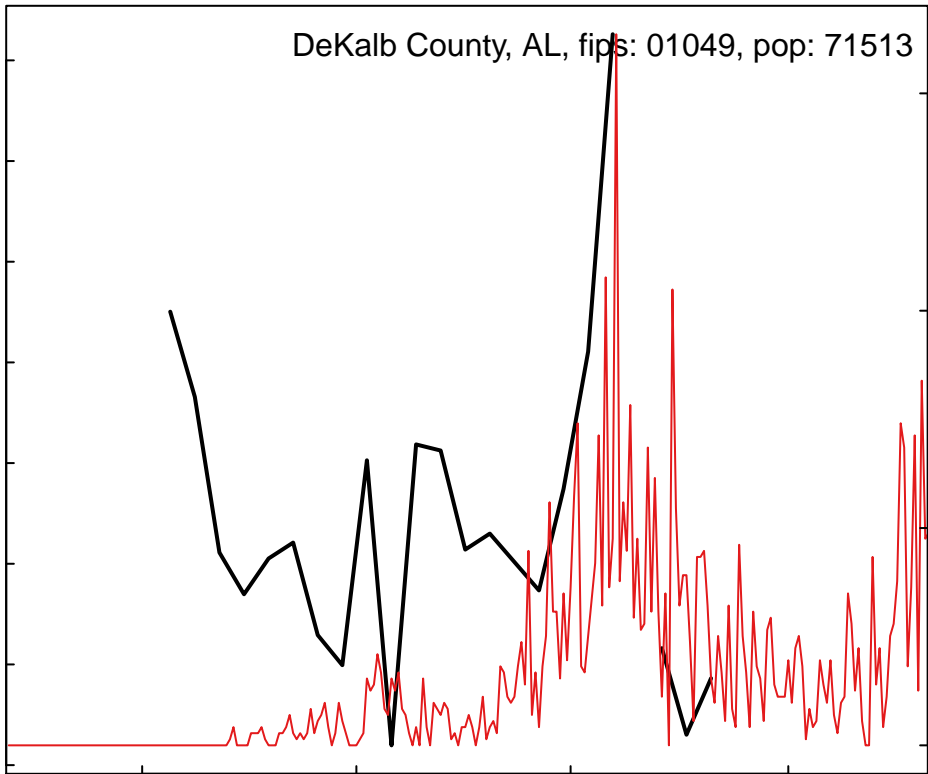

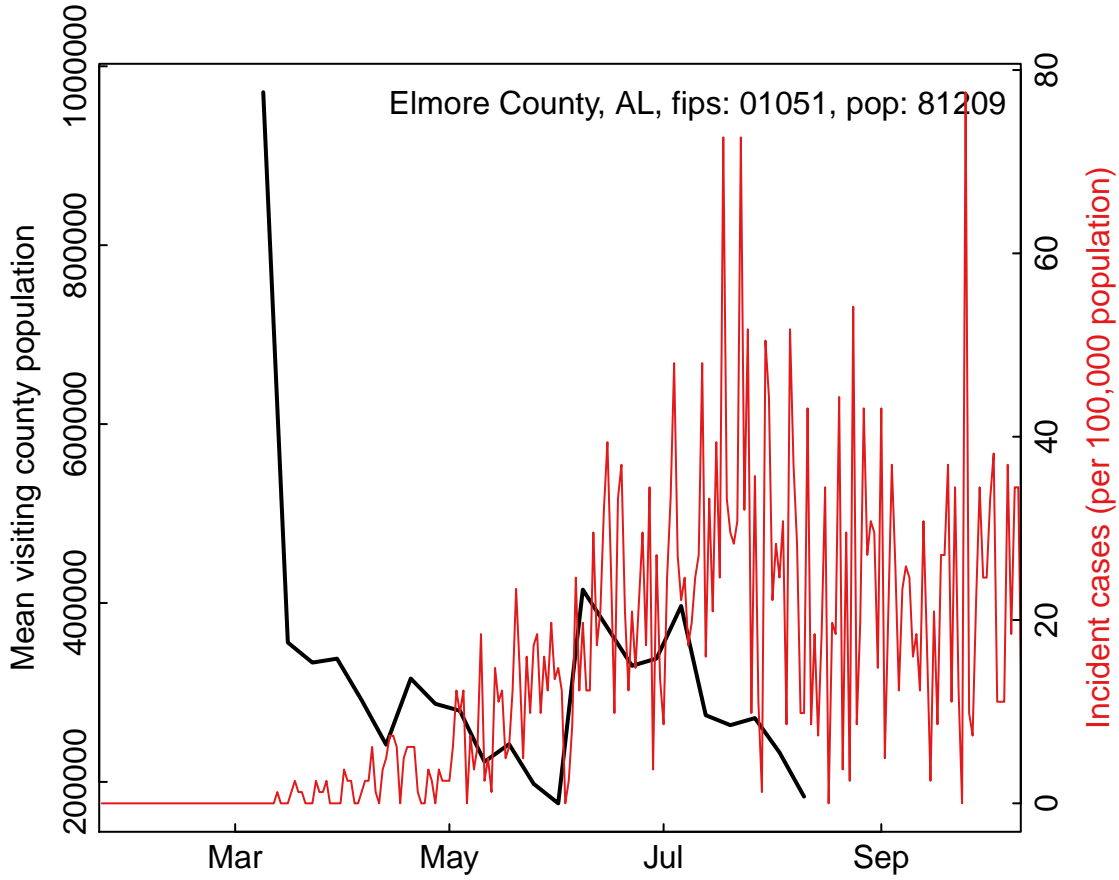

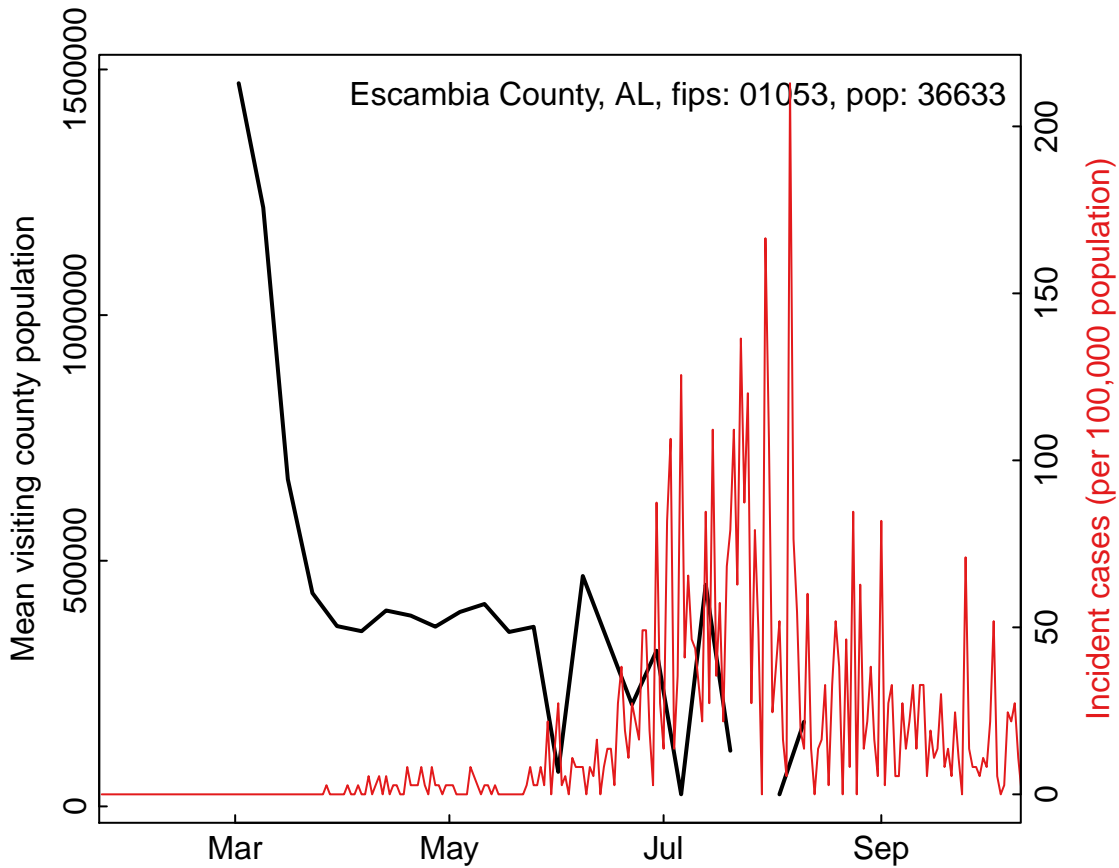

Etowah County, AL, fips: 01055, pop: 102268

Mean visiting county population

2500000  
1500000  
500000  
0

Mar

May

Jul

Sep

150  
100  
50  
0

Incident cases (per 100,000 population)

0

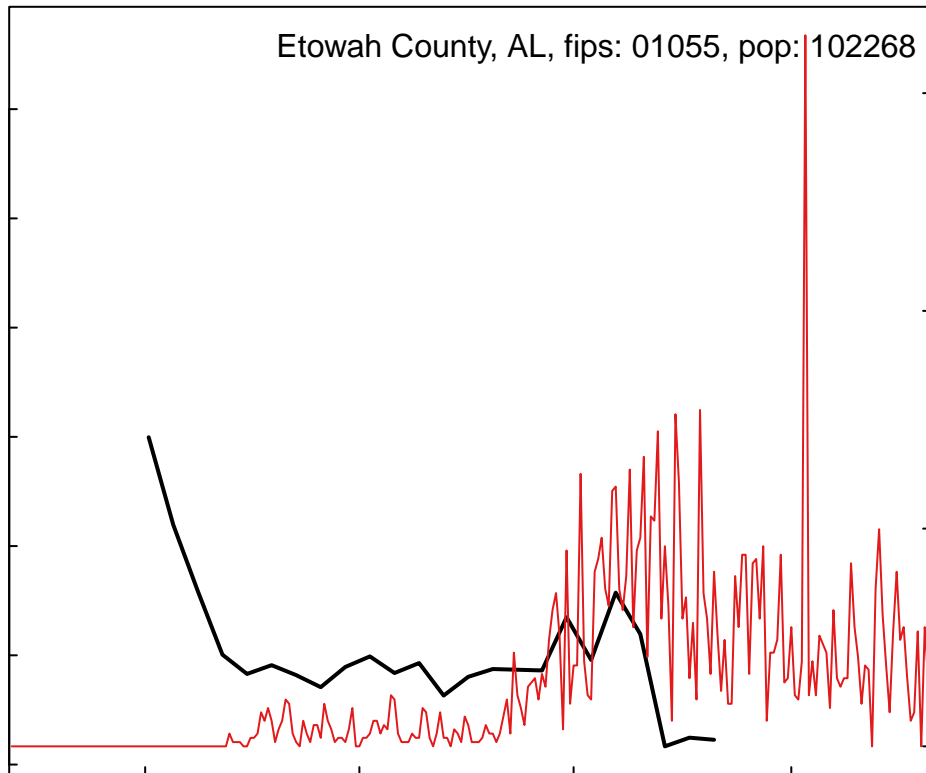

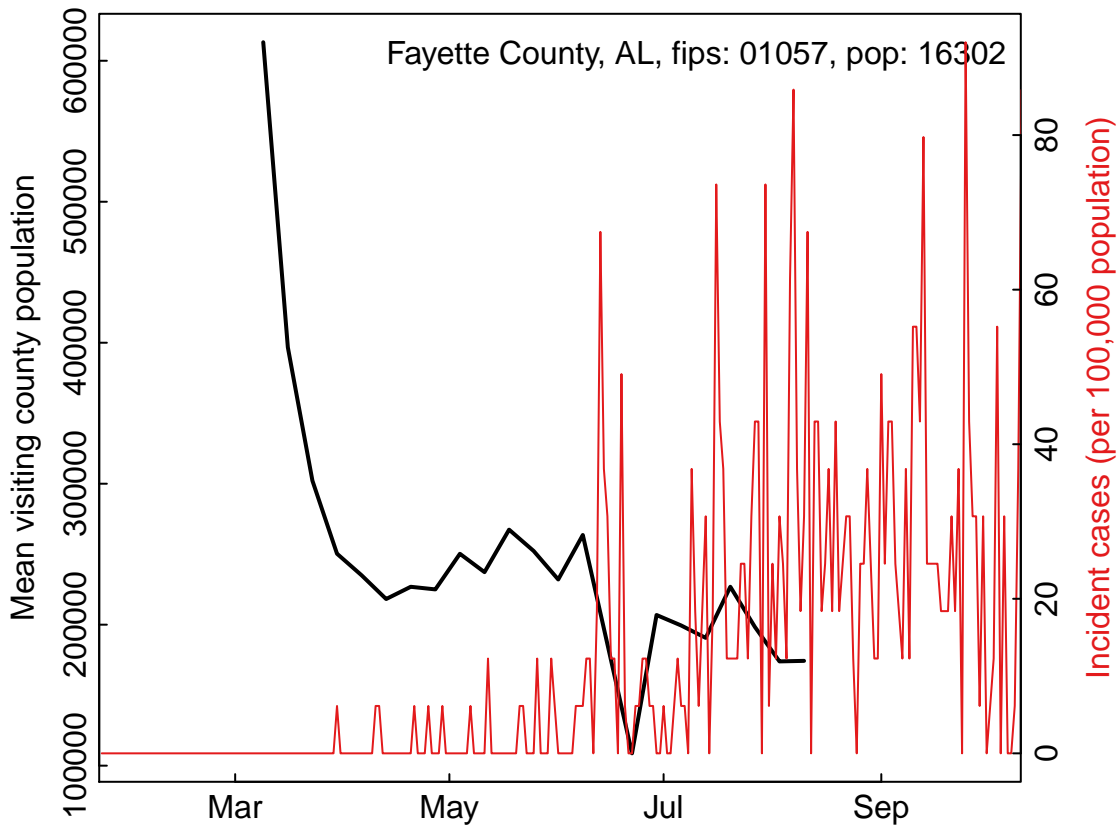

Mean visiting county population

1500000  
1000000  
500000  
0

Franklin County, AL, fips: 01059, pop: 31362

Mar May Jul Sep

Incident cases (per 100,000 population)

140  
120  
100  
80  
60  
40  
20  
0

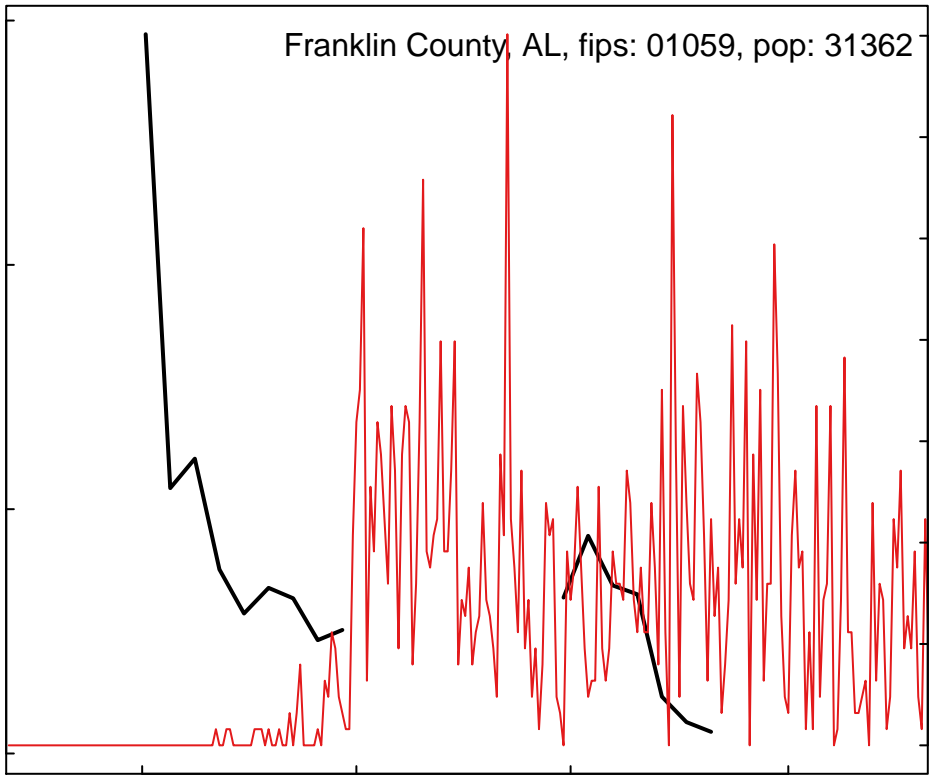

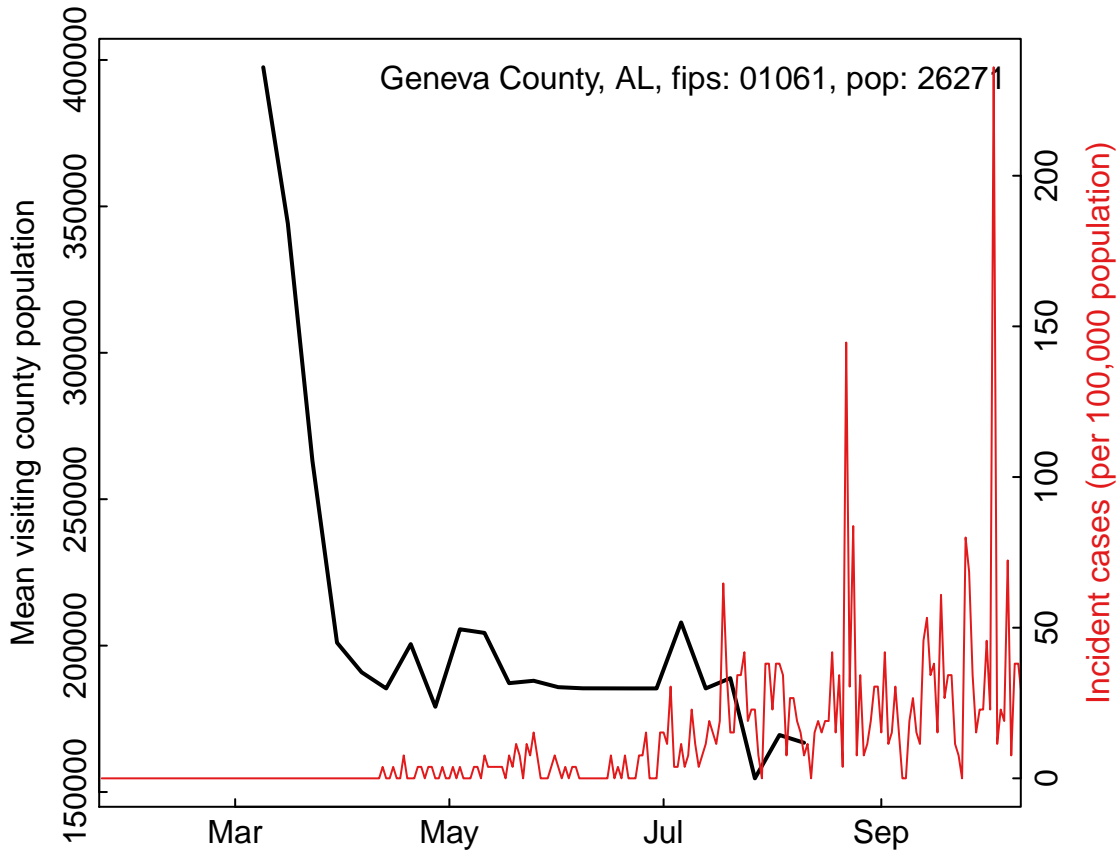



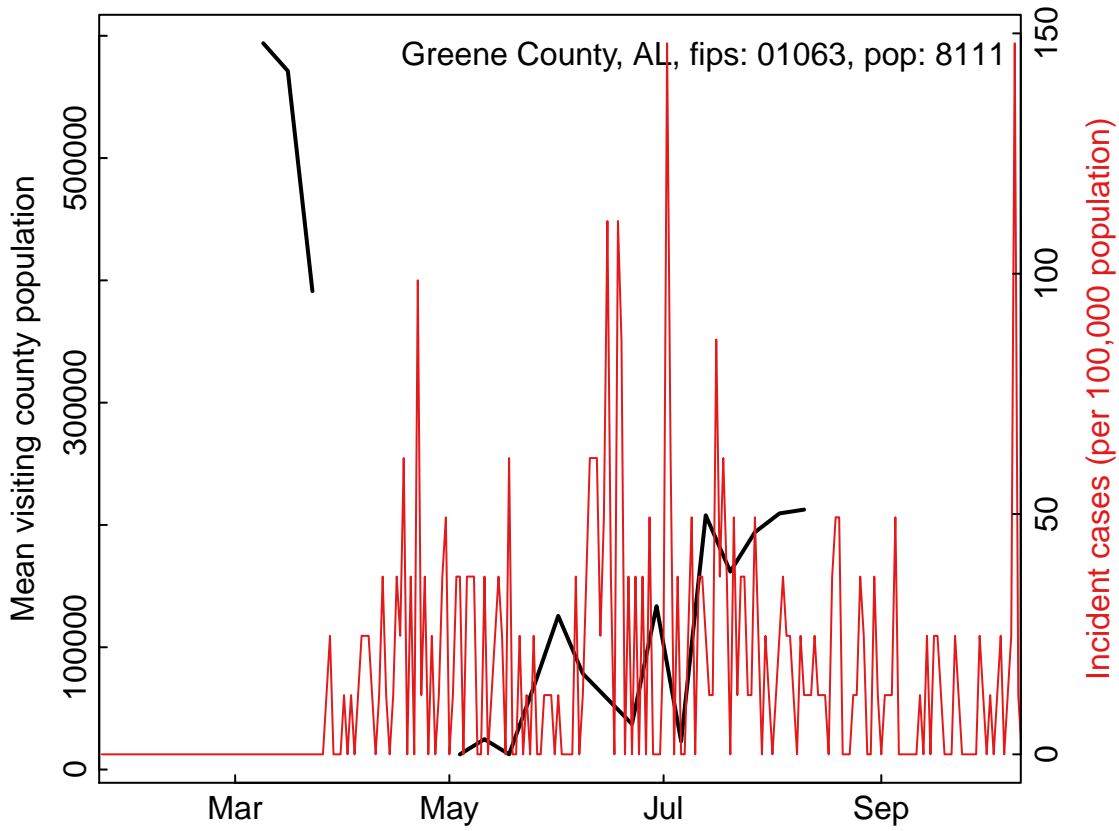

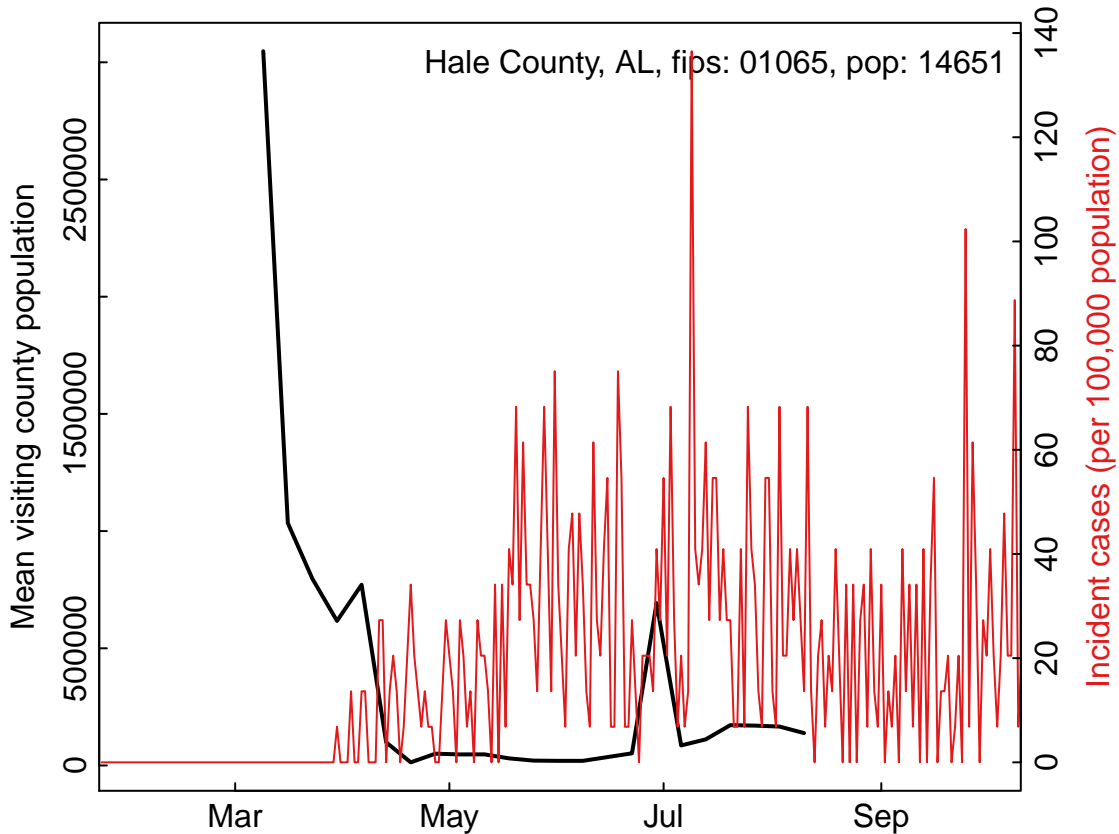

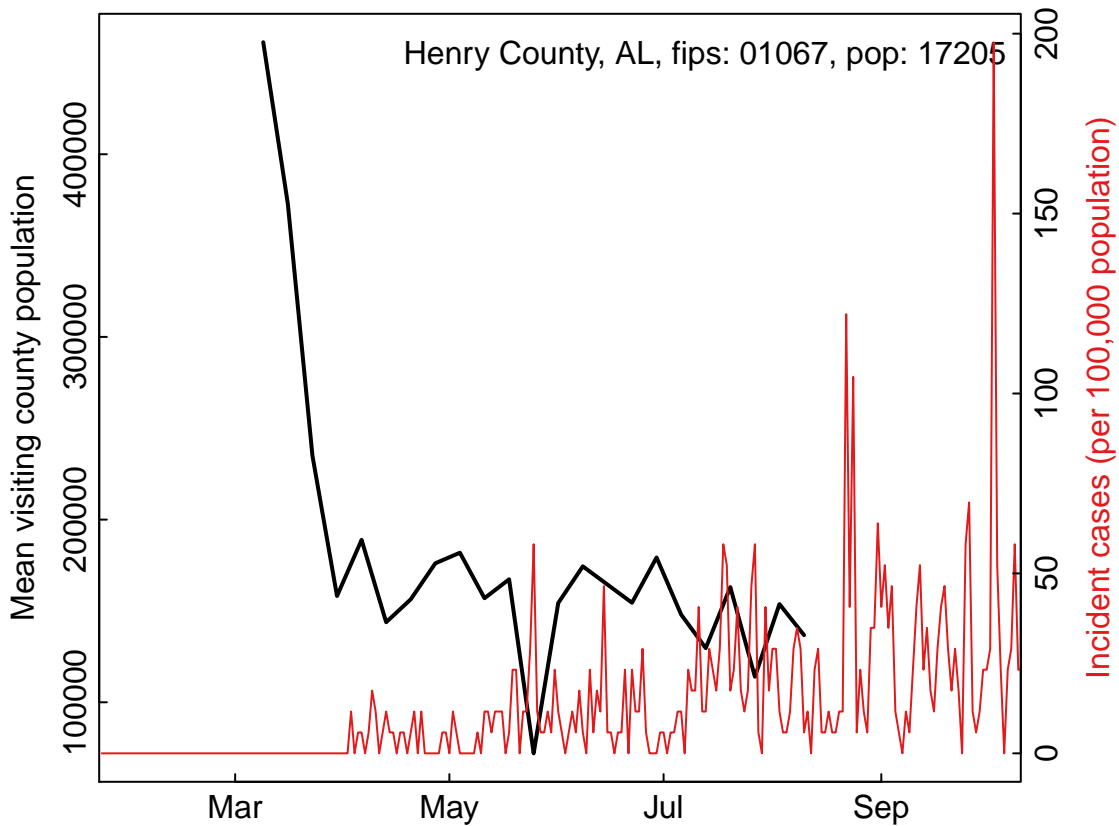

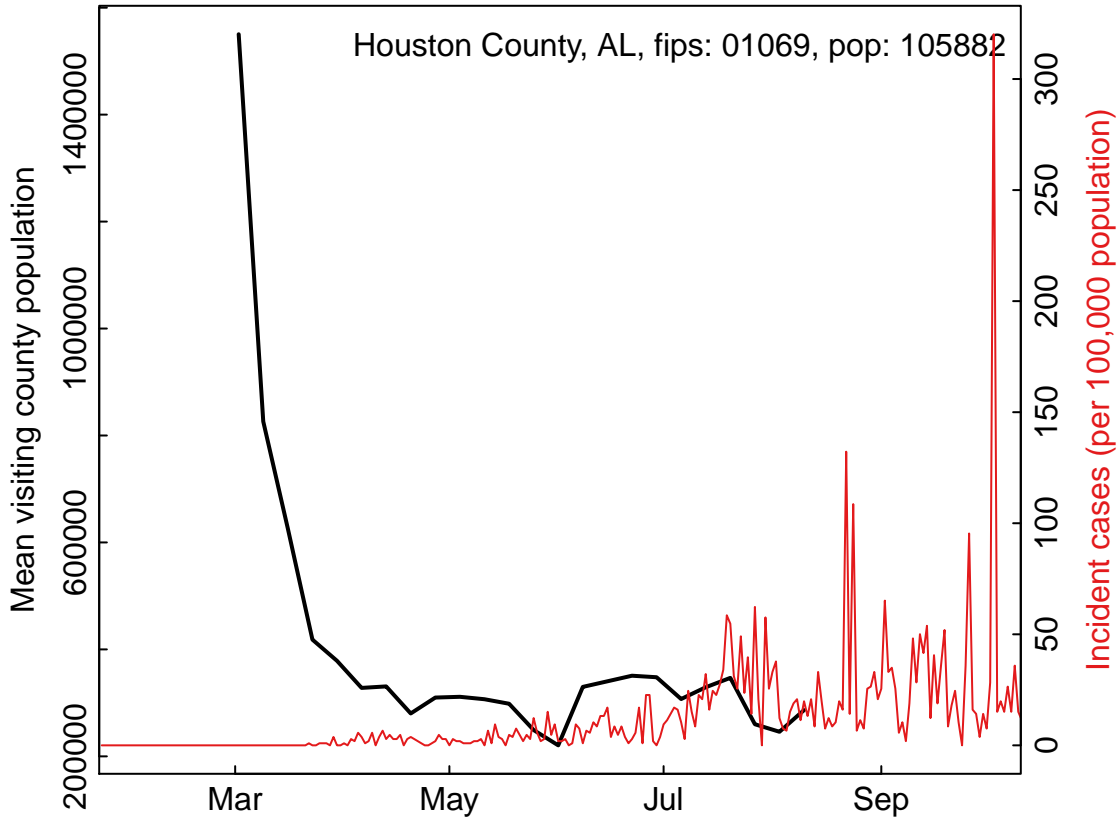

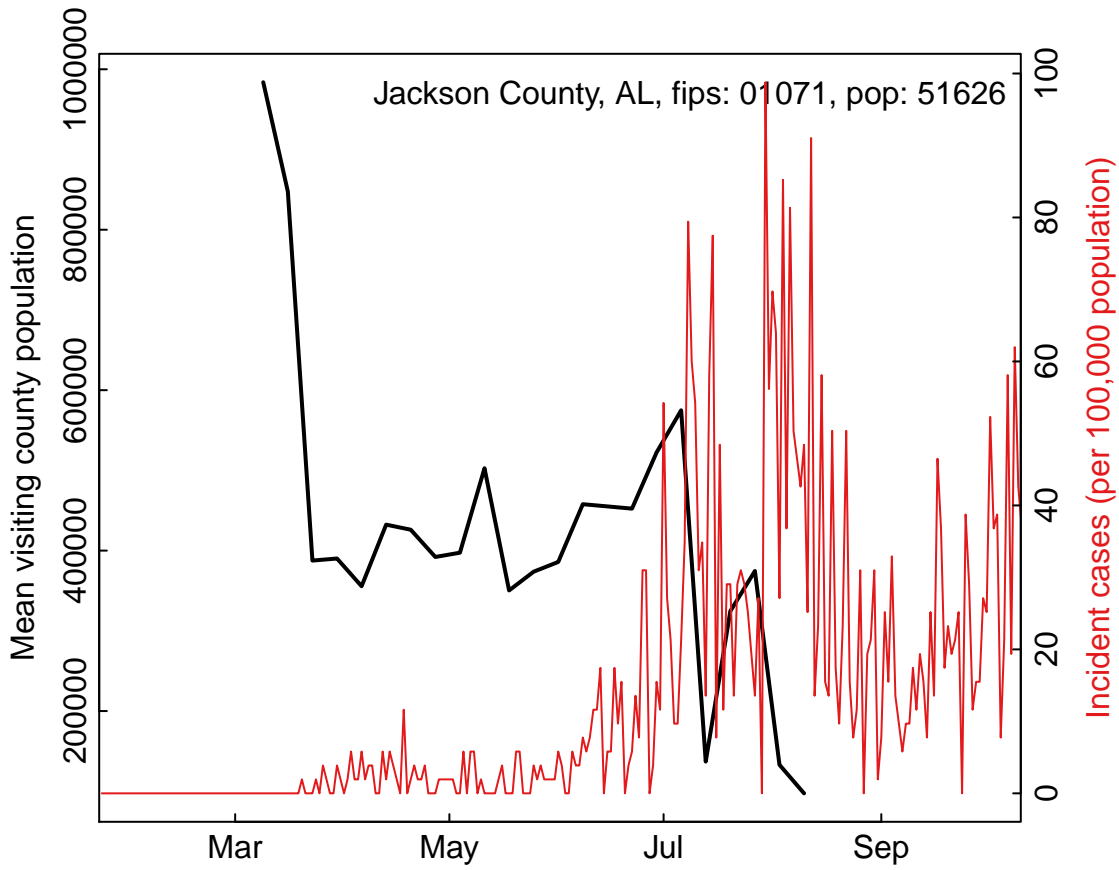

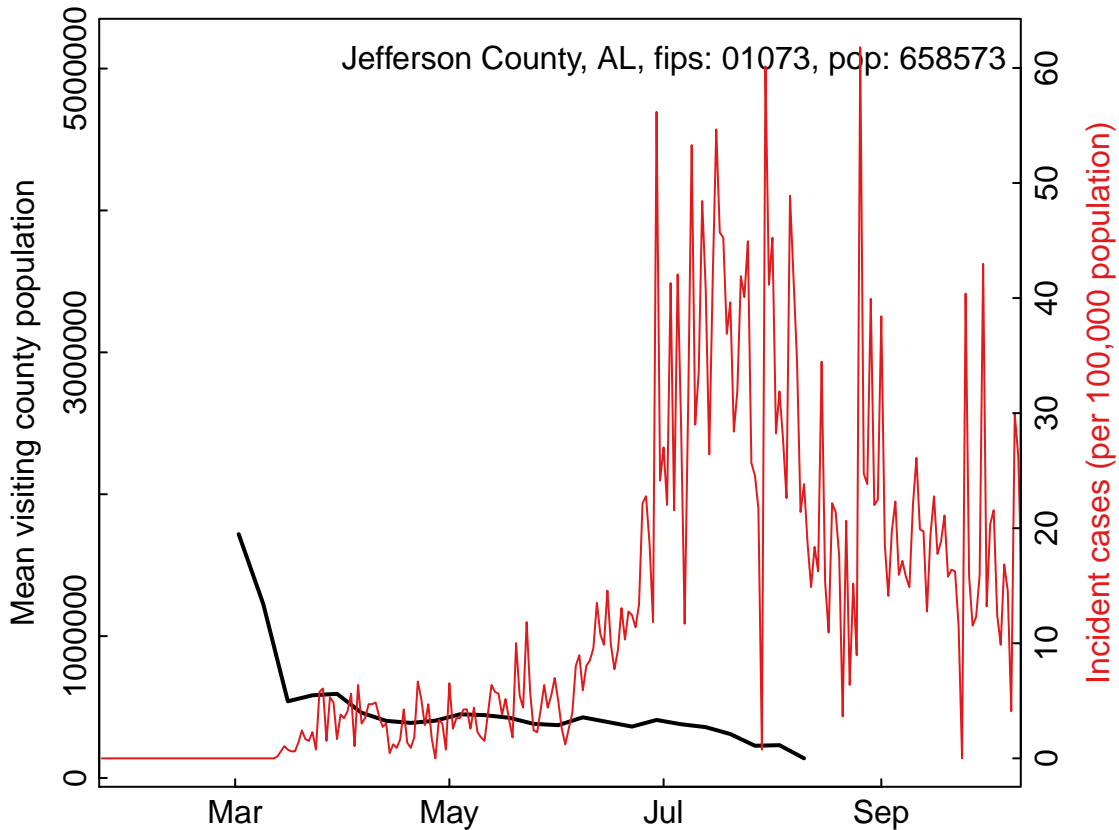

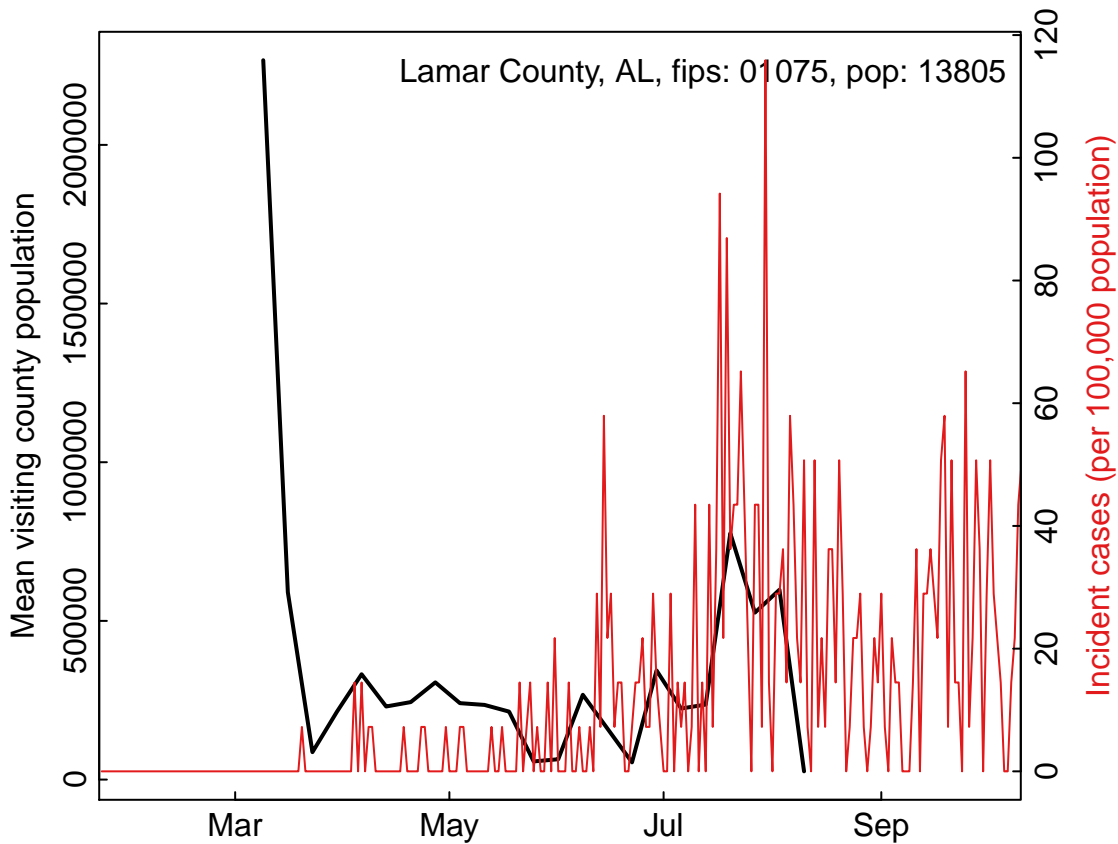

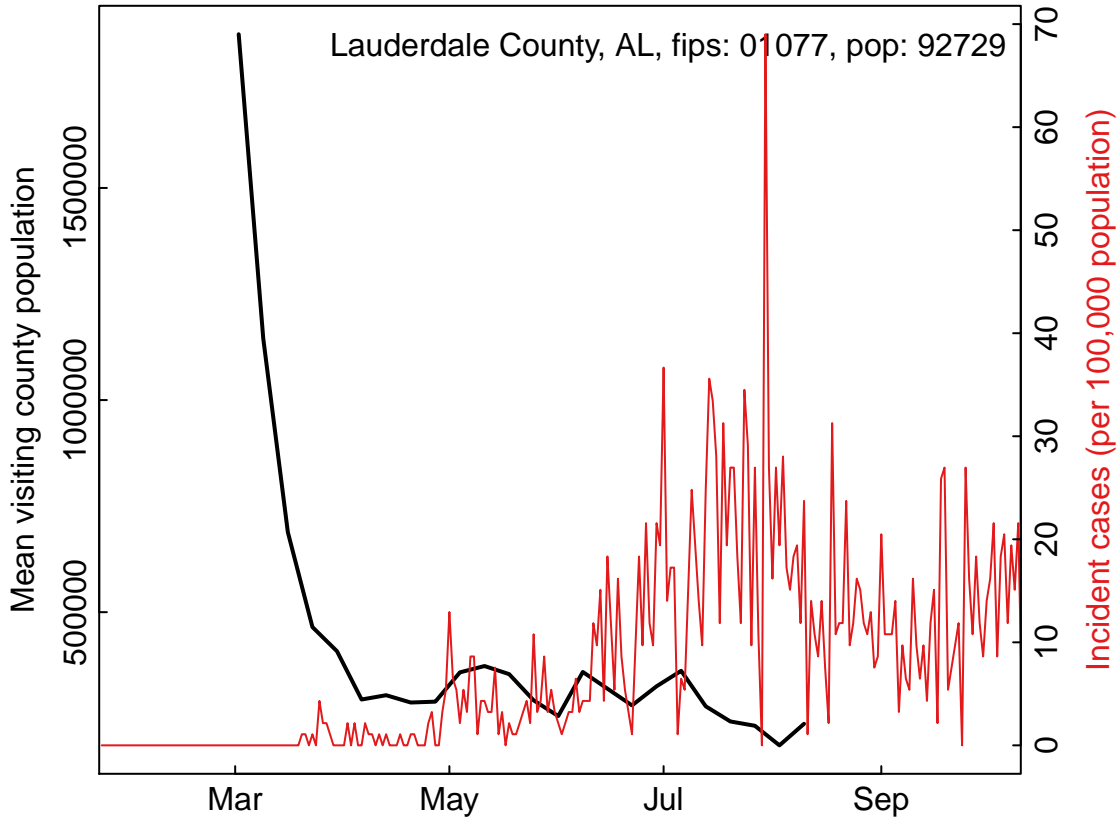



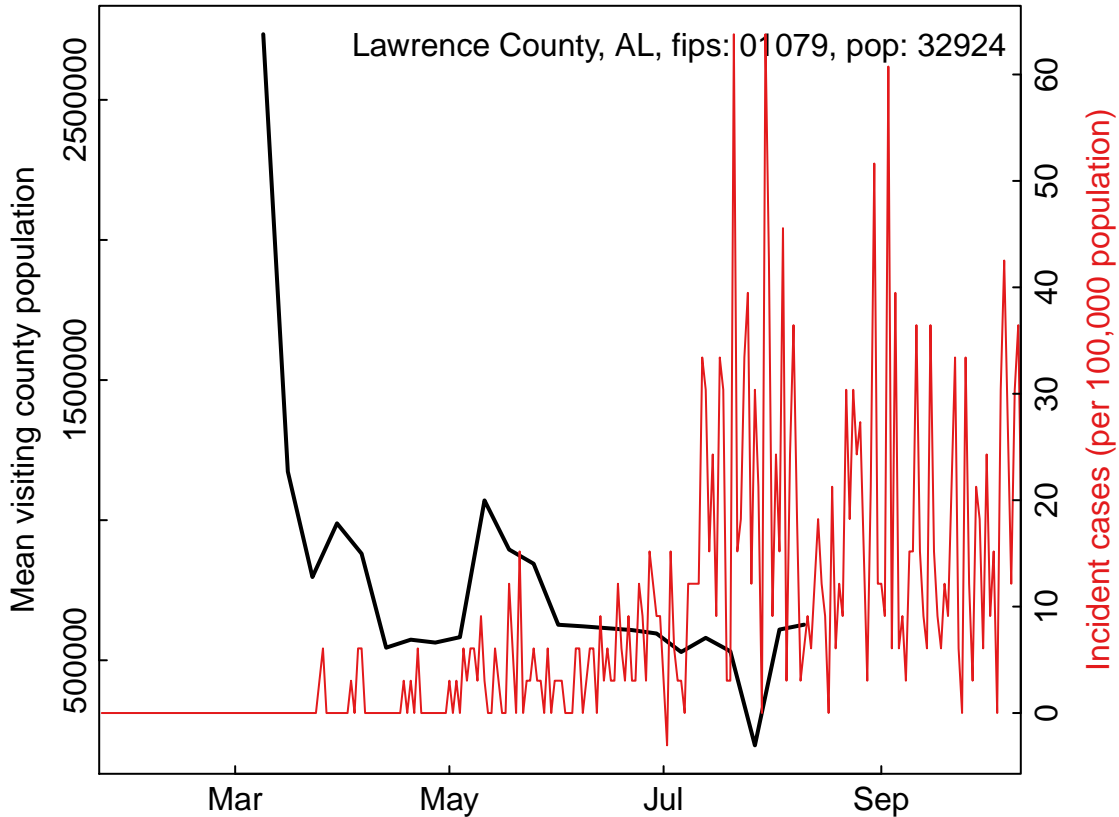

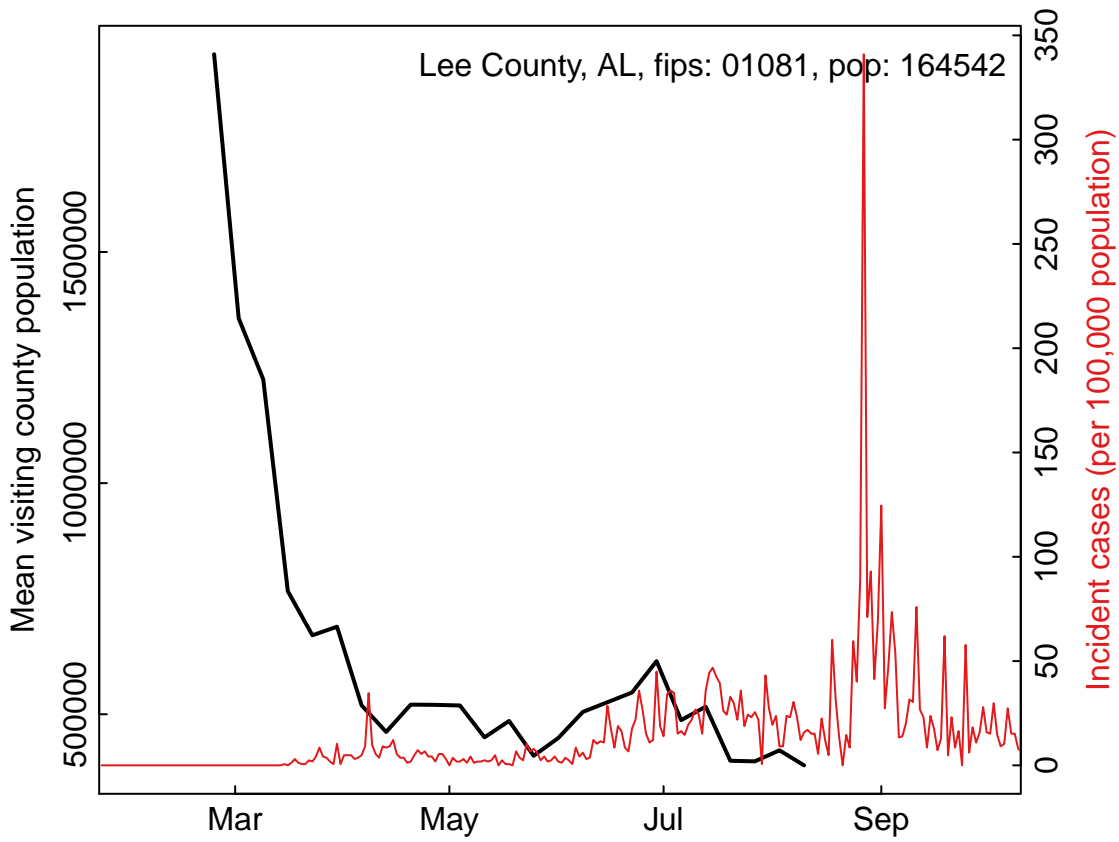

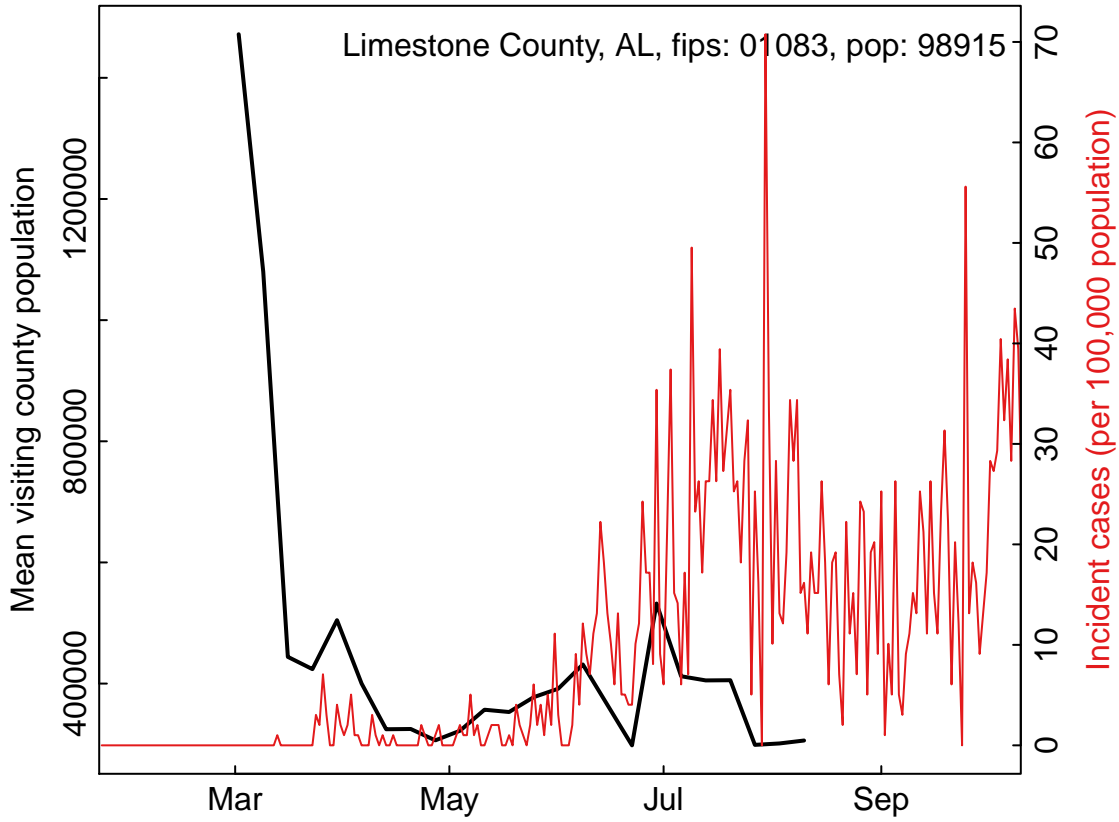

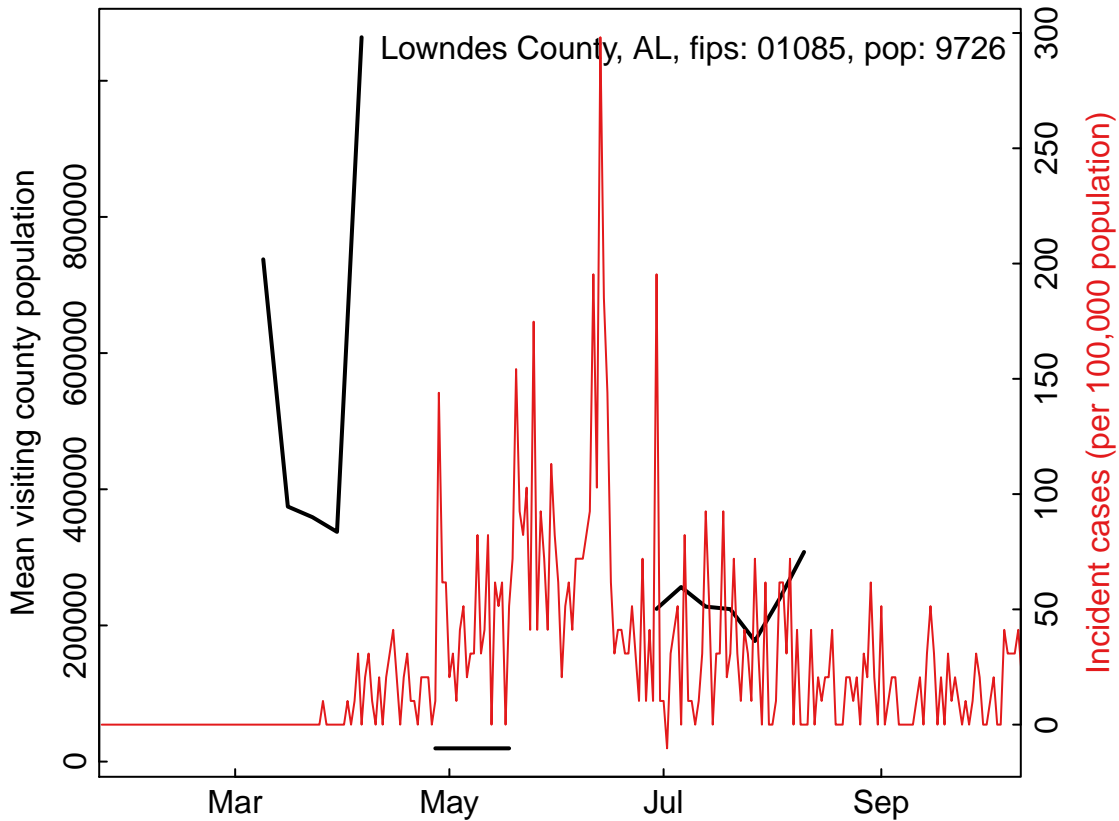

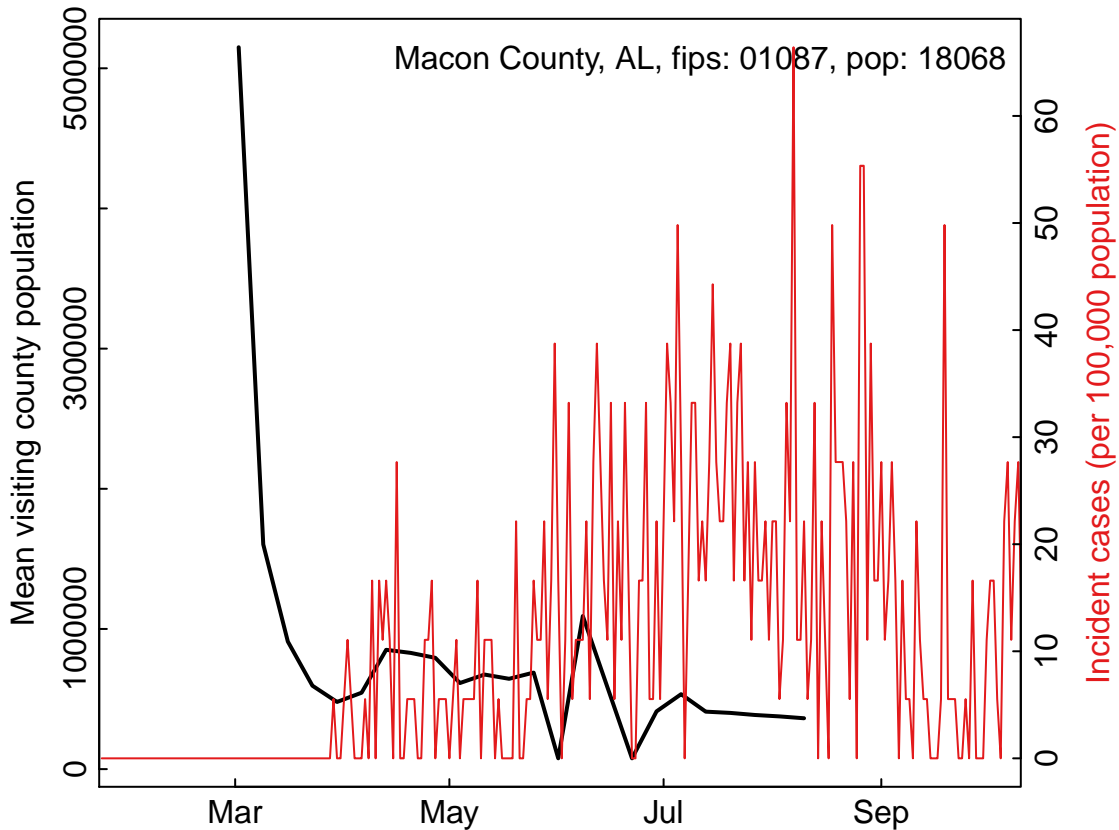

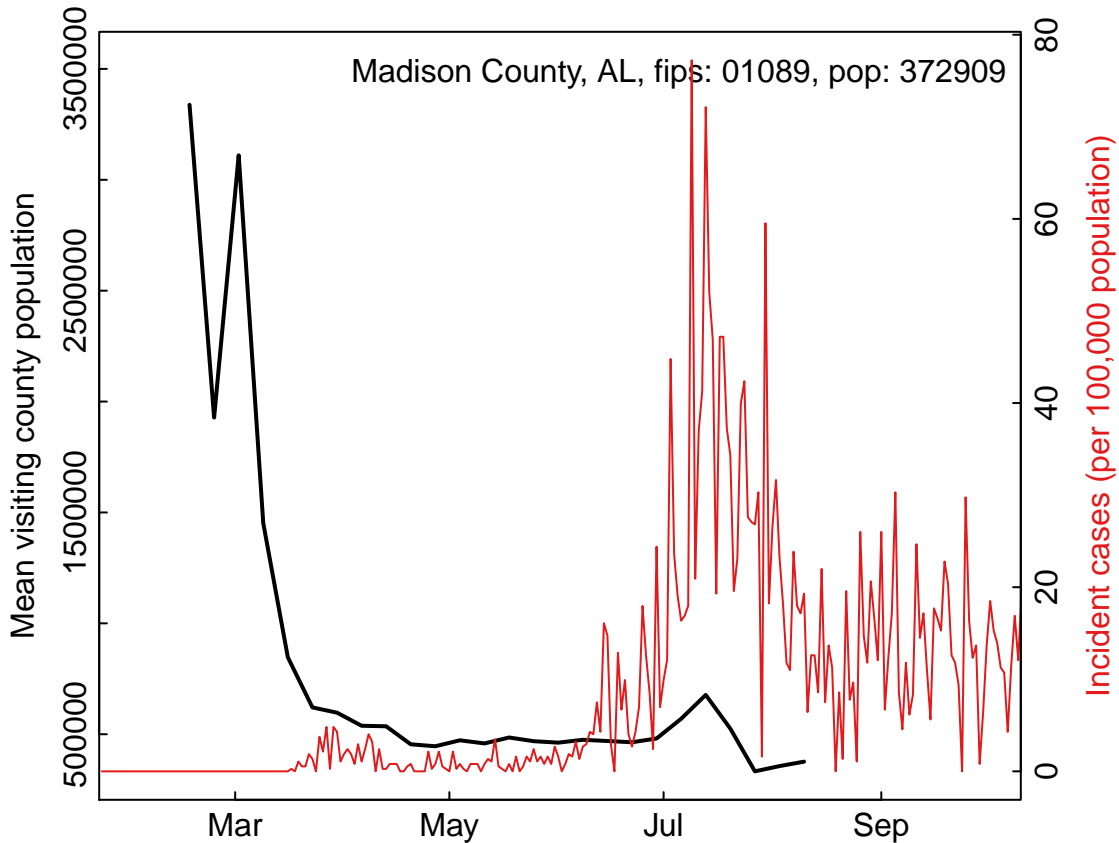

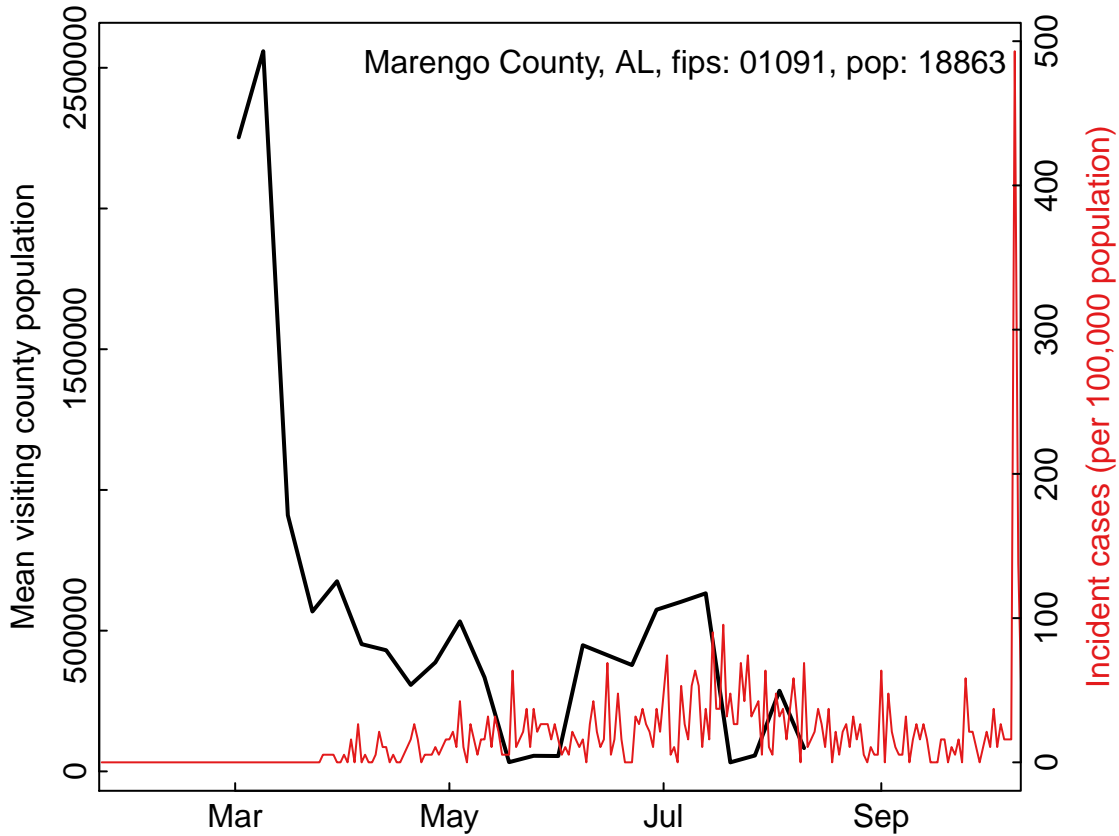

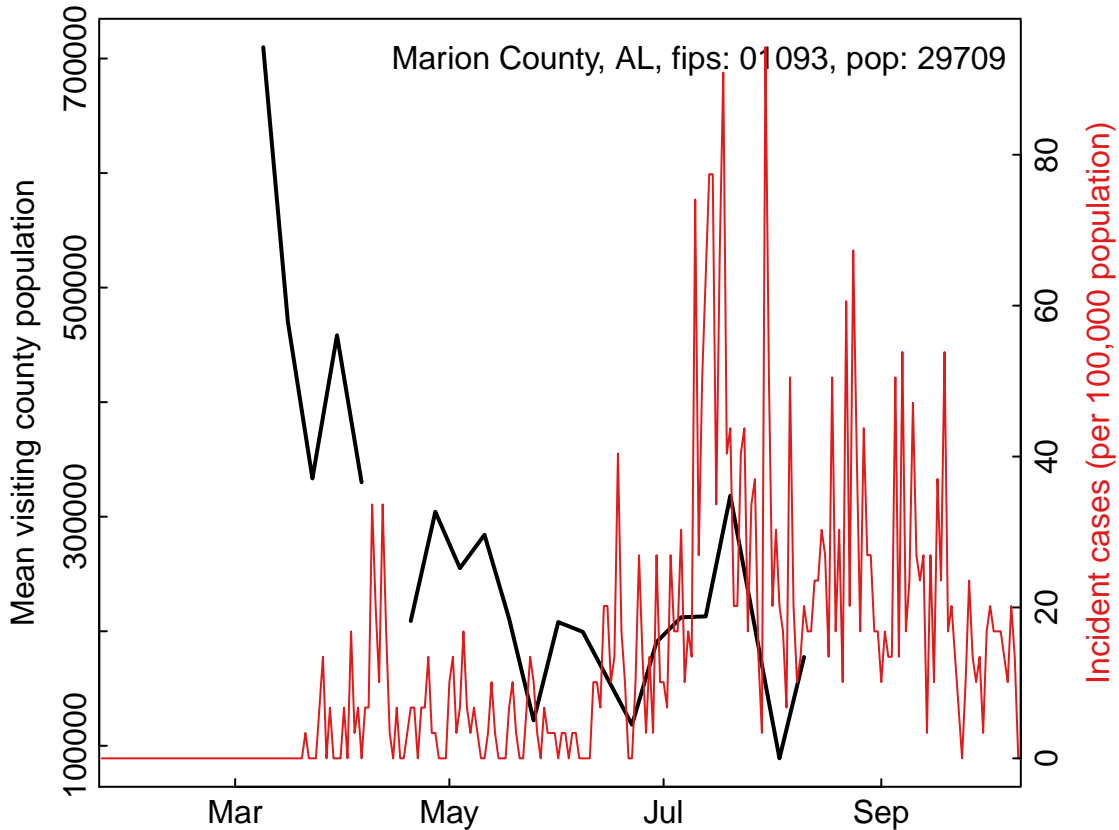



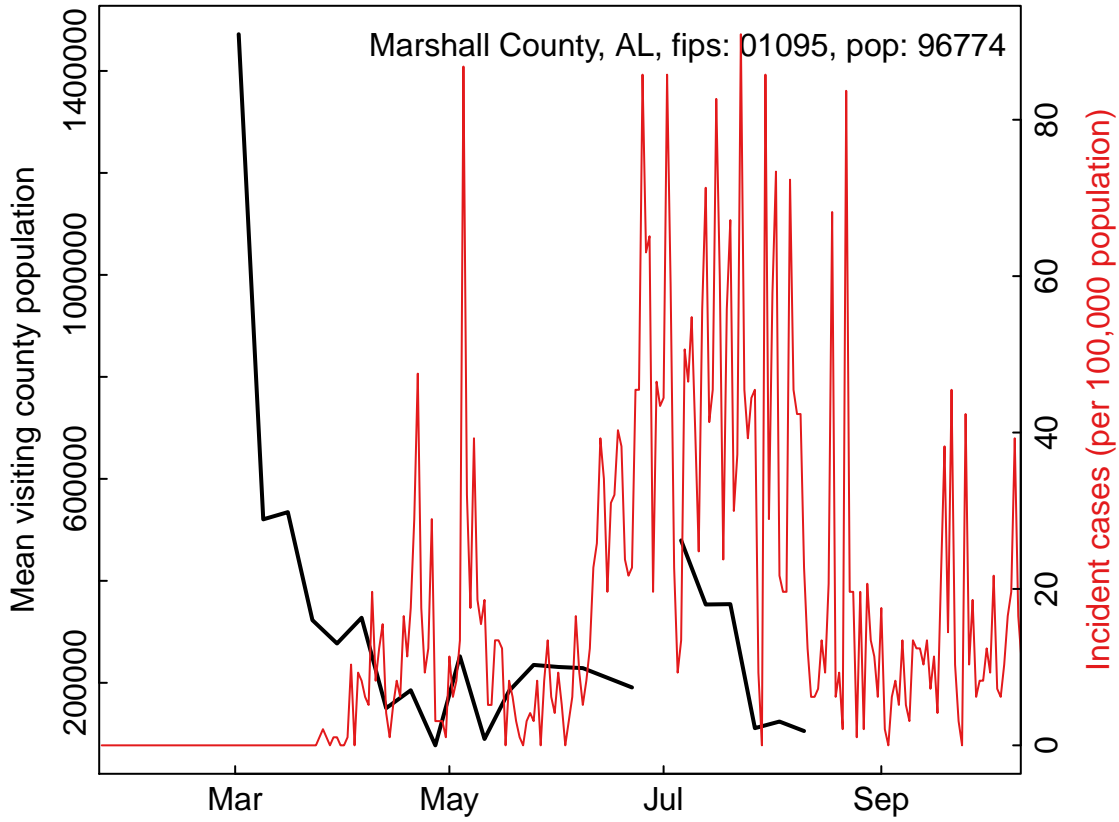

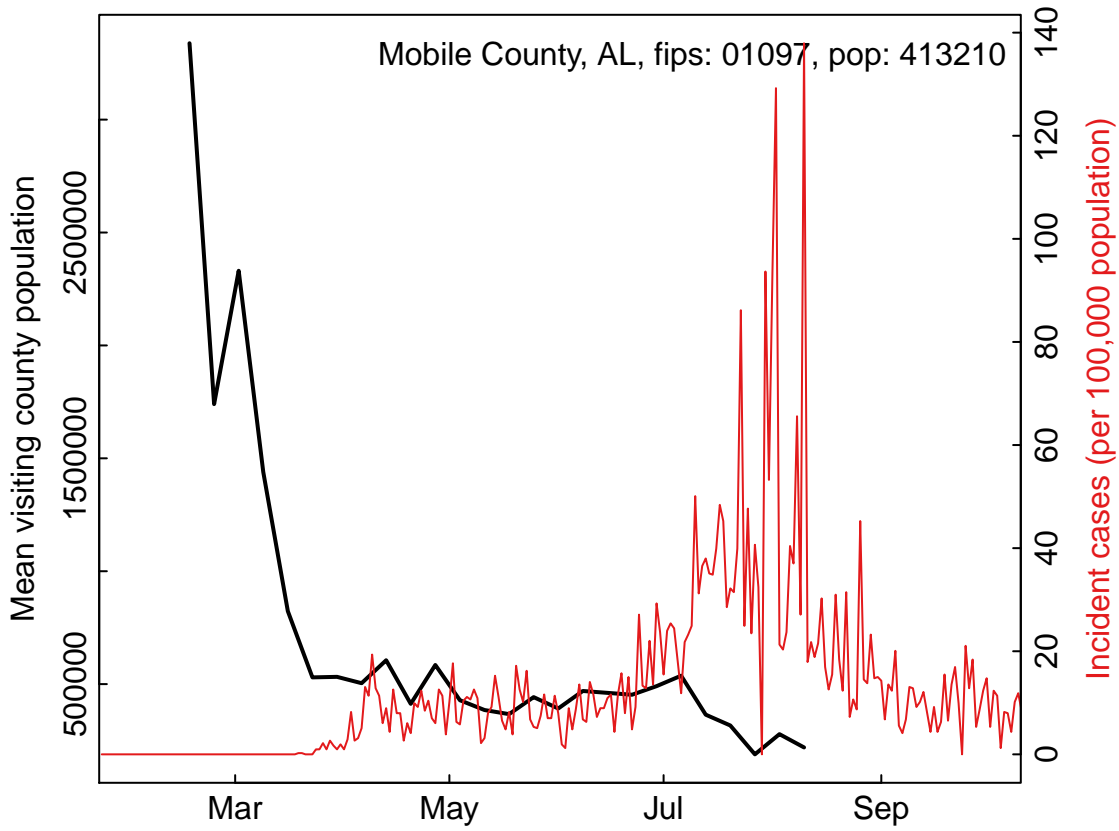

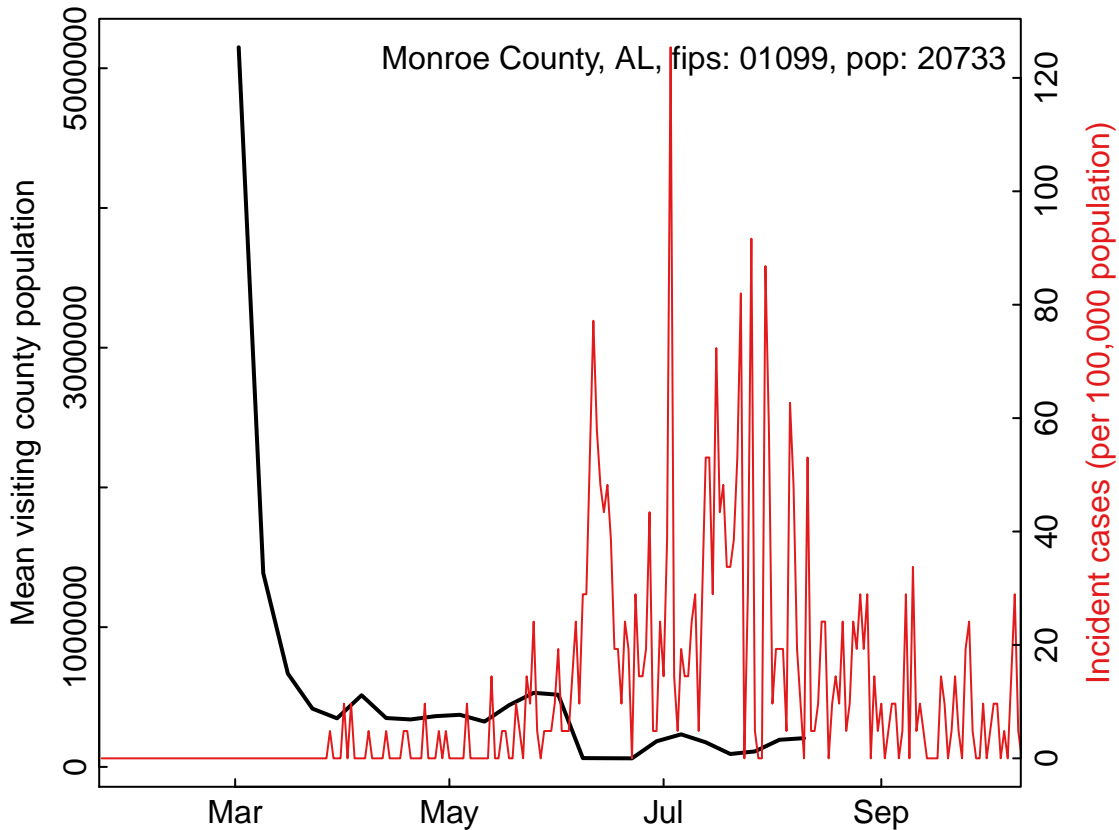

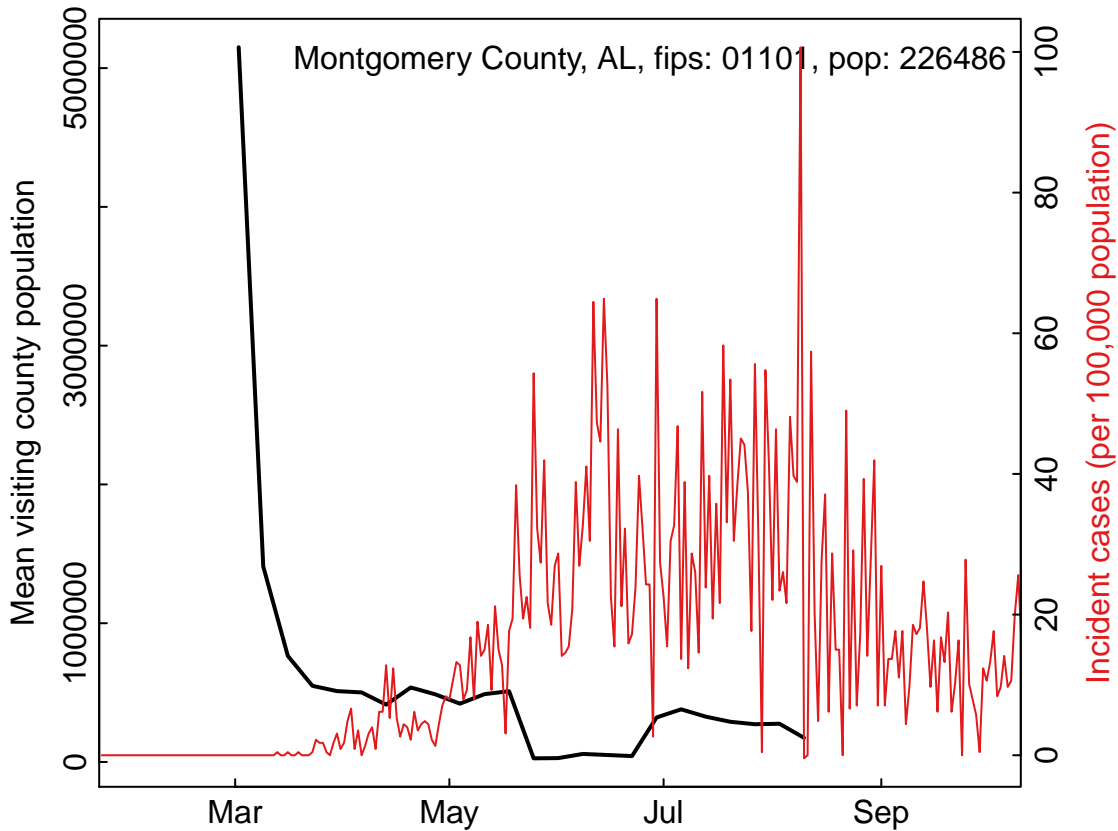

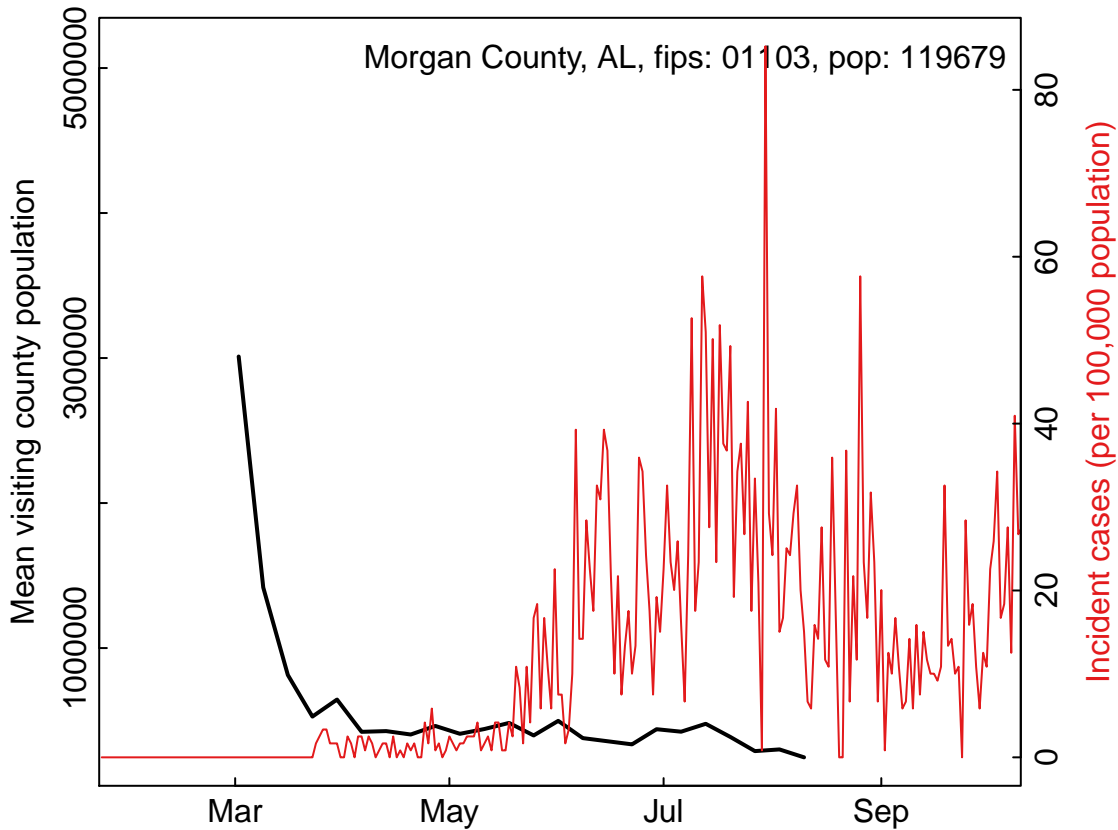

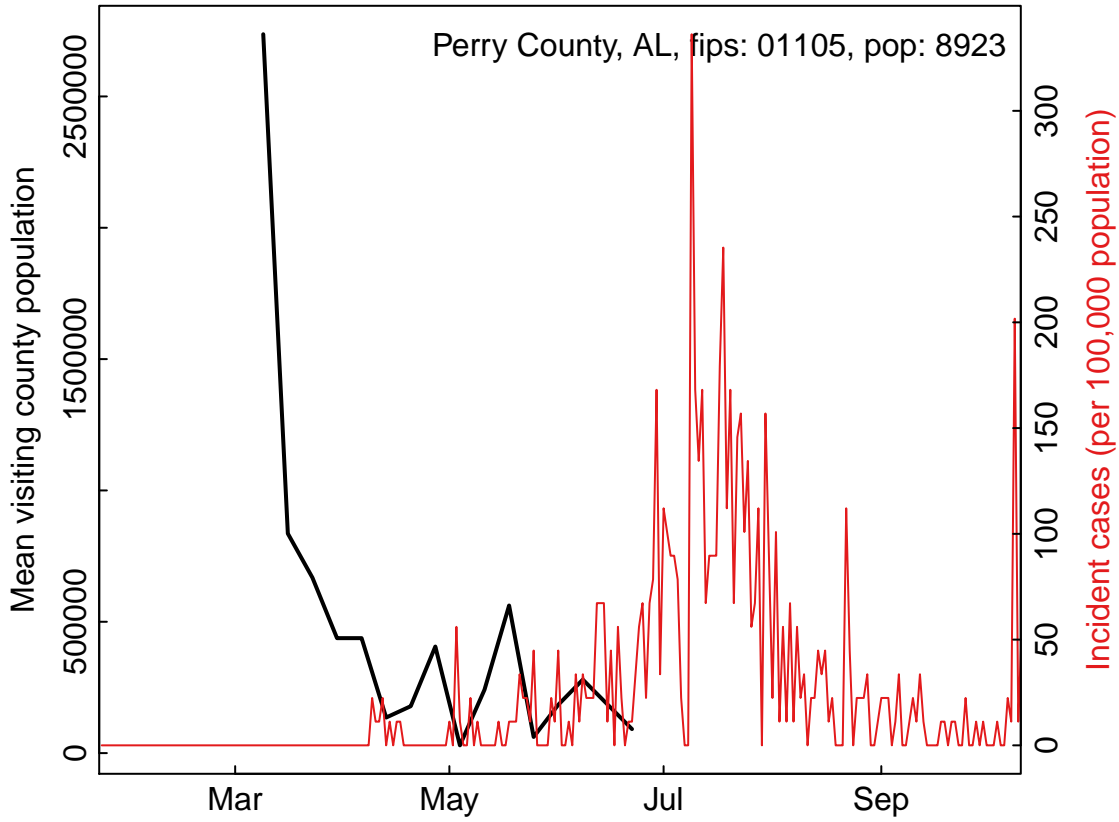

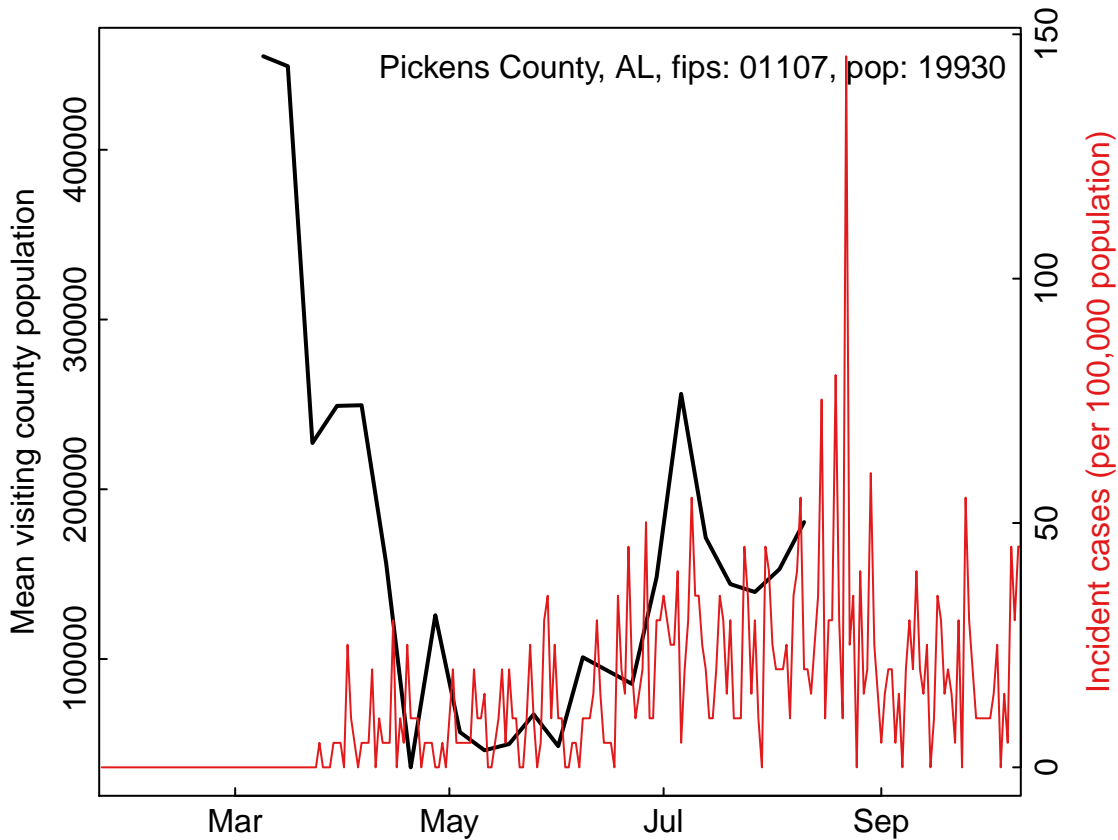

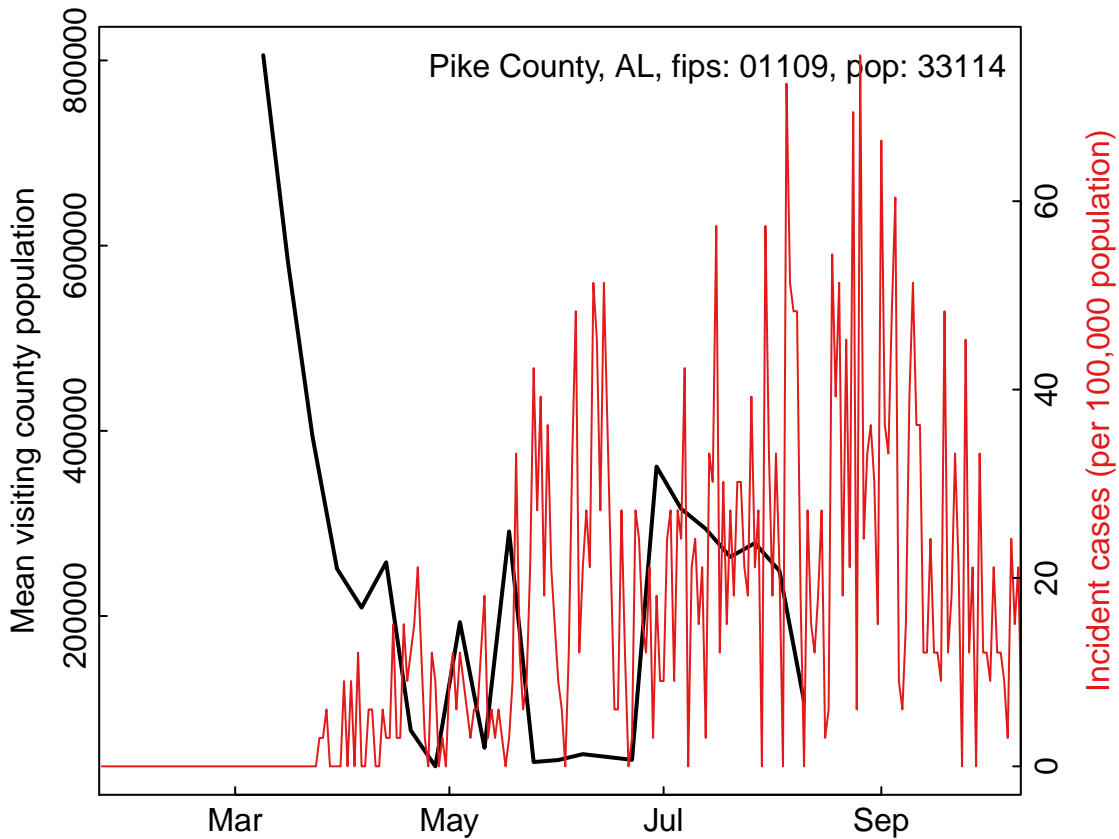



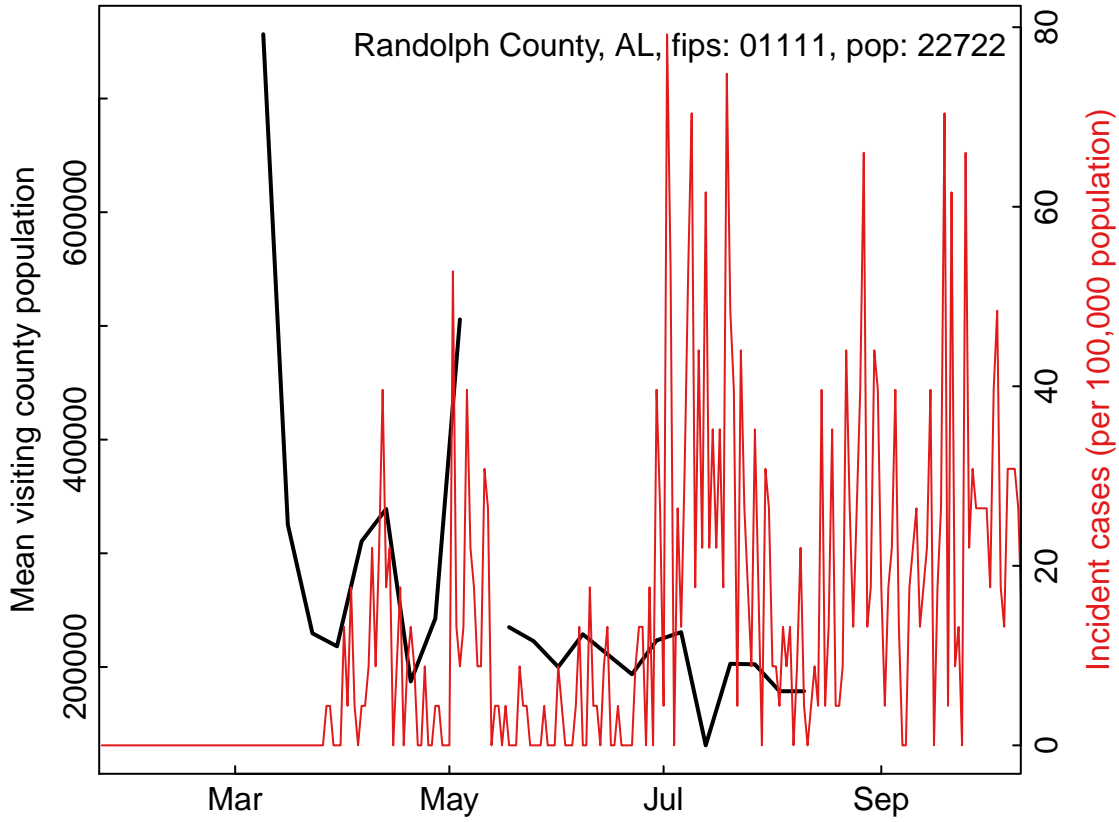

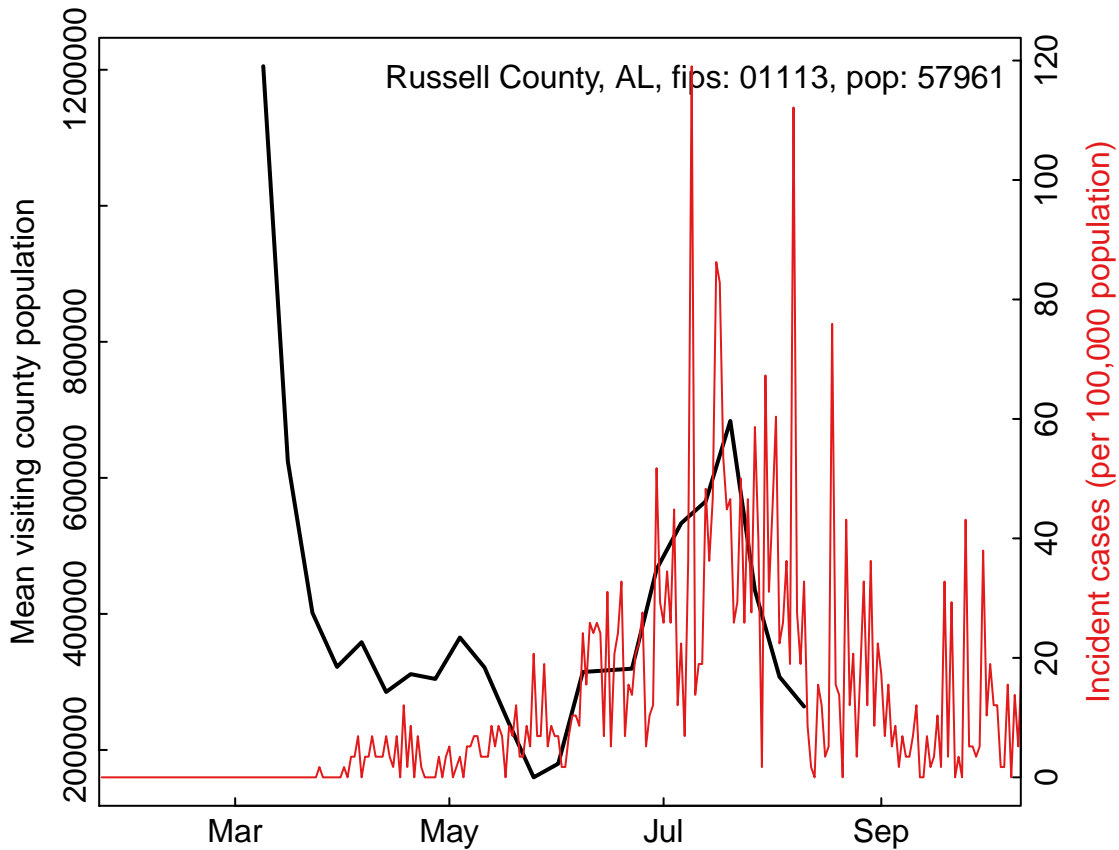

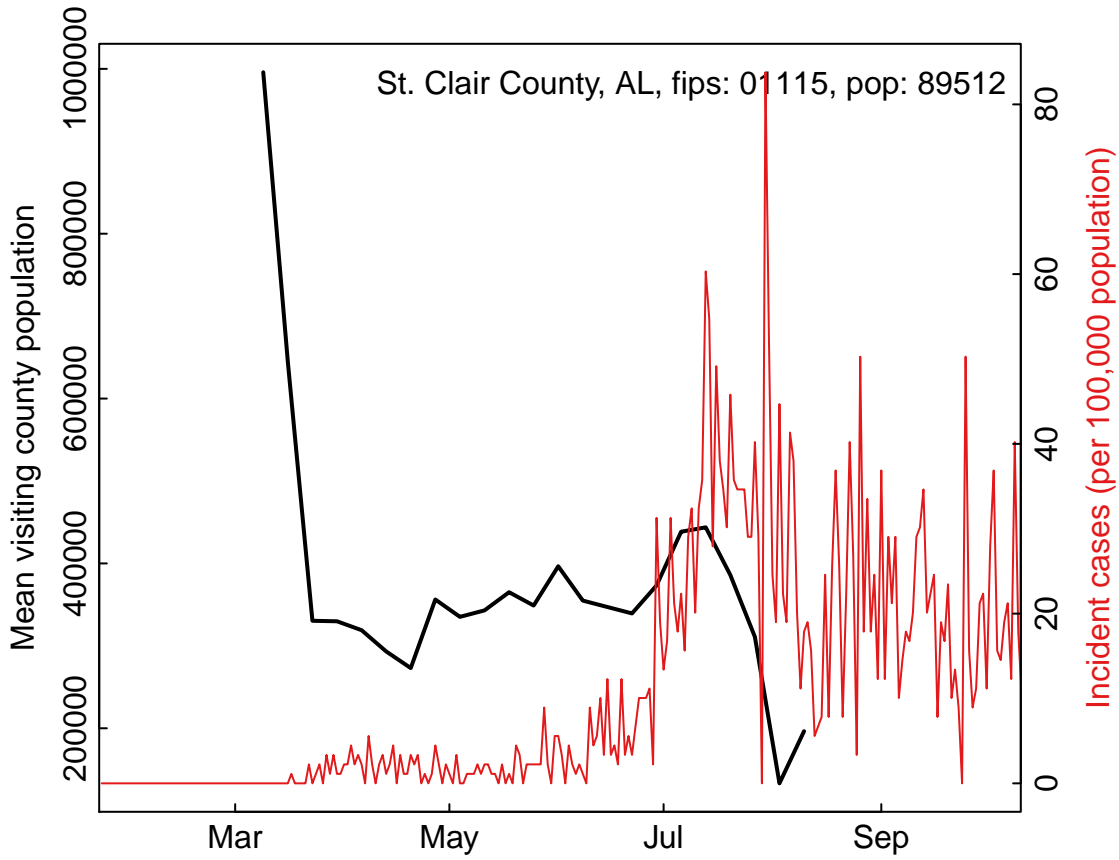

Shelby County, AL, fips: 01117, pop: 217702

Mean visiting county population

1500000  
1000000  
500000

Mar

May

Jul

Sep

60  
50  
40  
30  
20  
10  
0

Incident cases (per 100,000 population)

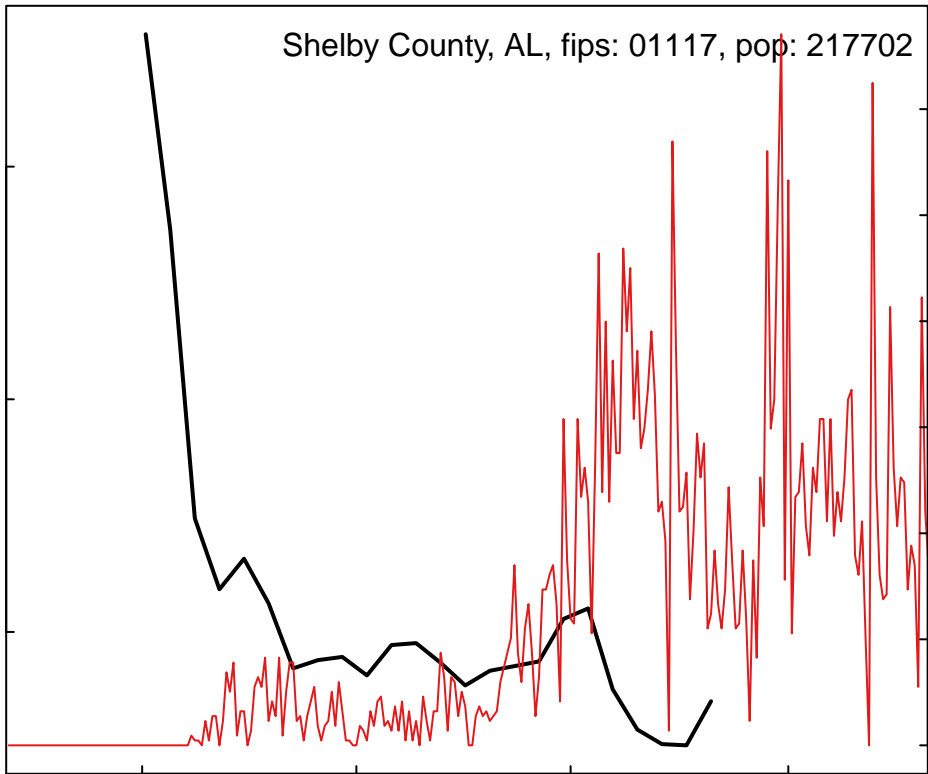

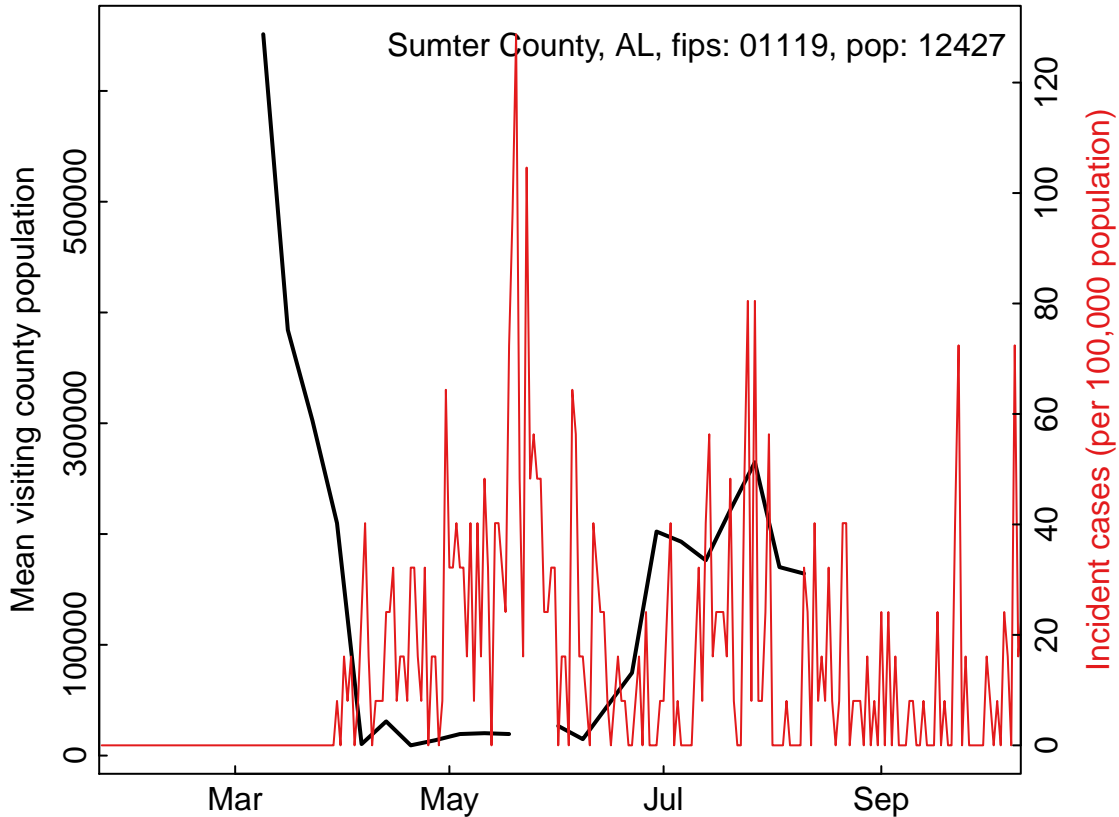

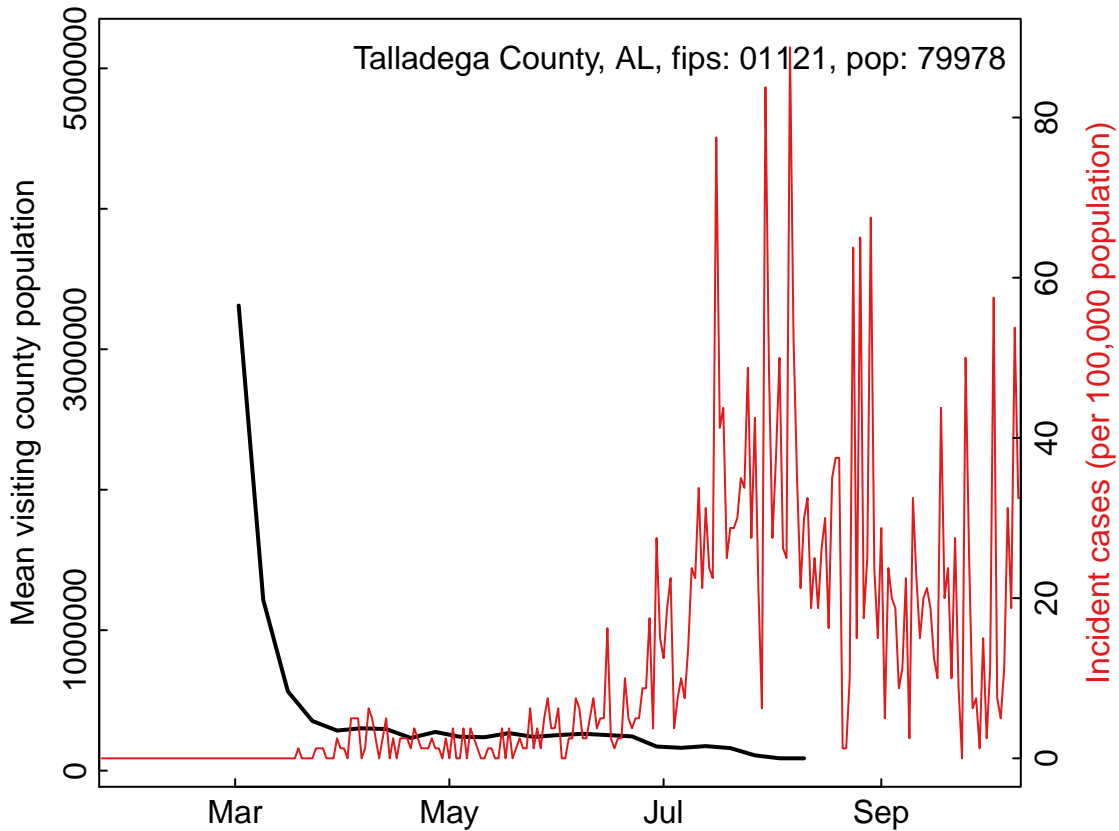

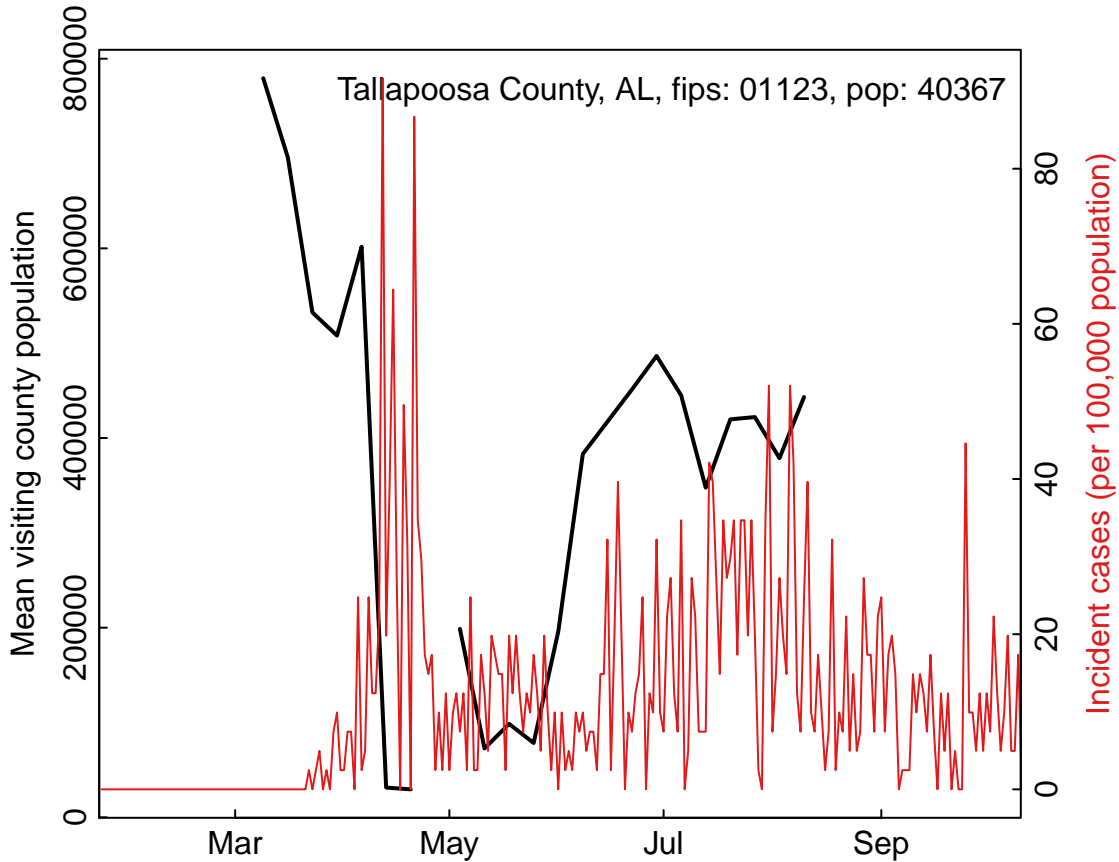

Tuscaloosa County, AL, fips: 01125, pop: 209355

Mean visiting county population

2500000  
1500000  
500000  
0

Mar May Jul Sep

Incident cases (per 100,000 population)

500  
400  
300  
200  
100  
0

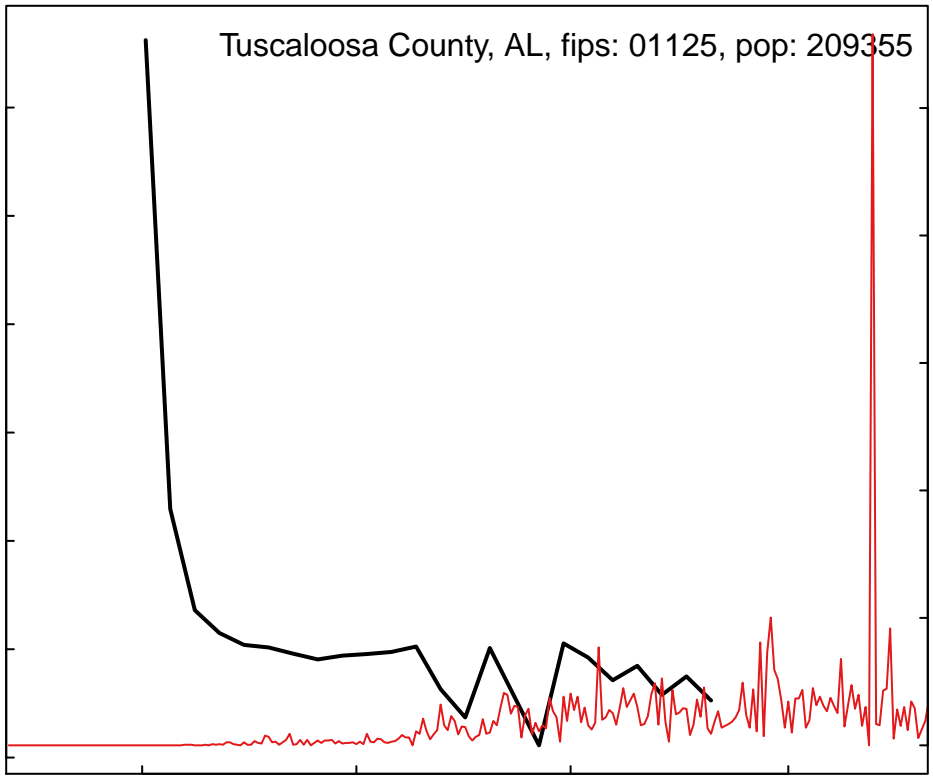



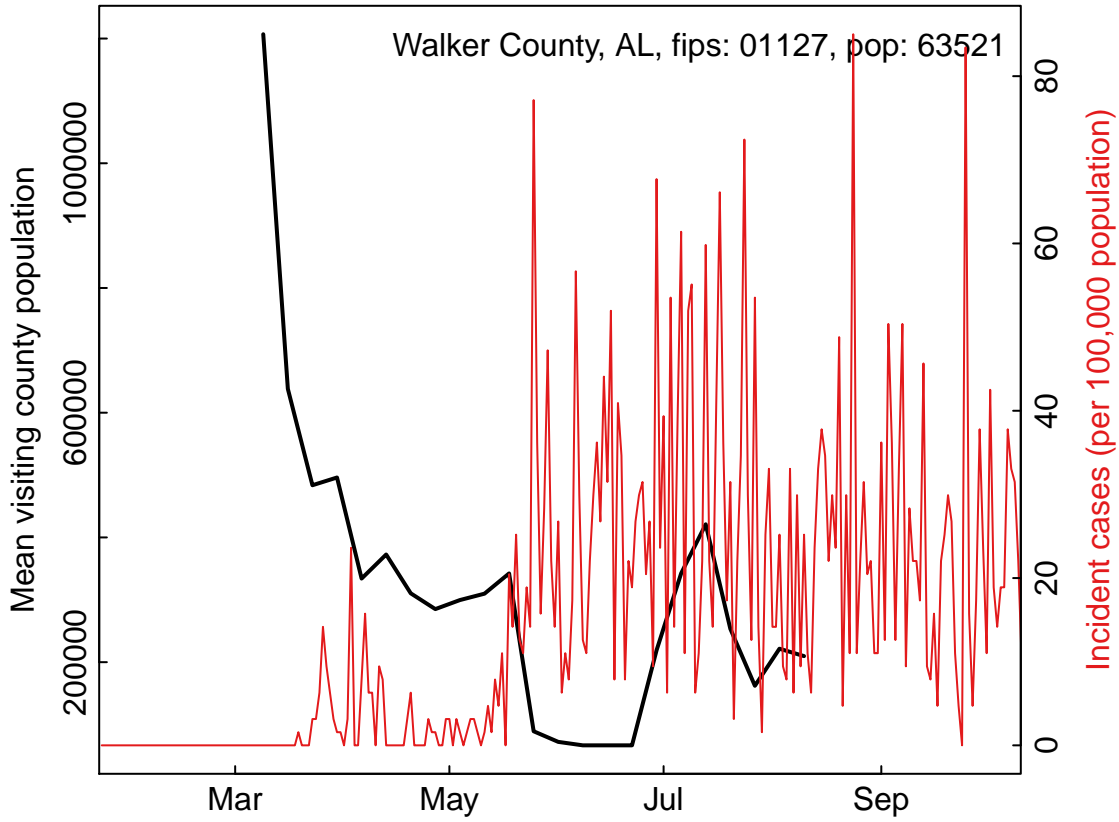

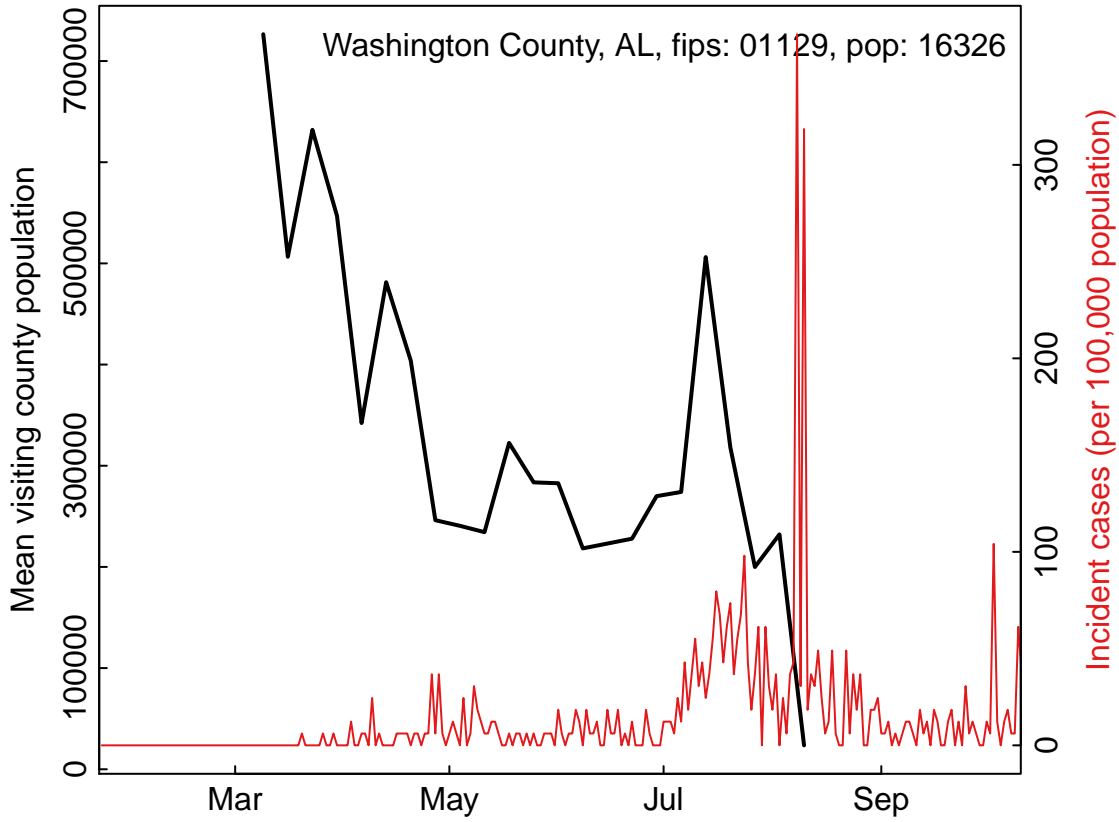

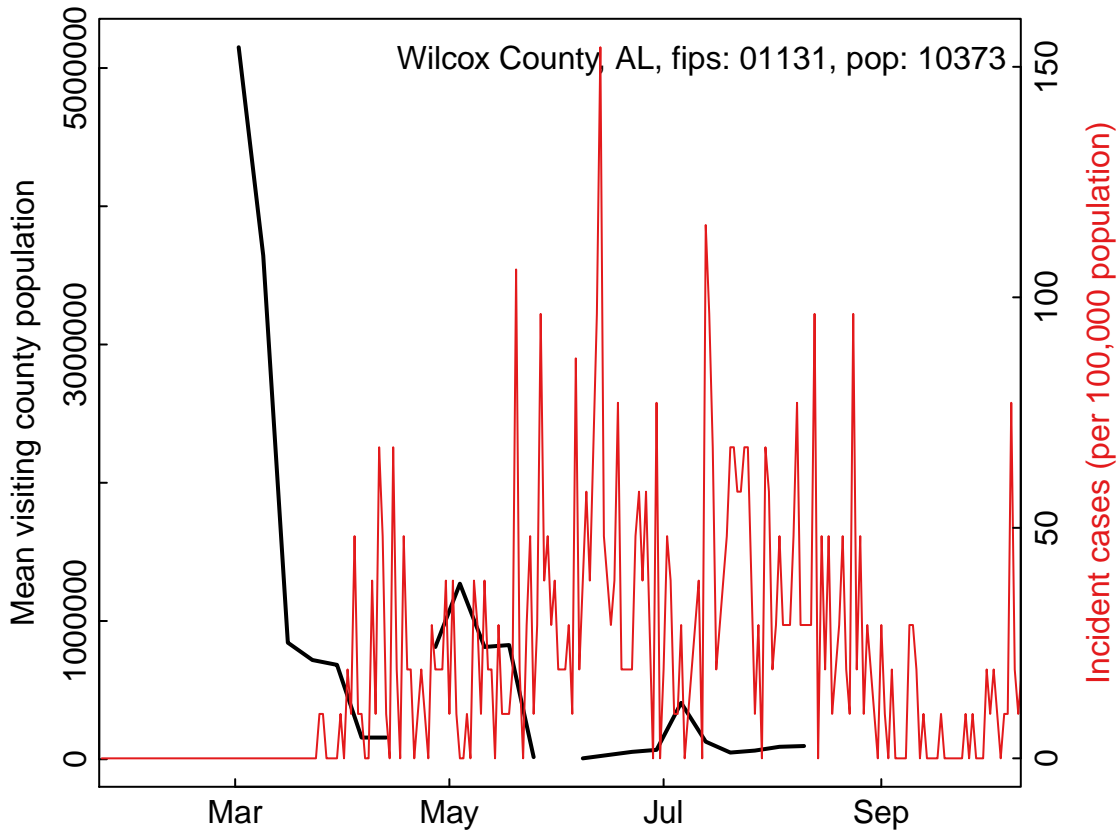

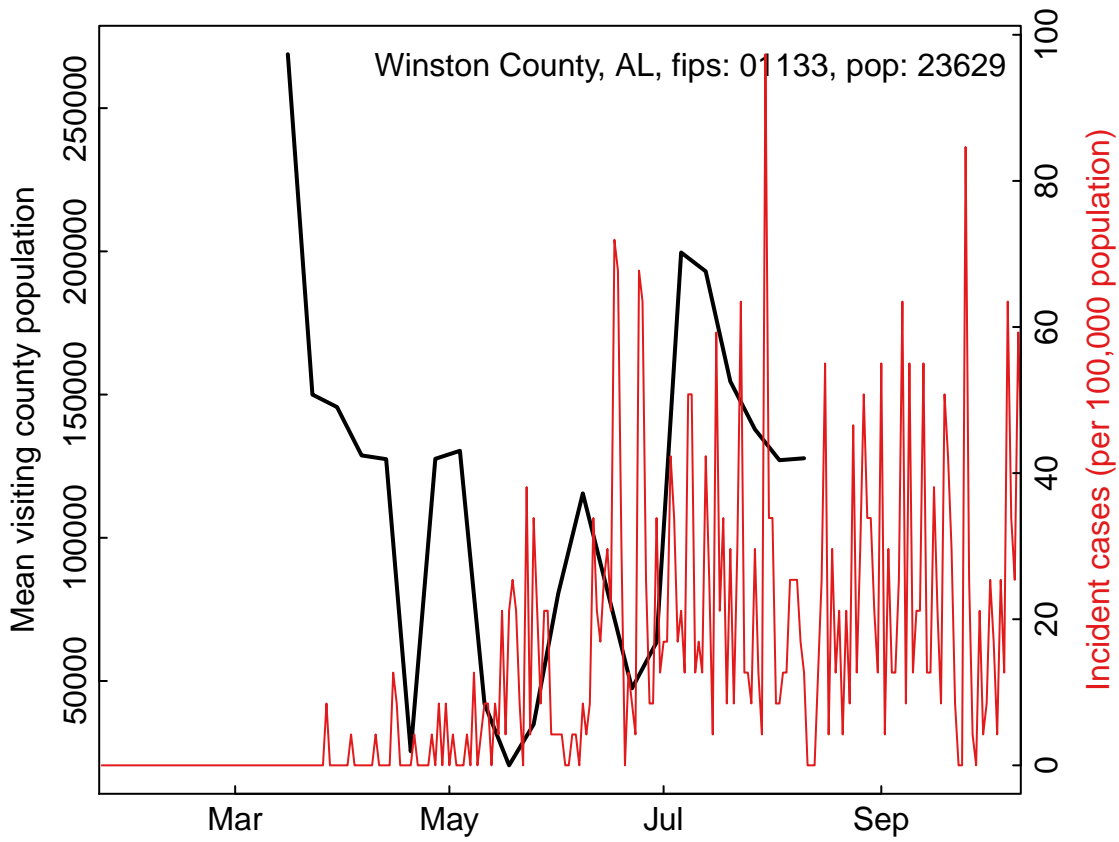

Apache County, AZ, fips: 04001, pop: 71887

Mean visiting county population

2500000  
1500000  
500000  
0

Mar

May

Jul

Sep

150  
100  
50  
0

Incident cases (per 100,000 population)

0

Cochise County, AZ, fips: 04003, pop: 125922

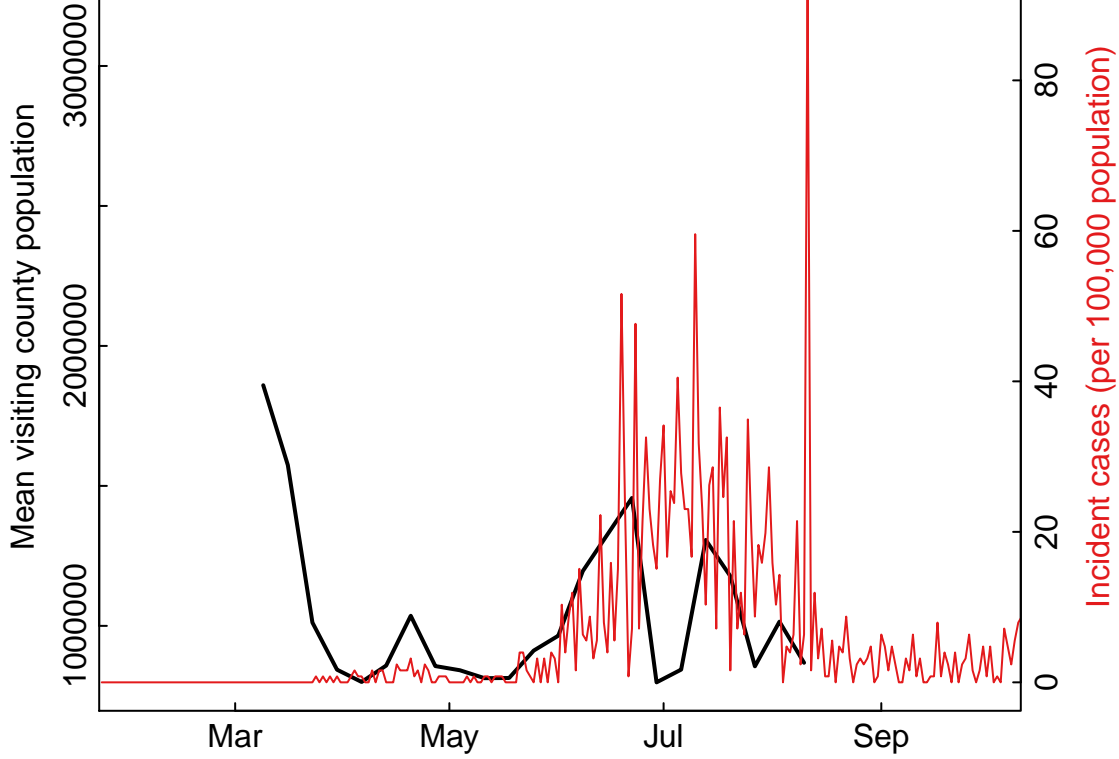

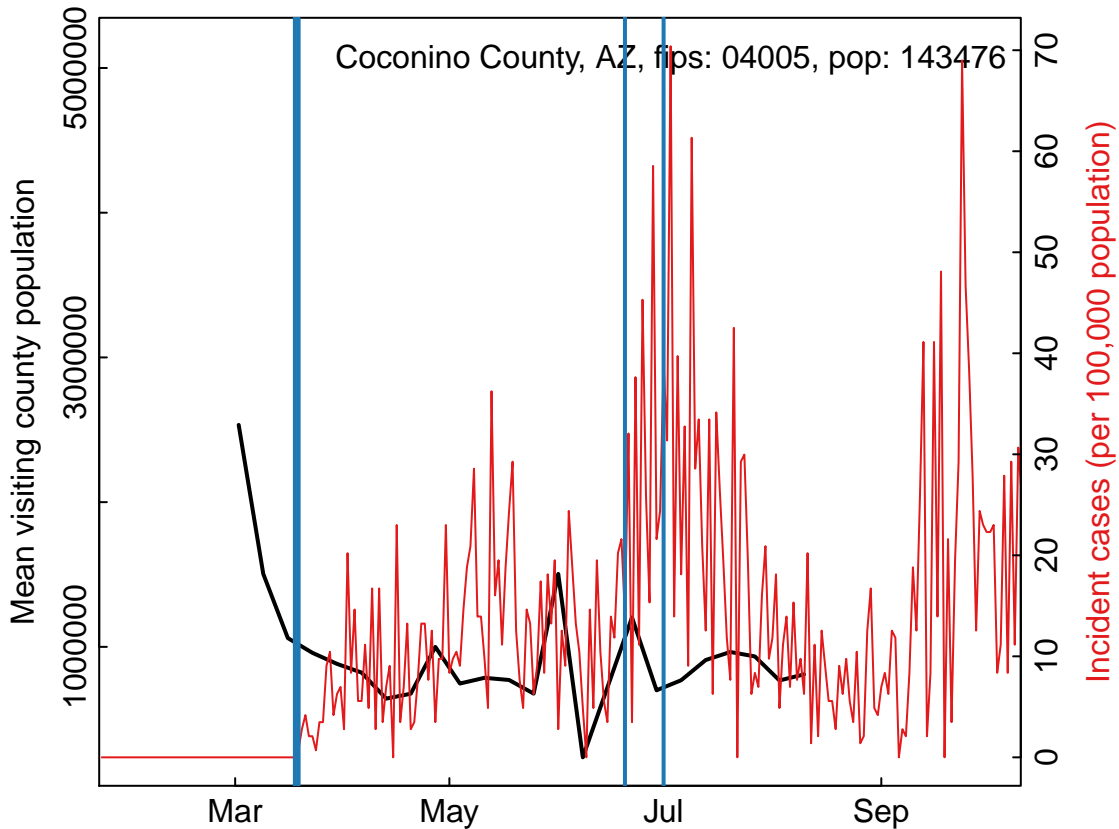

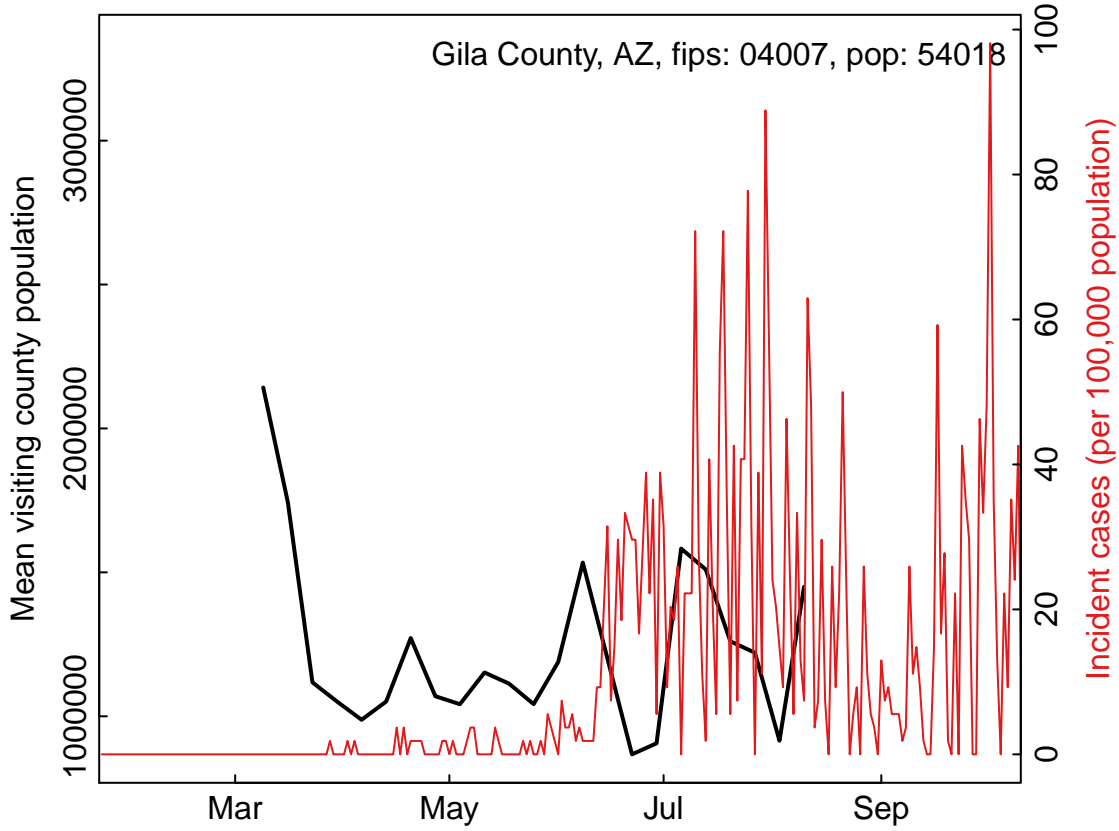



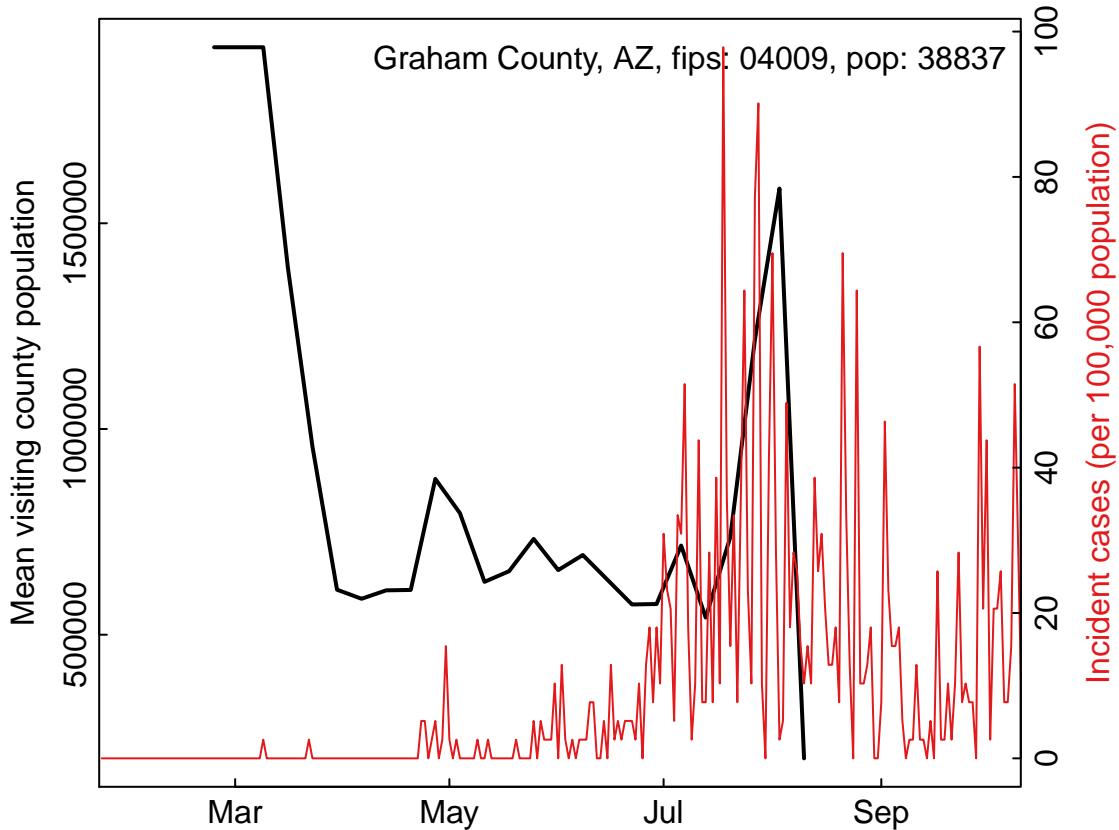

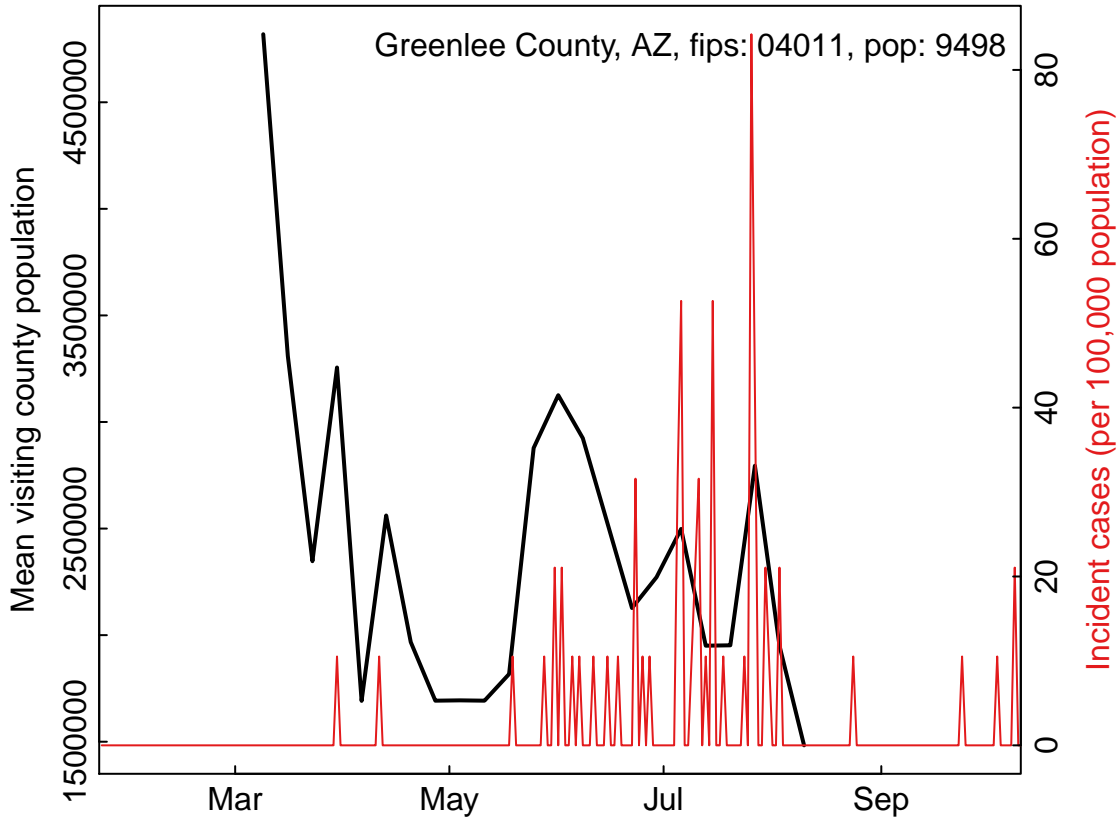

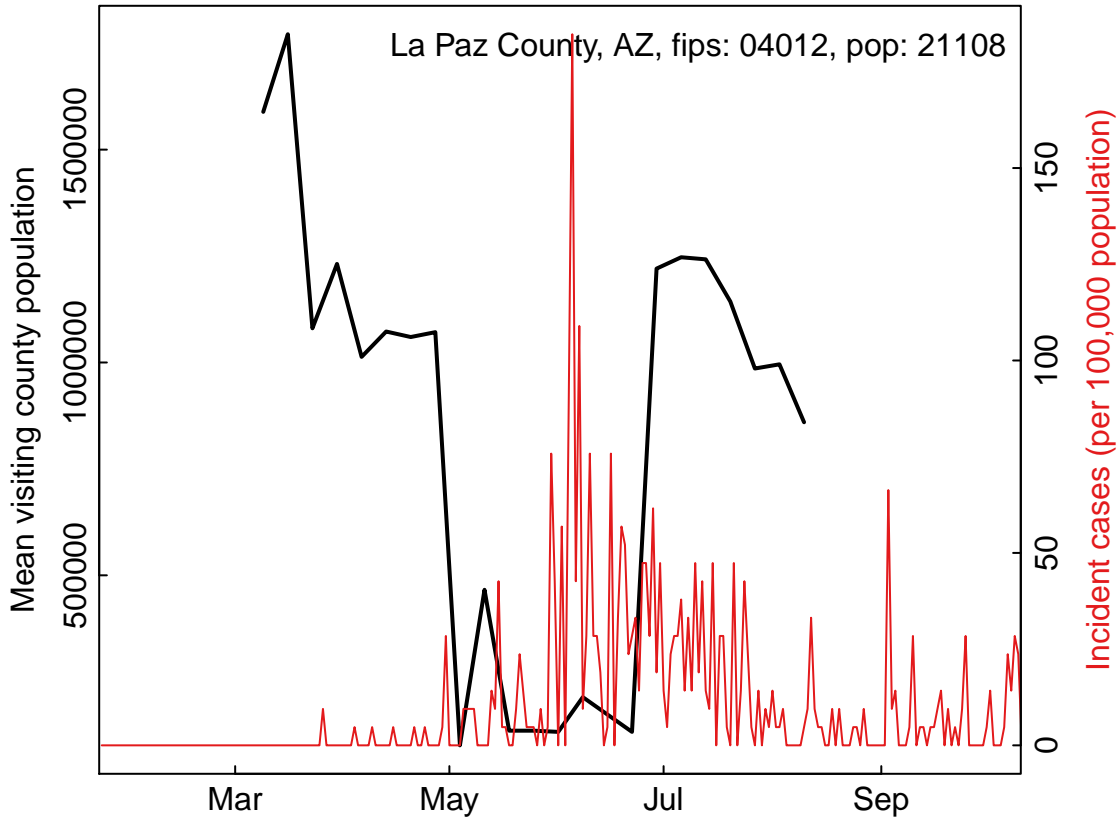

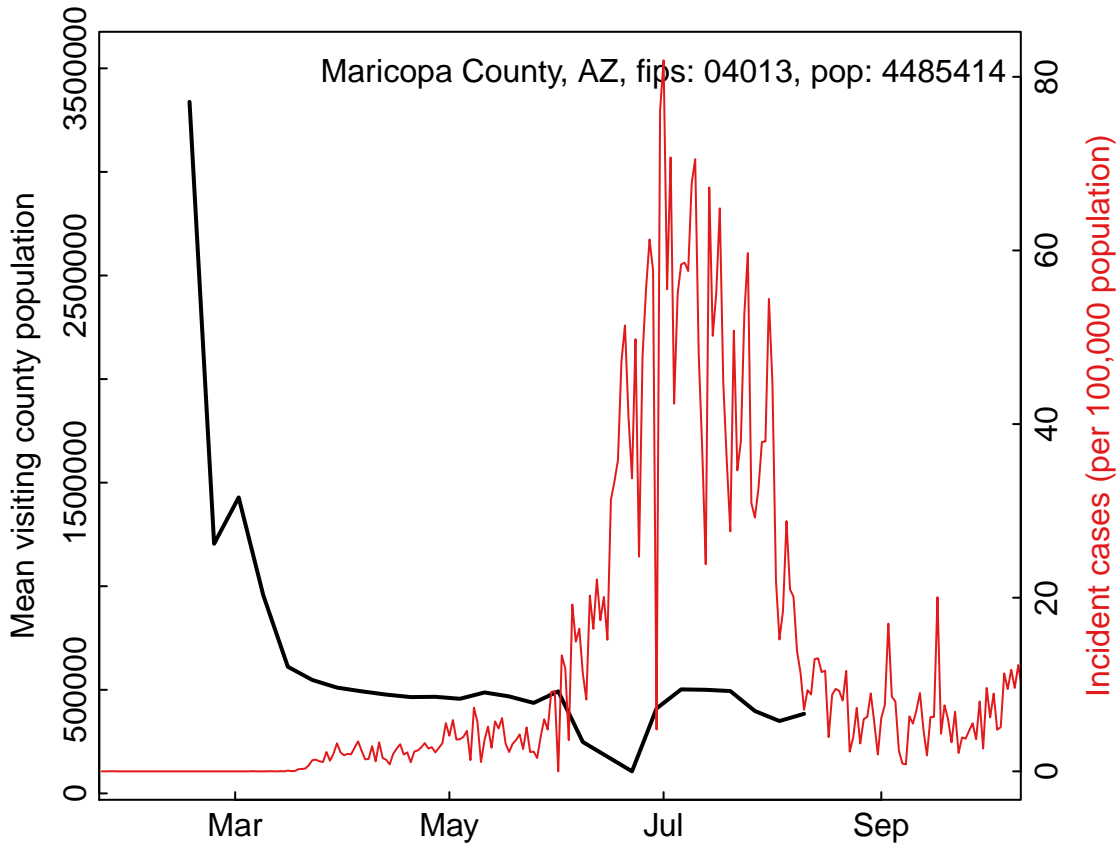

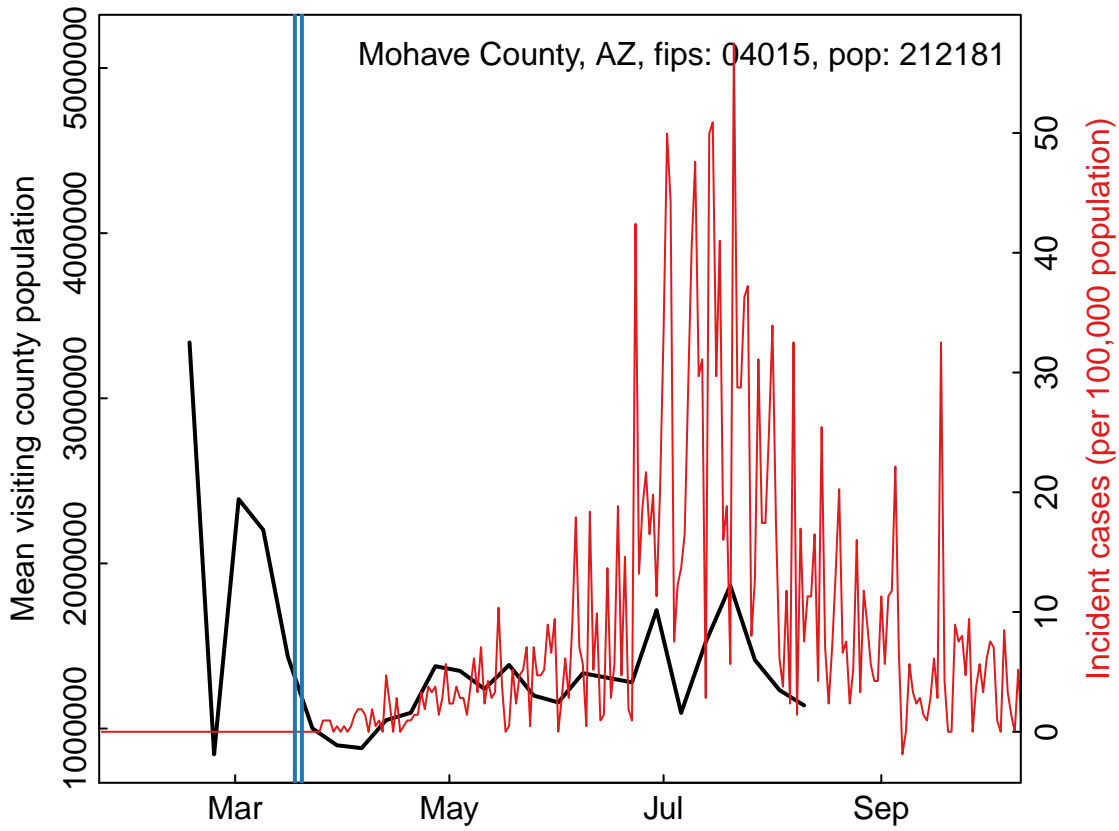

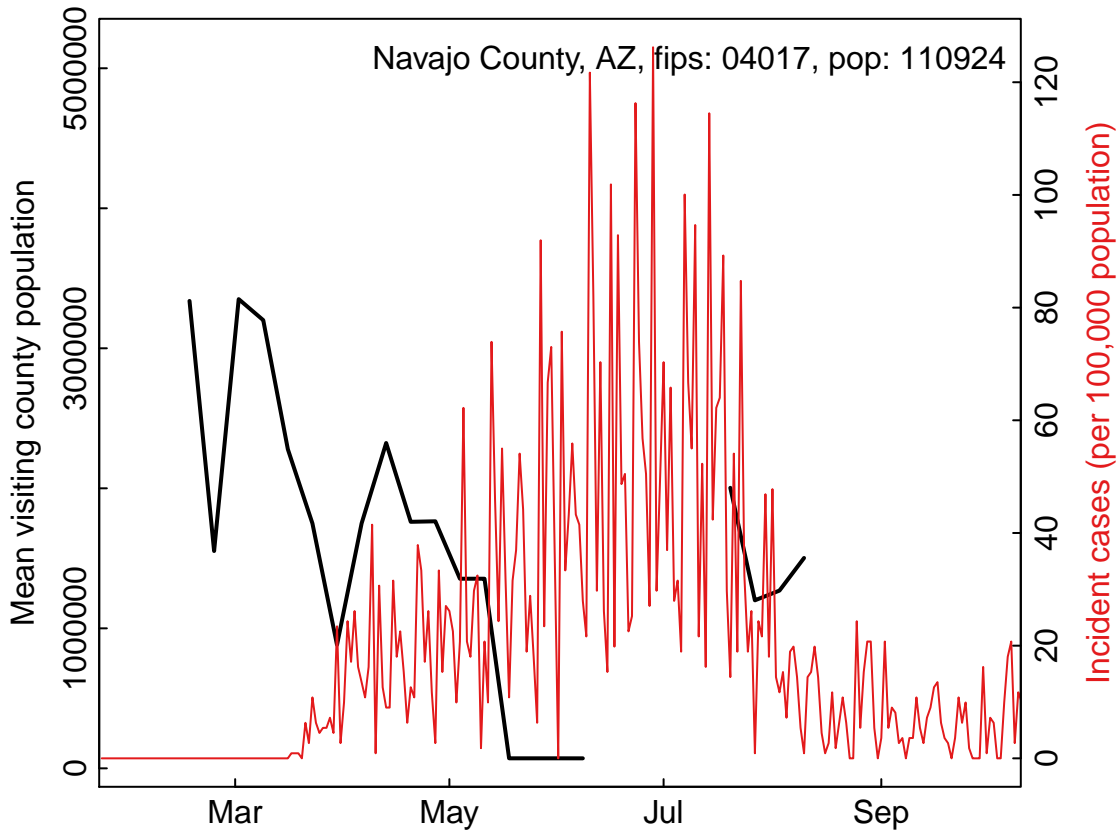

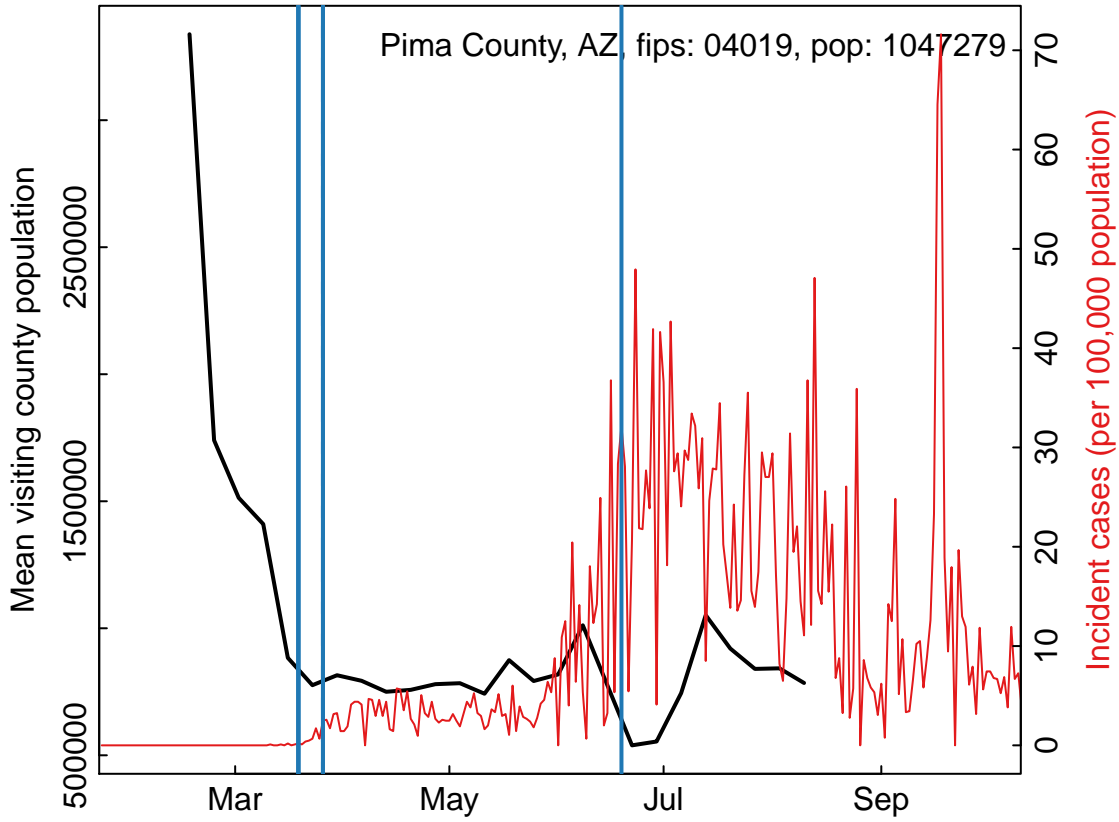

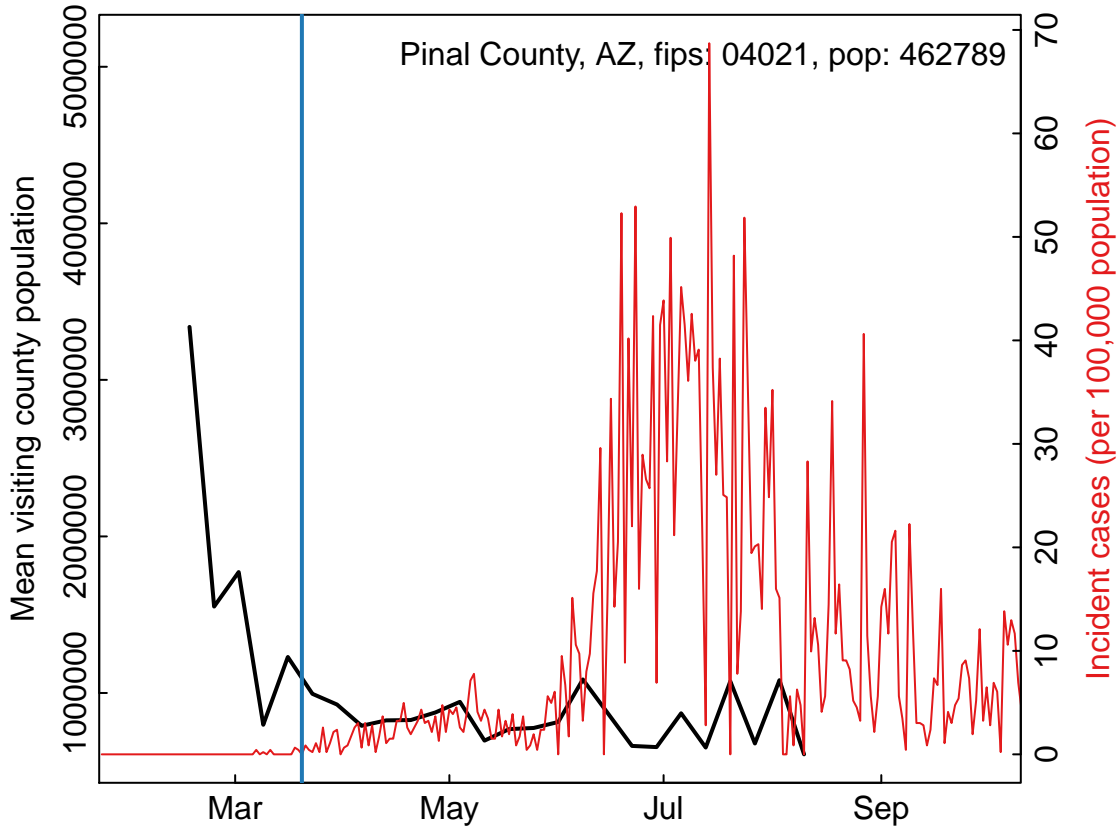



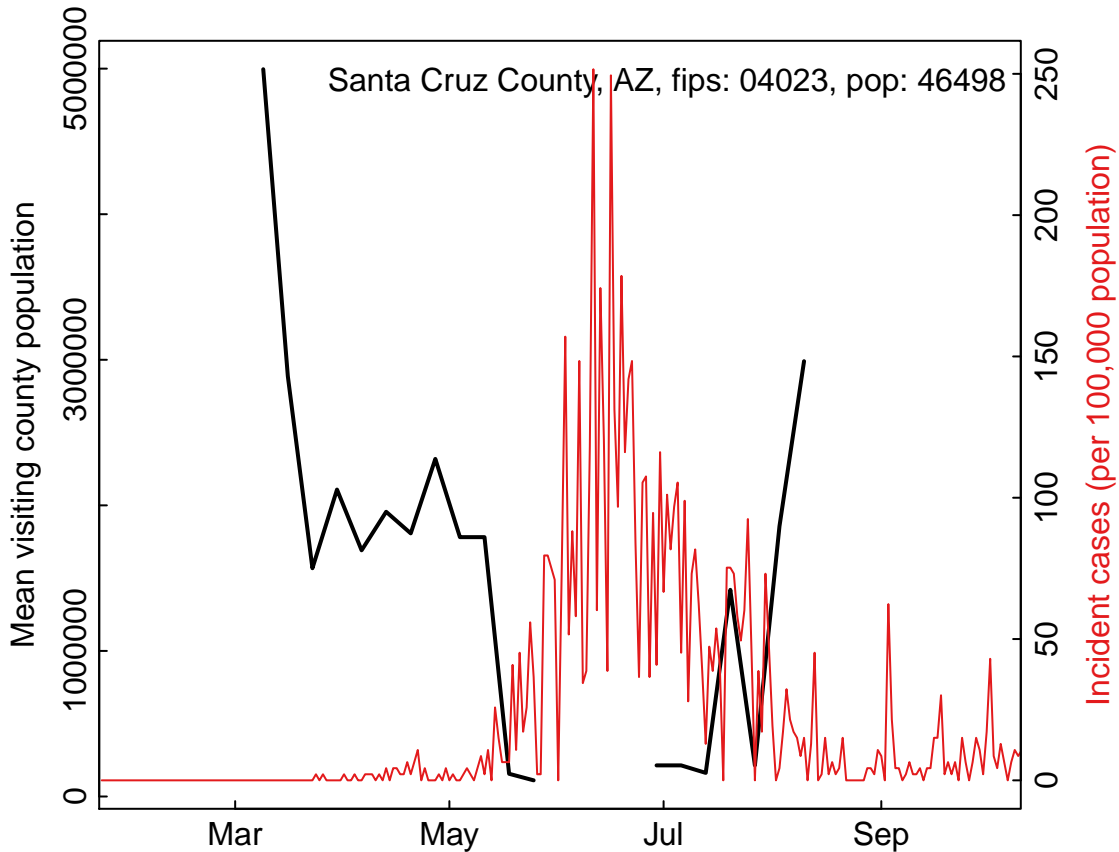

Yavapai County, AZ, fips: 04025, pop: 235099

Mean visiting county population

3000000  
2000000  
1000000

Mar

May

Jul

Sep

Incident cases (per 100,000 population)

30  
20  
10  
0

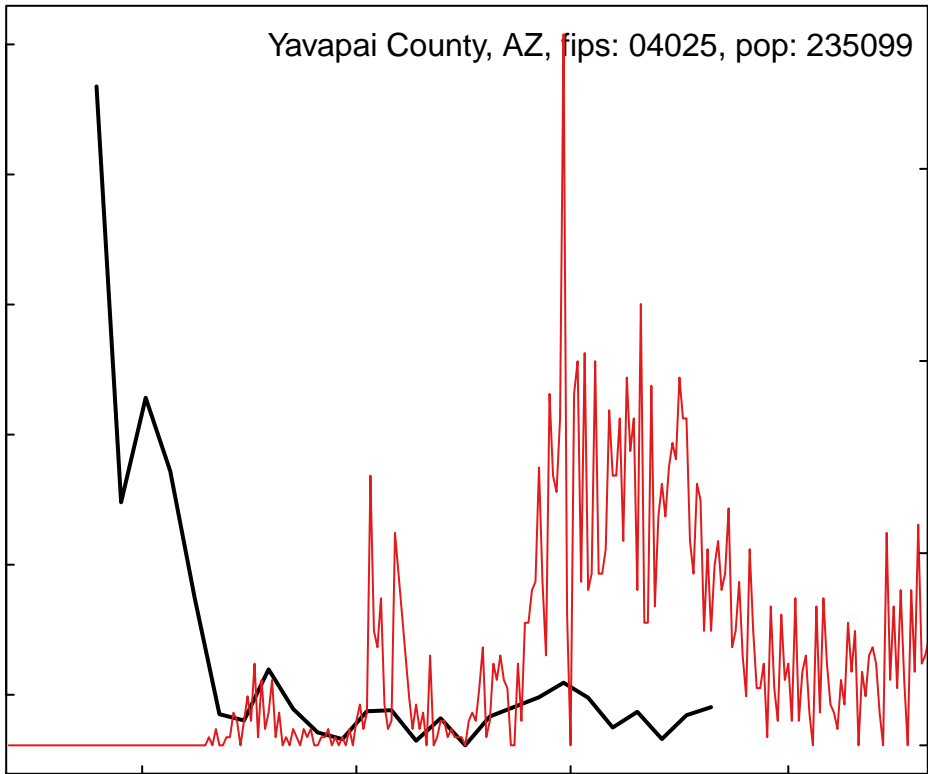

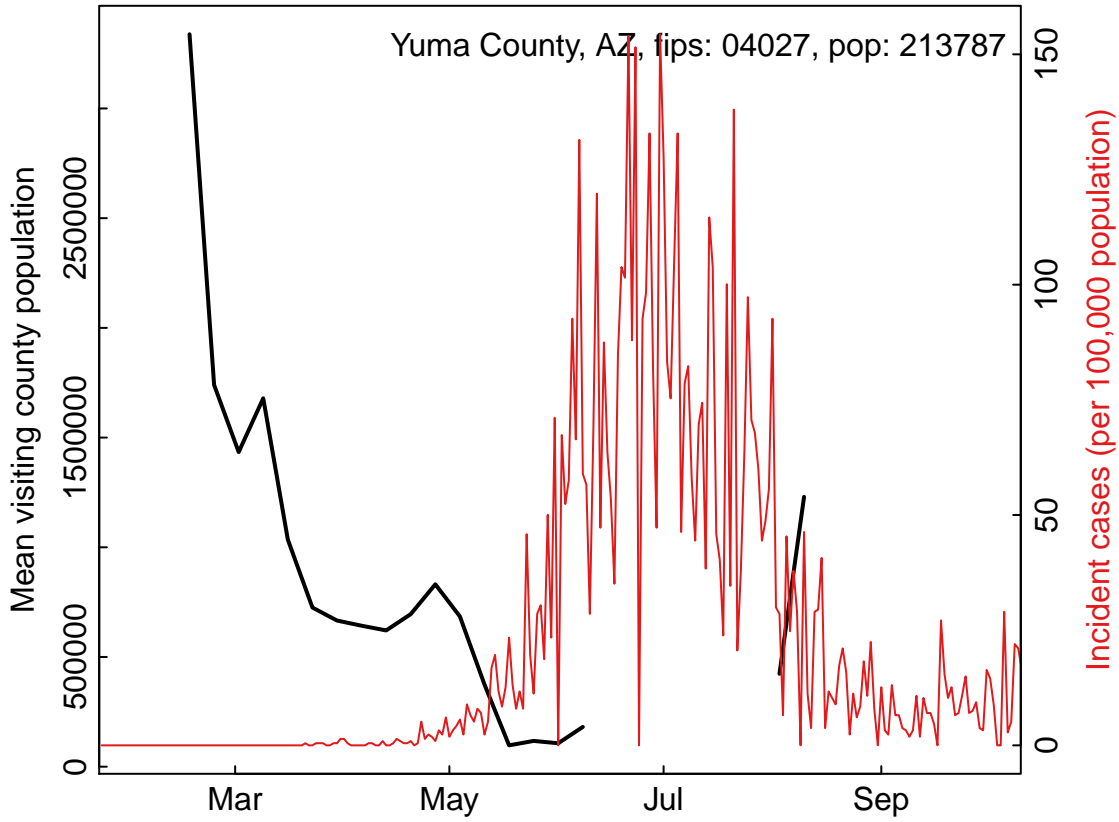

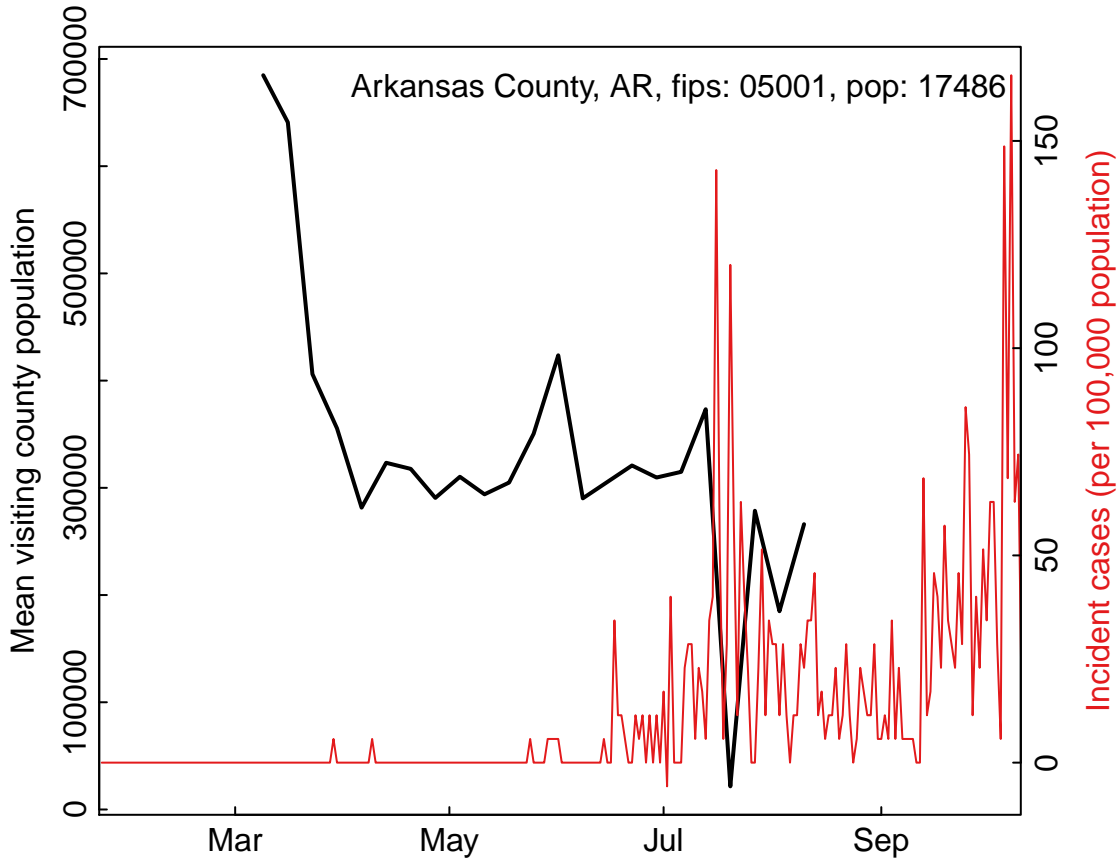

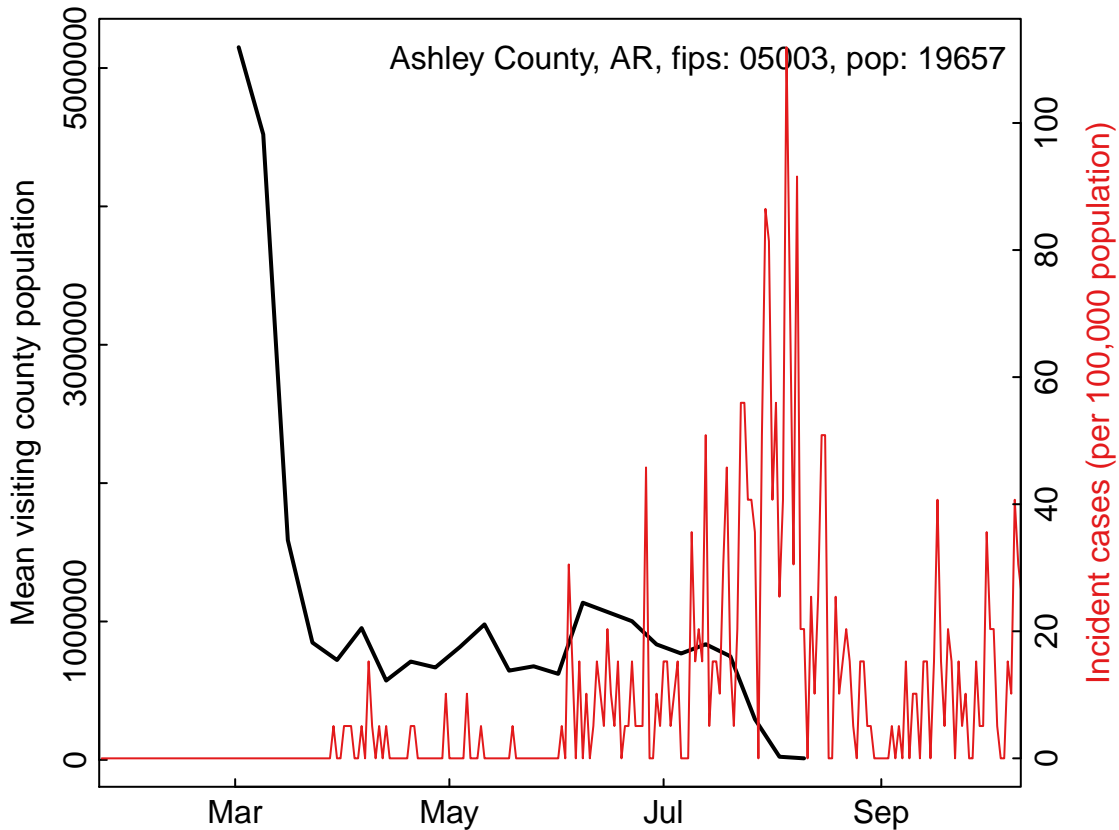

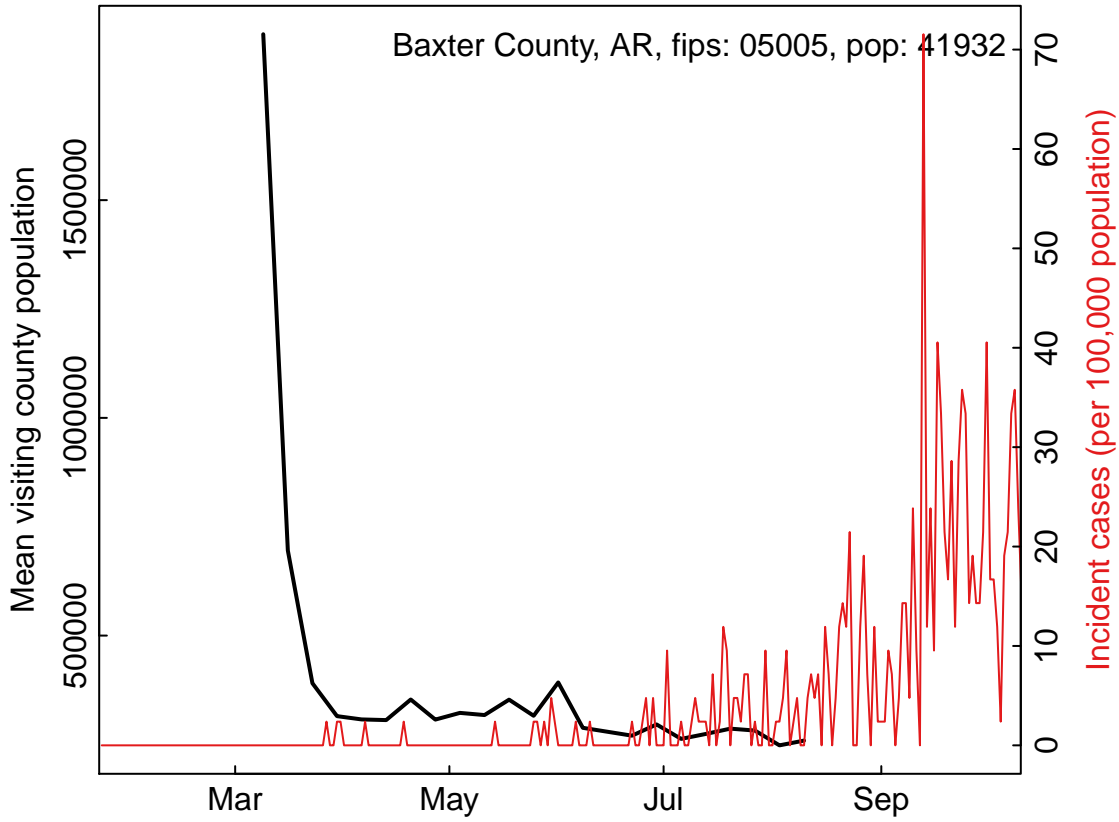

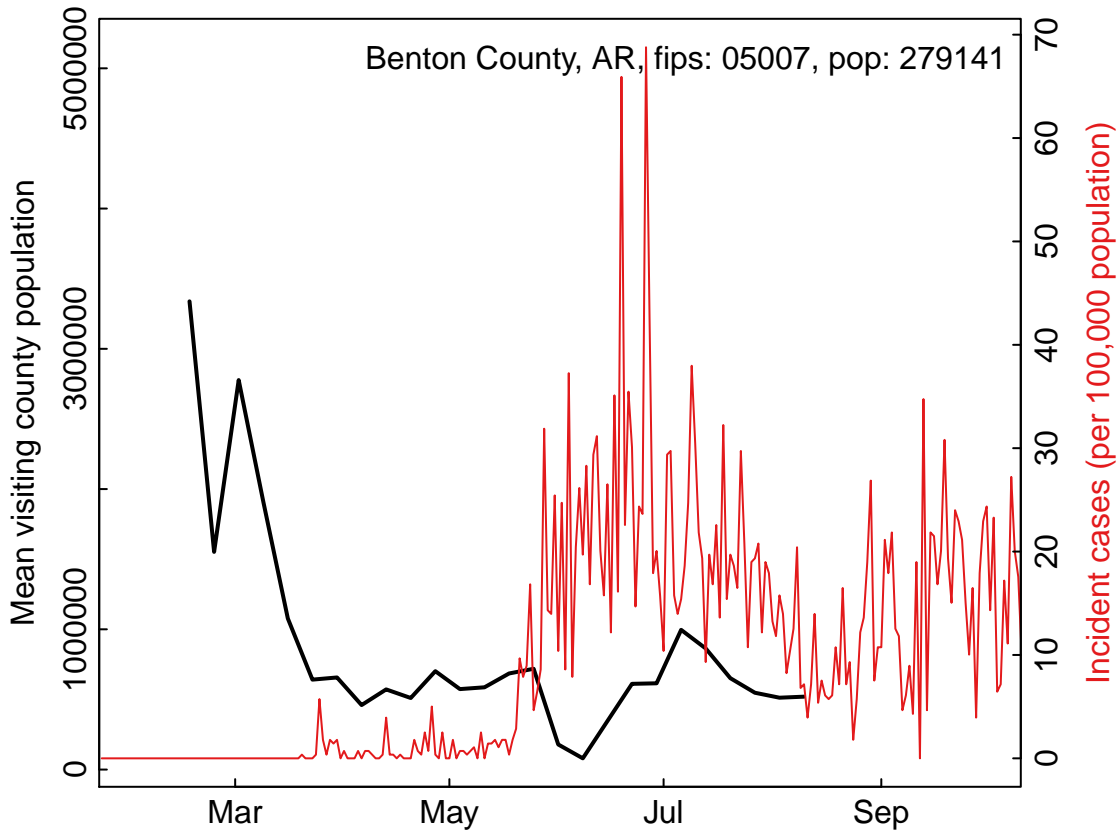

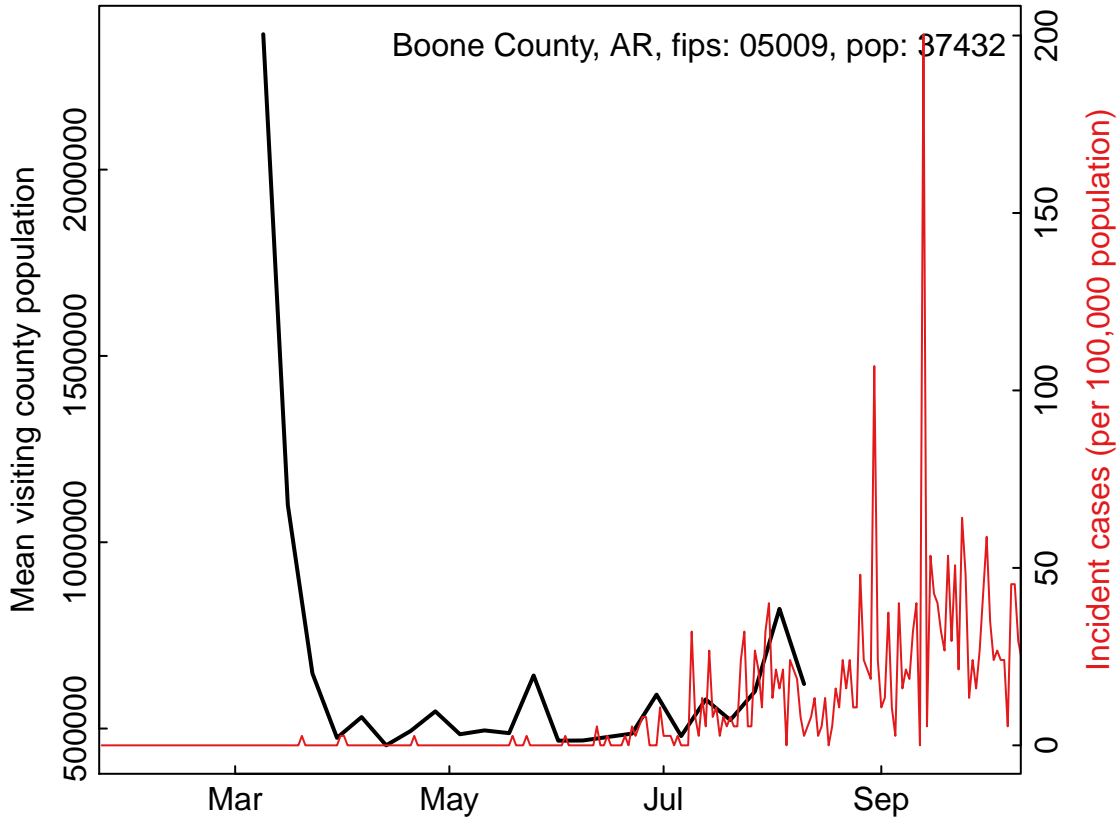



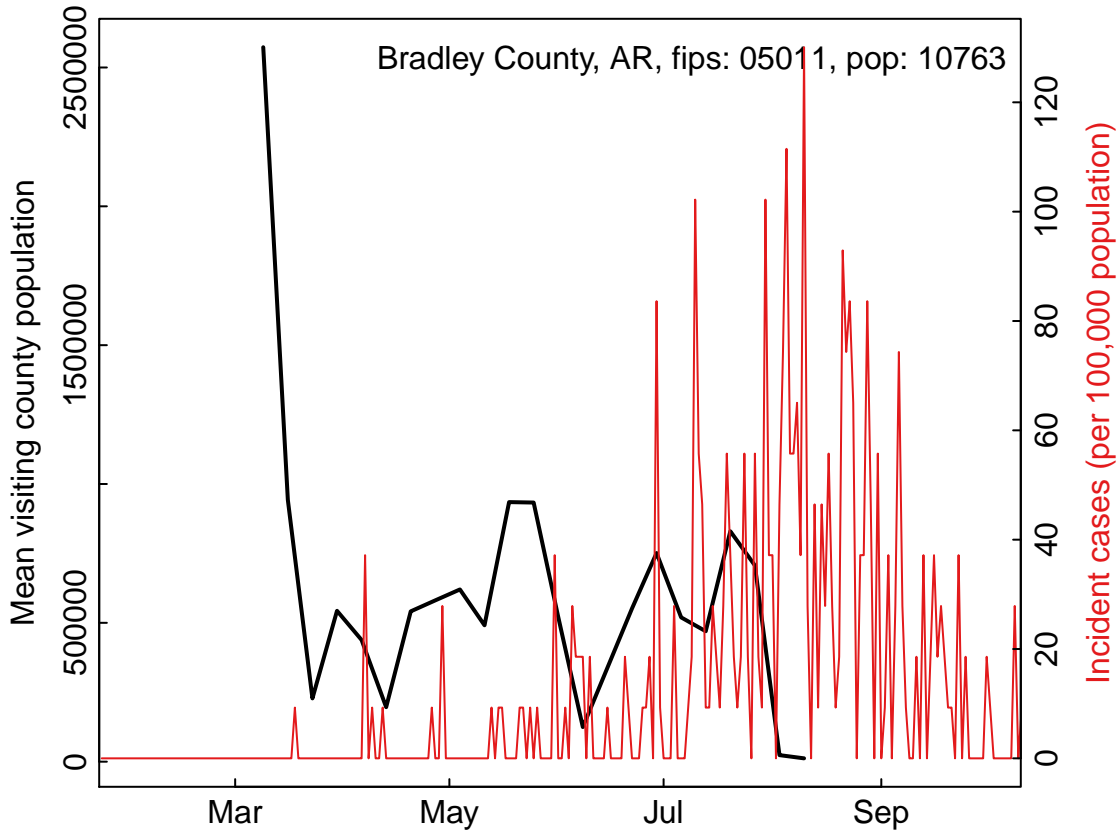

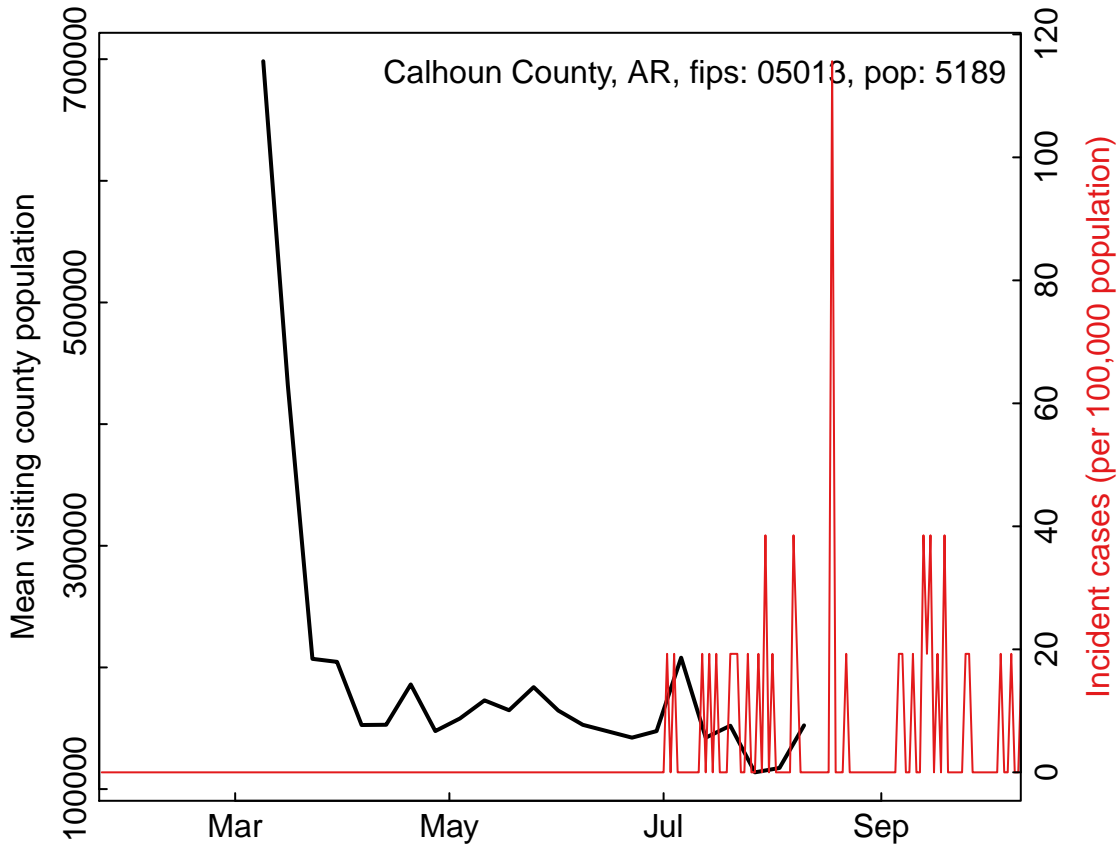

Carroll County, AR, fips: 05015, pop: 28380

Mean visiting county population

500000  
300000  
100000

Mar May Jul Sep

Incident cases (per 100,000 population)

150  
100  
50  
0

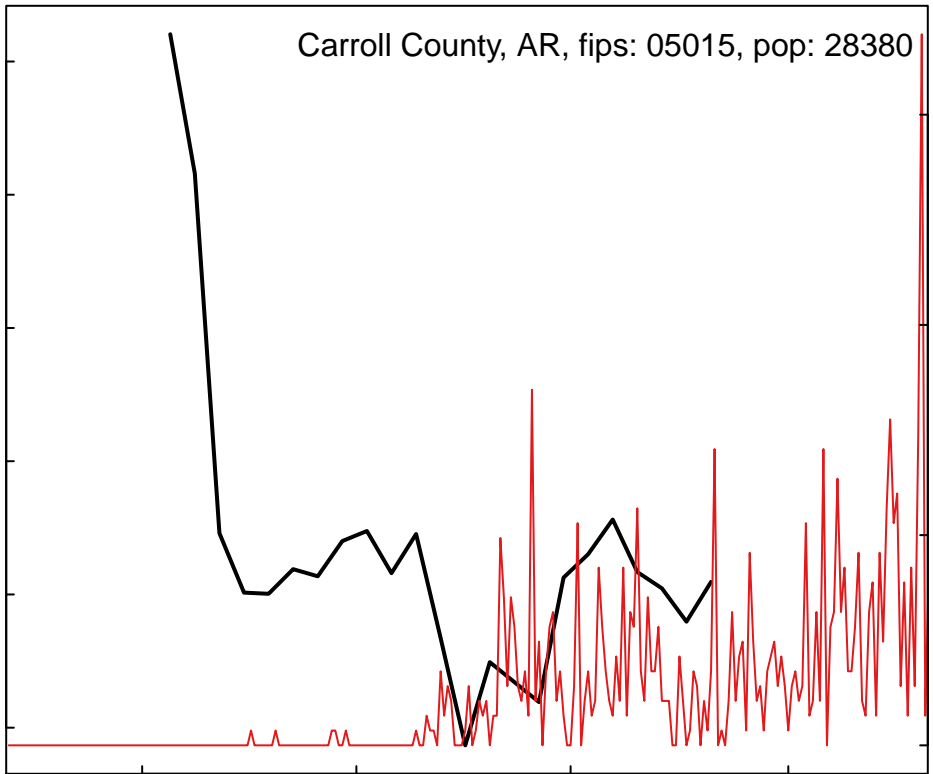

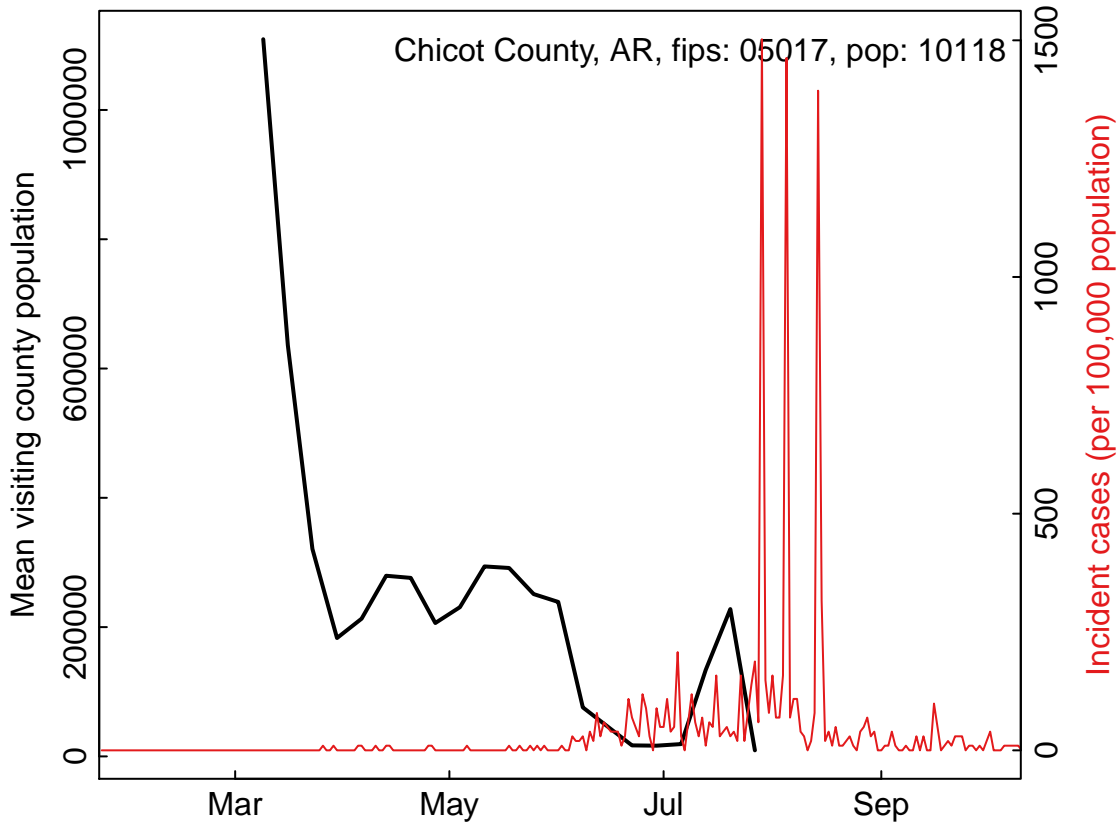

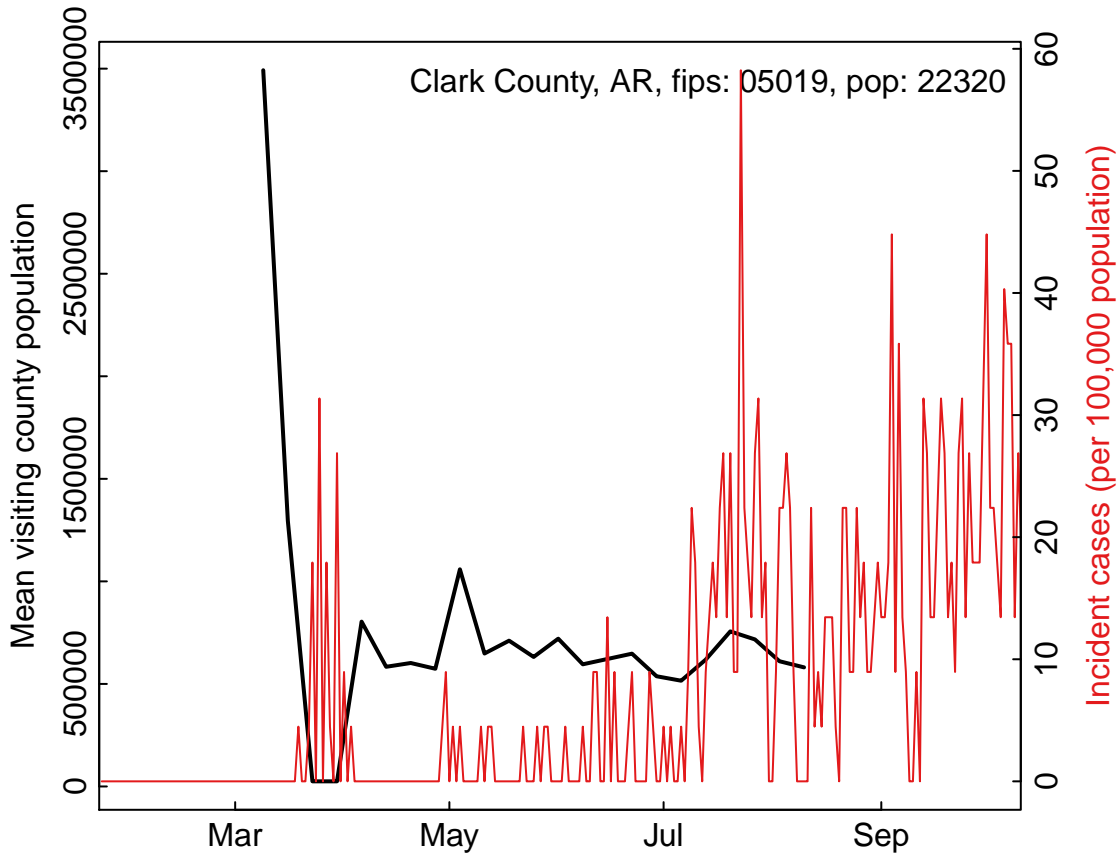

Clay County, AR, fips: 05021, pop: 14551

Mean visiting county population

Incident cases (per 100,000 population)

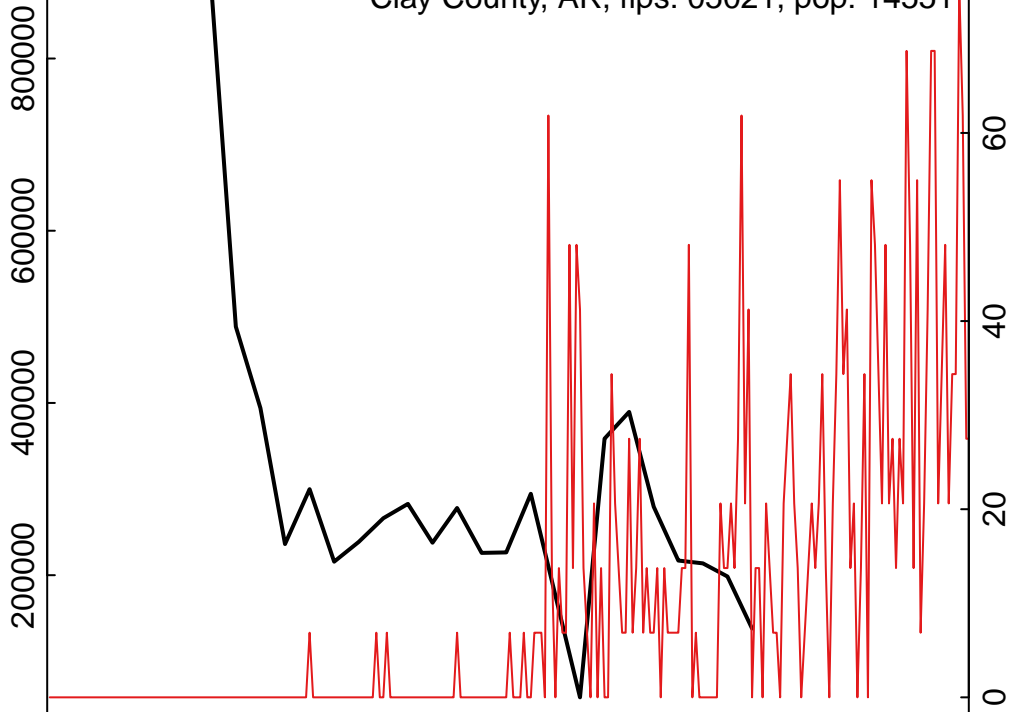

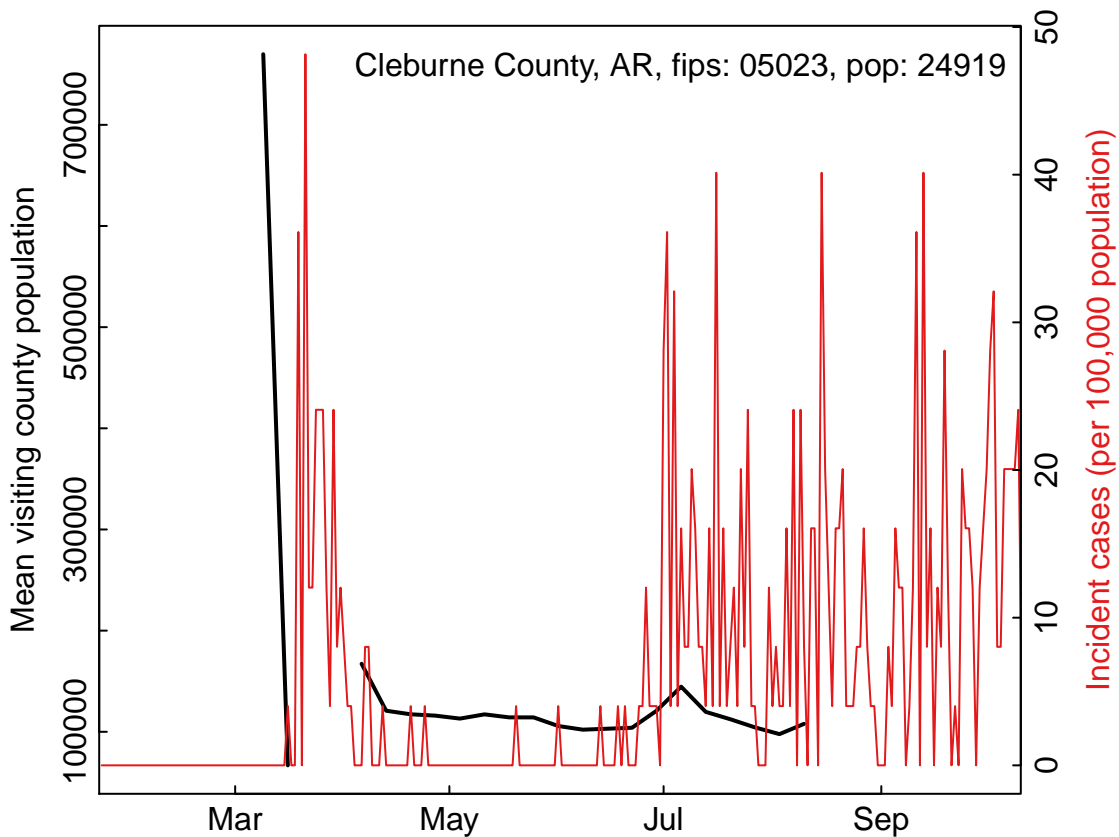

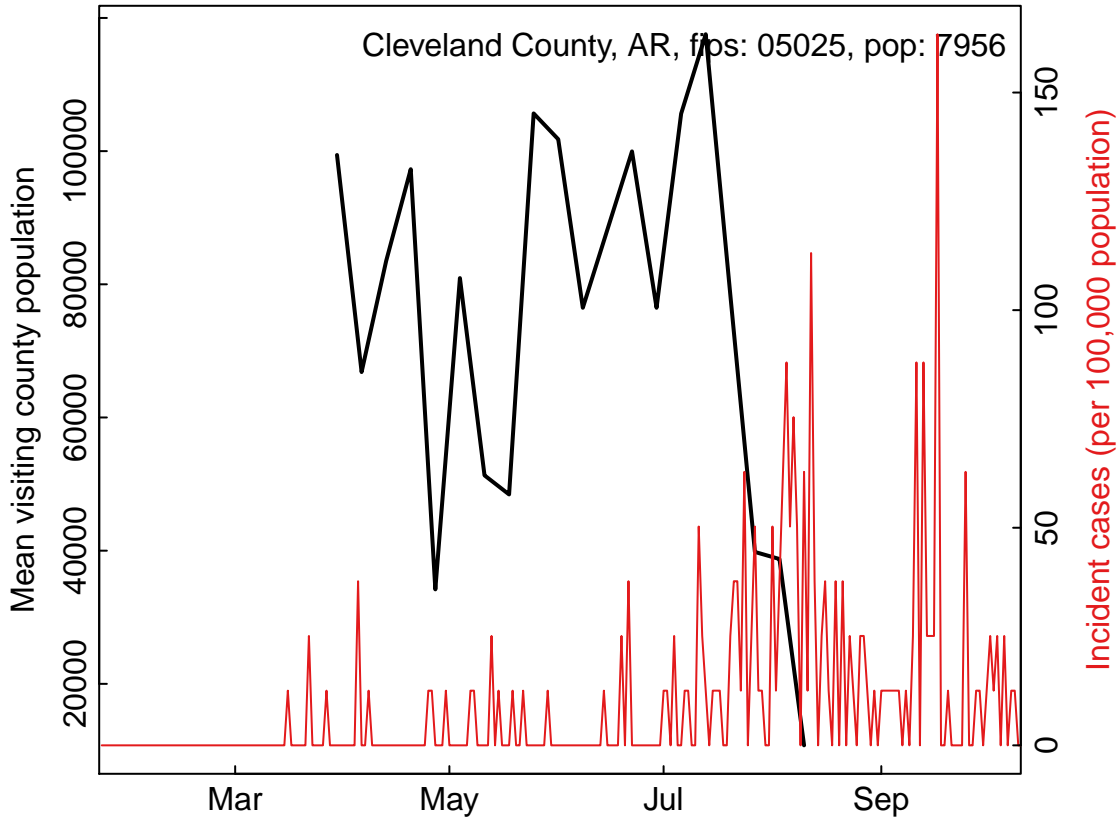



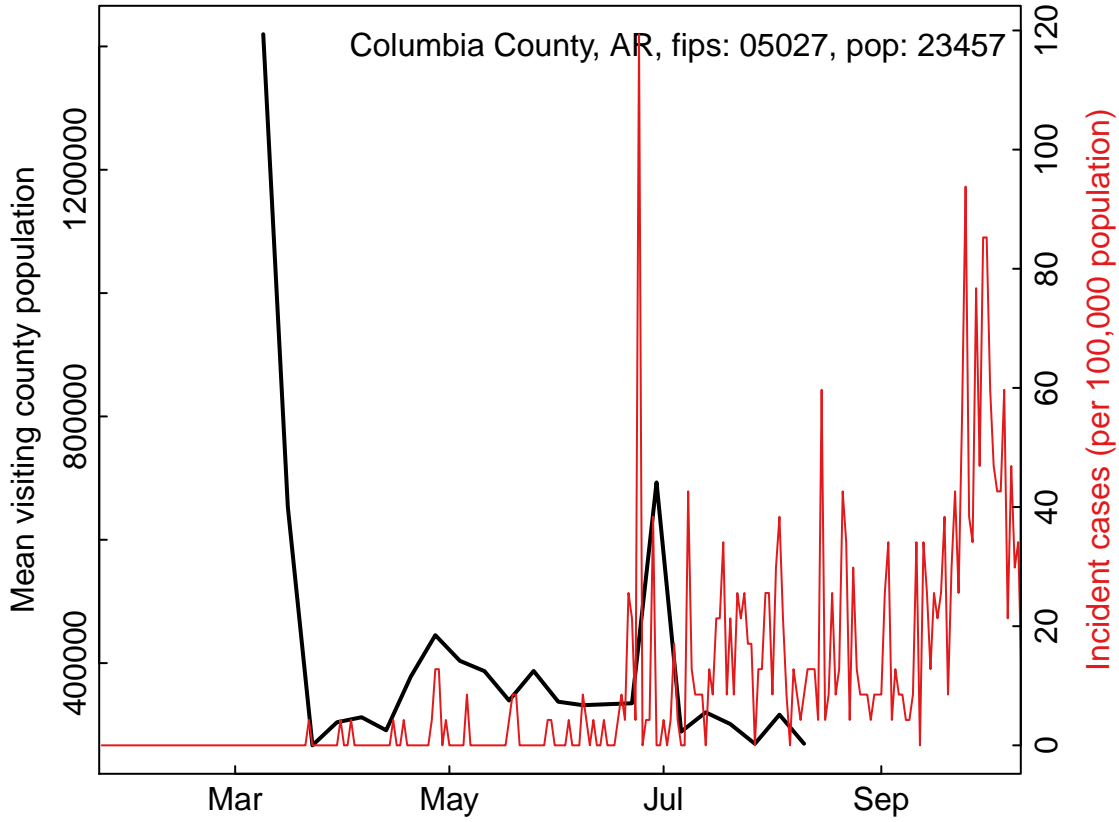

Conway County, AR, fips: 05029, pop: 20846

Mean visiting county population

Incident cases (per 100,000 population)

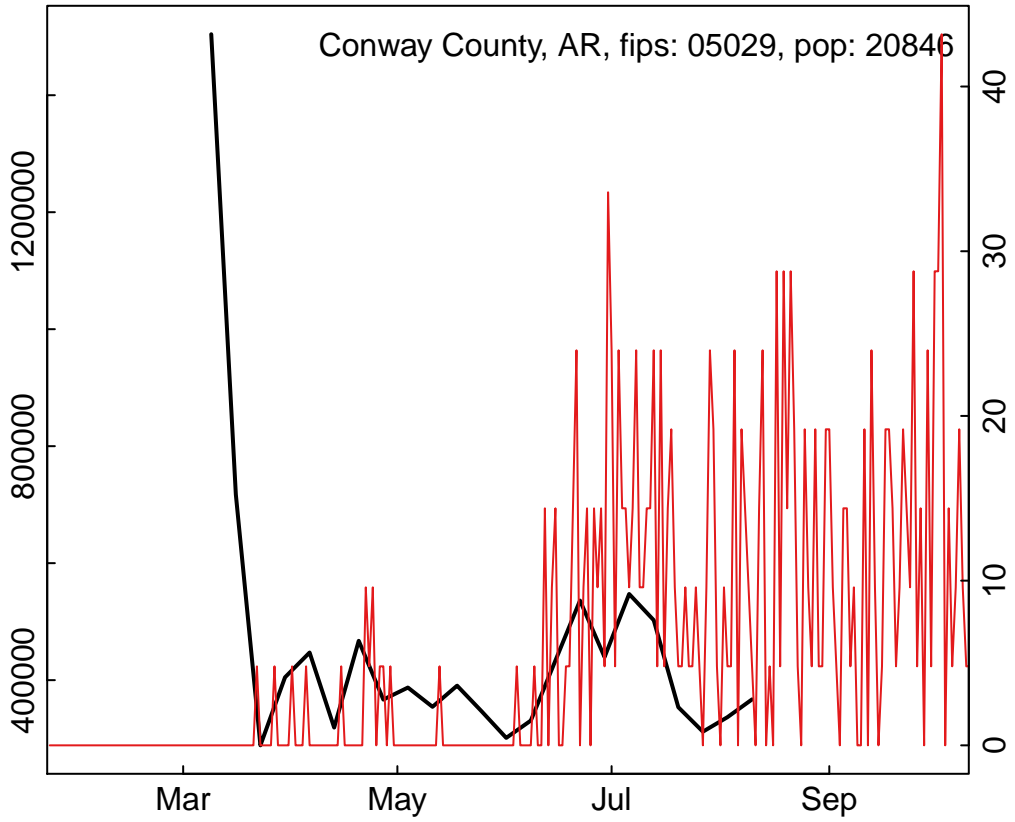

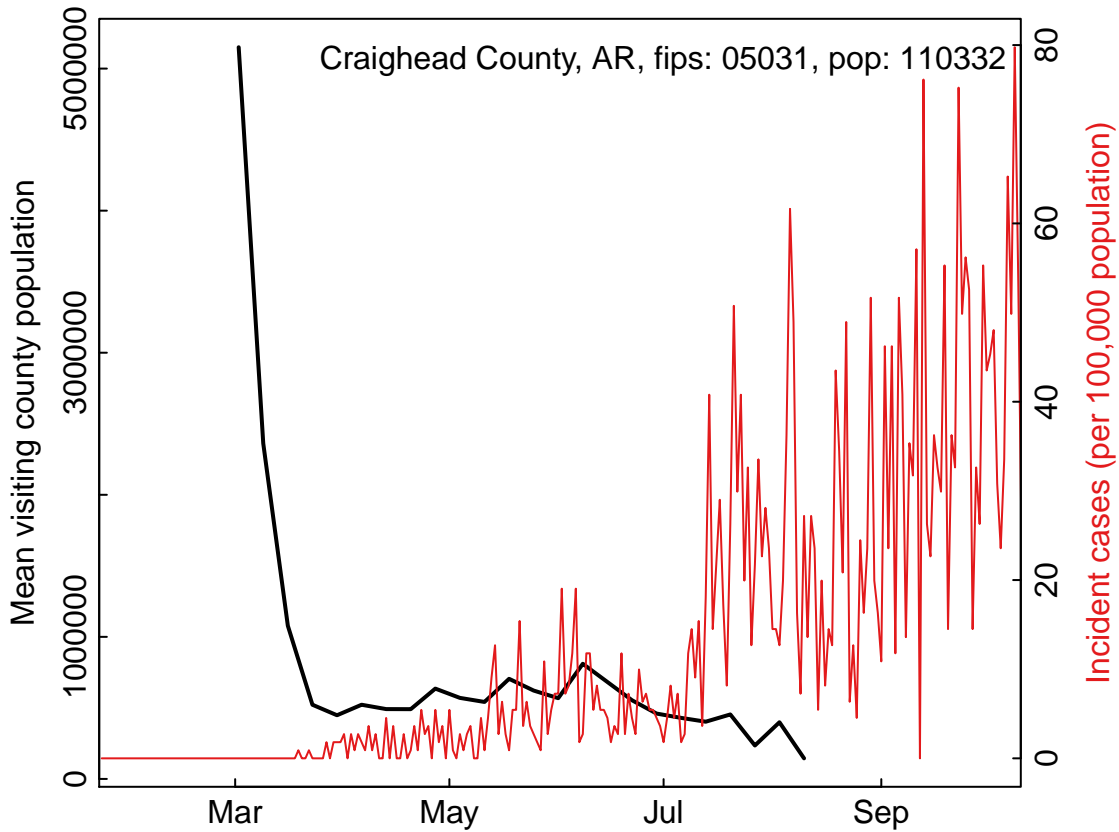

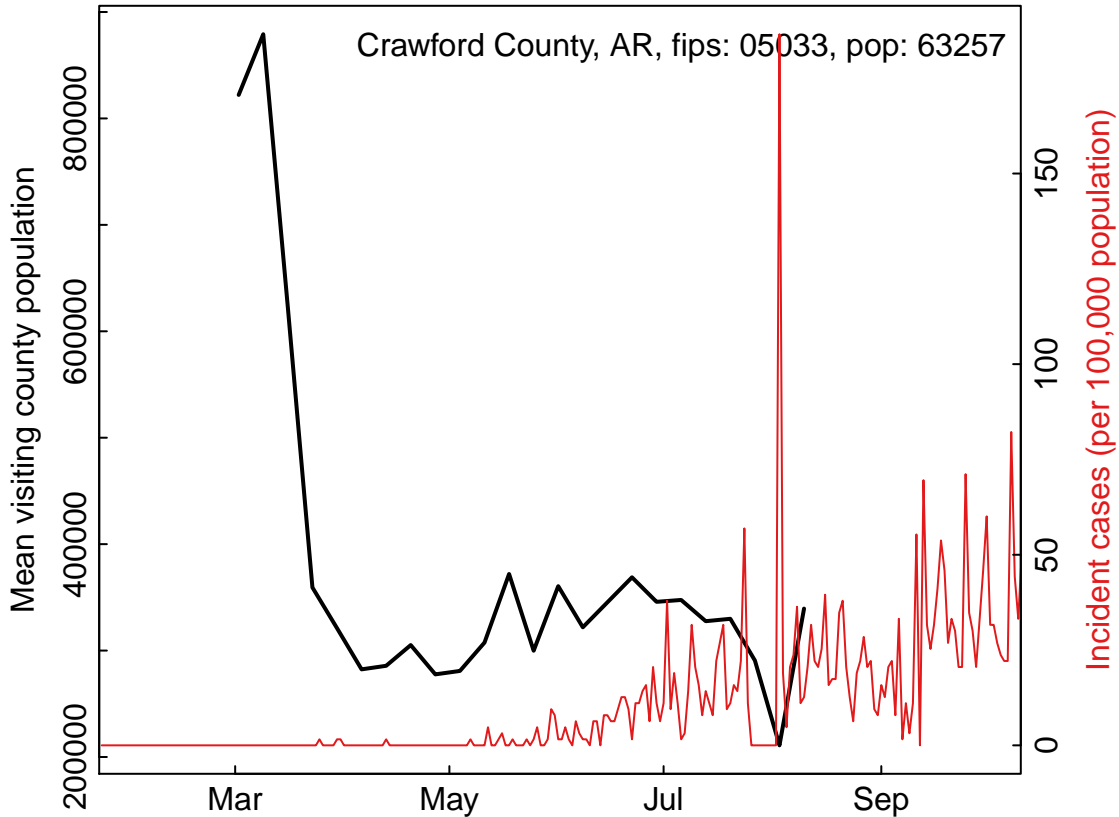

Crittenden County, AR, fips: 05035, pop: 47955

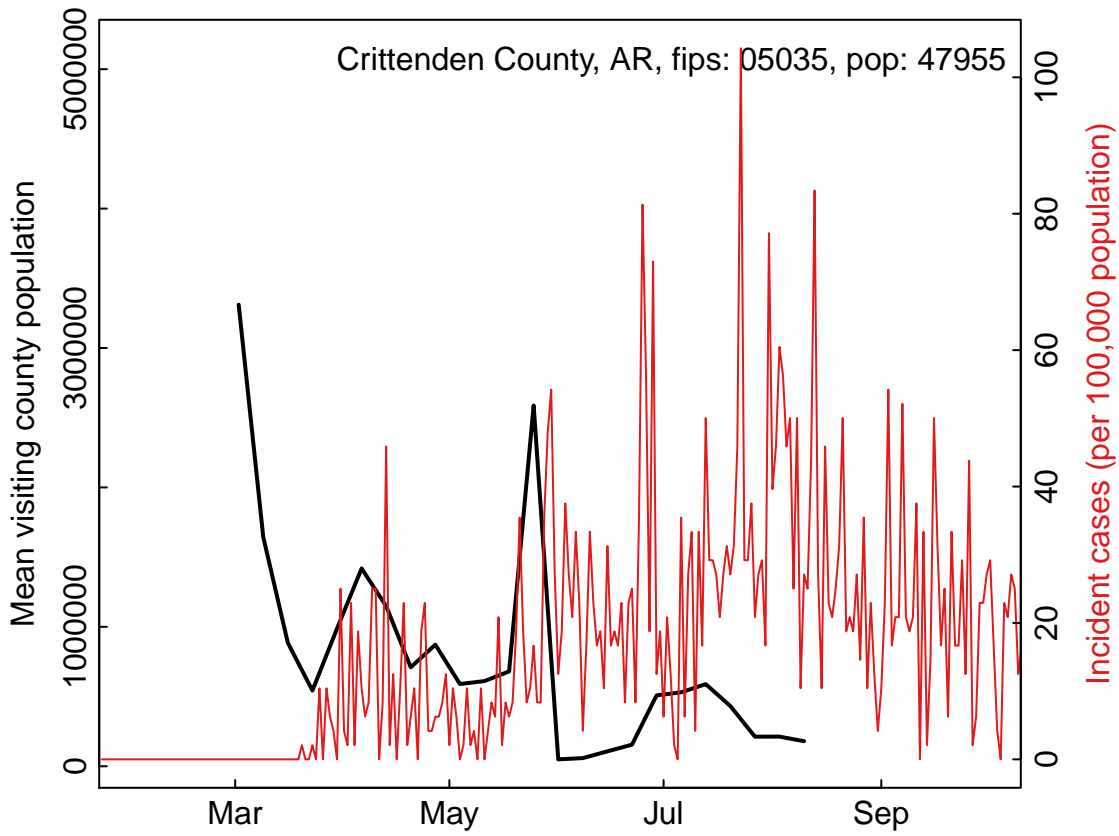

Mean visiting county population

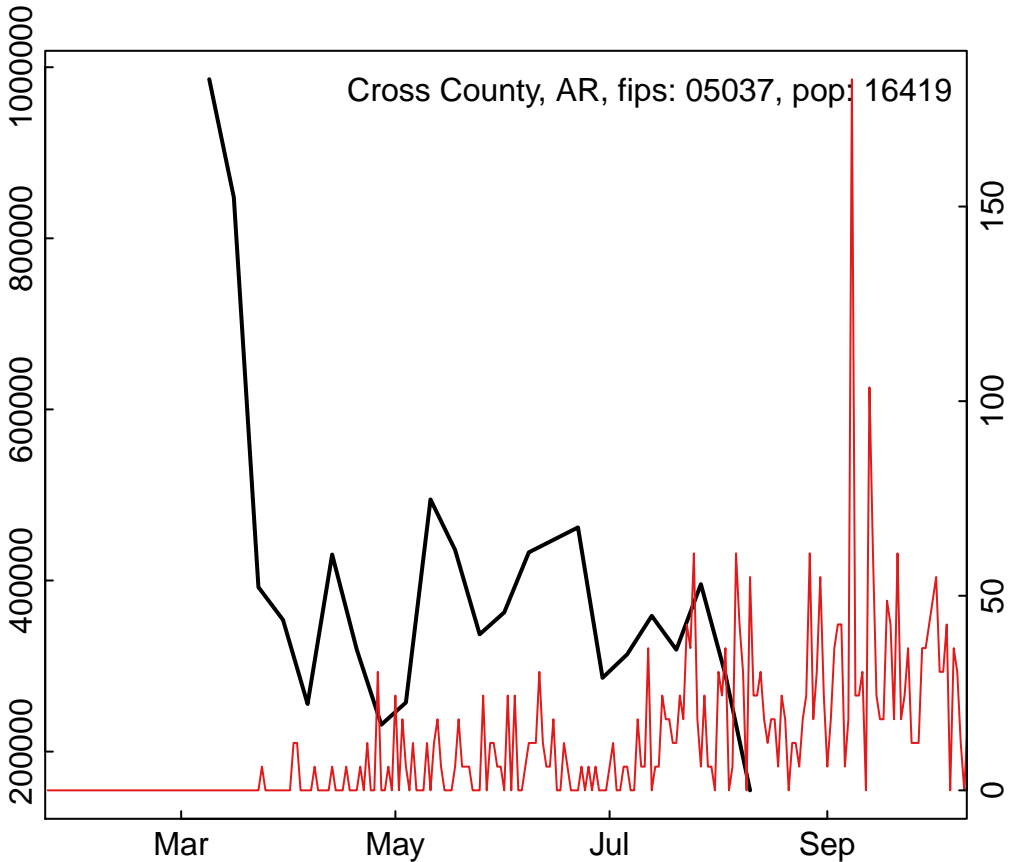

Incident cases (per 100,000 population)

Dallas County, AR, fips: 05039, pop: 7009

Mean visiting county population

500000  
1000000  
2000000

Mar May Jul Sep

Incident cases (per 100,000 population)

0 50 100 150 200

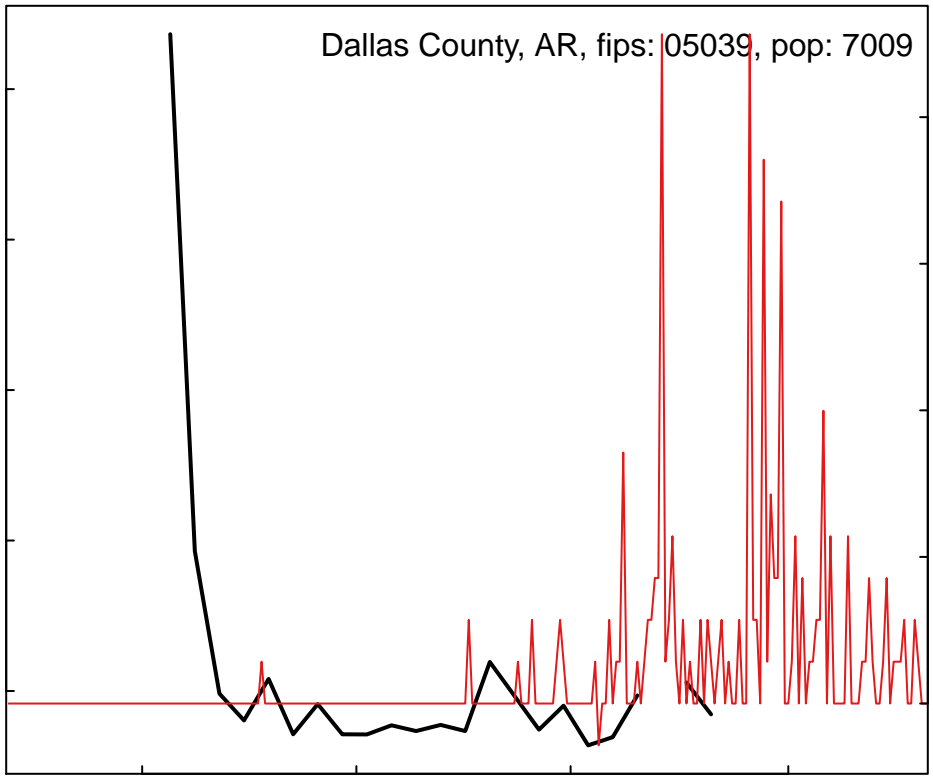

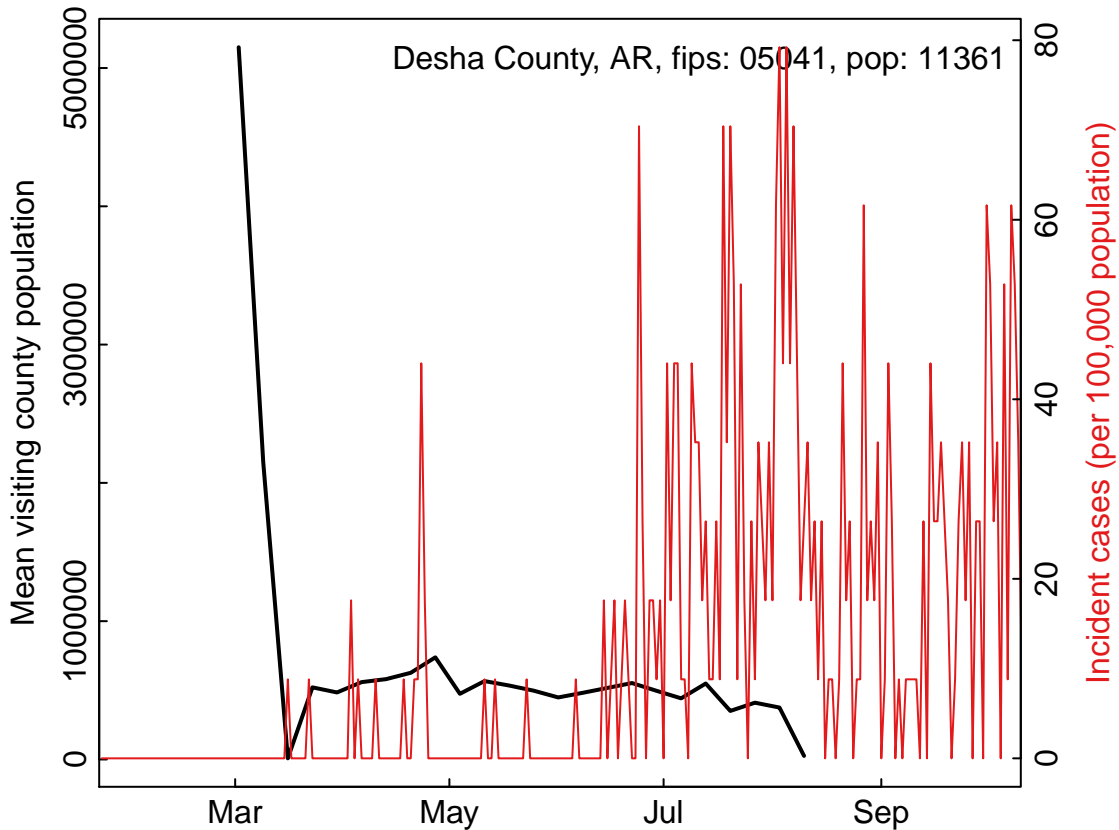



Drew County, AR, fips: 05043, pop: 18219

Mean visiting county population

1000000  
600000  
200000  
0

Mar May Jul Sep

Incident cases (per 100,000 population)

60  
40  
20  
0

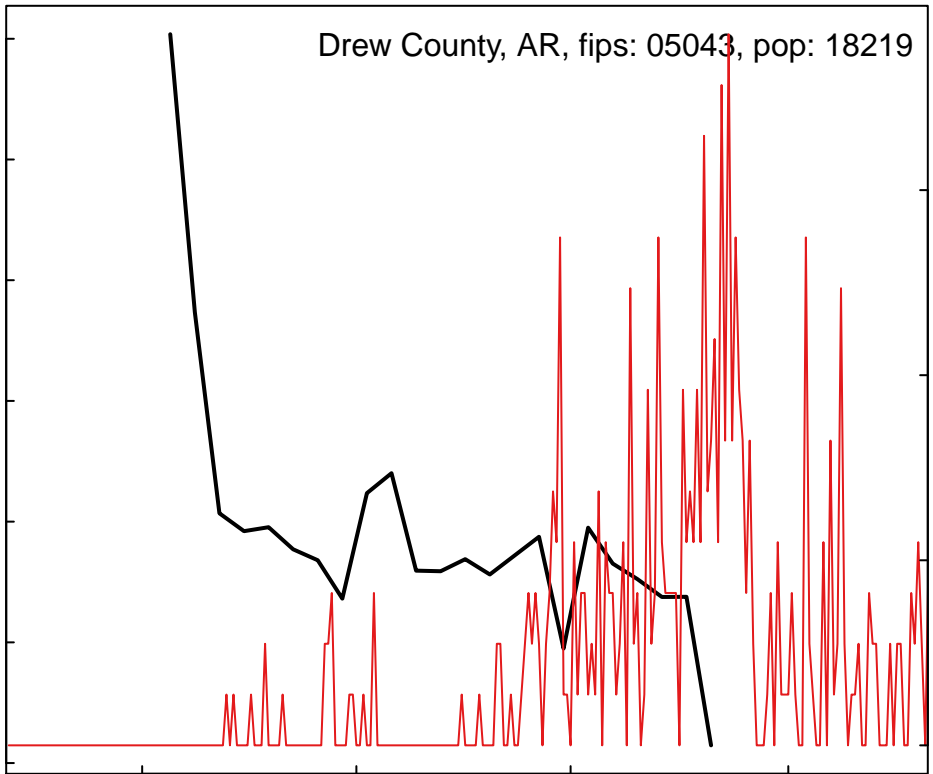

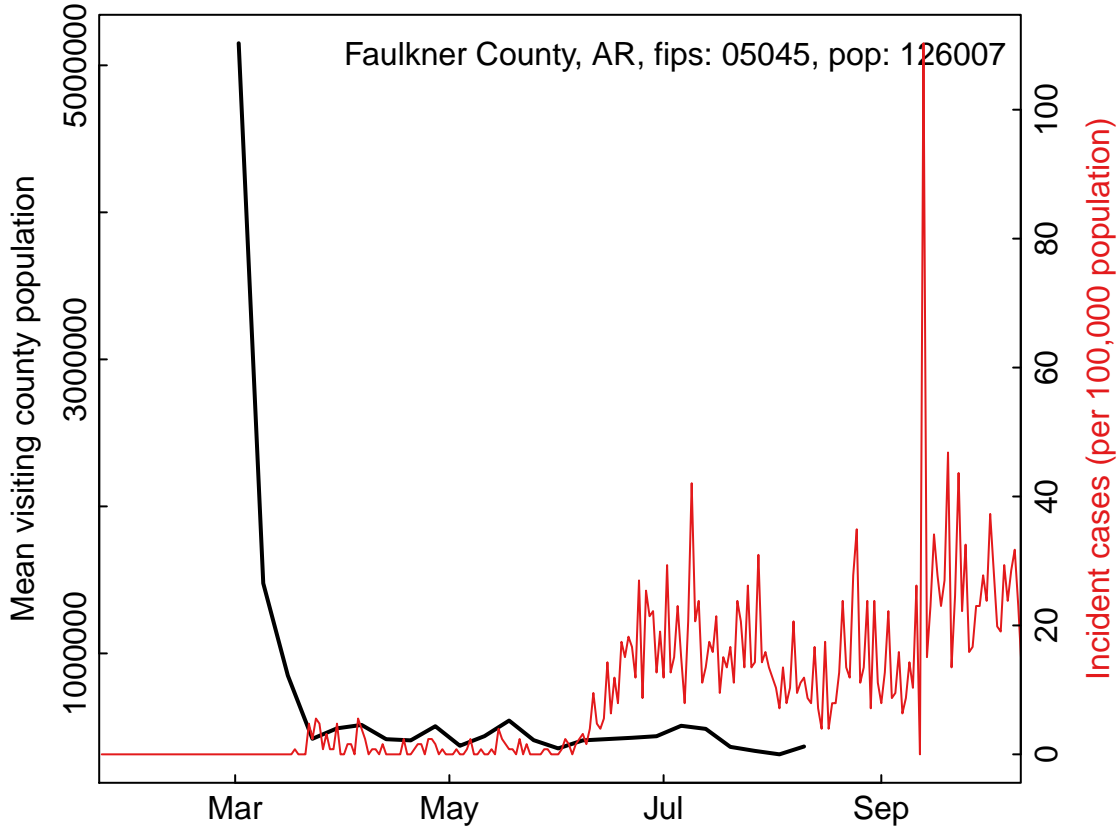

Franklin County, AR, fips: 05047, pop: 17715

Mean visiting county population

600000  
400000  
200000

Mar May Jul Sep

Incident cases (per 100,000 population)

120  
100  
80  
60  
40  
20  
0

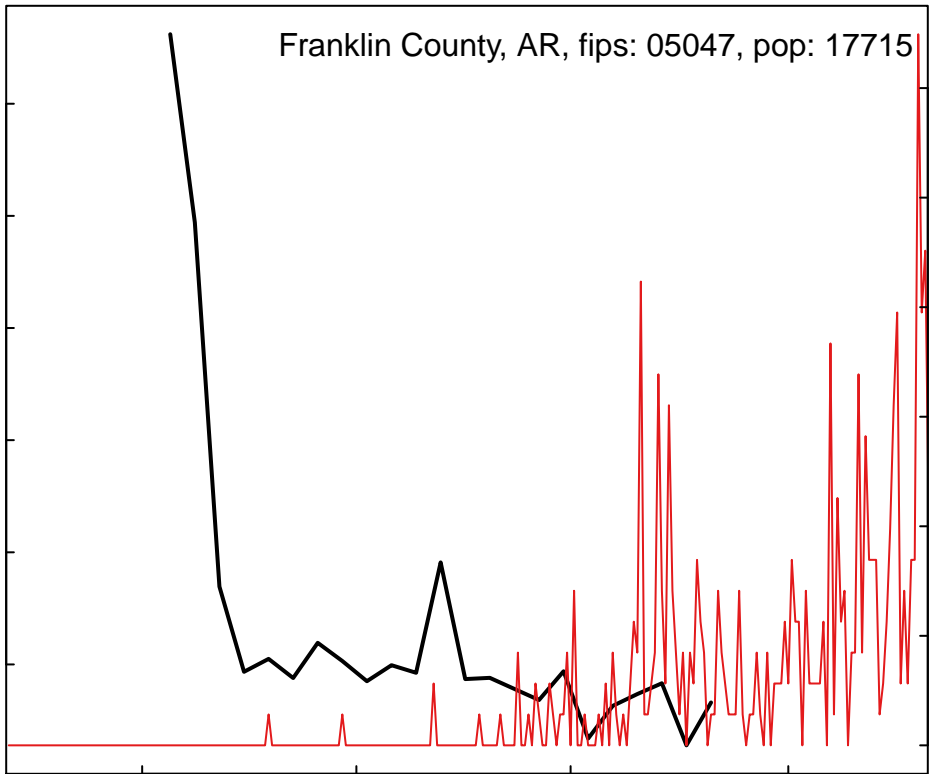

Fulton County, AR, fips: 05049, pop: 12477

Mean visiting county population

2000000  
1000000  
500000

Mar

May

Jul

Sep

100  
80  
60  
40  
20  
0

Incident cases (per 100,000 population)

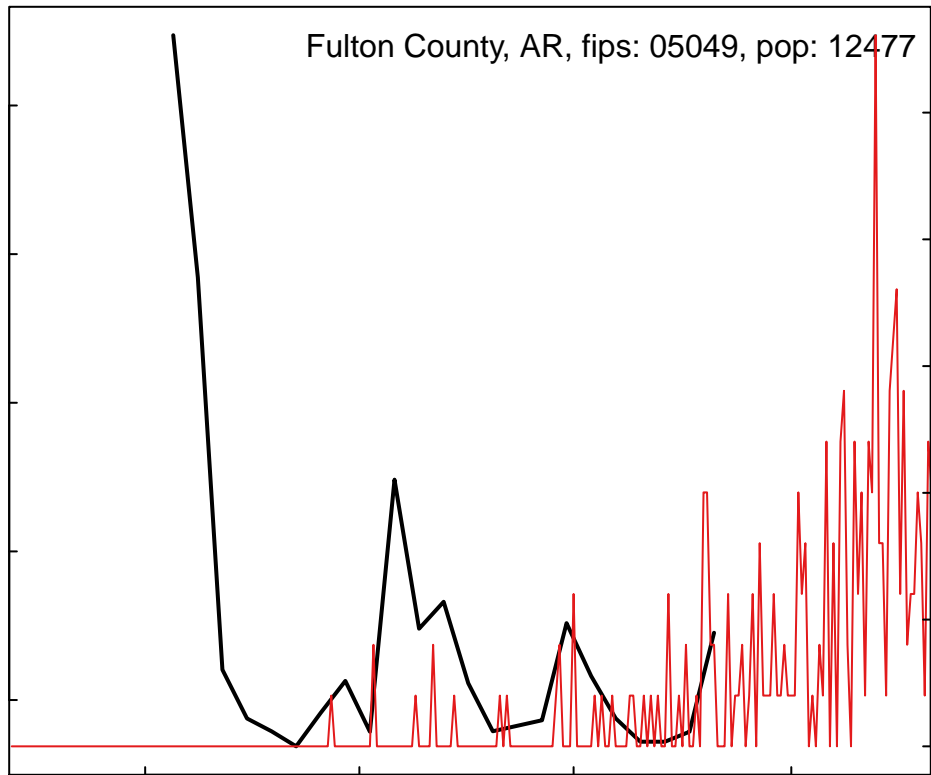

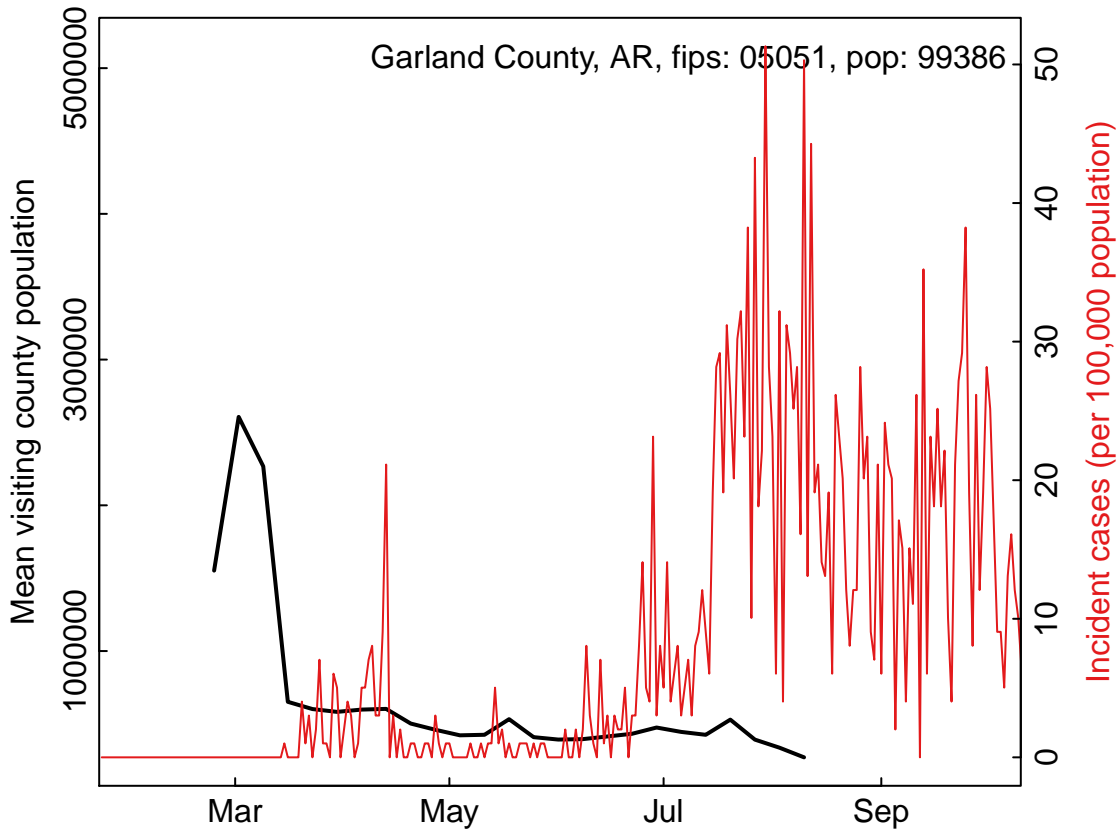

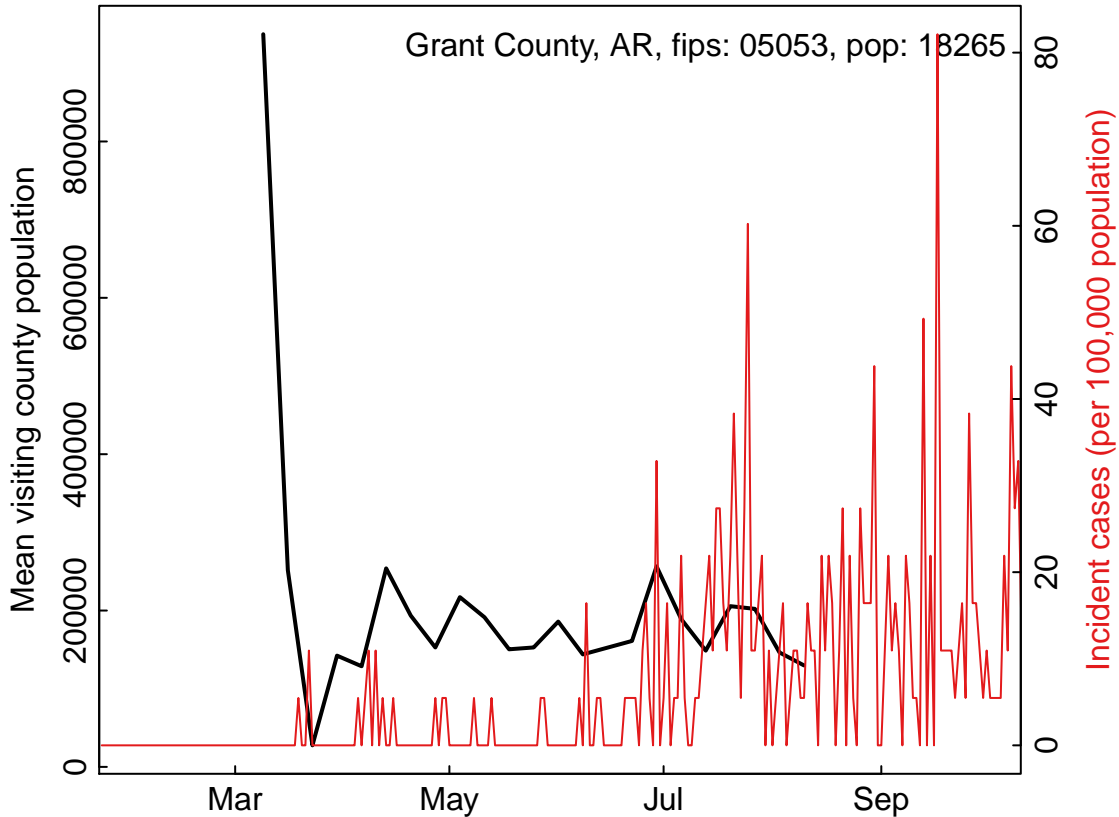

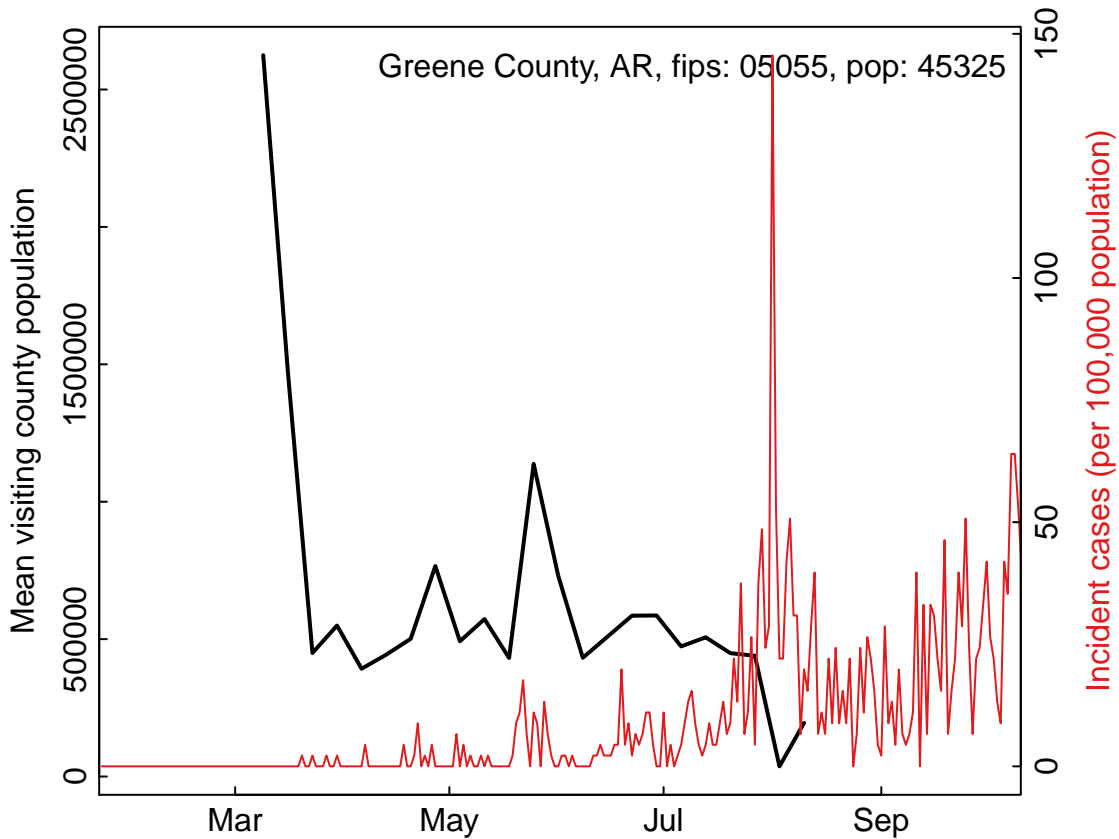

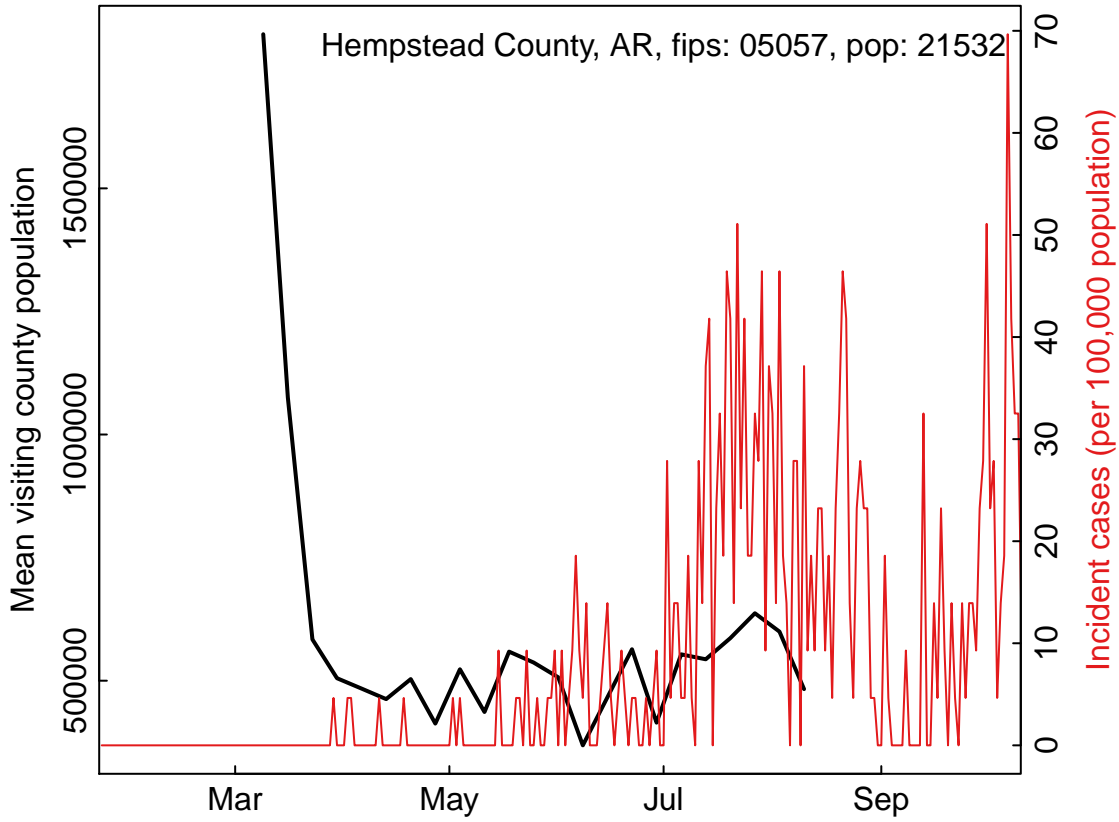



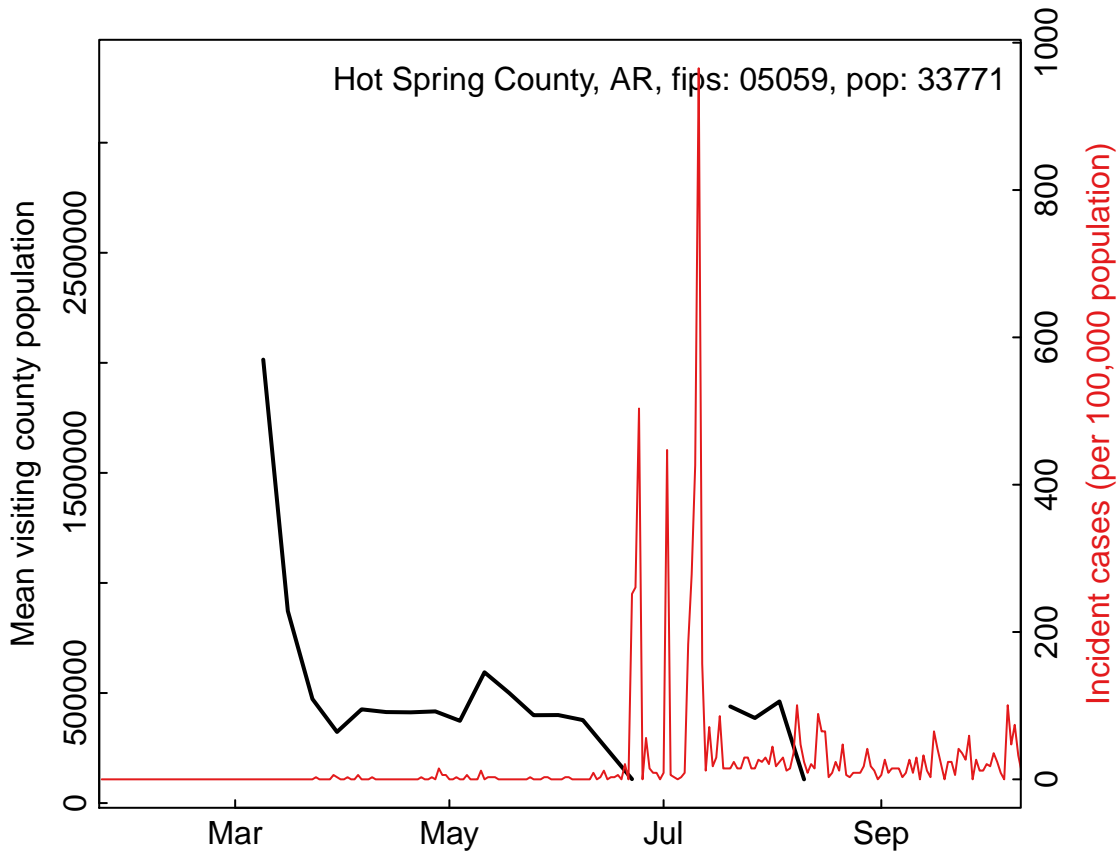

Howard County, AR, fips: 05061, pop: 13202

Mean visiting county population

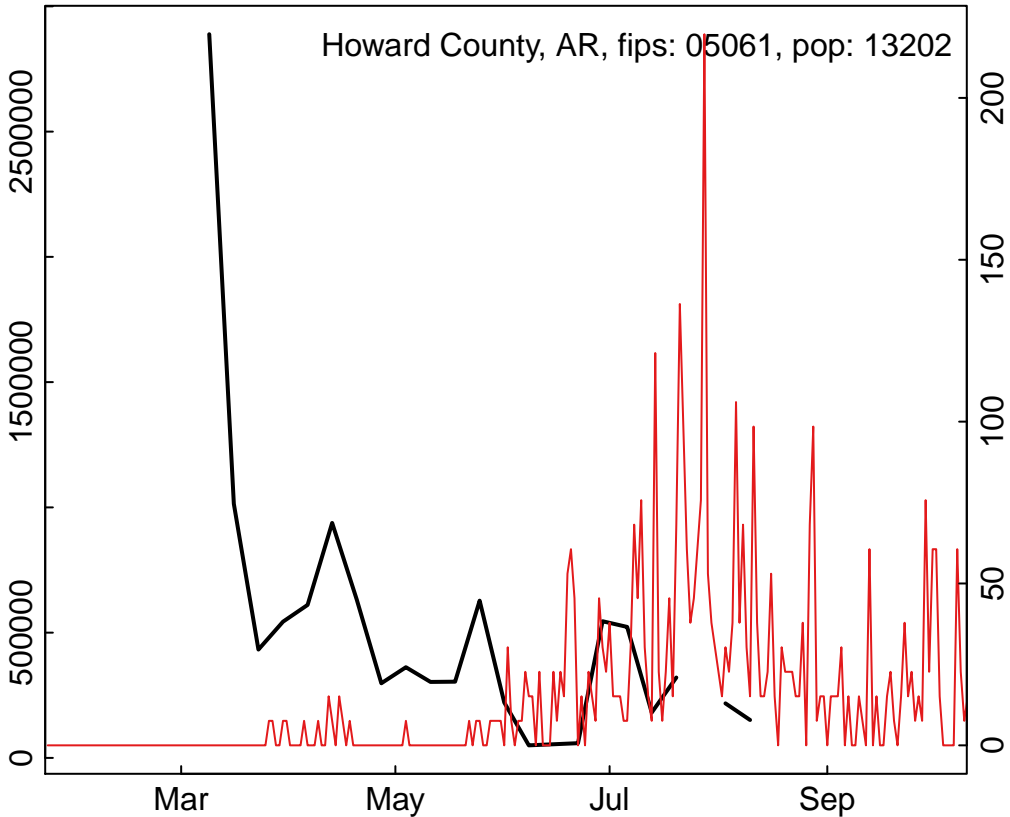

Incident cases (per 100,000 population)

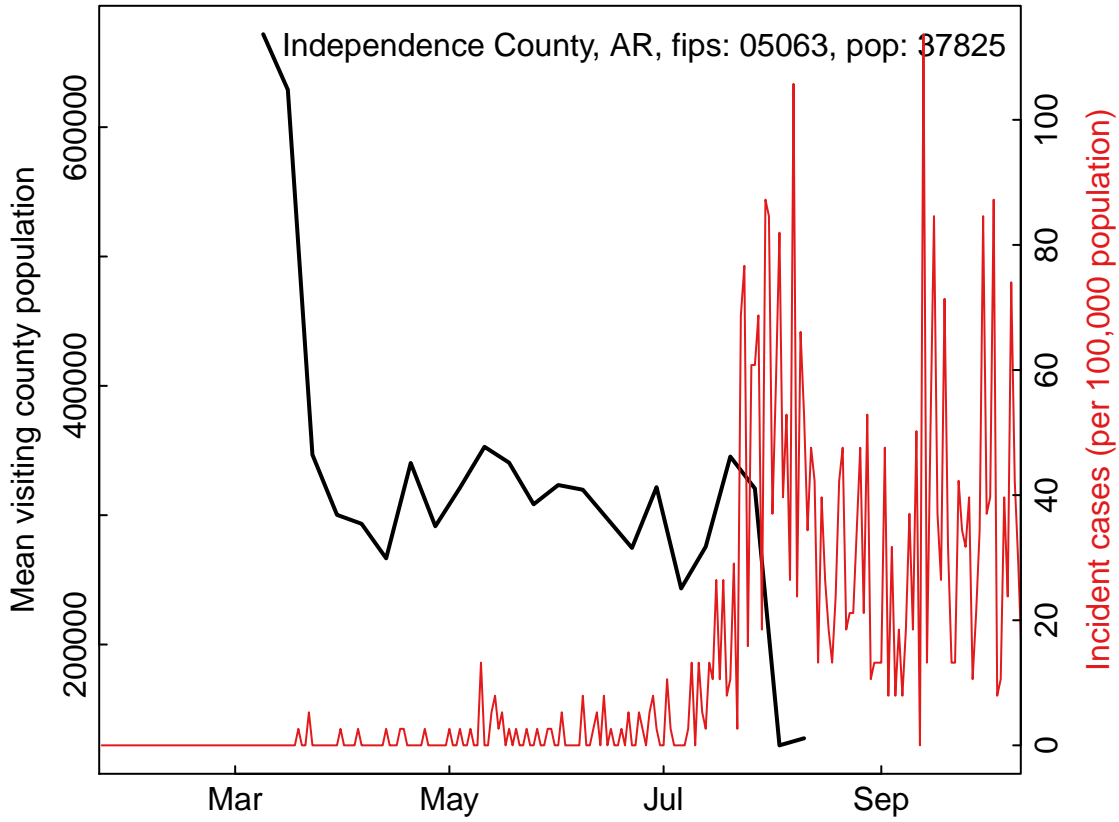

Izard County, AR, fips: 05065, pop: 13629

Mean visiting county population

2000000  
1000000  
500000

Mar May Jul Sep

Incident cases (per 100,000 population)  
300  
250  
200  
150  
100  
50  
0

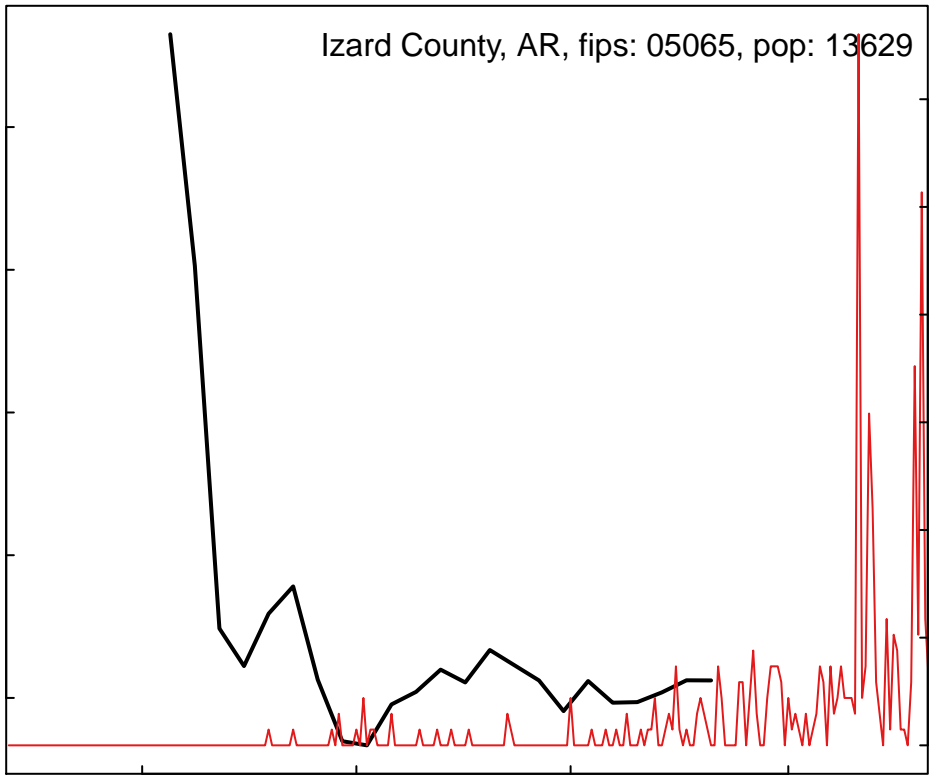

Jackson County, AR, fips: 05067, pop: 16719

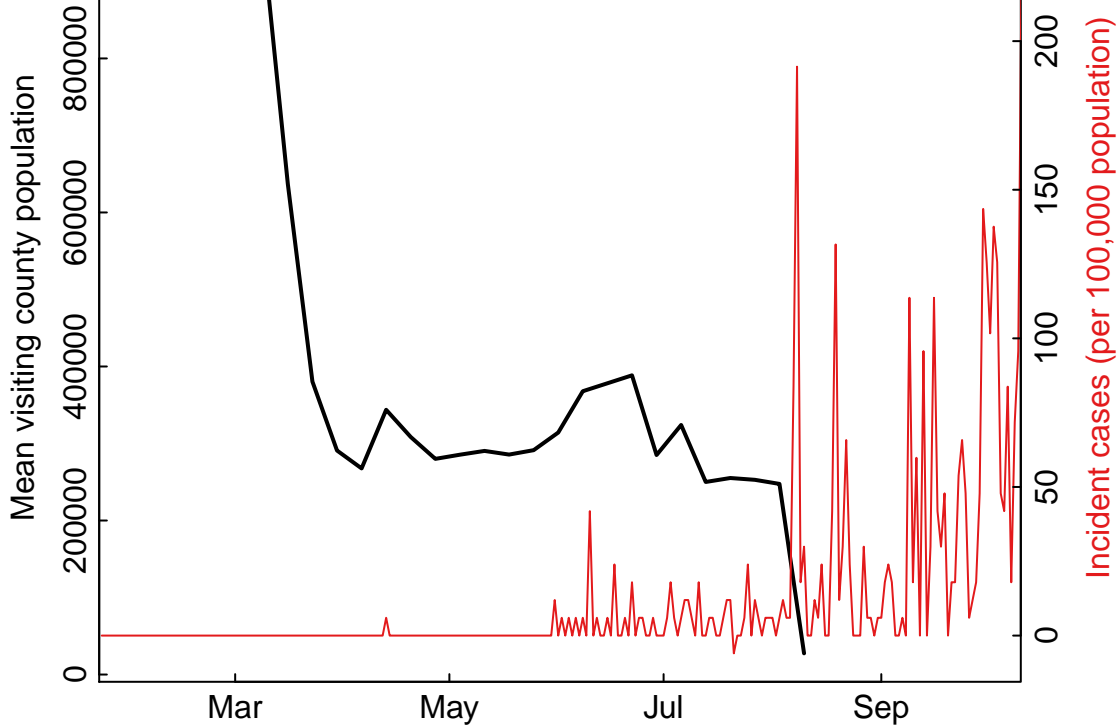

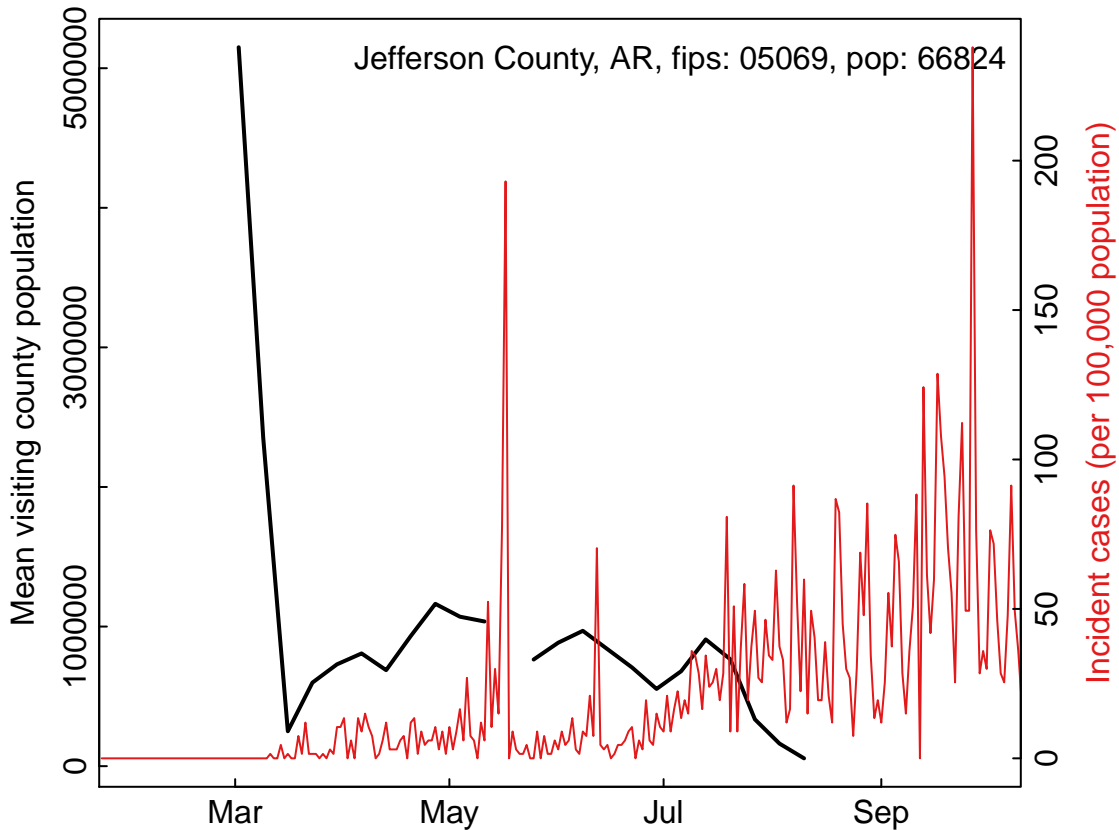

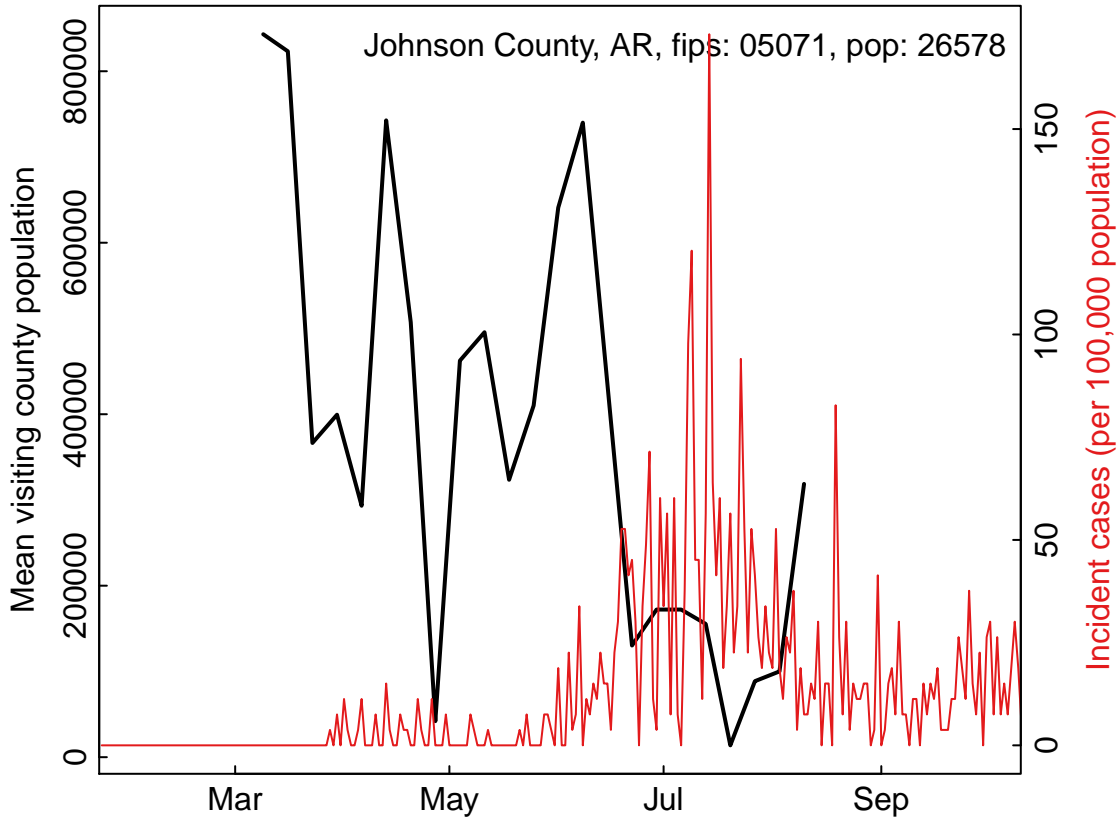

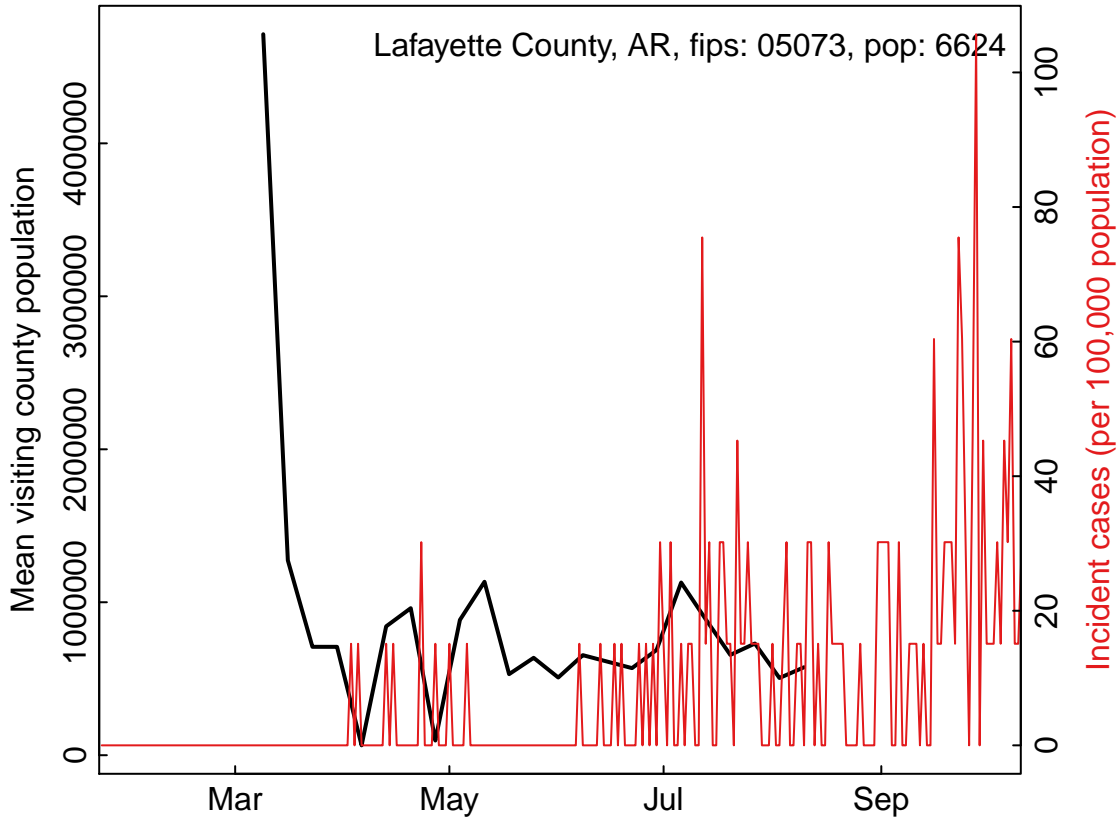



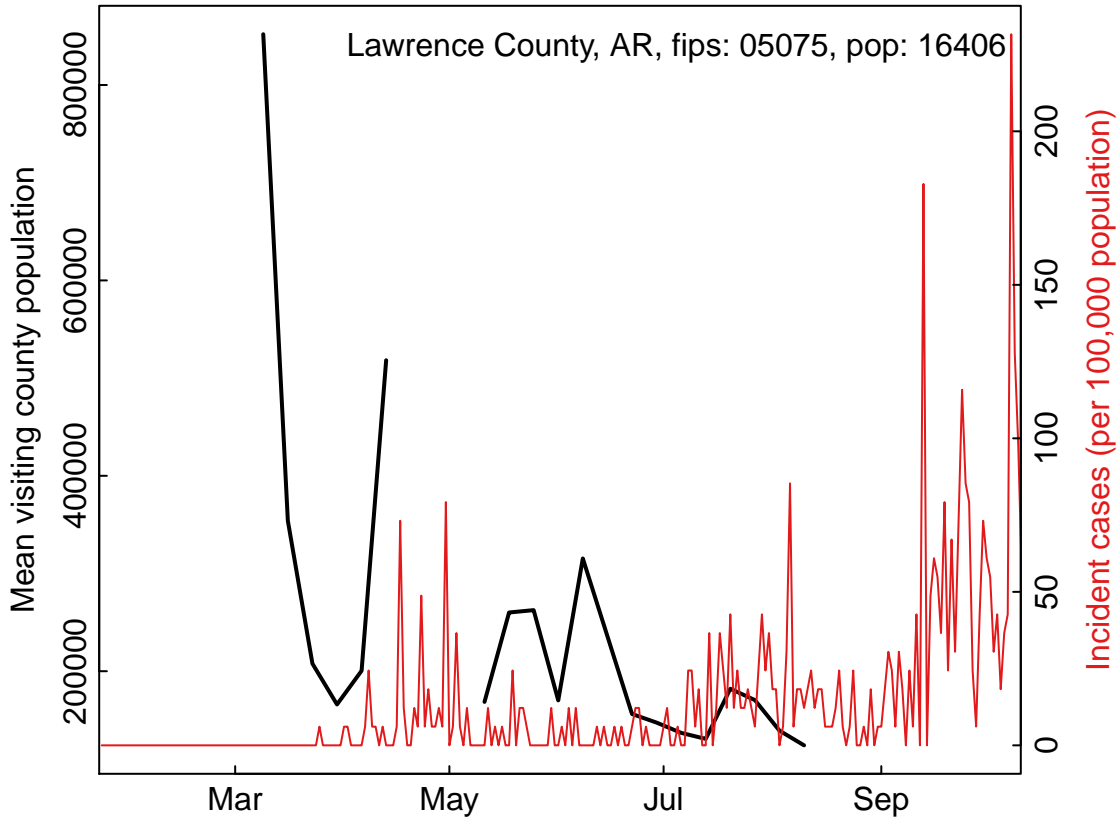

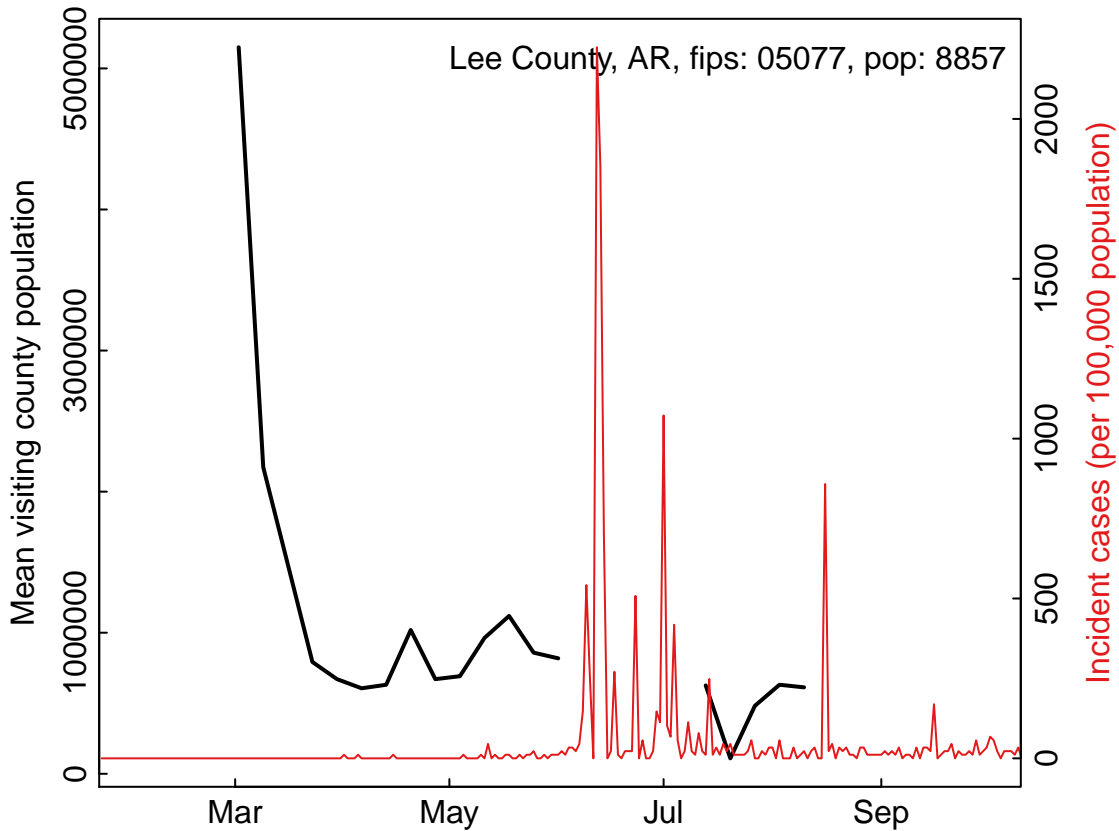

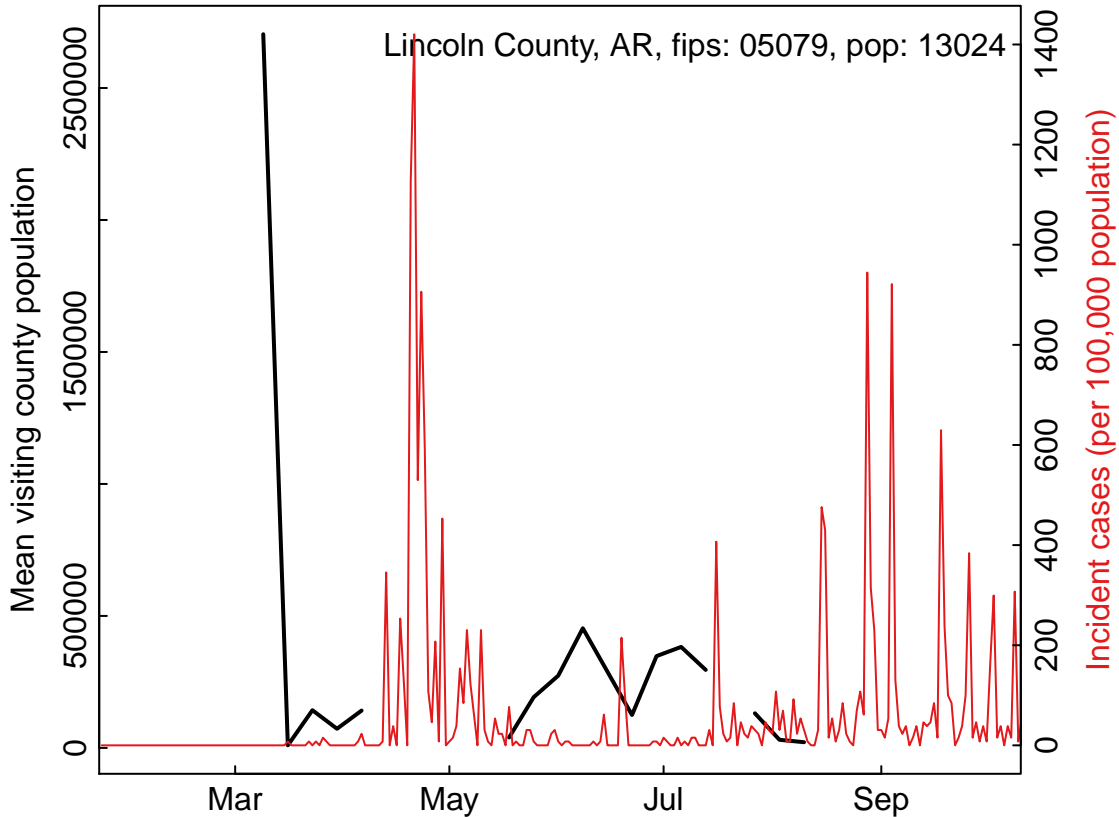

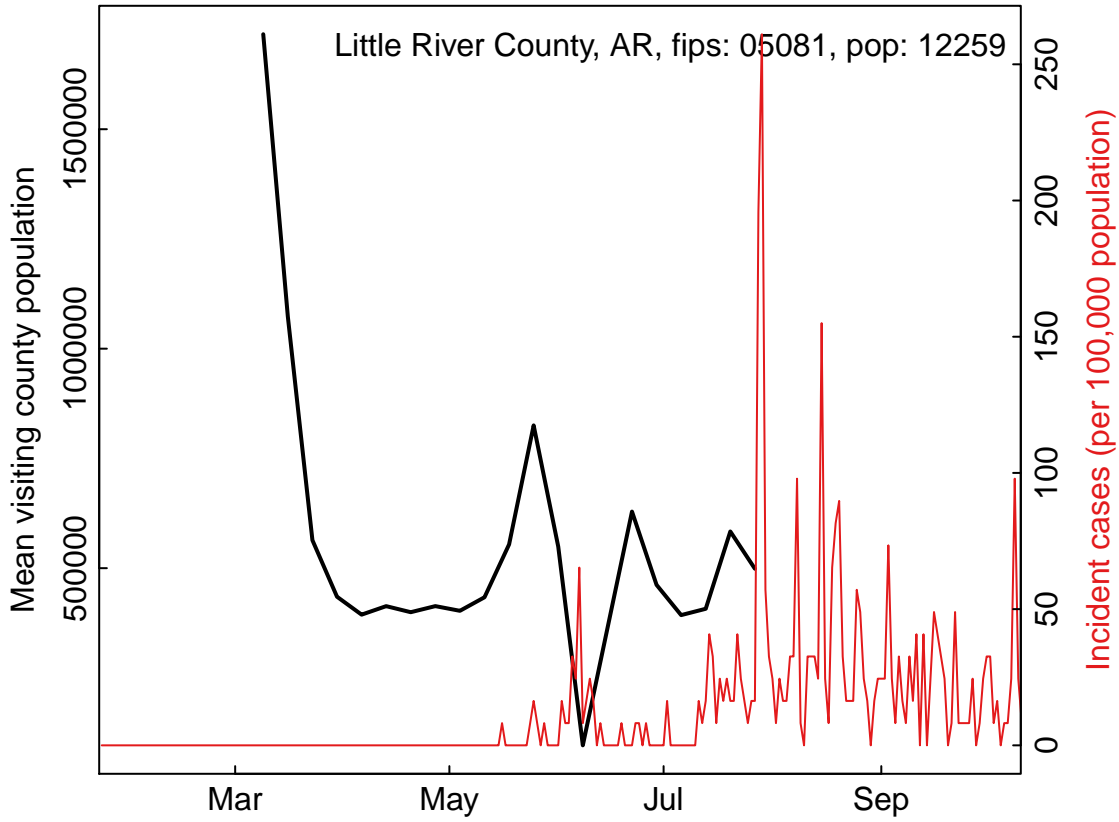

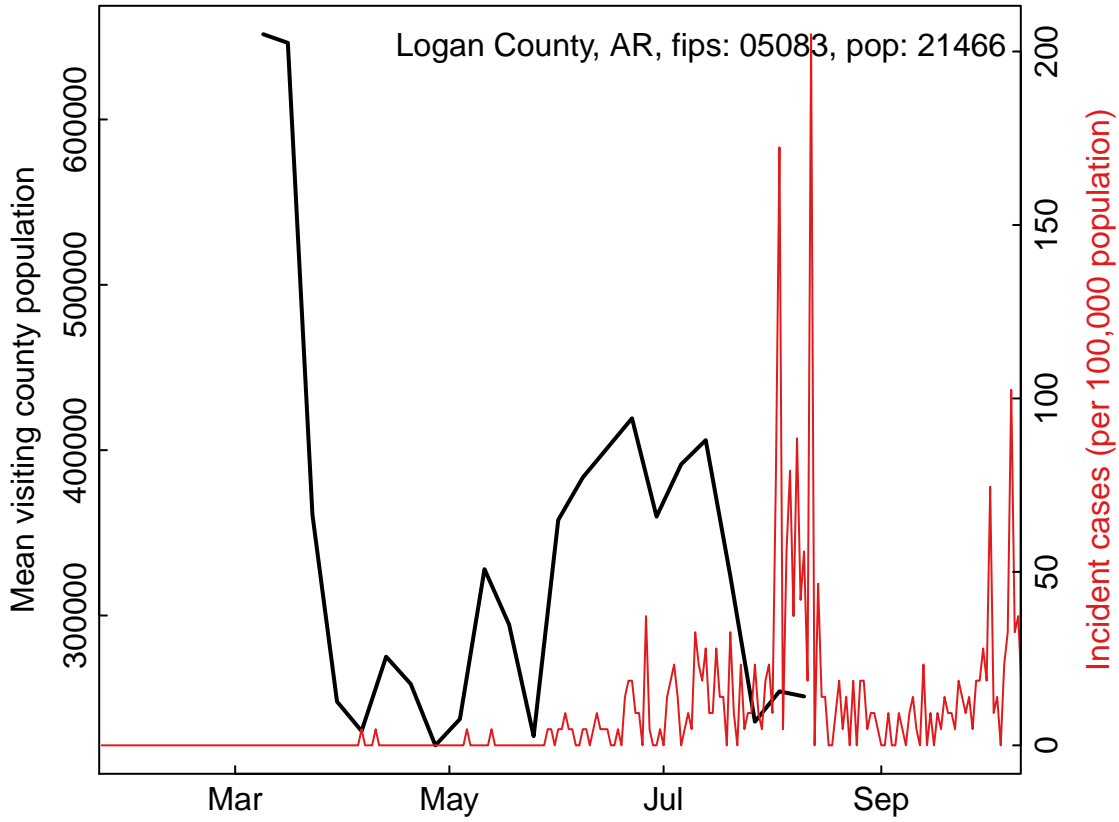

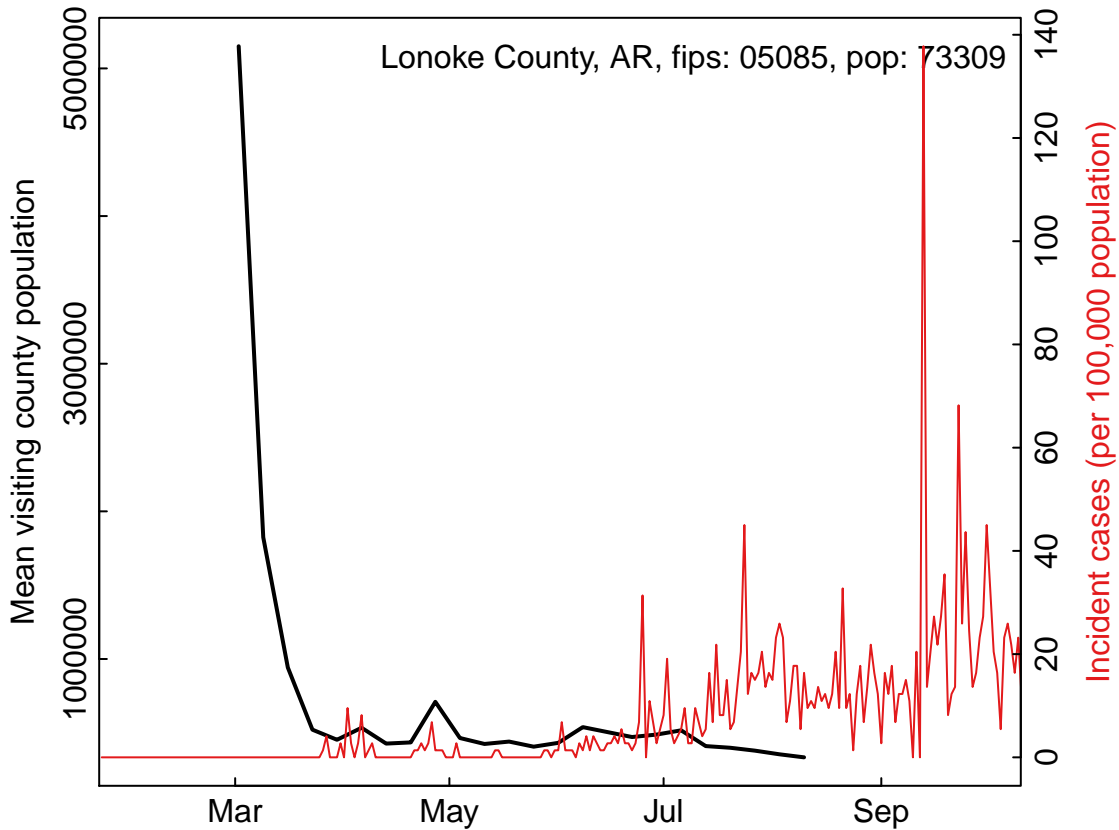

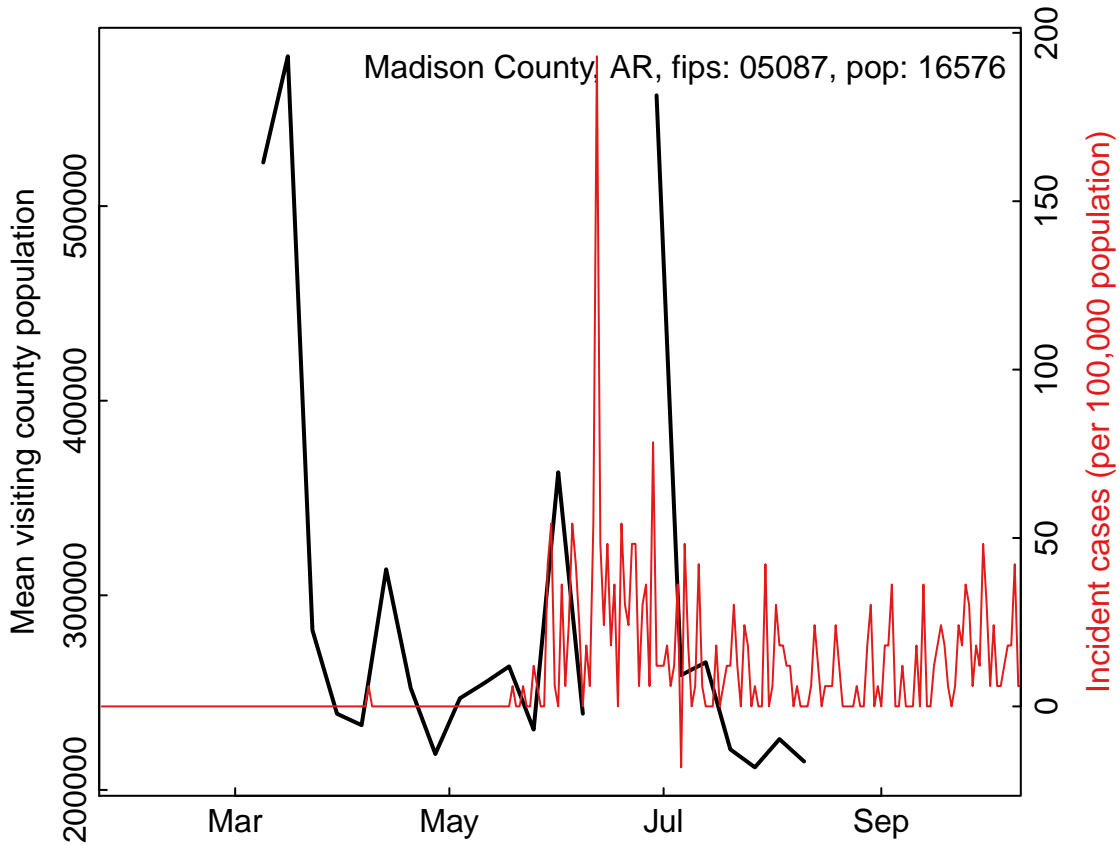

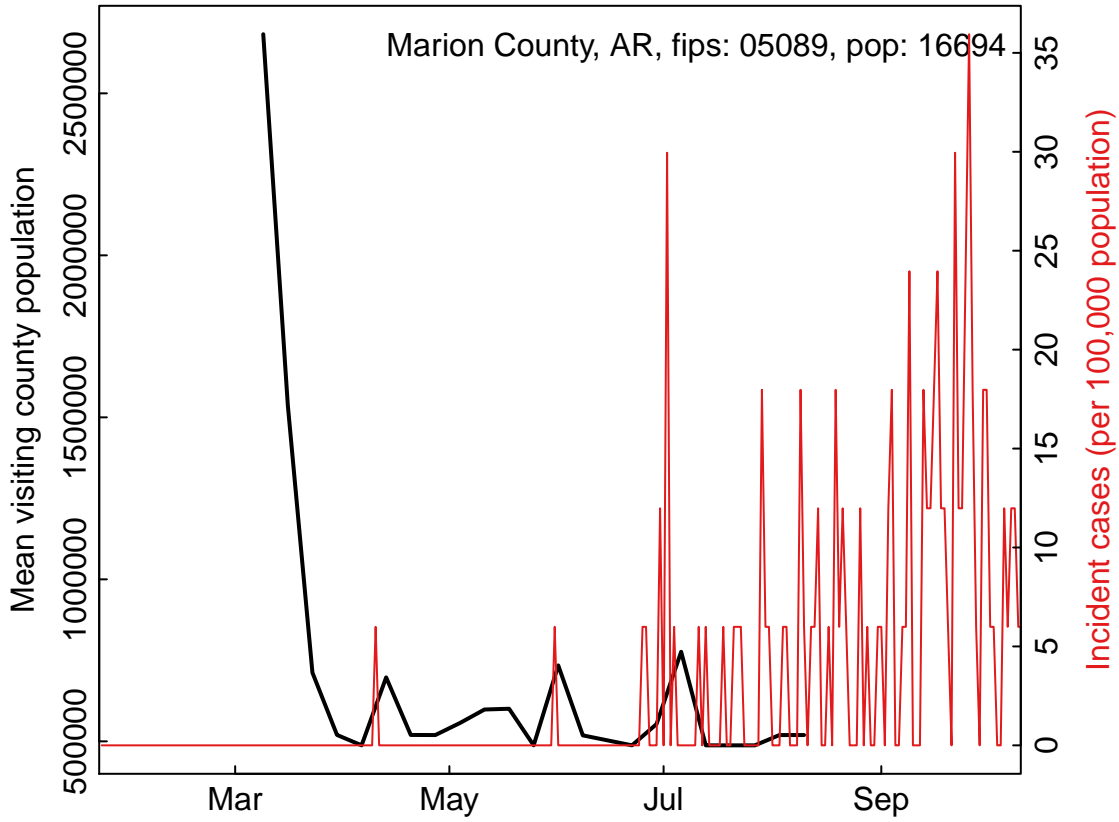



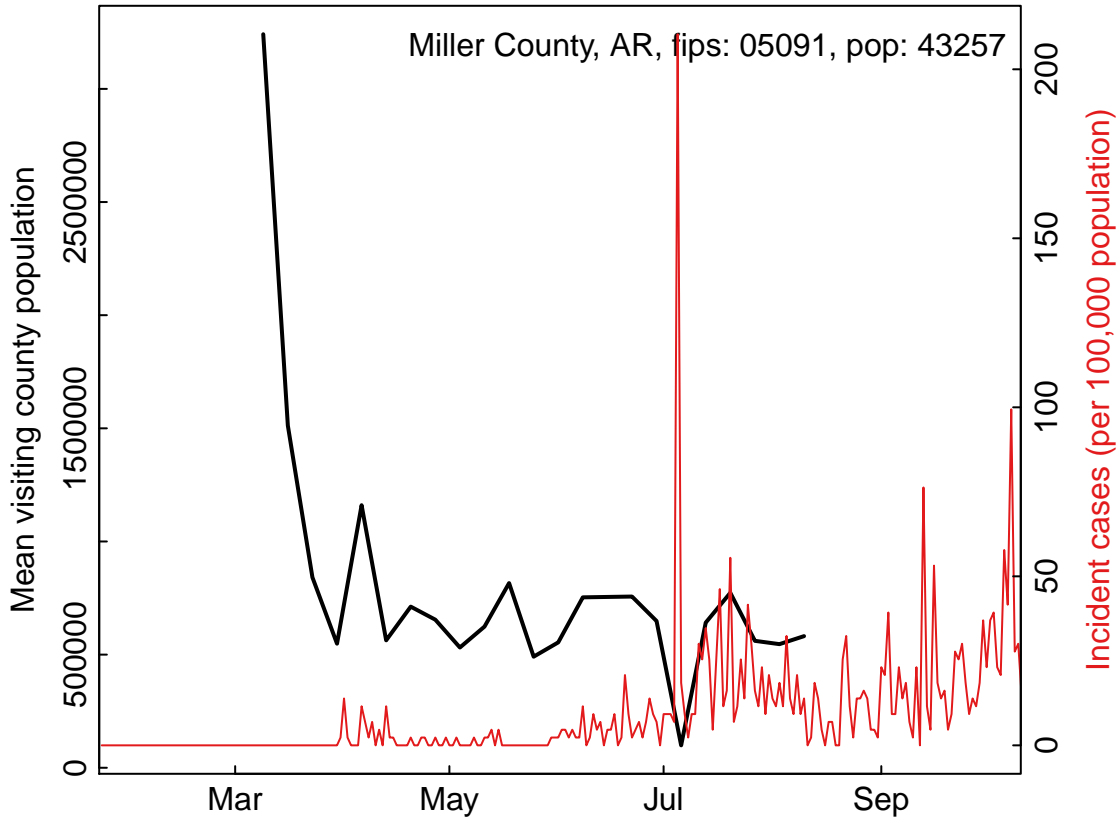

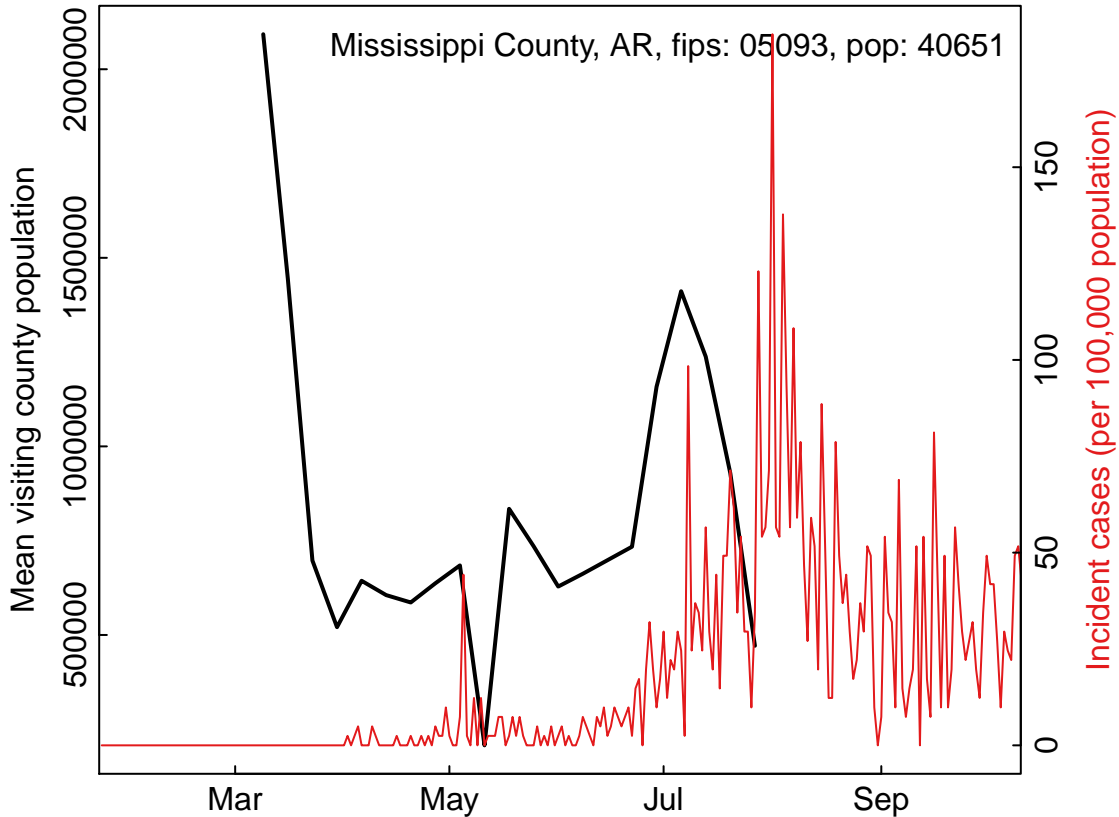

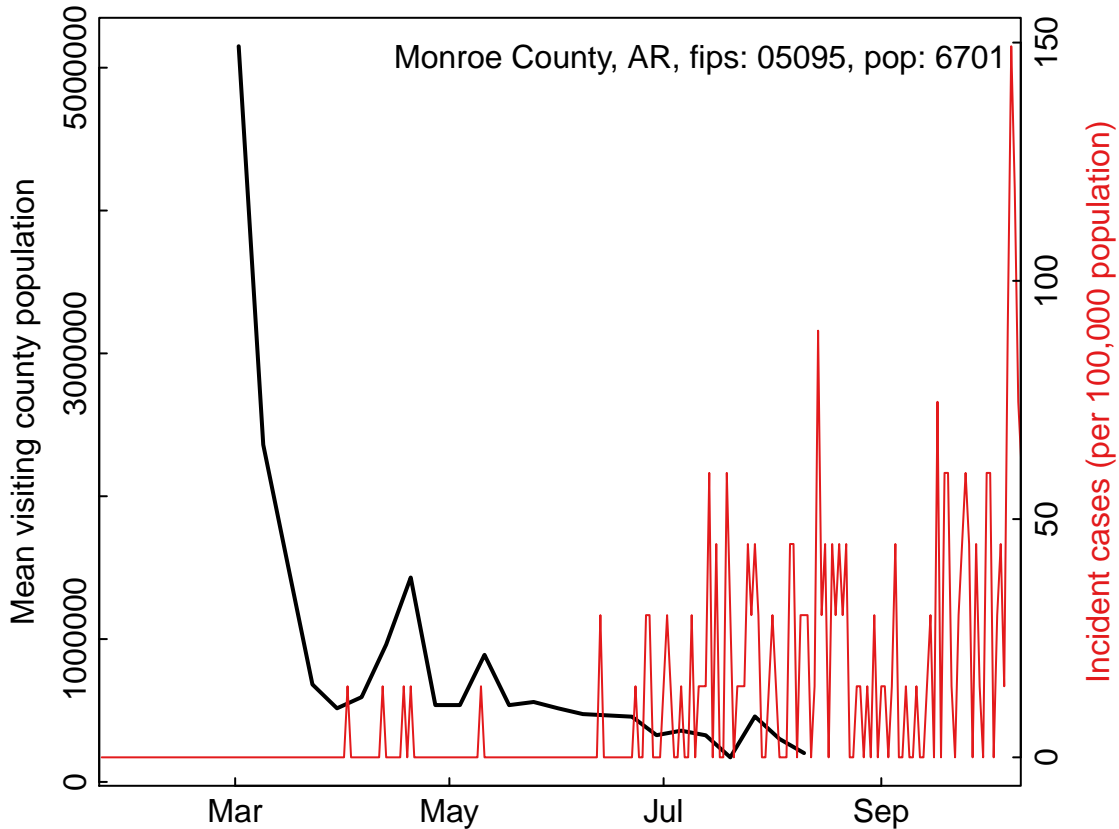

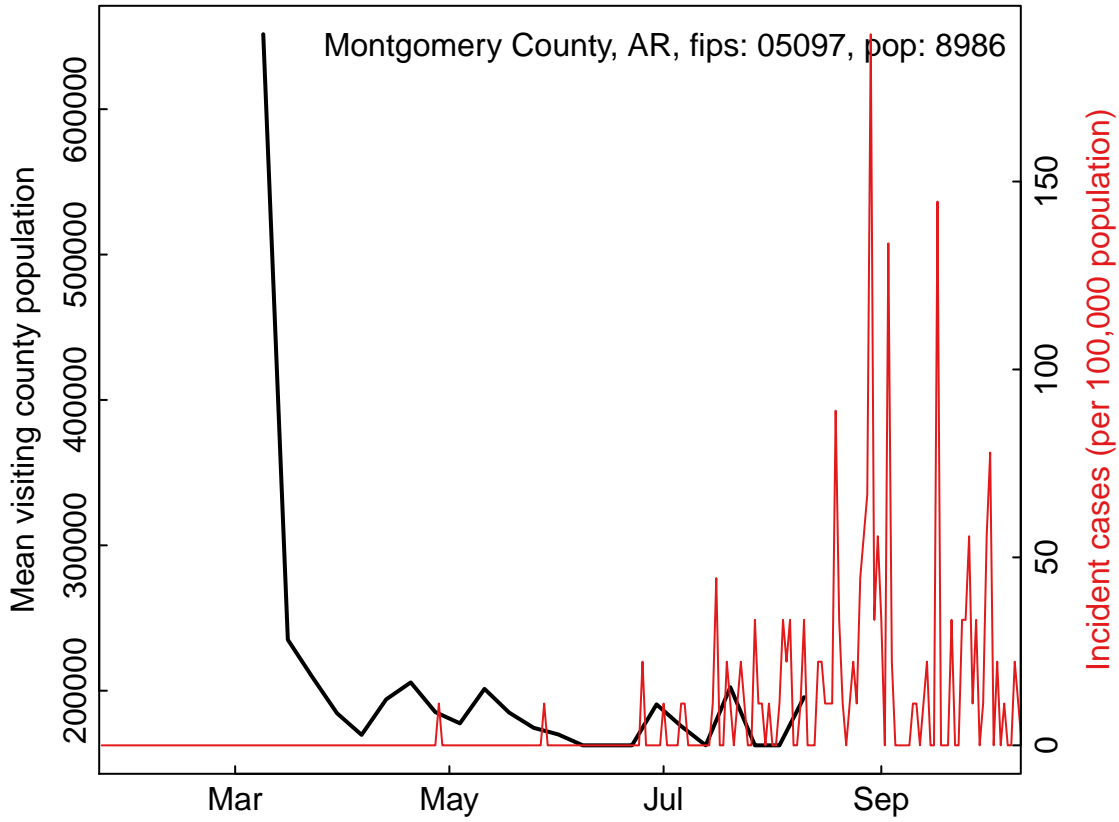

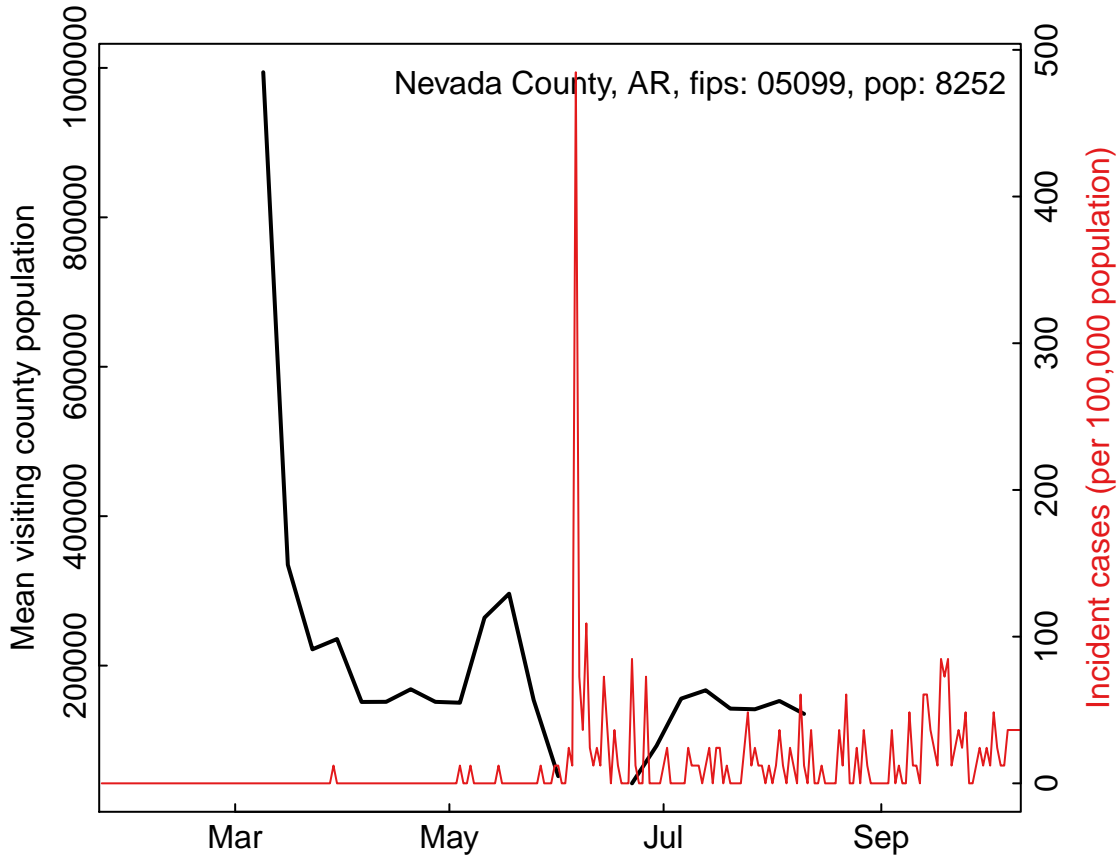

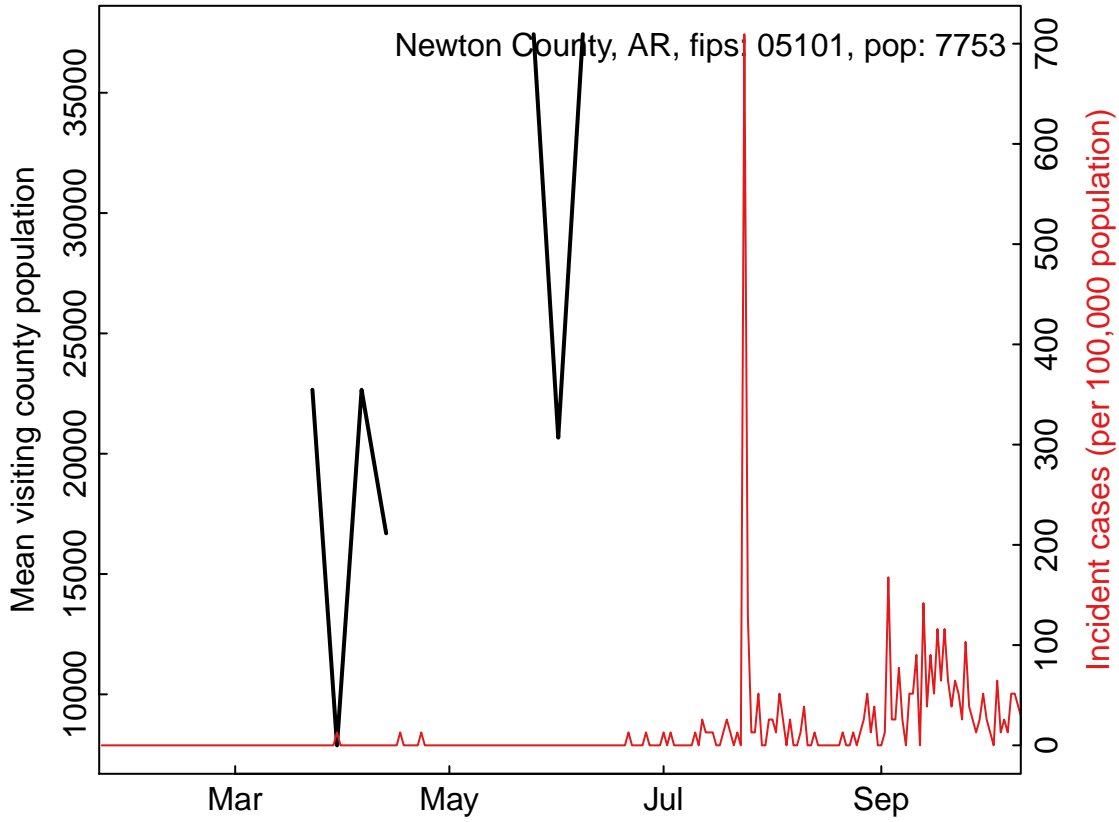

Ouachita County, AR, fips: 05103, pop: 23382

Mean visiting county population

Incident cases (per 100,000 population)

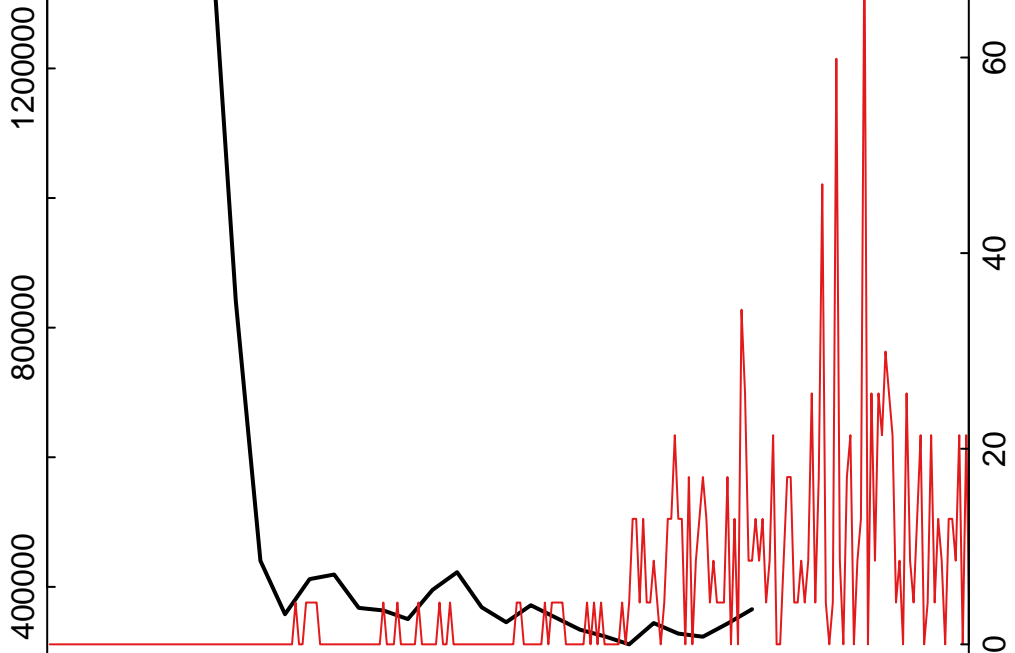

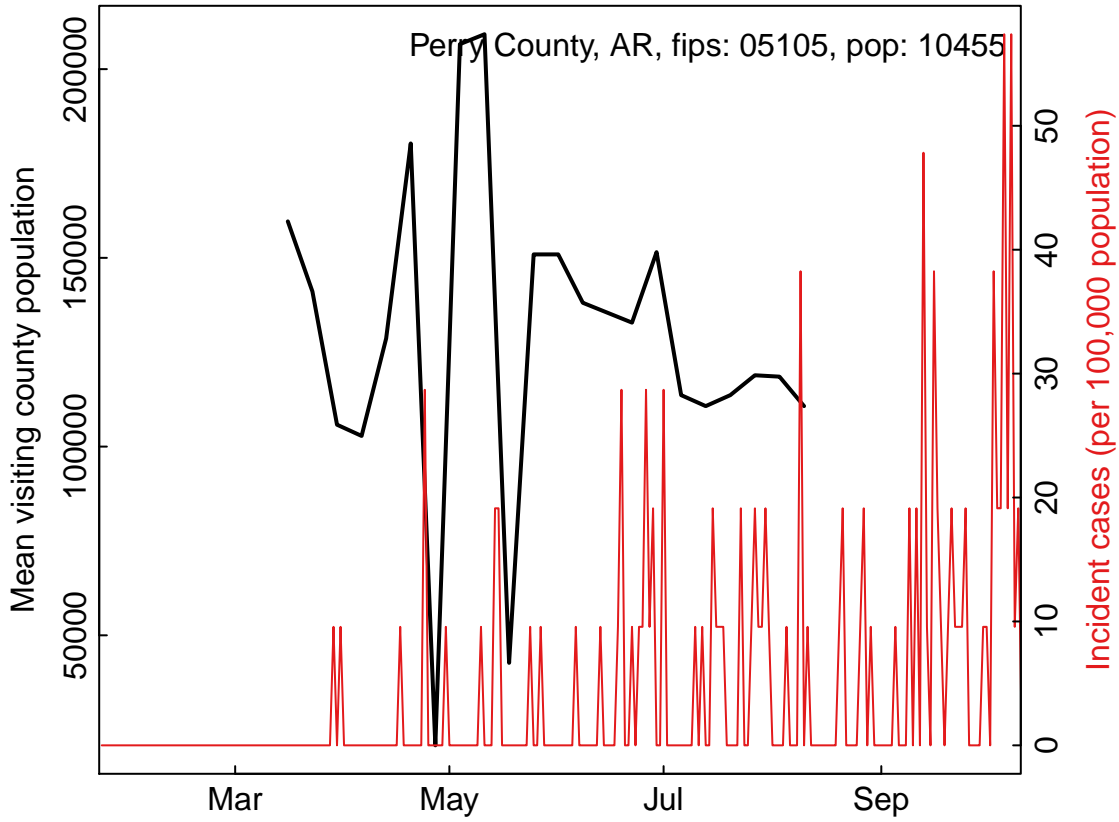



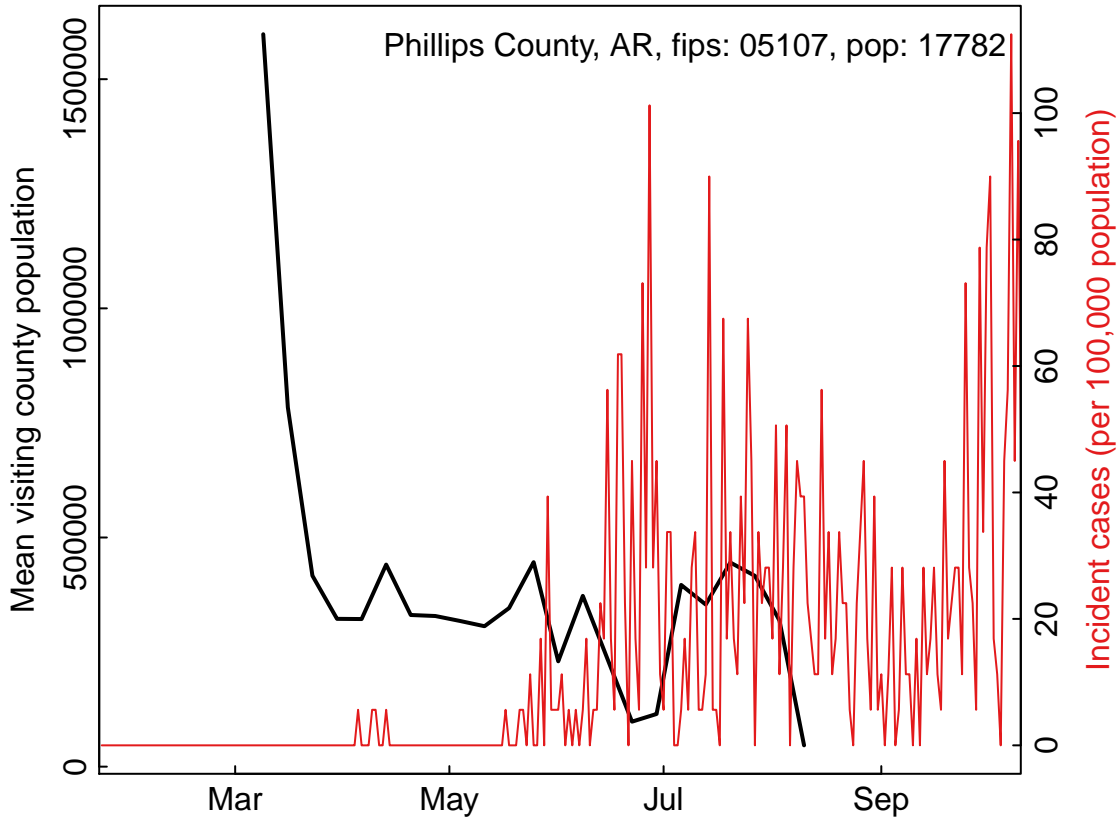

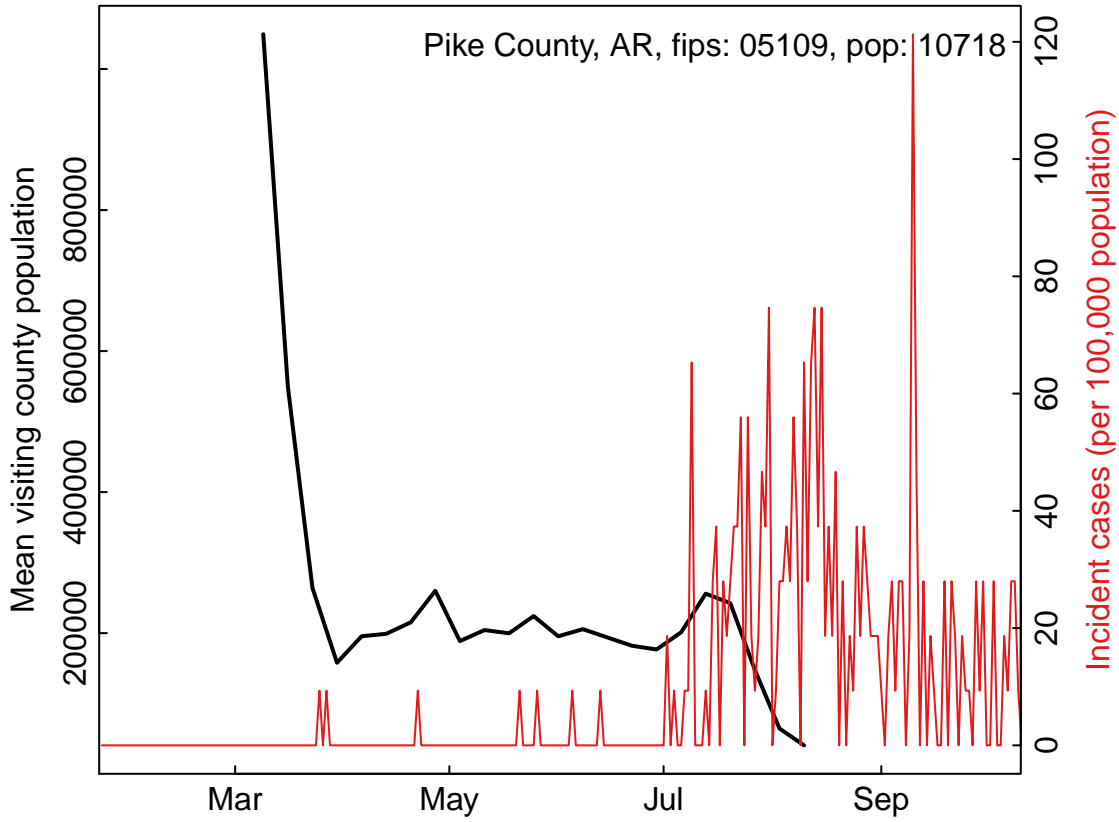

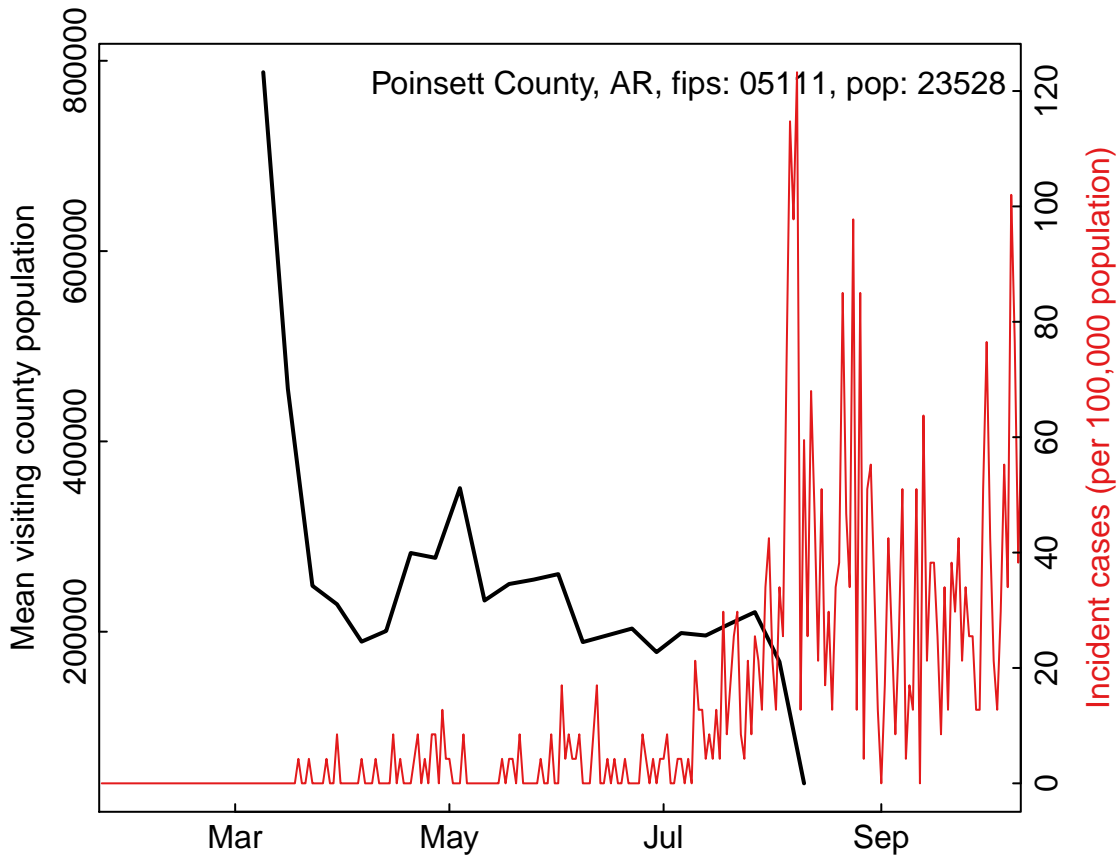

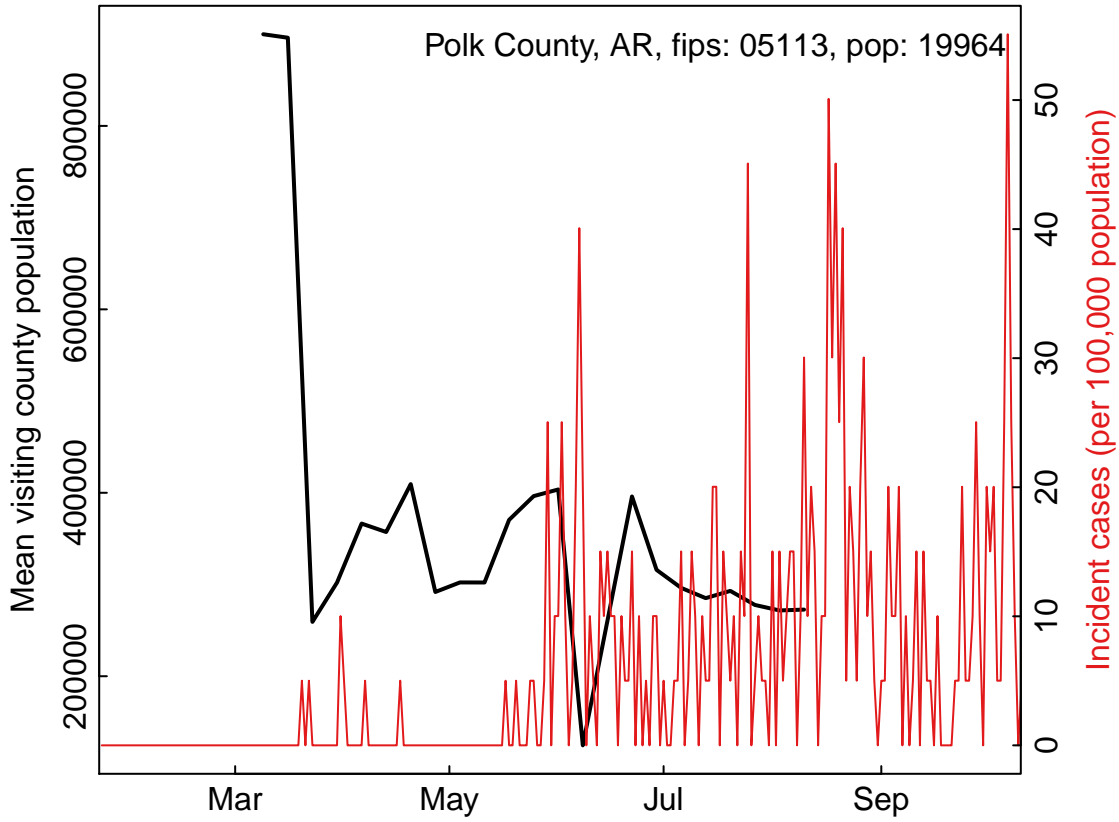

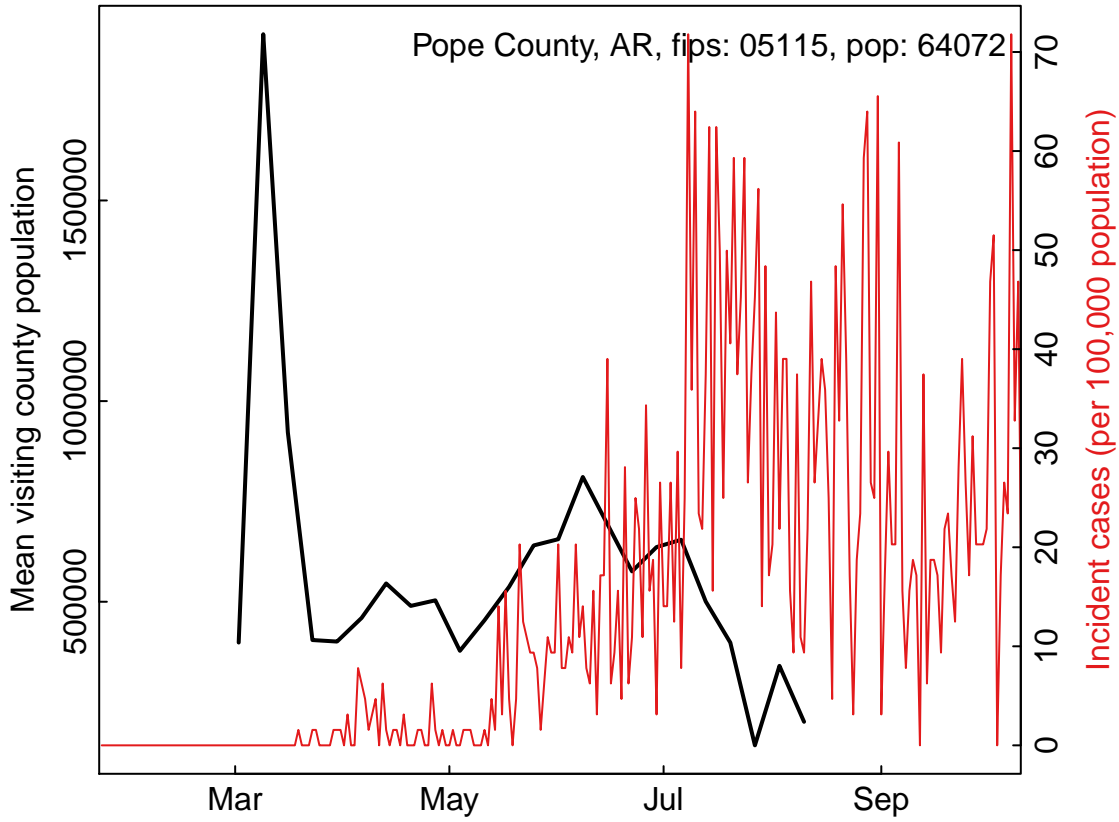

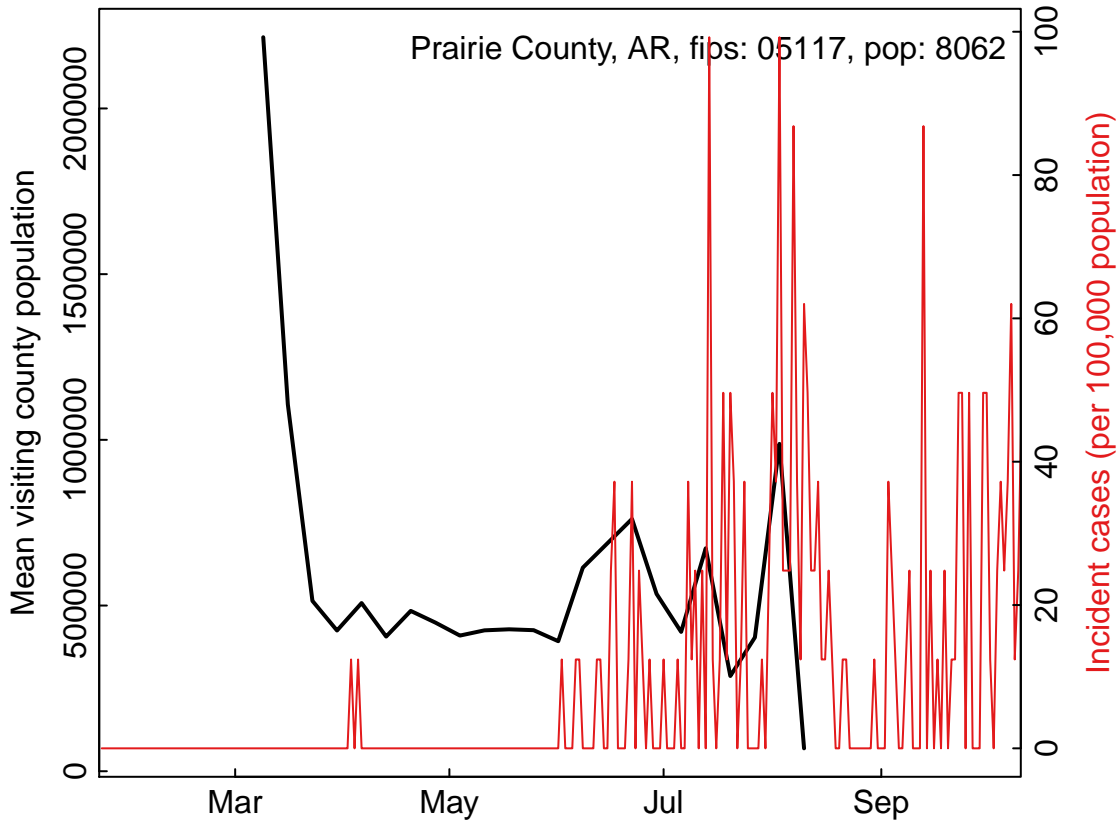

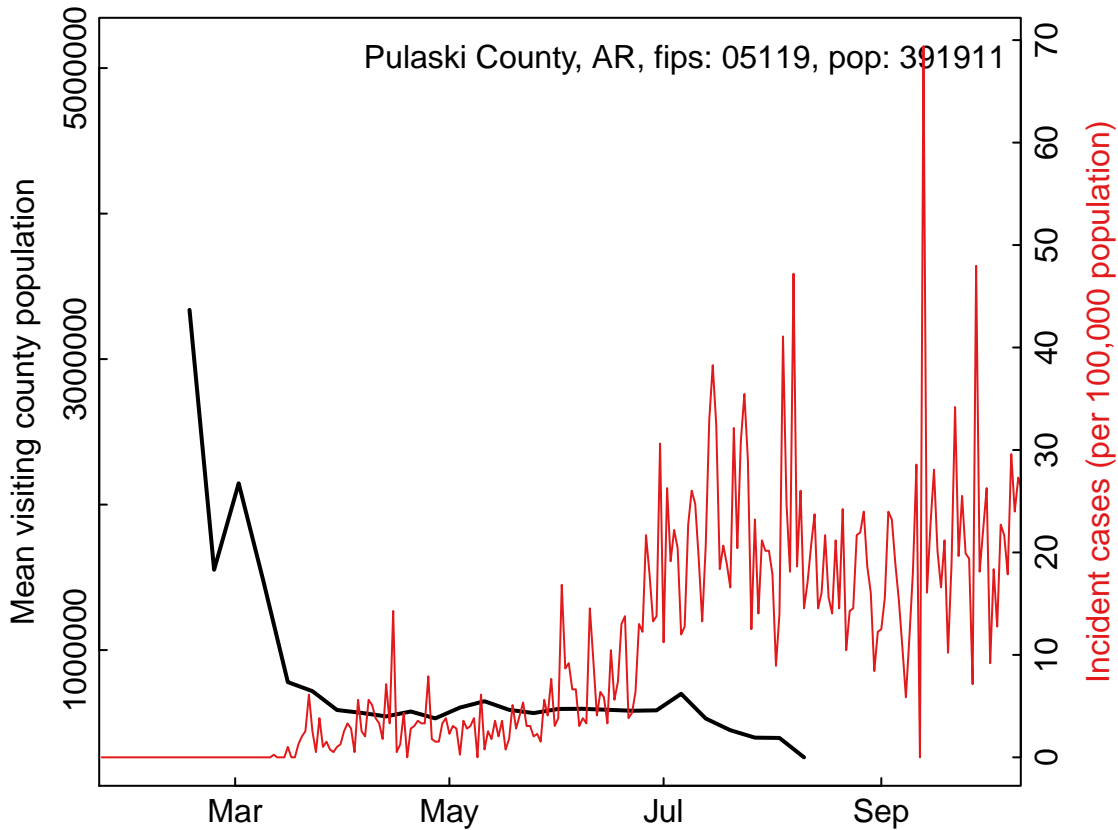

Randolph County, AR, fips: 05121, pop: 17958

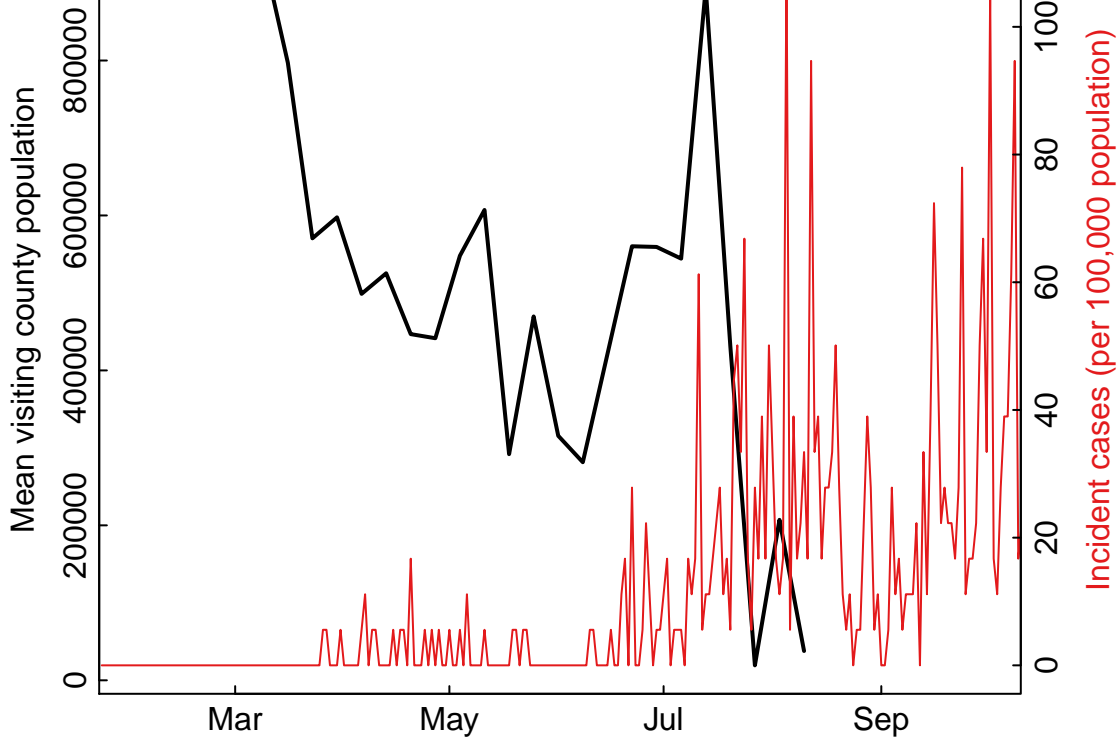



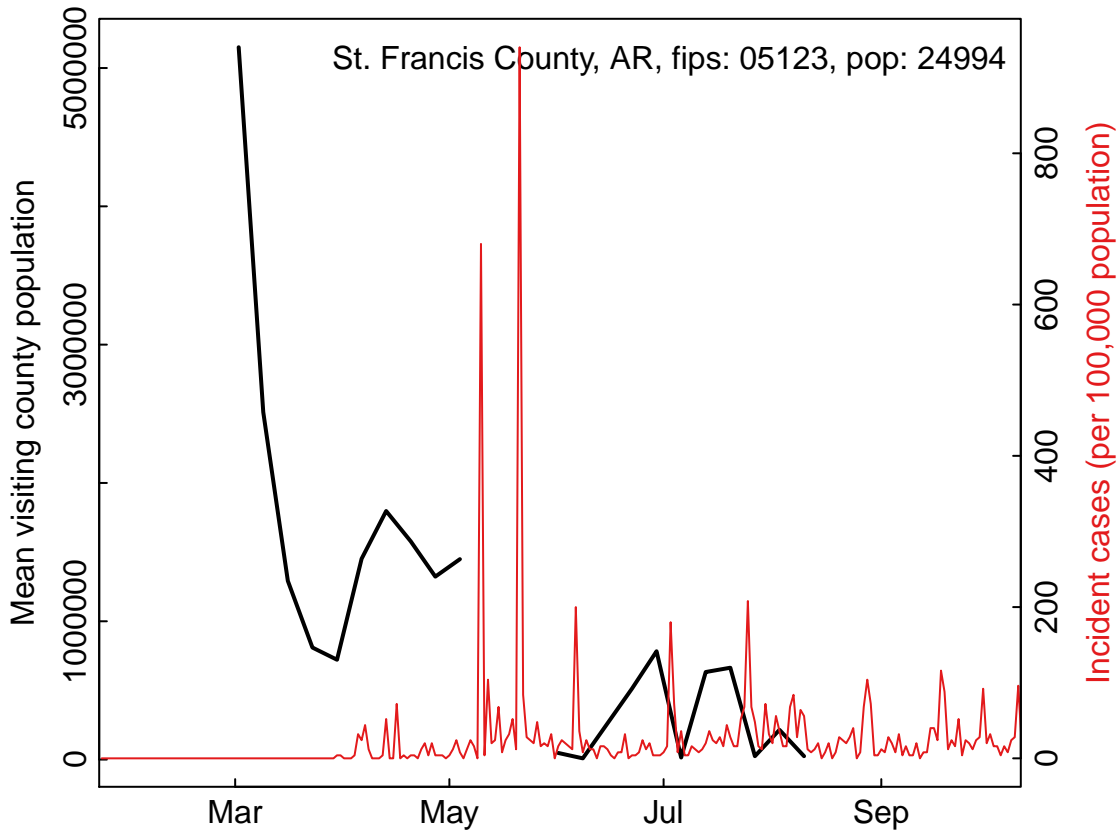

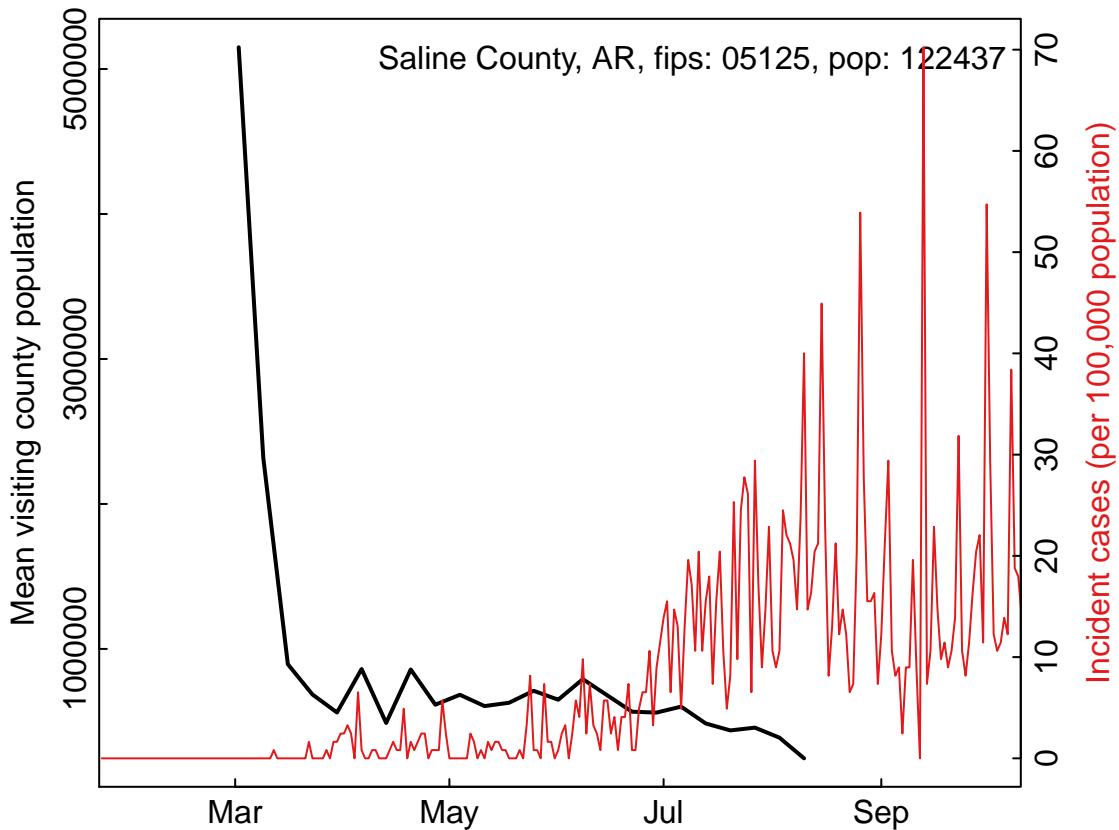

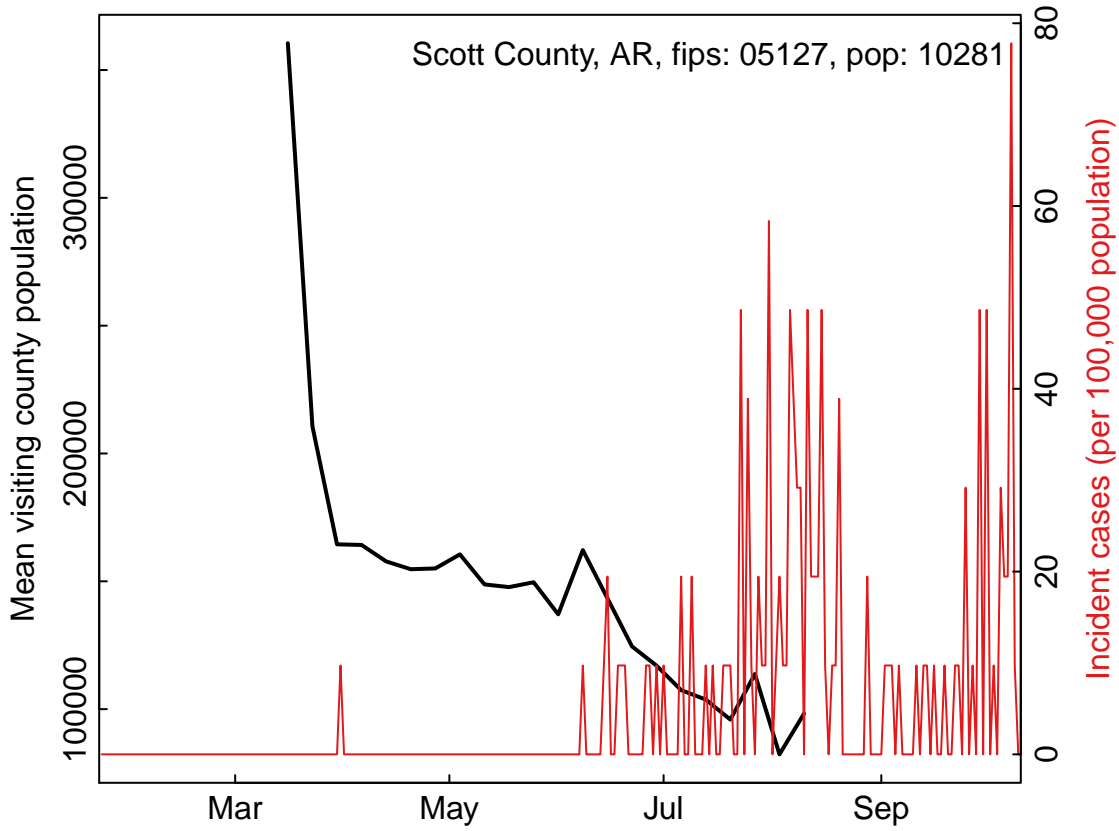

Searcy County, AR, fips: 05129, pop: 7881

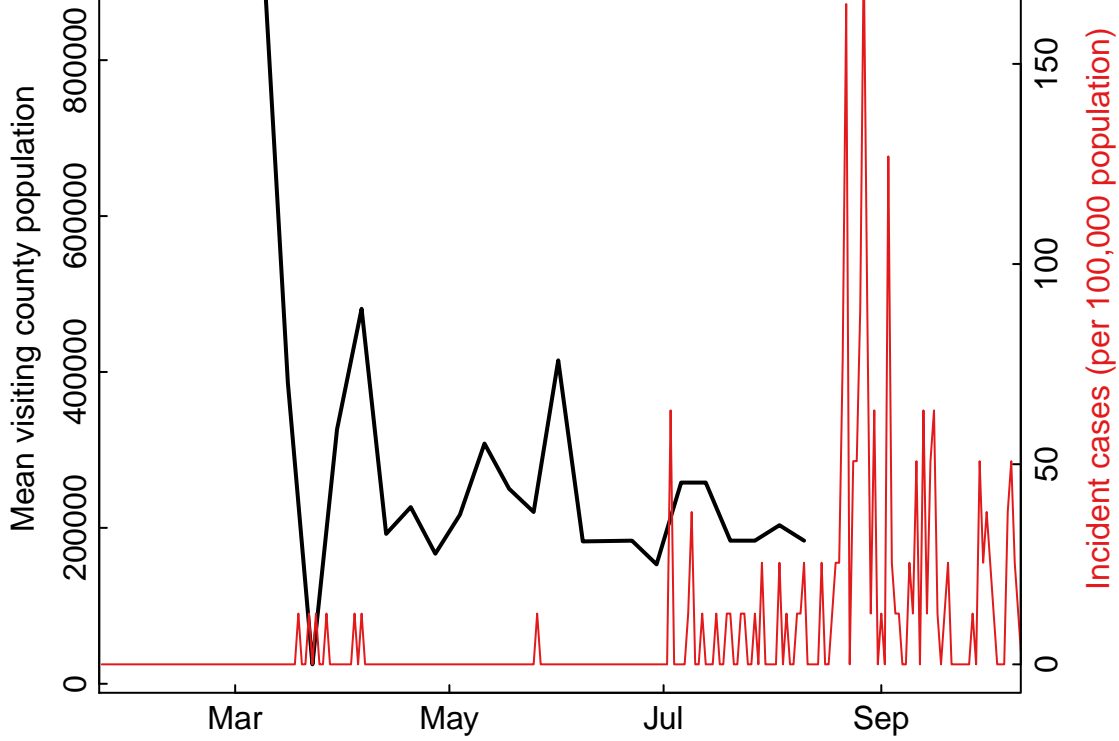

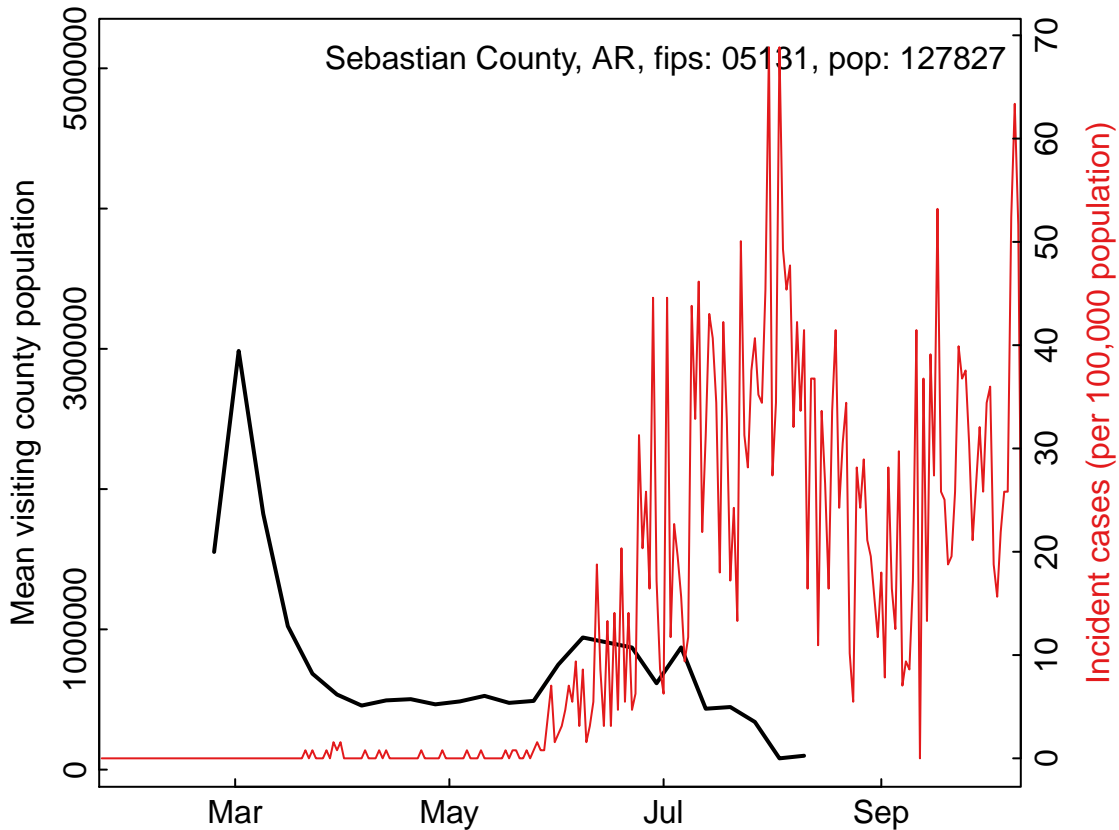

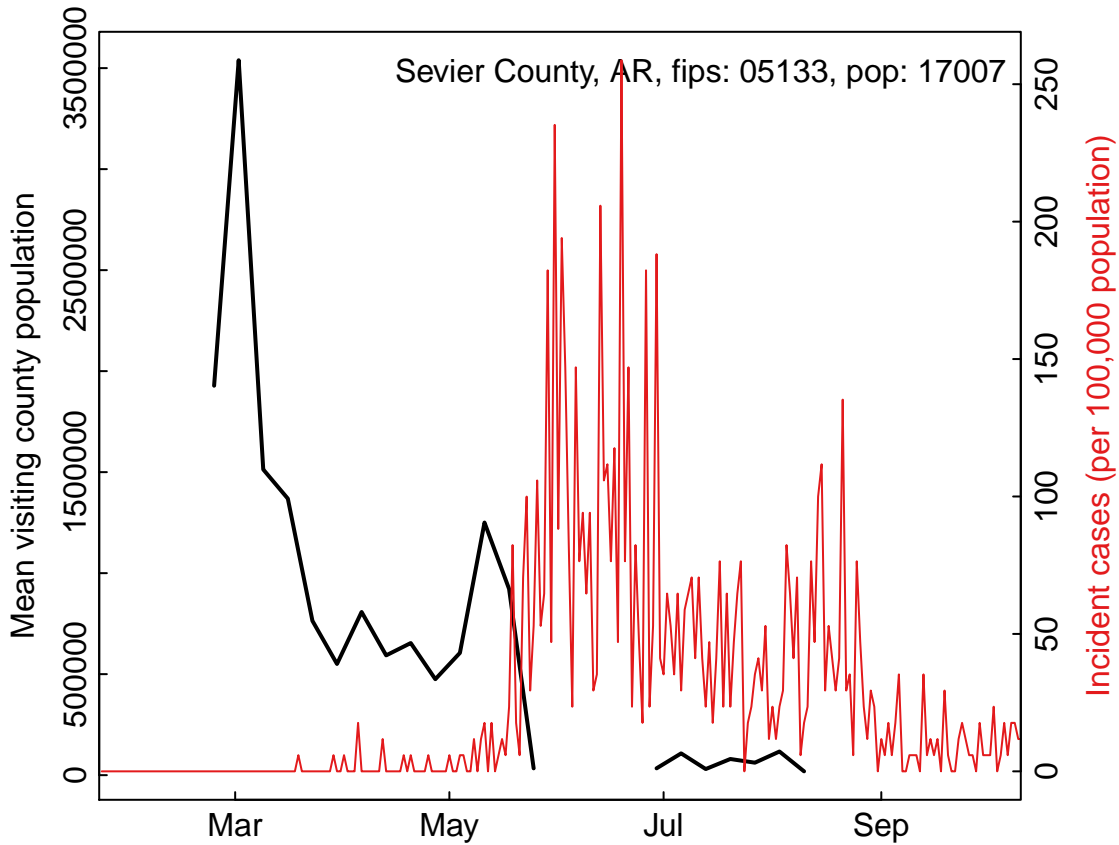

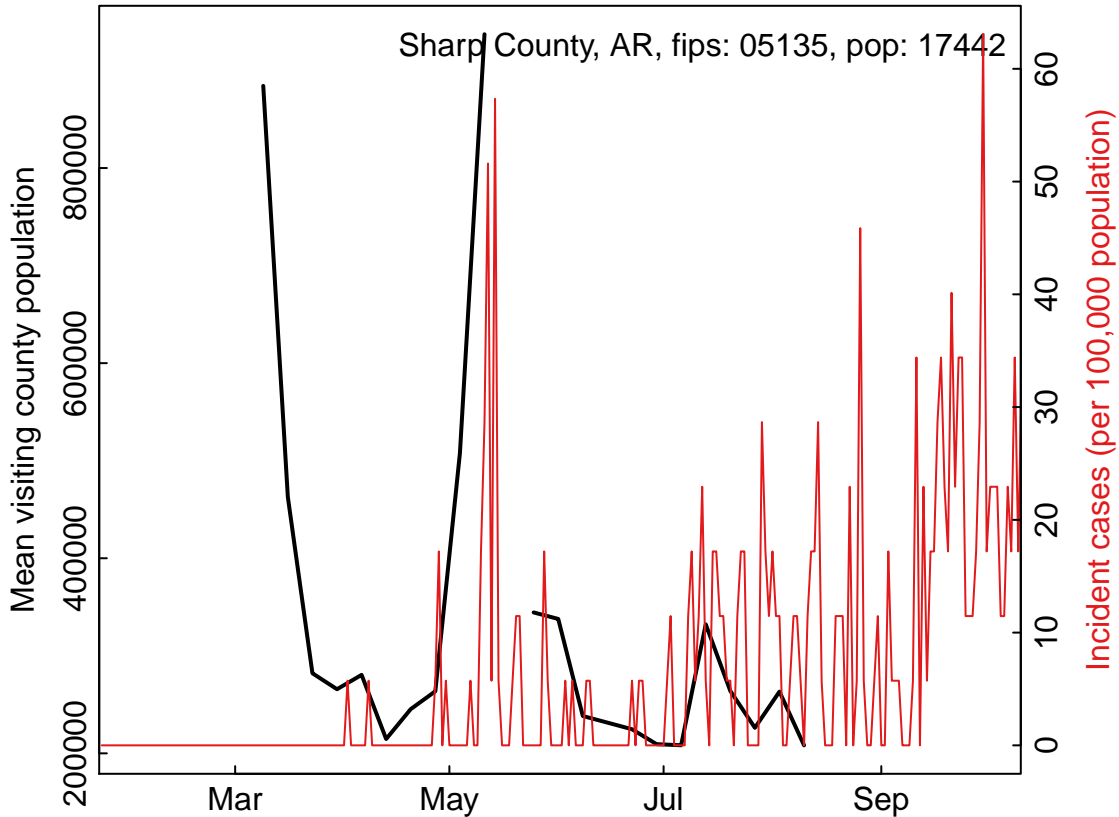

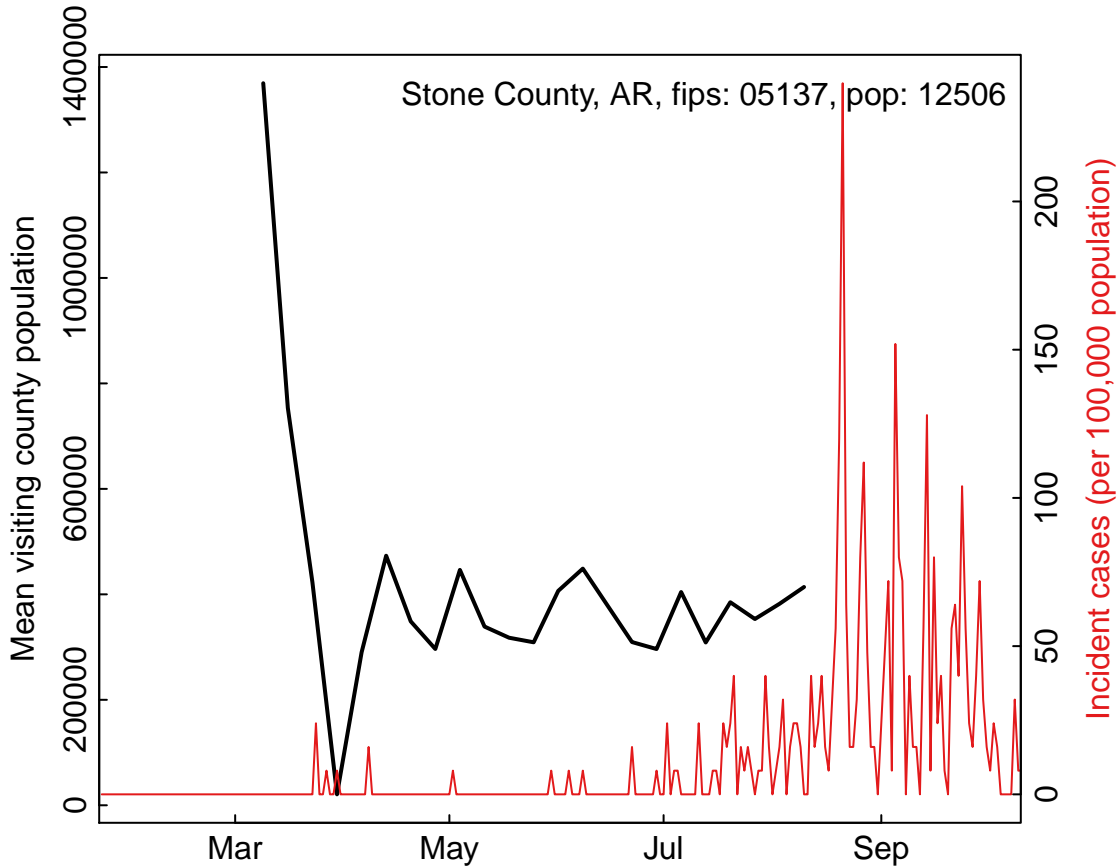



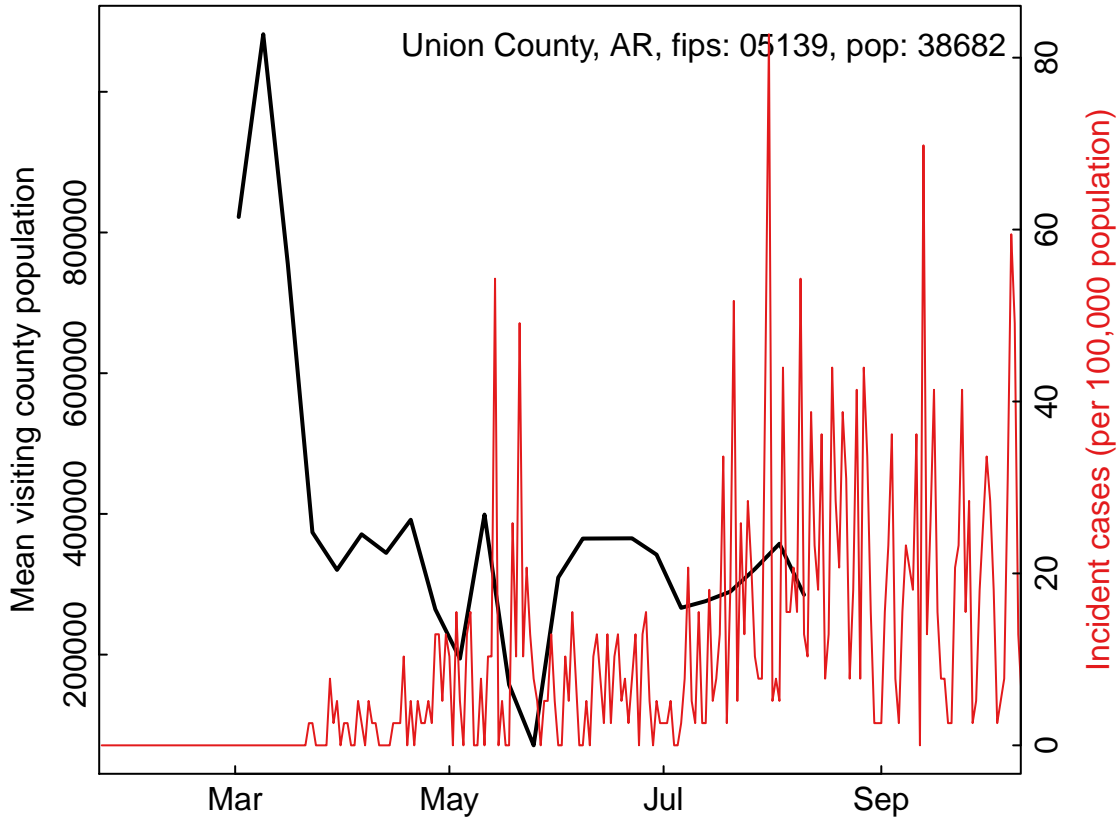

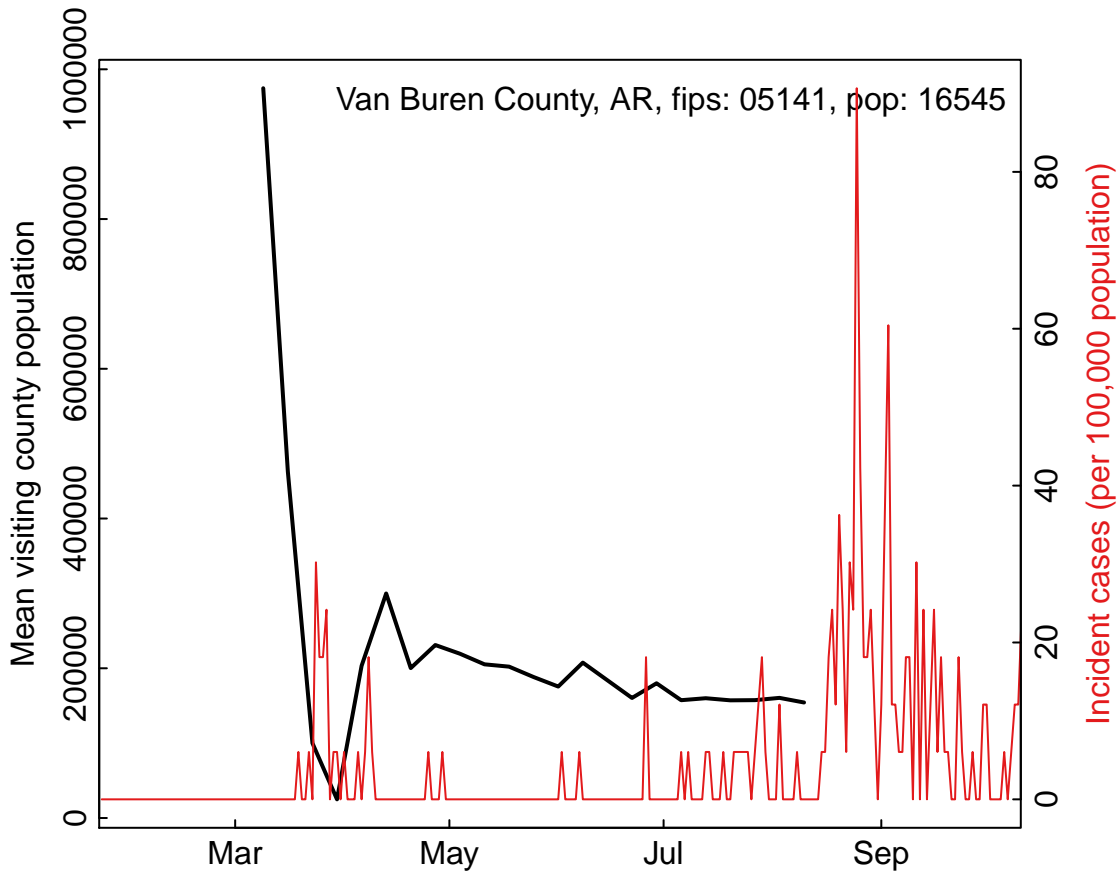

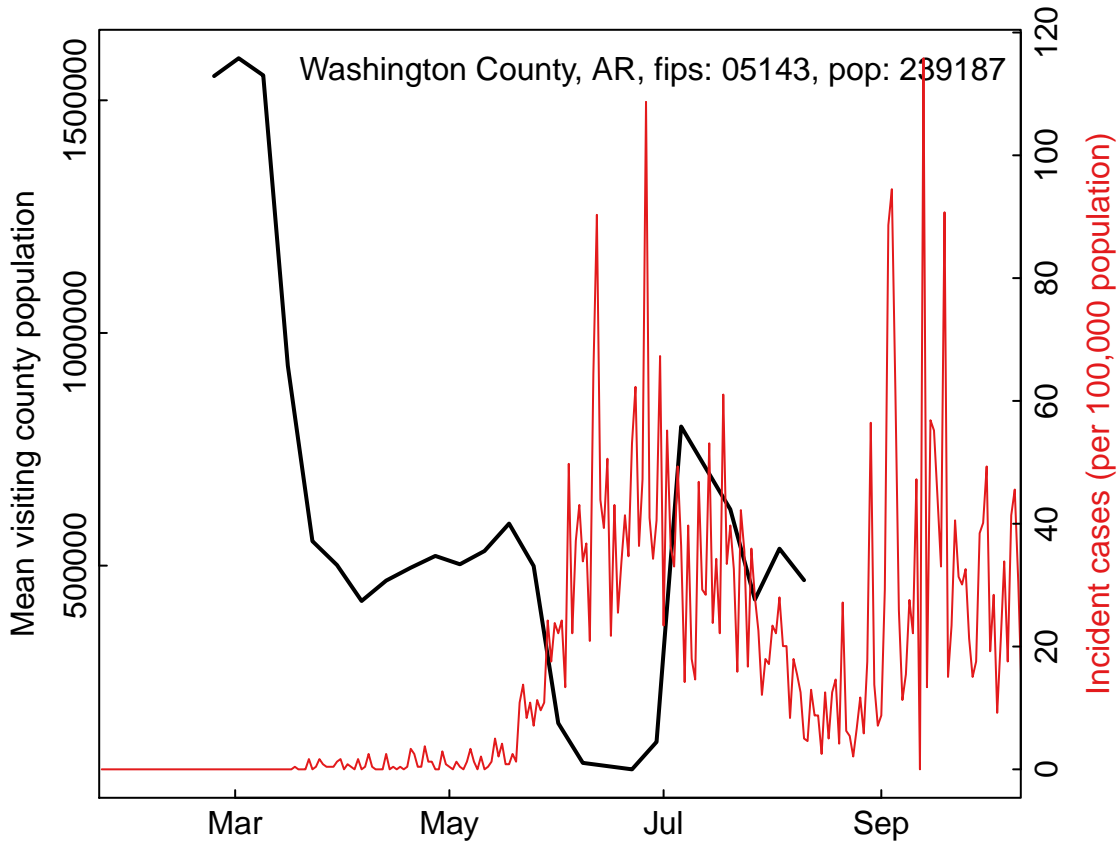

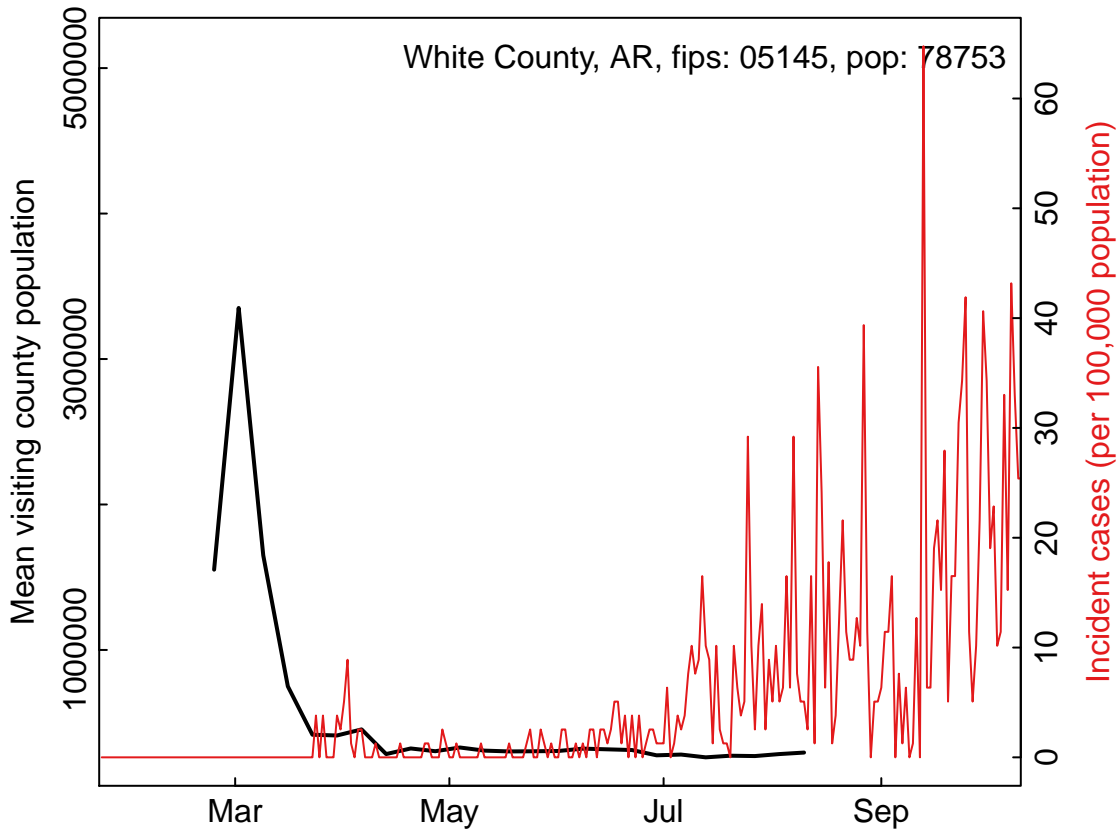

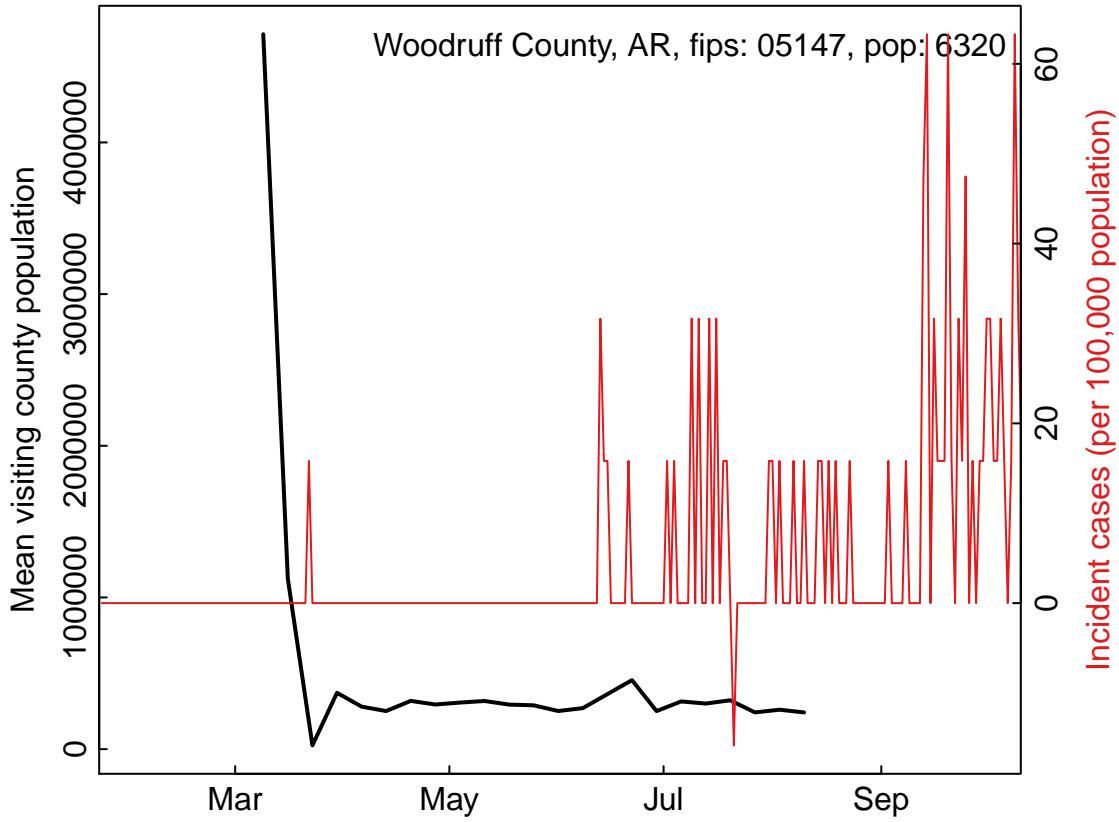

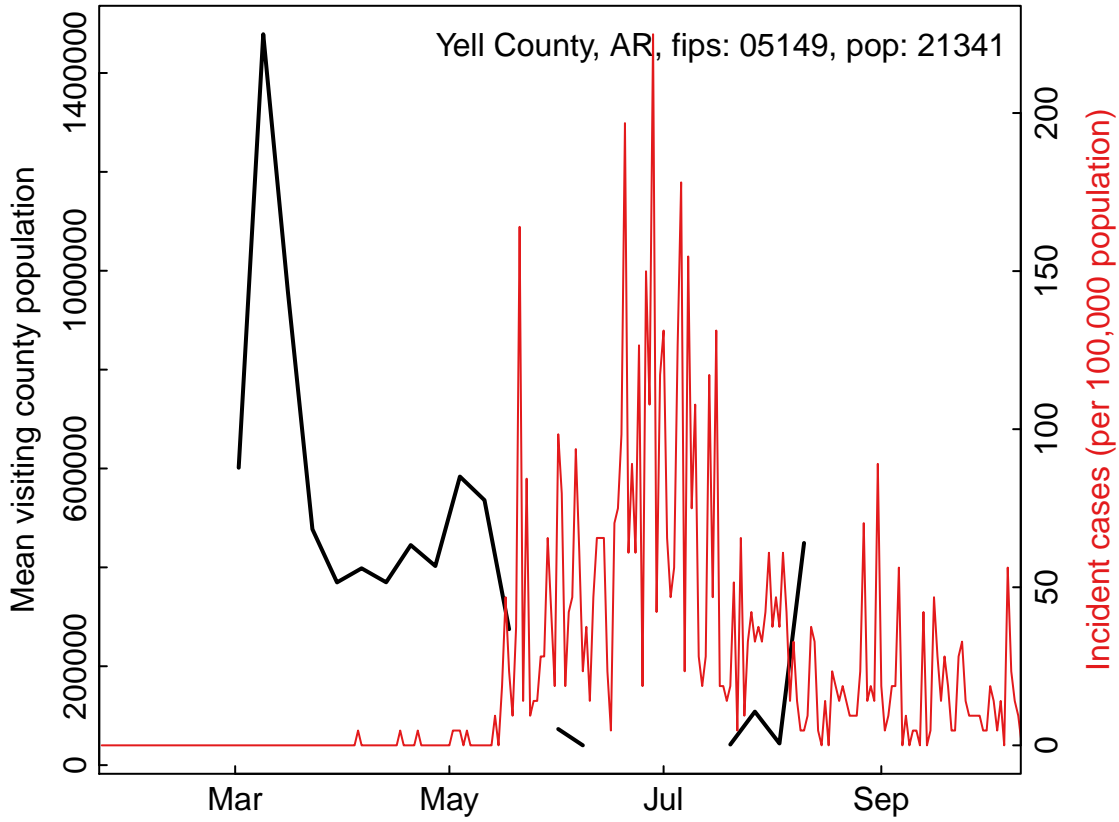

Alameda County, CA, fips: 06001, pop: 1671329

Mean visiting county population

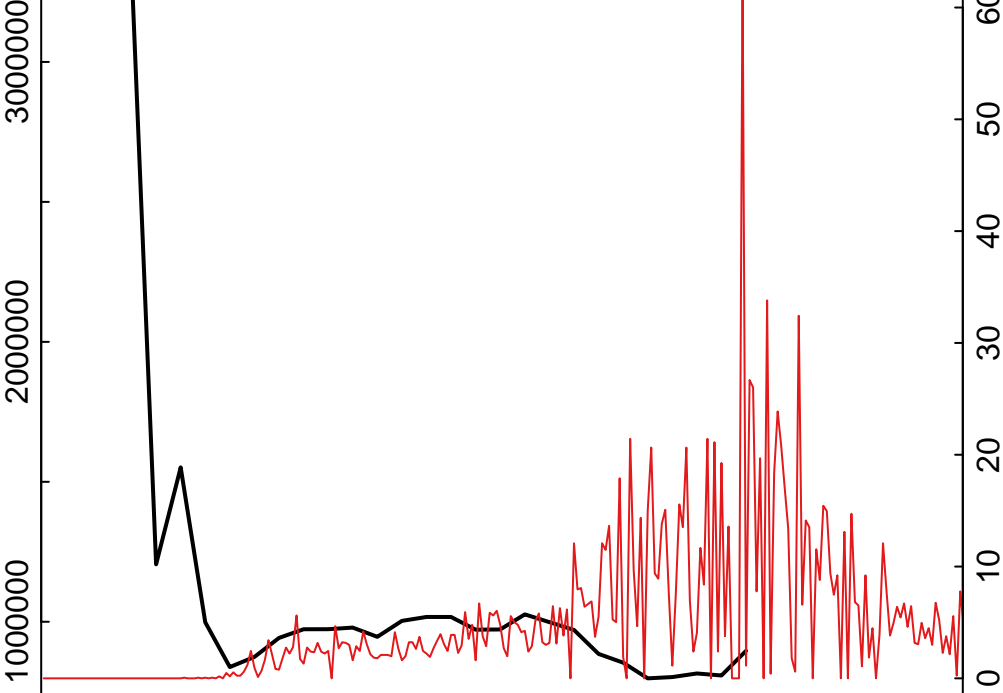

Incident cases (per 100,000 population)

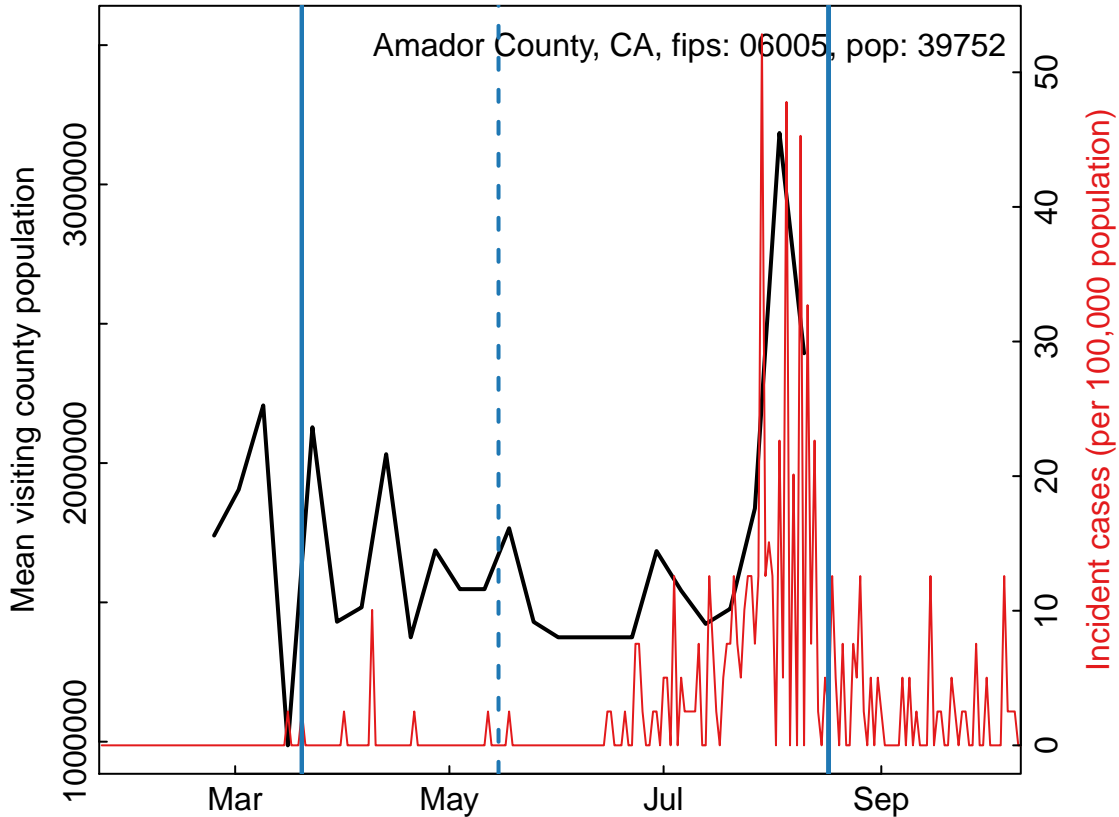



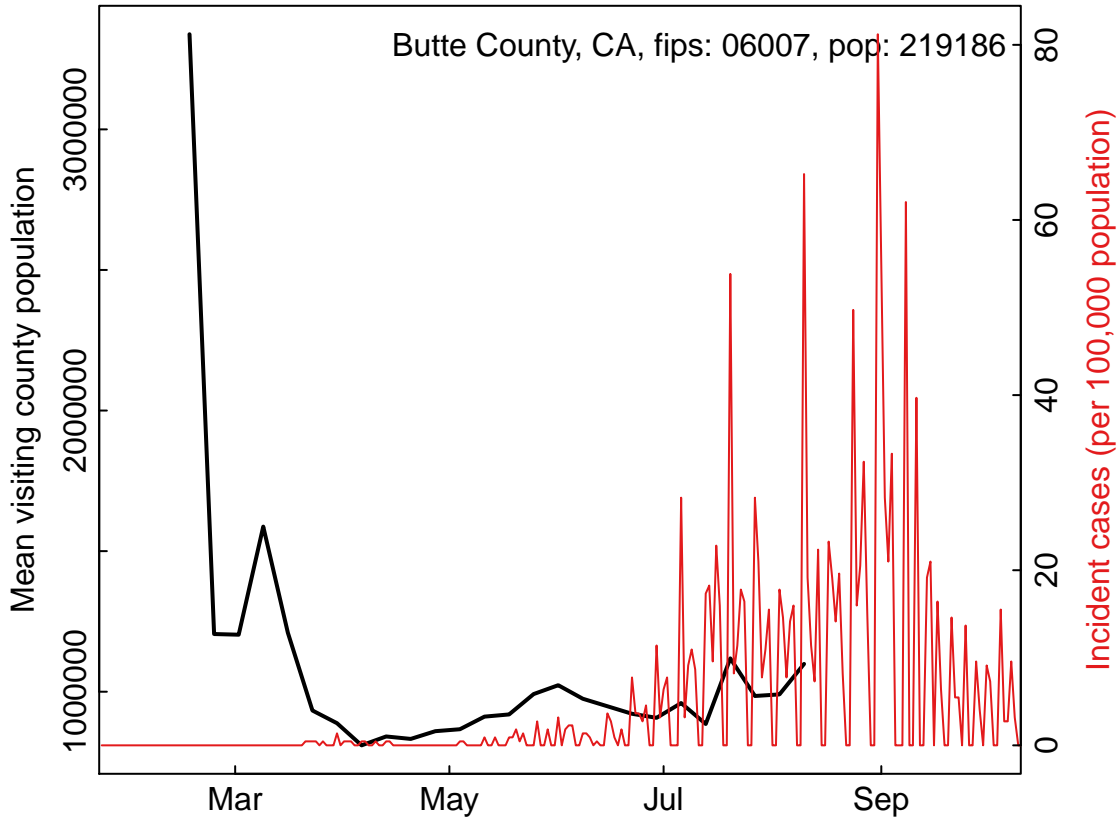

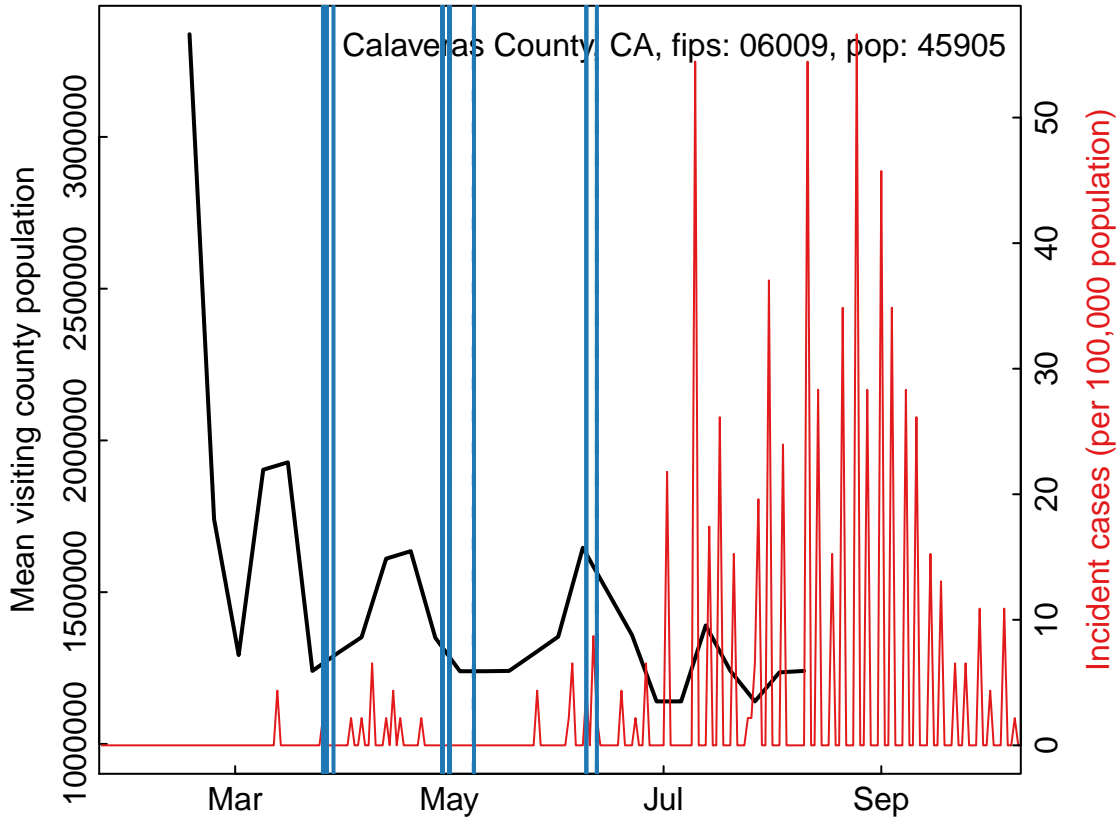

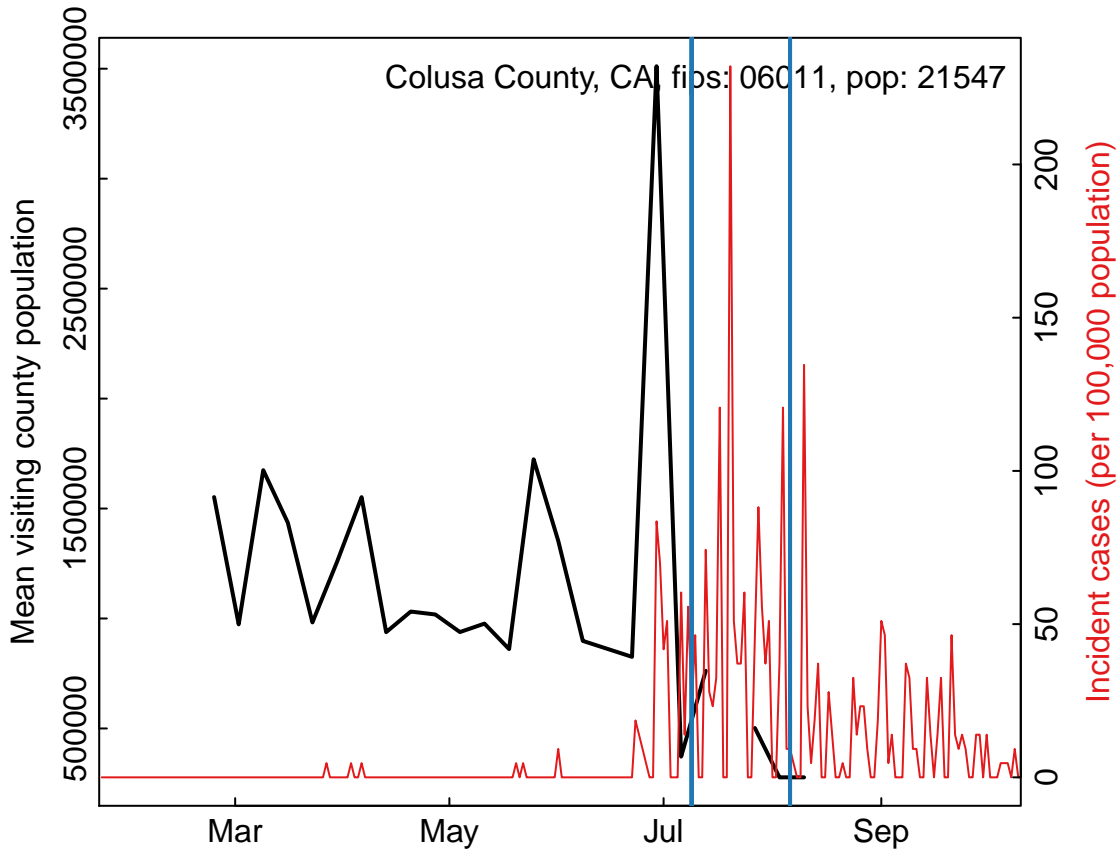

Contra Costa County, CA, fips: 06013, pop: 1153526

Mean visiting county population

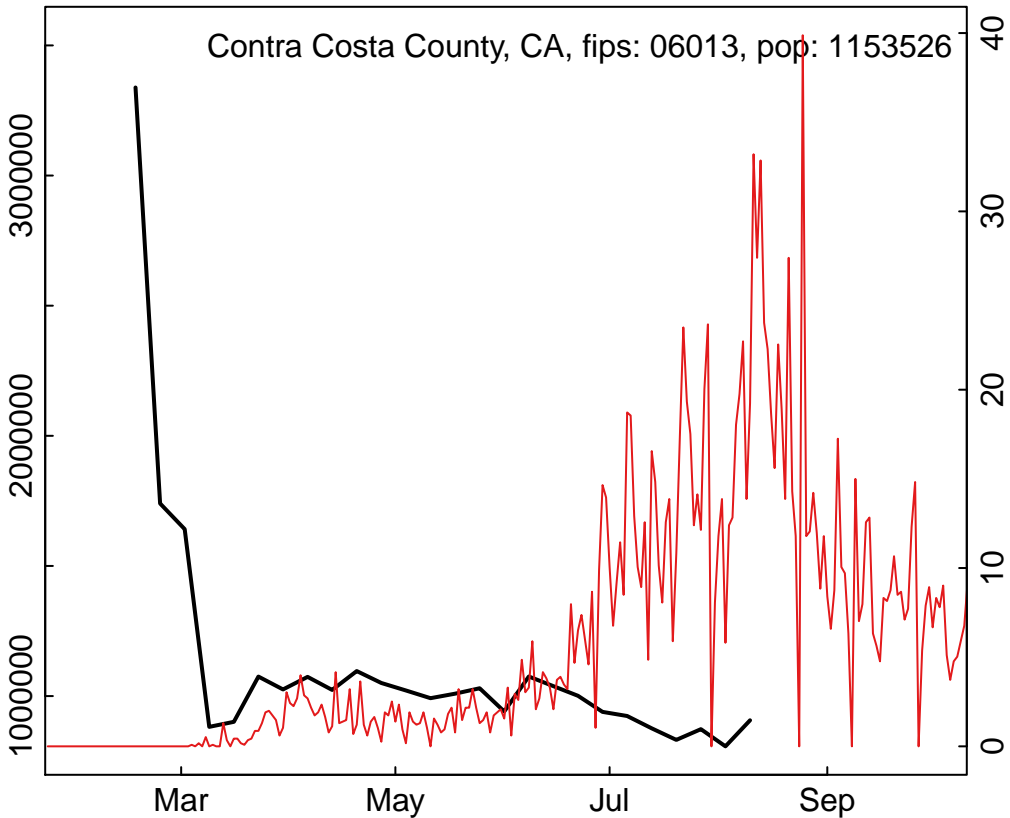

Incident cases (per 100,000 population)

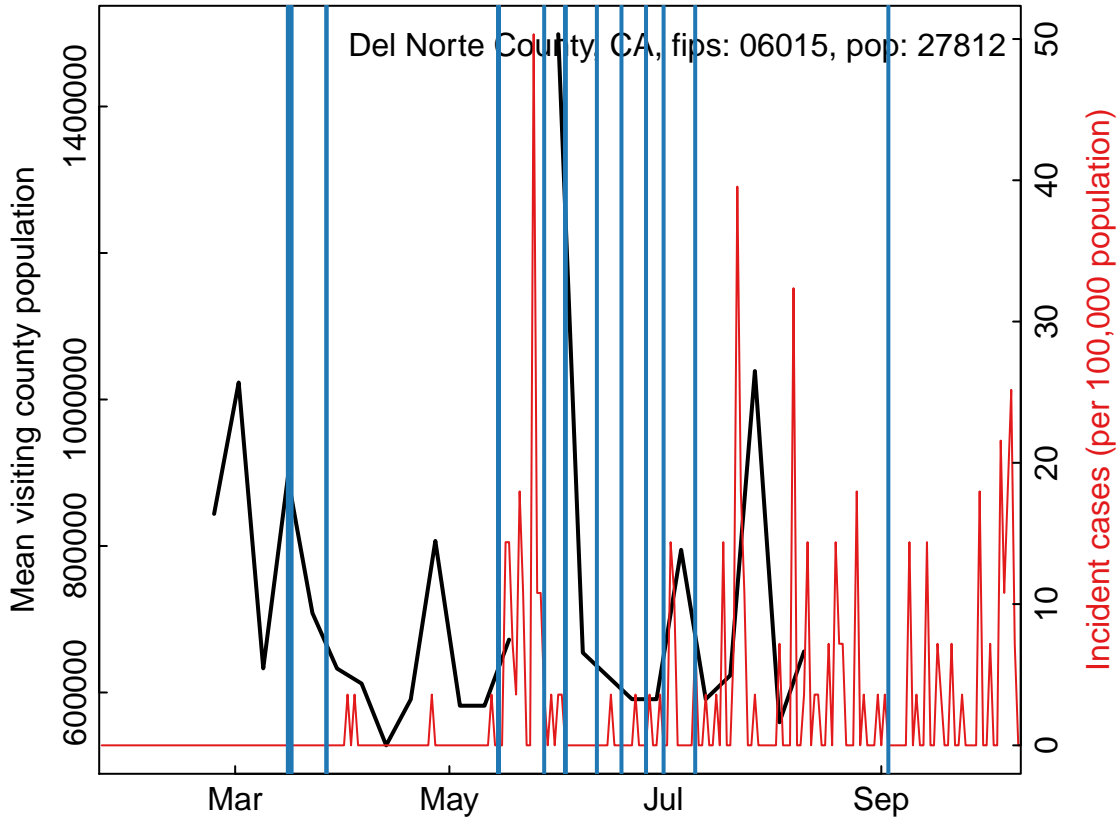

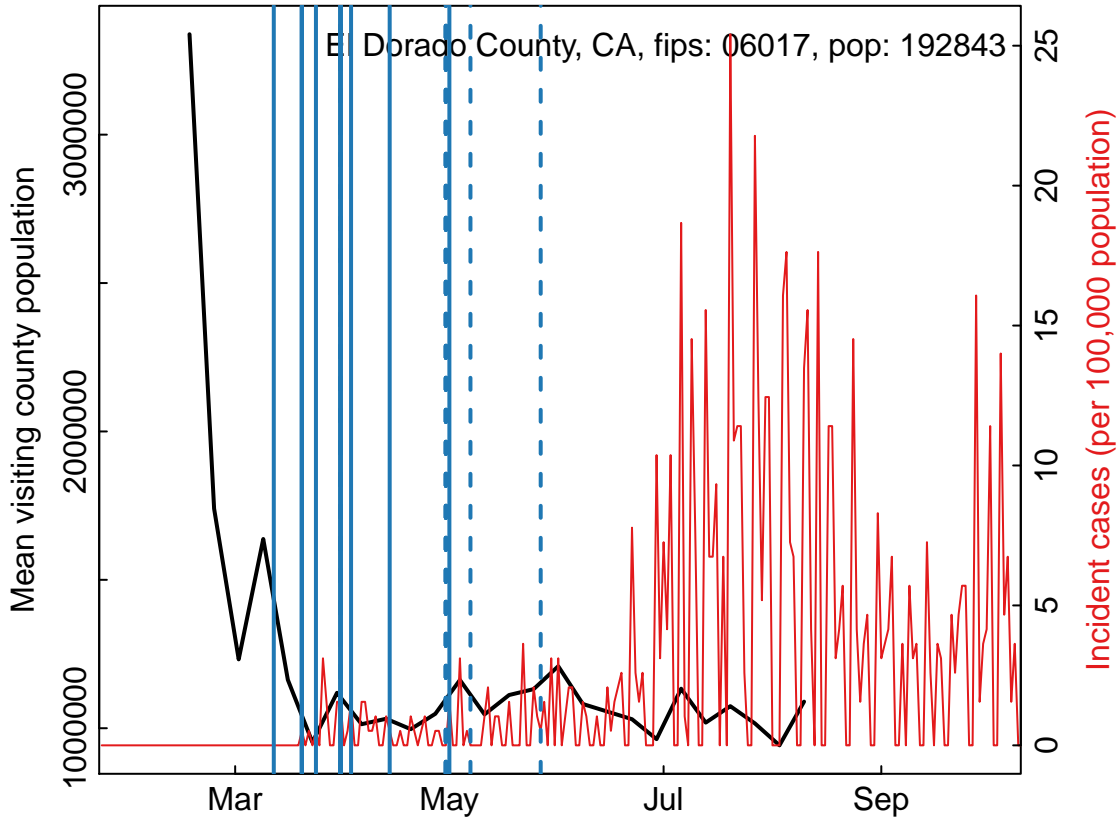

Fresno County, CA, fips: 06019, pop: 999101

Mean visiting county population

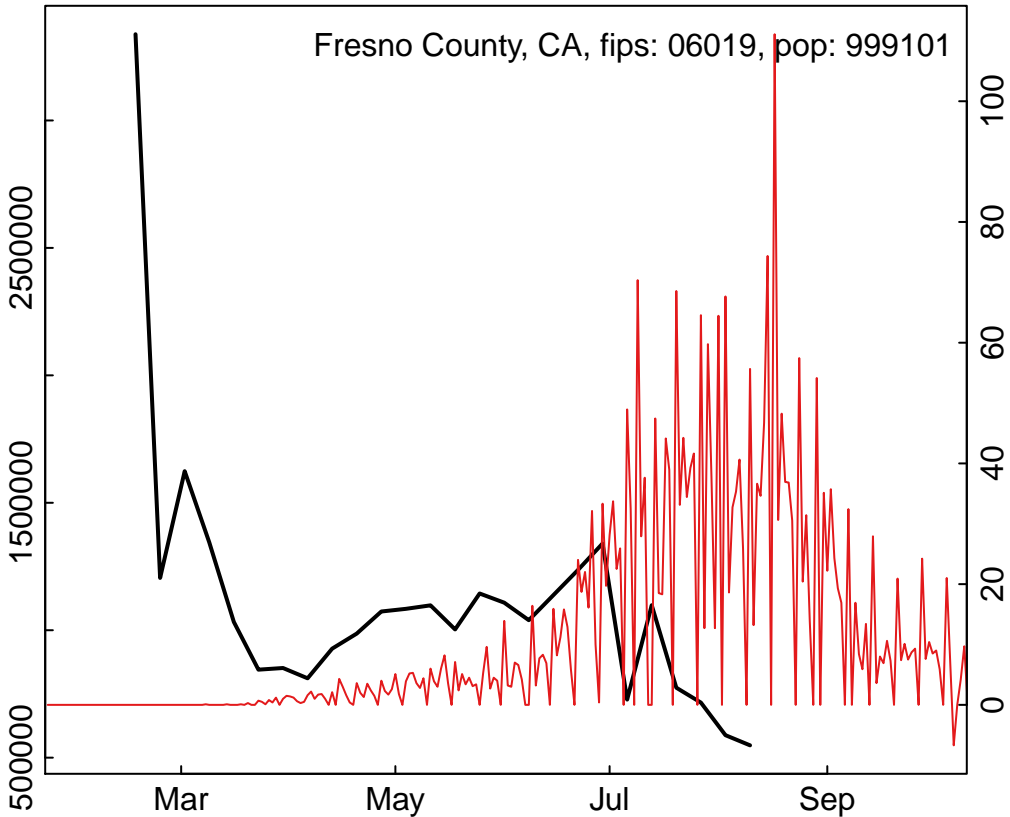

Incident cases (per 100,000 population)

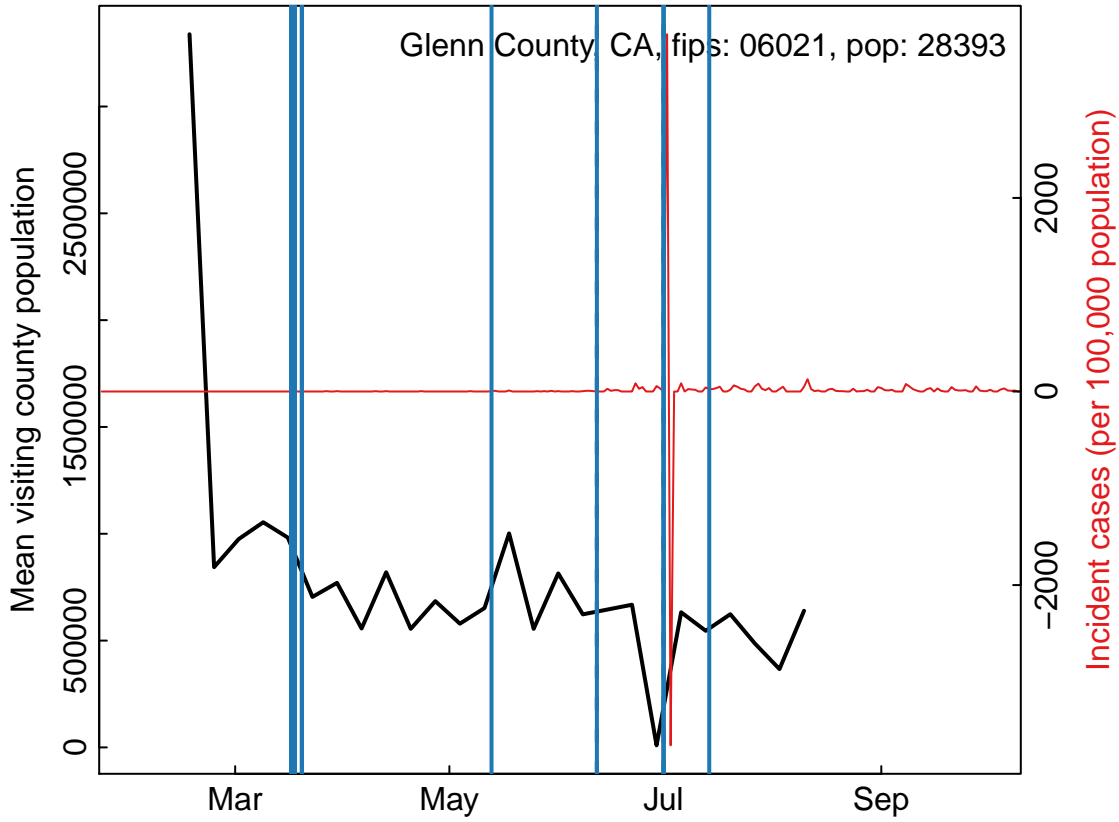



Humboldt County, CA, fips: 06023, pop: 135558

Mean visiting county population

3000000  
2000000  
1000000

Mar

May

Jul

Sep

25  
20  
15  
10  
5  
0

Incident cases (per 100,000 population)

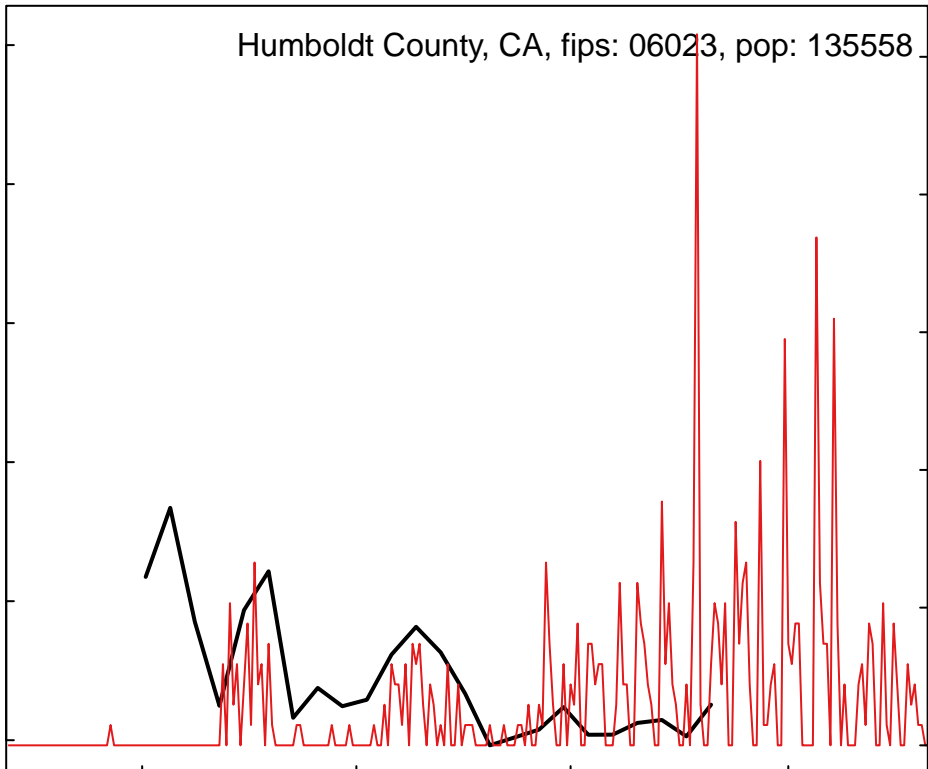

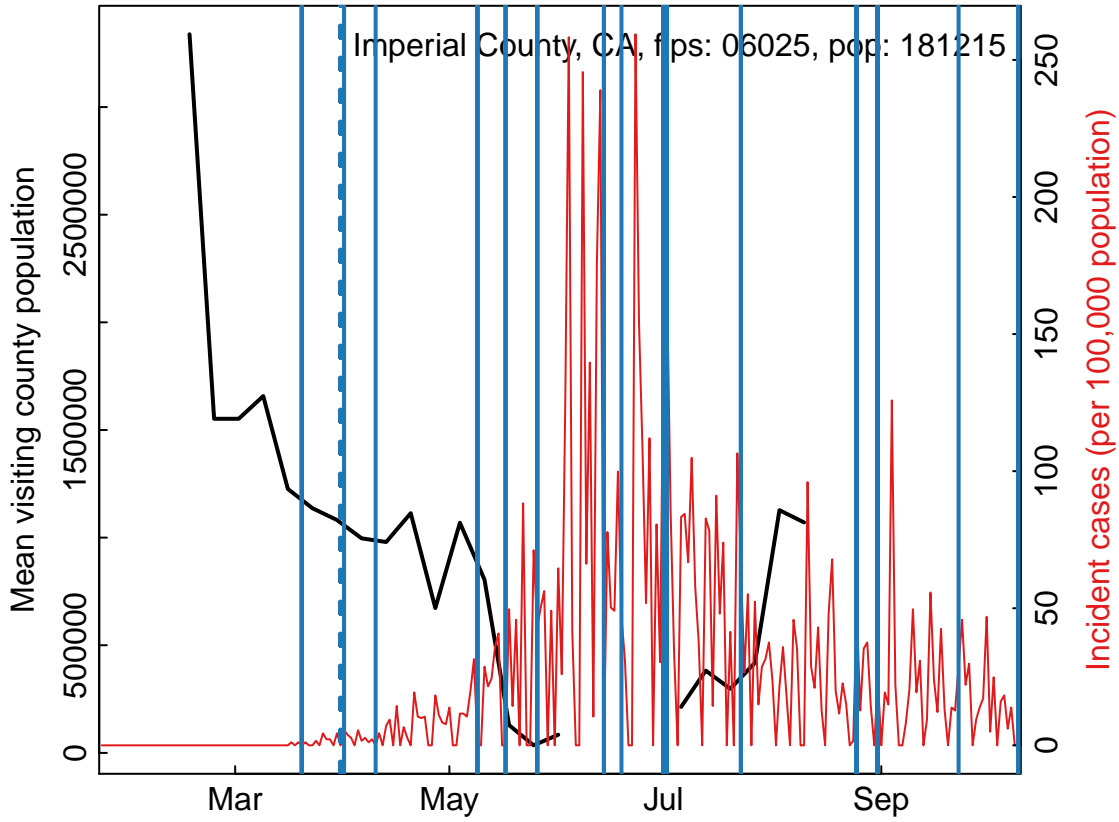

Inyo County, CA, fips: 06027, pop: 18039

Mean visiting county population

2500000  
1500000  
500000  
0

Mar May Jul Sep

Incident cases (per 100,000 population)

200  
150  
100  
50  
0

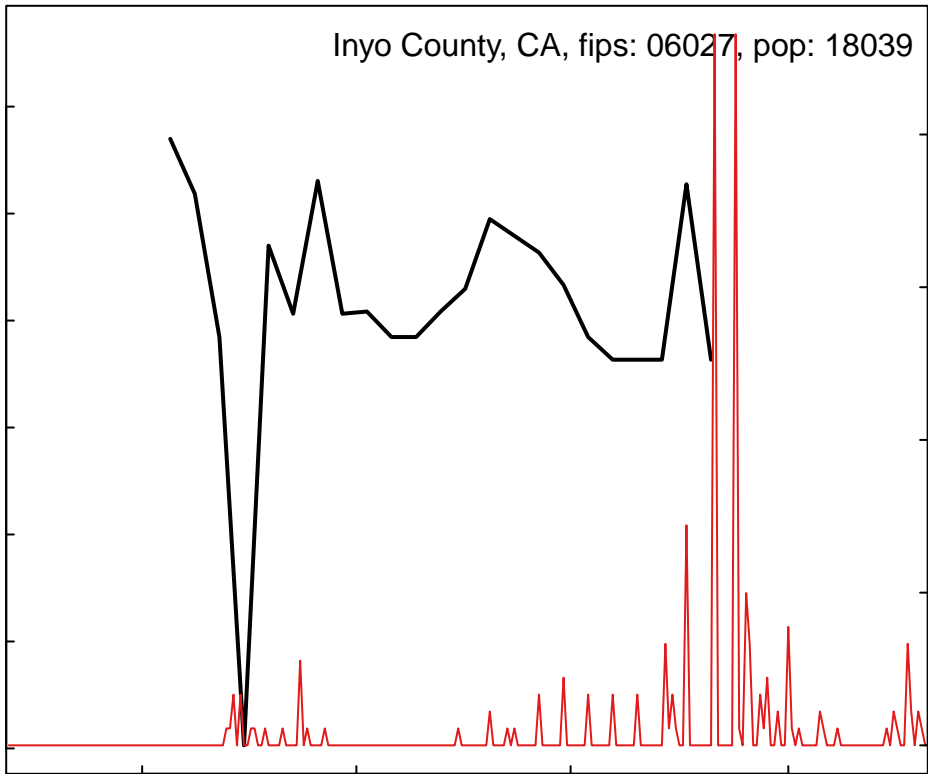

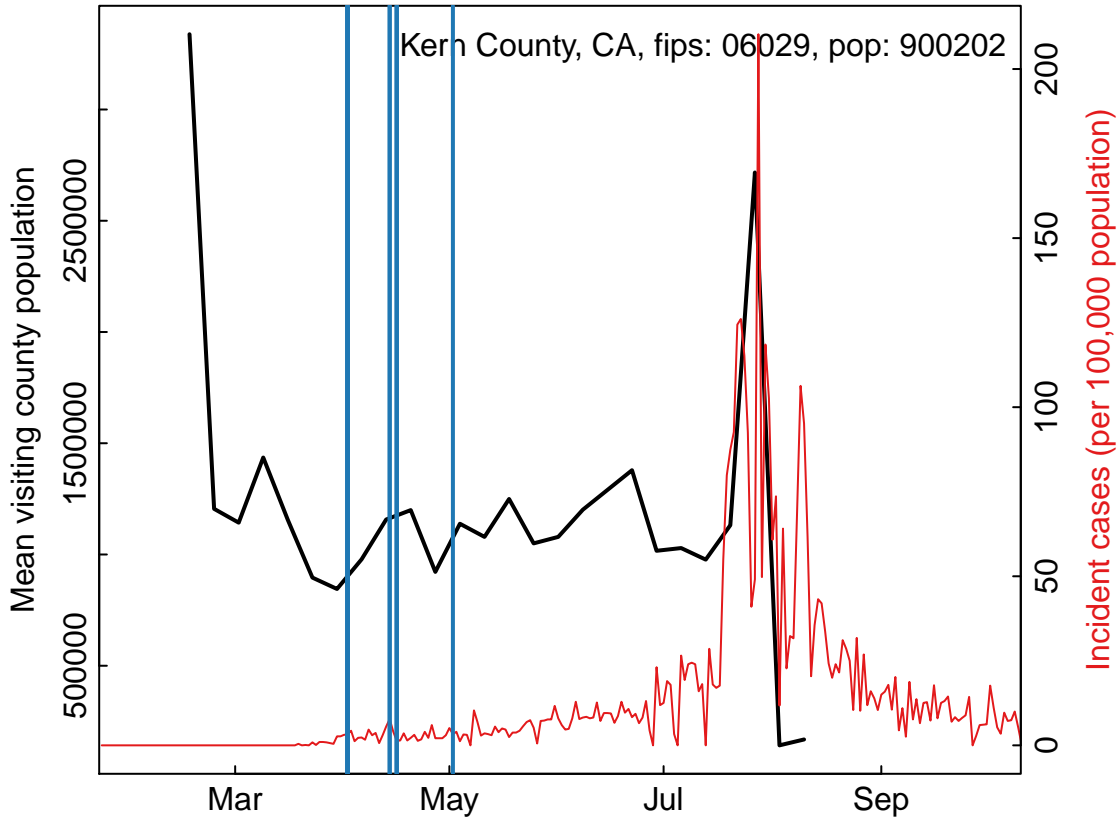



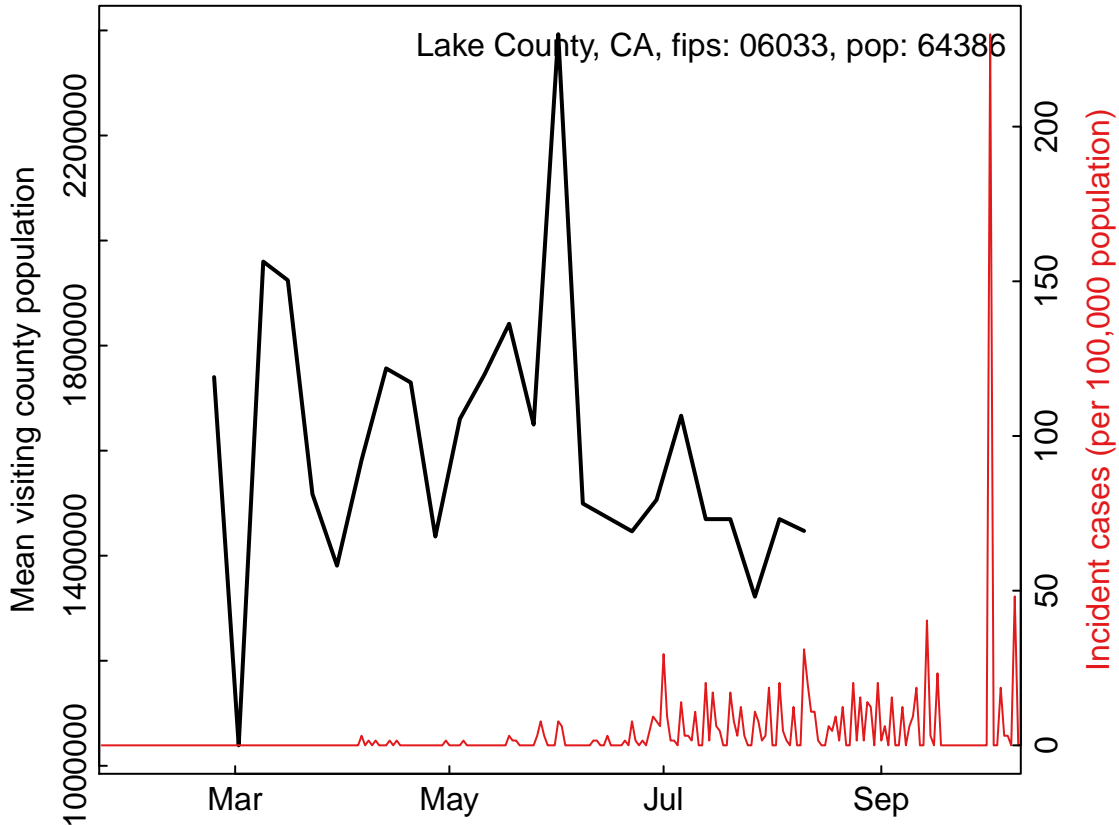

Lassen County, CA, fips: 06035, pop: 30573

Mean visiting county population

1600000  
1200000  
800000

Mar

May

Jul

Sep

1500  
1000  
500  
0

Incident cases (per 100,000 population)

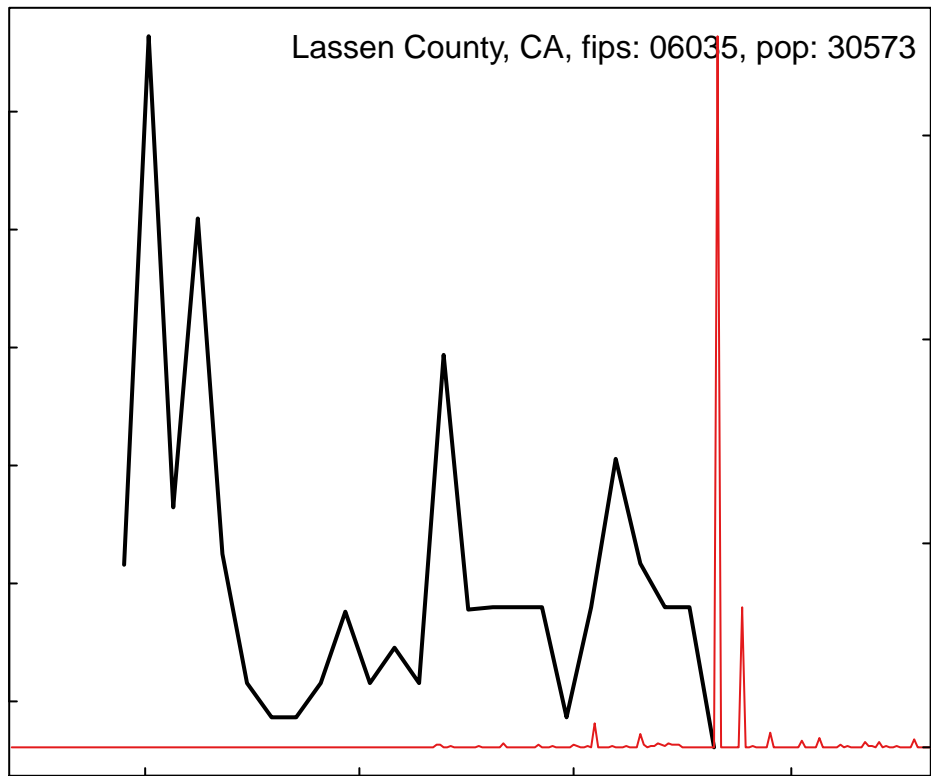

Los Angeles County, CA, fips: 06037, pop: 10039107

Mean visiting county population

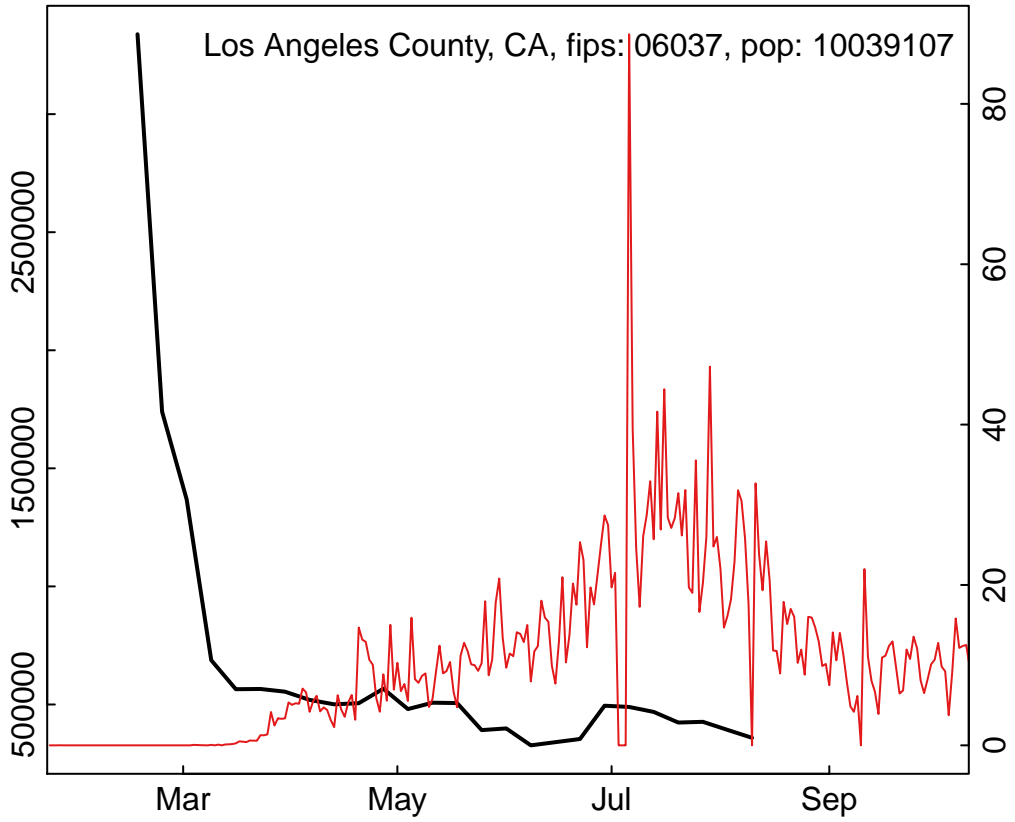

Incident cases (per 100,000 population)



Madera County, CA, fips: 06039, pop: 157327

Mean visiting county population

Incident cases (per 100,000 population)

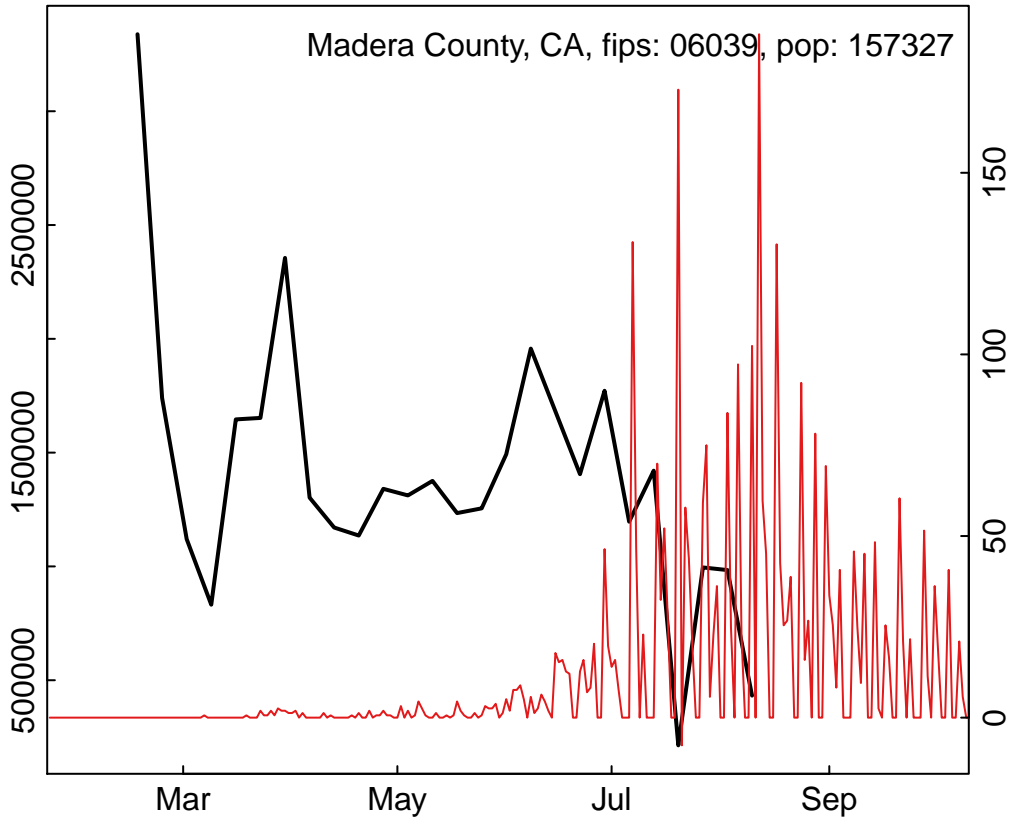

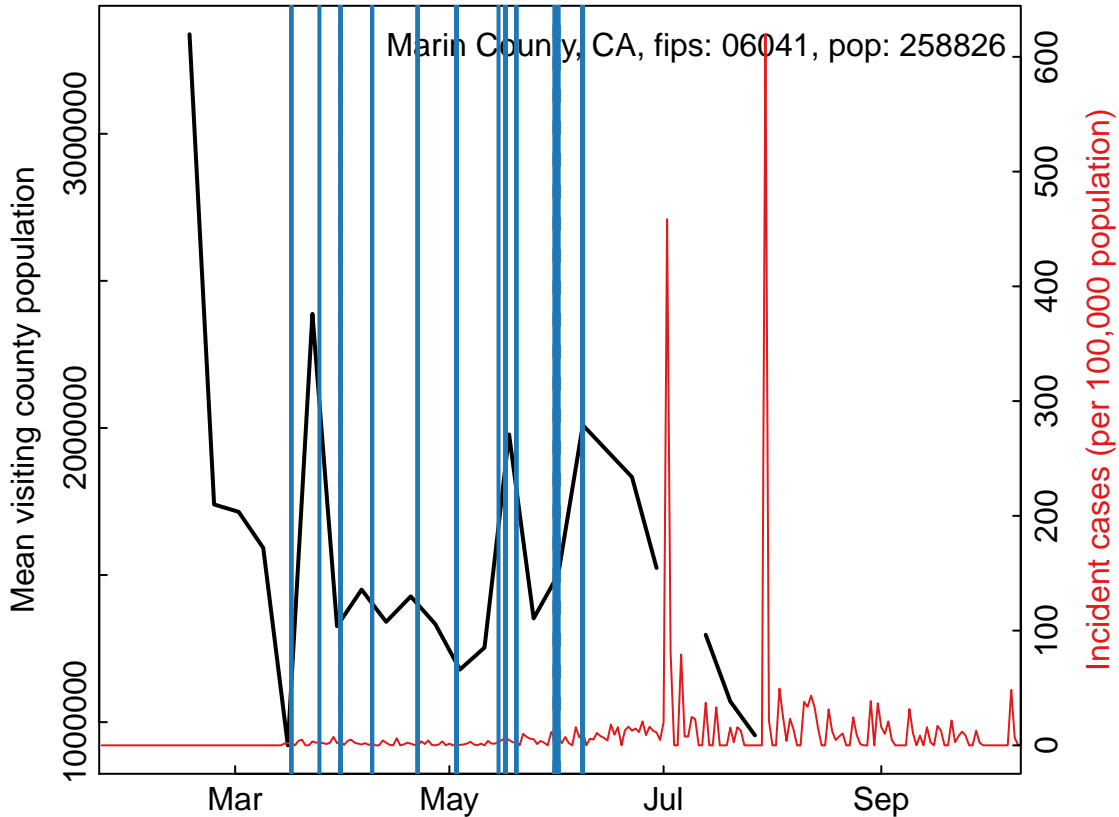

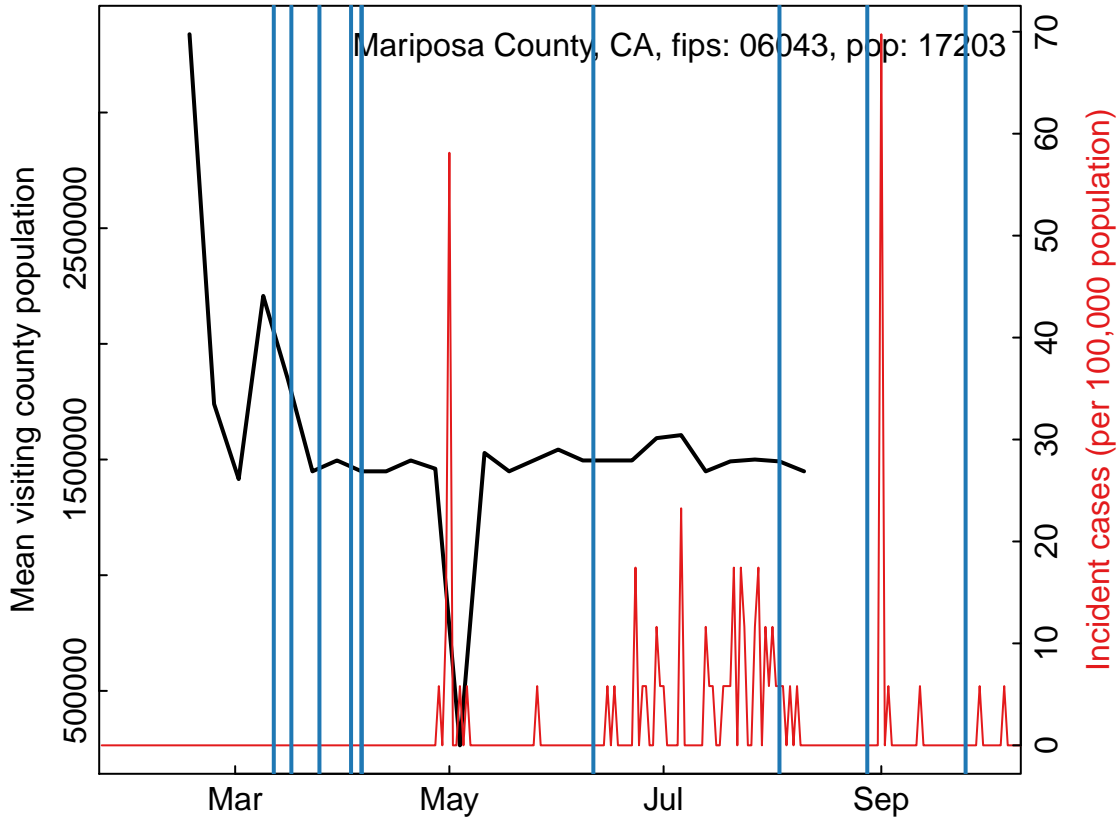

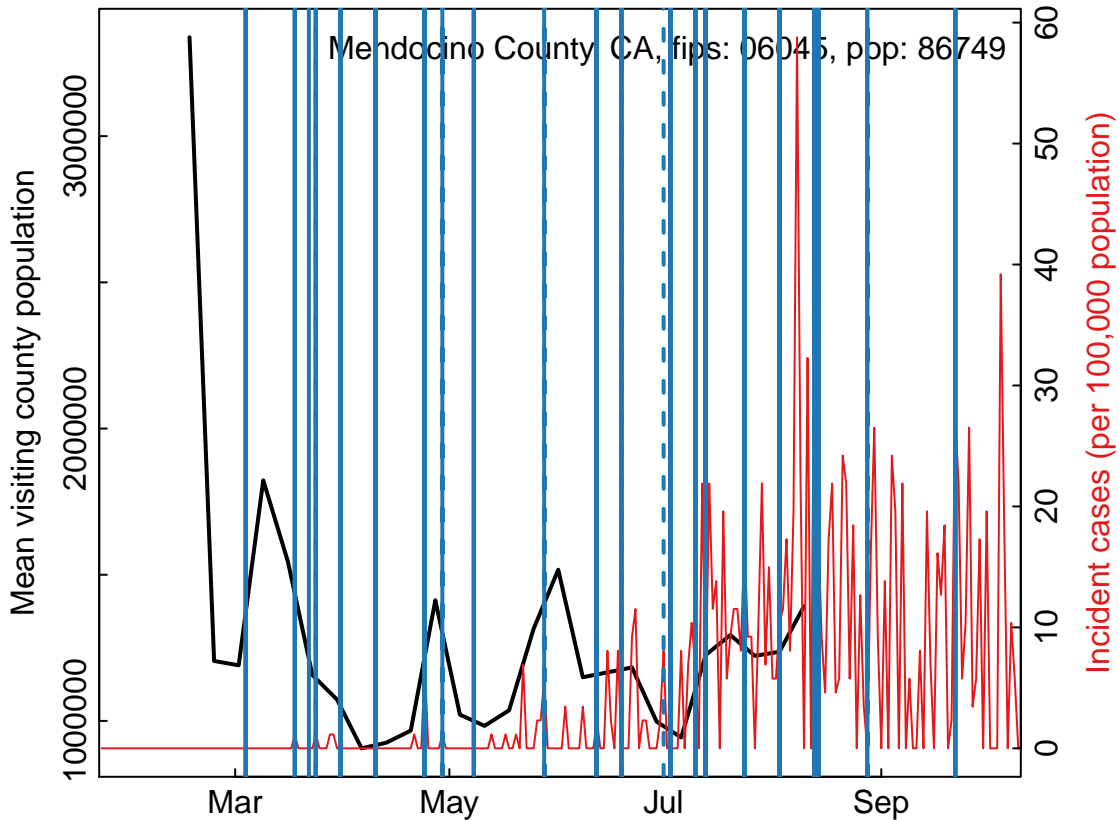

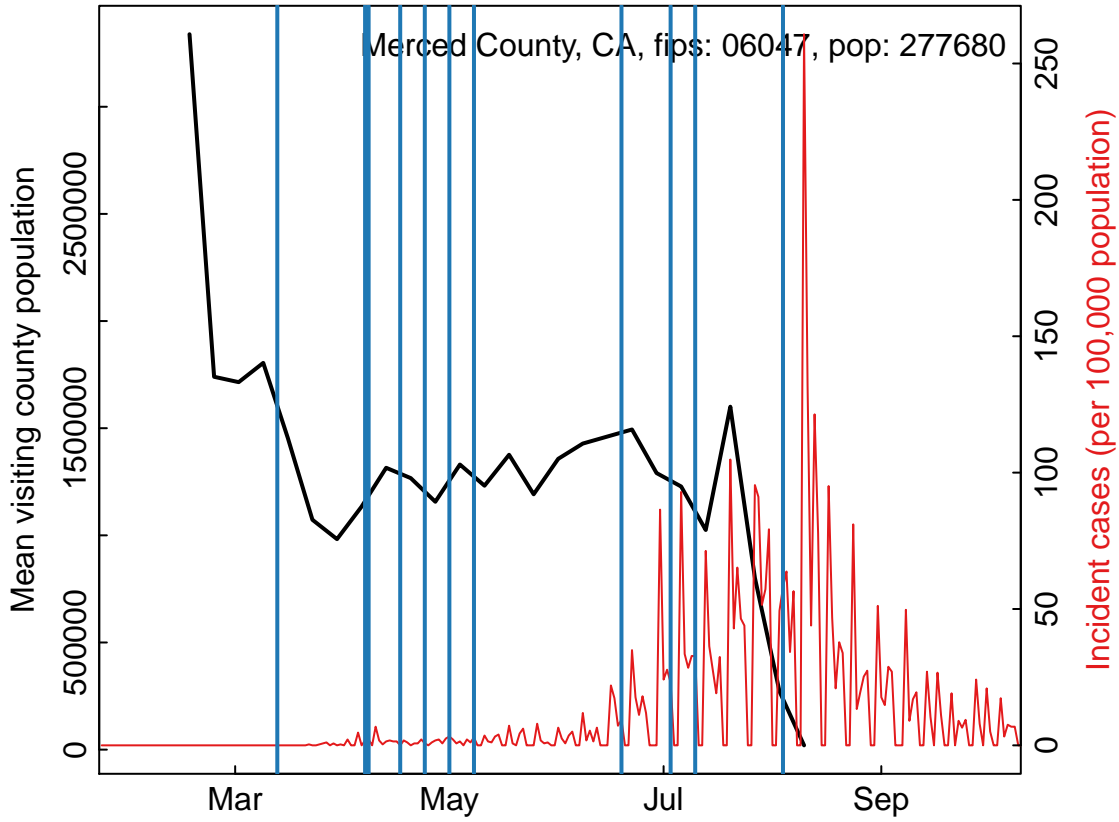

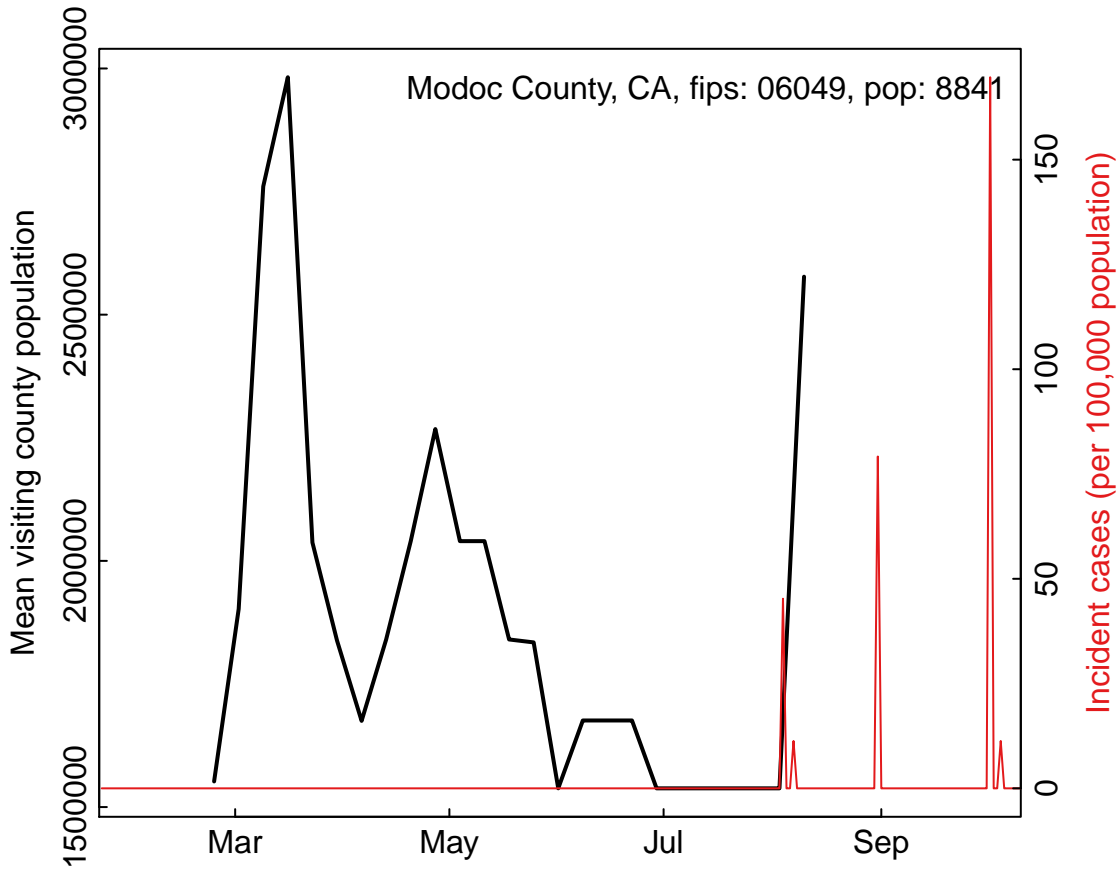

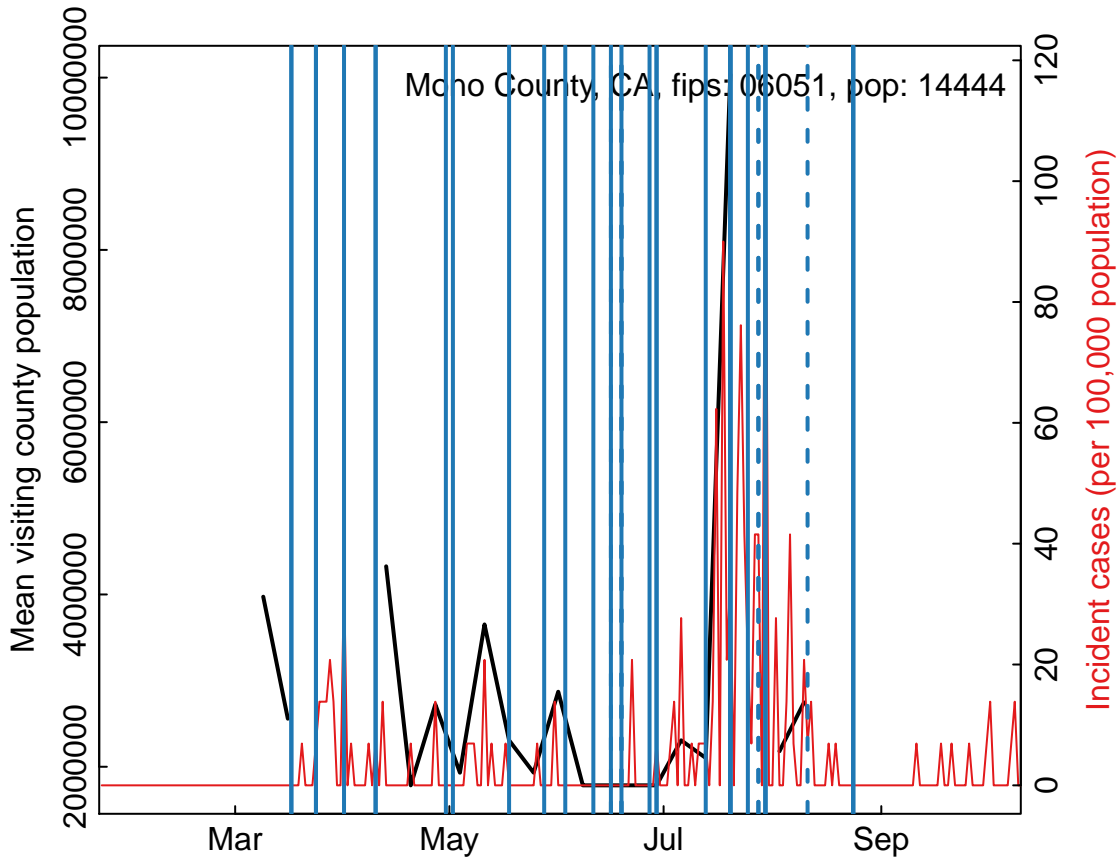

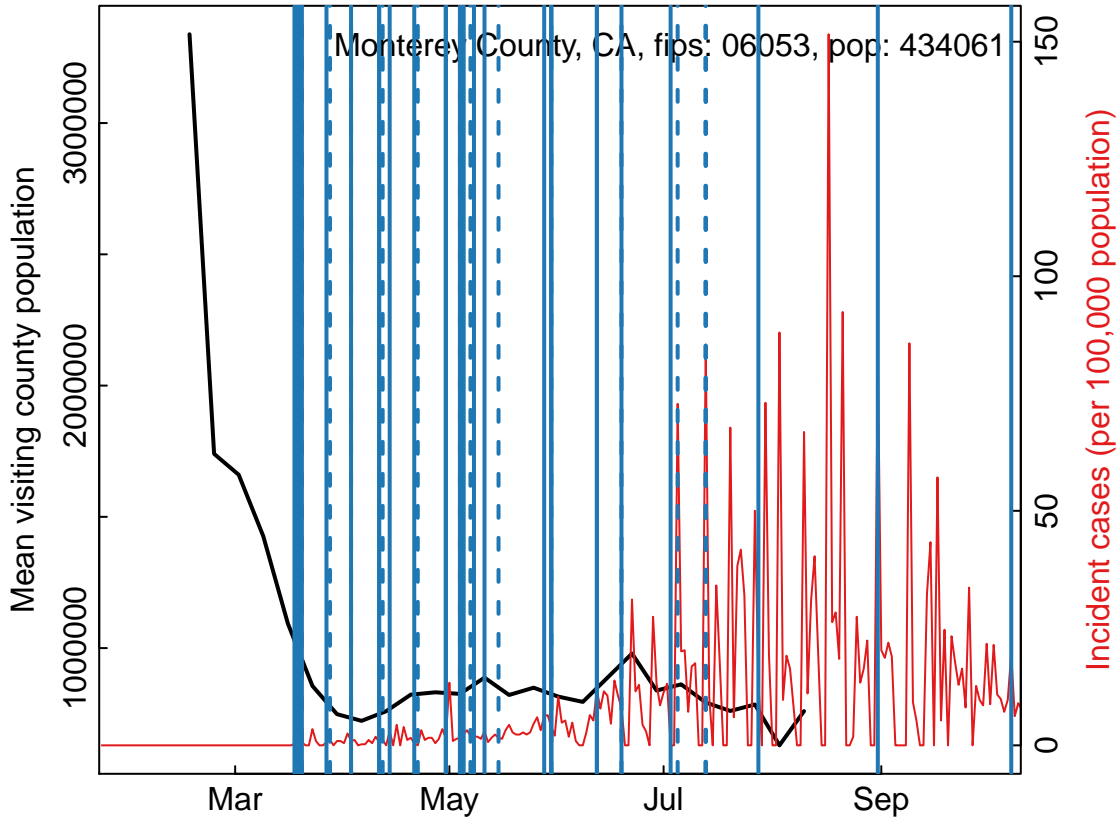



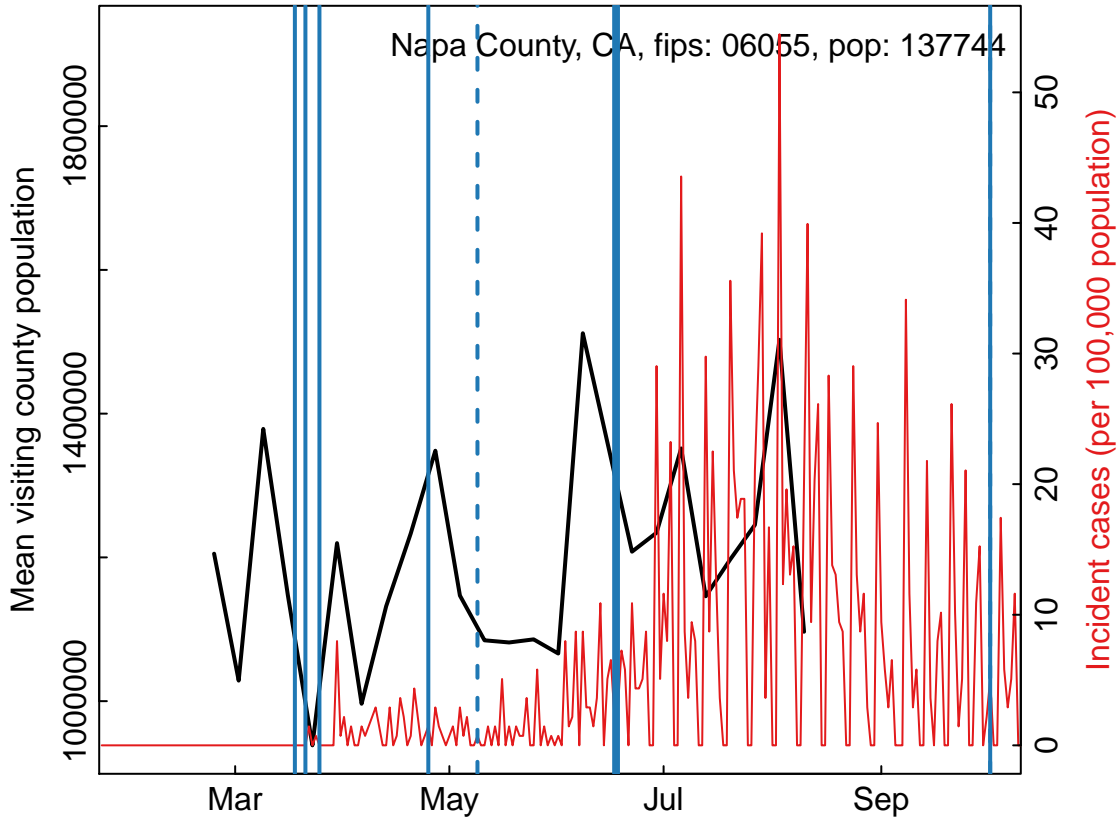

Nevada County, CA, fips: 06057, pop: 99755

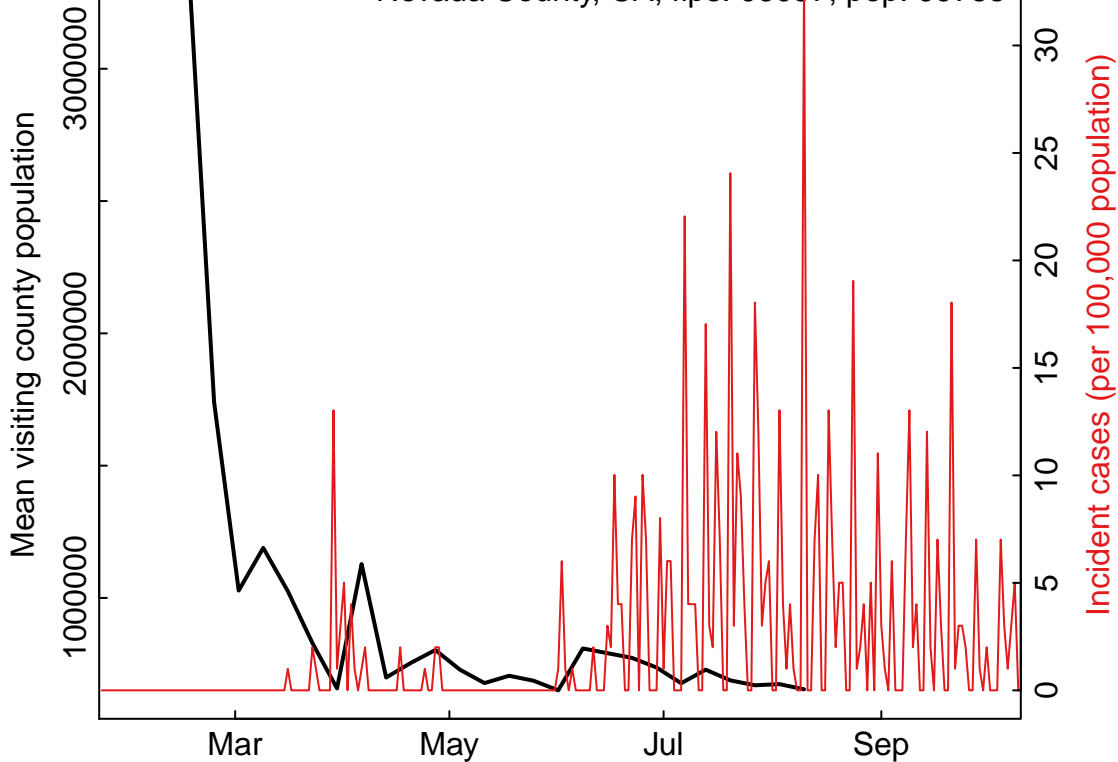

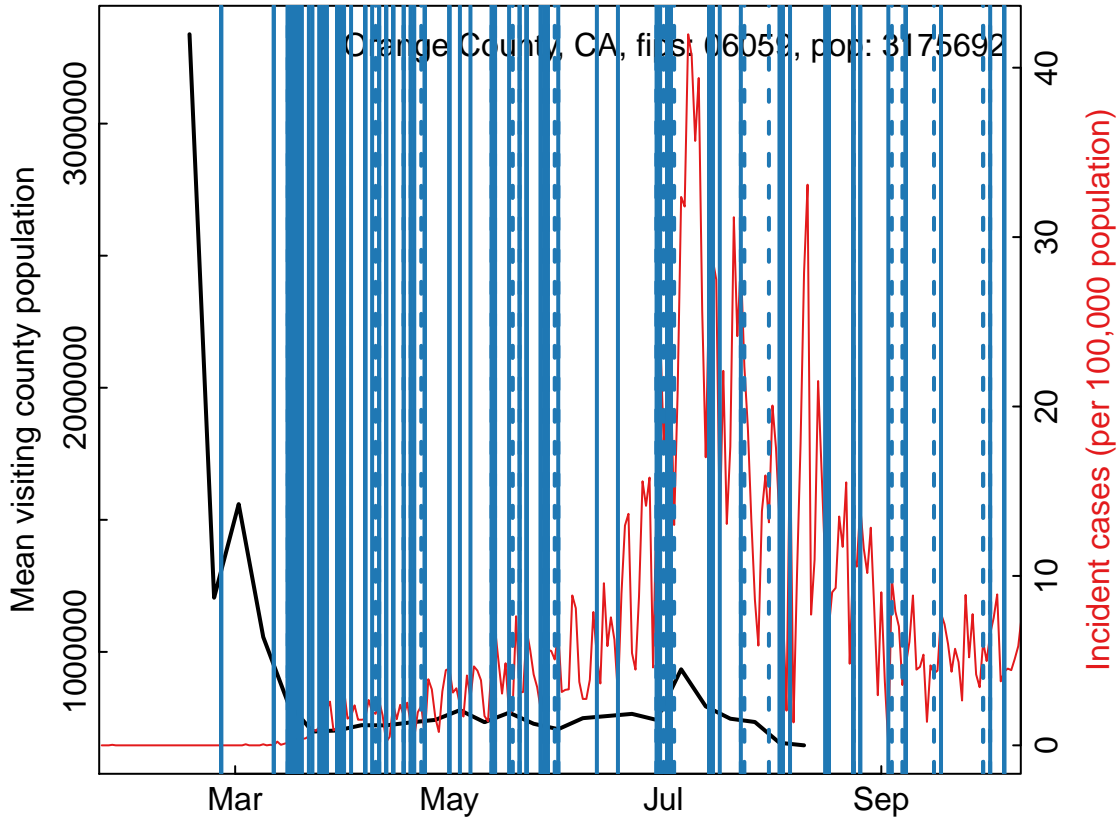

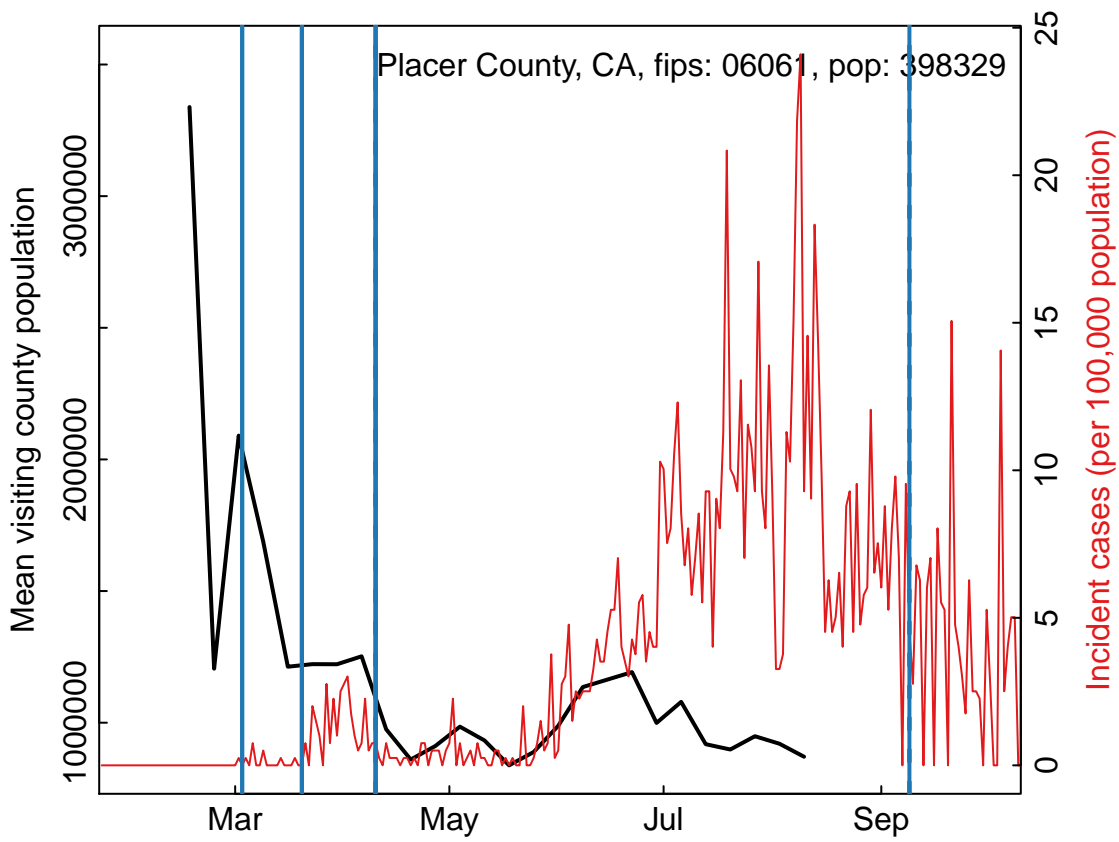

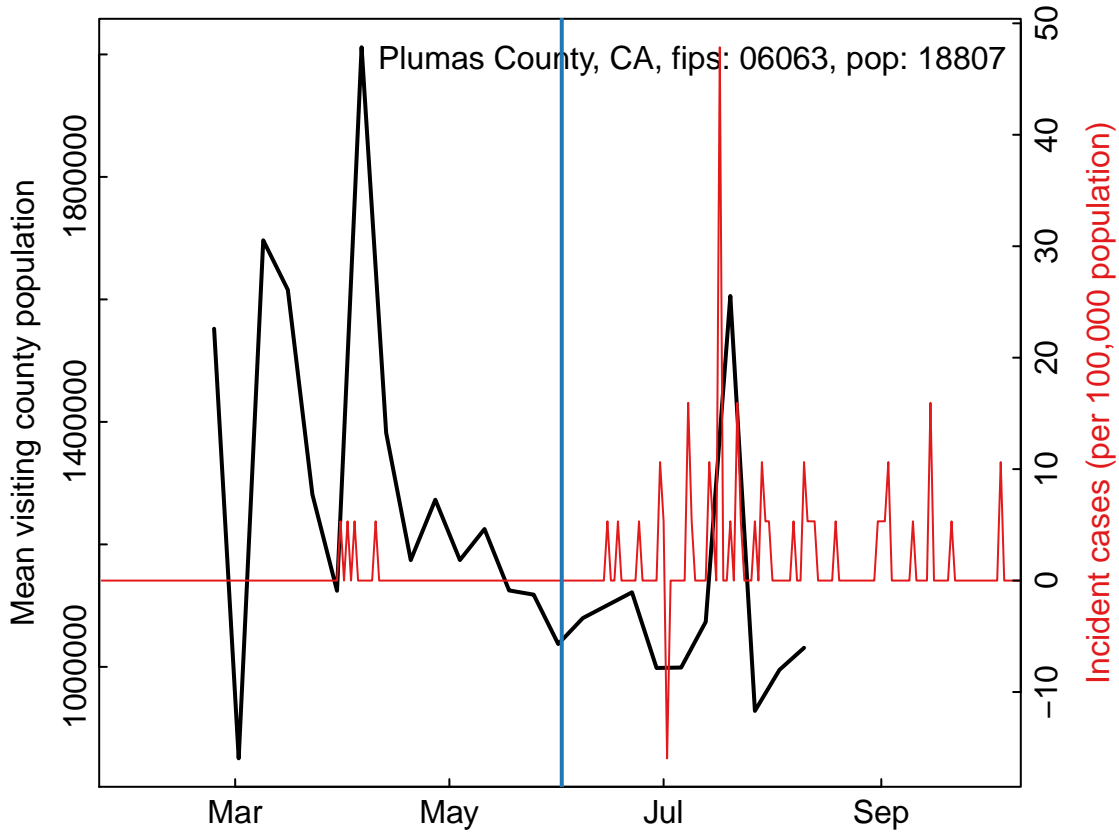

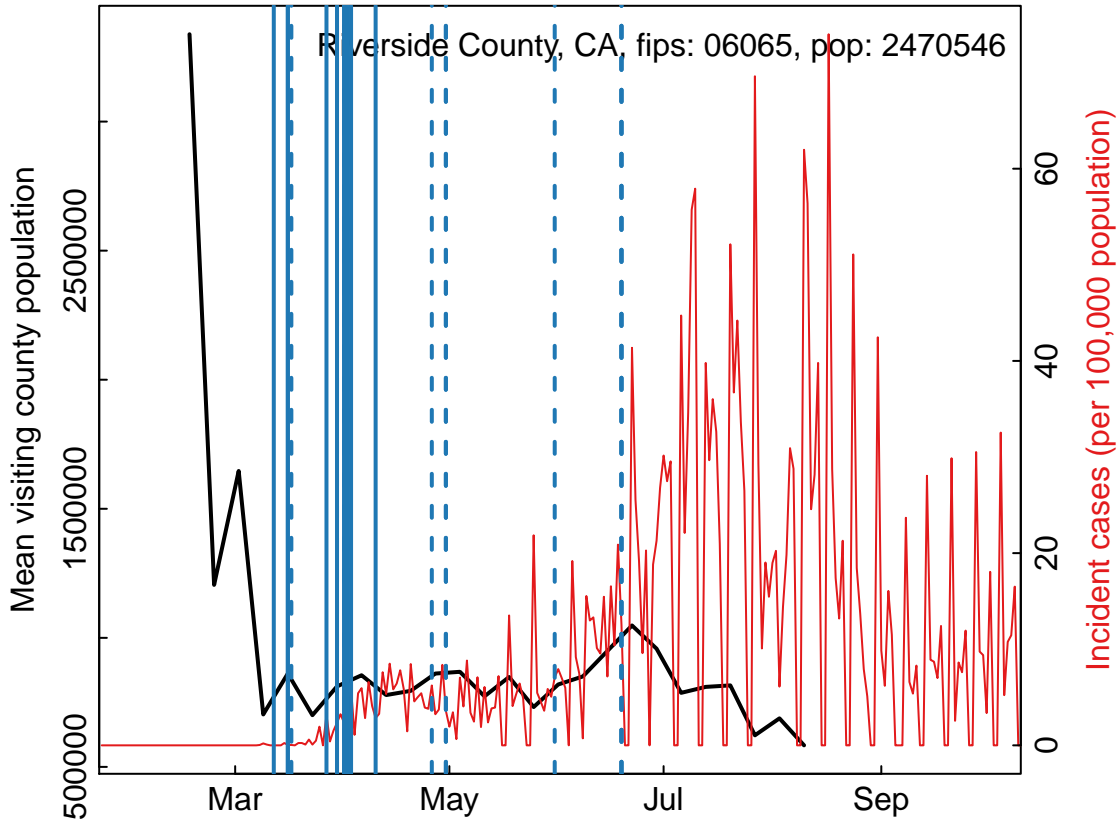

Sacramento County, CA, fips: 06067, pop: 1552058

Mean visiting county population

Incident cases (per 100,000 population)

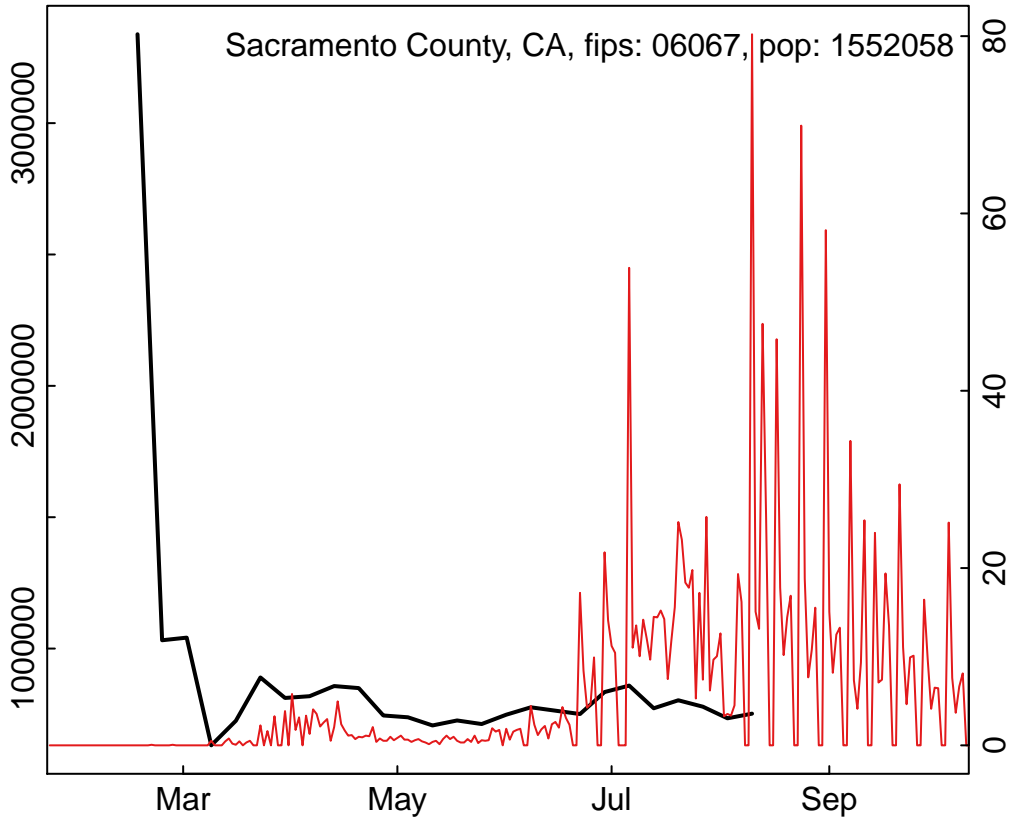

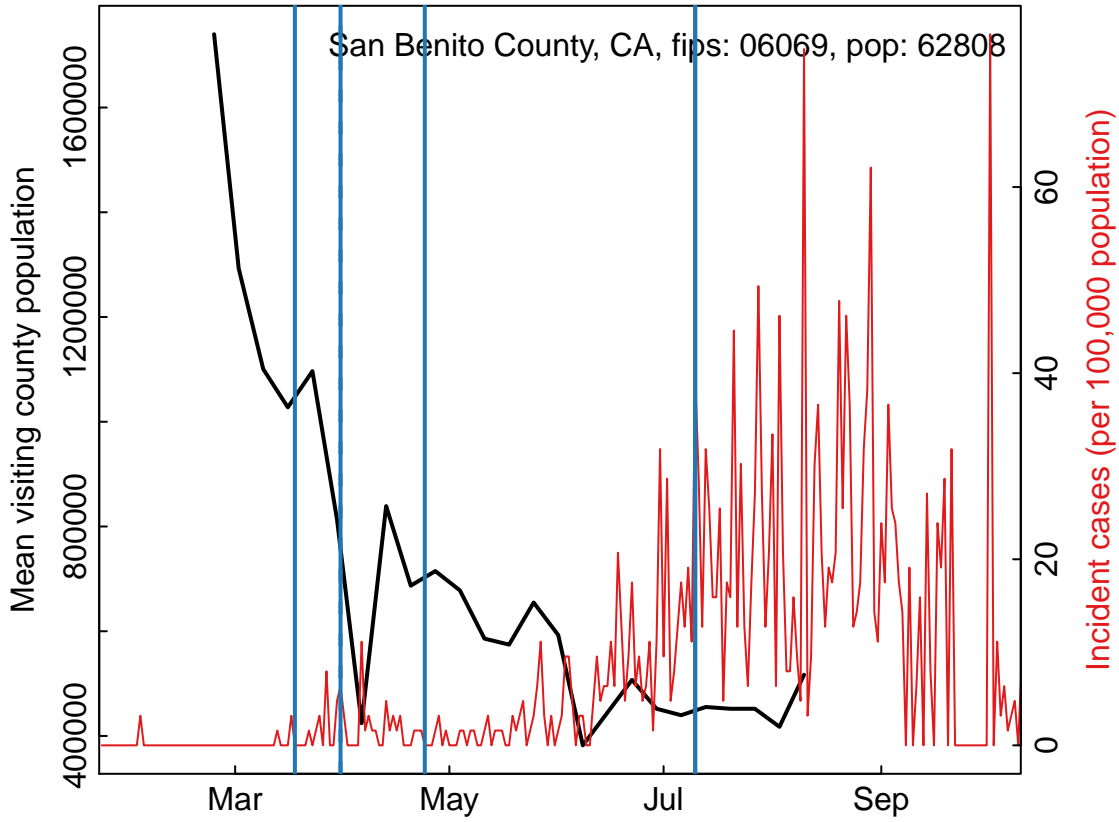



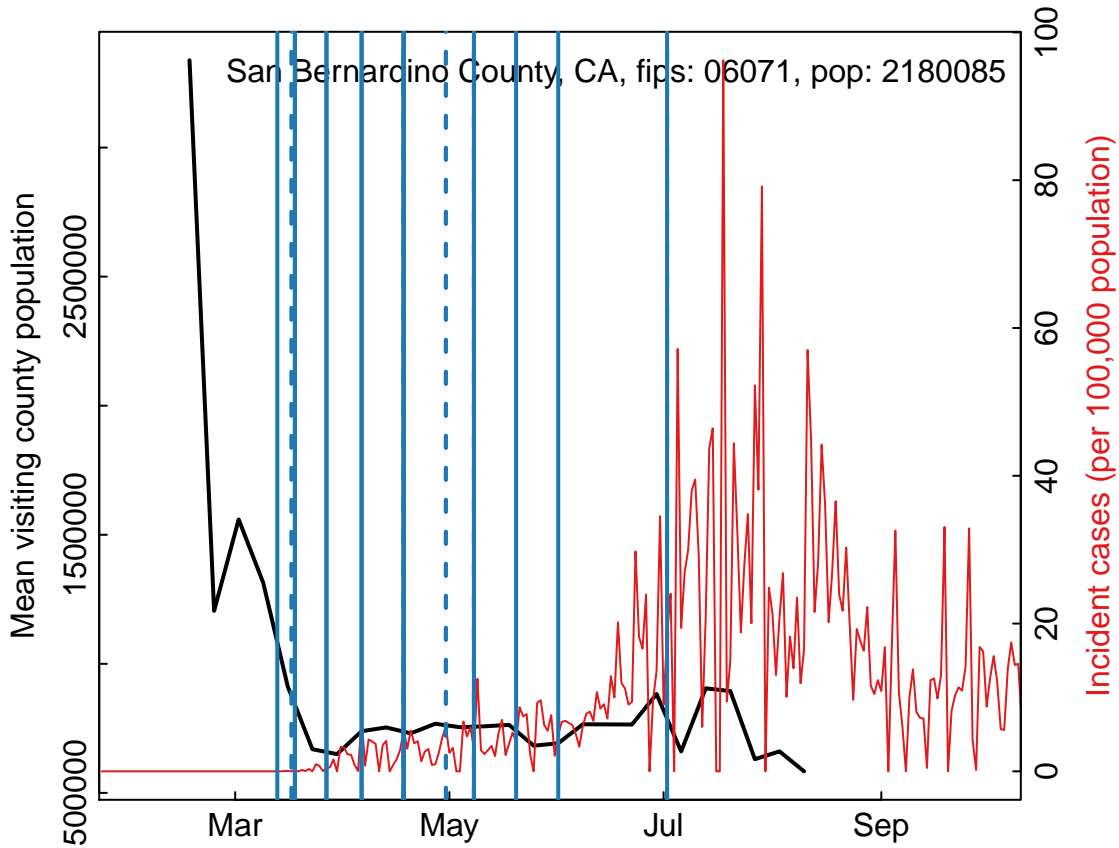

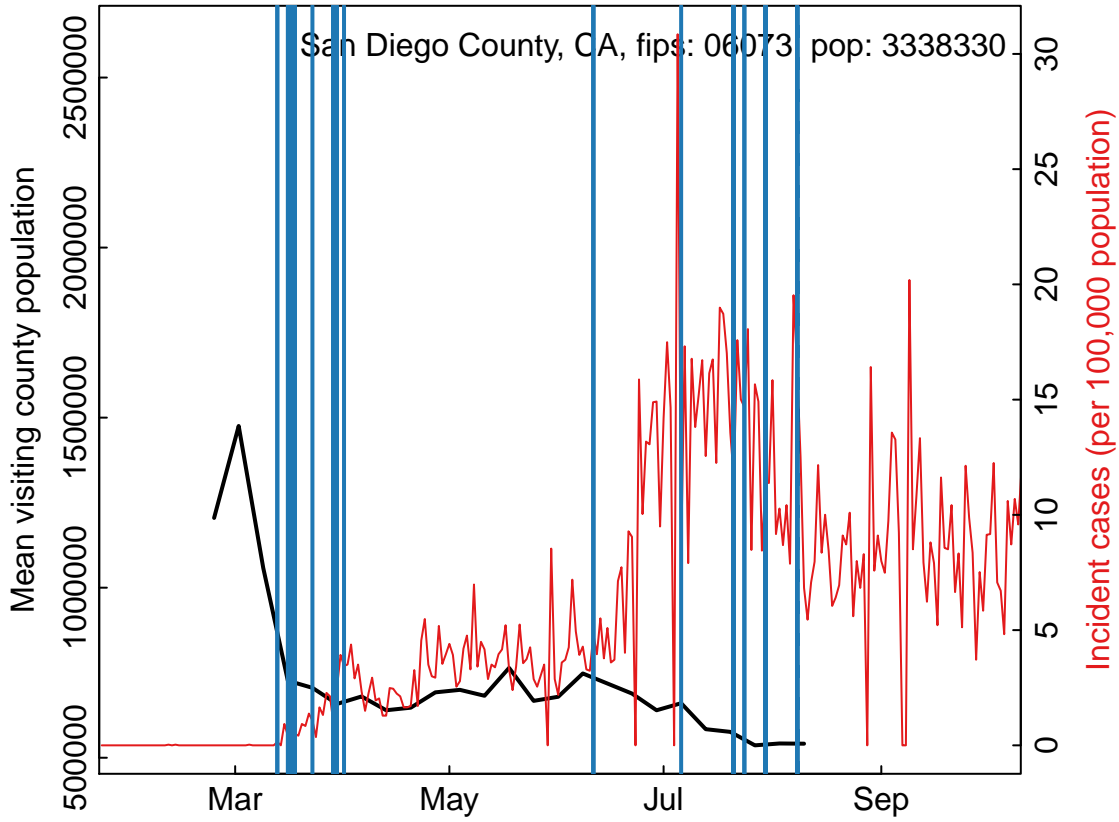

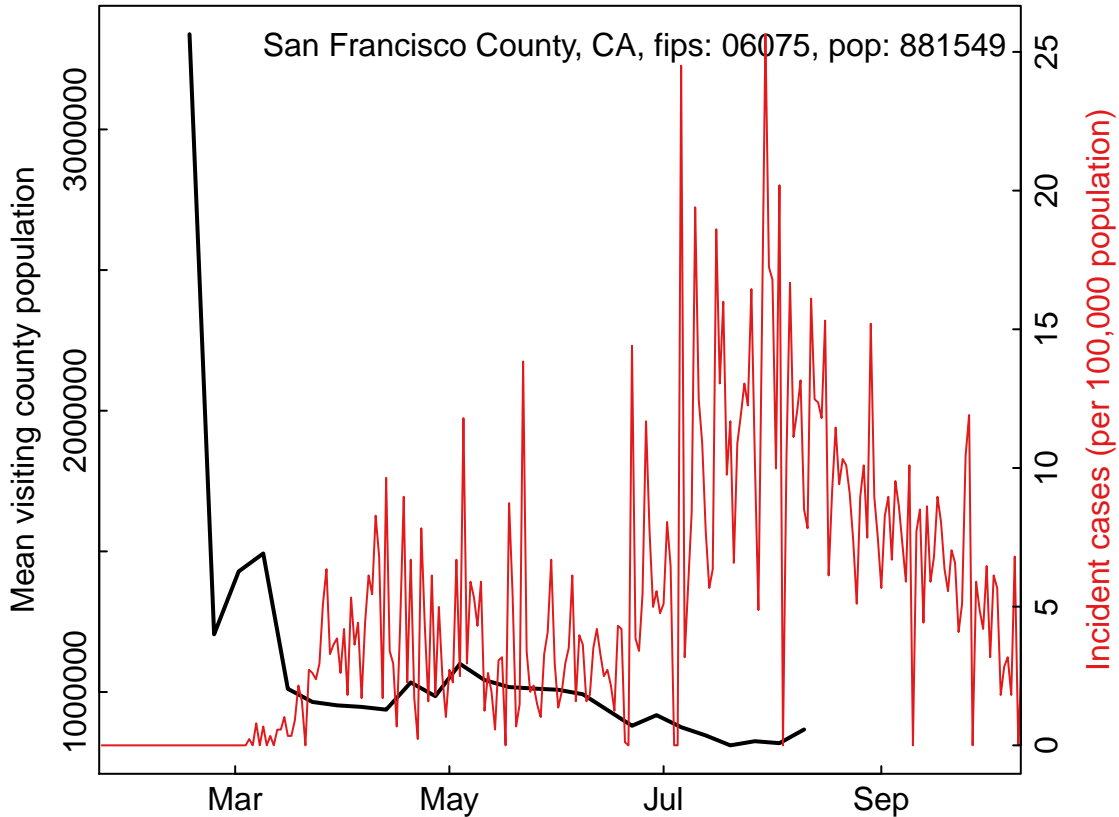

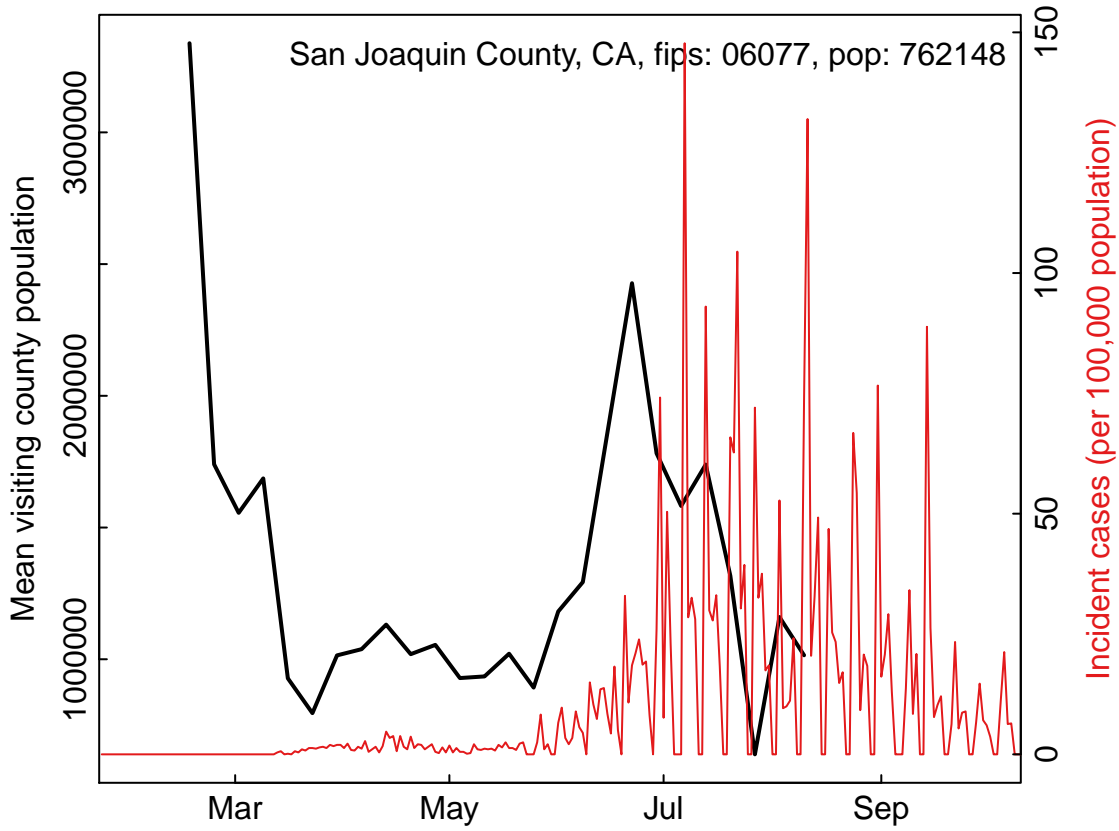

San Luis Obispo County, CA, fips: 06079, pop: 283111

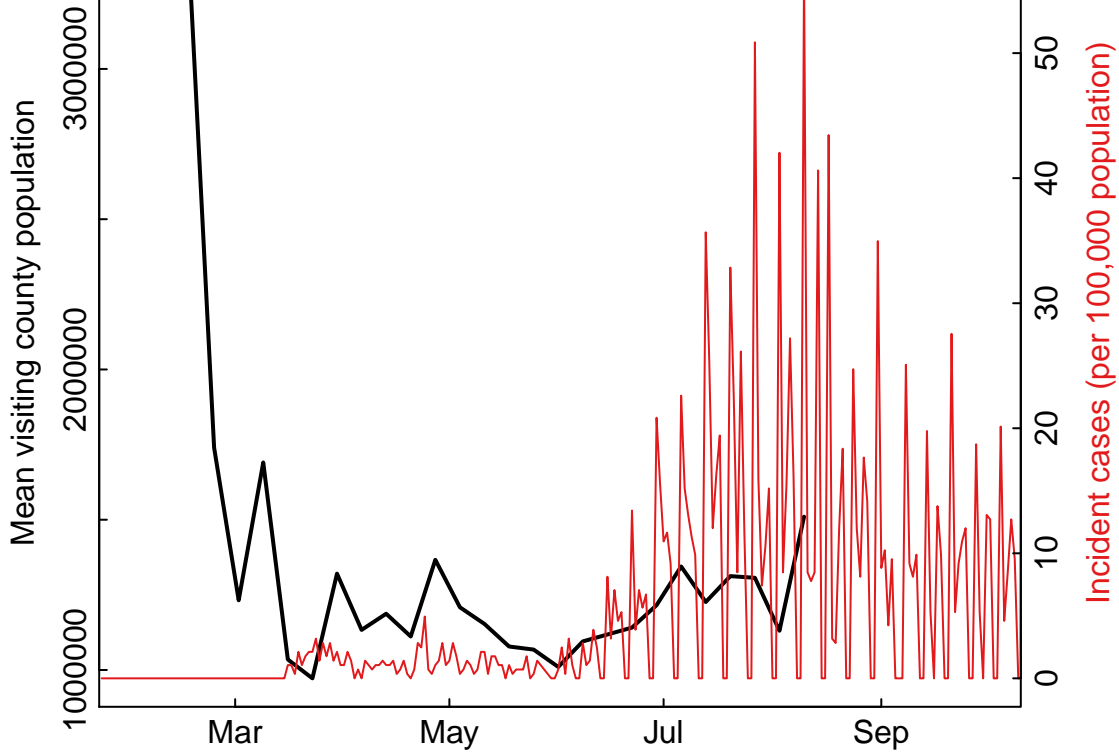

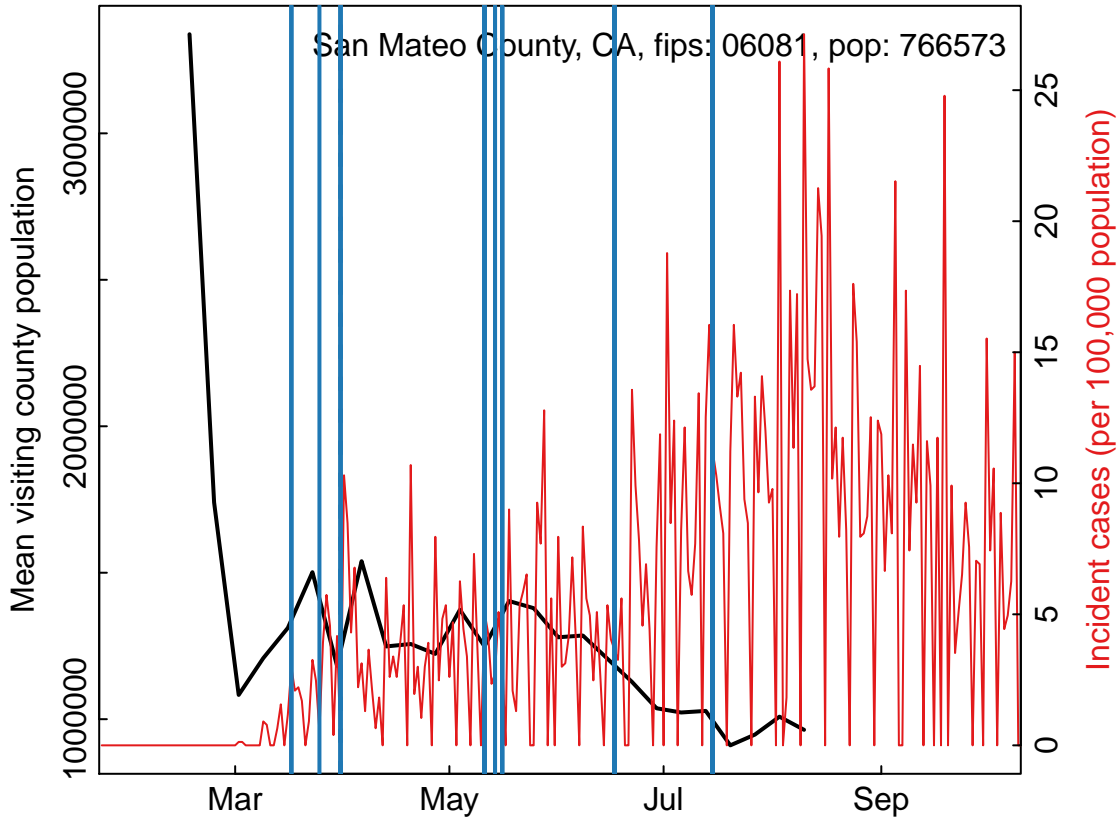

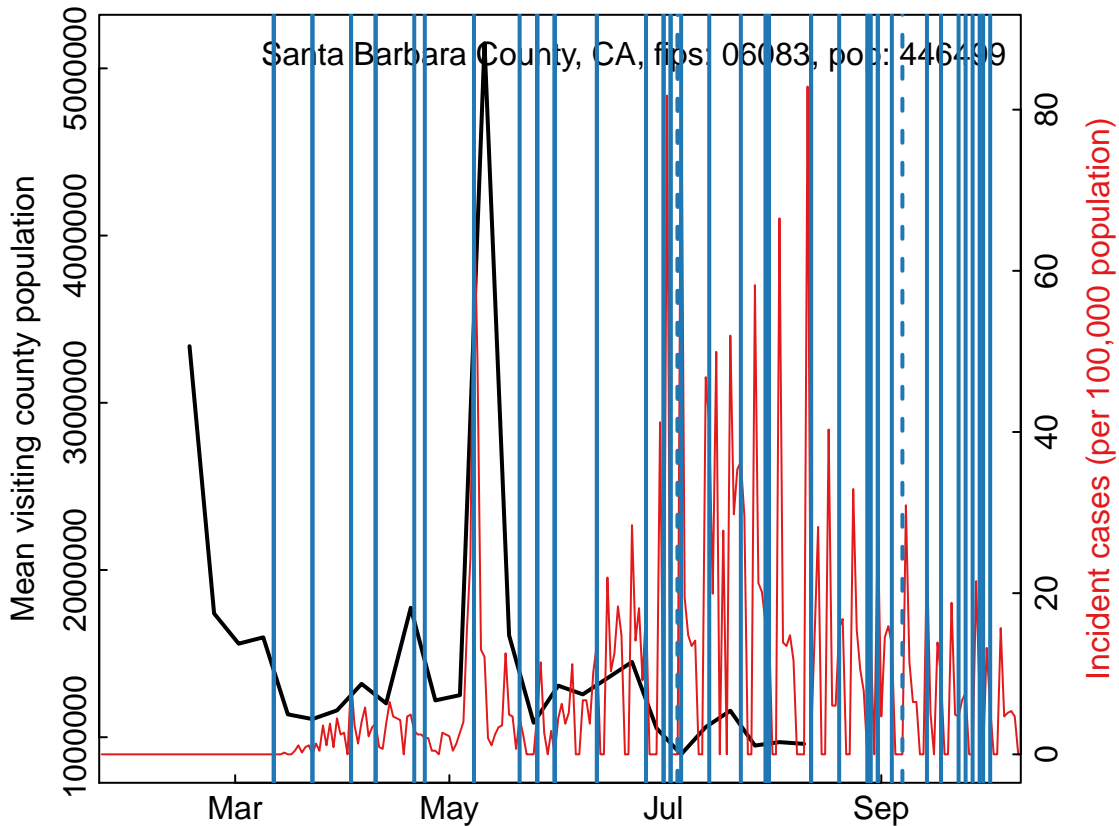

Santa Clara County, CA, fips: 06085, pop: 1927852

Mean visiting county population

500000  
1500000  
2500000

Mar

May

Jul

Sep

0  
10  
20  
30

Incident cases (per 100,000 population)

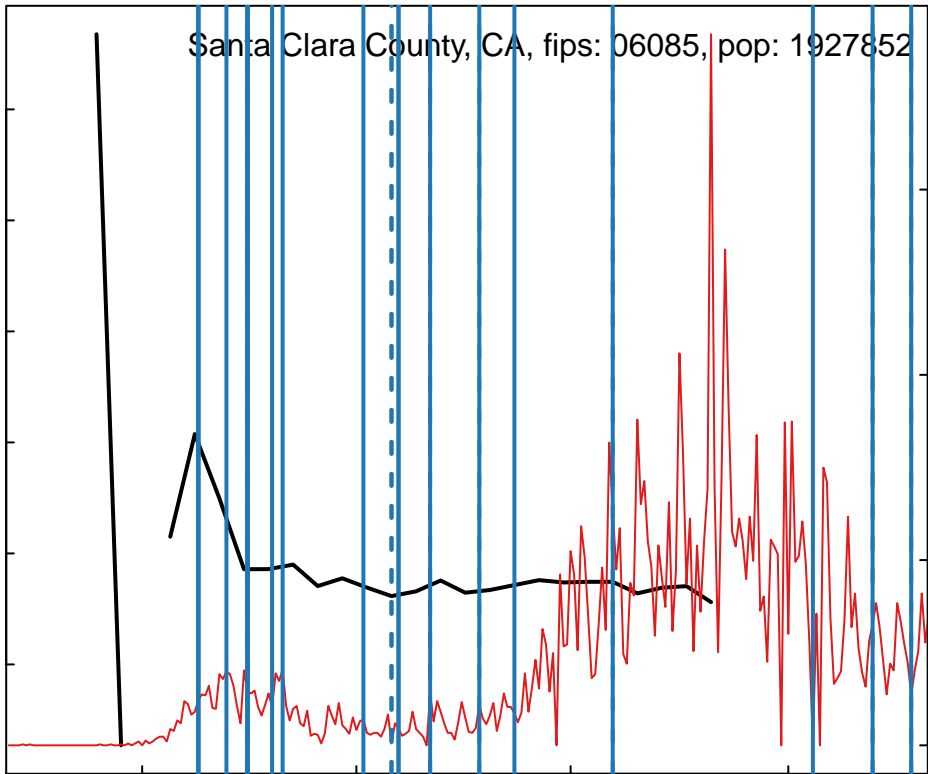



Santa Cruz County, CA, fips: 06087, pop: 273213

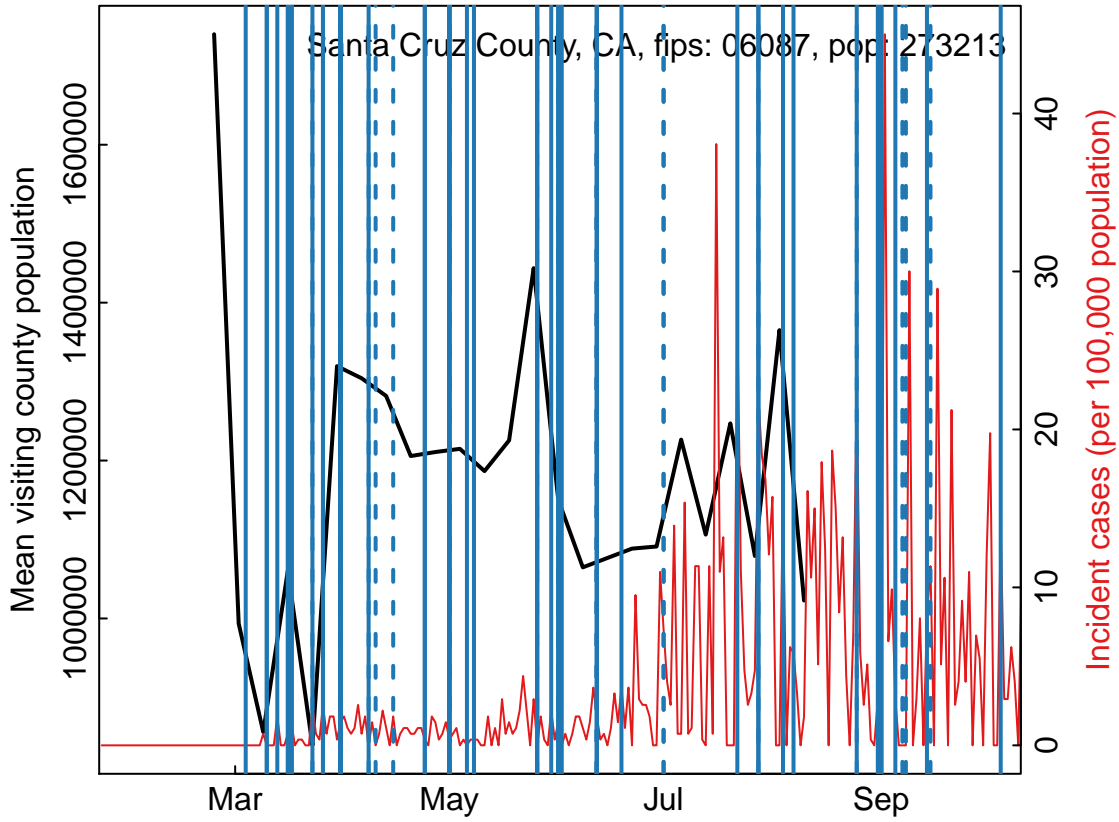

Shasta County, CA, fips: 06089, pop: 180080

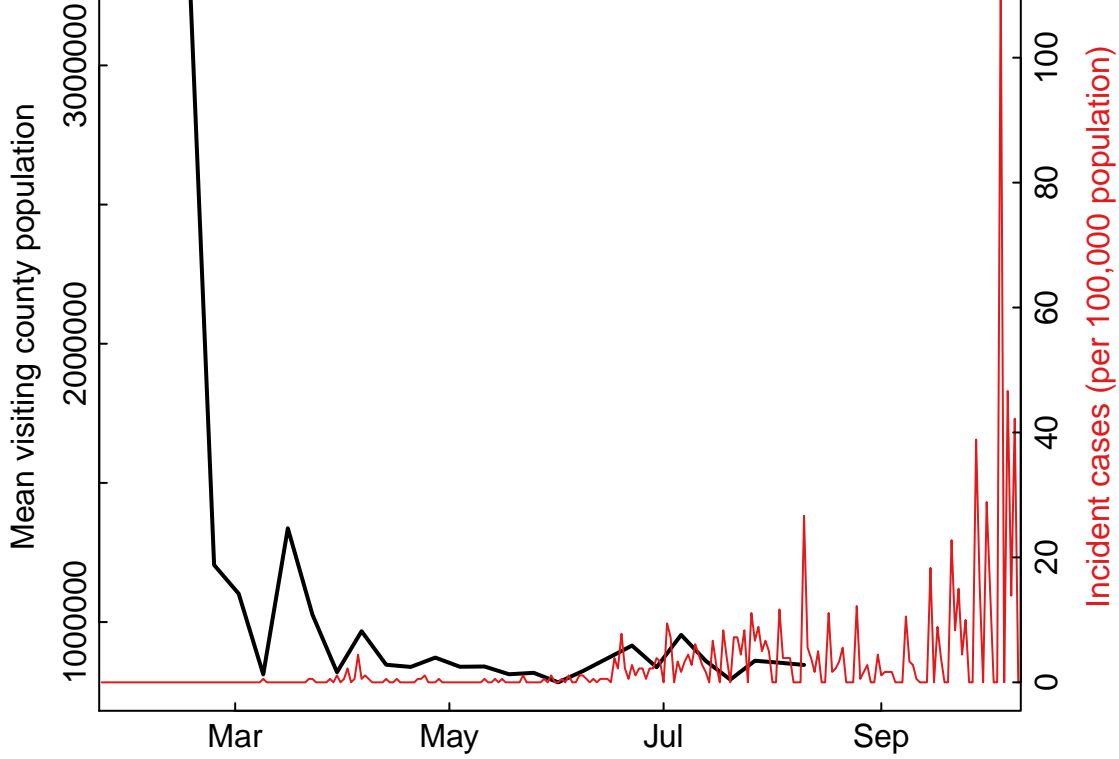

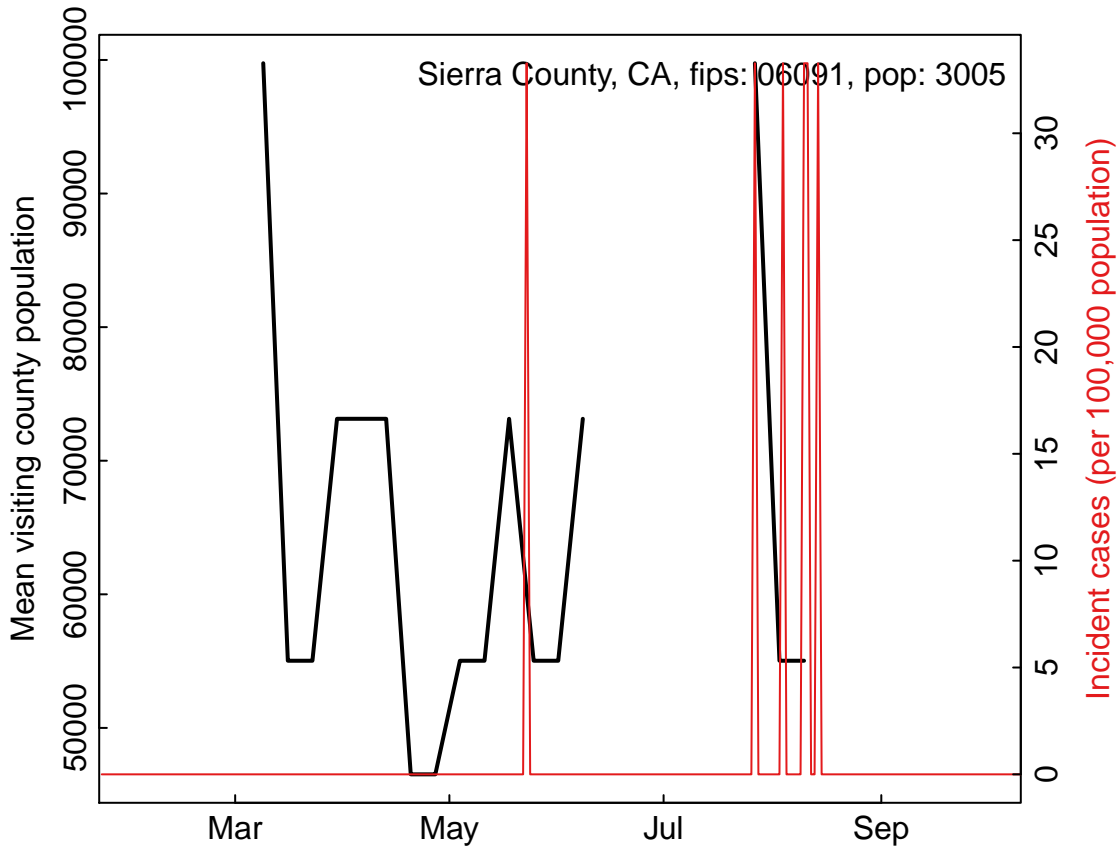

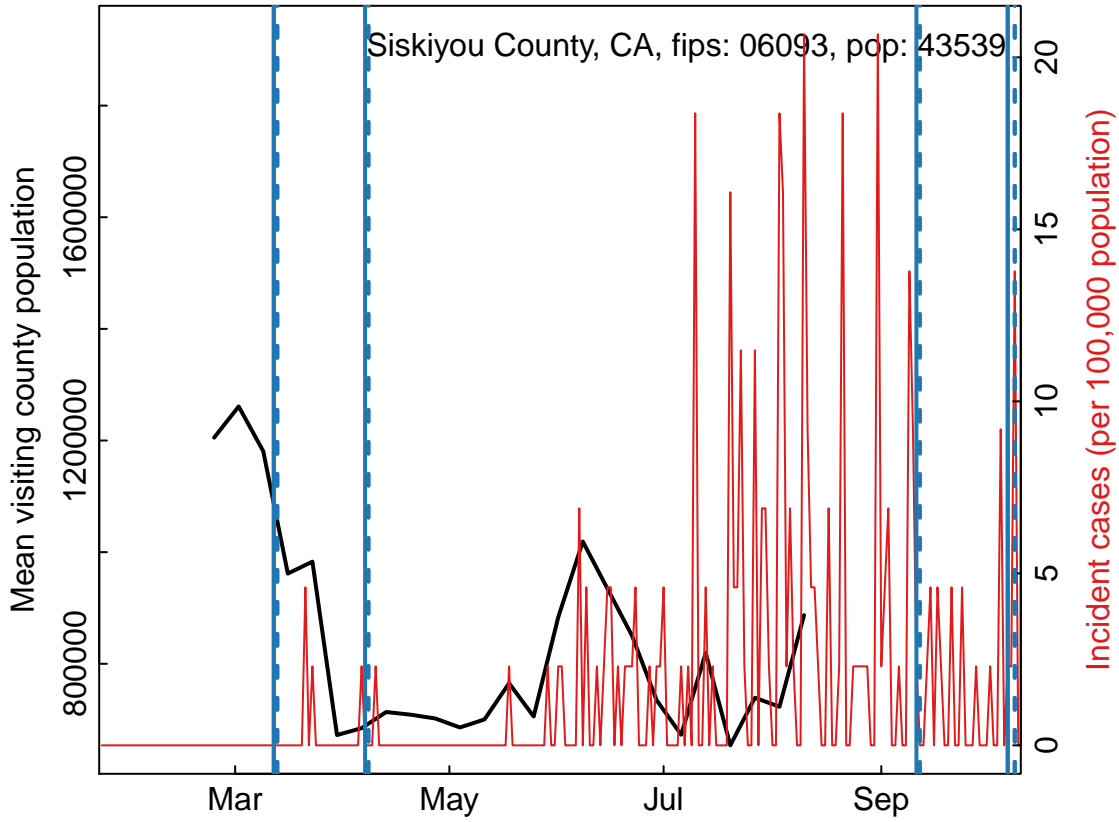

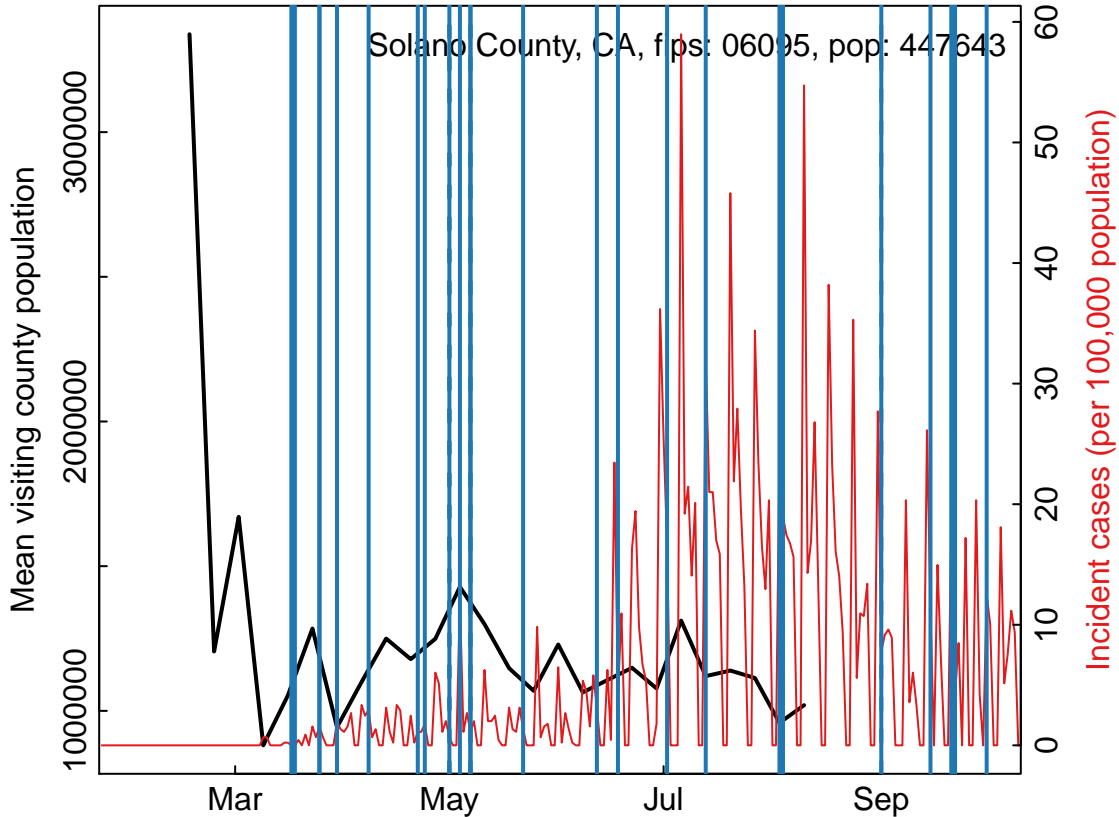

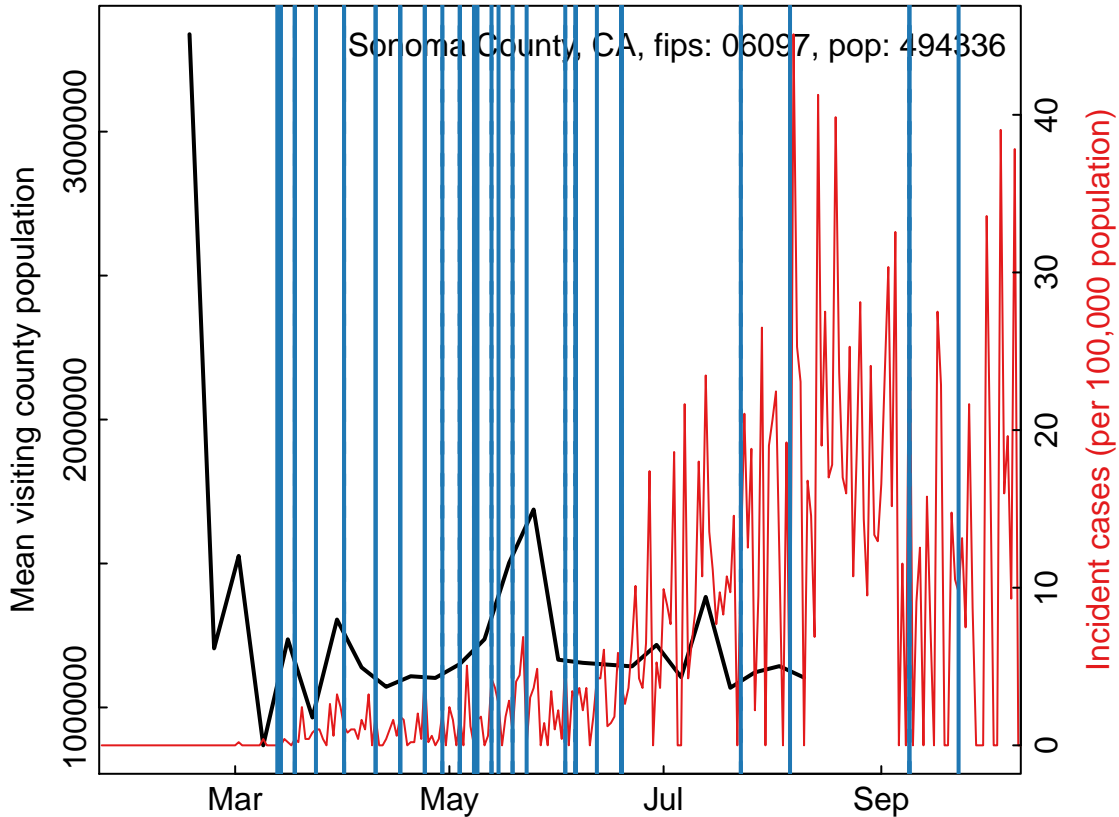

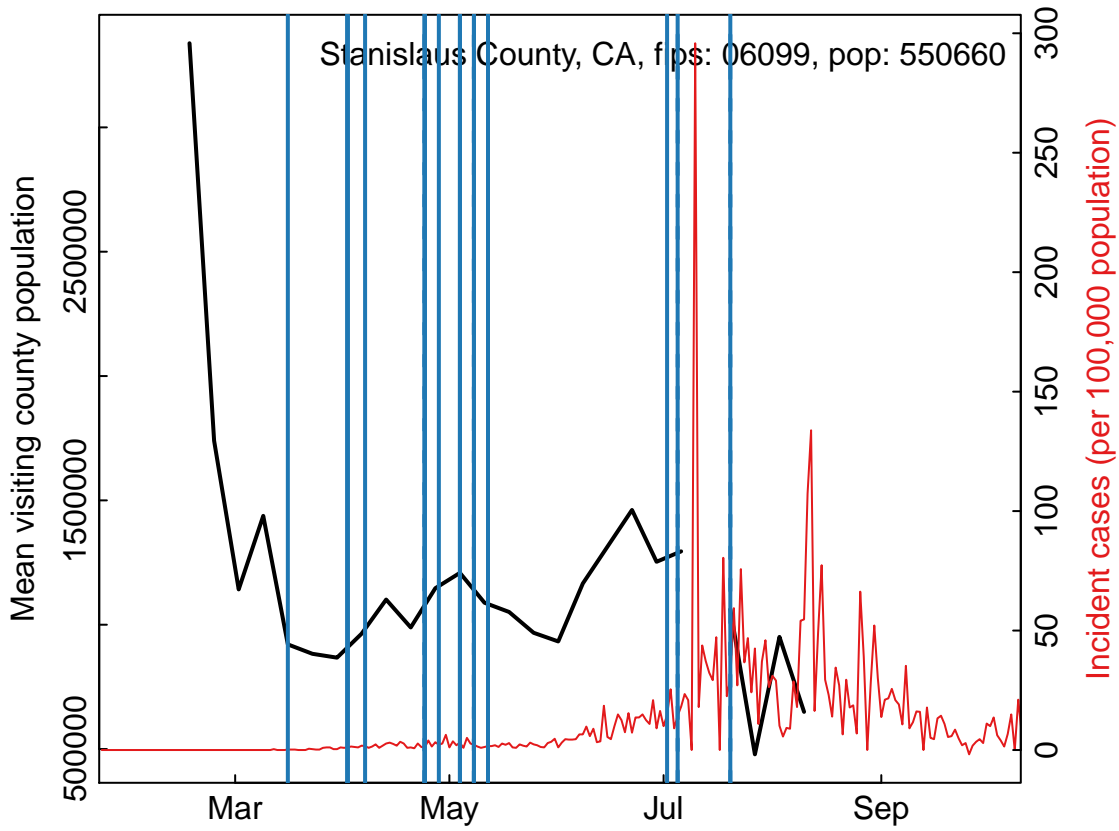

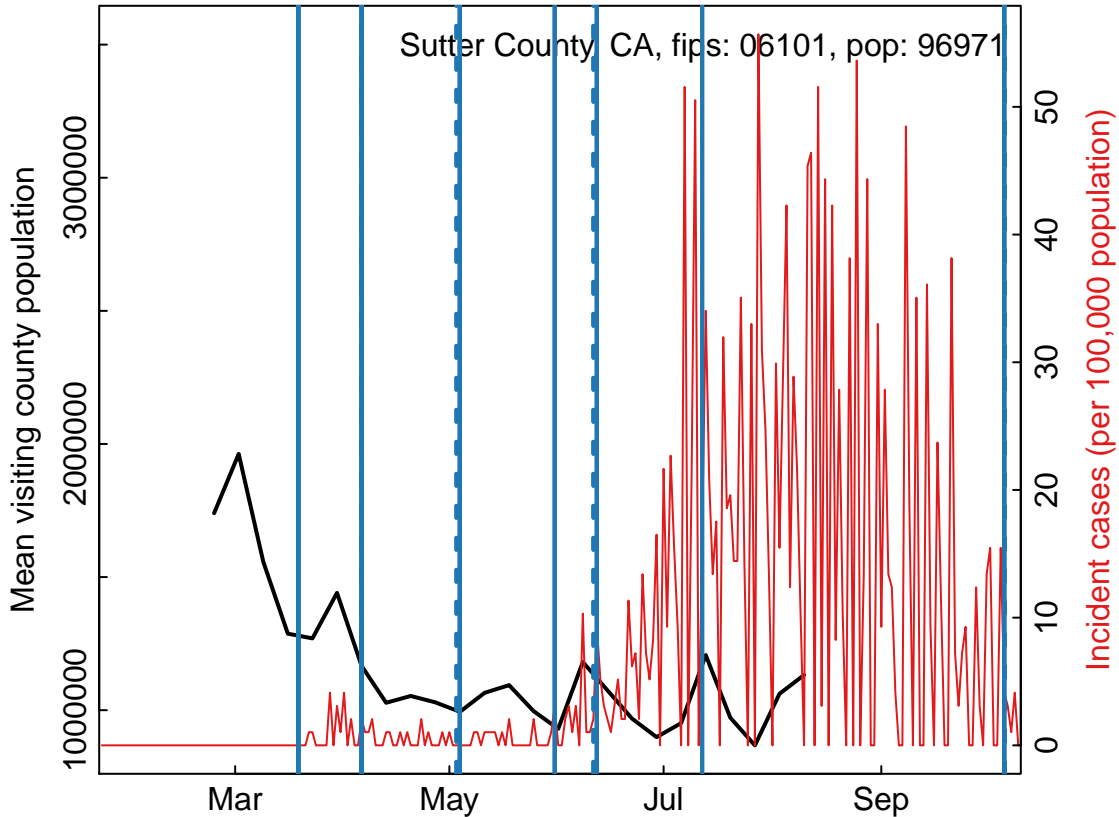



Tehama County, CA, fips: 06103, pop: 65084

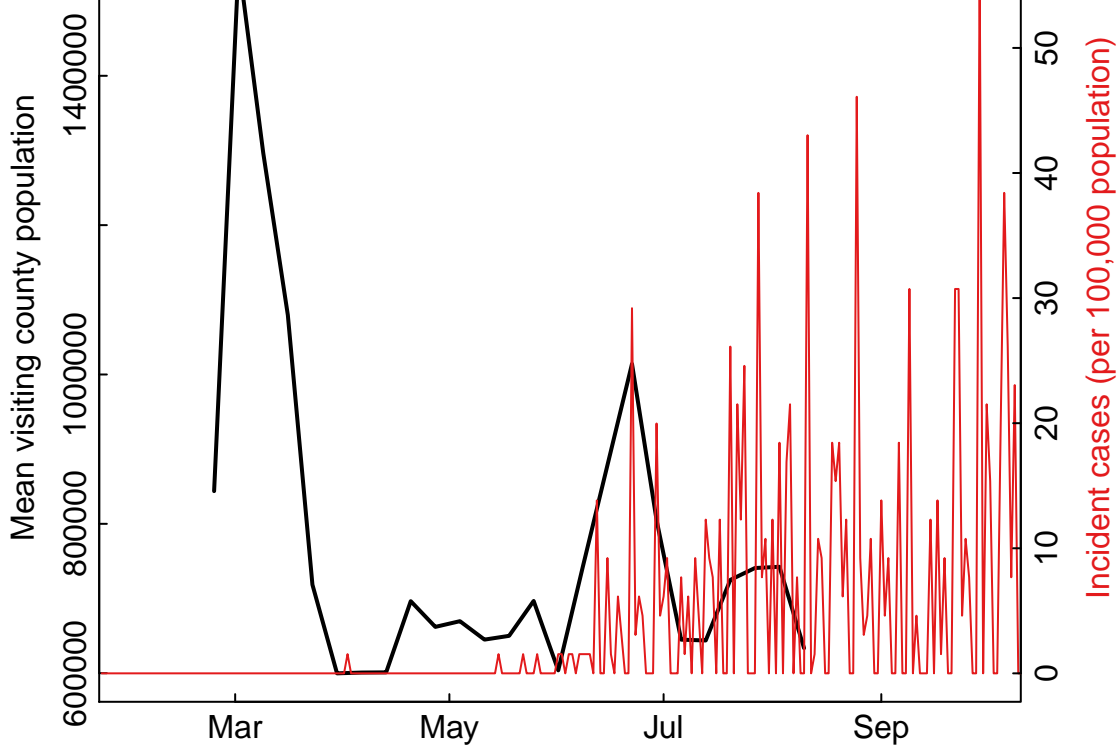

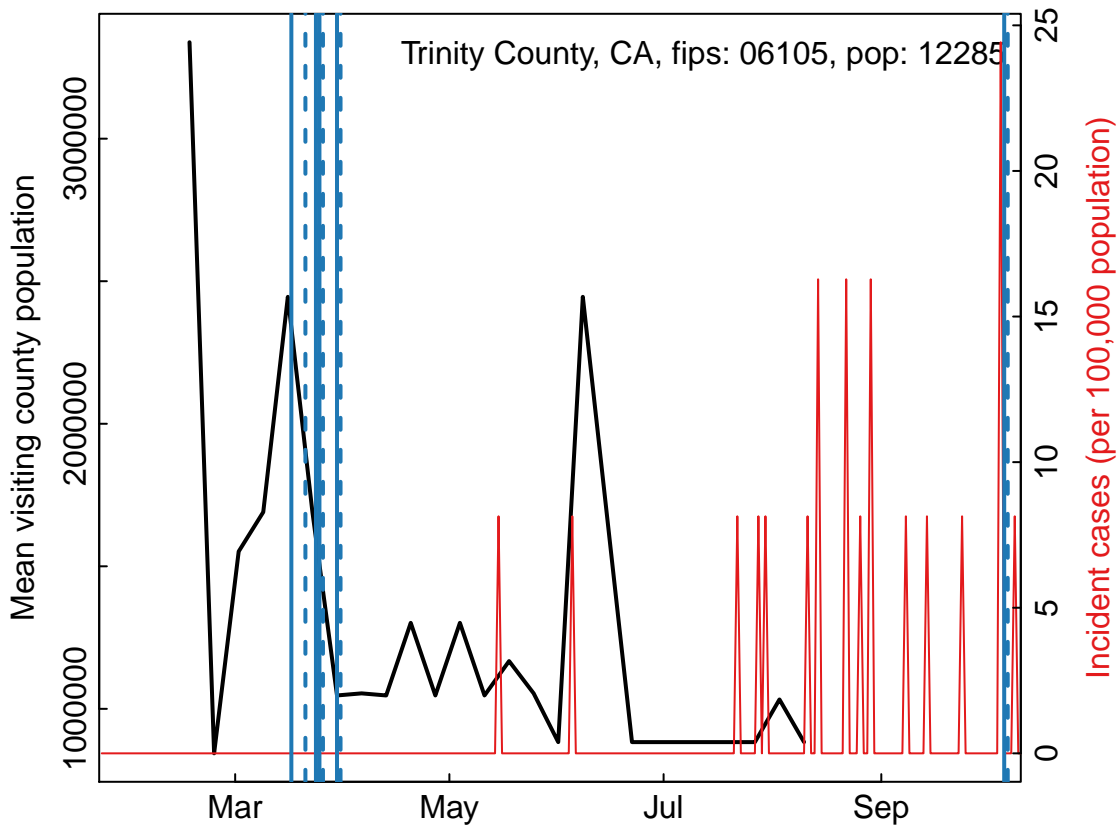

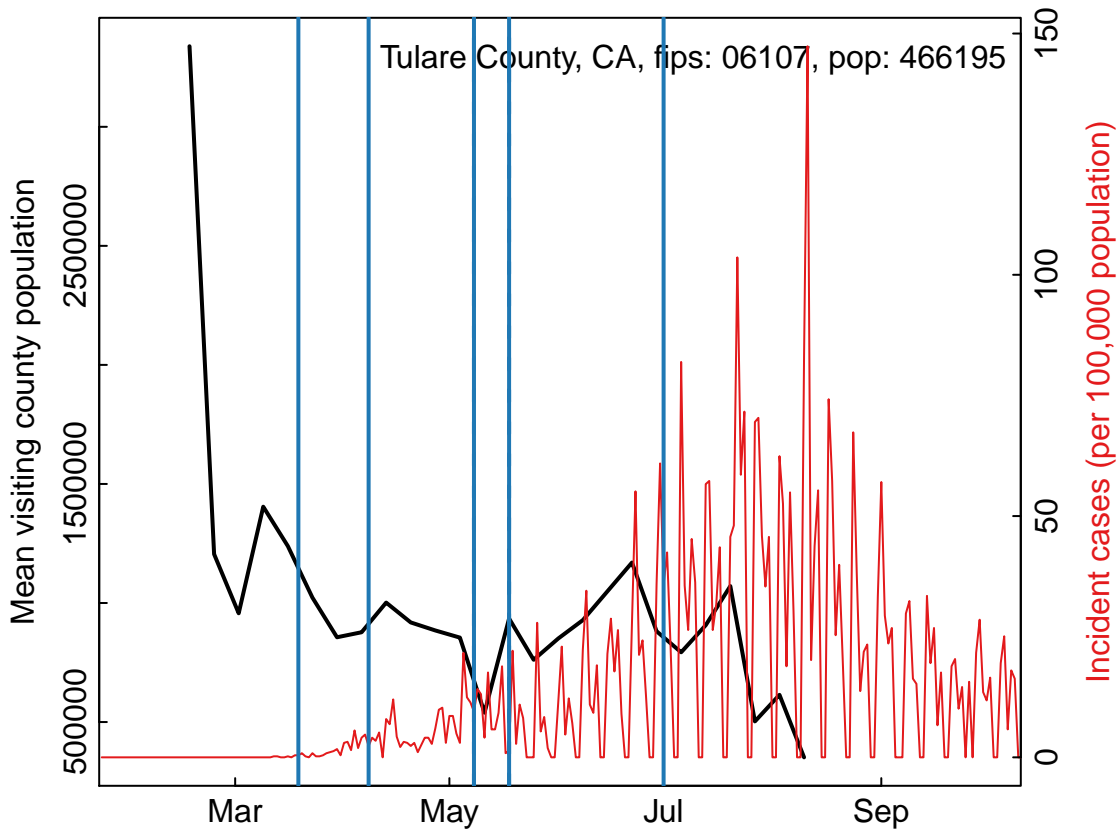

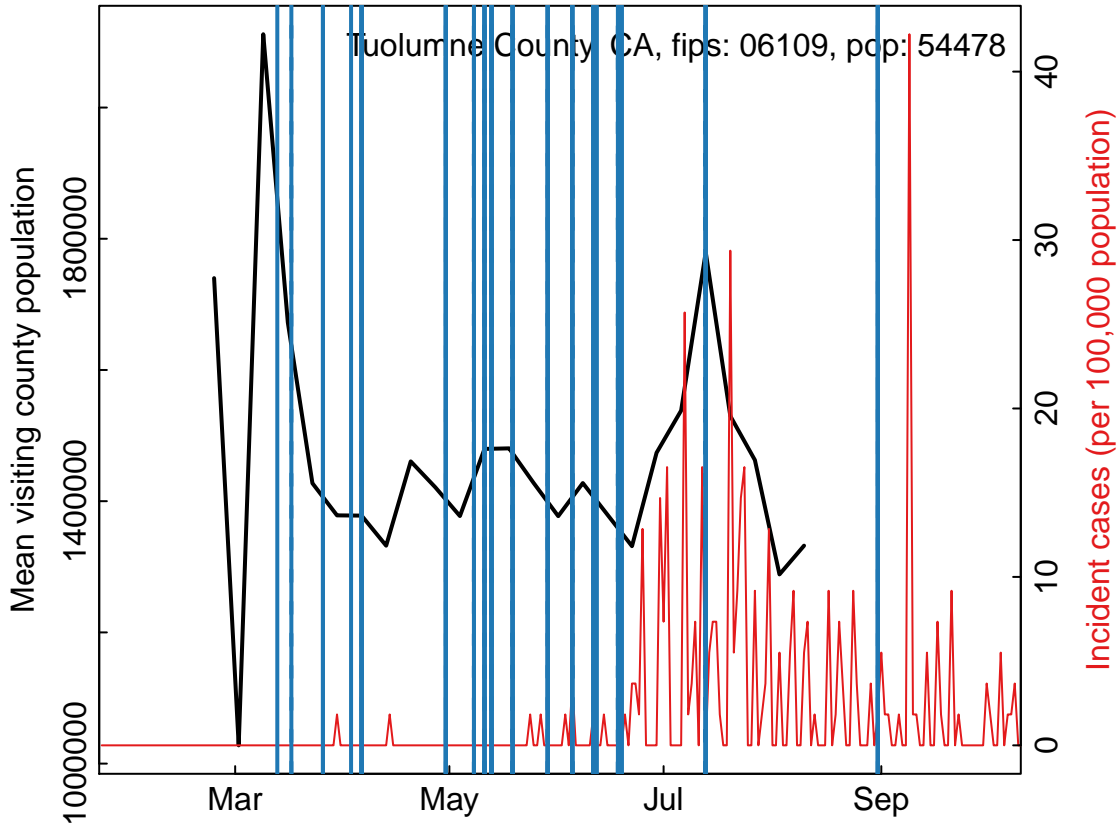

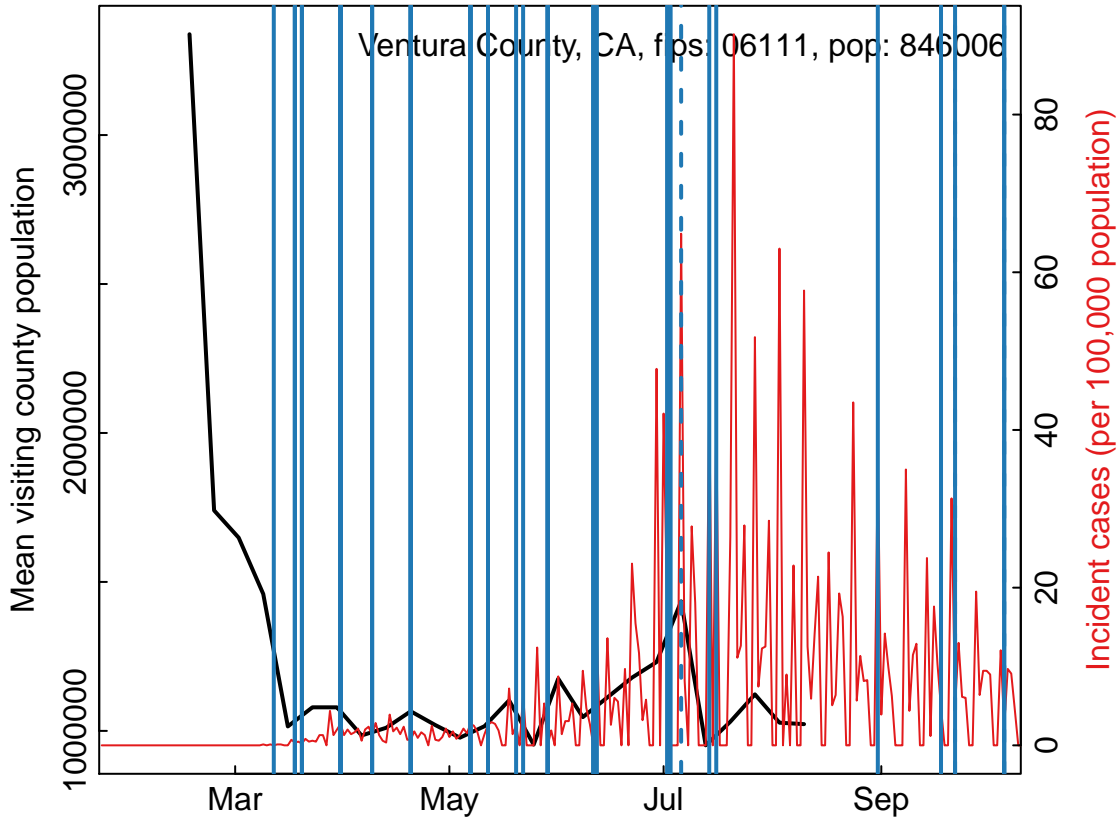

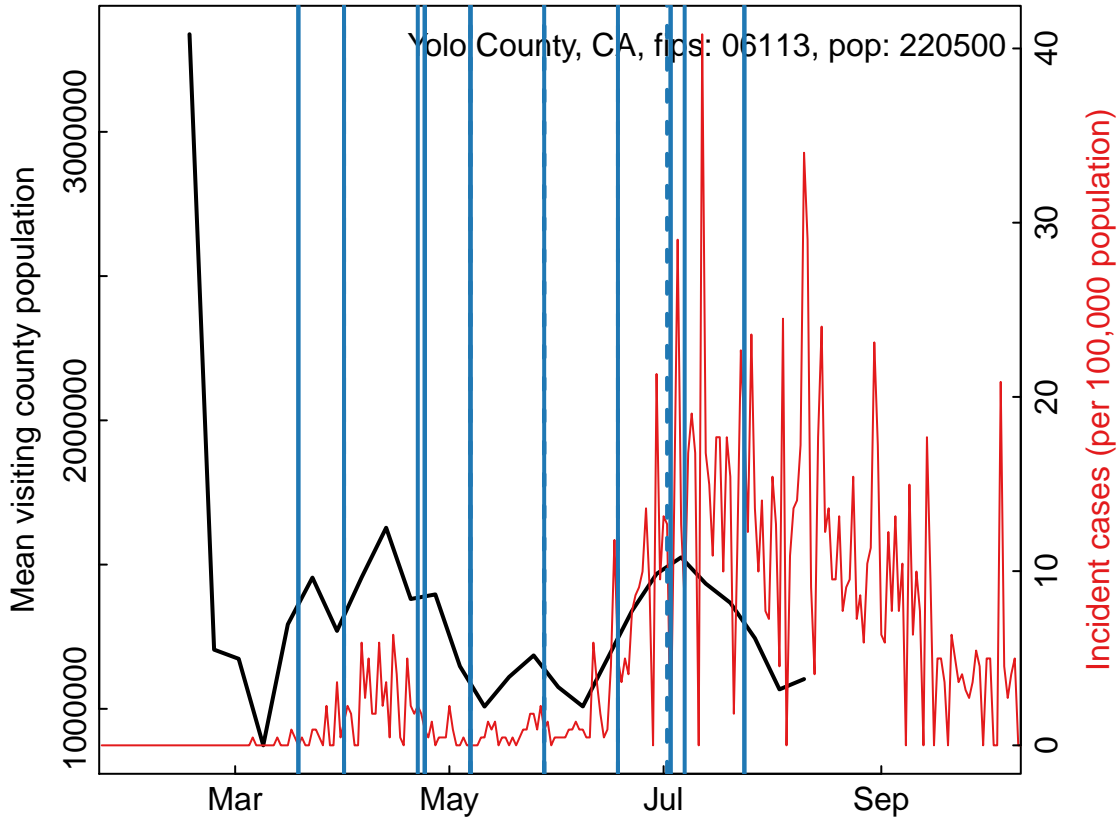

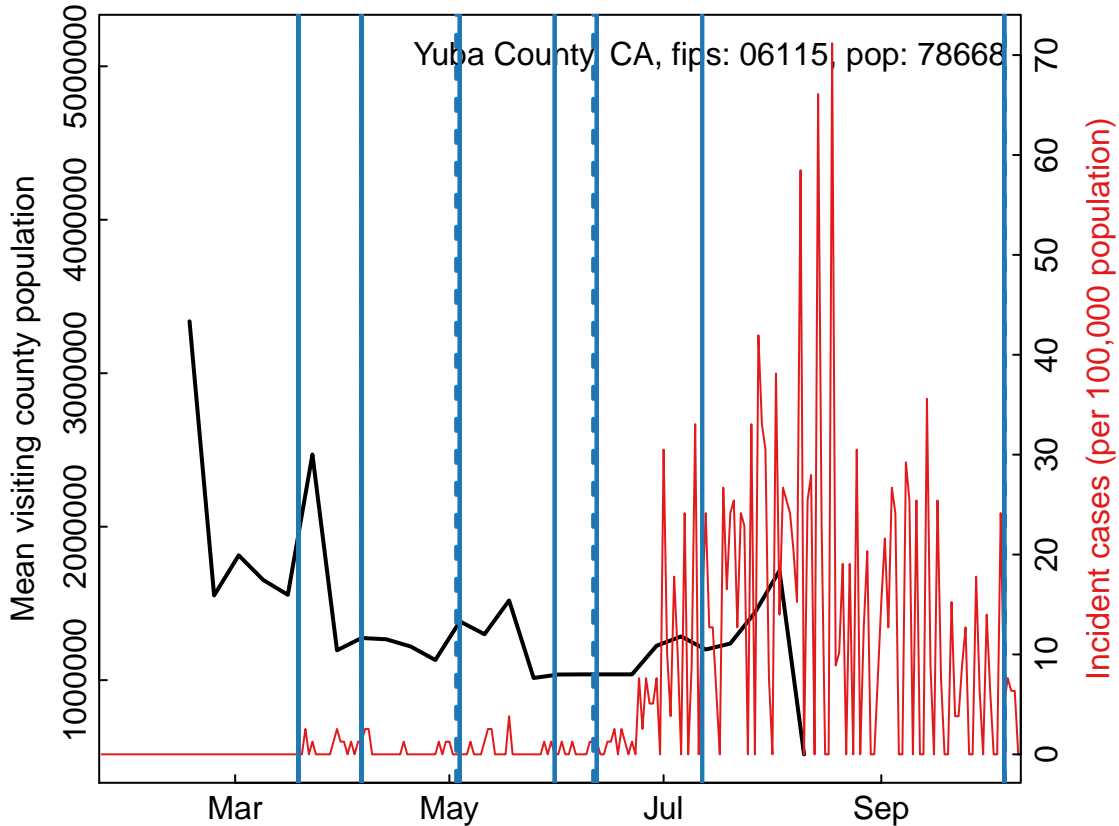

Adams County, CO, fips: 08001, pop: 517421

Mean visiting county population

500000  
1500000  
2500000

Mar

May

Jul

Sep

0  
10  
20  
30  
40

Incident cases (per 100,000 population)

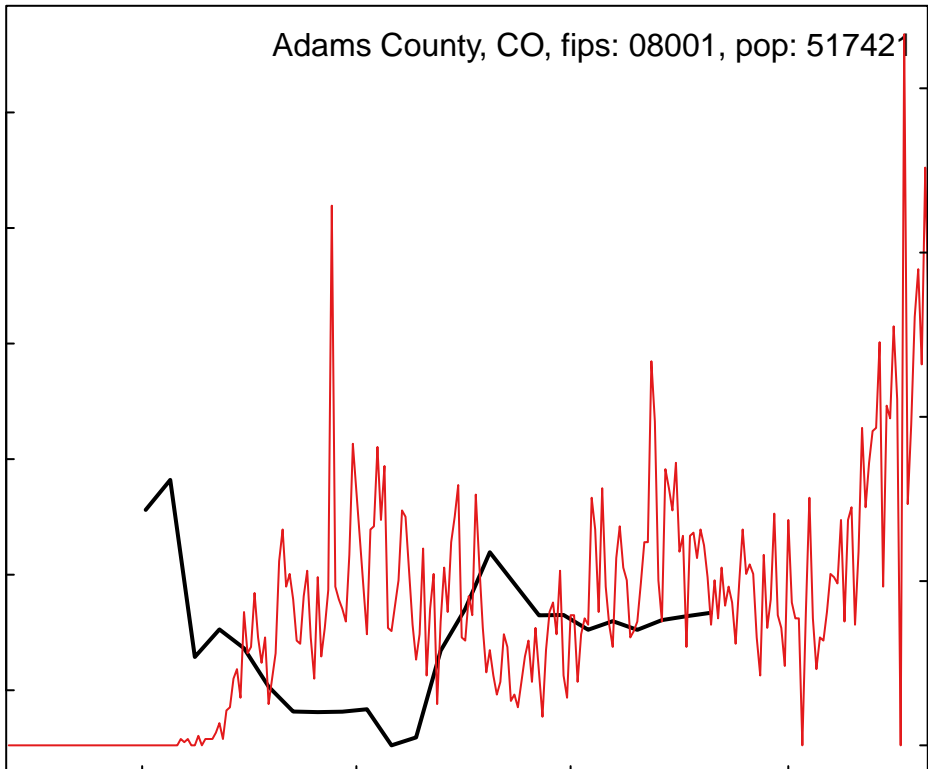



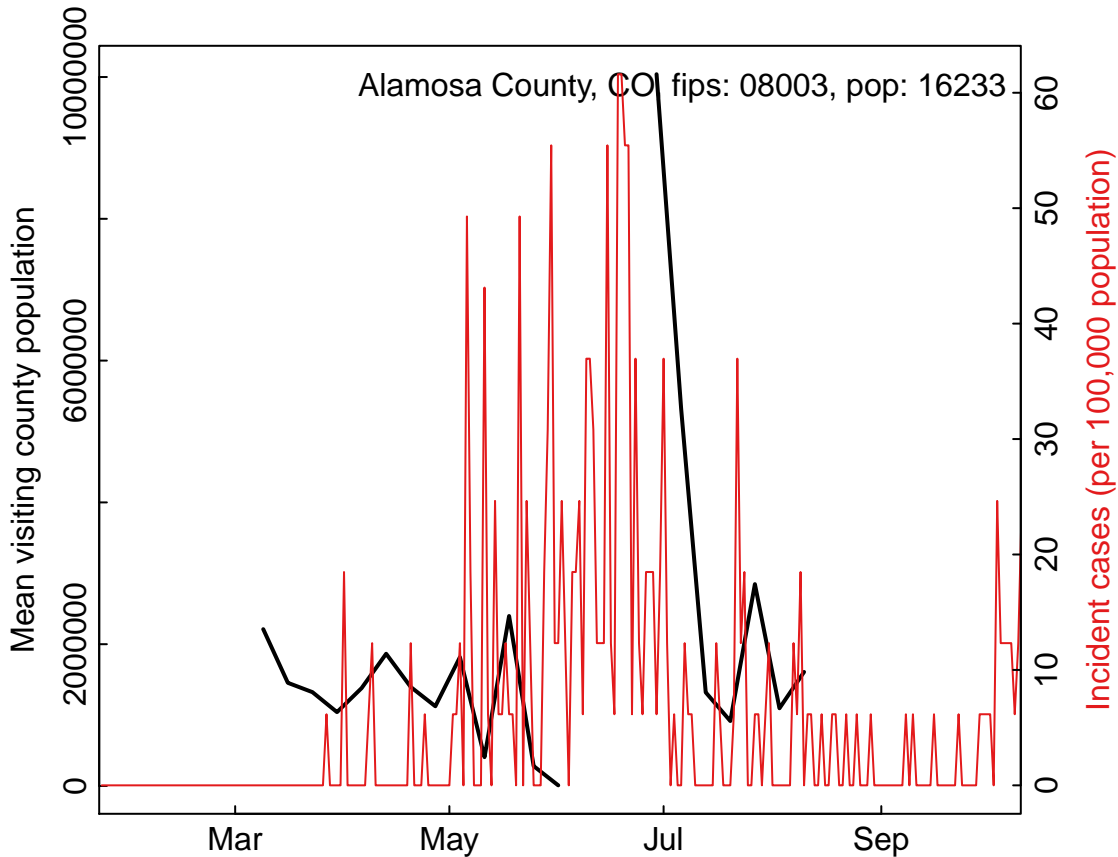

Arapahoe County, CO, fips: 08005, pop: 656590

Mean visiting county population

3000000  
2000000  
1000000

Mar

May

Jul

Sep

50  
40  
30  
20  
10  
0

Incident cases (per 100,000 population)

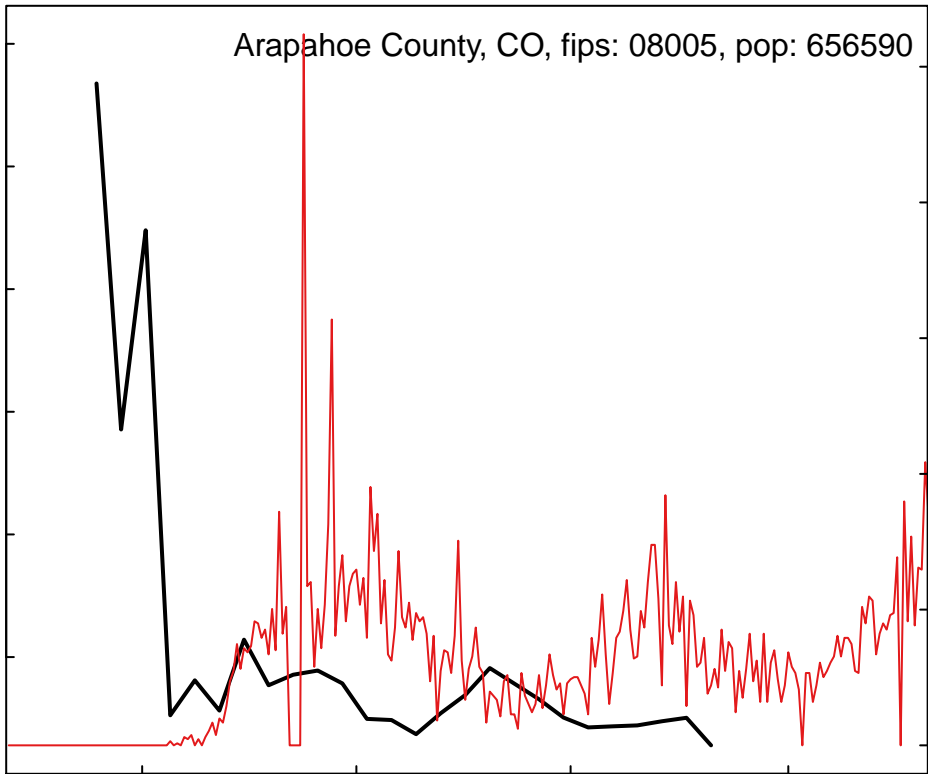

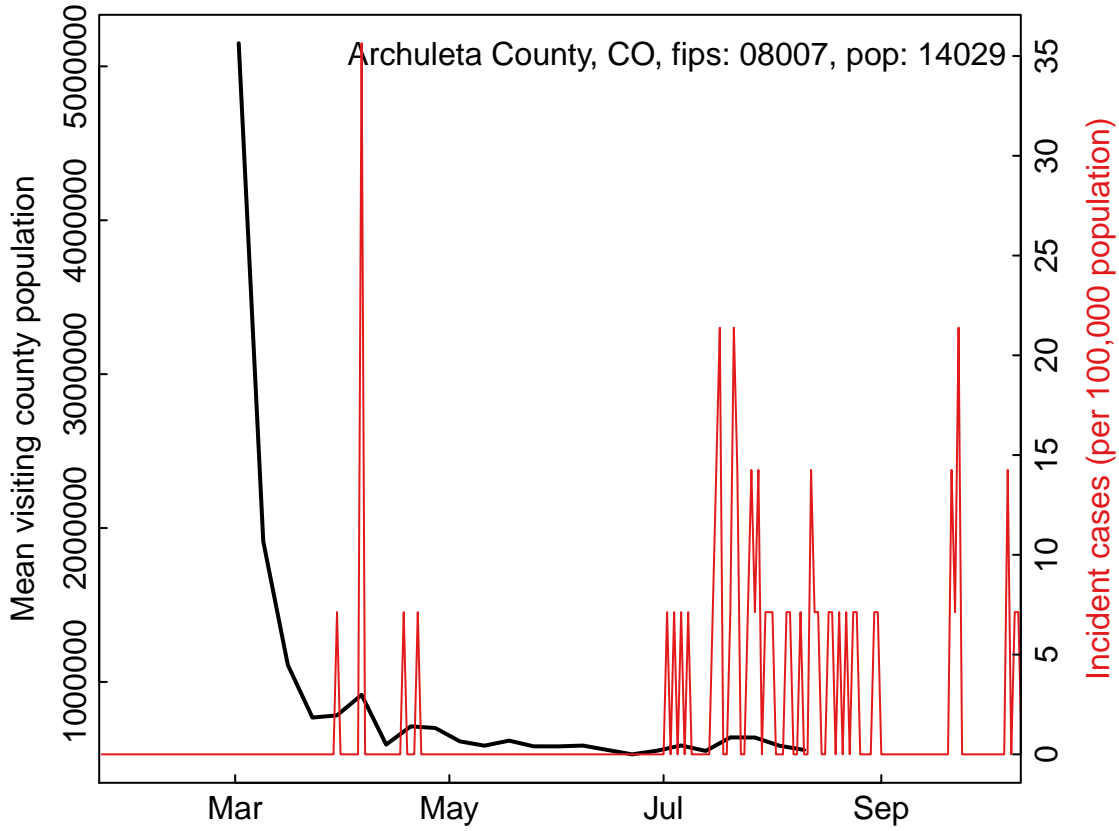

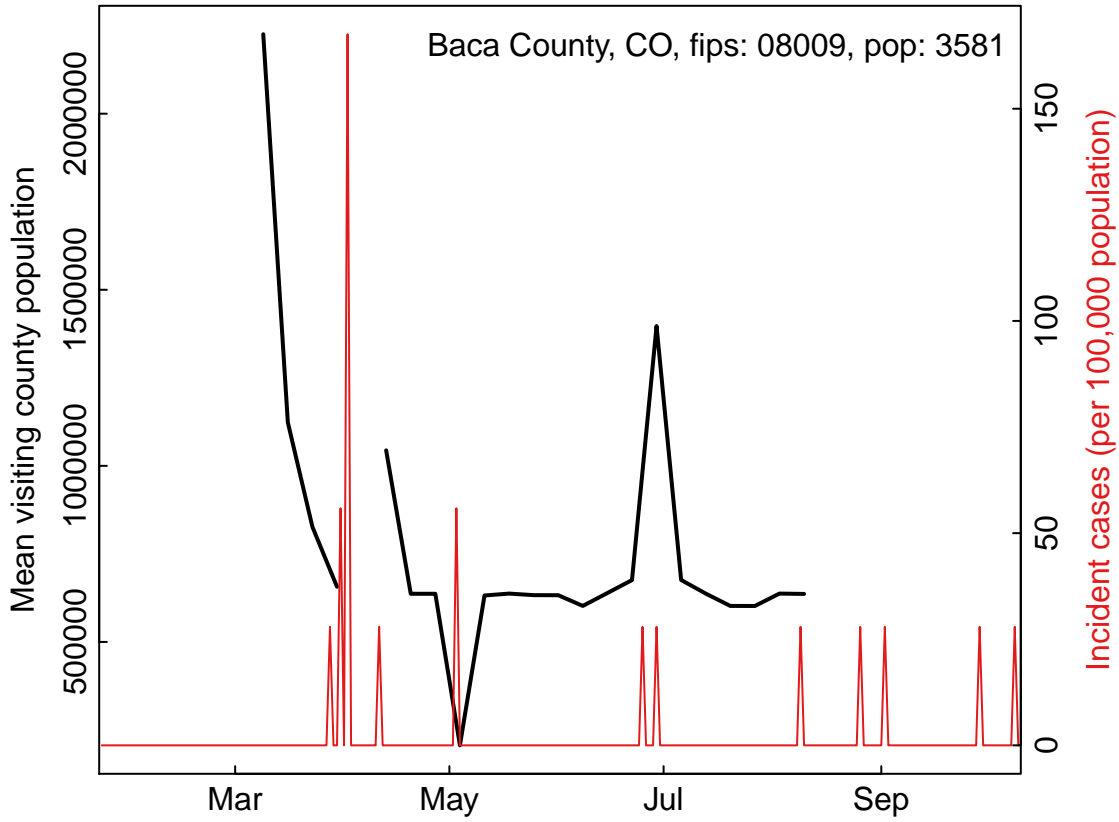

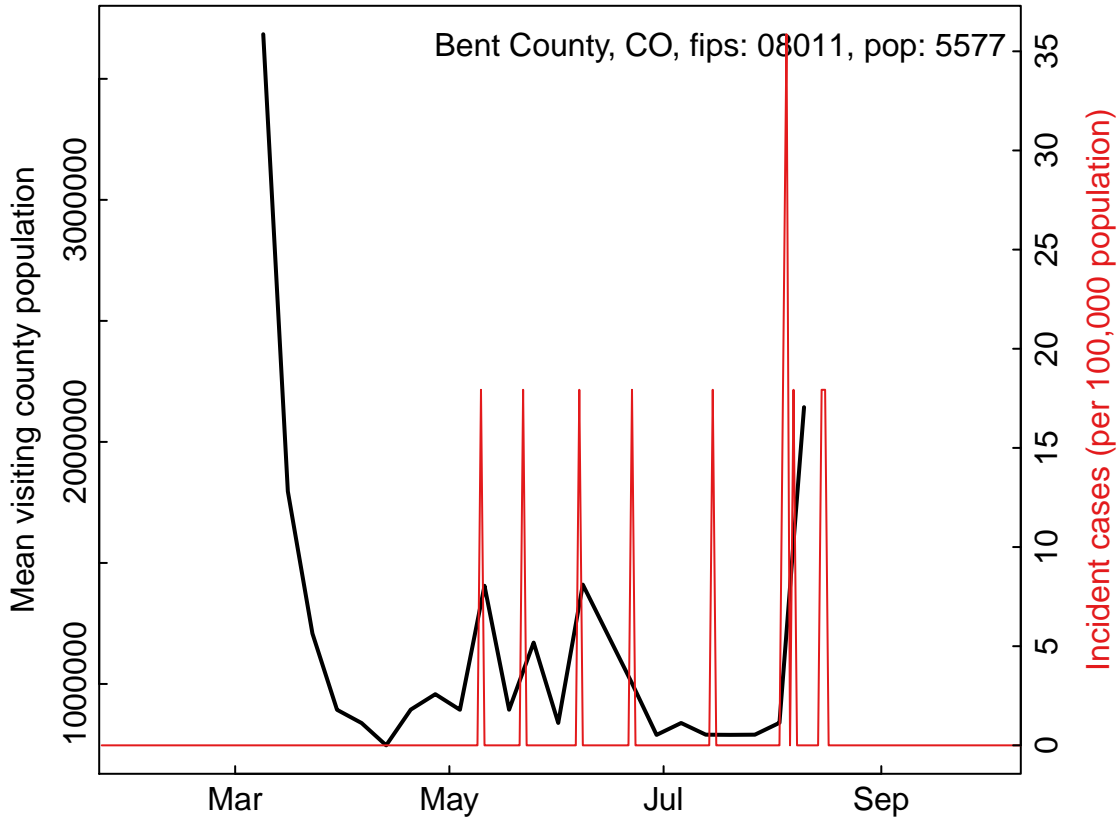

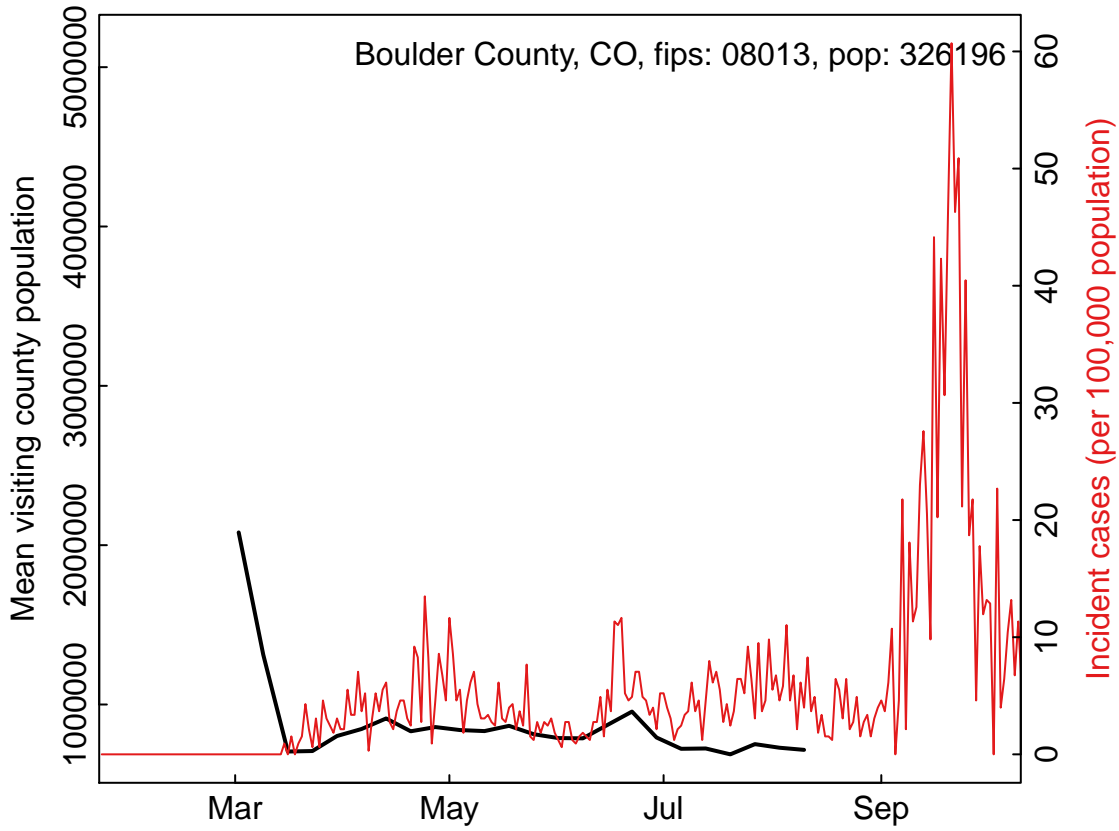

Broomfield County, CO, fips: 08014, pop: 70465

Mean visiting county population

1400000  
1000000  
600000

Mar May Jul Sep

Incident cases (per 100,000 population)

20  
15  
10  
5  
0

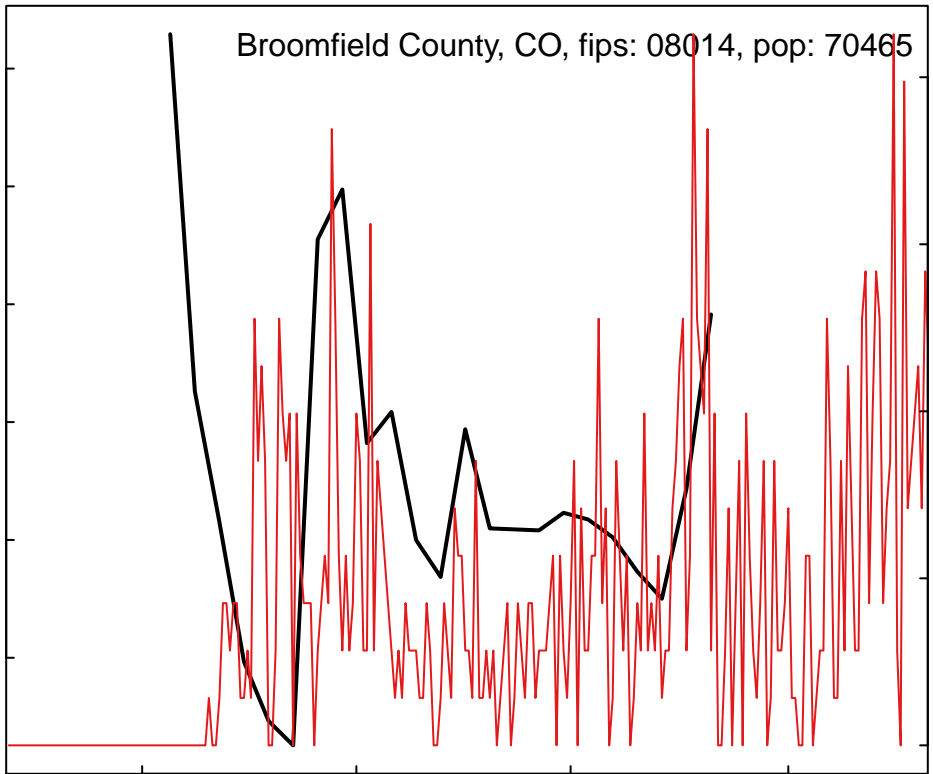

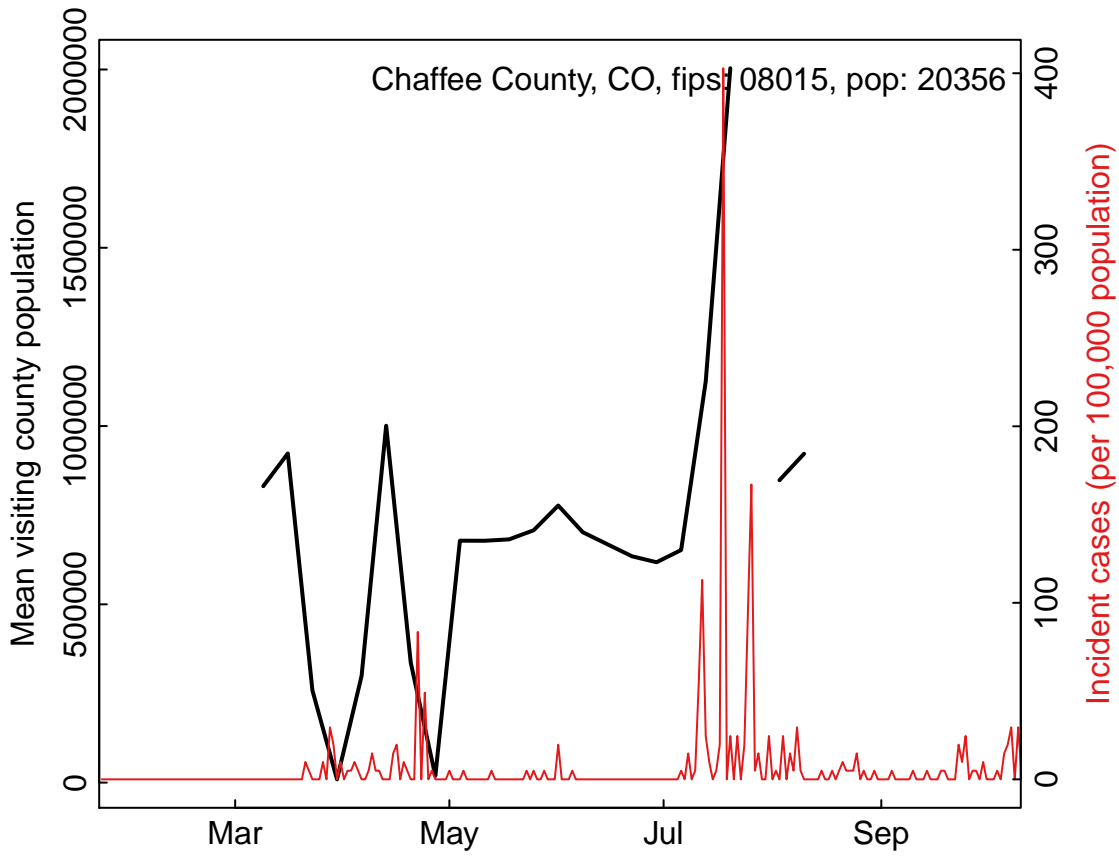



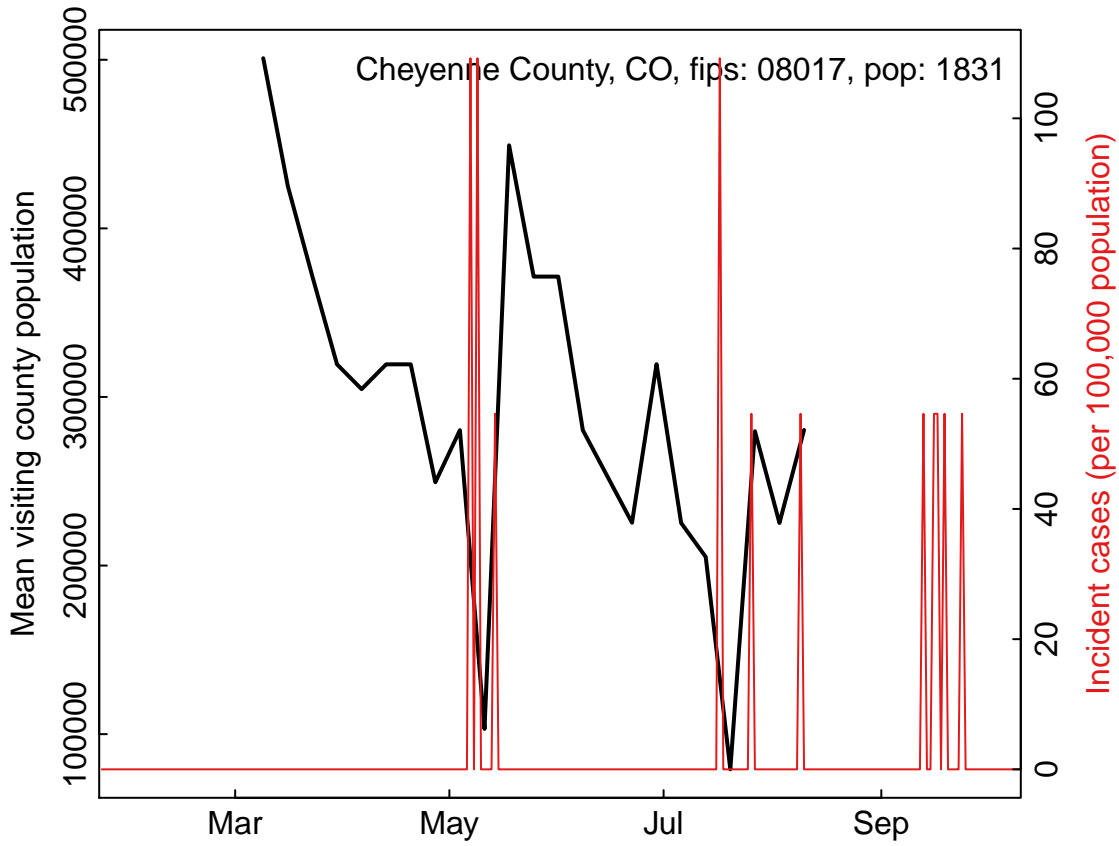

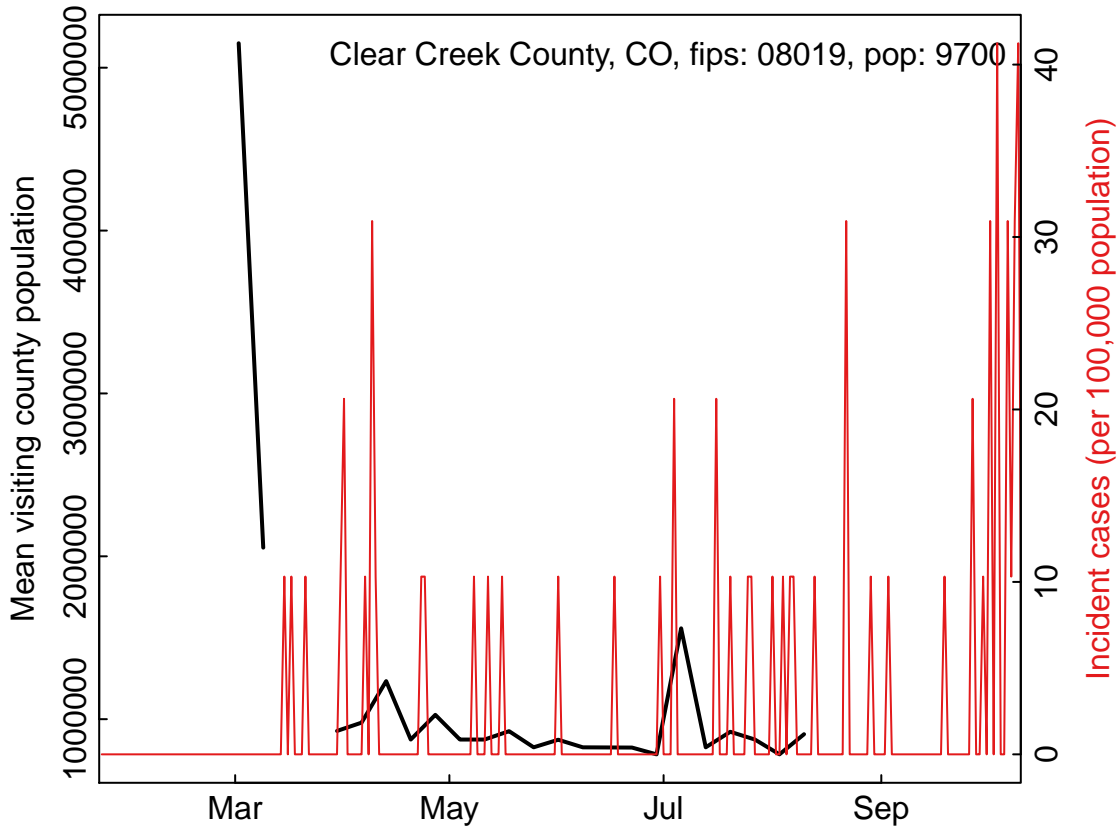

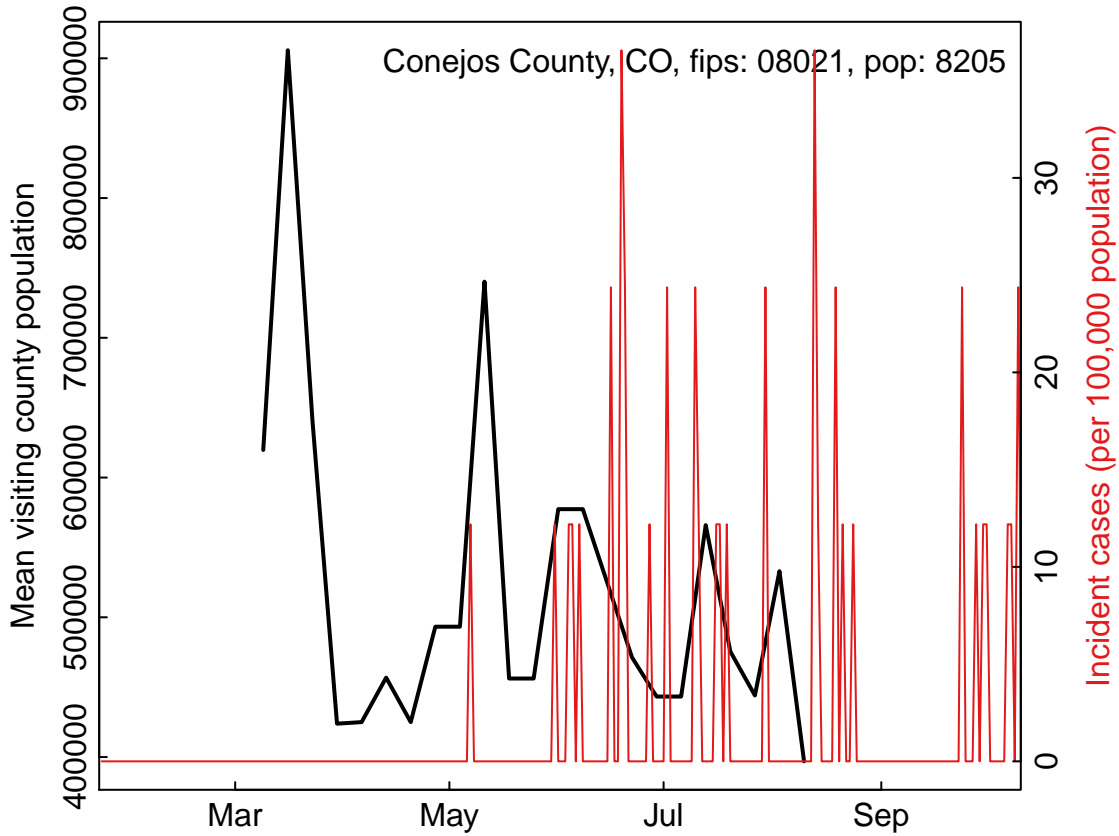

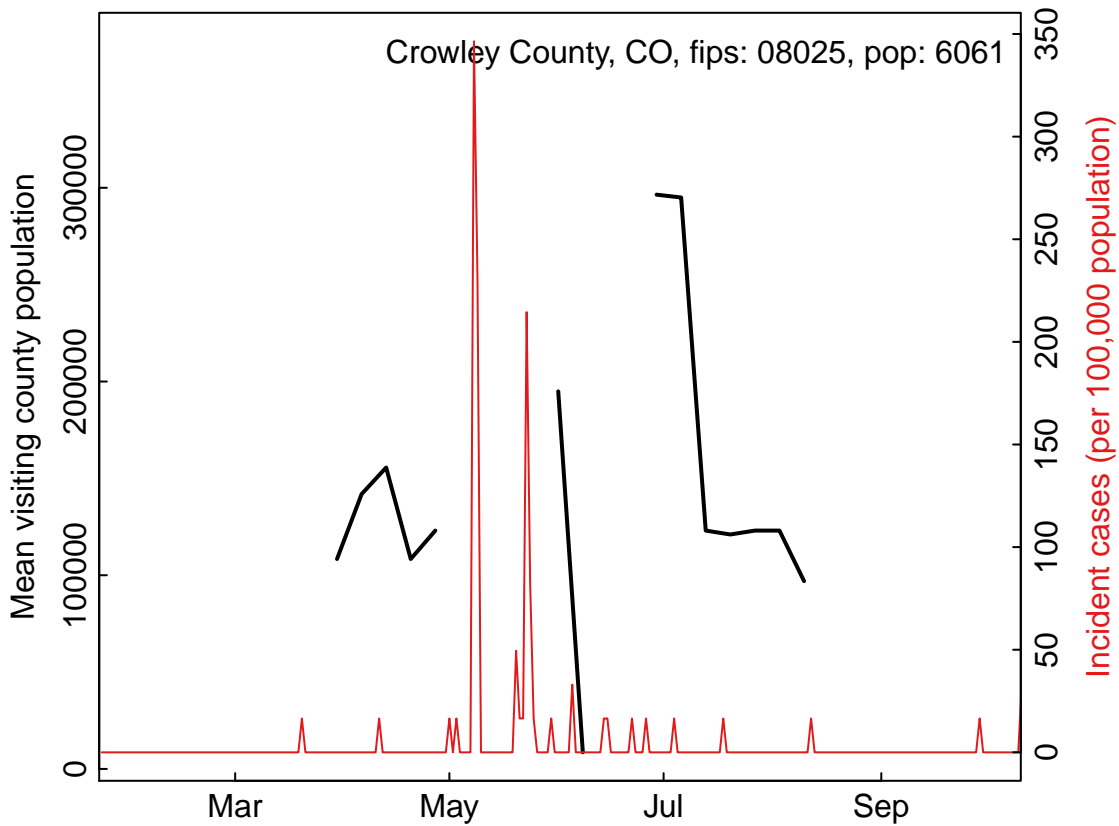

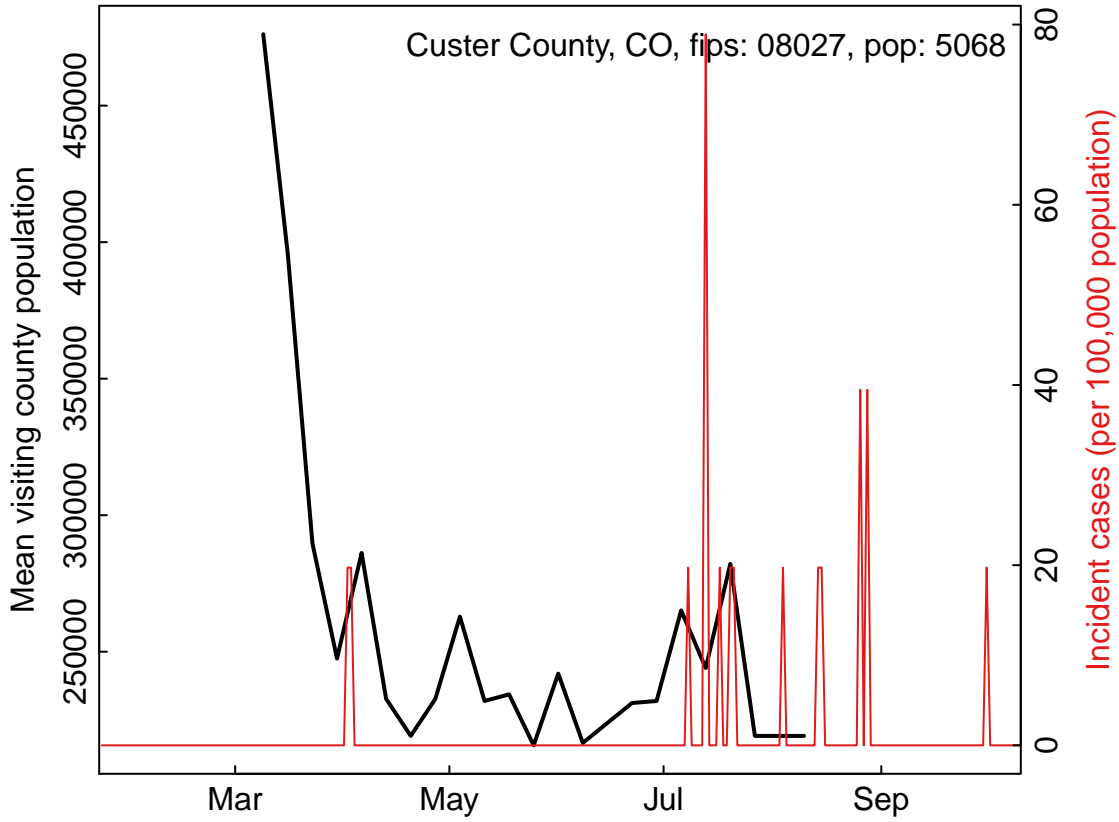

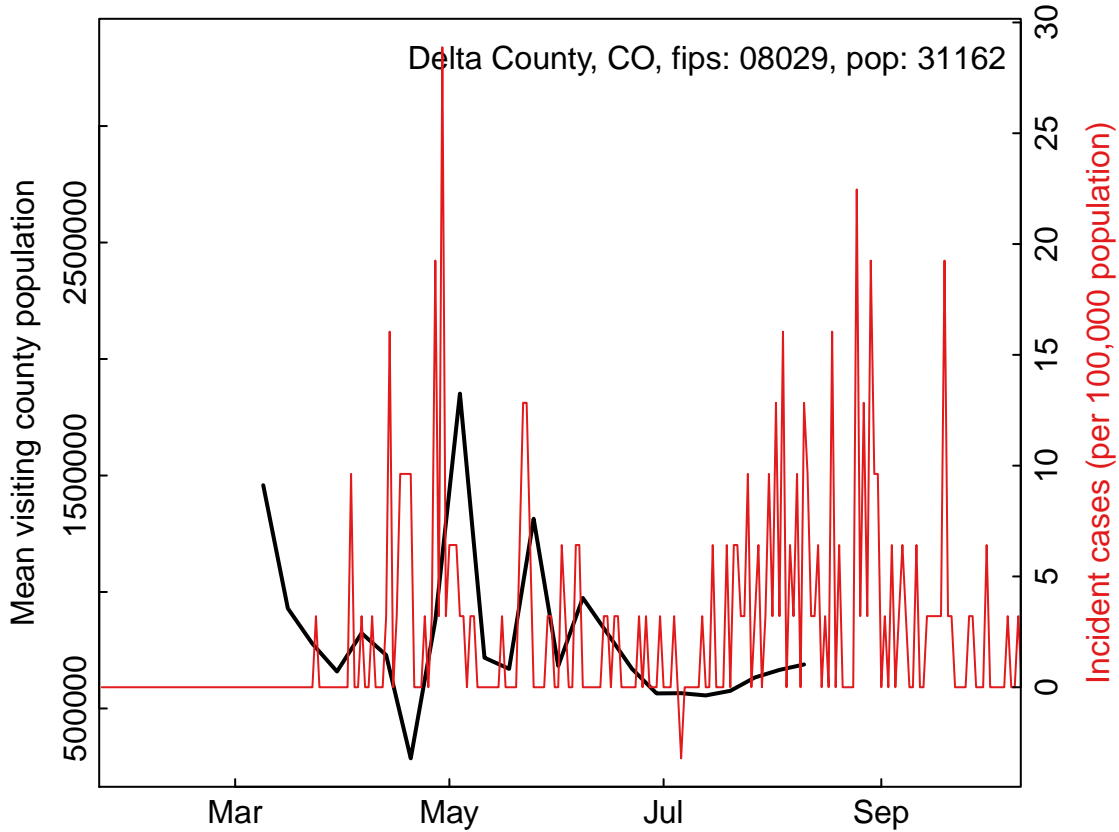

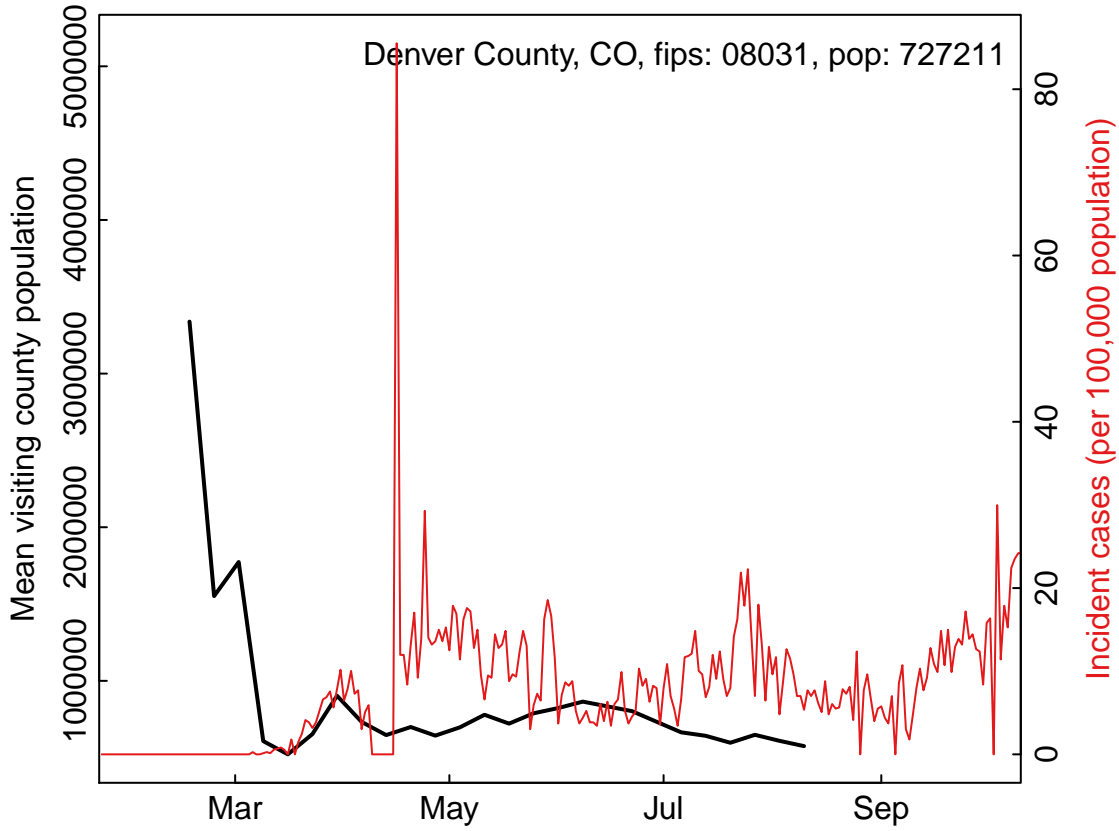

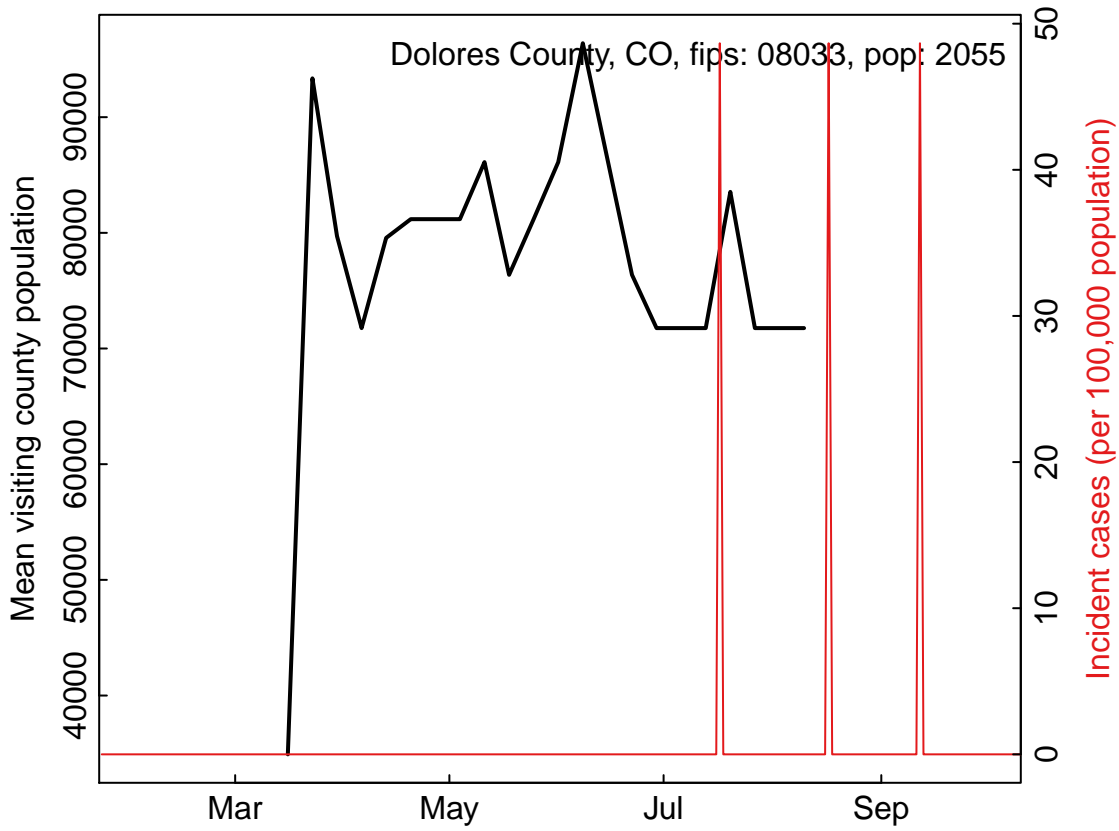



Douglas County, CO, fips: 08035, pop: 351154

Mean visiting county population

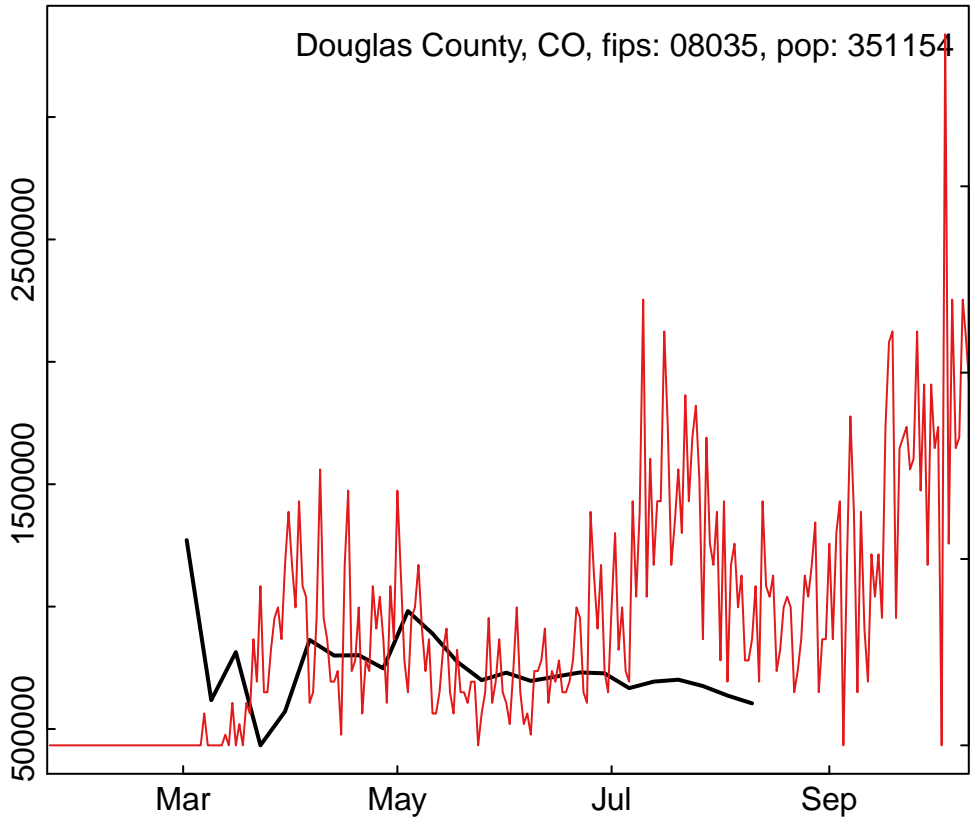

Incident cases (per 100,000 population)

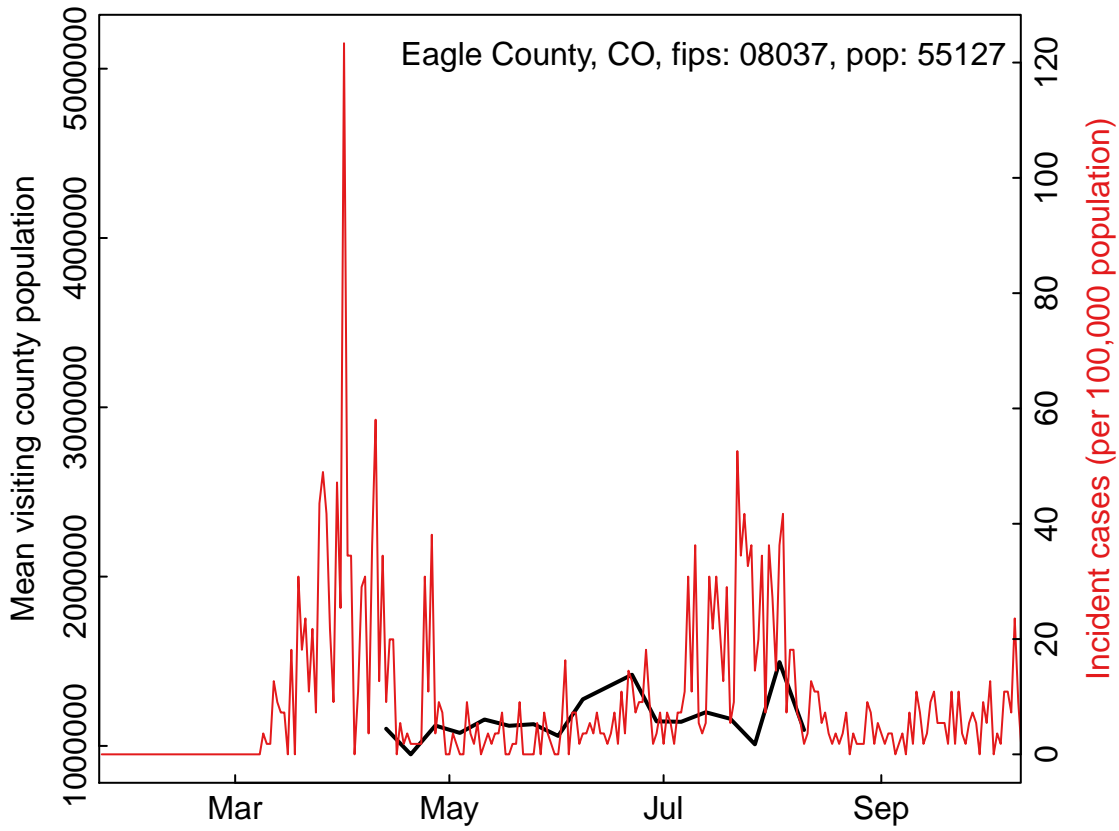

Elbert County, CO, fips: 08039, pop: 26729

Mean visiting county population

1200000  
800000  
400000

Mar

May

Jul

Sep

15  
10  
5  
0

Incident cases (per 100,000 population)

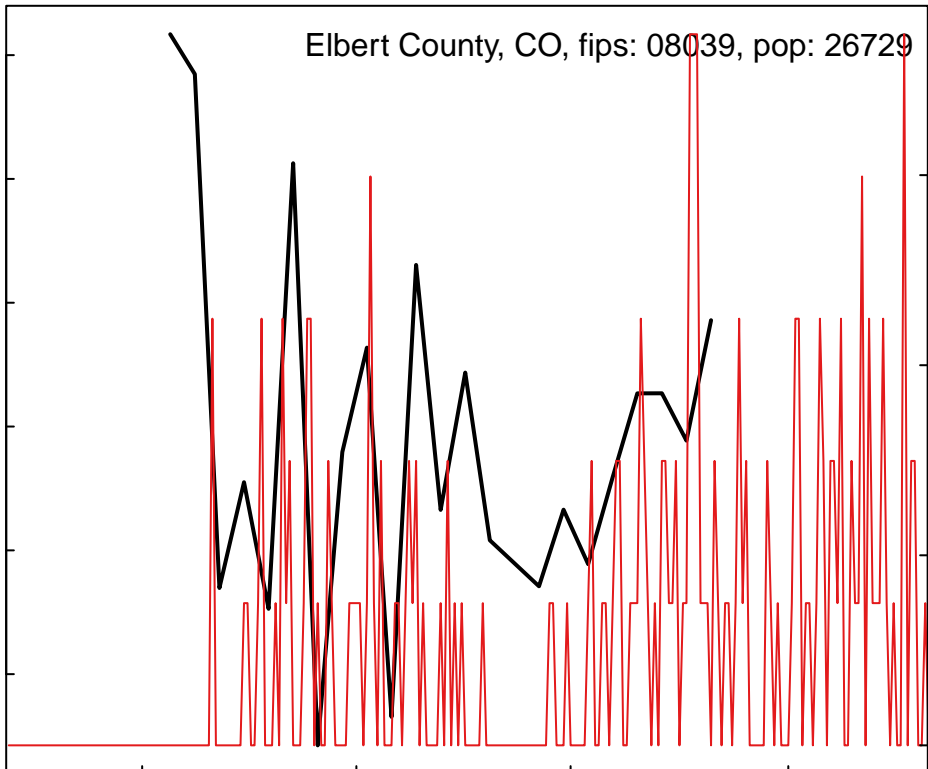

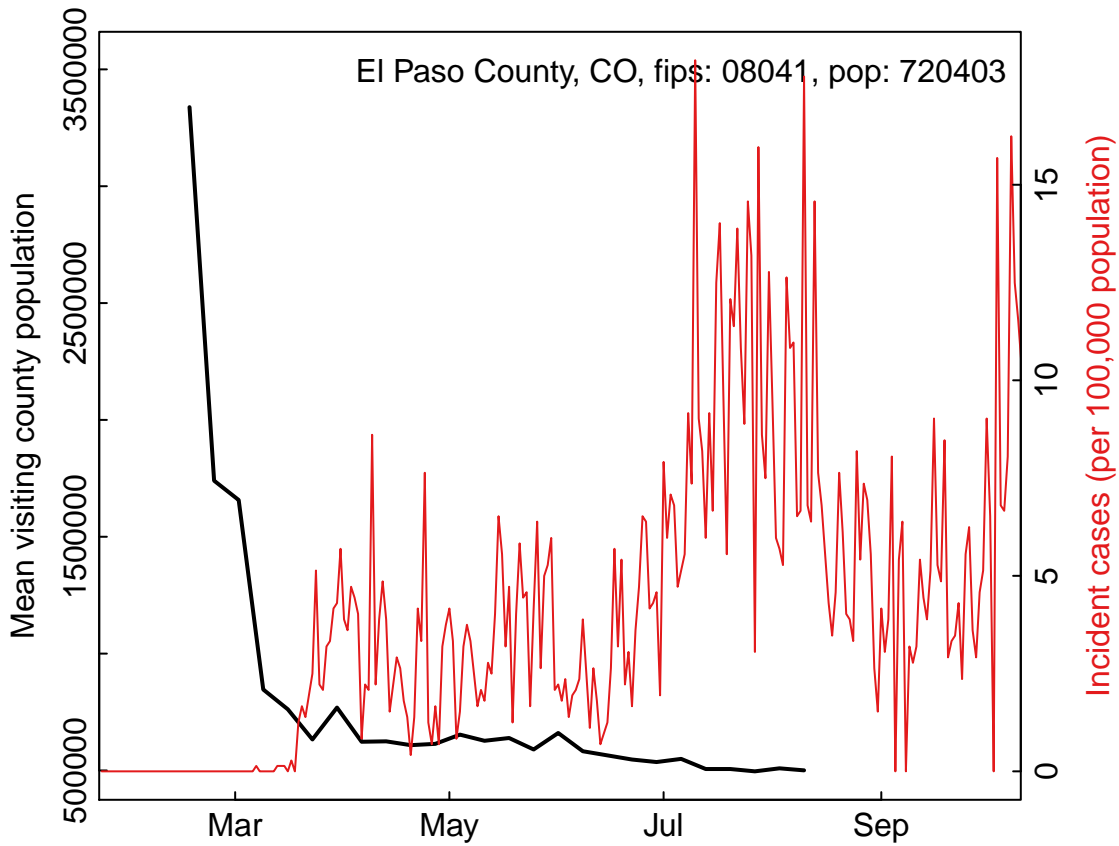

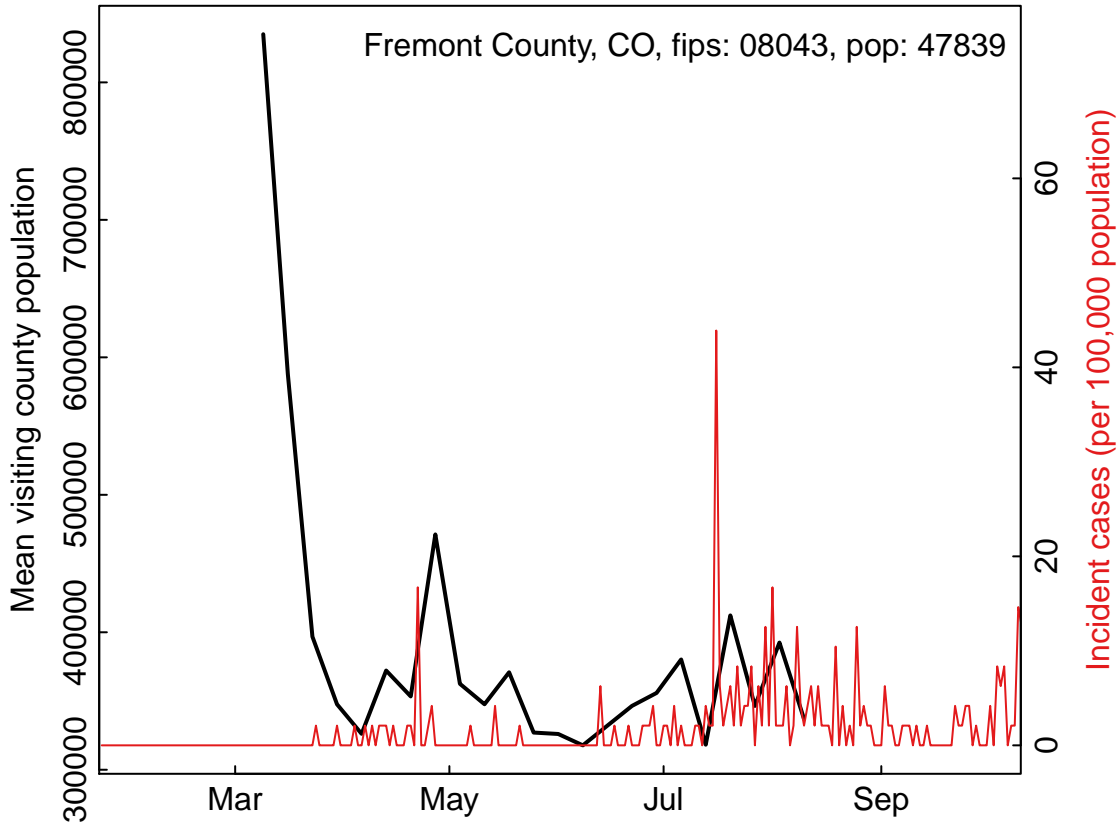

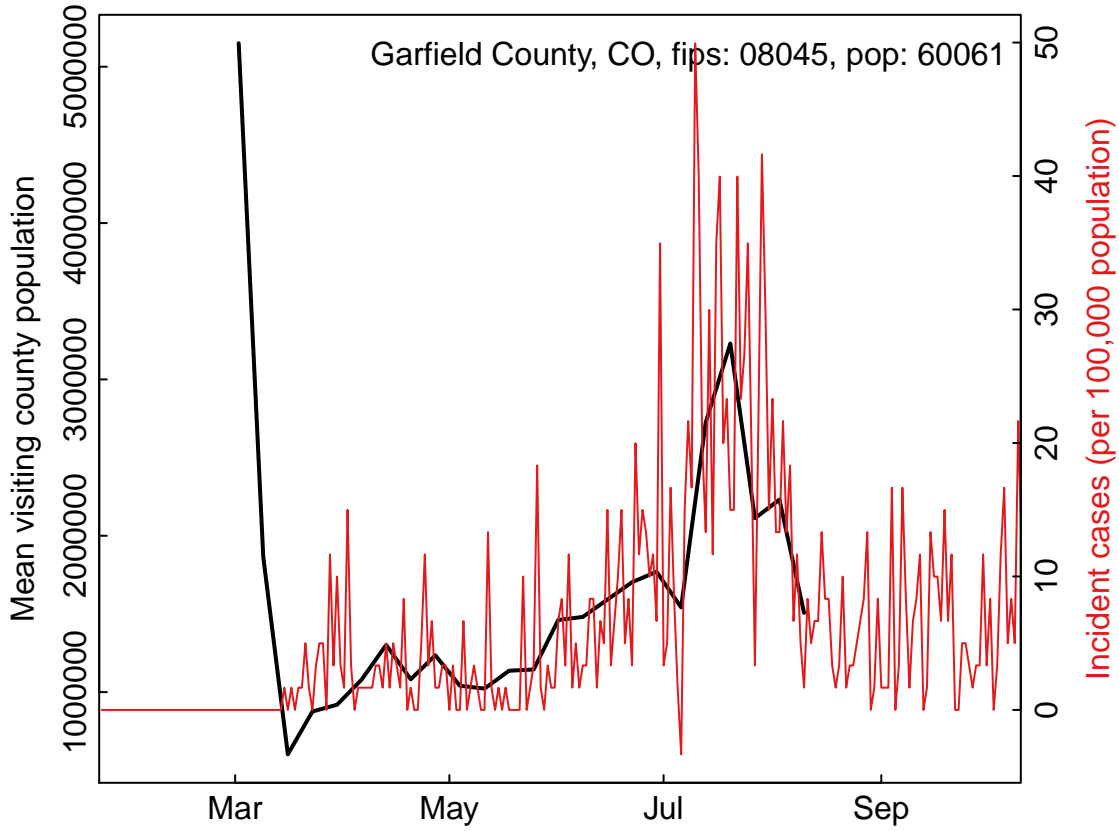

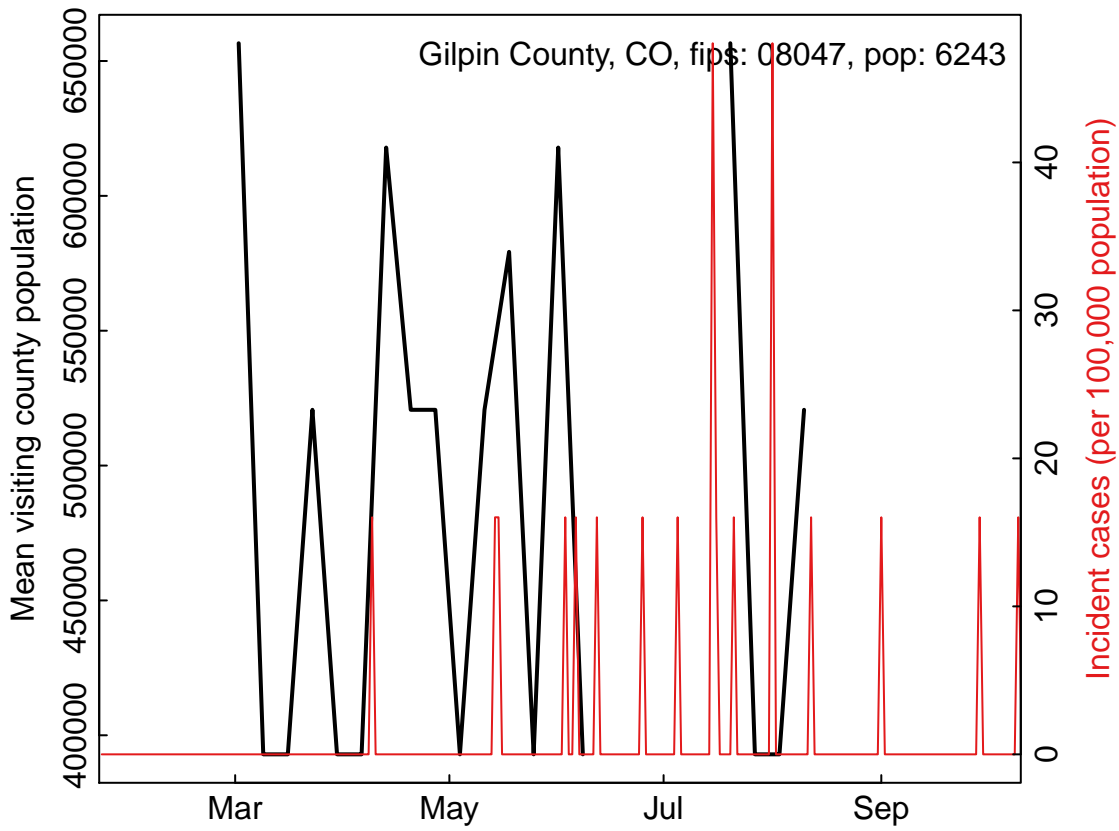

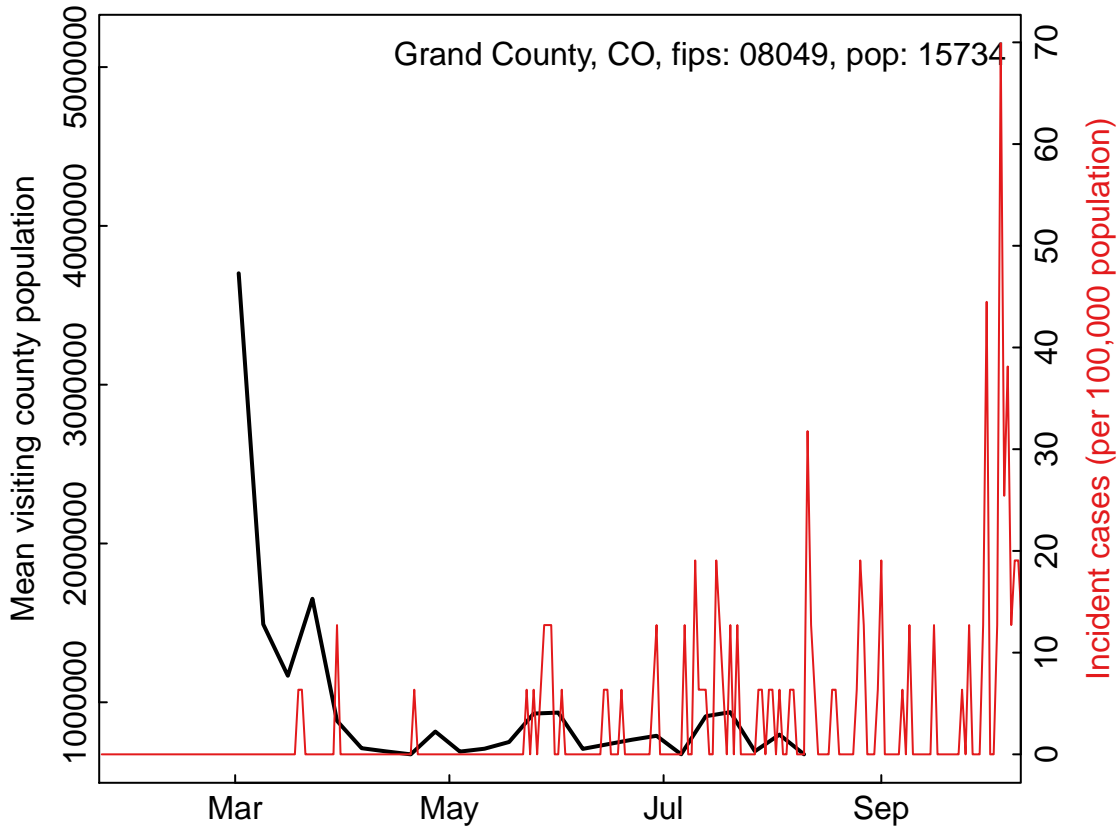



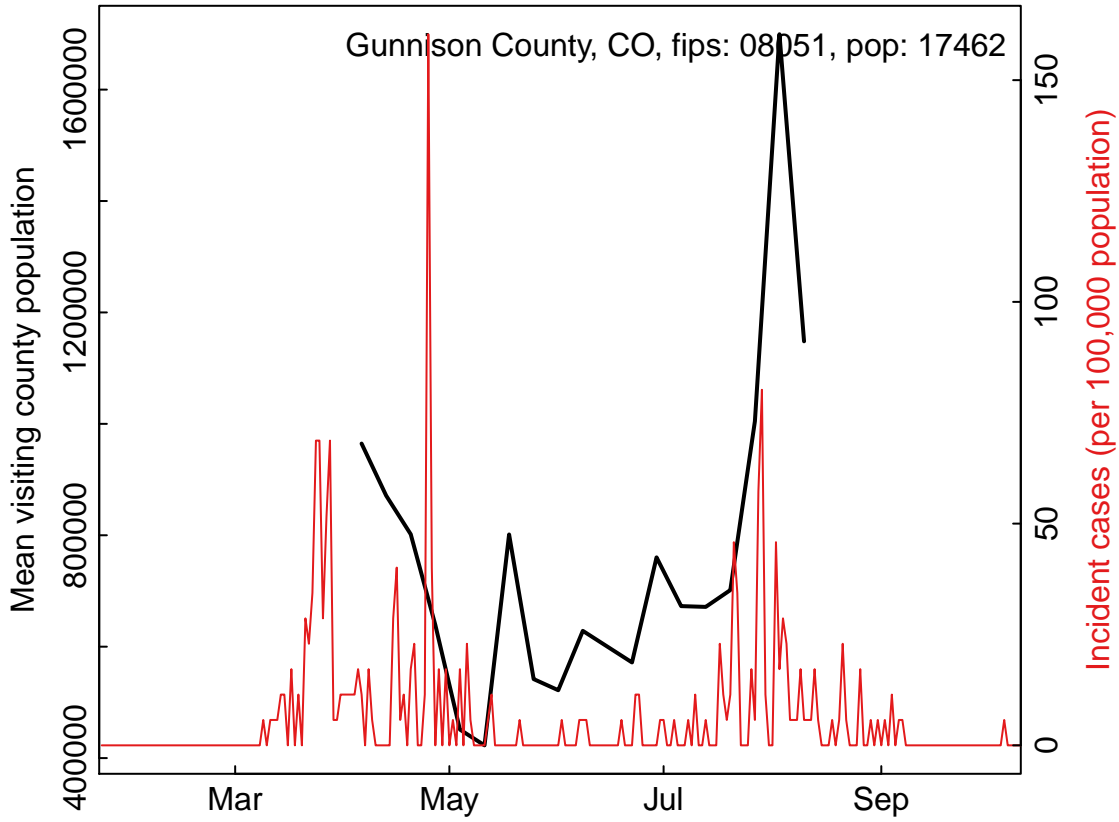

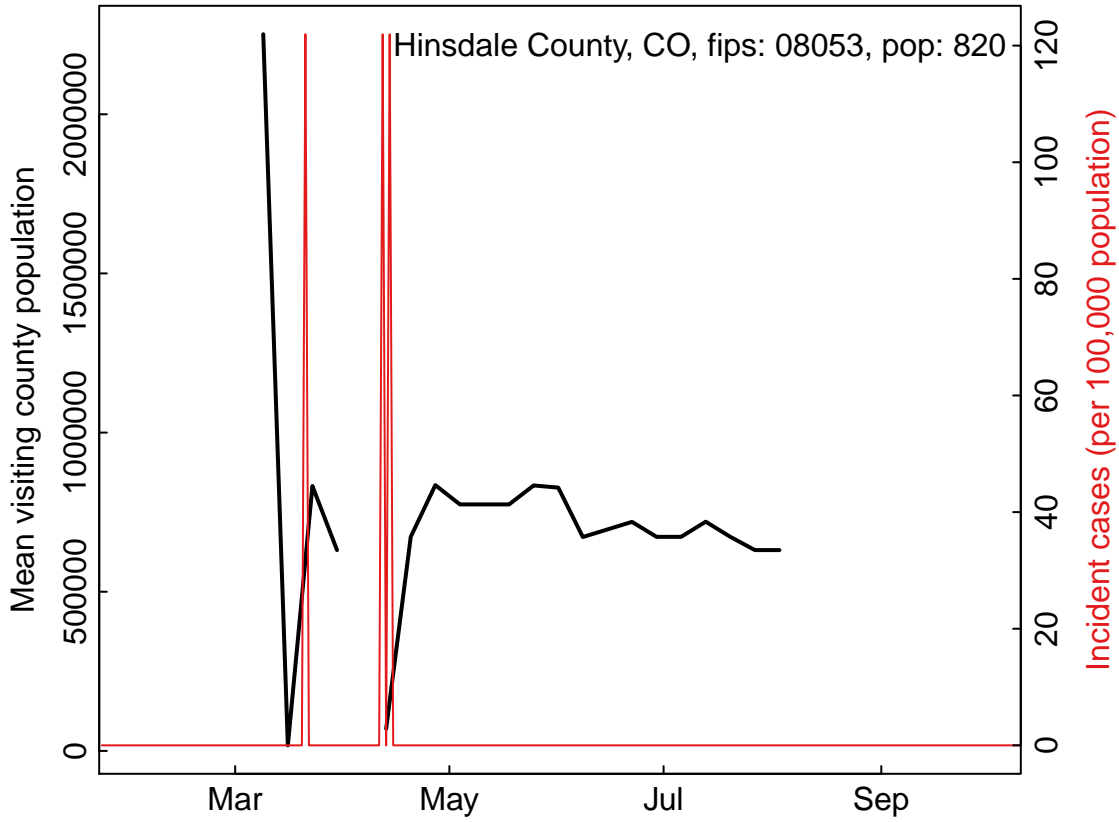

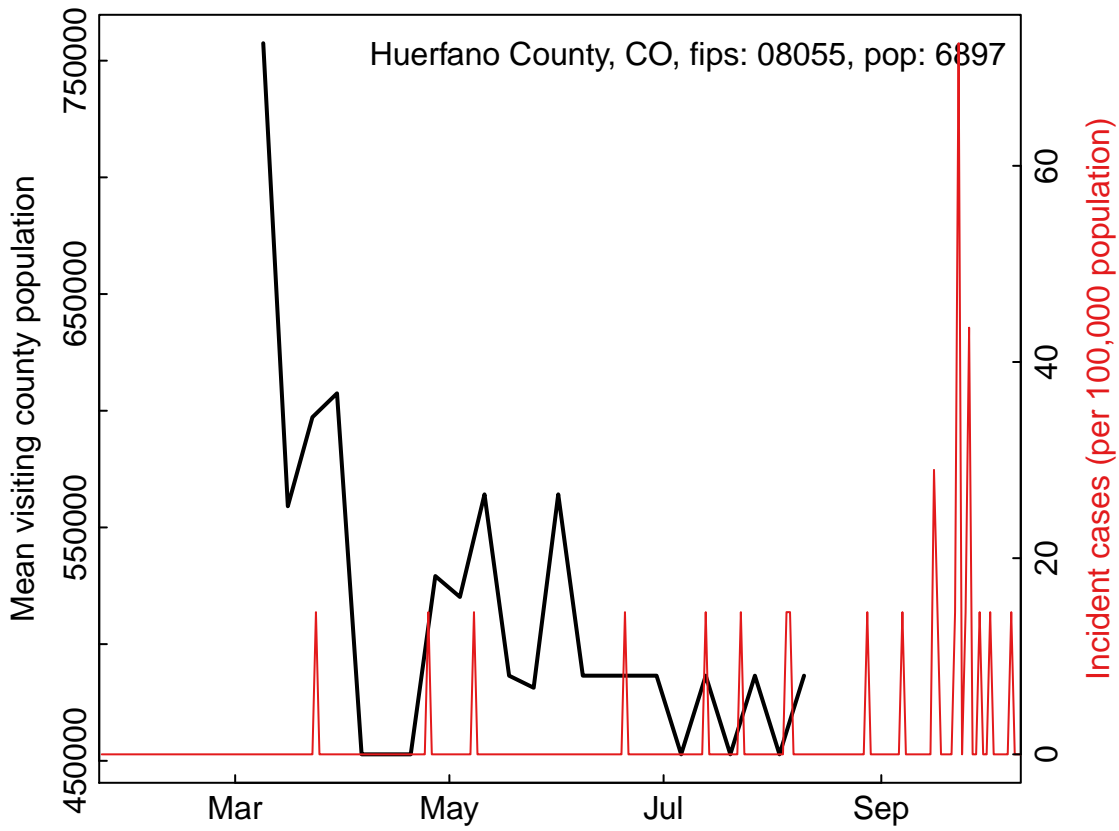

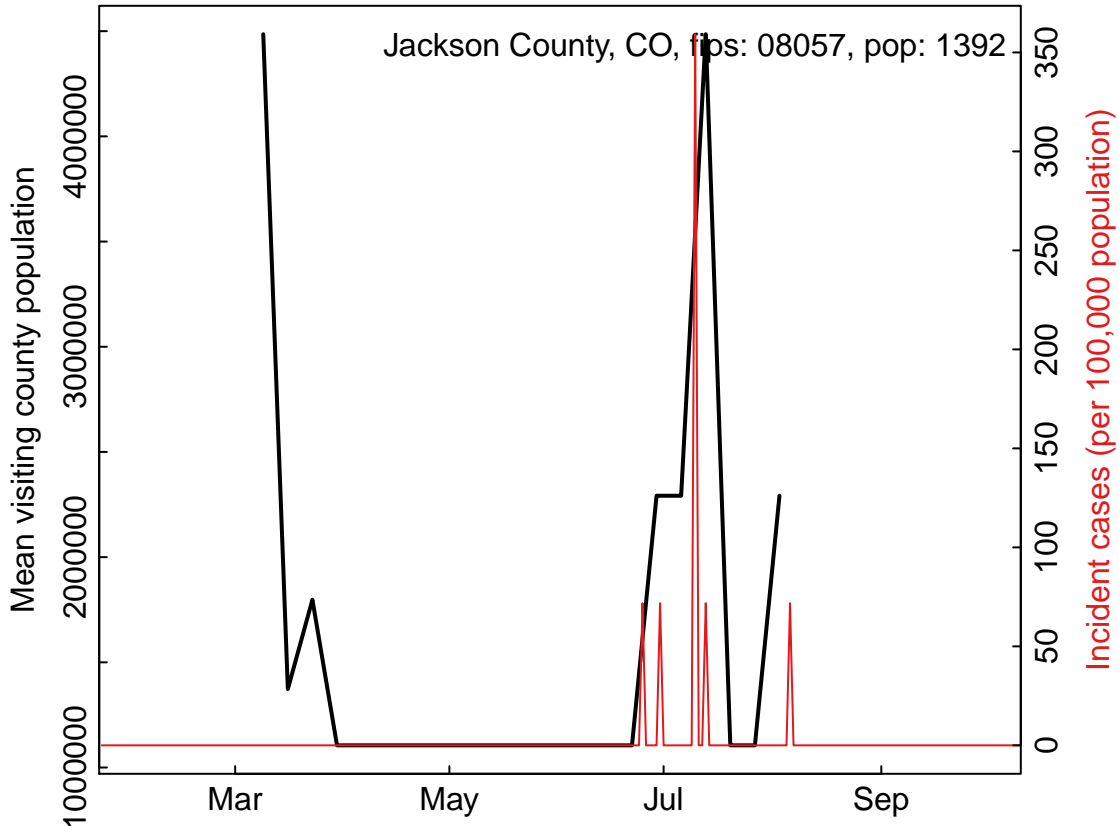

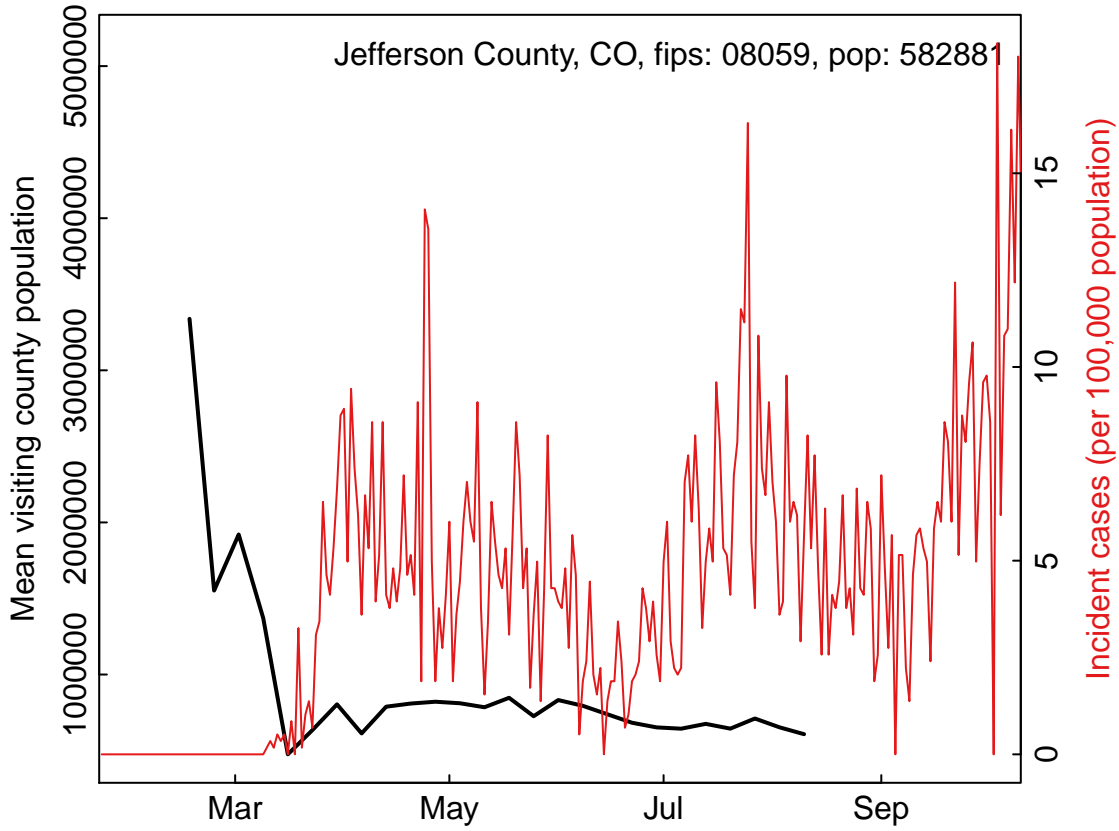

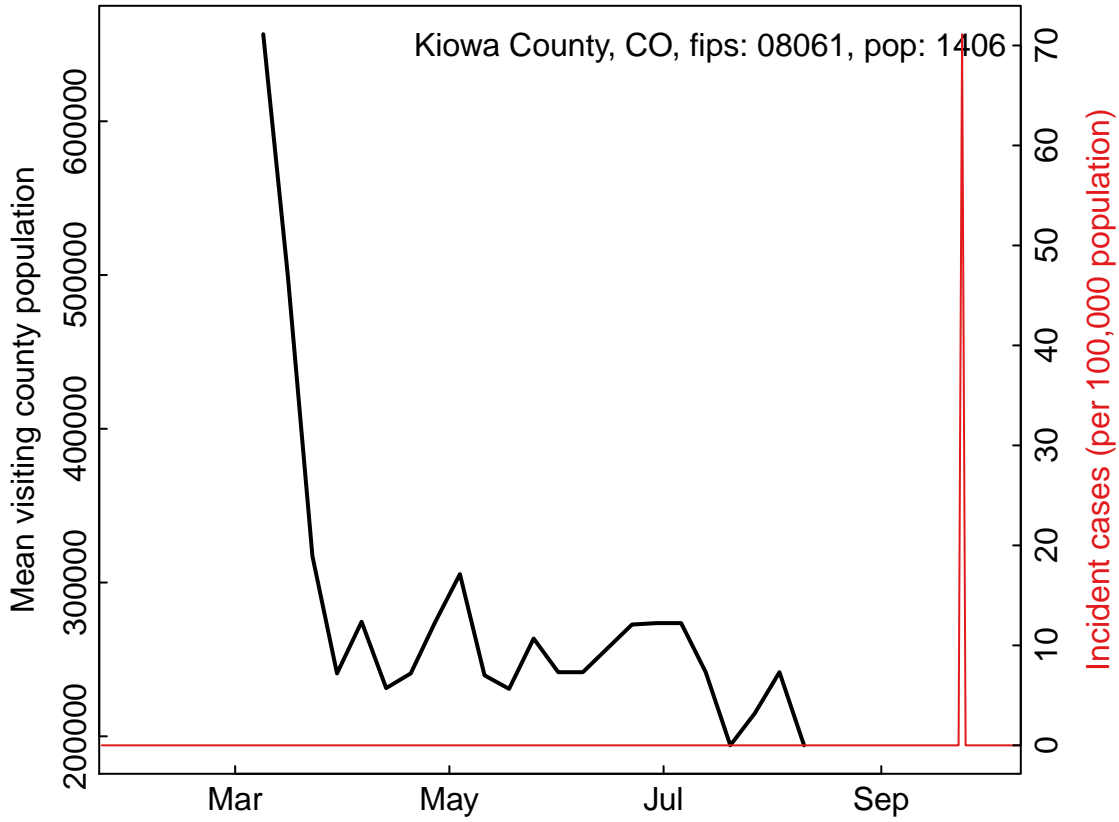

Kit Carson County, CO, fips: 08063, pop: 7097

Mean visiting county population

500000  
1500000  
2500000

Mar

May

Jul

Sep

0  
50  
100  
150  
200

Incident cases (per 100,000 population)

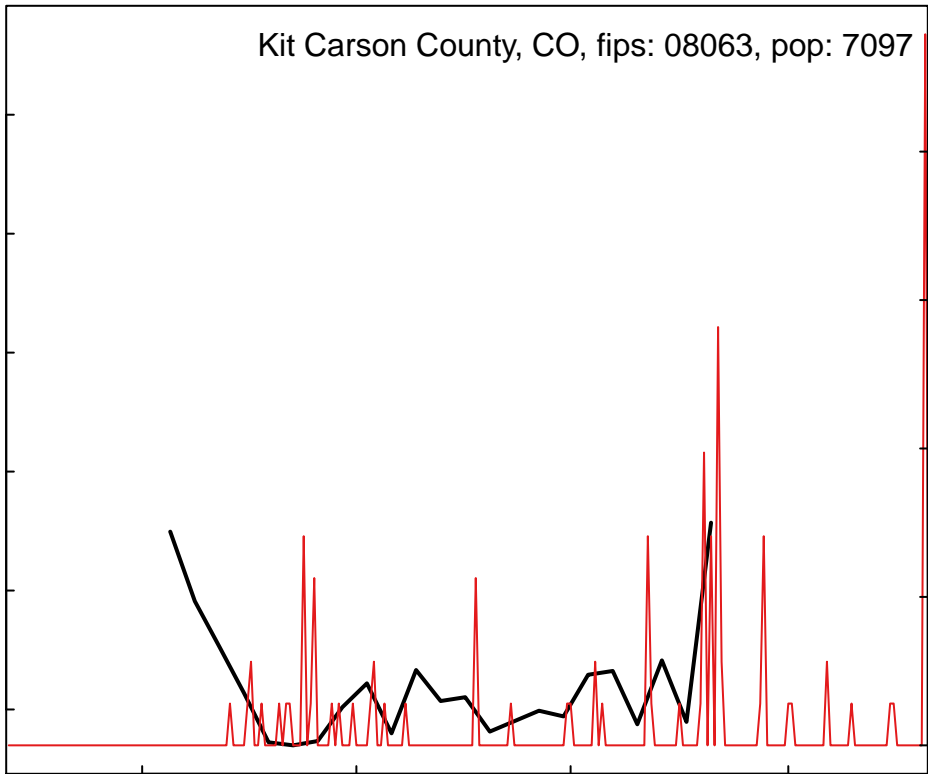

Lake County, CO, fips: 08065, pop: 8127

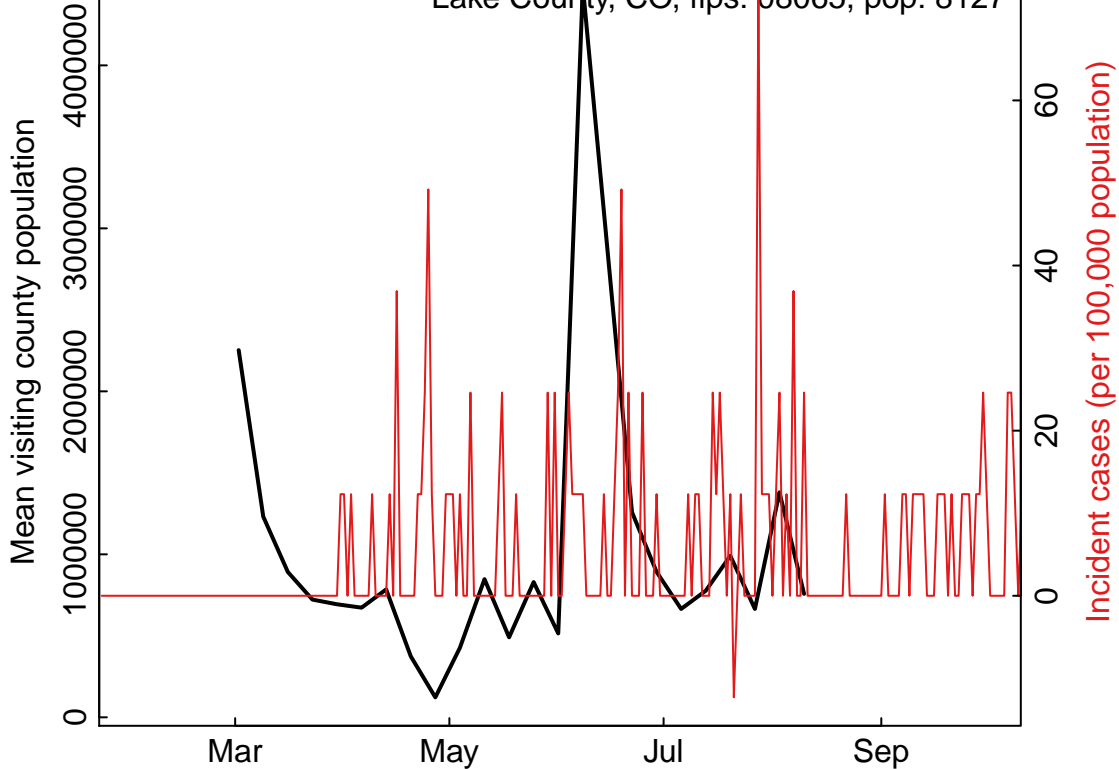



La Plata County, CO, fips: 08067, pop: 56221

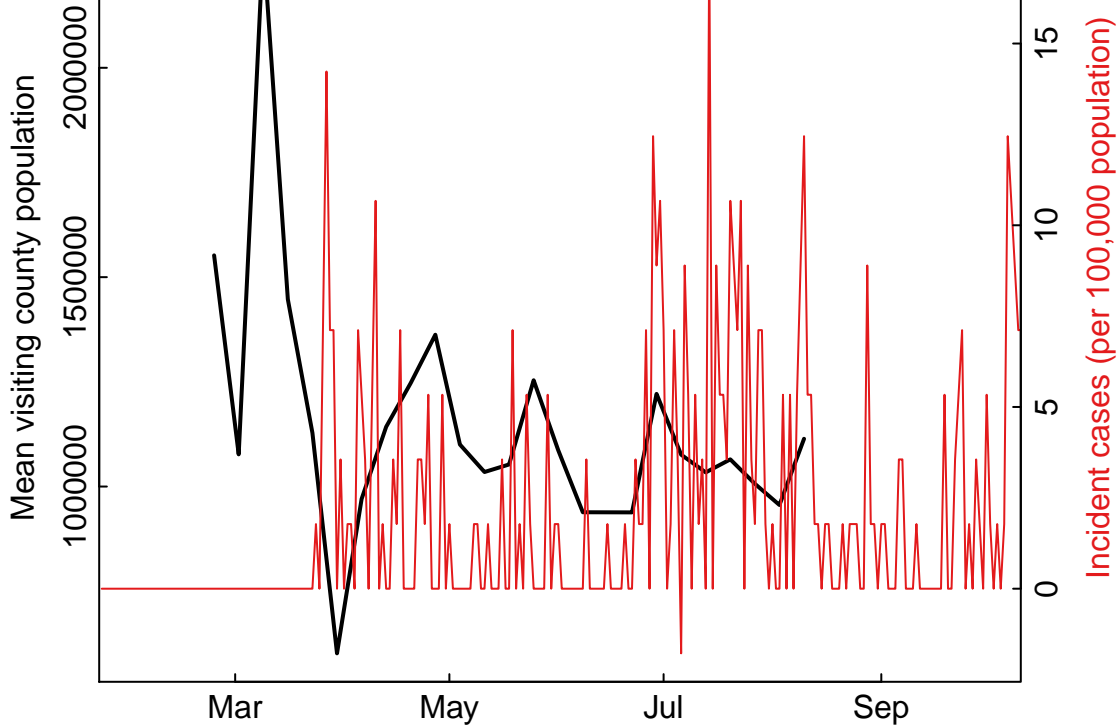

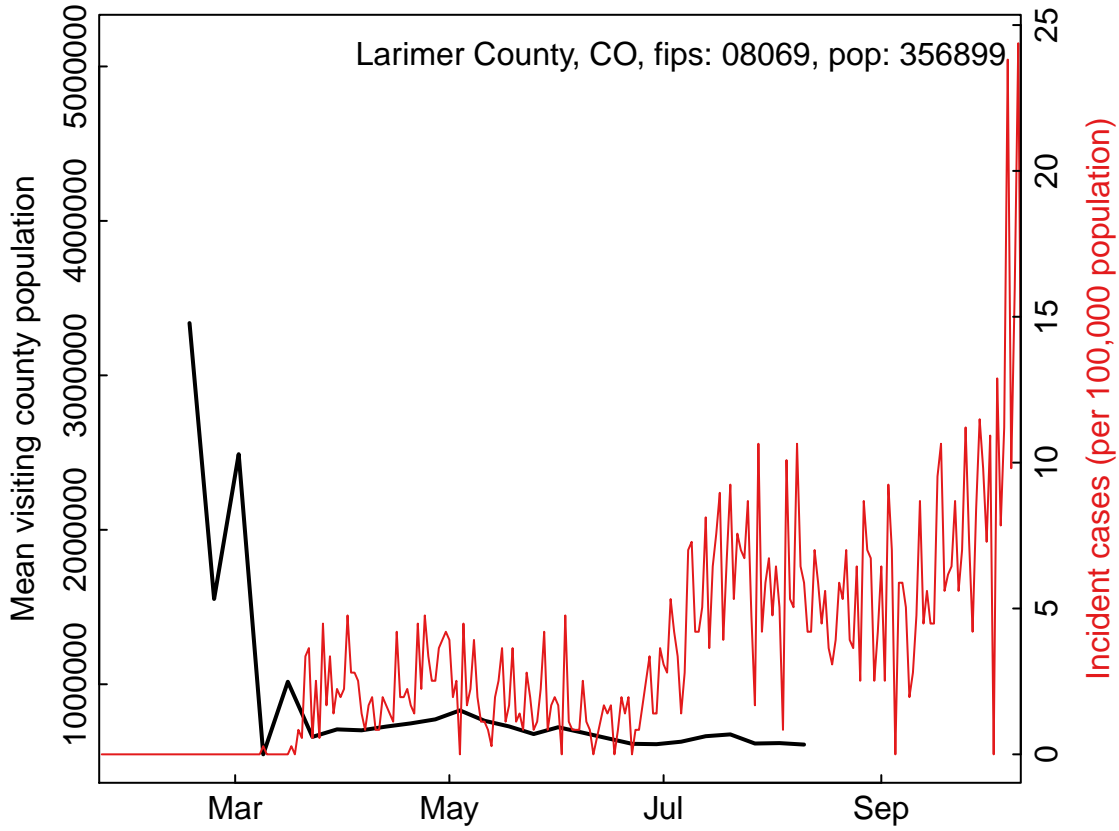

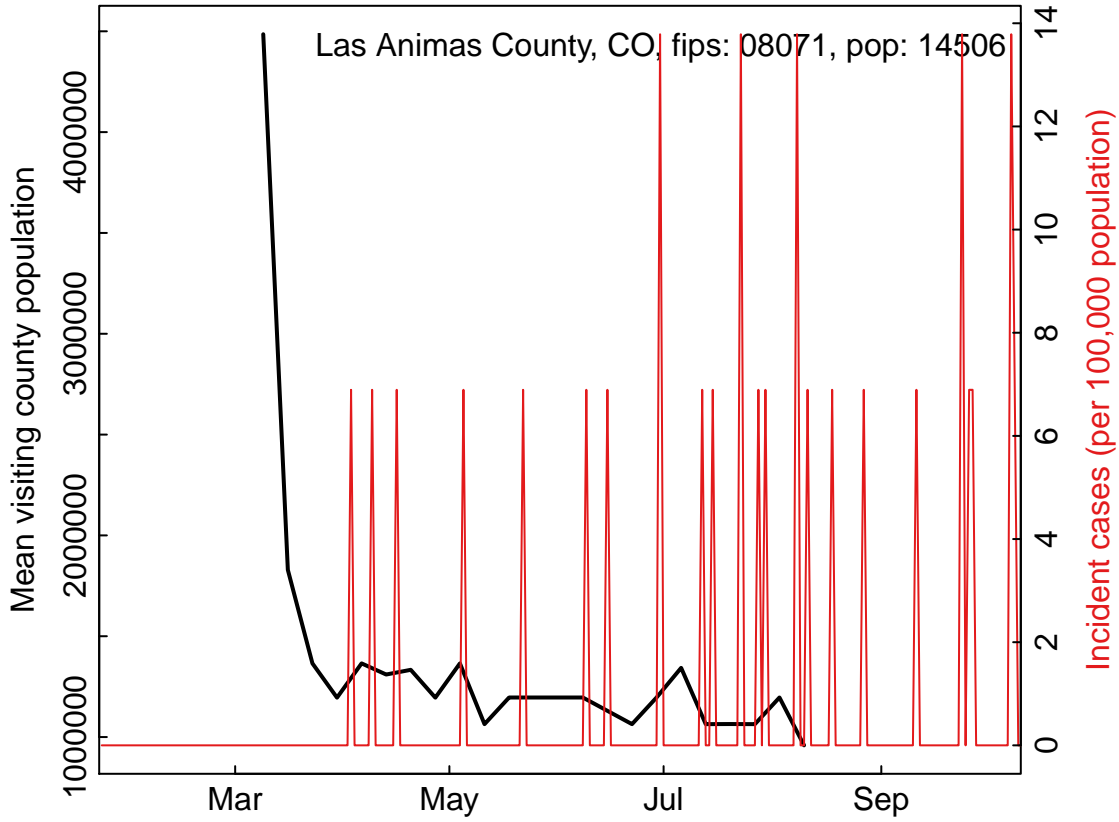

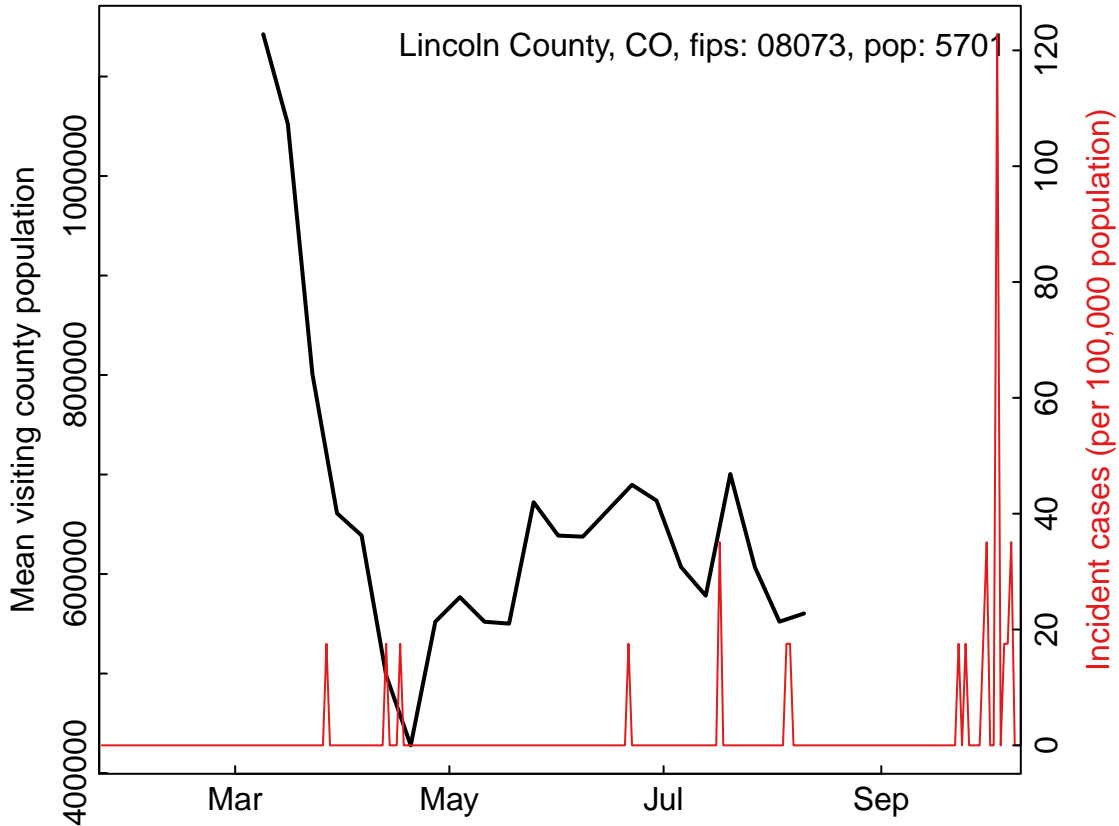

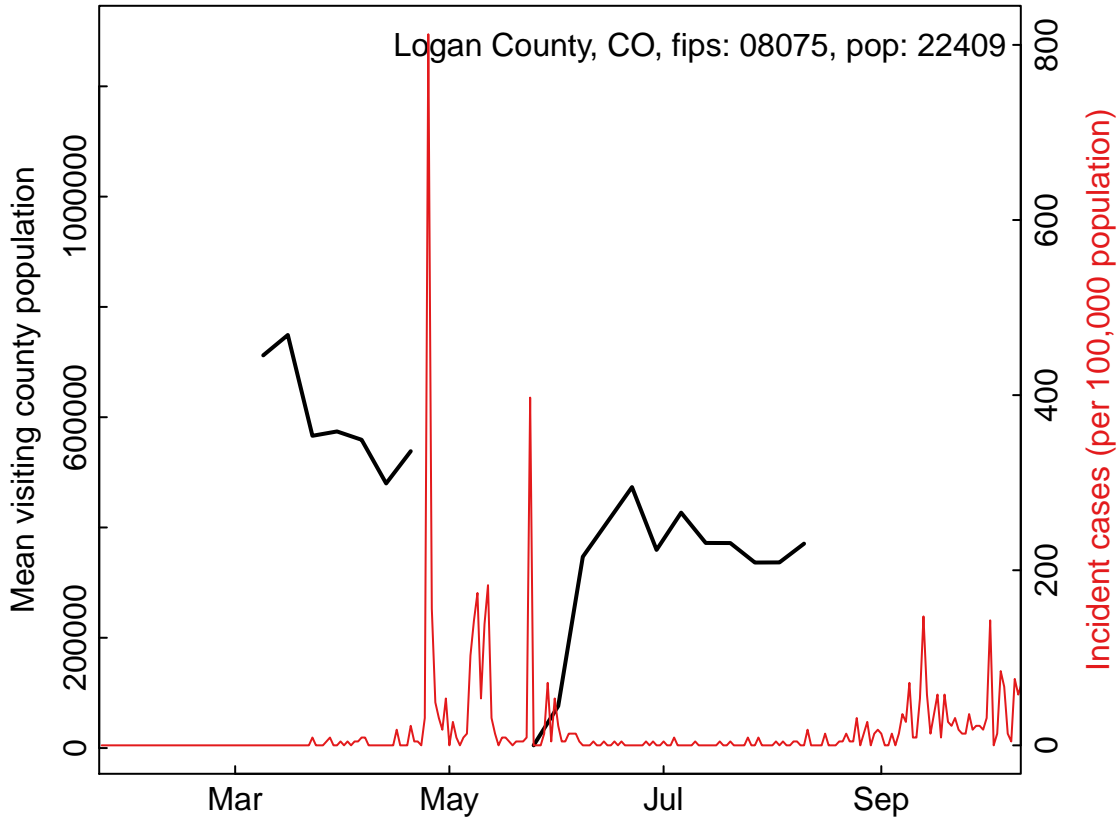

Mesa County, CO, fips: 08077, pop: 154210

Mean visiting county population

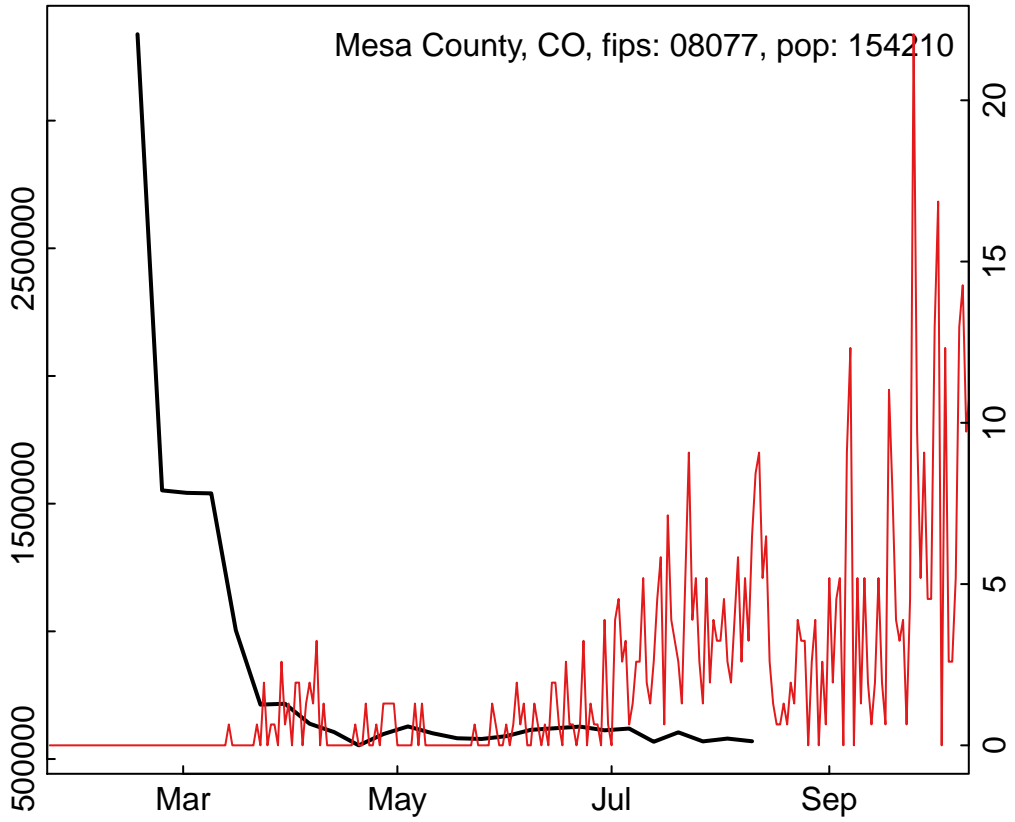

Incident cases (per 100,000 population)

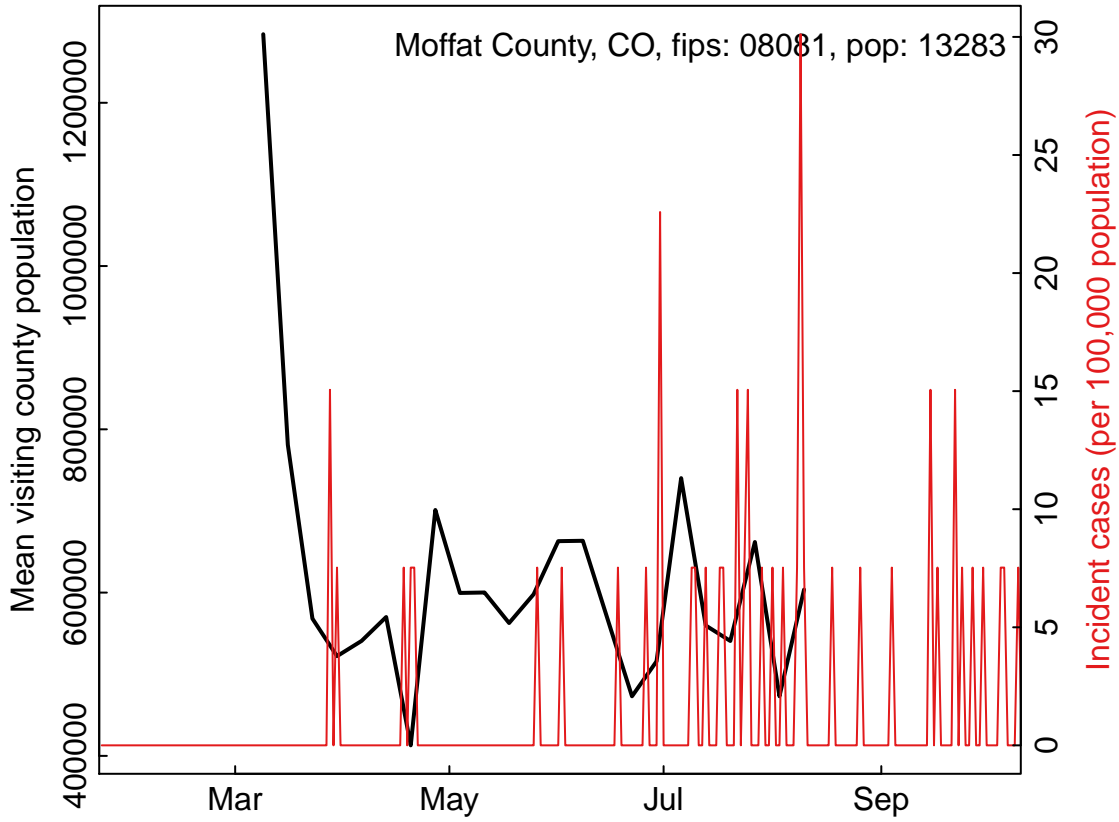

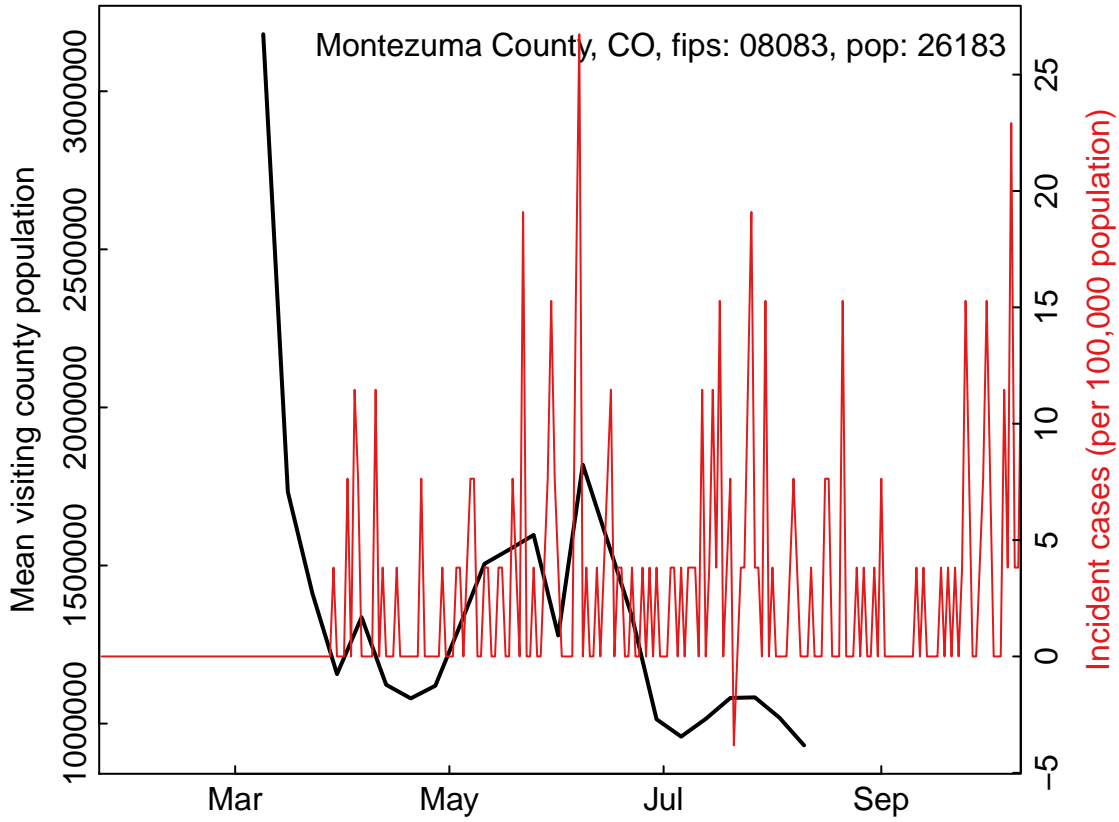



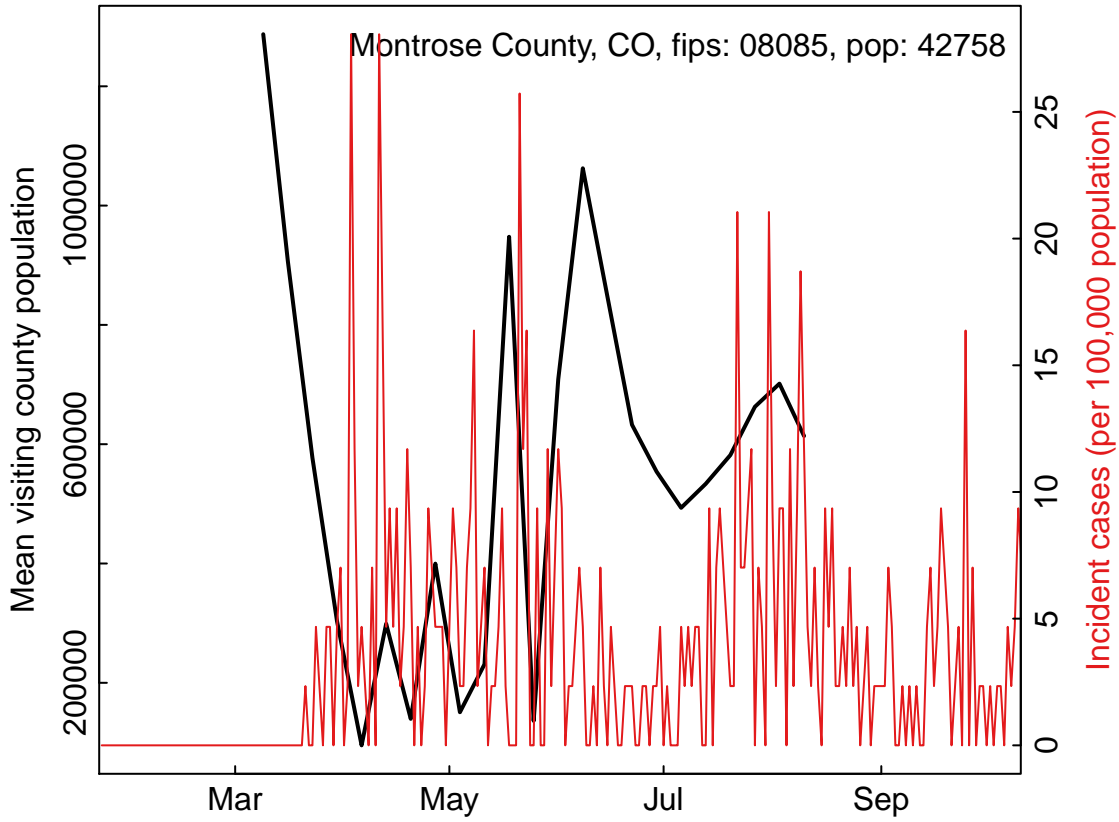

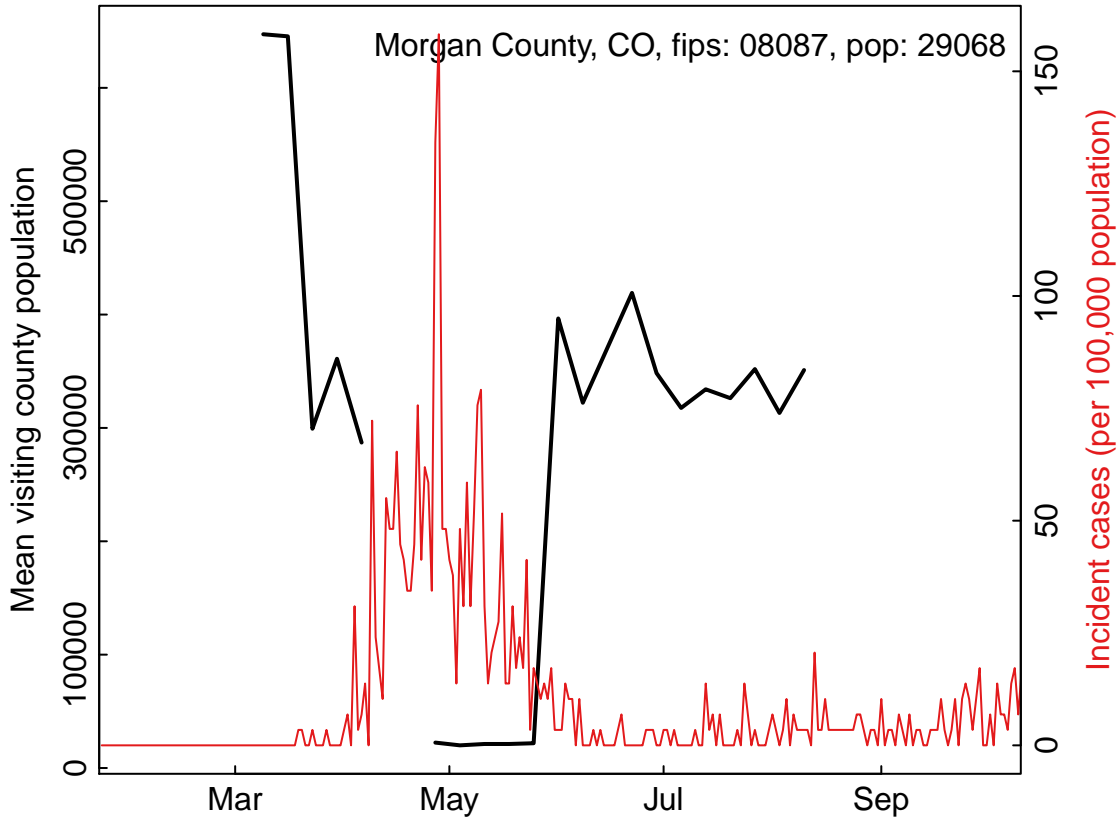

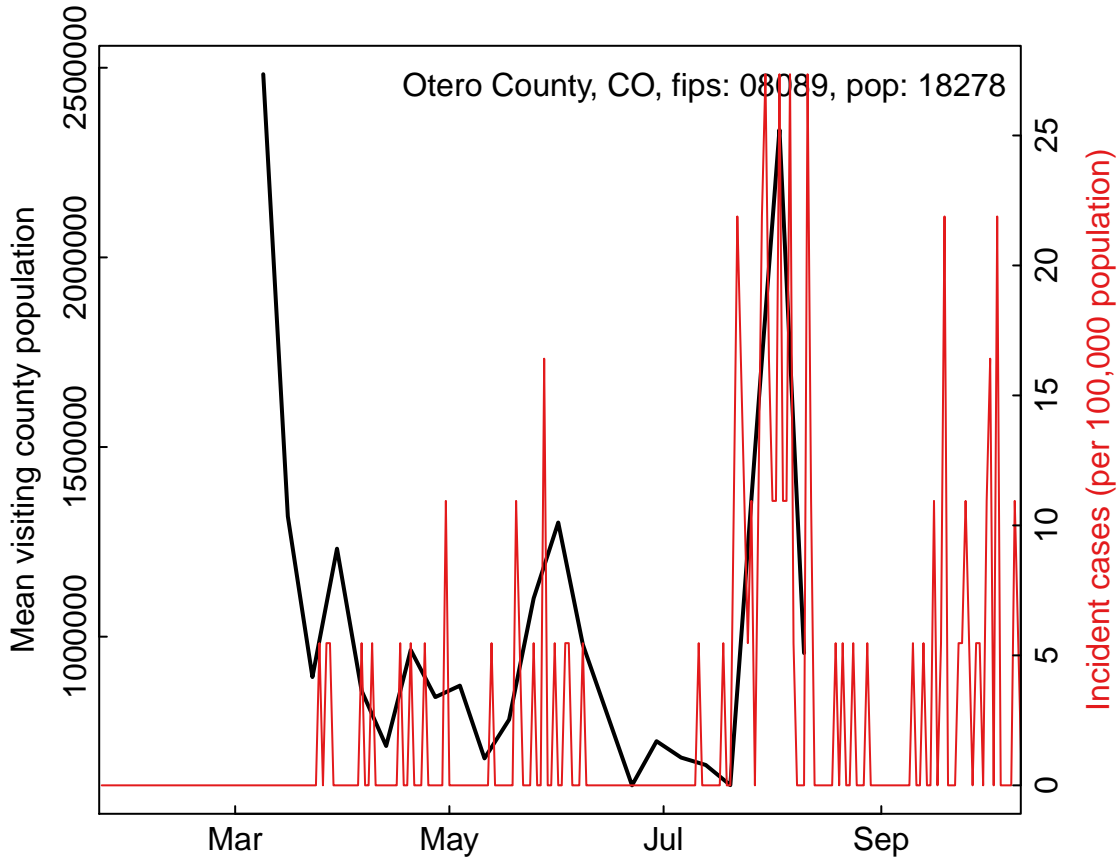

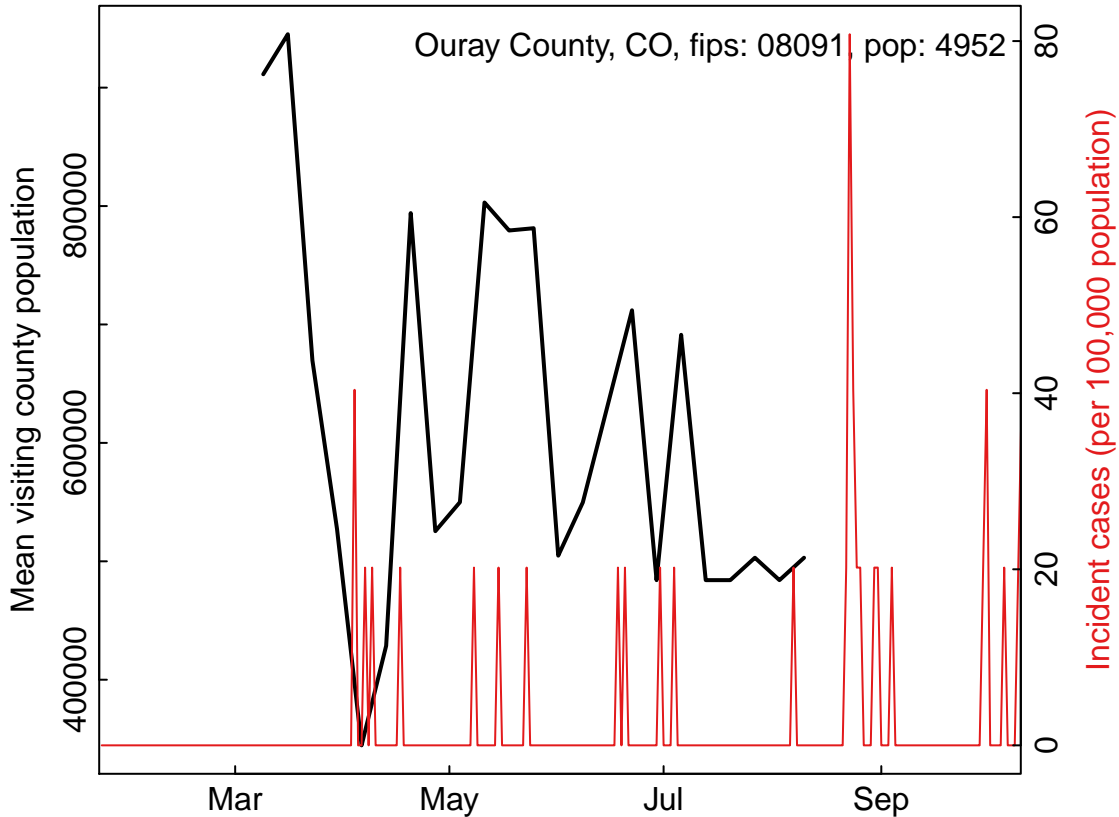

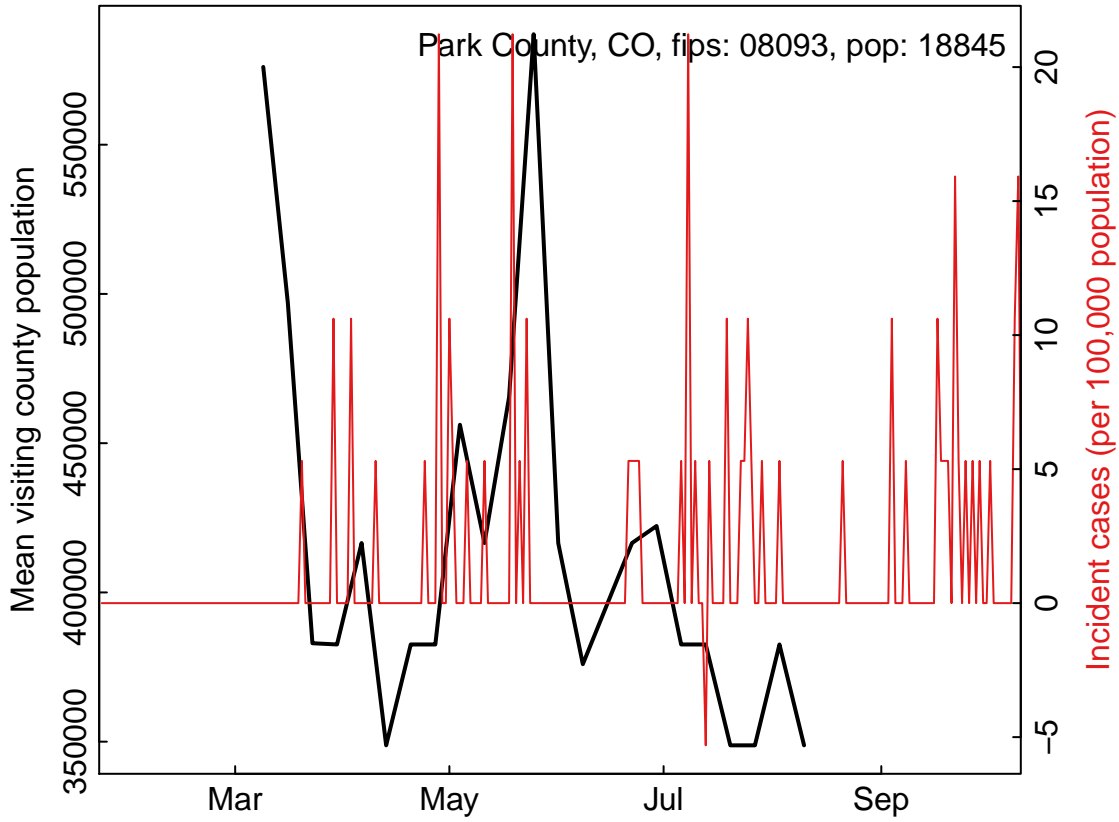

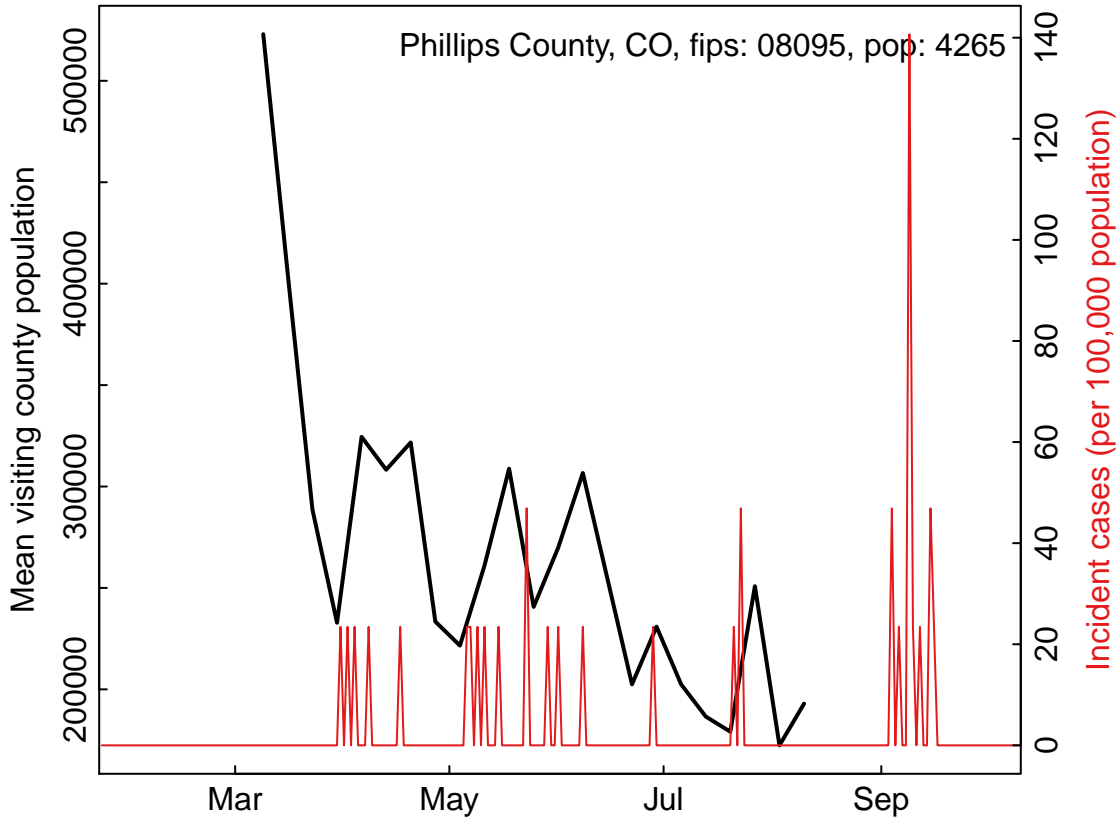

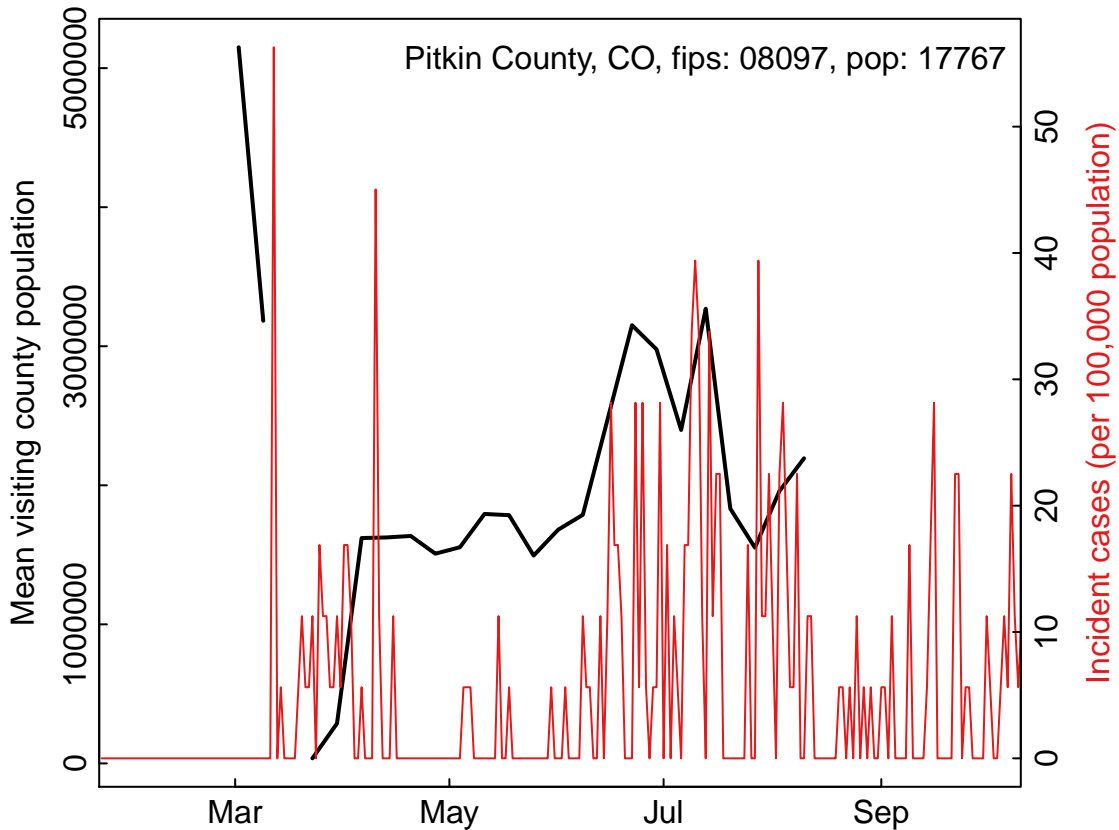

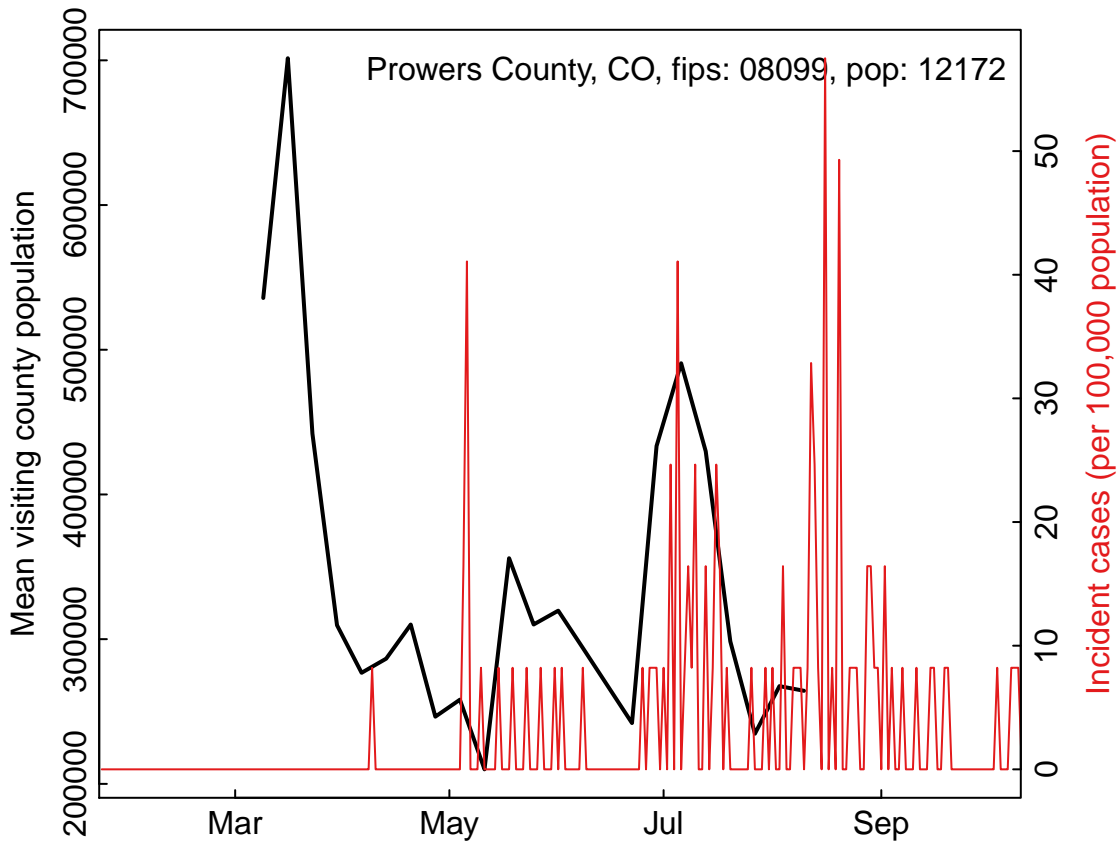



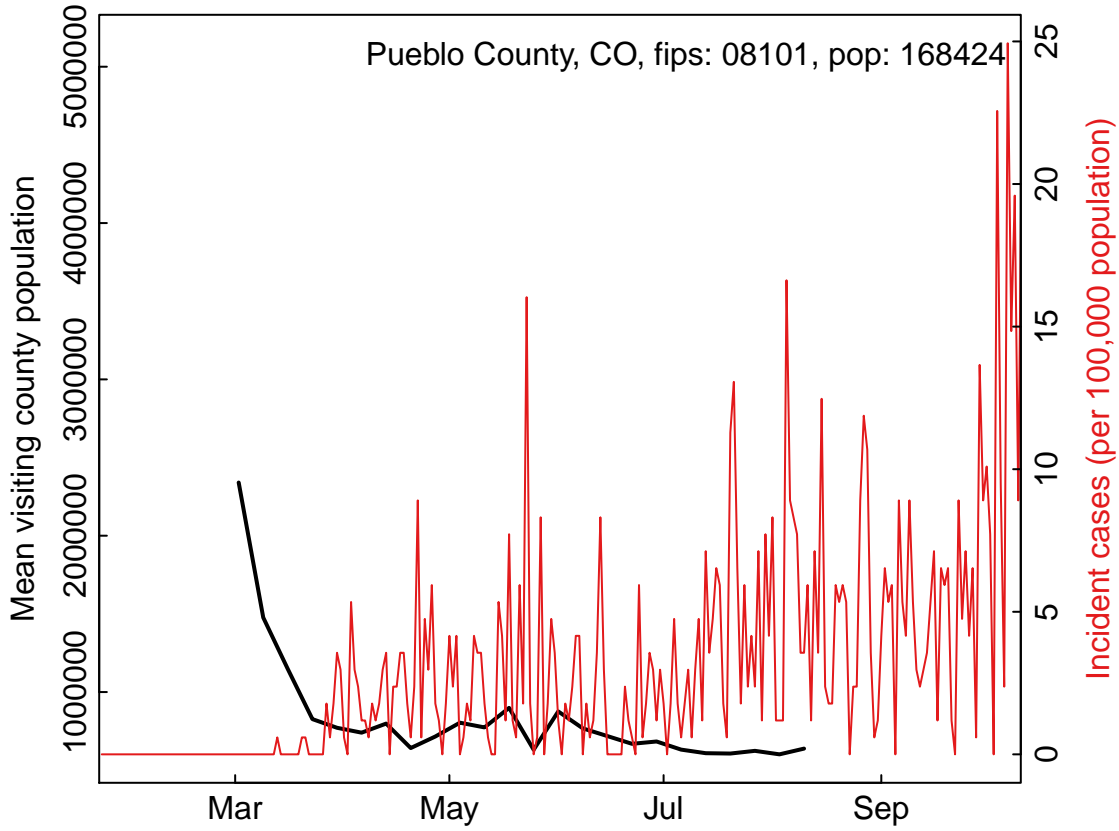

Rio Blanco County, CO, fips: 081103, pop: 6324

Mean visiting county population

500000 1000000 1500000 2000000 2500000

Mar

May

Jul

Sep

Incident cases (per 100,000 population)

0 20 40 60 80

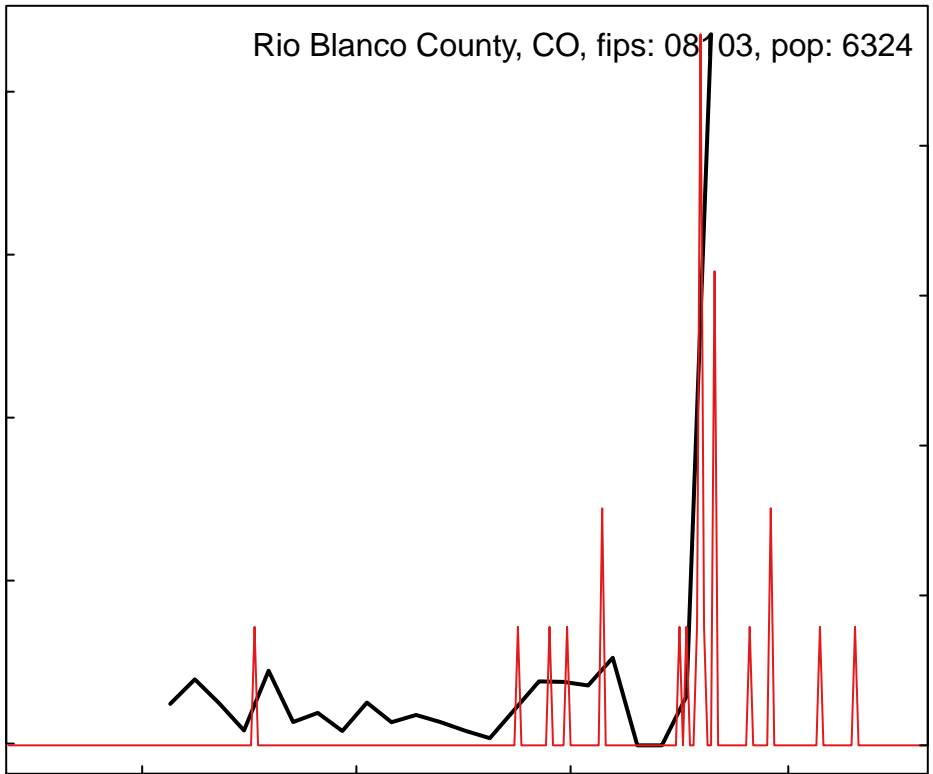

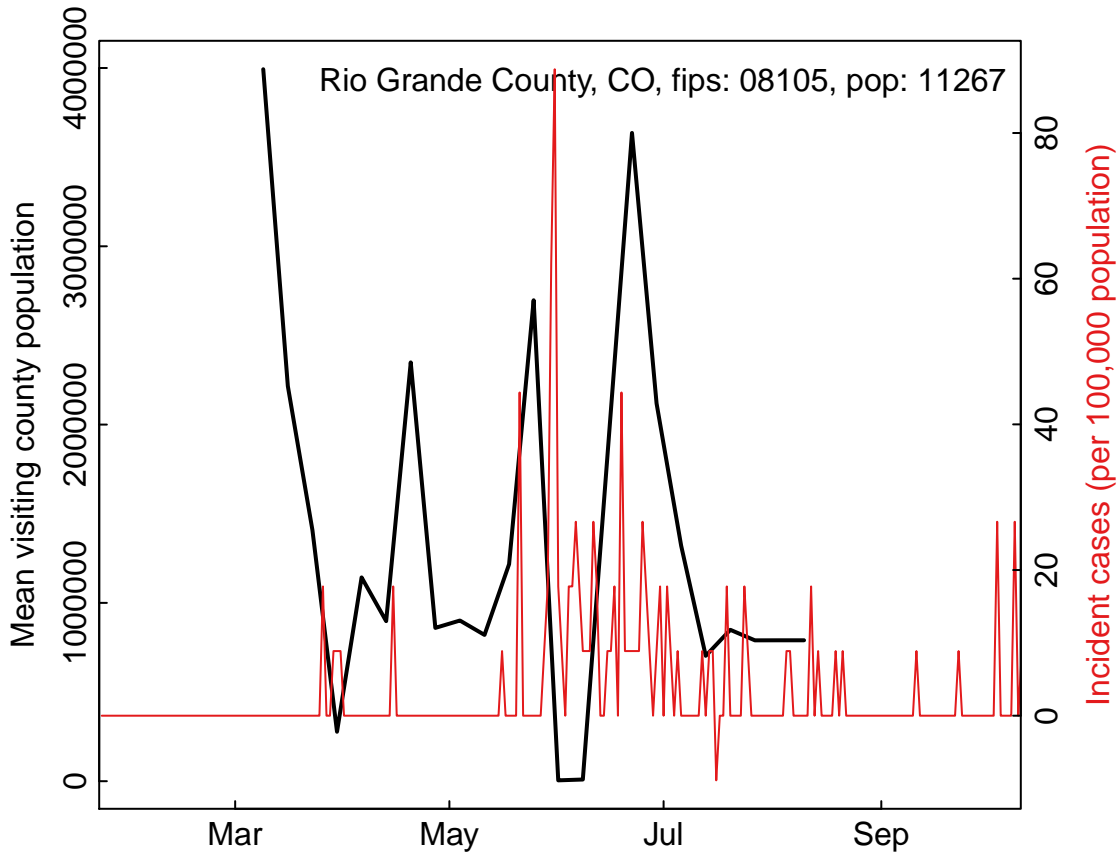

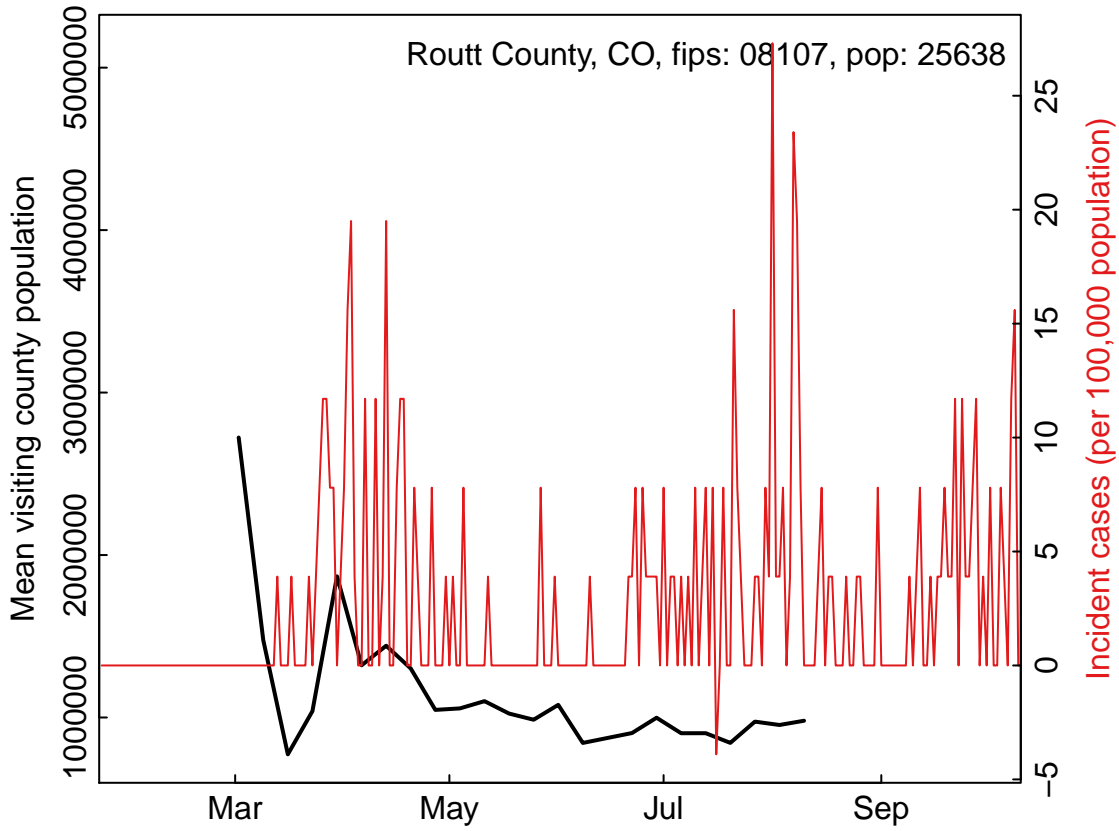

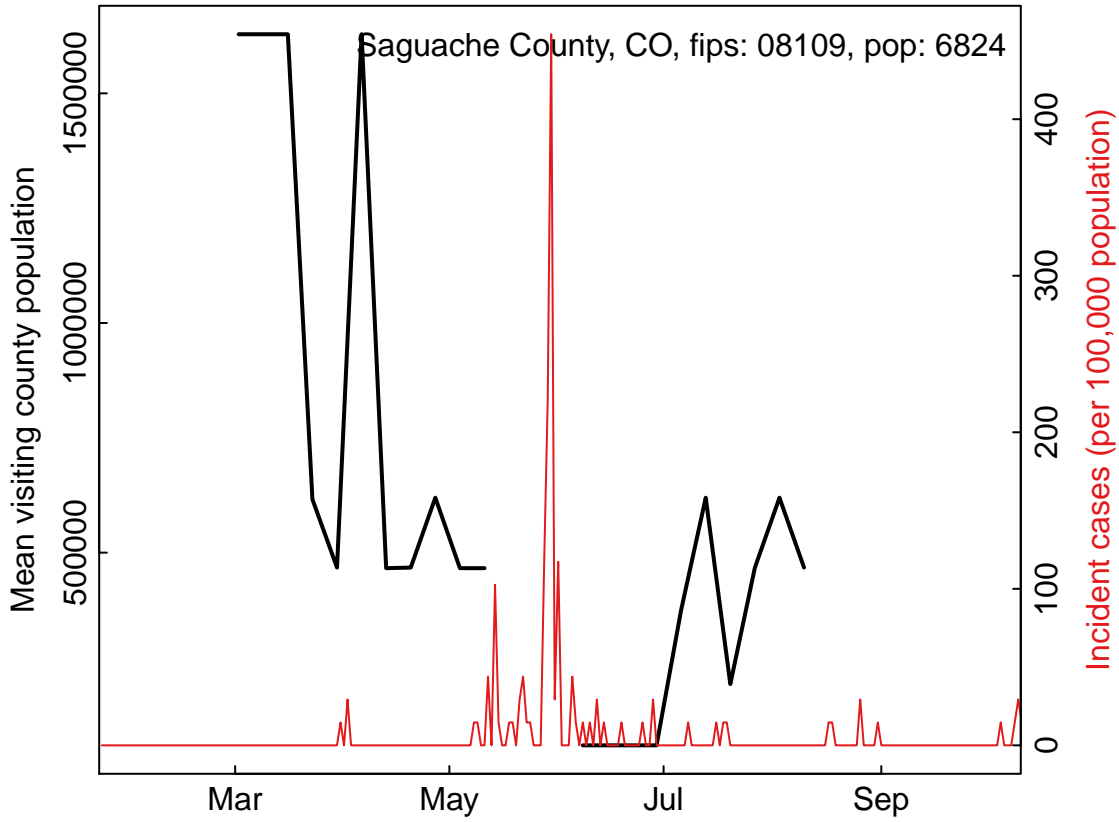

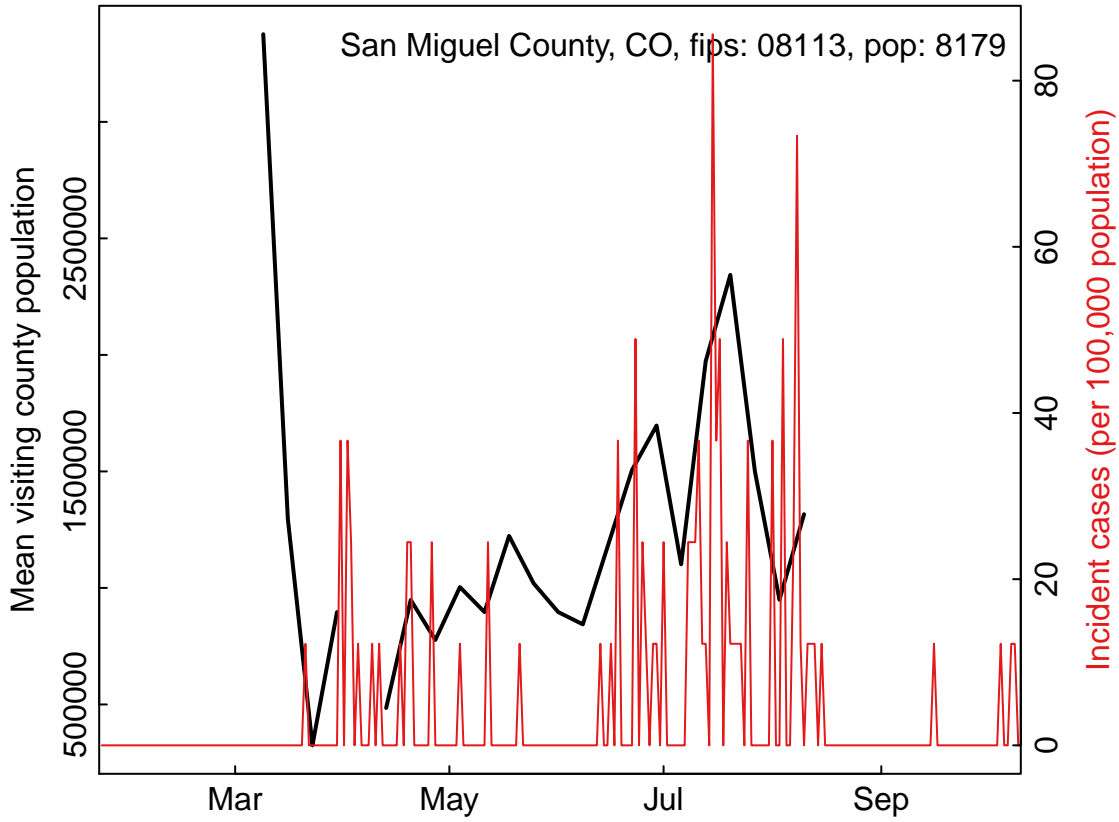

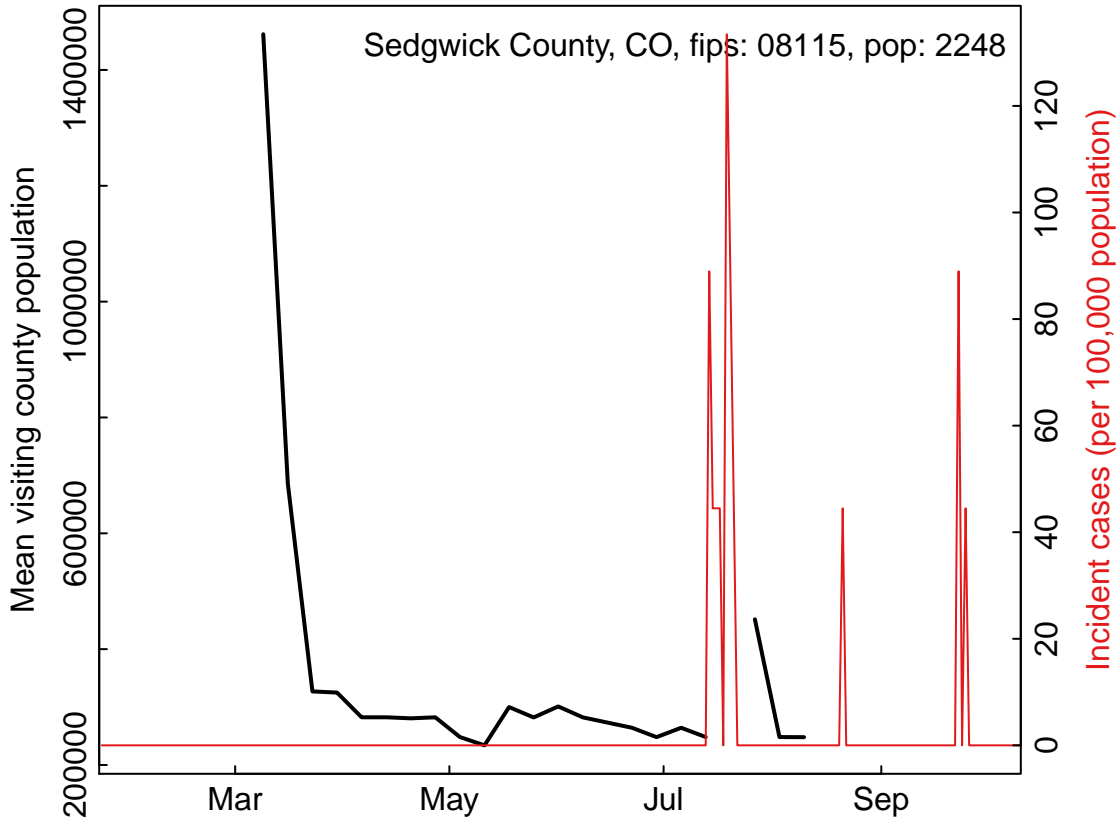

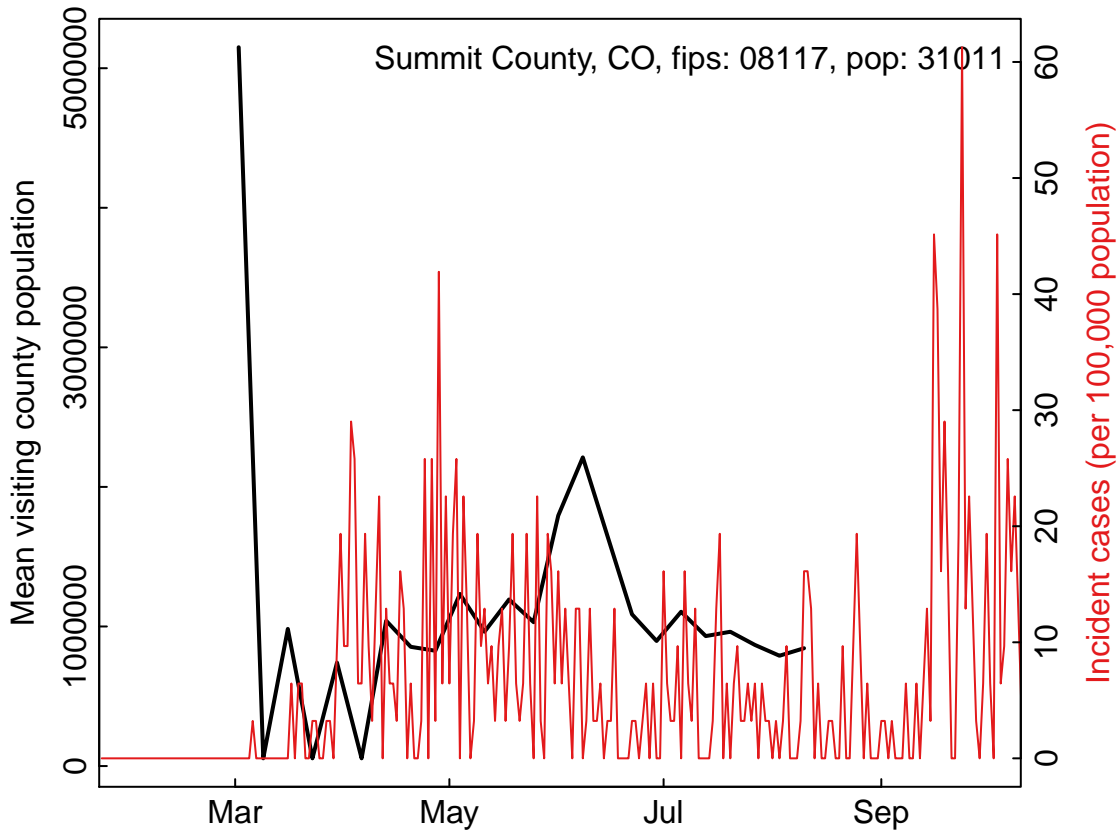



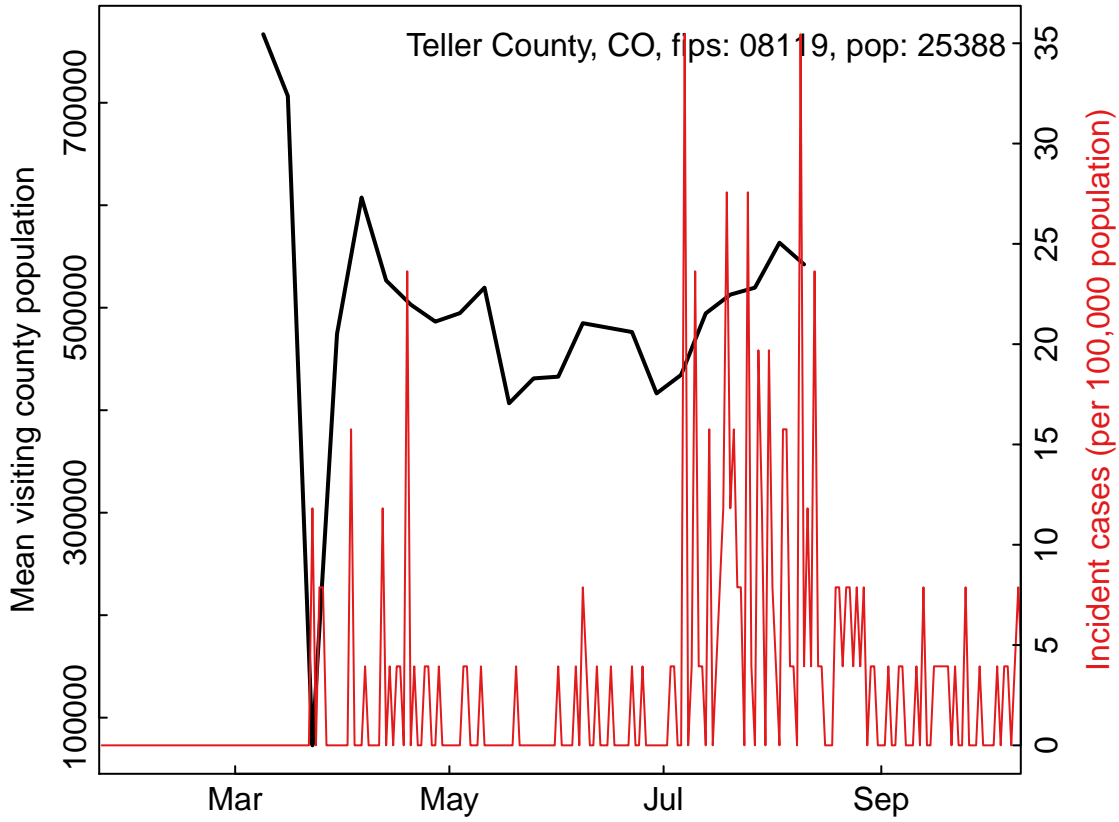

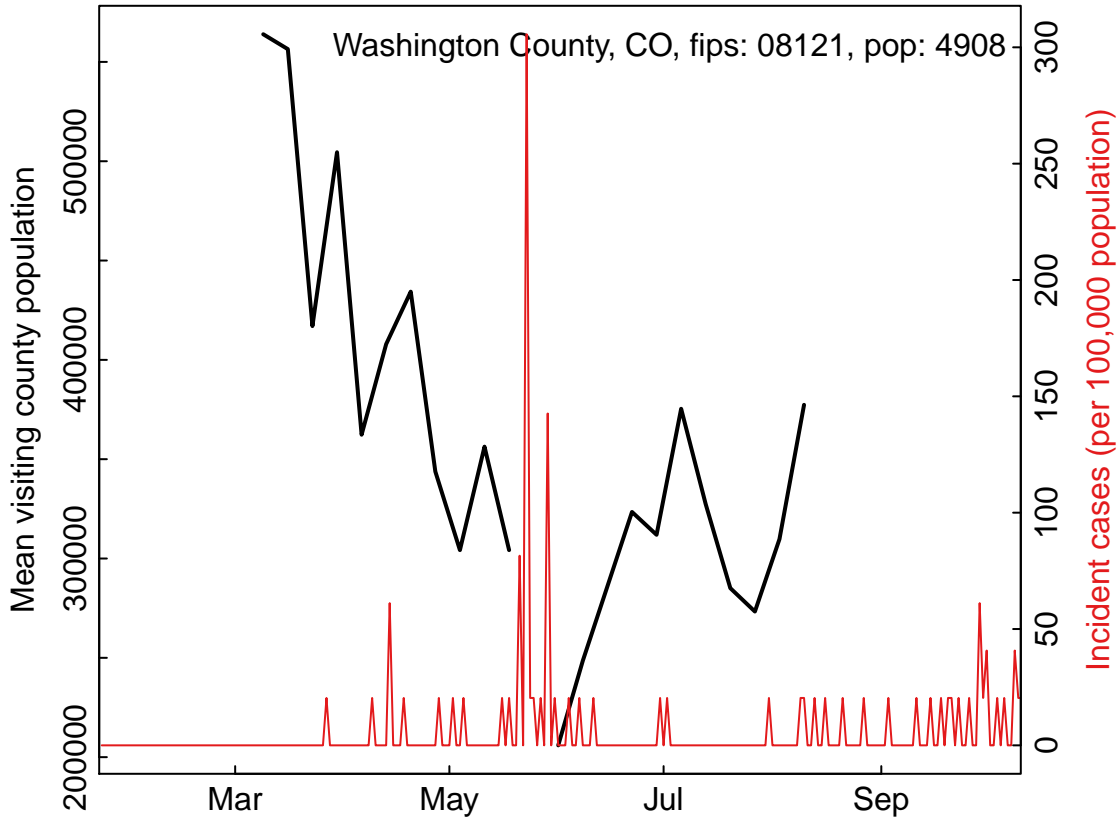

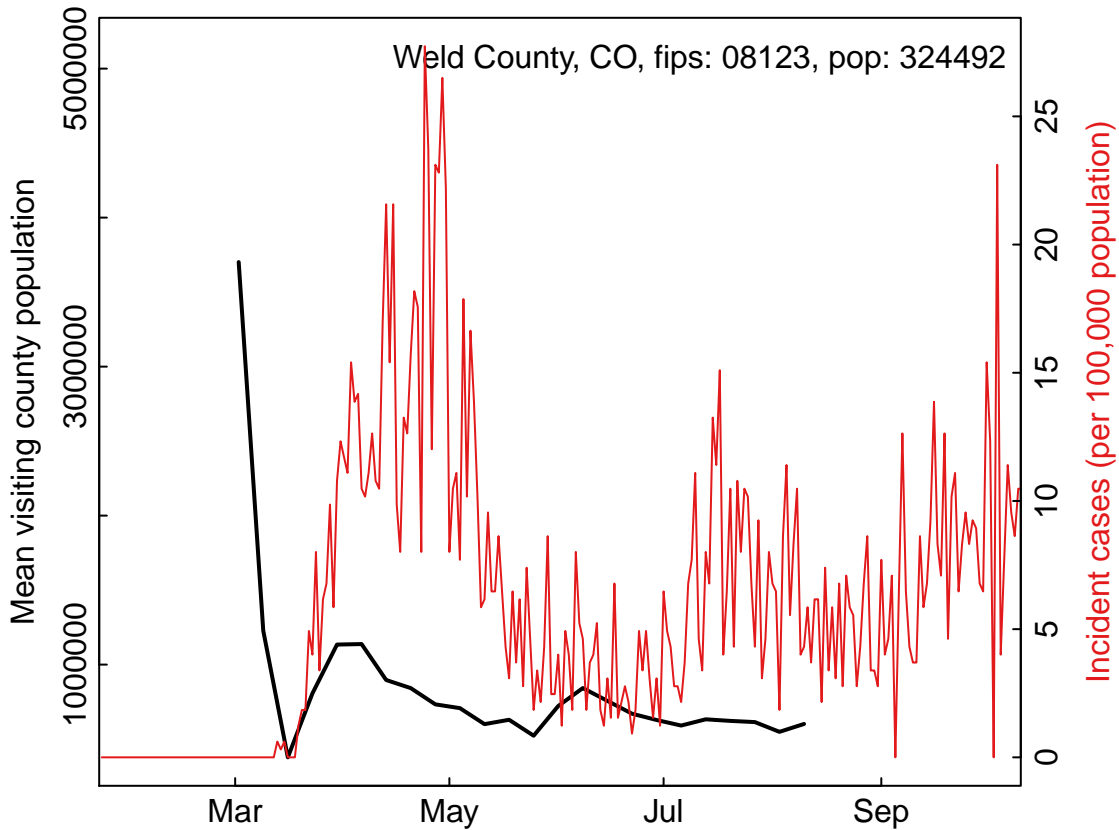

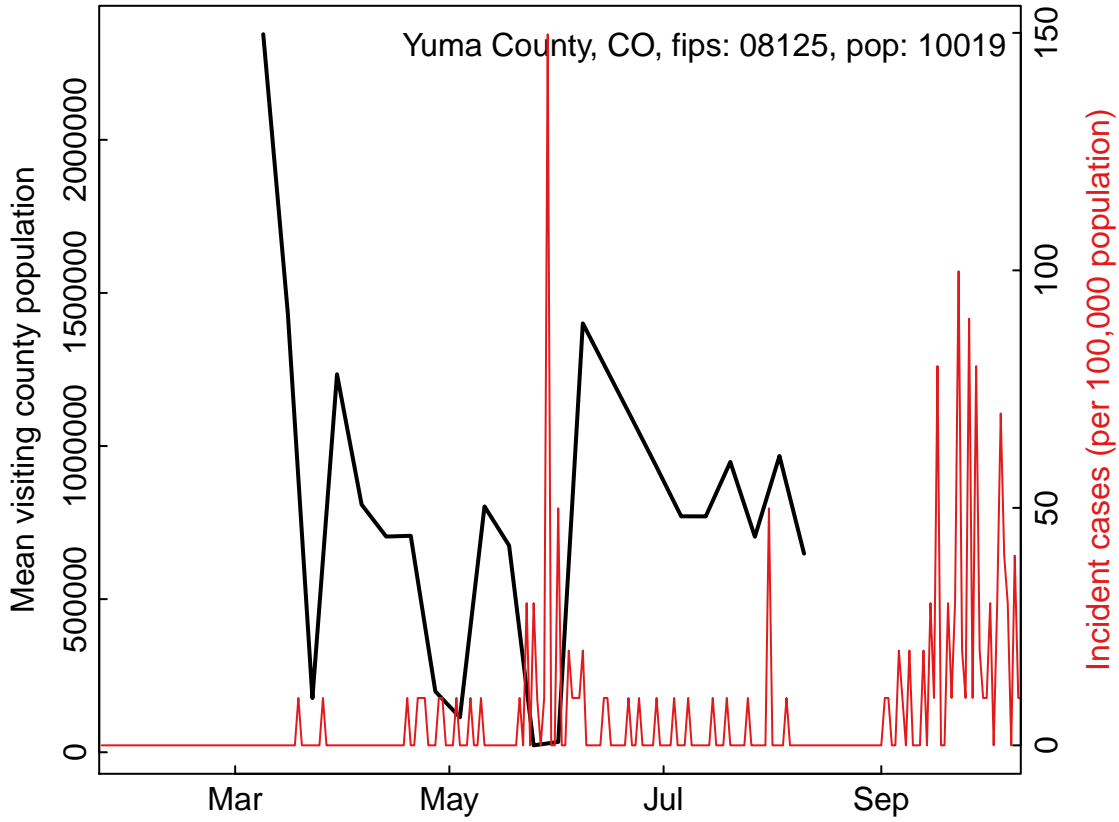

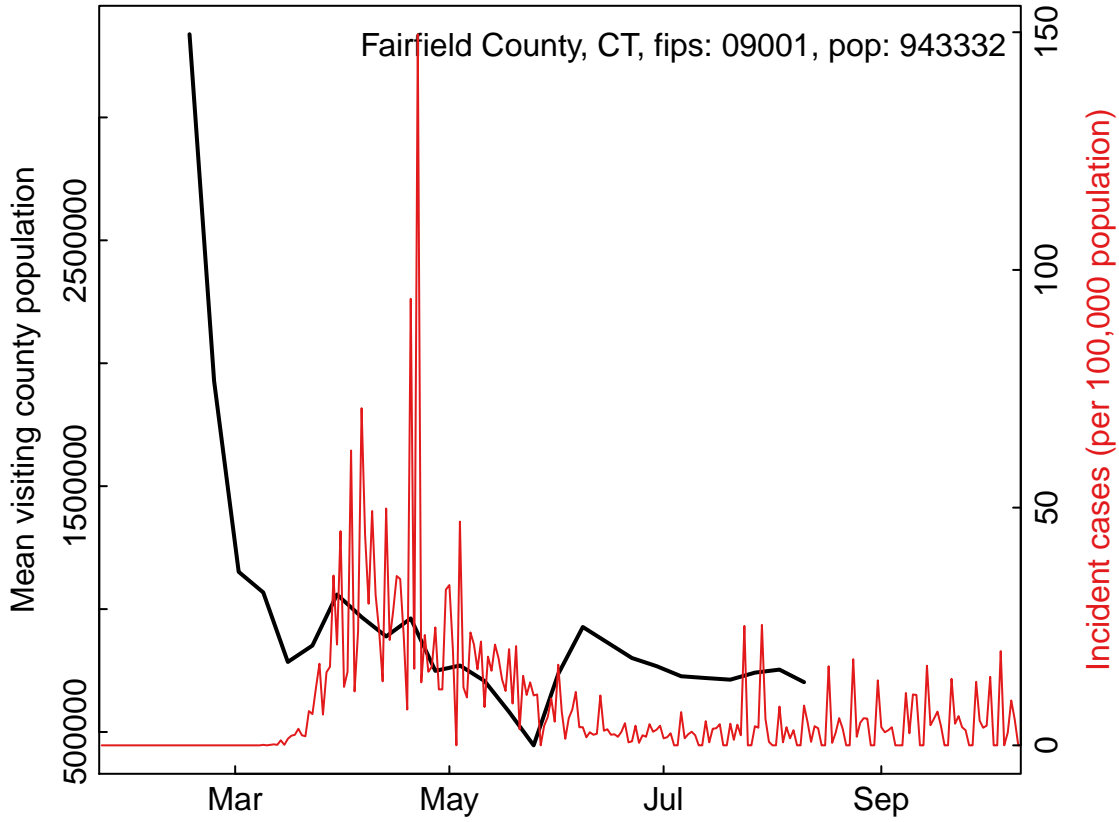

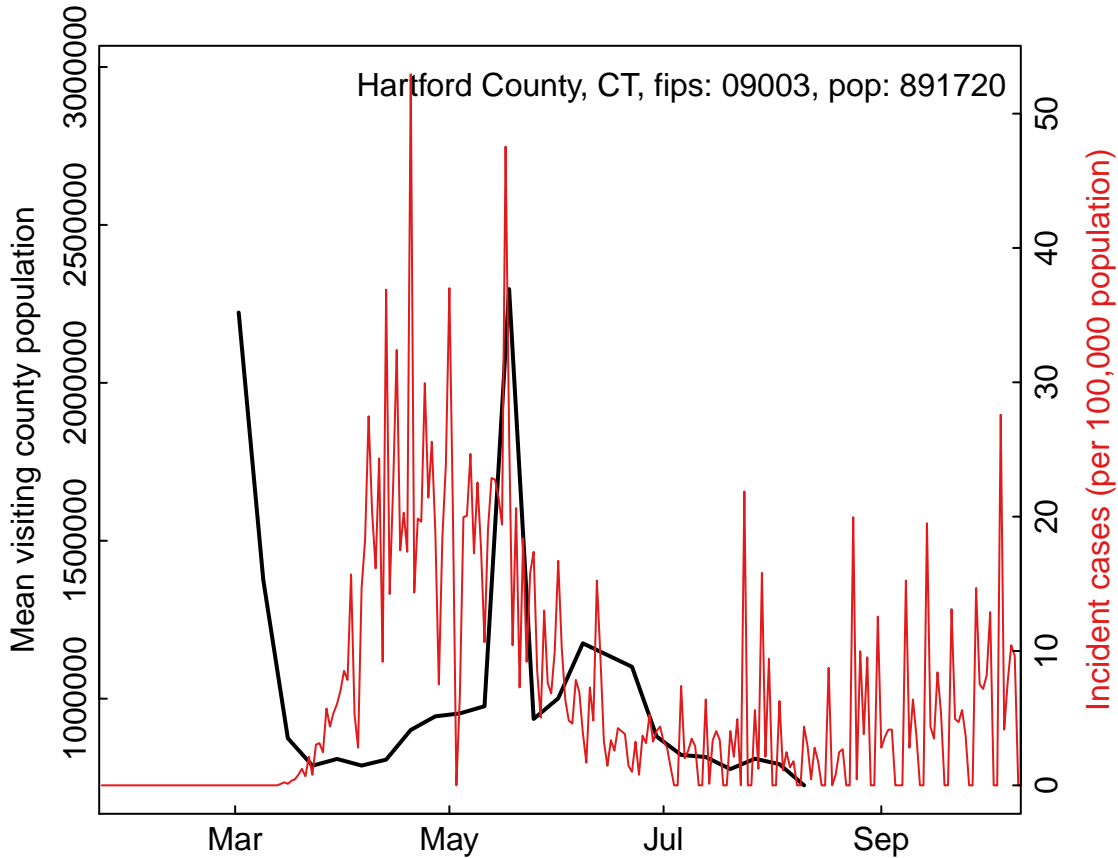

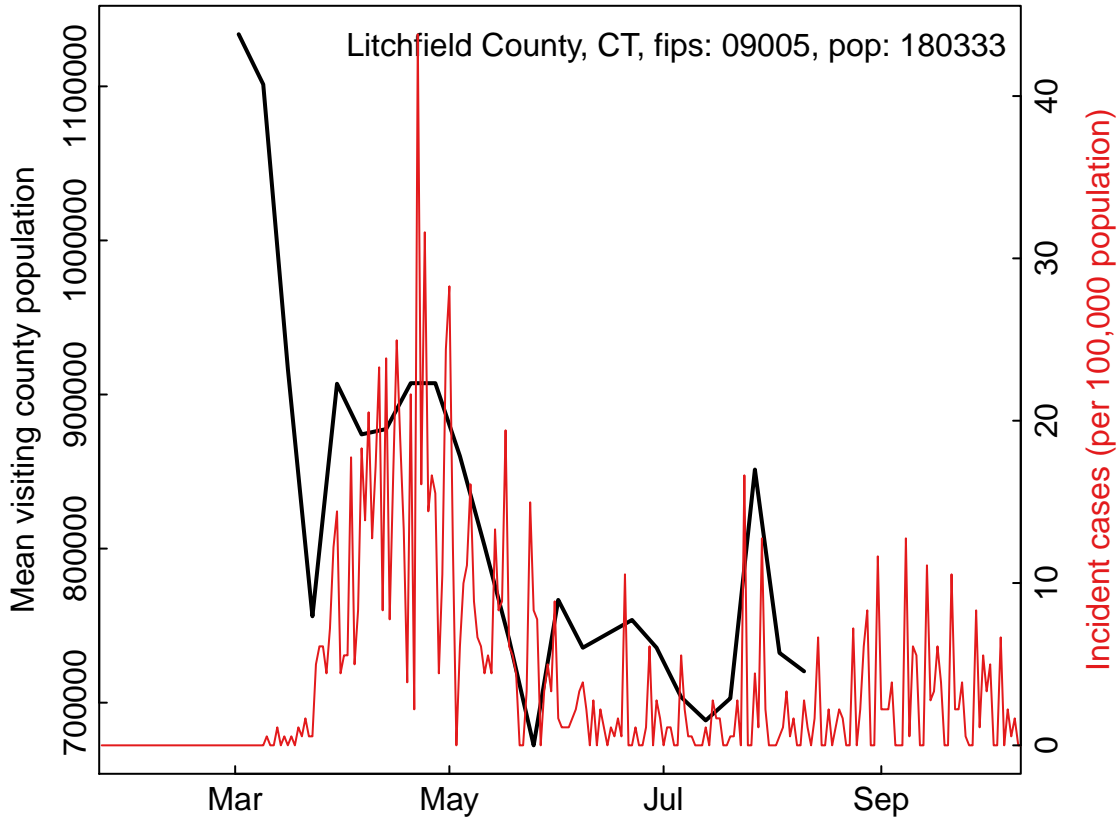

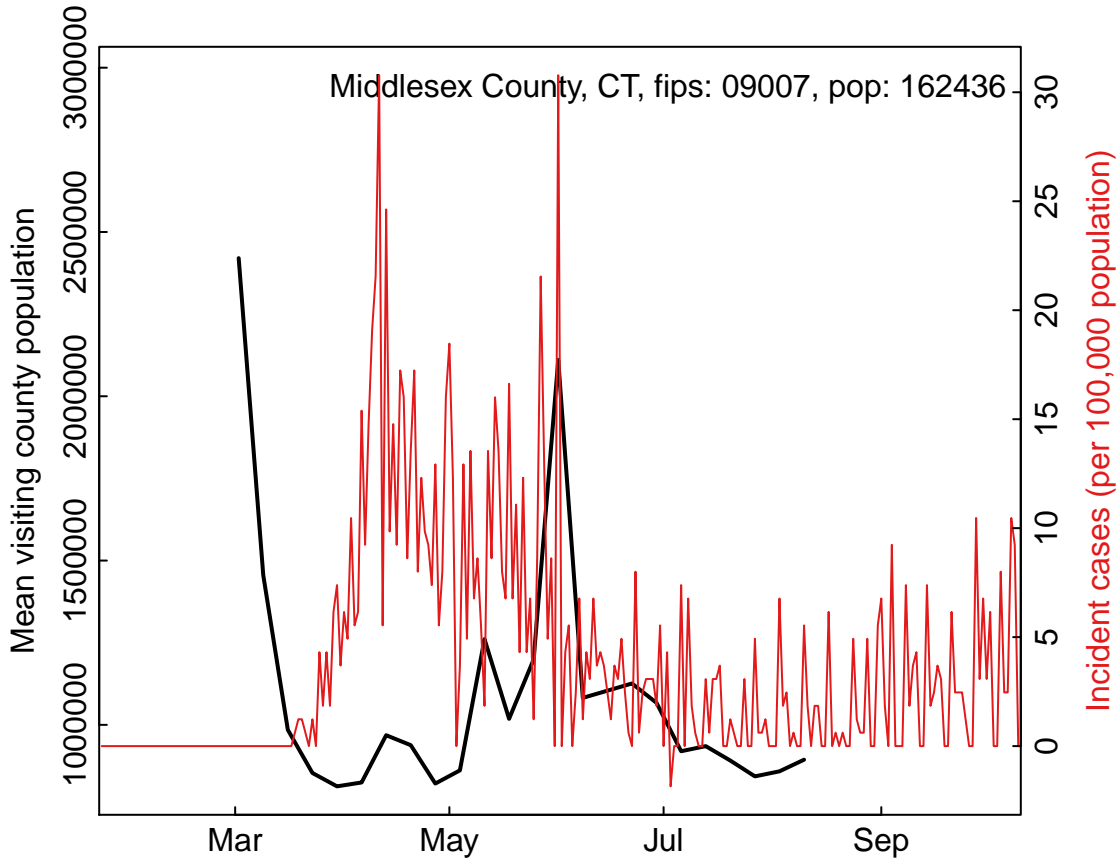



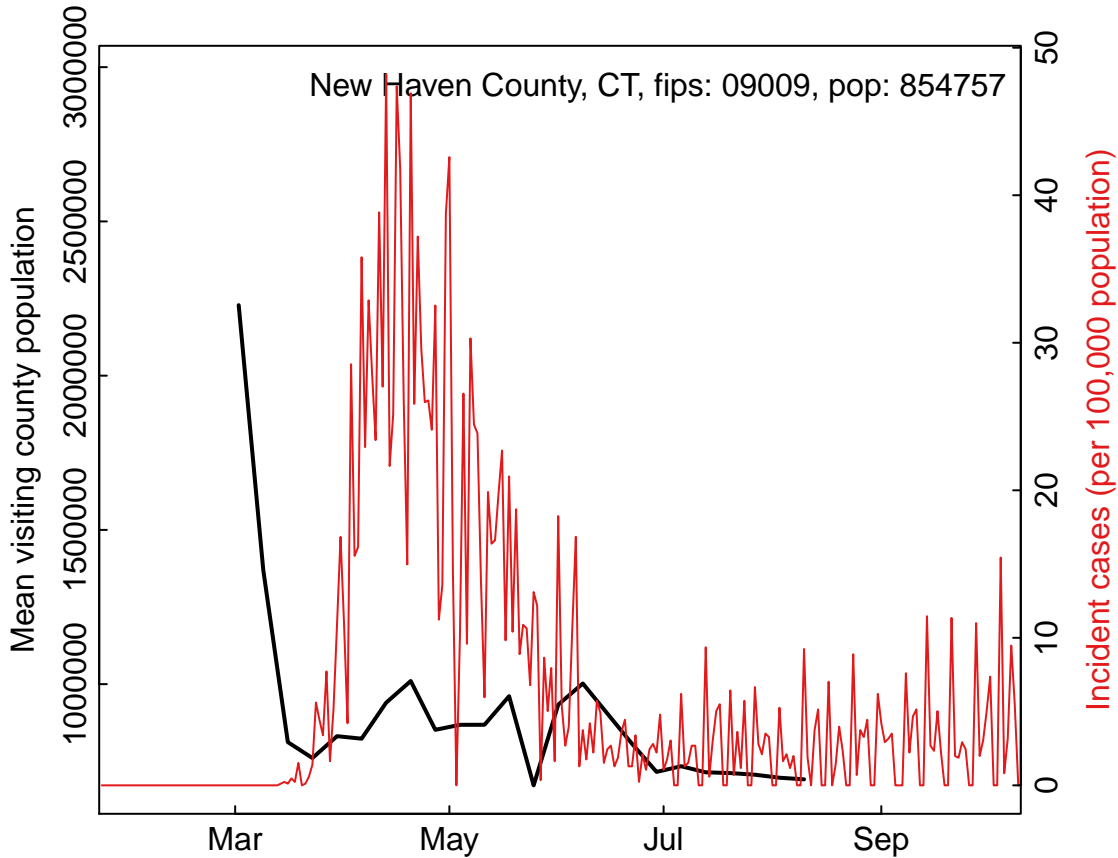

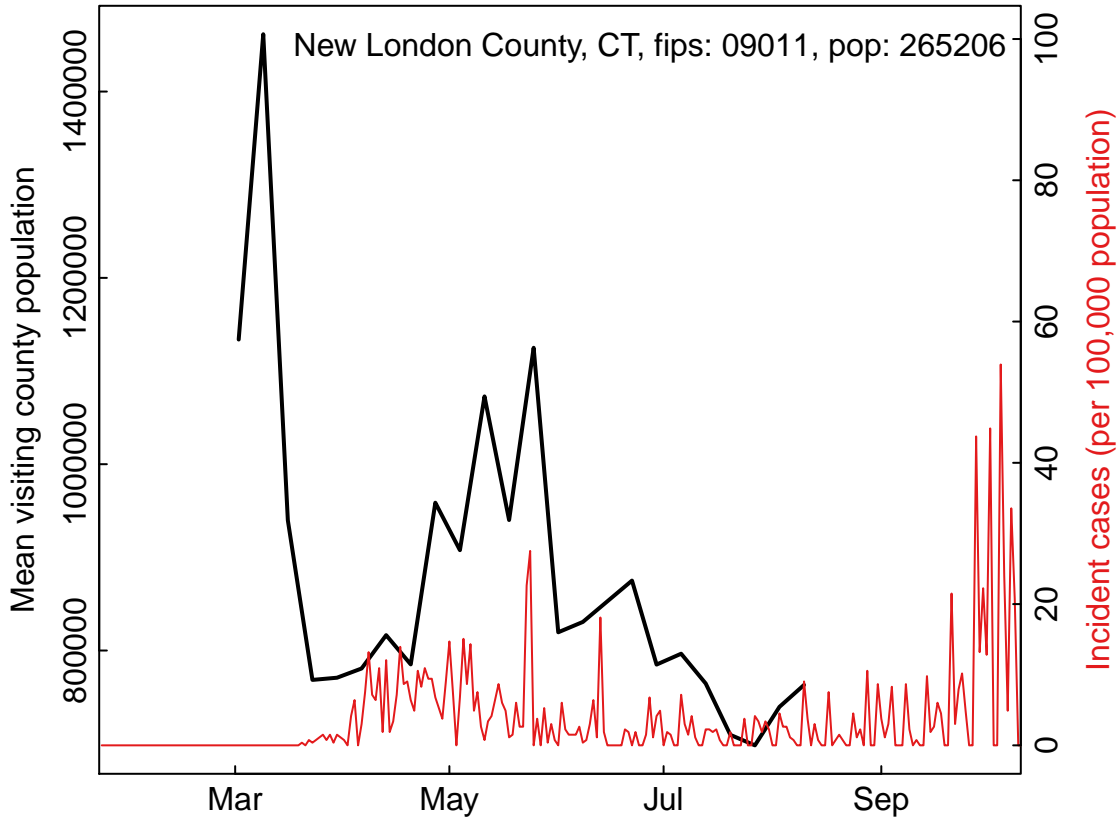

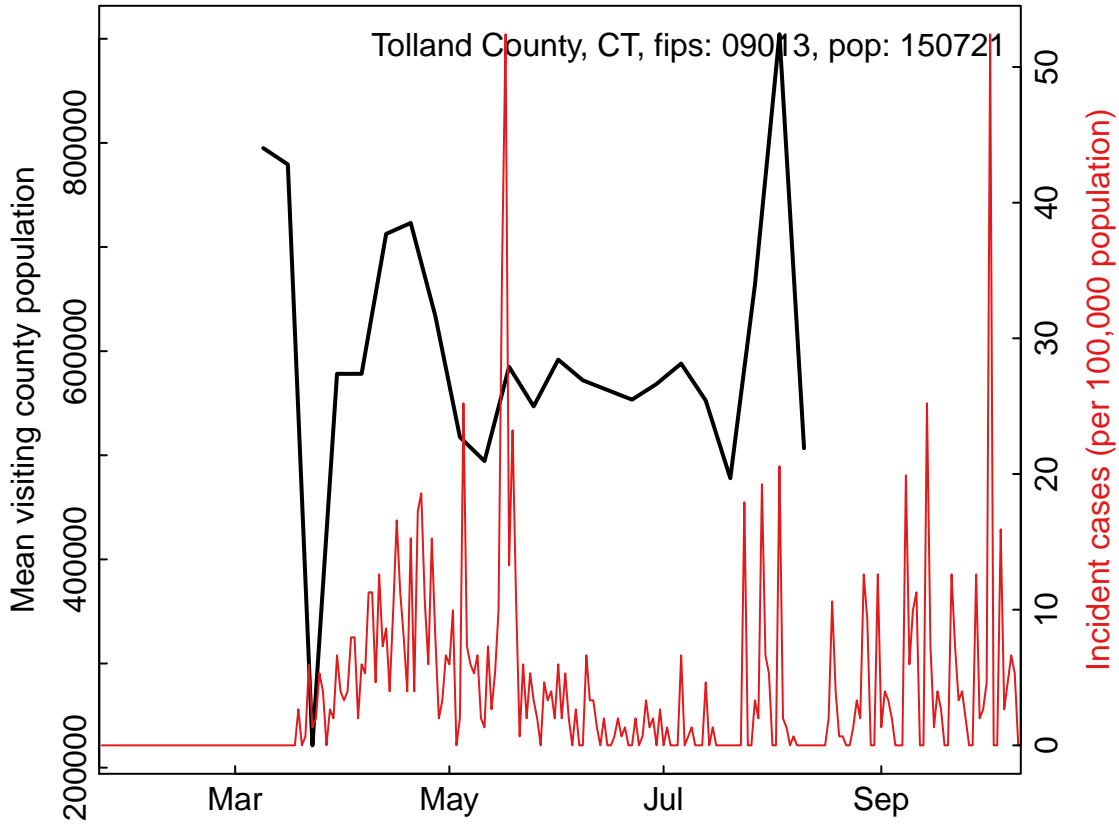

Windham County, CT, fips: 09015, pop: 116782

Mean visiting county population

Incident cases (per 100,000 population)

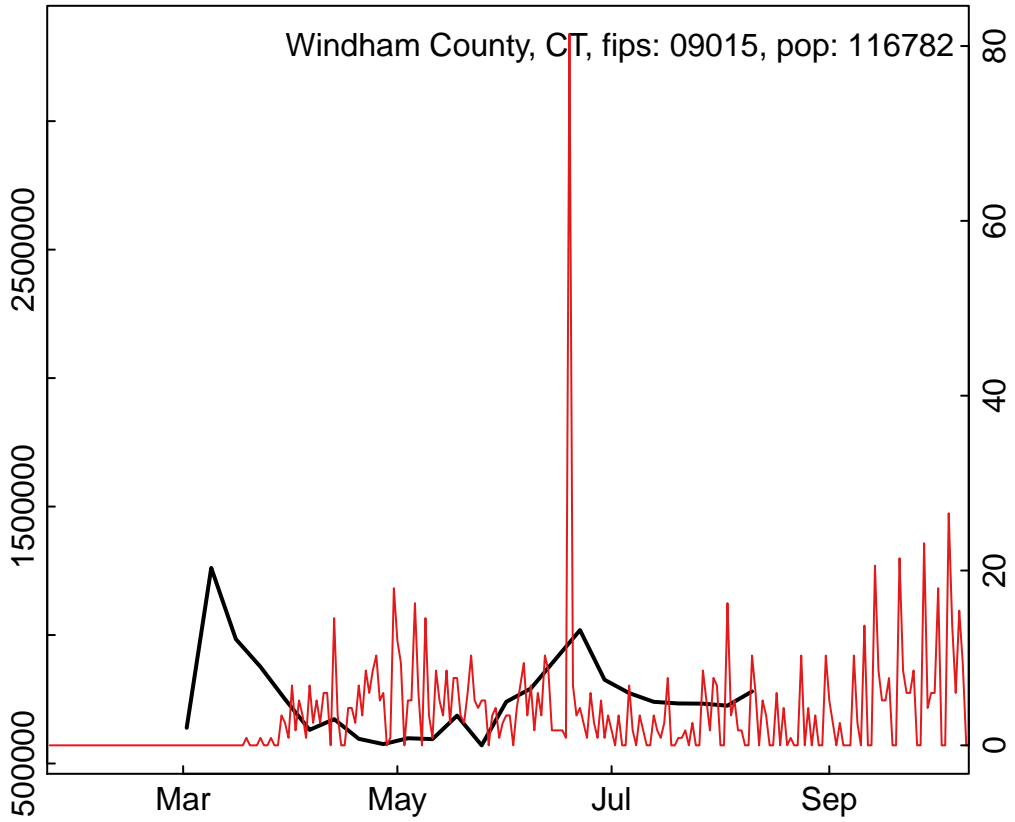

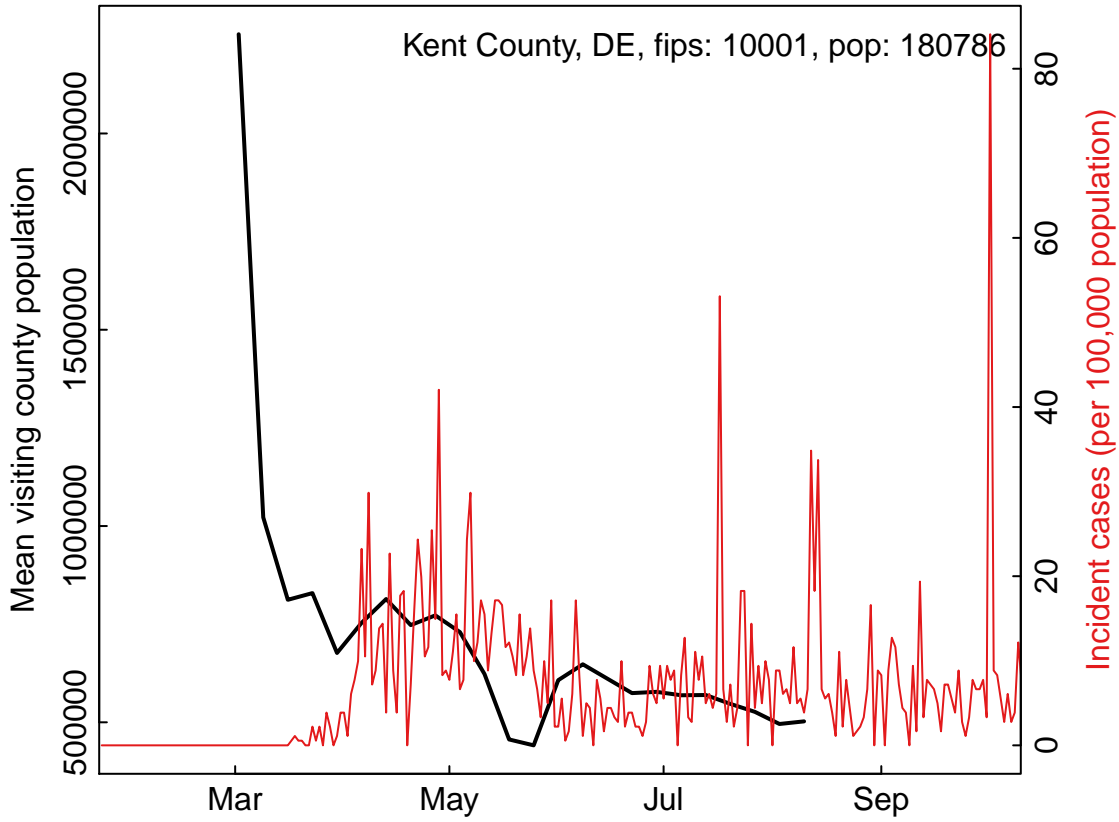

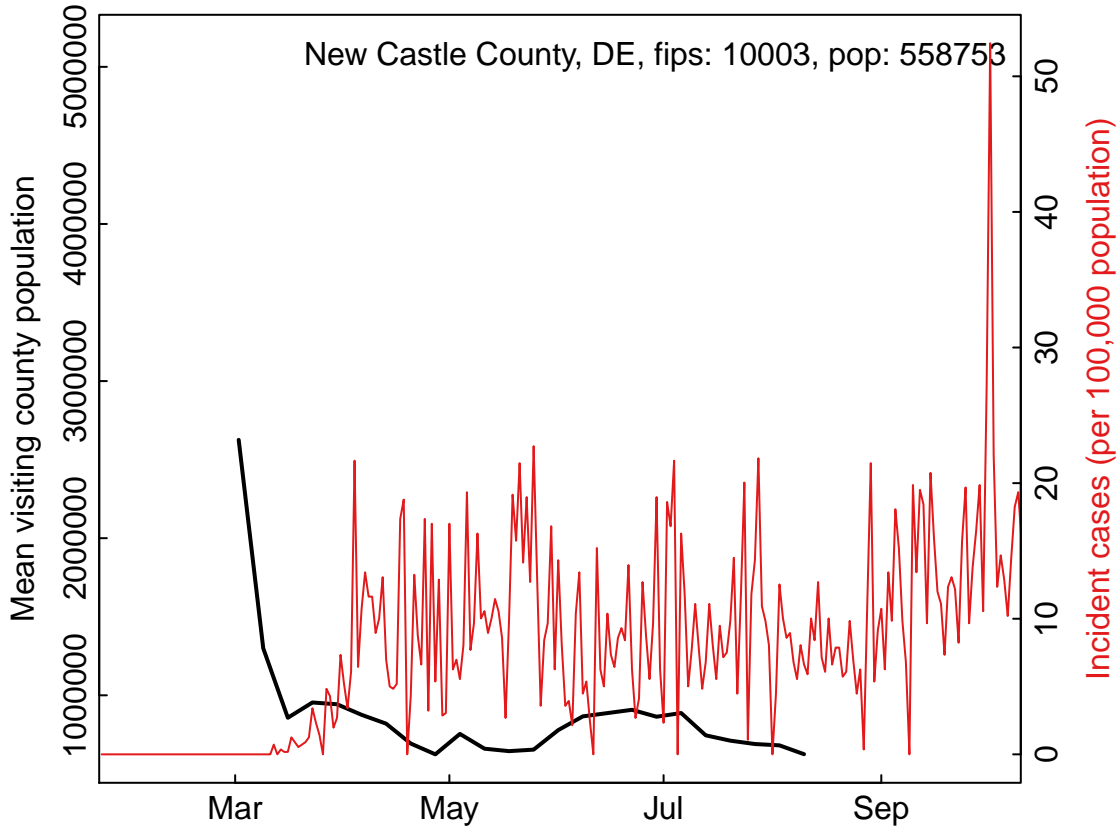

Sussex County, DE, fips: 10005, pop: 234225

Mean visiting county population

2500000  
1500000  
500000  
0

Mar

May

Jul

Sep

120  
100  
80  
60  
40  
20  
0

Incident cases (per 100,000 population)

0

District of Columbia, DC, fips: 11001, pop: 705749

Mean visiting county population

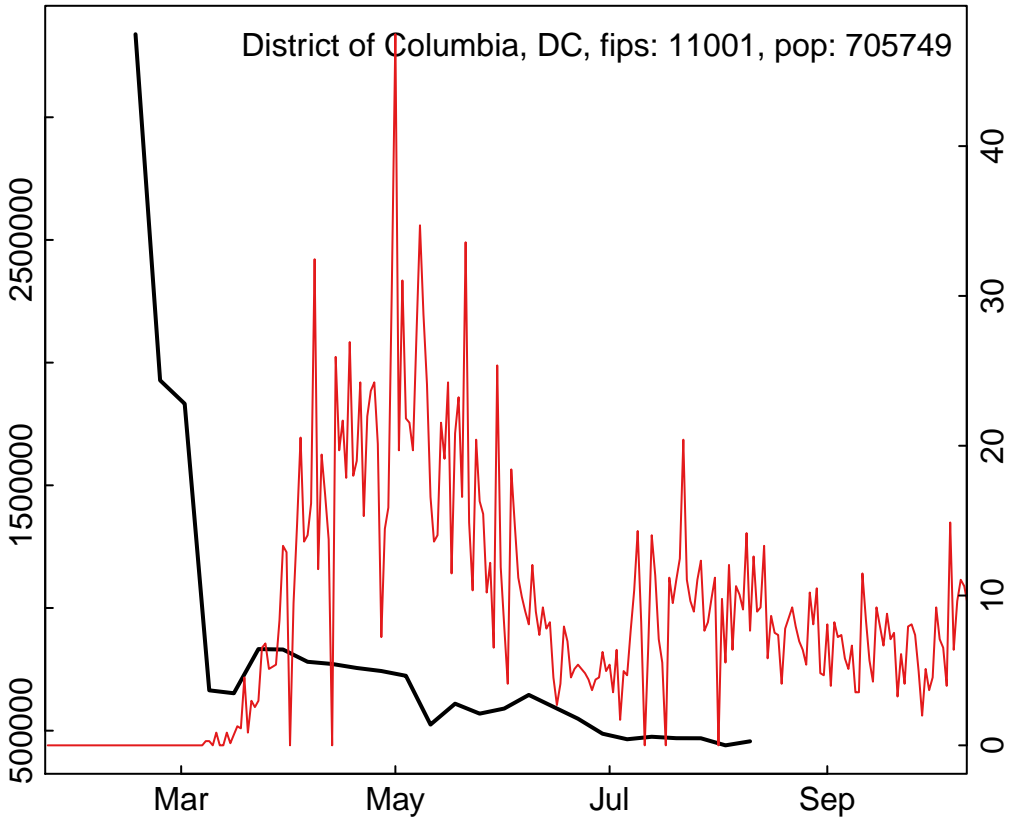



Alachua County, FL, fips: 12001, pop: 269043

Mean visiting county population

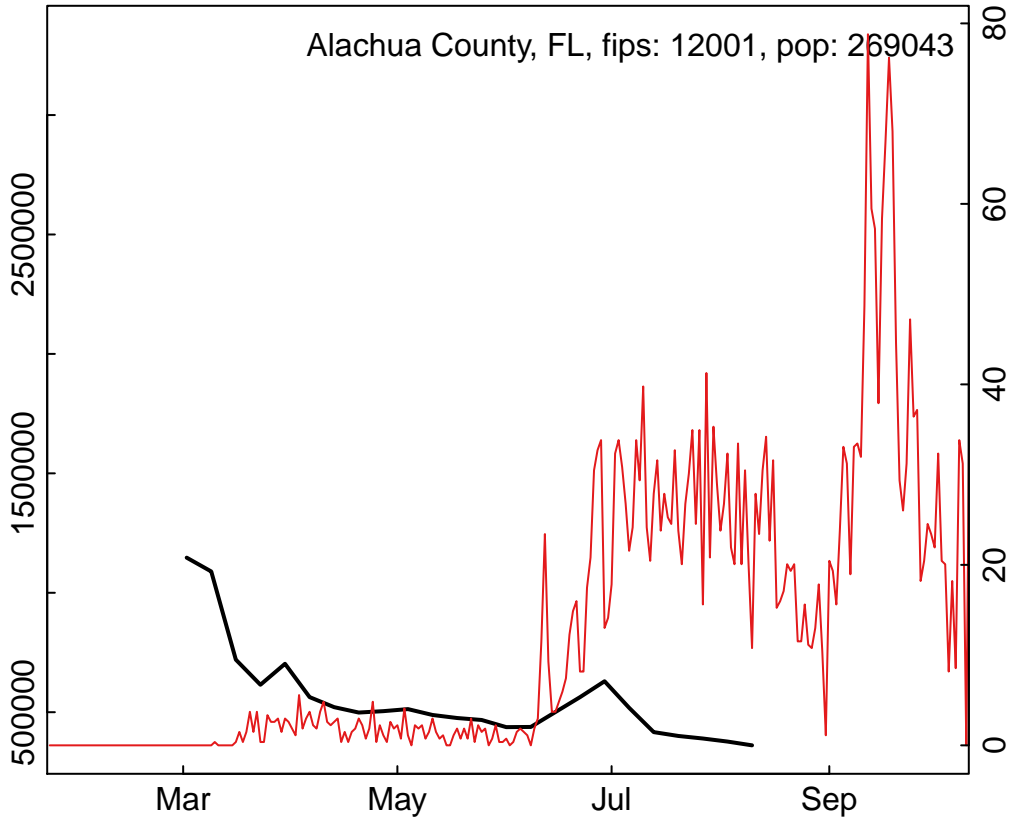

Incident cases (per 100,000 population)

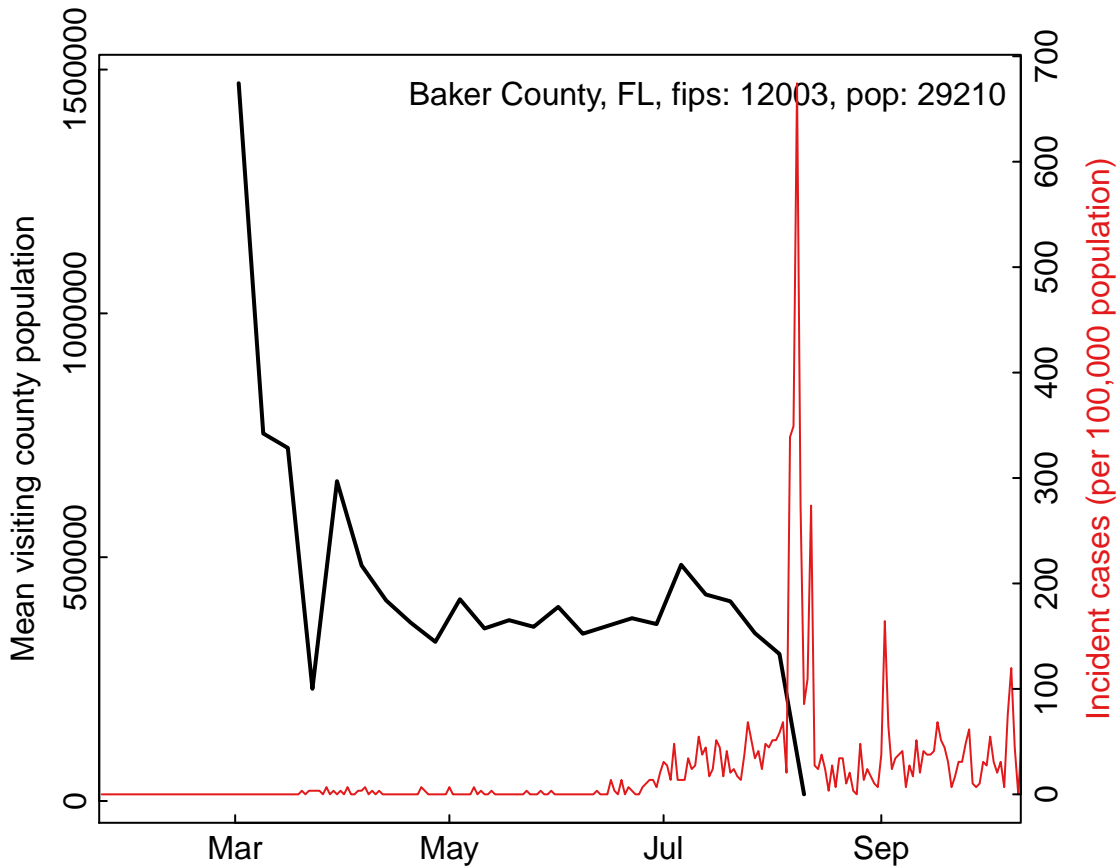

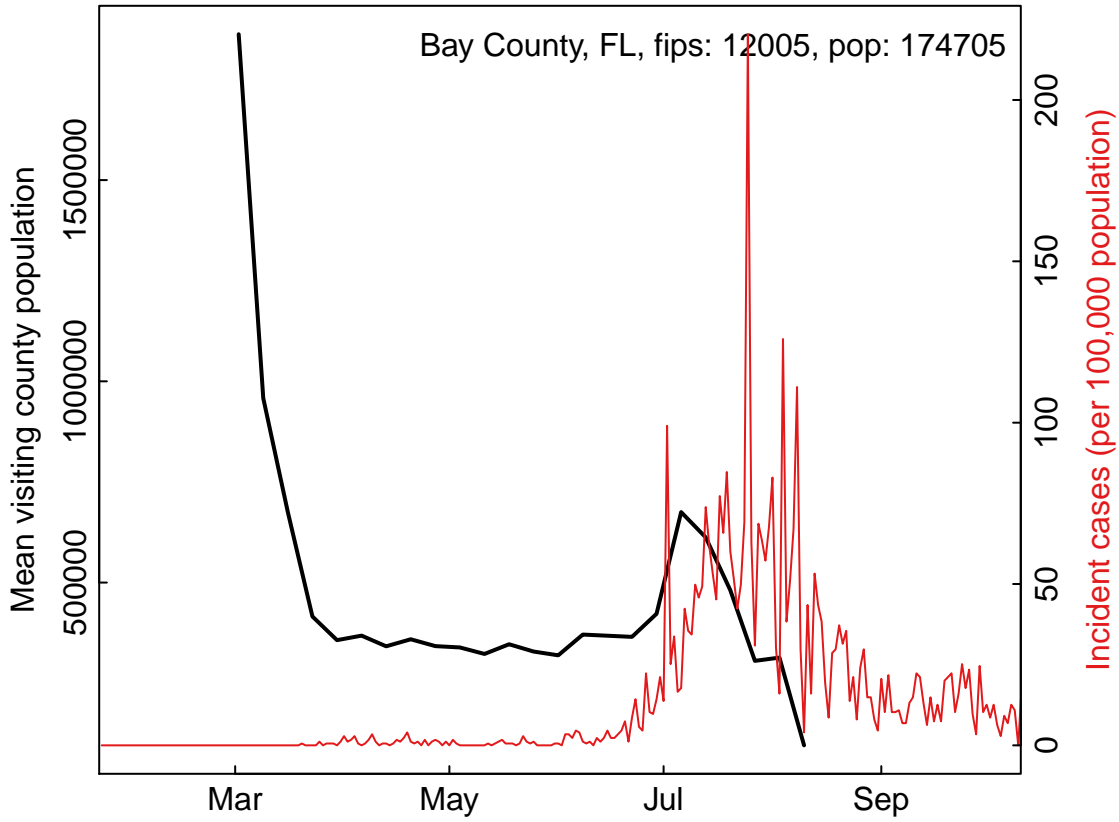

Mean visiting county population

1500000  
1000000  
500000  
0

Bradford County, FL, fips: 12007, pop: 28201

Mar May Jul Sep

Incident cases (per 100,000 population)

200  
150  
100  
50  
0

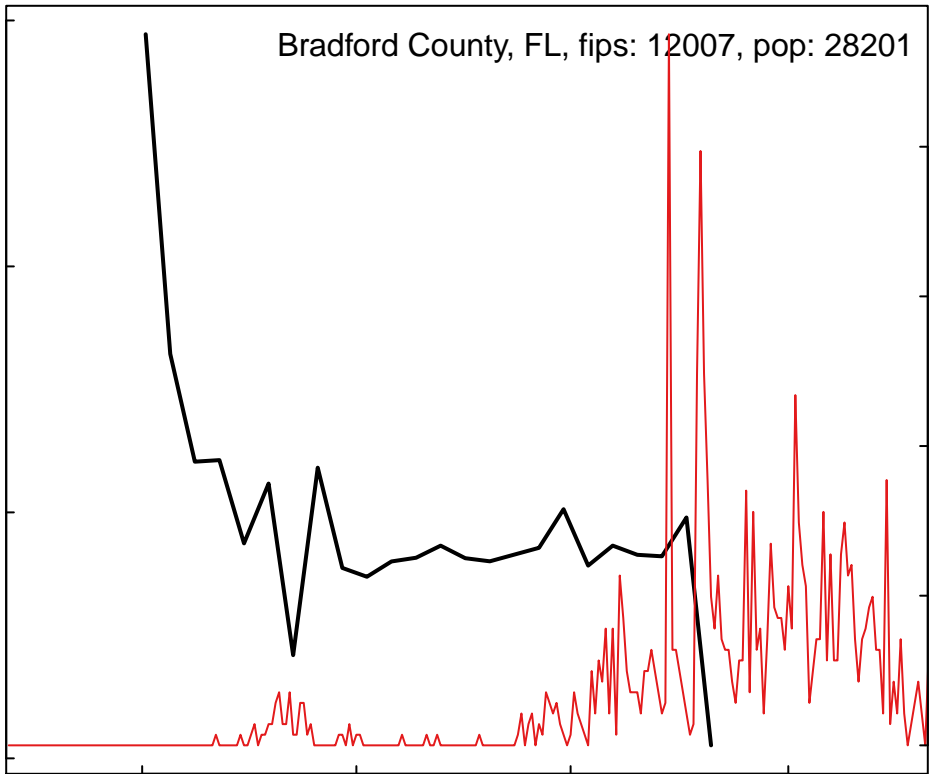

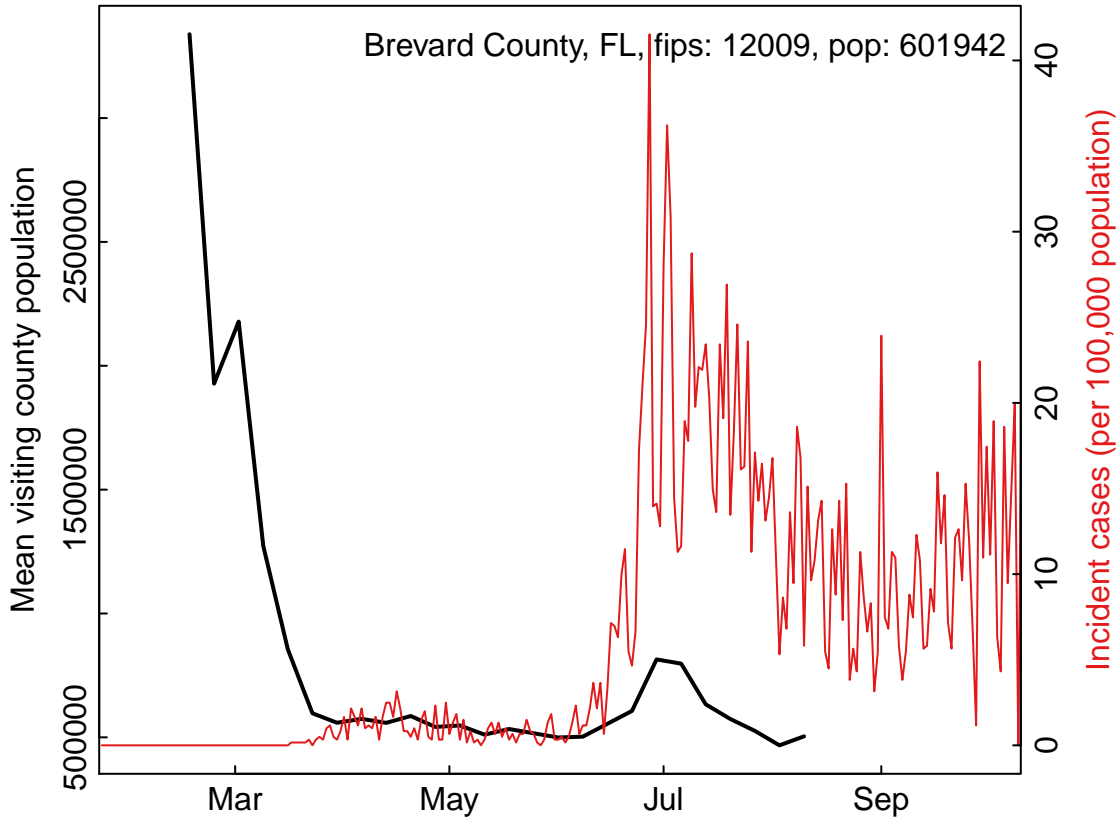

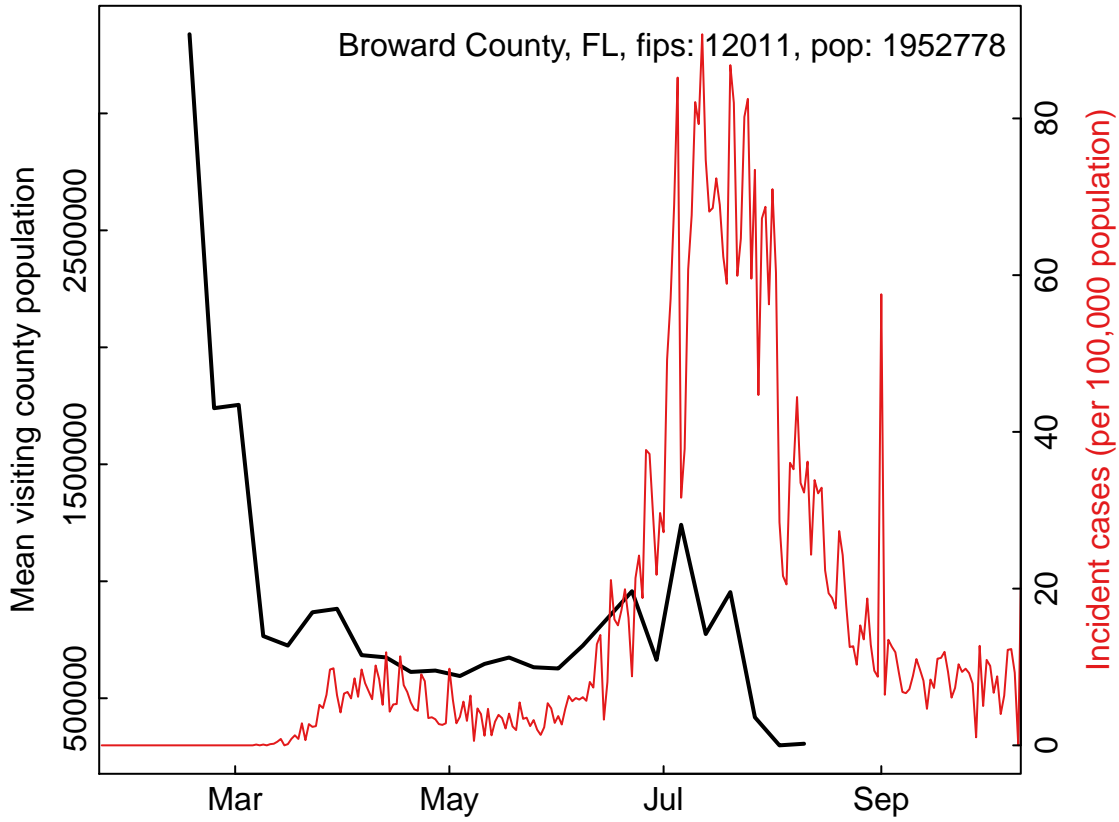

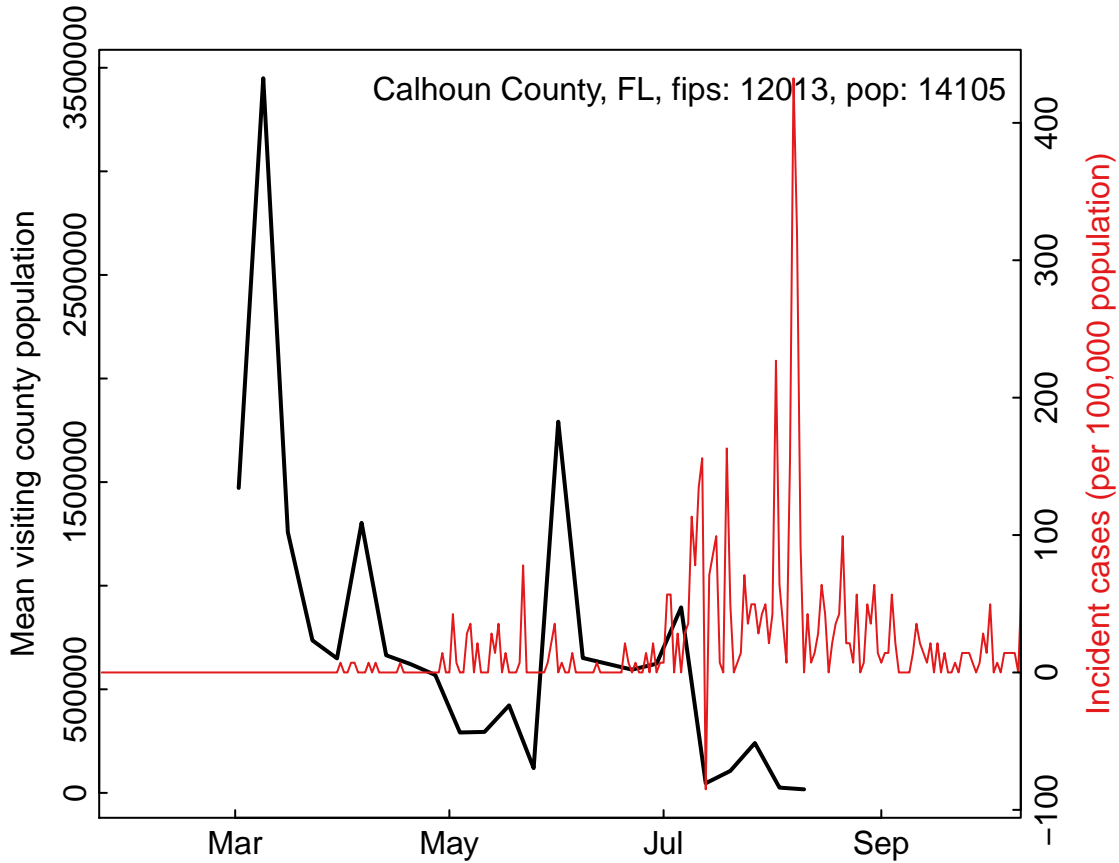

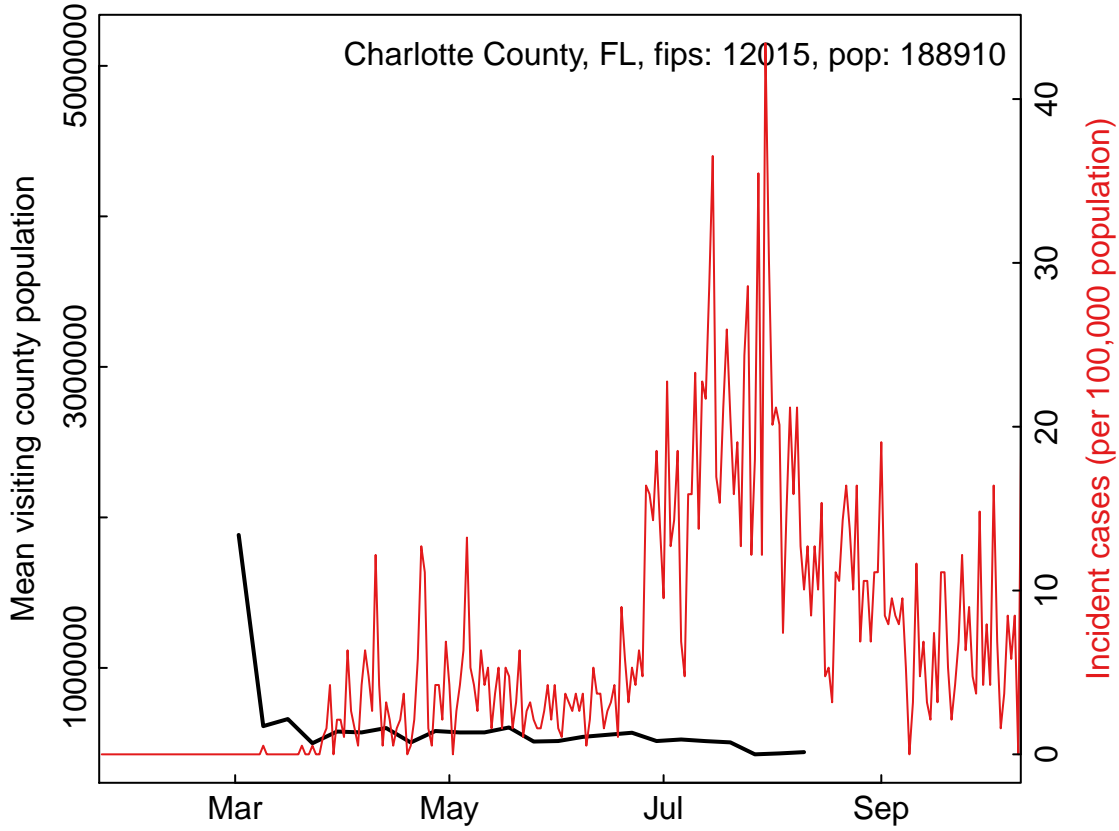



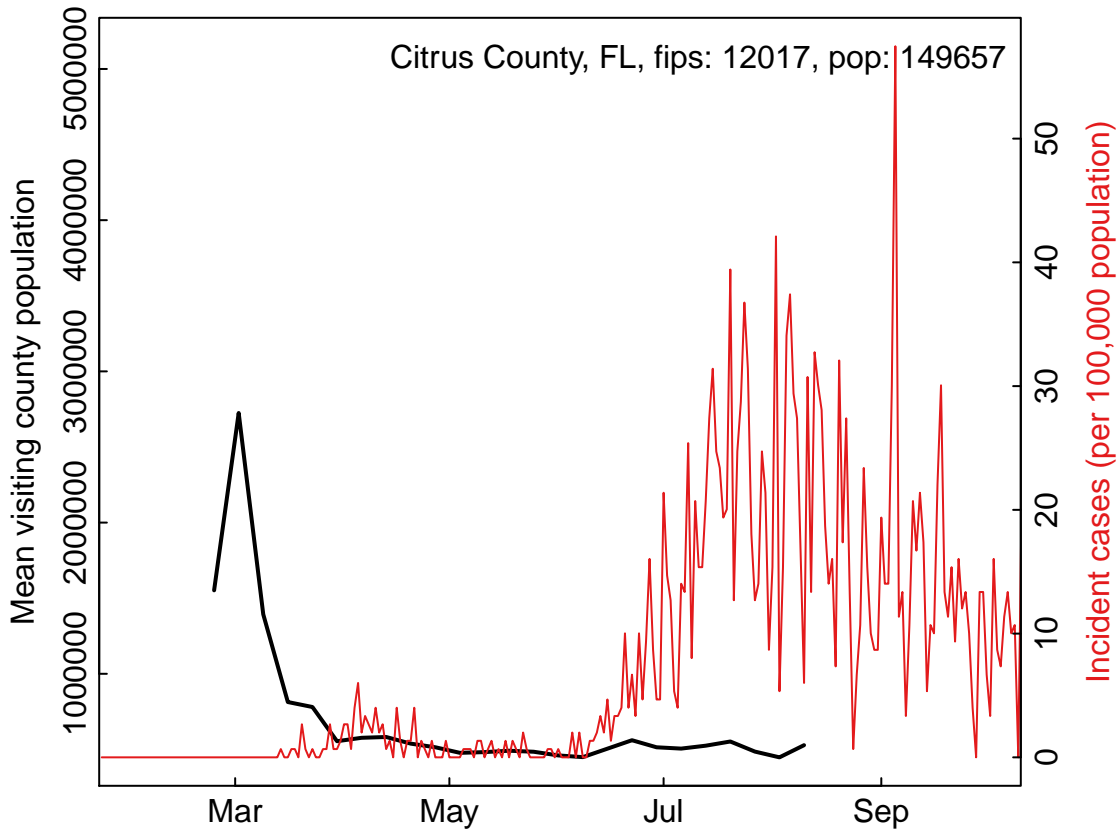

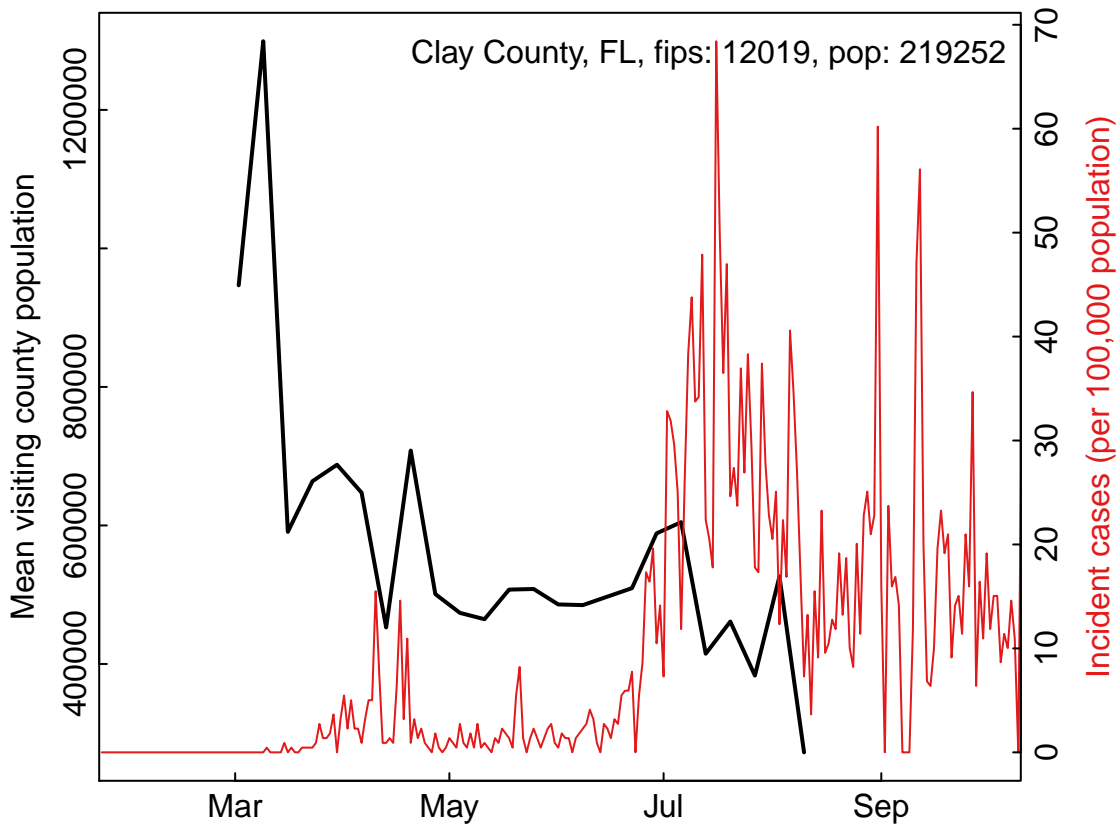

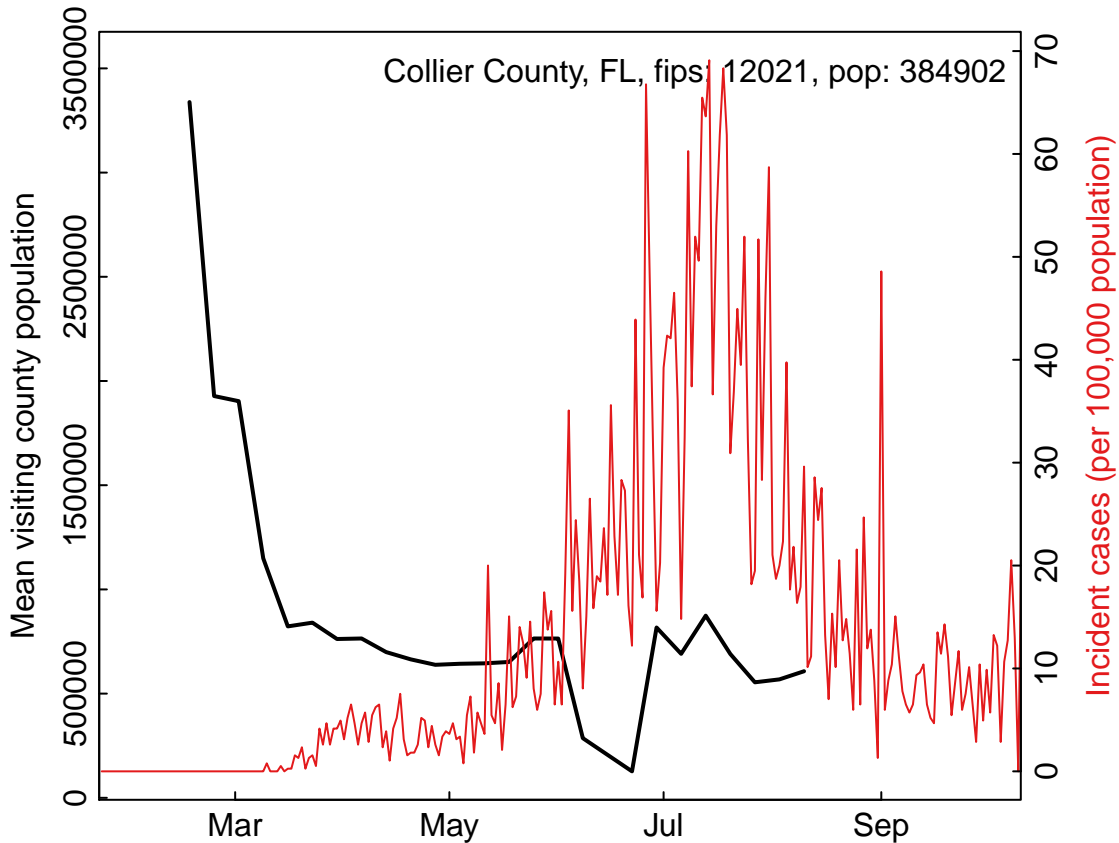

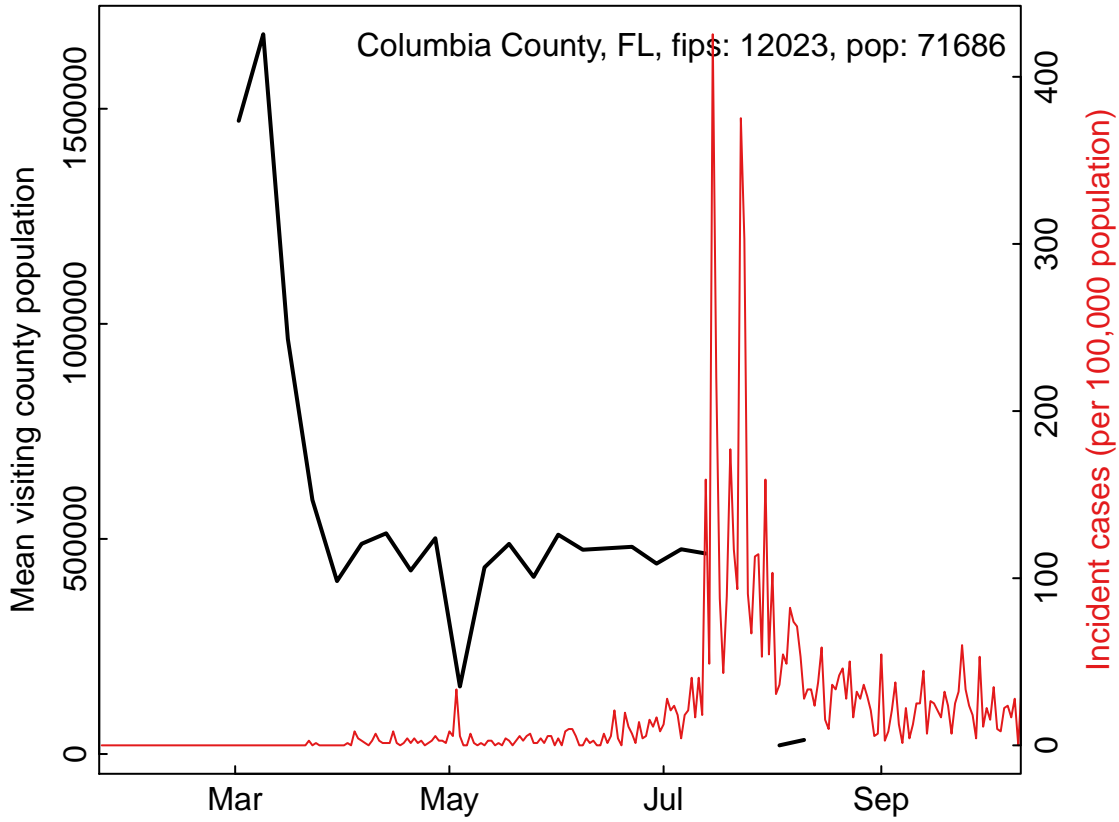

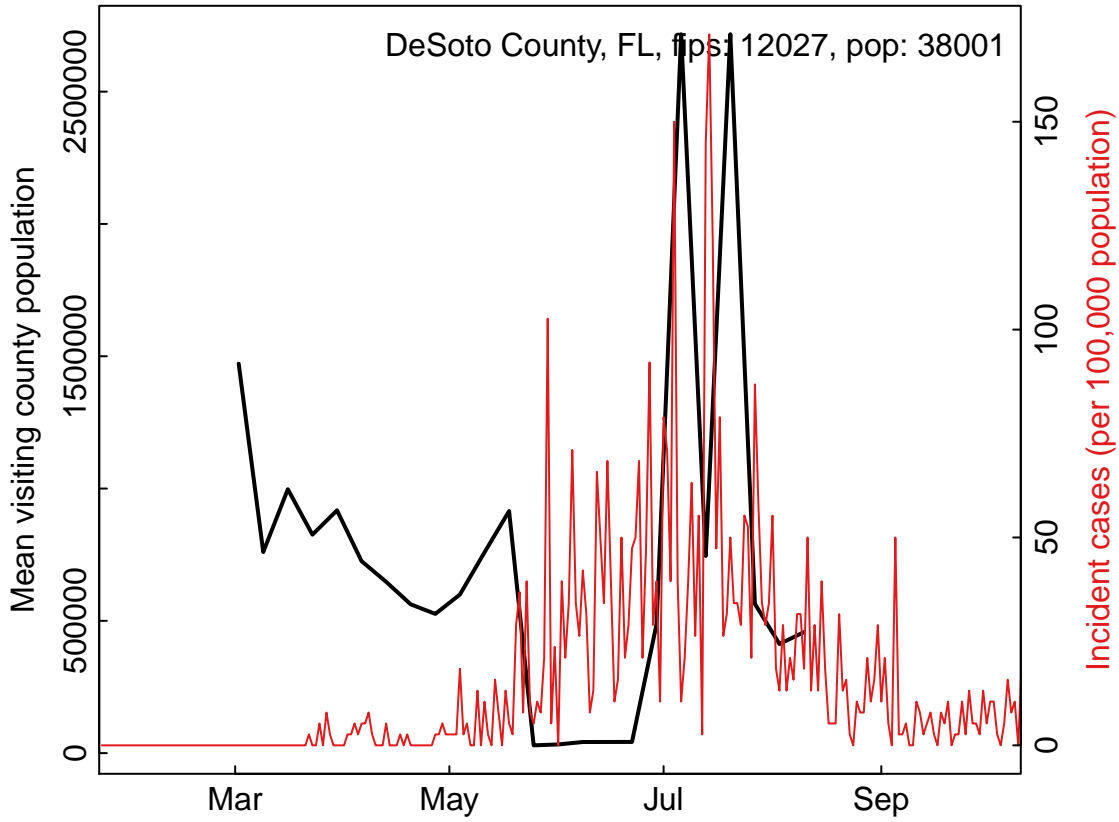

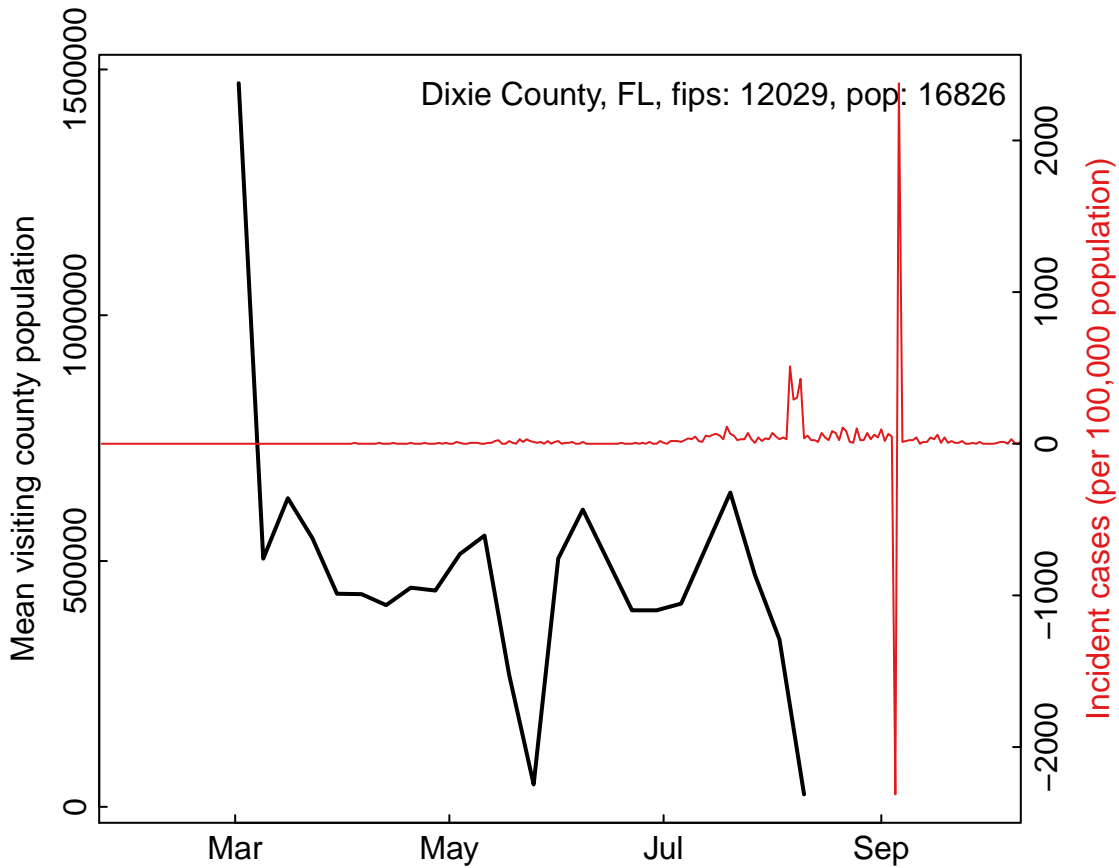

Duval County, FL, fips: 12031, pop: 957755

Mean visiting county population

Incident cases (per 100,000 population)

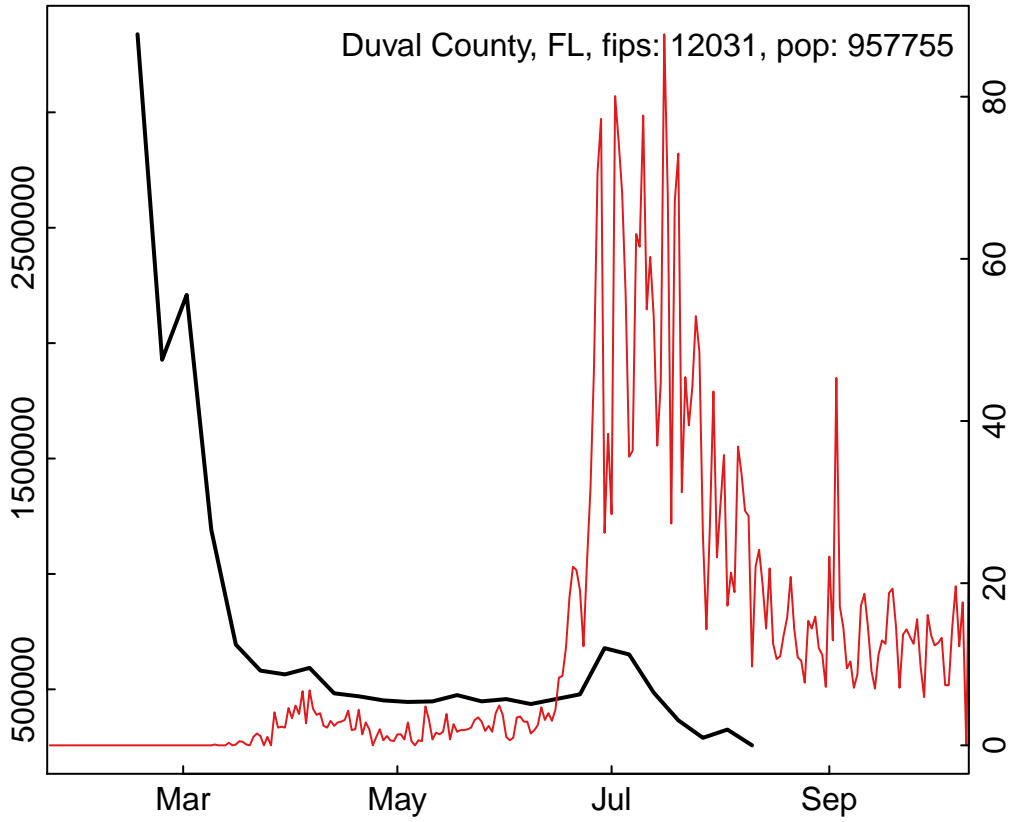

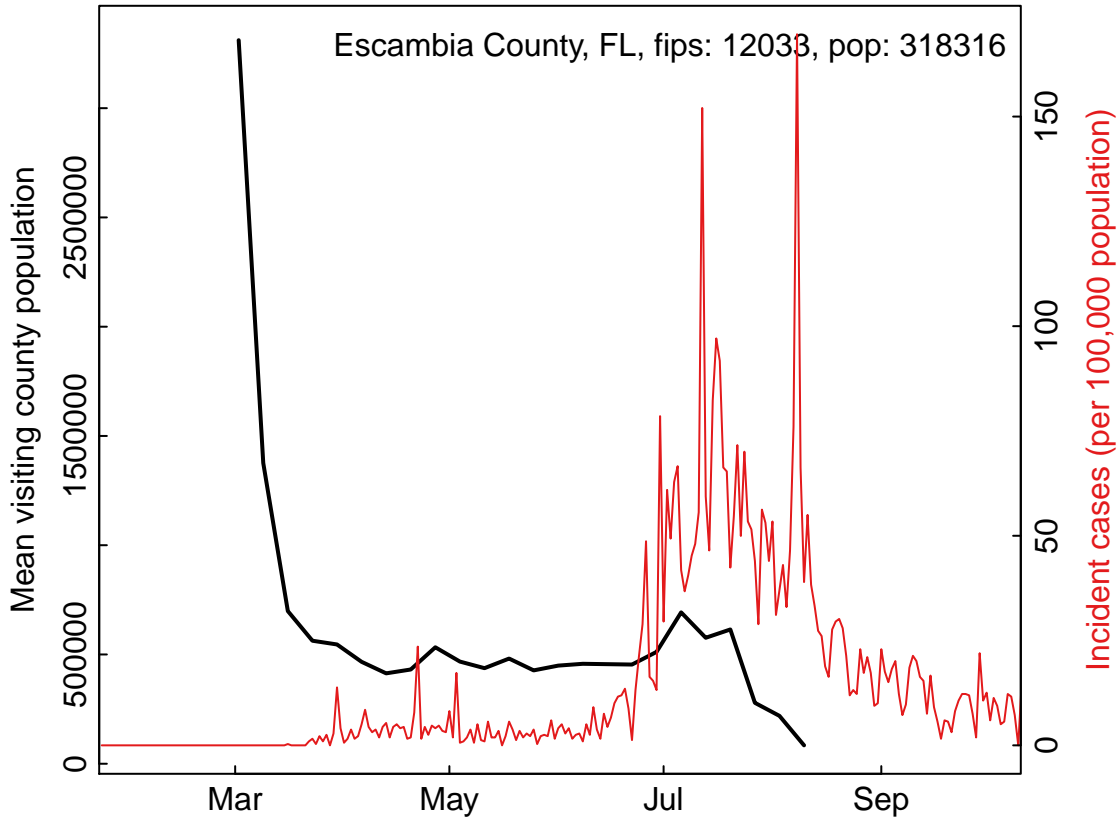



Flagler County, FL, fips: 12035, pop: 115081

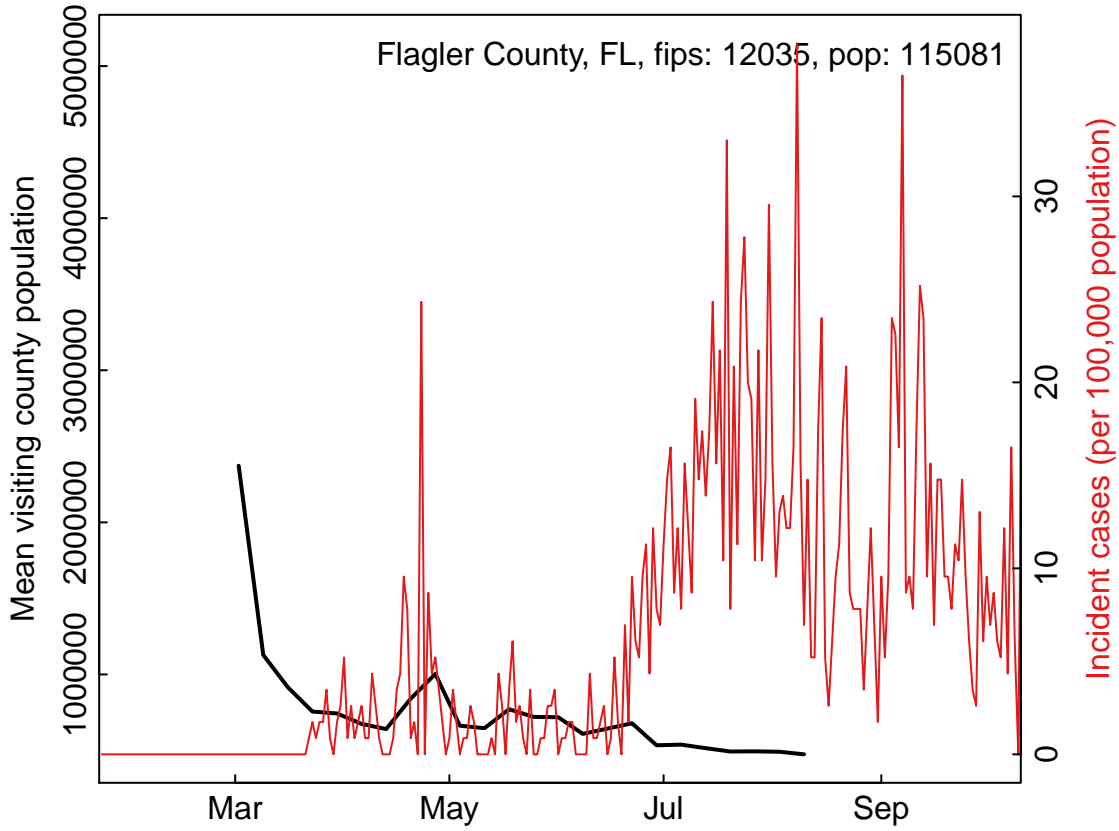

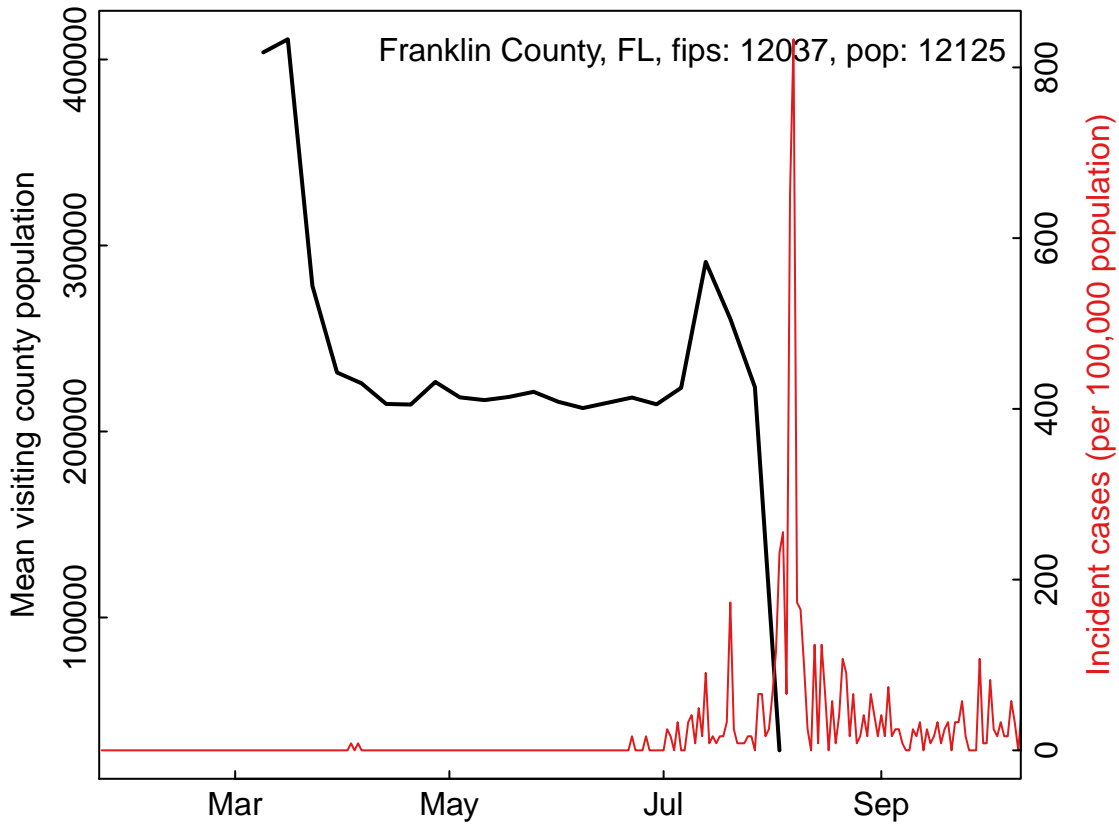

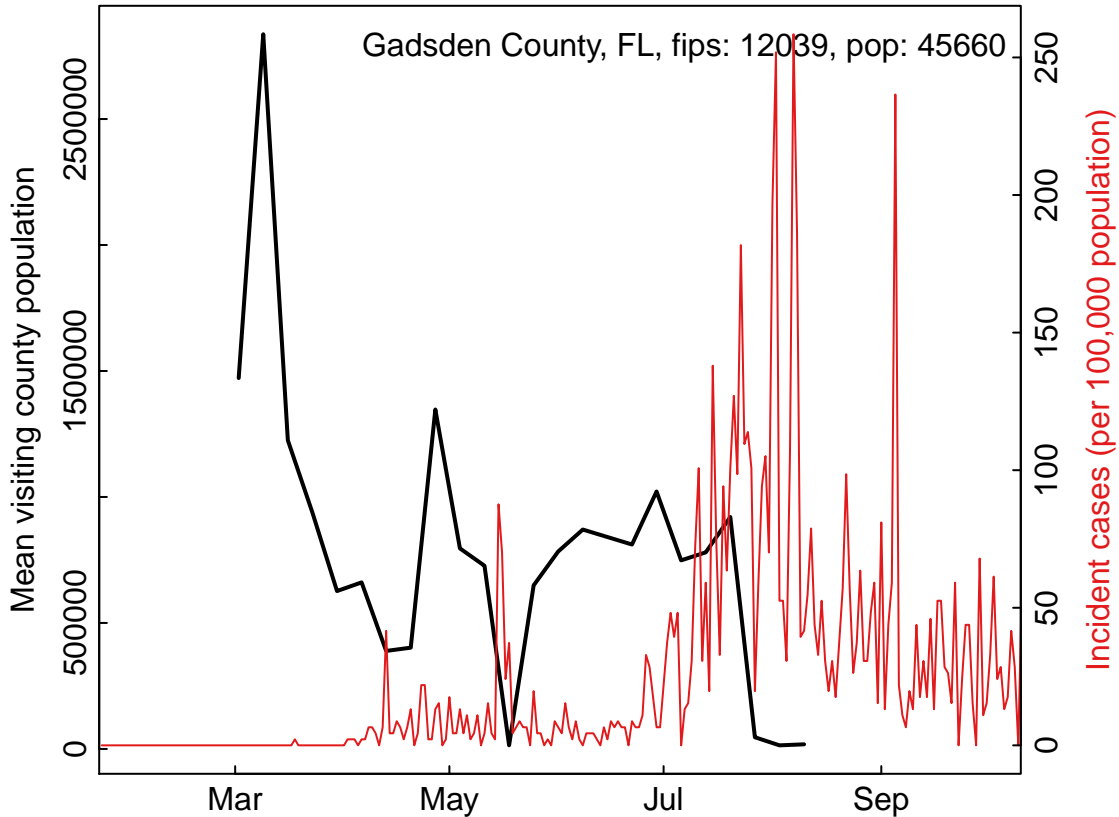

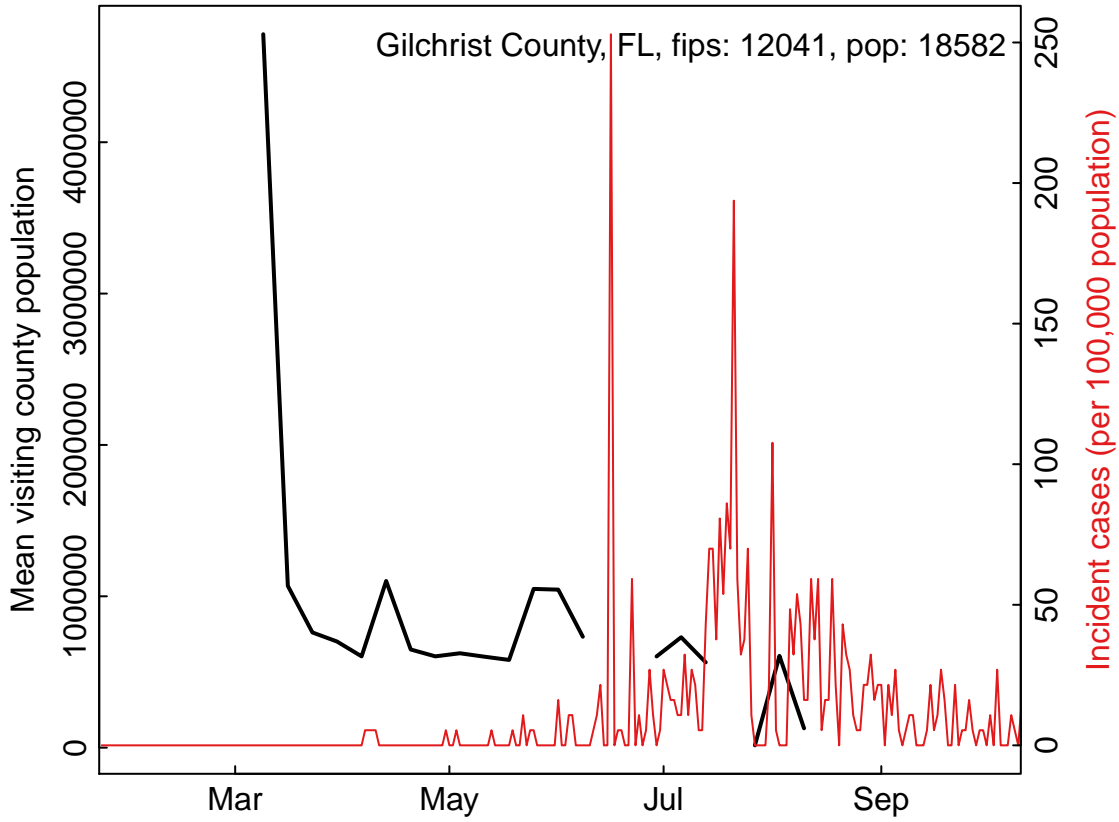

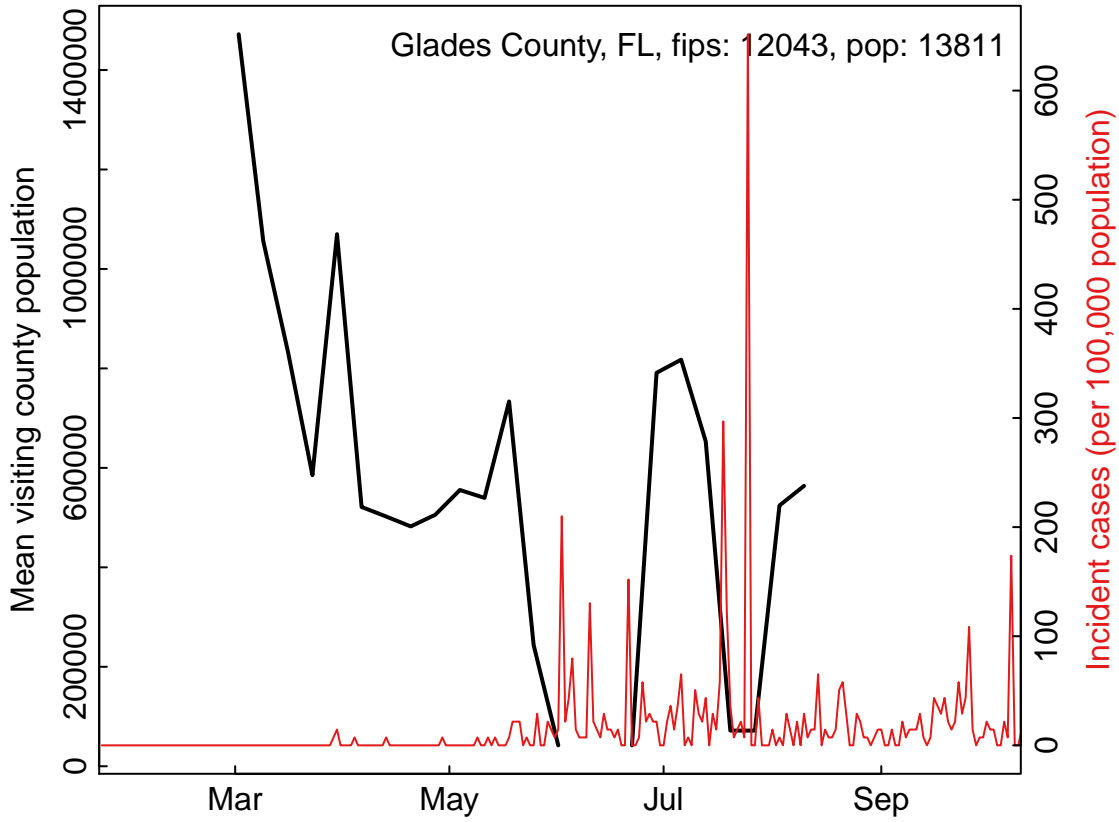

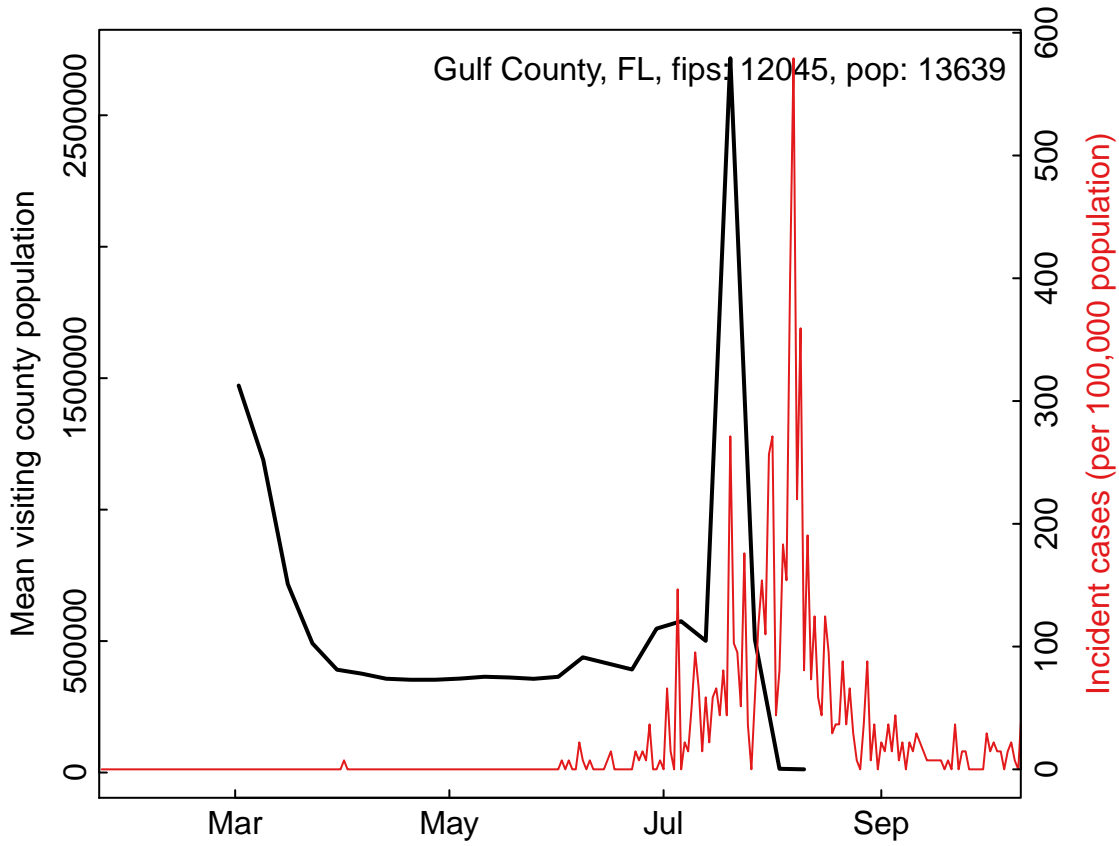

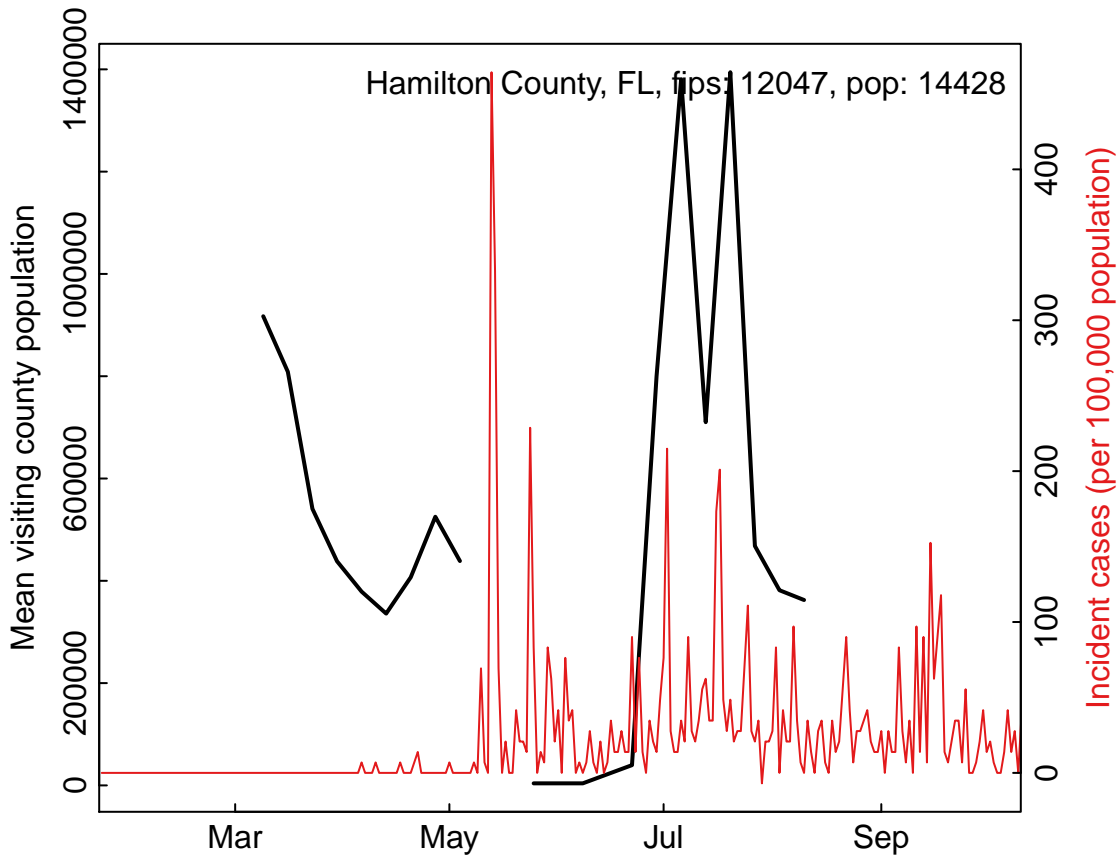

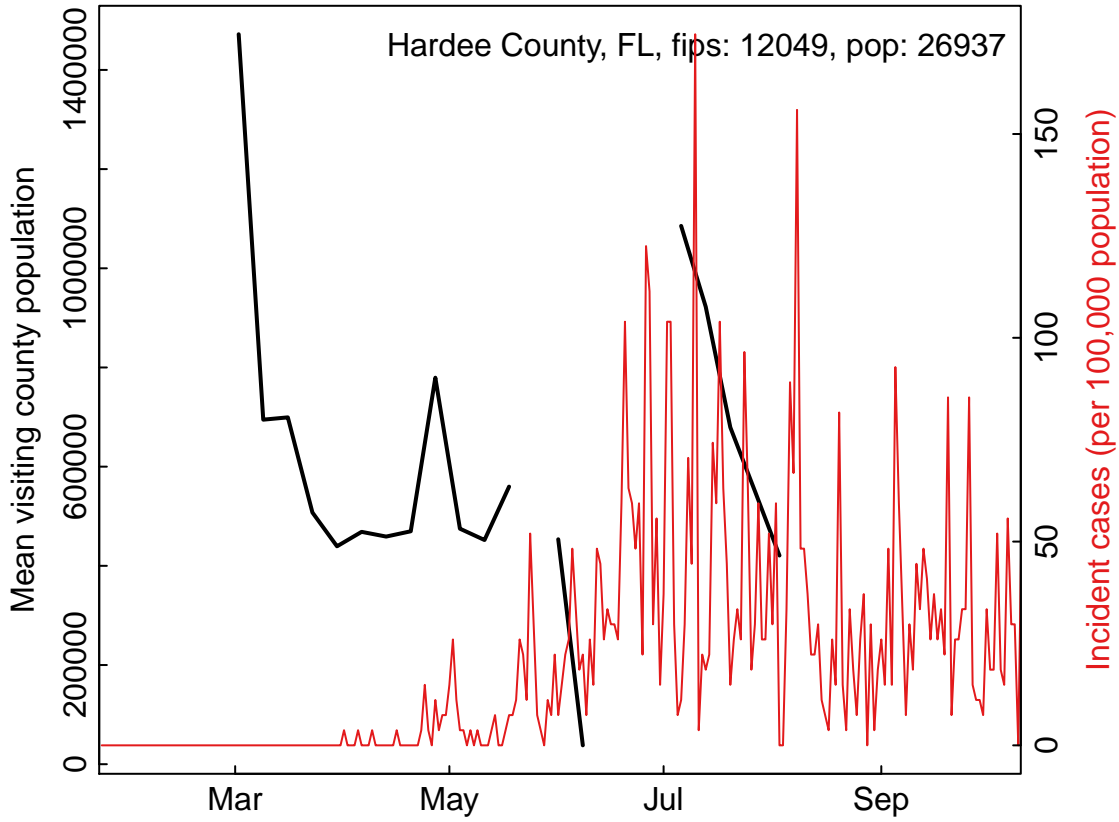



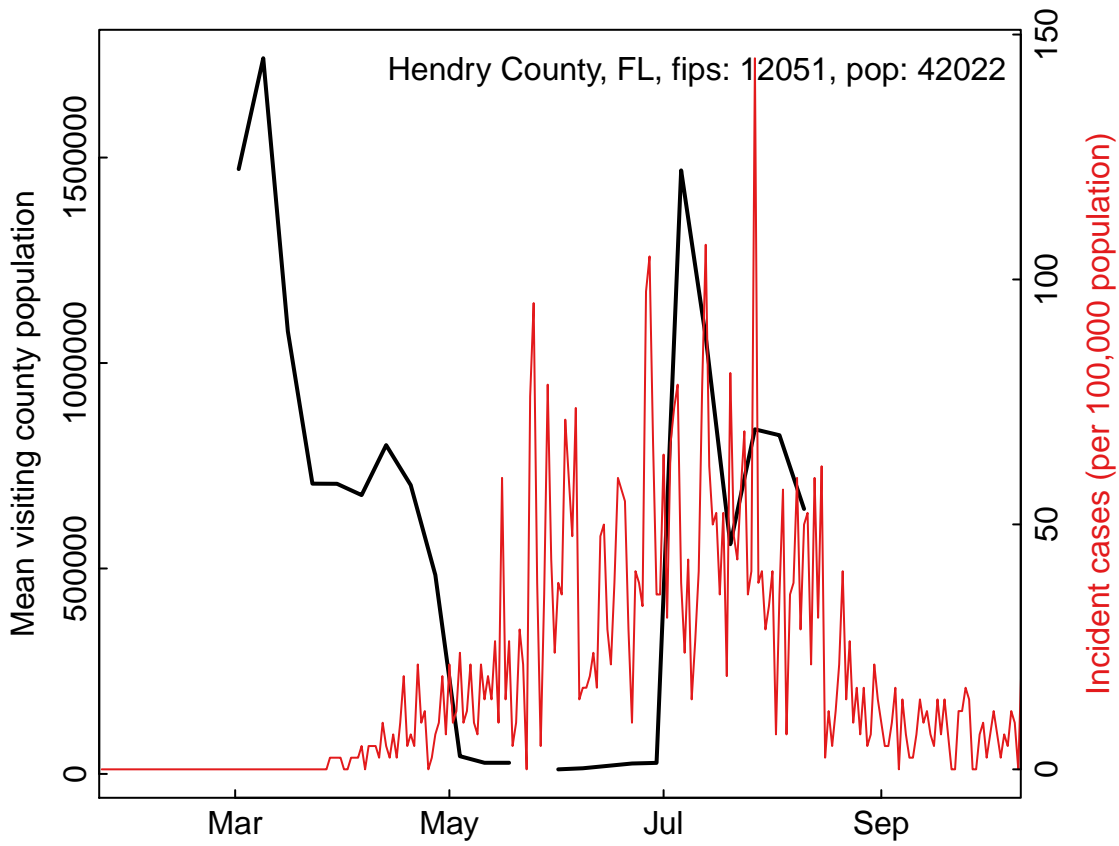

Hernando County, FL, fips: 12053, pop: 193920

Mean visiting county population

1600000  
1200000  
800000  
400000

Mar May Jul Sep

Incident cases (per 100,000 population)

30  
20  
10  
0

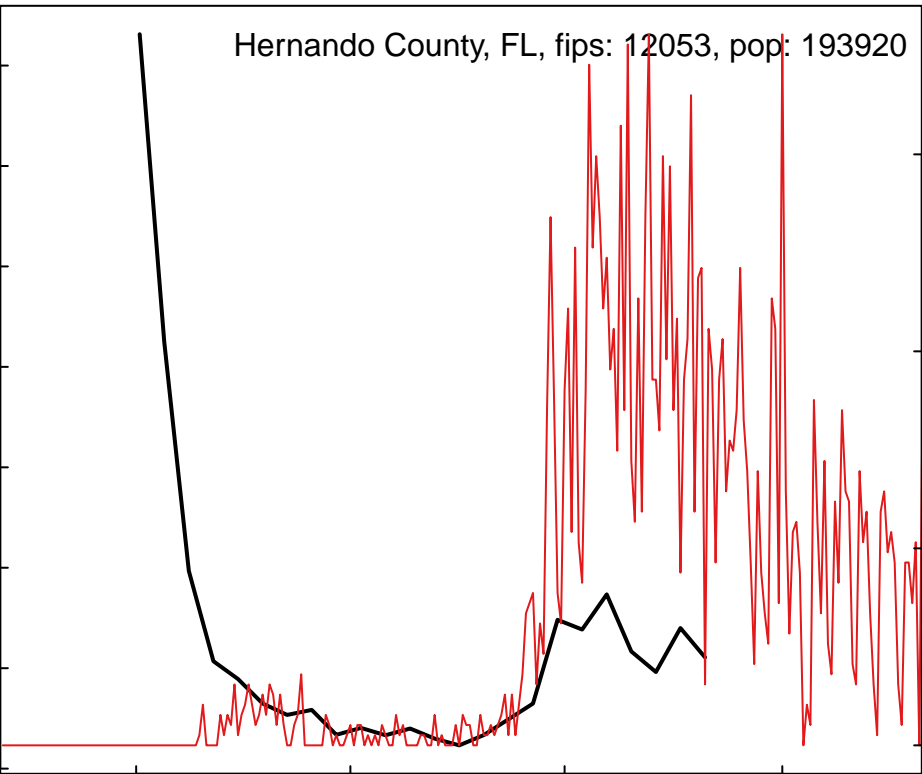

Highlands County, FL, fips: 12055, pop: 106221

Mean visiting county population

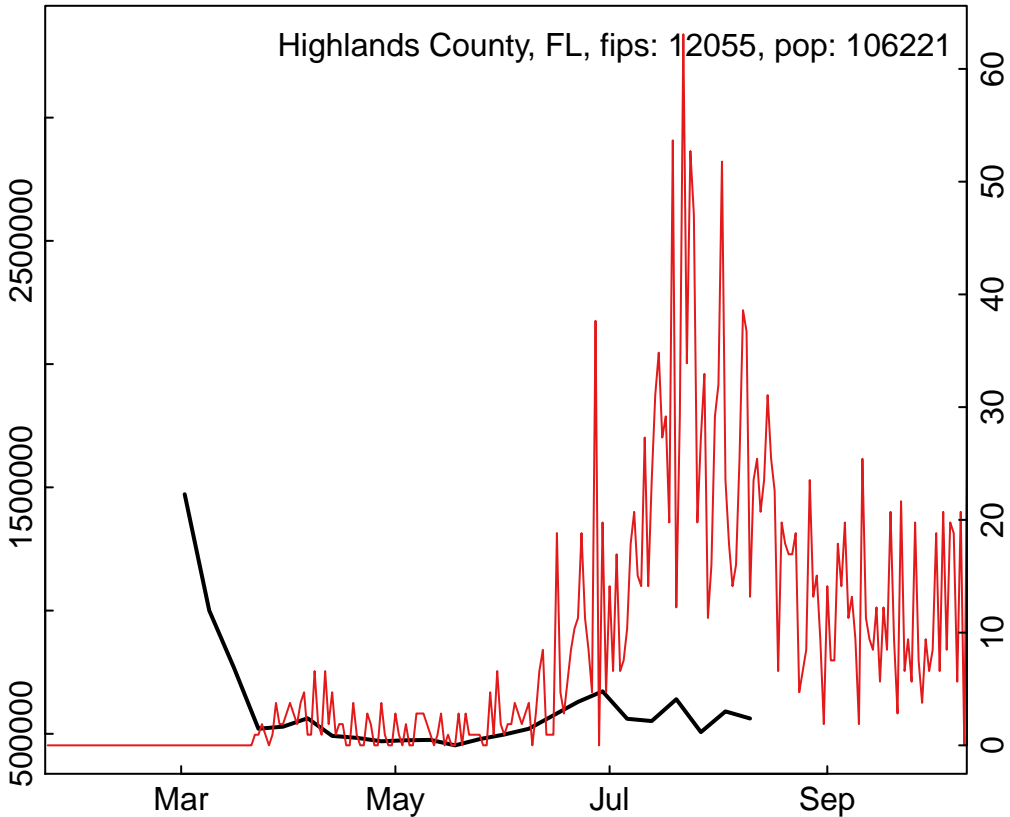

Incident cases (per 100,000 population)

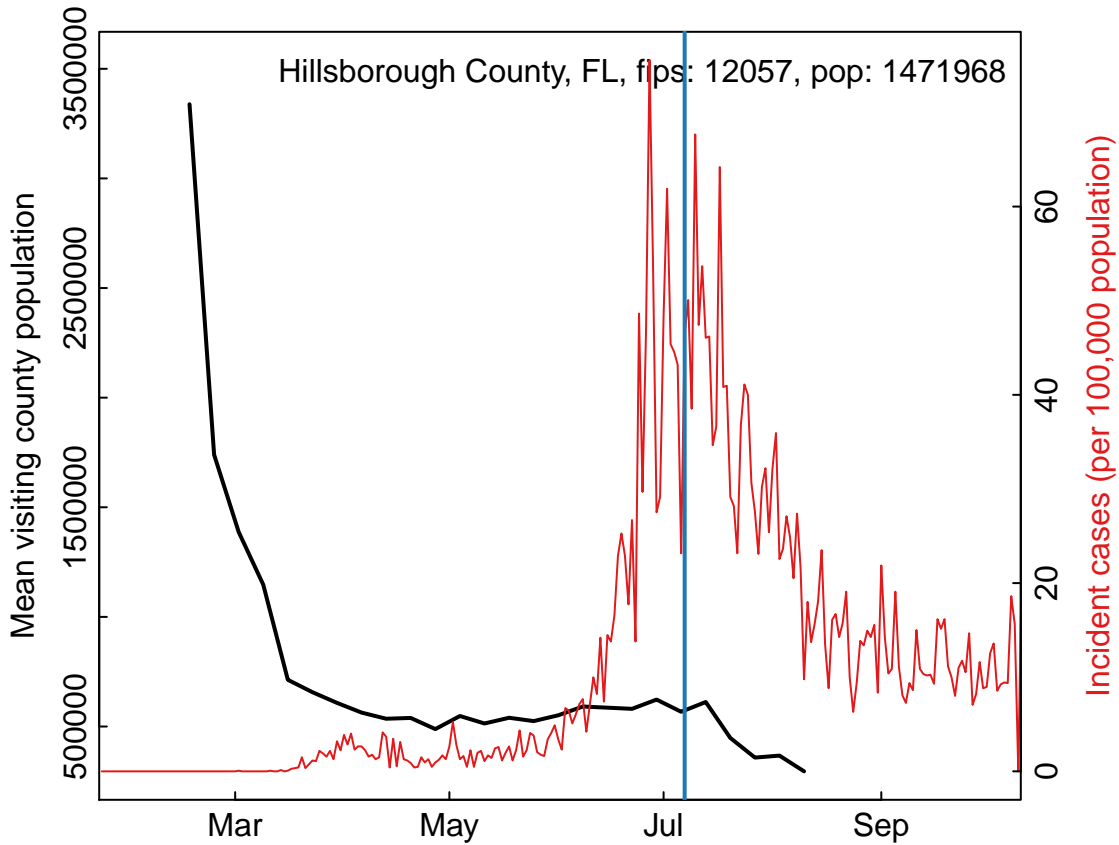

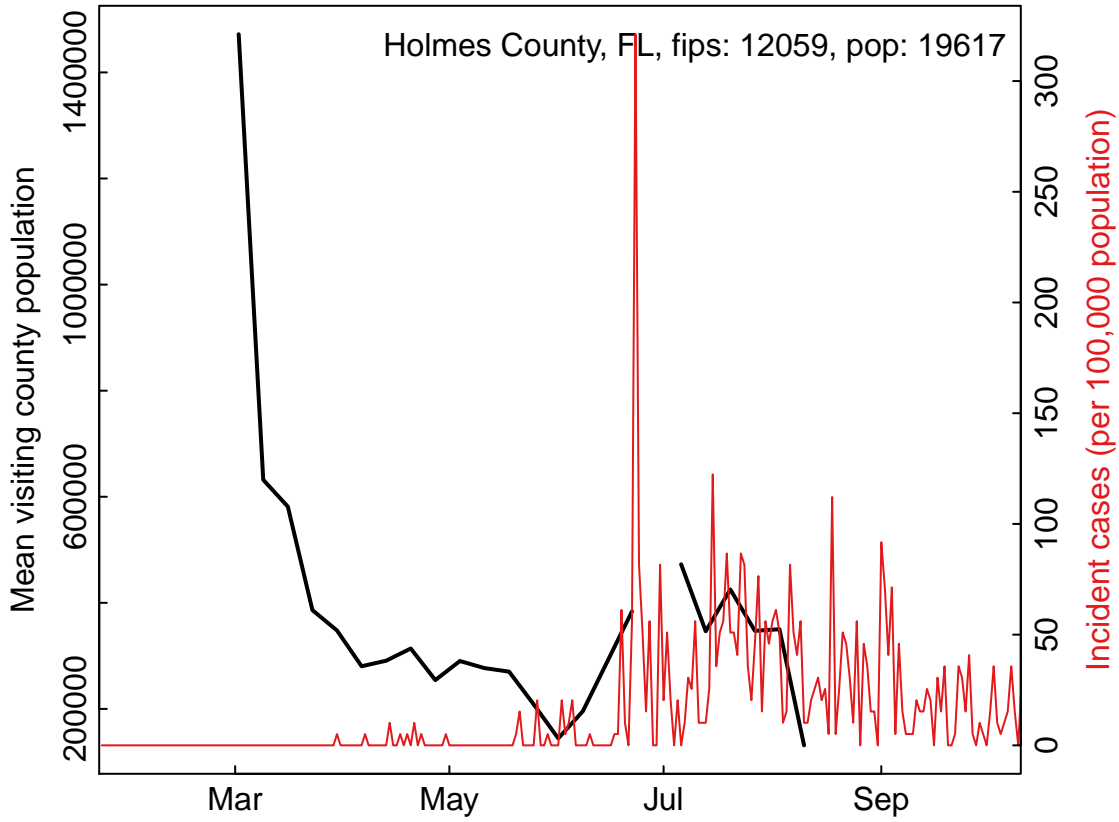

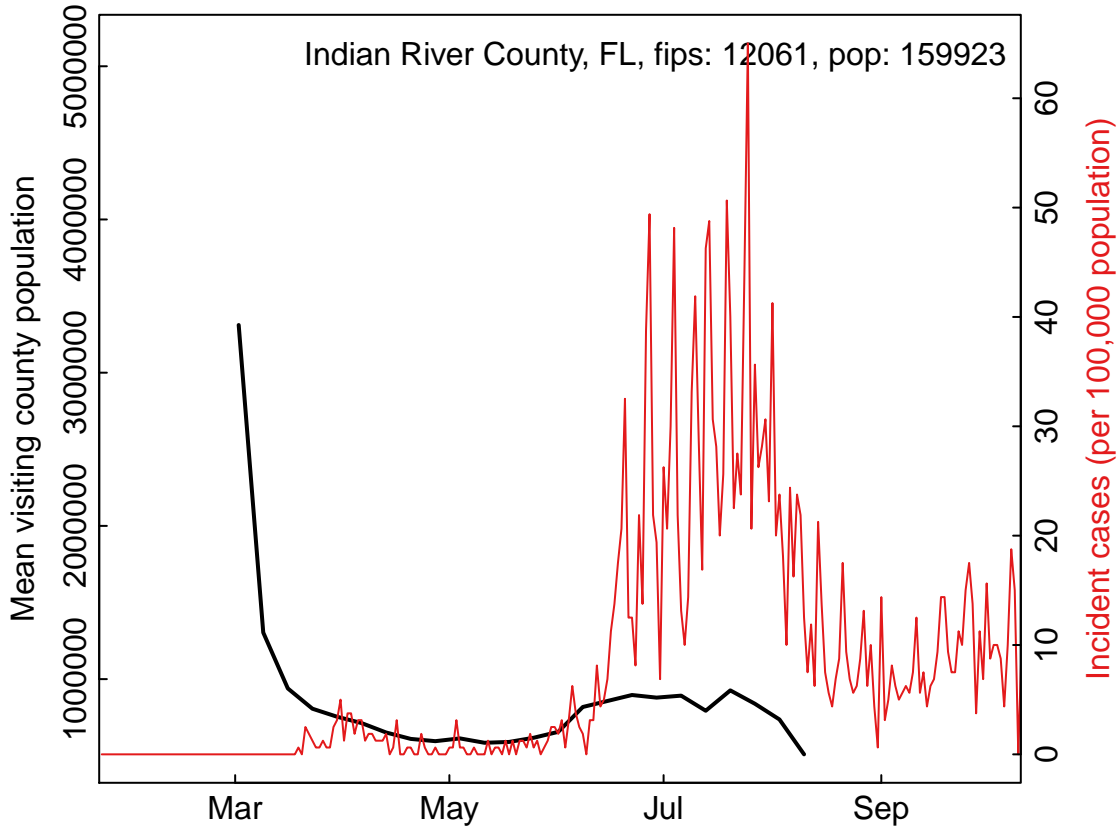

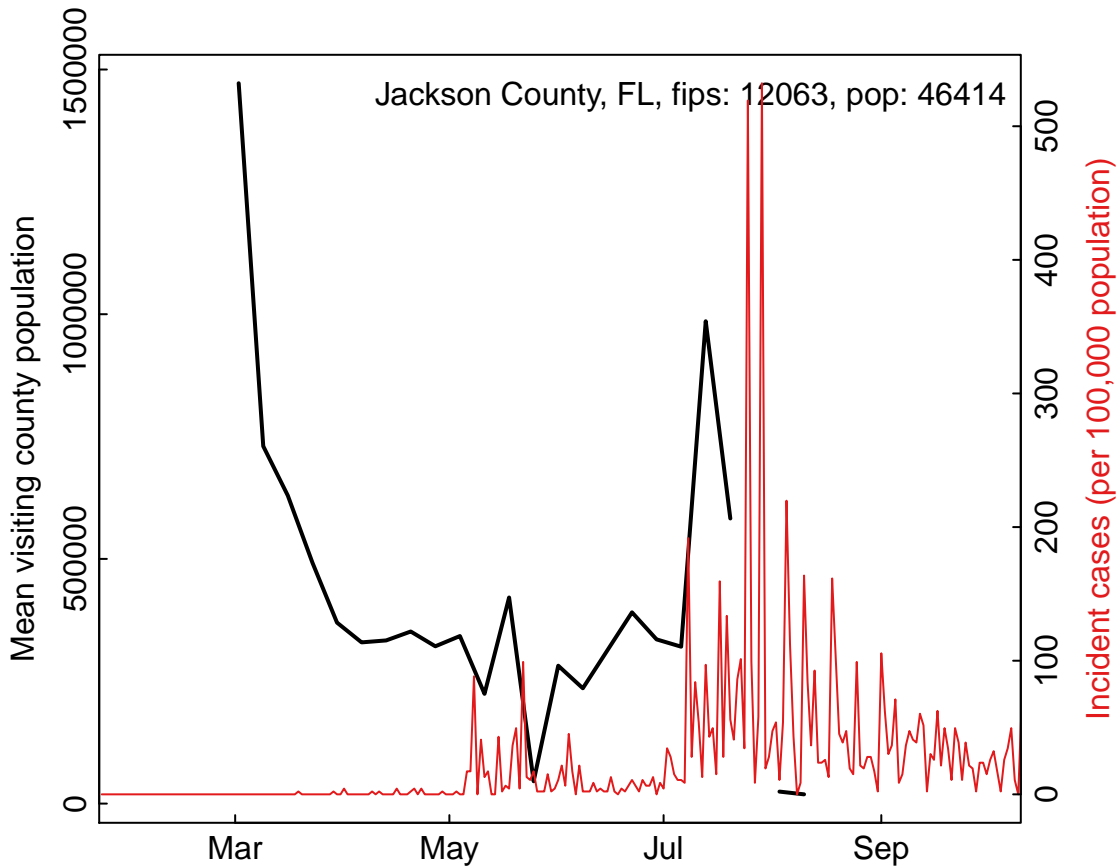

Jefferson County, FL, fips: 12065, pop: 14246

Mean visiting county population

800000  
600000  
400000  
200000  
0

Mar

May

Jul

Sep

Incident cases (per 100,000 population)

600  
400  
200  
0

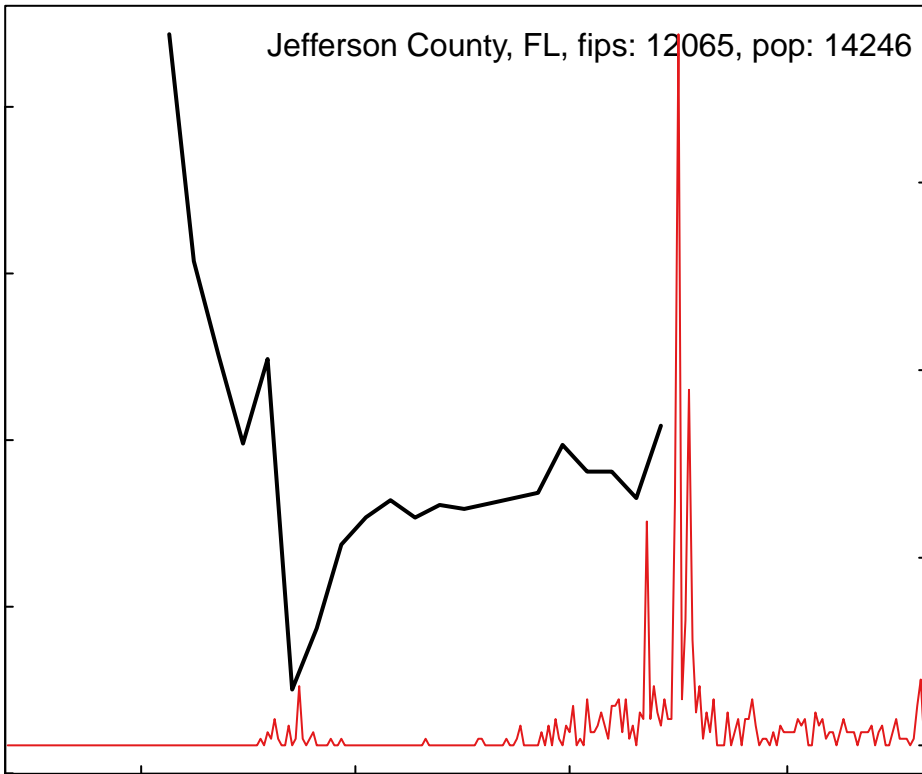



Mean visiting county population

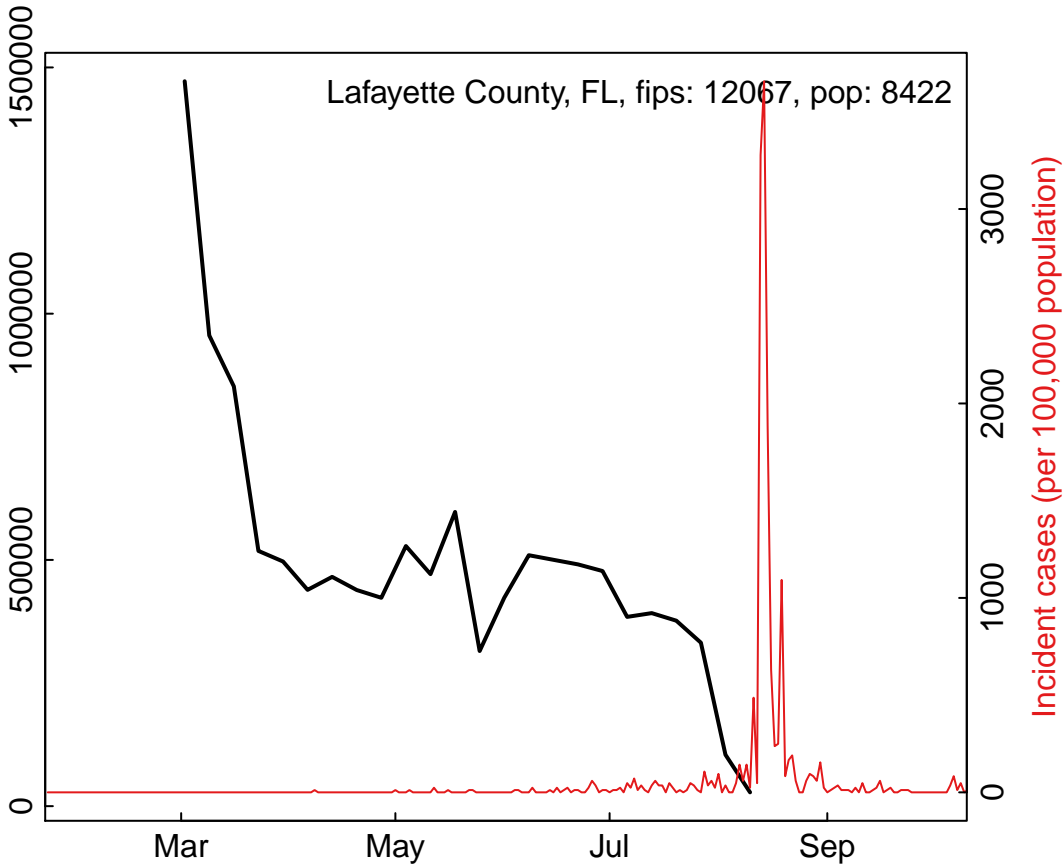

Lake County, FL, fips: 12069, pop: 367118

Mean visiting county population

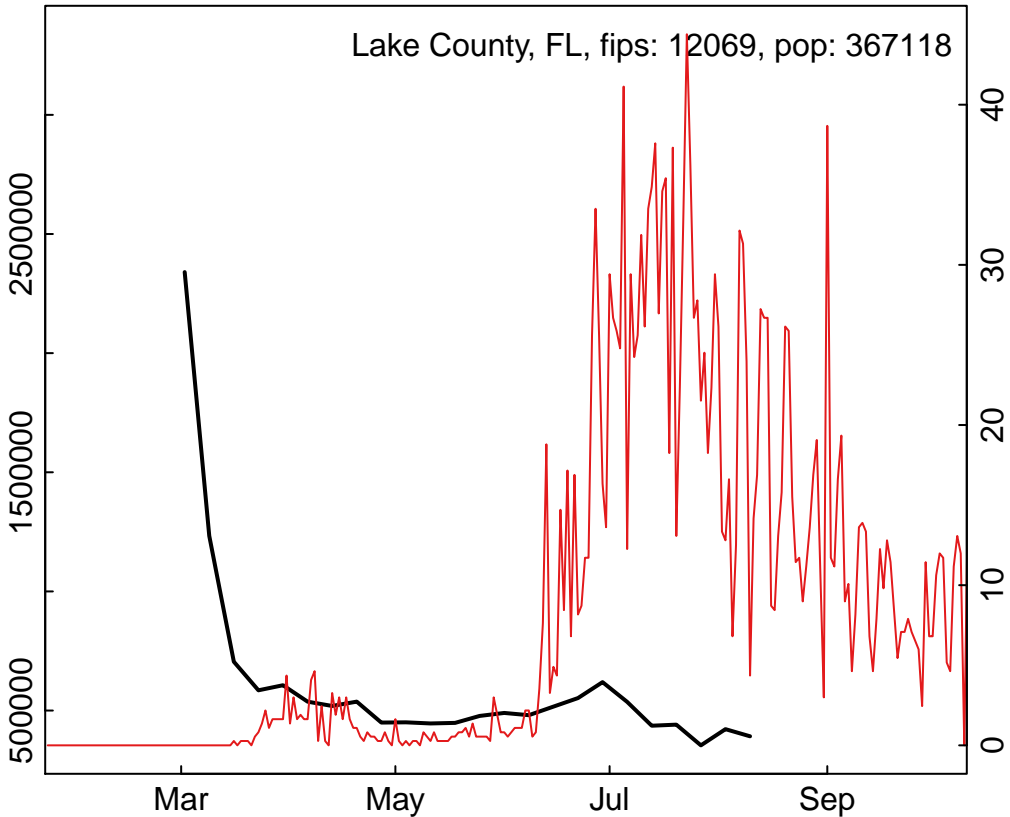

Incident cases (per 100,000 population)

Lee County, FL, fips: 12071, pop: 770577

Mean visiting county population

500000  
1500000  
2500000

Mar

May

Jul

Sep

0  
50  
100  
150

Incident cases (per 100,000 population)

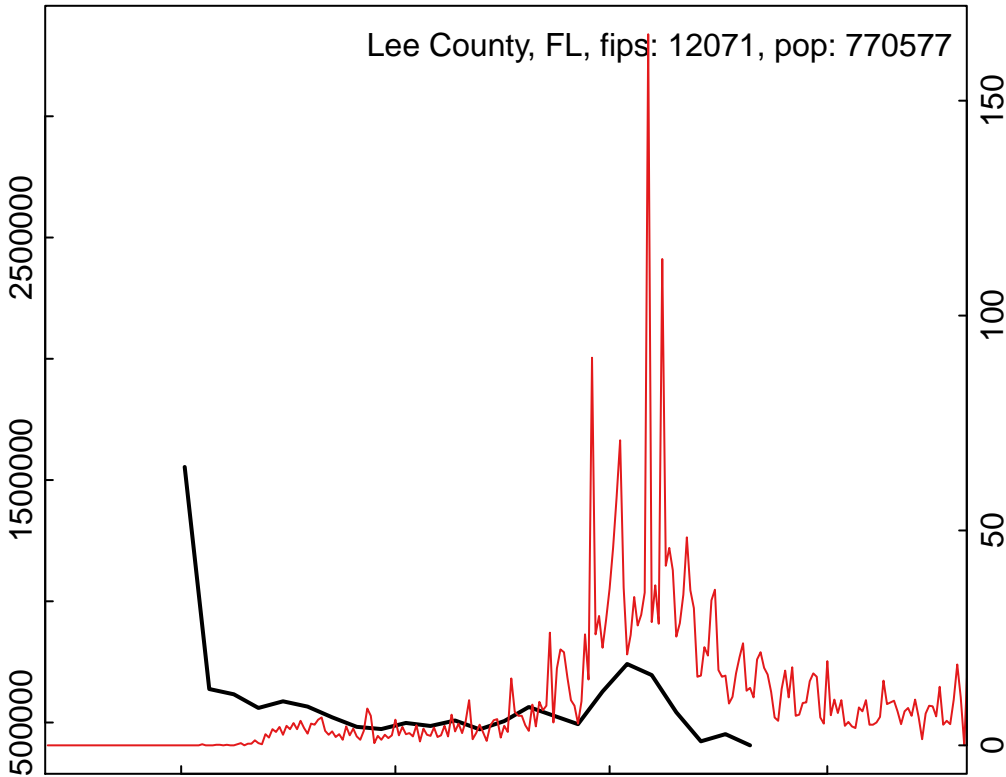

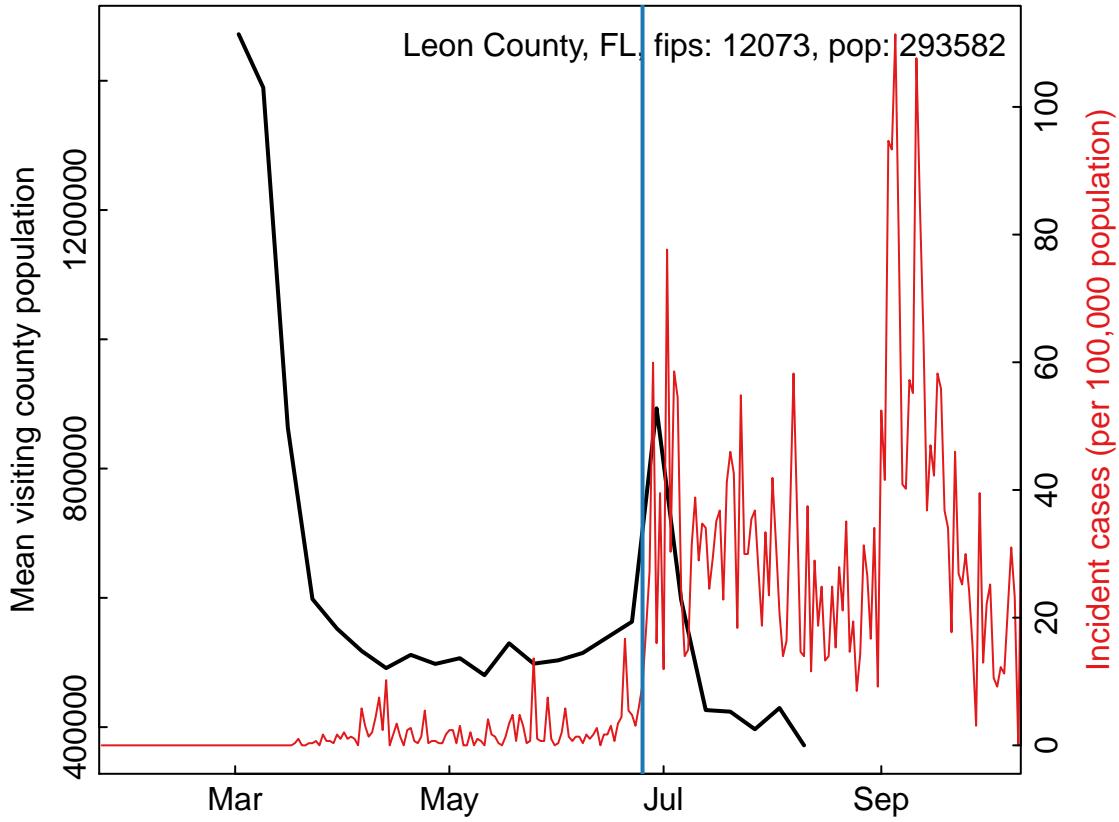

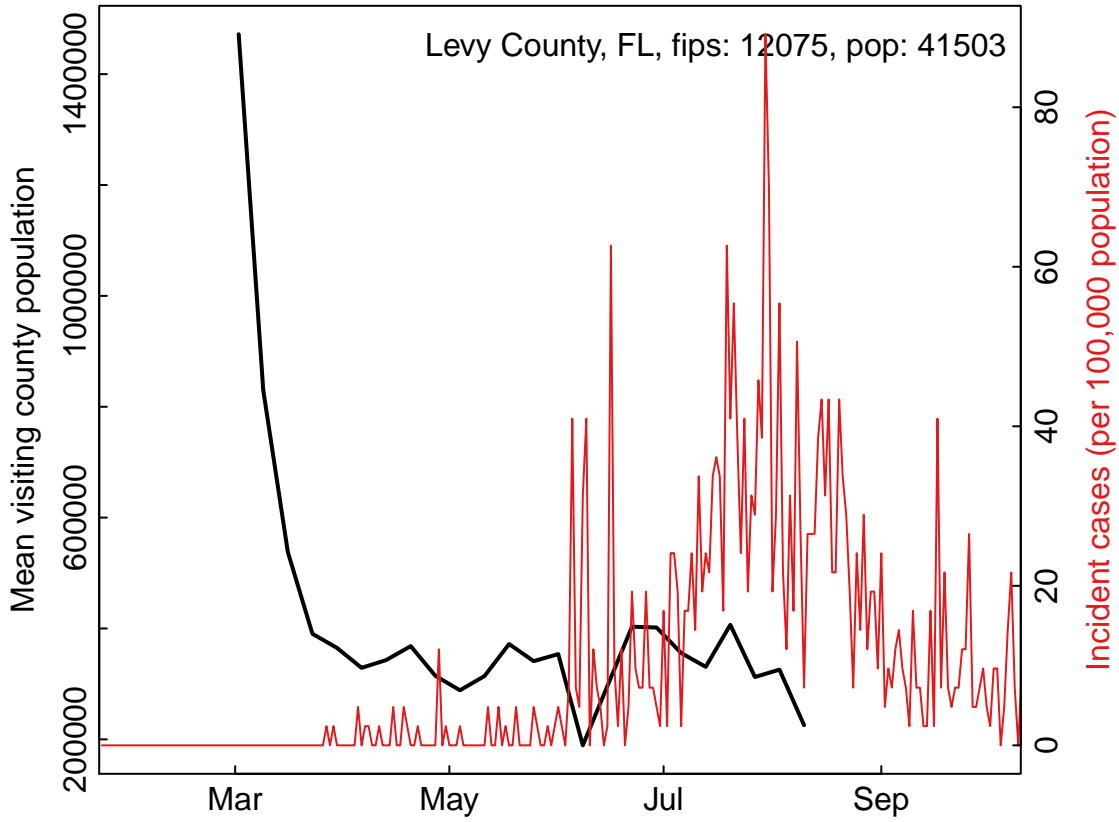

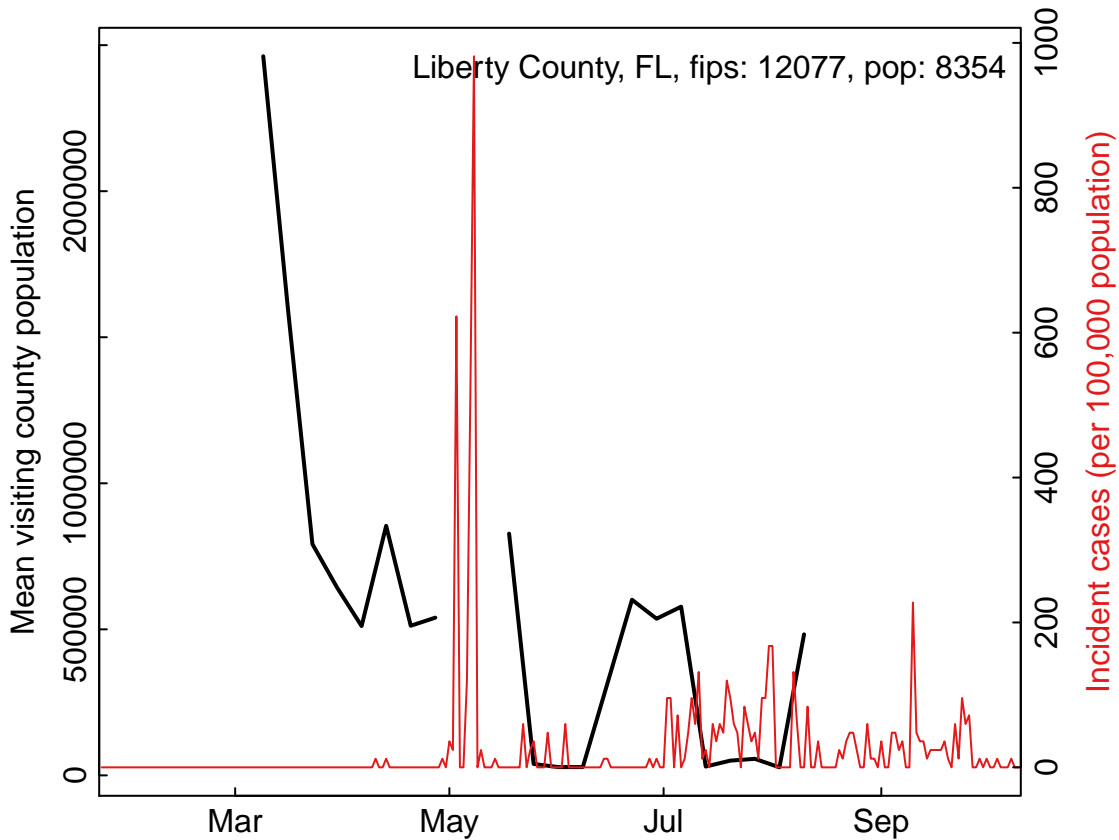

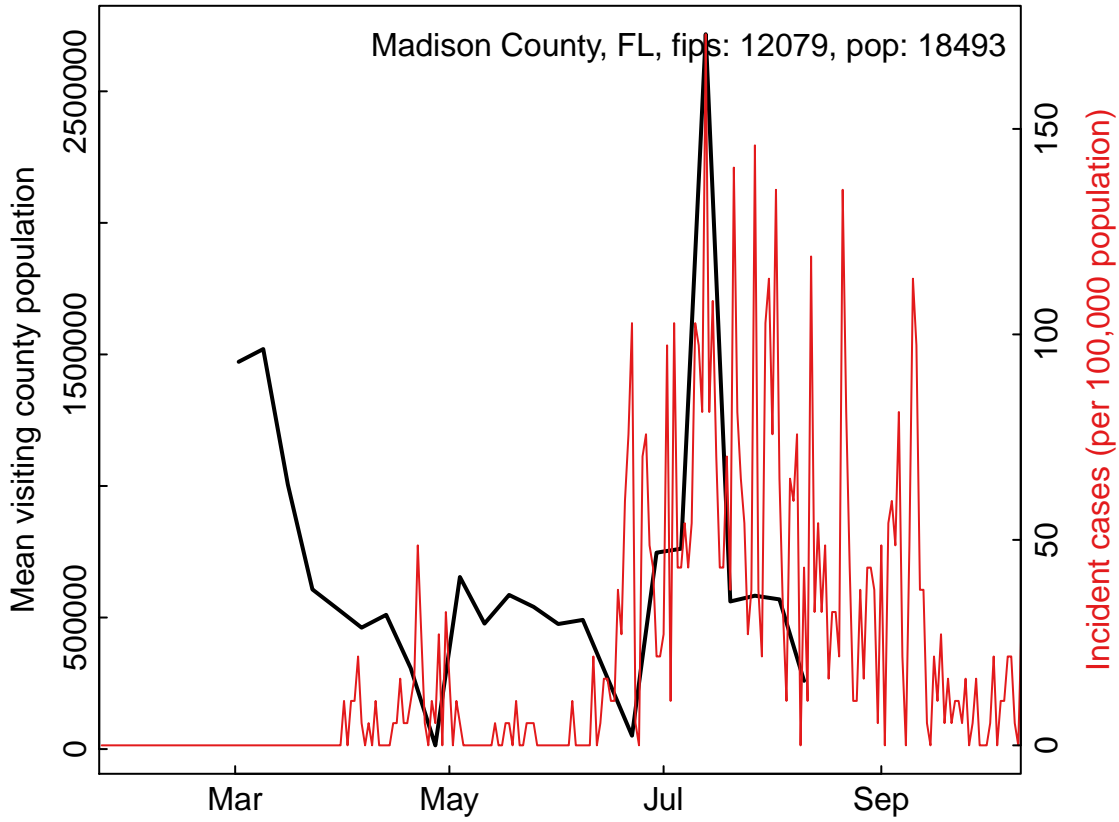

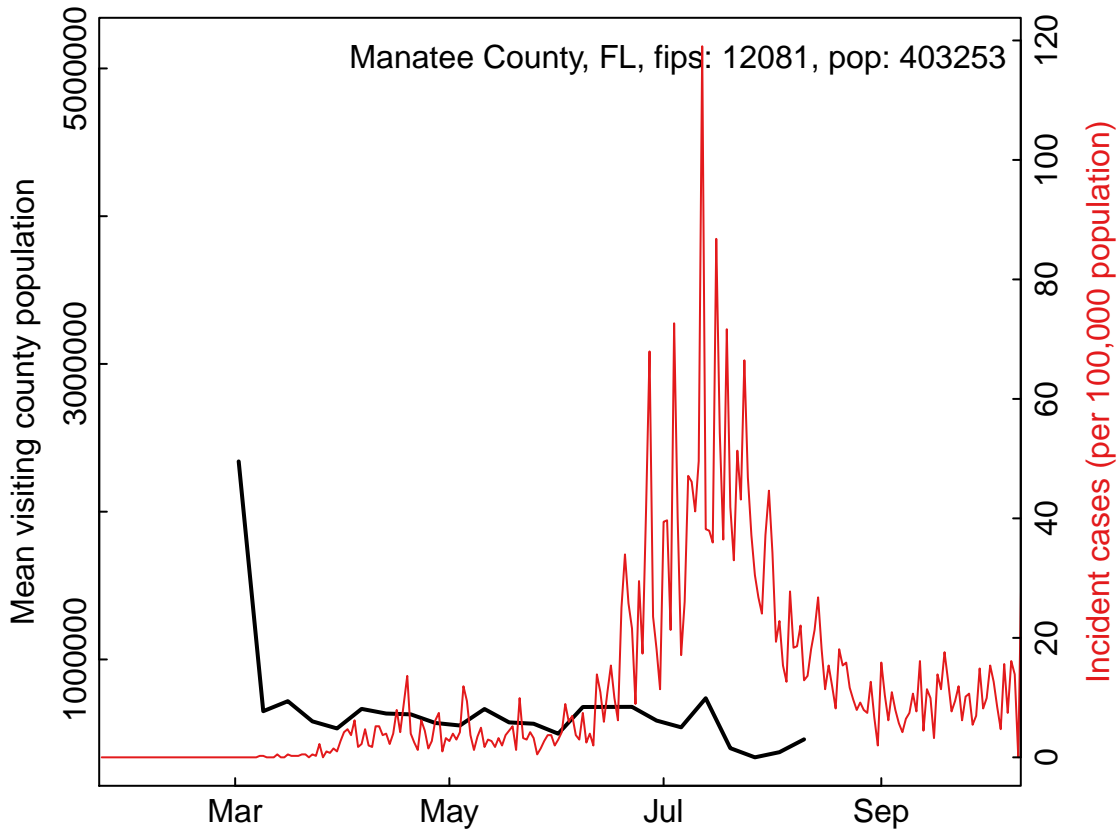



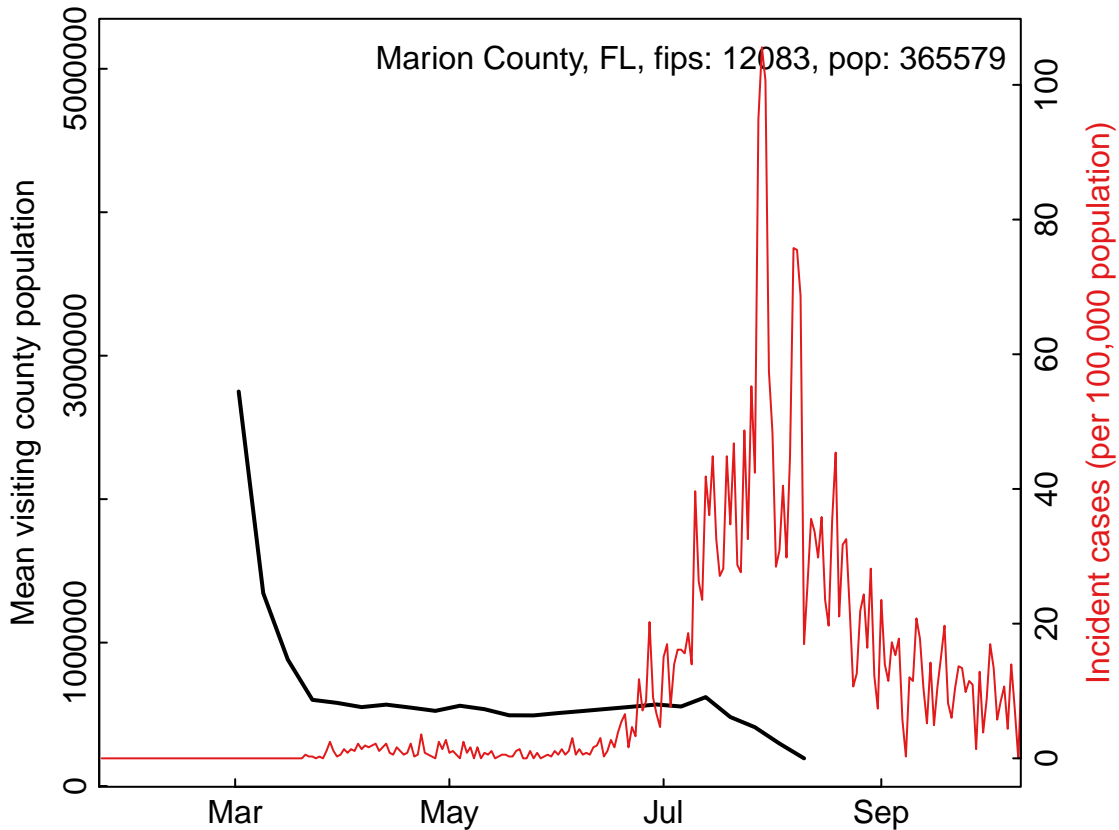

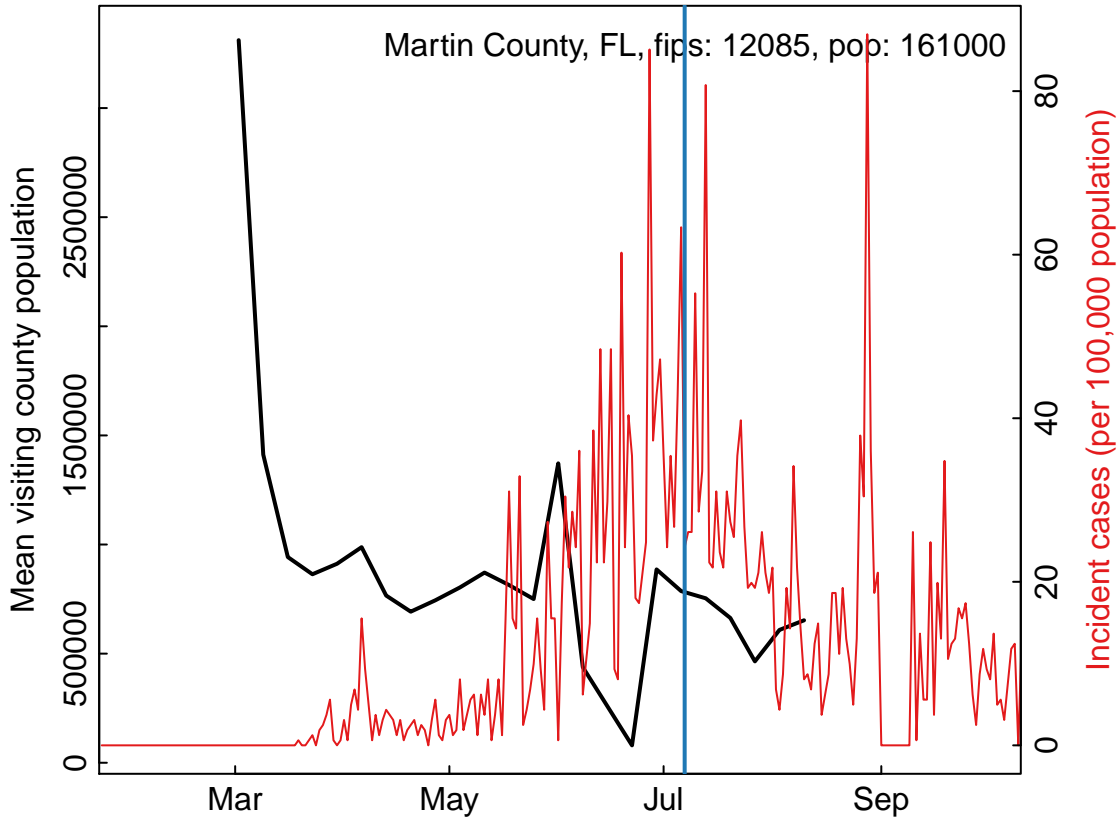

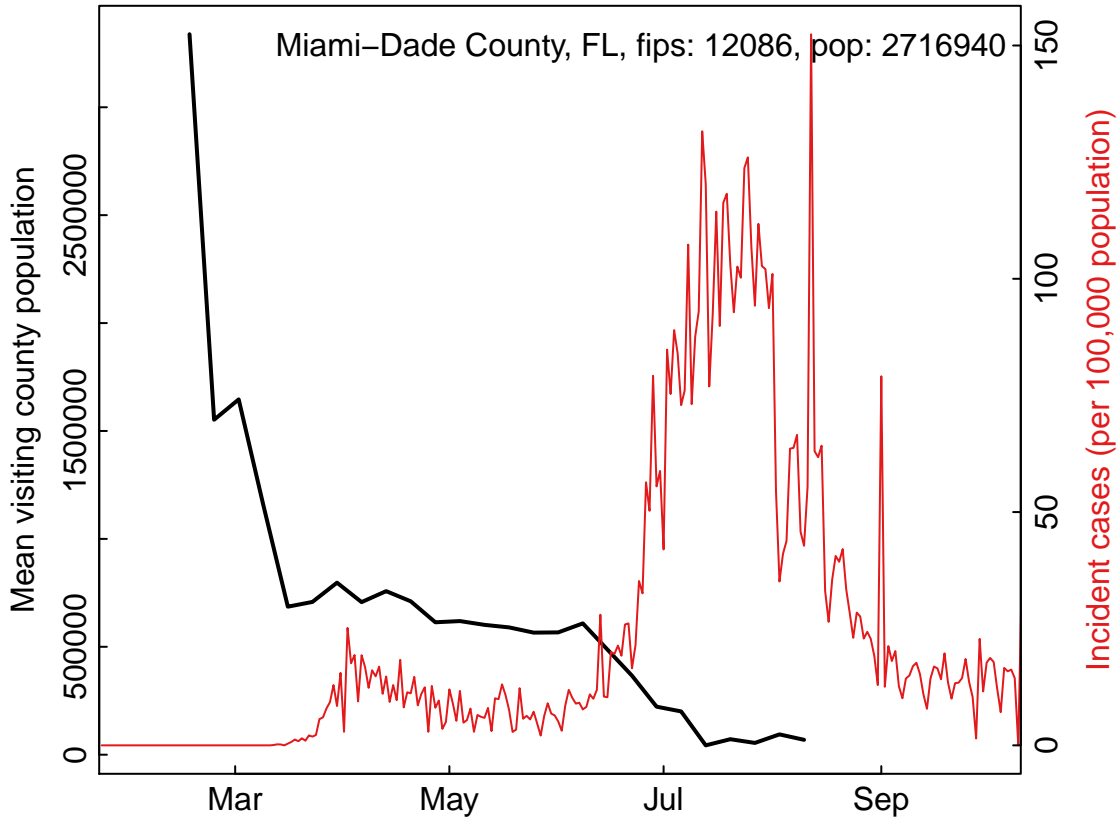

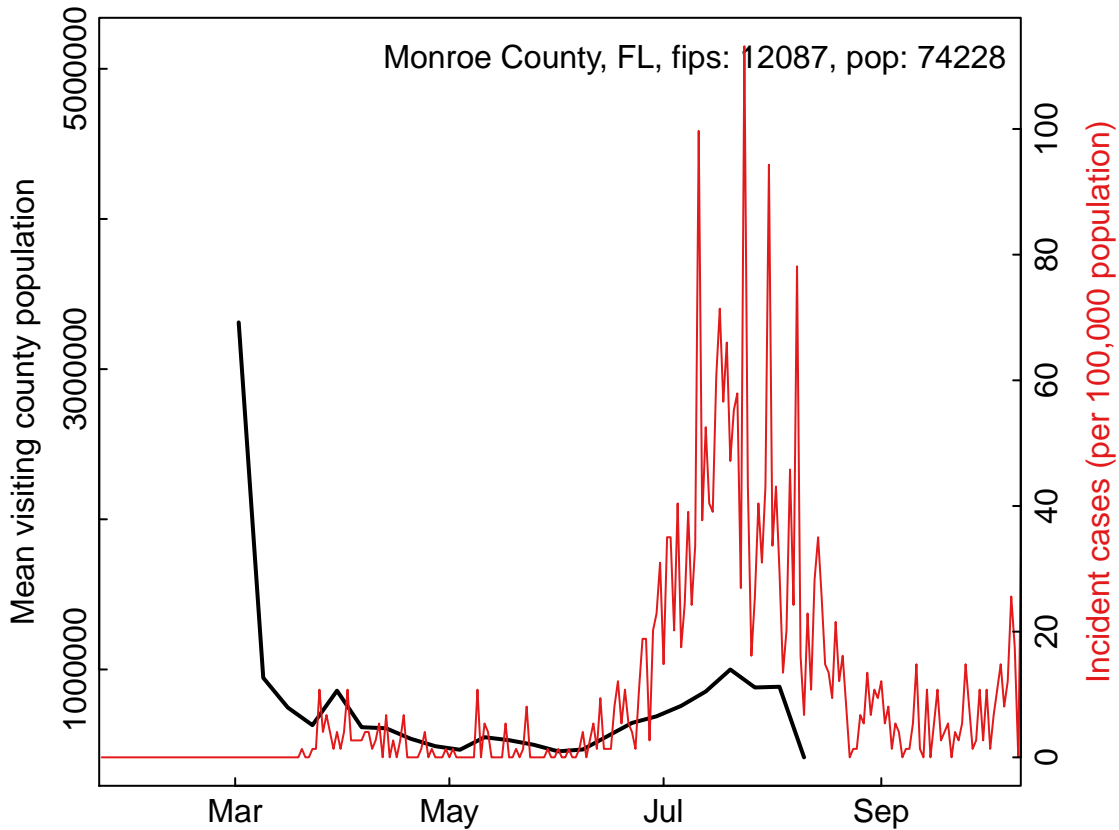

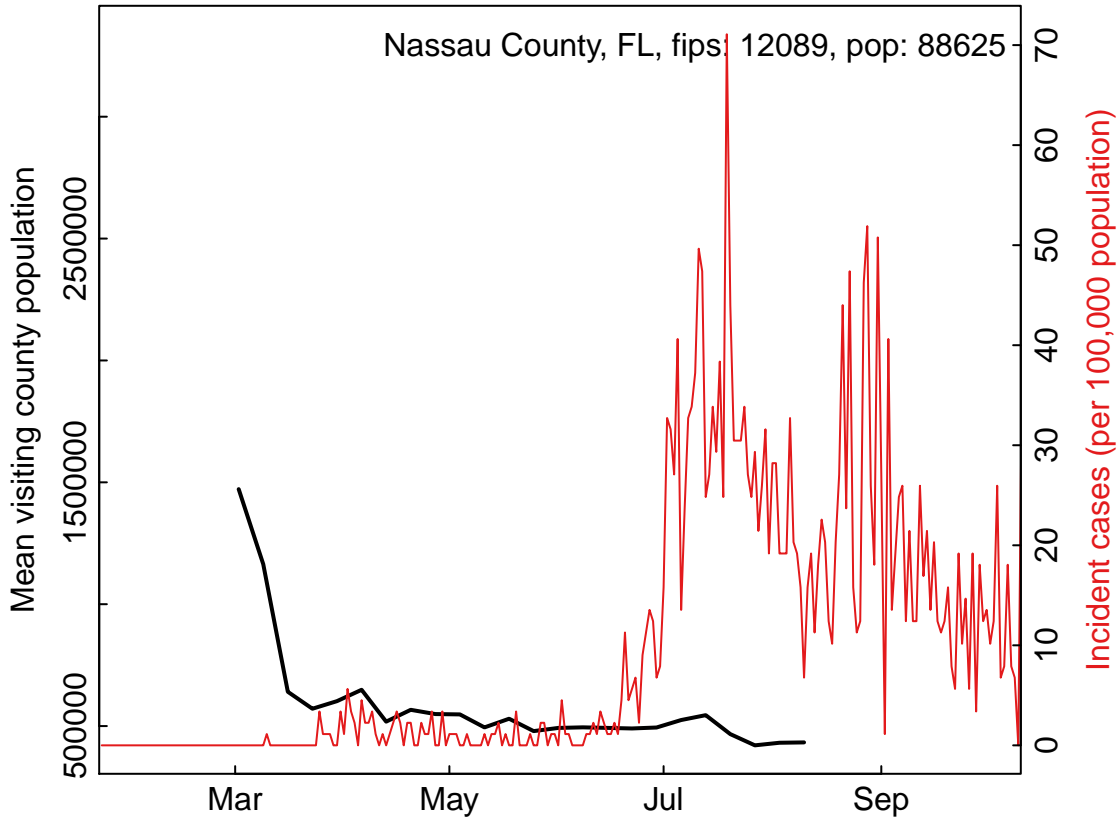

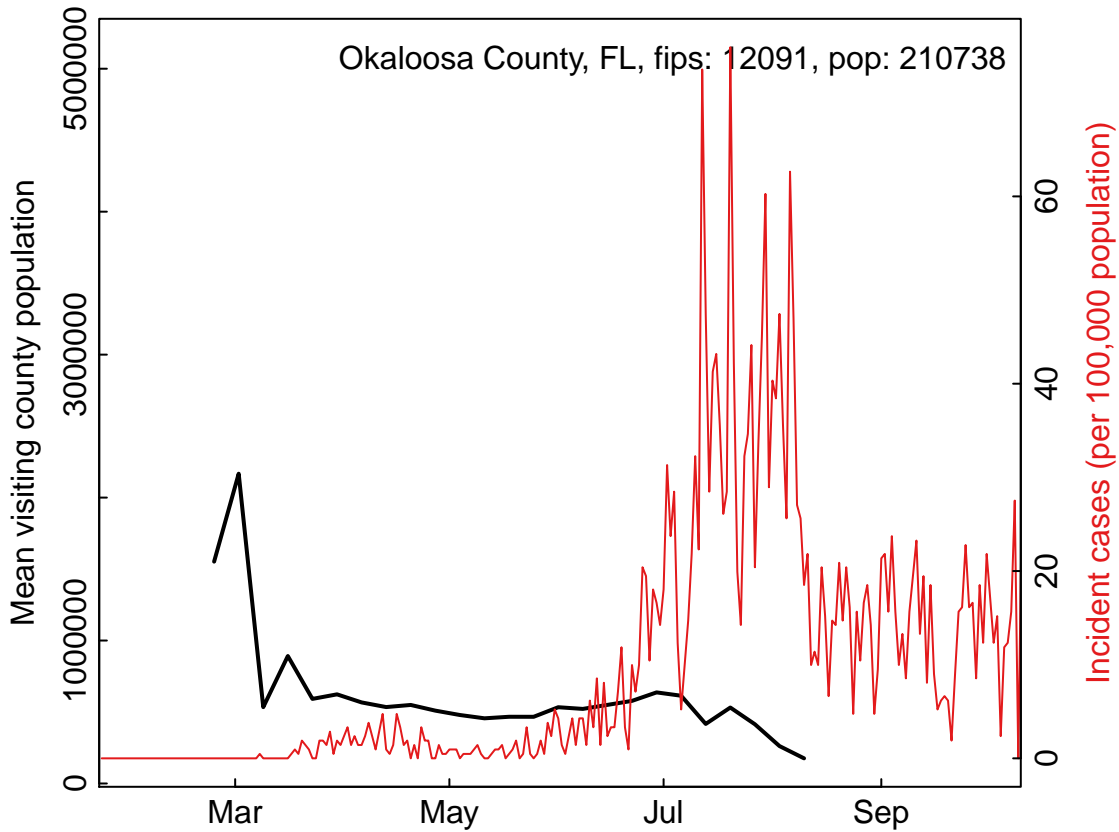

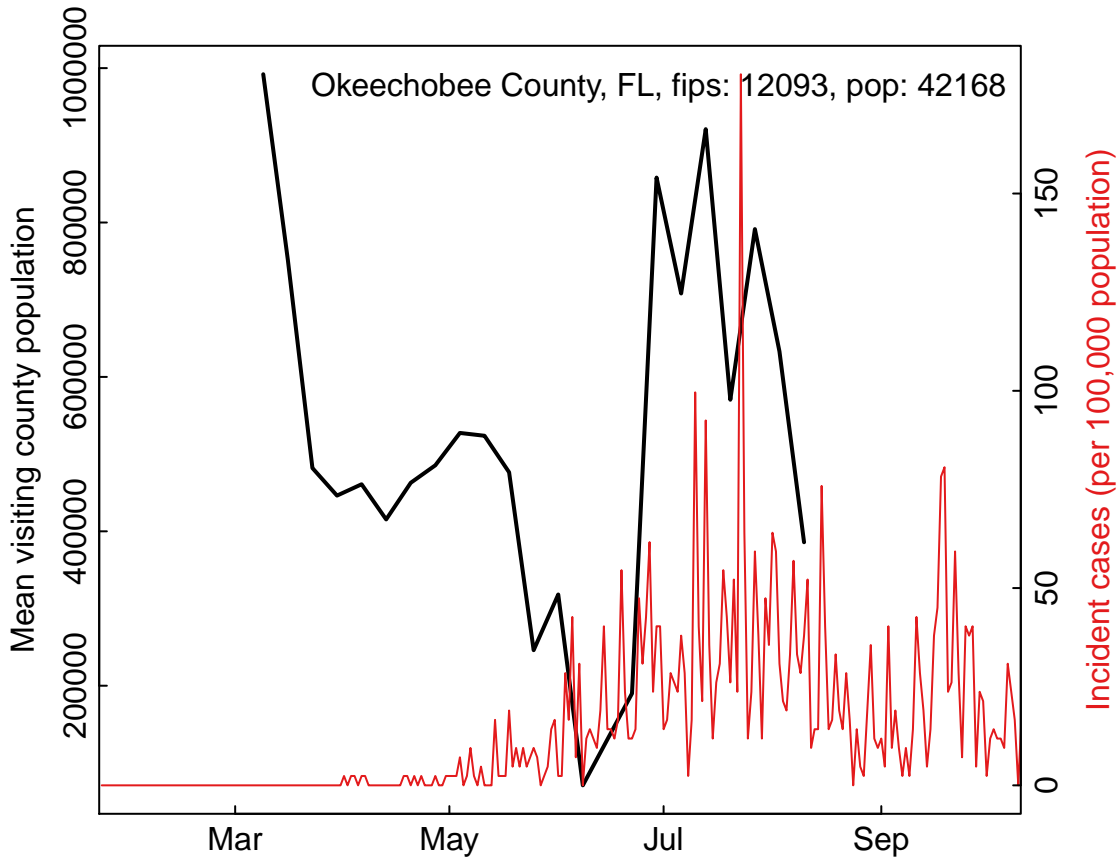

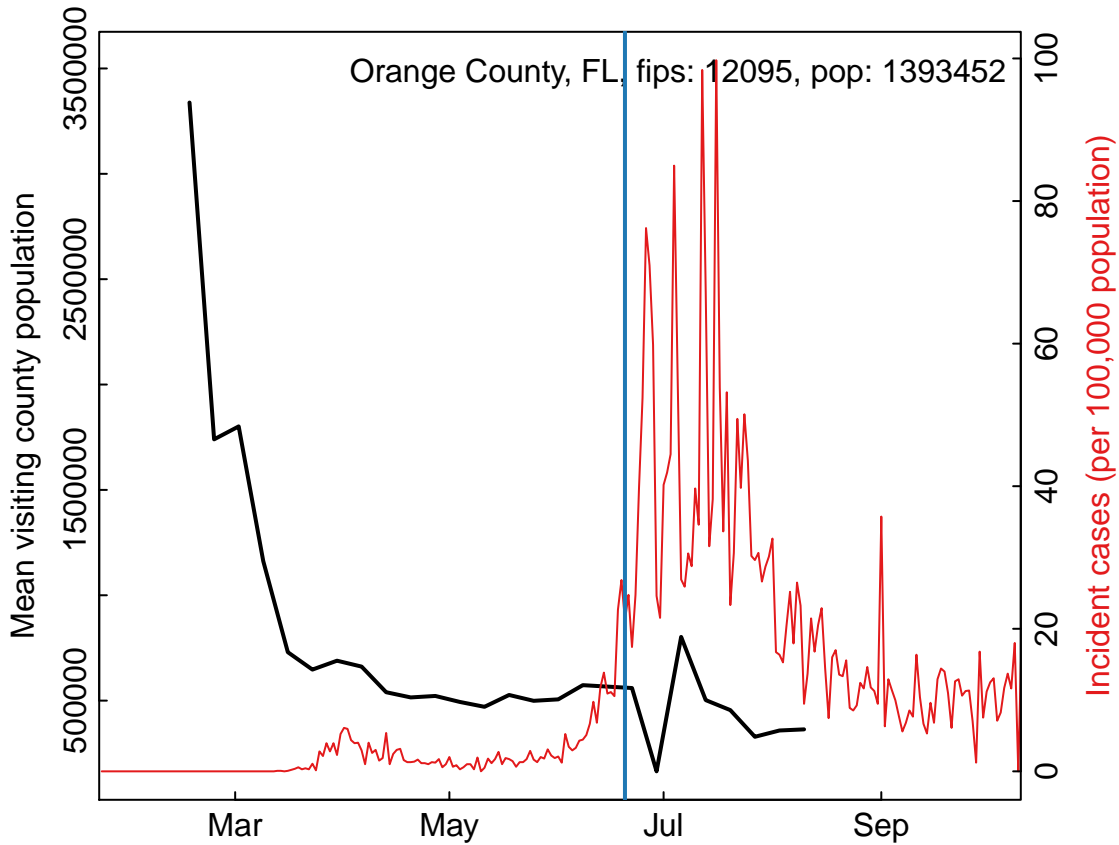



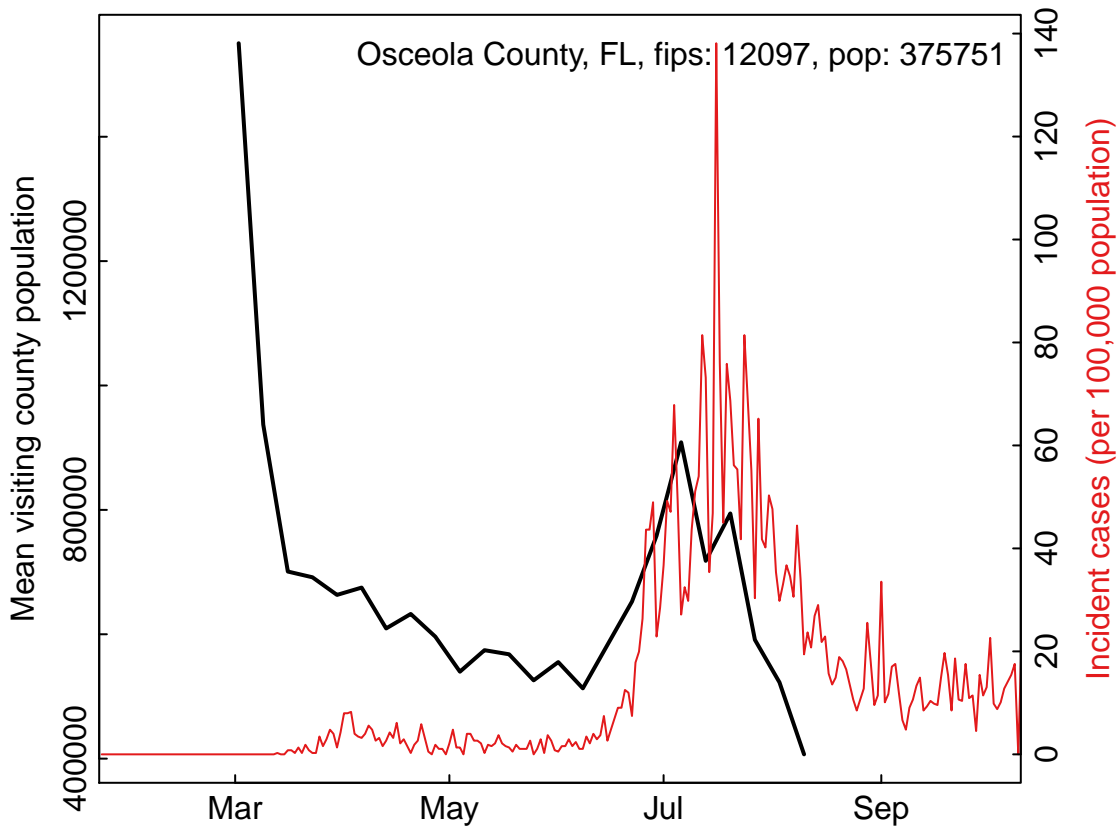

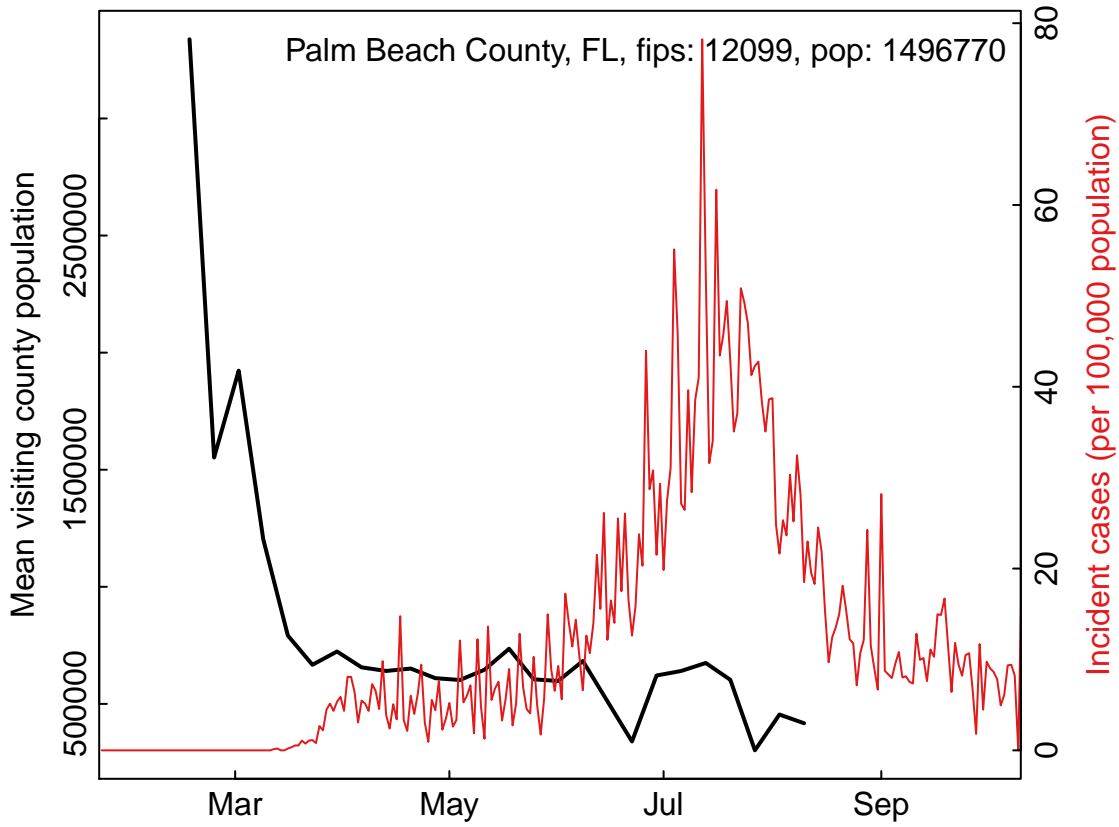

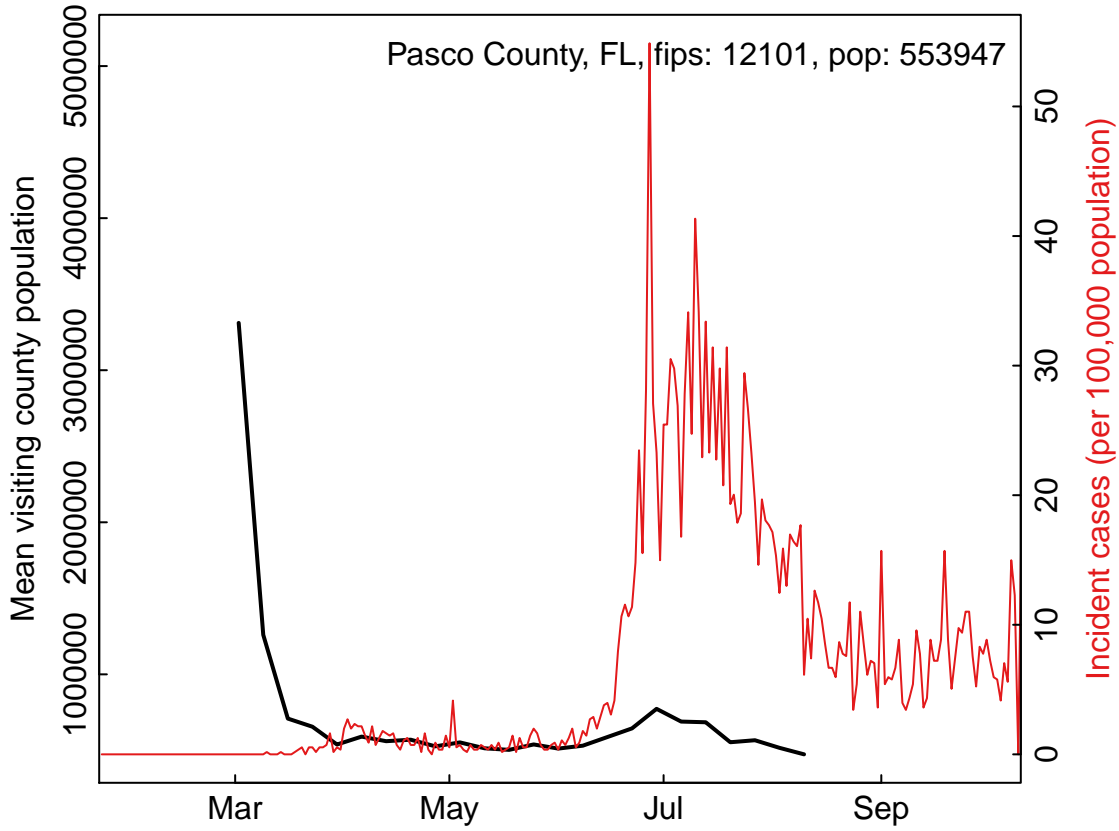

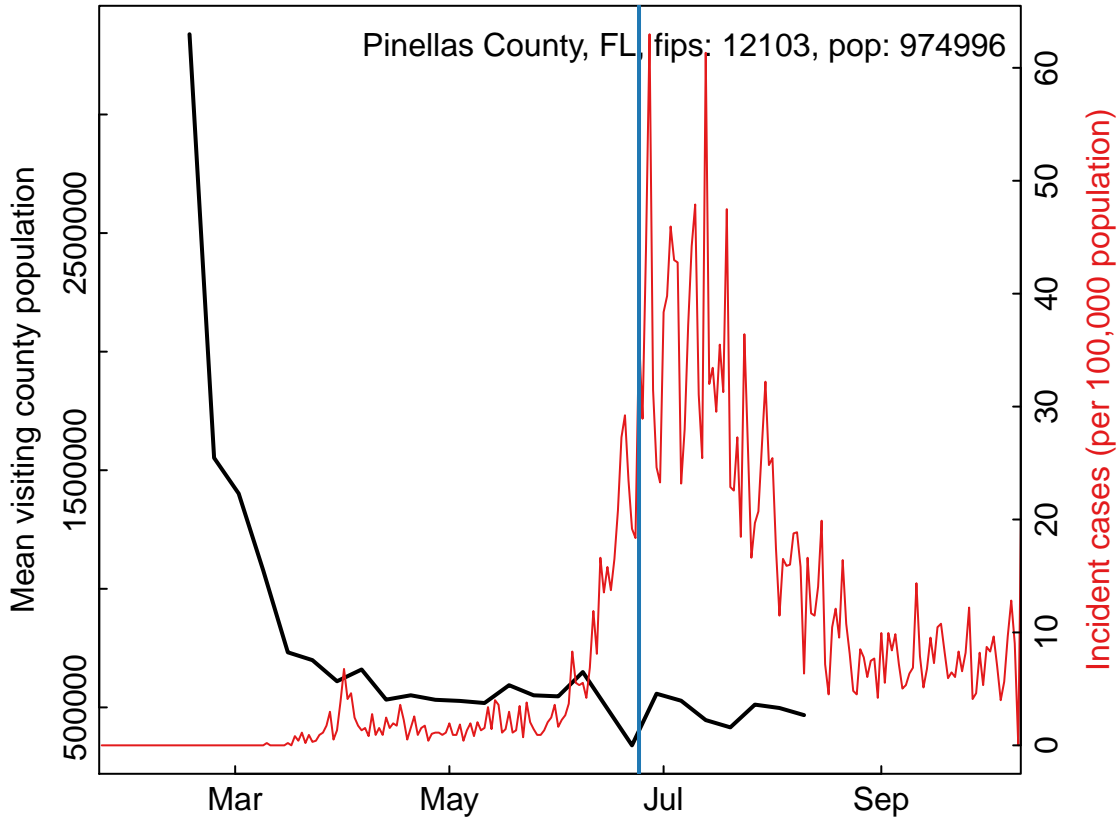

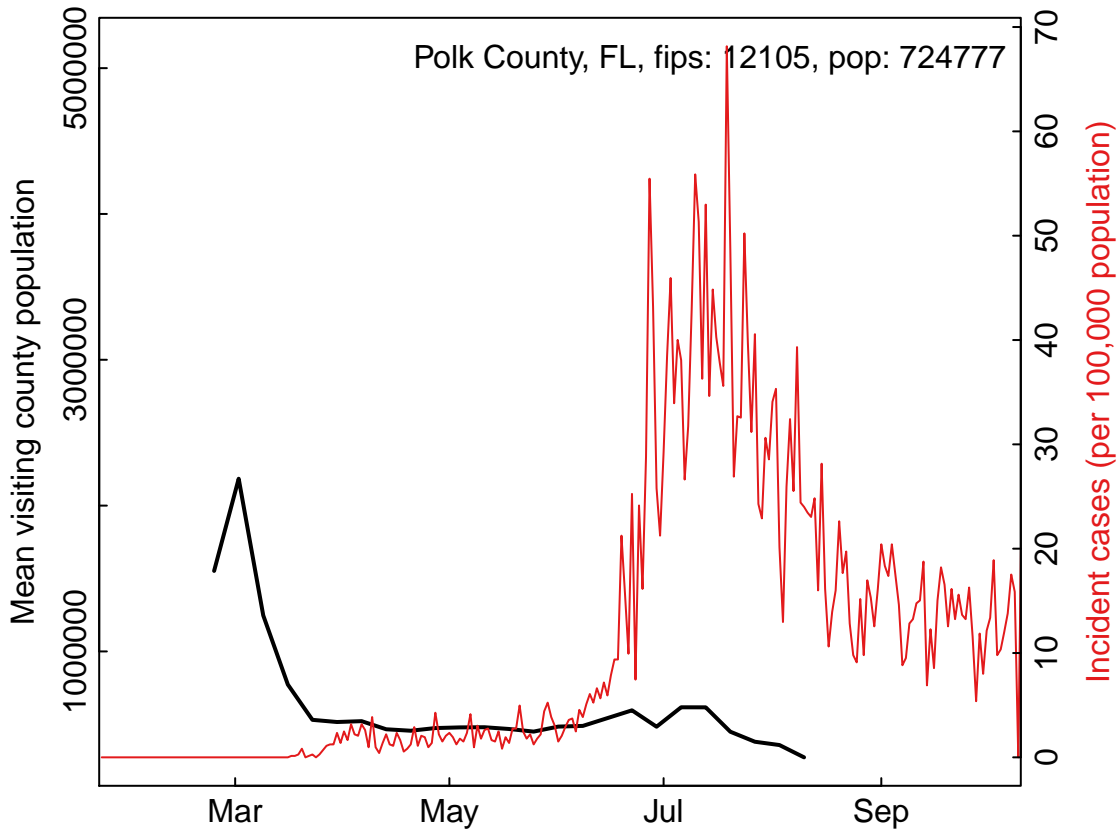

Putnam County, FL, fips: 12107, pop: 74521

Mean visiting county population

Incident cases (per 100,000 population)

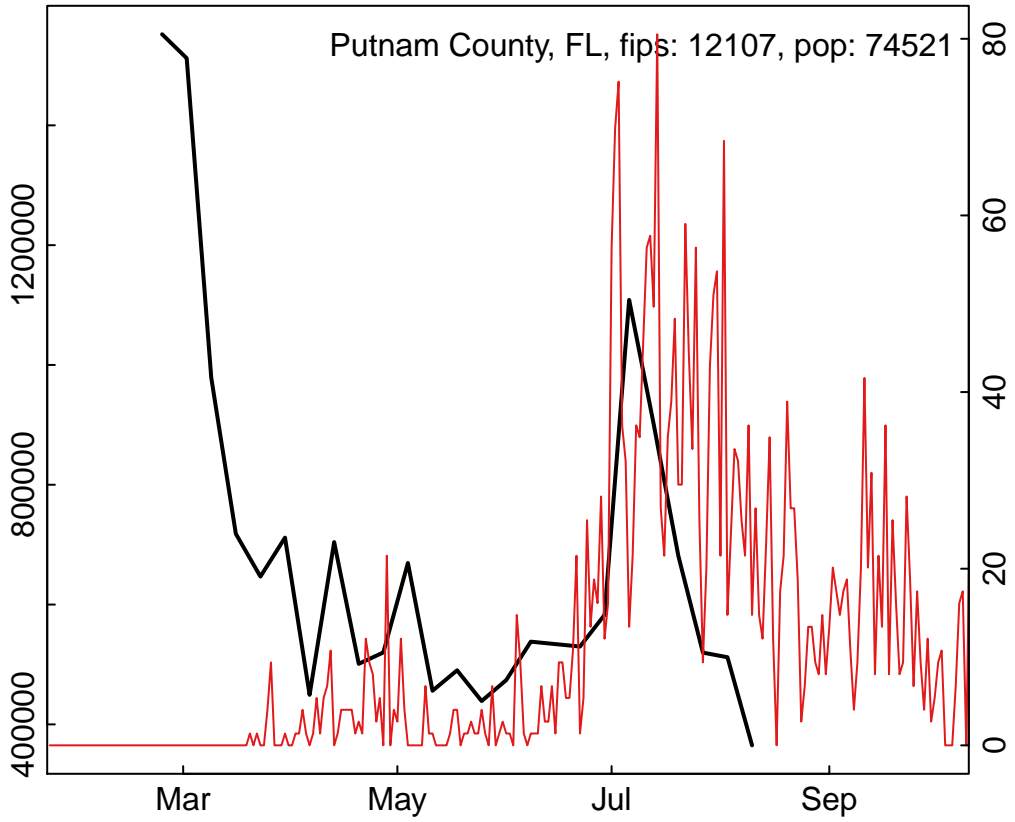

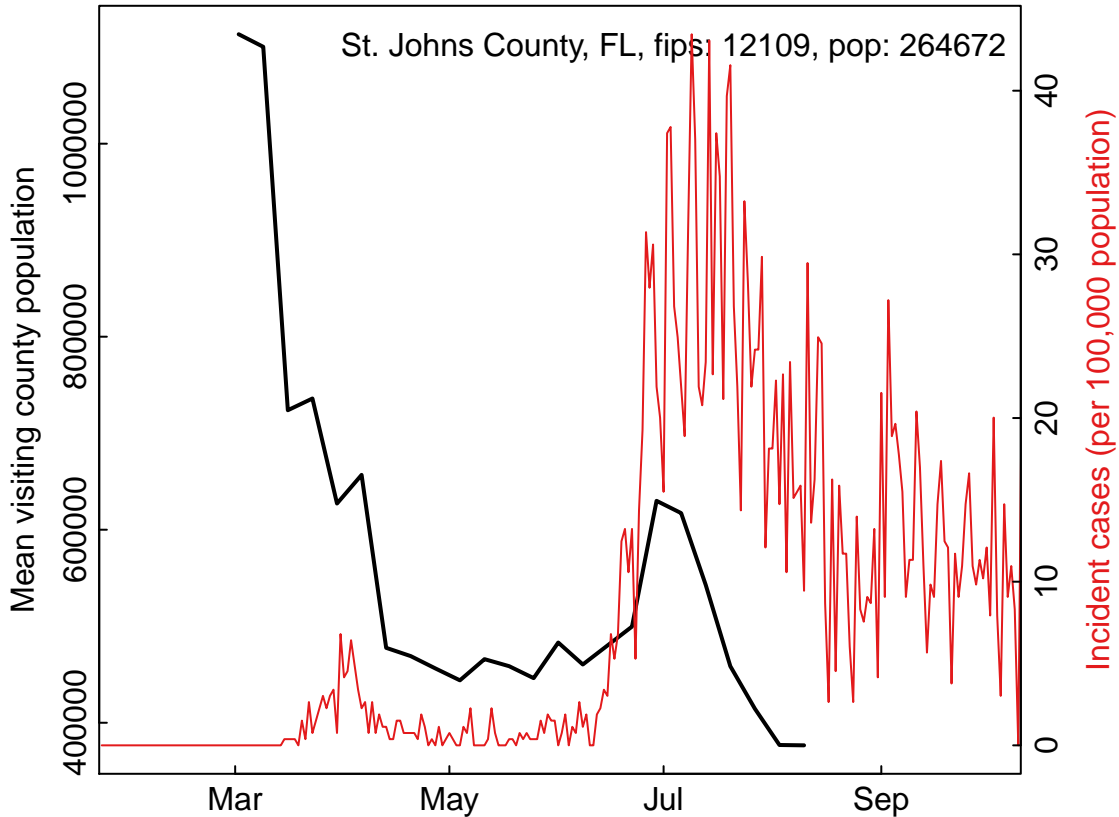

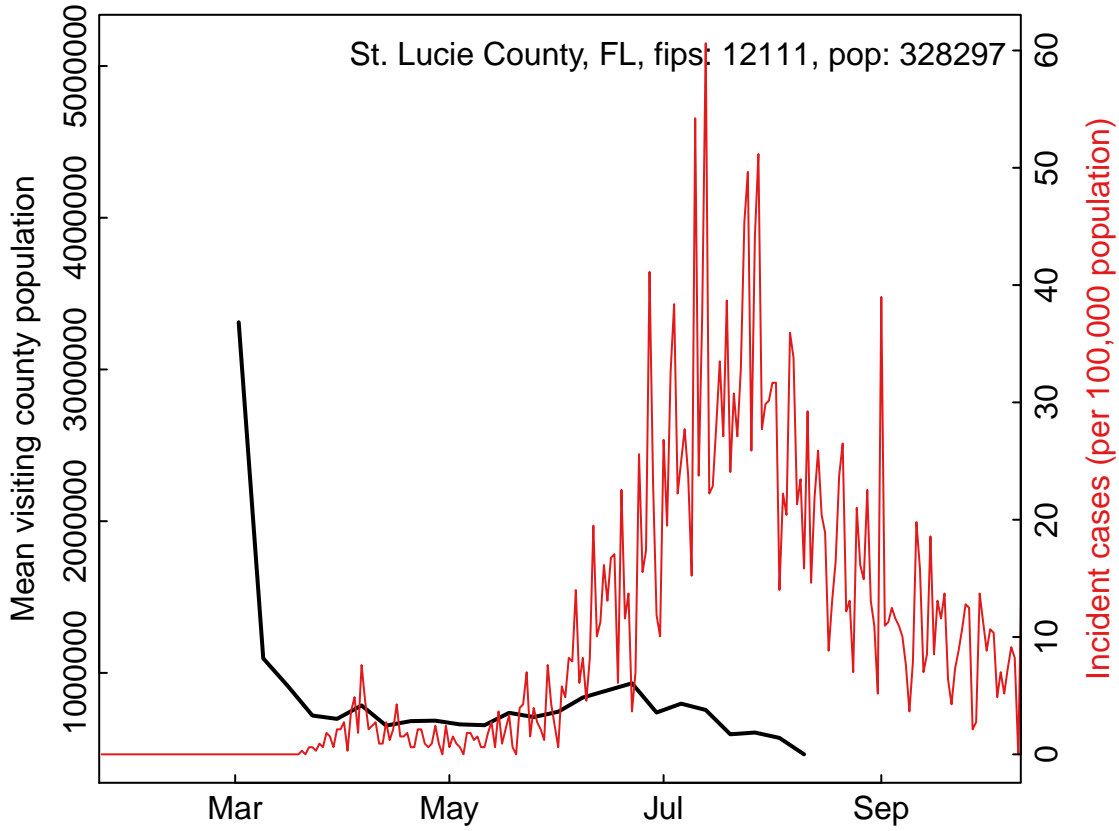



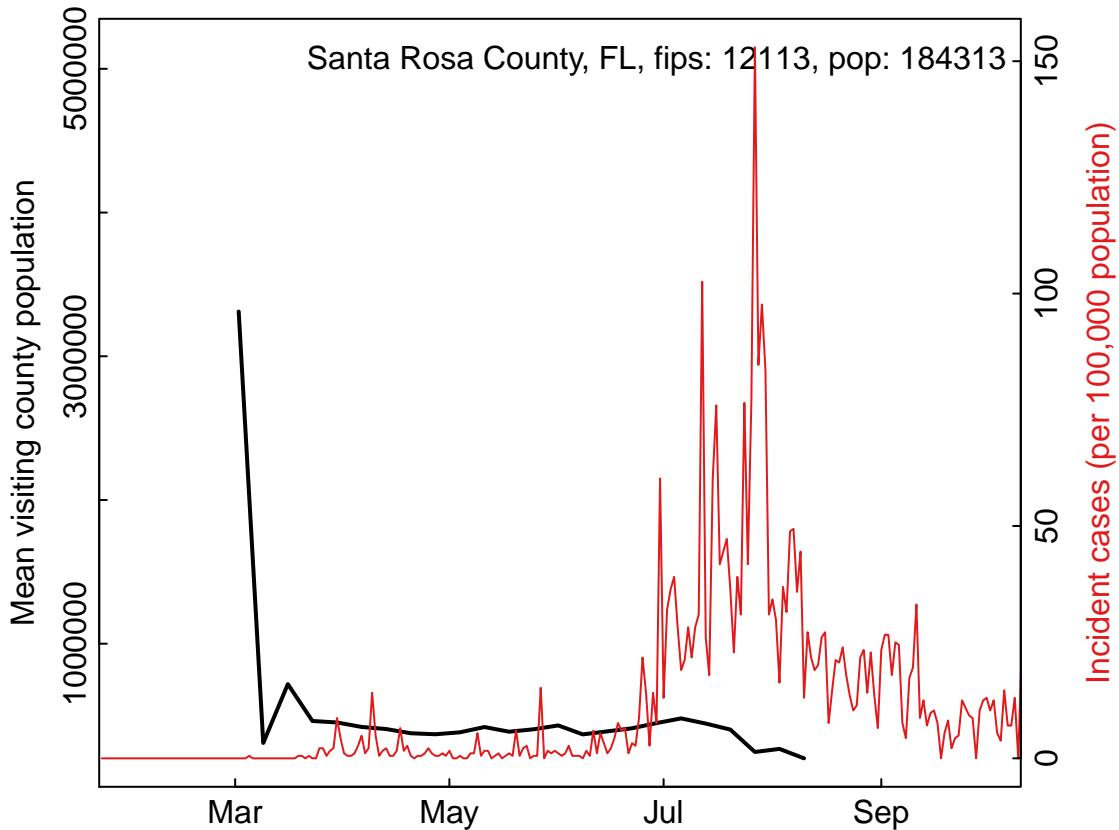

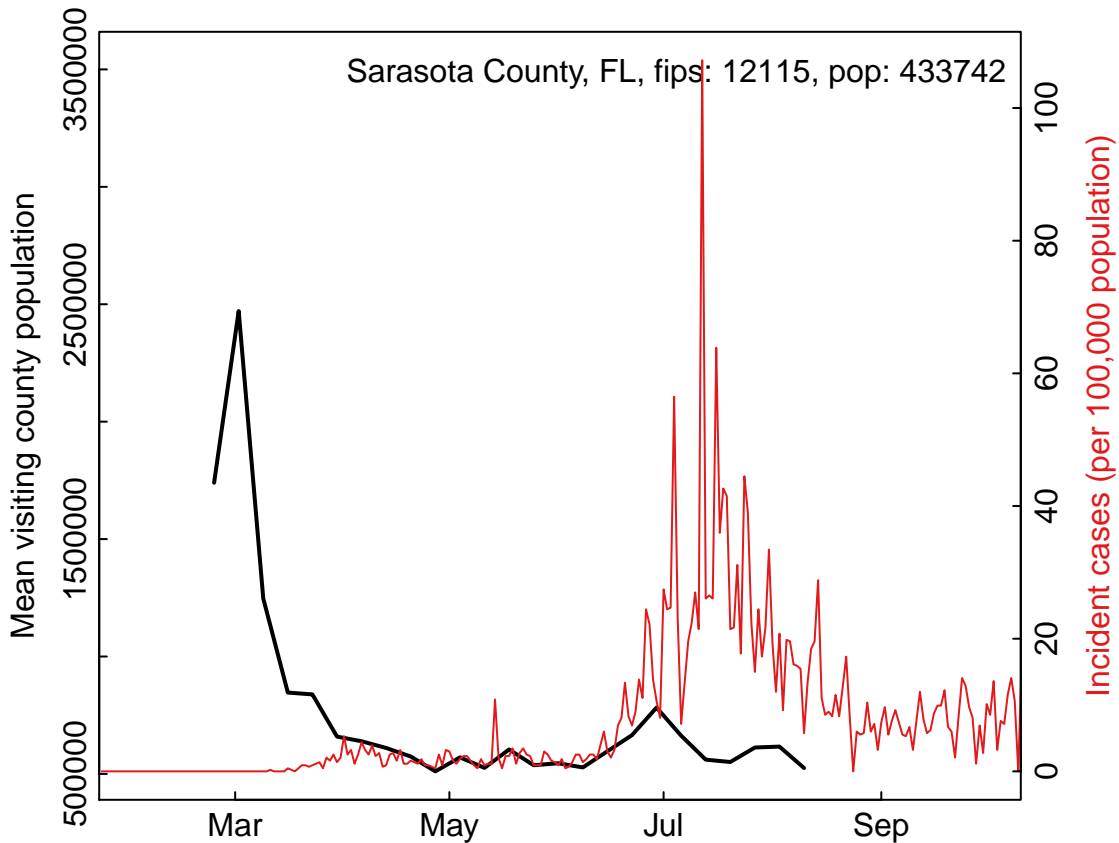

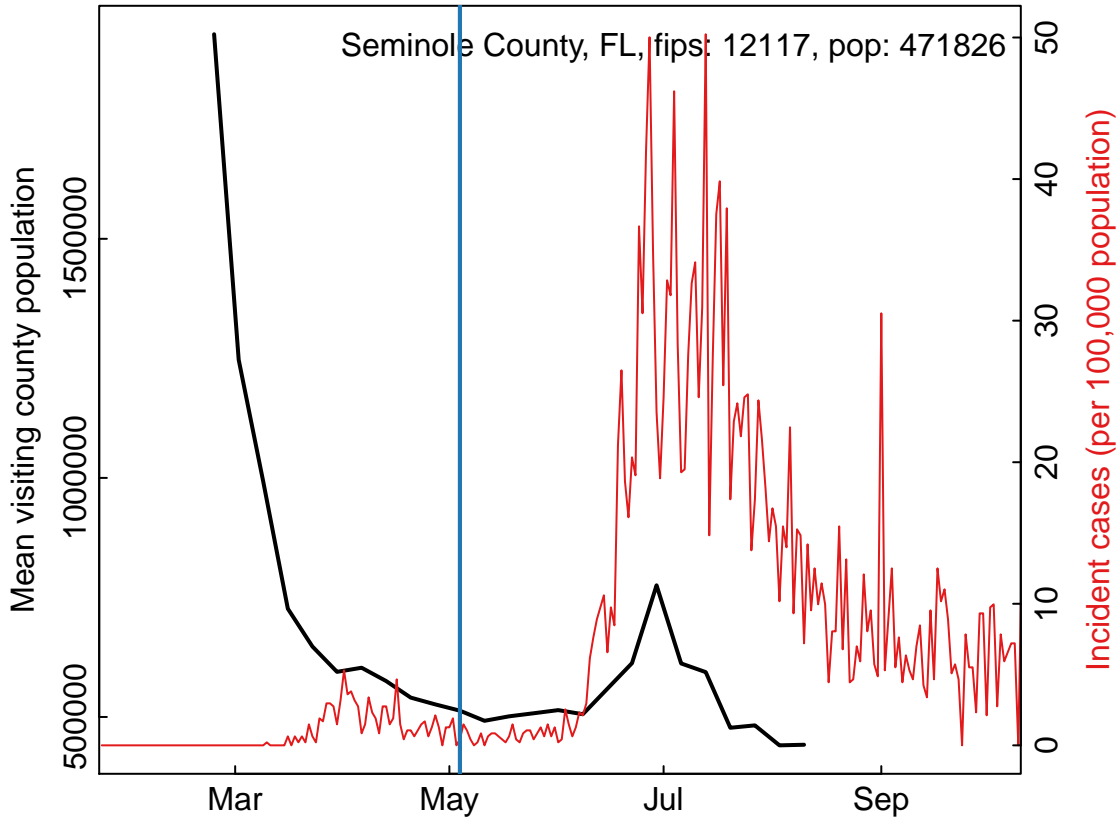

Sumter County, FL, fips: 12119, pop: 132420

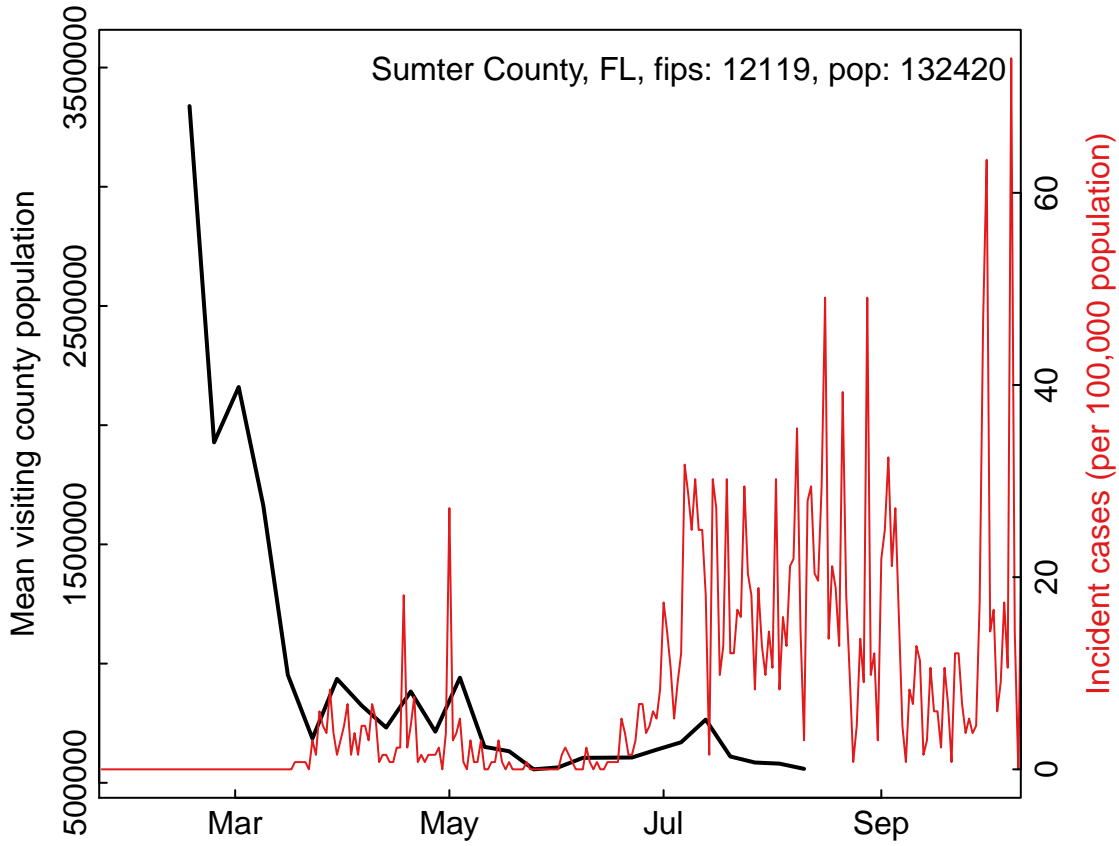

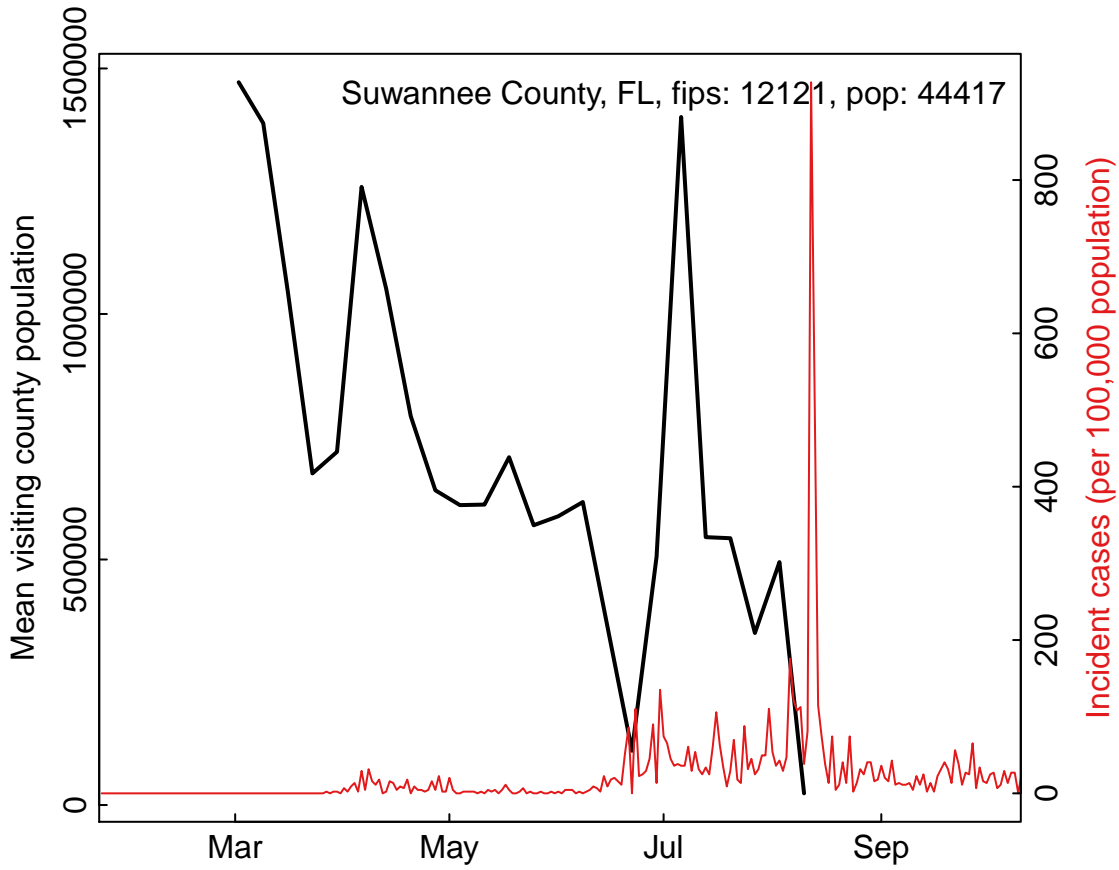

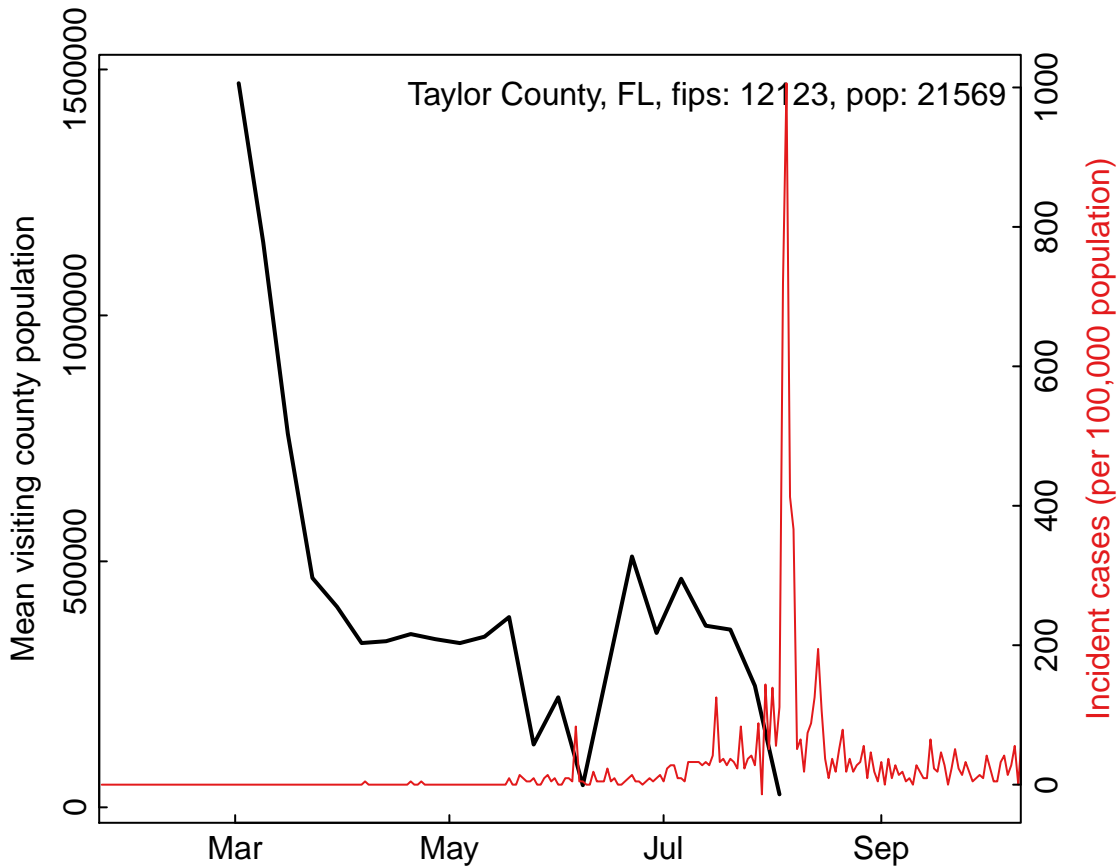

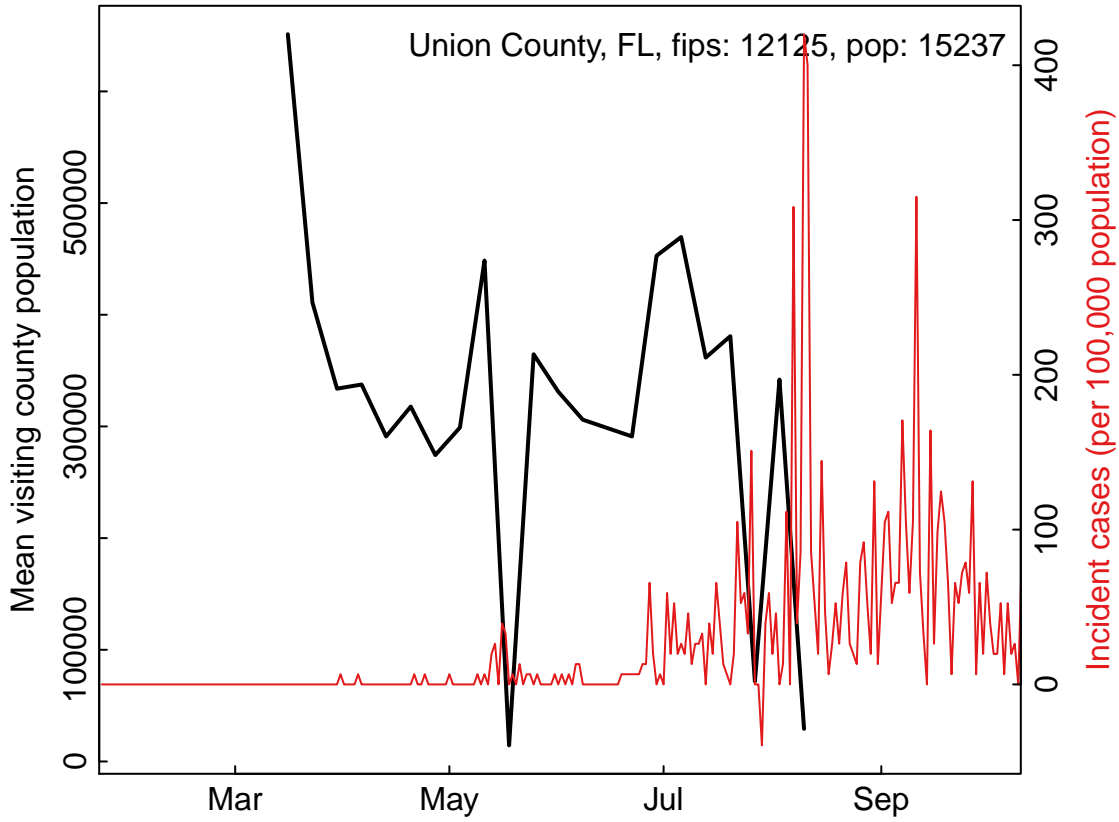

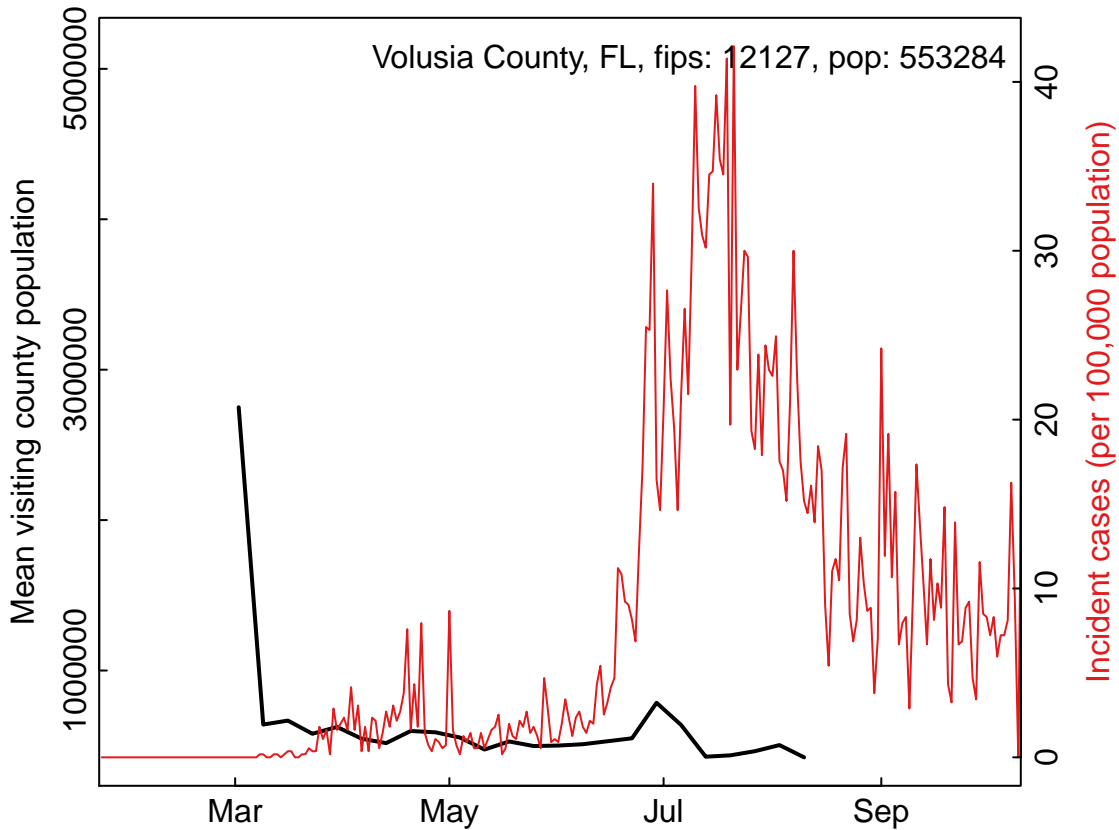



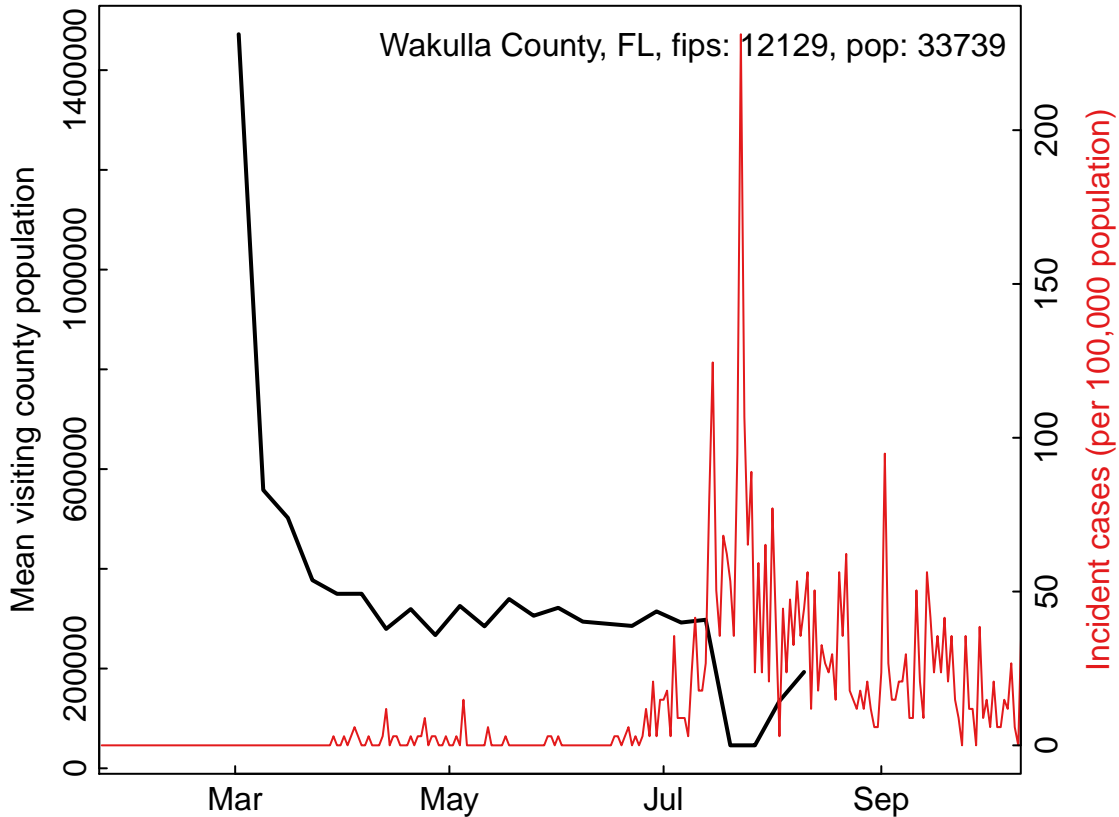

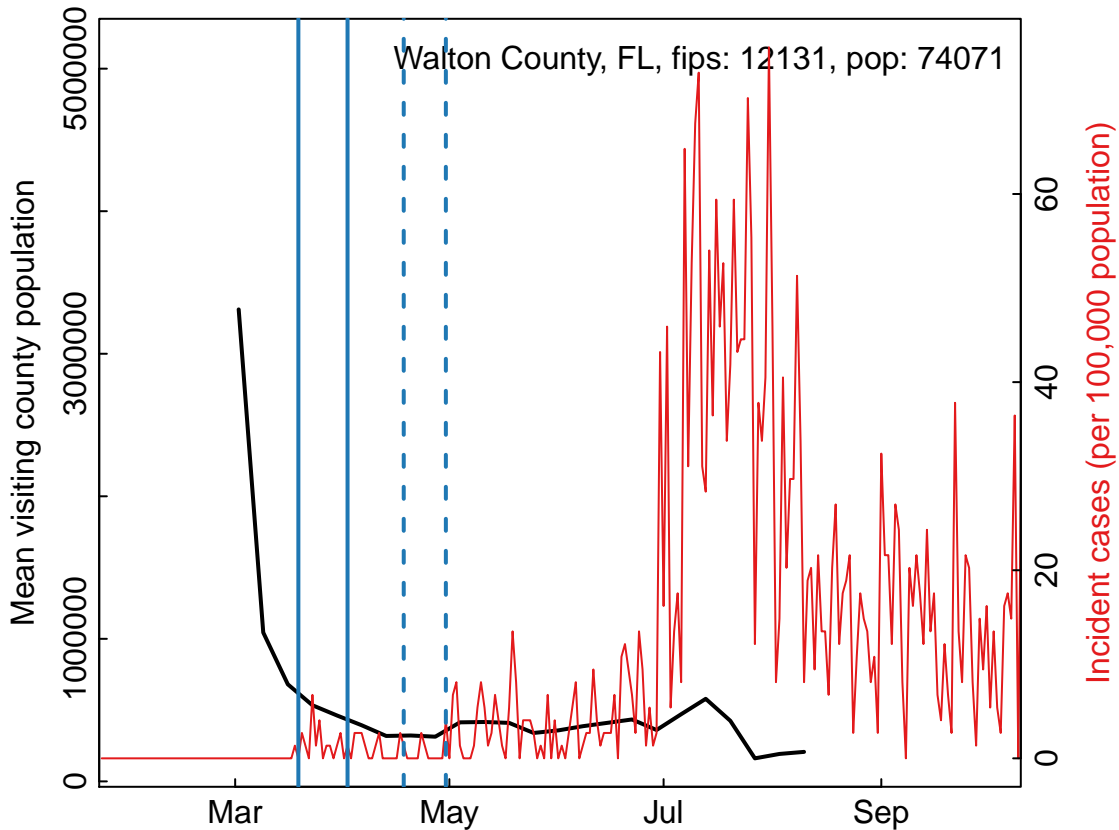

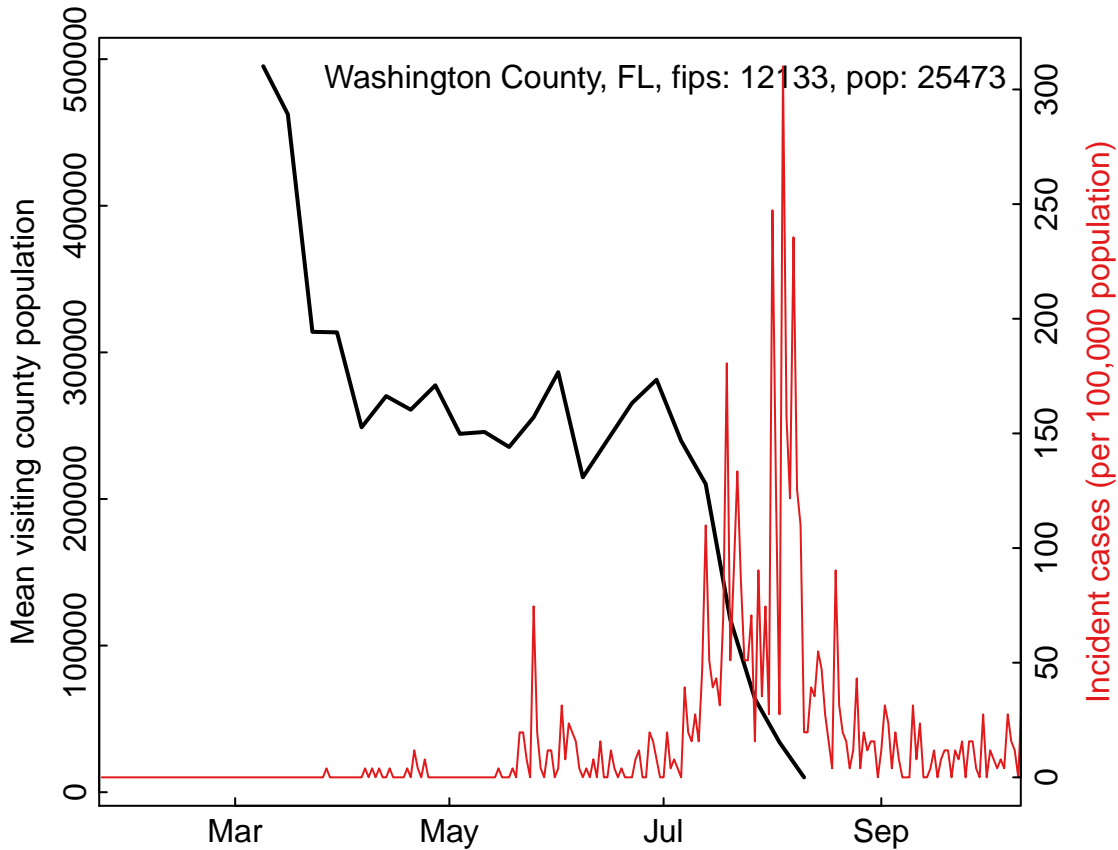

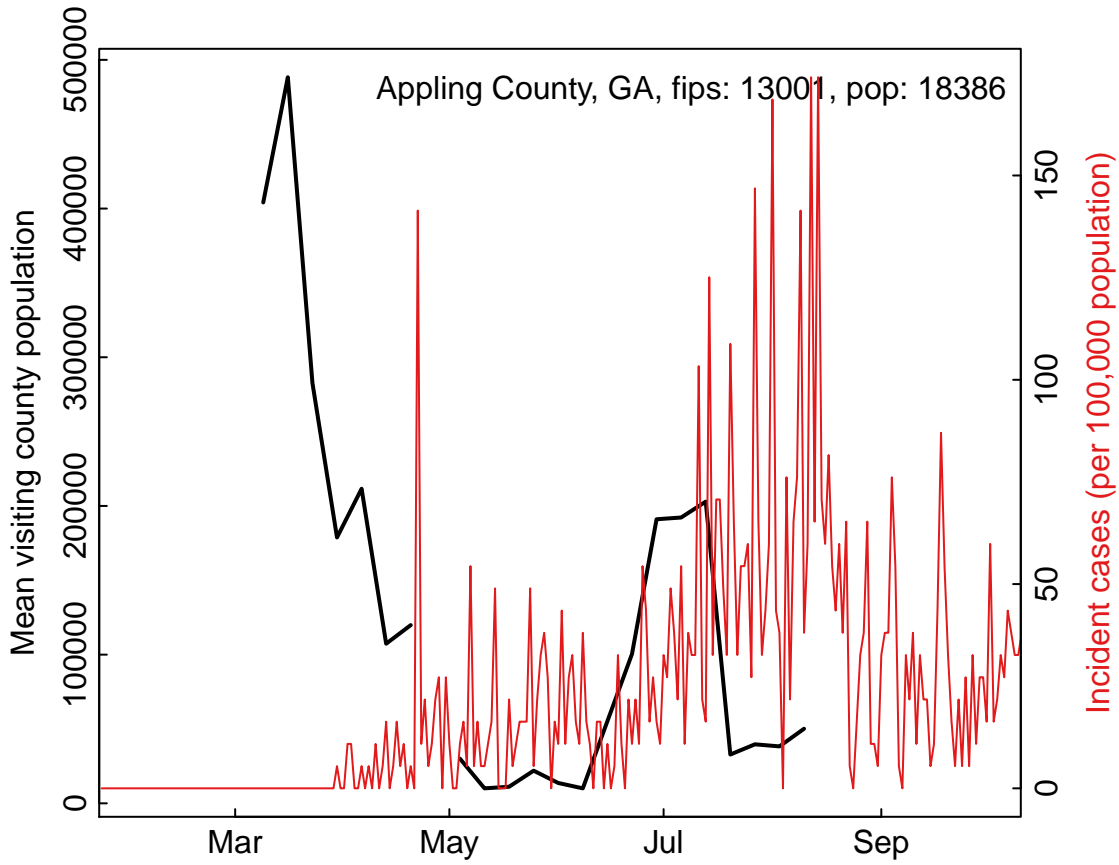

Mean visiting county population

1500000  
1000000  
500000  
0

Mar

May

Jul

Sep

Atkinson County, GA, fips: 13003, pop: 8165

Incident cases (per 100,000 population)

250  
200  
150  
100  
50  
0

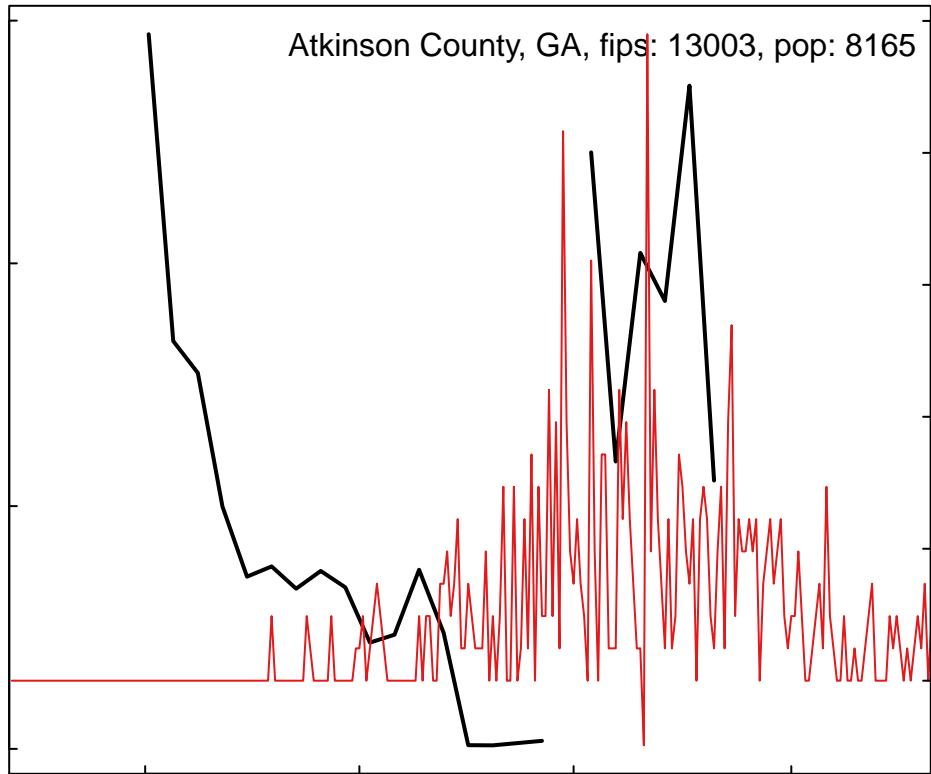

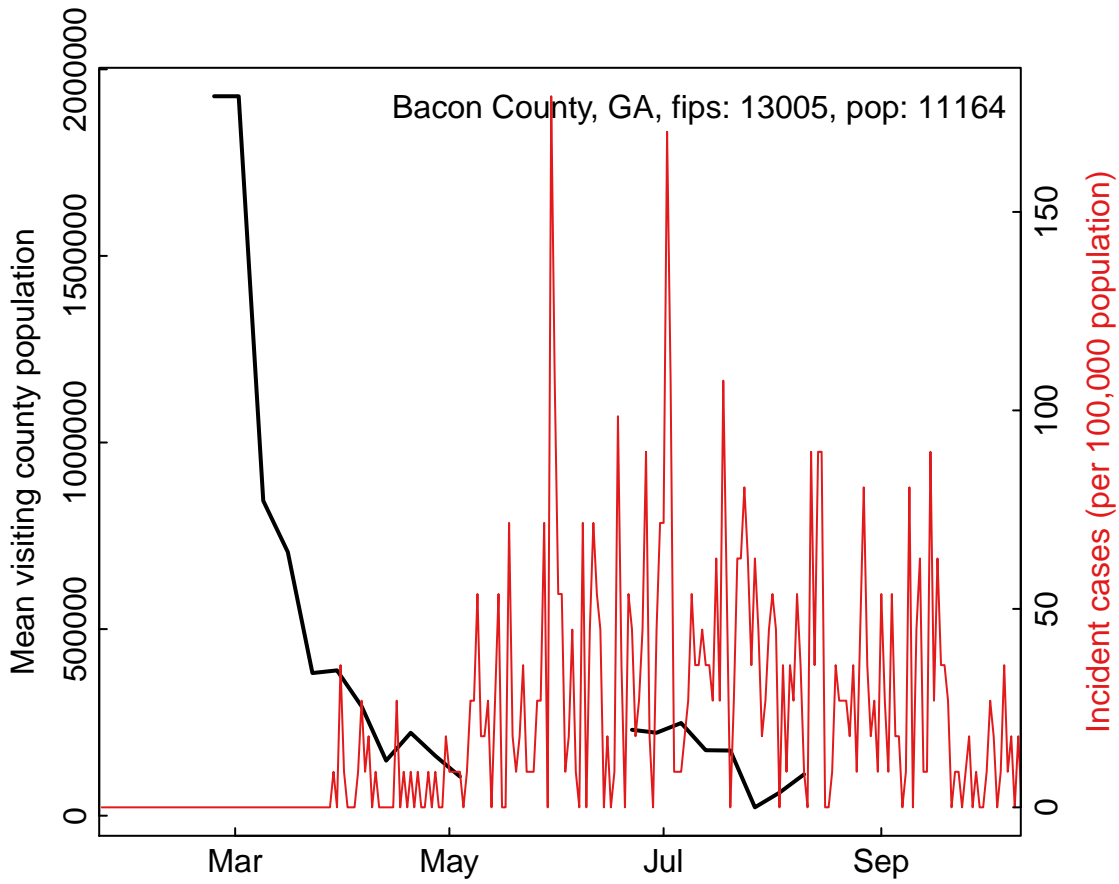

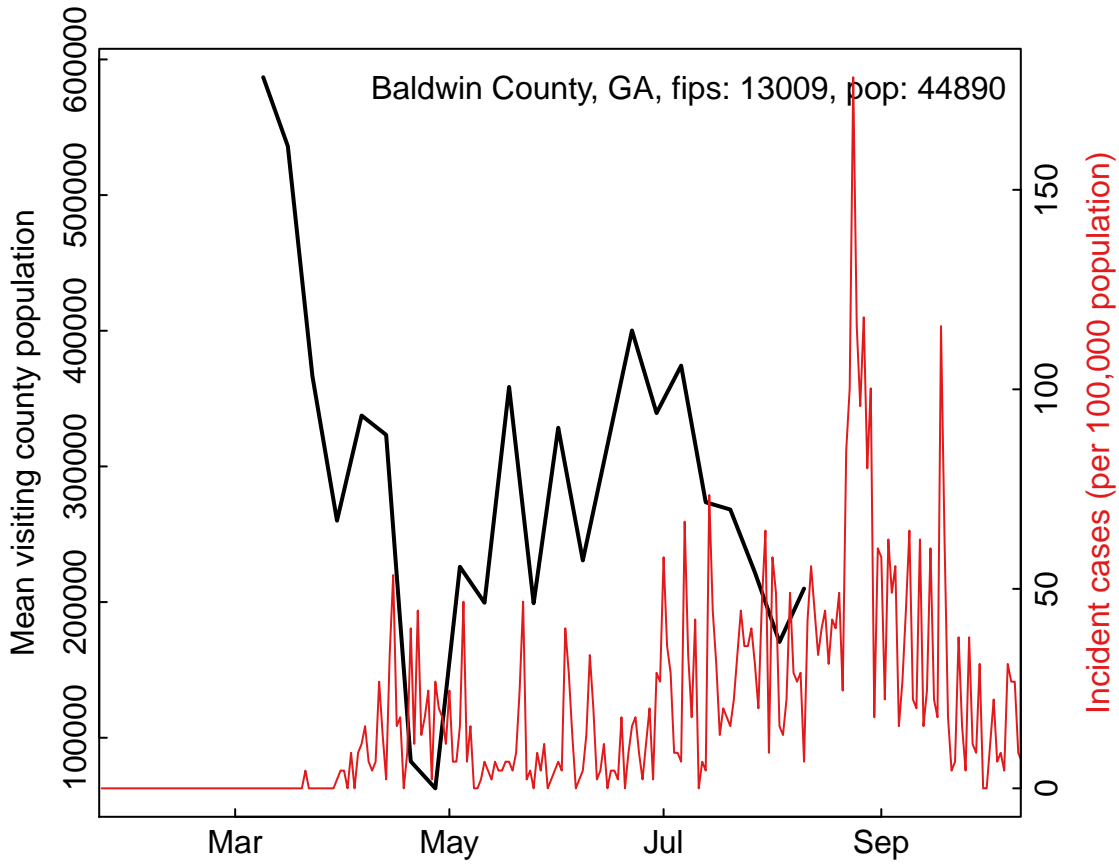

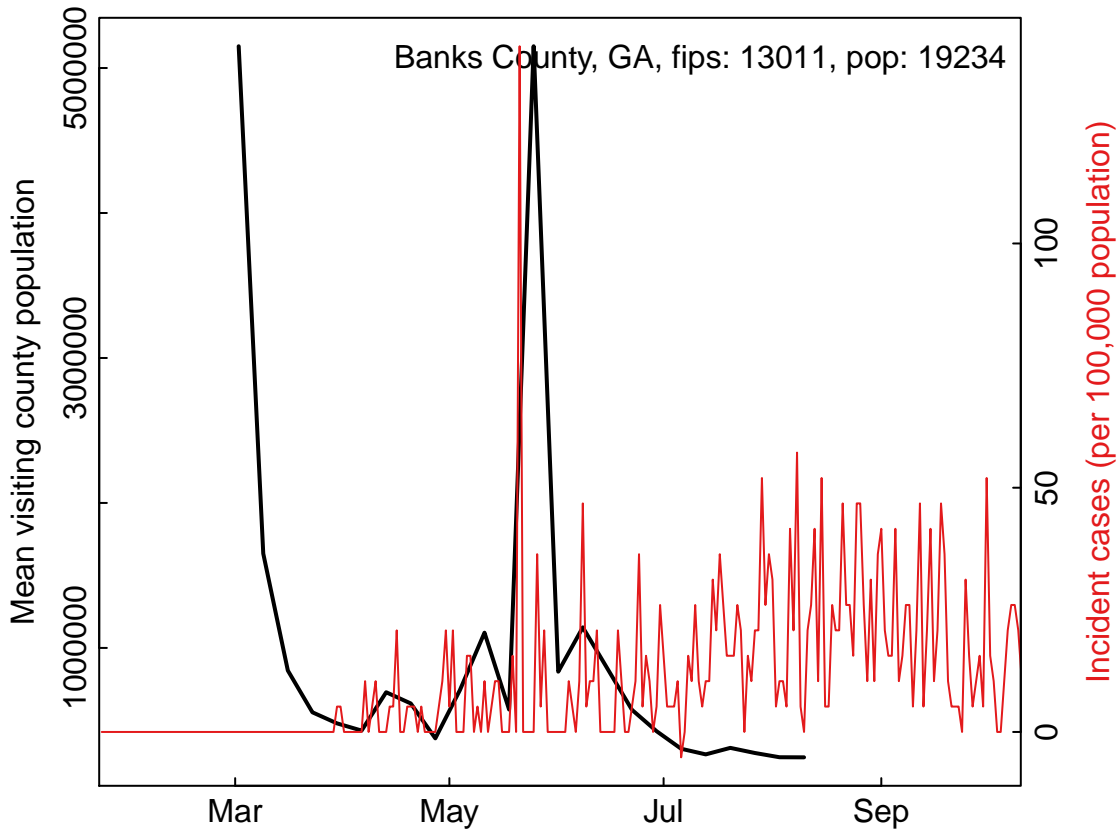



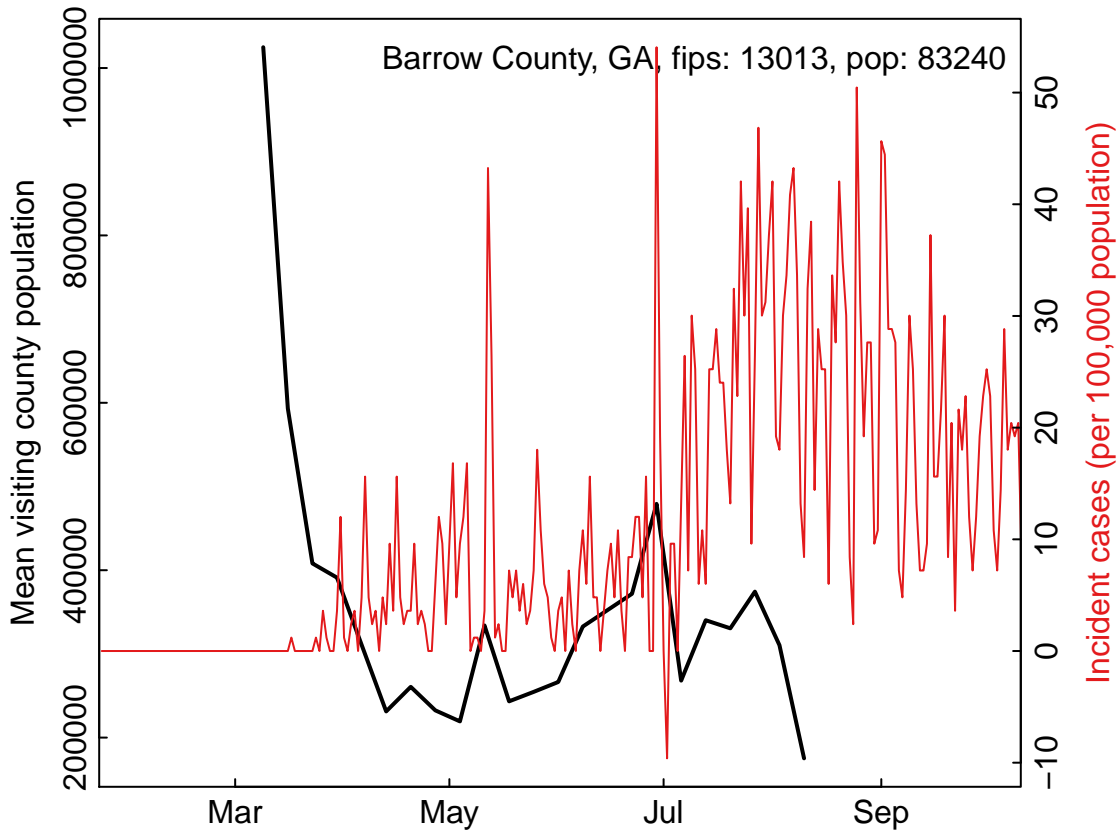

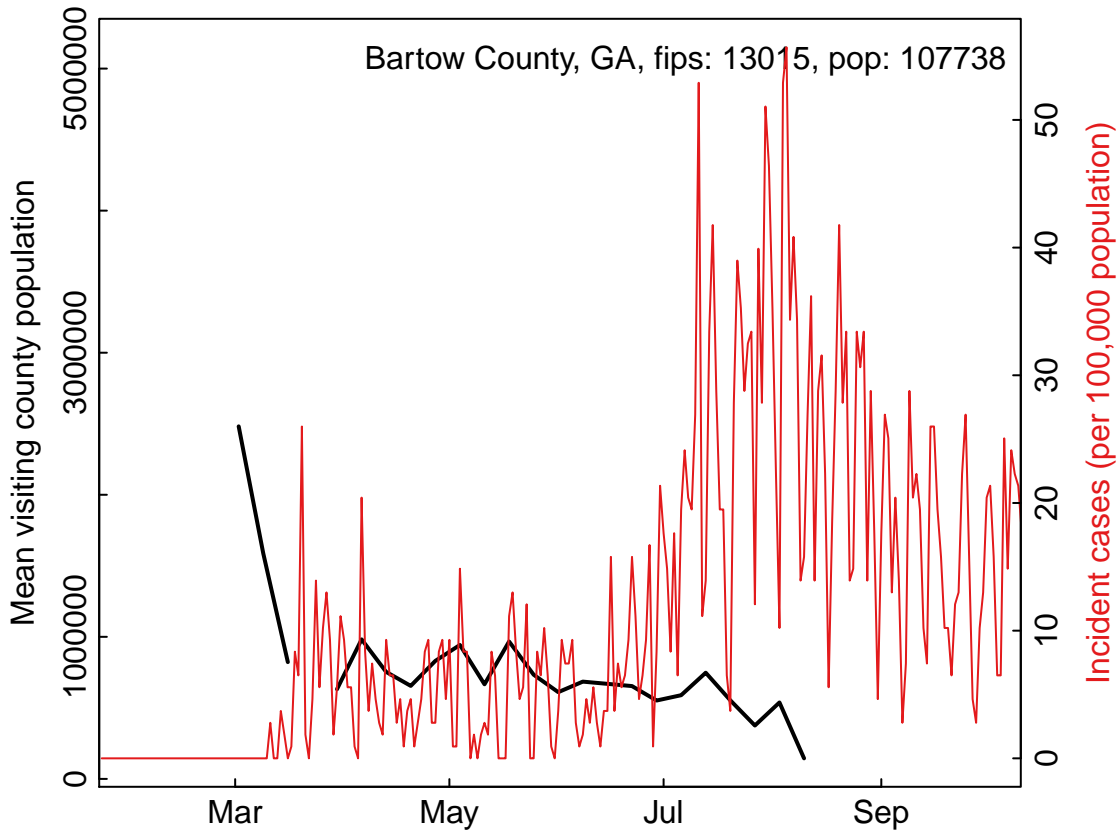

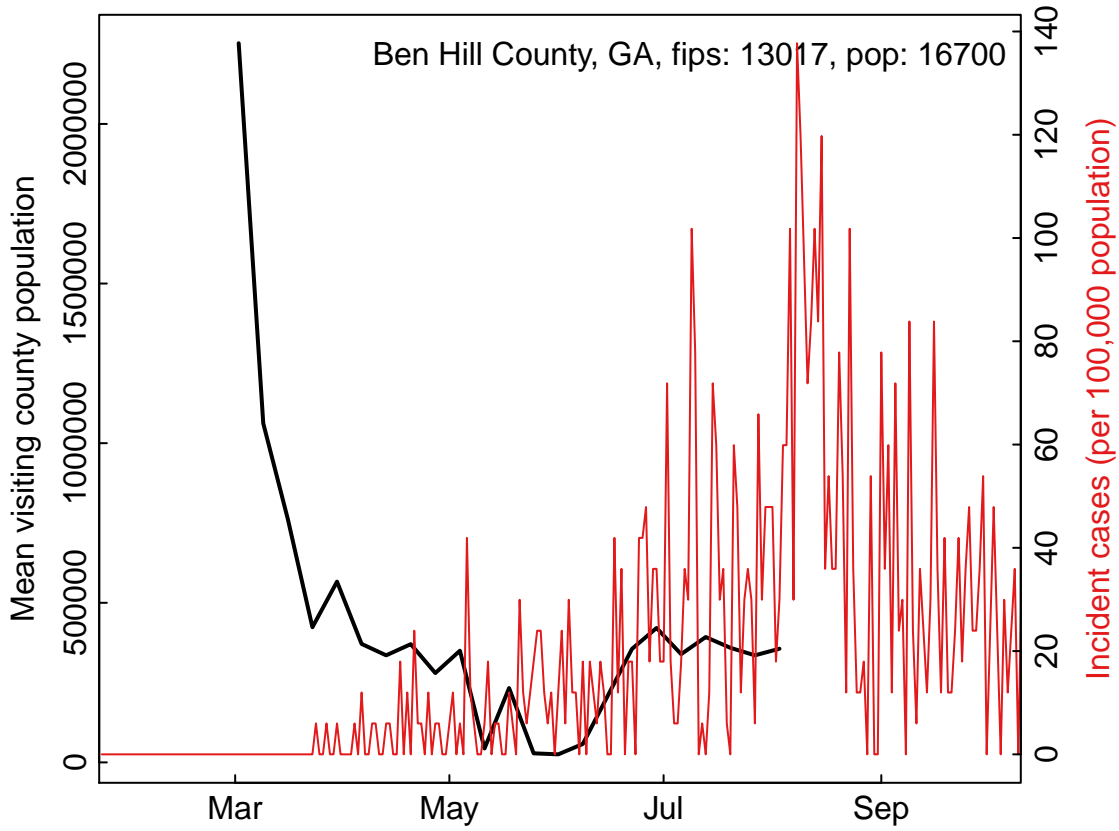

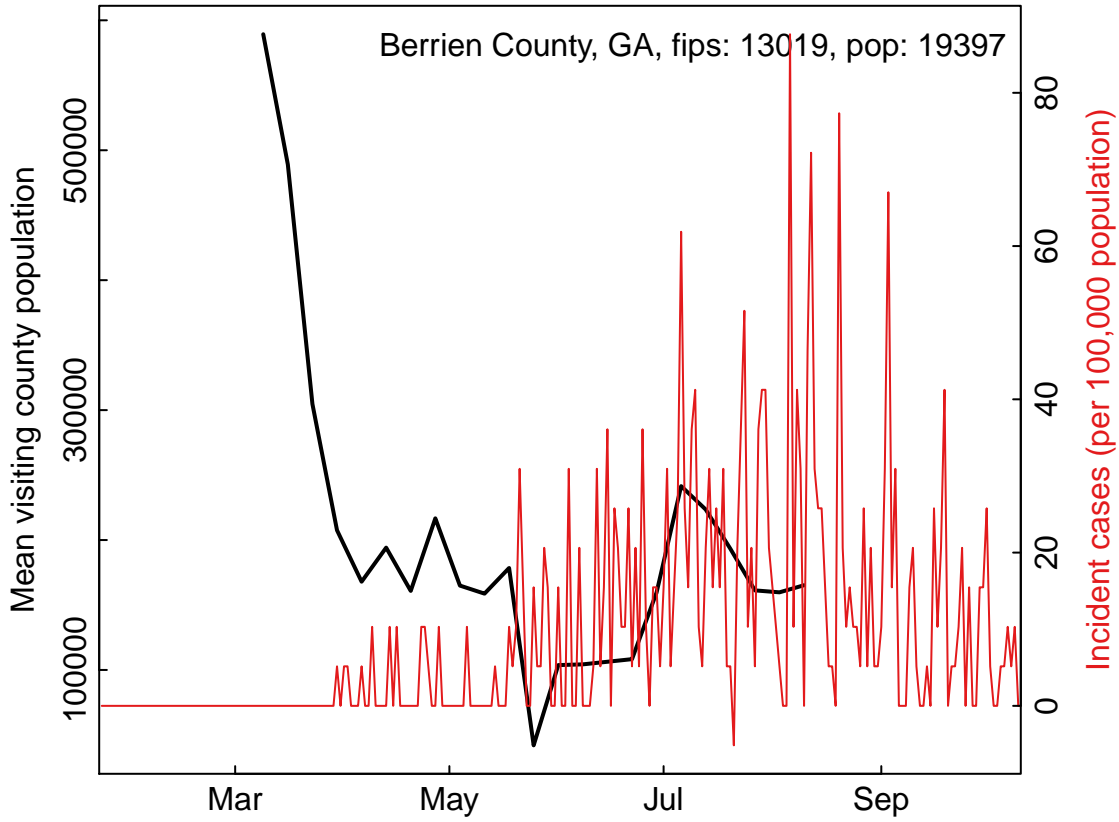

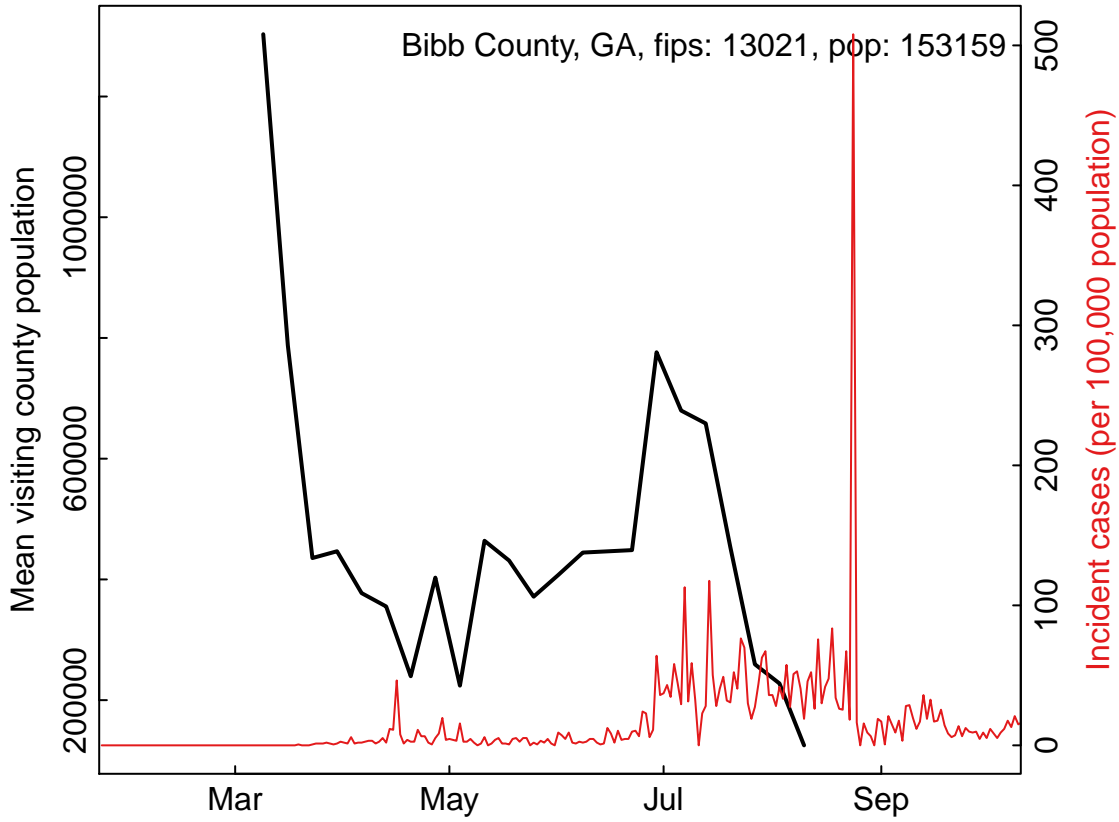

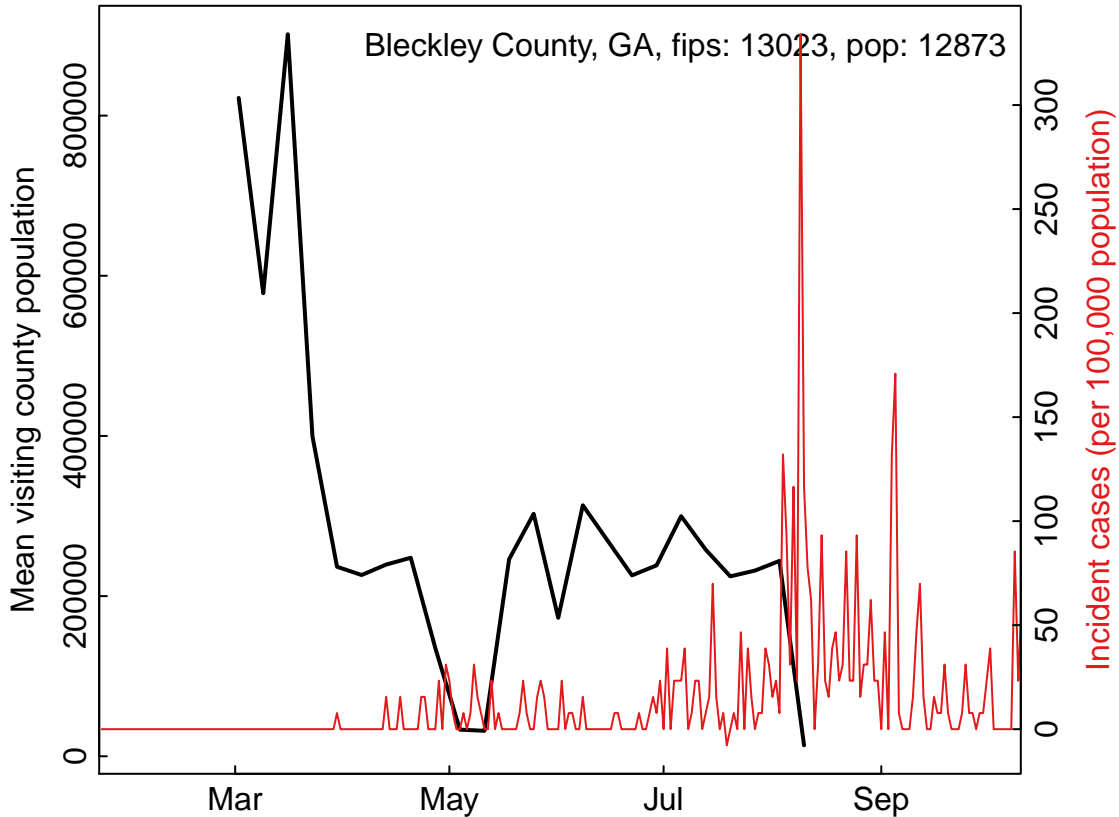

Brantley County, GA, fips: 13025, pop: 19109

Mean visiting county population

4000000  
3000000  
2000000  
1000000  
0

Mar

May

Jul

Sep

40  
30  
20  
10  
0

Incident cases (per 100,000 population)

0

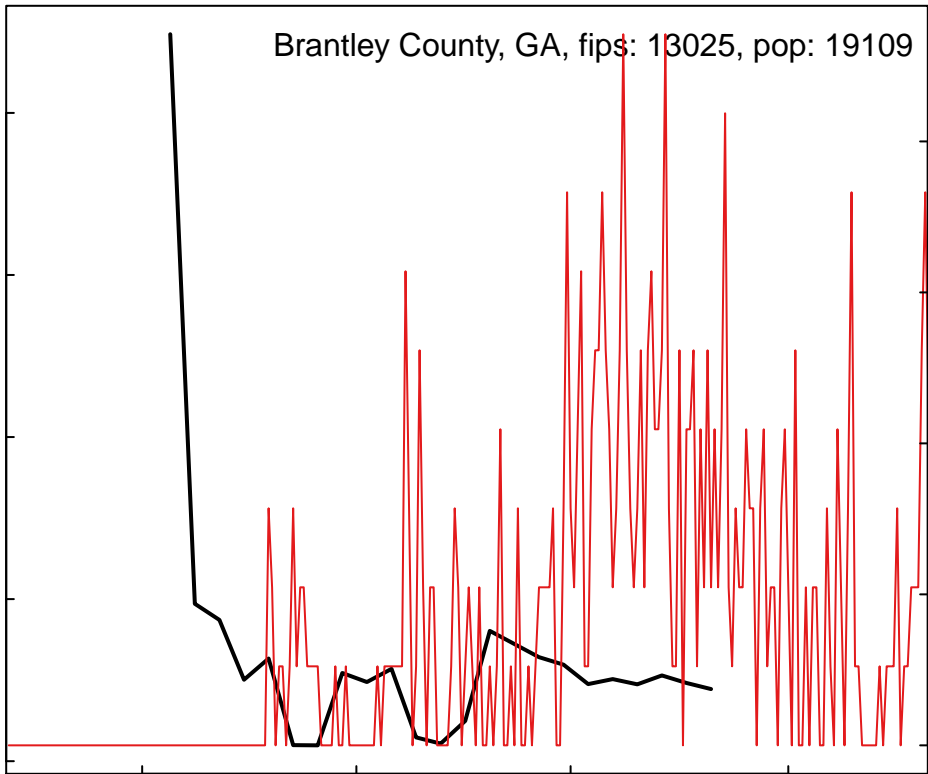

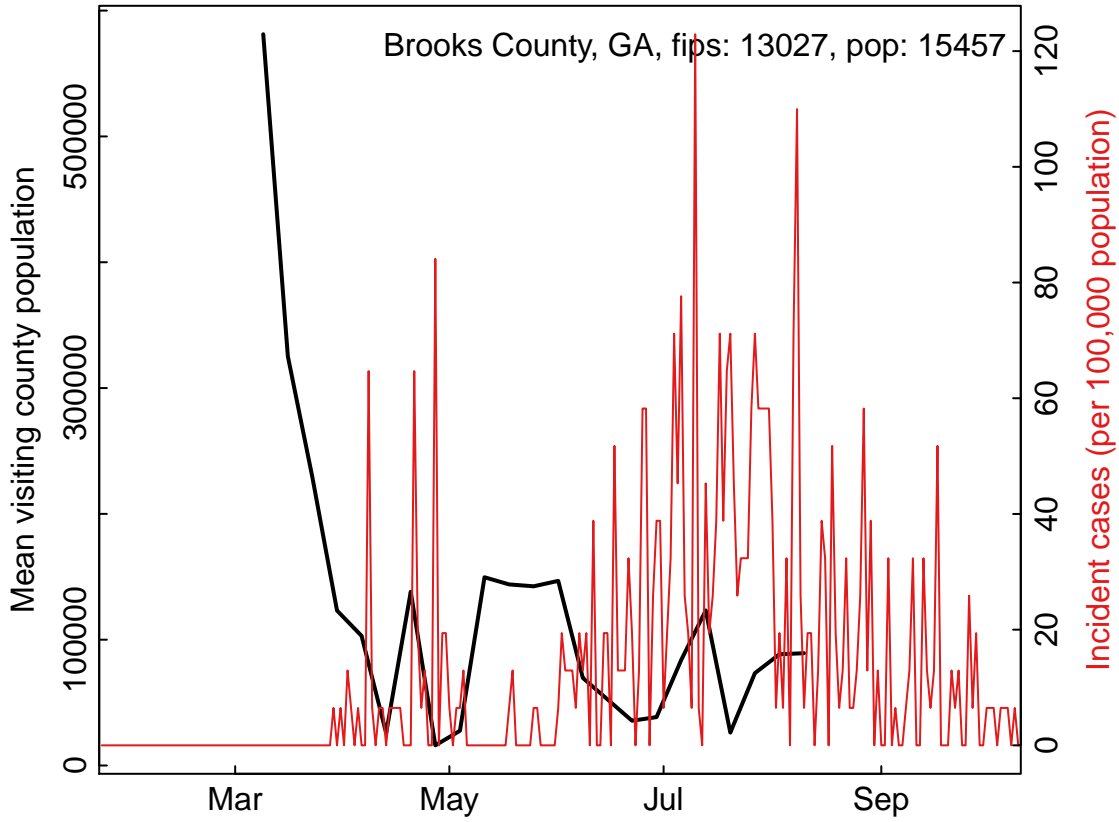



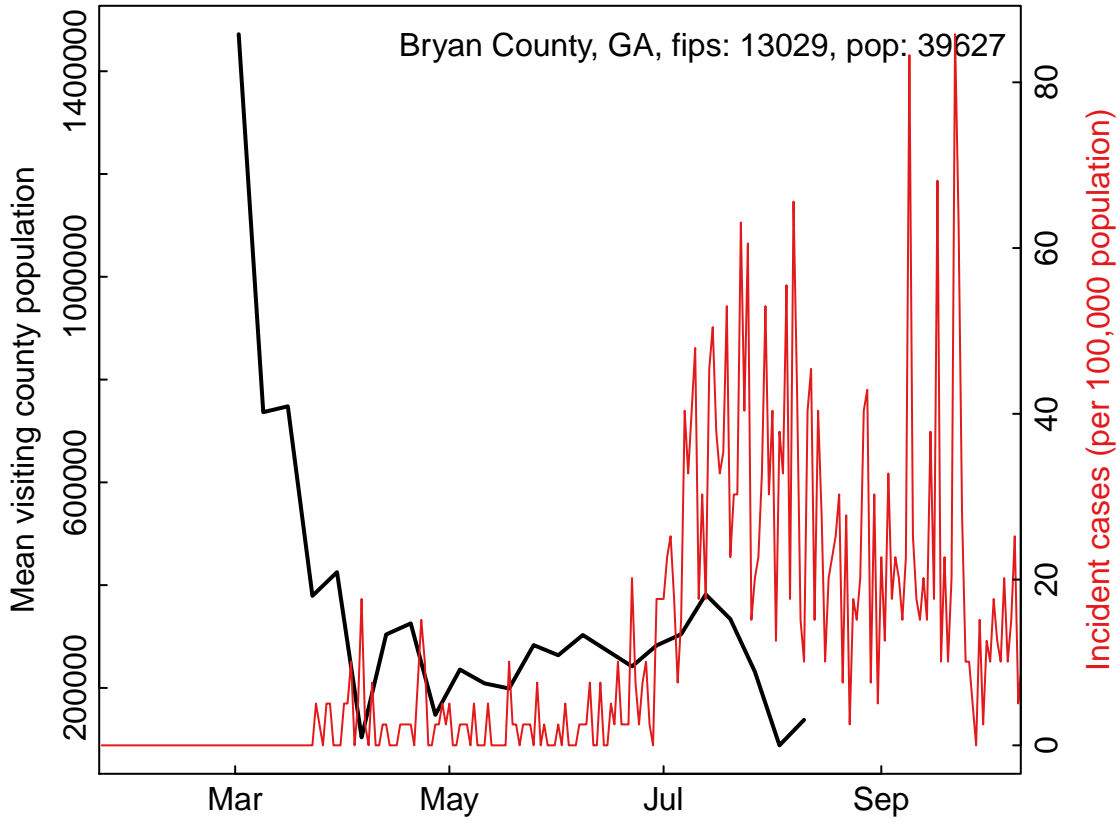

Bulloch County, GA, fips: 13031, pop: 79608

Mean visiting county population

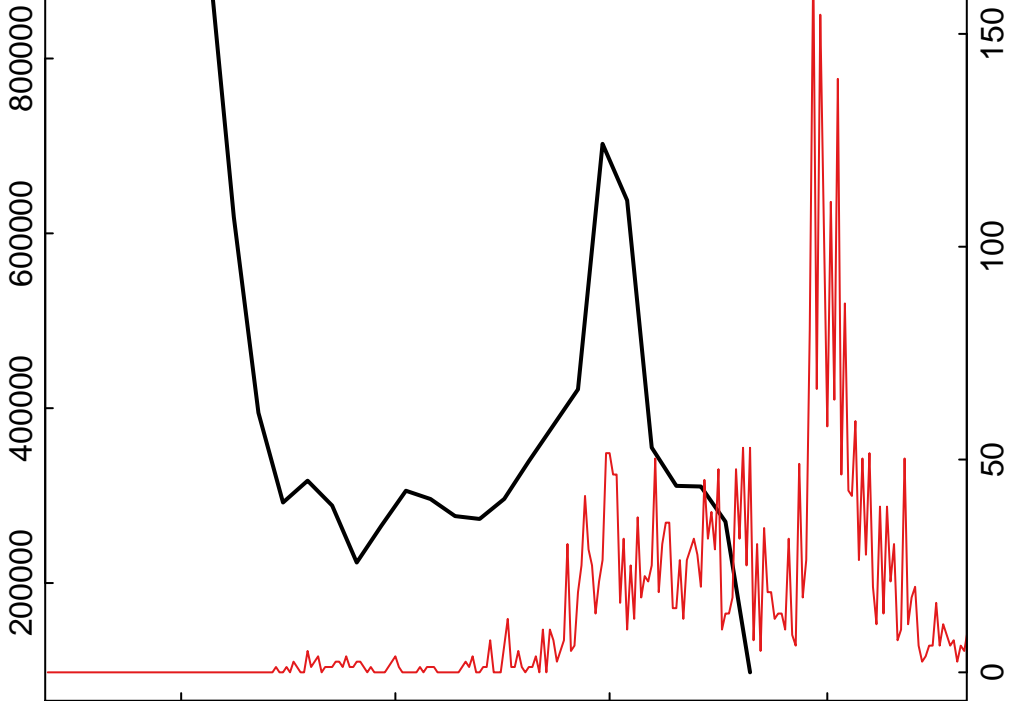

Incident cases (per 100,000 population)

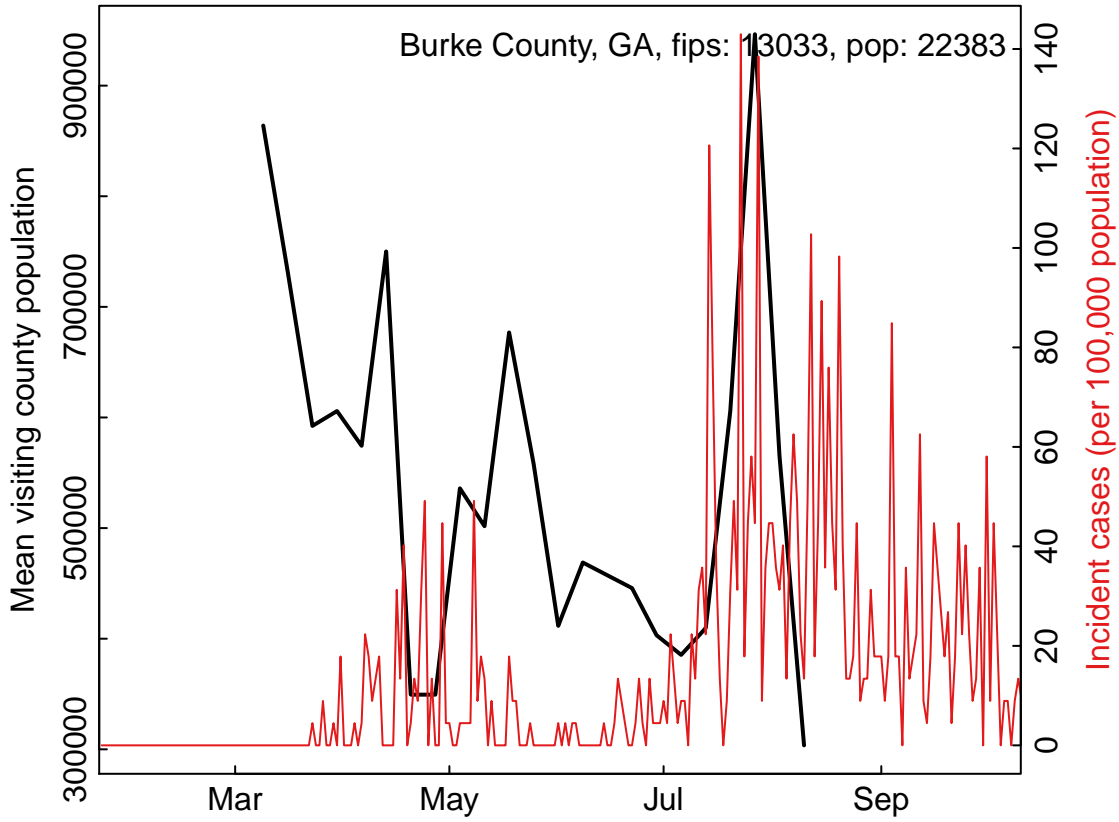

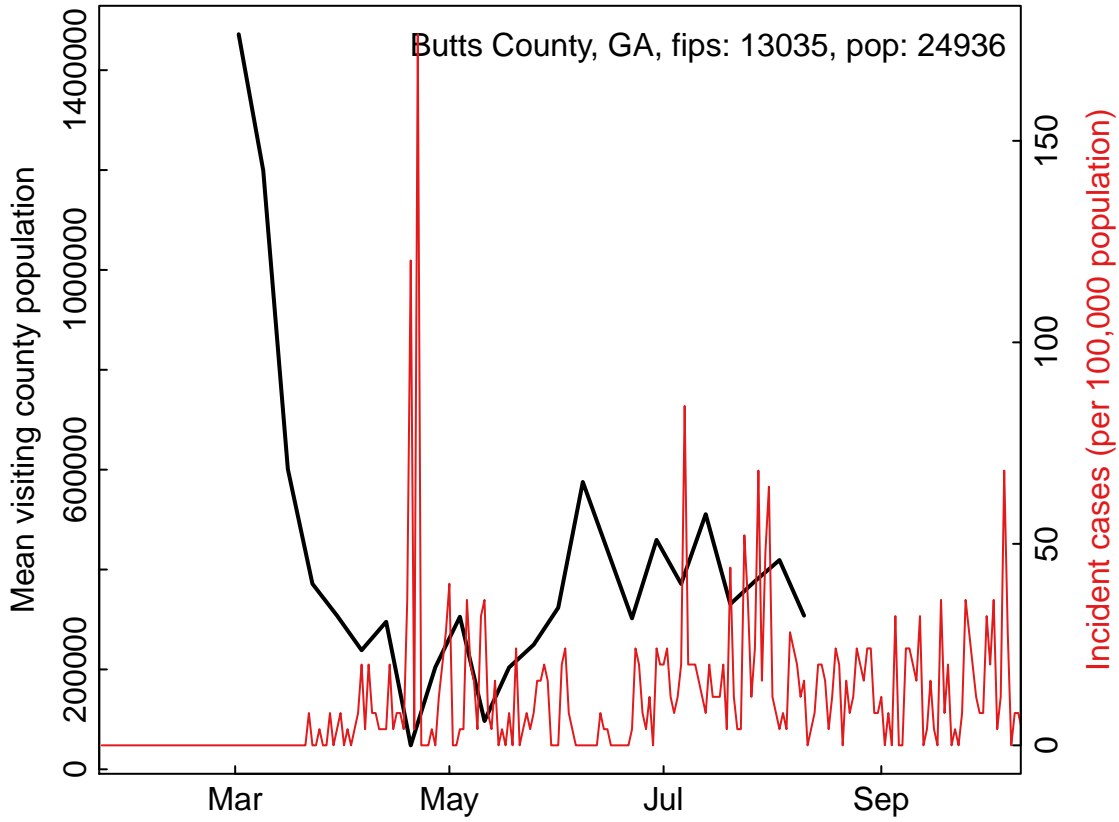

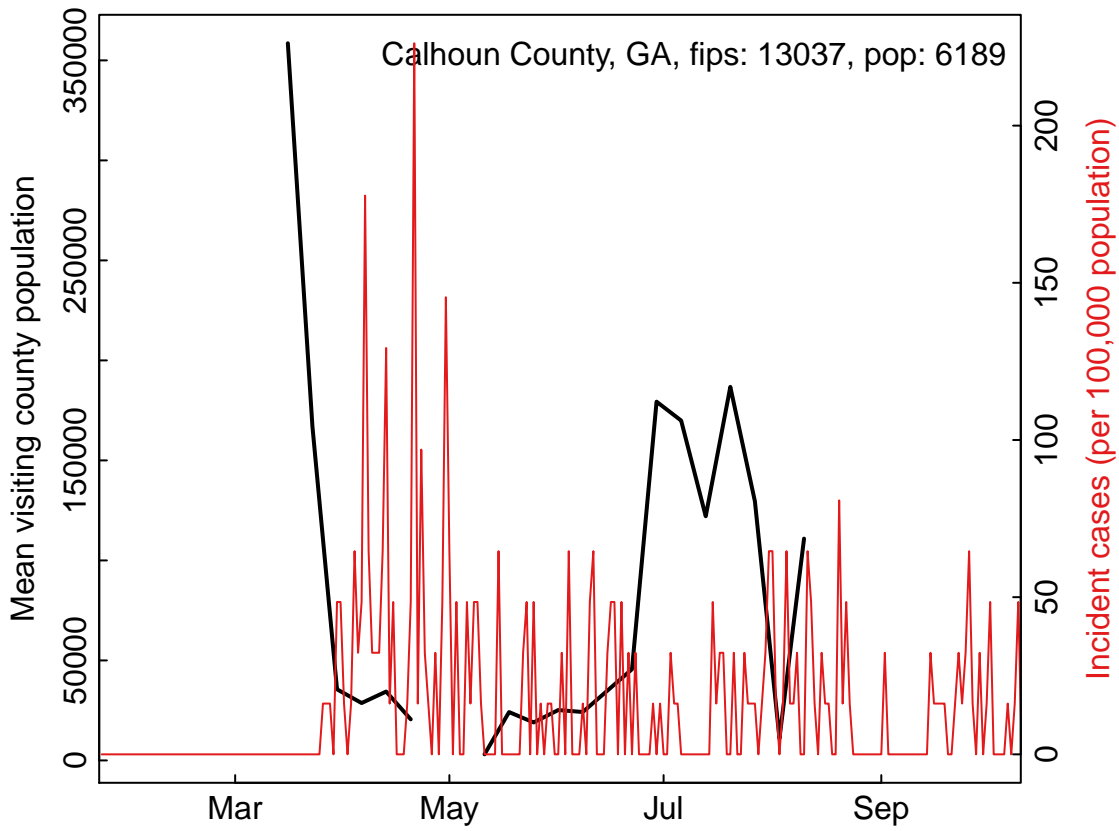

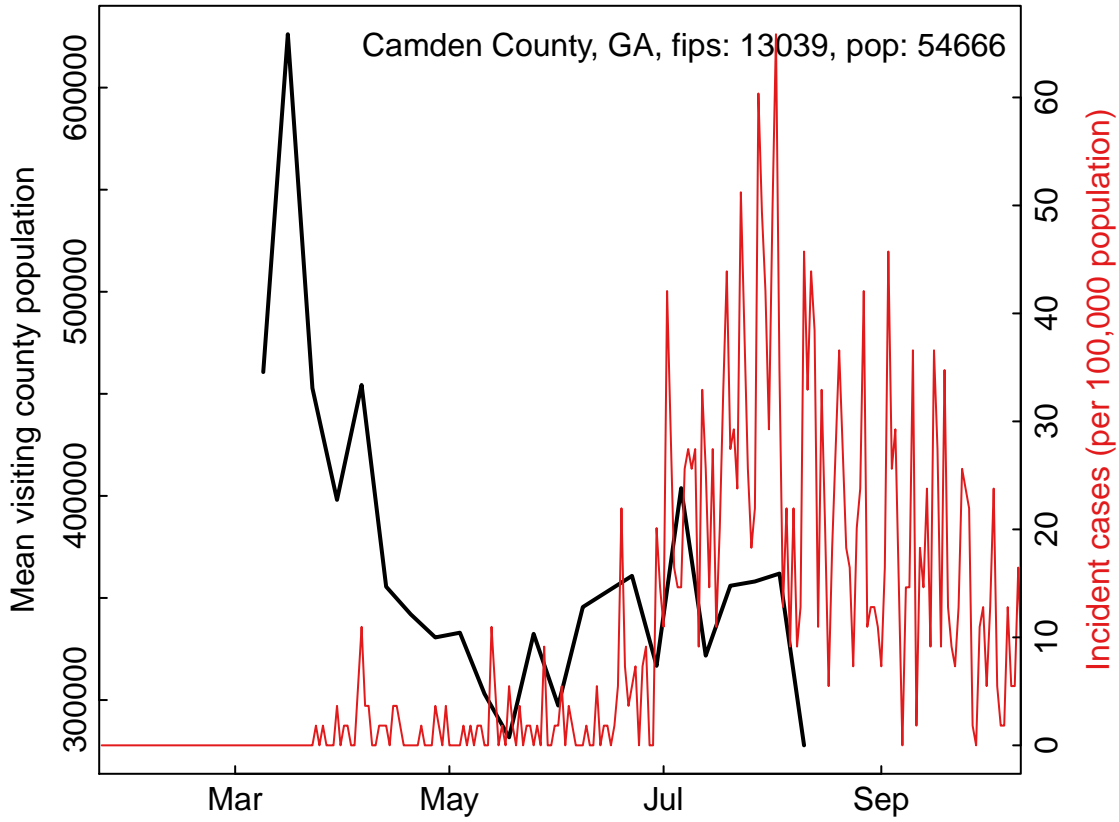

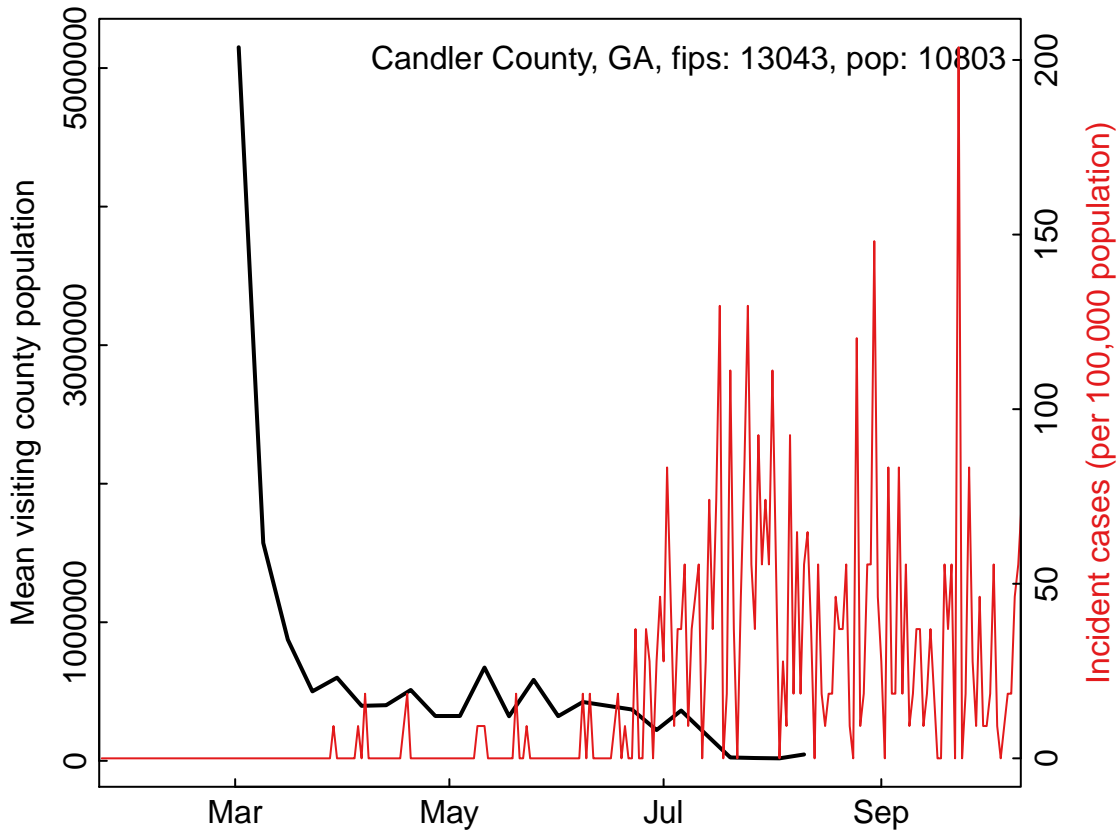

Carroll County, GA, fips: 13045, pop: 119992

Mean visiting county population

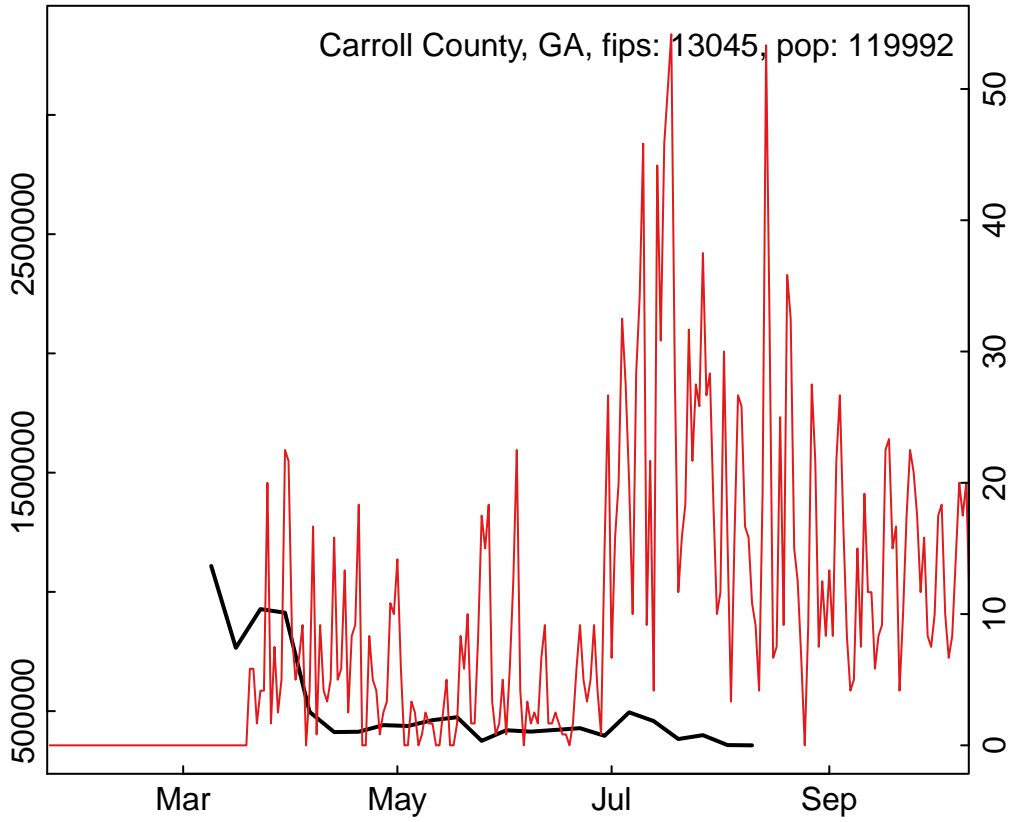

Incident cases (per 100,000 population)



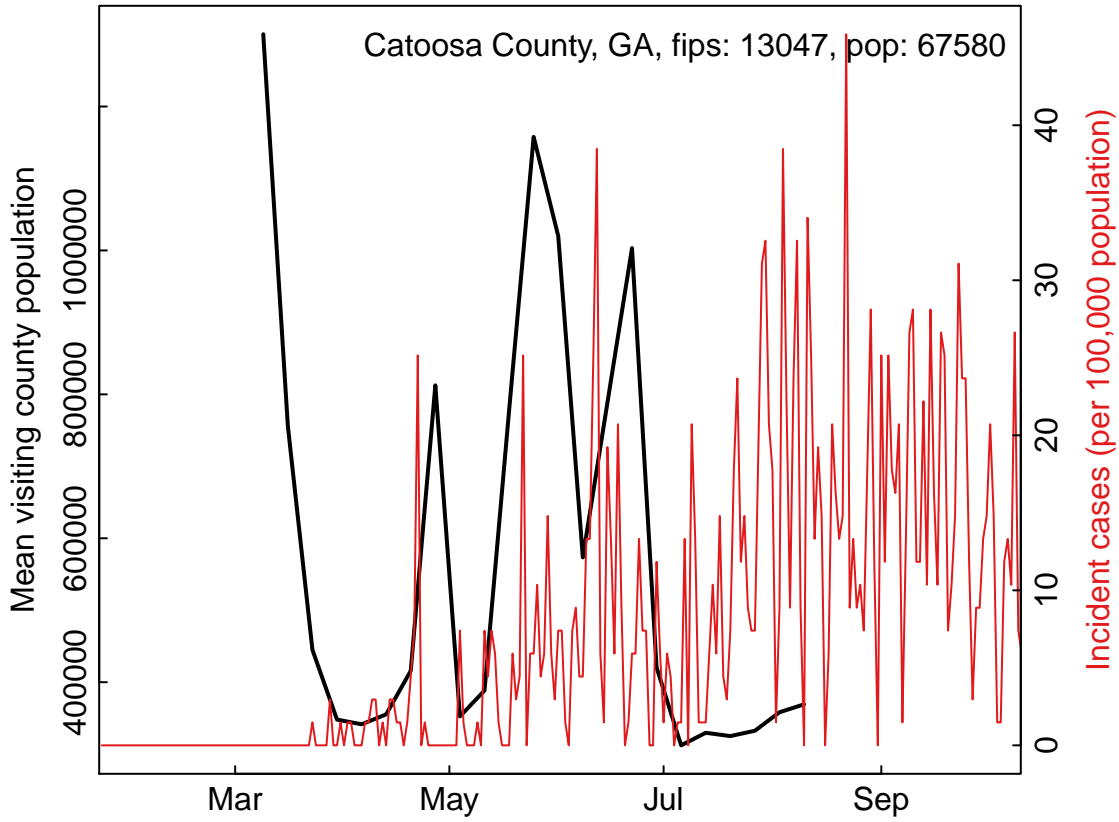

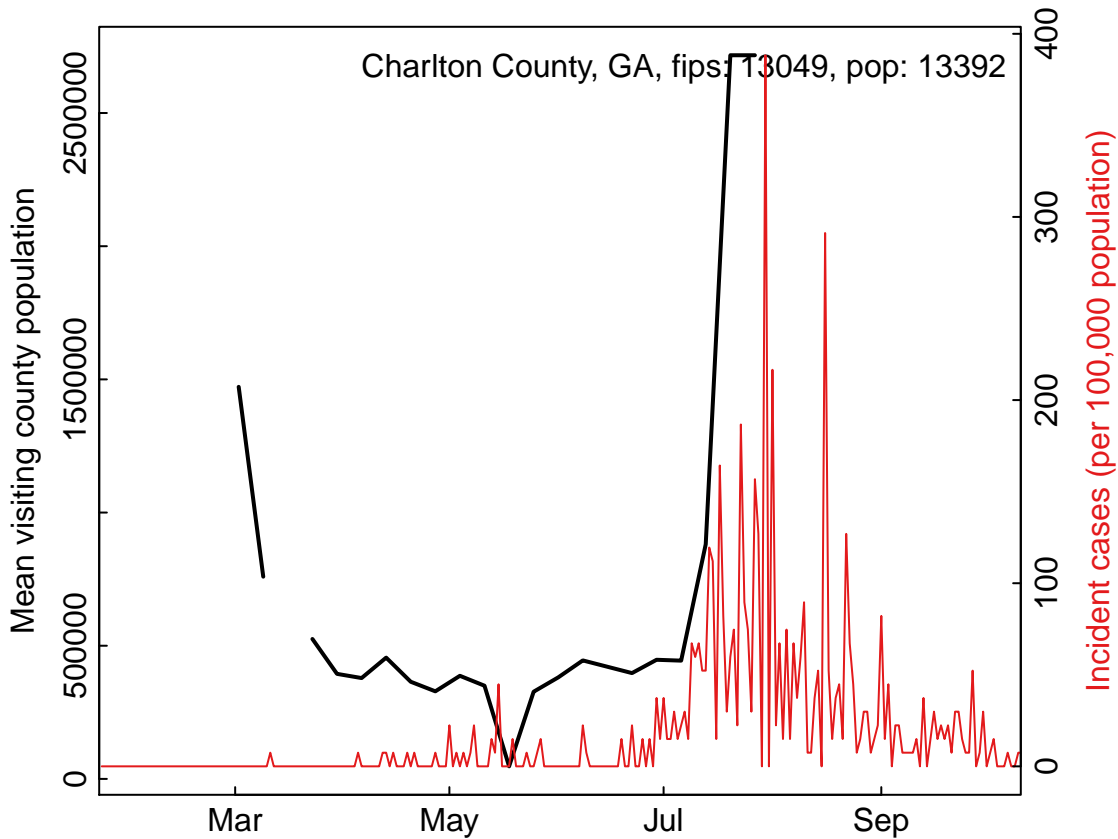

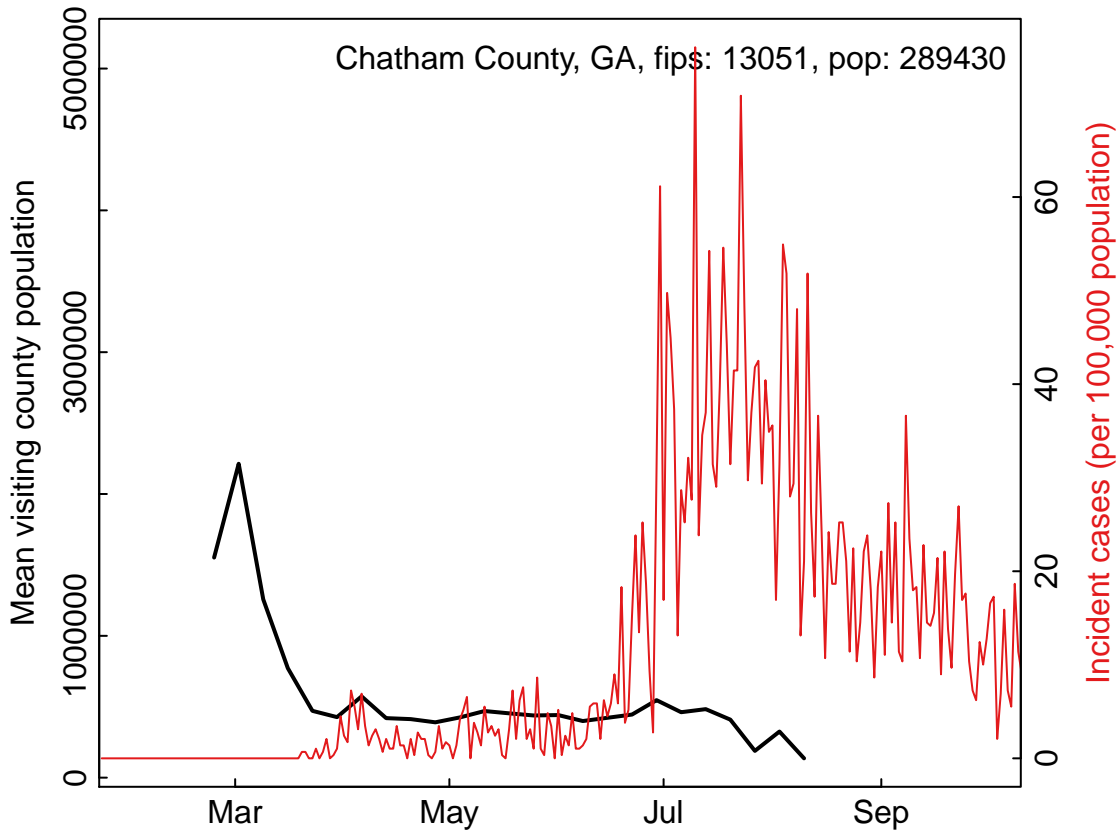

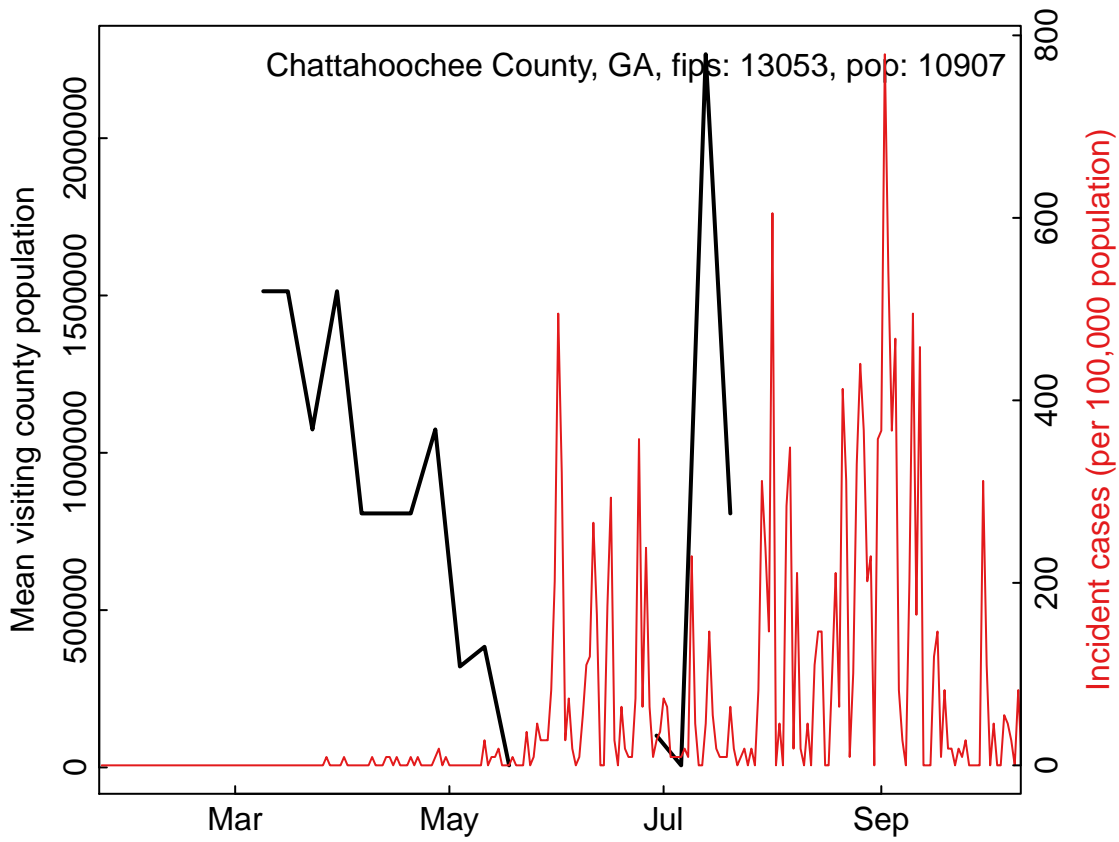

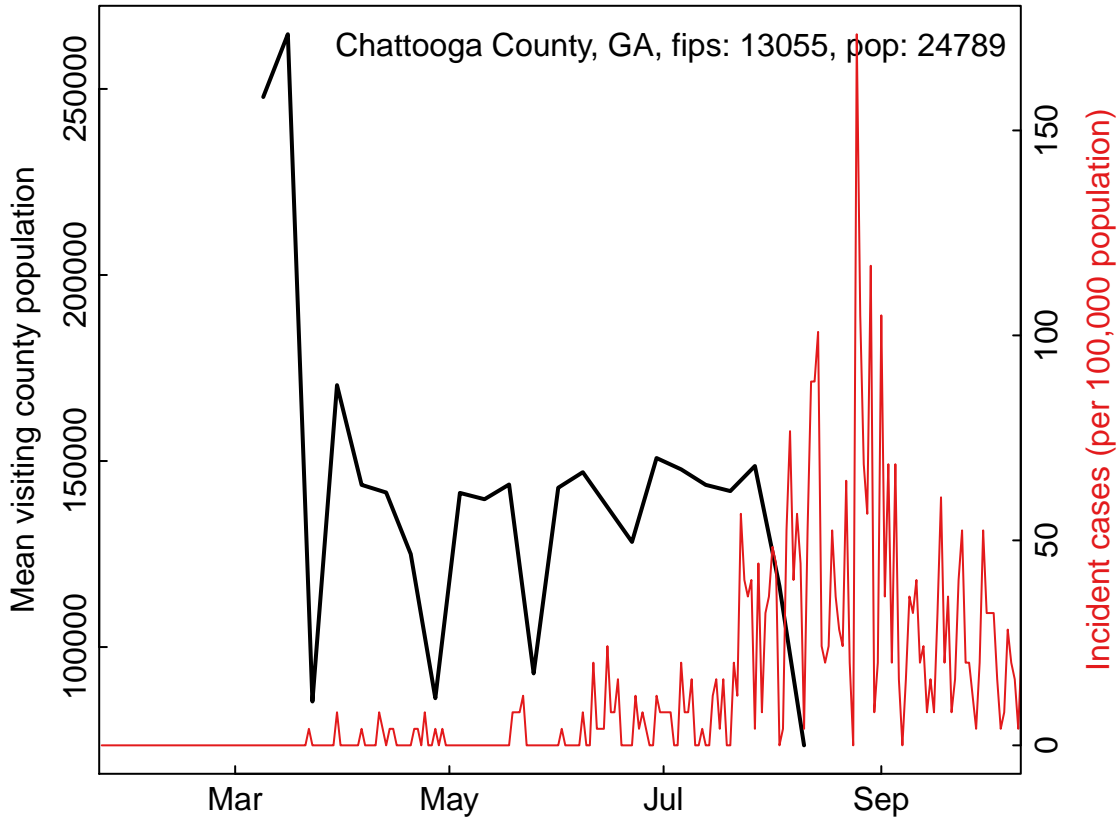

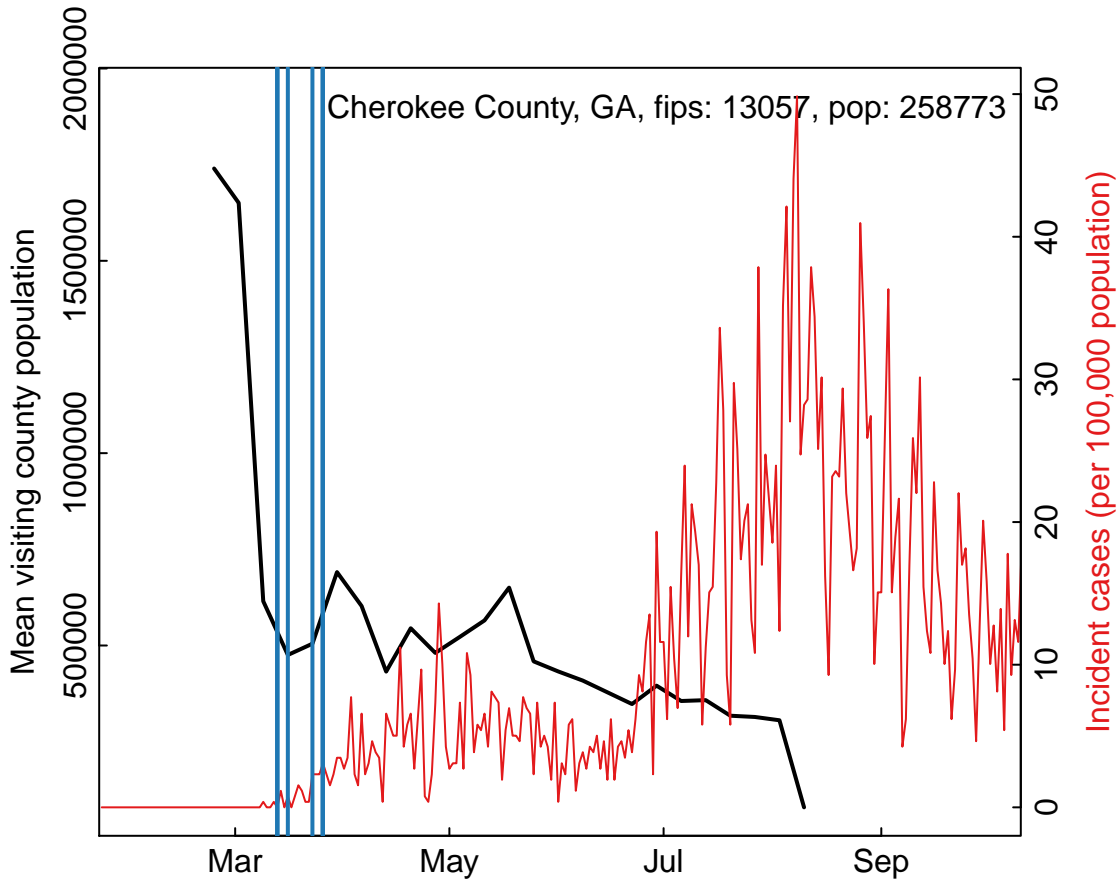

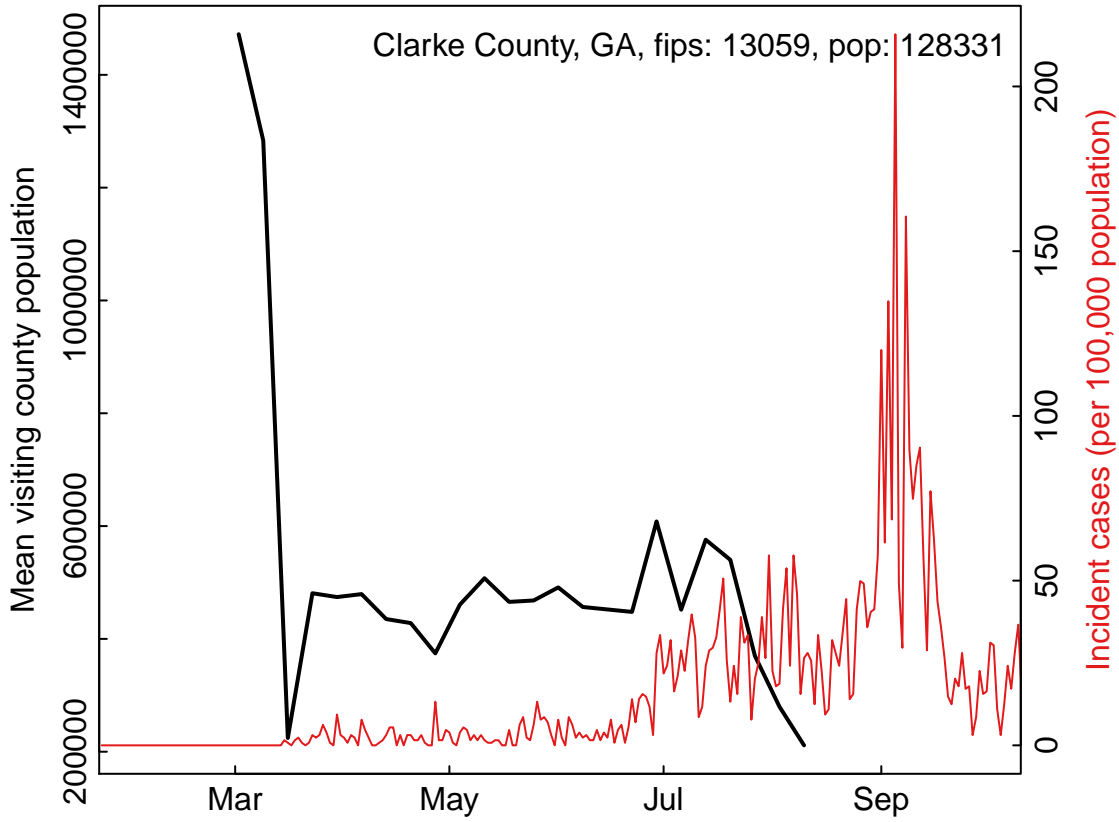

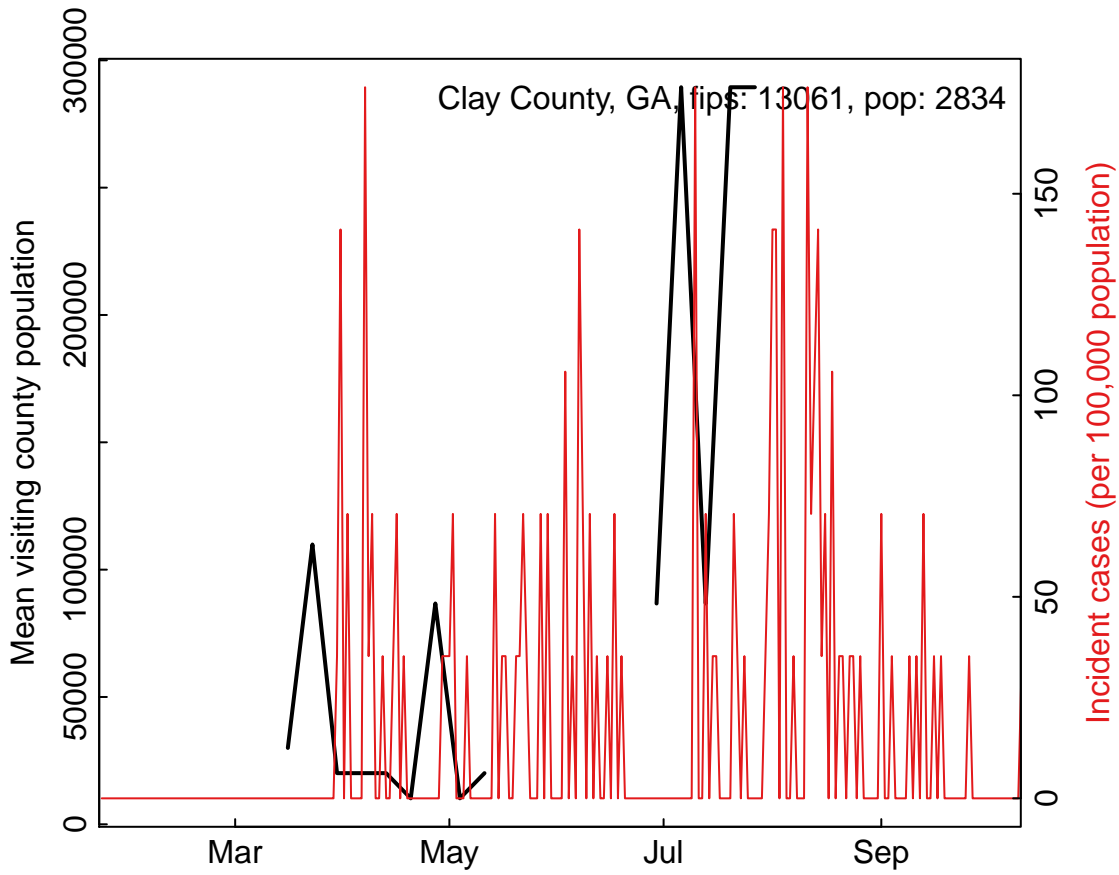



Clayton County, GA, fips: 13063, pop: 292256

Mean visiting county population

Incident cases (per 100,000 population)

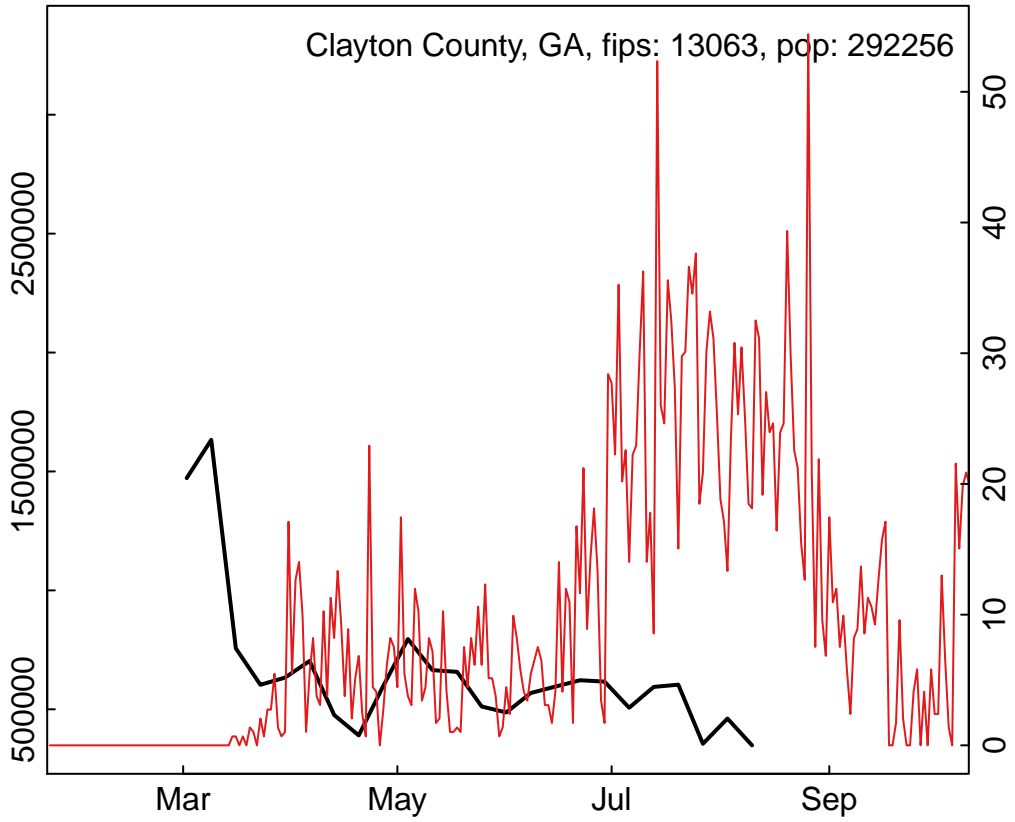

Mean visiting county population

1500000  
1000000  
500000  
0

Mar

May

Jul

Sep

Clinch County, GA, fips: 13065, pop: 6618

Incident cases (per 100,000 population)

600  
500  
400  
300  
200  
100  
0

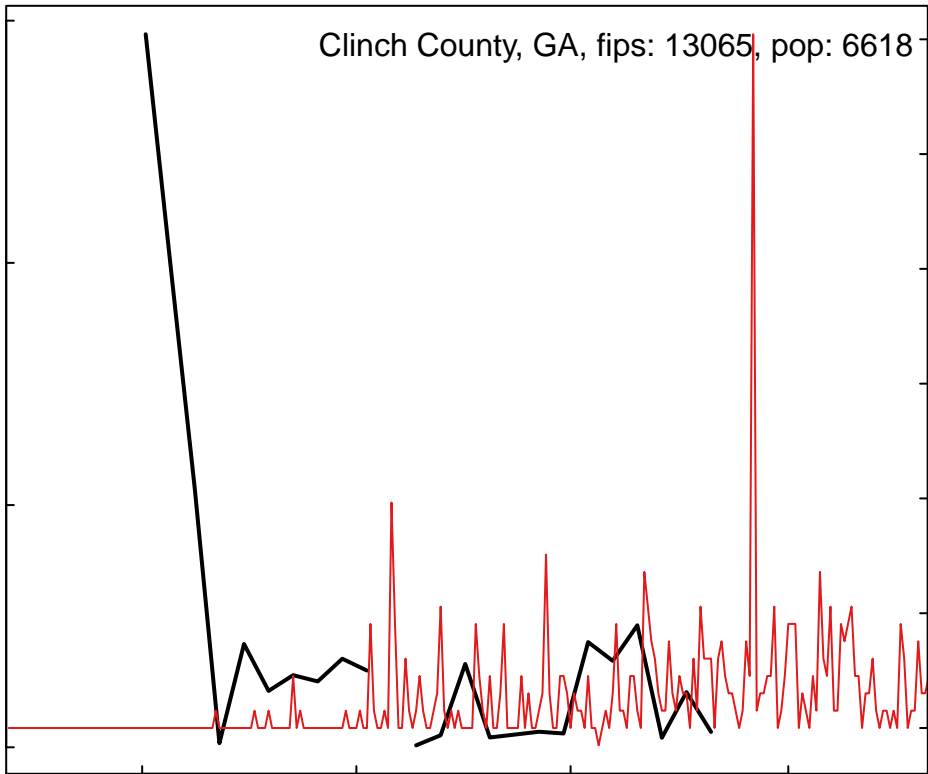

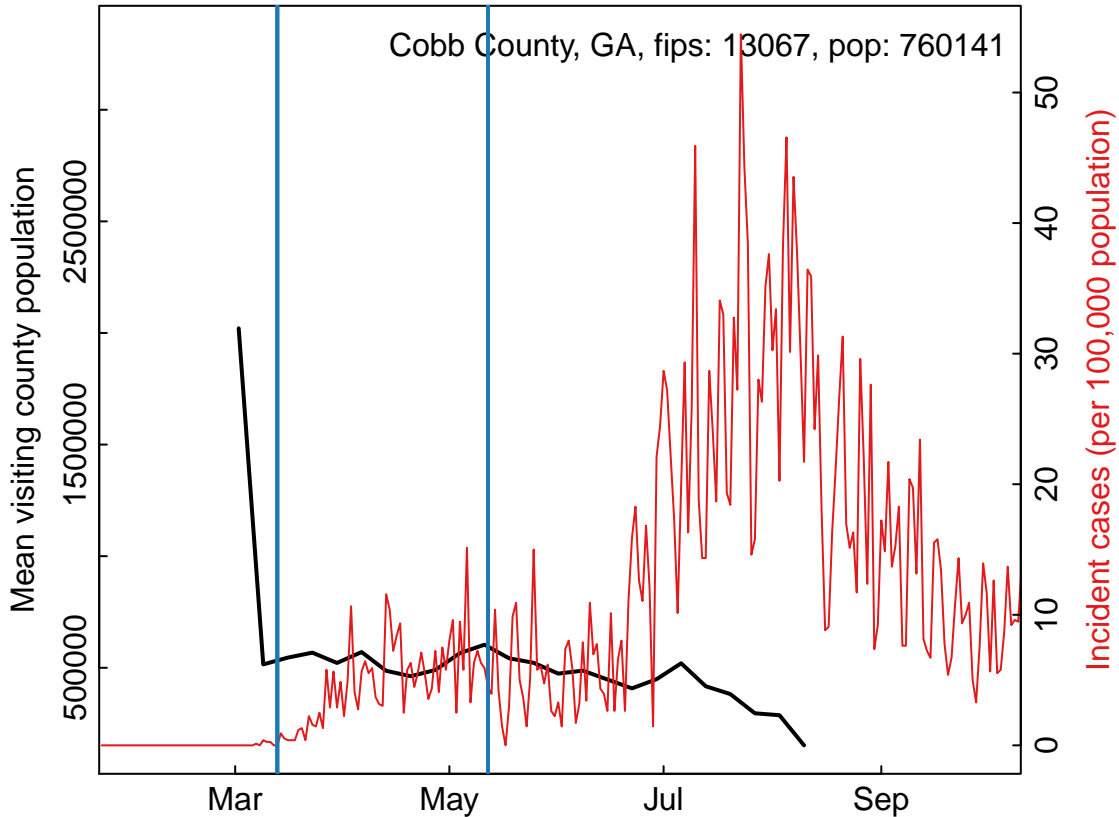

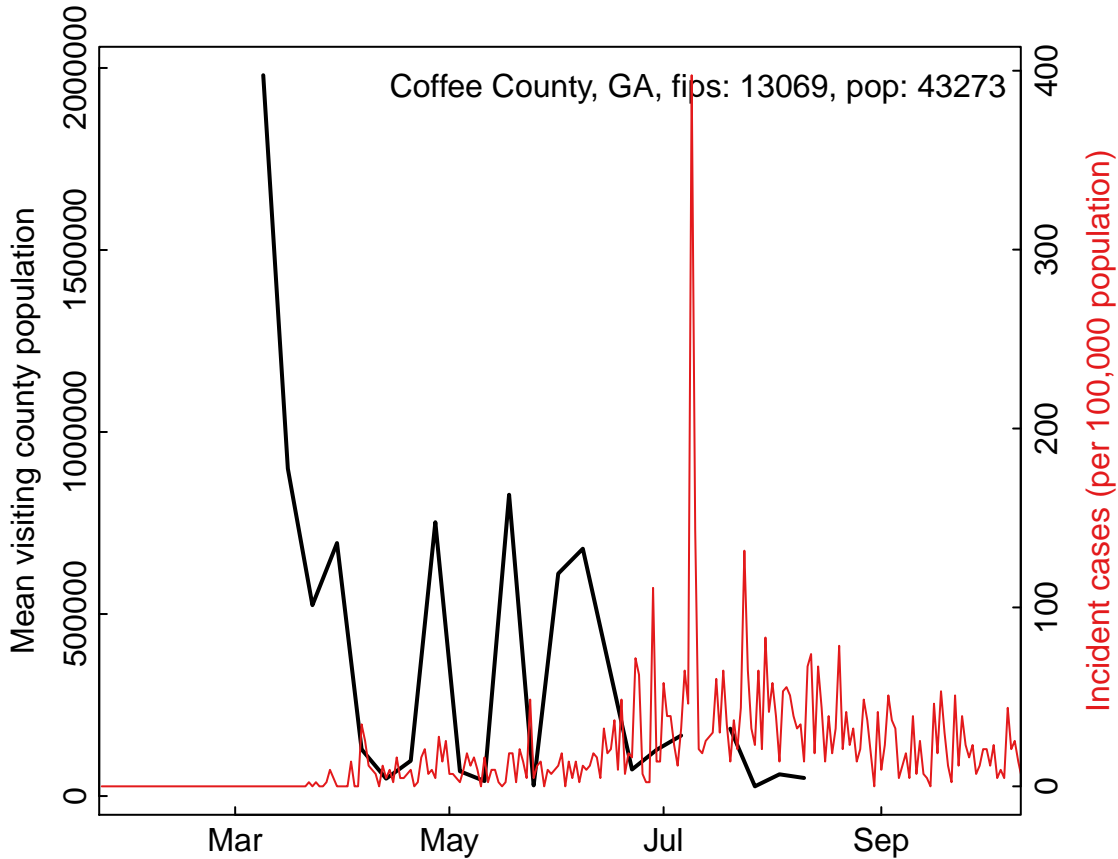

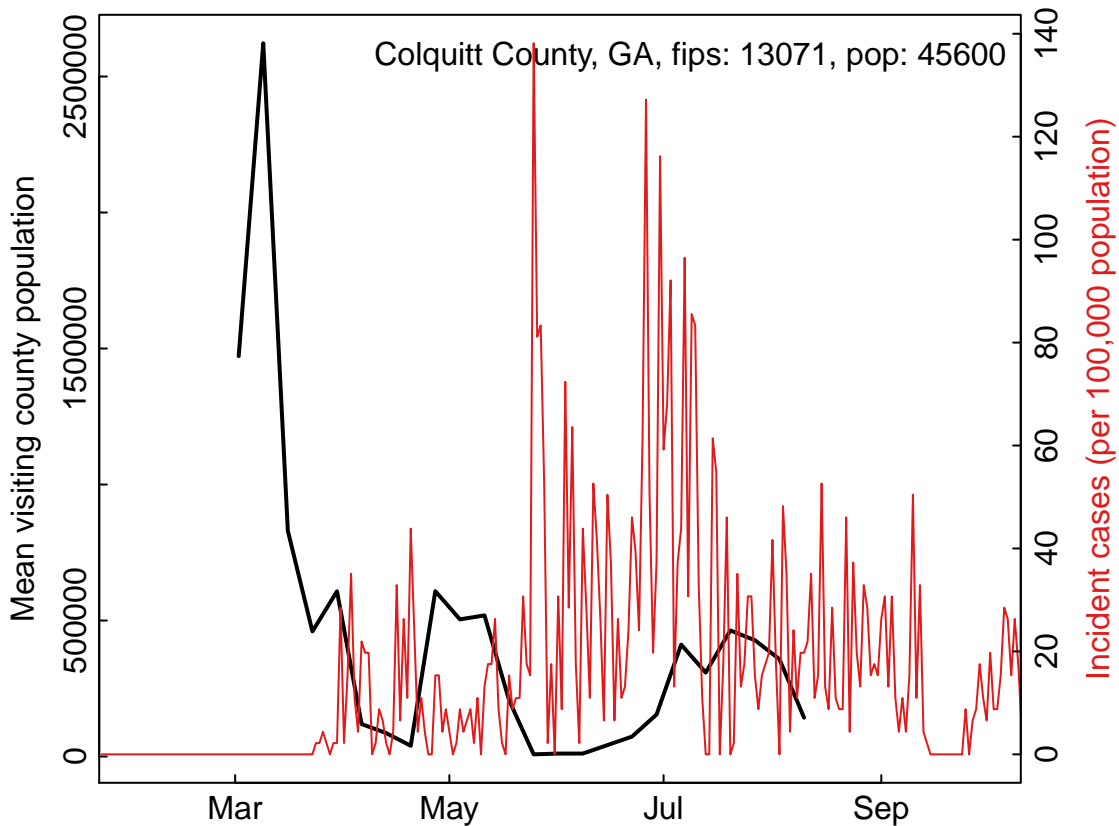

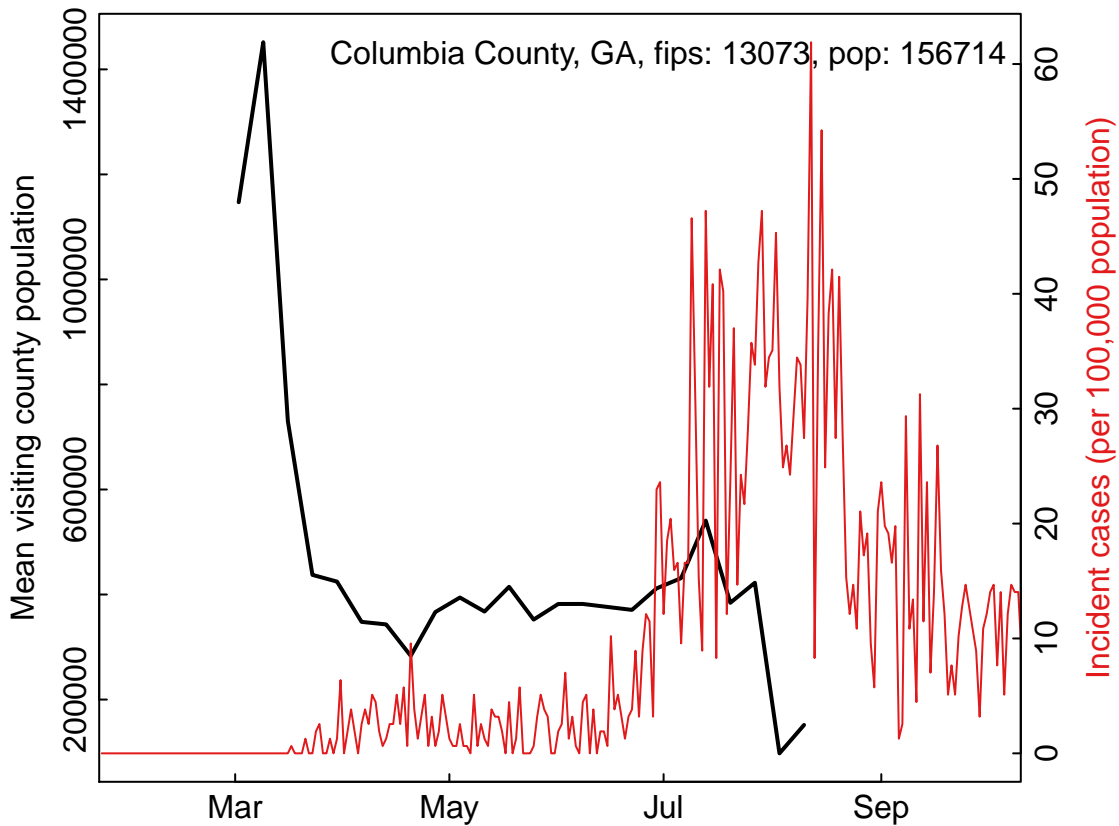

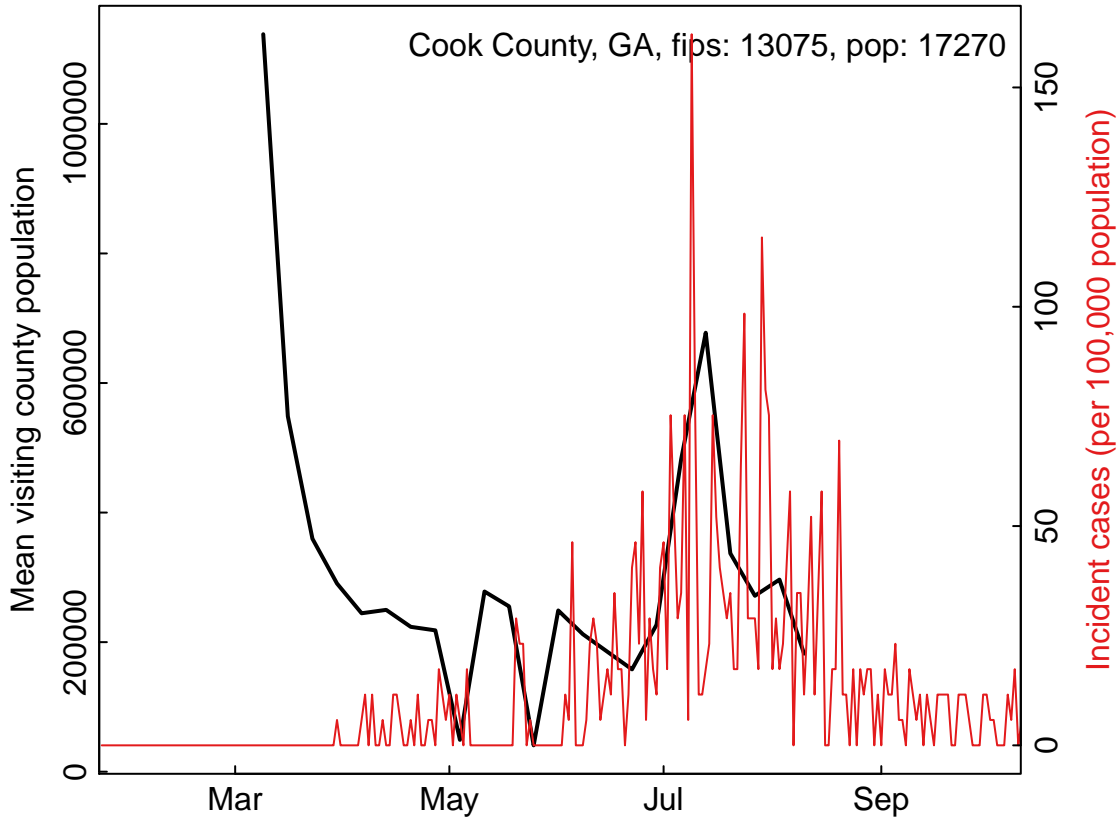

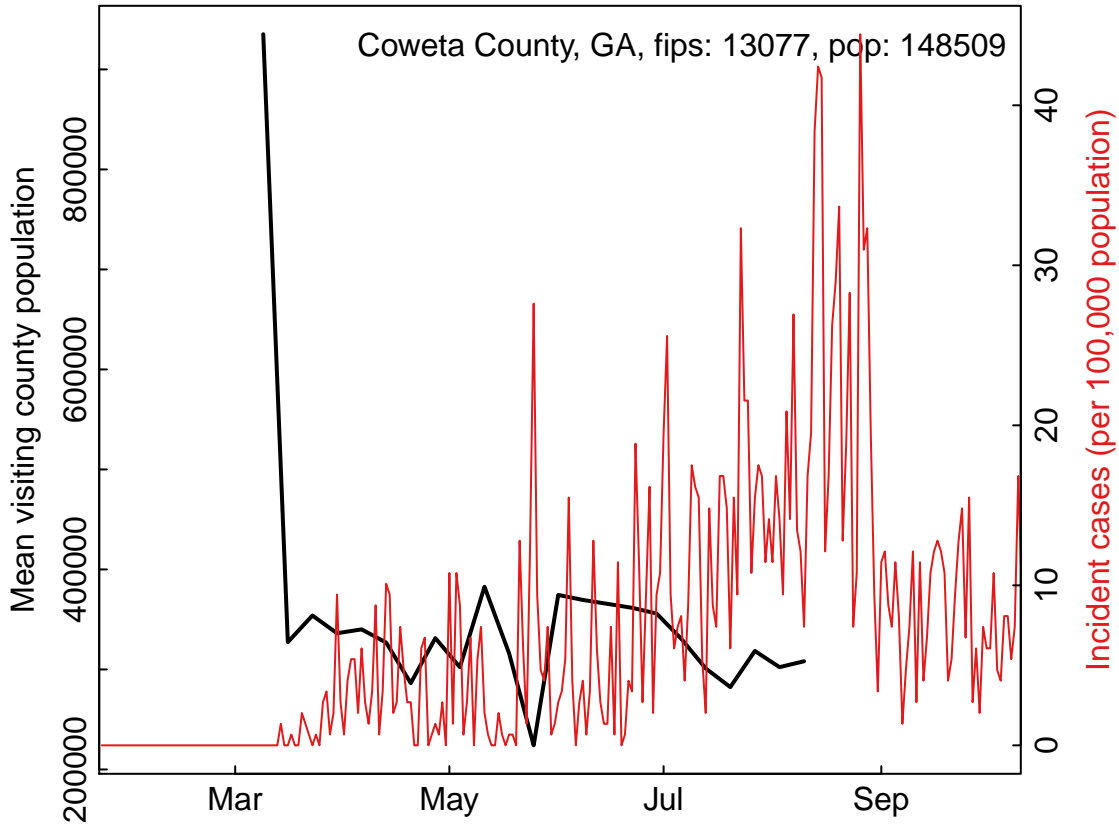



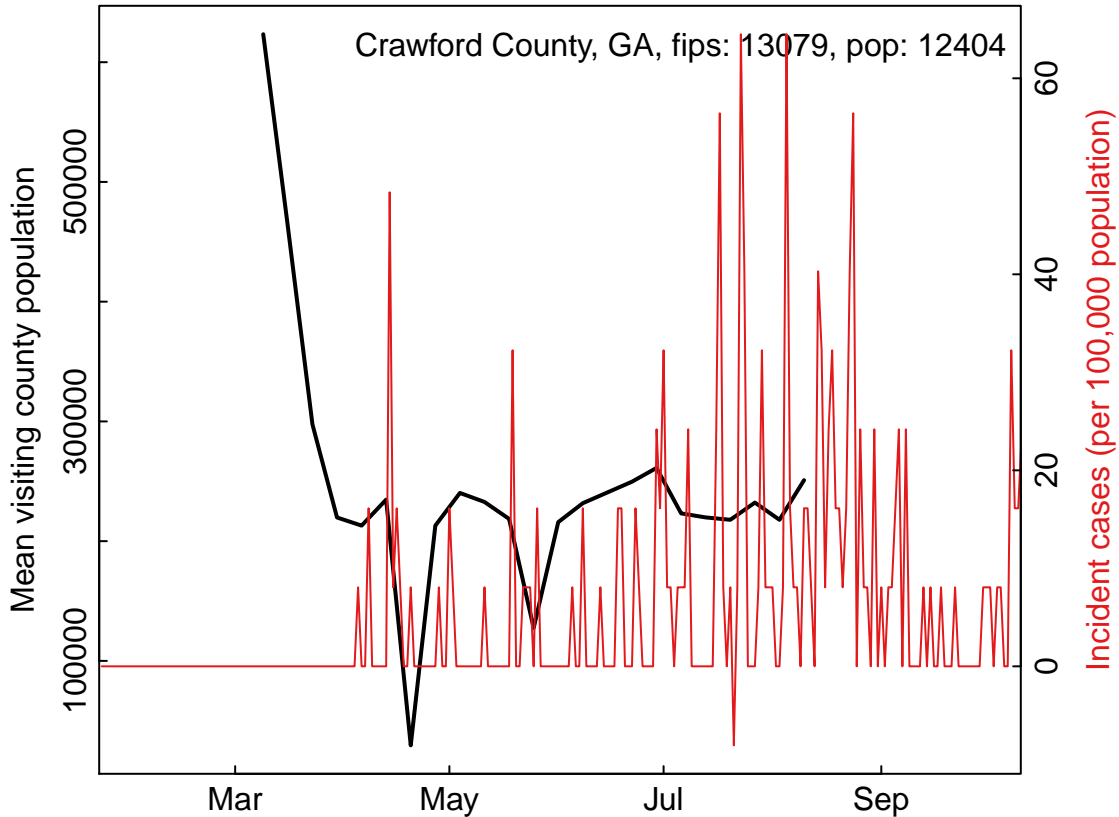

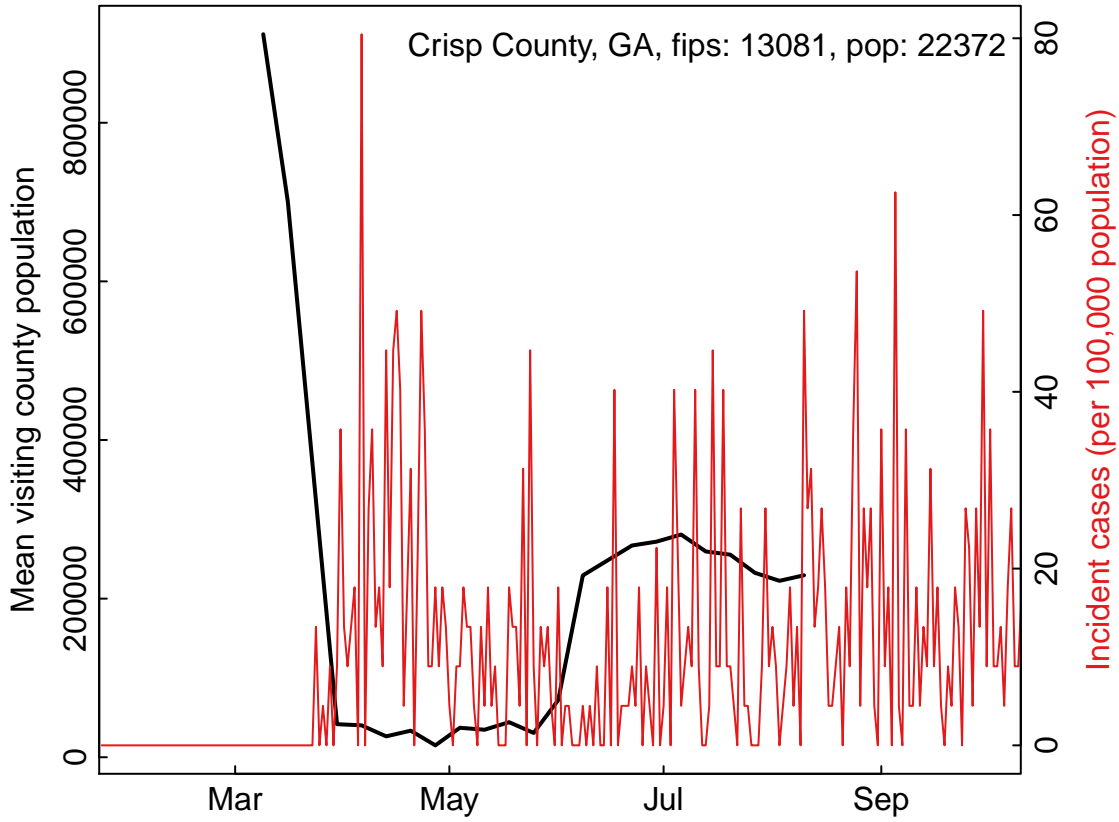

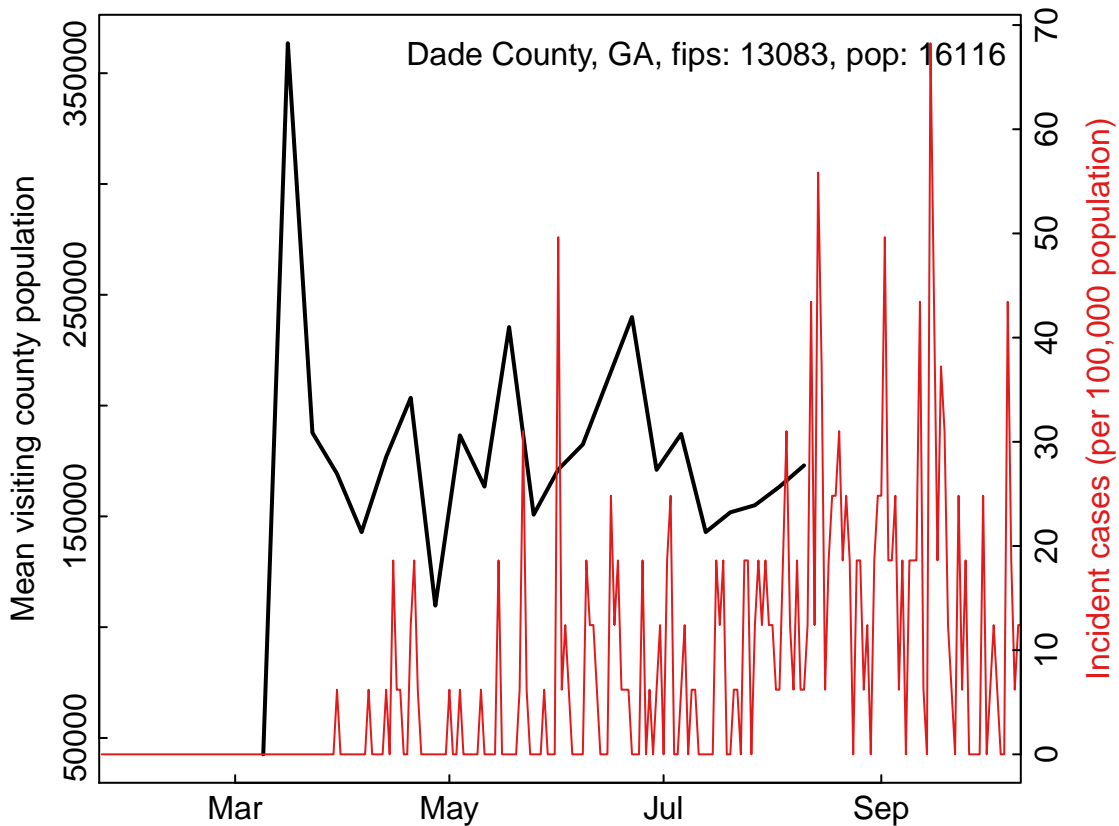

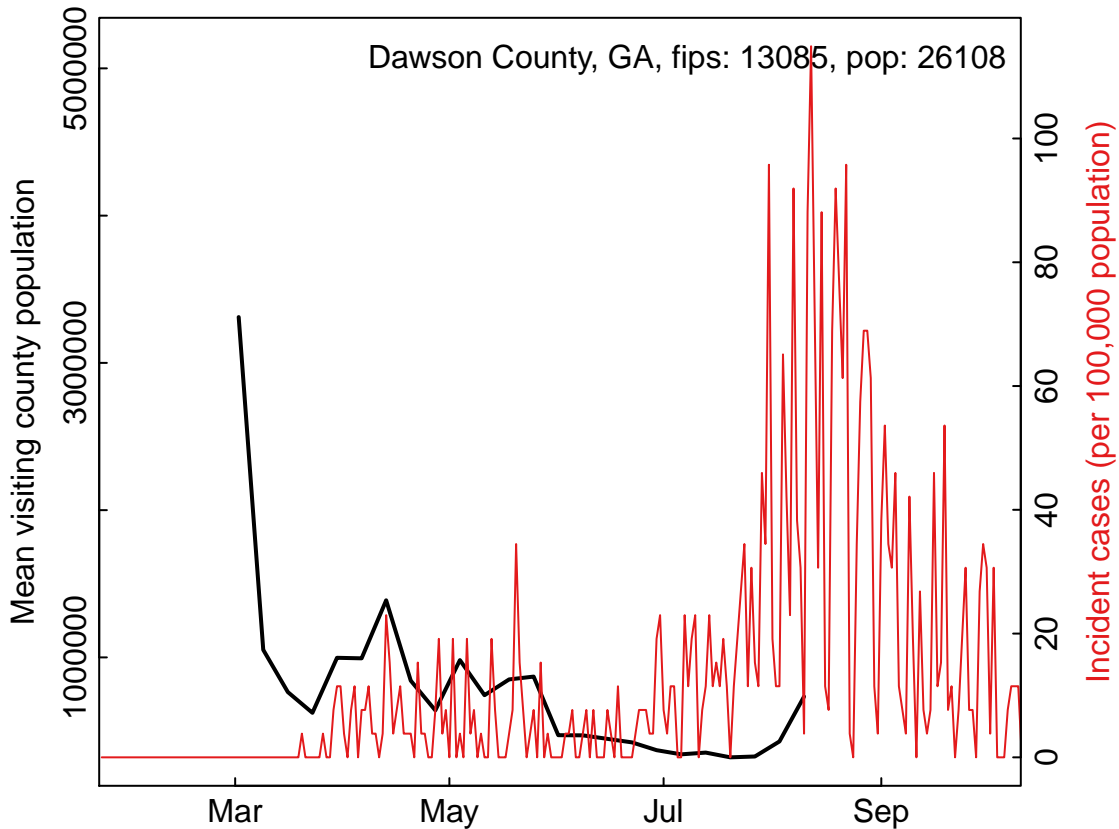

Mean visiting county population

1500000  
1000000  
500000  
0

Decatur County, GA, fips: 13087, pop: 26404

Mar May Jul Sep

Incident cases (per 100,000 population)

100  
50  
0

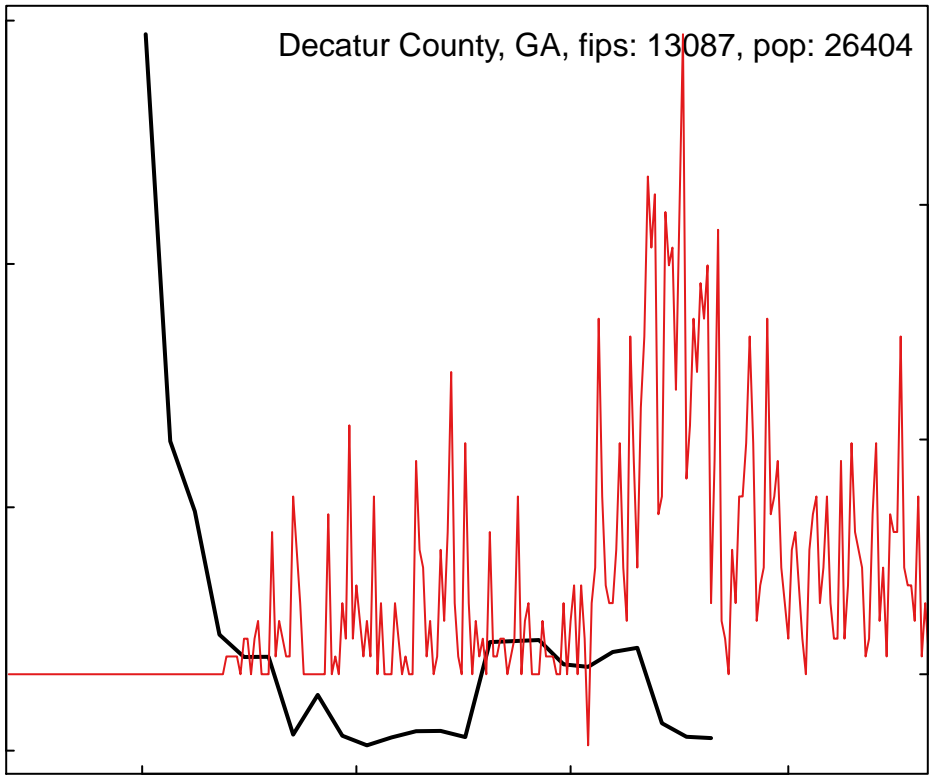

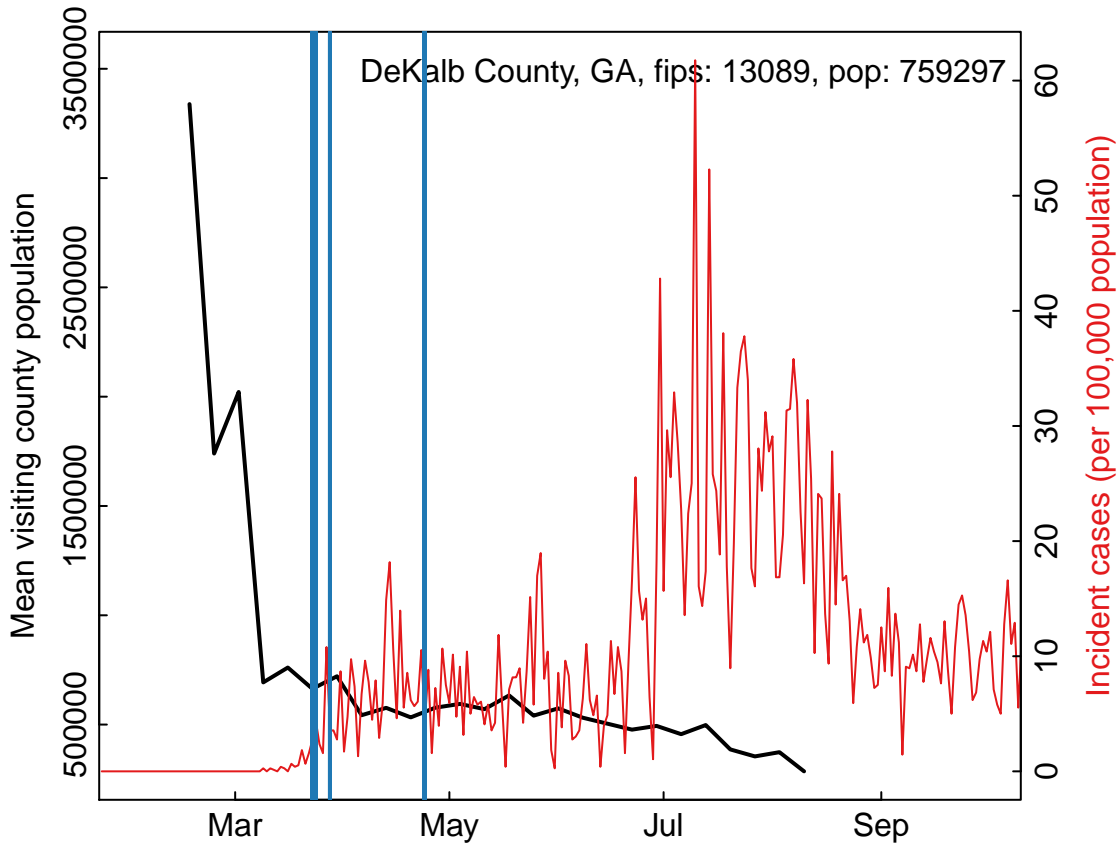

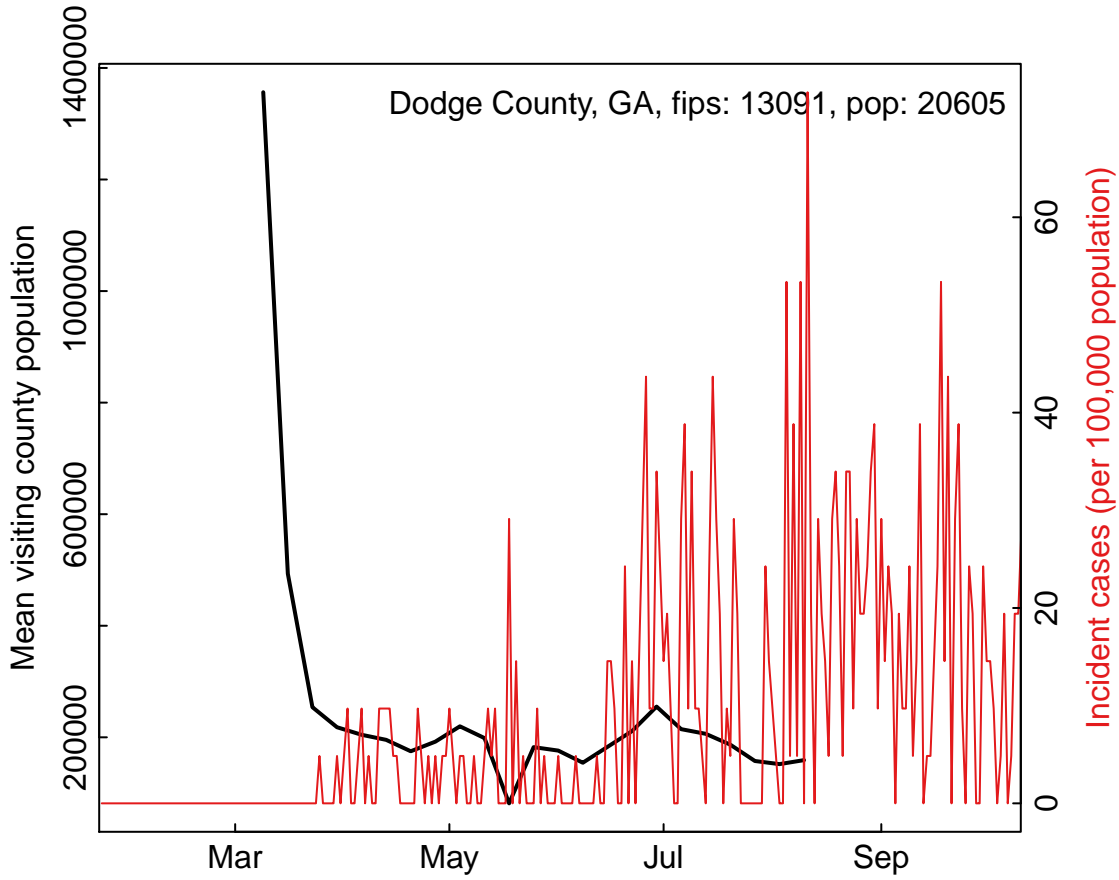

Dooly County, GA, fips: 13093, pop: 13390

Mean visiting county population

0  
200000  
400000  
600000  
800000

Mar

May

Jul

Sep

150

100

50

0

Incident cases (per 100,000 population)

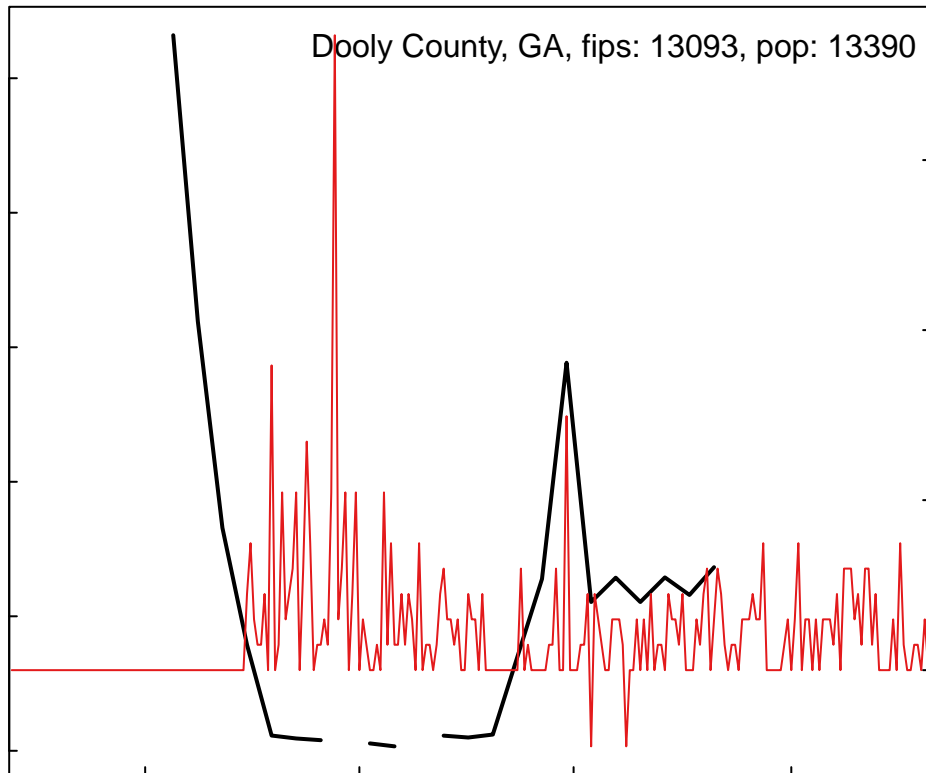



Mean visiting county population

1500000  
1000000  
500000  
0

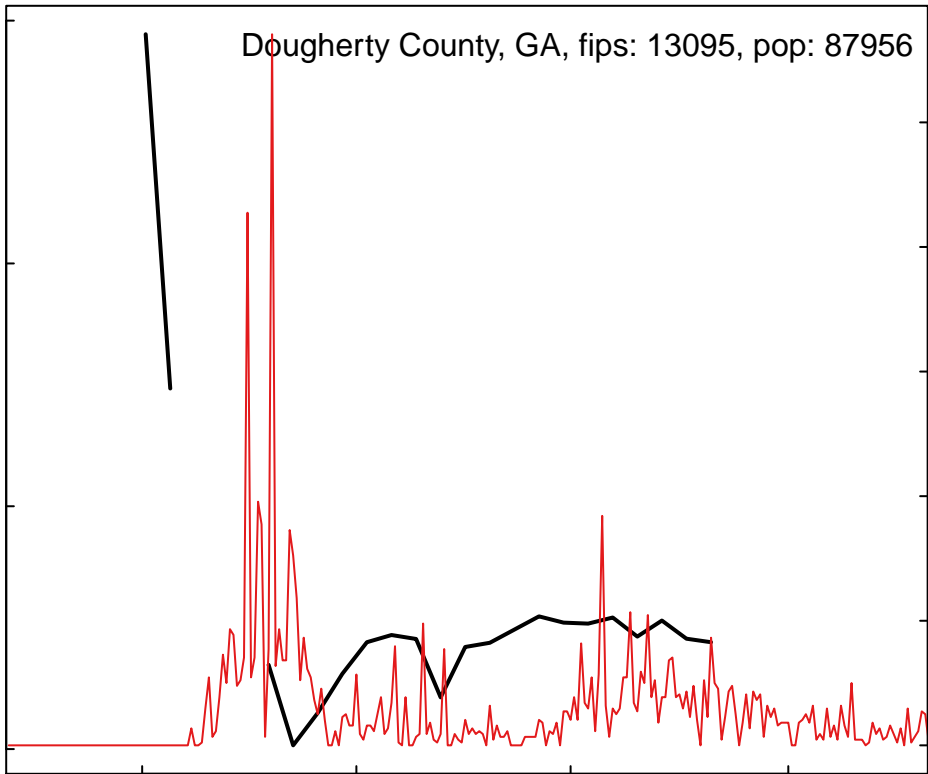

Mar

May

Jul

Sep

Incident cases (per 100,000 population)

250  
200  
150  
100  
50  
0

Douglas County, GA, fips: 13097, pop: 146343

Mean visiting county population

1200000  
800000  
400000

Mar

May

Jul

Sep

Incident cases (per 100,000 population)

40  
30  
20  
10  
0

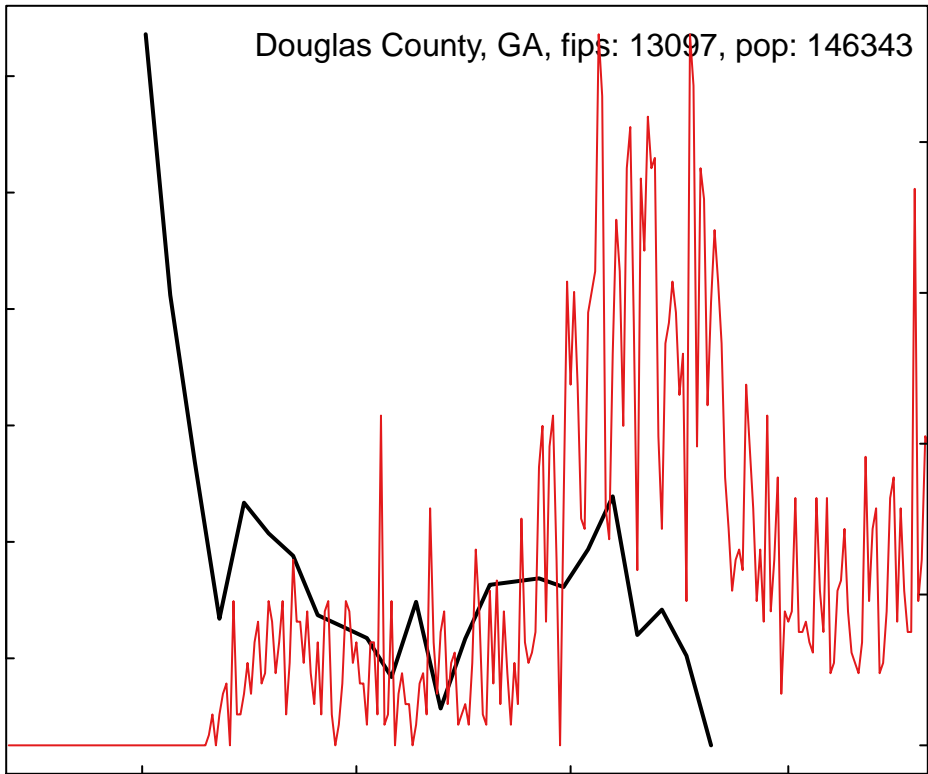

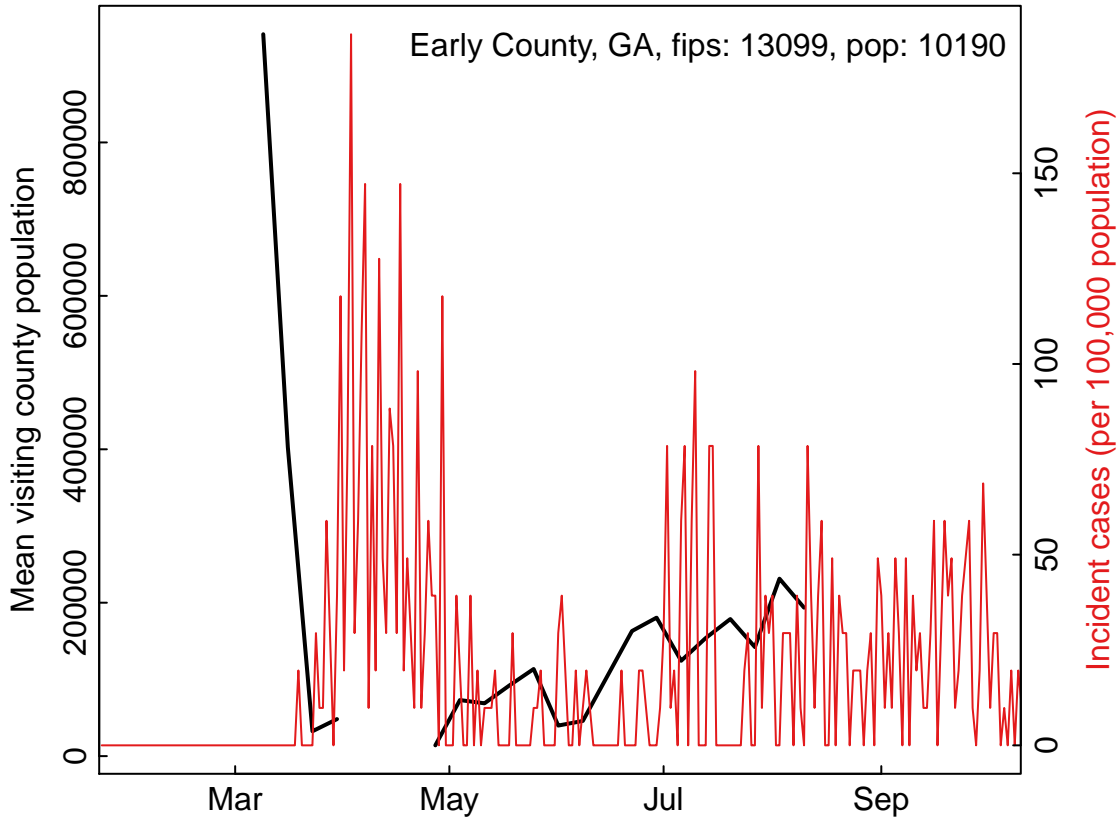

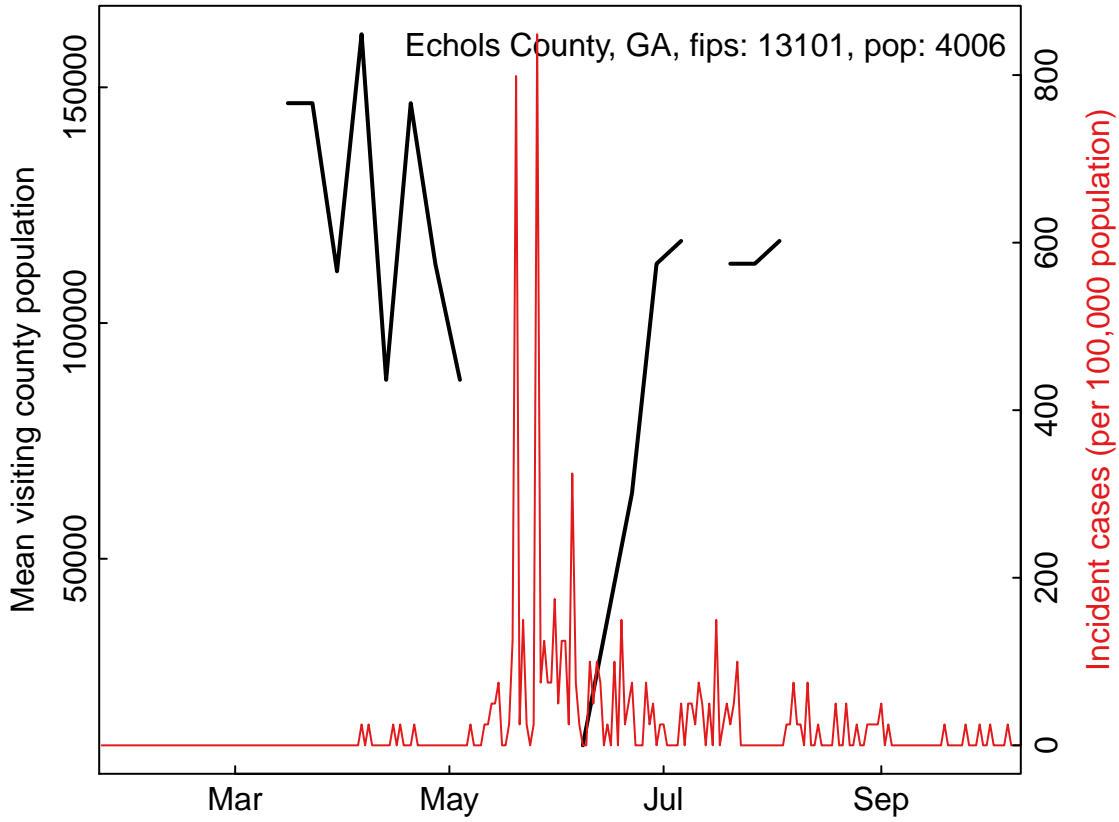

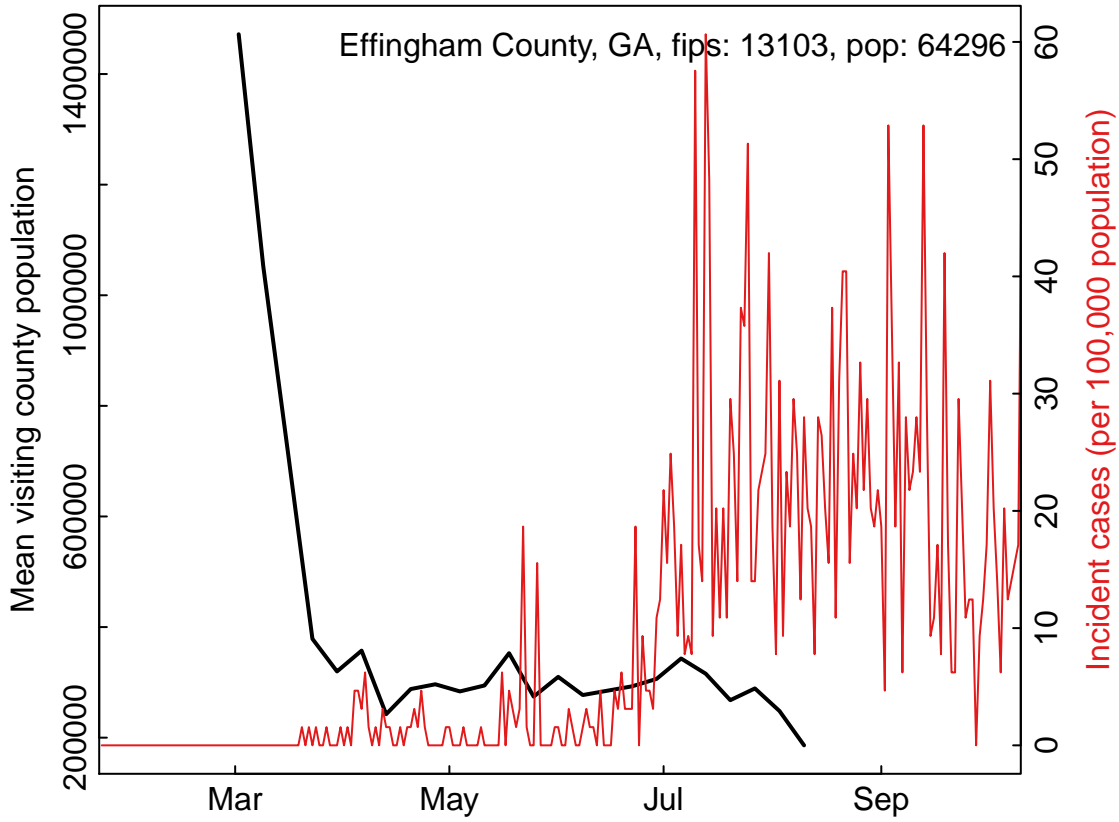

Elbert County, GA, fips: 13105, pop: 19194

Mean visiting county population

1000000  
600000  
200000  
0

Mar

May

Jul

Sep

150  
100  
50  
0

Incident cases (per 100,000 population)

0

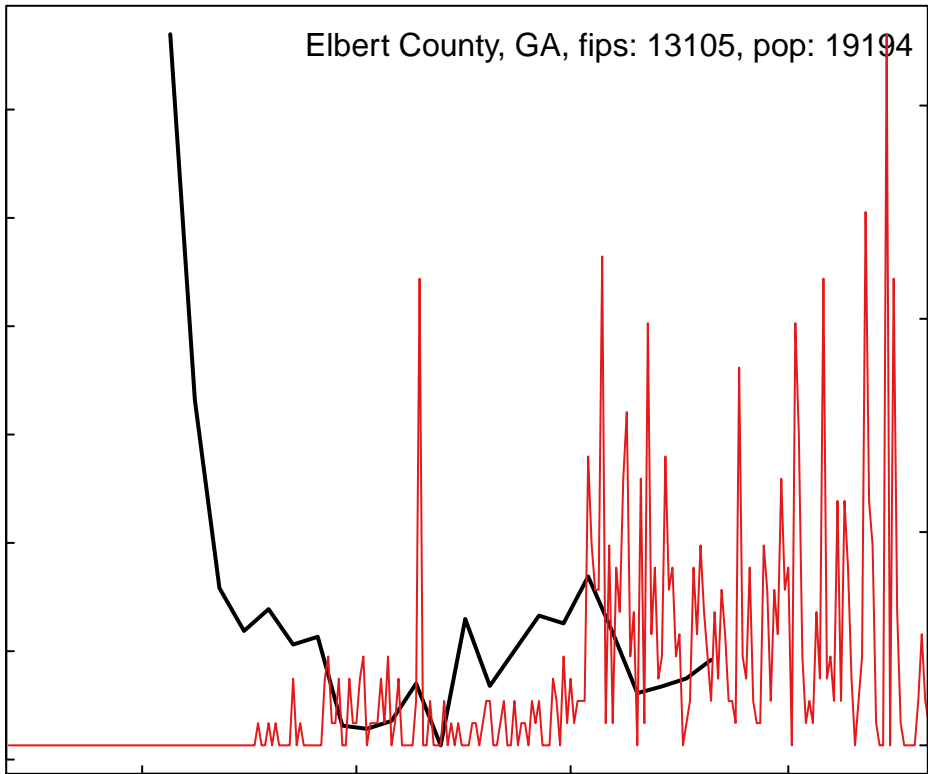

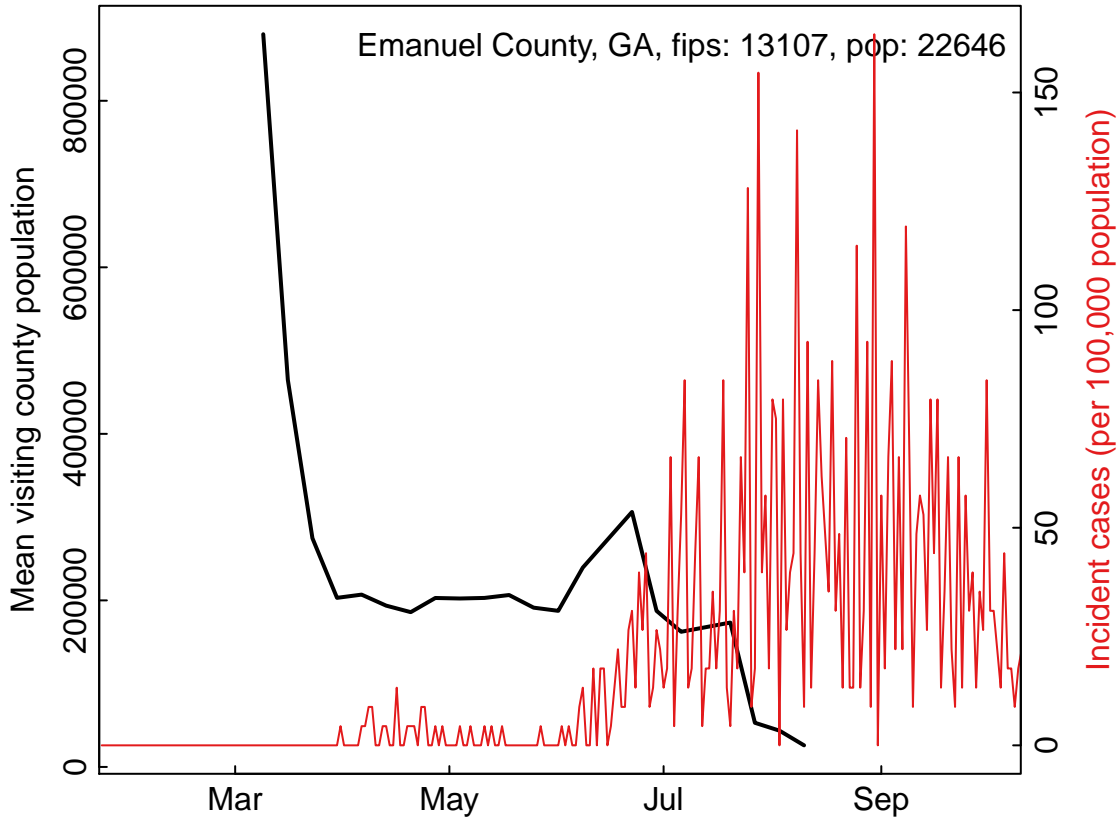

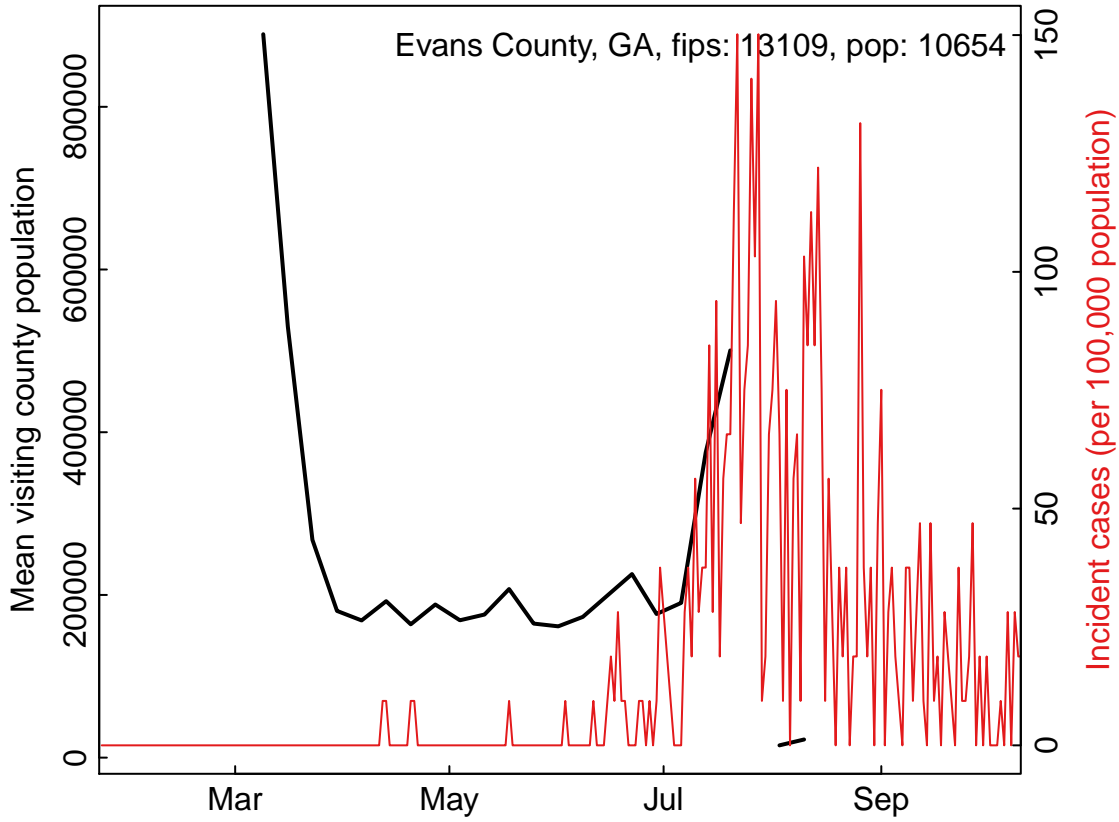



Fannin County, GA, fips: 13111, pop: 26188

Mean visiting county population

1200000  
800000  
400000

Mar

May

Jul

Sep

Incident cases (per 100,000 population)

80  
60  
40  
20  
0

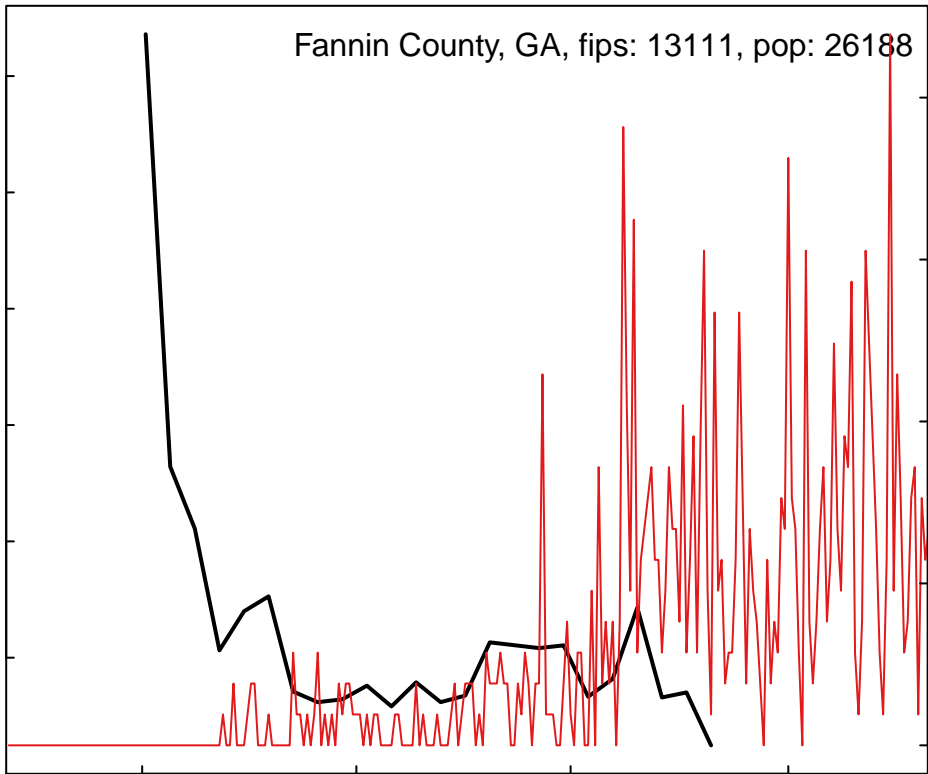

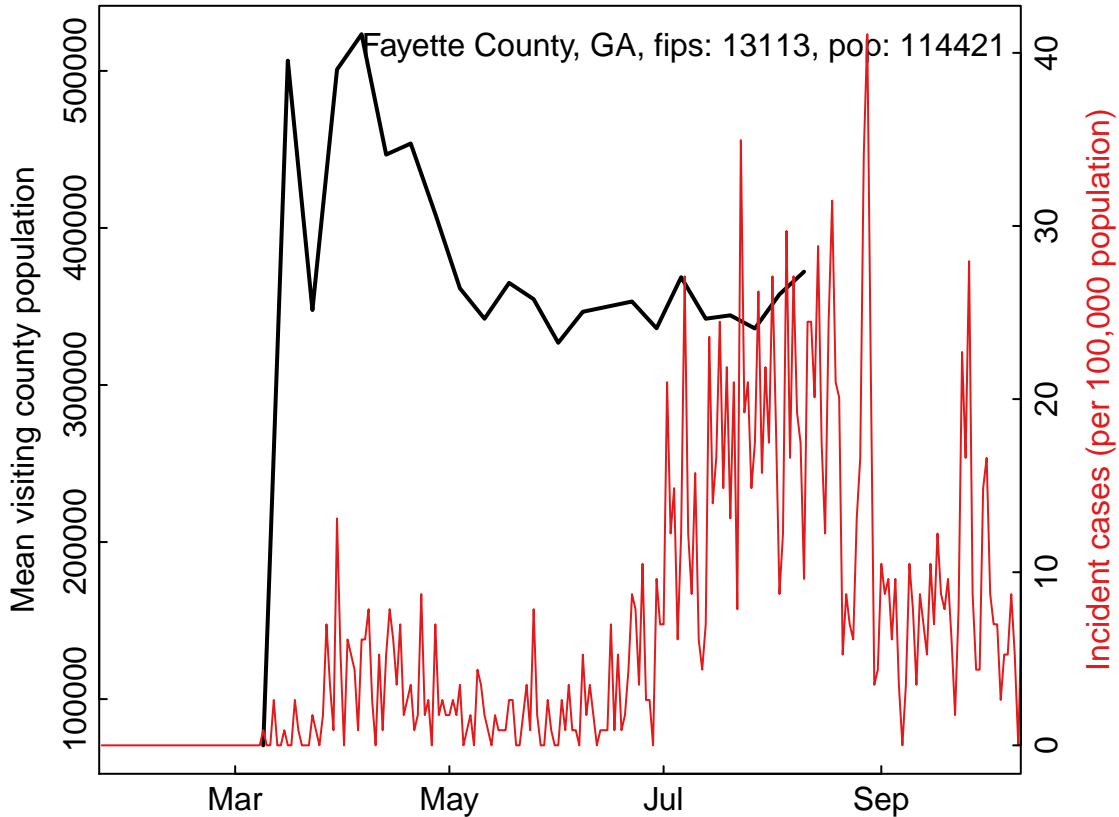

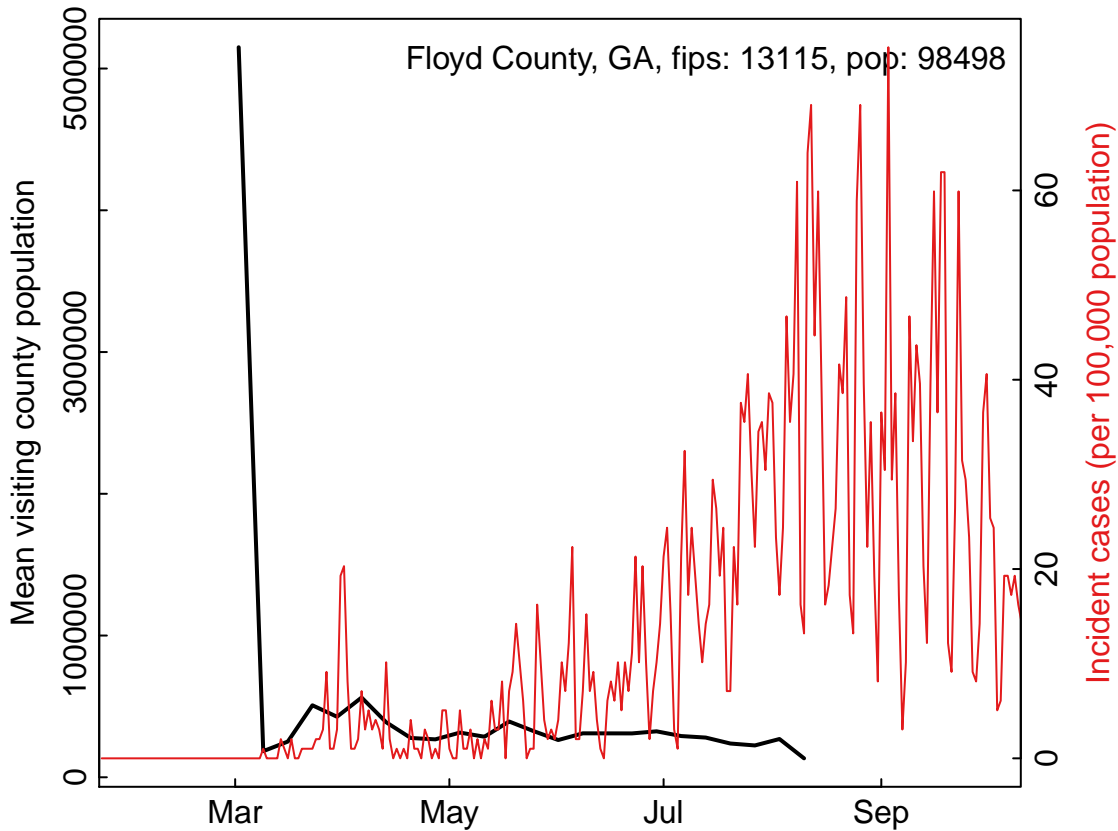

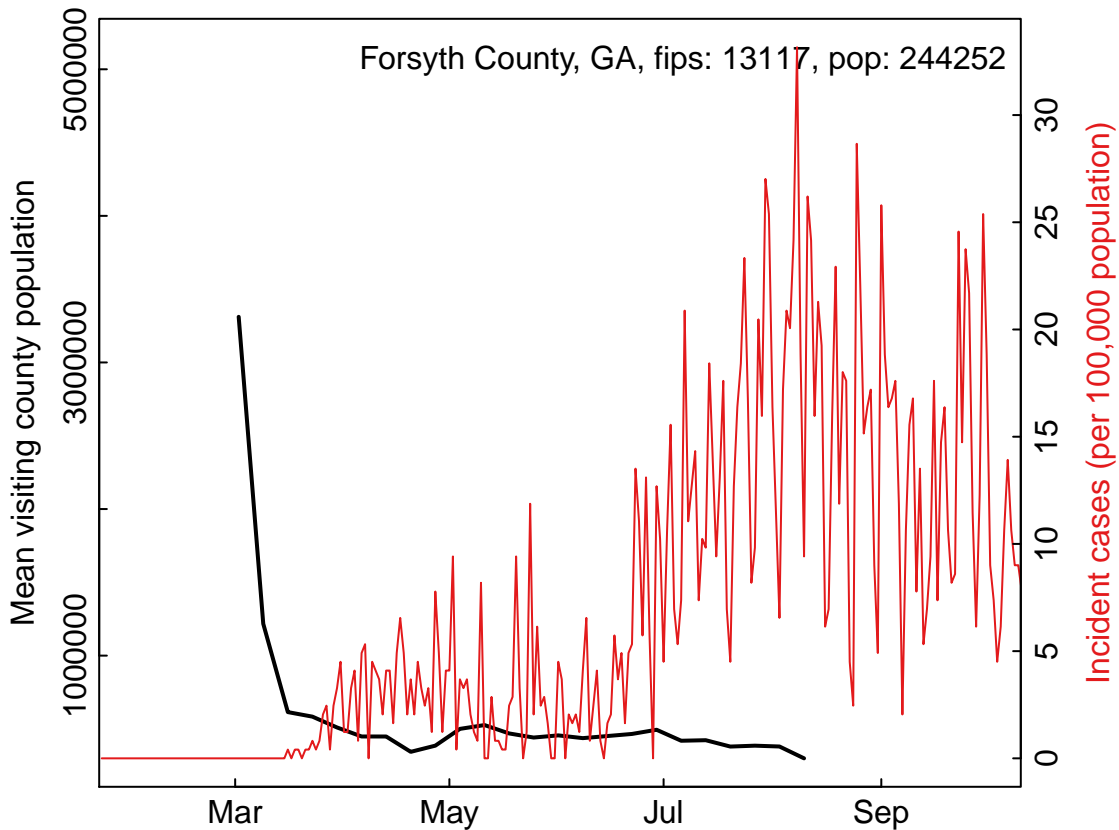

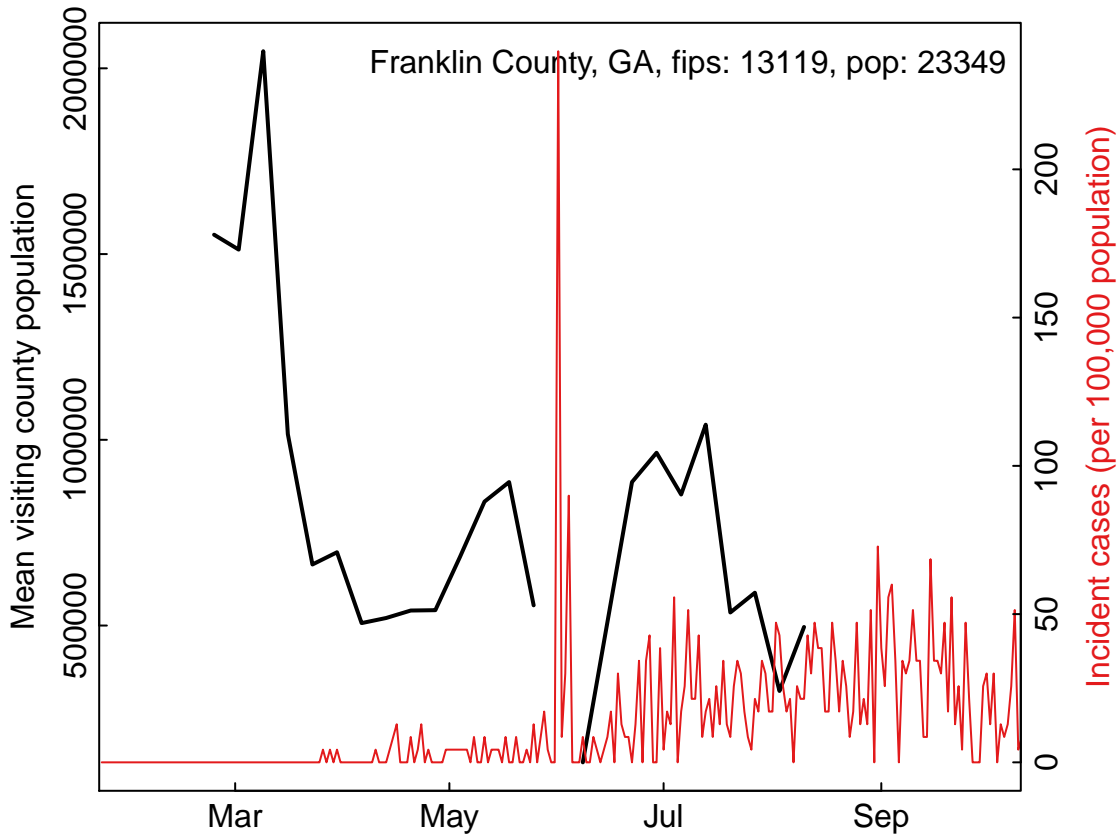

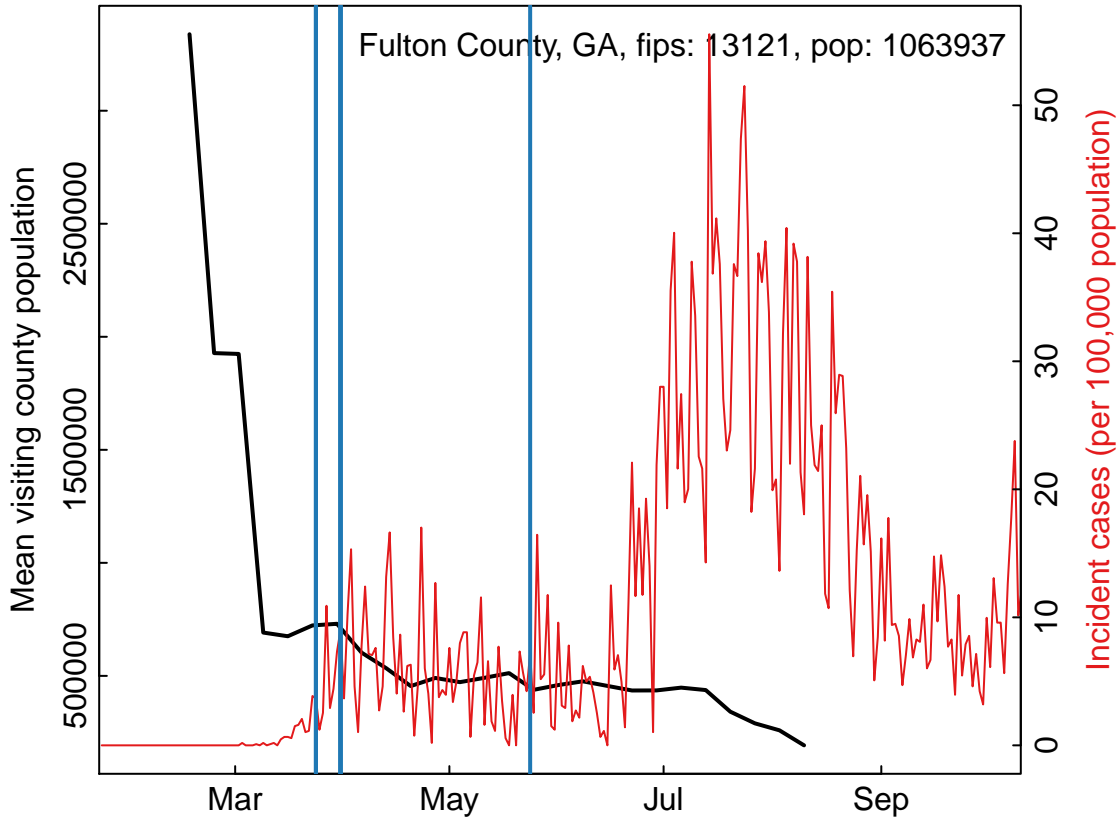

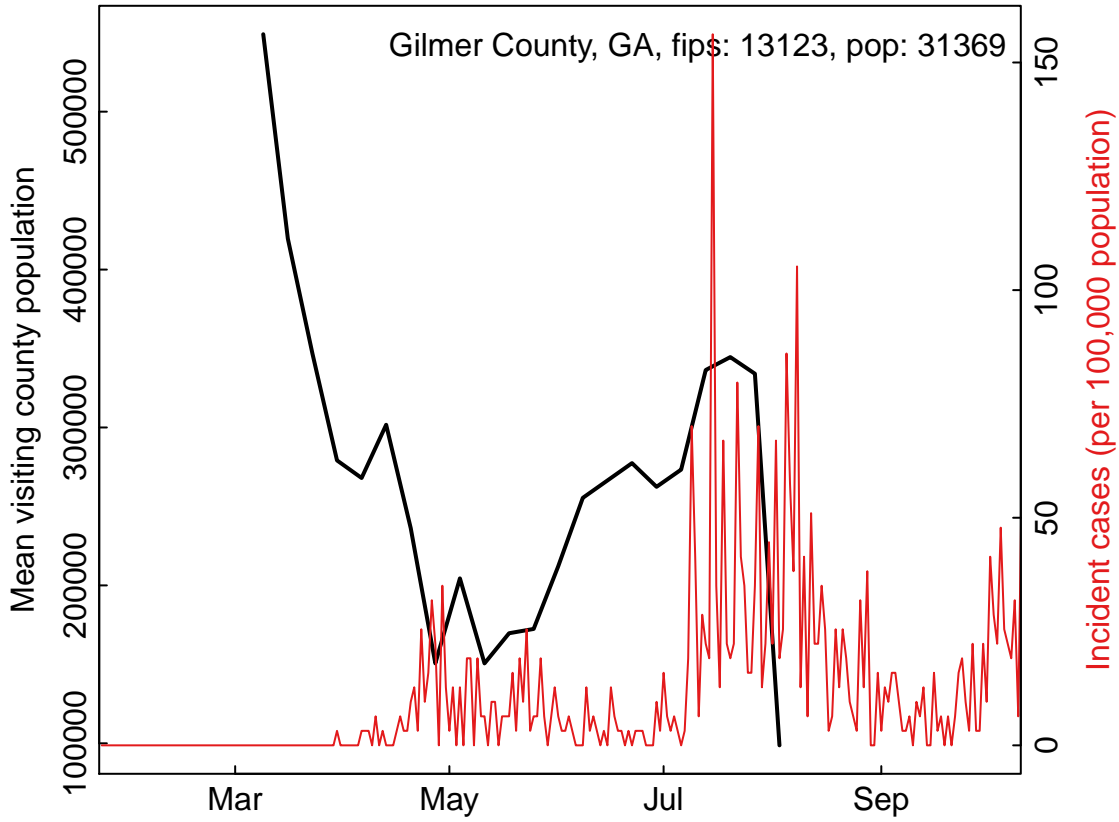

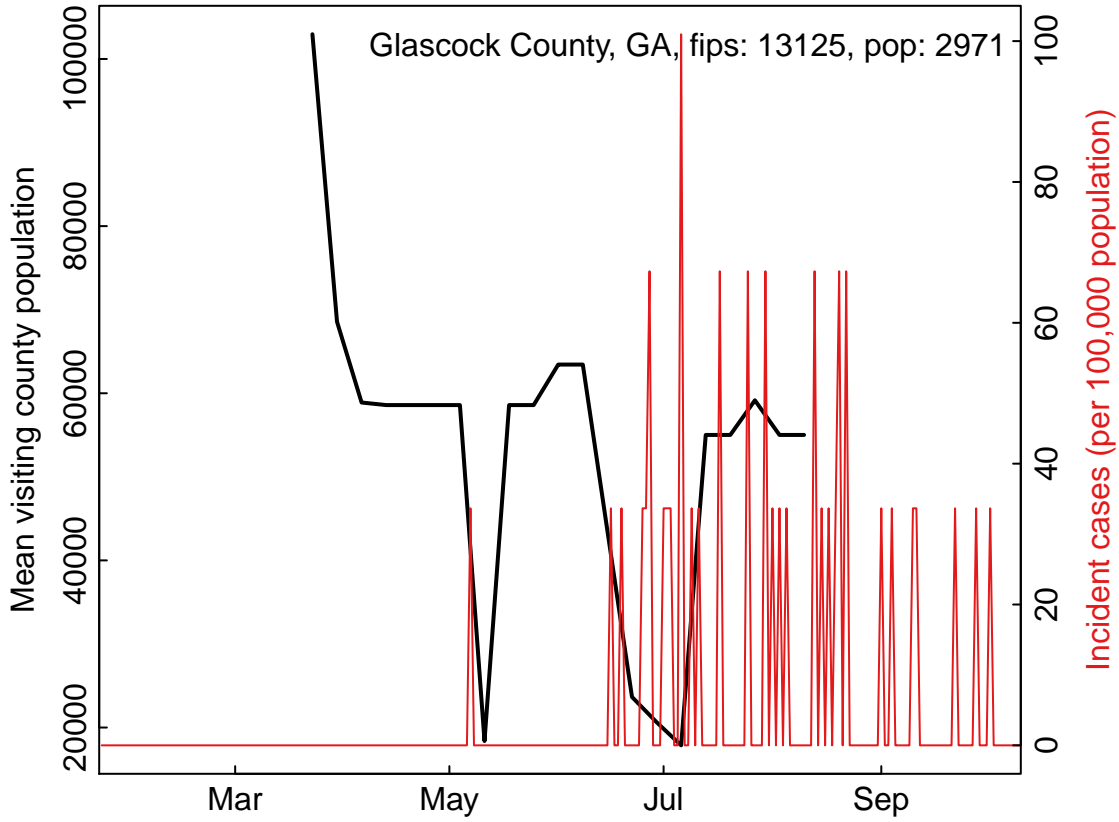



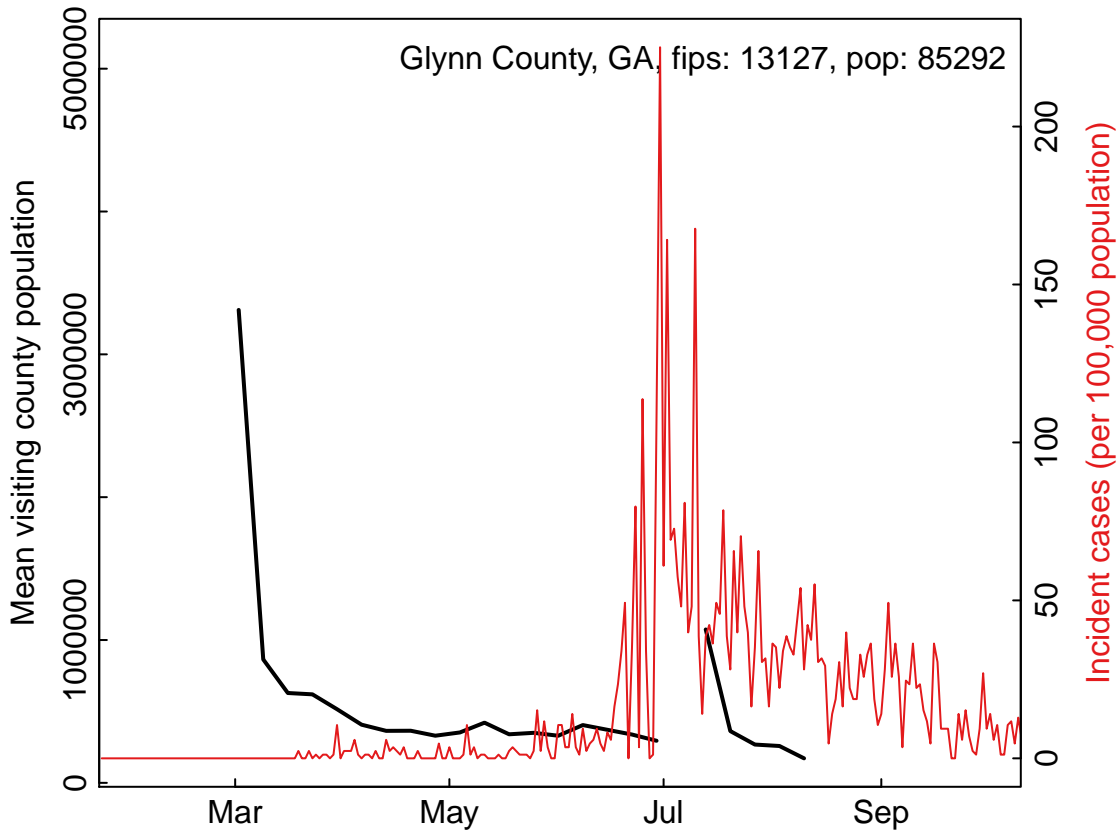

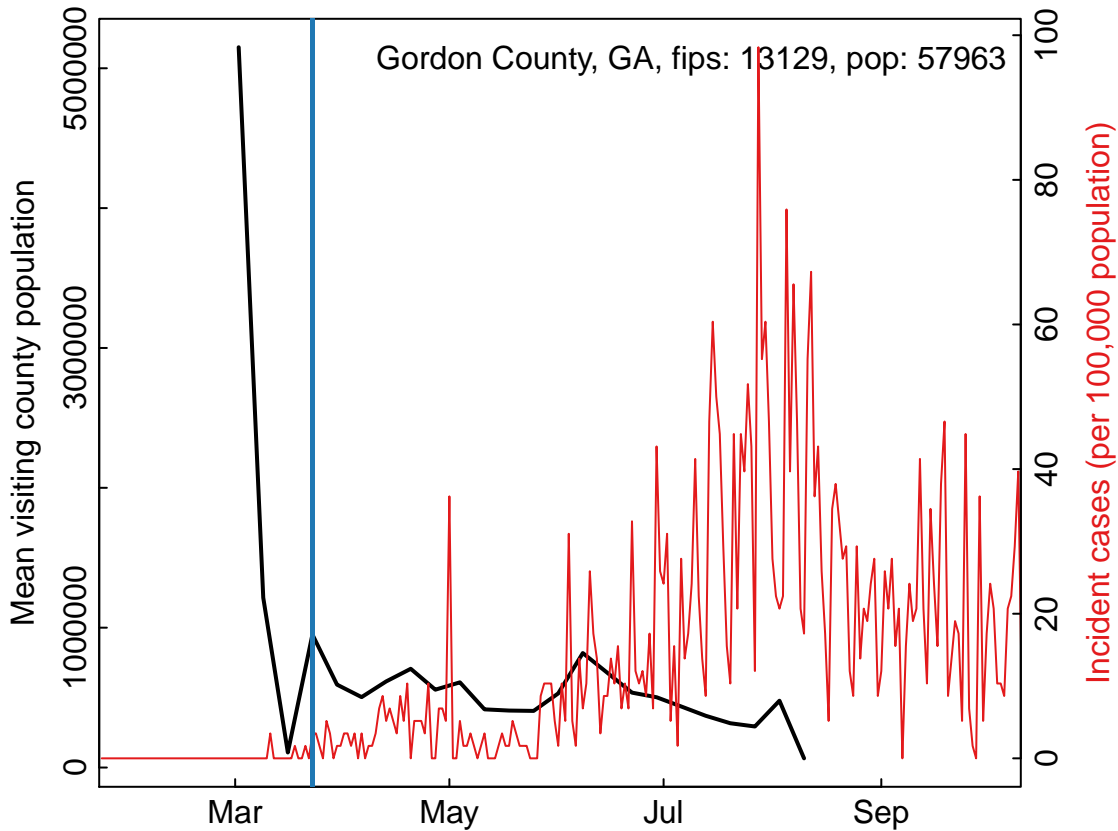

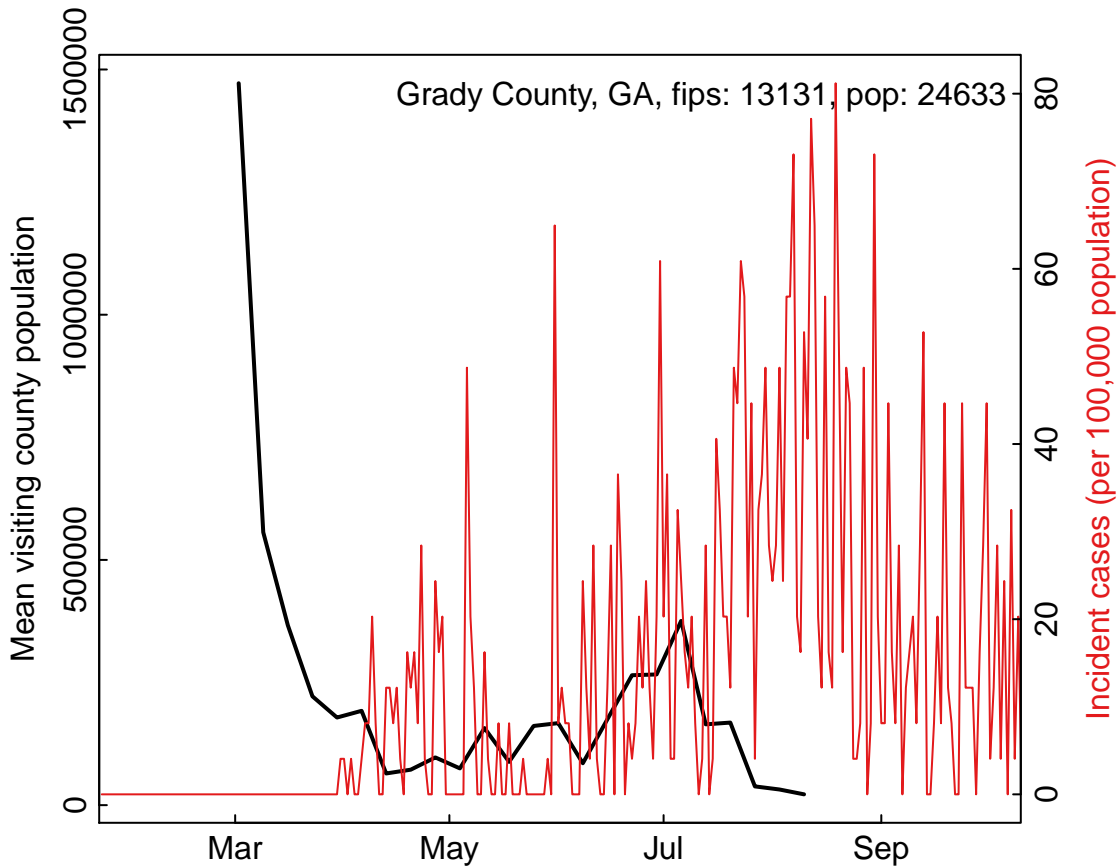

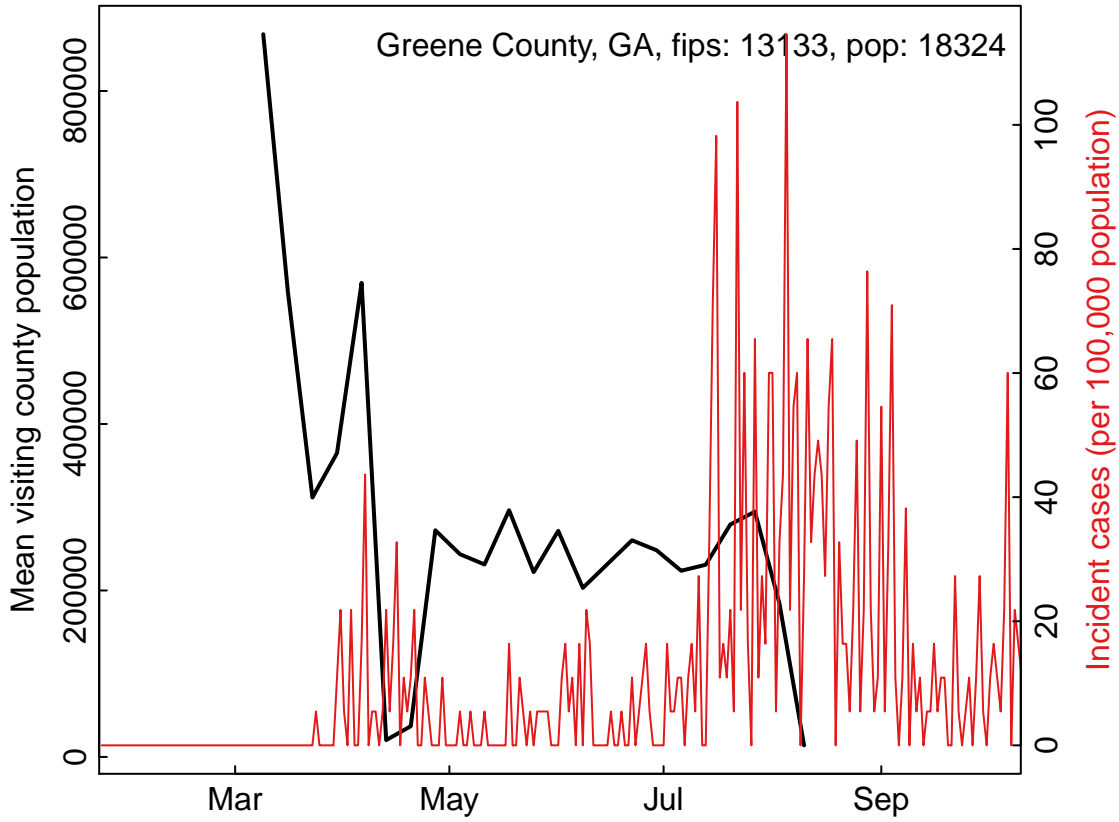

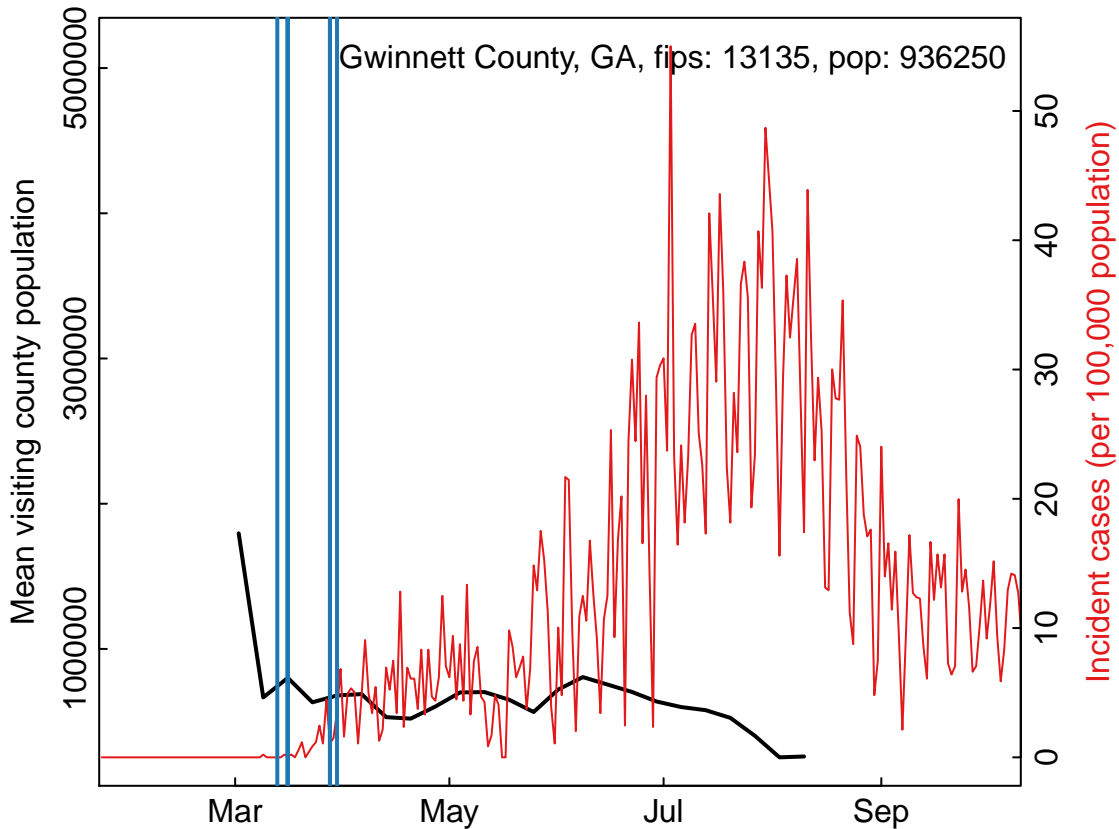

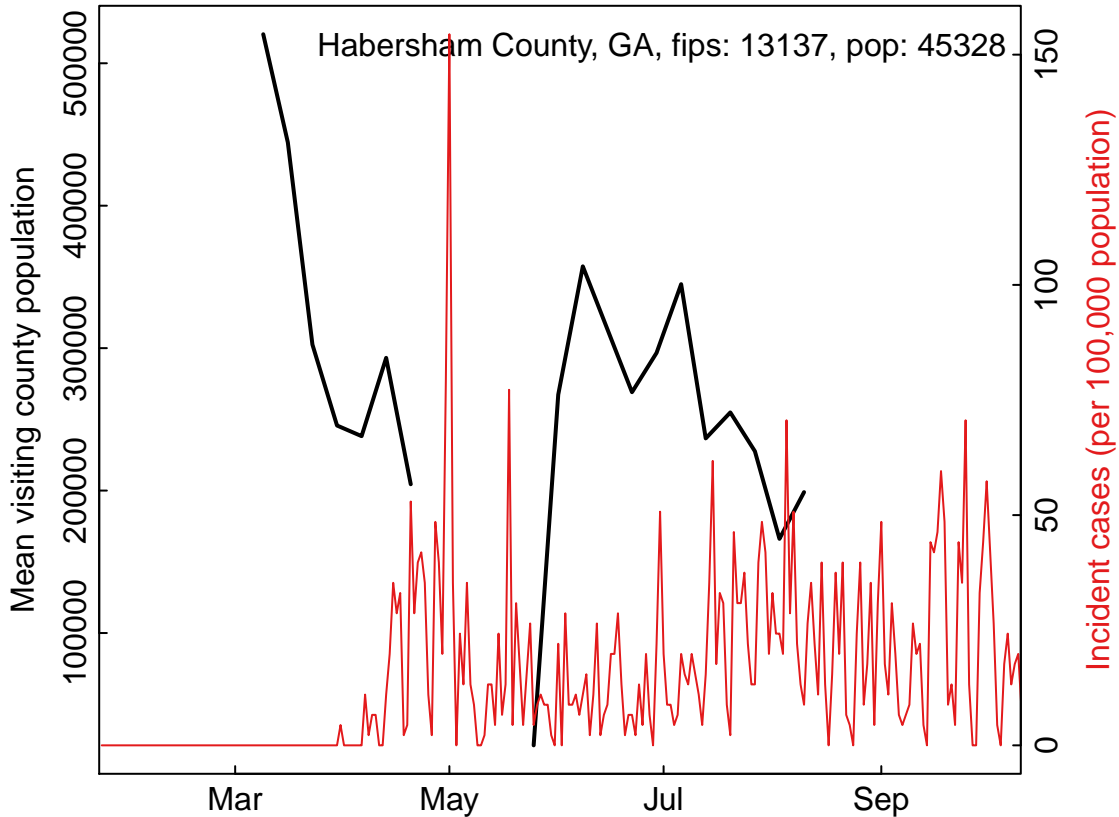

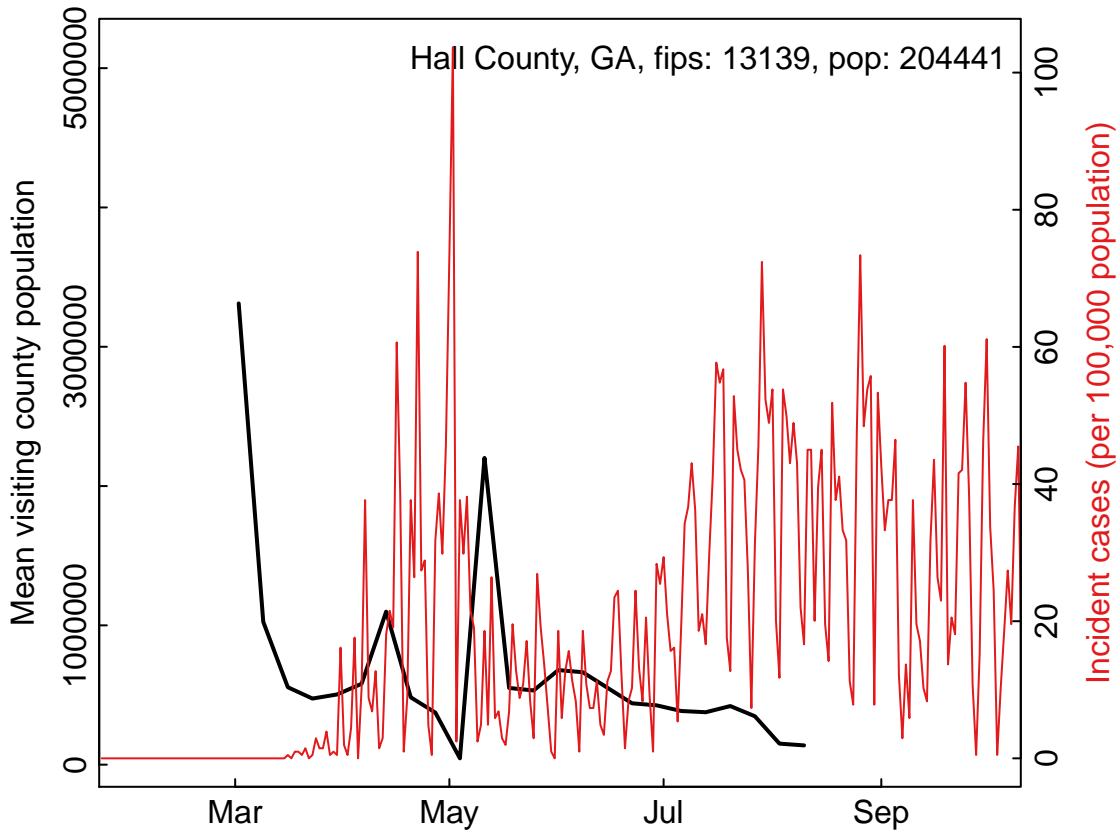

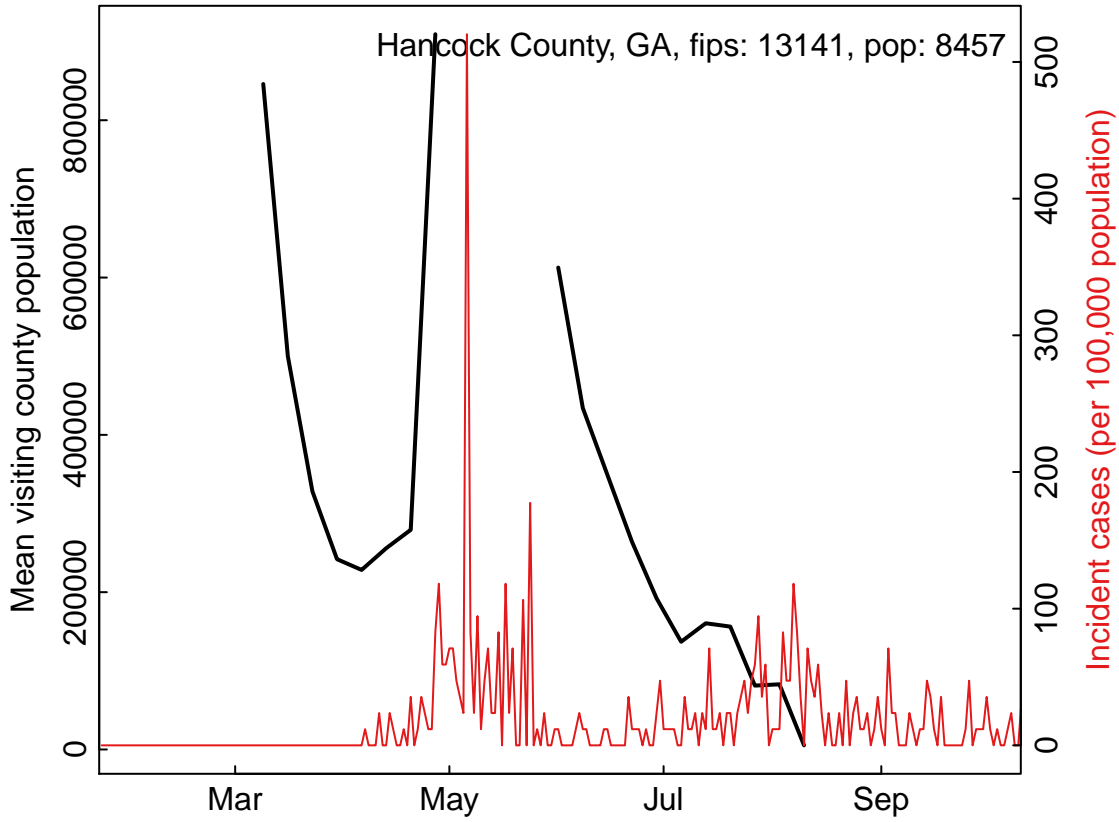



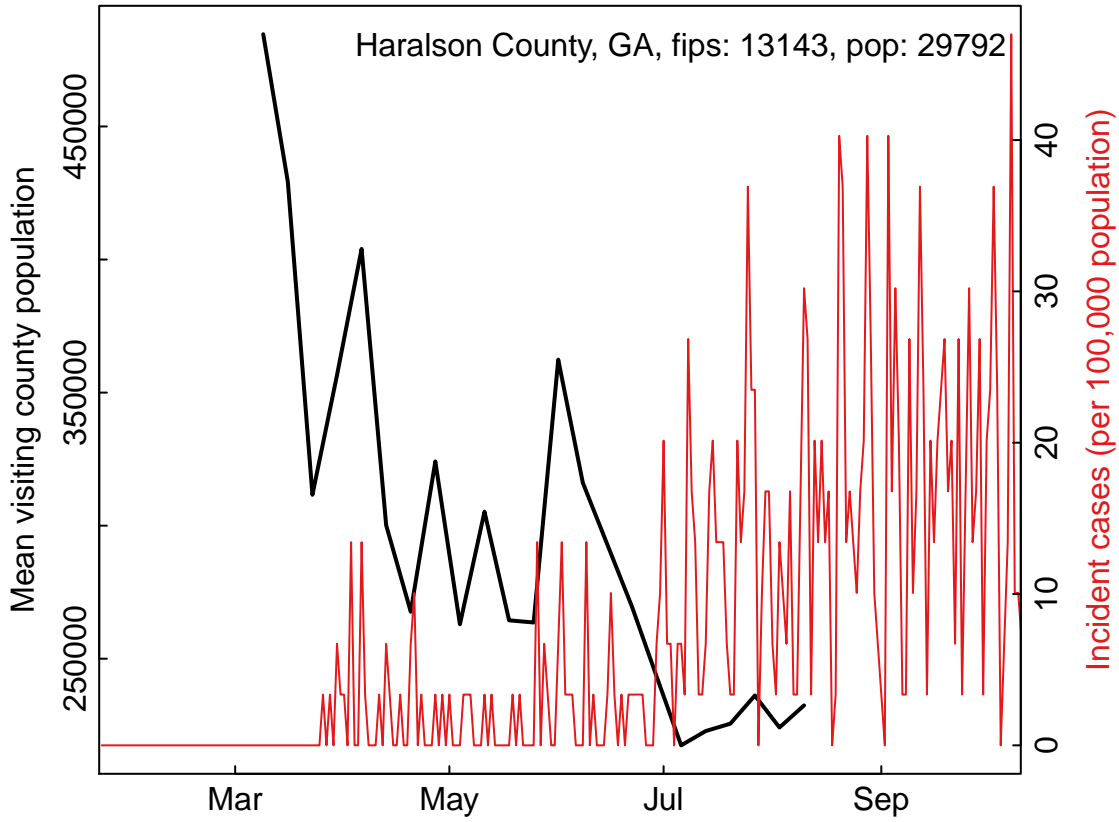

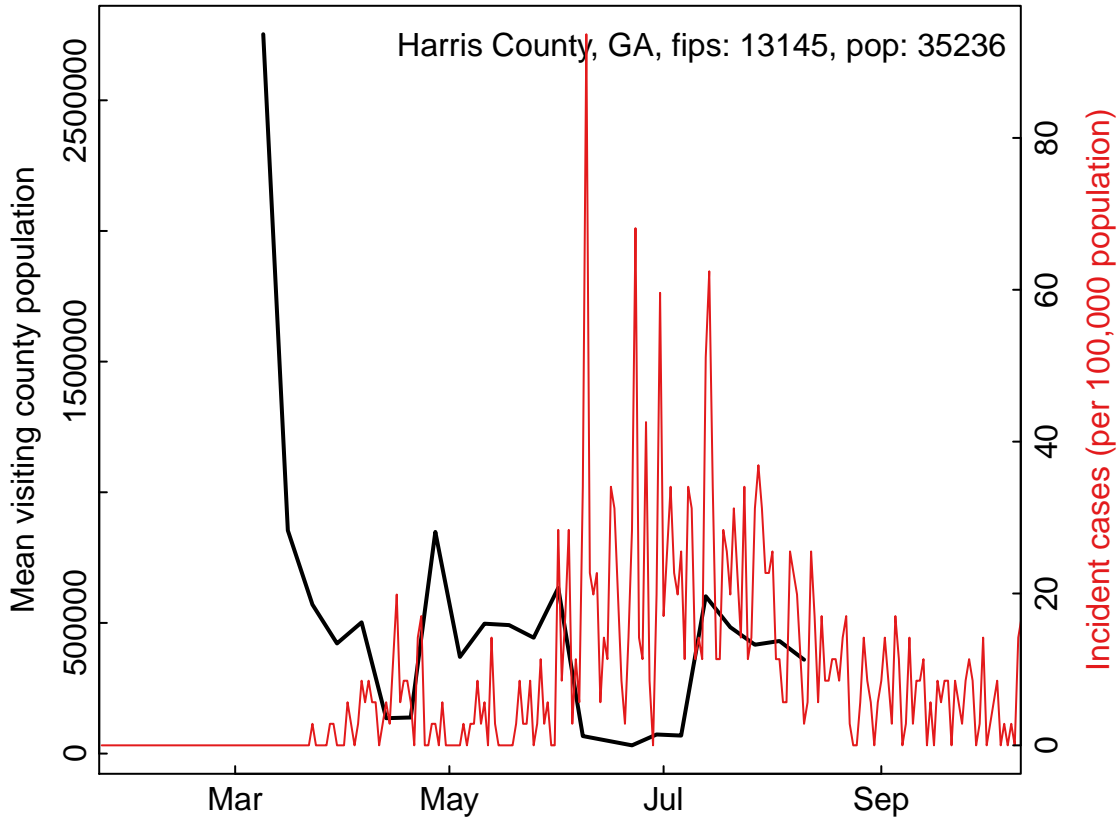

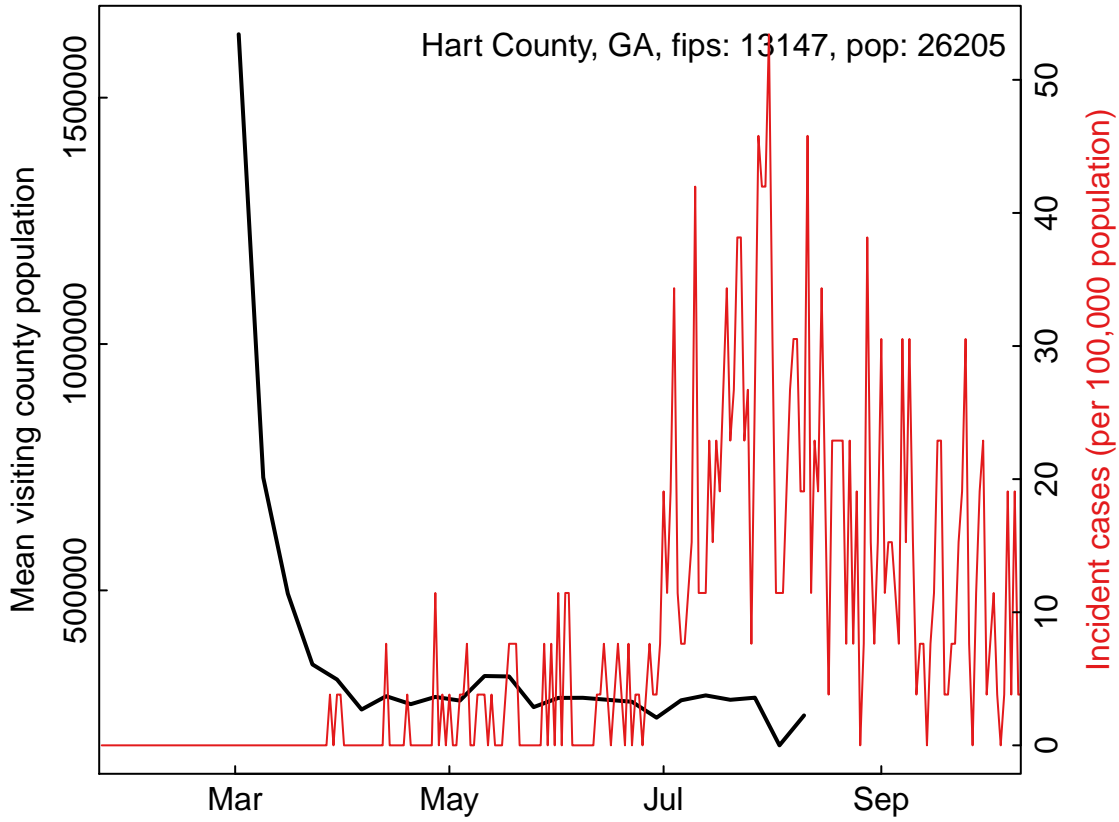

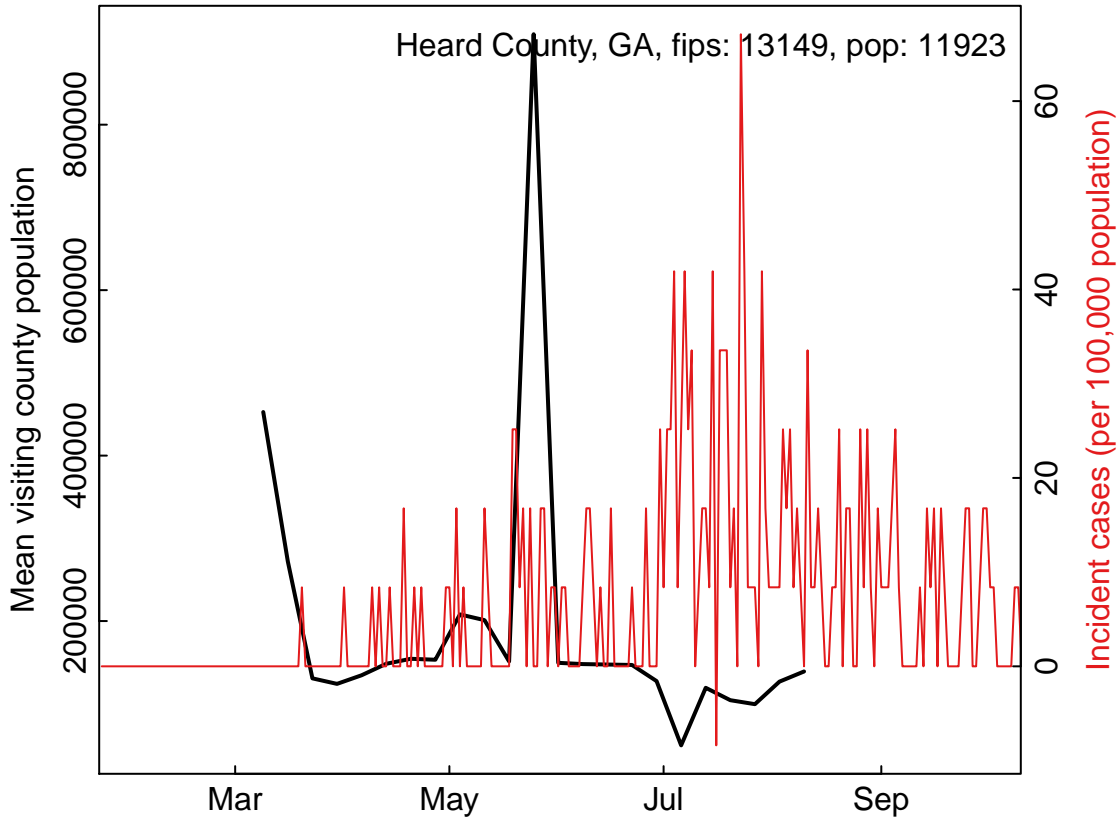

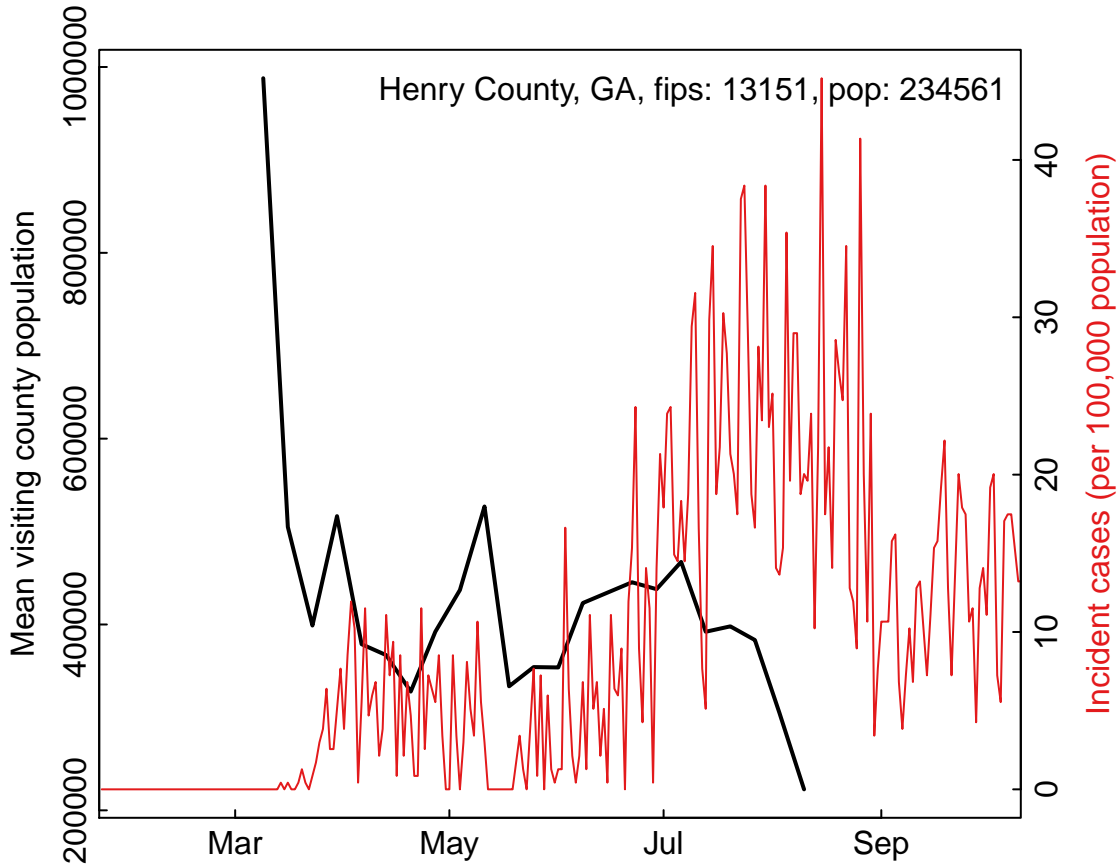

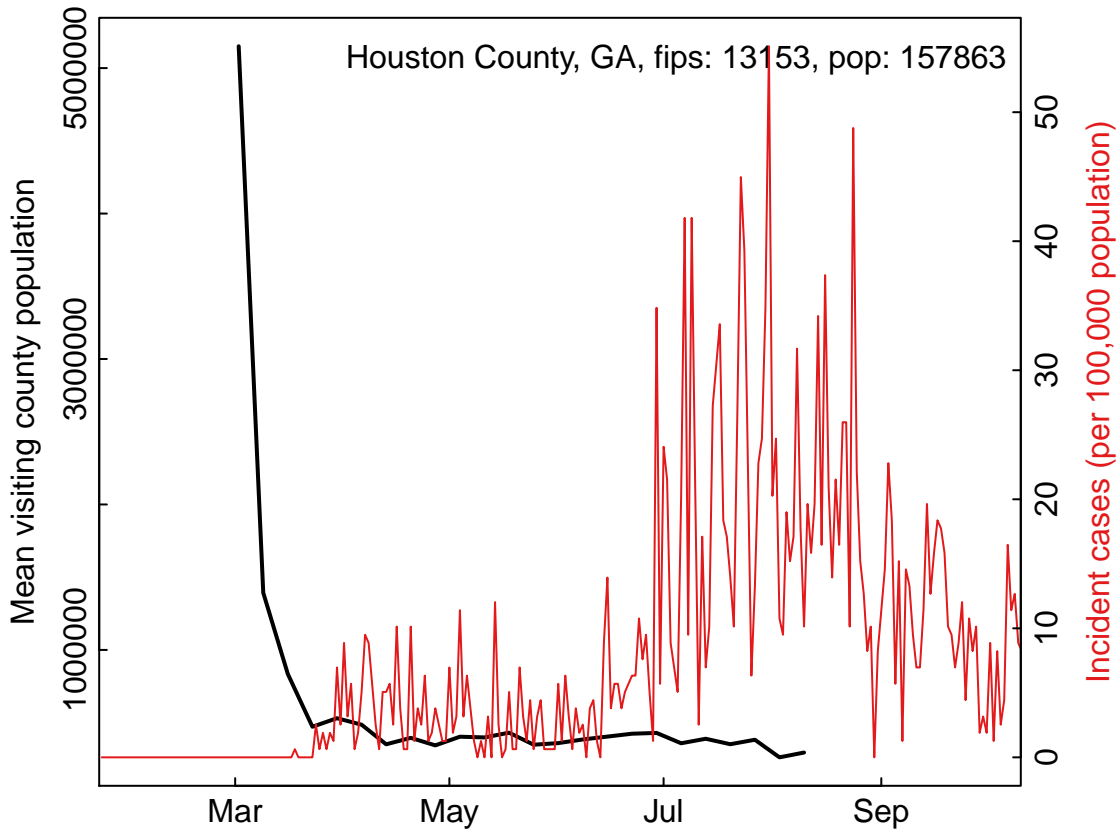

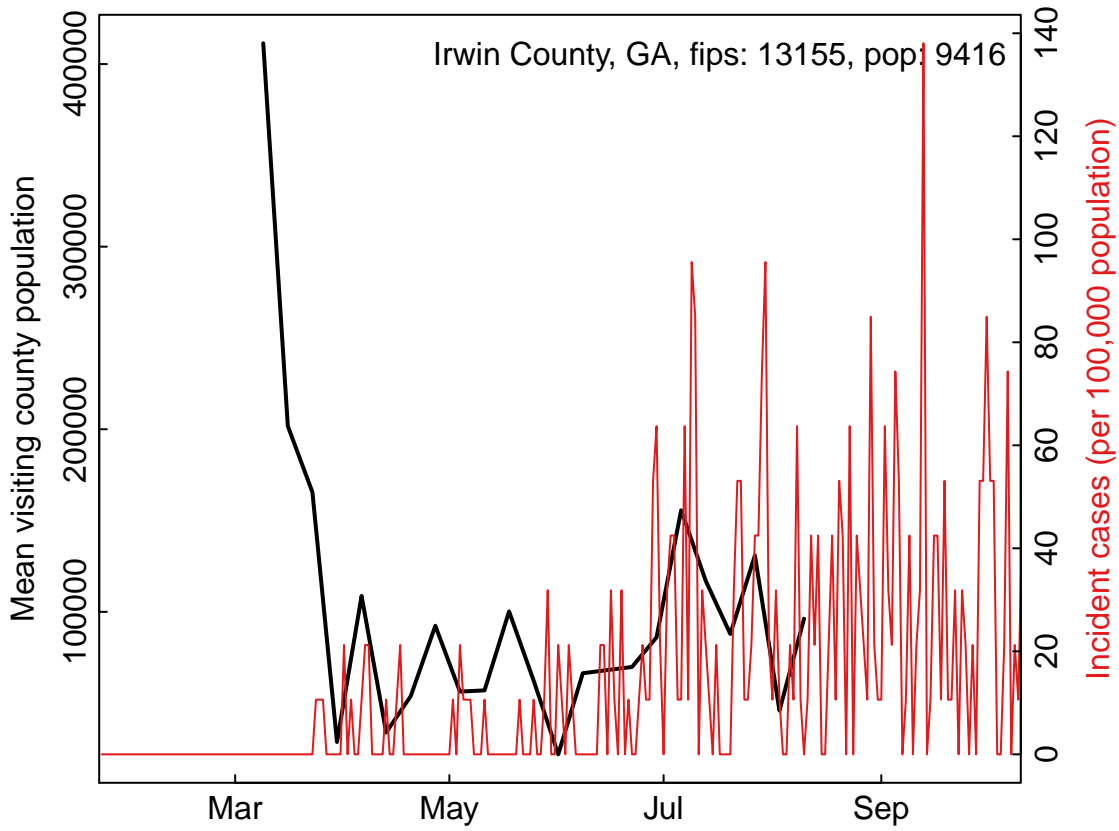

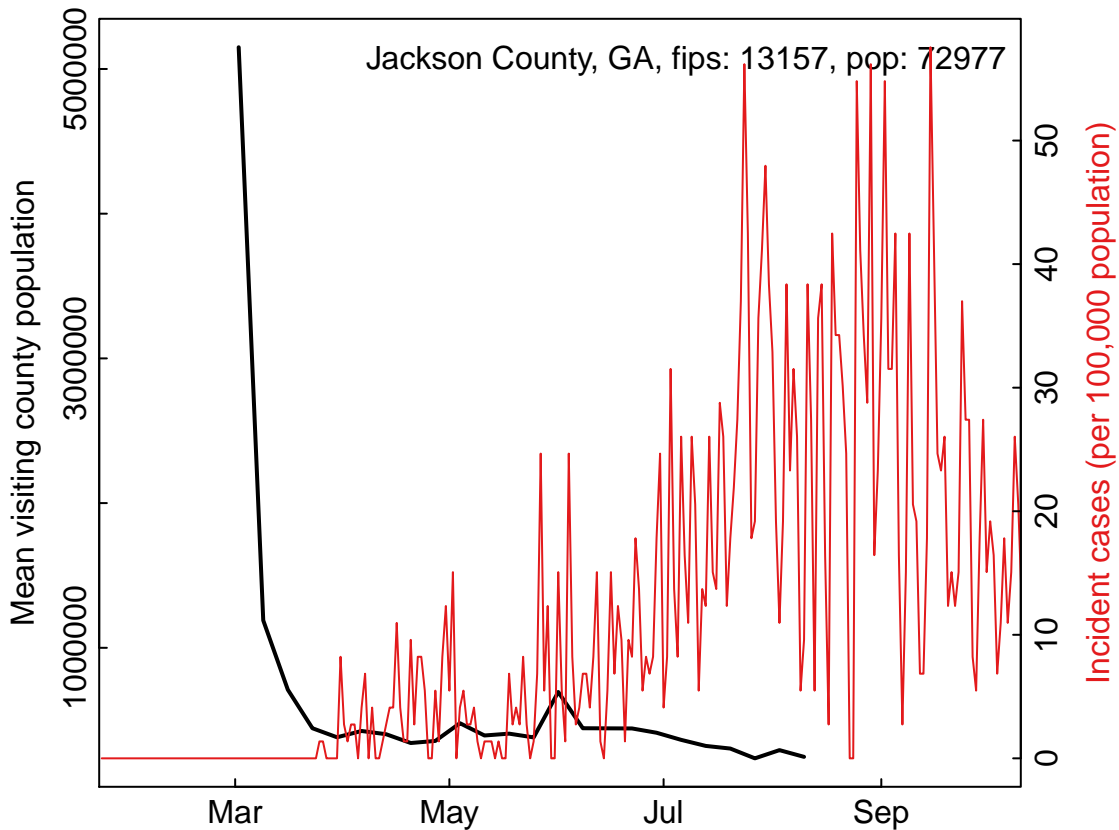



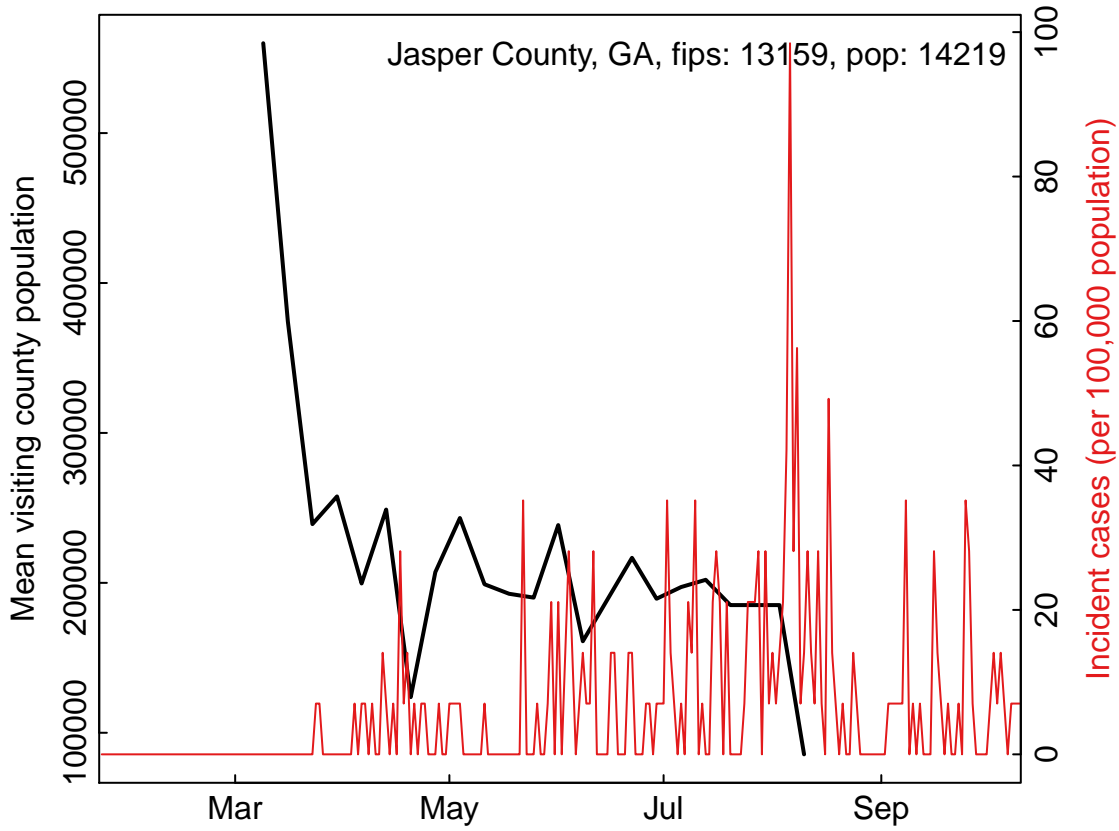

Jeff Davis County, GA, fips: 13161, pop: 15115

Mean visiting county population

Incident cases (per 100,000 population)

500000  
300000  
100000

150  
100  
50  
0

Mar May Jul Sep

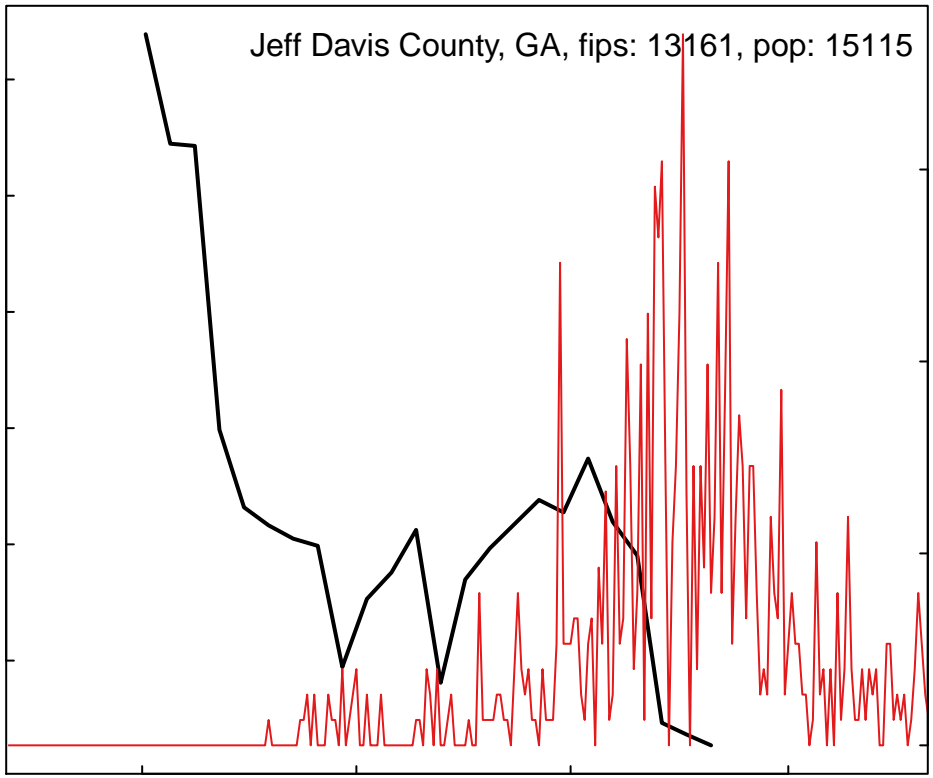

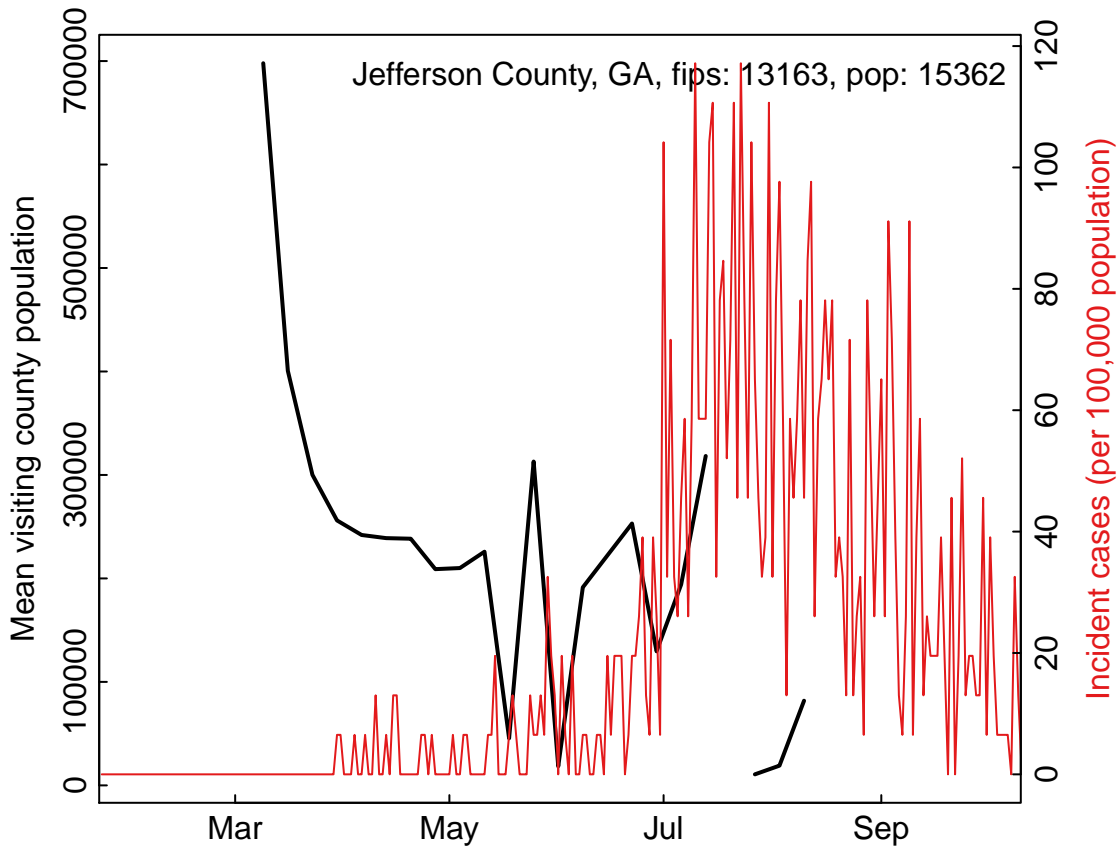

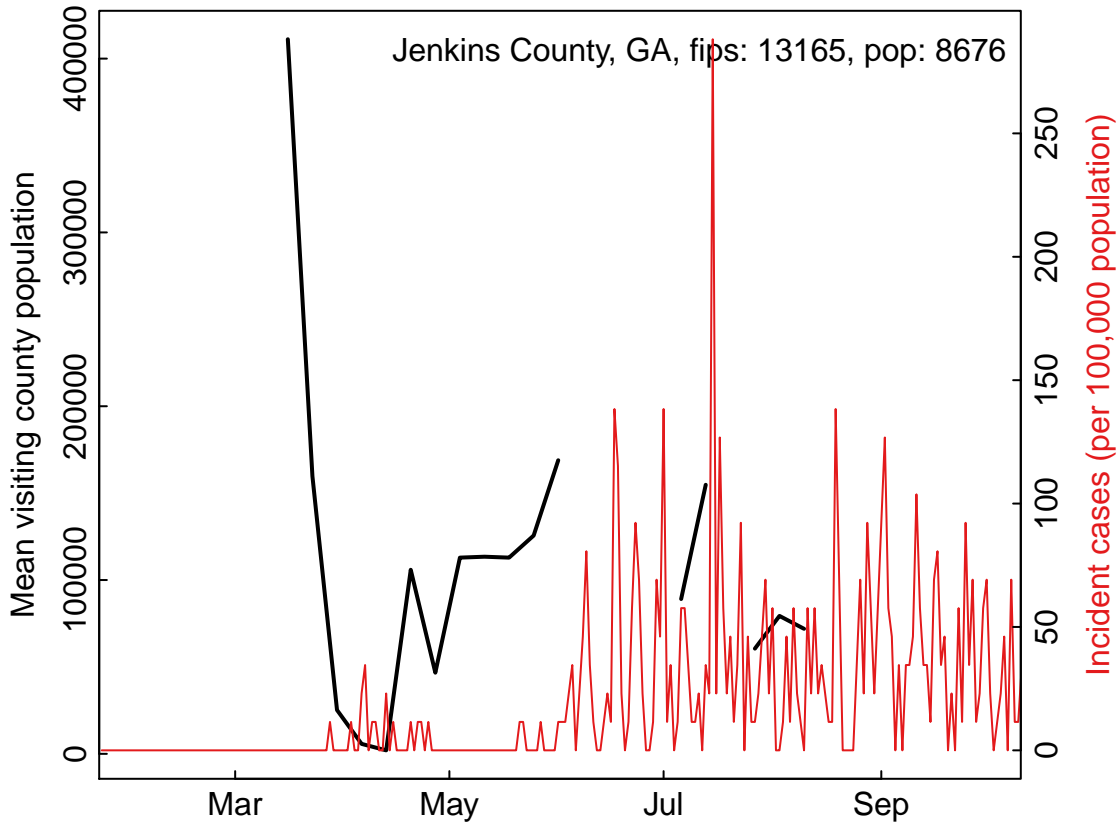

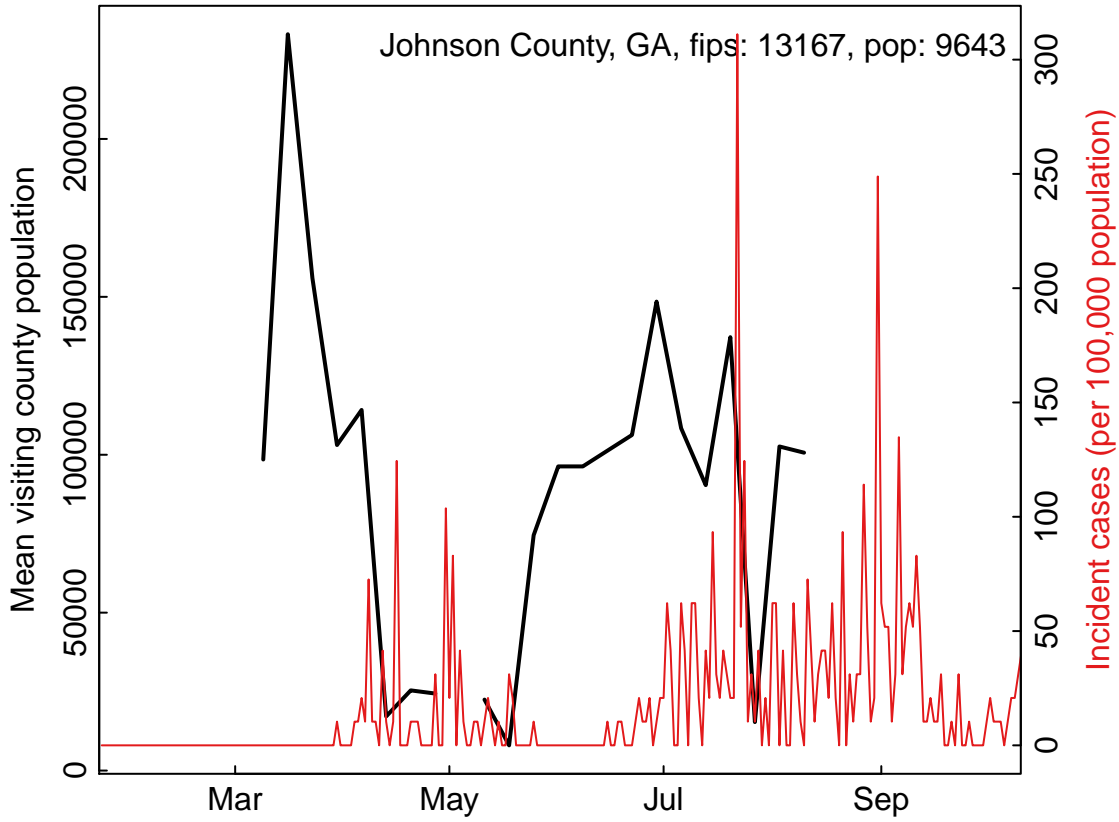

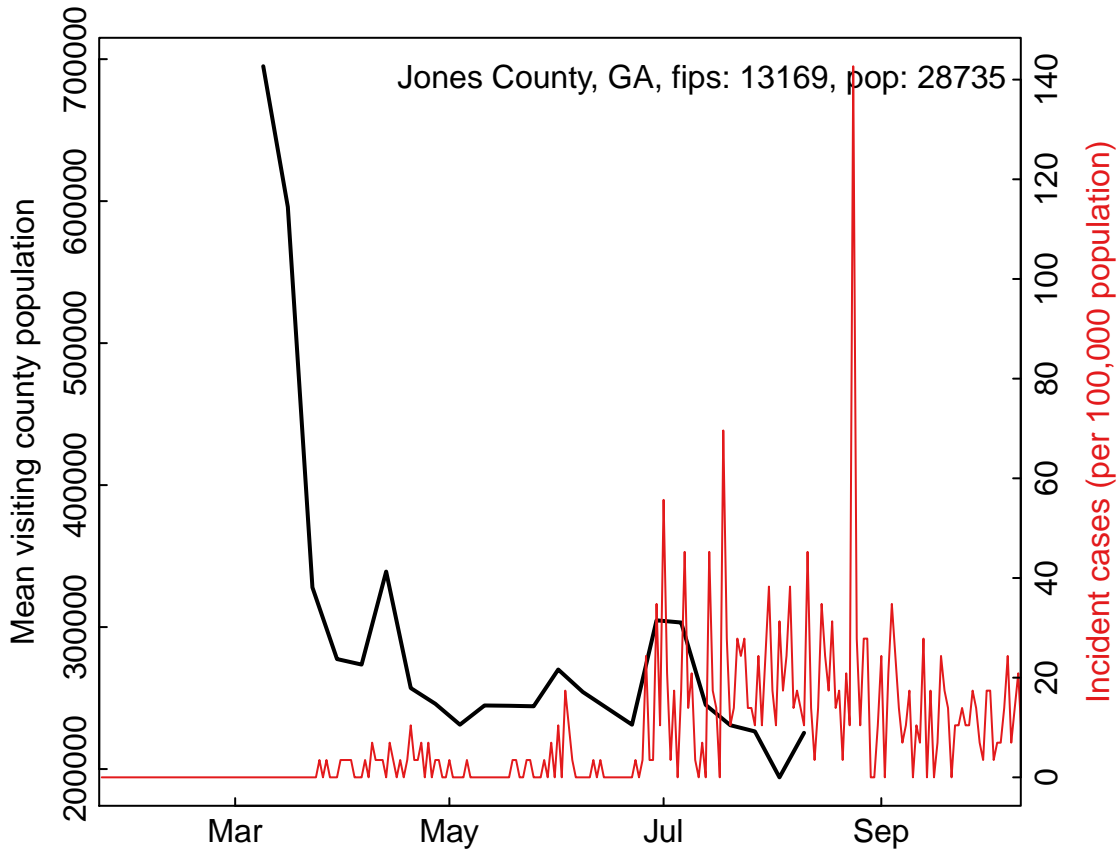

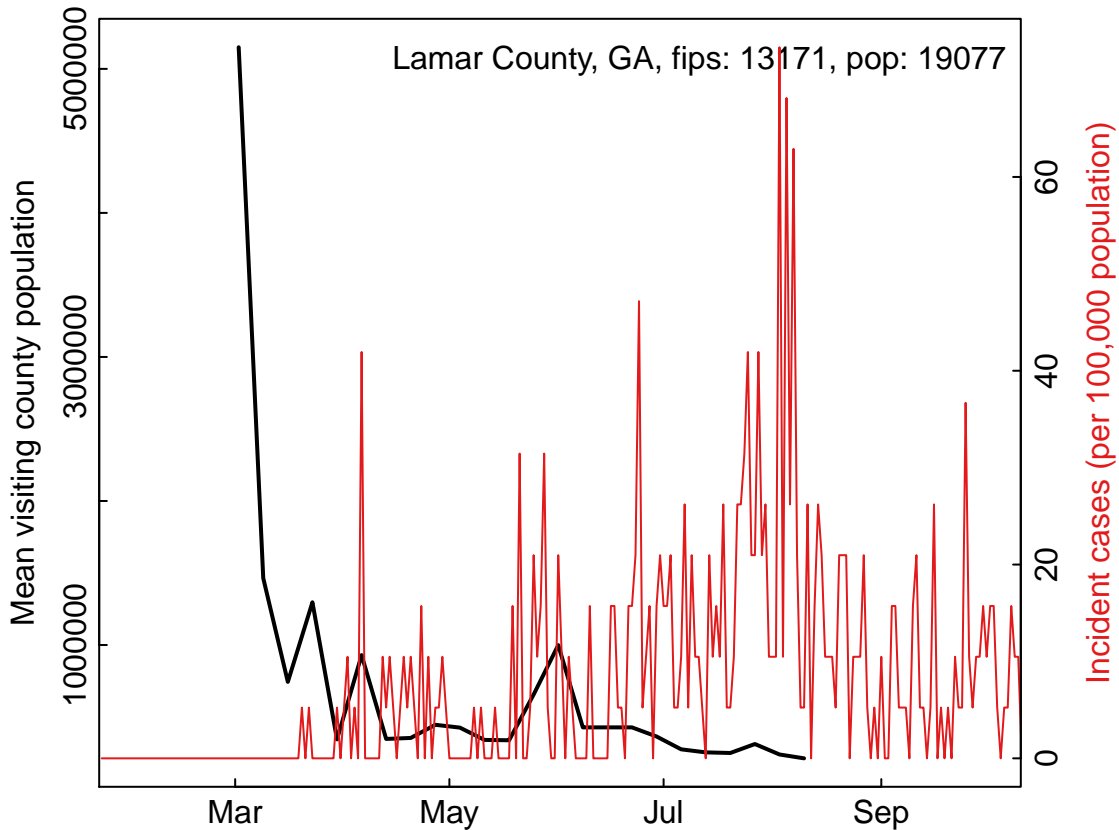

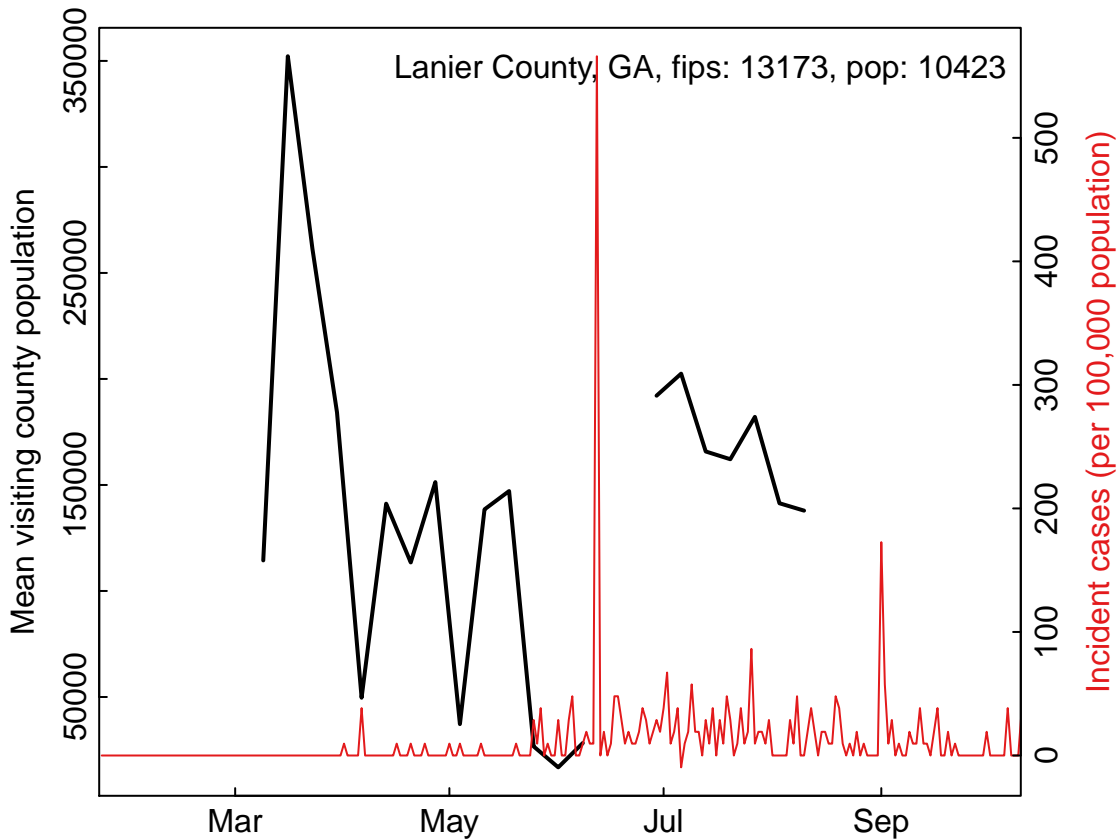



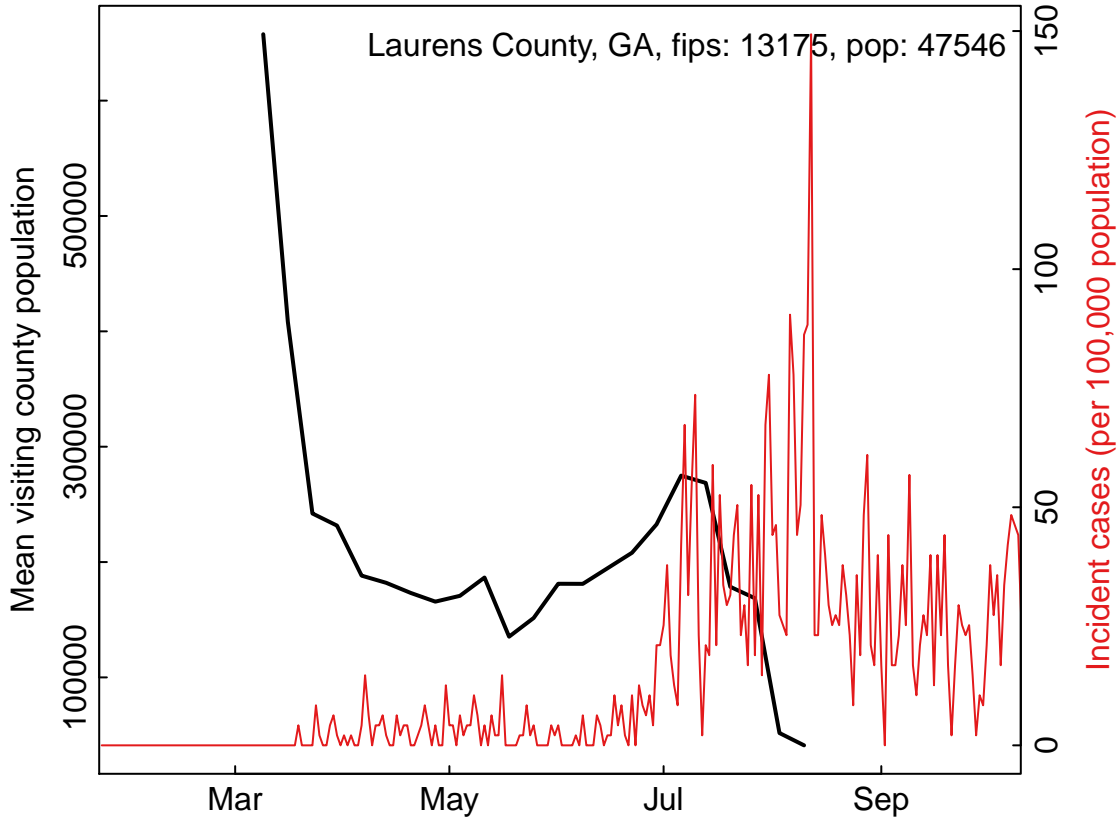

Lee County, GA, fips: 13177, pop: 29992

Mean visiting county population

500000  
300000  
100000  
0

Mar

May

Jul

Sep

150  
100  
50  
0

Incident cases (per 100,000 population)

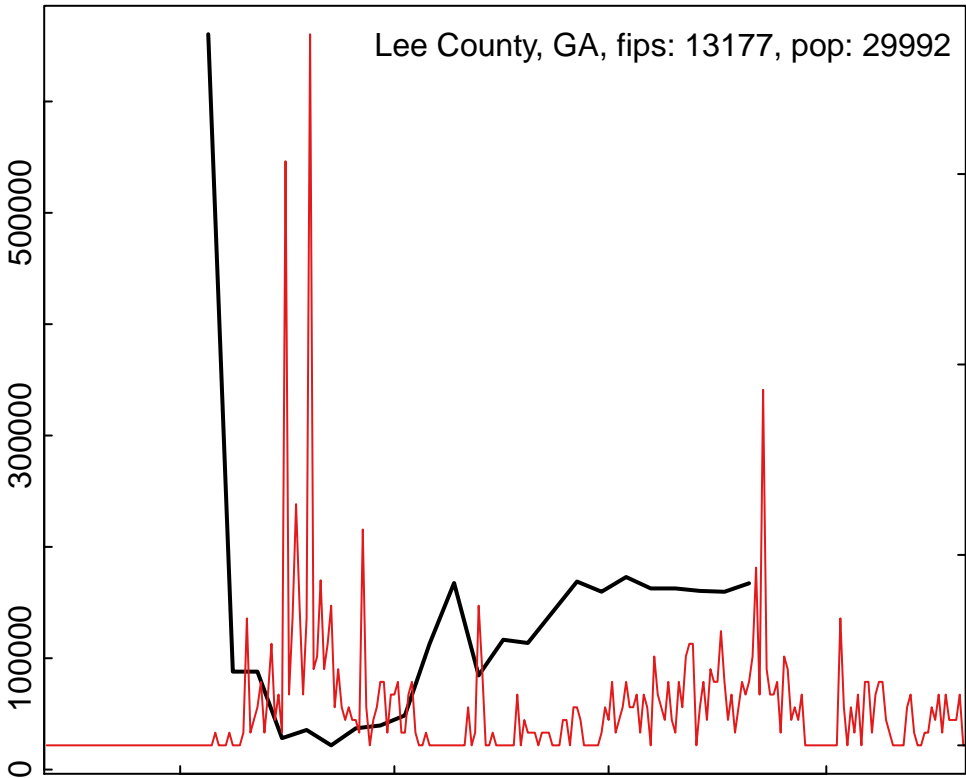

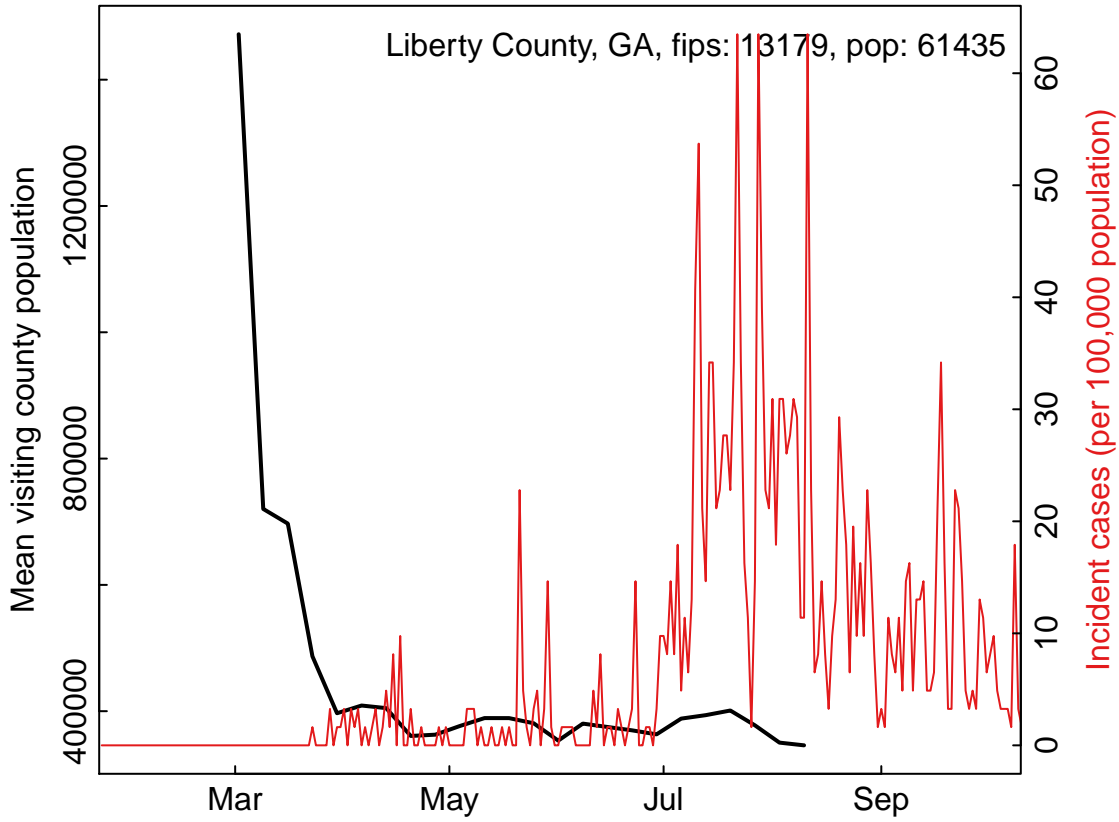

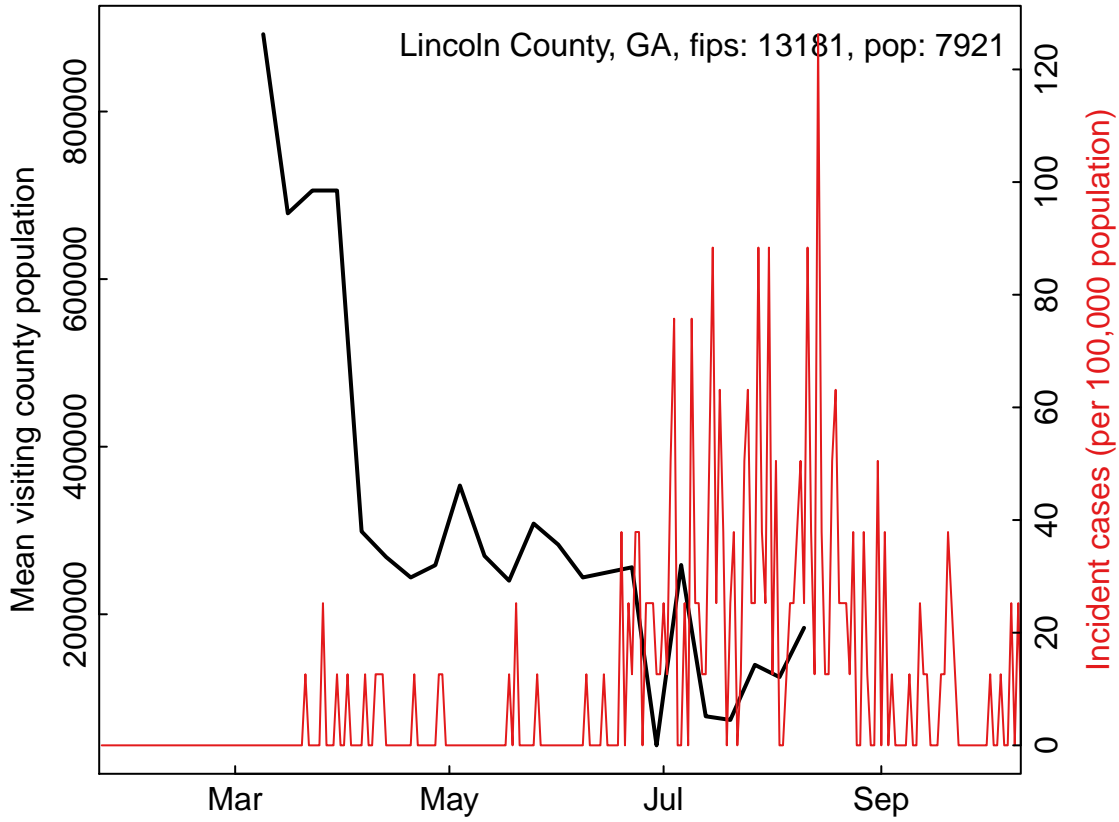

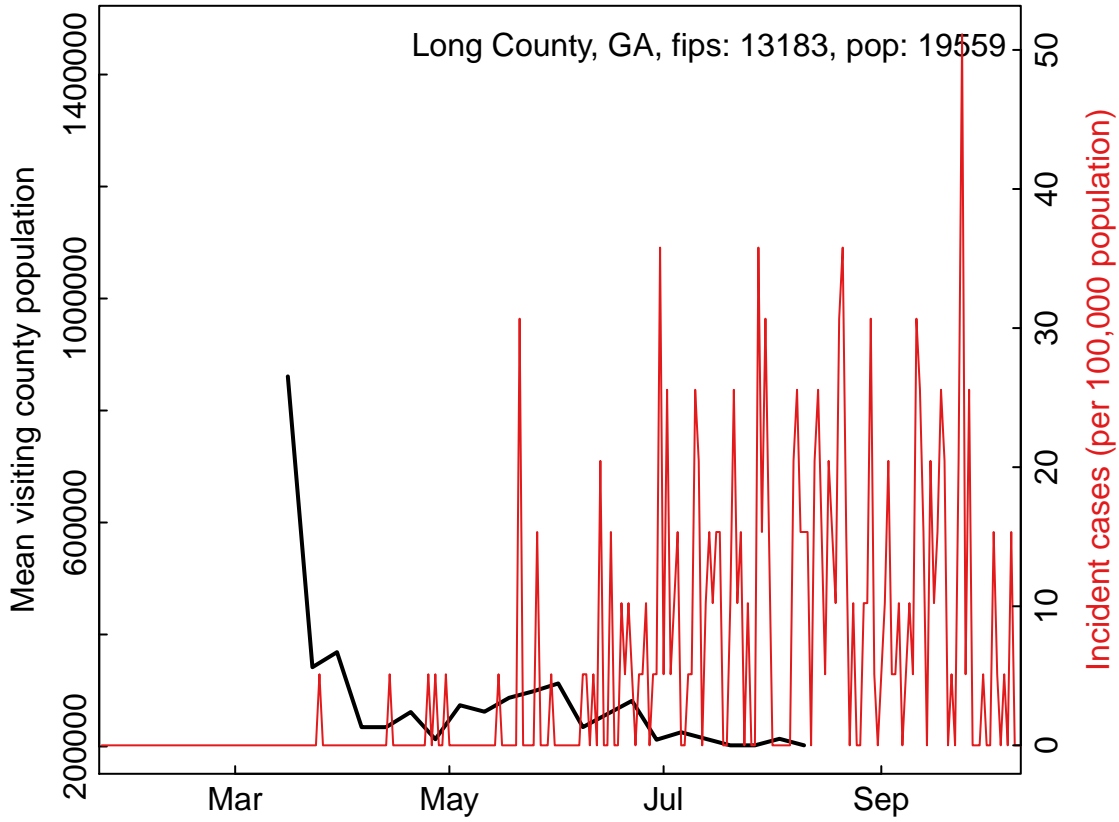

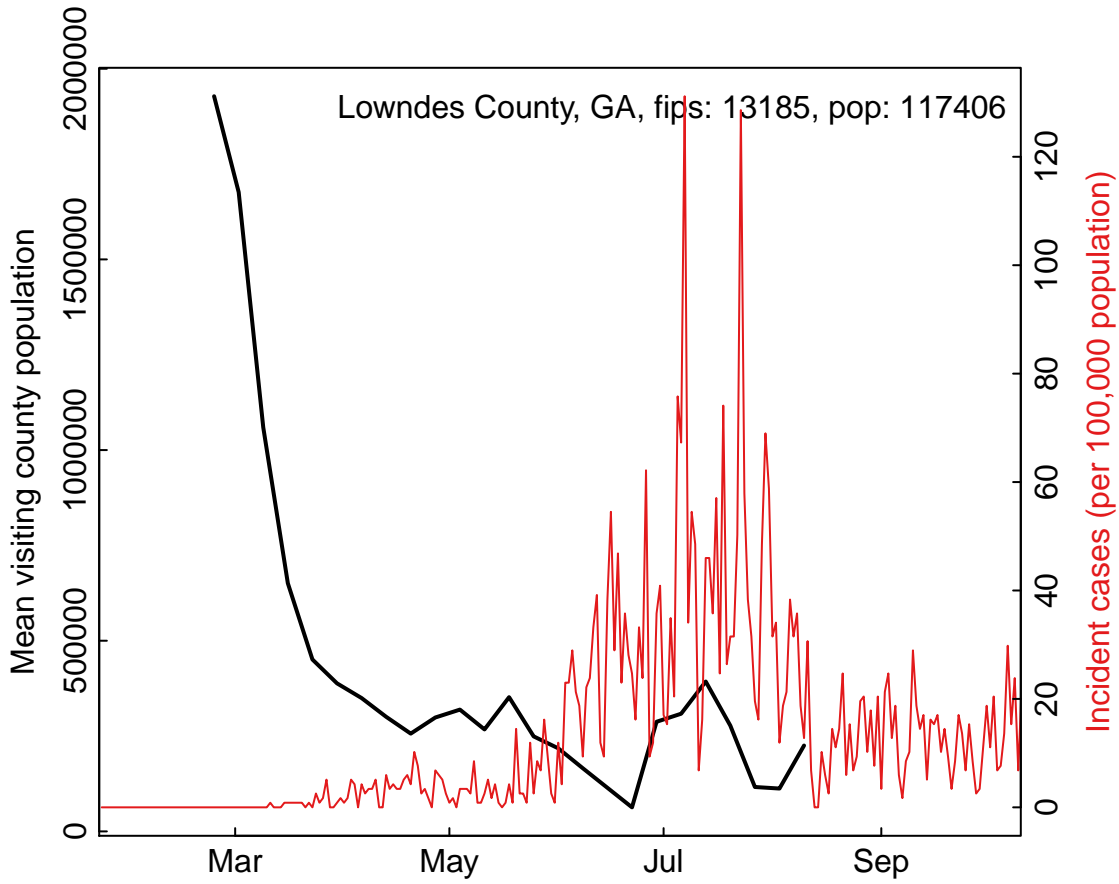

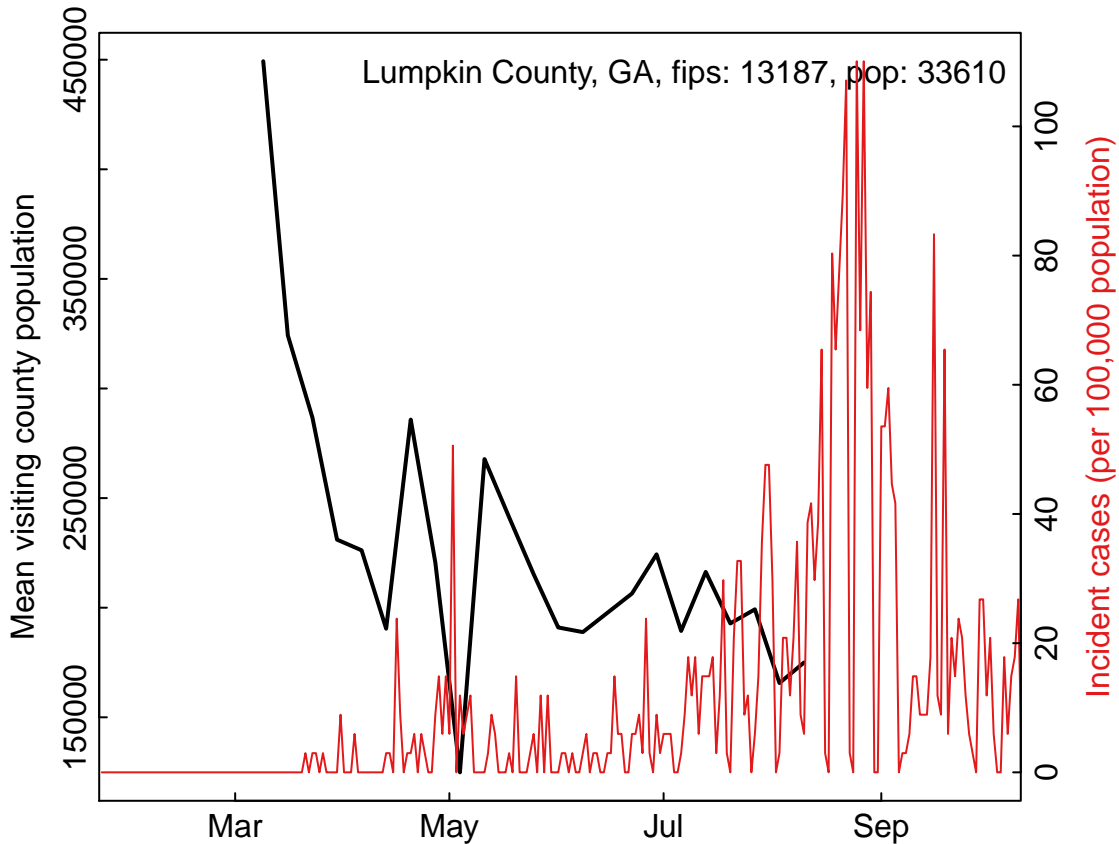

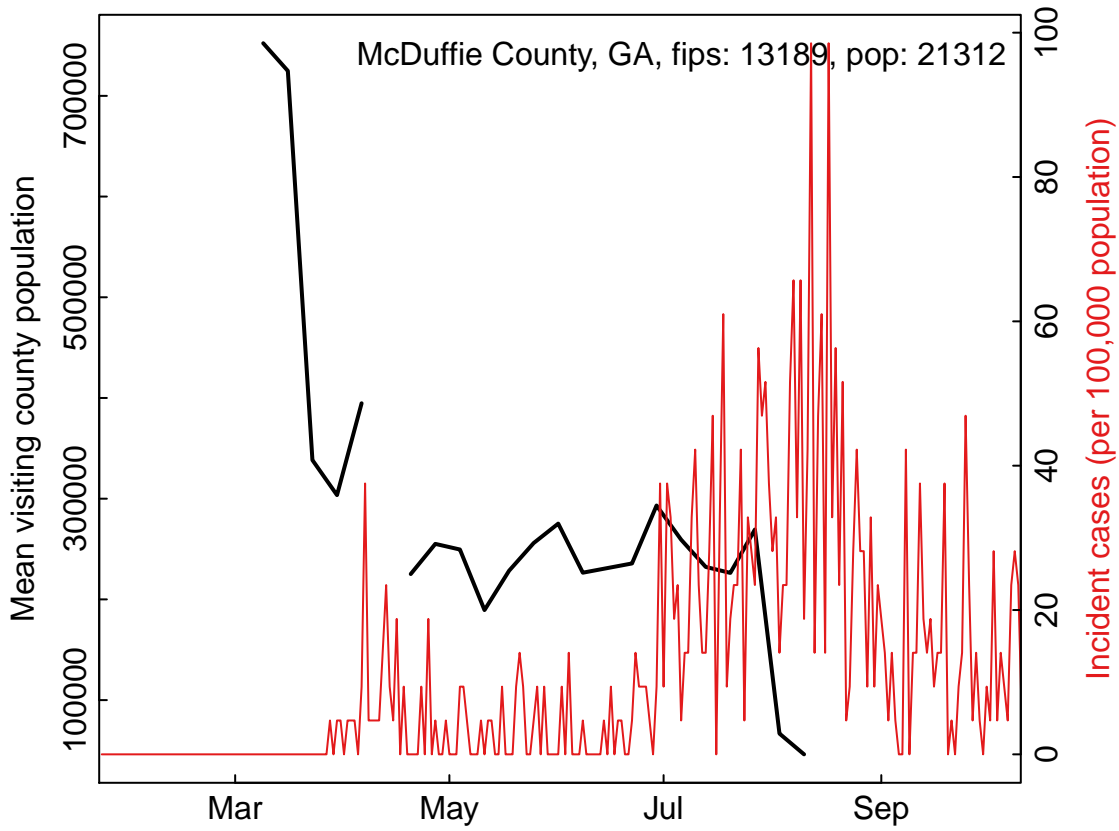



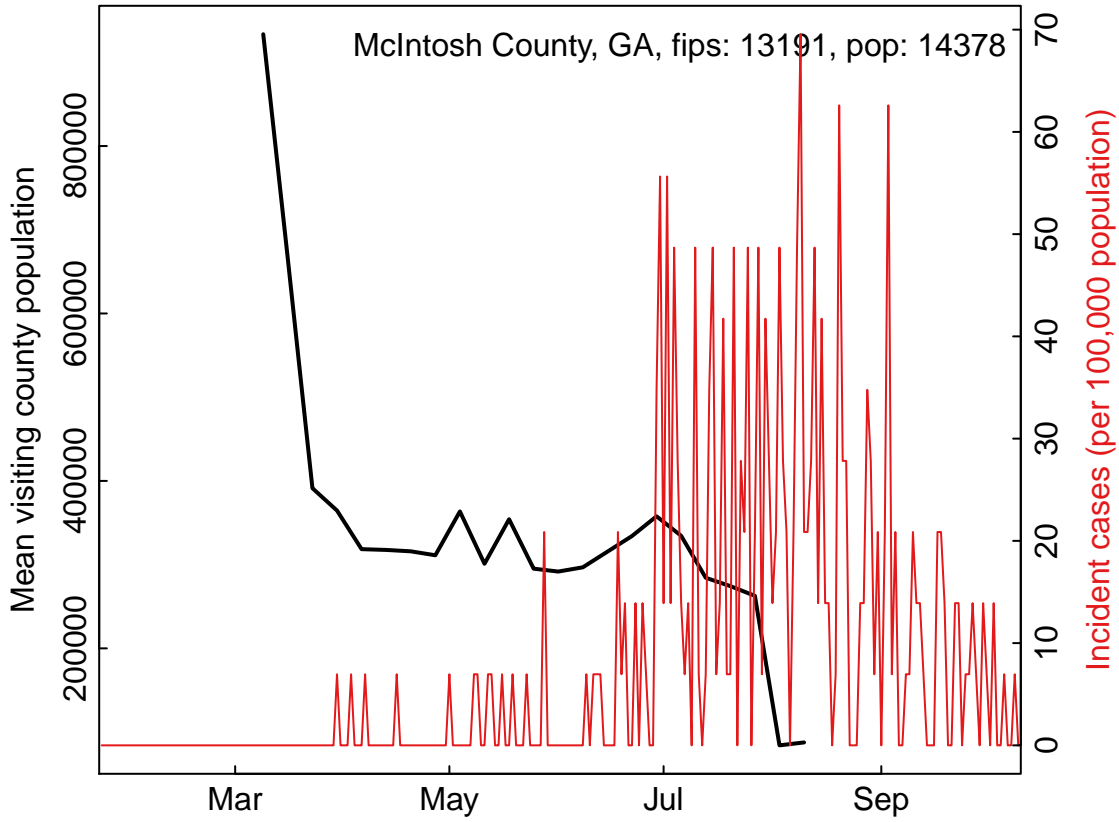

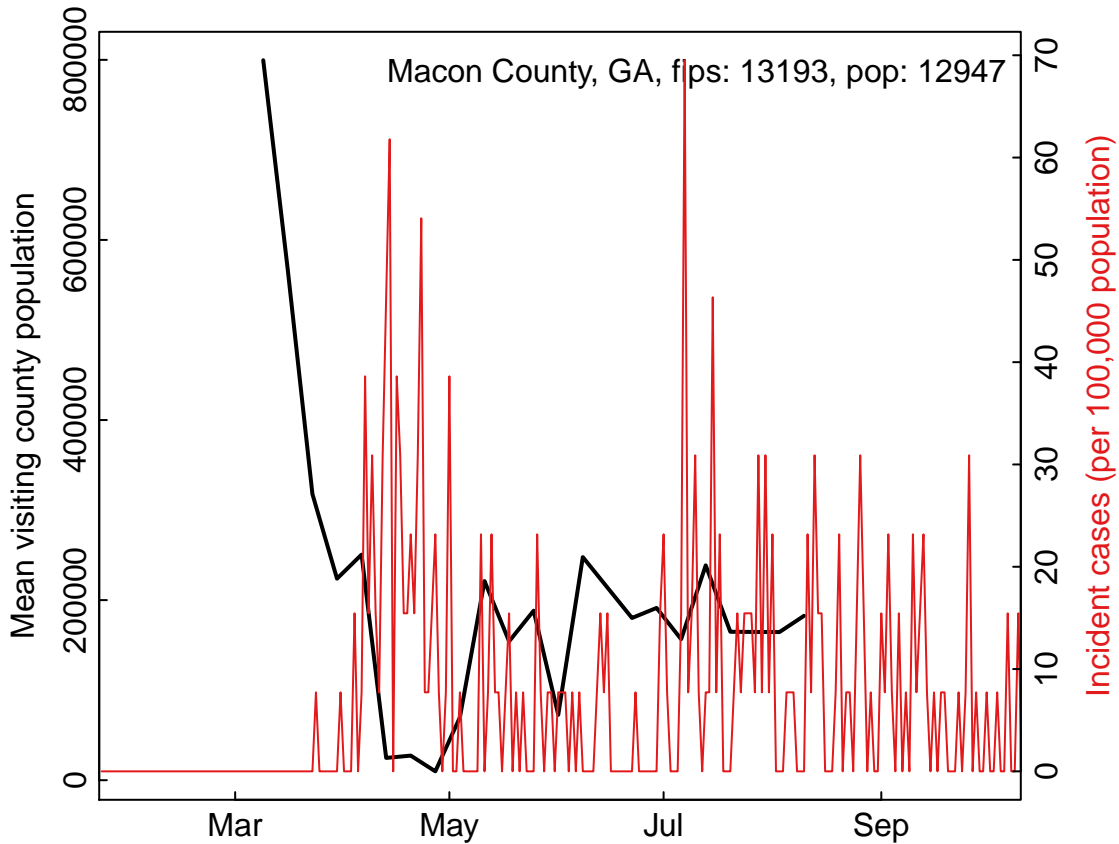

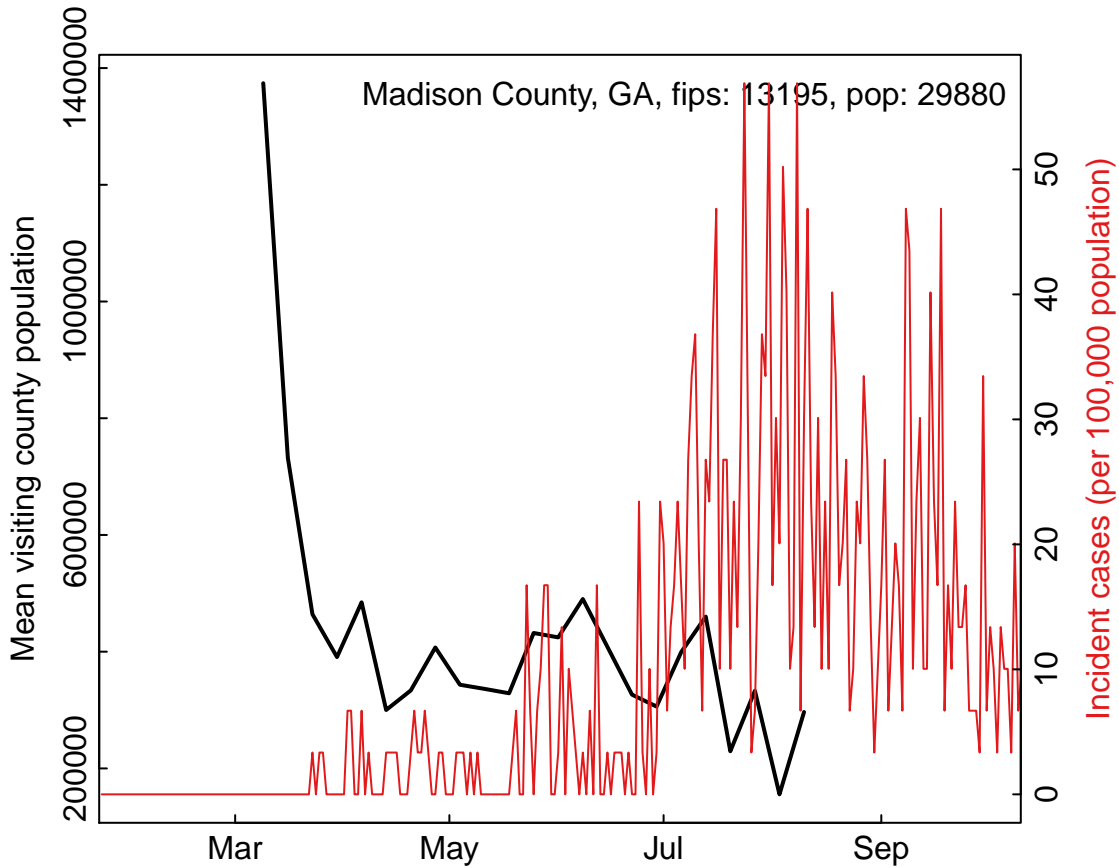



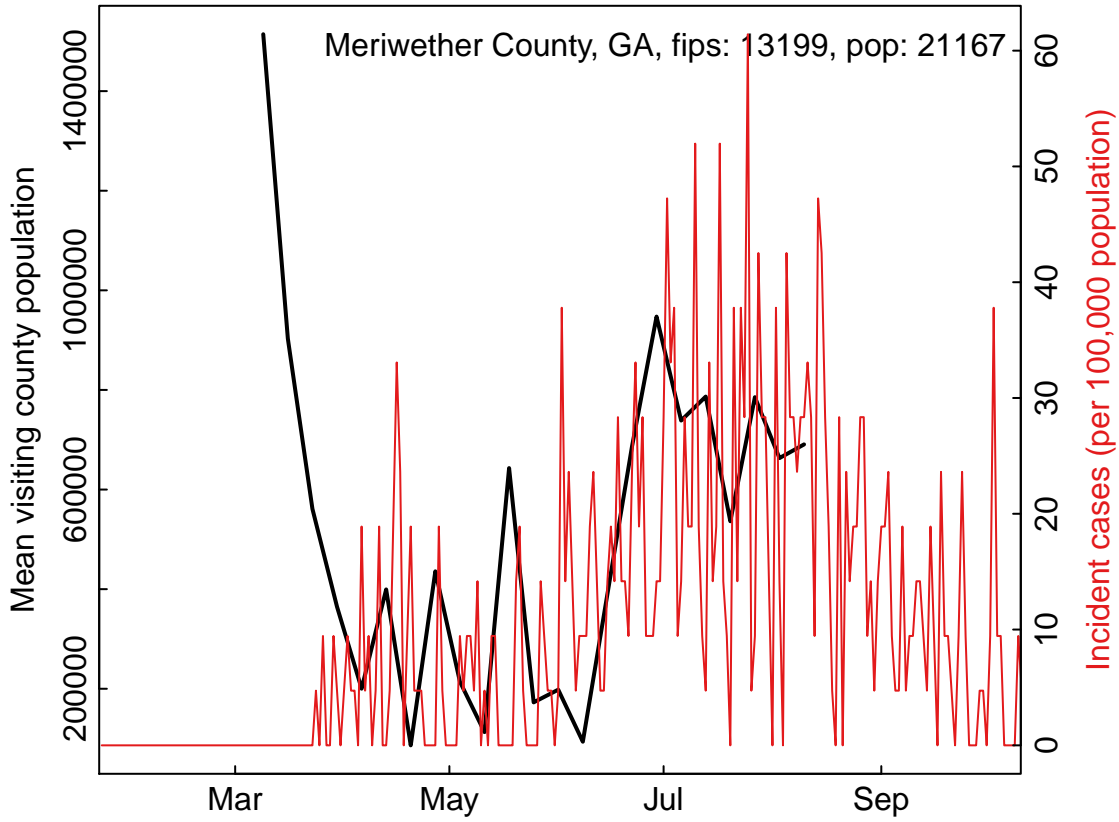

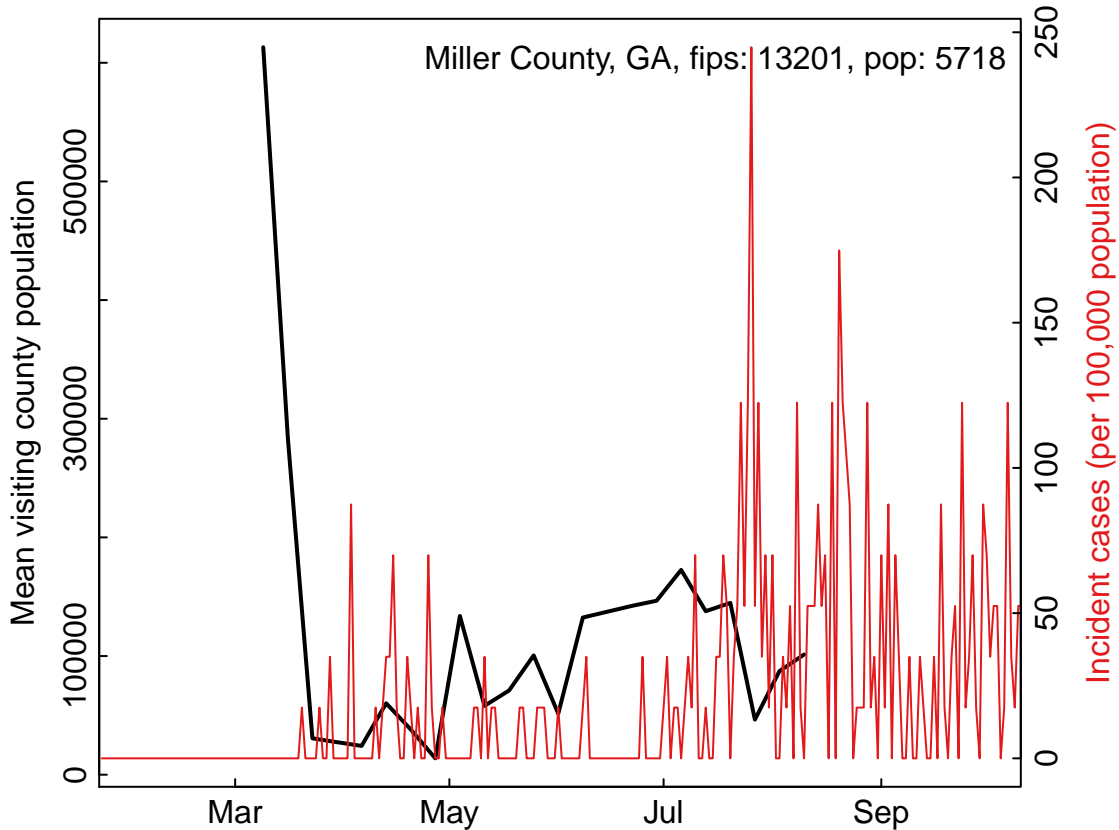

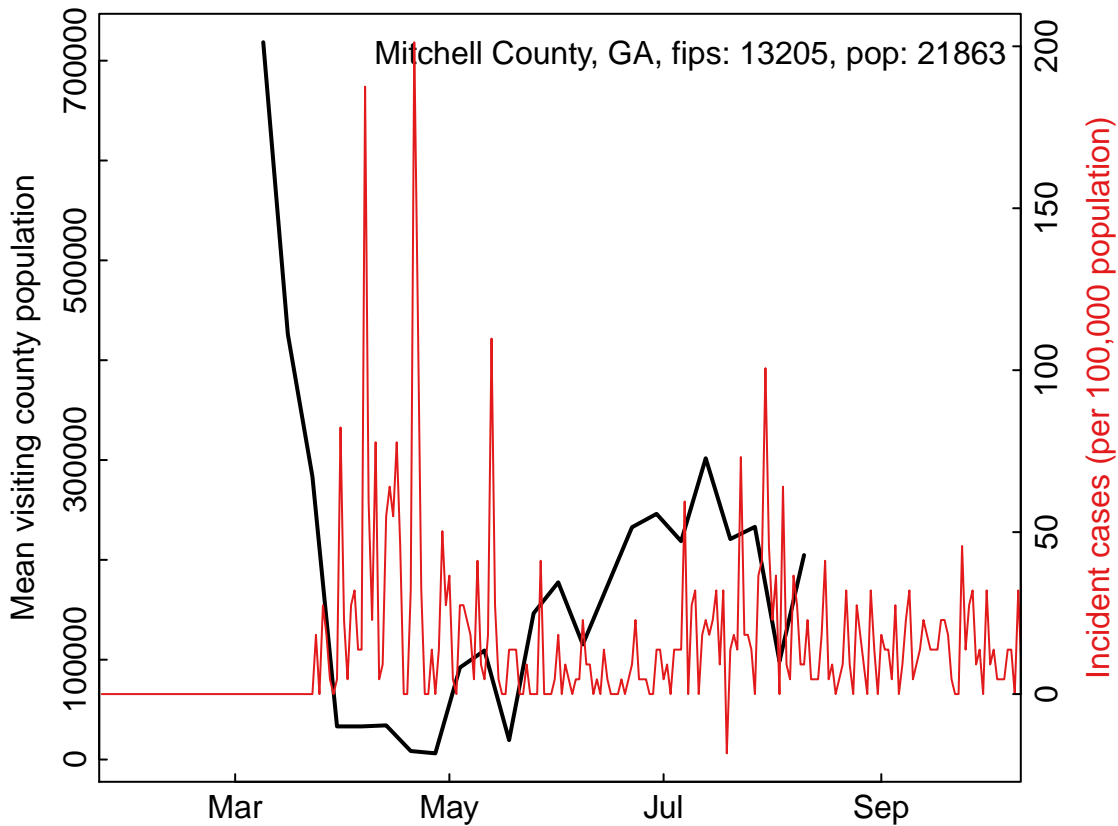

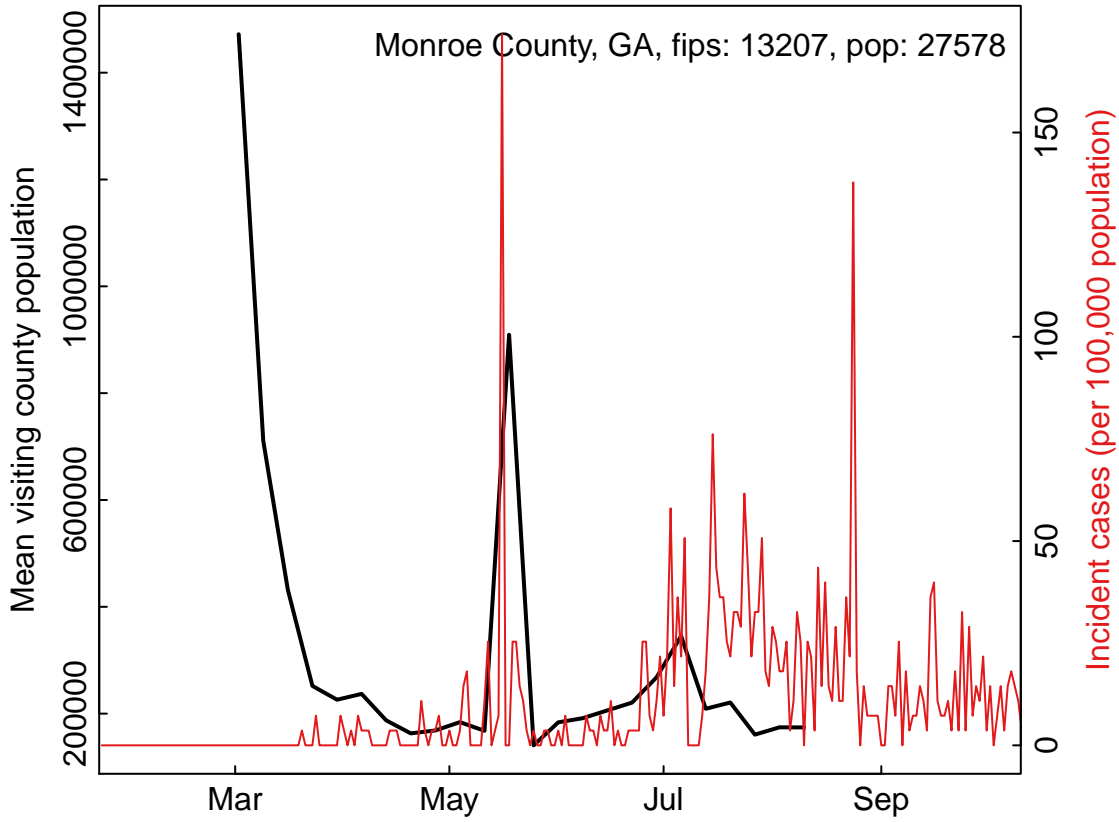



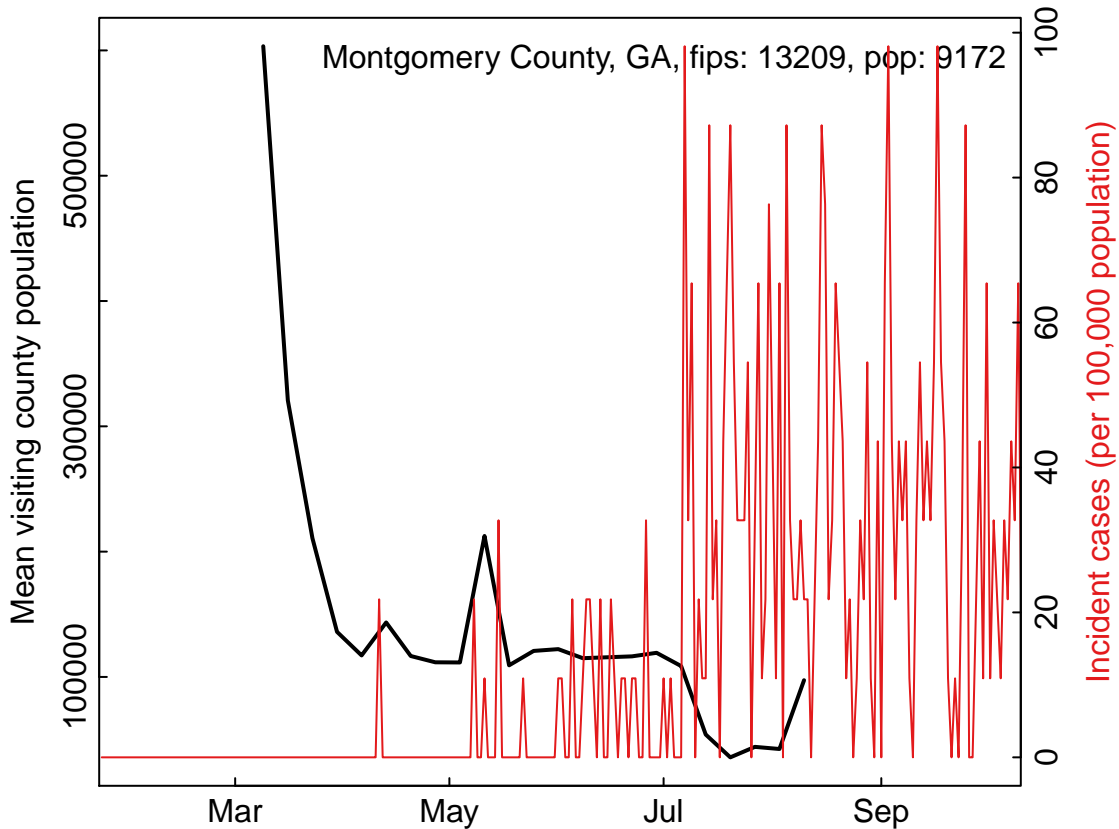

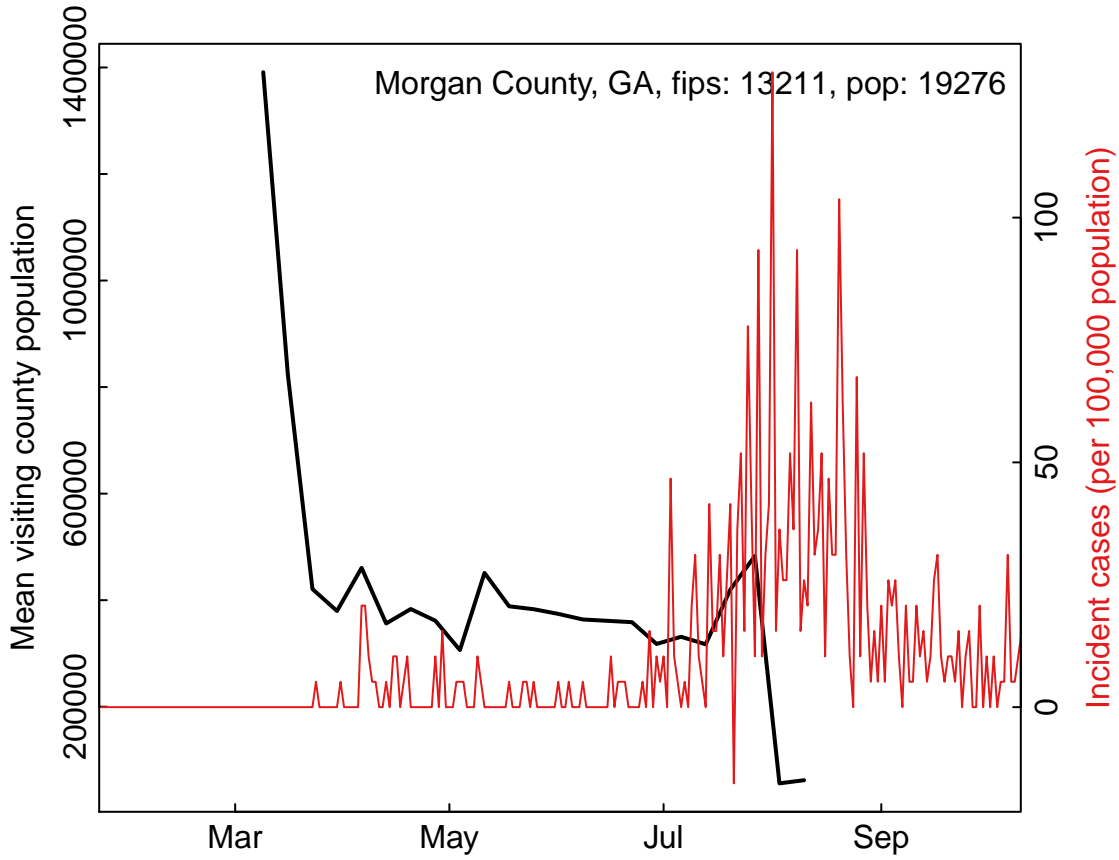

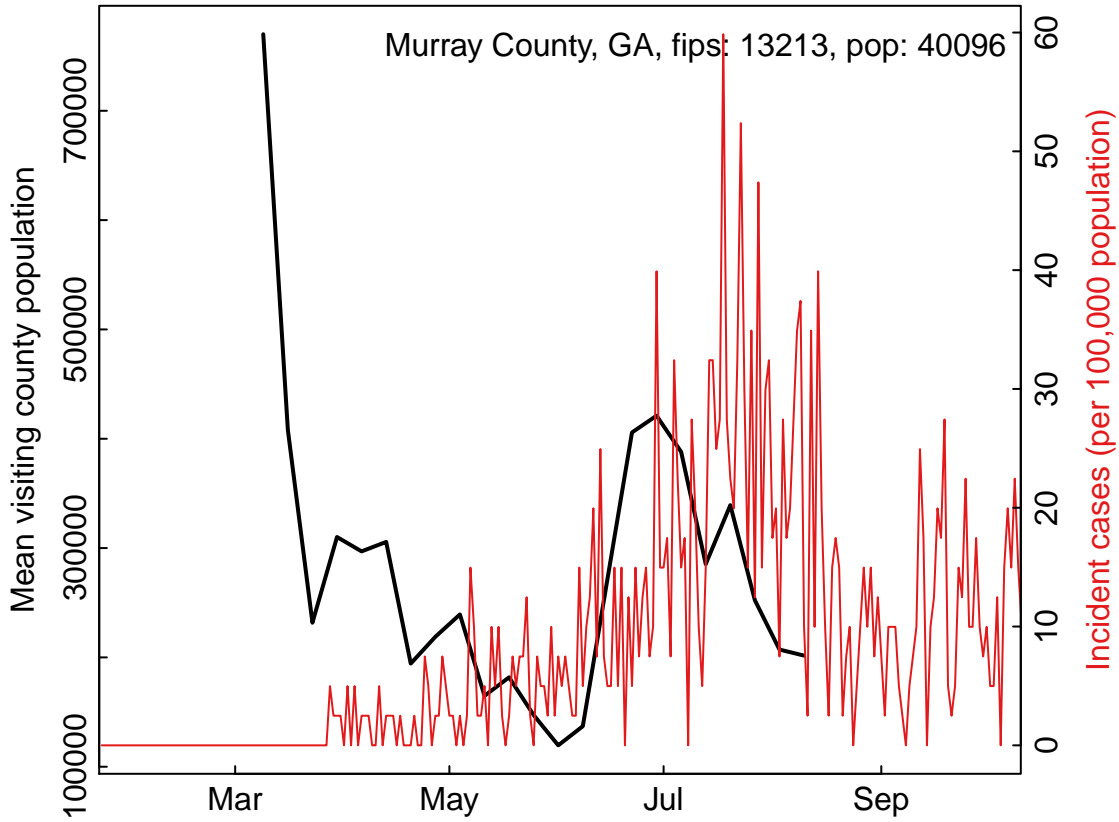

Muscogee County, GA, fips: 13215, pop: 195769

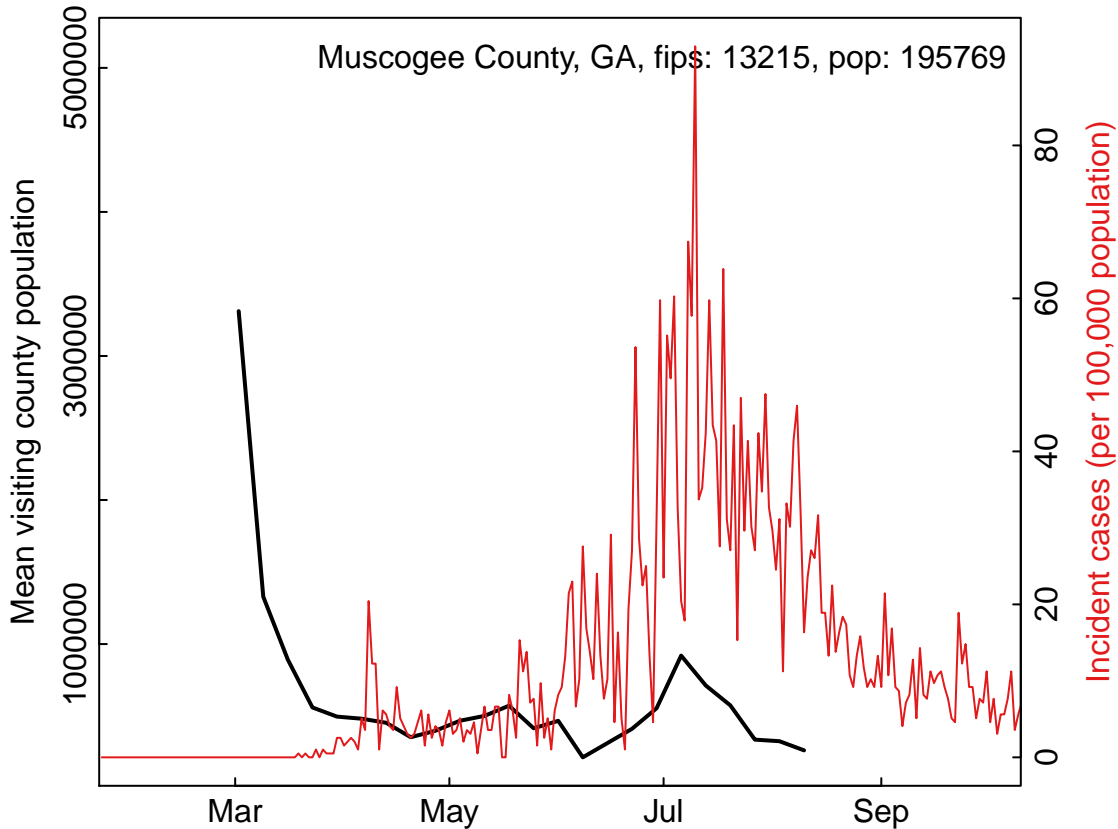

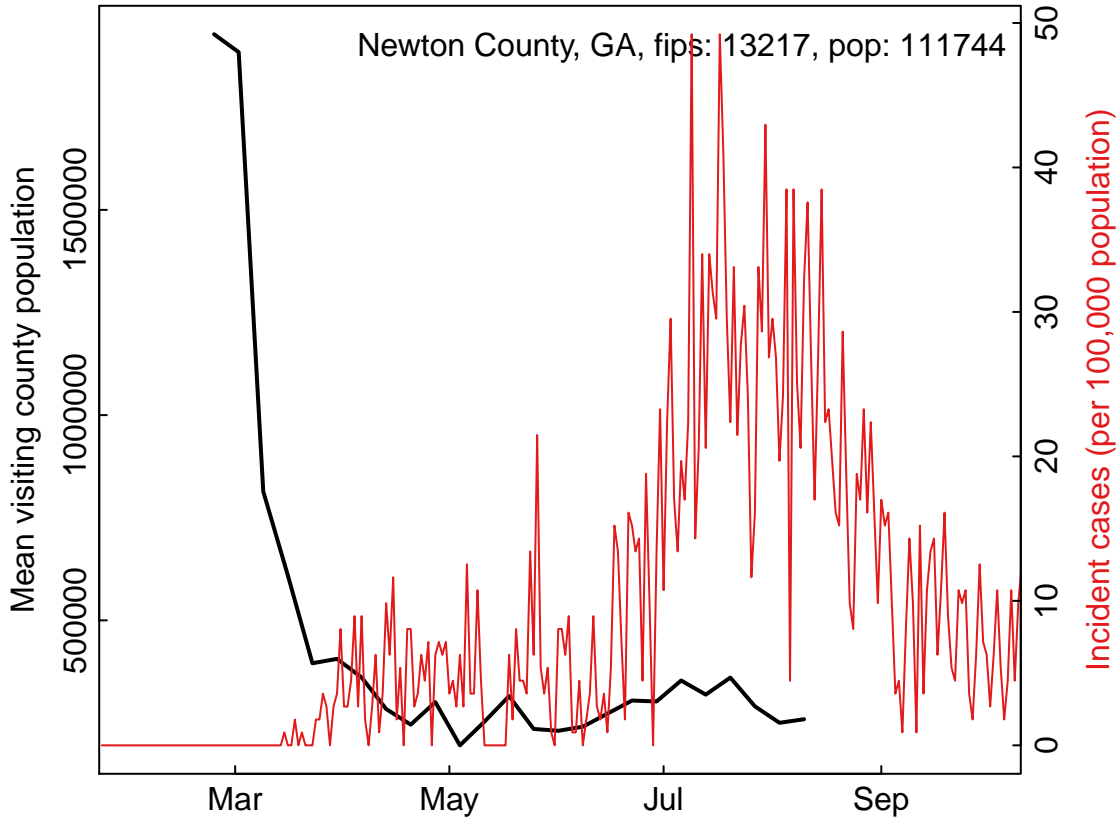

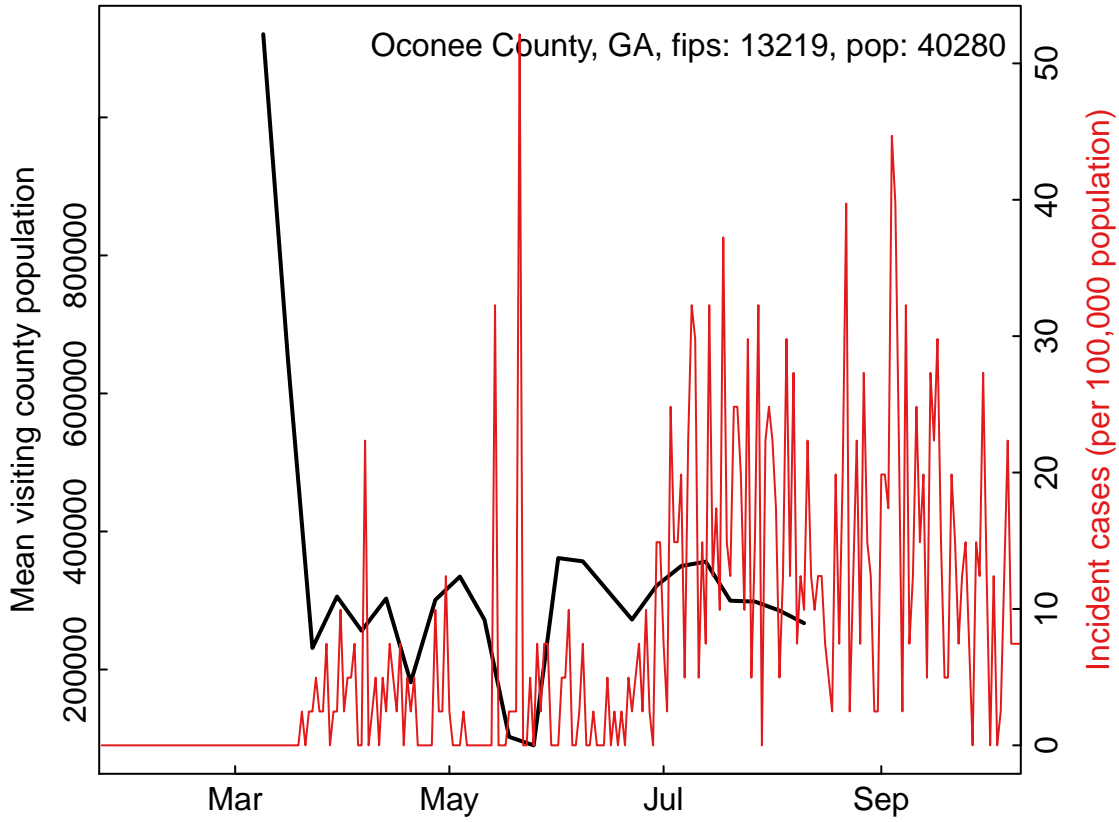

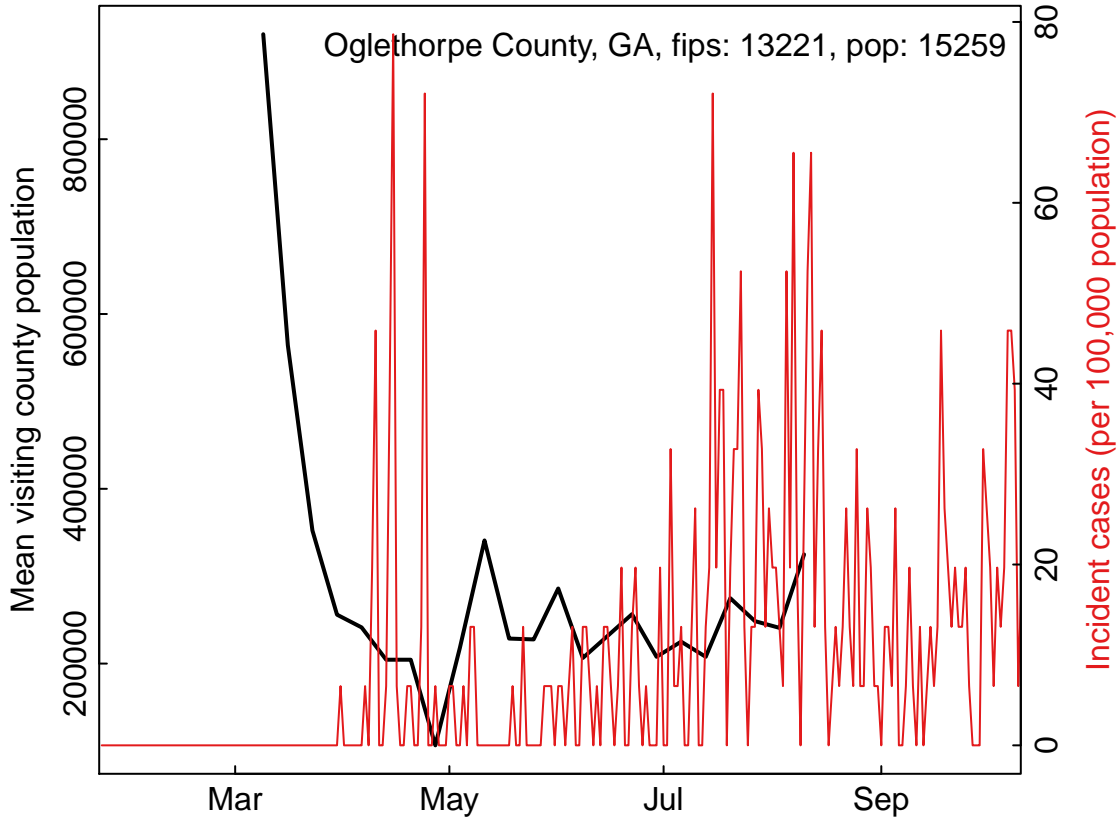

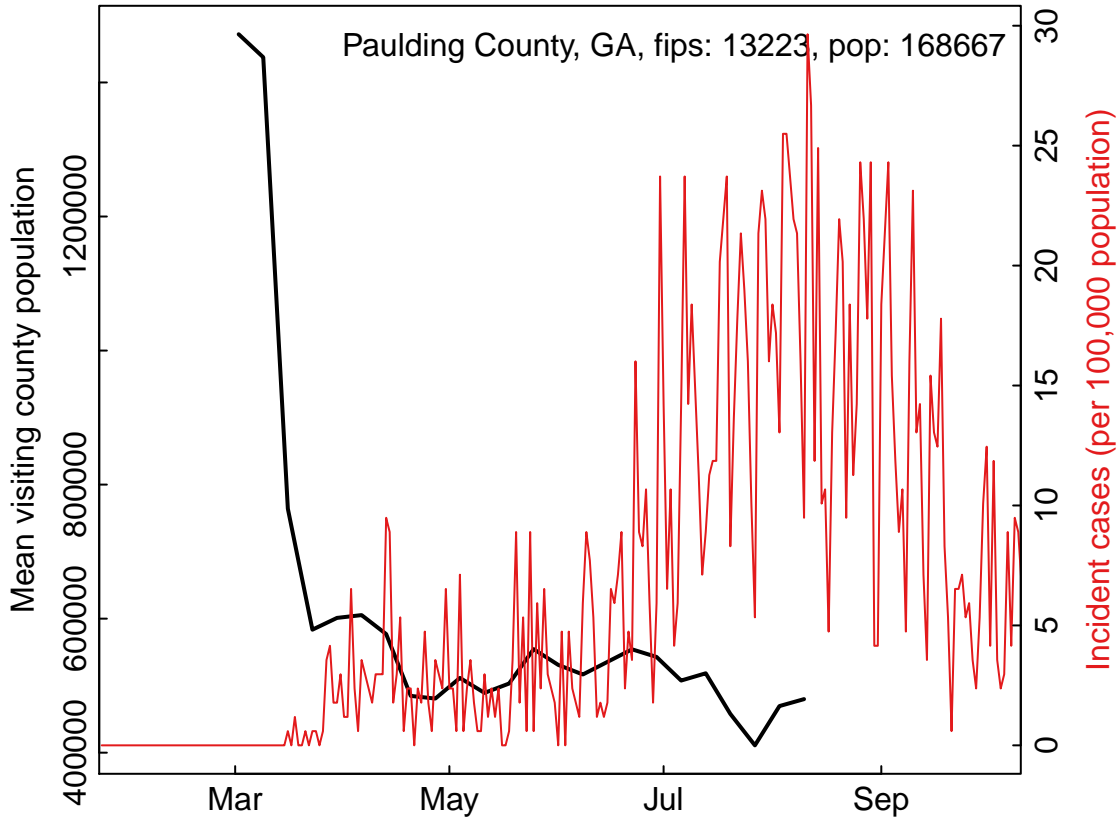



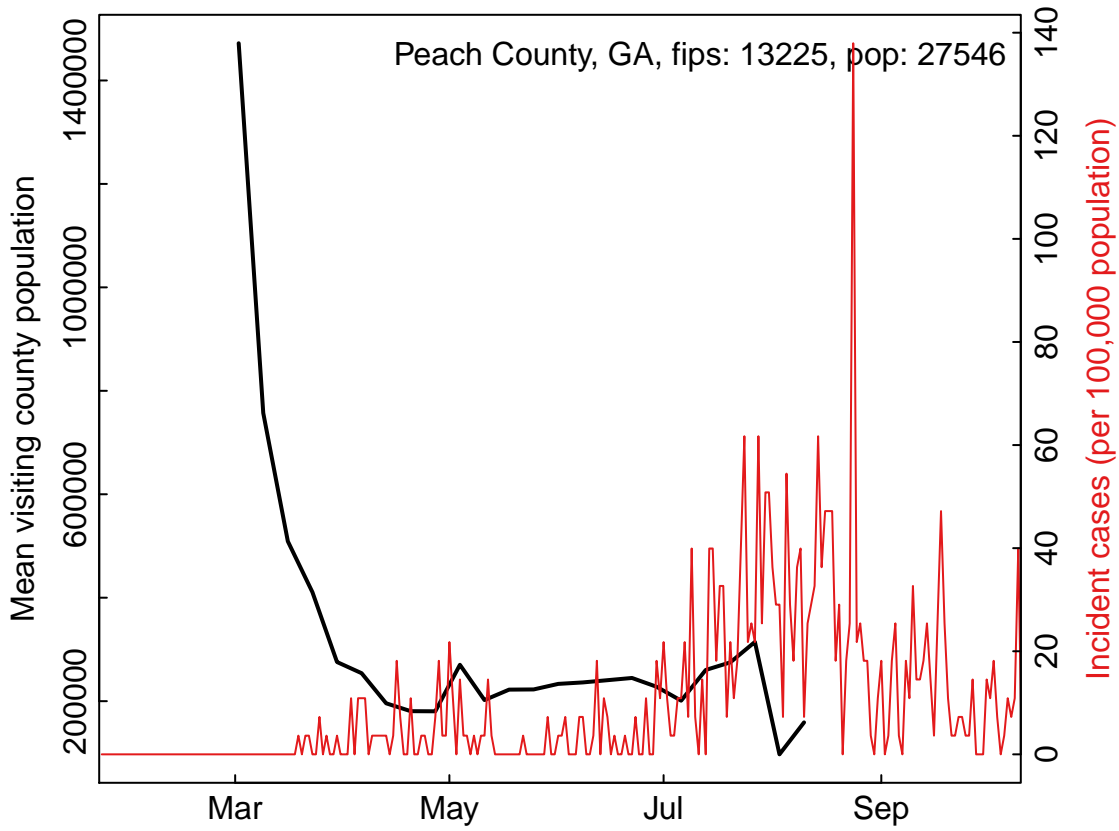

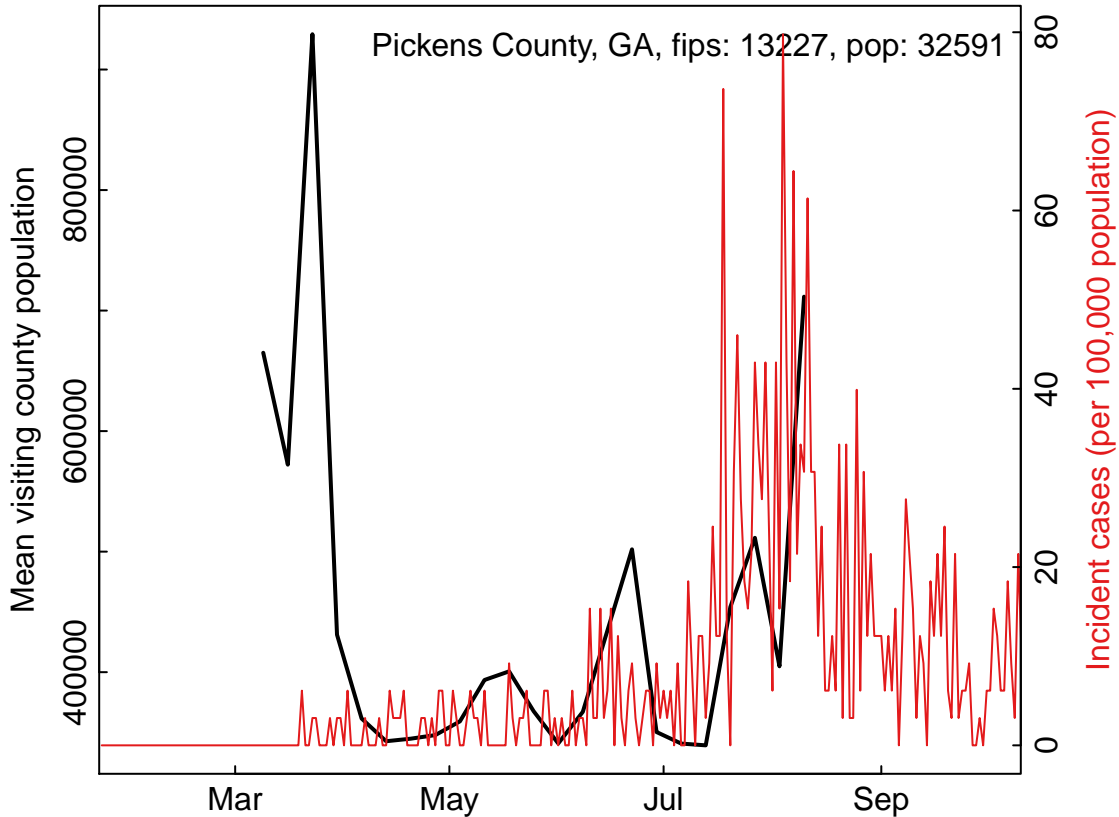

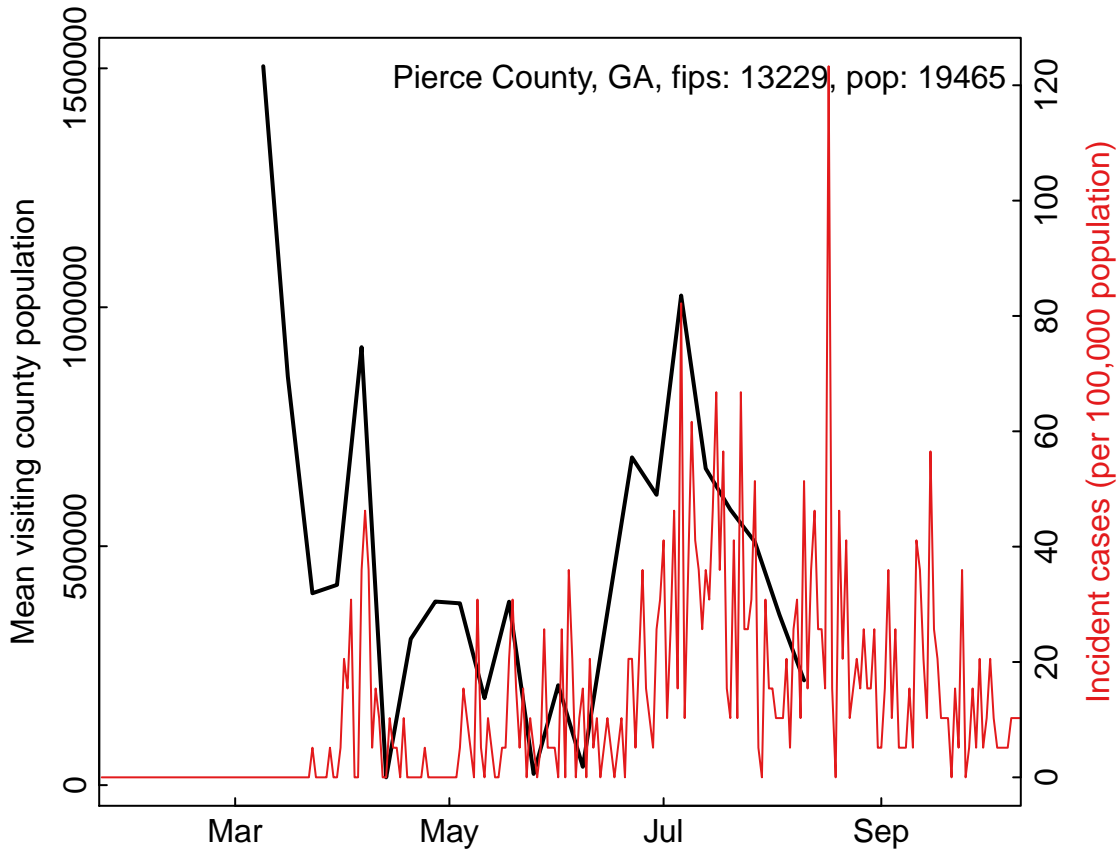

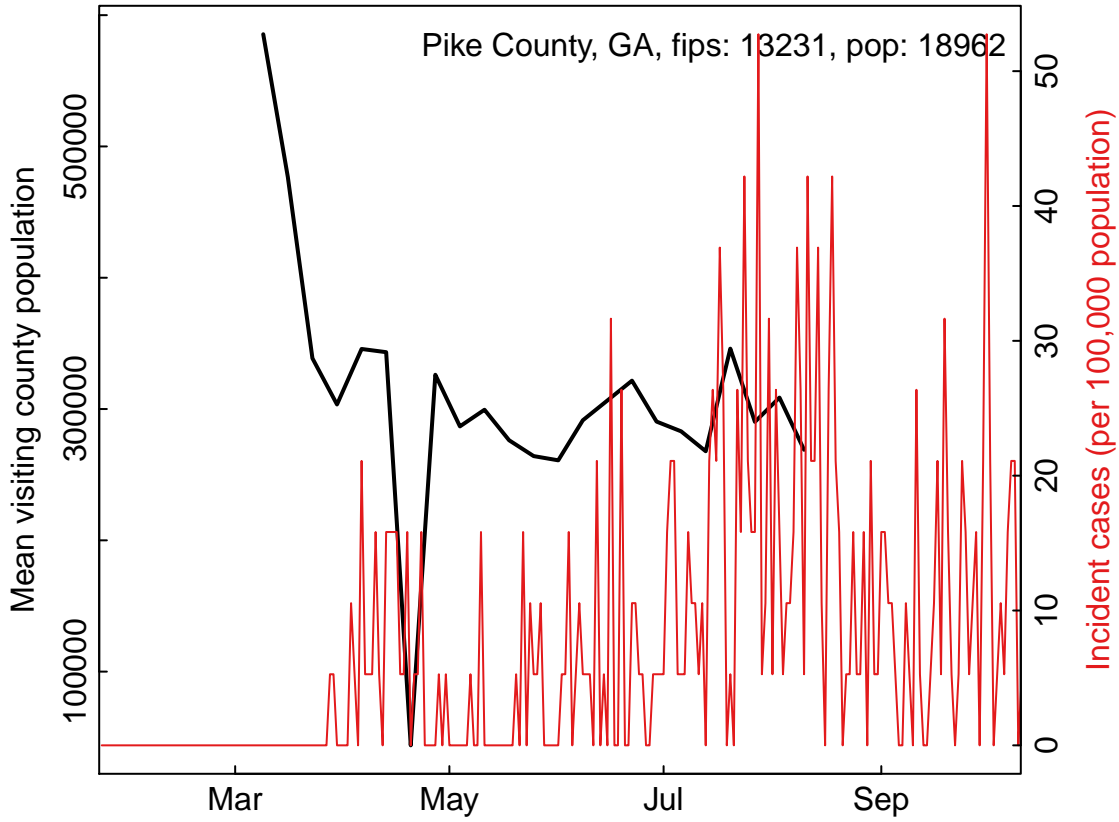

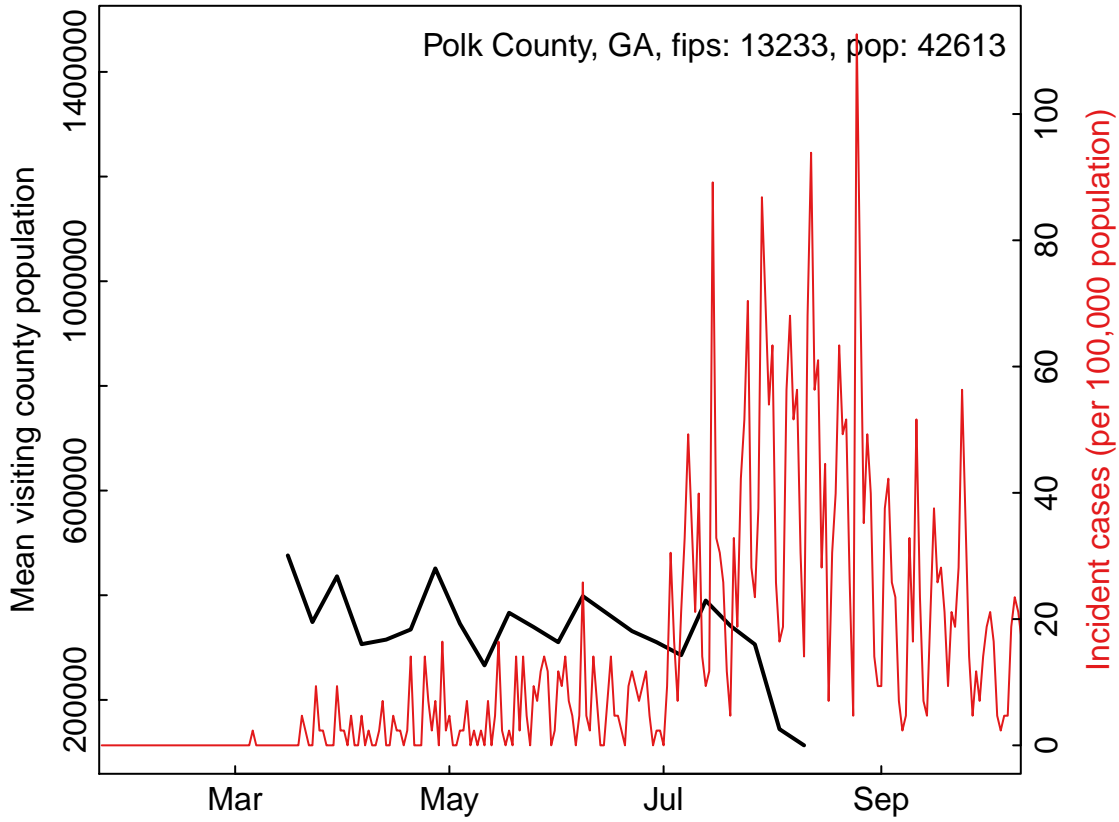

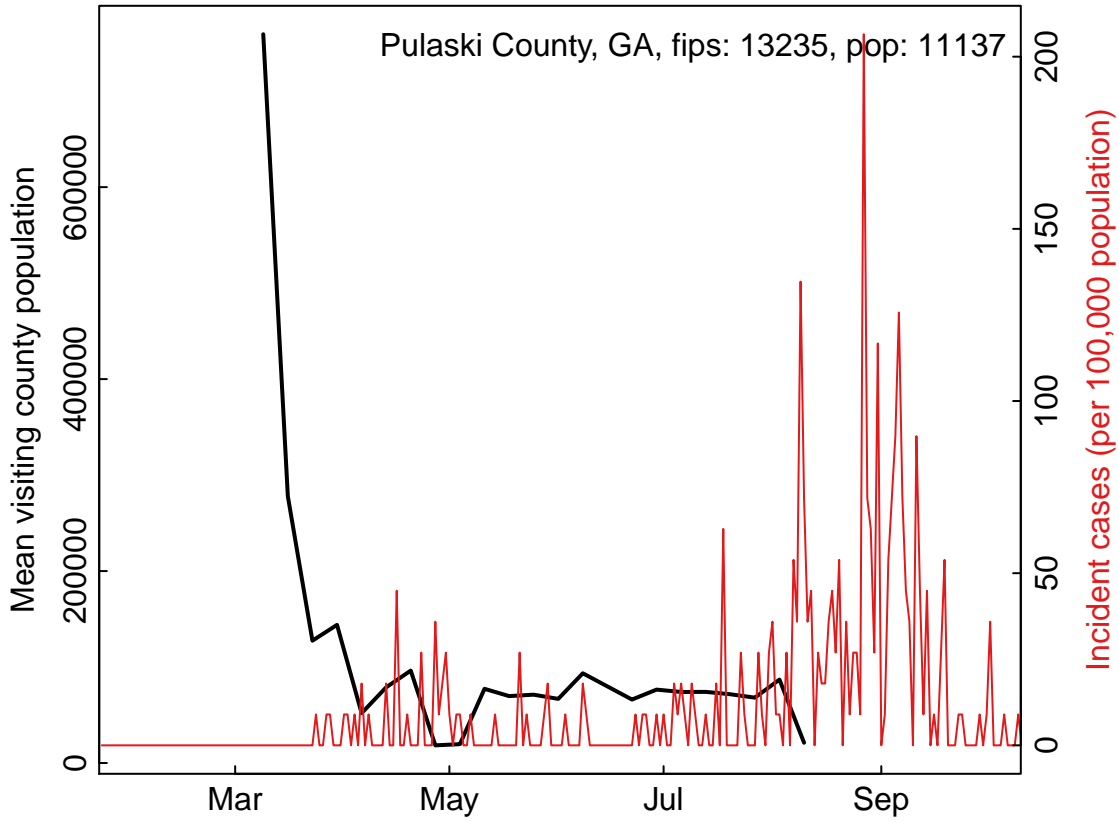

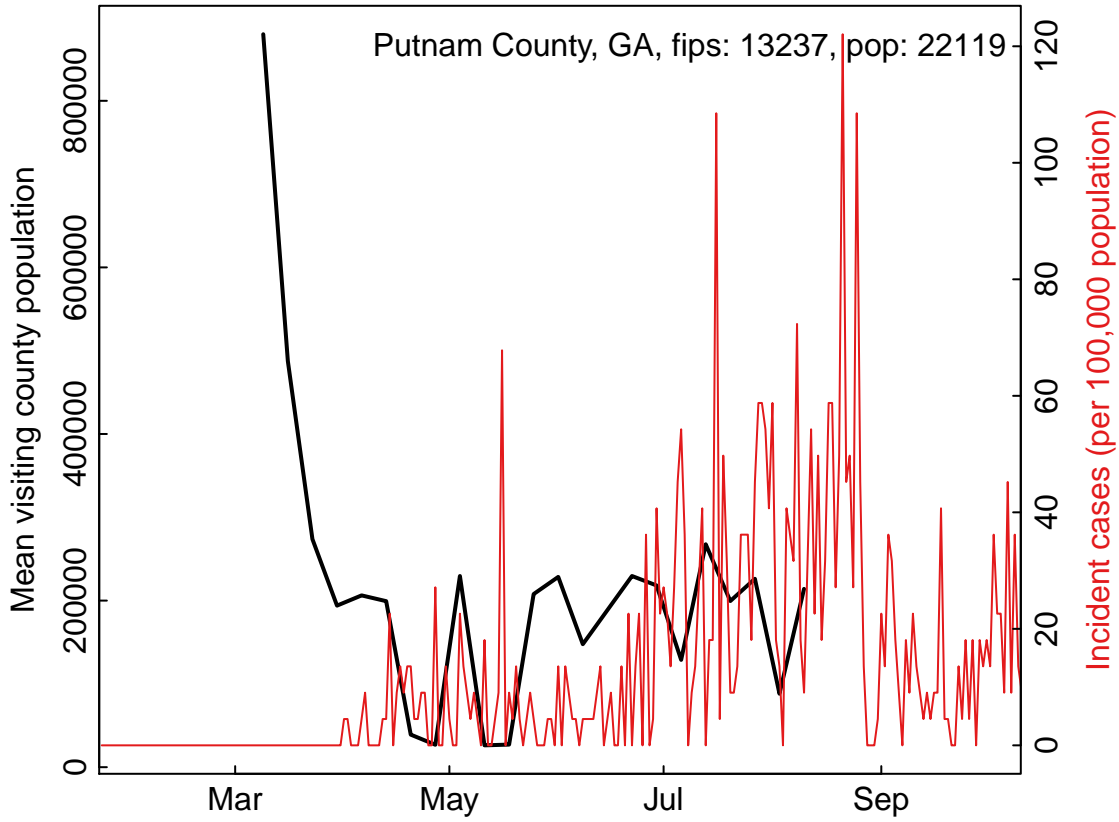

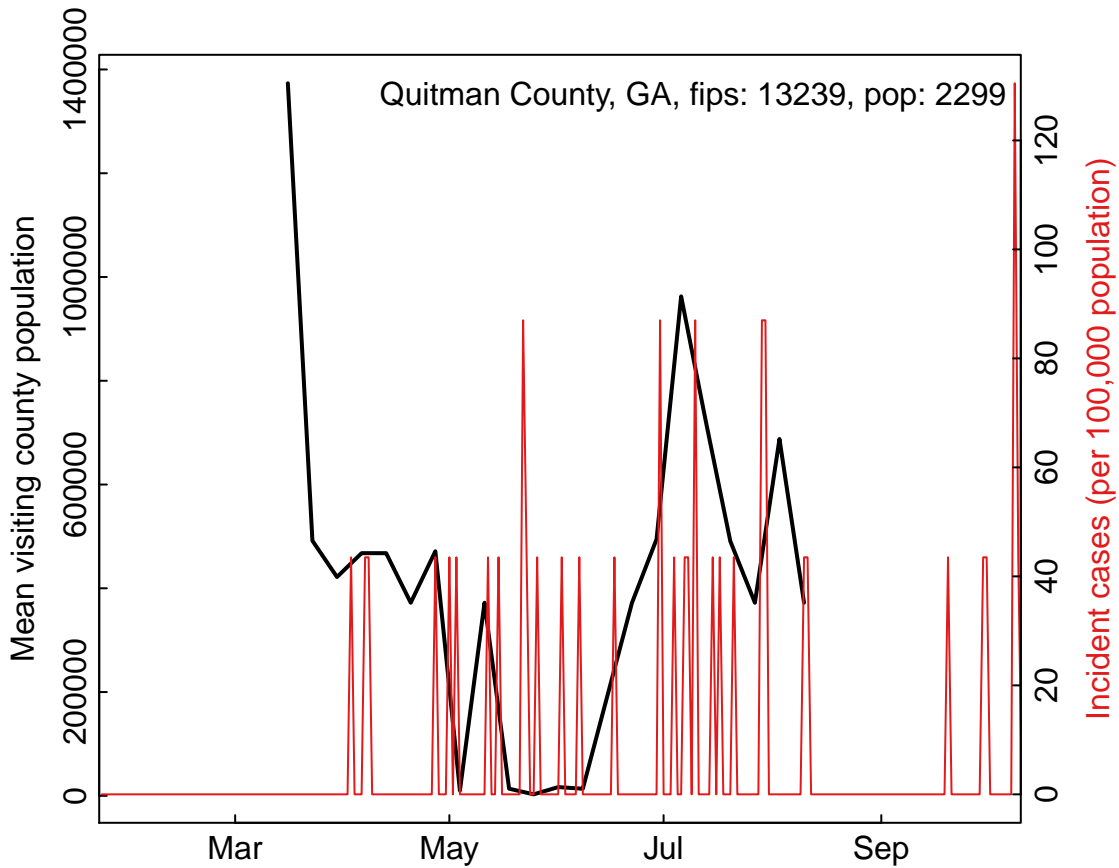



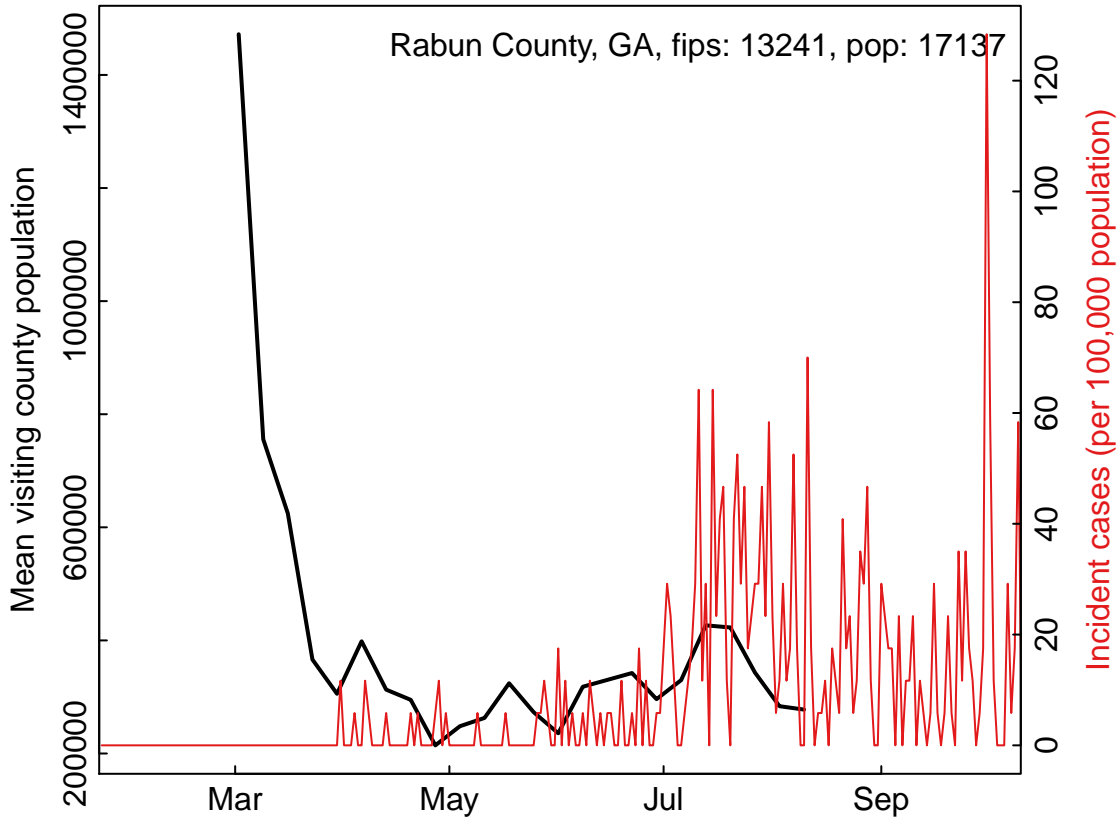

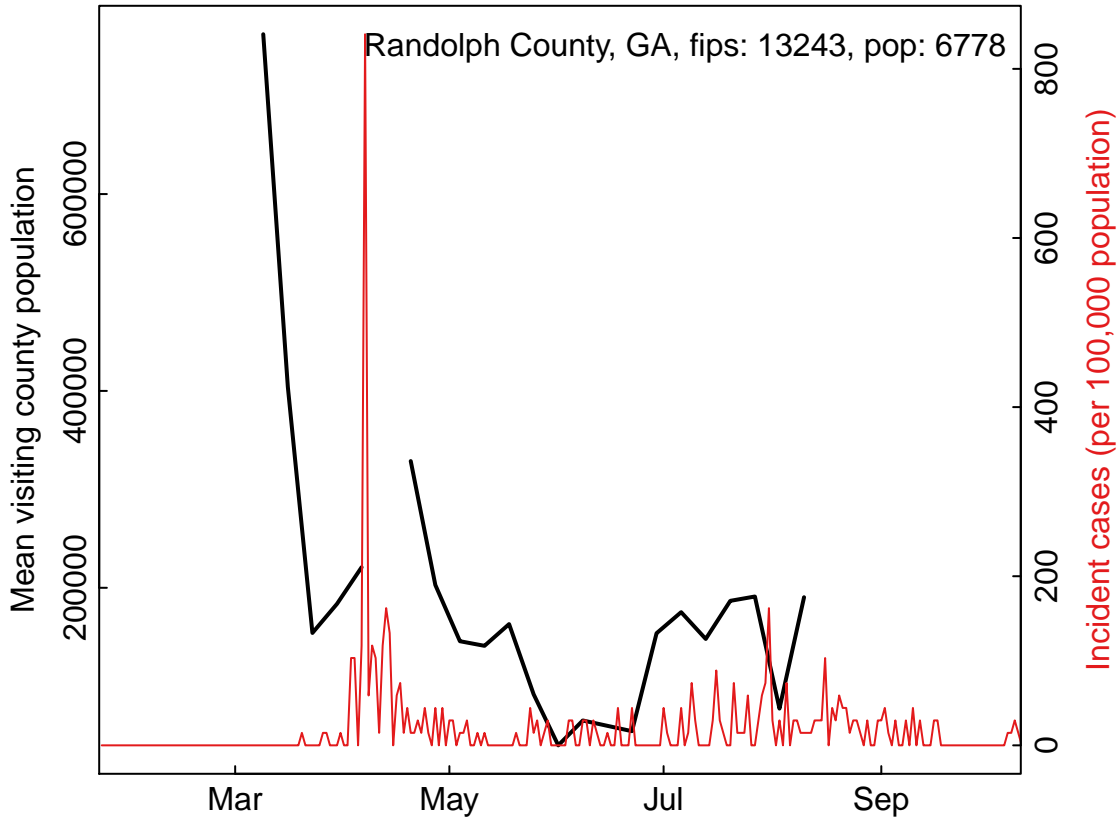

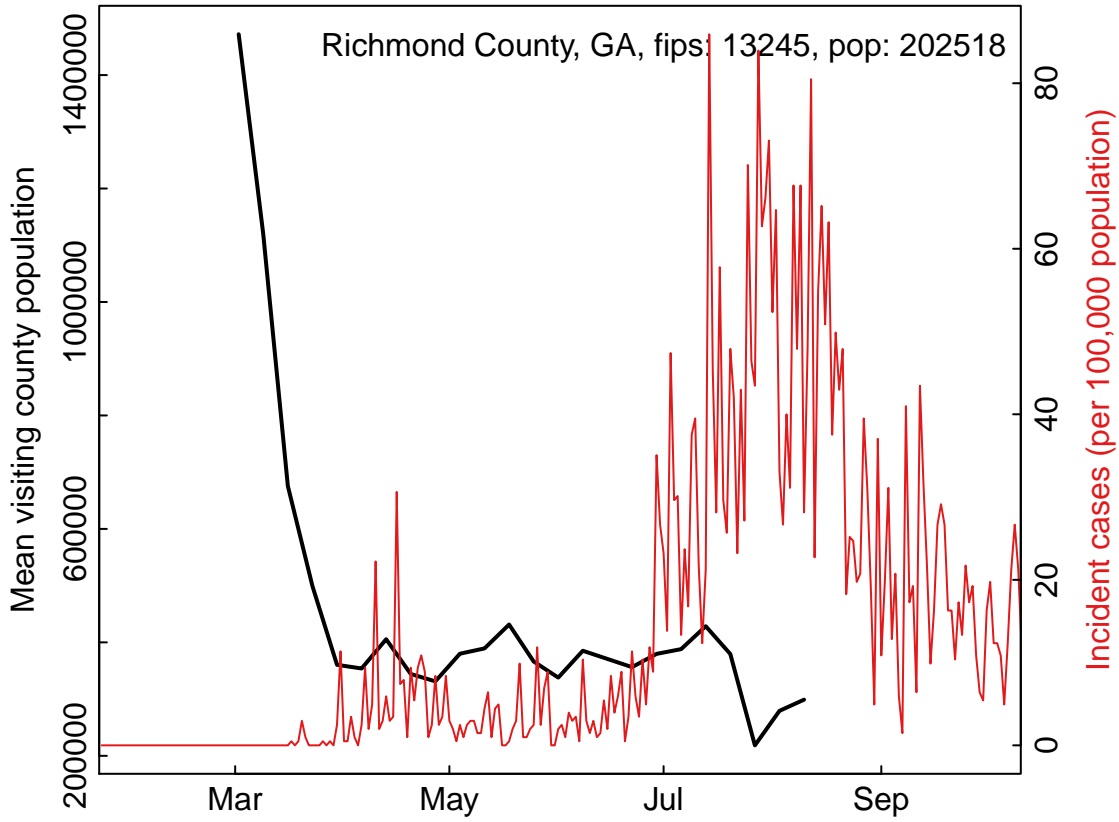

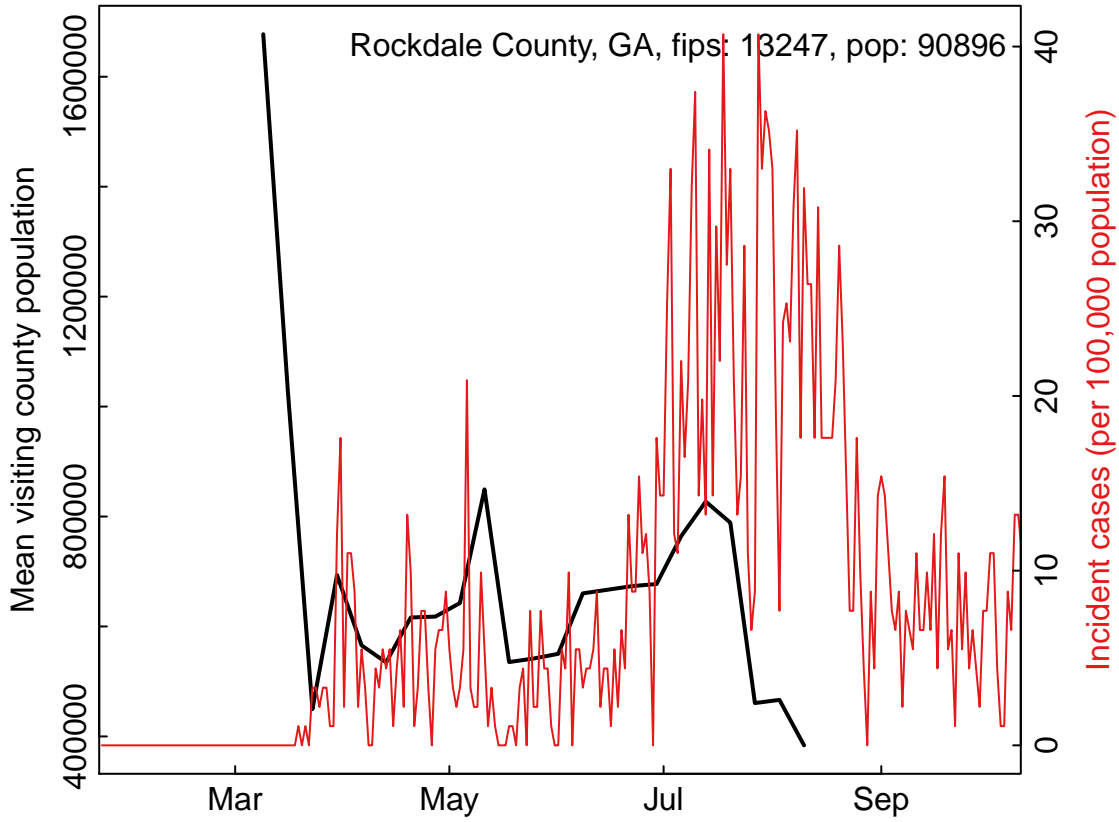

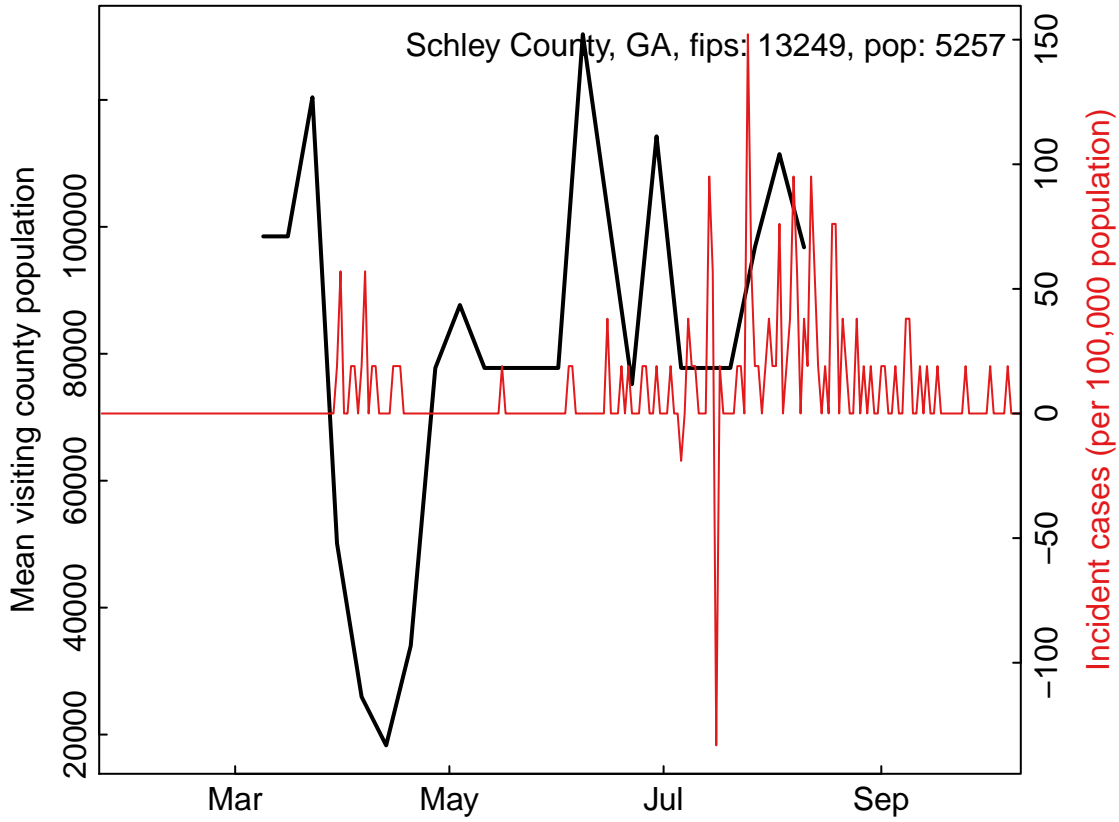

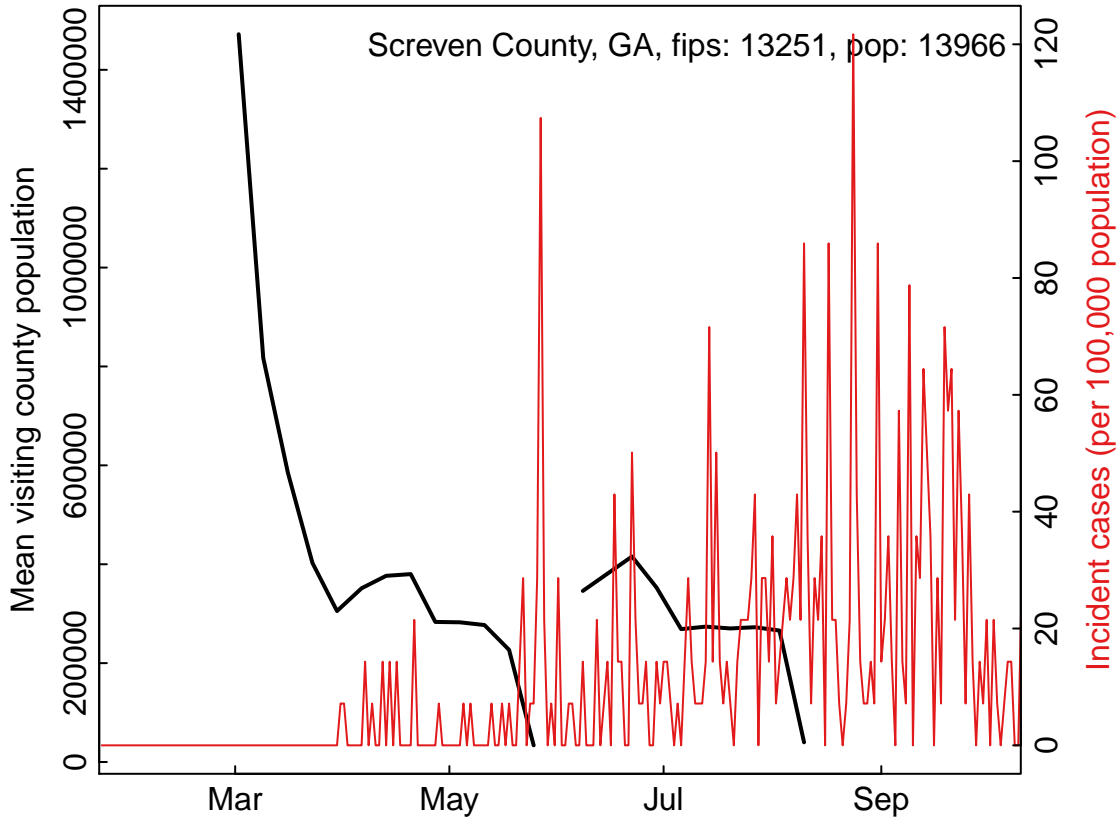

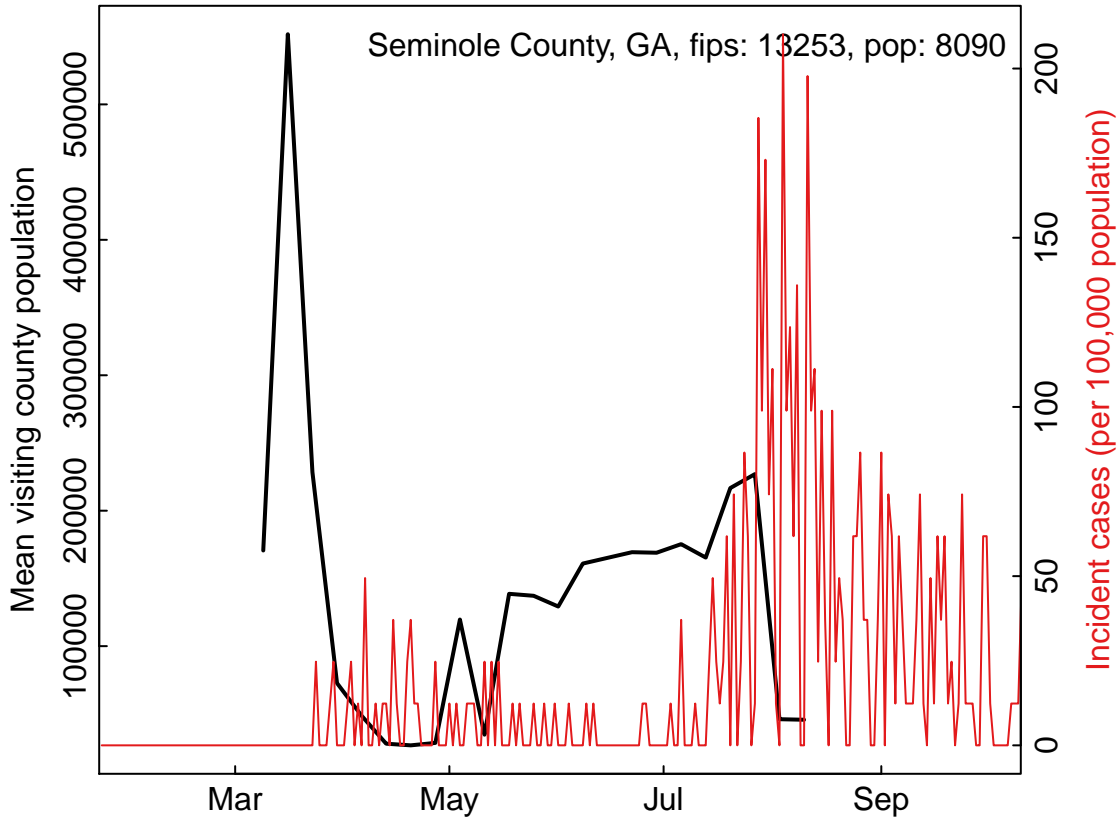

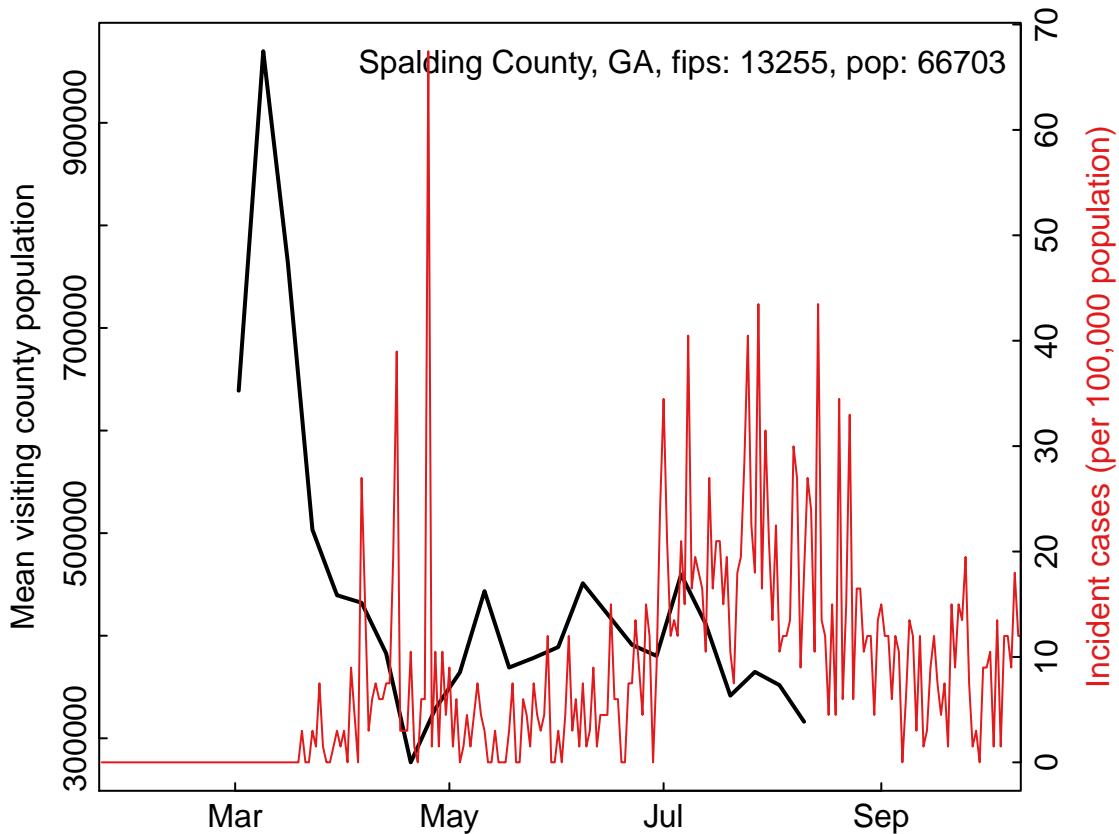



Stephens County, GA, fips: 13257, pop: 25925

Mean visiting county population

0  
200000  
400000  
600000  
800000

Mar

May

Jul

Sep

0  
50  
100  
150

Incident cases (per 100,000 population)

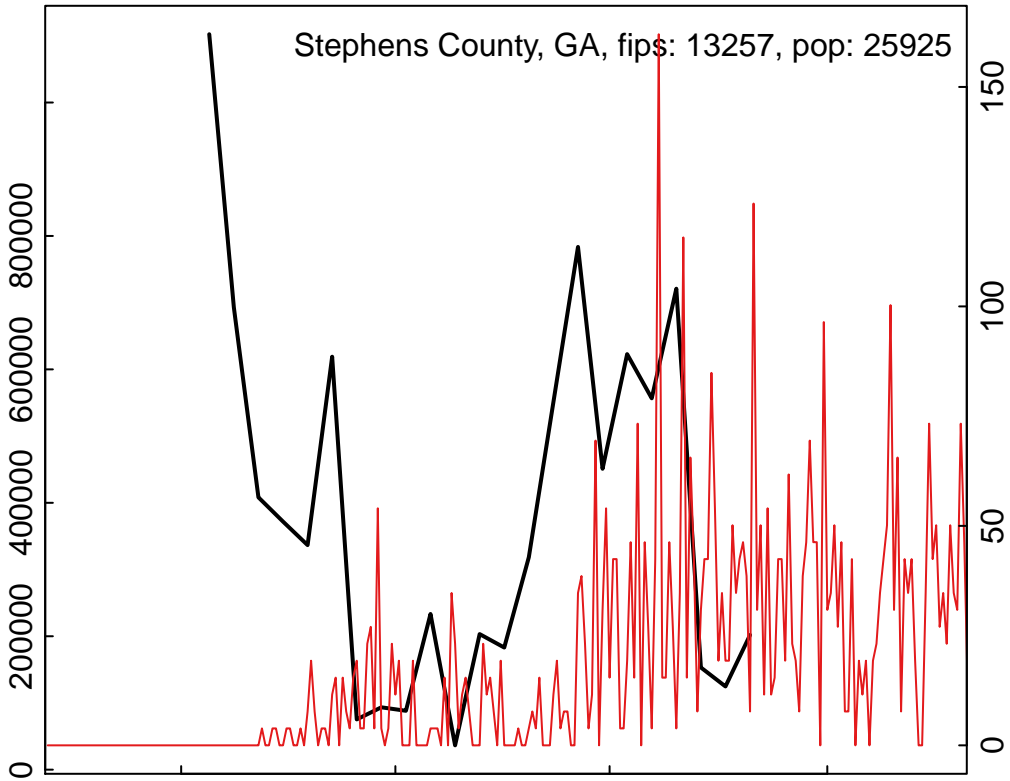

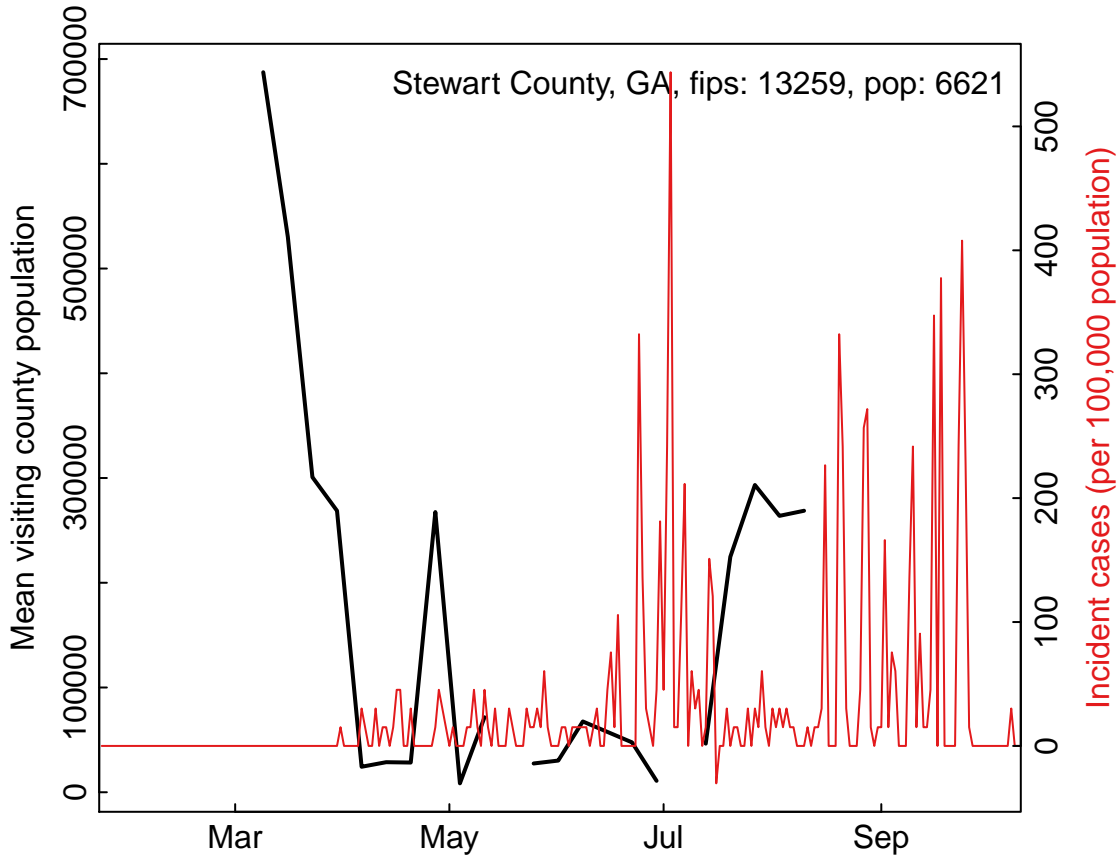

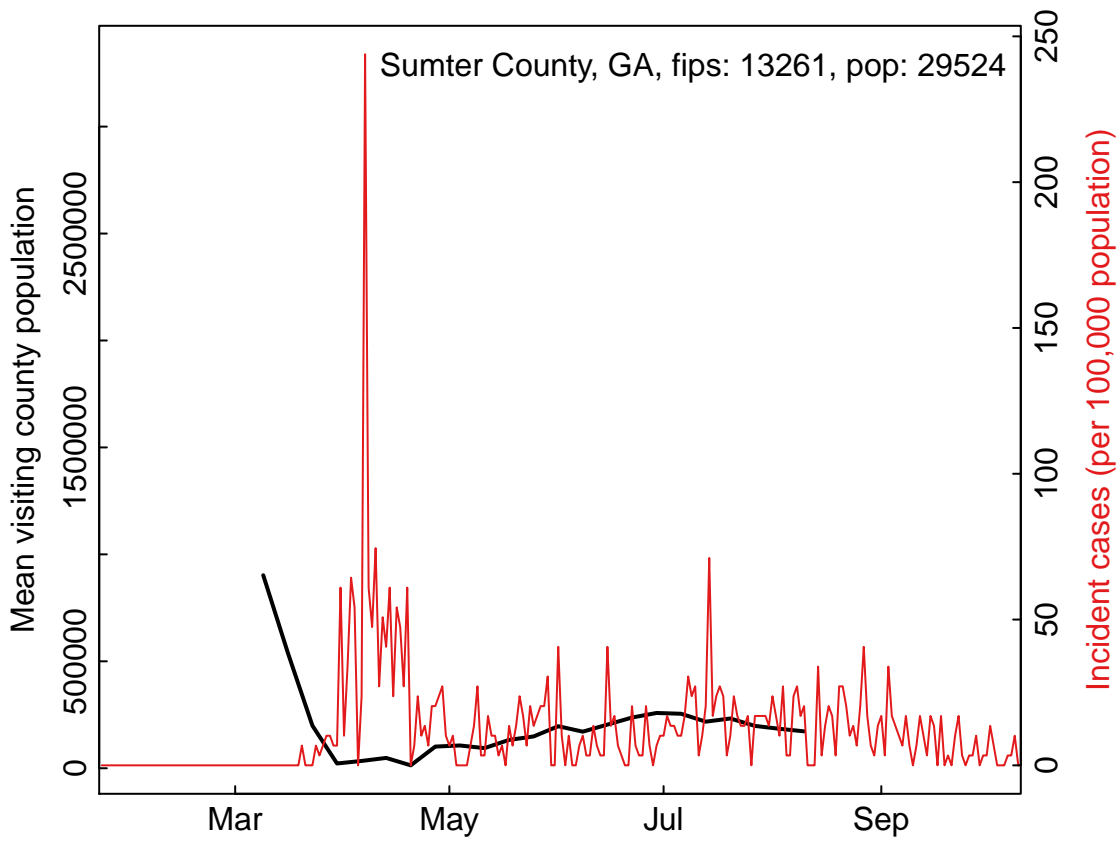

Mean visiting county population

1500000  
1000000  
500000  
0

Mar May Jul Sep

Talbot County, GA, fips: 13263, pop: 6195

100  
80  
60  
40  
20  
0

Incident cases (per 100,000 population)

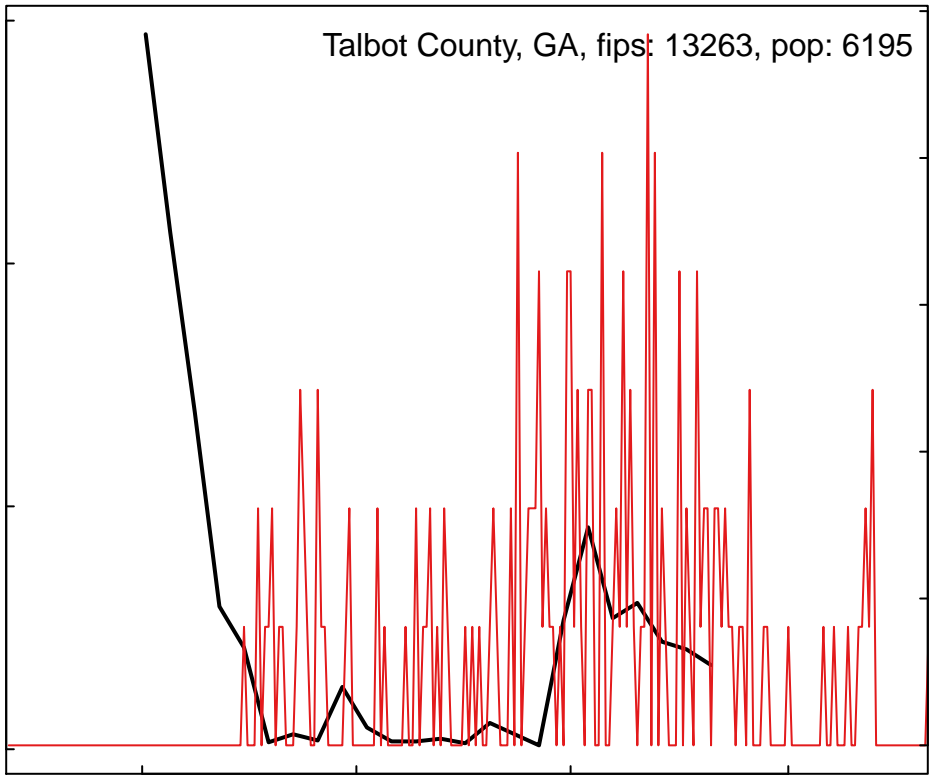

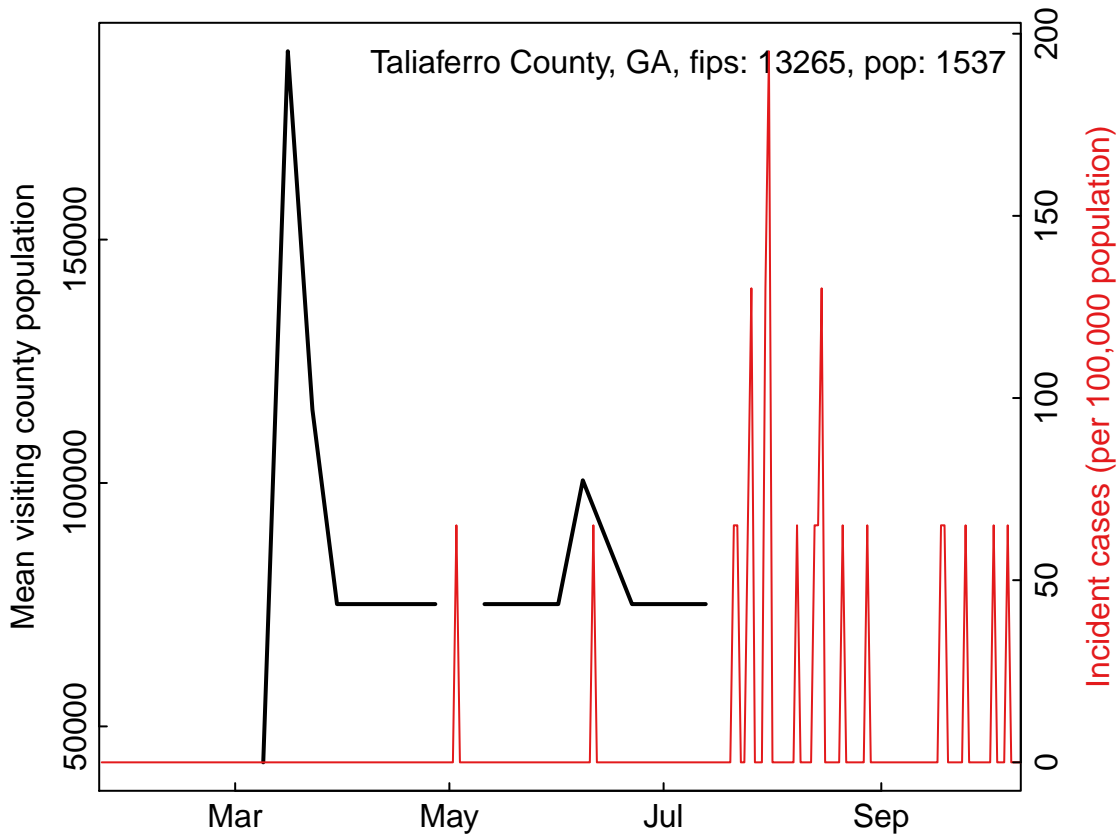

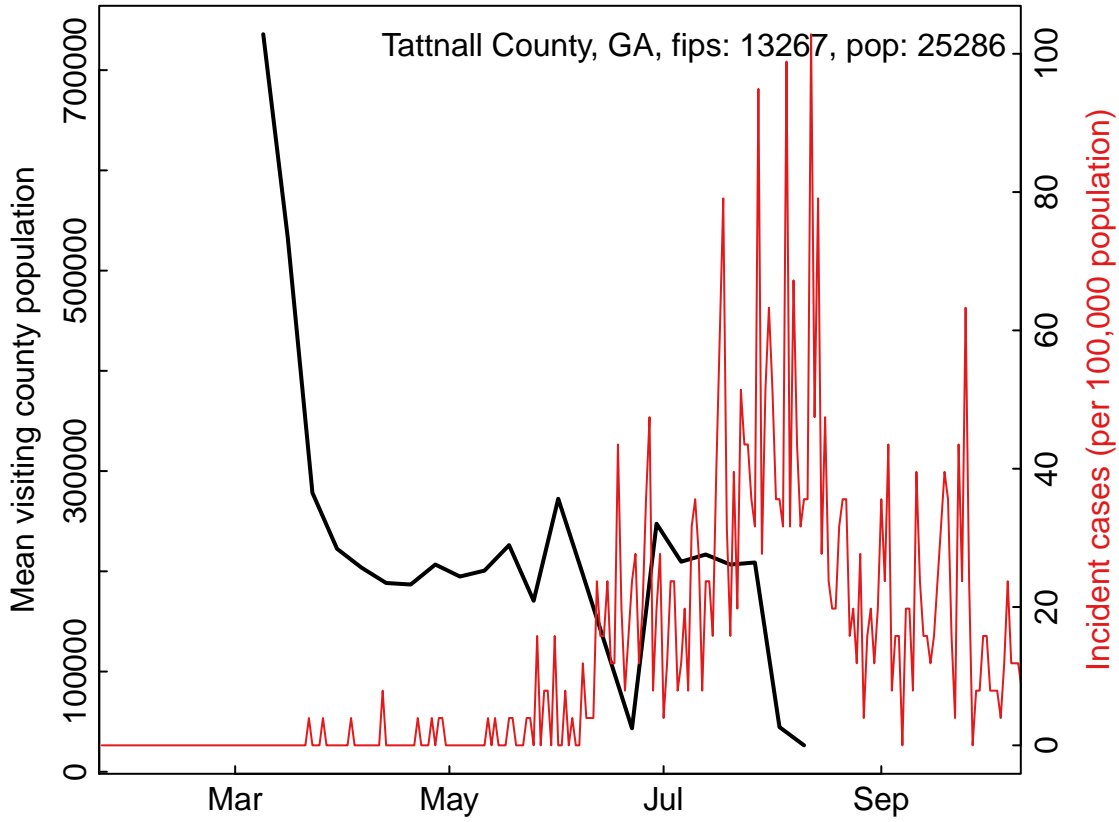

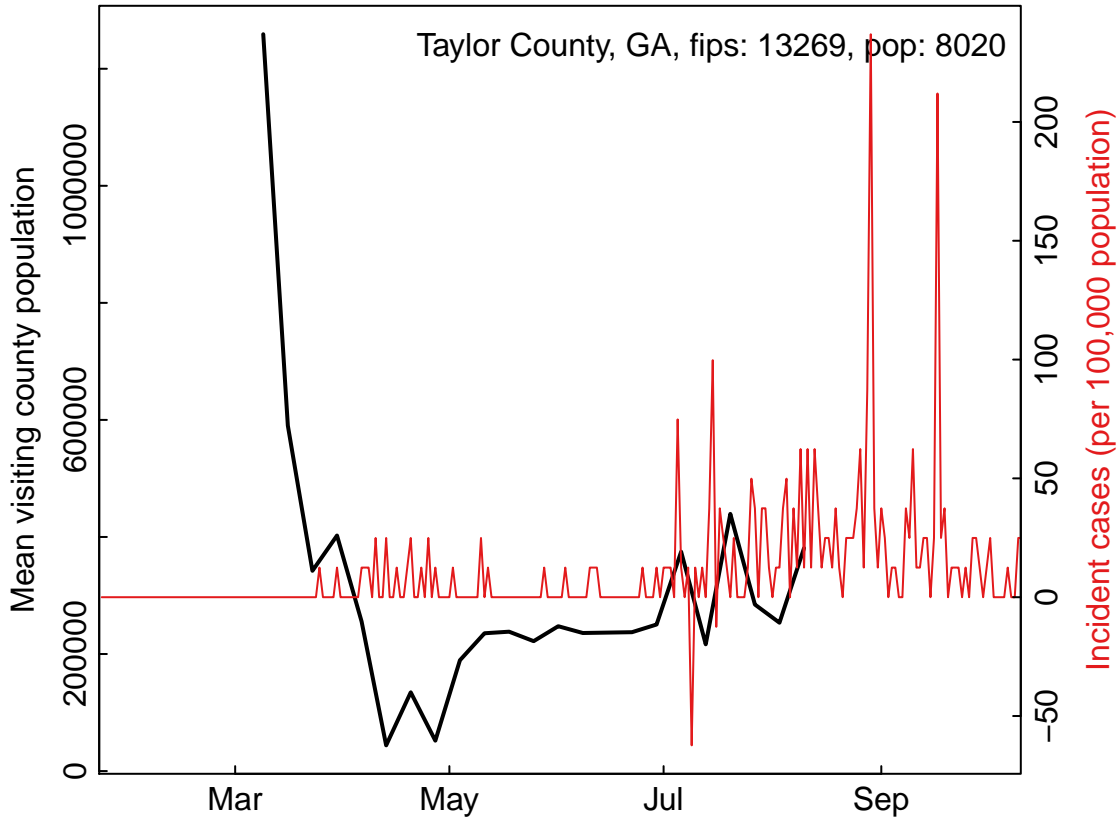

Telfair County, GA, fips: 13271, pop: 15860

Mean visiting county population

0  
200000  
400000  
600000  
800000

Mar

May

Jul

Sep

0  
50  
100  
150

Incident cases (per 100,000 population)

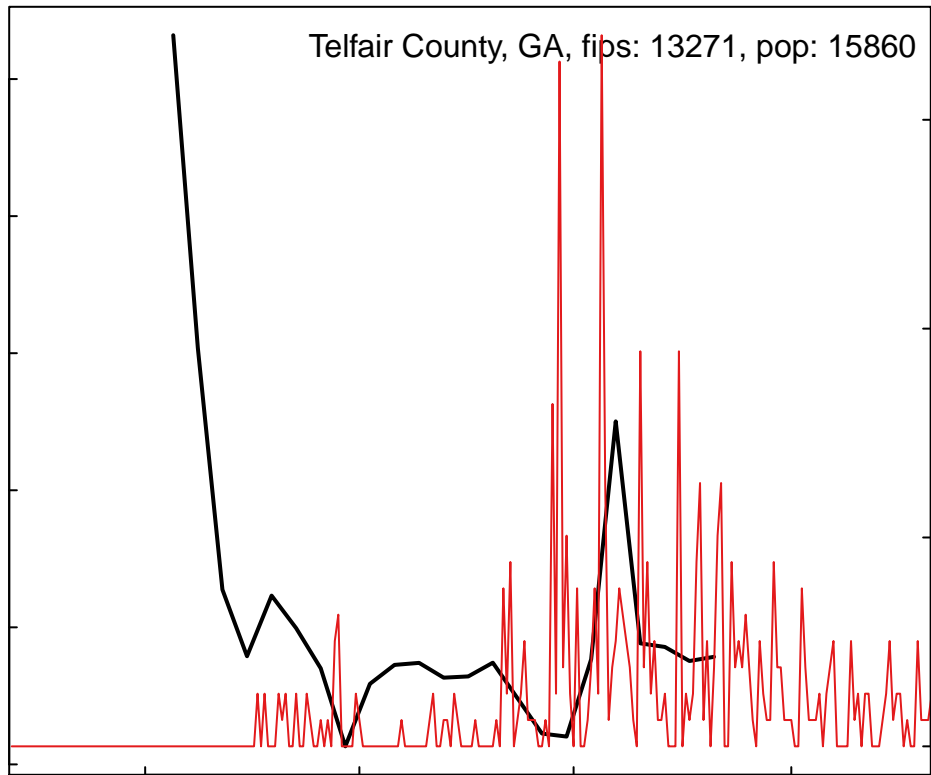



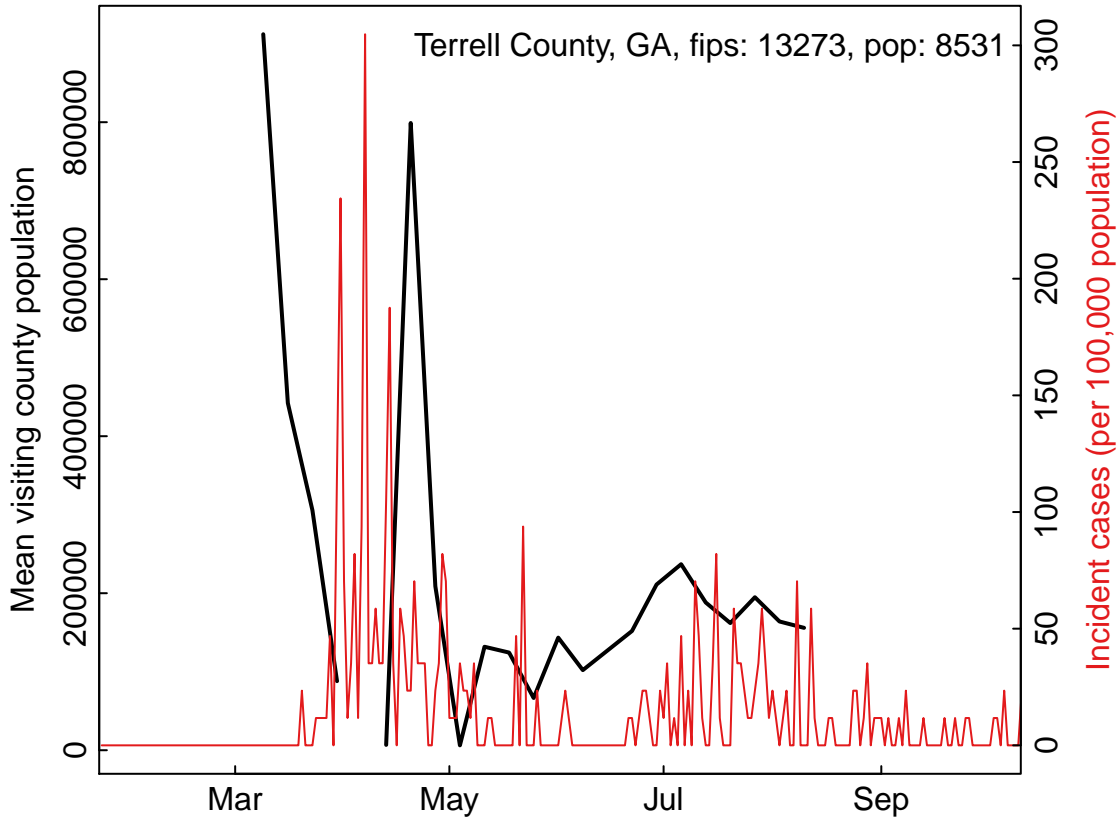

Mean visiting county population

1500000

1000000

500000

0

Mar

May

Jul

Sep

Thomas County, GA, fips: 13275, pop: 44451

150

100

50

0

Incident cases (per 100,000 population)

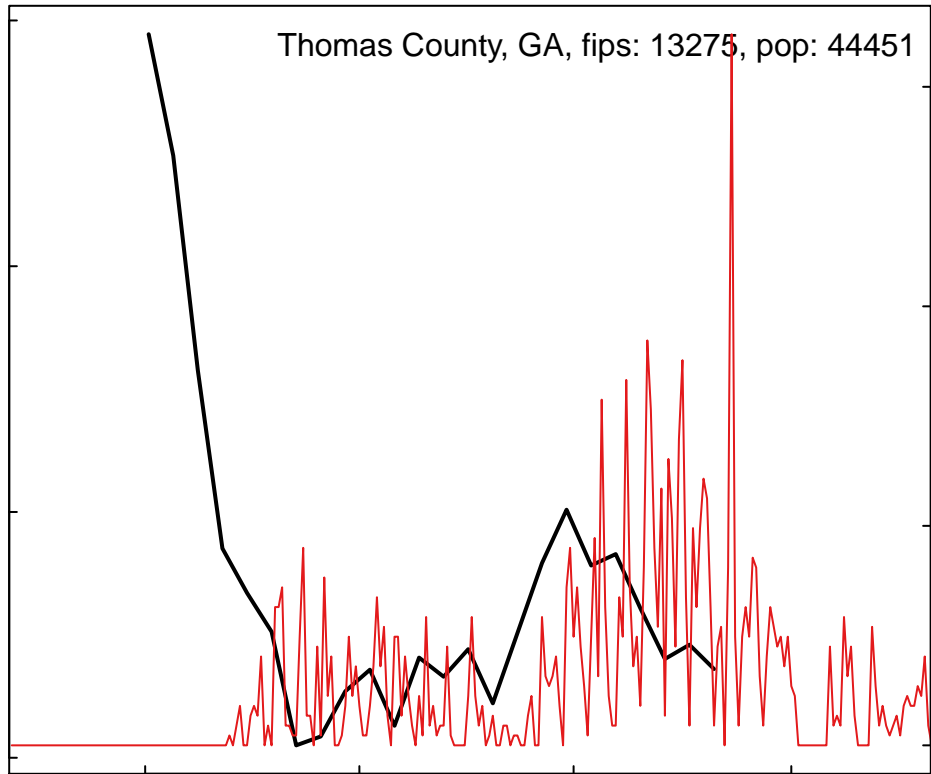

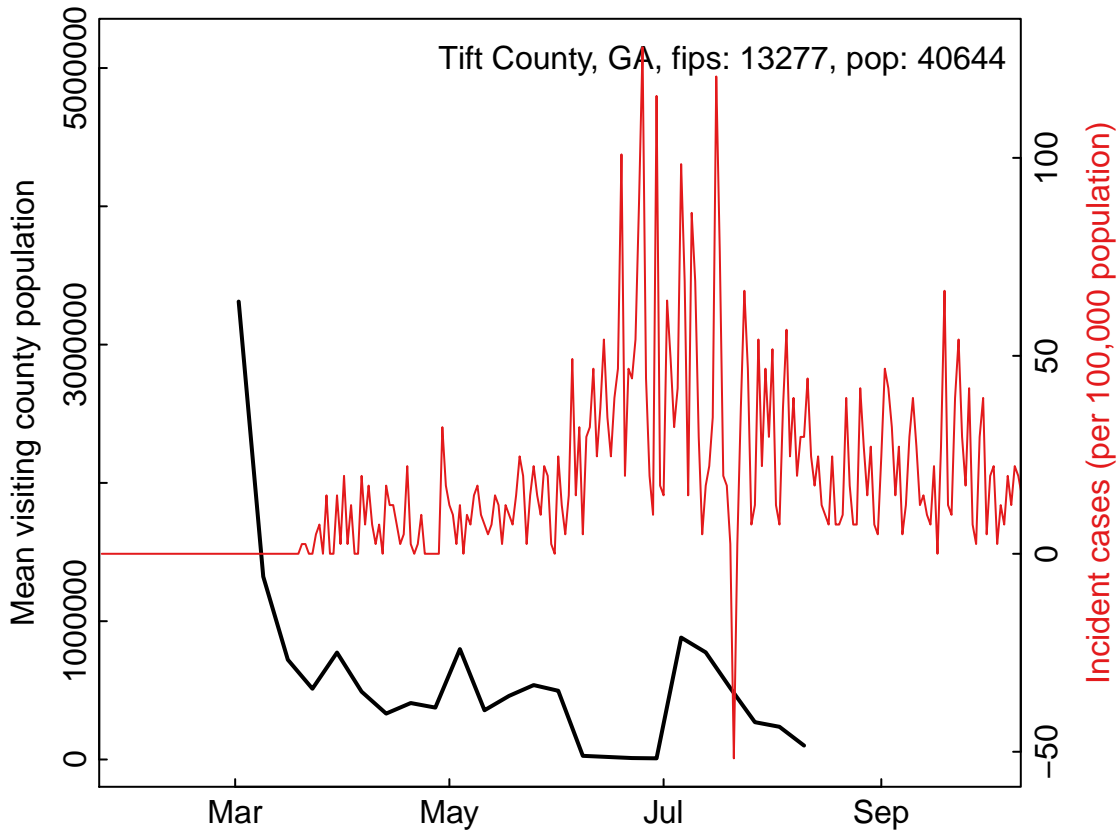

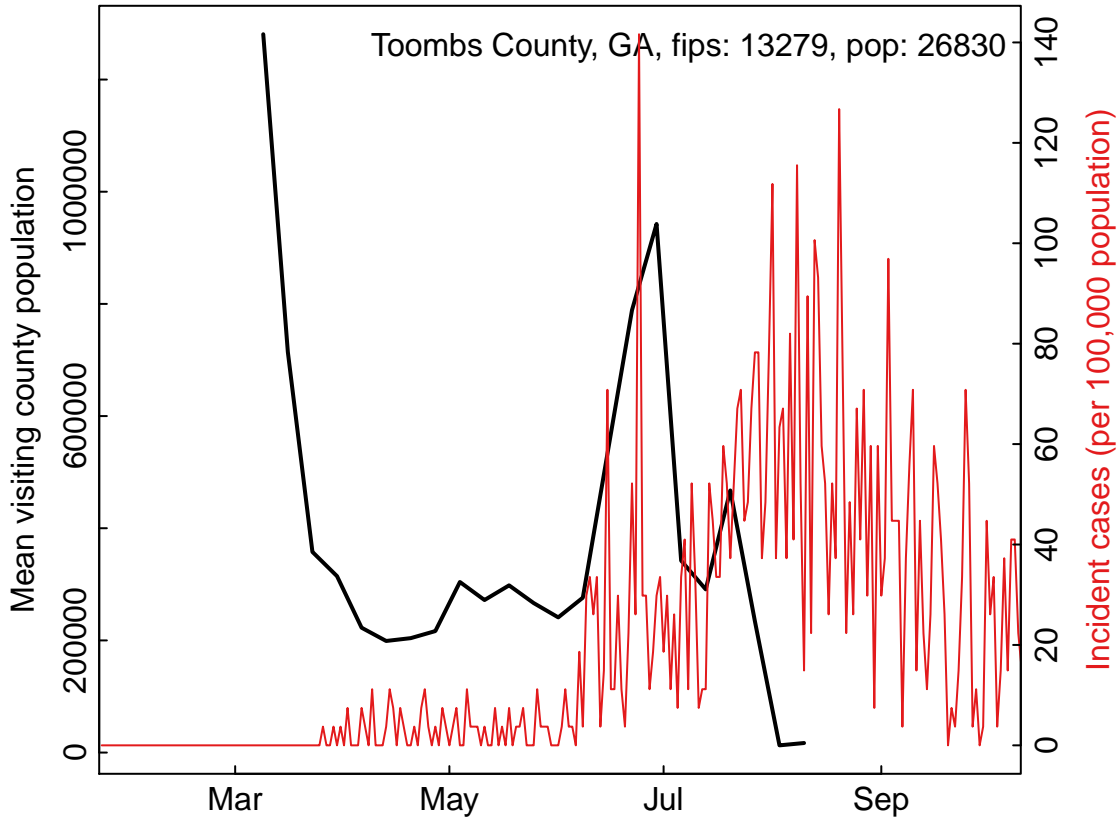

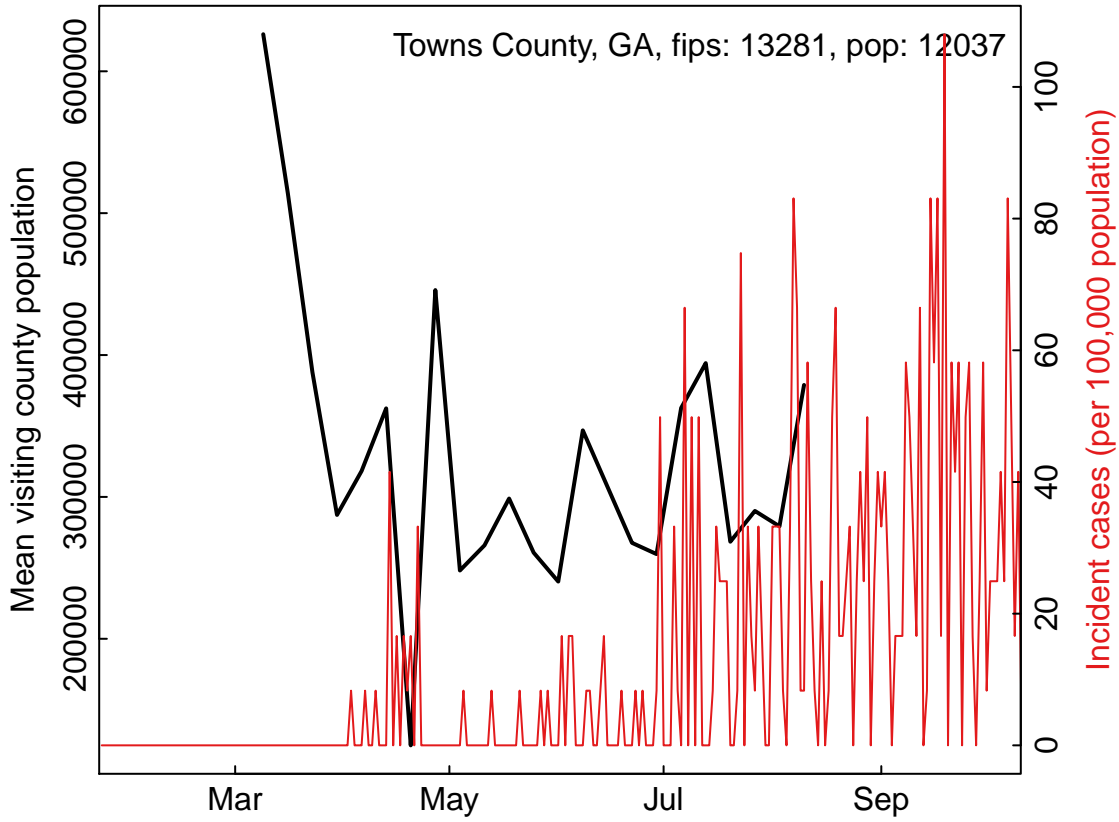

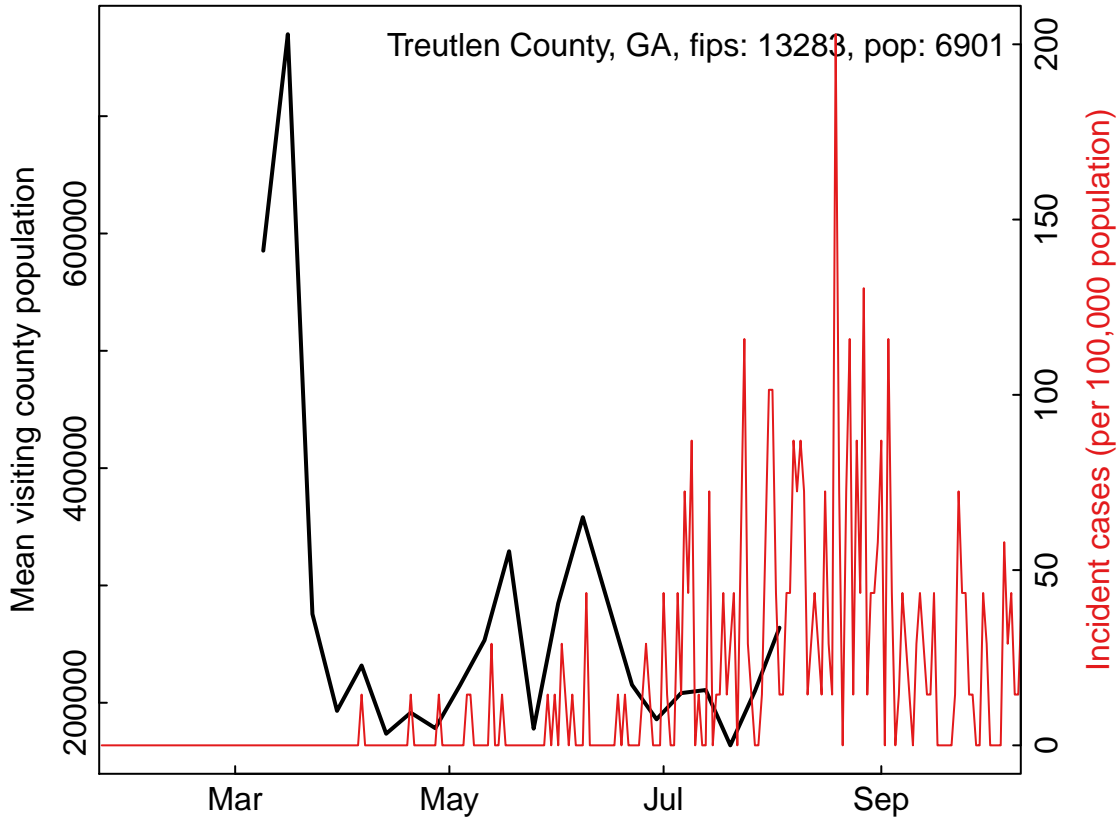

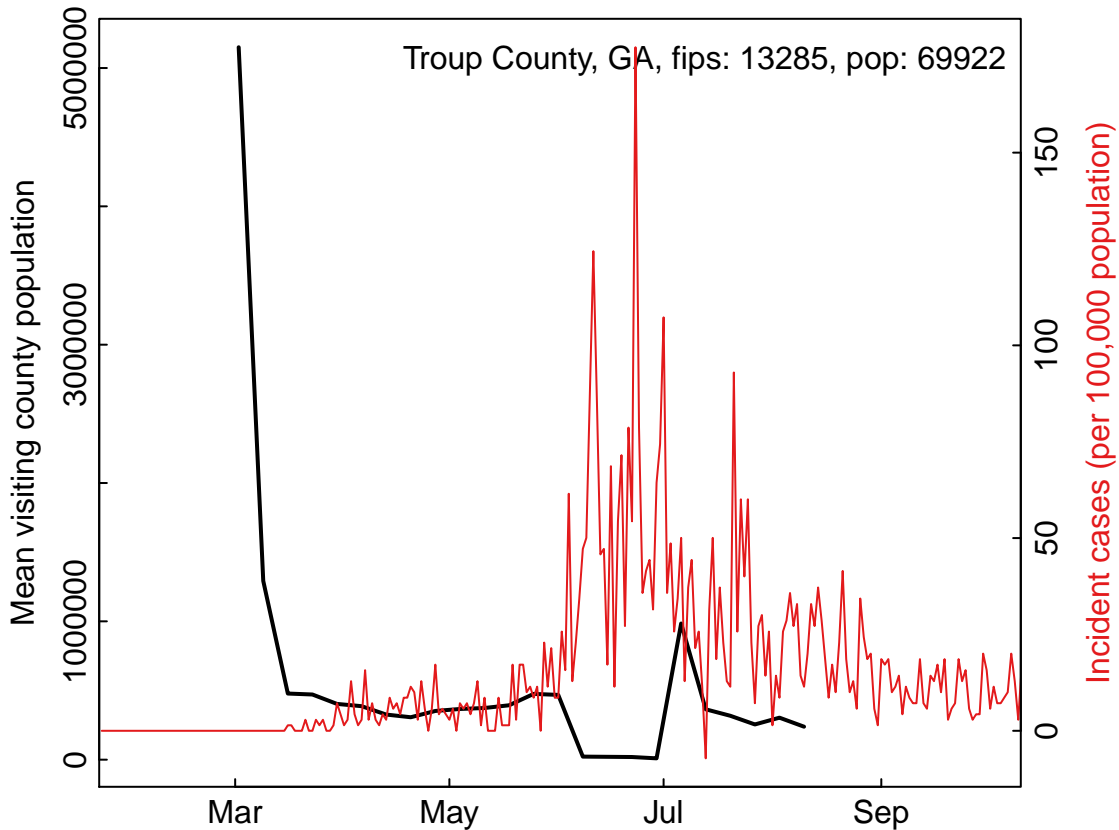

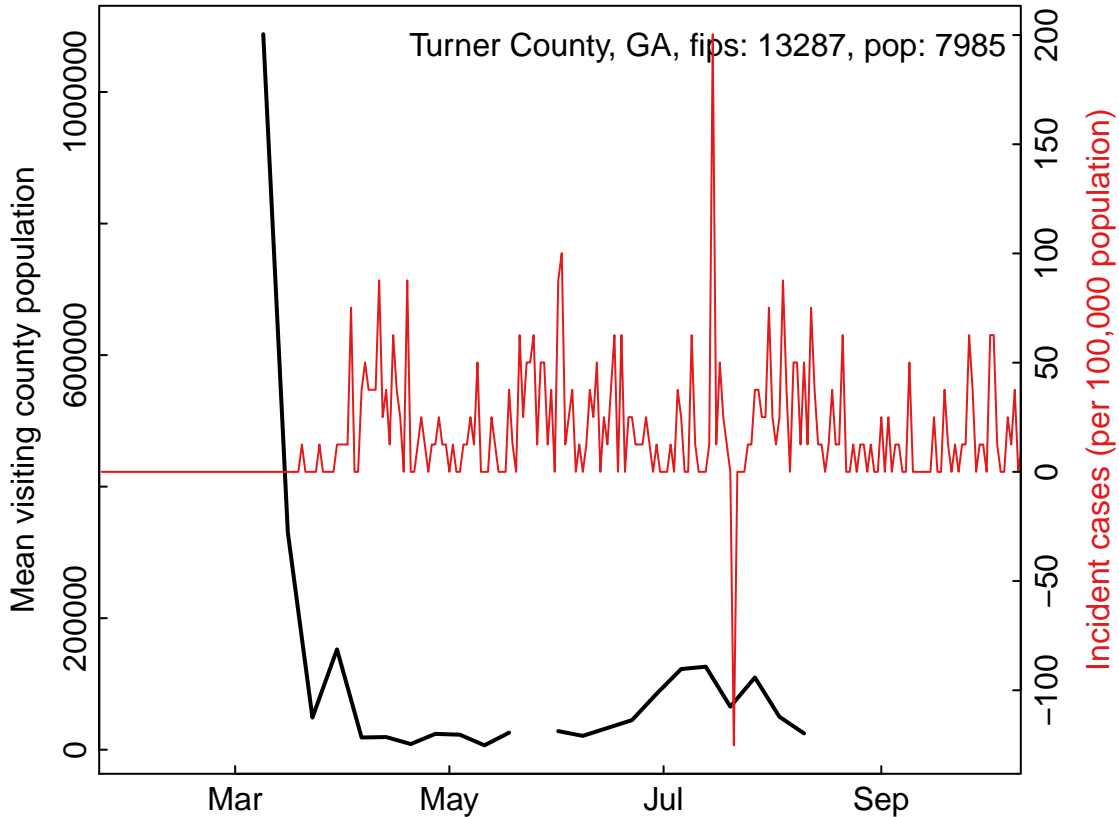



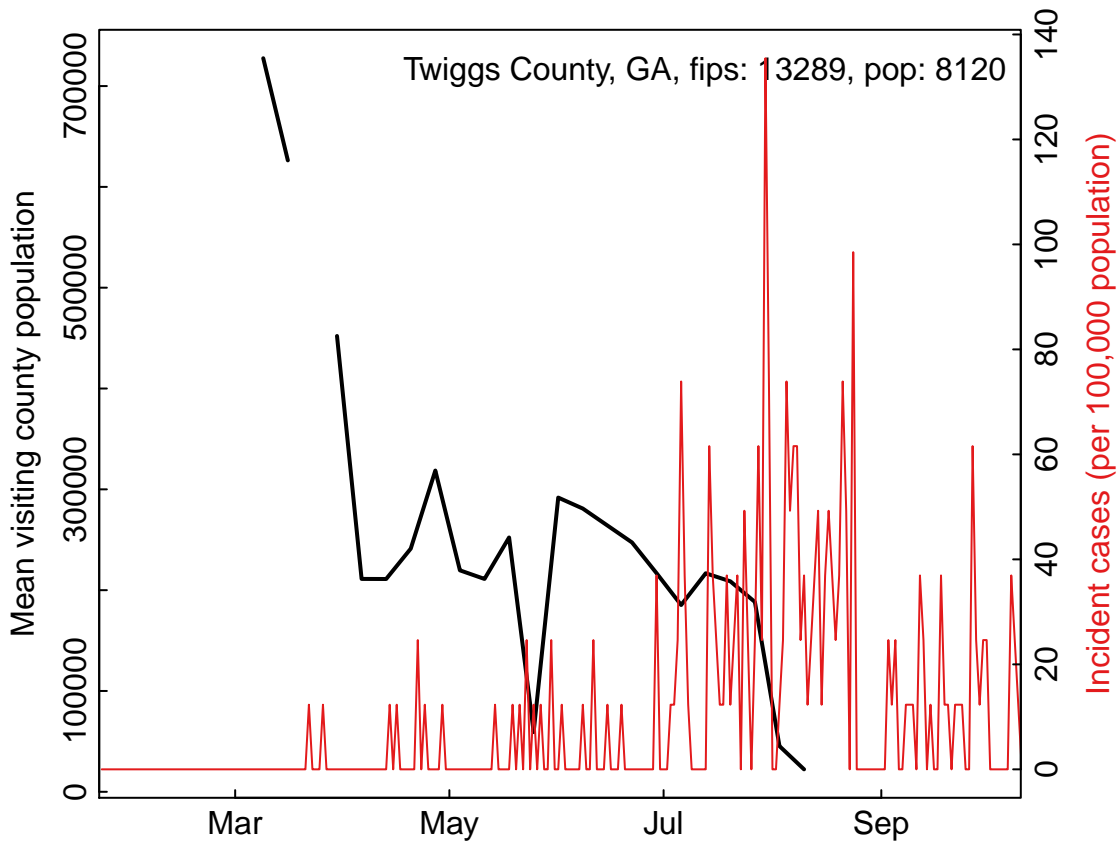

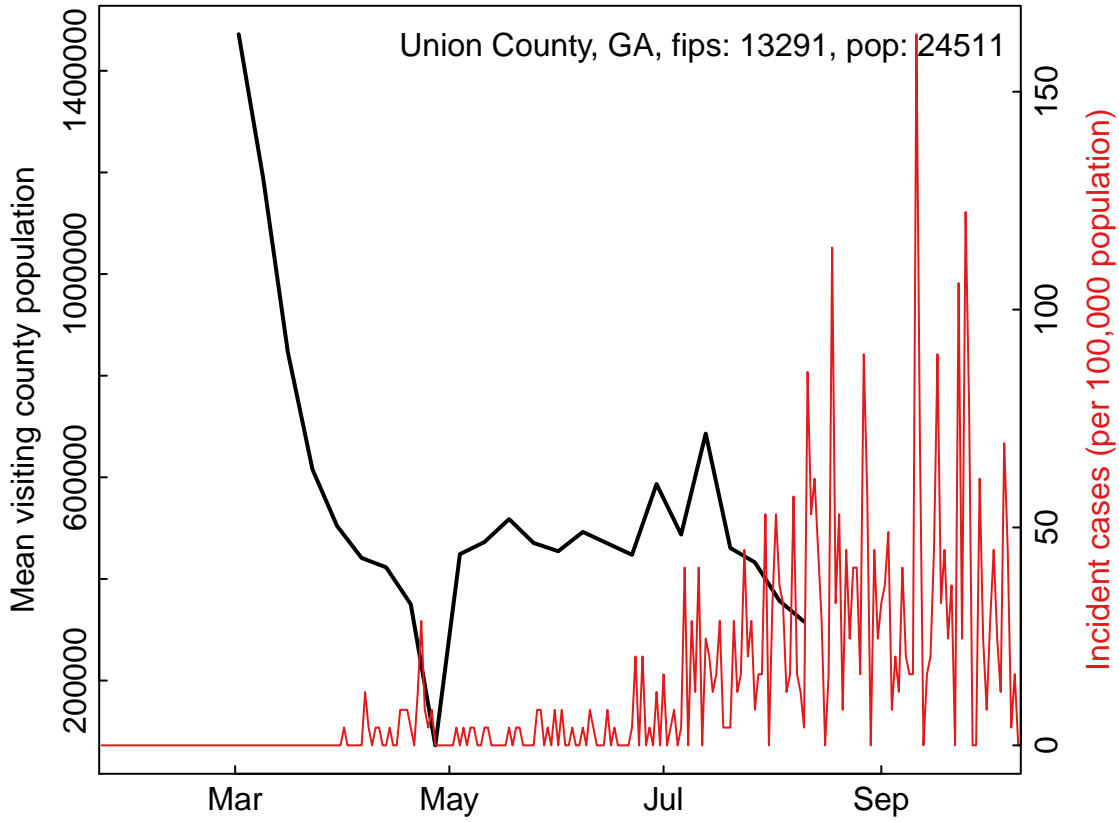

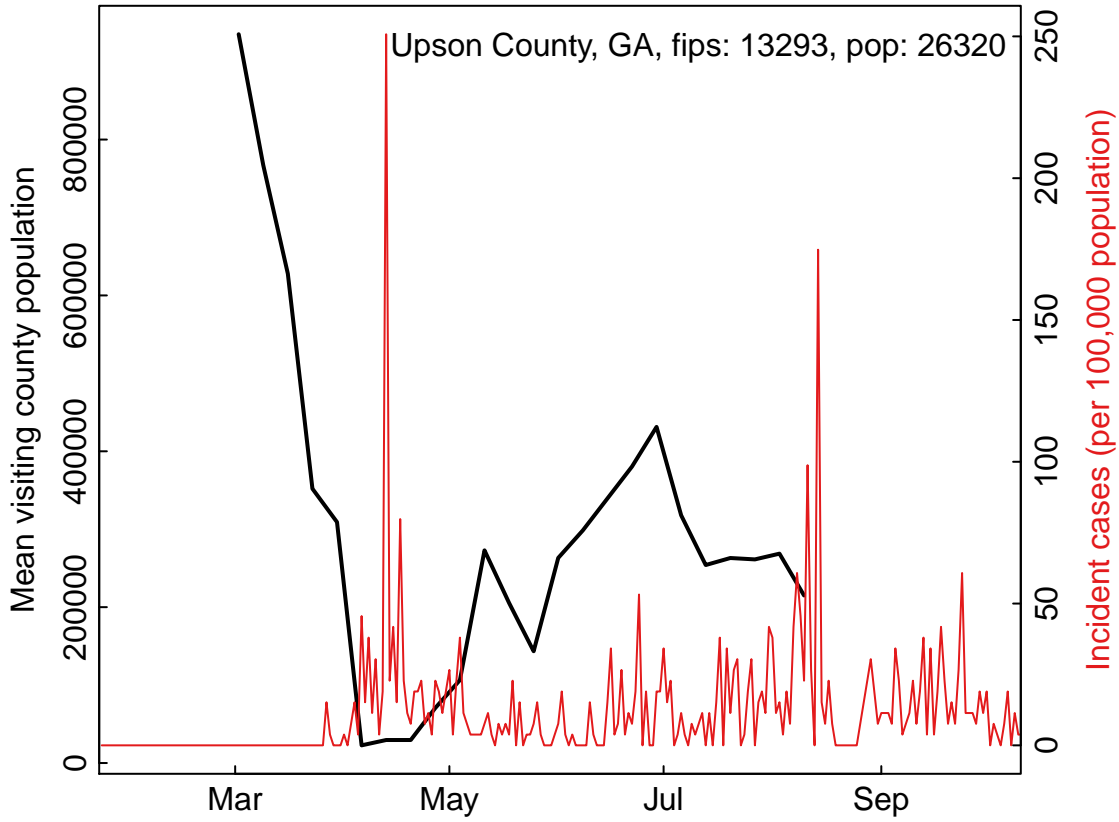

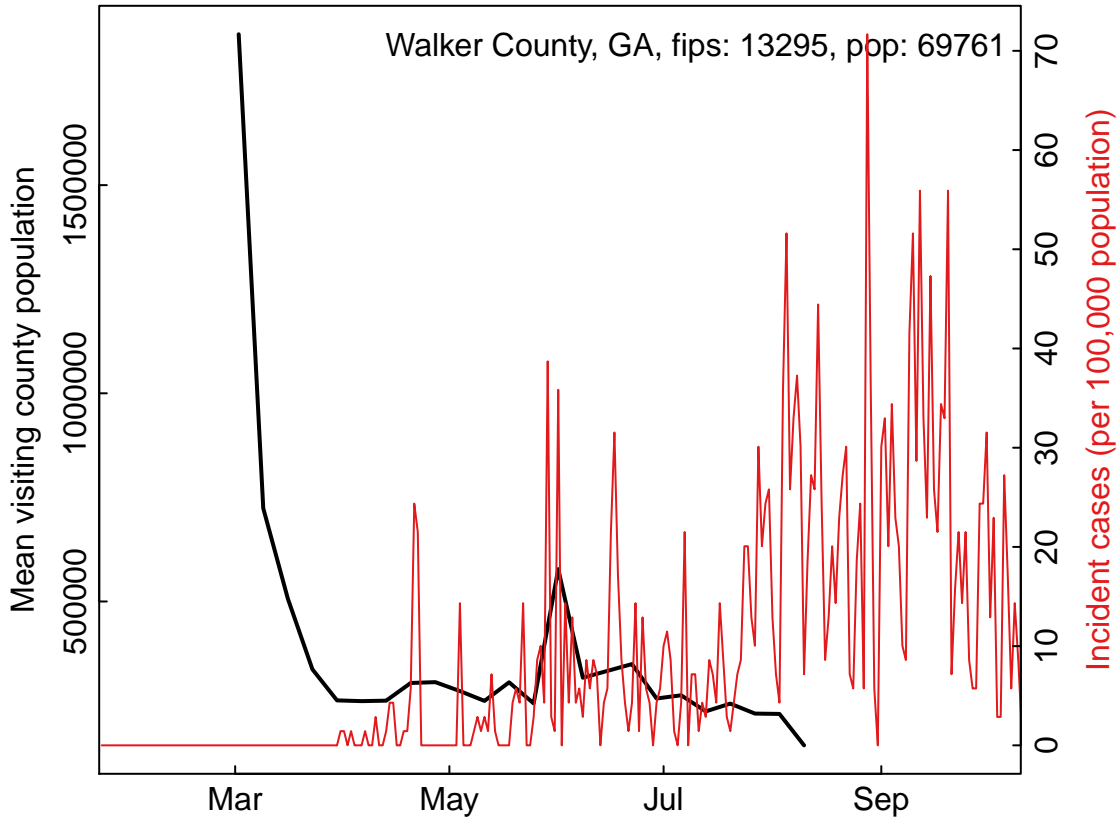

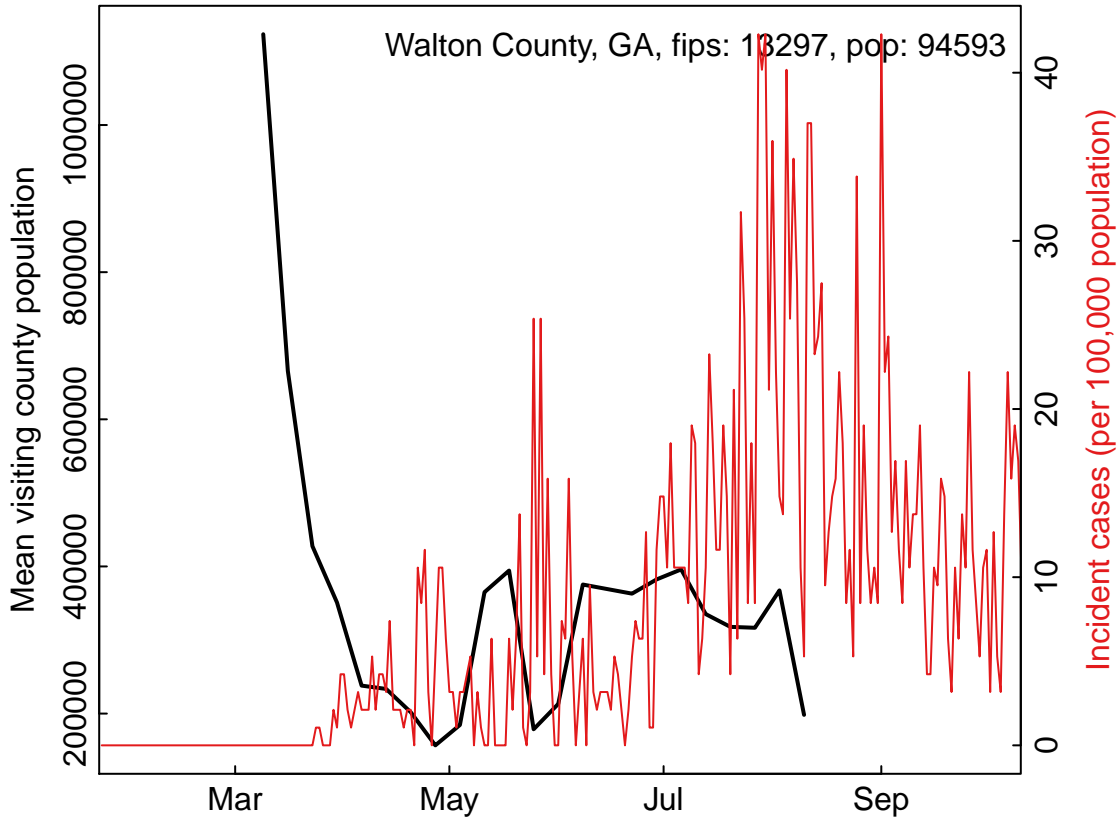

Ware County, GA, fips: 13299, pop: 35734

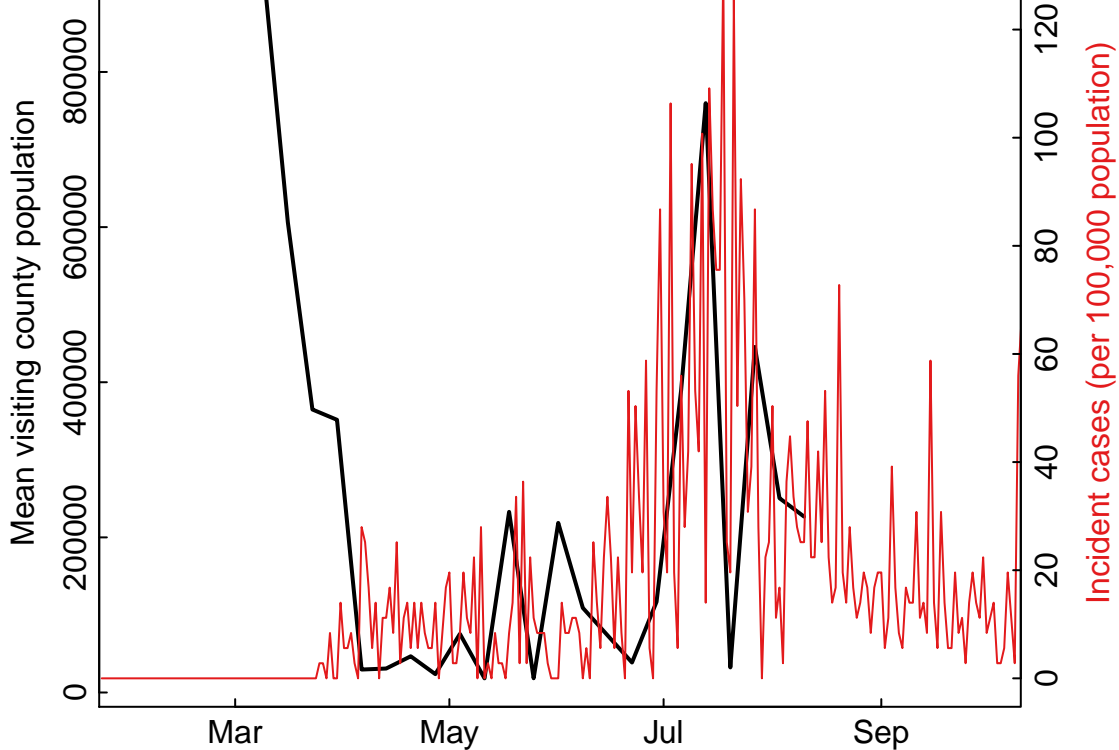

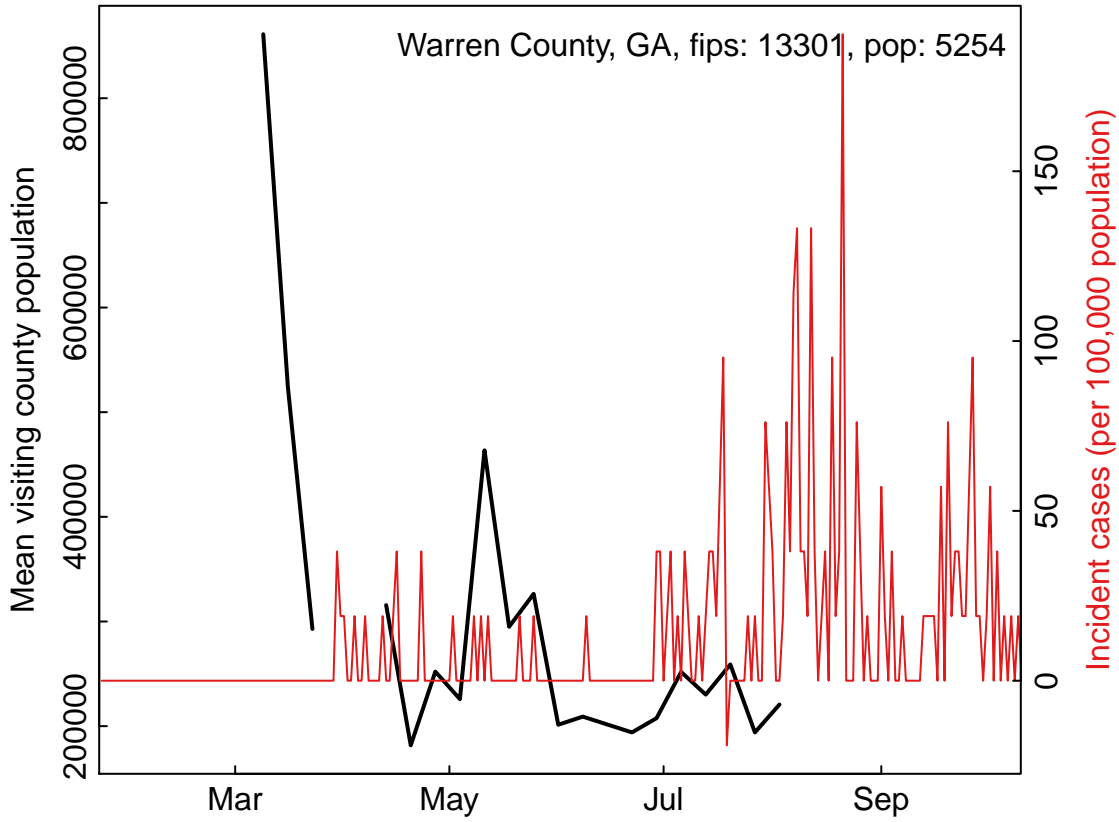

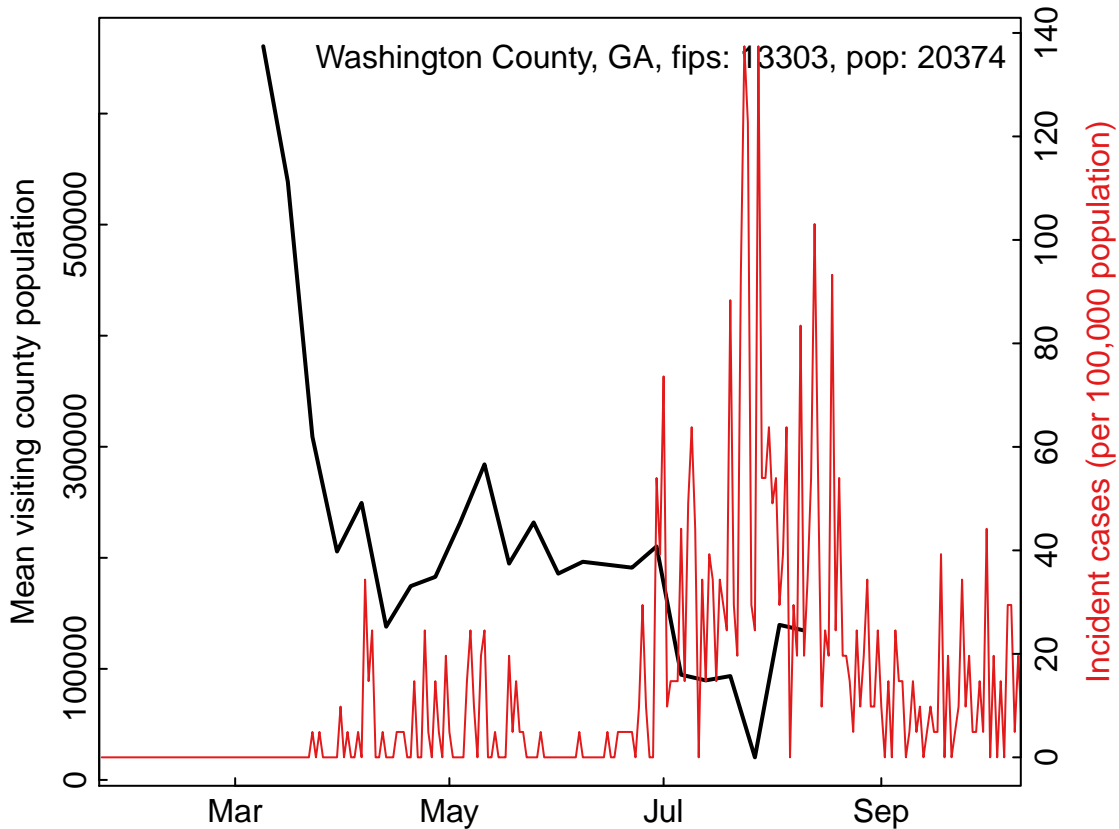



Wayne County, GA, fips: 13305, pop: 29927

Mean visiting county population

2500000  
1500000  
500000  
0

Mar

May

Jul

Sep

150  
100  
50  
0

Incident cases (per 100,000 population)

0

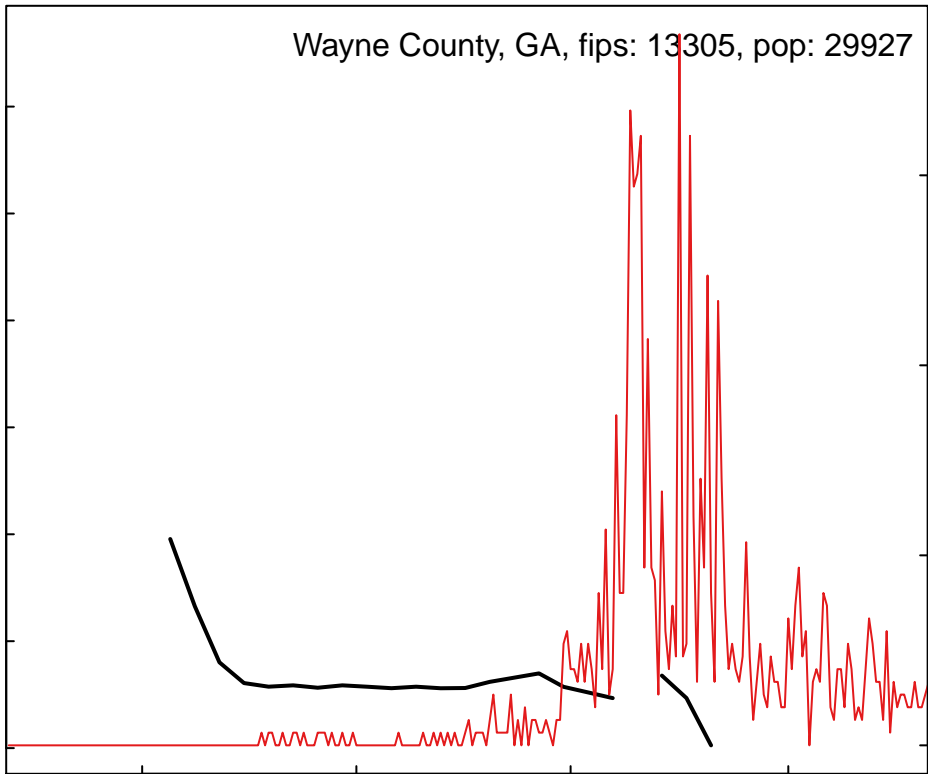

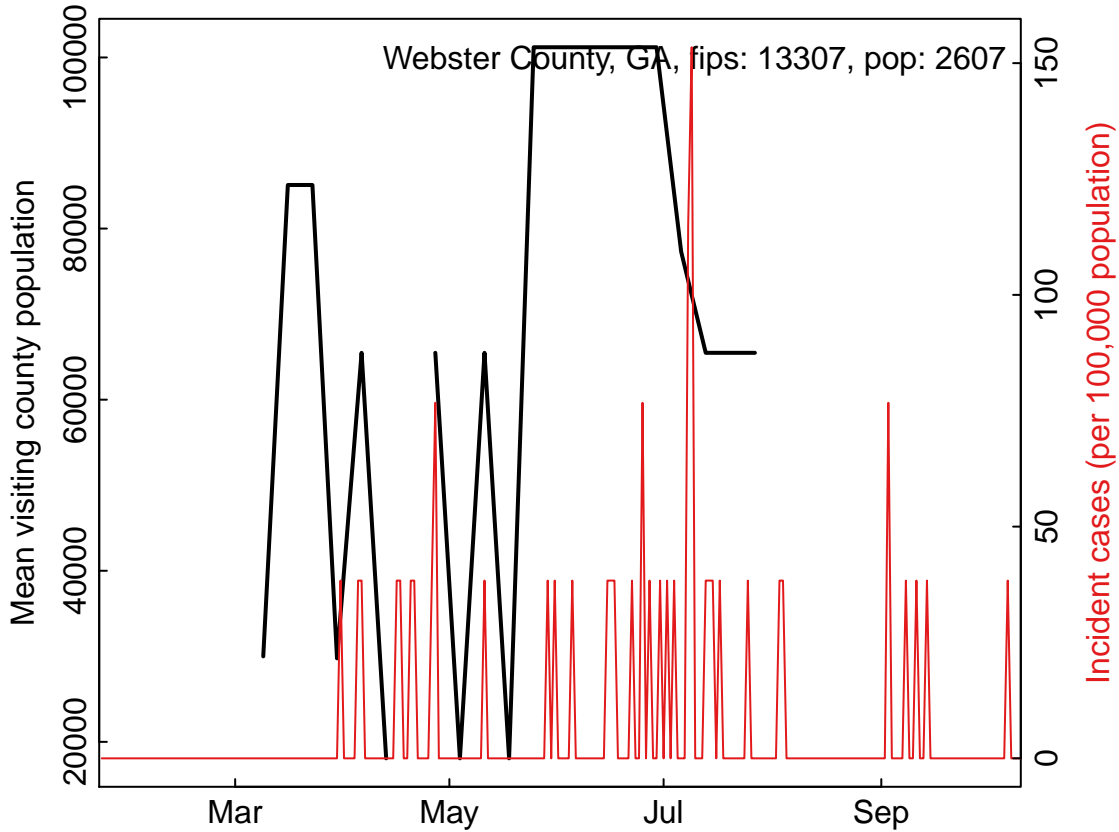

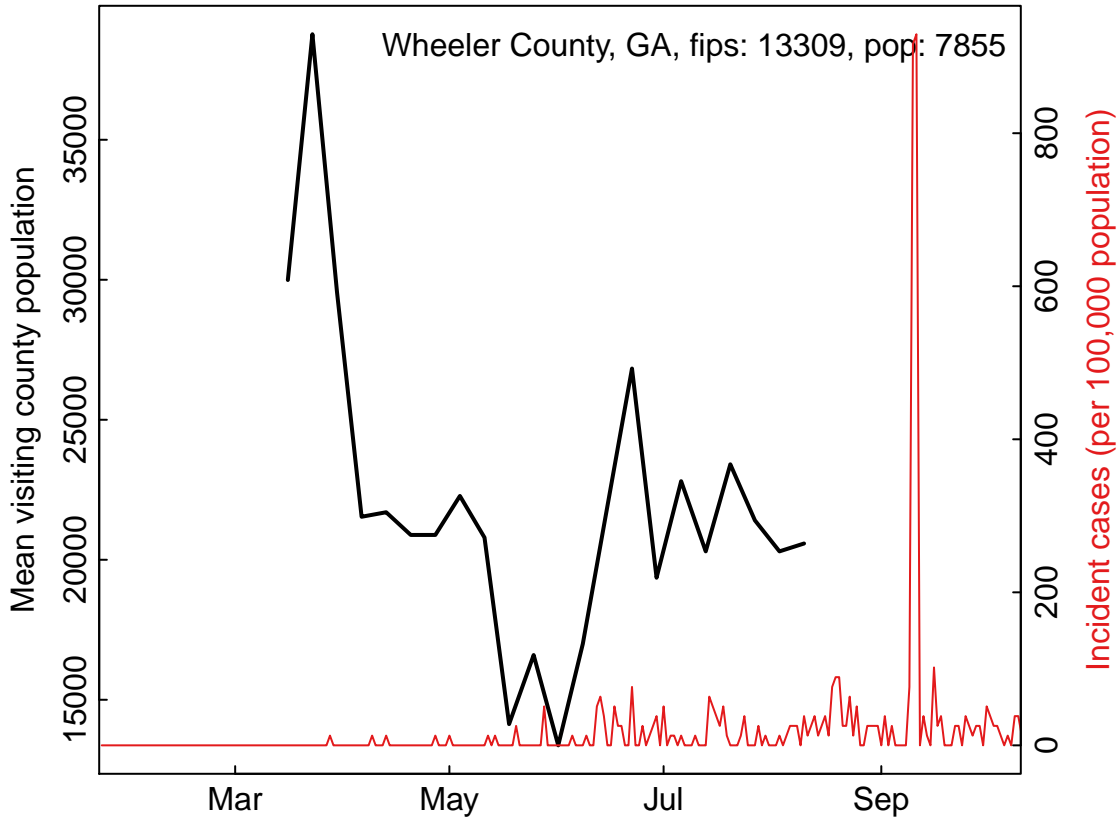

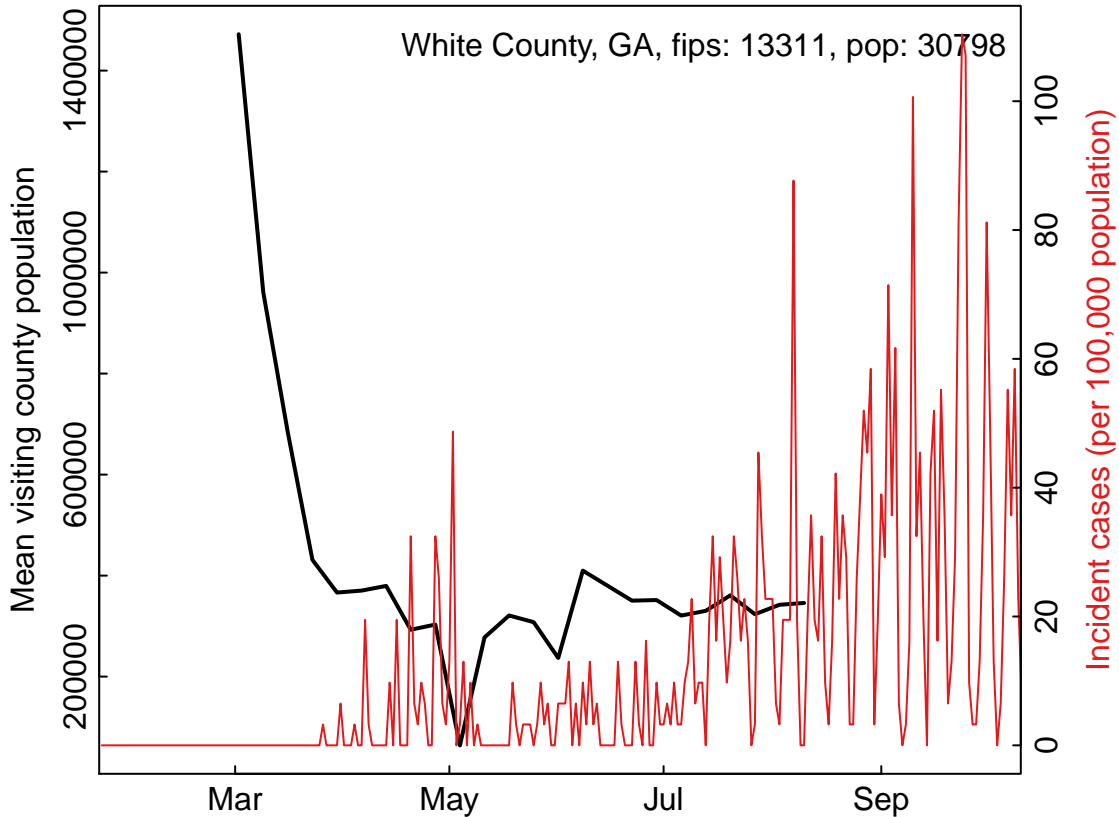

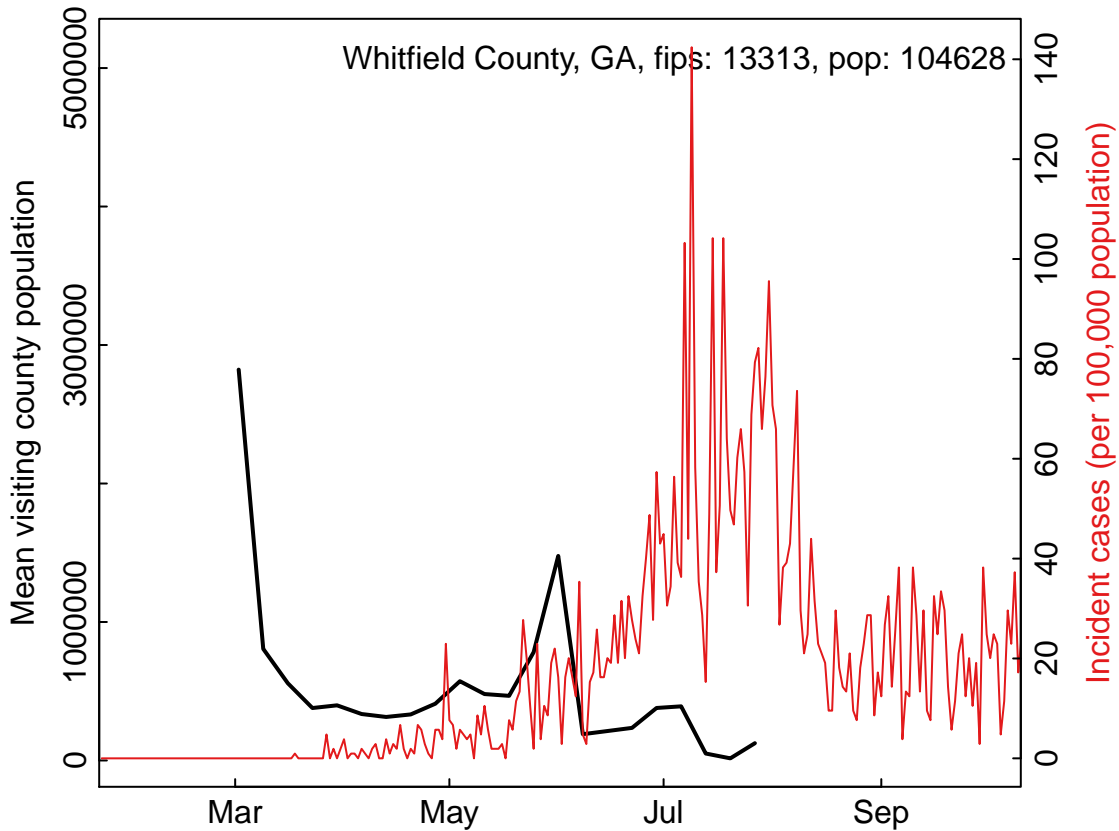

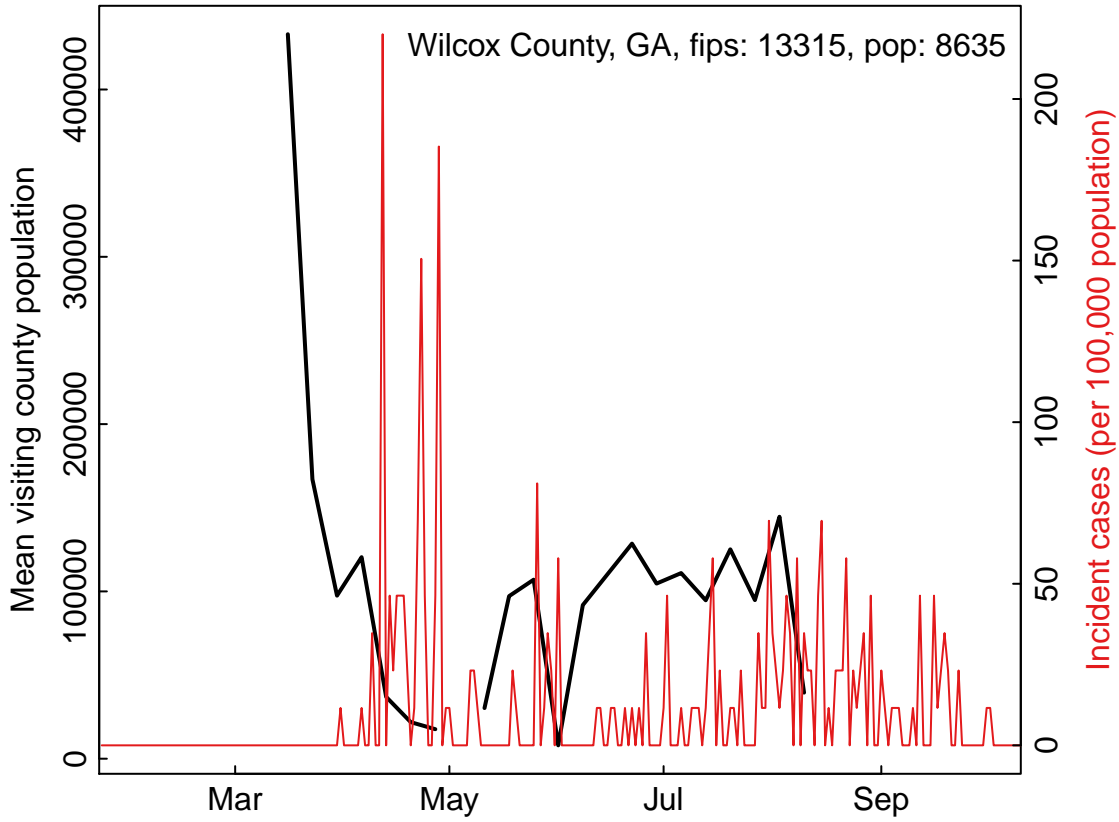

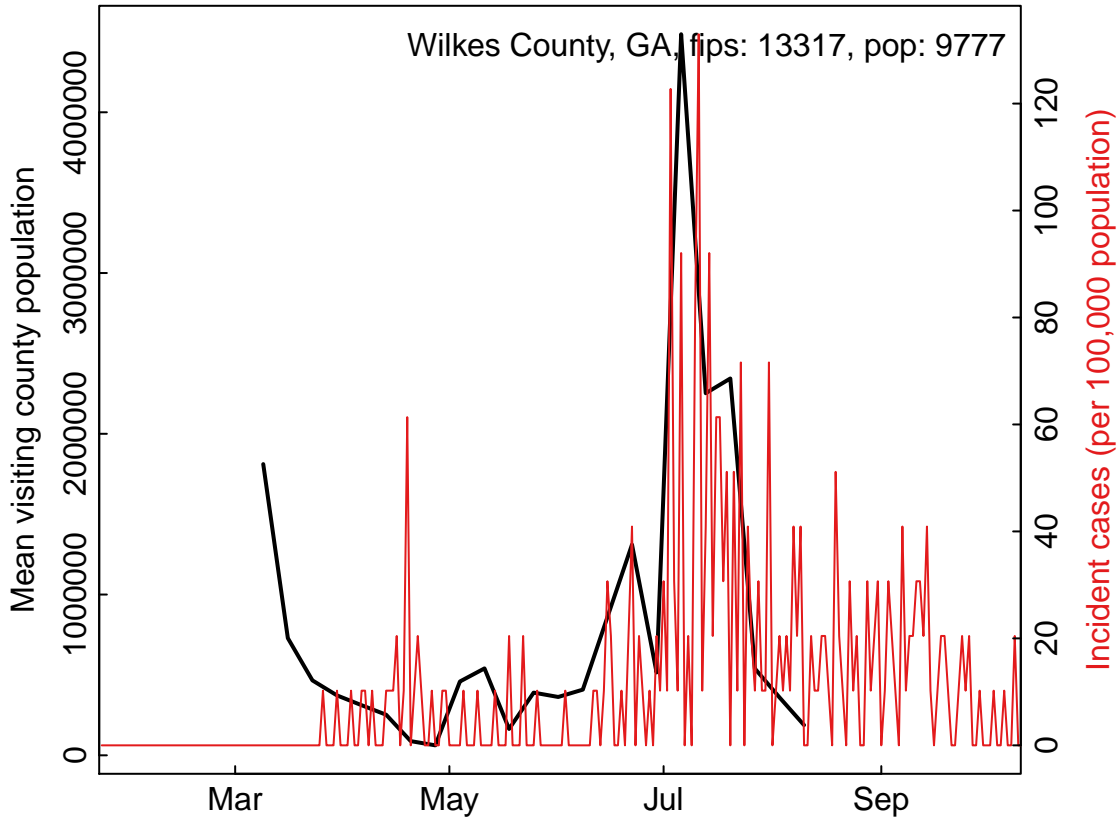

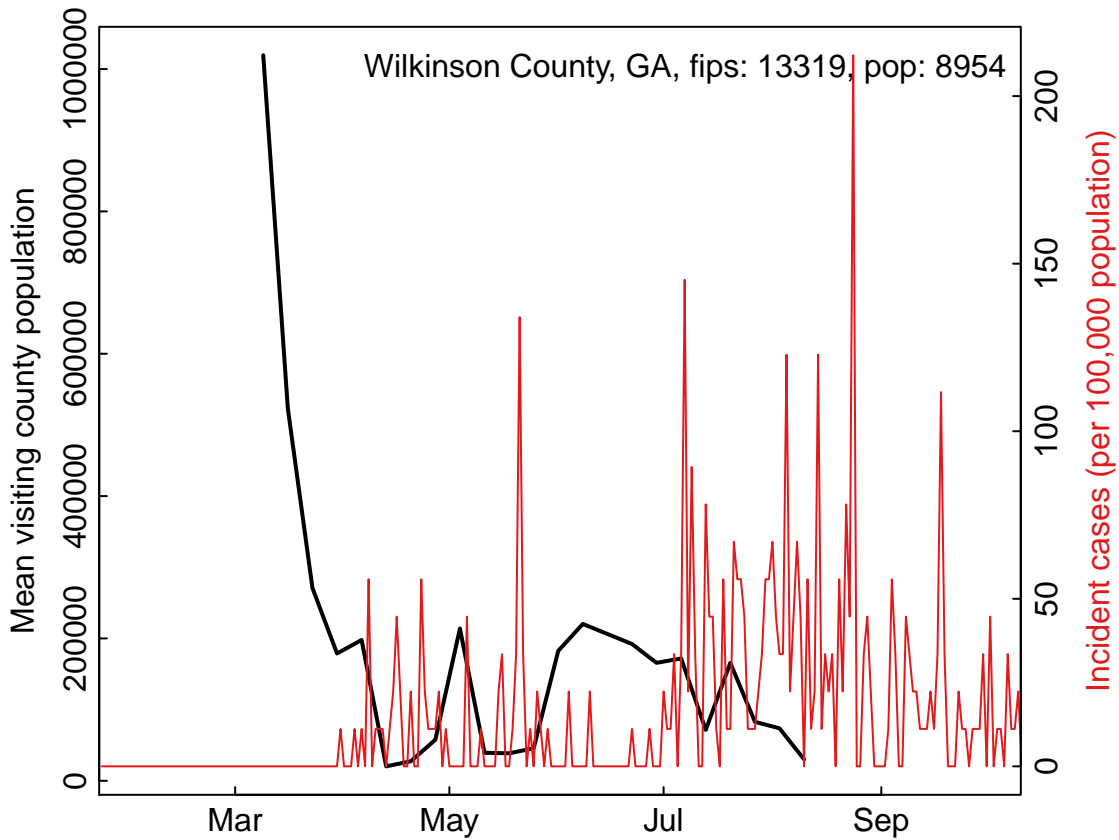



Mean visiting county population

1500000  
1000000  
500000  
0

Mar

May

Jul

Sep

Worth County, GA, fips: 13321, pop: 20247

Incident cases (per 100,000 population)

100  
80  
60  
40  
20  
0

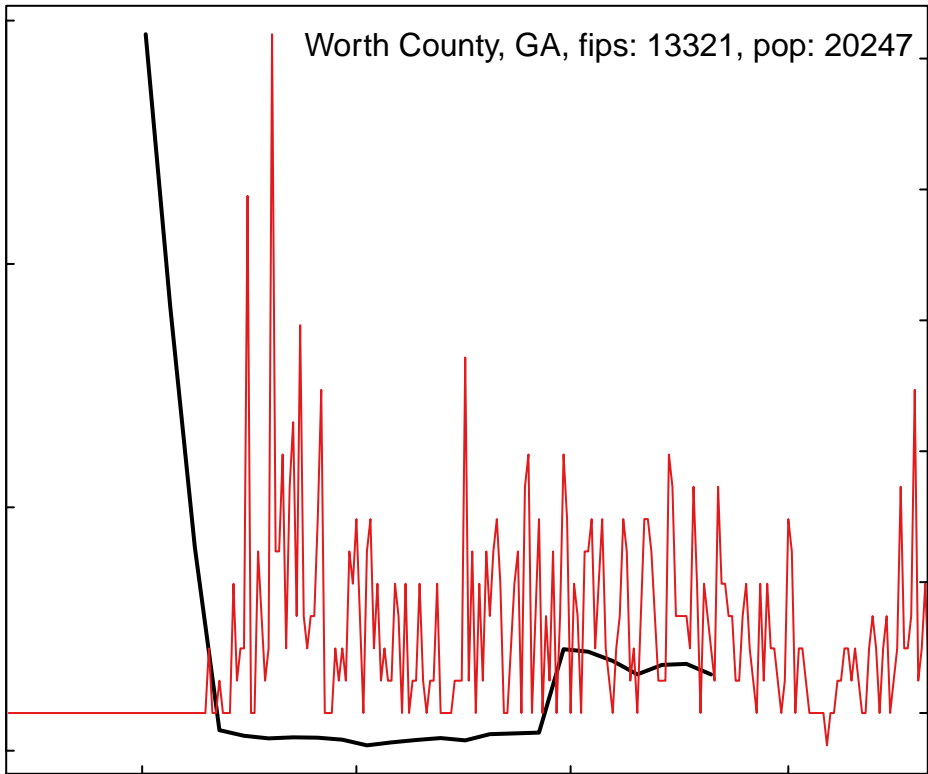

Ada County, ID, fips: 16001, pop: 481587

Mean visiting county population

Incident cases (per 100,000 population)

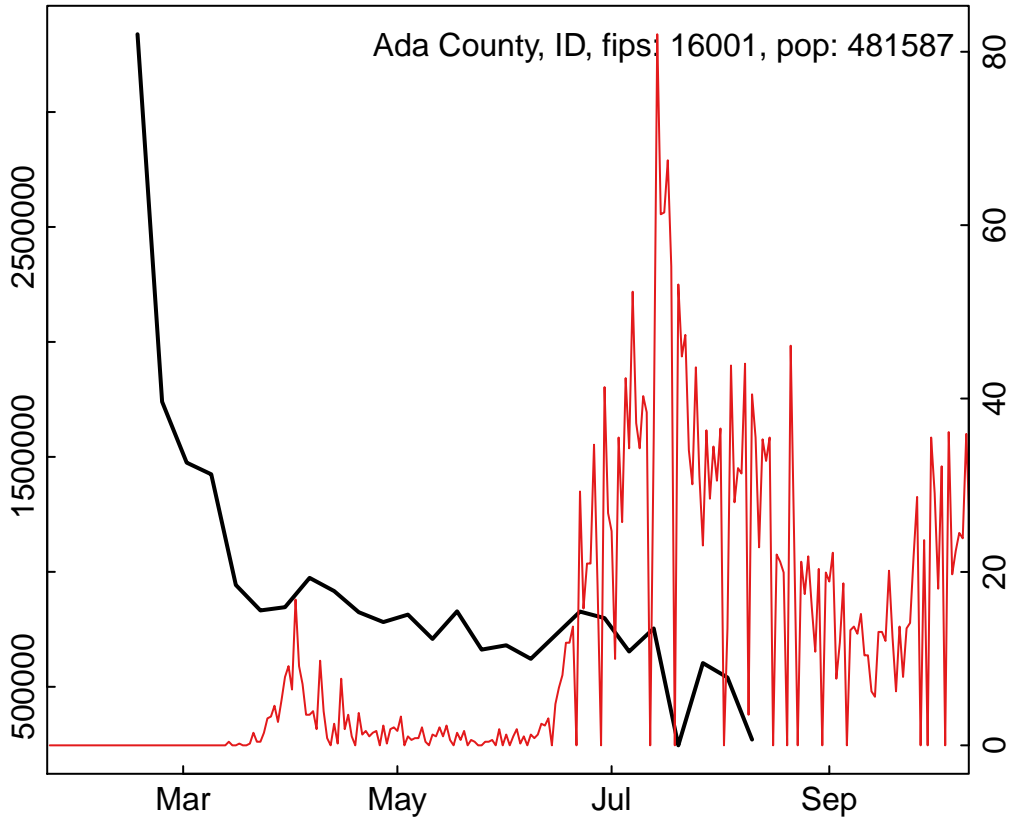

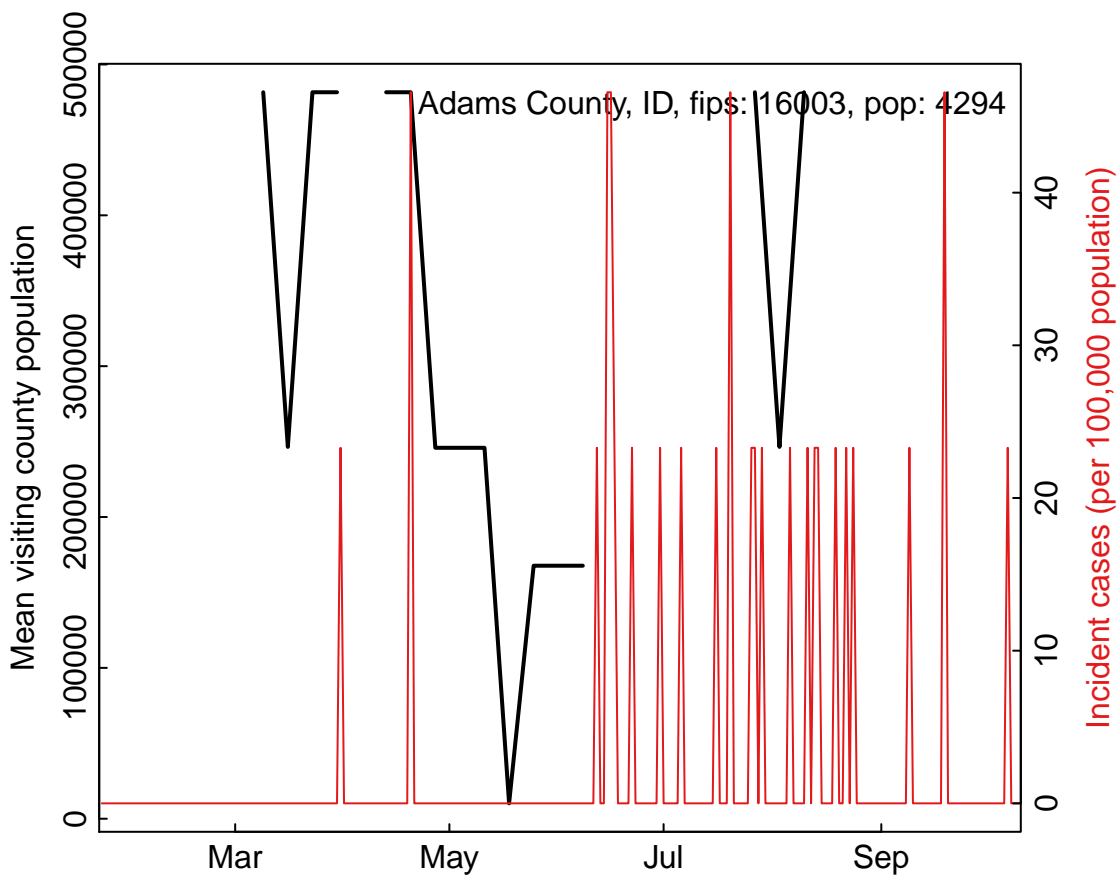

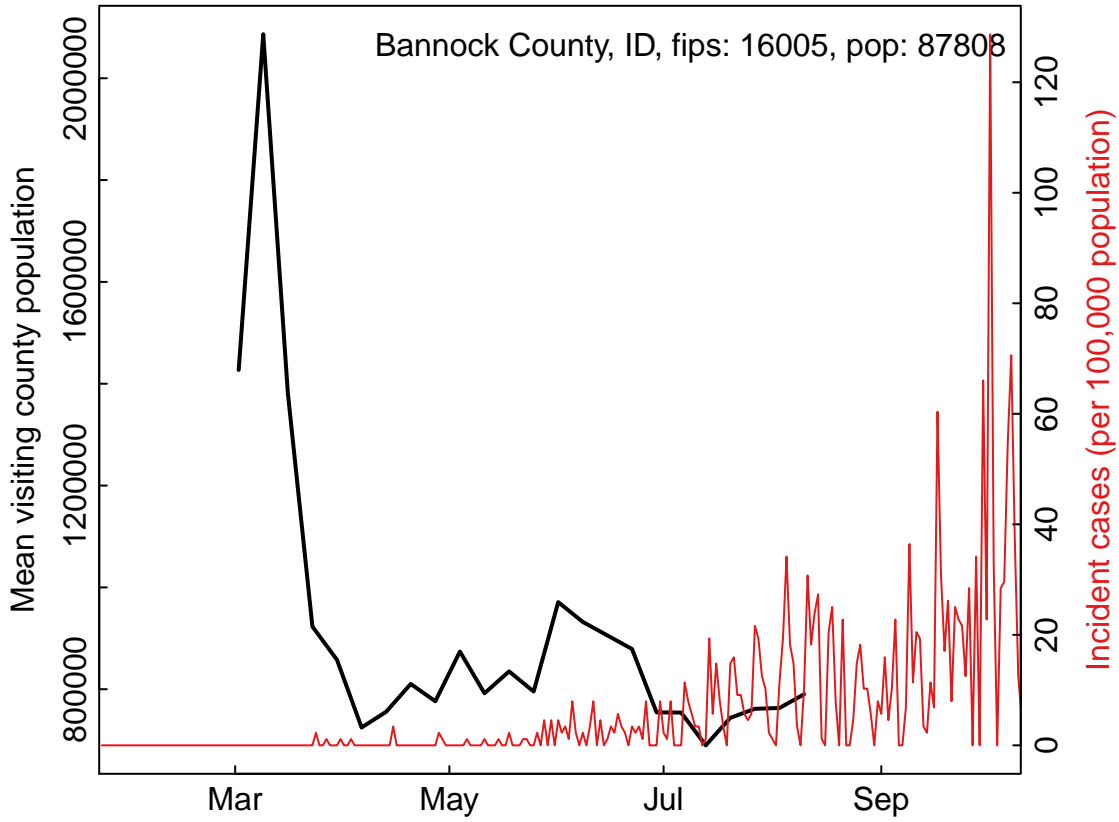

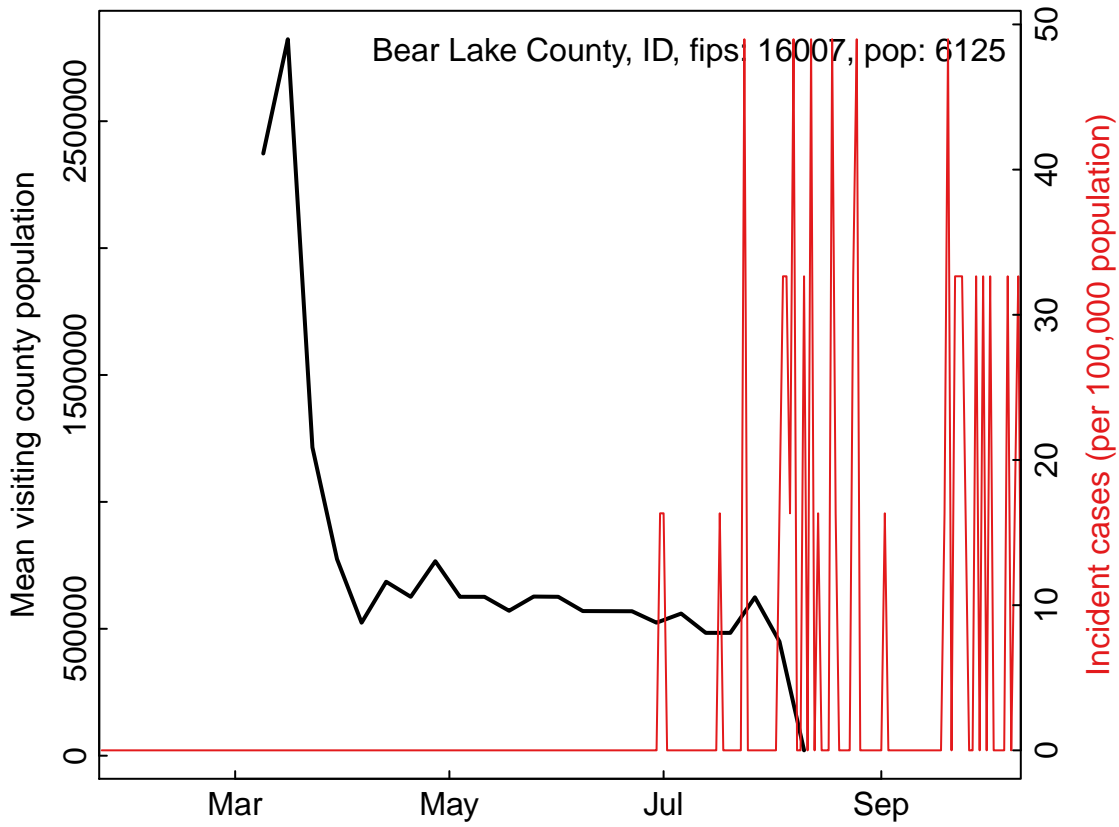

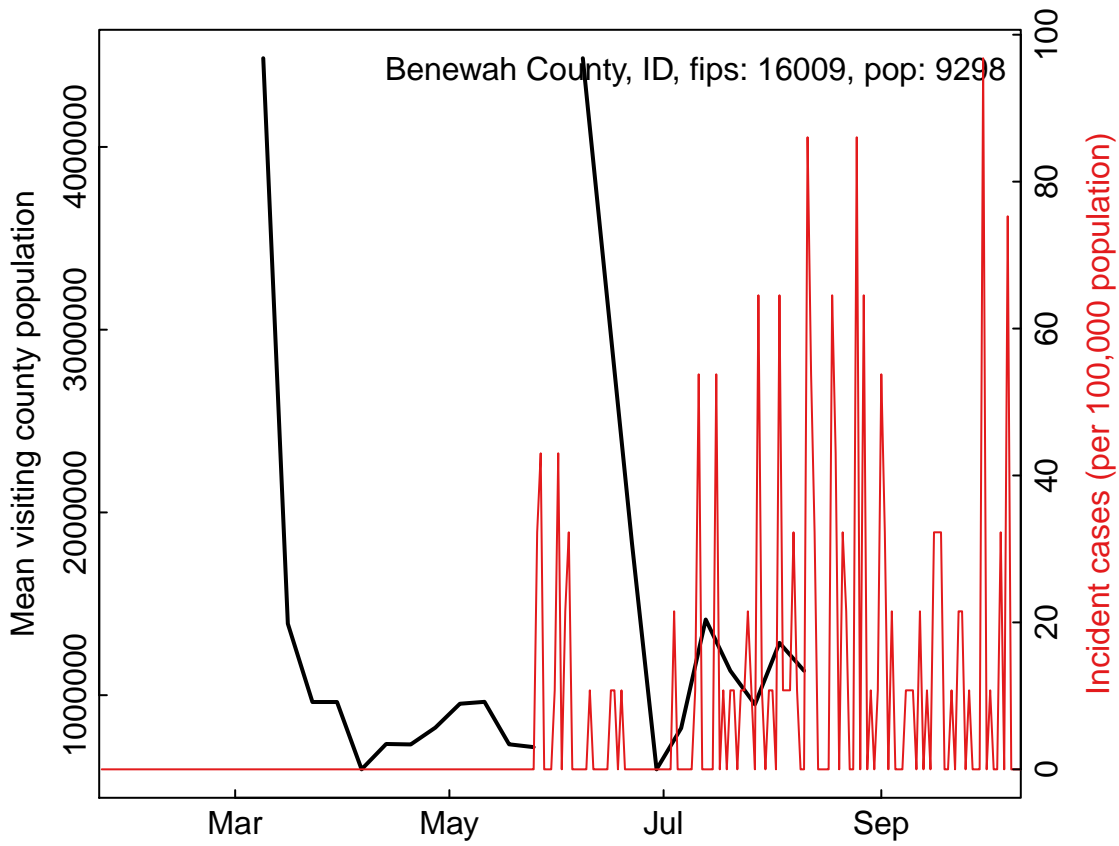

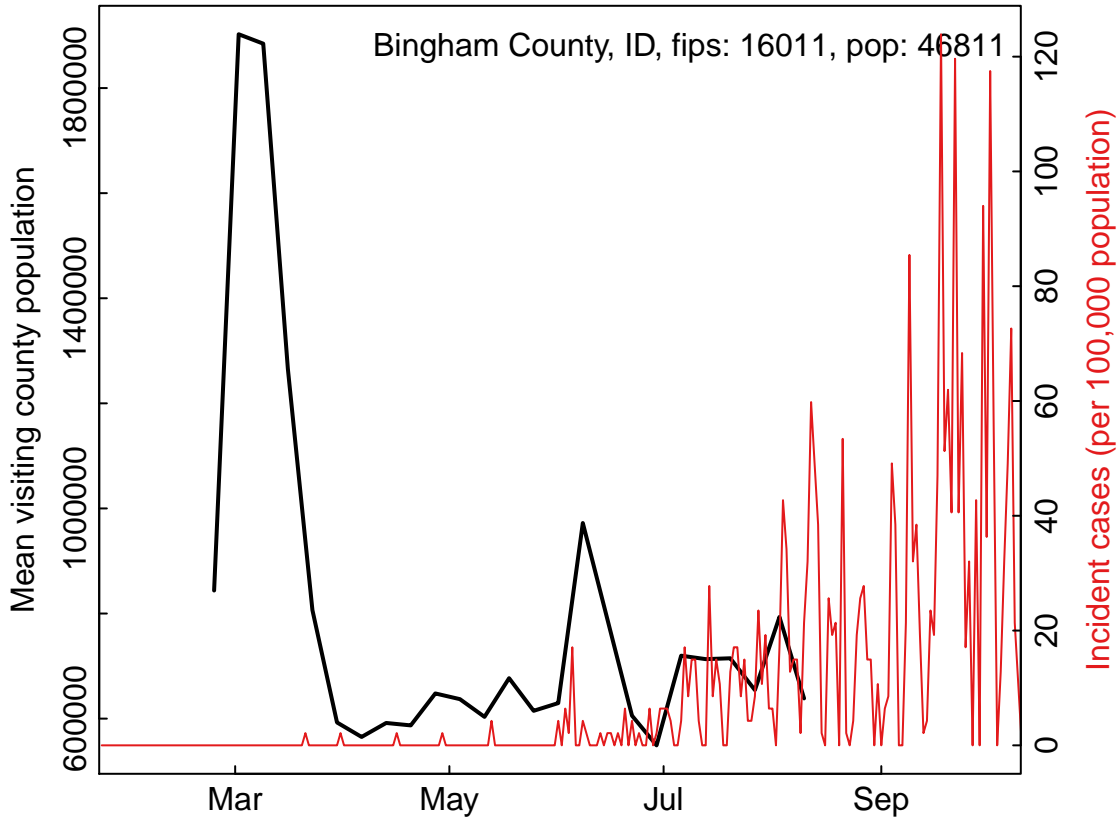

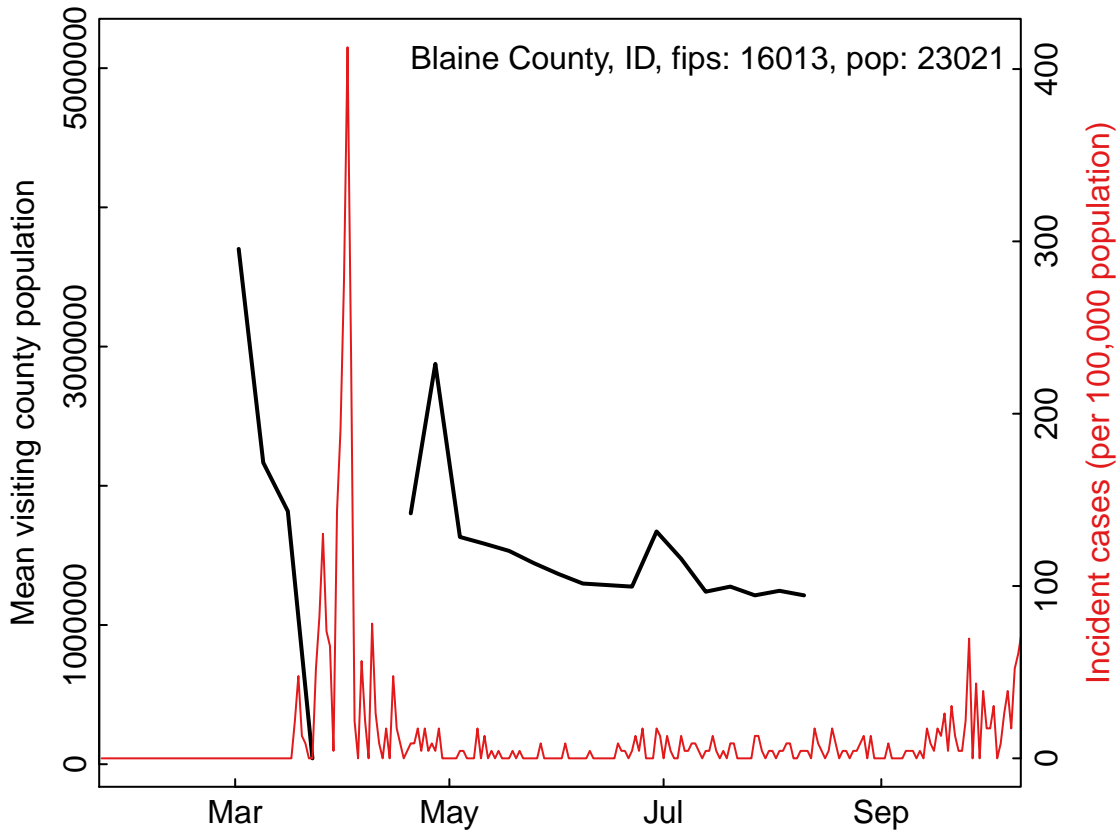



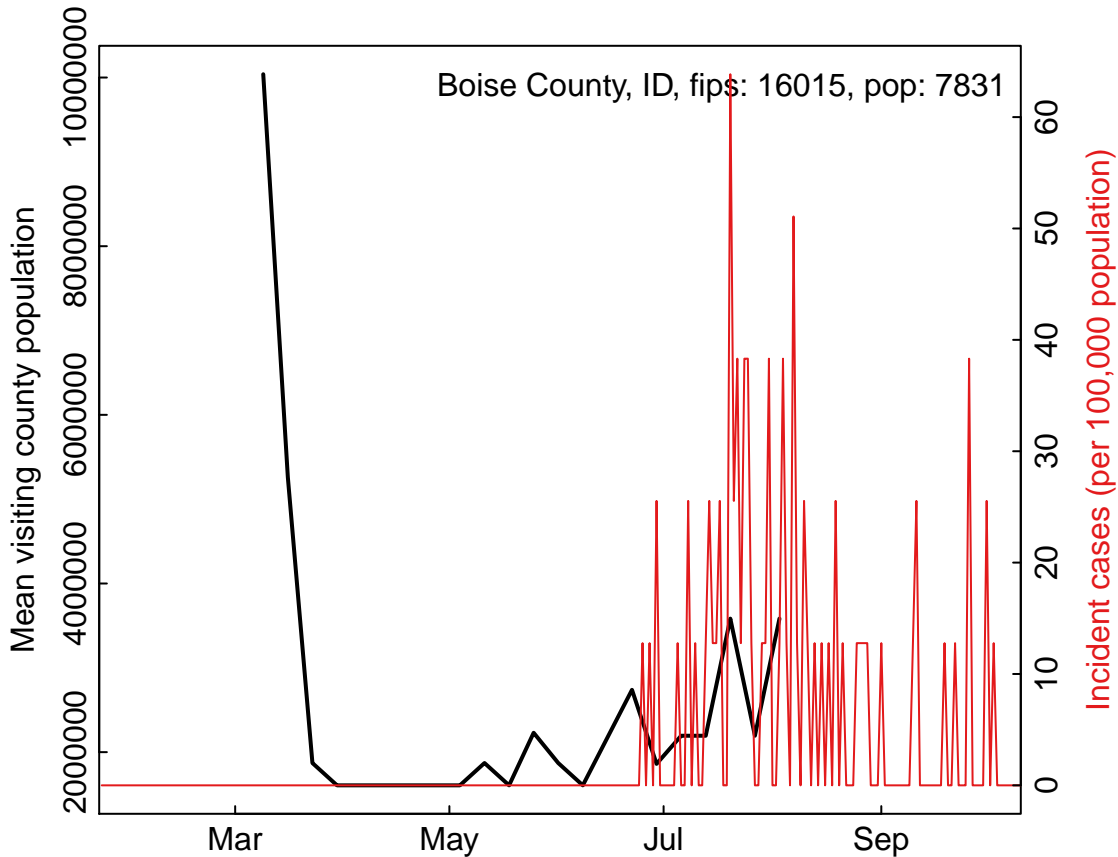

Bonner County, ID, fips: 16017, pop: 45739

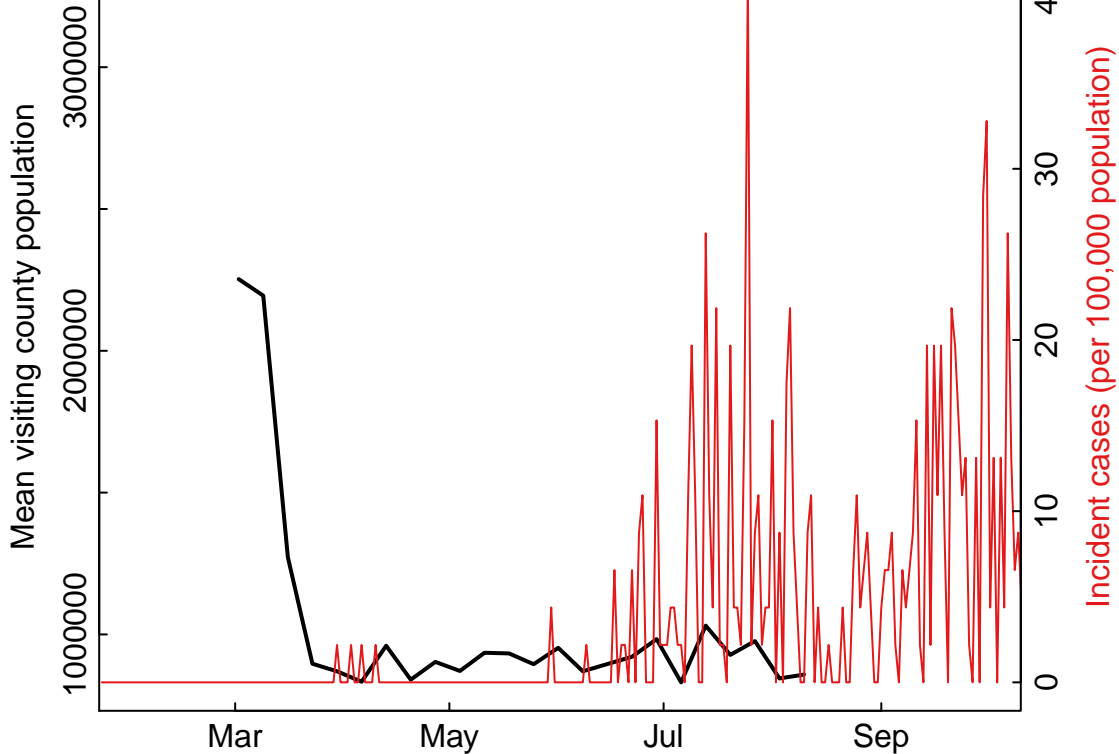

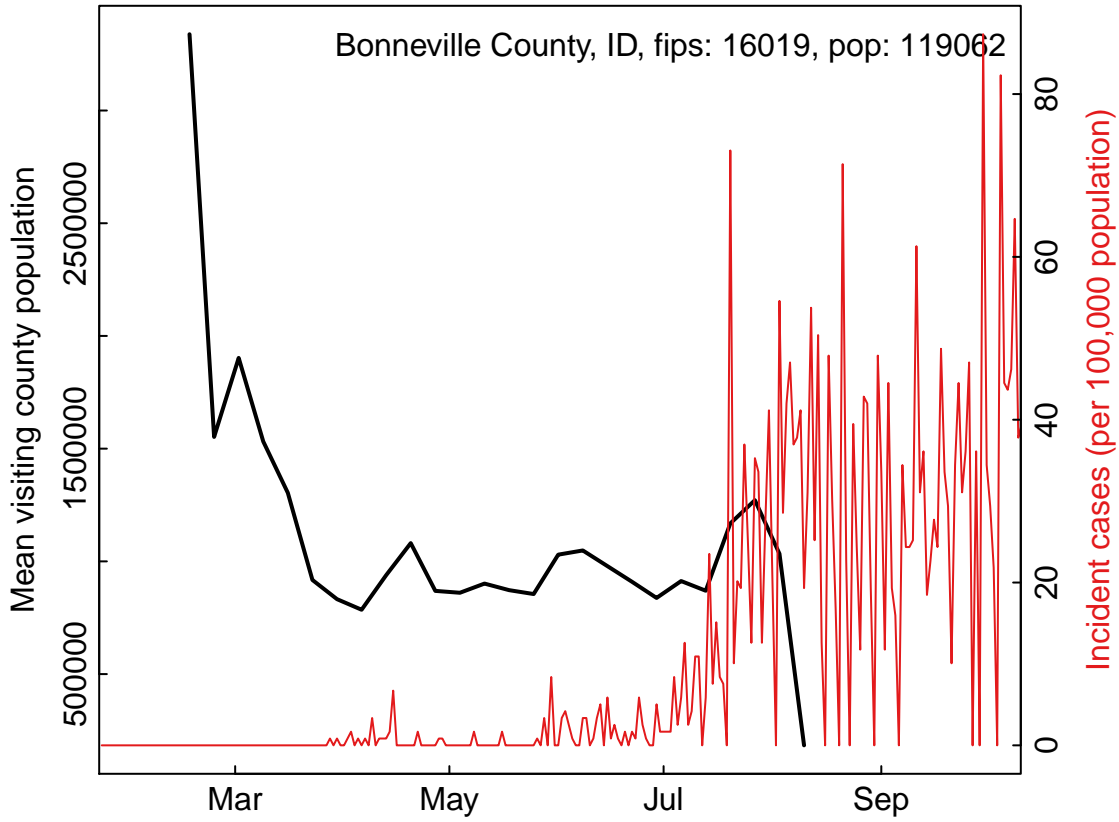

Boundary County, ID, fips: 16021, pop: 12245

Mean visiting county population

2500000  
1500000  
500000

Mar

May

Jul

Sep

50  
40  
30  
20  
10  
0

Incident cases (per 100,000 population)

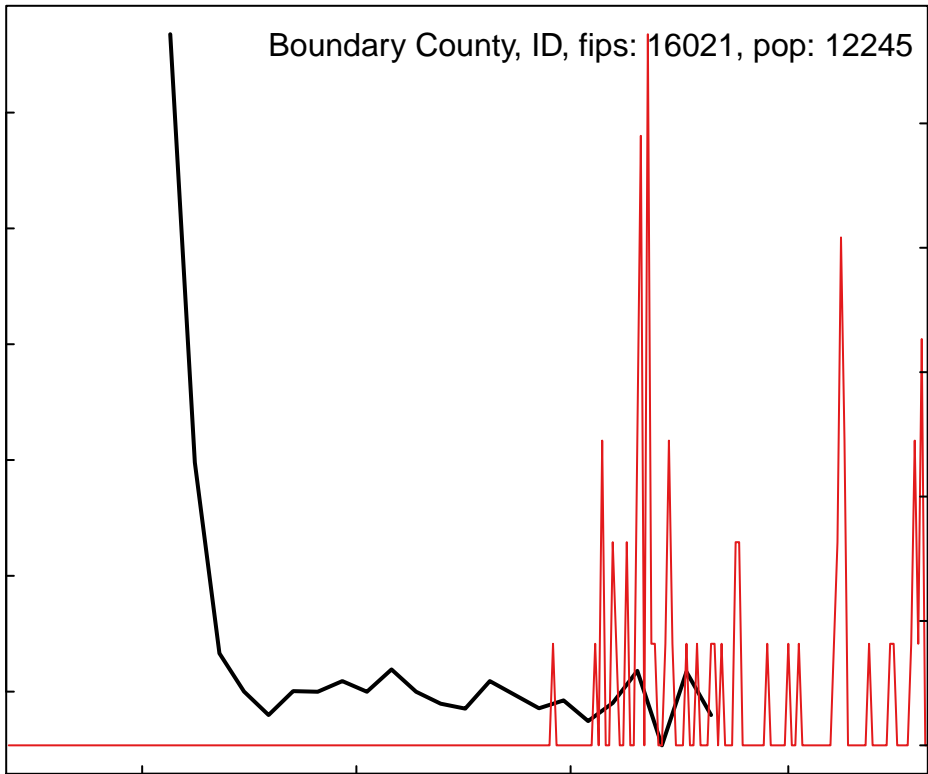

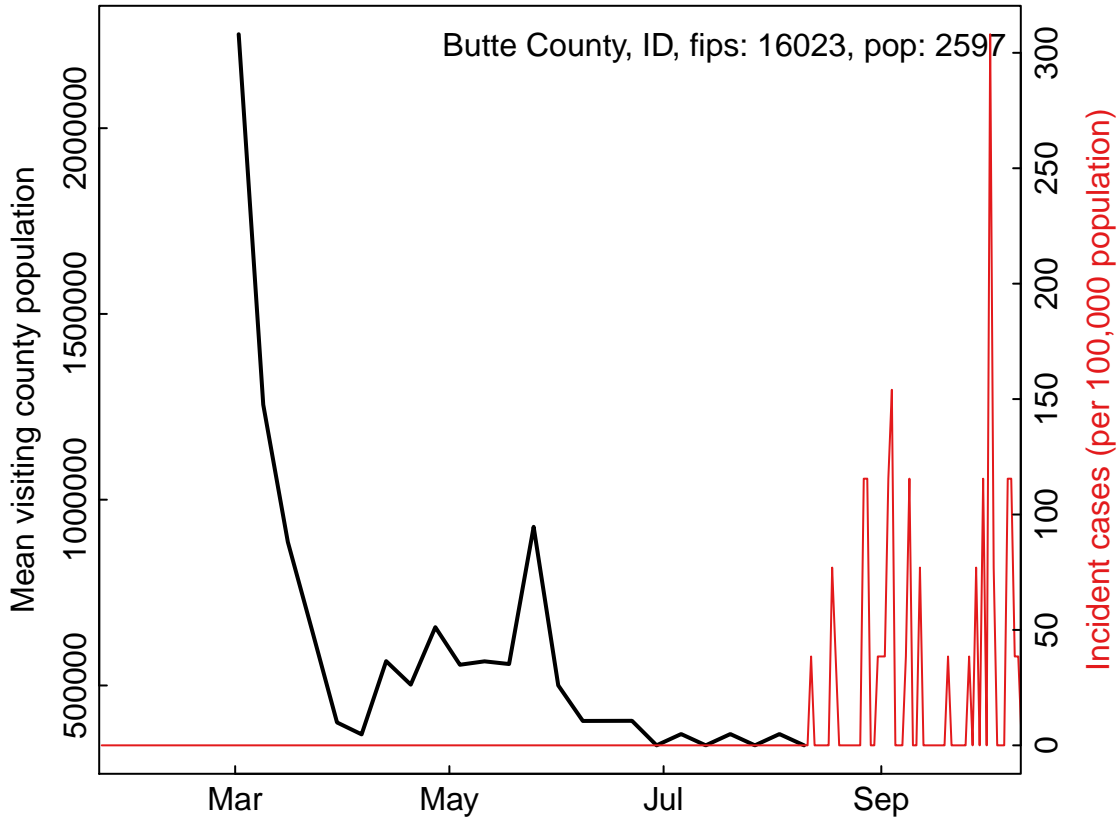

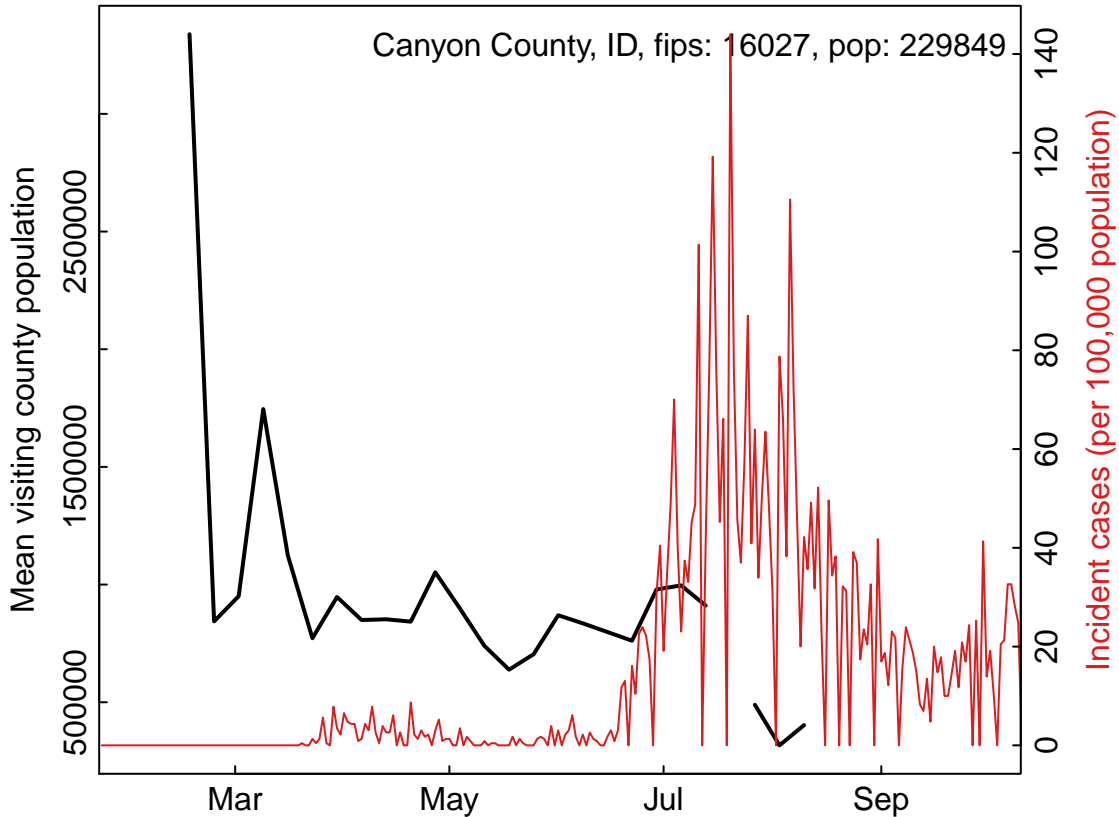

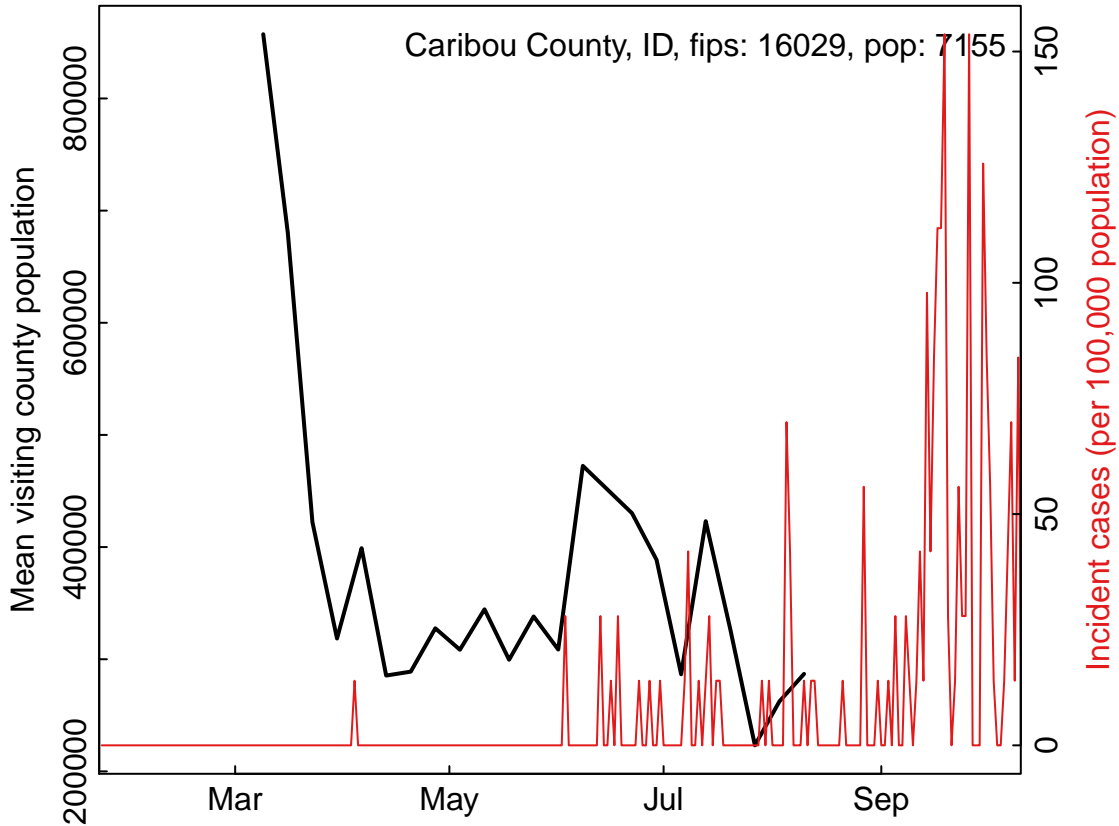

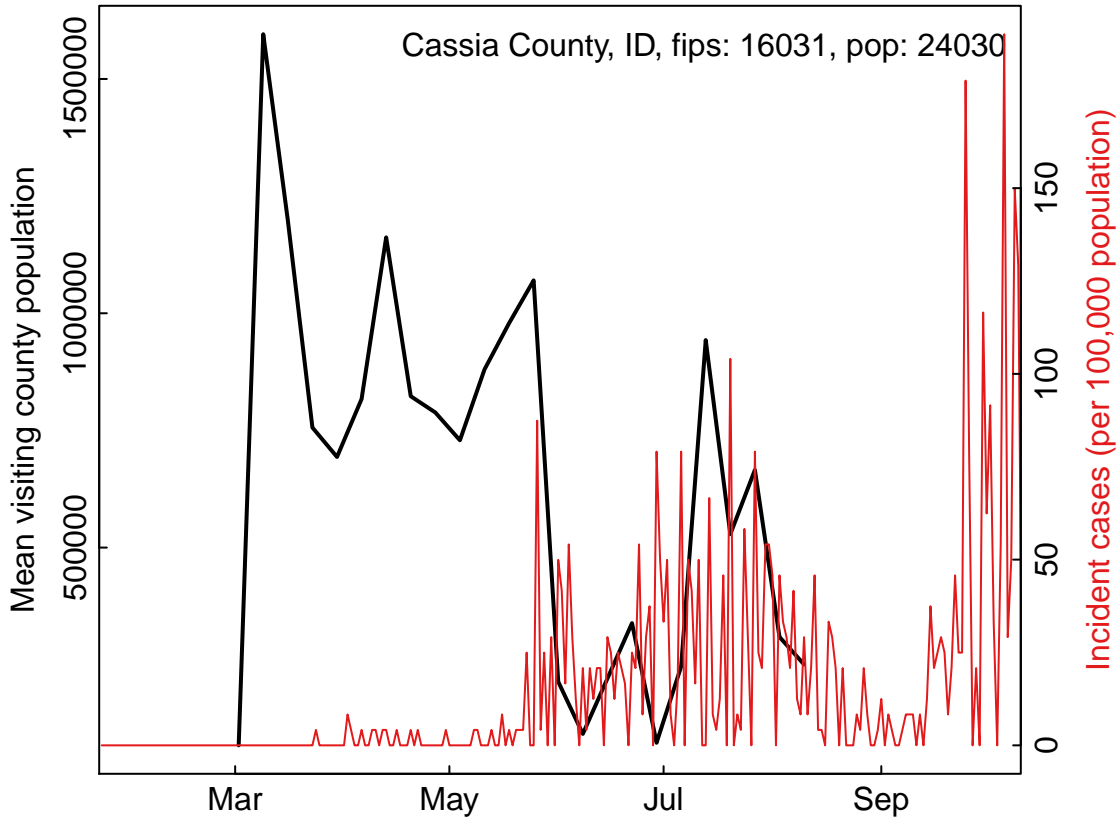



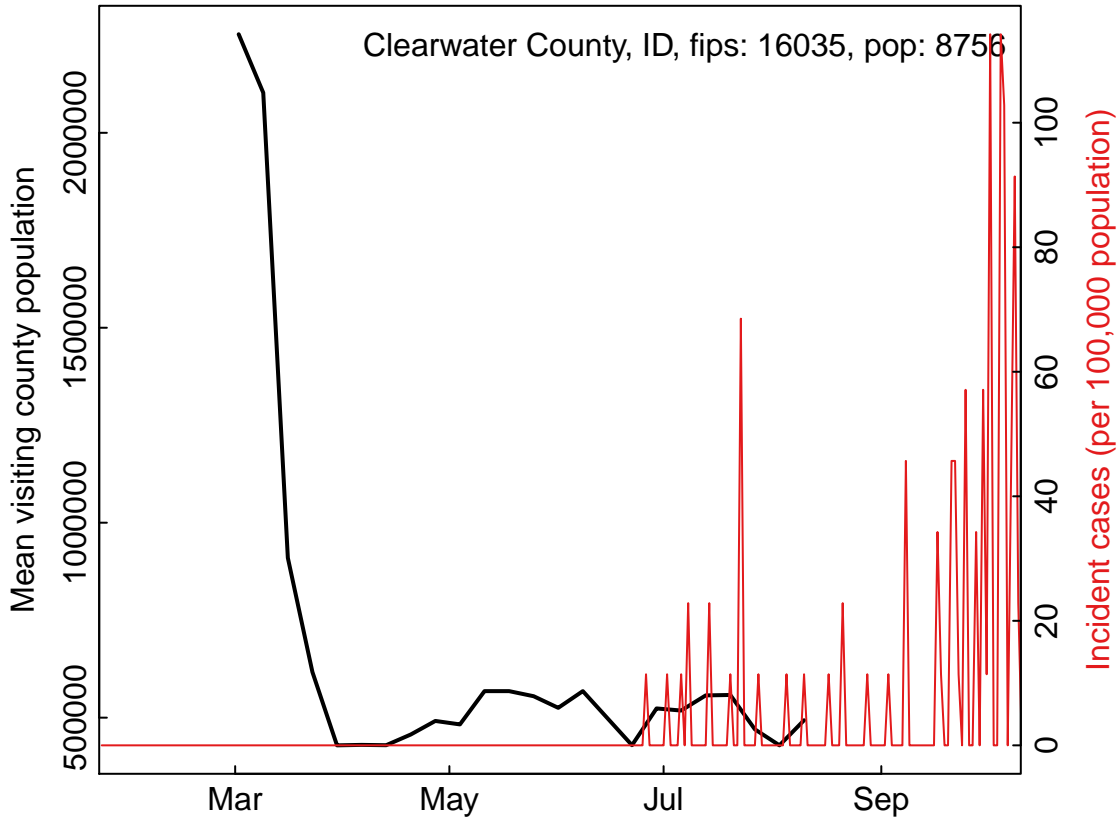

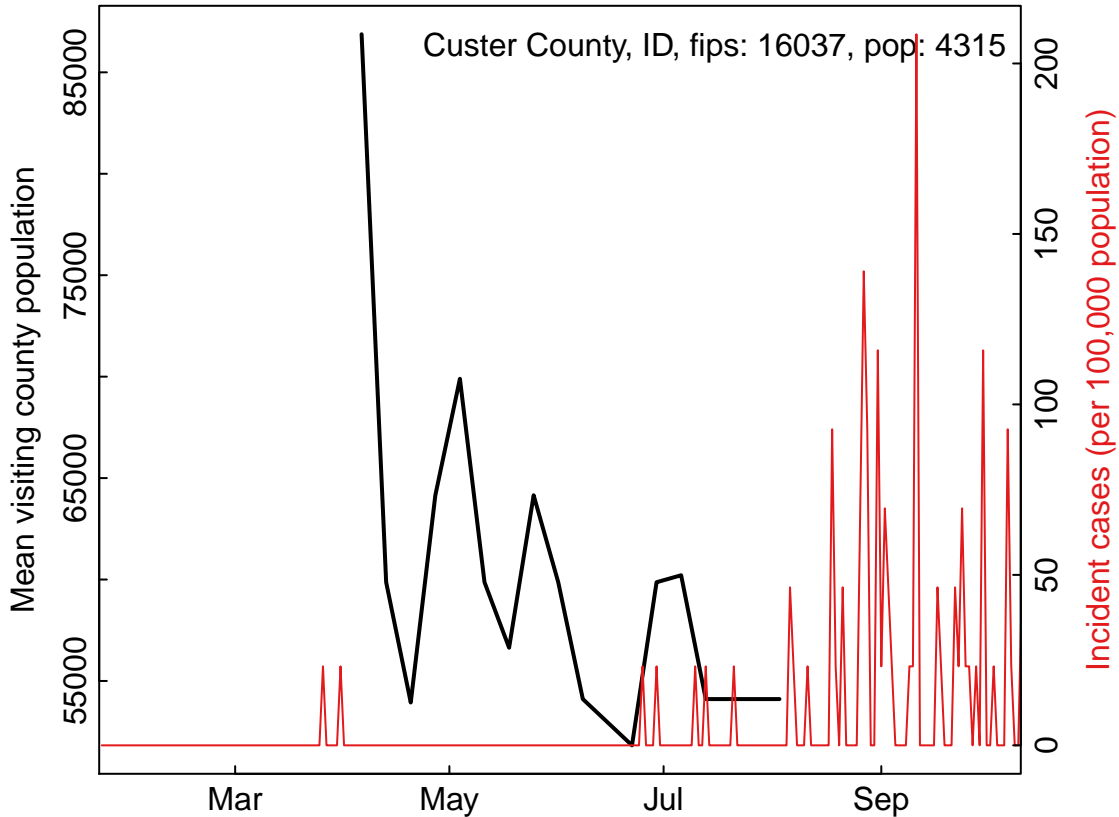

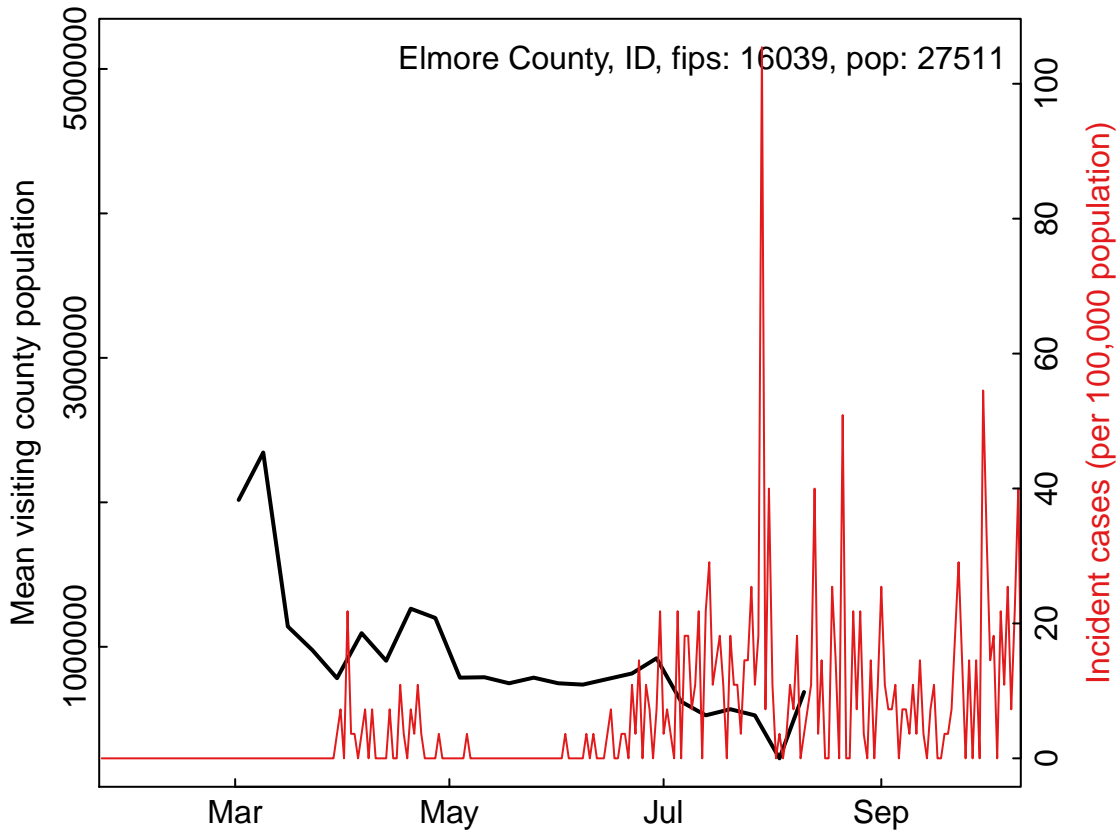

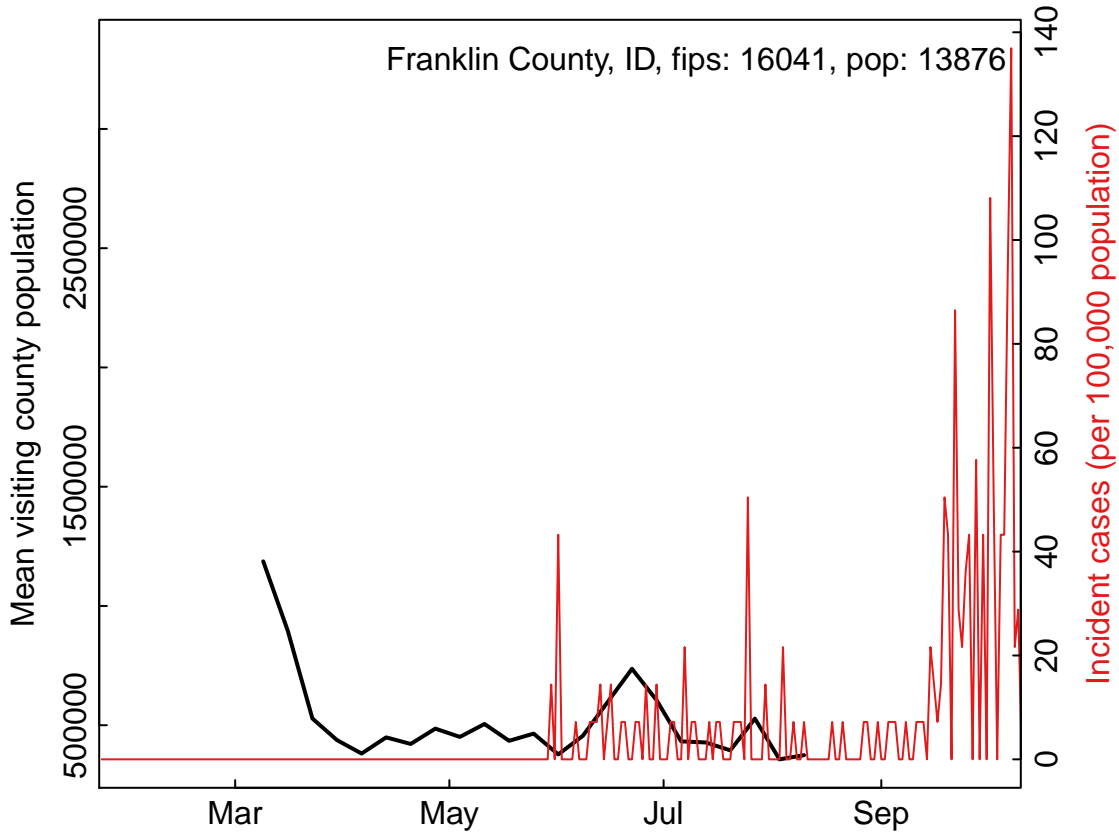

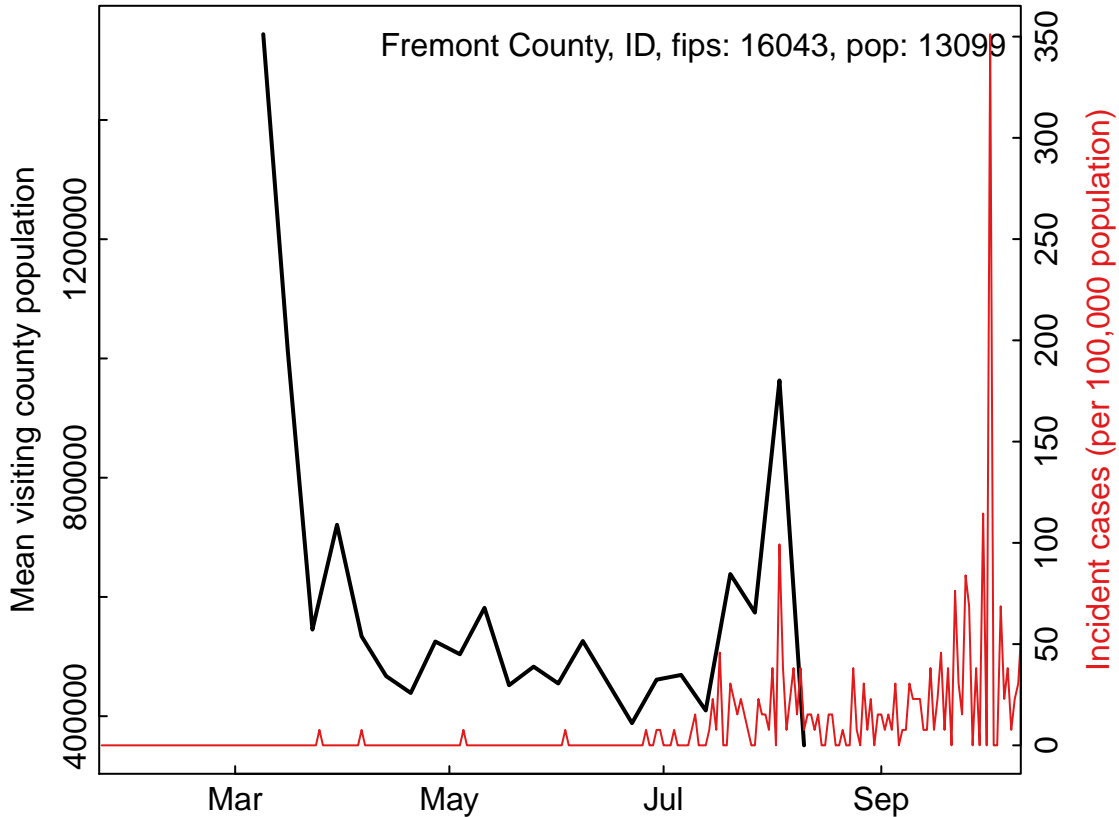

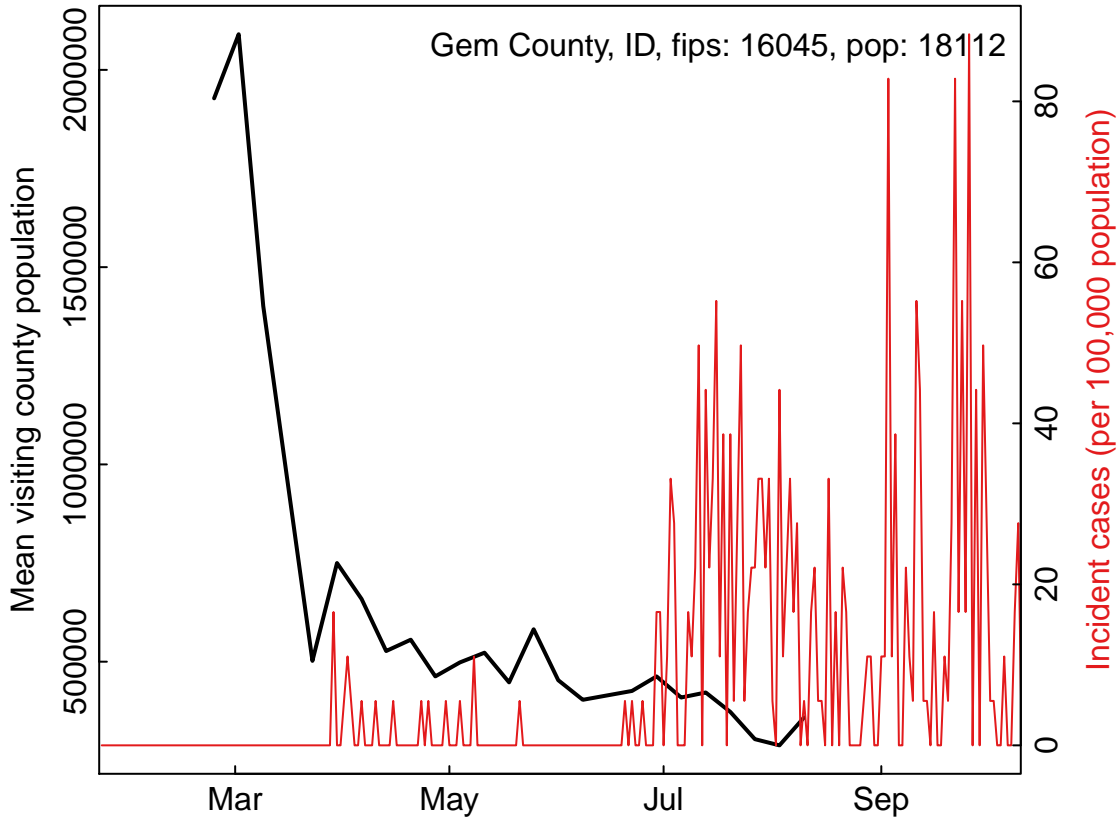

Gooding County, ID, fips: 16047, pop: 15179

Mean visiting county population

2500000  
1500000  
500000  
0

Mar

May

Jul

Sep

100  
80  
60  
40  
20  
0

Incident cases (per 100,000 population)

0

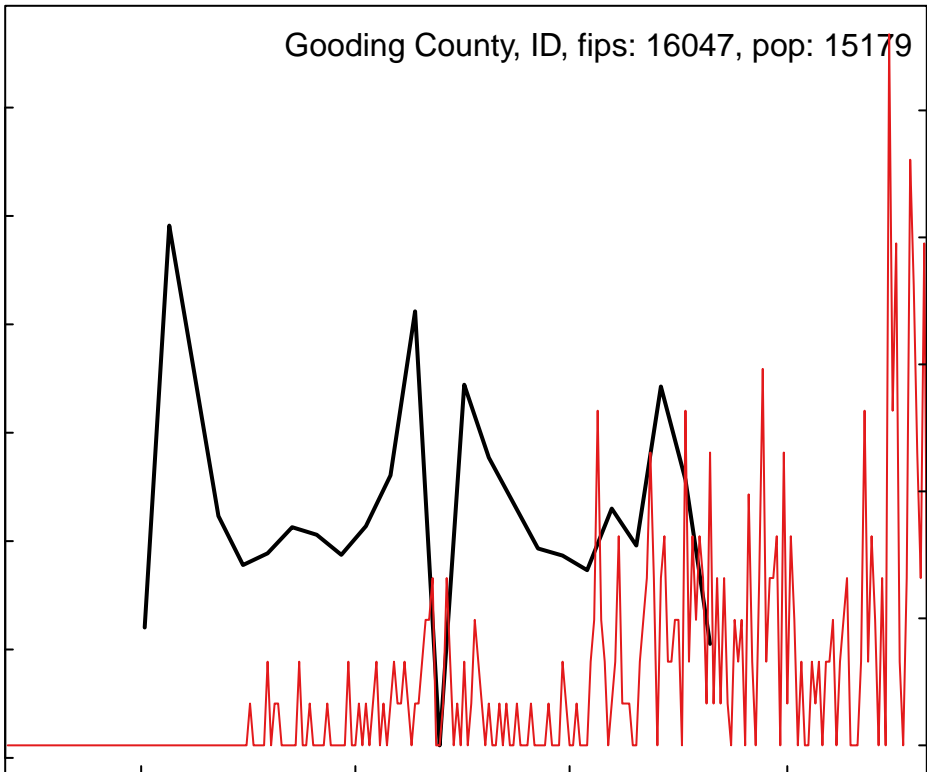

Idaho County, ID, fips: 16049, pop: 16667

Mean visiting county population

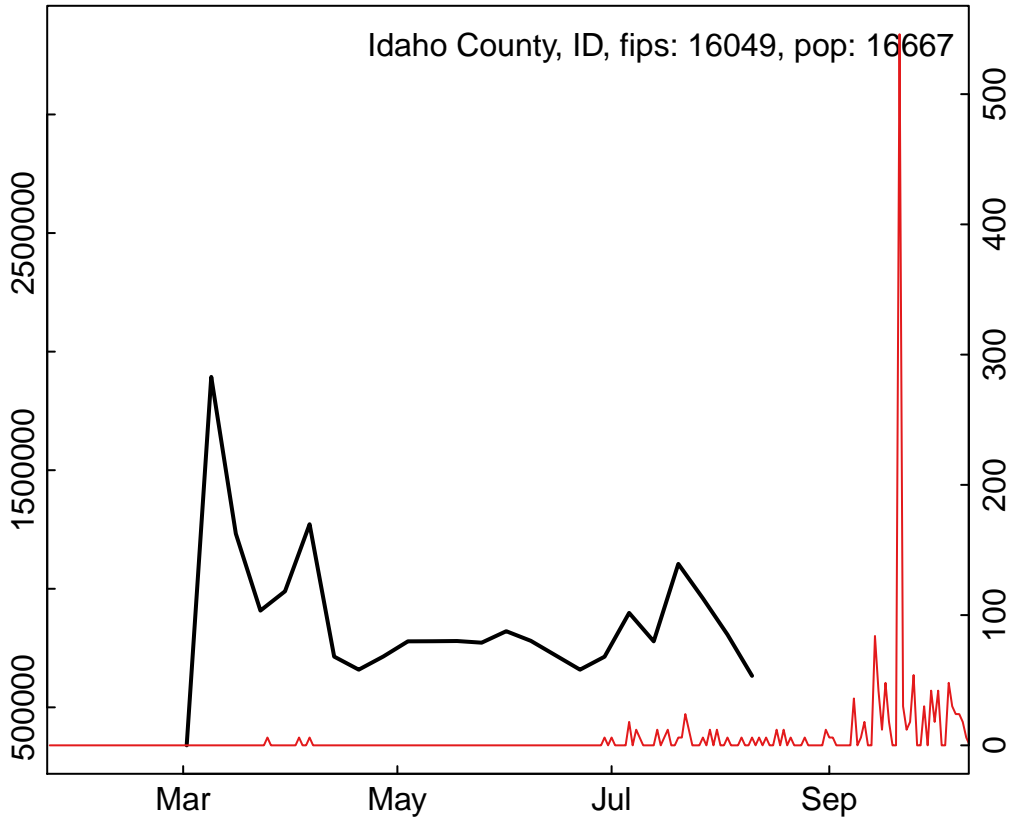

Incident cases (per 100,000 population)



Jefferson County, ID, fips: 16051, pop: 29871

Mean visiting county population

4000000  
3000000  
2000000  
1000000  
0

Mar May Jul Sep

Incident cases (per 100,000 population)

80  
60  
40  
20  
0

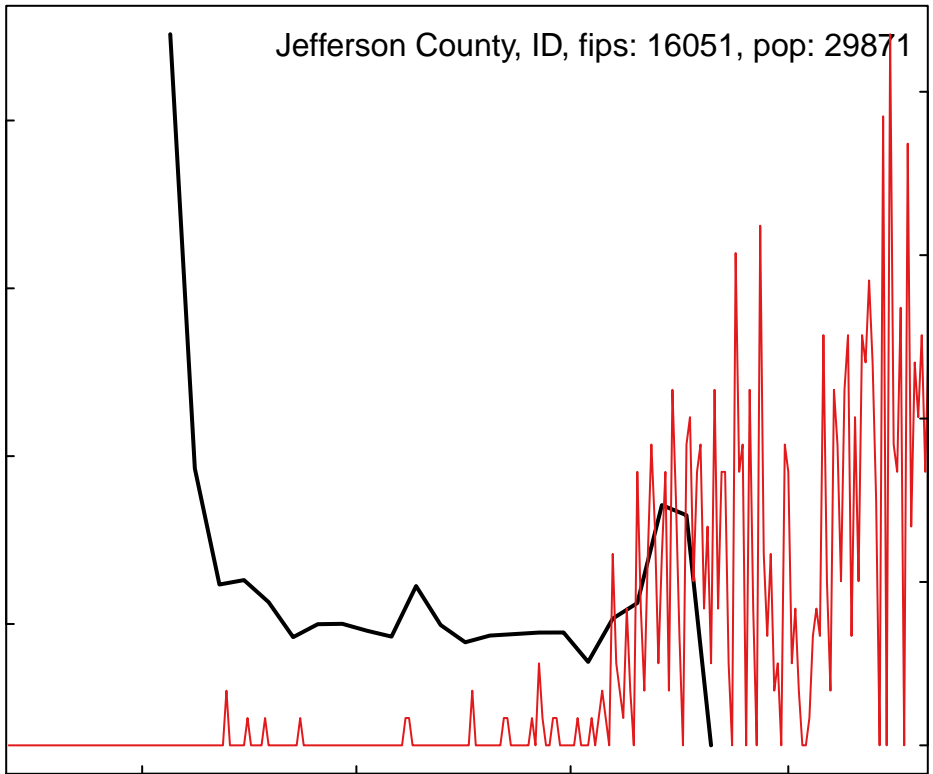

Jerome County, ID, fips: 16053, pop: 24412

Mean visiting county population

0  
1000000  
2000000  
3000000

Mar May Jul Sep

Incident cases (per 100,000 population)

0  
20  
40  
60  
80

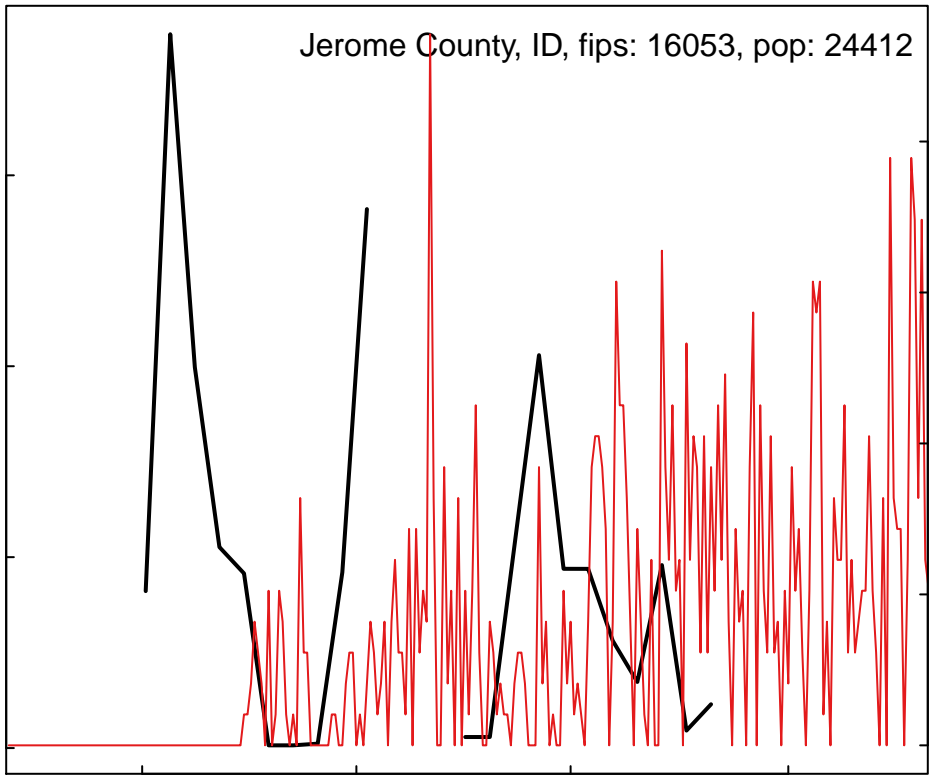

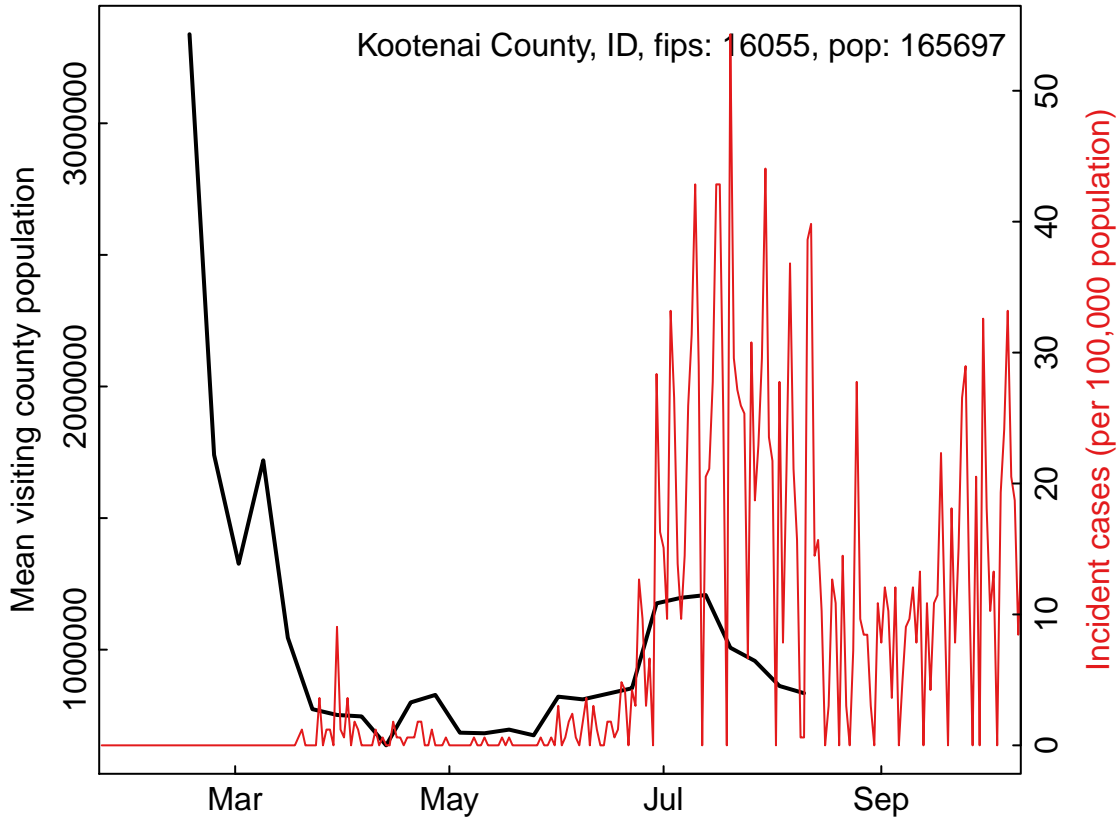

Latah County, ID, fips: 16057, pop: 40108

Mean visiting county population

1600000  
1200000  
800000

Mar May Jul Sep

Incident cases (per 100,000 population)

150  
100  
50  
0

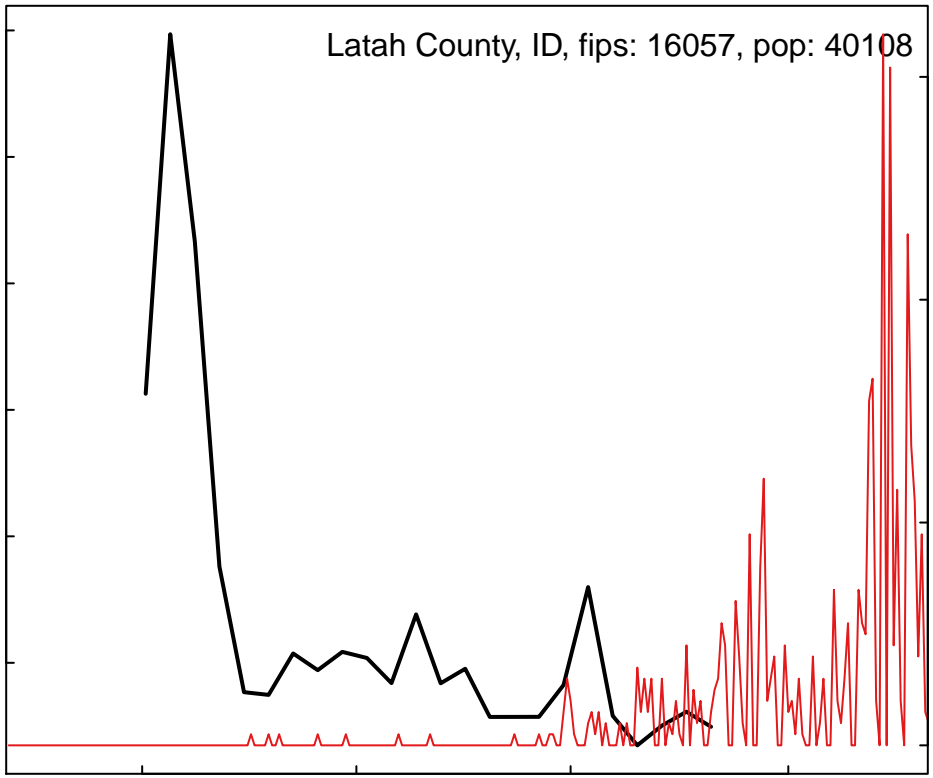

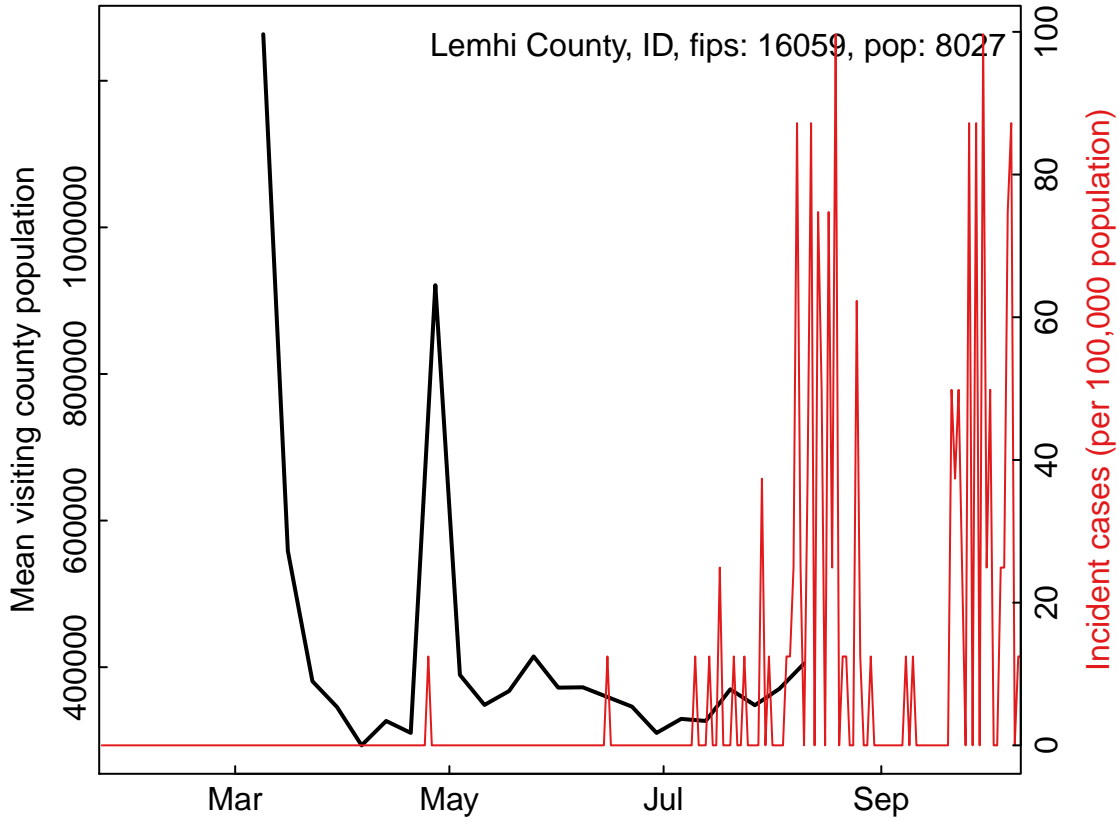

Lewis County, ID, fips: 16061, pop: 3838

Mean visiting county population

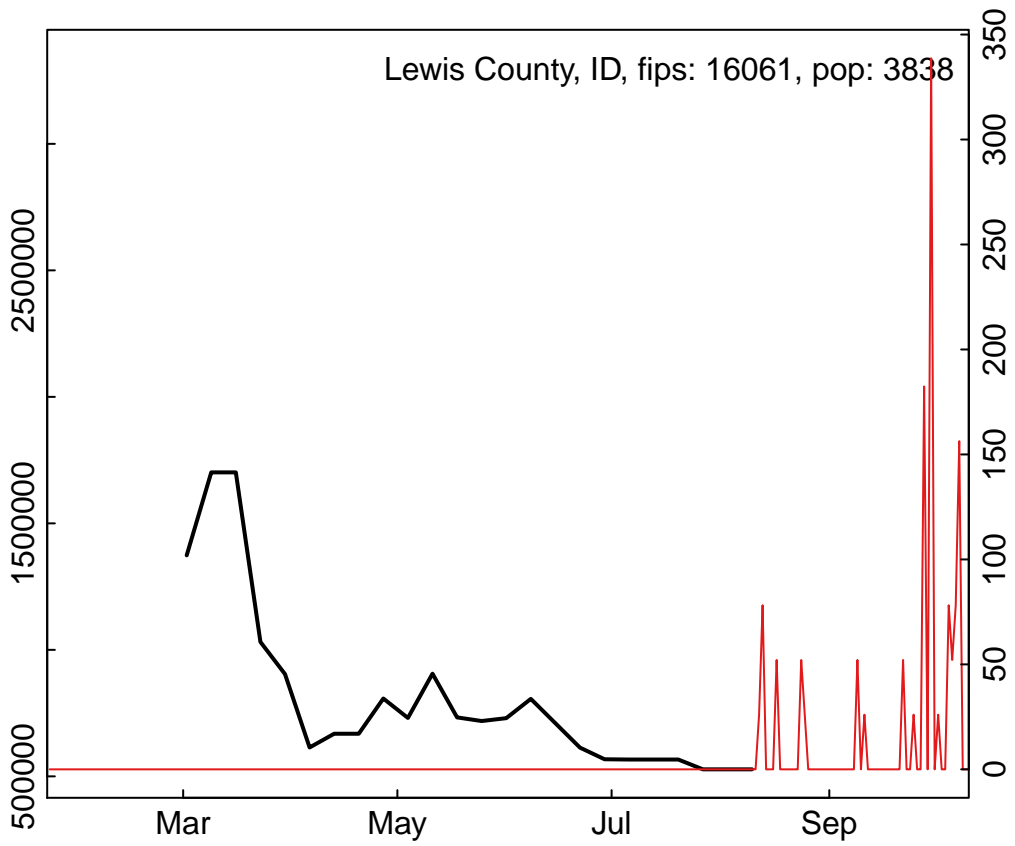

Incident cases (per 100,000 population)

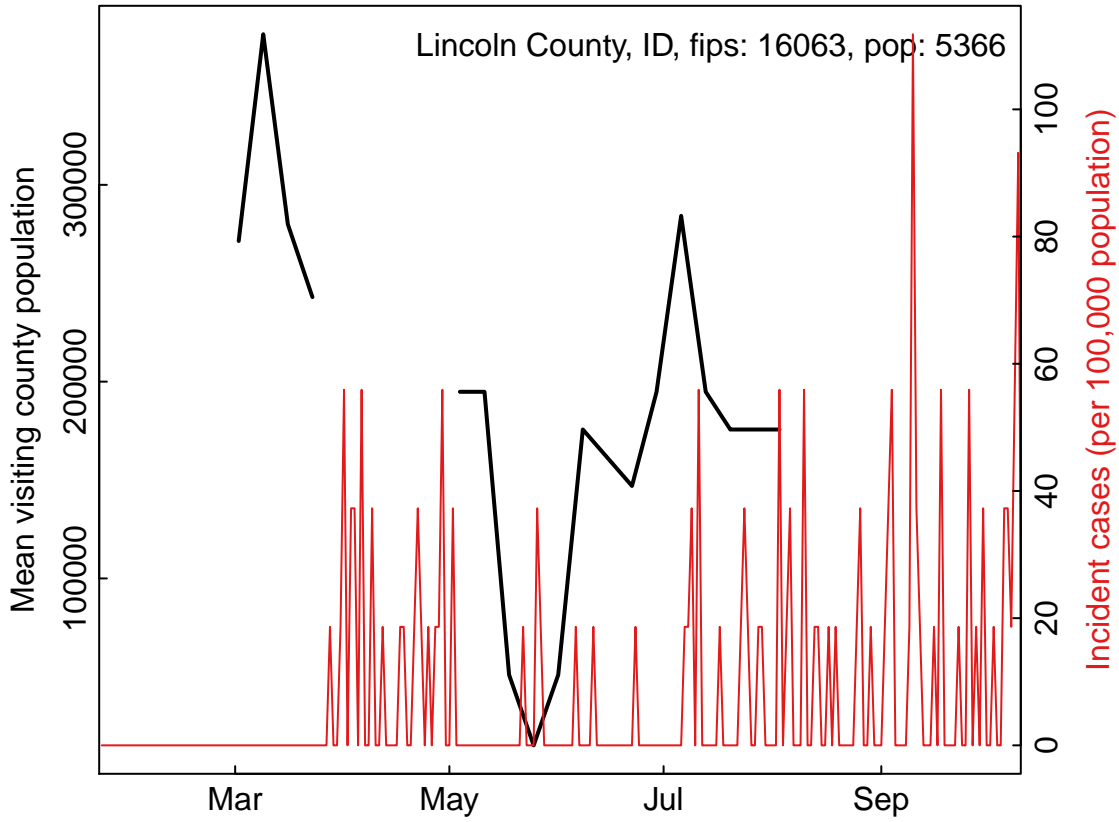

Madison County, ID, fips: 16065, pop: 39907

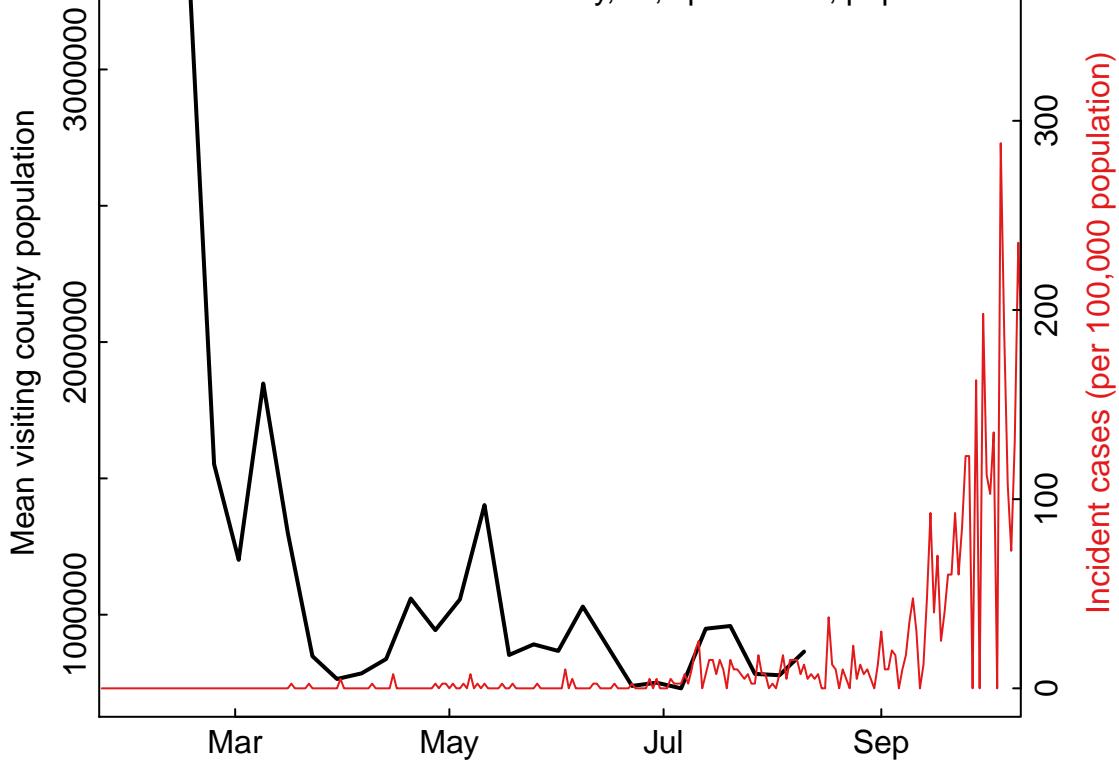



Minidoka County, ID, fips: 16067, pop: 21039

Mean visiting county population

2500000  
1500000  
500000  
0

Mar May Jul Sep

Incident cases (per 100,000 population)

200  
150  
100  
50  
0

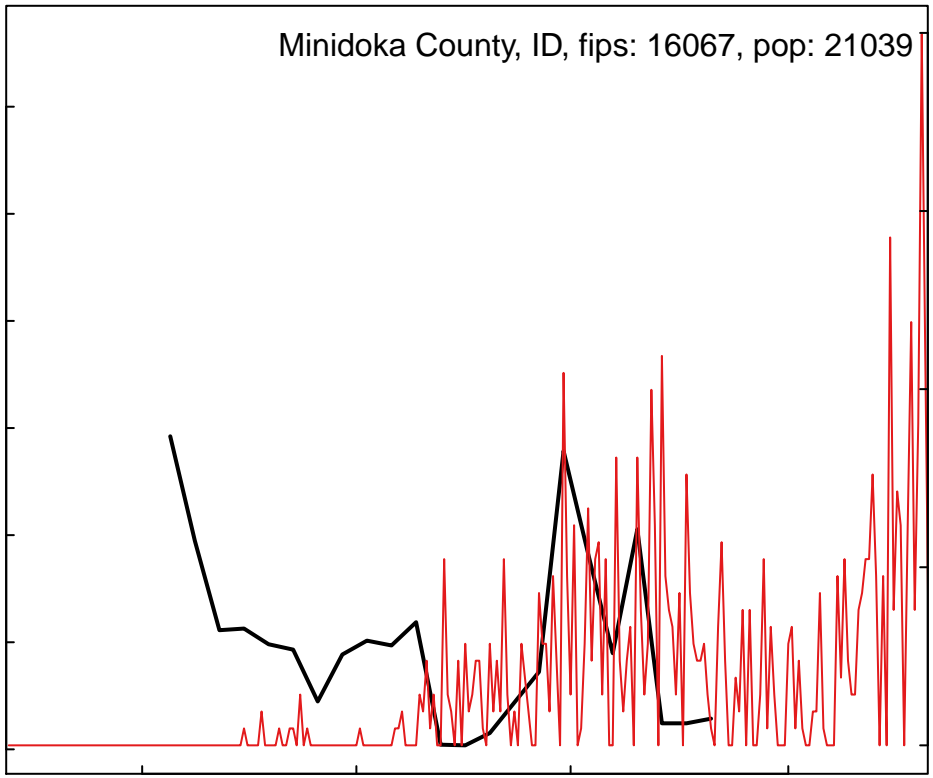

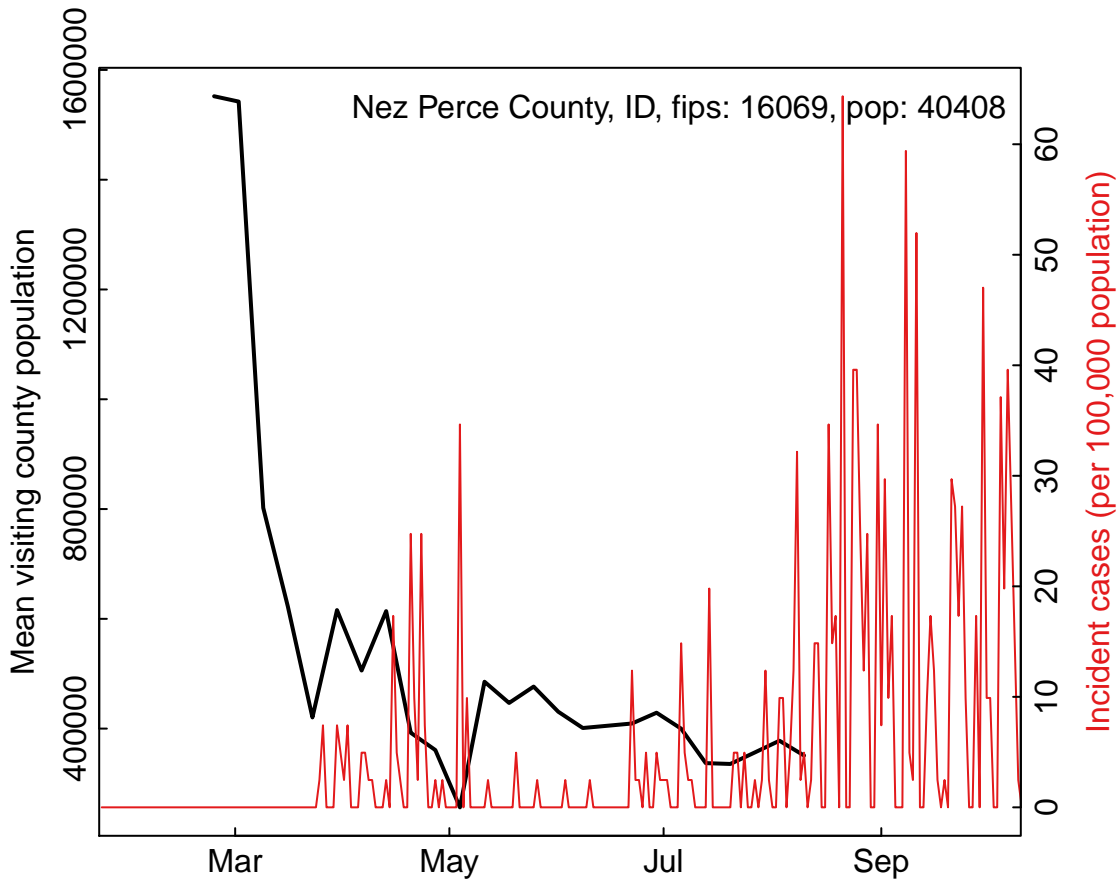

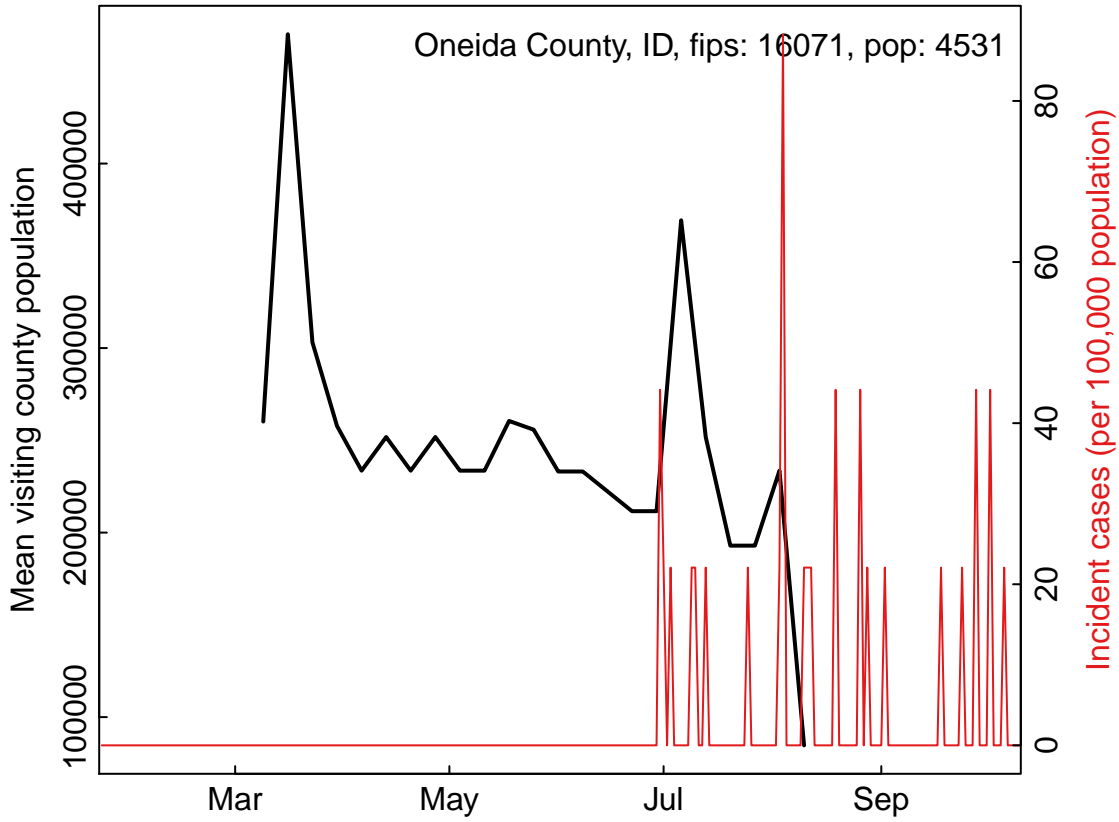

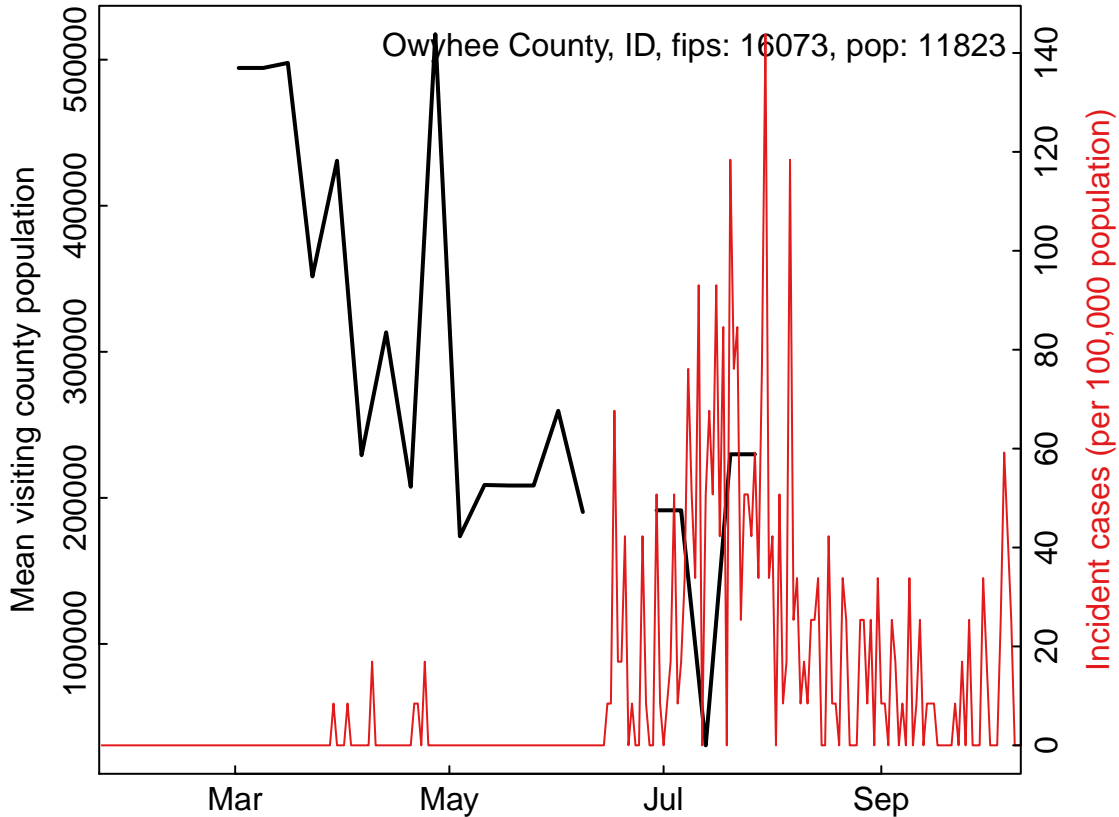

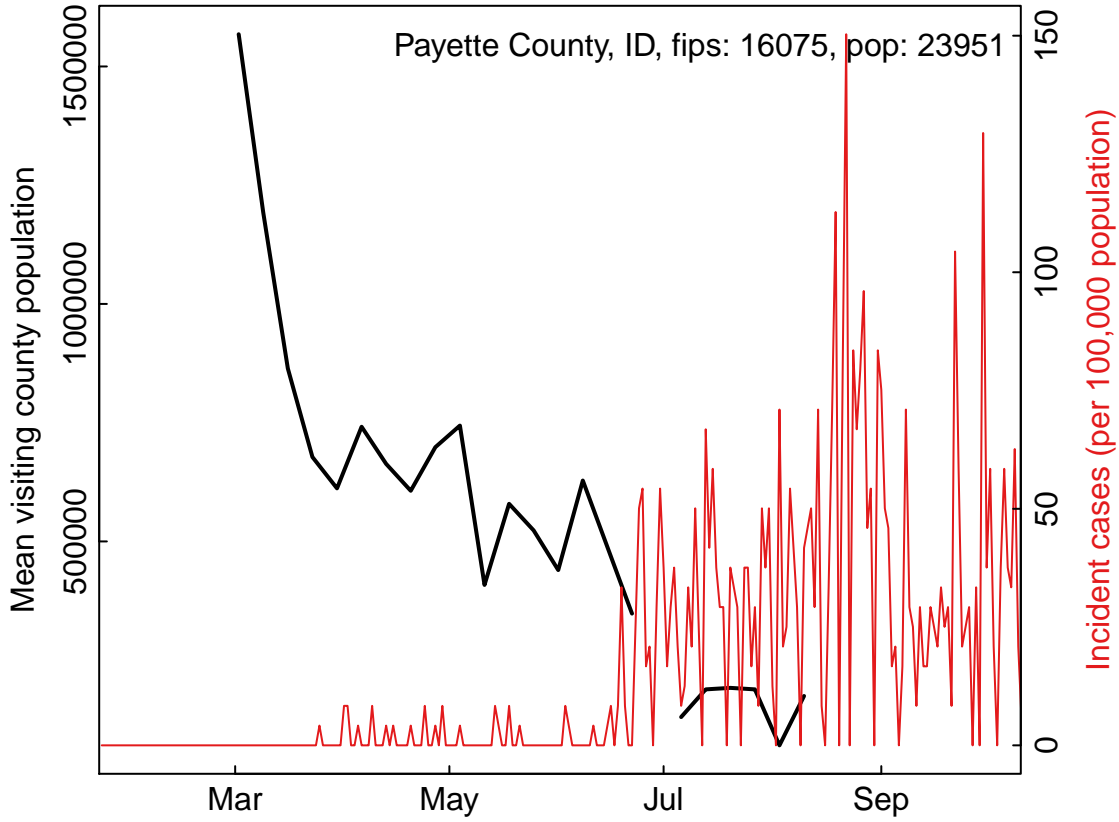

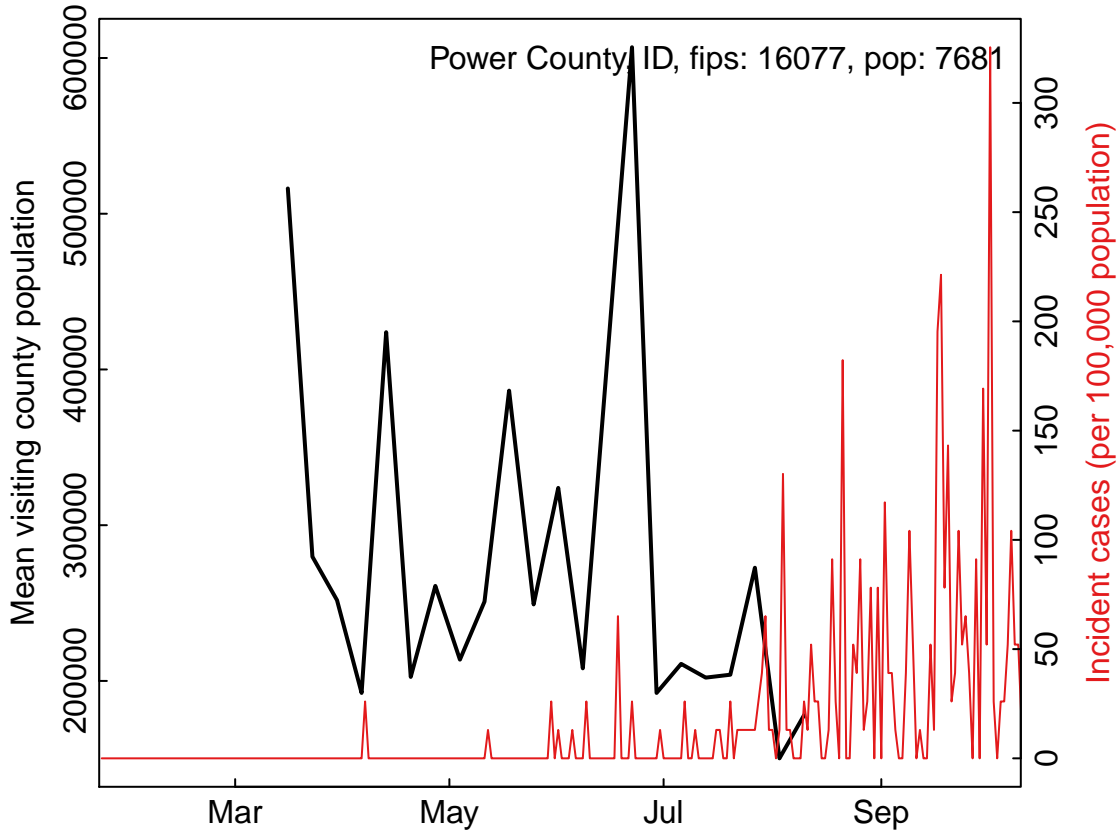

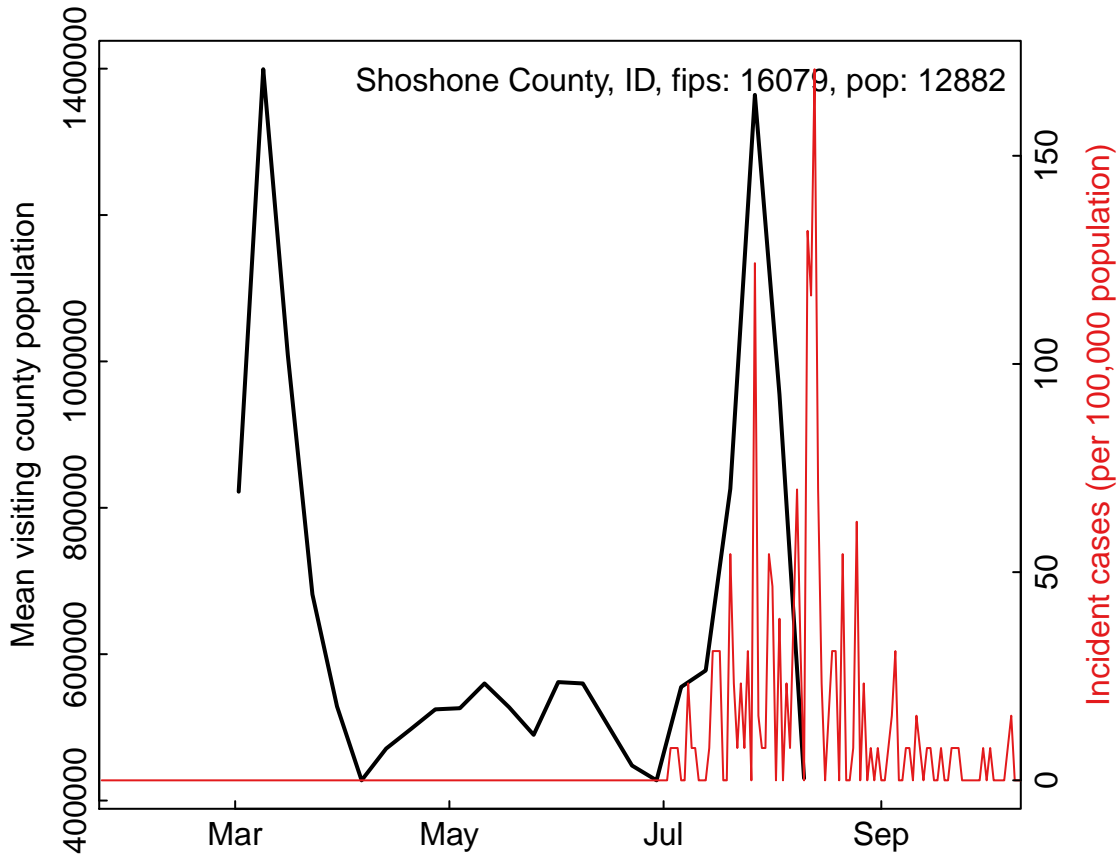

Twin Falls County, ID, fips: 16083, pop: 86878

Mean visiting county population

2500000  
1500000  
500000  
0

Mar

May

Jul

Sep

120  
100  
80  
60  
40  
20  
0

Incident cases (per 100,000 population)

0



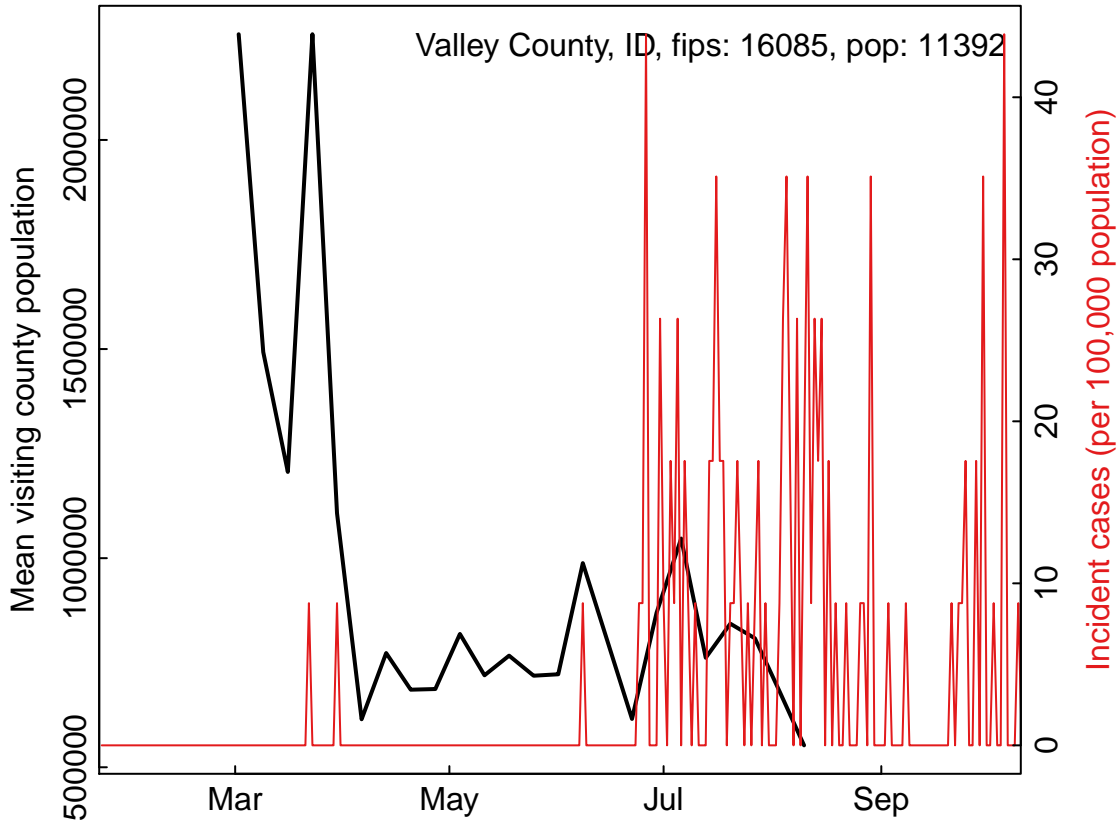

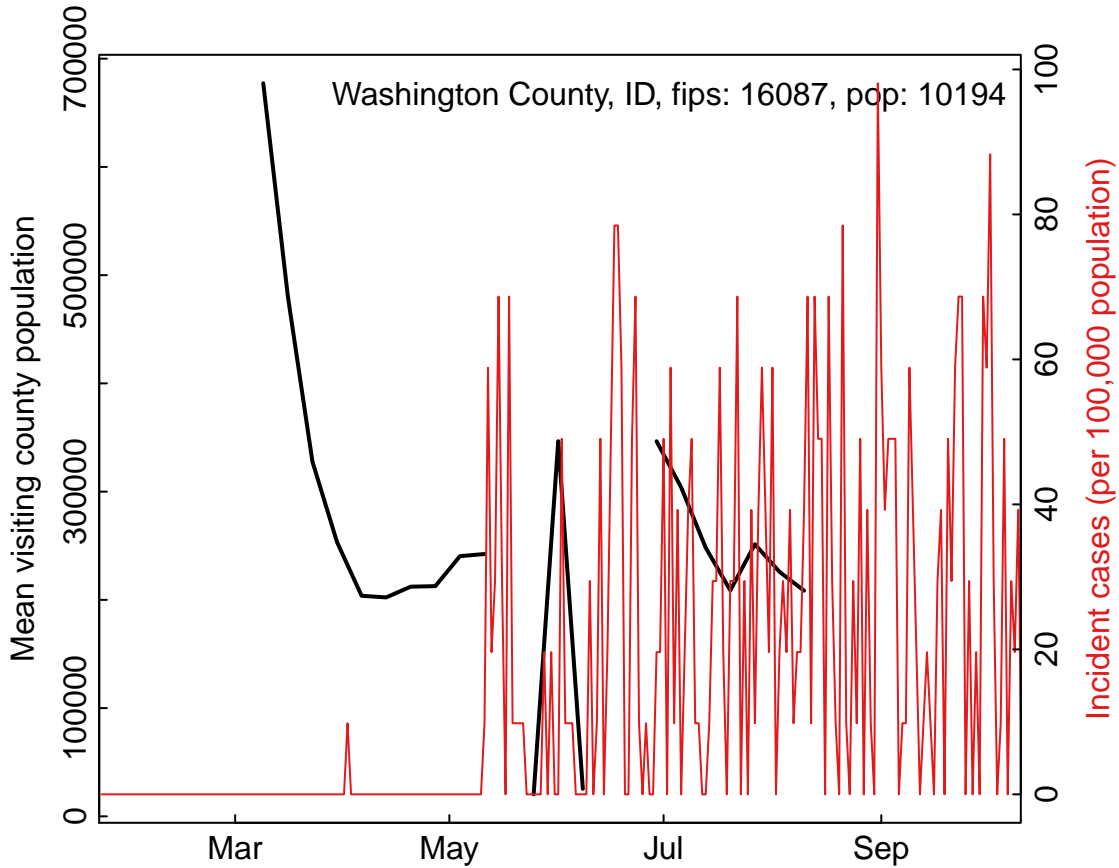

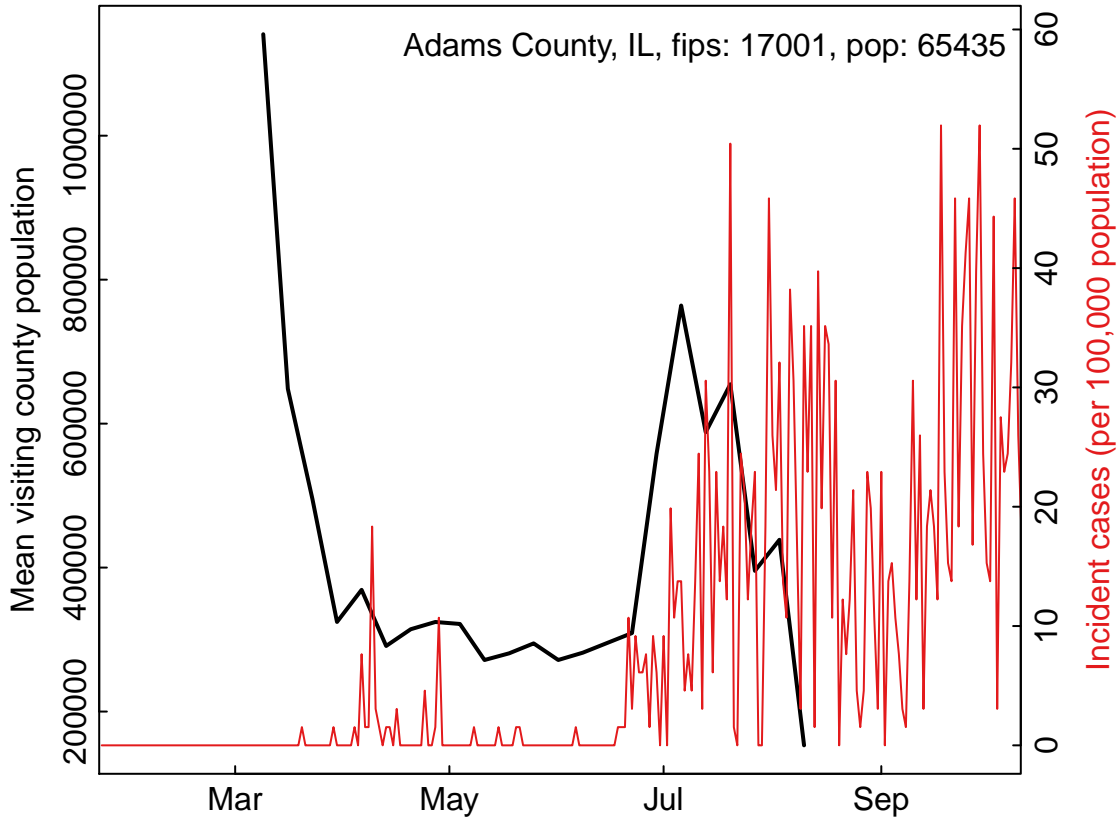

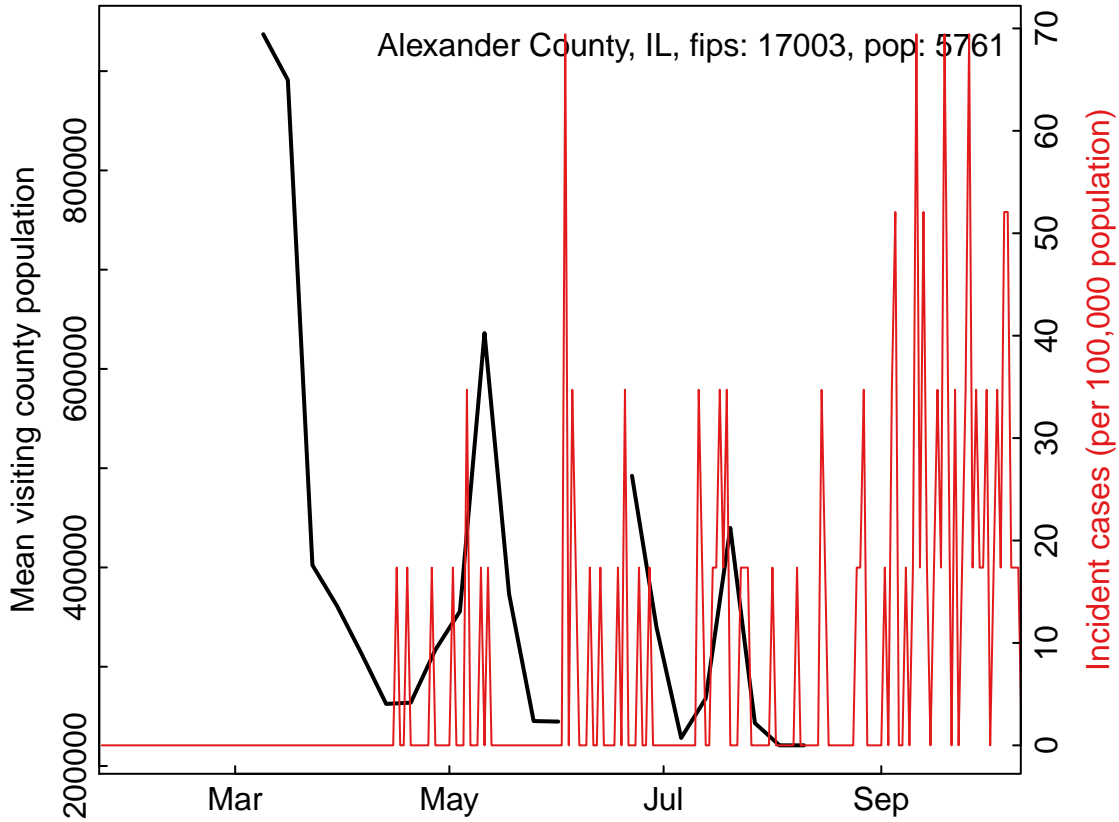

Bond County, IL, fips: 17005, pop: 16426

Mean visiting county population

3000000  
2000000  
1000000

Mar May Jul Sep

Incident cases (per 100,000 population)

150  
100  
50  
0

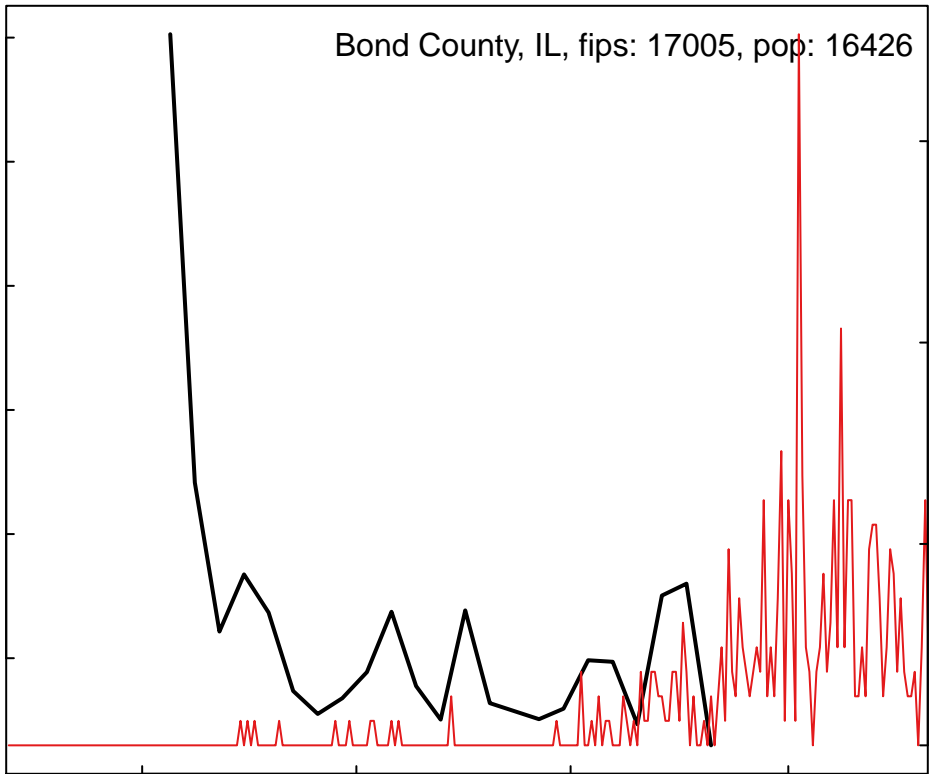

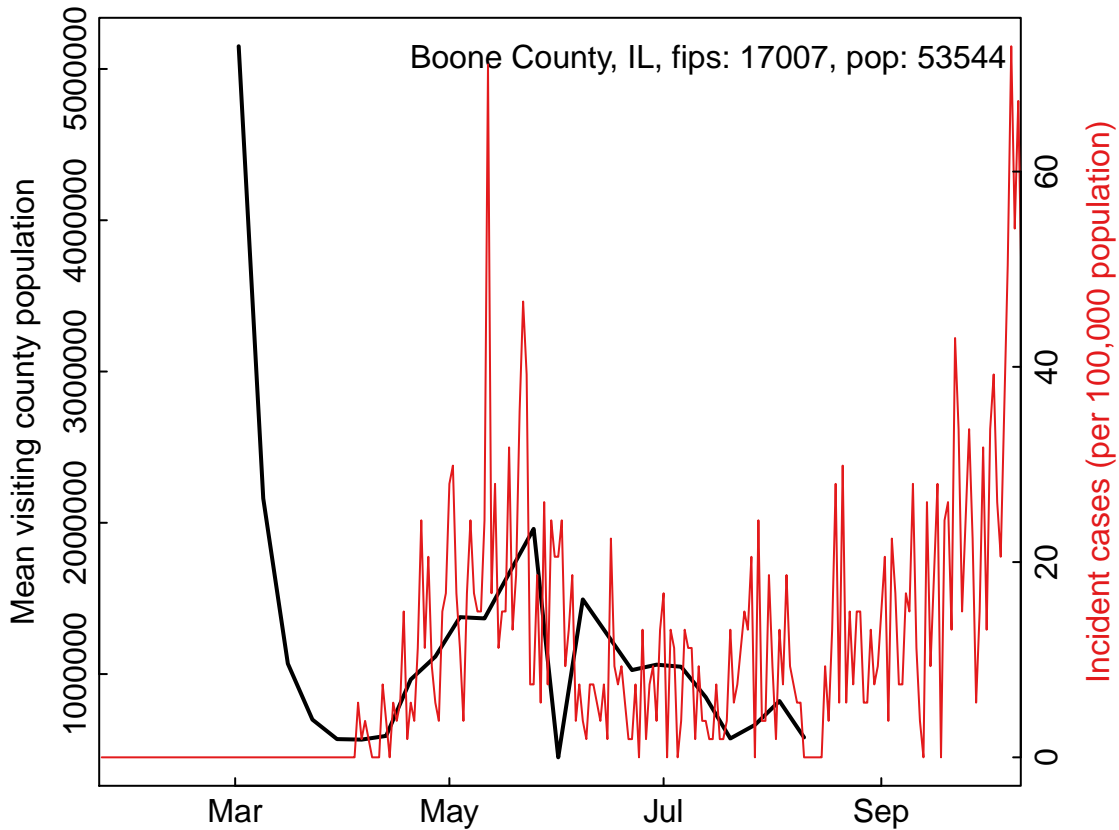

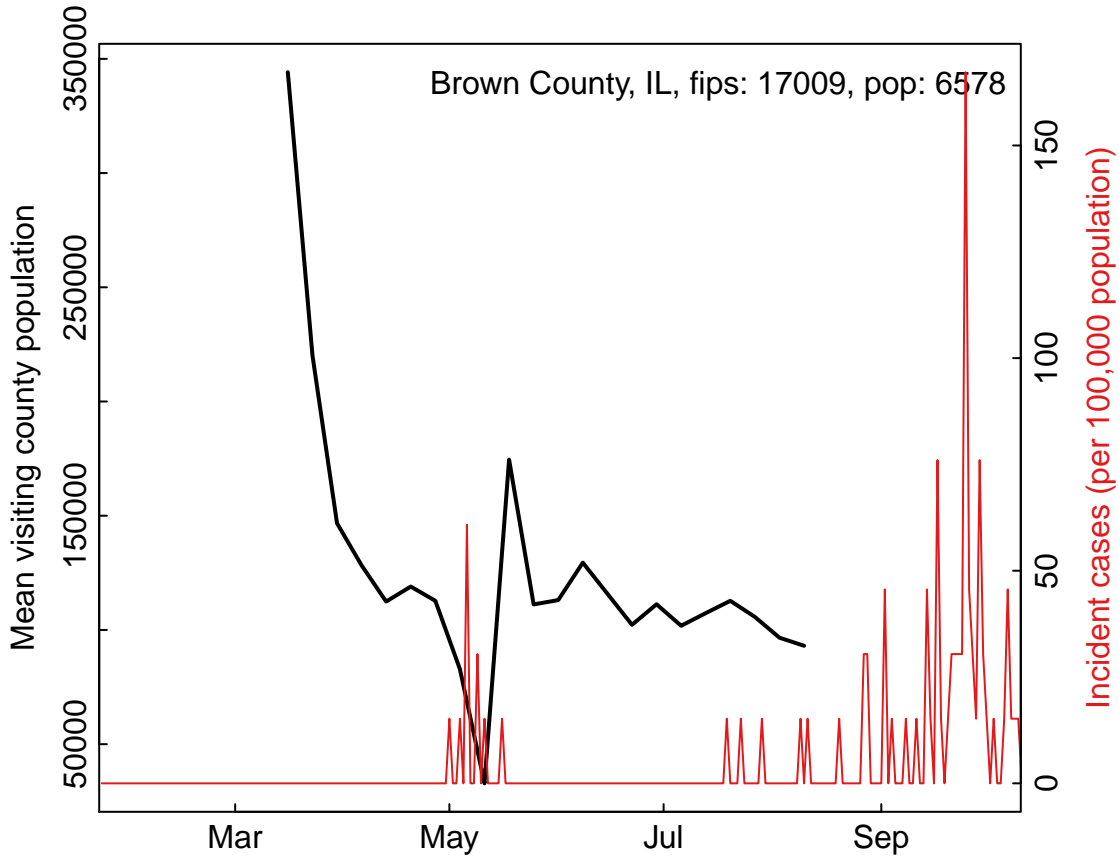

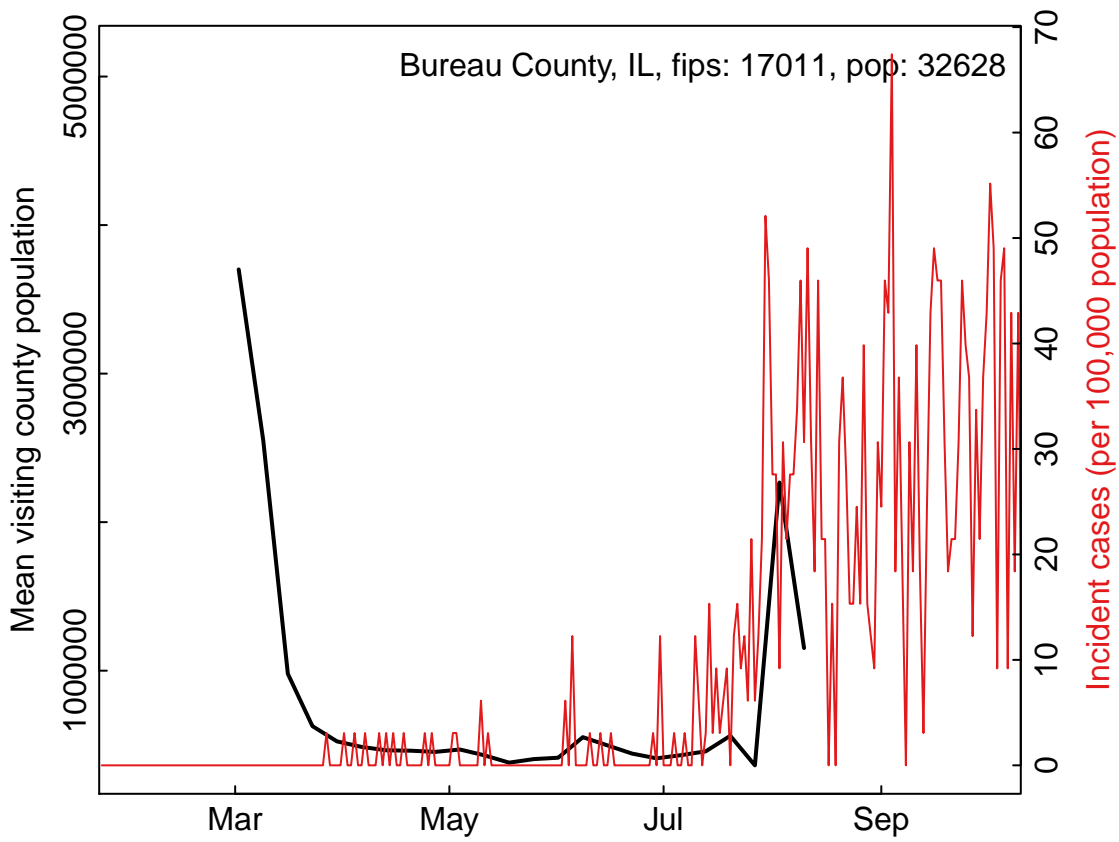



Calhoun County, IL, fips: 17013, pop: 4739

Mean visiting county population

200000  
300000  
400000  
500000

Mar May Jul Sep

Incident cases (per 100,000 population)

0  
50  
100  
150  
200

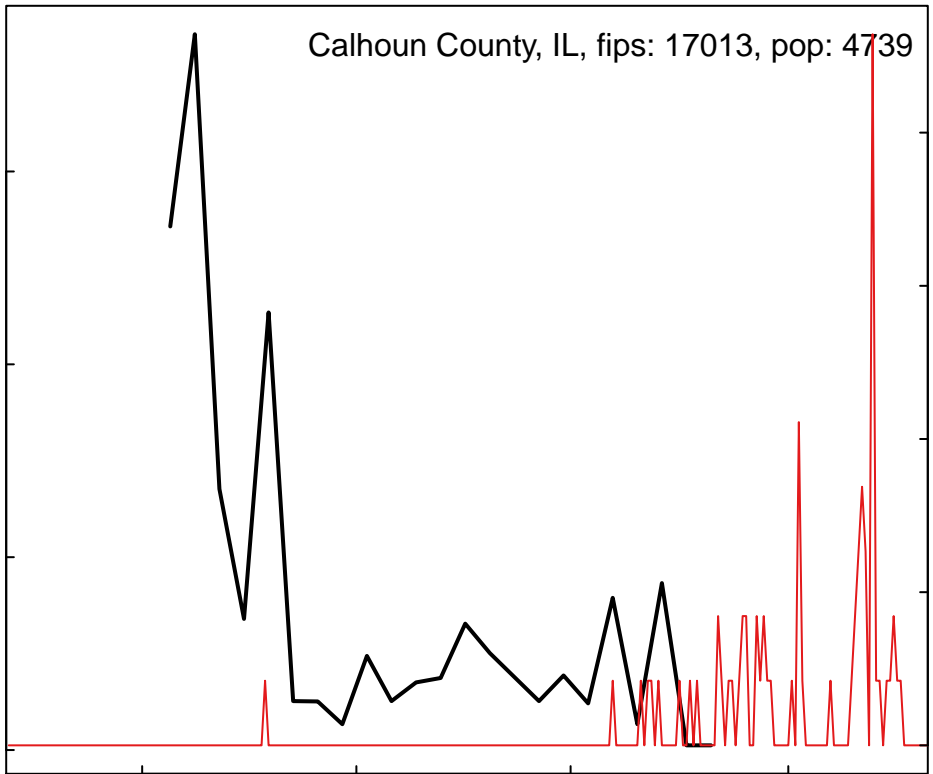

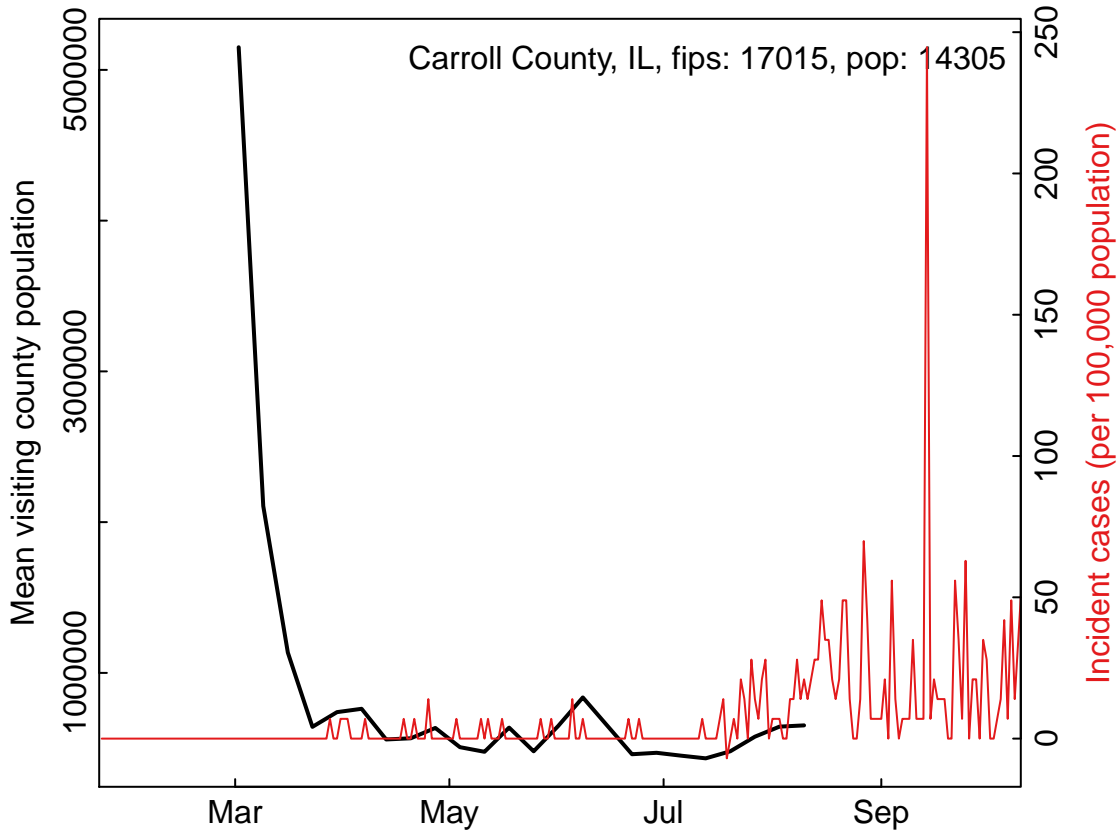

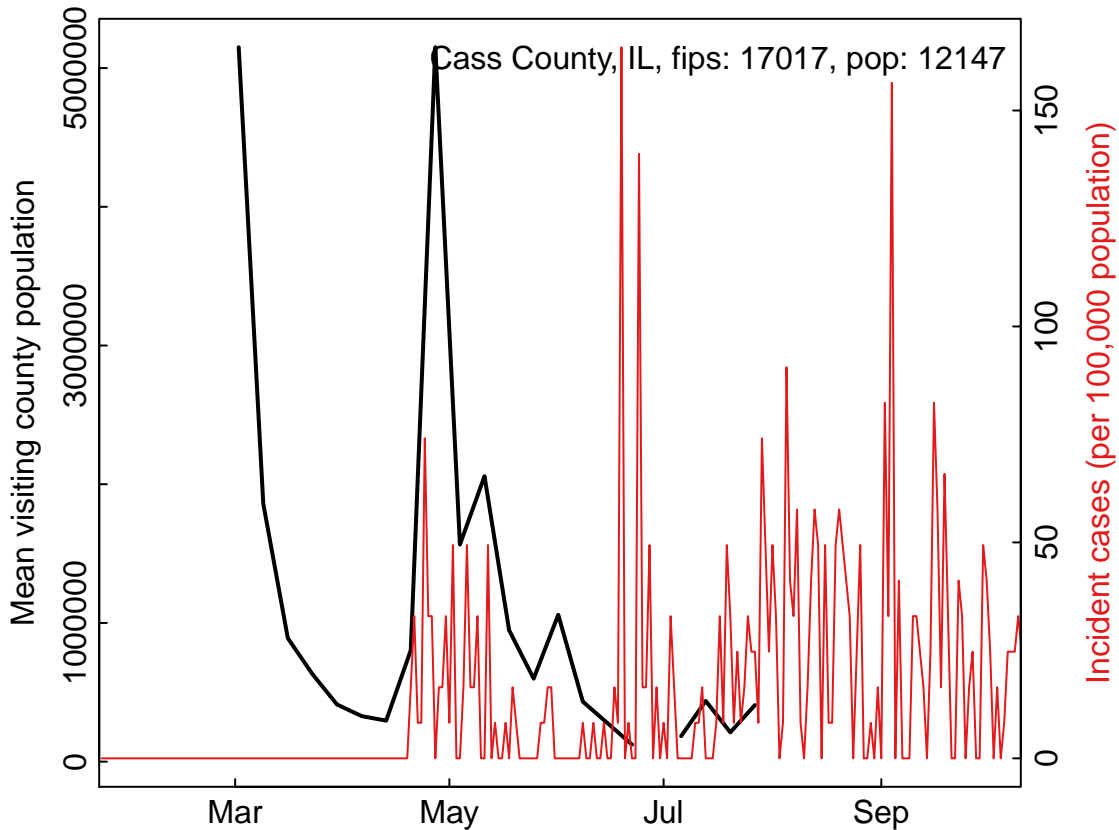

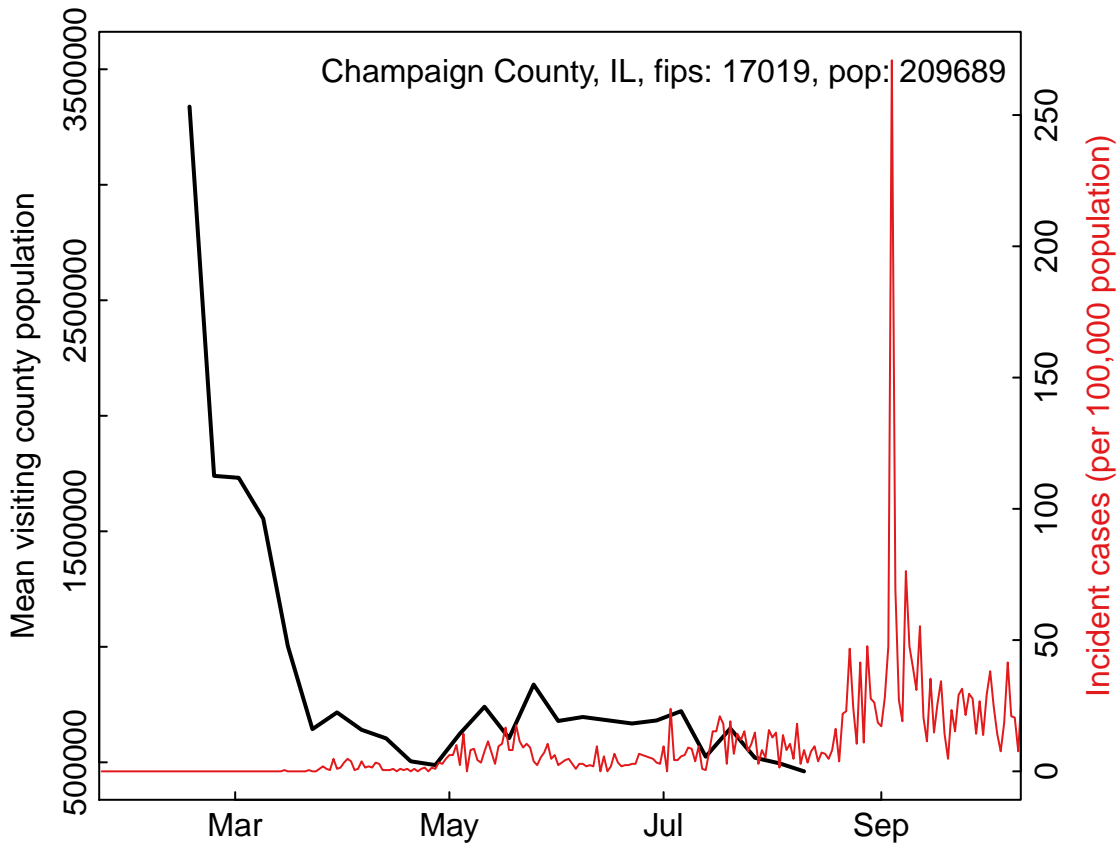

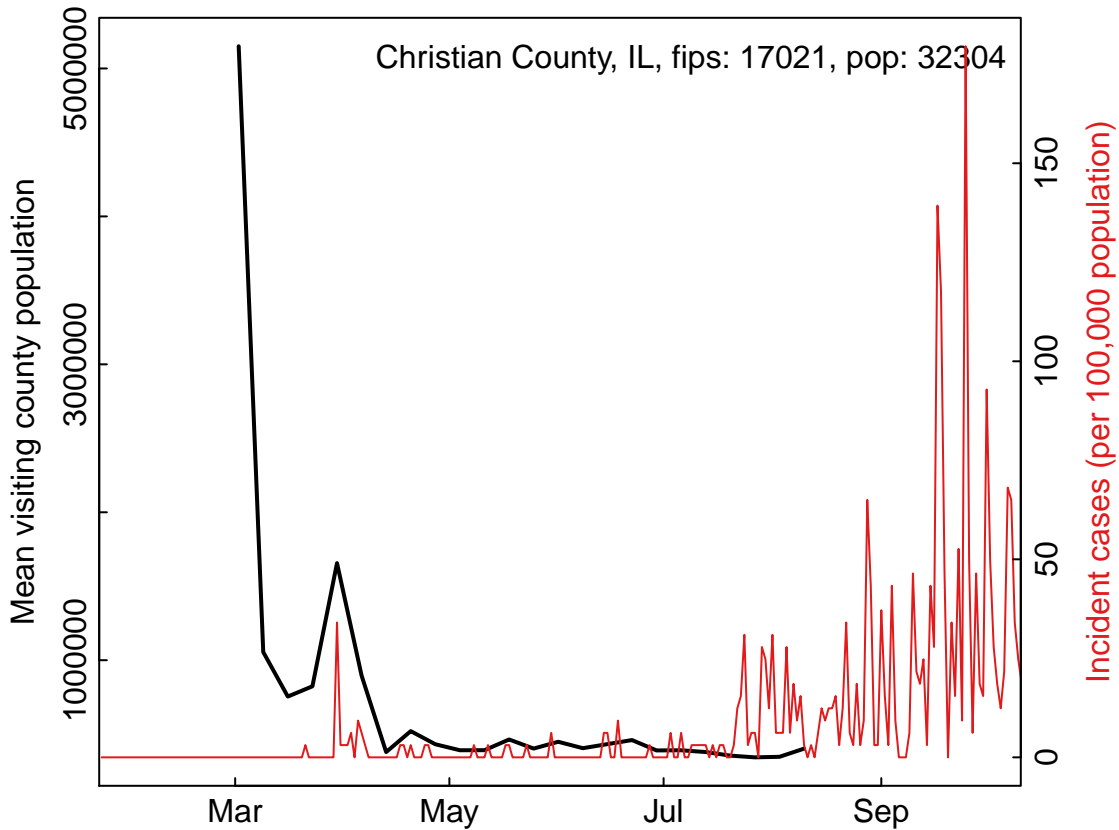

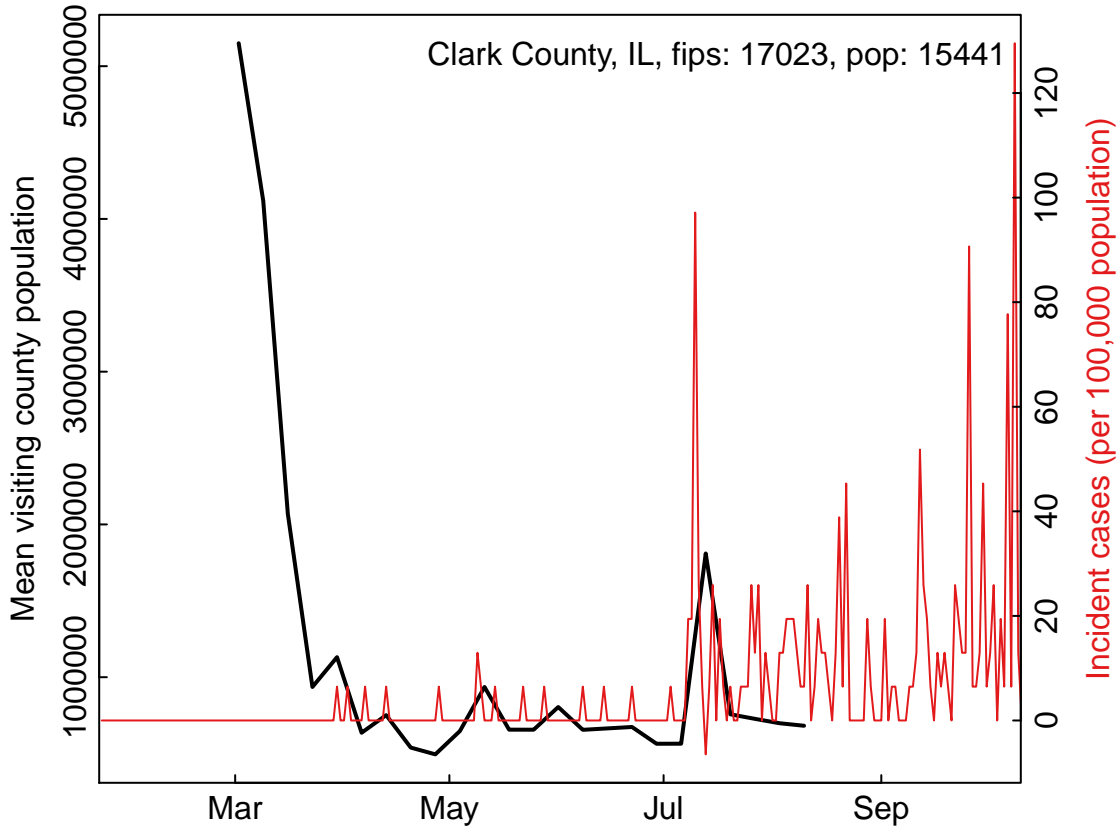

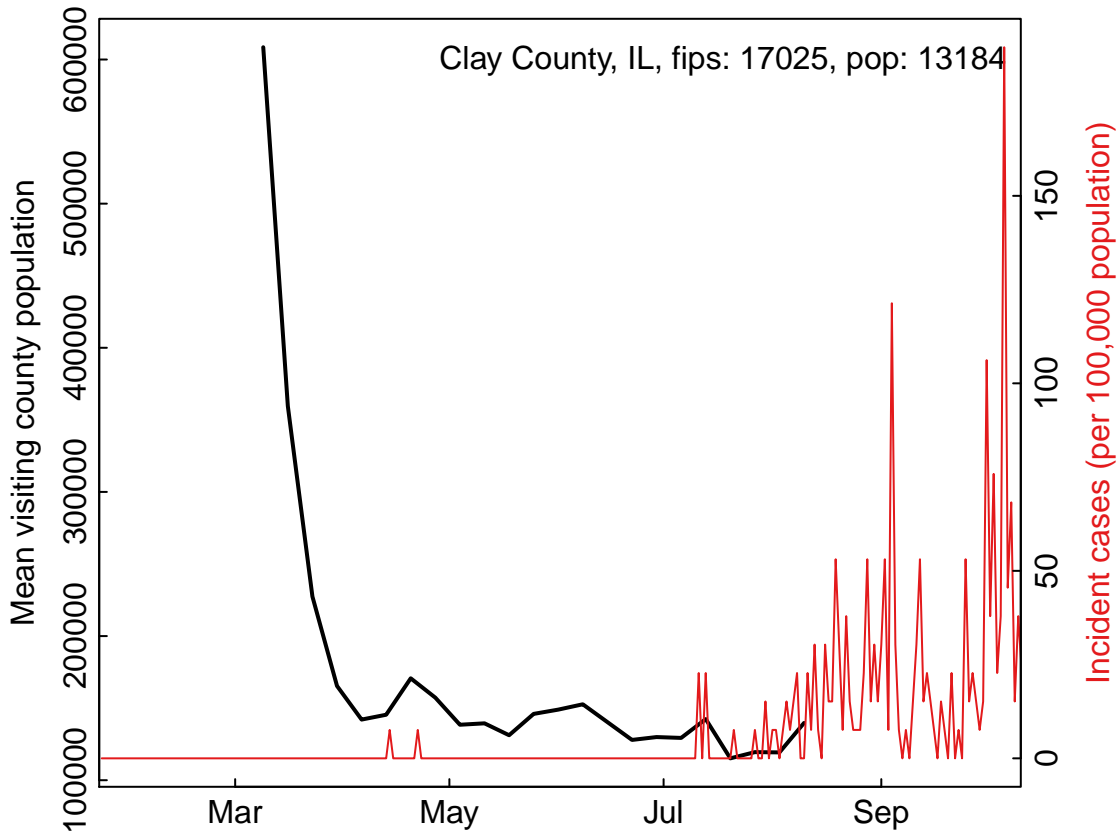

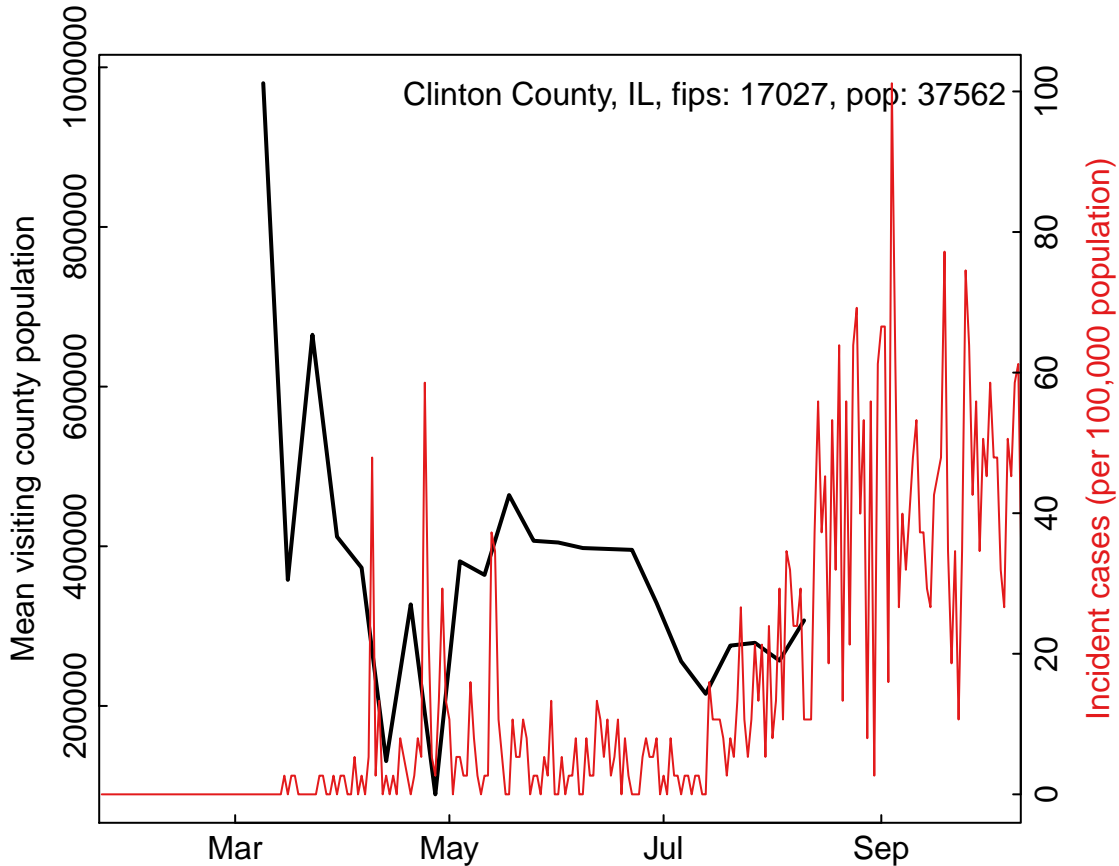



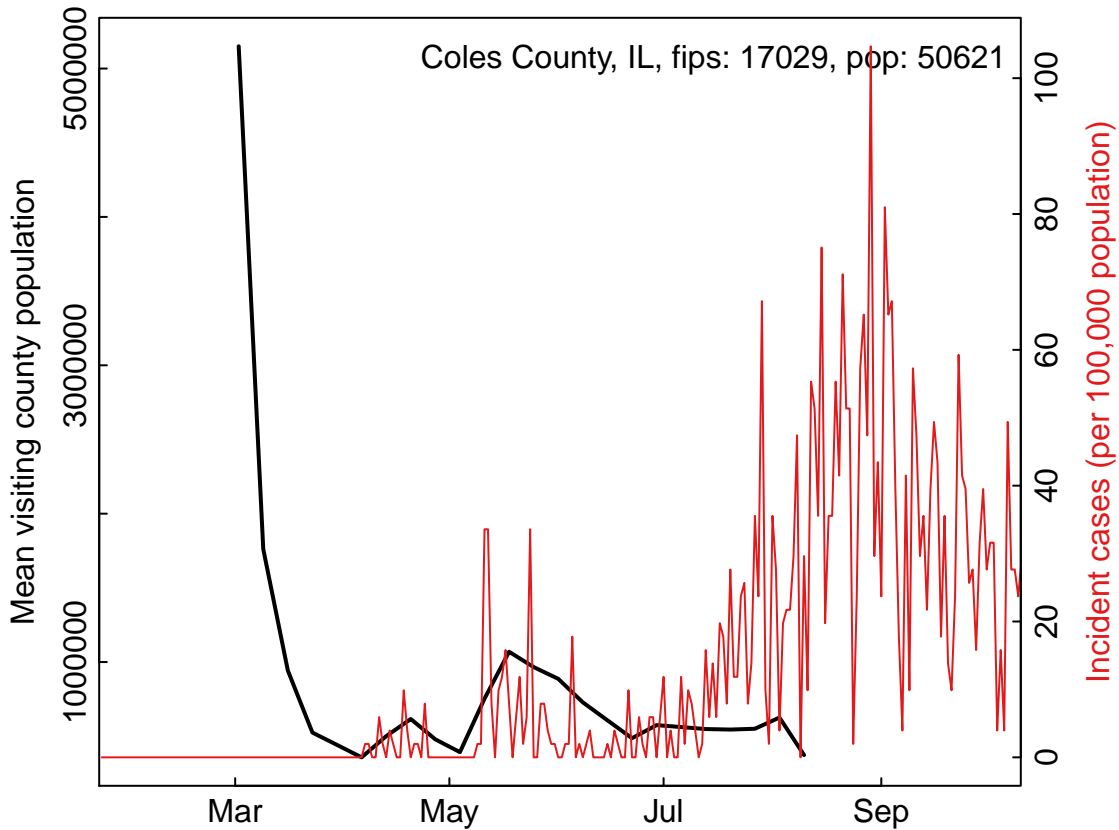

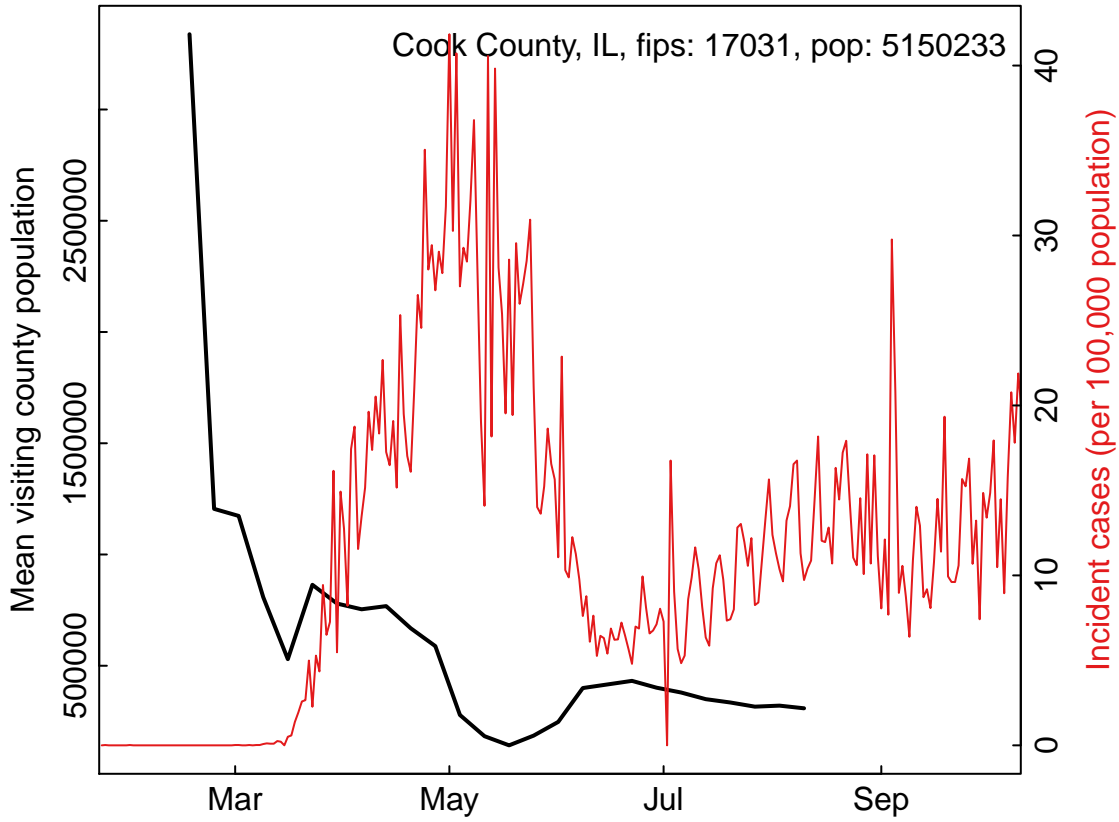

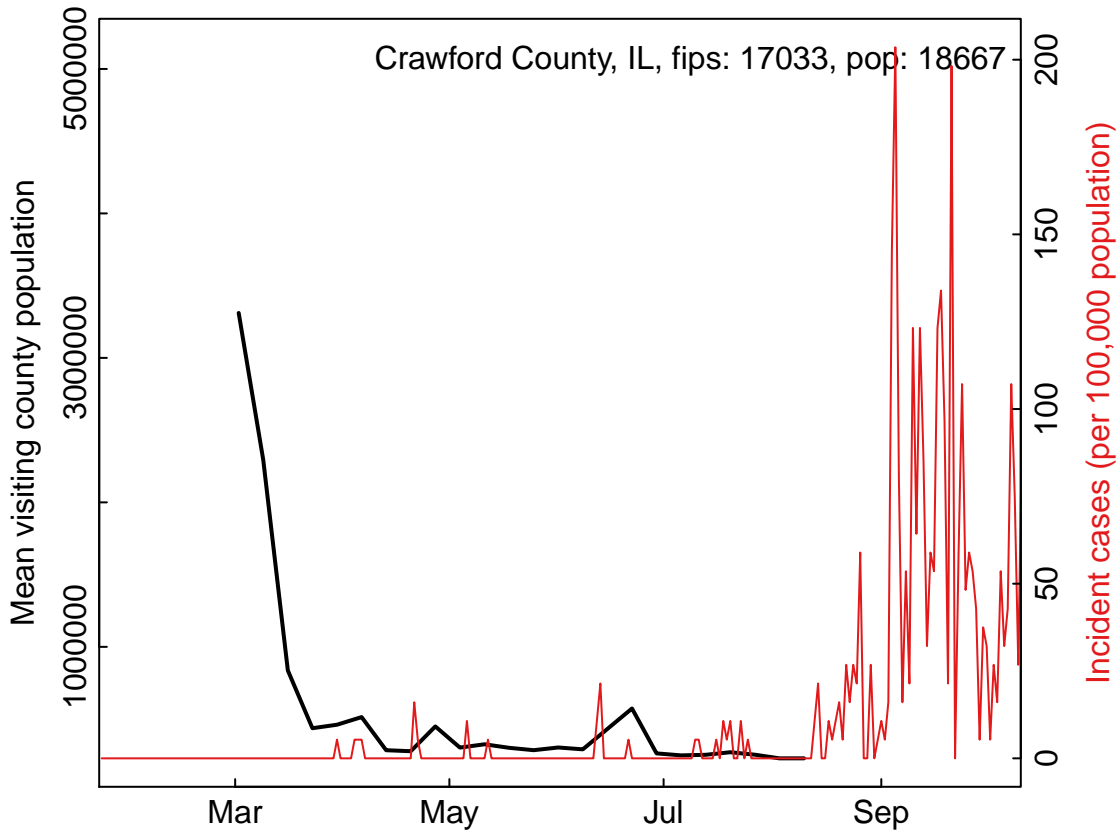

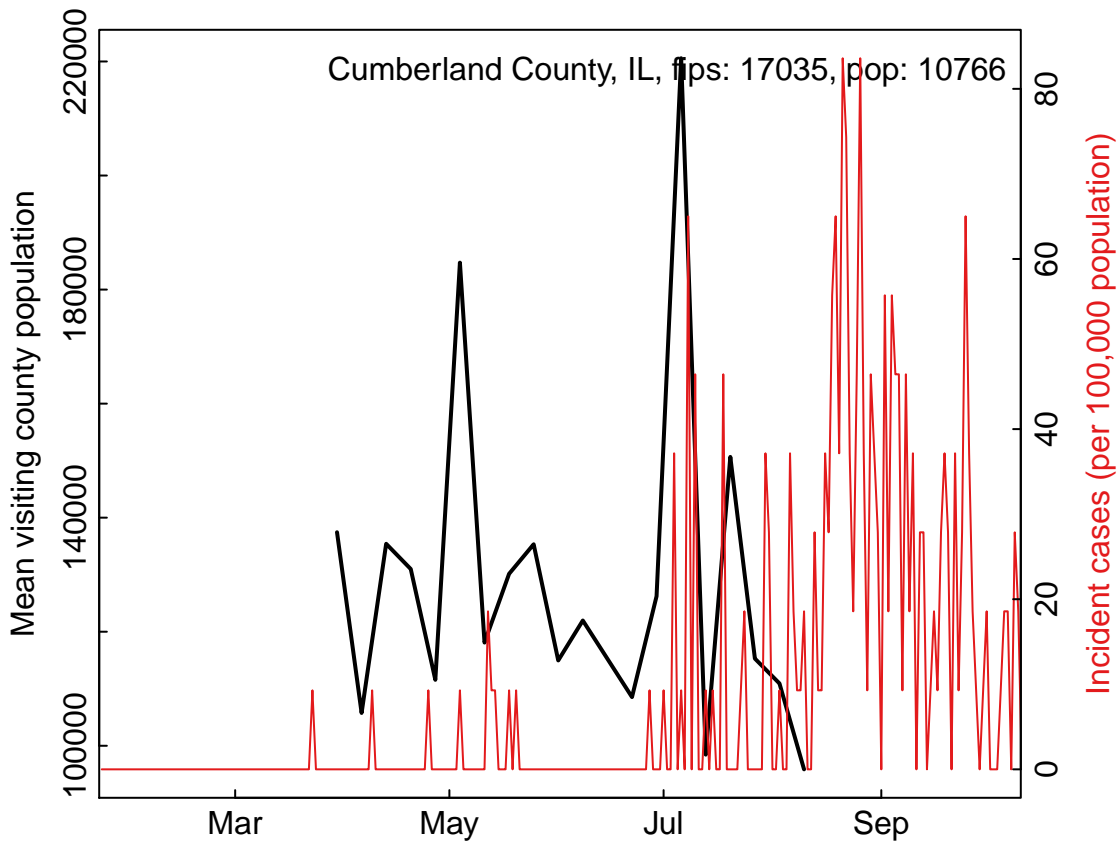

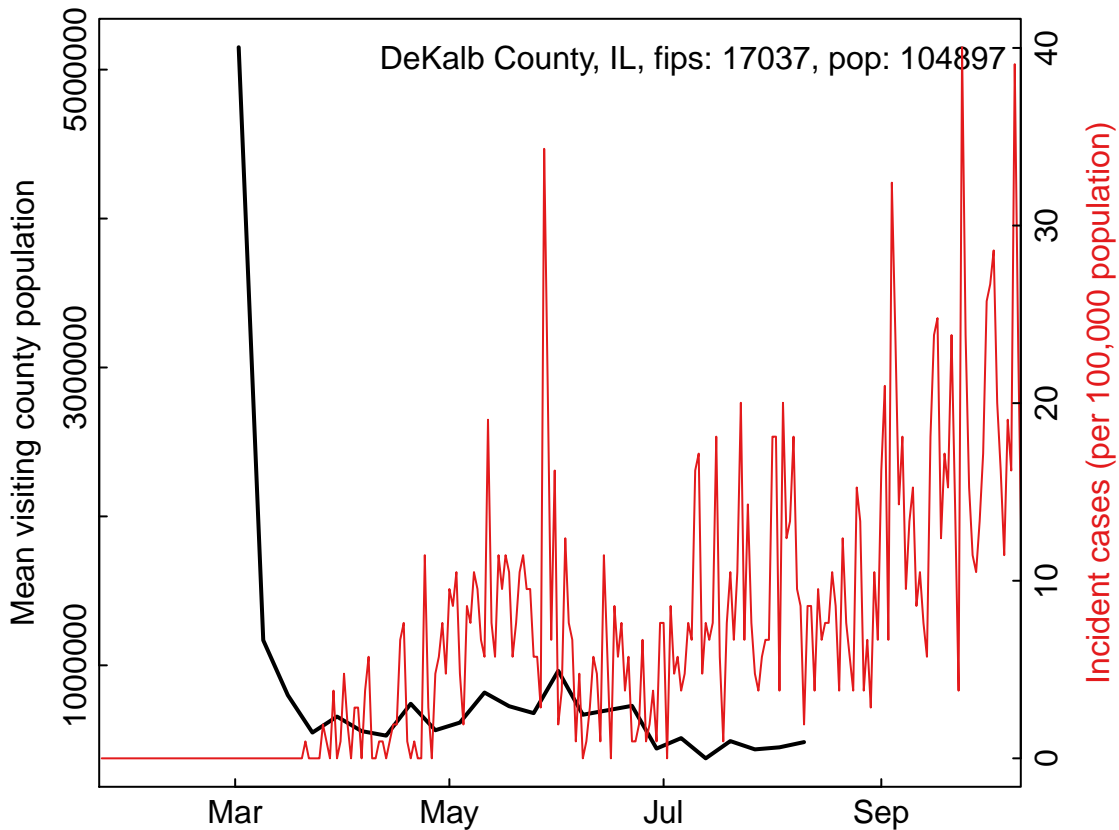

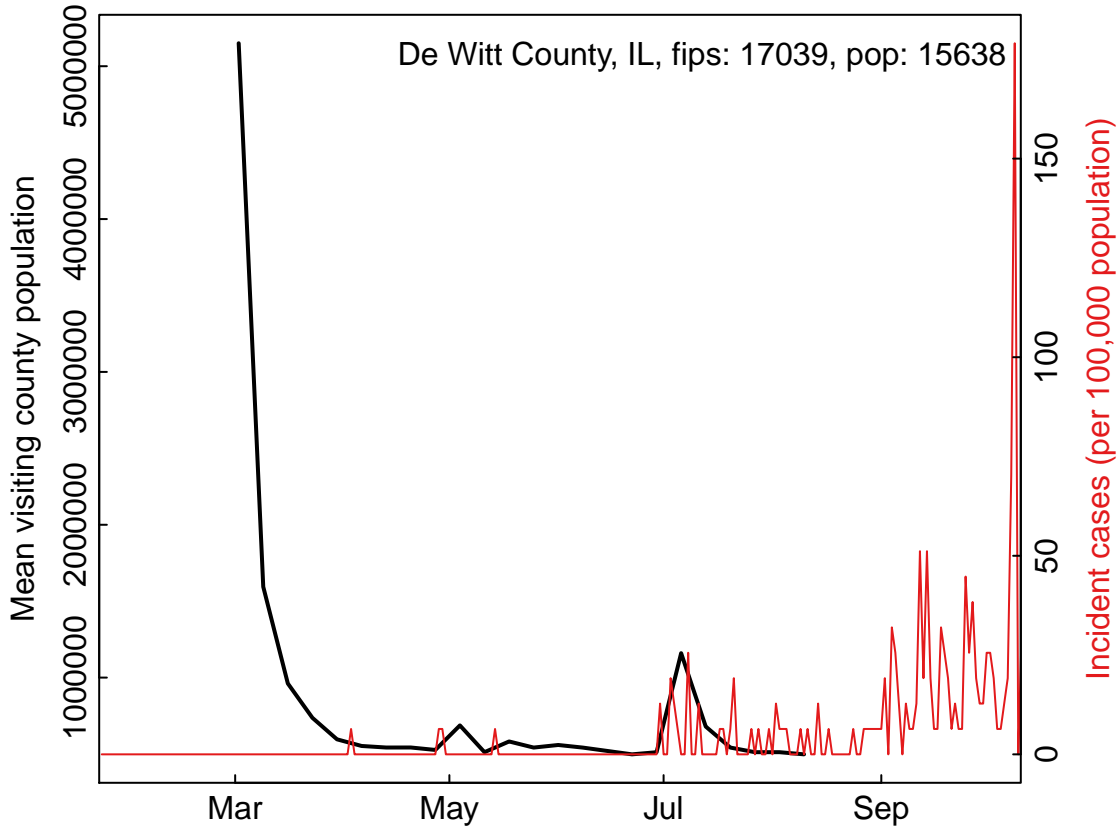

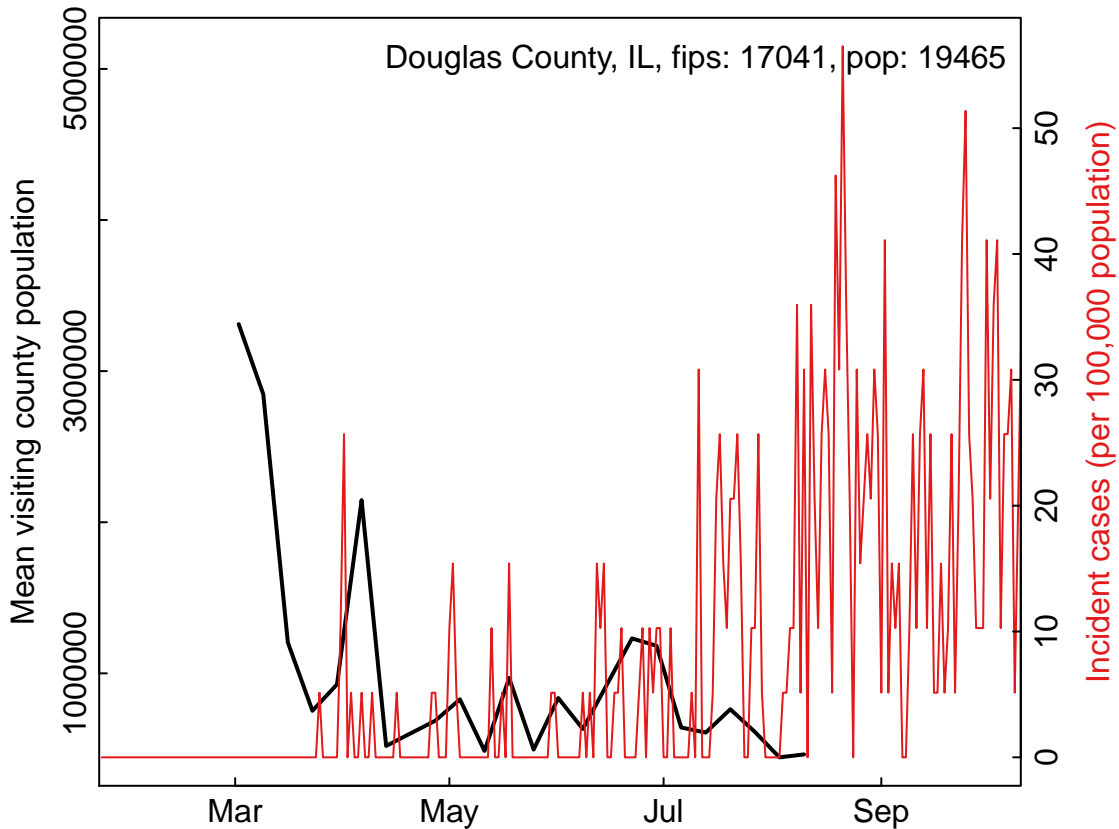

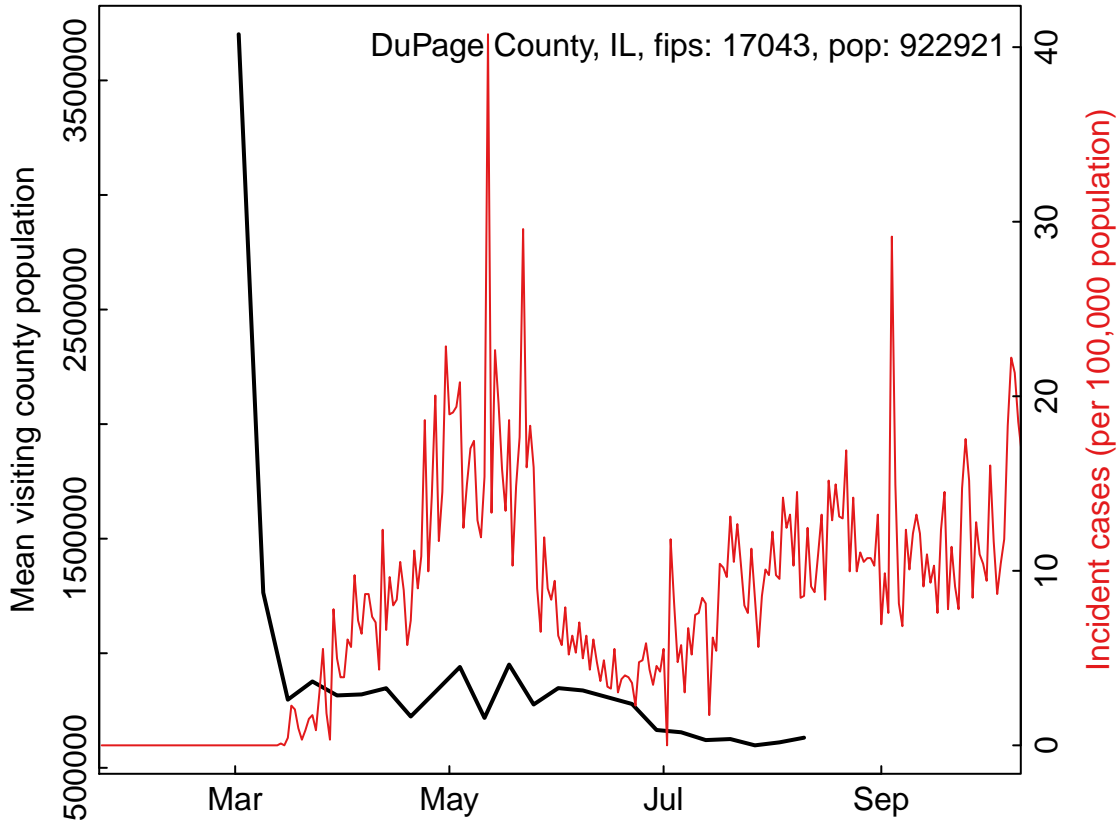



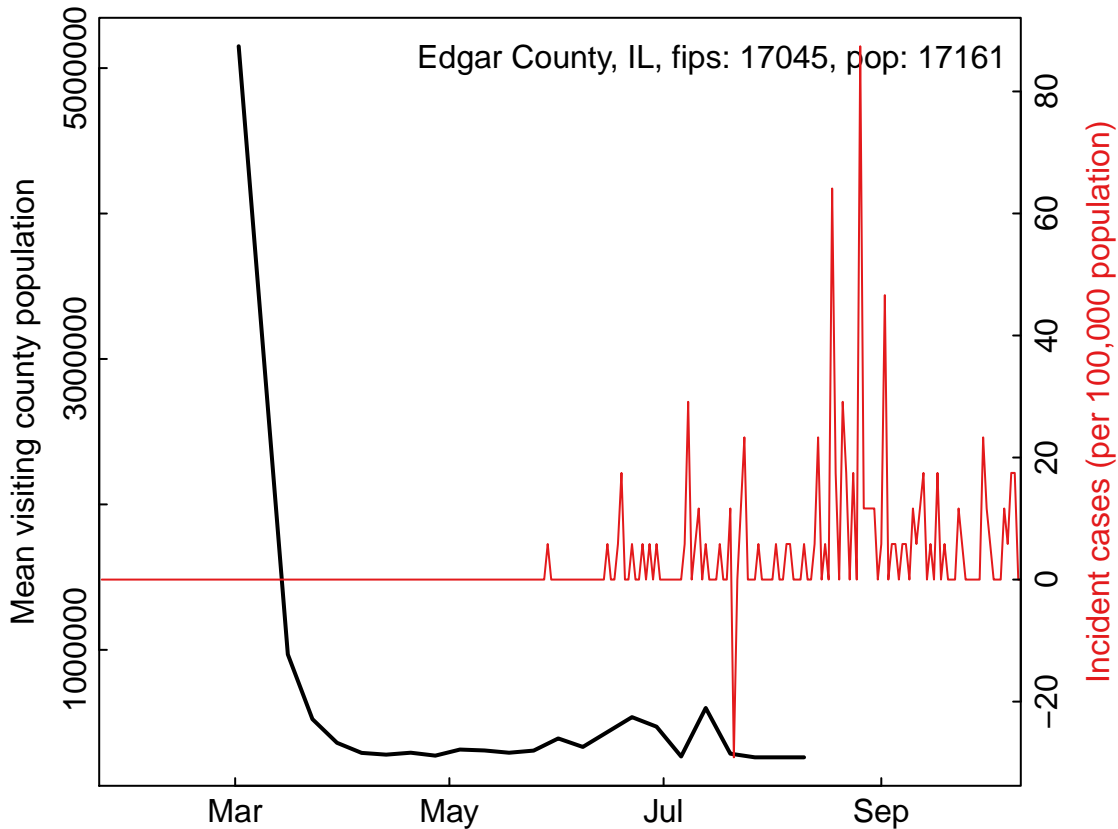

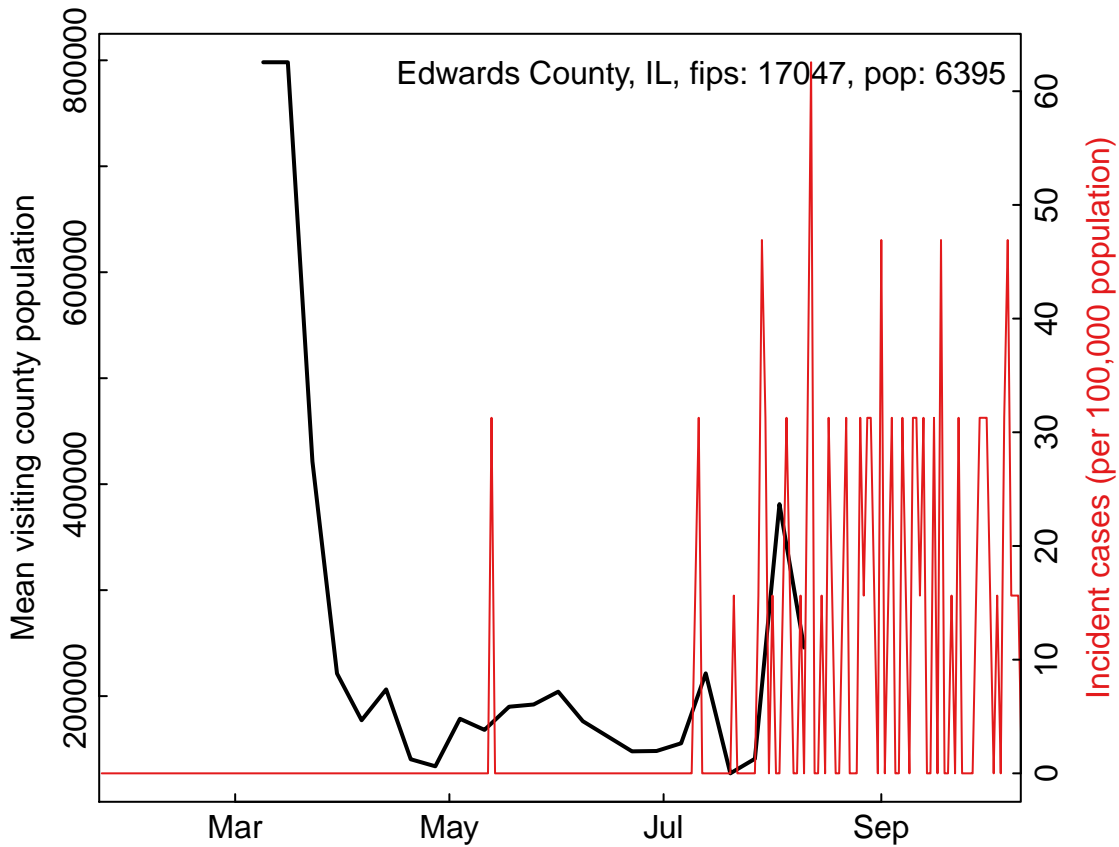

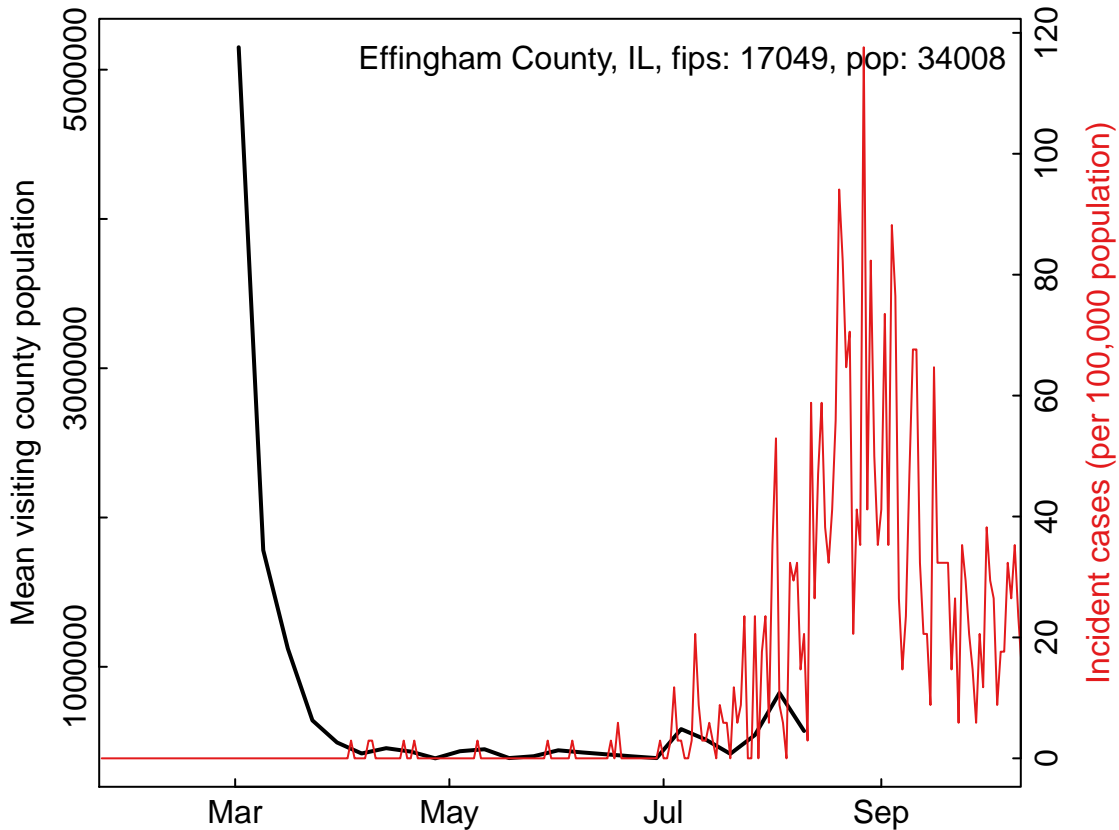

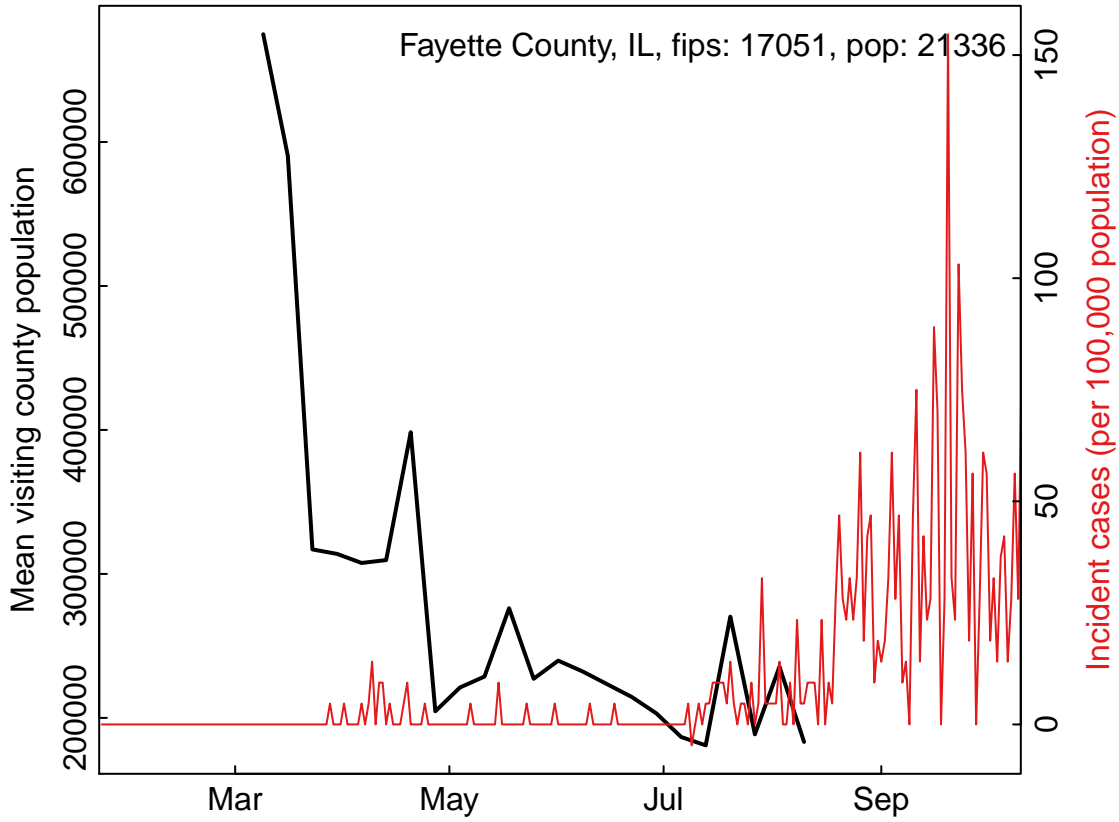

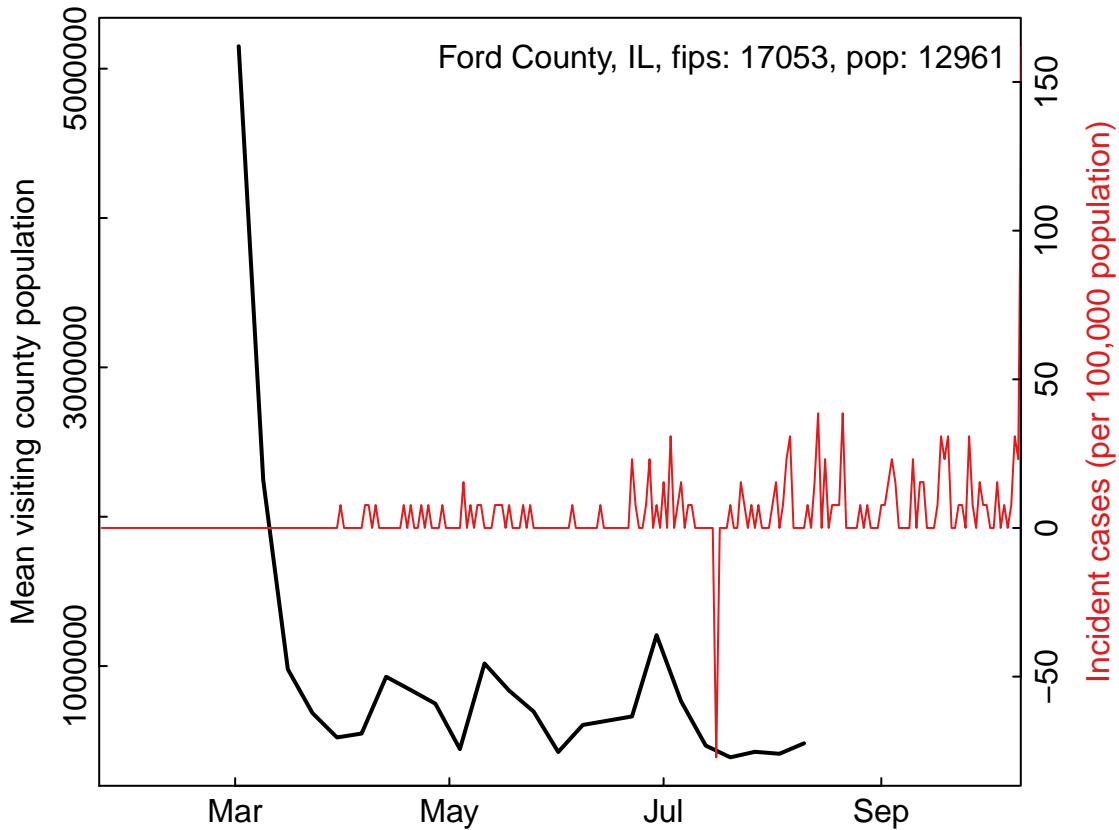

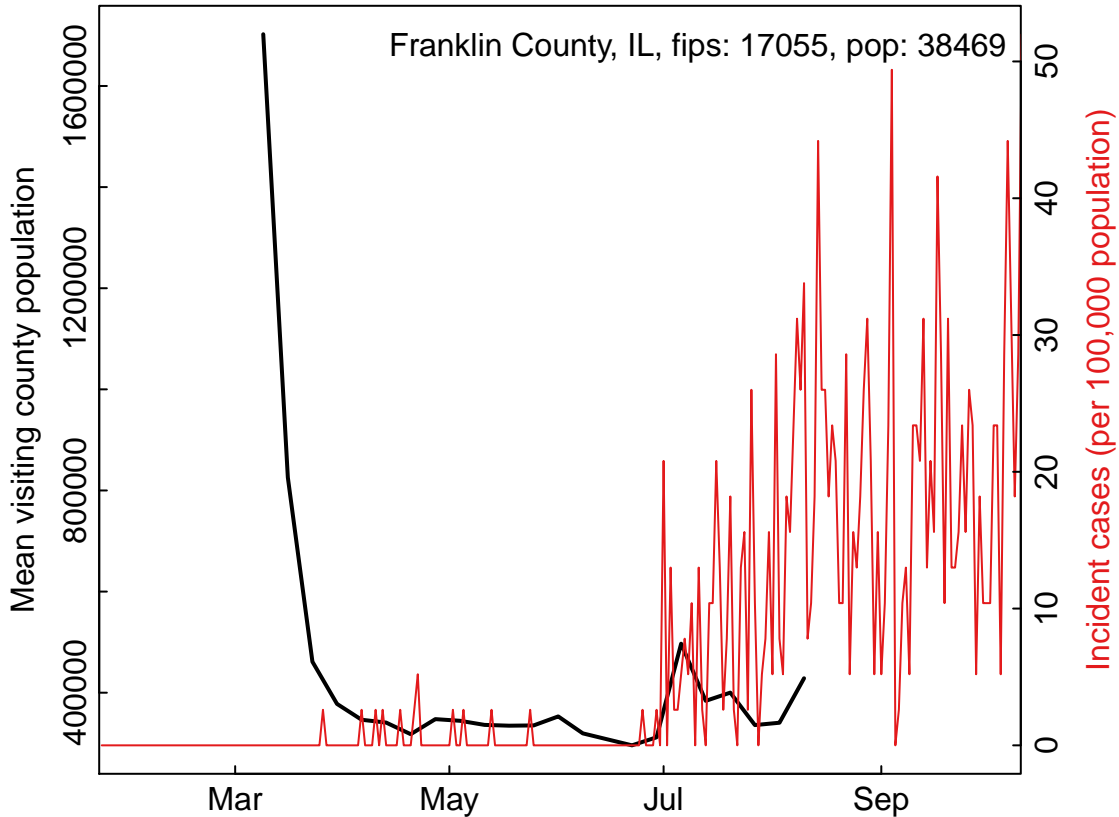

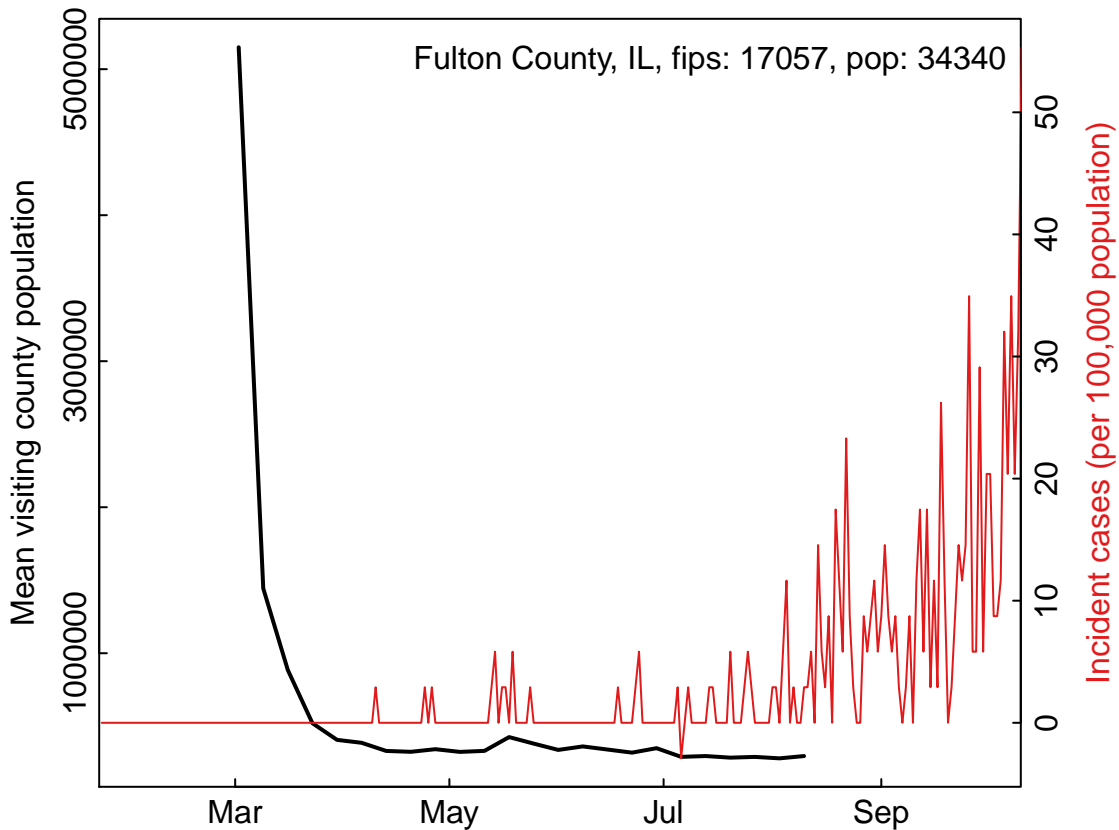

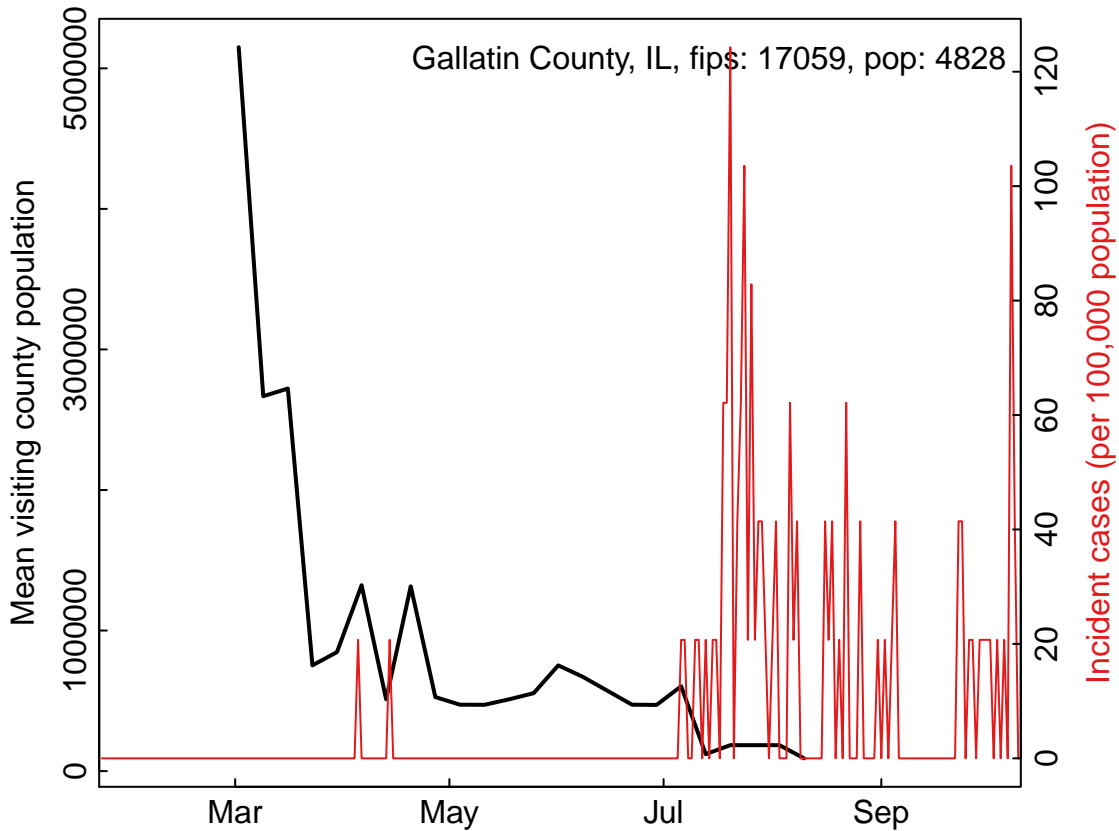



Greene County, IL, fips: 17061, pop: 12969

Mean visiting county population

2500000  
1500000  
500000

Mar

May

Jul

Sep

150  
100  
50  
0

Incident cases (per 100,000 population)

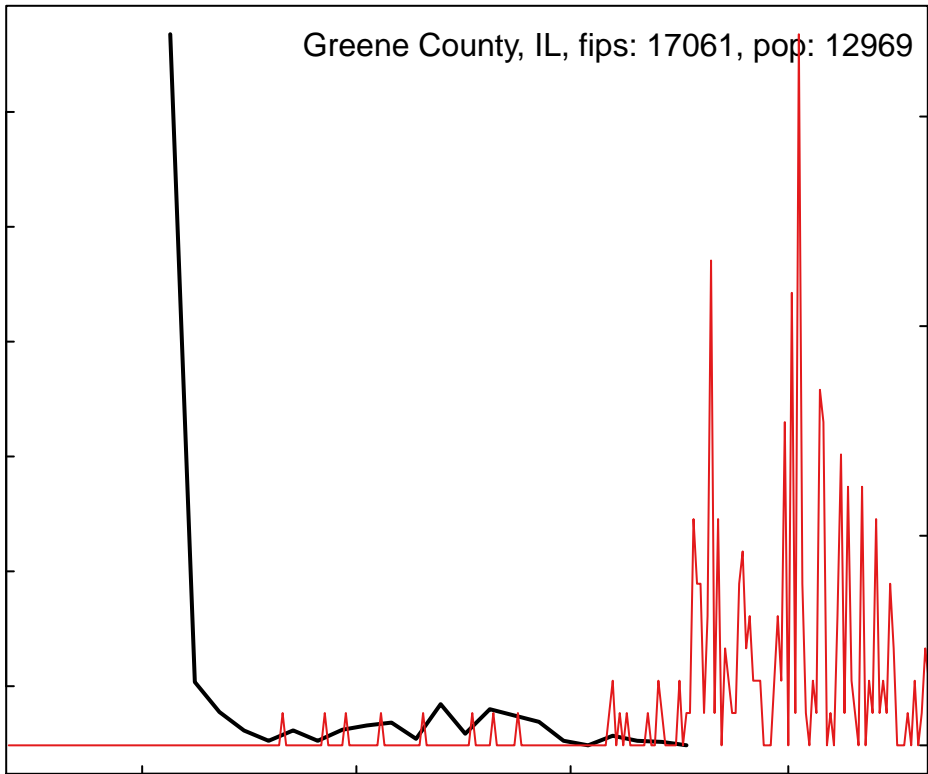

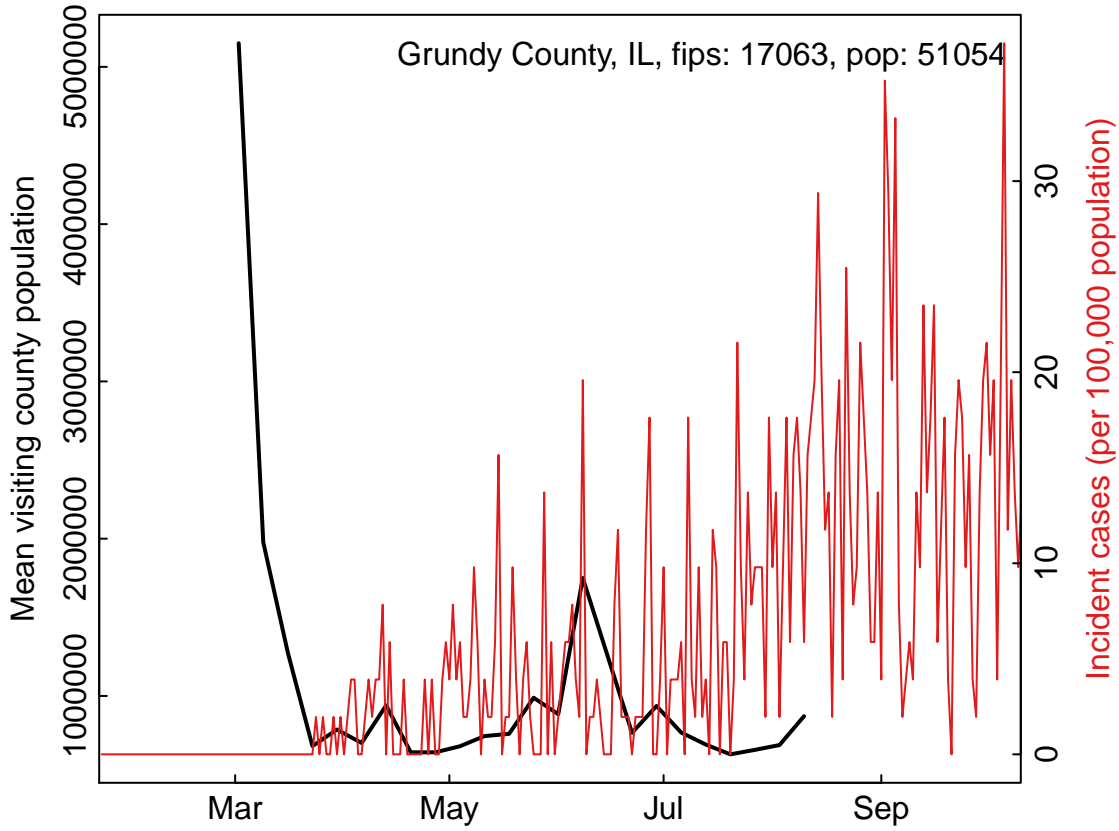

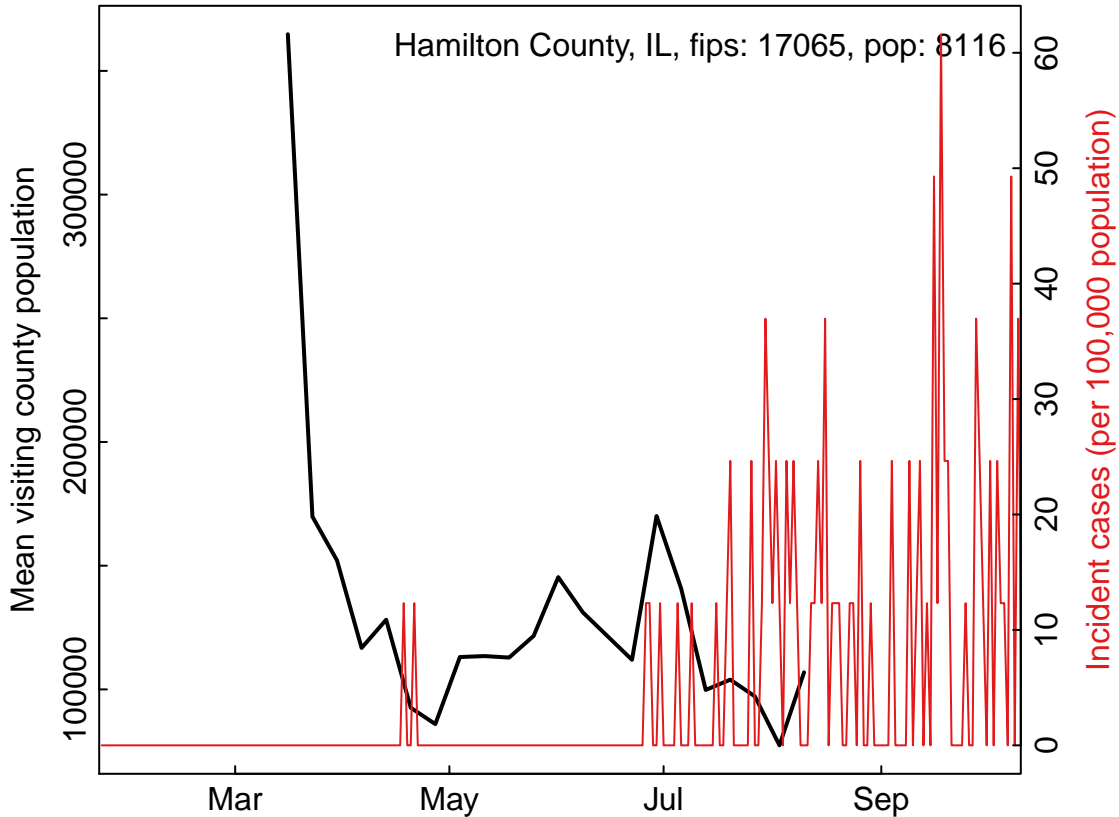

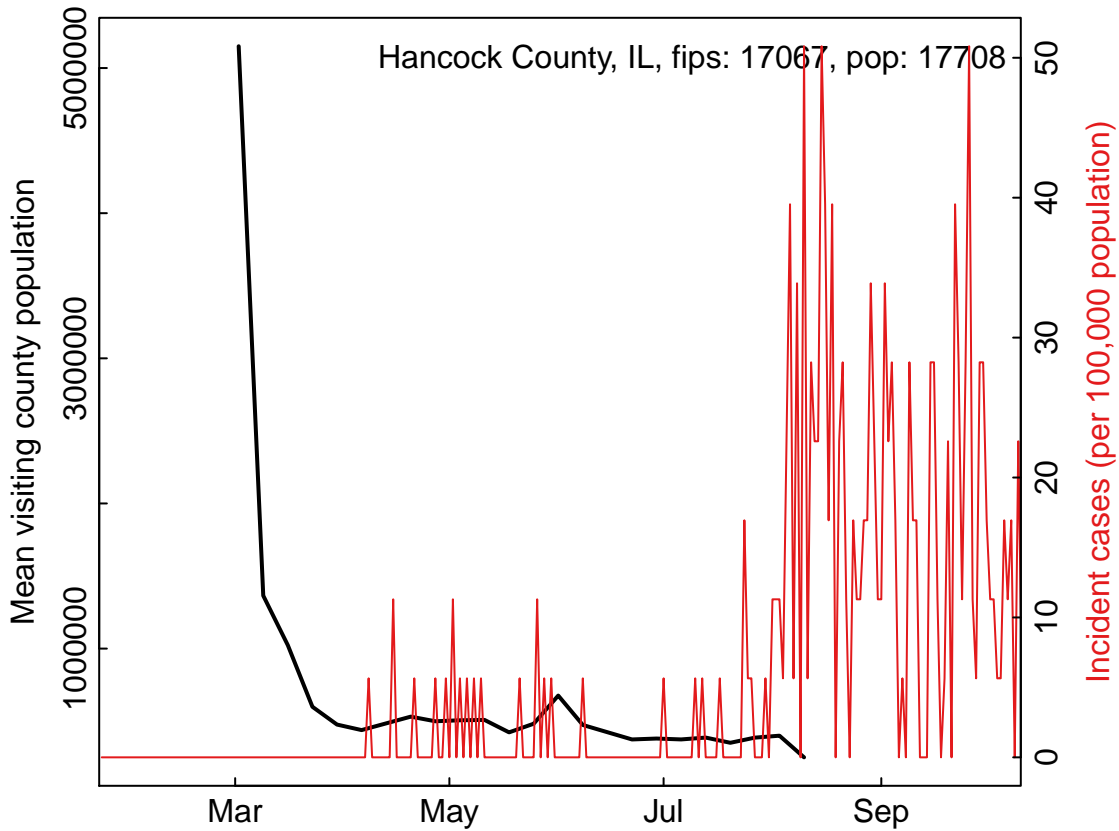

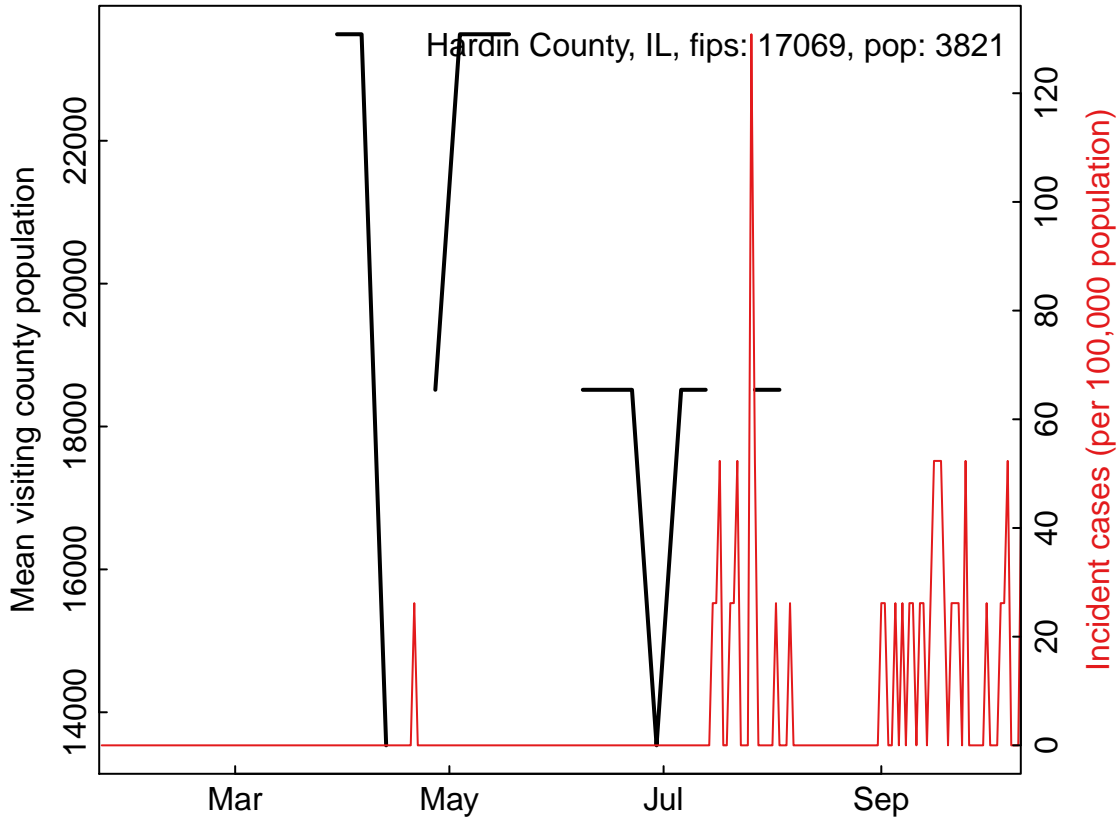

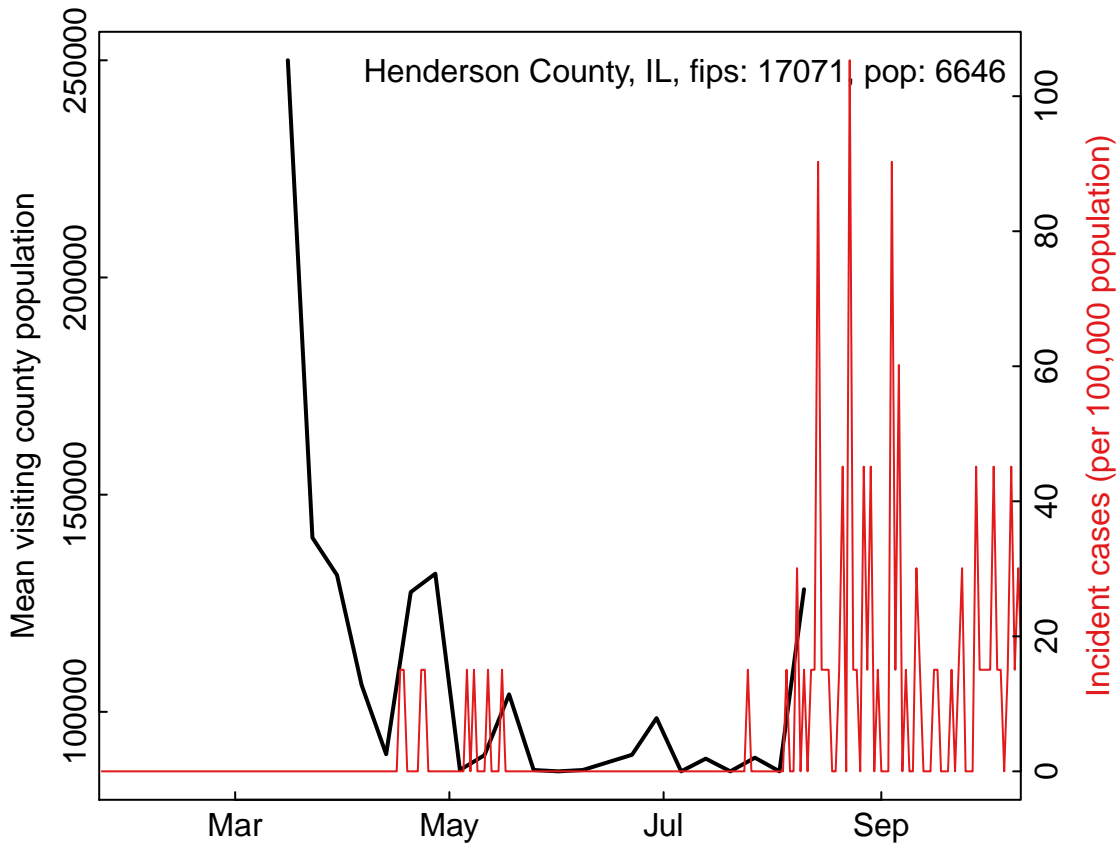

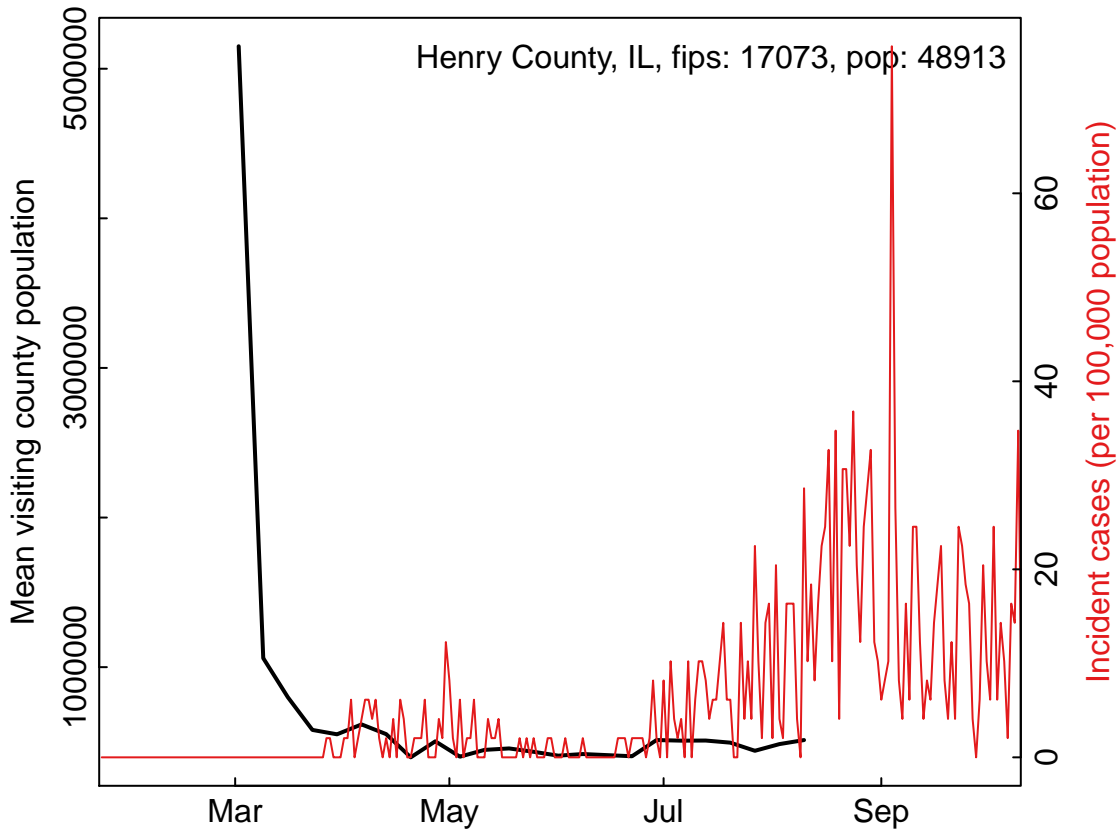

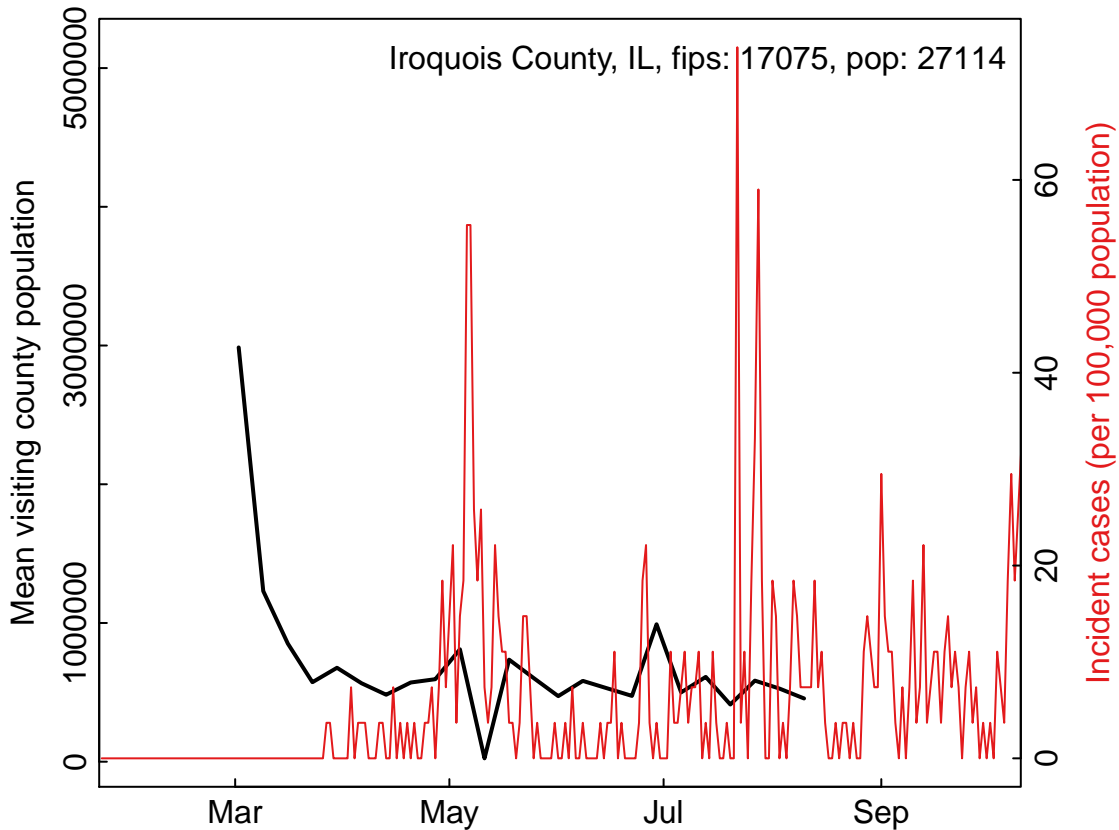



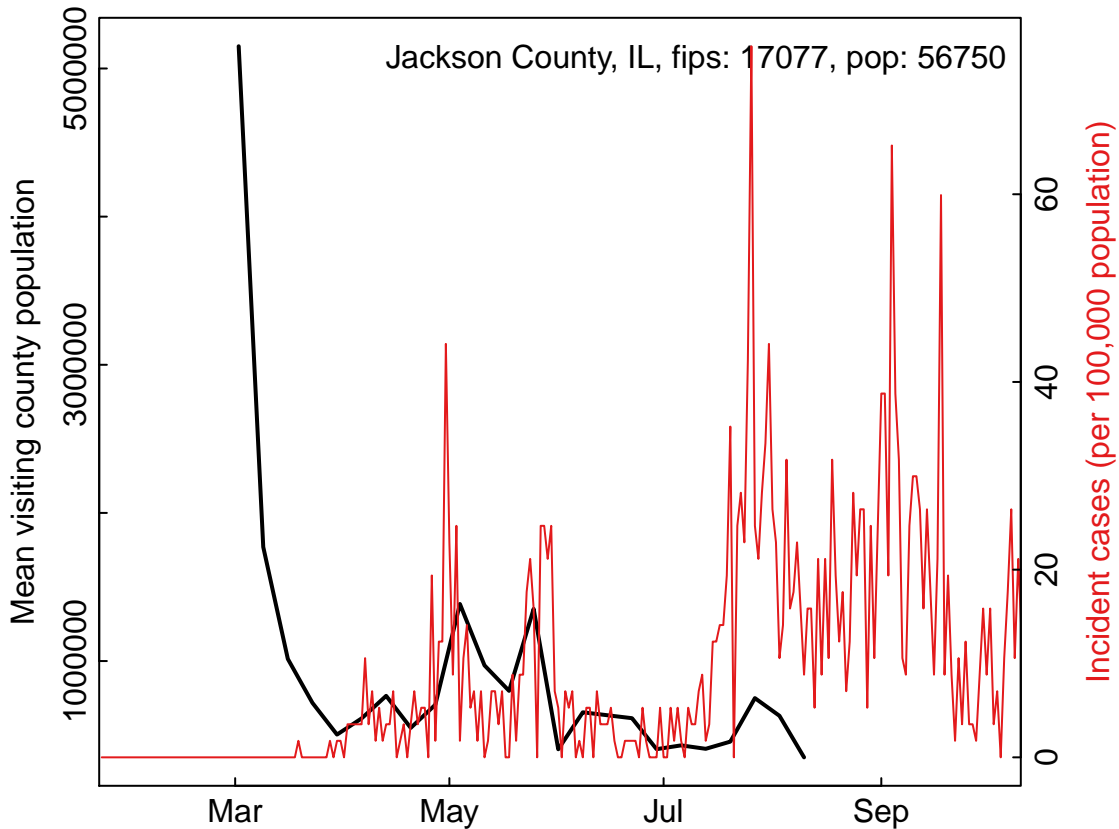

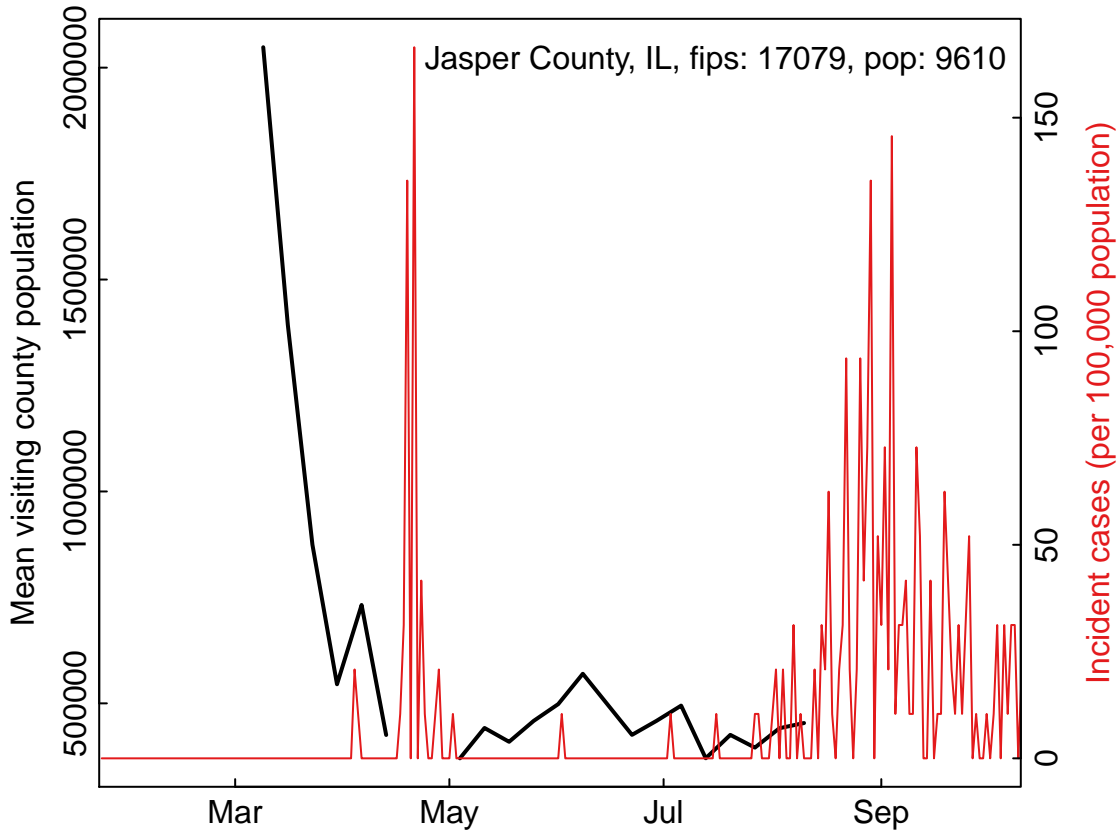

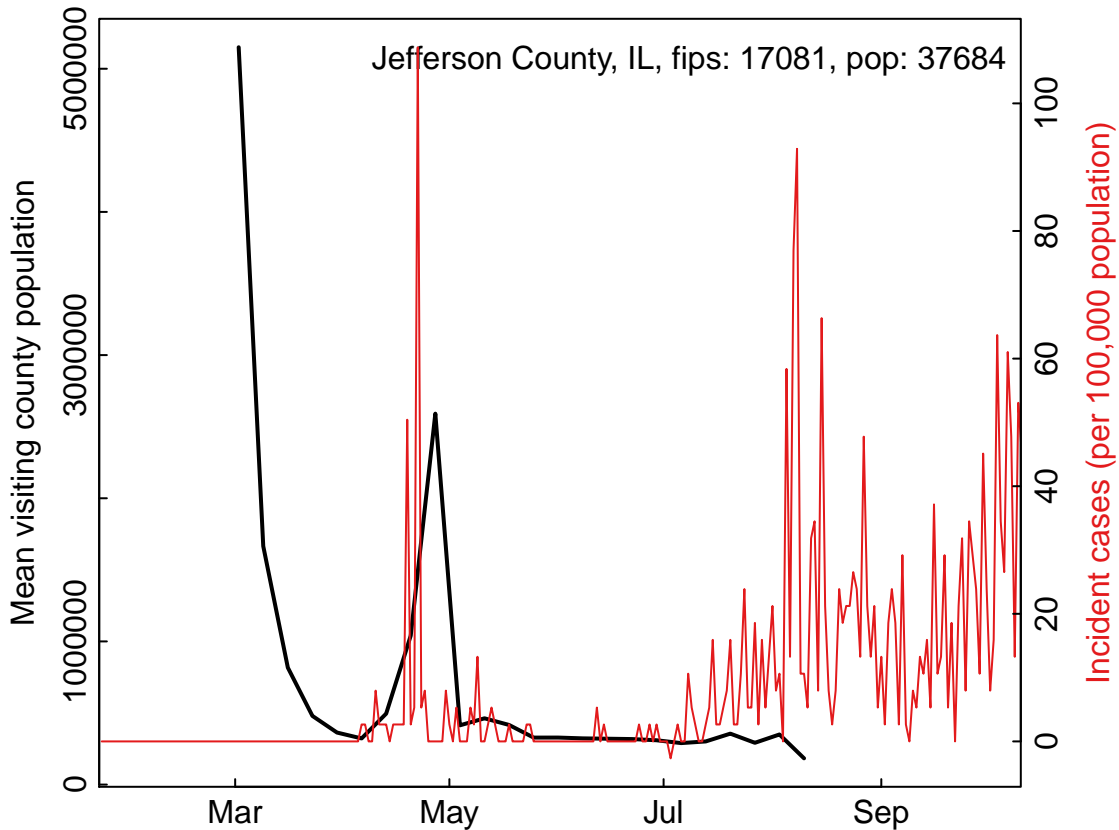

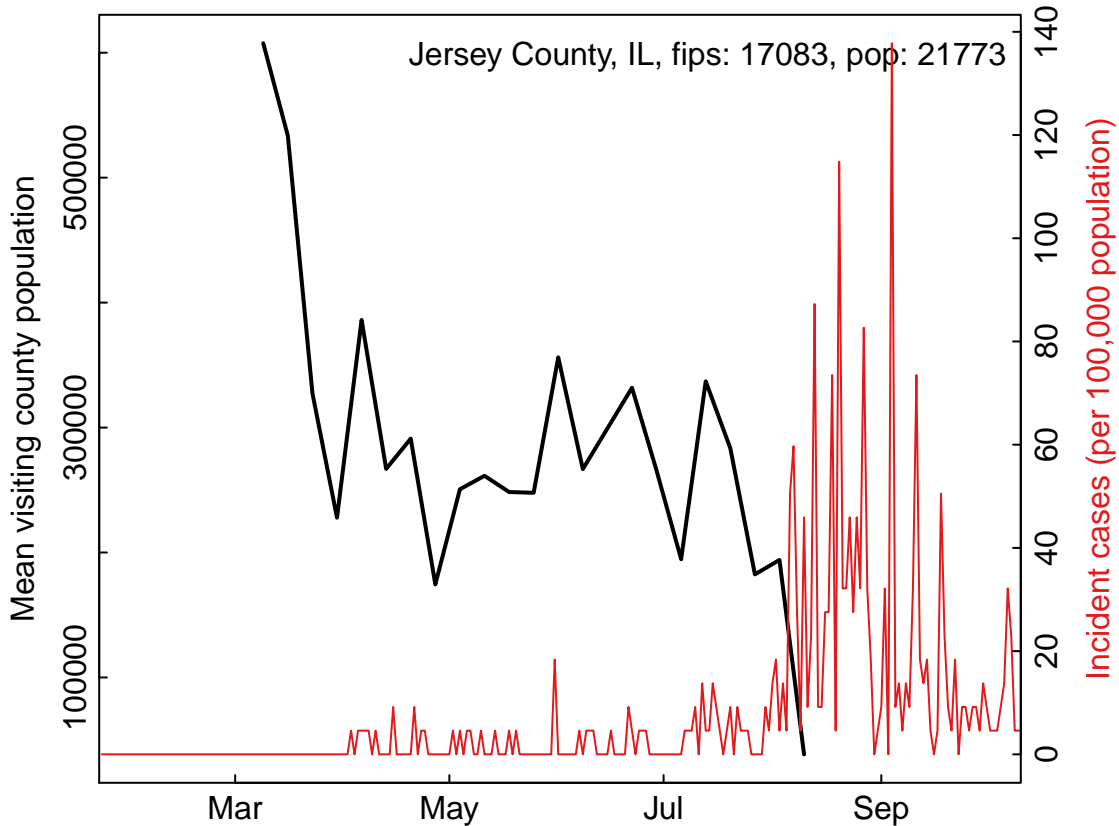

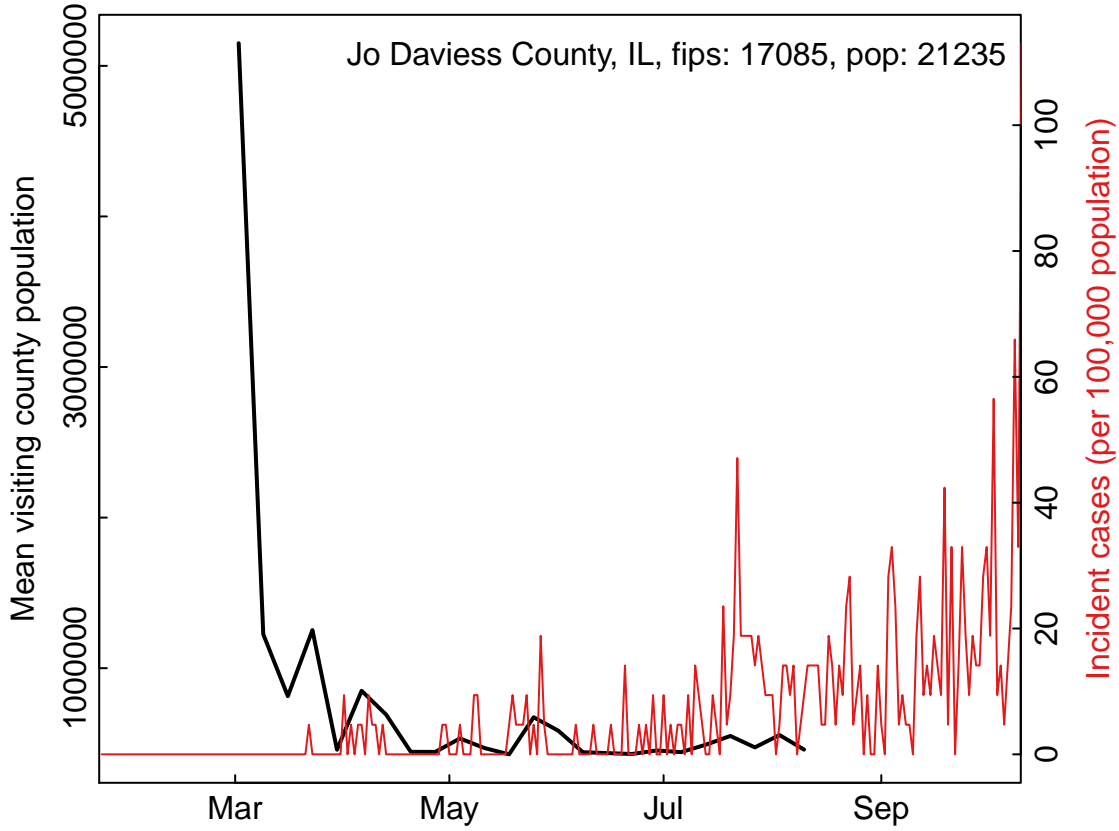

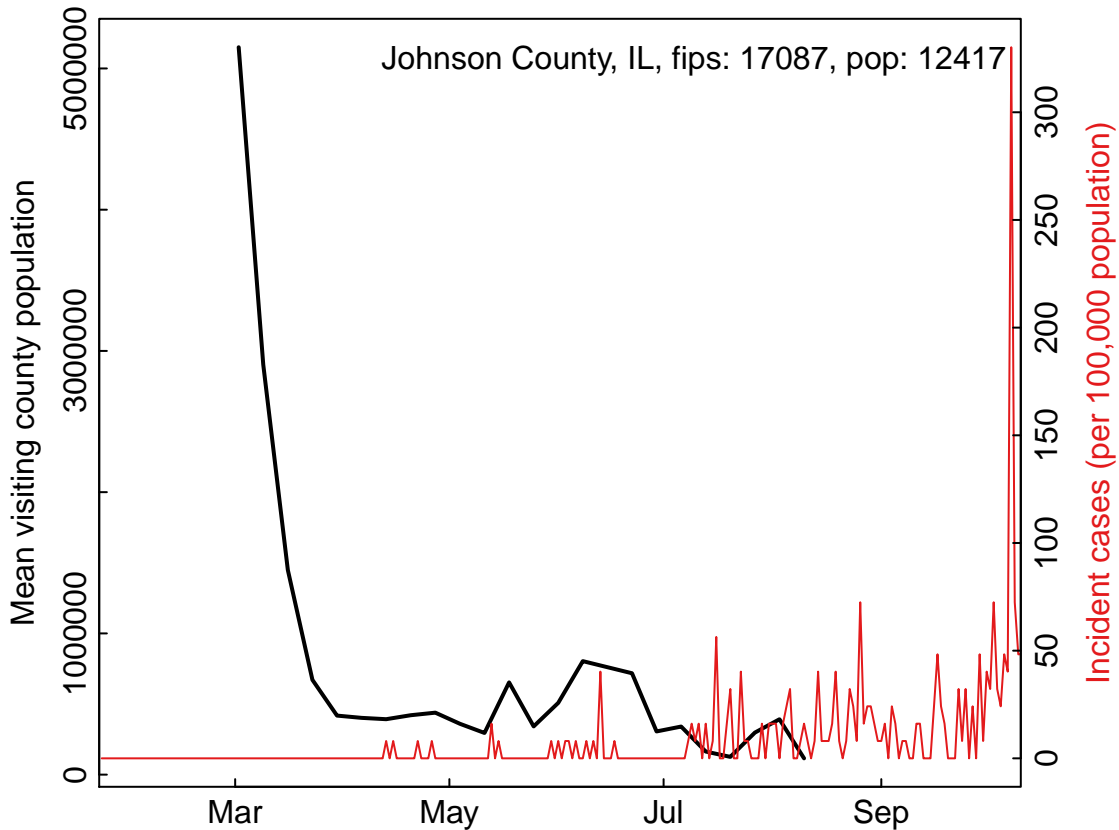

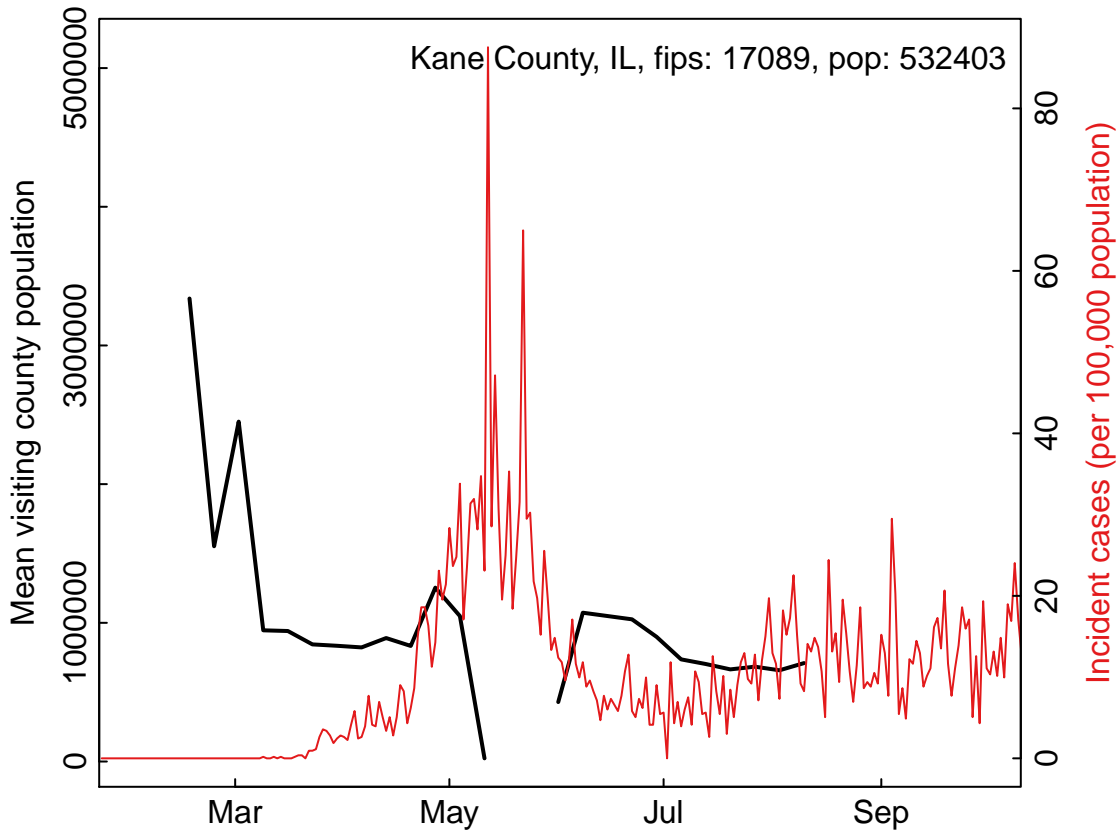

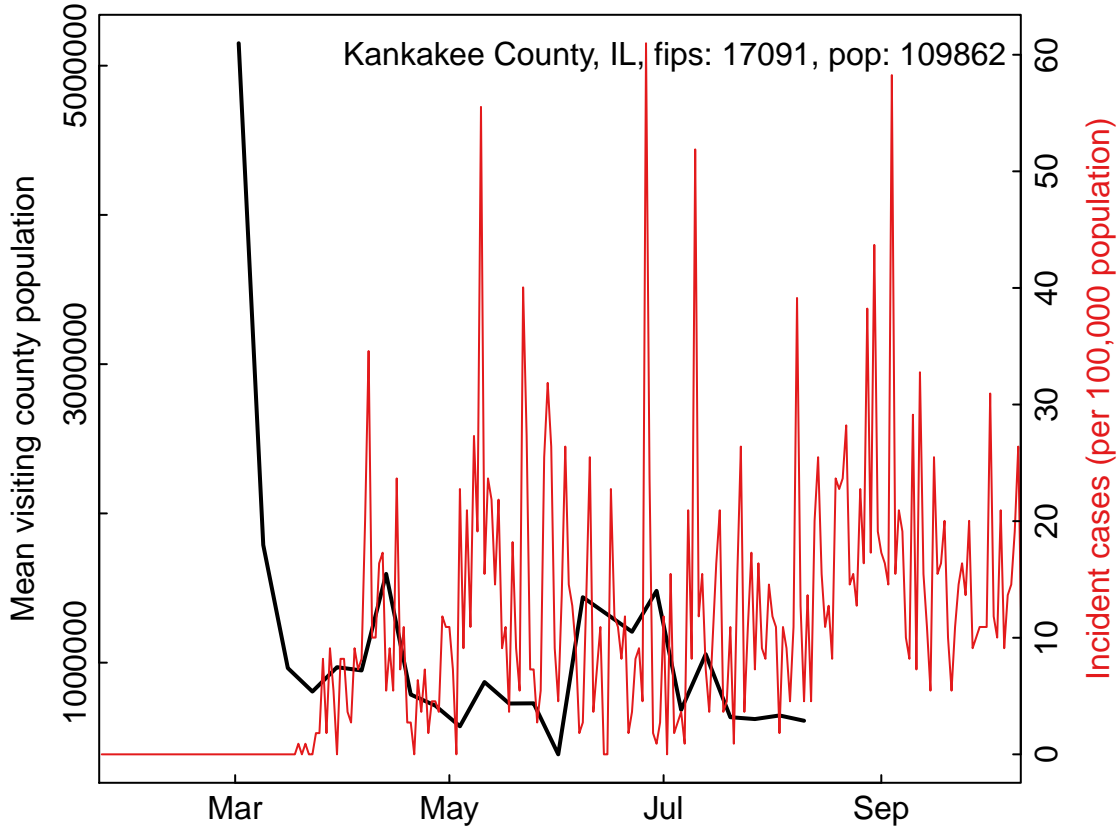



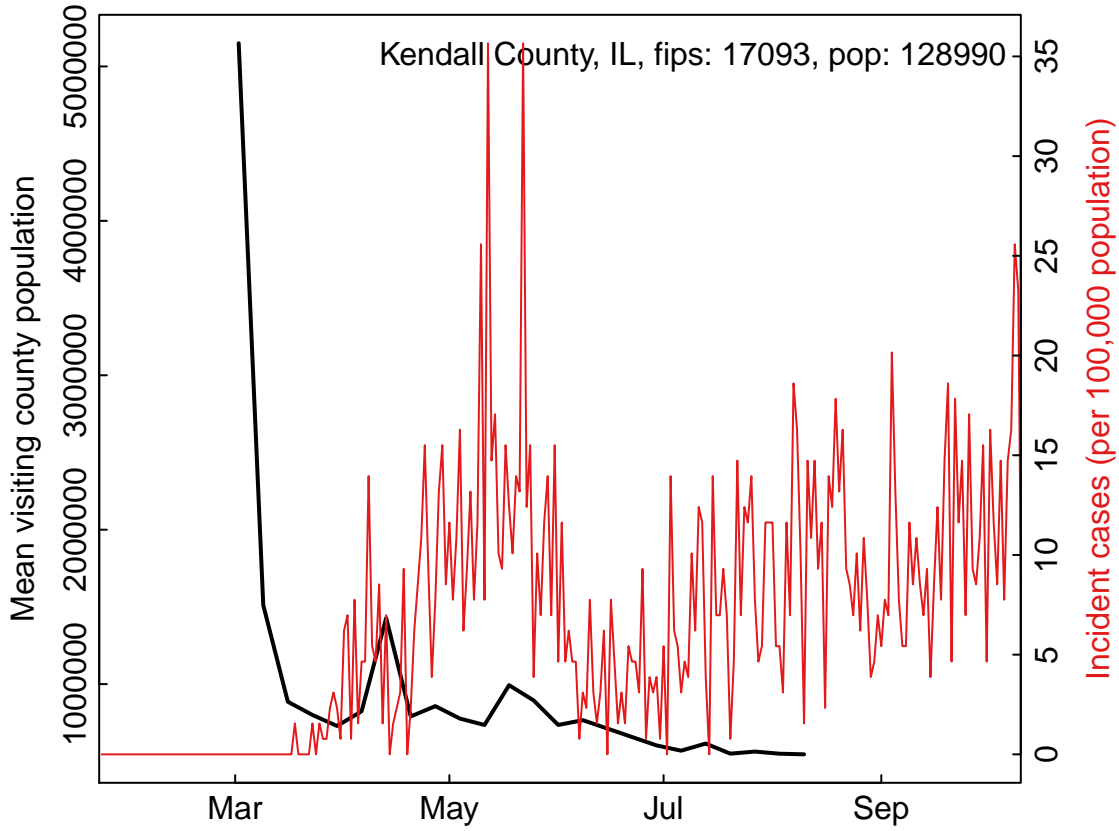

Knox County, IL, fips: 17095, pop: 49699

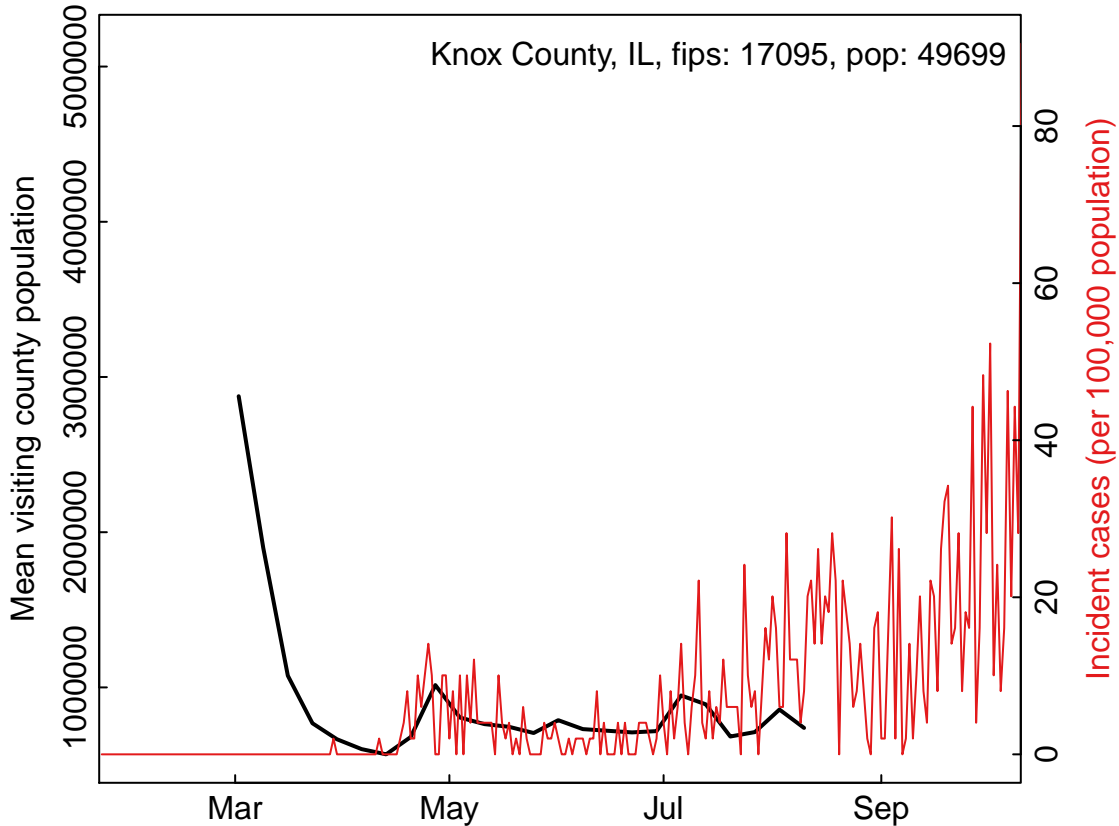

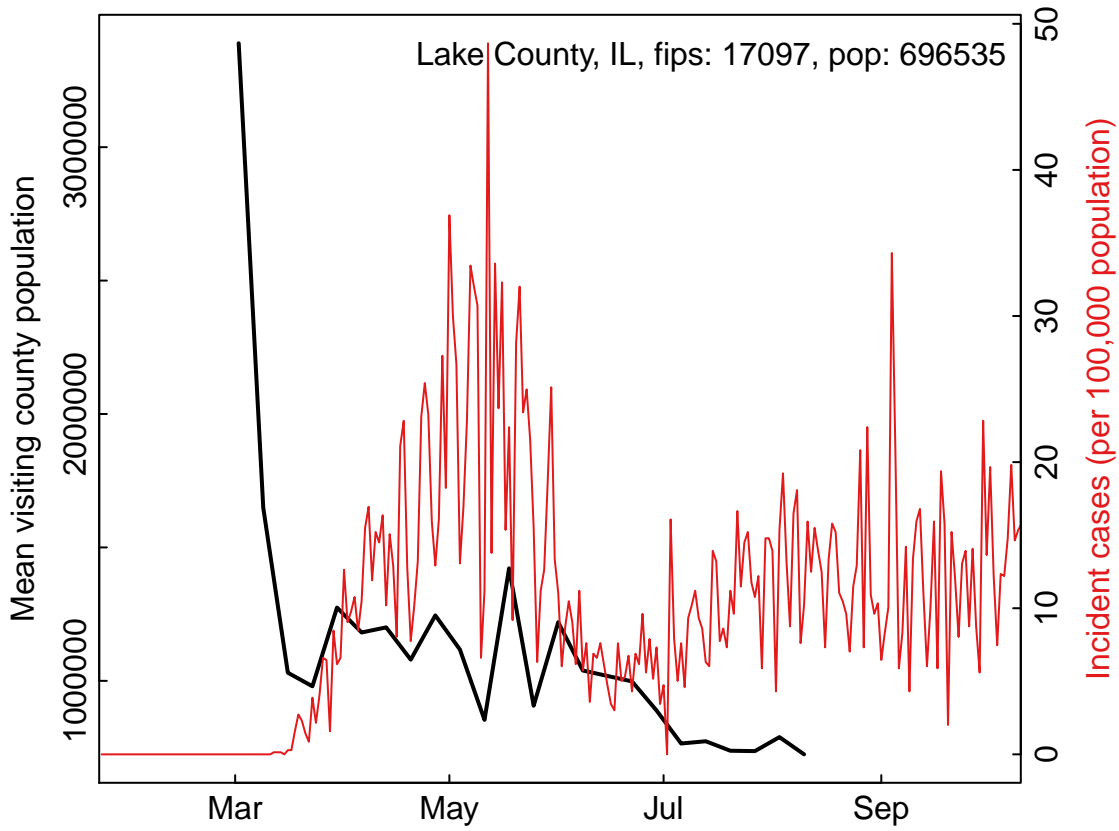

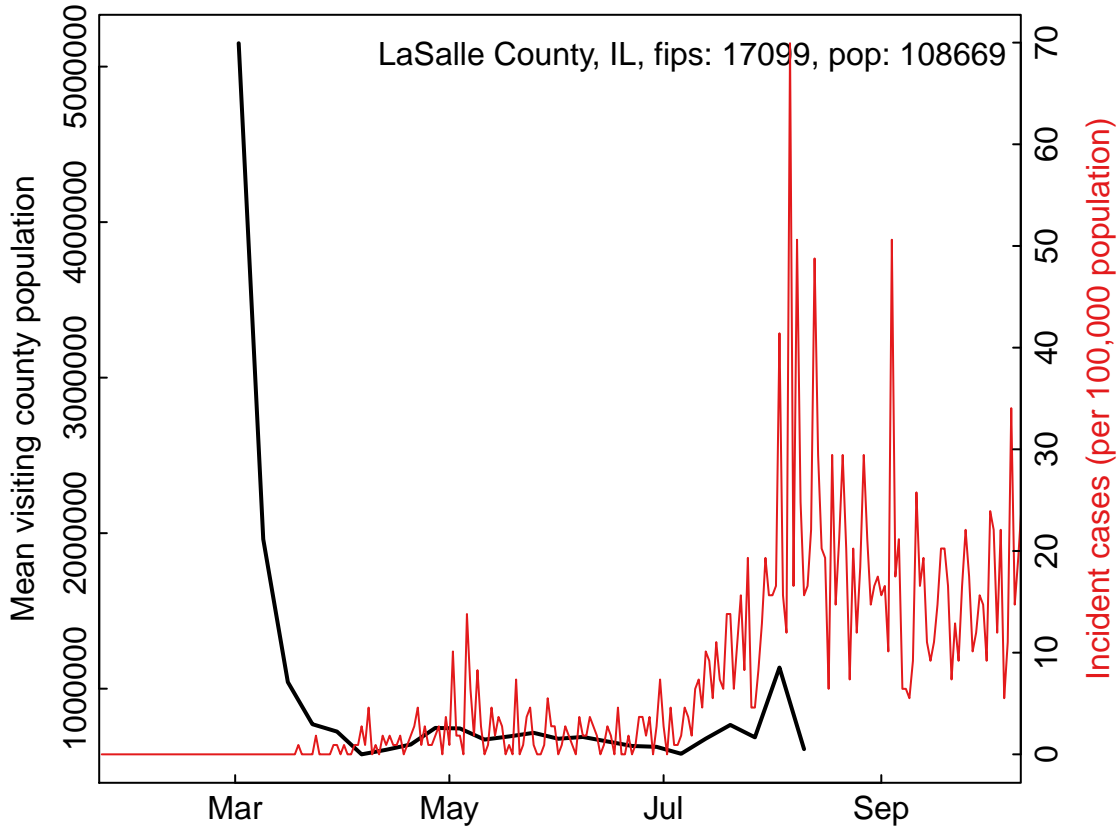

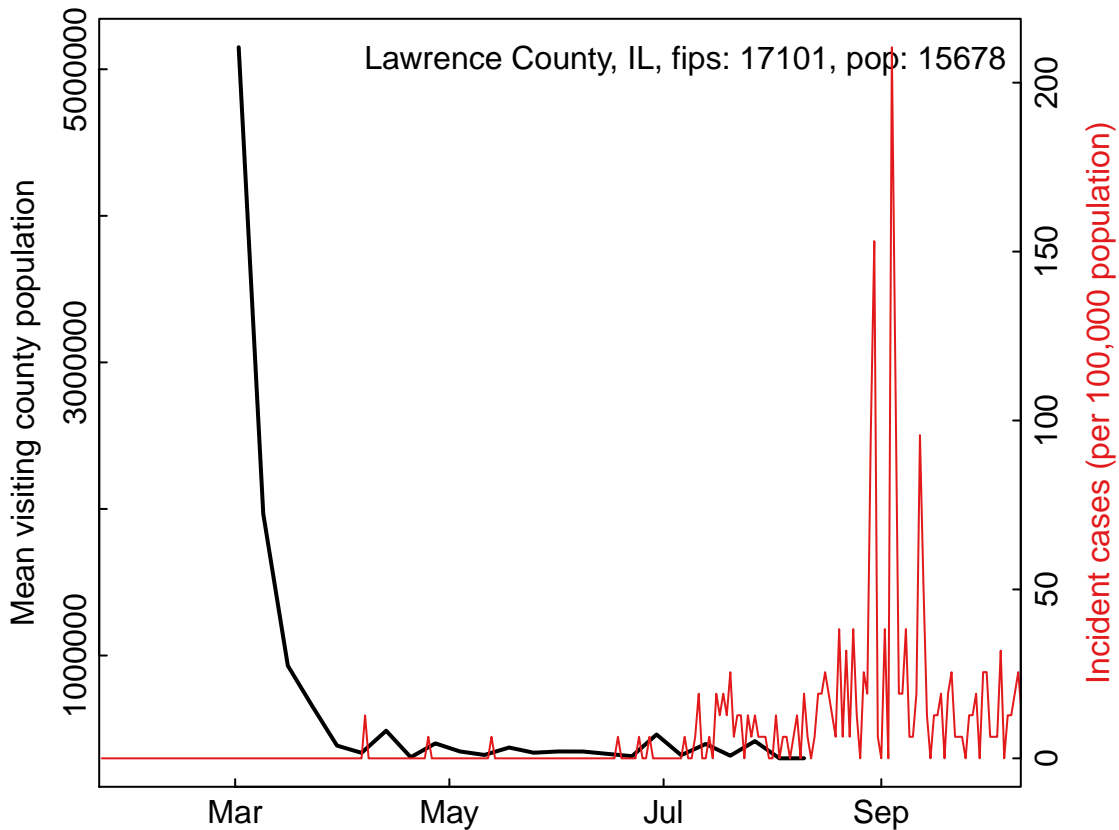

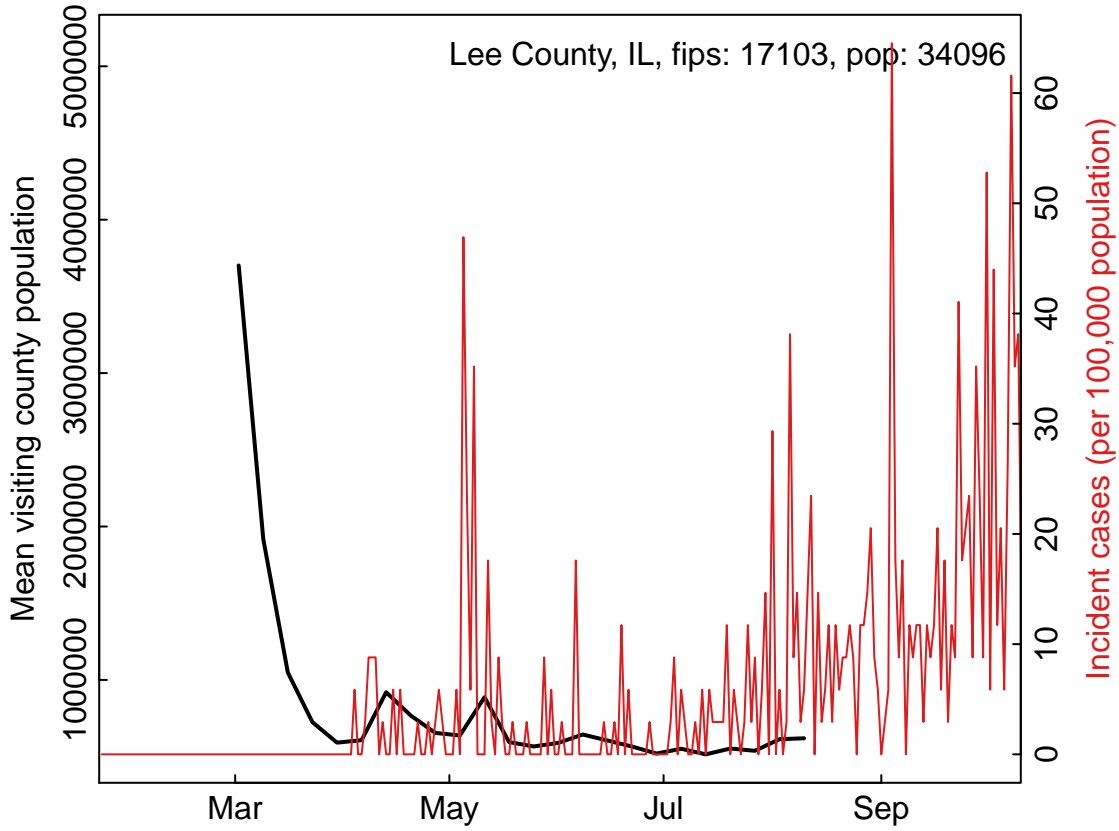

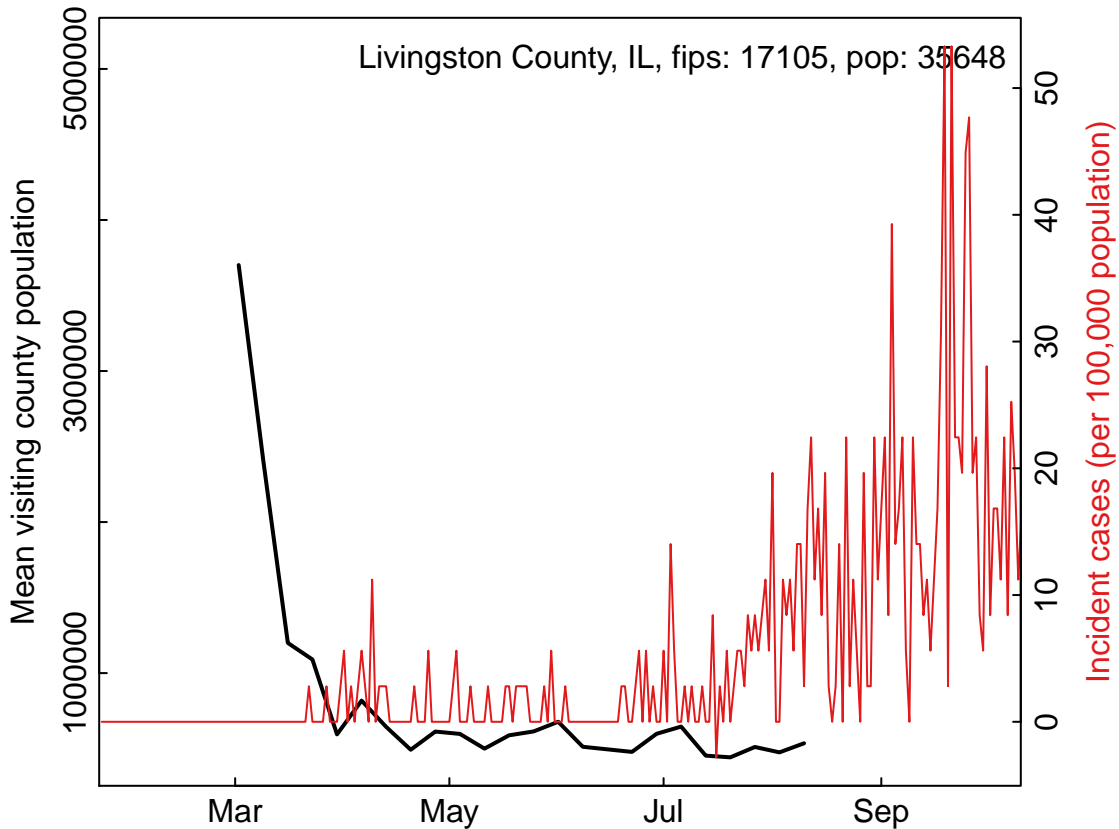

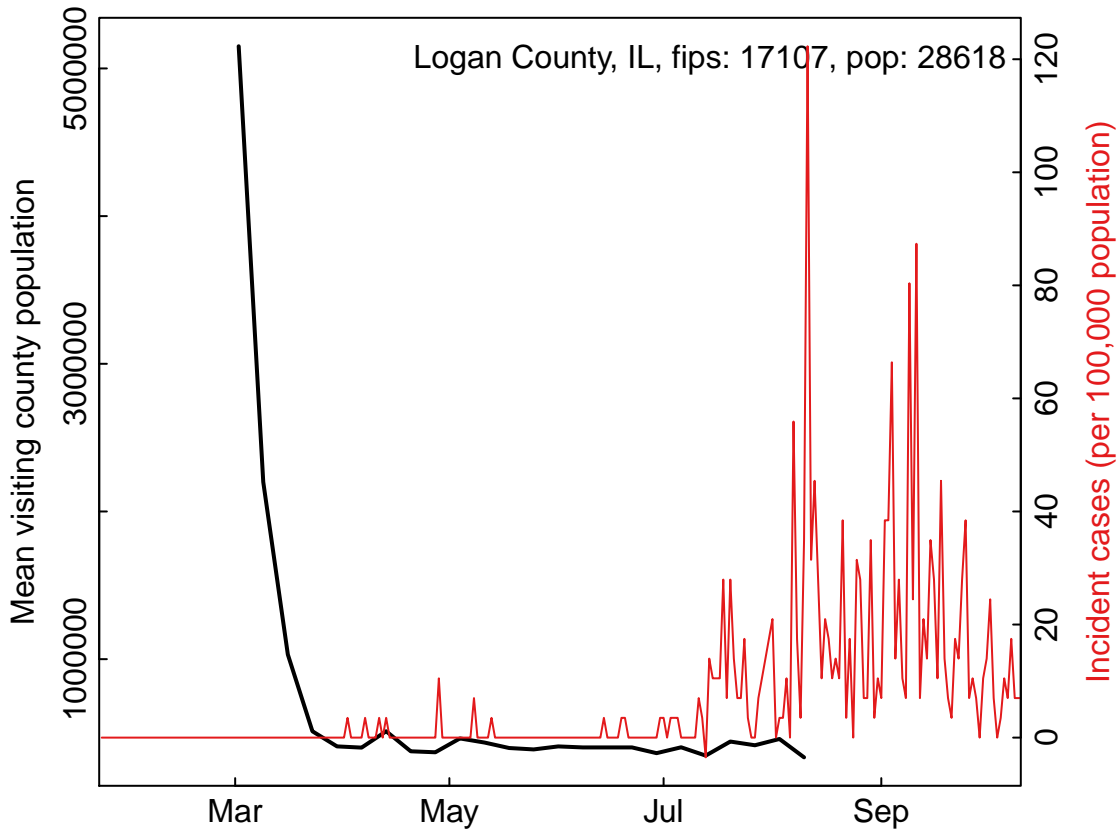



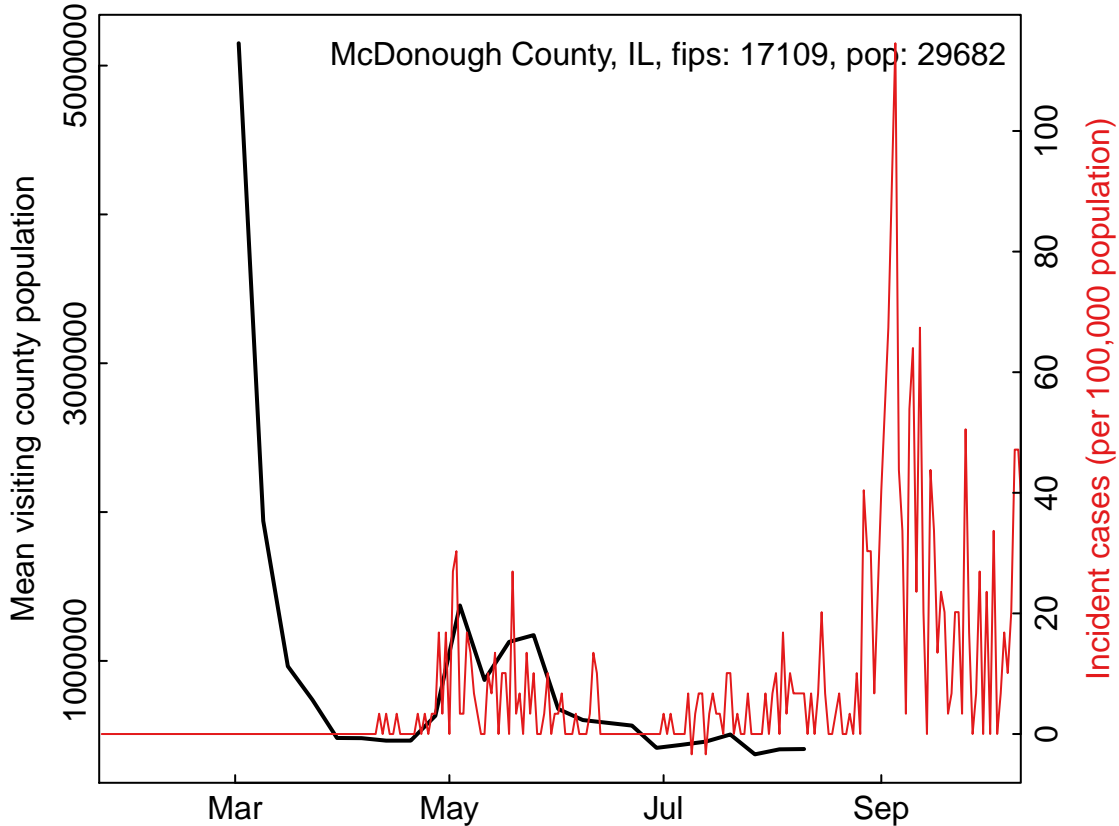

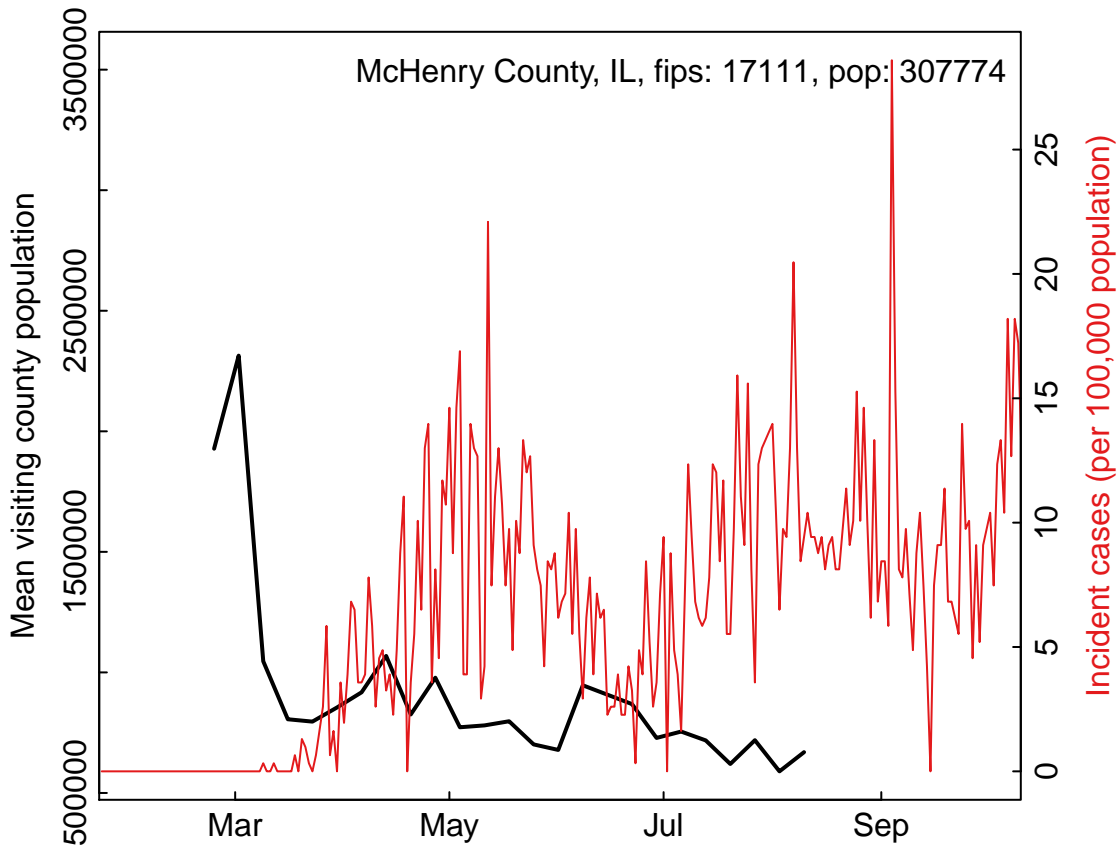

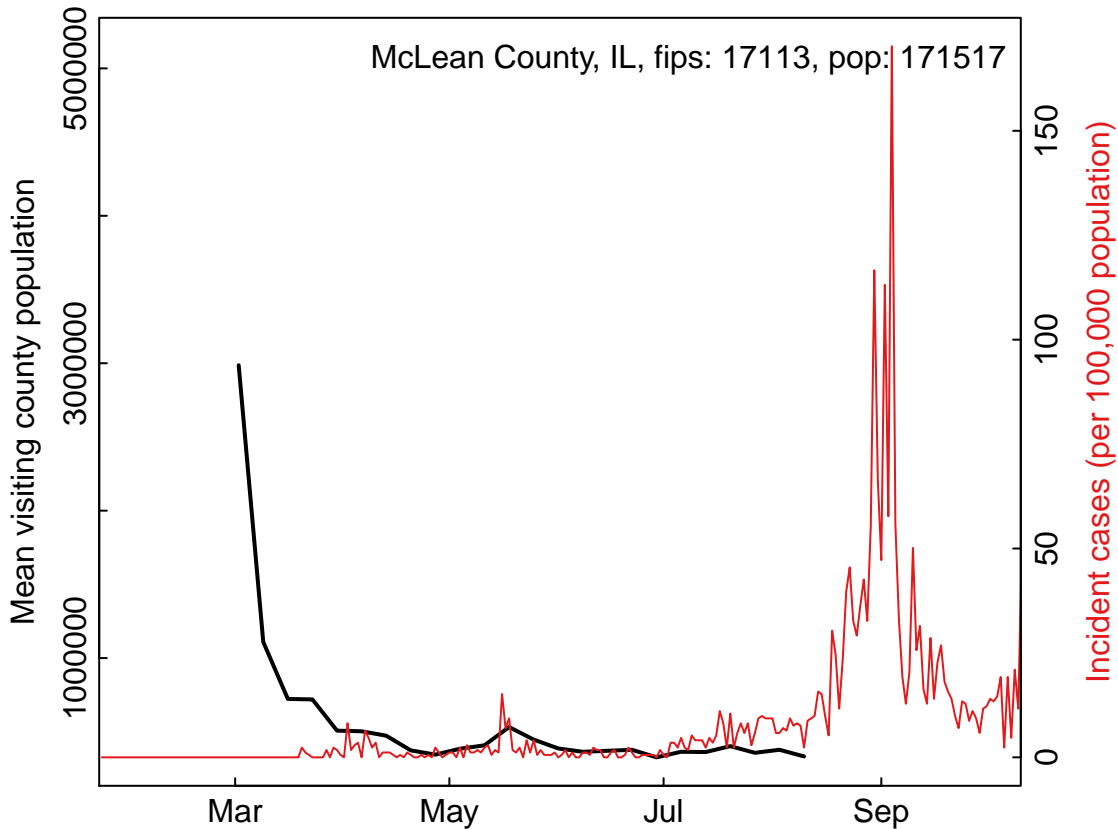

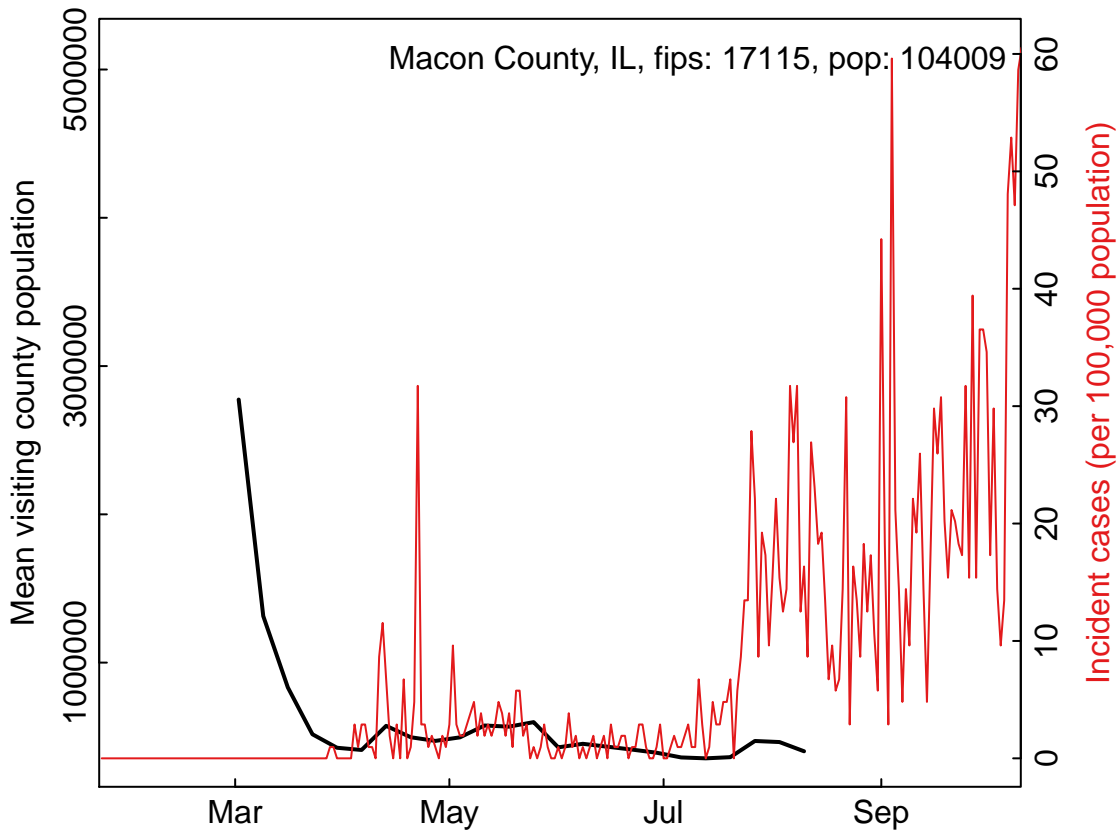

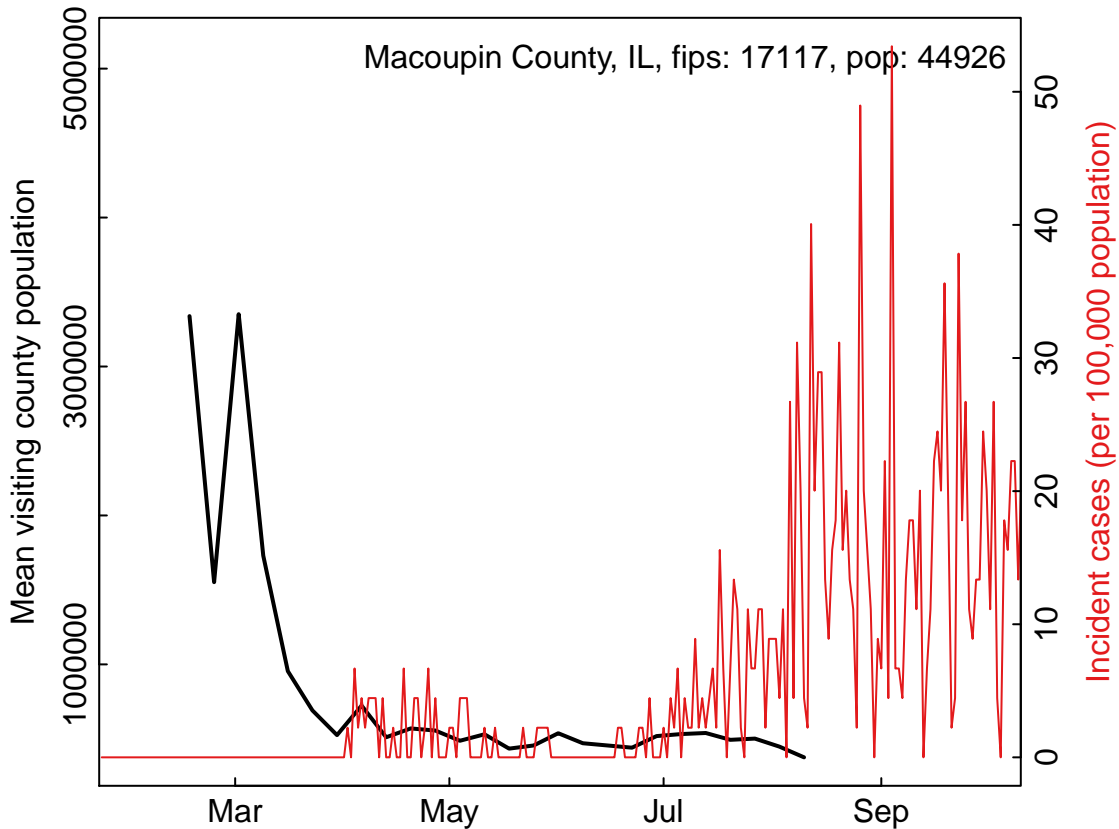

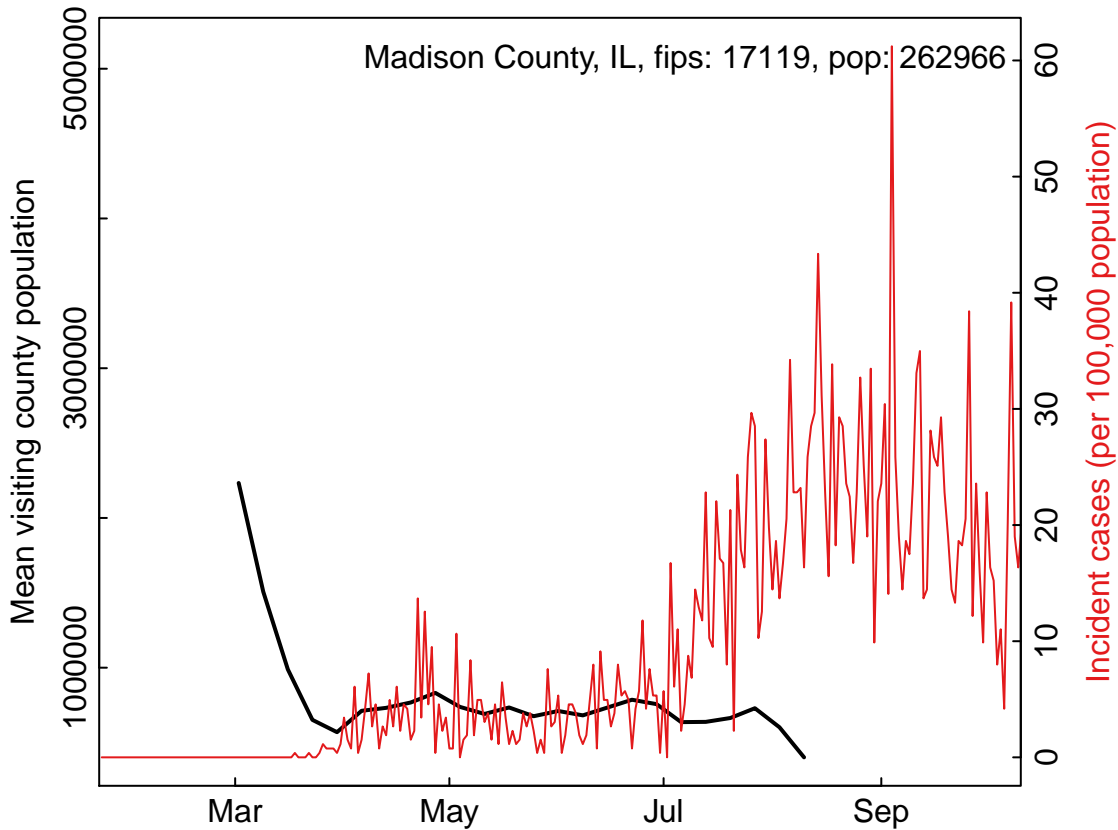

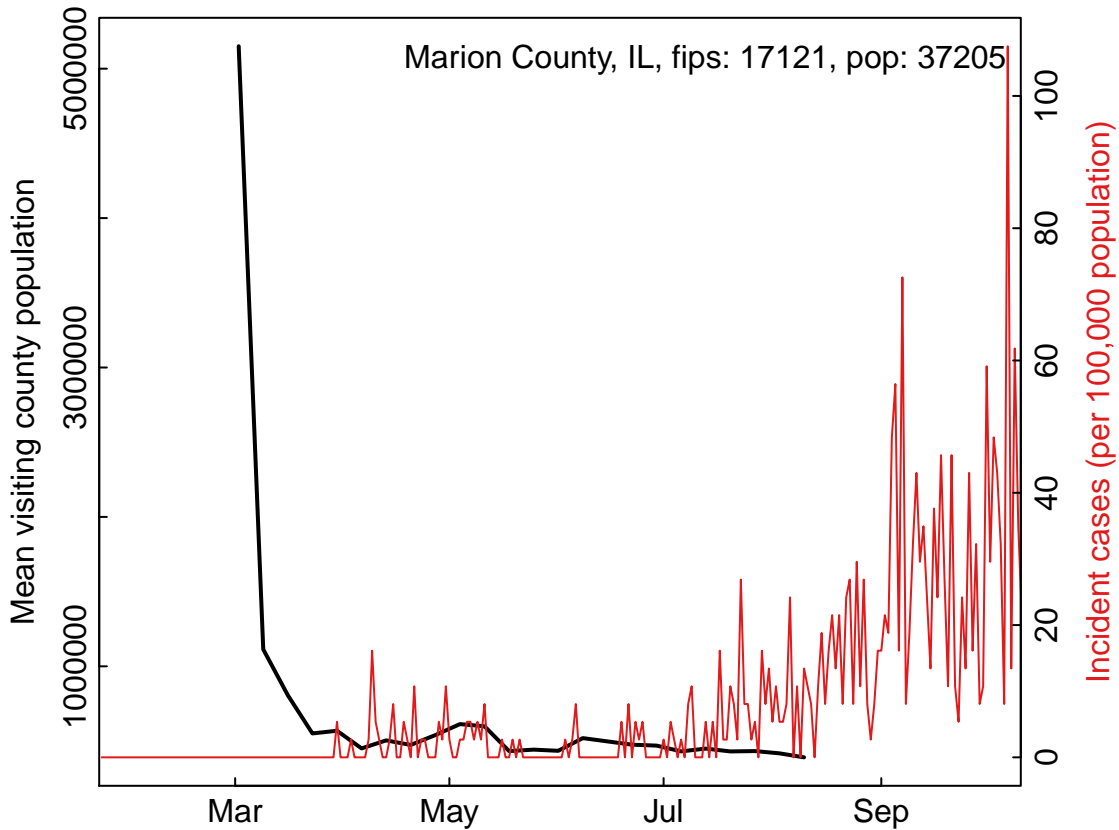

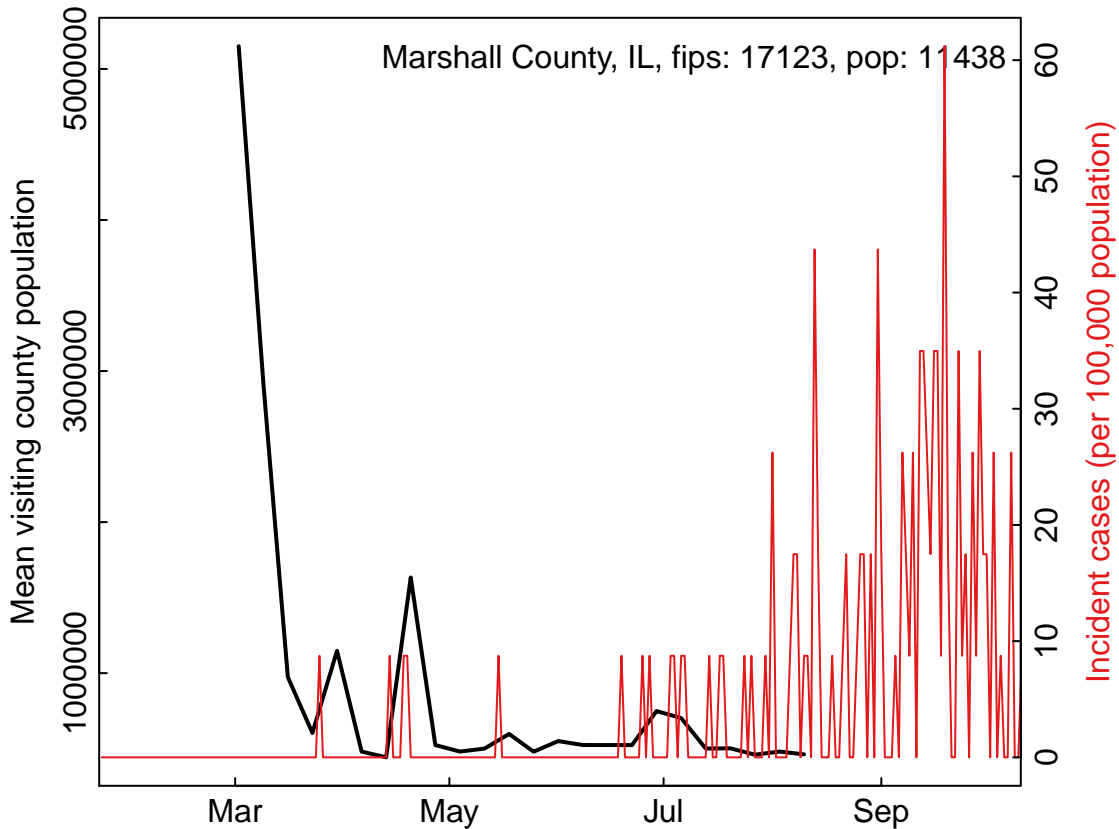



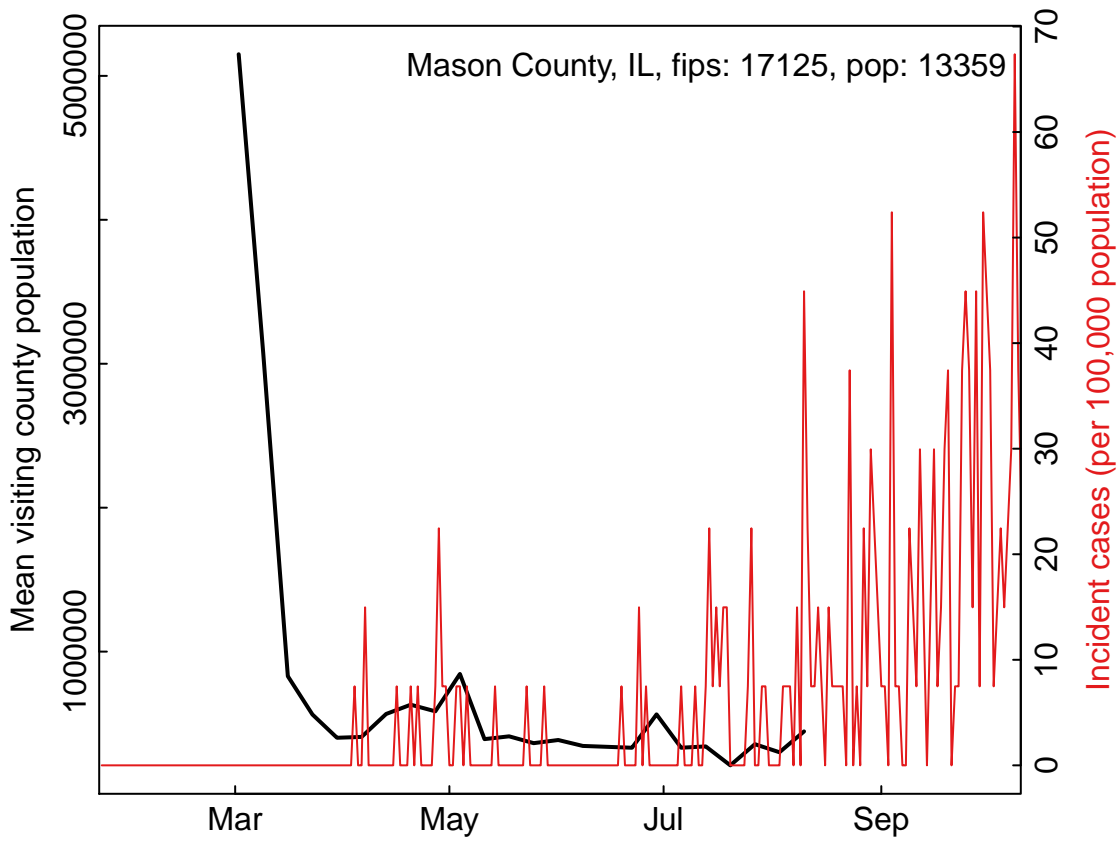

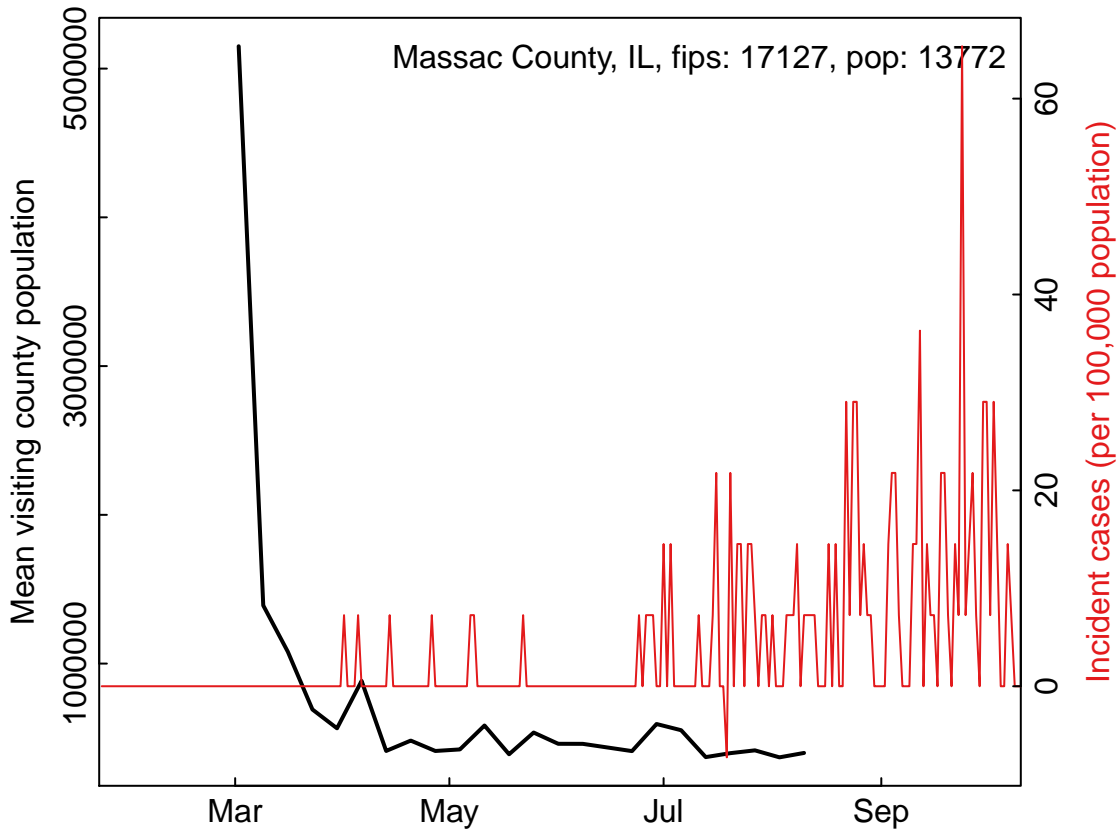

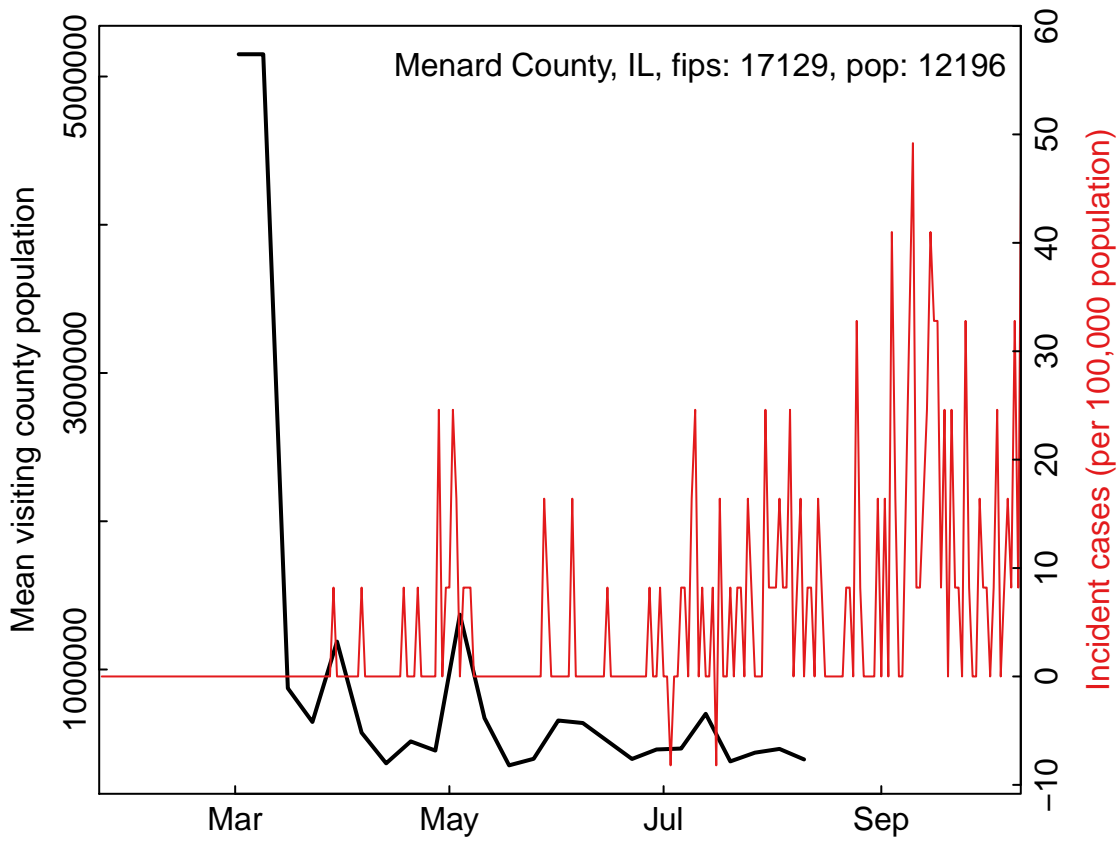

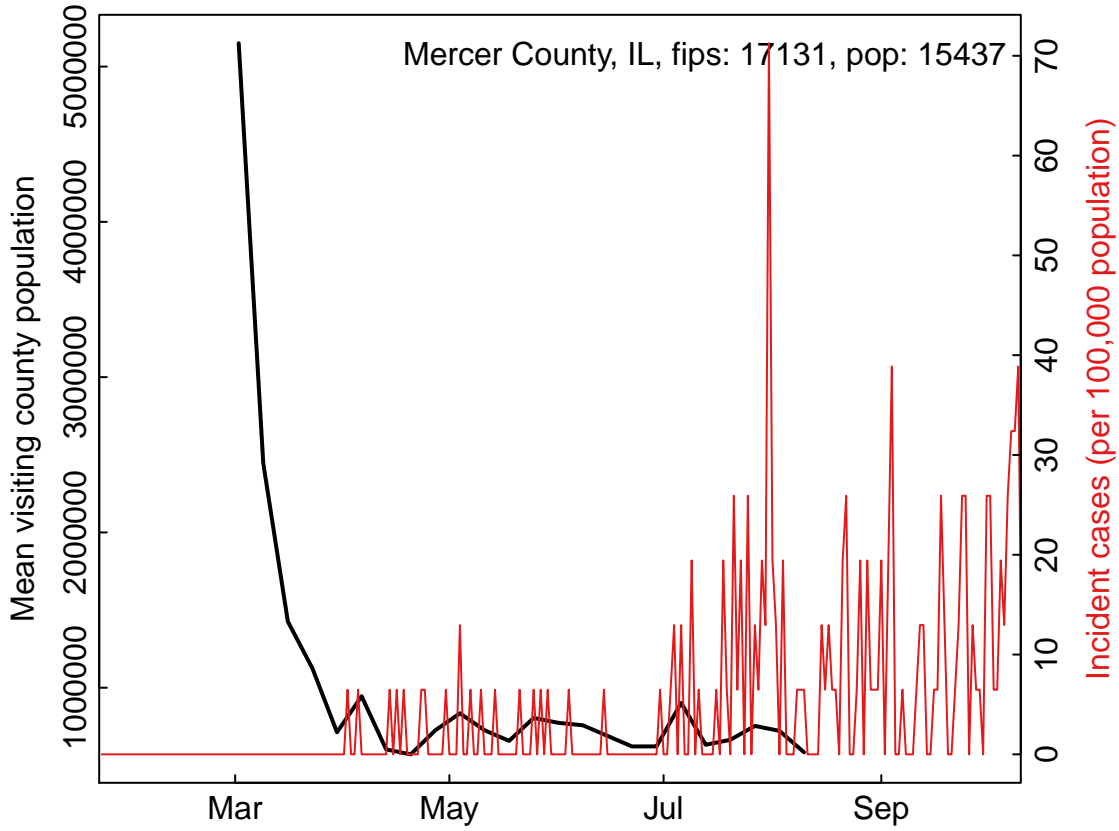

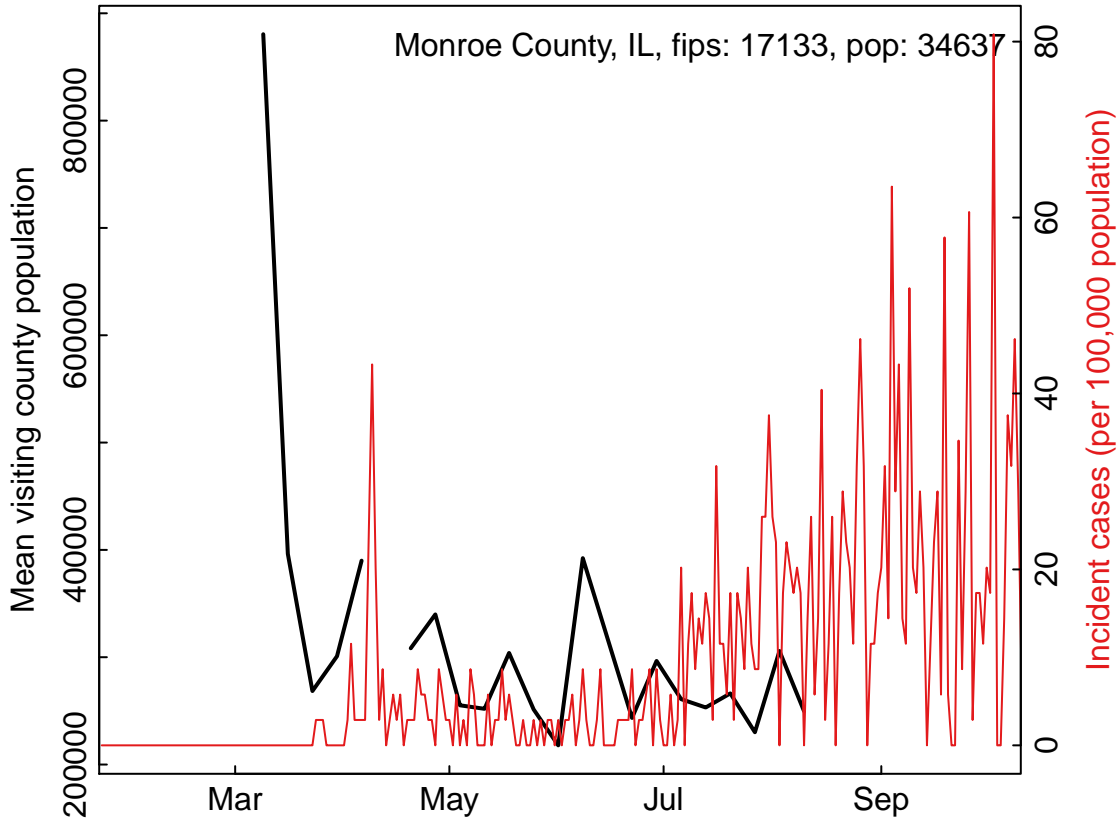

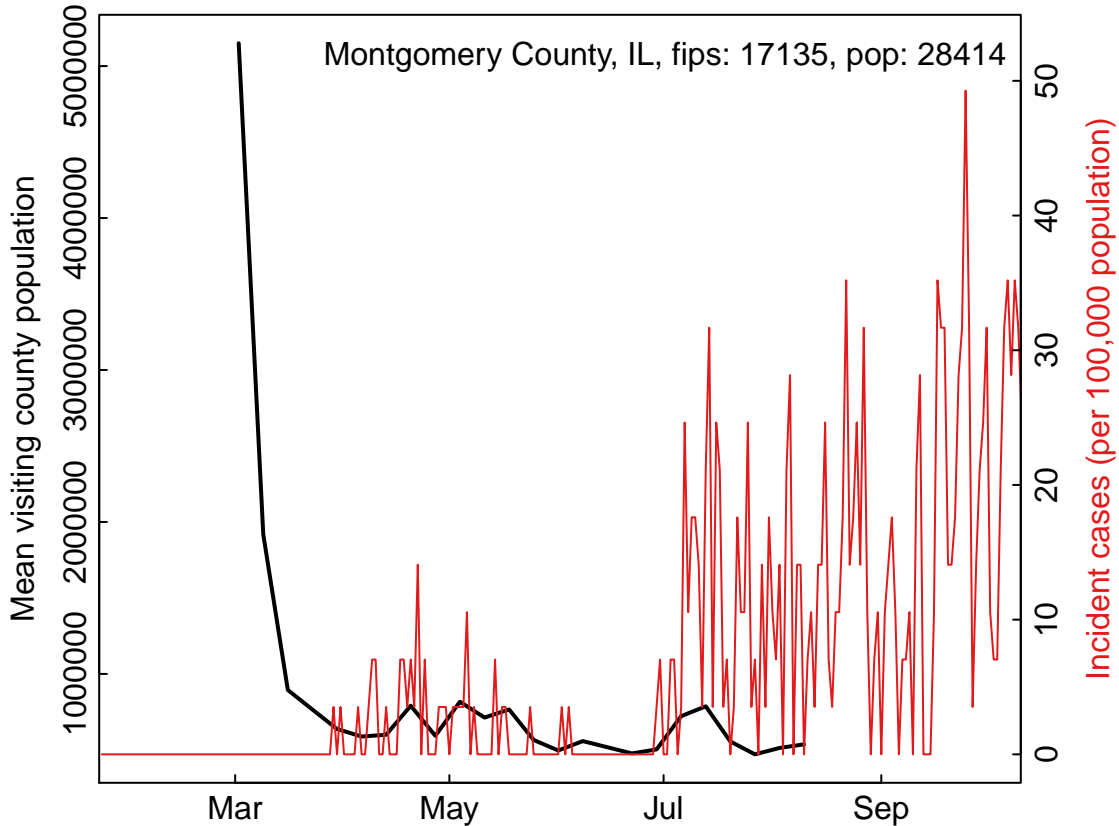

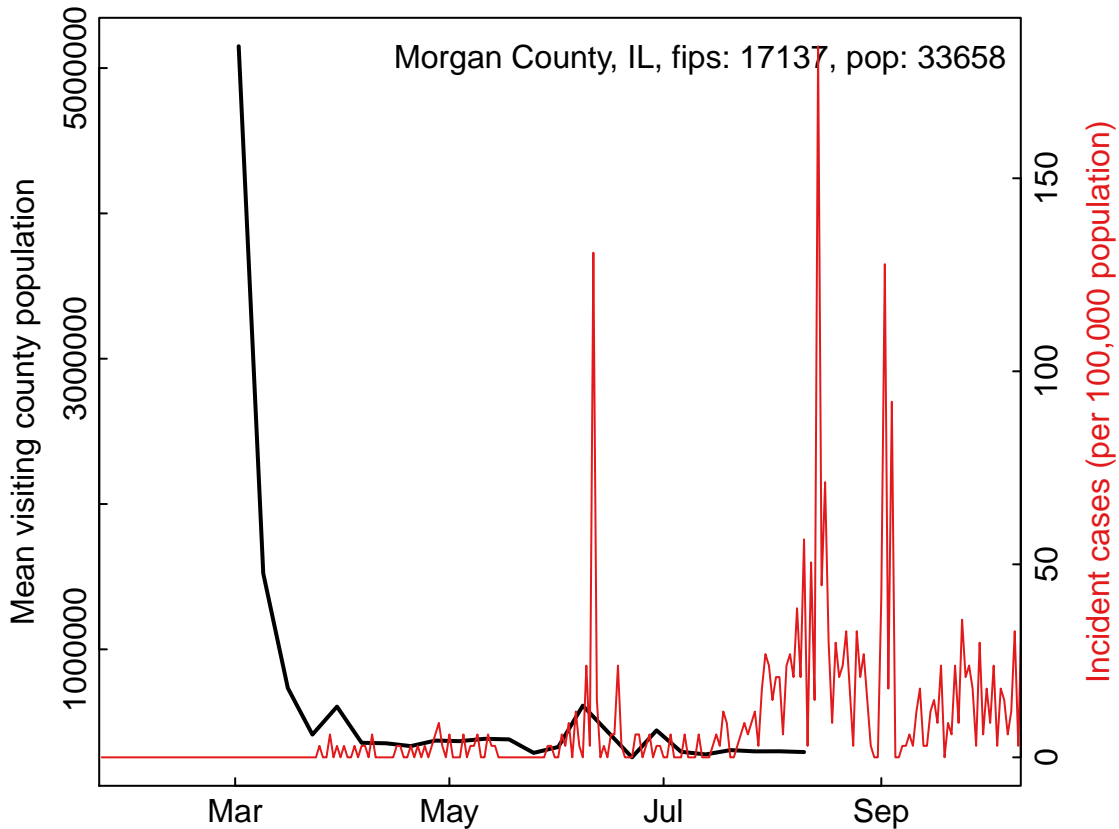

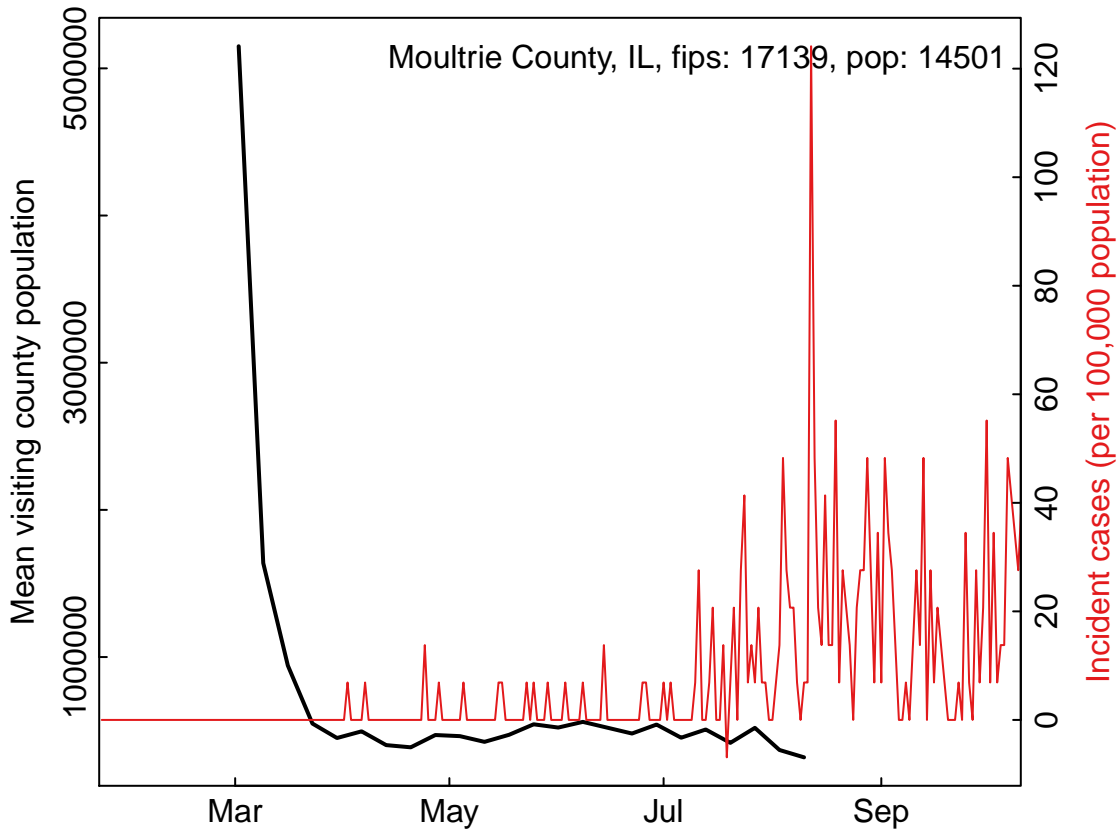



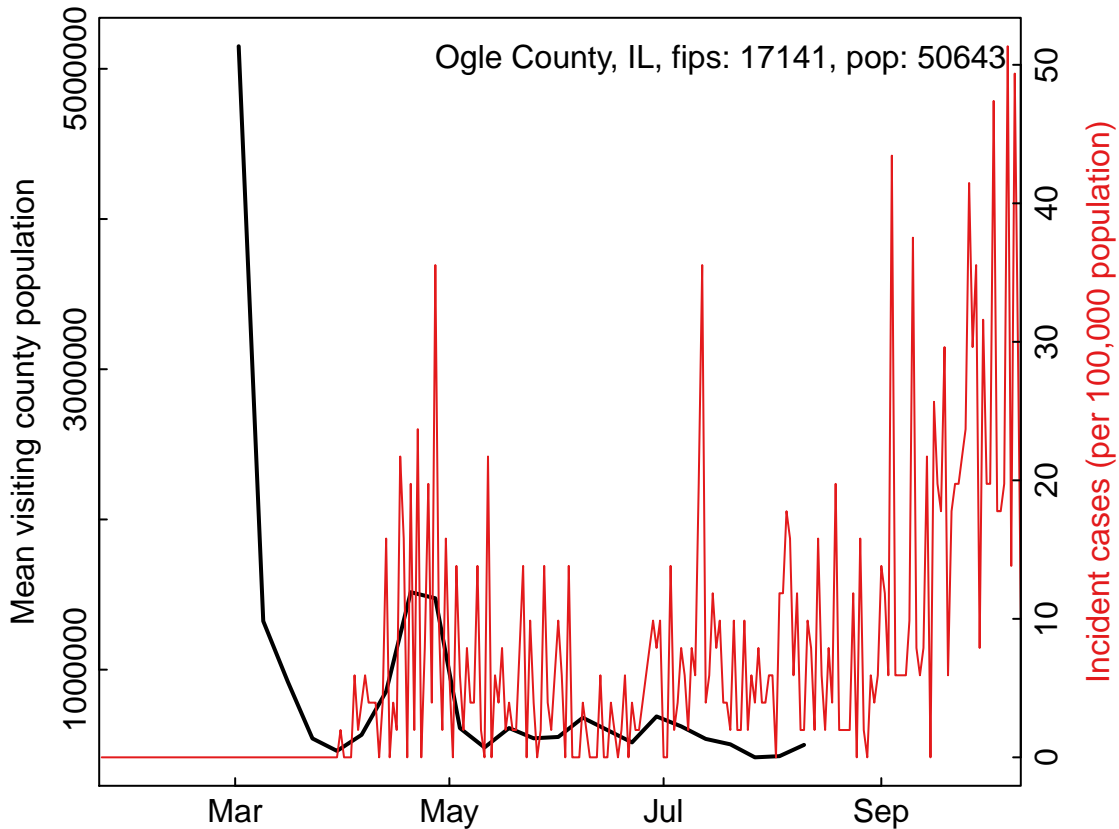

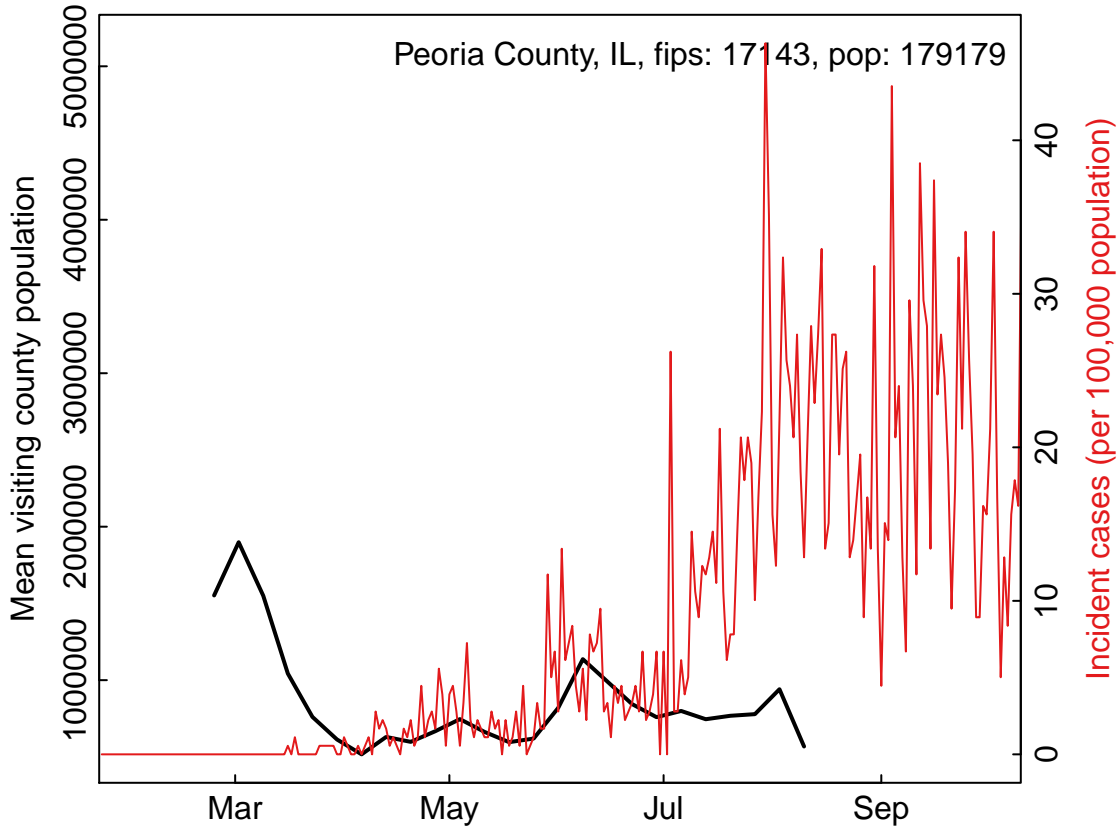

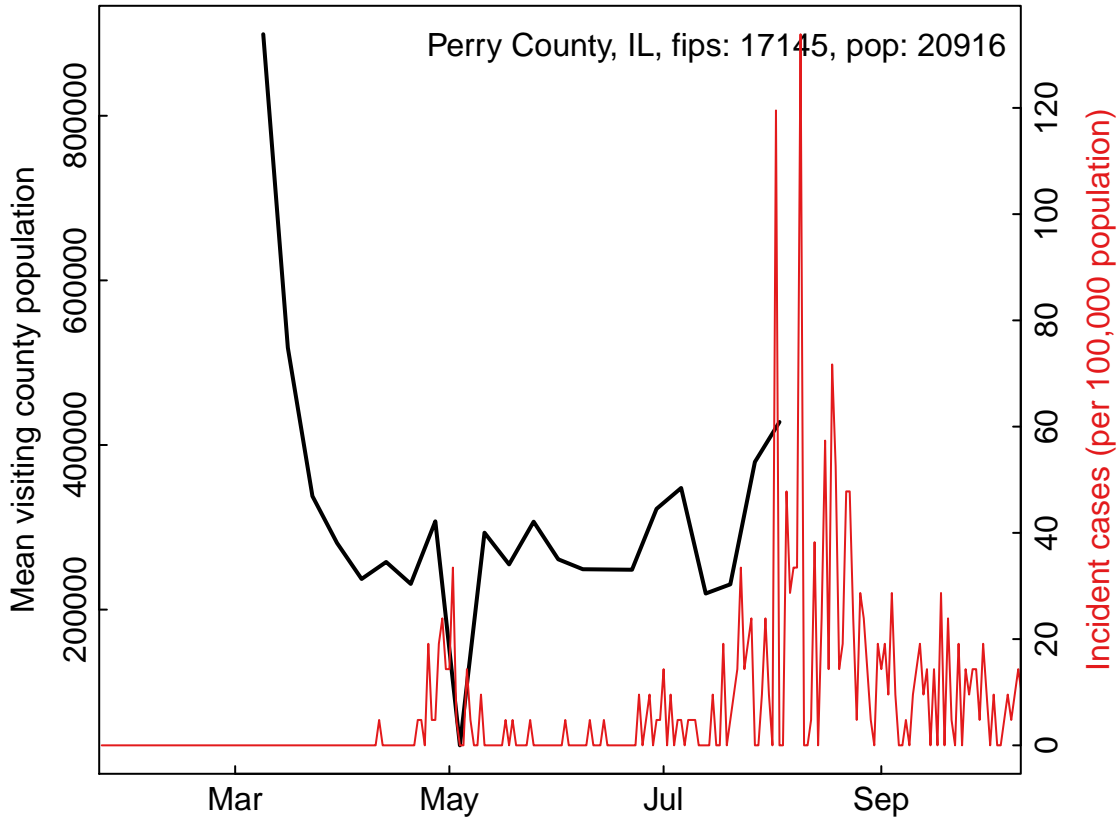

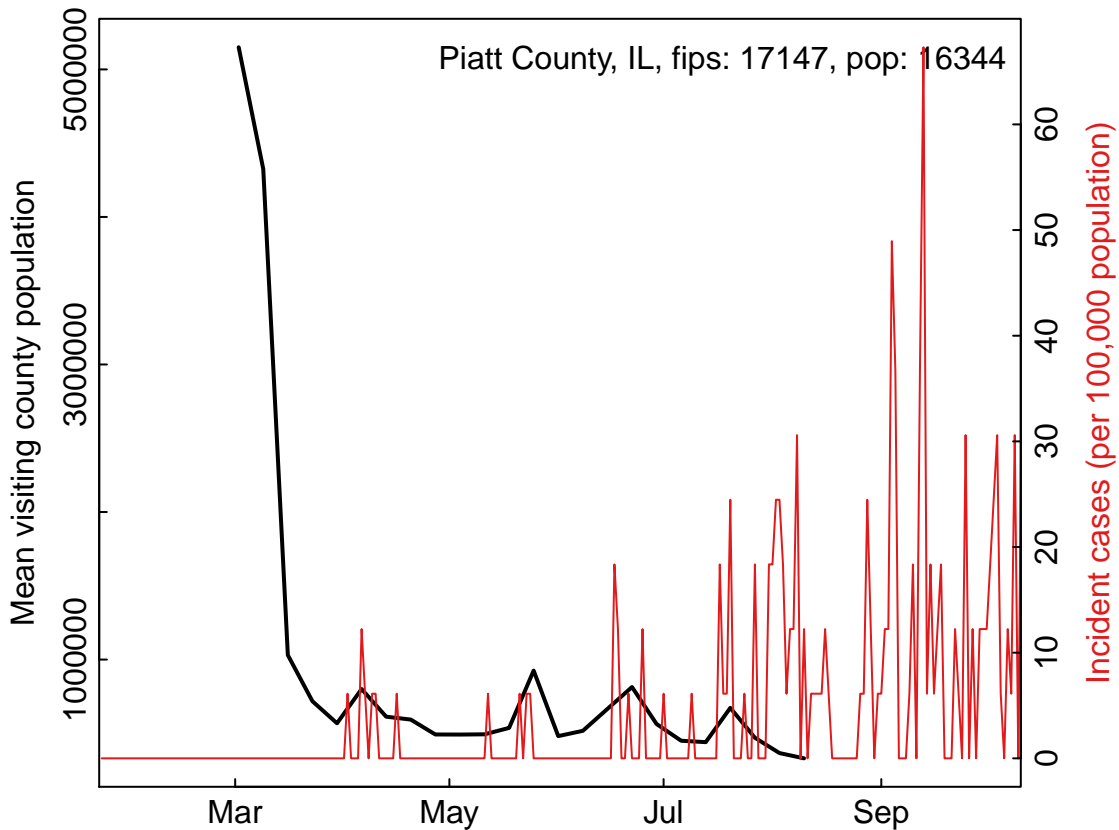

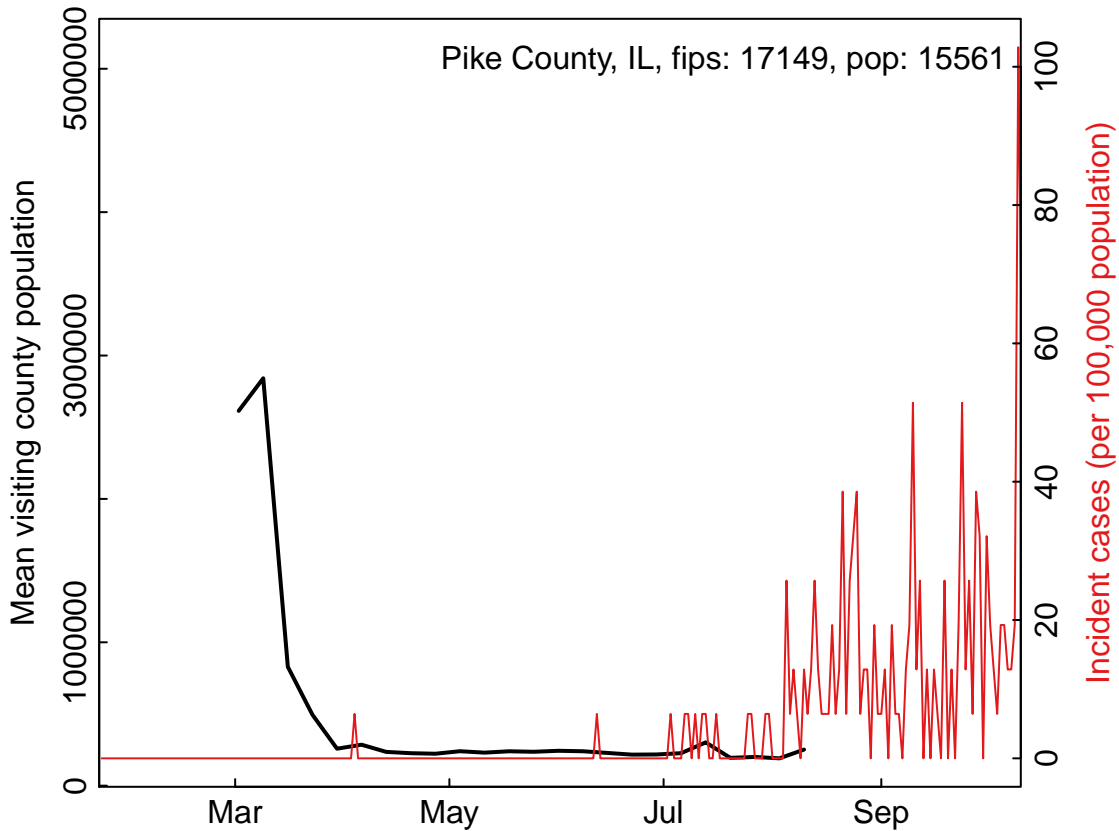

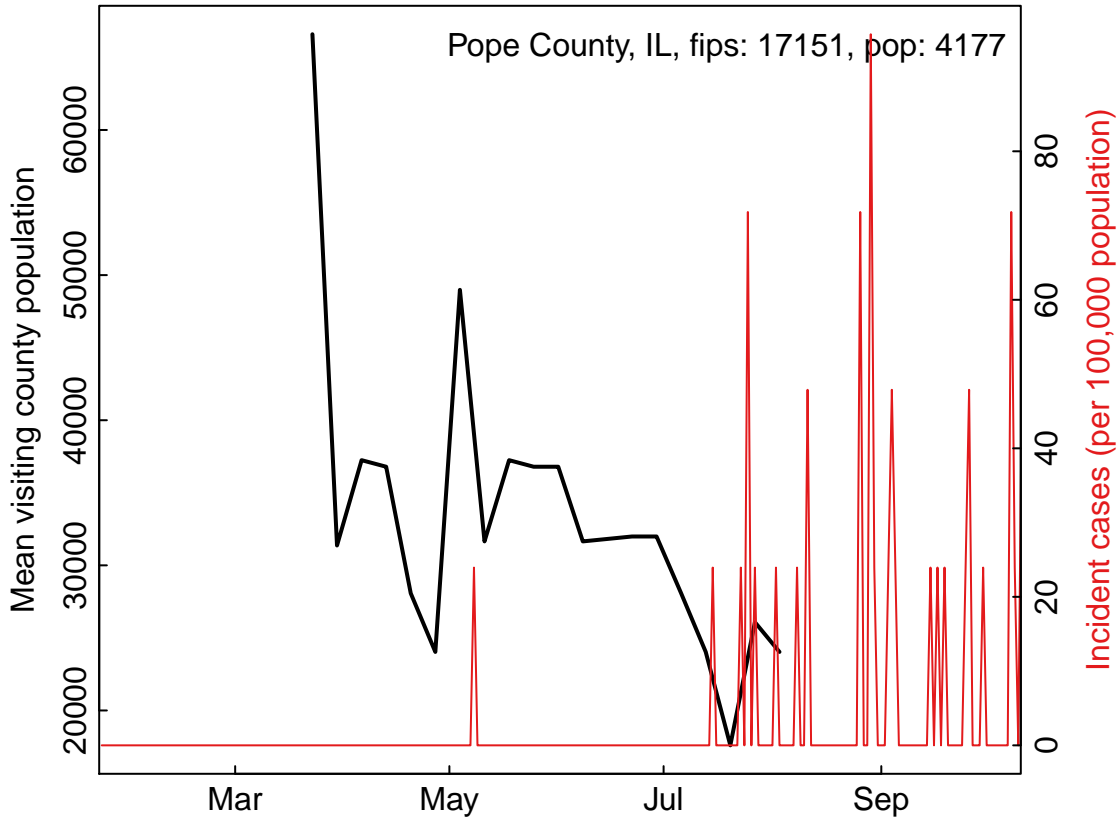

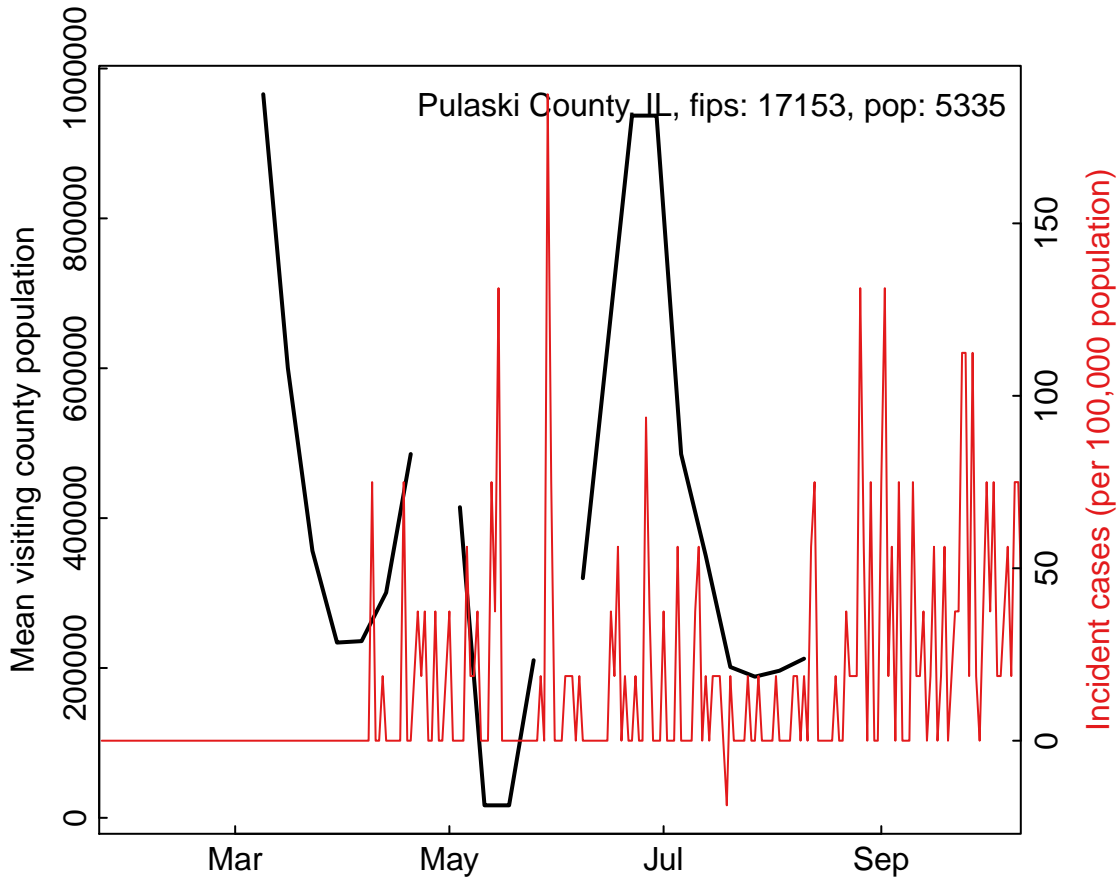

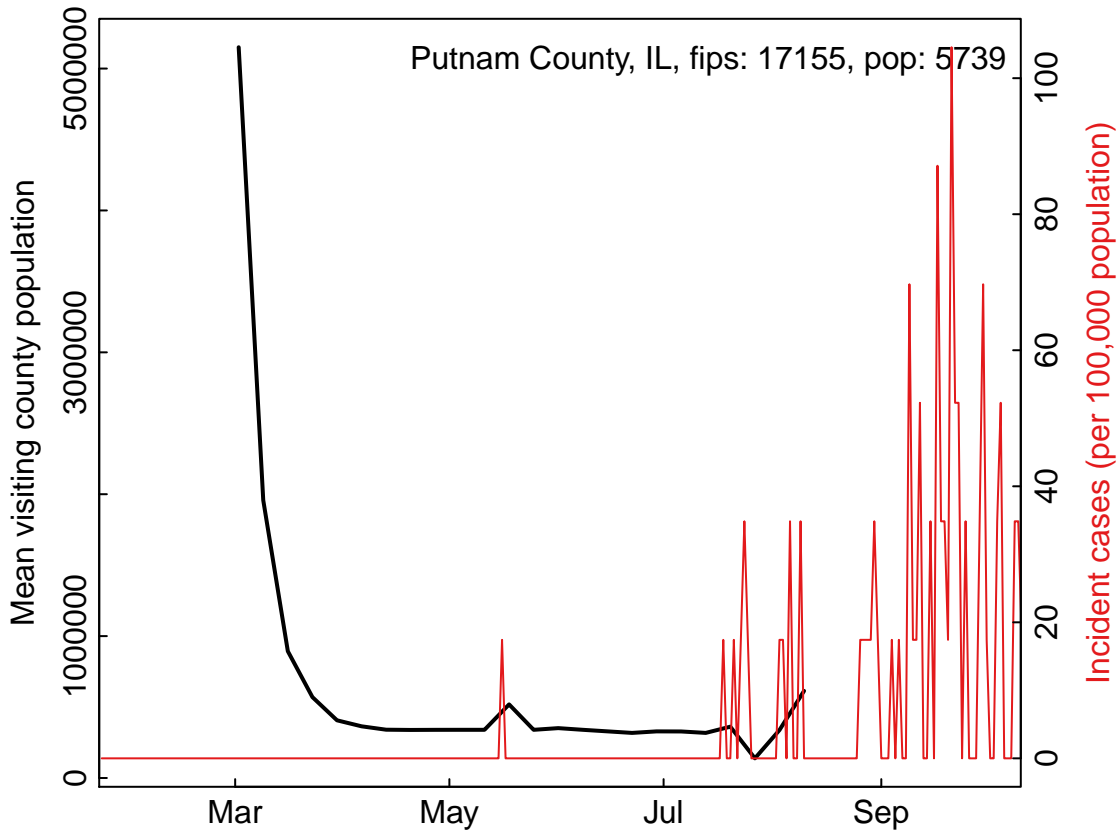



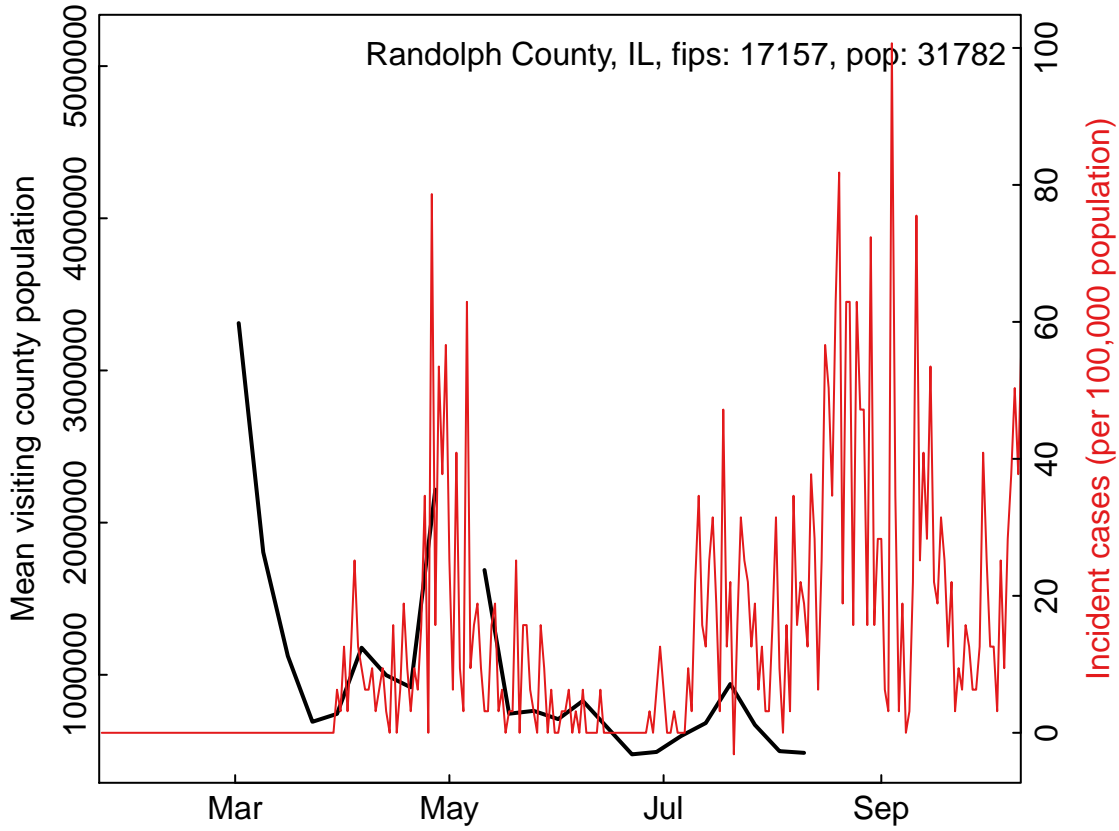

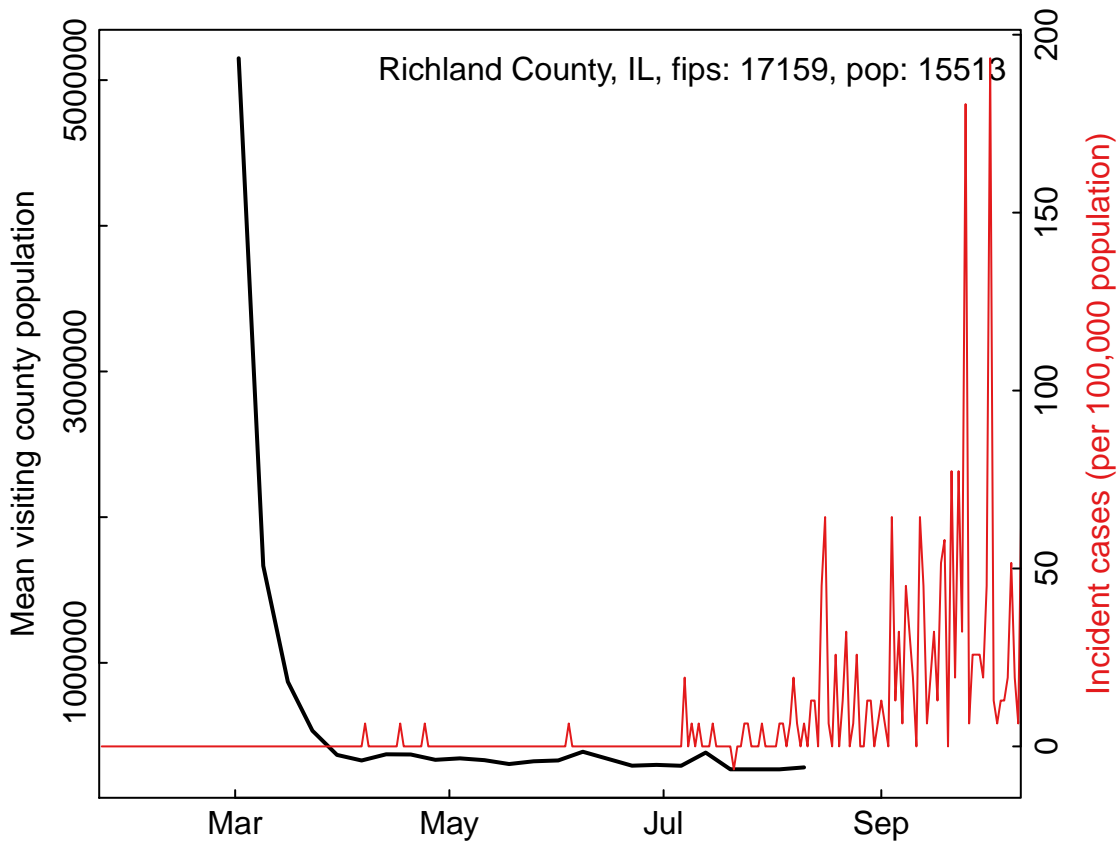

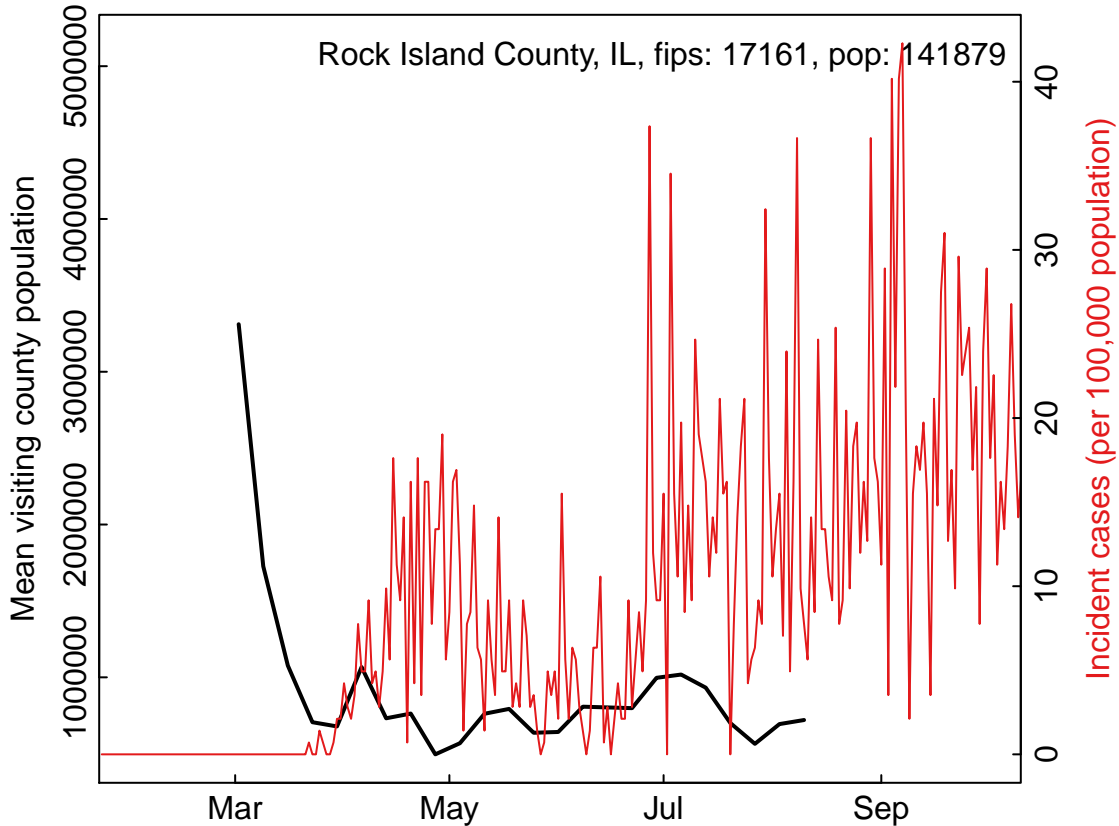

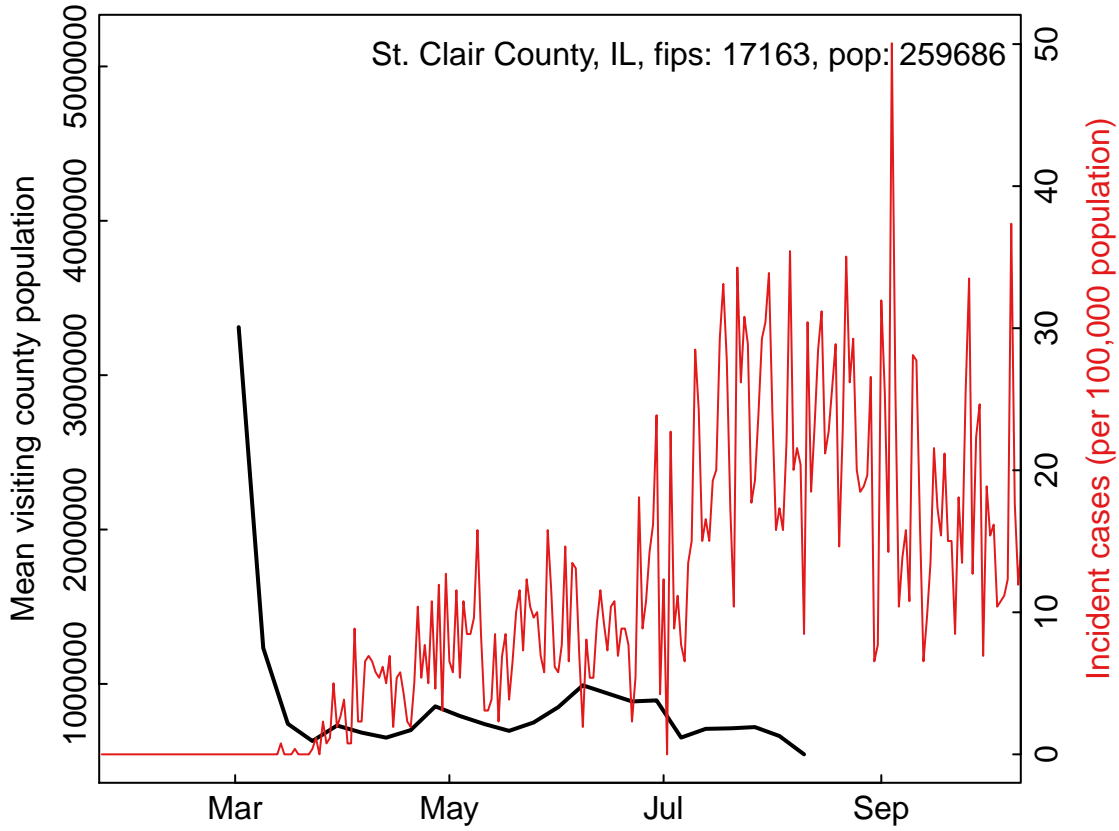

Saline County, IL, fips: 17165, pop: 23491

Mean visiting county population

800000  
600000  
400000  
200000

Mar May Jul Sep

Incident cases (per 100,000 population)

80  
60  
40  
20  
0

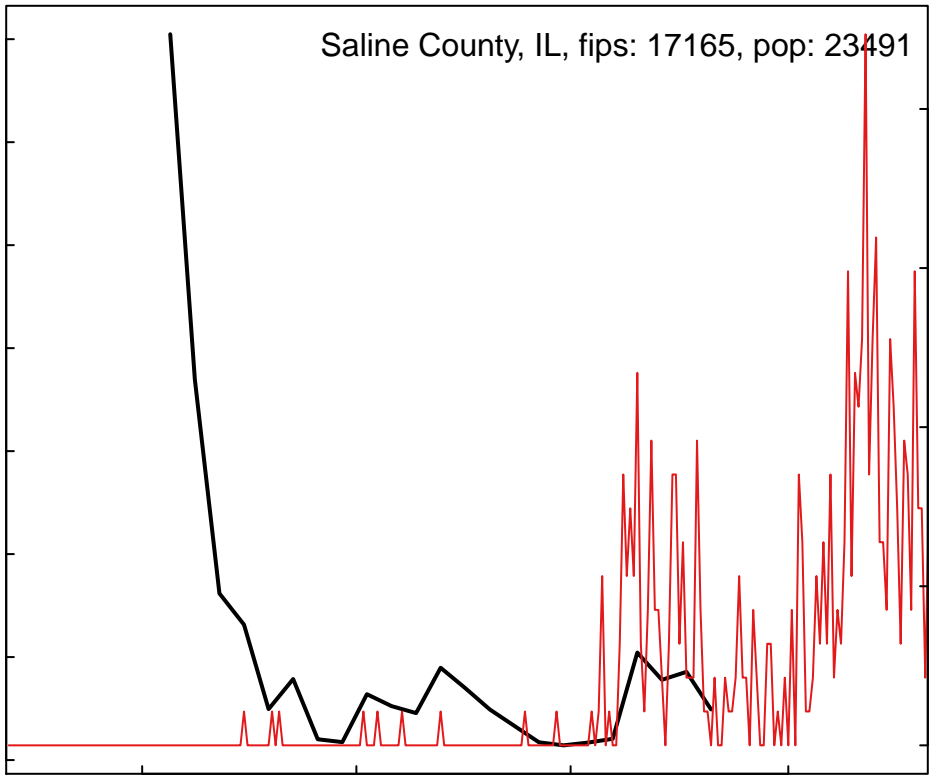

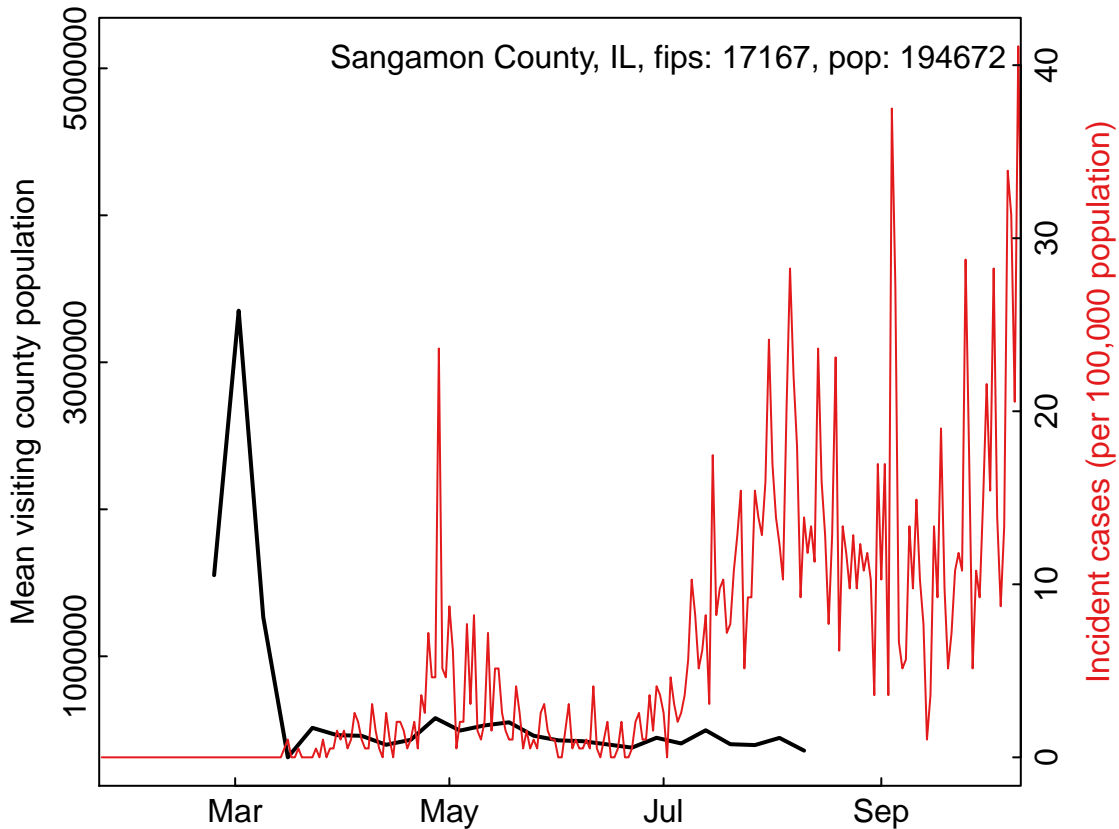

Schuyler County, IL, fips: 17169, pop: 6768

Mean visiting county population

600000  
400000  
200000

Mar

May

Jul

Sep

60  
40  
20  
0

Incident cases (per 100,000 population)

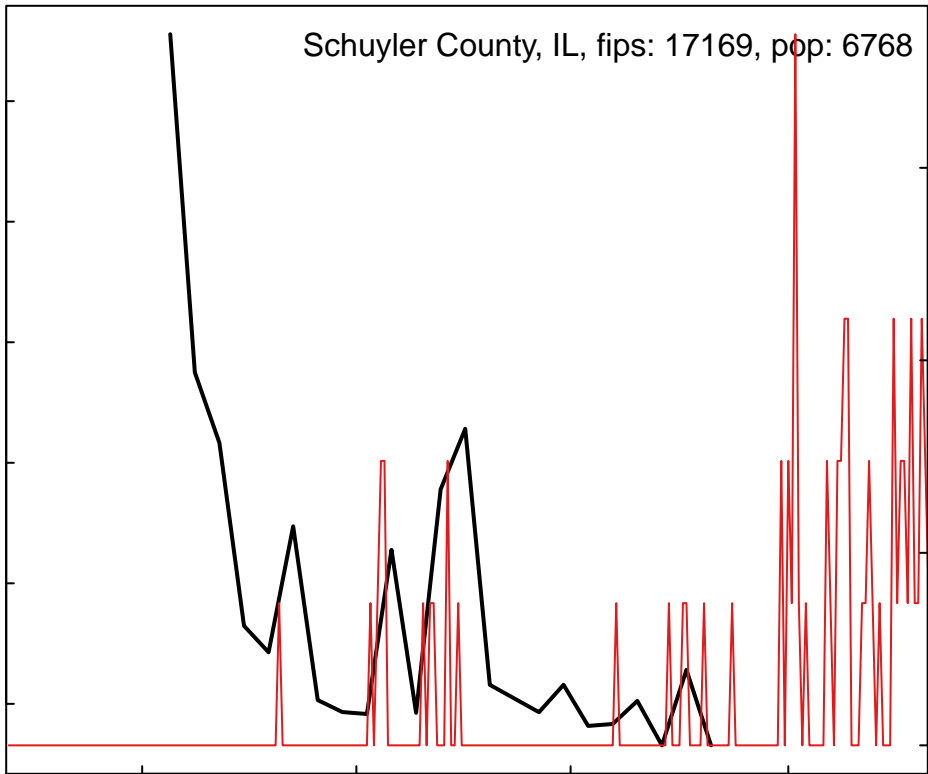

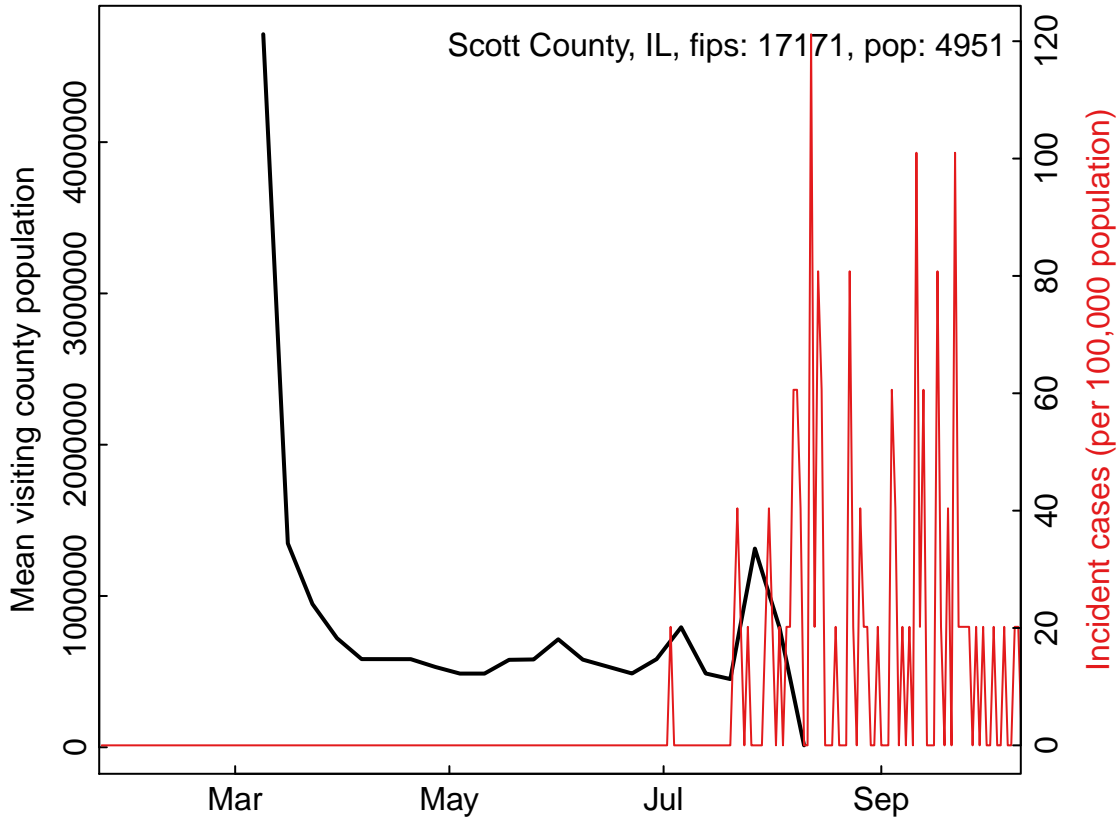



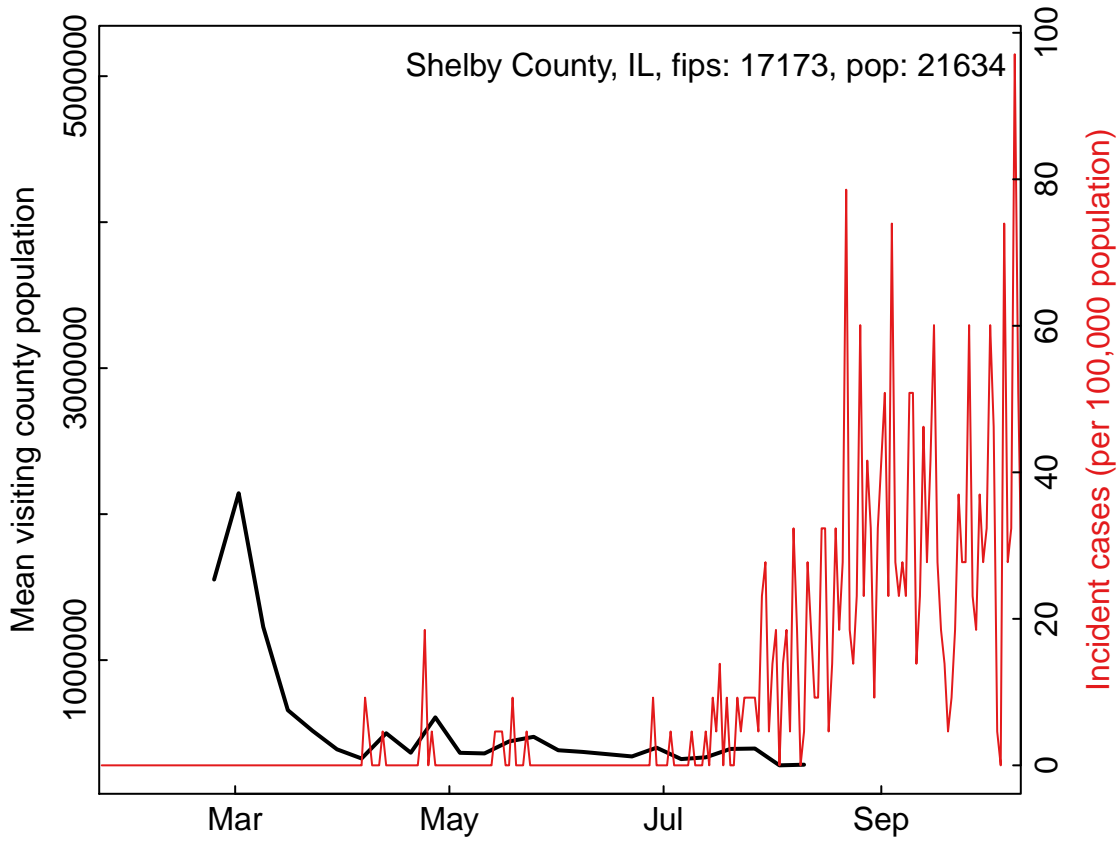

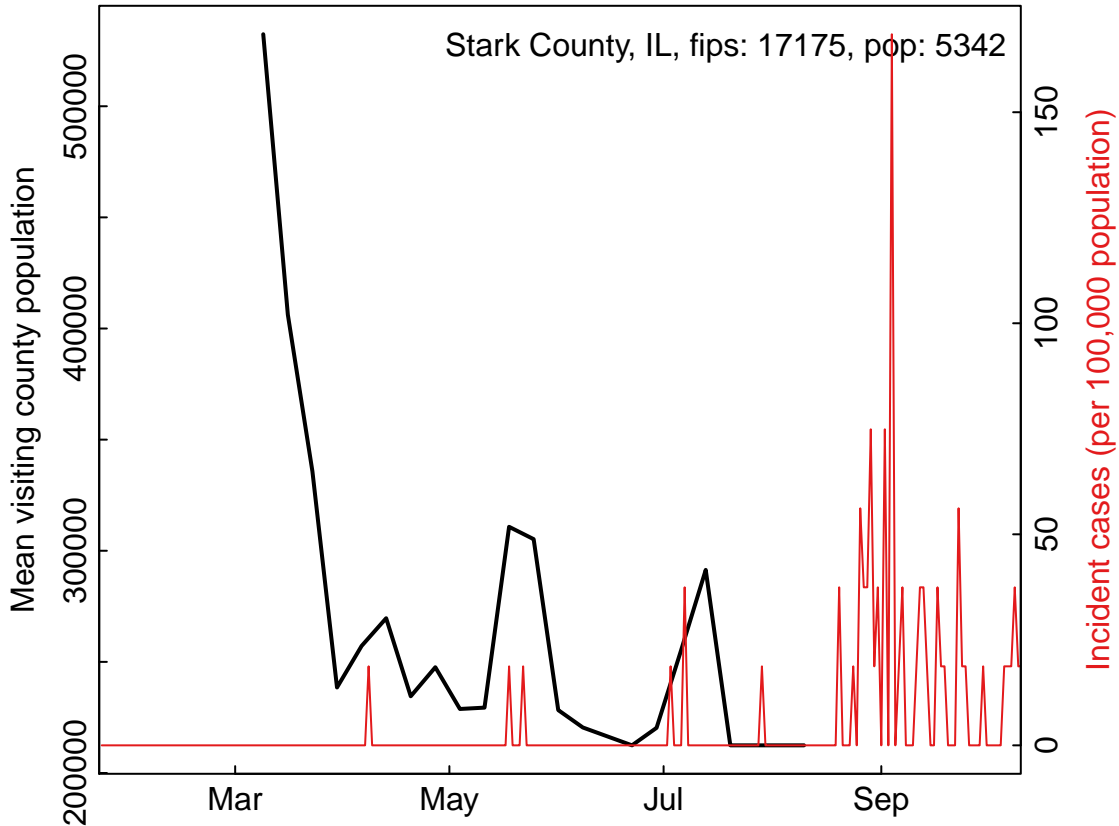

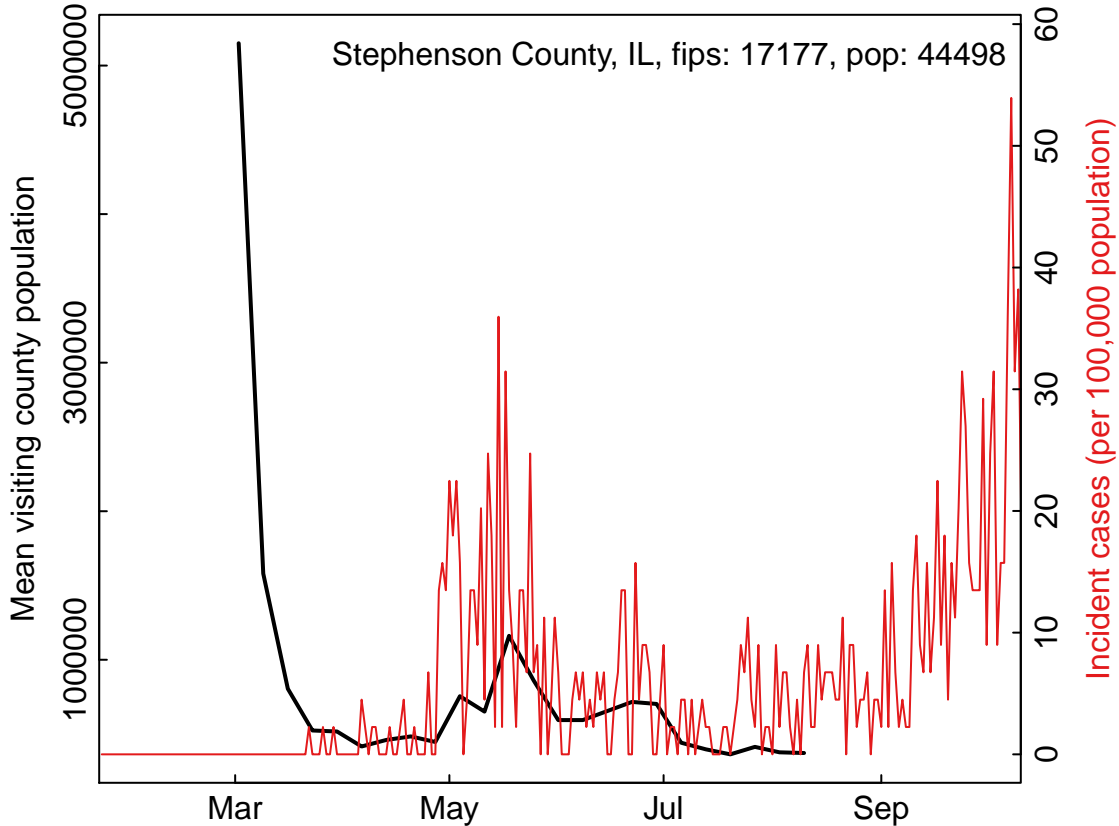

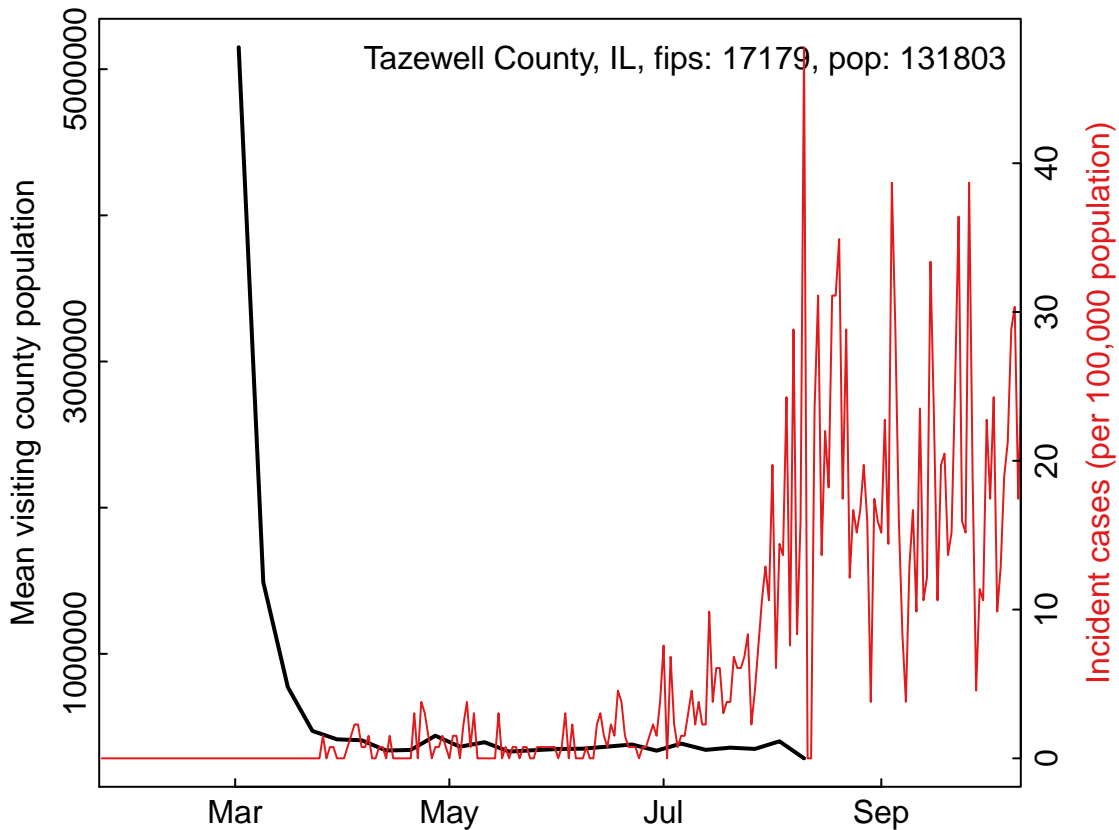

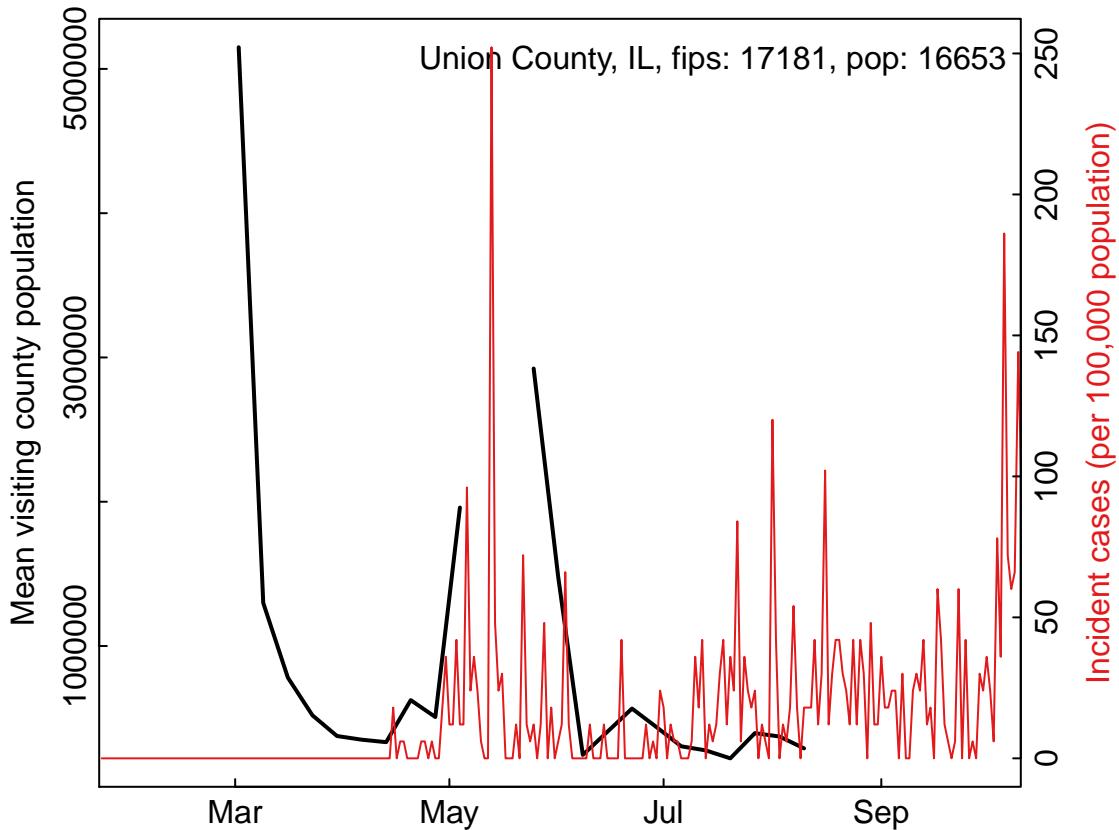

Vermilion County, IL, fips: 17183, pop: 75758

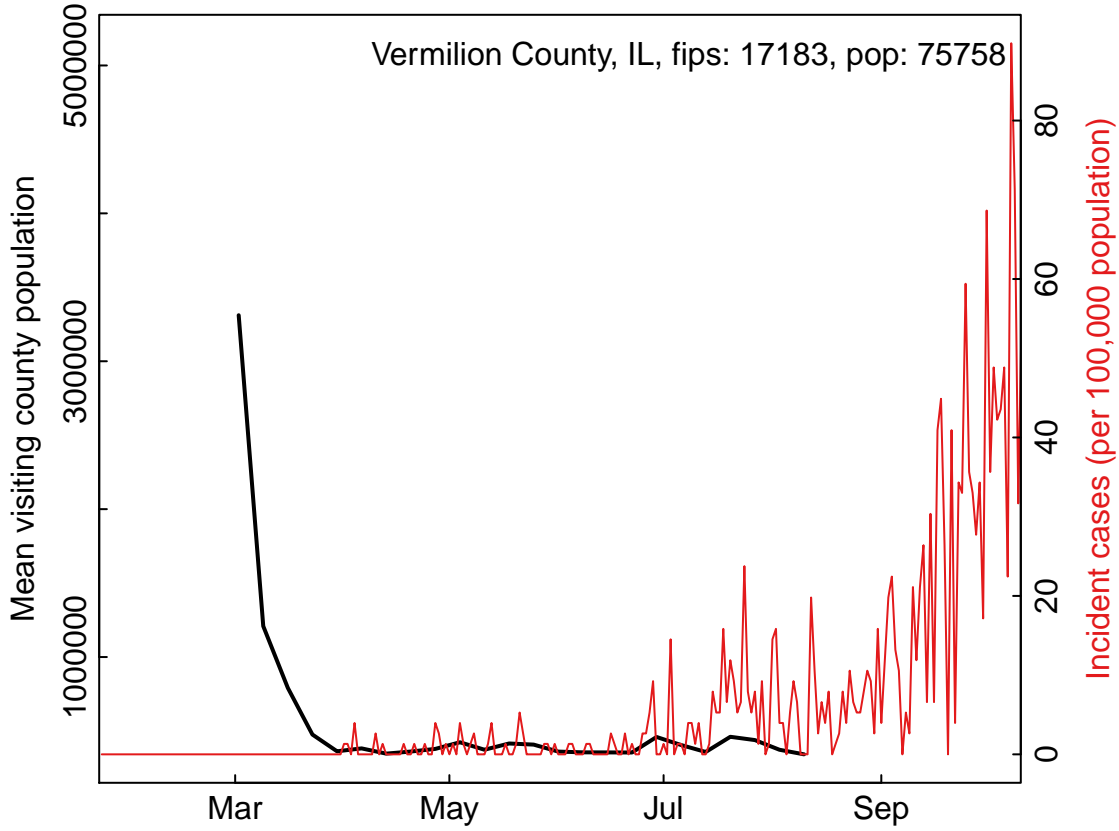

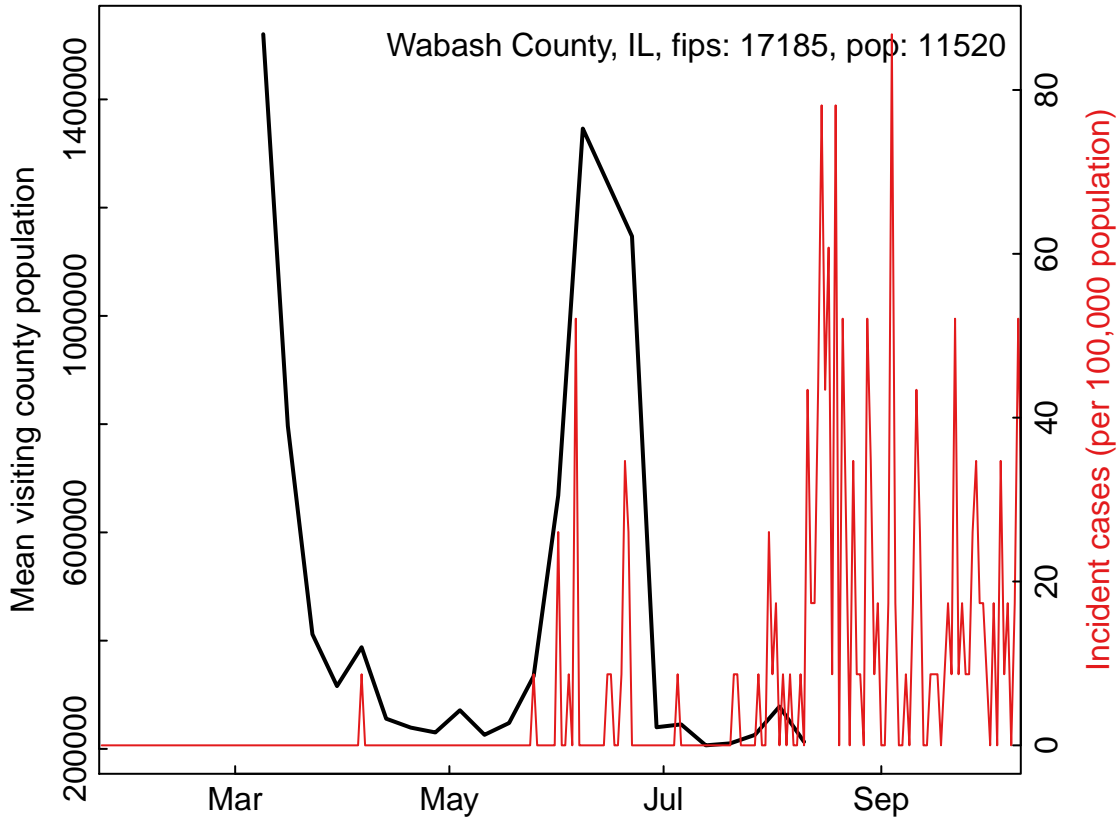

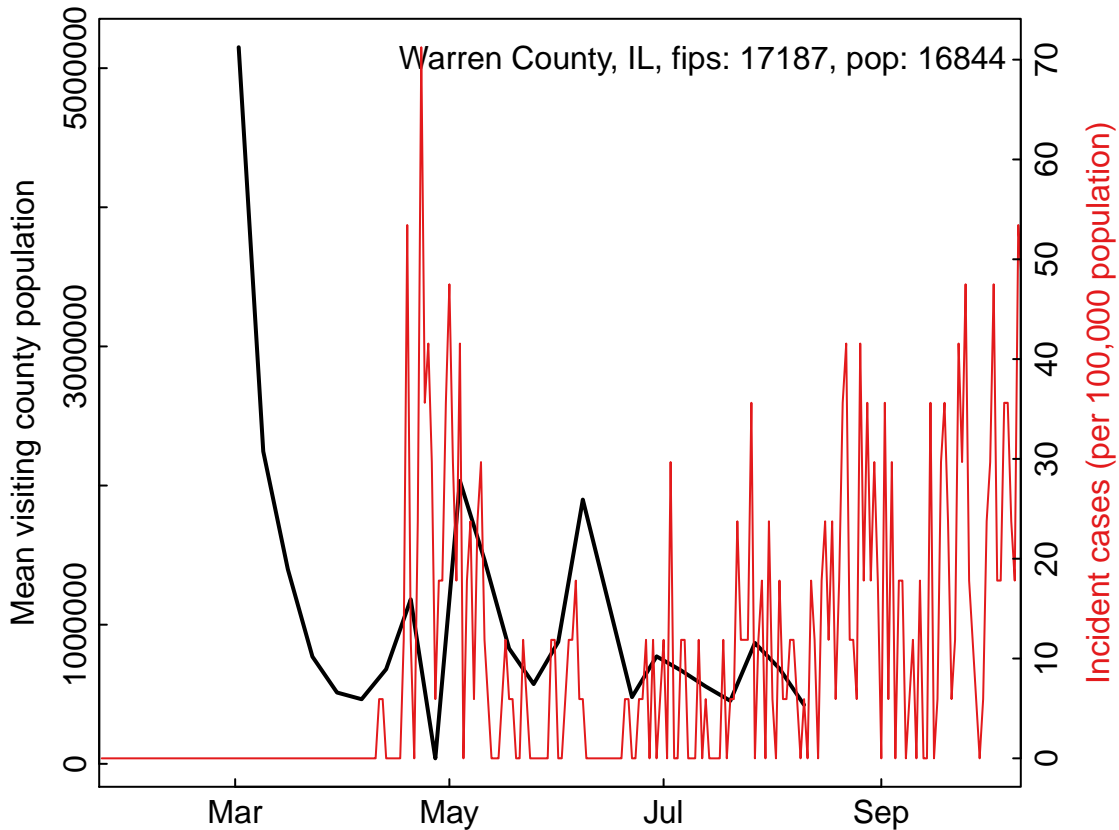



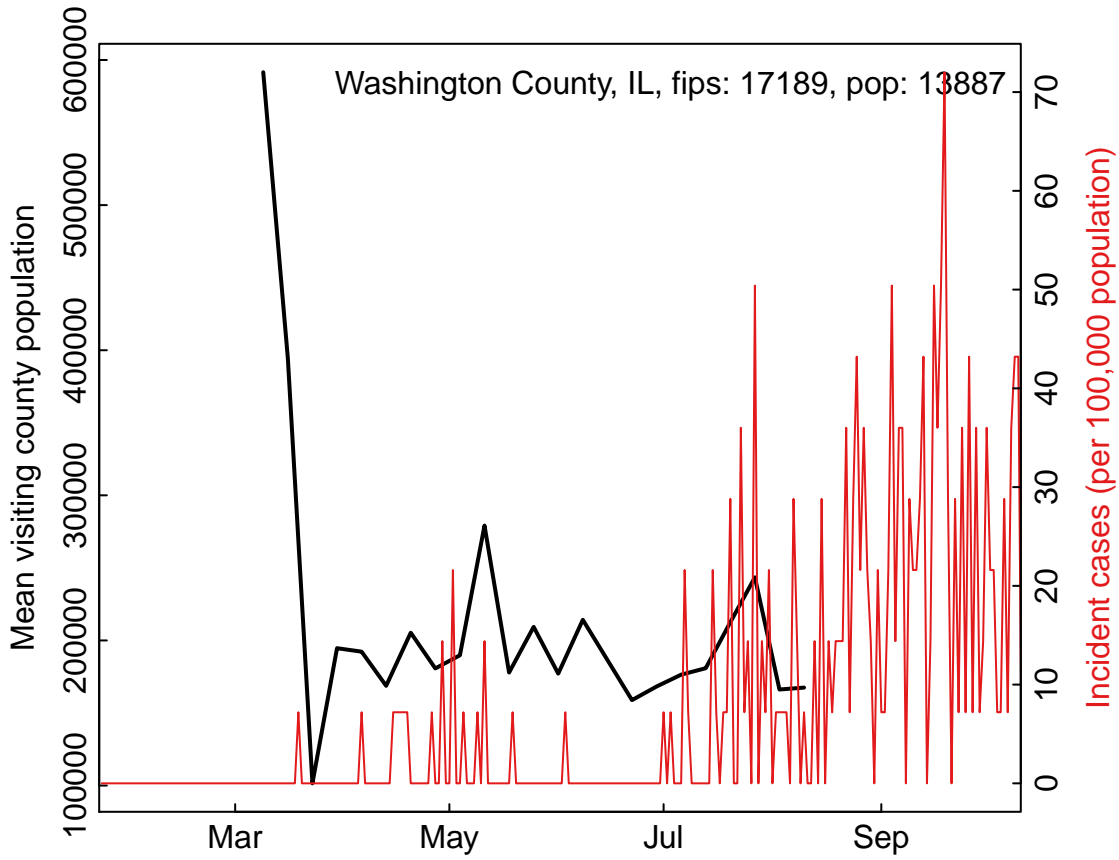

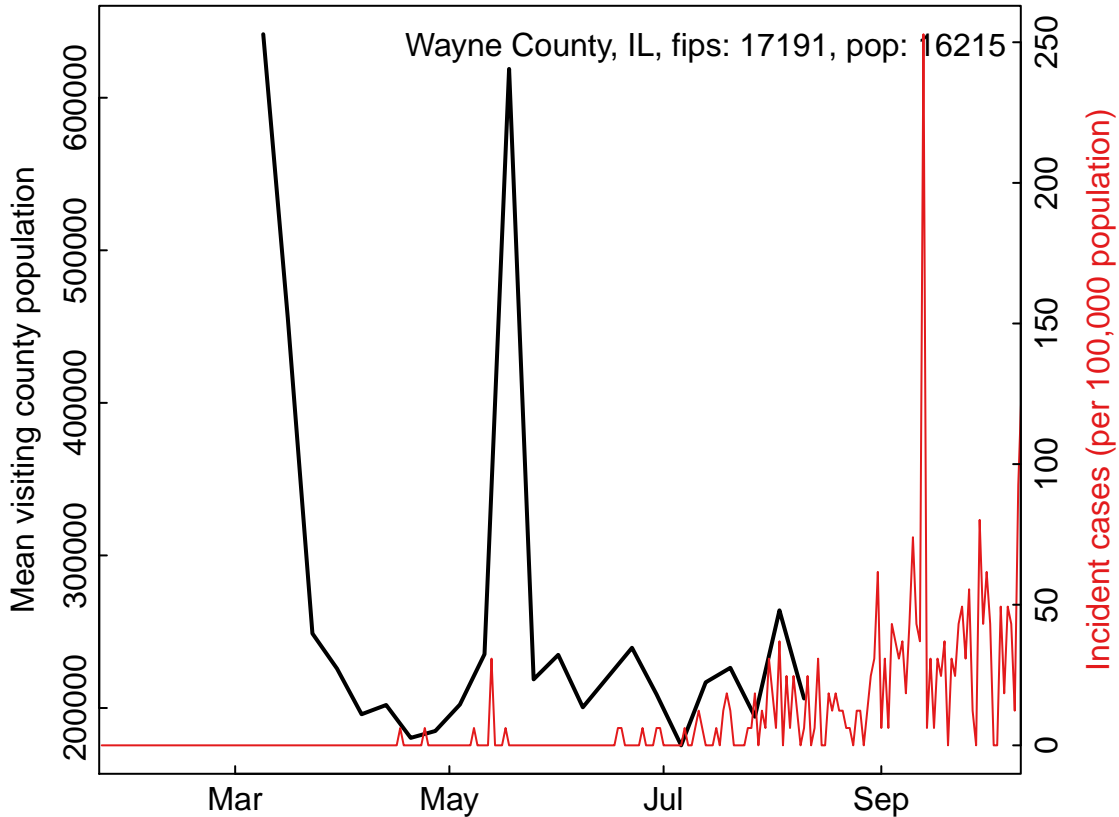

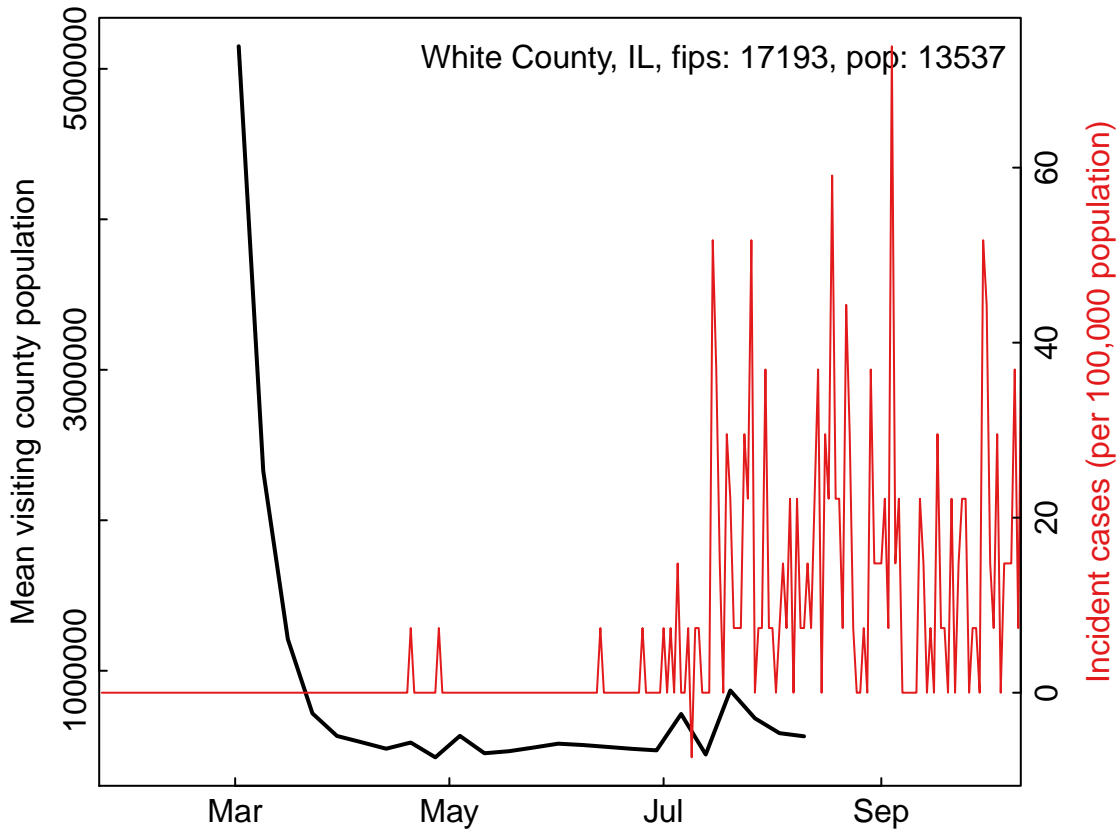

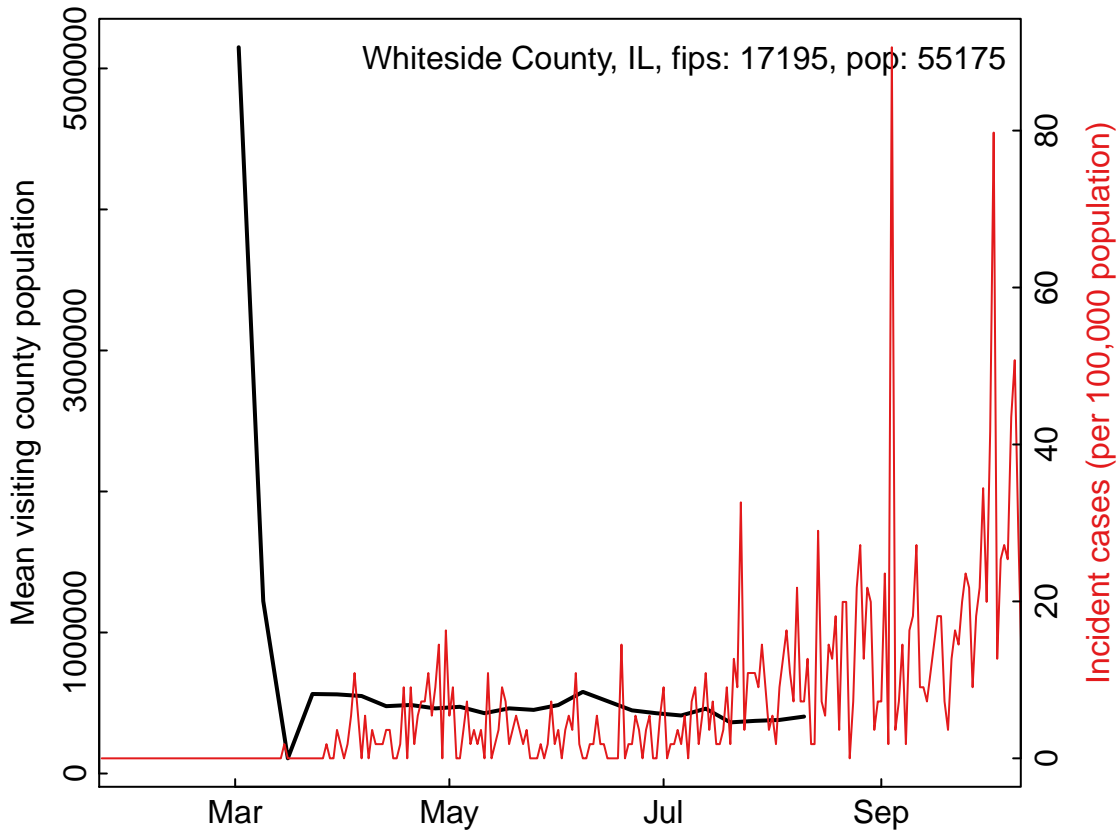

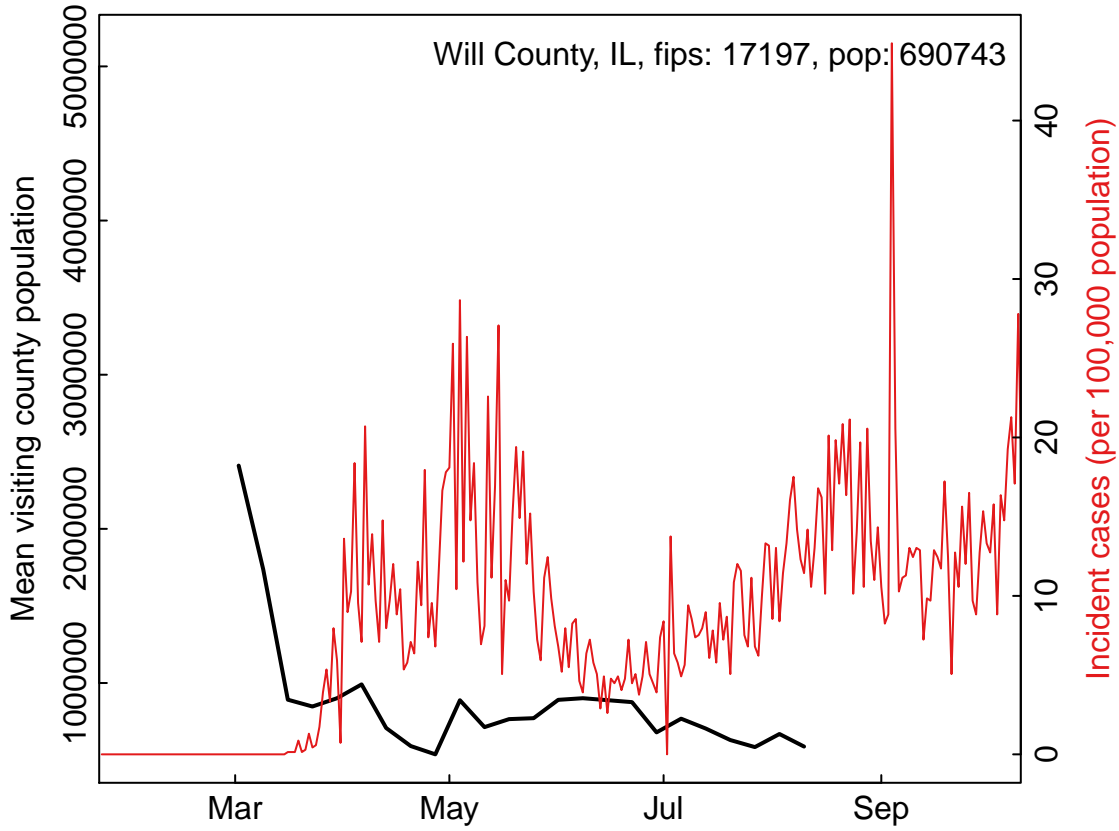

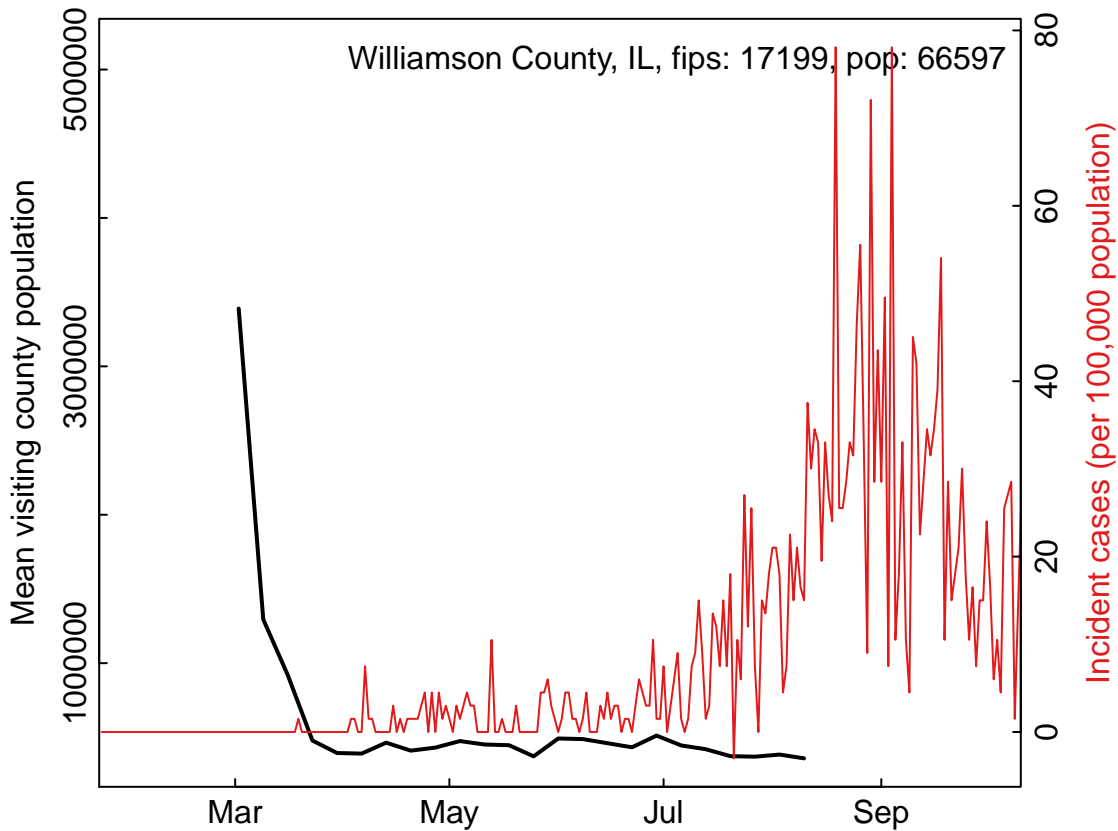

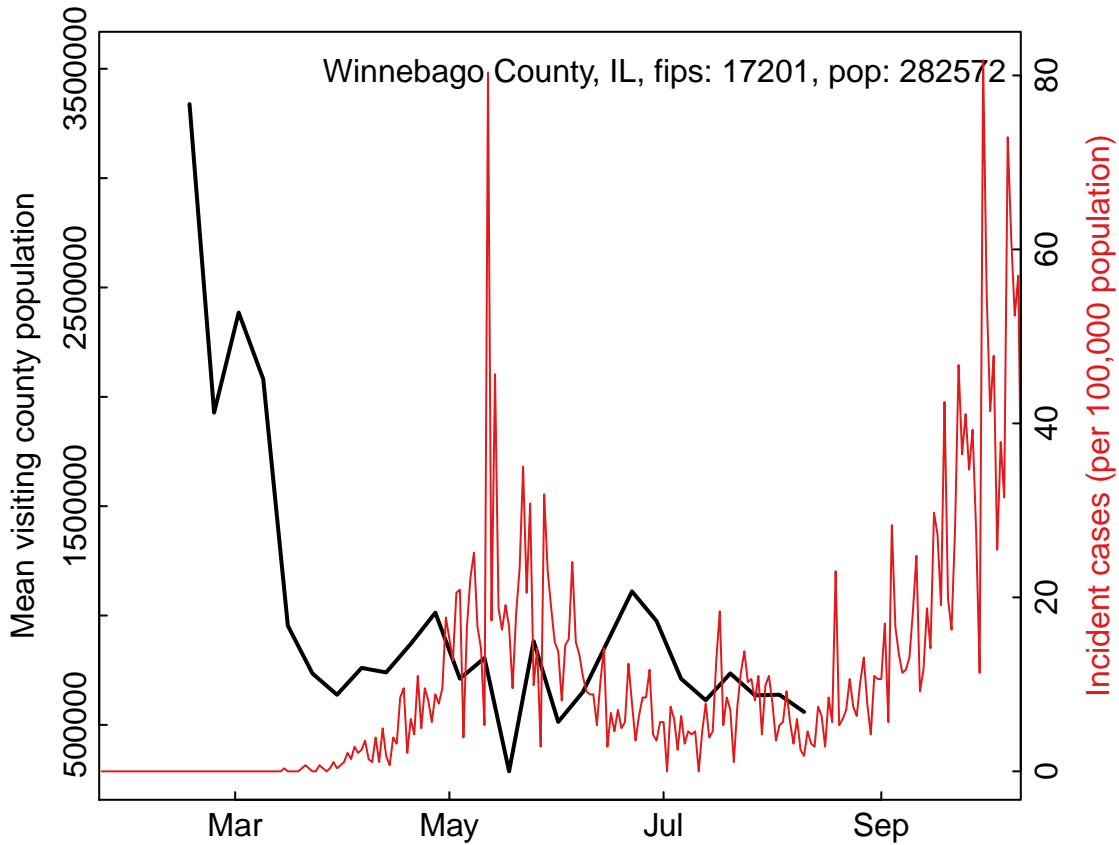

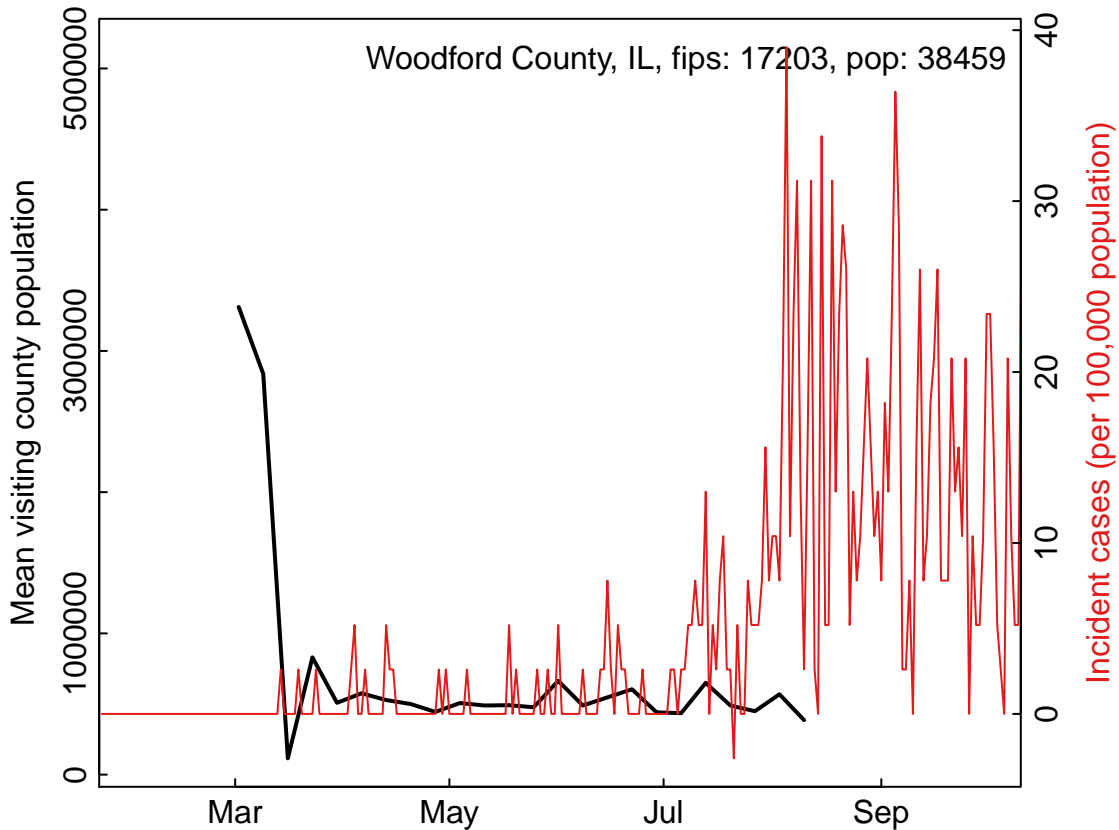



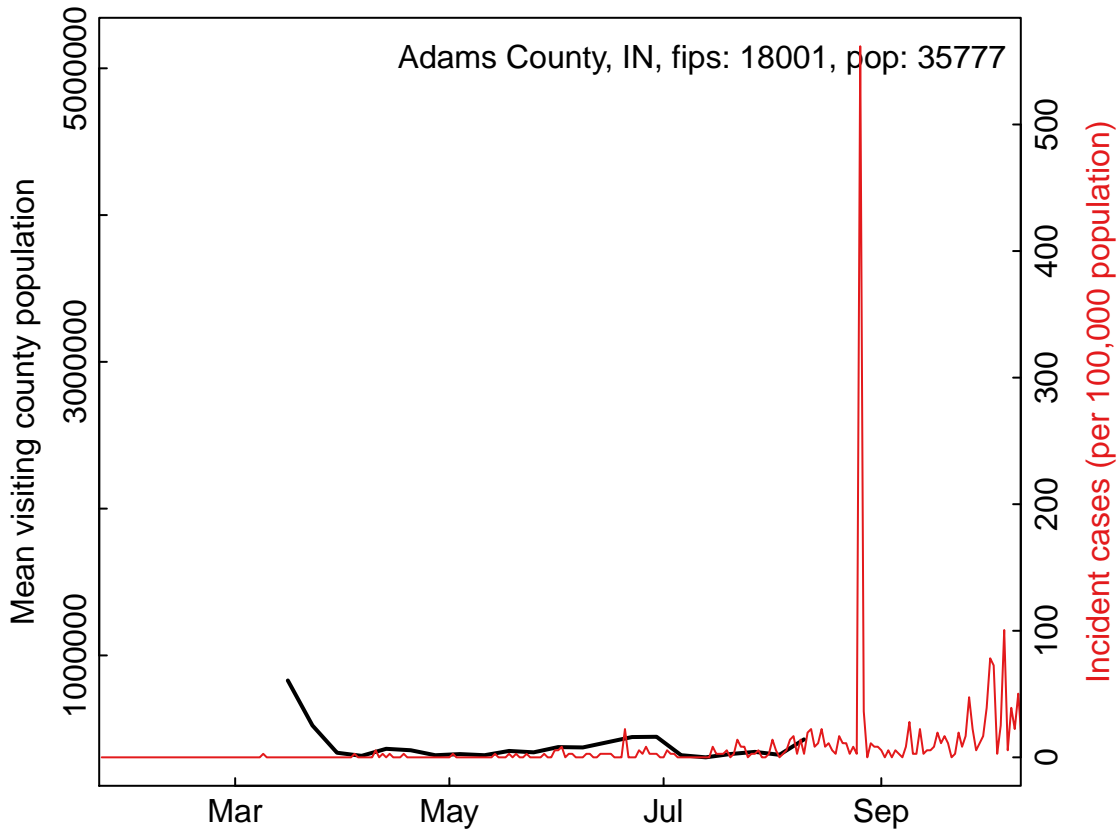

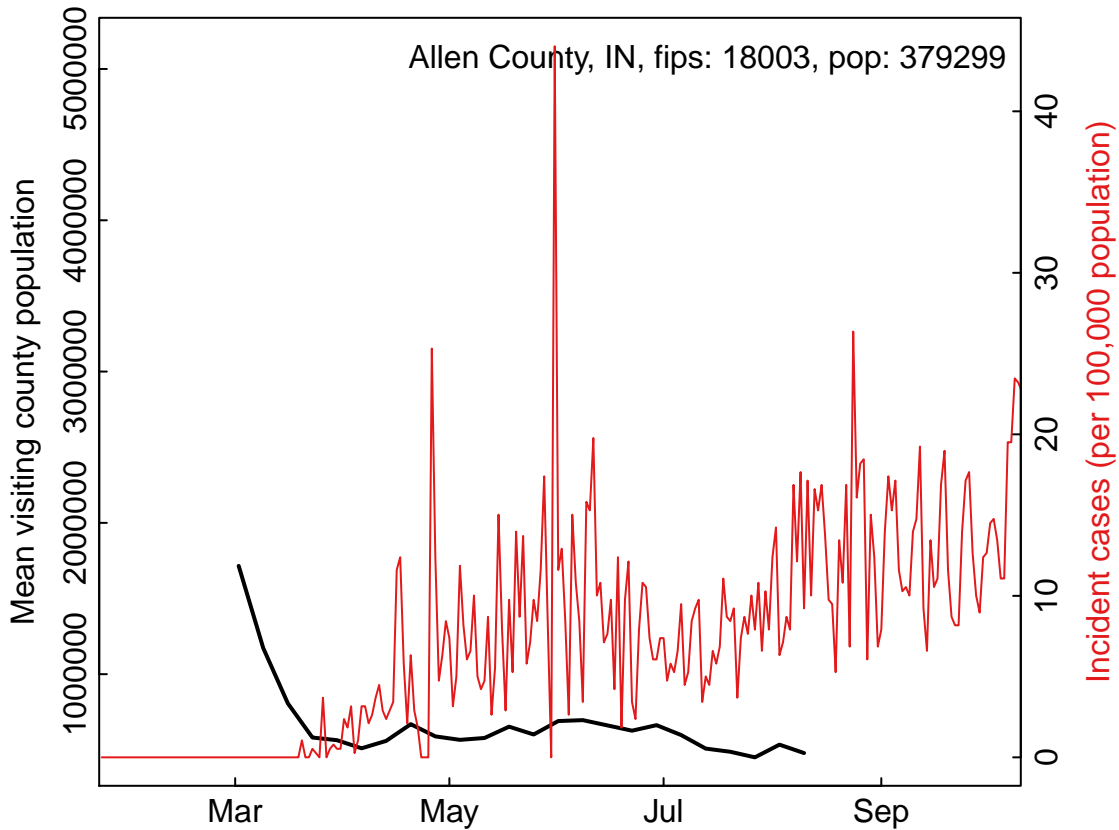

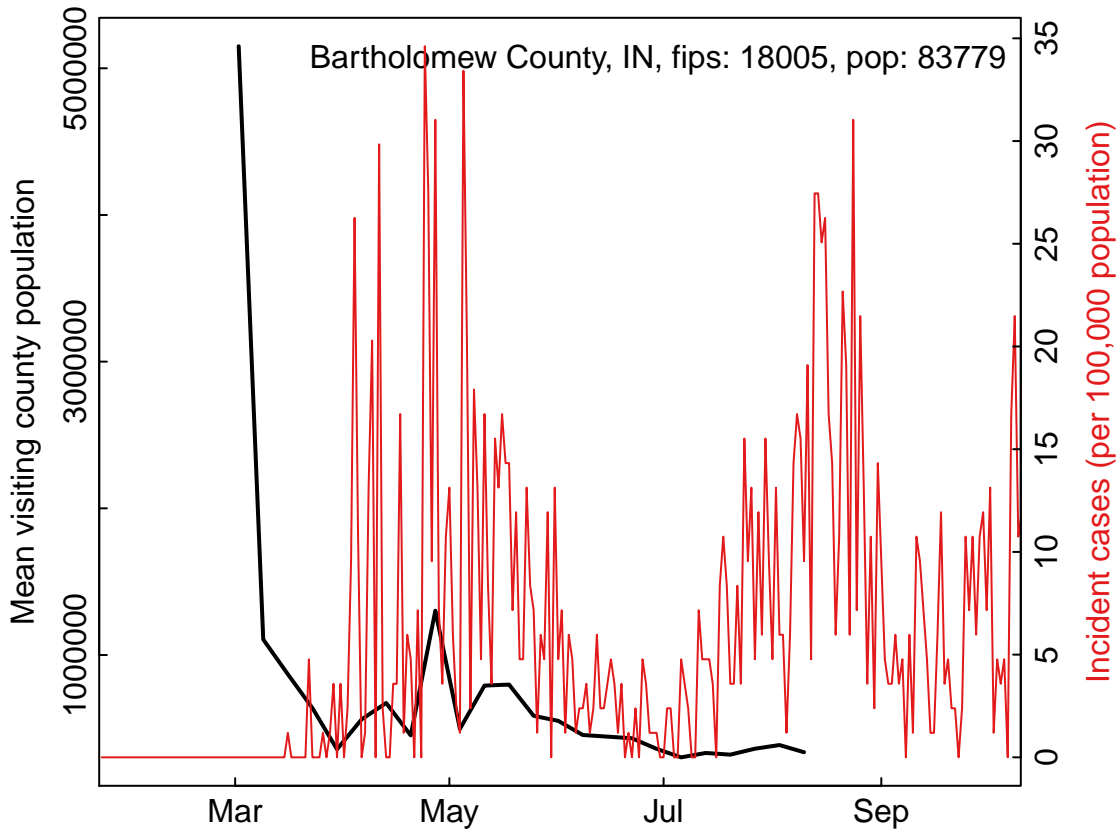

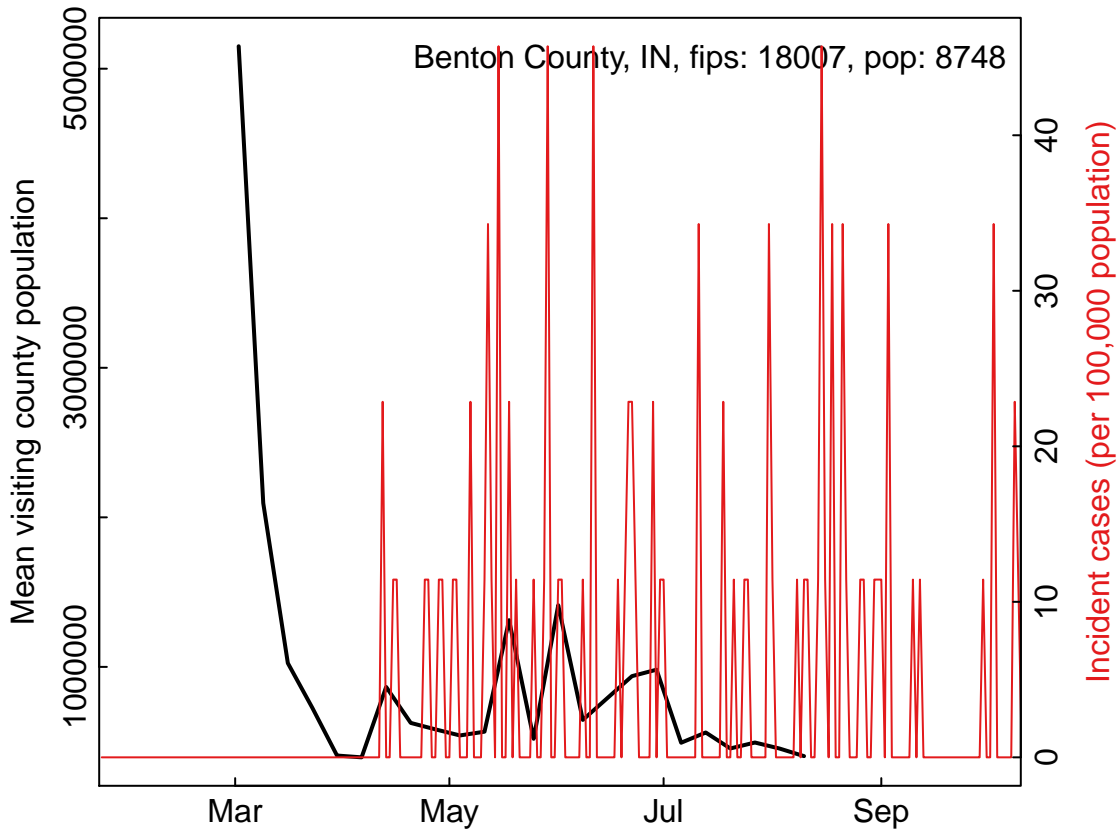

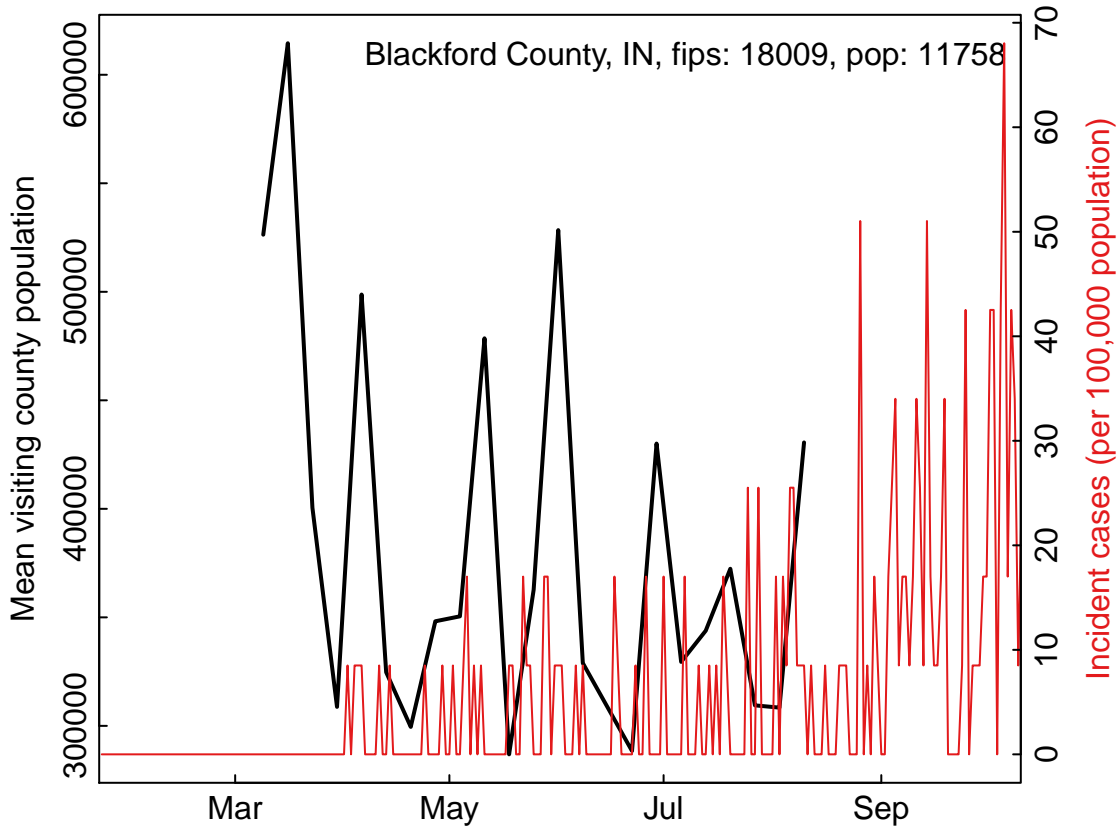

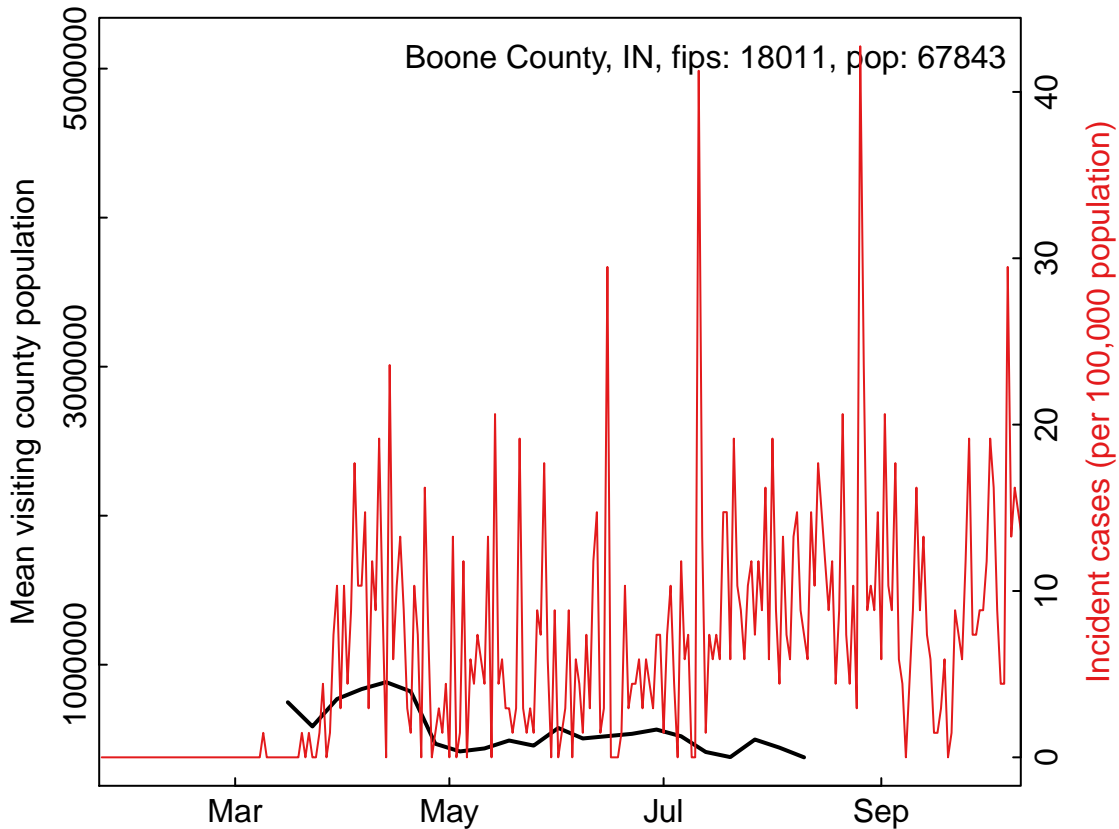

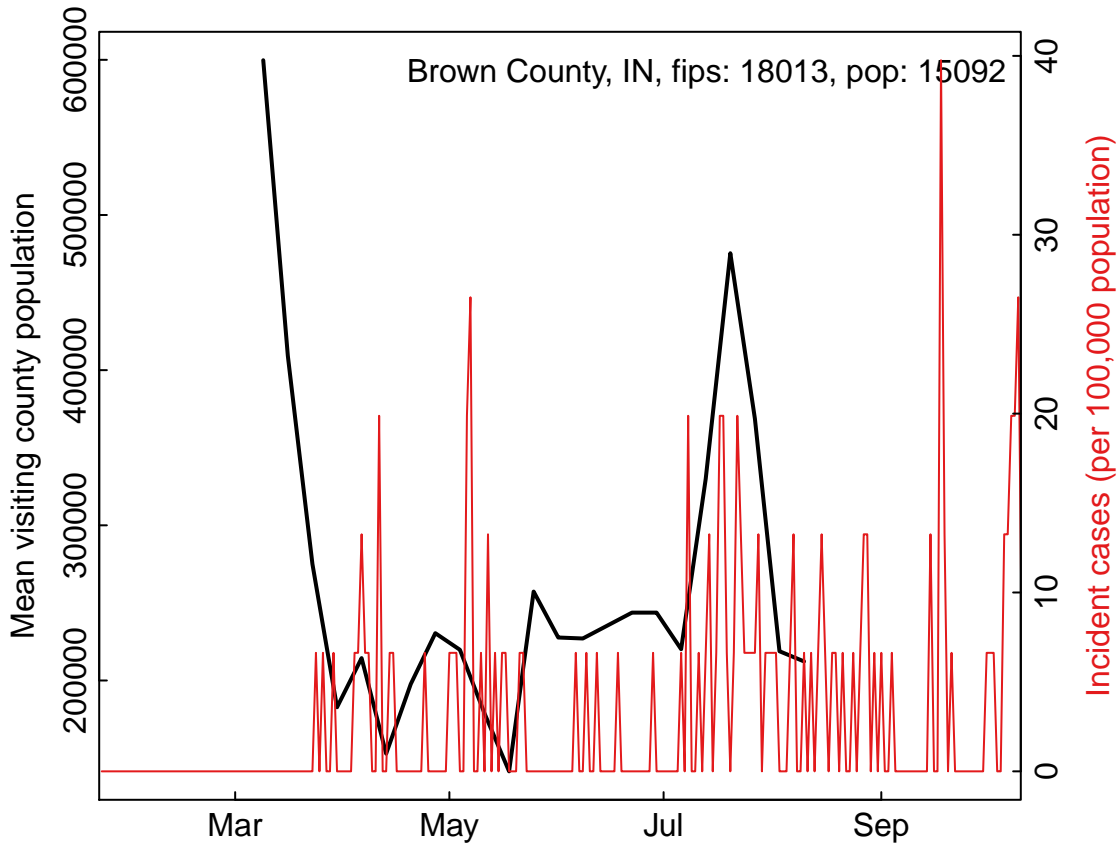

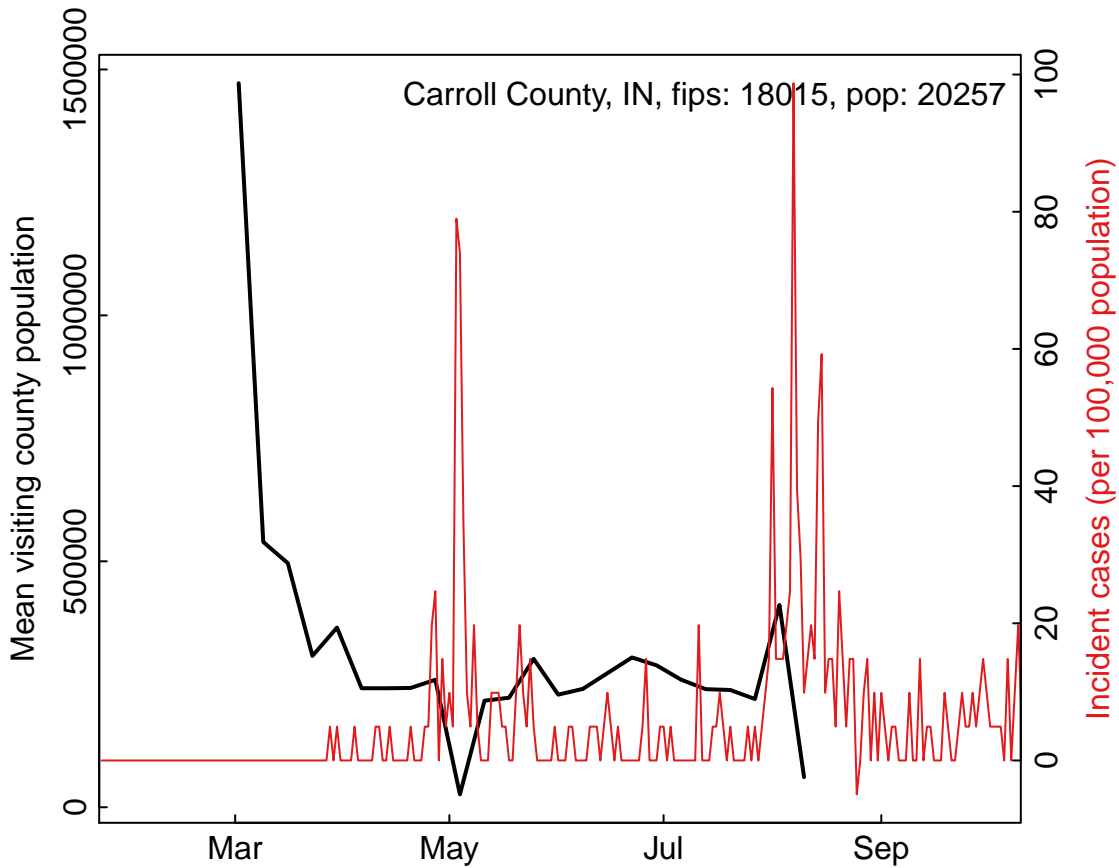



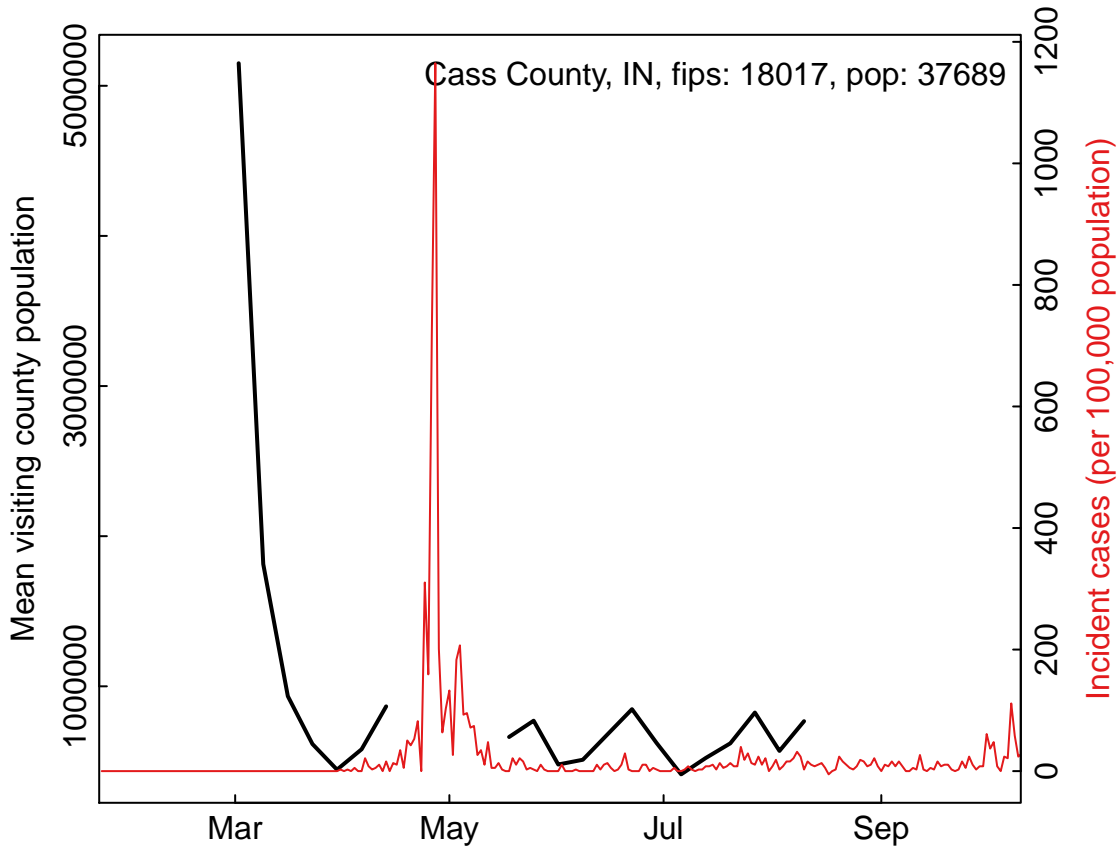

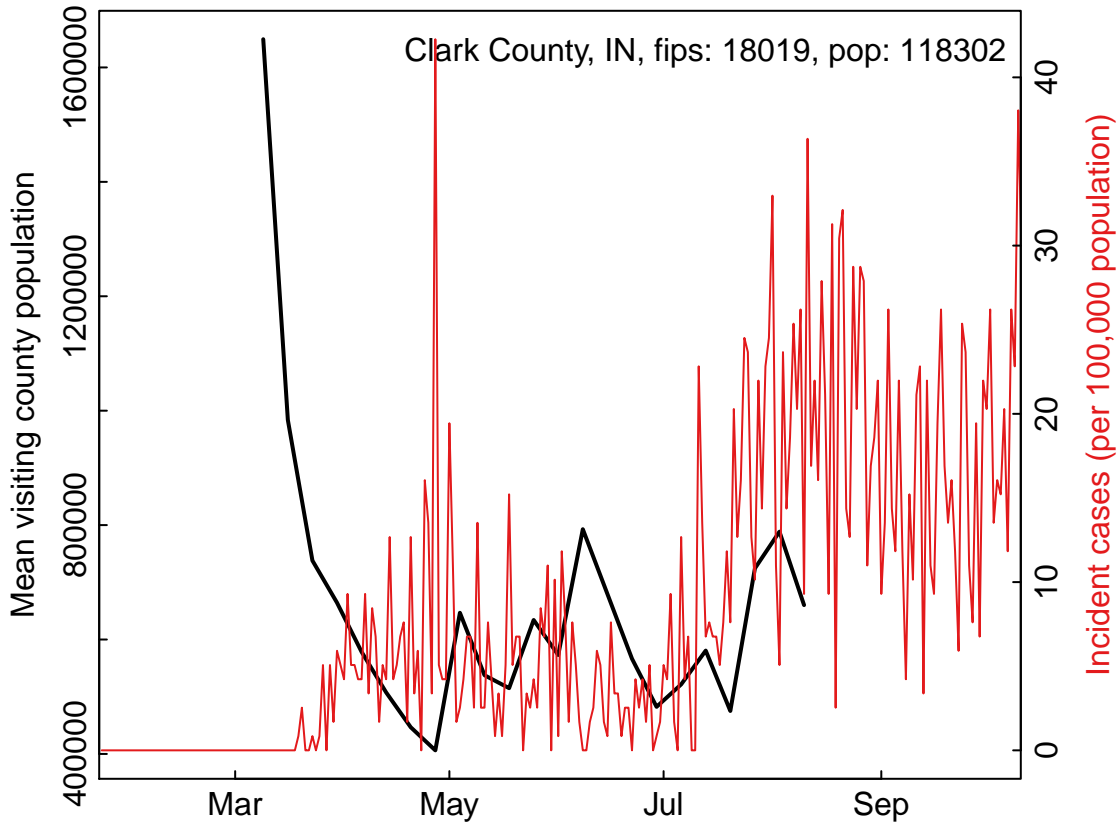

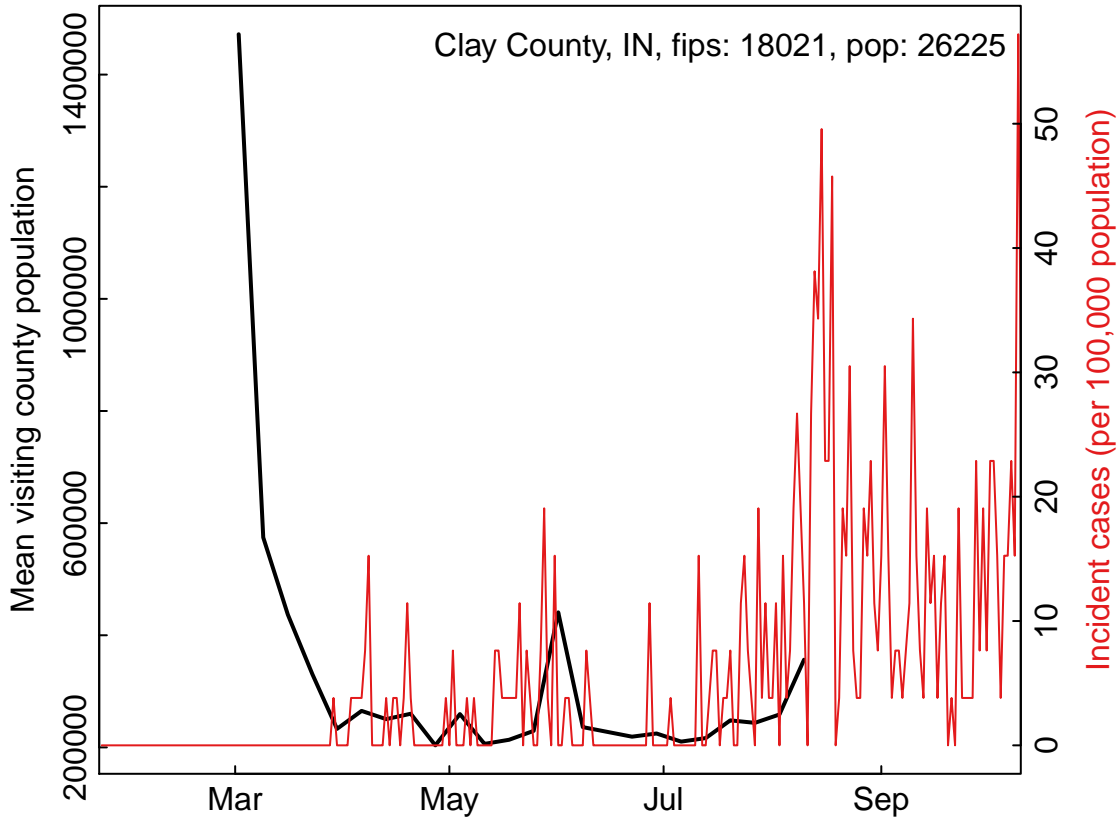

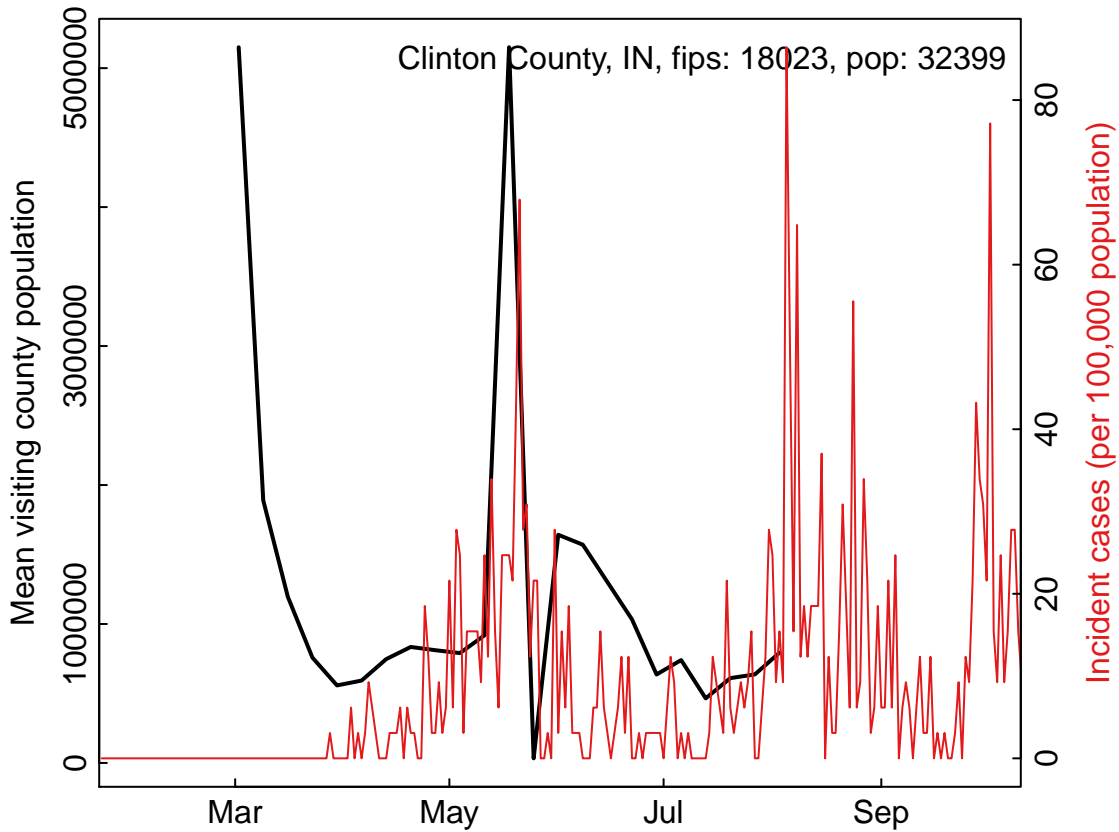

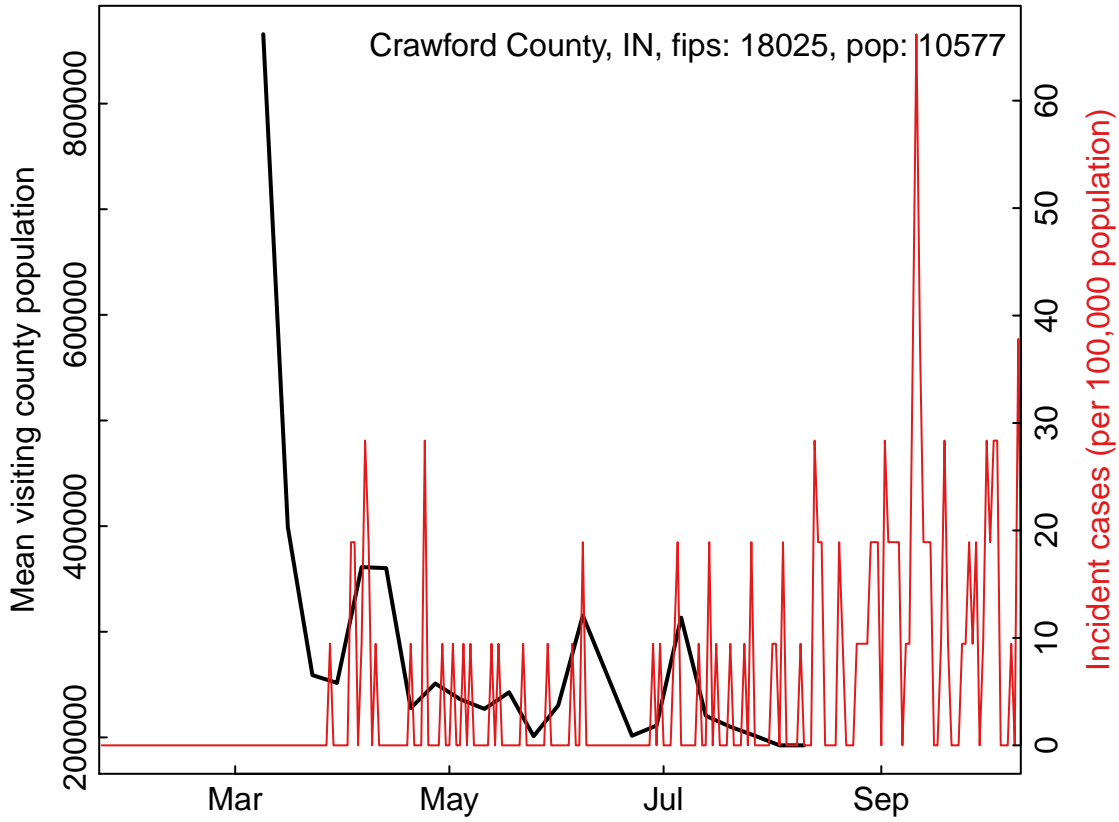

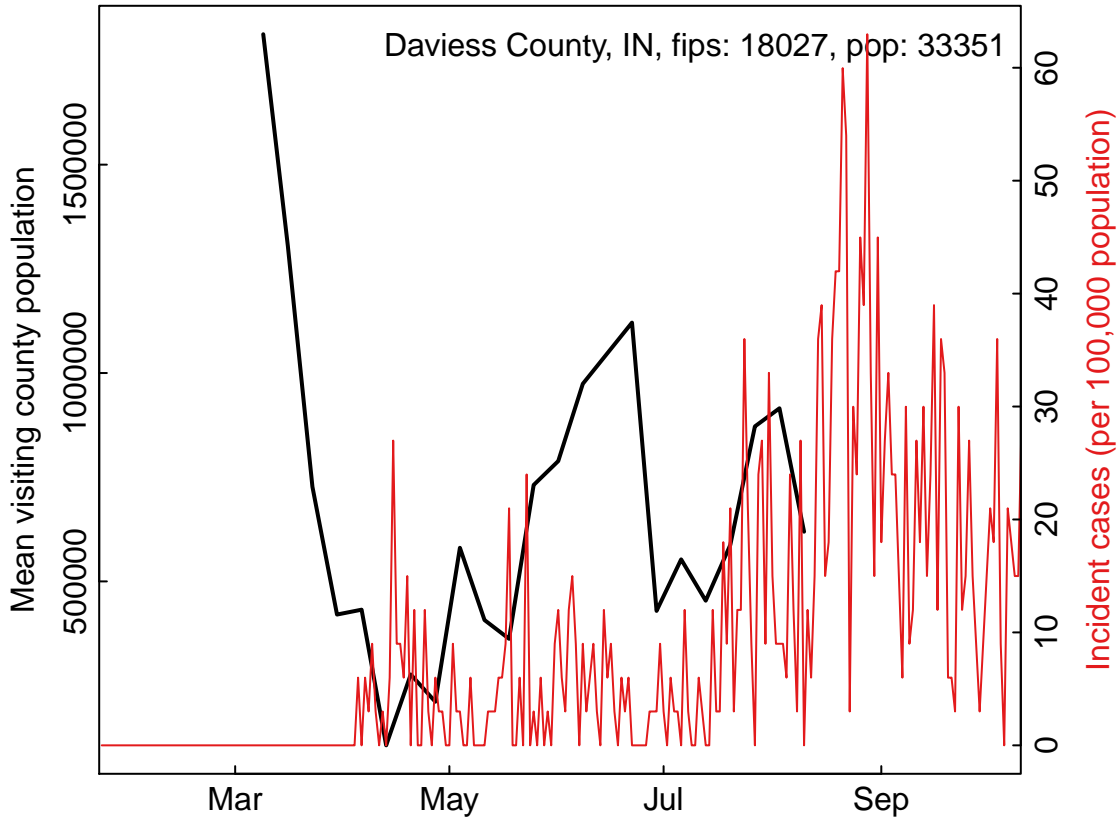

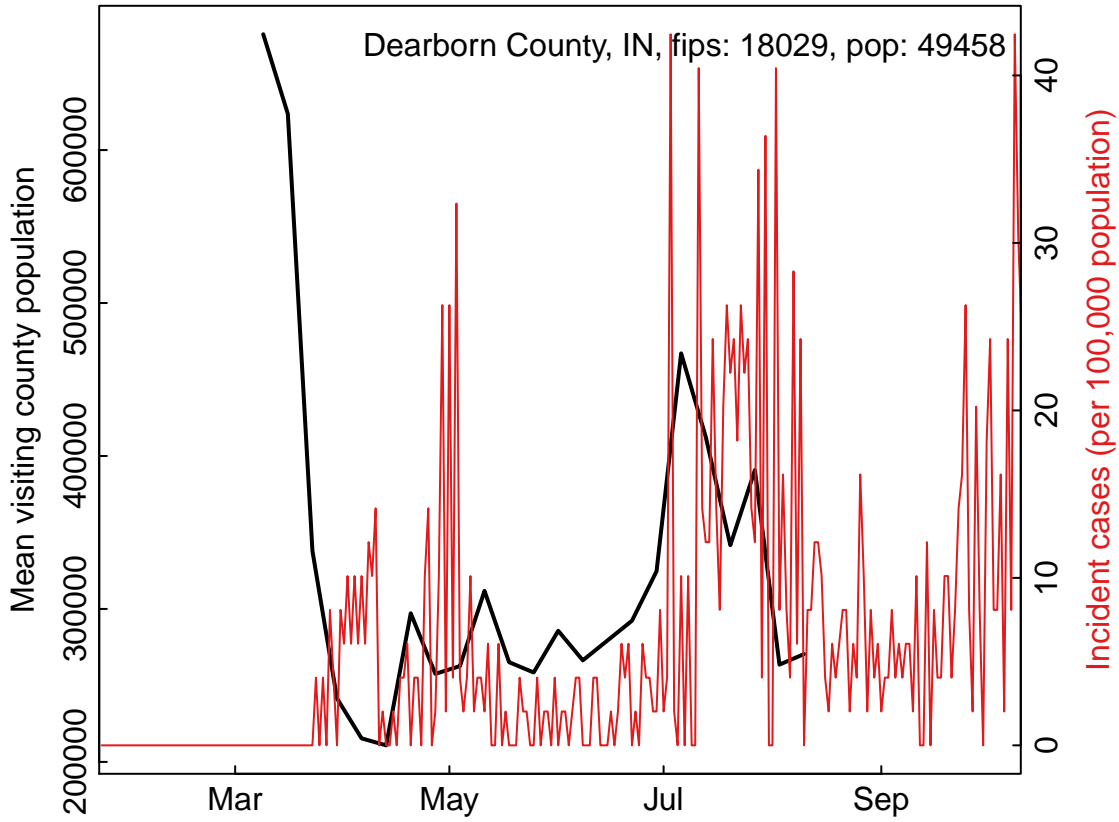

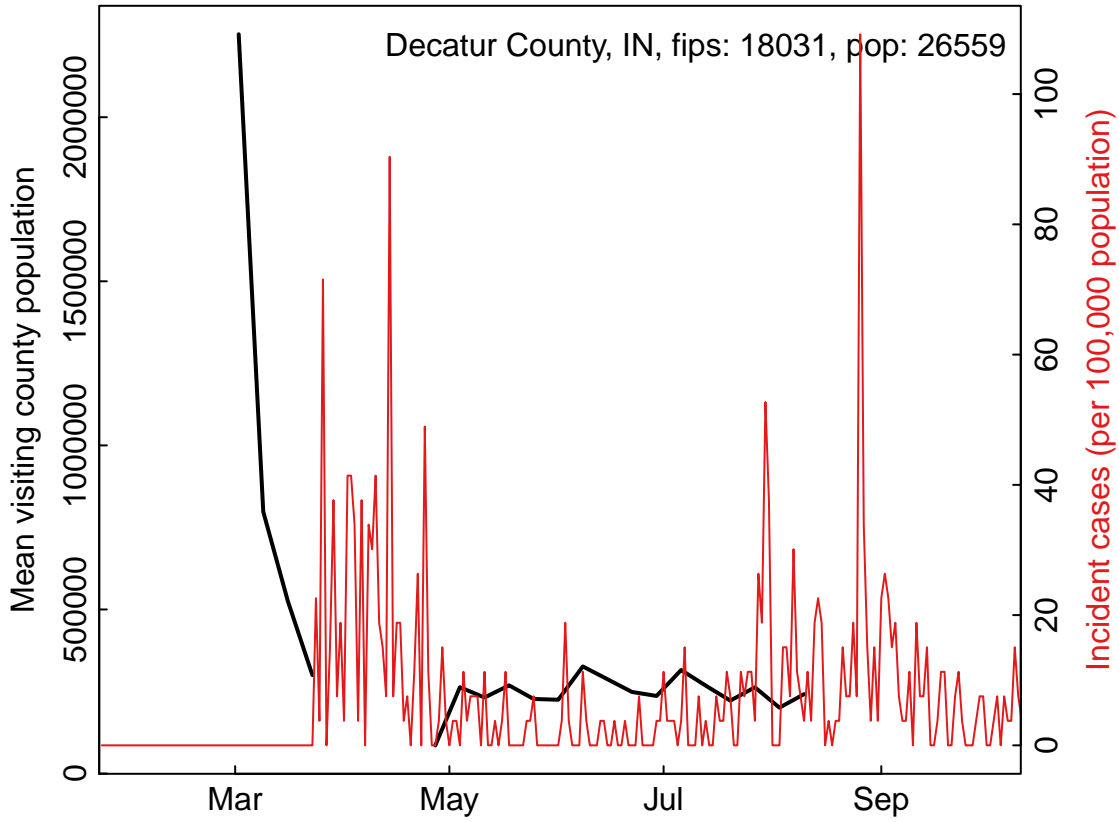



DeKalb County, IN, fips: 18033, pop: 43475

Mean visiting county population

2000000  
1500000  
1000000  
500000  
0

Mar May Jul Sep

Incident cases (per 100,000 population)

40  
30  
20  
10  
0

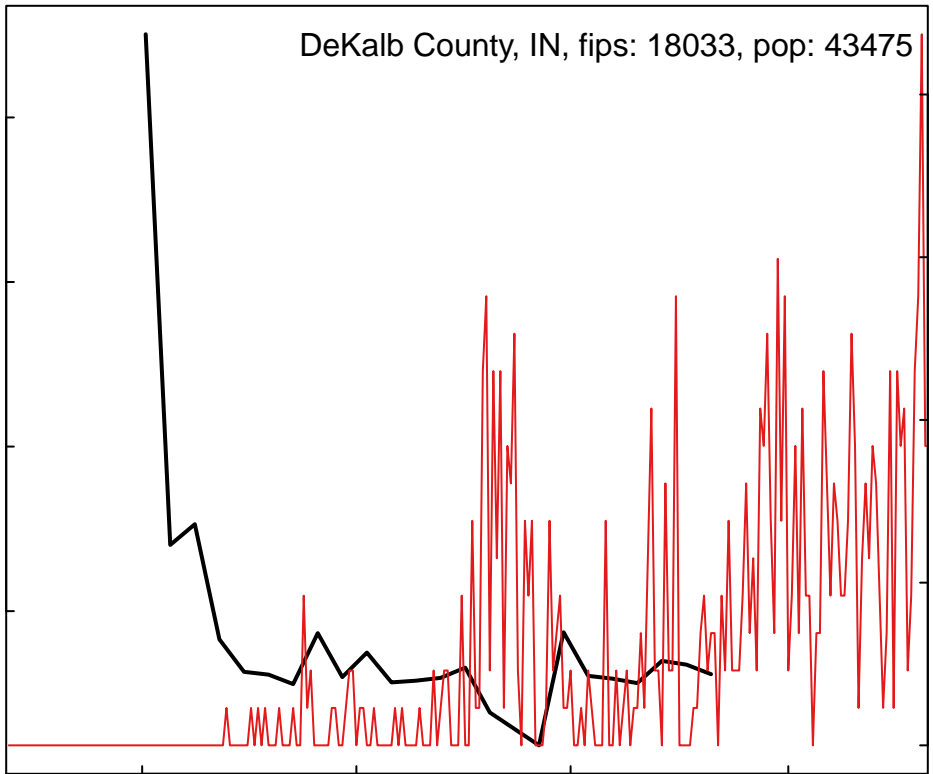

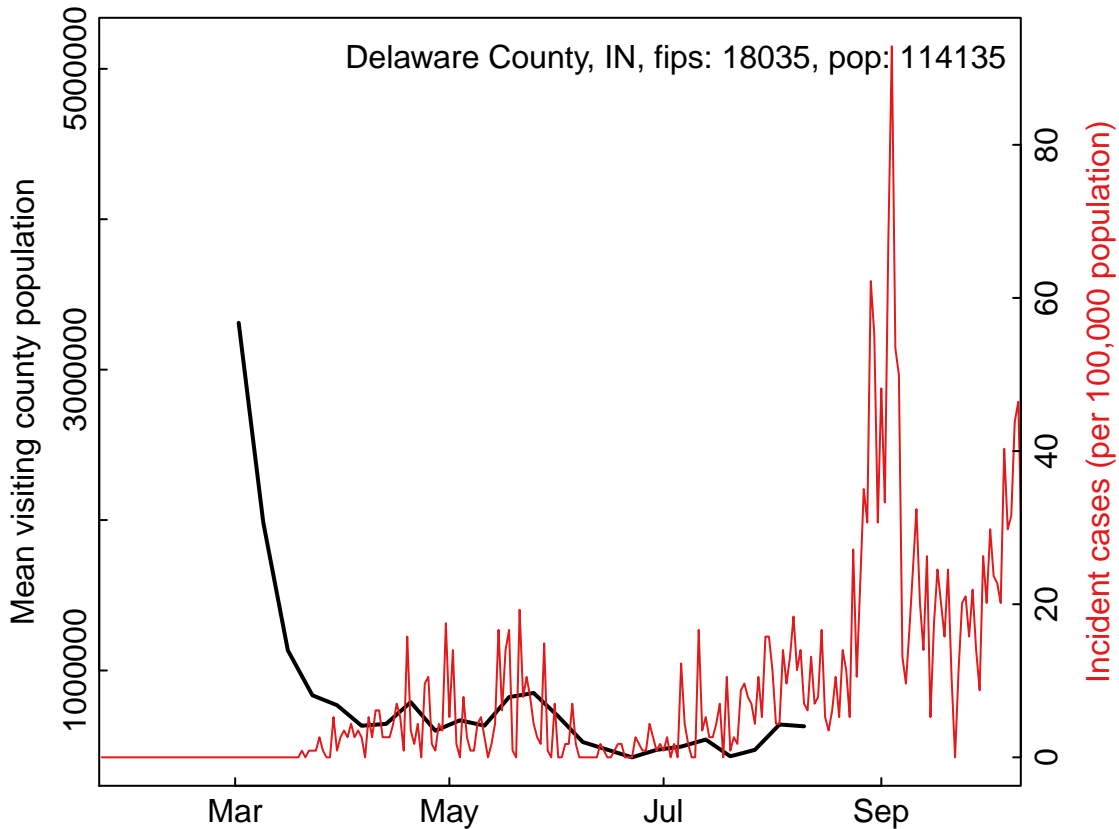

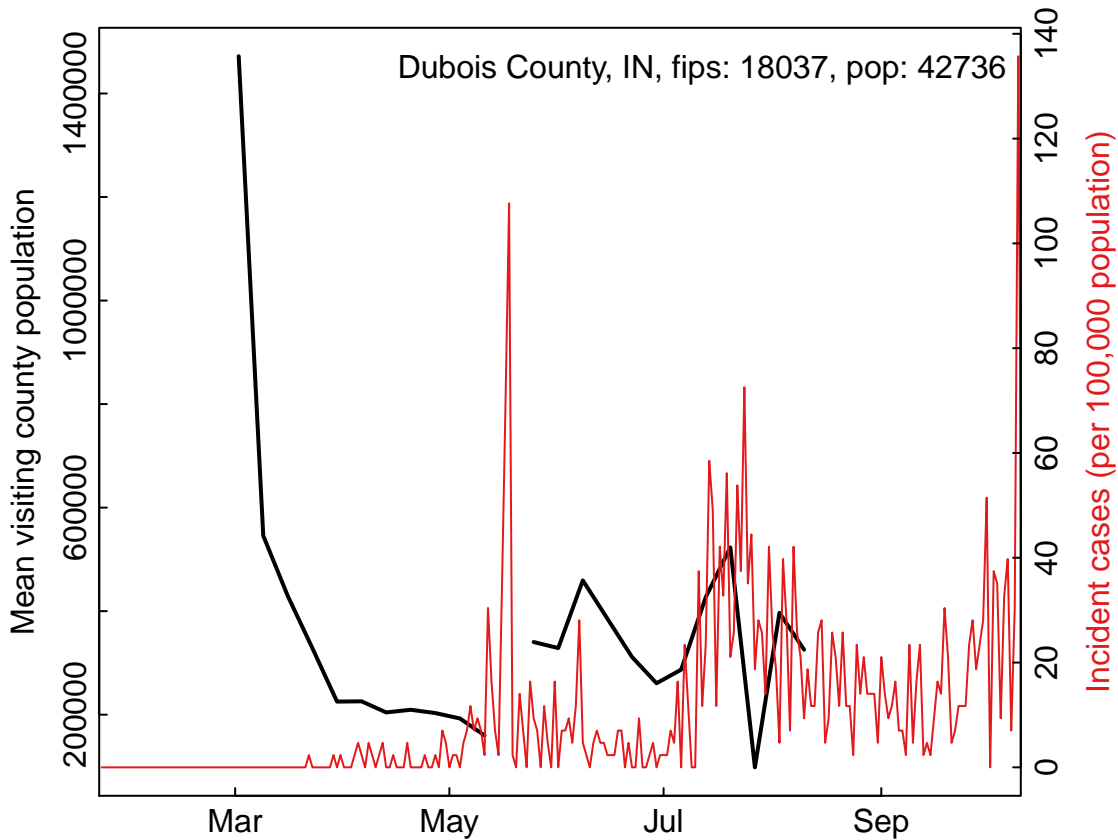

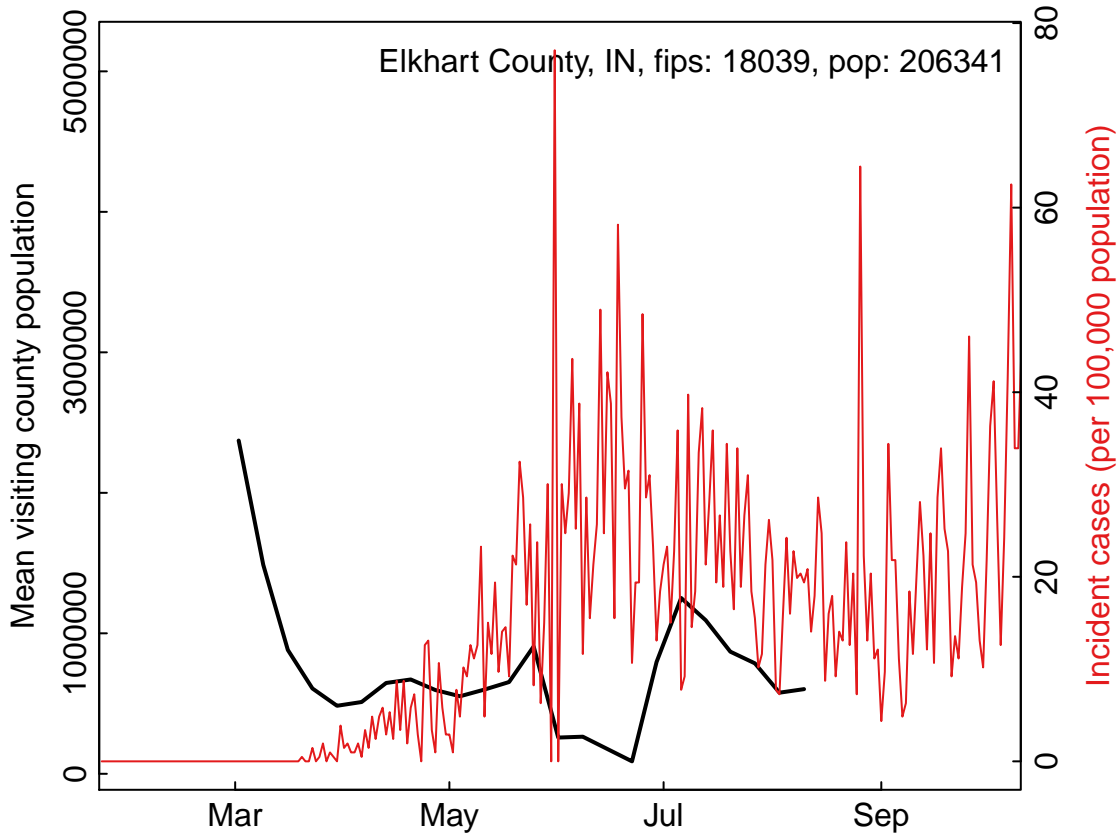

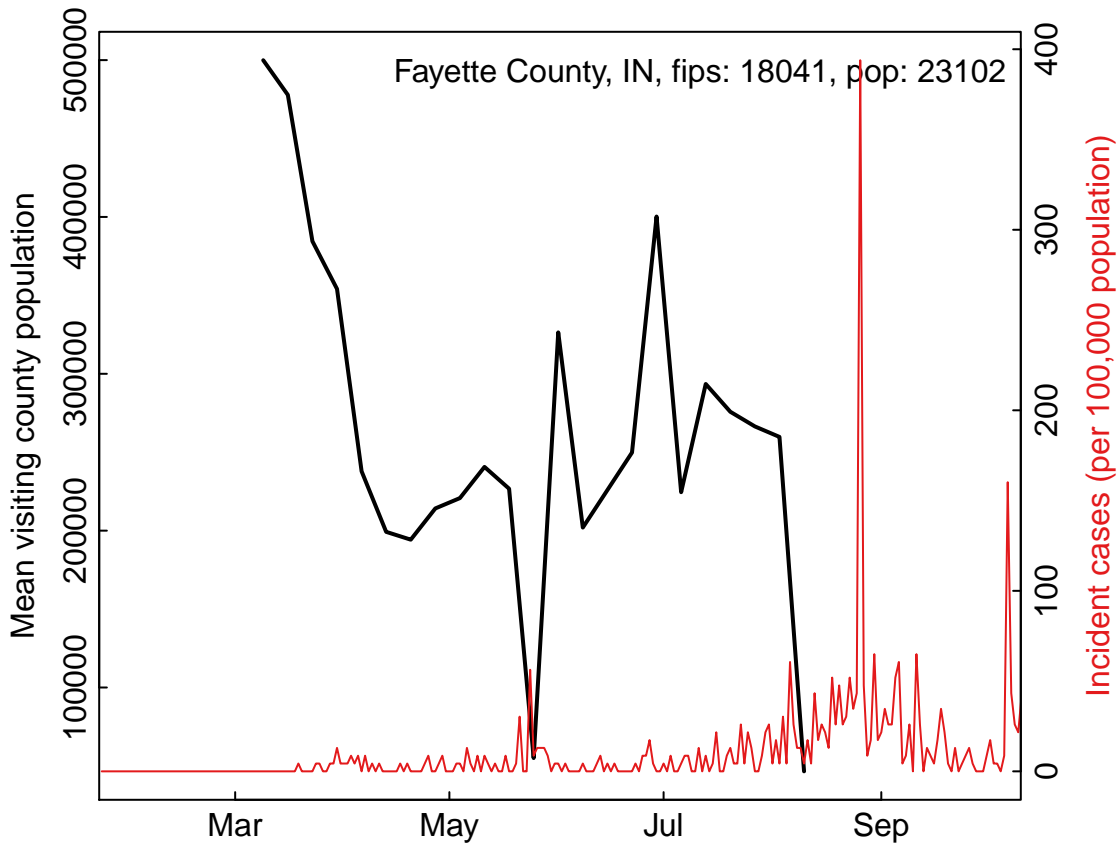

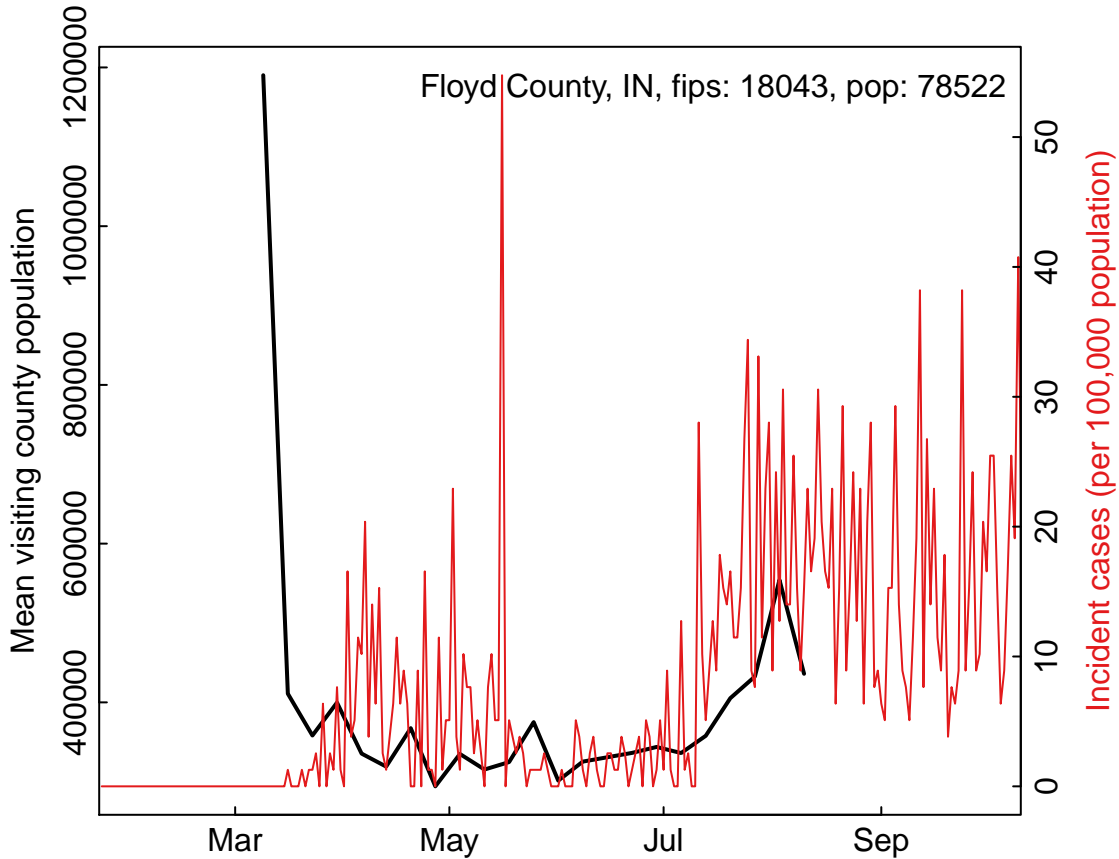

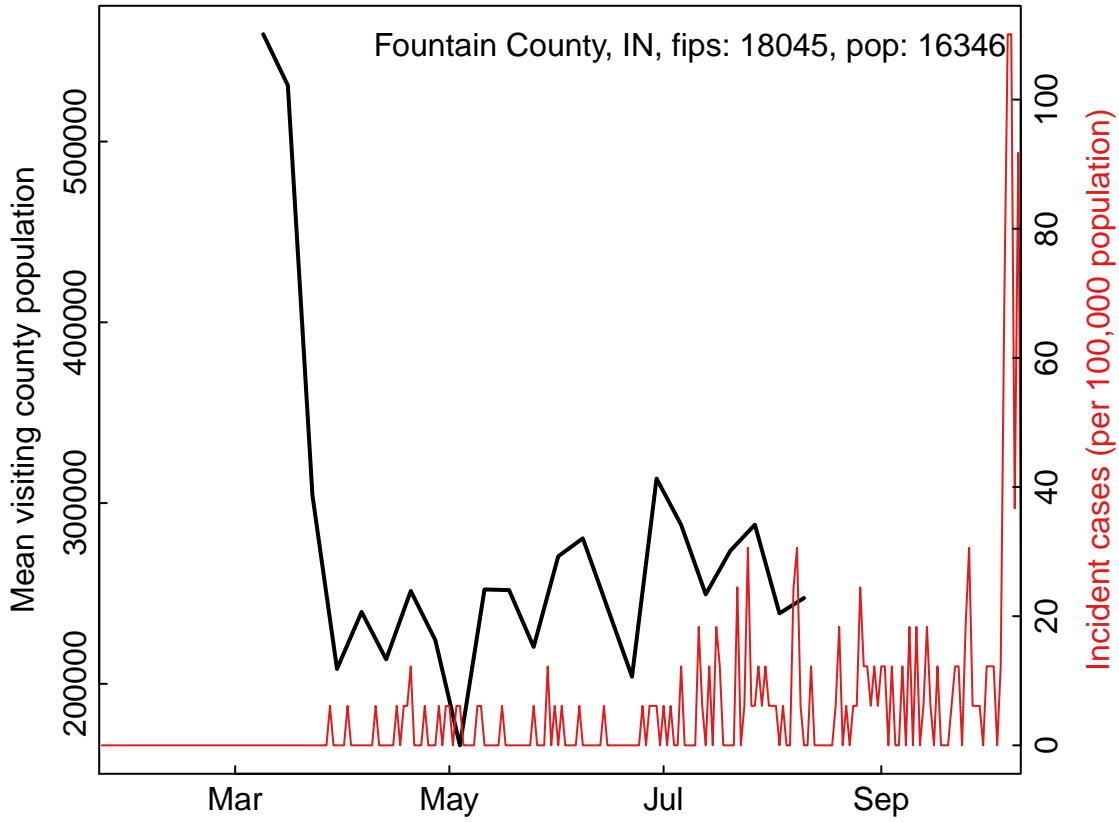

Franklin County, IN, fips: 18047, pop: 22758

Mean visiting county population

500000  
300000  
100000

Mar

May

Jul

Sep

80  
60  
40  
20  
0

Incident cases (per 100,000 population)

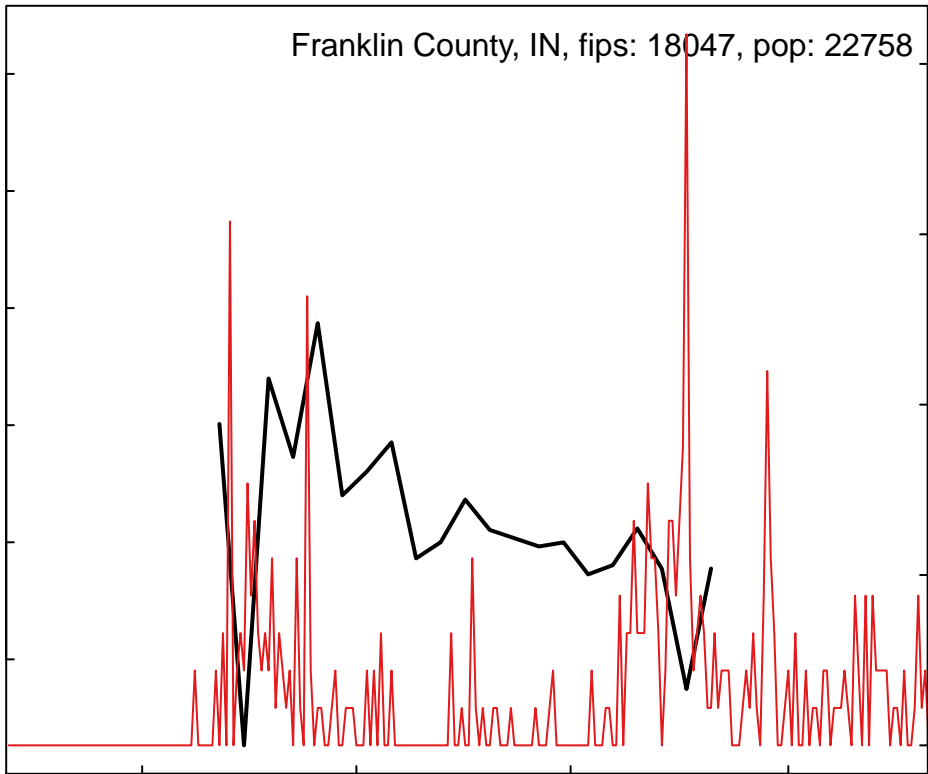



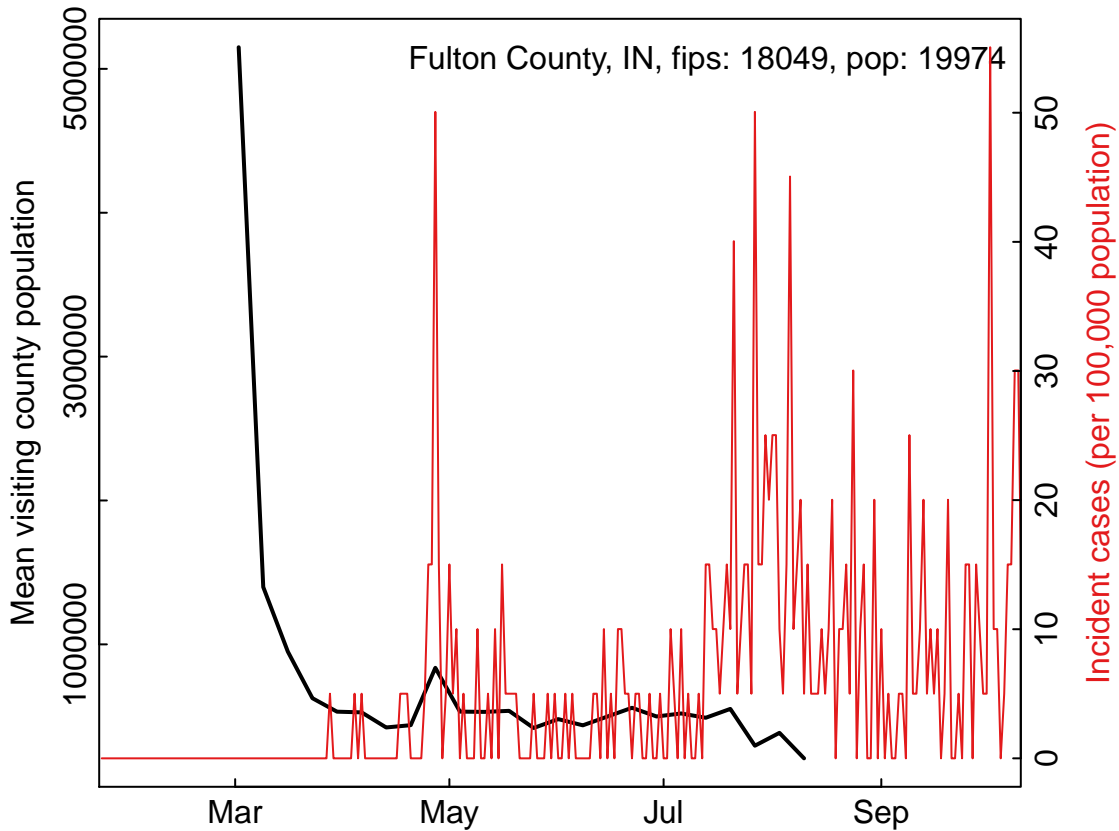

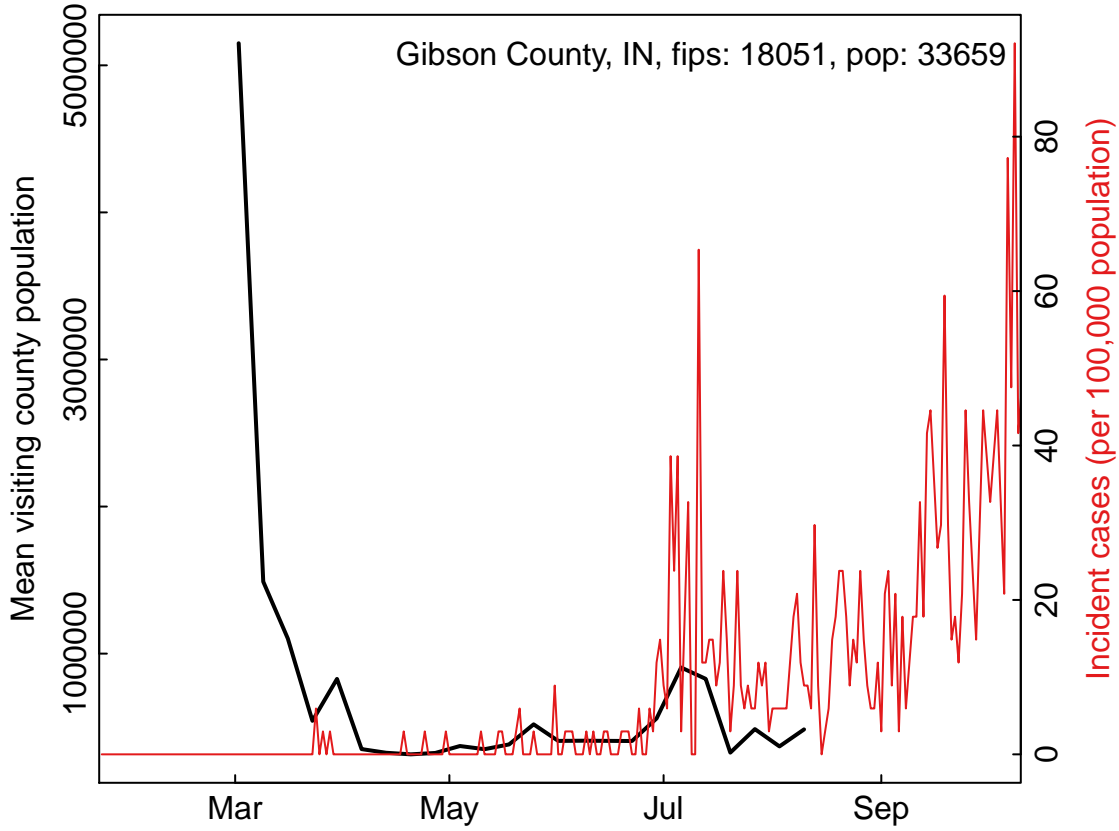

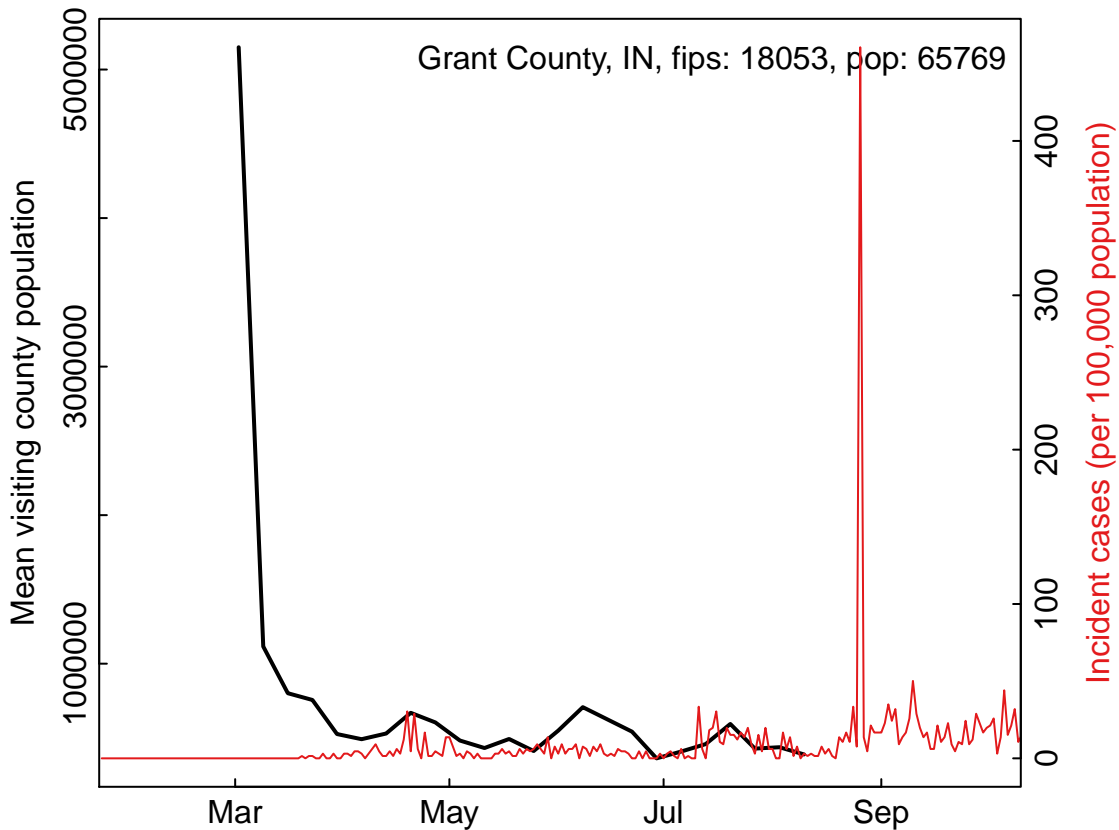

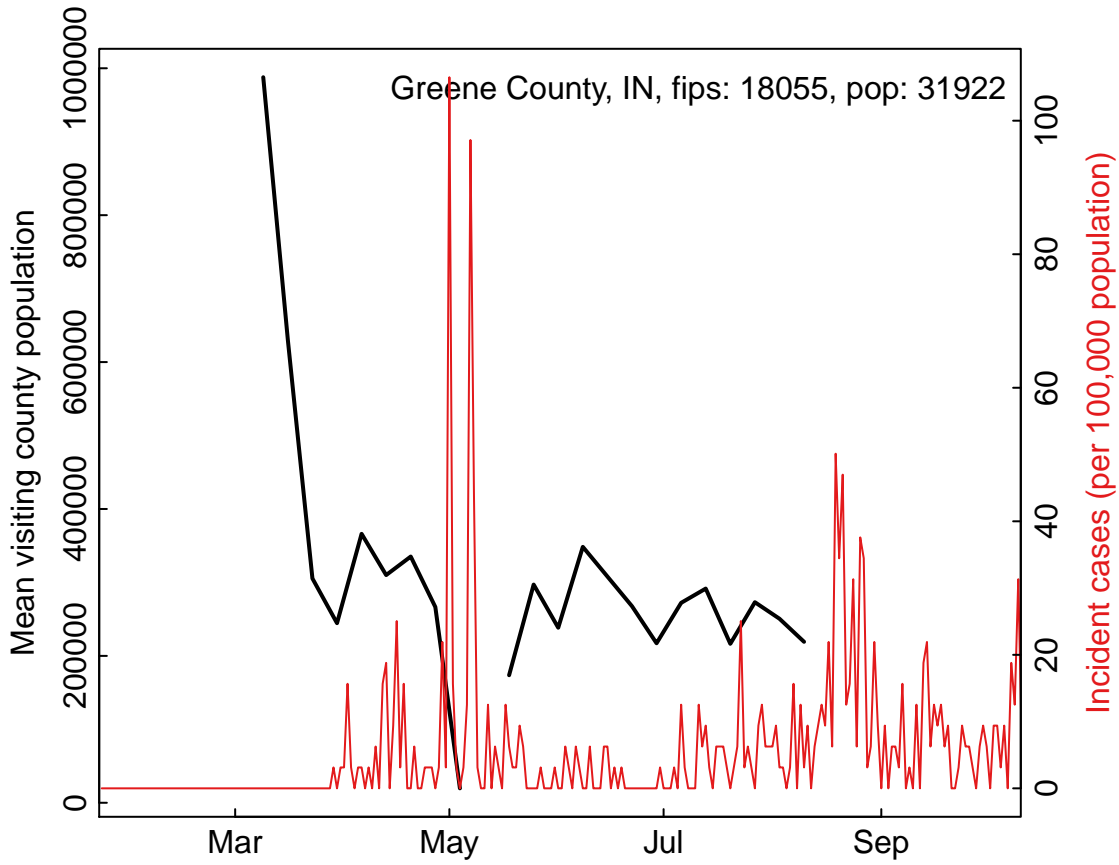

Hamilton County, IN, fips: 18057, pop: 338011

Mean visiting county population

500000 1500000 2500000

Mar

May

Jul

Sep

0 5 10 15 20 25 30

Incident cases (per 100,000 population)

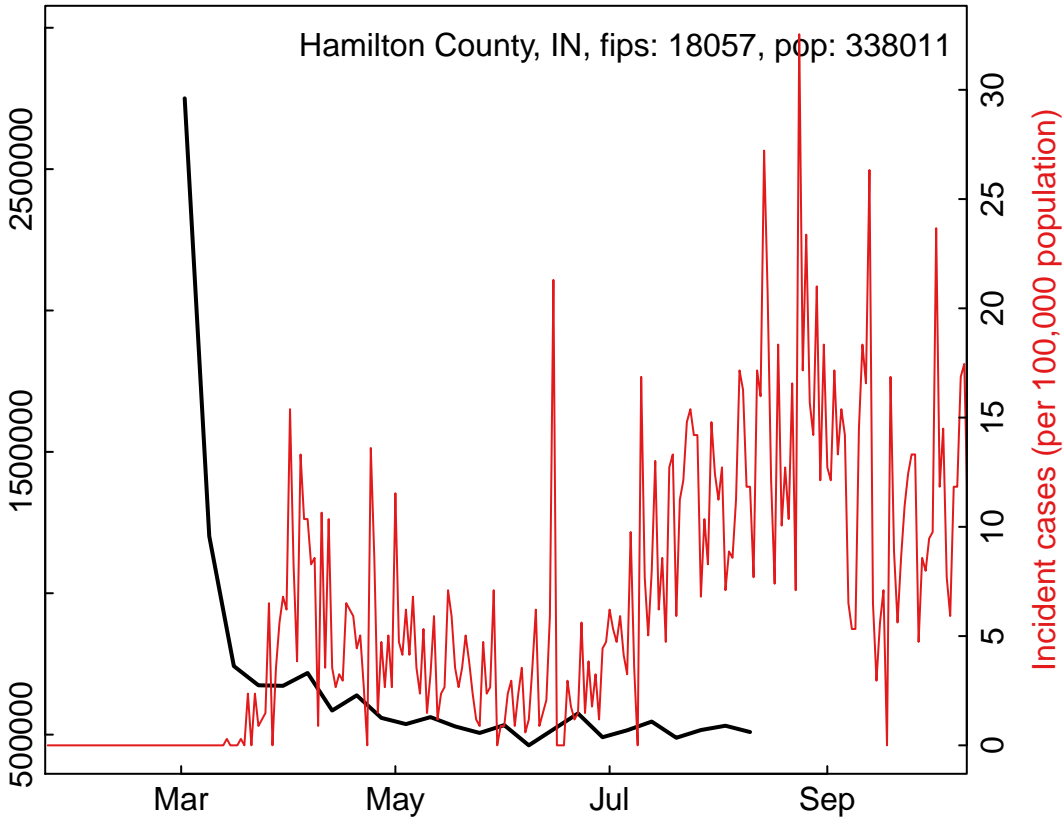

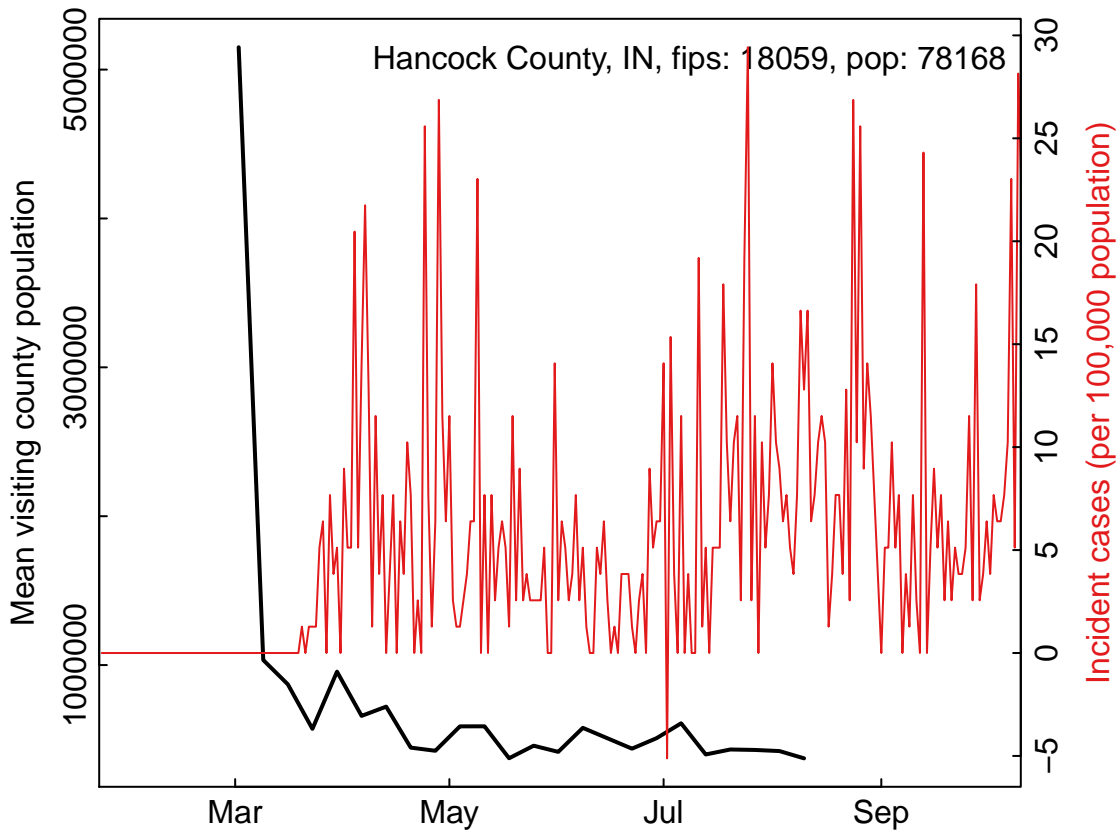

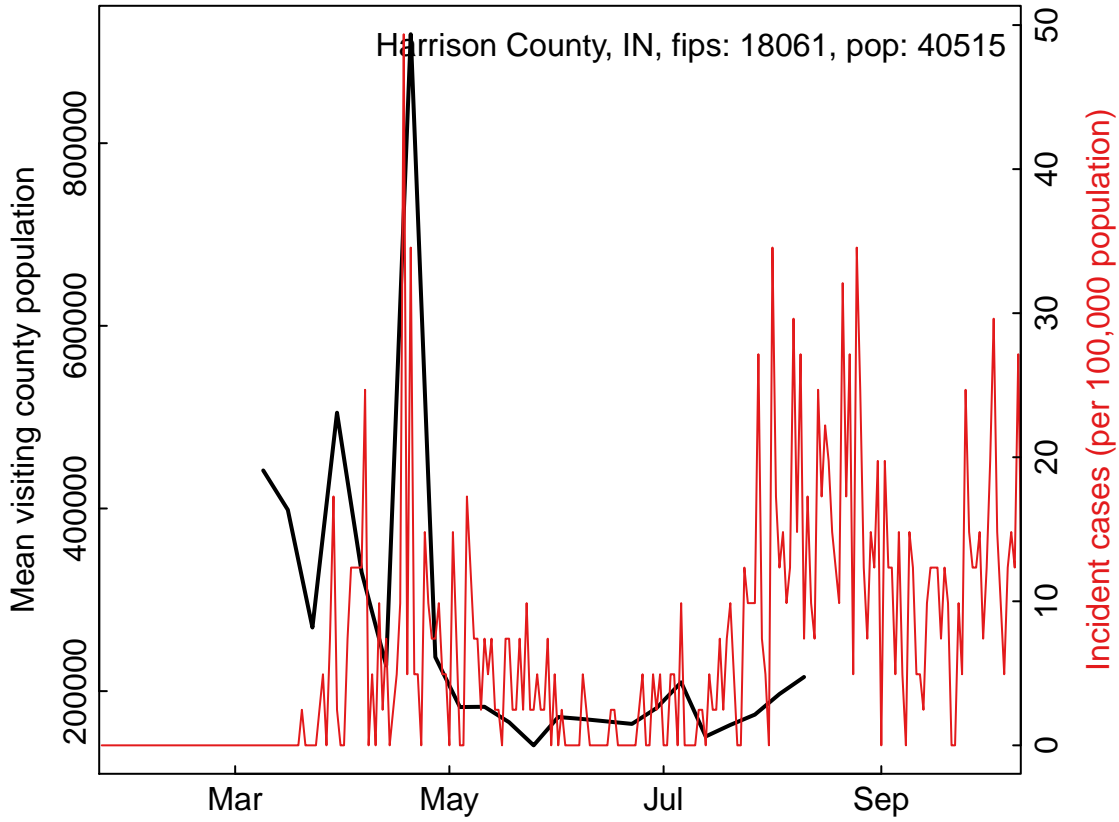

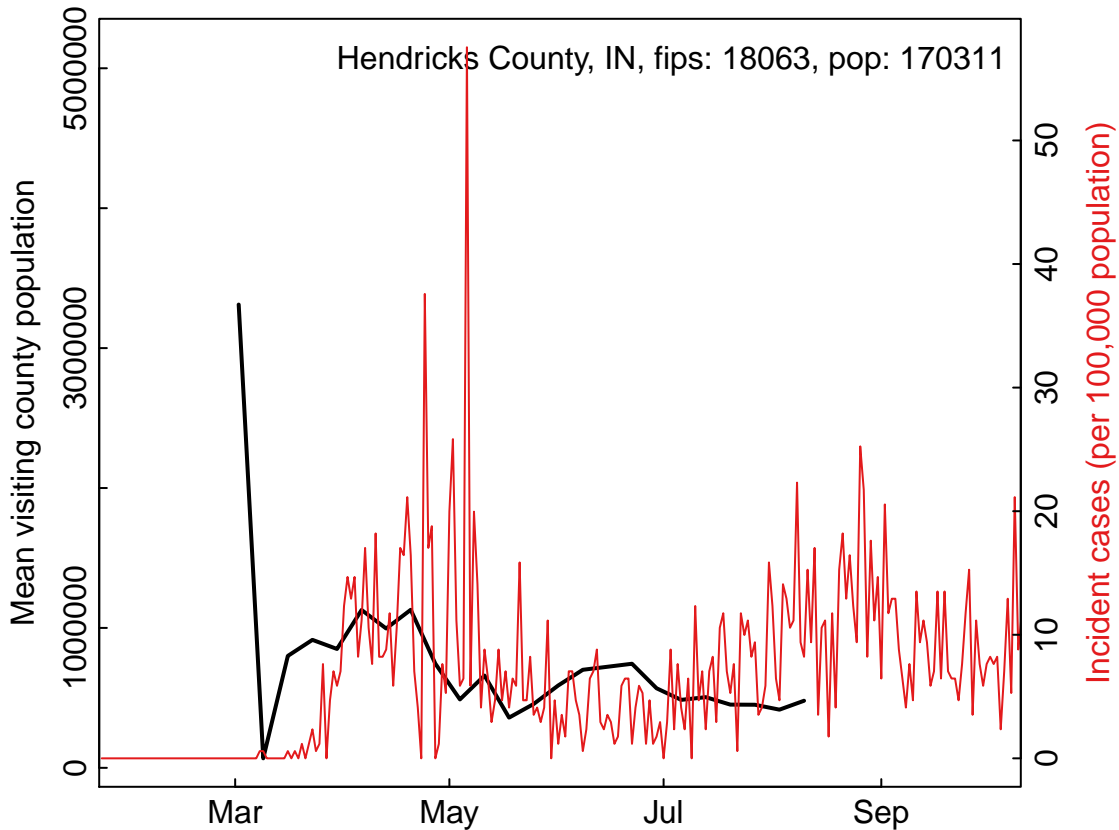



Henry County, IN, fips: 18065, pop: 47972

Mean visiting county population

1000000  
800000  
600000  
400000

Mar May Jul Sep

Incident cases (per 100,000 population)

80  
60  
40  
20  
0

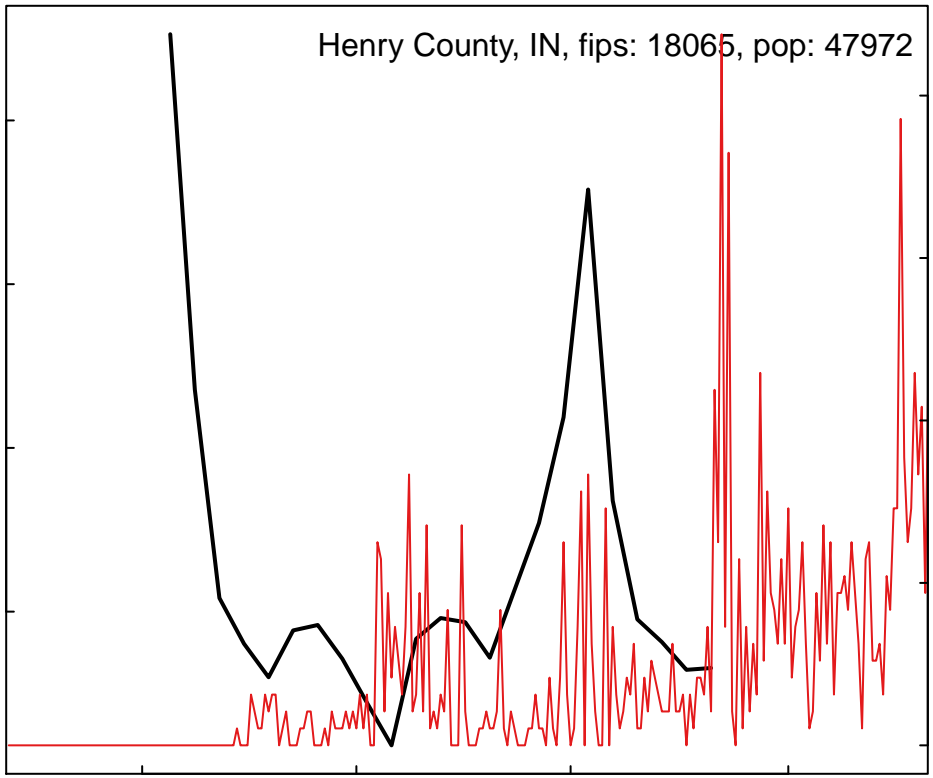

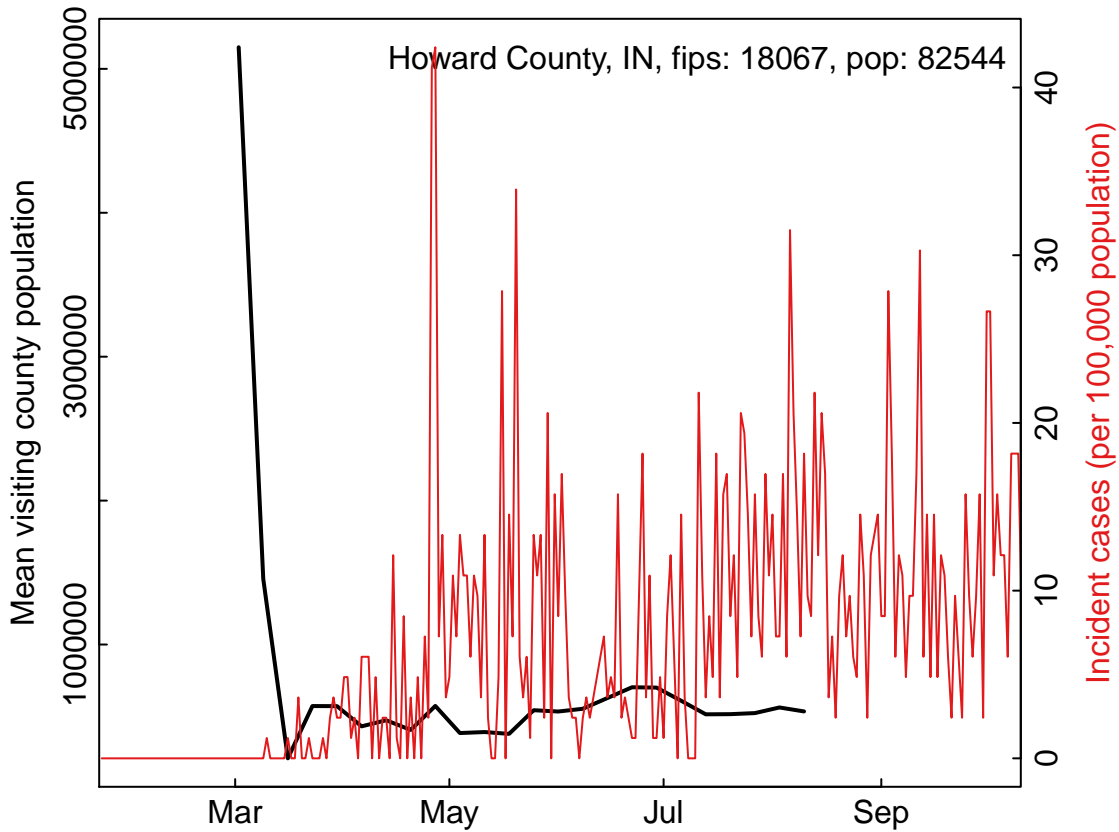

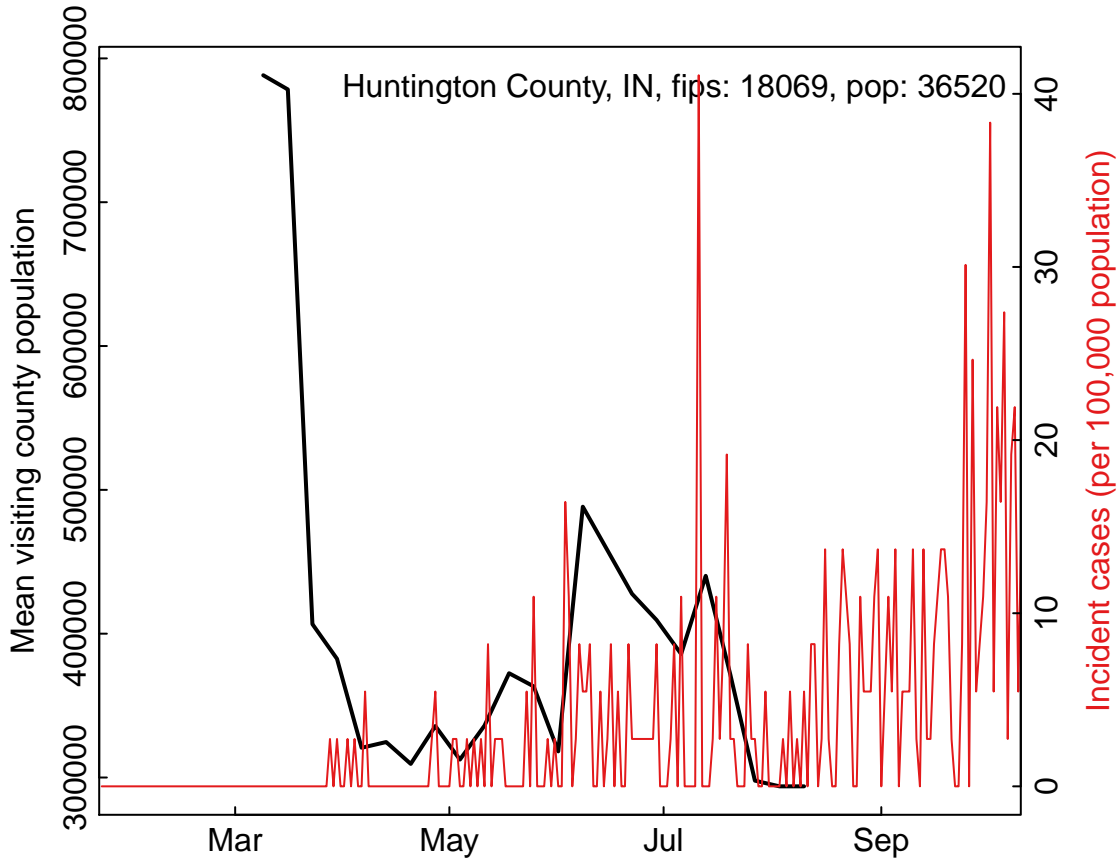

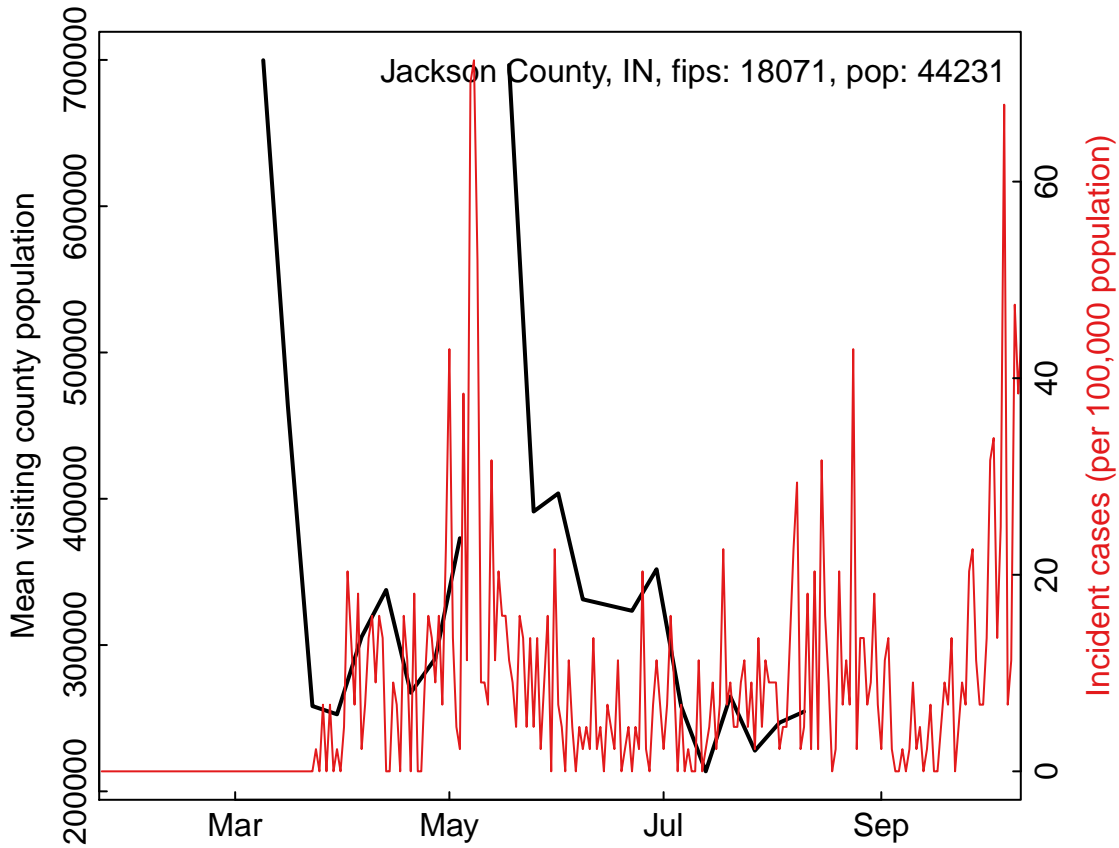

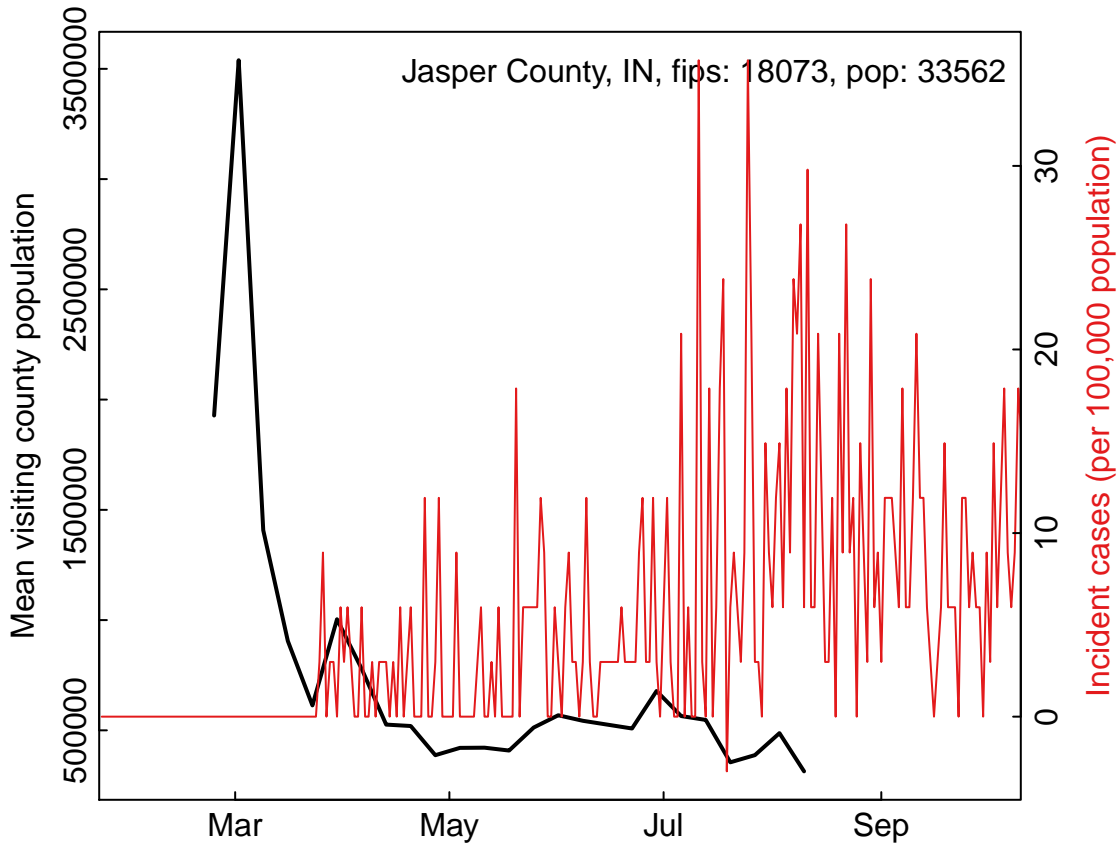

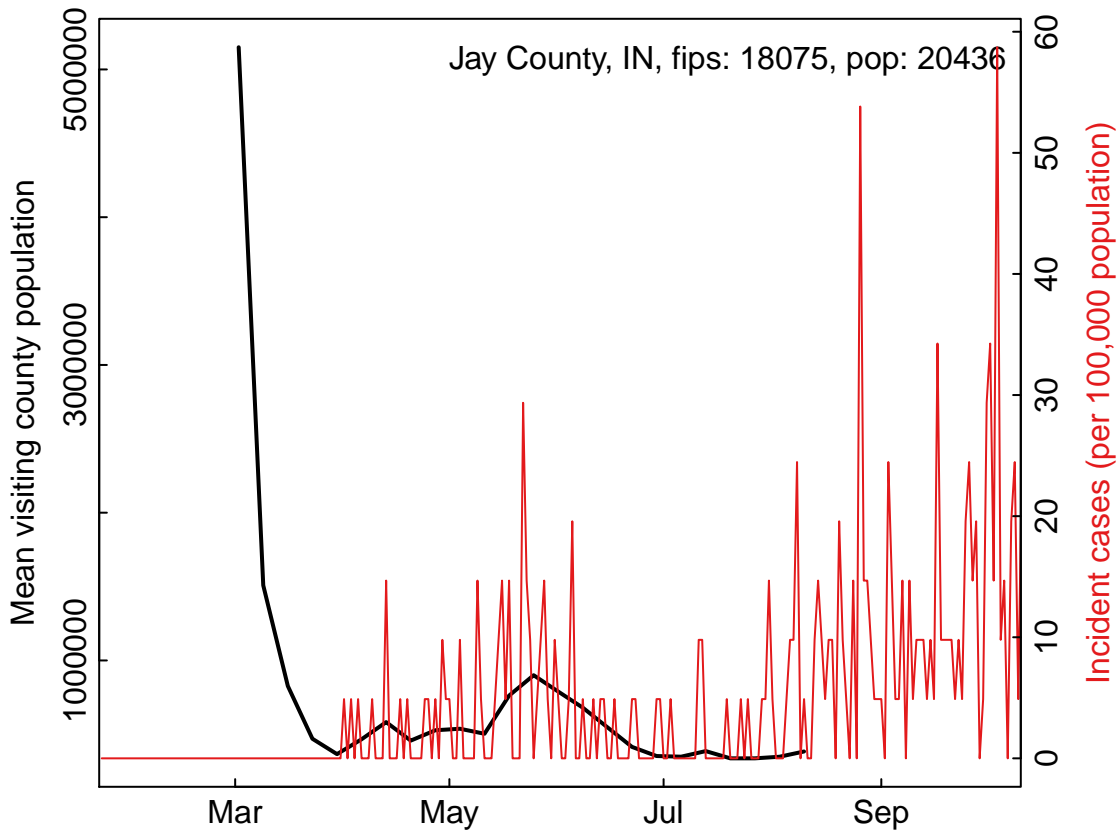

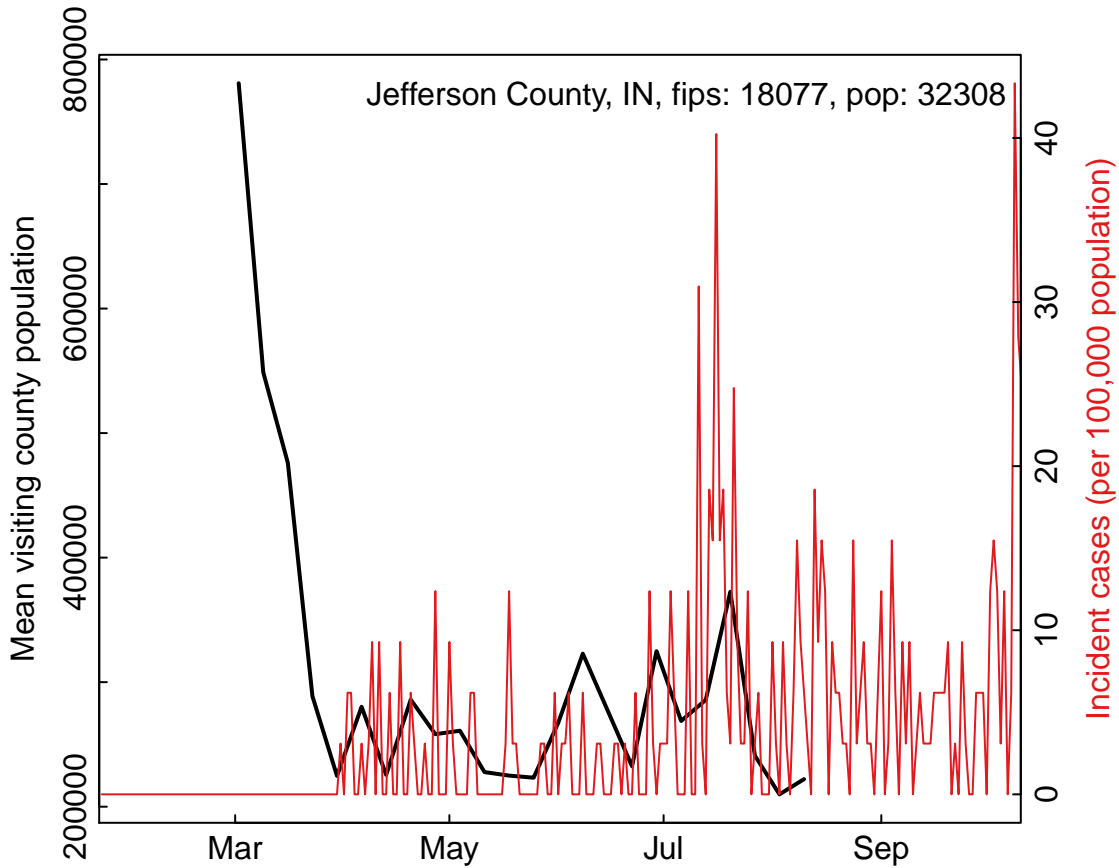

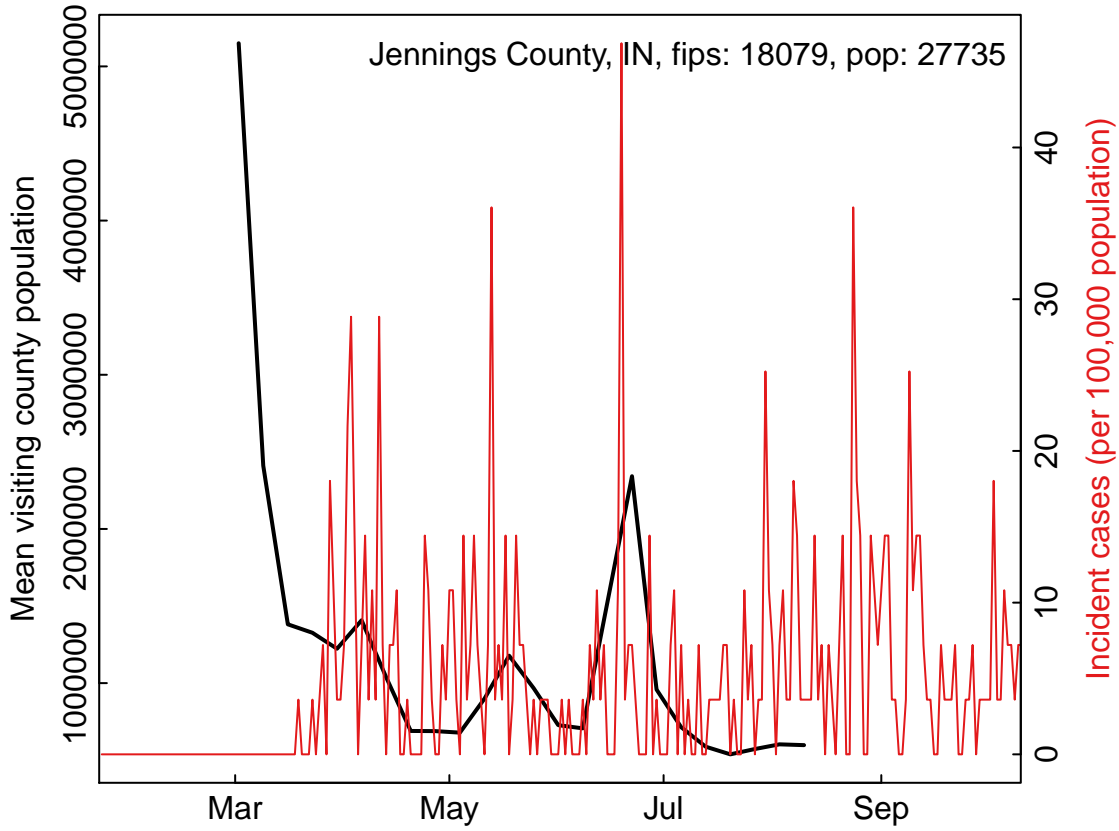



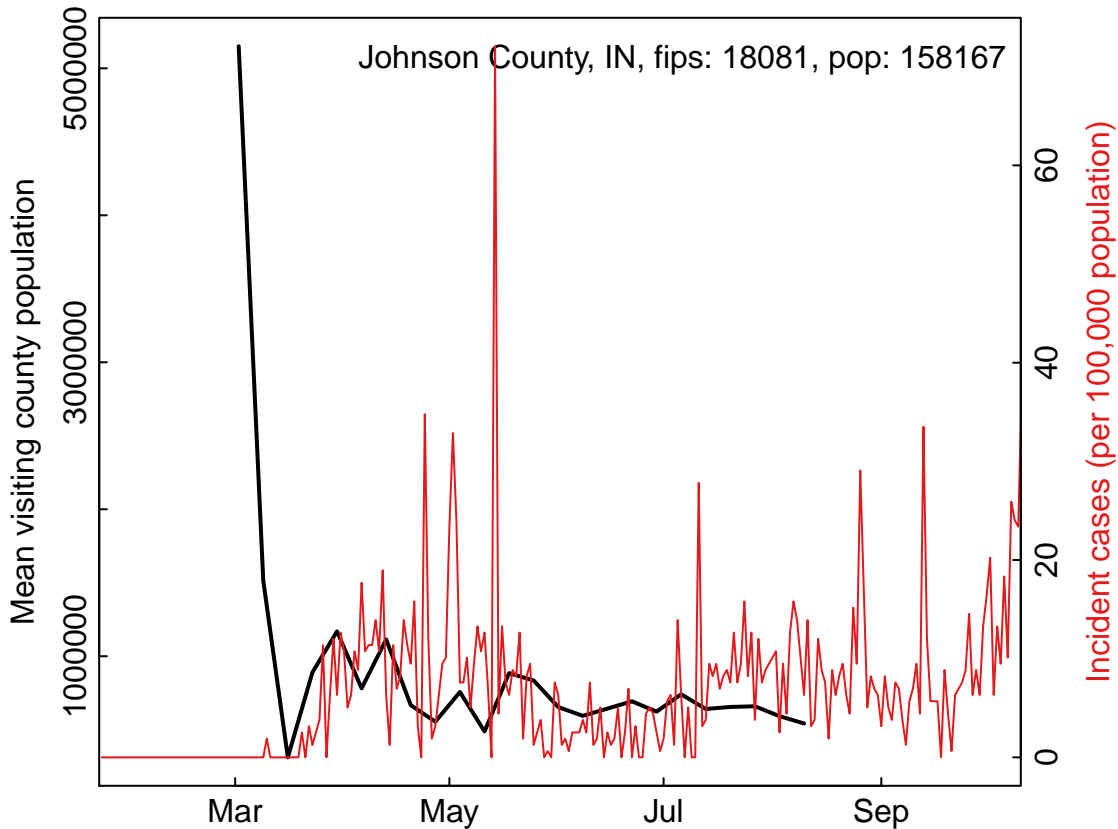

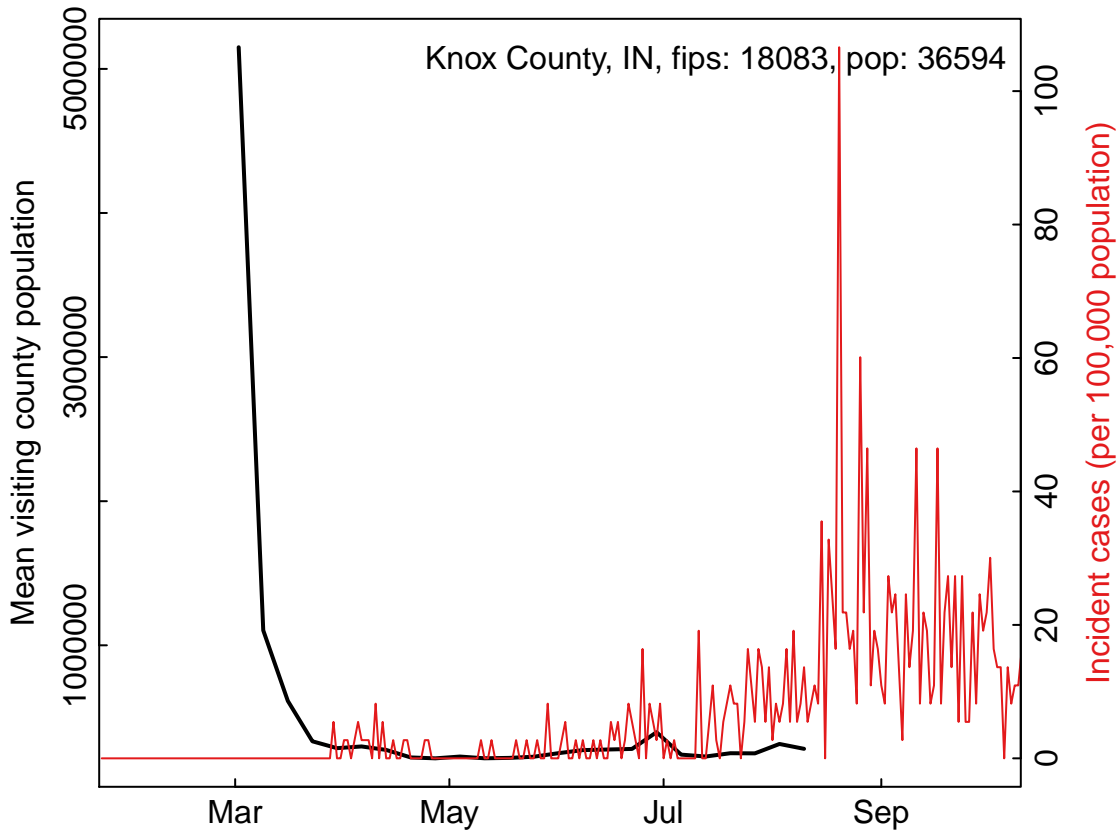

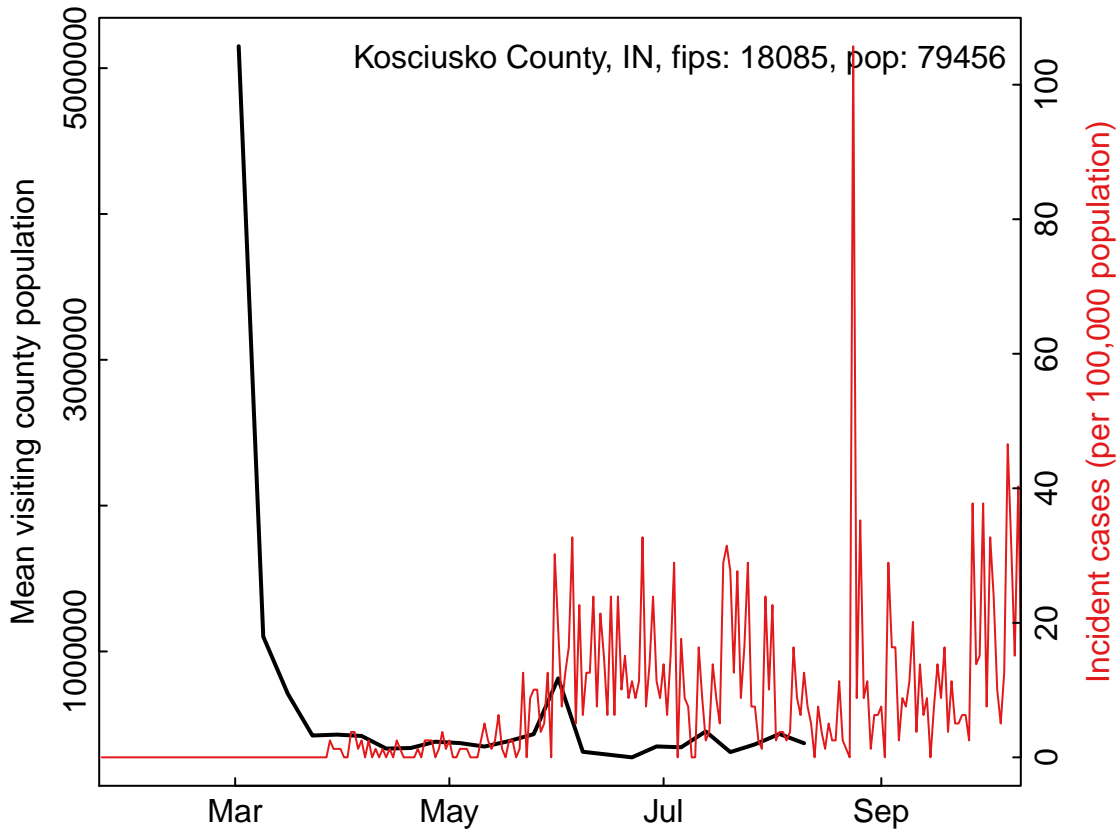

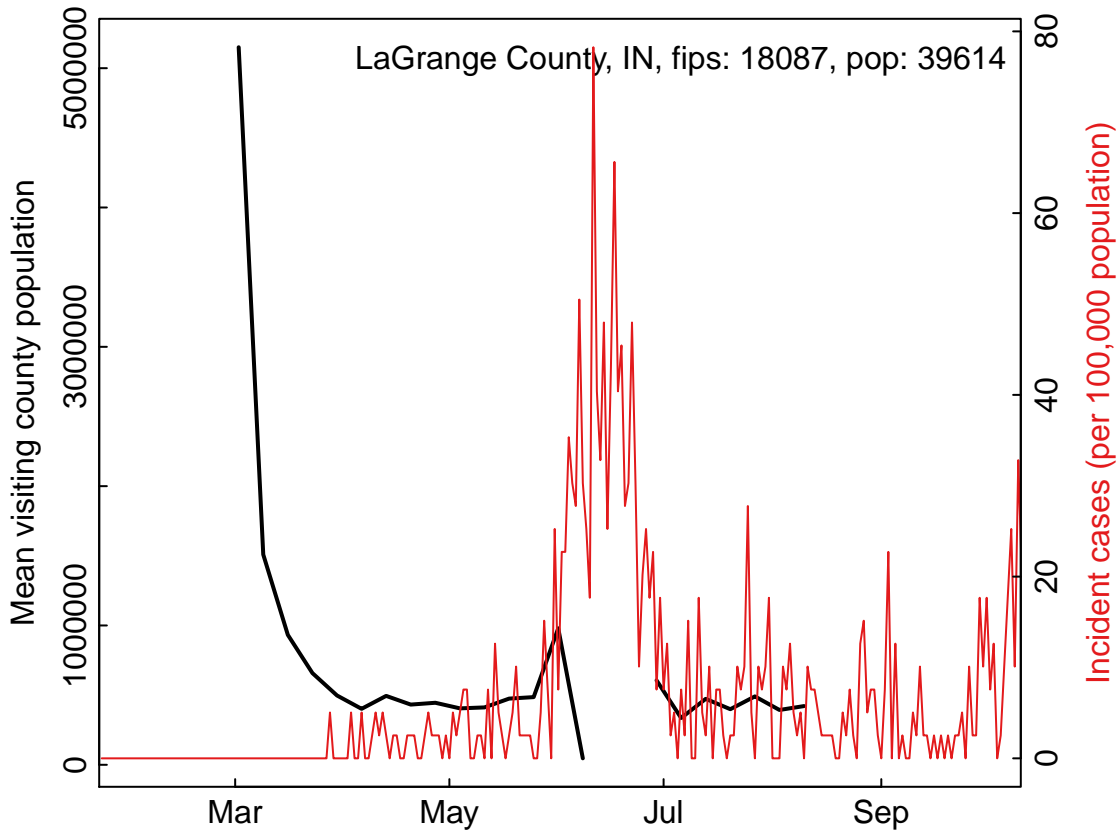

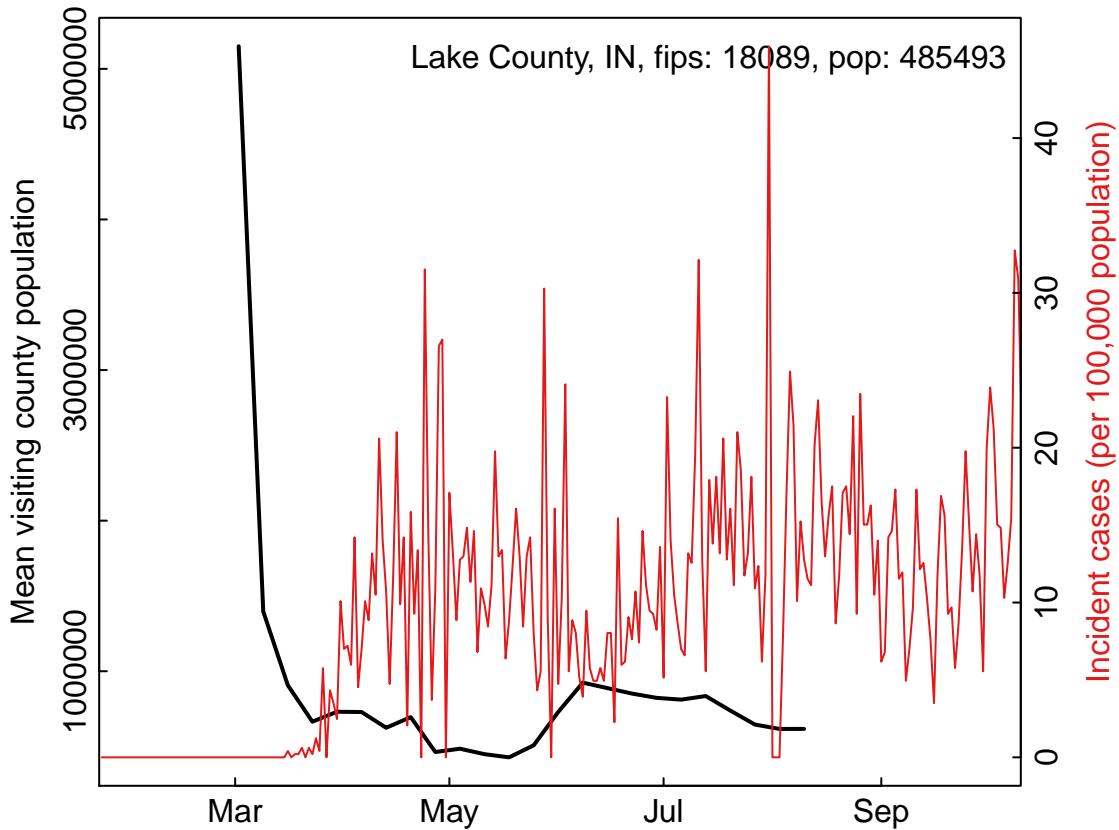

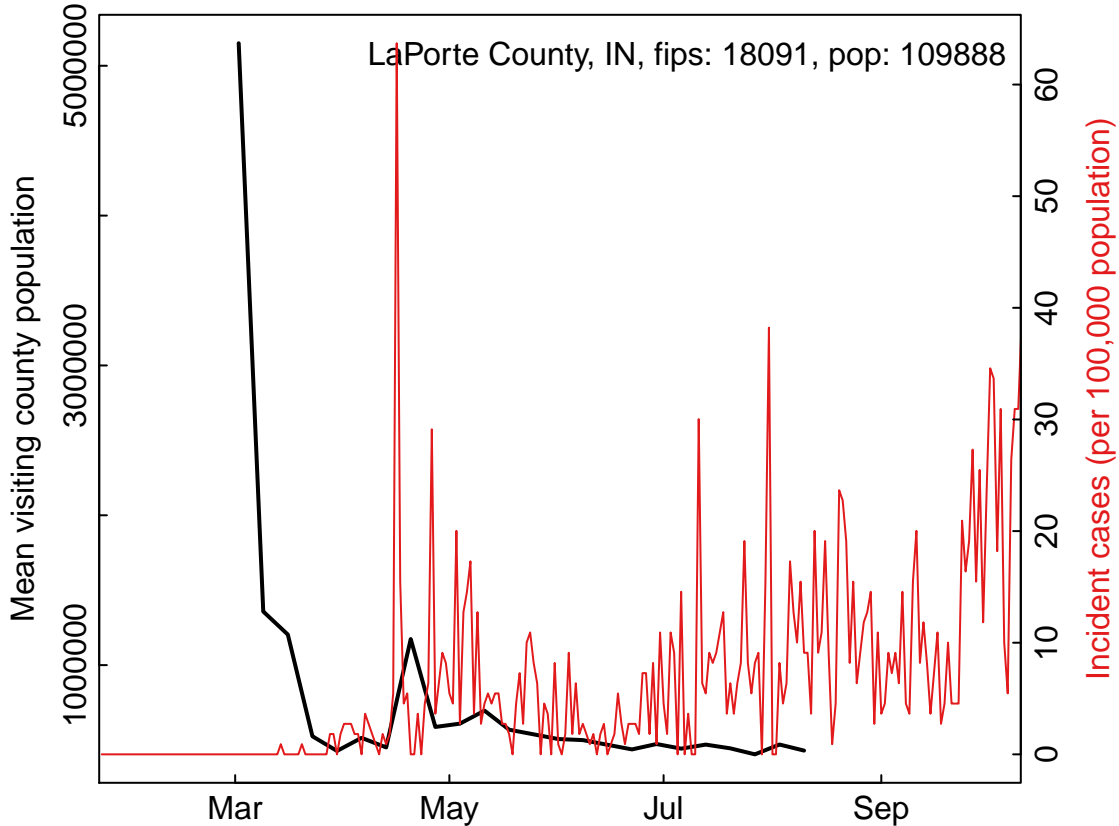

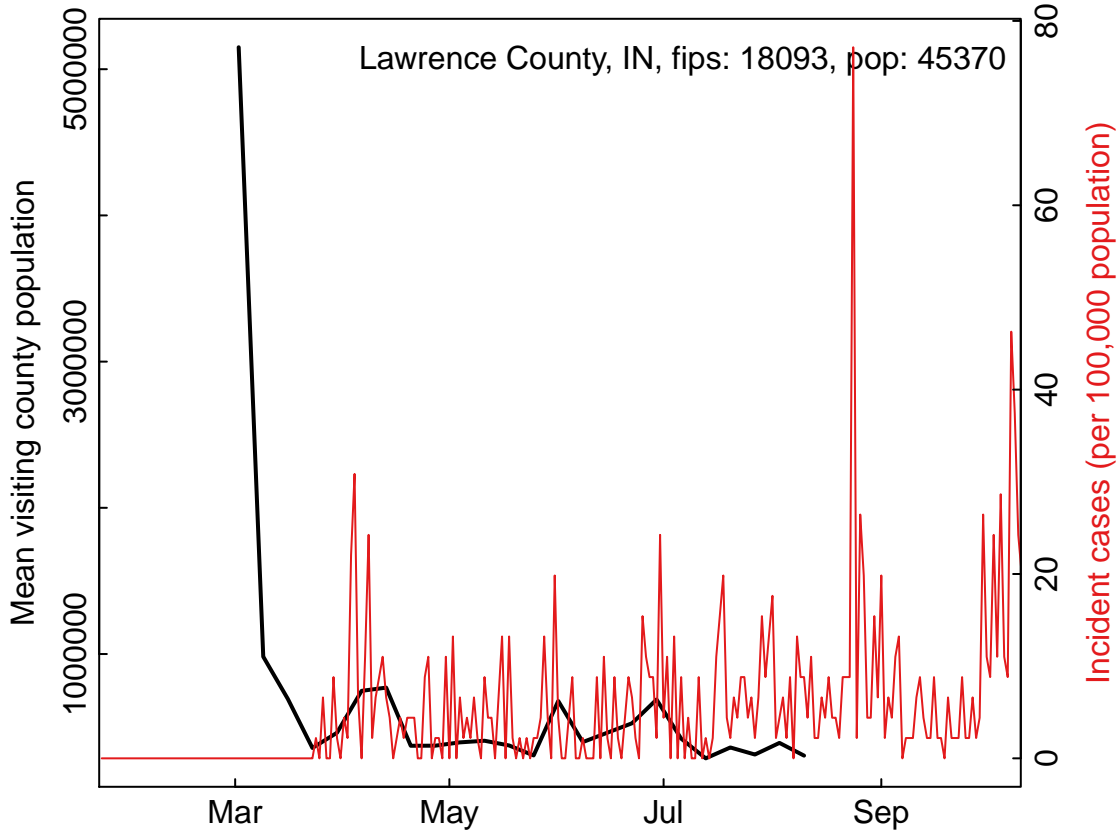

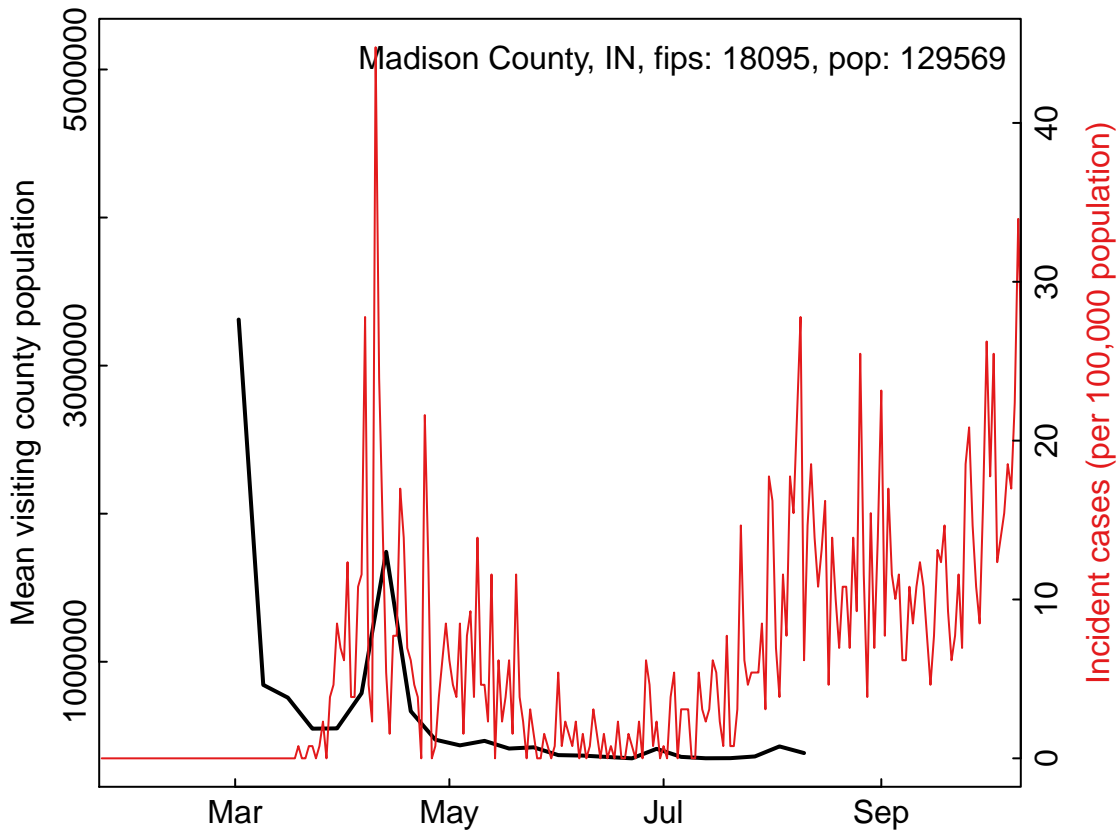



Marion County, IN, fips: 18097, pop: 964582

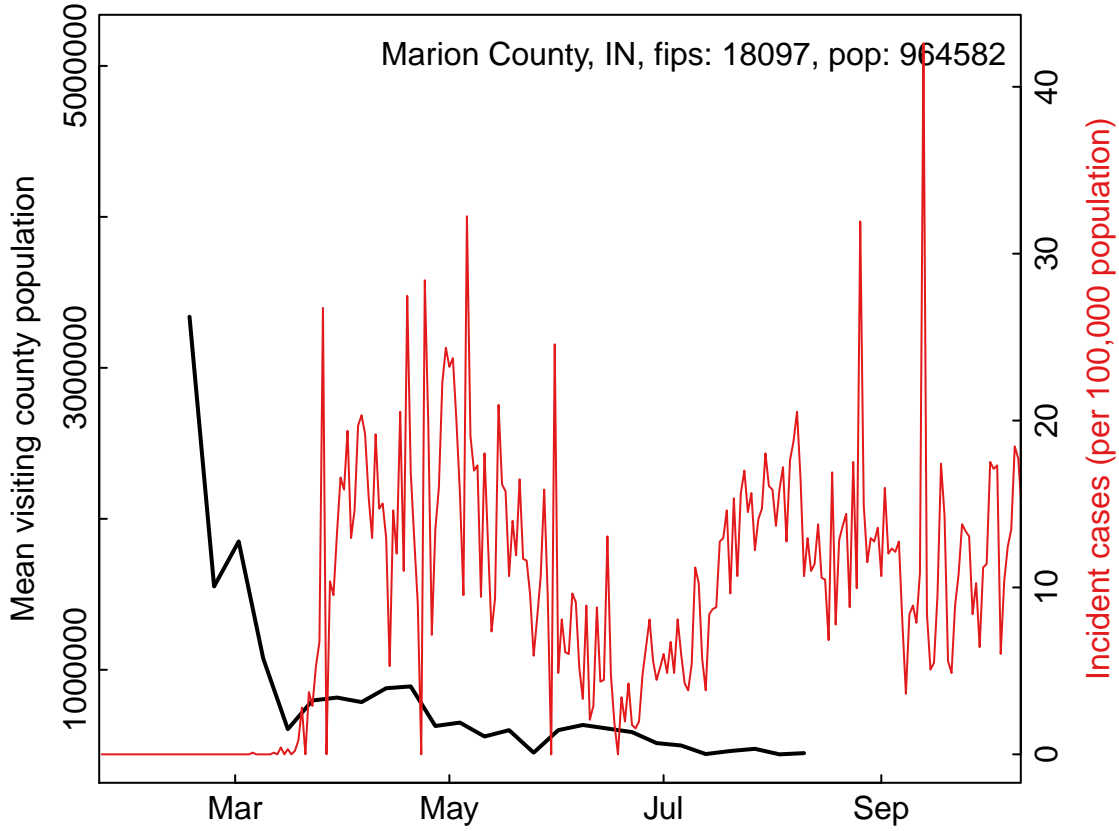

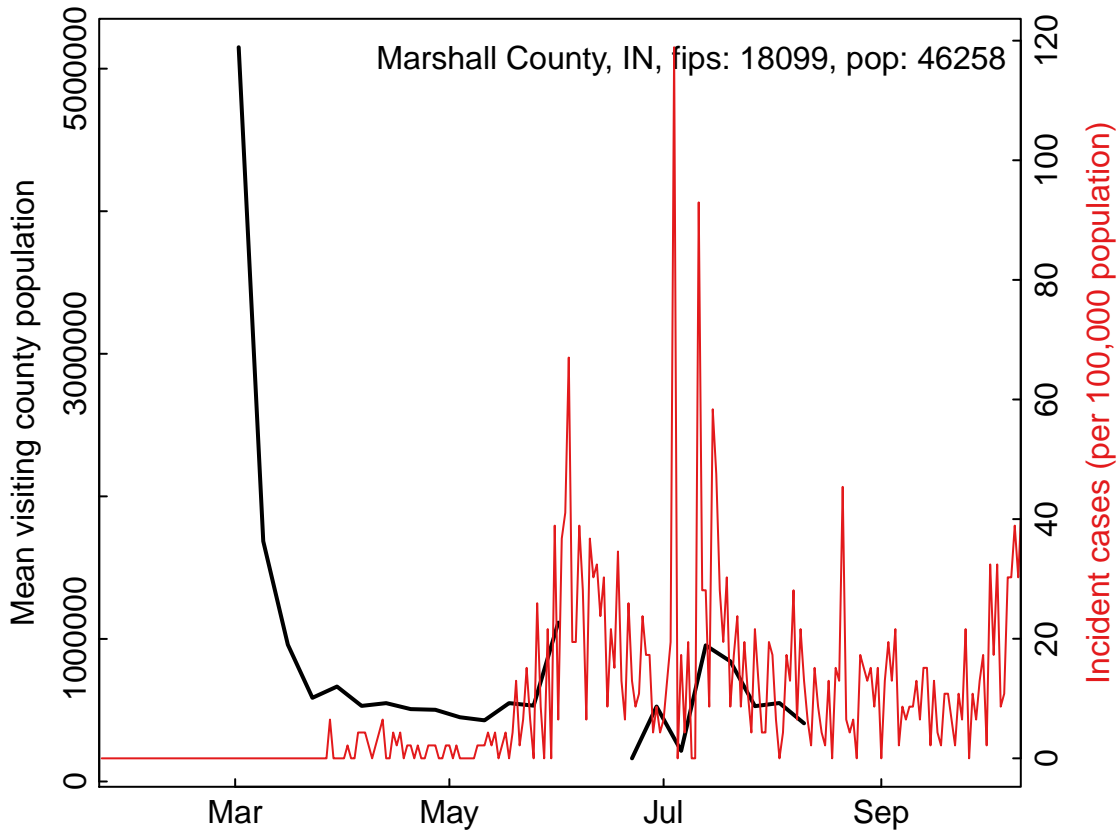

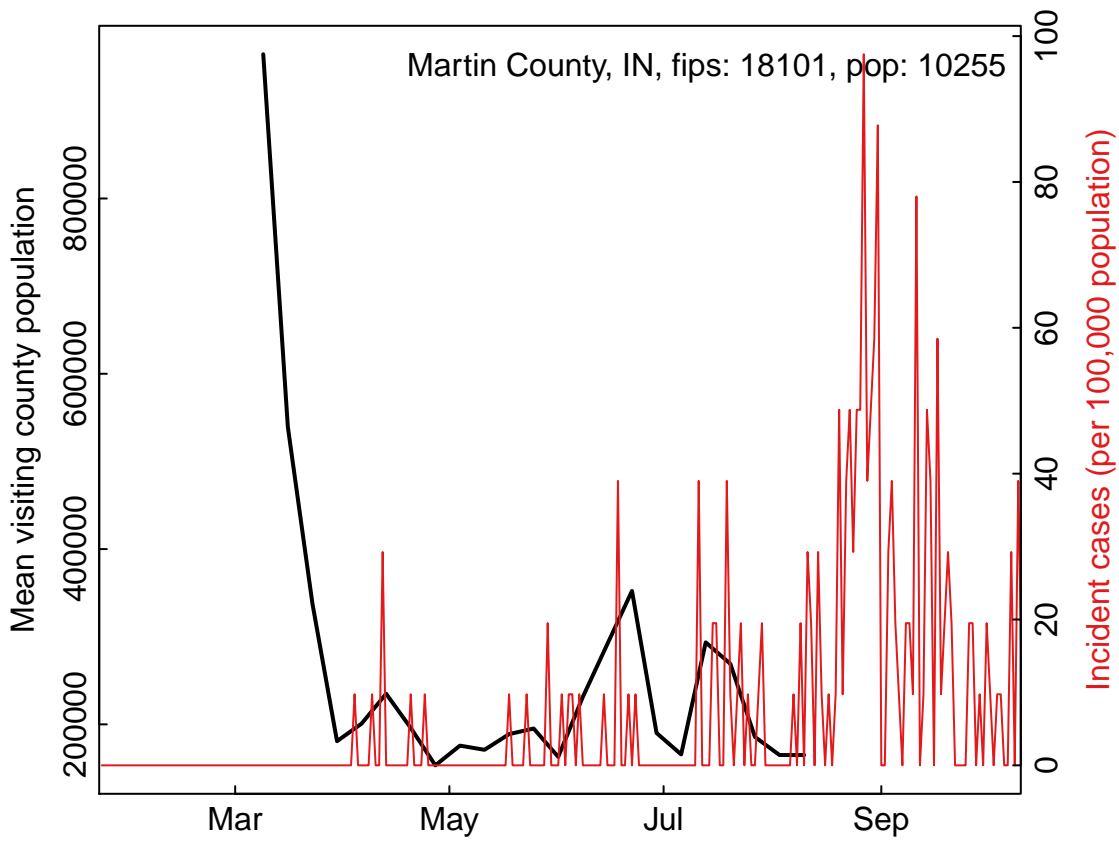

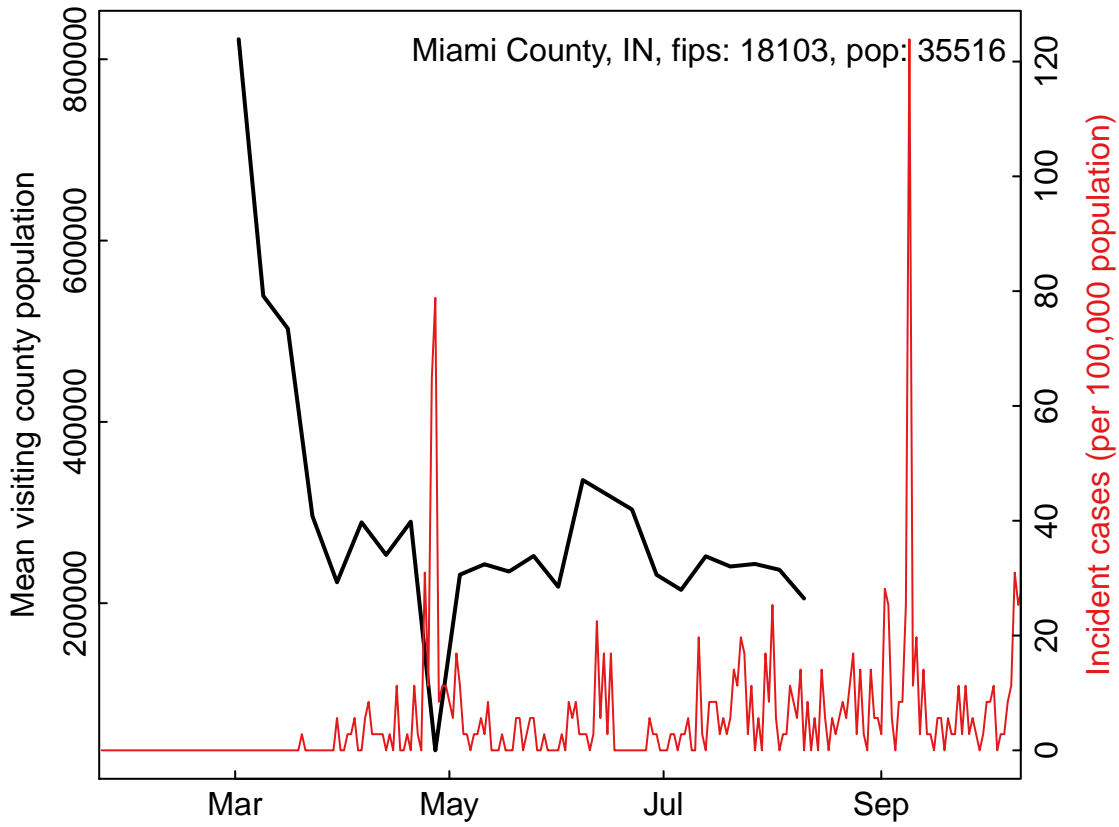

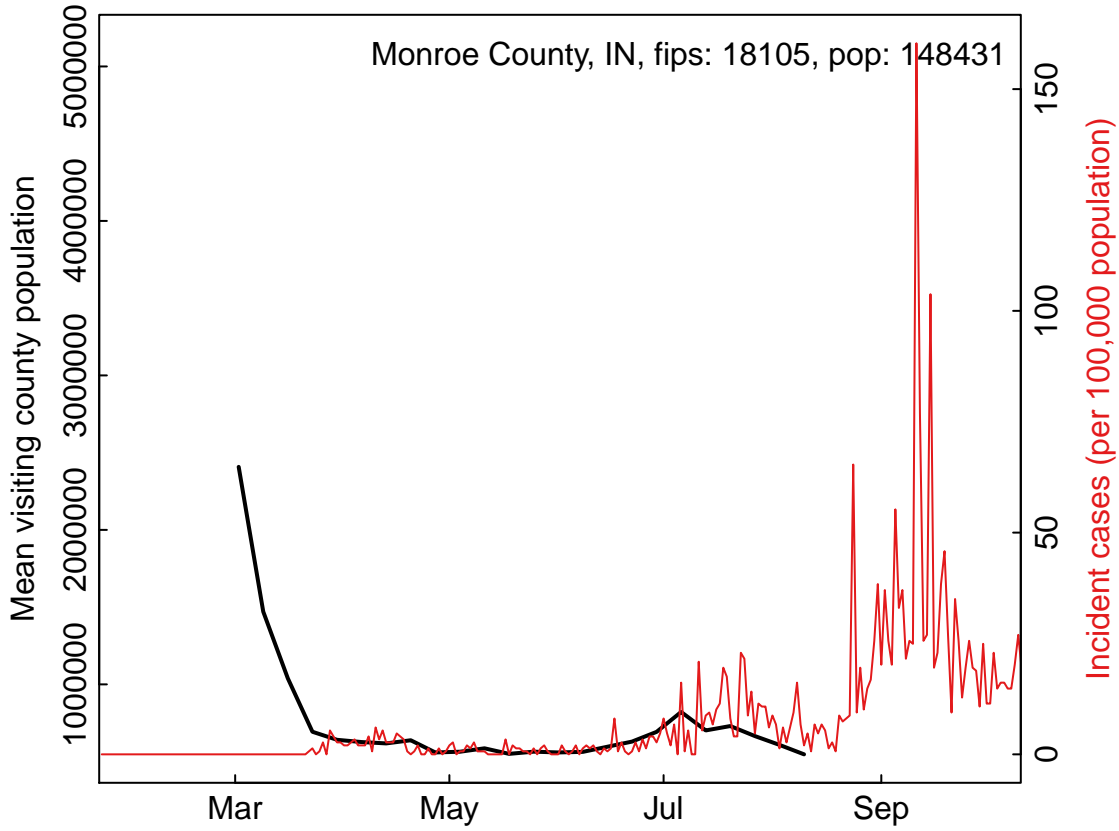

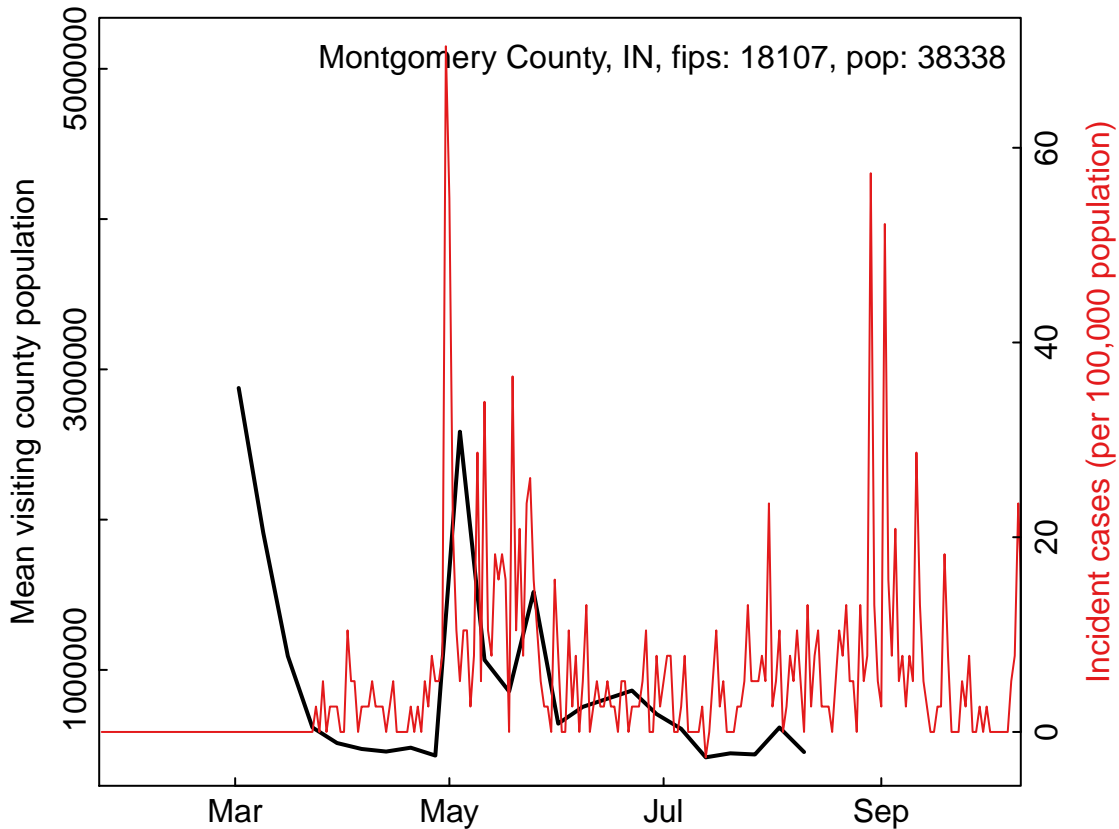

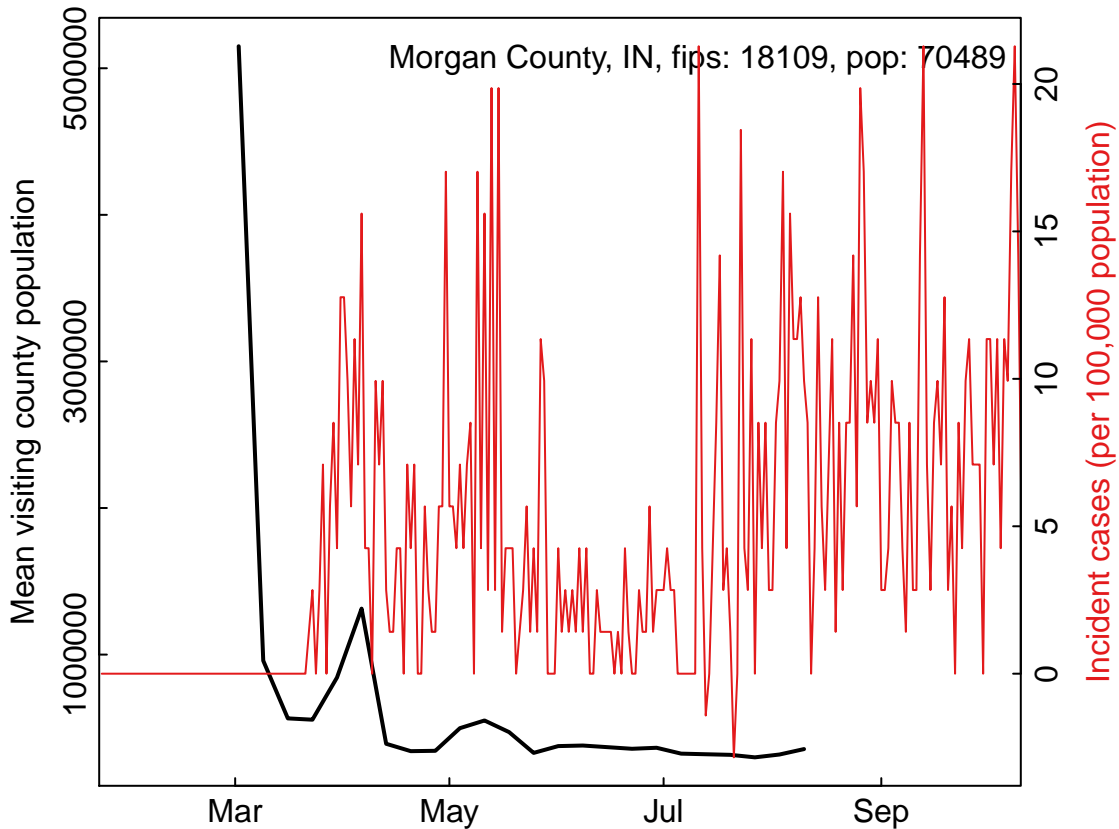

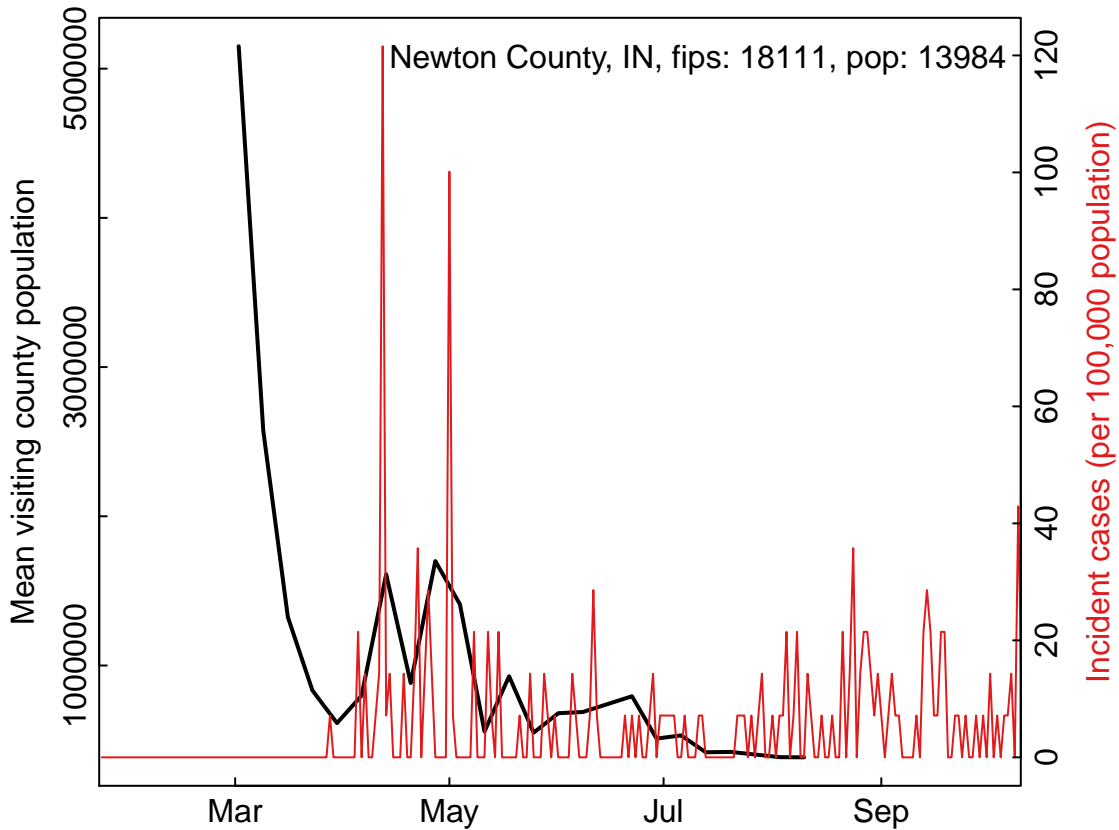



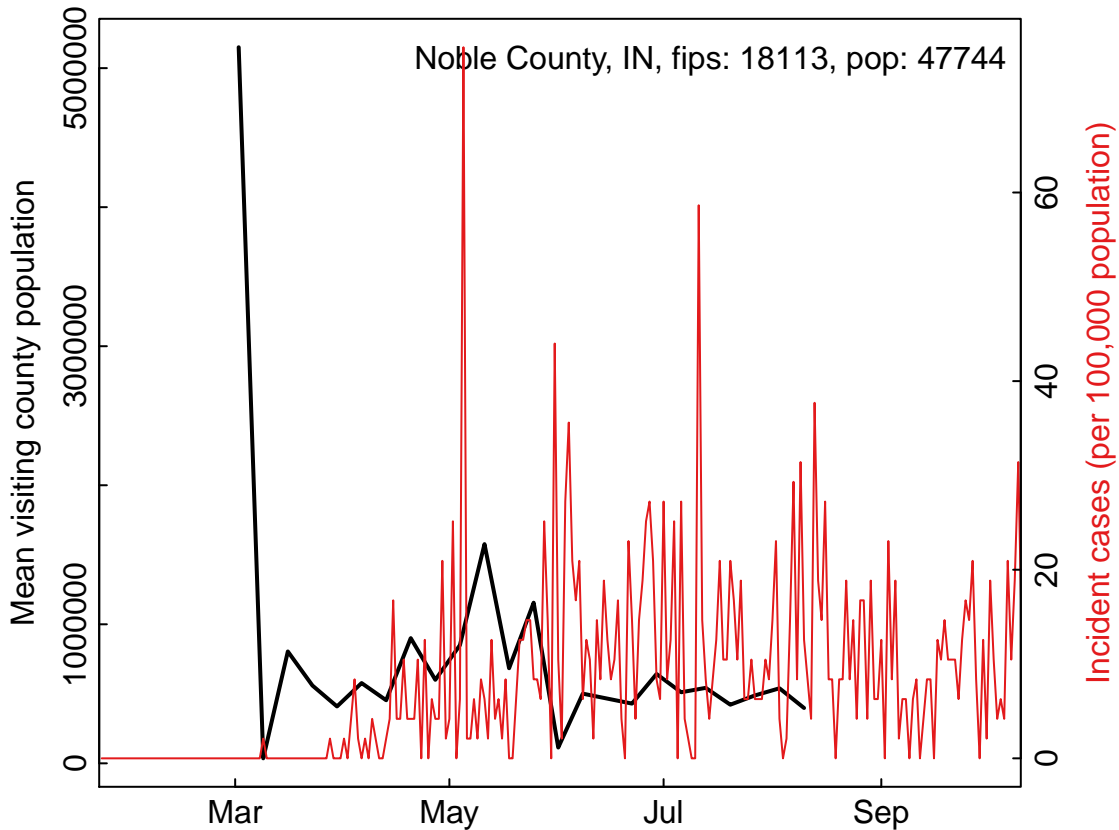

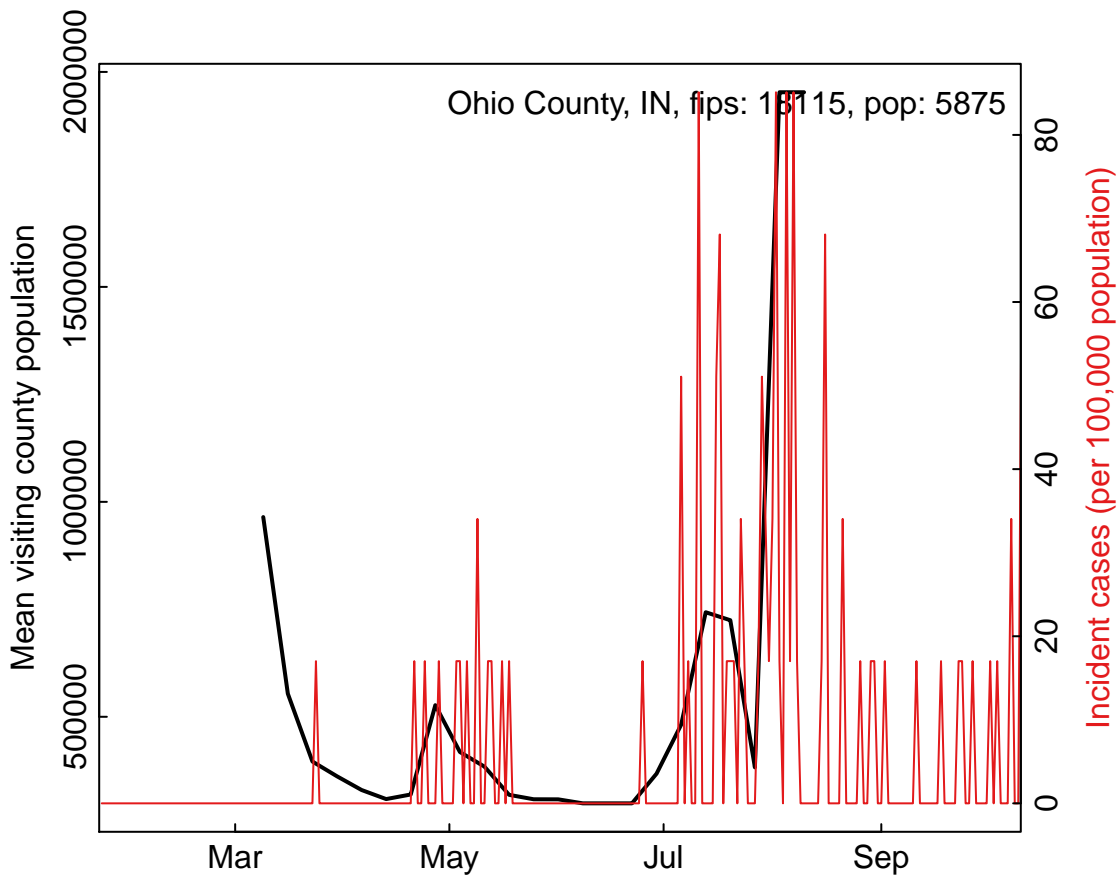

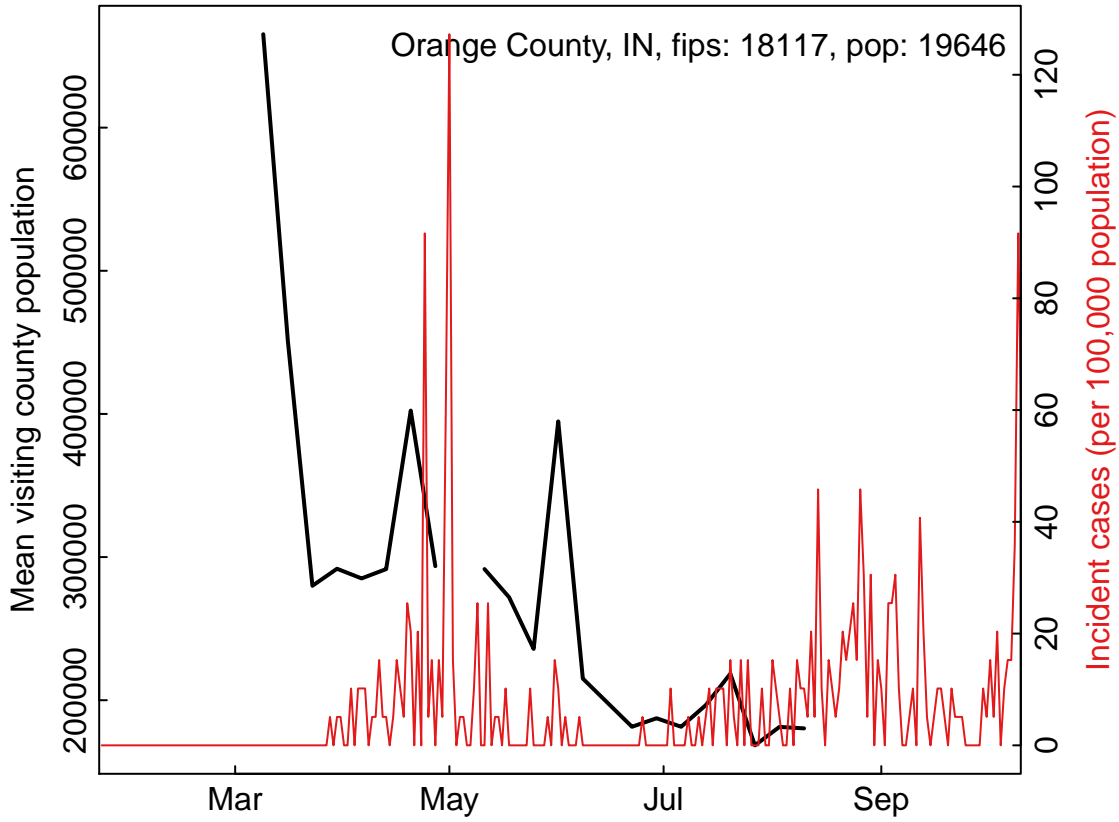

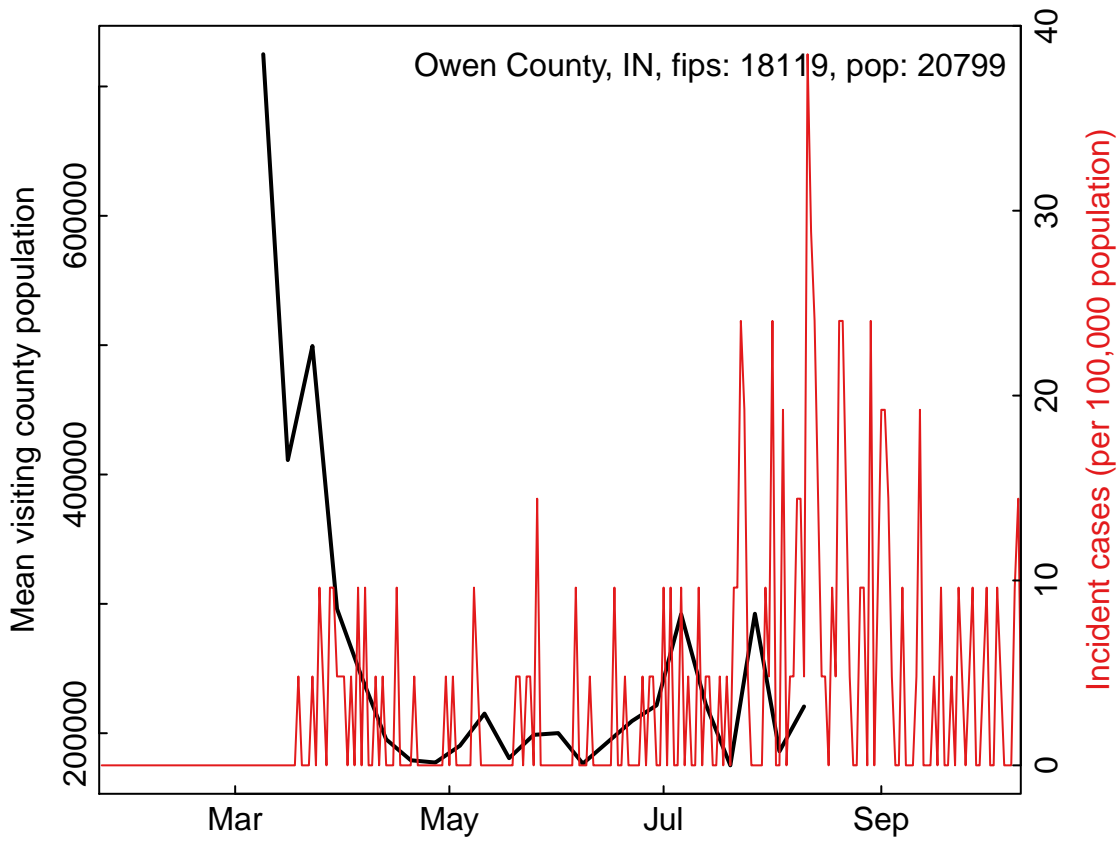

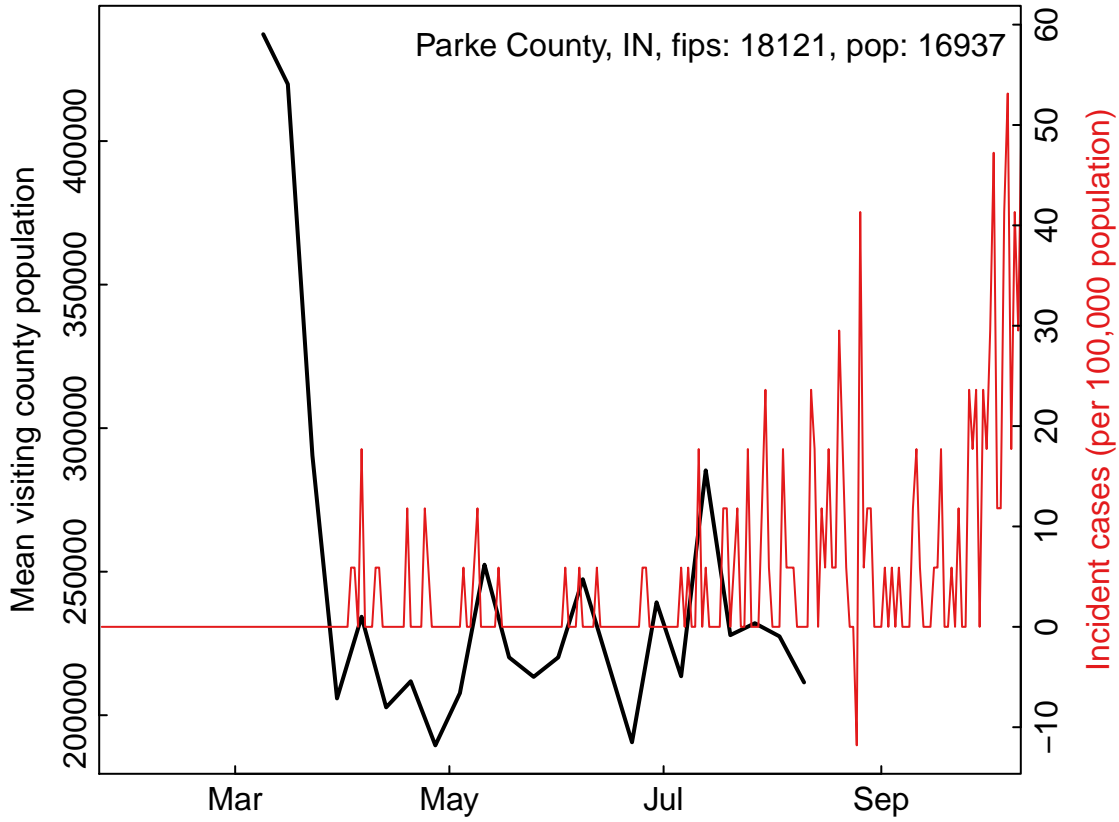

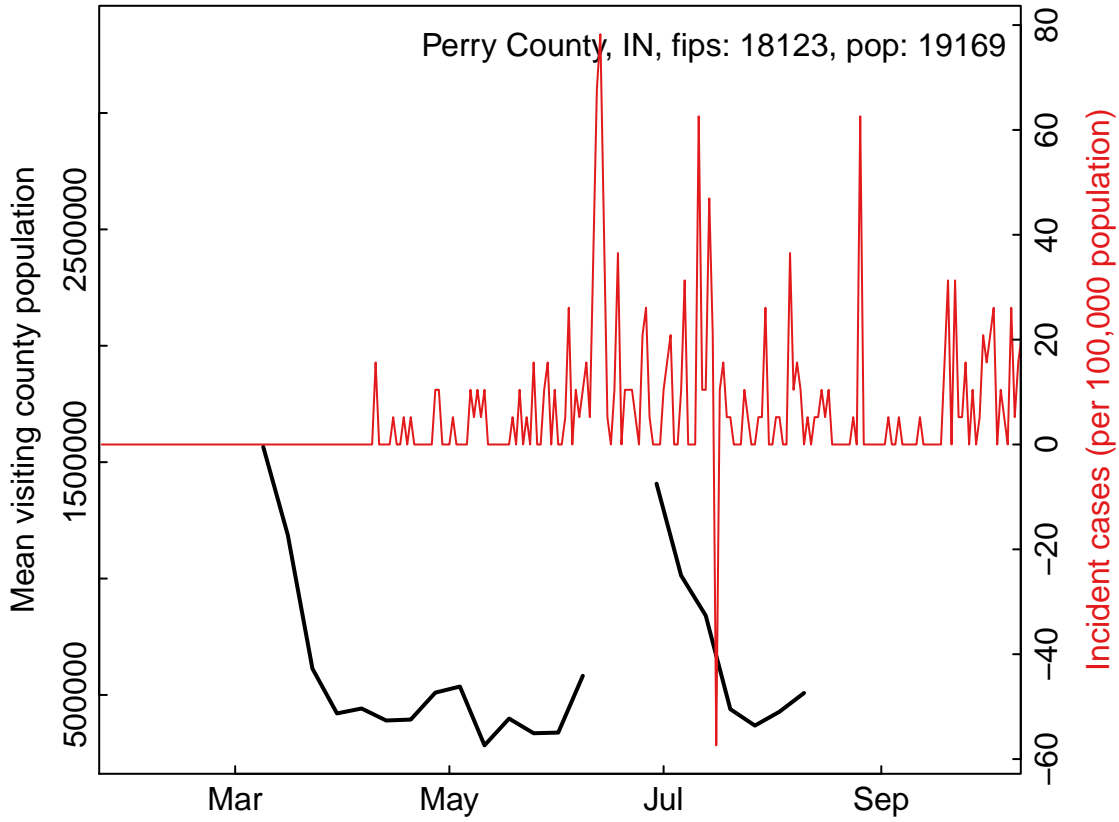

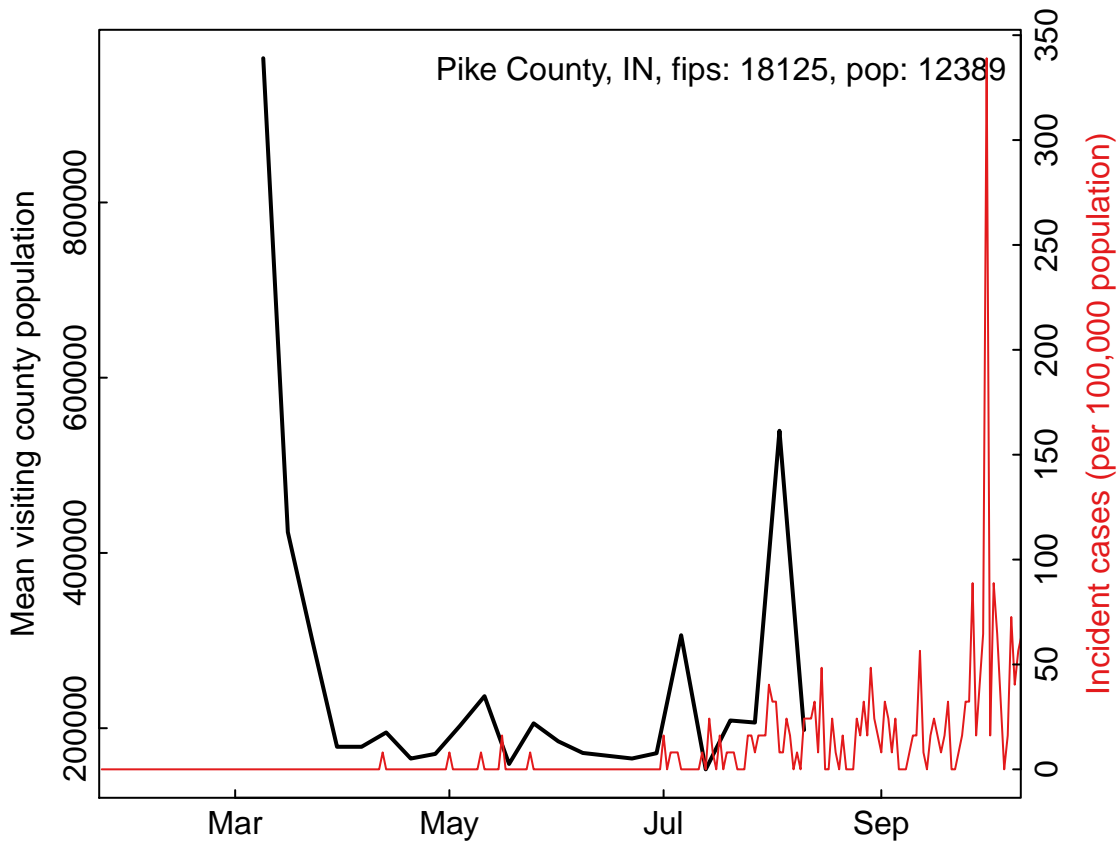

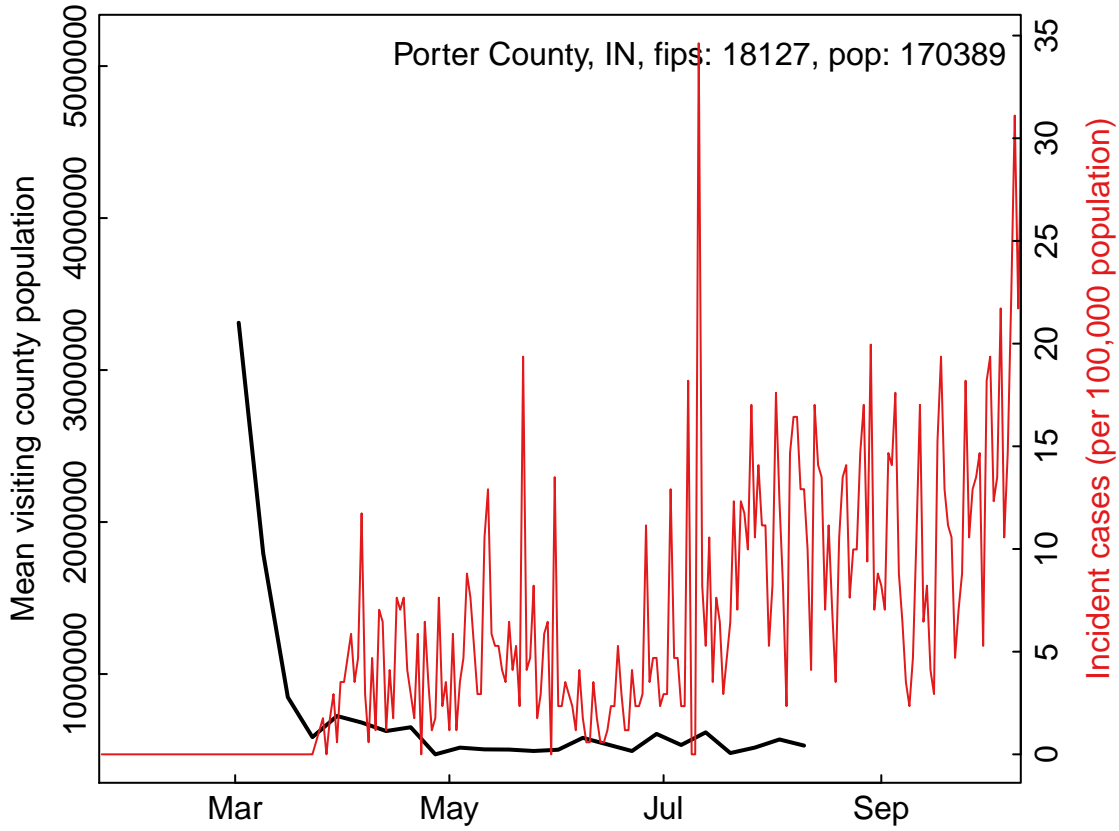



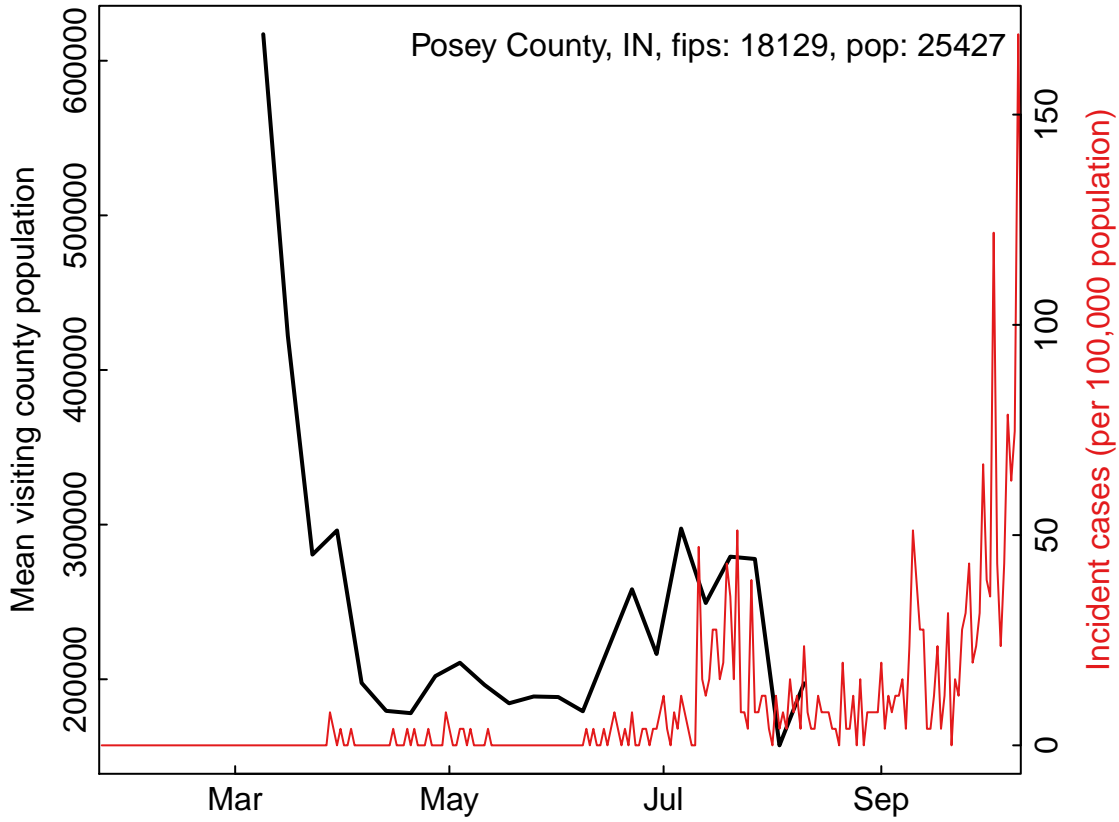

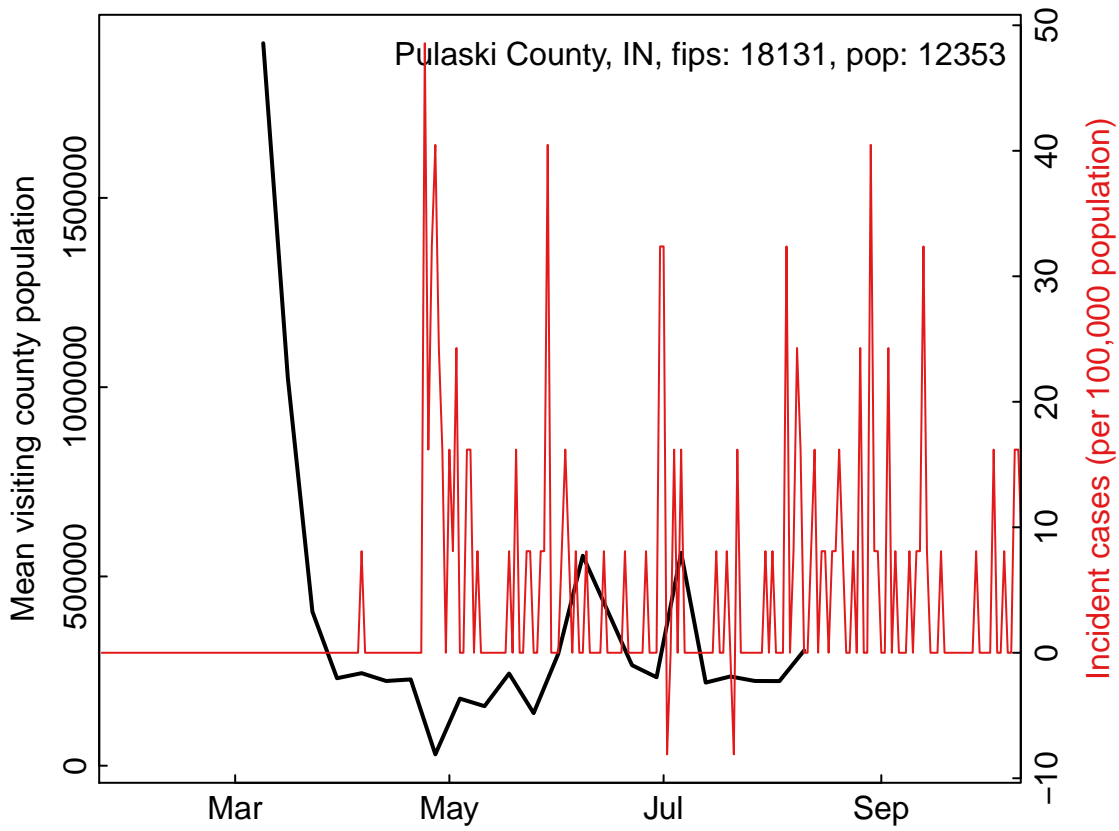

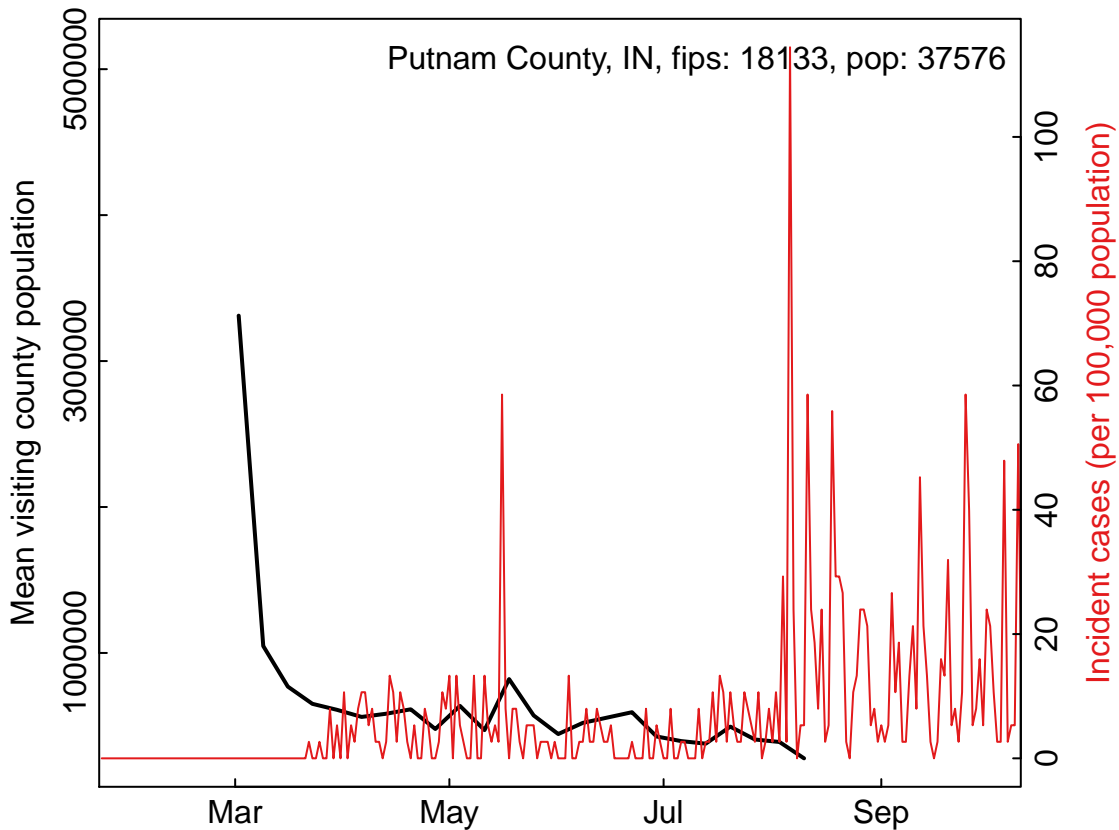

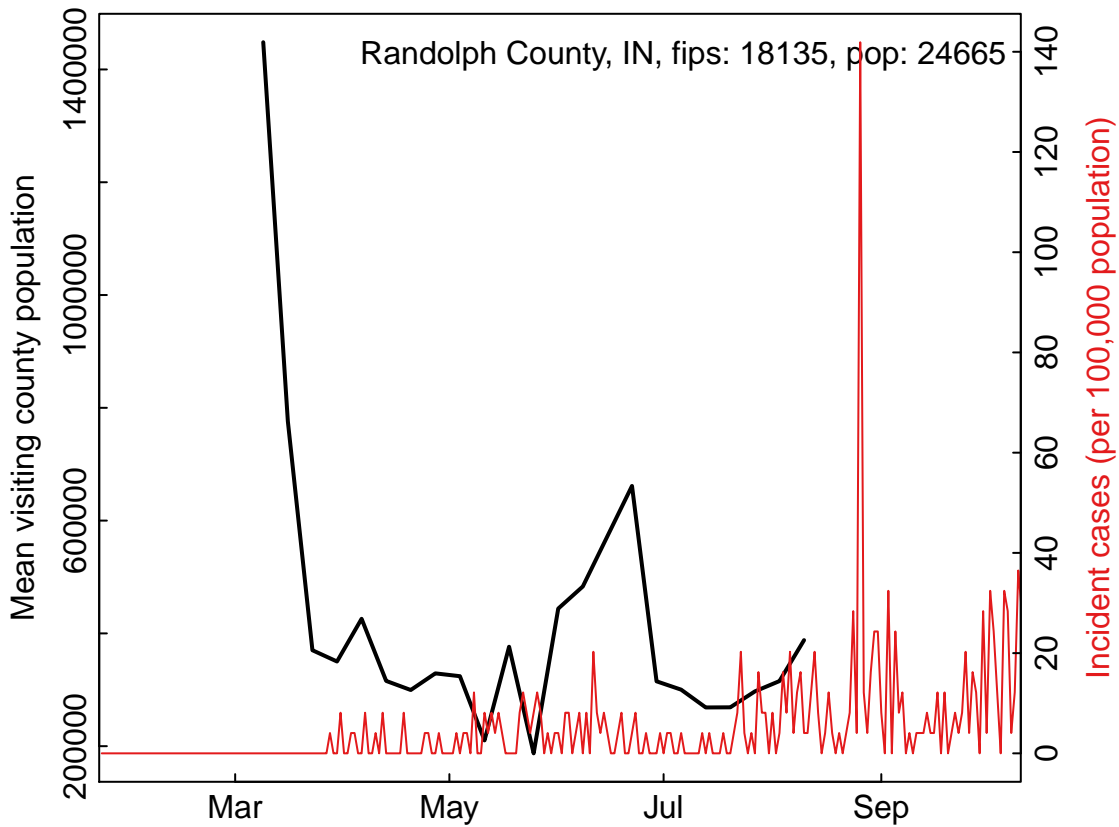

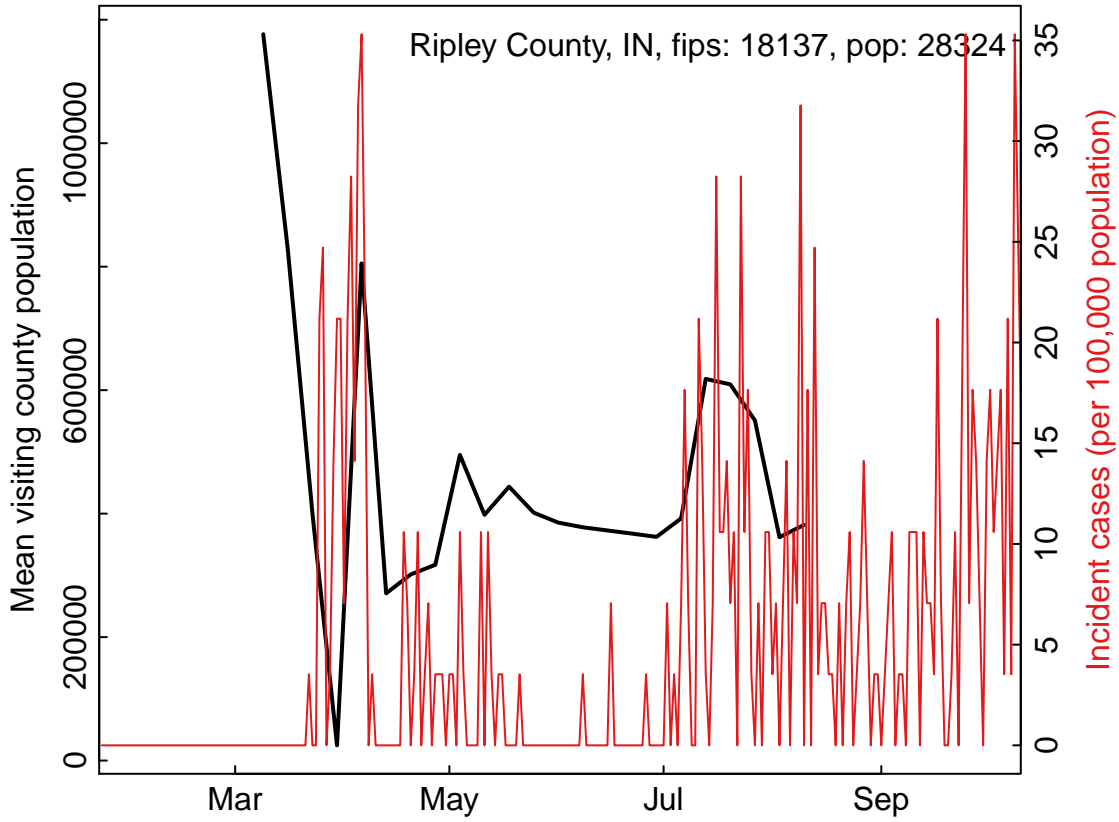

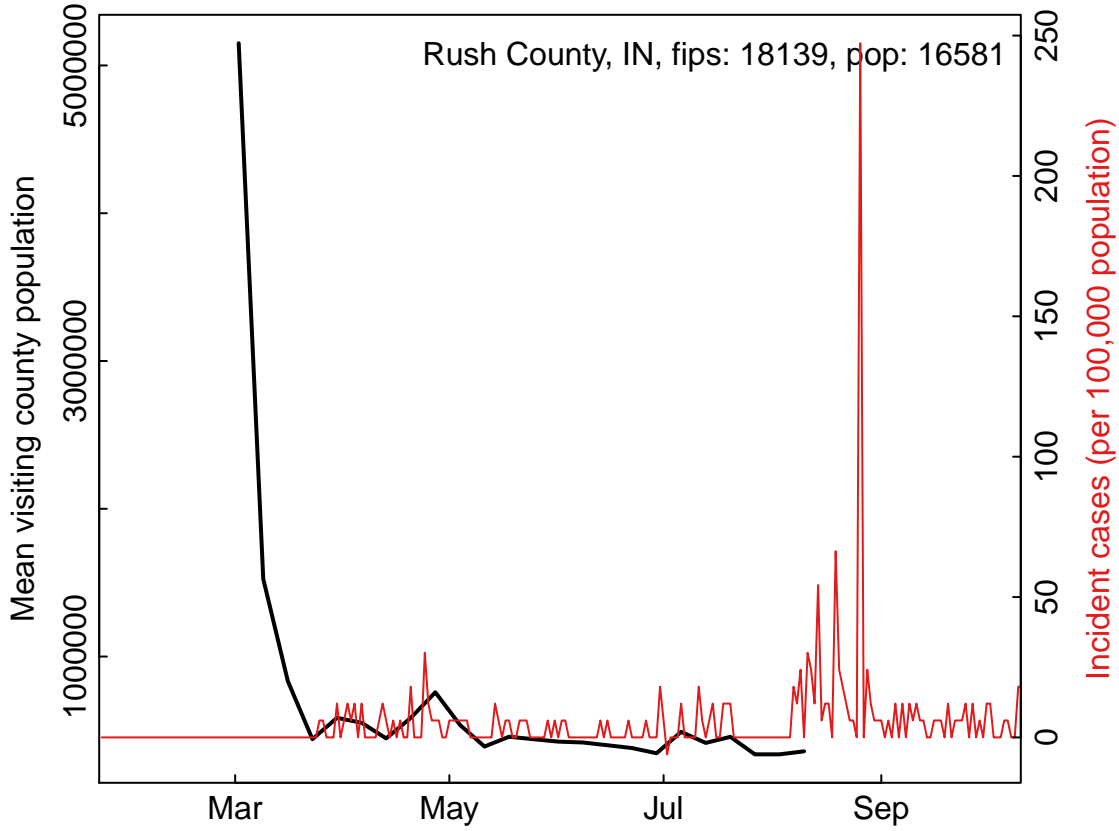

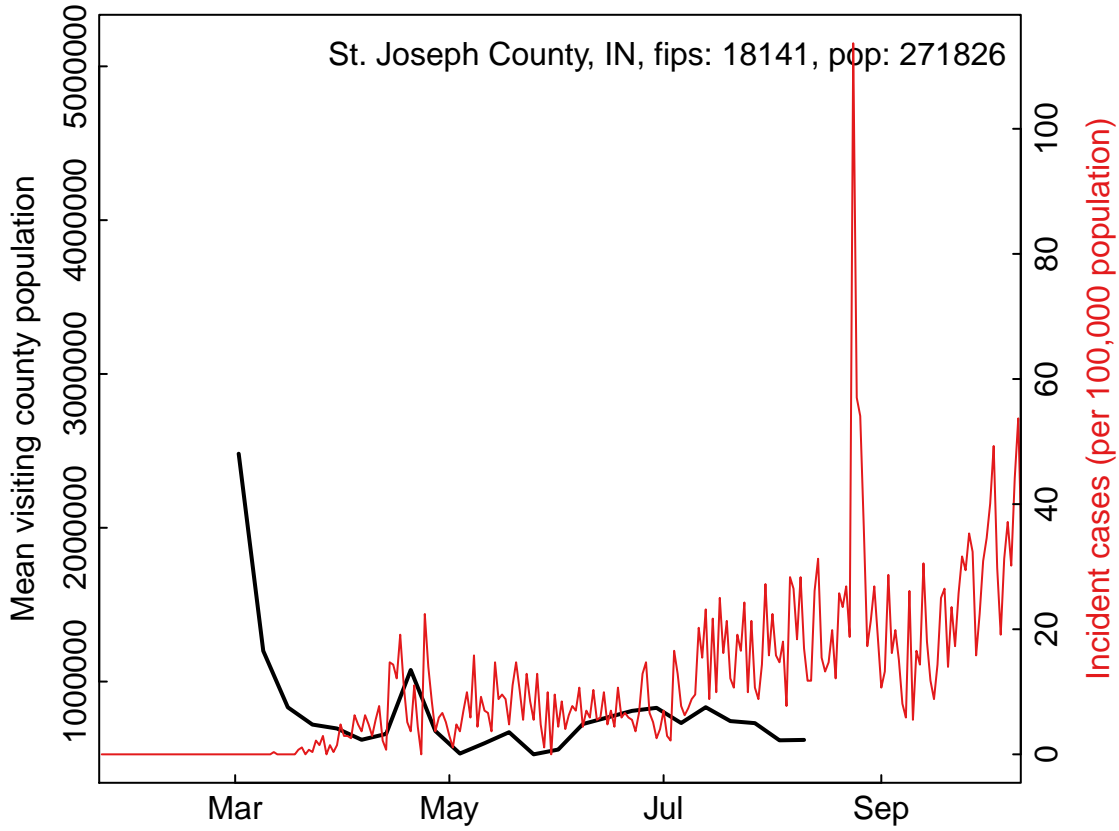

Scott County, IN, fips: 18143, pop: 23873

Mean visiting county population

200000  
400000  
600000  
800000

Mar

May

Jul

Sep

0  
10  
20  
30  
40

Incident cases (per 100,000 population)

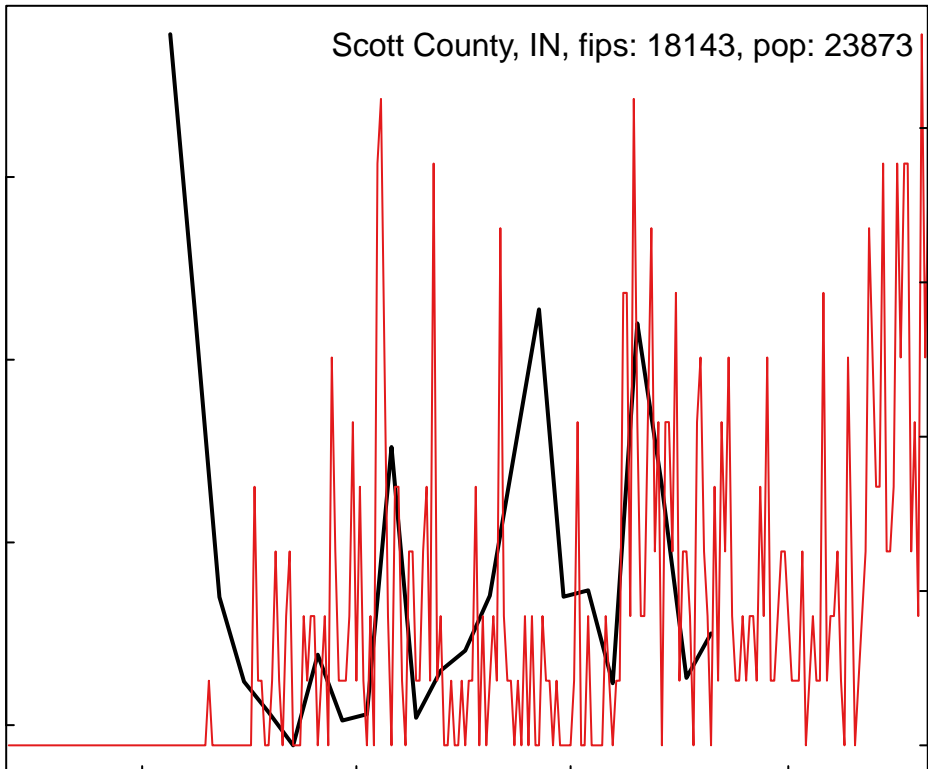



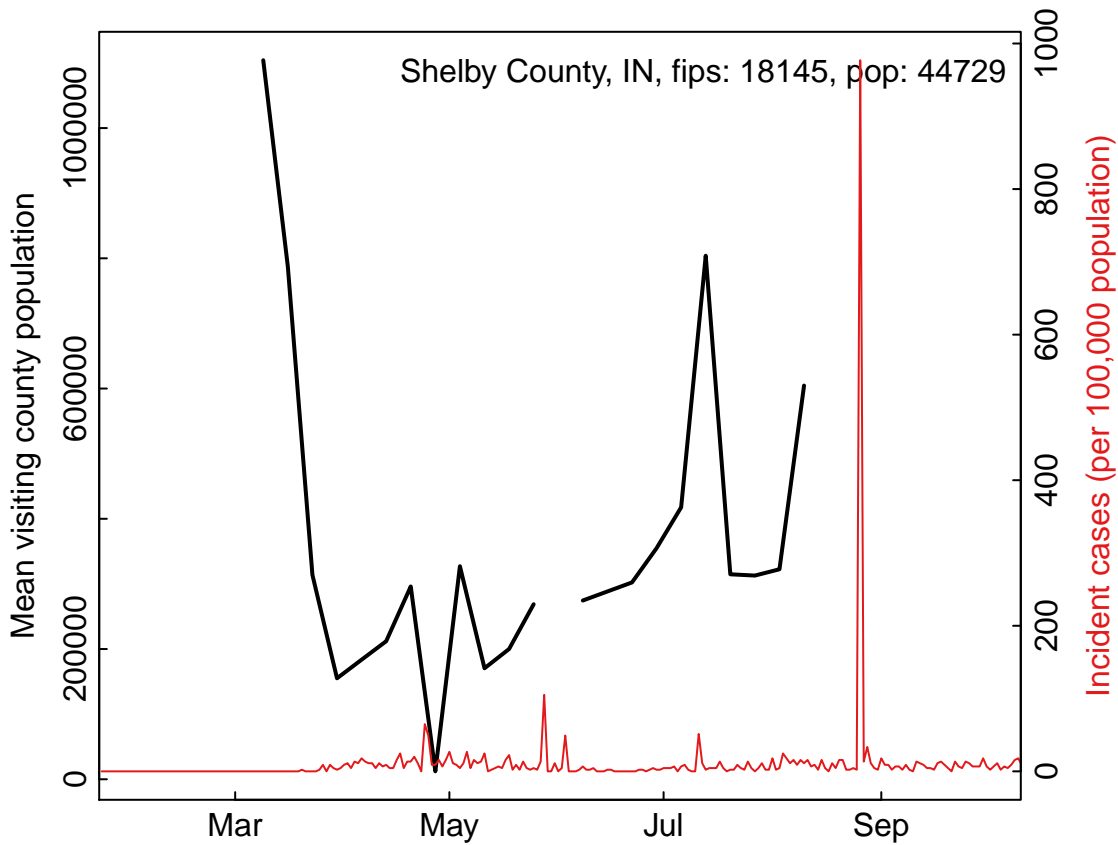

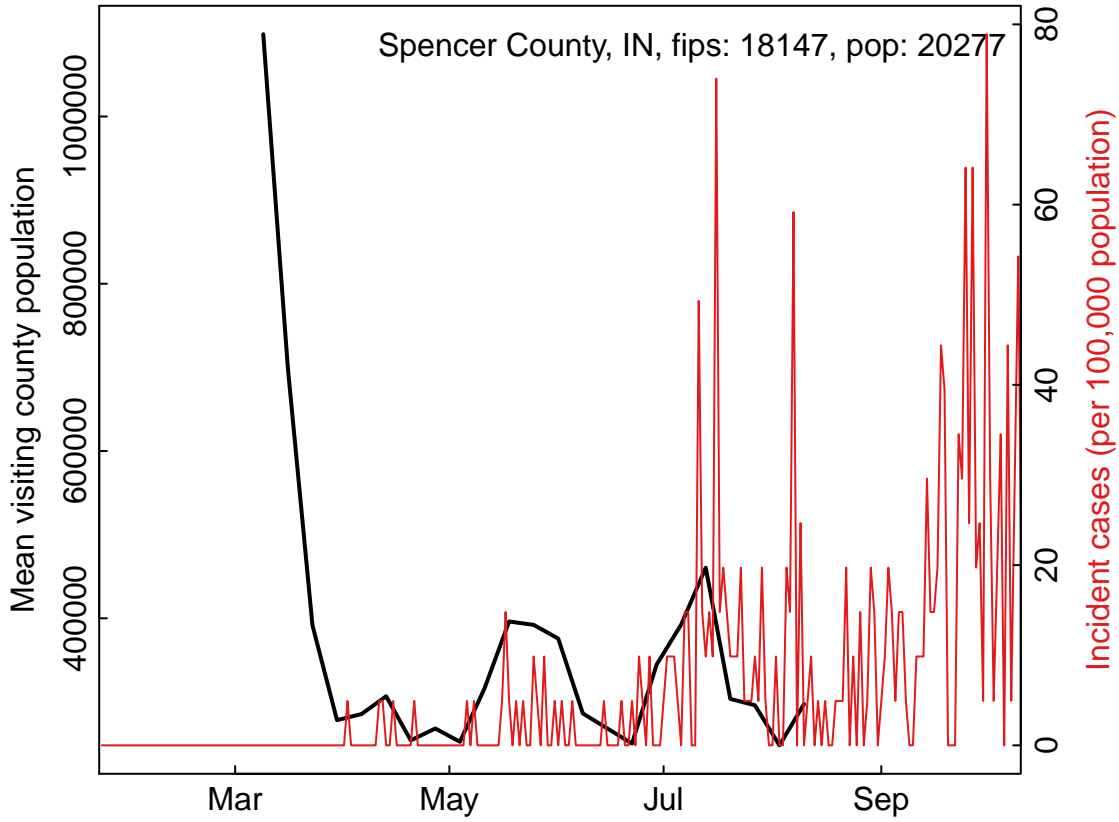

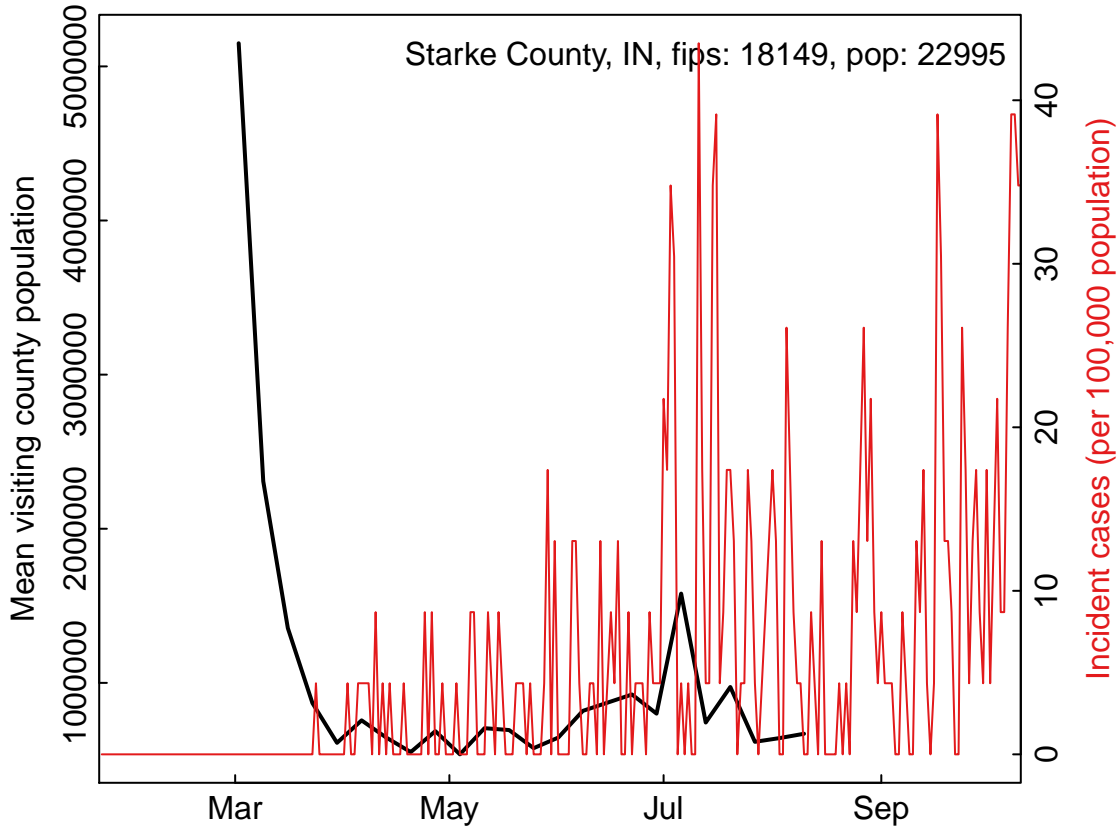

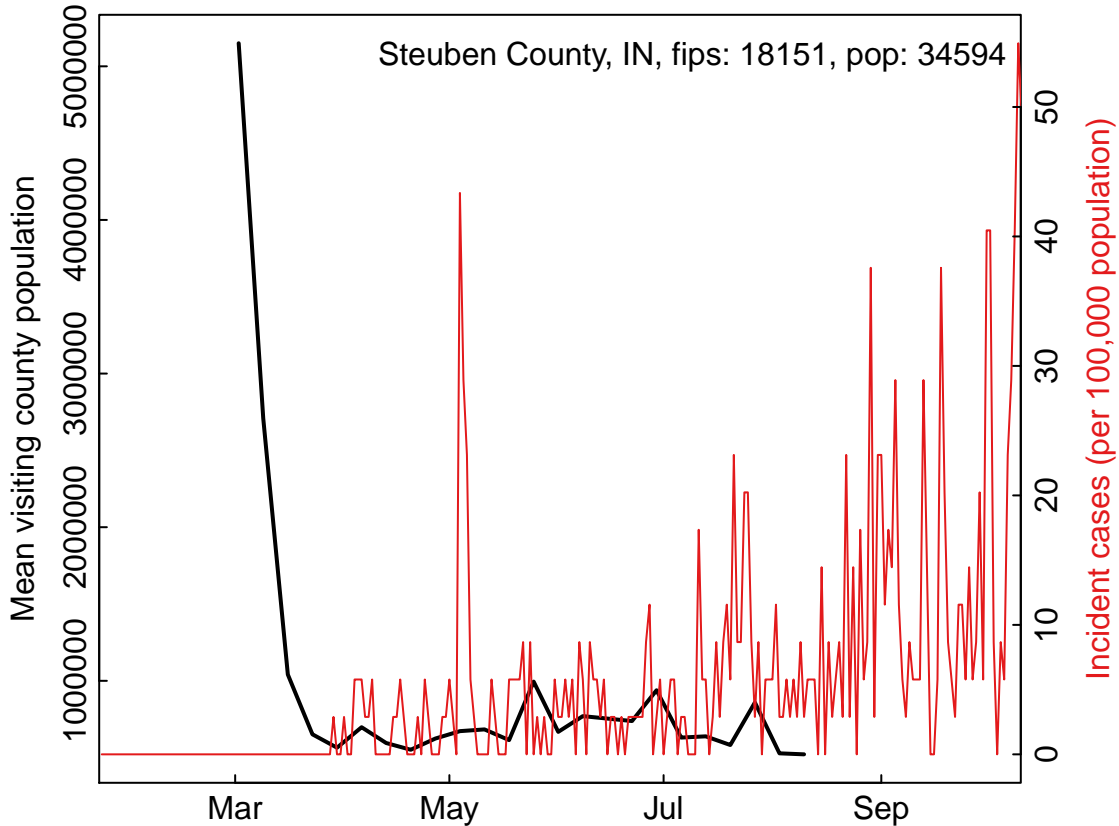

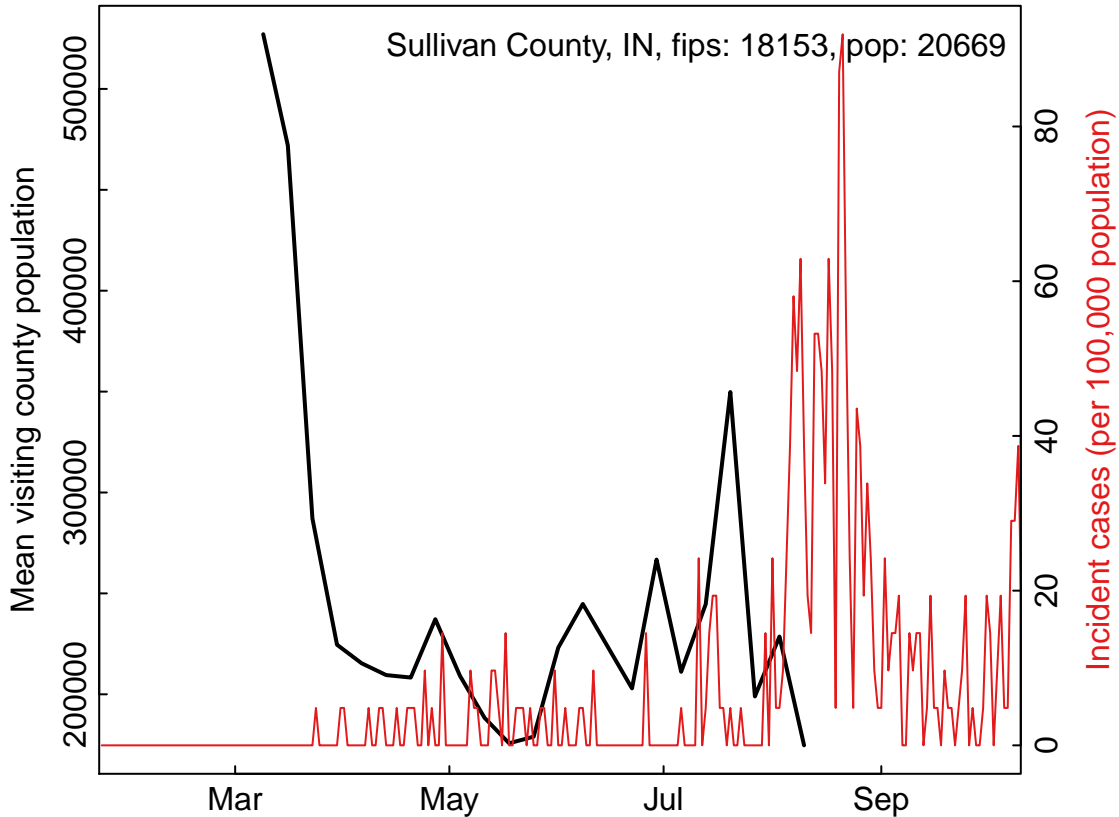

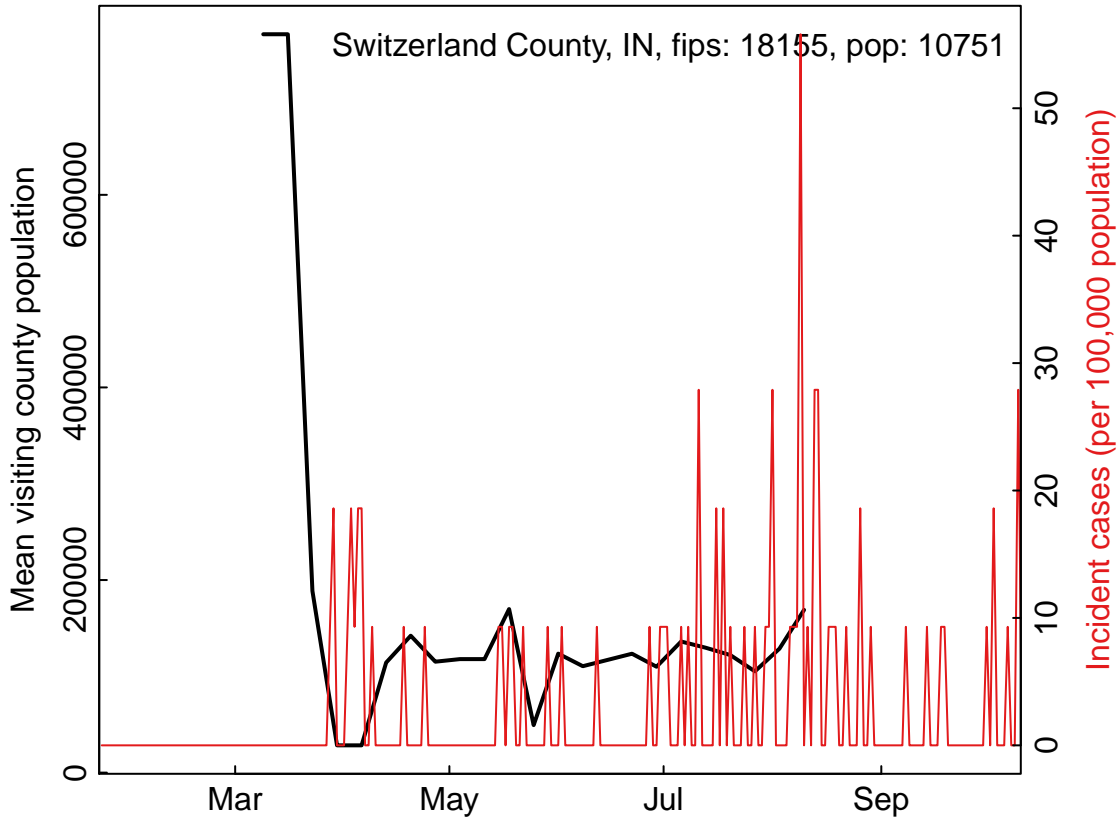

Tippecanoe County, IN, fips: 18157, pop: 195732

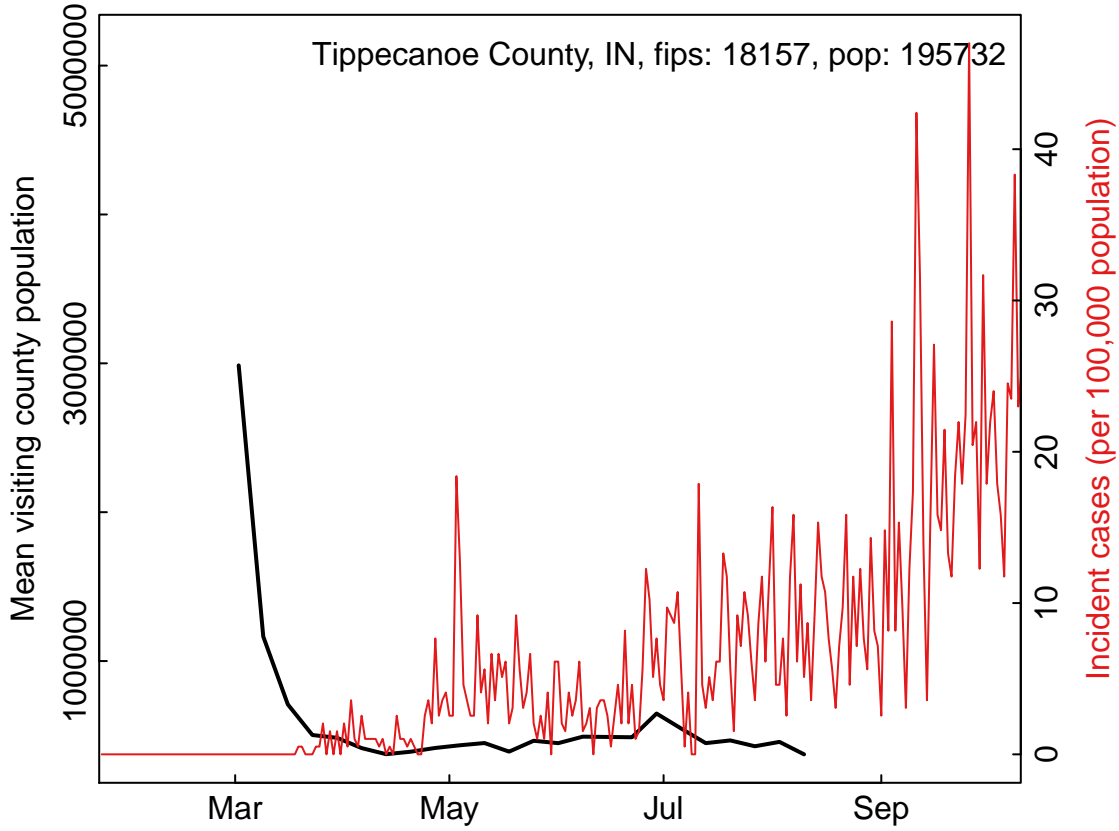

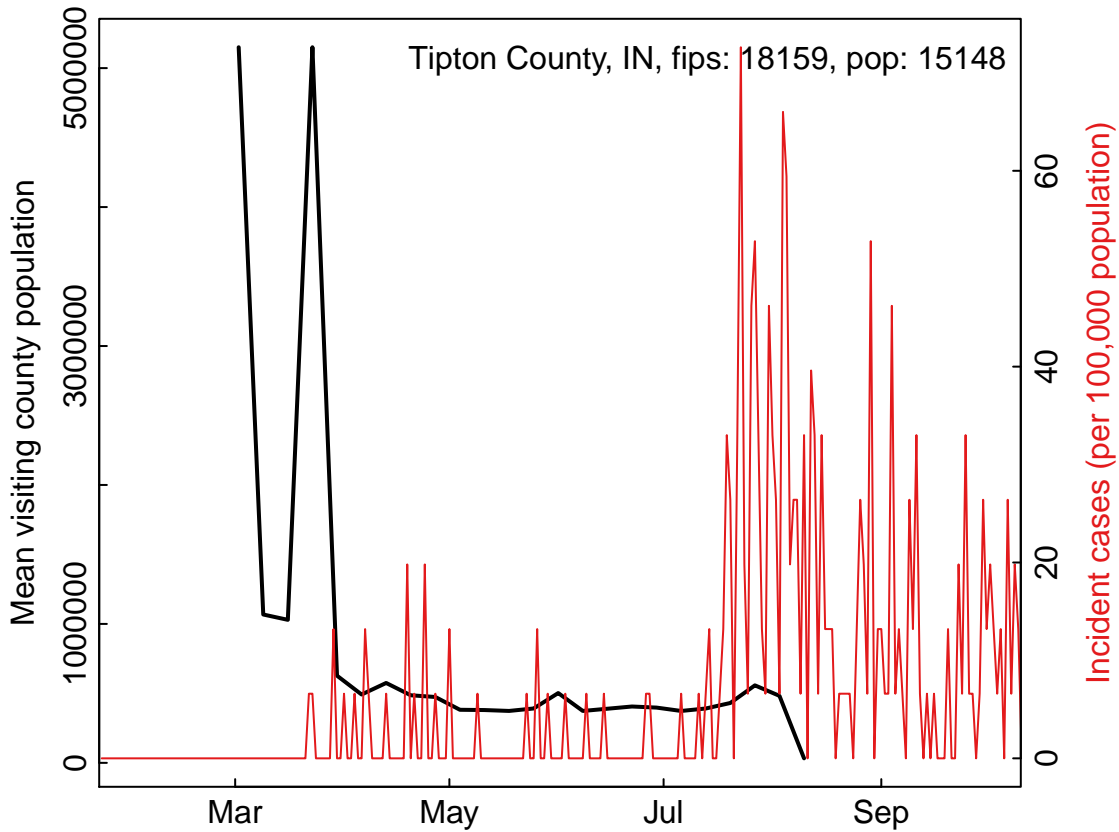



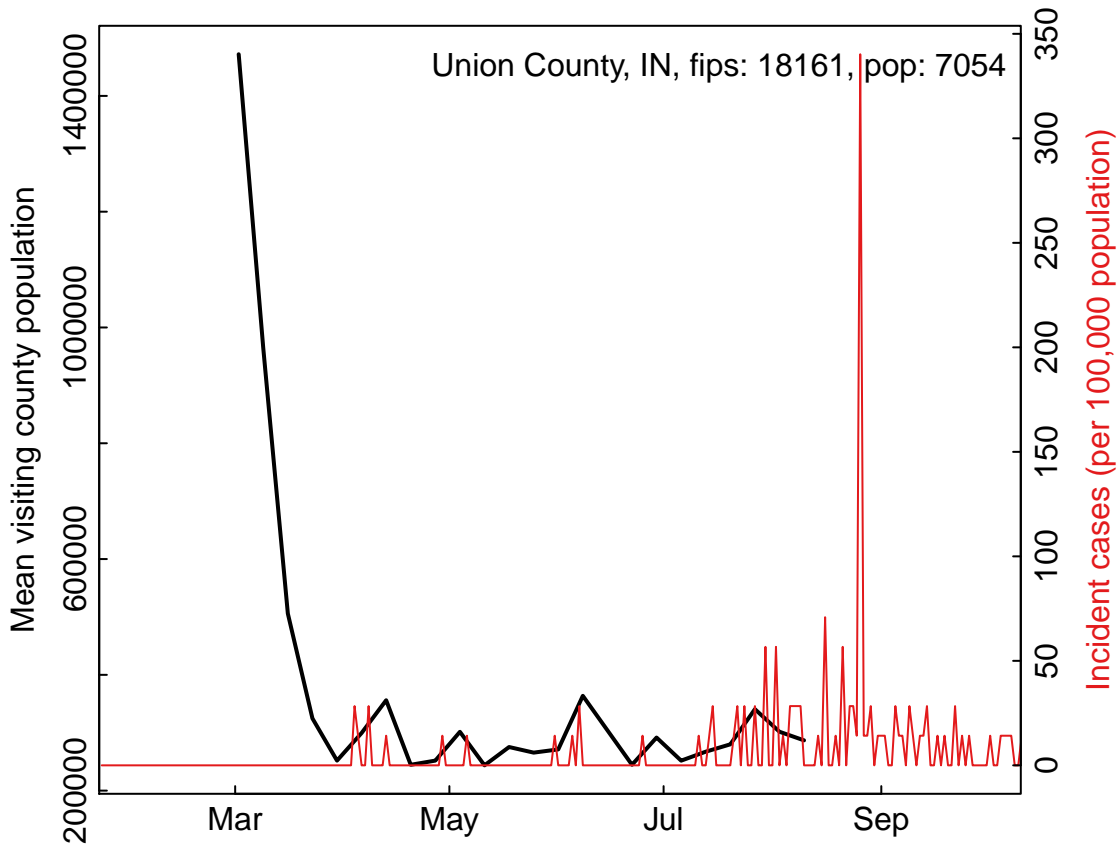

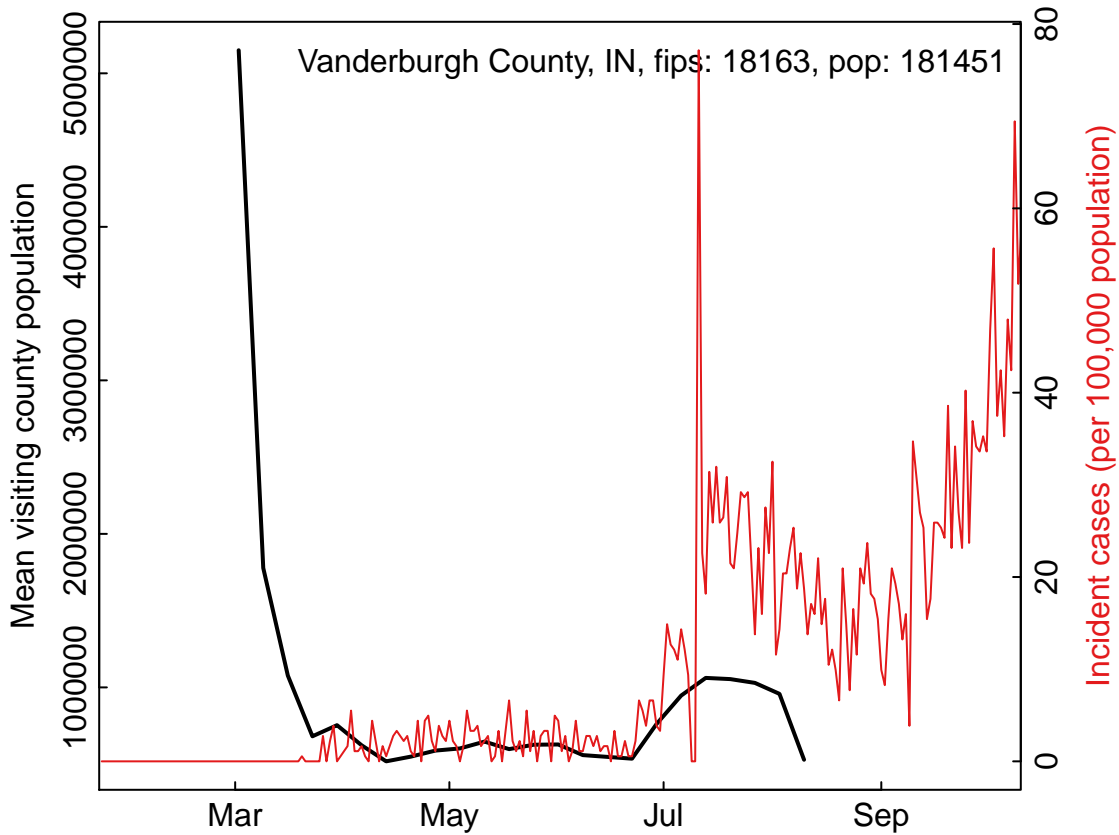

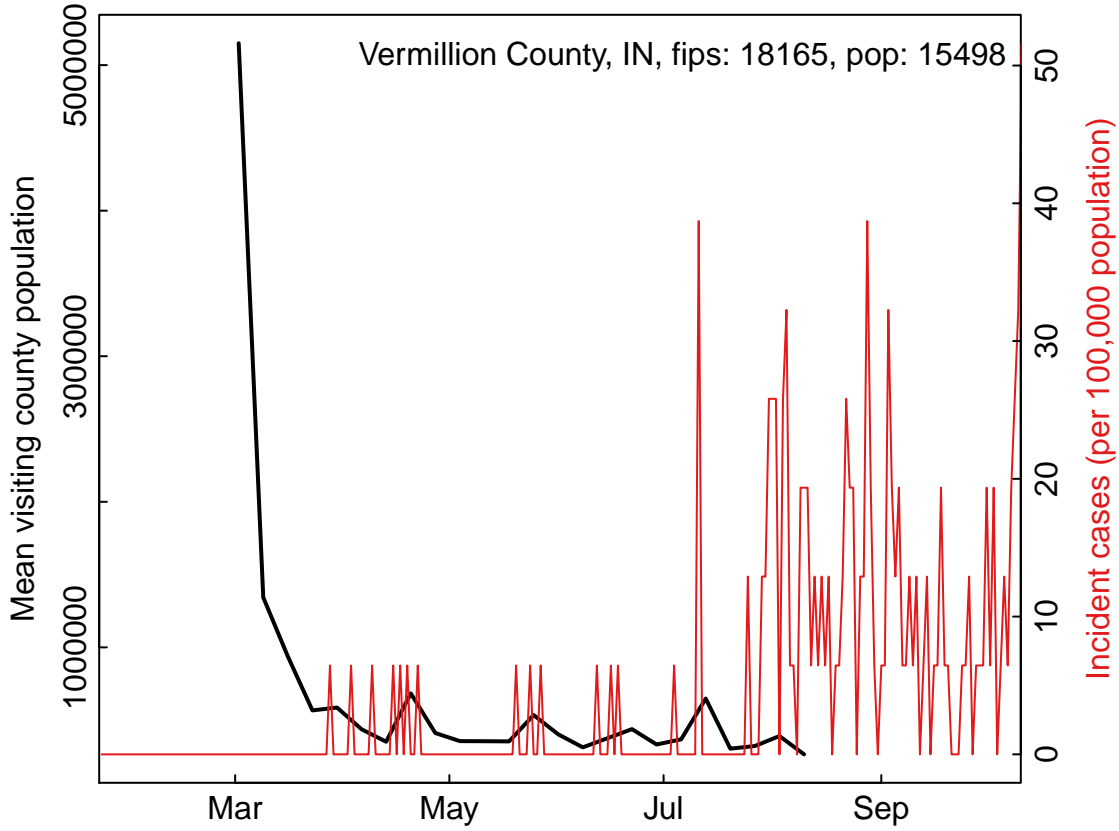

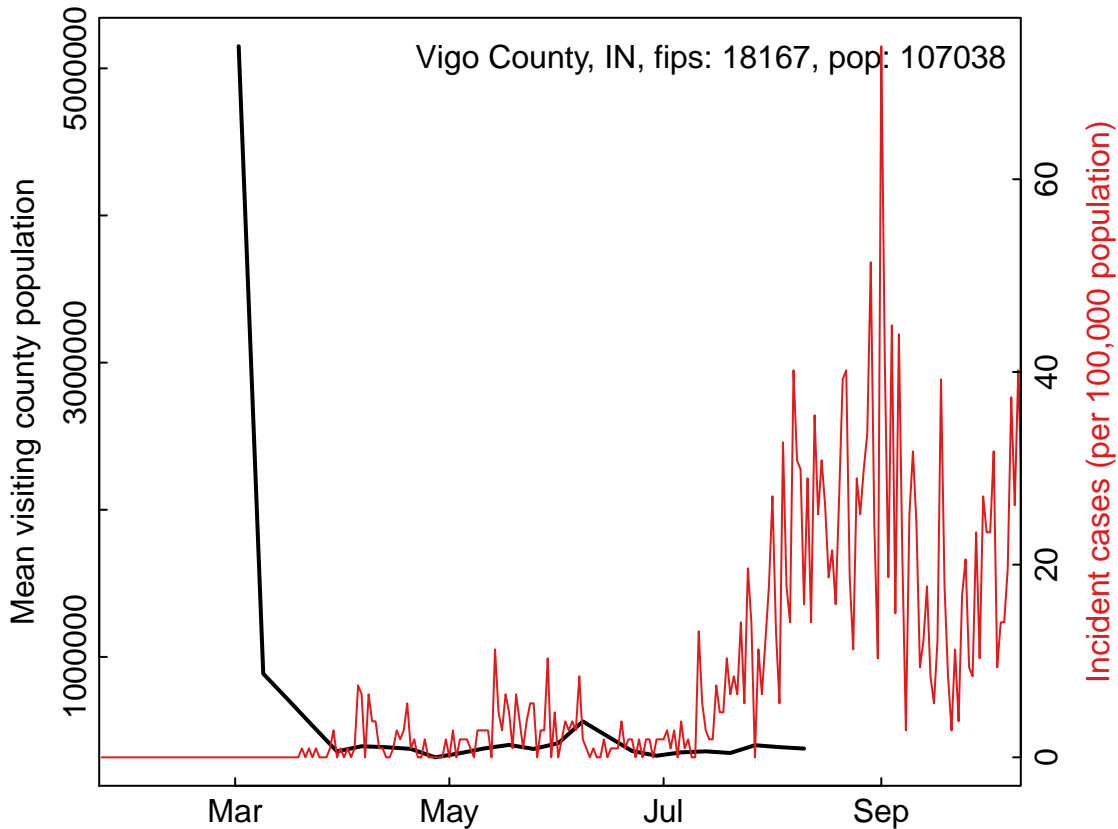

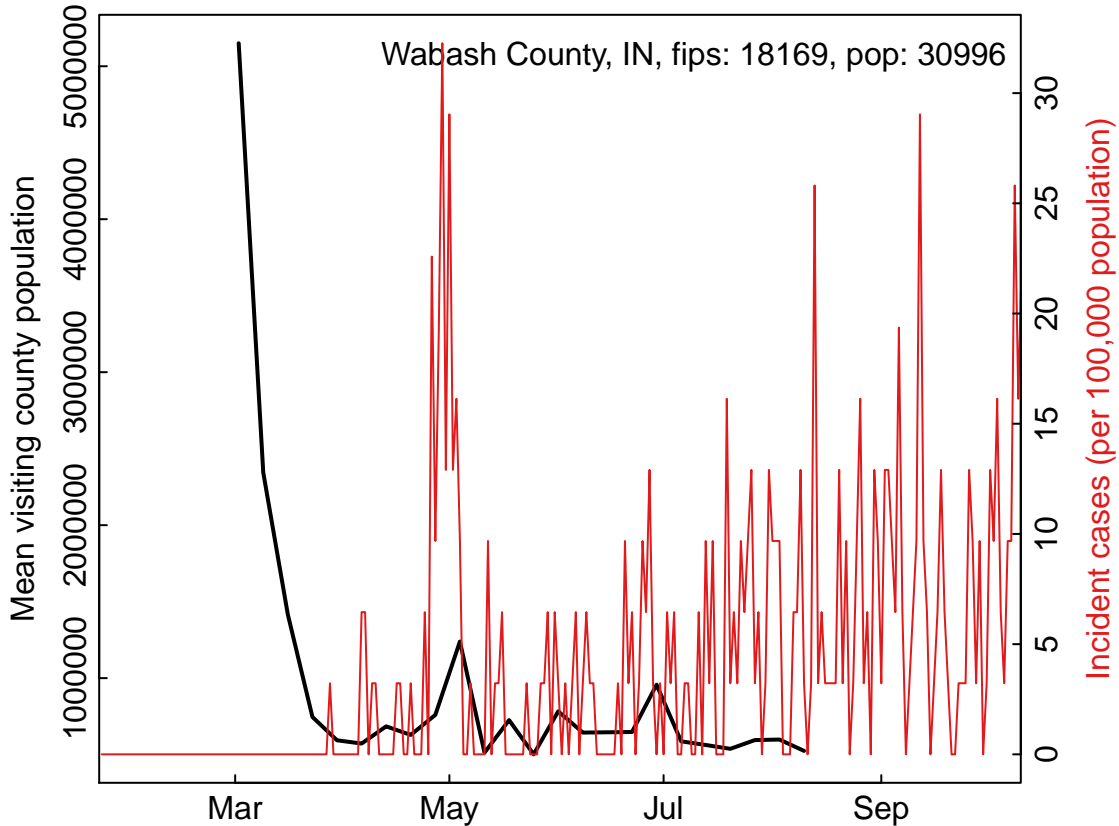

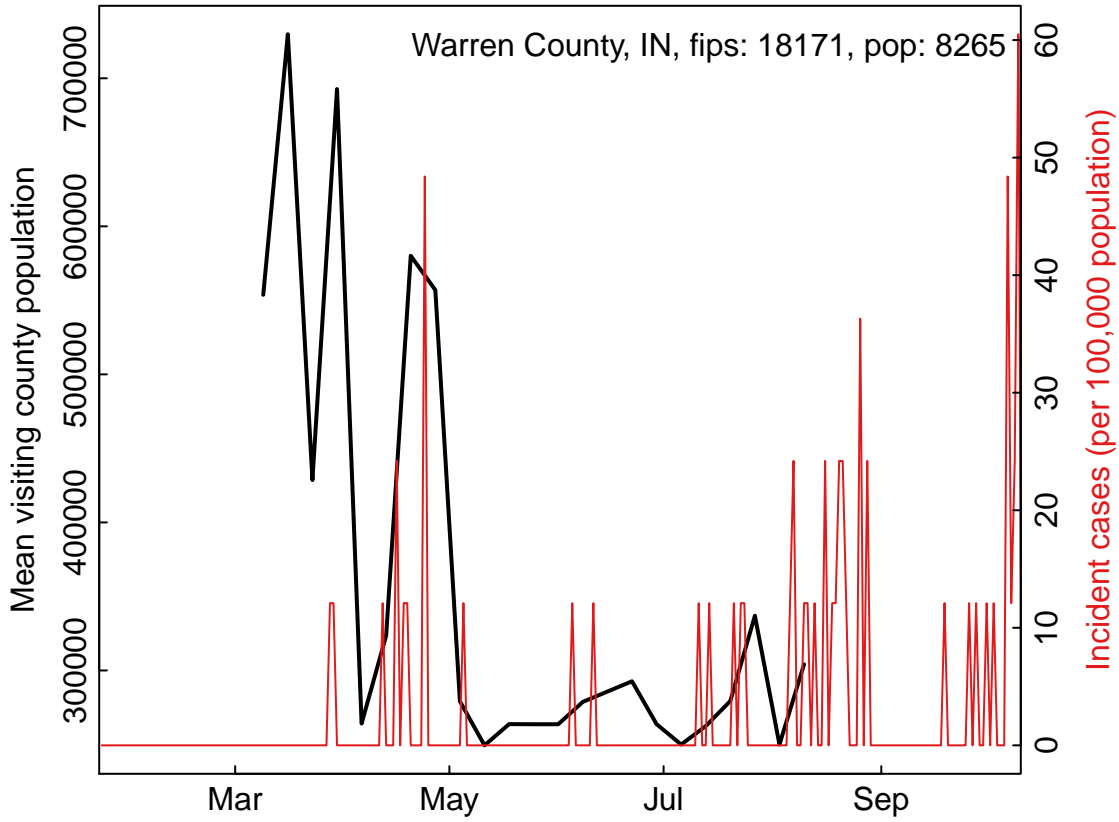

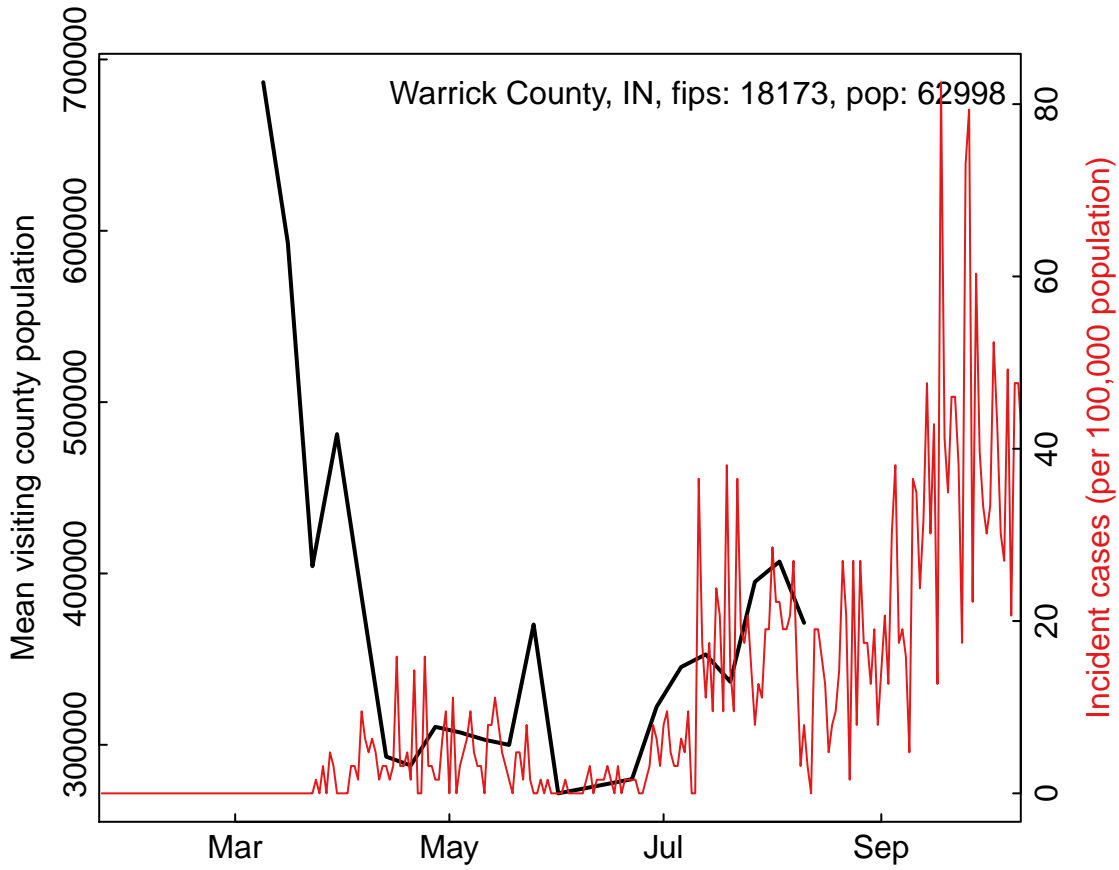

Washington County, IN, fips: 18175, pop: 28036

Mean visiting county population

1400000  
1000000  
600000  
200000

Mar May Jul Sep

Incident cases (per 100,000 population)

30  
20  
10  
0

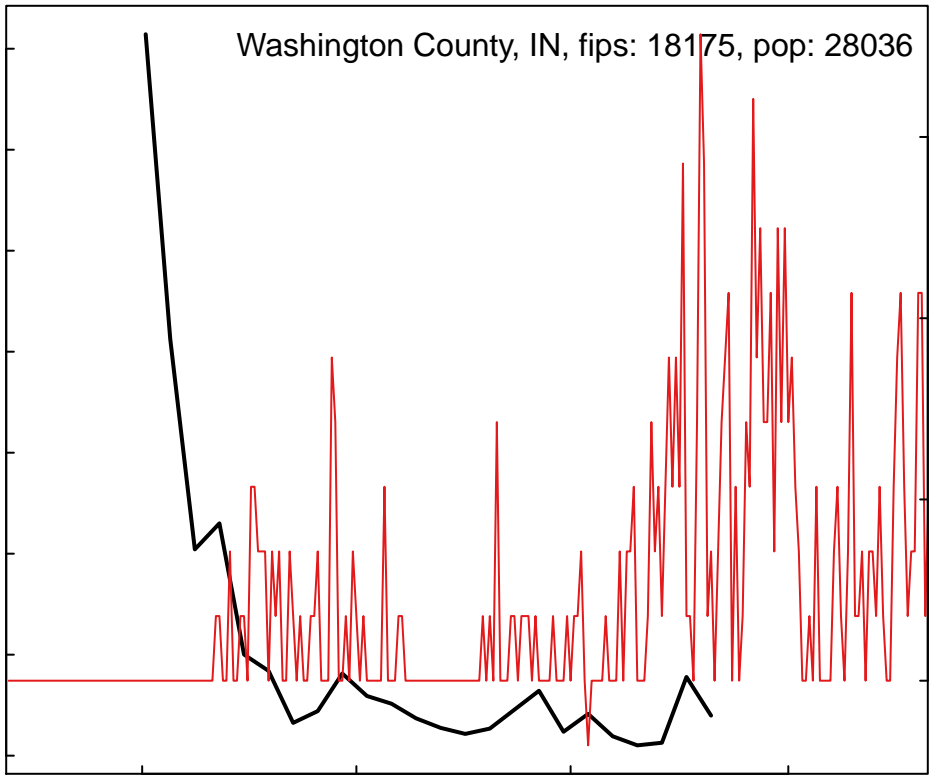



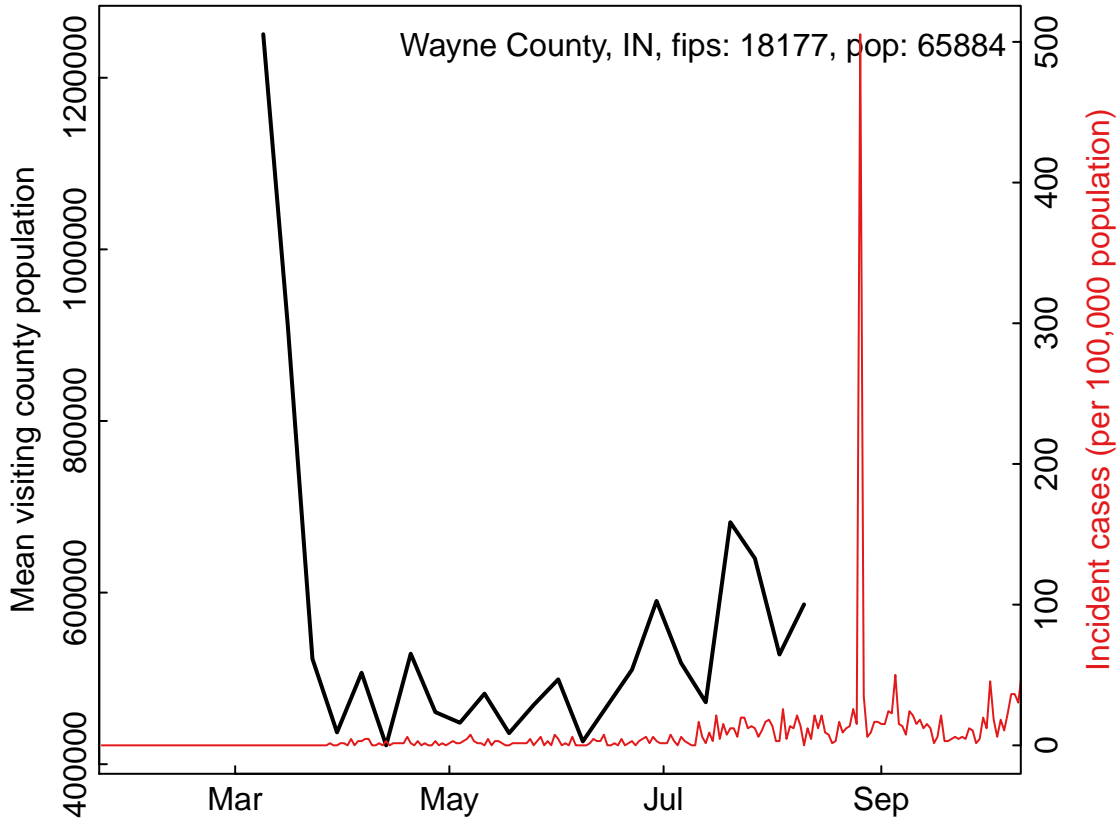

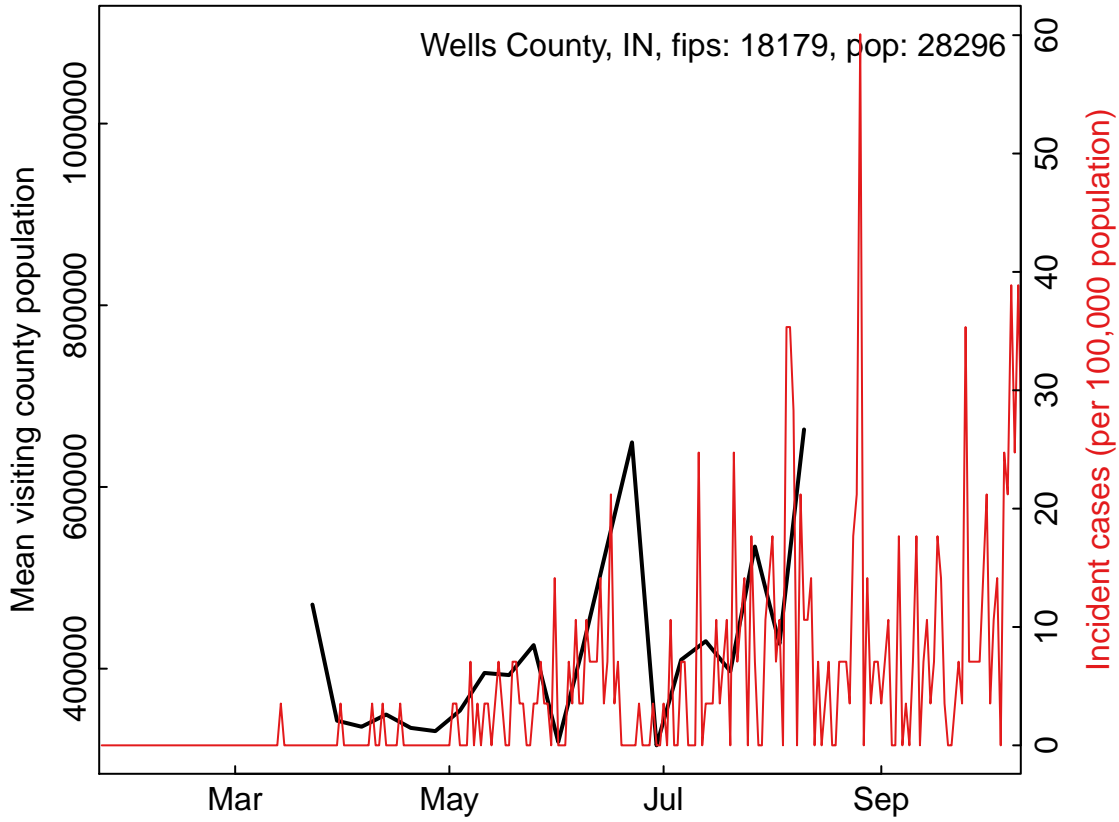

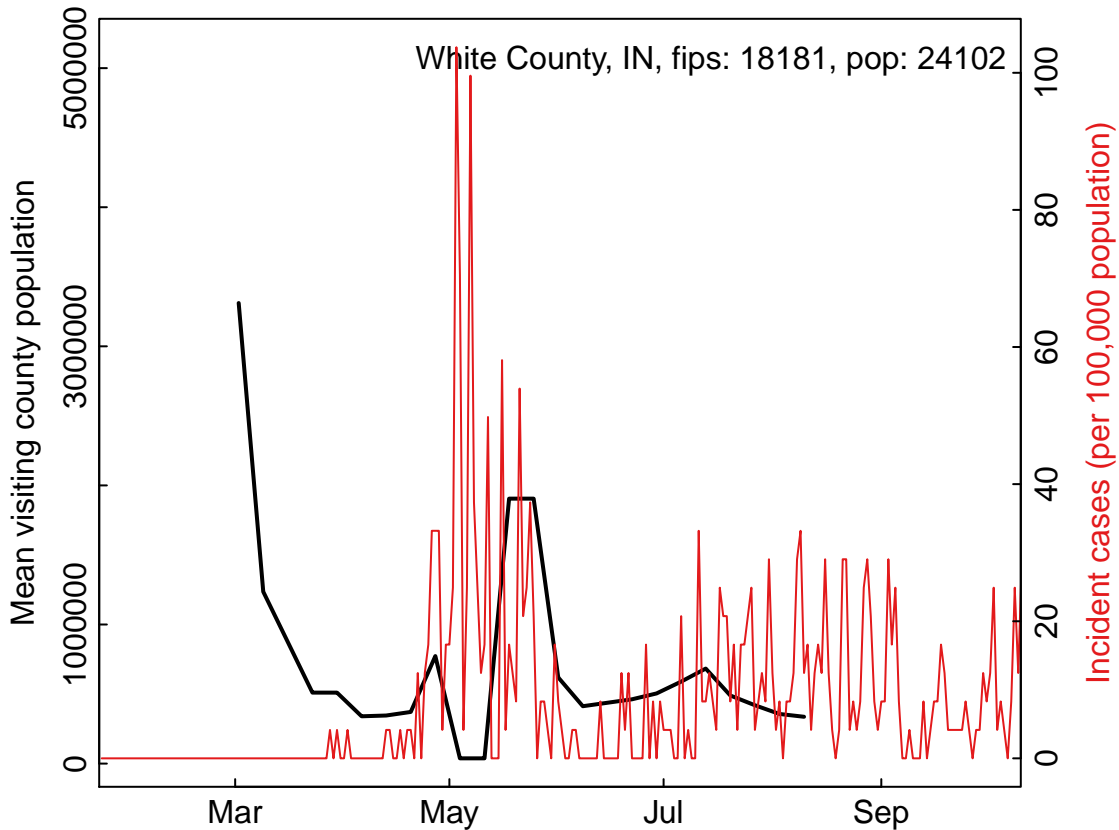

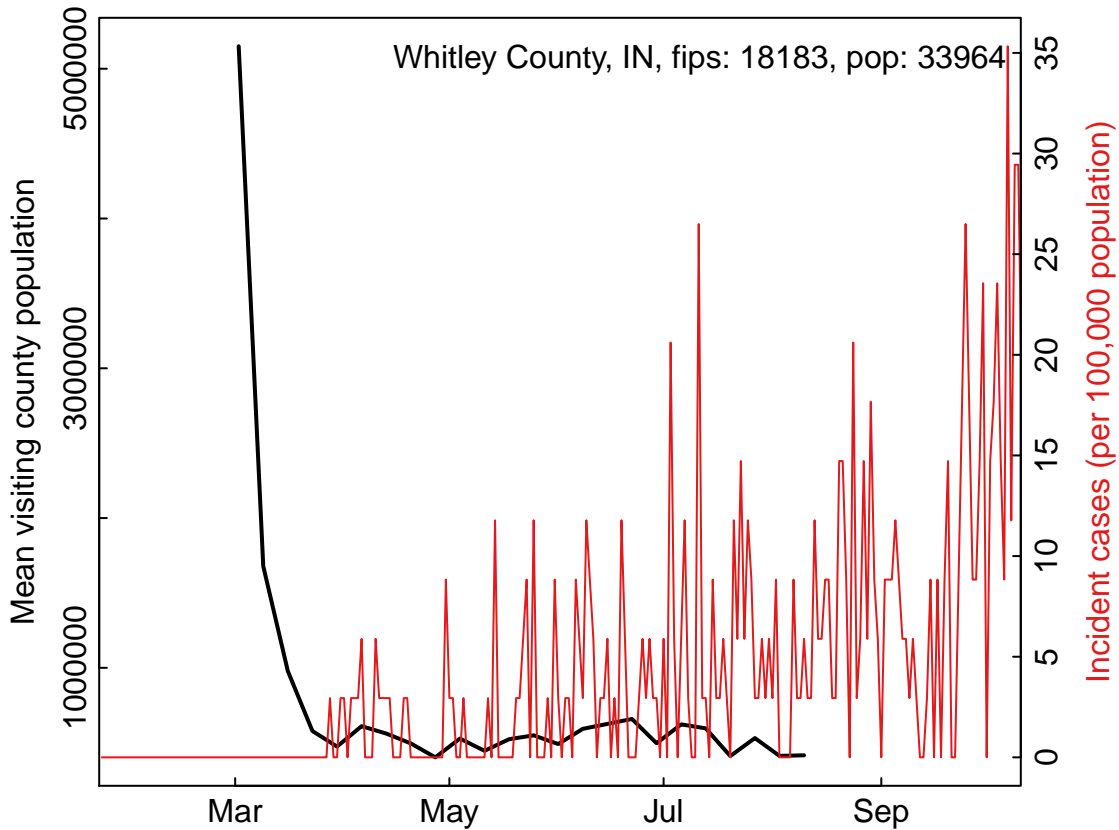

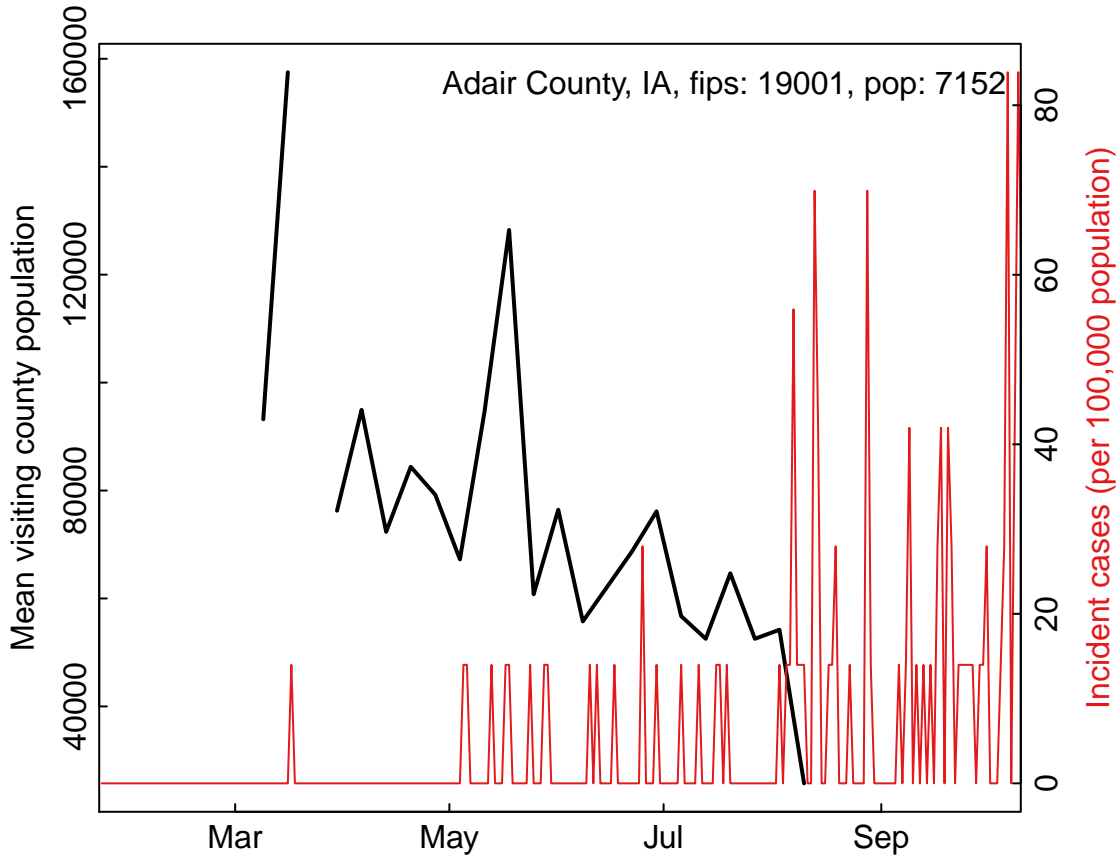

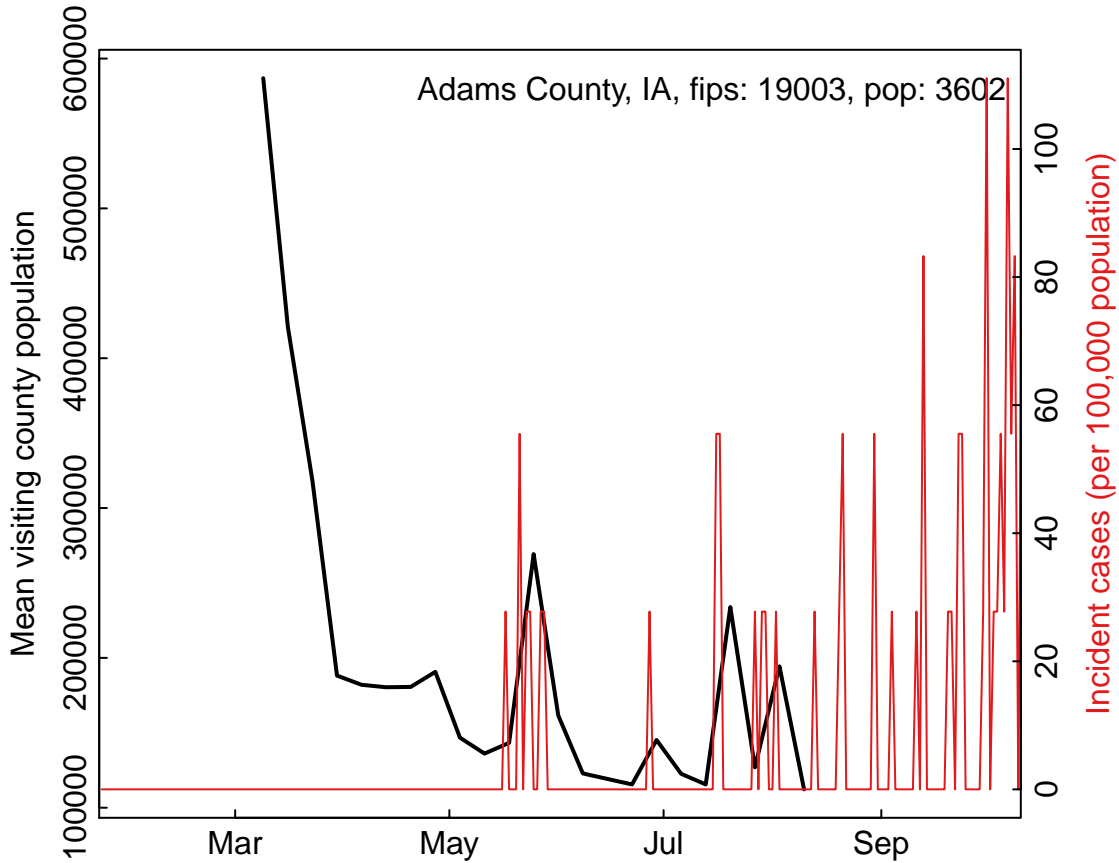

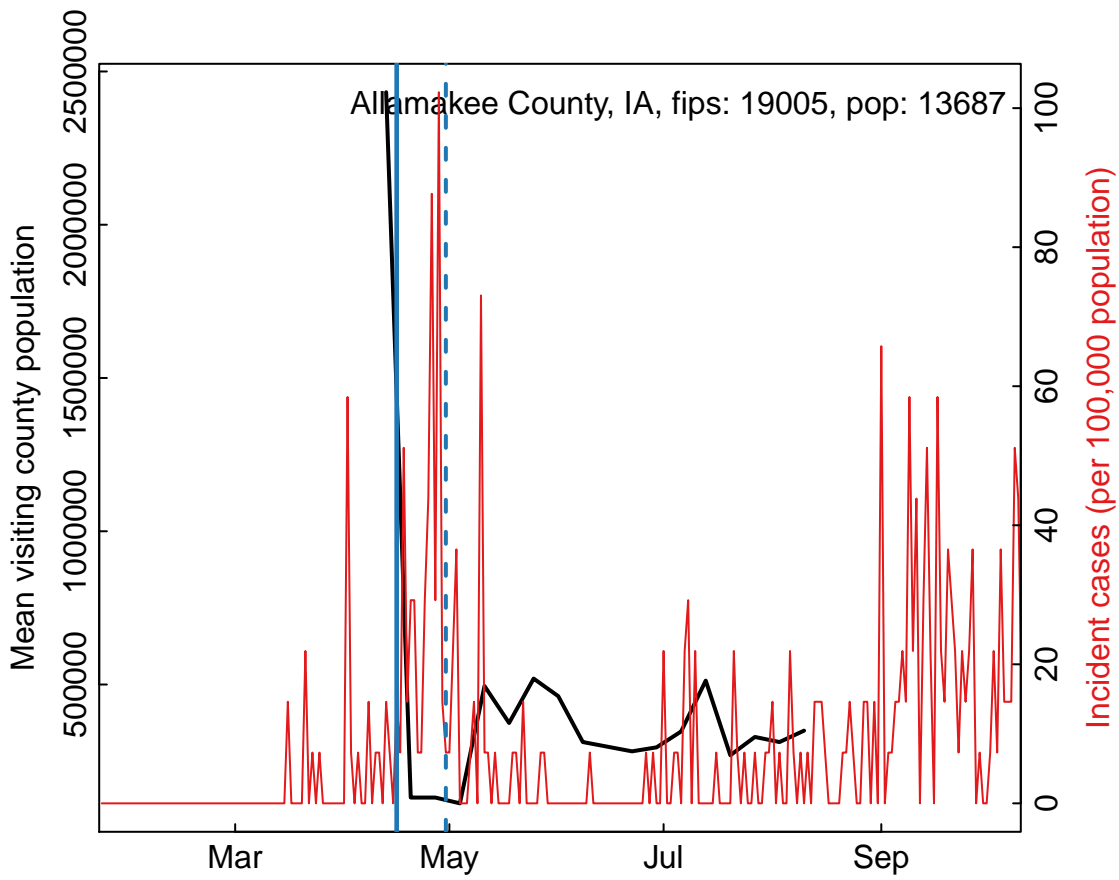

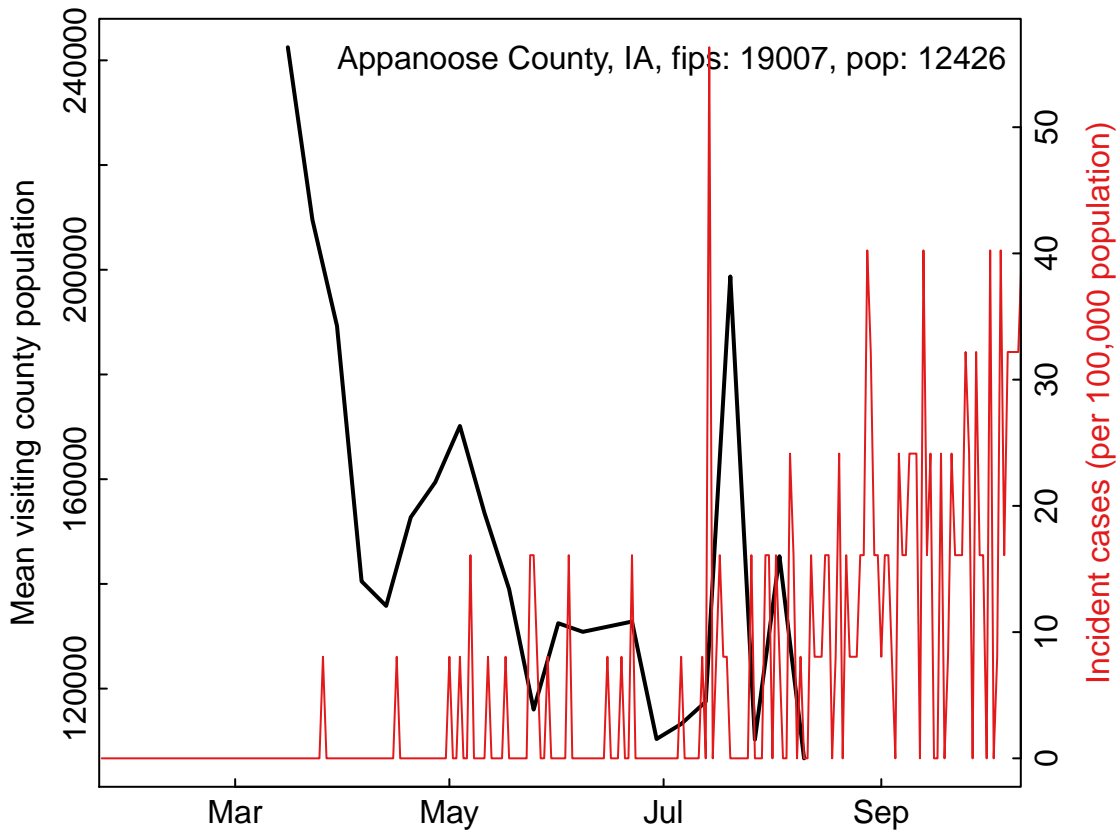



Audubon County, IA, fips: 19009, pop: 5496

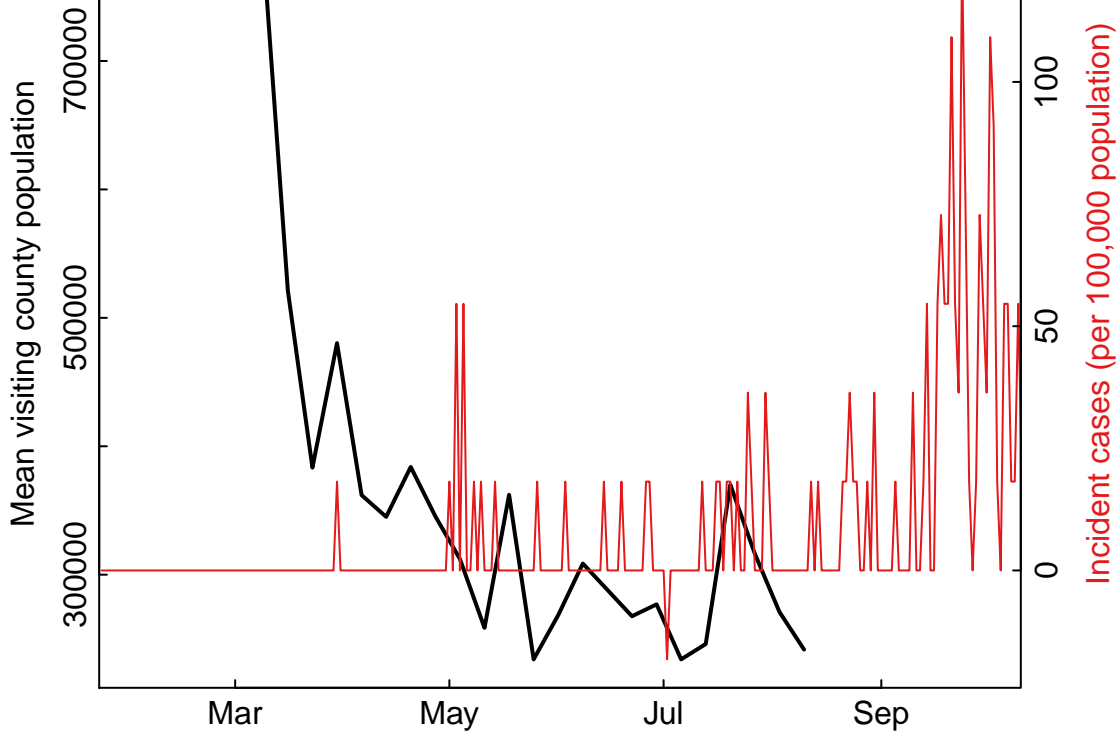

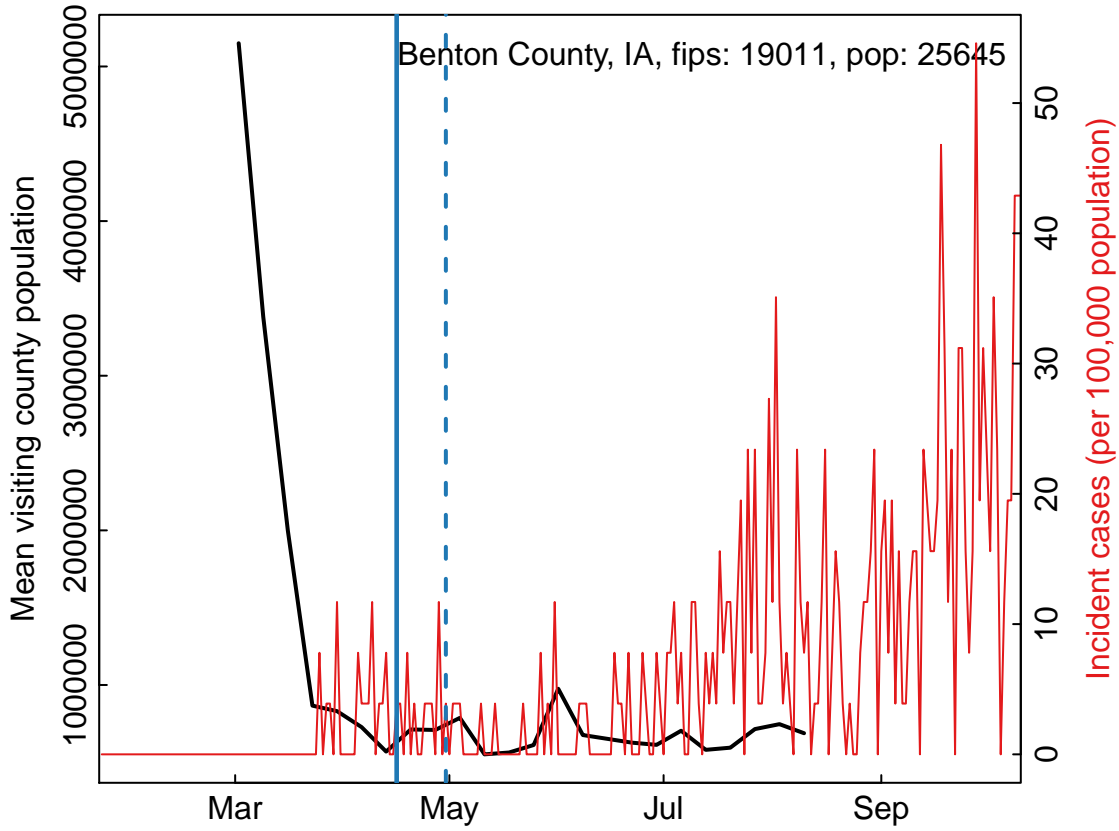

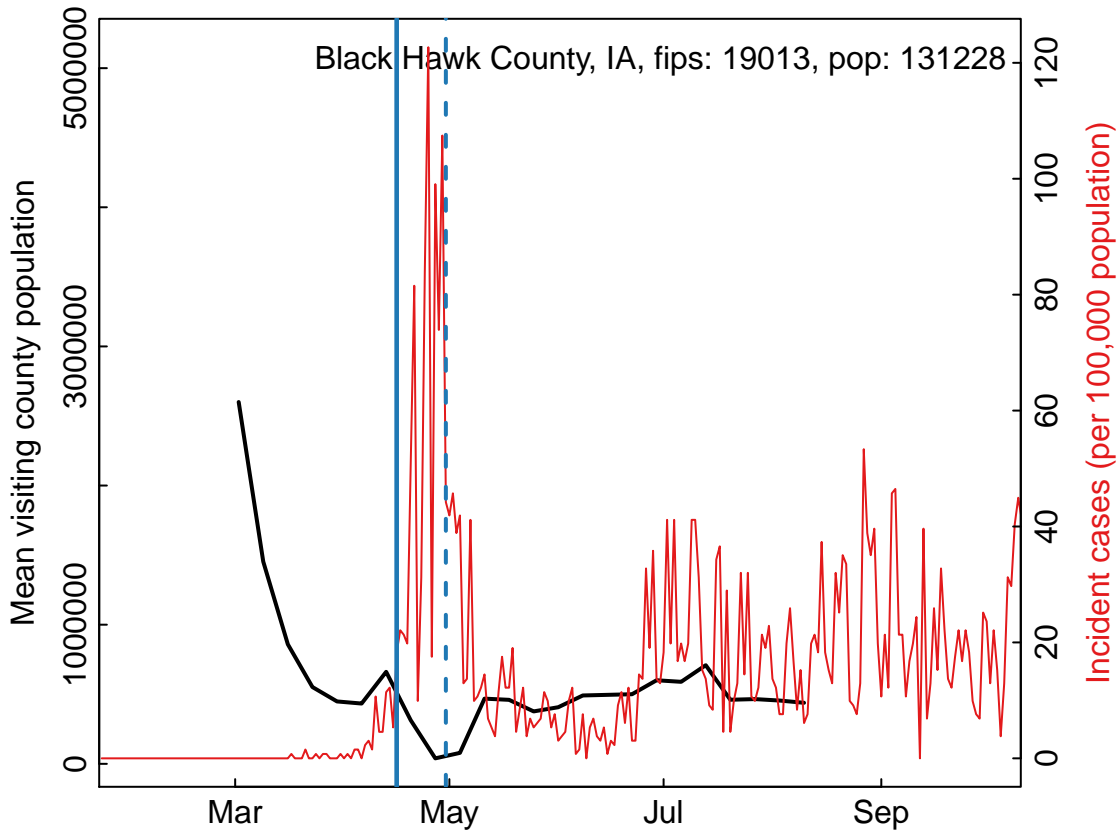

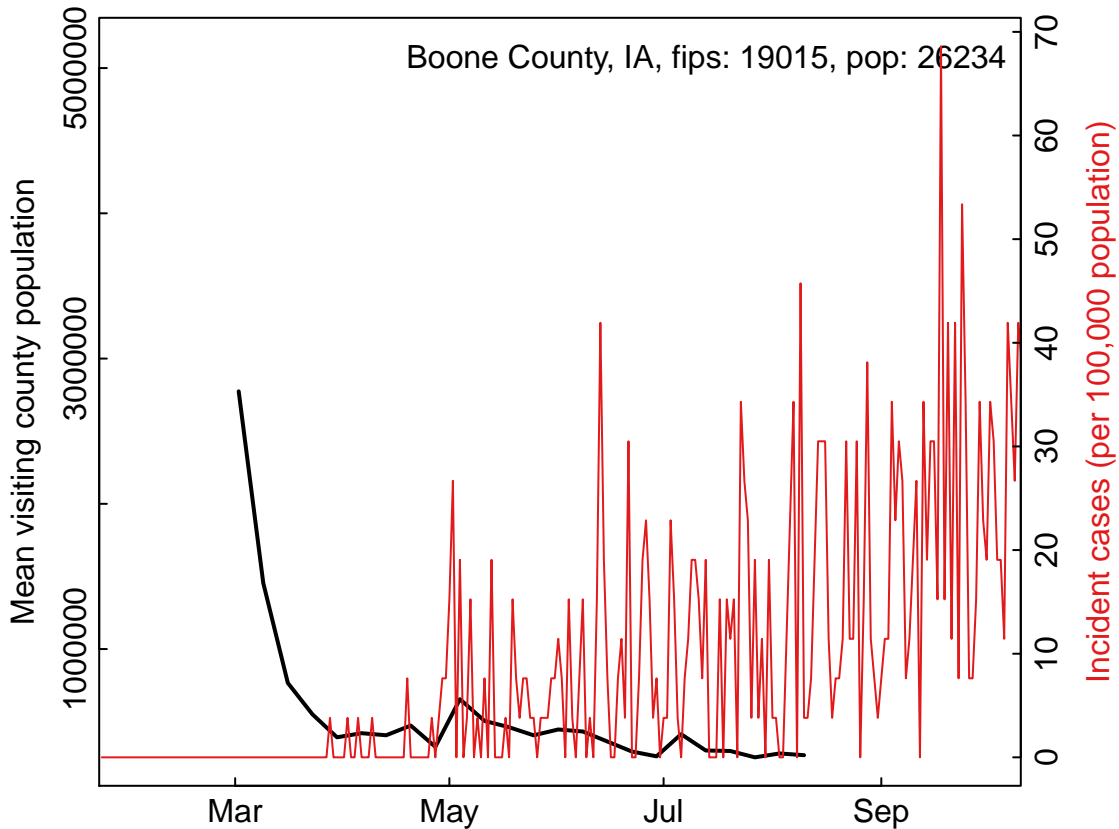

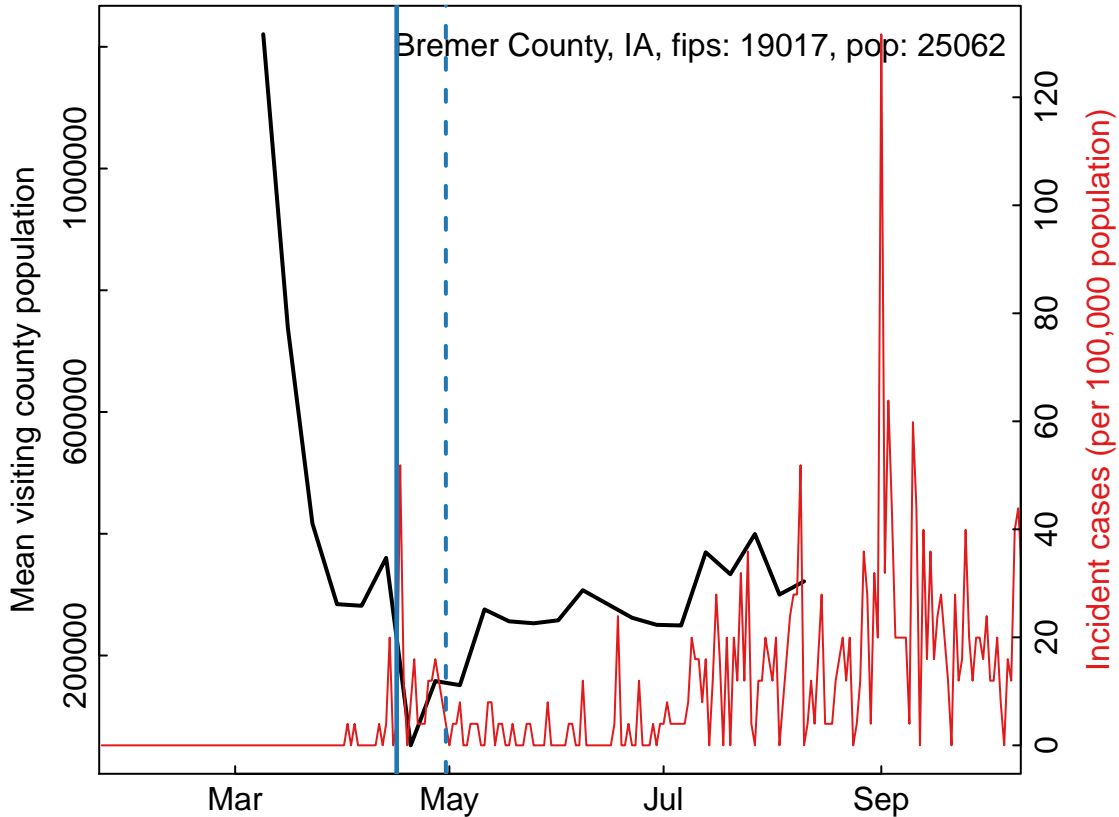

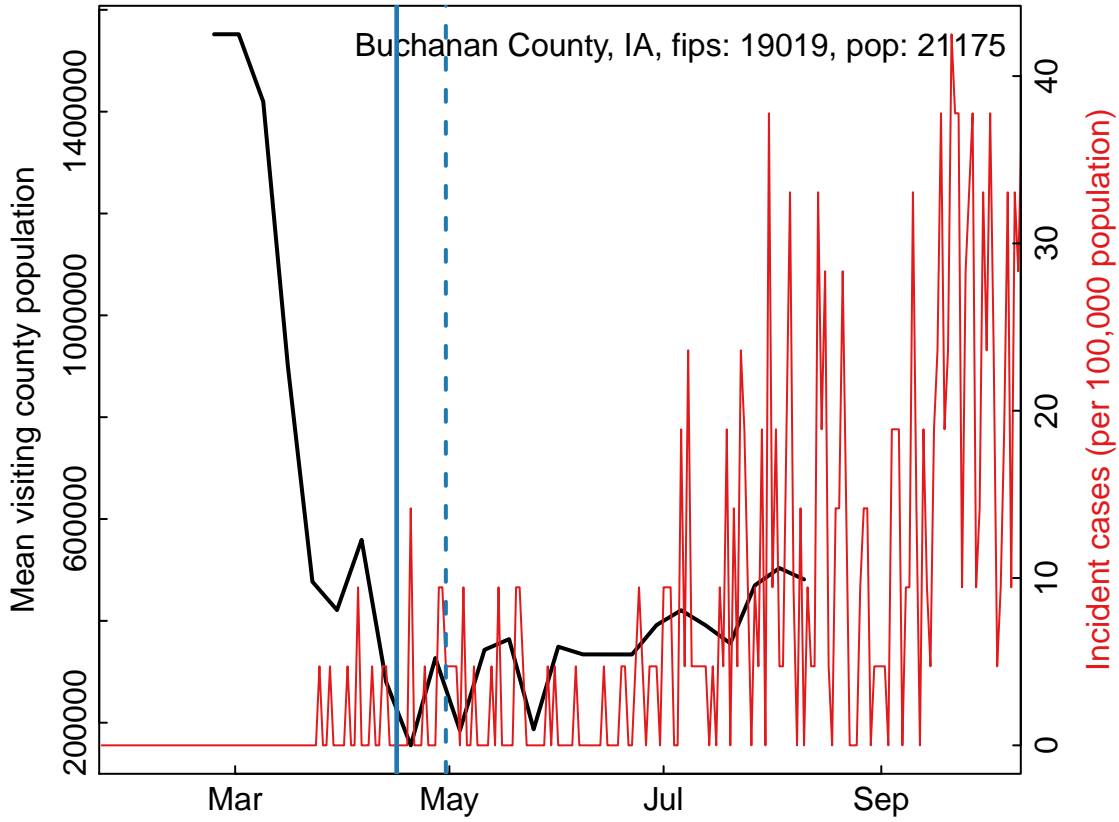

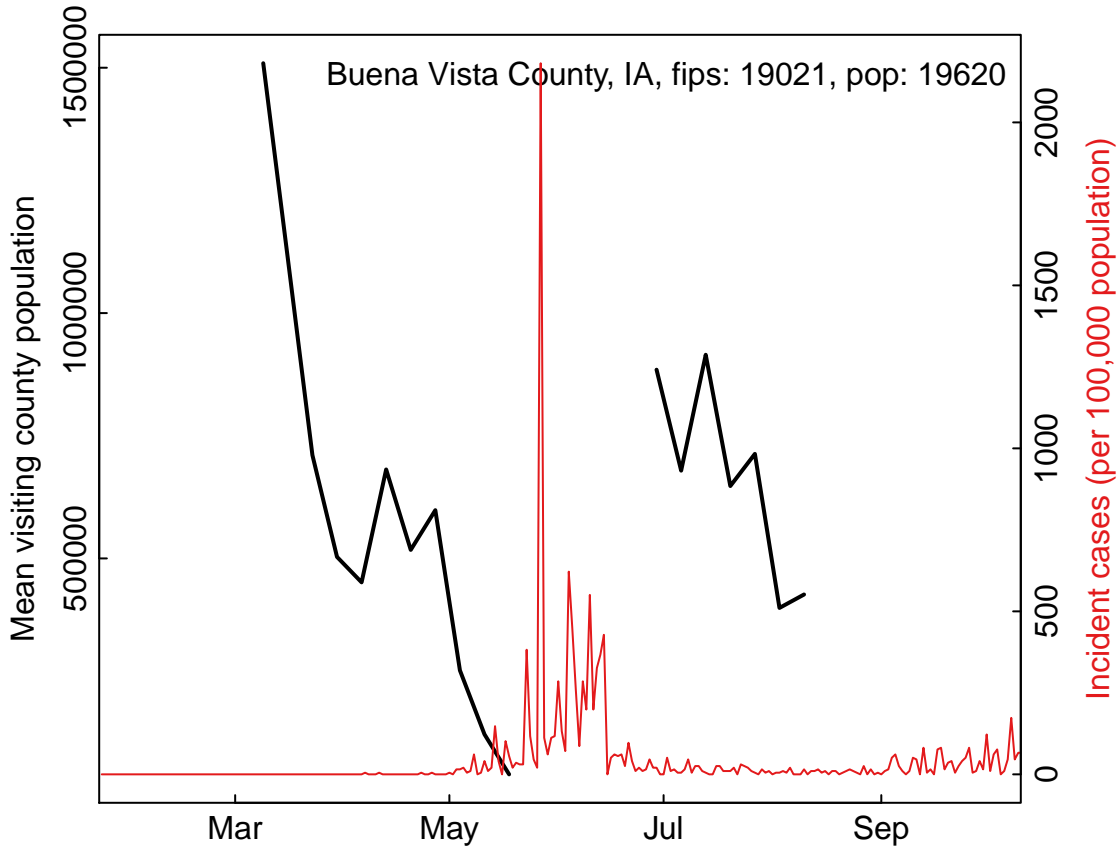

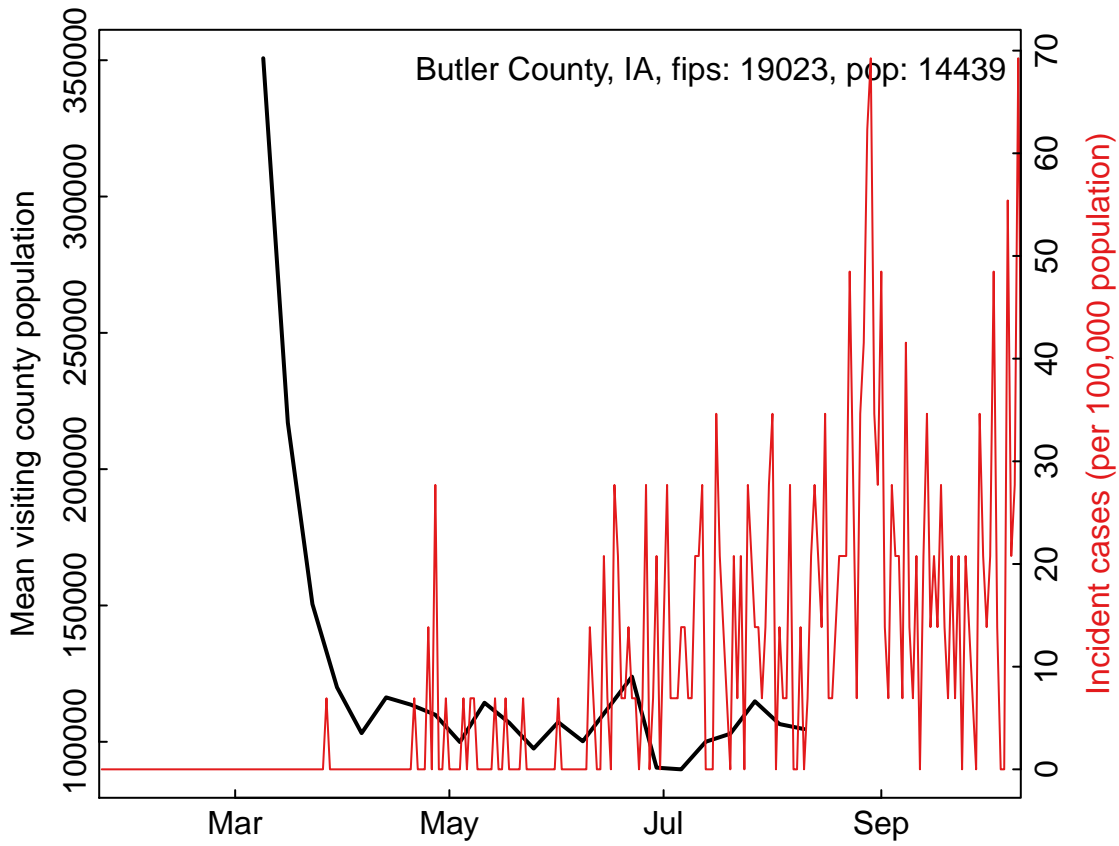



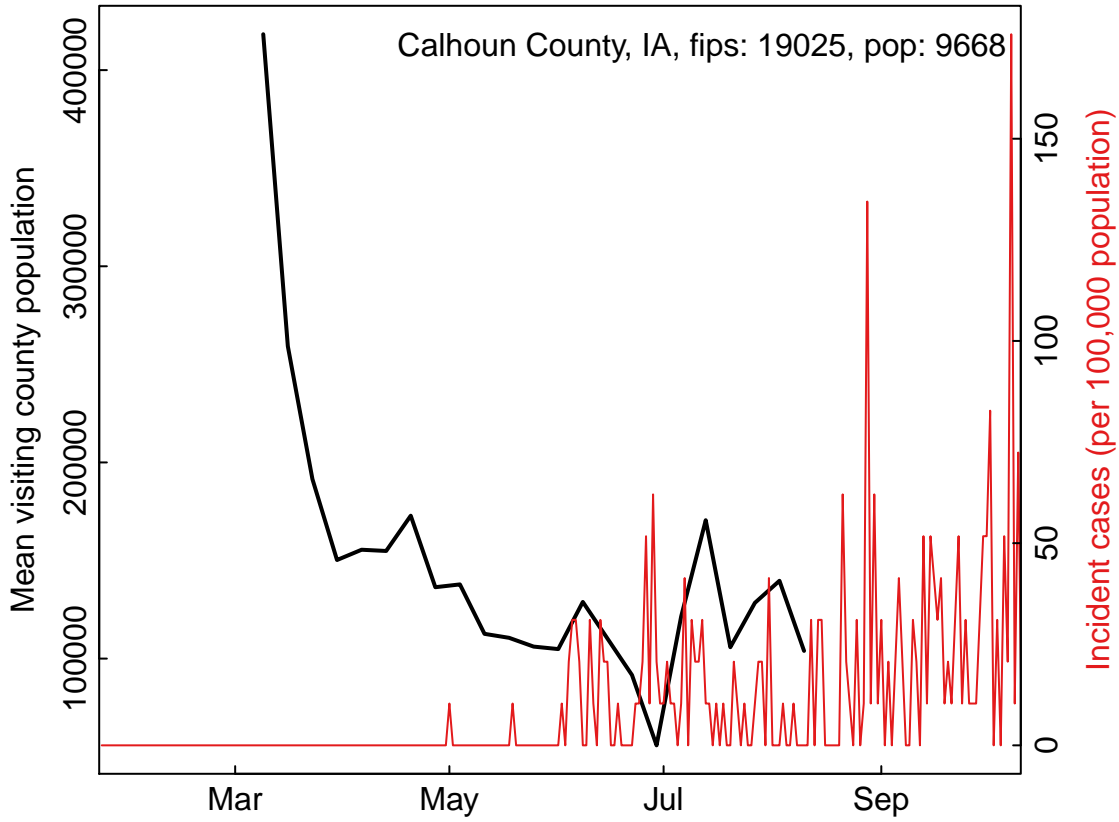

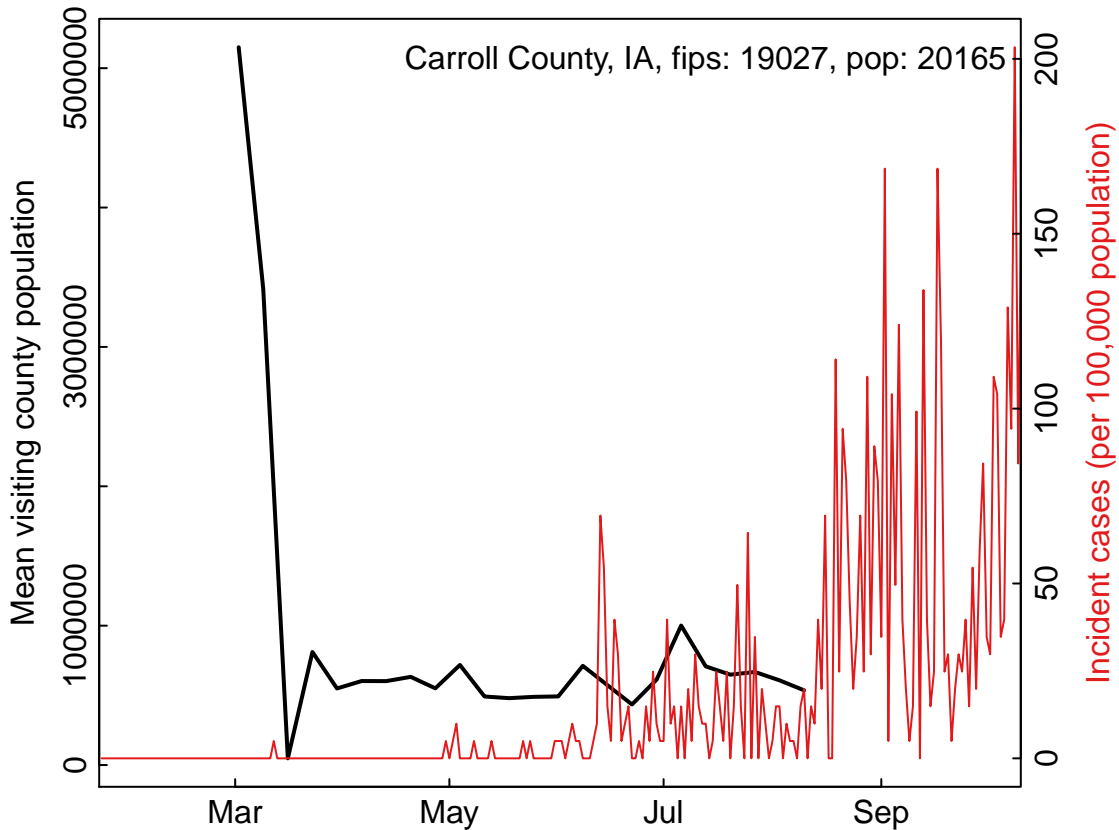

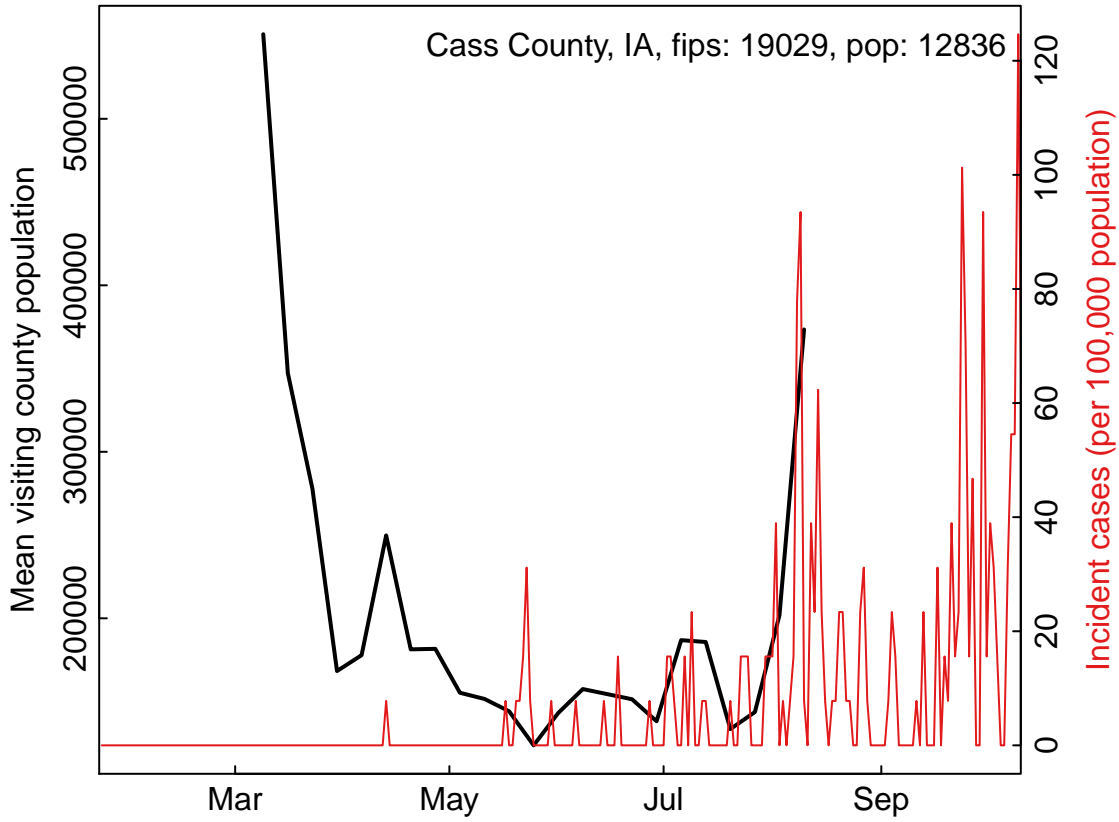

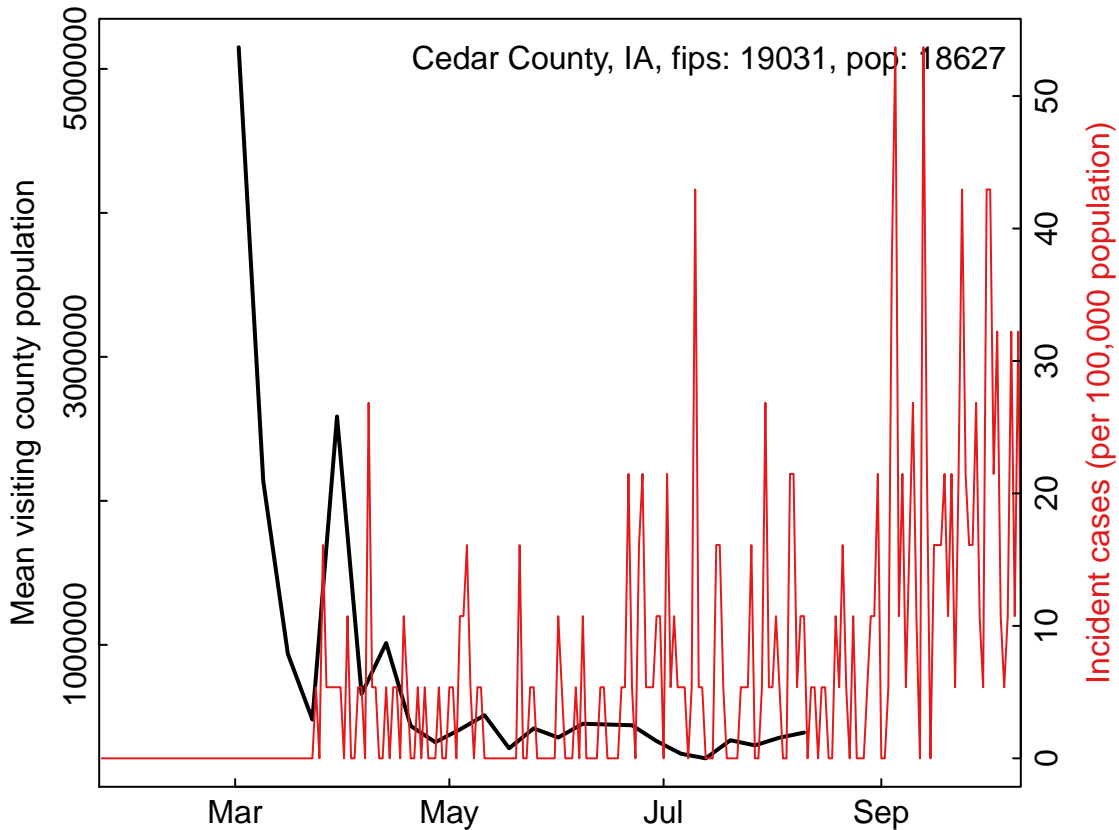

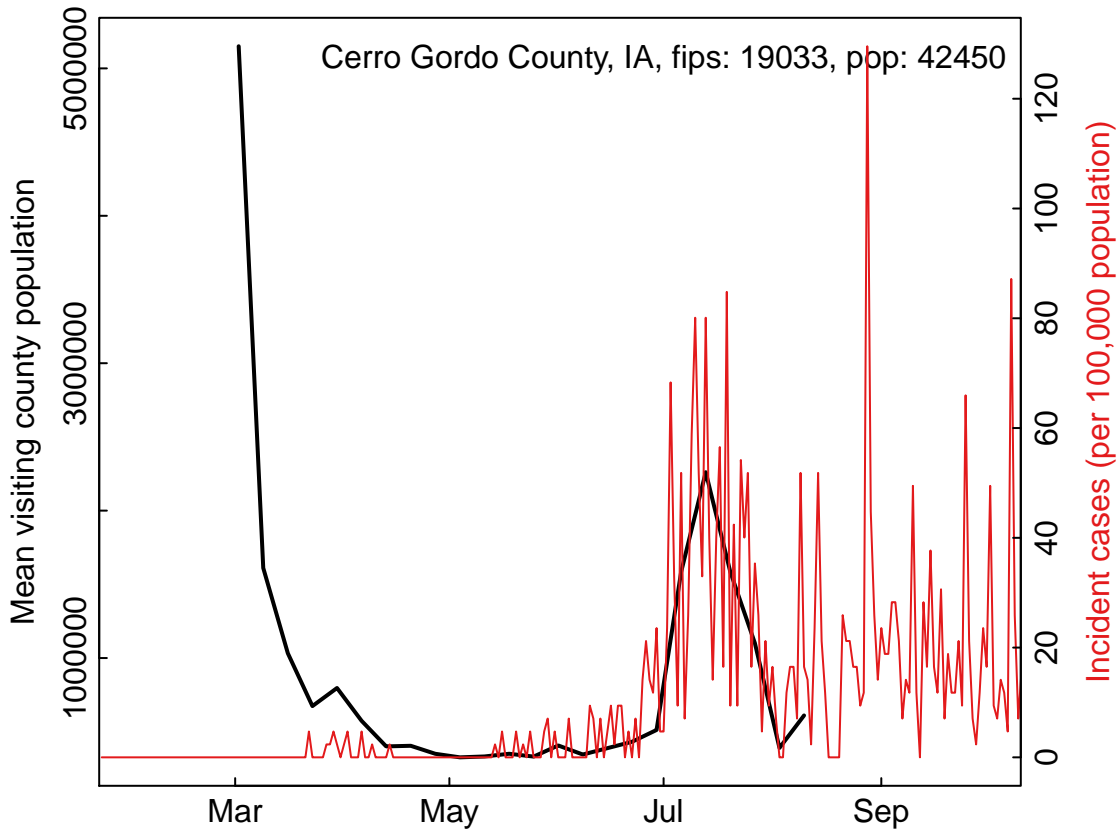

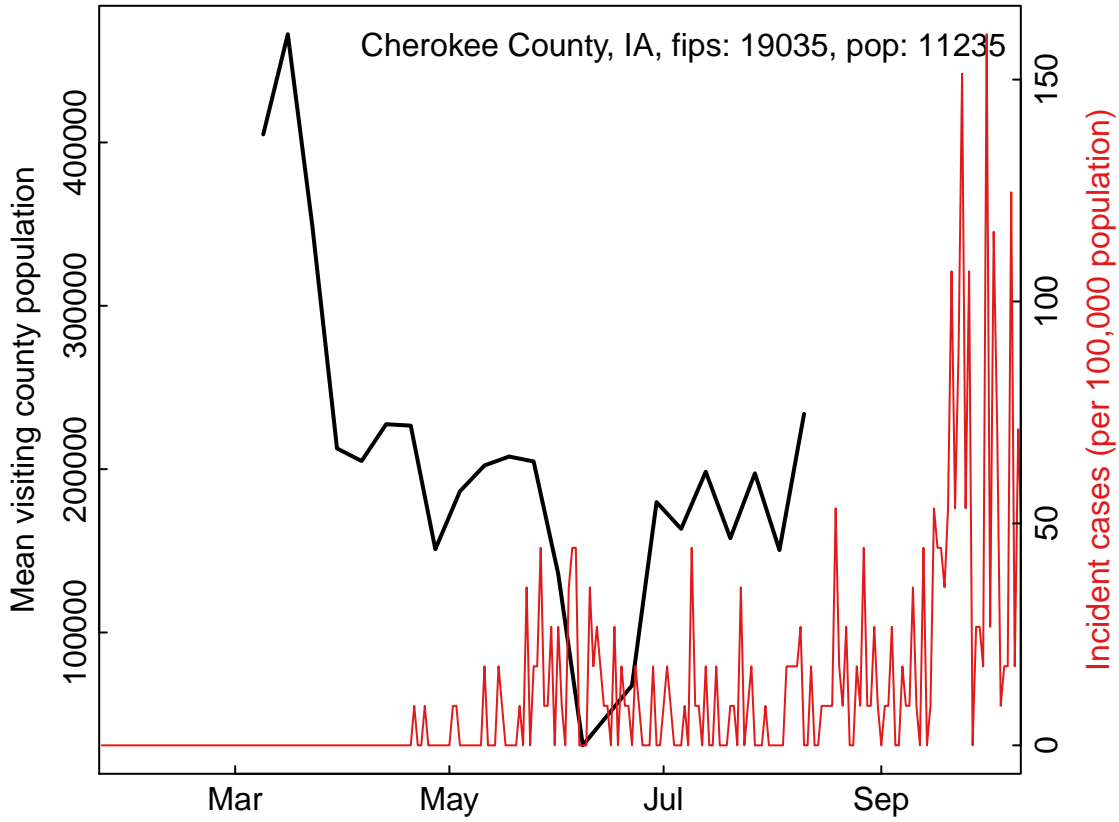

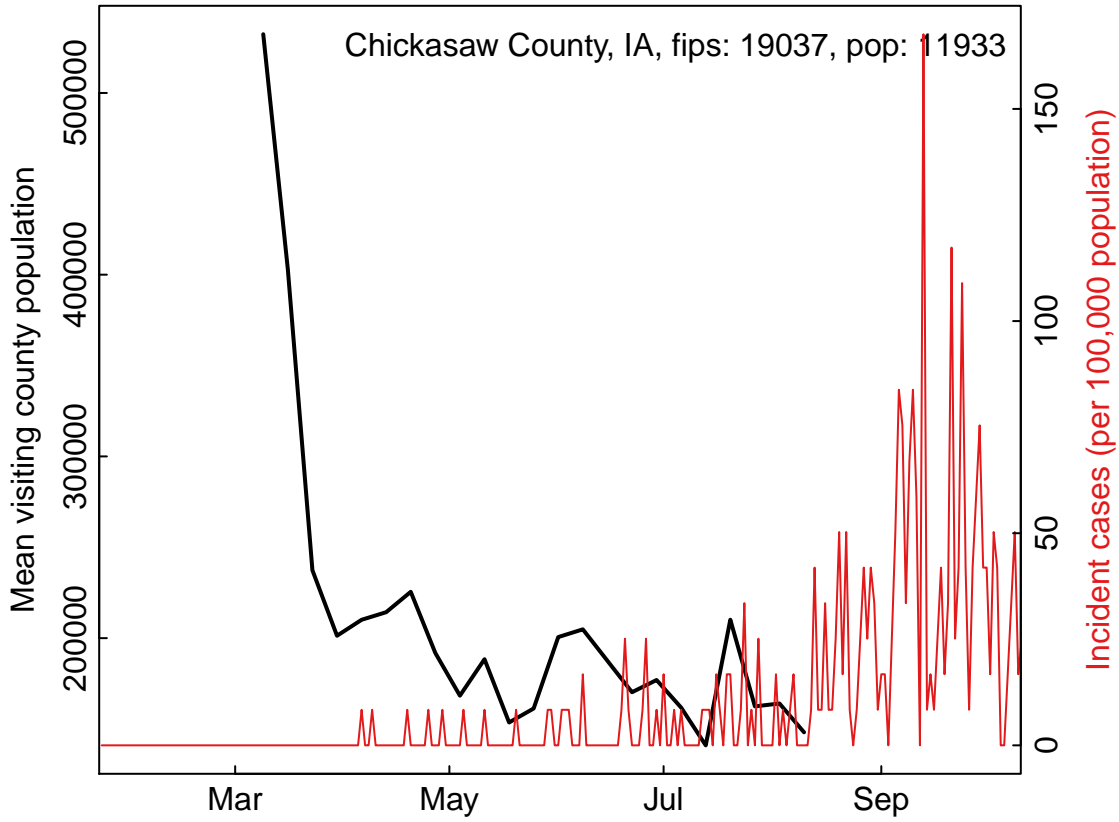

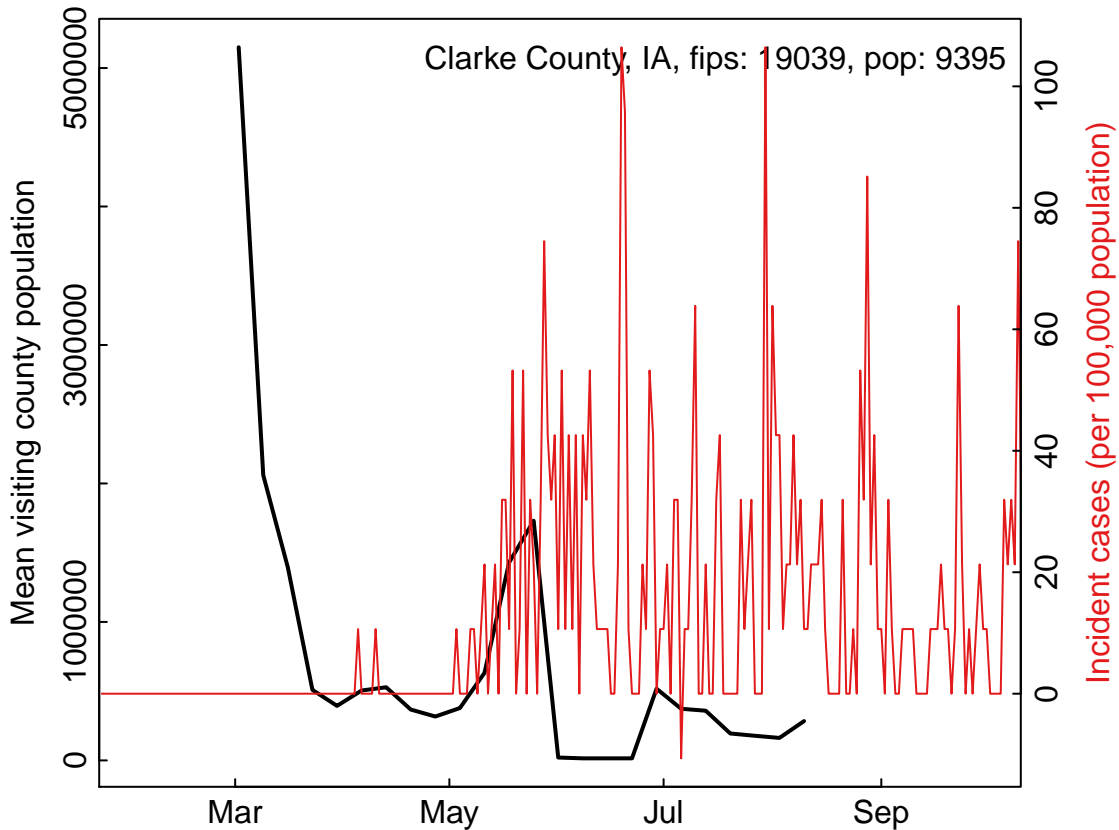



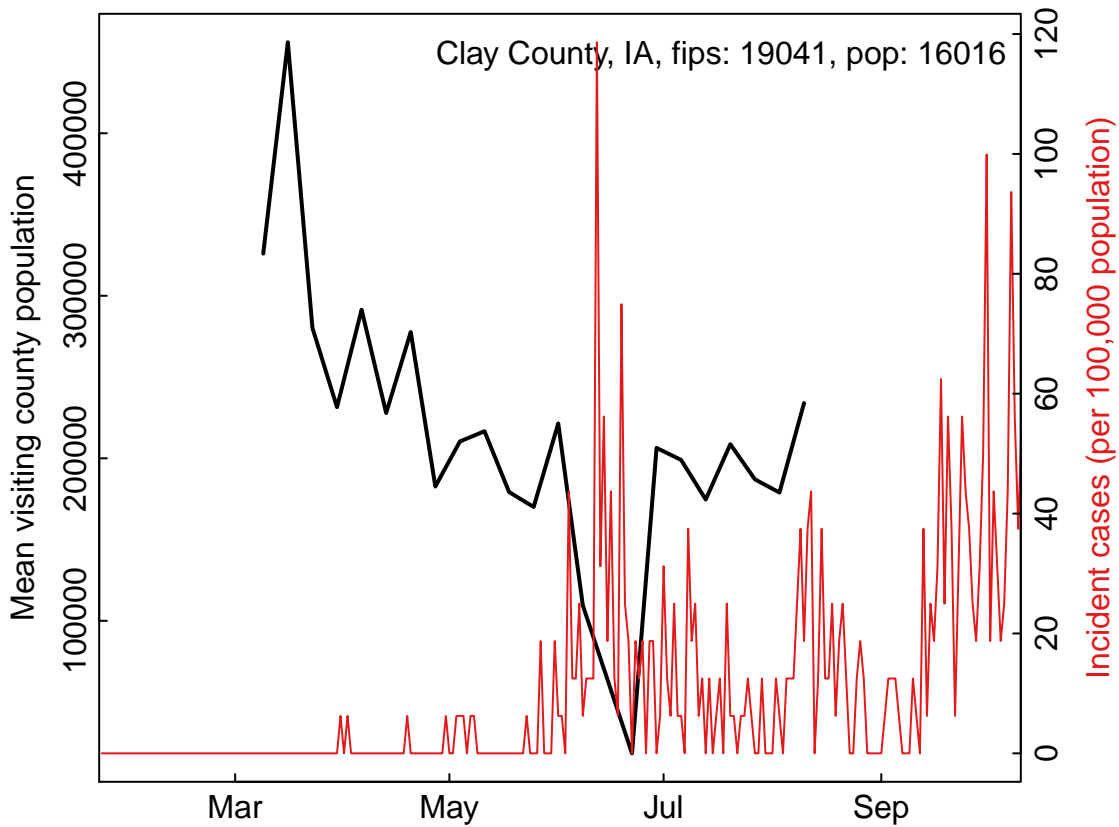

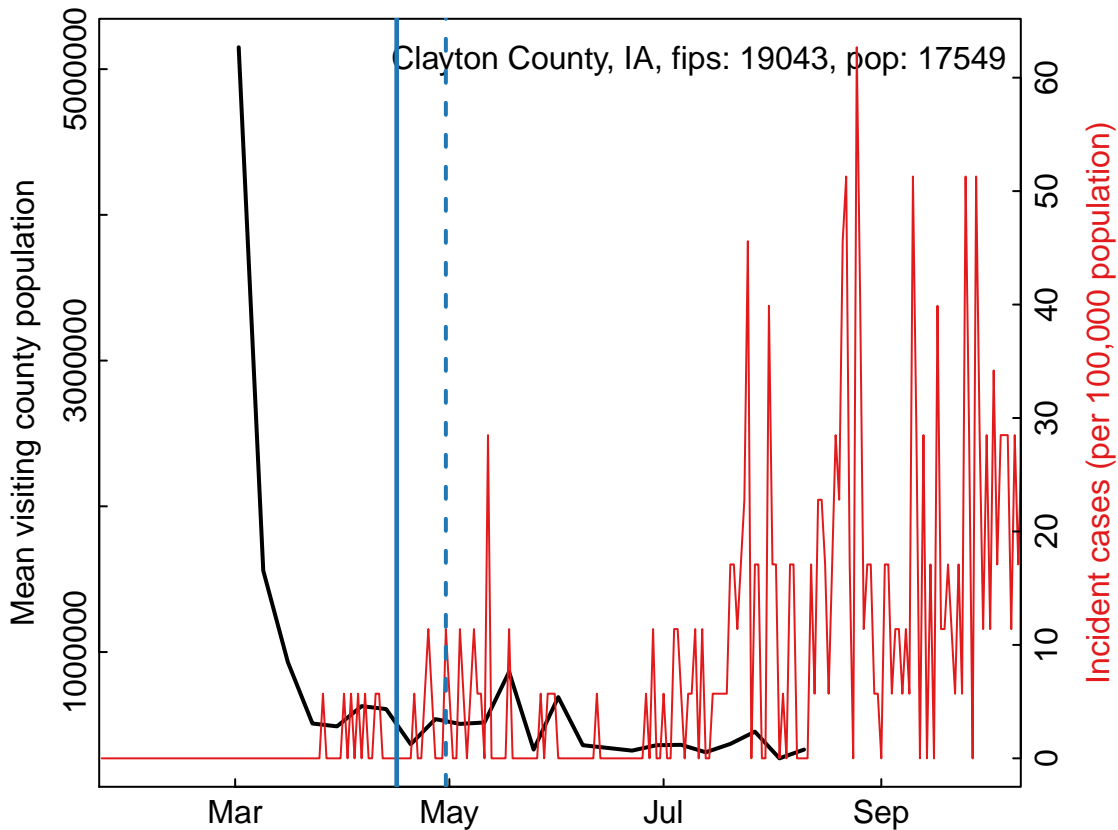

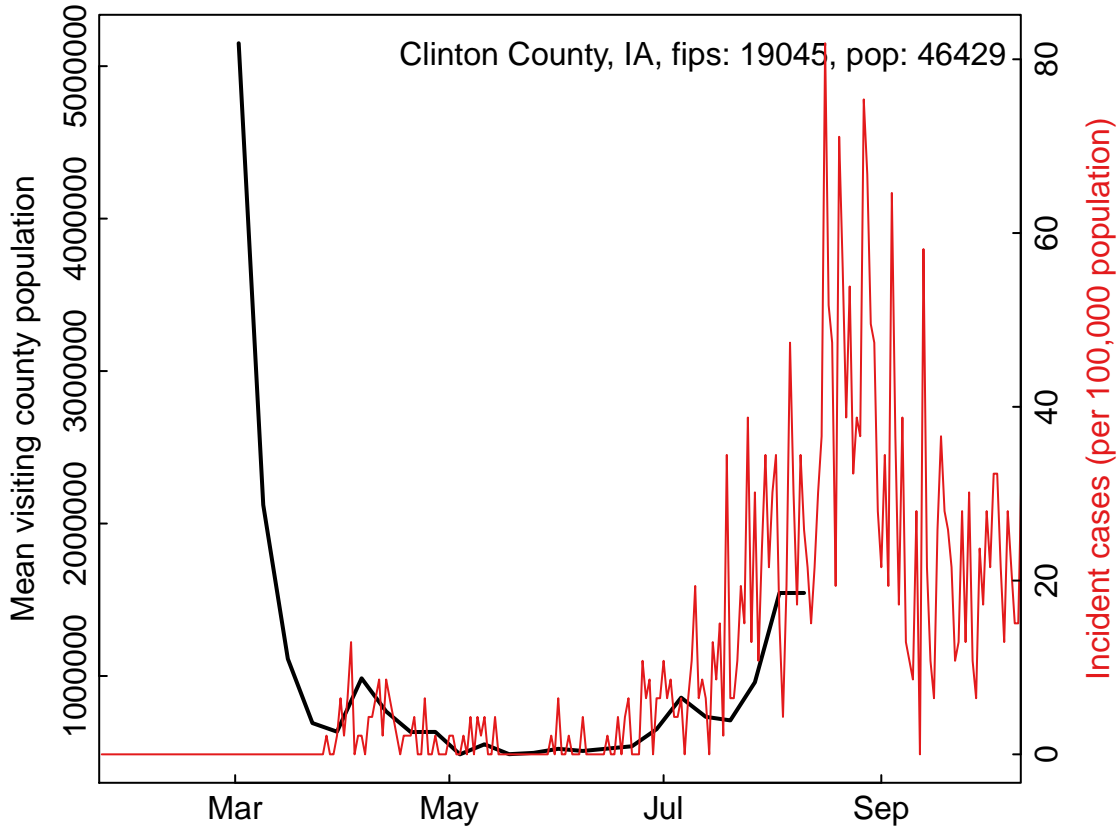

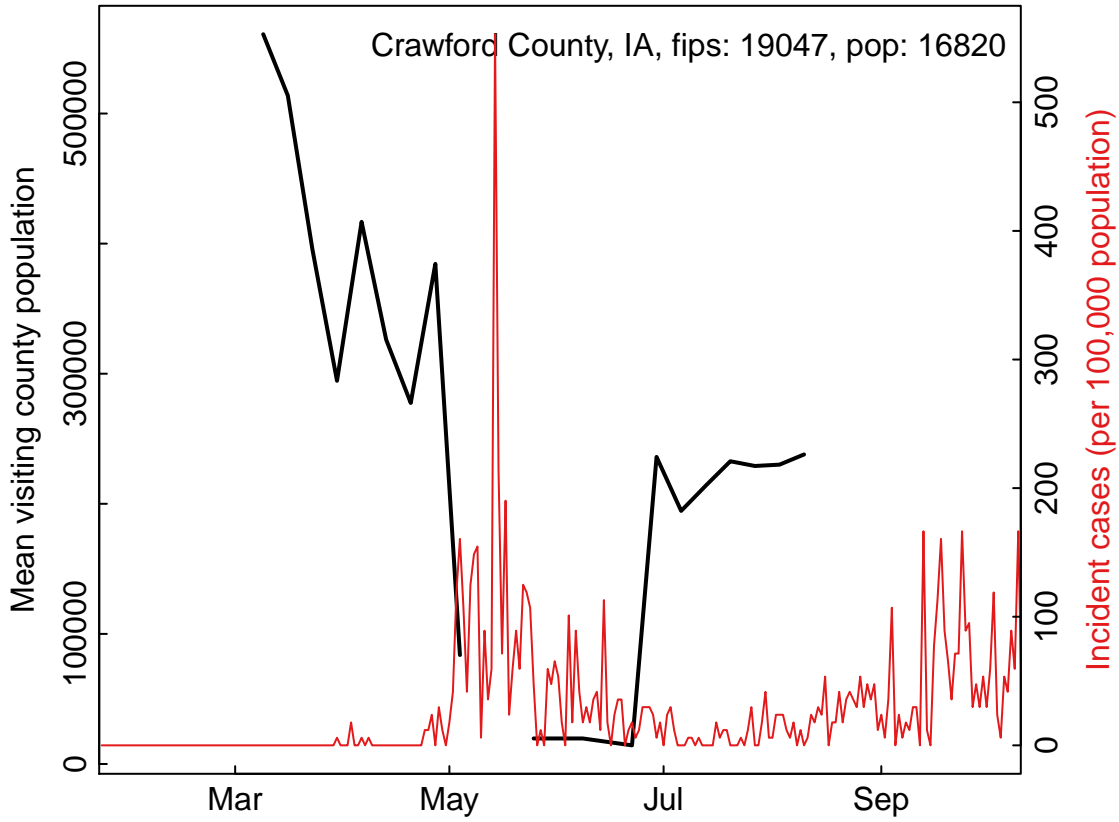

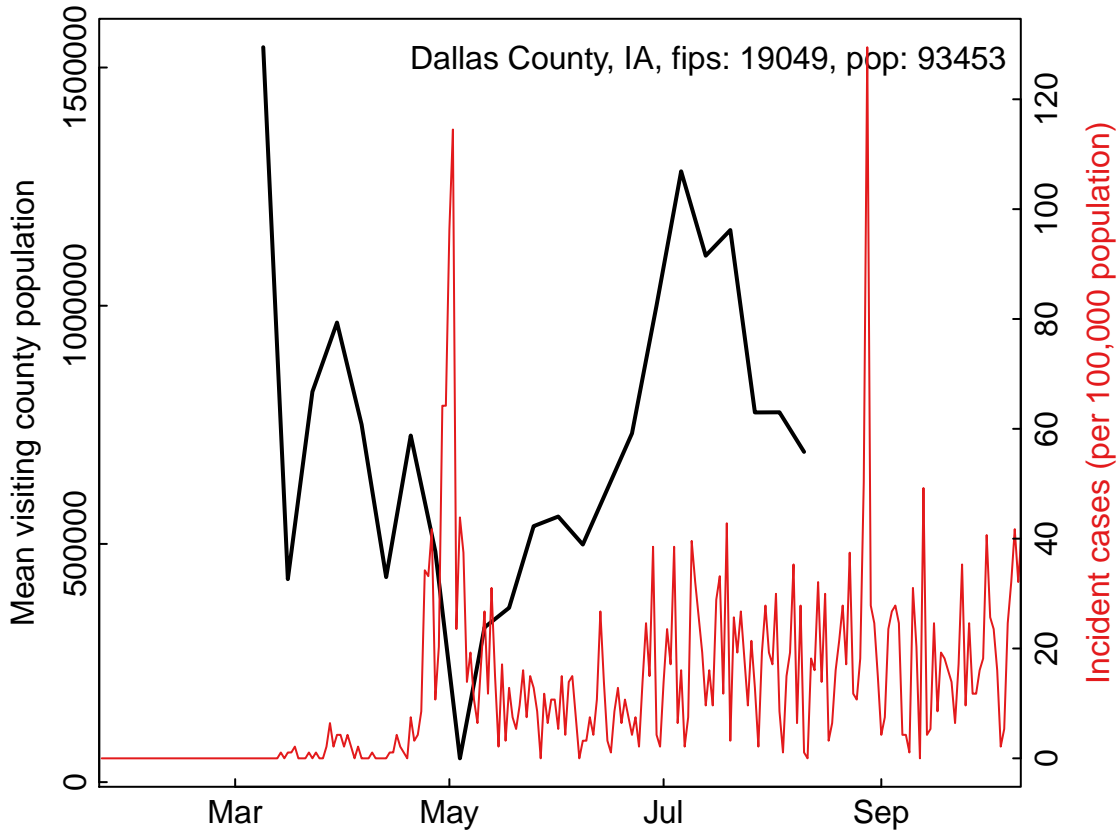

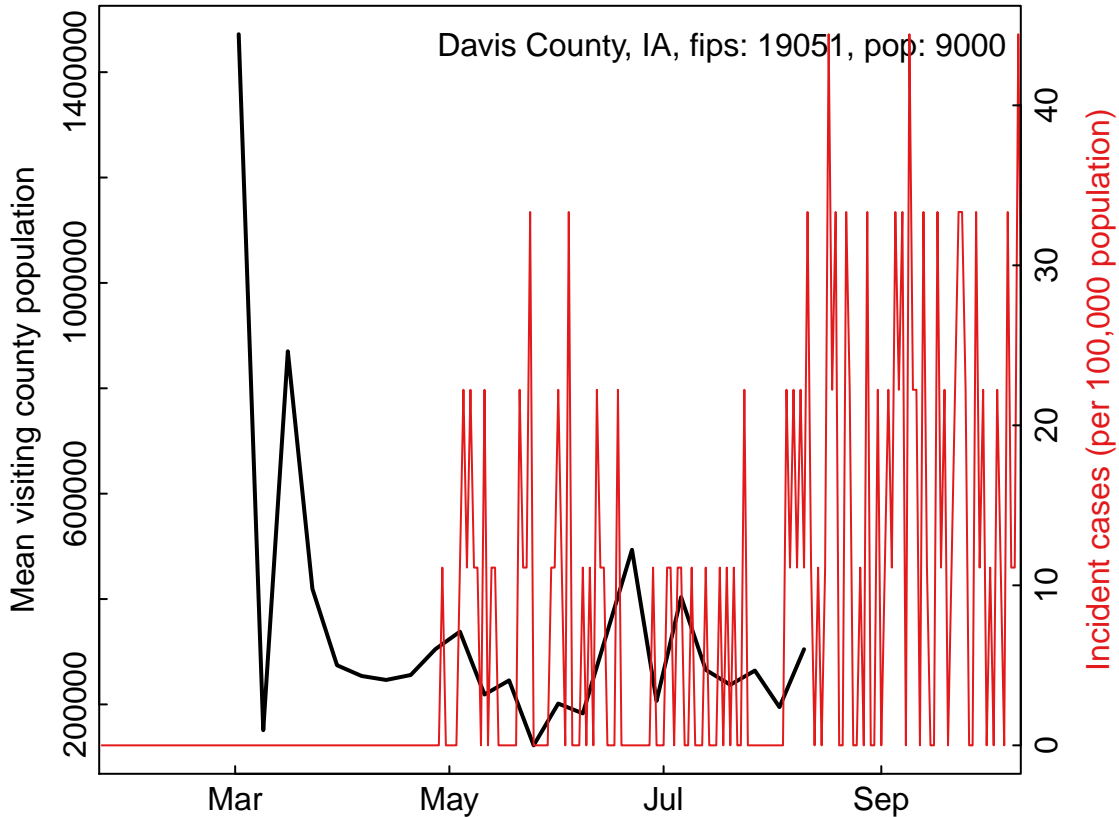

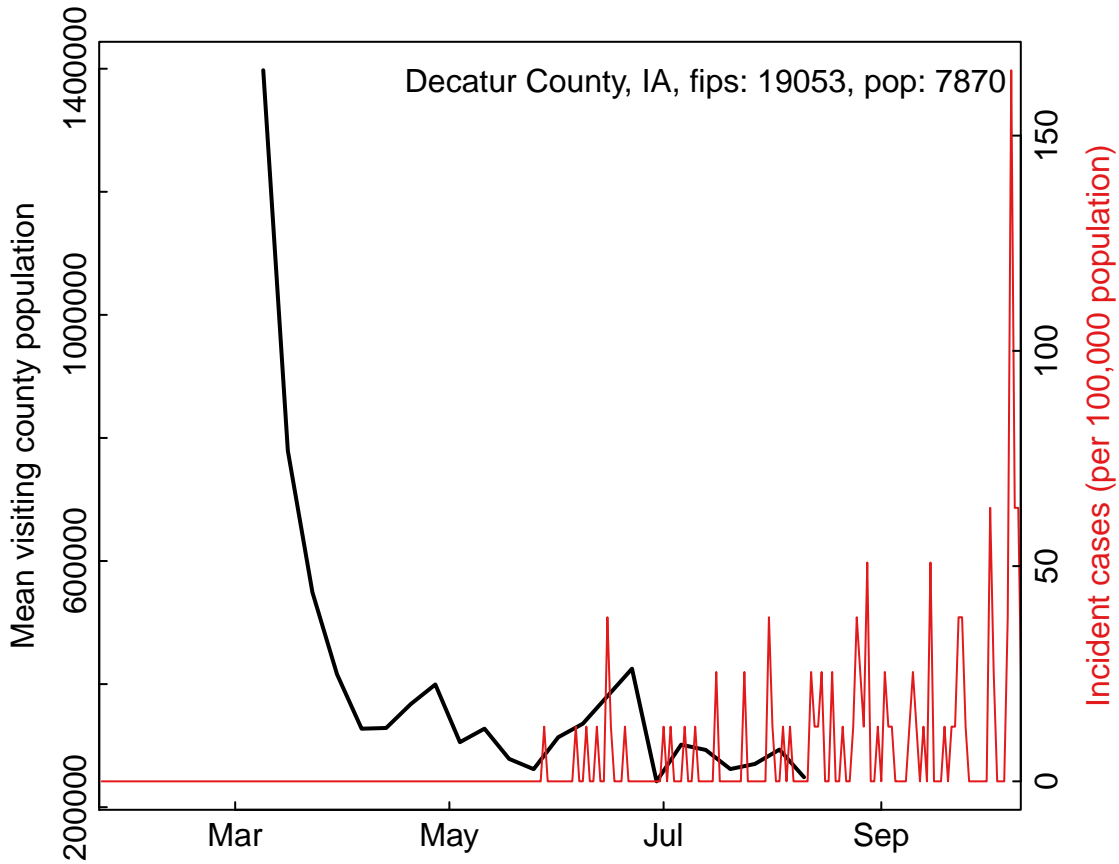

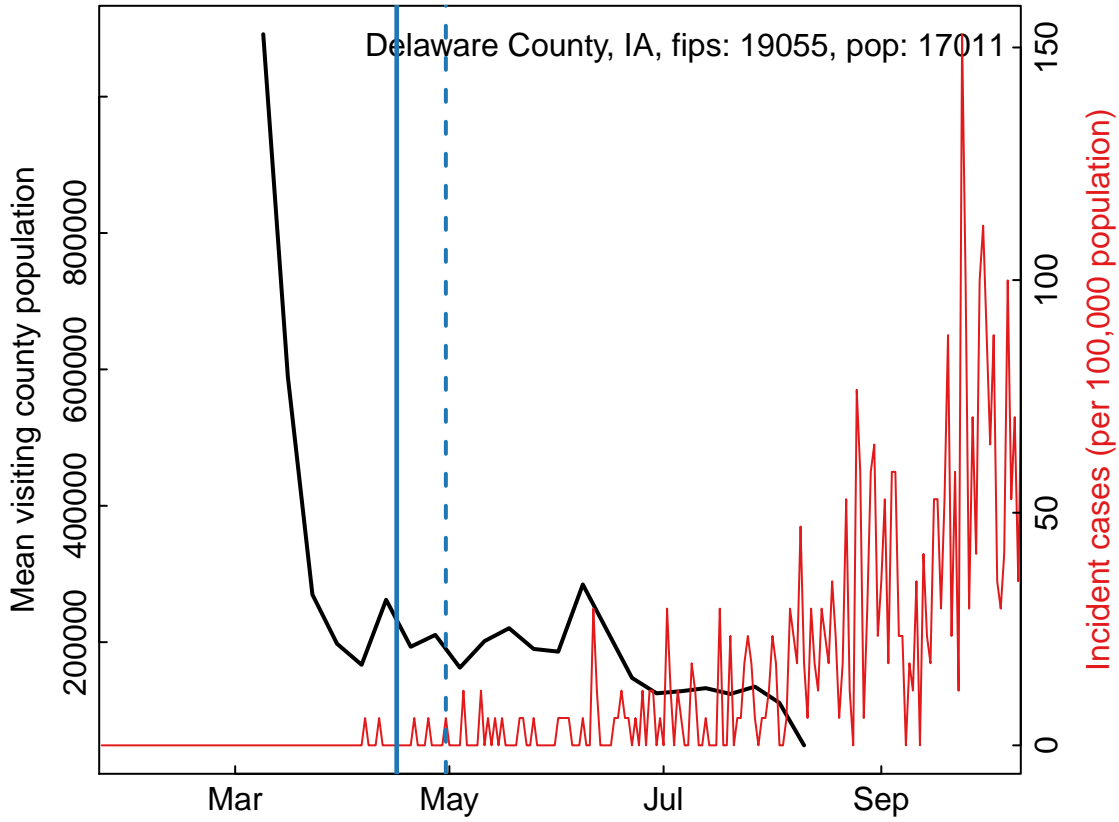



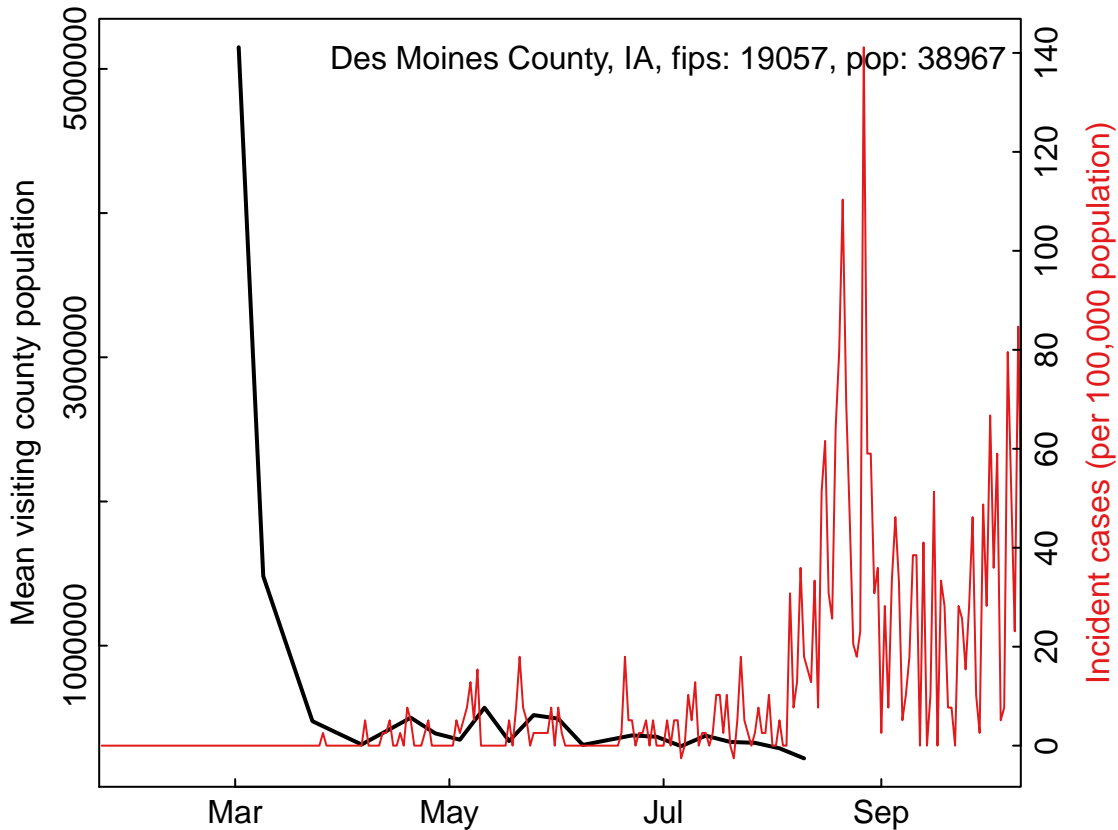

Dickinson County, IA, fips: 19059, pop: 17258

Mean visiting county population

1000000  
600000  
200000  
0

Mar May Jul Sep

150  
100  
50  
0

Incident cases (per 100,000 population)

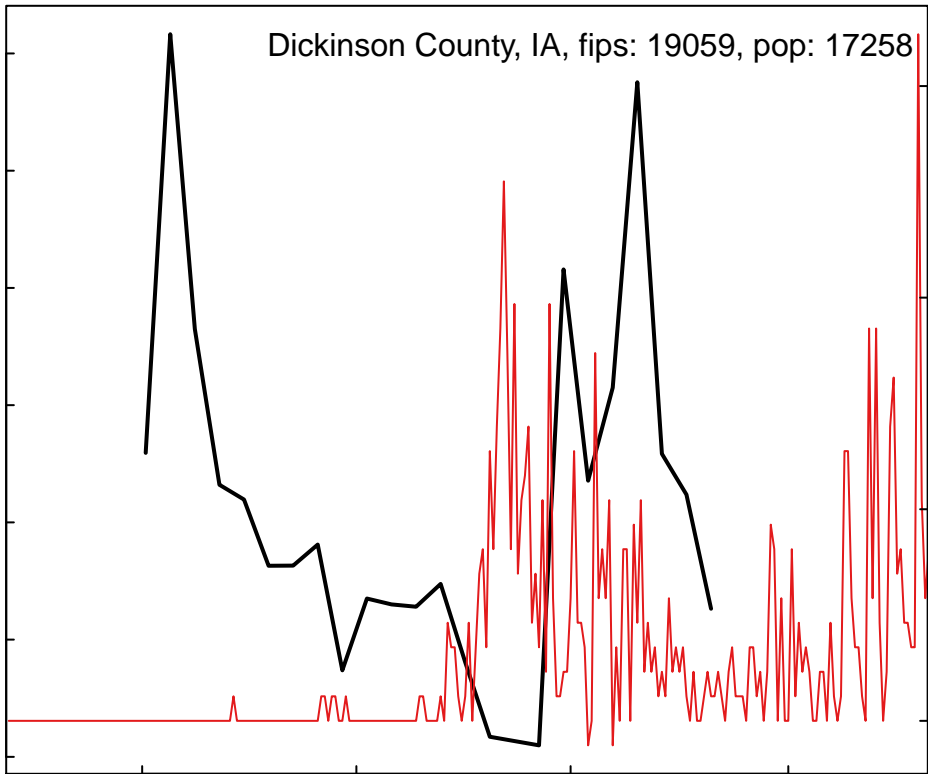

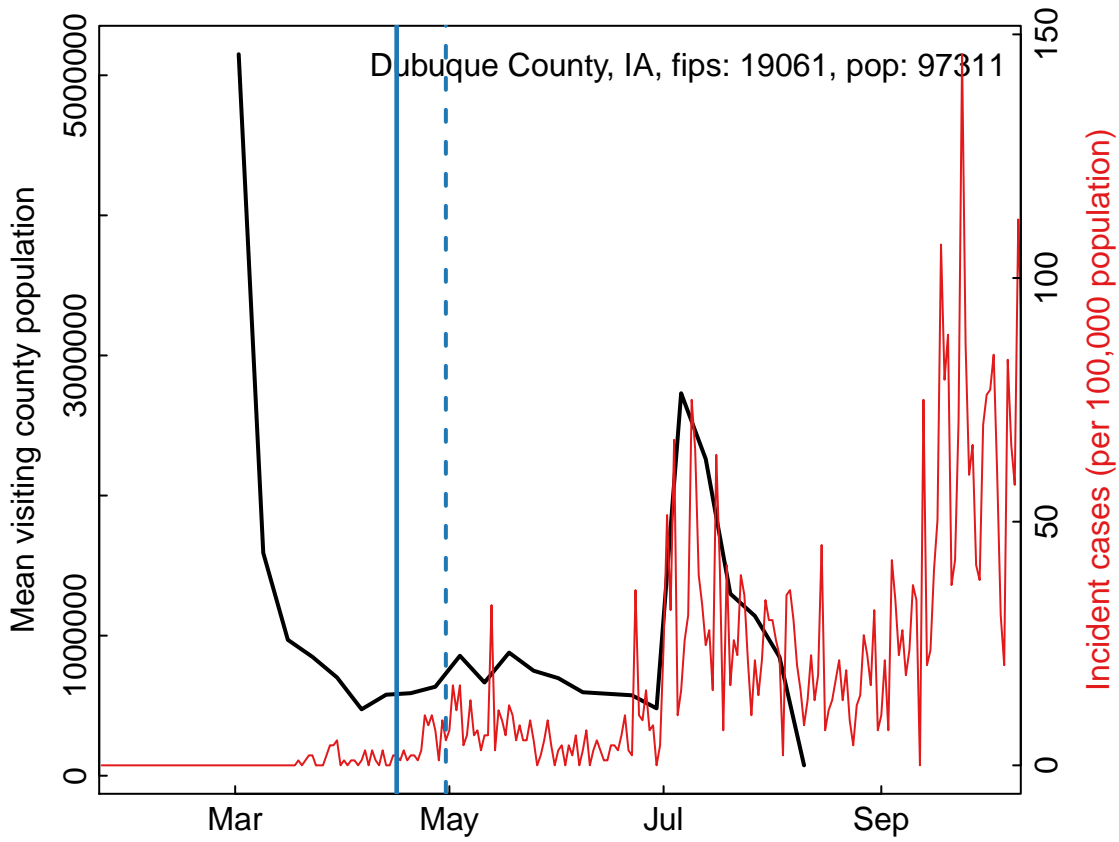

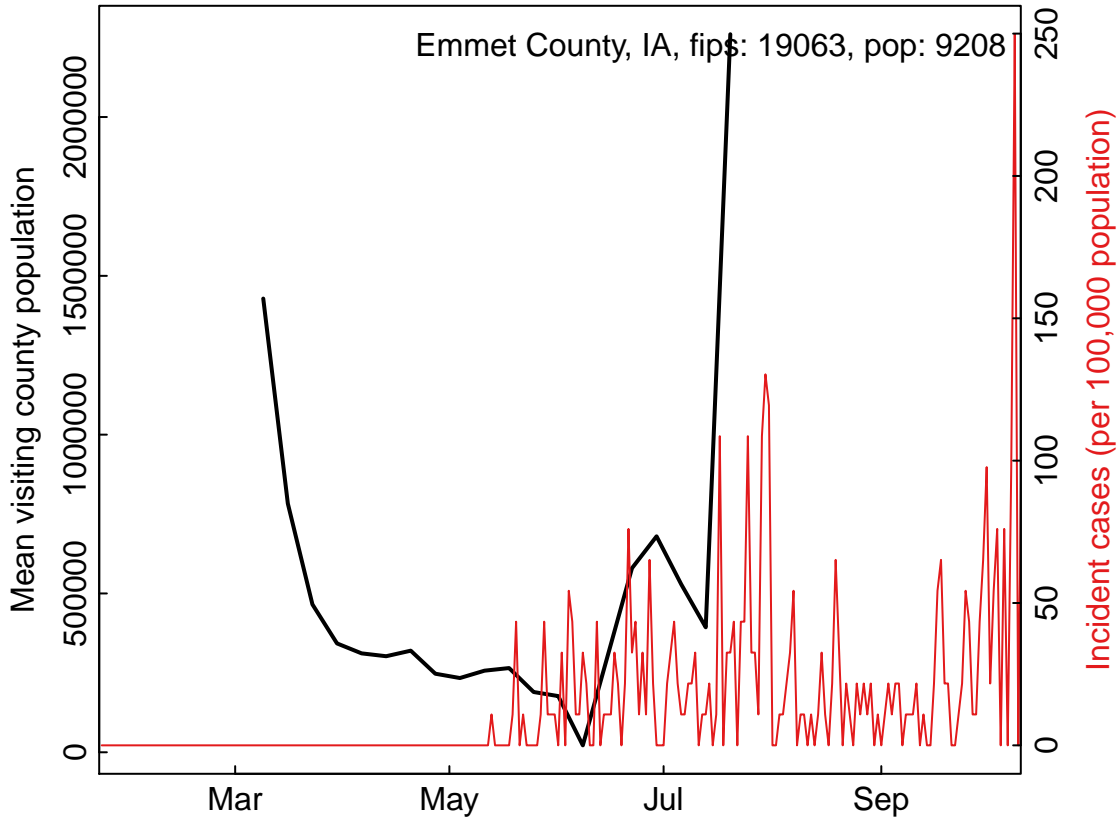

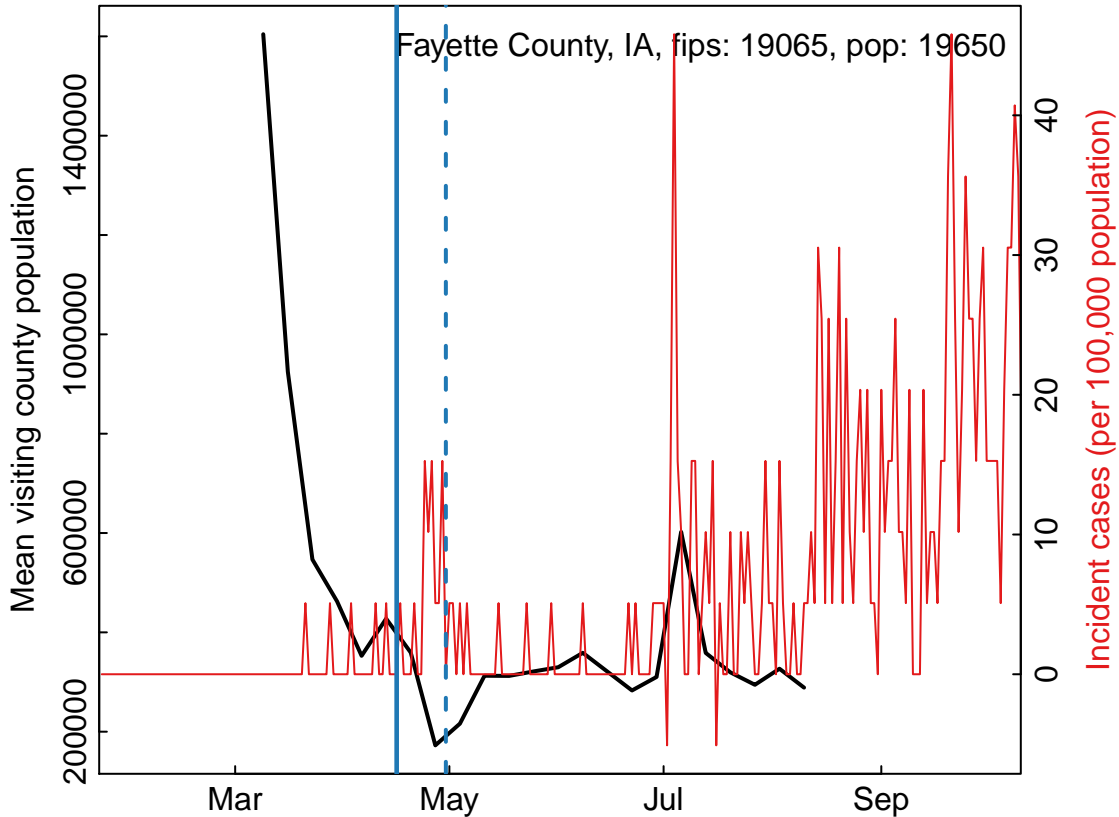

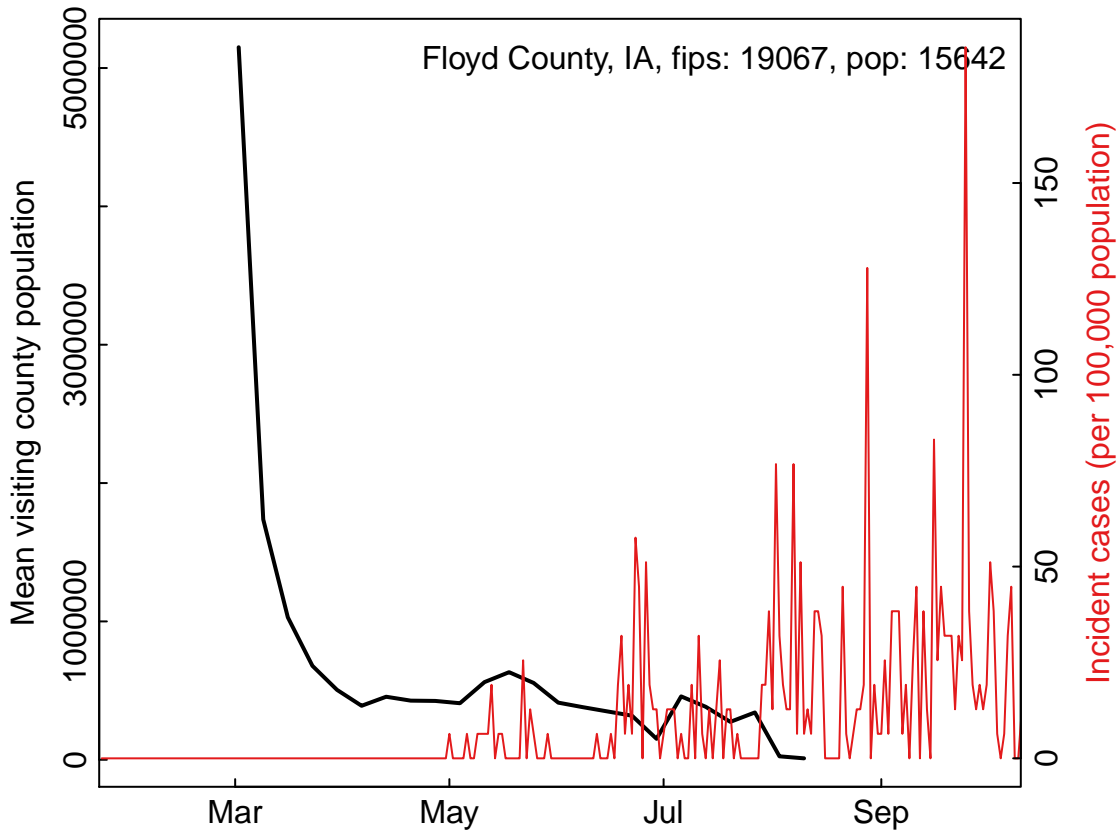

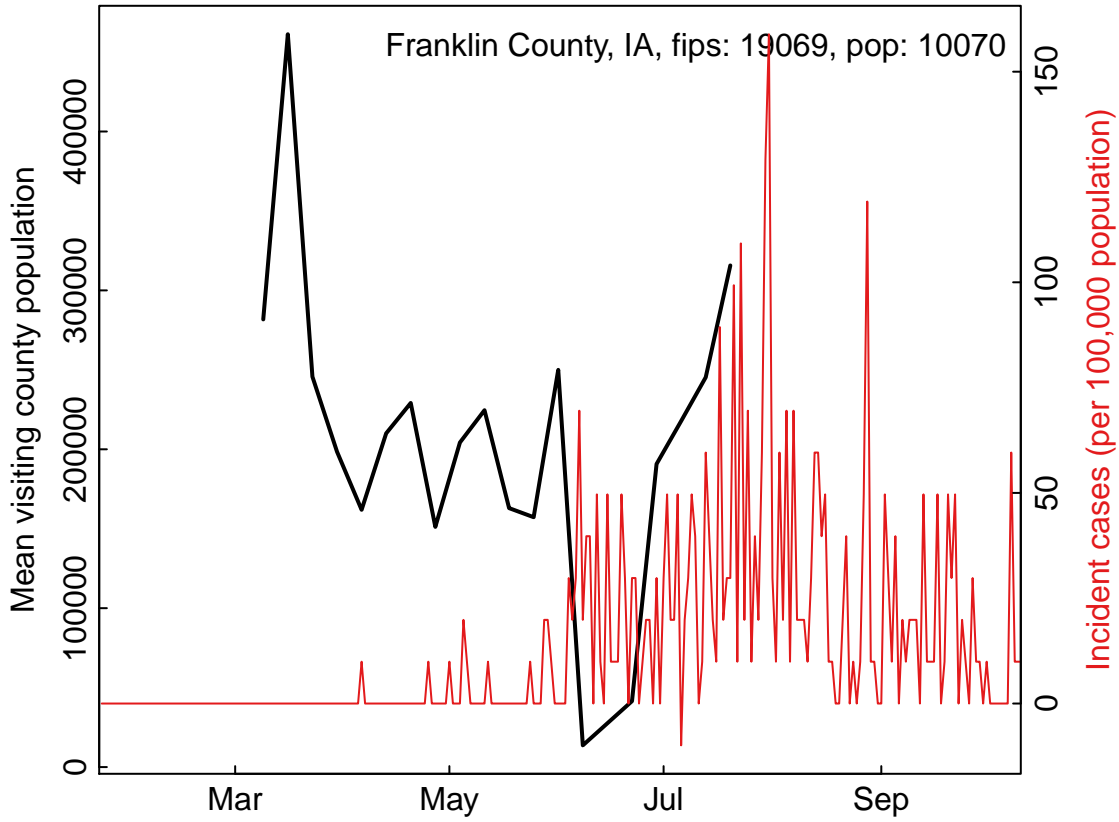

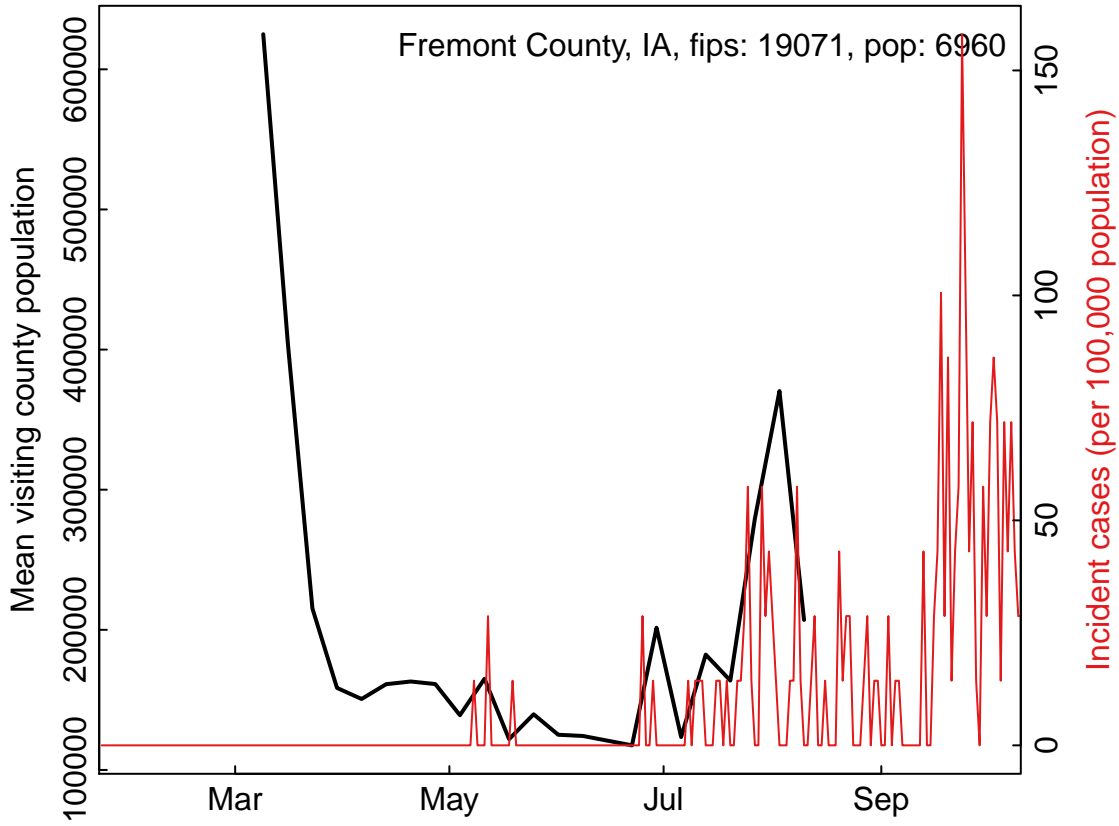



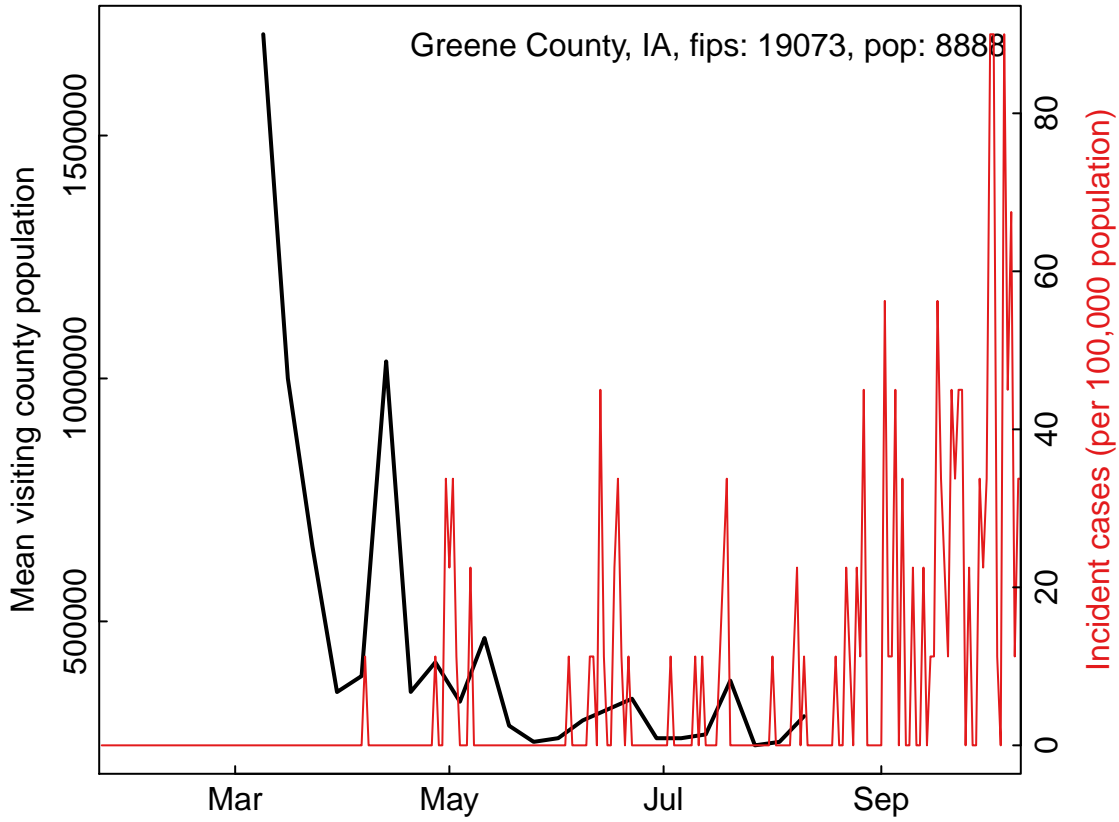

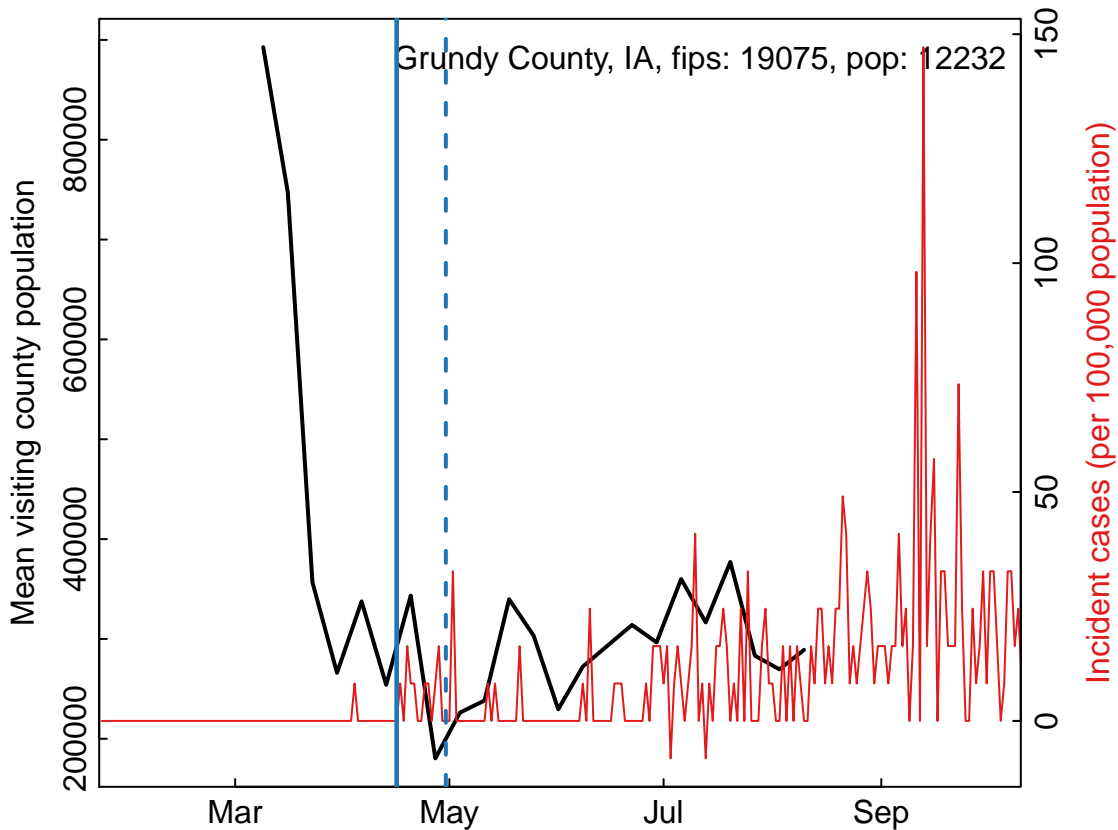

Guthrie County, IA, fips: 19077, pop: 10689

Mean visiting county population

2500000  
1500000  
500000  
0

Mar May Jul Sep

Incident cases (per 100,000 population)

100  
80  
60  
40  
20  
0

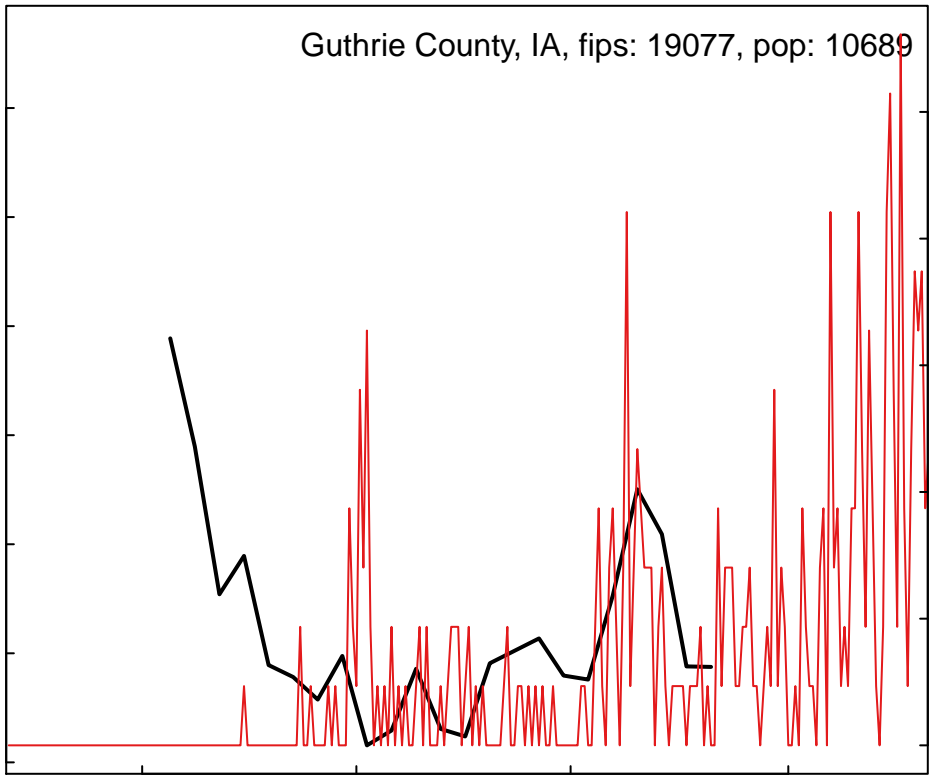

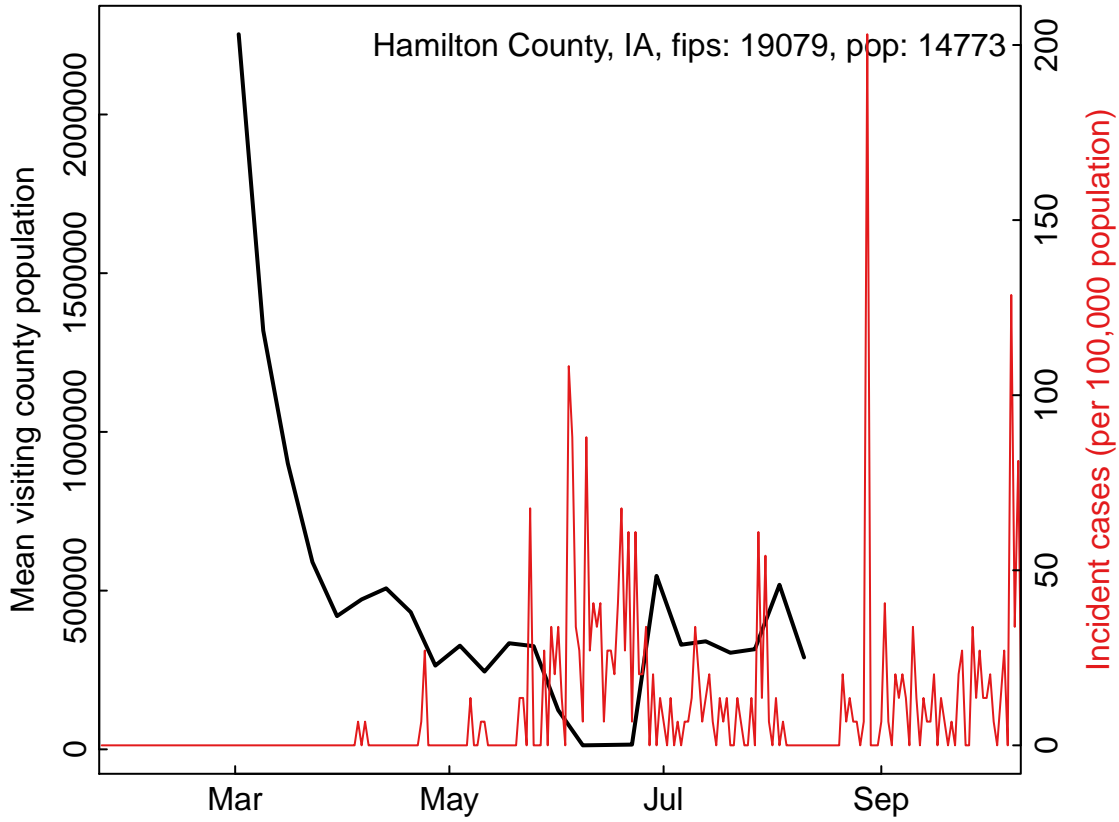

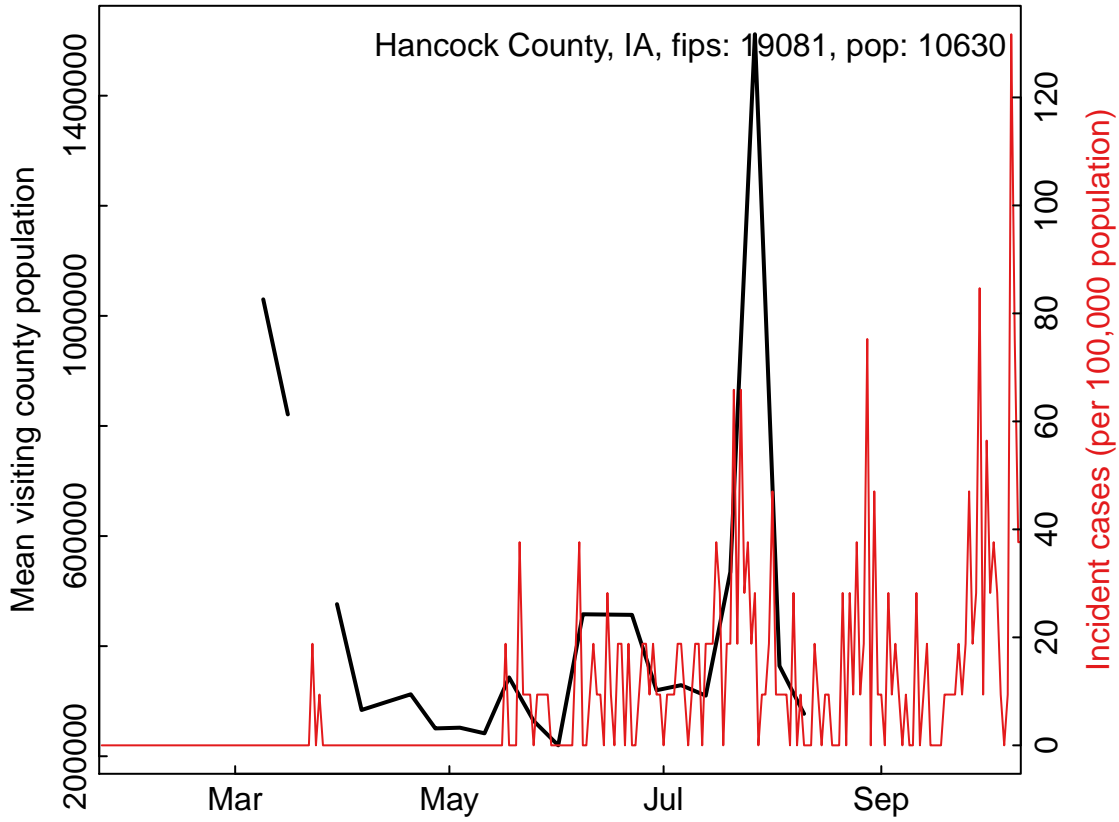

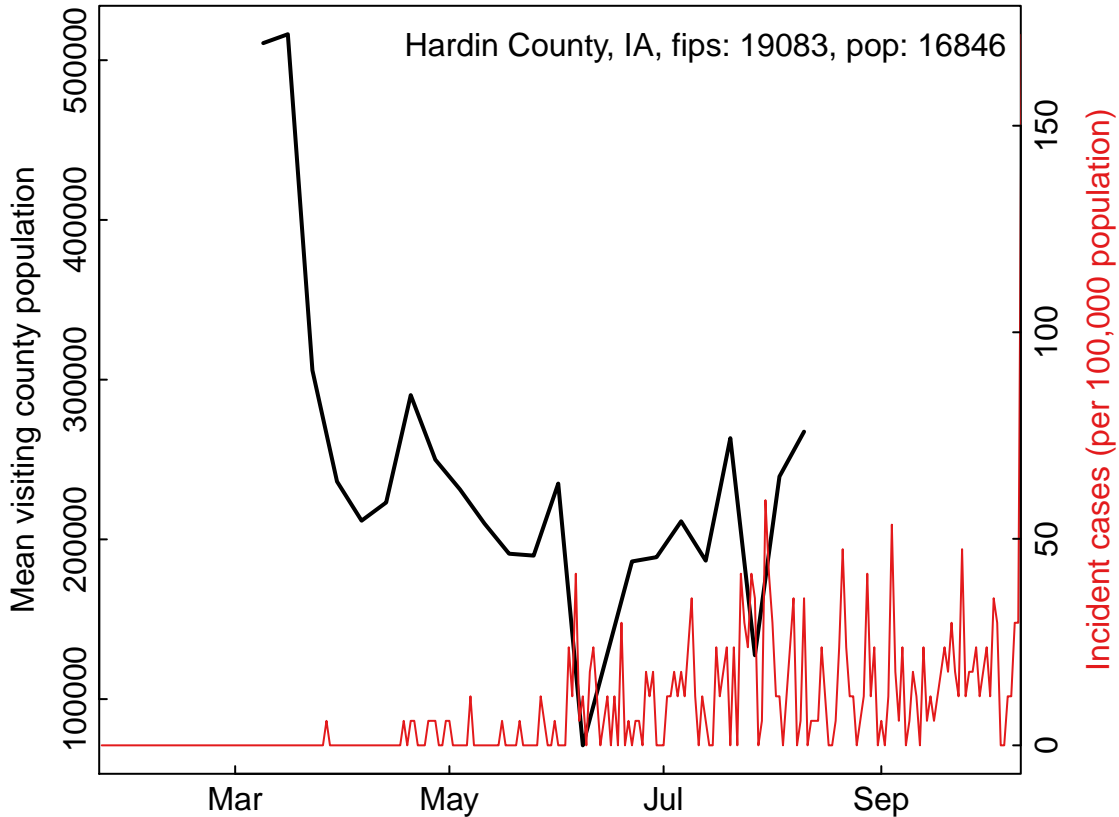

Harrison County, IA, fips: 19085, pop: 14049

Mean visiting county population

2500000  
1500000  
500000  
0

Mar

May

Jul

Sep

300  
250  
200  
150  
100  
50  
0

Incident cases (per 100,000 population)

0

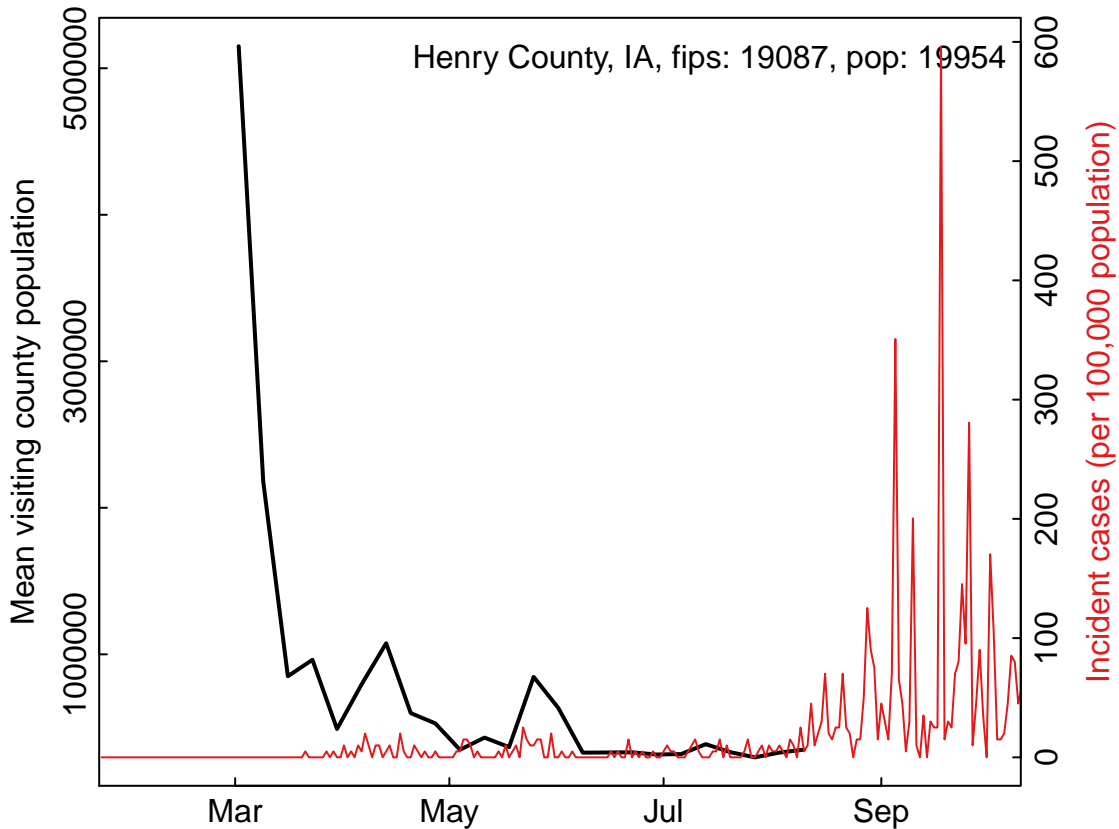



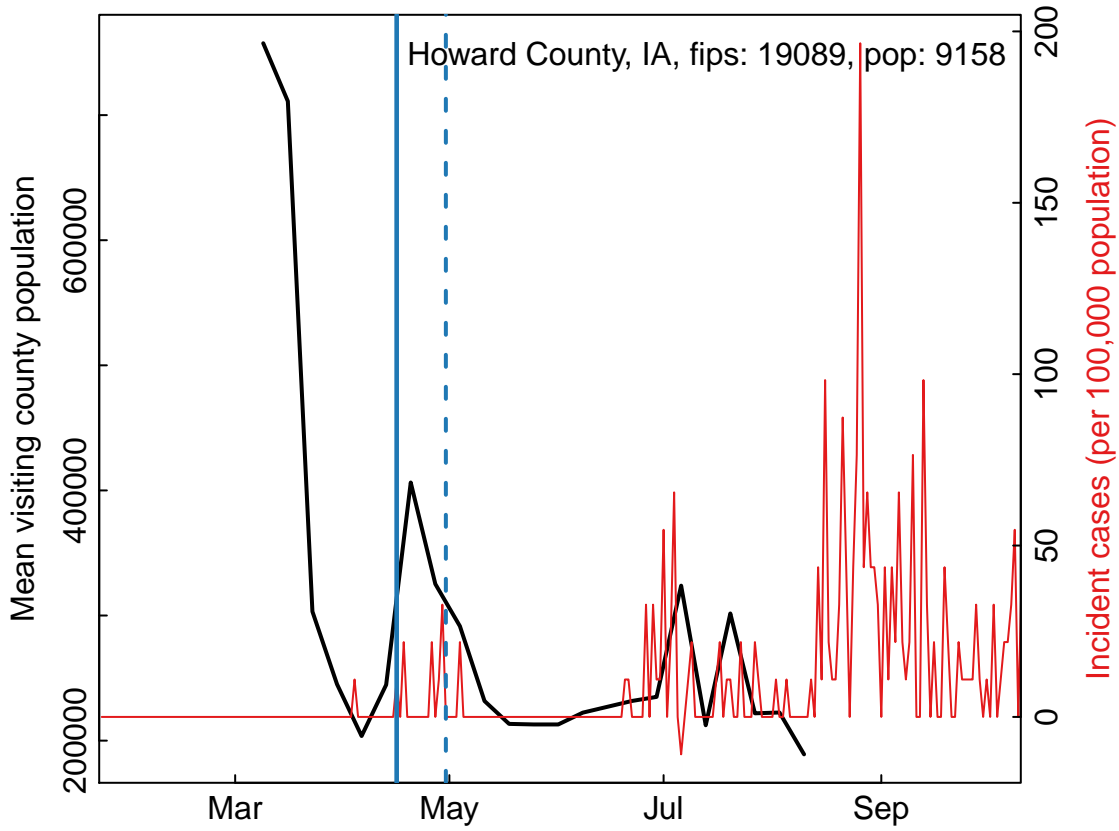

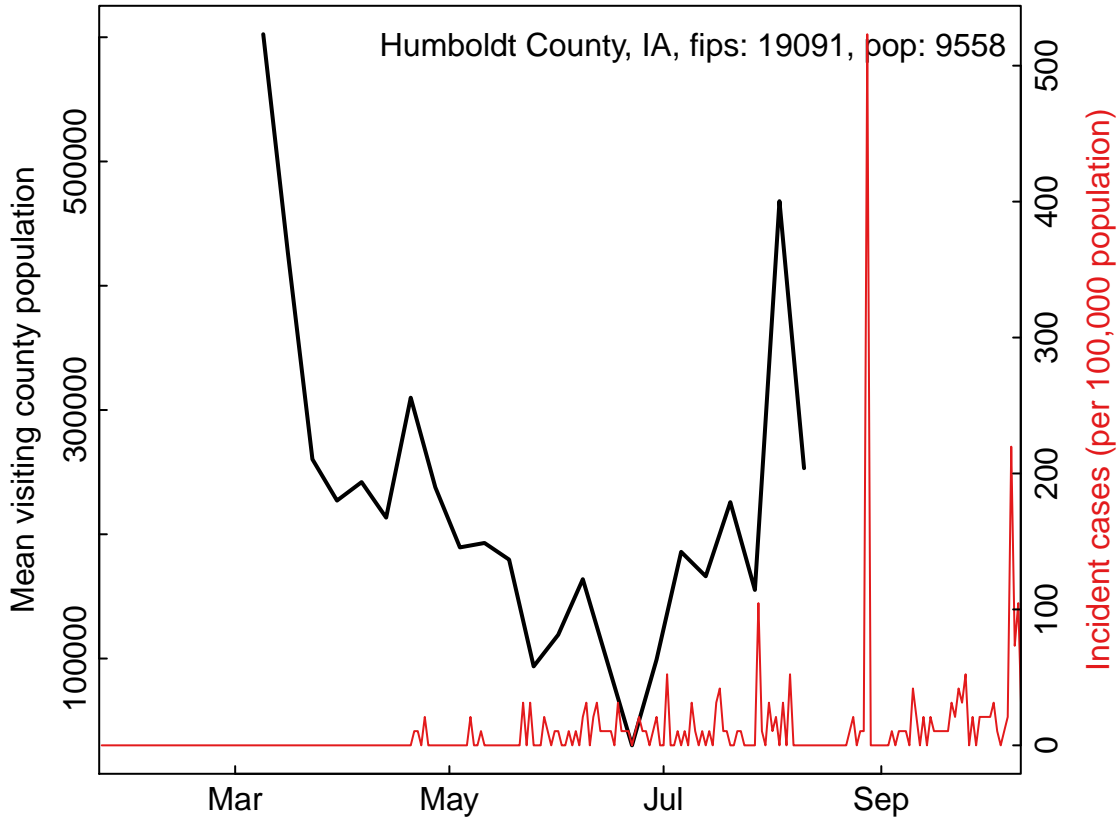

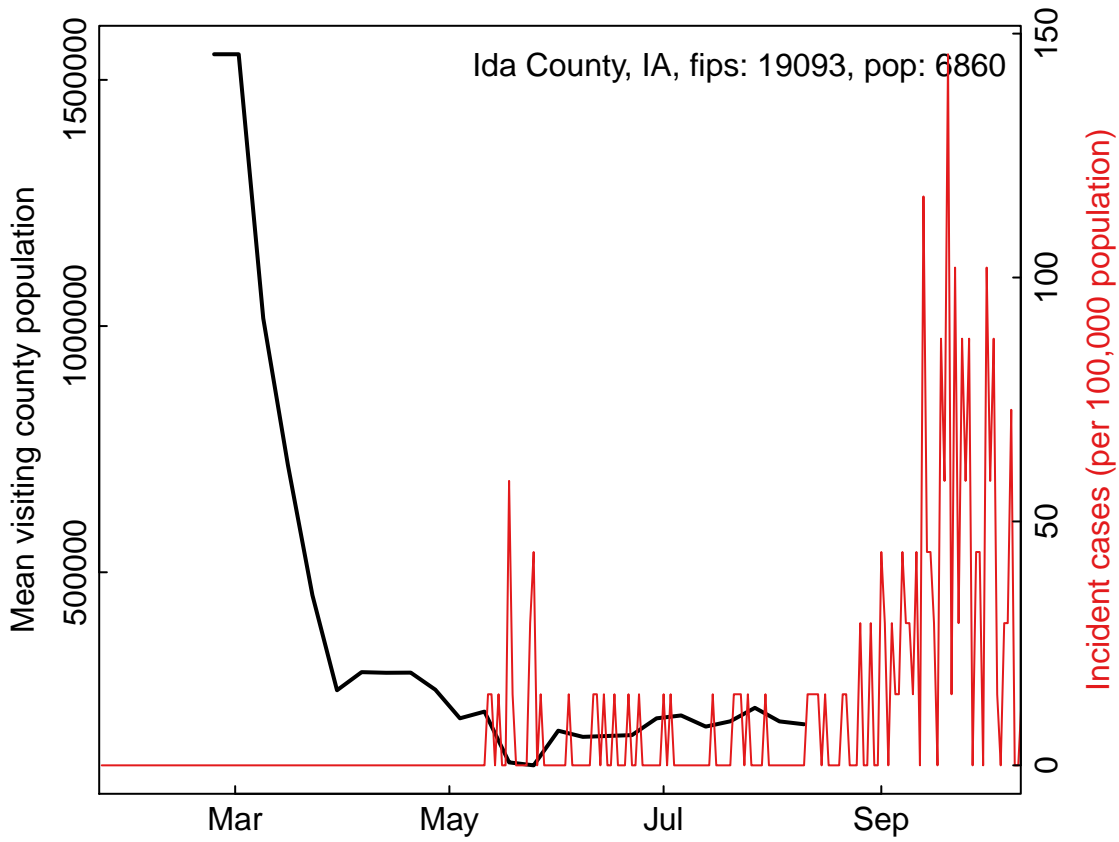

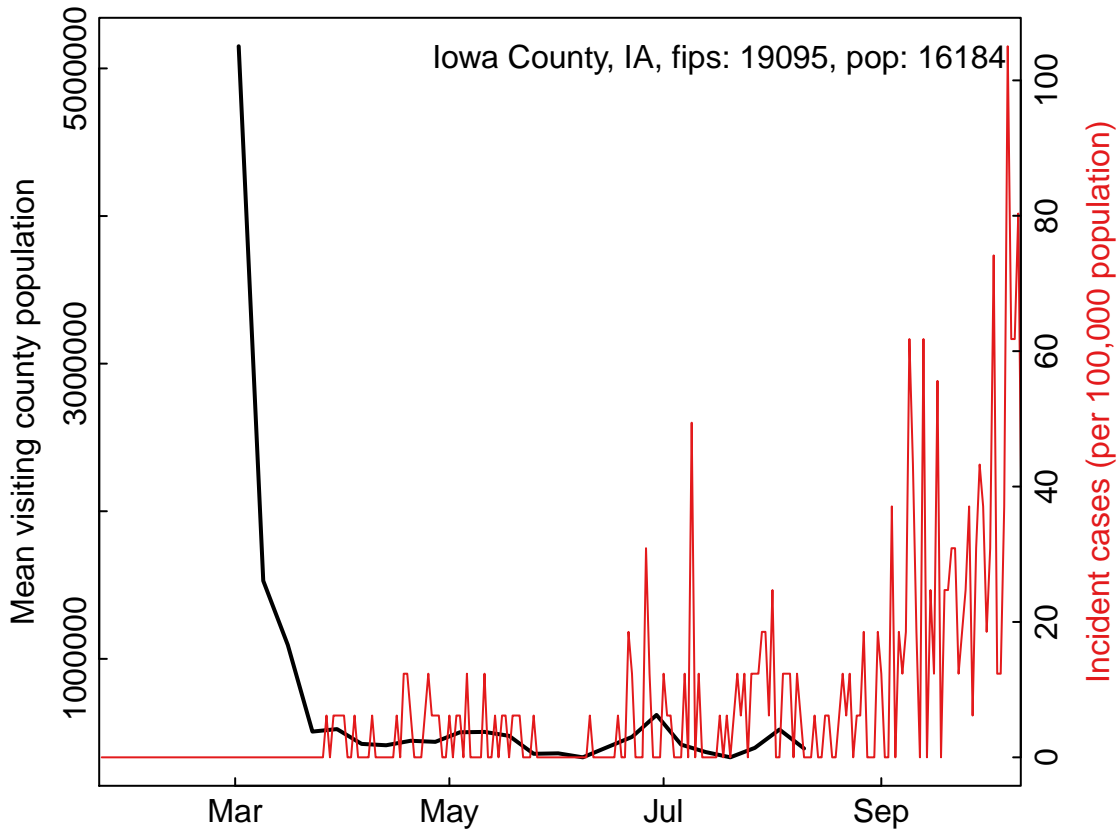

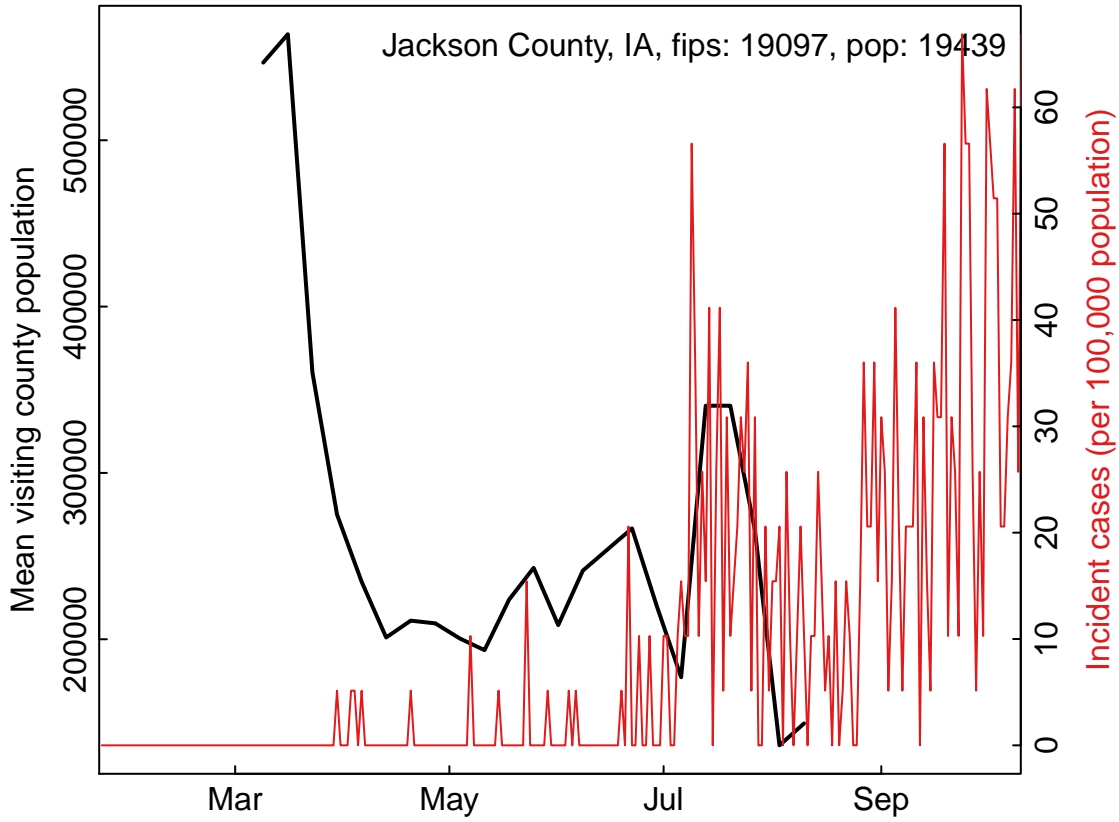

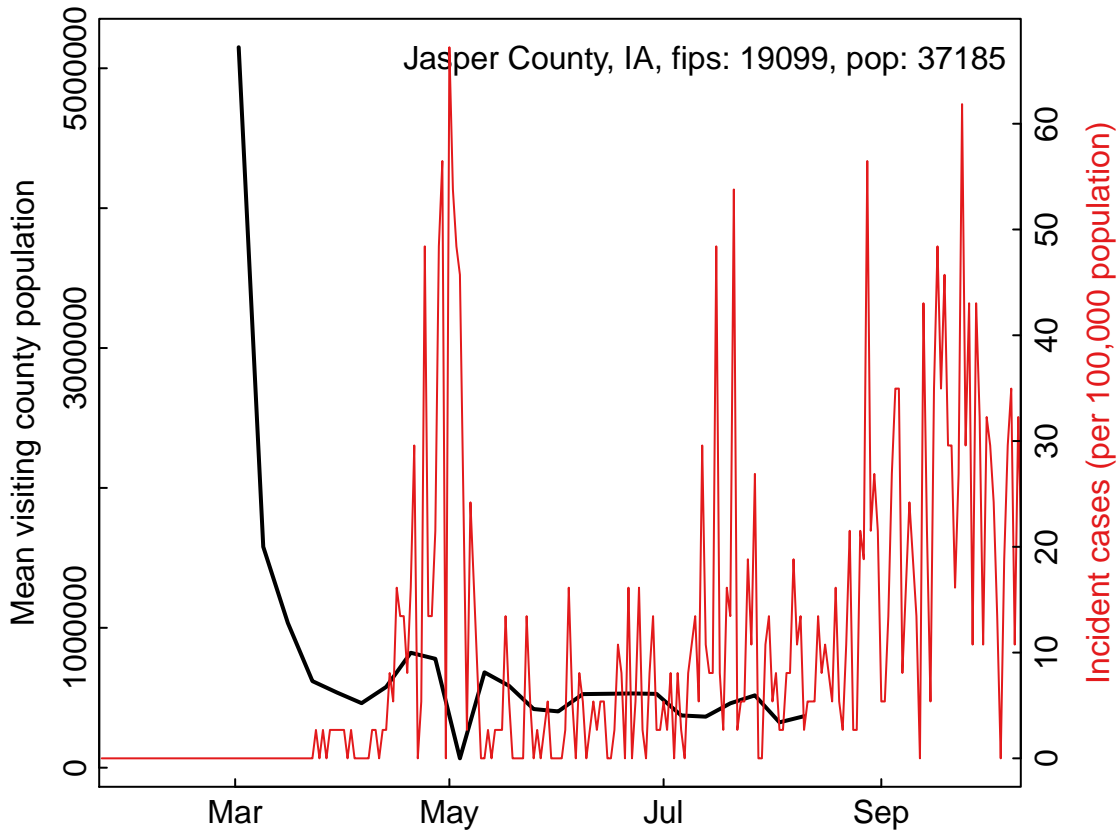

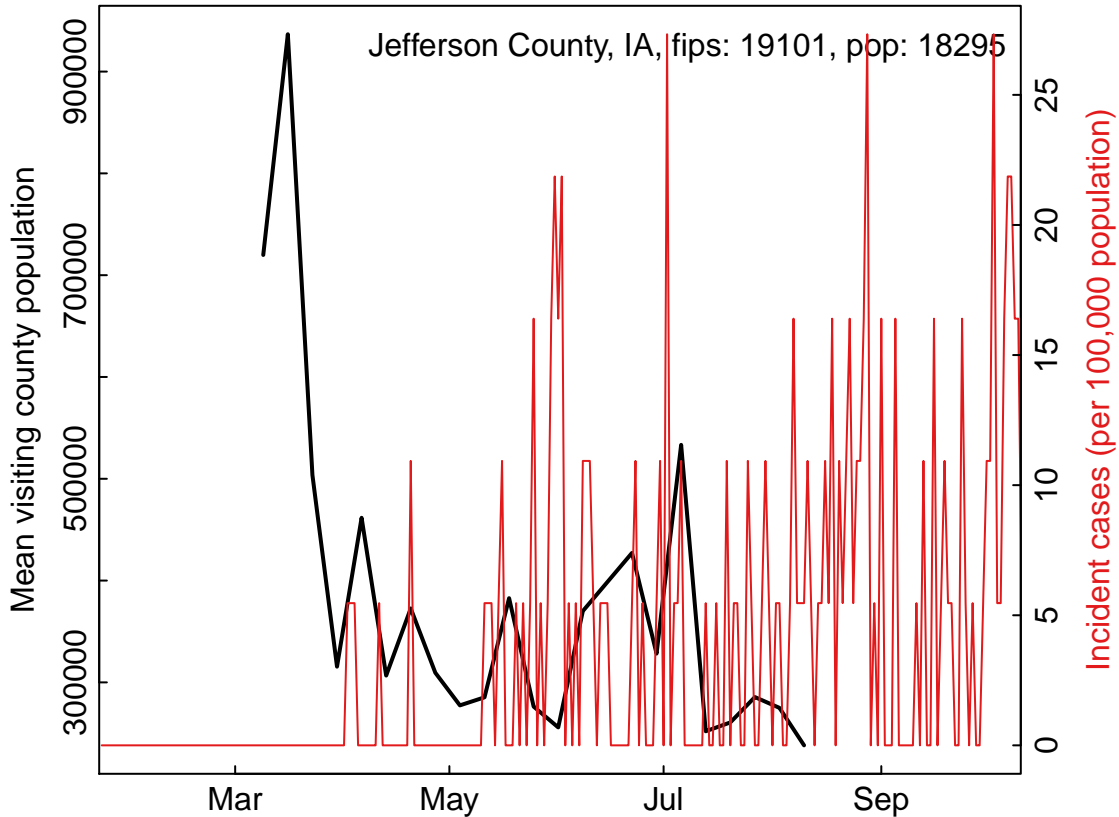

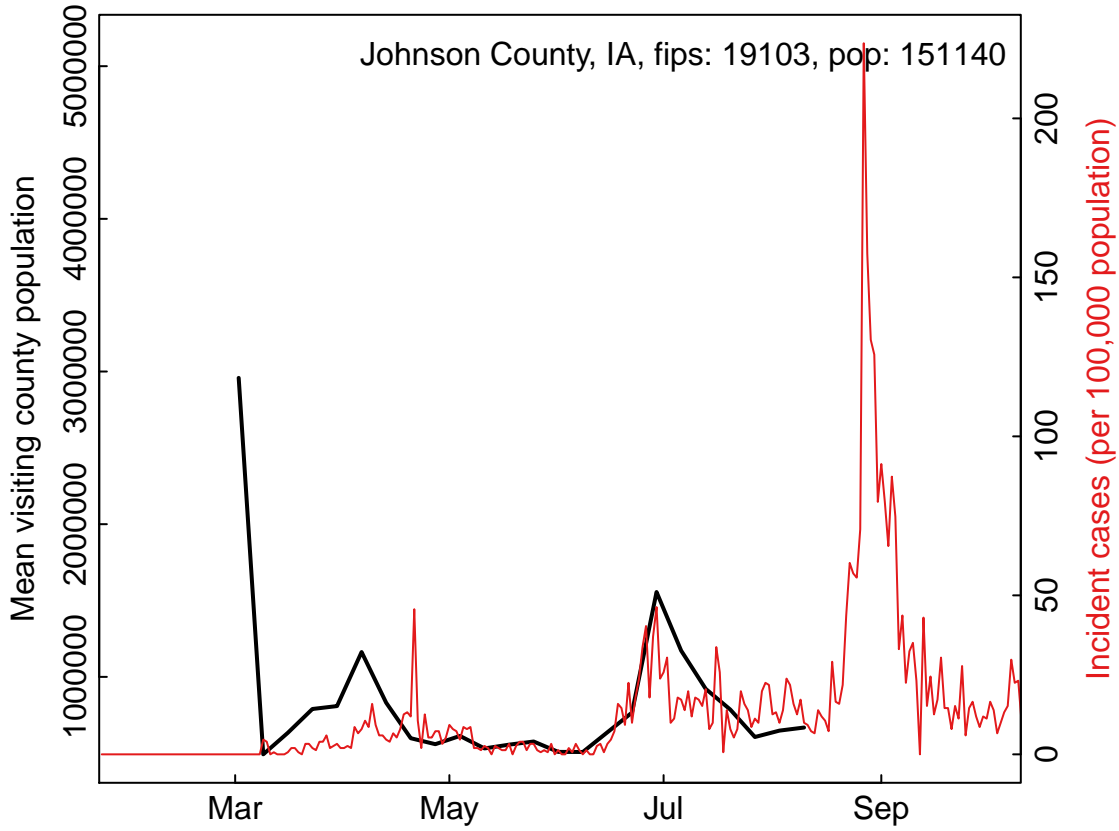



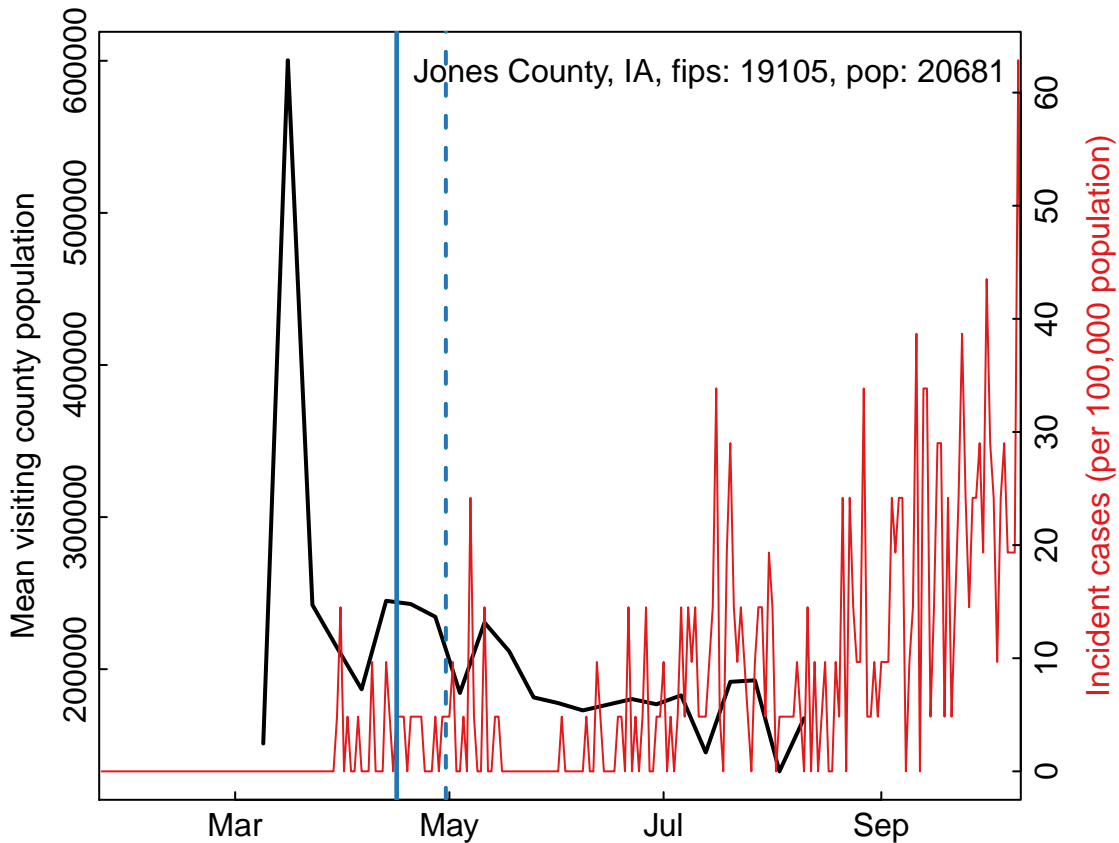

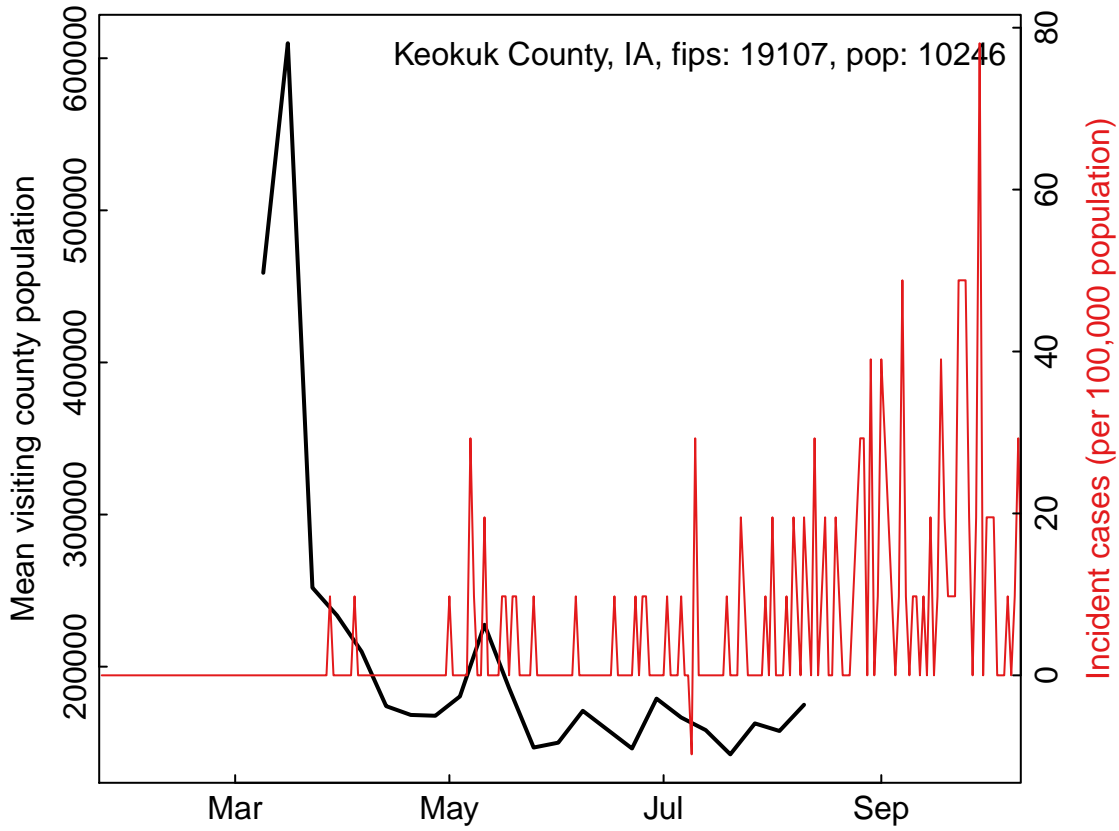

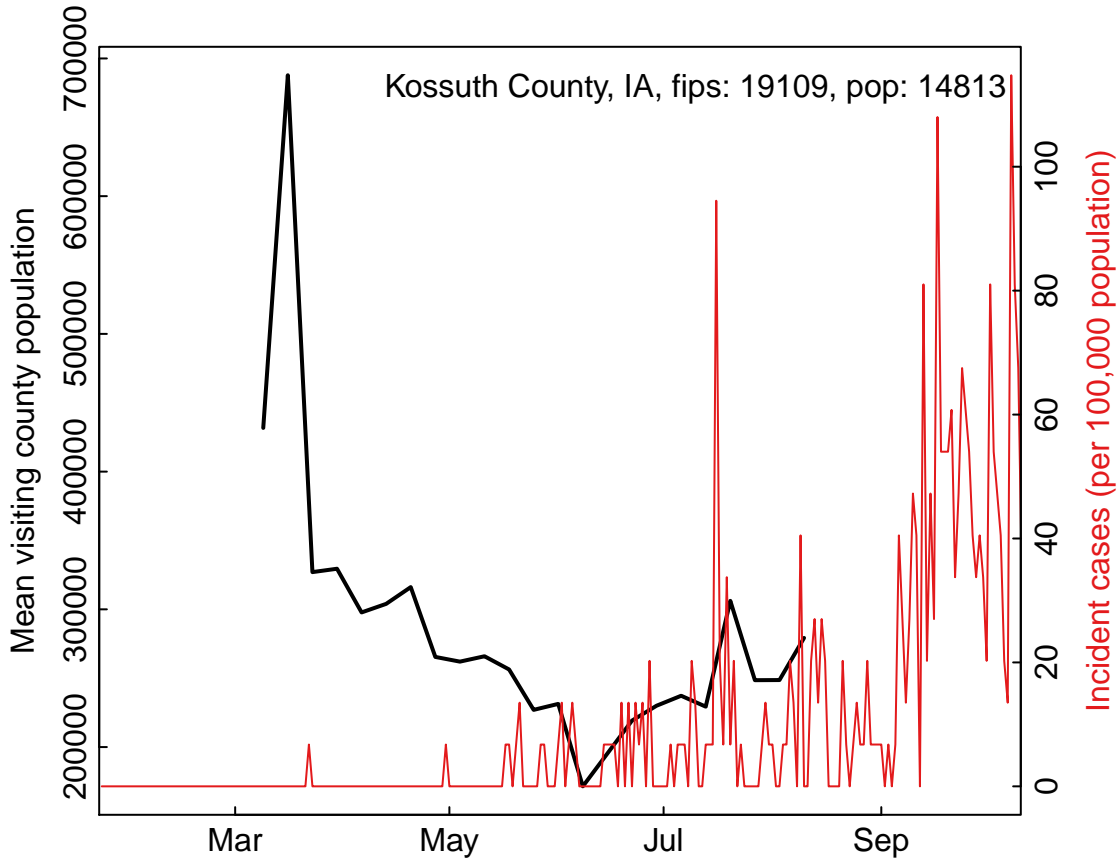

Lee County, IA, fips: 19111, pop: 33657

Mean visiting county population

400000  
300000  
200000

Mar

May

Jul

Sep

100  
80  
60  
40  
20  
0

Incident cases (per 100,000 population)

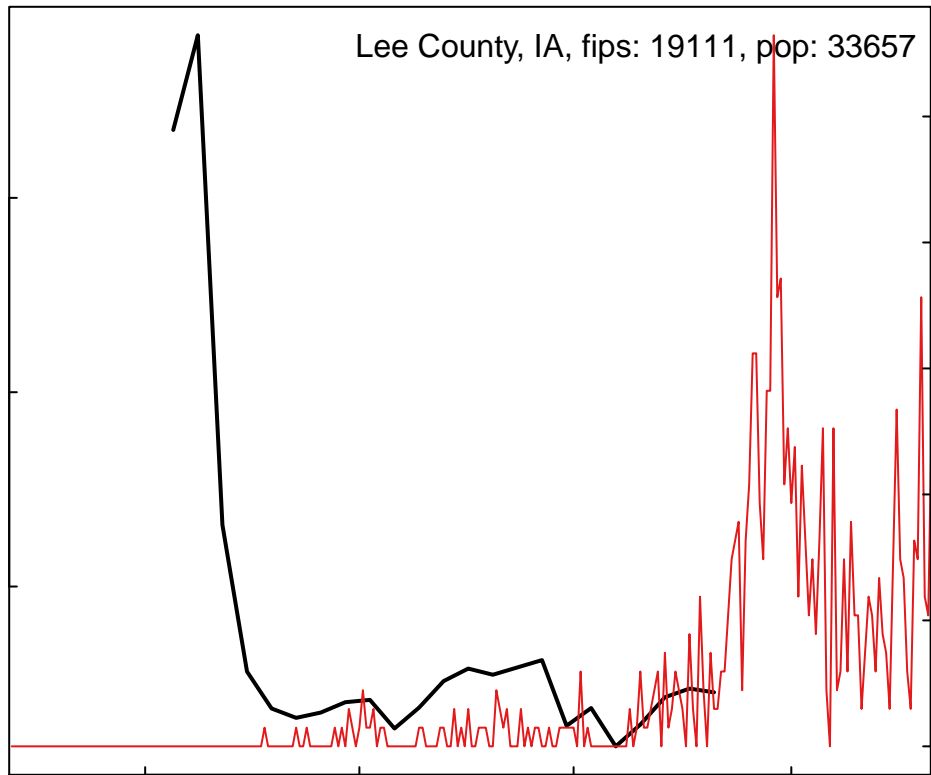

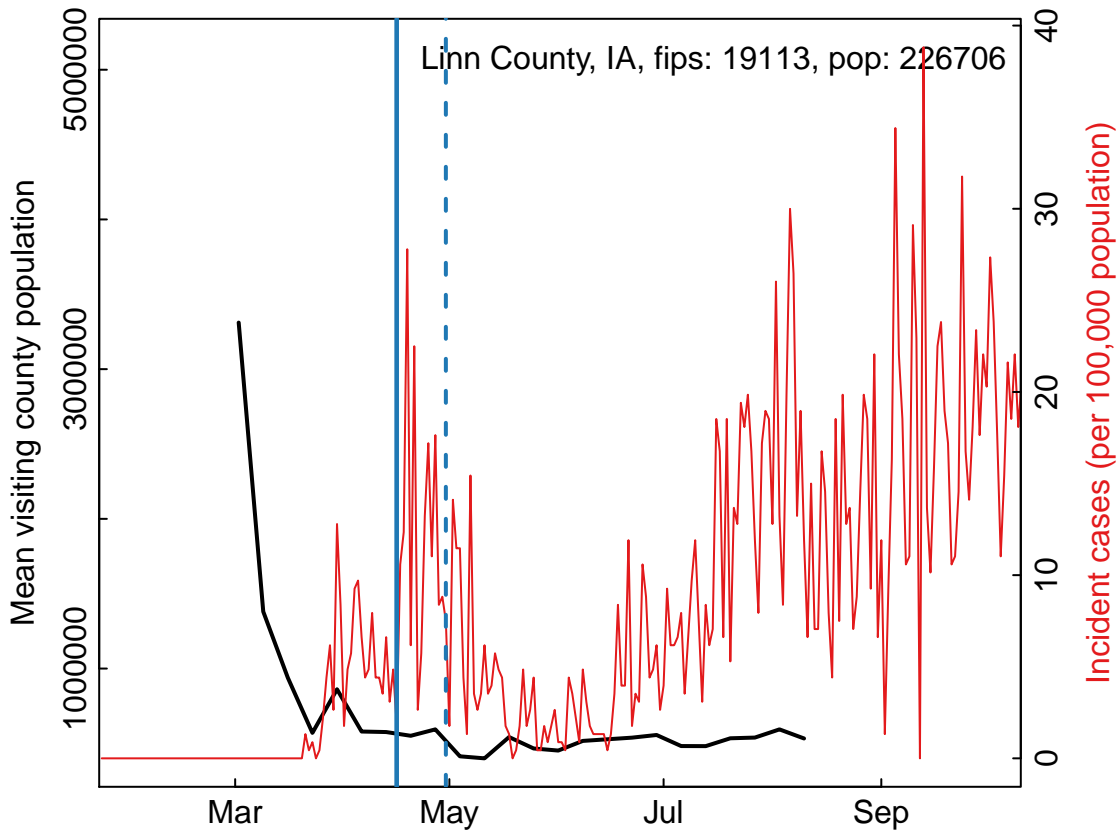

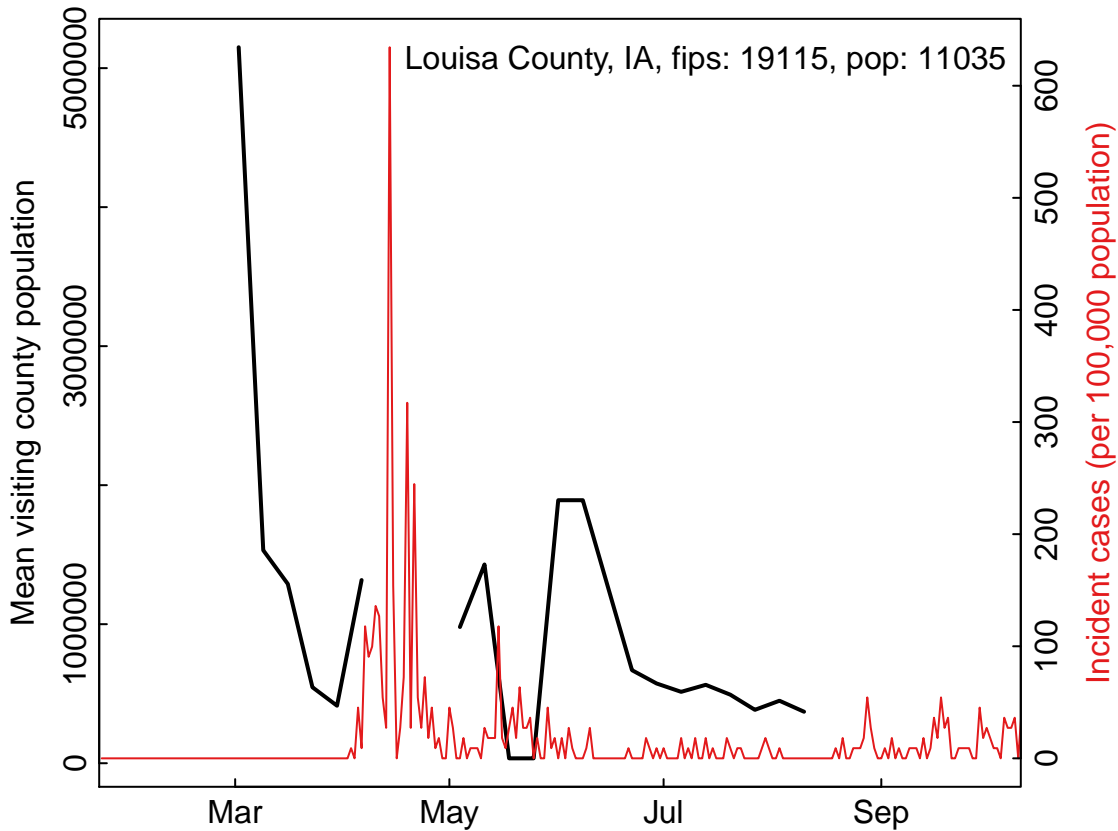

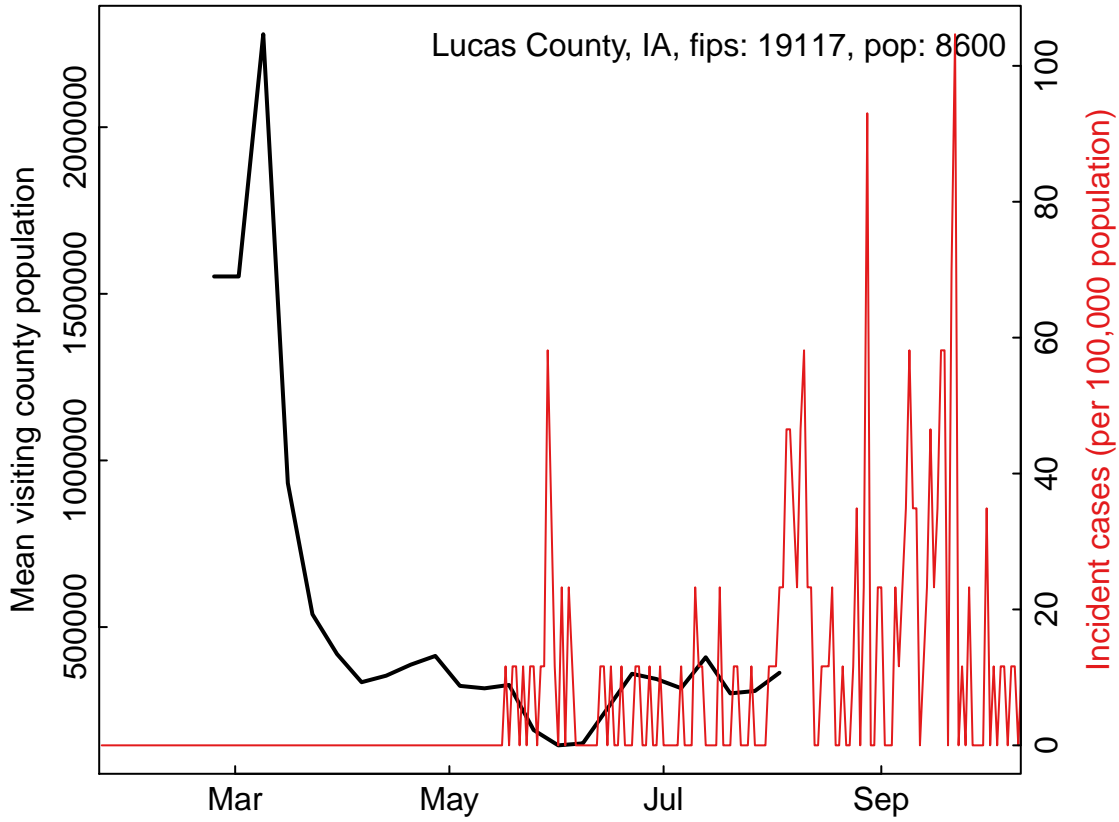

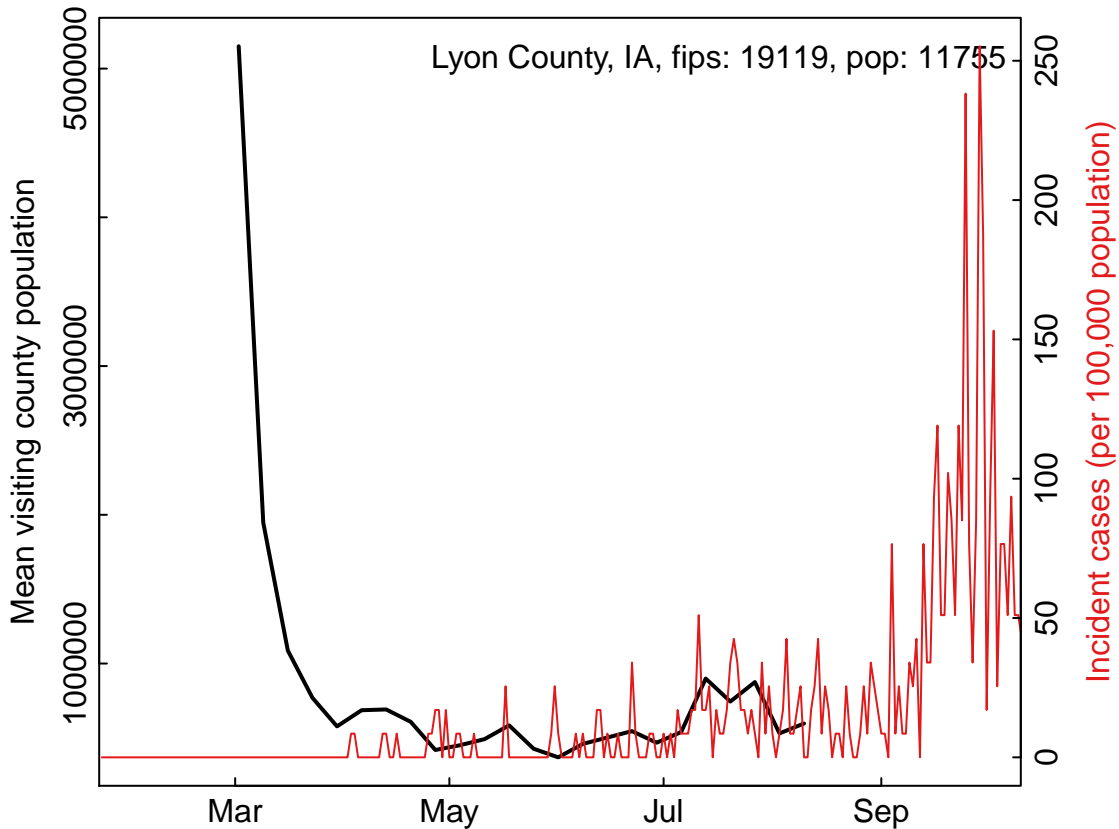



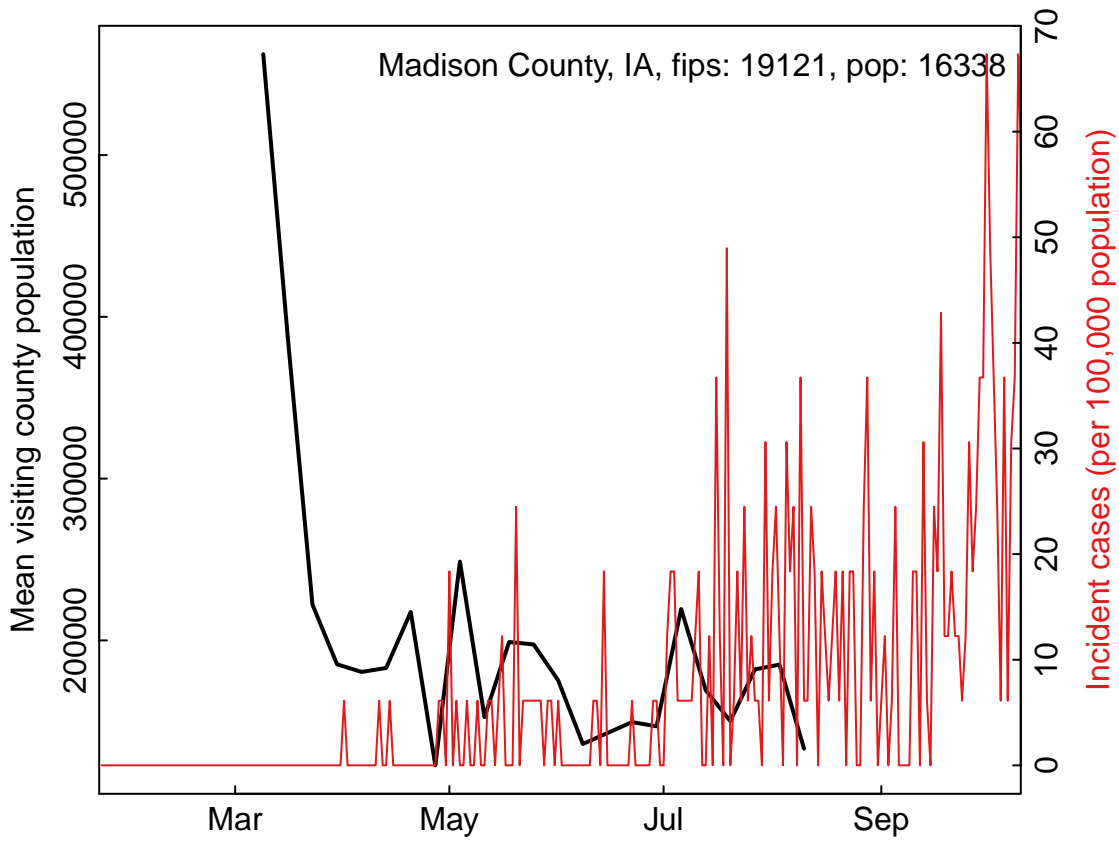

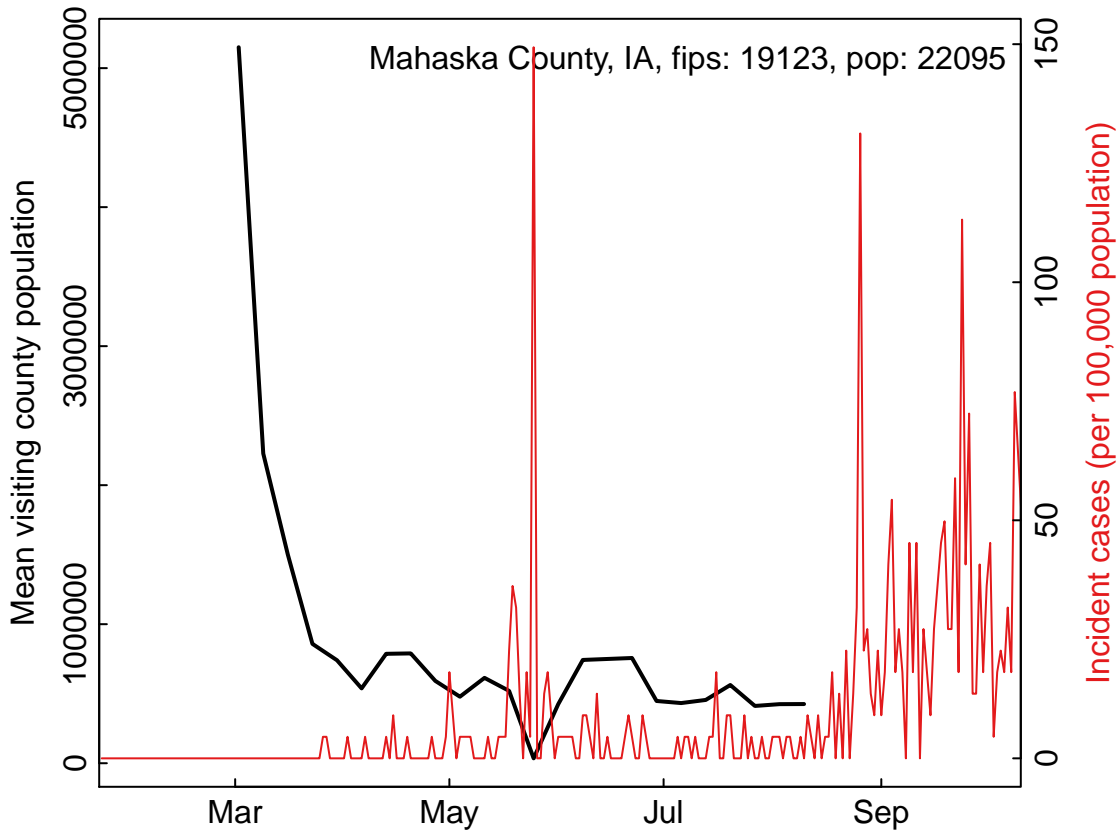

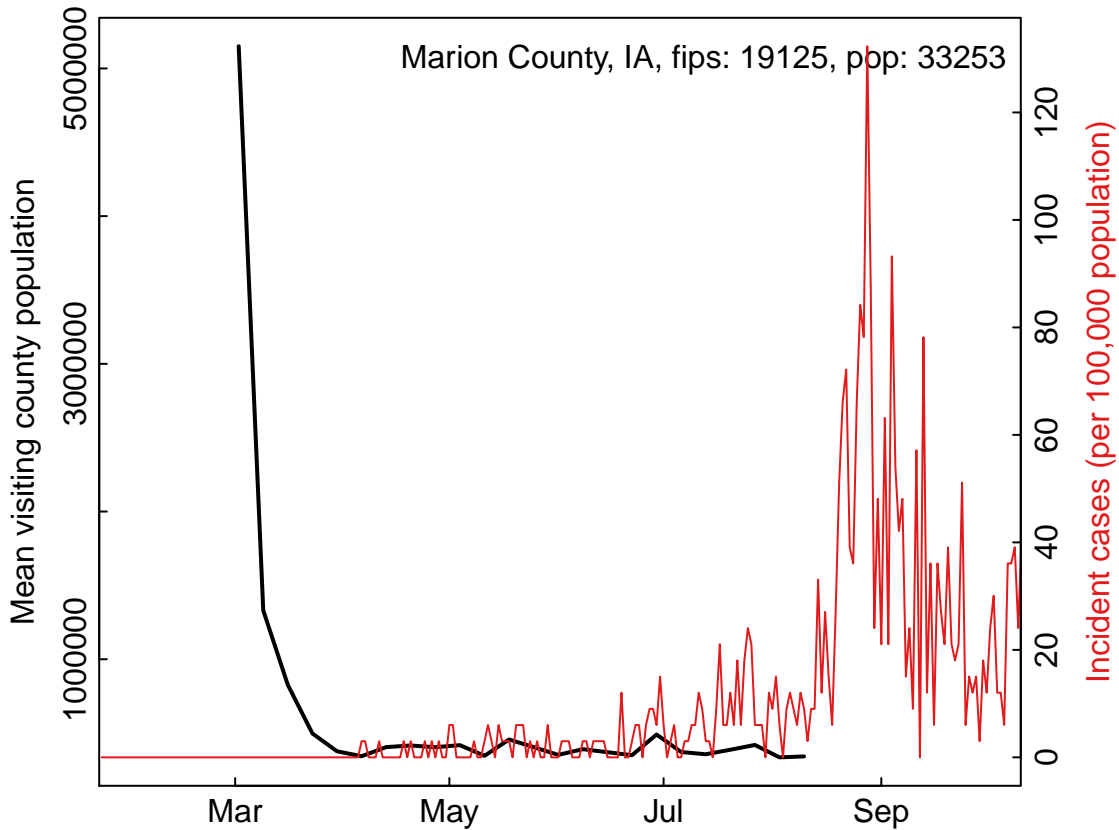

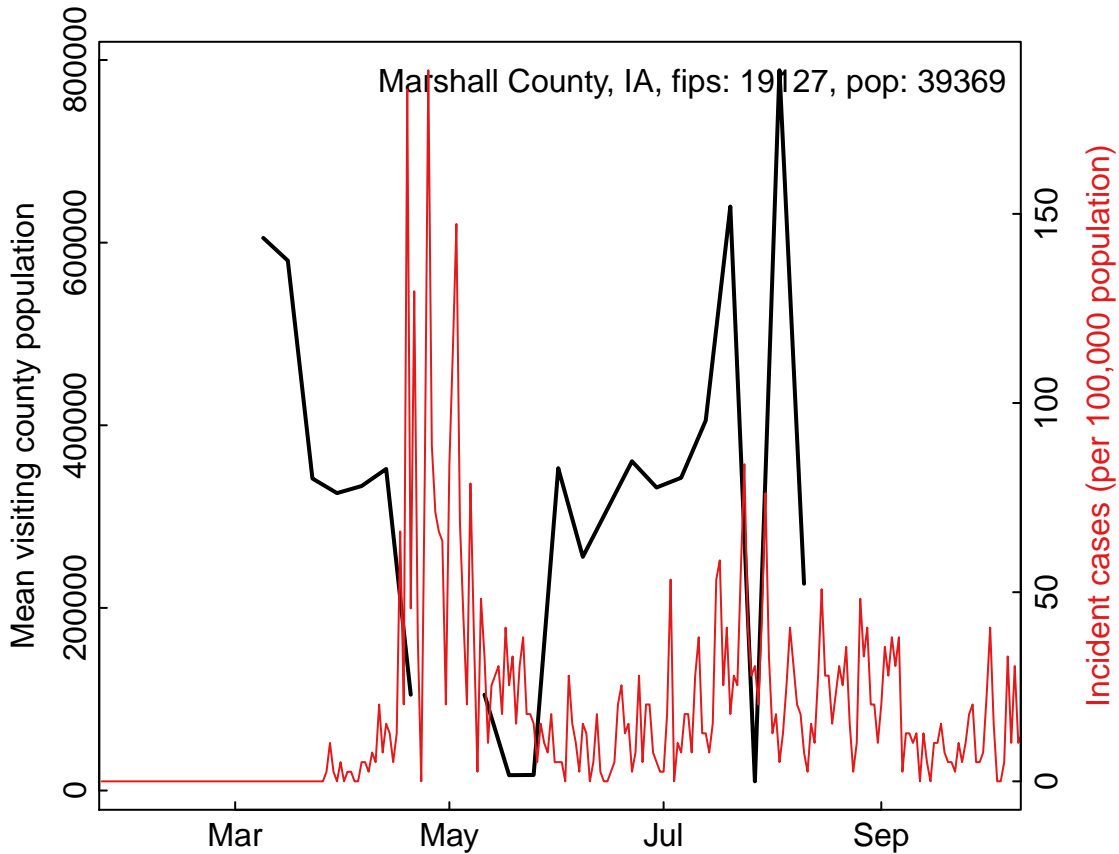

Mills County, IA, fips: 19129, pop: 15109

Mean visiting county population

1200000  
800000  
400000

Mar

May

Jul

Sep

120  
100  
80  
60  
40  
20  
0

Incident cases (per 100,000 population)

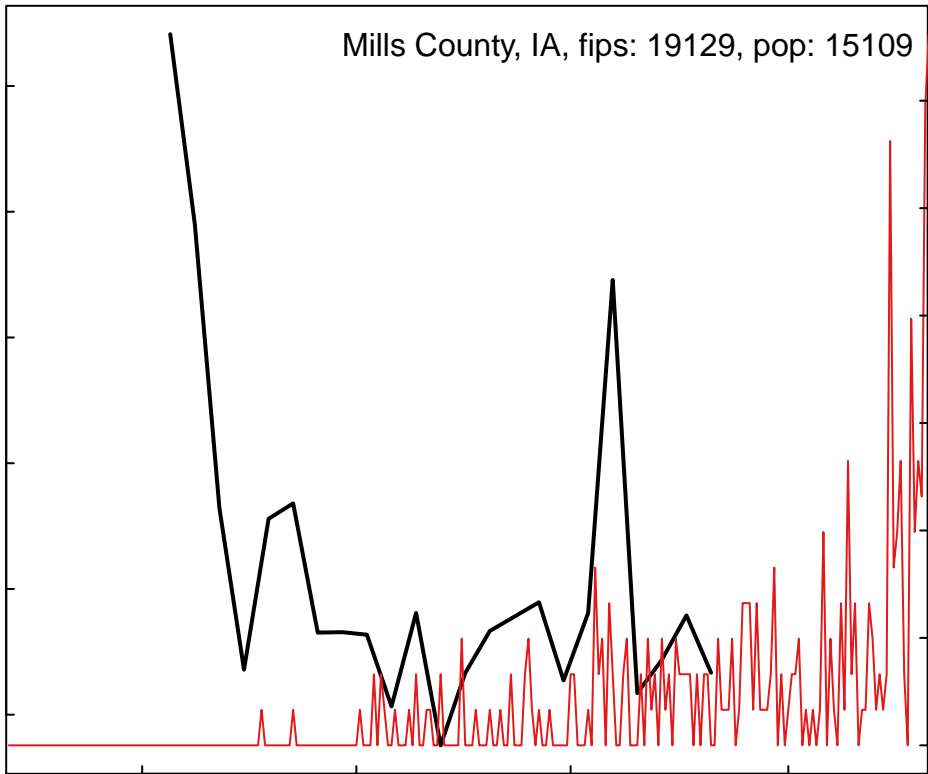

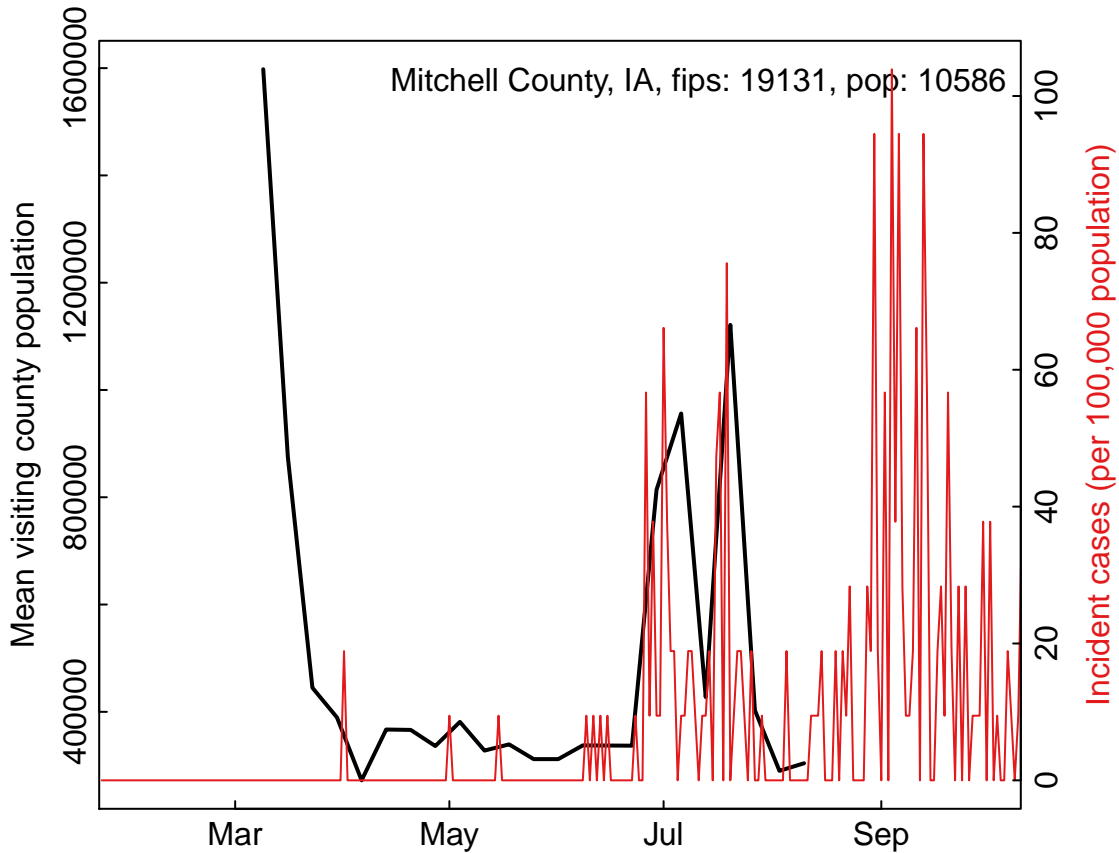

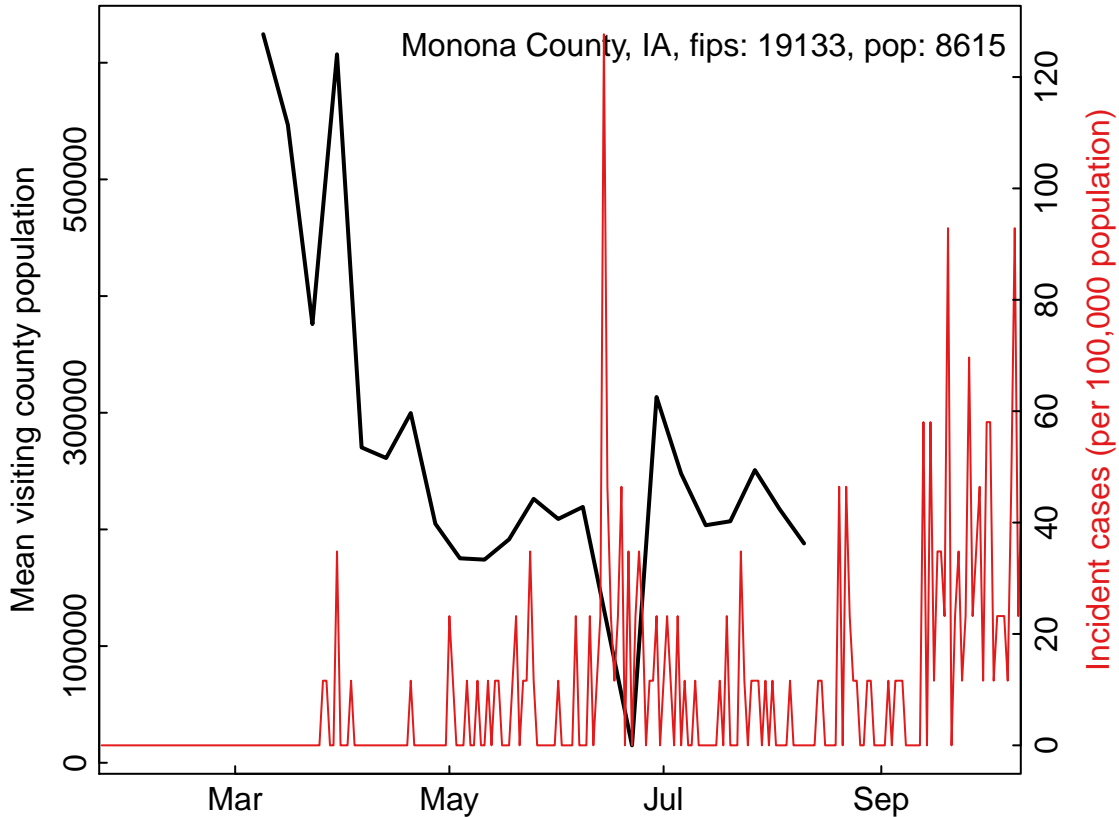

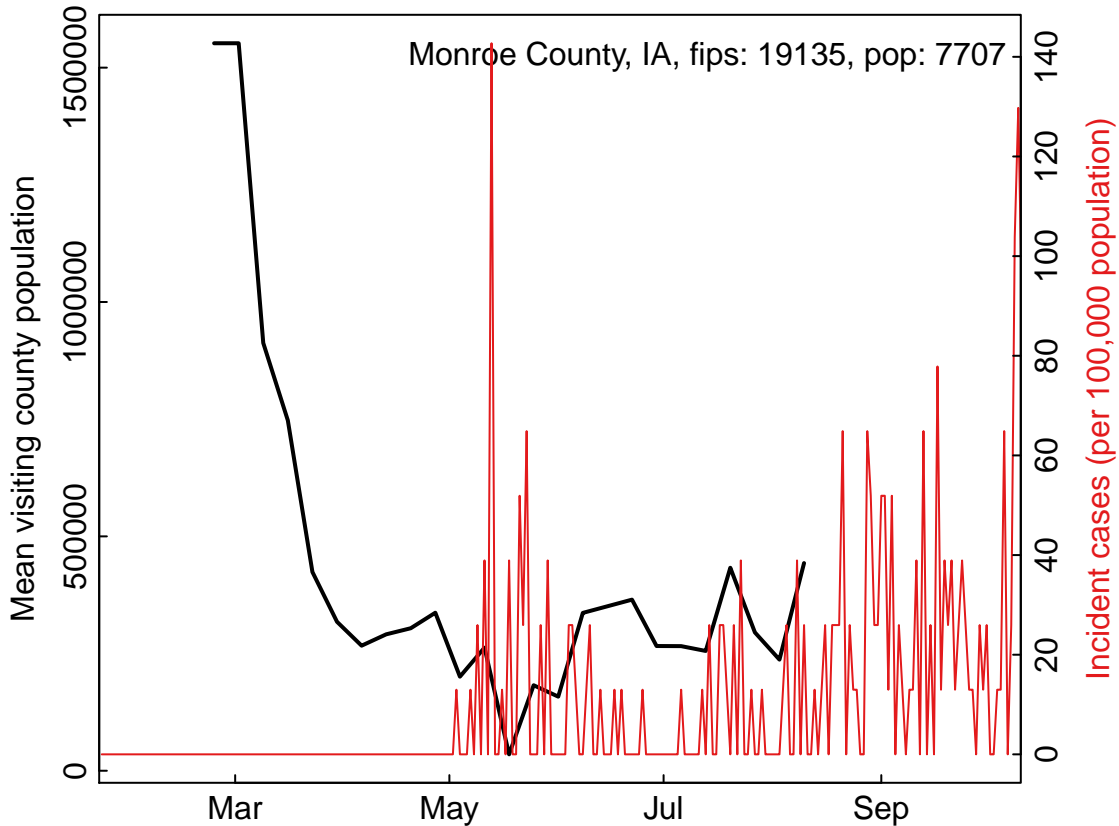



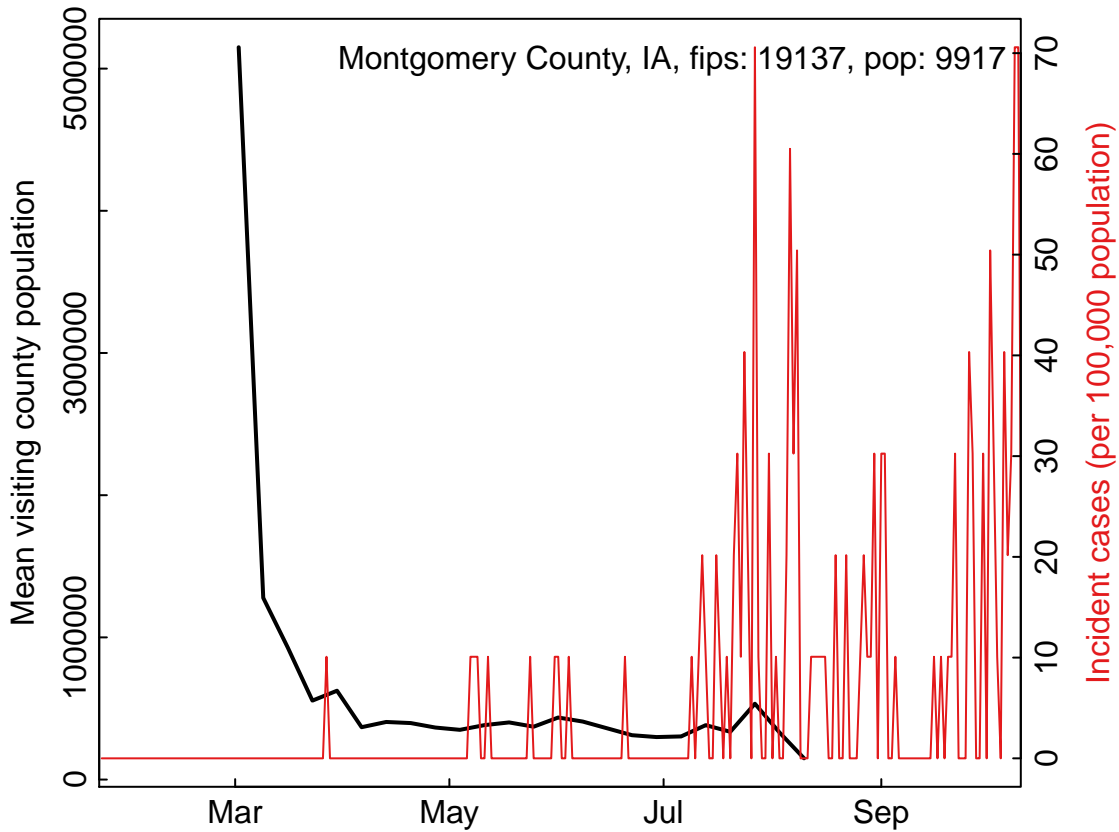

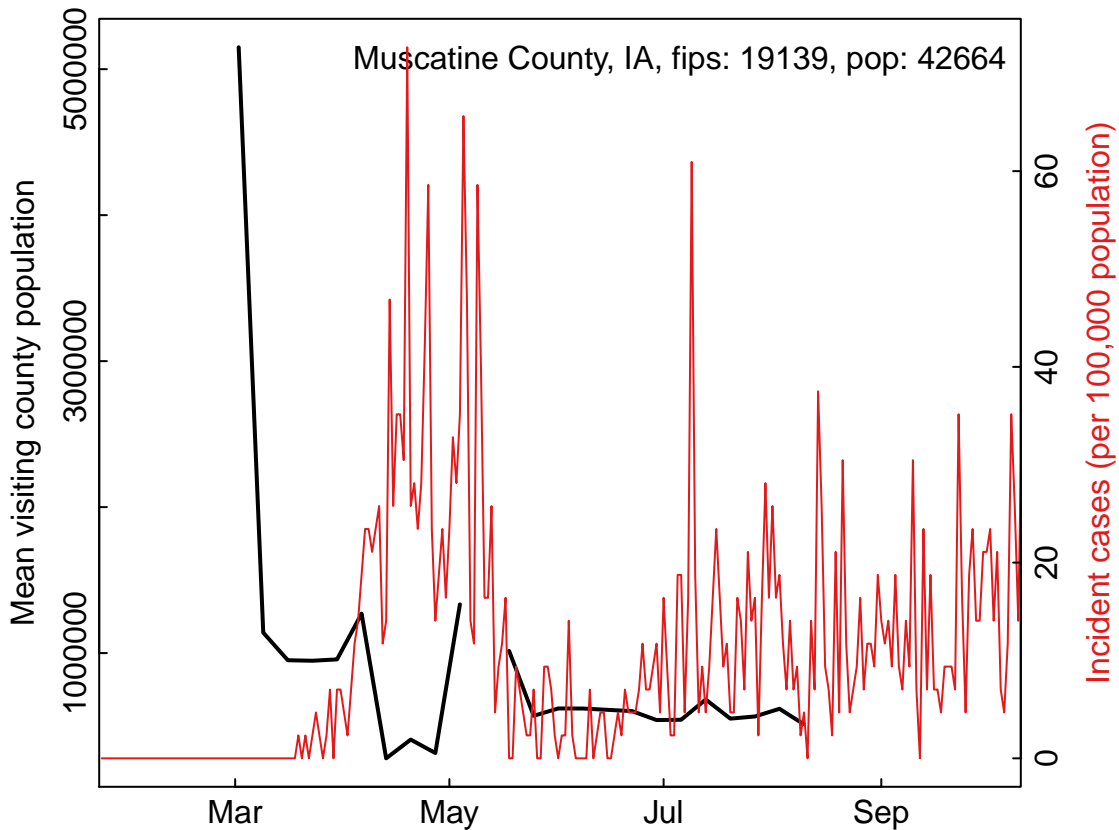

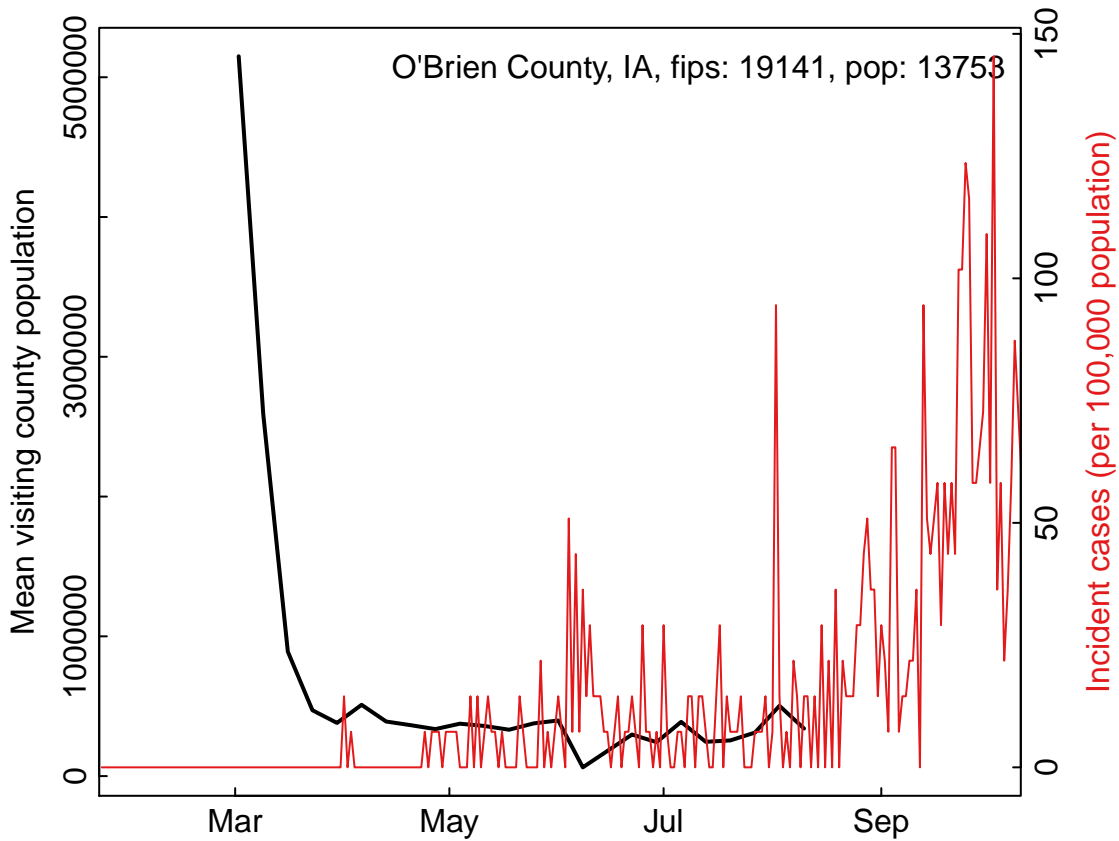

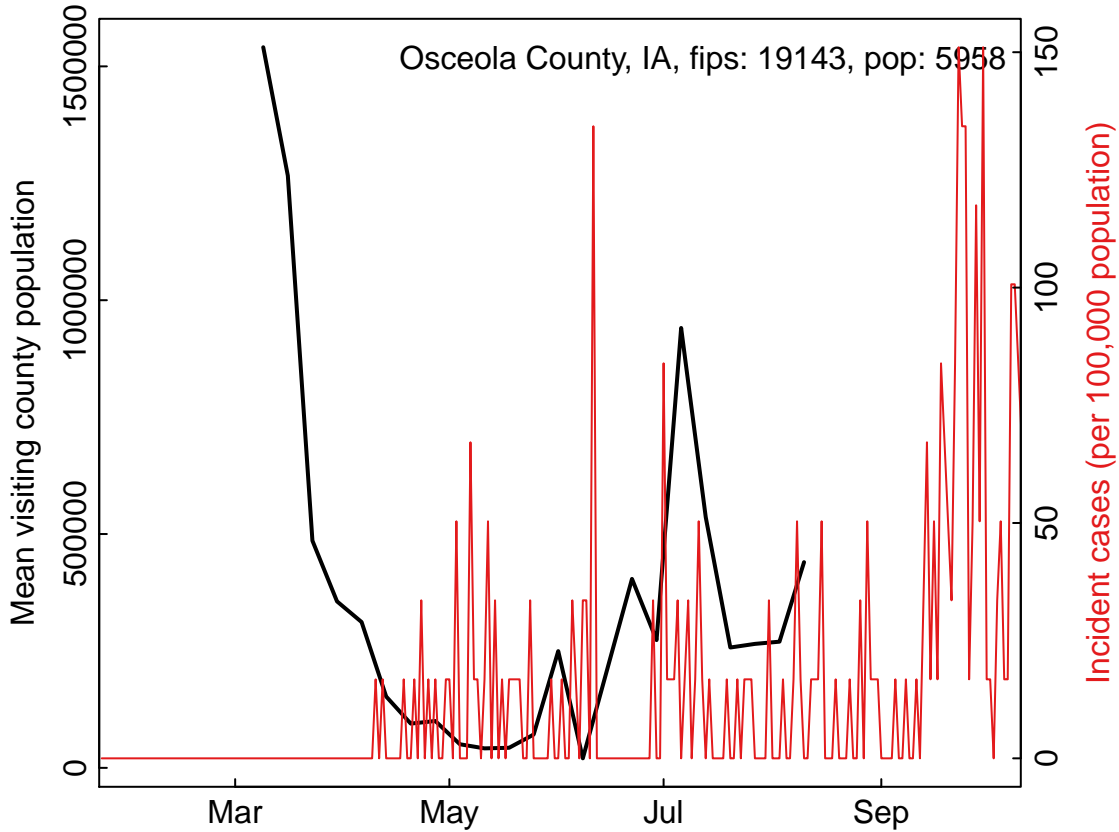

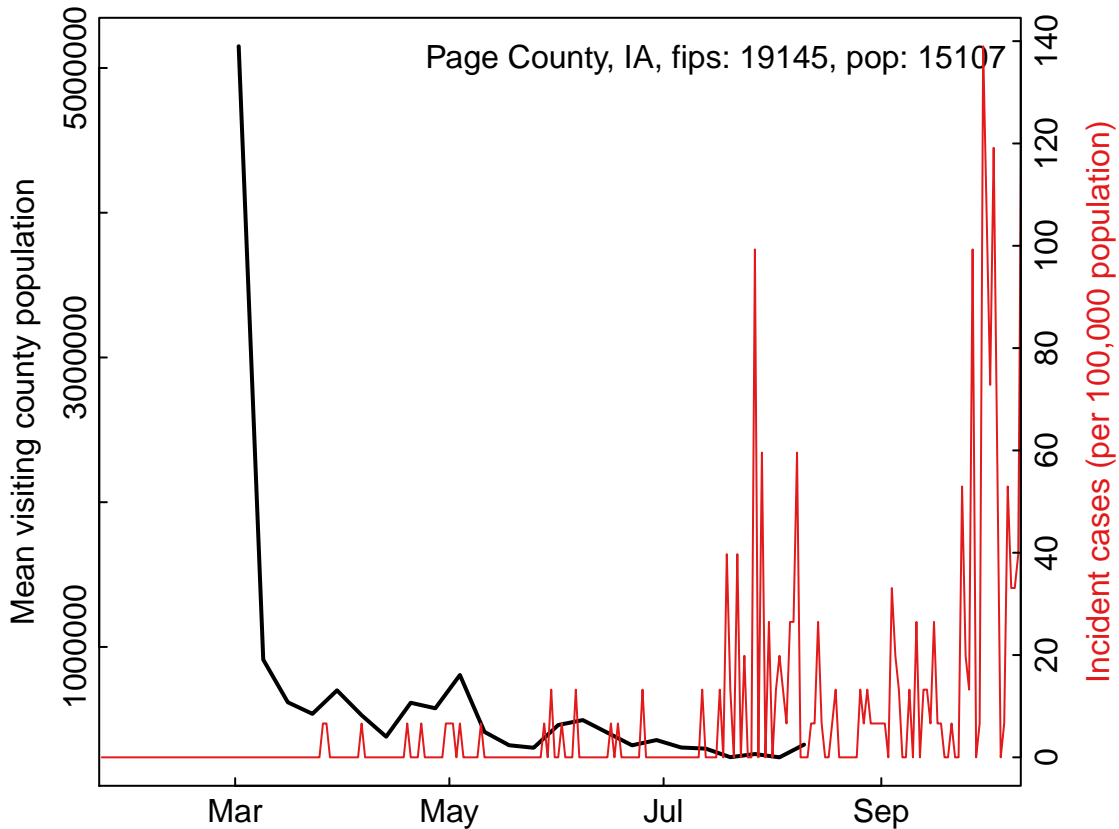

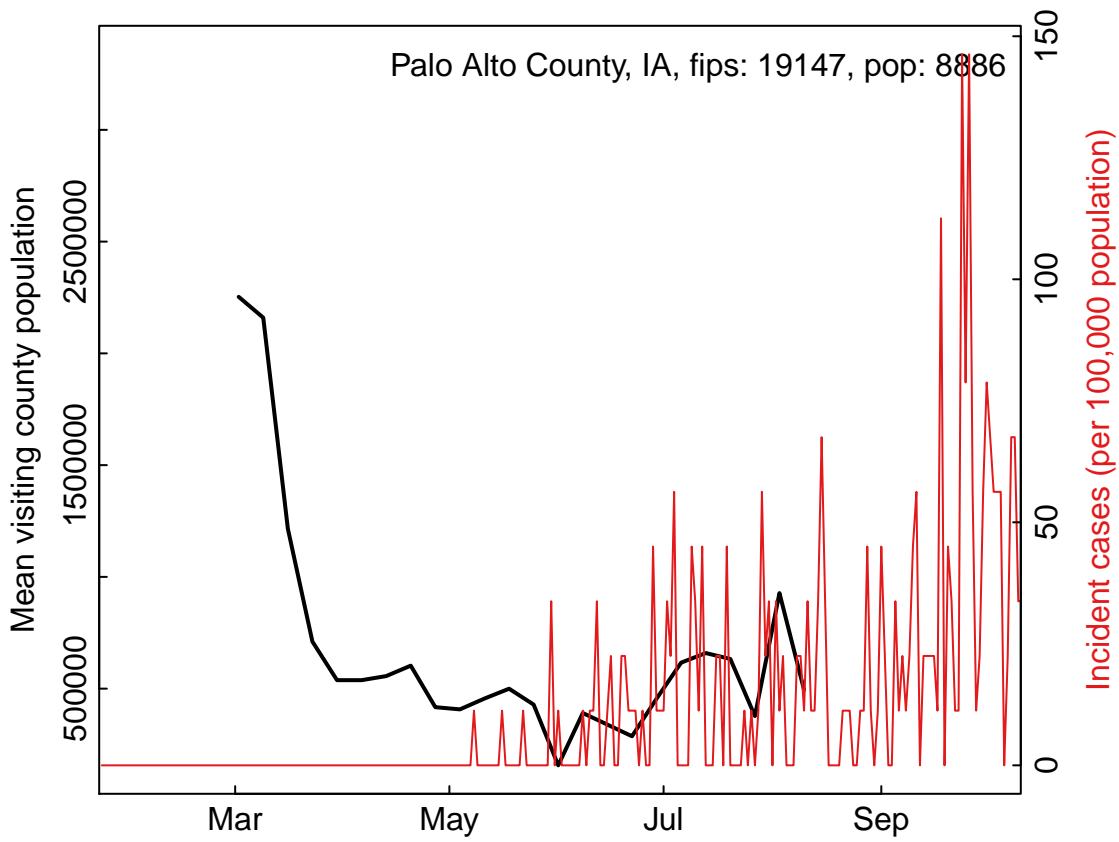

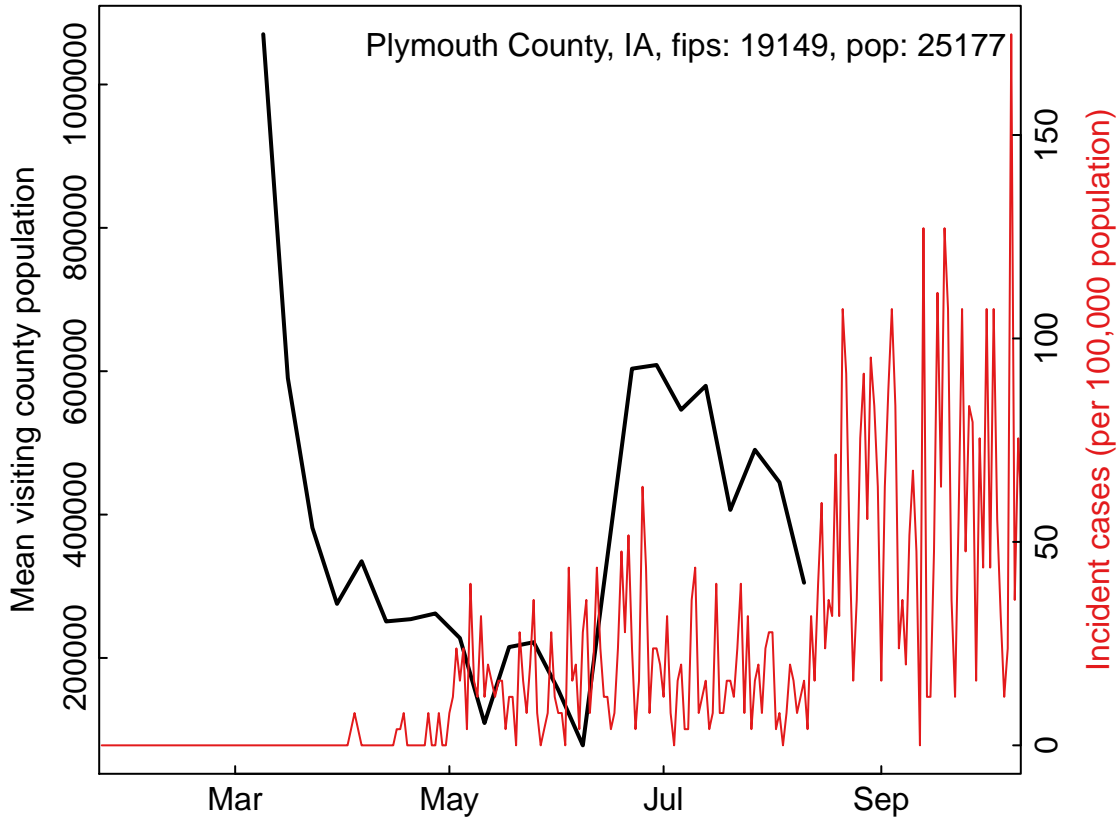

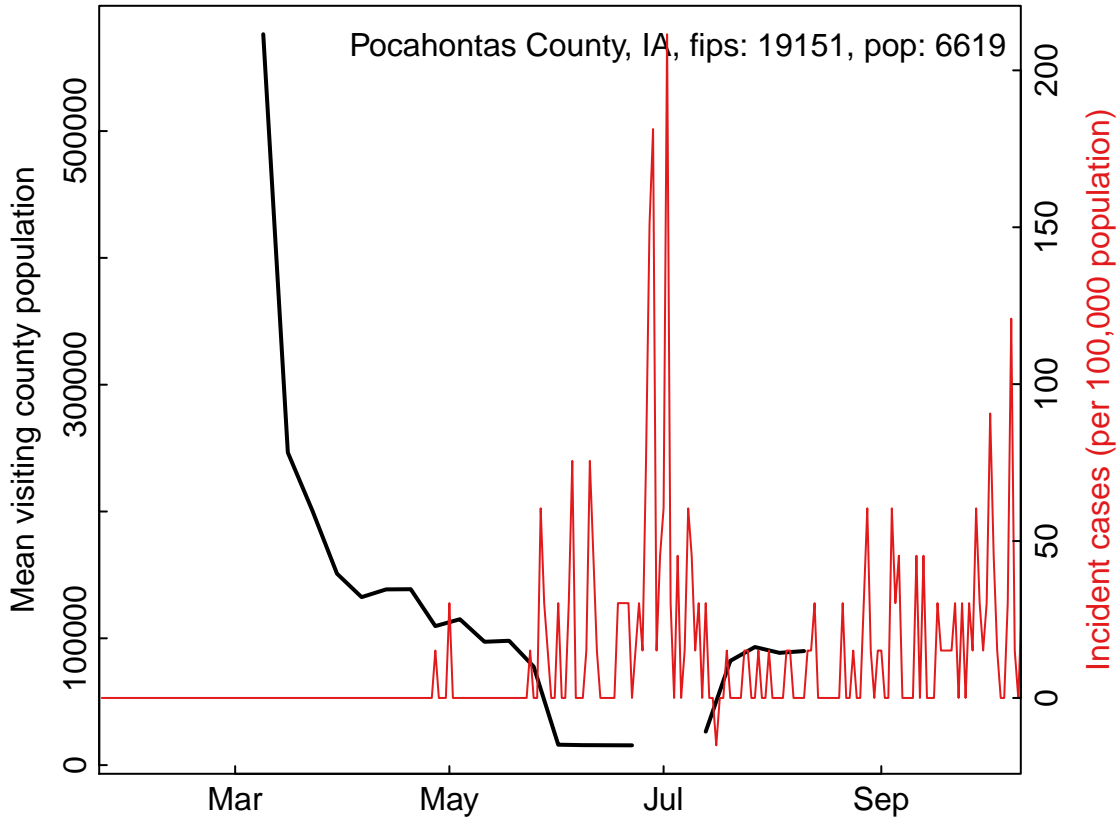



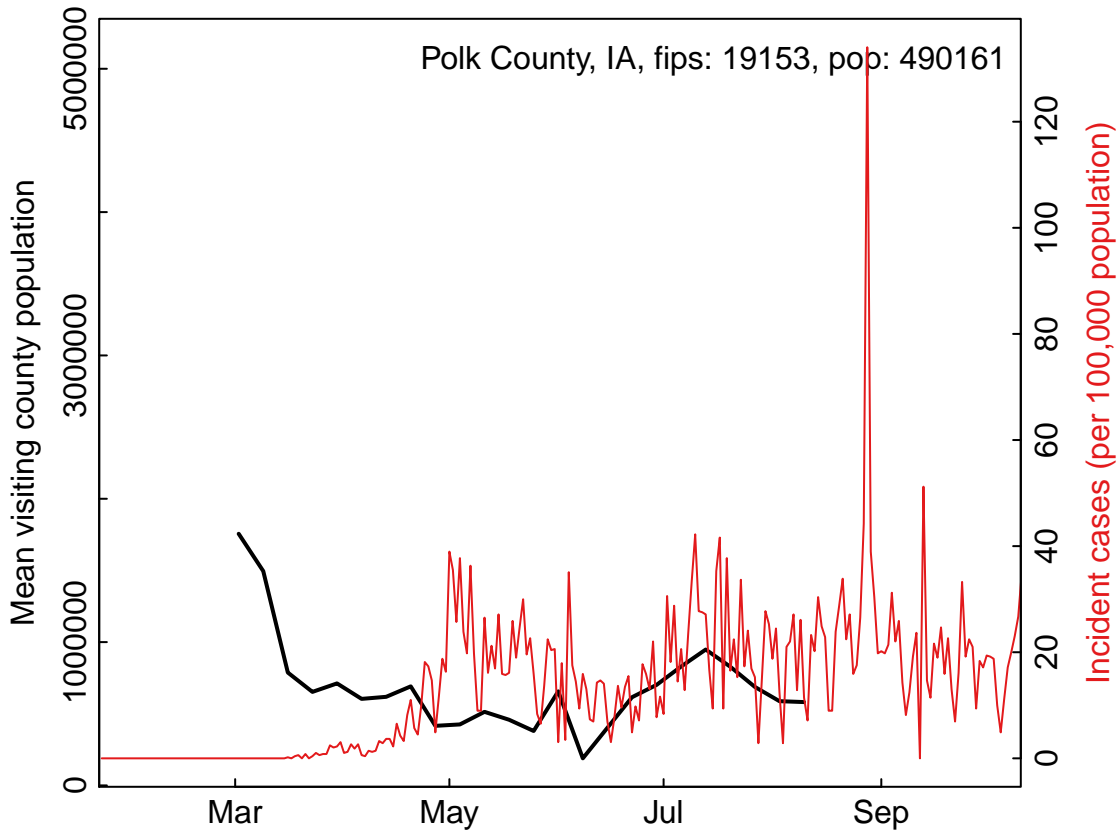

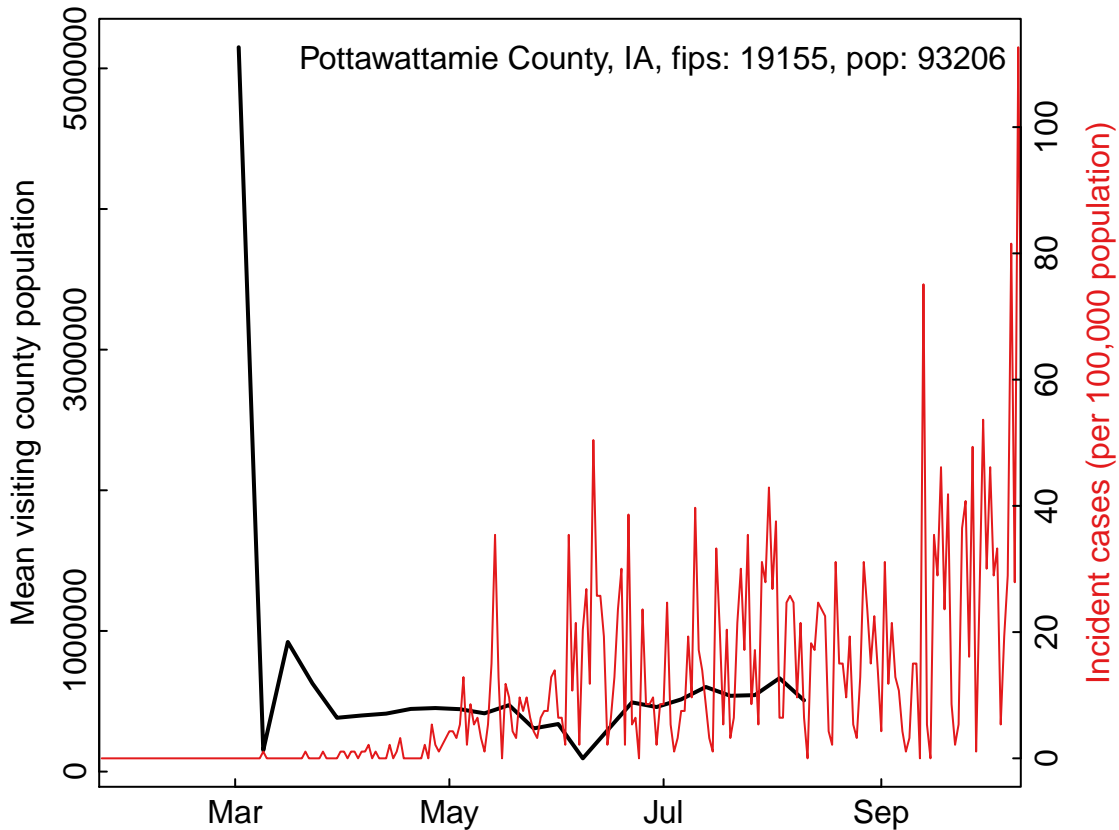

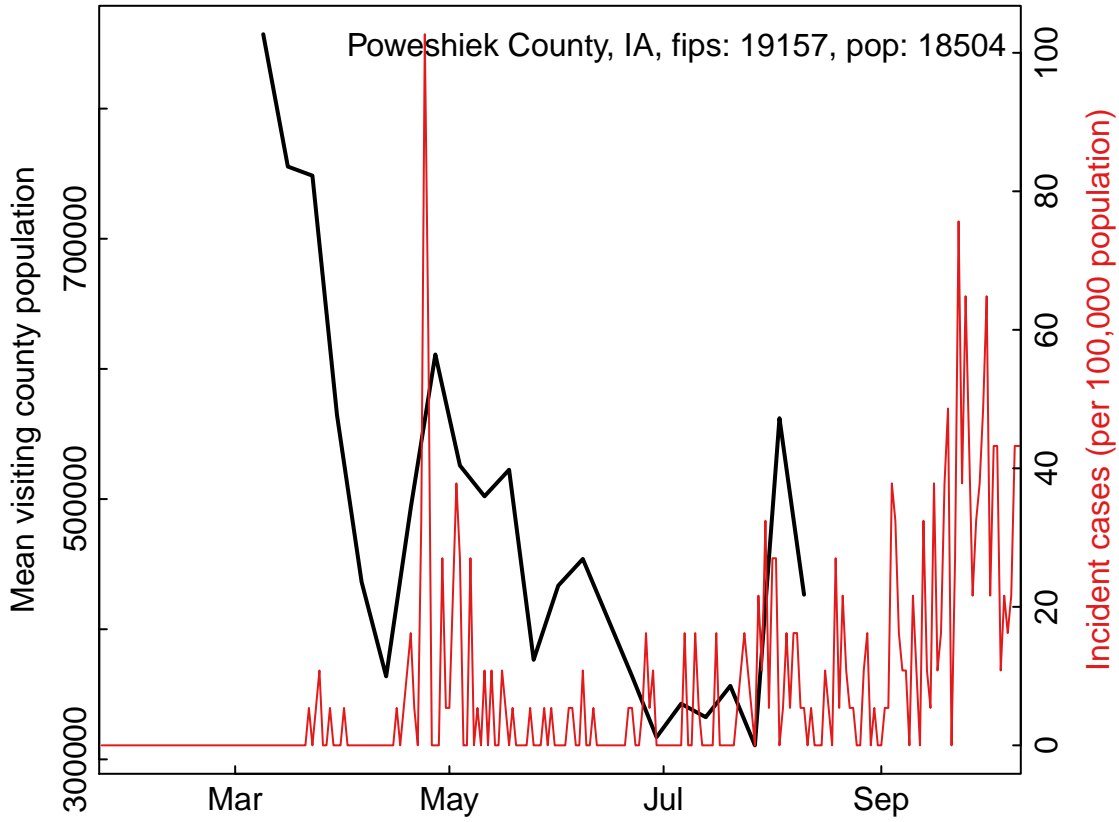

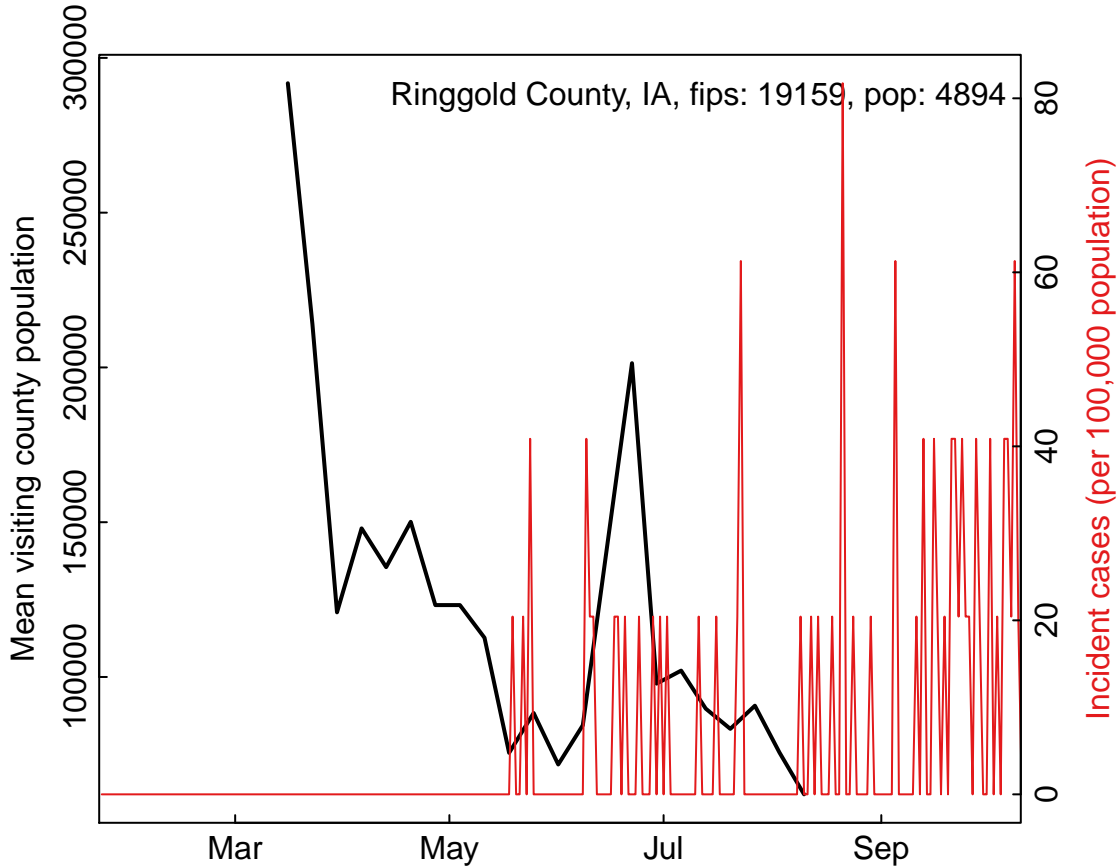

Sac County, IA, fips: 19161, pop: 9721

Mean visiting county population

2500000  
1500000  
500000  
0

Mar May Jul Sep

Incident cases (per 100,000 population)

150  
100  
50  
0

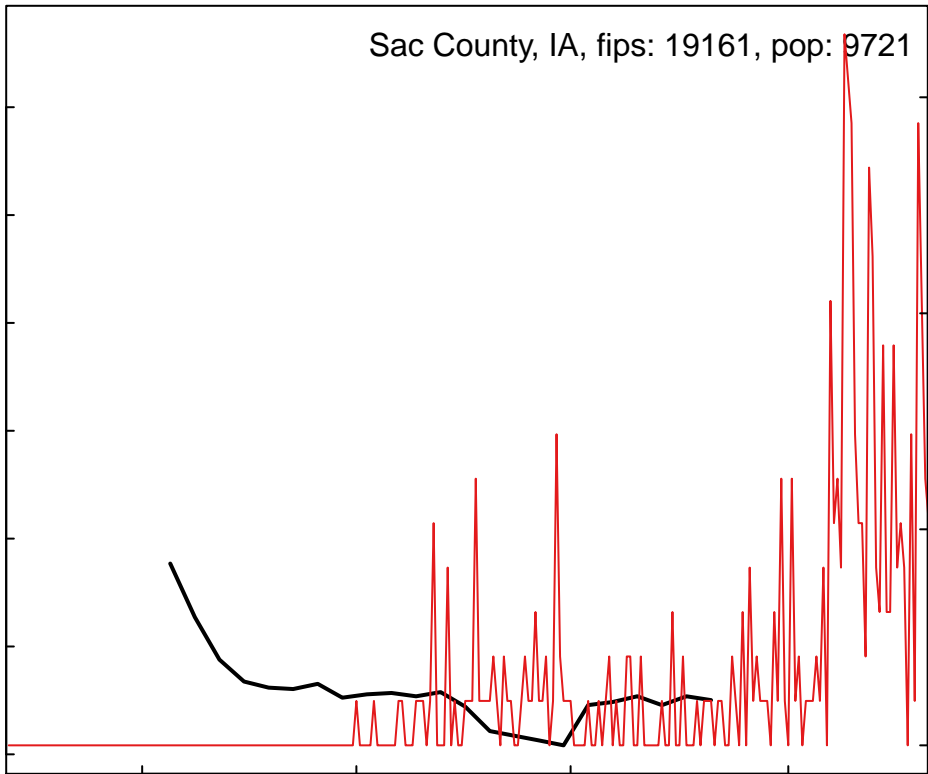

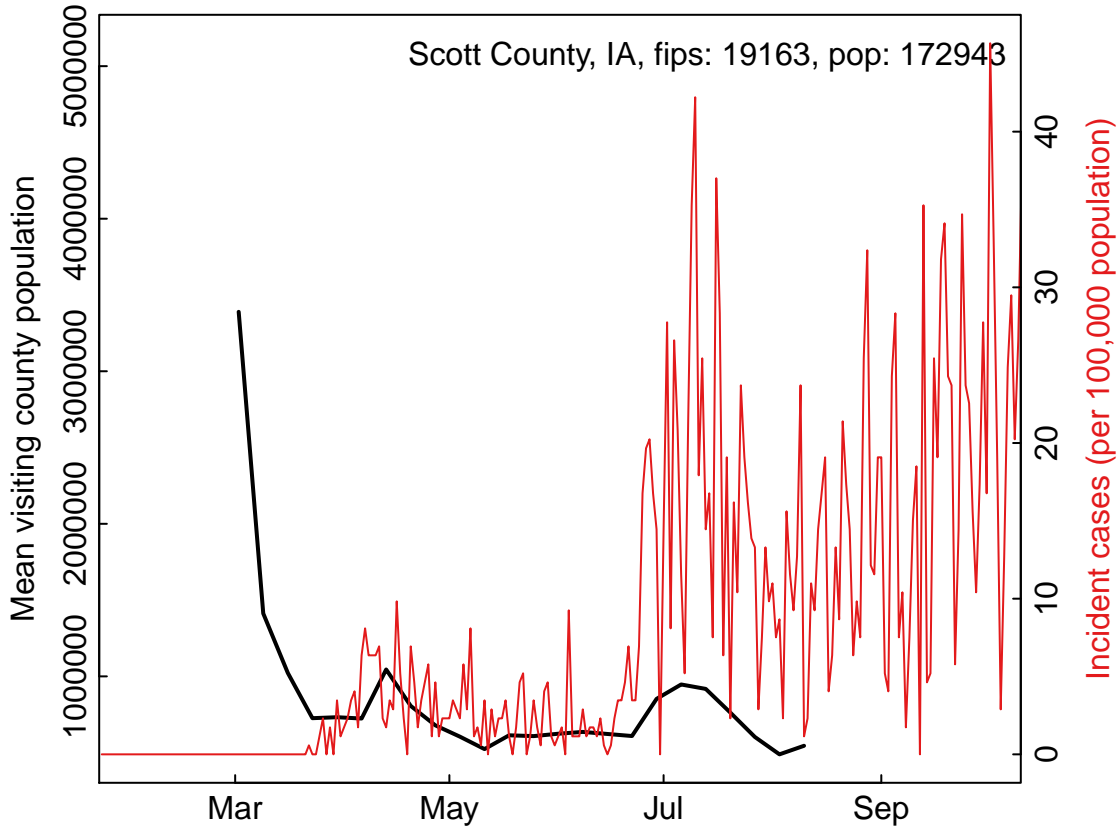

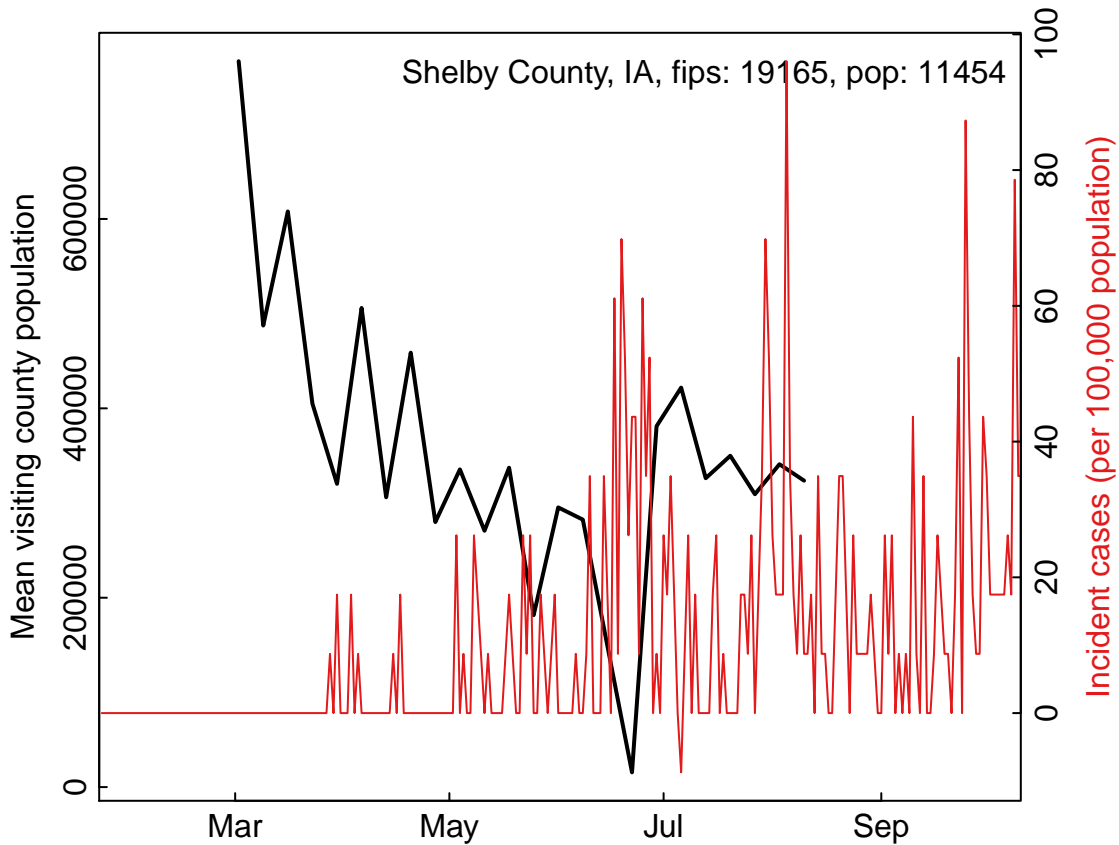

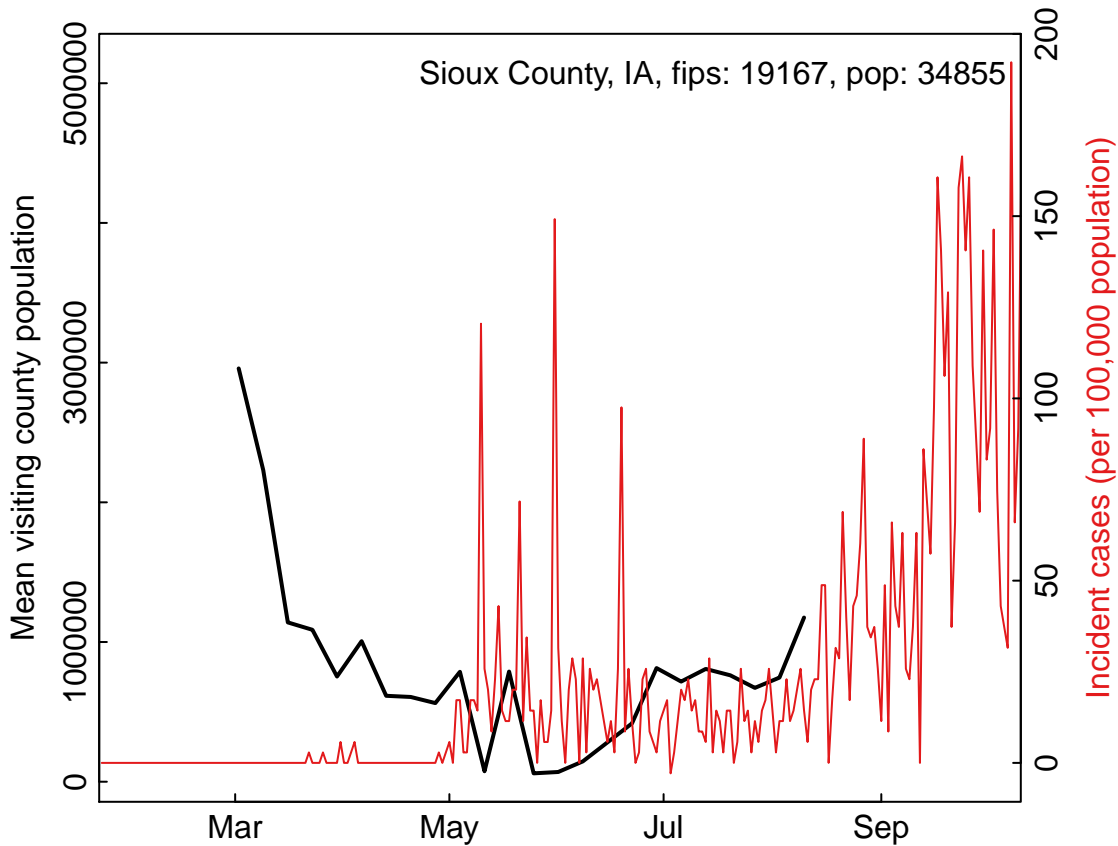



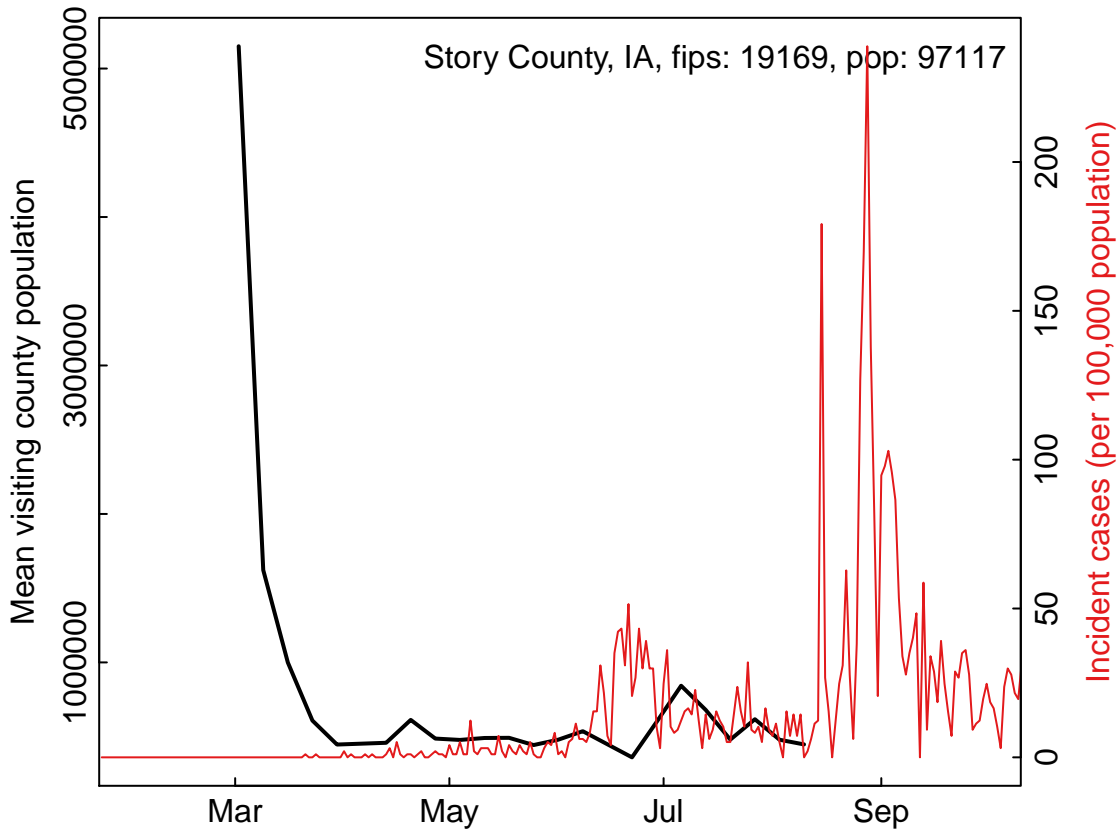

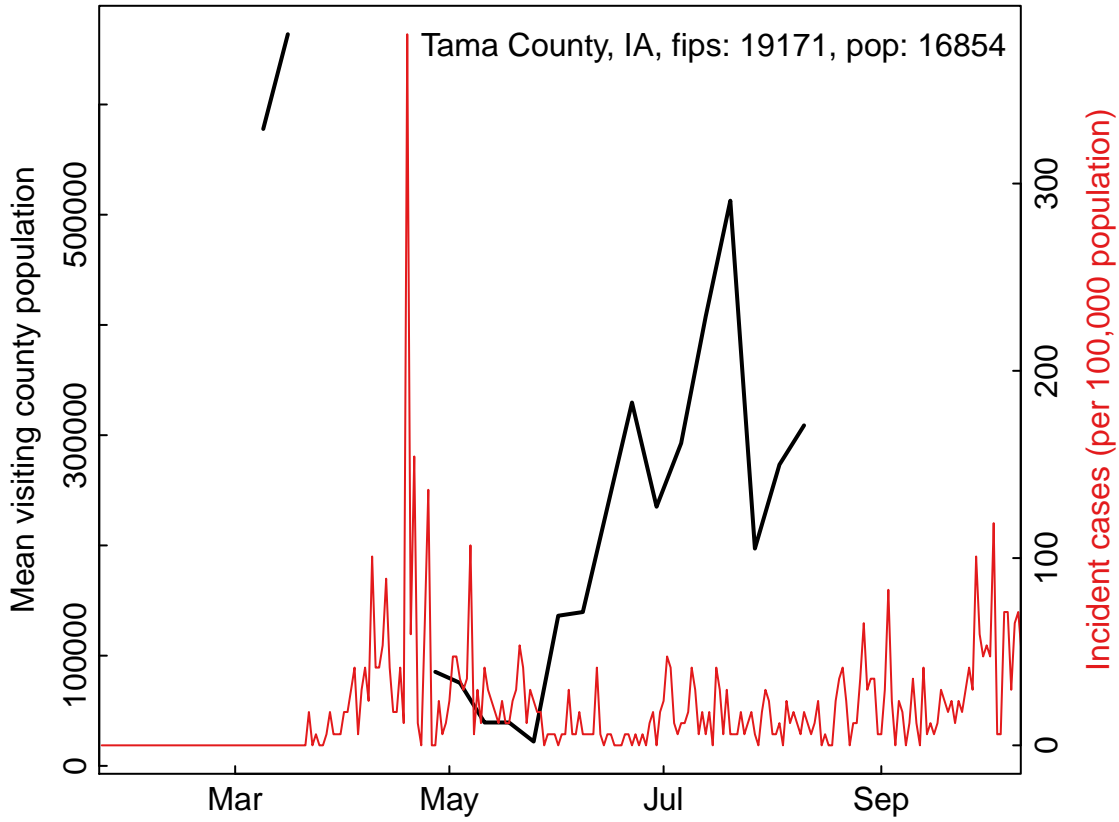

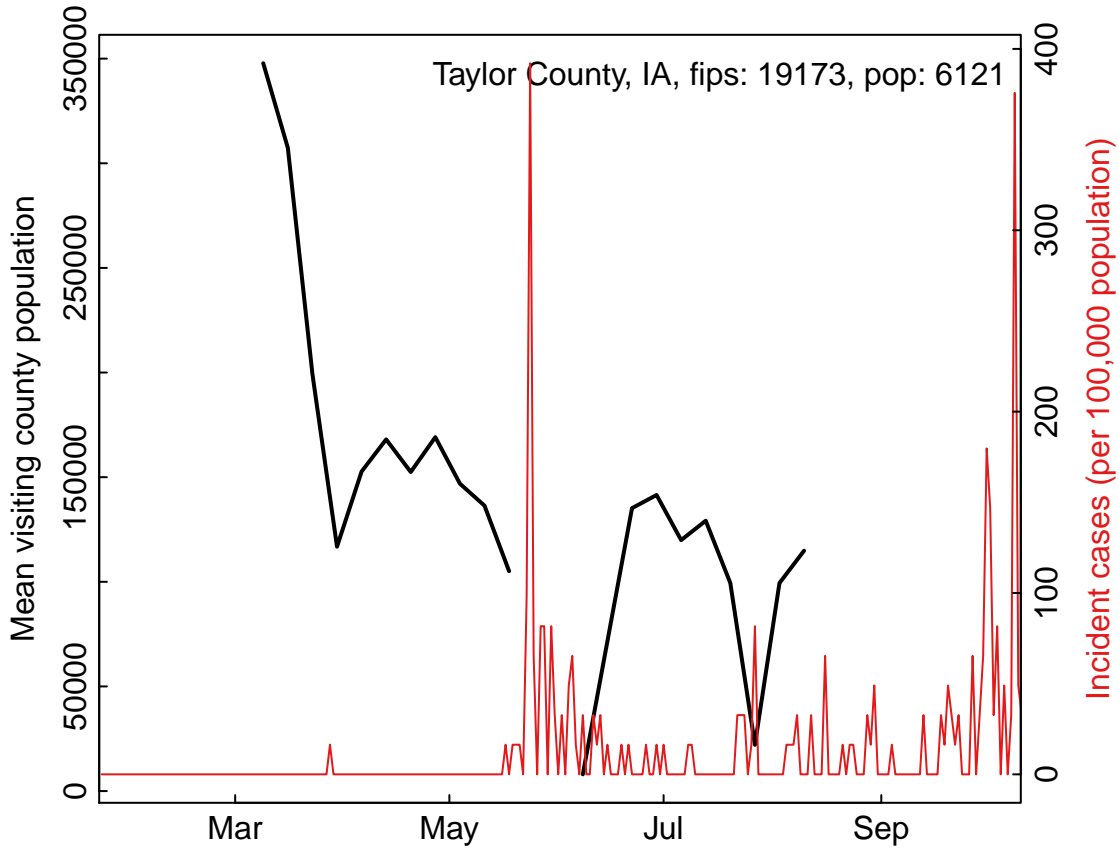

Union County, IA, fips: 19175, pop: 12241

Mean visiting county population

Incident cases (per 100,000 population)

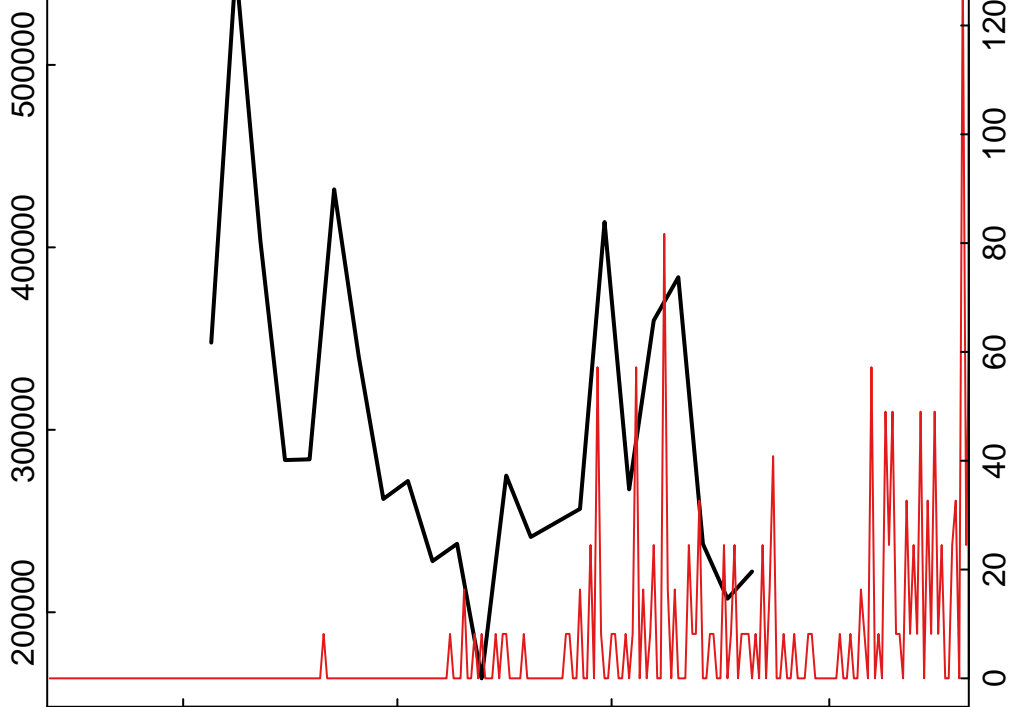

Mar

May

Jul

Sep

200000  
300000  
400000  
500000

0  
20  
40  
60  
80  
100  
120

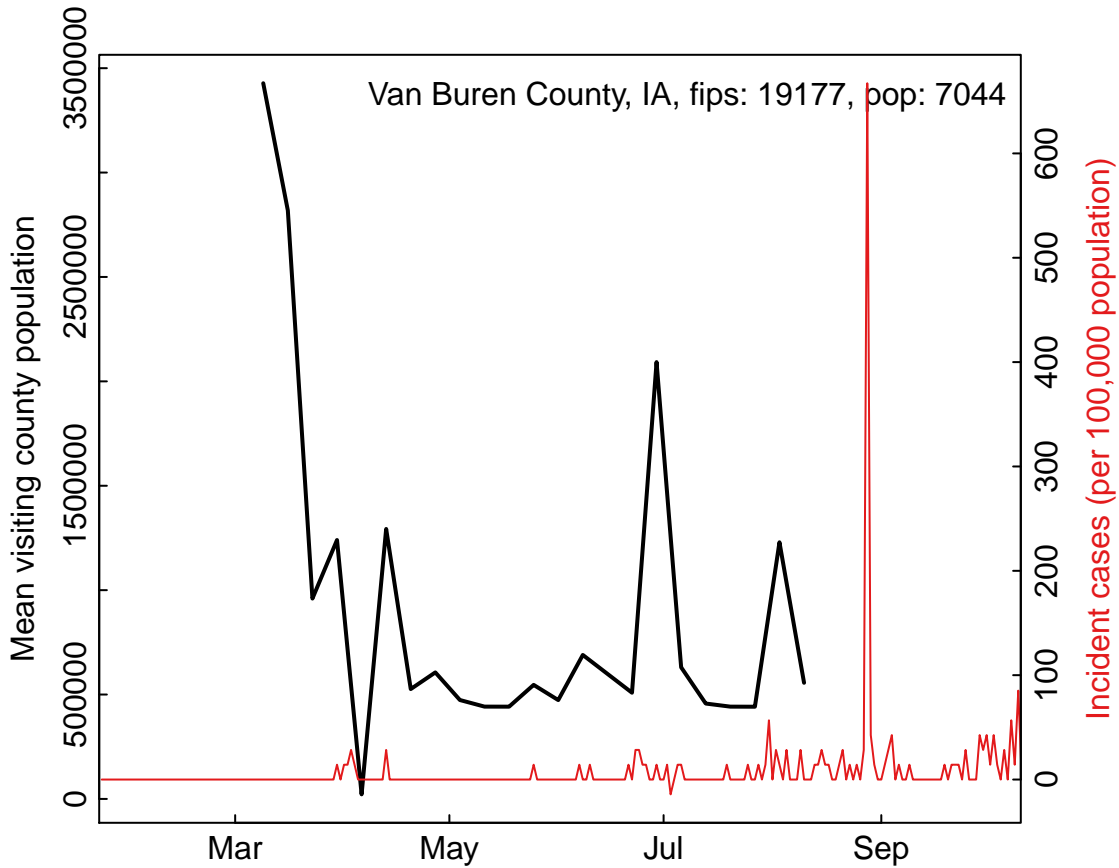

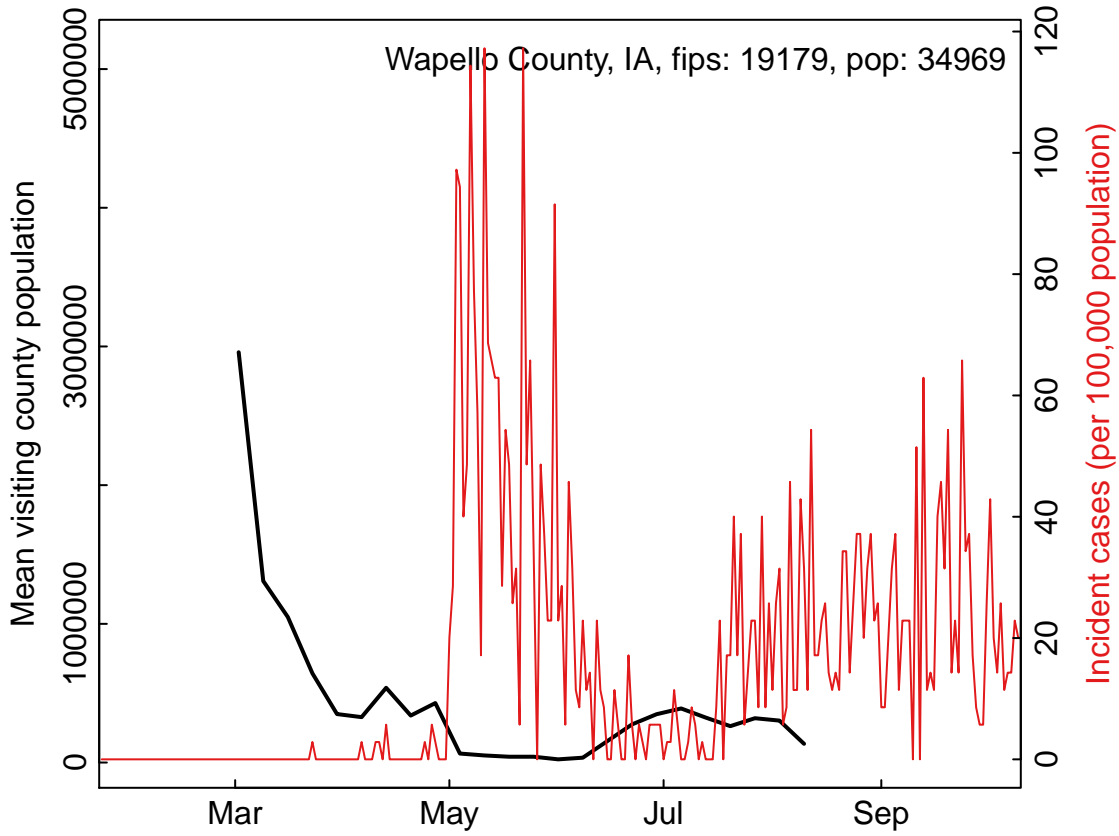

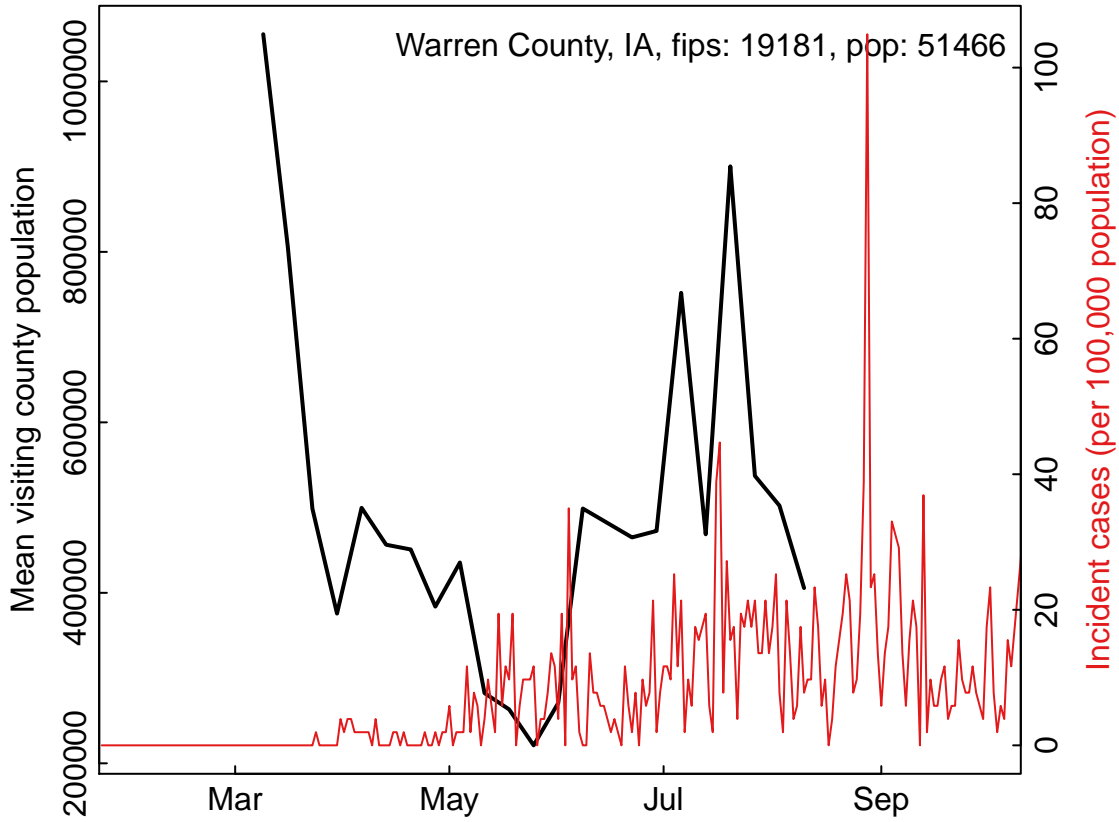

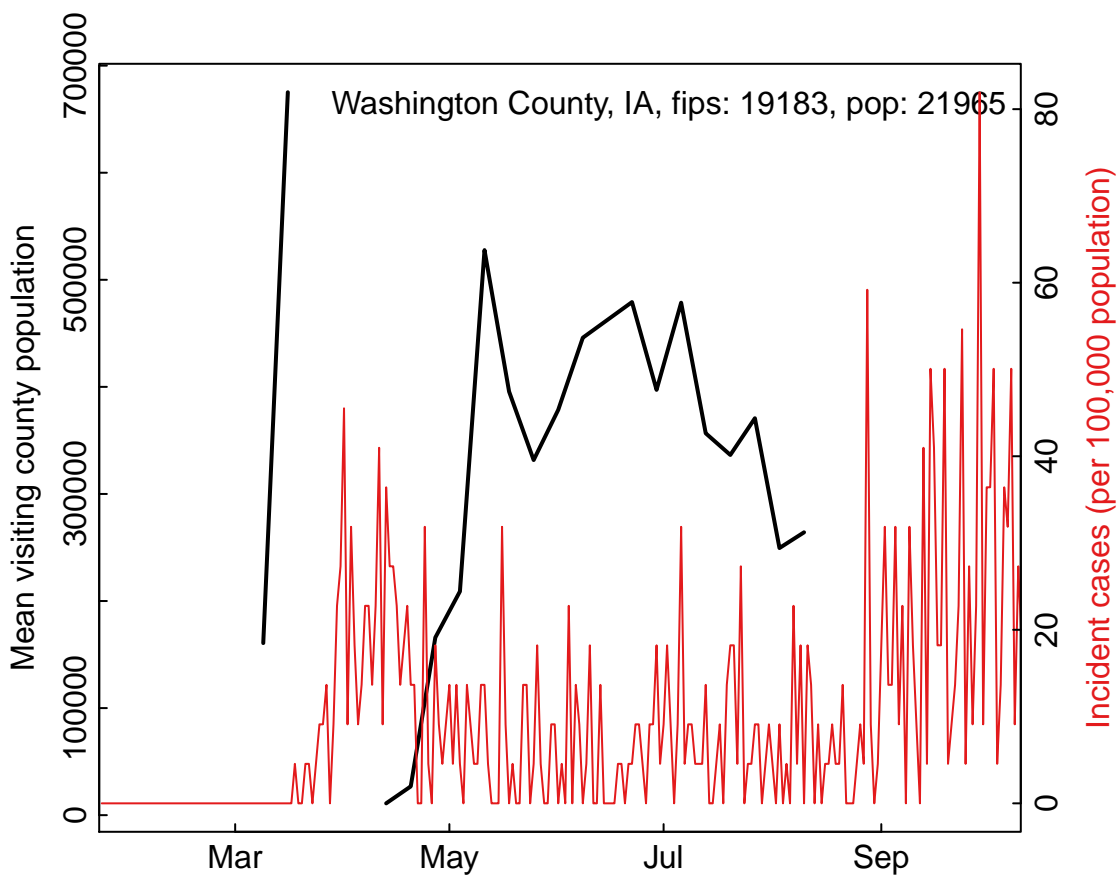



Wayne County, IA, fips: 19185, pop: 6441

Mean visiting county population

200000  
400000  
600000

Mar May Jul Sep

Incident cases (per 100,000 population)

0 20 40 60 80

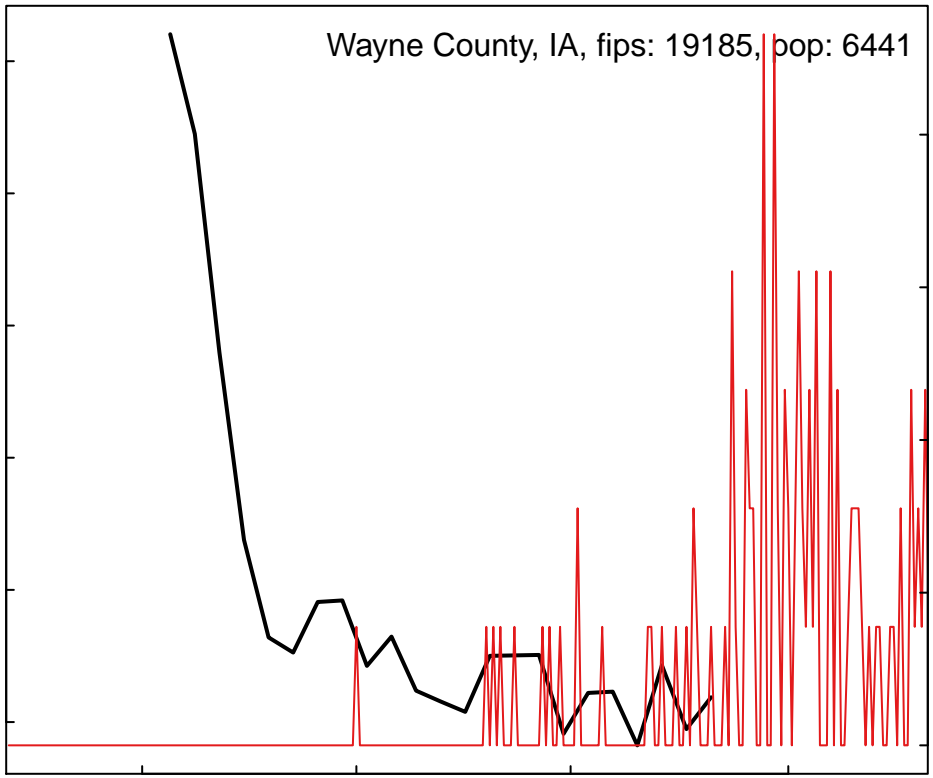

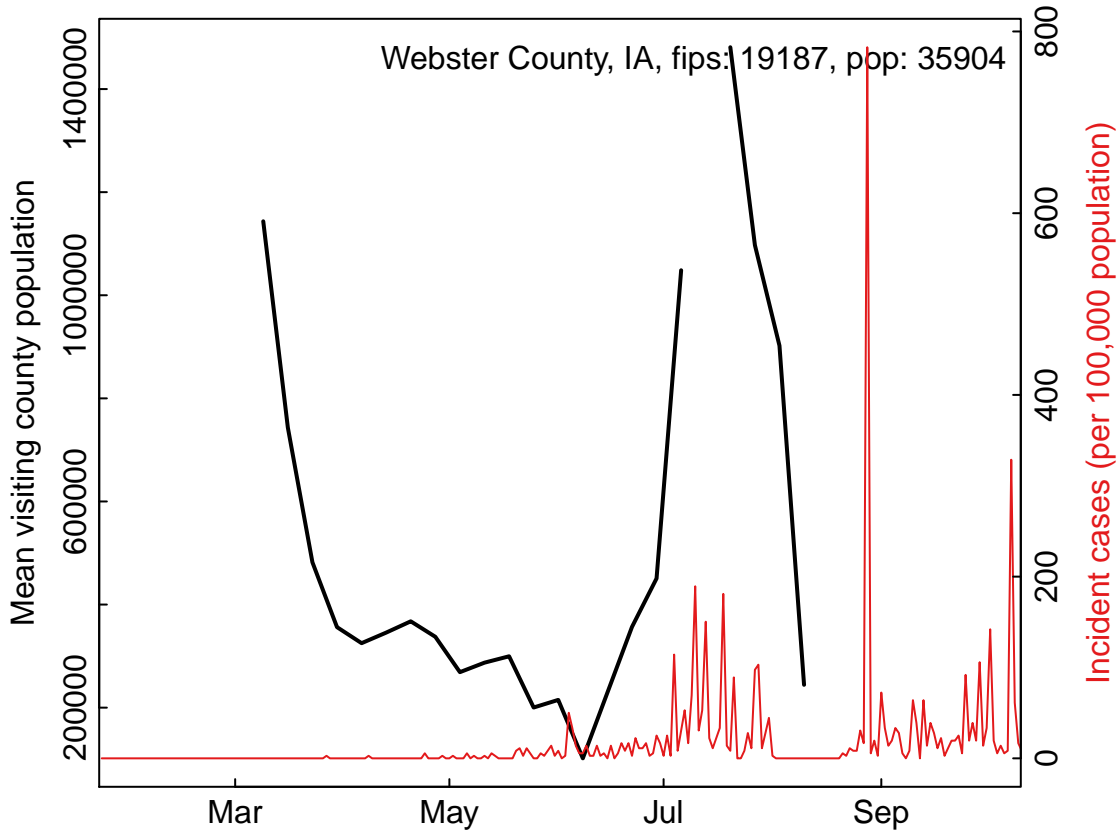

Winnebago County, IA, fips: 19189, pop: 10354

Mean visiting county population

2500000  
1500000  
500000

Mar

May

Jul

Sep

150  
100  
50  
0

Incident cases (per 100,000 population)

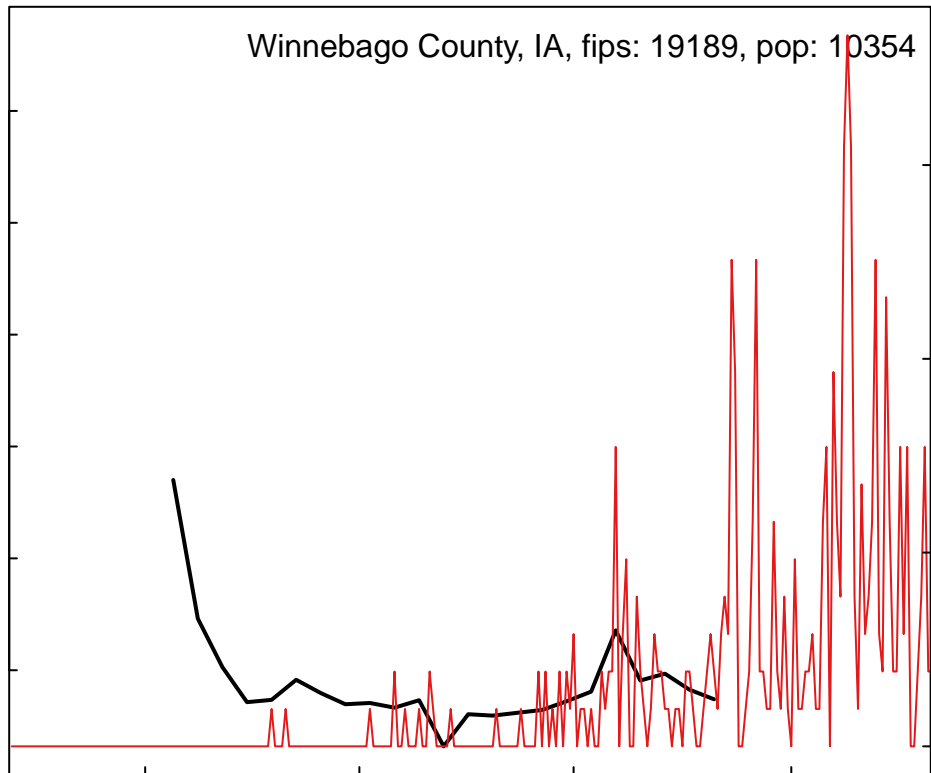

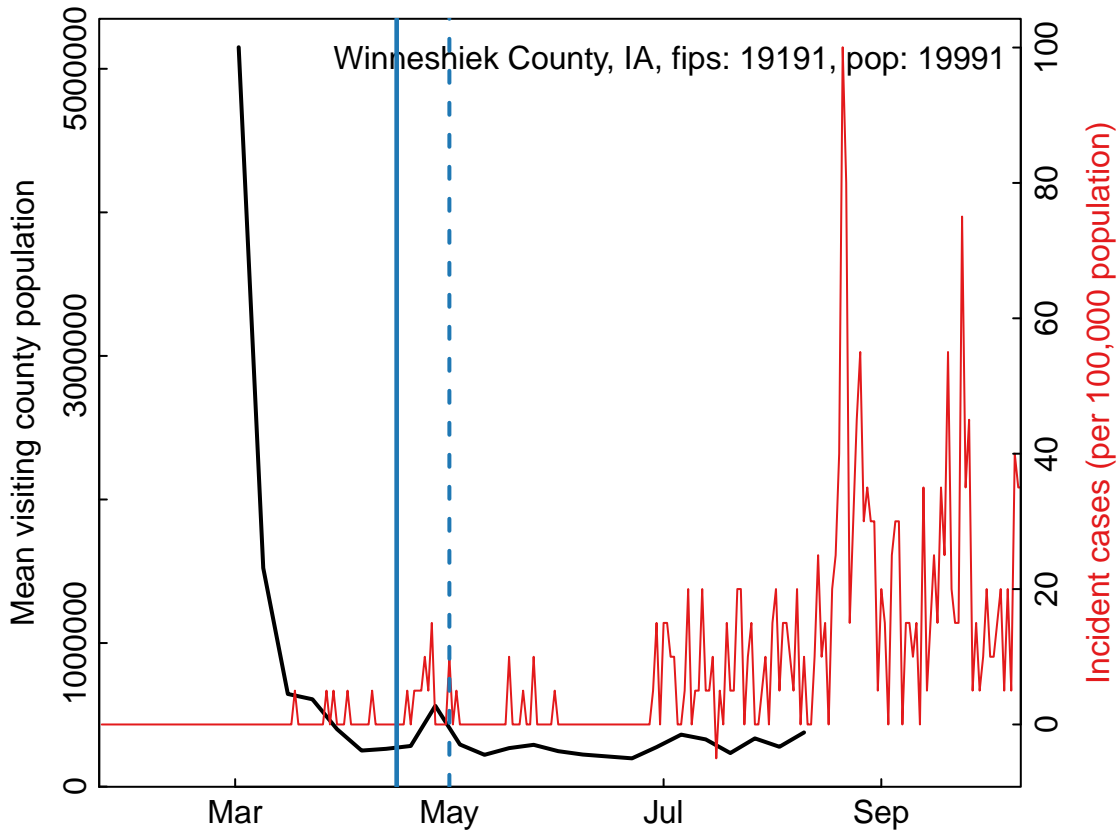

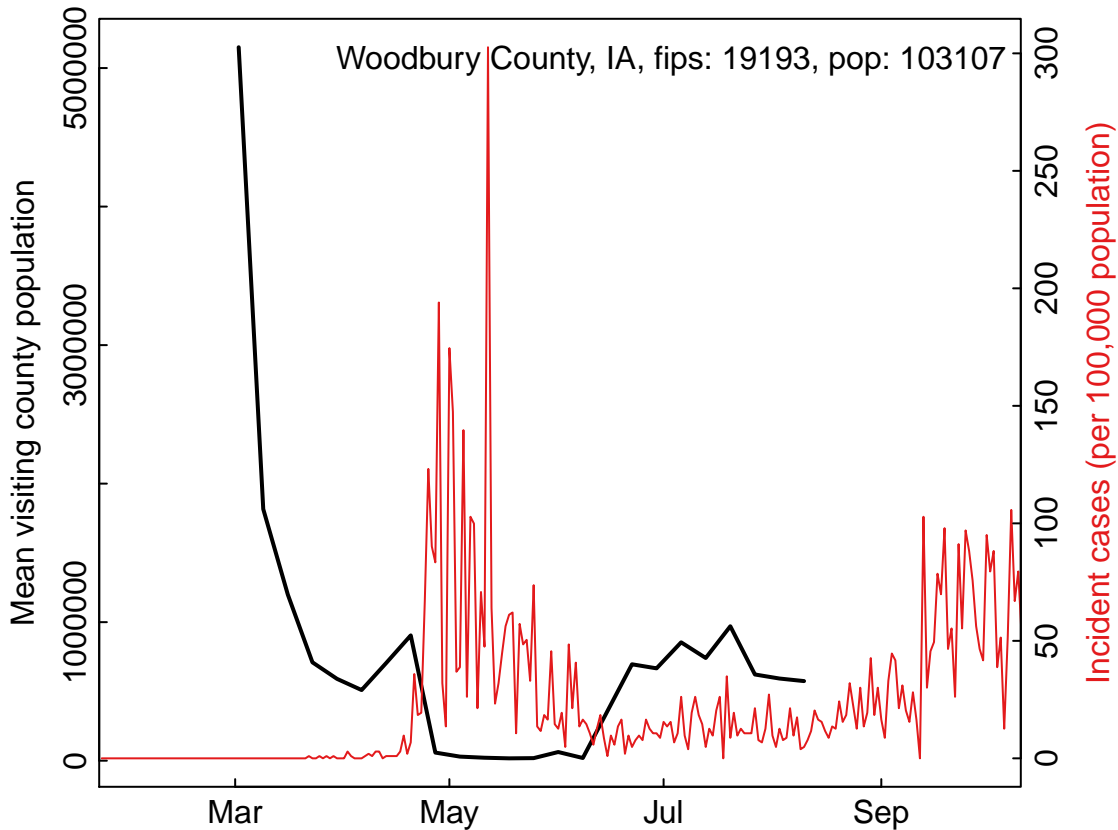

Worth County, IA, fips: 19195, pop: 7381

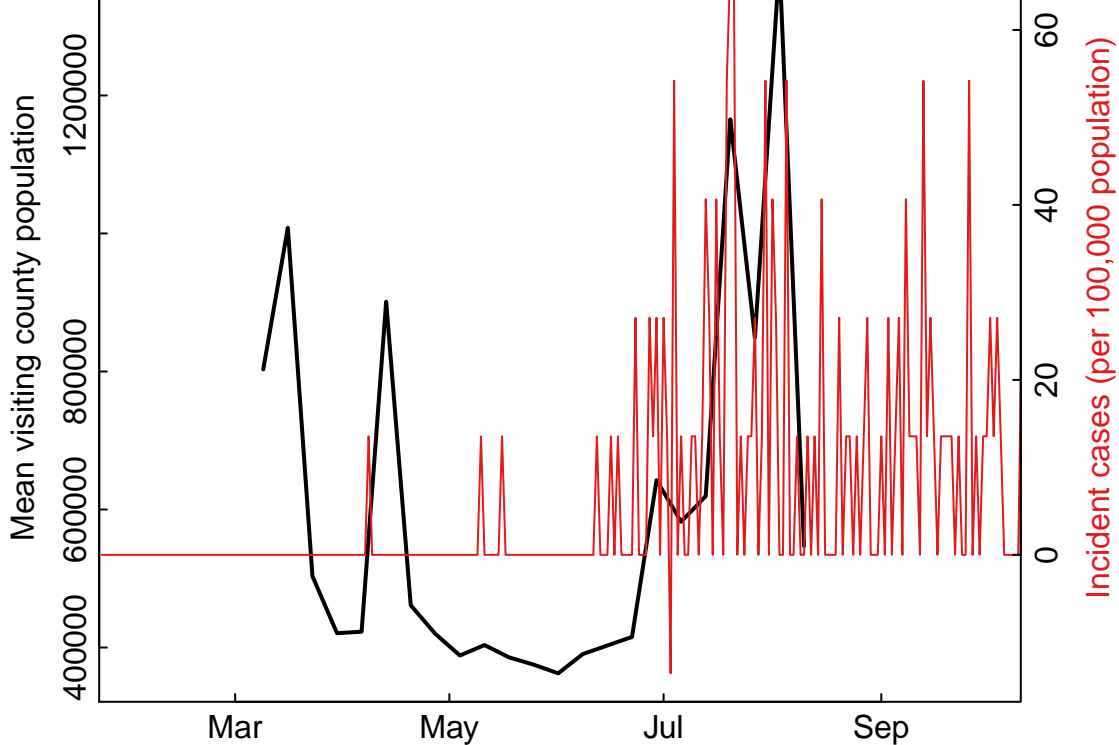

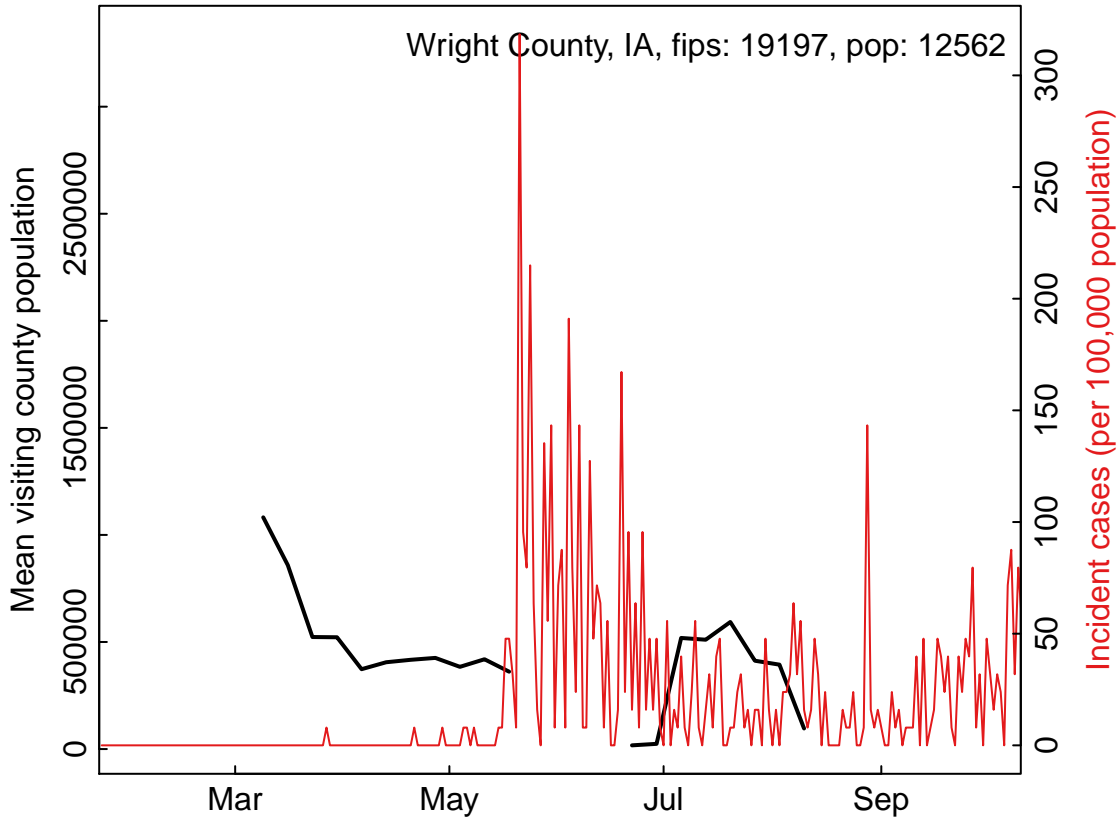

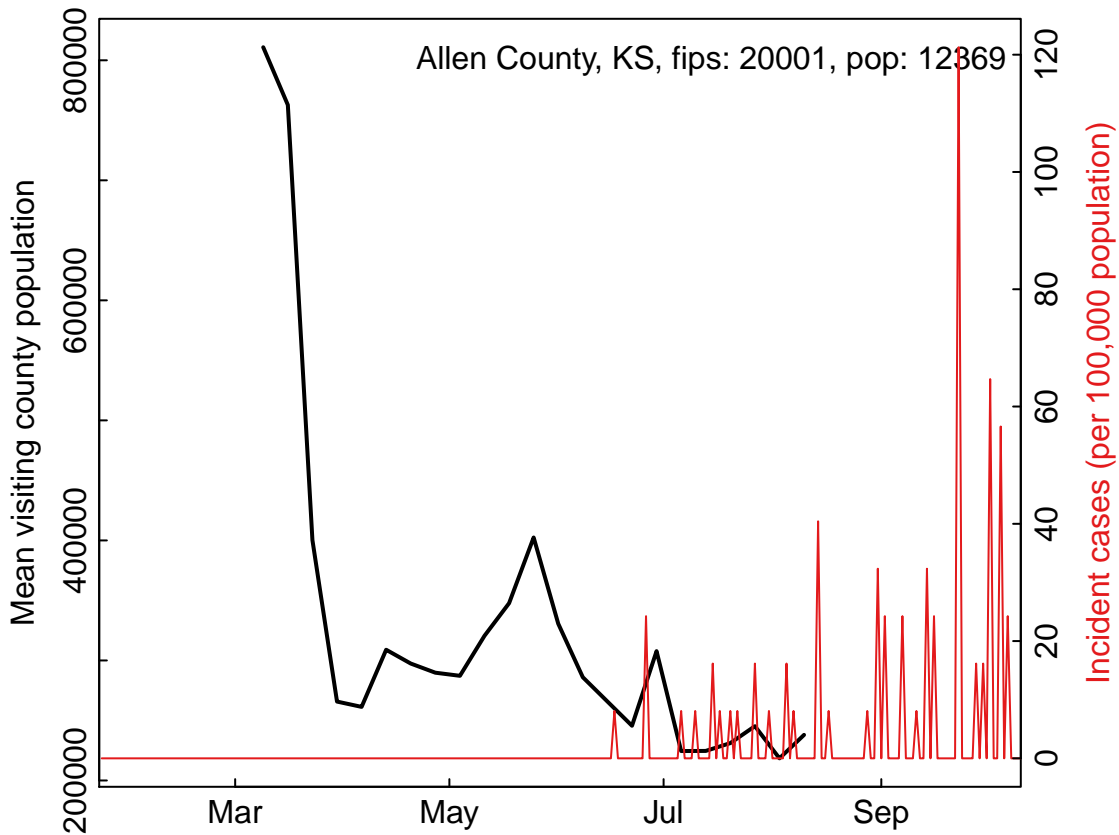



Anderson County, KS, fibs: 20003, pop: 7858

Mean visiting county population

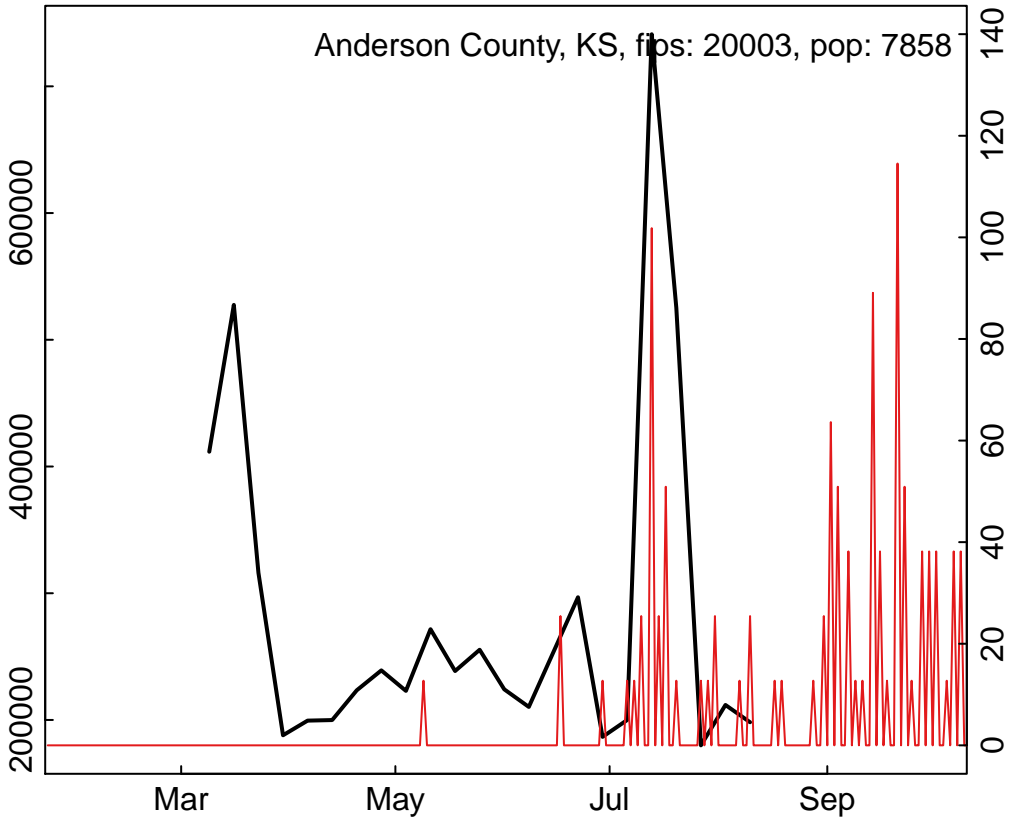

Incident cases (per 100,000 population)

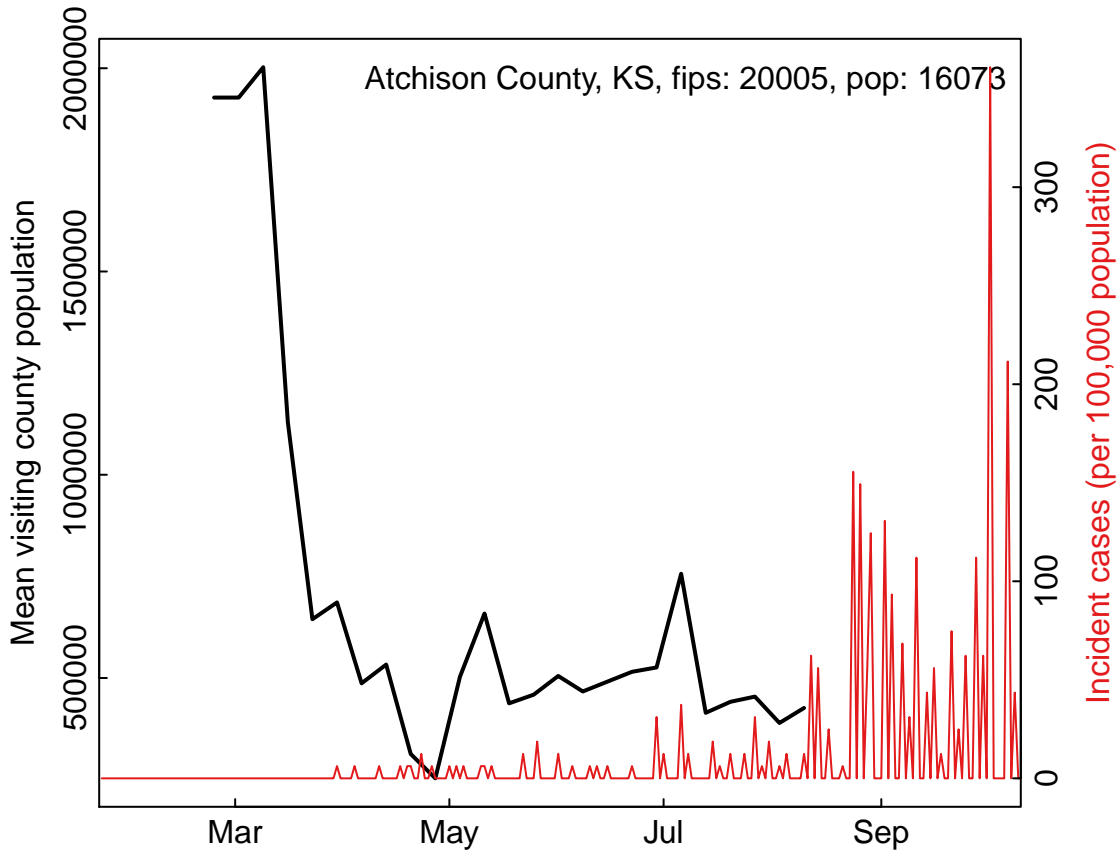

Barber County, KS, fips: 20007, pop: 4427

Mean visiting county population

2500000  
1500000  
500000

Mar

May

Jul

Sep

140  
120  
100  
80  
60  
40  
20  
0

Incident cases (per 100,000 population)

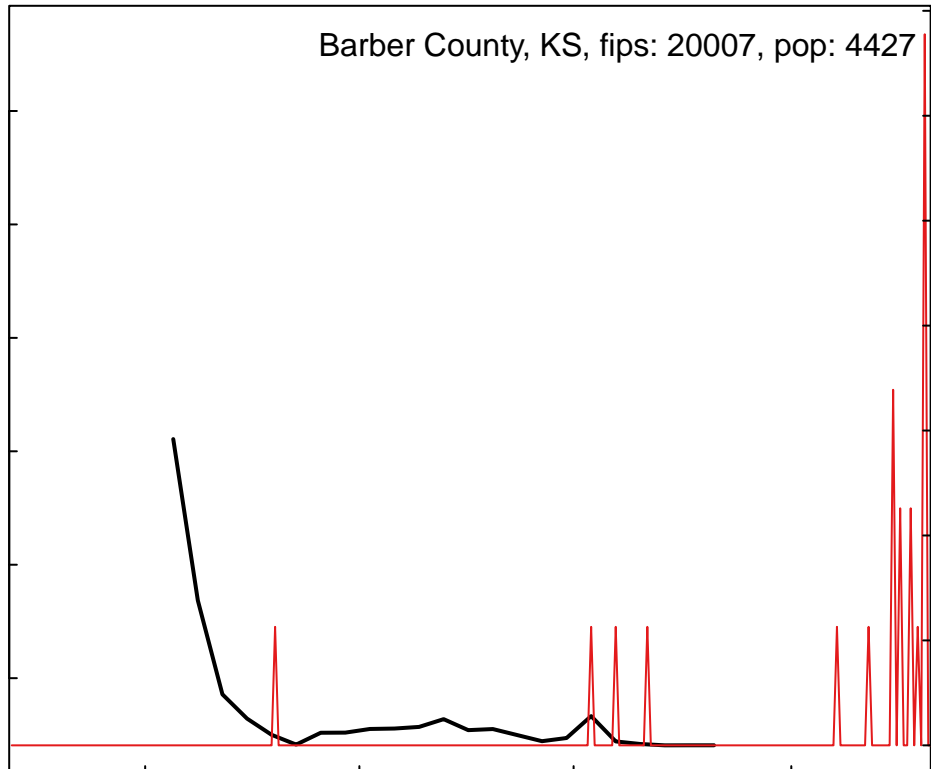

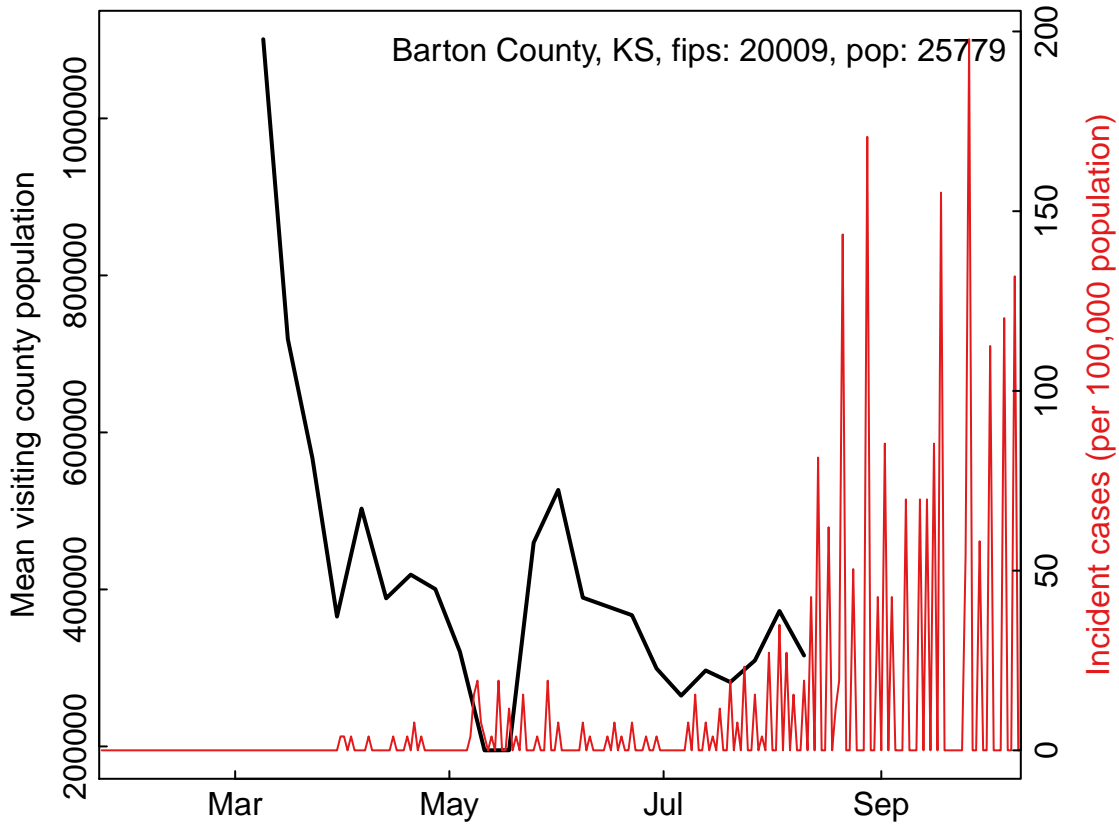

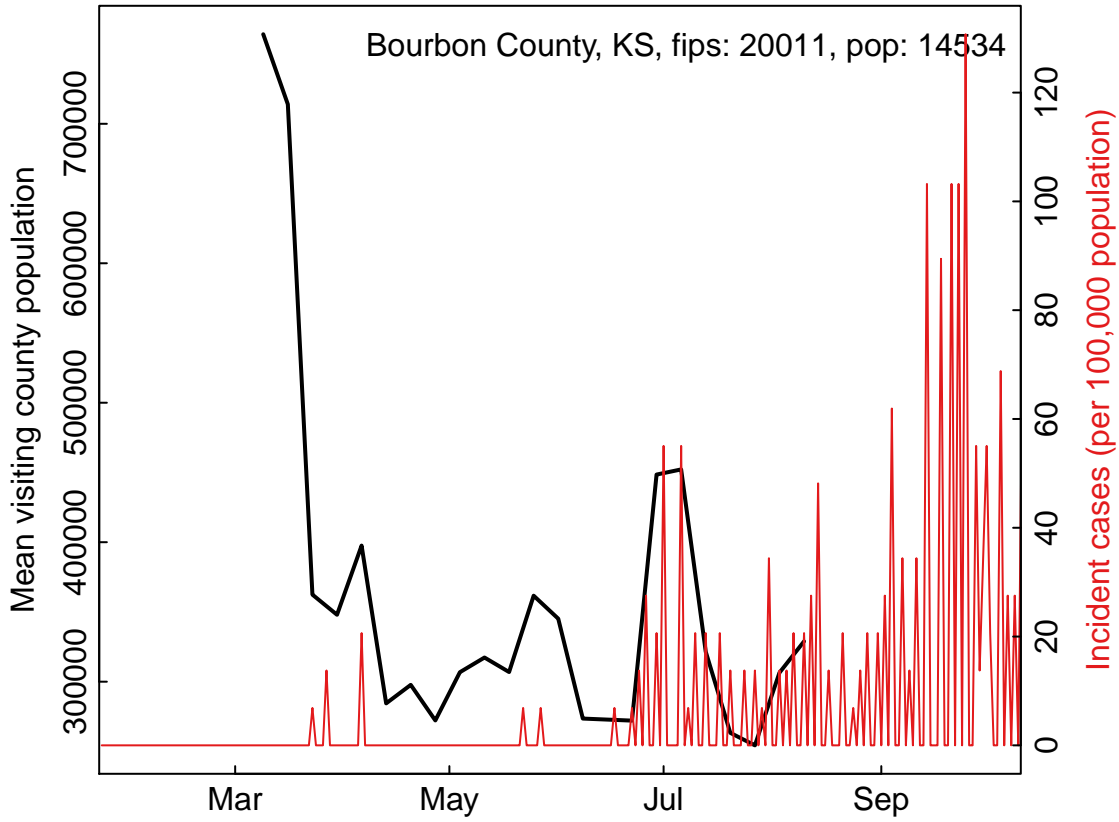

Brown County, KS, fips: 20013, pop: 9564

Mean visiting county population

200000  
400000  
600000

Mar

May

Jul

Sep

0  
20  
40  
60  
80  
100  
120

Incident cases (per 100,000 population)

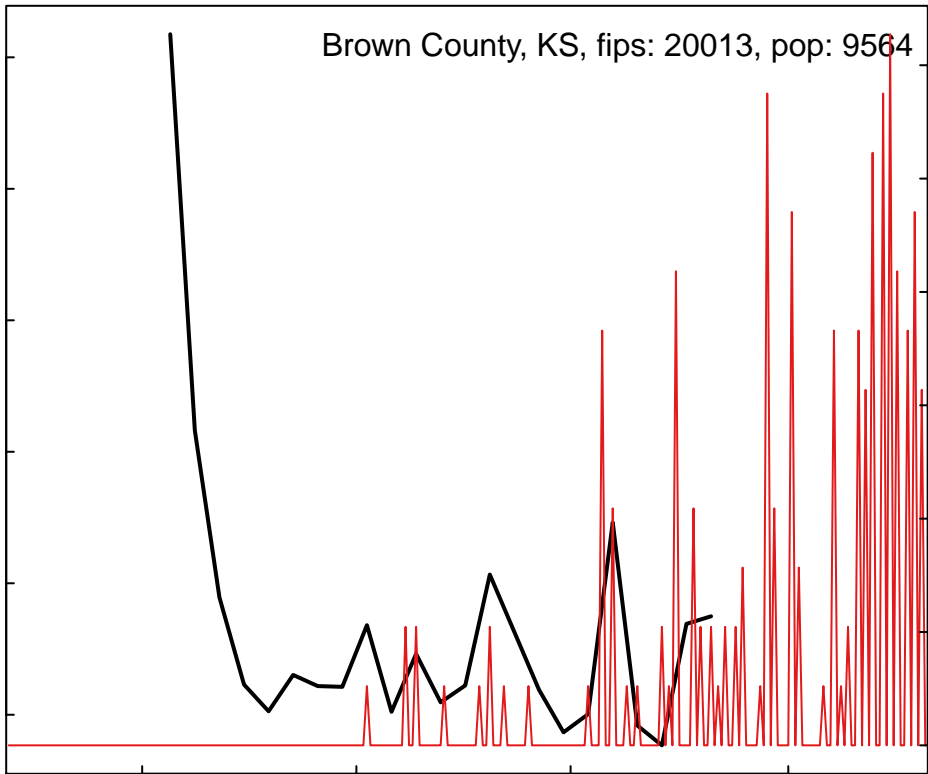

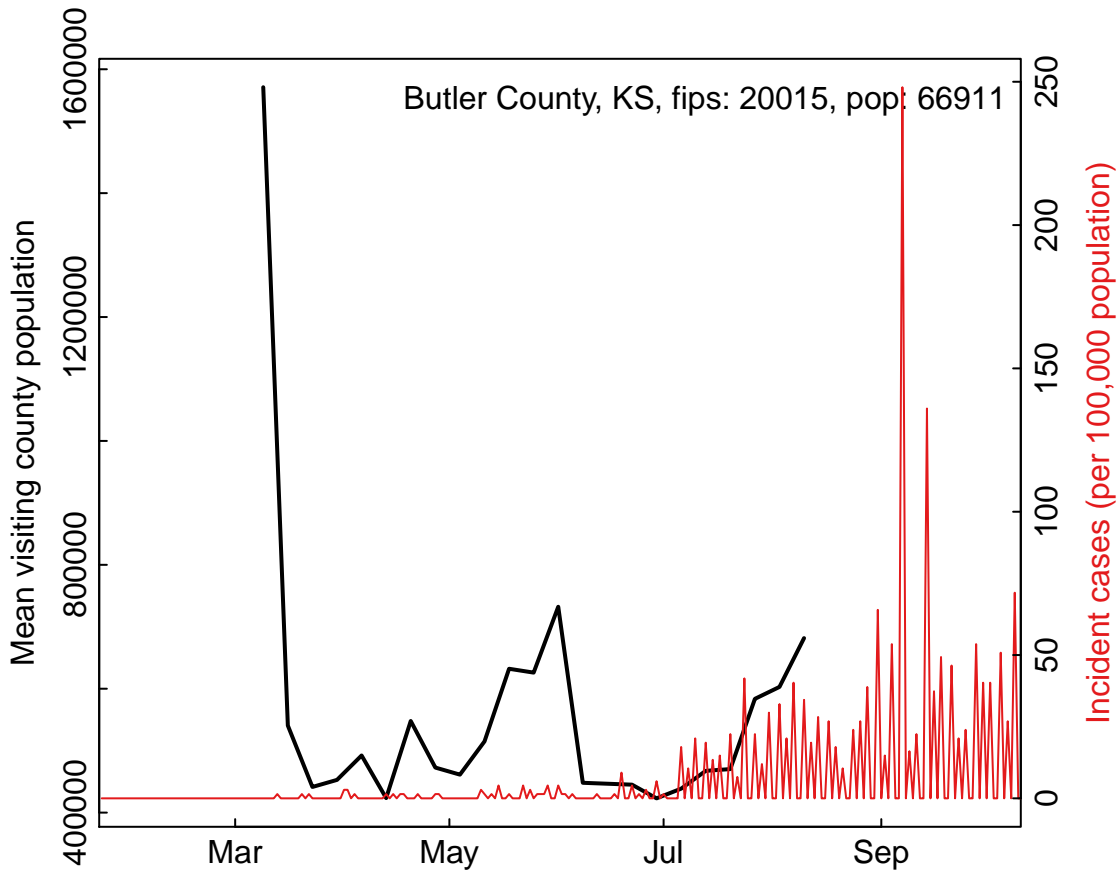

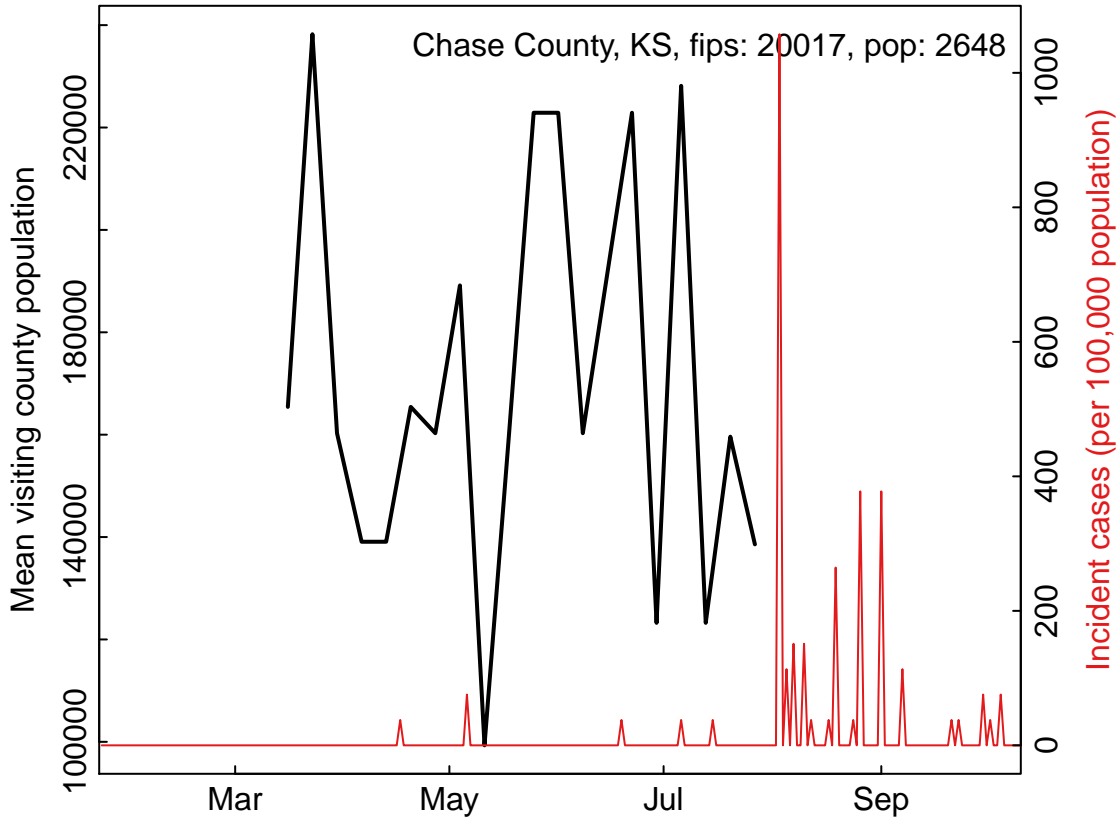



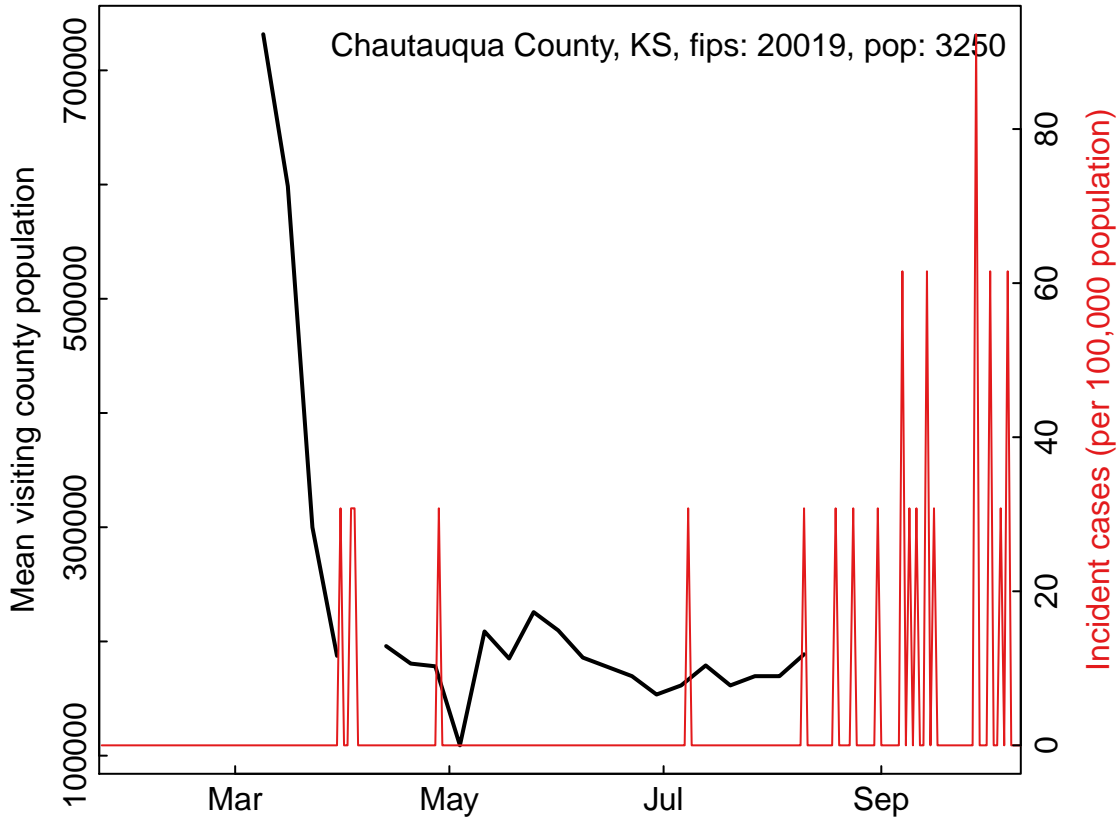

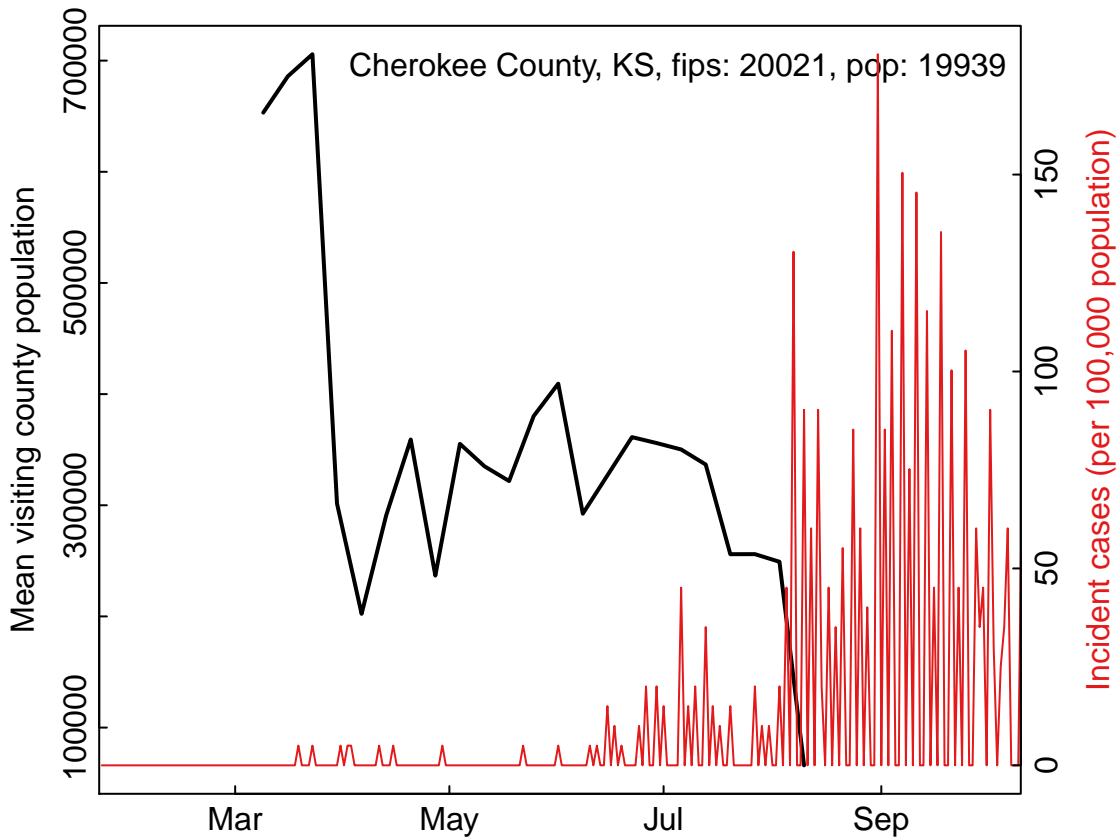

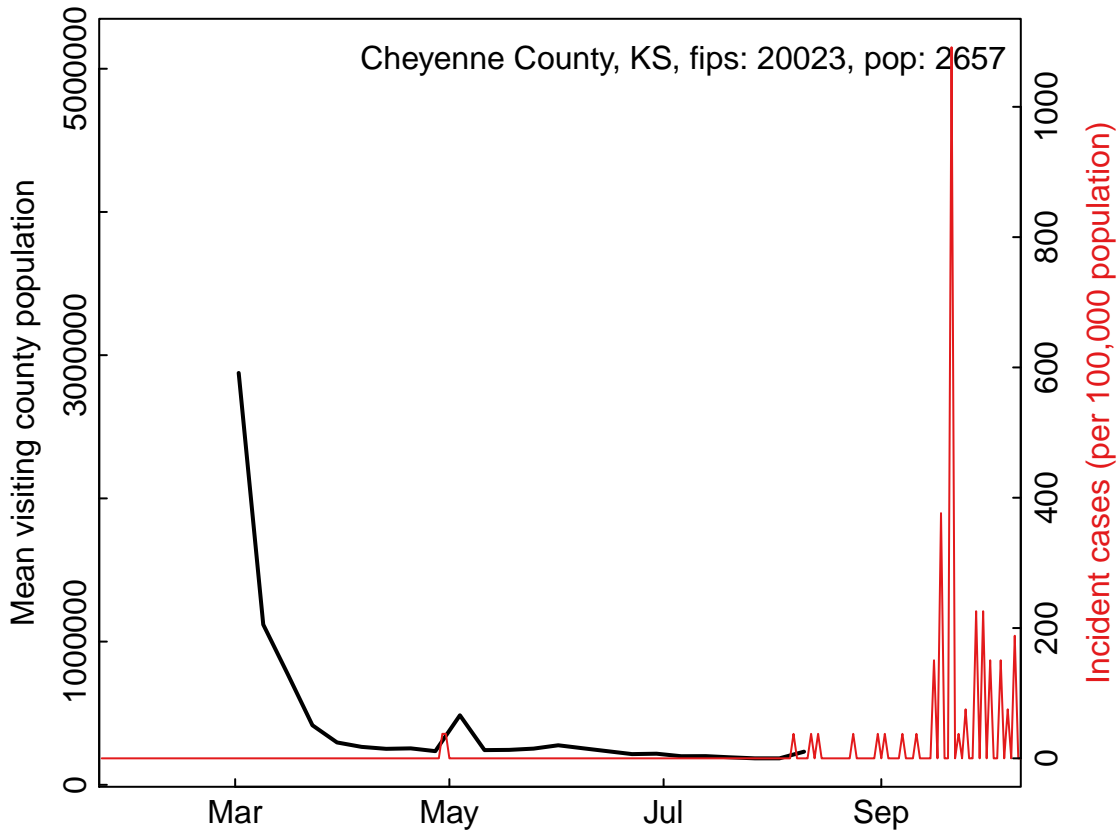

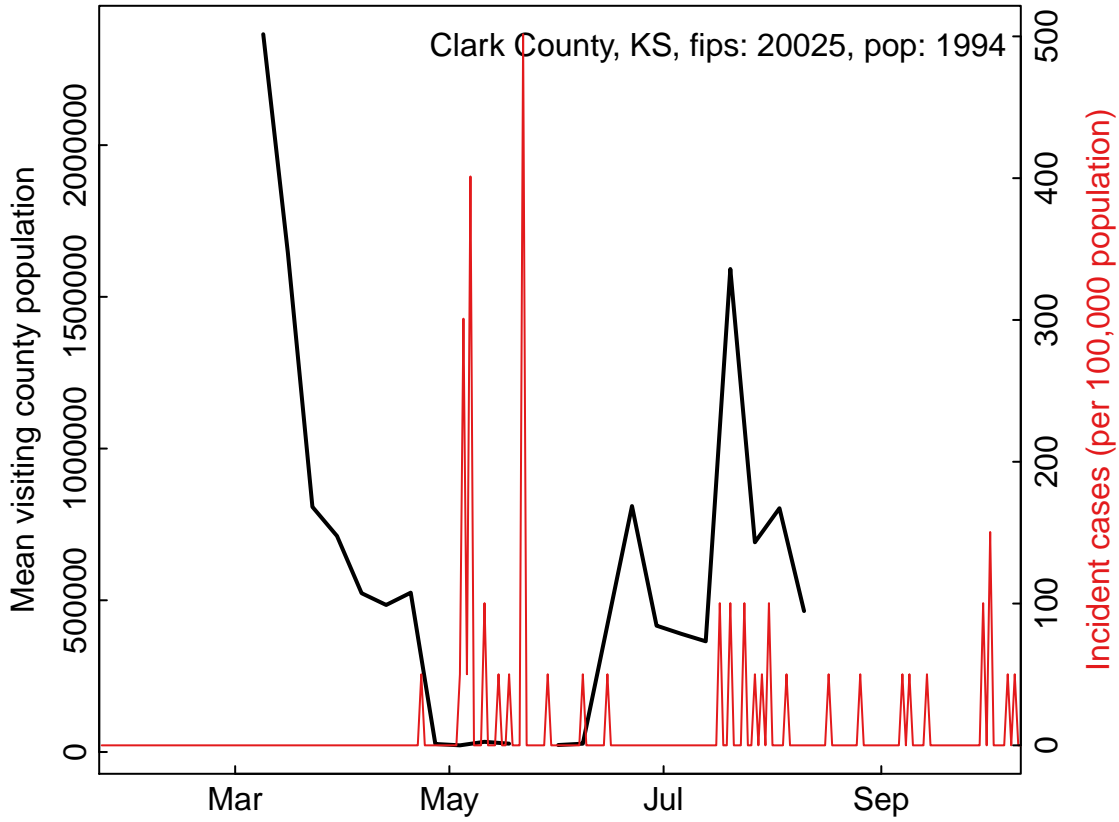

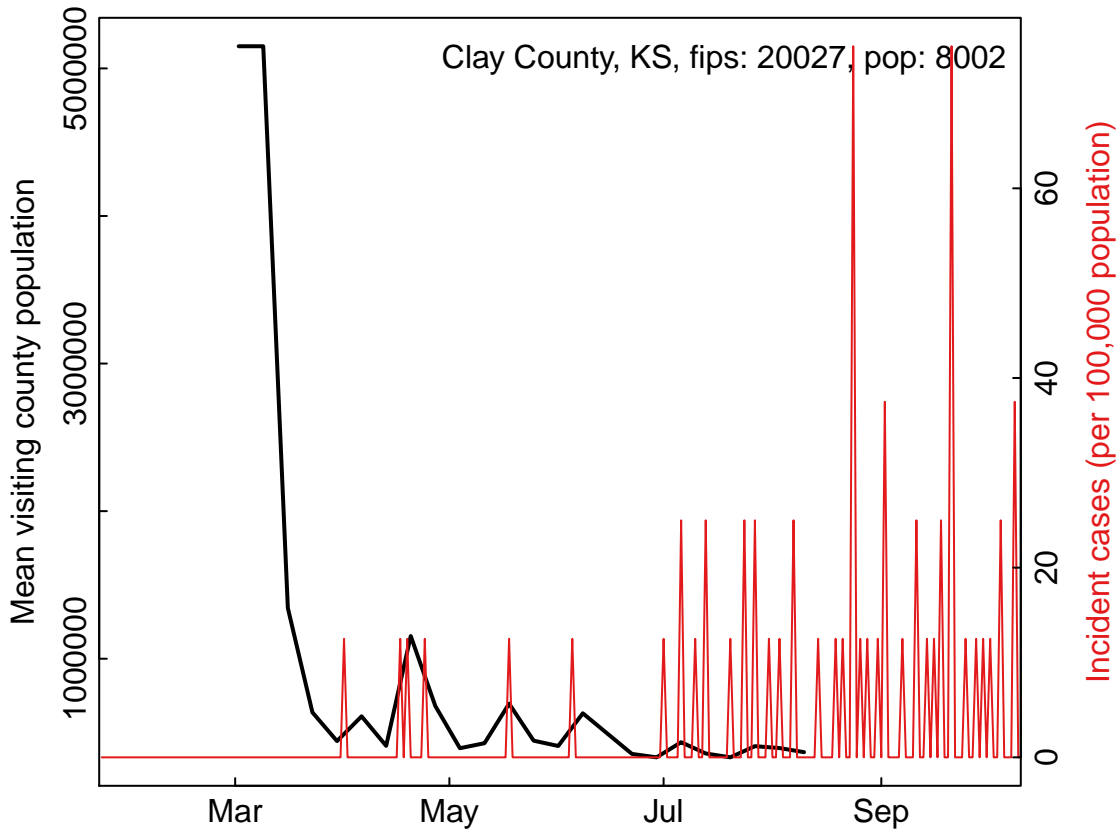

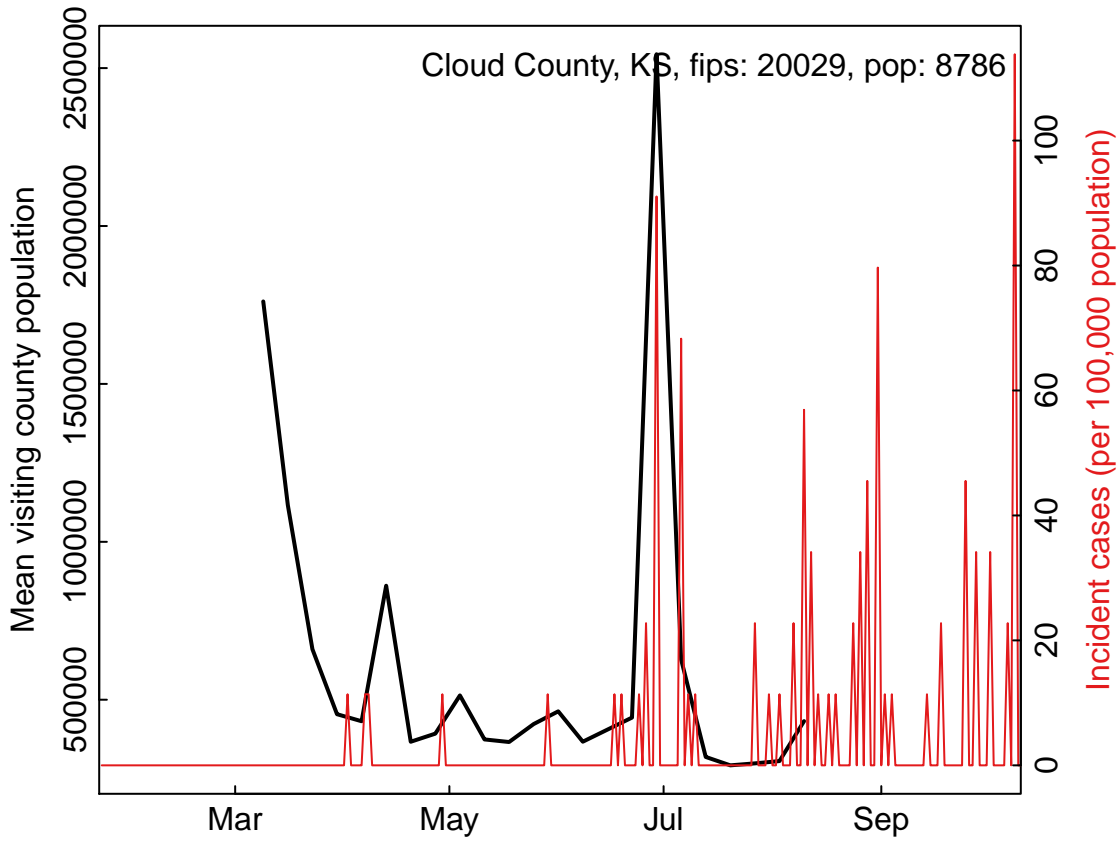

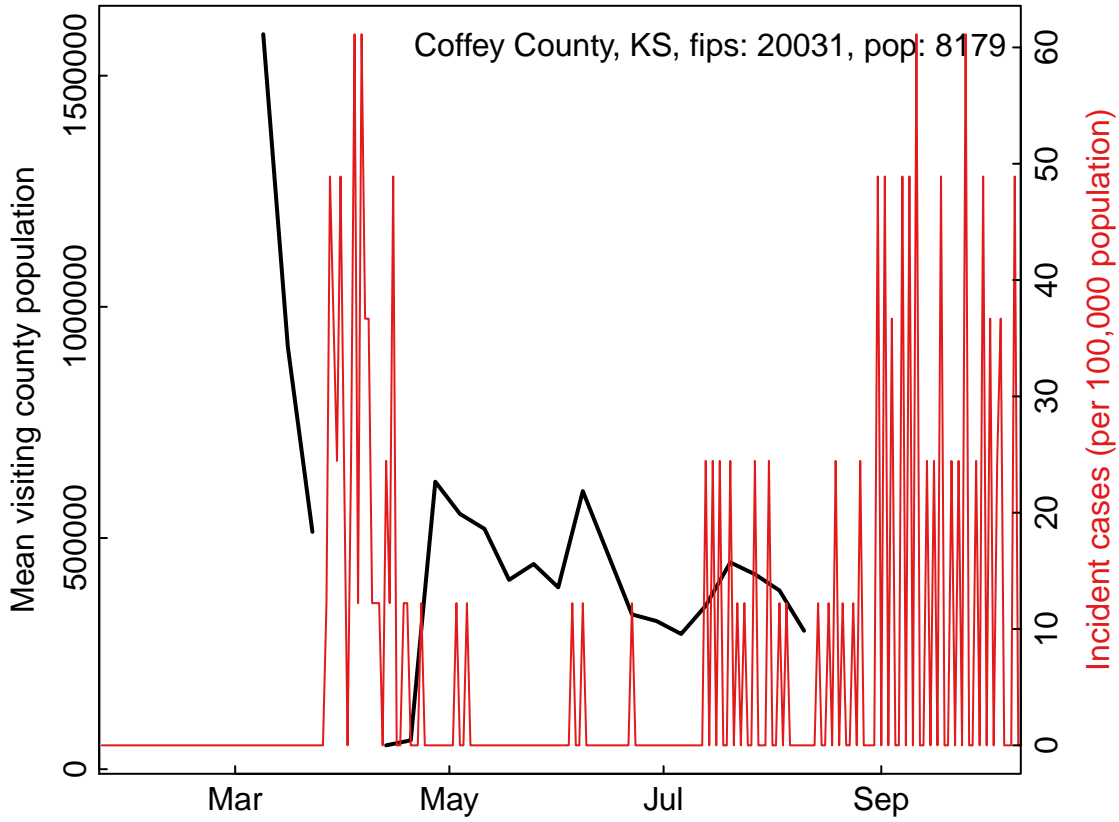

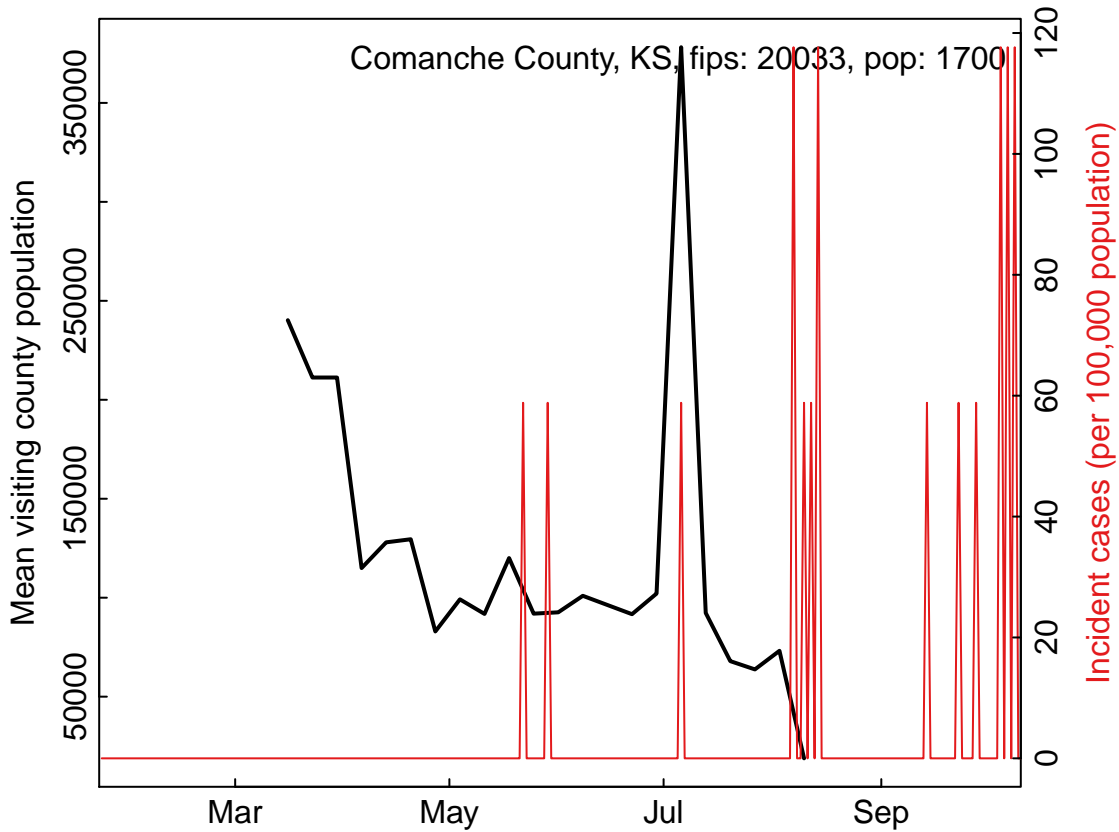



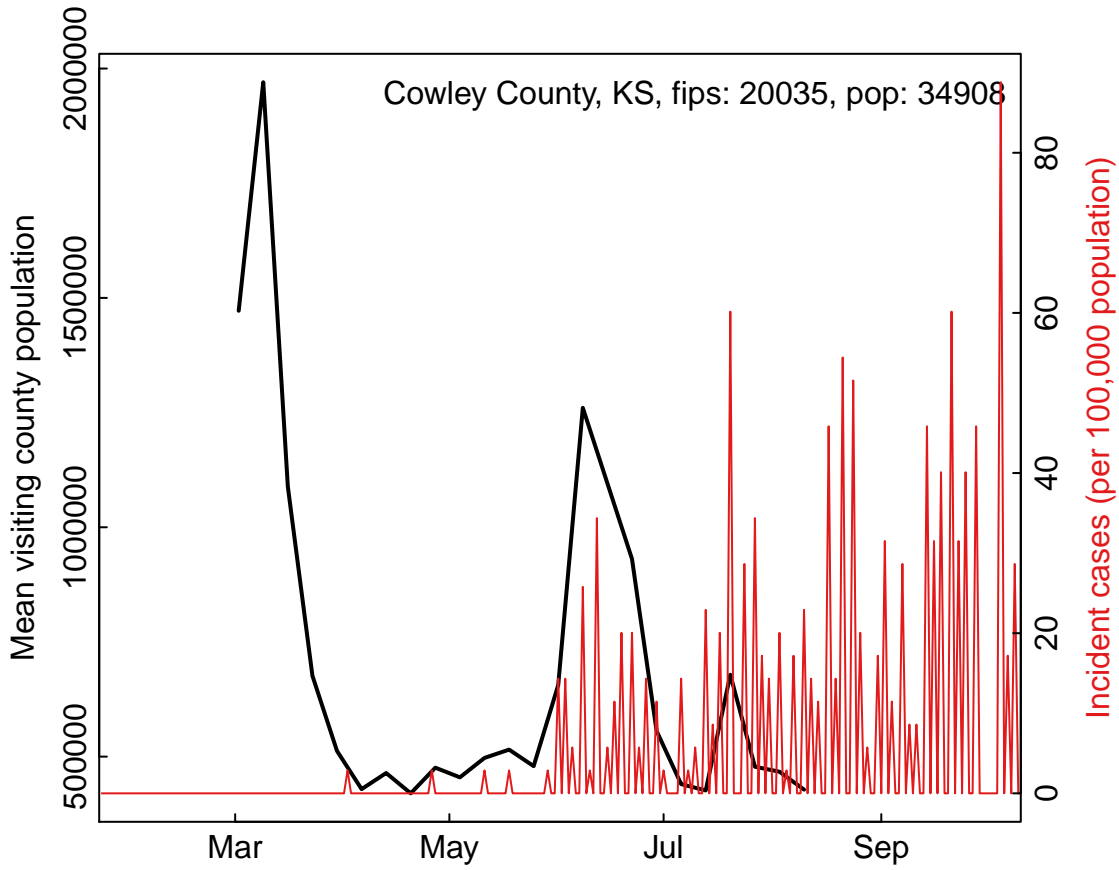

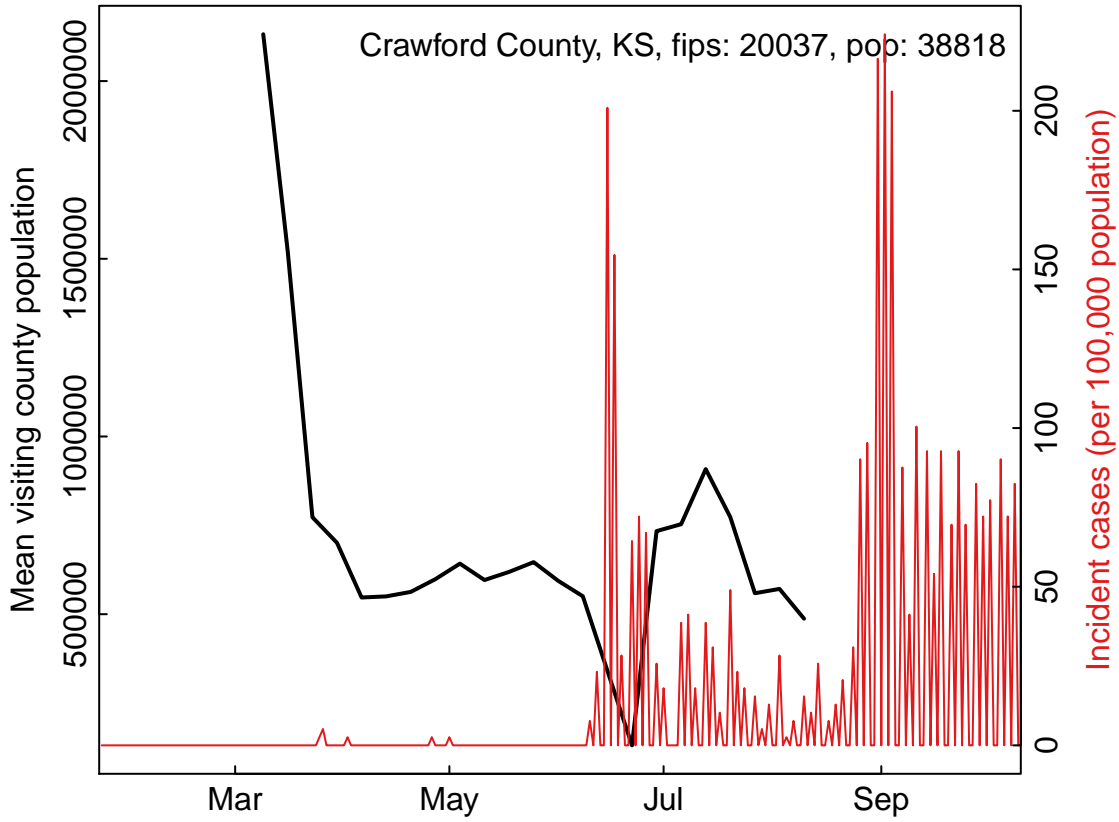

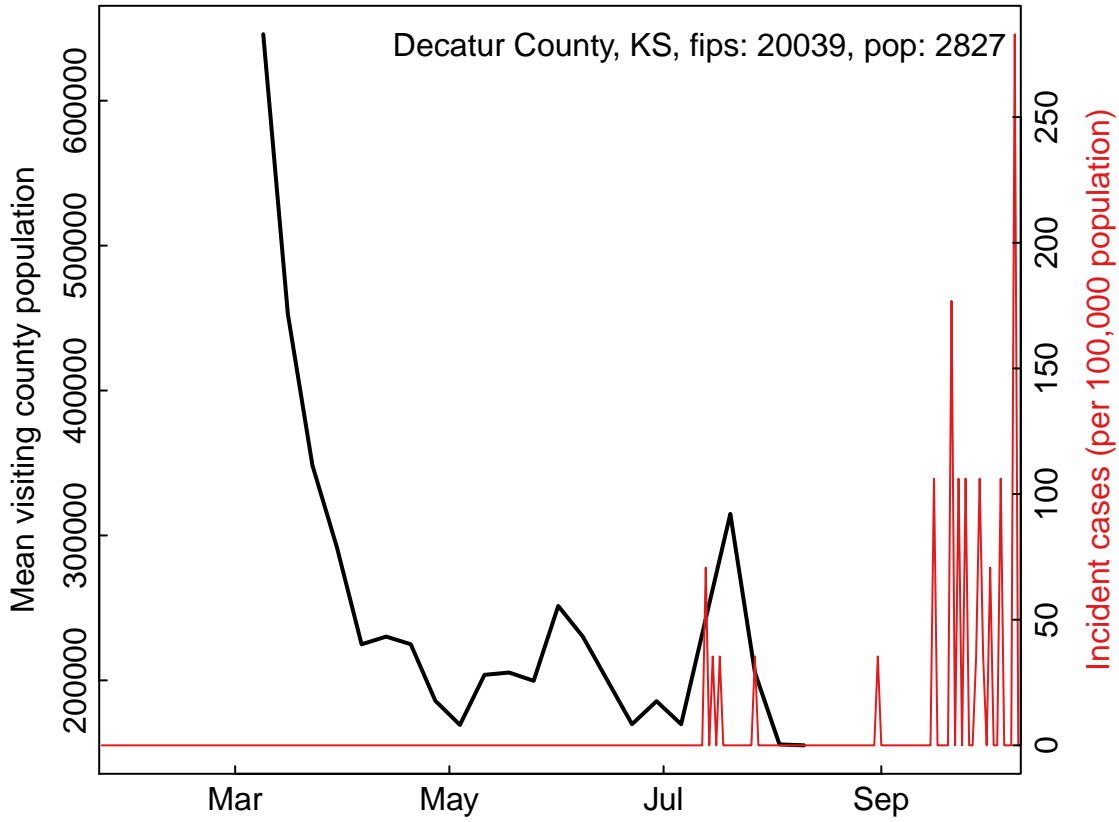

Dickinson County, KS, fips: 20041, pop: 18466

Mean visiting county population

2500000  
1500000  
500000  
0

Mar

May

Jul

Sep

200  
150  
100  
50  
0

Incident cases (per 100,000 population)

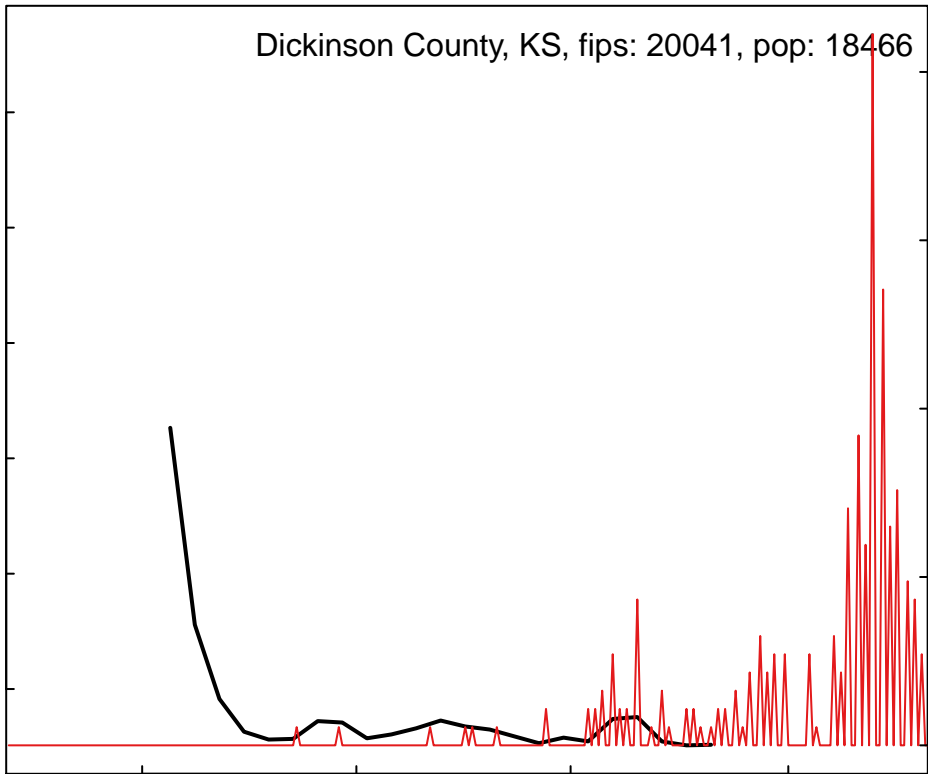

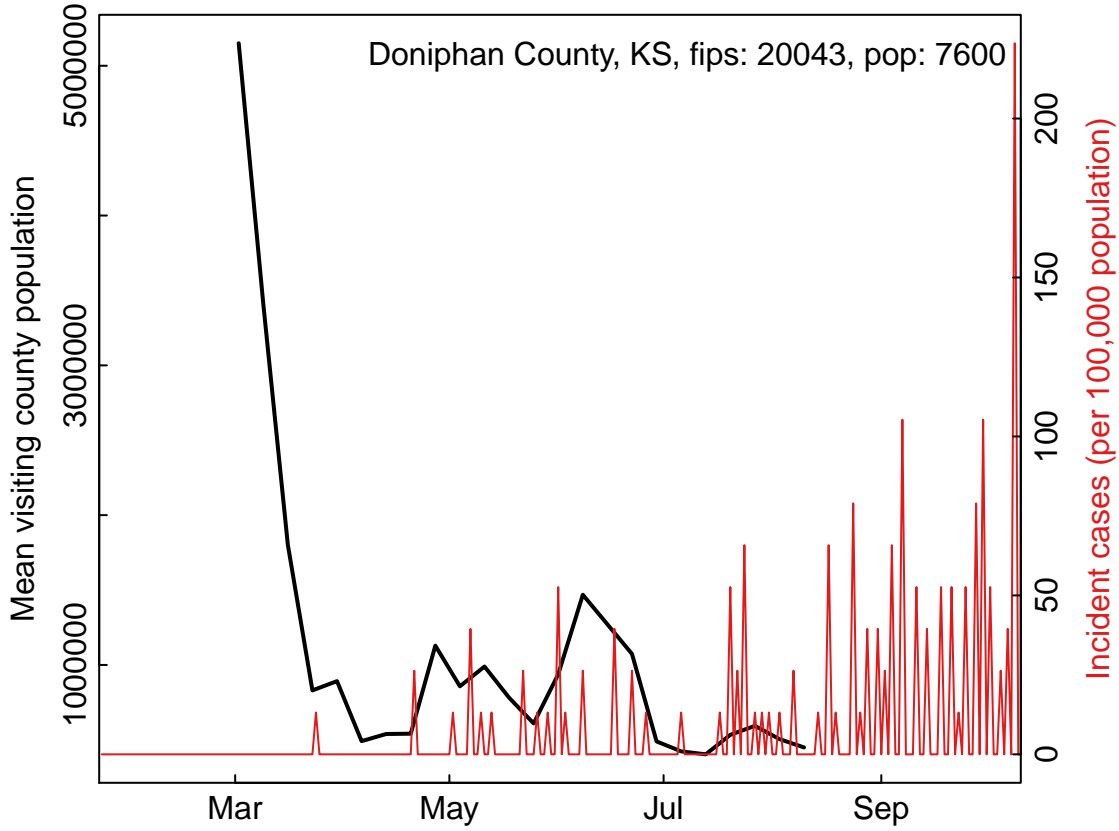

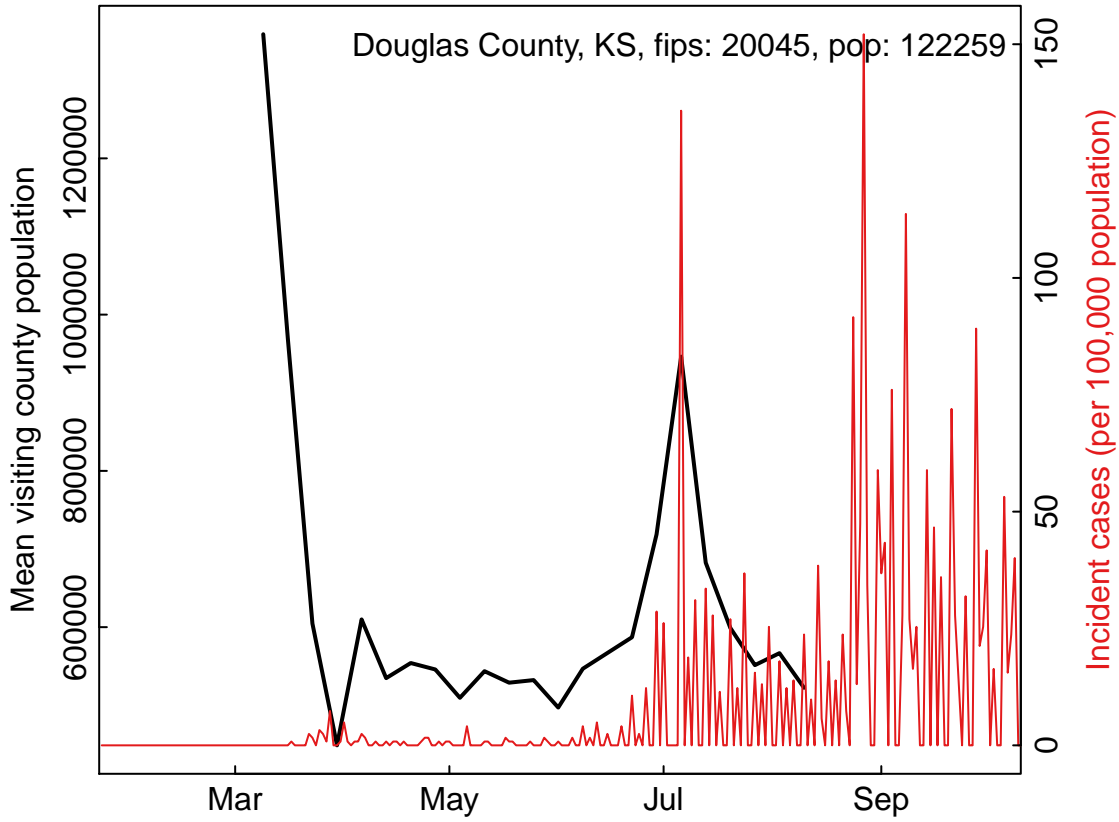

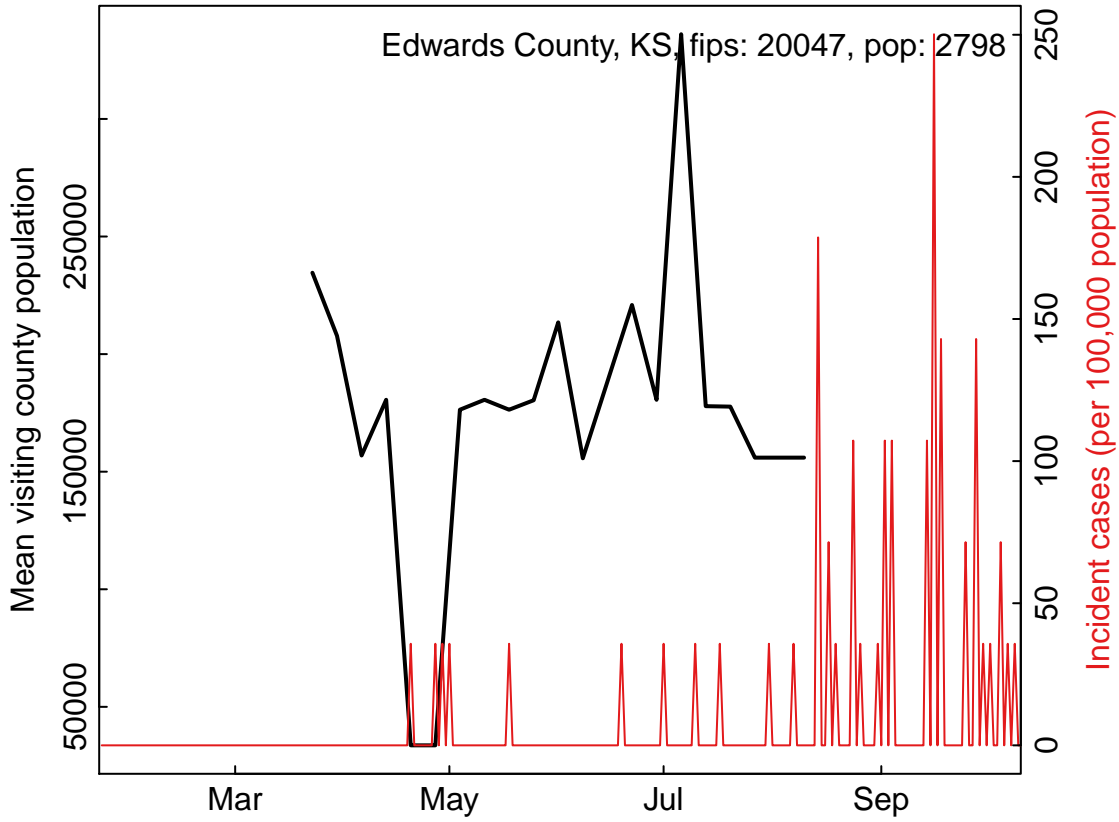

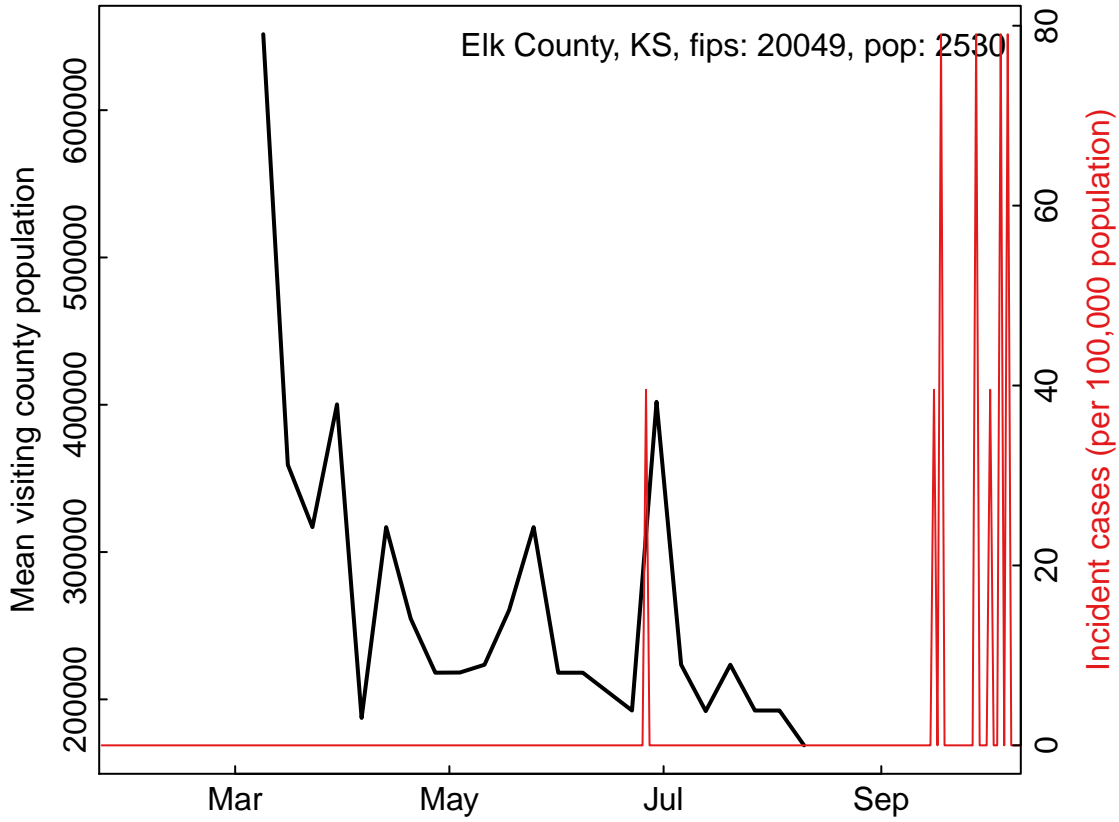



Ellis County, KS, fips: 20051, pop: 28553

Mean visiting county population

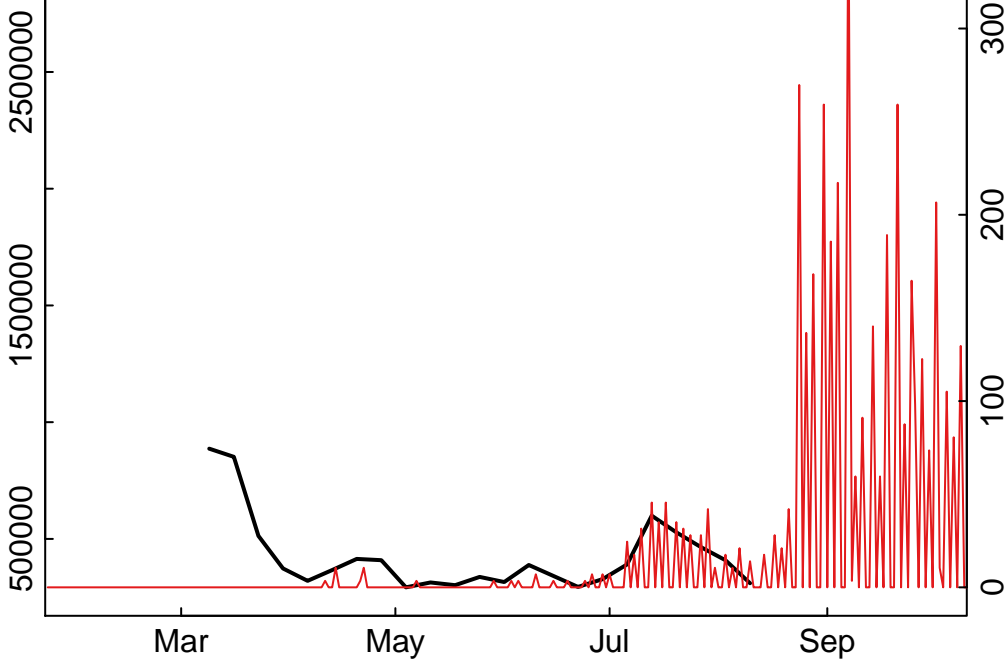

Incident cases (per 100,000 population)

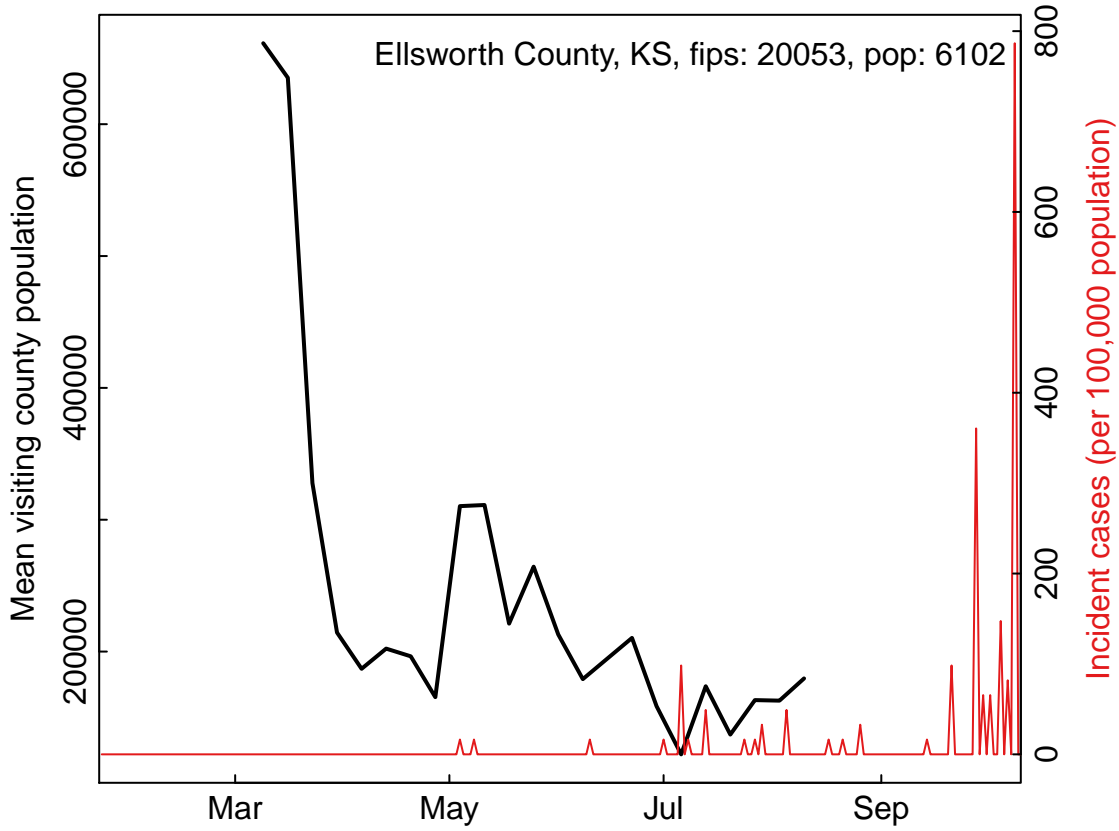

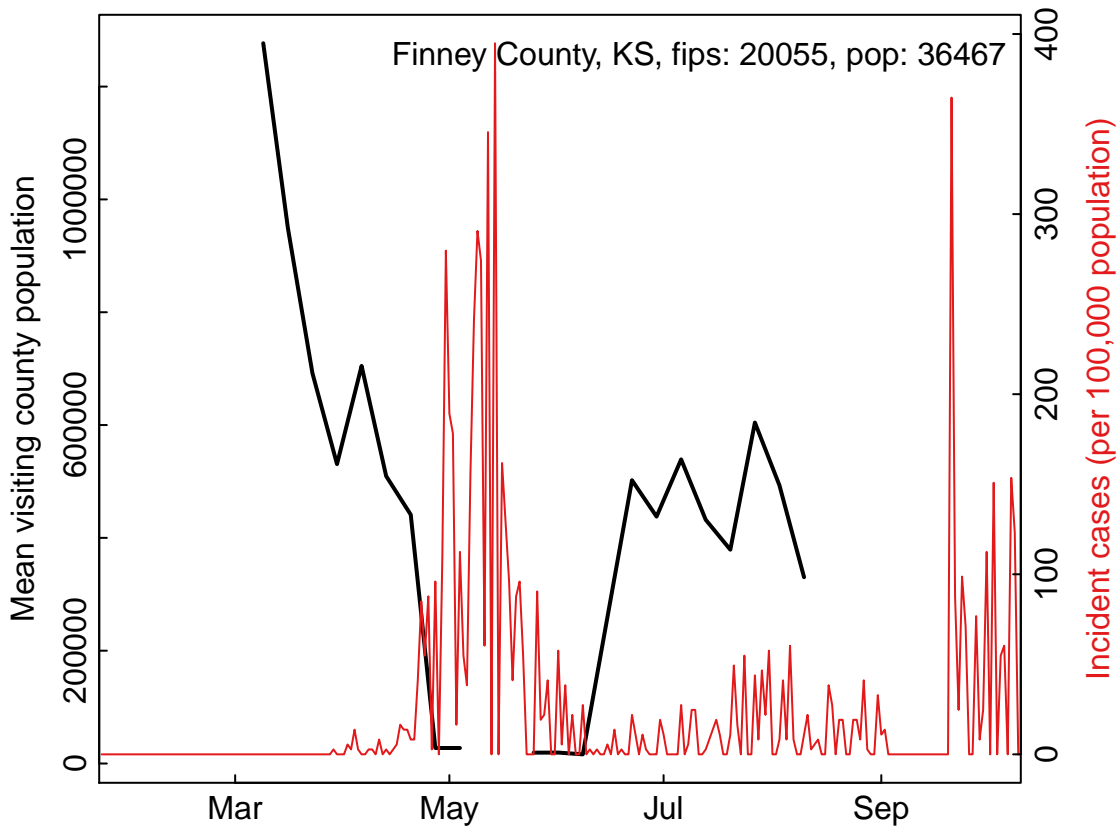

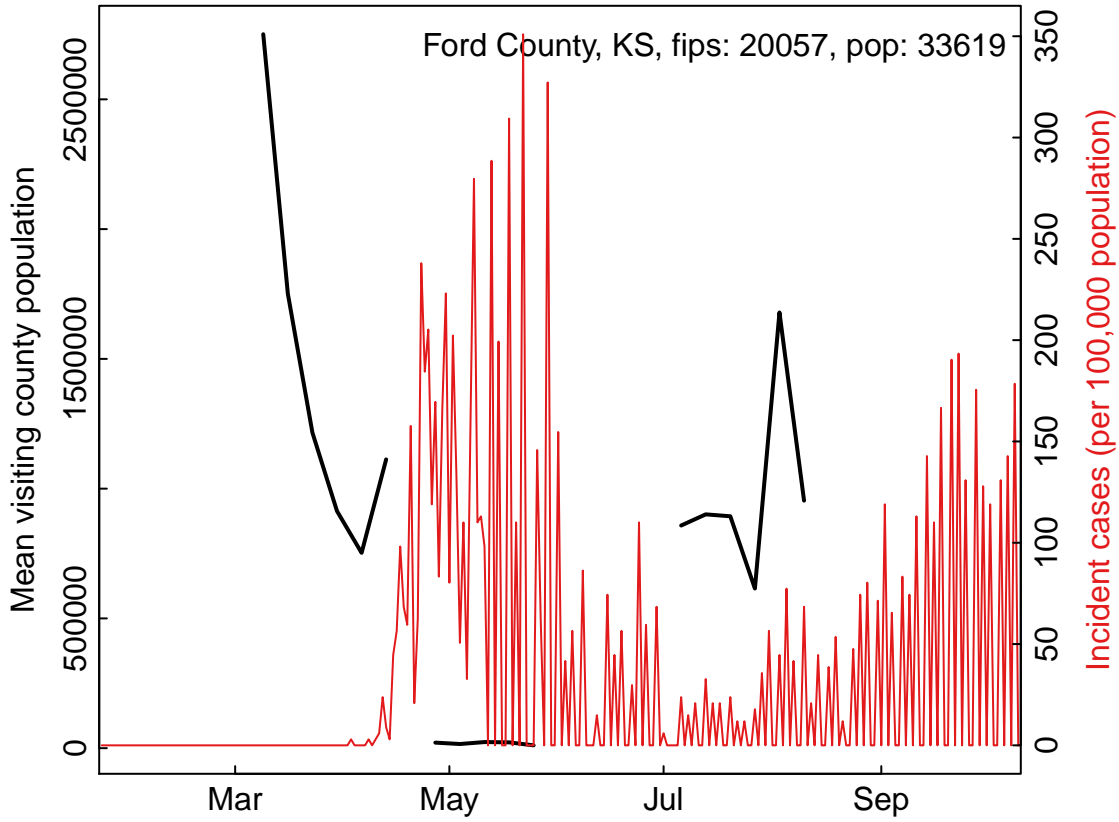

Franklin County, KS, fips: 20059, pop: 25544

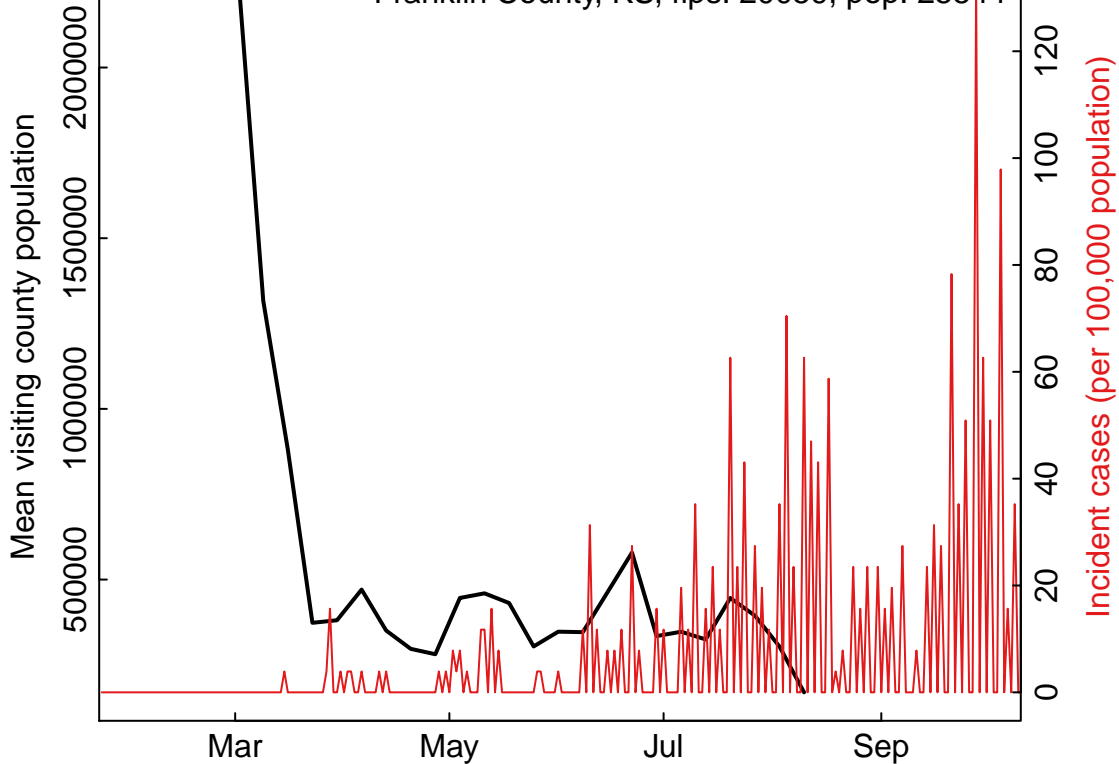

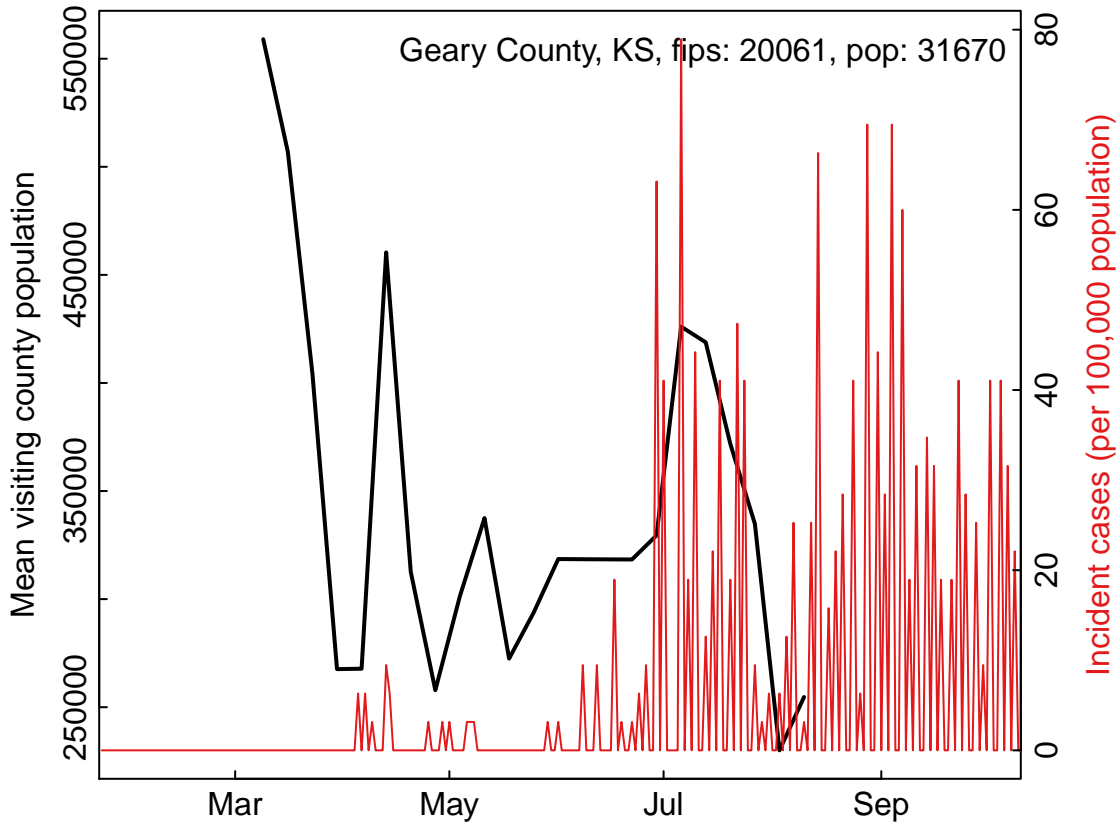

Gove County, KS, fips: 20063, pop: 2636

Mean visiting county population

500000  
300000  
100000

Mar May Jul Sep

Incident cases (per 100,000 population)

400  
300  
200  
100  
0

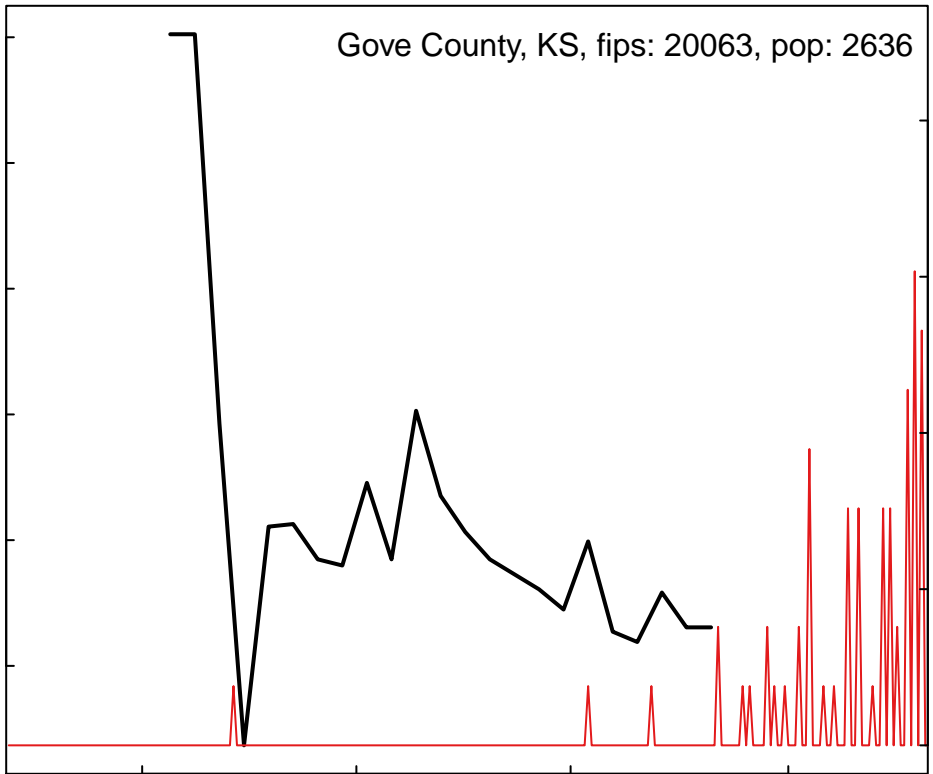

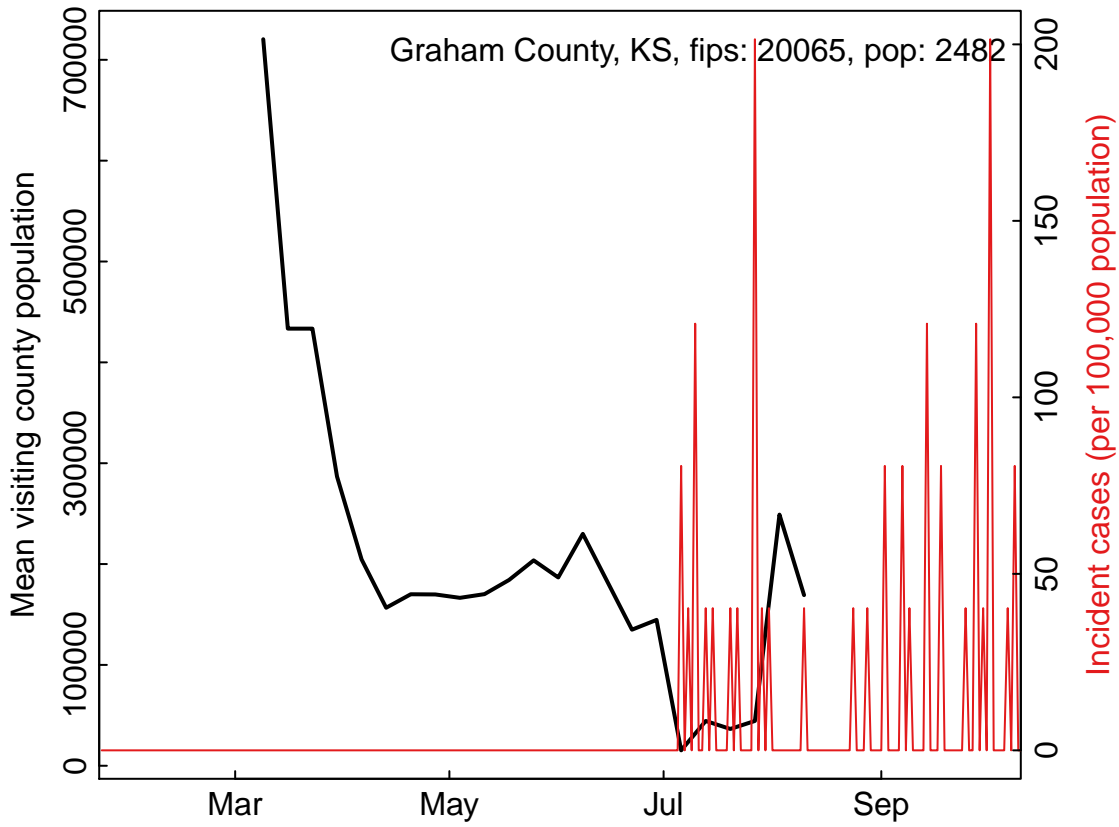



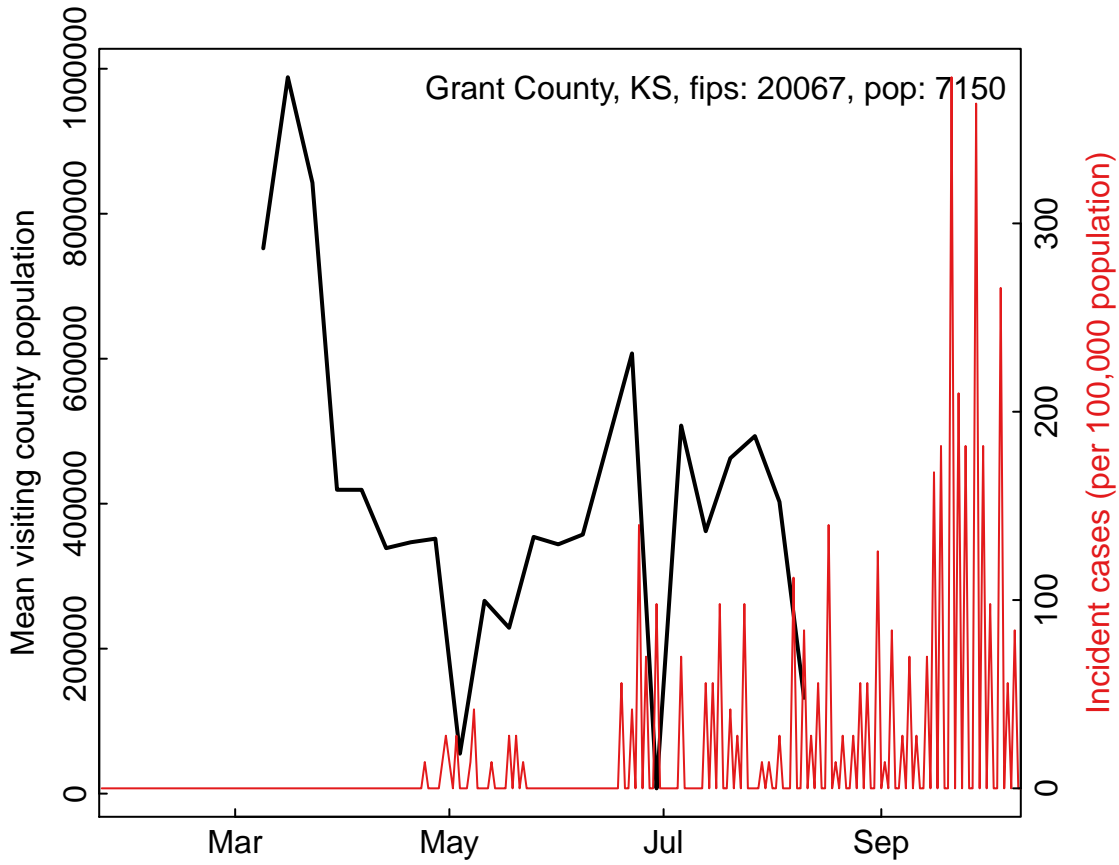

Gray County, KS, fips: 20069, pop: 5988

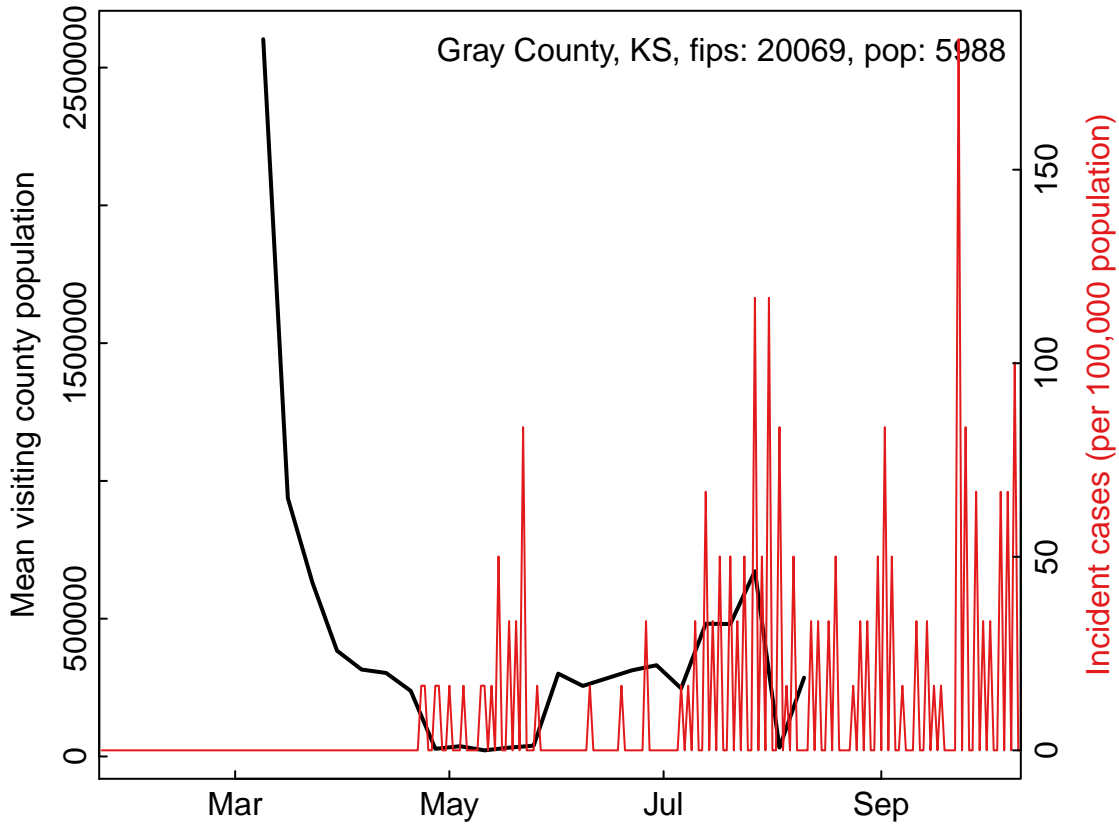

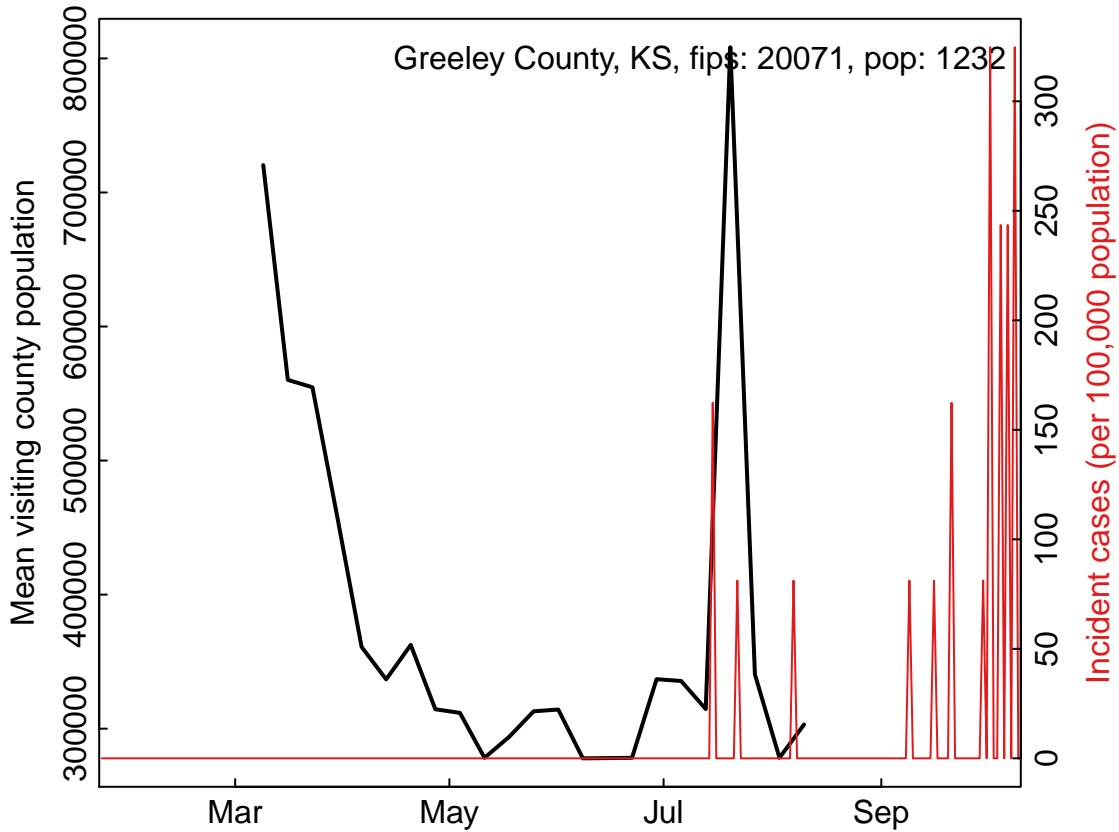

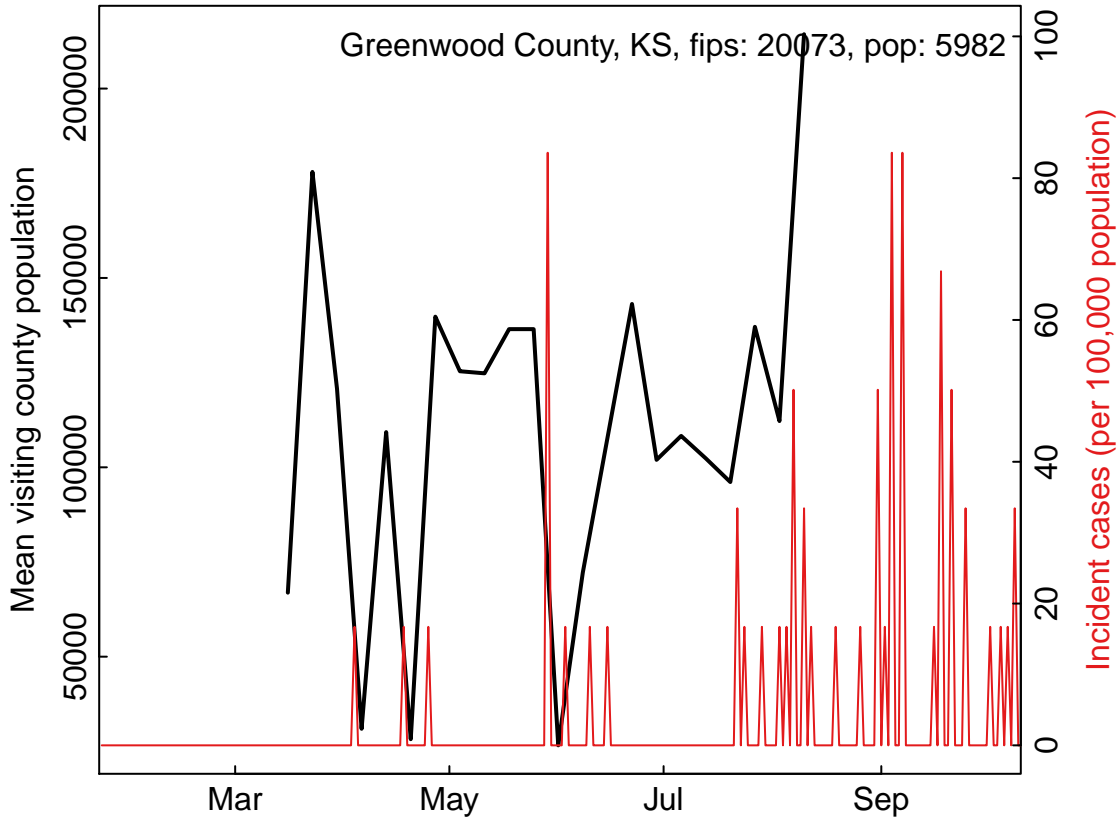

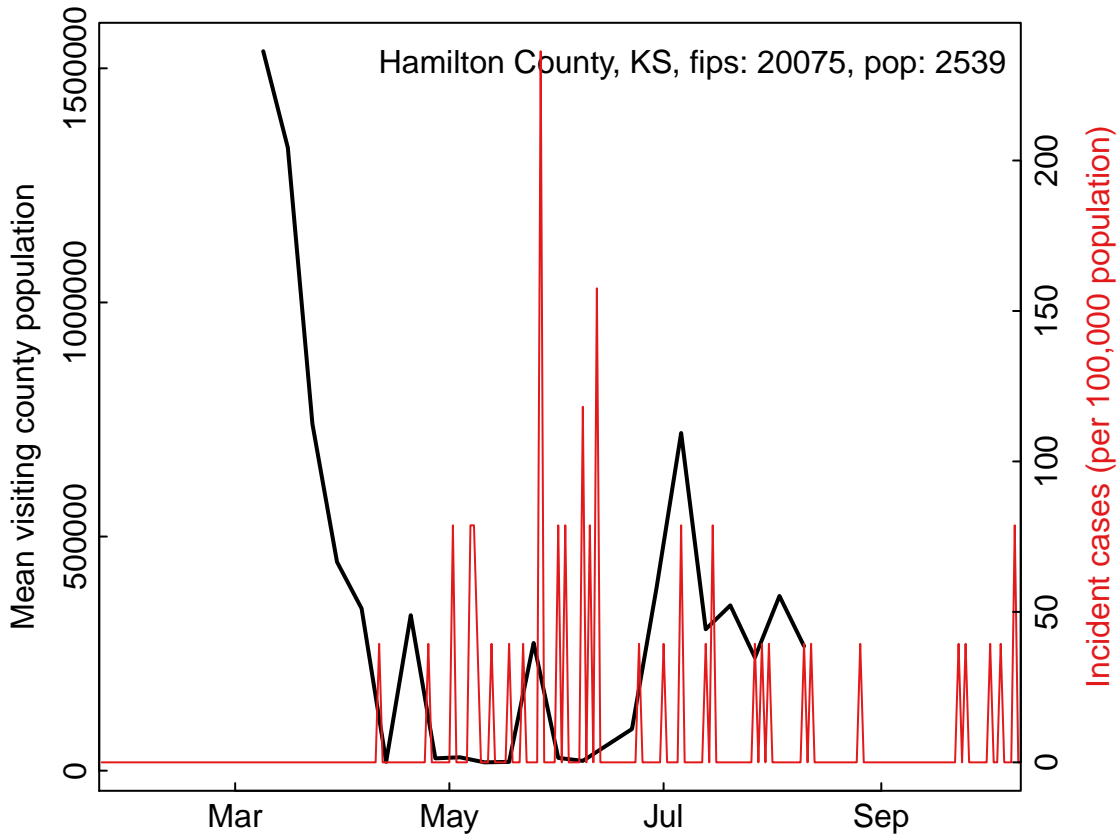

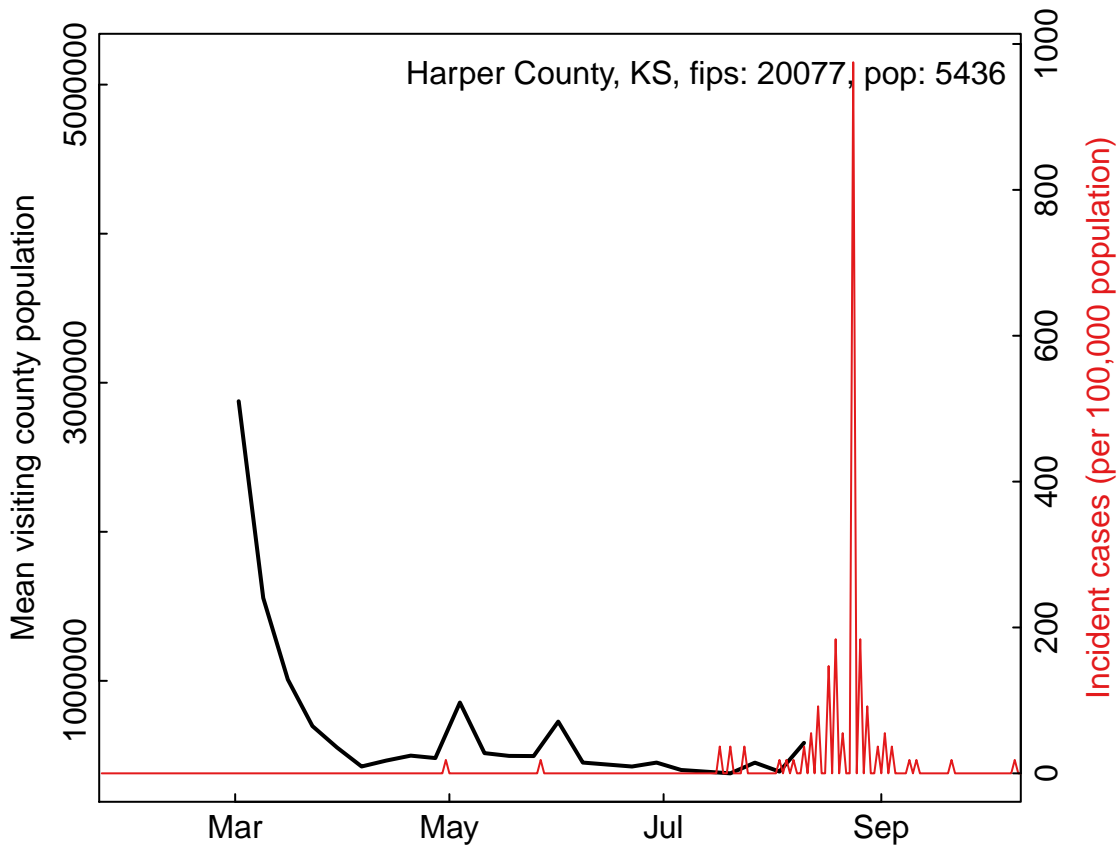

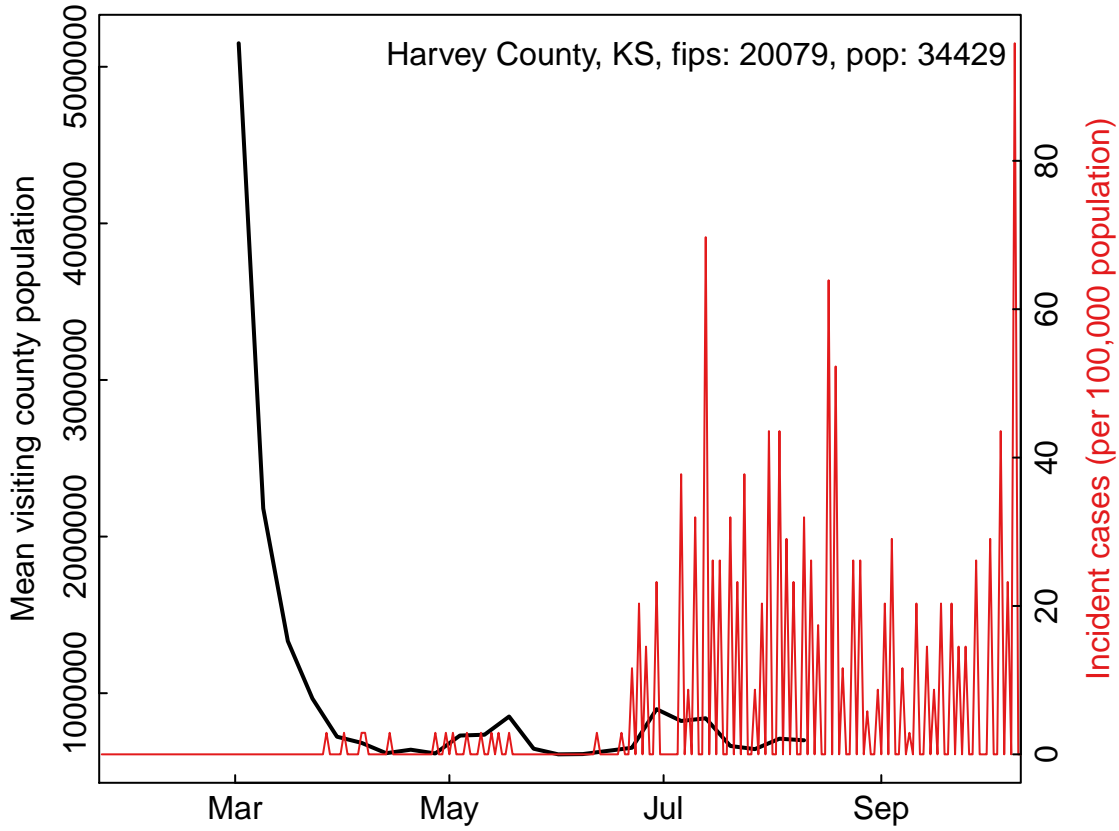

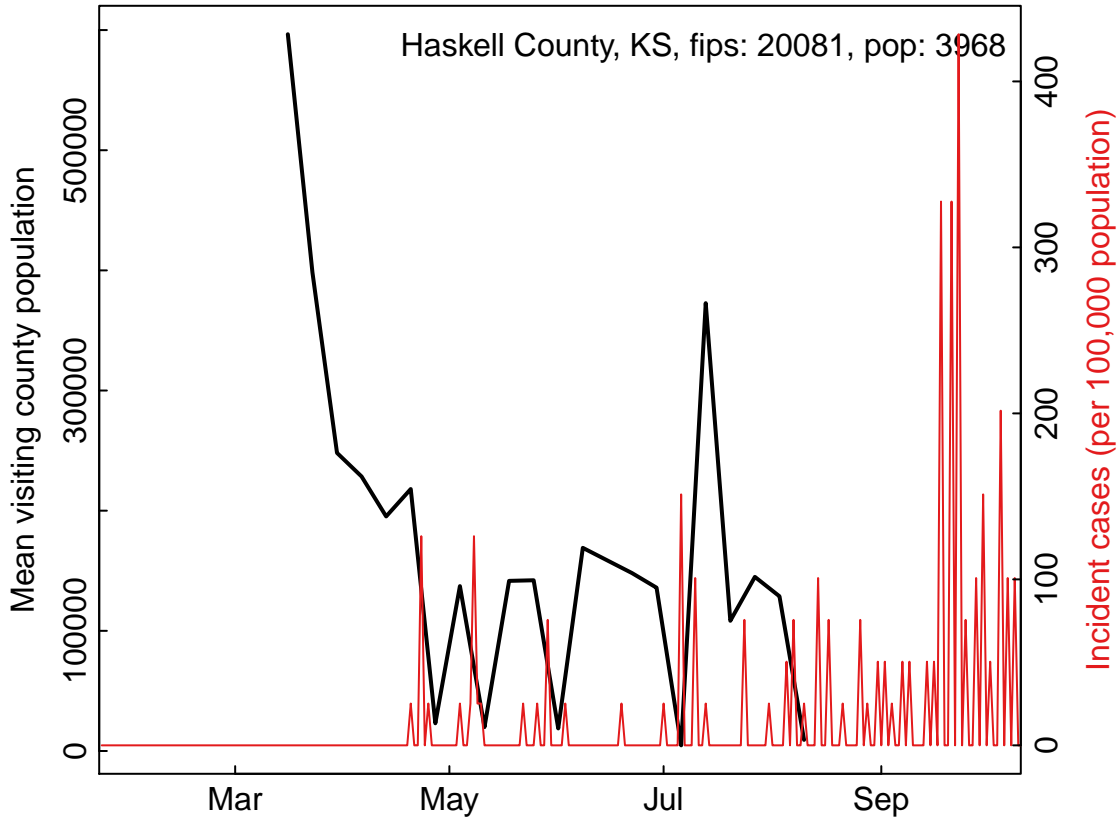



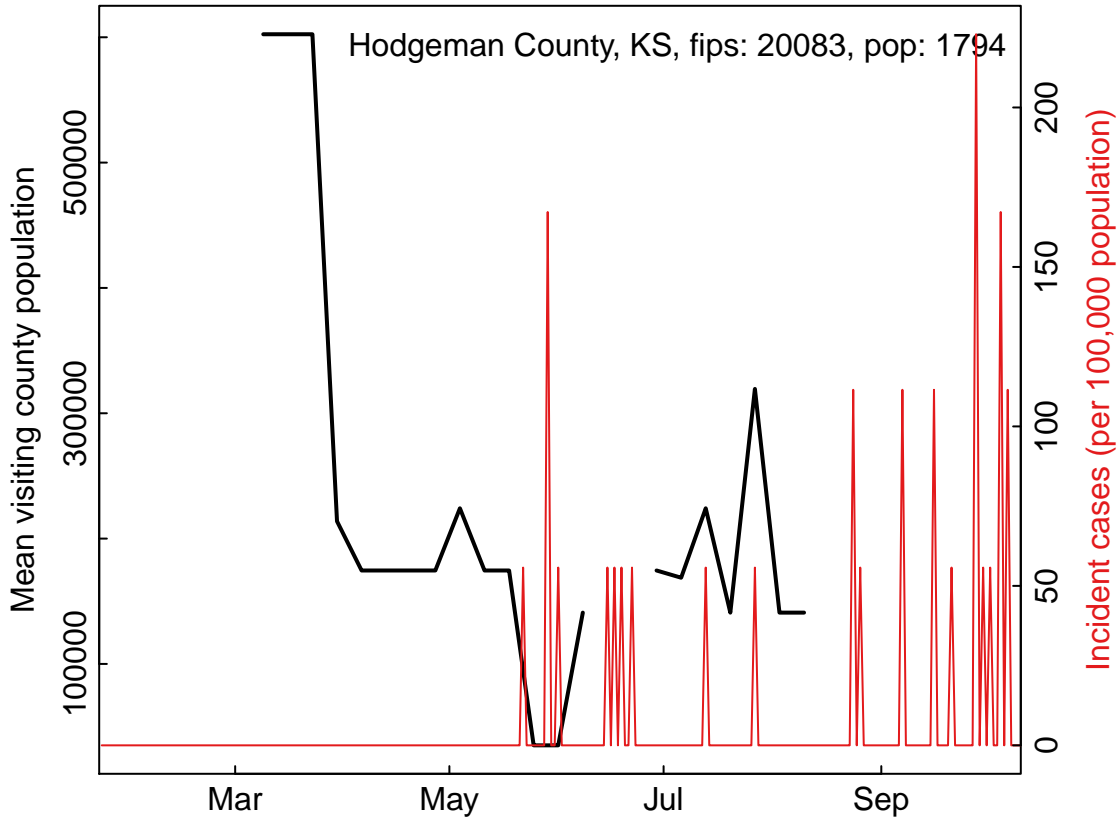

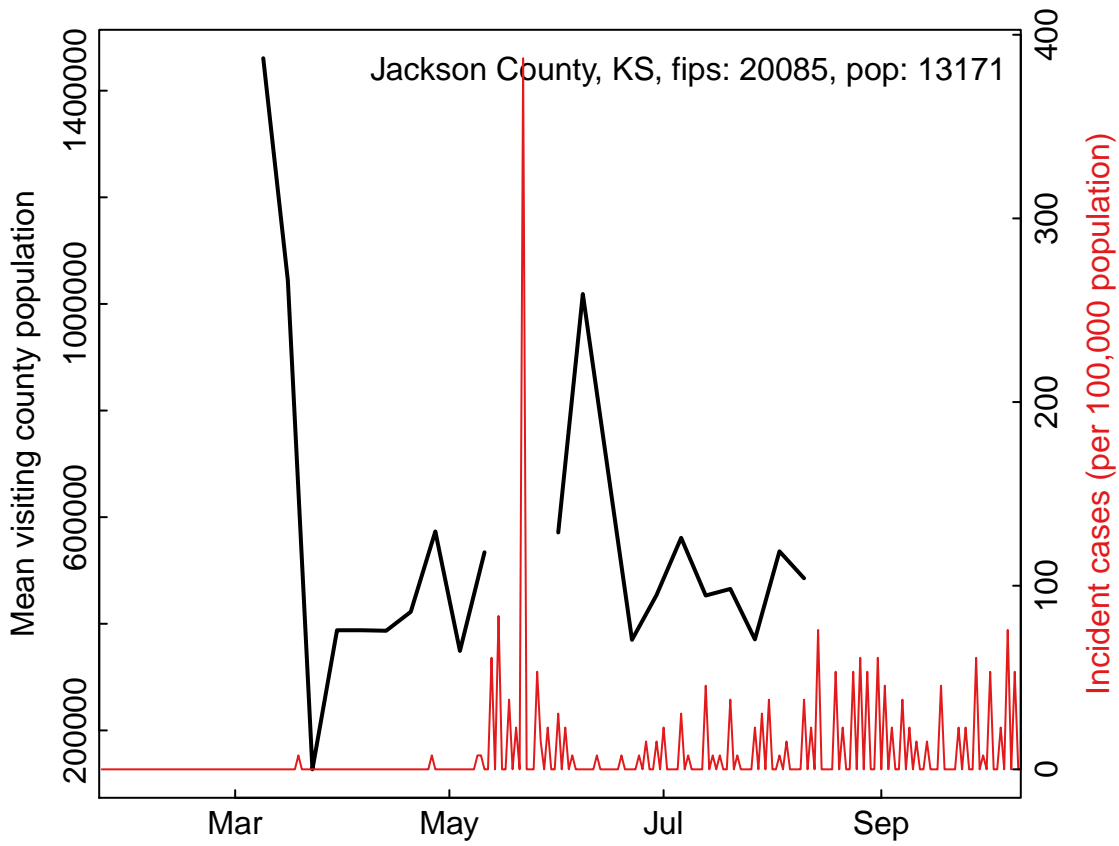

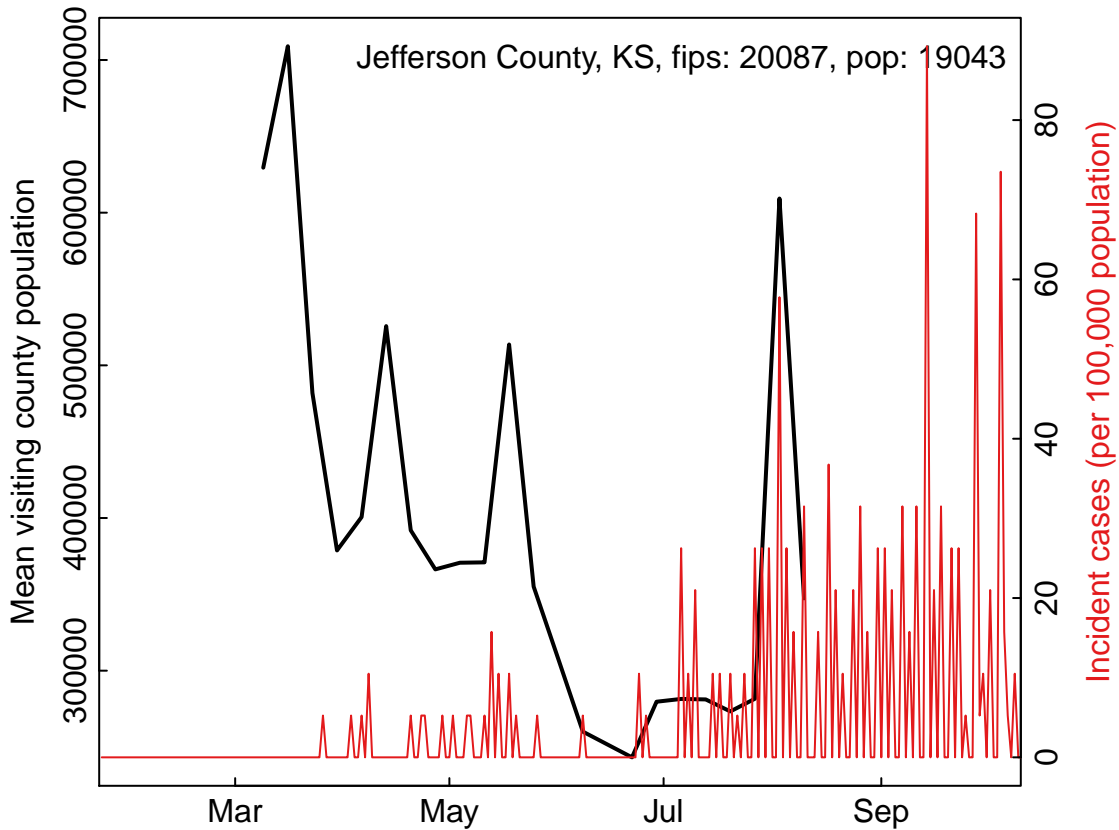

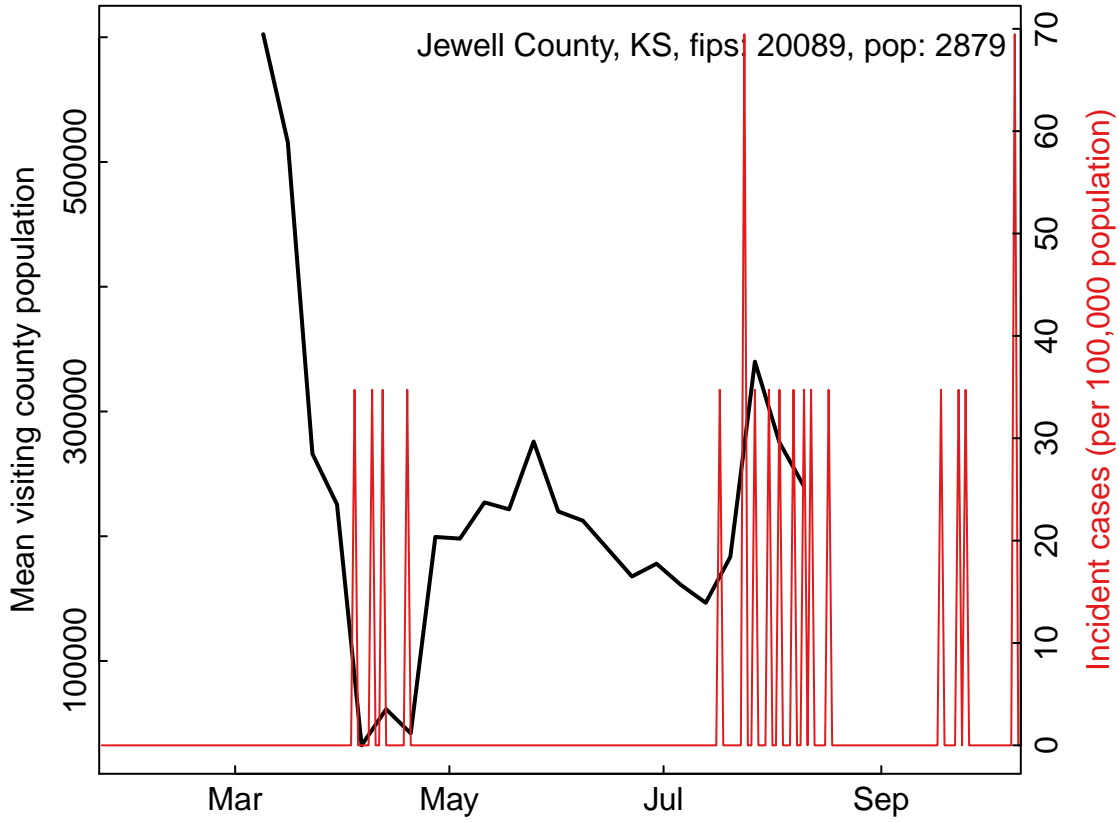

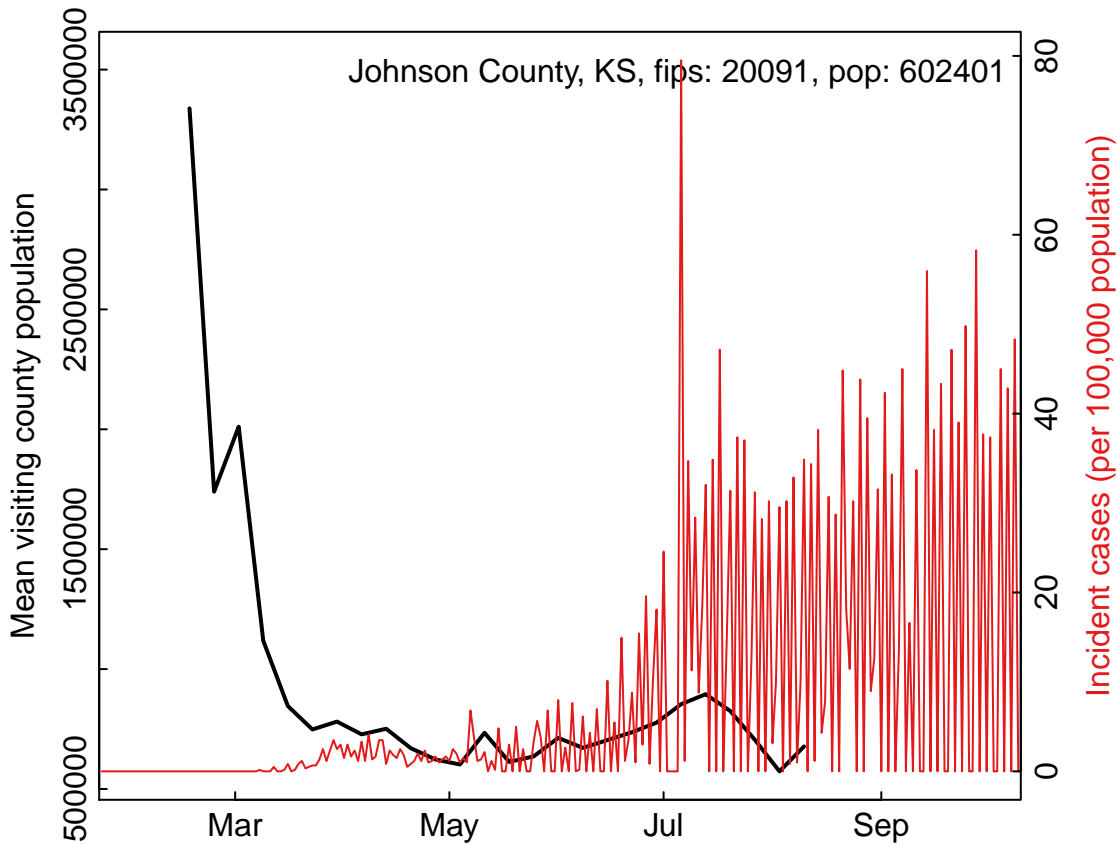

Kearny County, KS, fips: 20093, pop: 3838

Mean visiting county population

Incident cases (per 100,000 population)

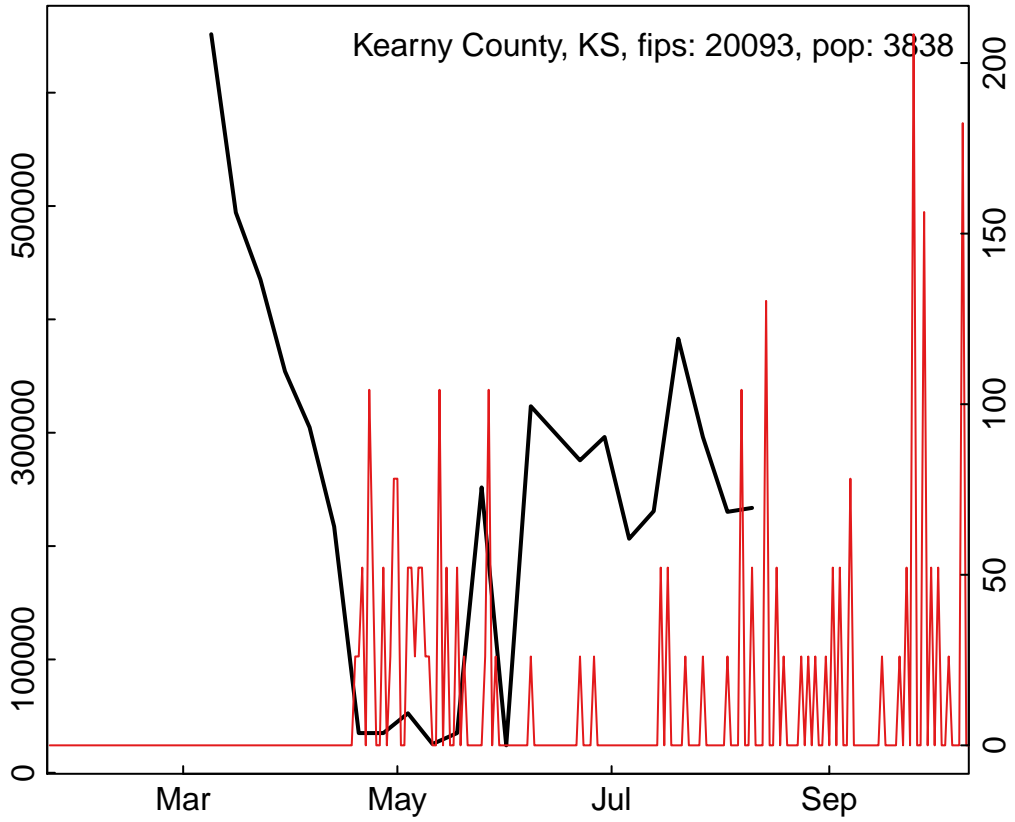

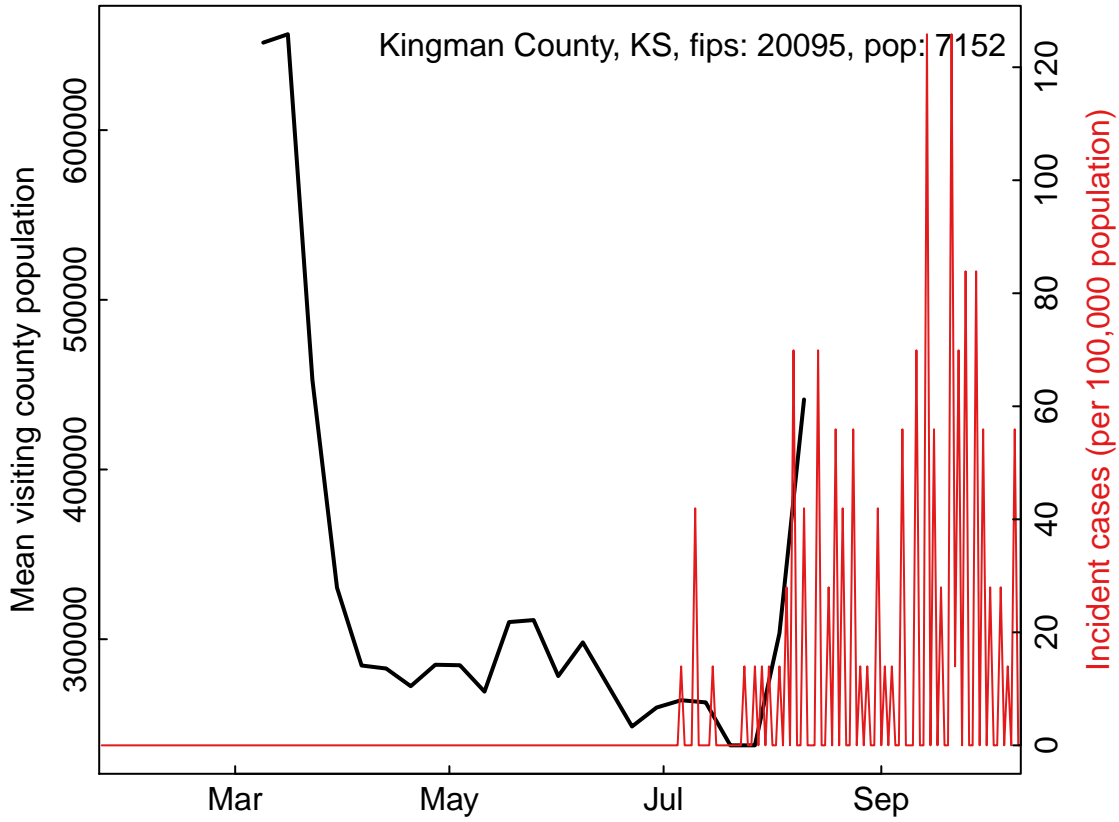

Kiowa County, KS, fips: 20097, pop: 2475

Mean visiting county population

1200000  
800000  
400000  
0

Mar

May

Jul

Sep

300  
200  
100  
0

Incident cases (per 100,000 population)

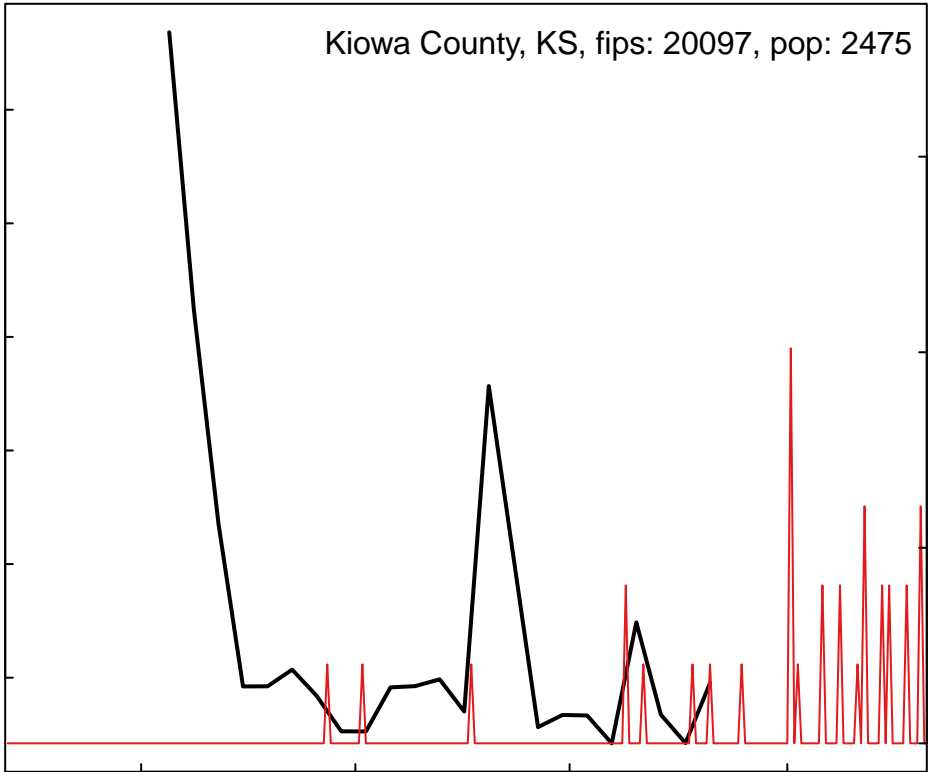



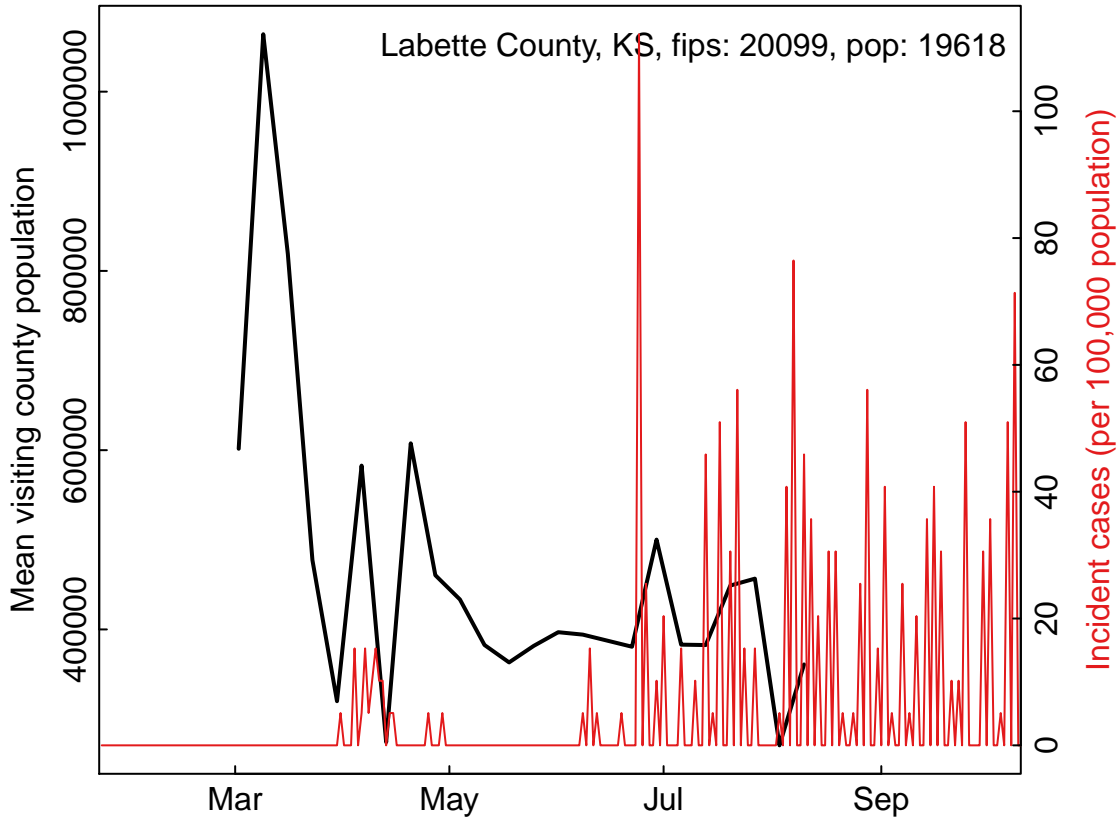

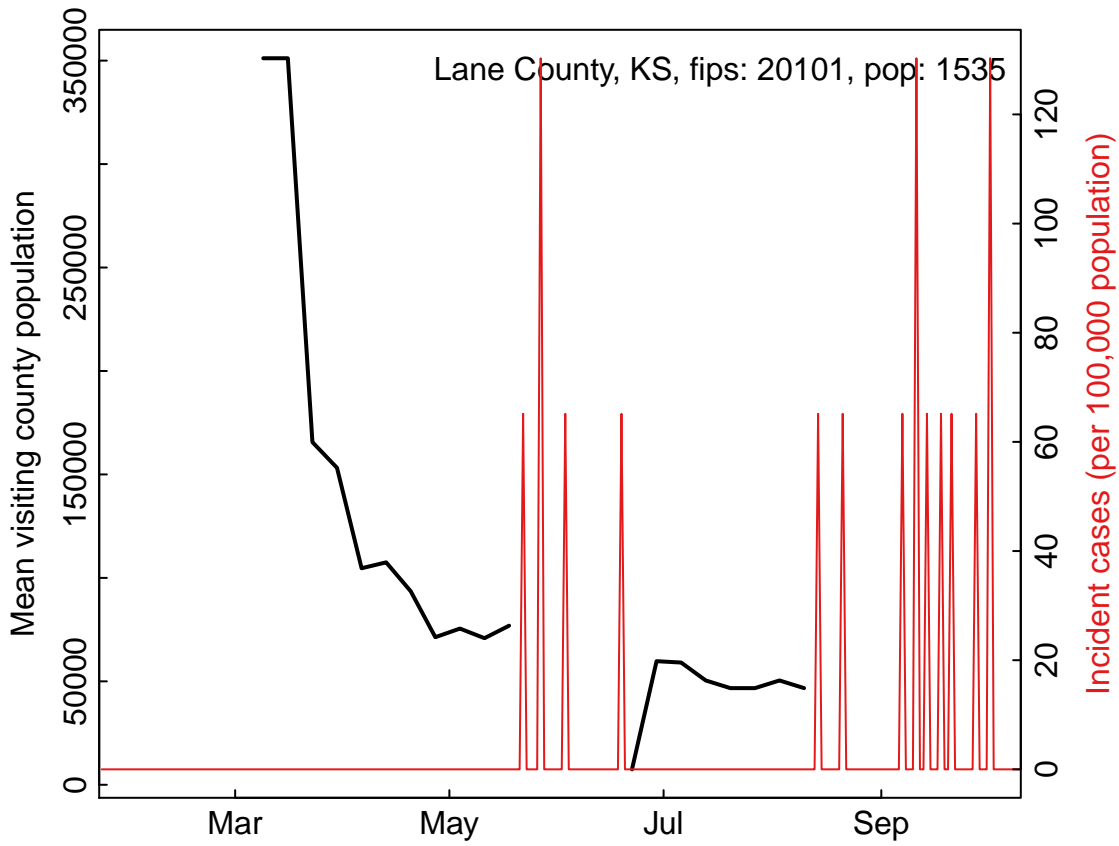

Leavenworth County, KS, fips: 20103, pop: 81758

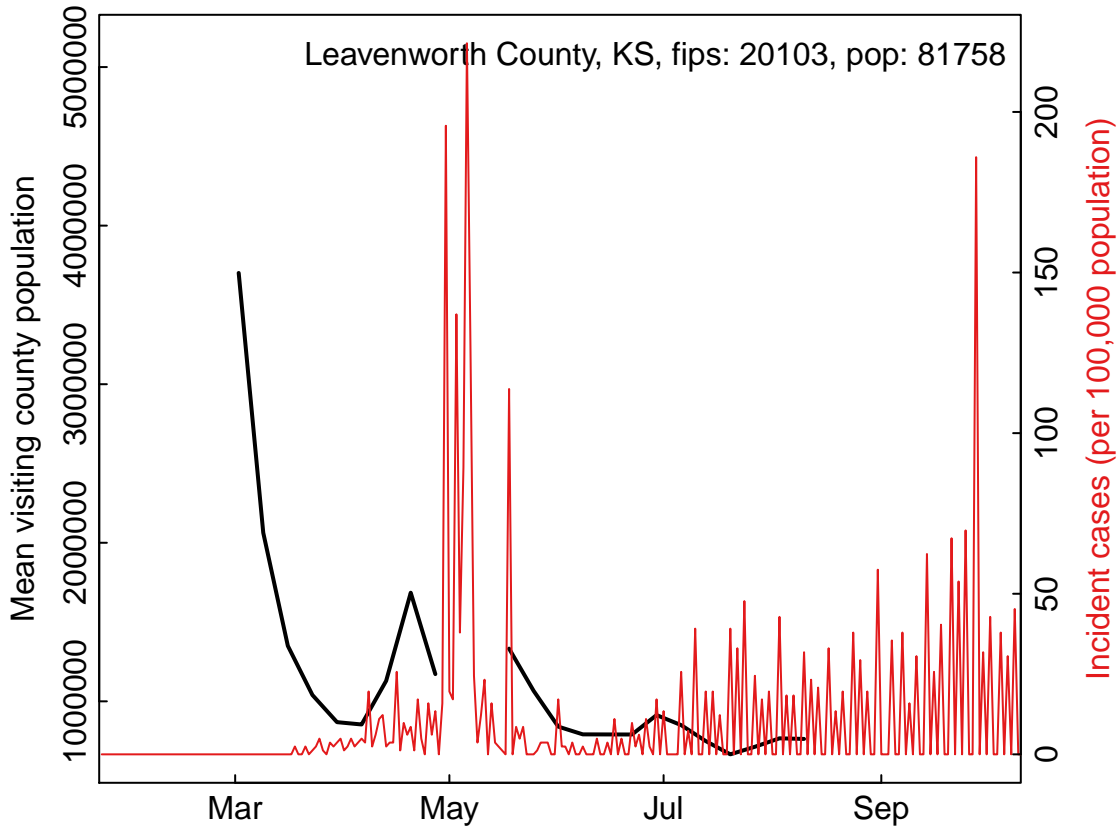

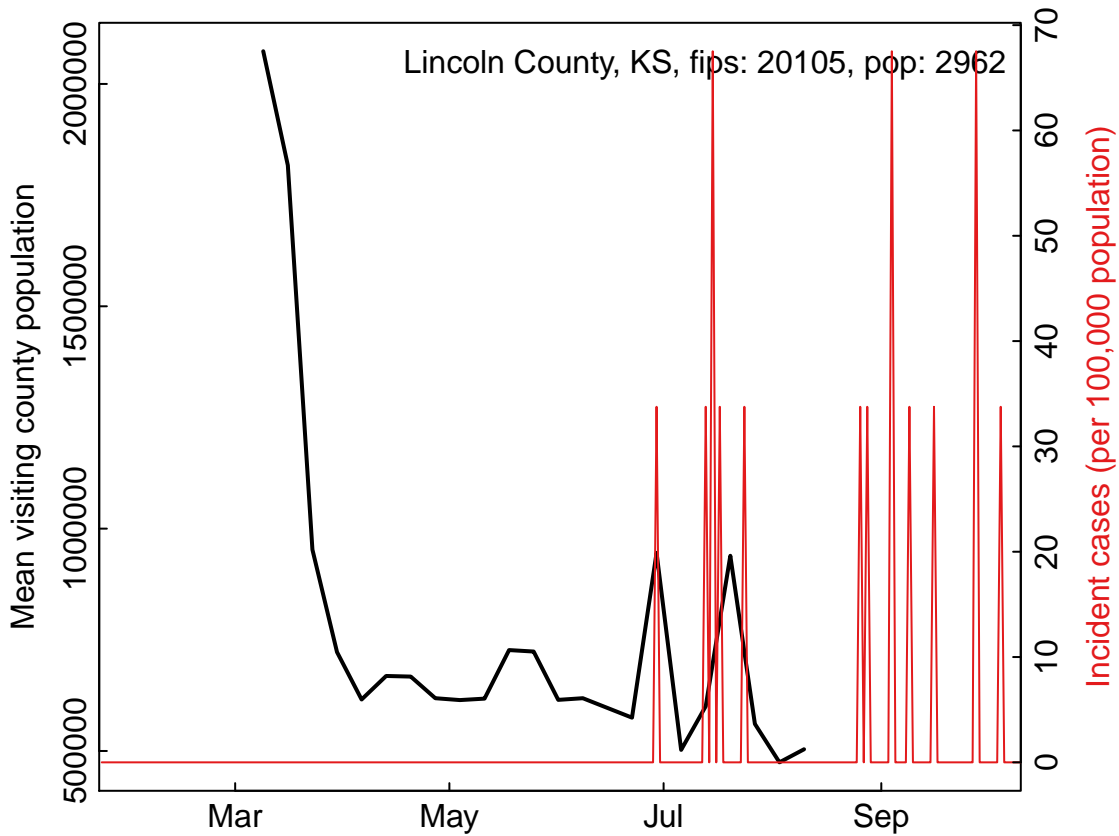

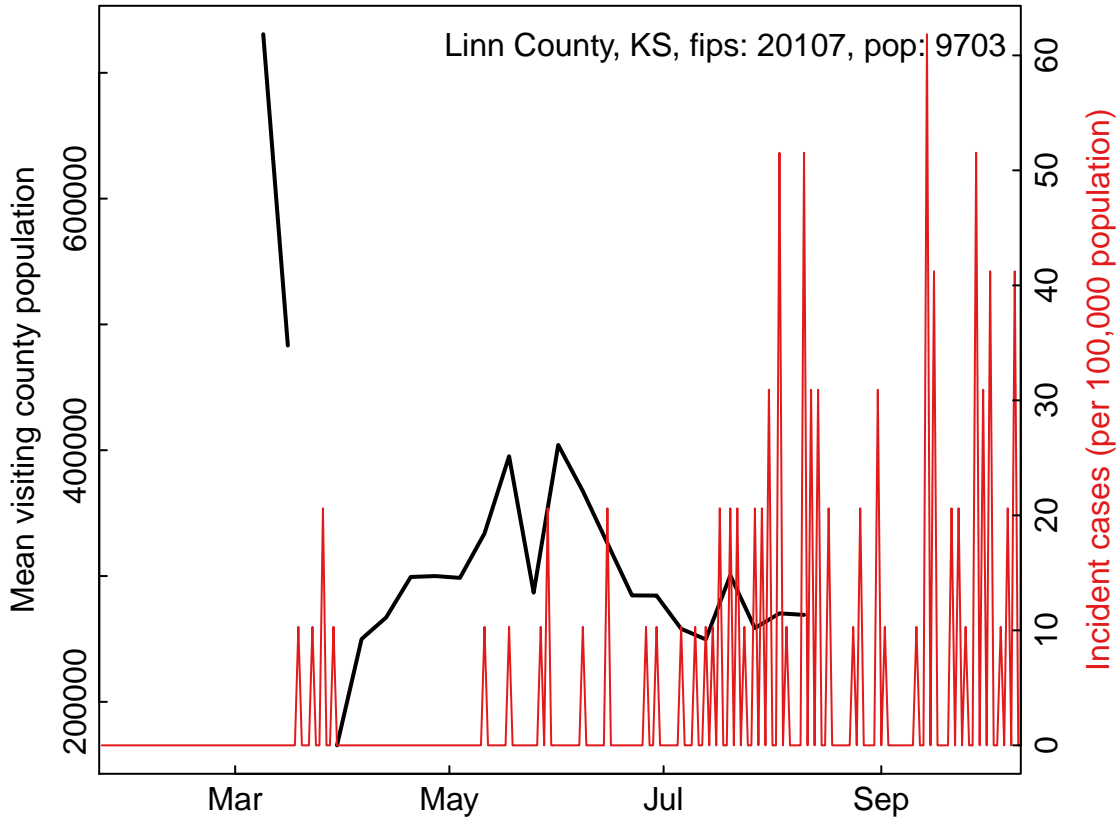

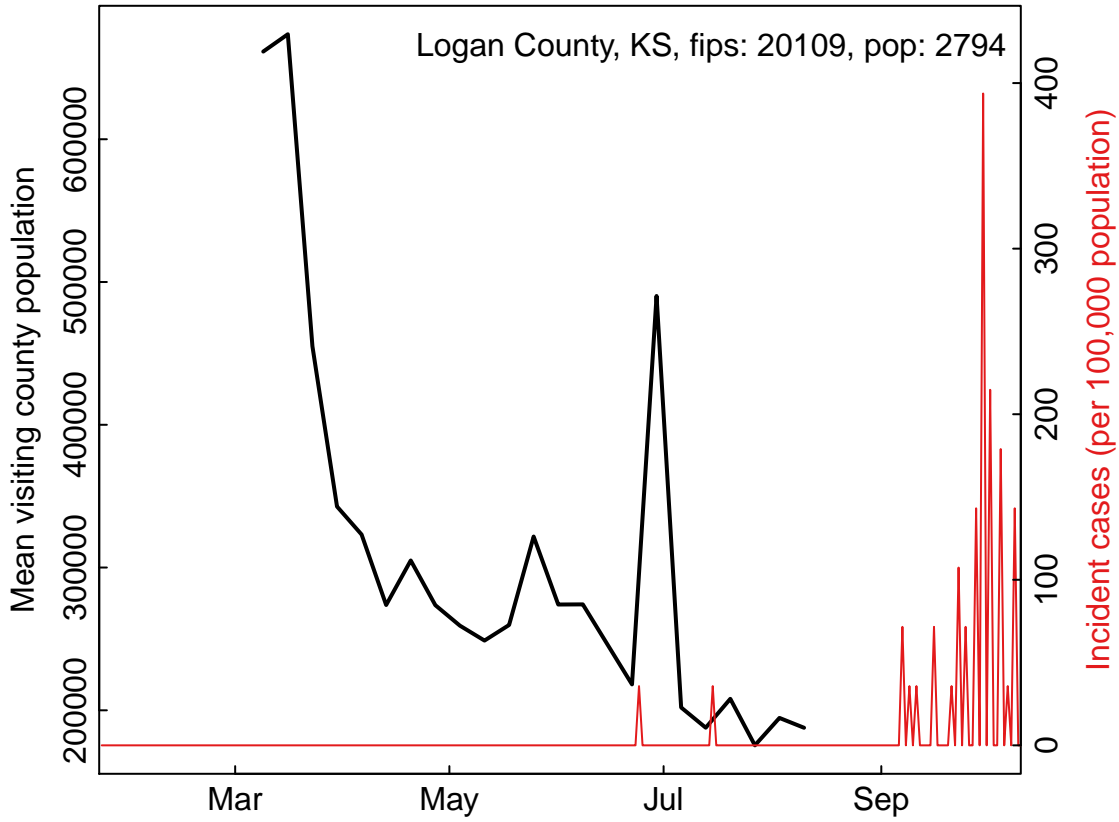

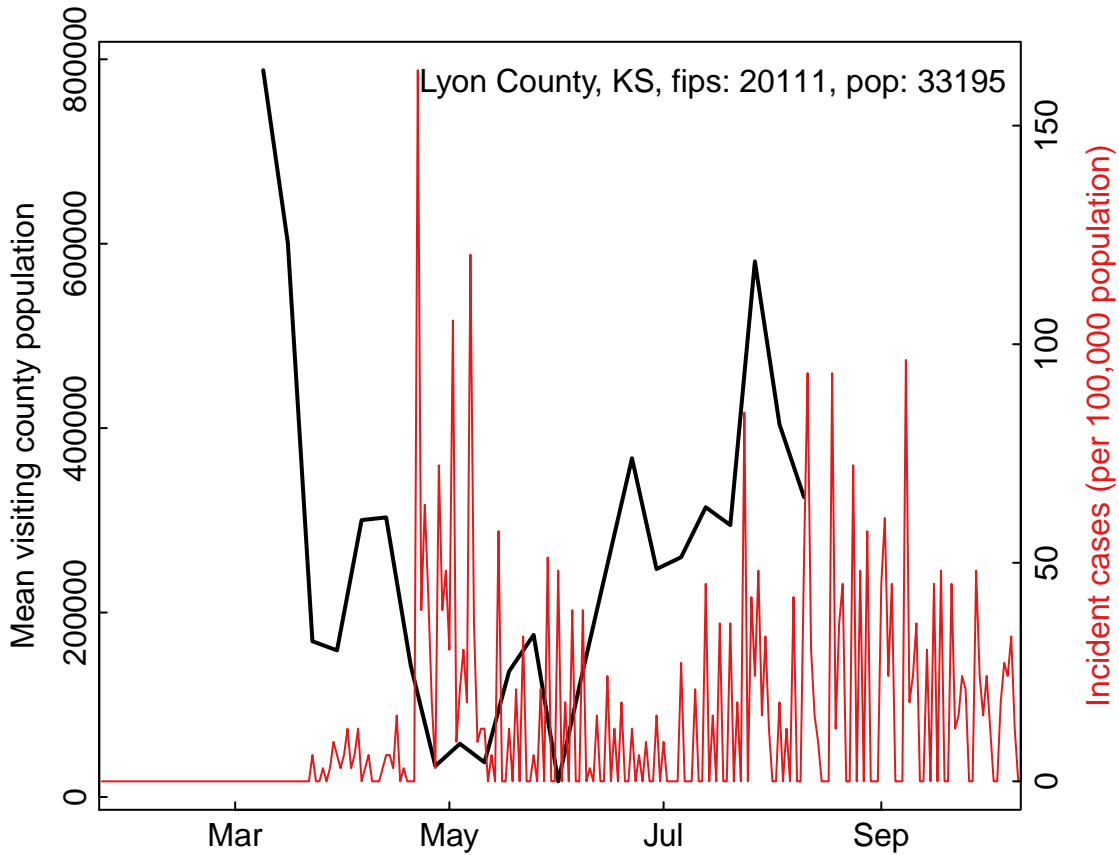

McPherson County, KS, fips: 20113, pop: 28542

Mean visiting county population

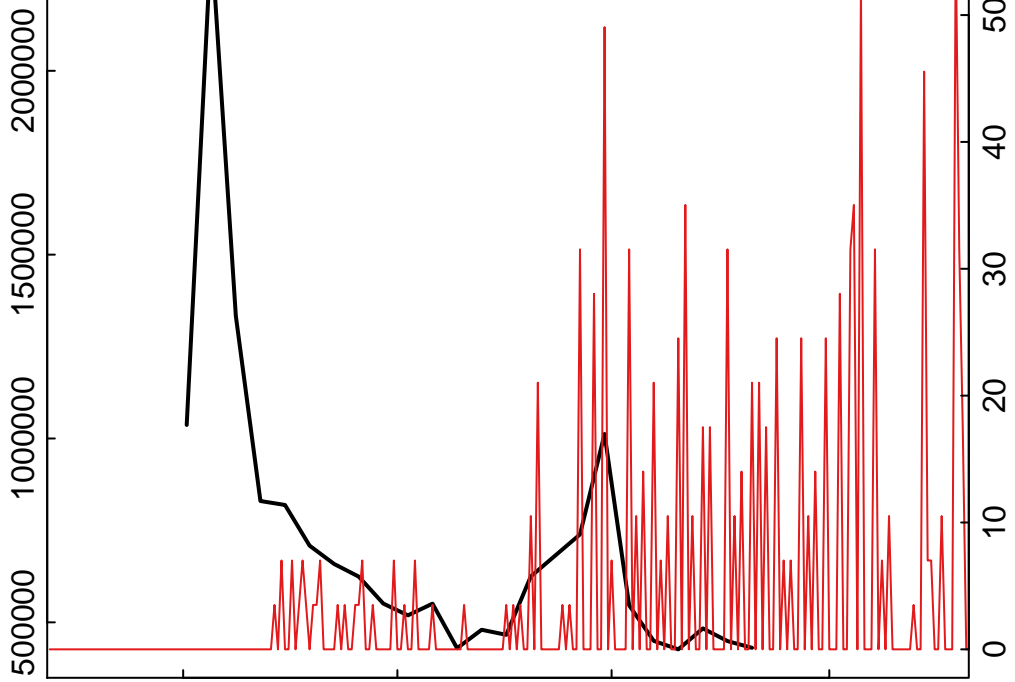

Incident cases (per 100,000 population)



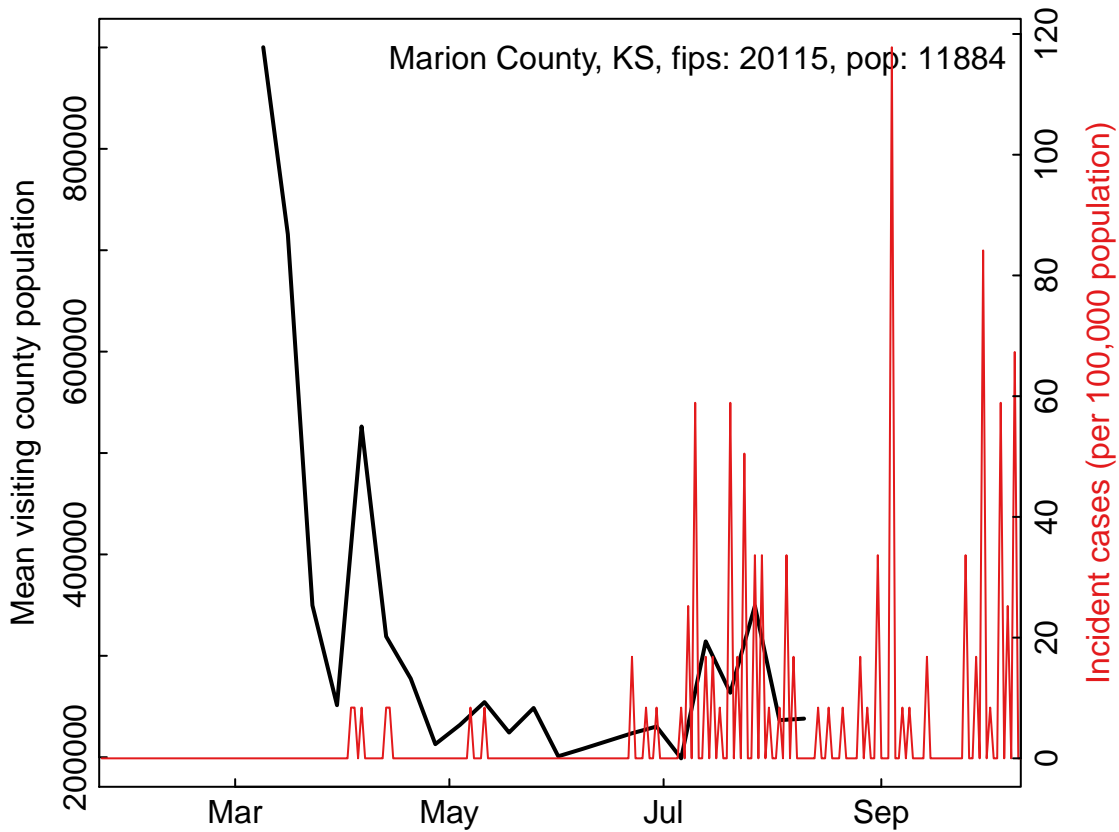

Marshall County, KS, fips: 20117, pop: 9707

Mean visiting county population

1500000  
1000000  
500000

Mar

May

Jul

Sep

0

20

40

60

Incident cases (per 100,000 population)

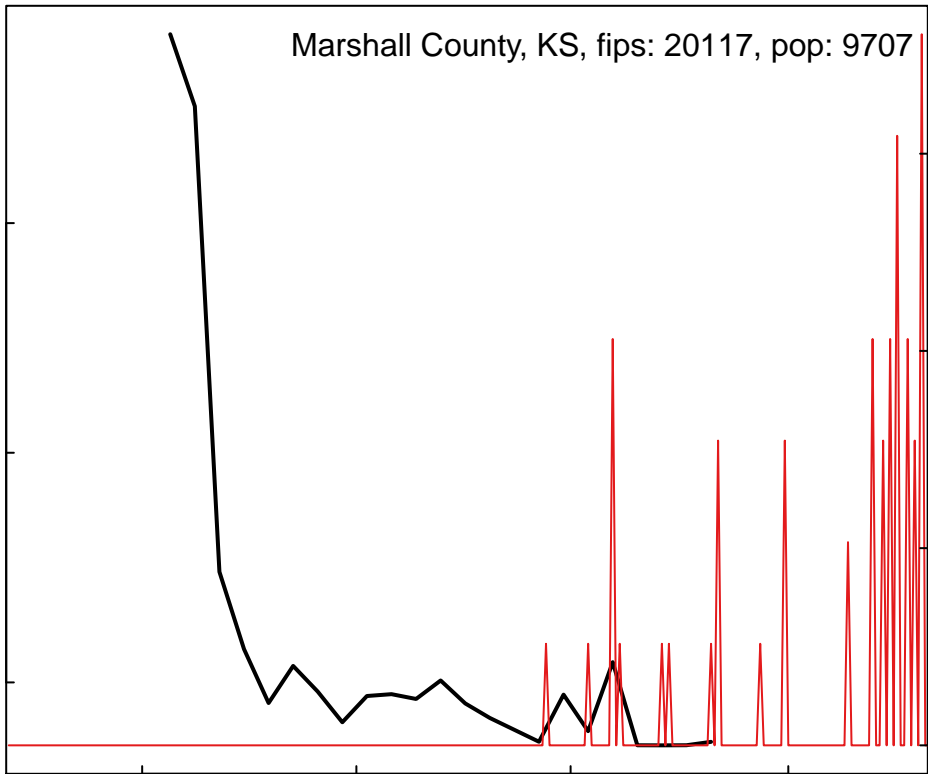

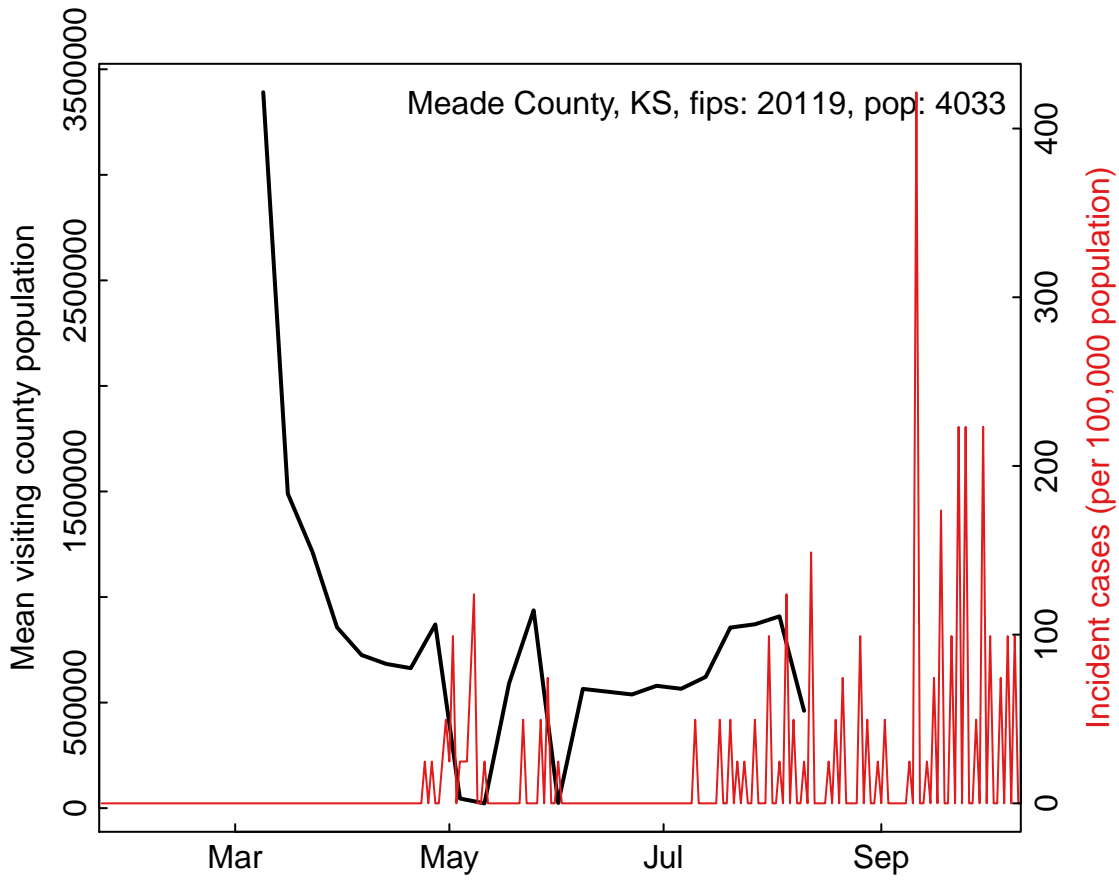

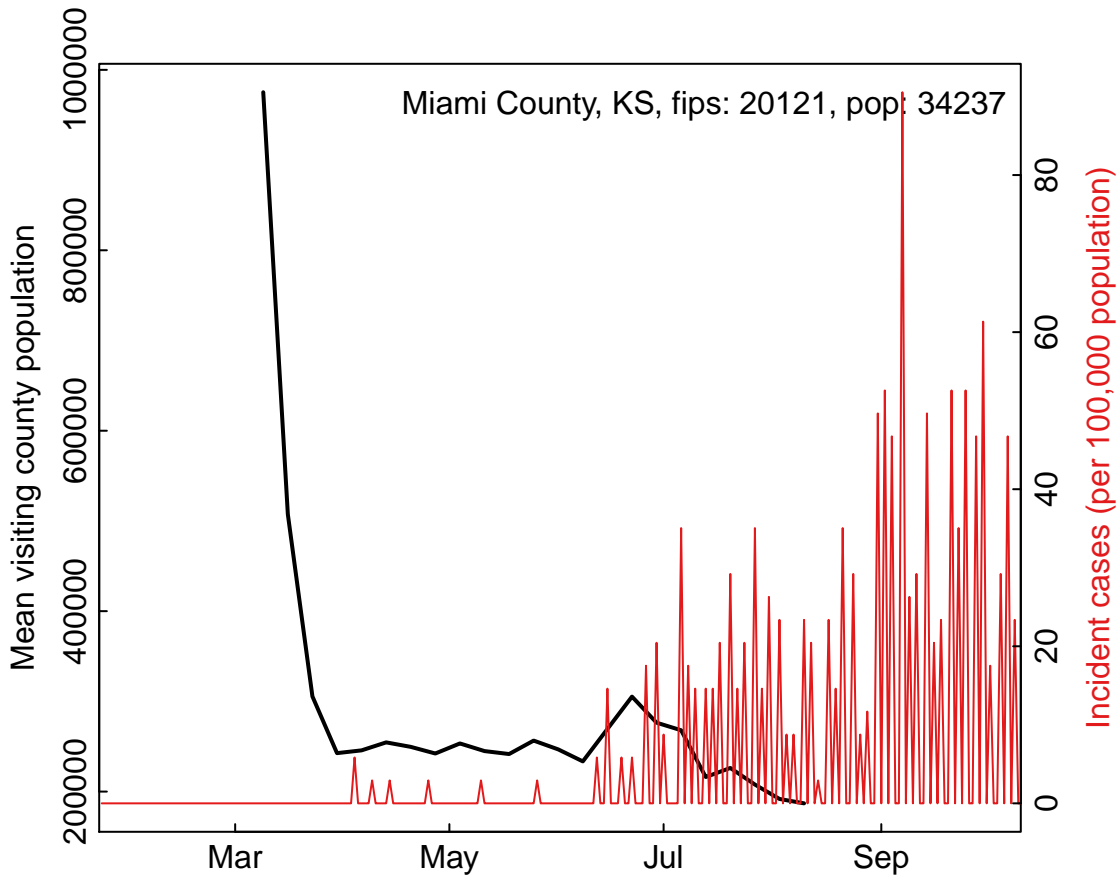

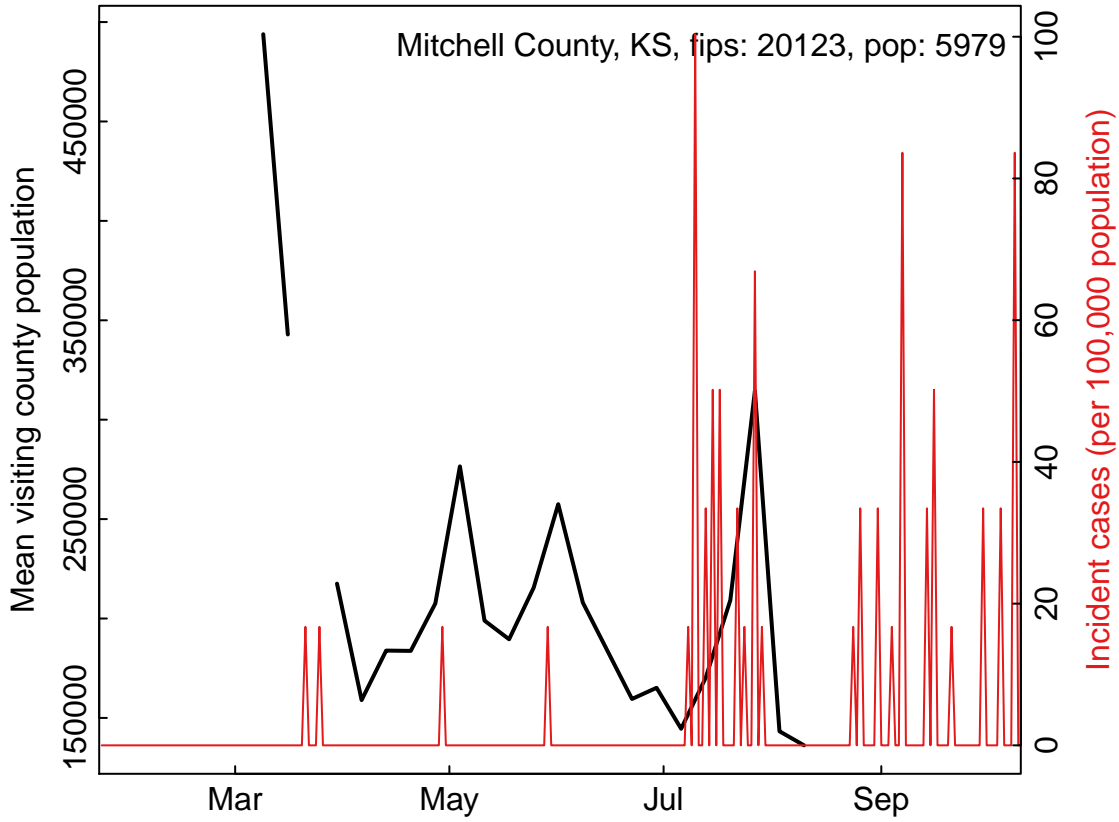

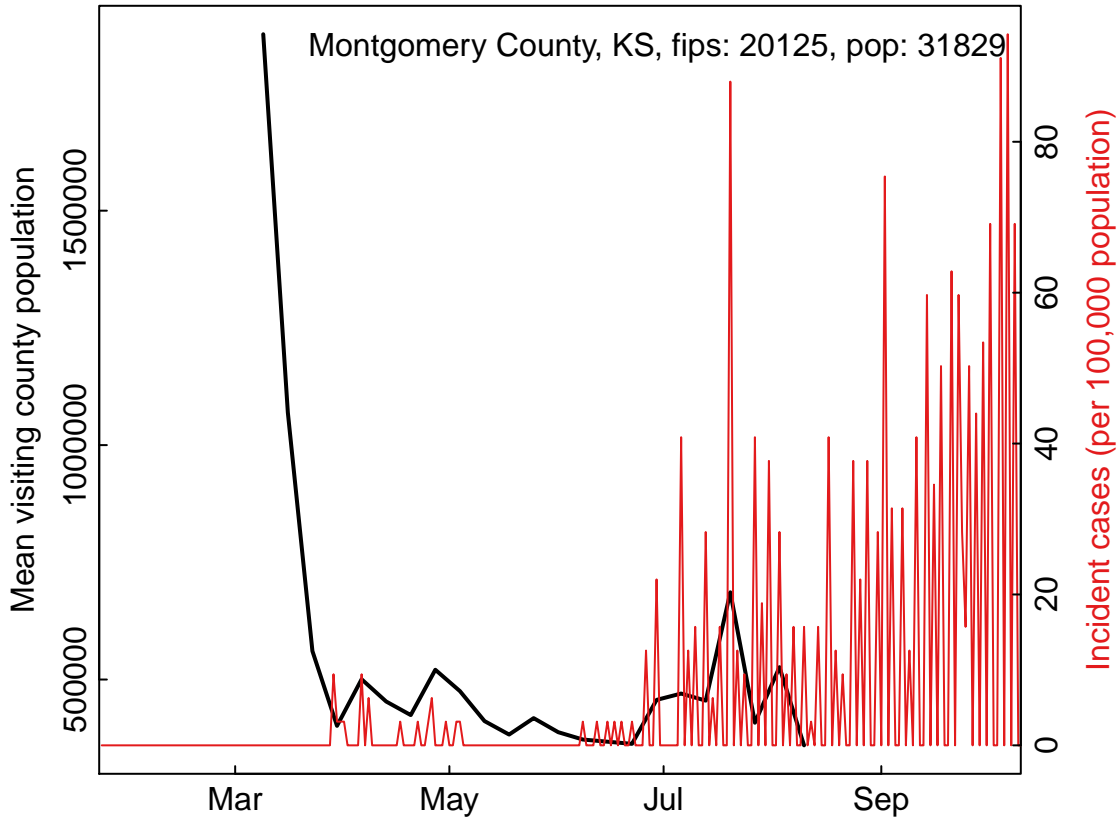

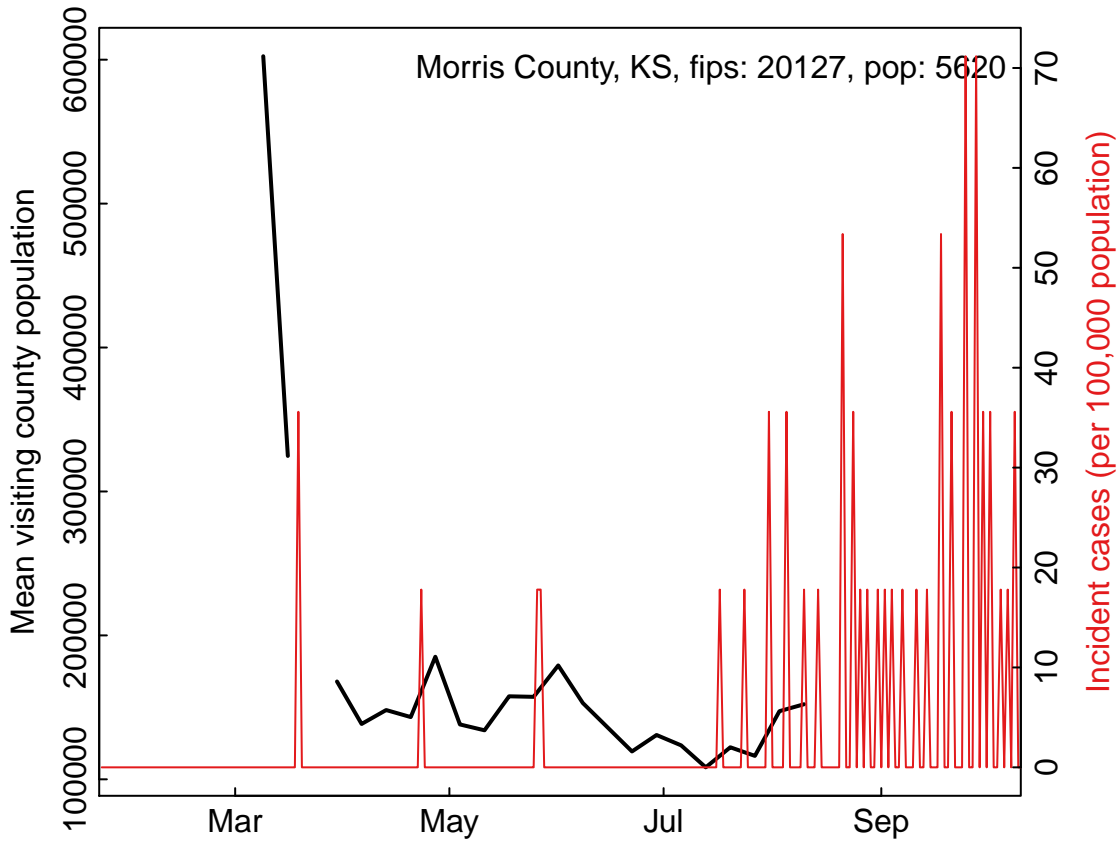

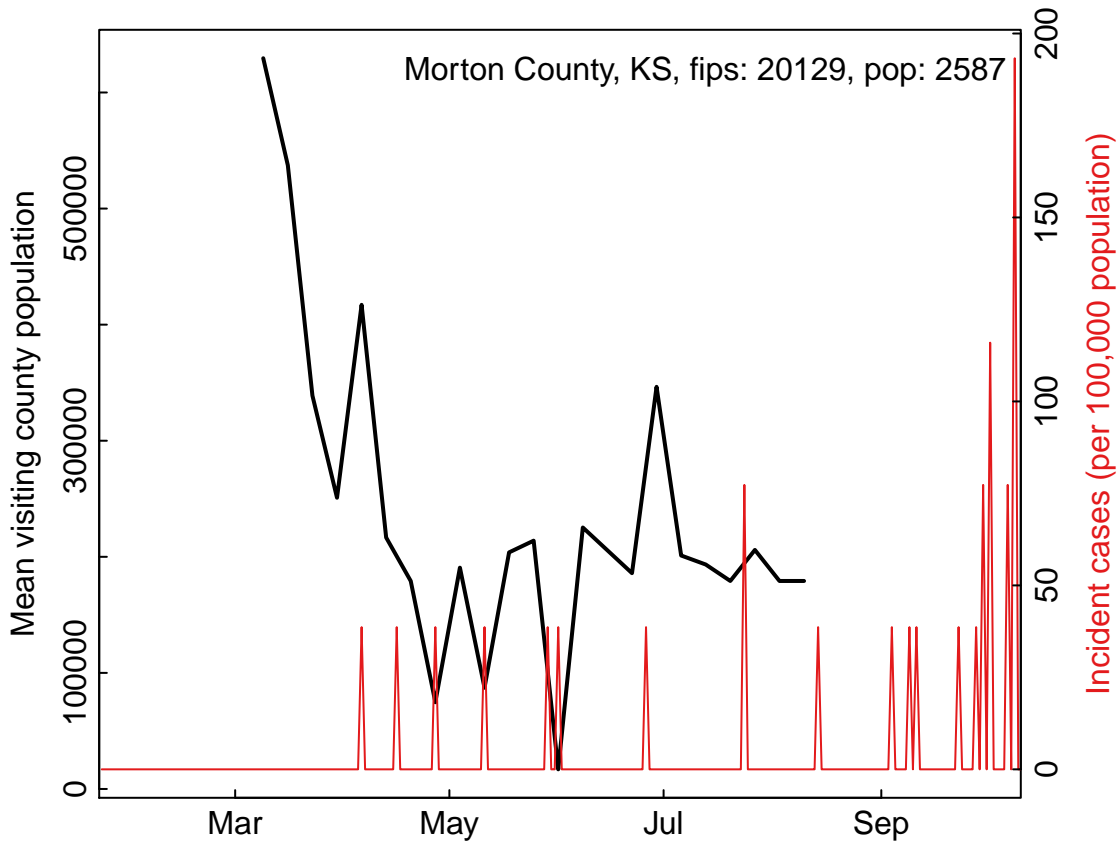



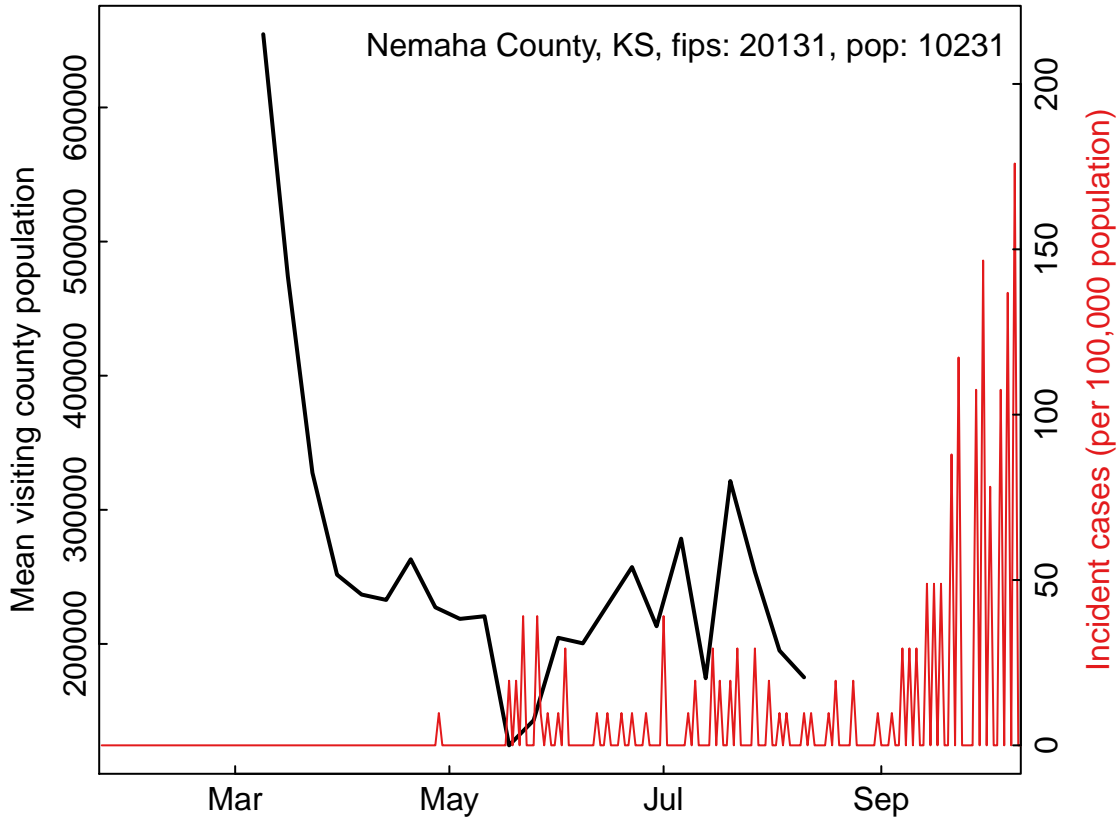

Neosho County, KS, fips: 20133, pop: 16007

Mean visiting county population

Incident cases (per 100,000 population)

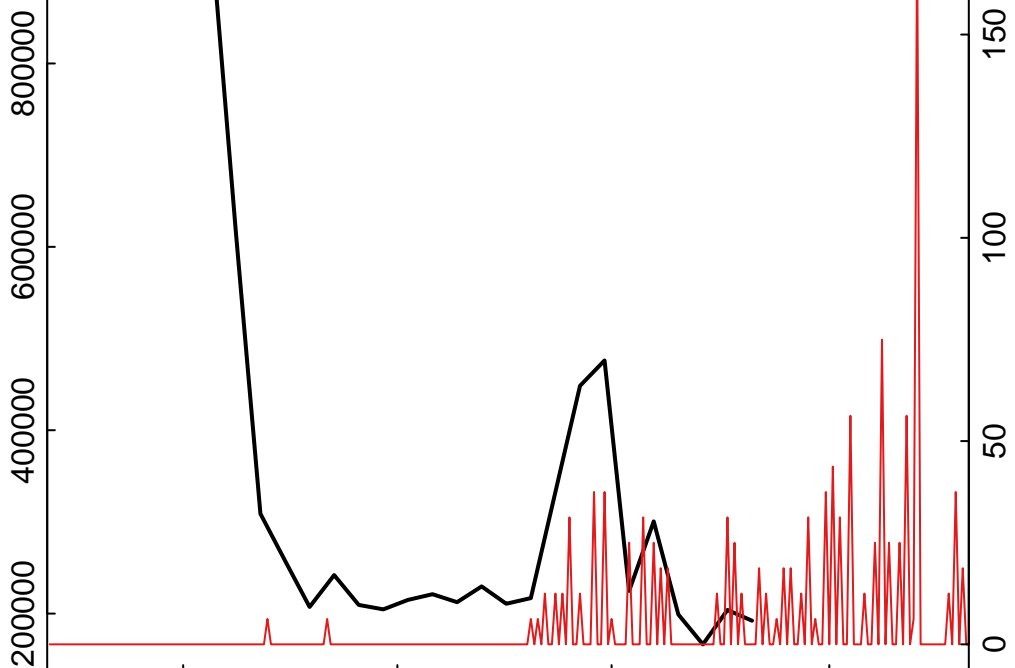

Ness County, KS, fips: 20135, pop: 2750

Mean visiting county population

600000  
400000  
200000  
0

Mar May Jul Sep

Incident cases (per 100,000 population)

300  
200  
100  
0

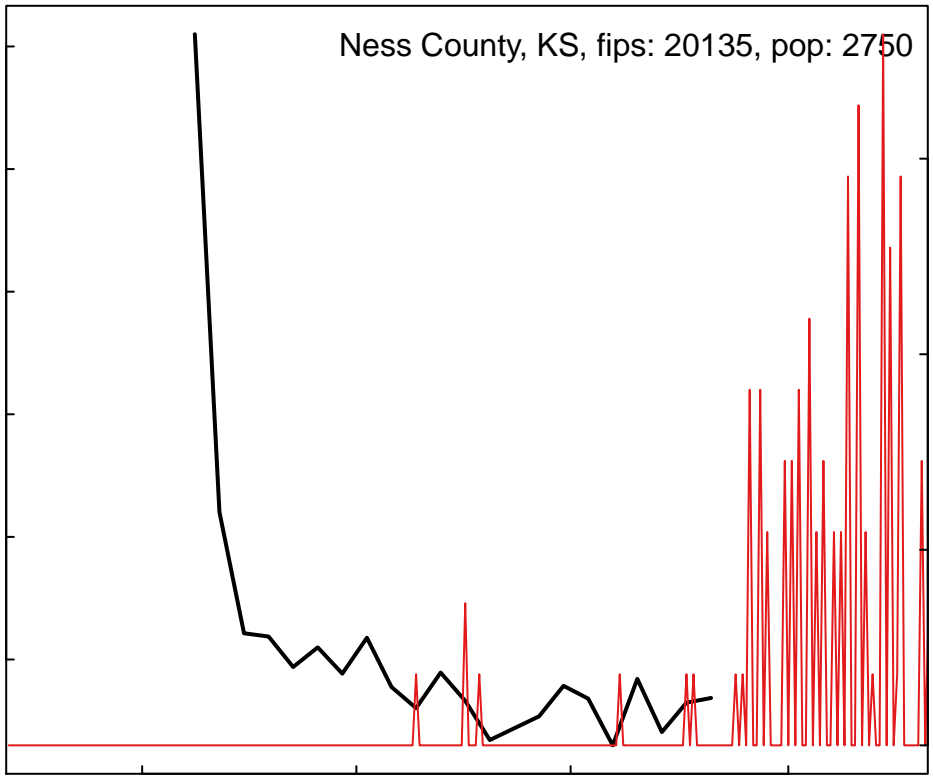

Norton County, KS, tips: 20137, pop: 5361

Mean visiting county population

0  
200000  
400000  
600000  
800000

Mar May Jul Sep

Incident cases (per 100,000 population)

0  
200  
400  
600  
800  
1000  
1200

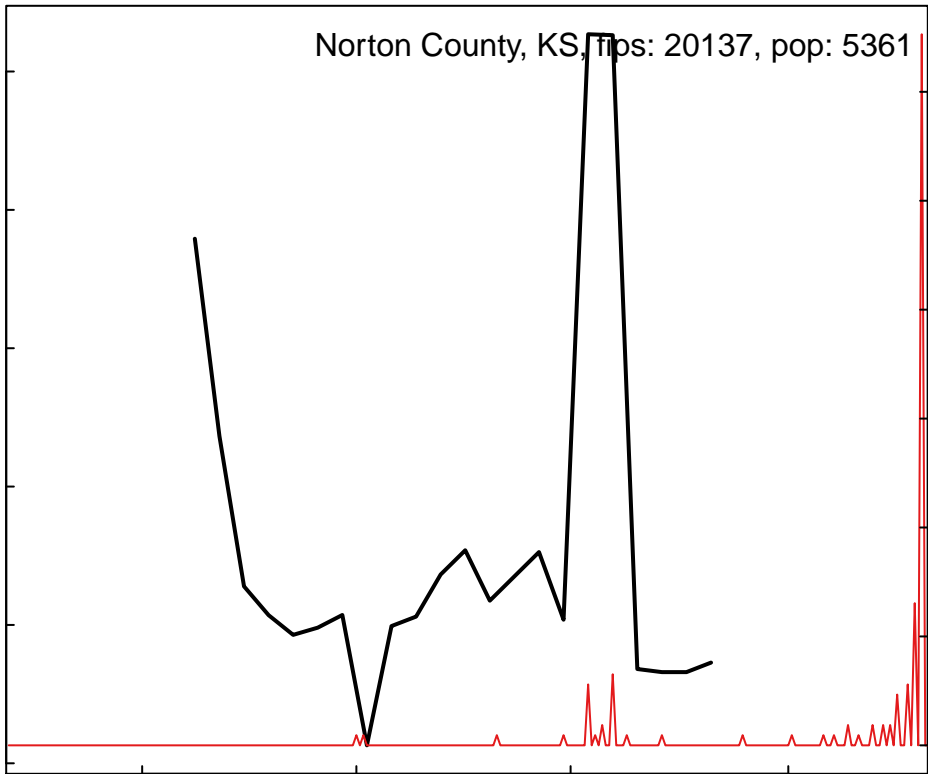

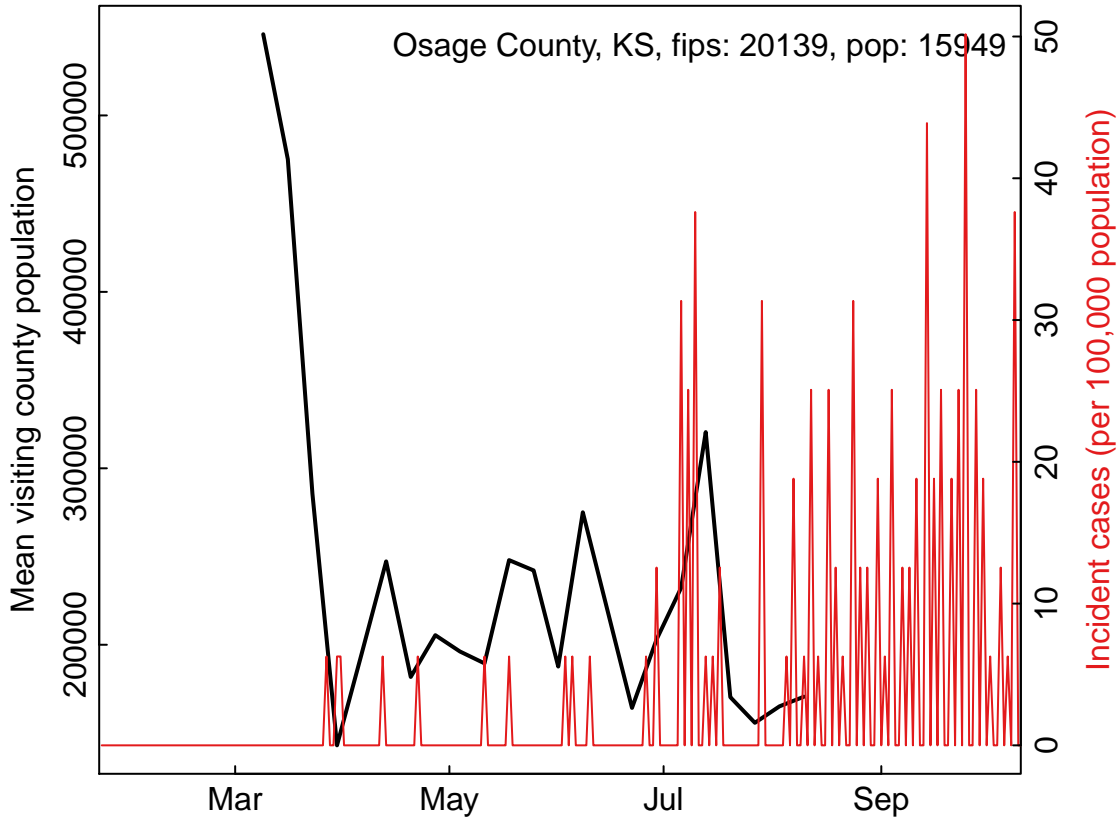

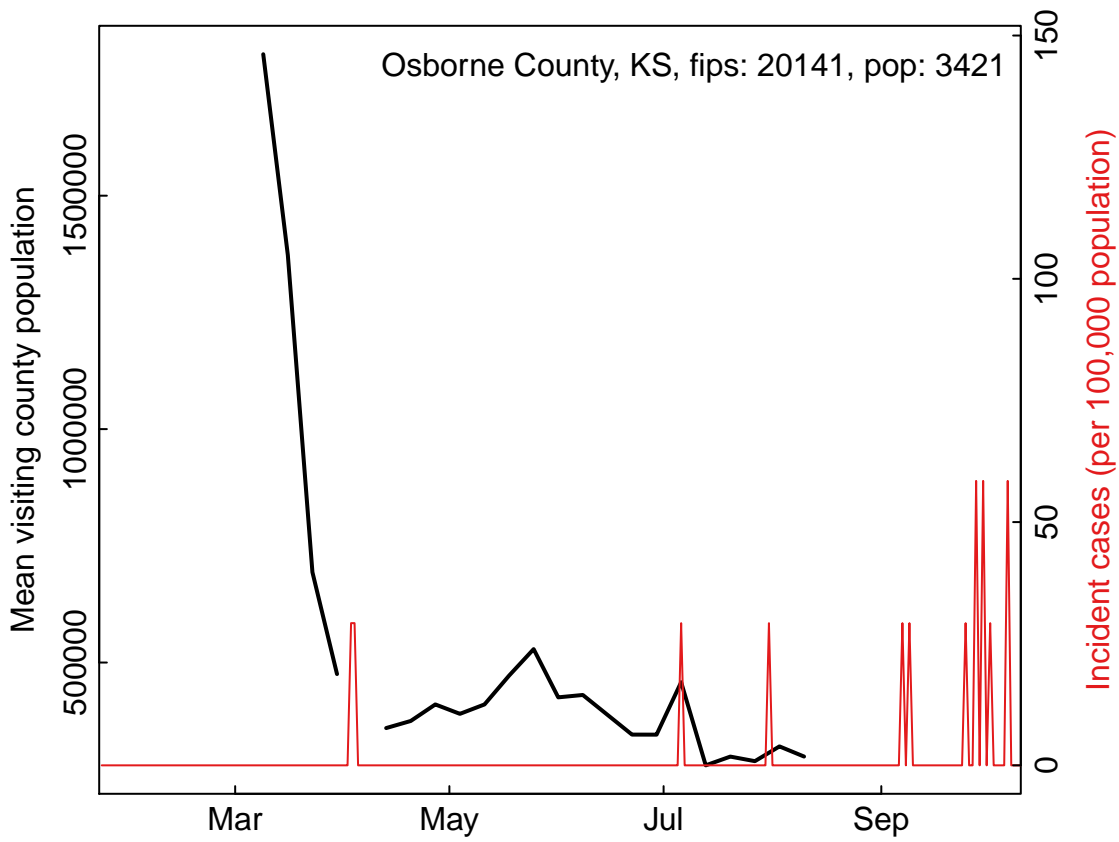

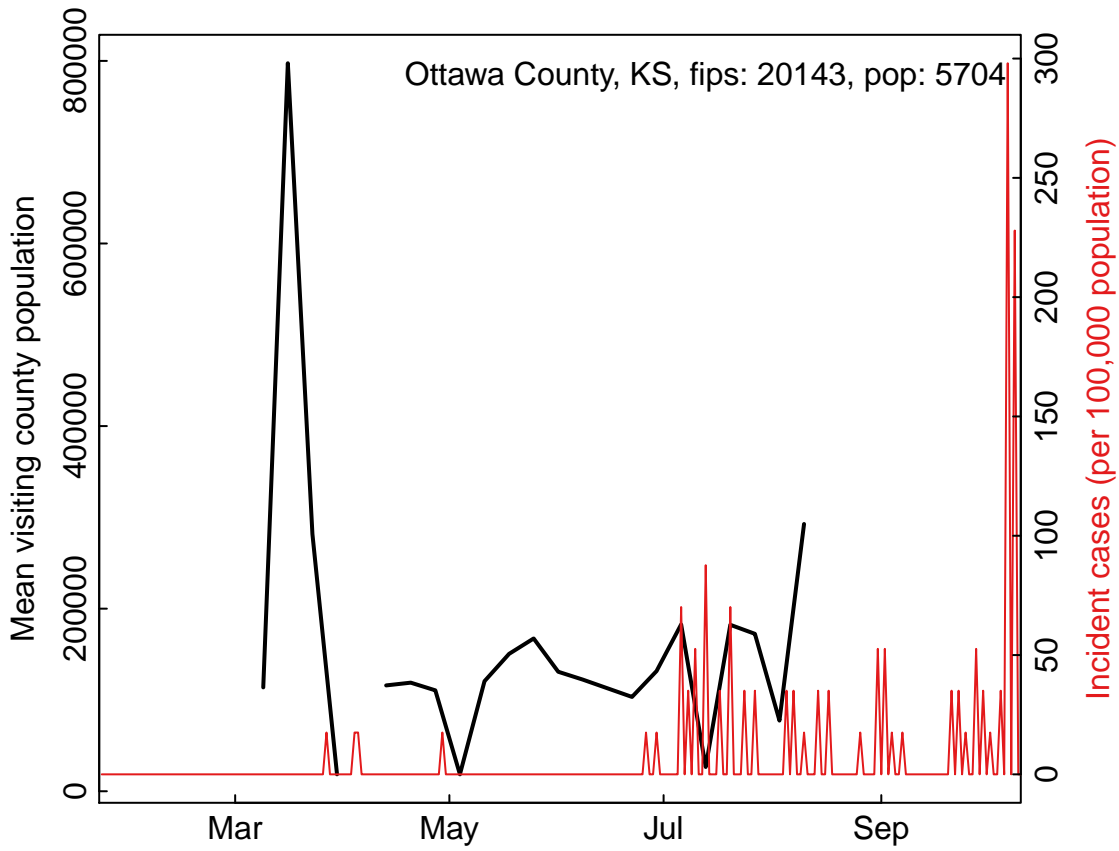

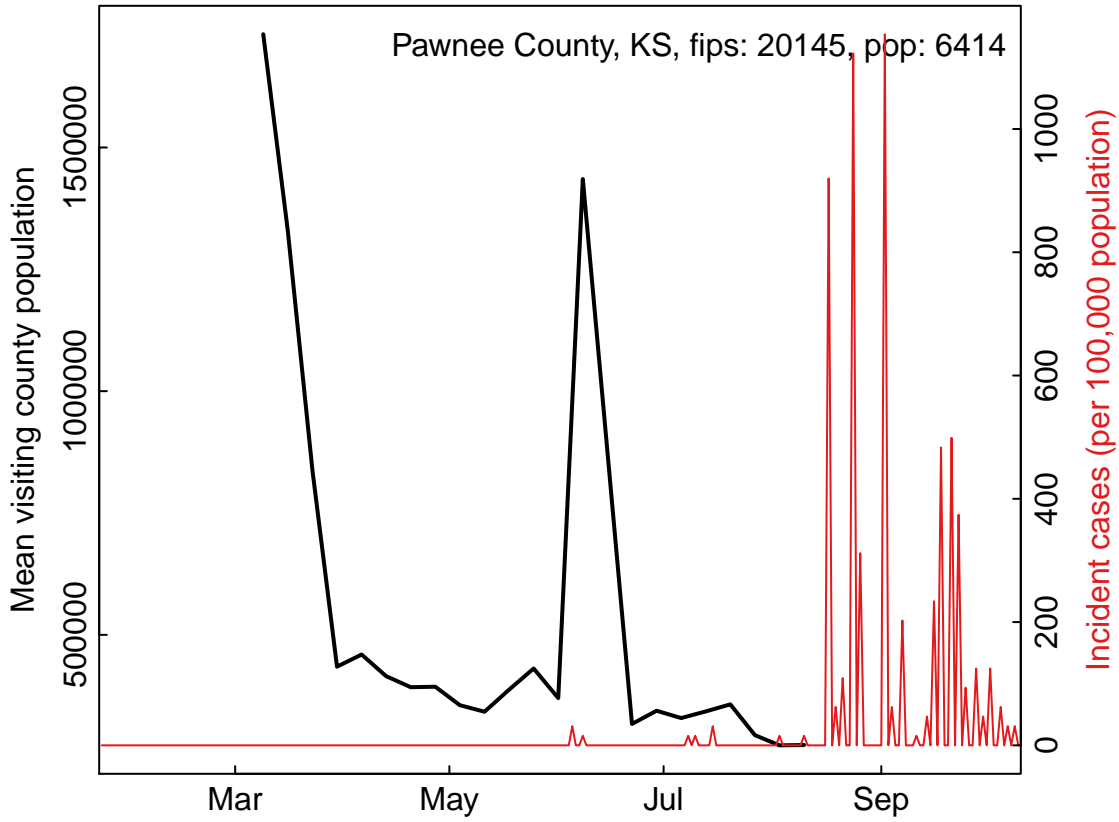



Phillips County, KS, fips: 20147, pop: 5234

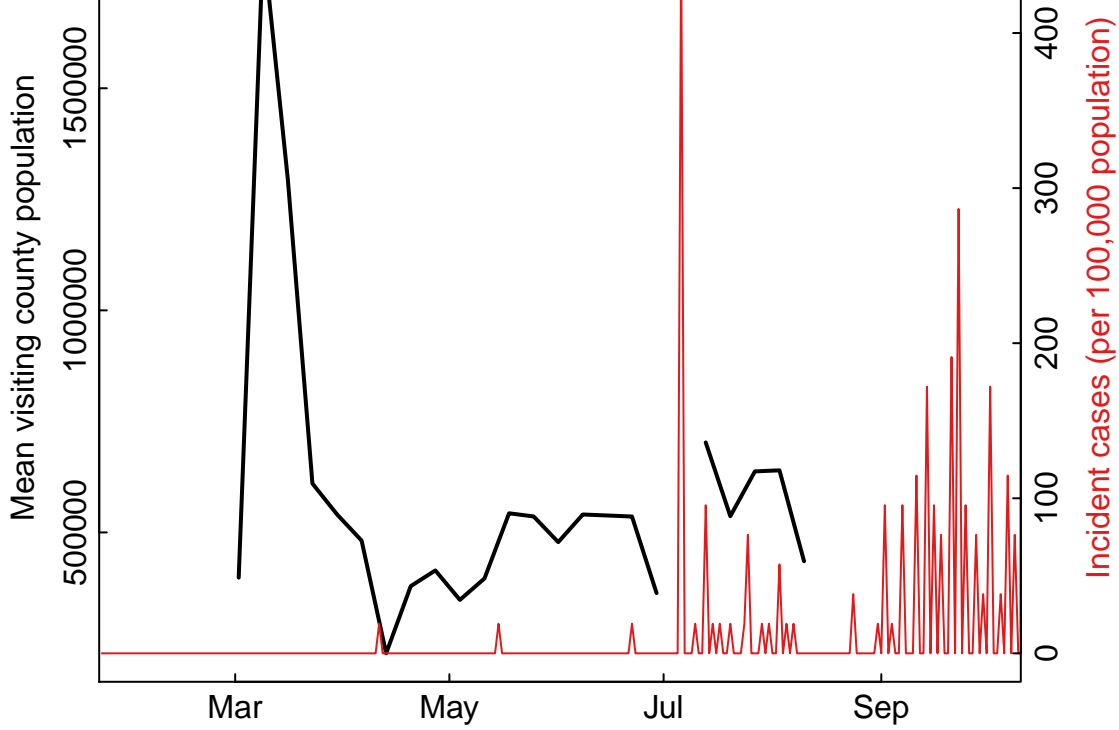

Pottawatomie County, KS, fips: 20149, pop: 24383

Mean visiting county population

2500000  
1500000  
500000

Incident cases (per 100,000 population)

70  
60  
50  
40  
30  
20  
10  
0

Mar May Jul Sep

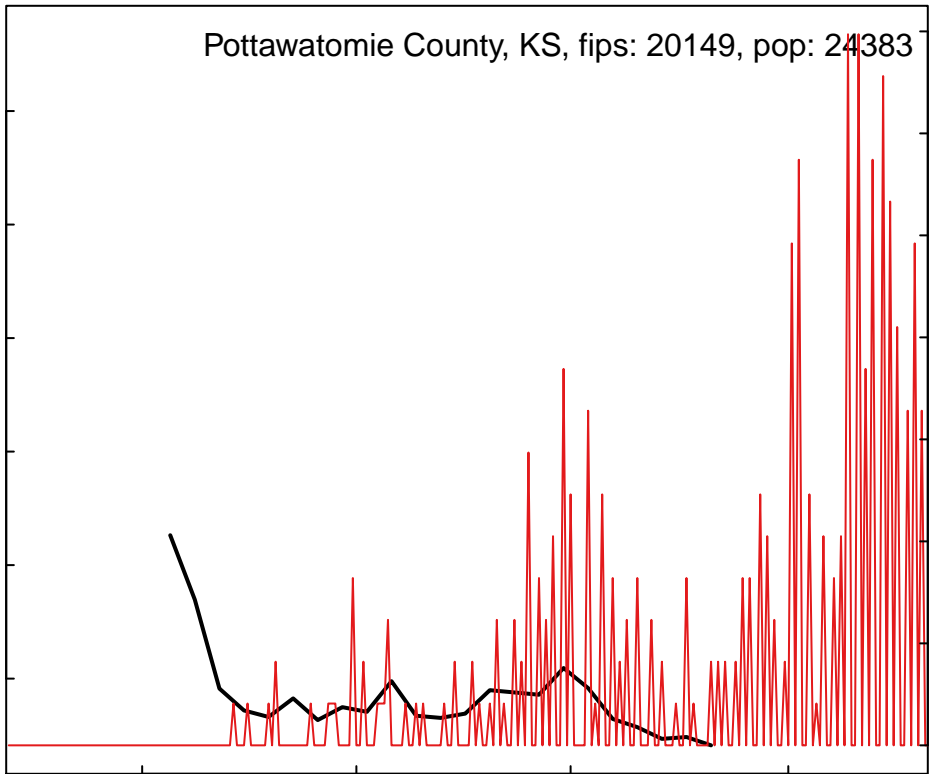

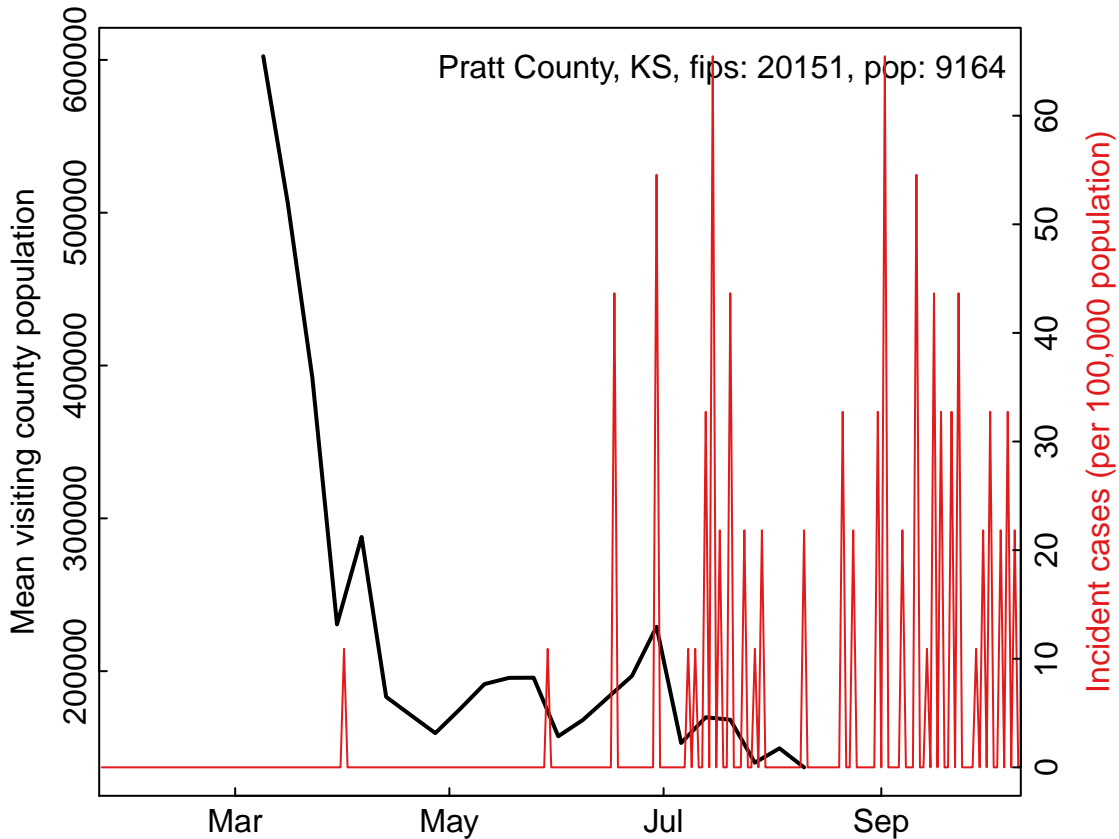

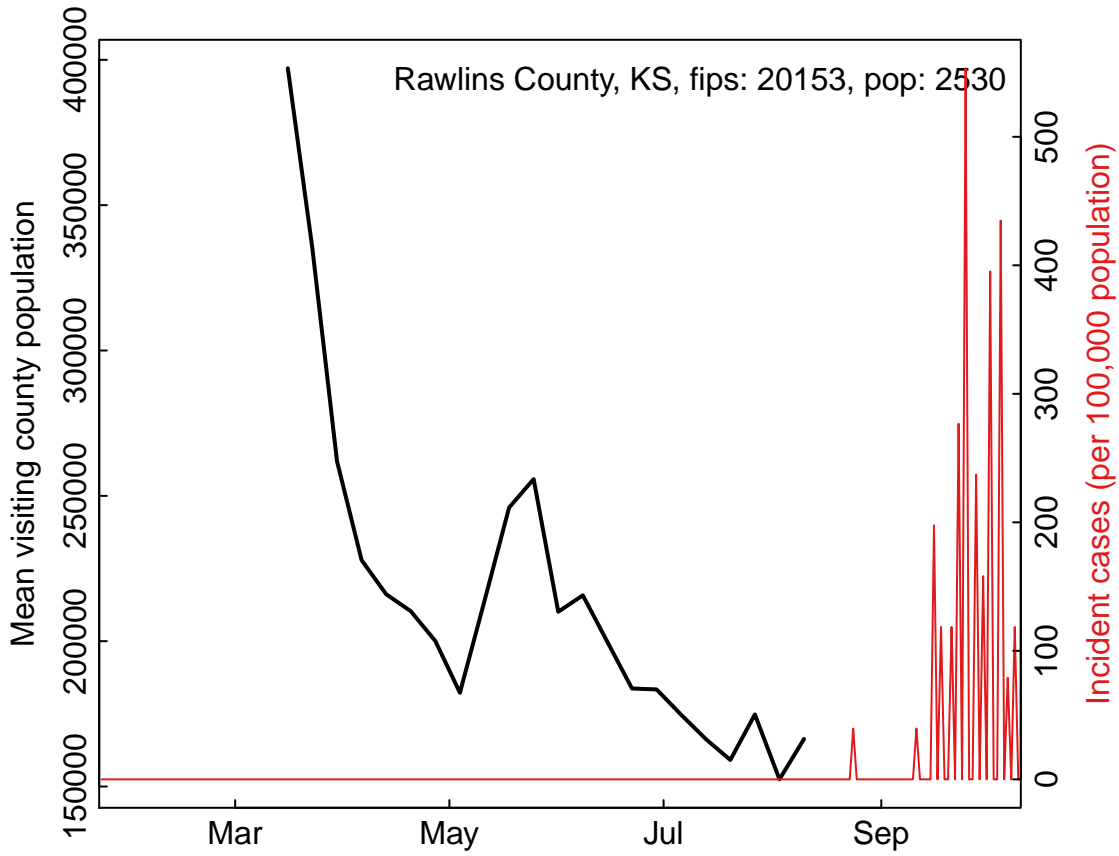

Reno County, KS, fips: 20155, pop: 61998

Mean visiting county population

1500000  
1000000  
500000

Incident cases (per 100,000 population)

150  
100  
50  
0

Mar

May

Jul

Sep

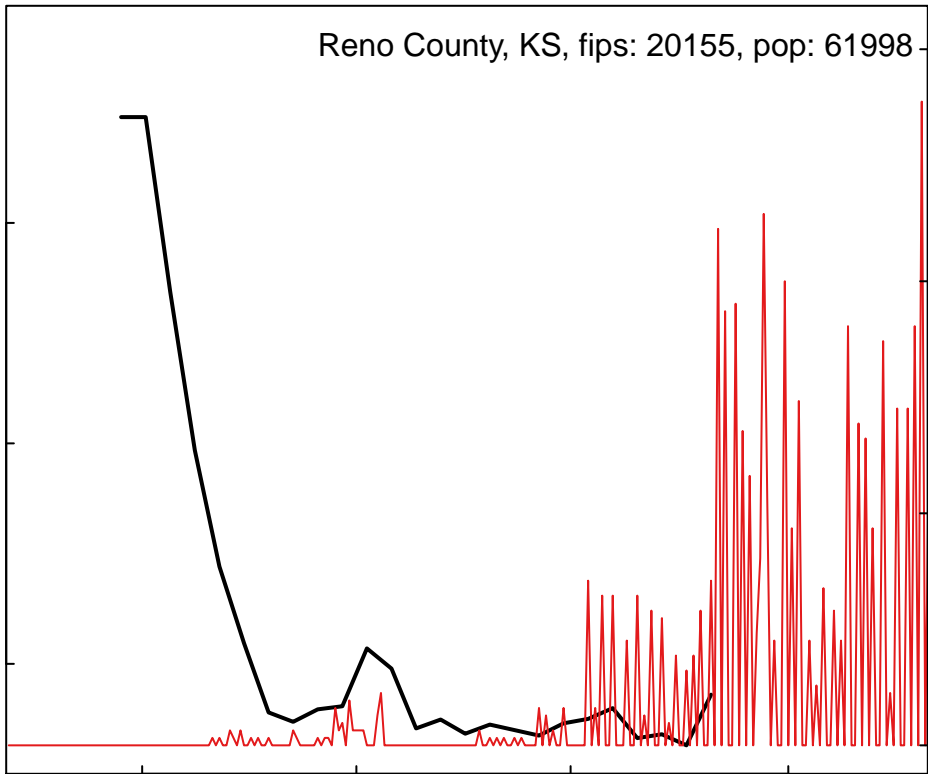

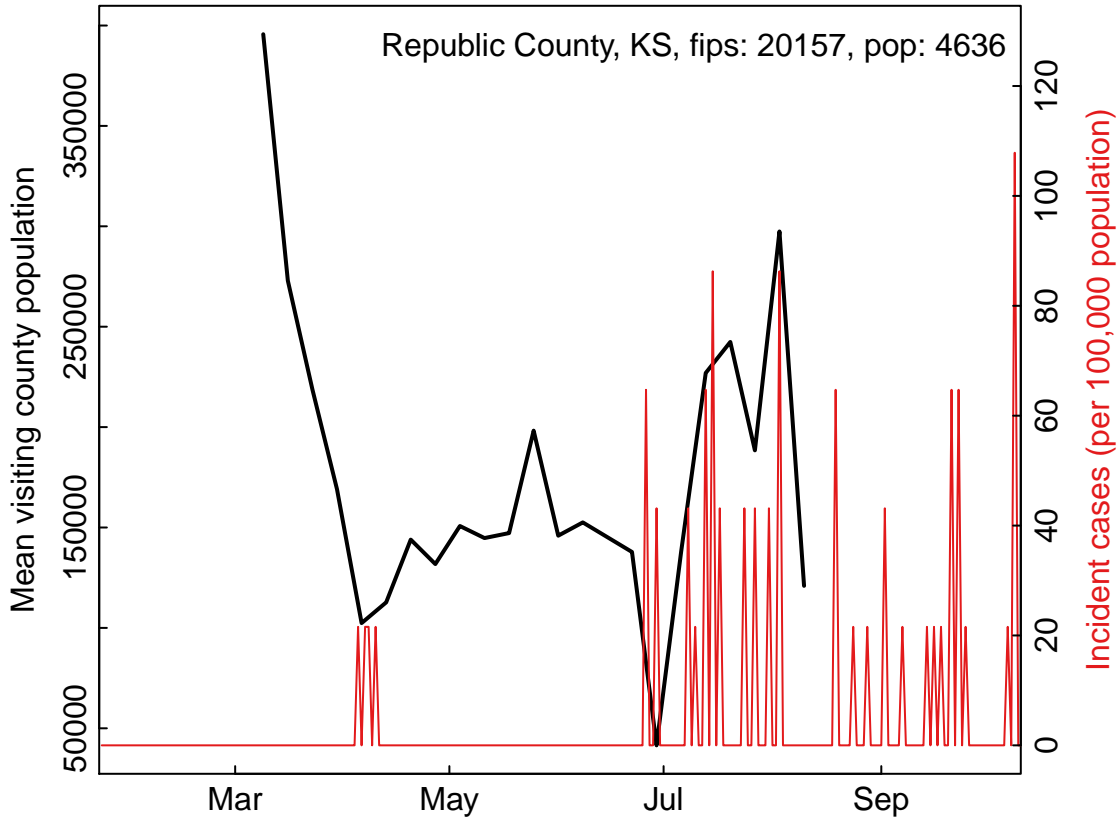

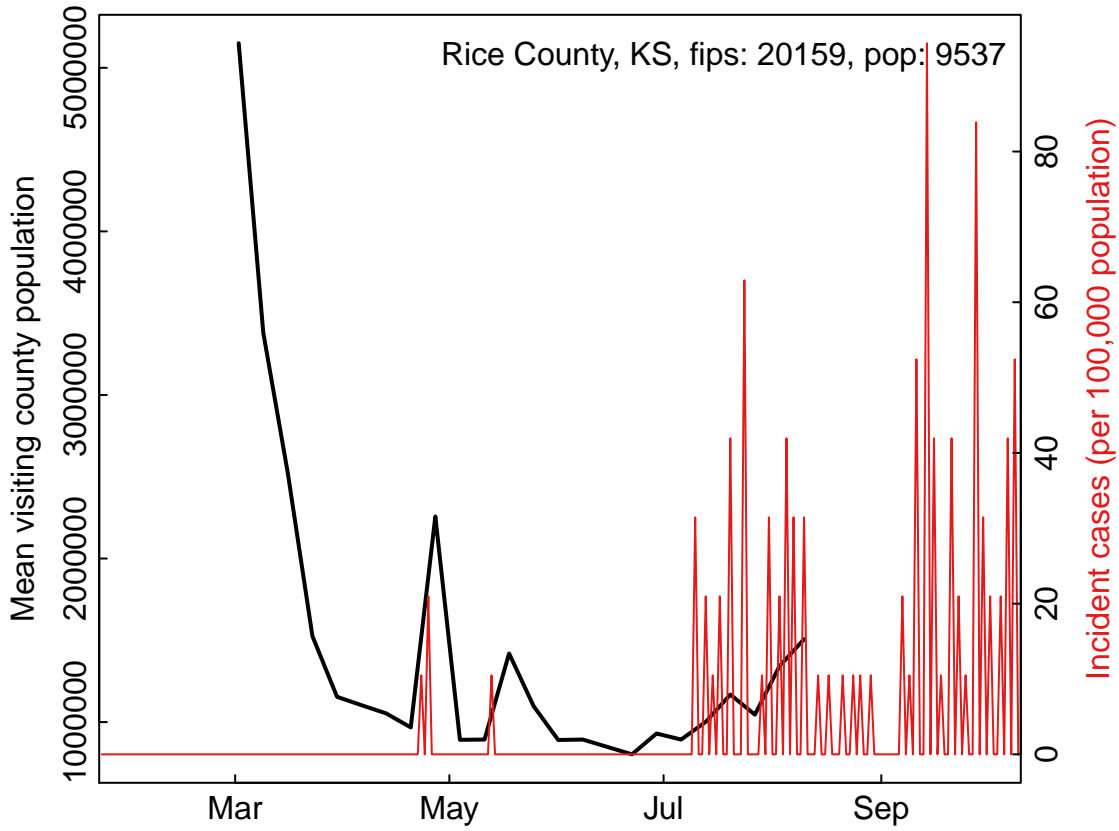

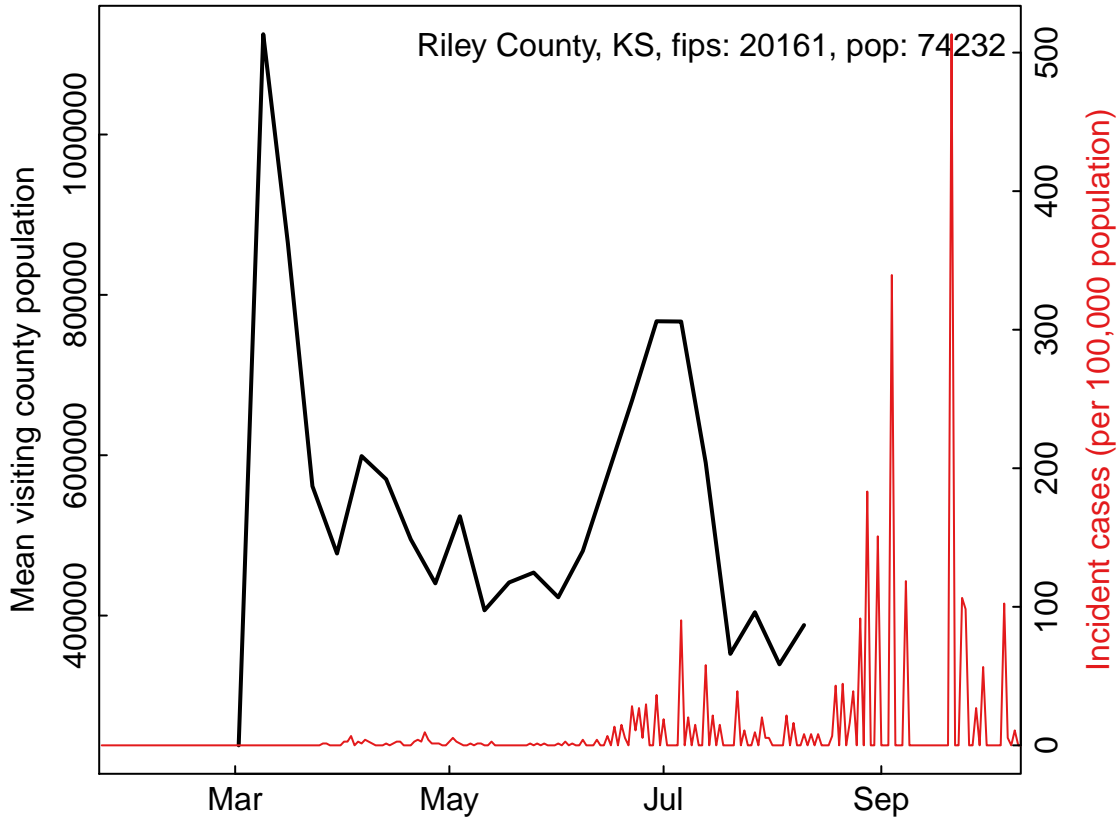



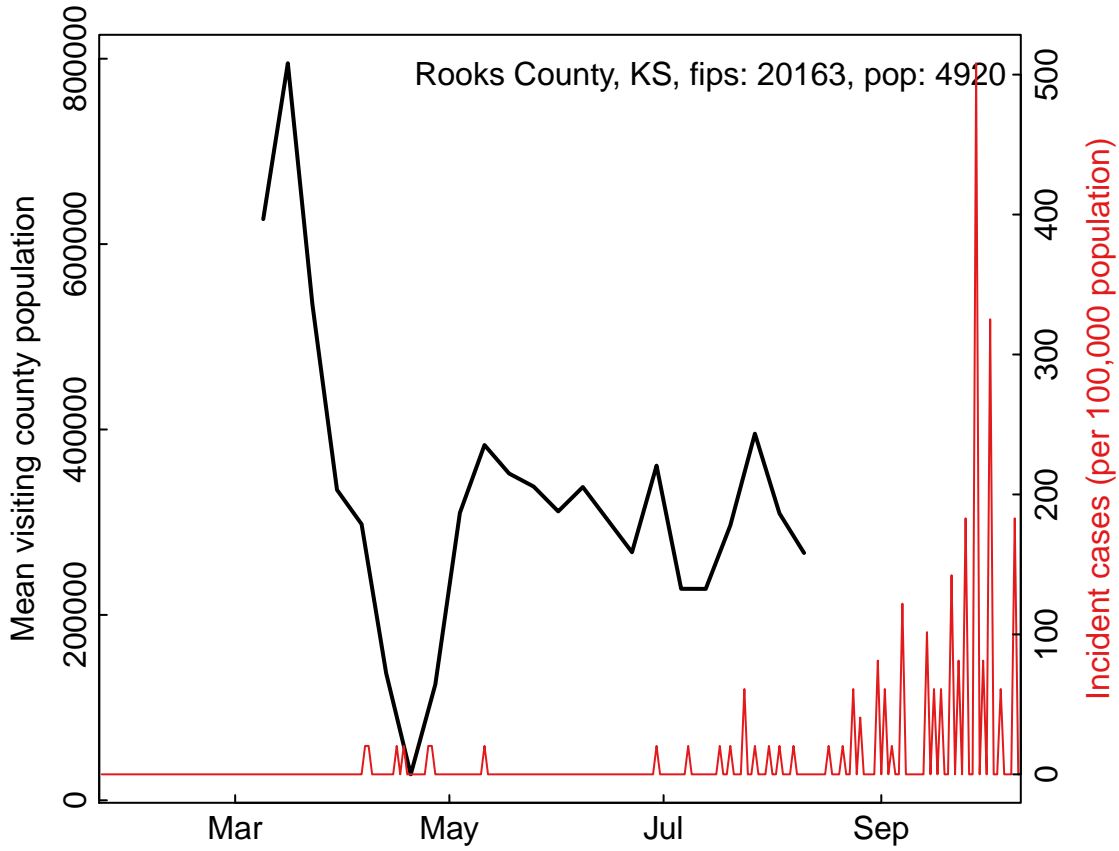

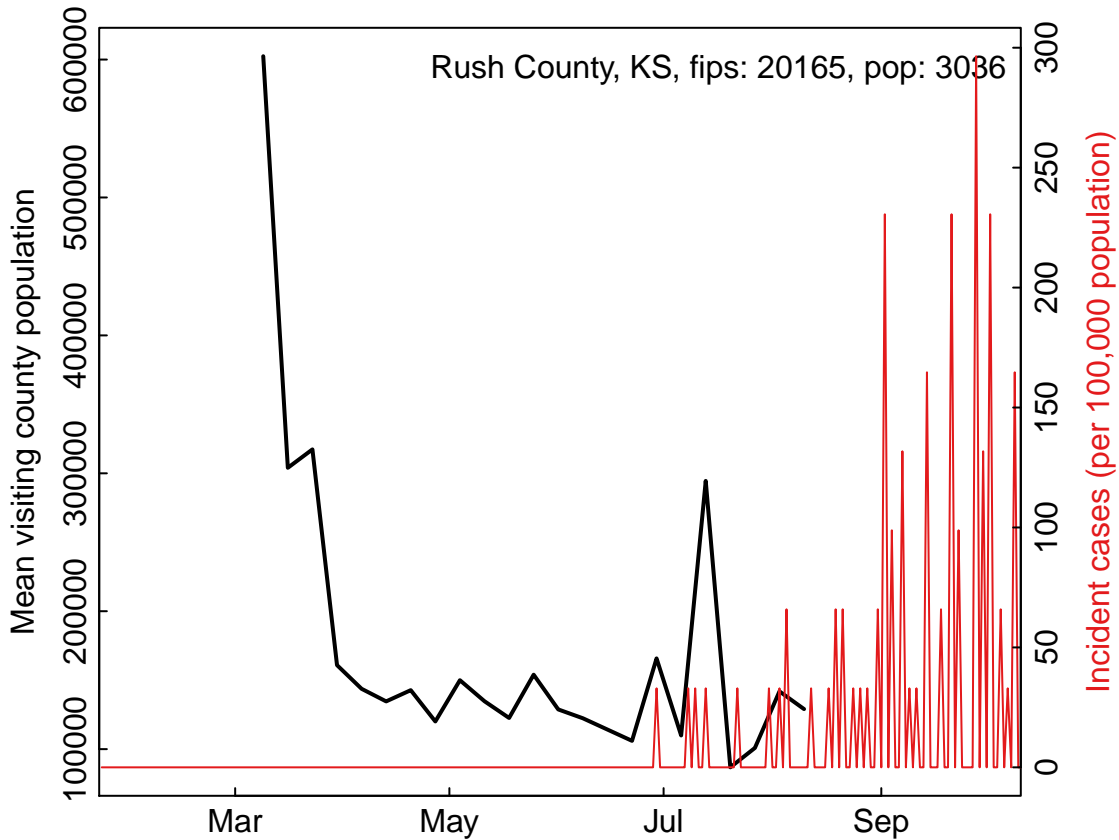

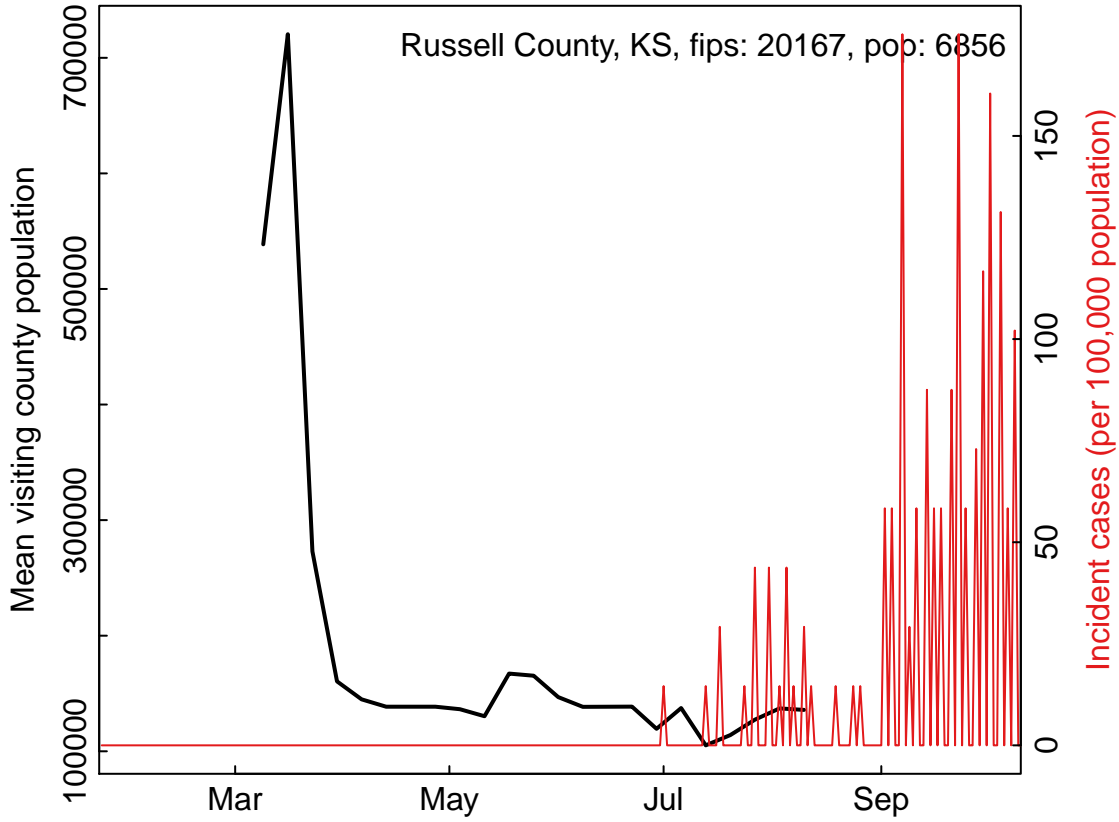

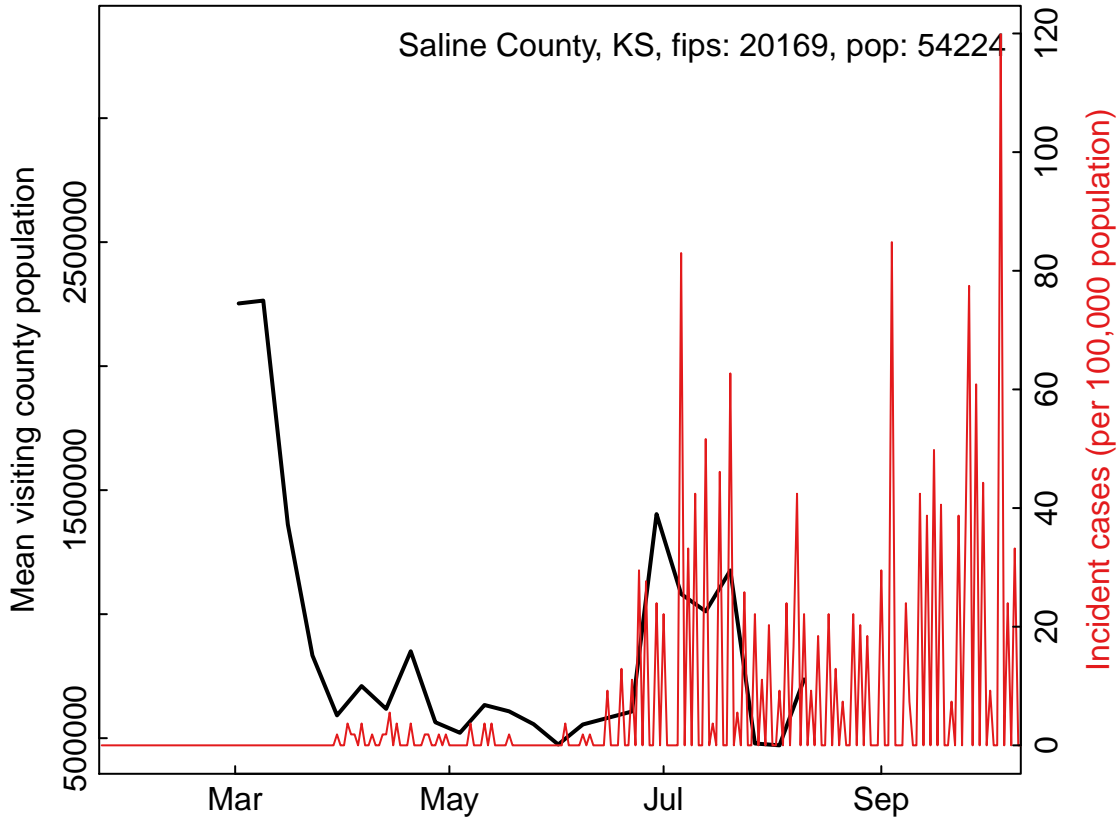

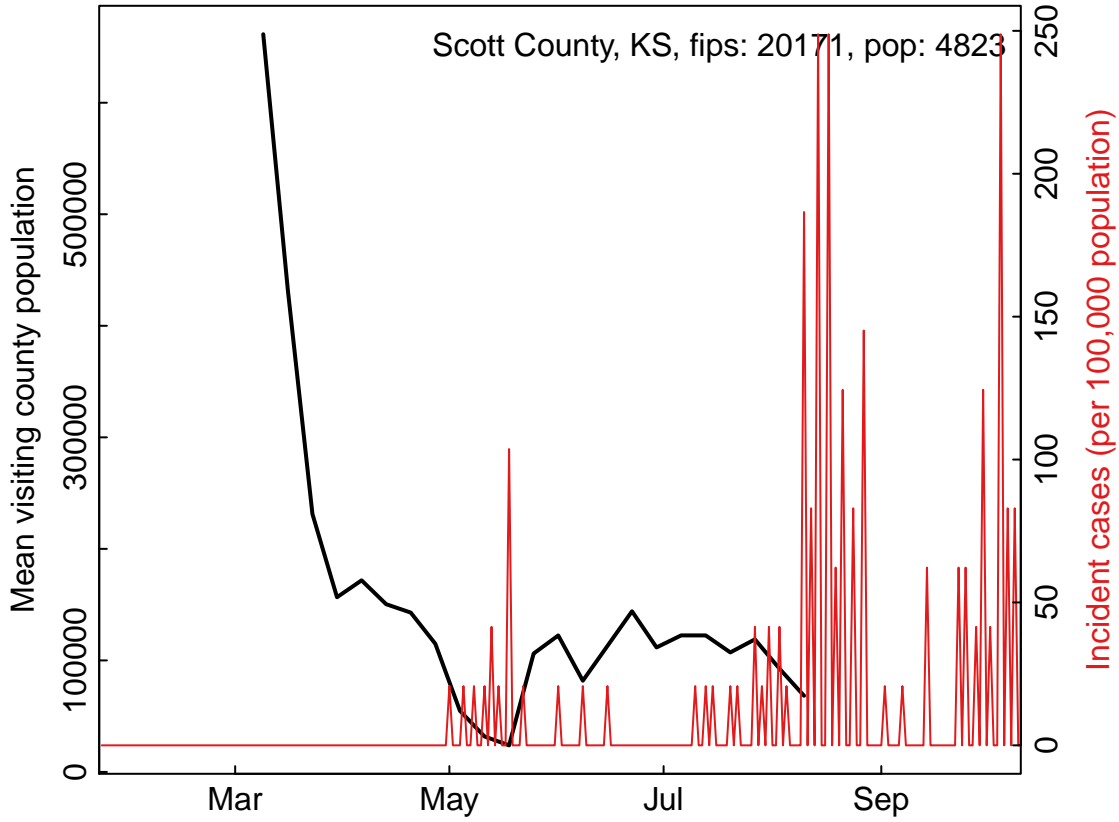

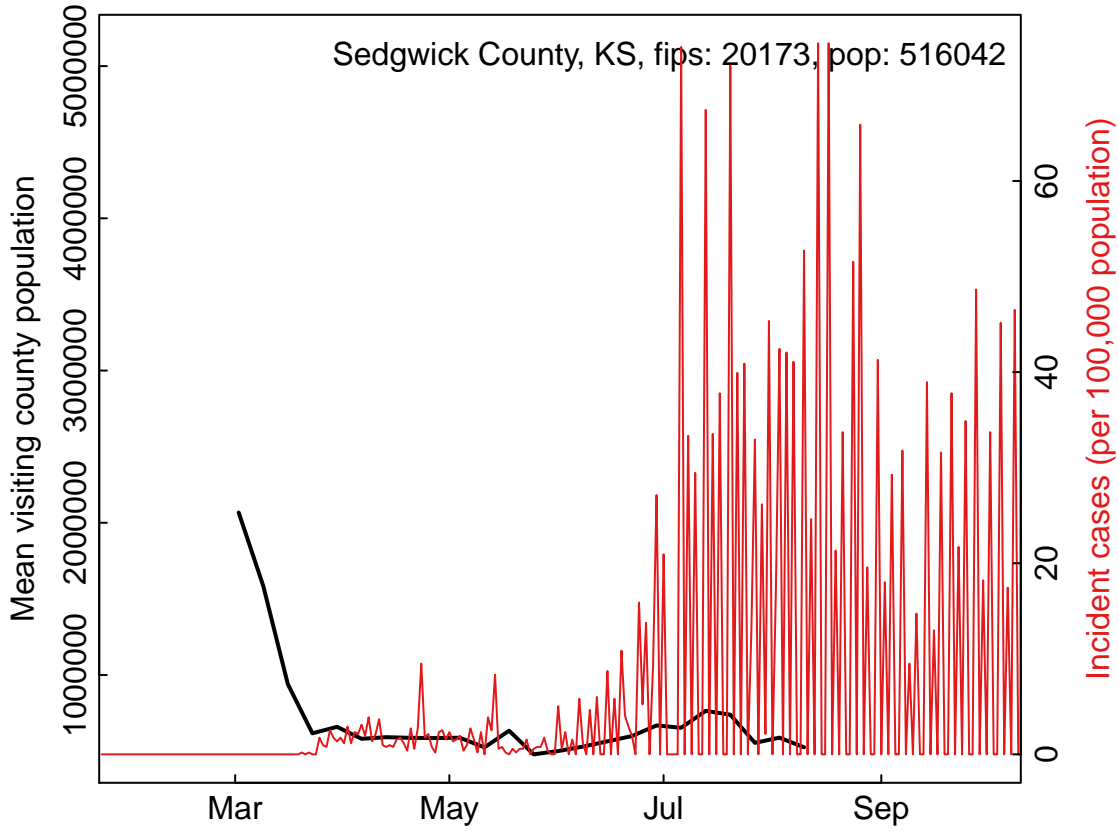

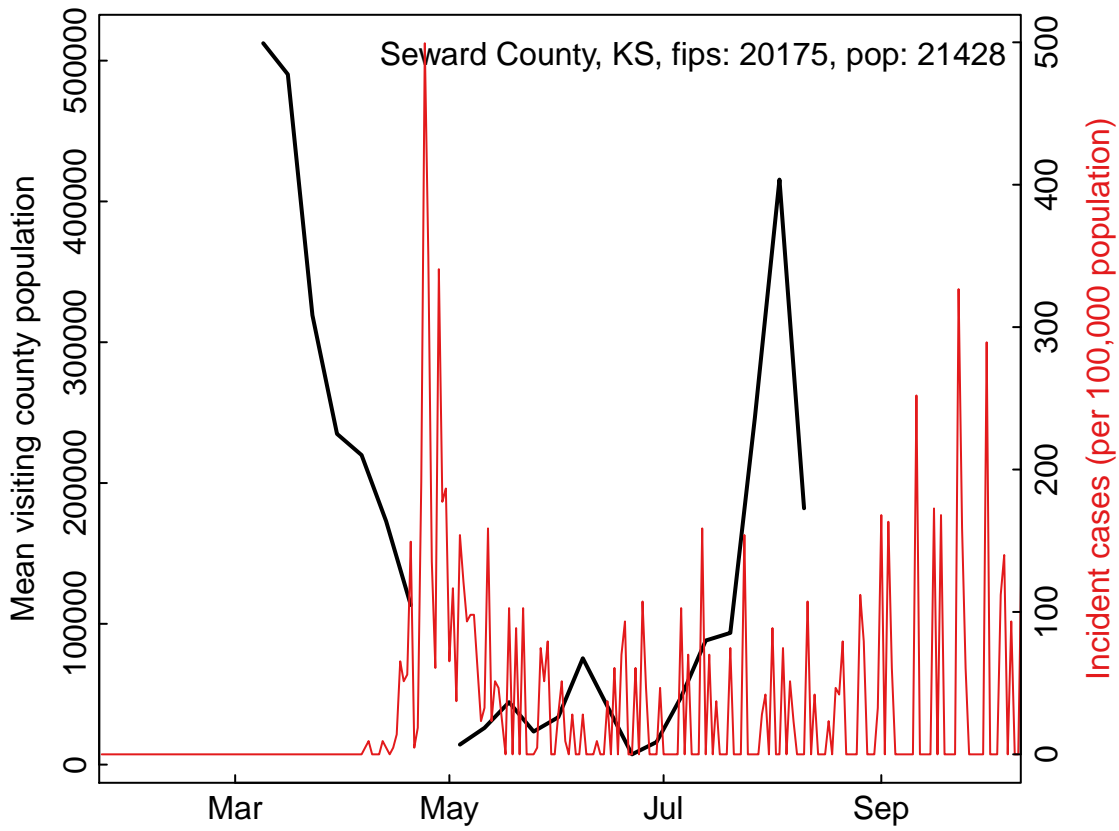

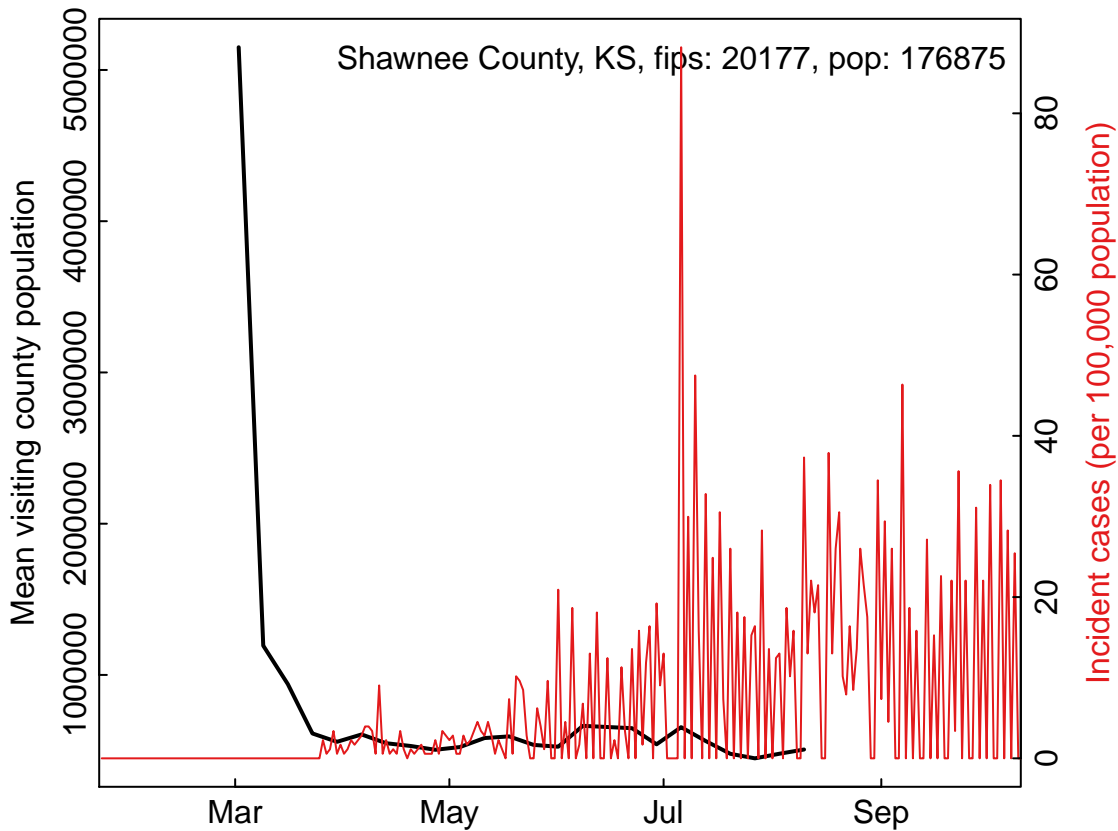



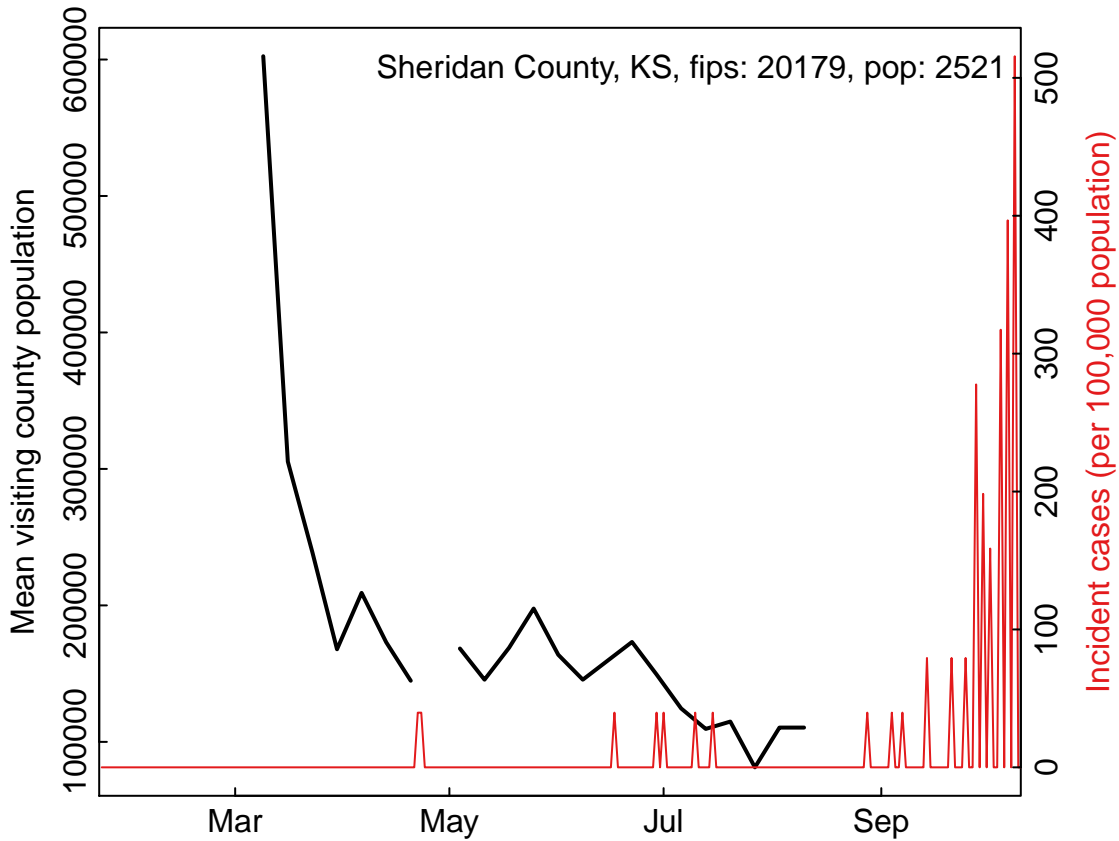

Sherman County, KS, fips: 20181, pop: 5917

Mean visiting county population

1500000  
1000000  
500000

Mar

May

Jul

Sep

800  
600  
400  
200  
0

Incident cases (per 100,000 population)

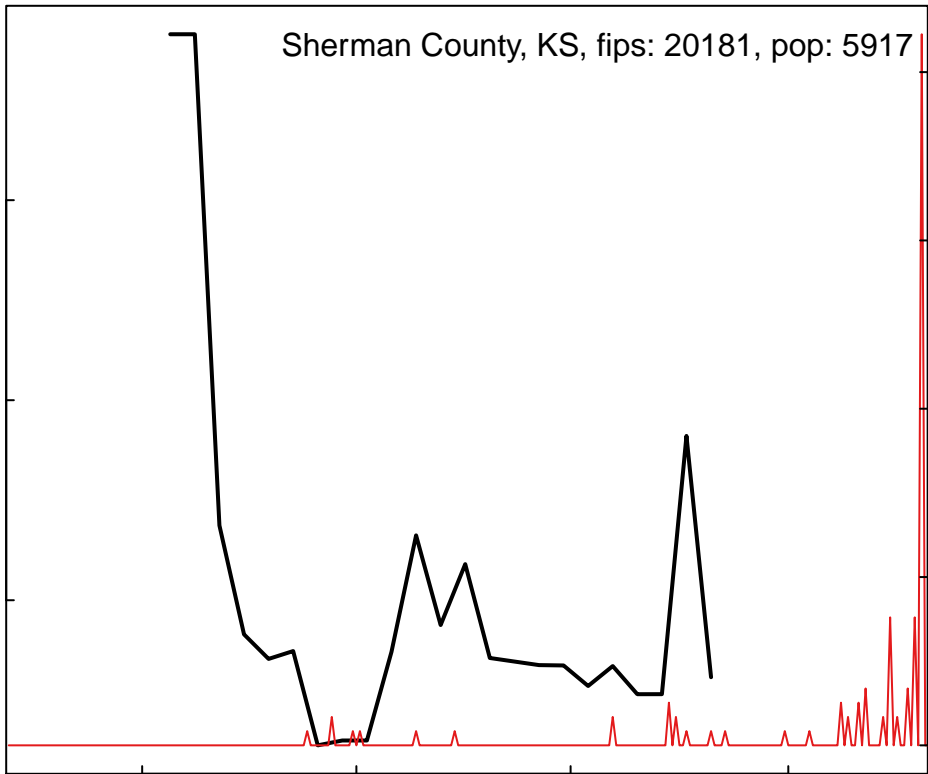

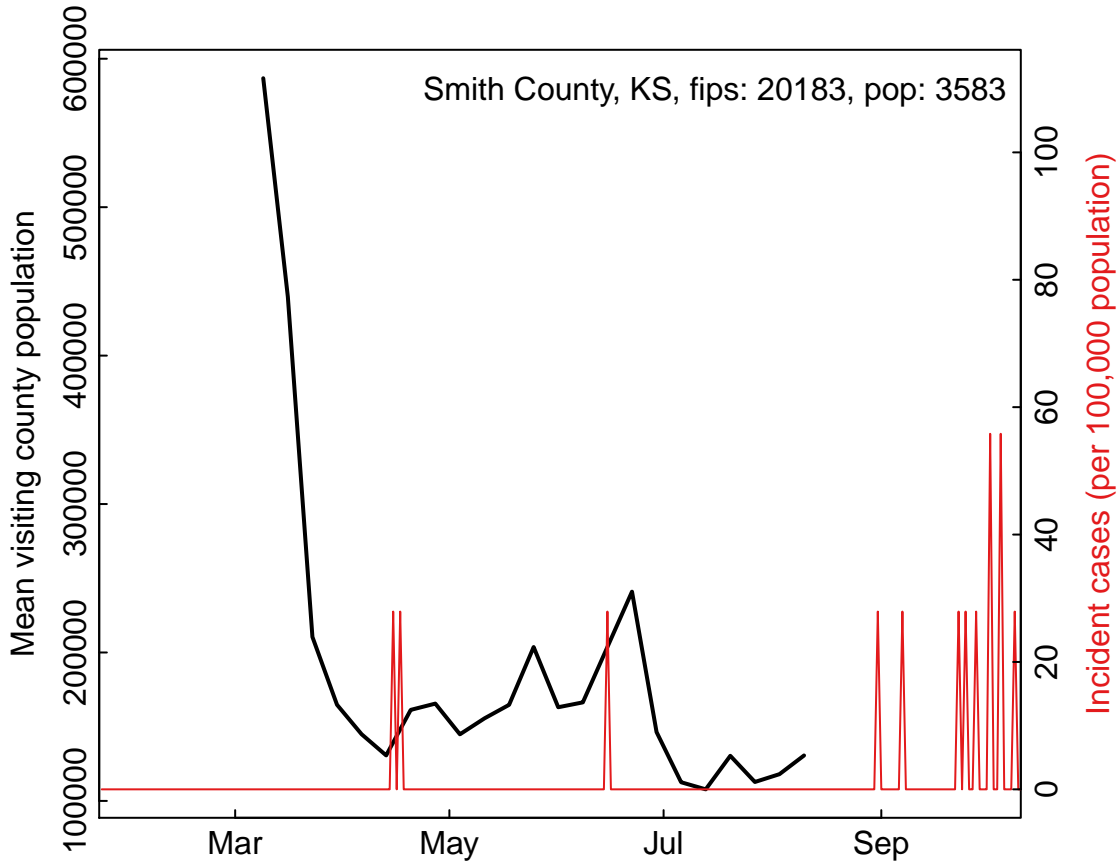

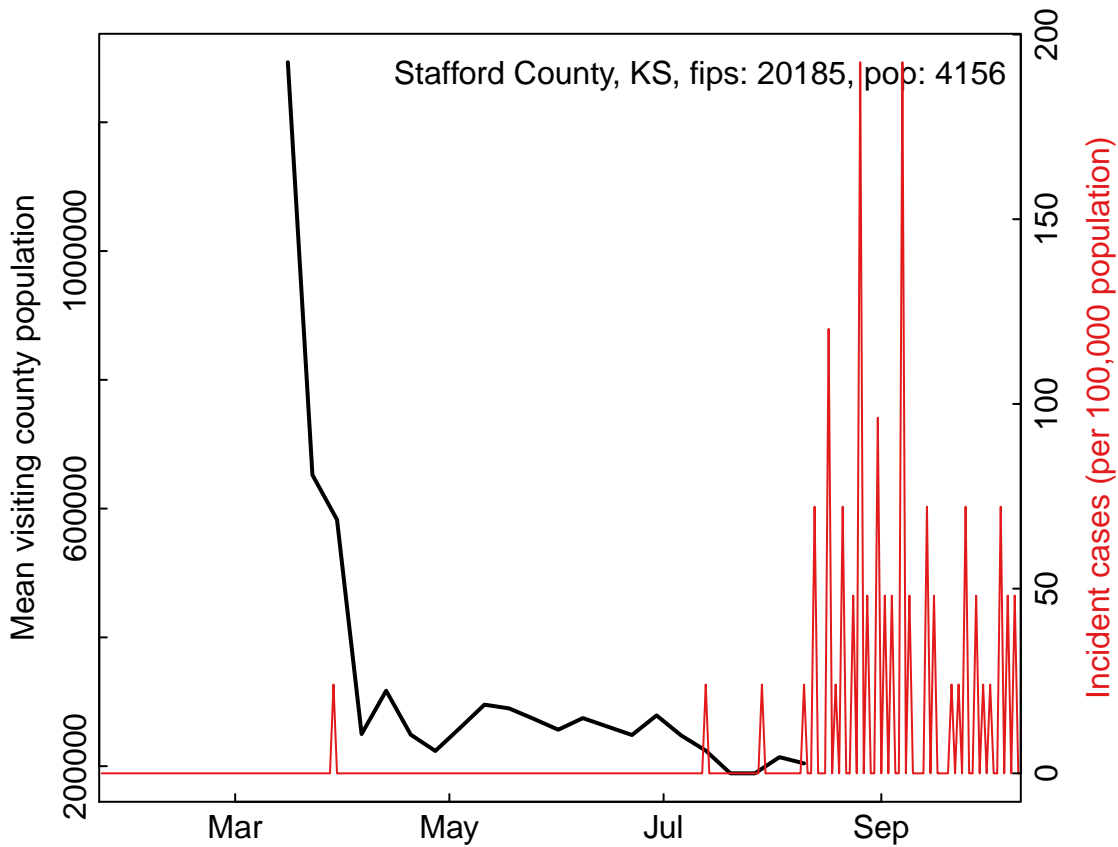

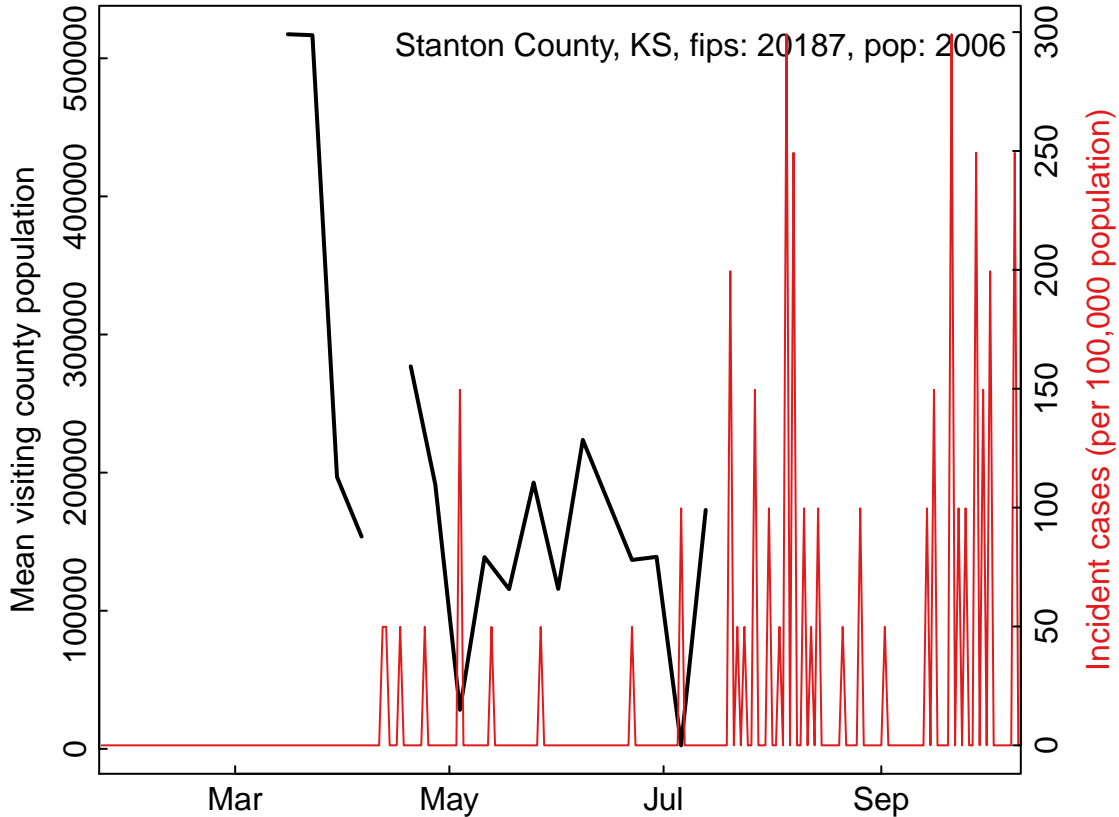

Stevens County, KS, fips: 20189, pop: 5485

Mean visiting county population

Incident cases (per 100,000 population)

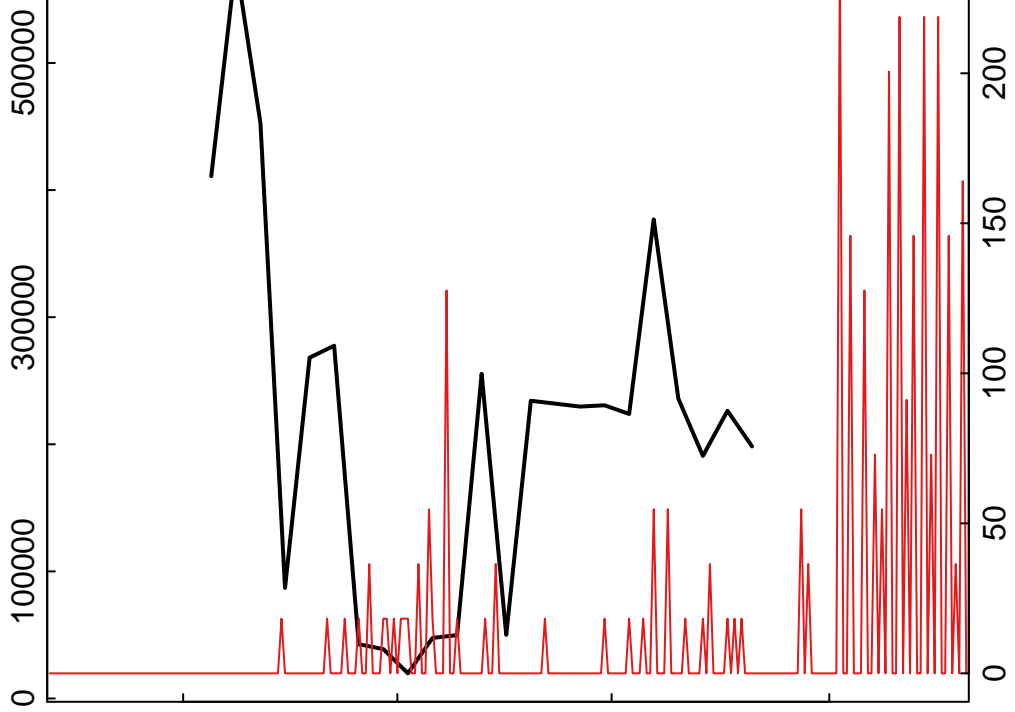

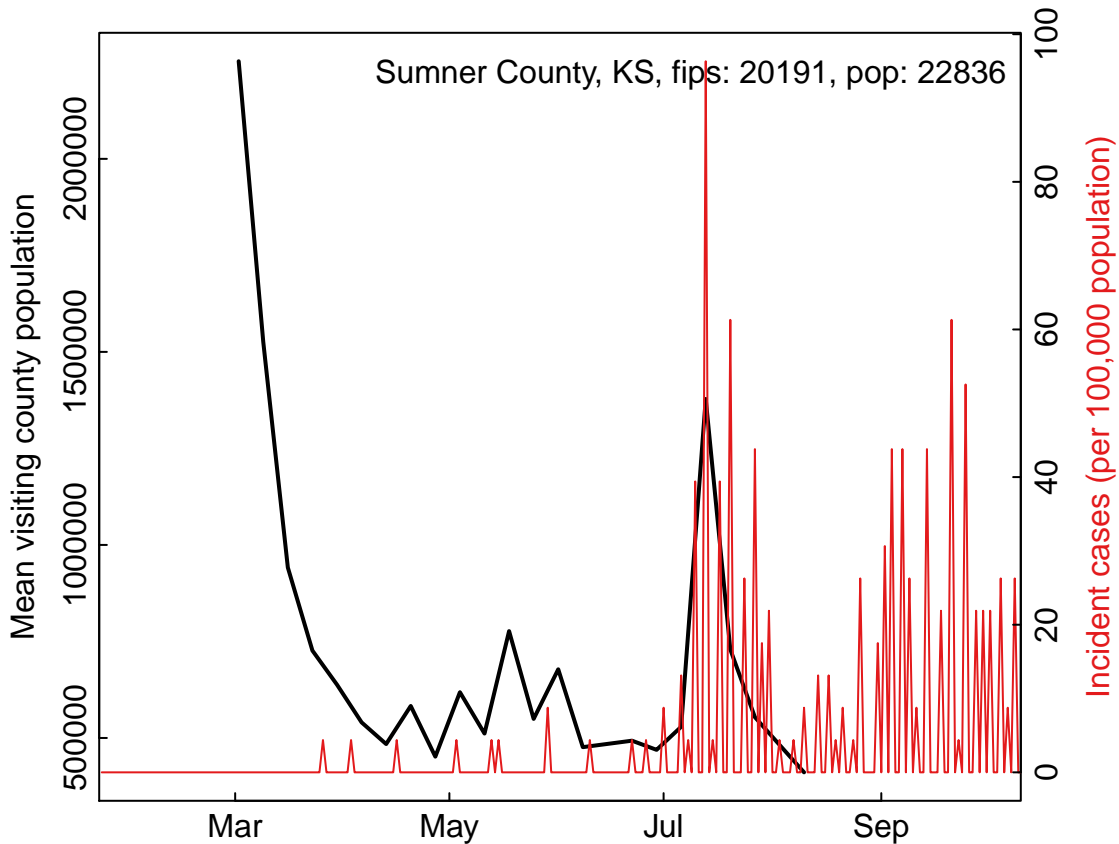

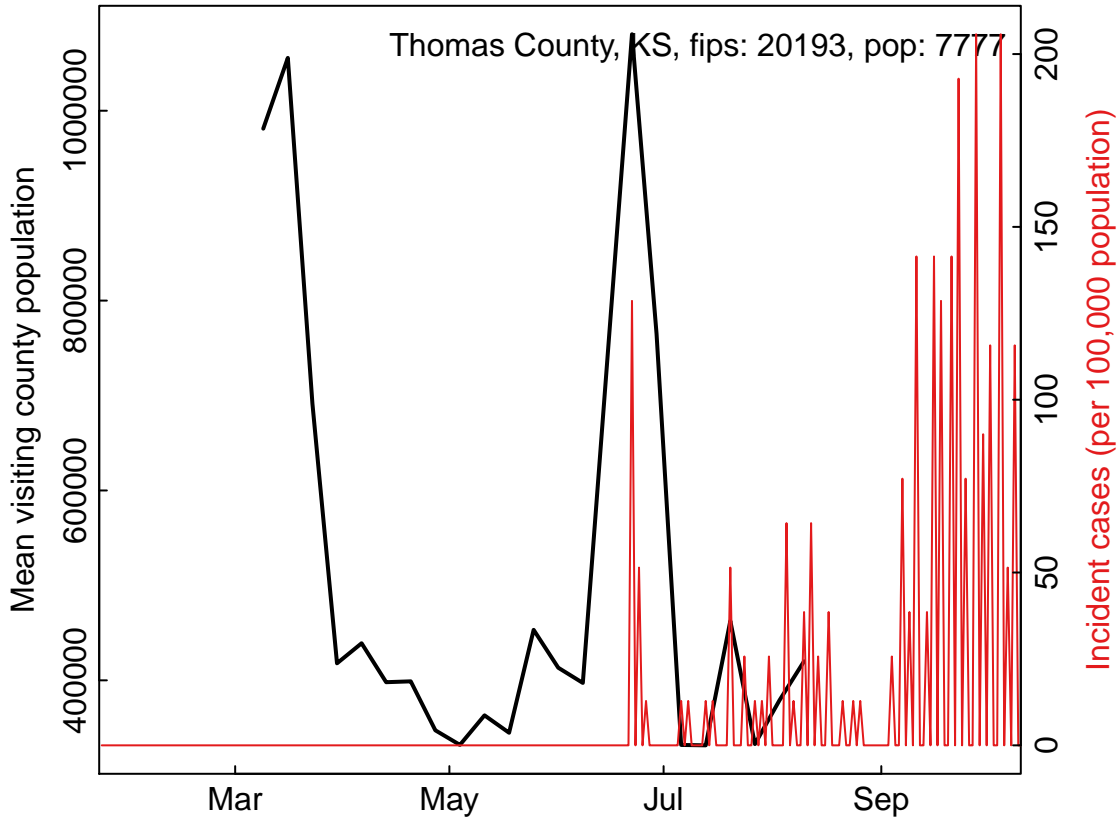



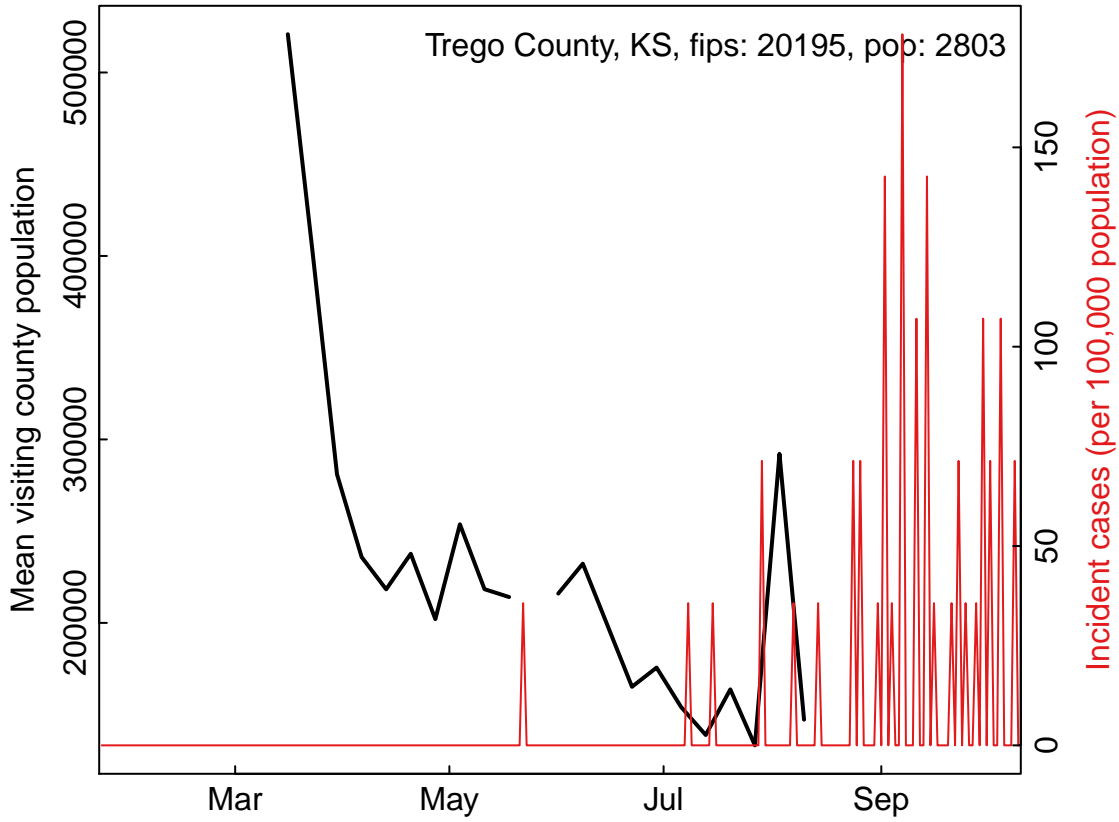

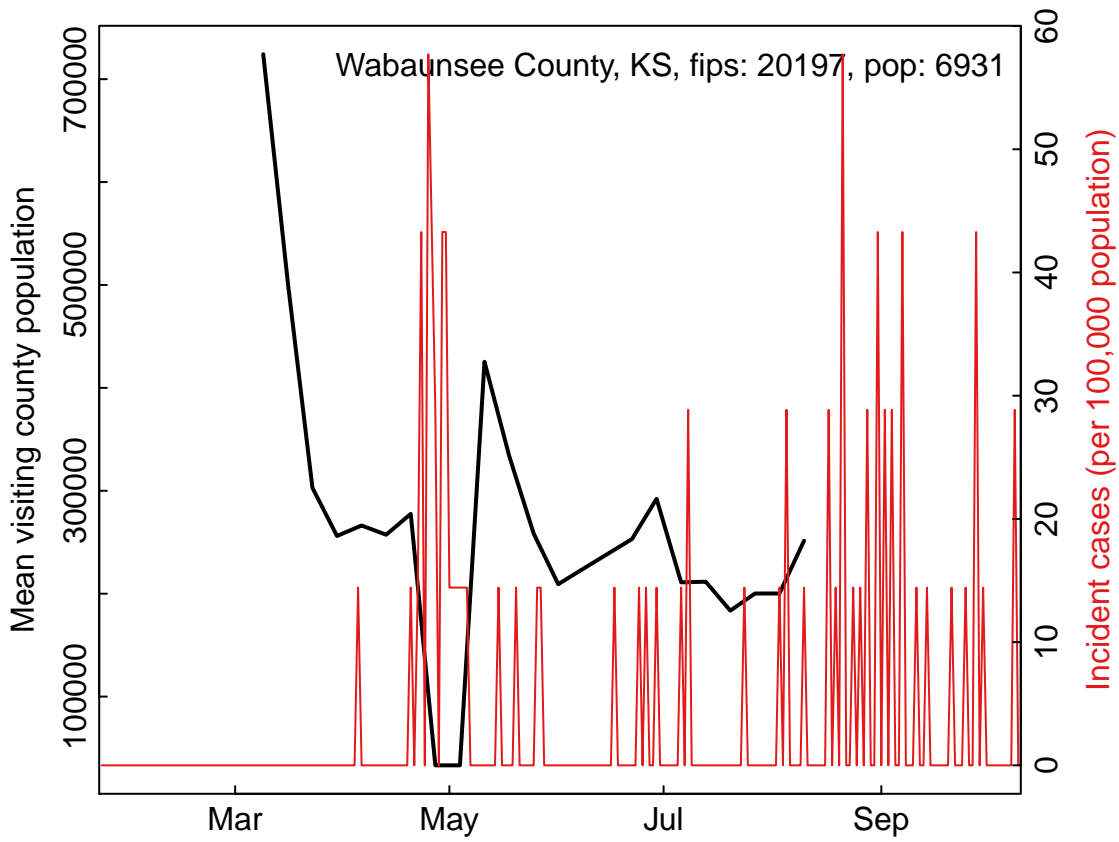

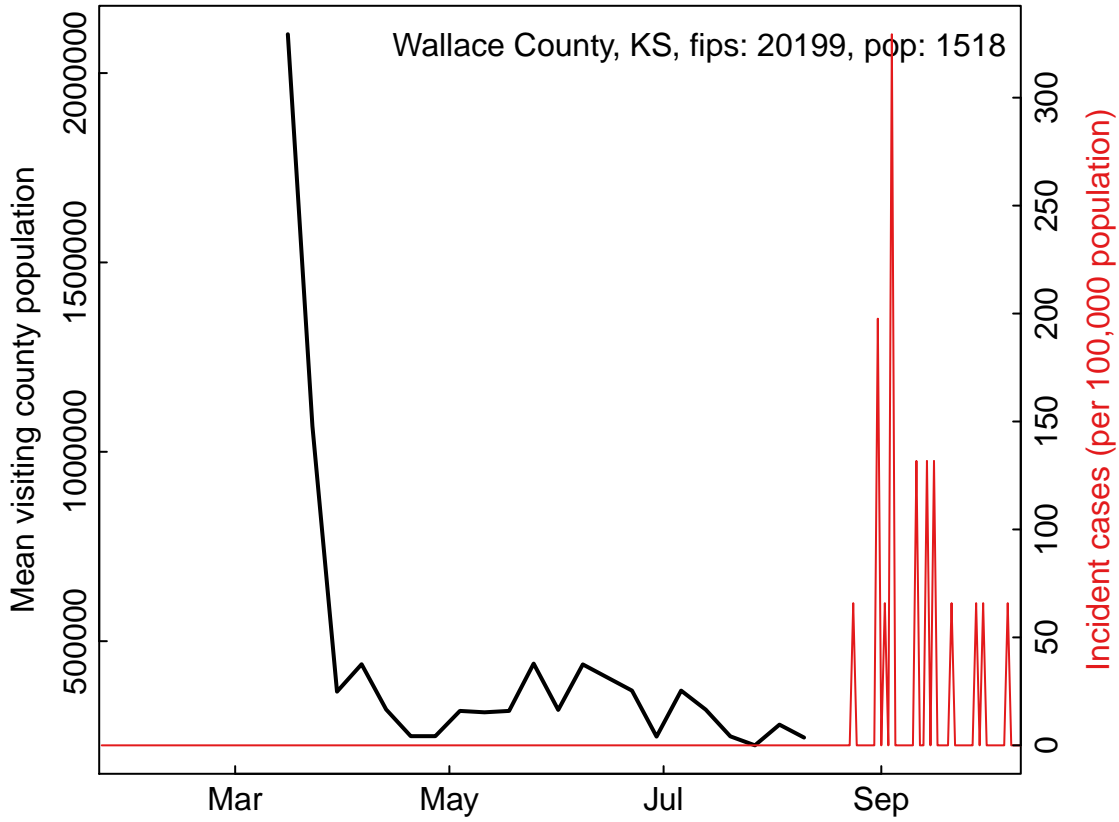

Washington County, KS, fips: 20201, pop: 5406

Mean visiting county population

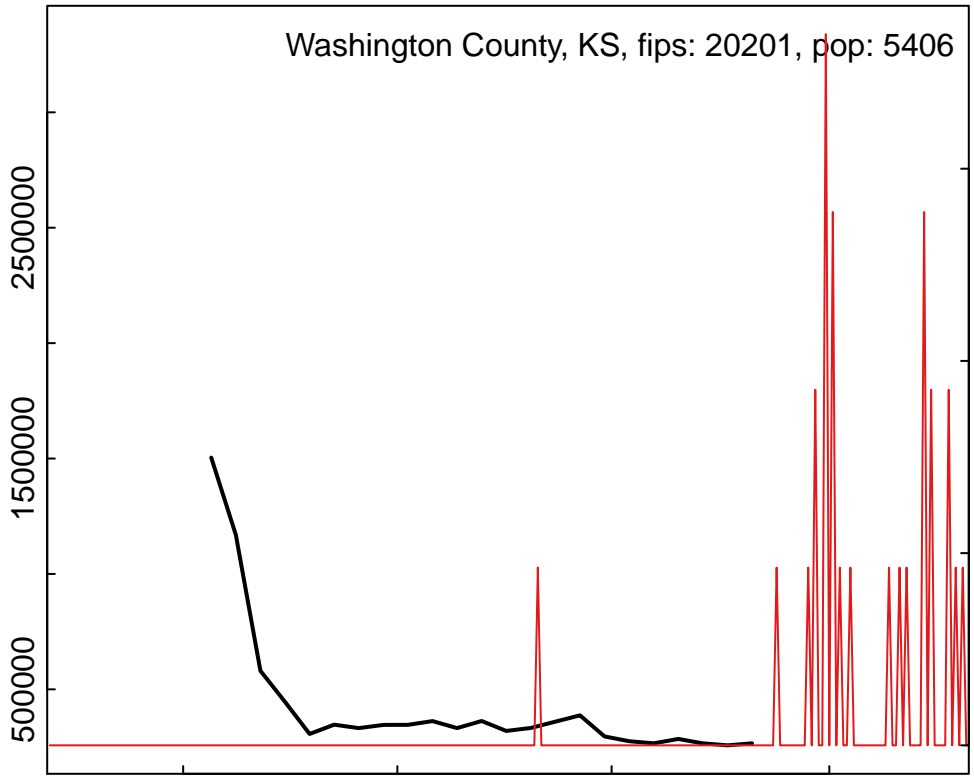

Incident cases (per 100,000 population)

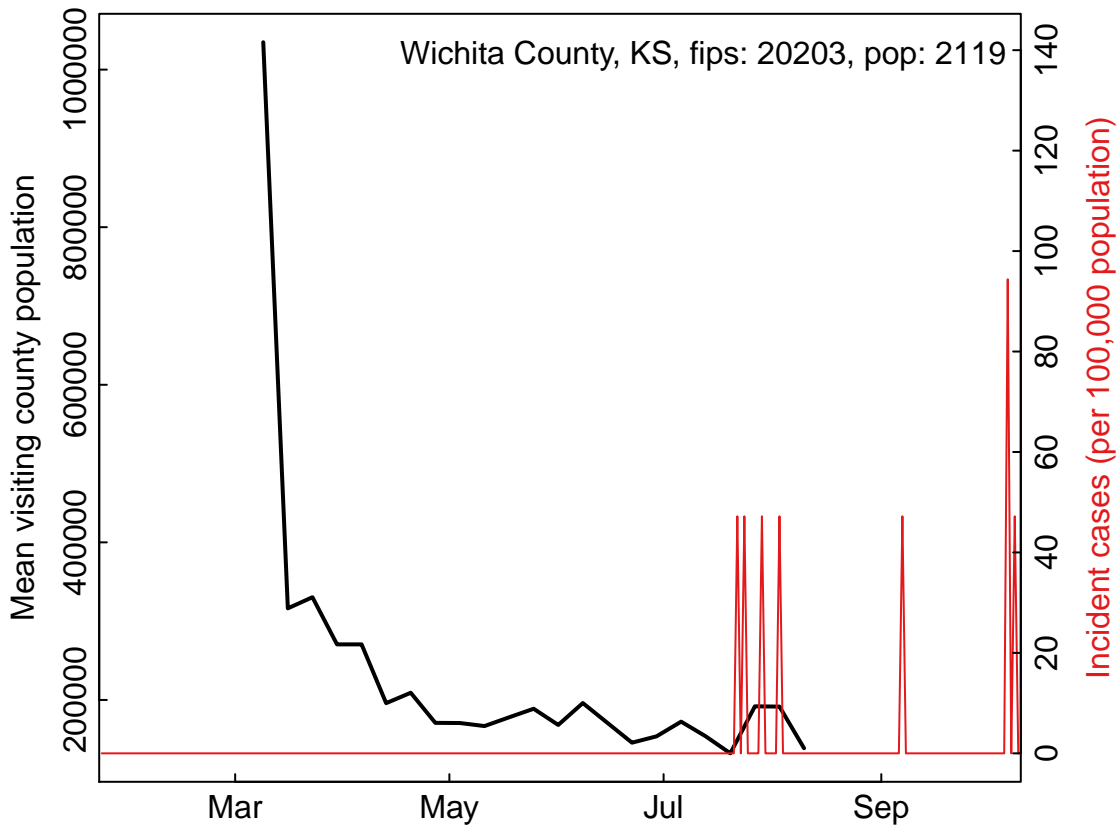

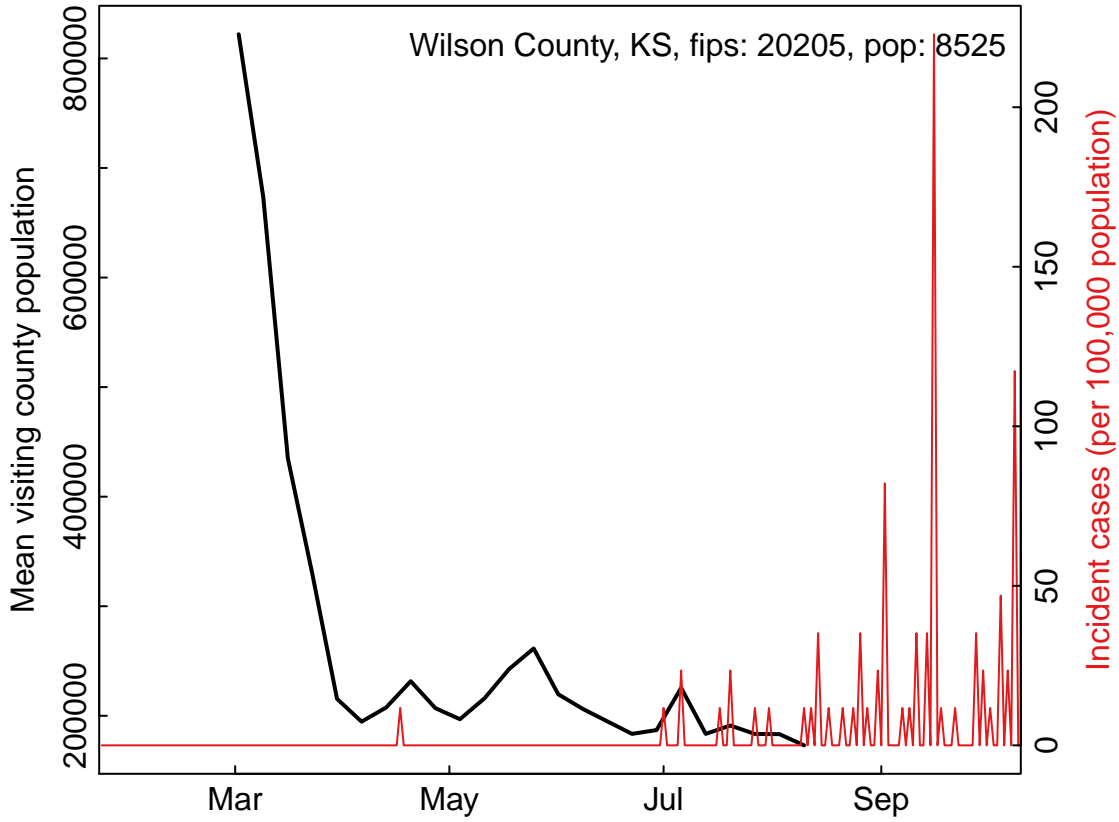

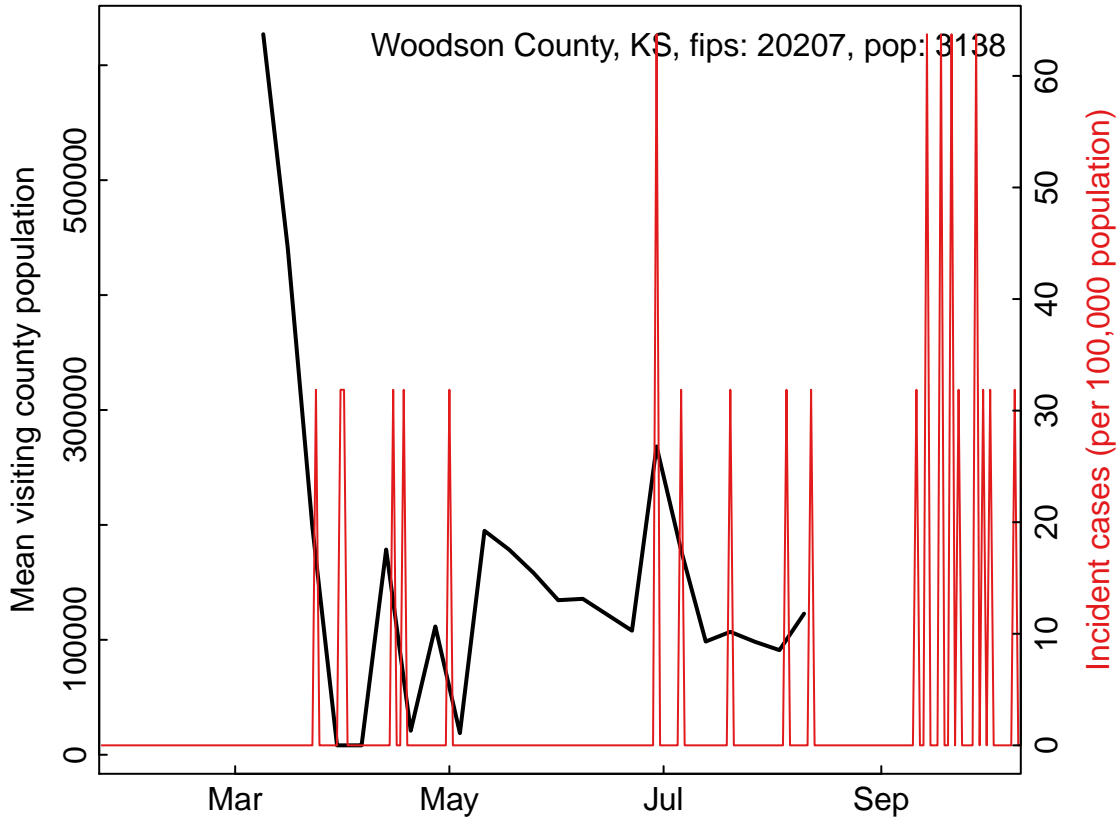

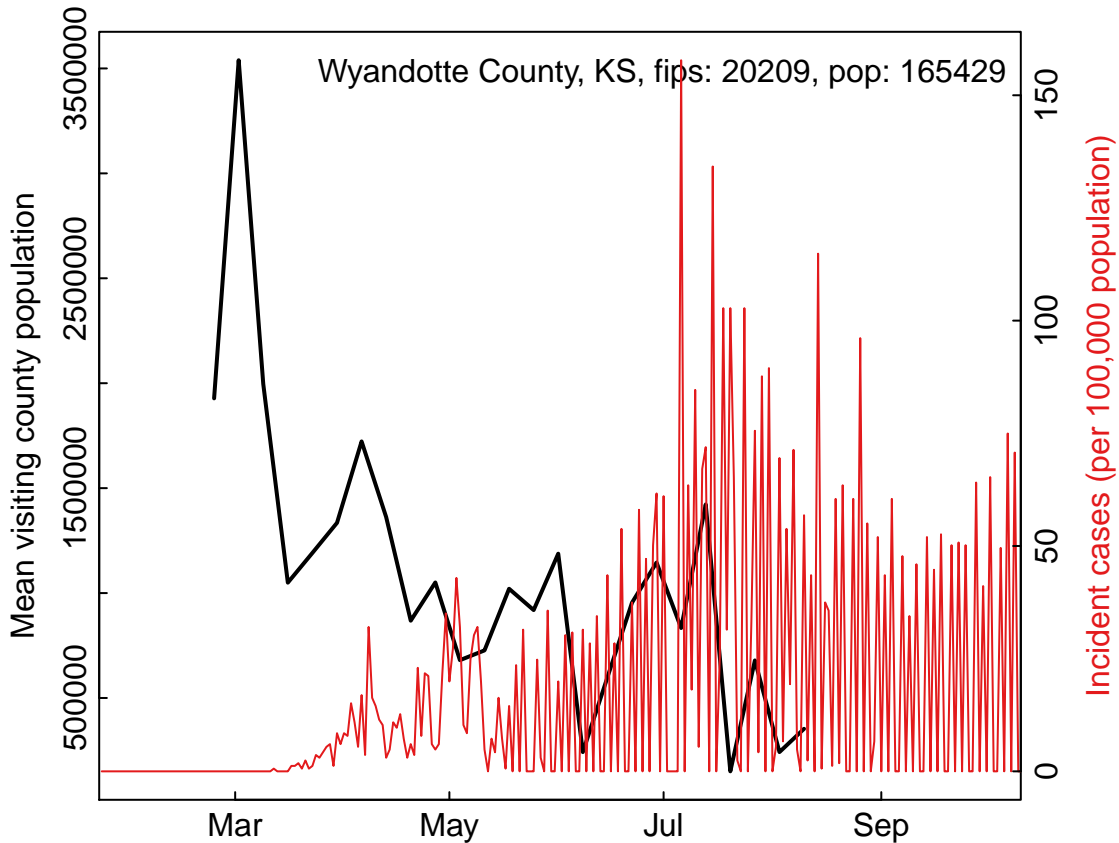



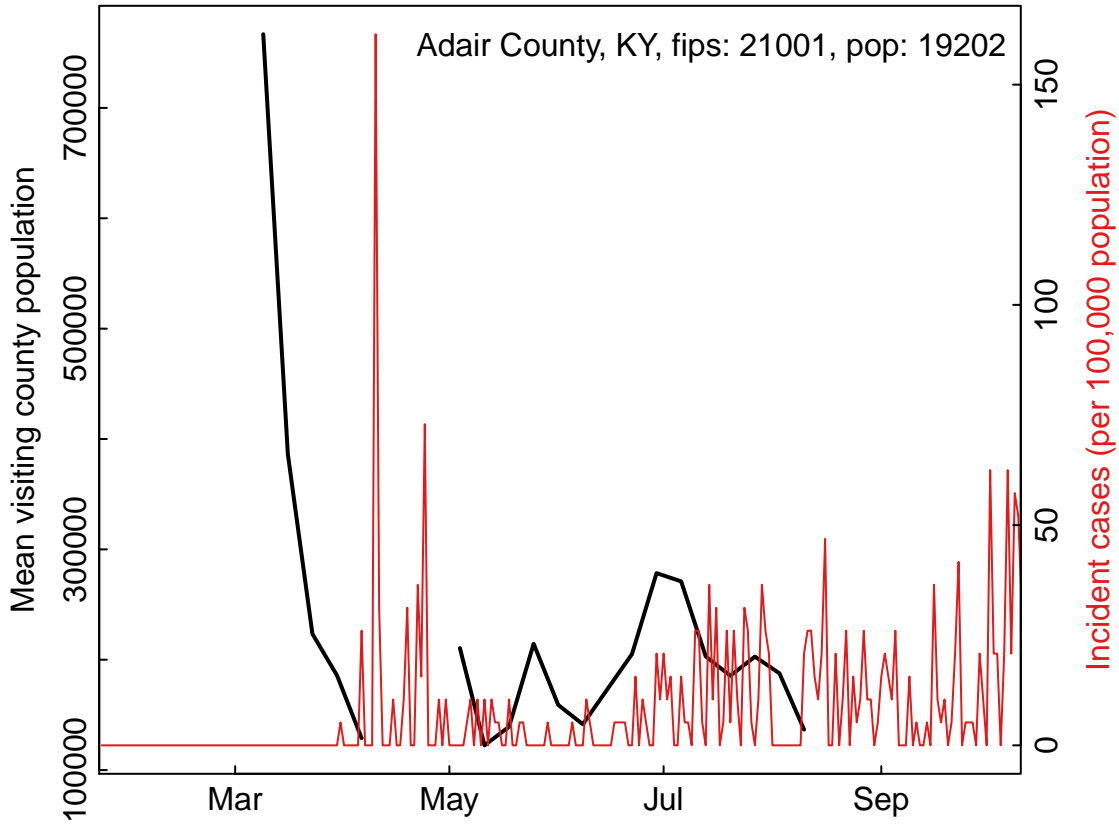

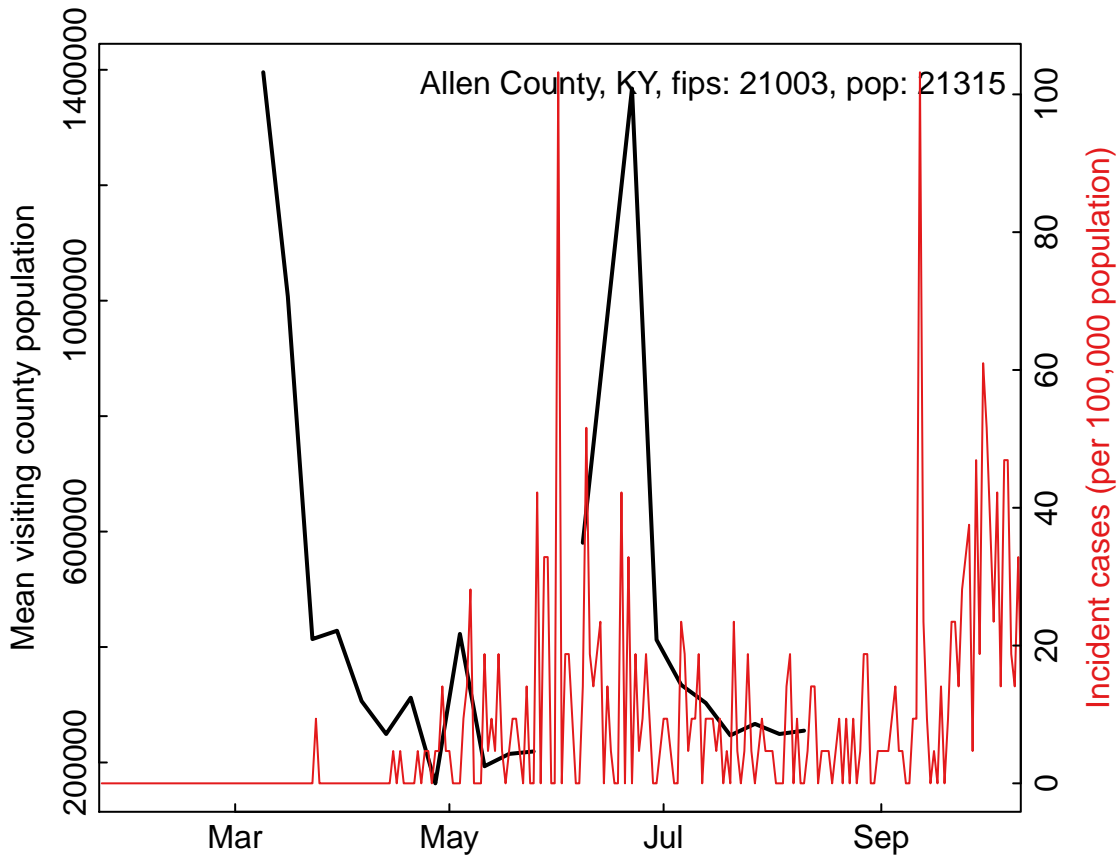

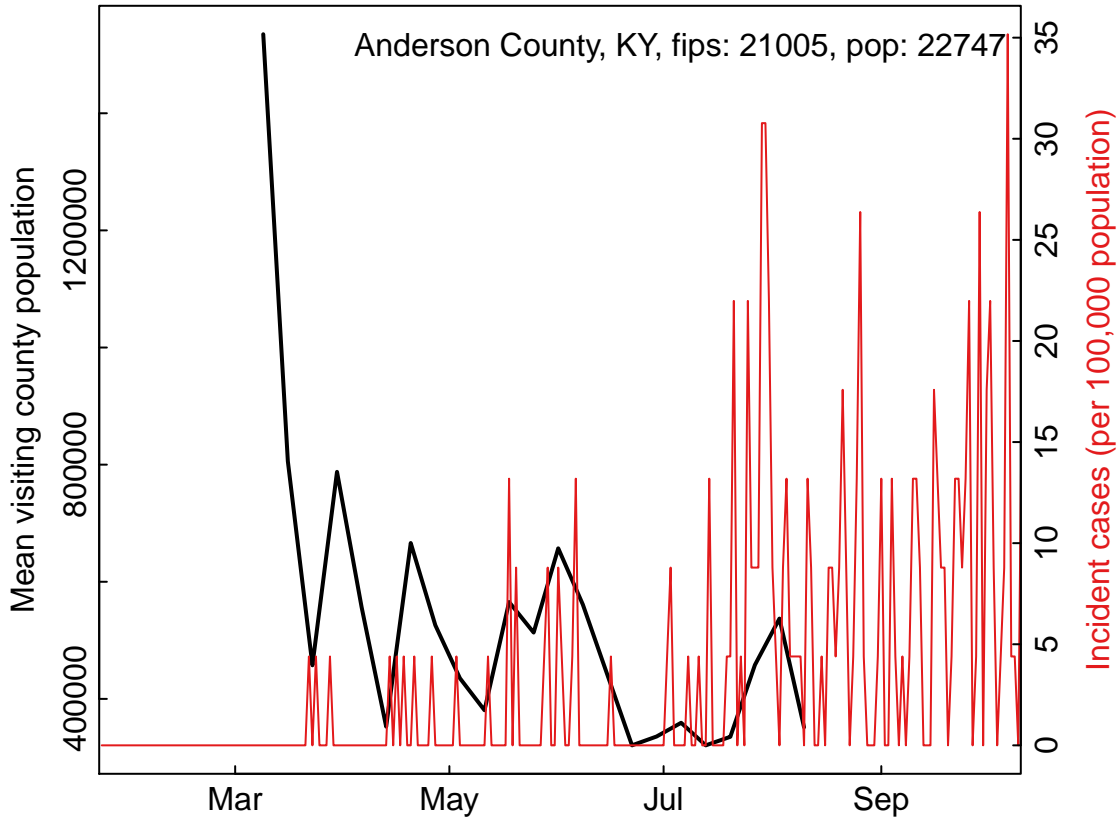

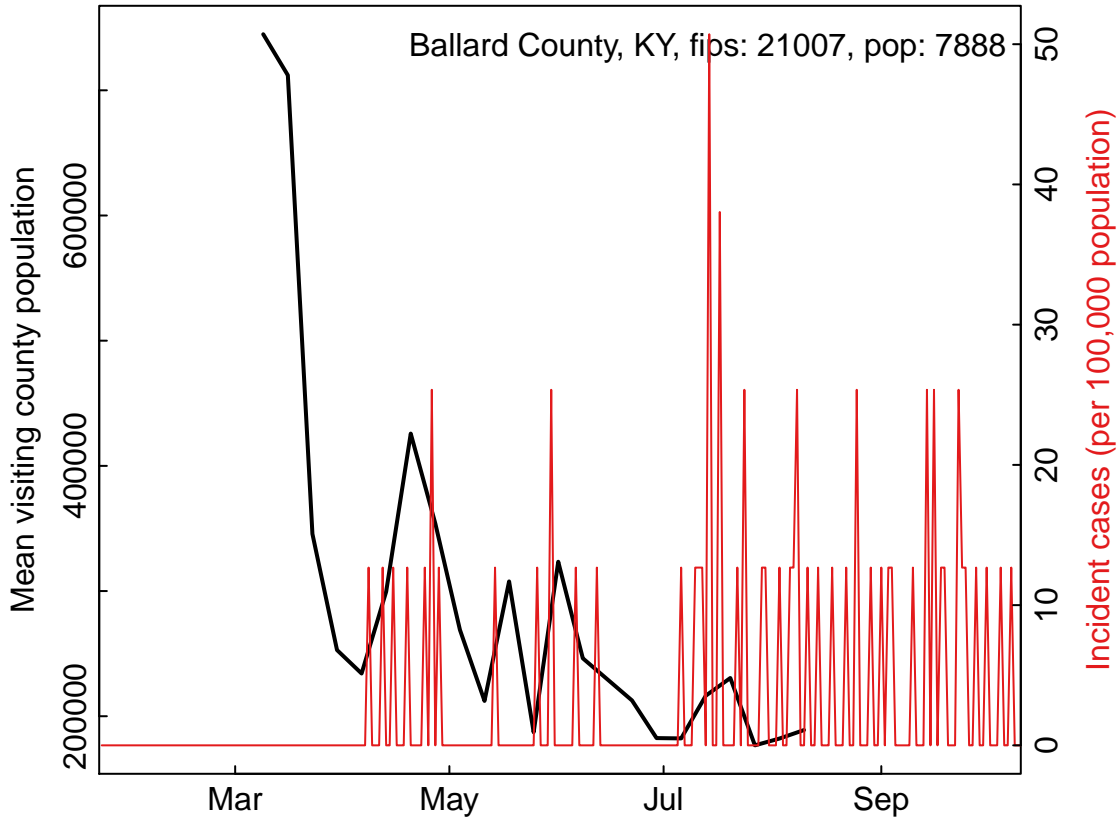

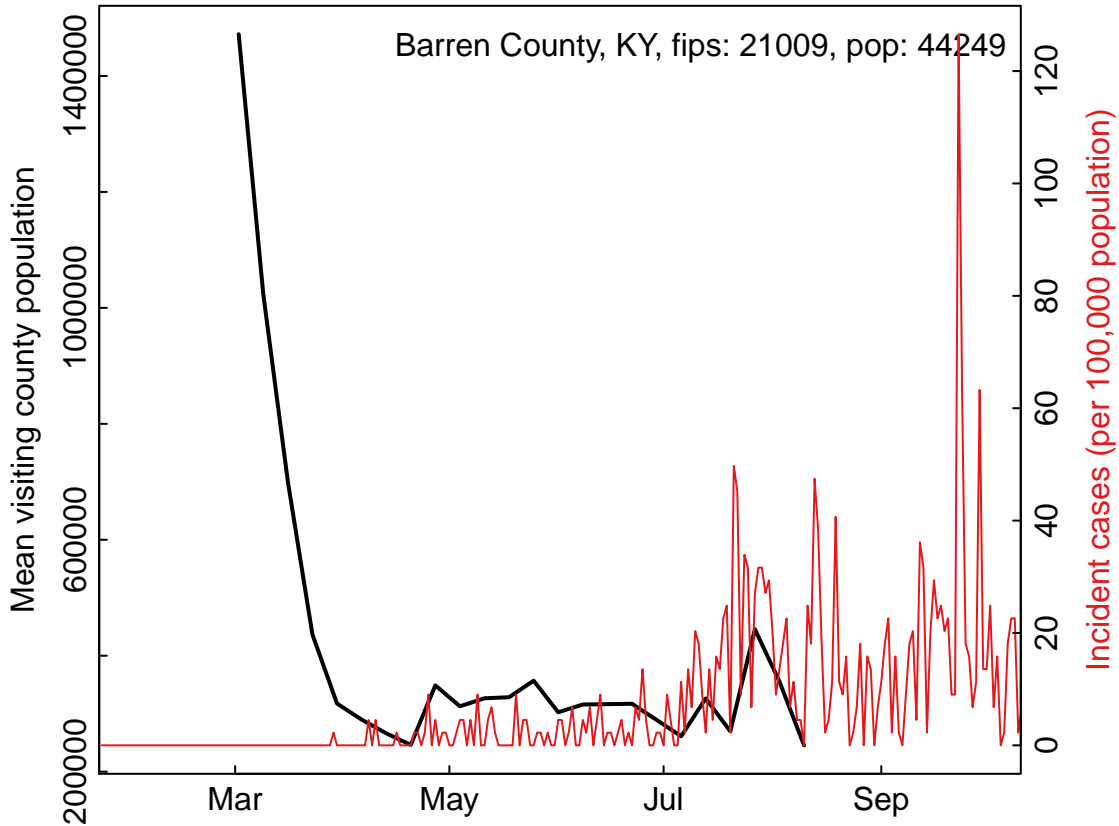

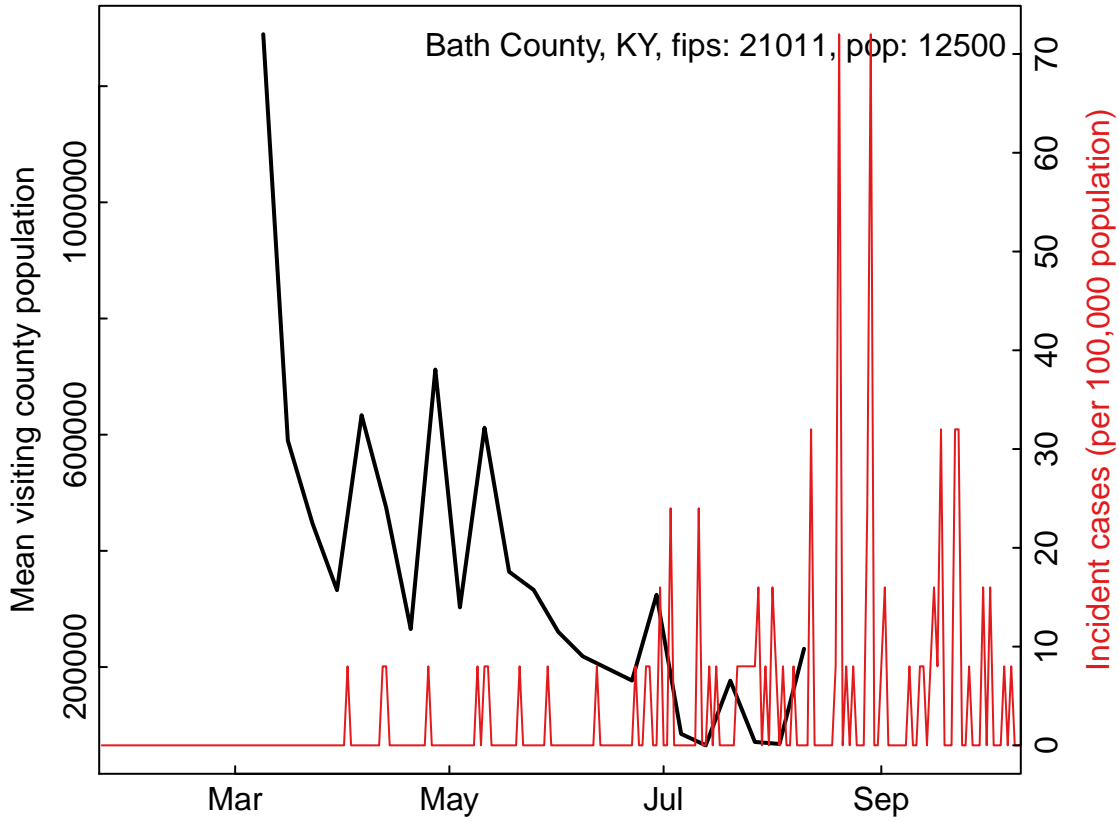

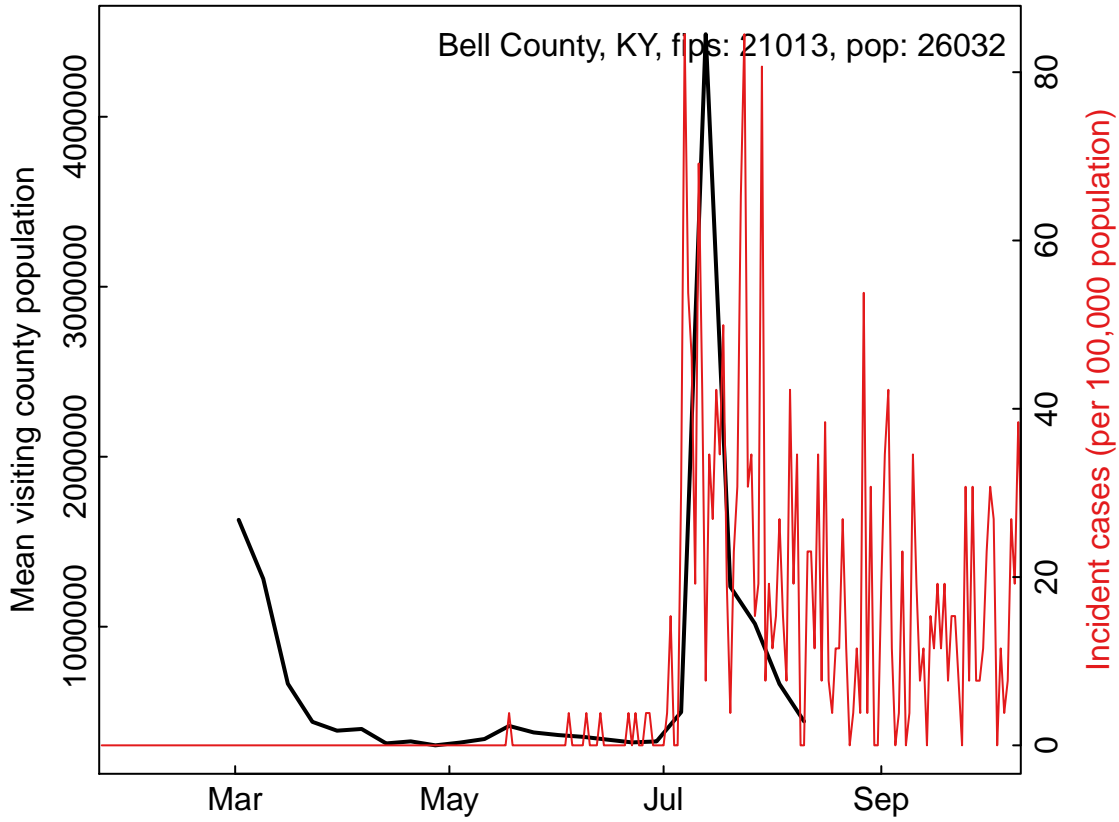

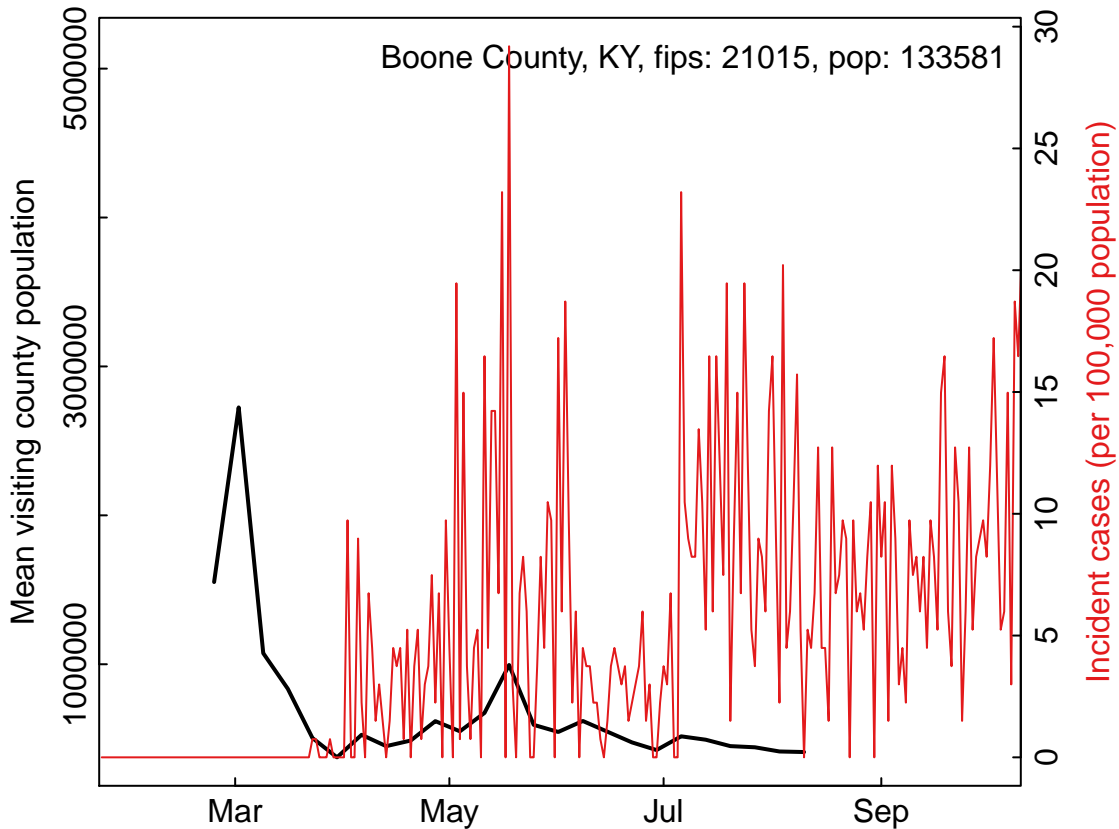



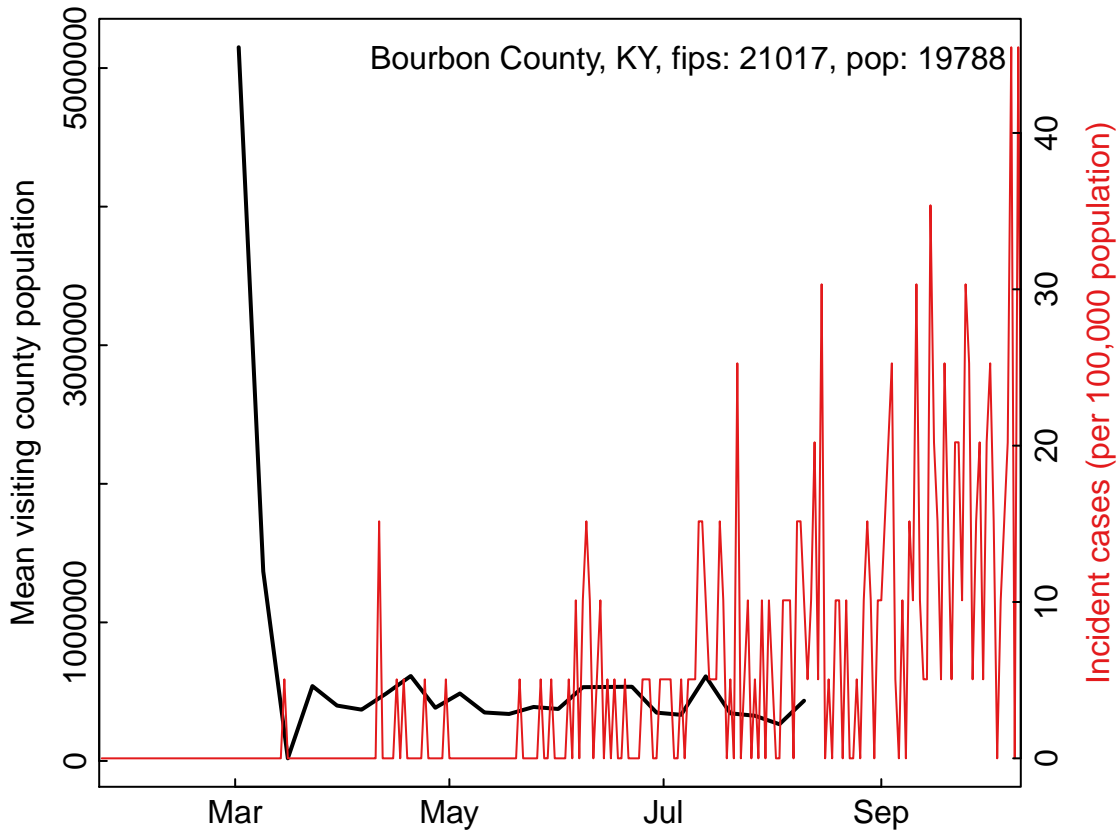

Boyd County, KY, fips: 21019, pop: 46718

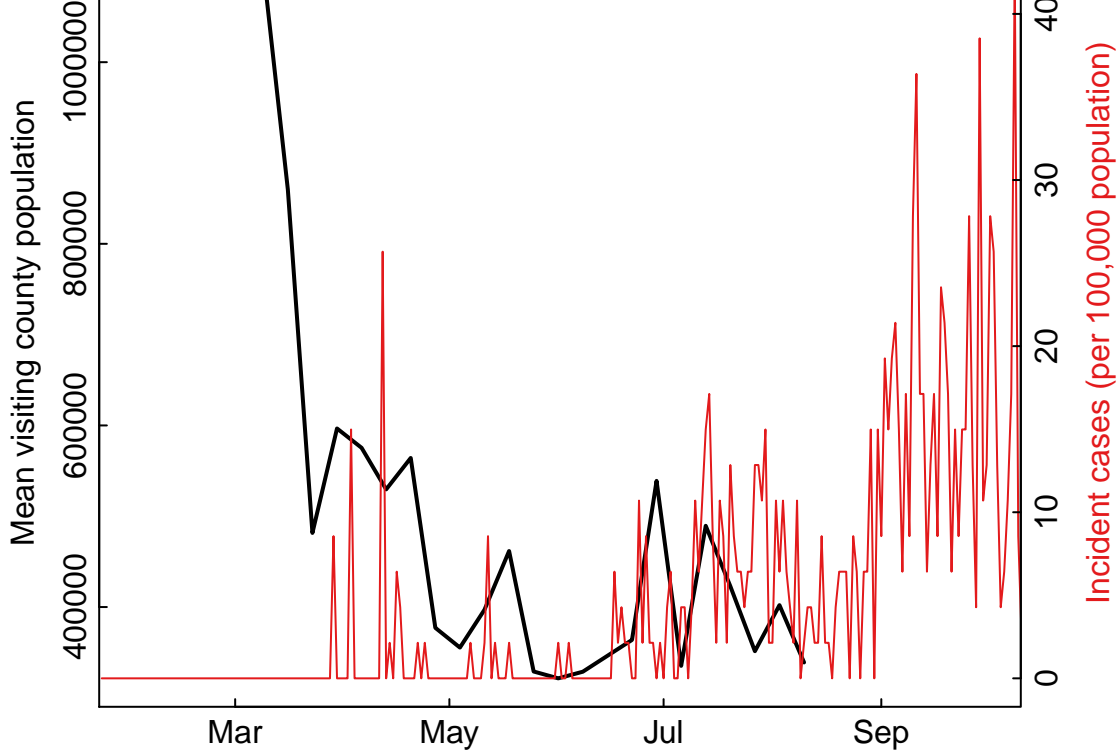

Boyle County, KY, fips: 21021, pop: 30060

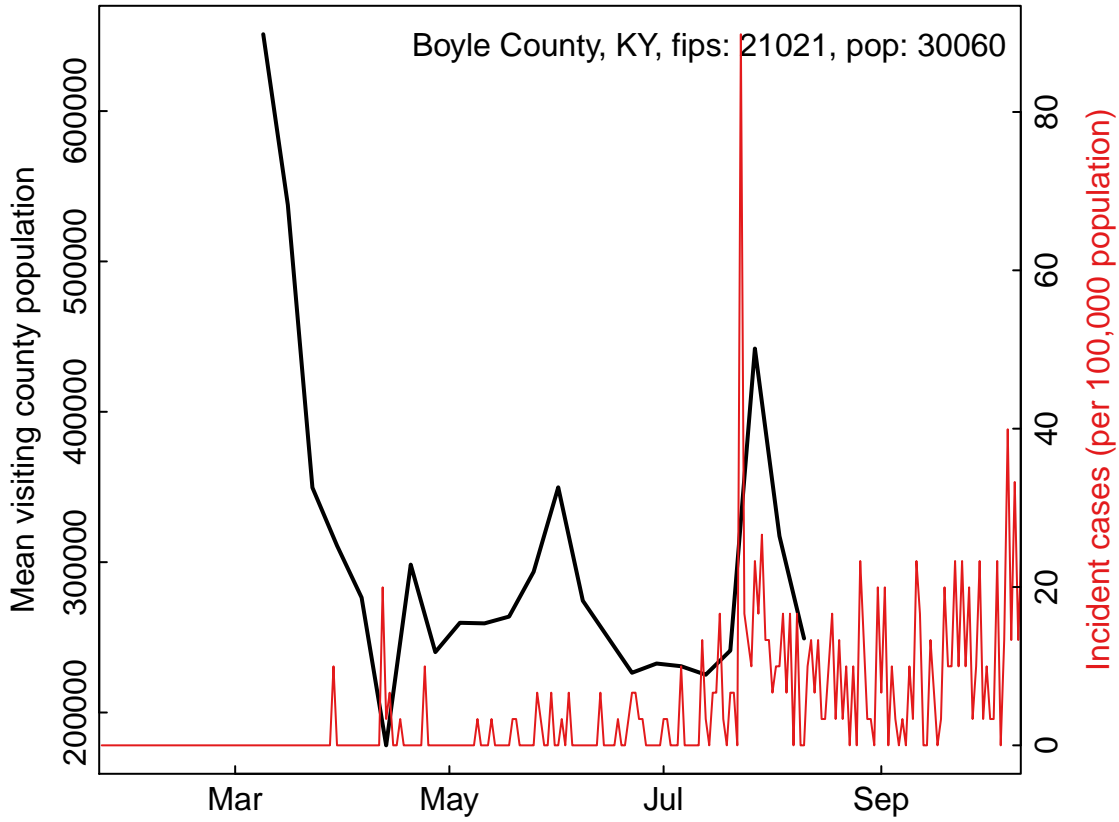

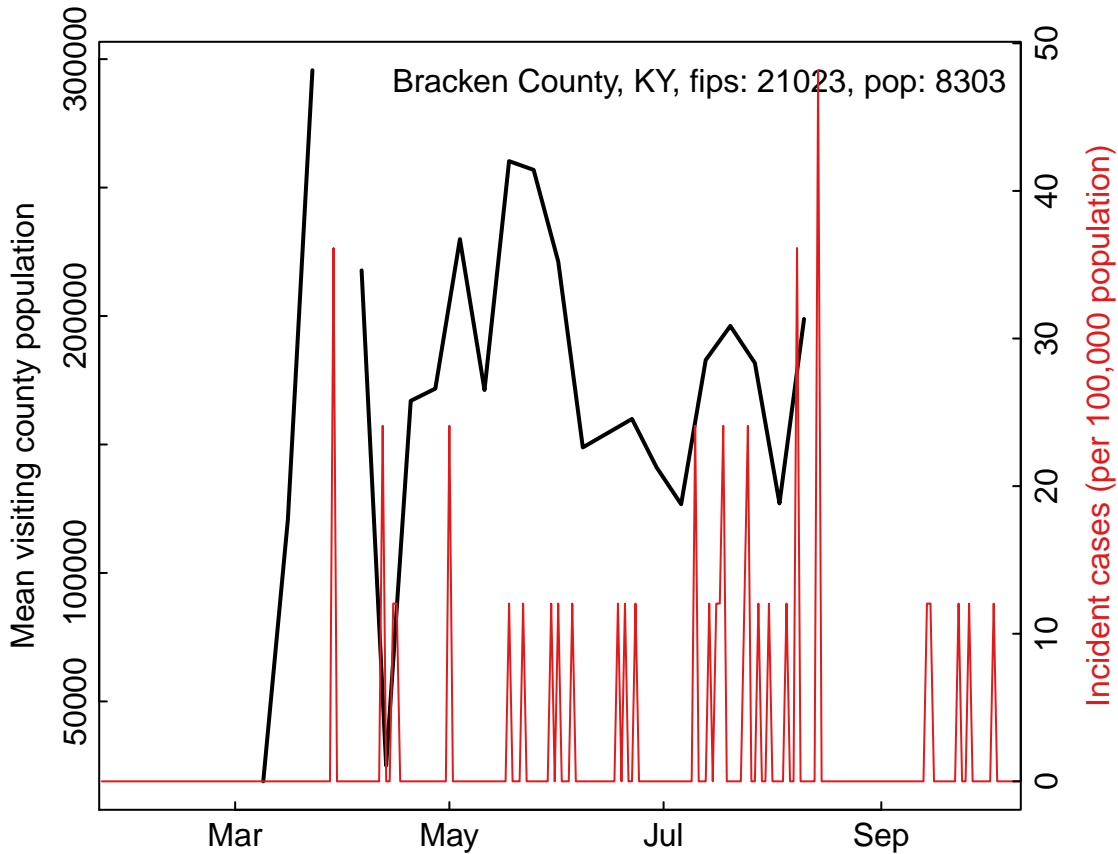

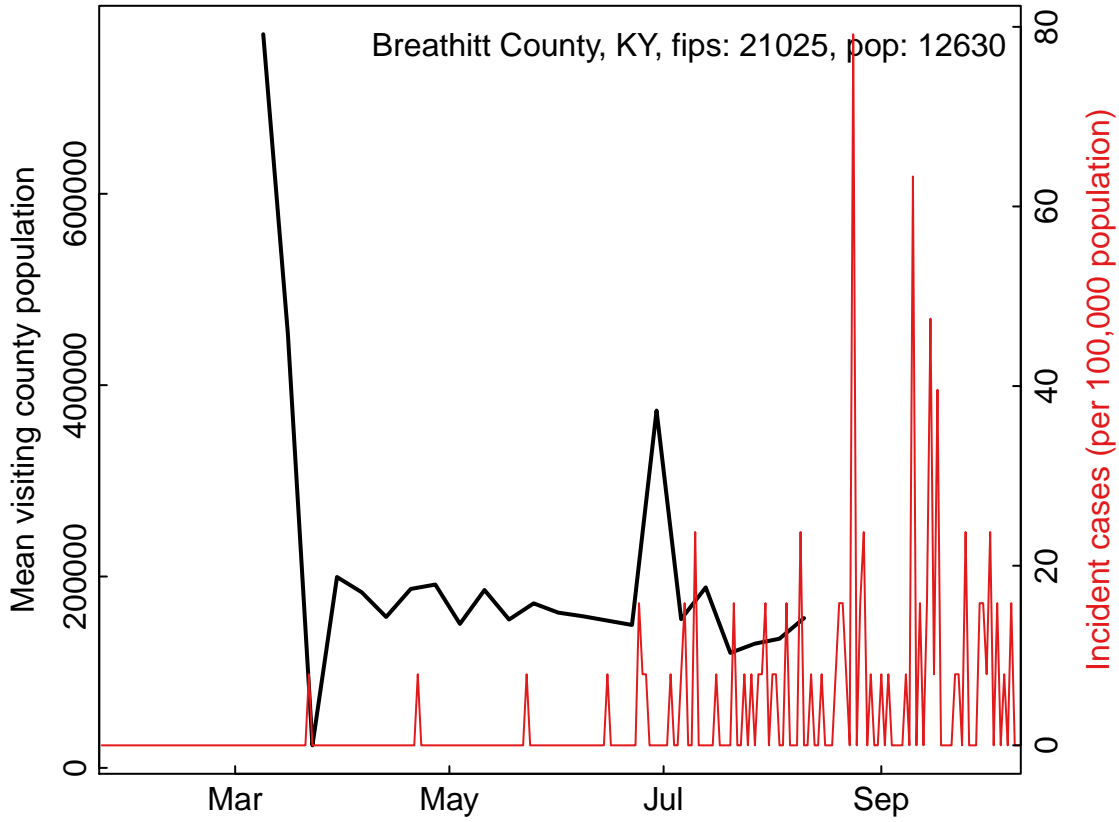

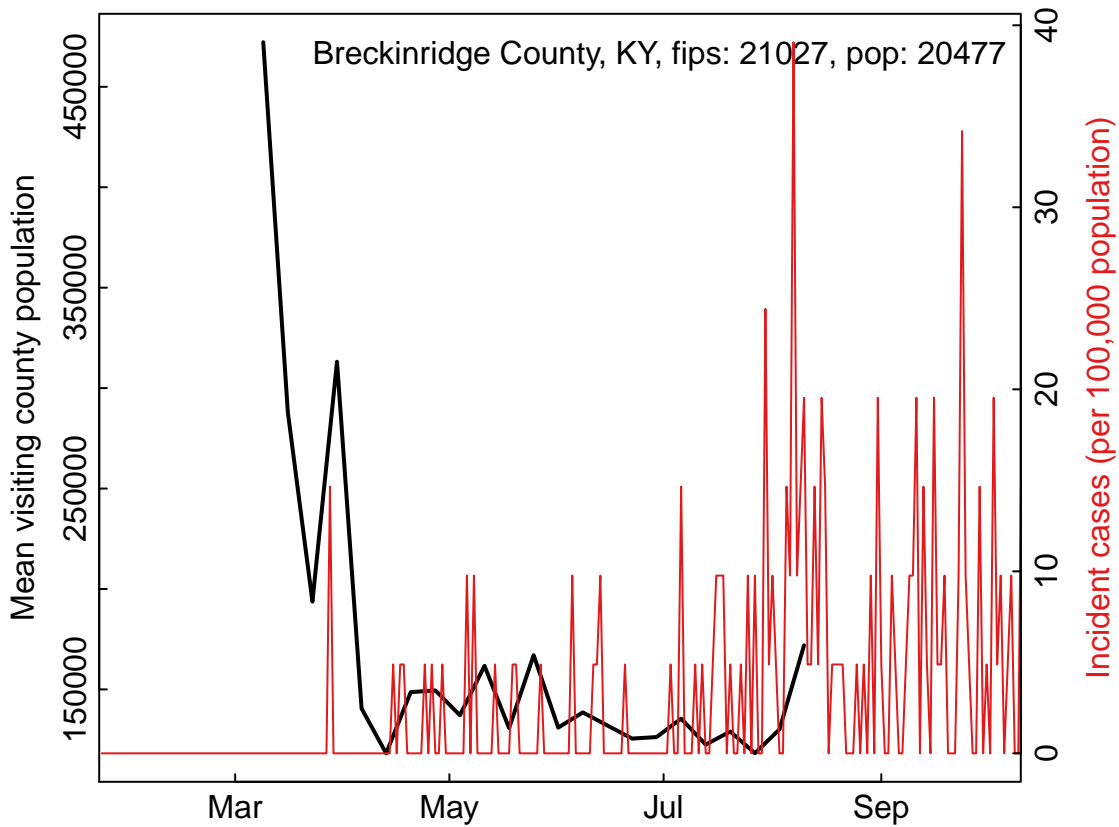

Bullitt County, KY, fips: 21029, pop: 81676

Mean visiting county population

1000000  
600000  
200000

Mar May Jul Sep

Incident cases (per 100,000 population)

30  
20  
10  
0

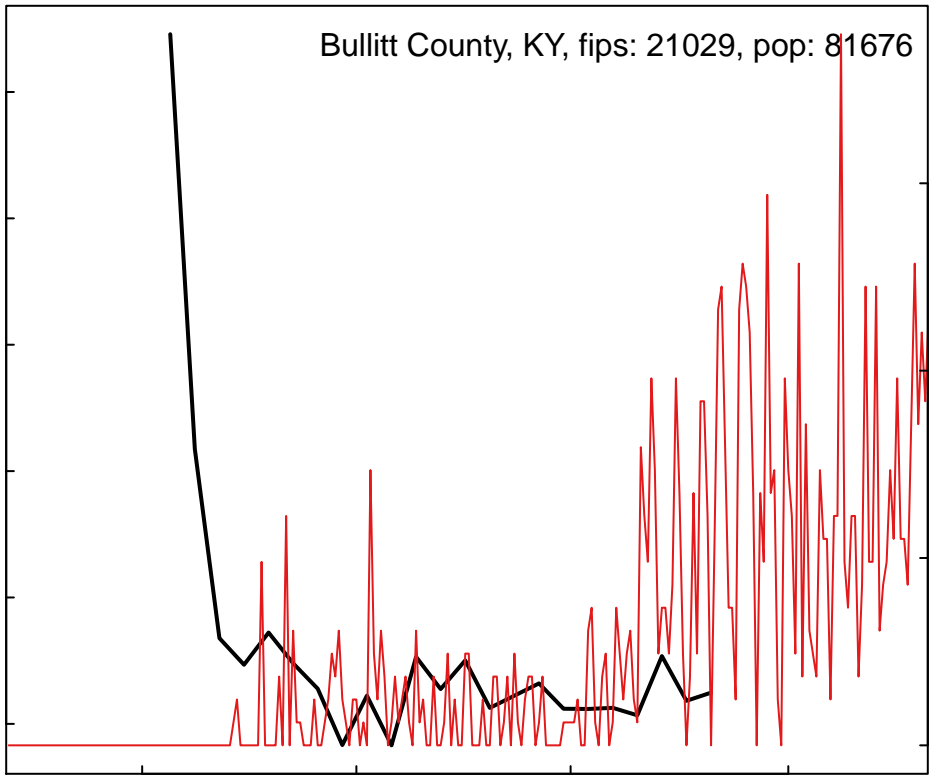

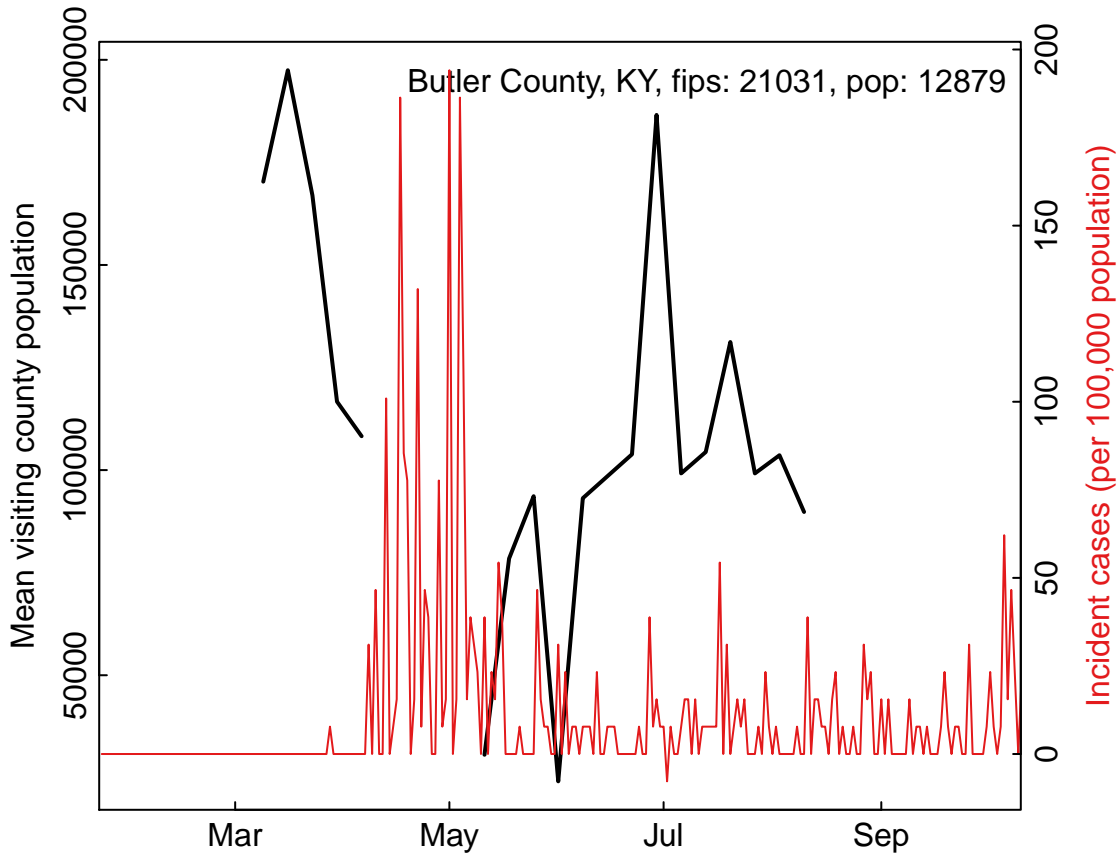



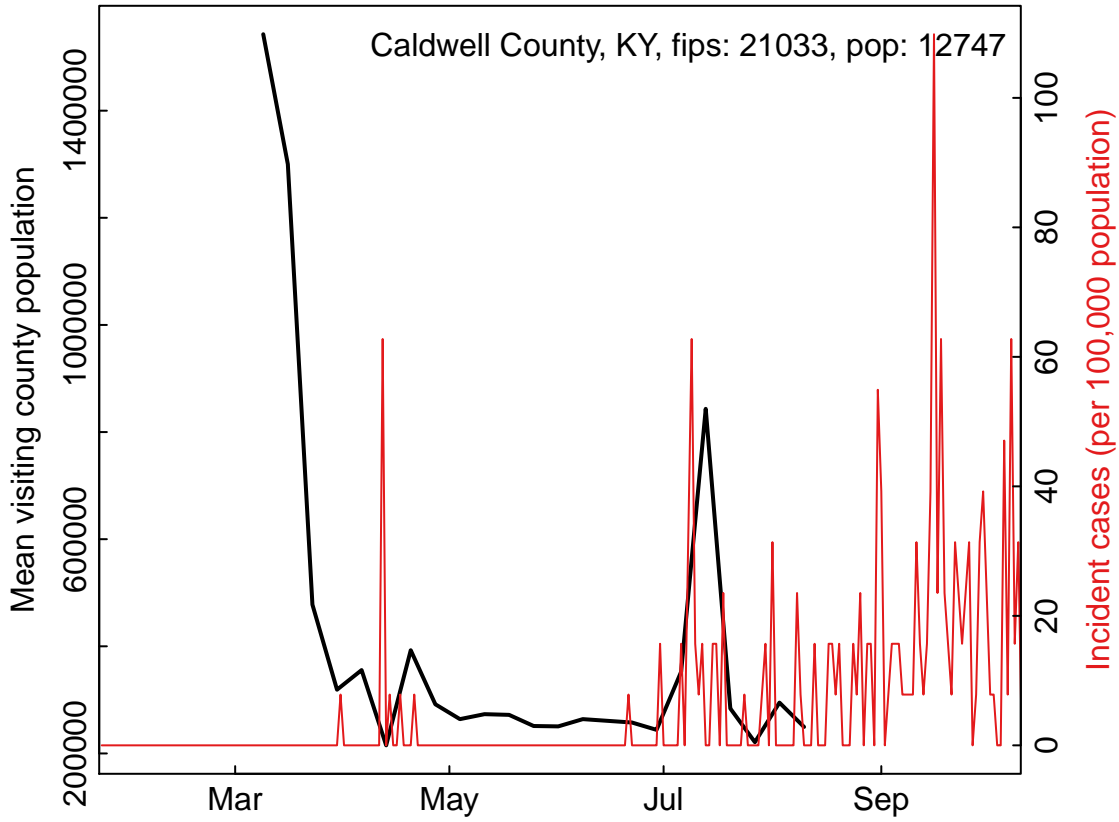

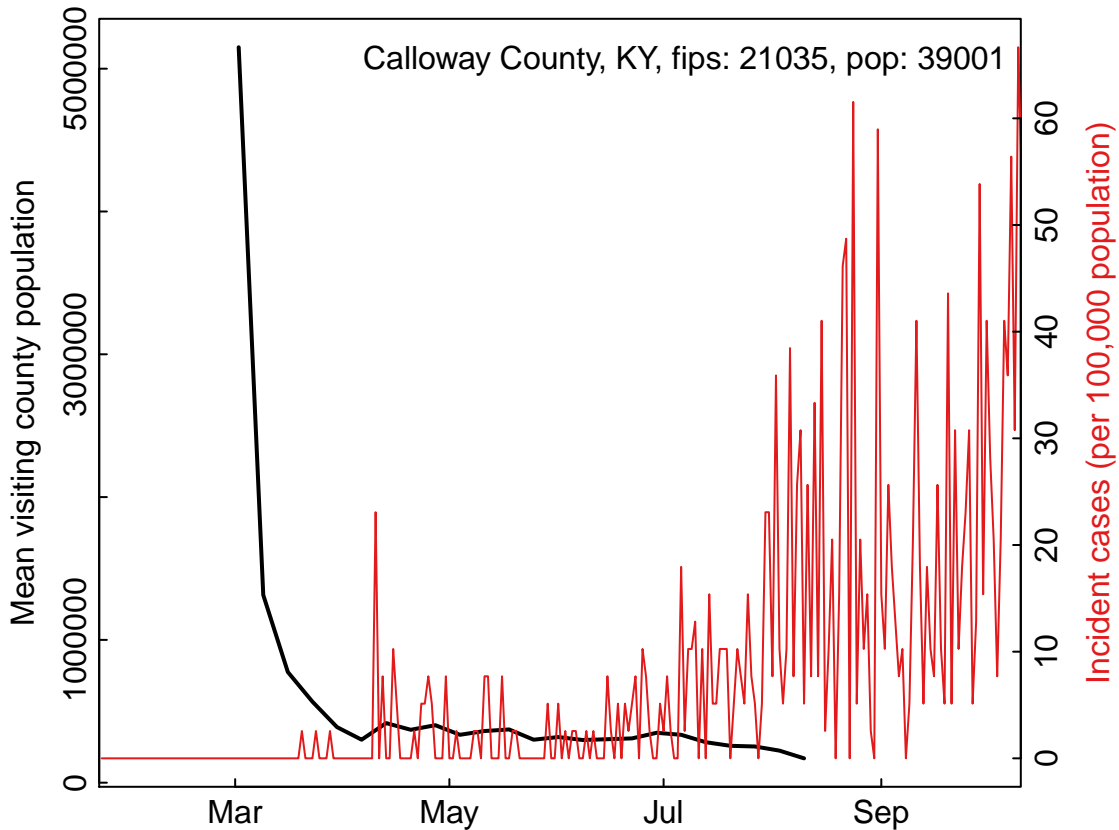

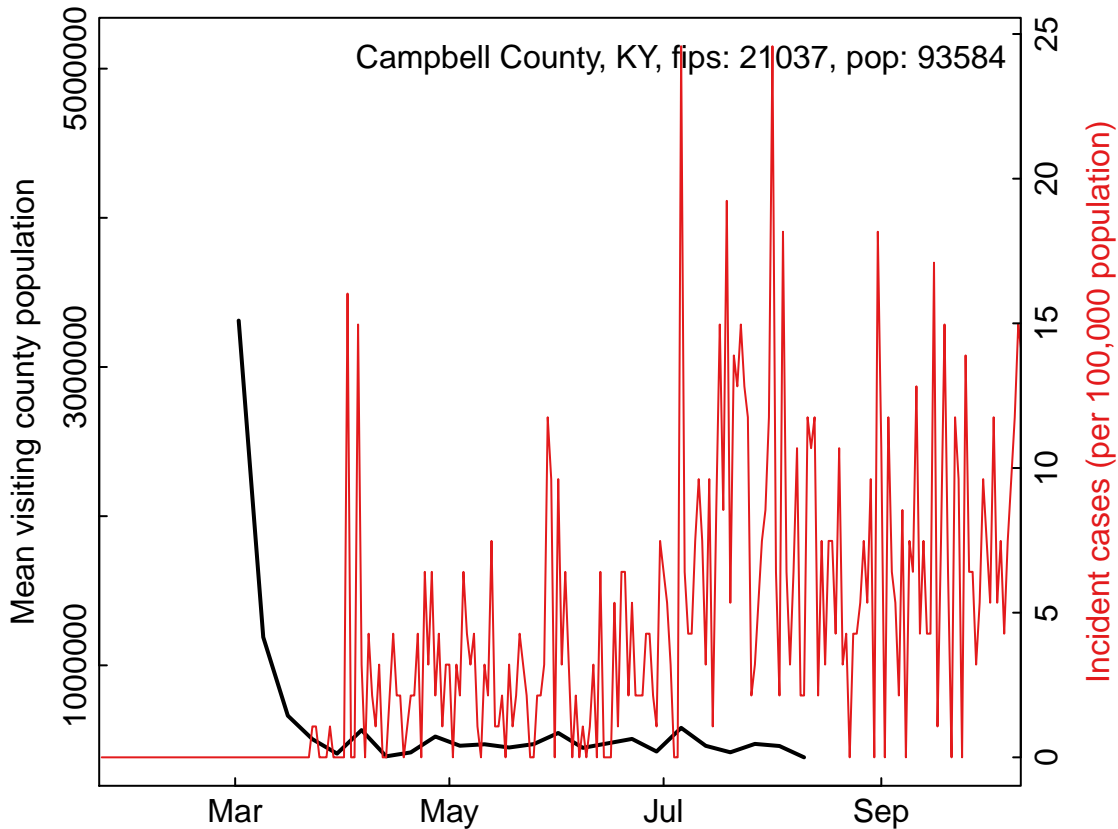

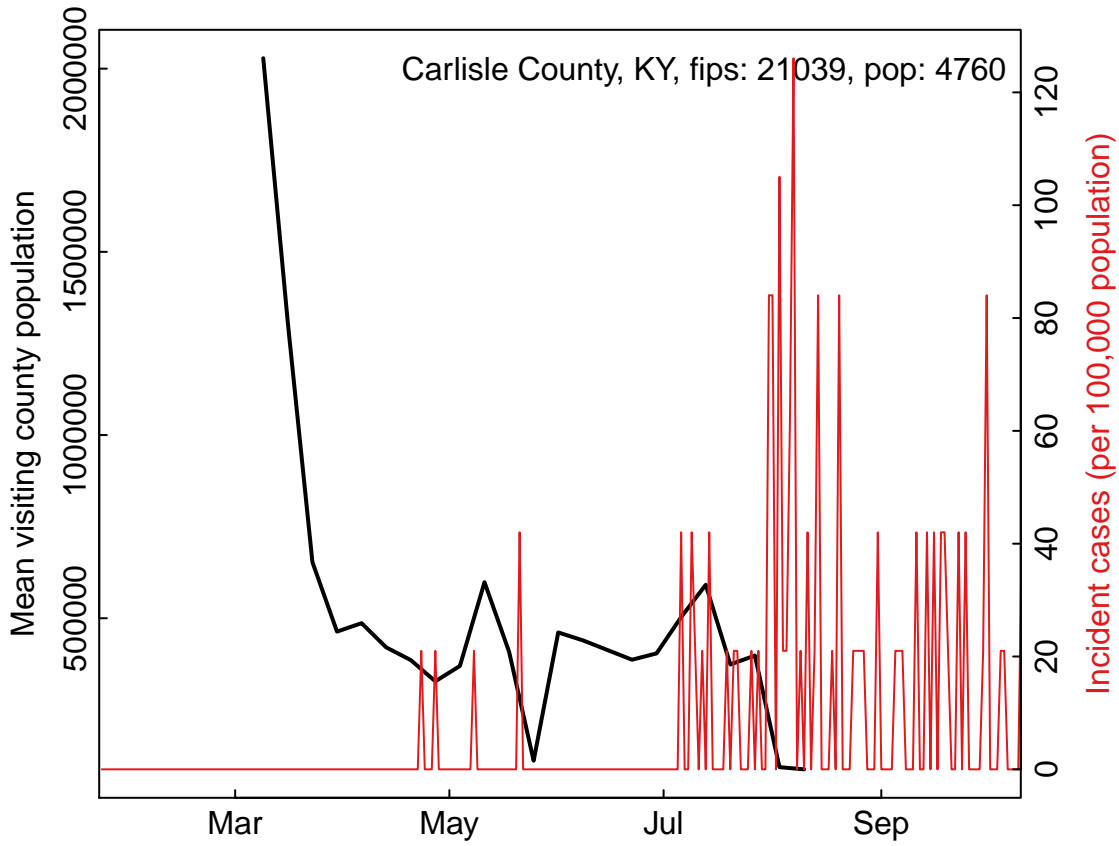

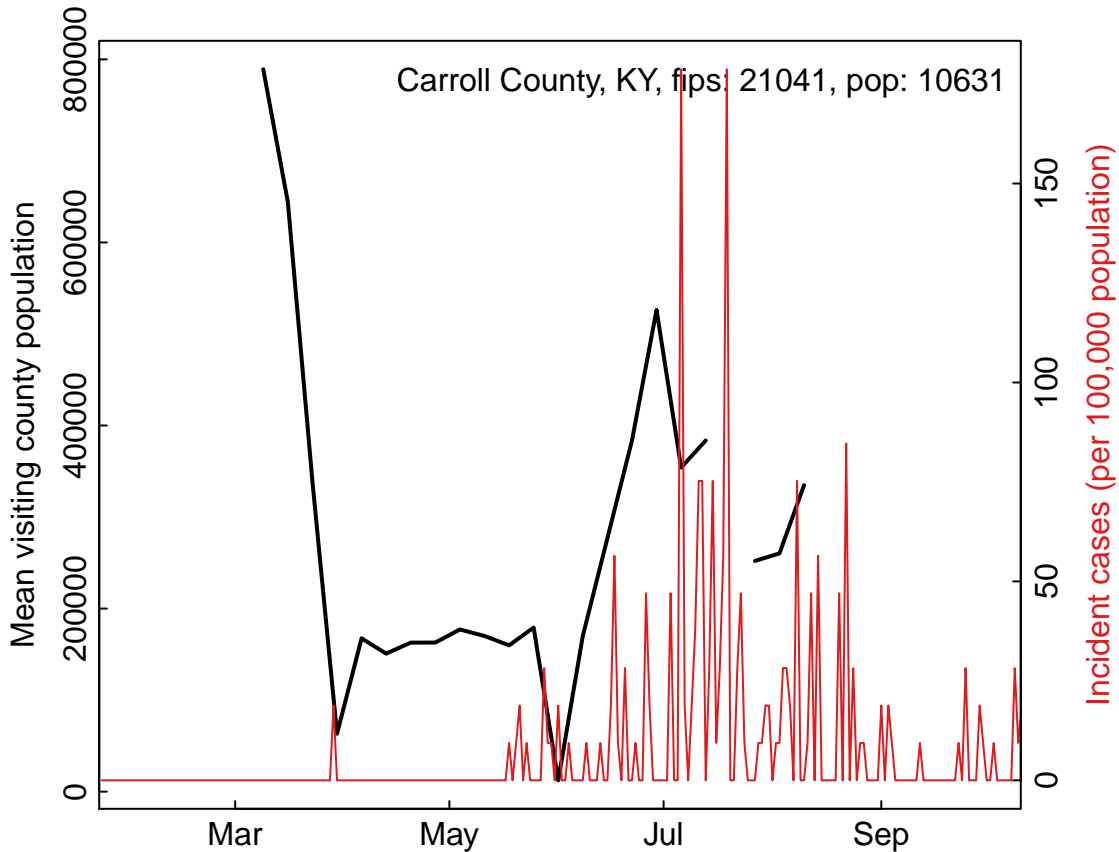

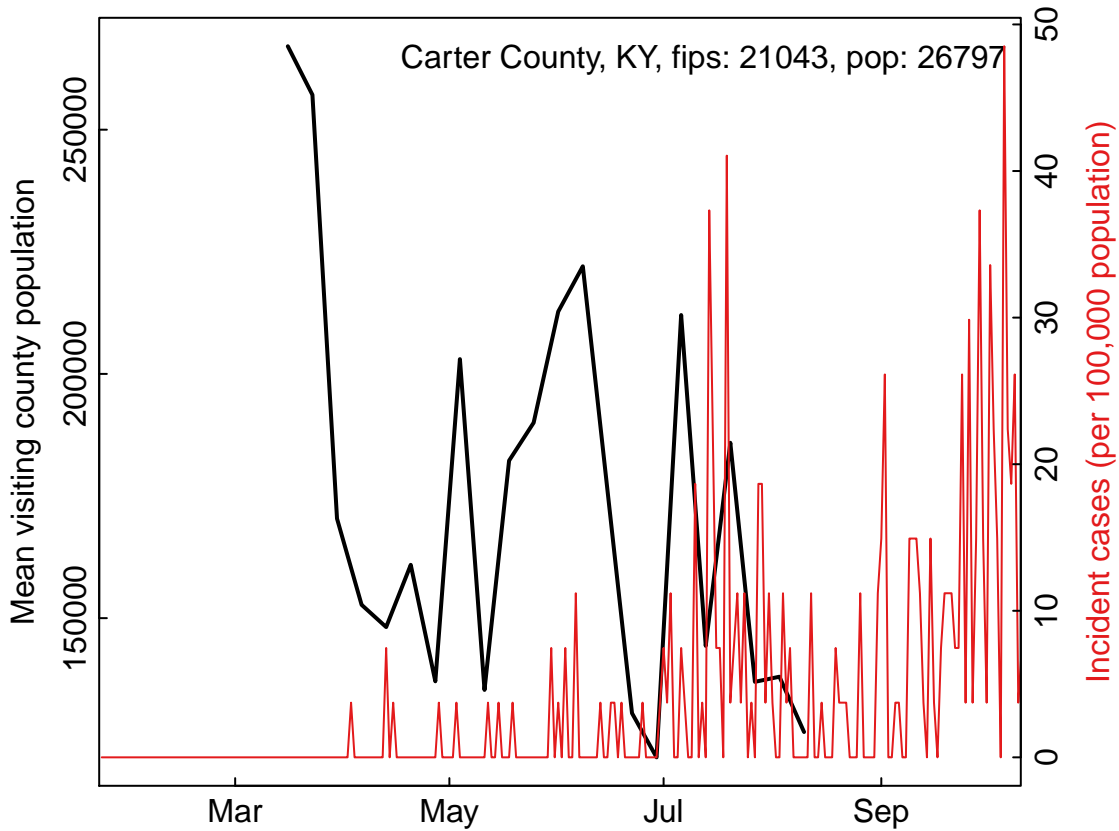

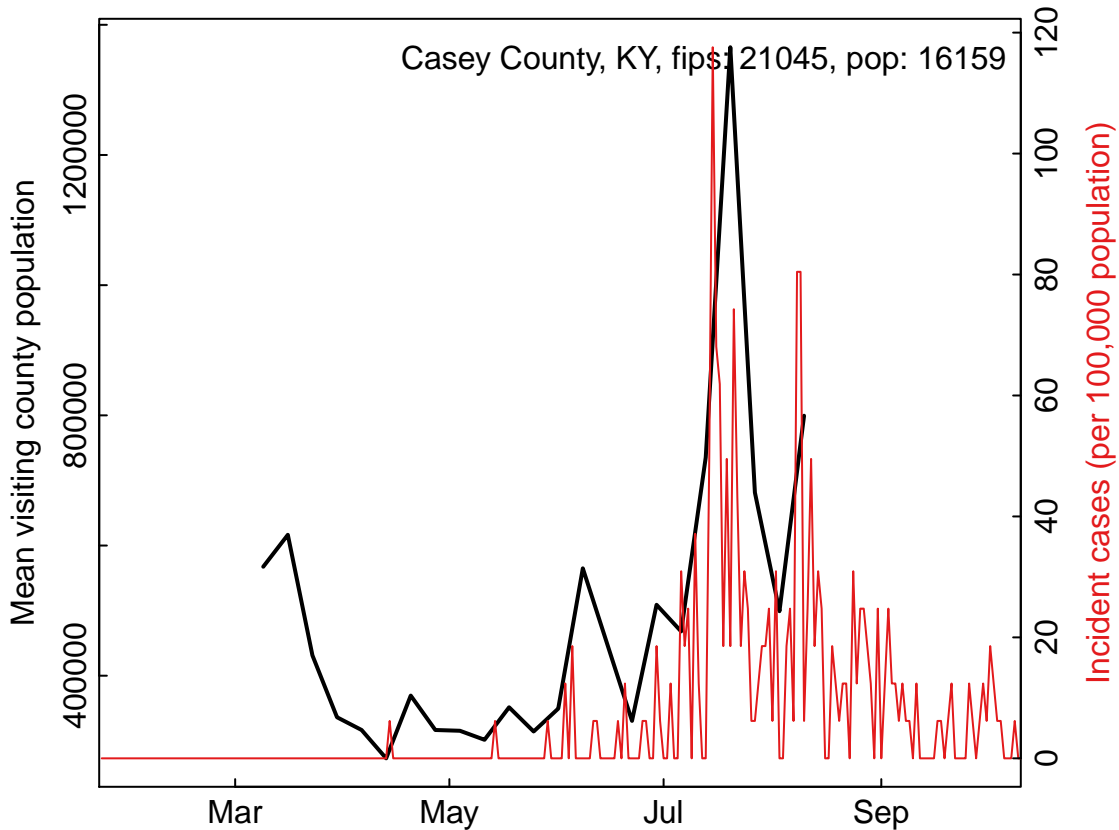

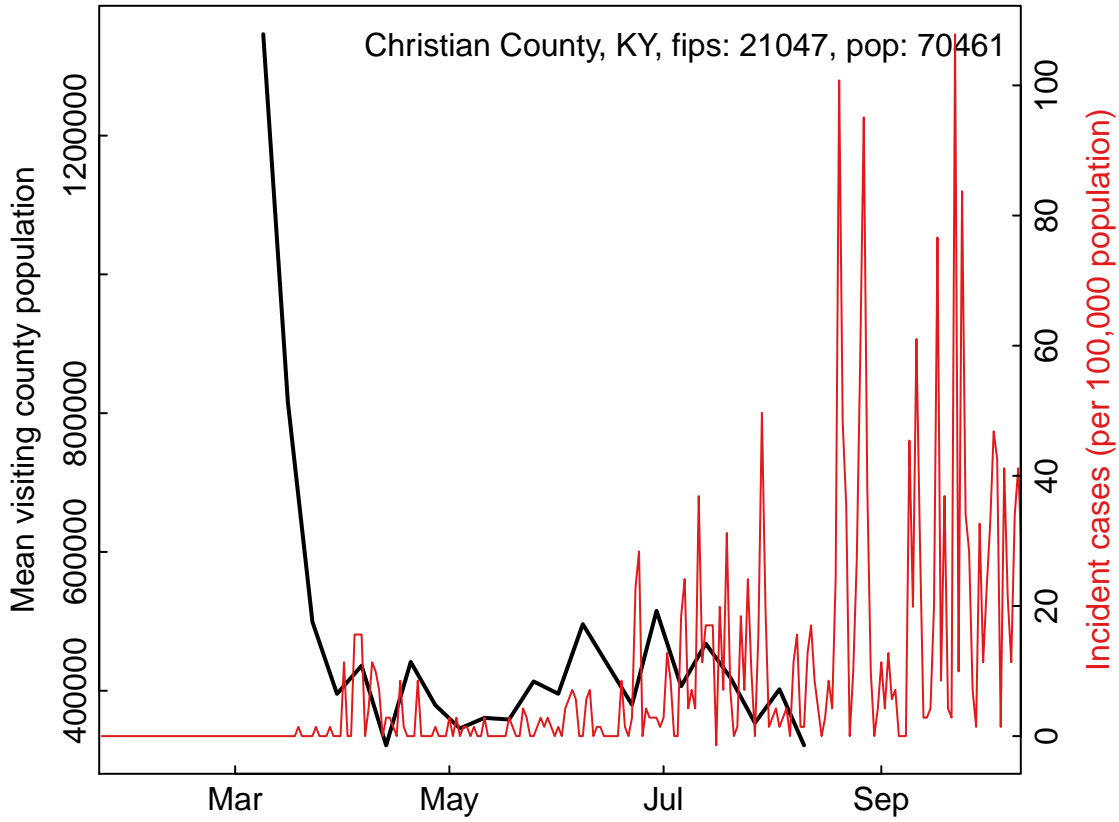



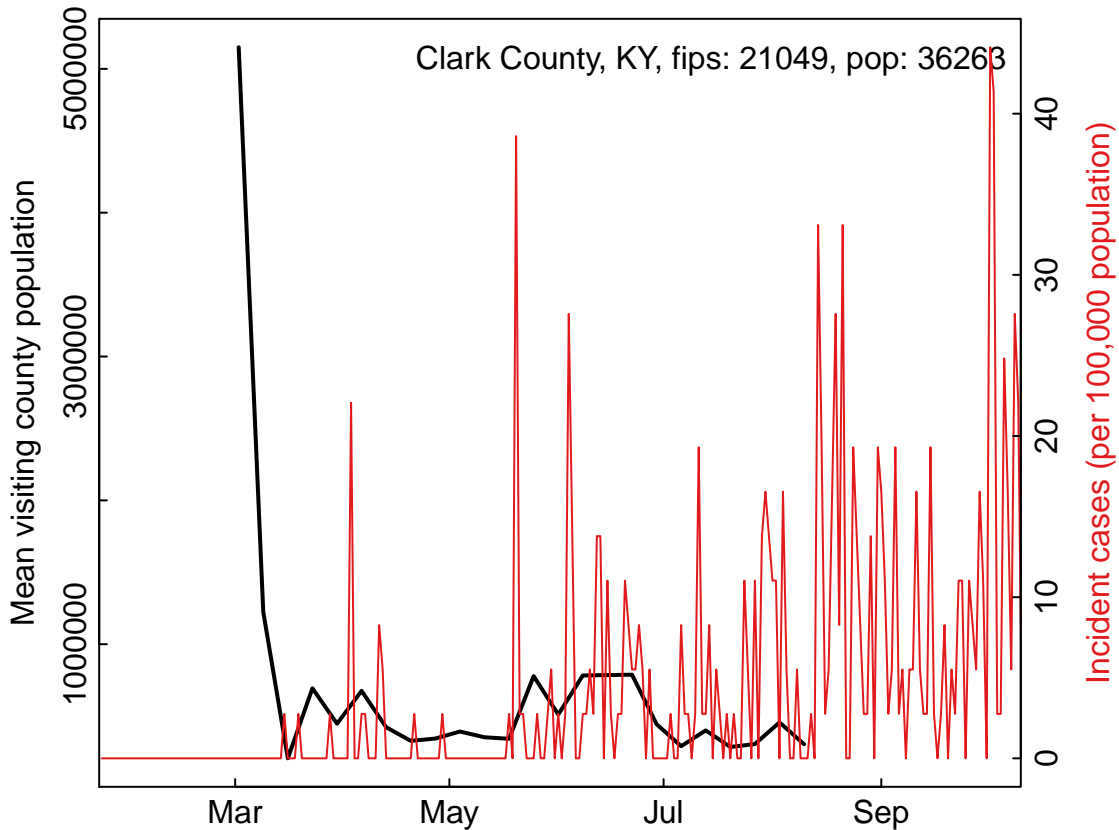

Clay County, KY, fips: 21051, pop: 19901

Mean visiting county population

300000  
200000  
100000  
0

Mar May Jul Sep

Incident cases (per 100,000 population)

100  
80  
60  
40  
20  
0

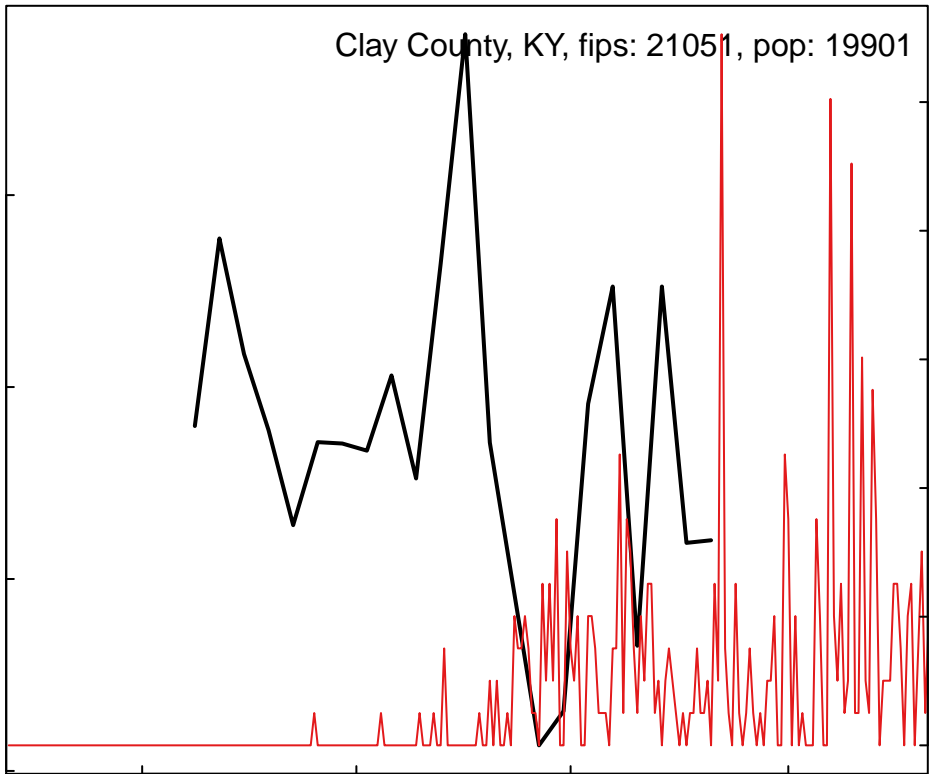

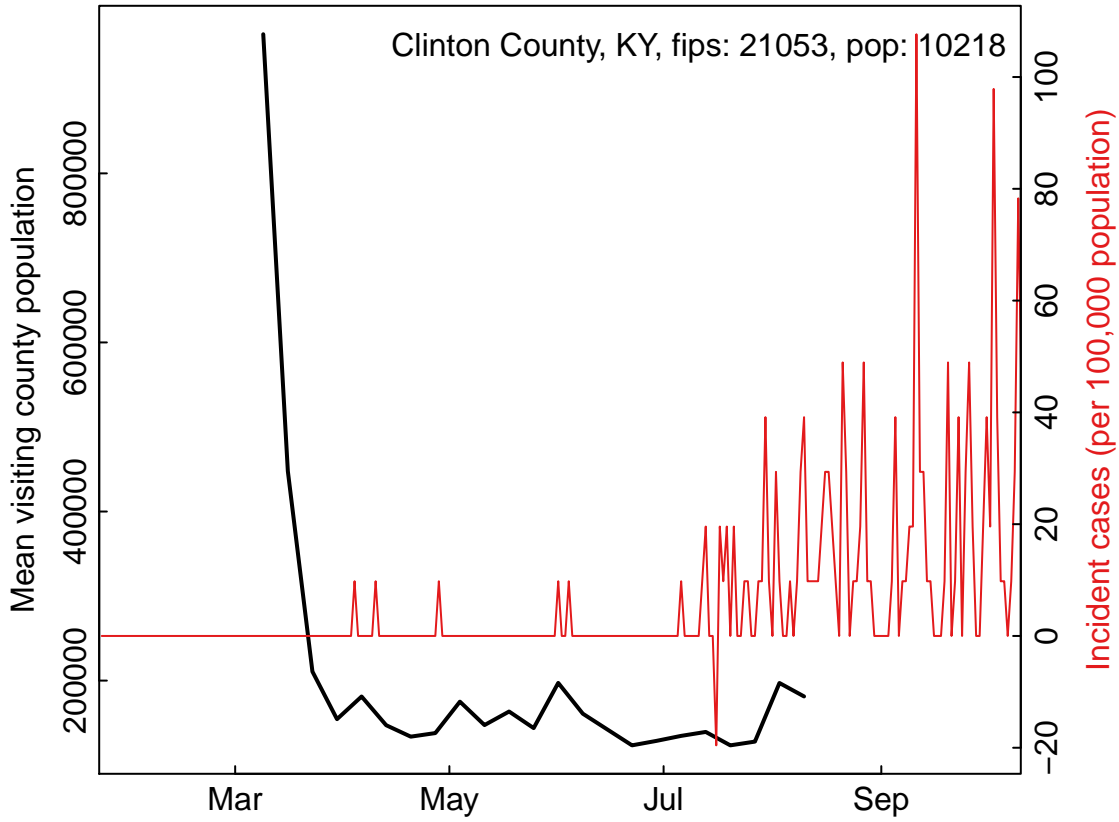

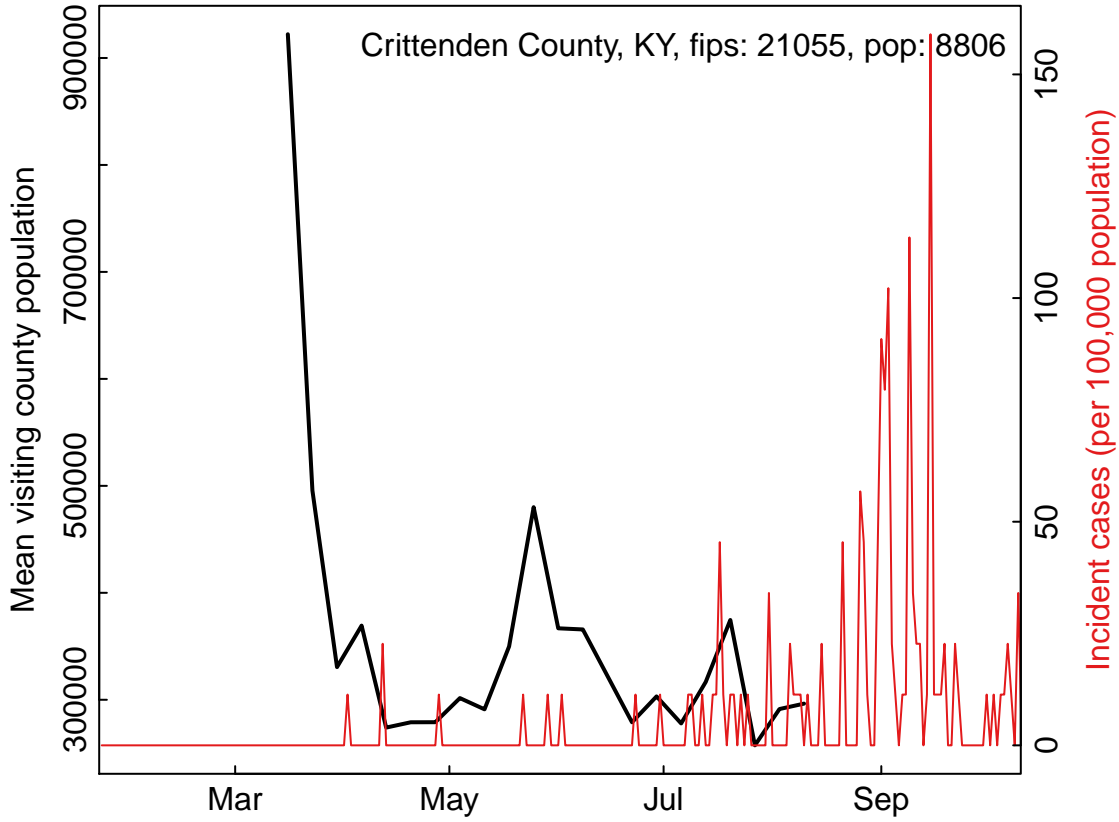

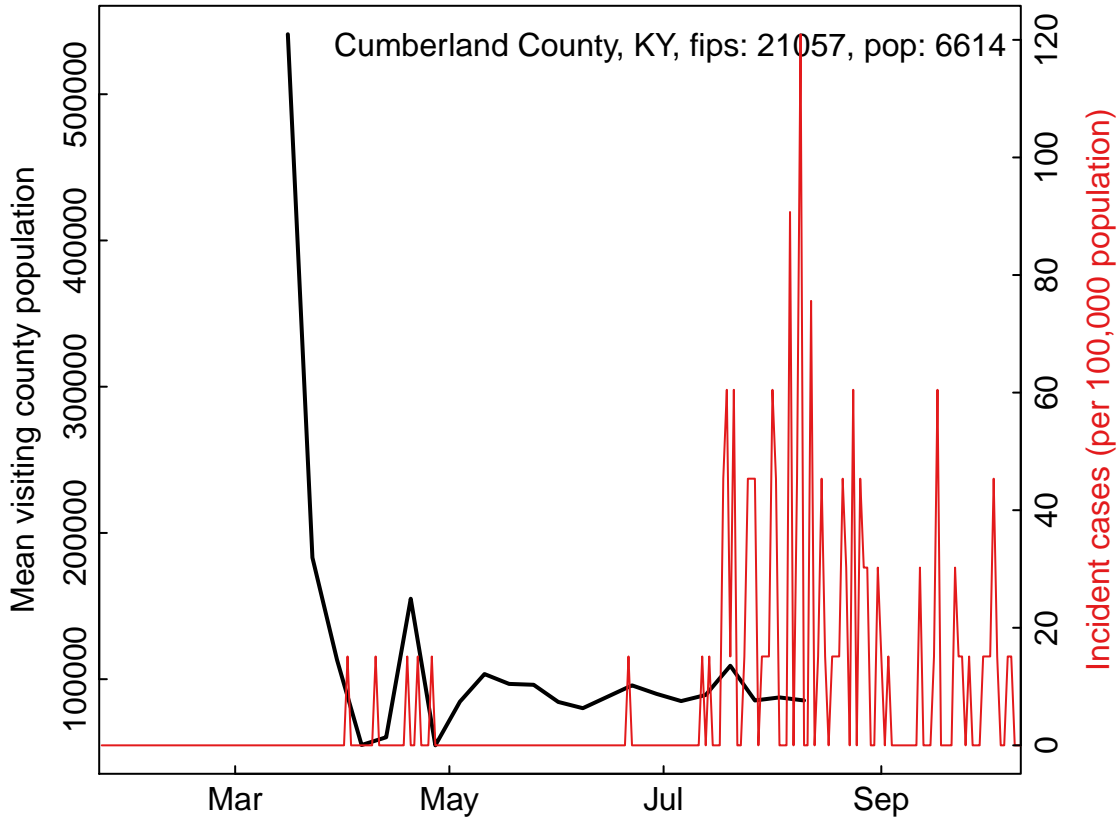

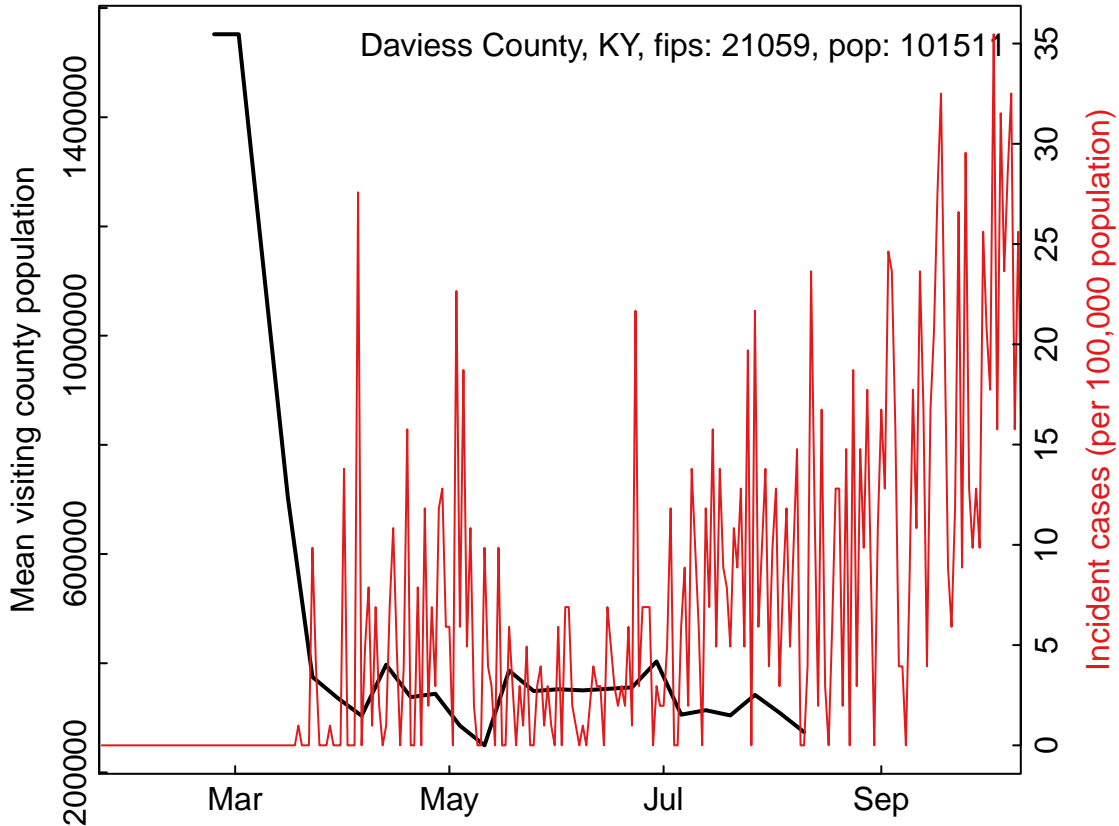

Estill County, KY, fips: 21065, pop: 14106

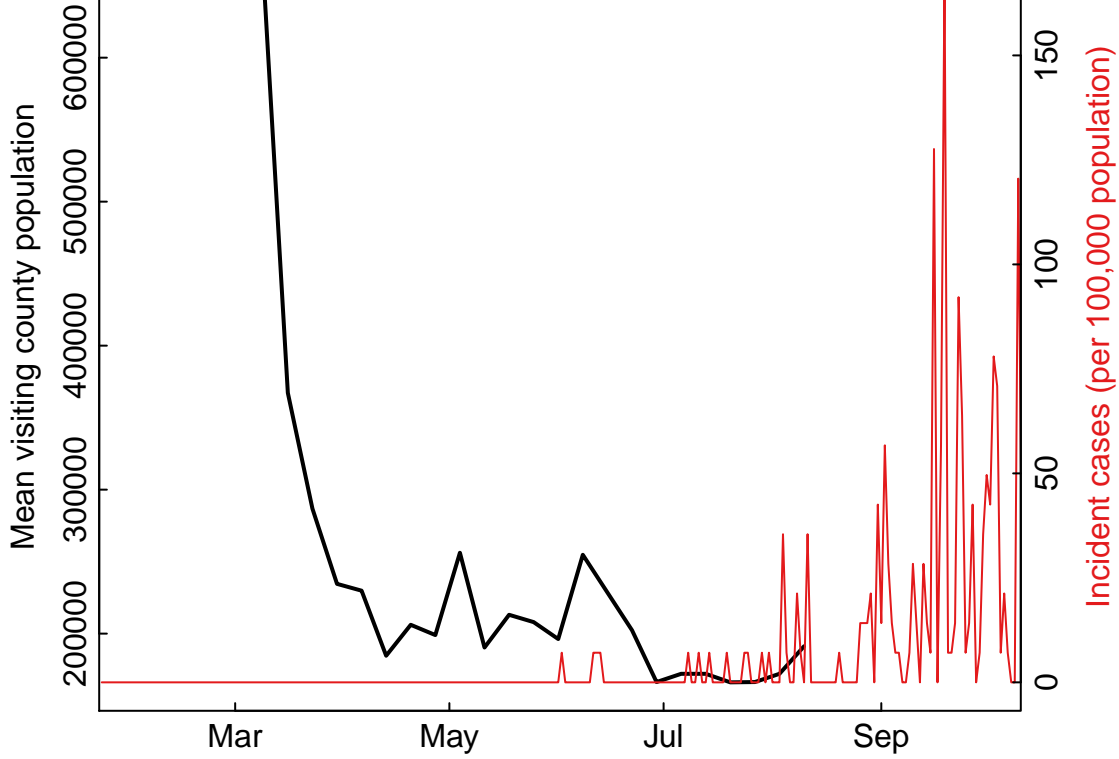

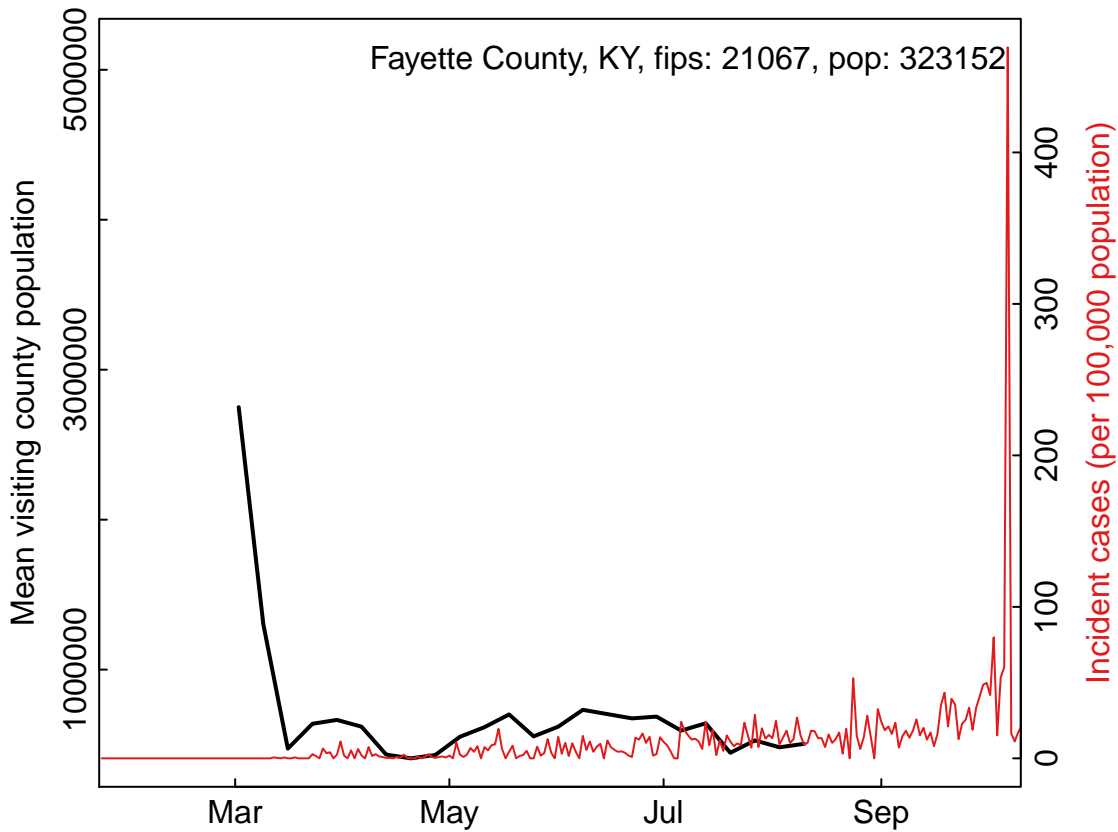



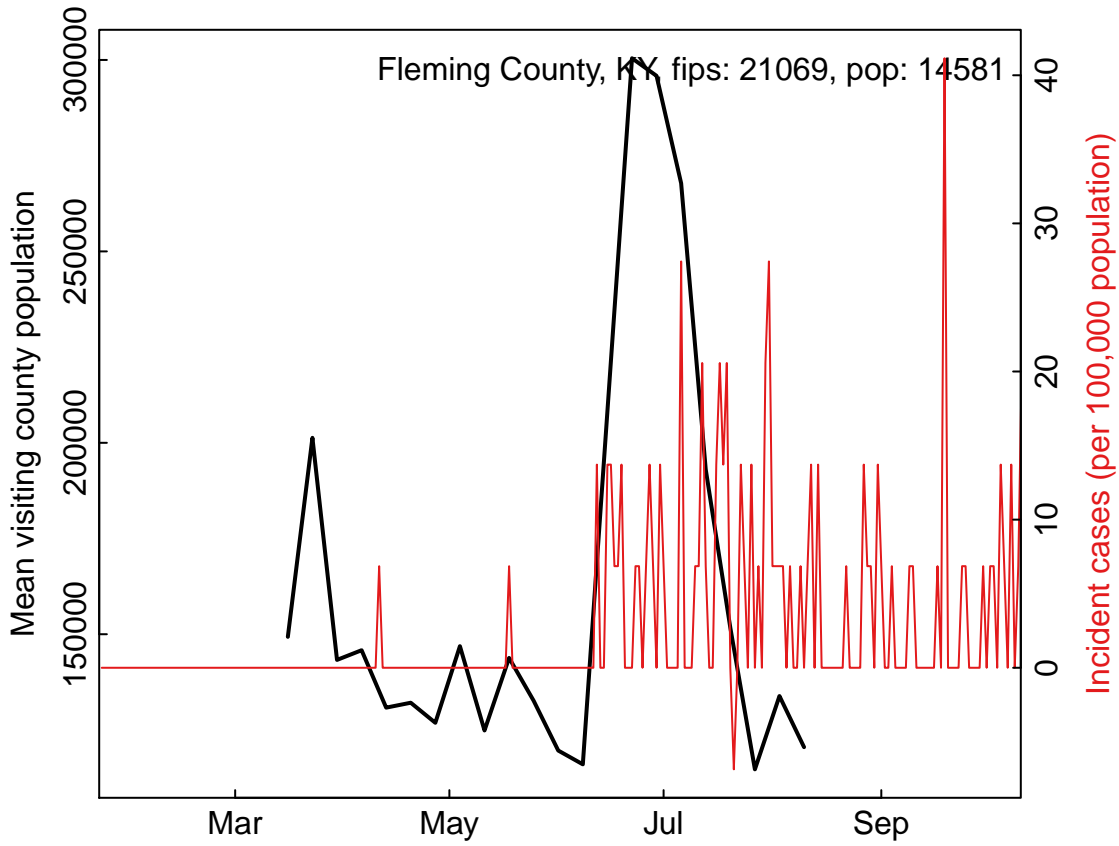

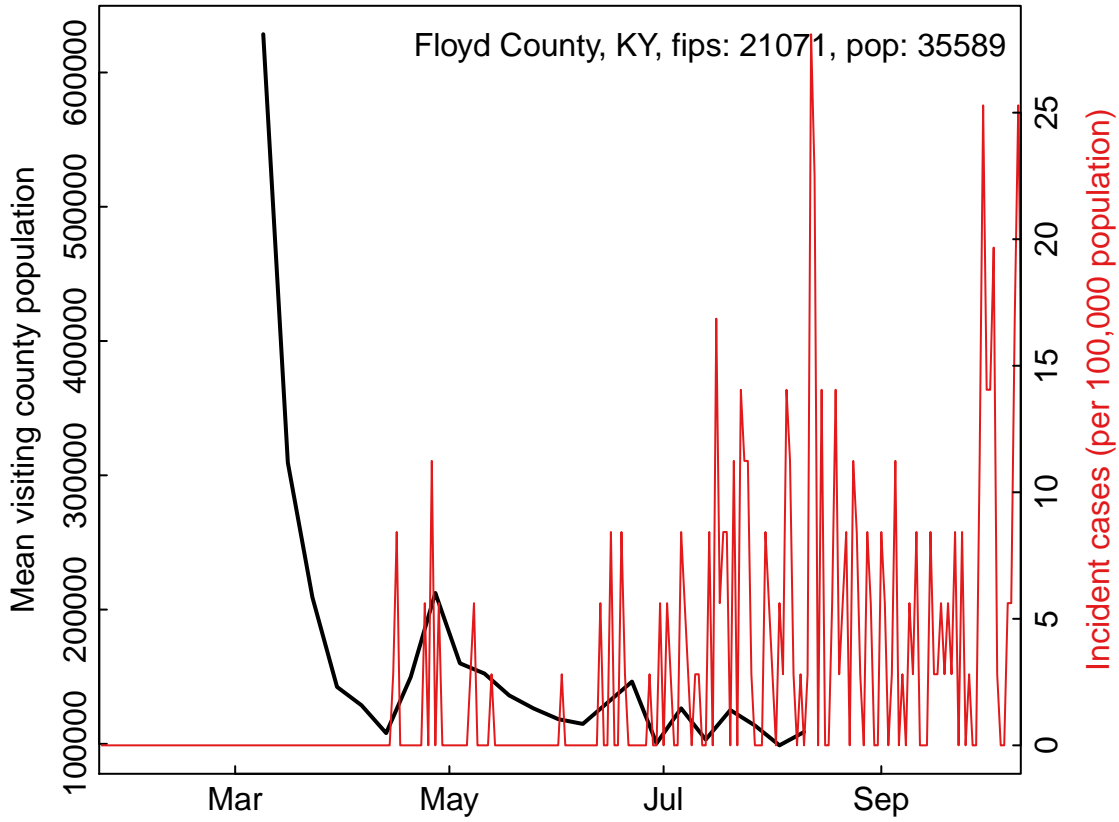

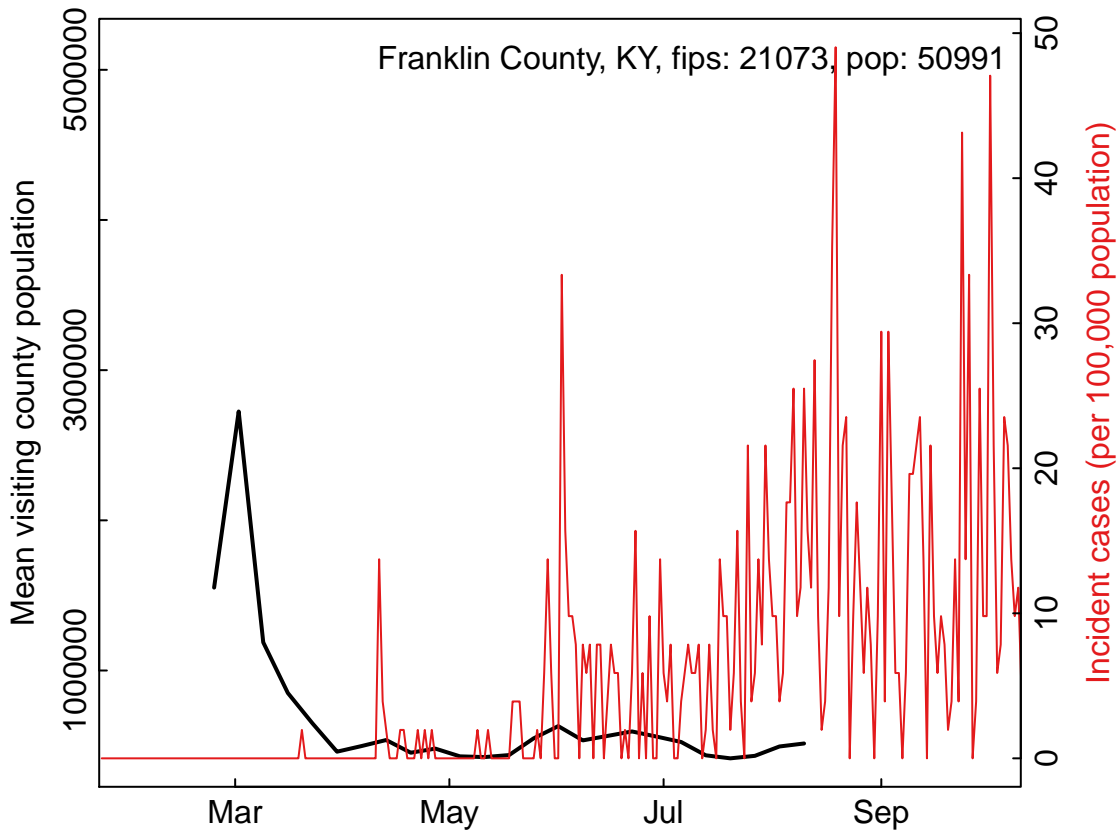

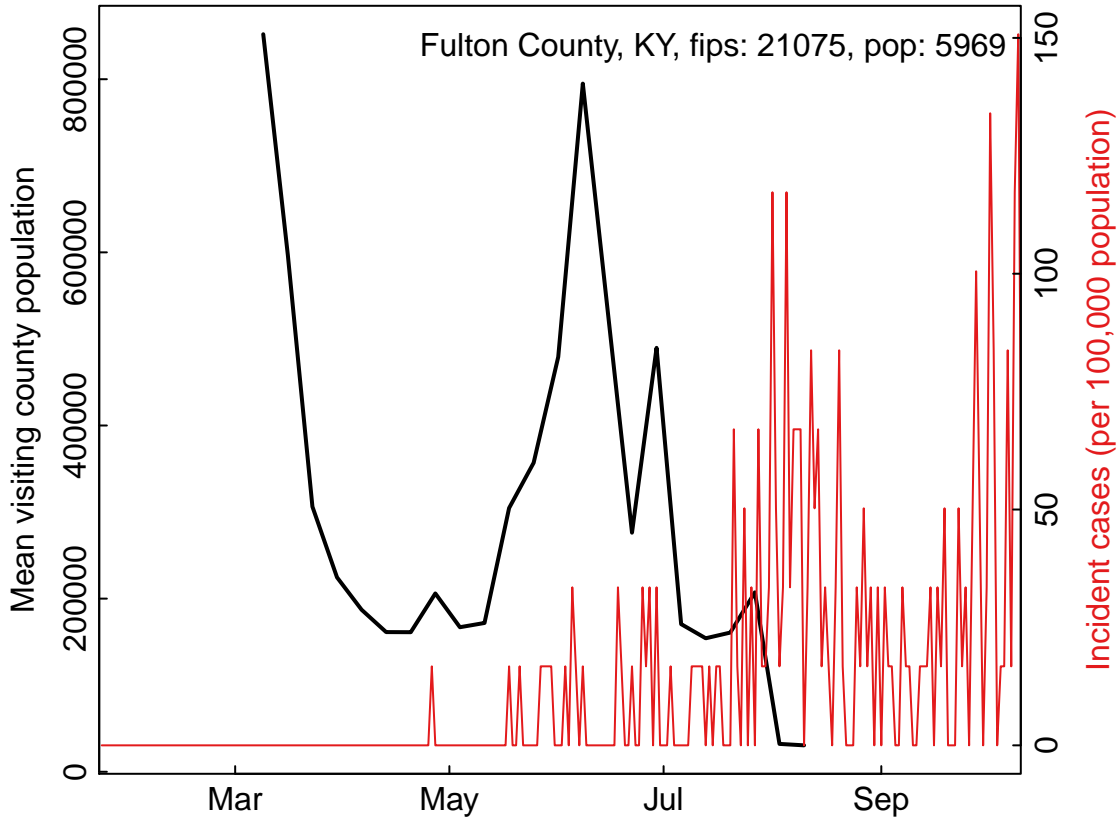

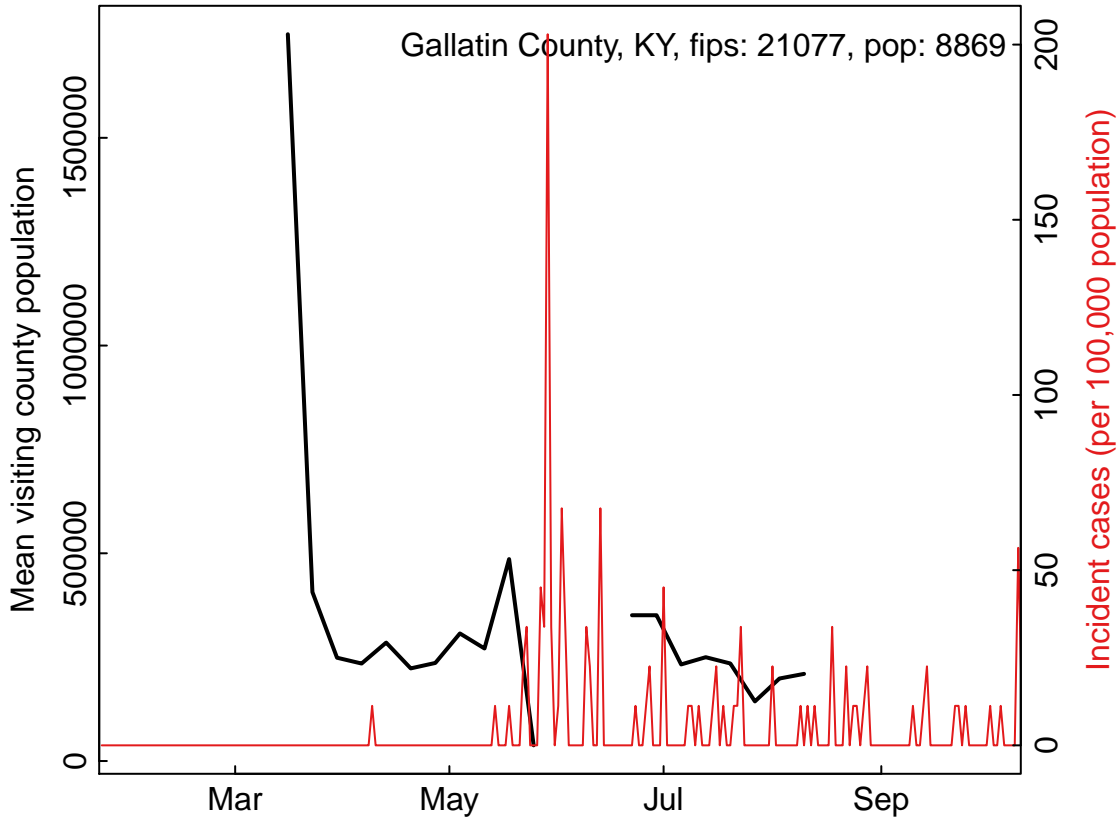

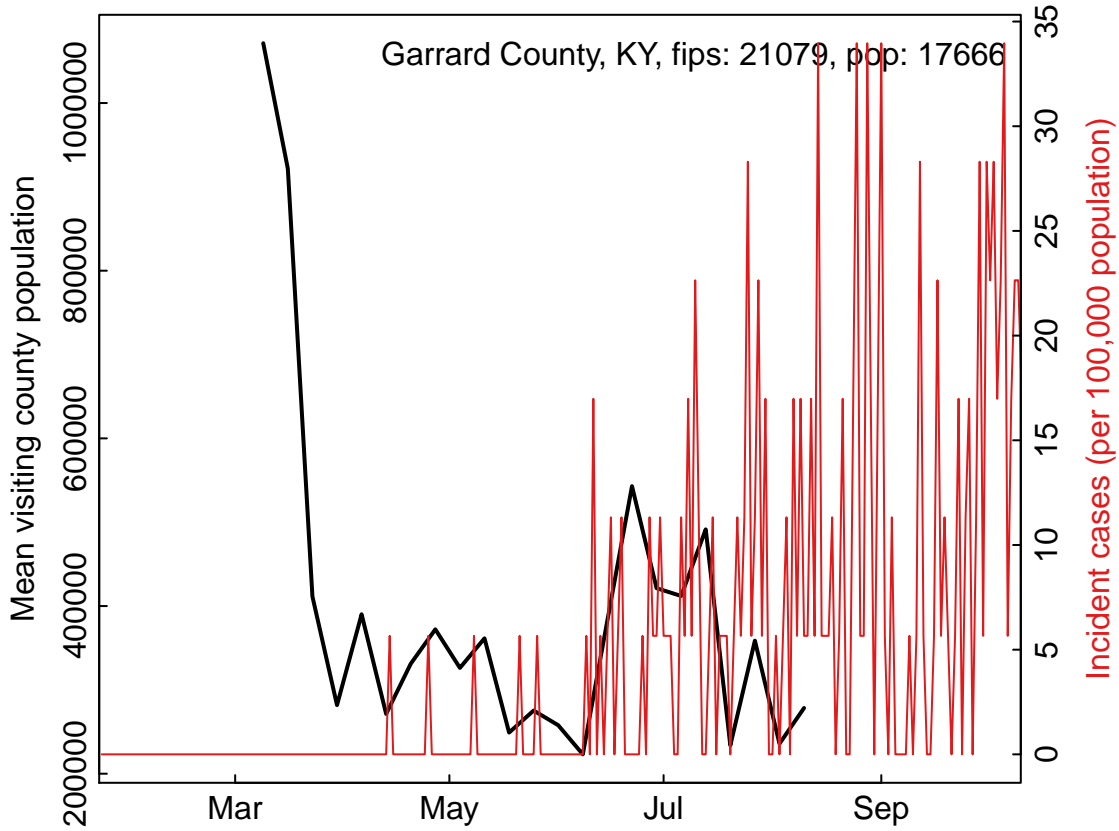

Grant County, KY, fips: 21081, pop: 25069

Mean visiting county population

Incident cases (per 100,000 population)

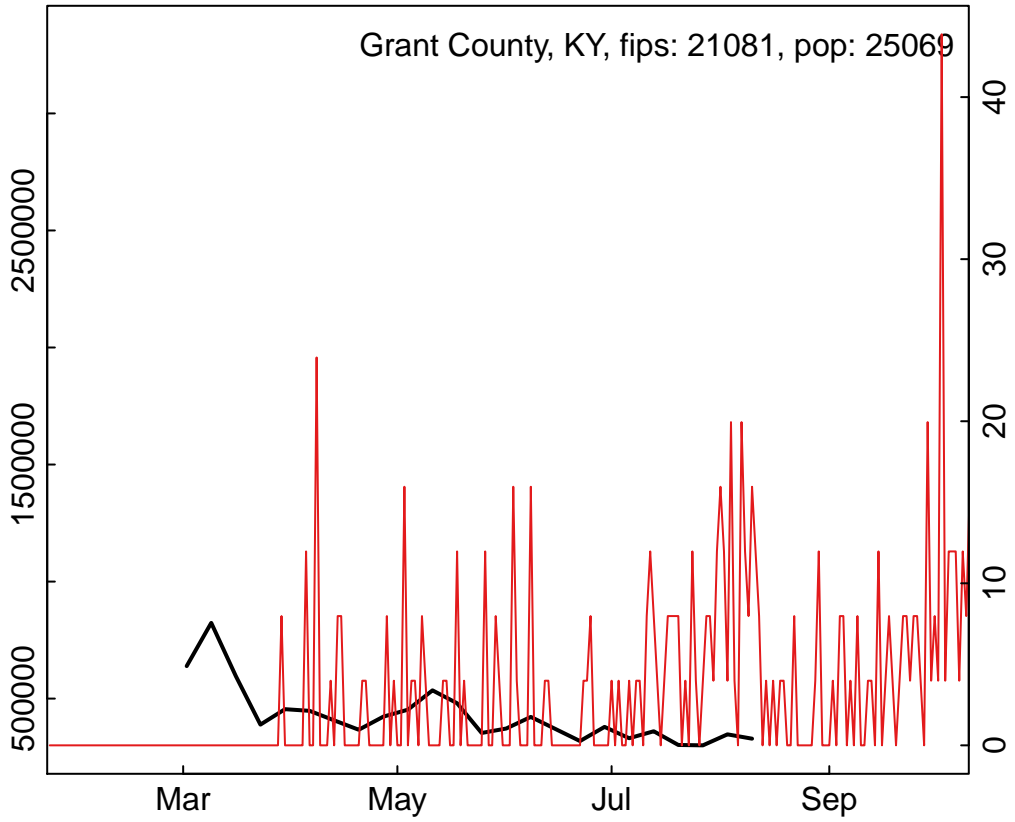

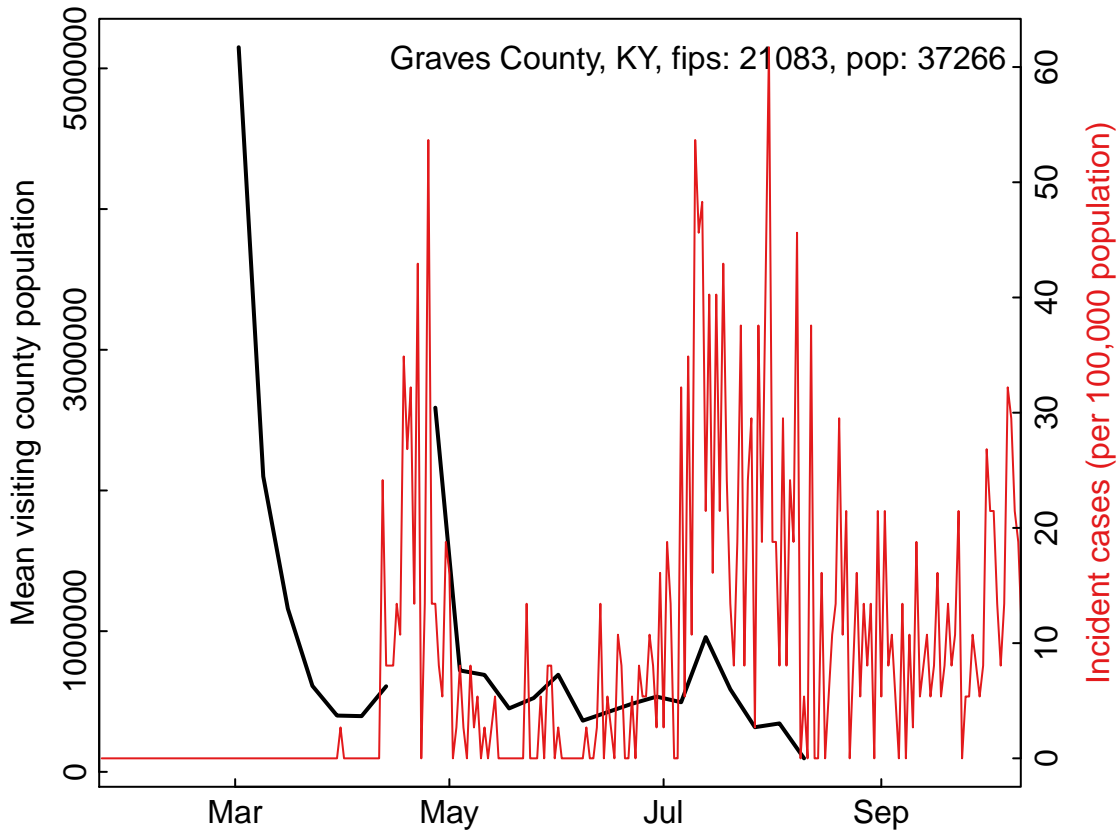



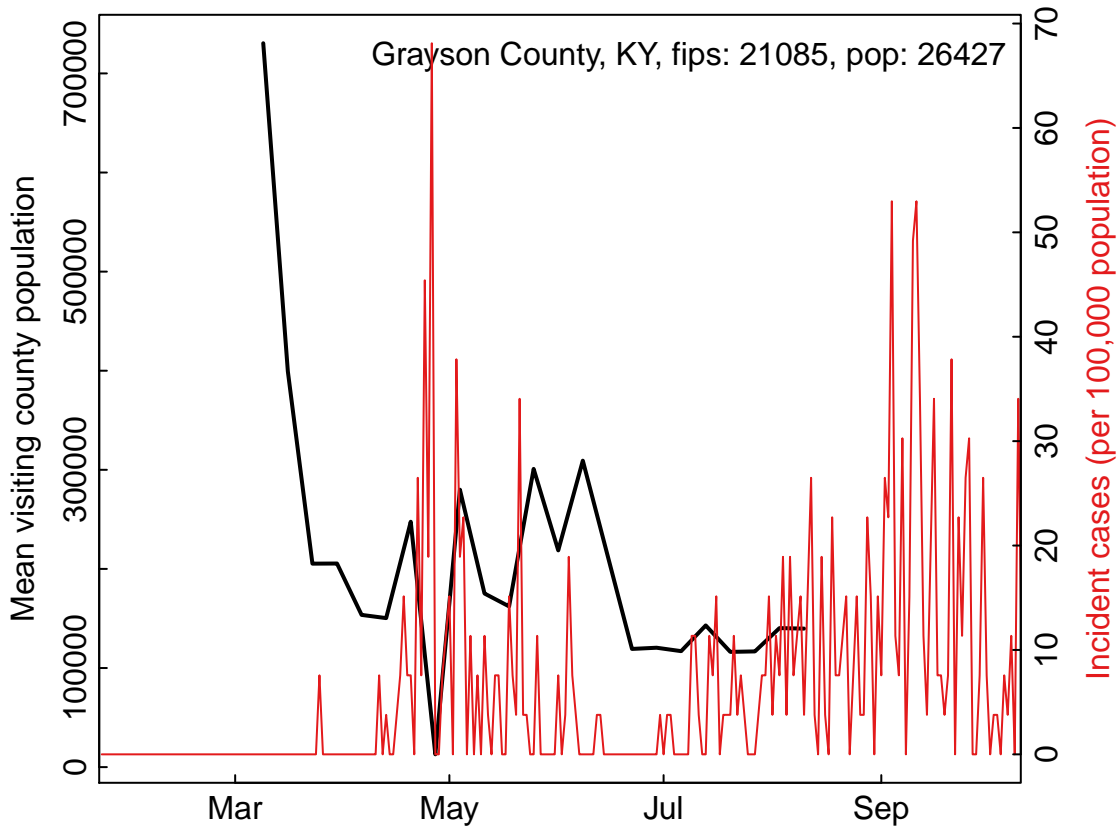

Green County, KY, fips: 21087, pop: 10941

Mean visiting county population

50000  
60000  
70000  
80000  
90000

Mar

May

Jul

Sep

Incident cases (per 100,000 population)

0  
50  
100  
150  
200

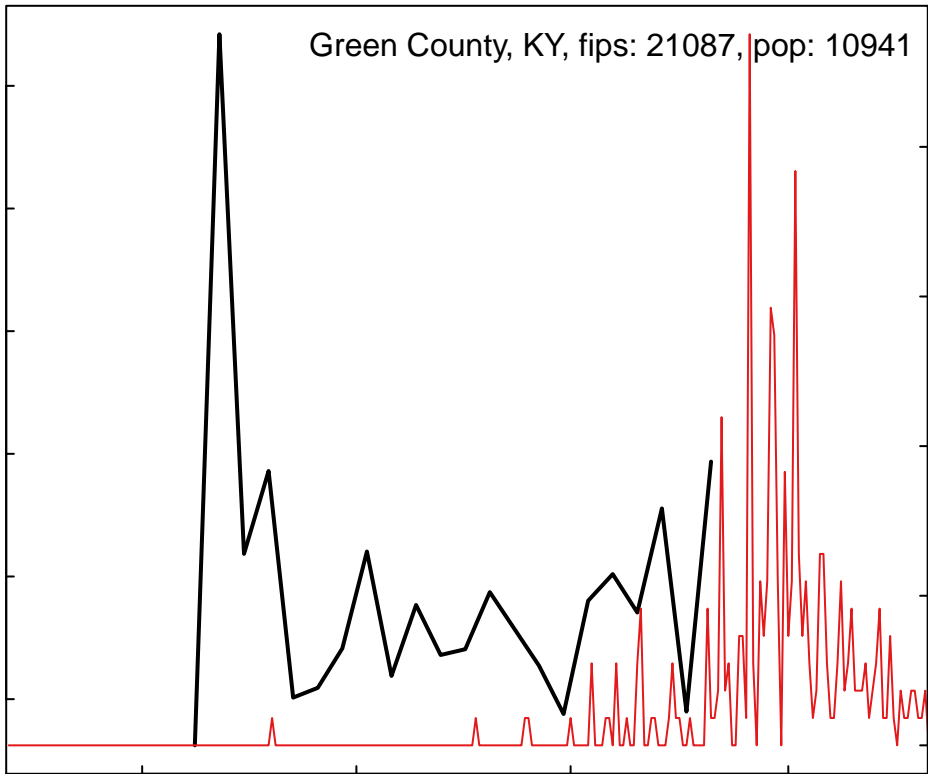

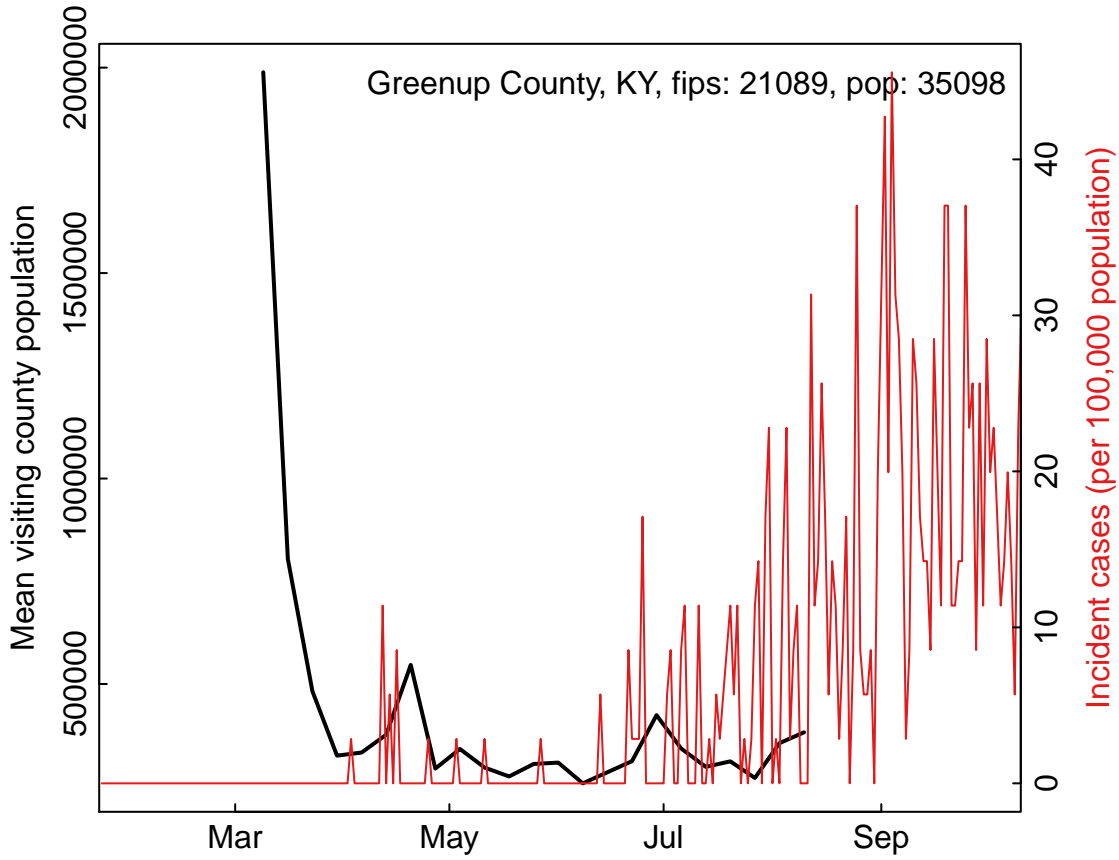

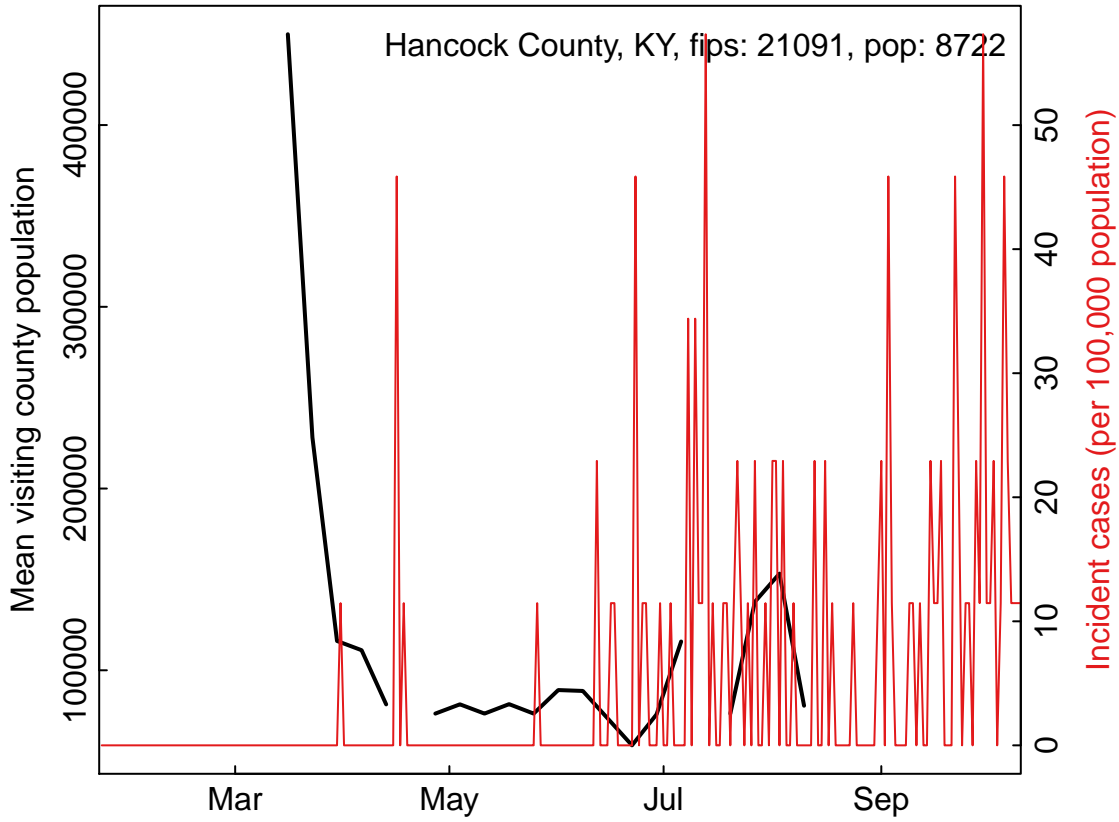

Hardin County, KY, fips: 21093, pop: 110958

Mean visiting county population

1200000  
800000  
400000

Mar

May

Jul

Sep

30  
25  
20  
15  
10  
5  
0

Incident cases (per 100,000 population)

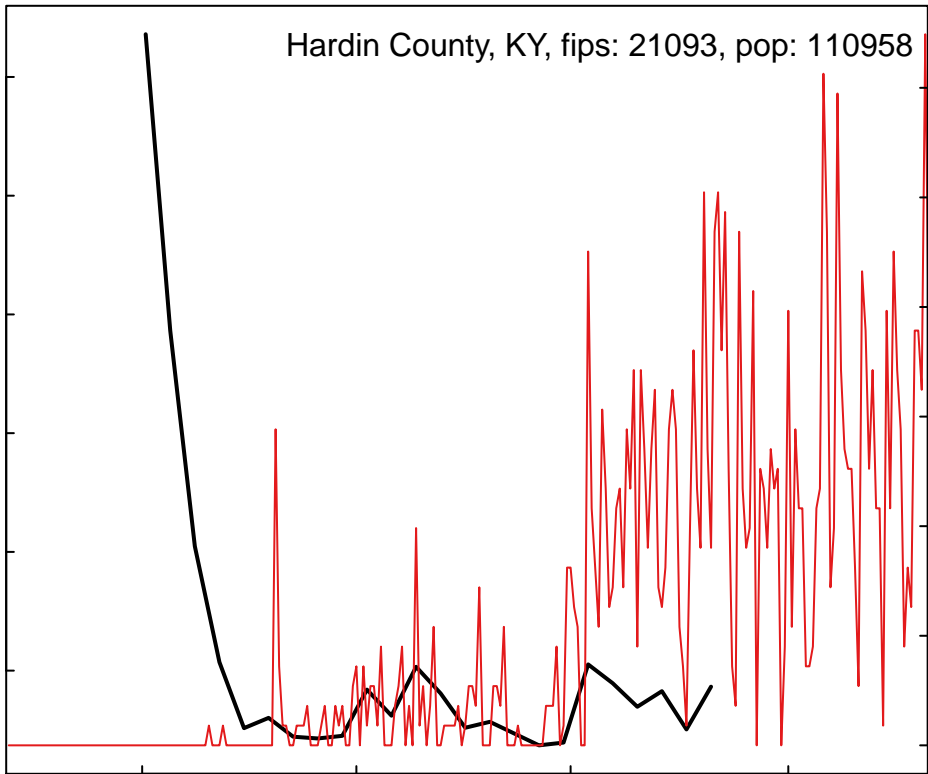

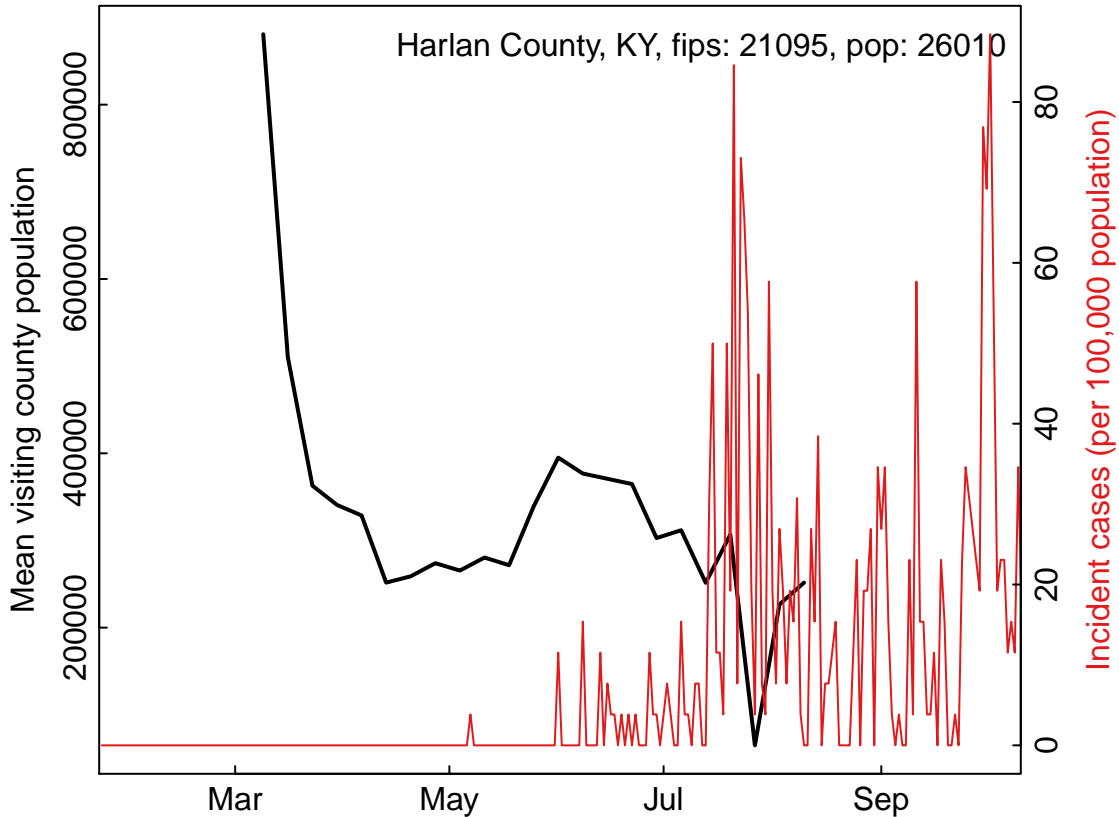

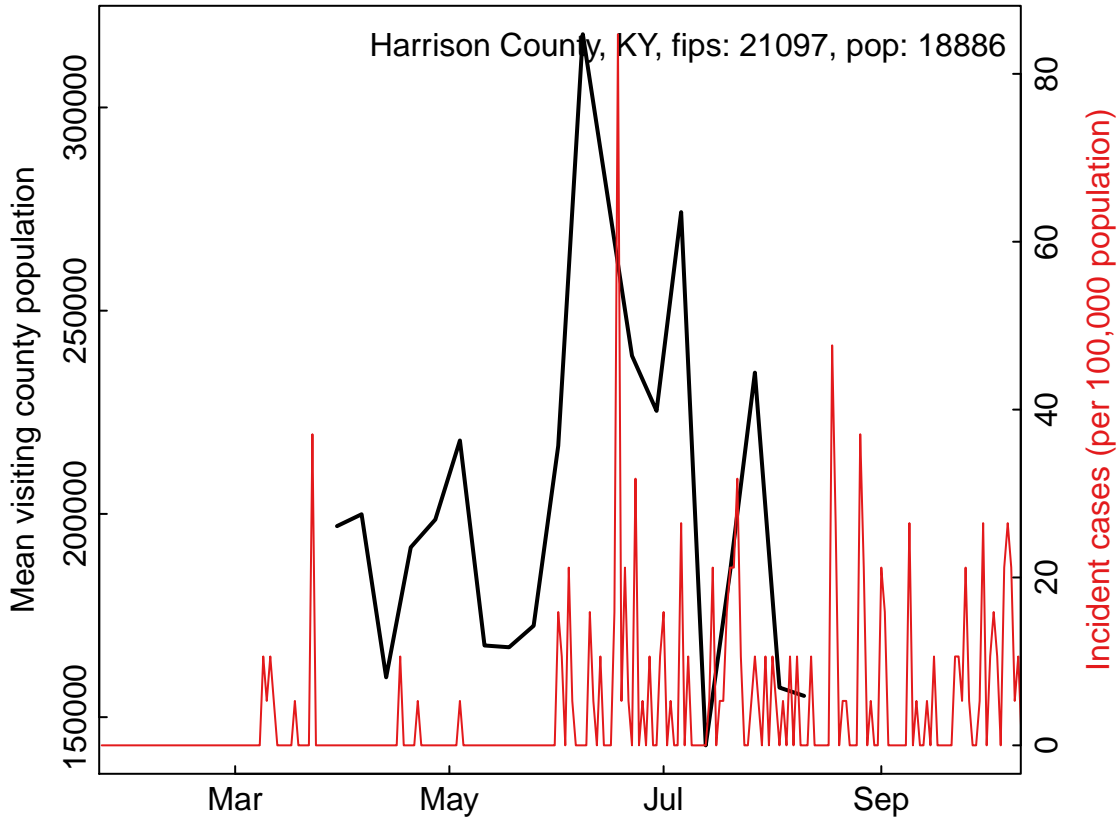

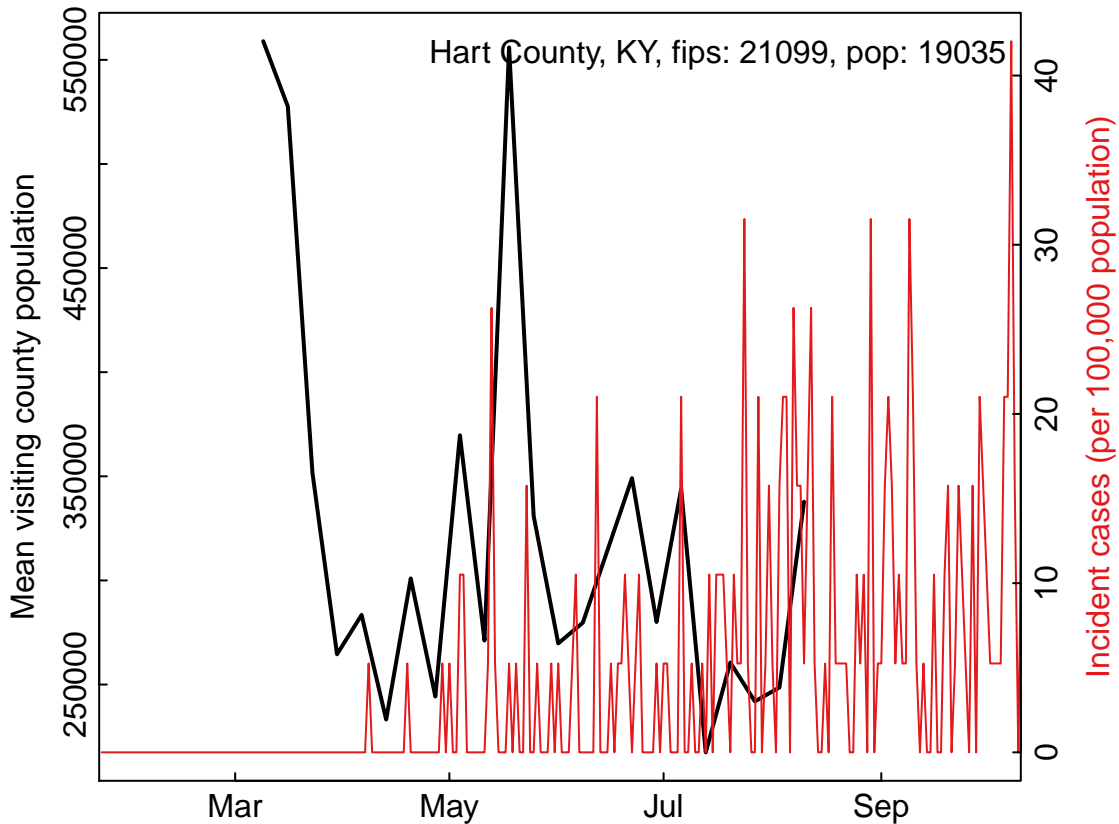



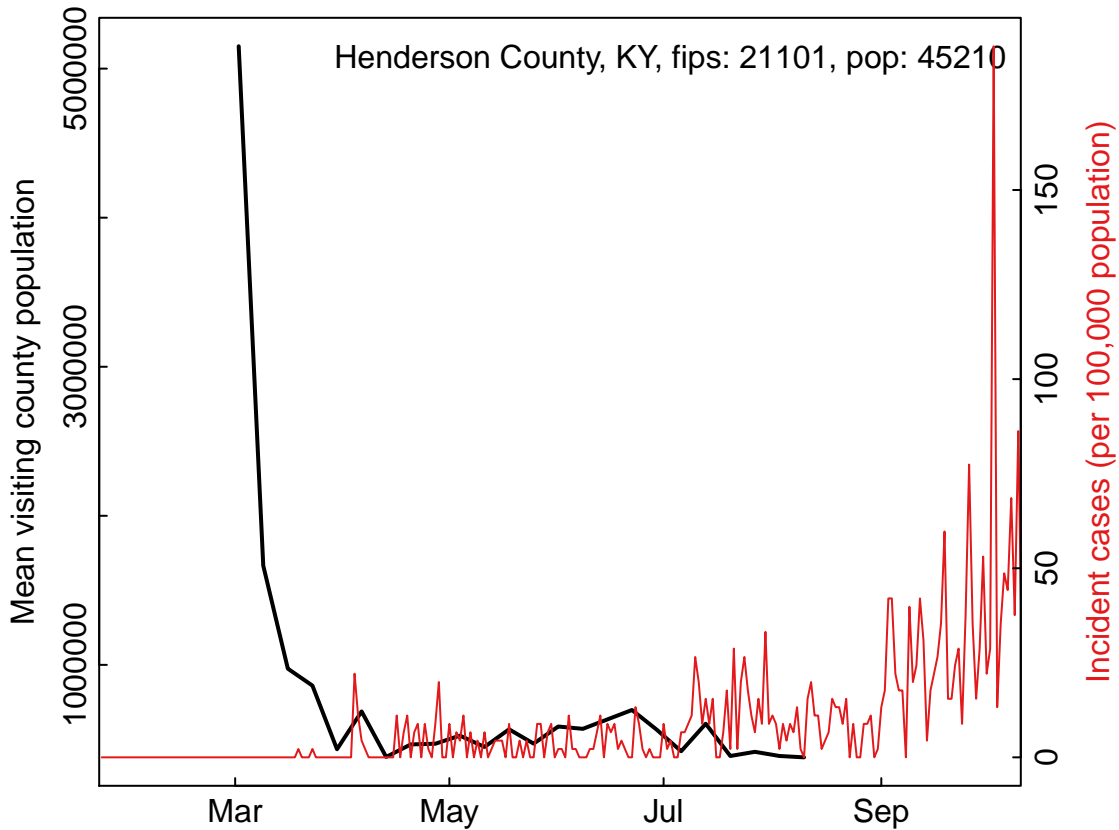

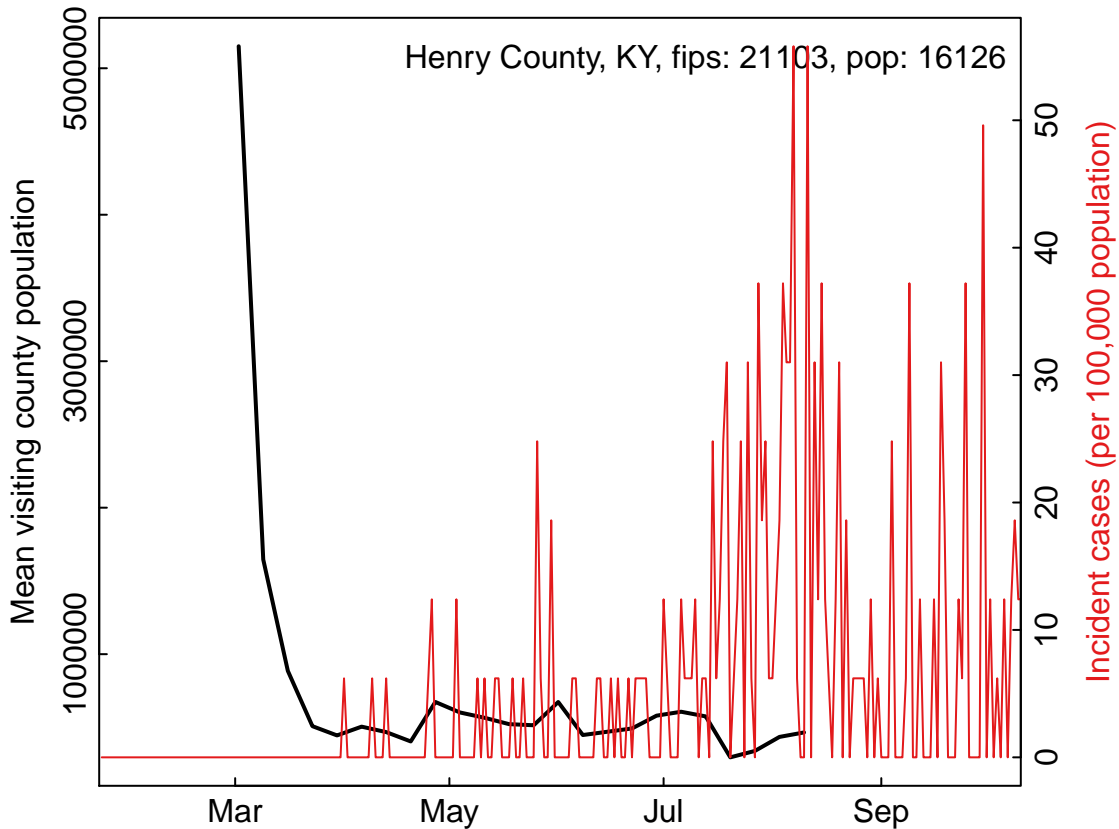

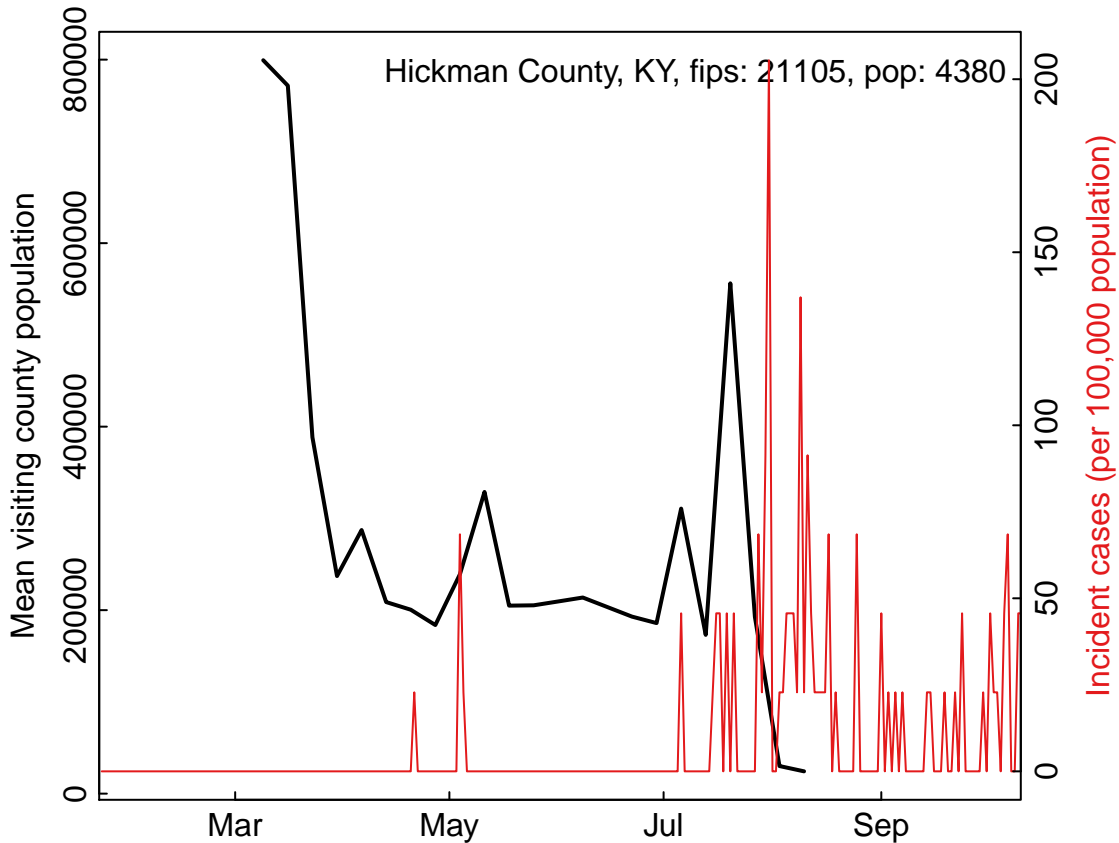

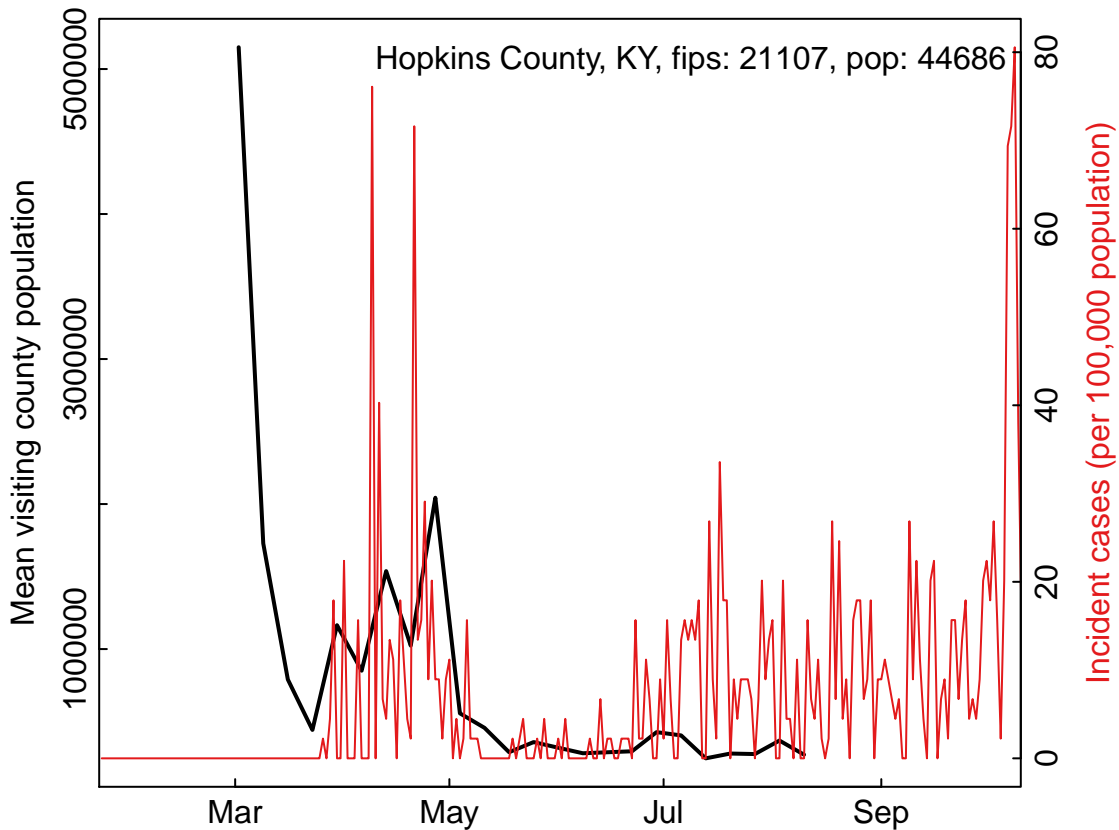

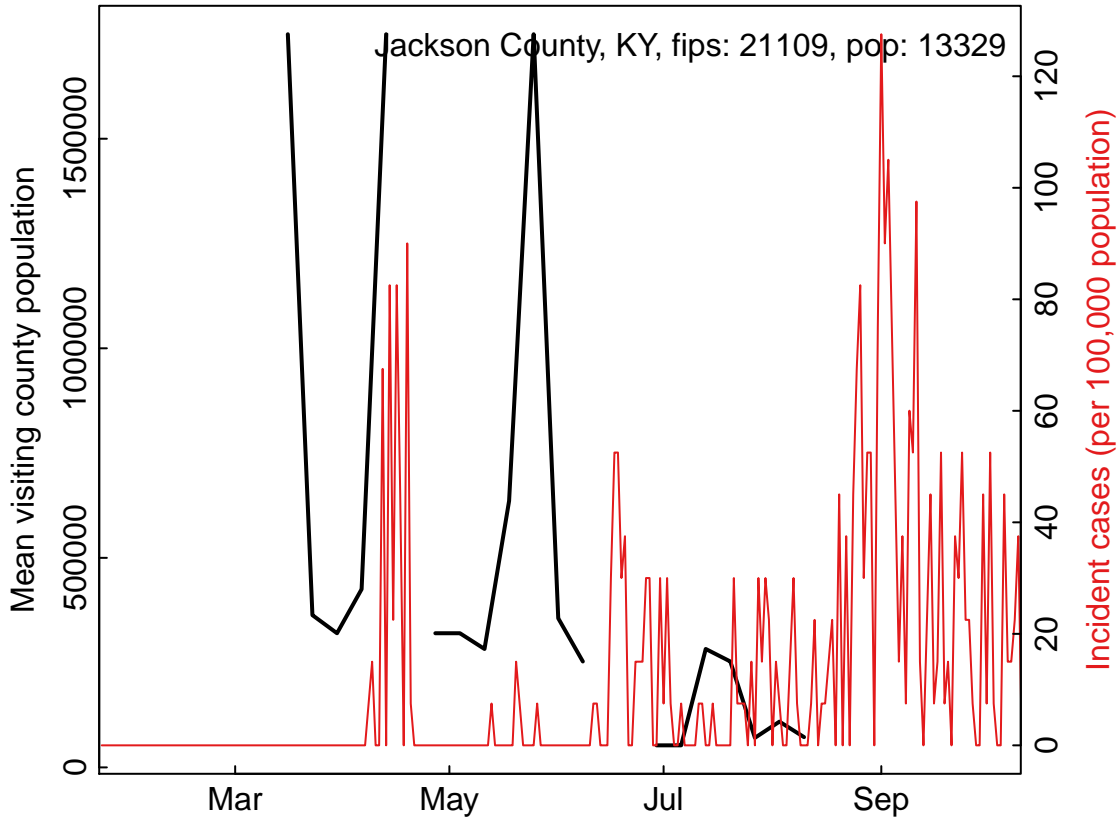

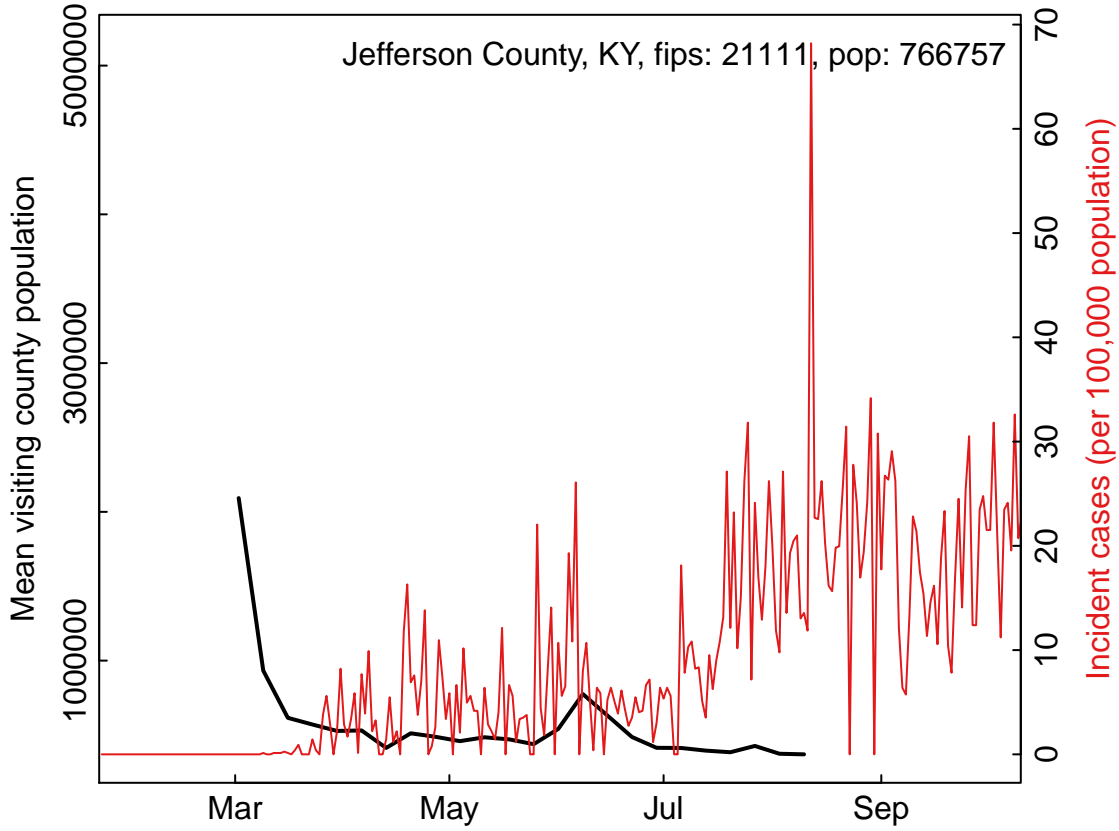

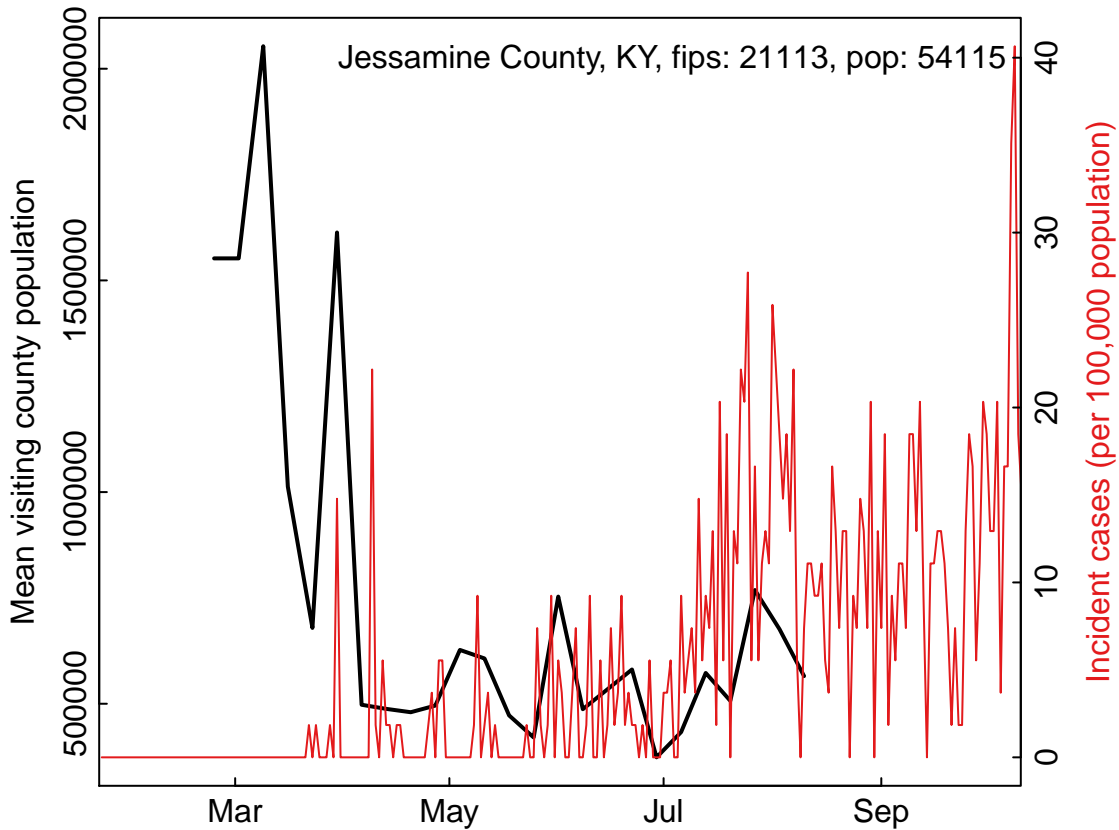

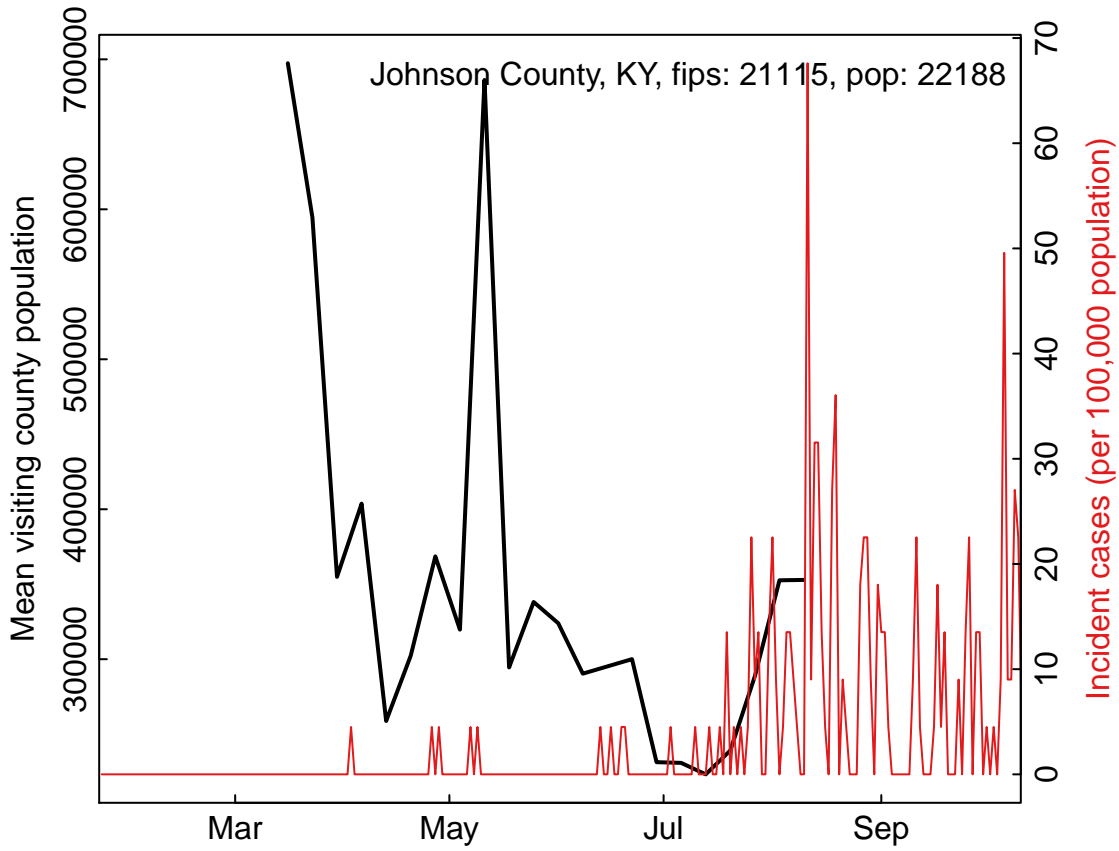



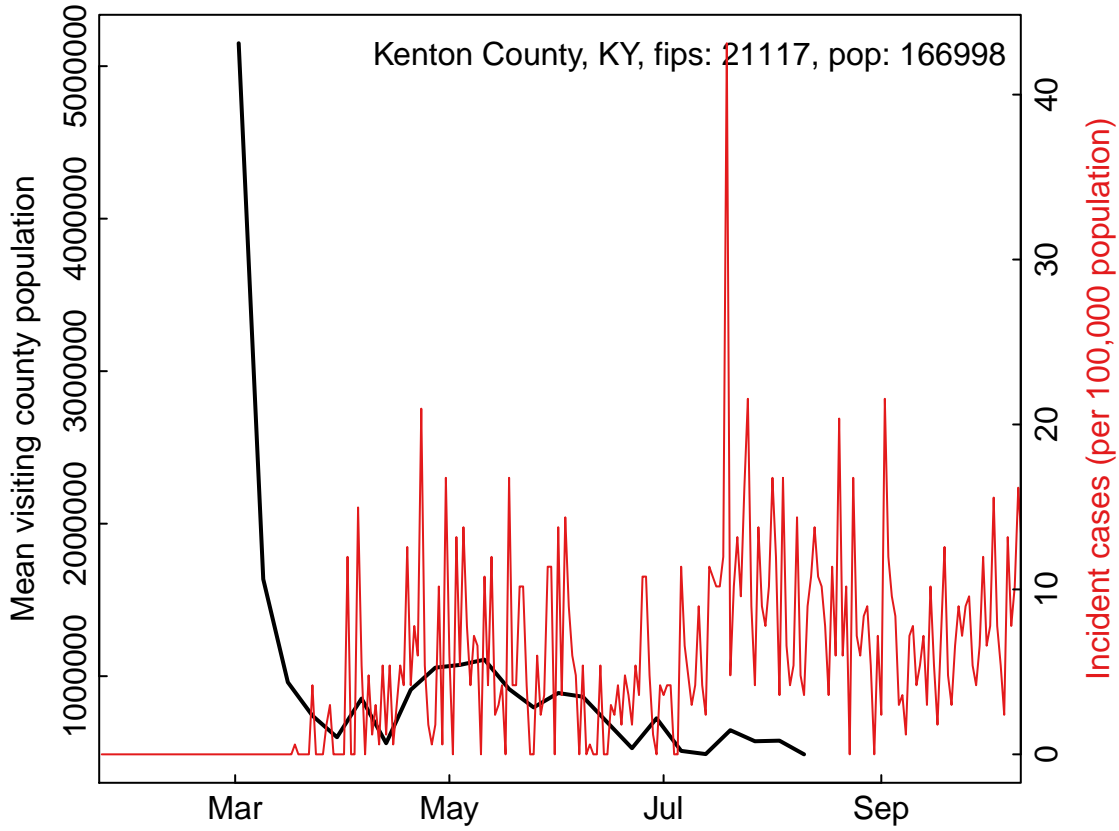

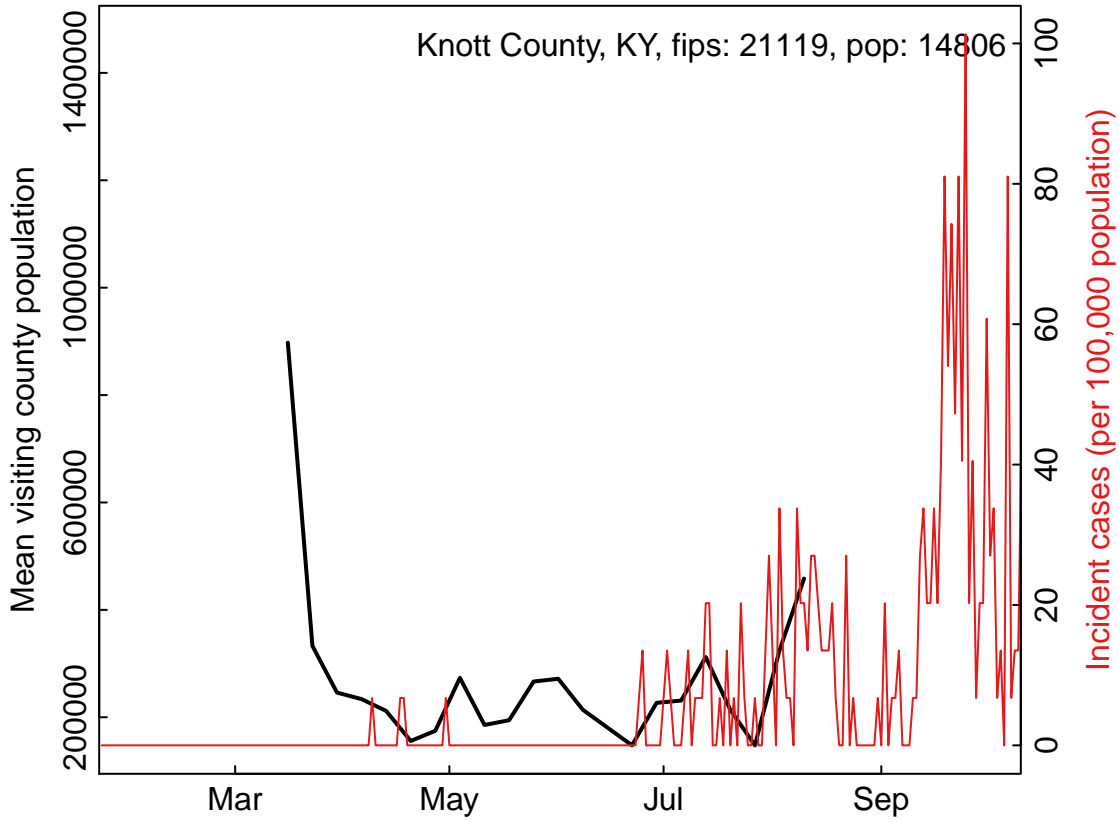

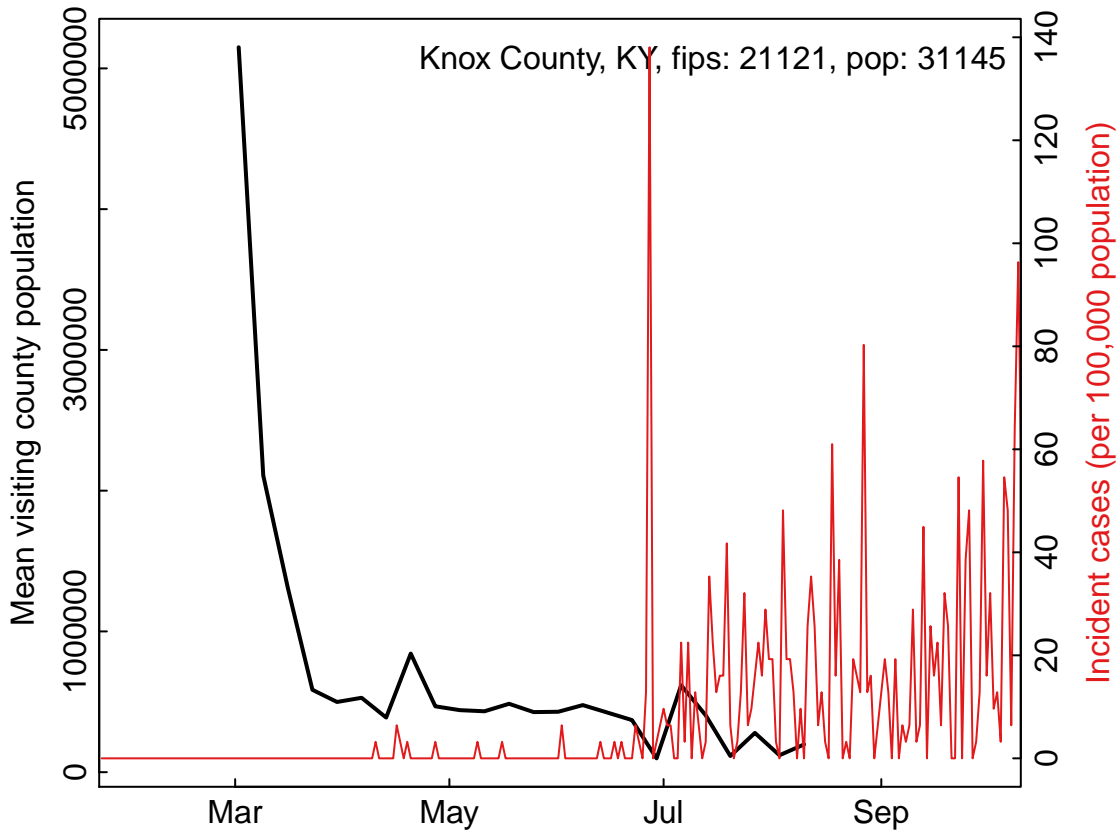

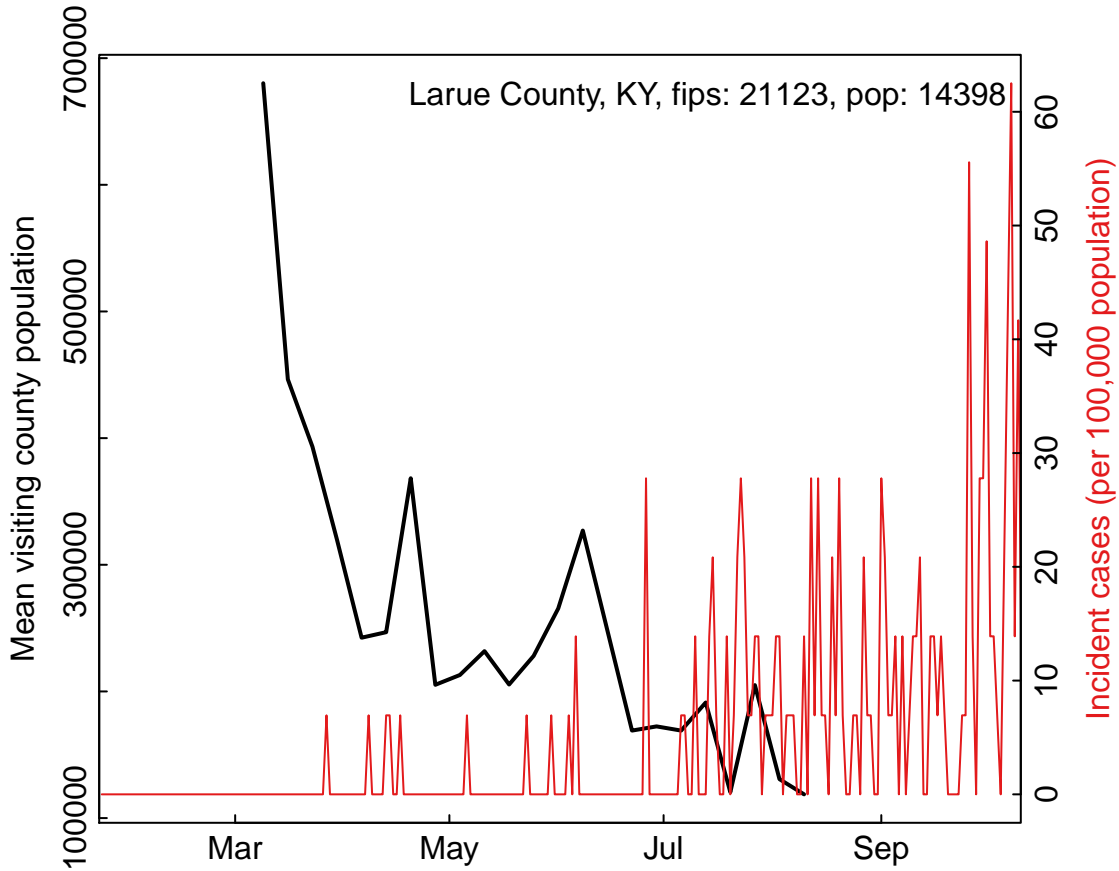

Laurel County, KY, fips: 21125, pop: 60813

Mean visiting county population

1200000  
800000  
400000

Mar

May

Jul

Sep

80  
60  
40  
20  
0

Incident cases (per 100,000 population)

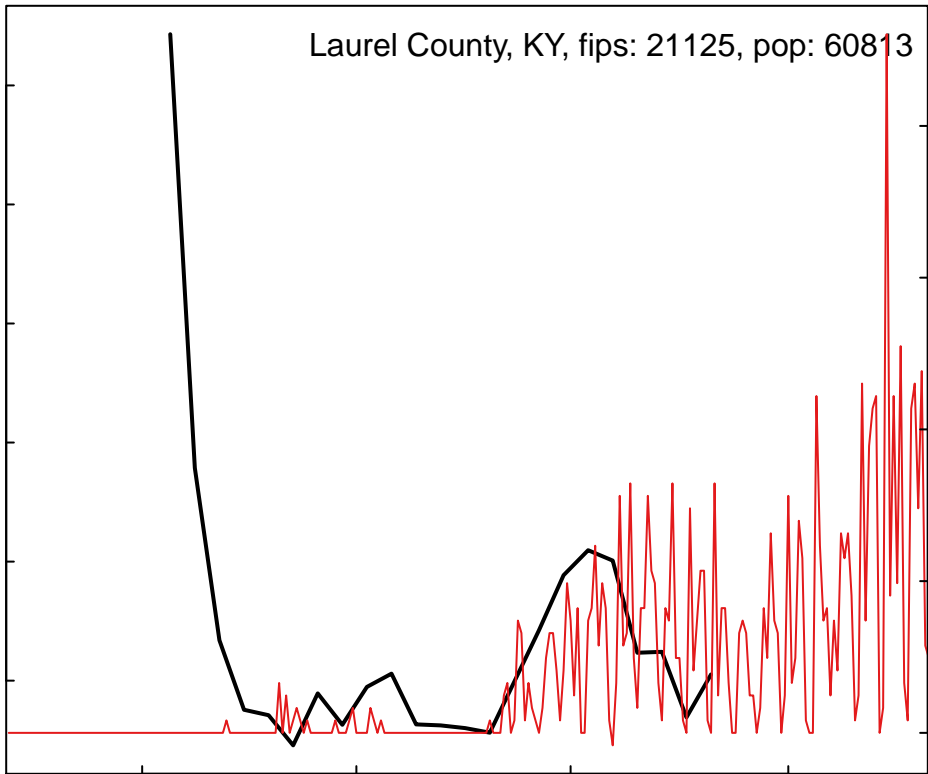

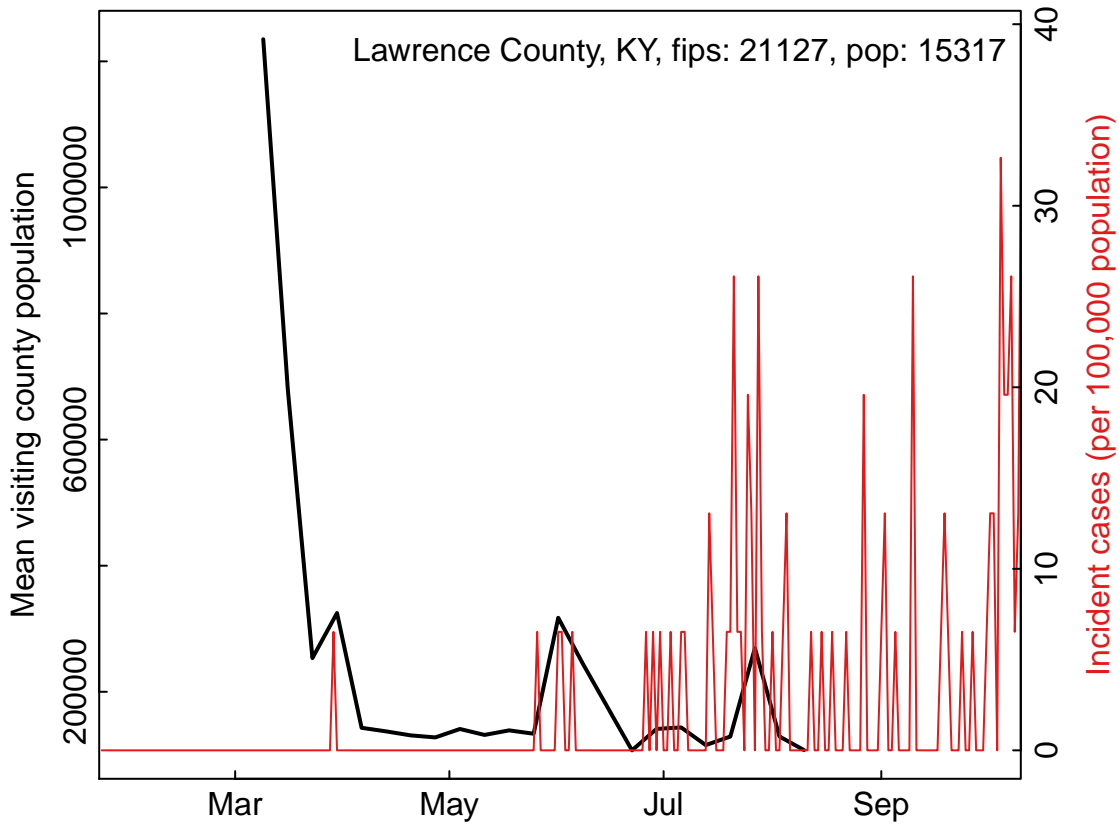

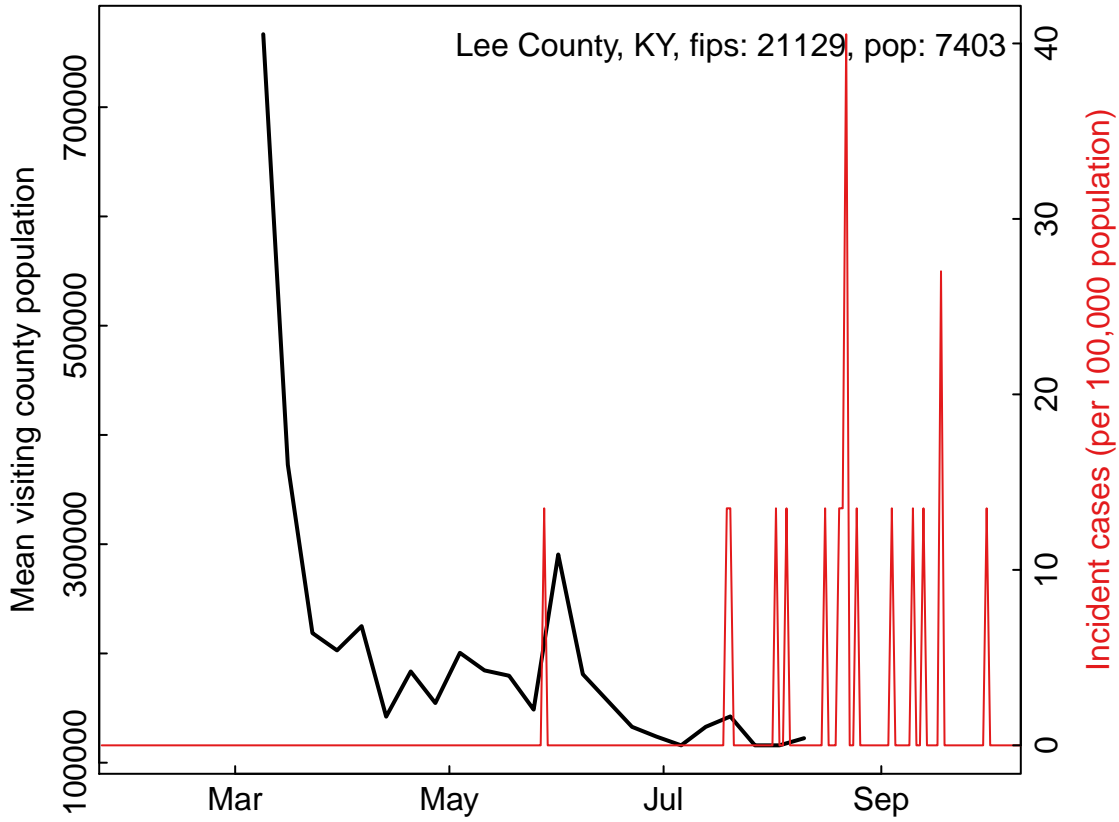

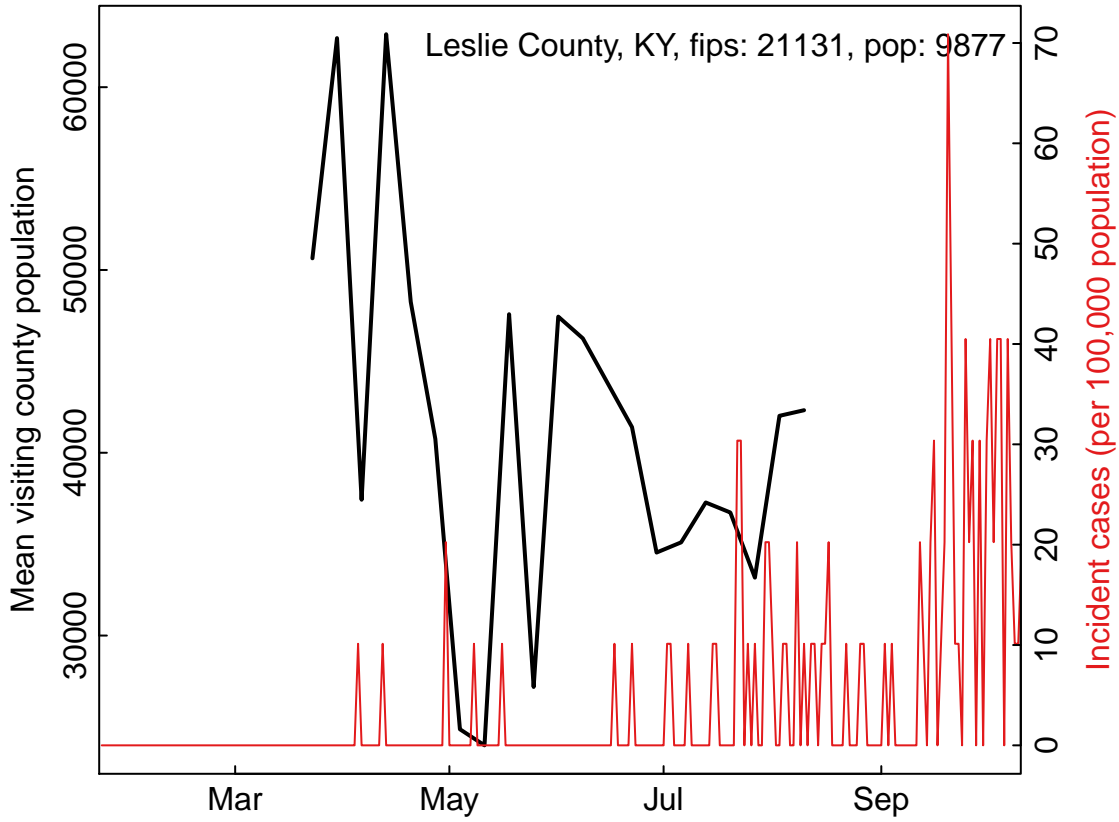



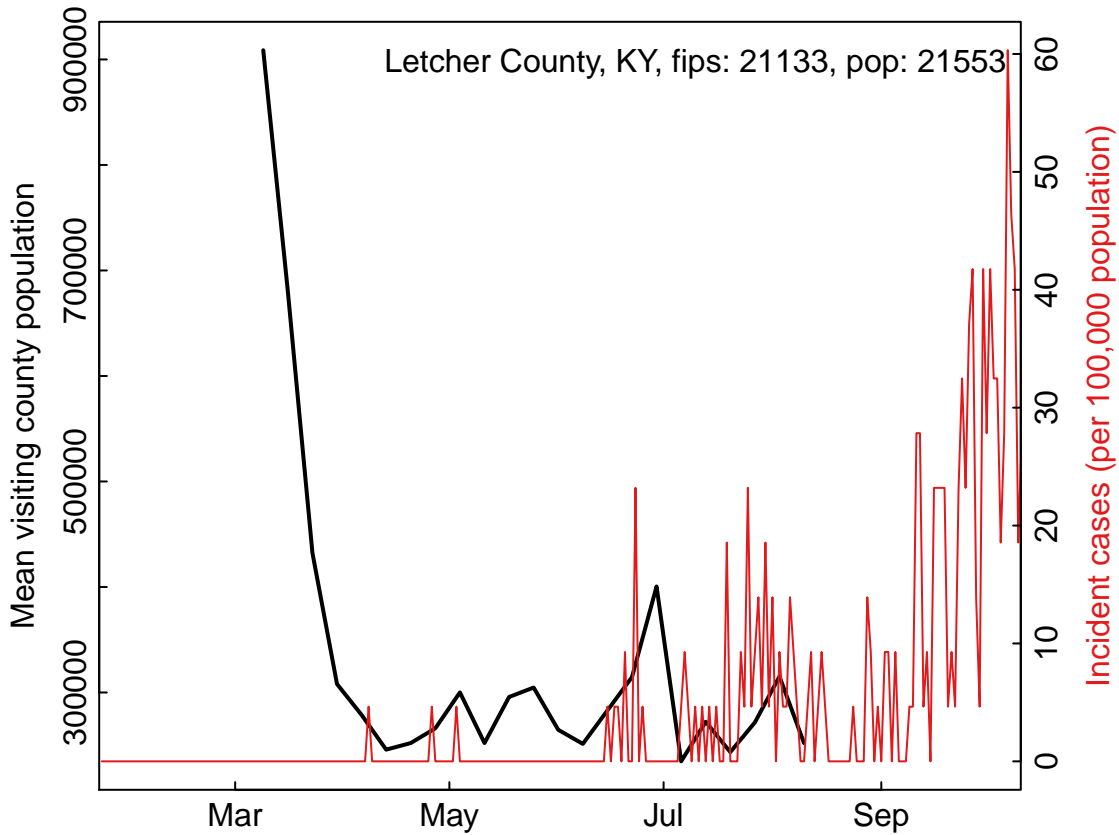

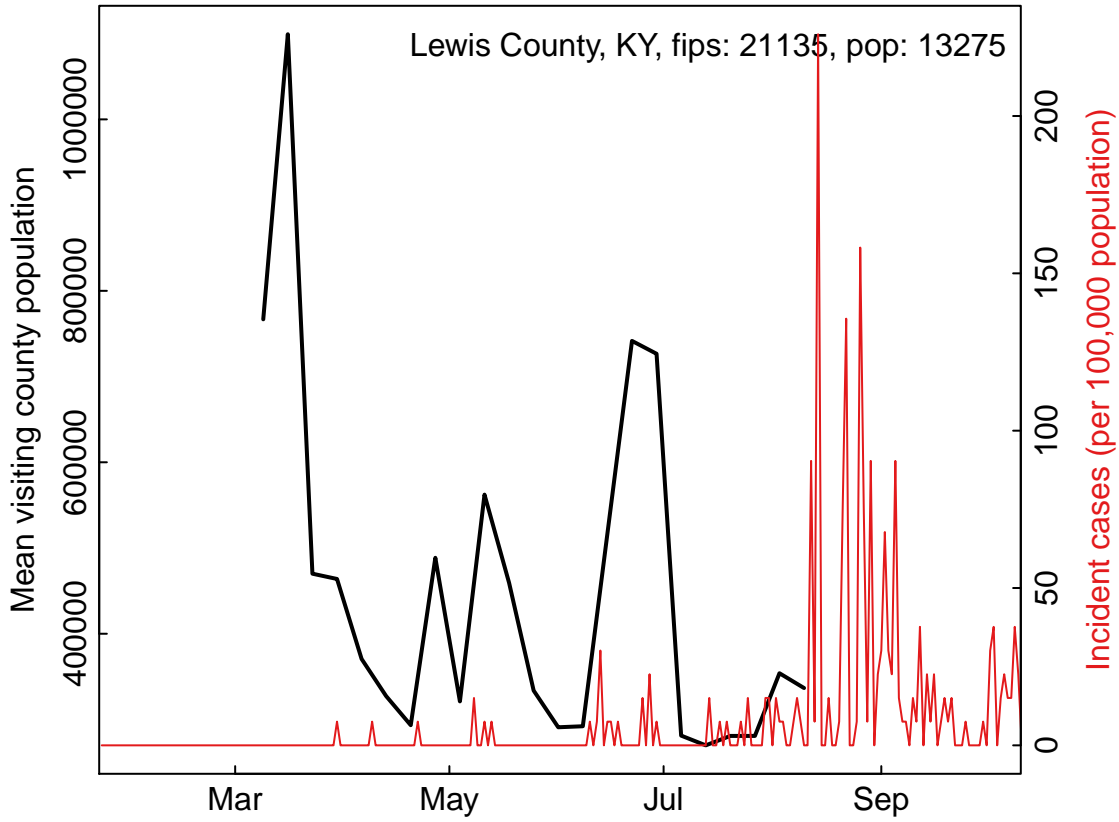

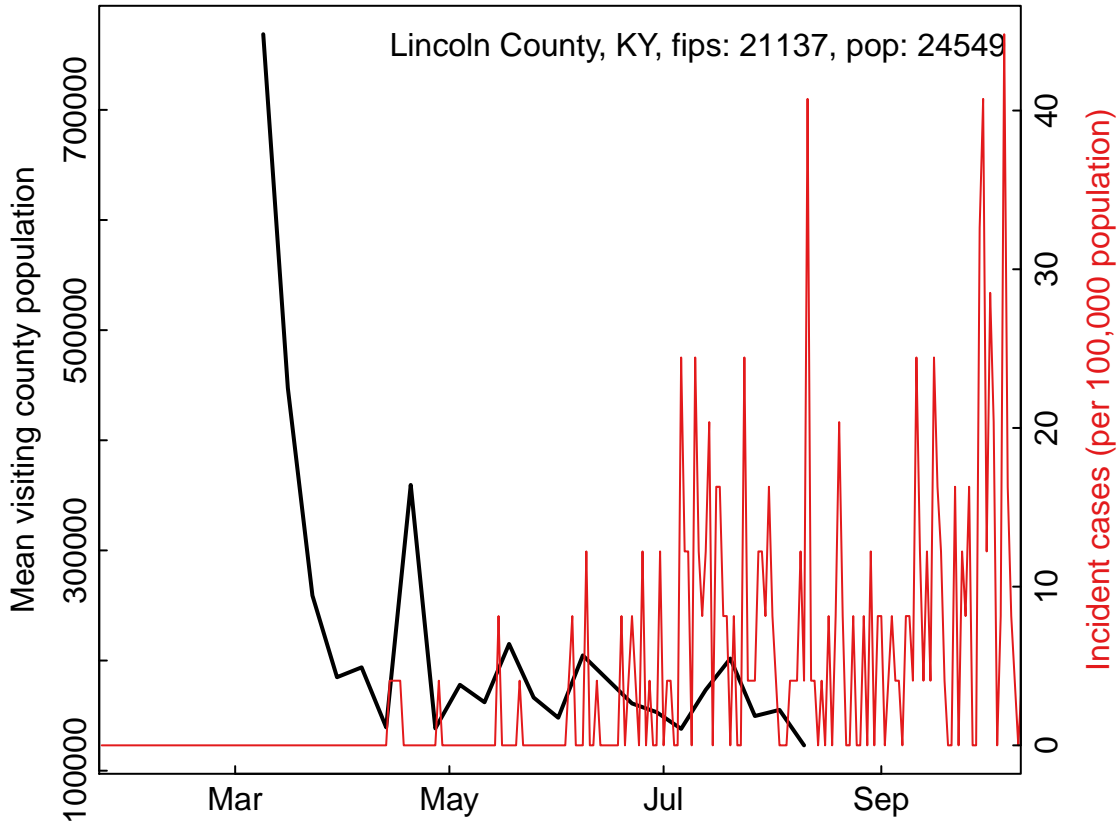

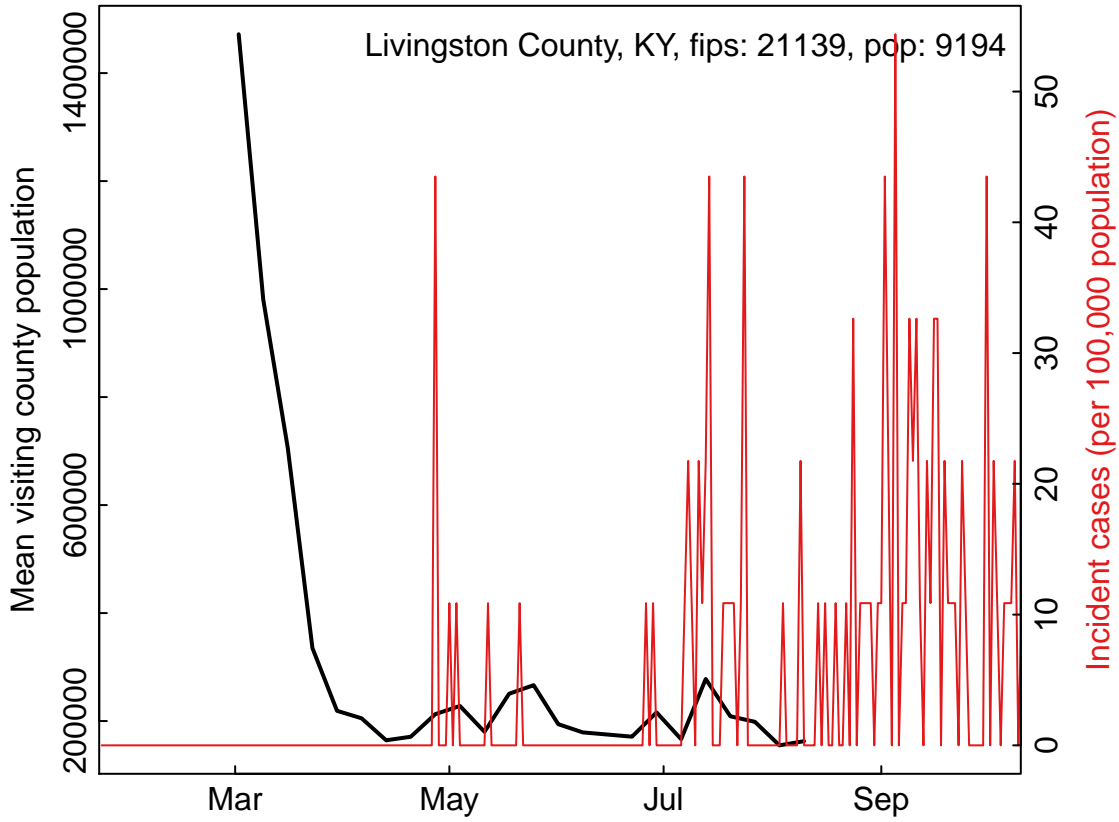

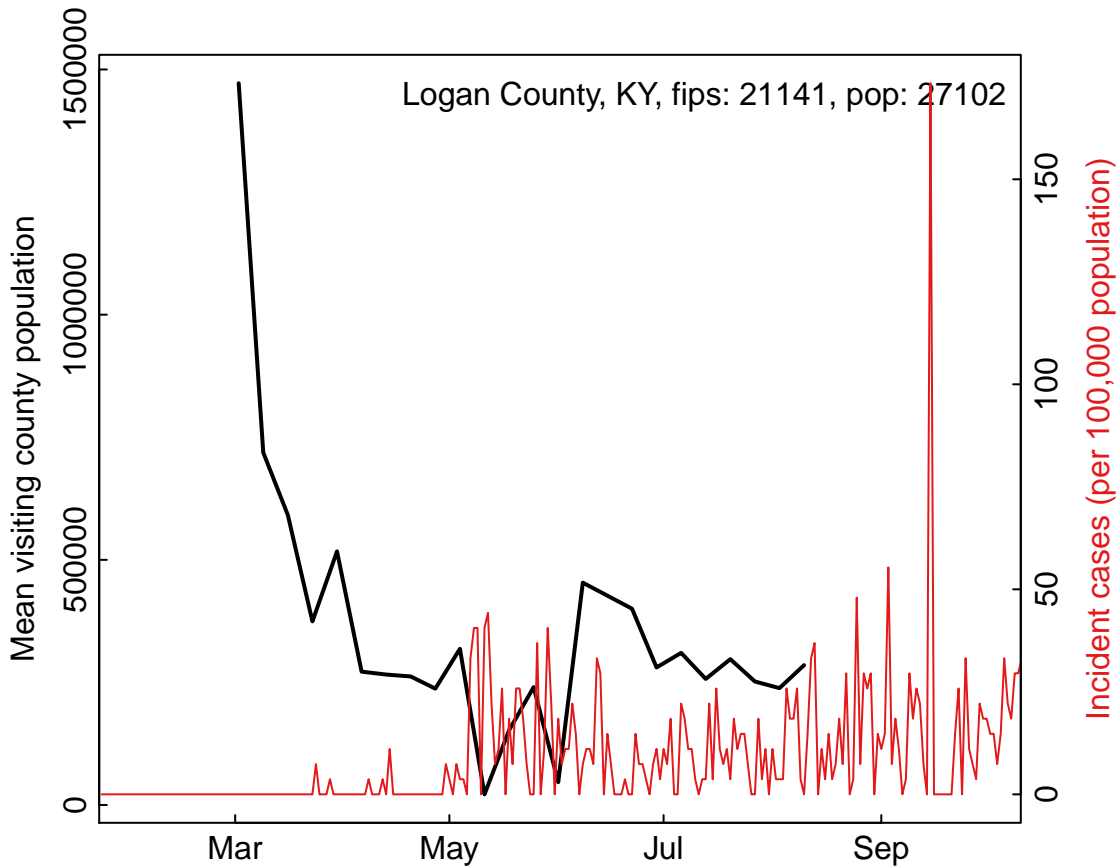

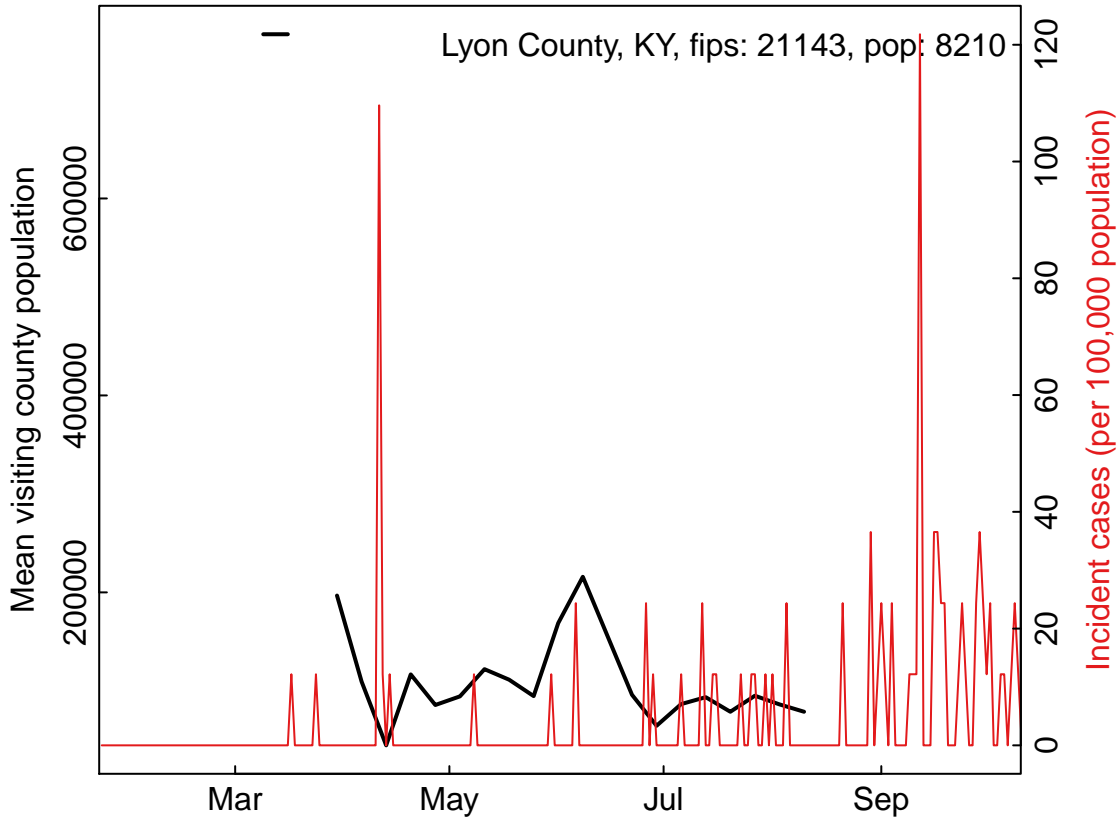

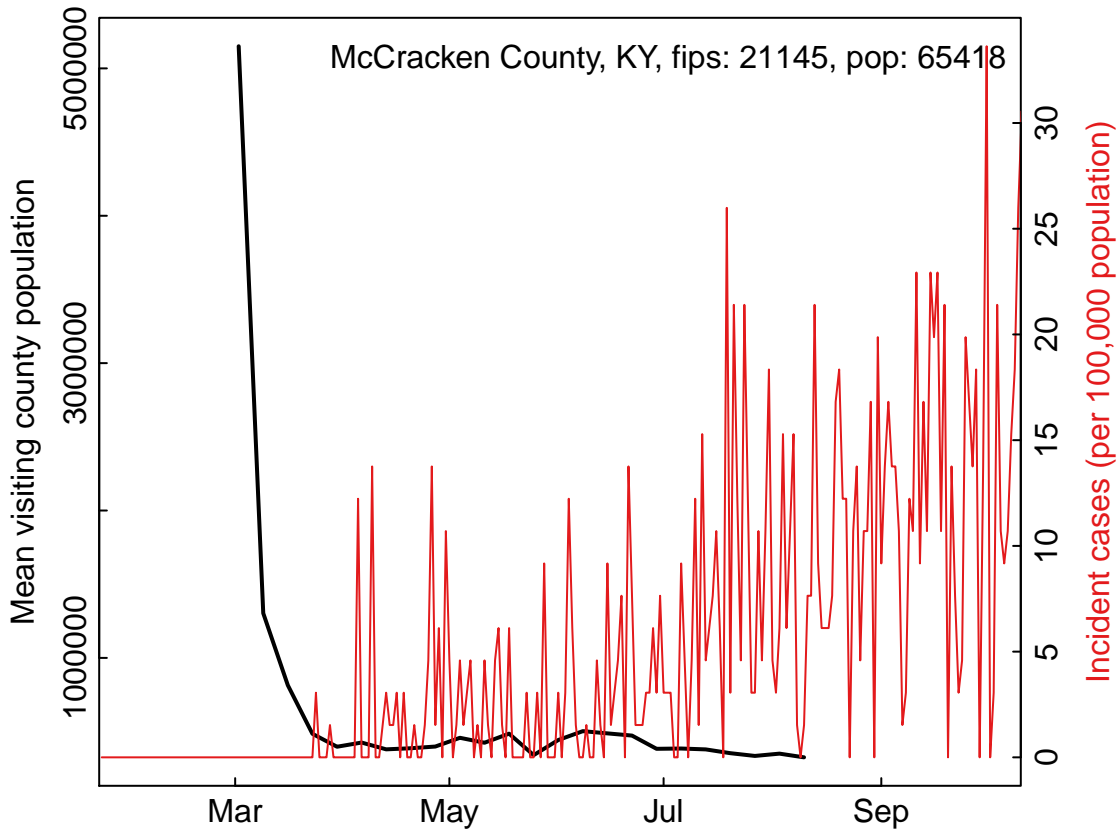

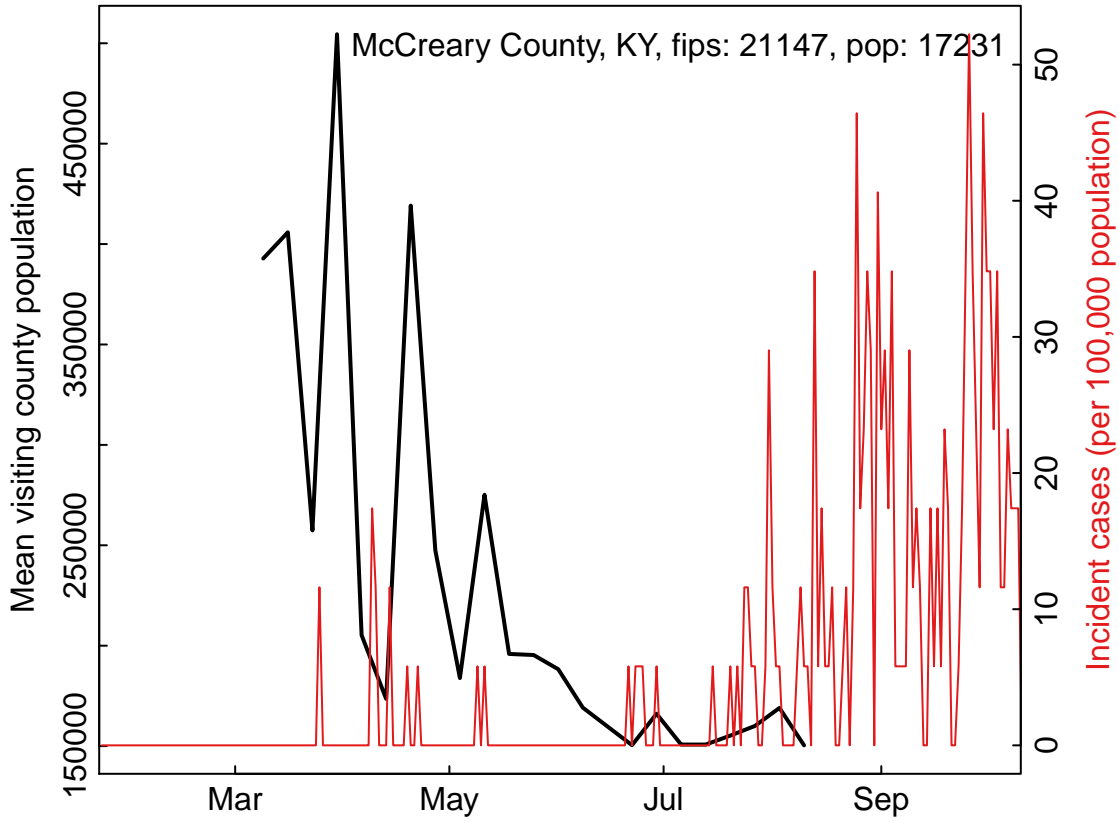



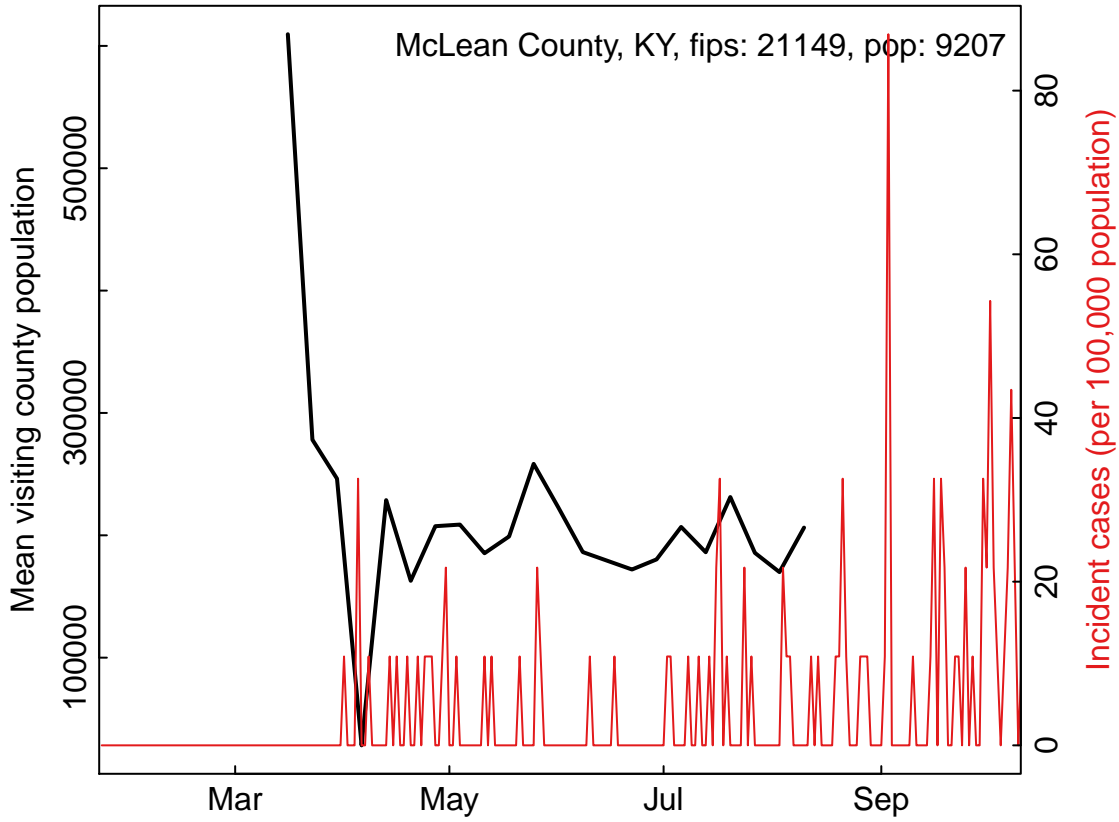

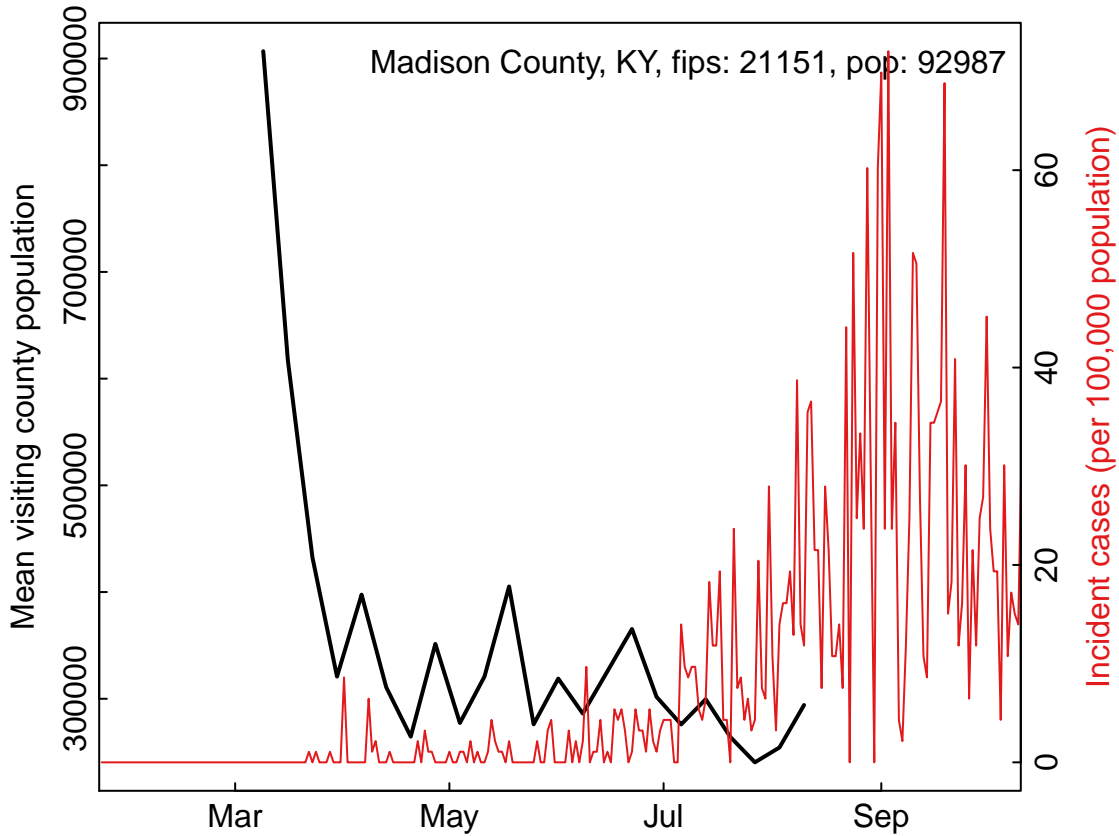

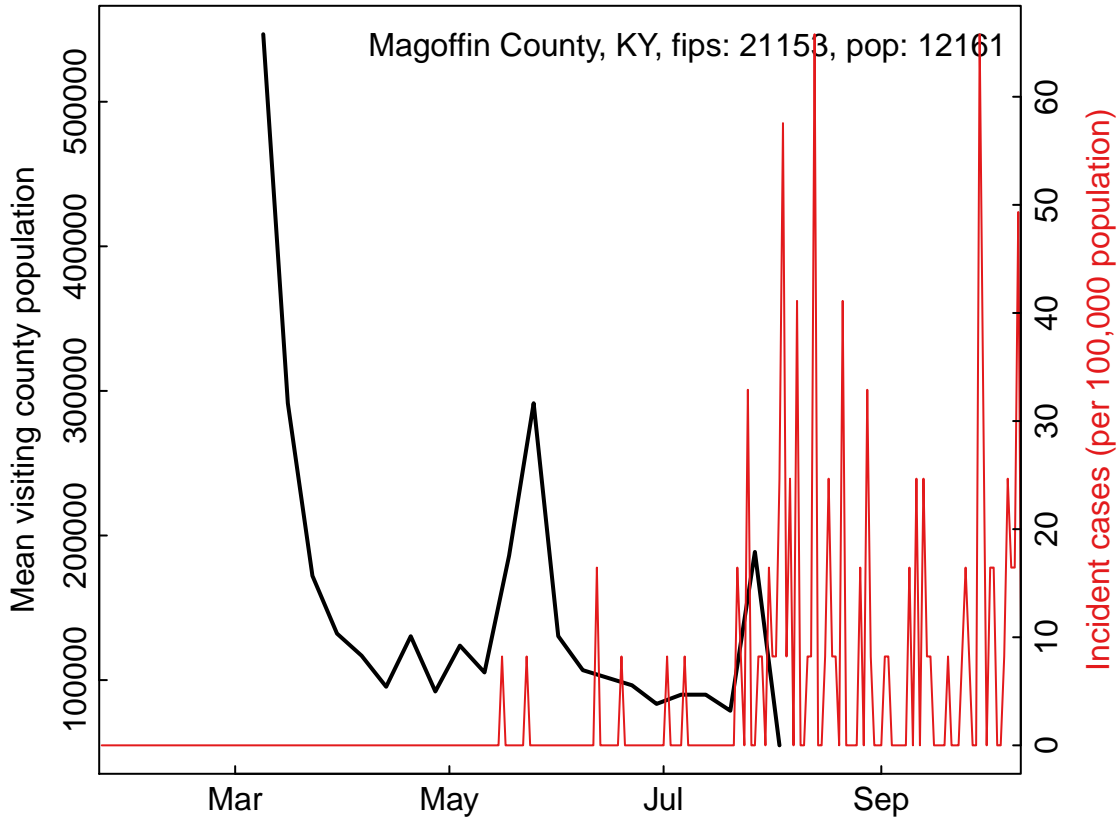

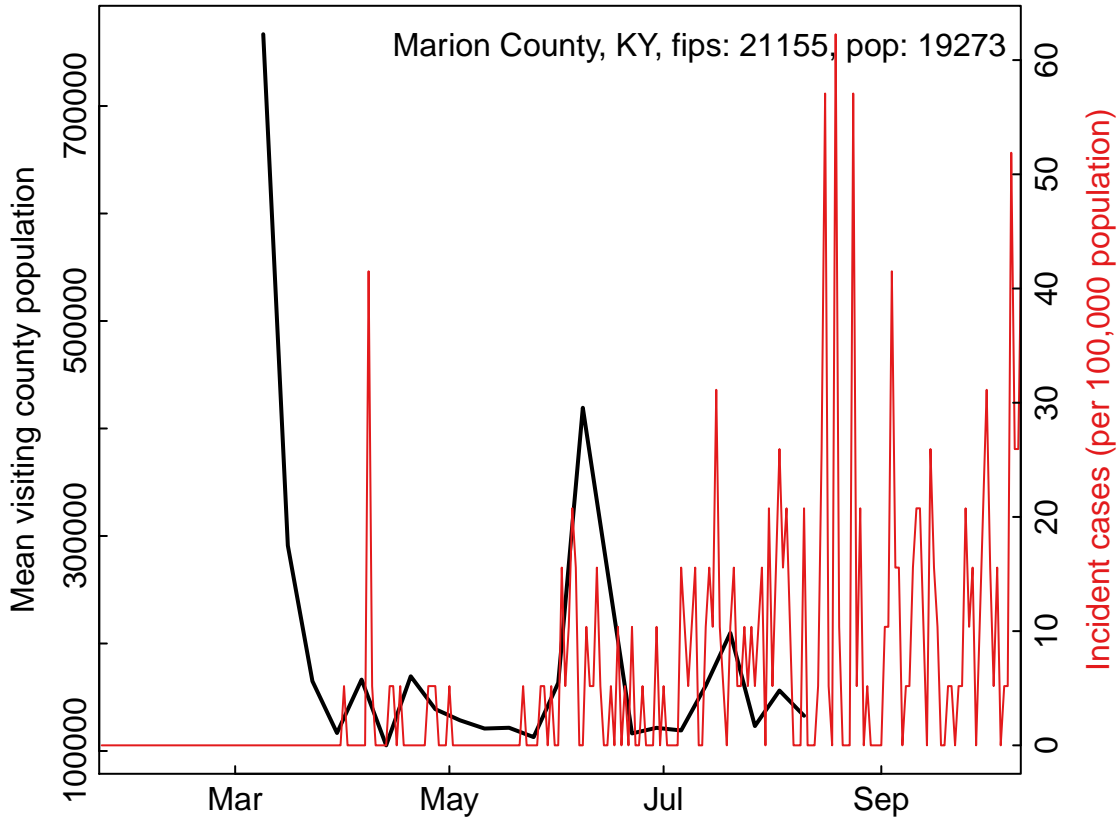

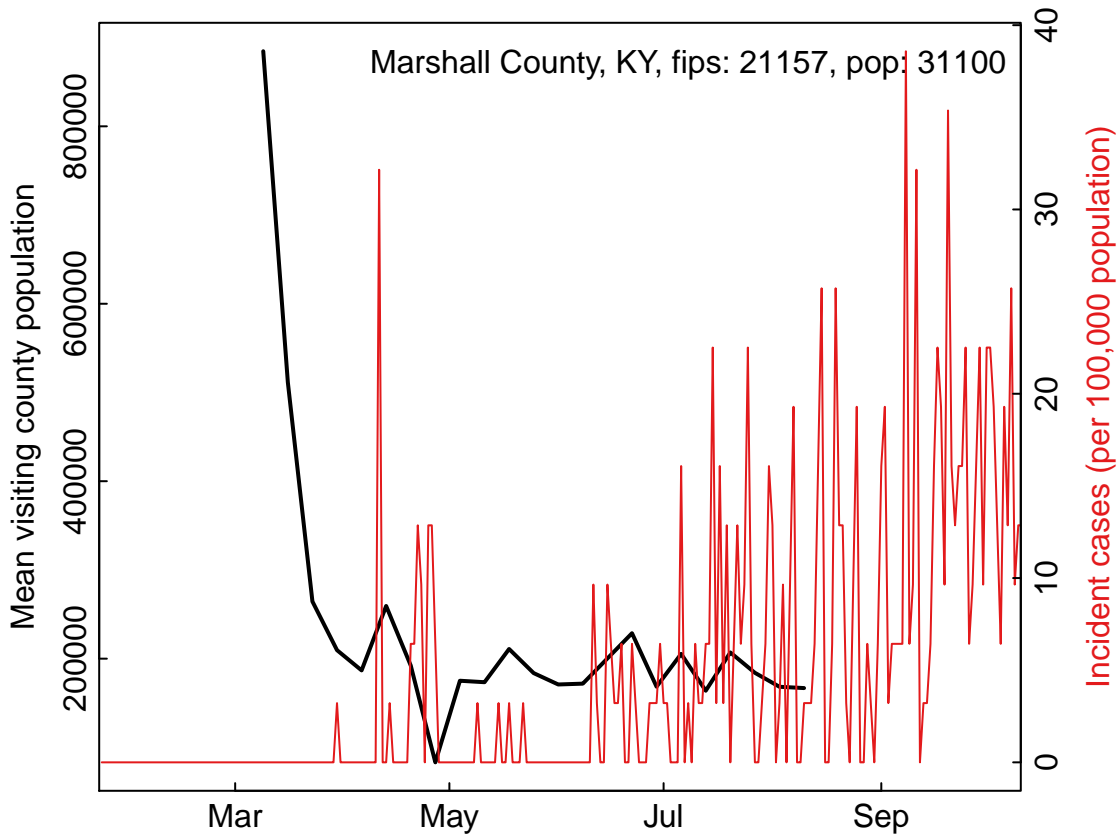

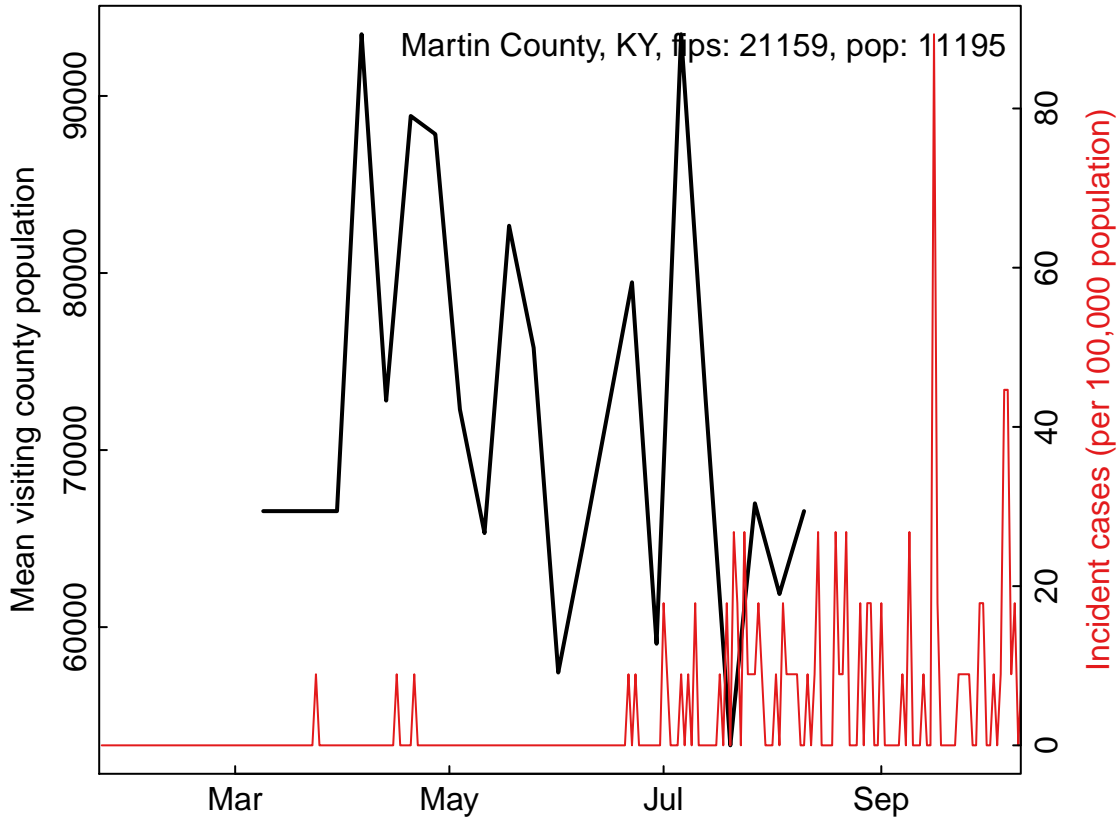

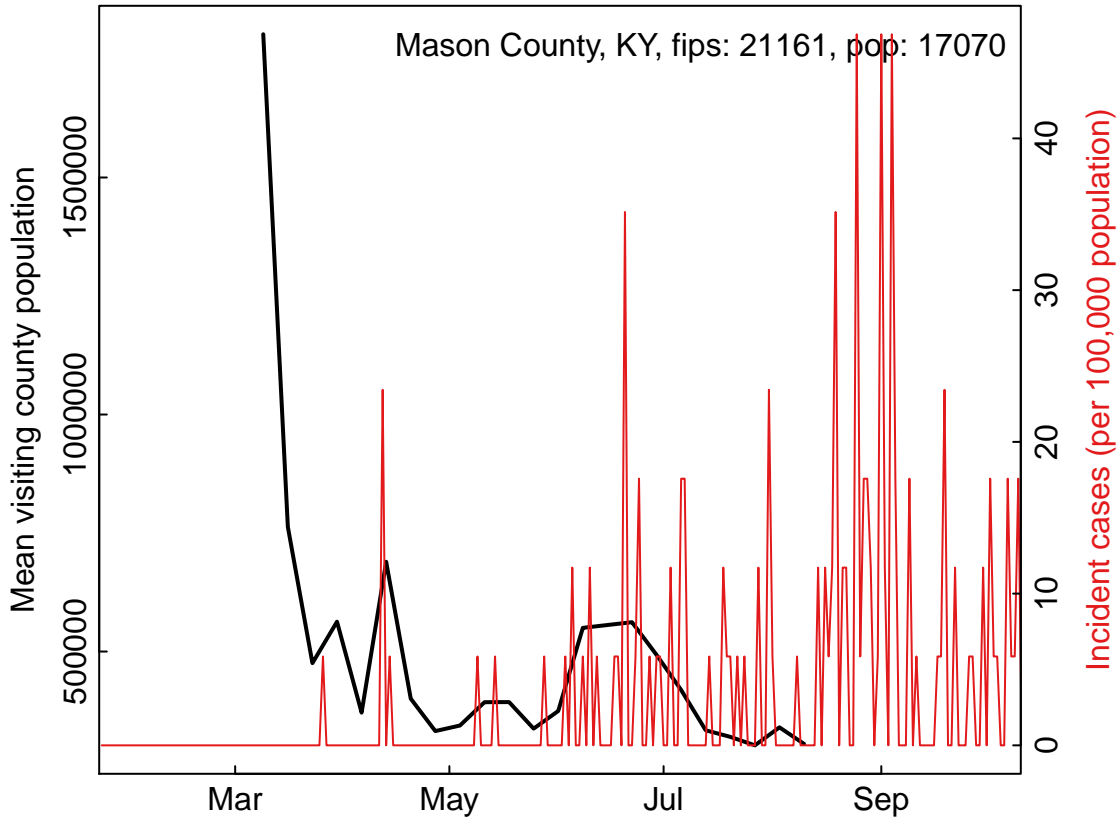

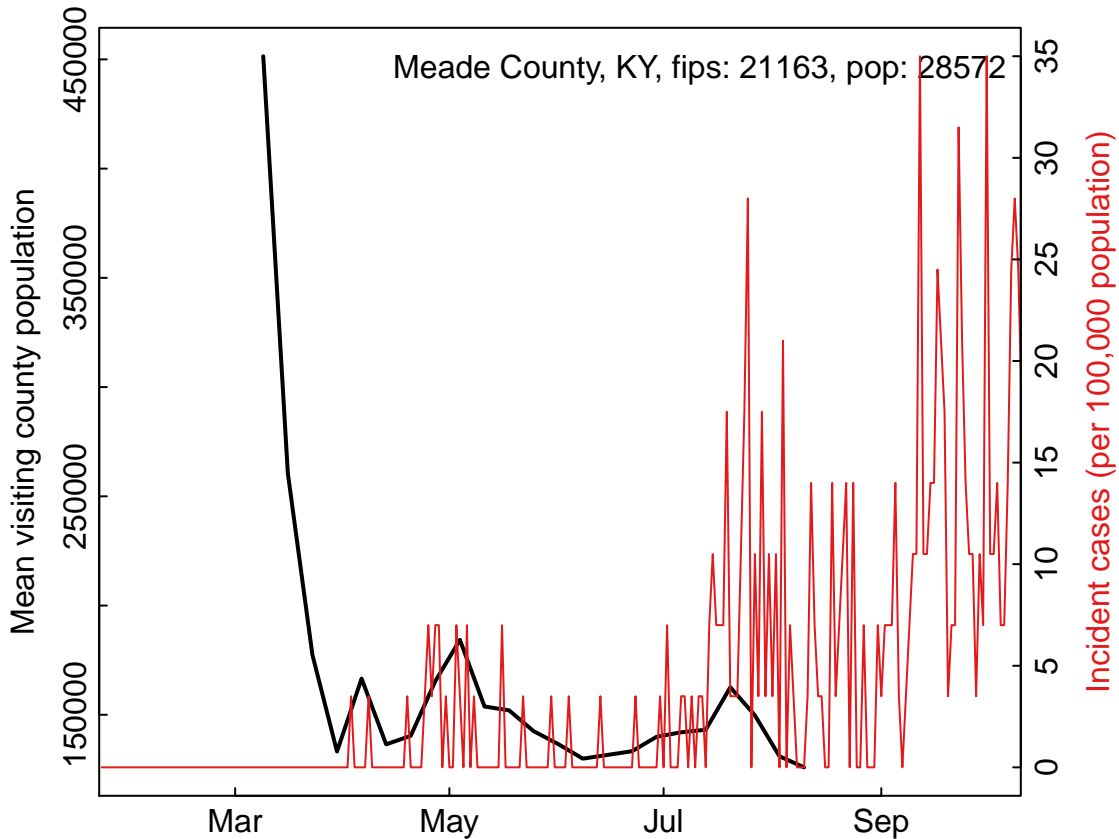



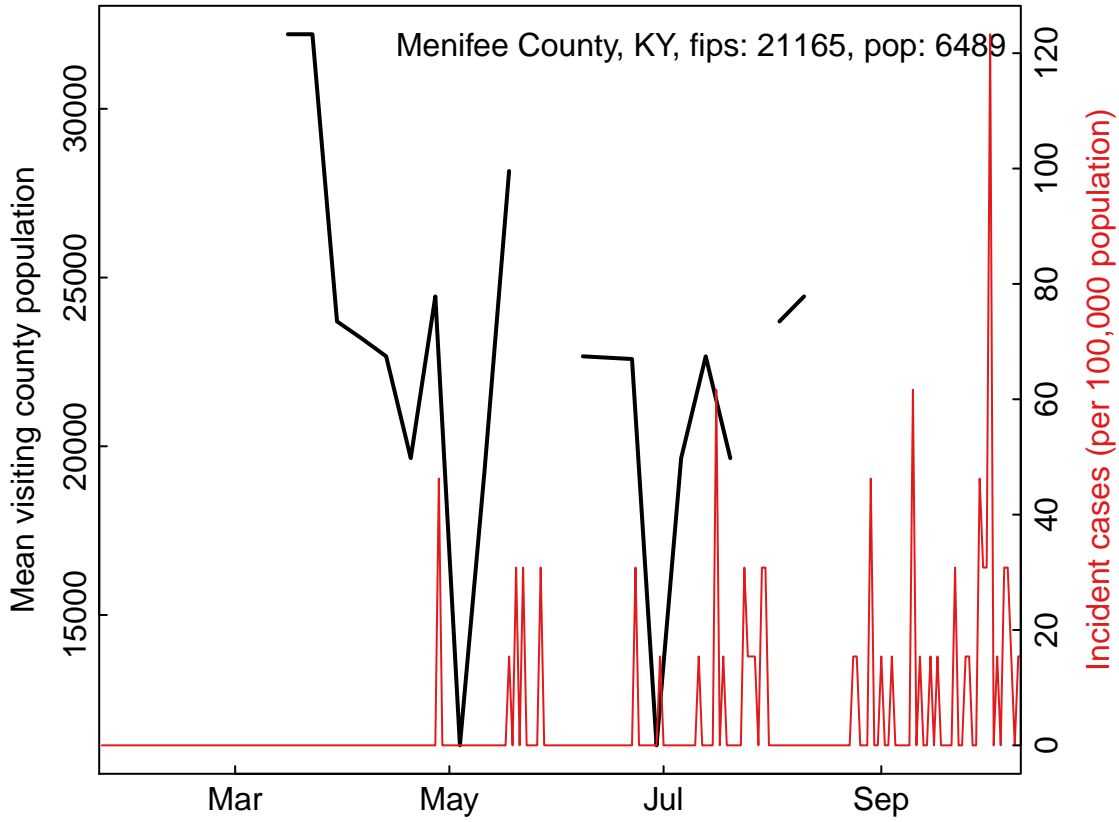

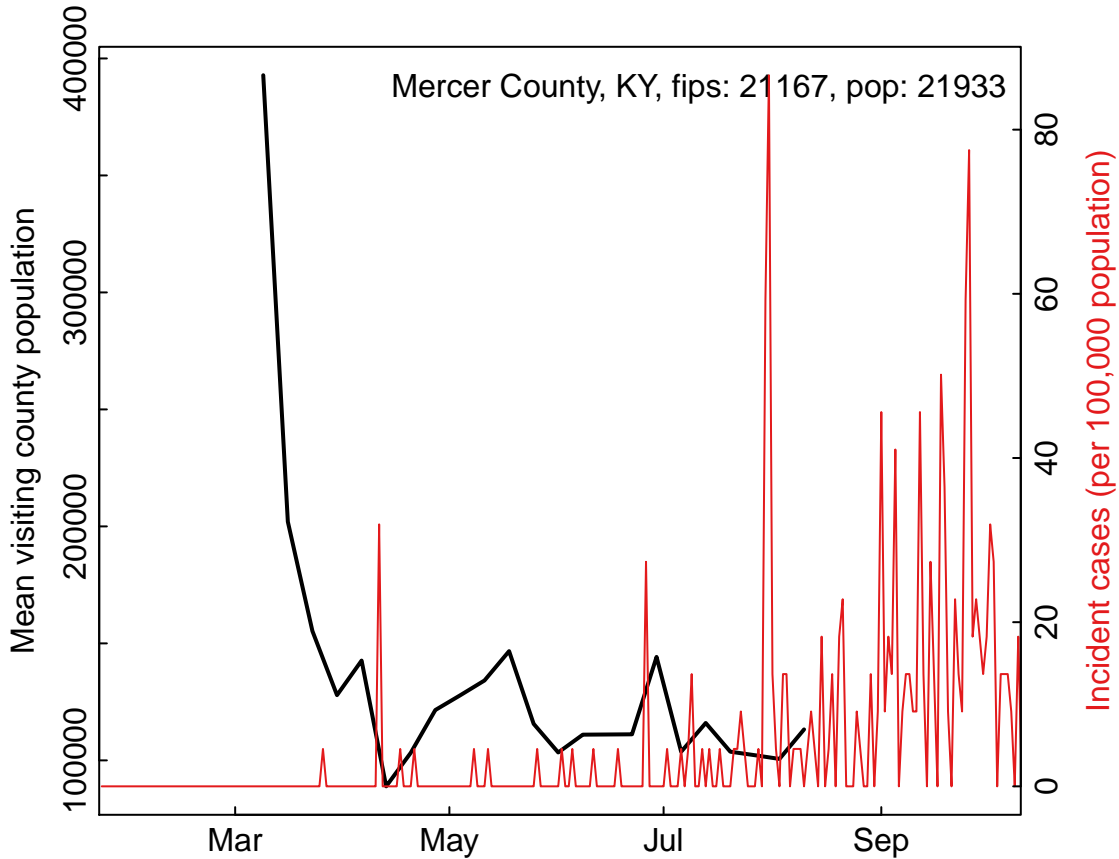

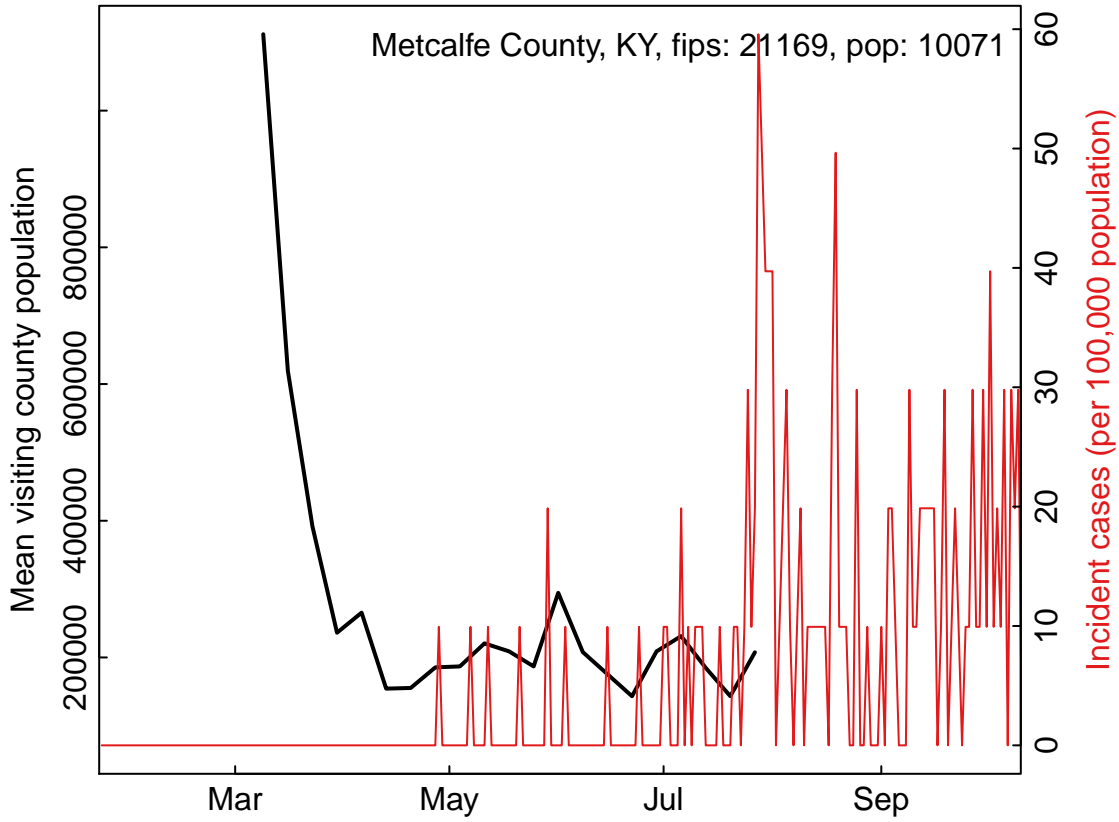

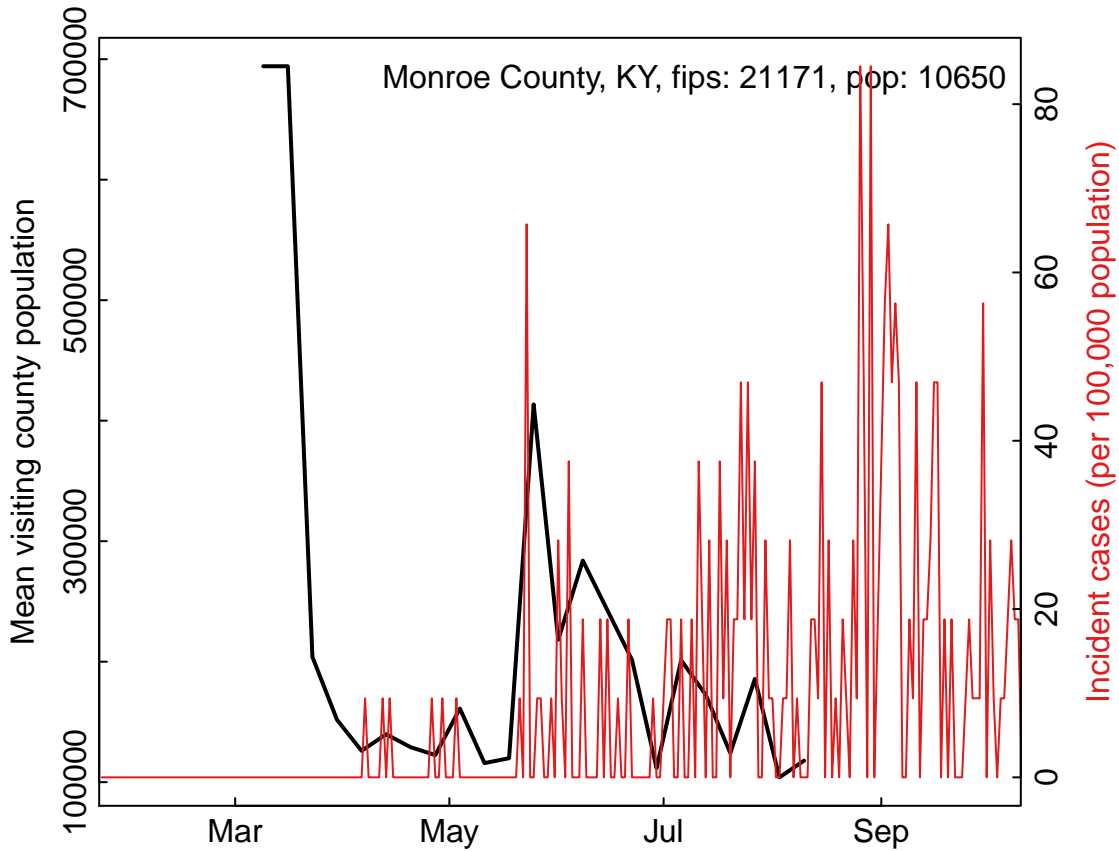

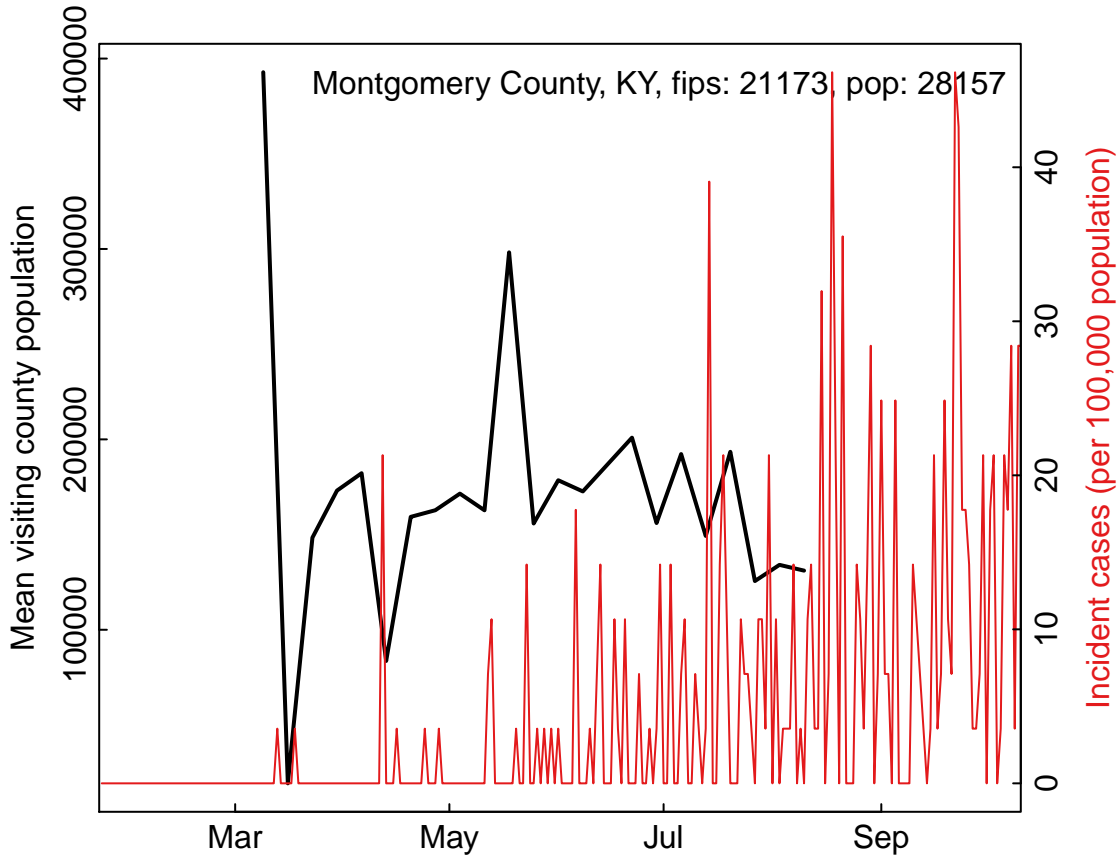

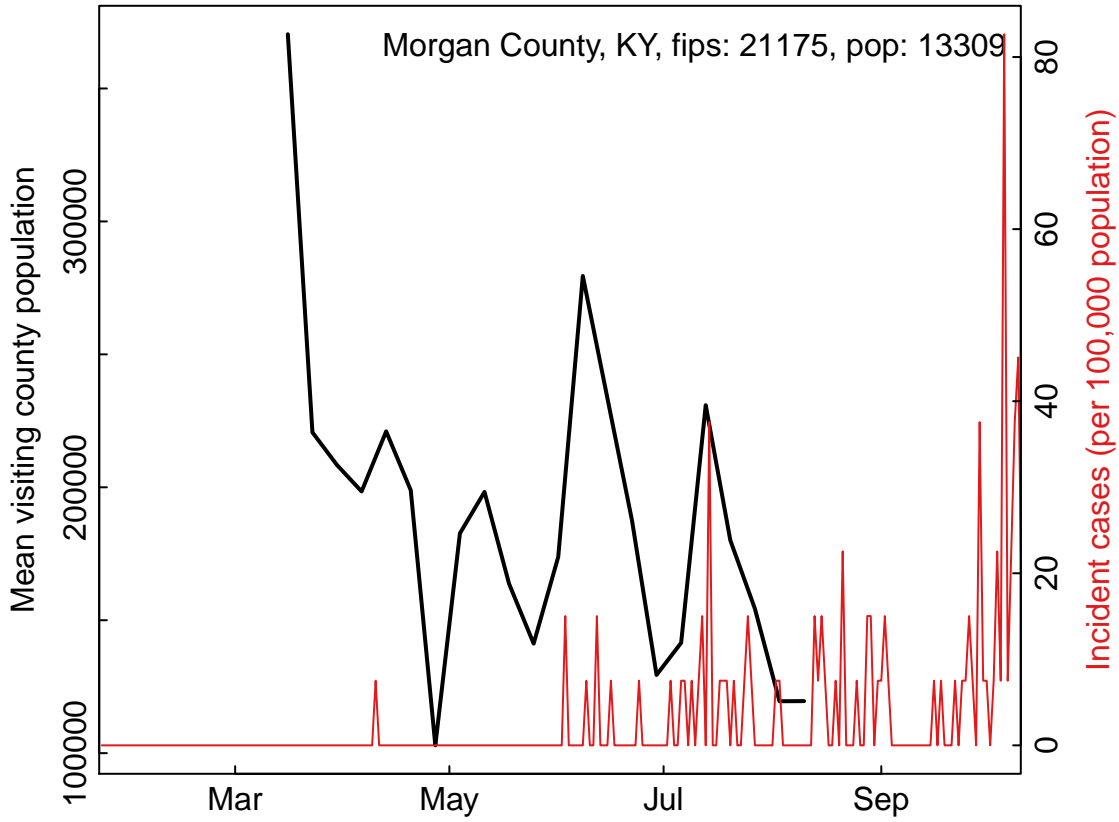

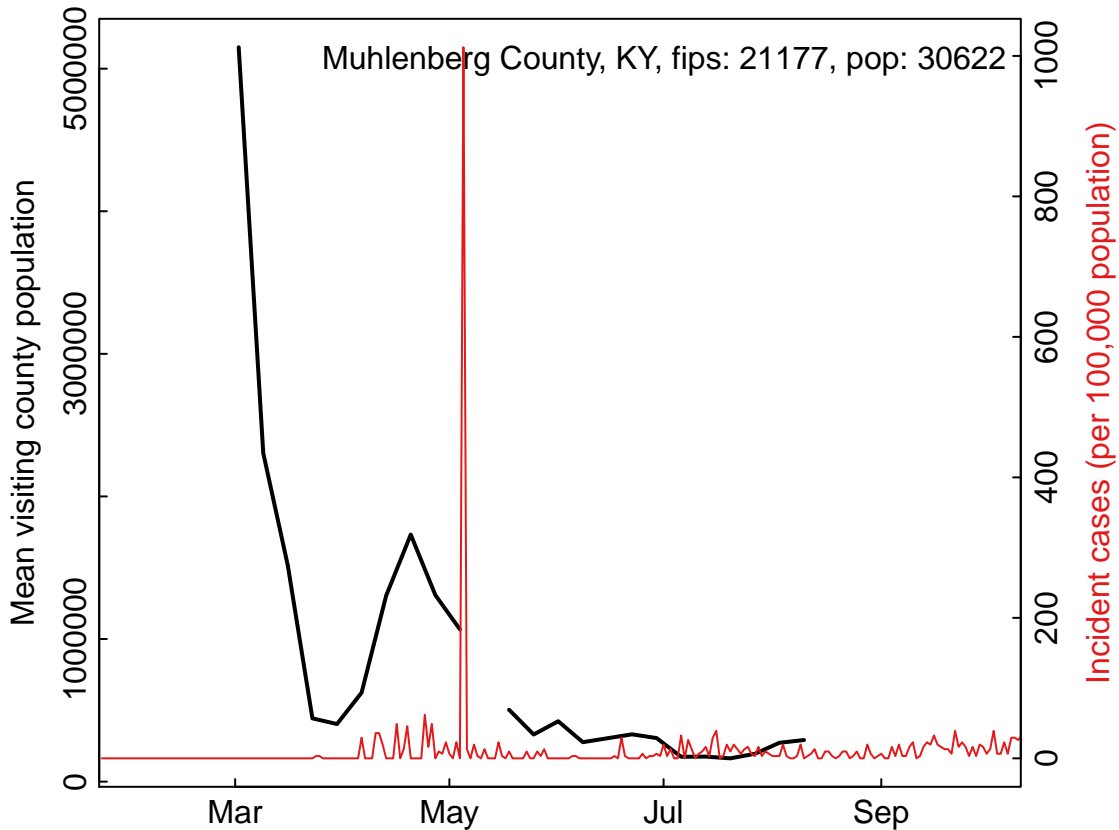

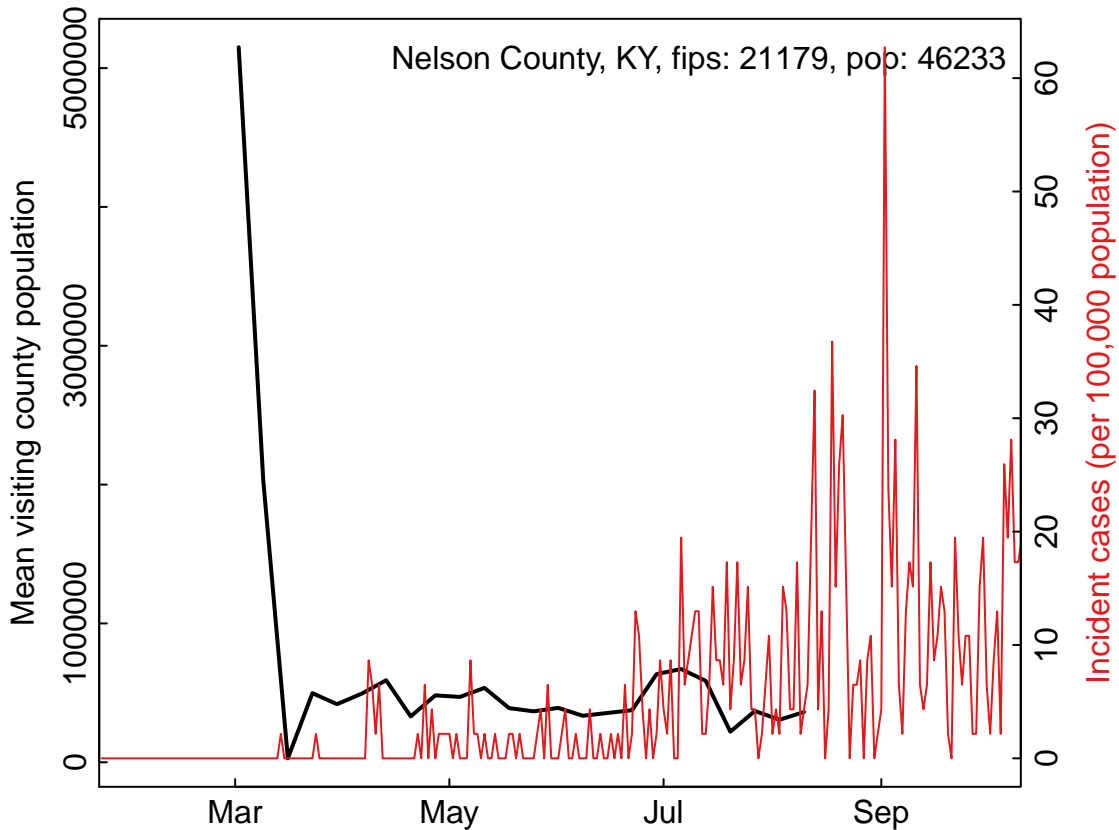



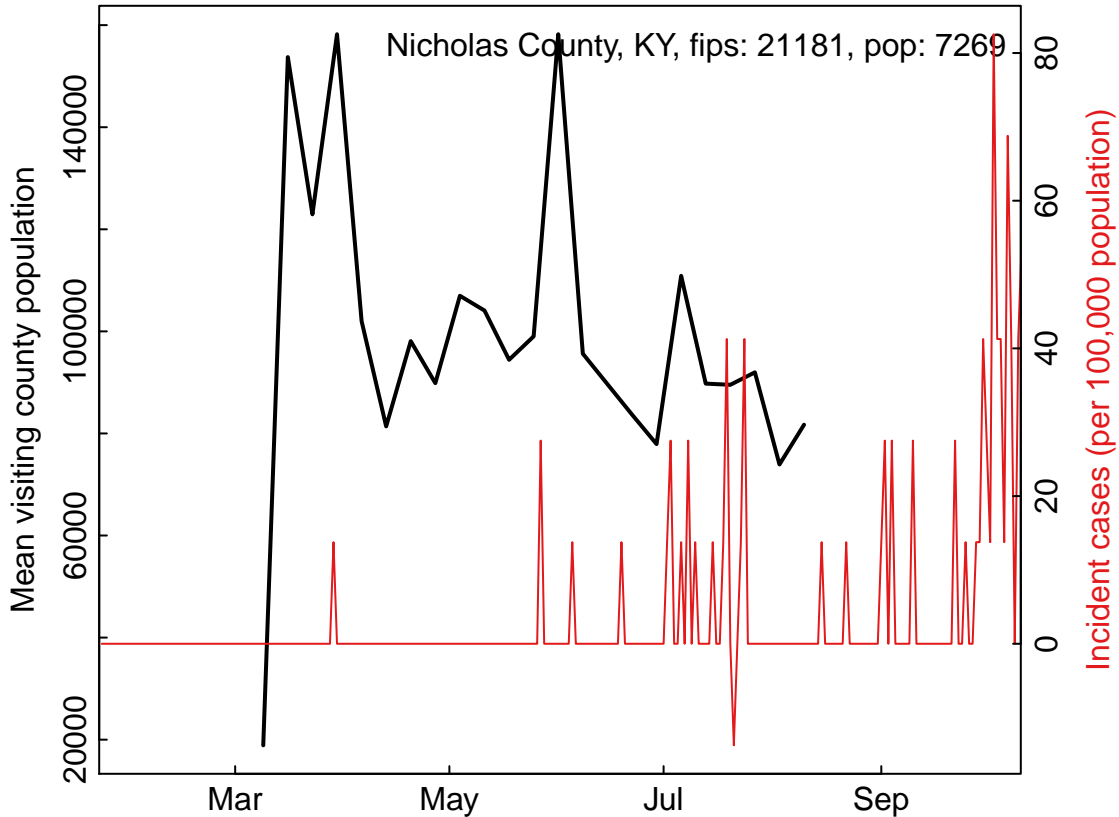

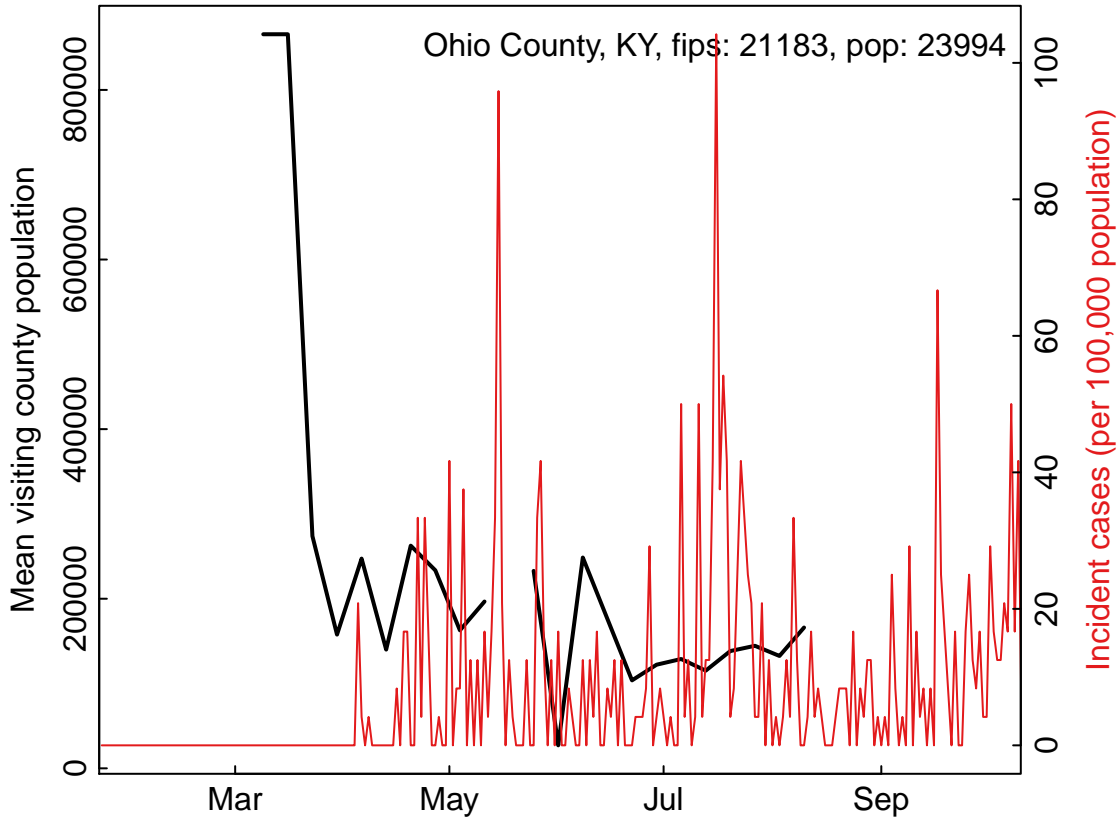

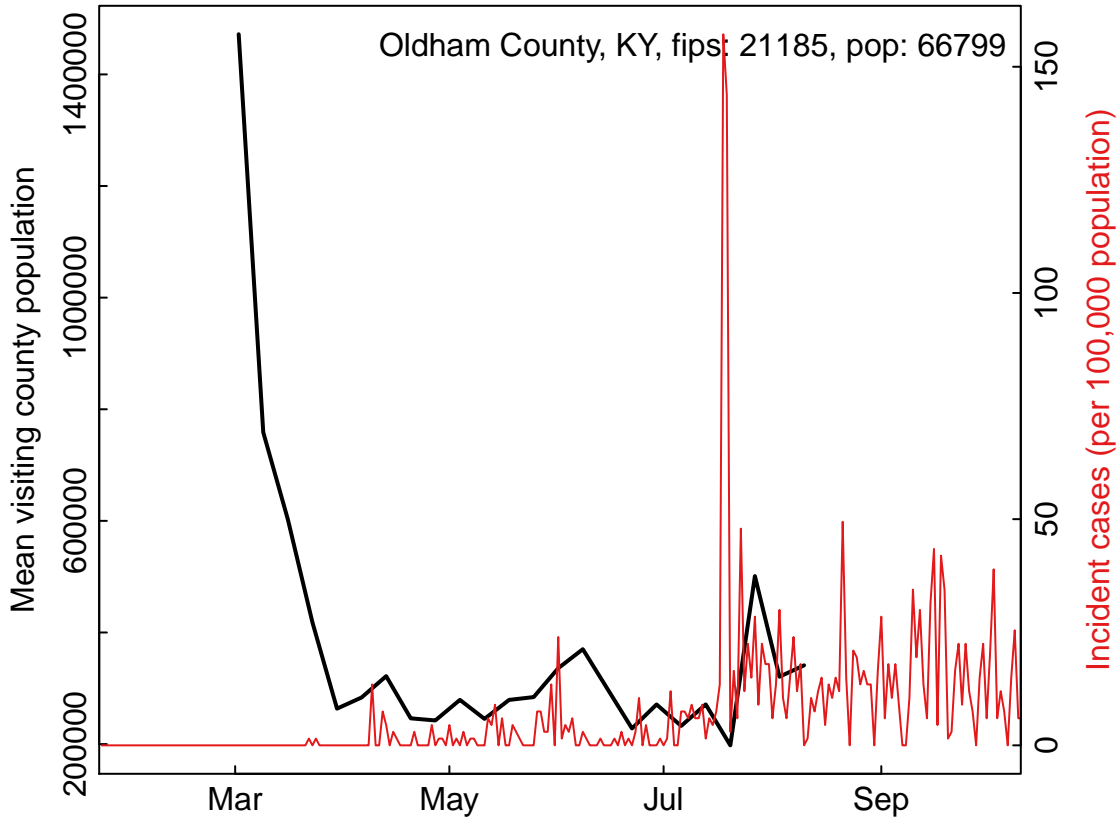

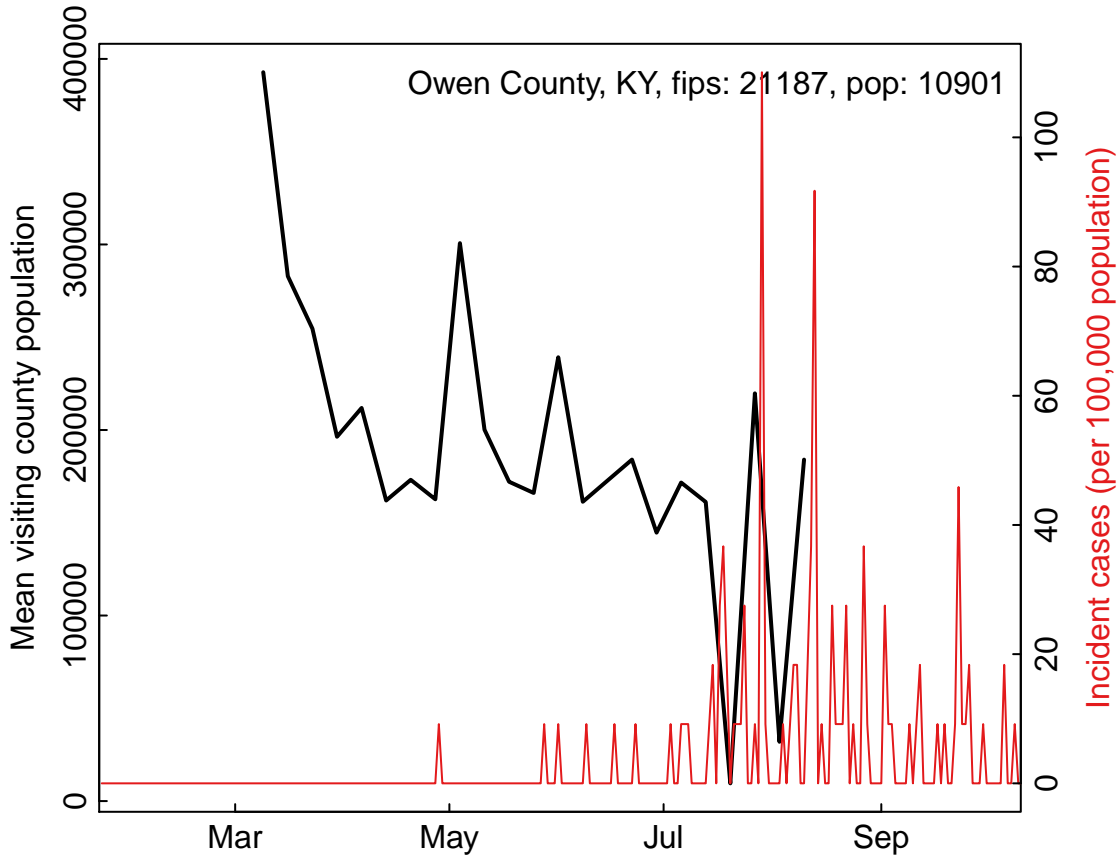

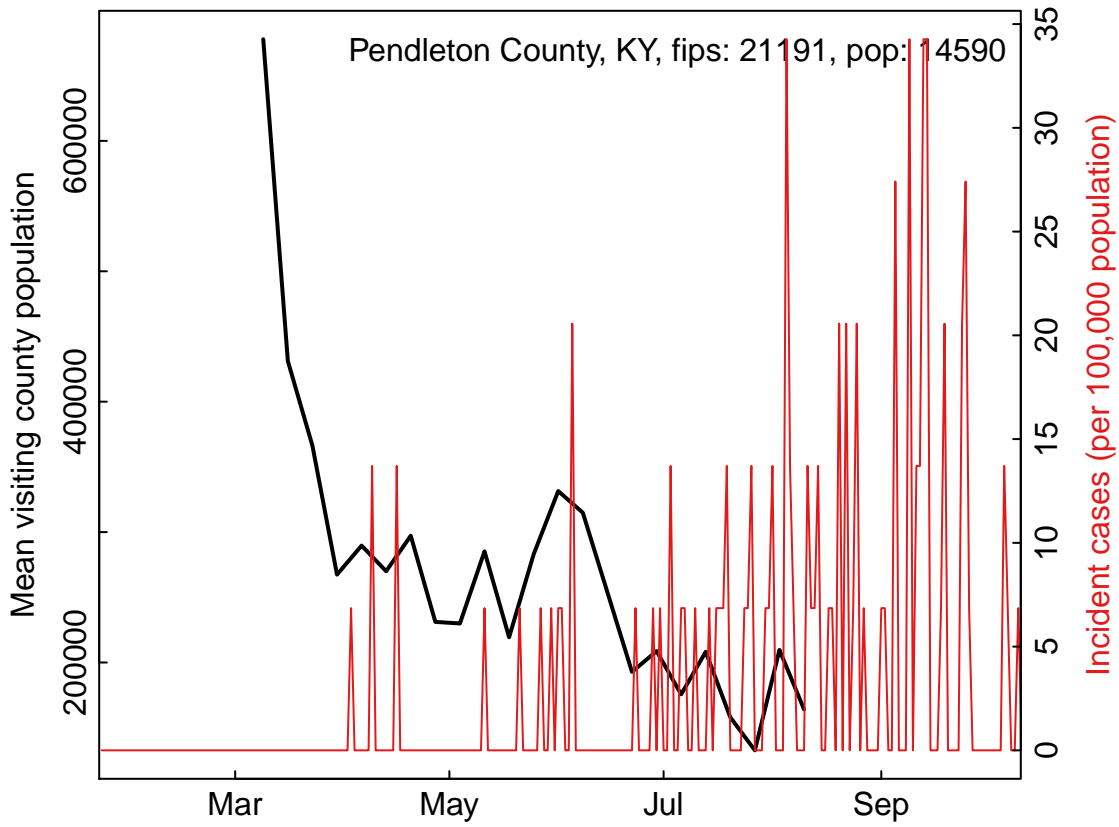

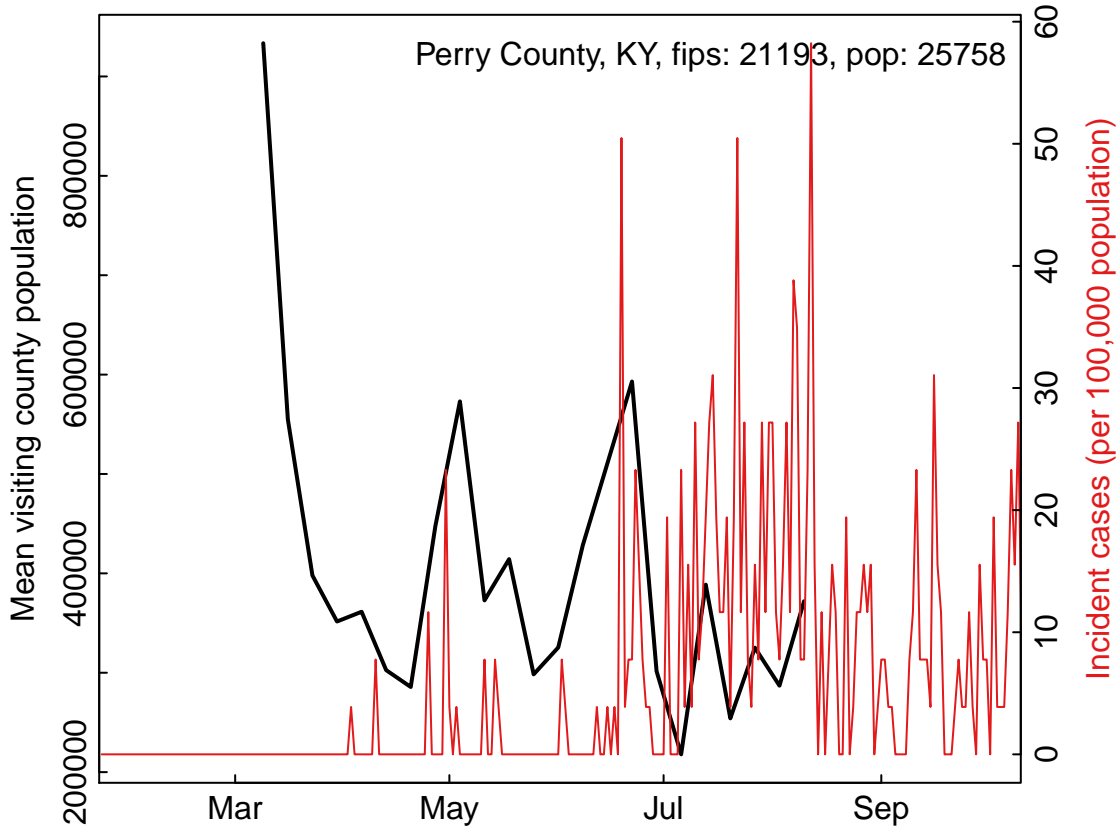

Pike County, KY, fips: 21195, pop: 57876

Mean visiting county population

Incident cases (per 100,000 population)

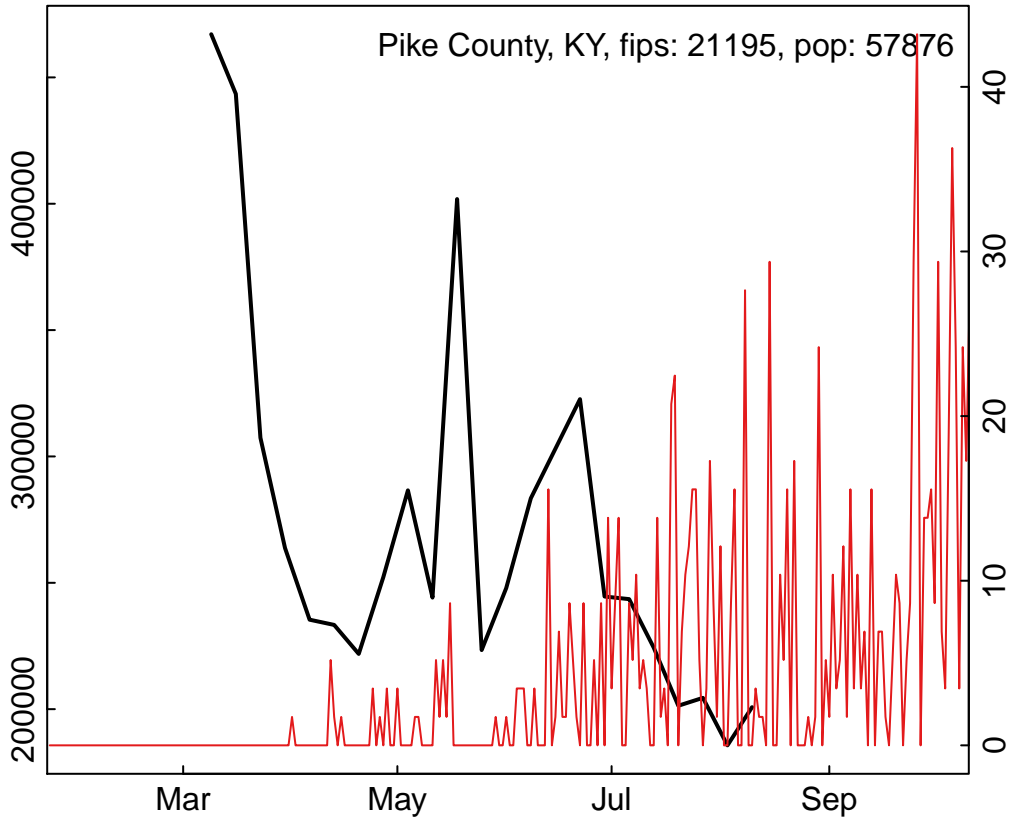

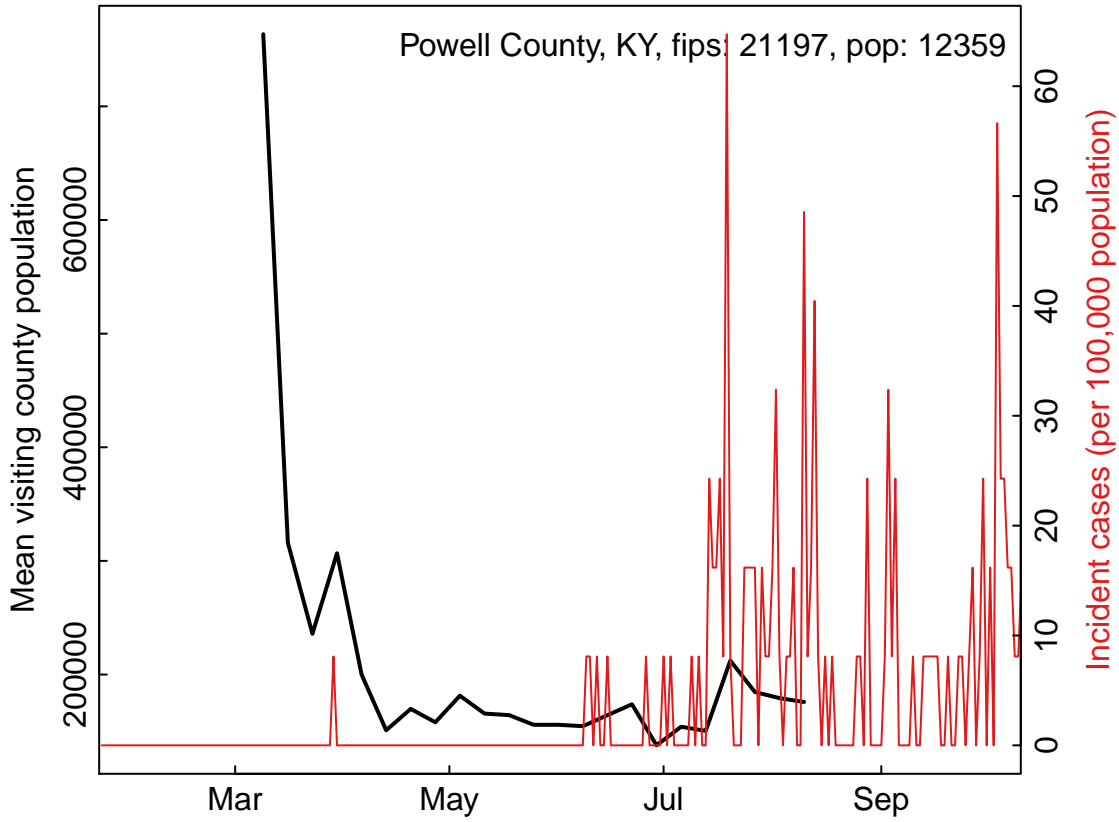



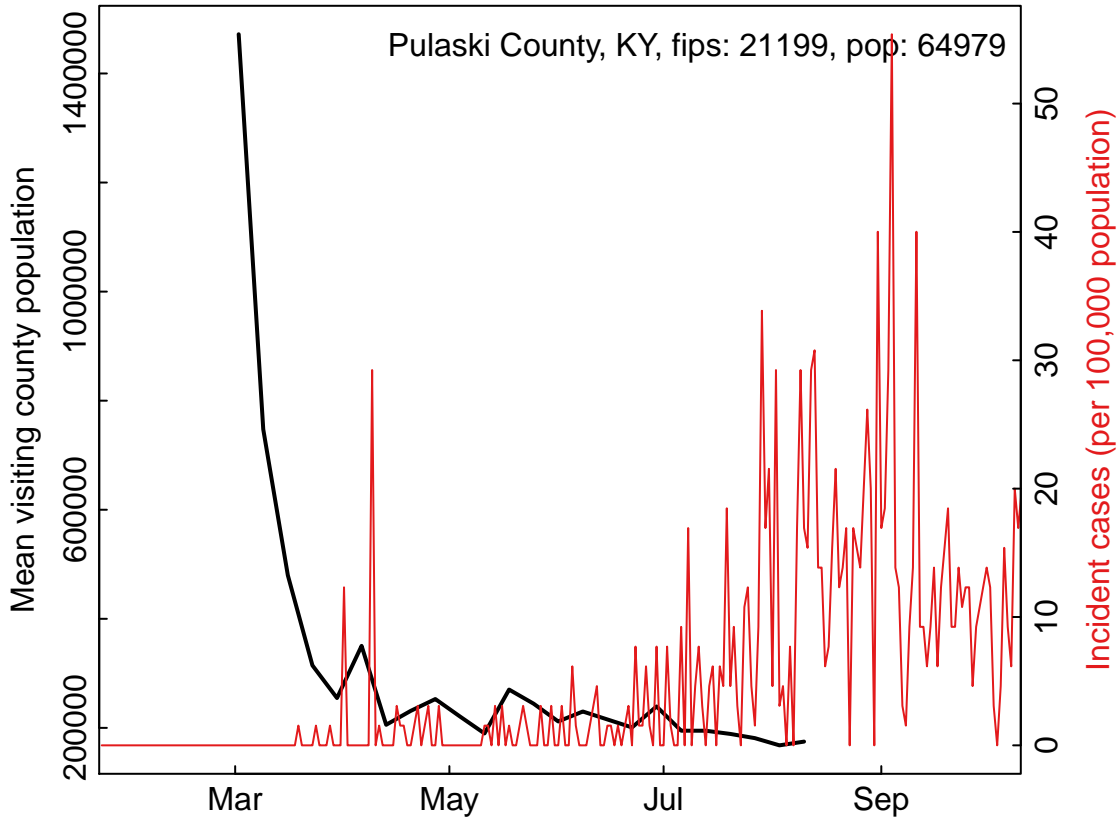

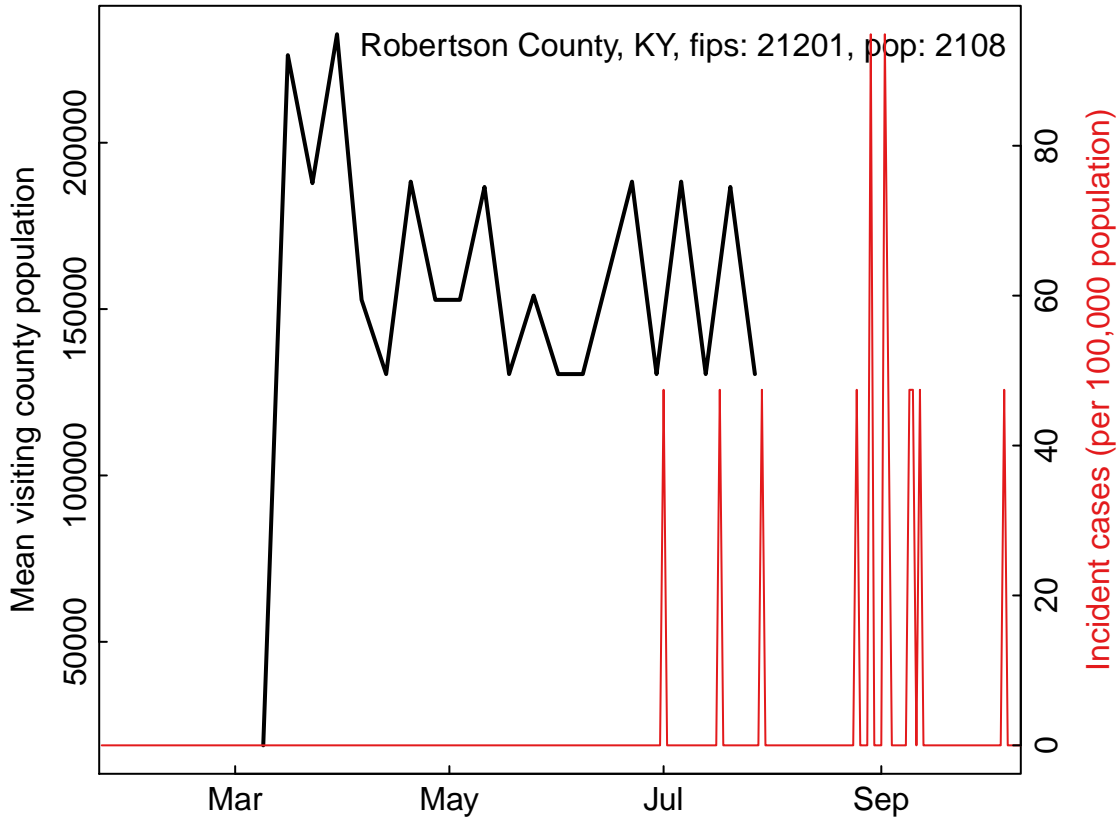

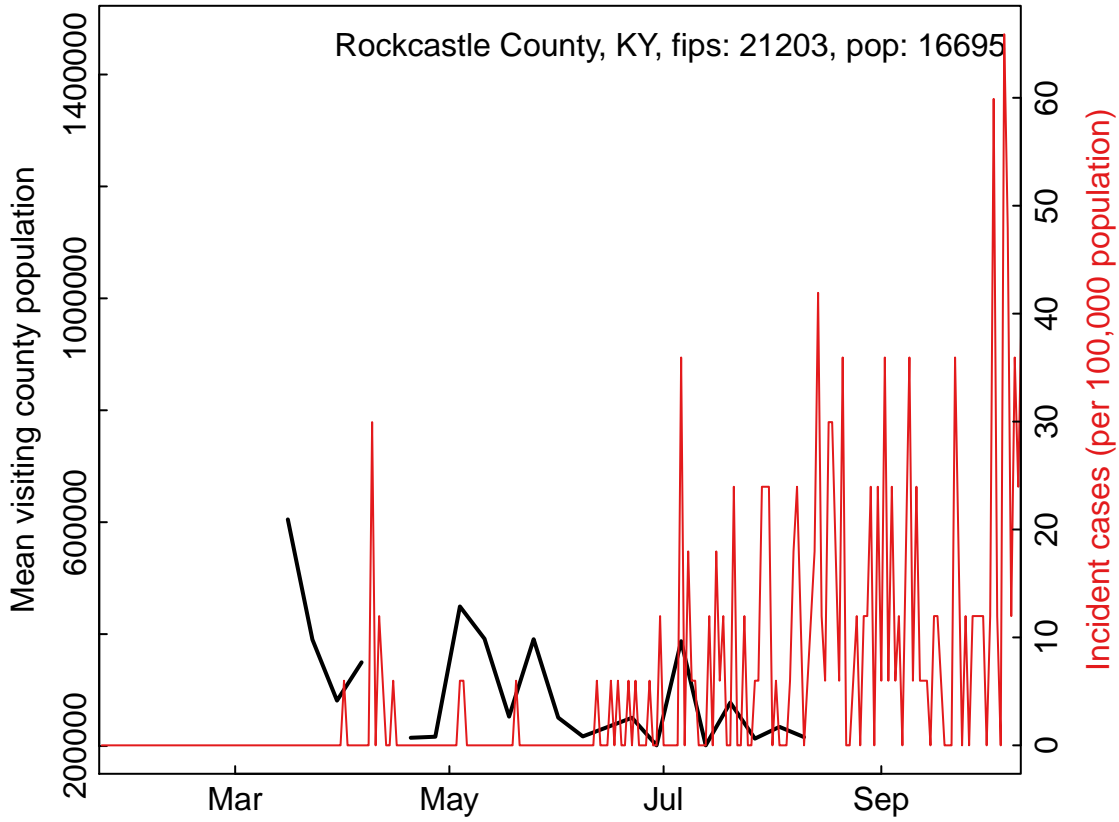

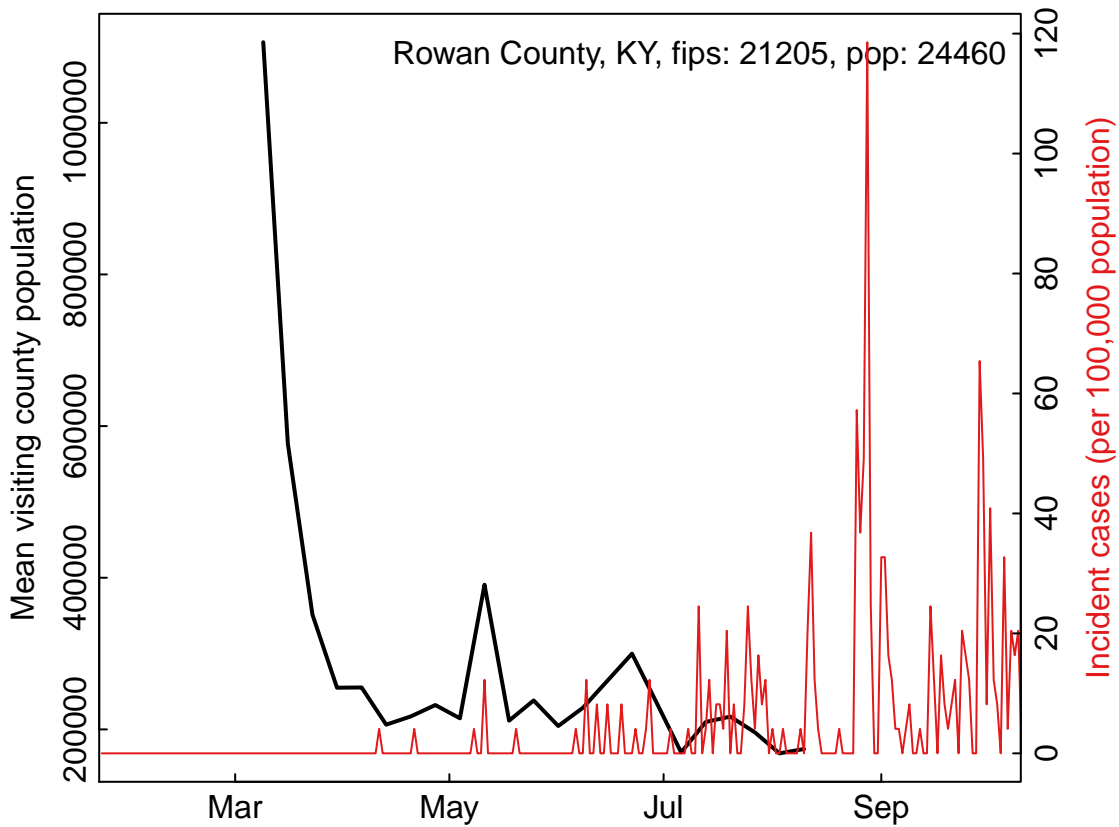

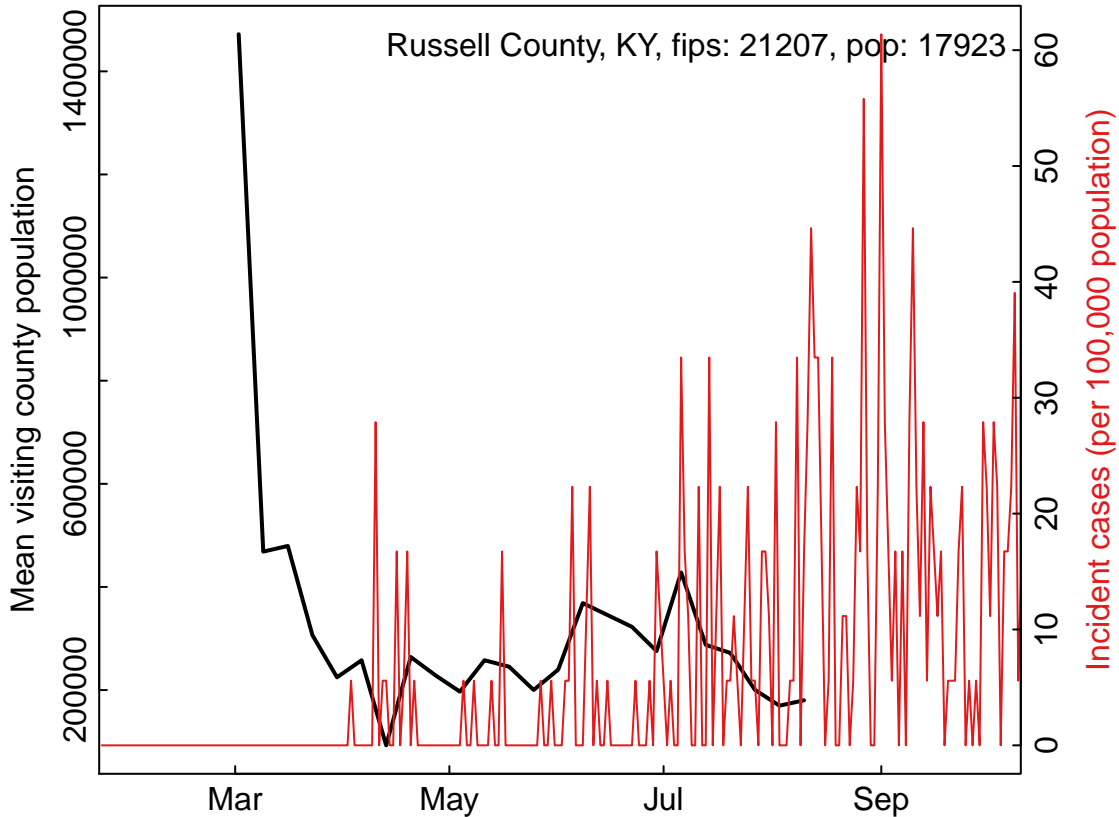

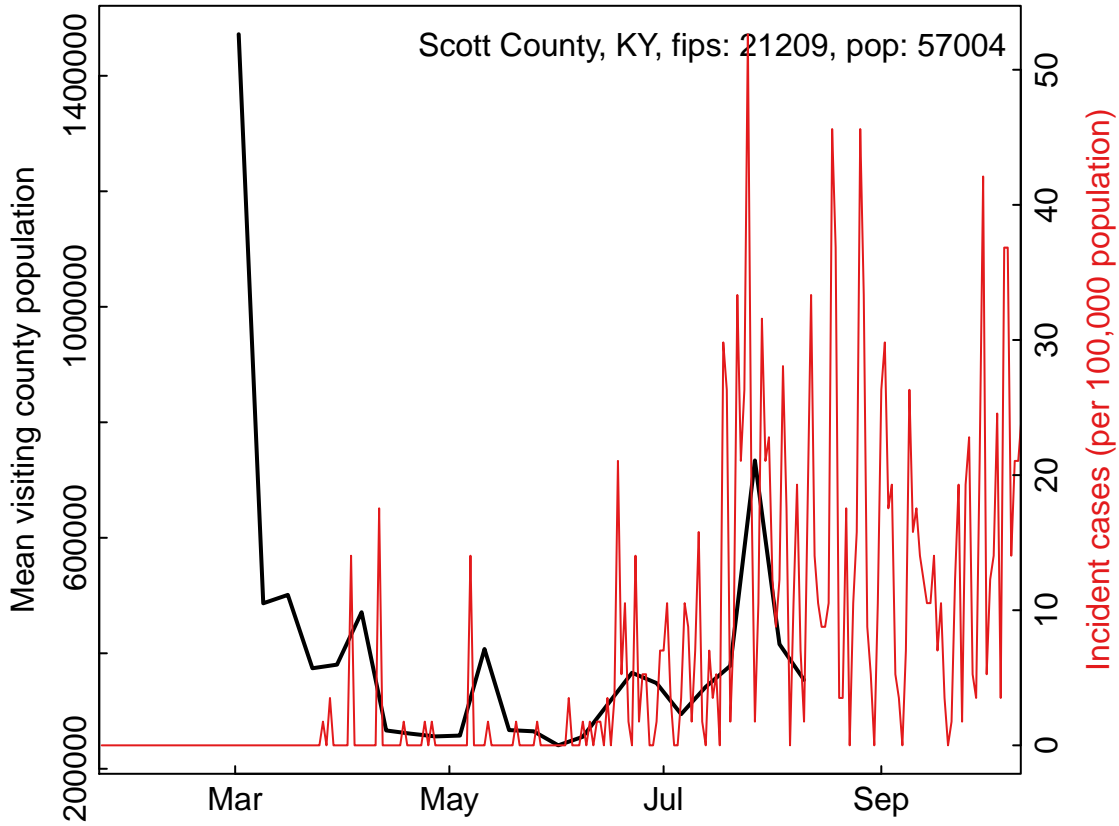

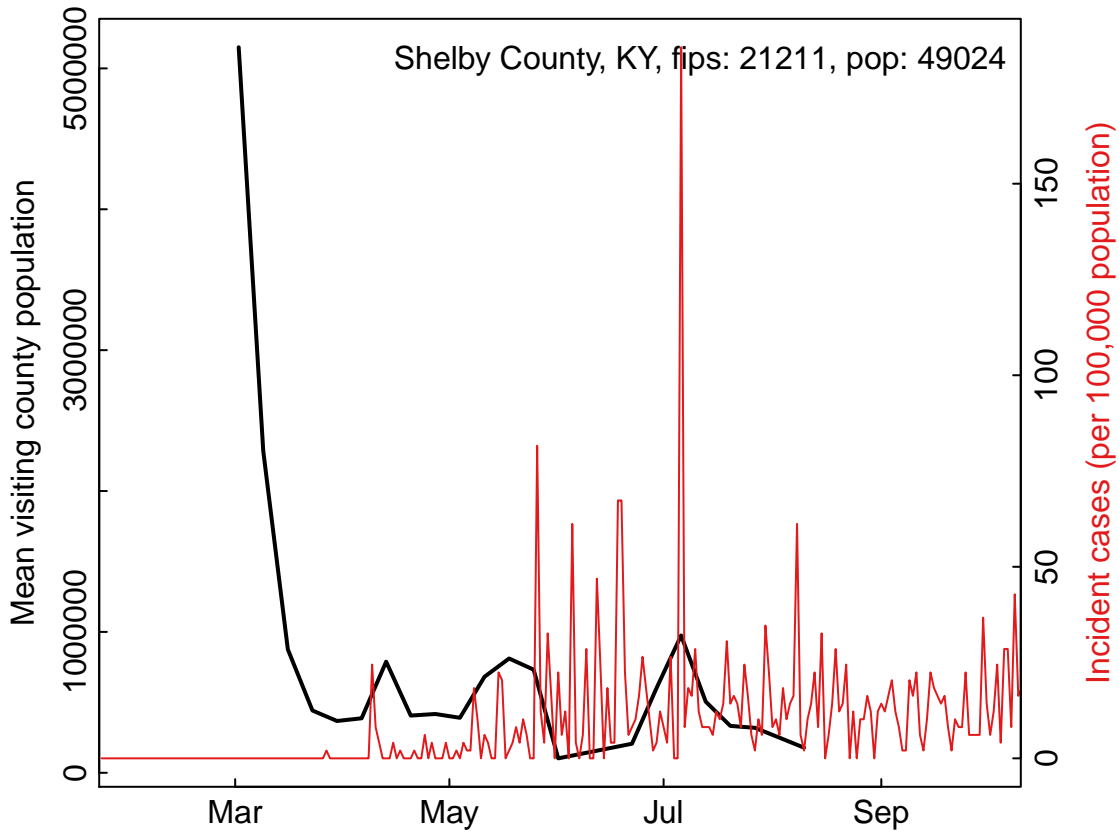

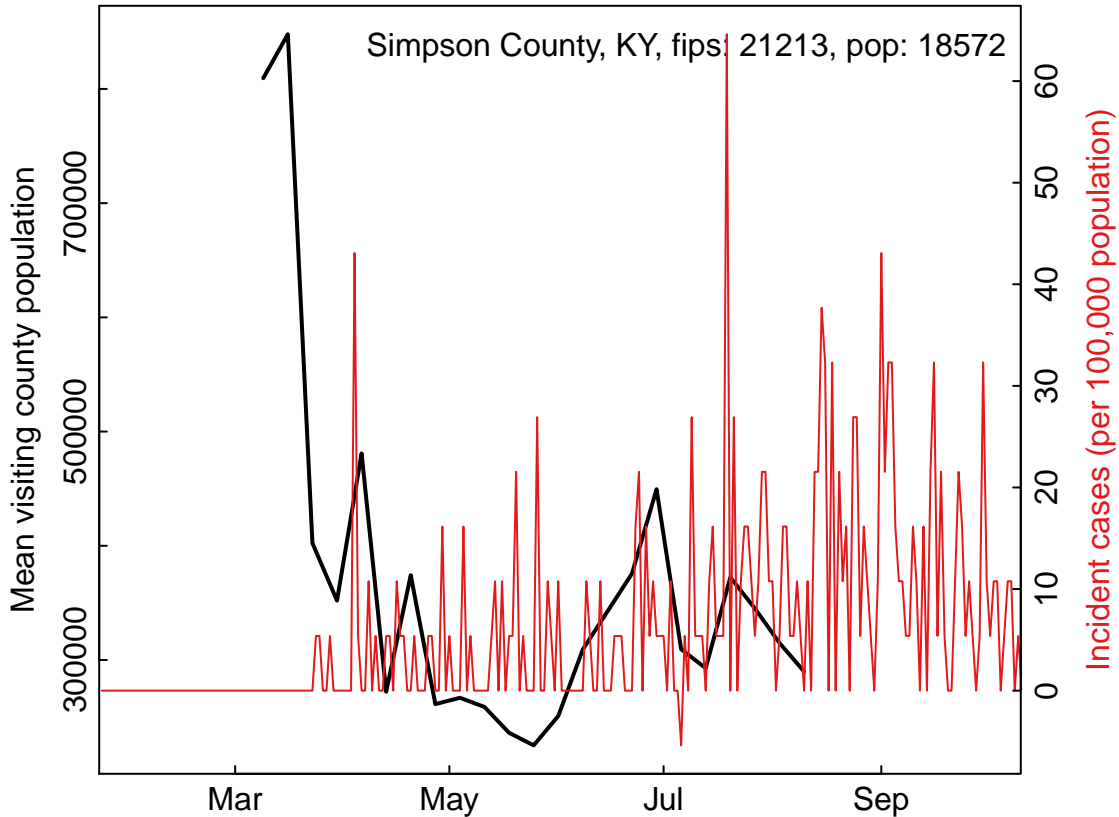



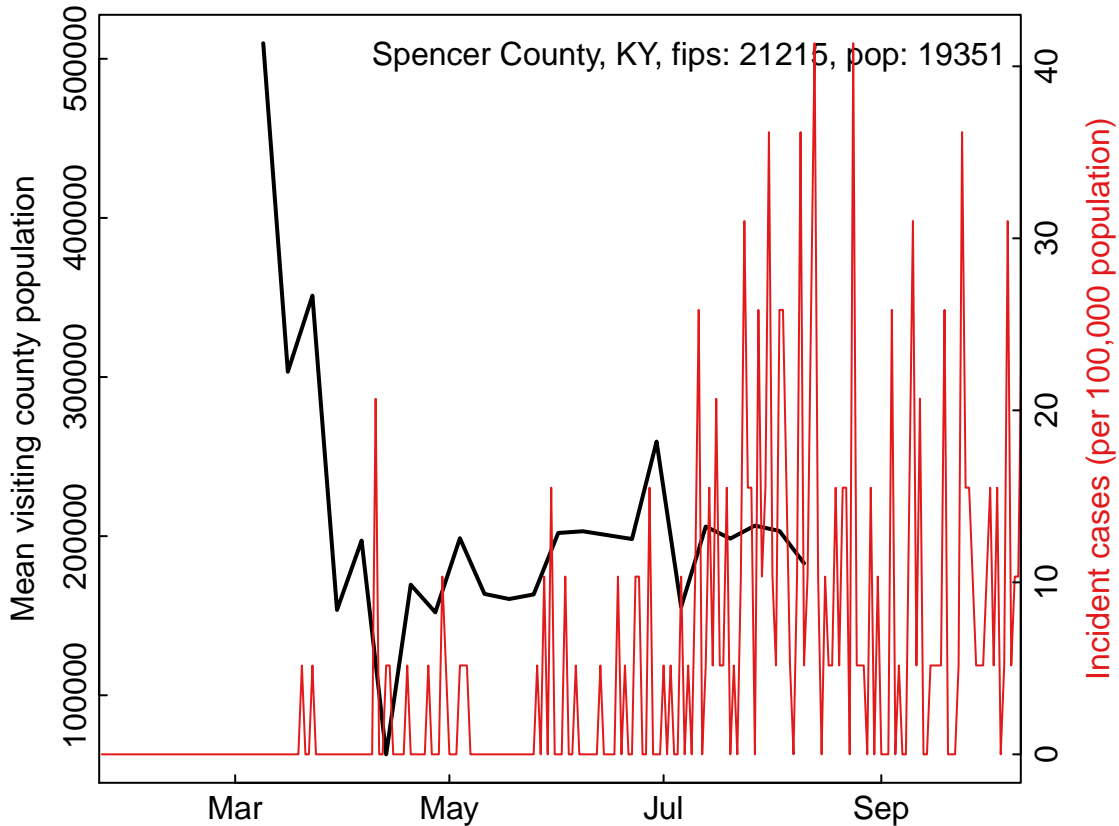

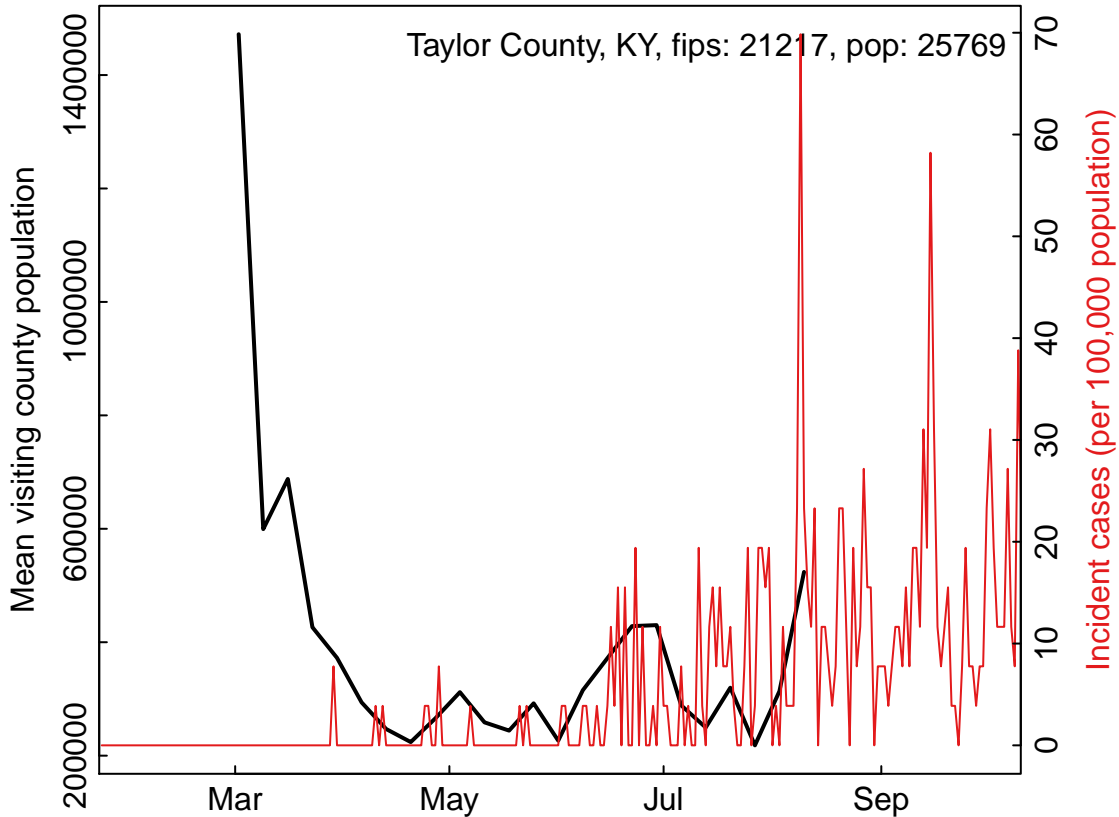

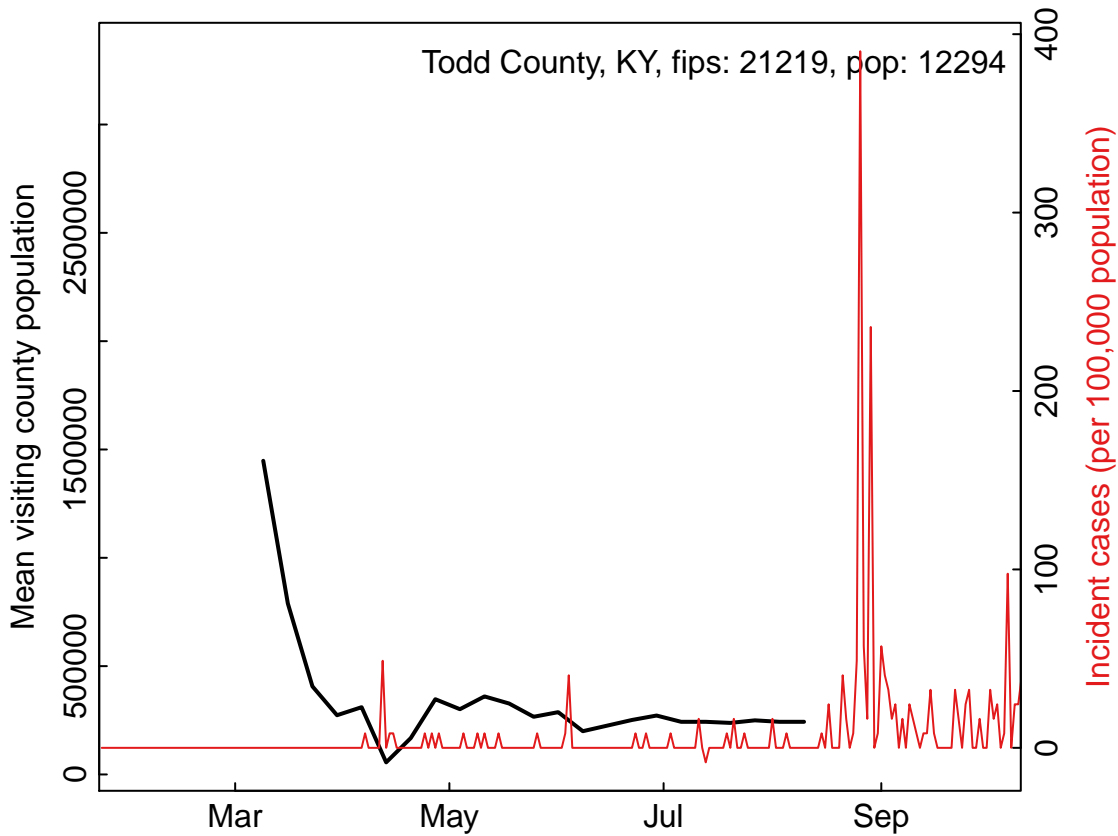

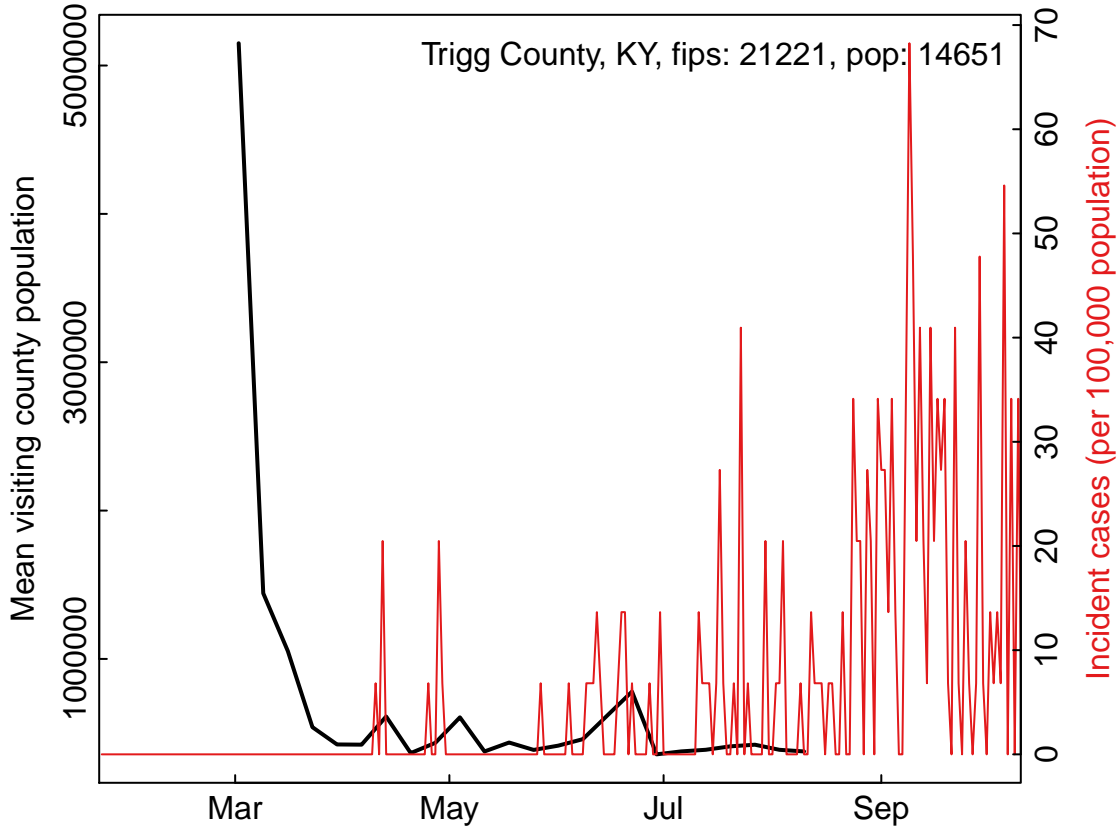

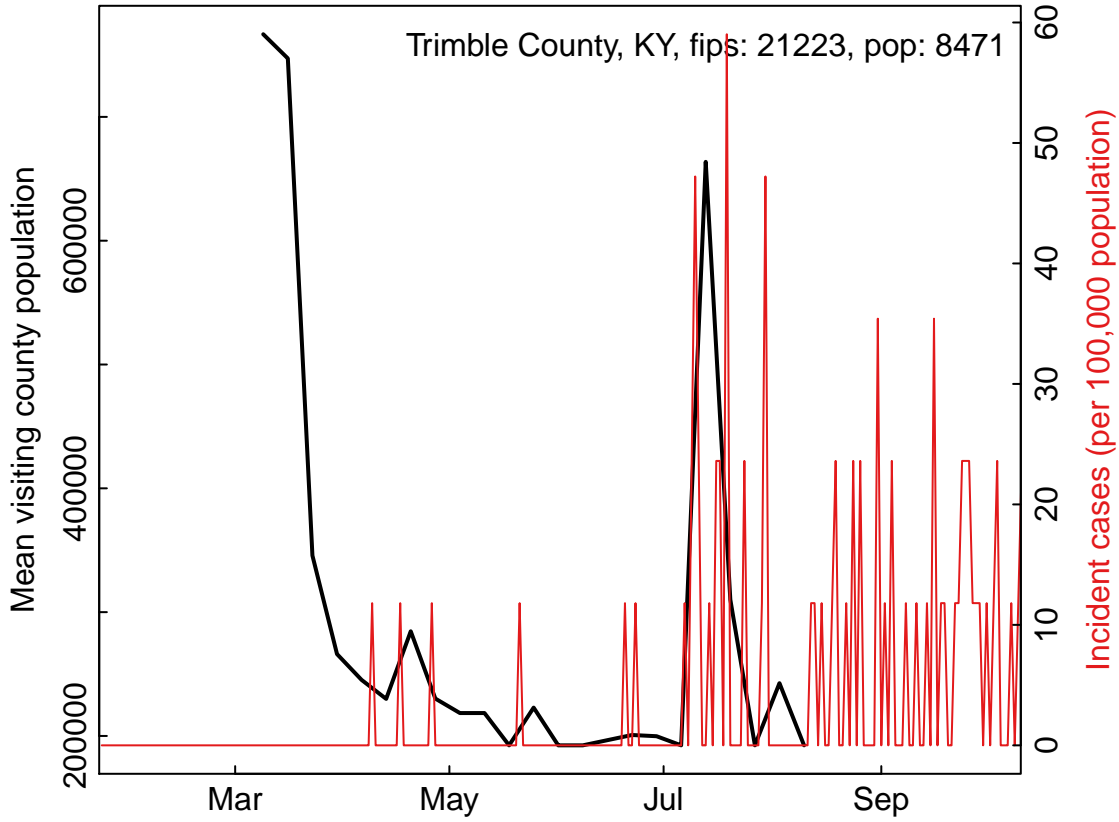

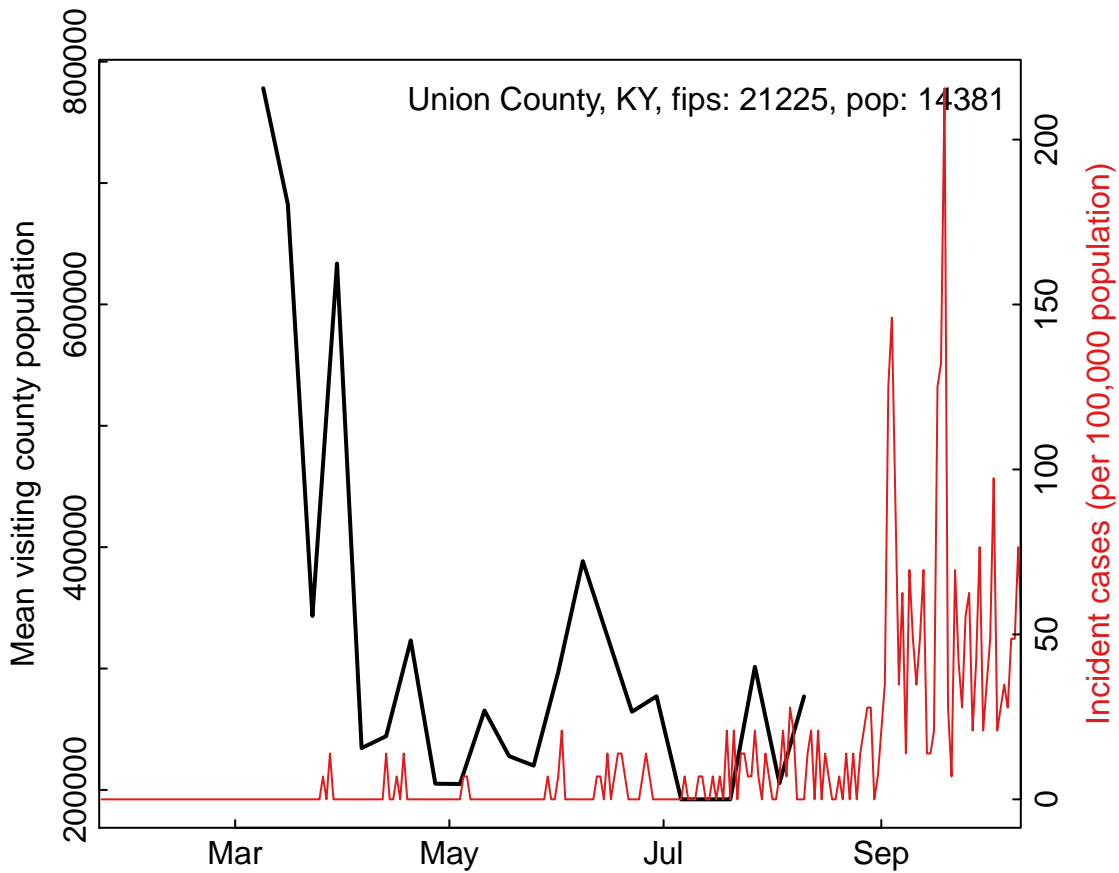

Warren County, KY, fips: 21227, pop: 132896

Mean visiting county population

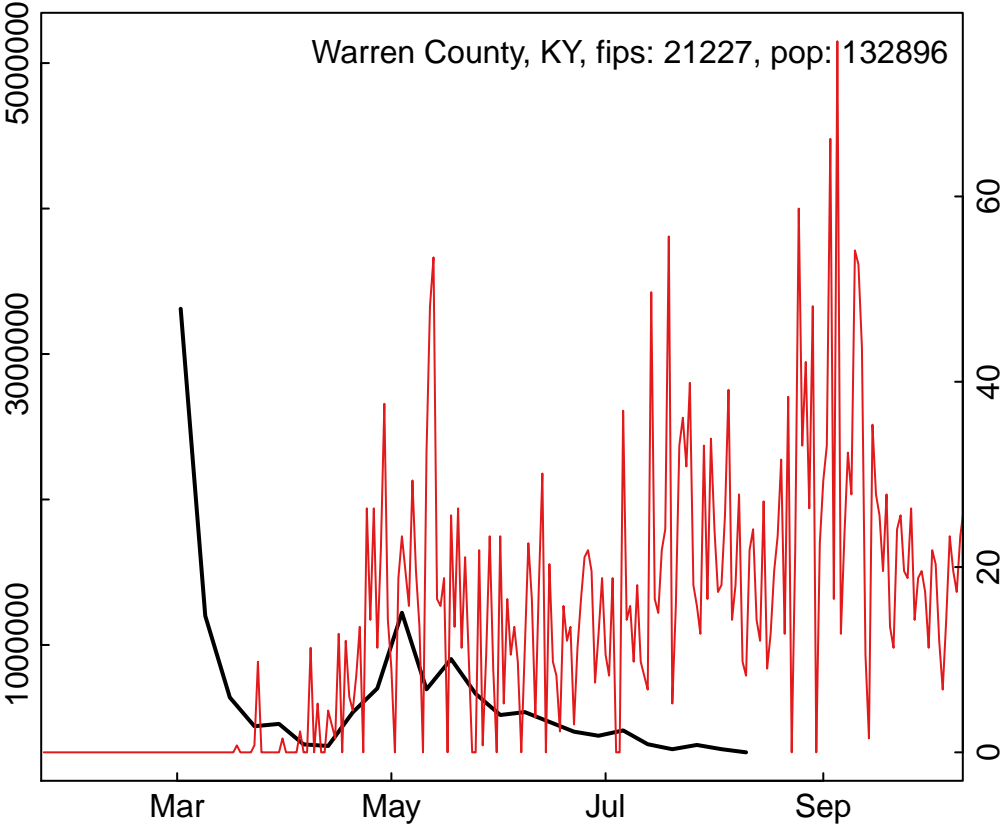

Incident cases (per 100,000 population)

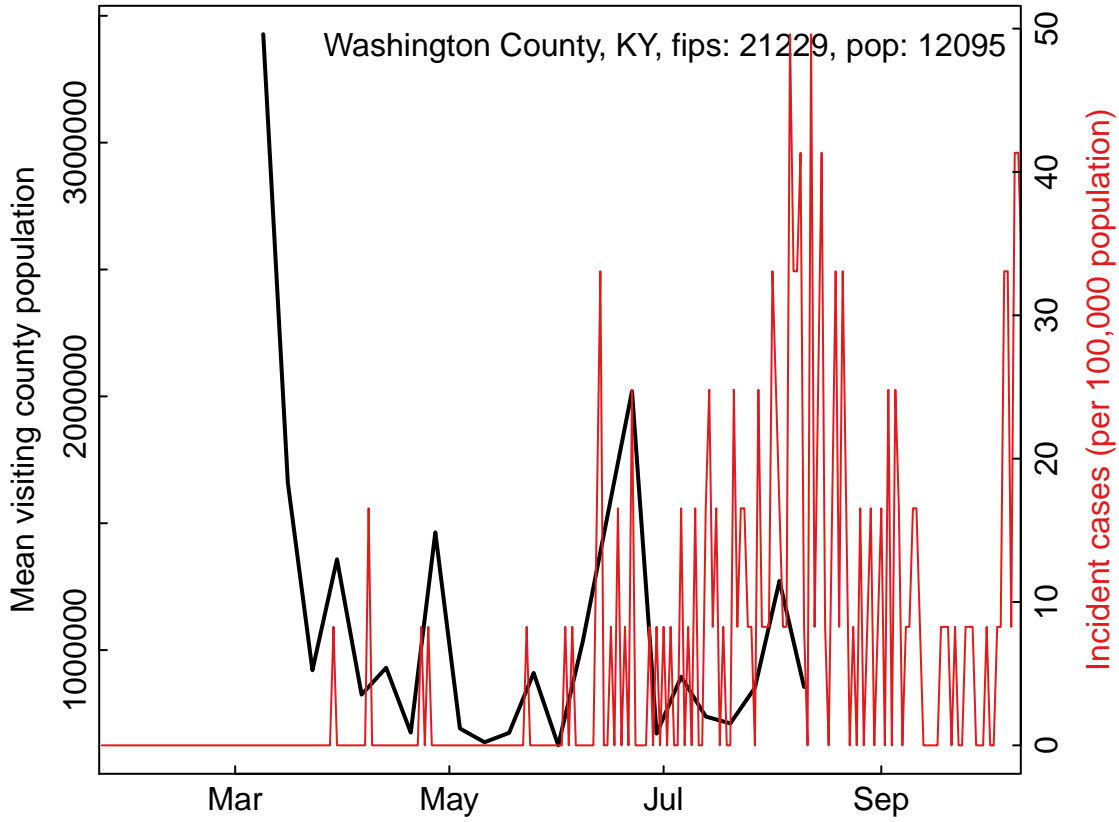



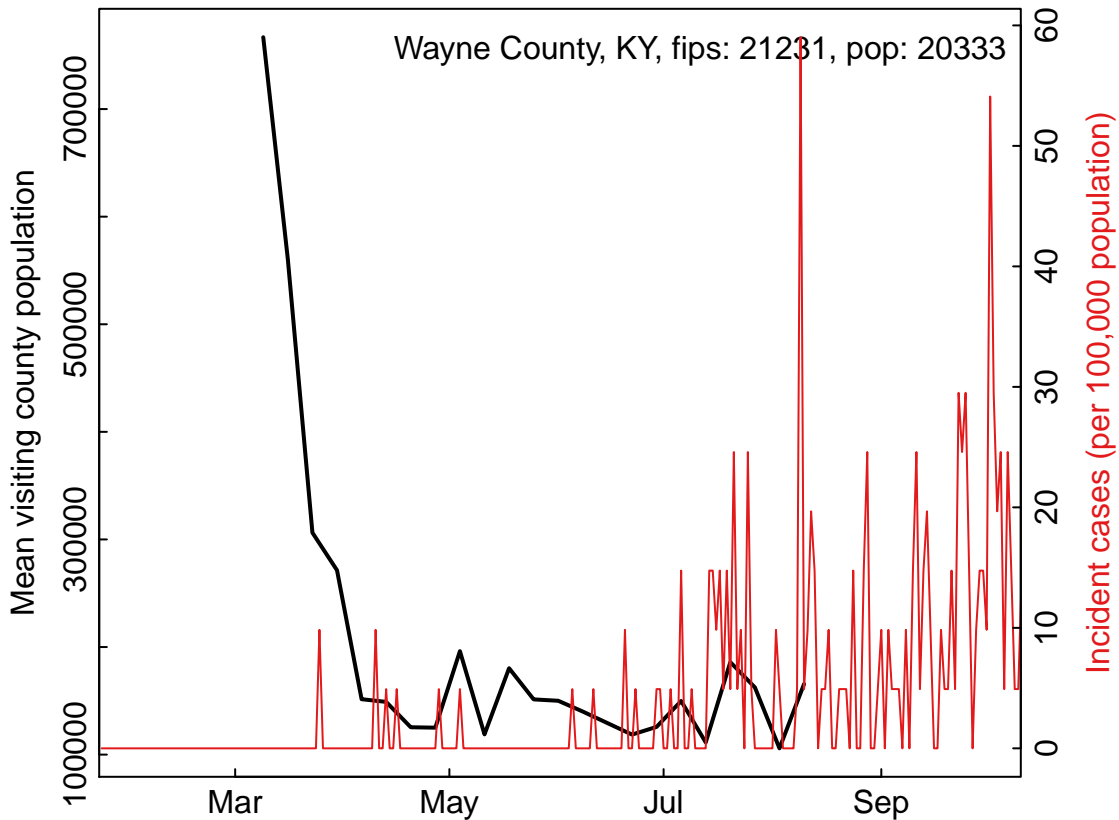

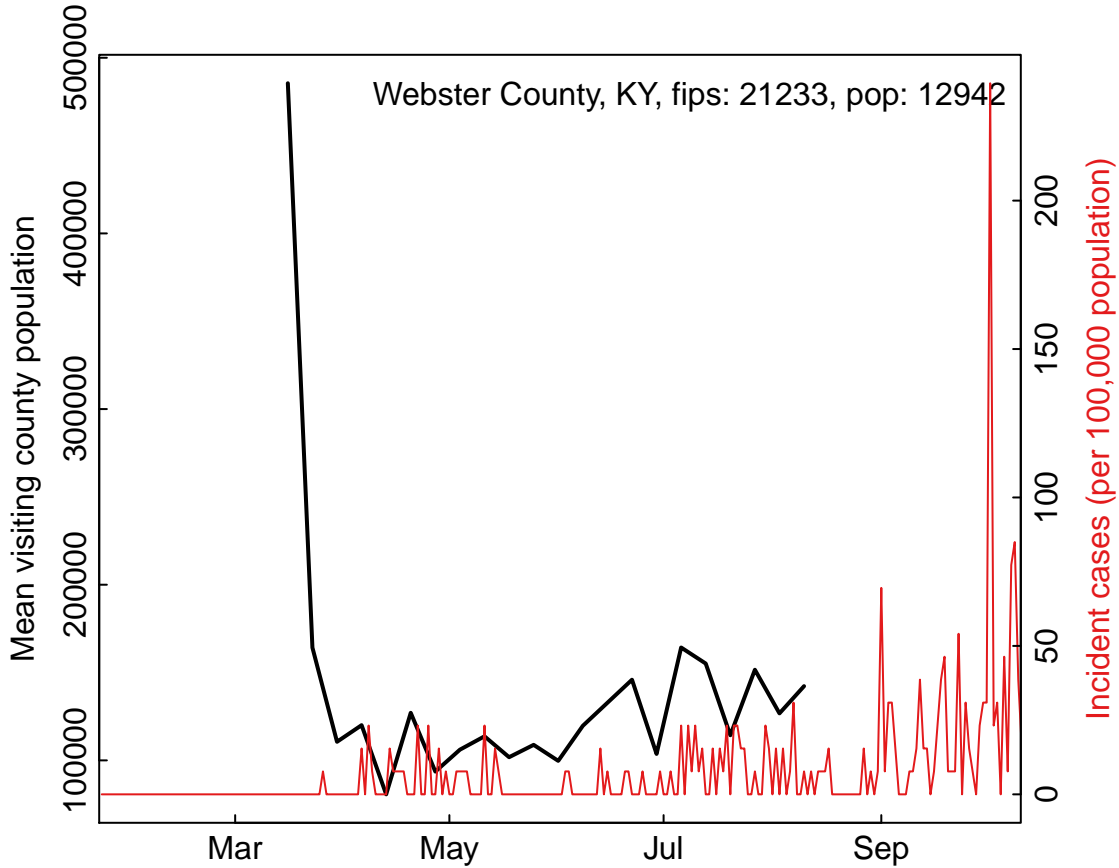

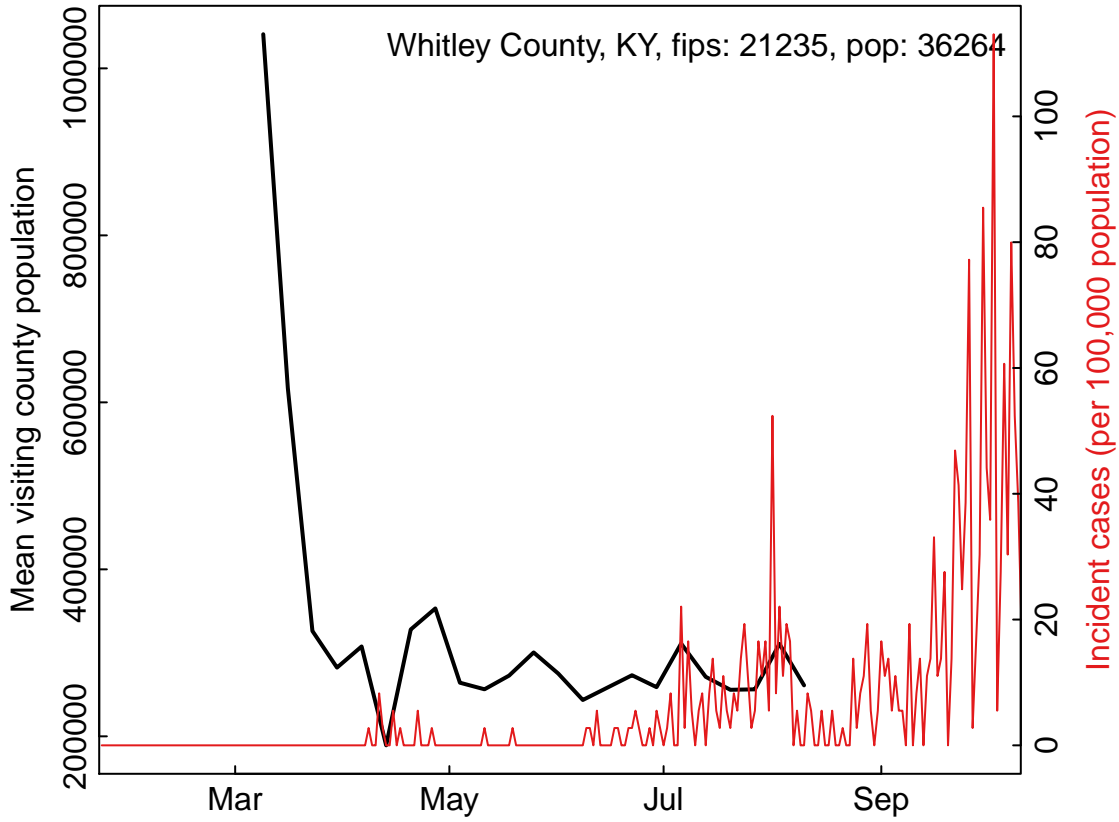

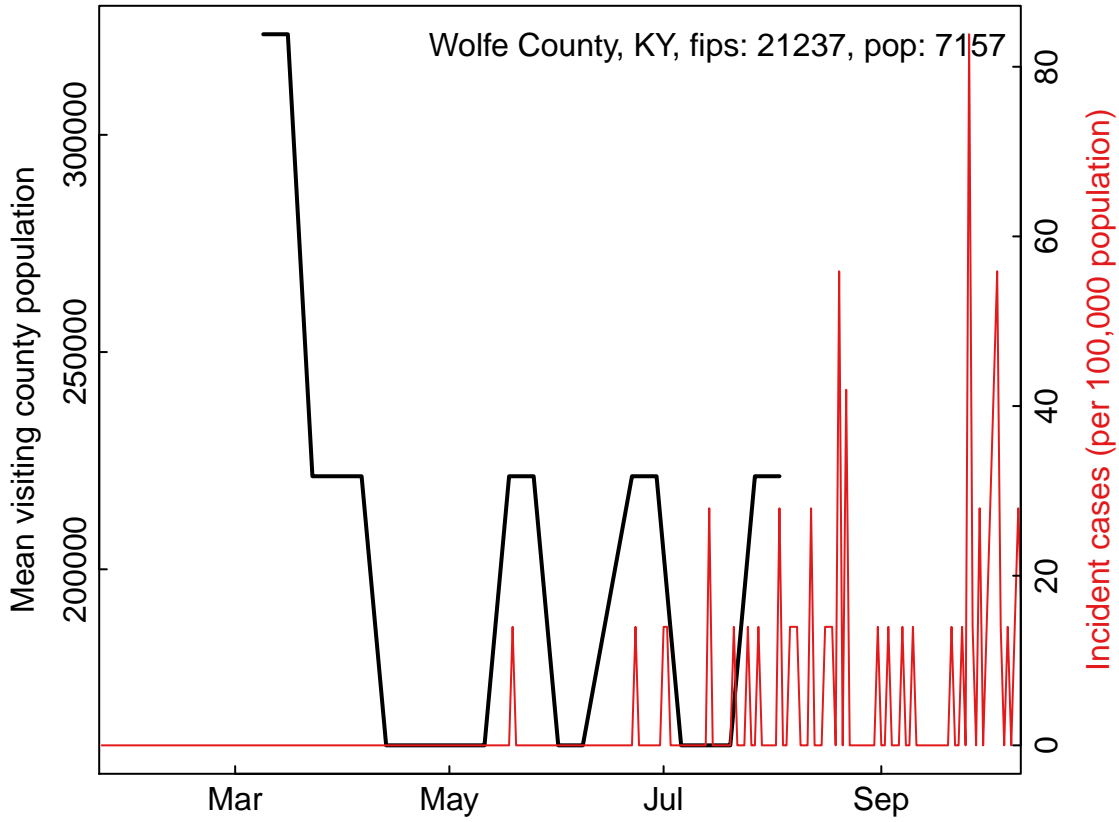

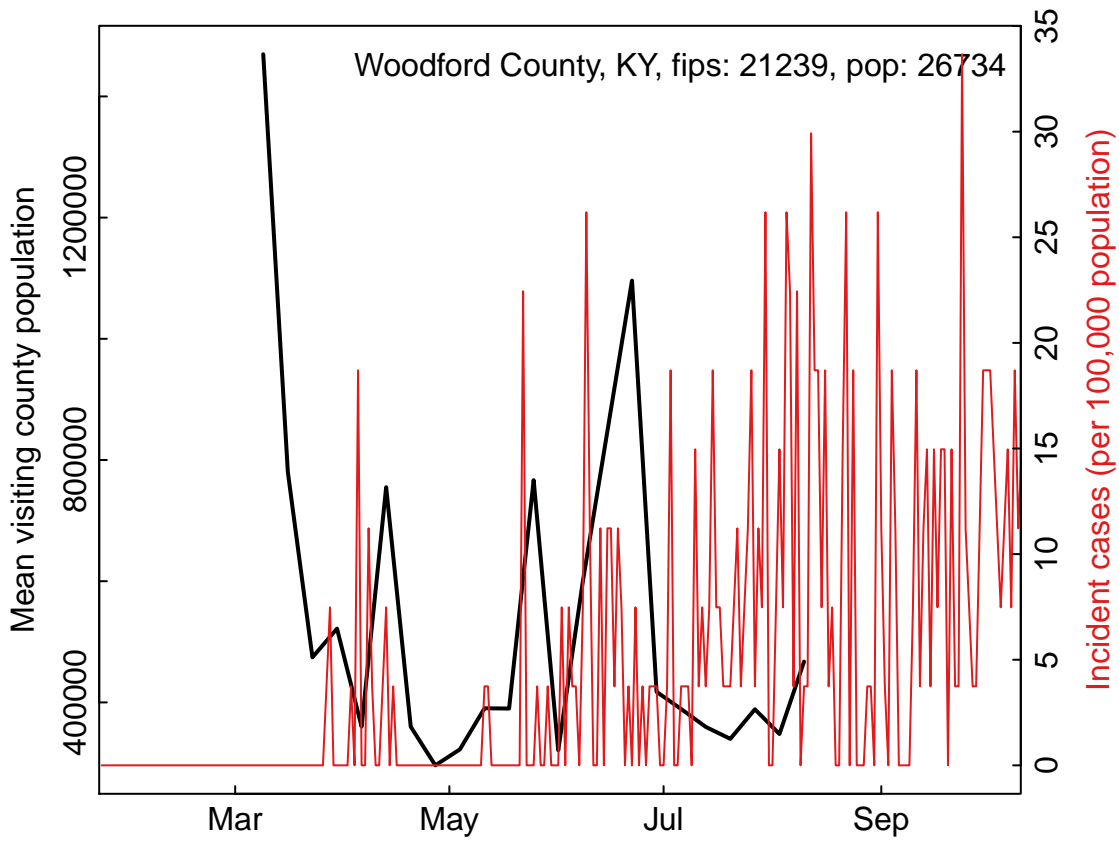

Acadia Parish, LA, fips: 22001, pop: 62045

Mean visiting county population

1000000  
600000  
200000  
0

Mar

May

Jul

Sep

200  
150  
100  
50  
0

Incident cases (per 100,000 population)

0

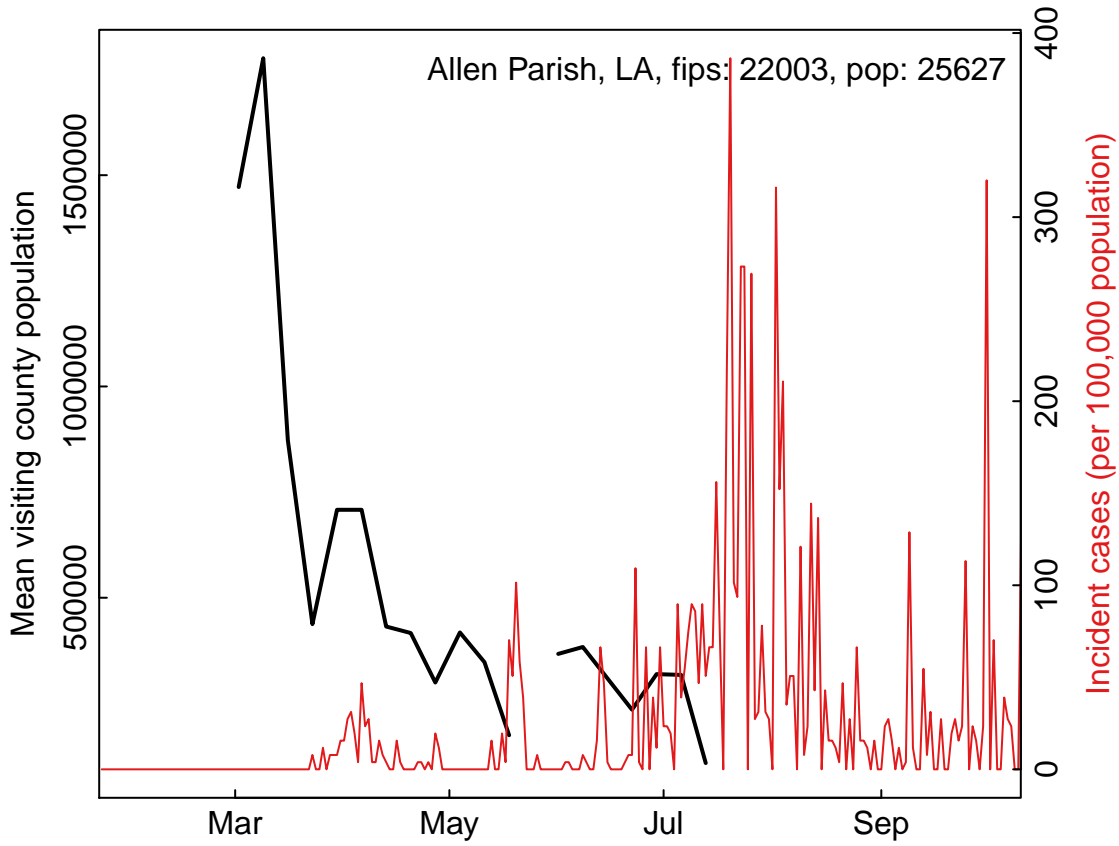

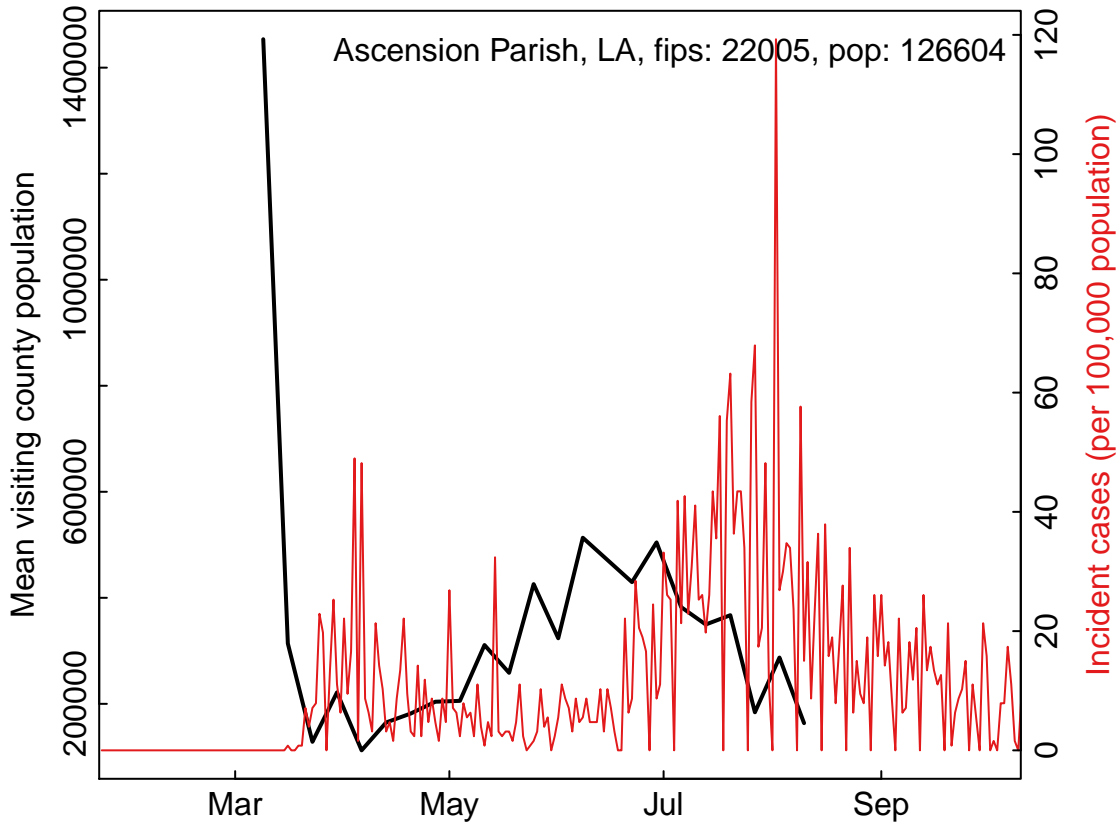



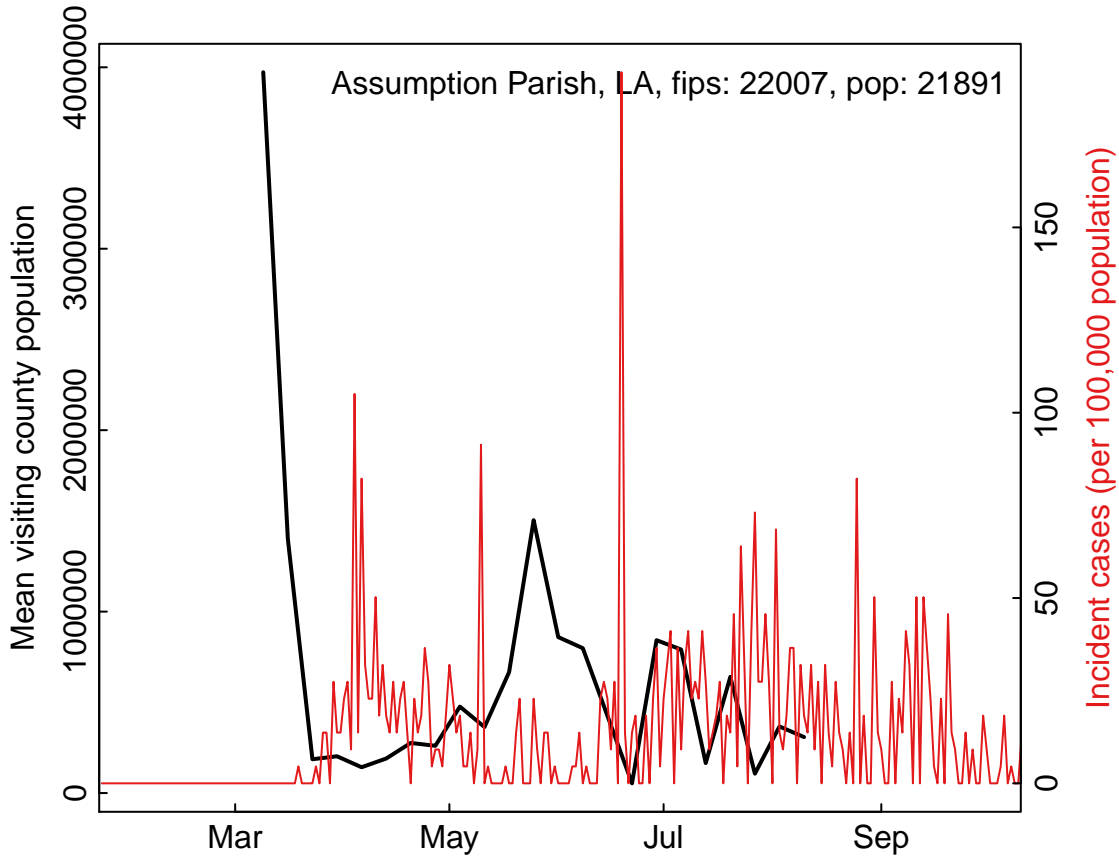

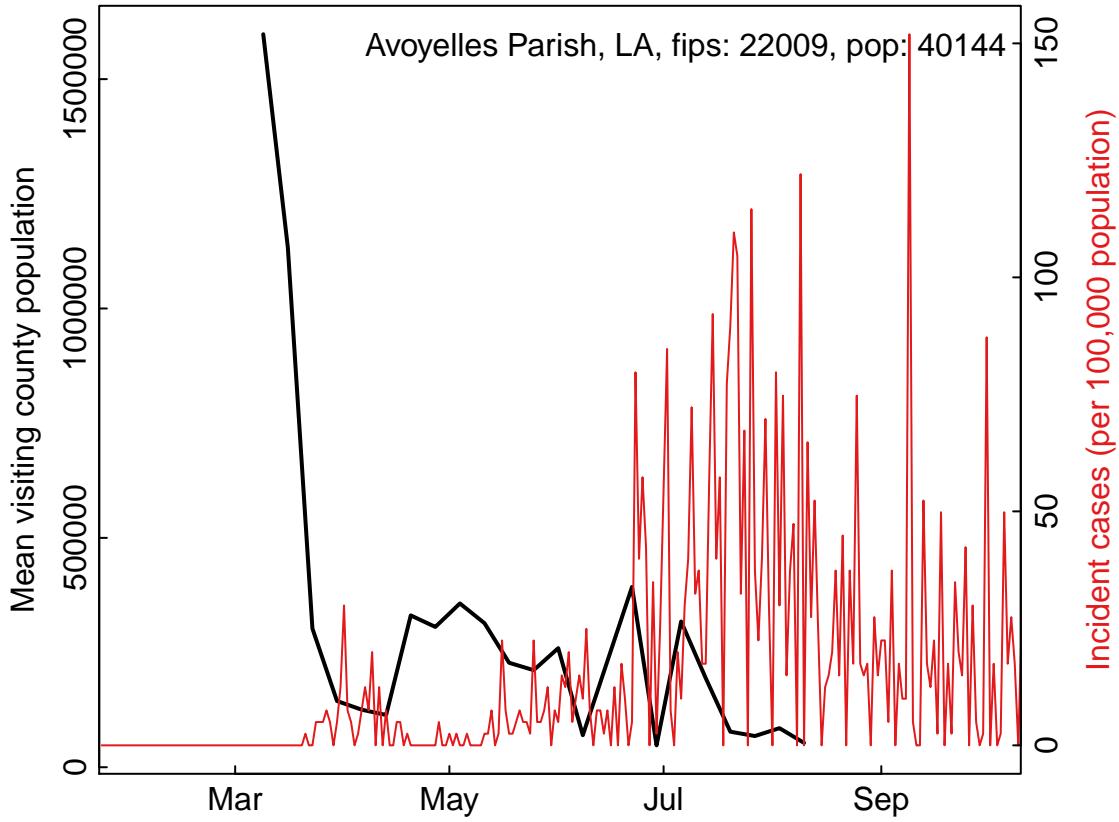

Beauregard Parish, LA, fips: 22011, pop: 37497

Mean visiting county population

2500000  
1500000  
500000  
0

Incident cases (per 100,000 population)

120  
100  
80  
60  
40  
20  
0

Mar

May

Jul

Sep

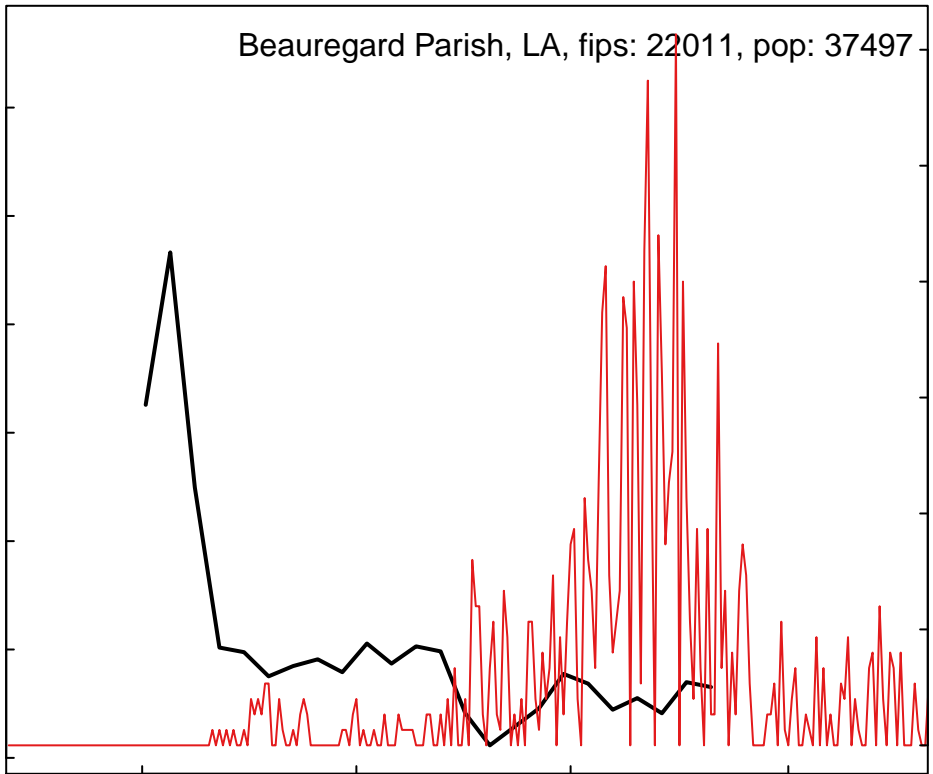

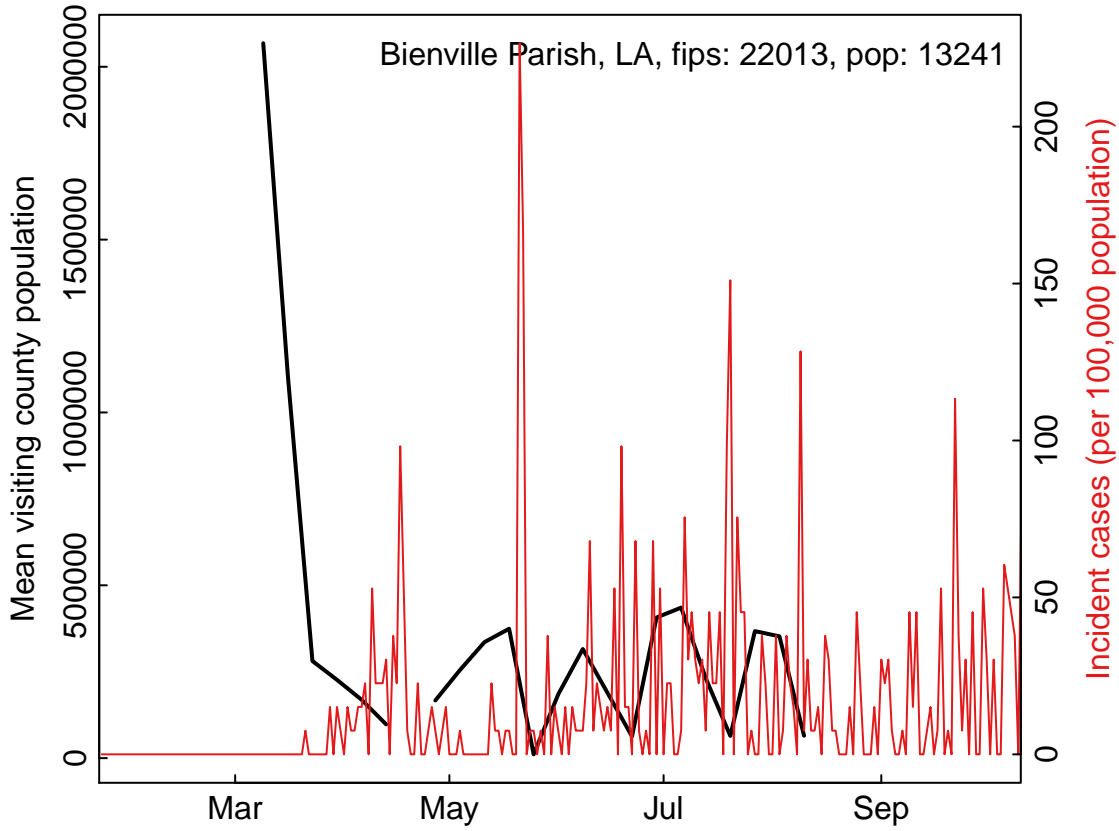

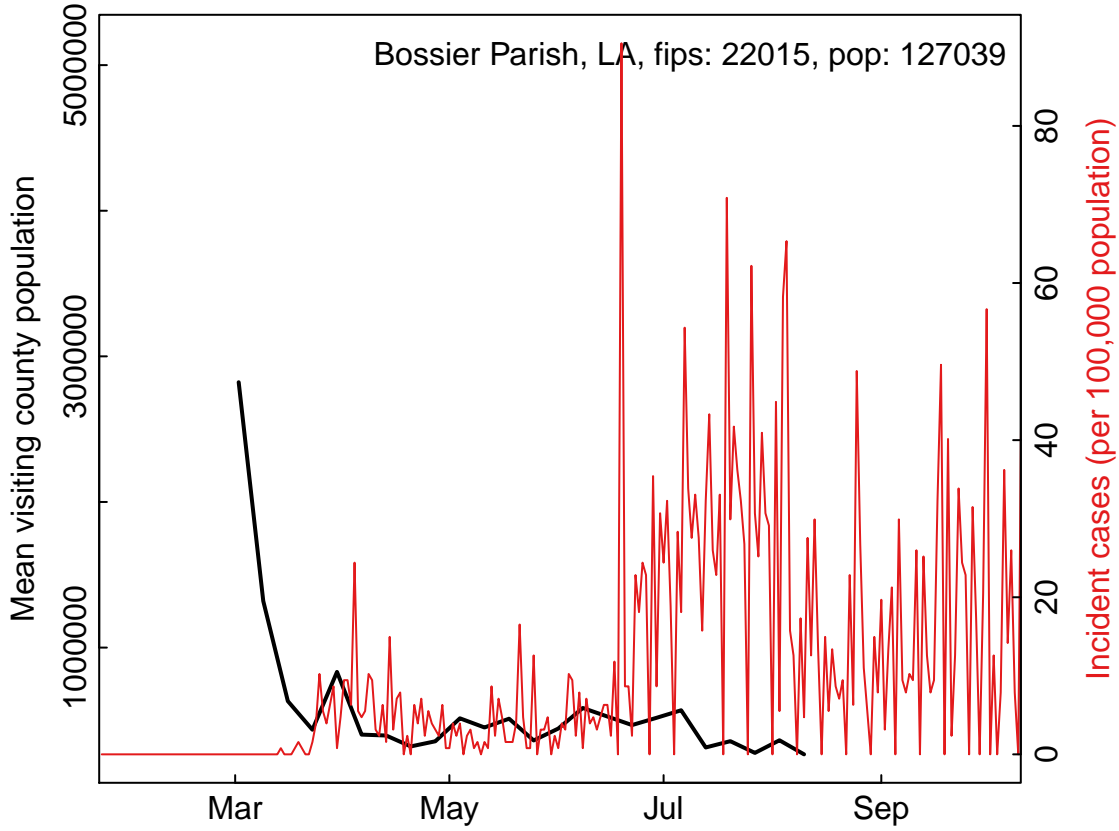

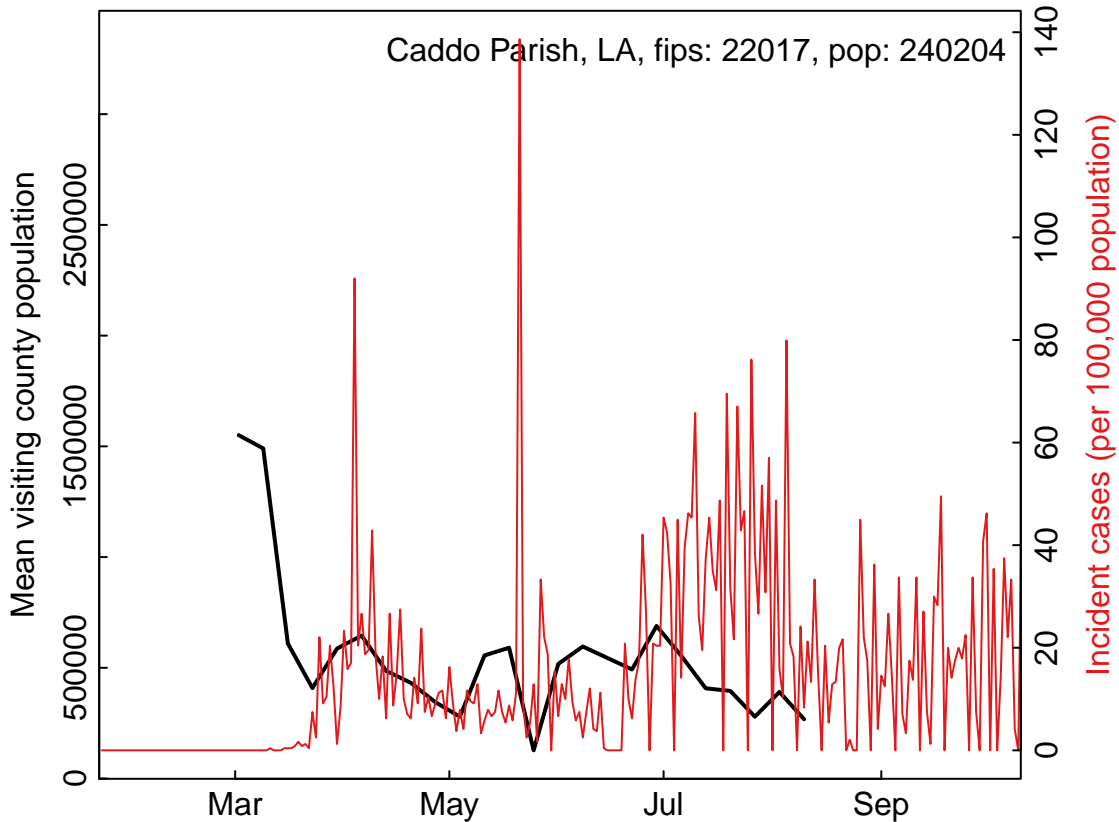

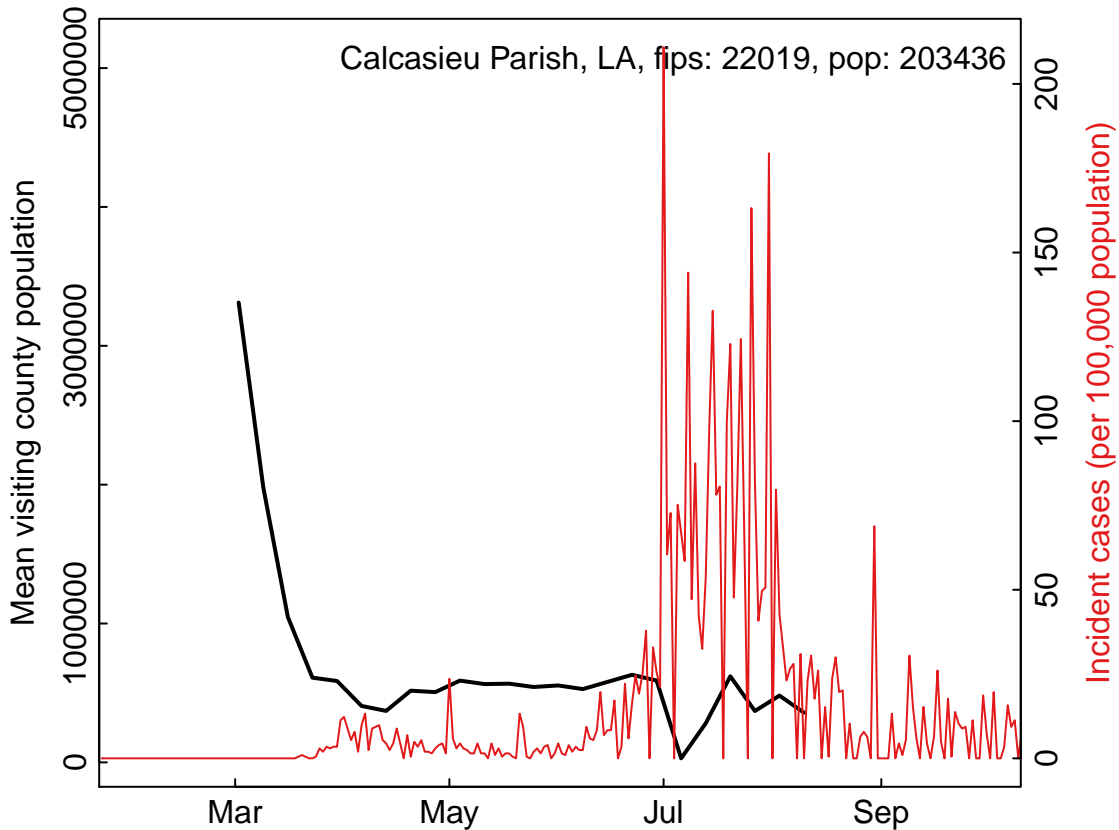

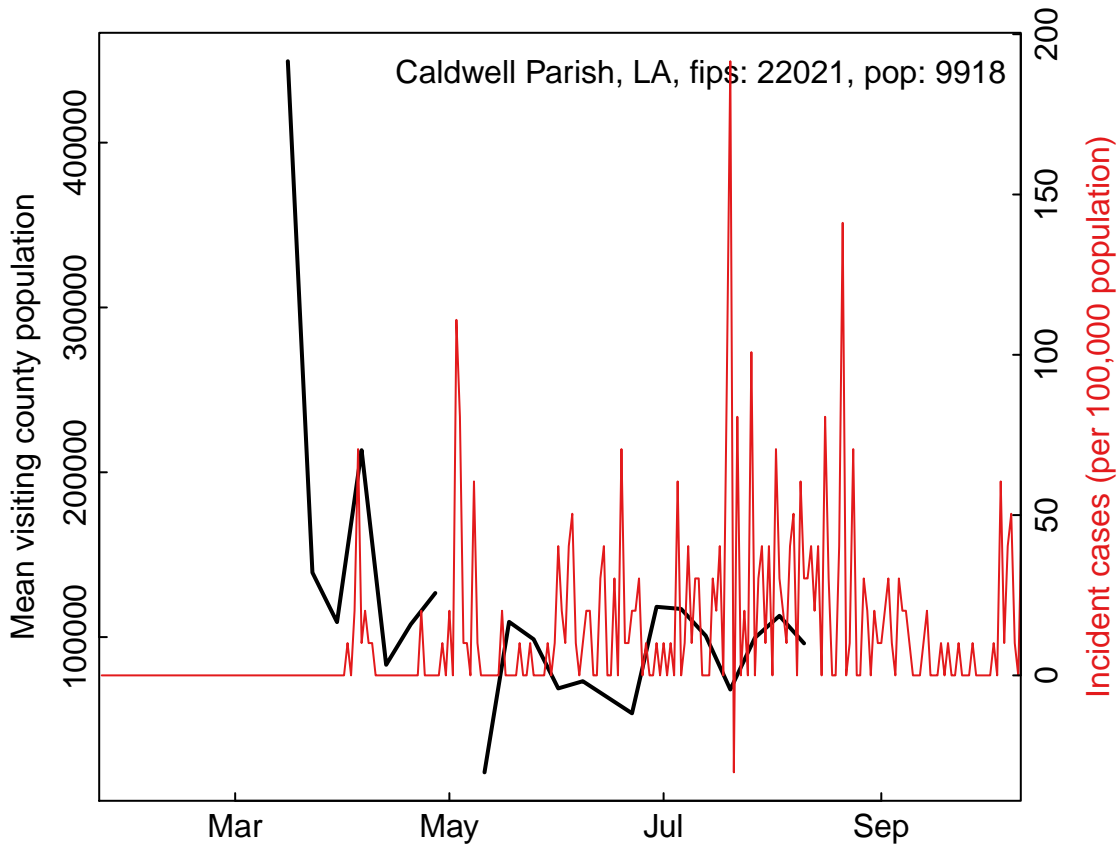



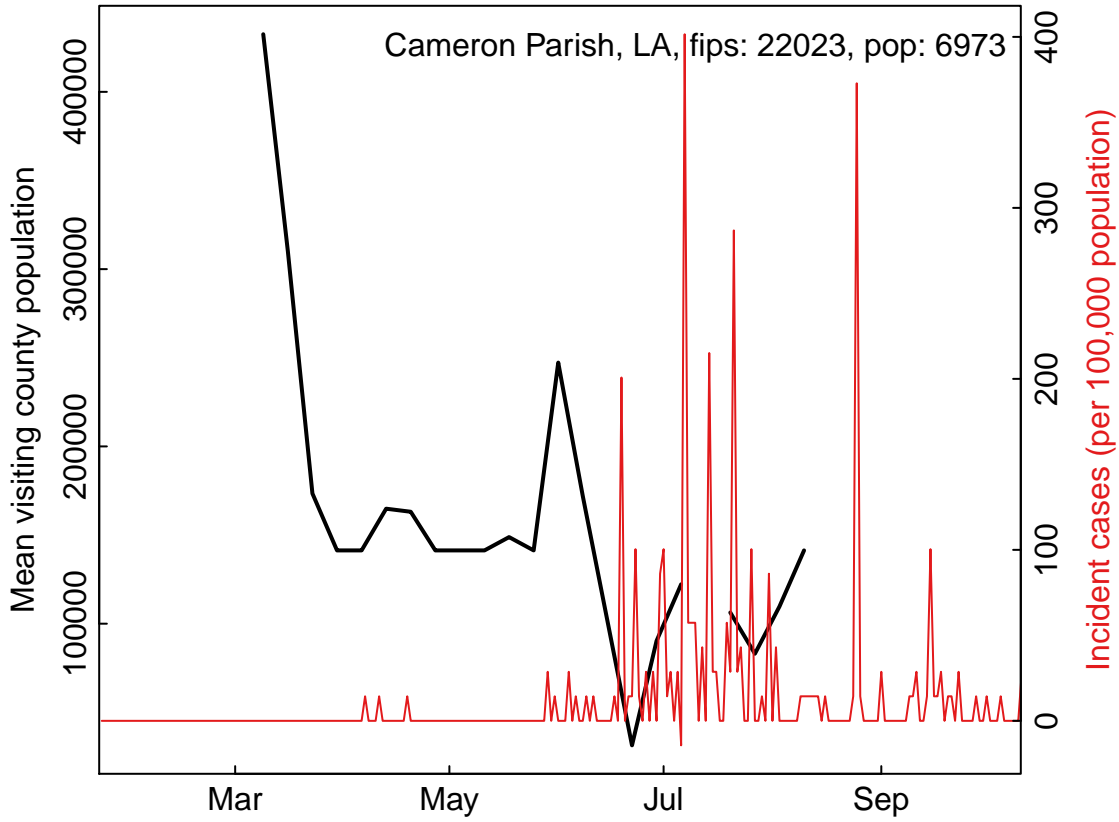

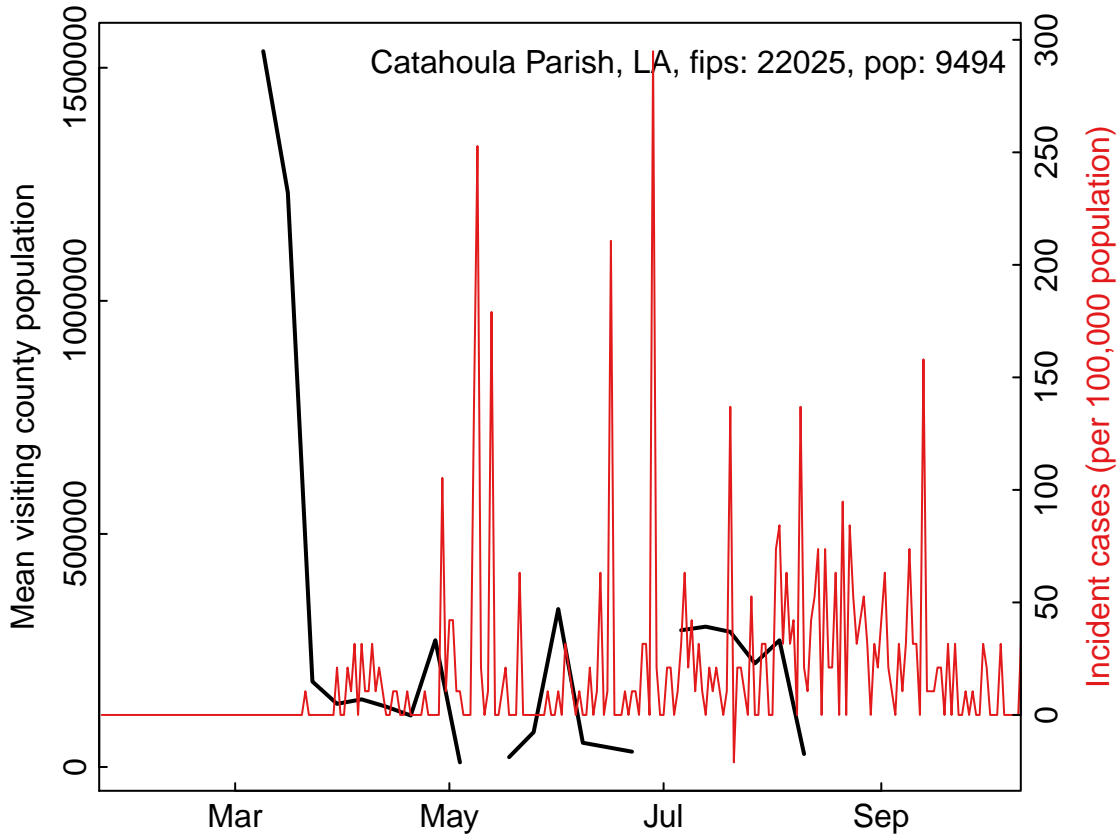

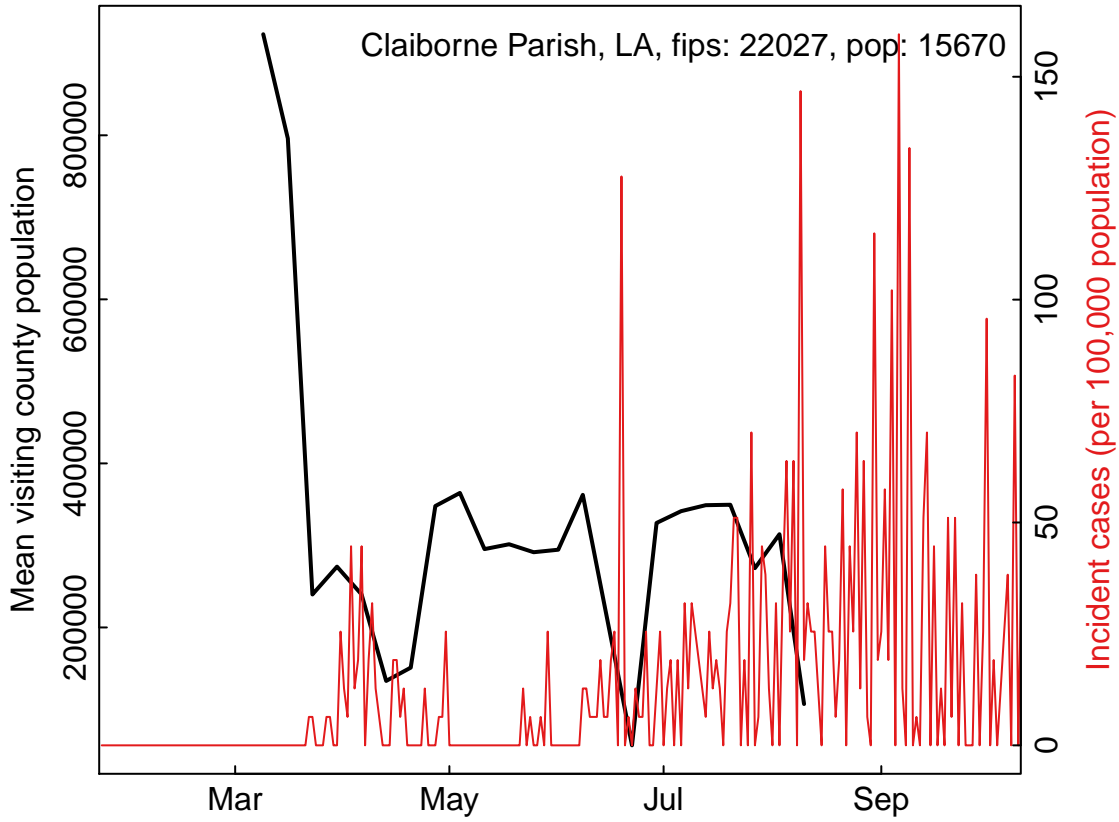

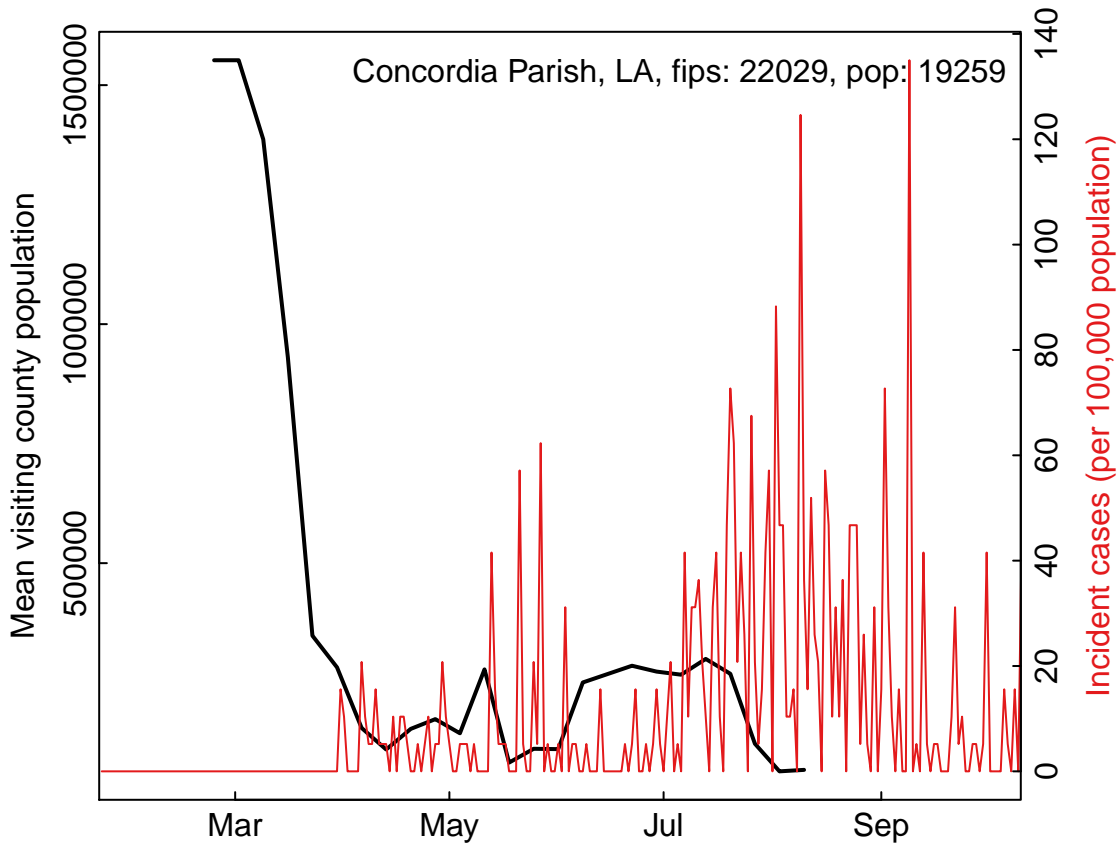

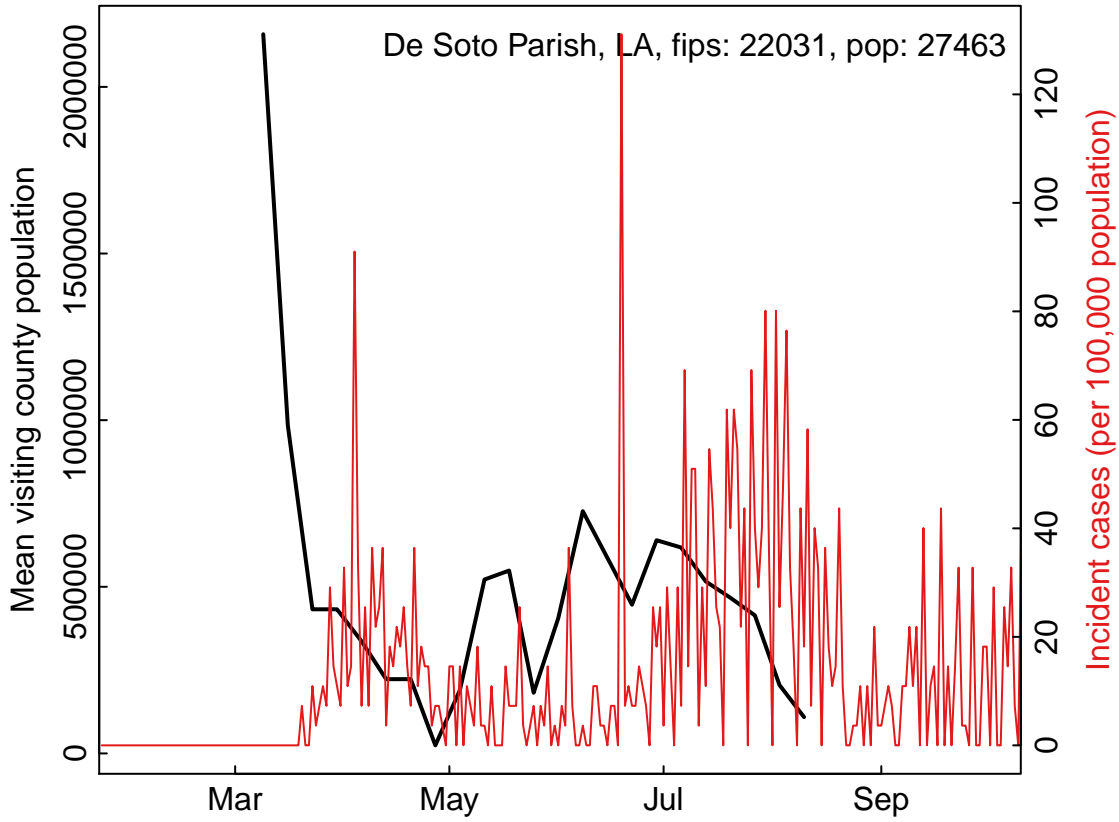

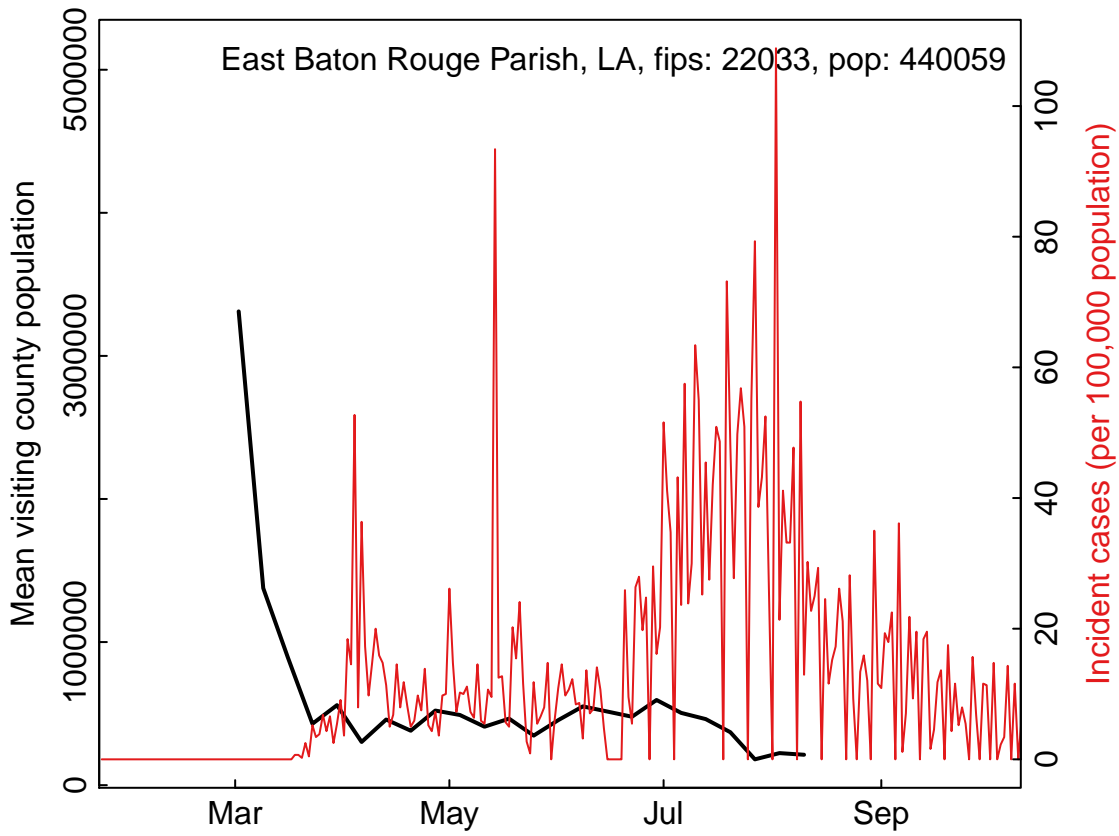

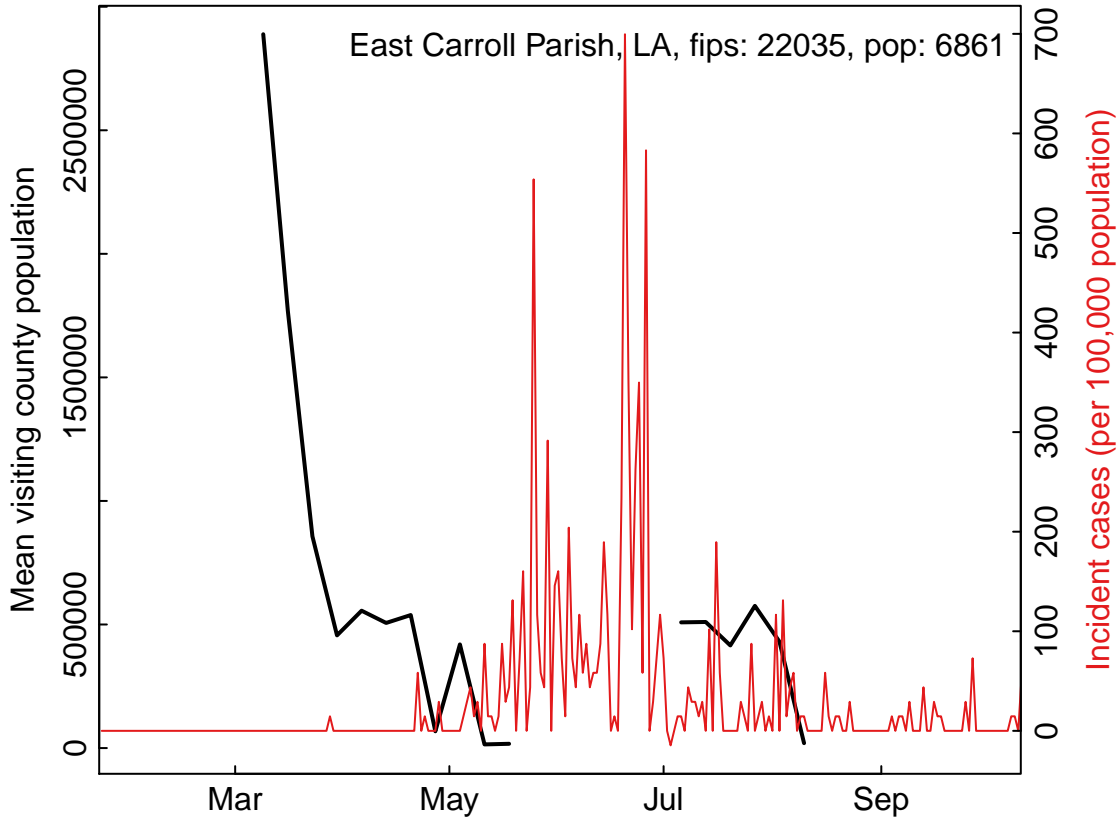

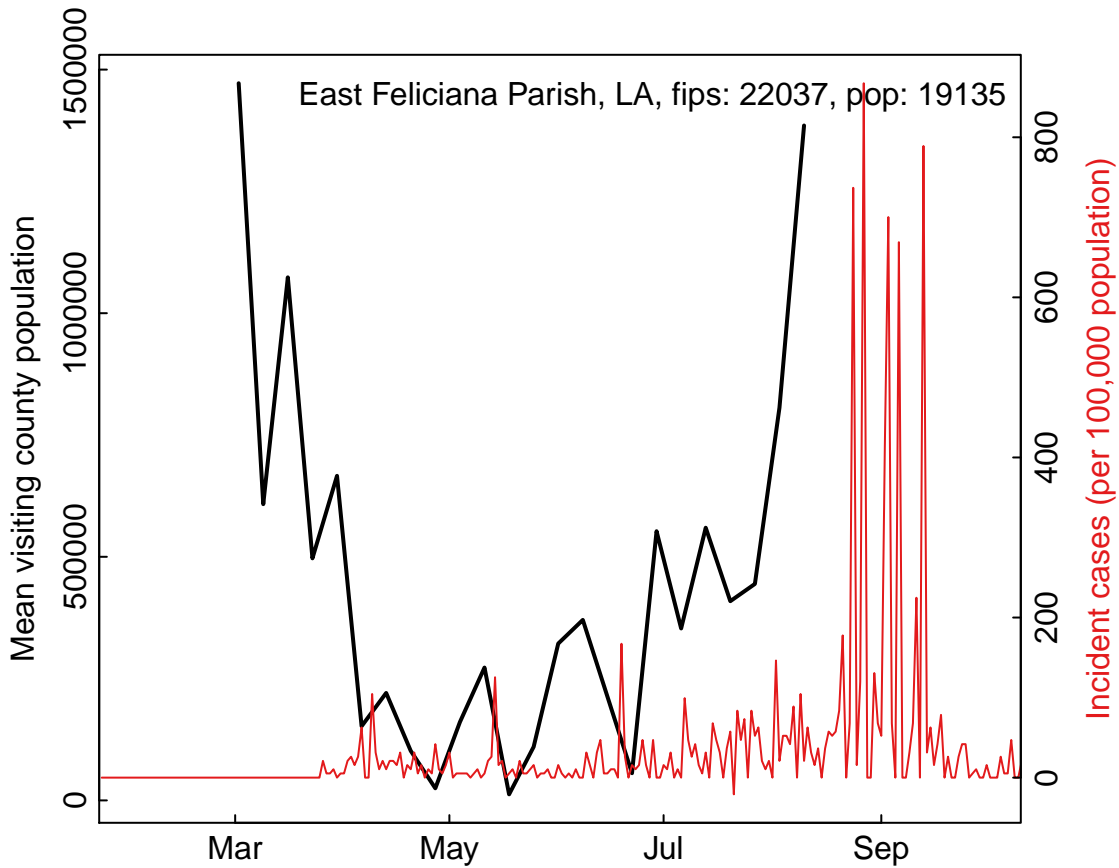



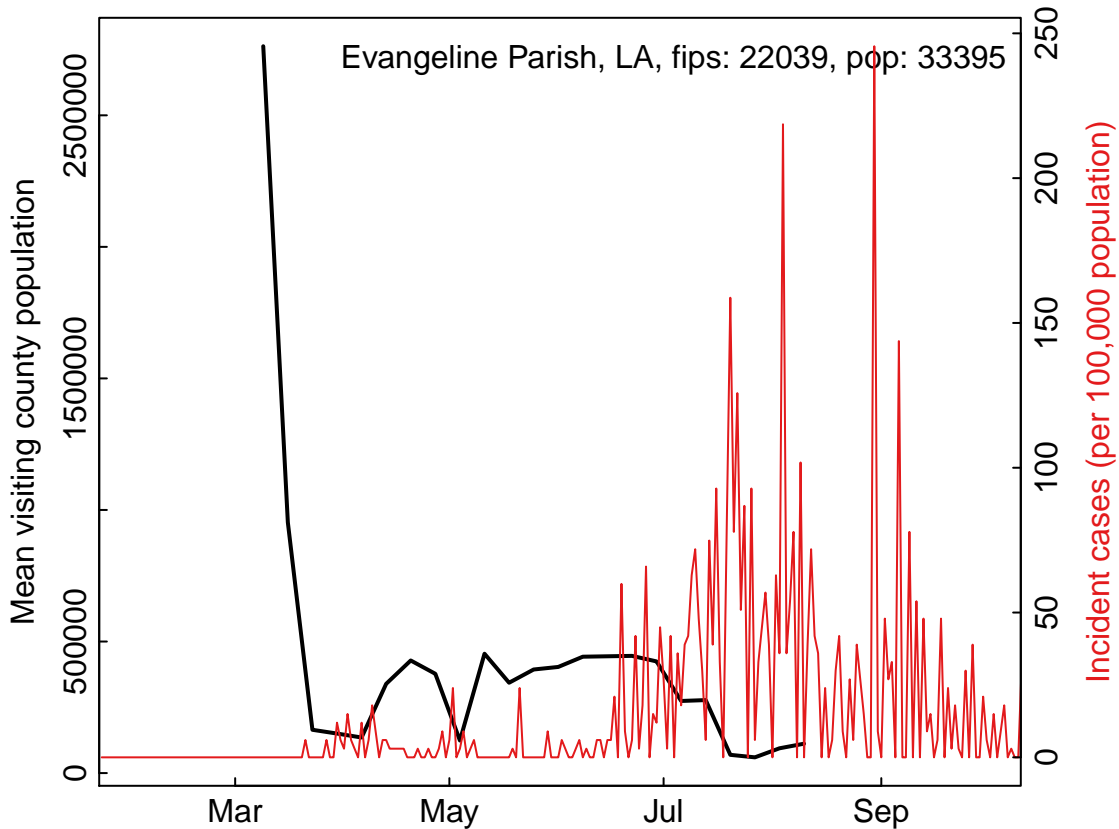

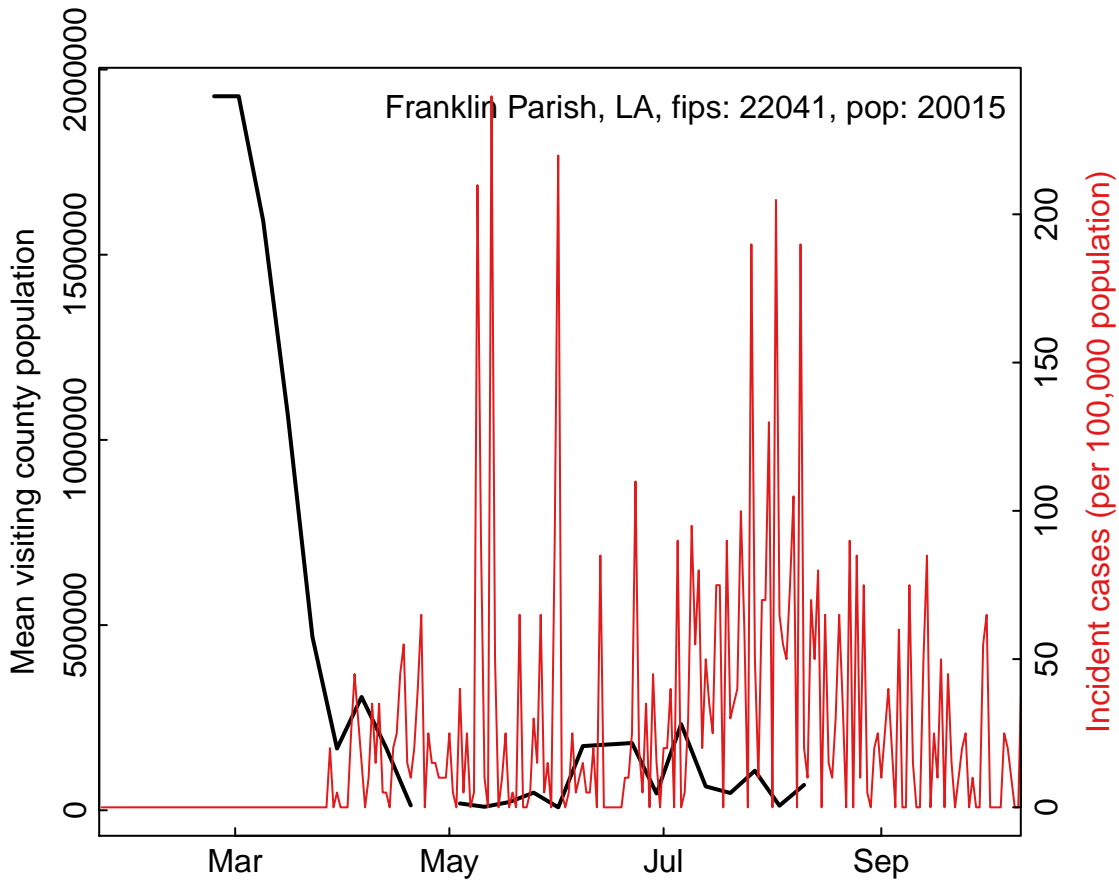

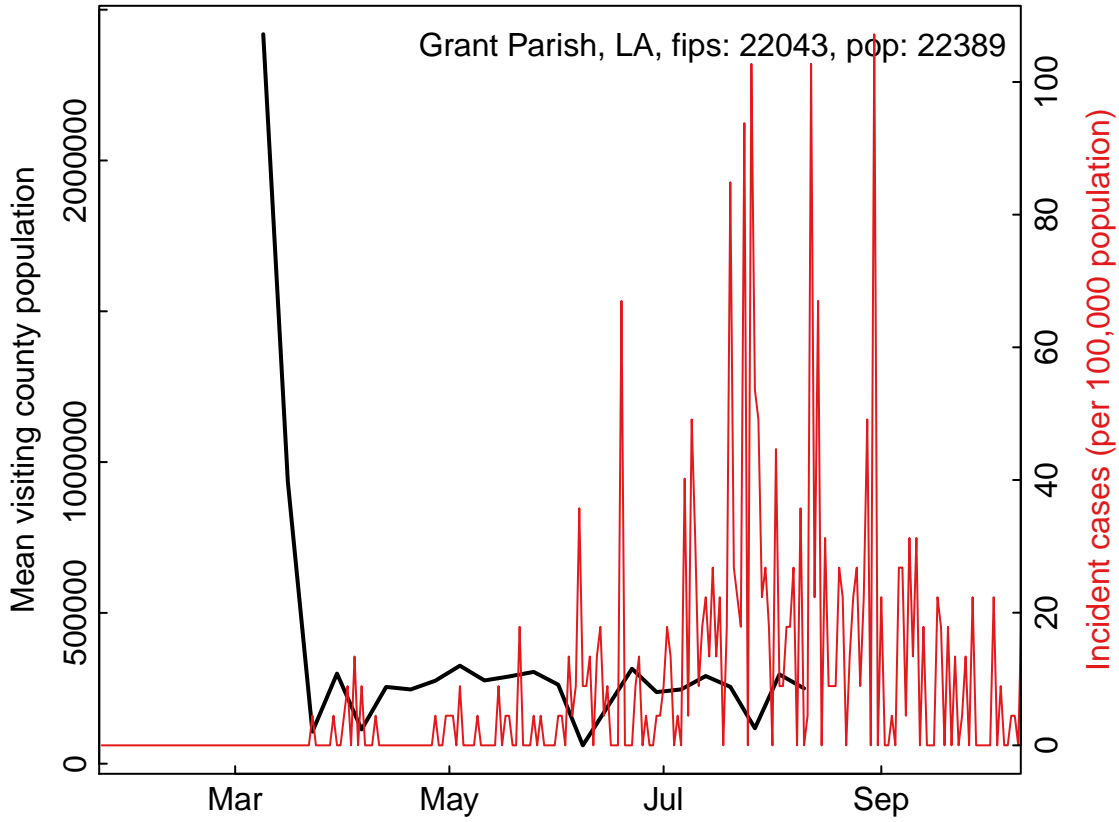

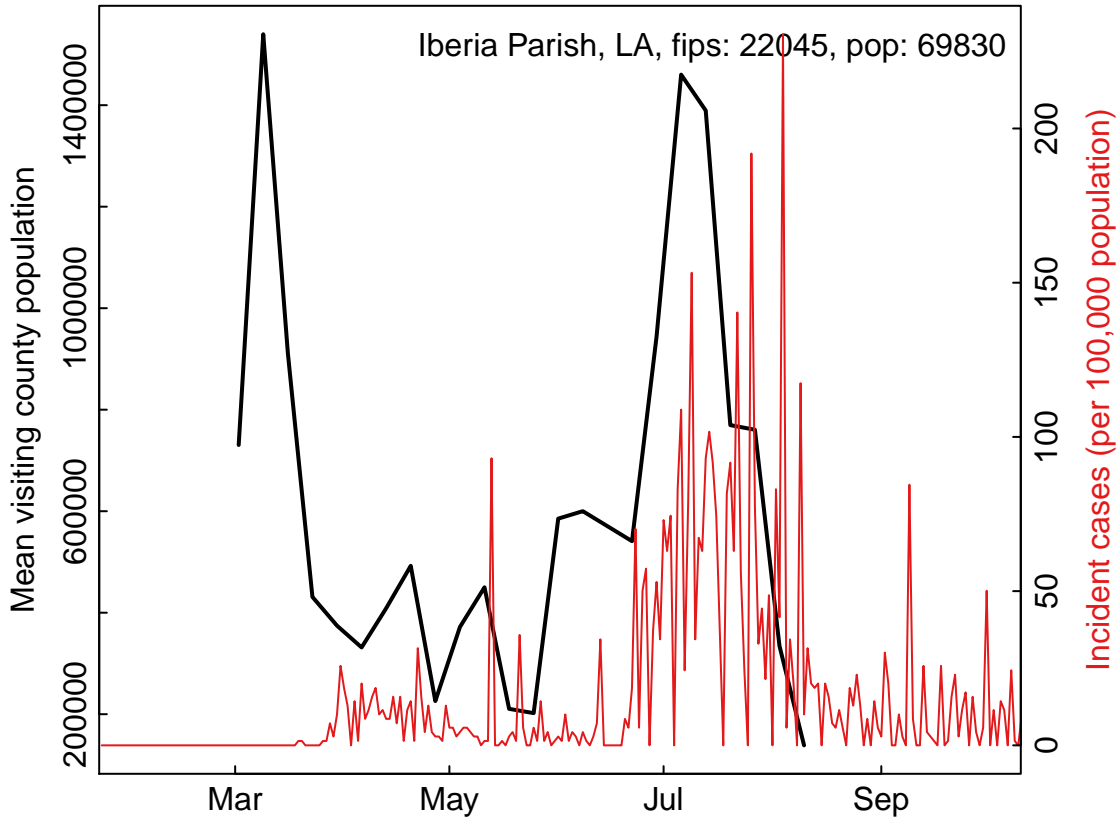

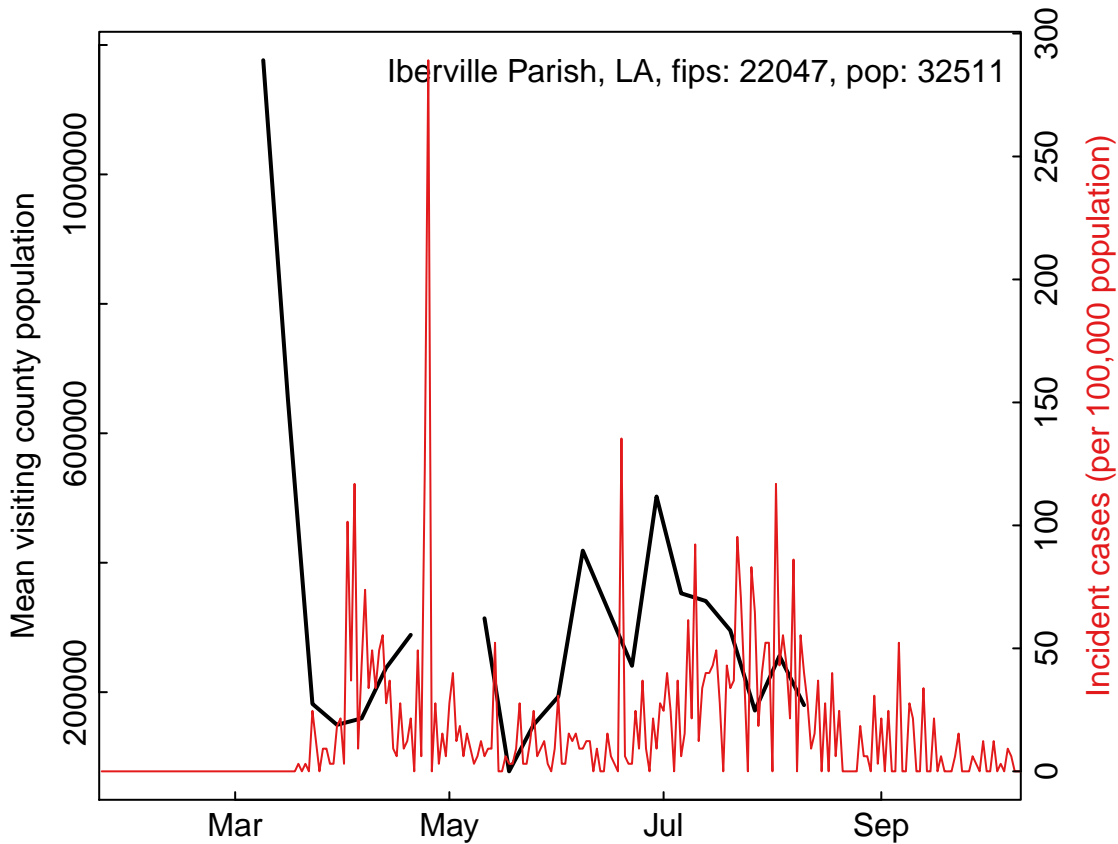

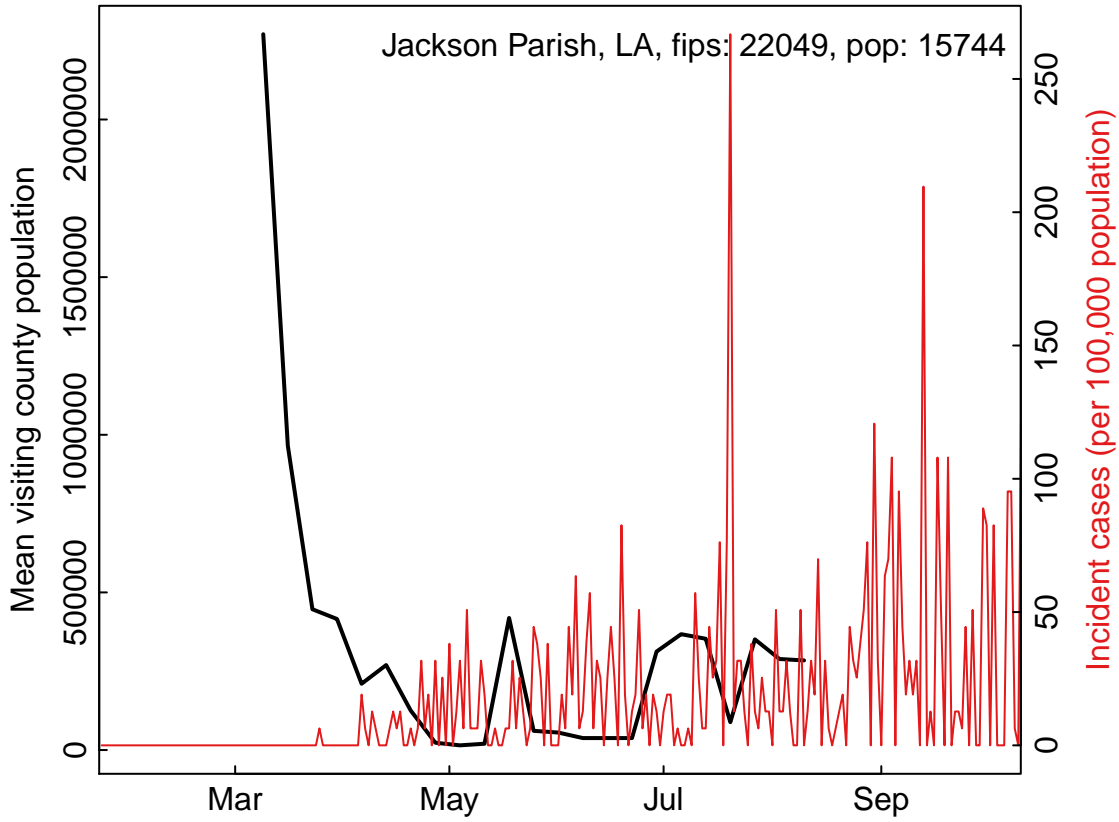

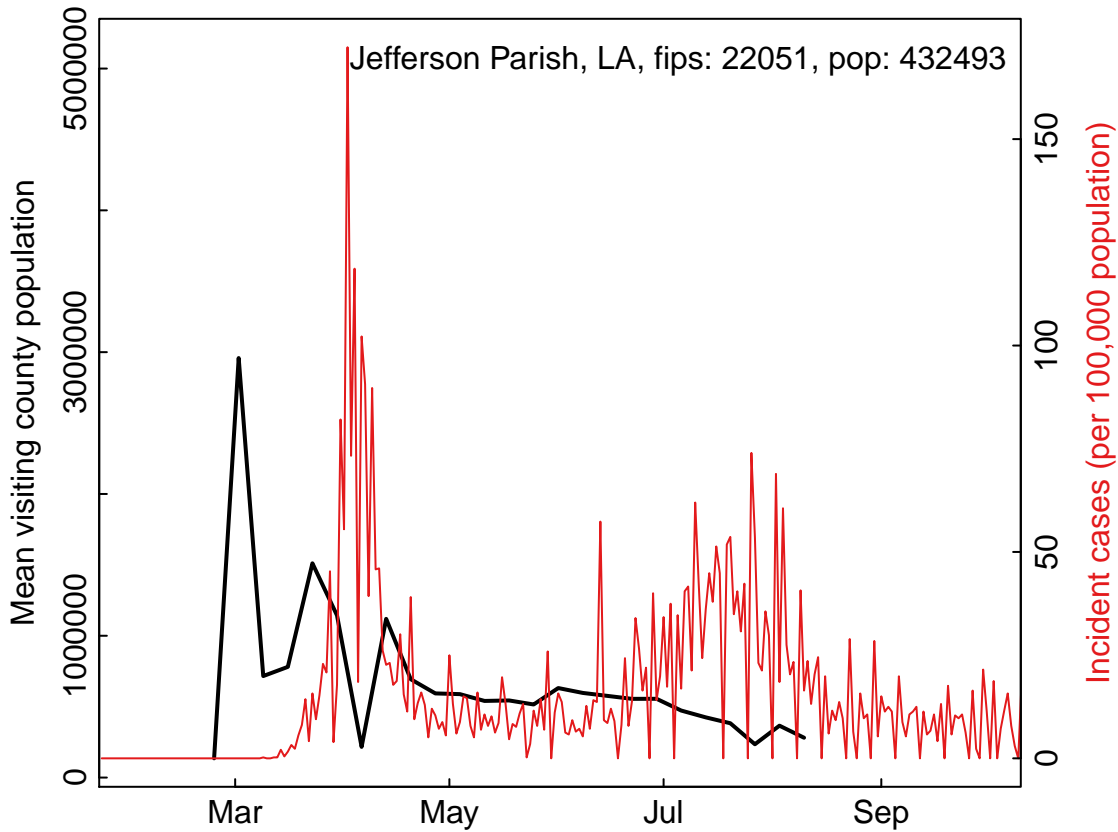

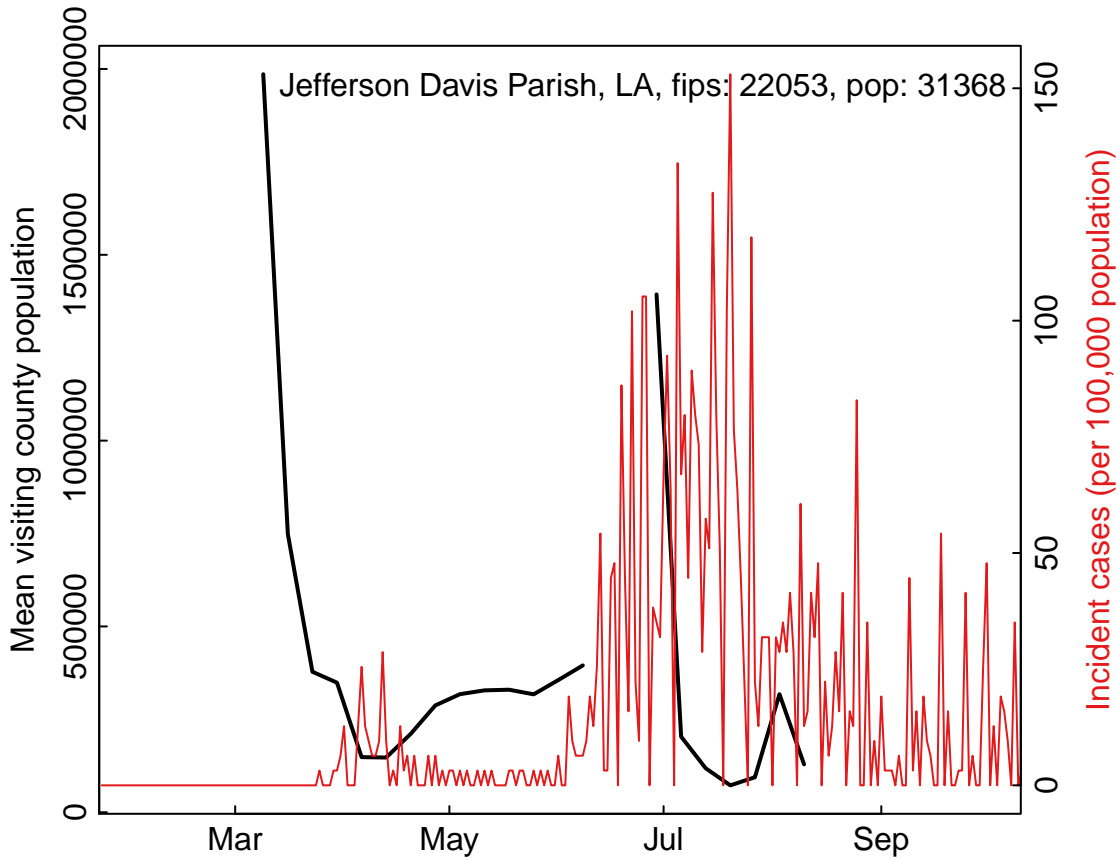



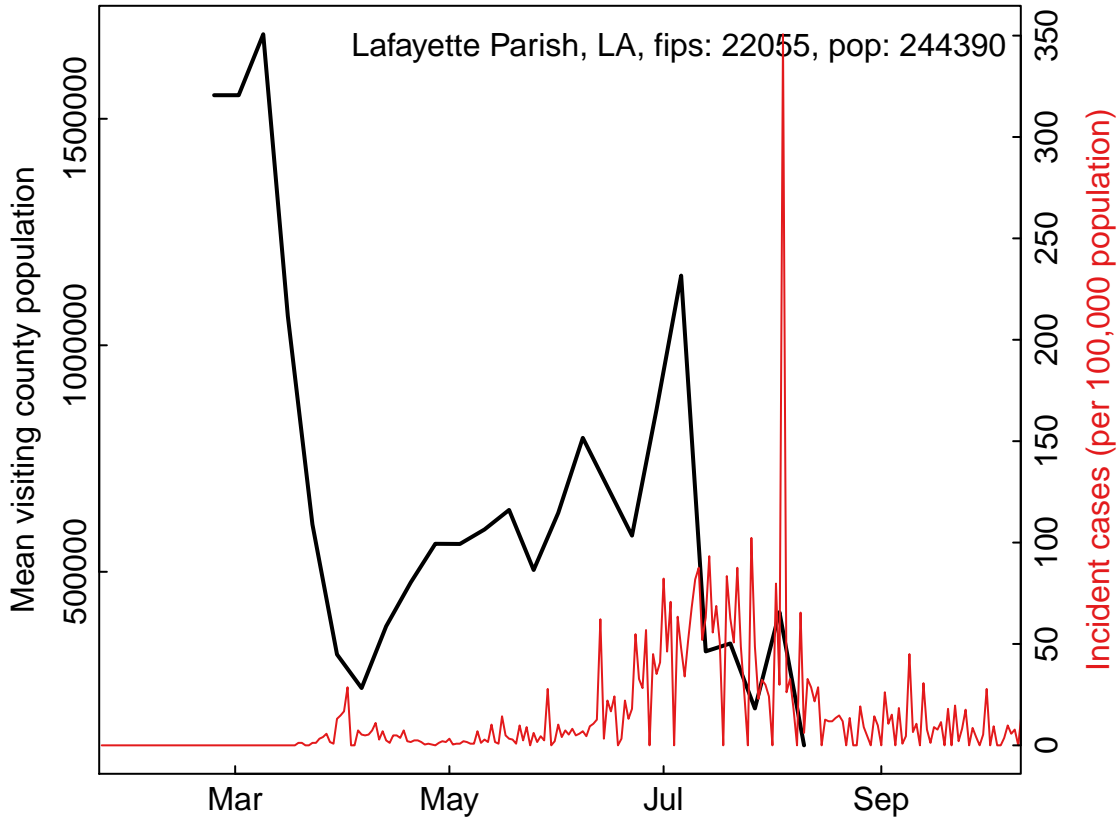

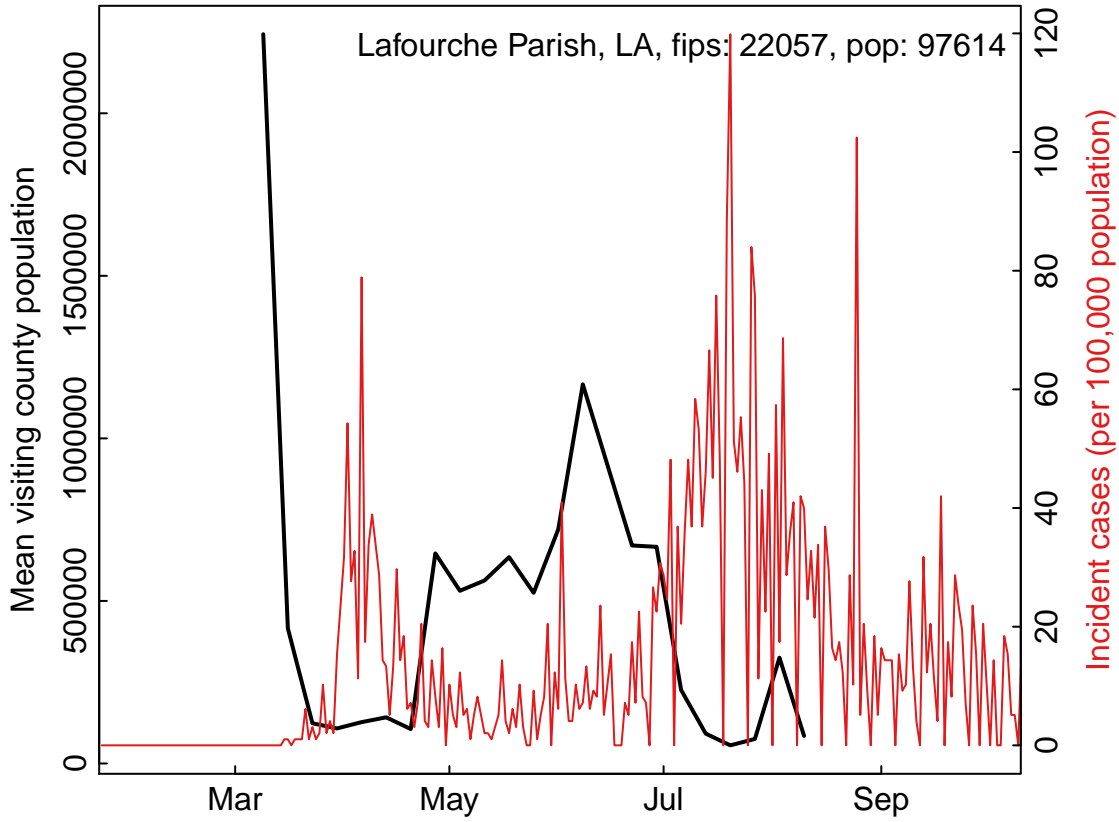

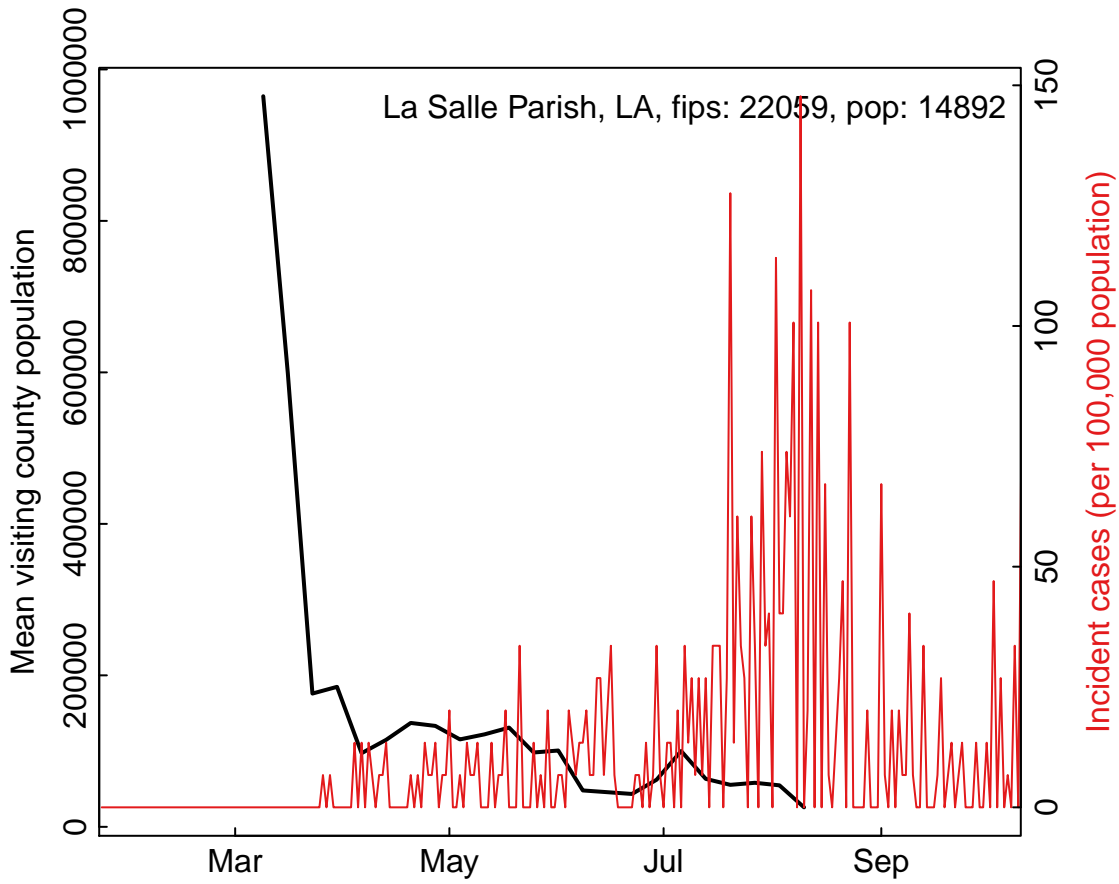

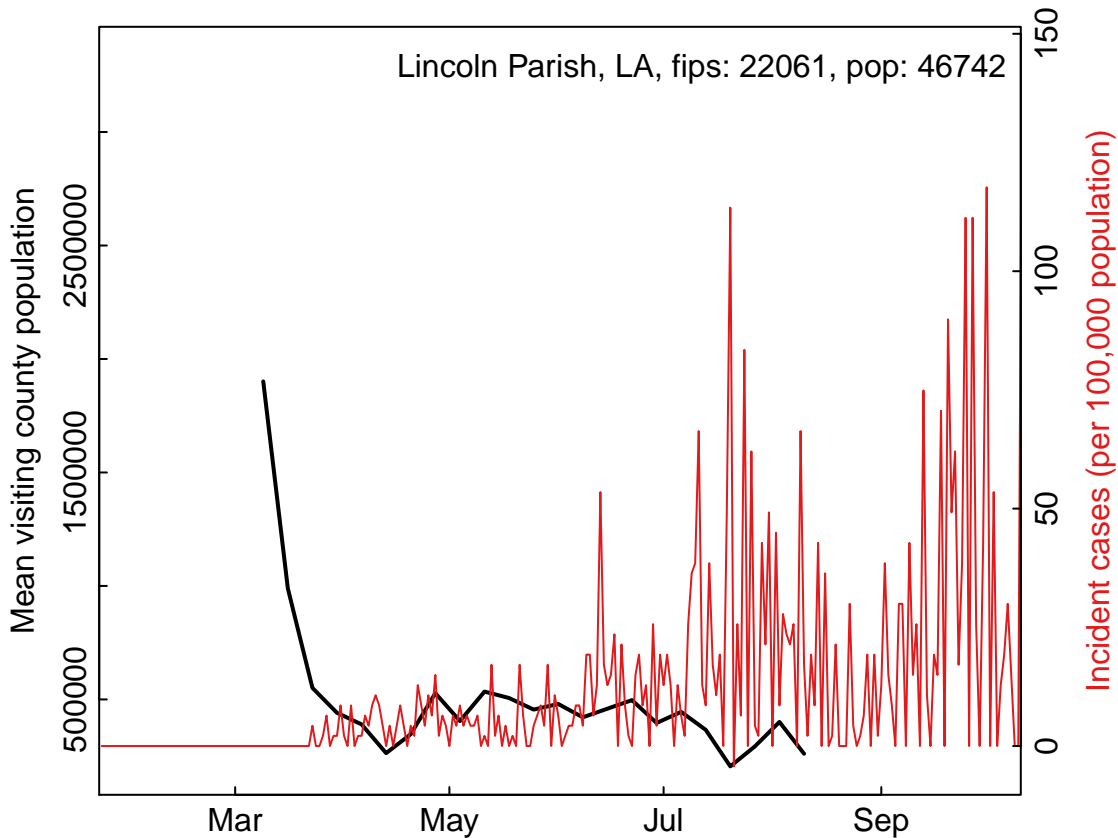

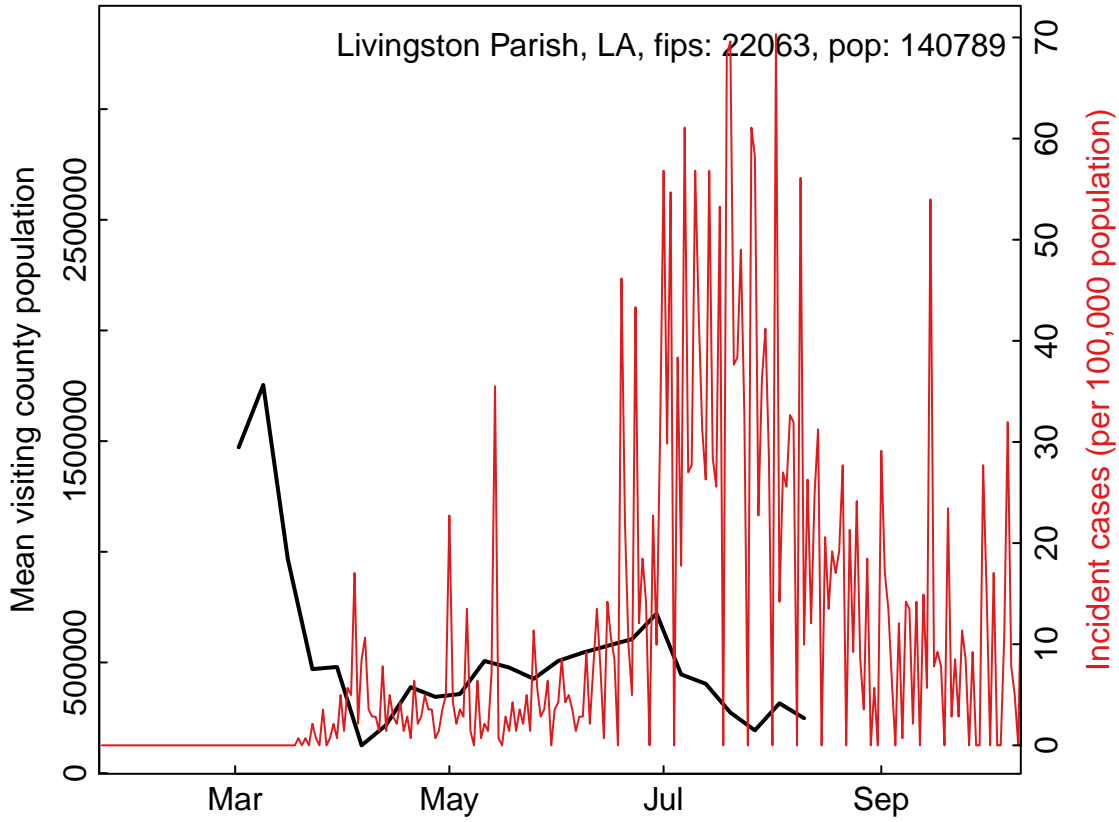

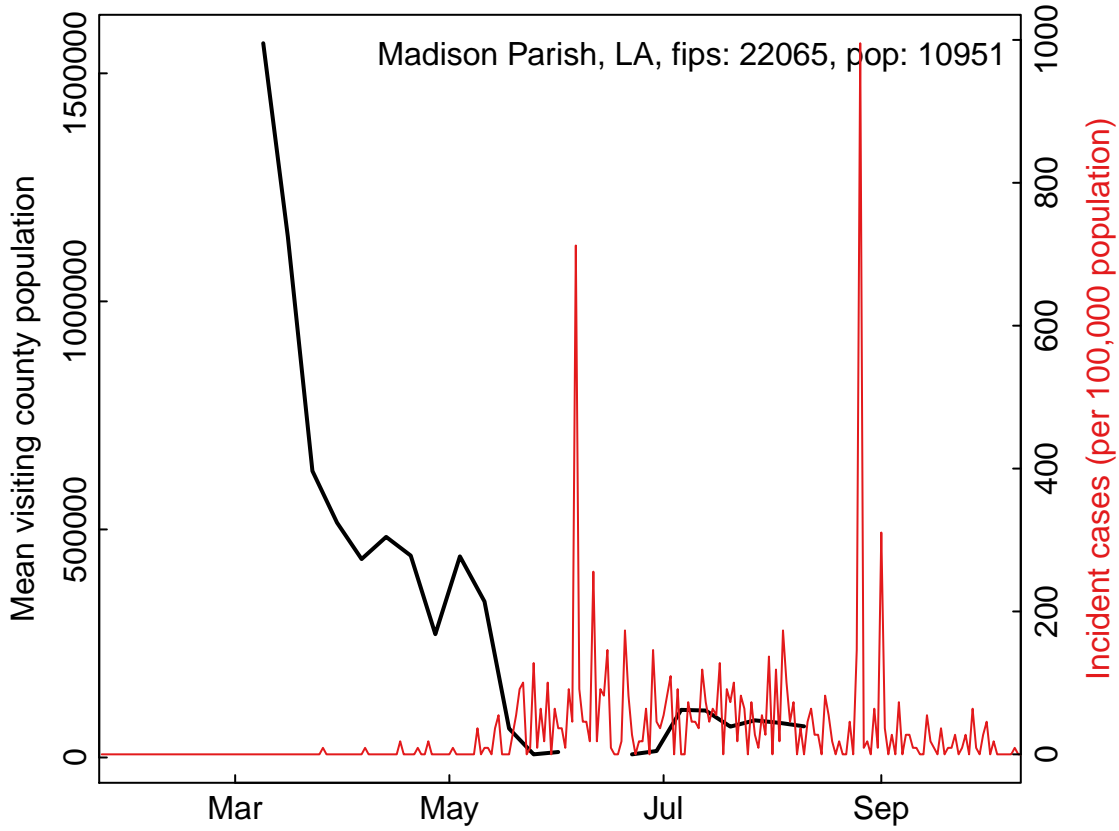

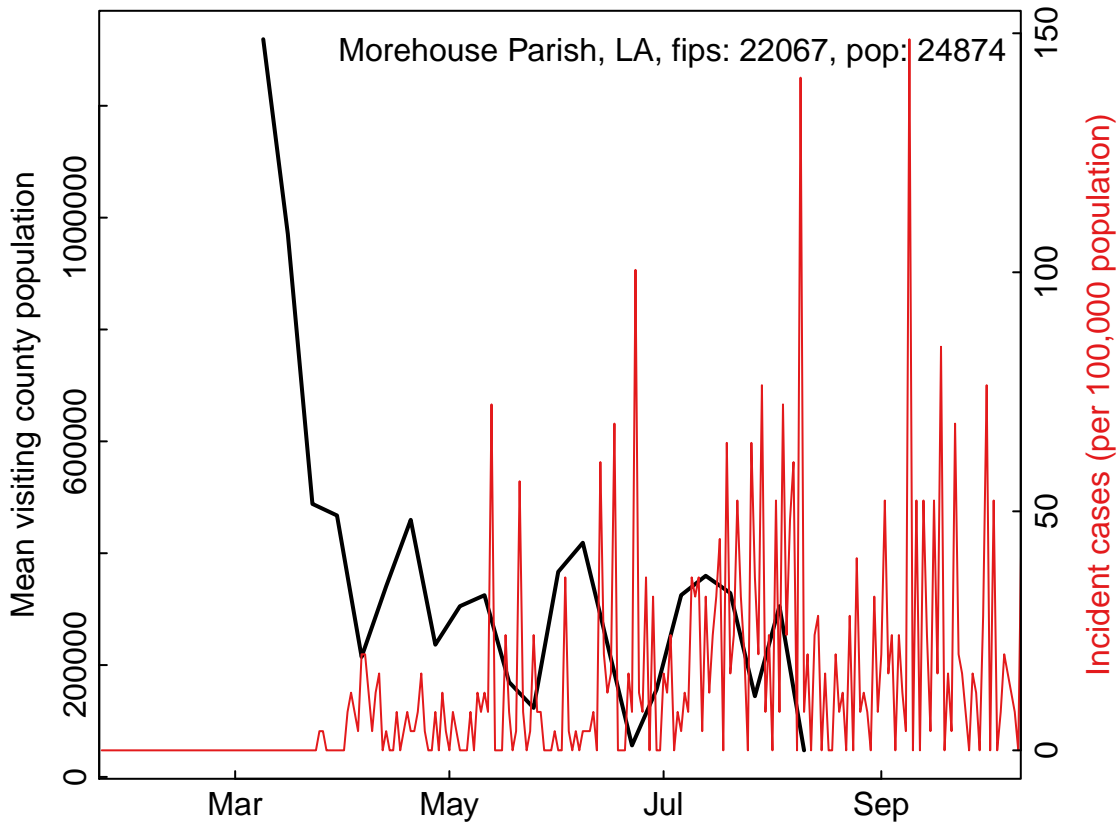

Natchitoches Parish, LA, fips: 22069, pop: 38158

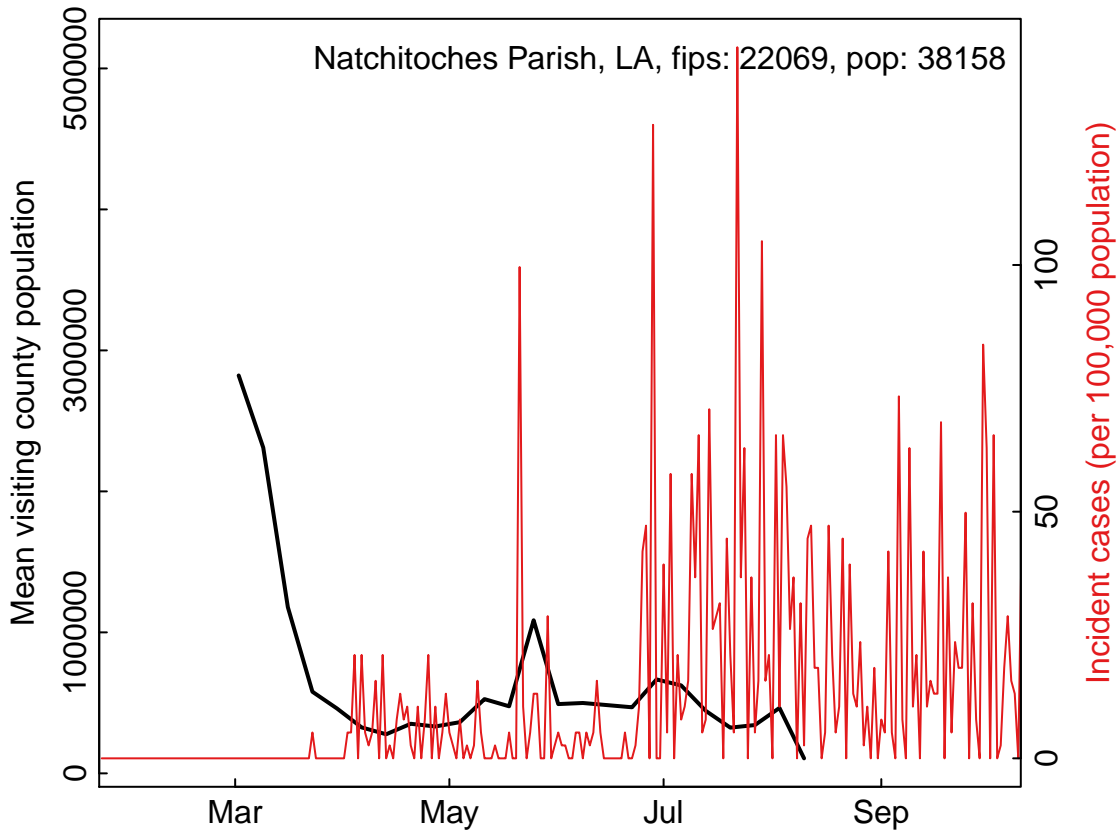



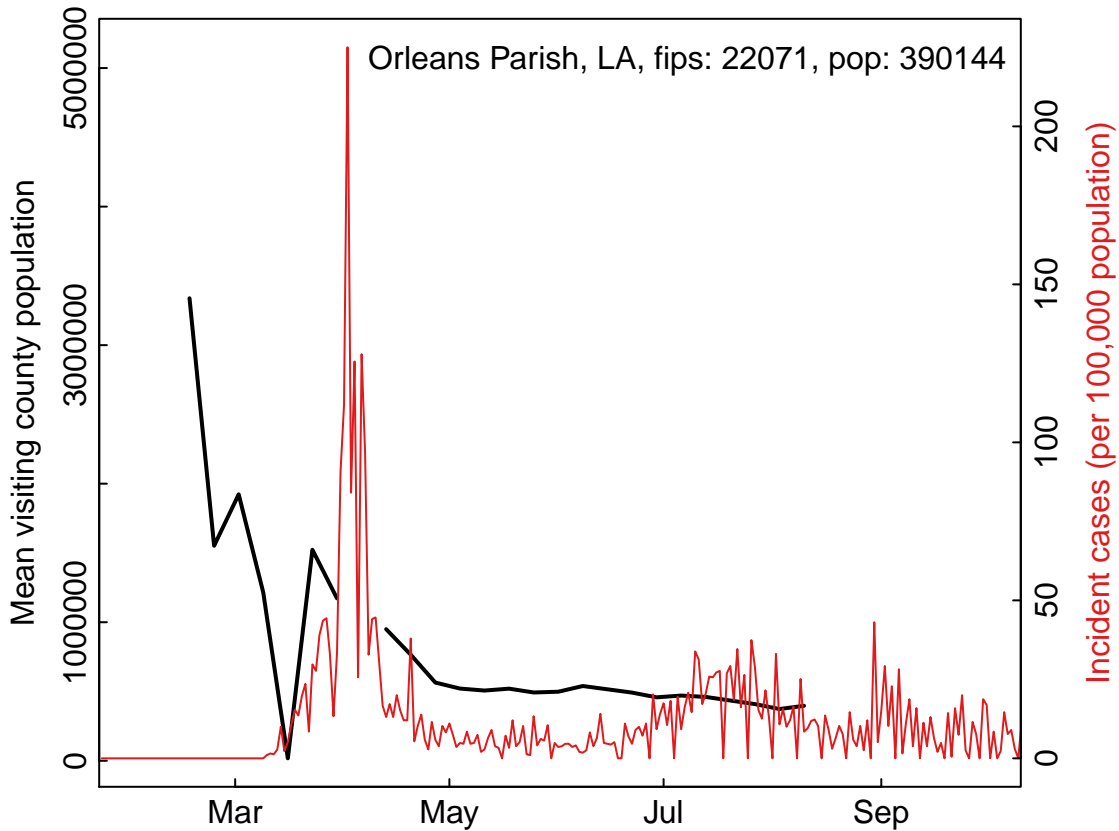

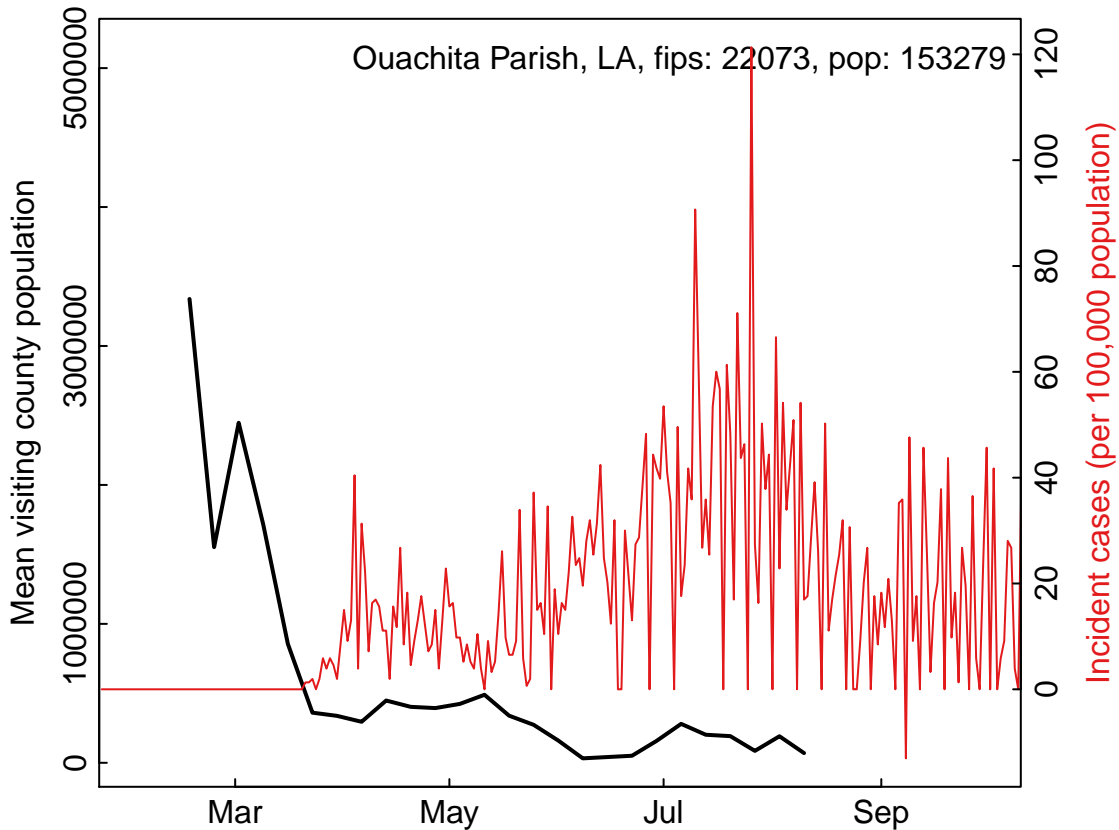

Plaquemines Parish, LA, fips: 22075, pop: 23197

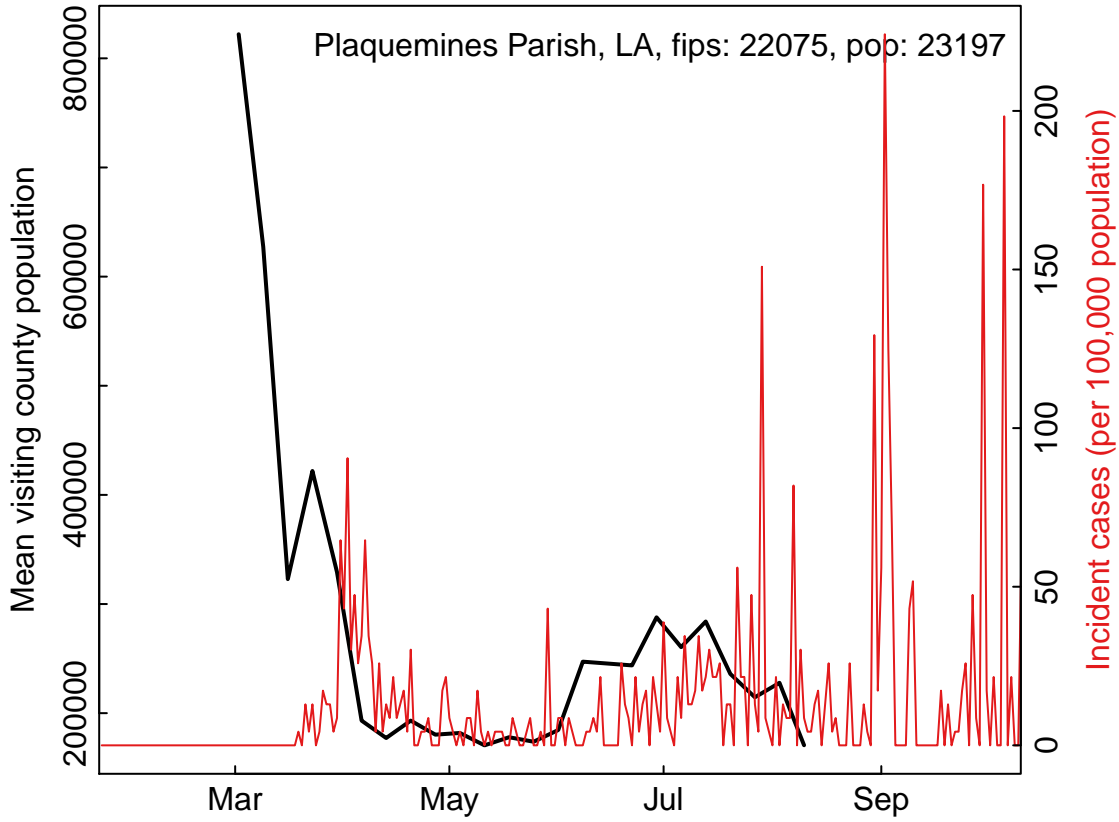

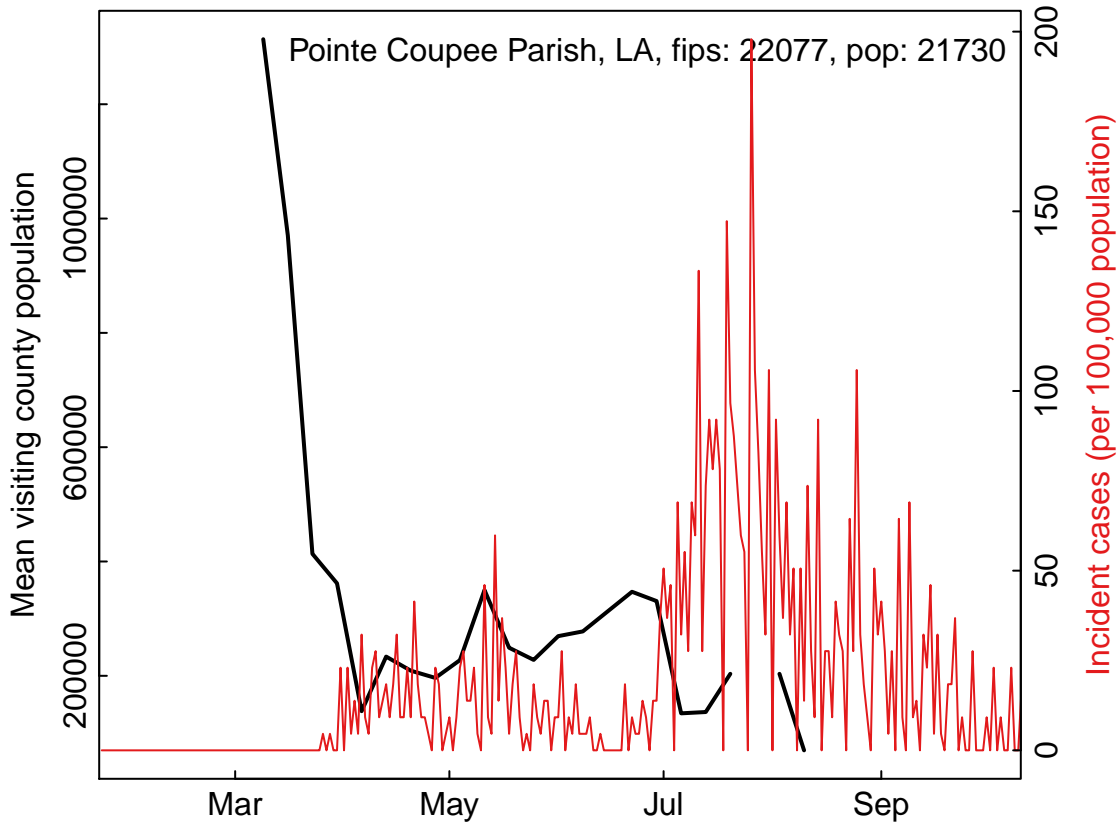

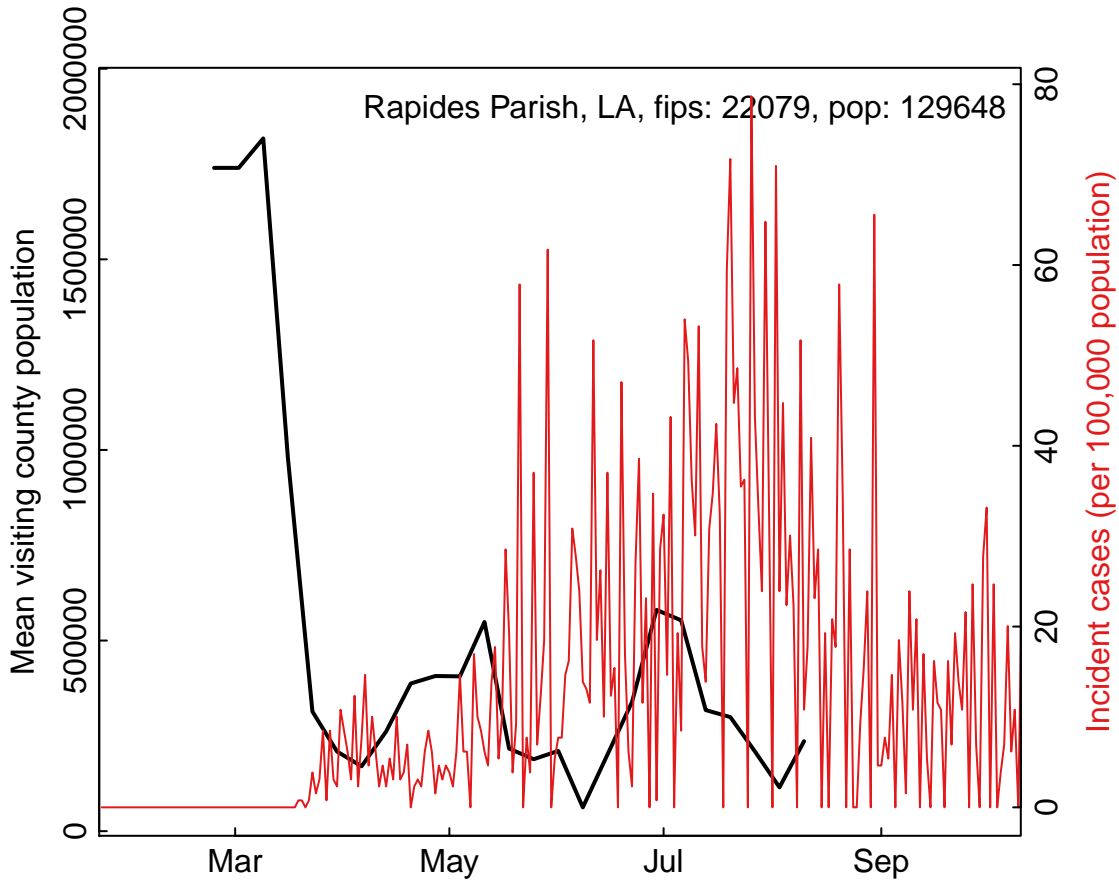

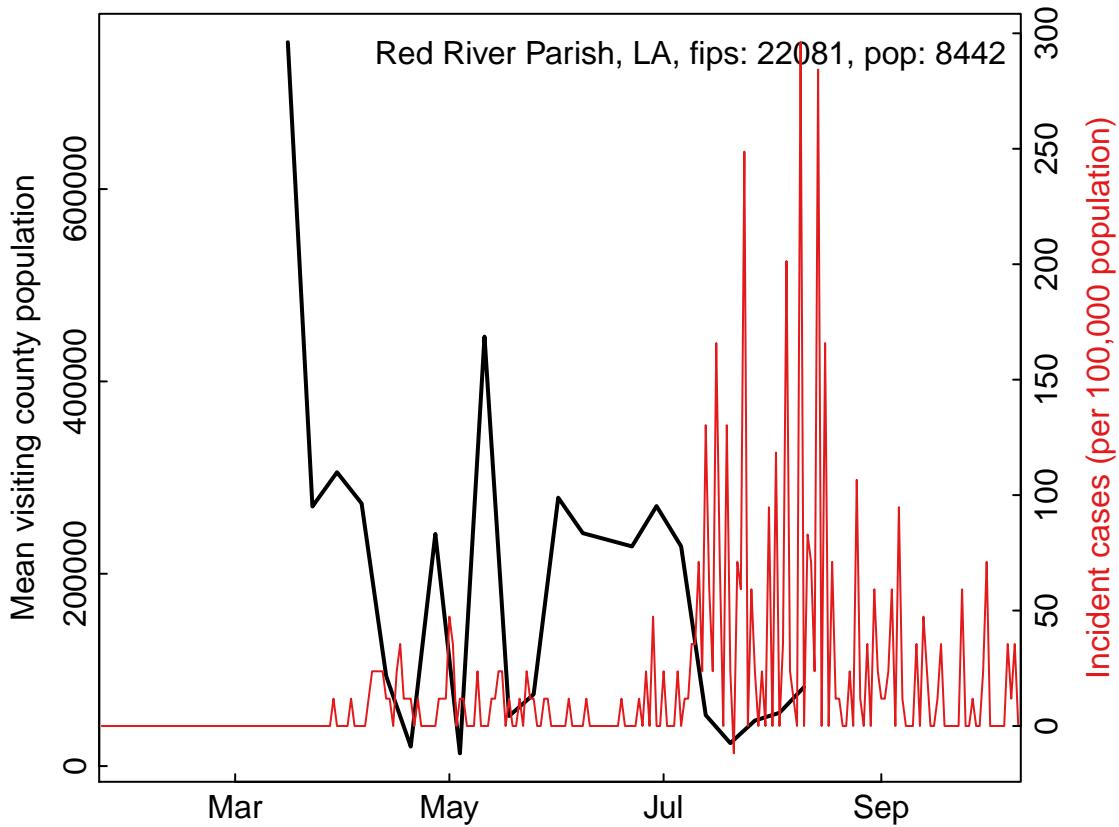

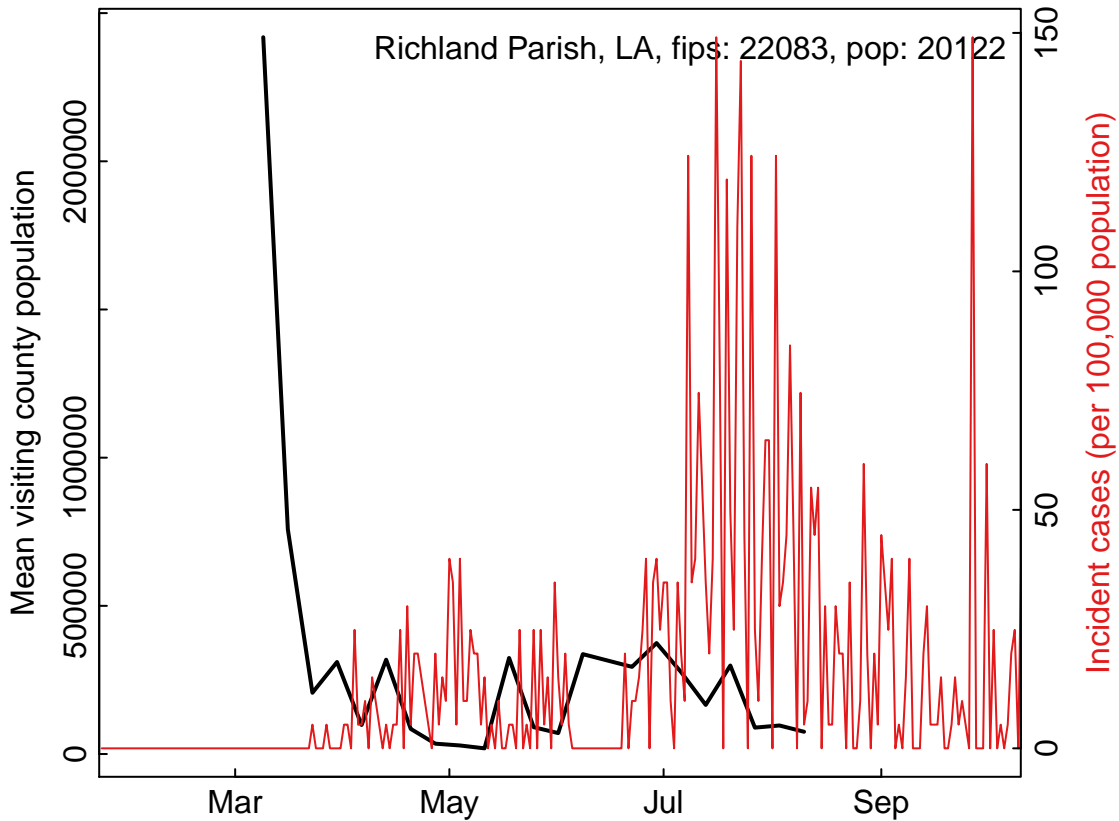

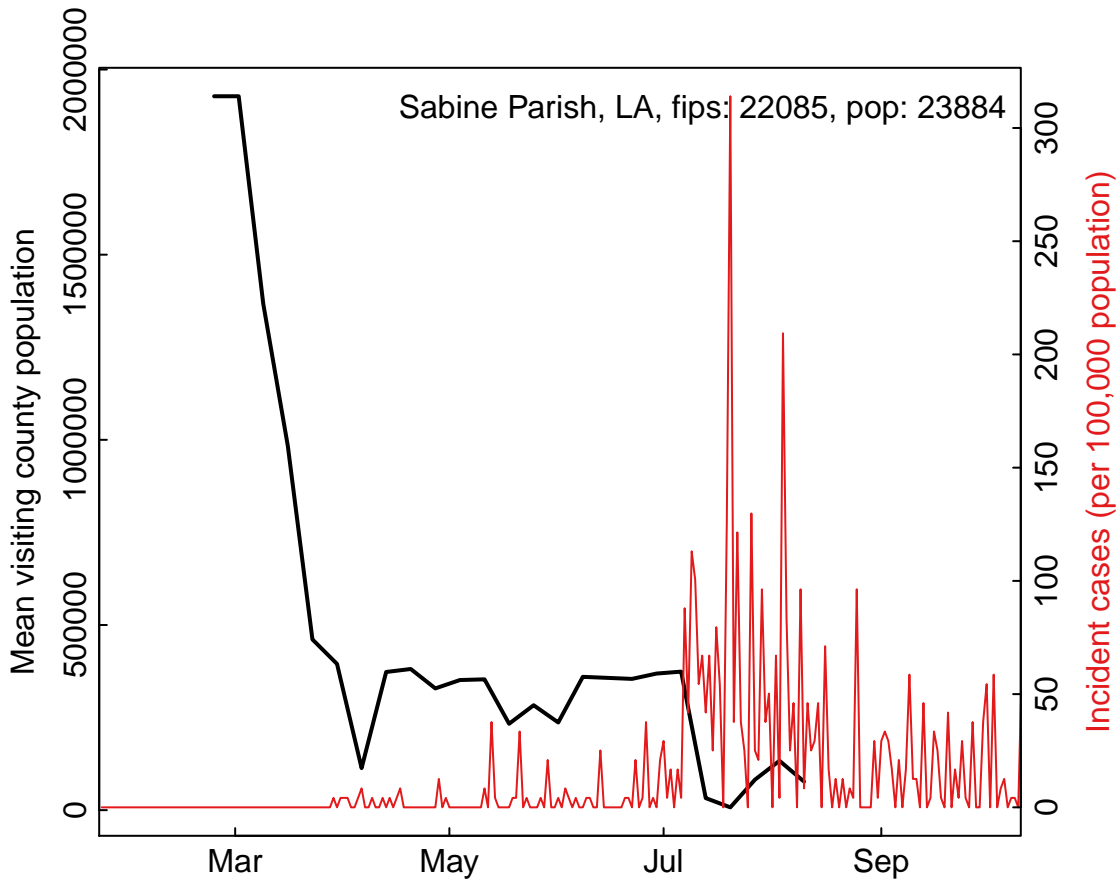



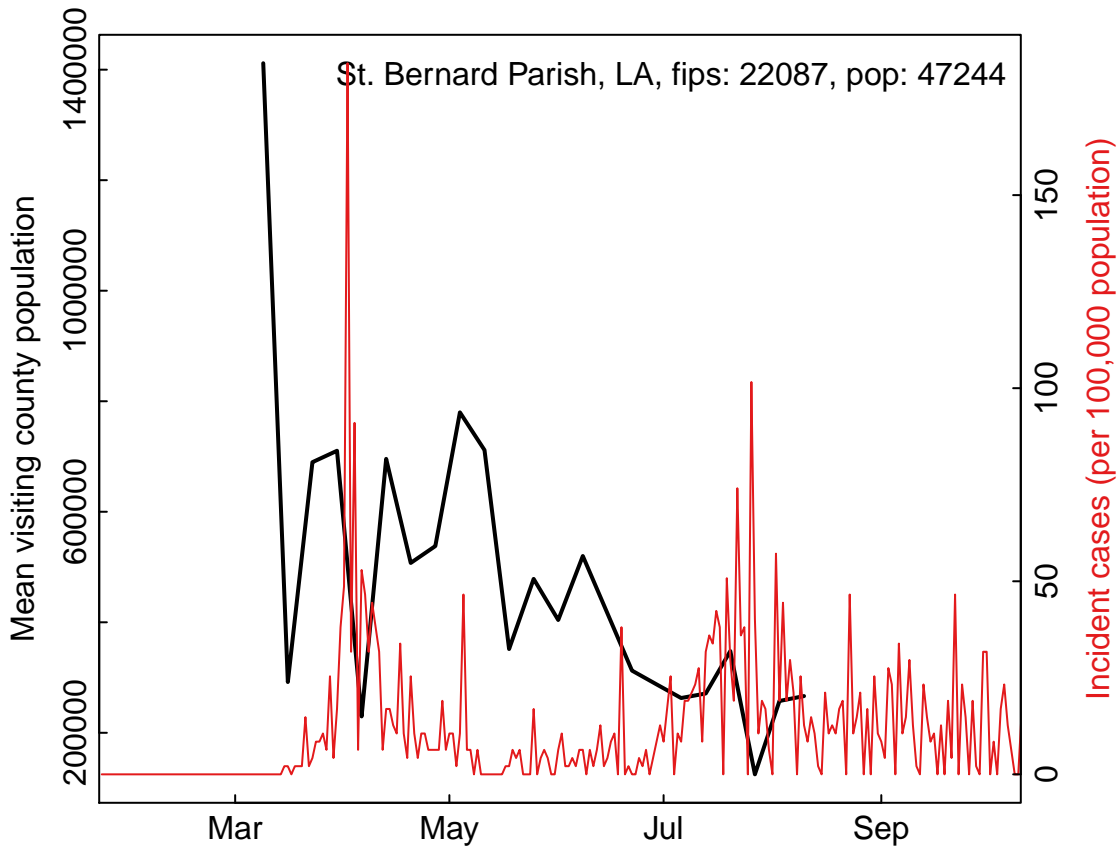

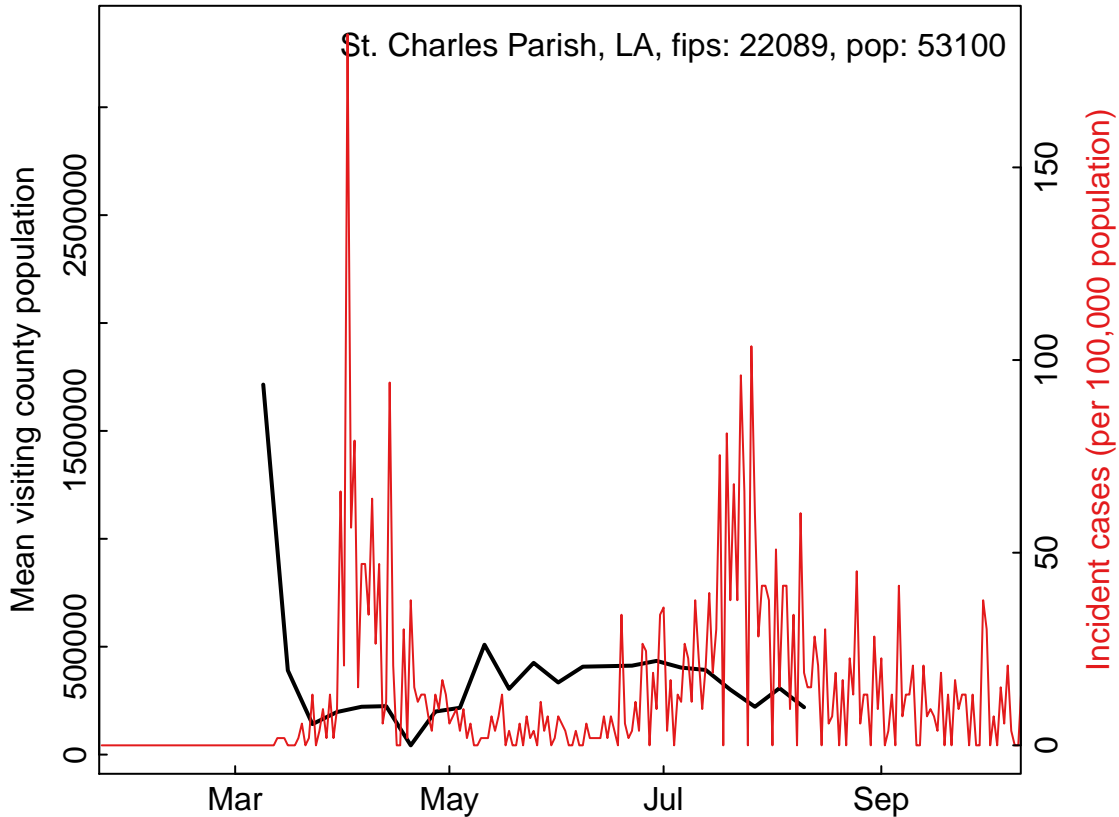

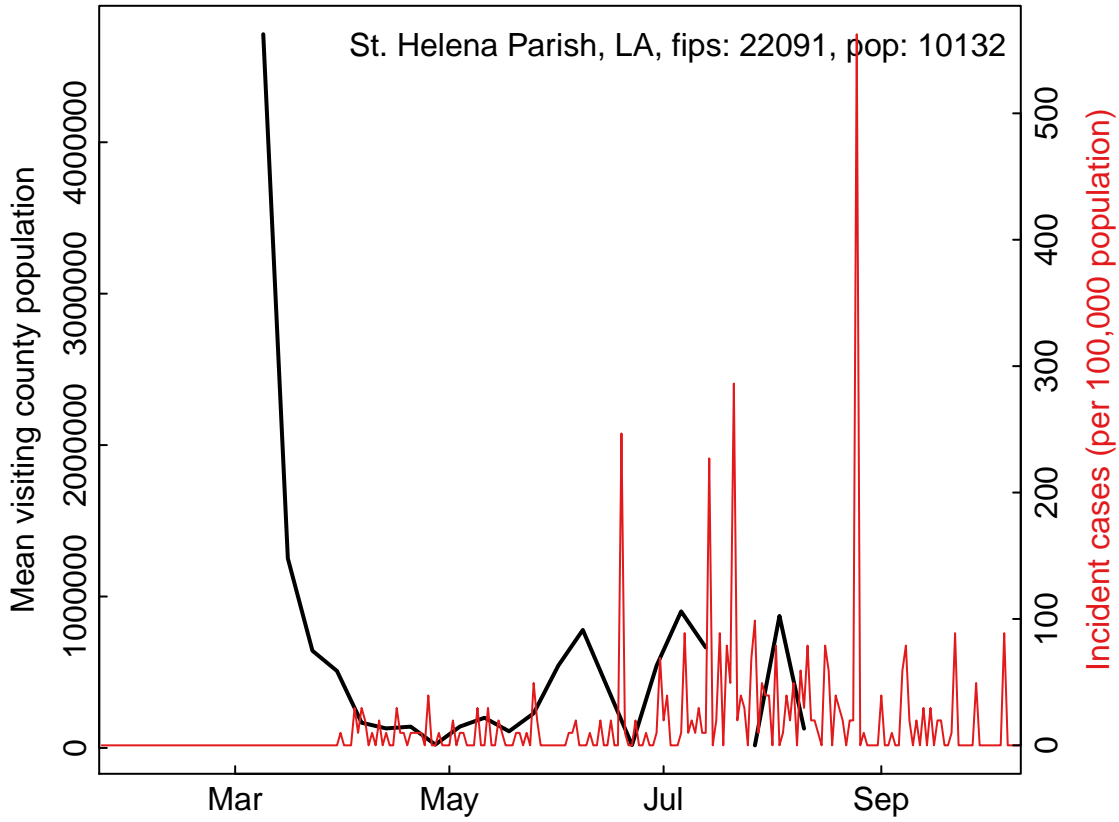

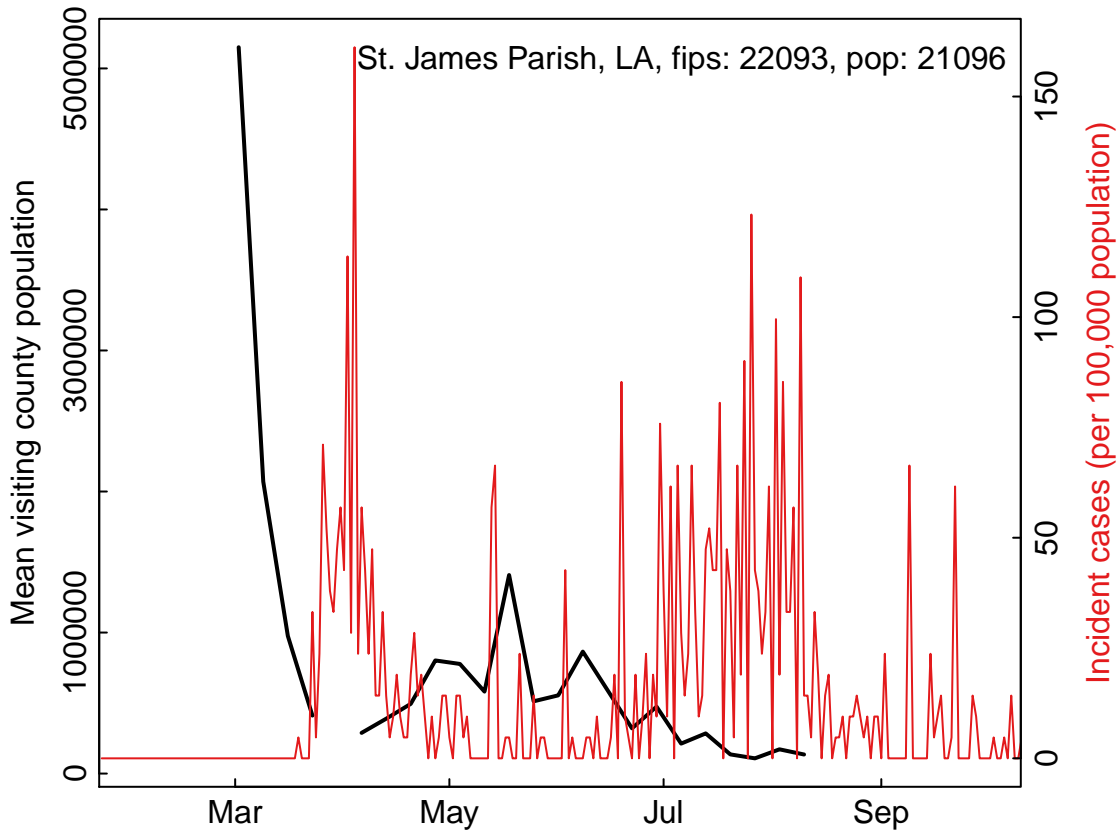

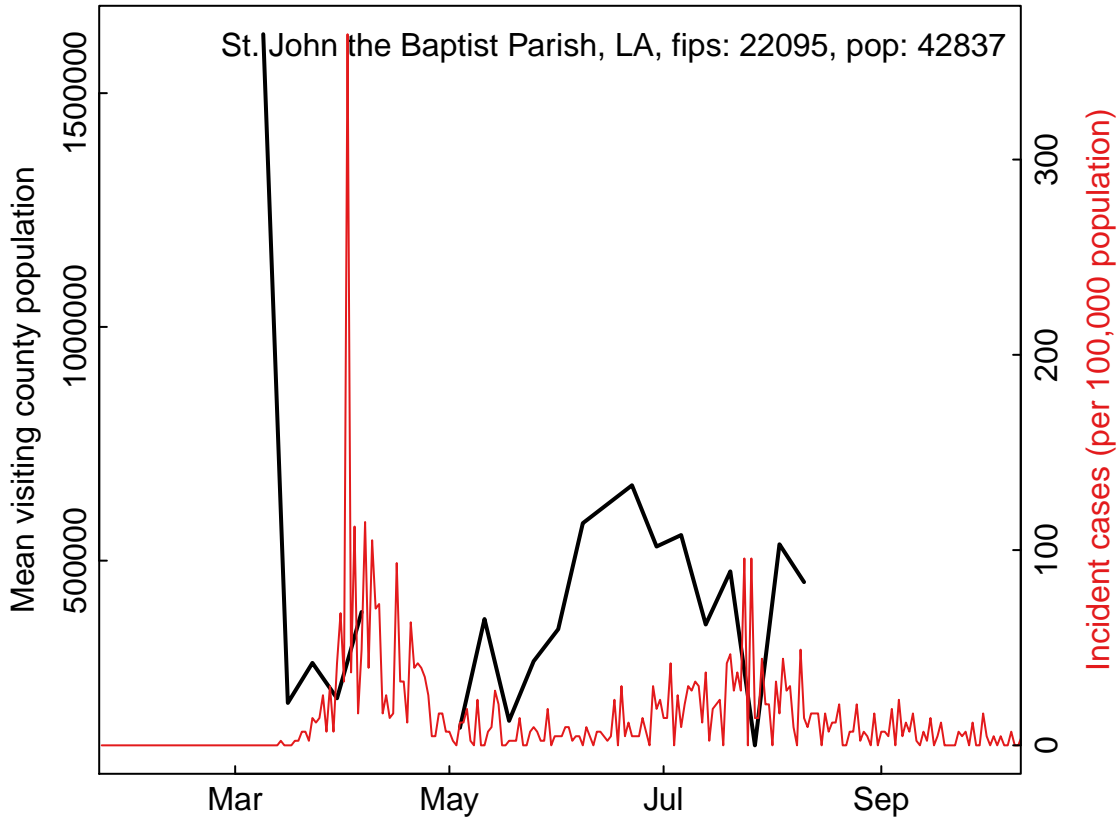

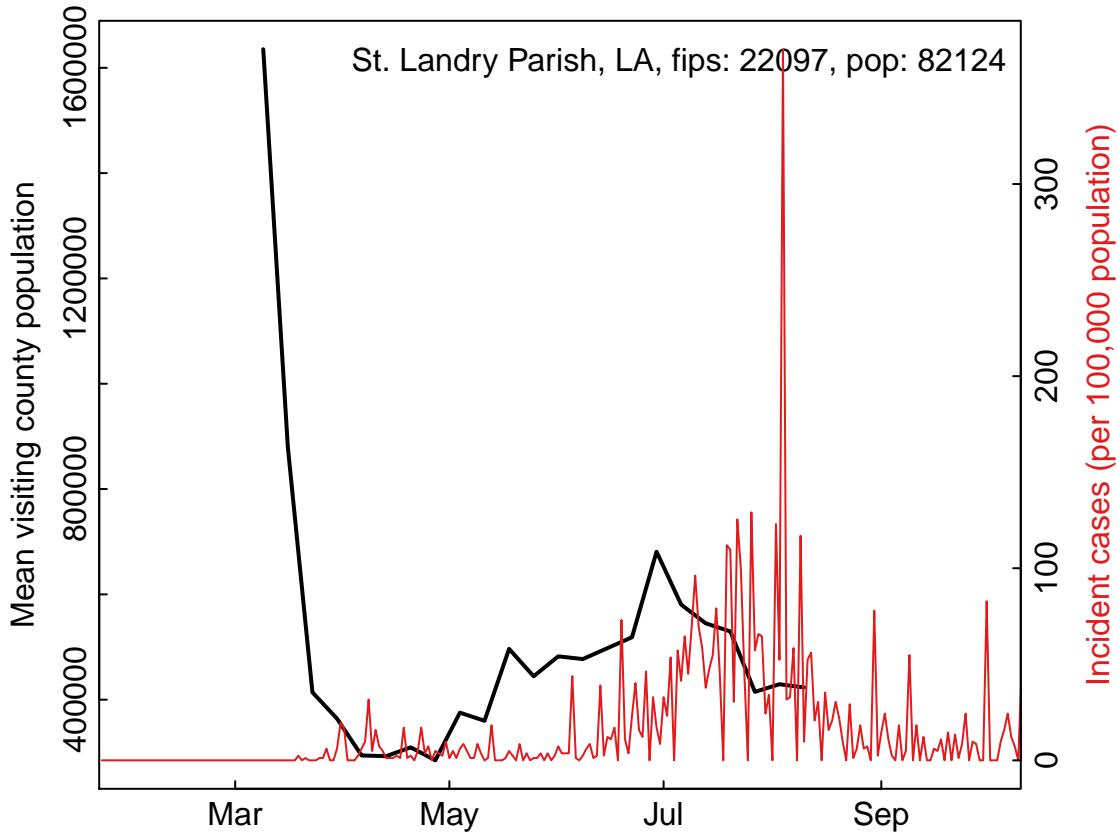

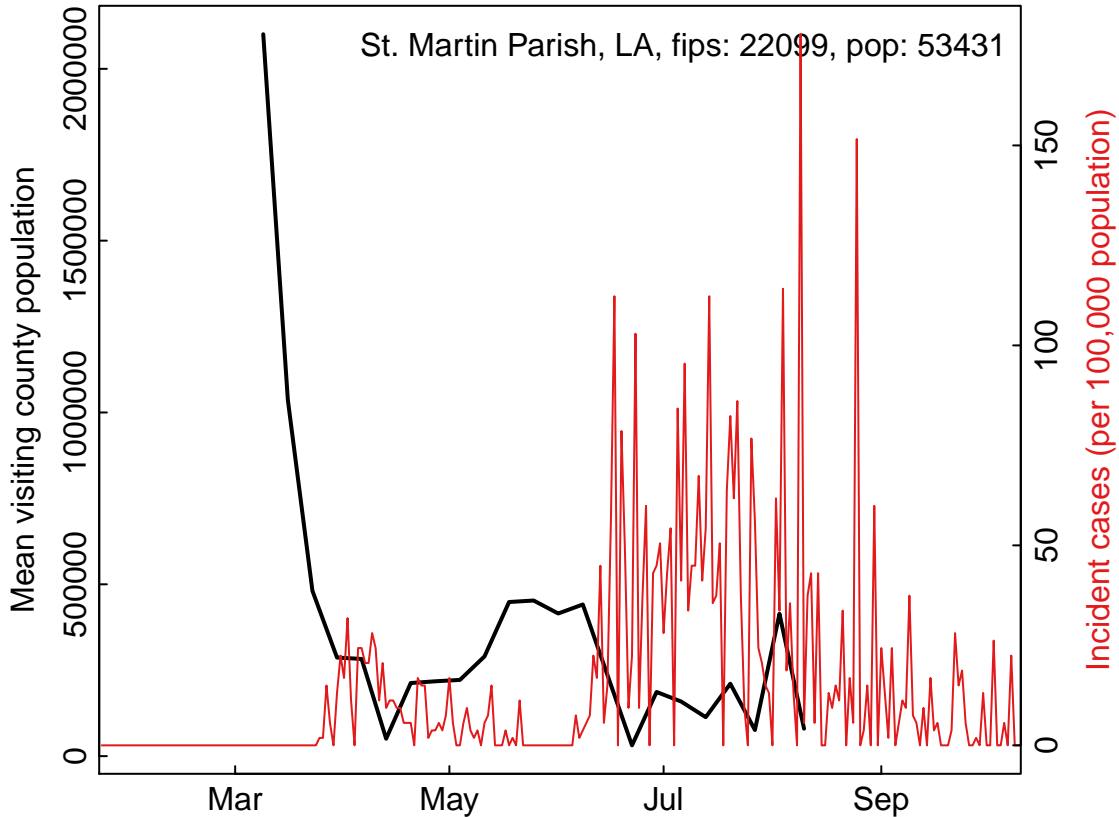

St. Mary Parish, LA, fips: 22101, pop: 49348

Mean visiting county population

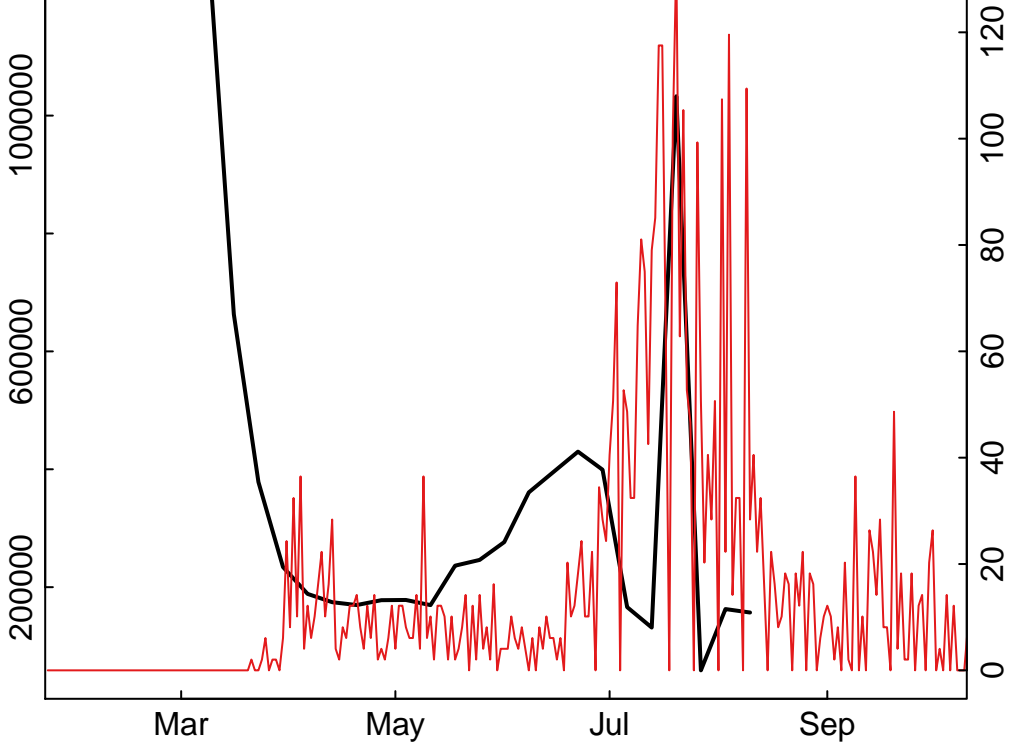

Incident cases (per 100,000 population)



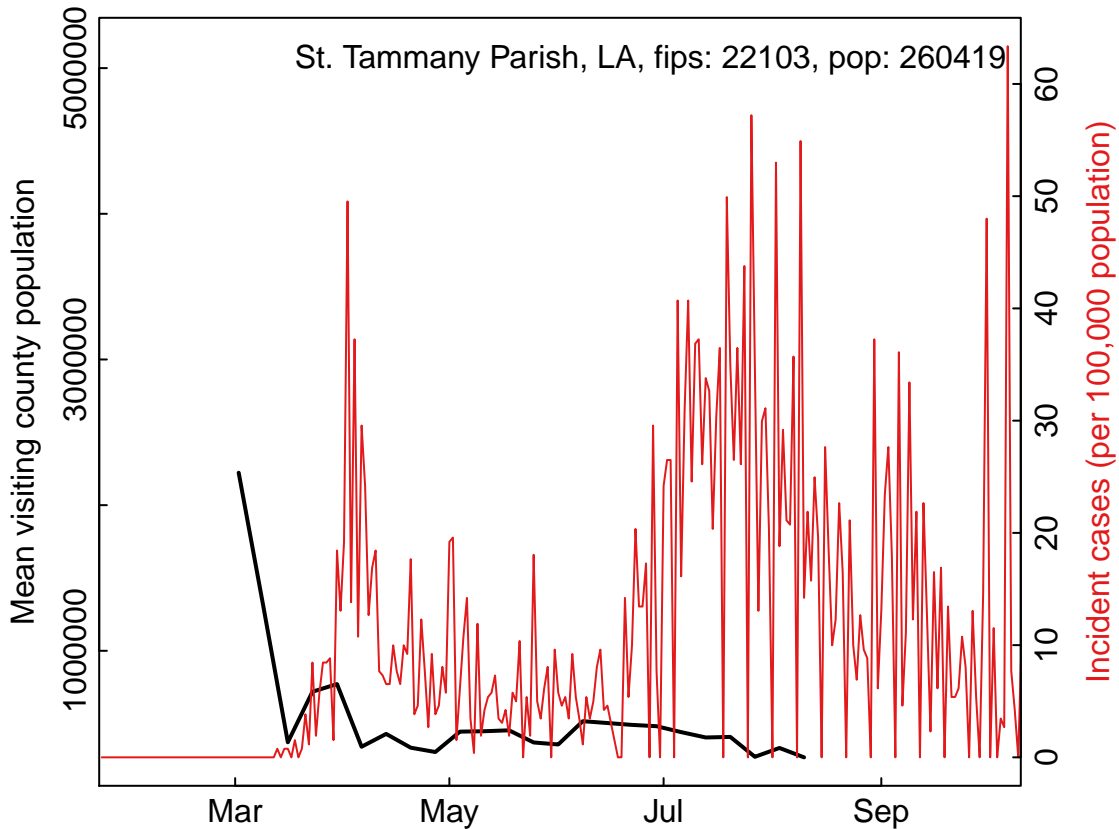

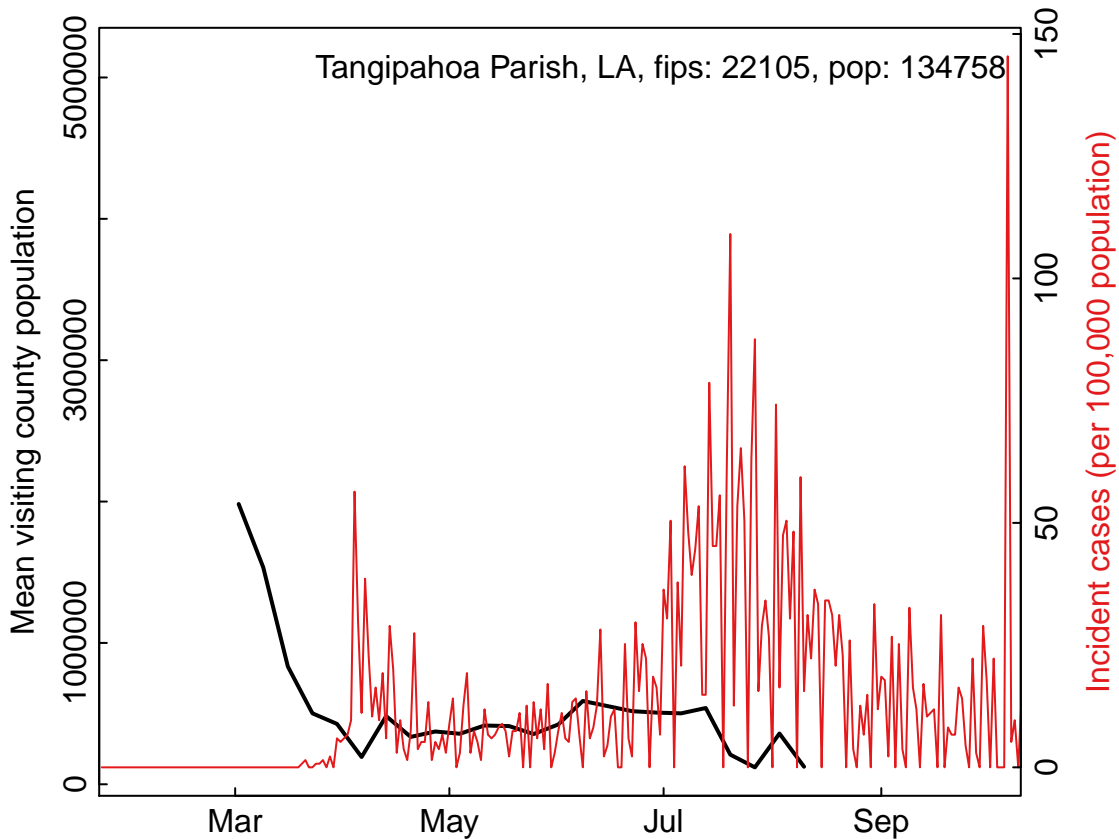

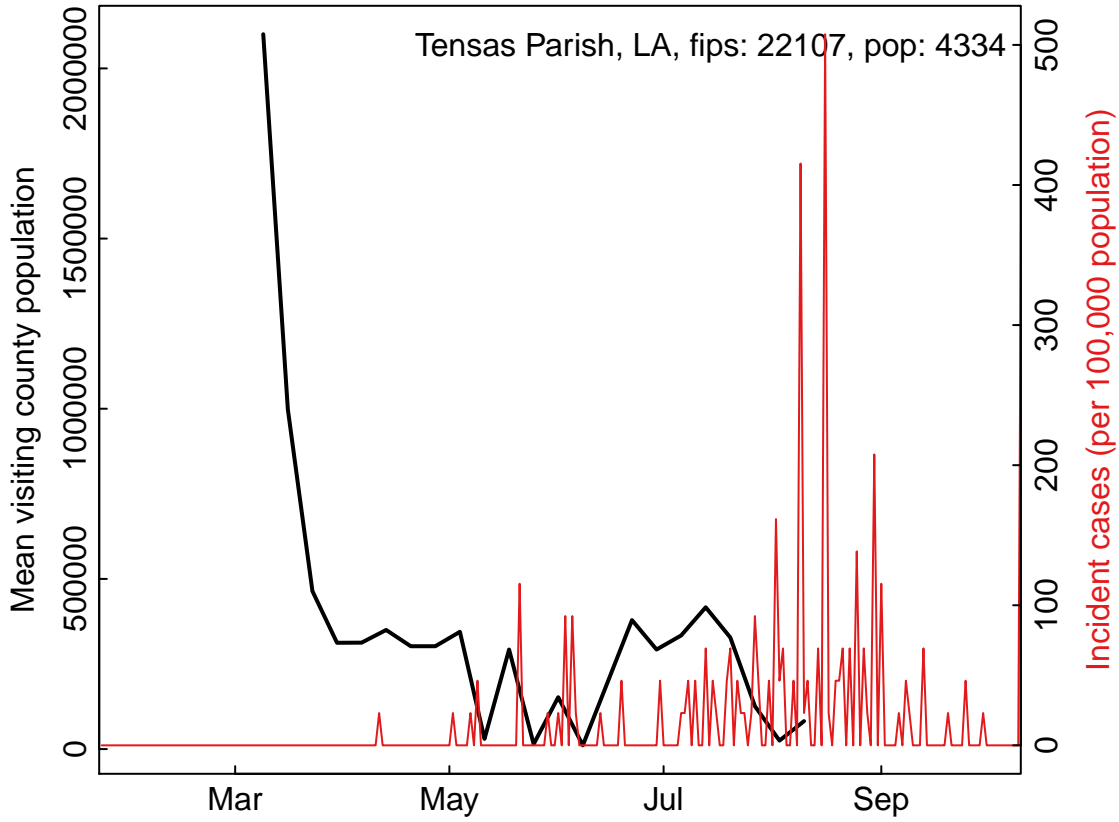

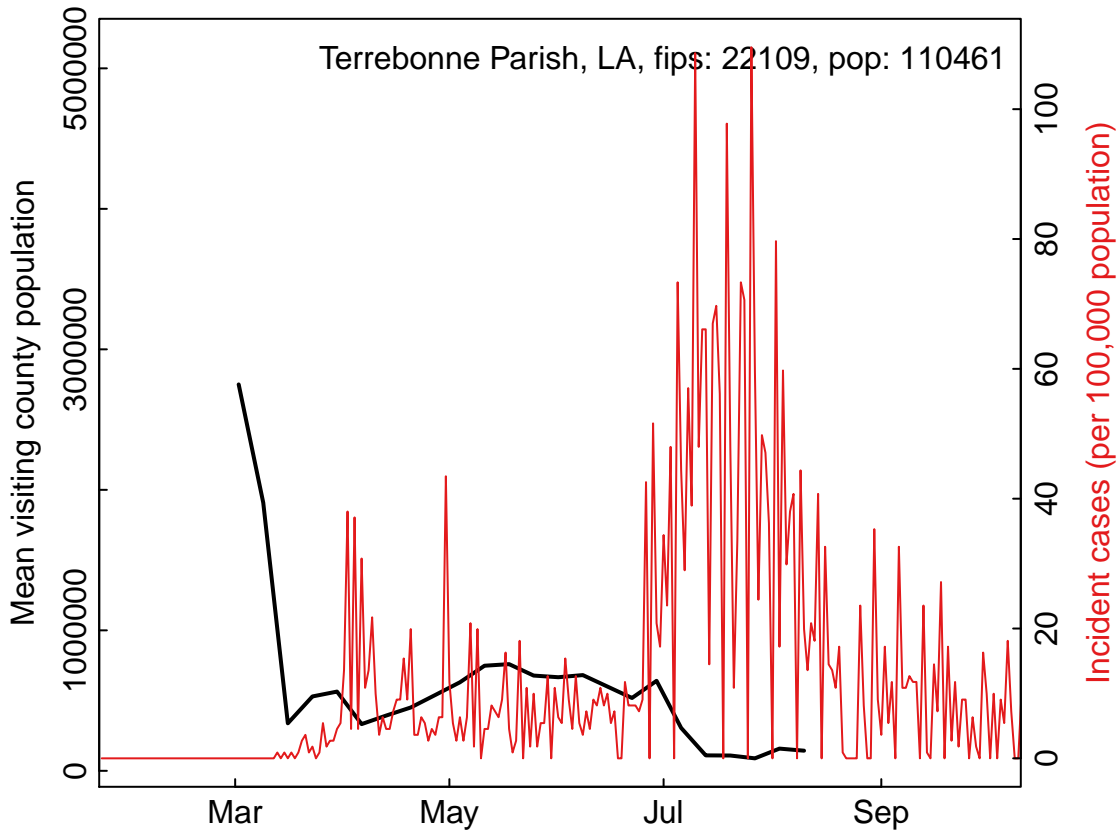

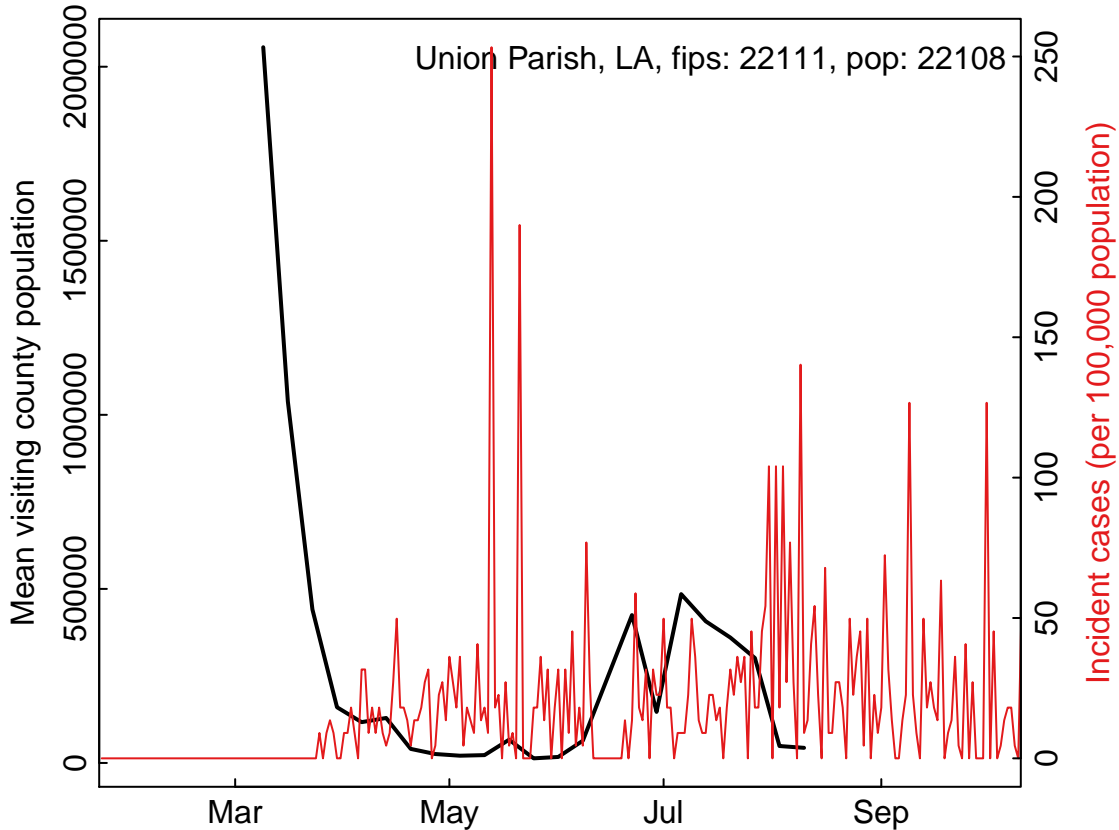

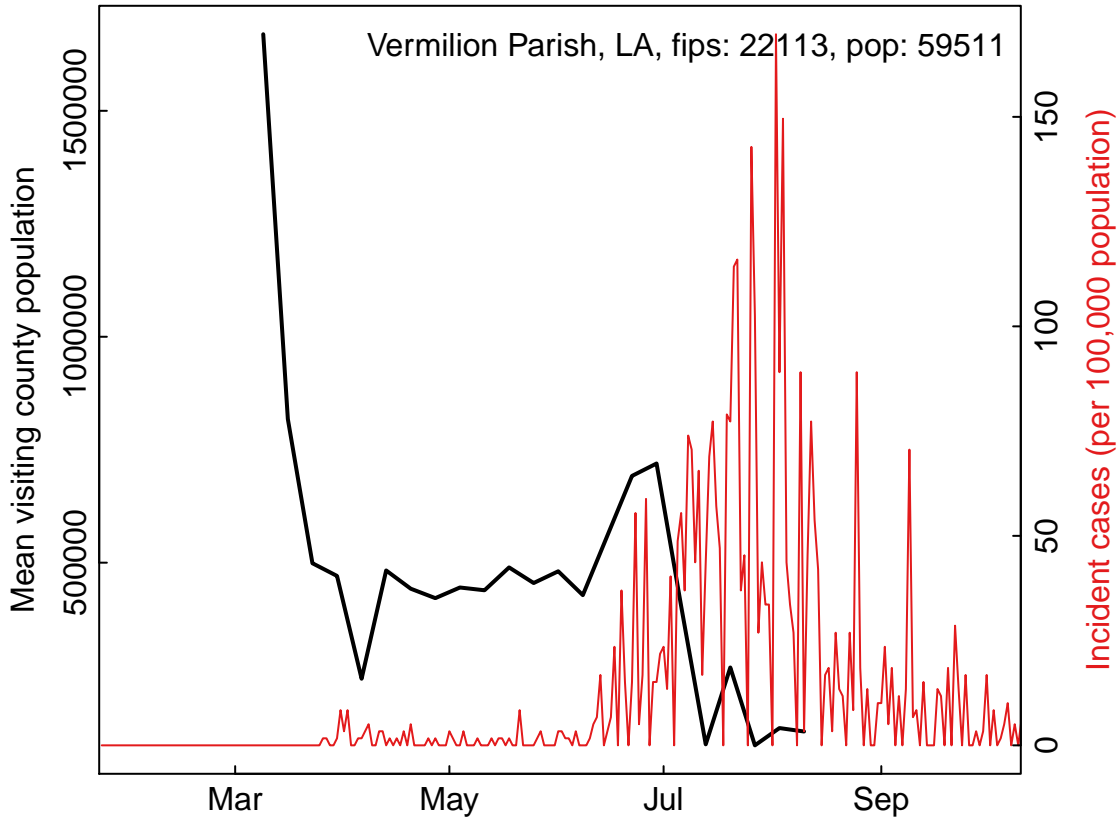

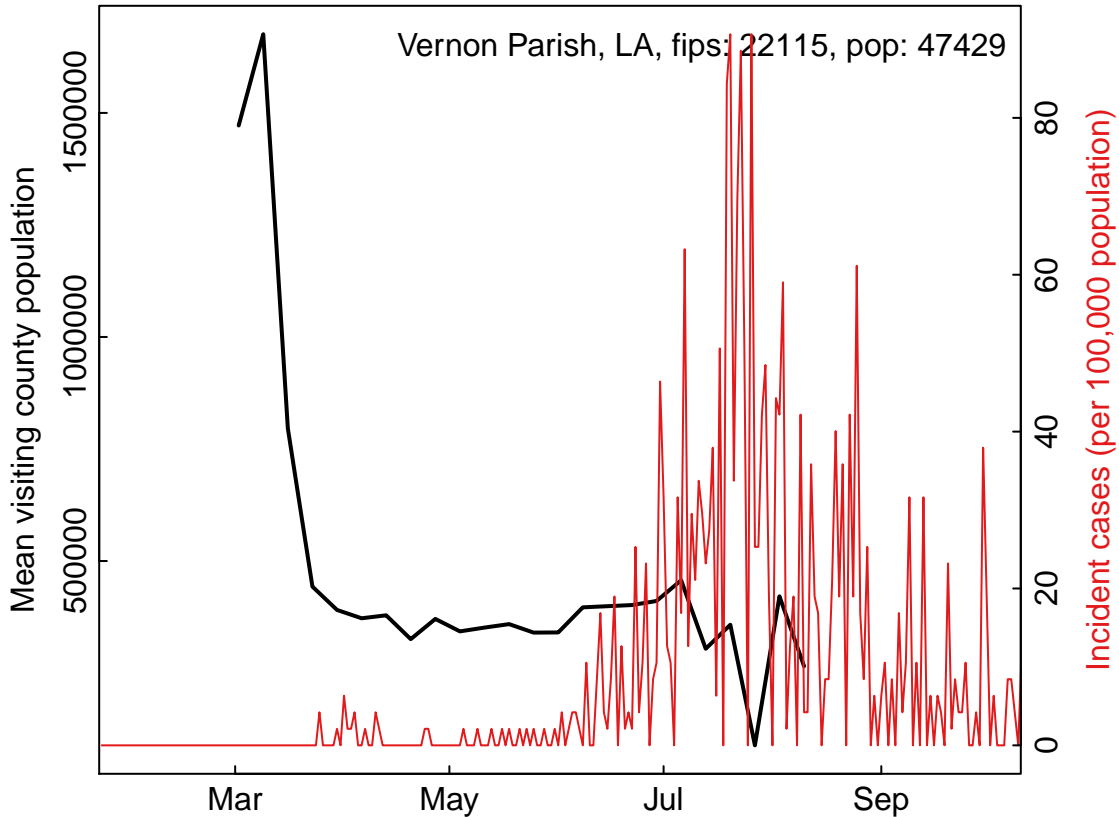

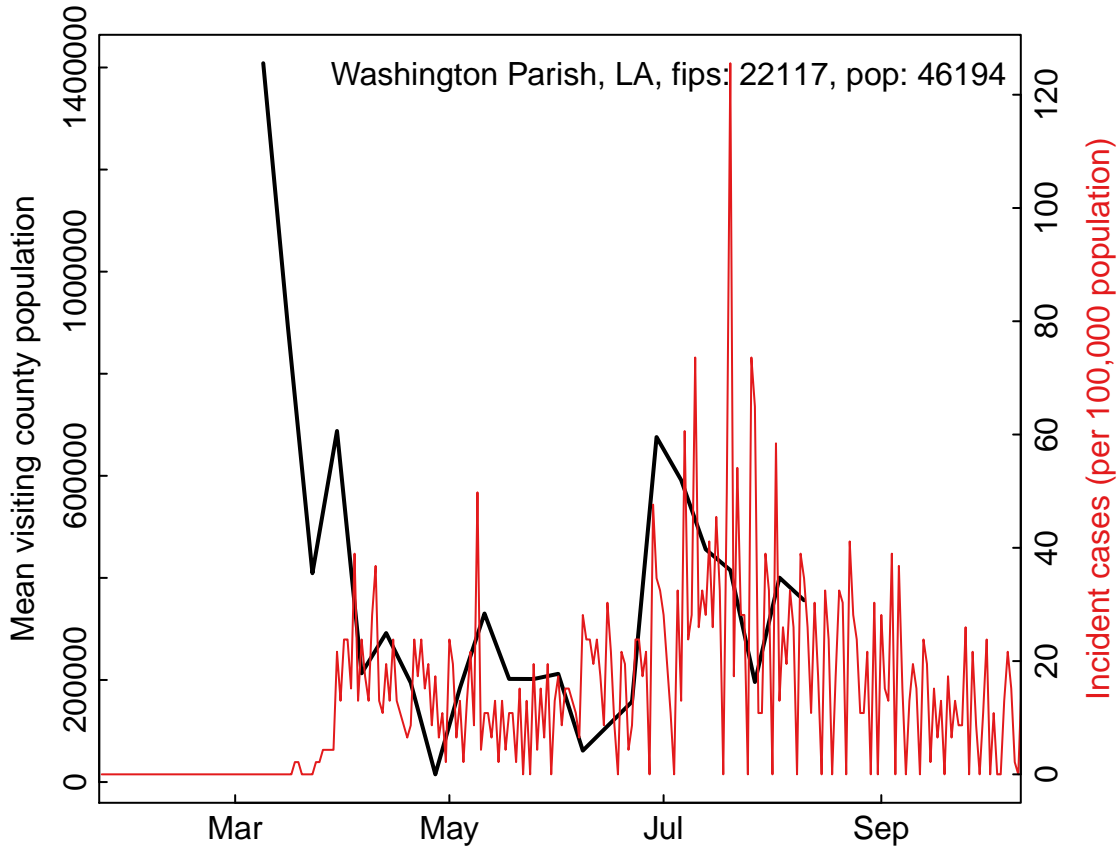



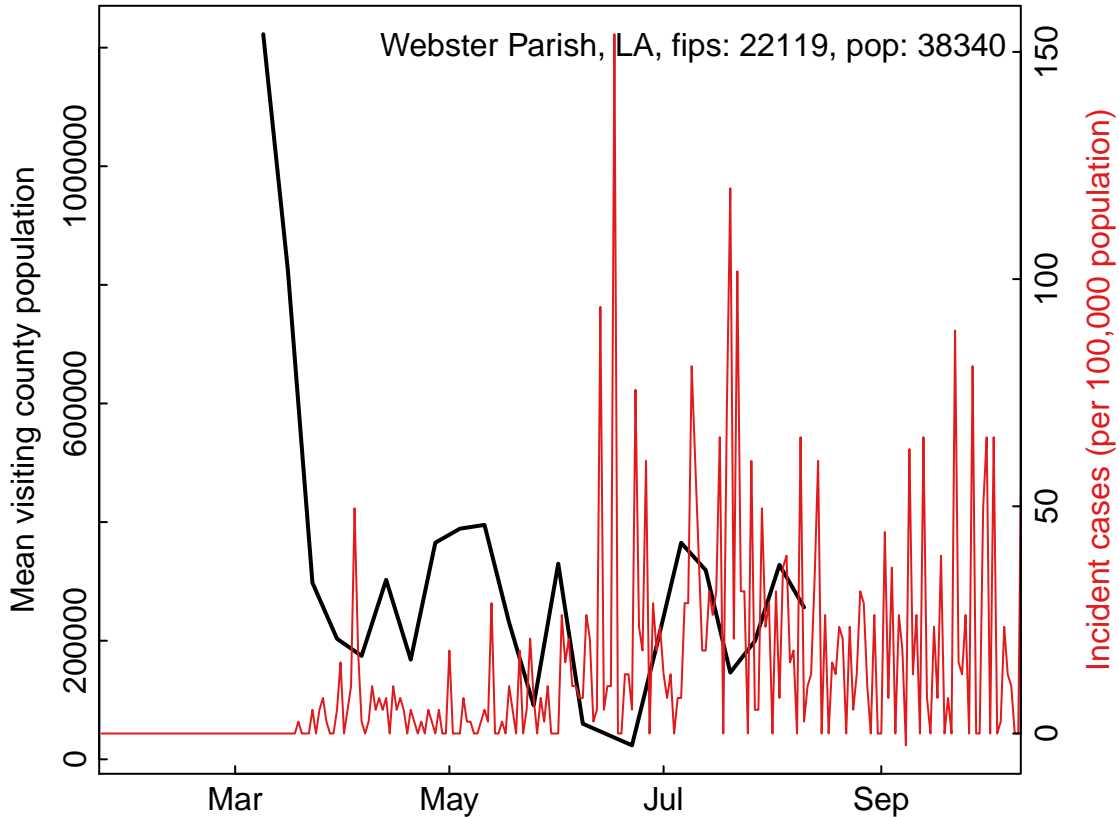

West Baton Rouge Parish, LA, fips: 22121, pop: 26465

Mean visiting county population

2500000  
1500000  
500000  
0

Mar

May

Jul

Sep

150  
100  
50  
0

Incident cases (per 100,000 population)

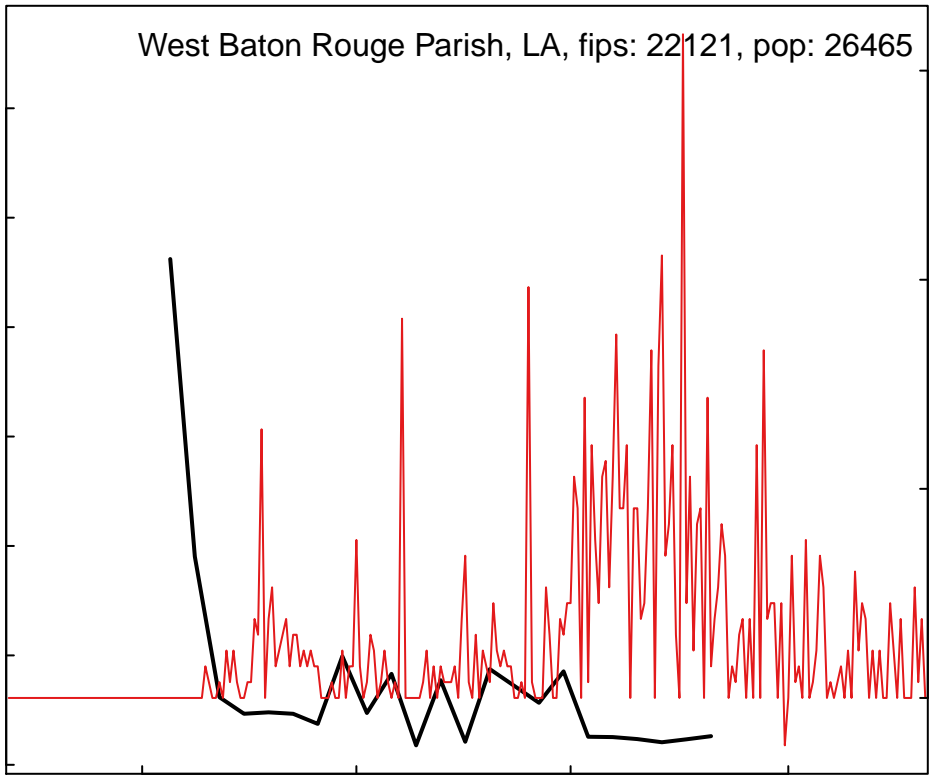

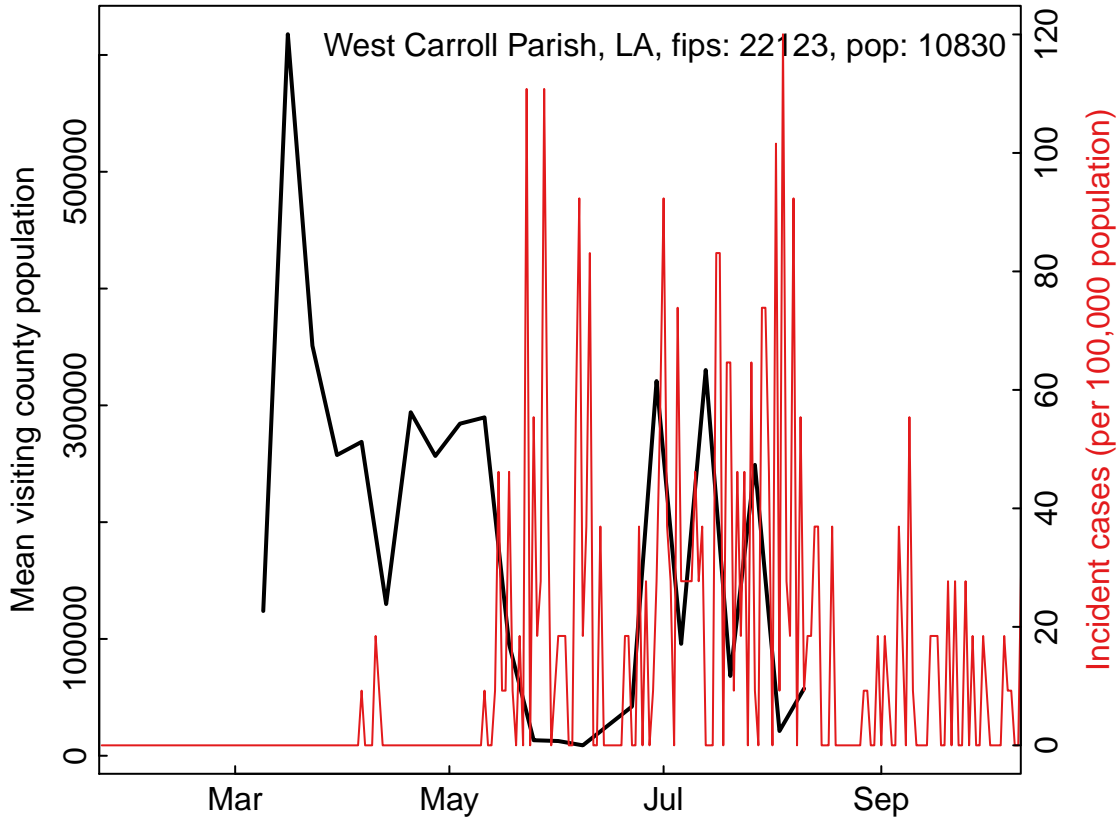

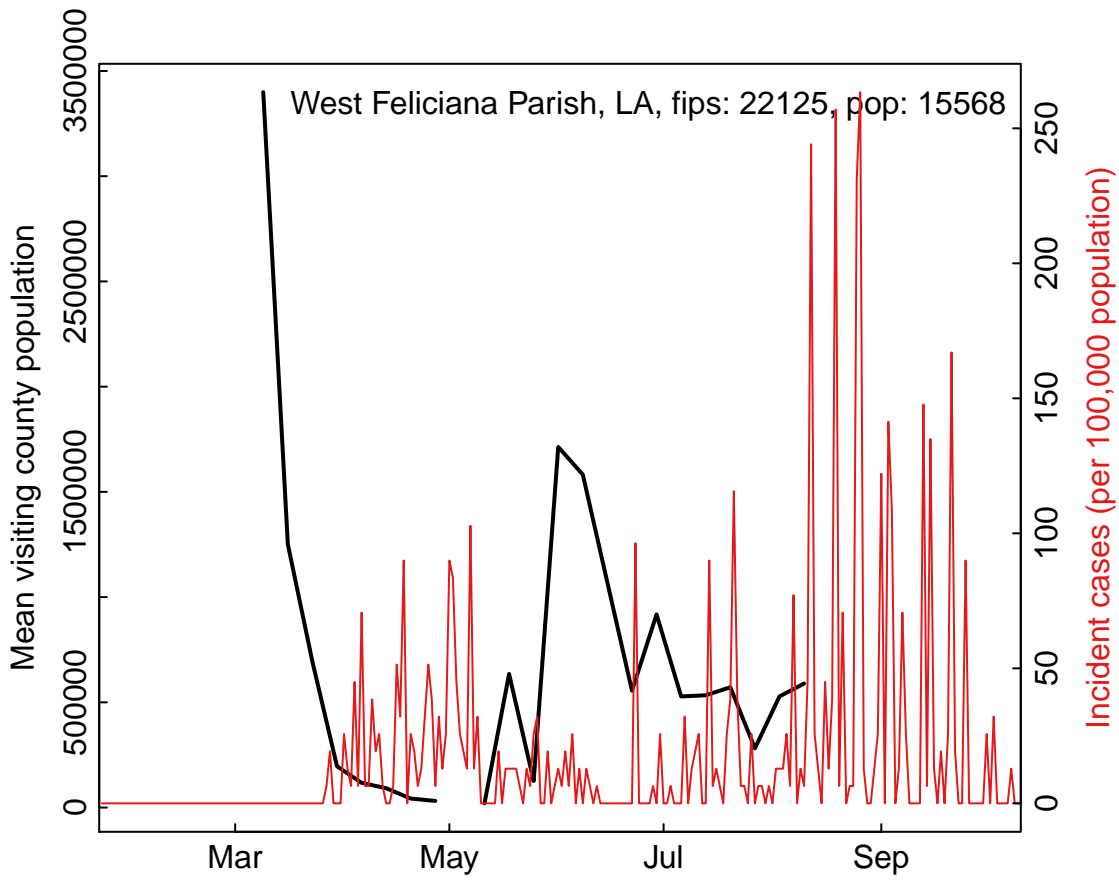

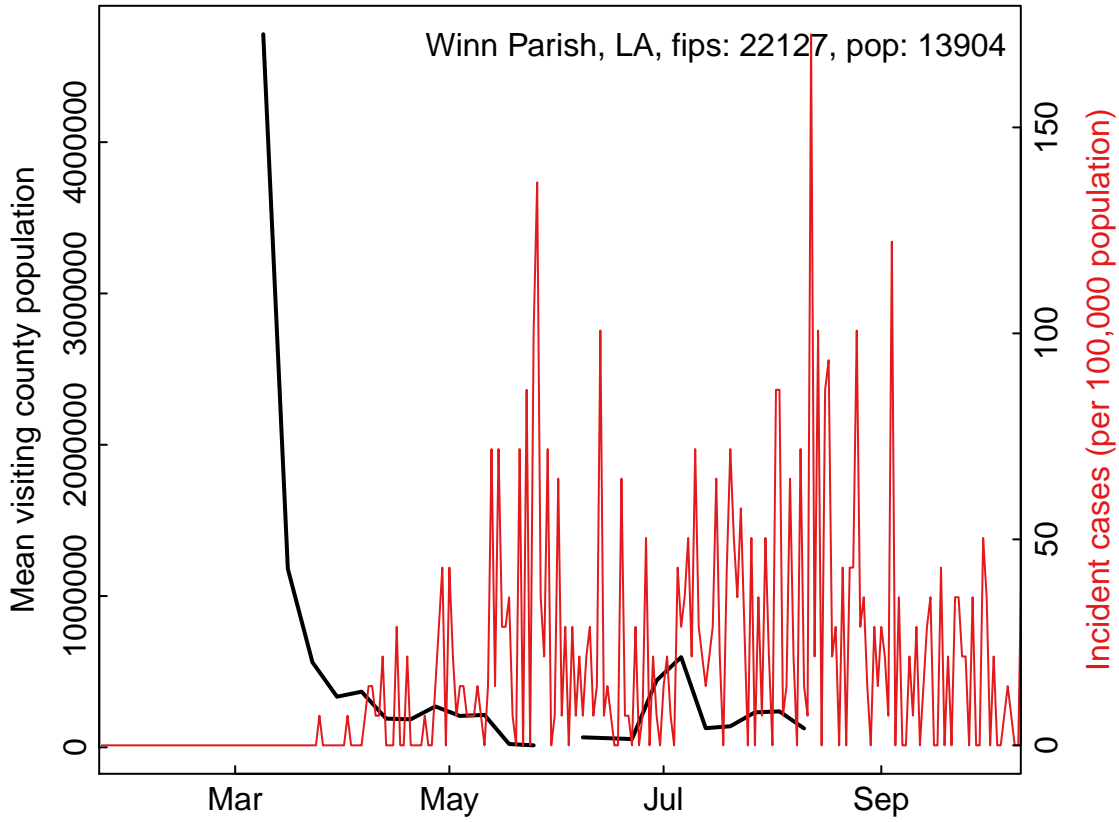

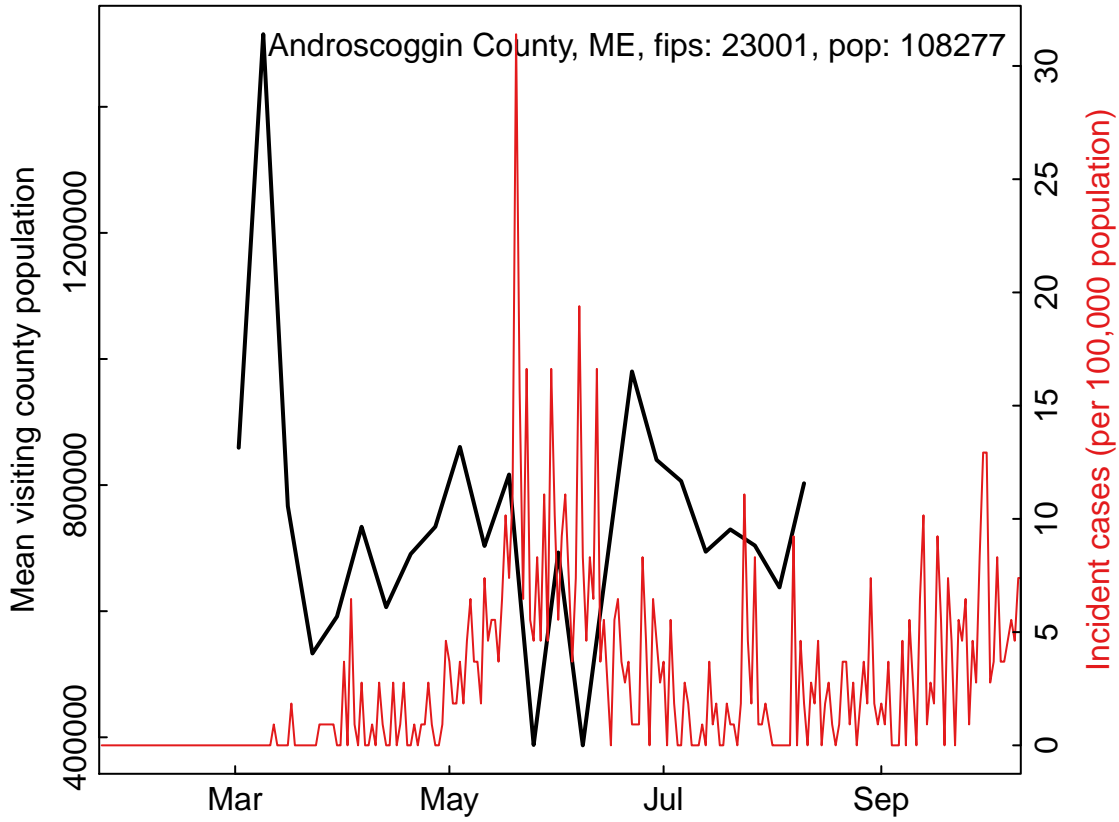

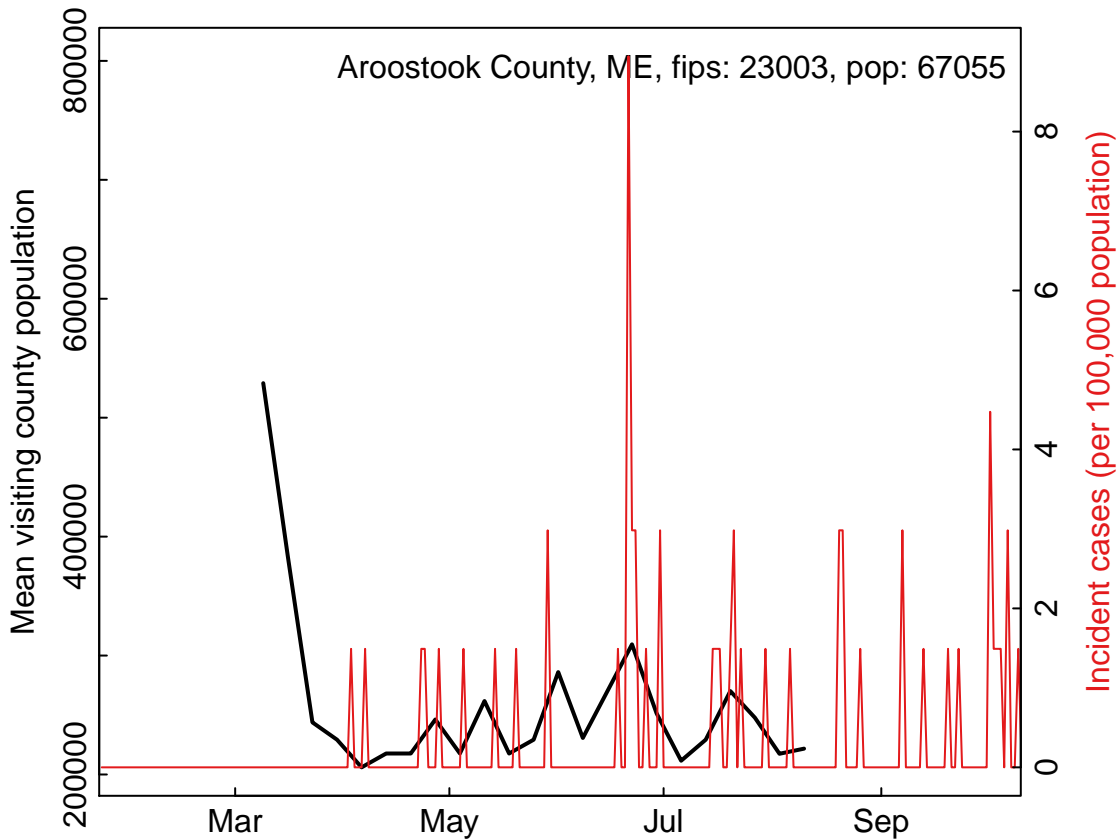

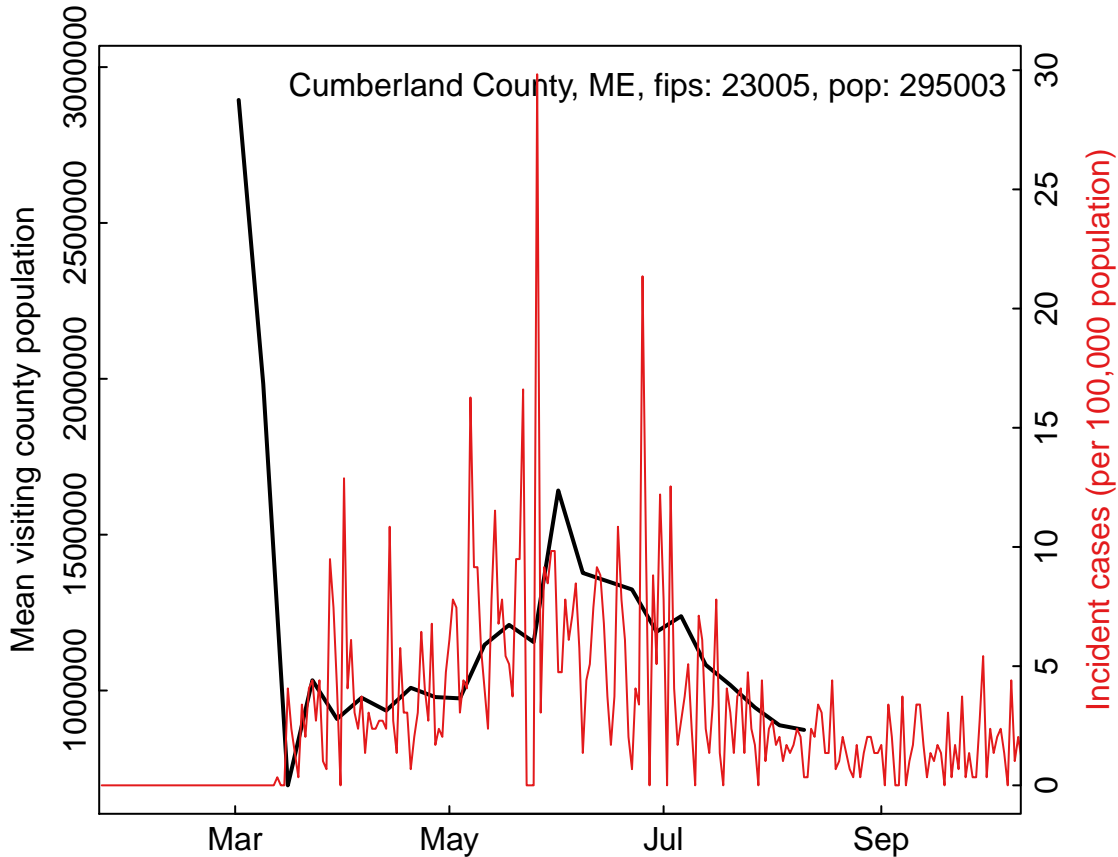



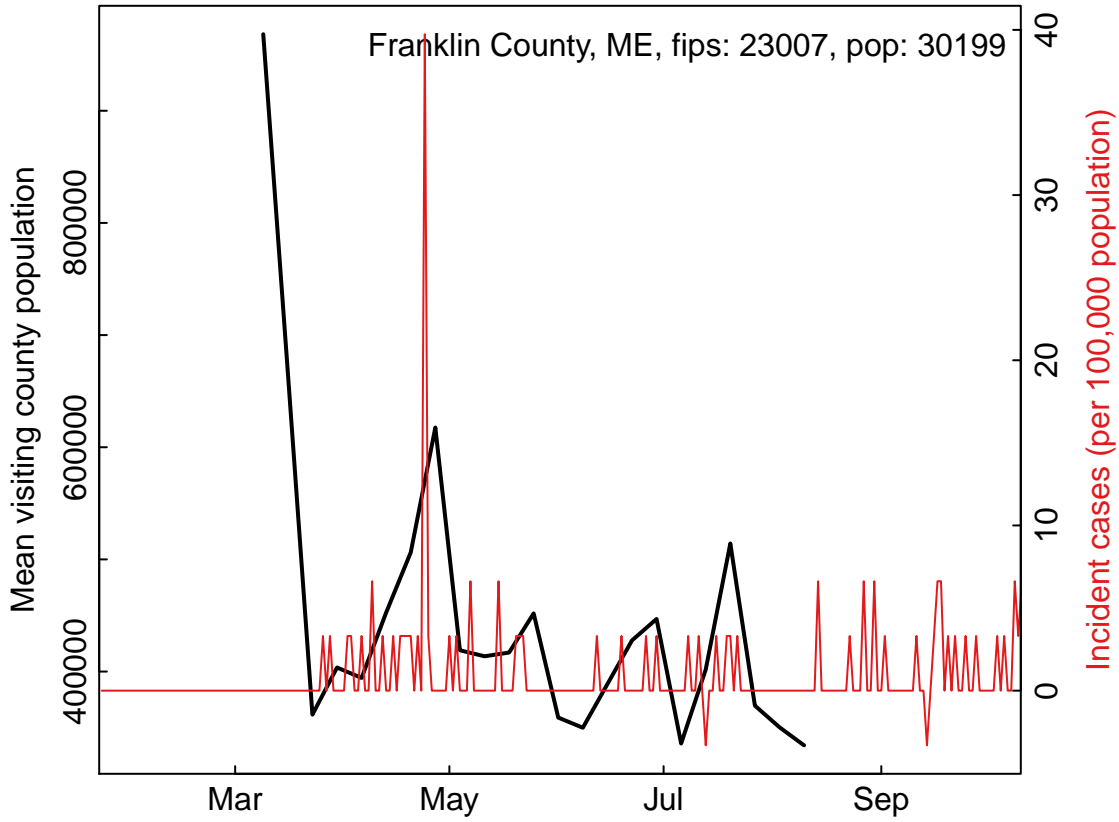

Hancock County, ME, fips: 23009, pop: 54987

Mean visiting county population

1200000  
800000  
600000

Mar

May

Jul

Sep

10

5

0

-5

Incident cases (per 100,000 population)

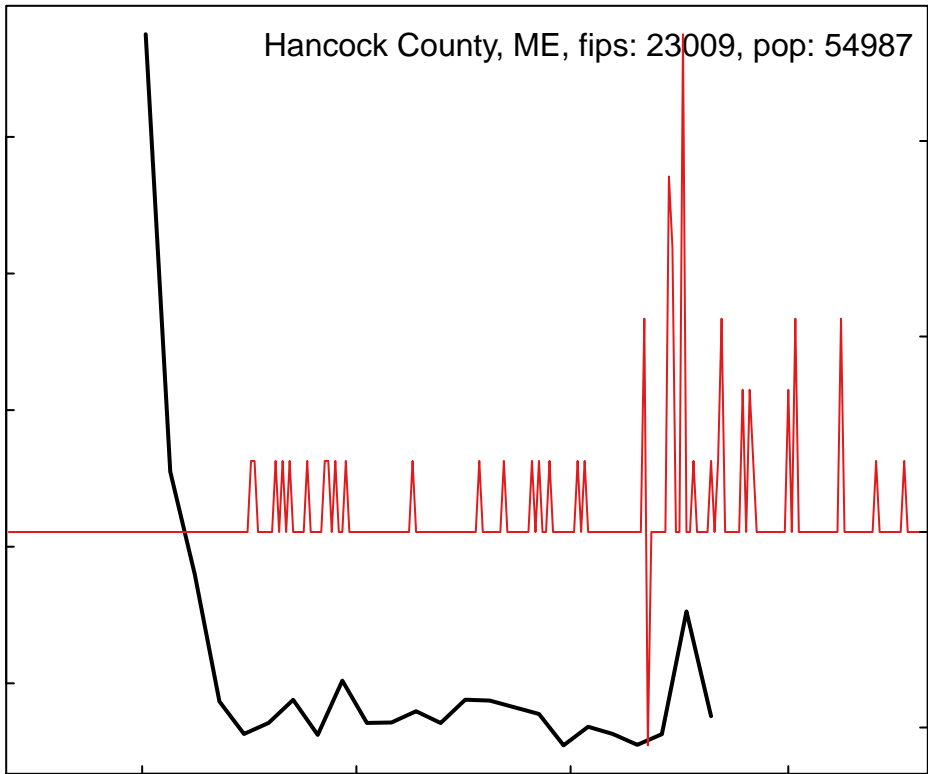

Kennebec County, ME, fips: 23011, pop: 122302

Mean visiting county population

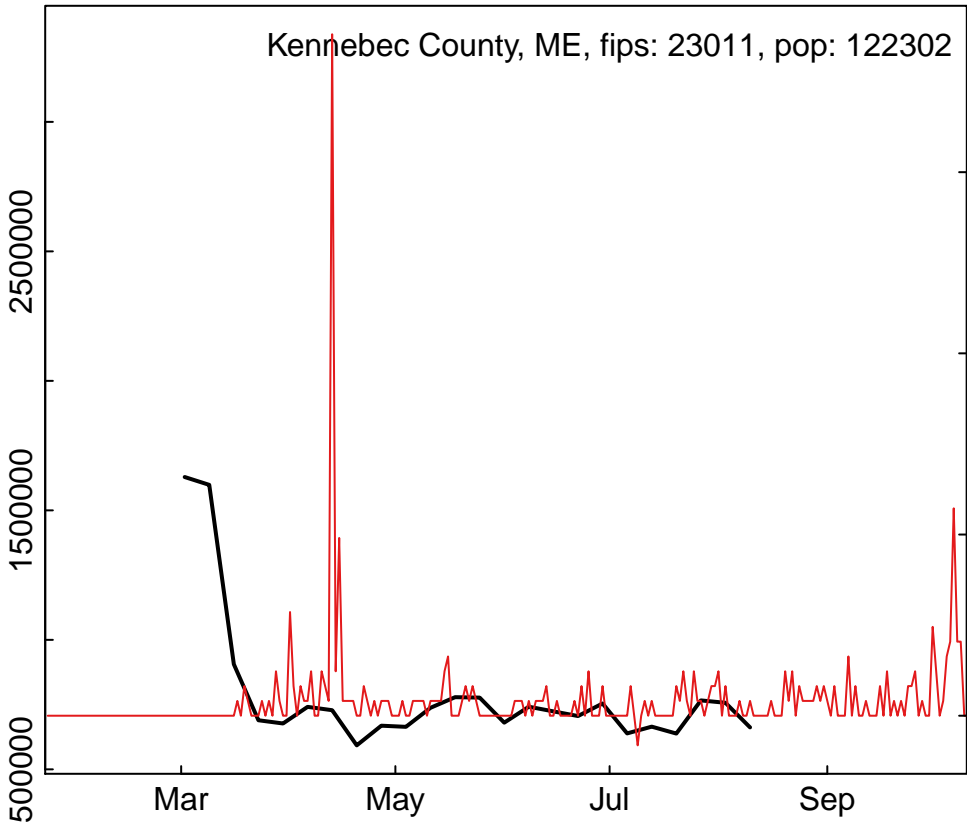

Incident cases (per 100,000 population)

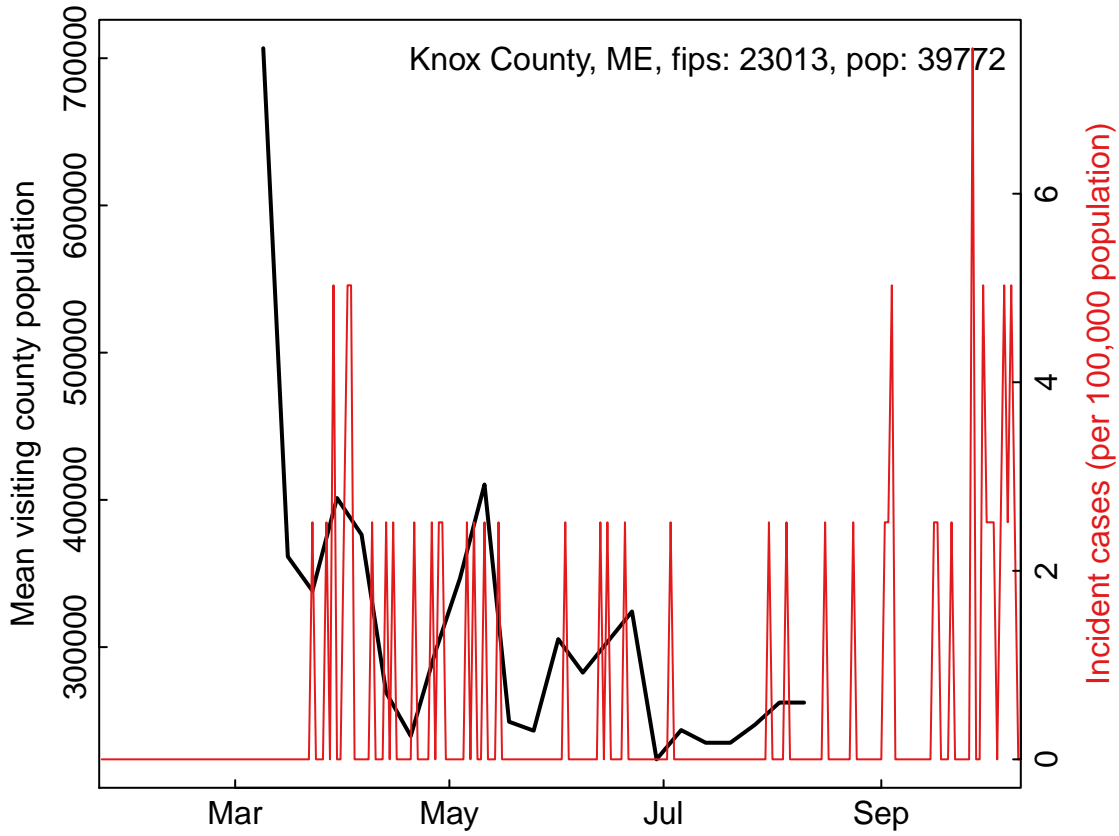

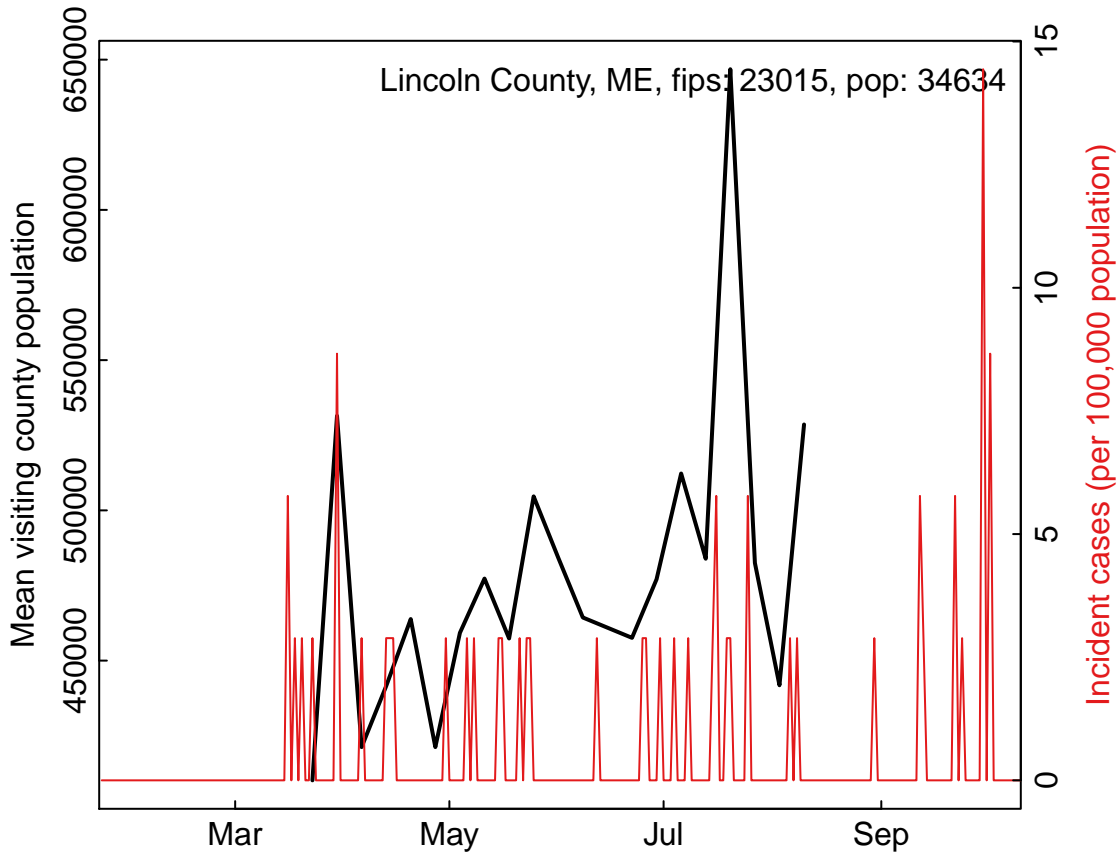

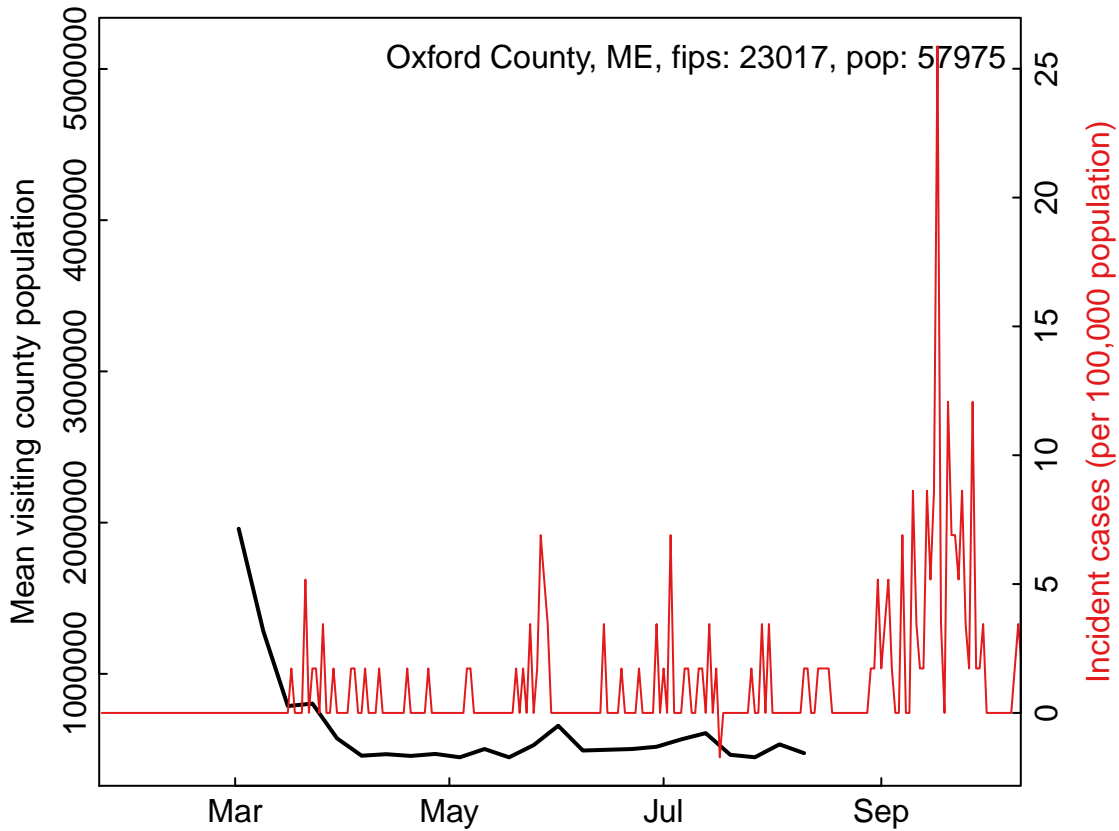

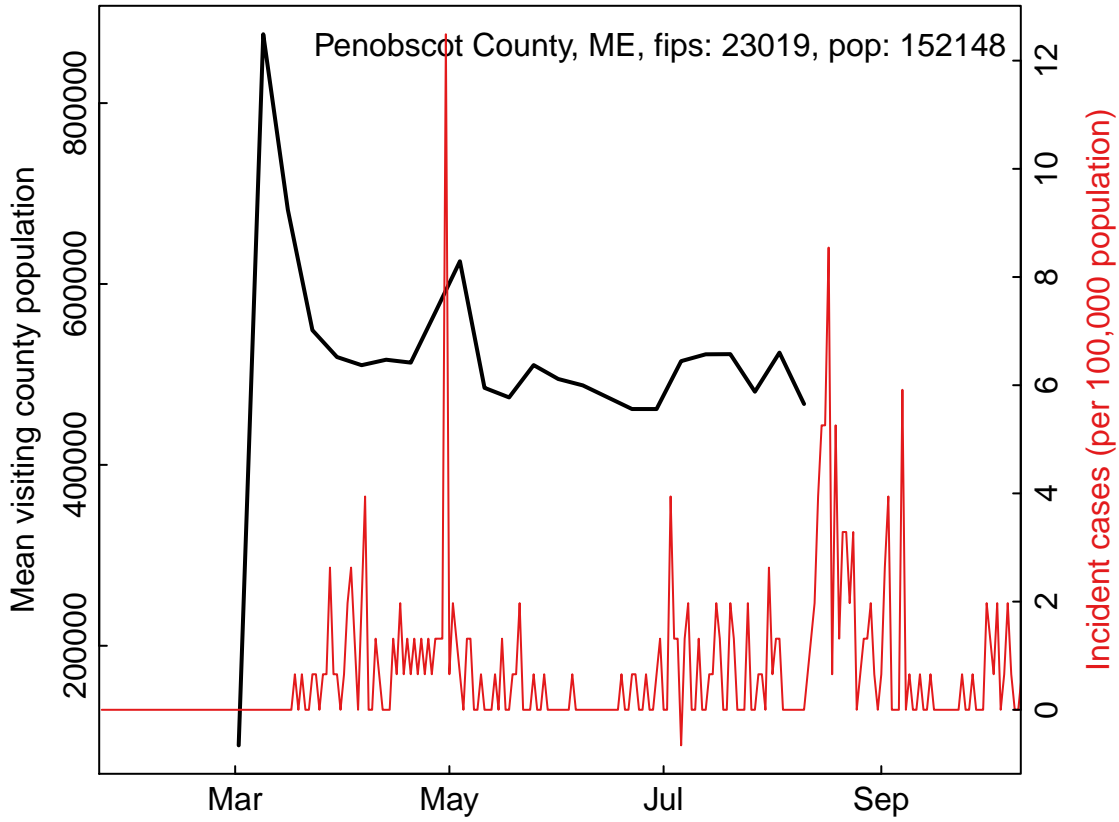

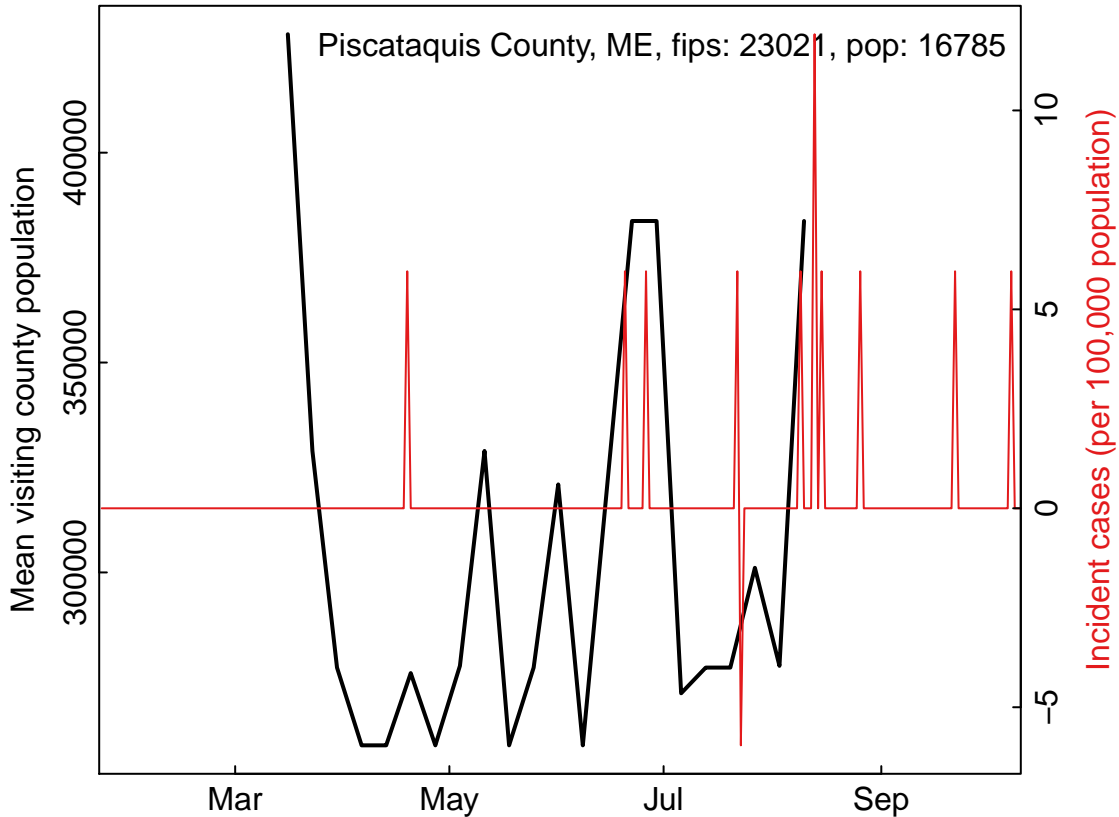



Sagadahoc County, ME, fips: 23023, pop: 35856

Mean visiting county population

500000  
1000000  
1500000

Mar

May

Jul

Sep

Incident cases (per 100,000 population)

-2  
0  
2  
4  
6  
8  
10

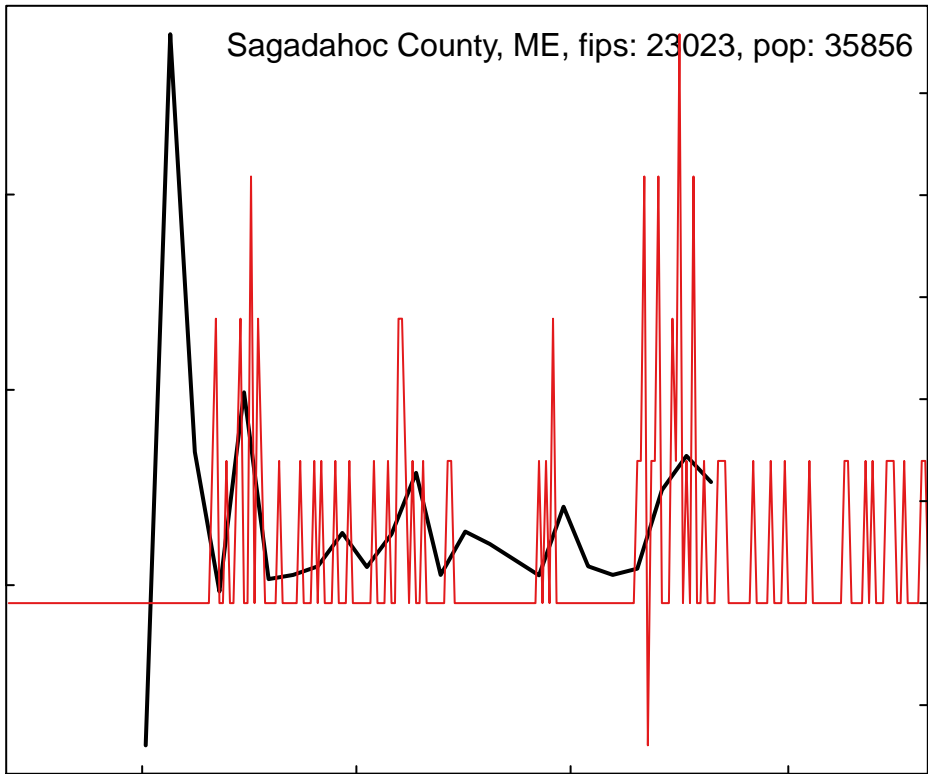

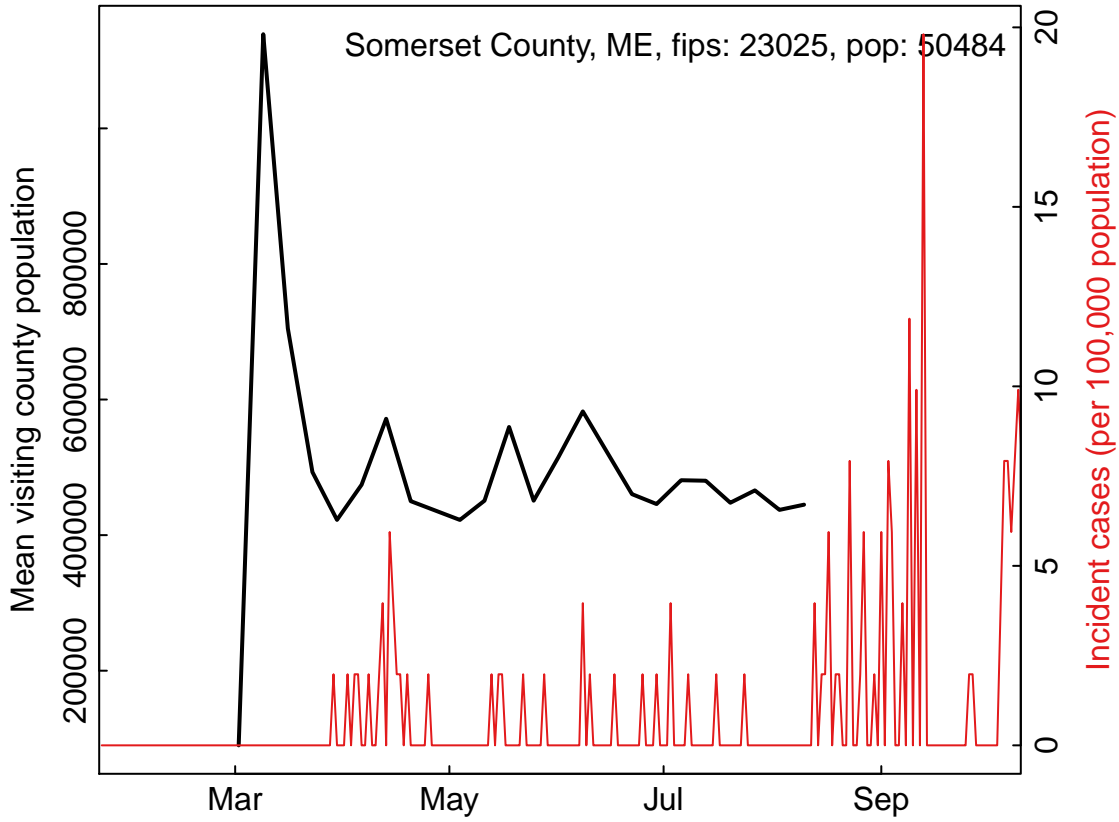

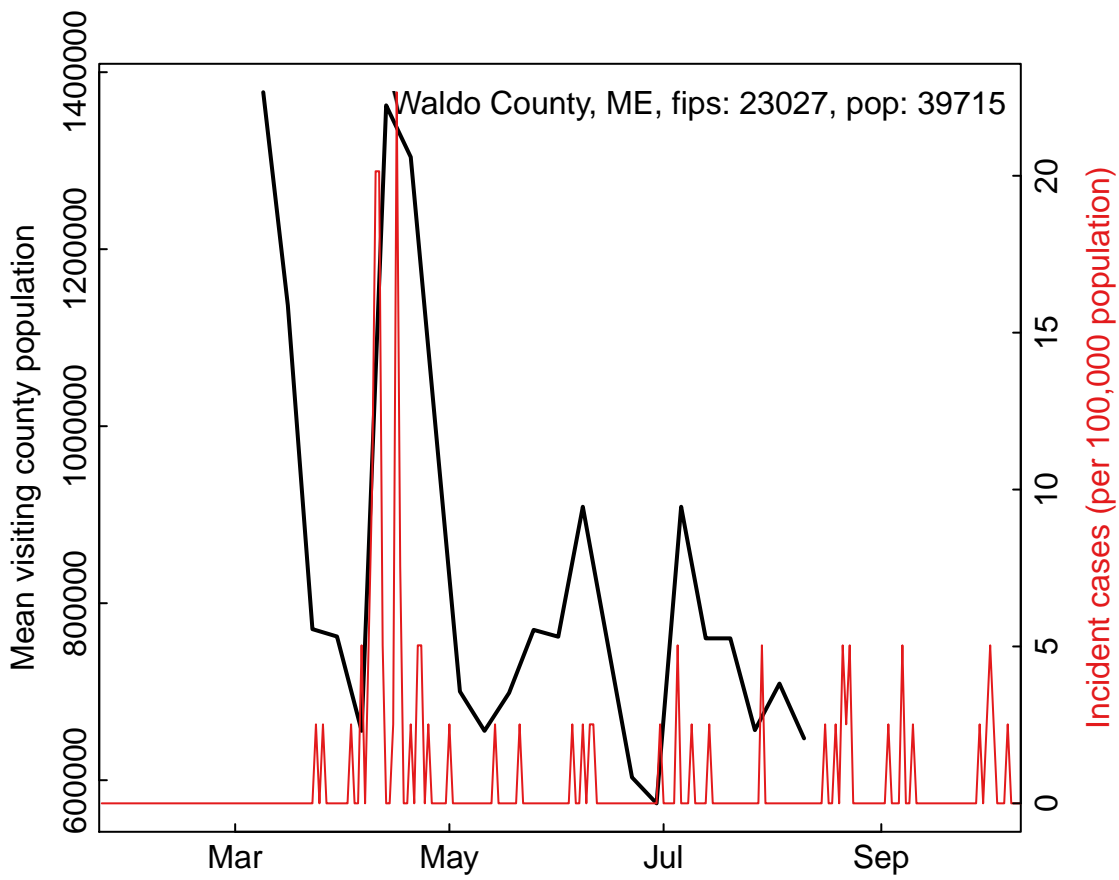

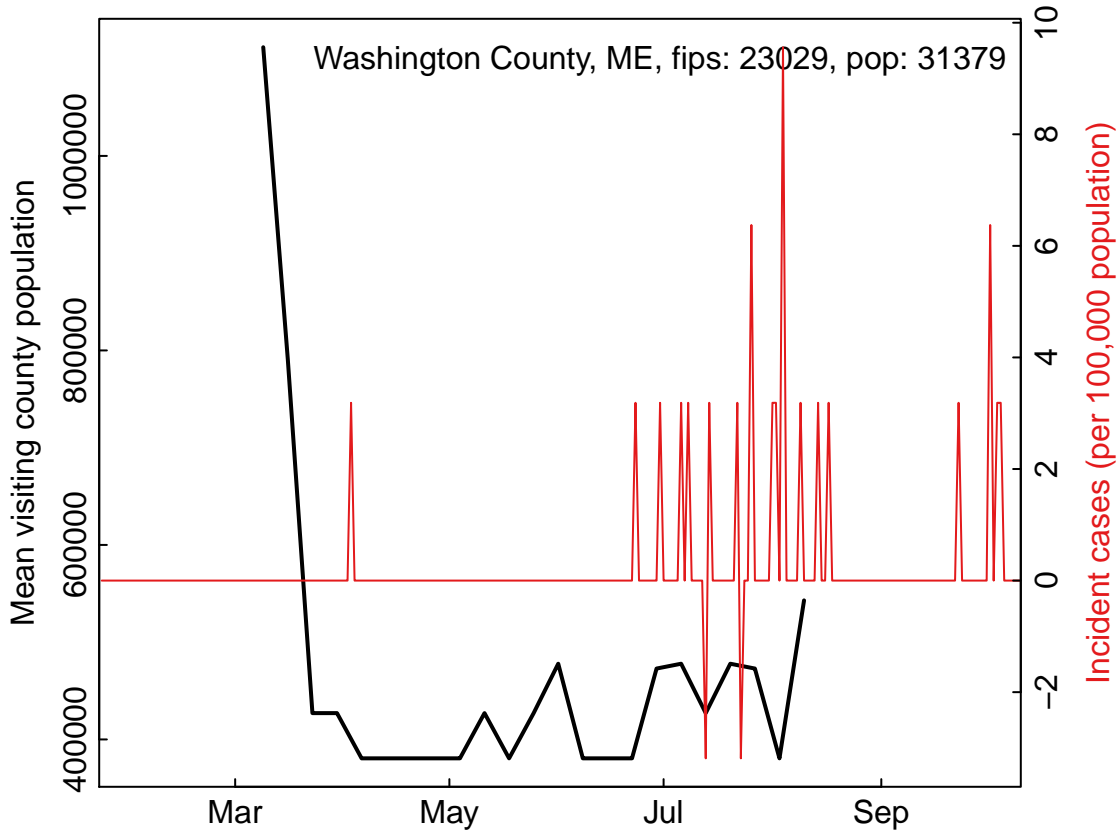

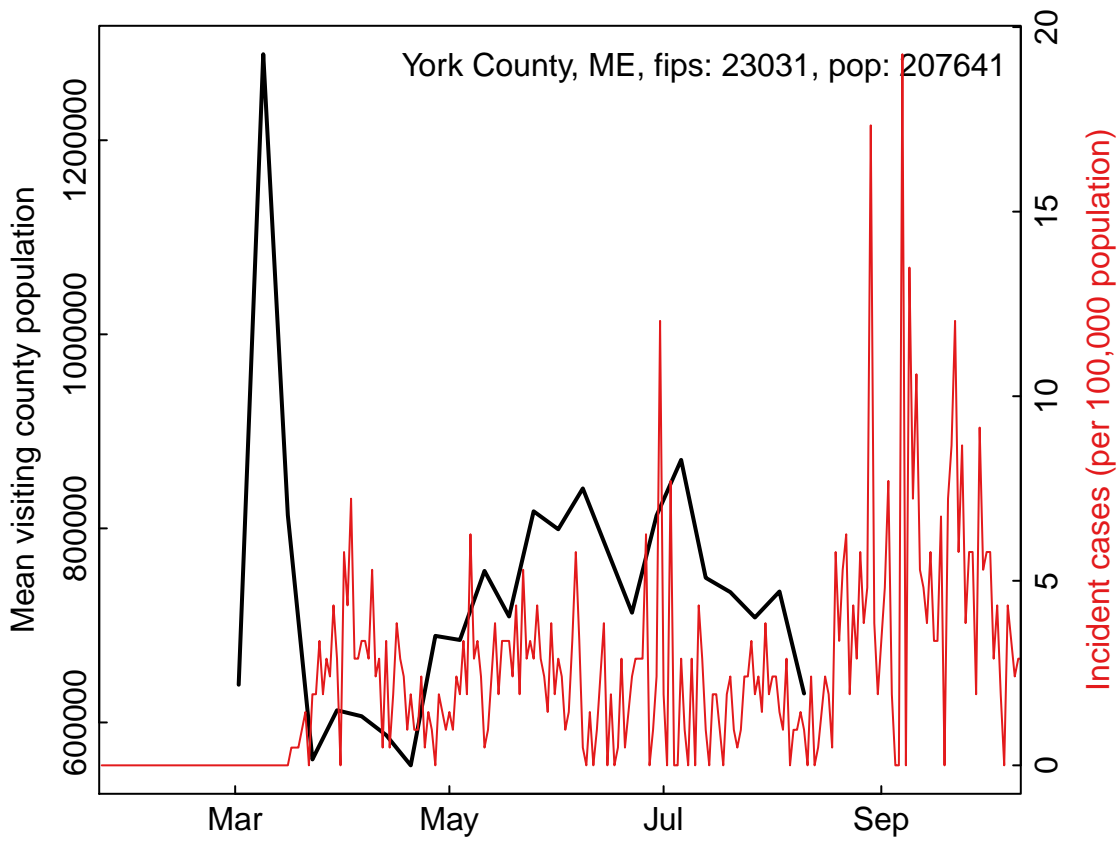

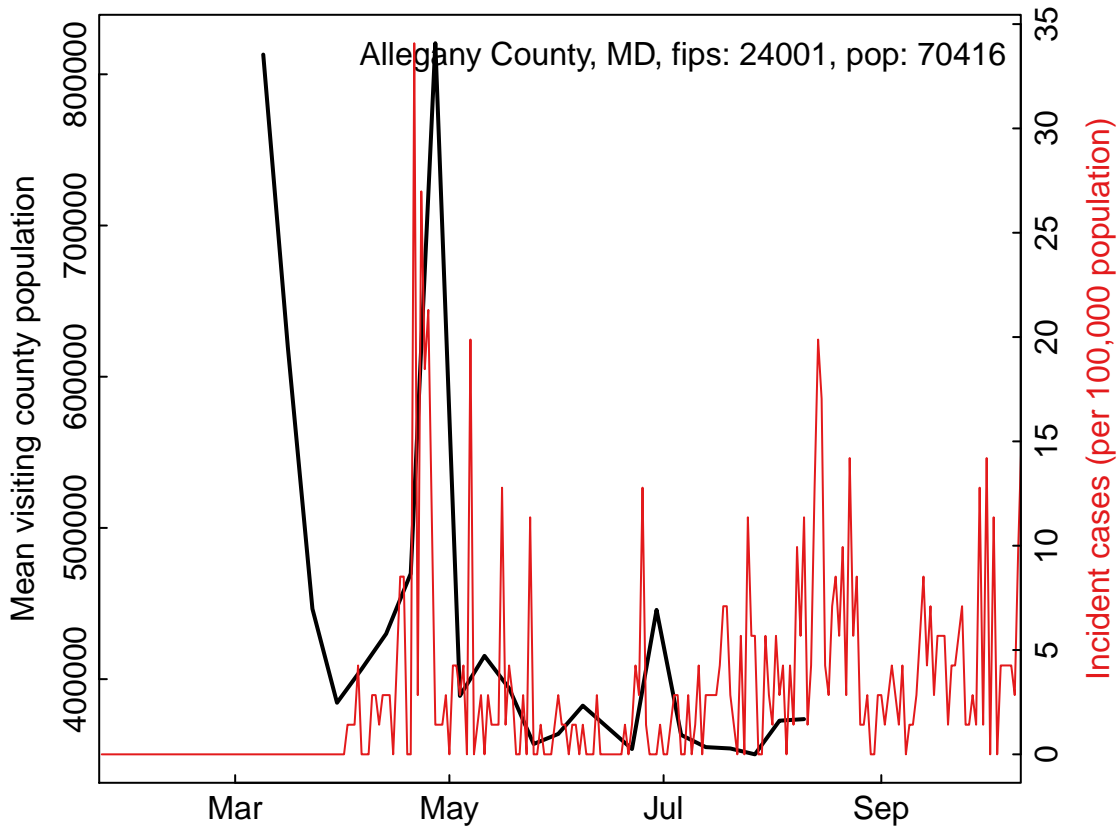

Anne Arundel County, MD, fips: 24003, pop: 579234

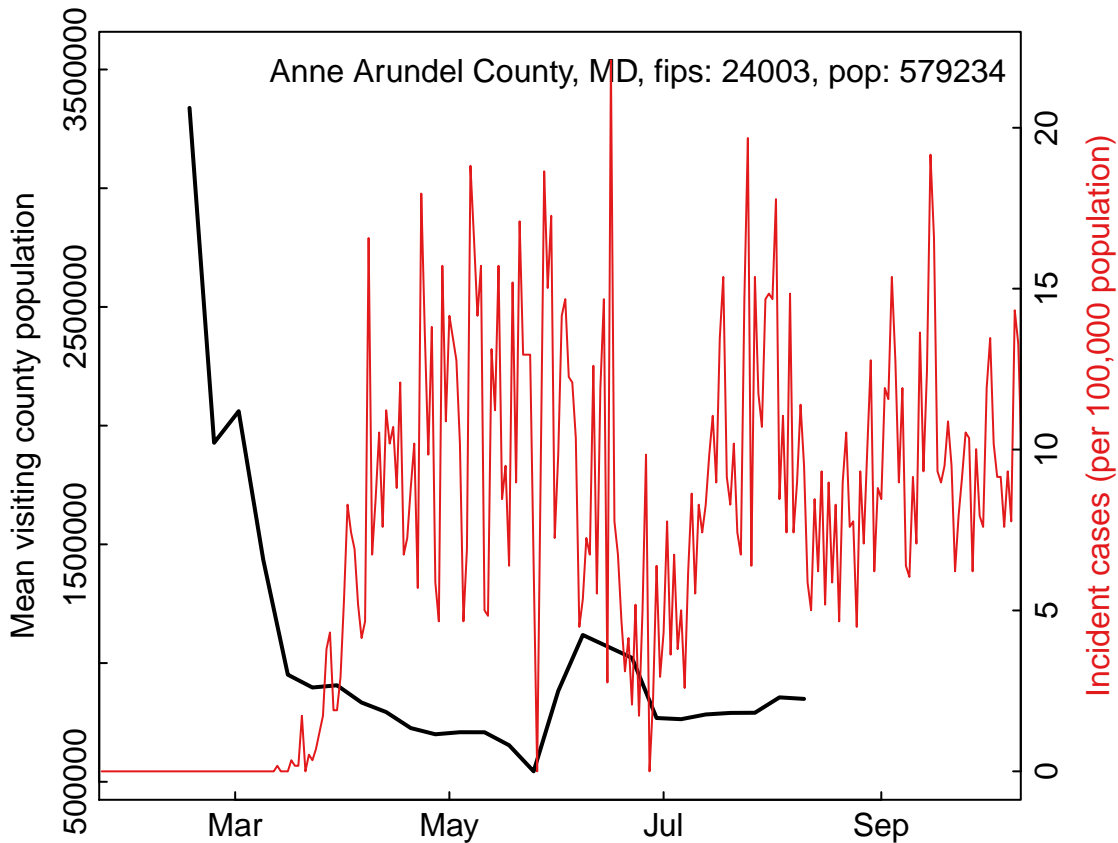

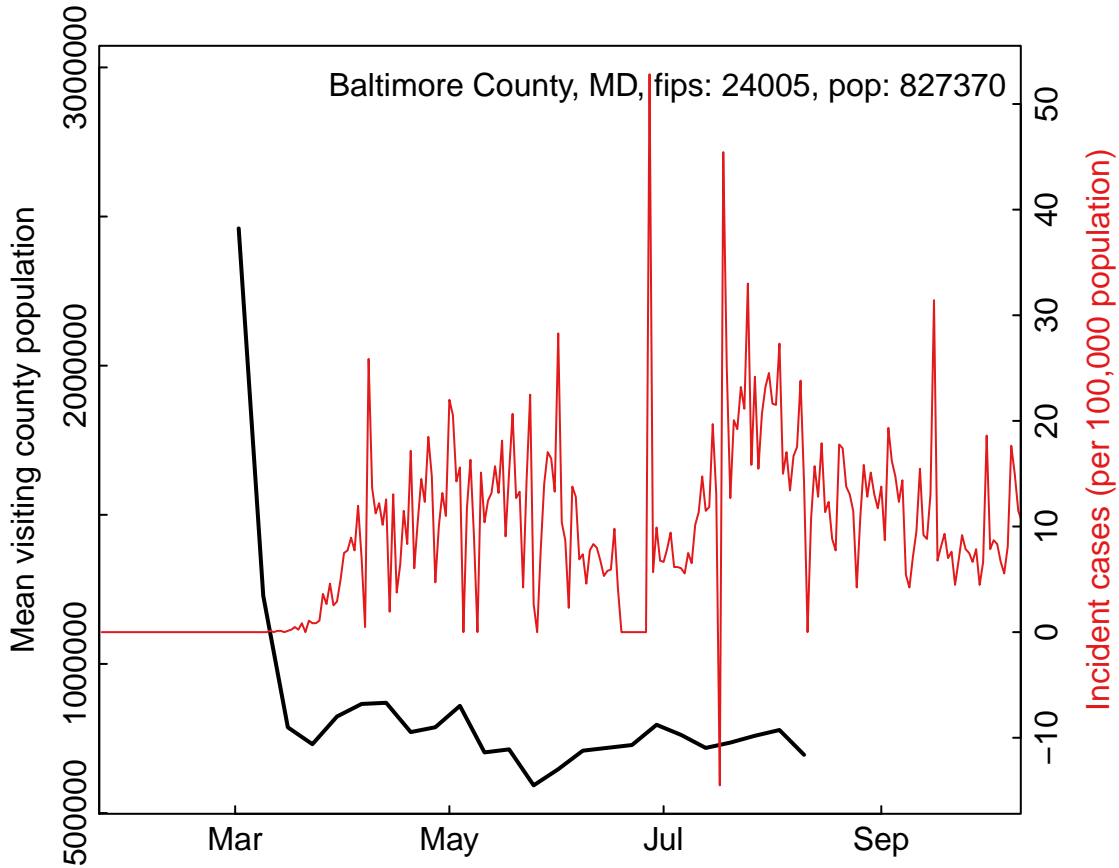



Calvert County, MD, fips: 24009, pop: 92525

Mean visiting county population

1400000  
1000000  
600000

Mar

May

Jul

Sep

25  
20  
15  
10  
5  
0

Incident cases (per 100,000 population)

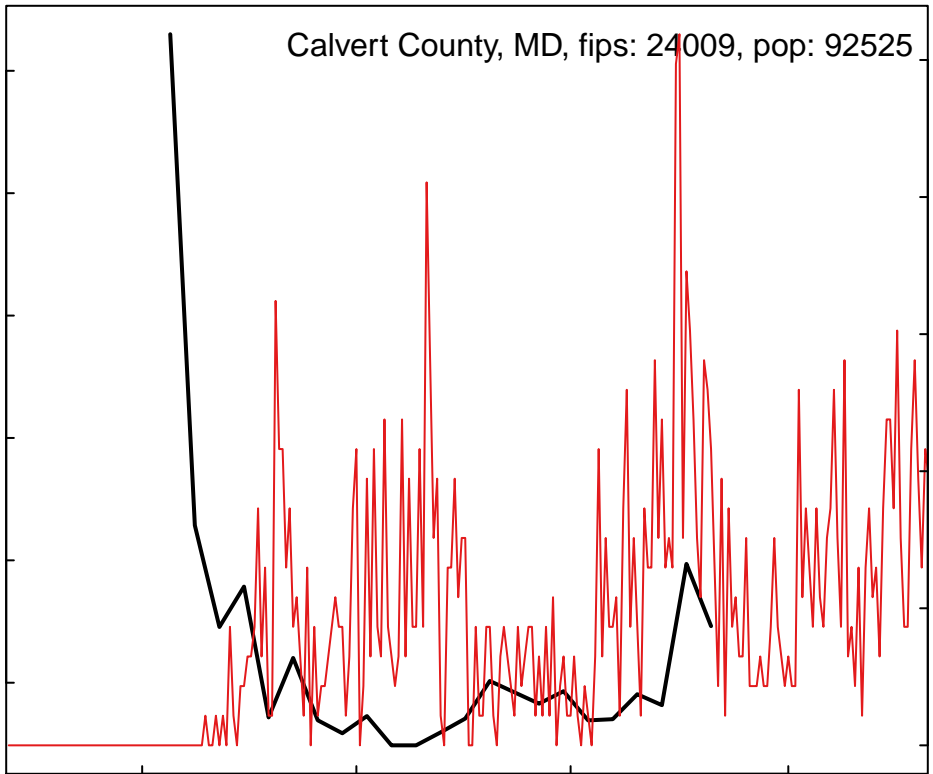

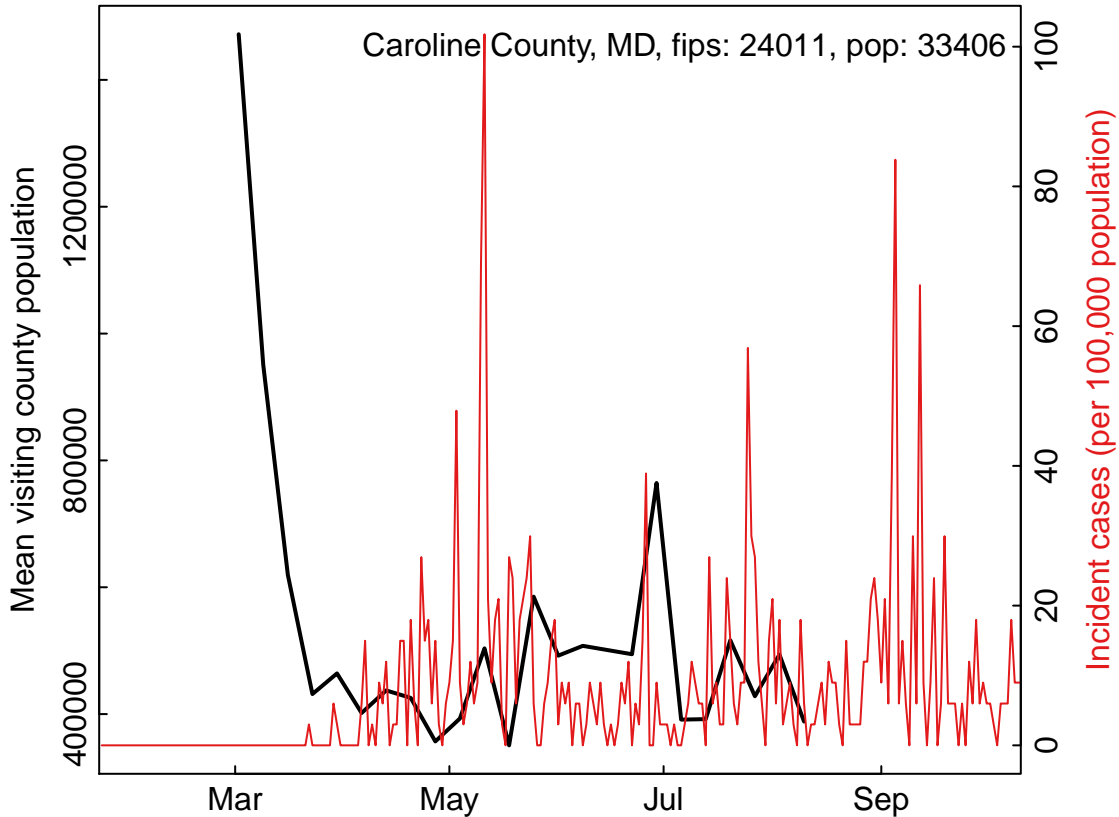

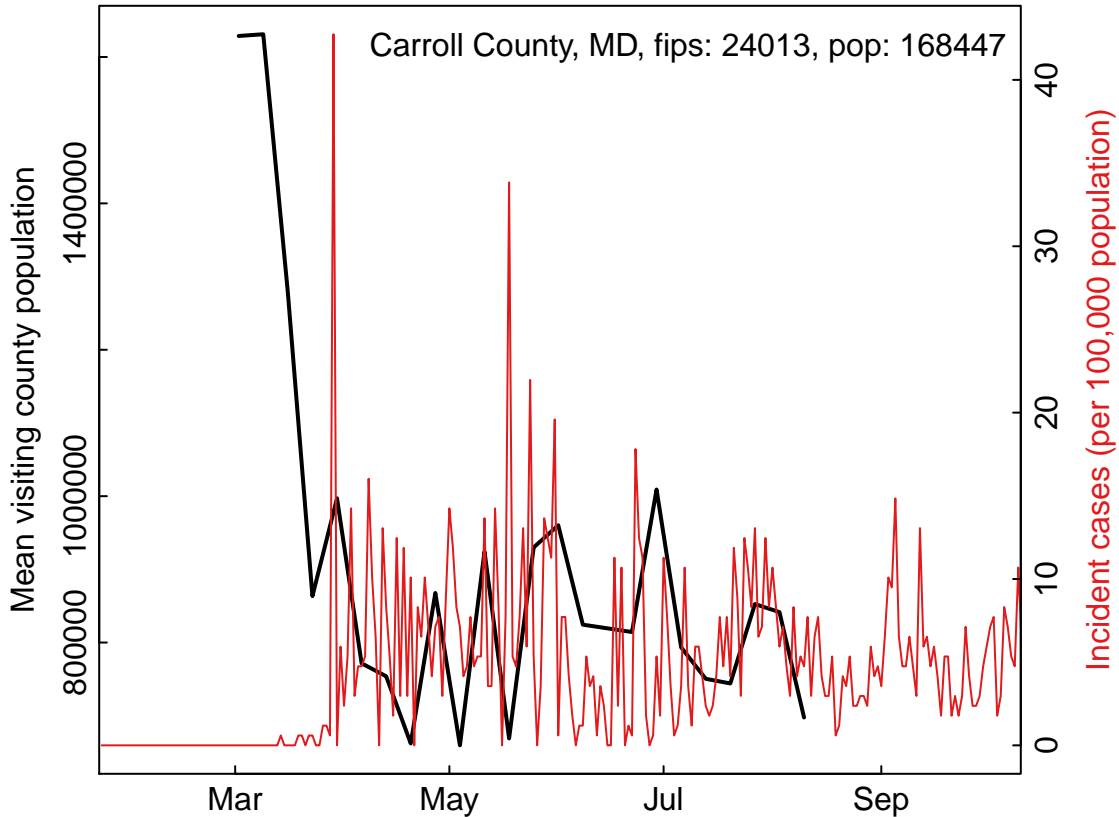

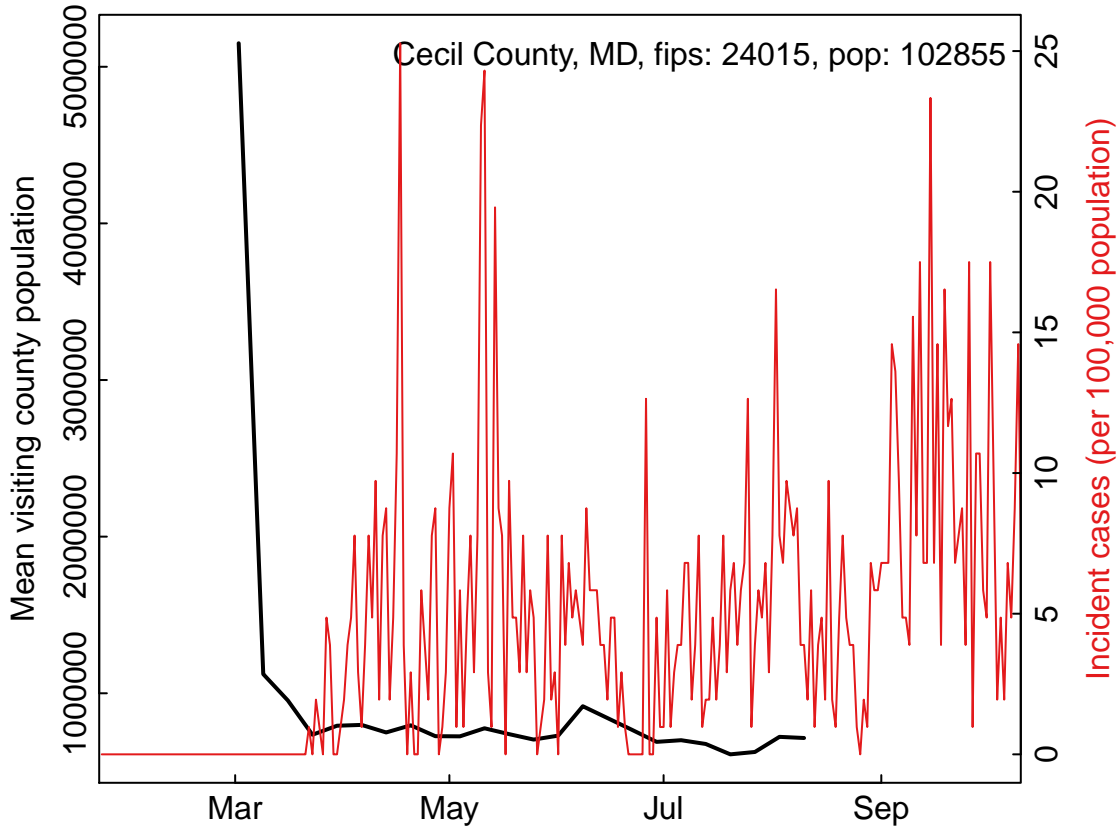

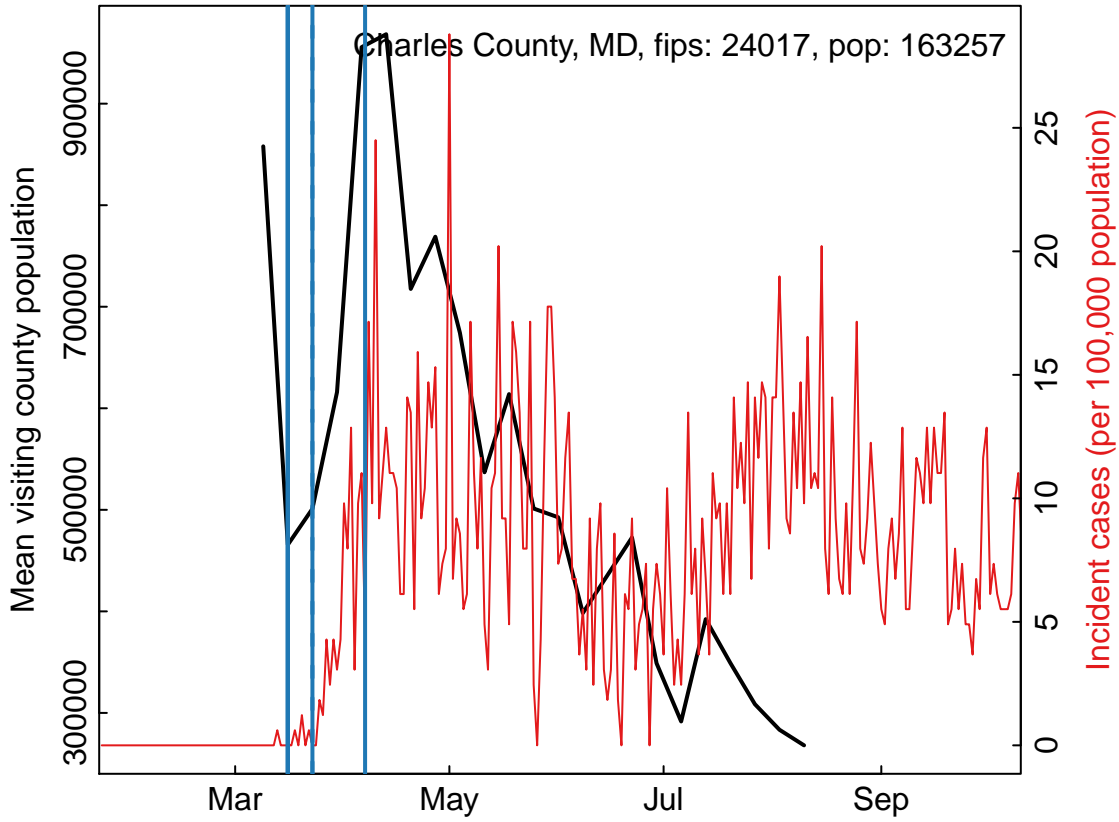

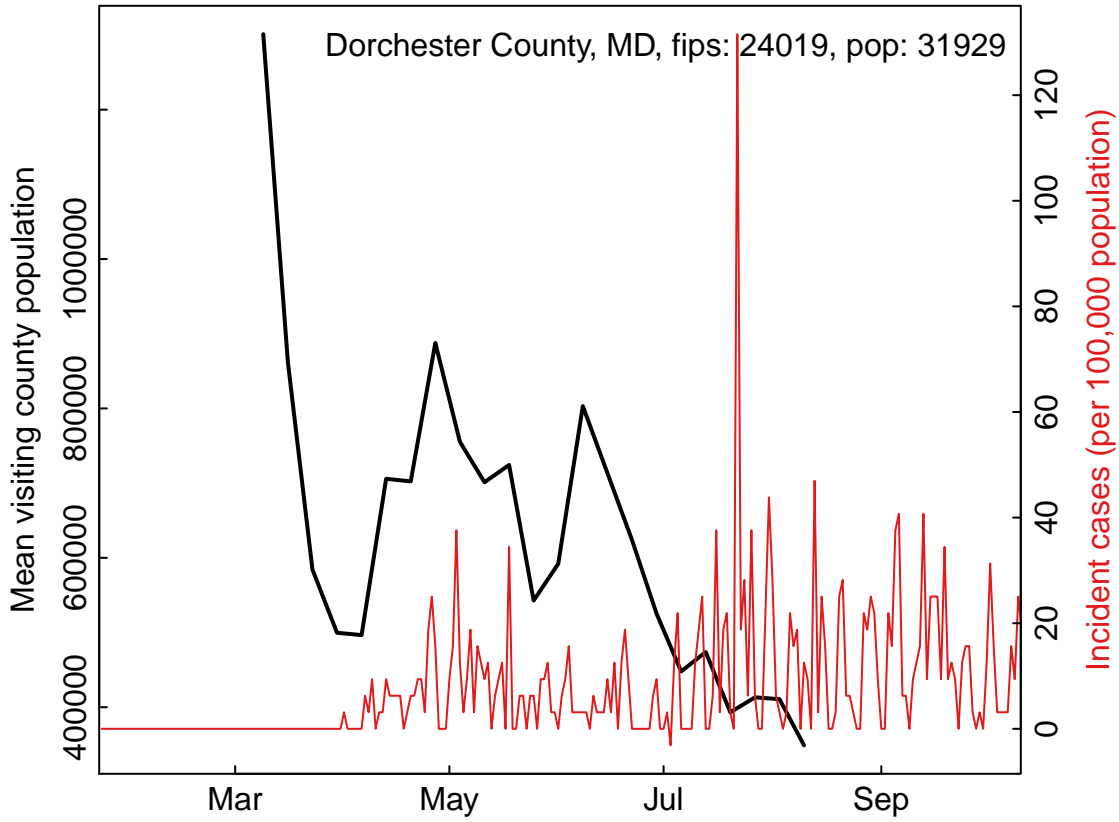

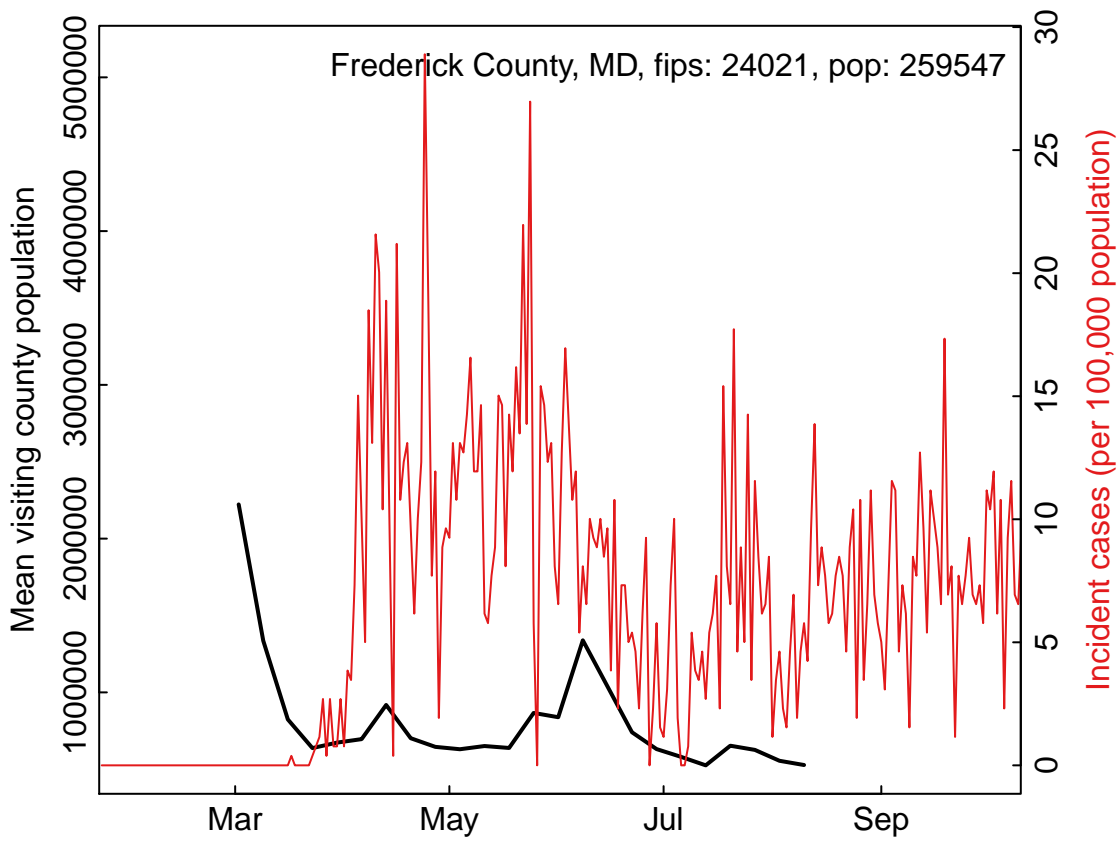

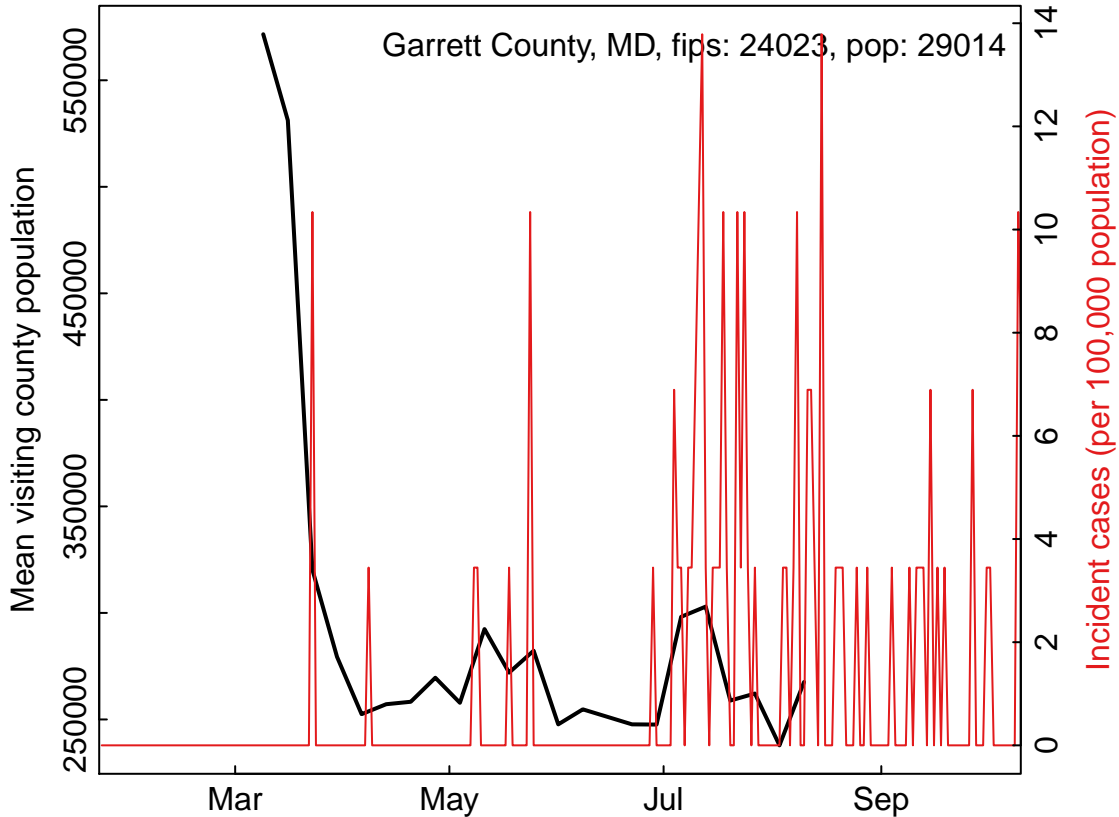



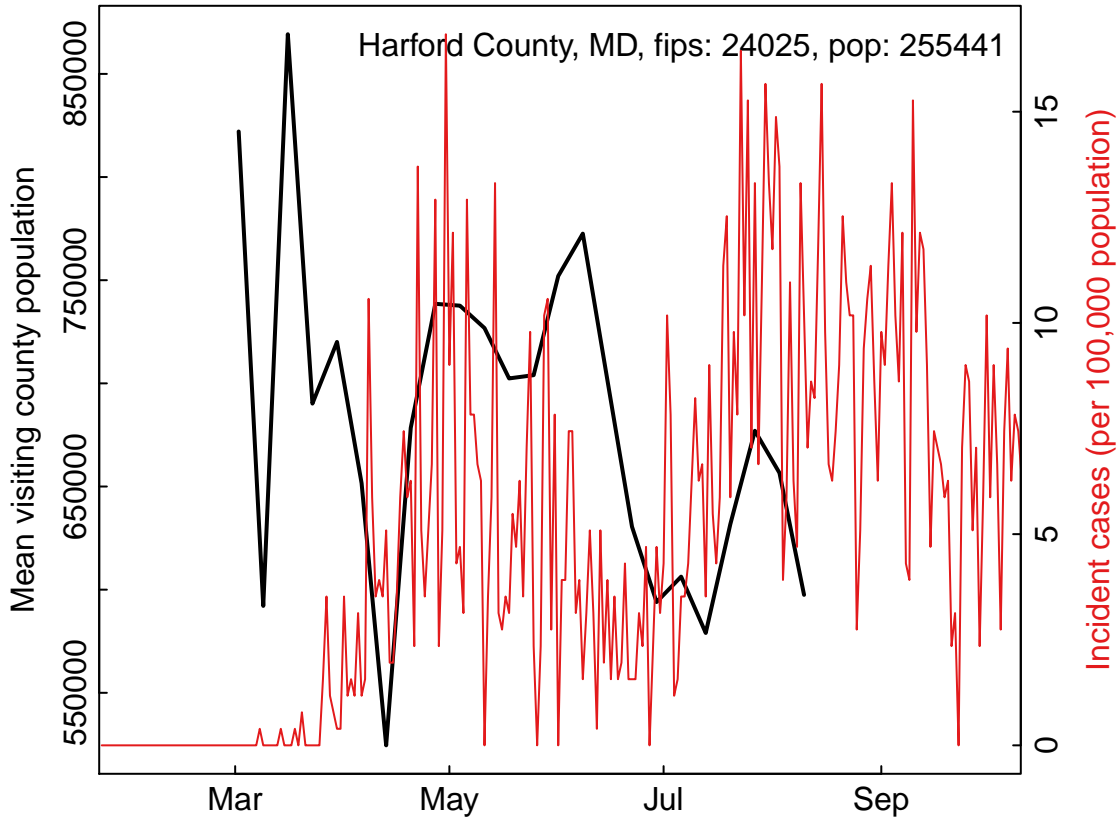

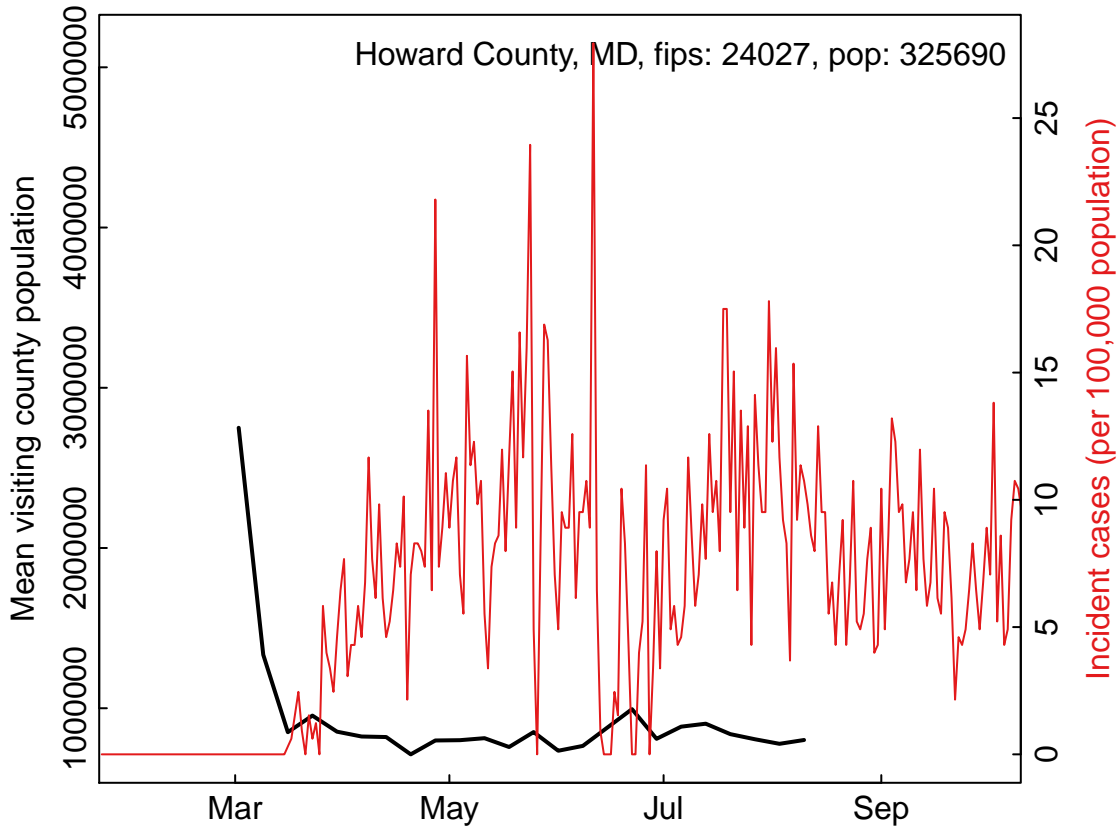

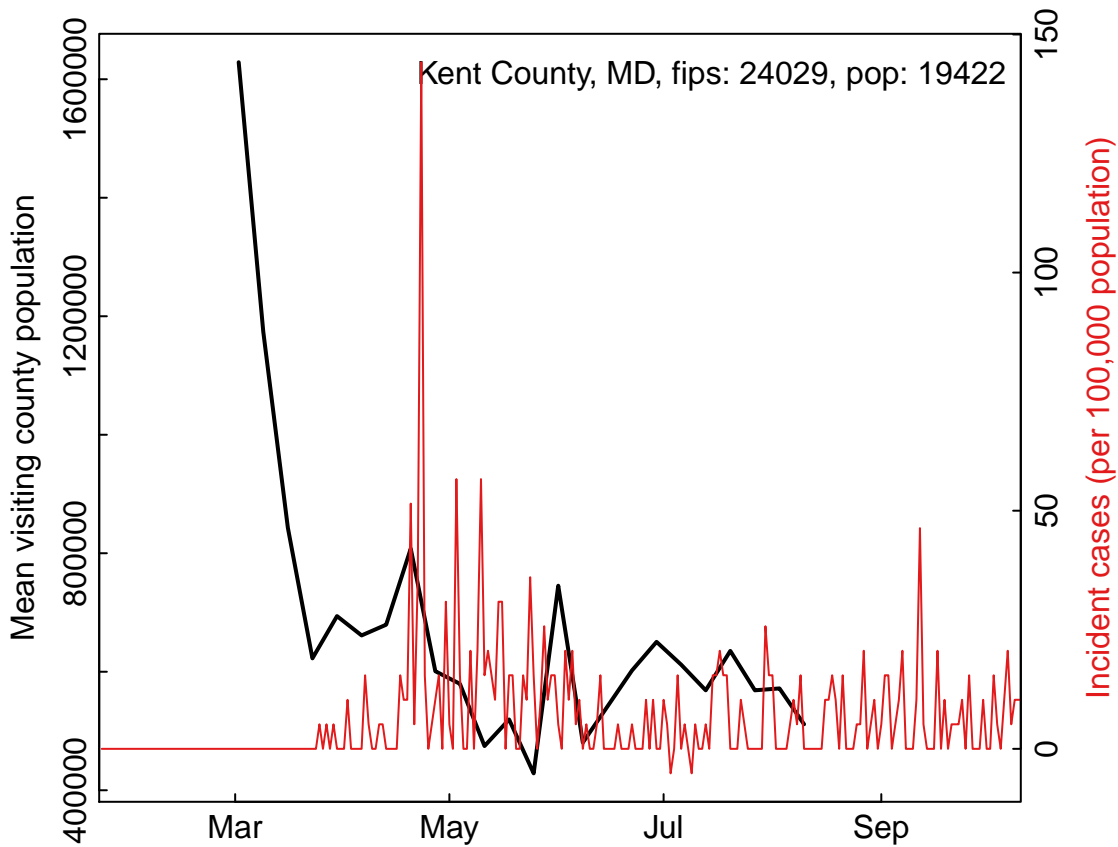

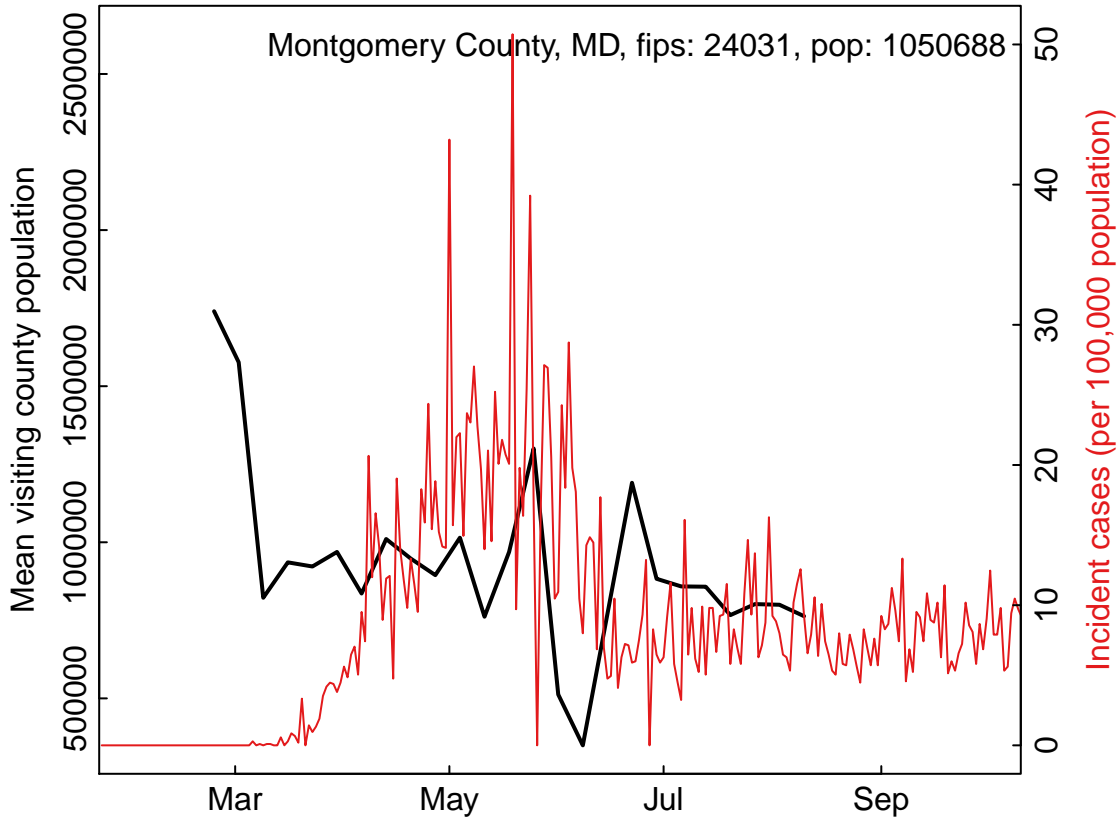

Prince George's County, MD, fips: 24033, pop: 909327

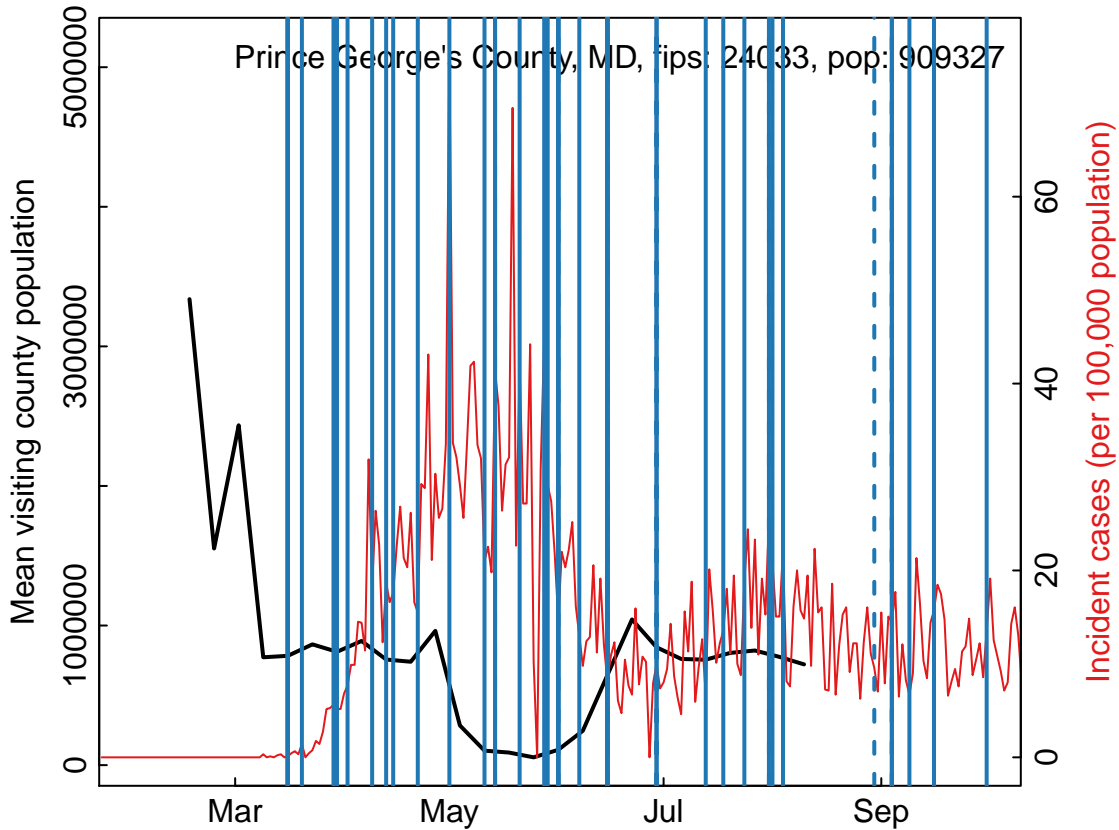

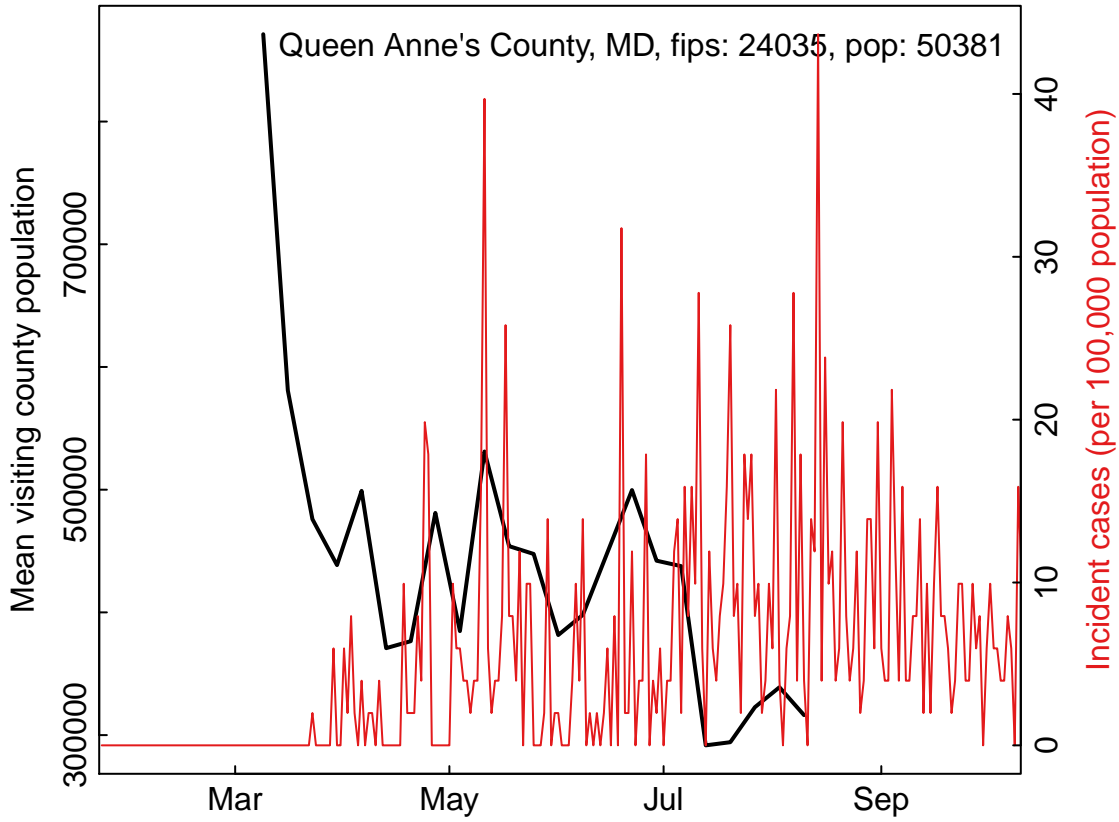

St. Mary's County, MD, fips: 24037, pop: 113510

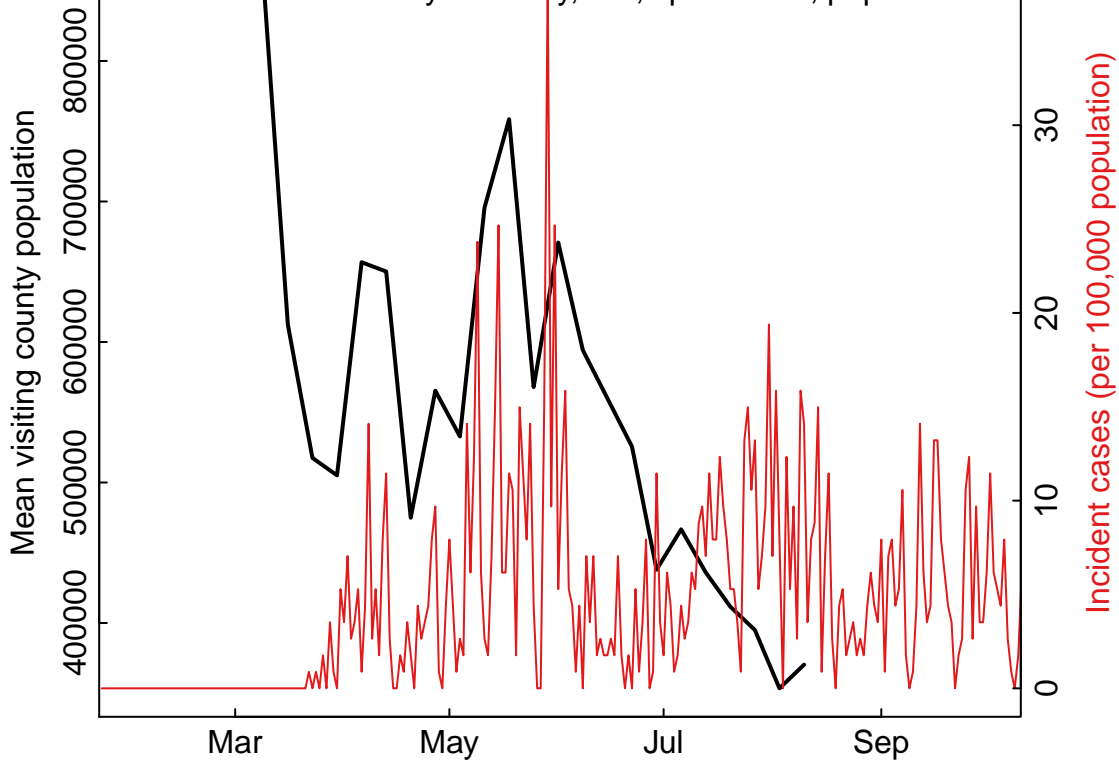

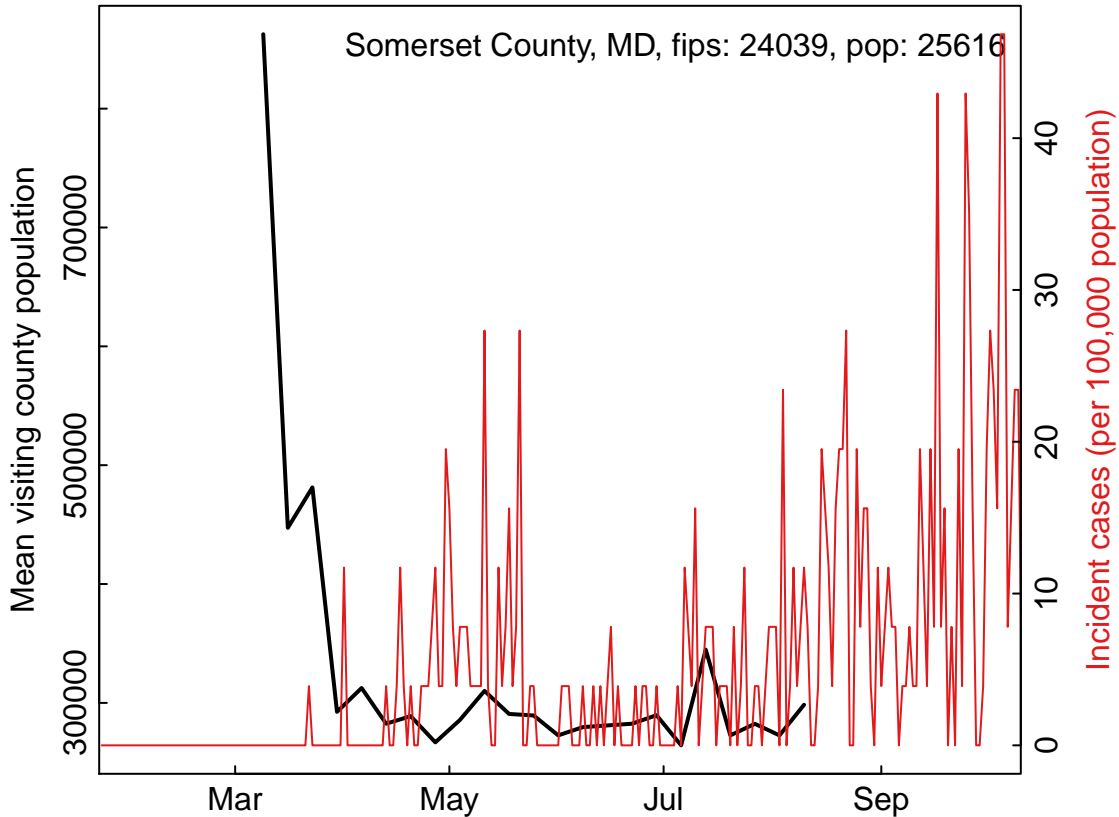



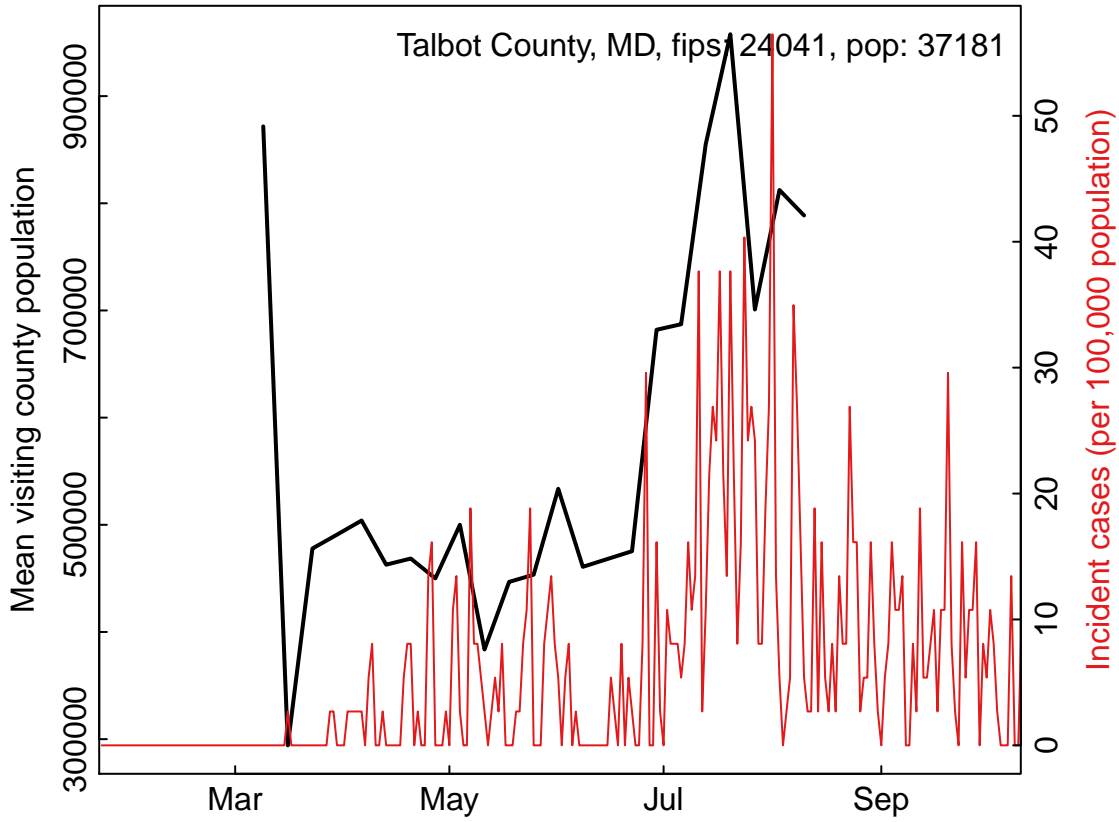

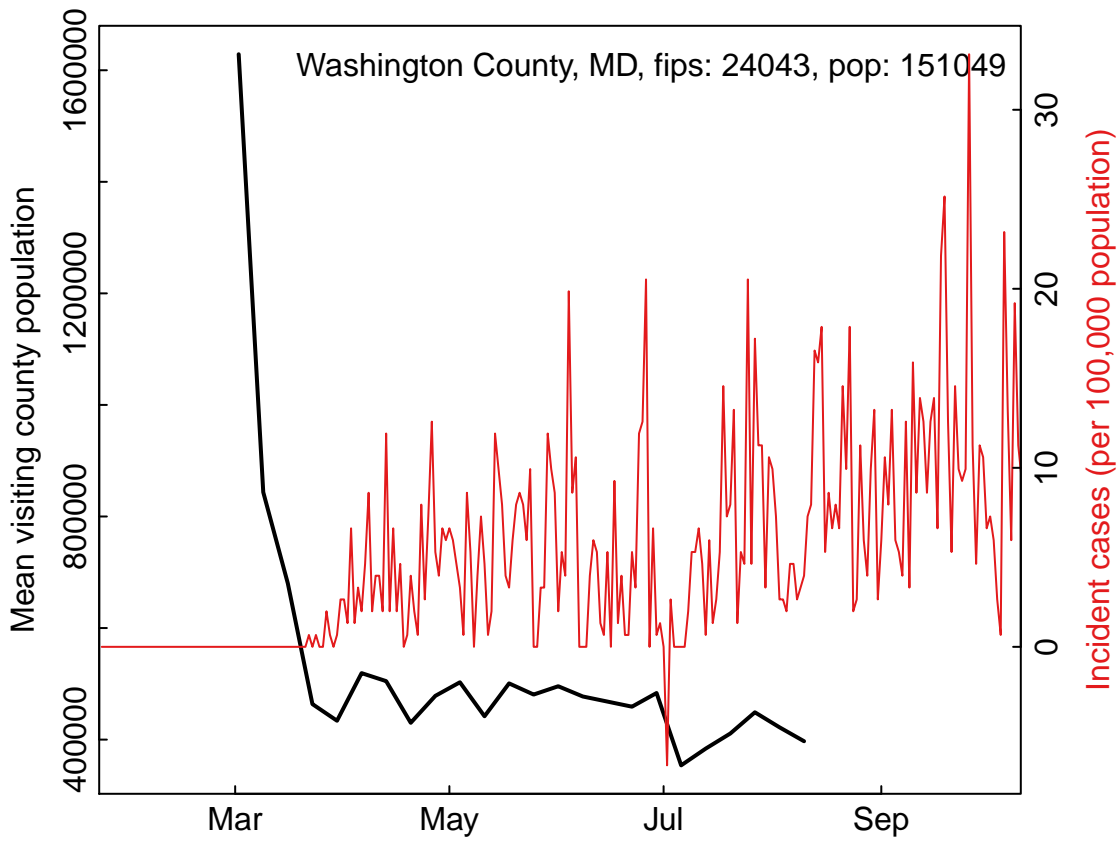

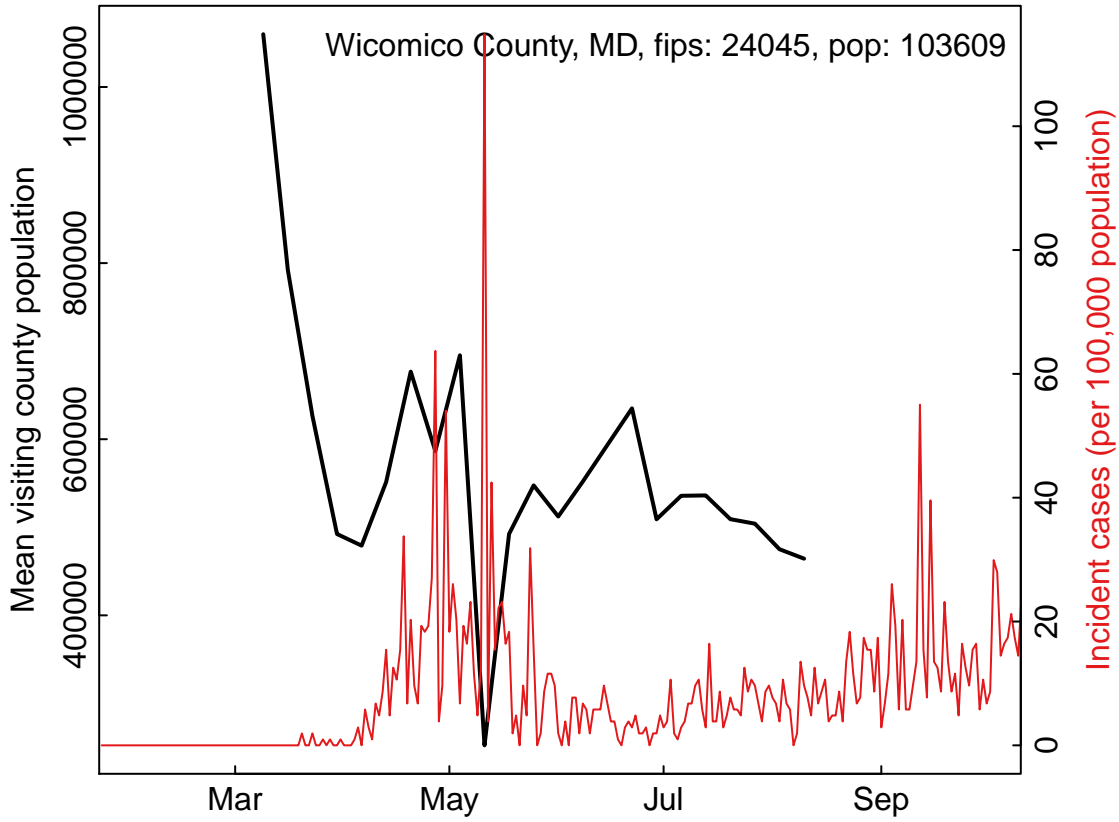

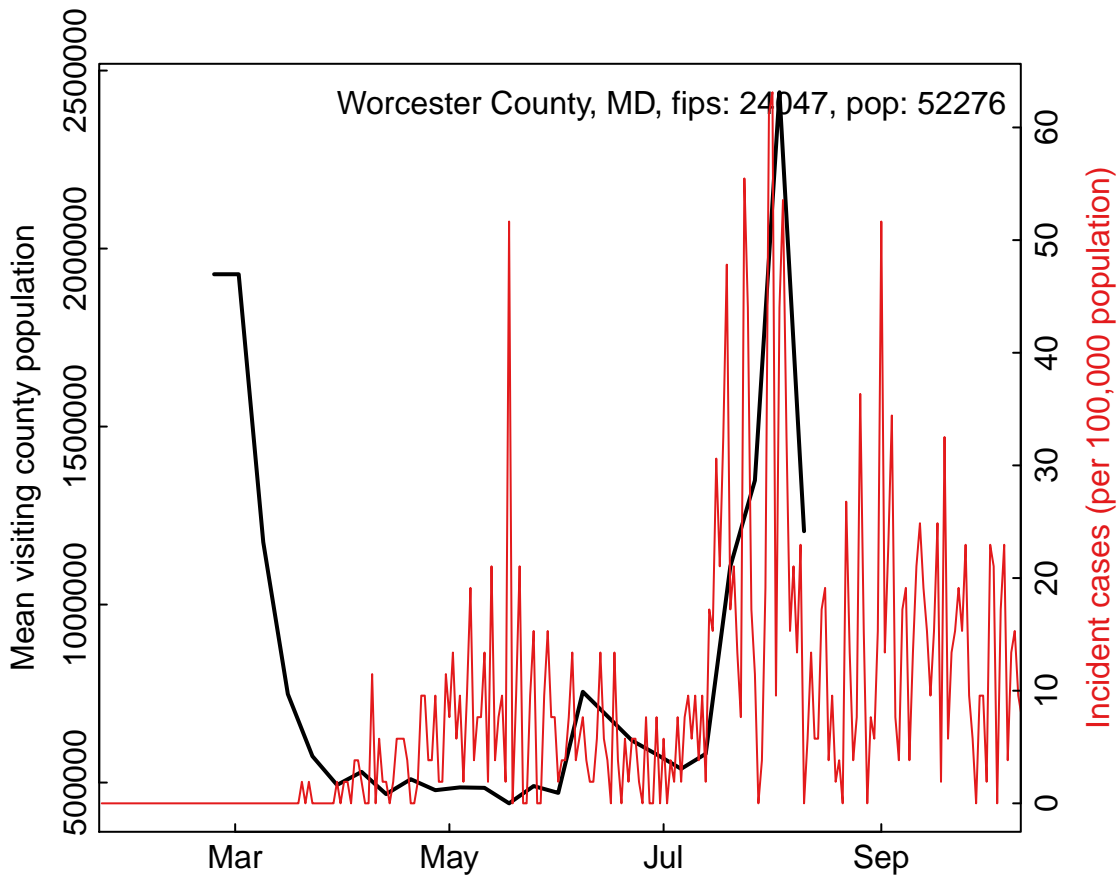

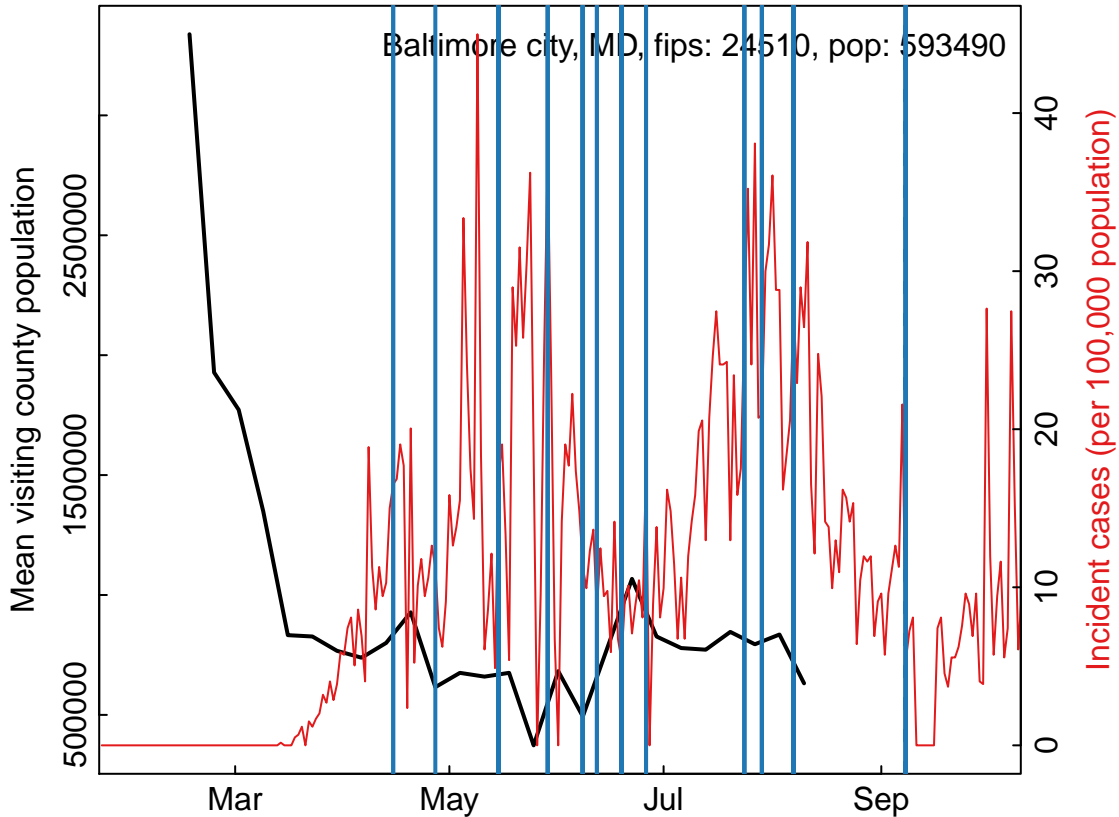

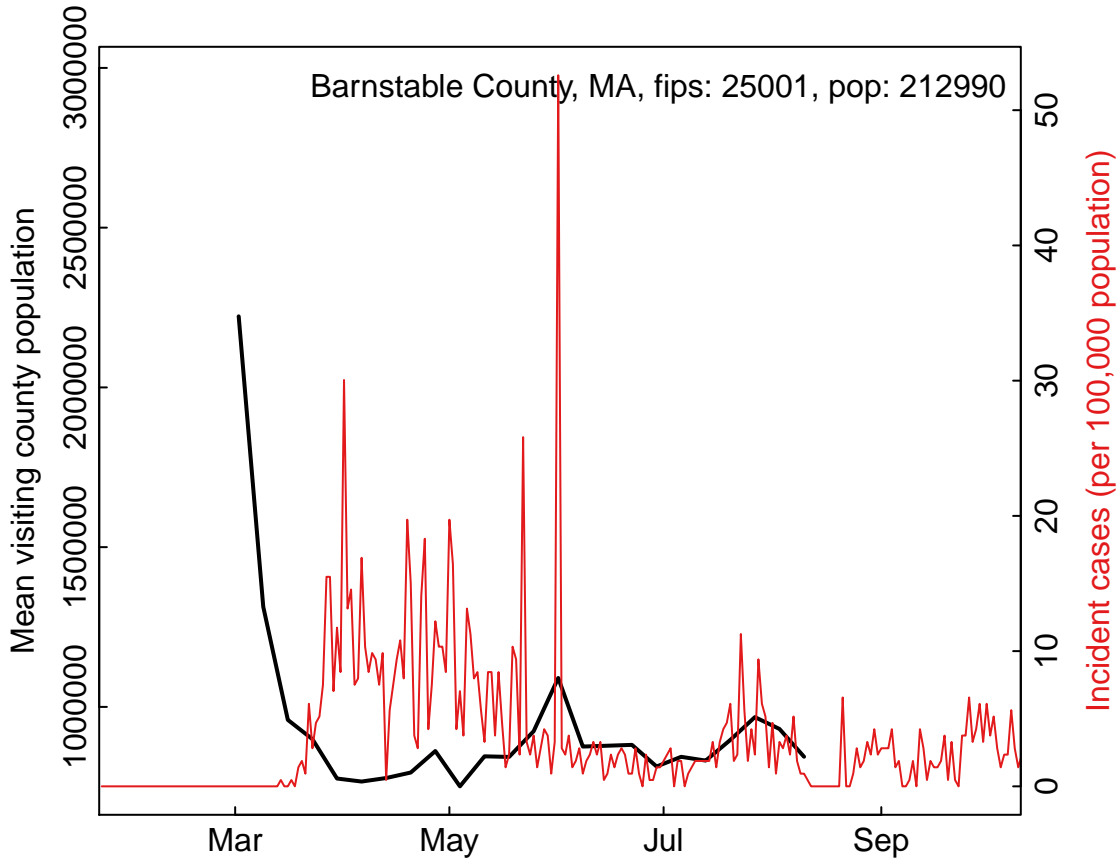

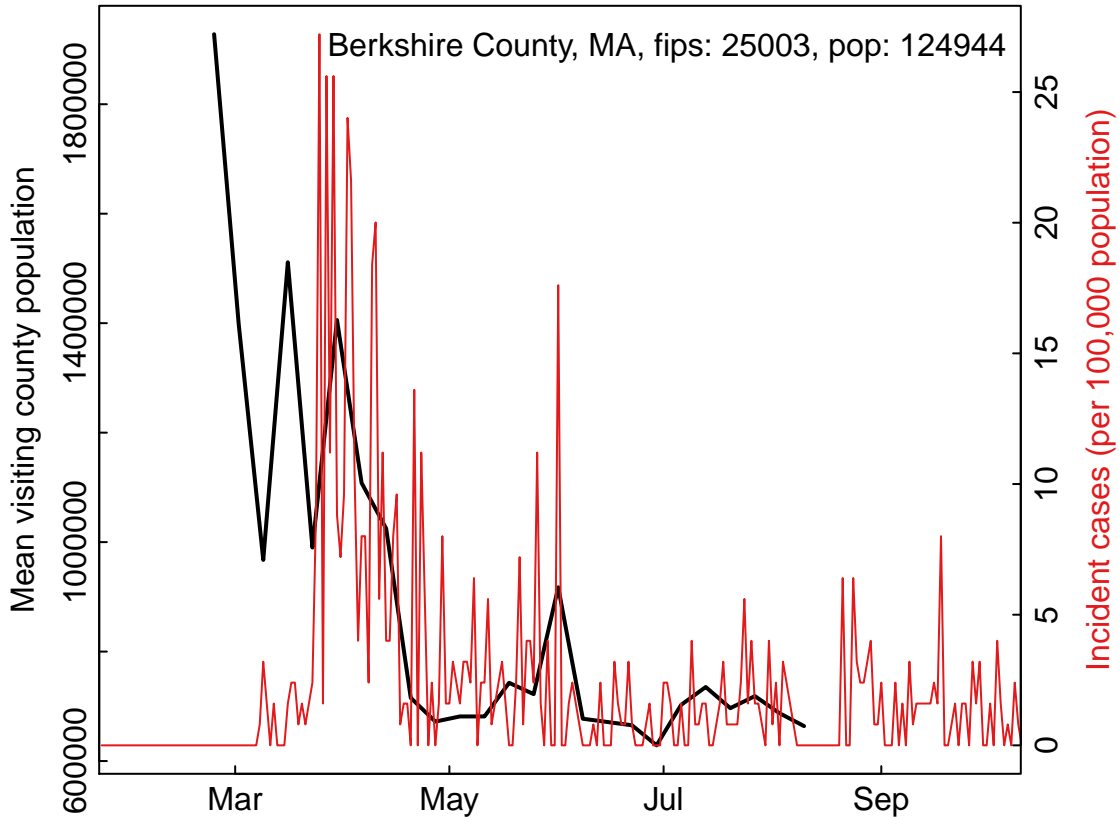

Bristol County, MA, fips: 25005, pop: 565217

Mean visiting county population

500000  
1500000  
2500000

Mar

May

Jul

Sep

Incident cases (per 100,000 population)

0  
20  
40  
60  
80

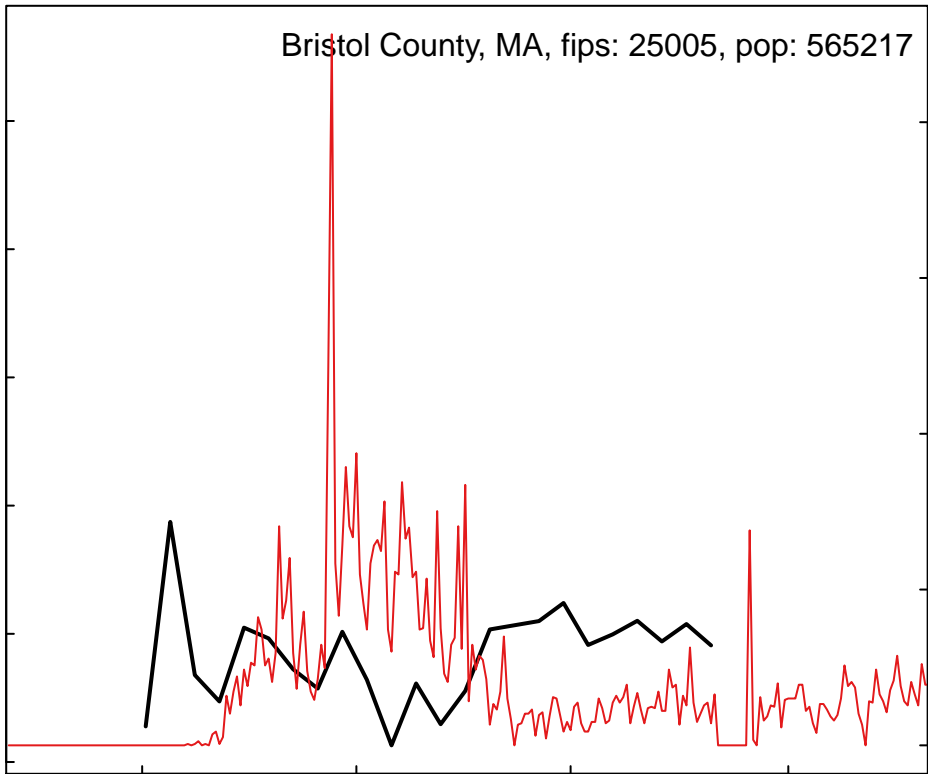



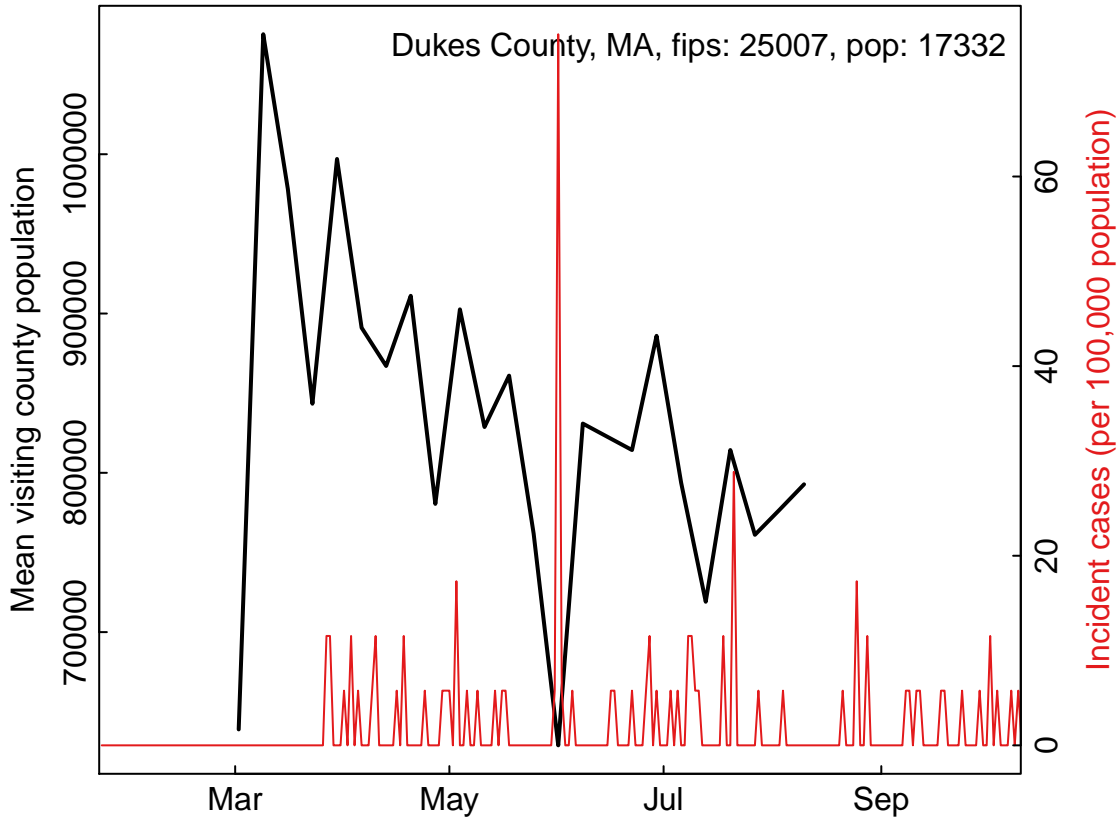

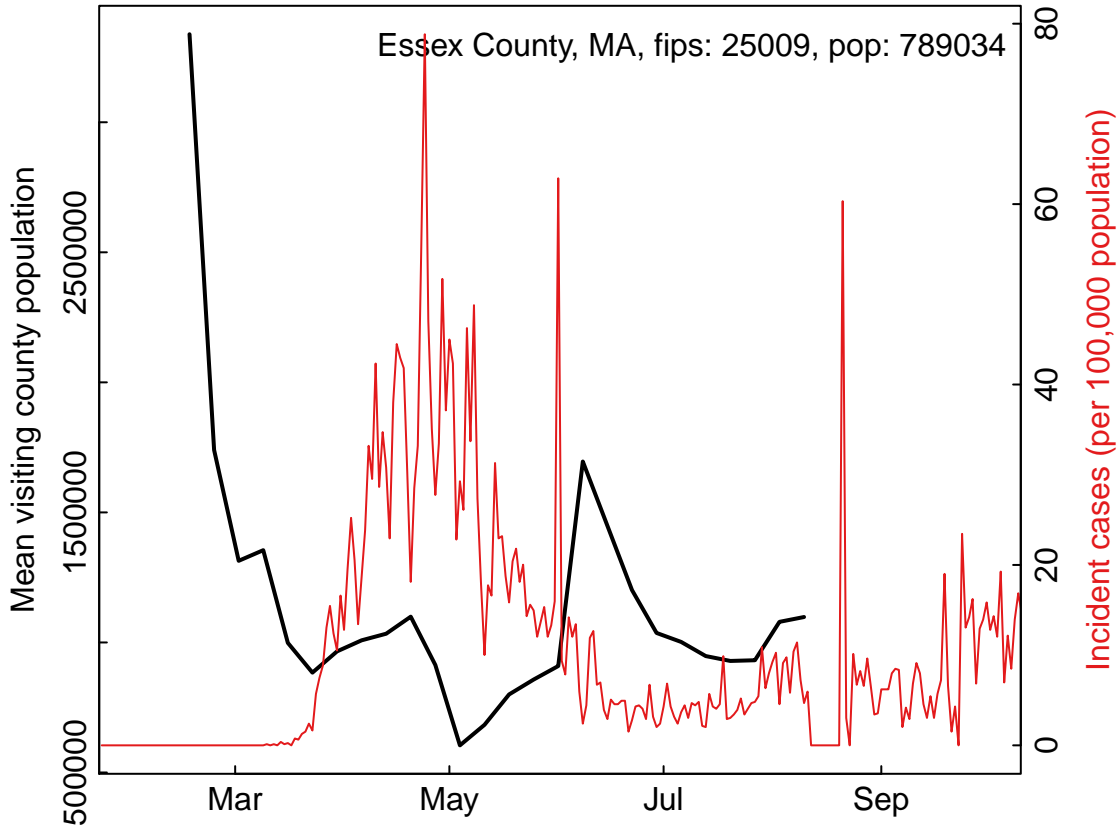

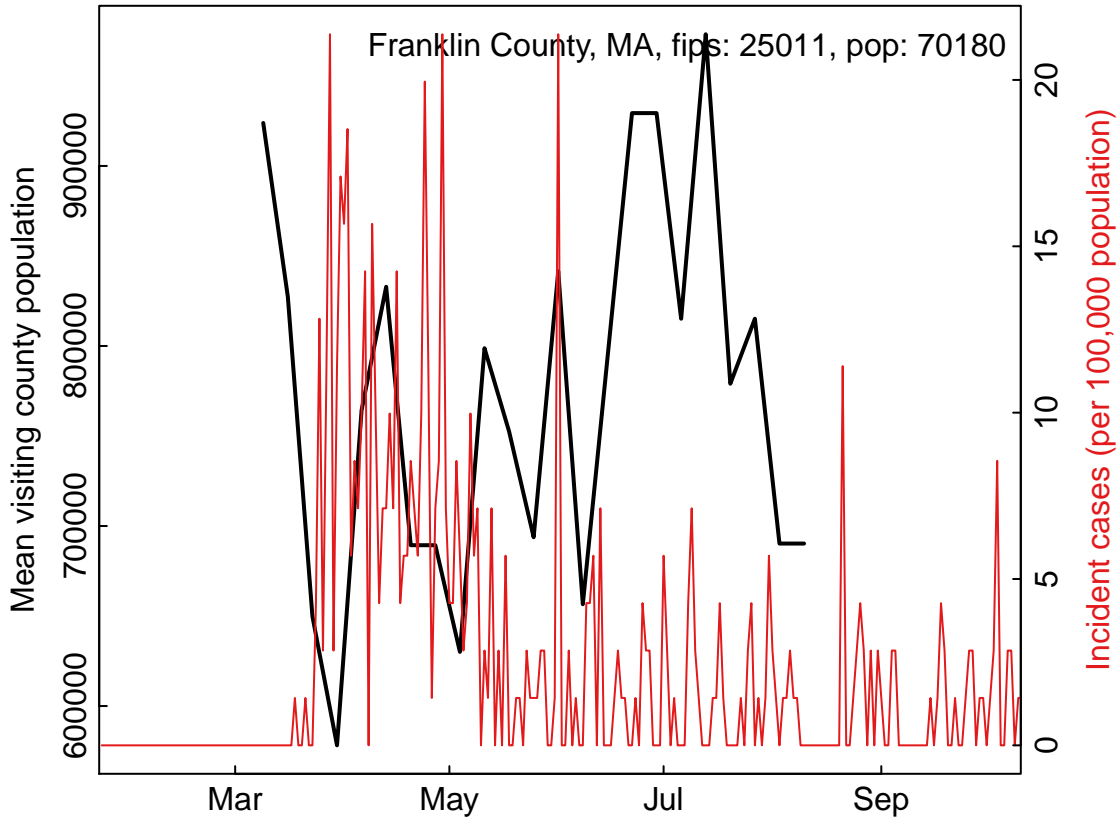

Hampden County, MA, fips: 25013, pop: 466372

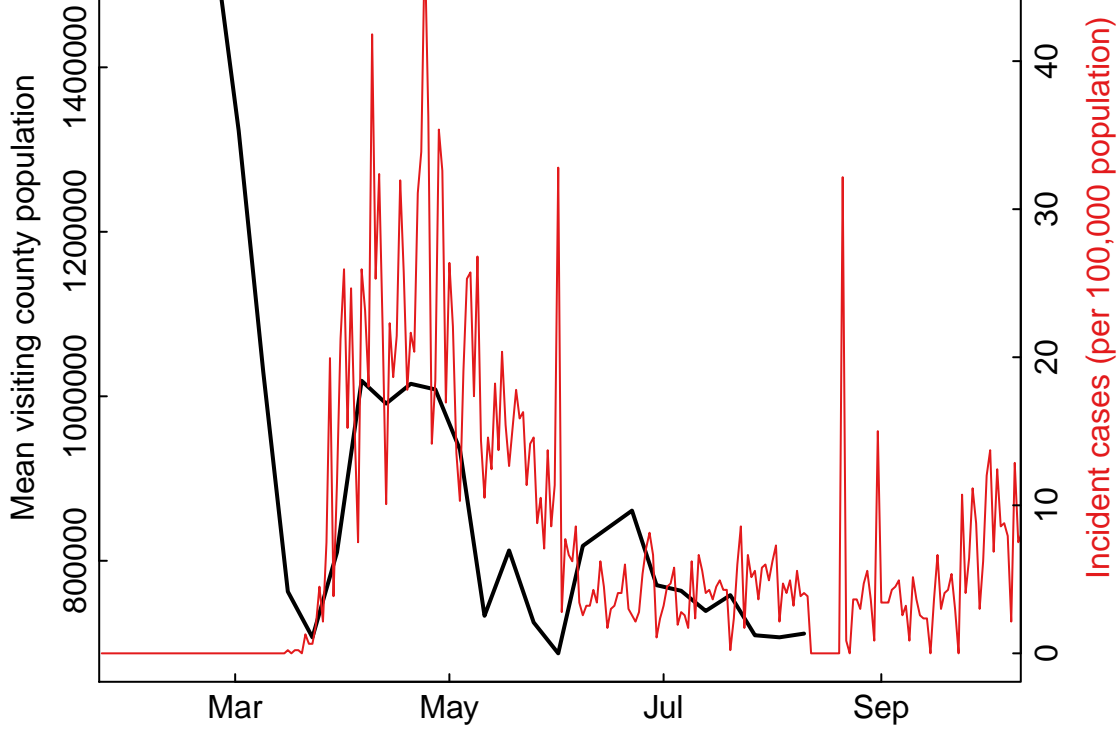

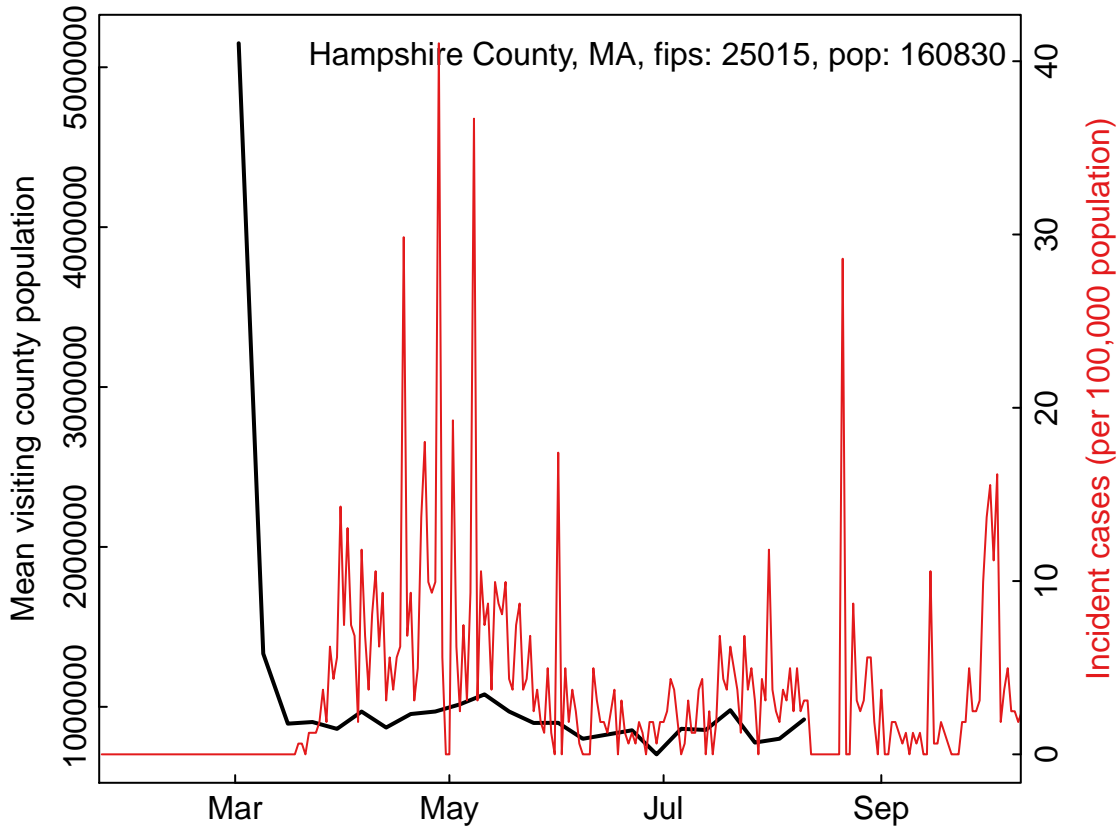

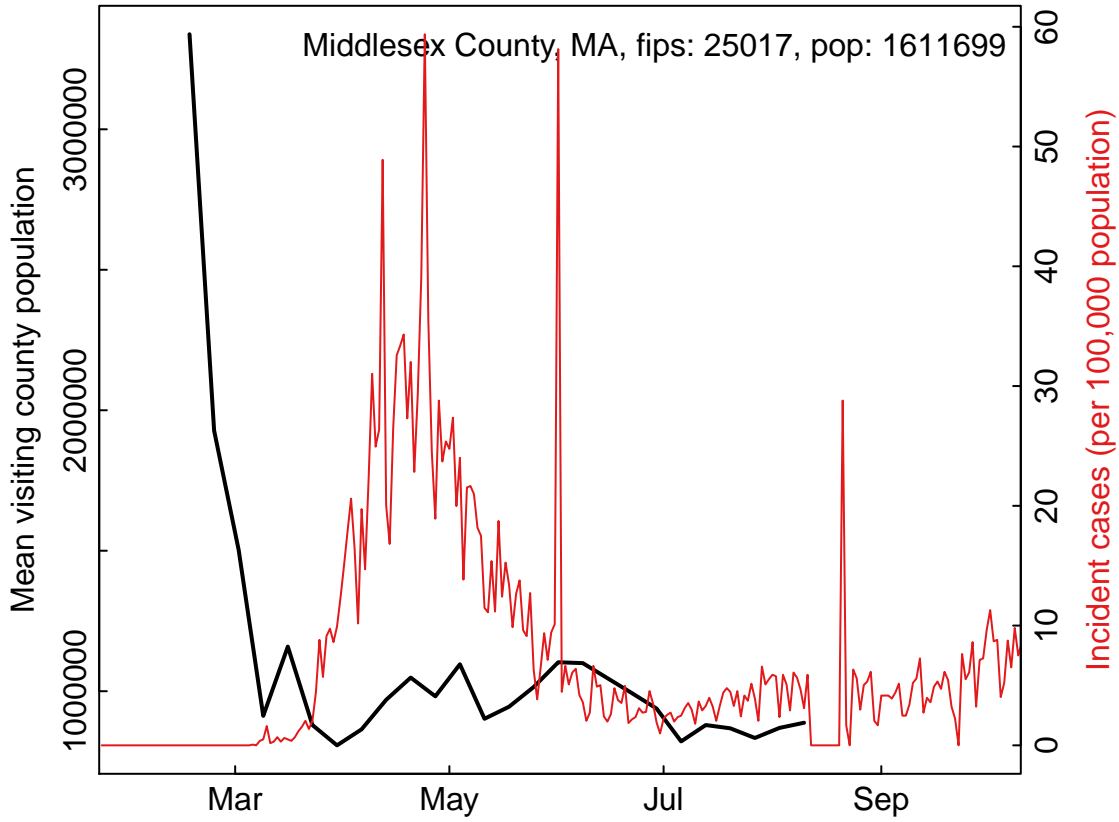

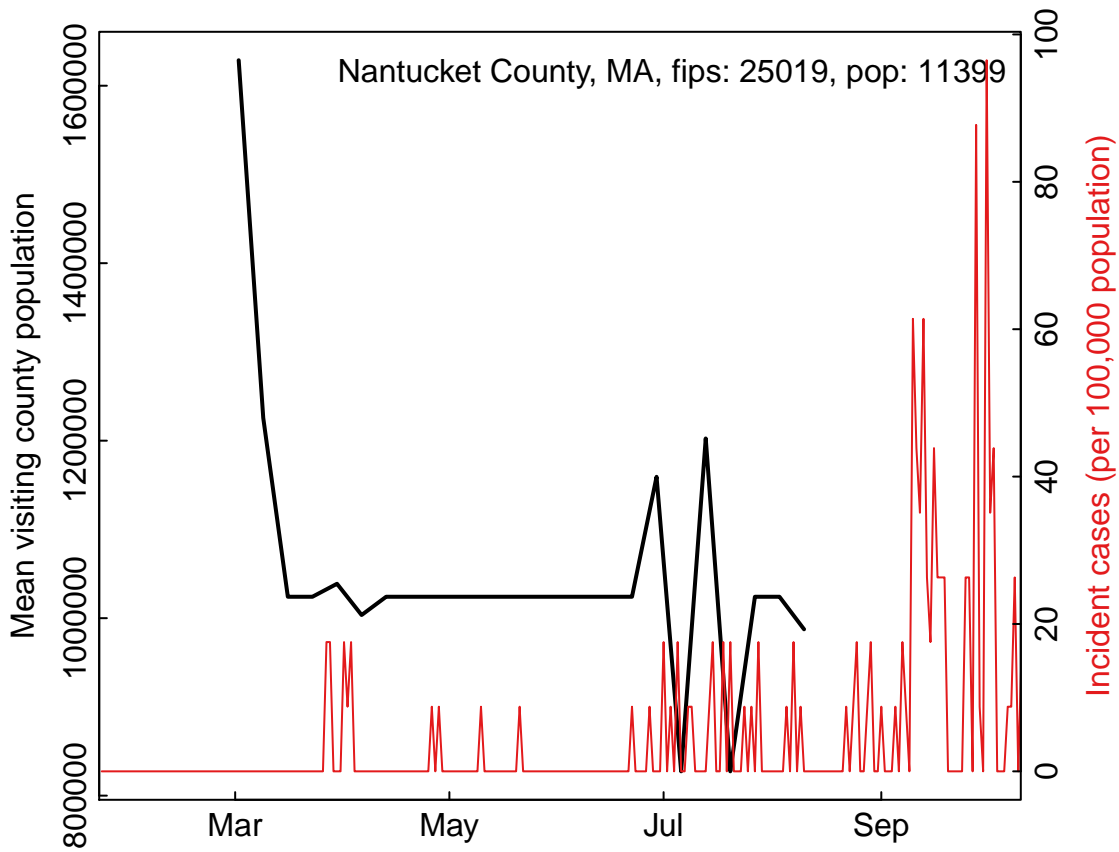

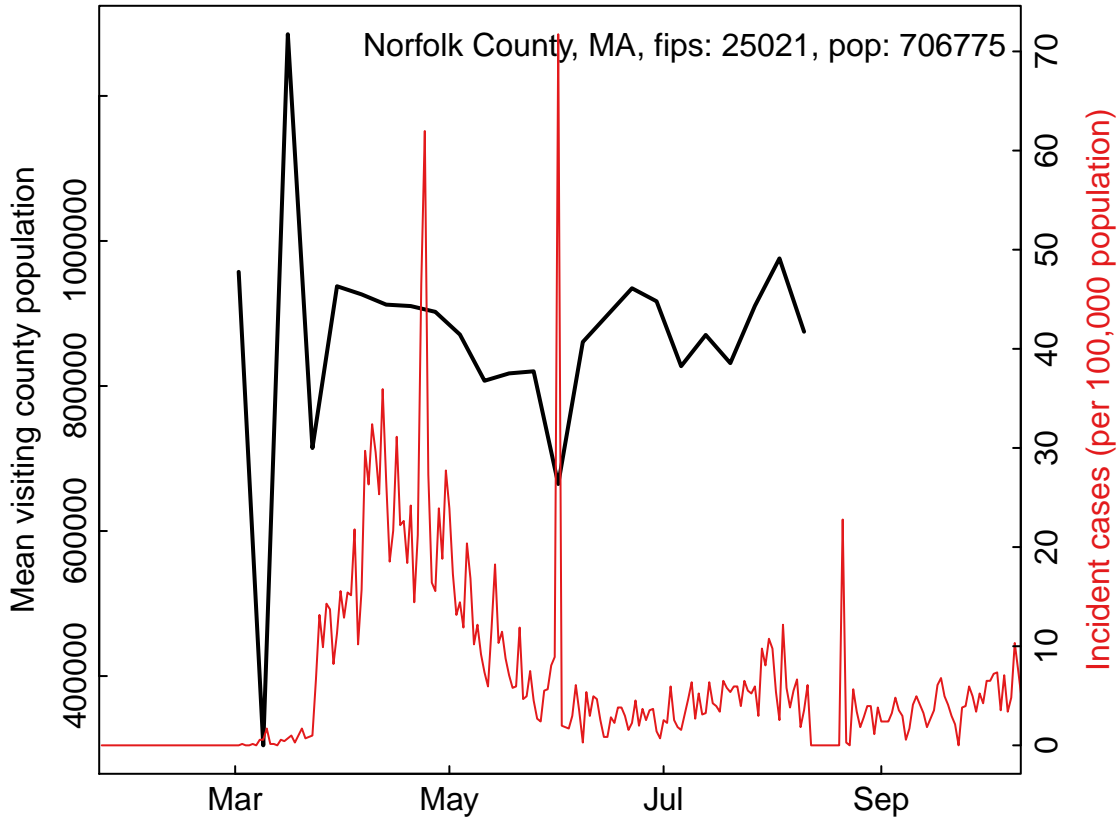



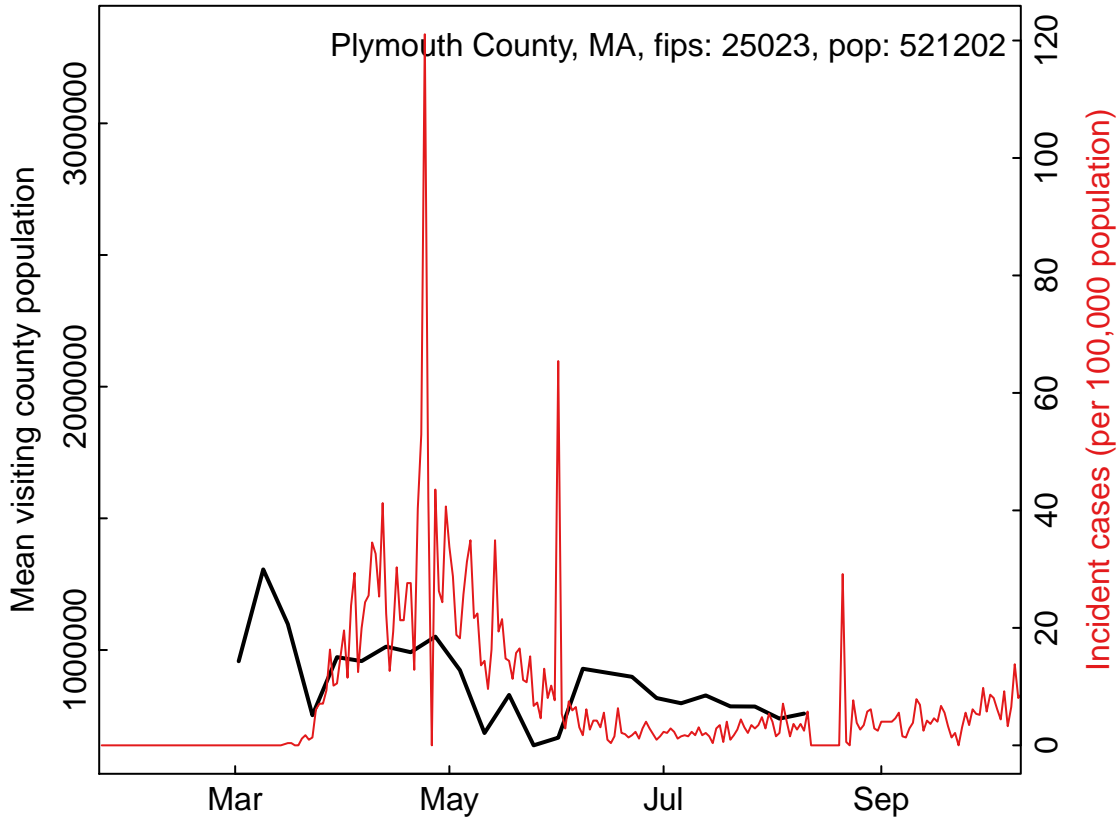

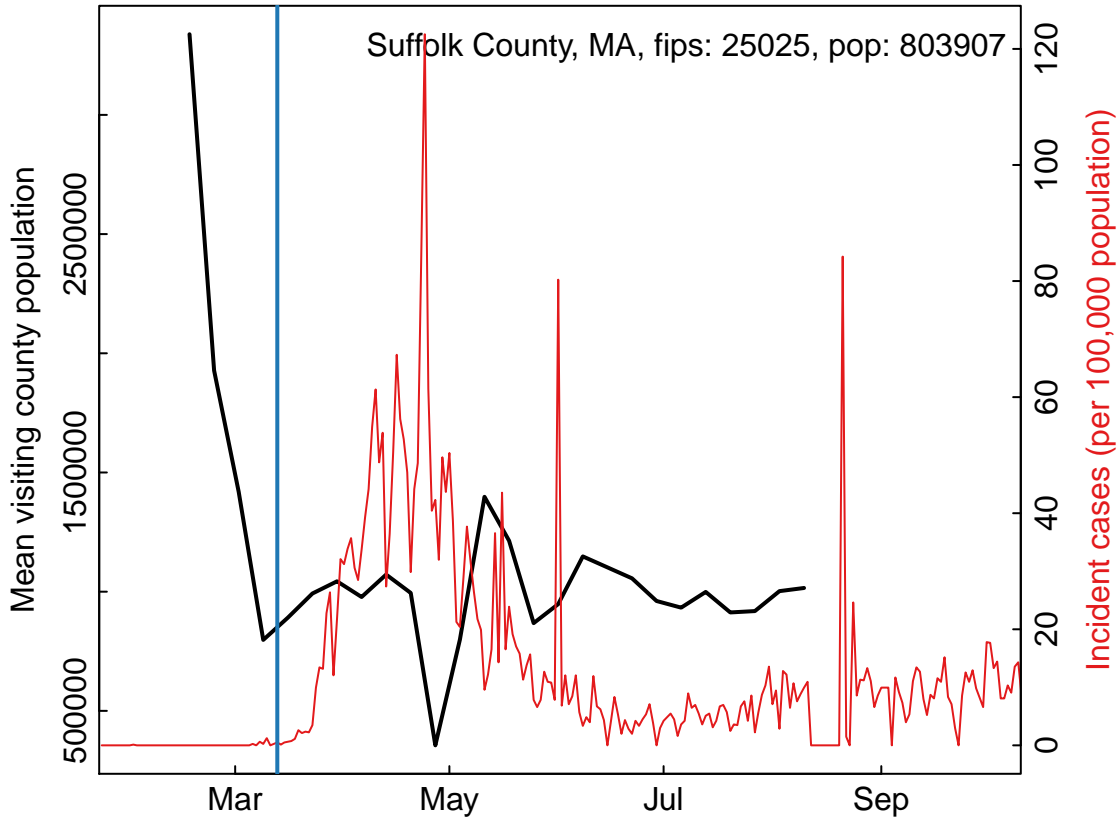

Worcester County, MA, fips: 25027, pop: 830622

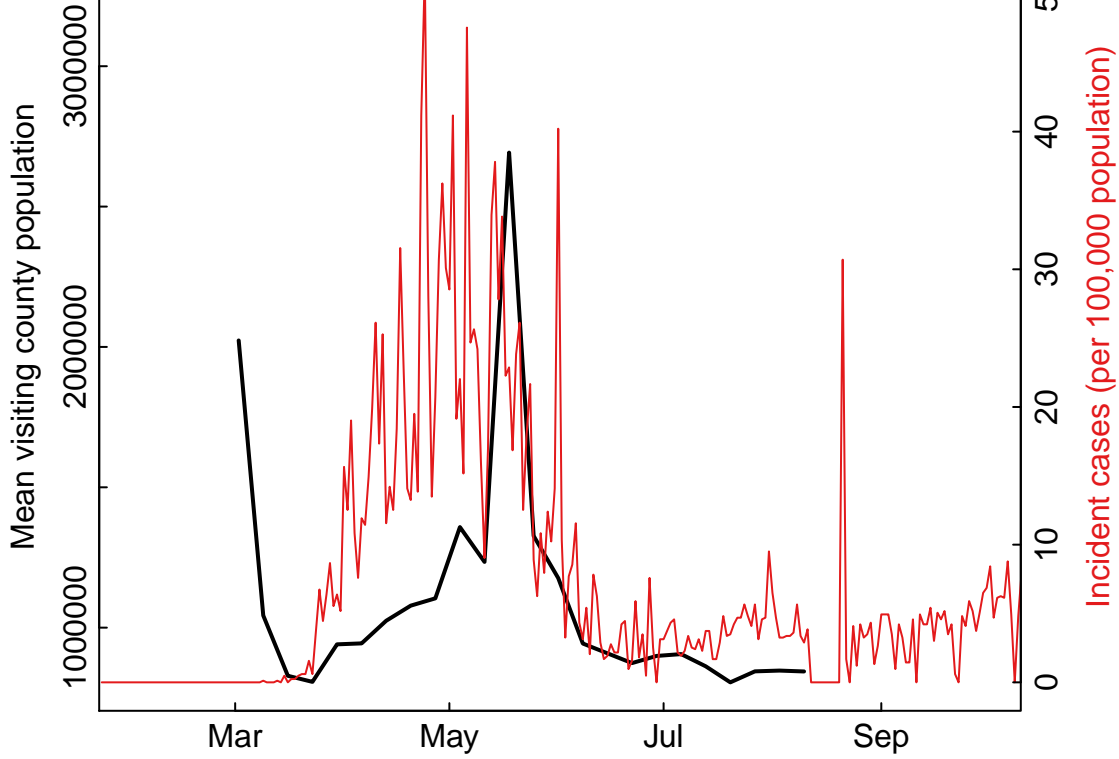

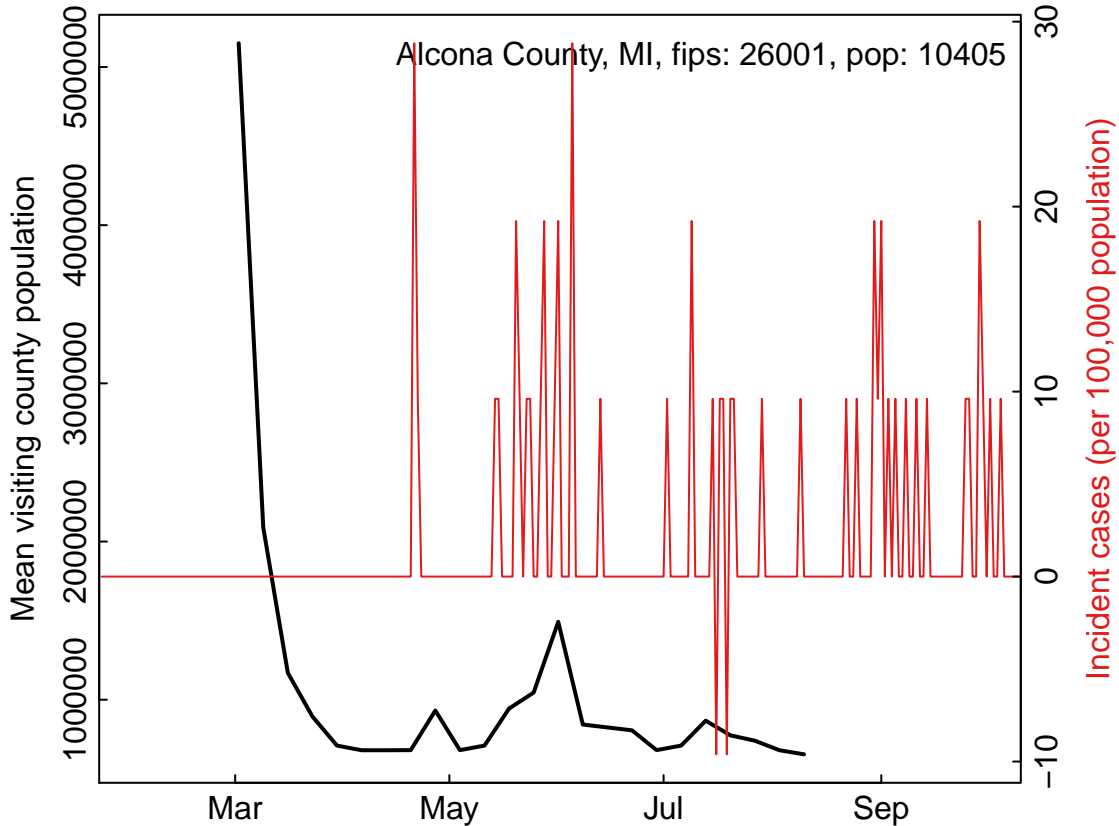

Alger County, MI, fips: 26003, pop: 9108

Mean visiting county population

1200000  
800000  
400000

Mar

May

Jul

Sep

60  
40  
20  
0

Incident cases (per 100,000 population)

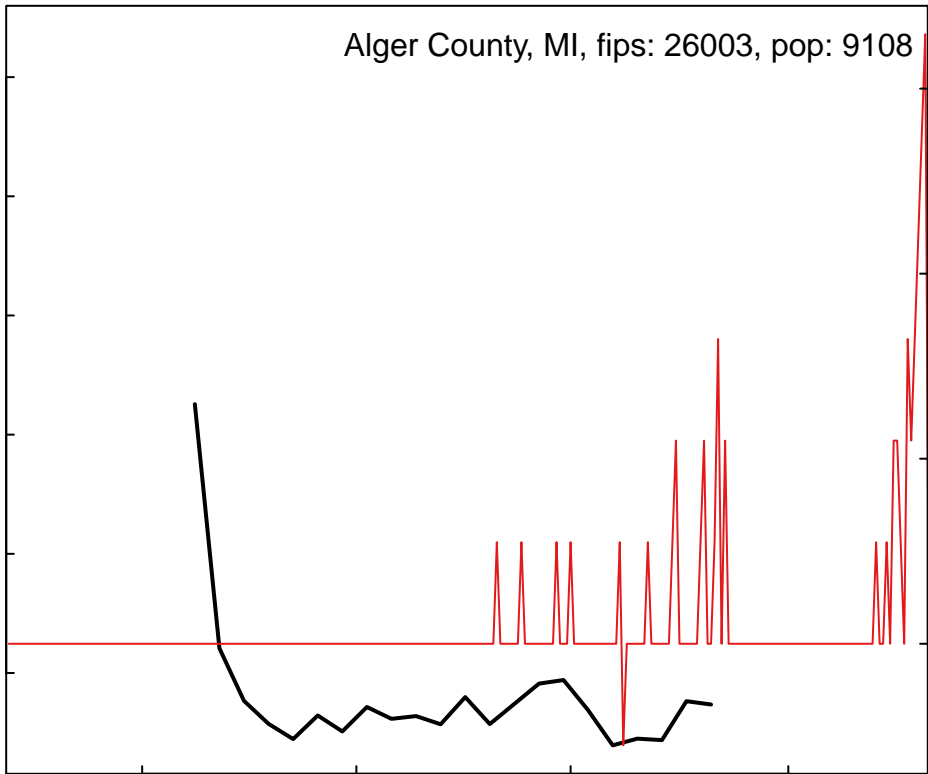

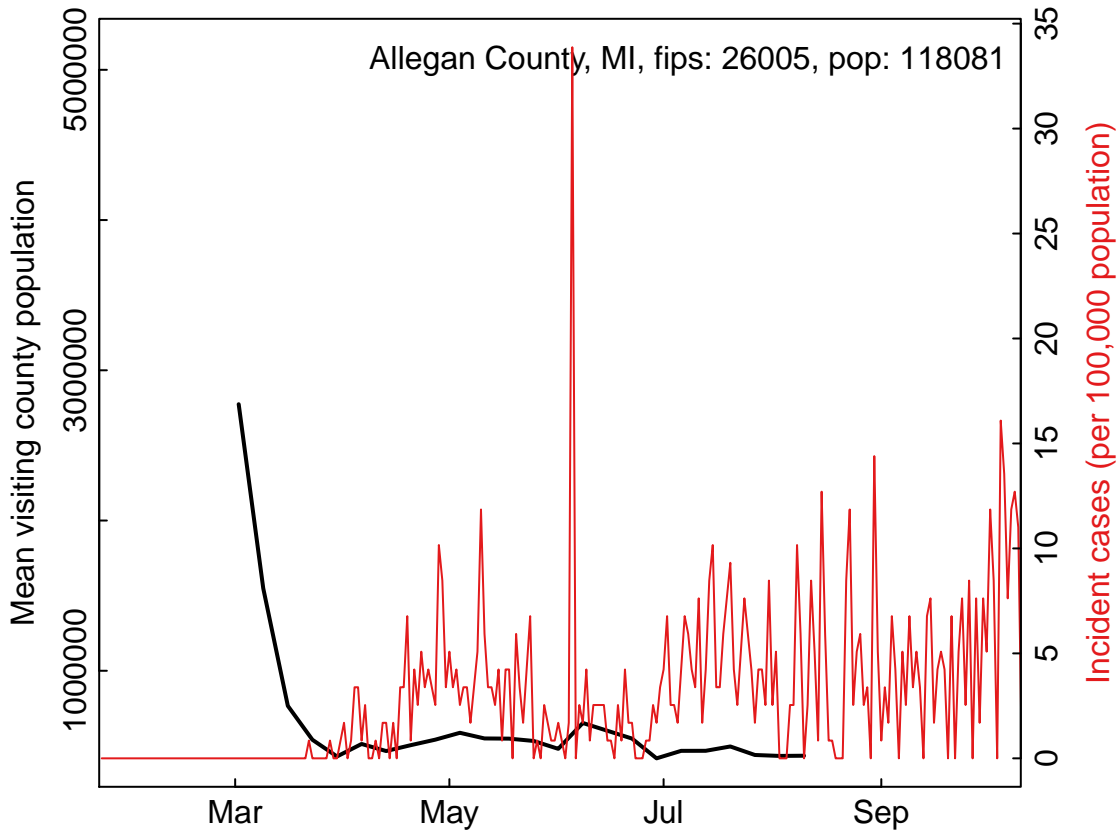

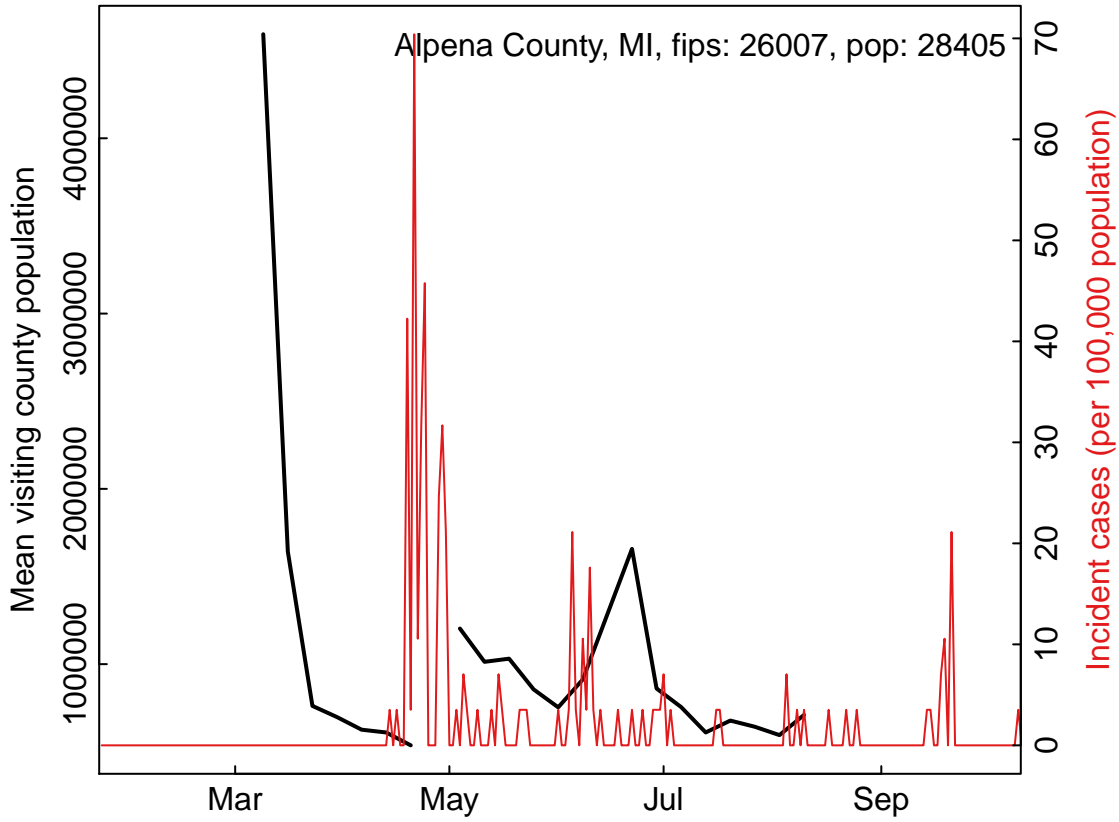

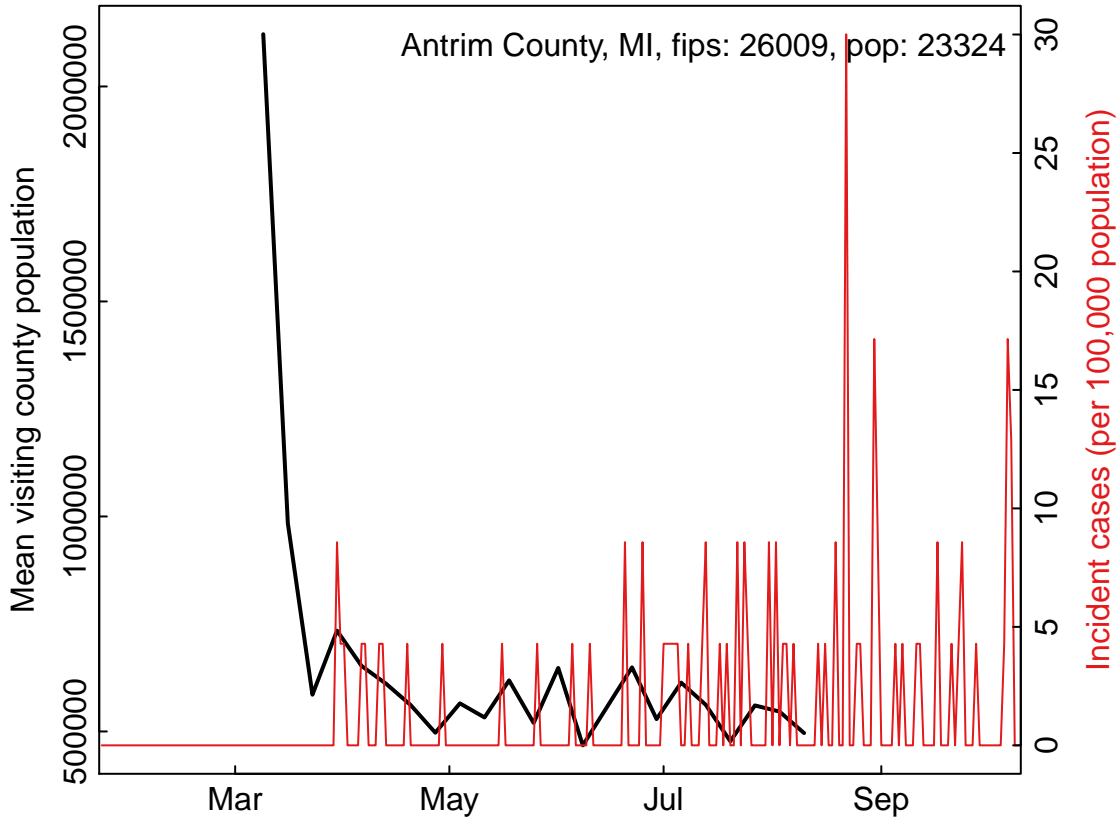



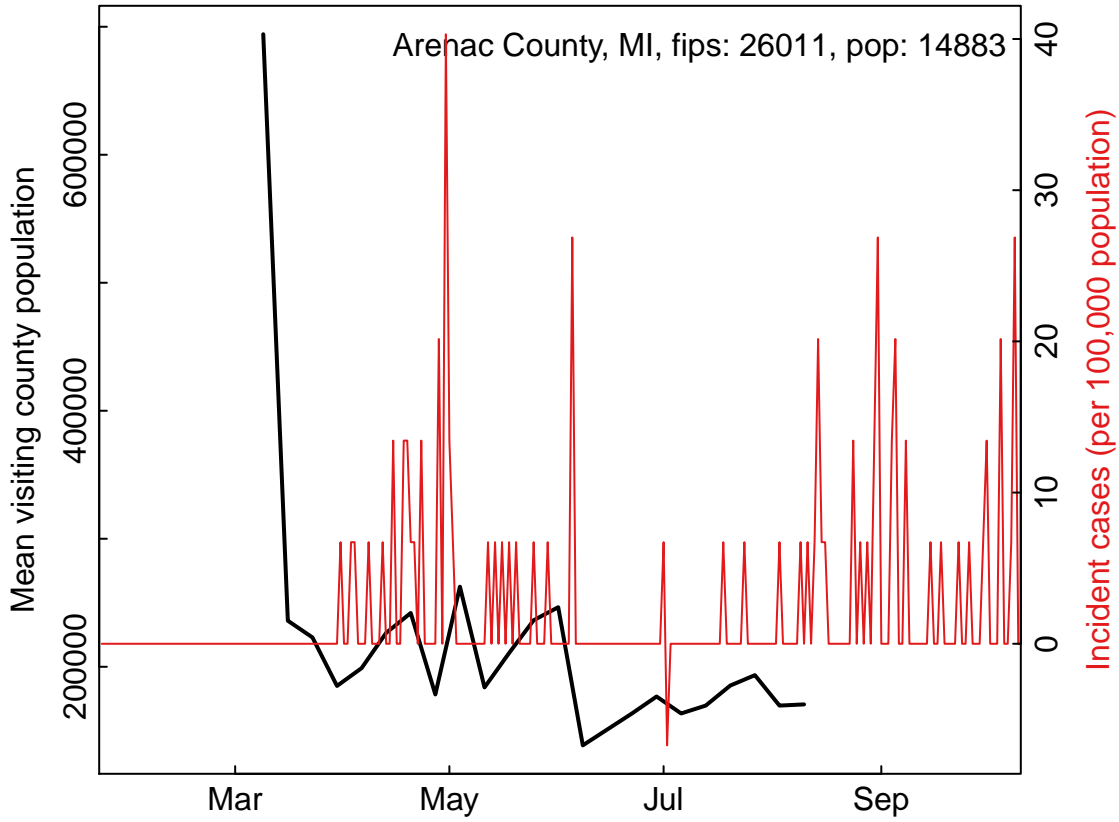

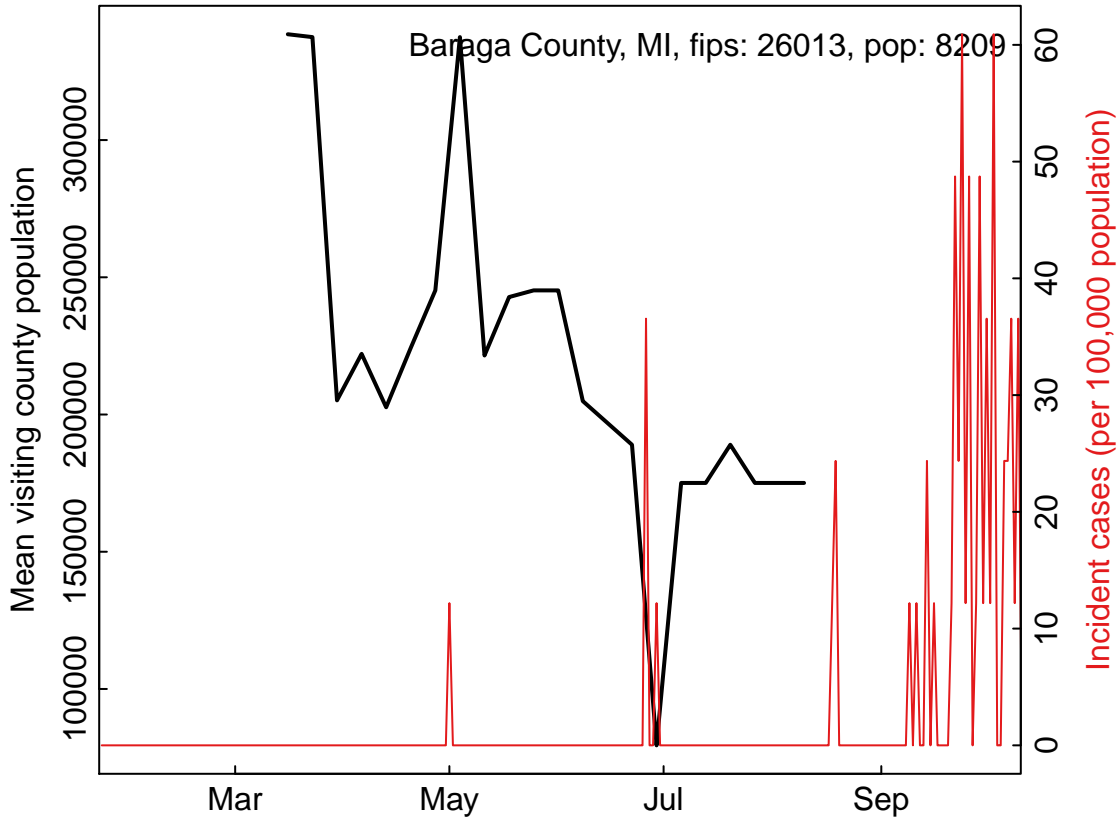

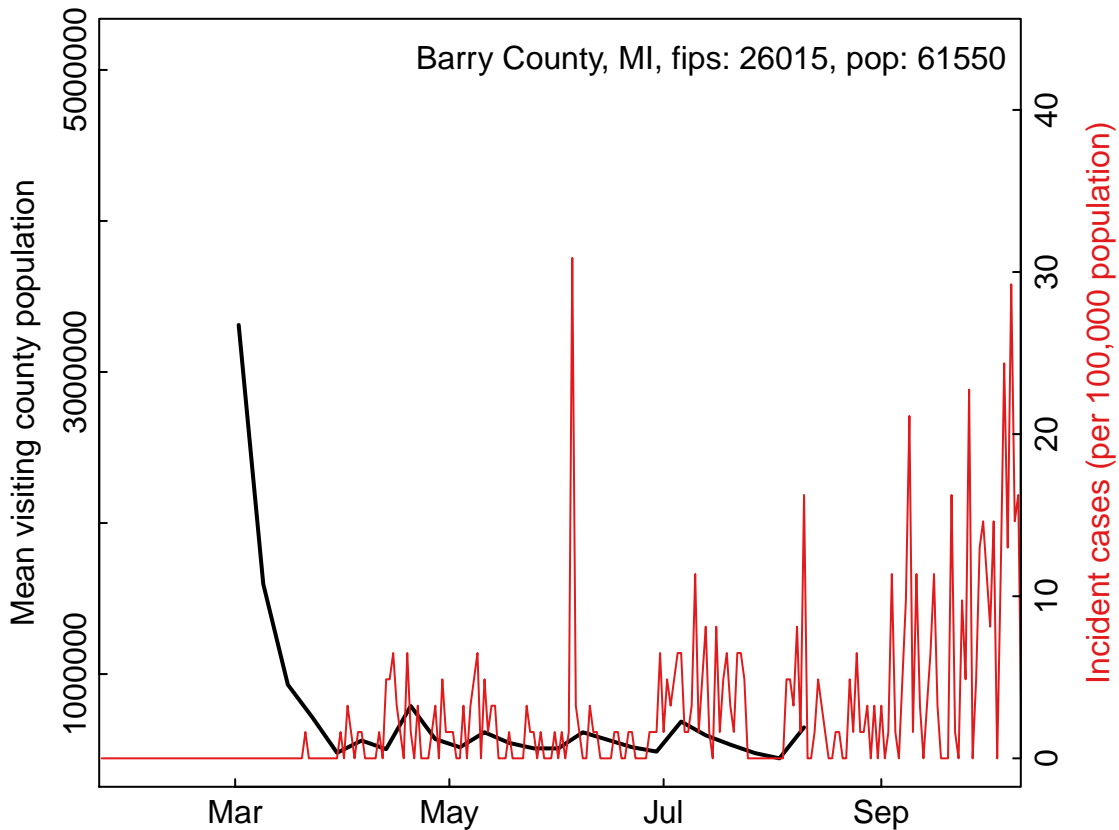

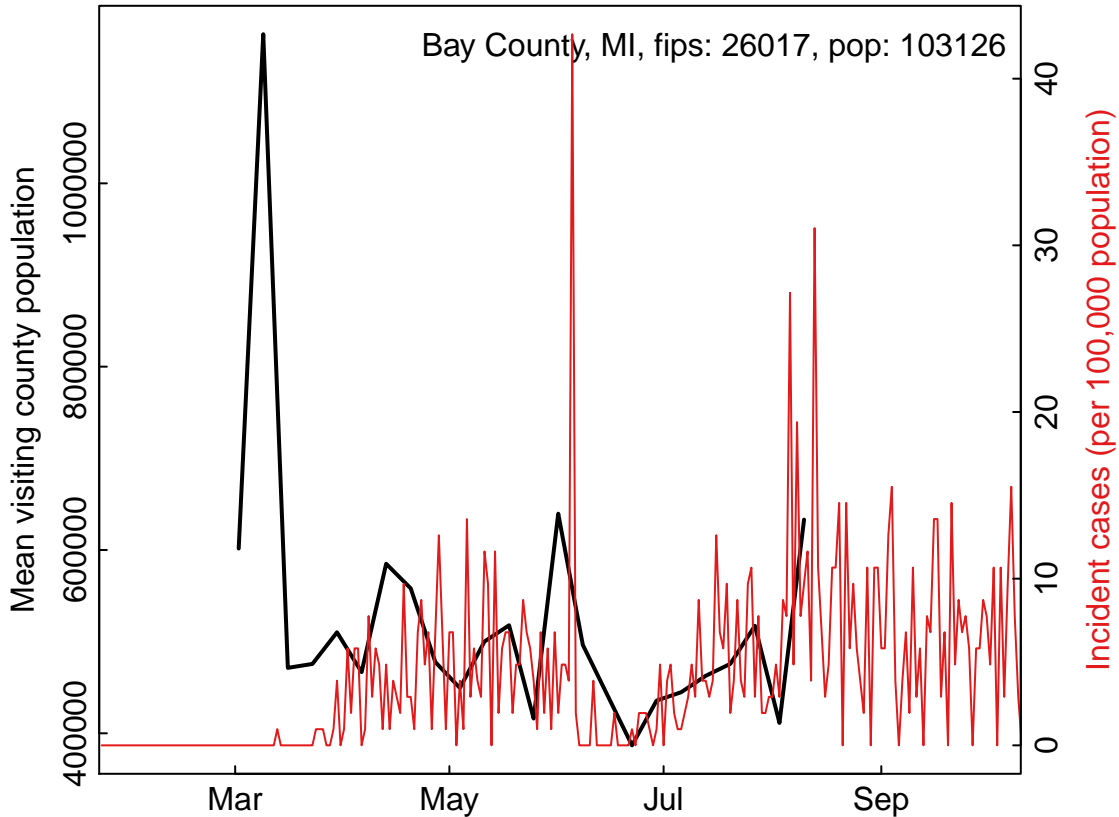

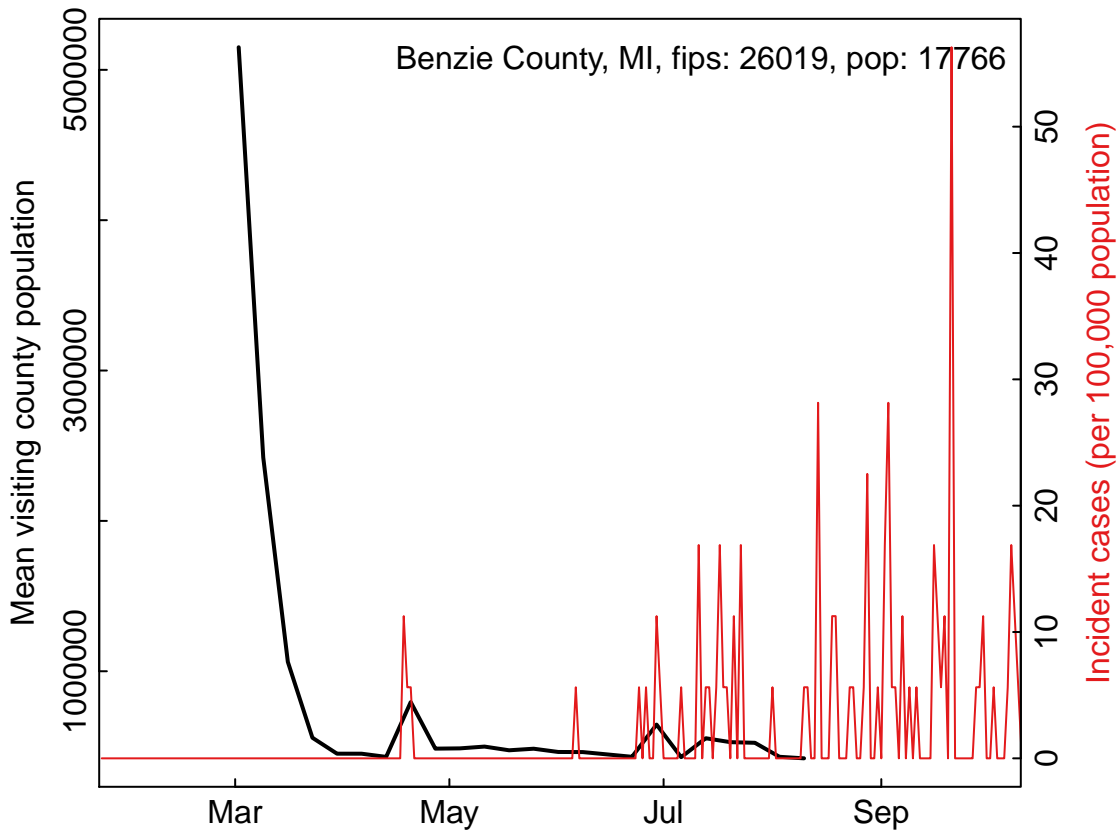

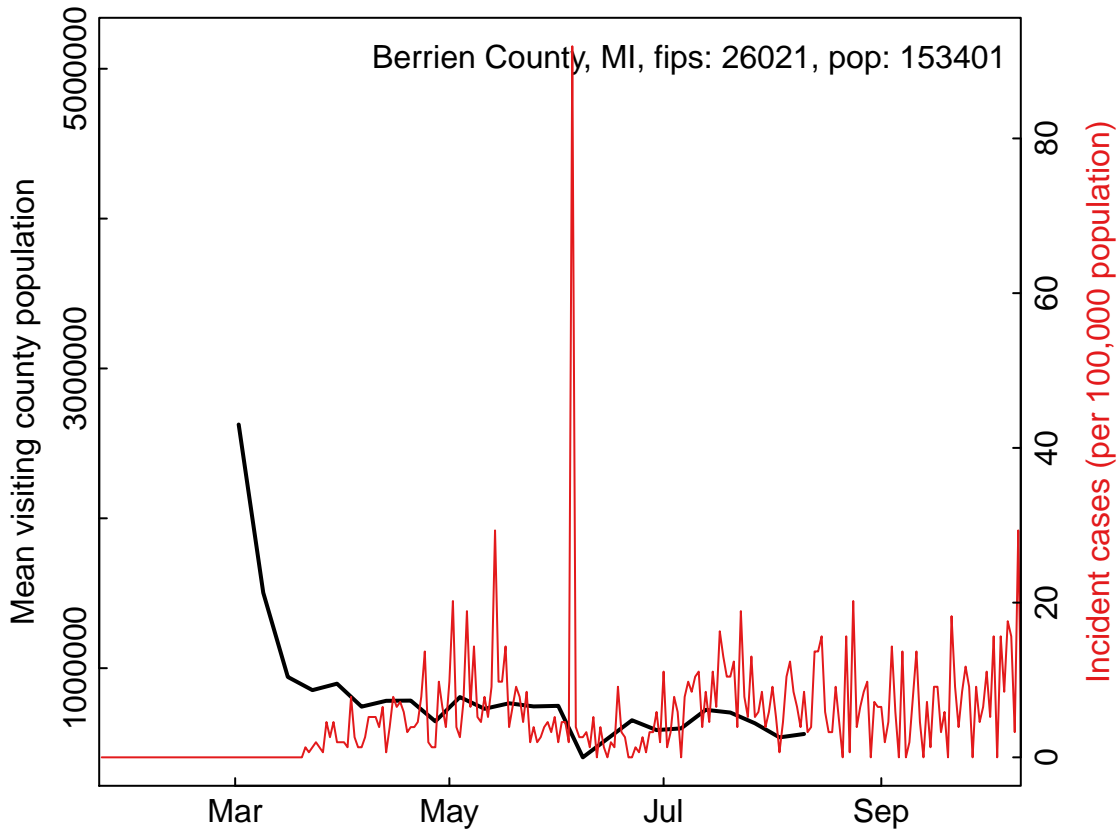

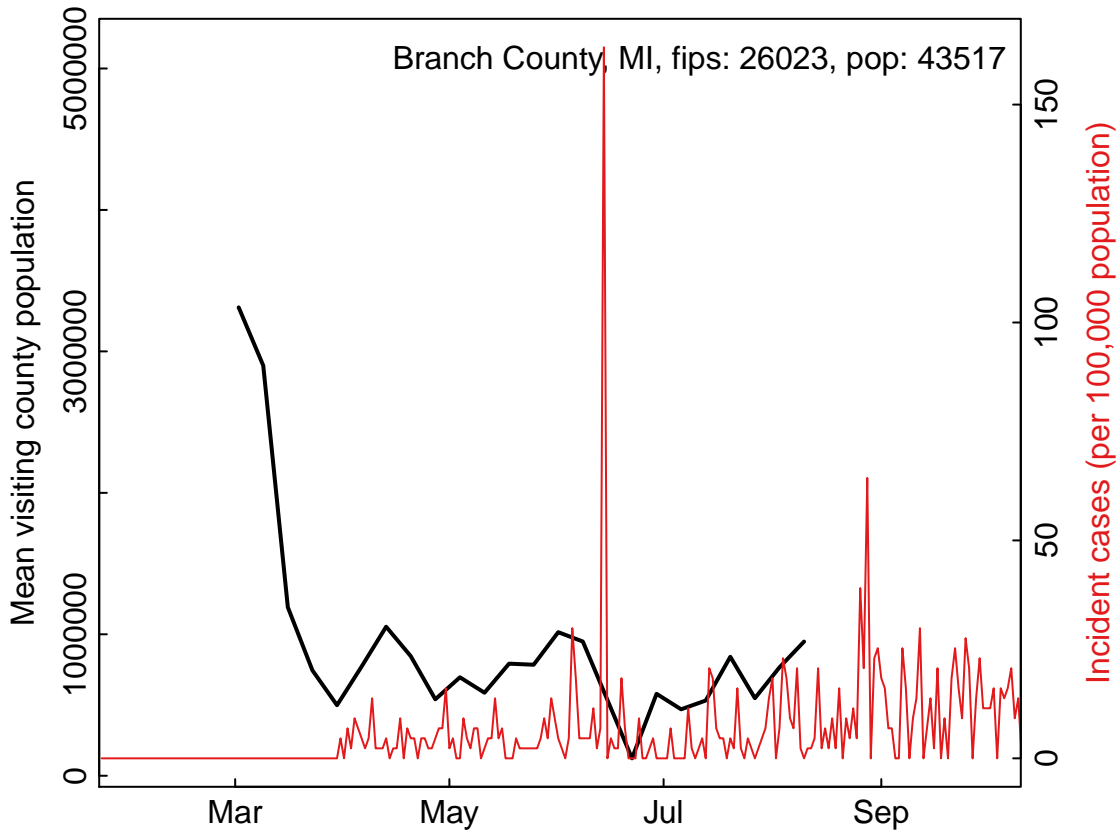

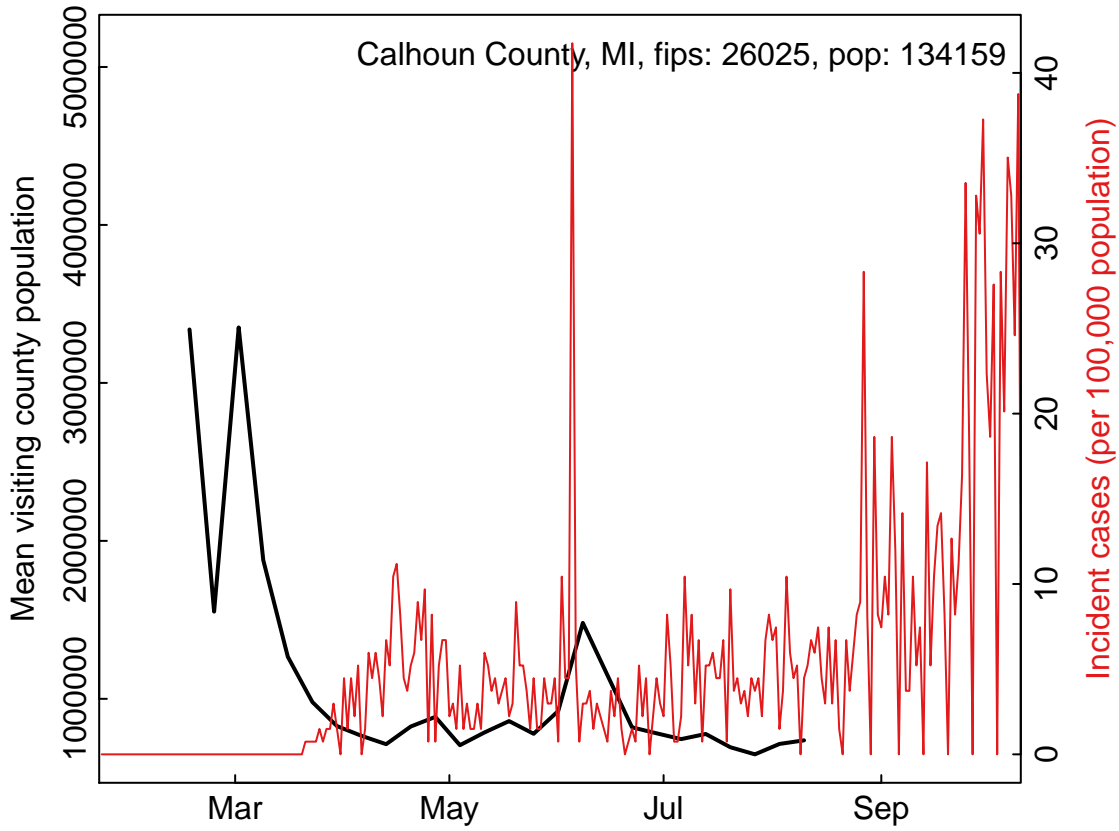



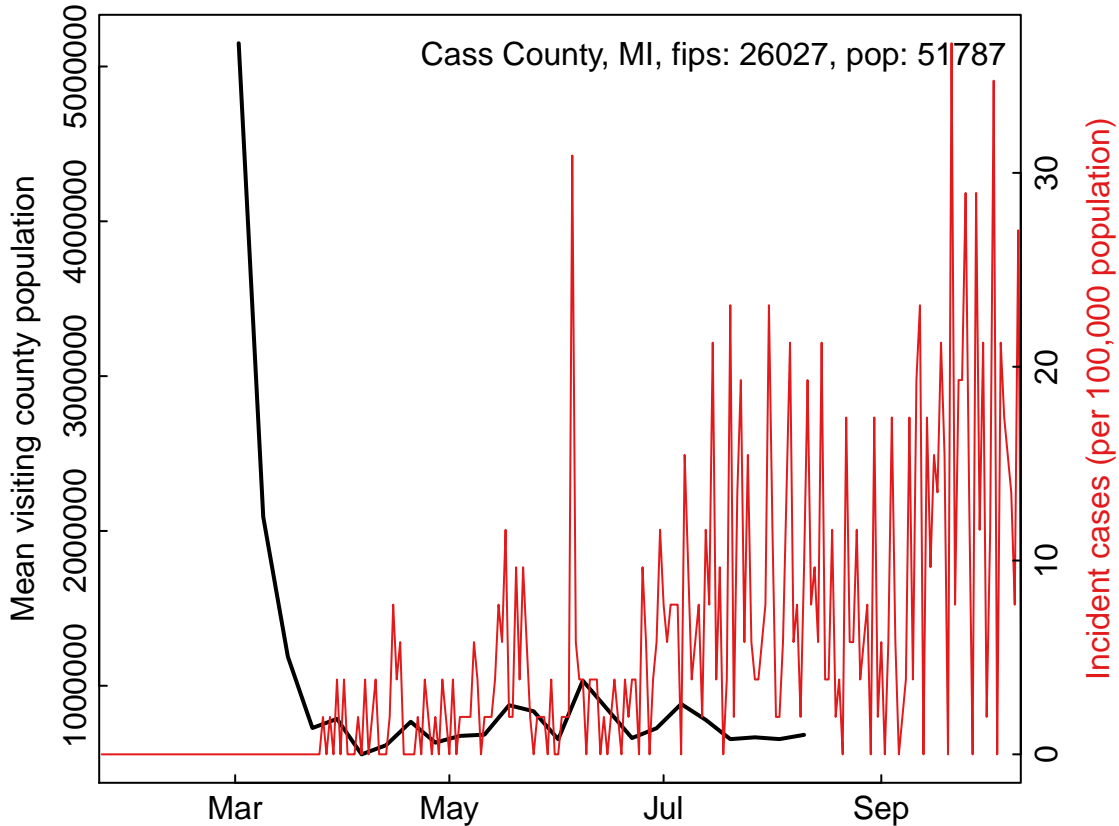

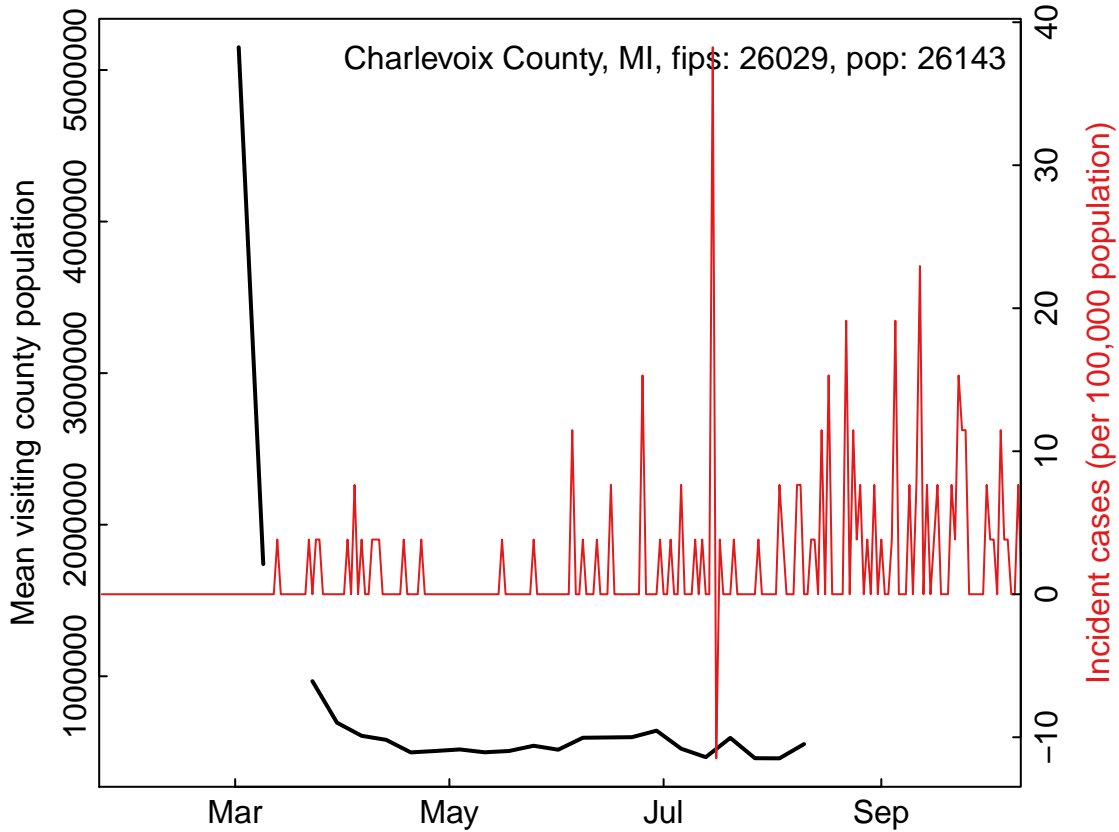

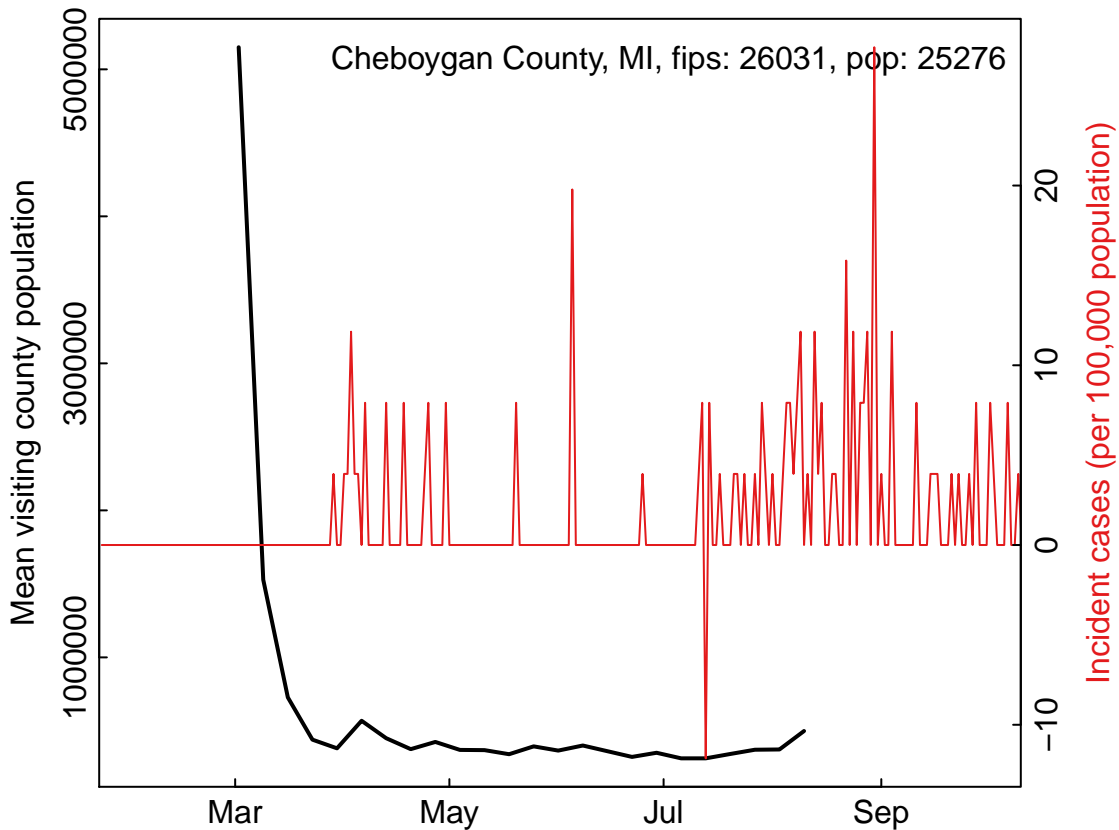

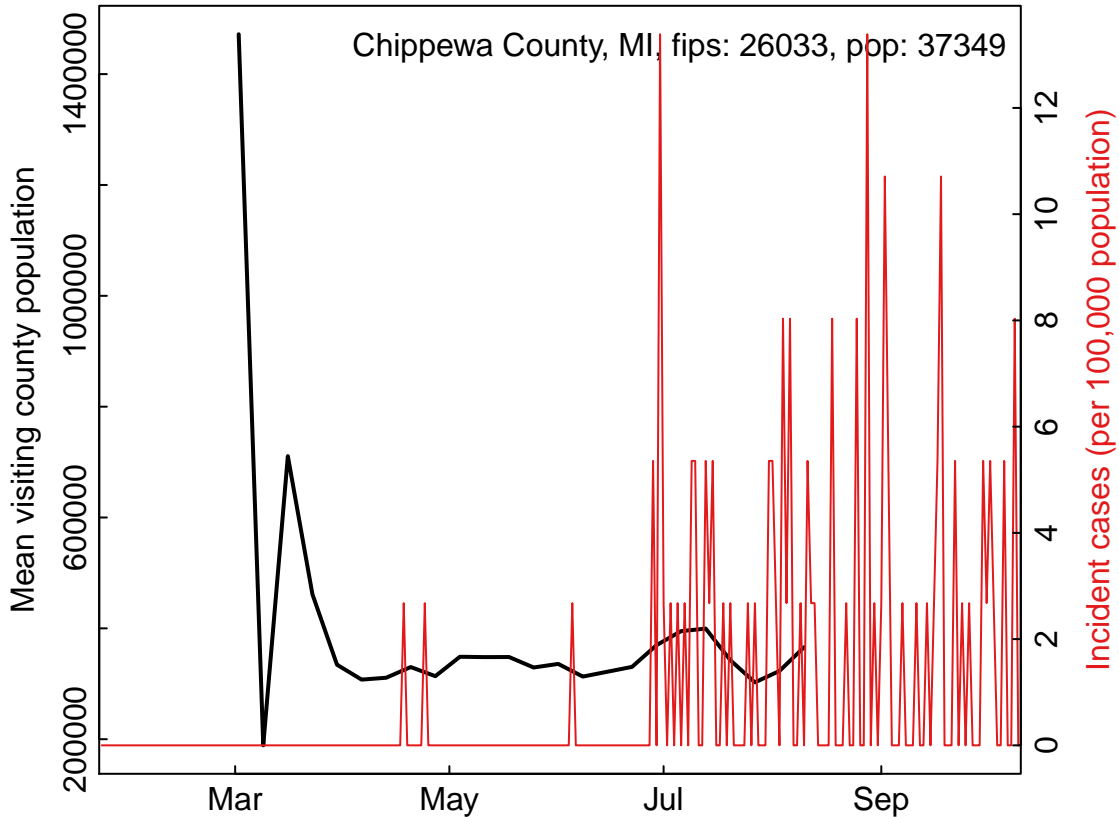

Clare County, MI, fips: 26035, pop: 30950

Mean visiting county population

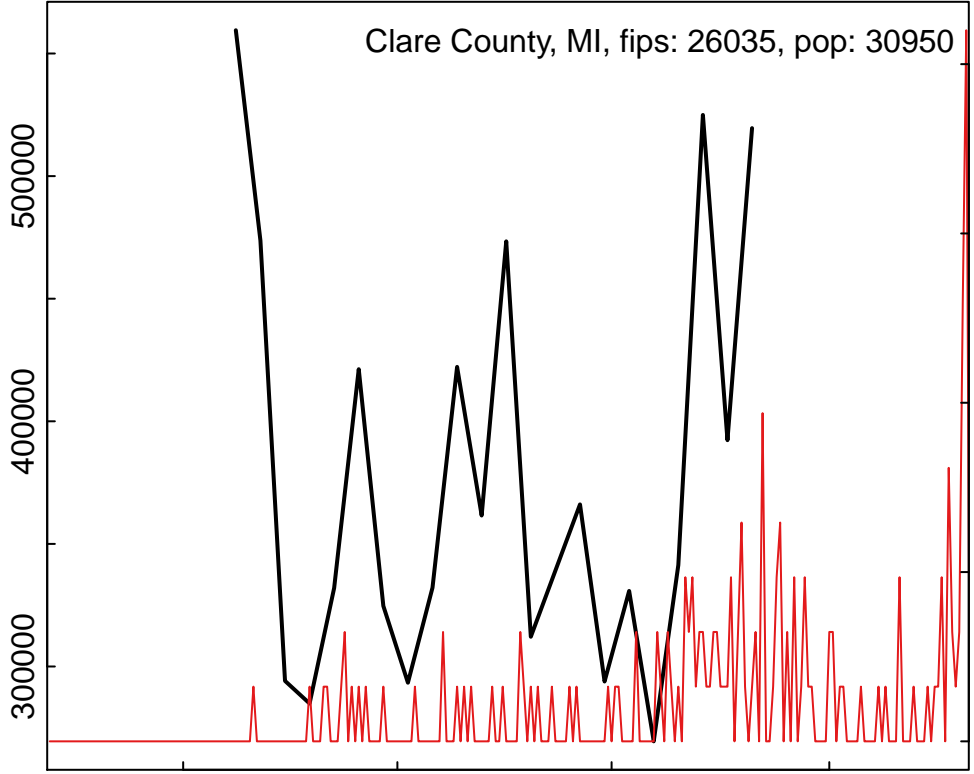

Incident cases (per 100,000 population)

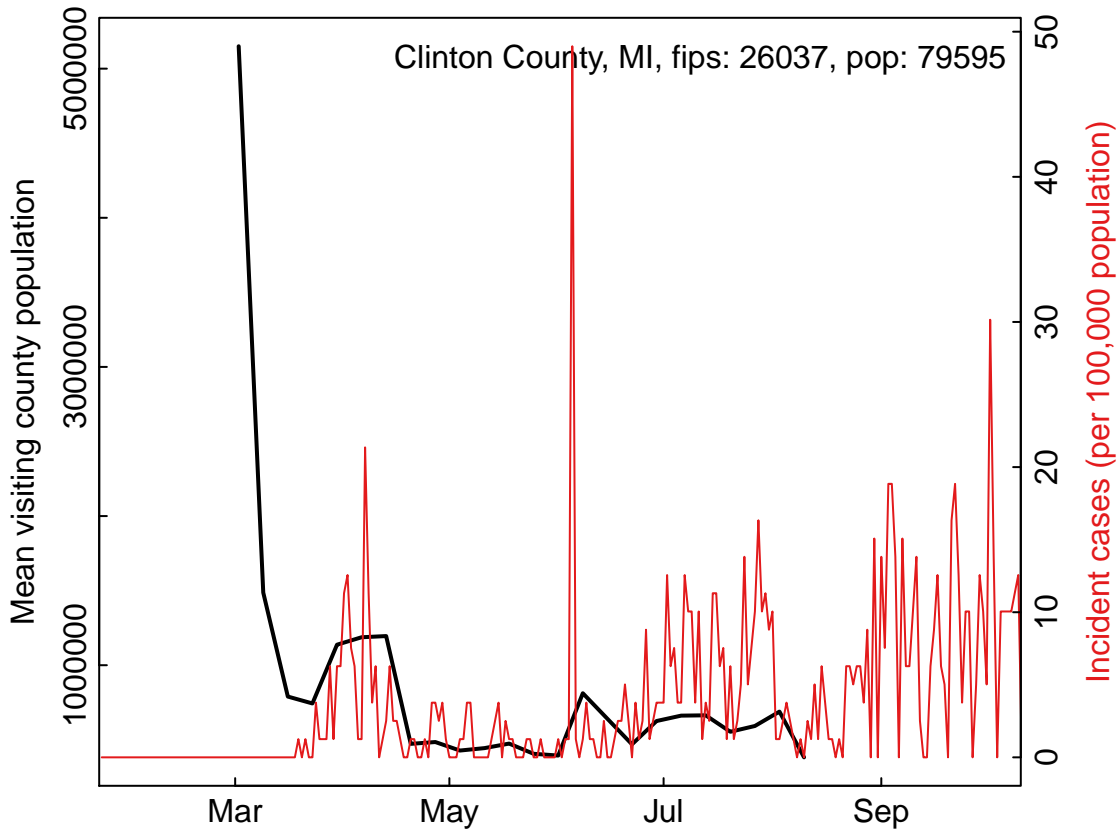

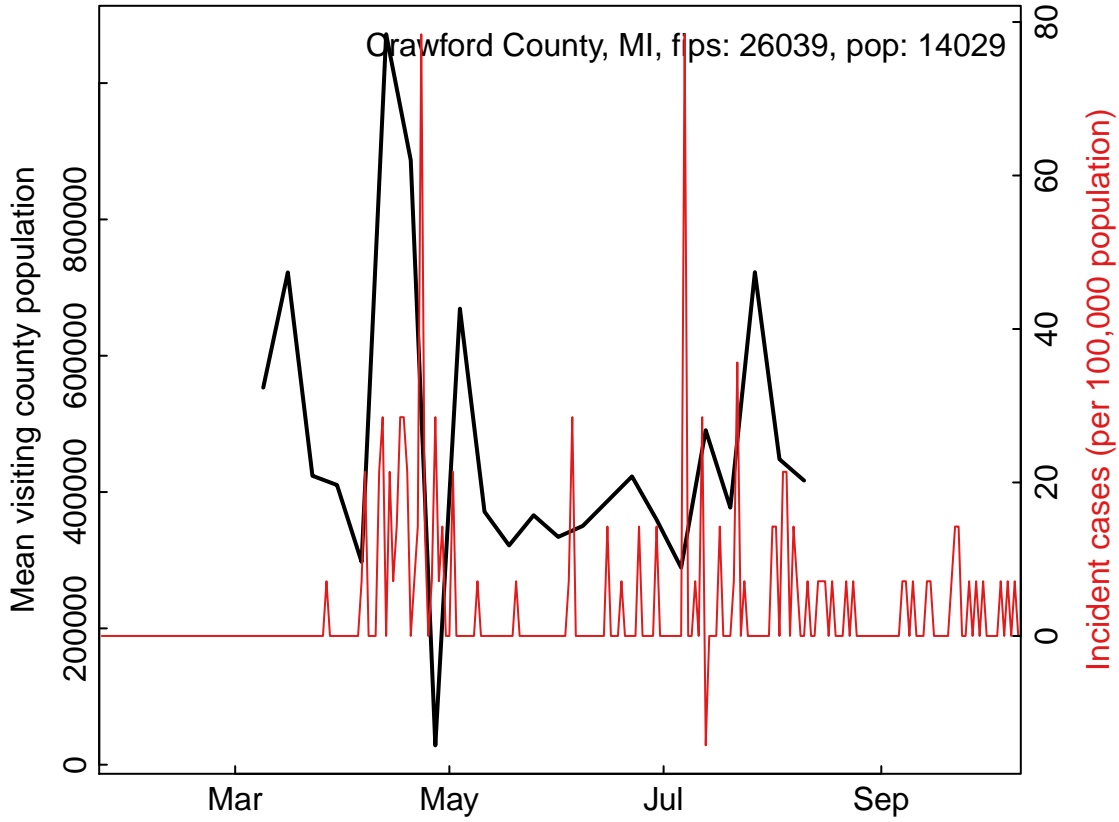

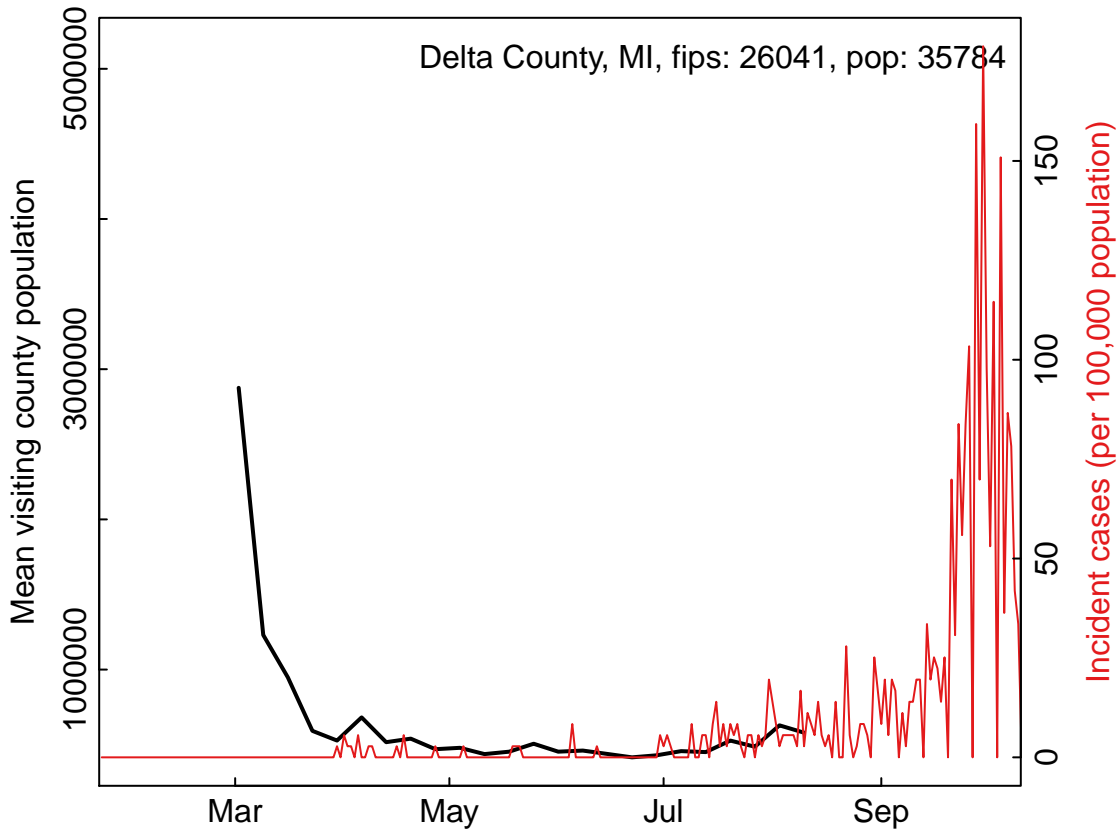



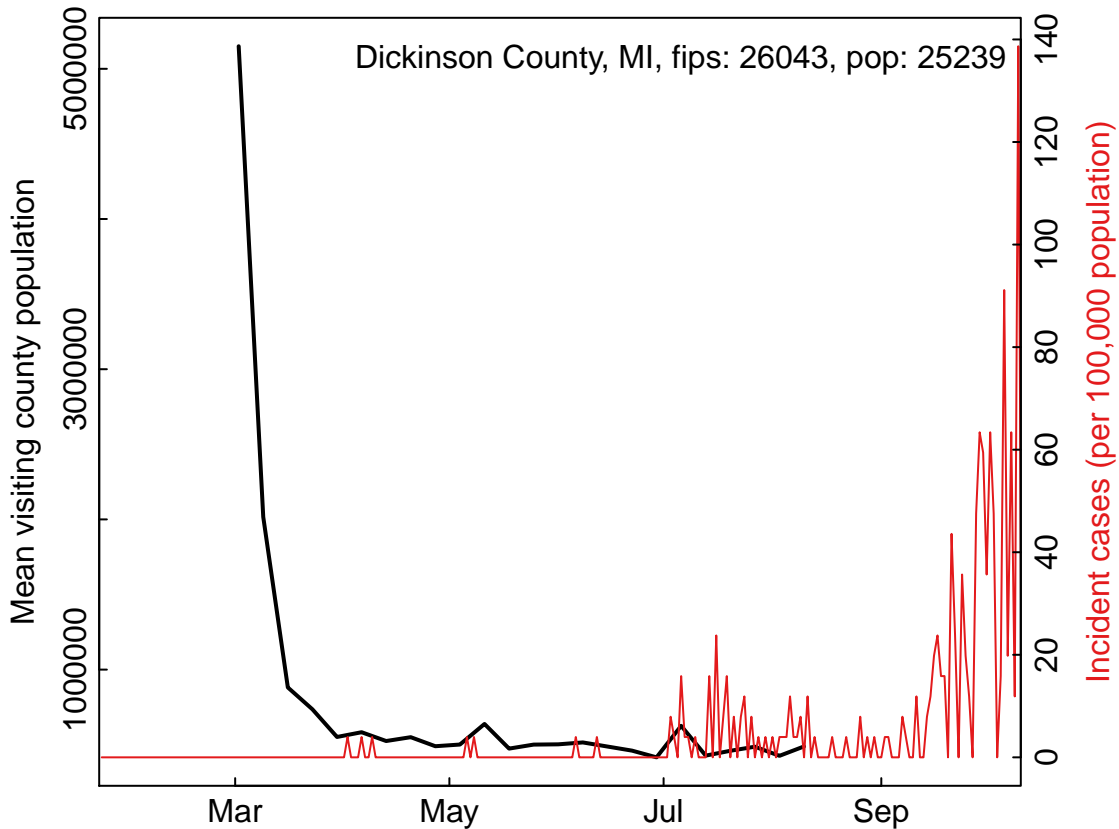

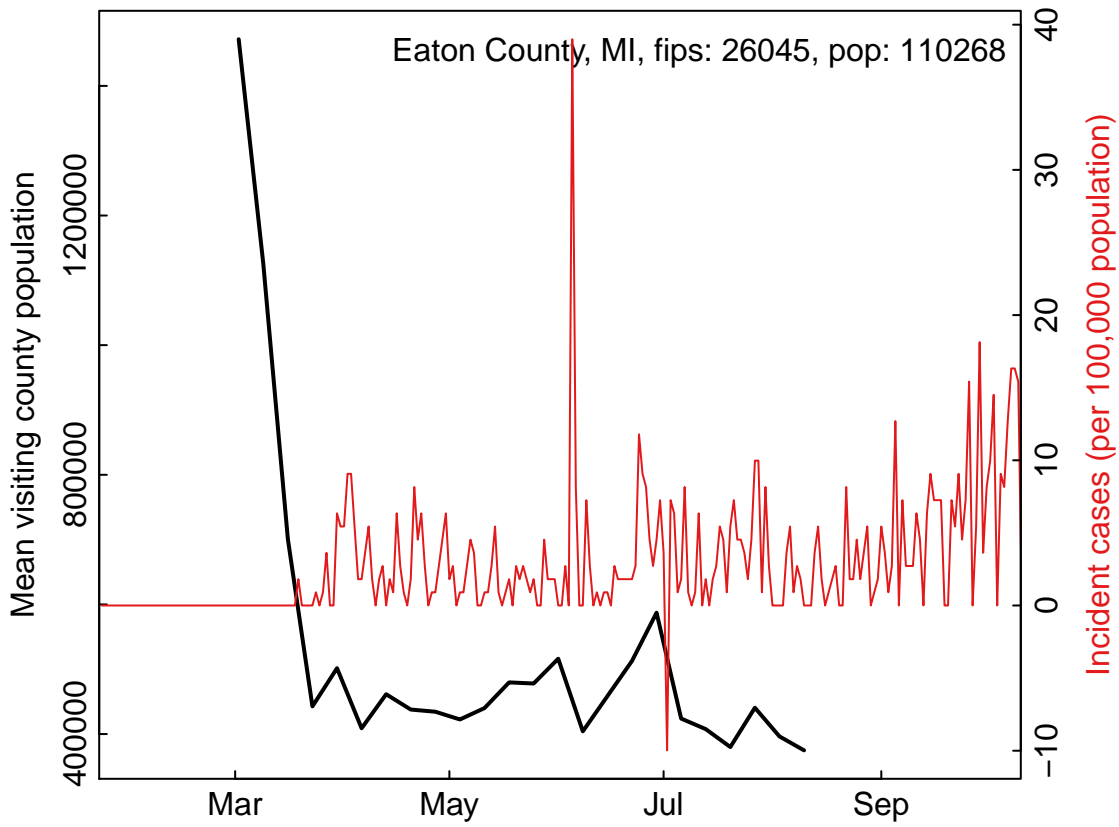

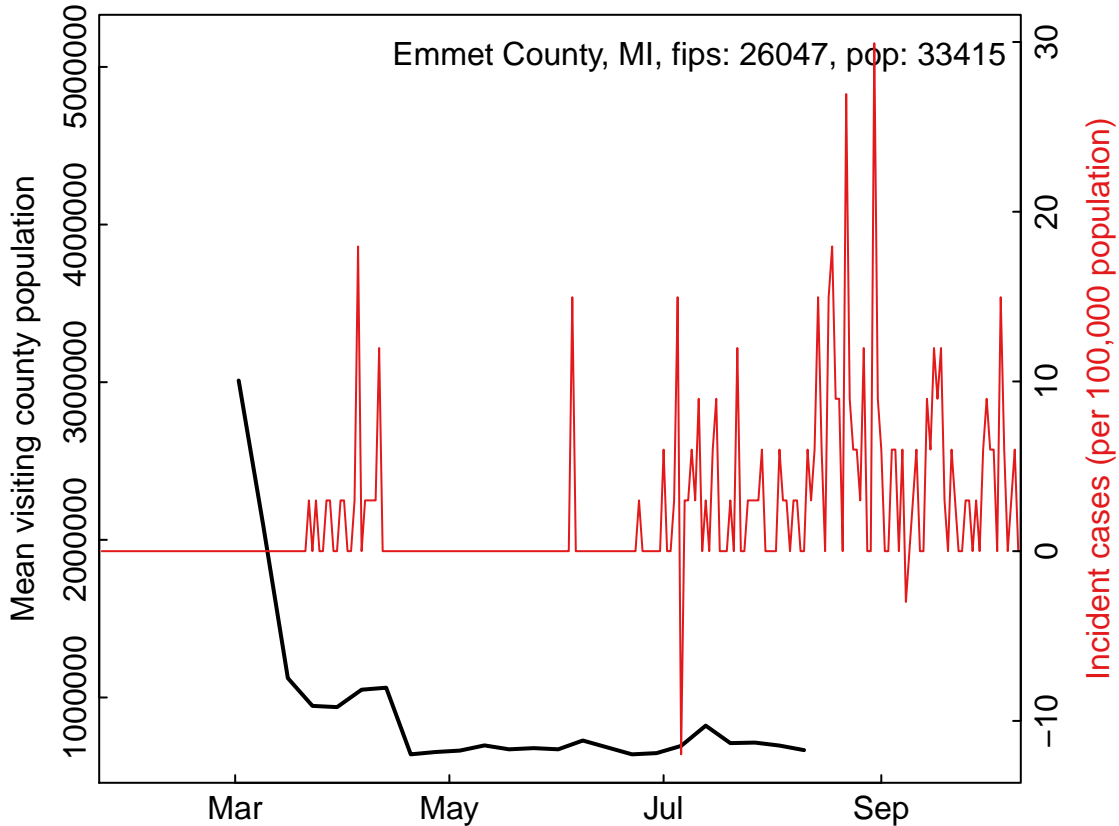

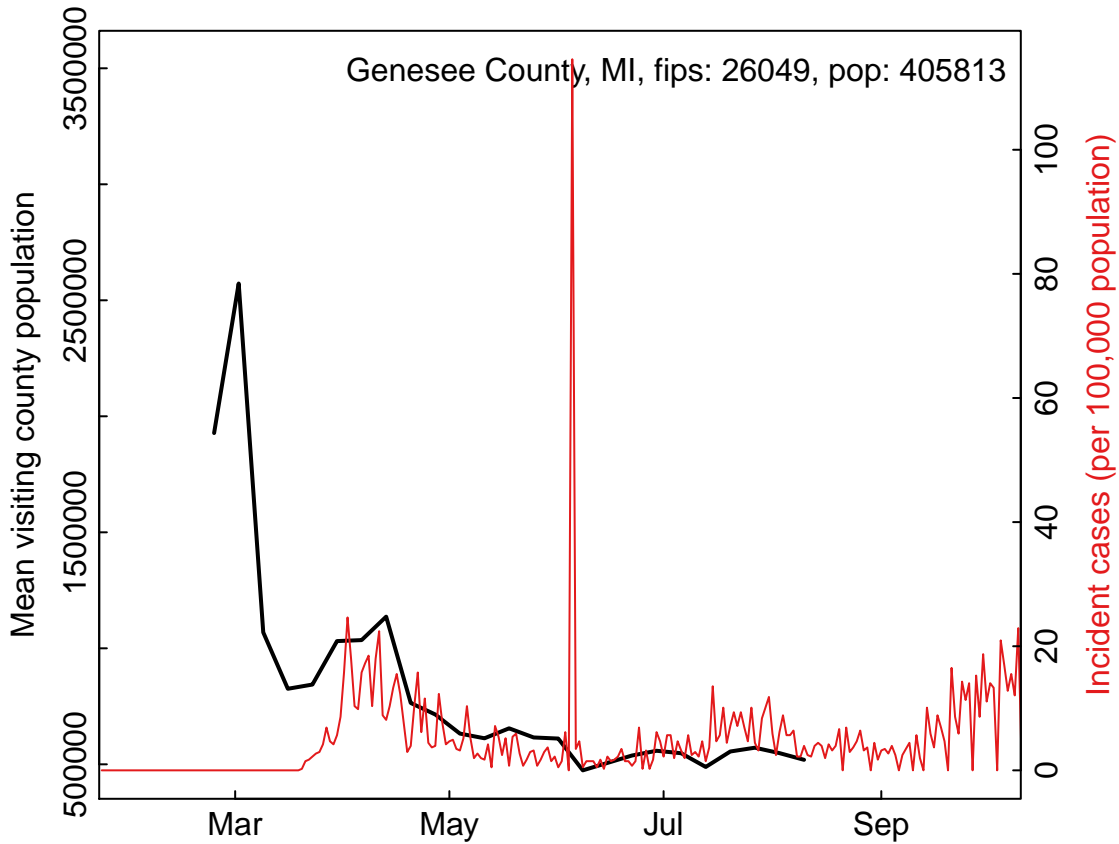

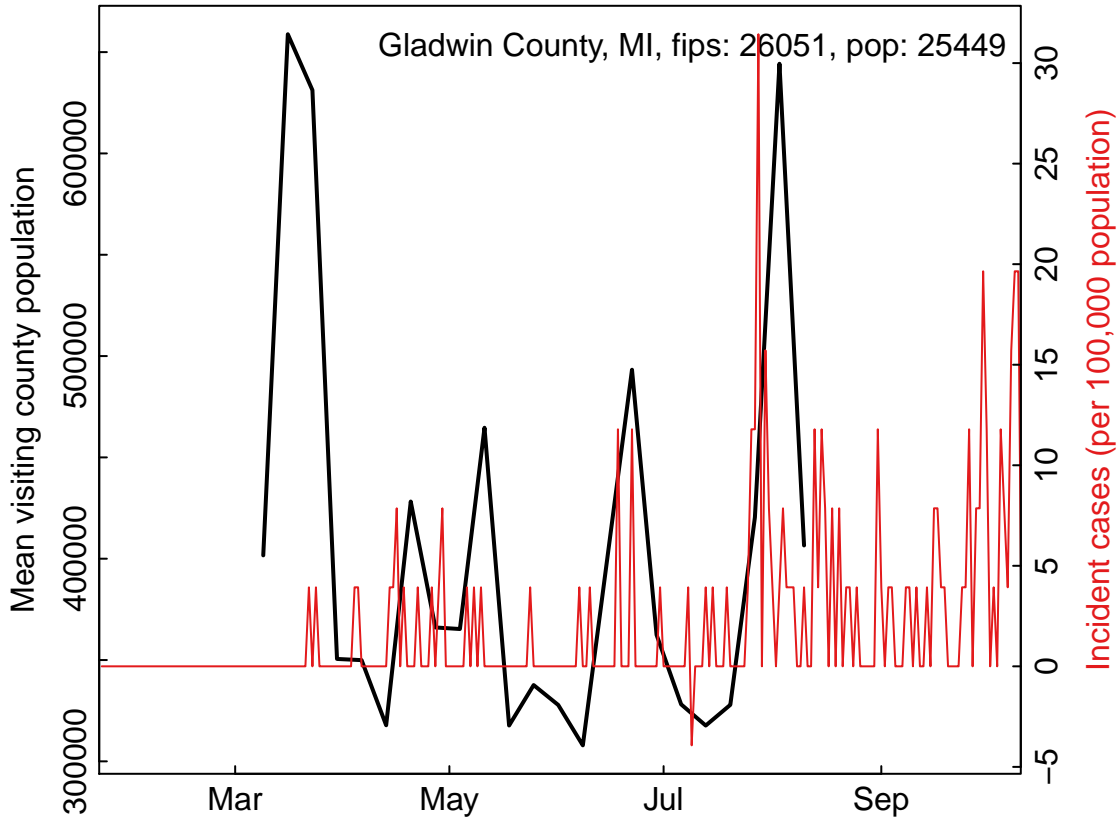

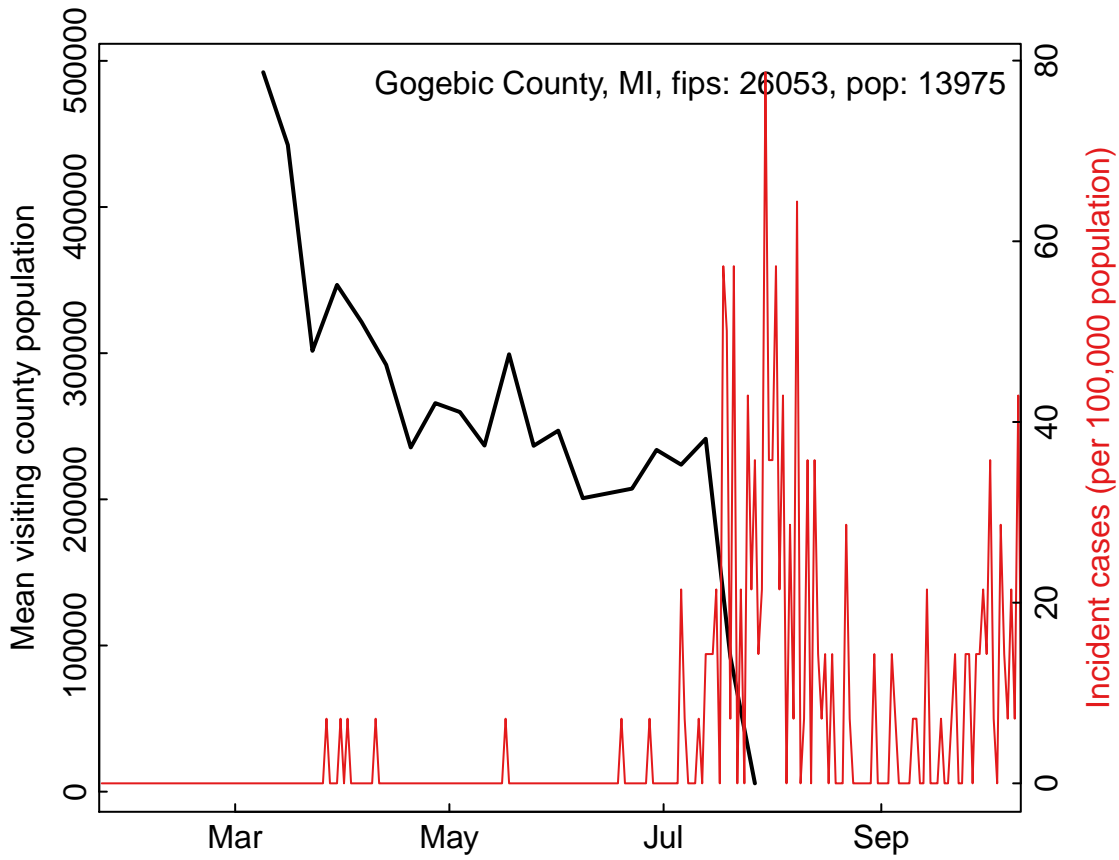

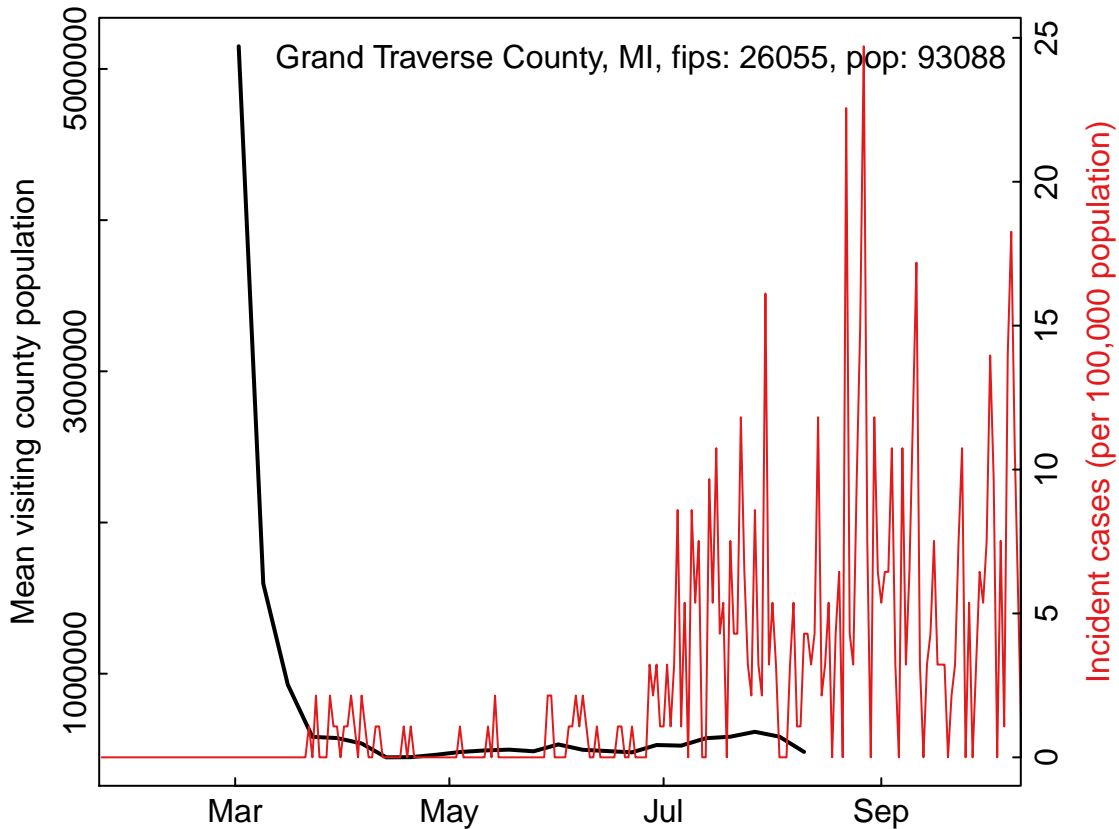

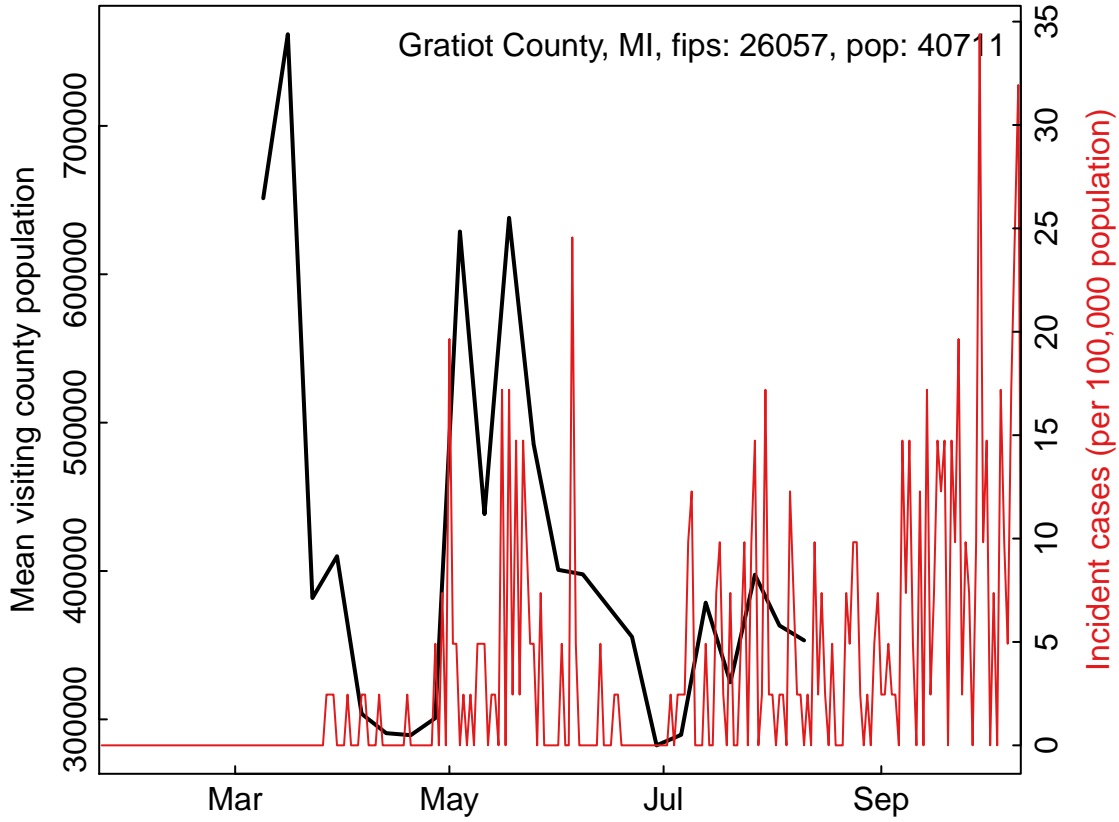



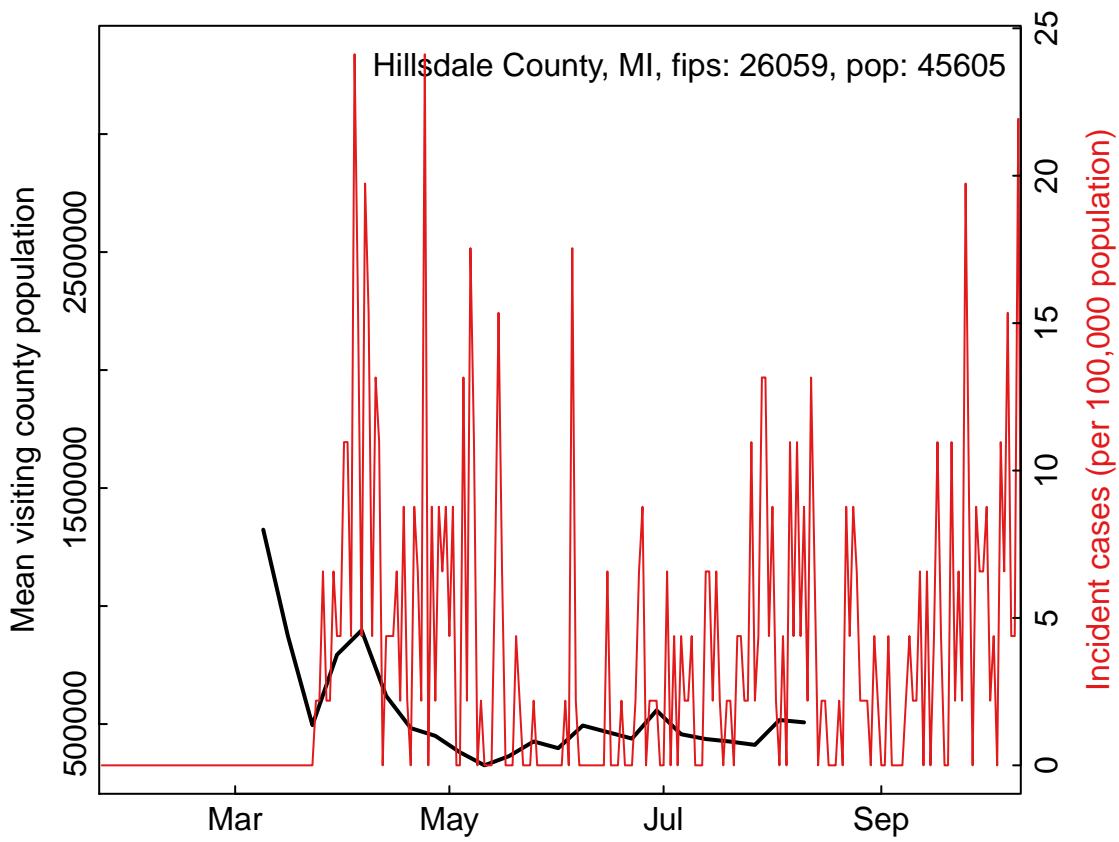

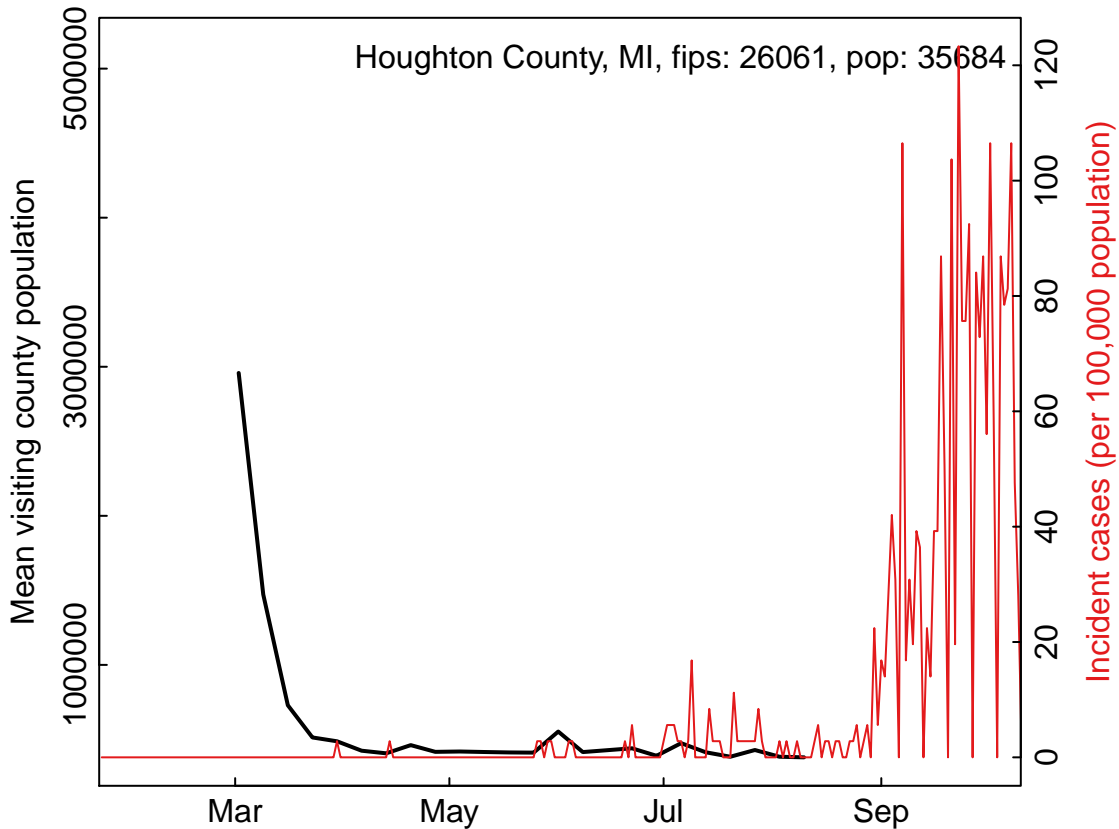

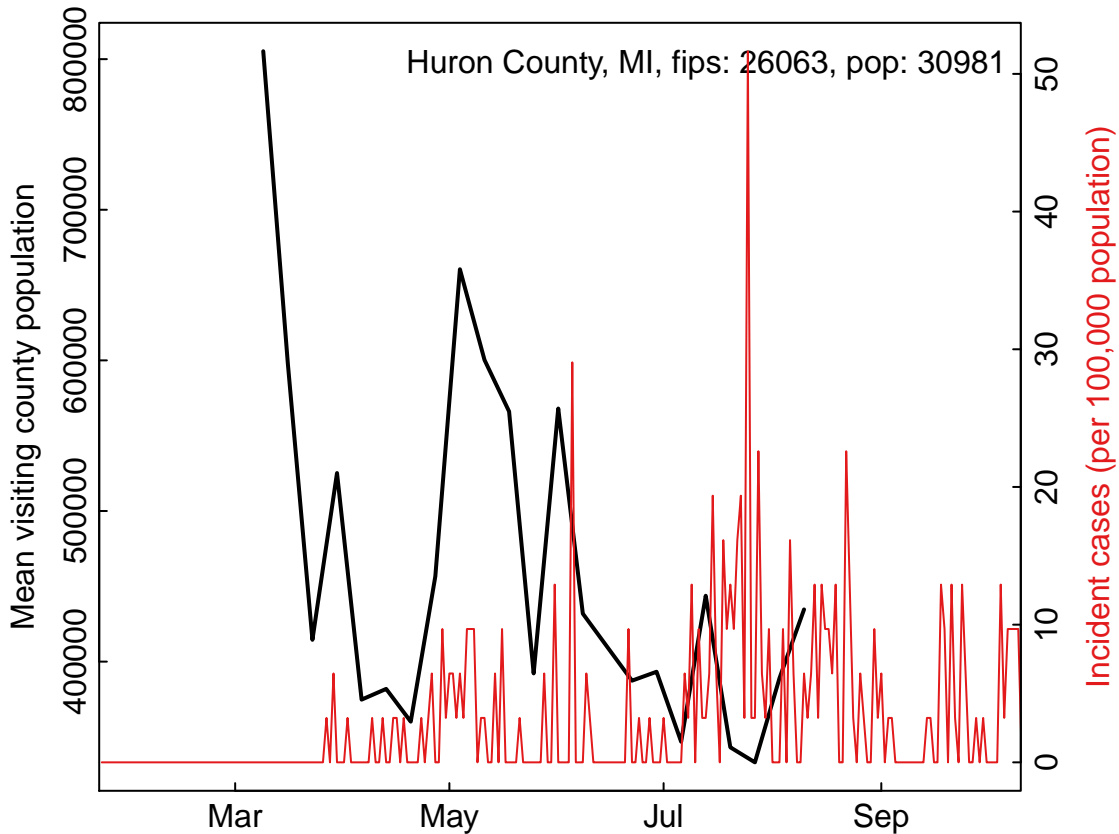

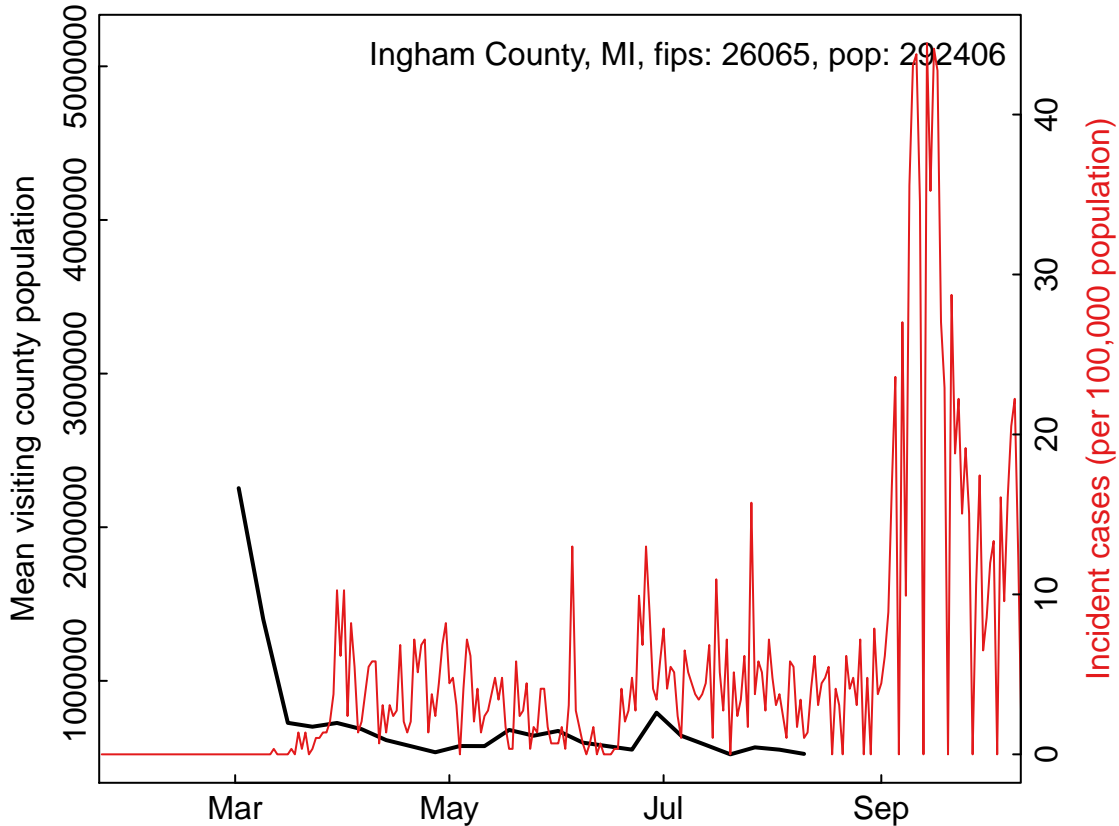

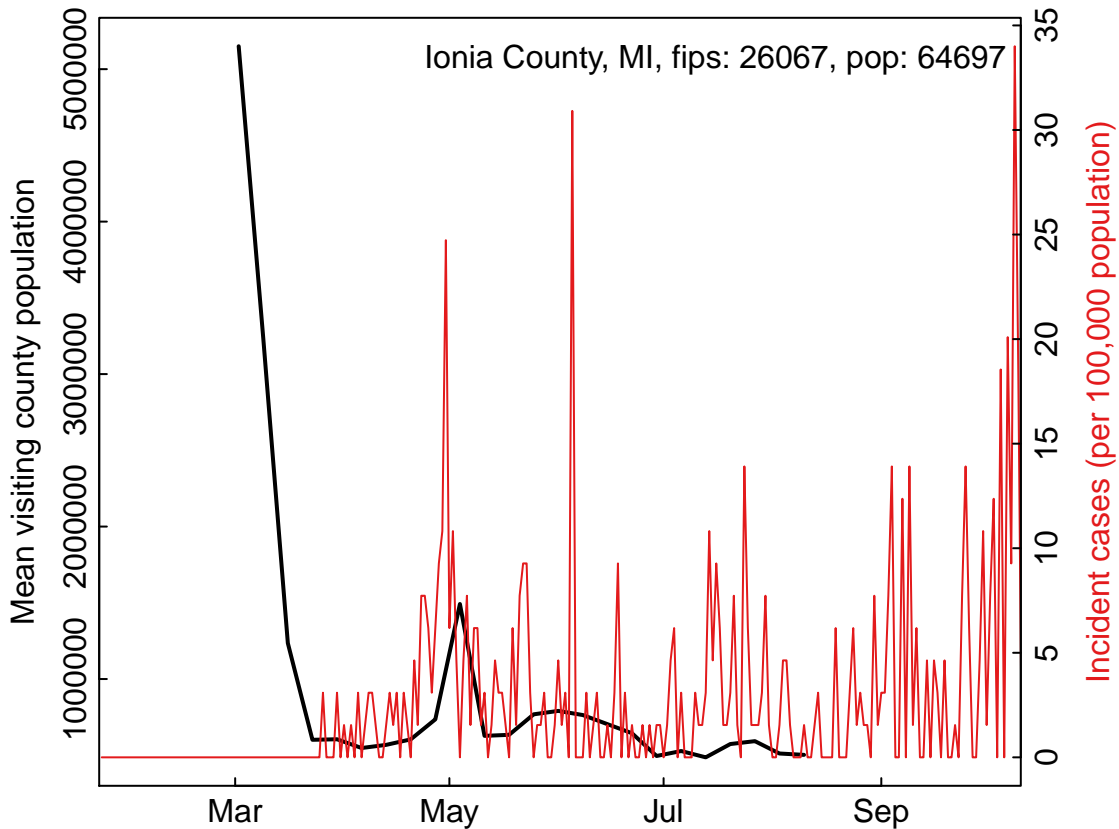

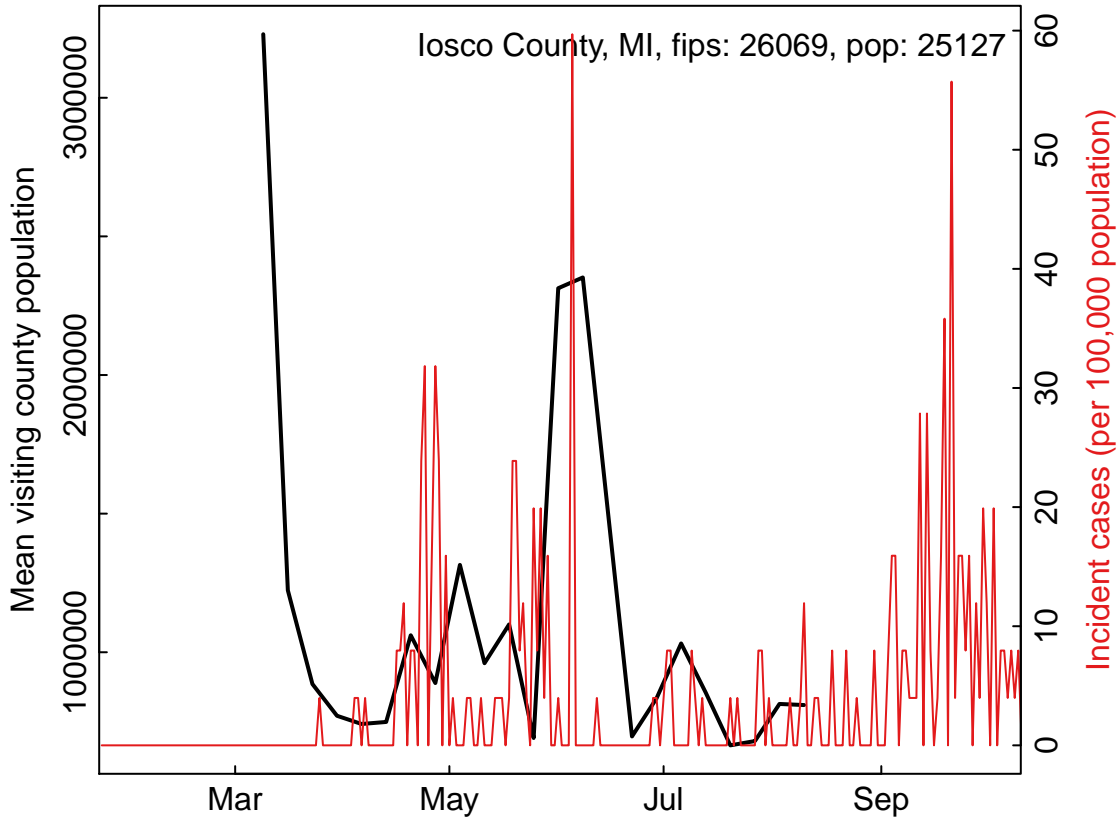

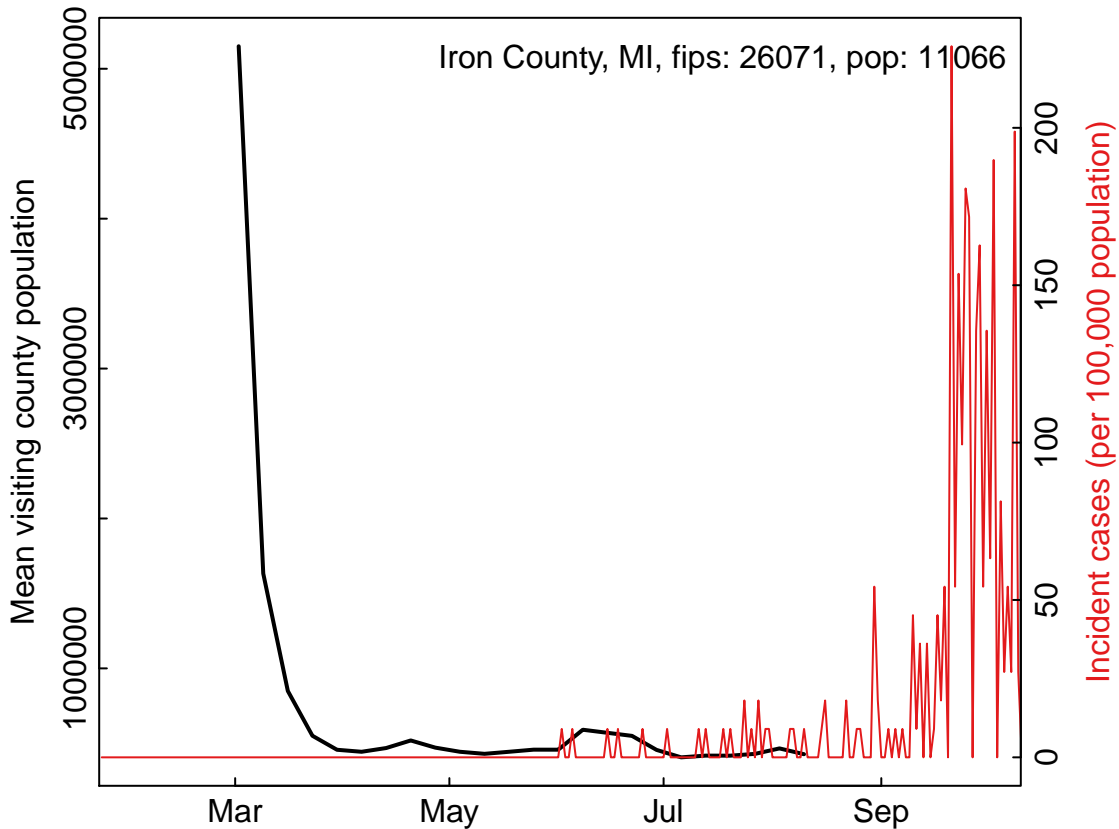

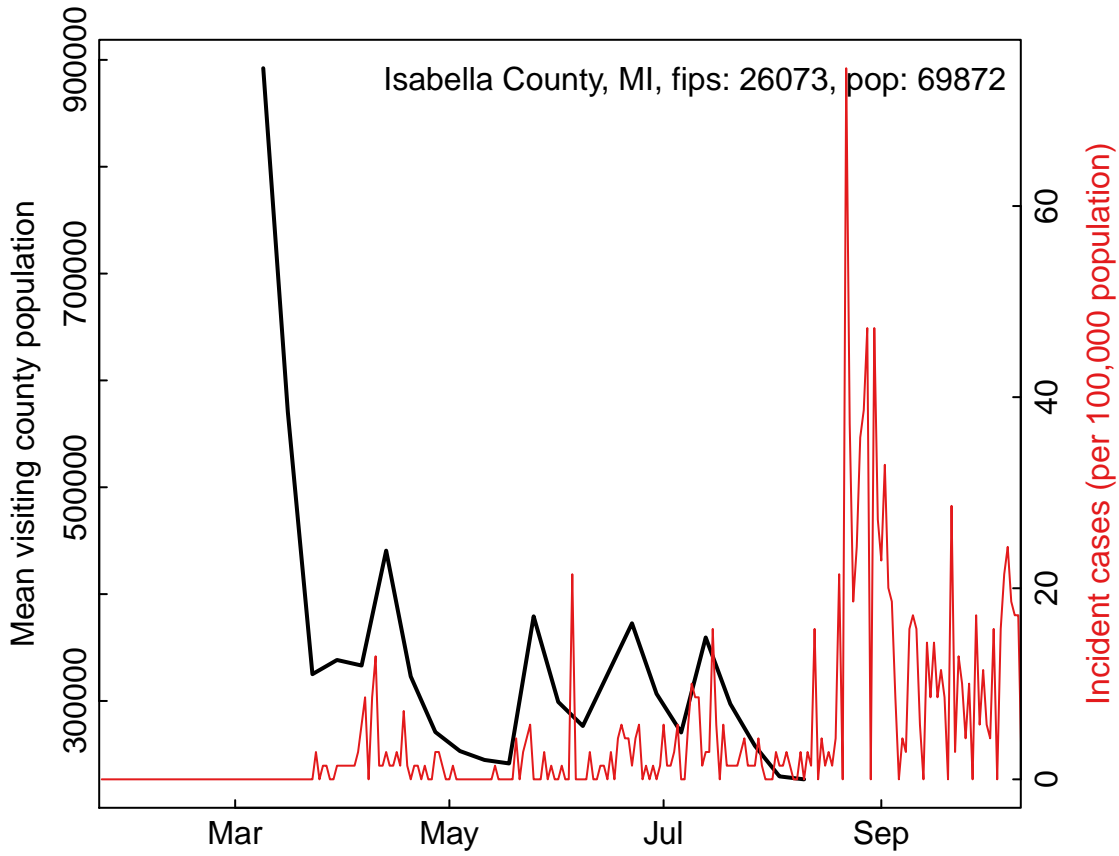



Jackson County, MI, fips: 26075, pop: 158510

Mean visiting county population

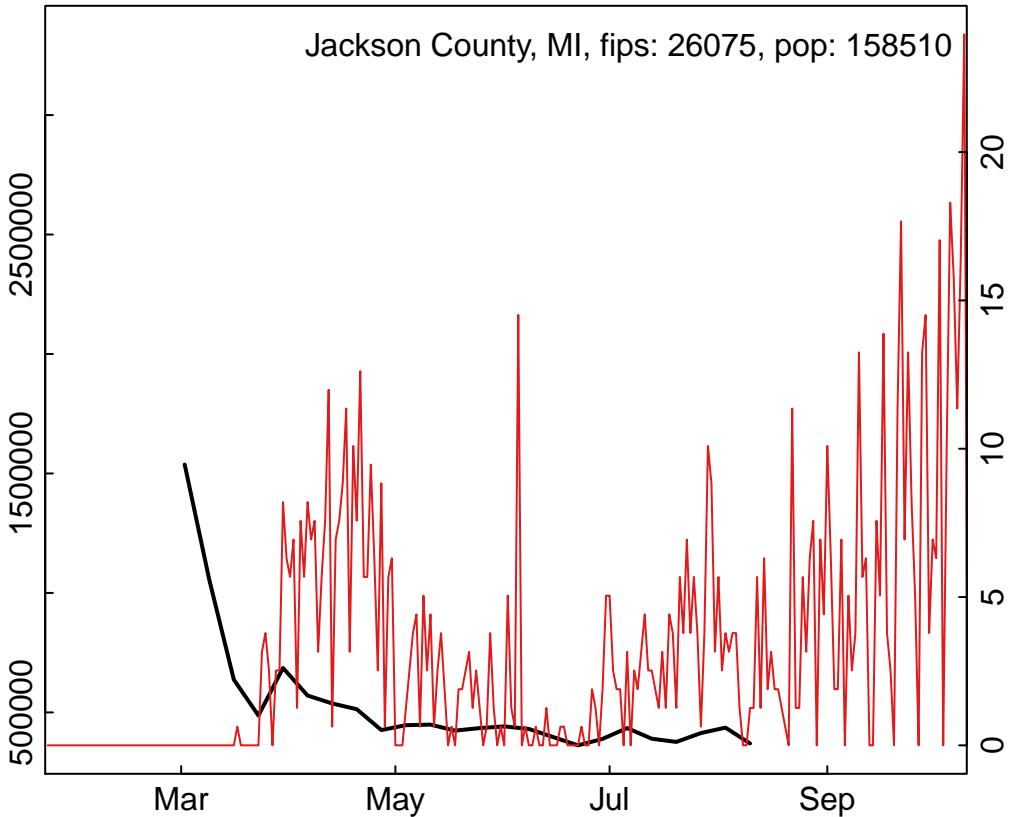

Incident cases (per 100,000 population)

Kalamazoo County, MI, fips: 26077, pop: 265066

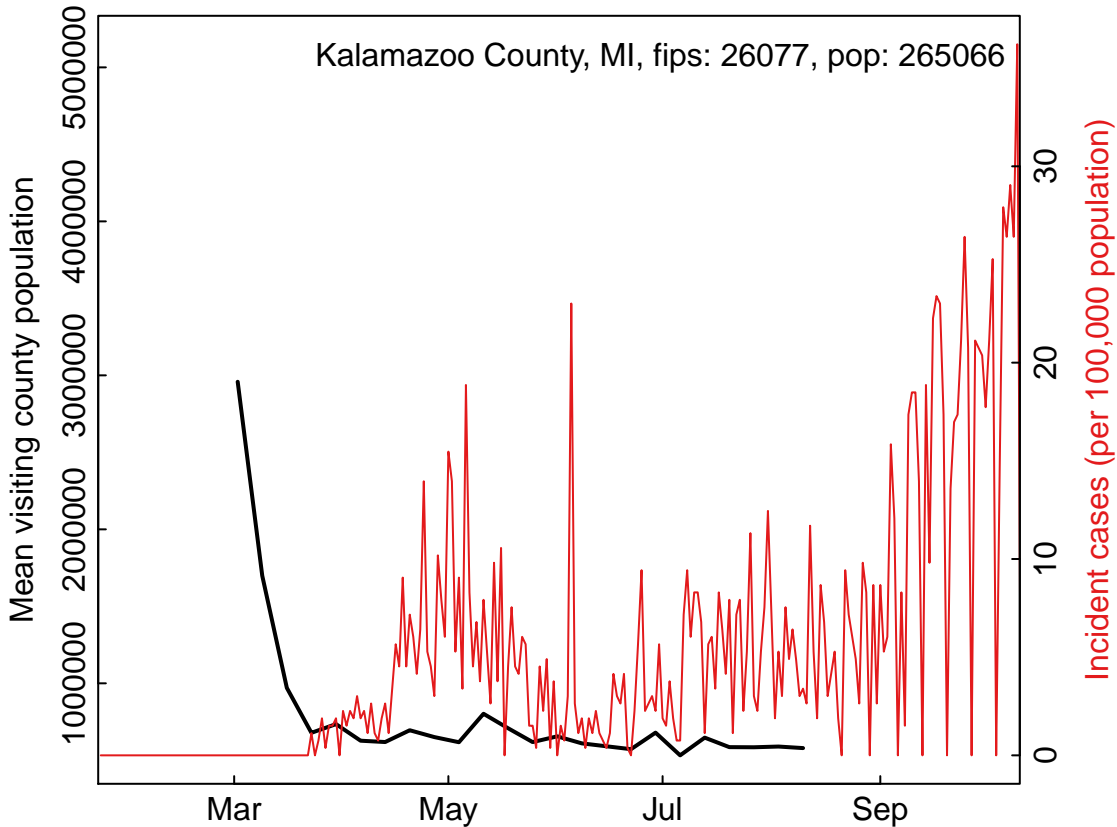

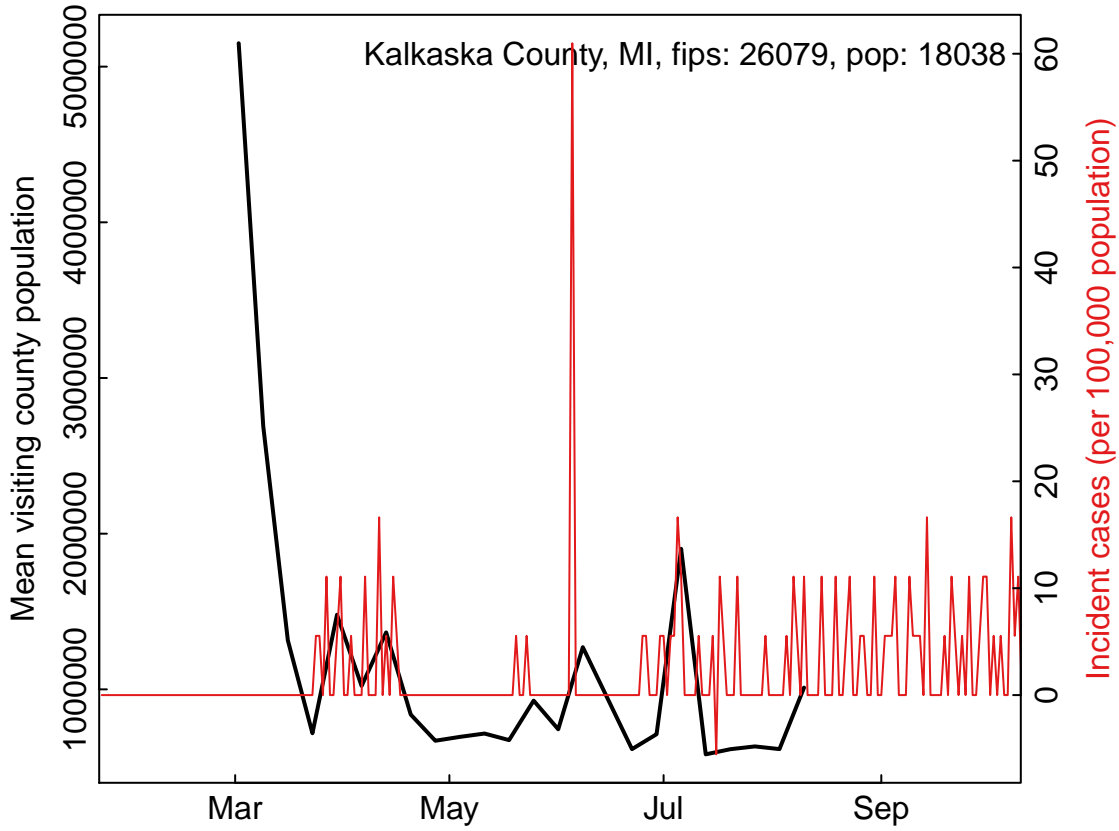

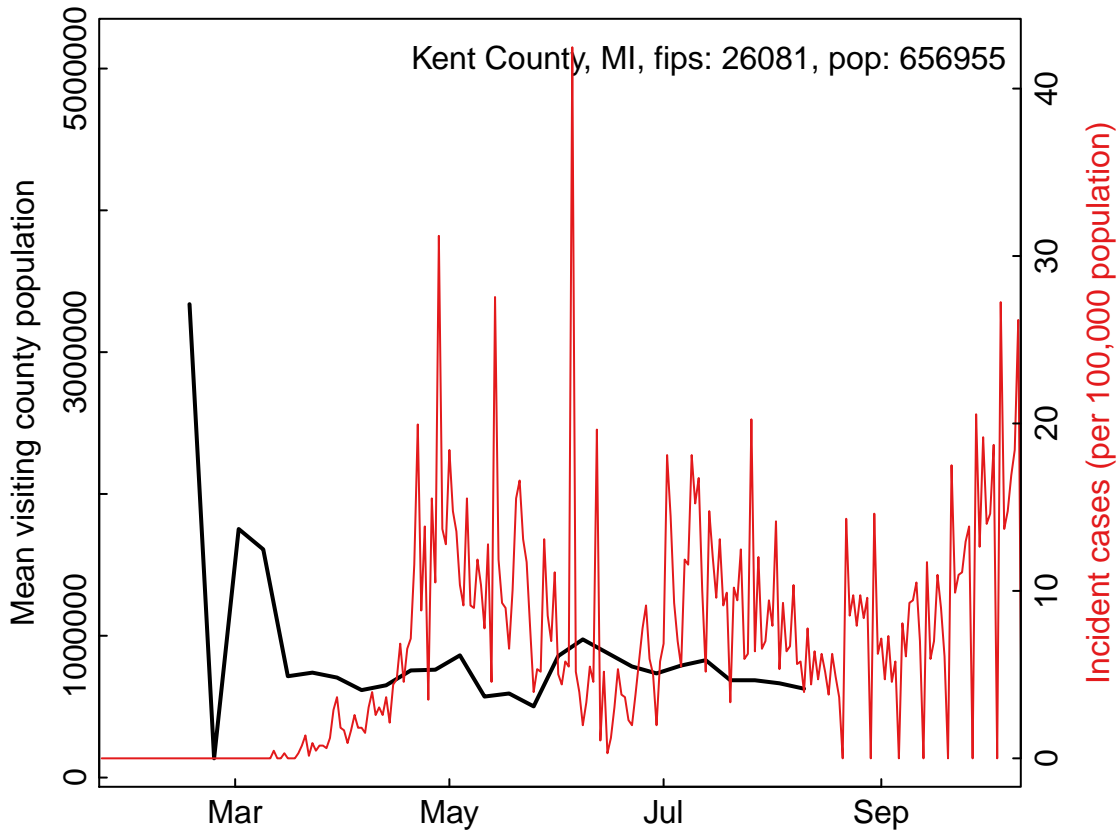

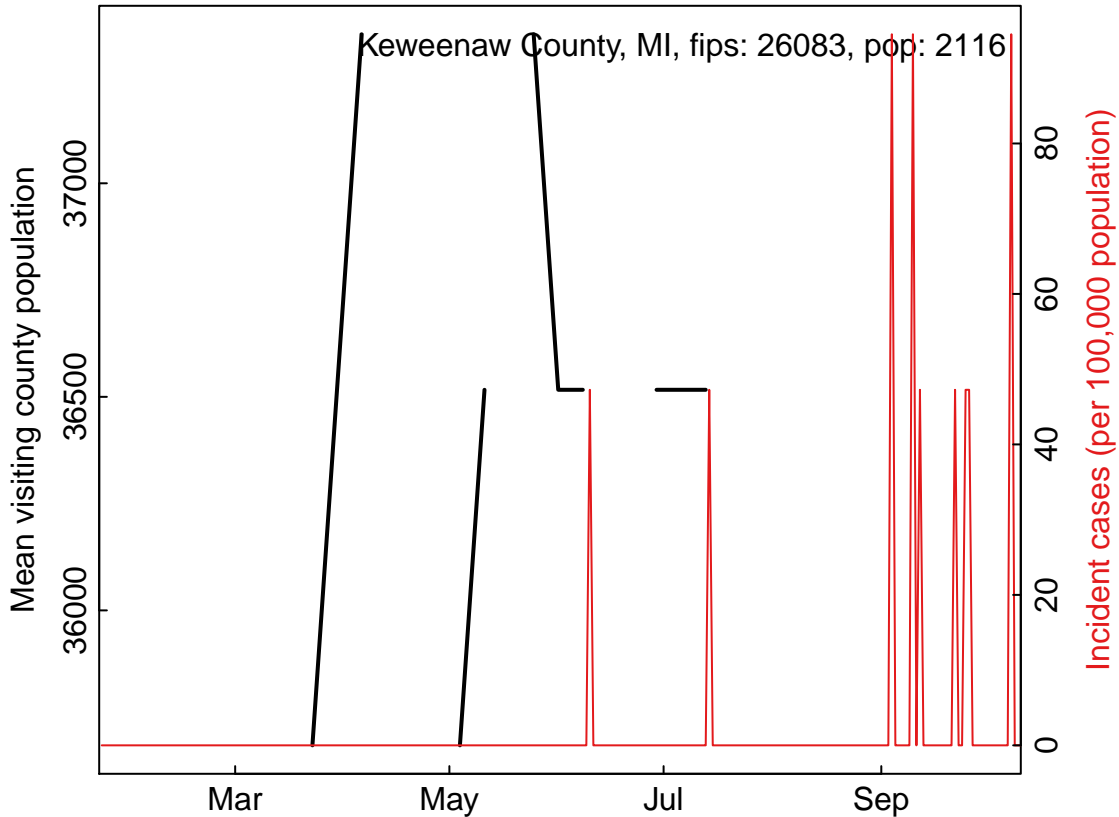

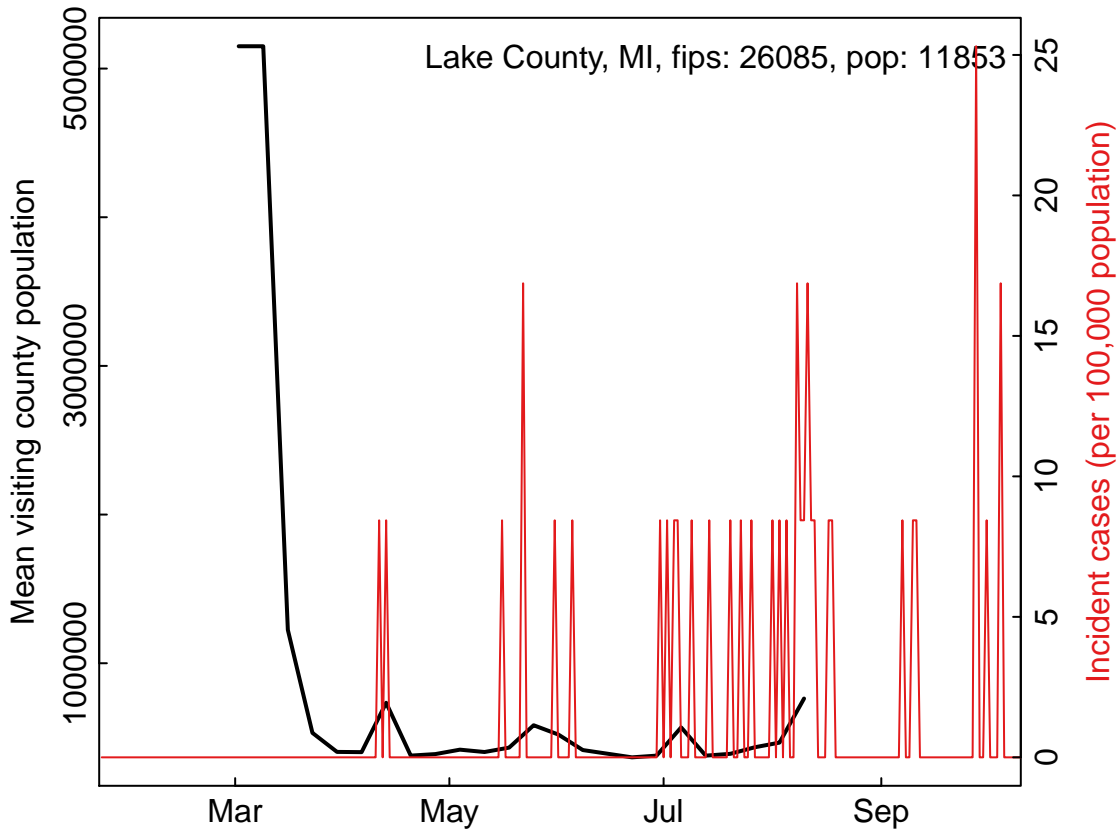

Lapeer County, MI, fips: 26087, pop: 87607

Mean visiting county population

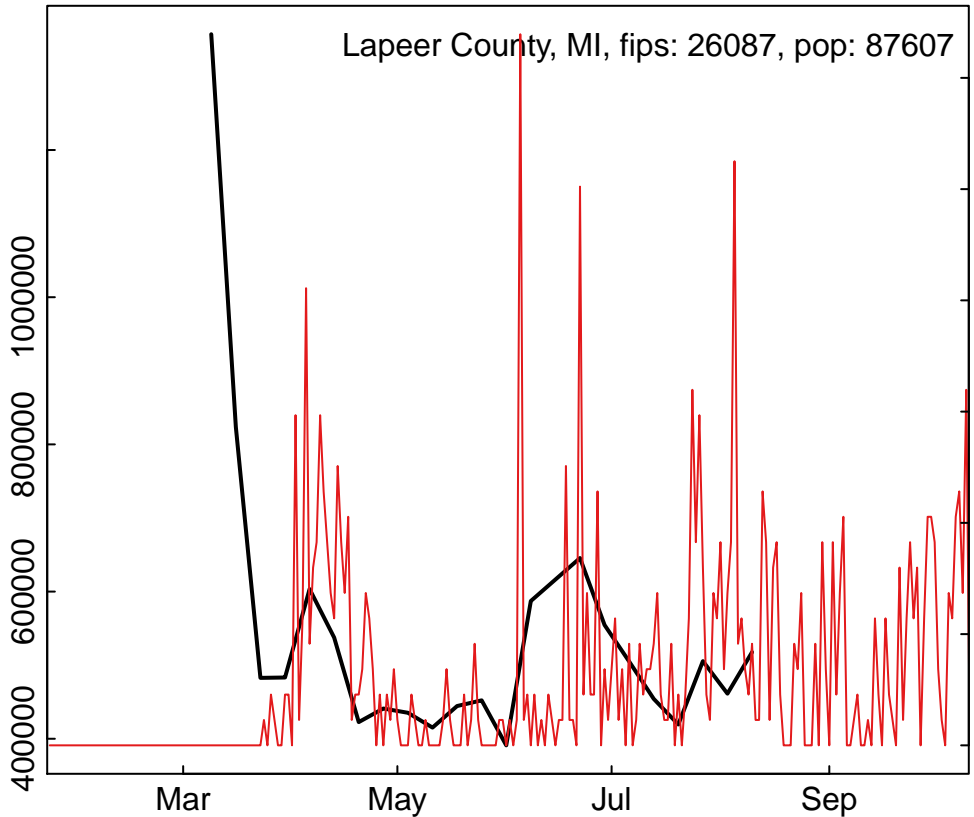

Incident cases (per 100,000 population)

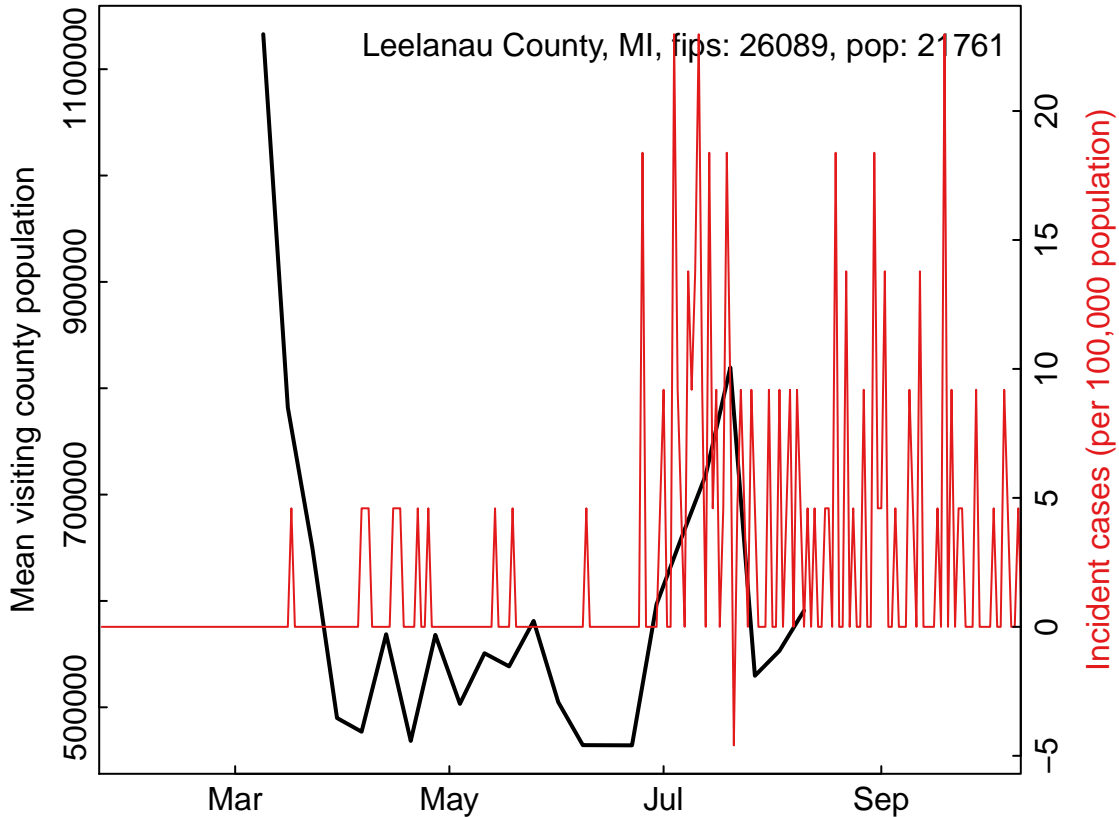



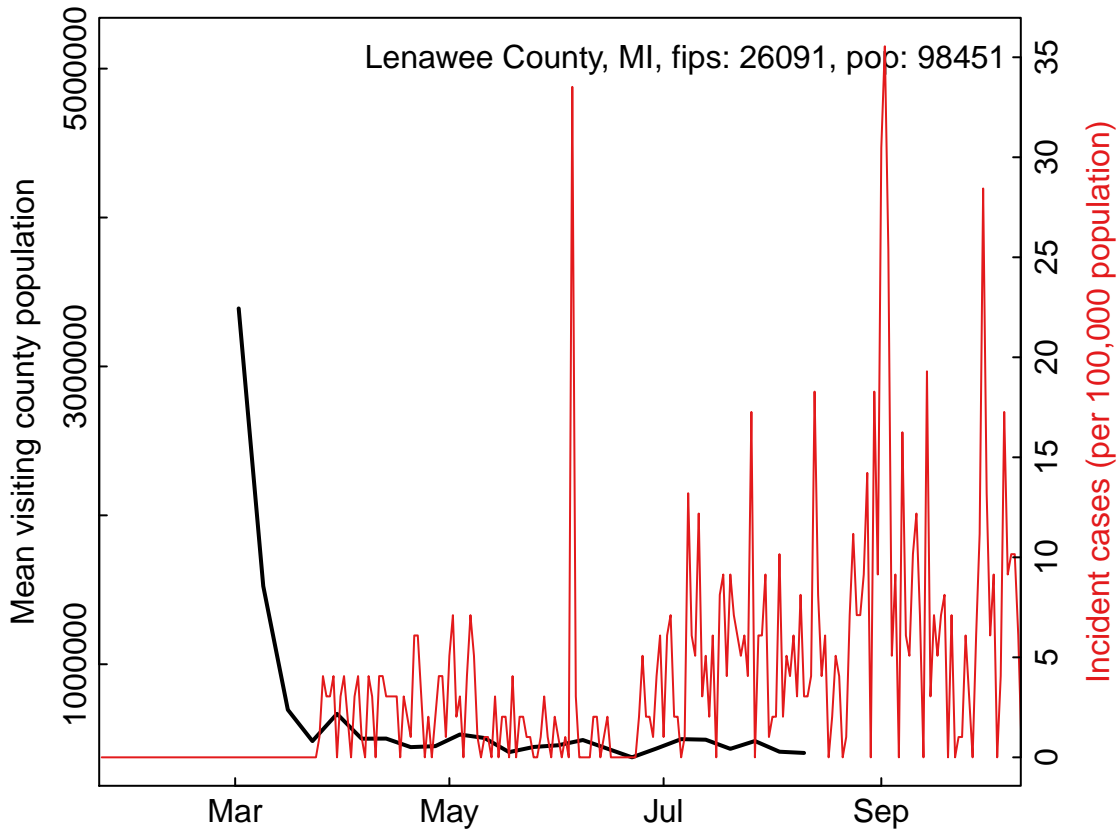

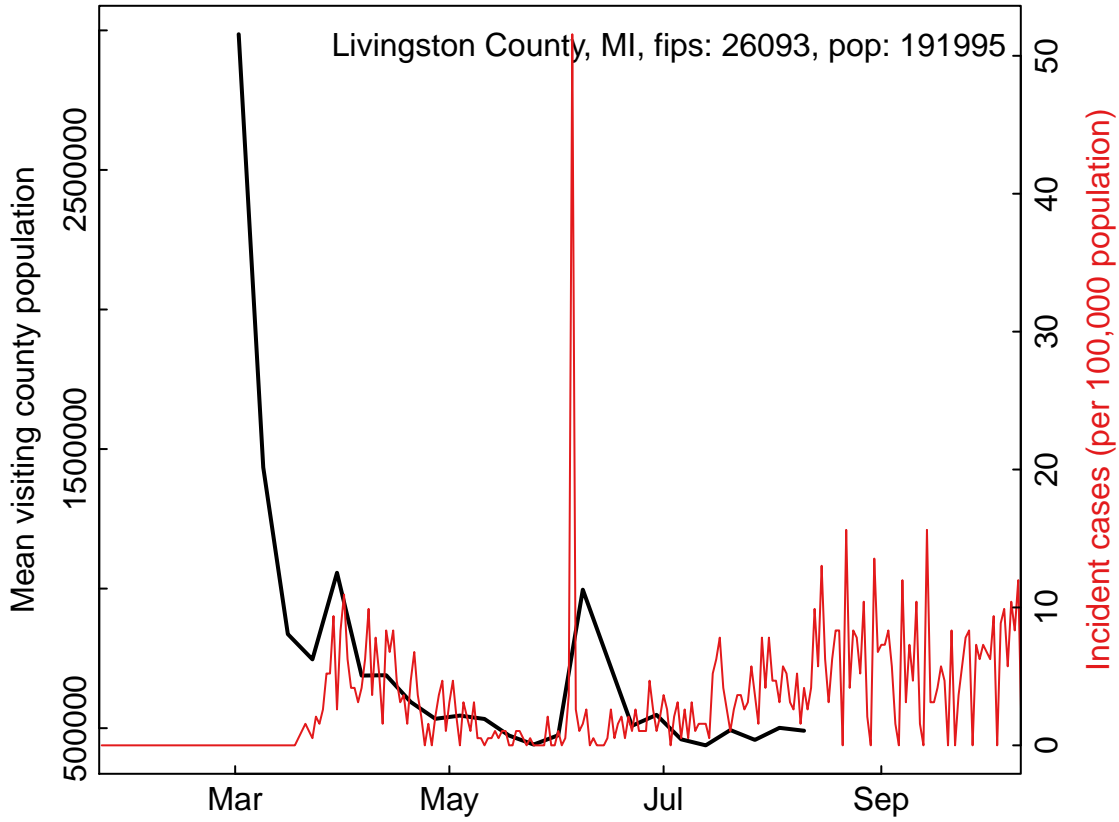

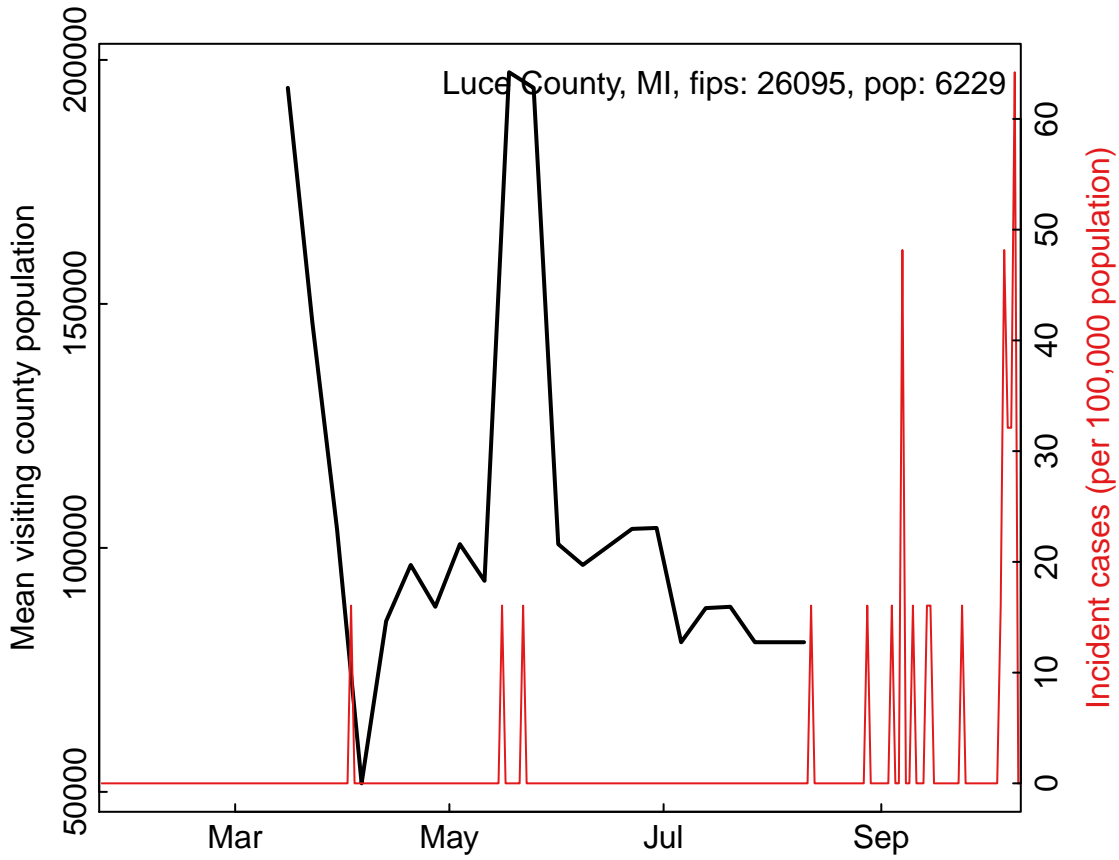

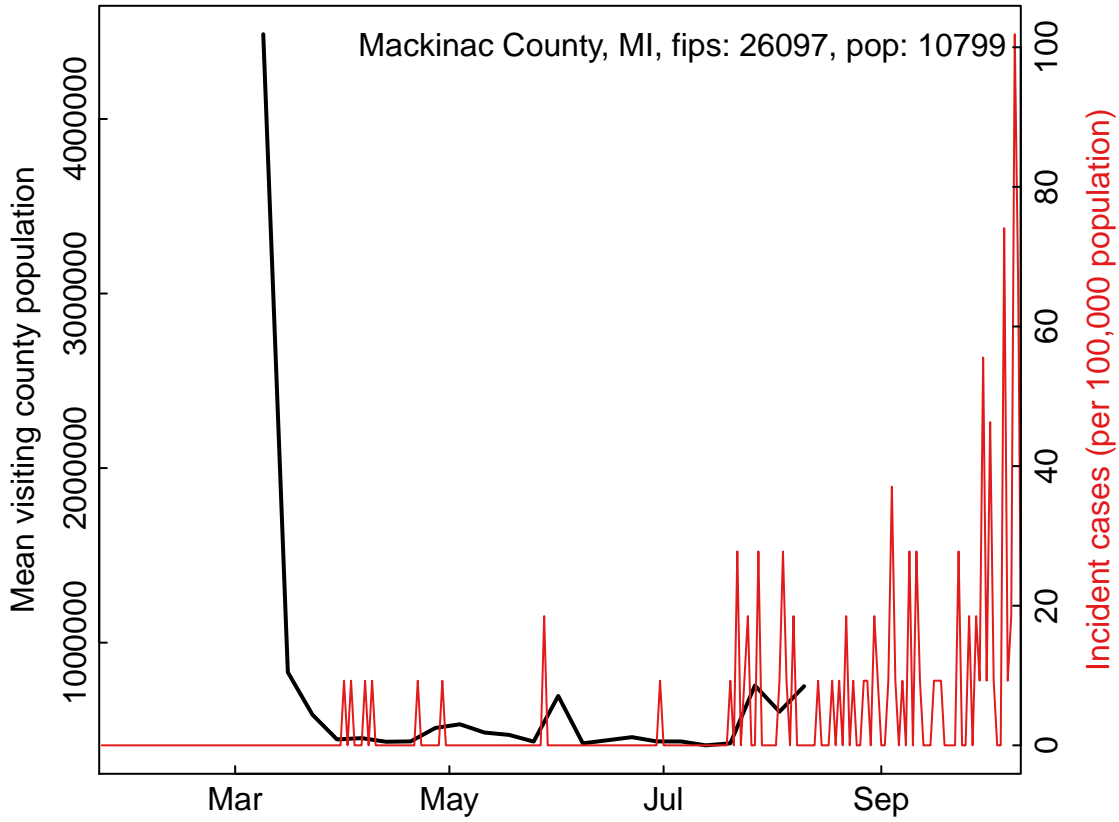

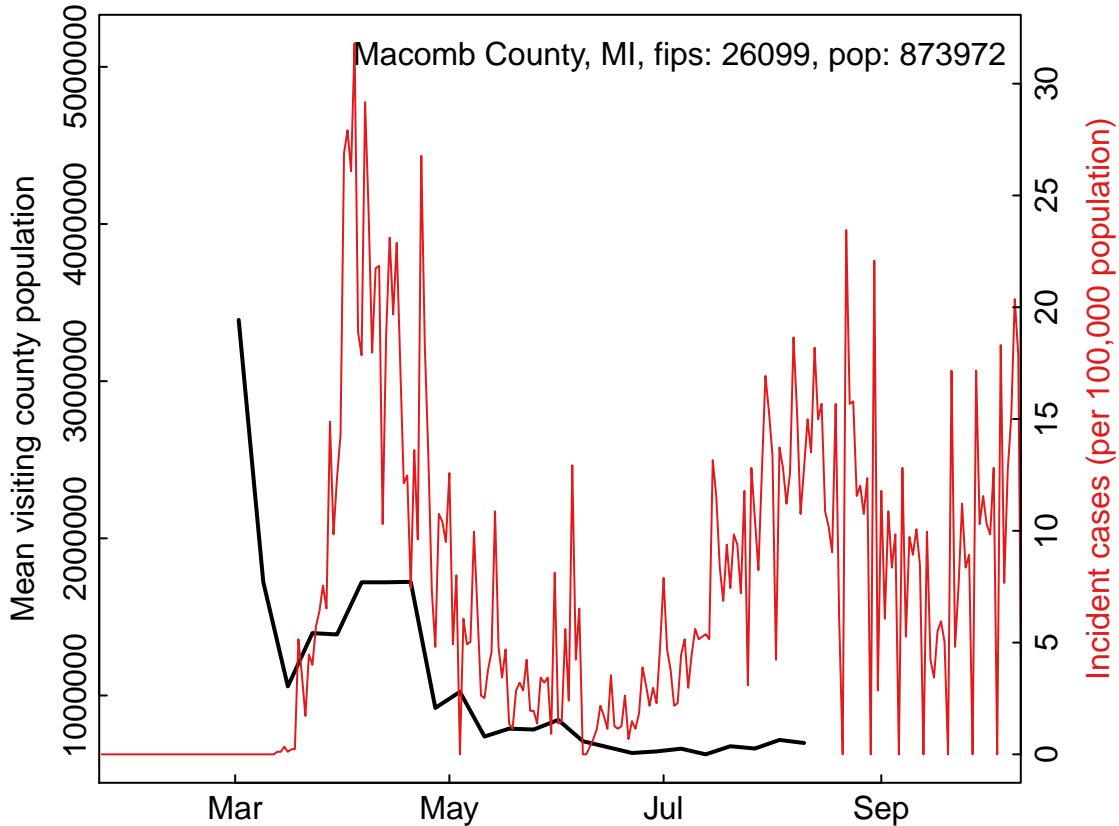

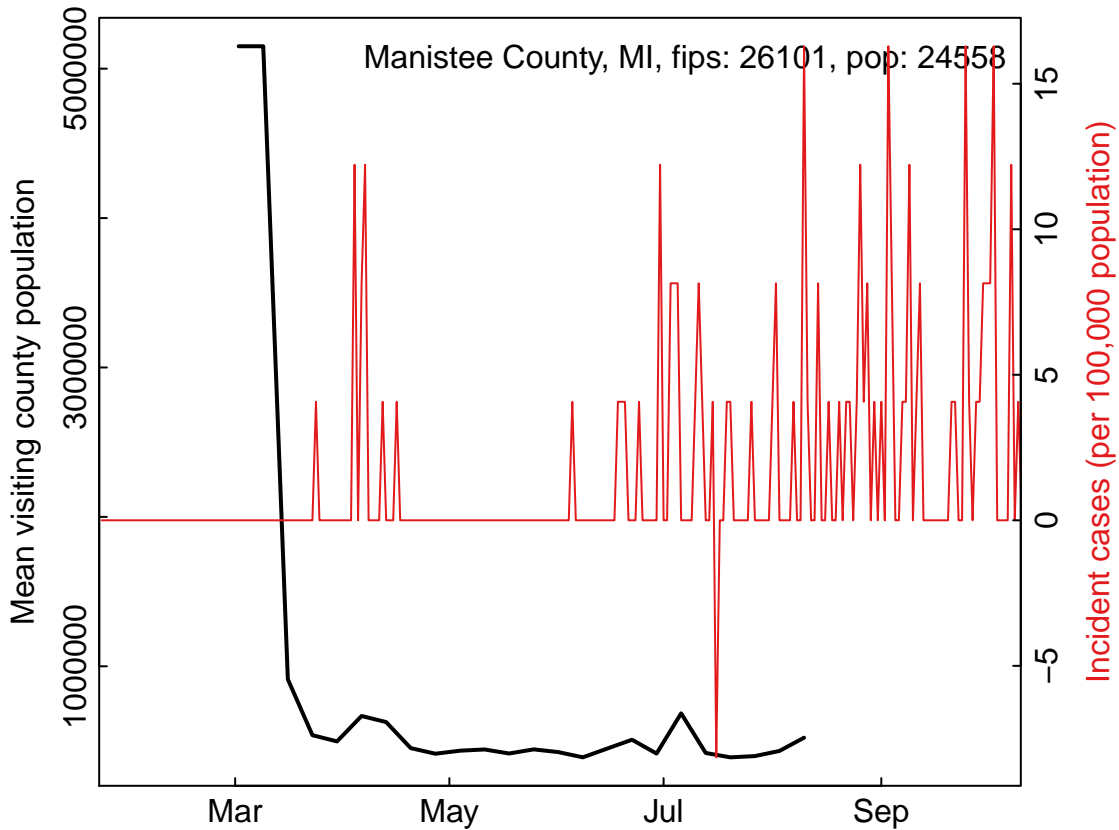

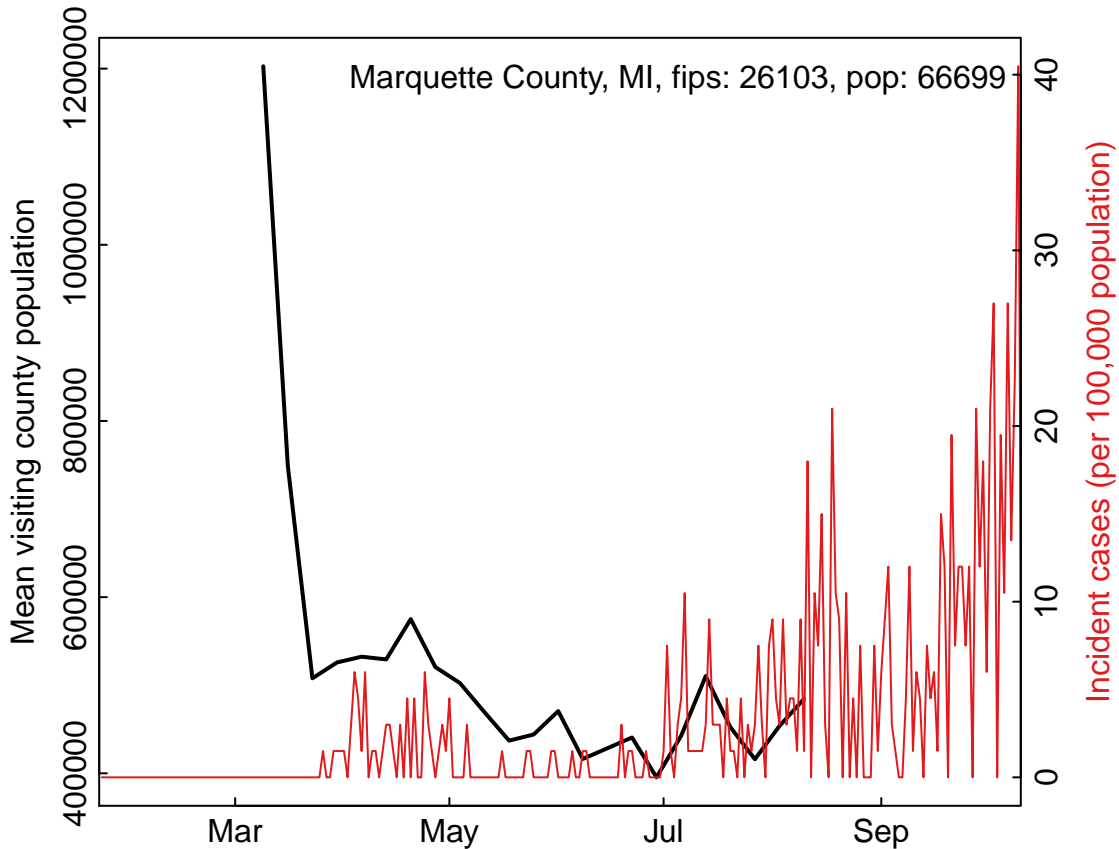

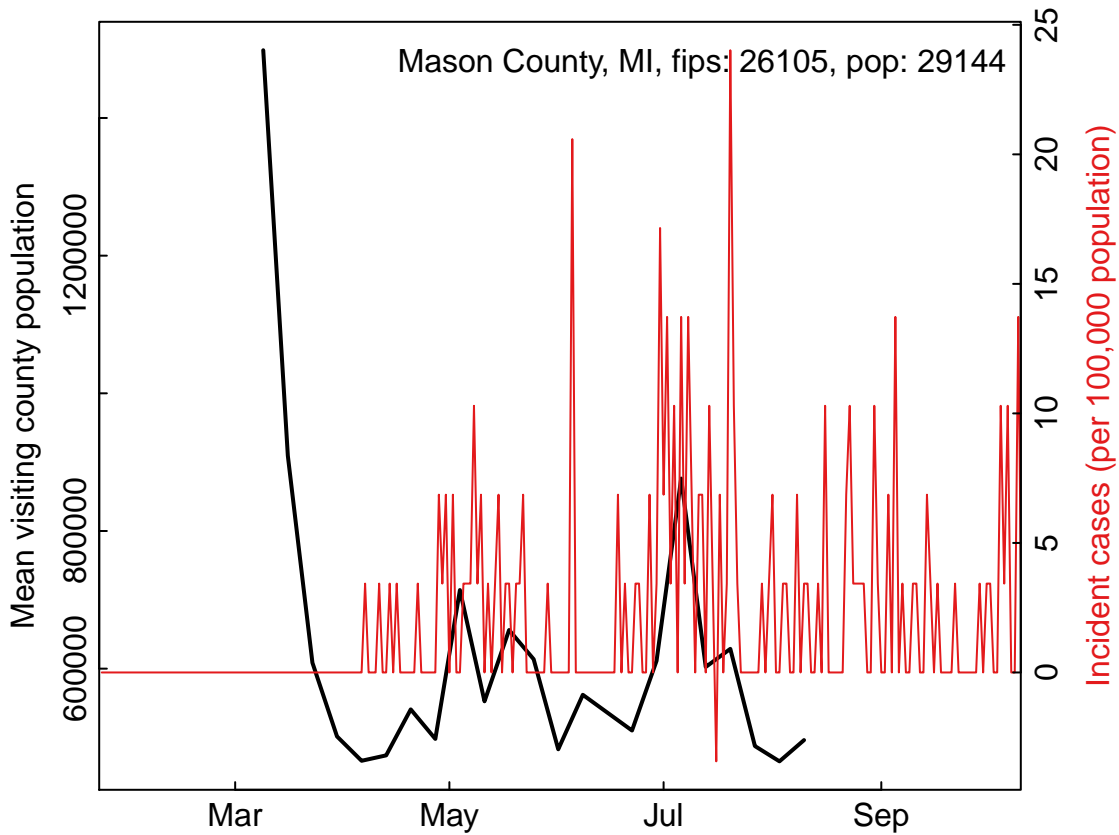



Mecosta County, MI, fips: 26107, pop: 43453

Mean visiting county population

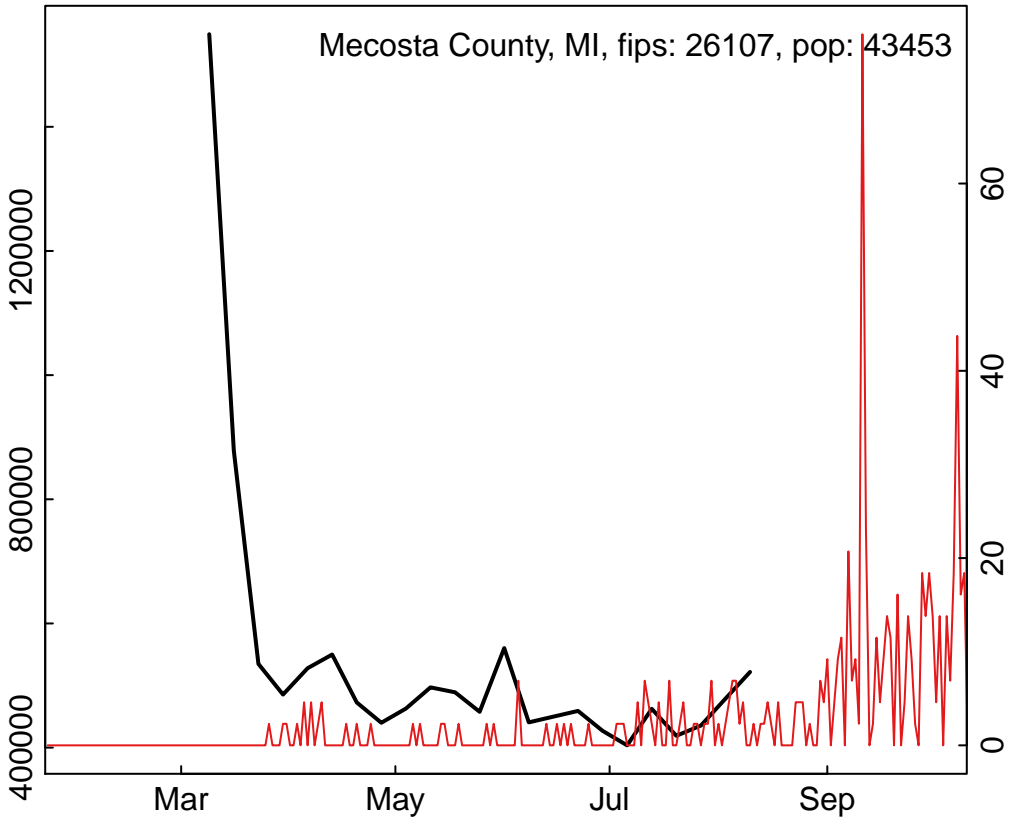

Incident cases (per 100,000 population)

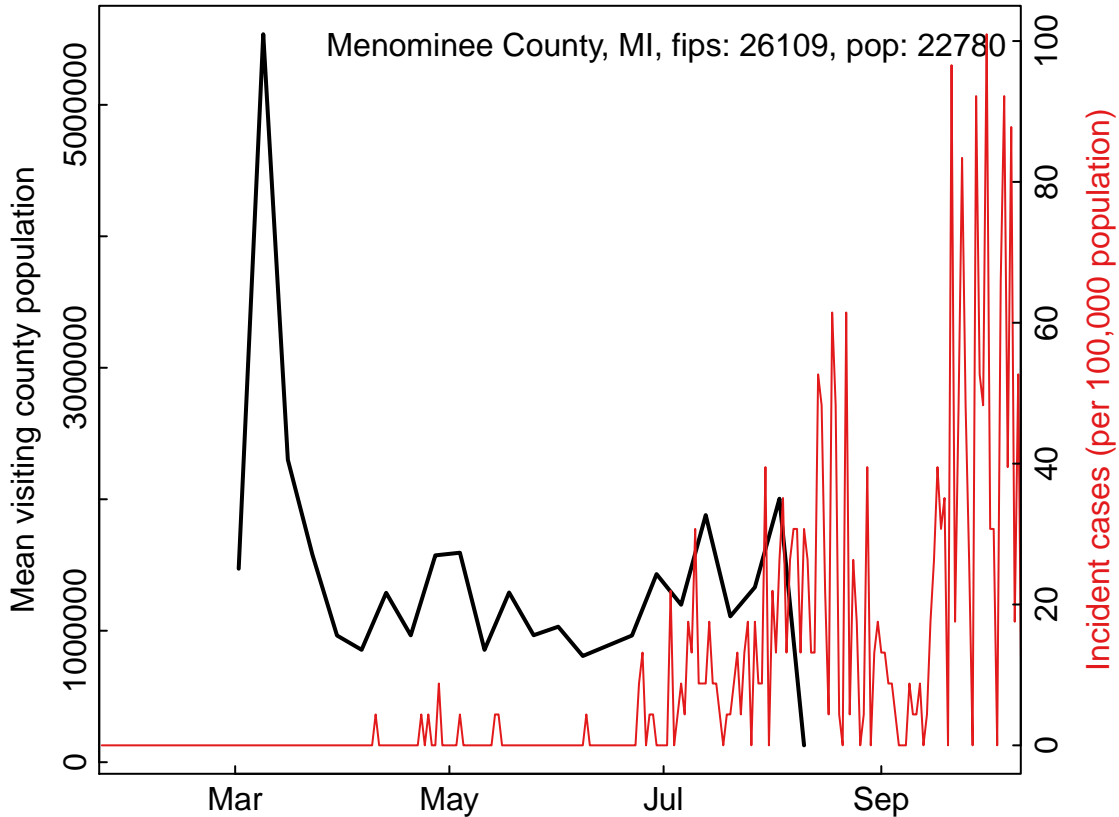

Midland County, MI, fips: 26111, pop: 83156

Mean visiting county population

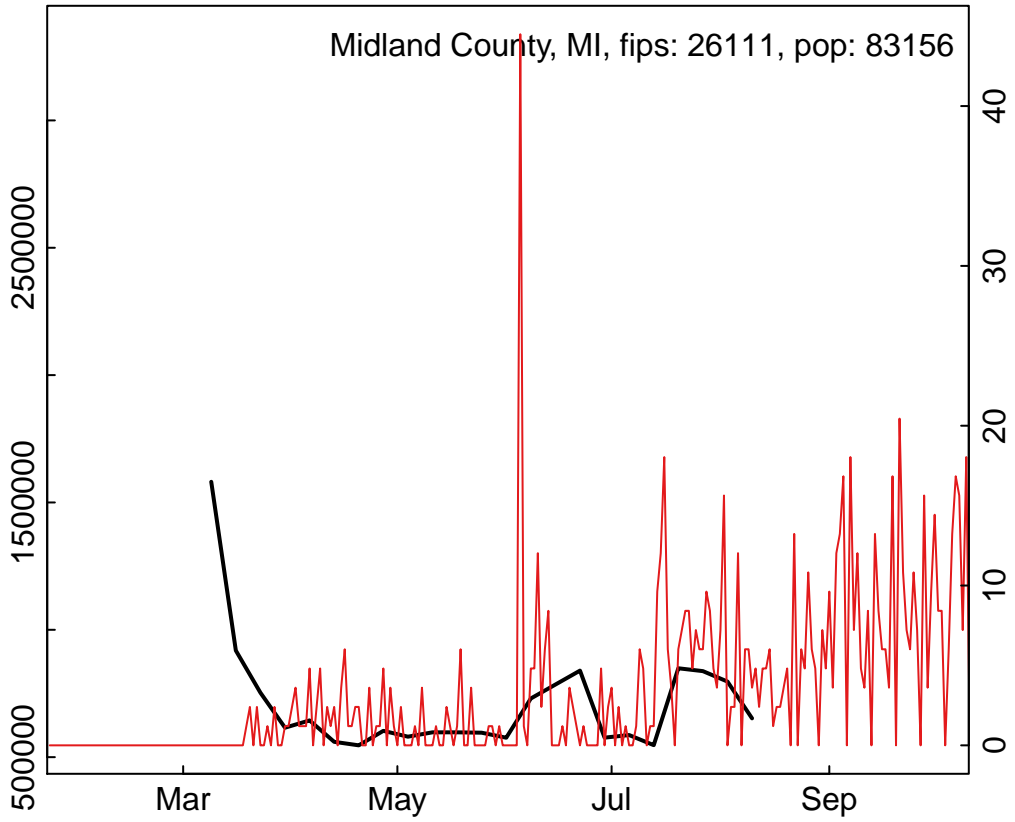

Incident cases (per 100,000 population)

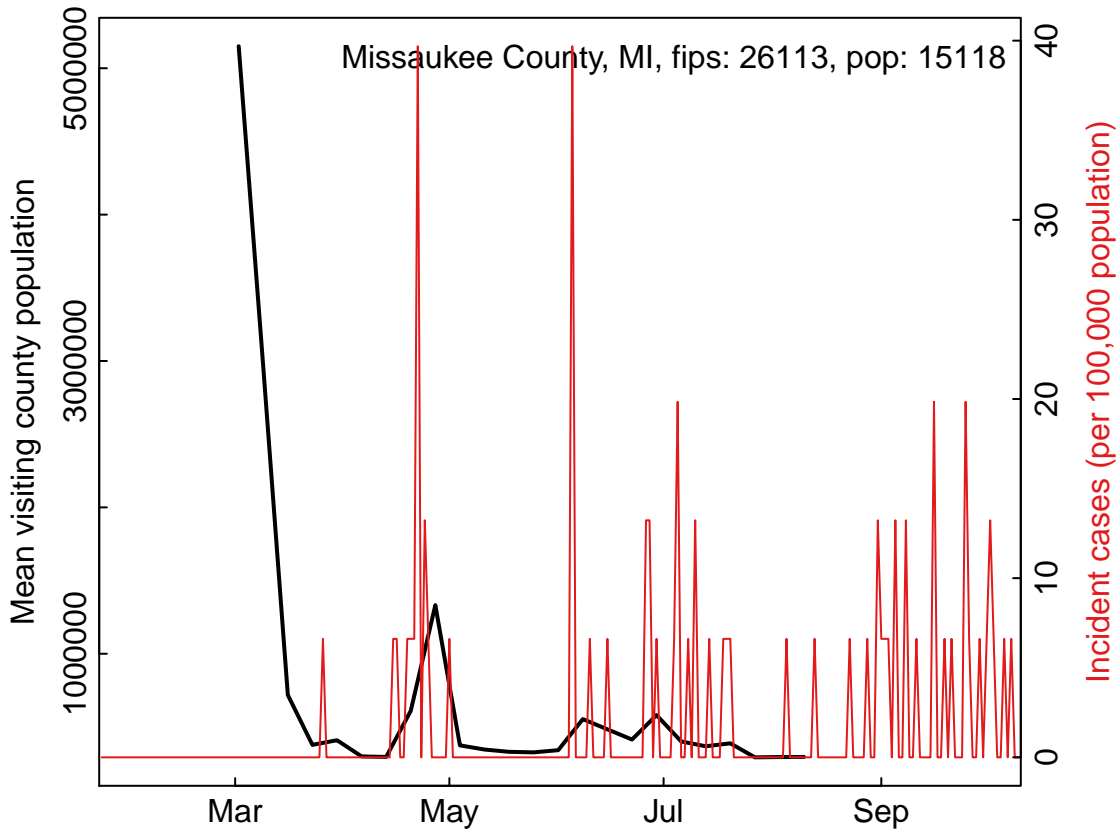

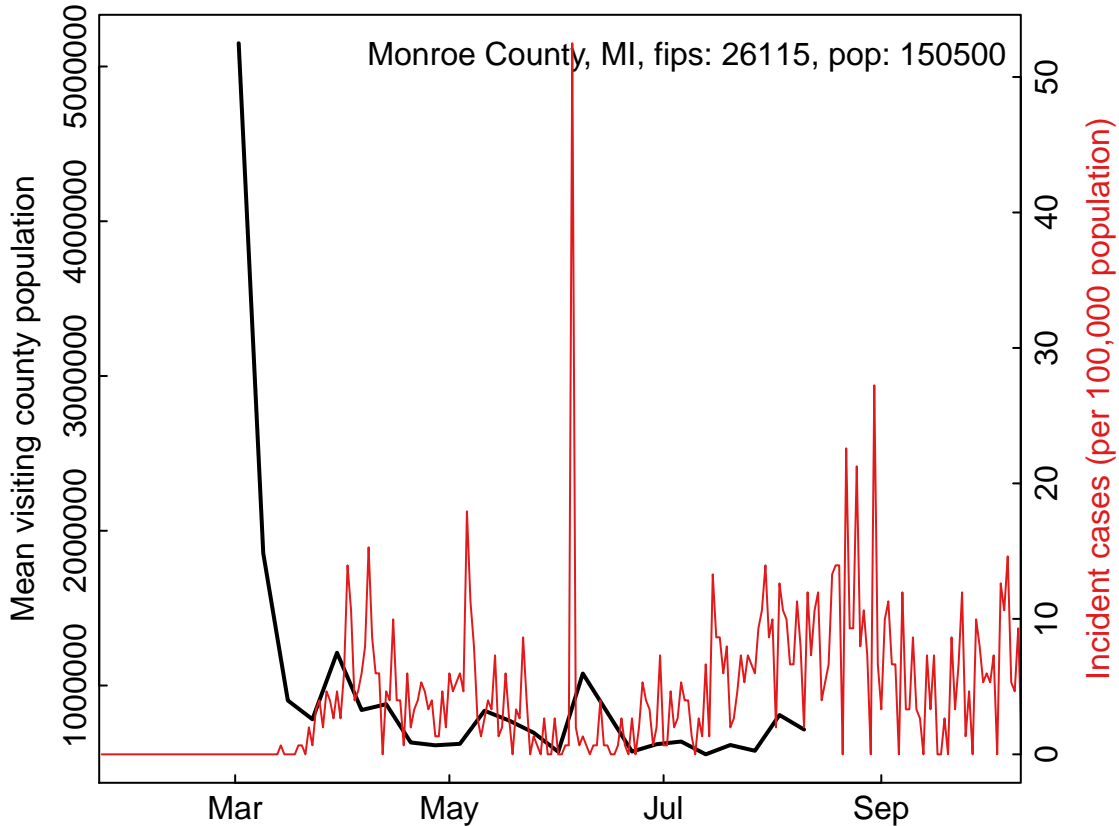

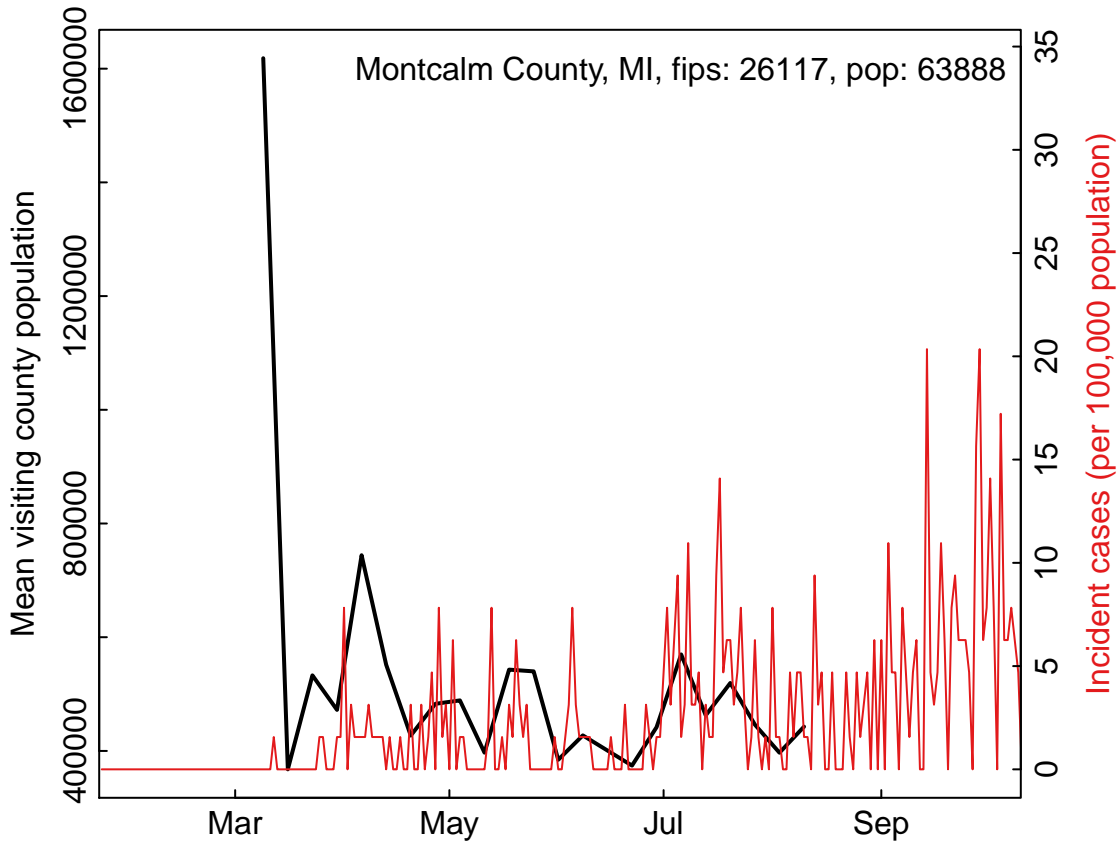

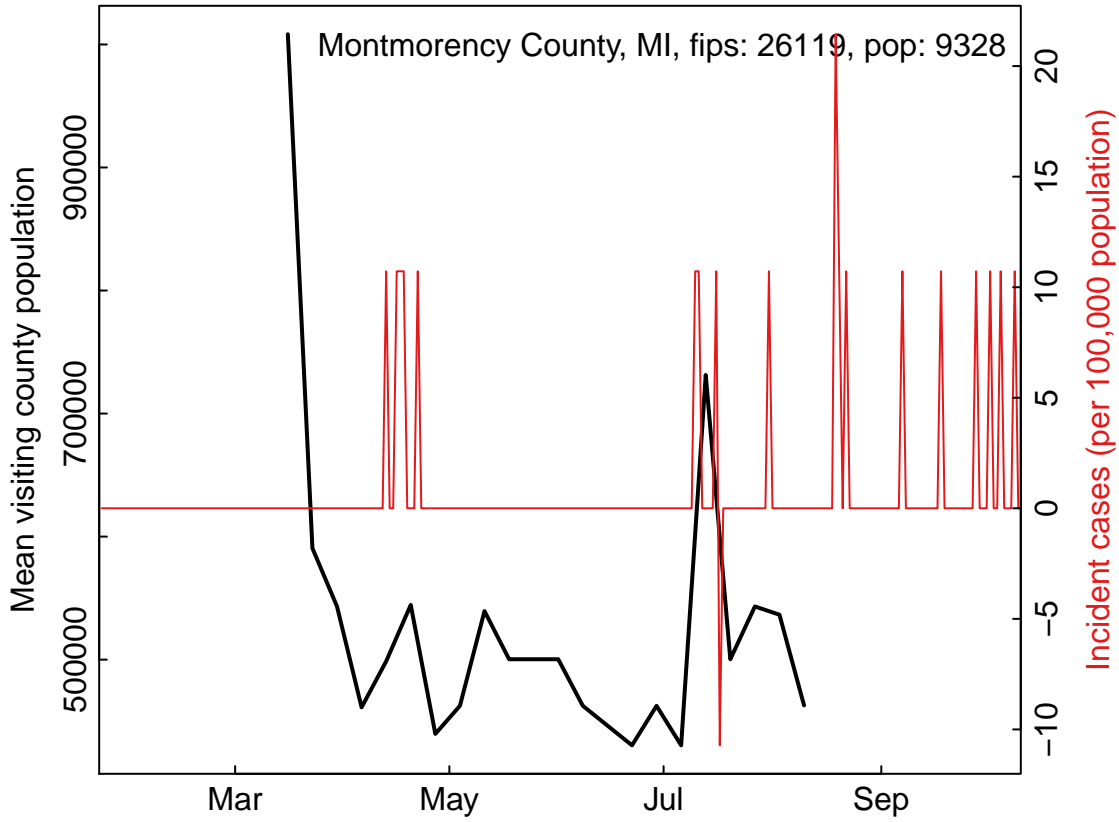

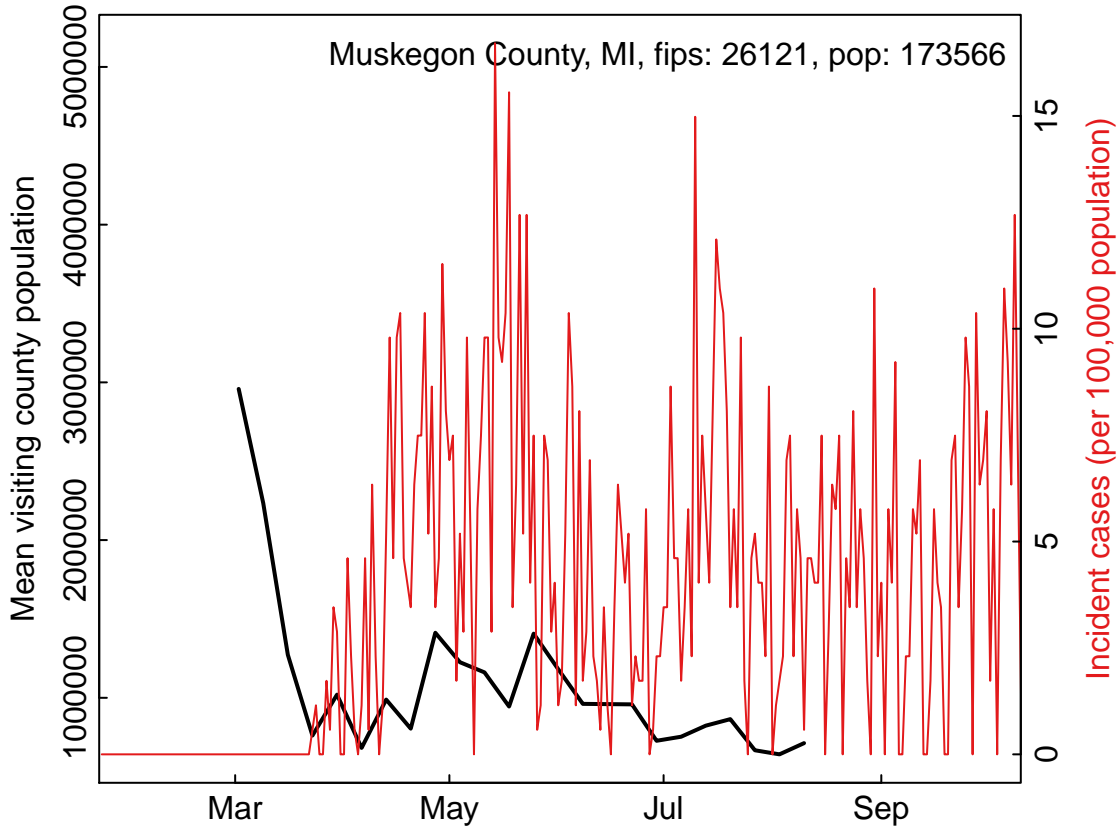



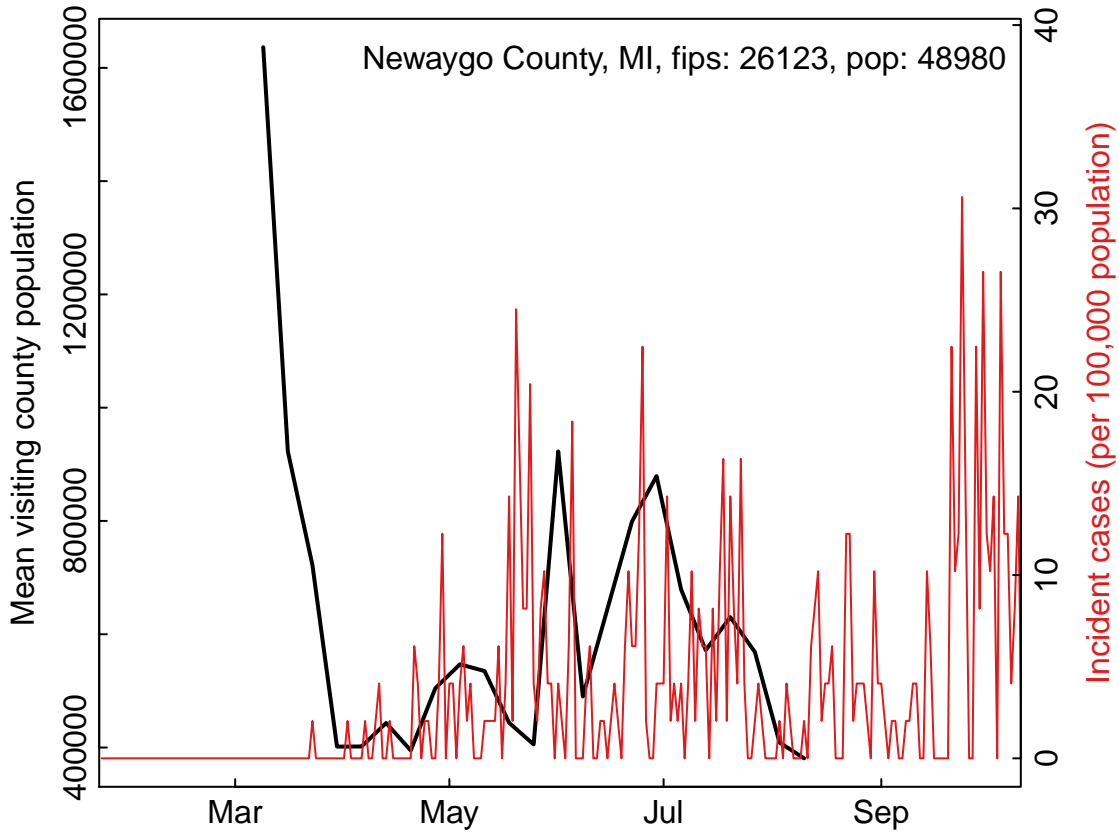

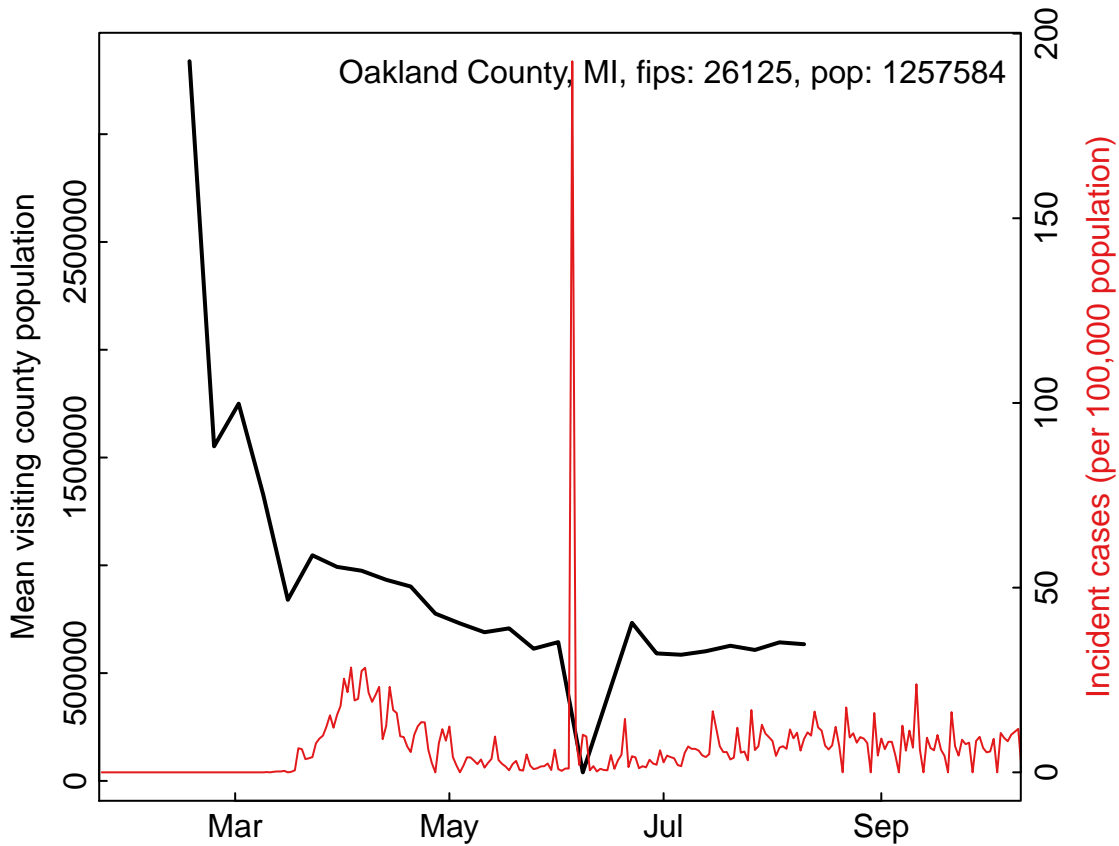

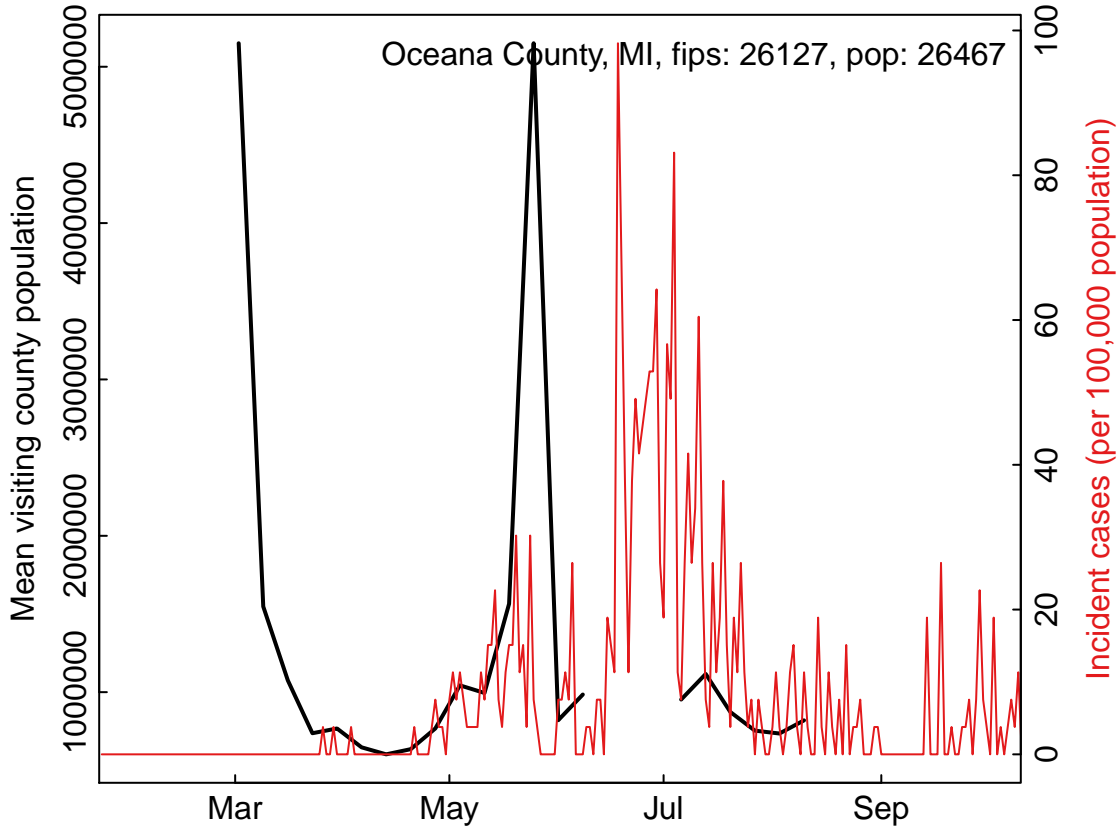

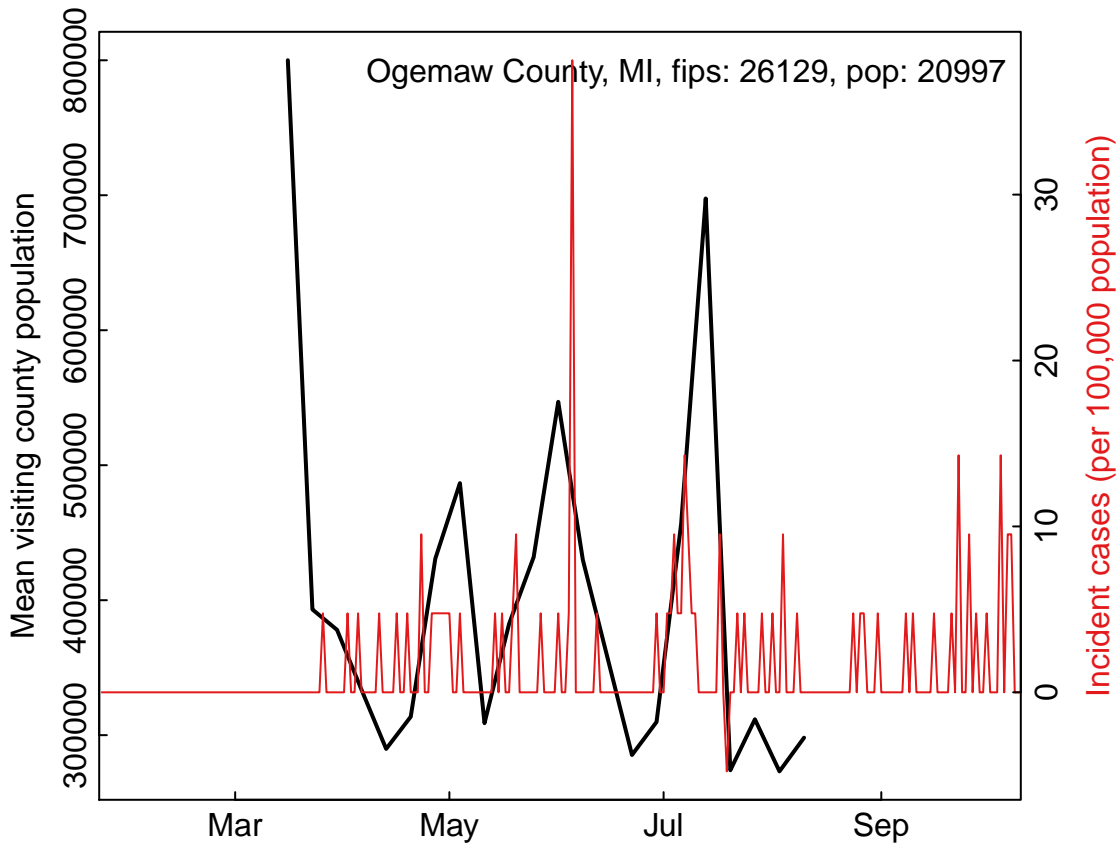

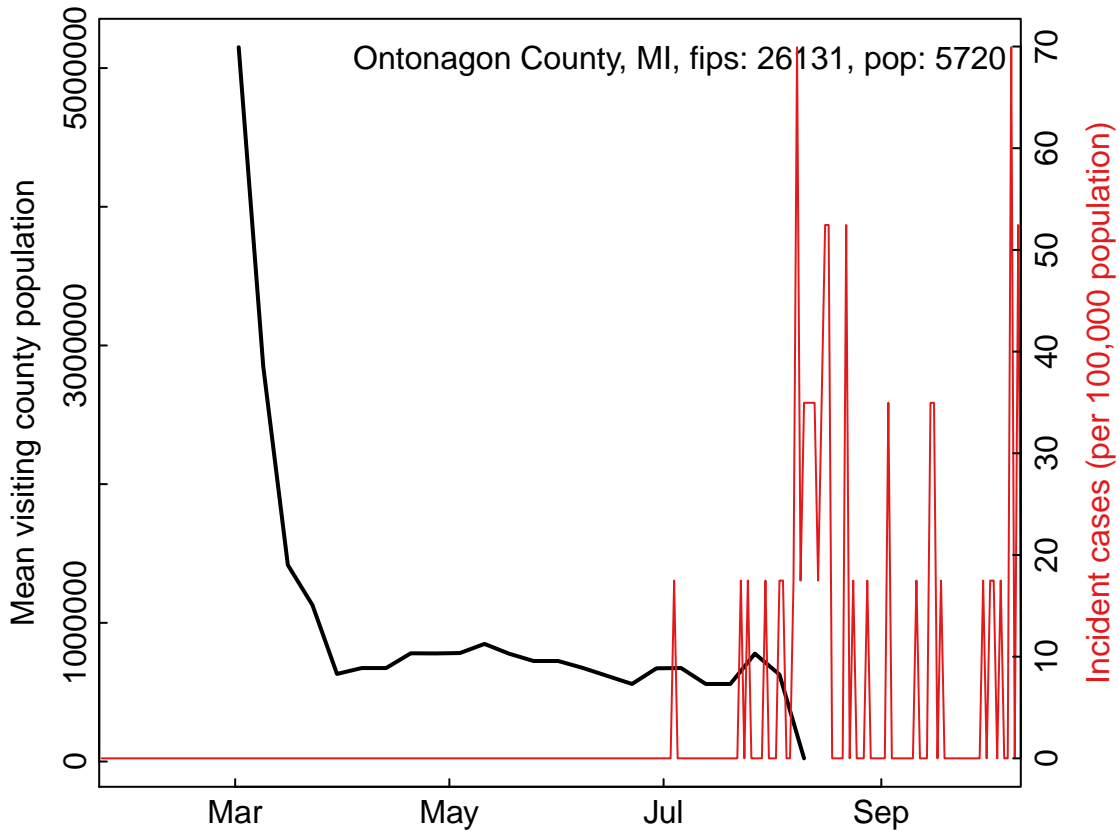

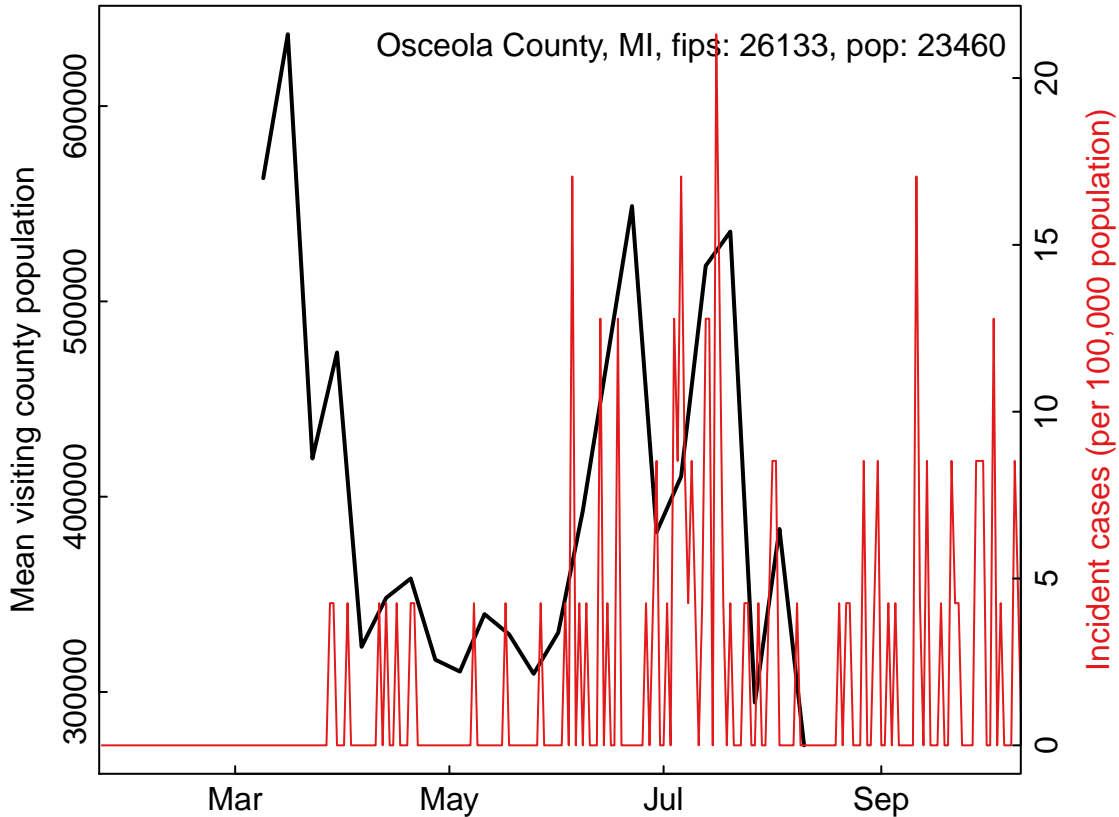

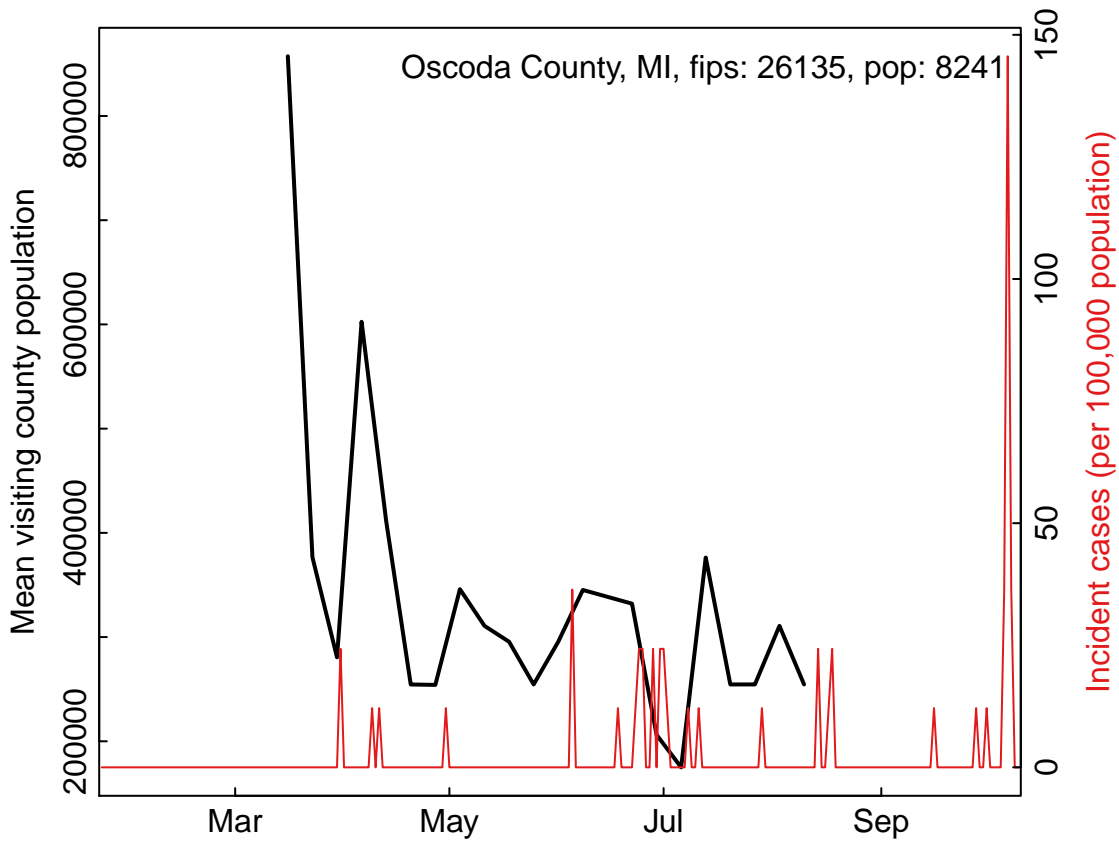

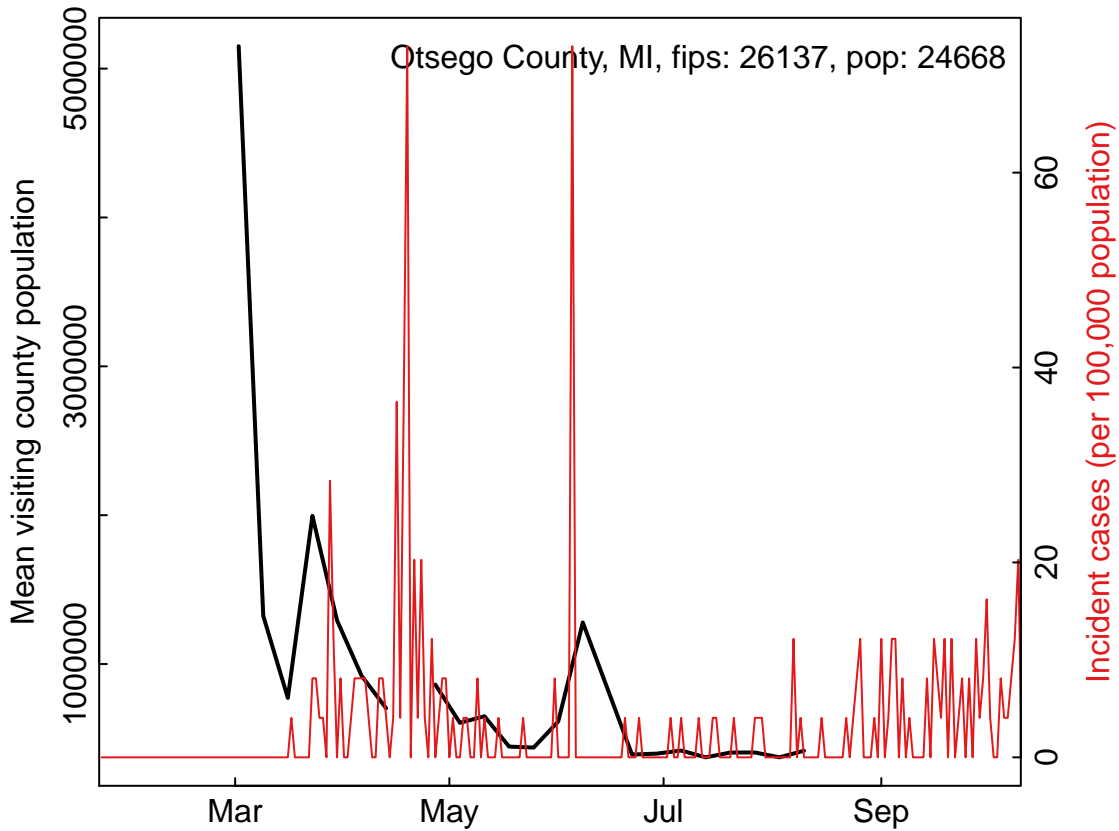



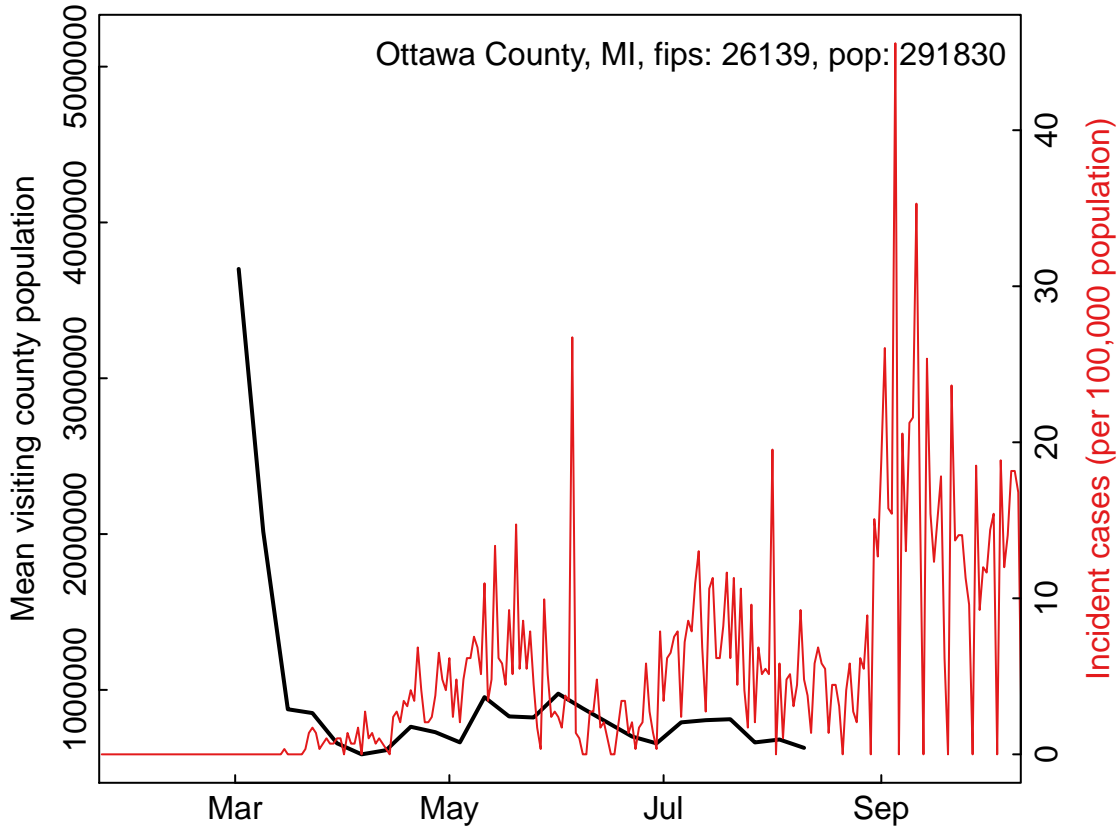

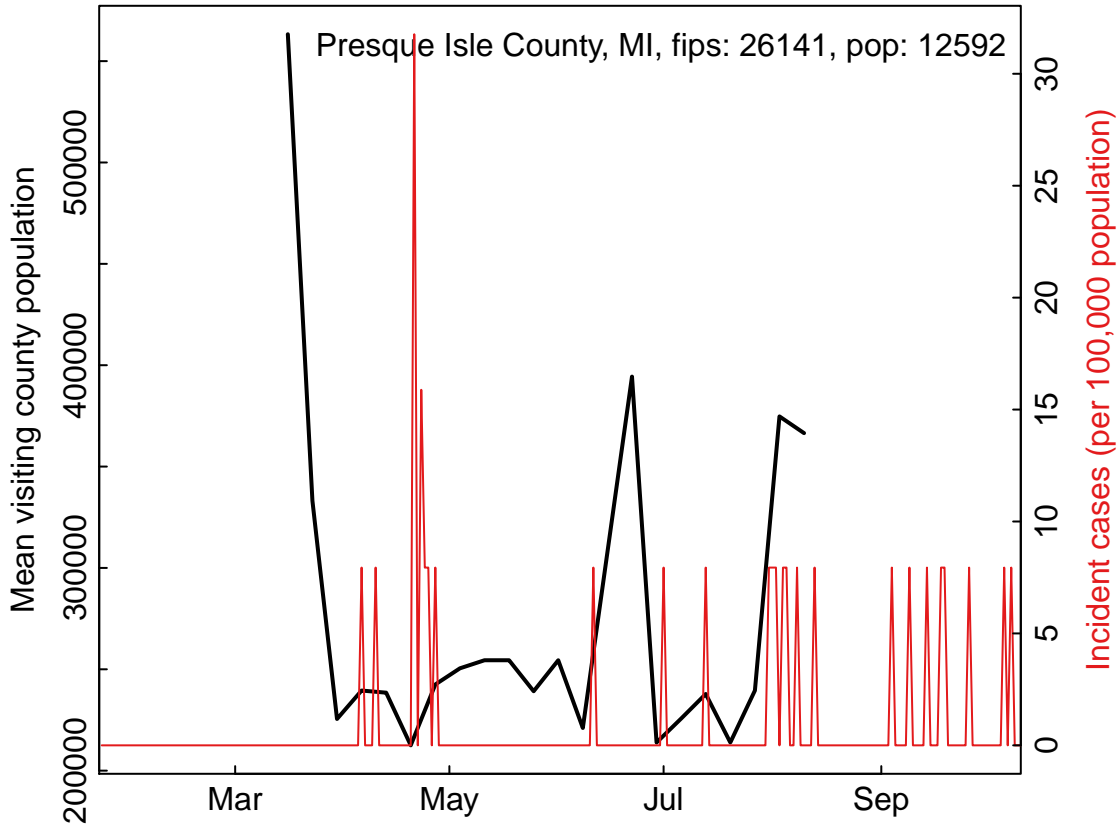

Mean visiting county population

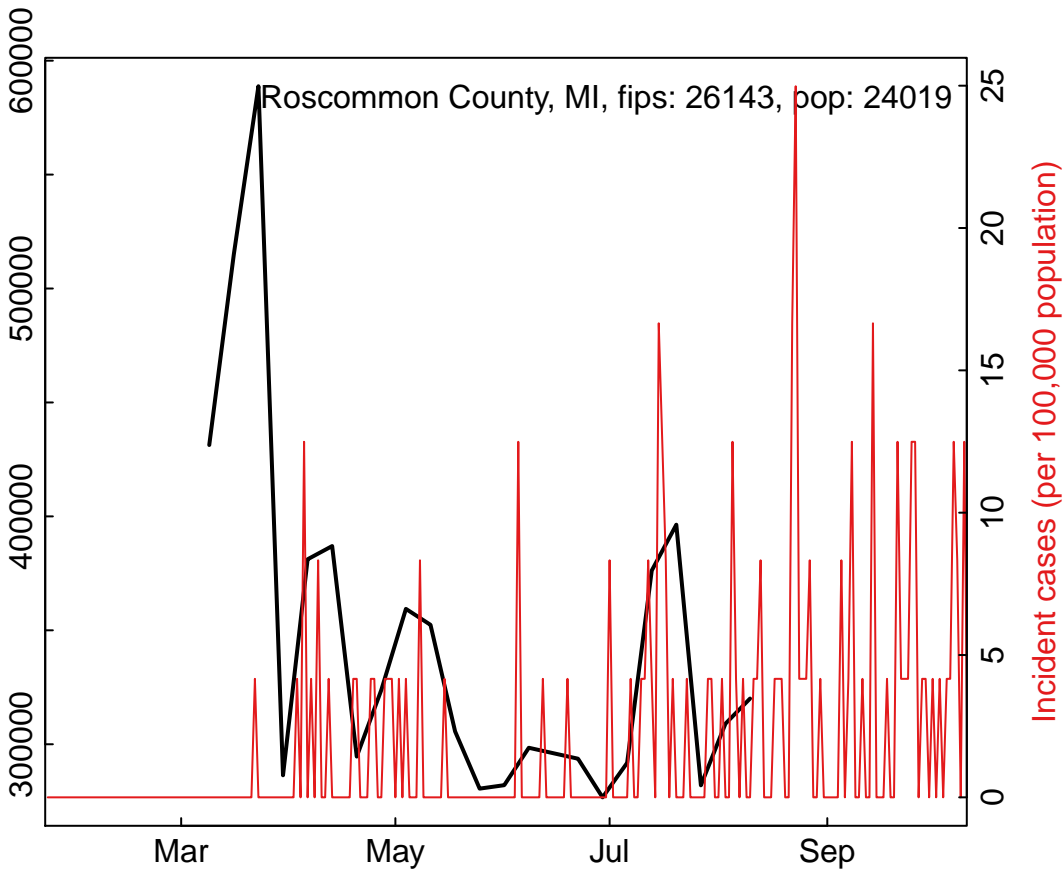

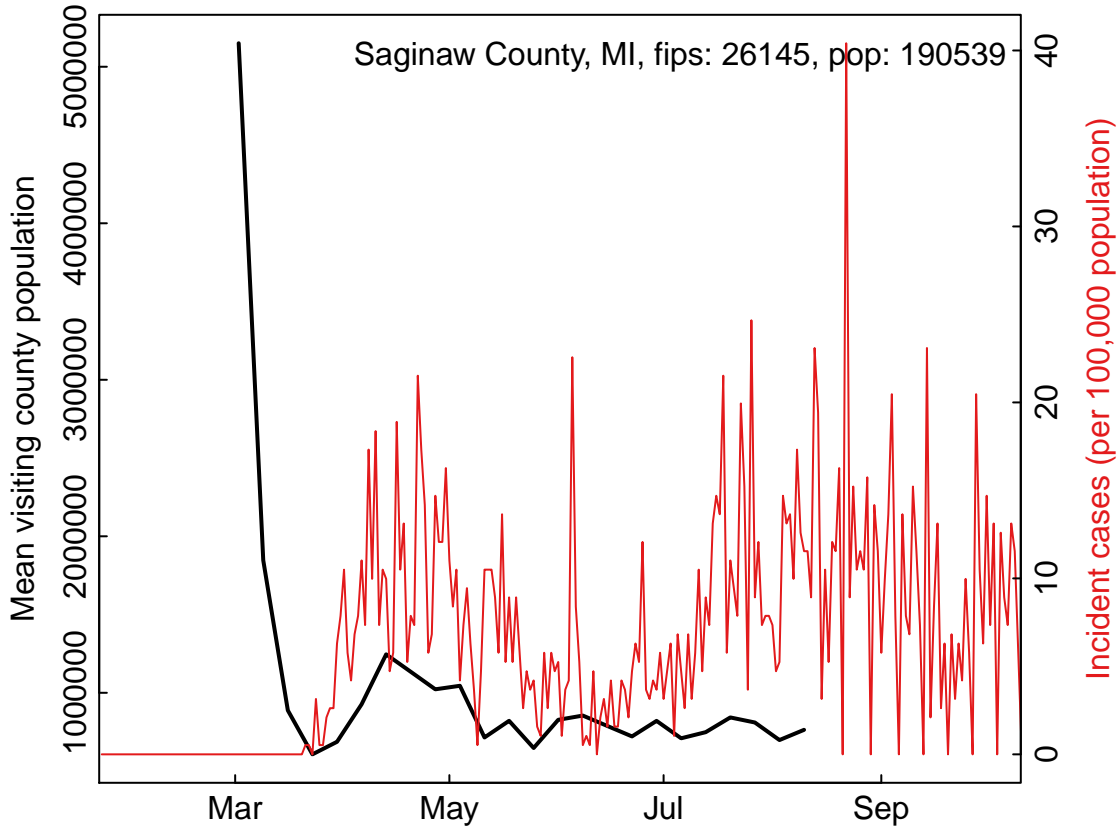

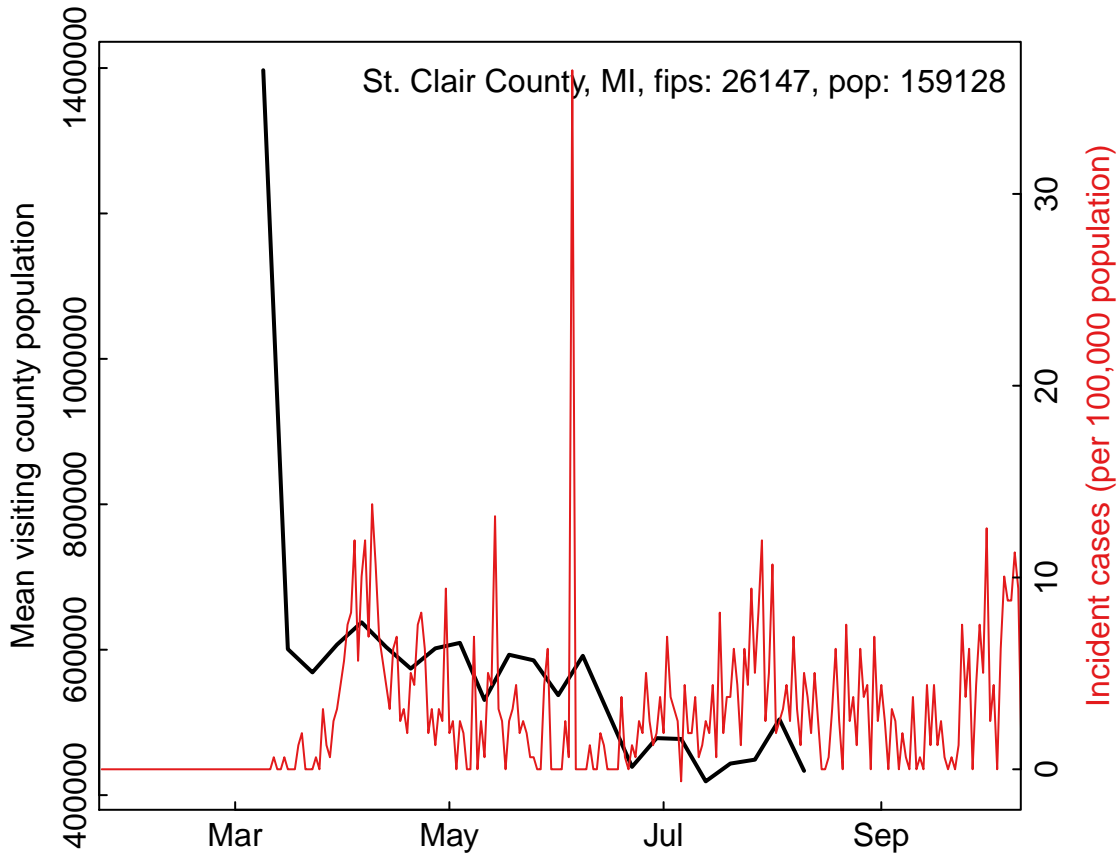

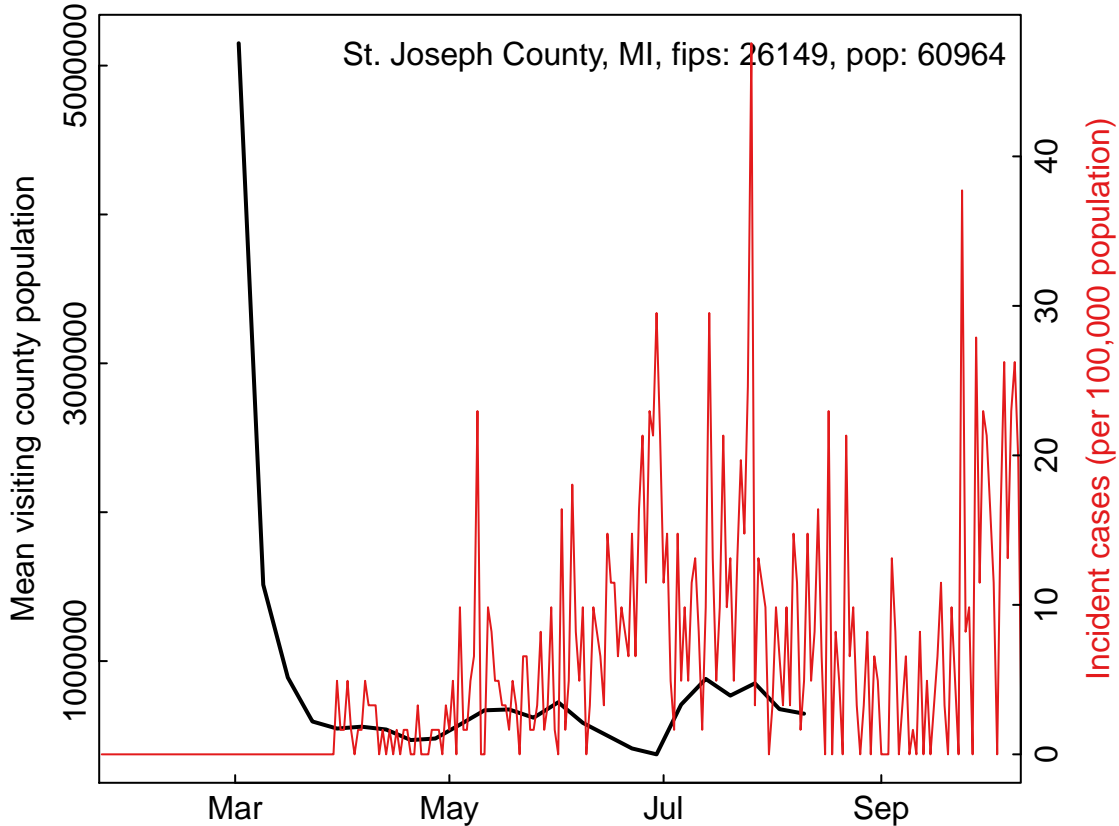

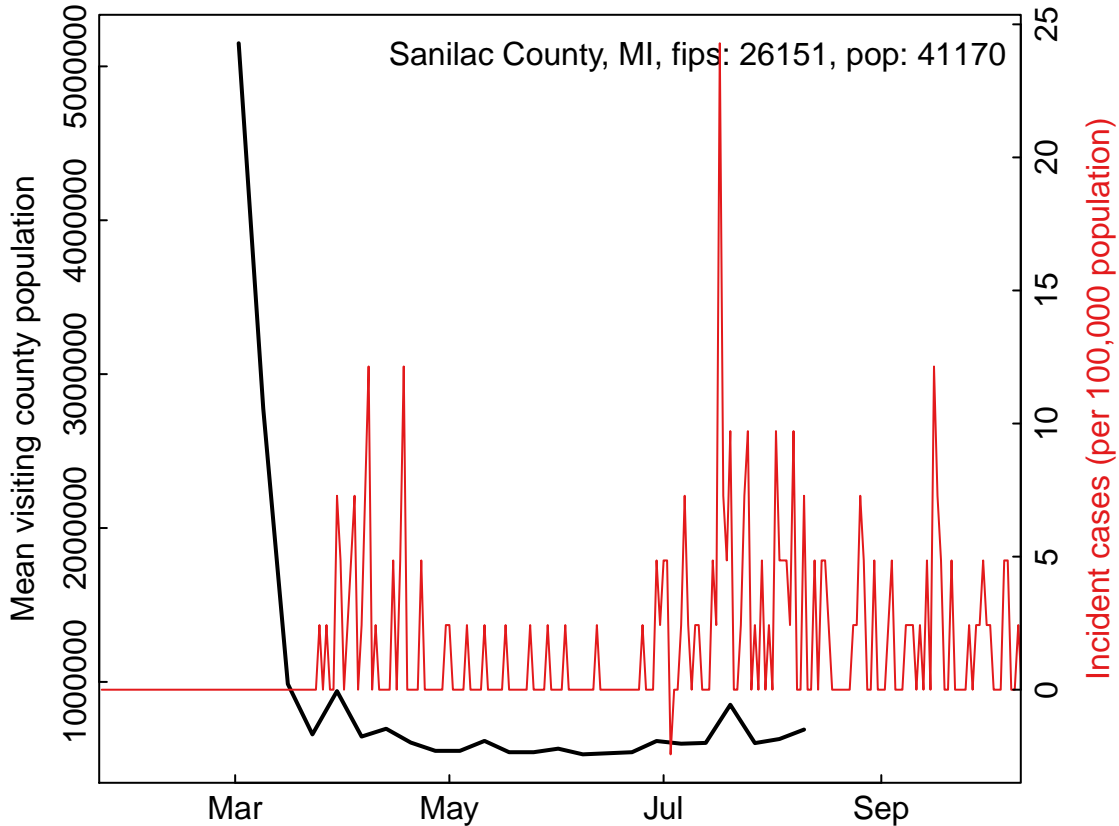

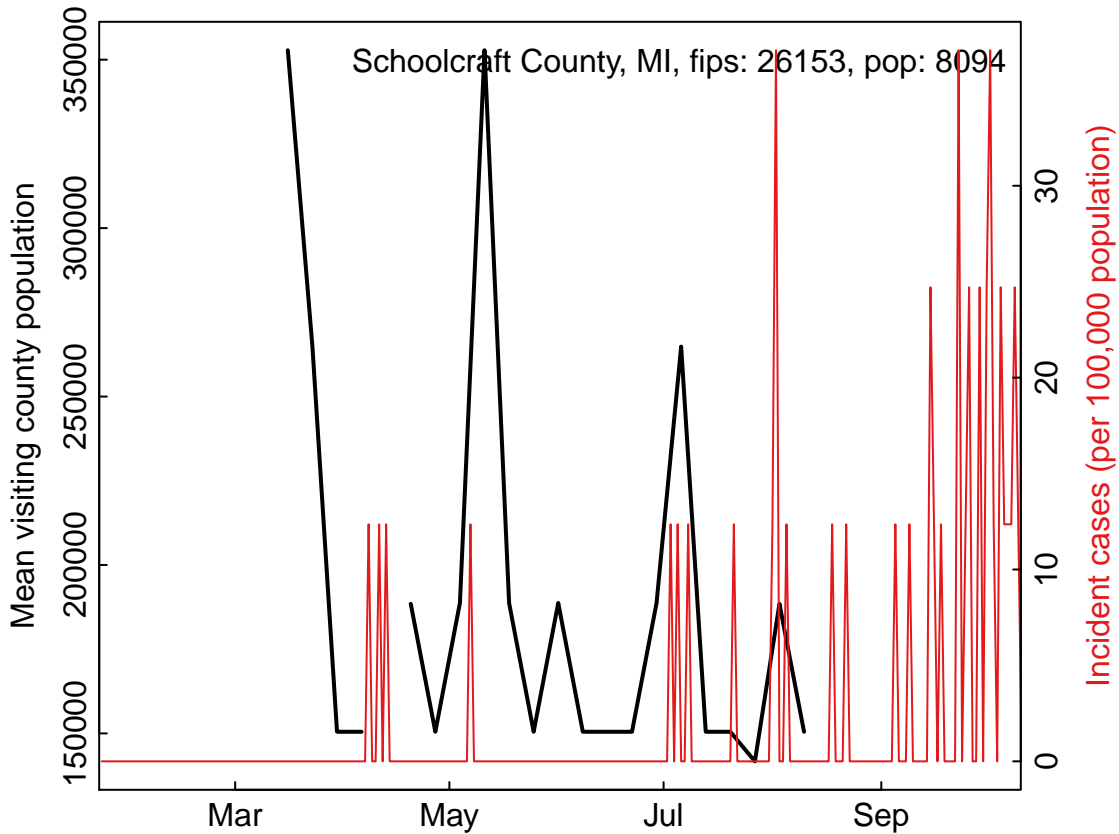



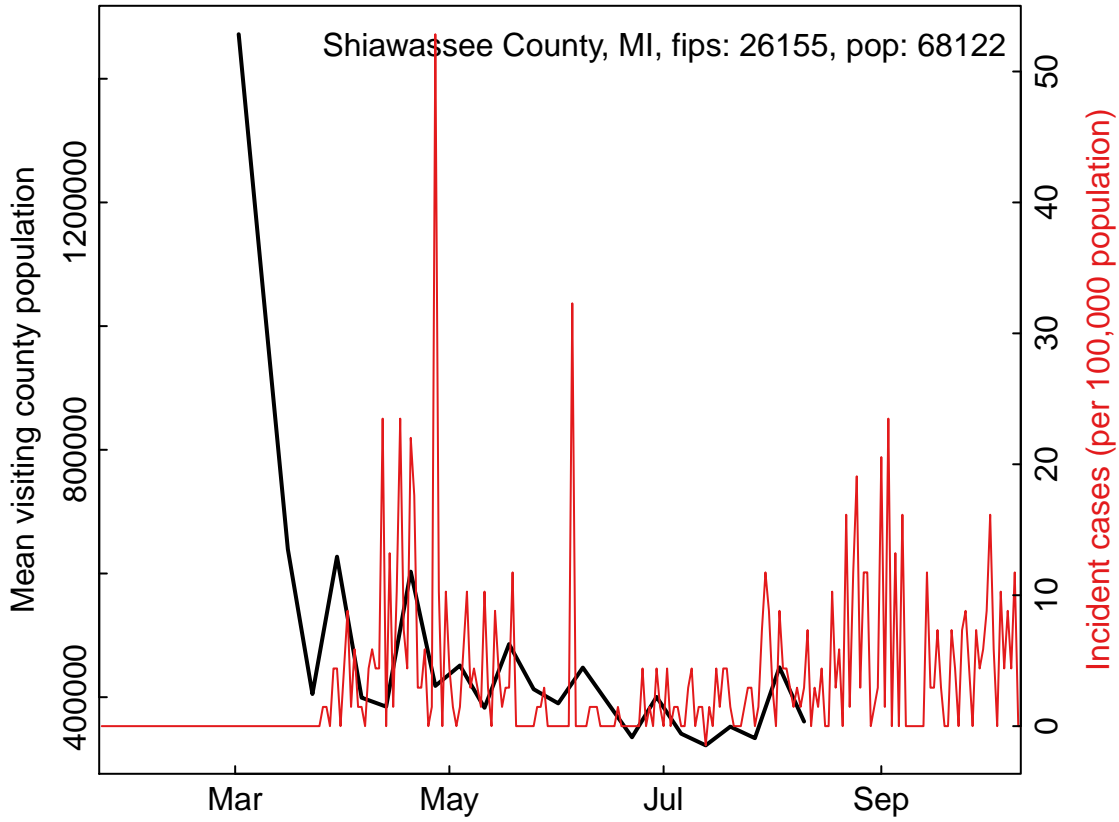

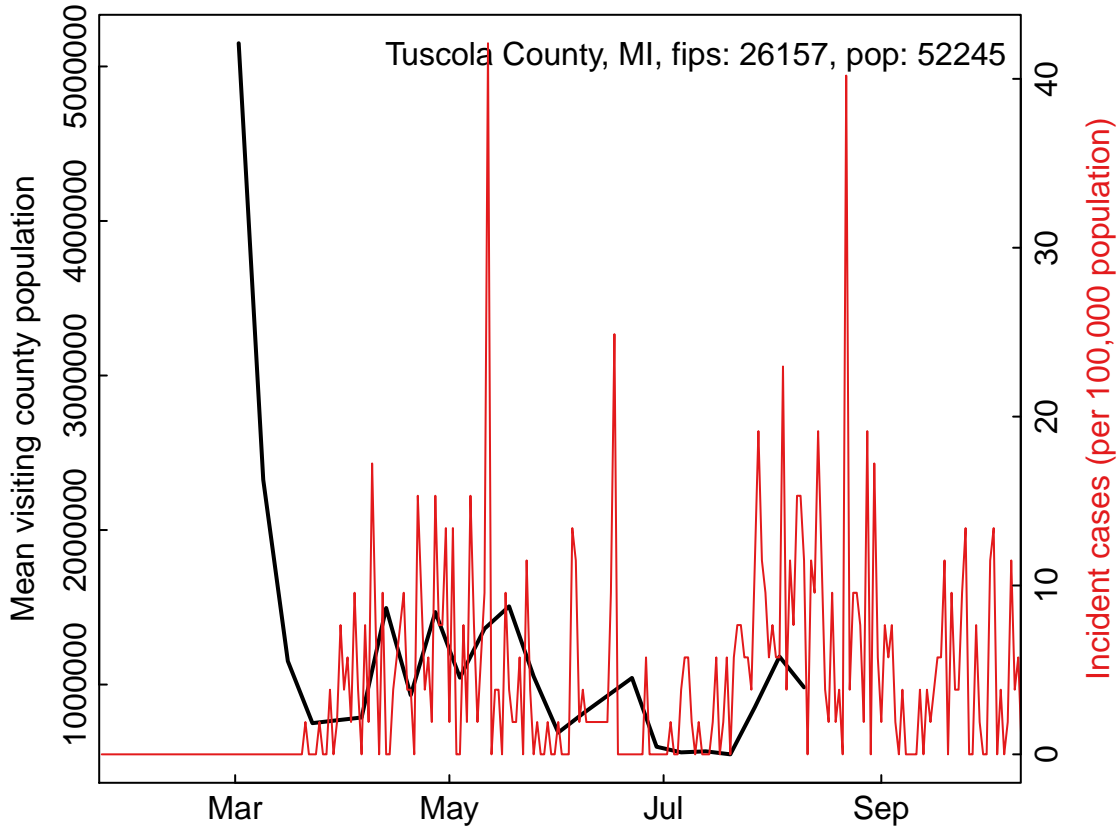

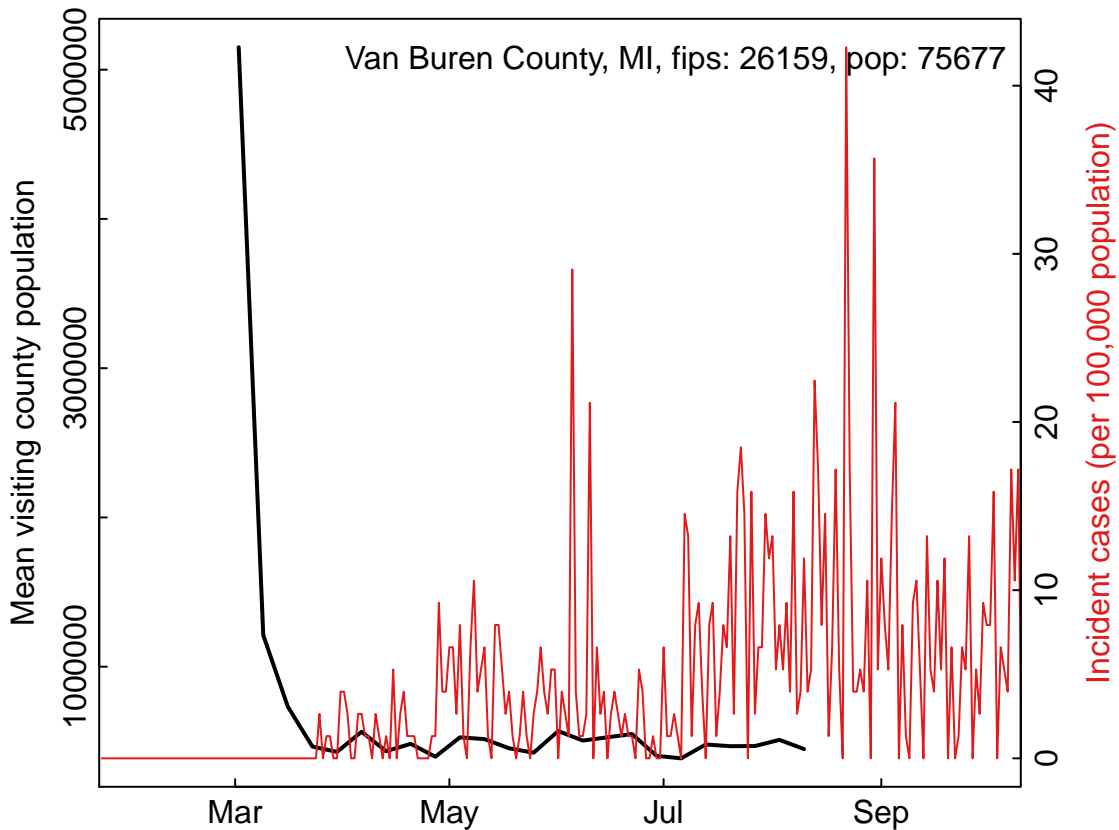

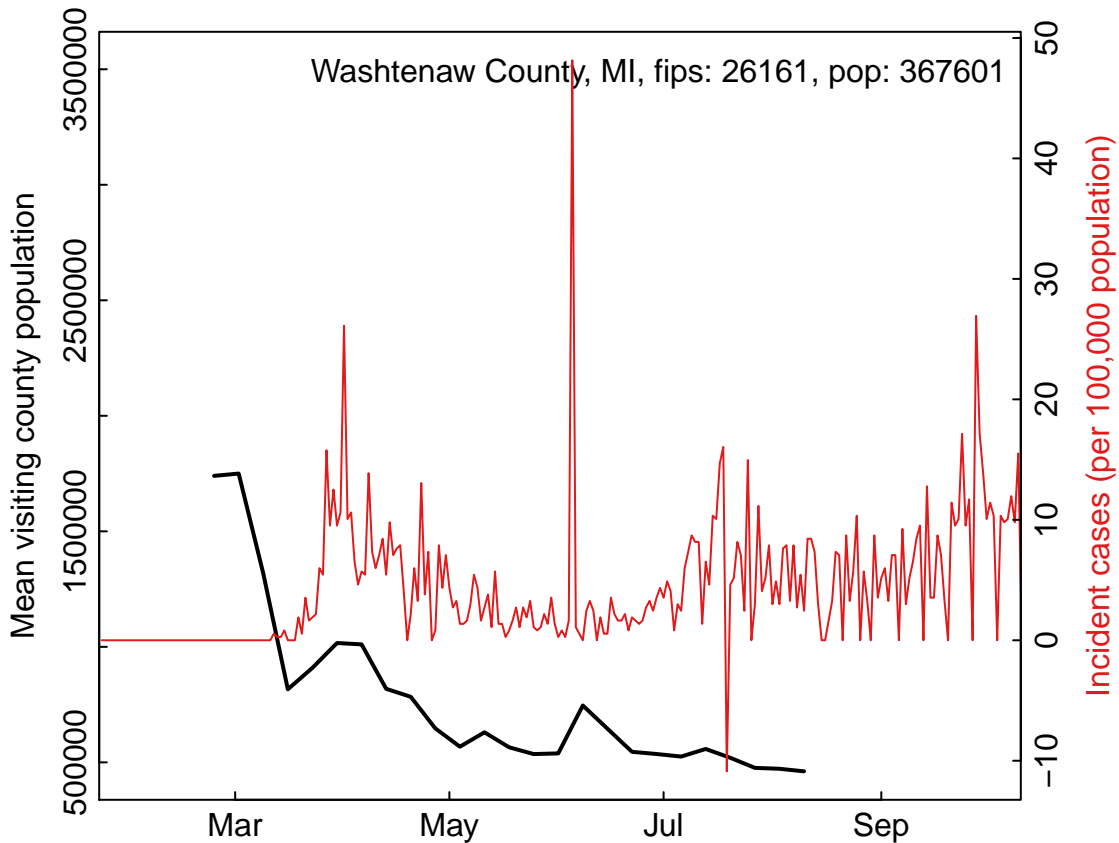

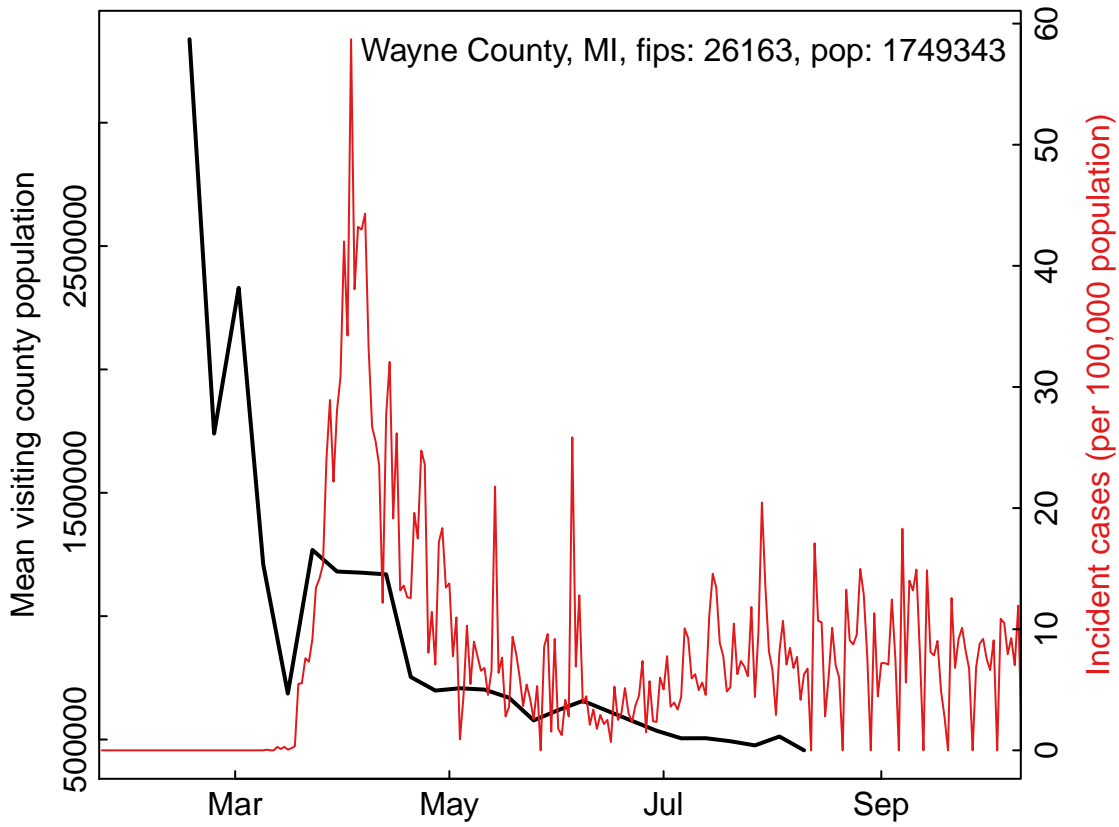

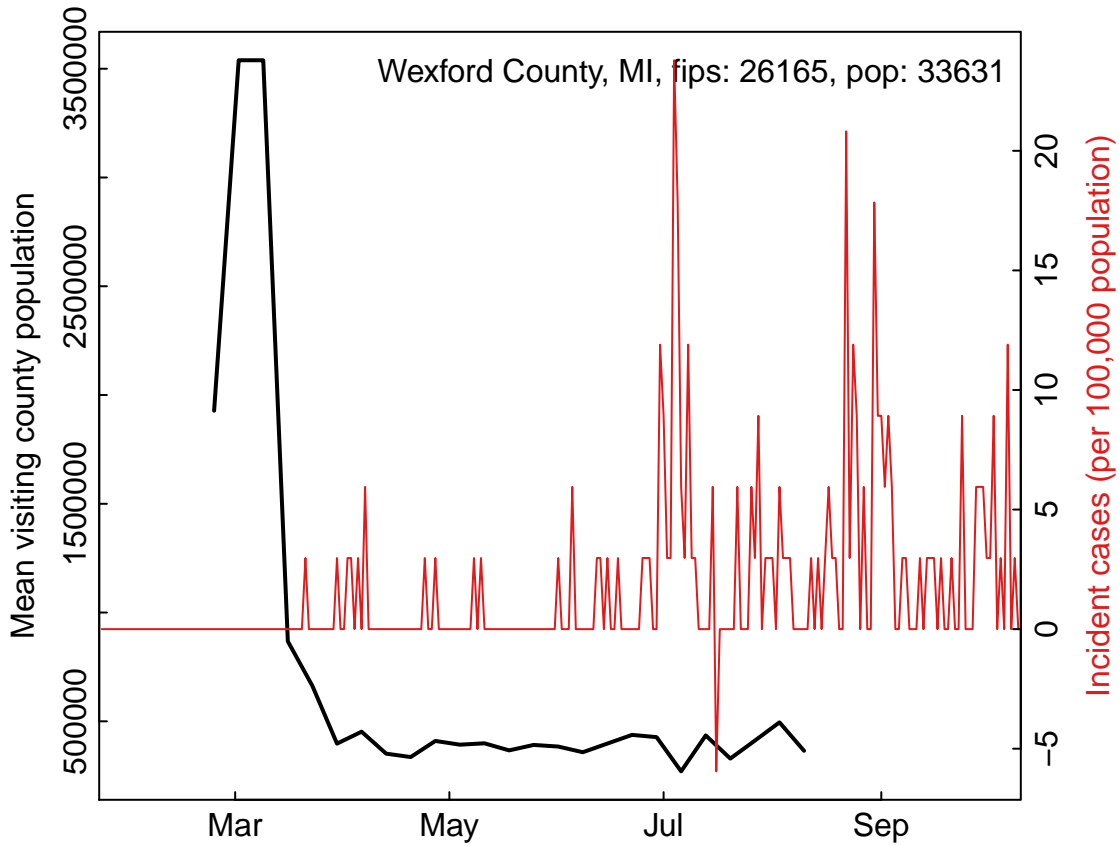

Aitkin County, MN, fips: 27001, pop: 15886

Mean visiting county population

1500000  
1000000  
500000

Mar May Jul Sep

Incident cases (per 100,000 population)

30  
20  
10  
0

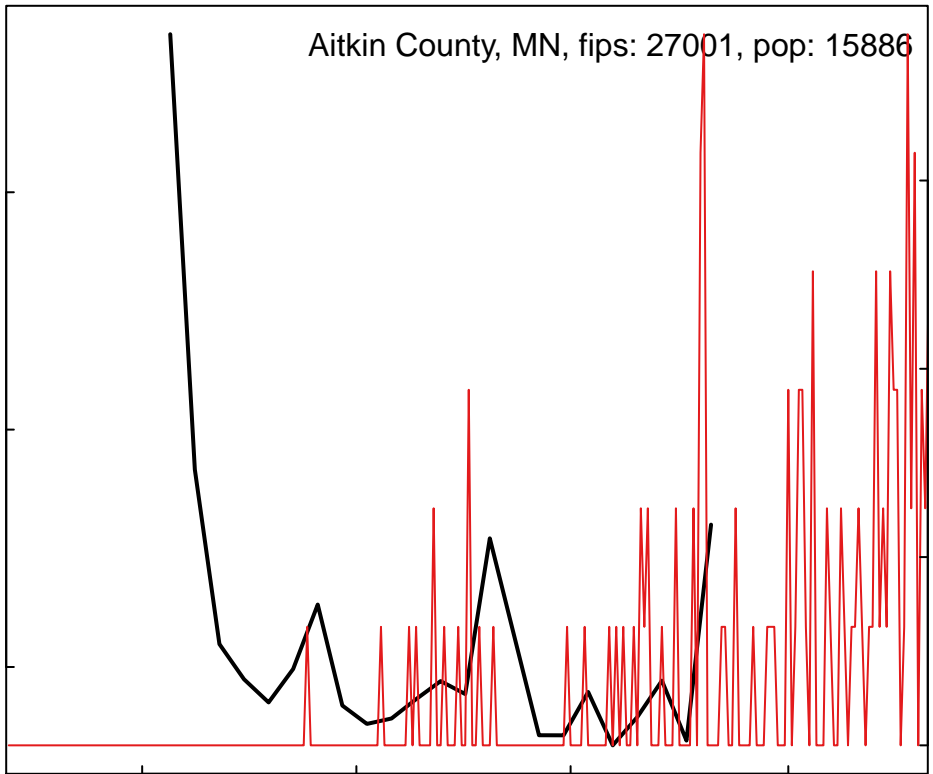

Anoka County, MN, fips: 27003, pop: 356921

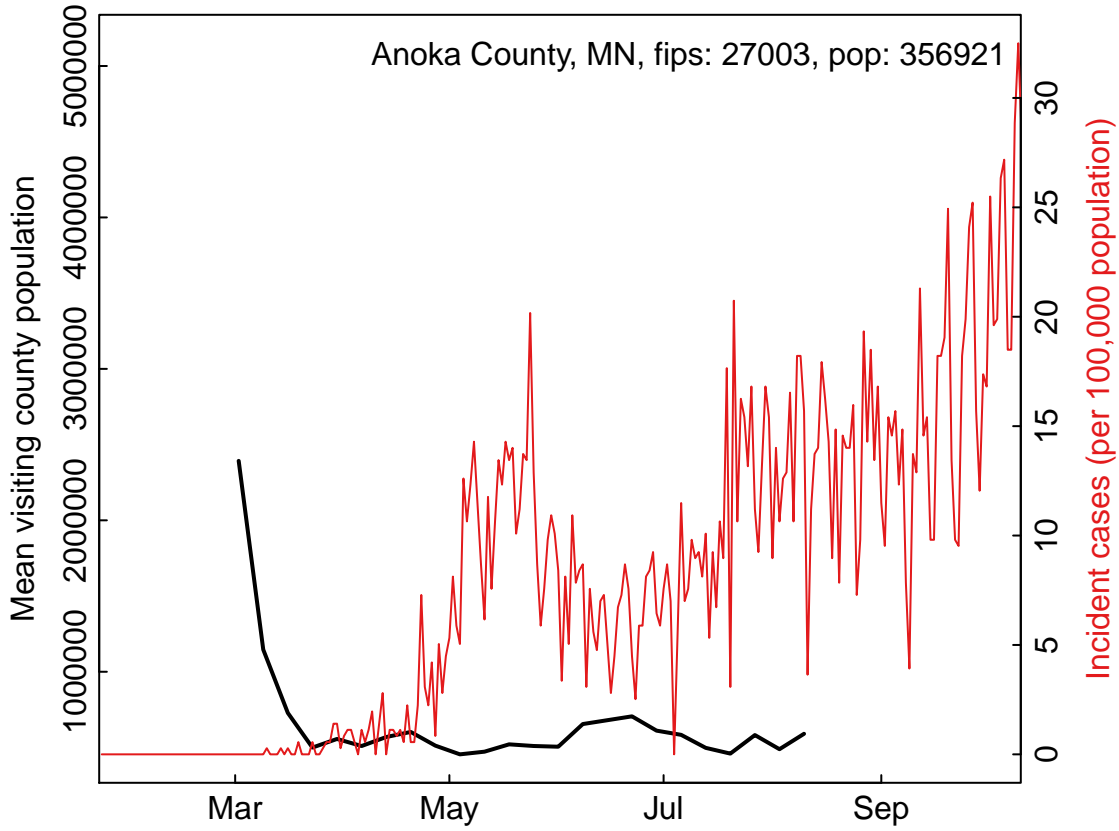



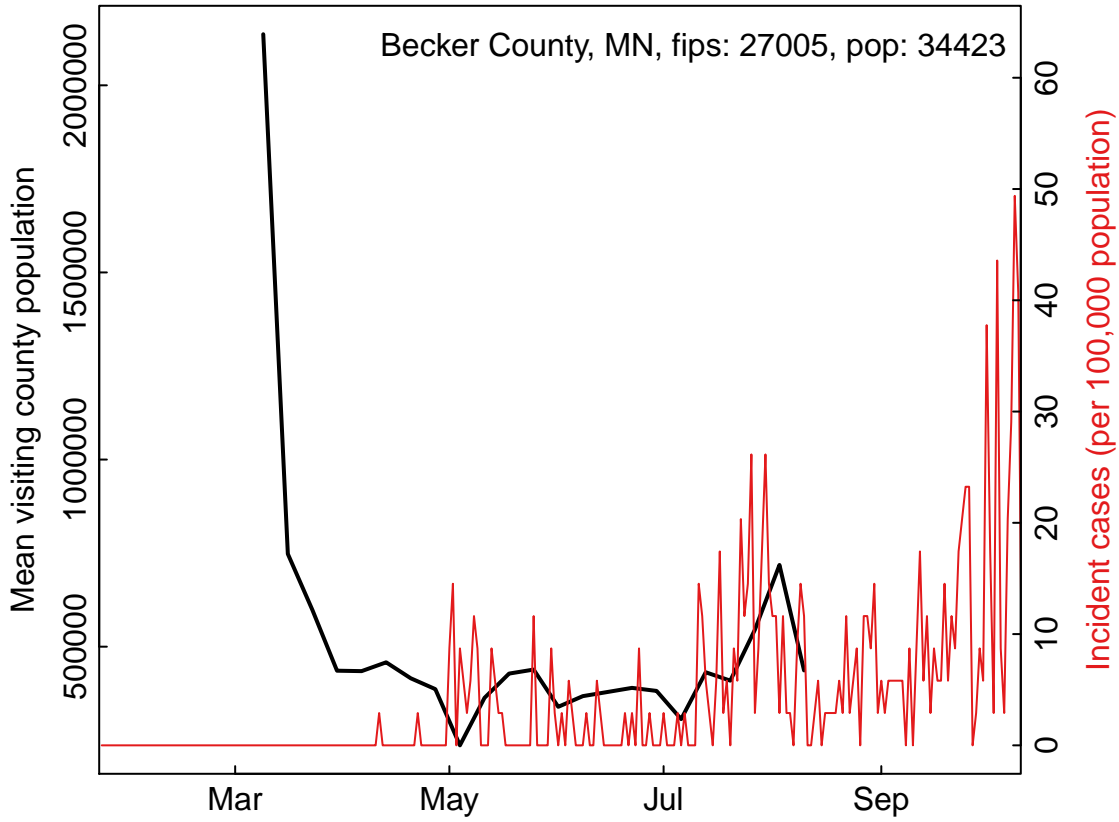

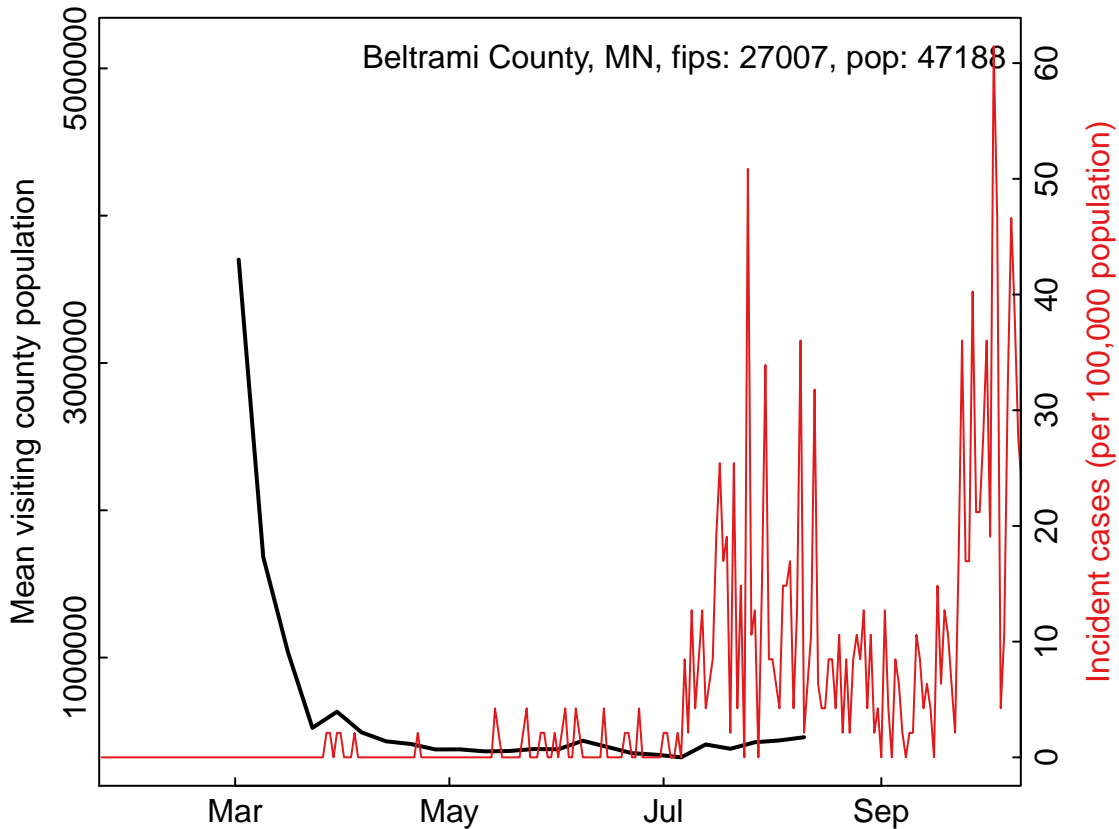

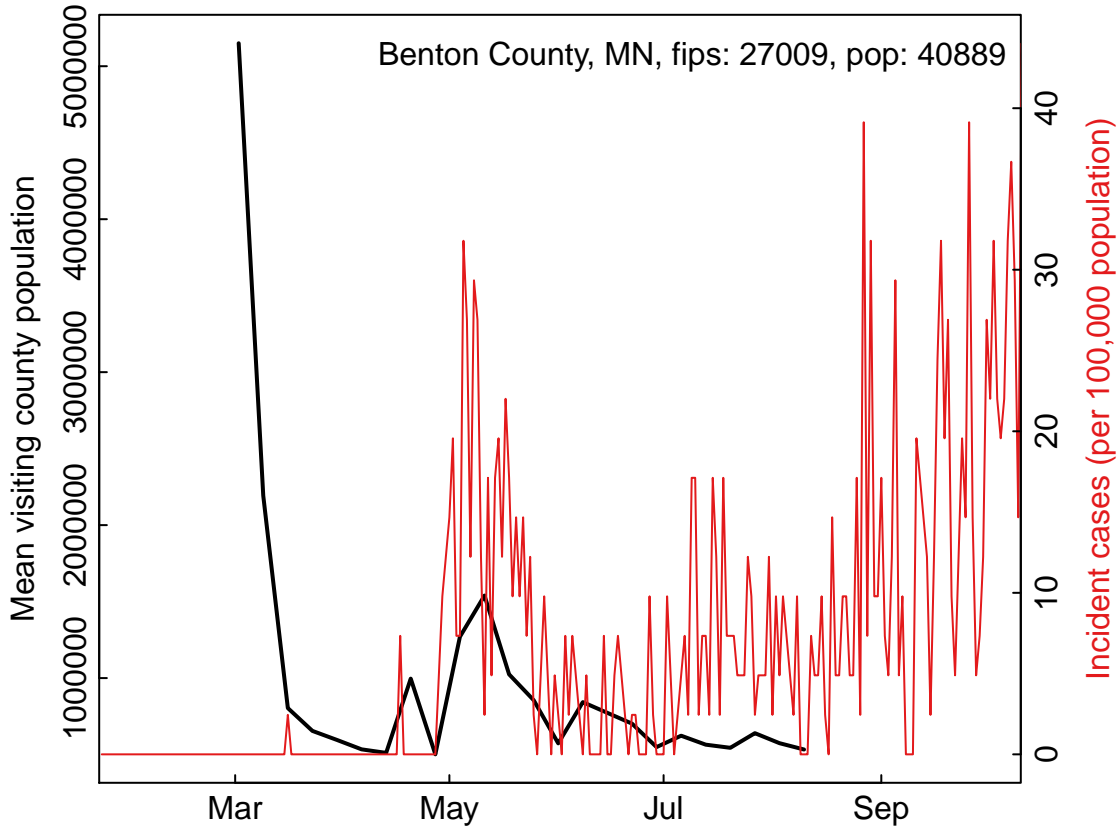

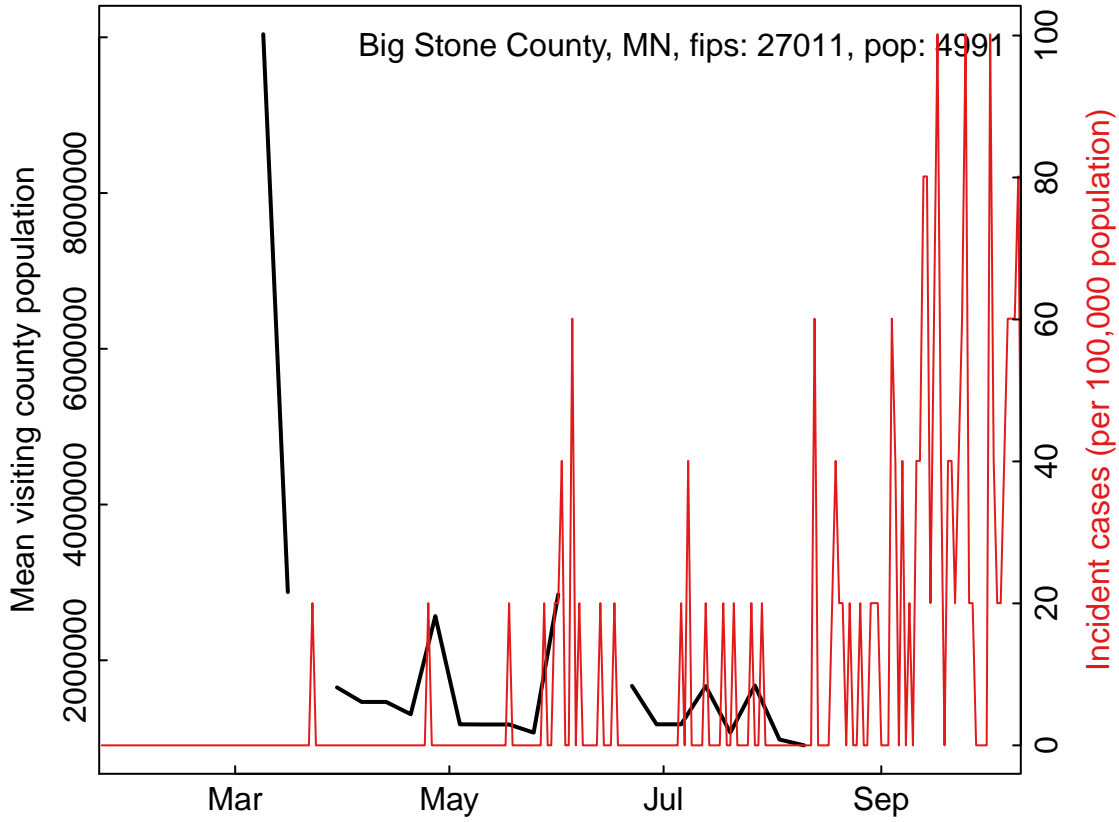

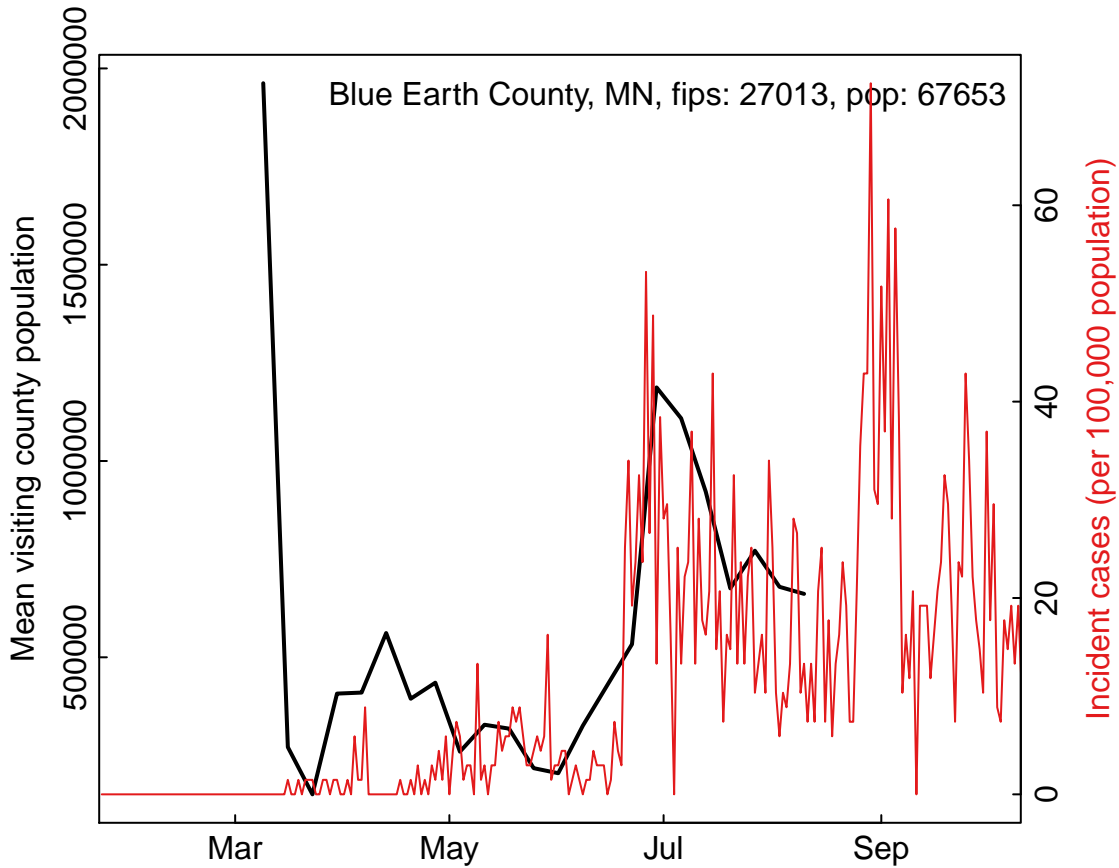

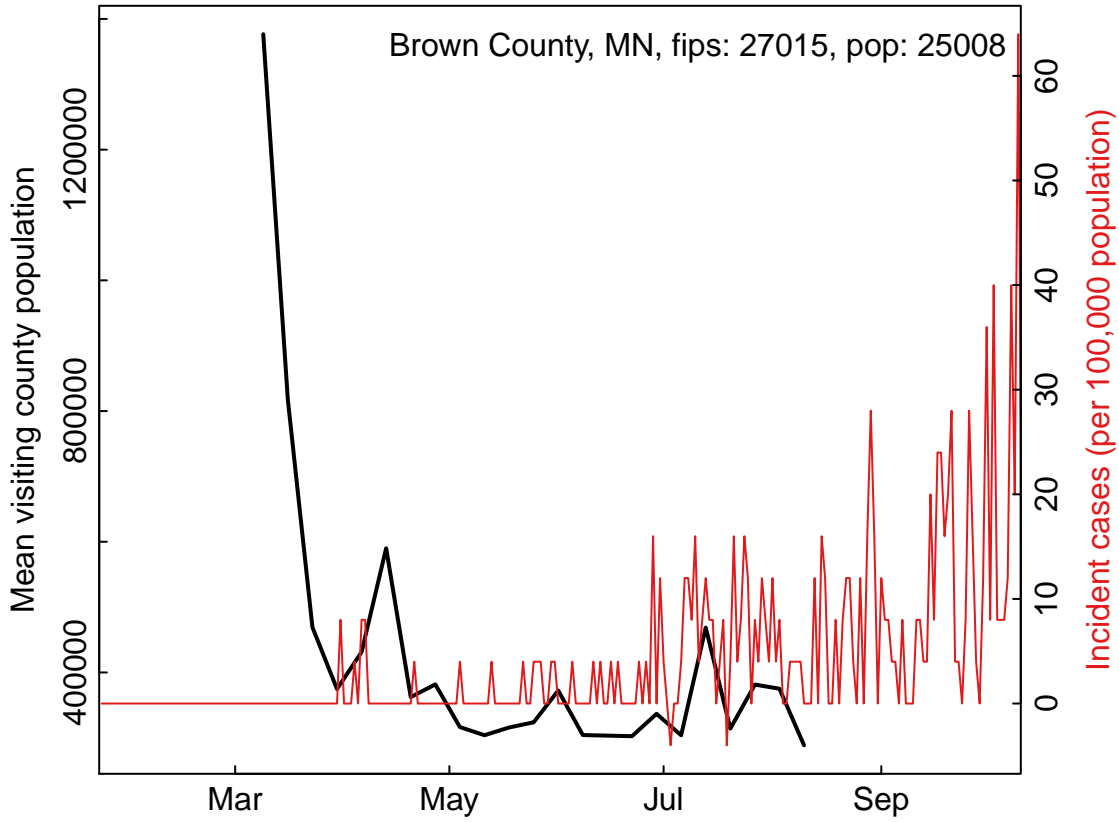

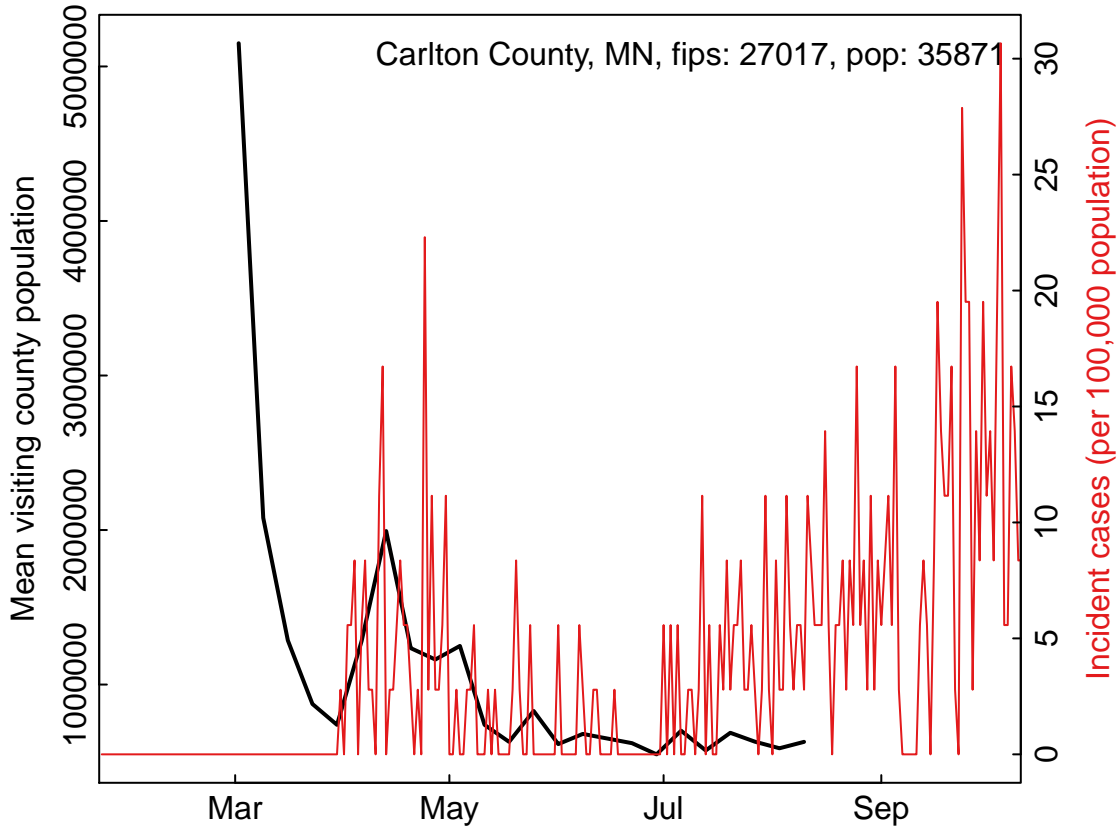

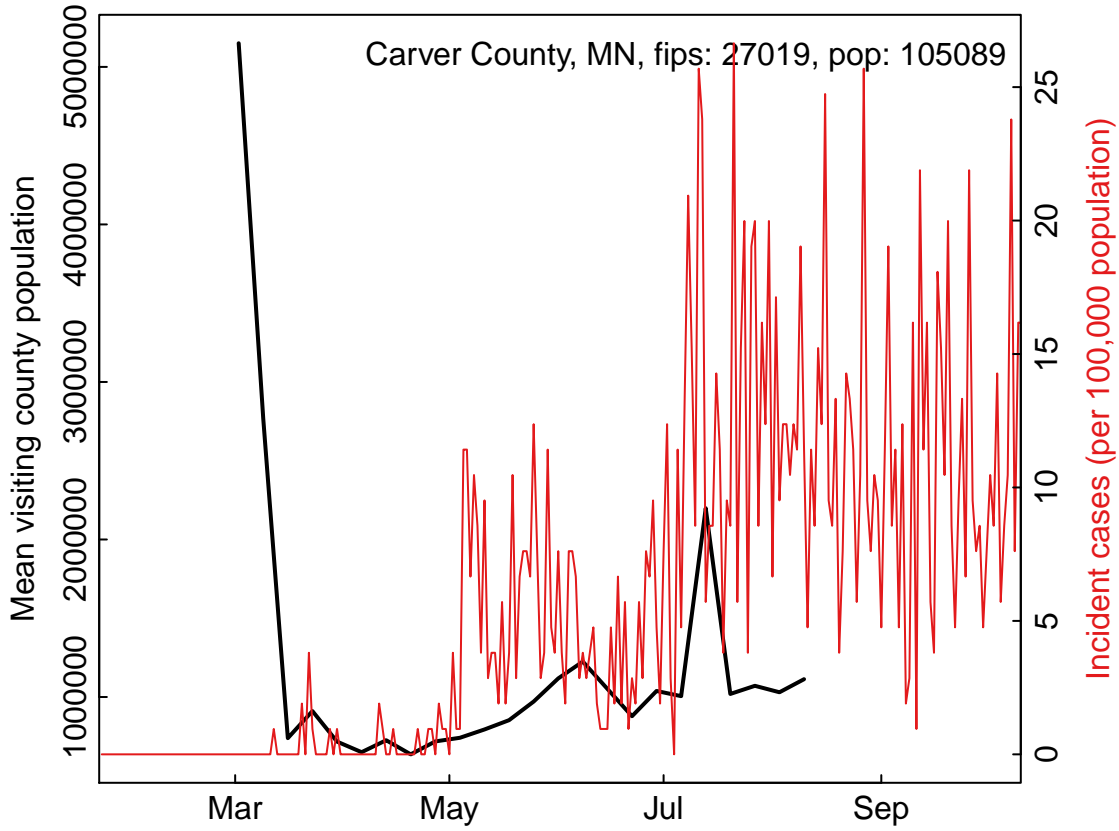



Cass County, MN, fips: 27021, pop: 29779

Mean visiting county population

2500000  
1500000  
500000

Mar

May

Jul

Sep

50  
40  
30  
20  
10  
0

Incident cases (per 100,000 population)

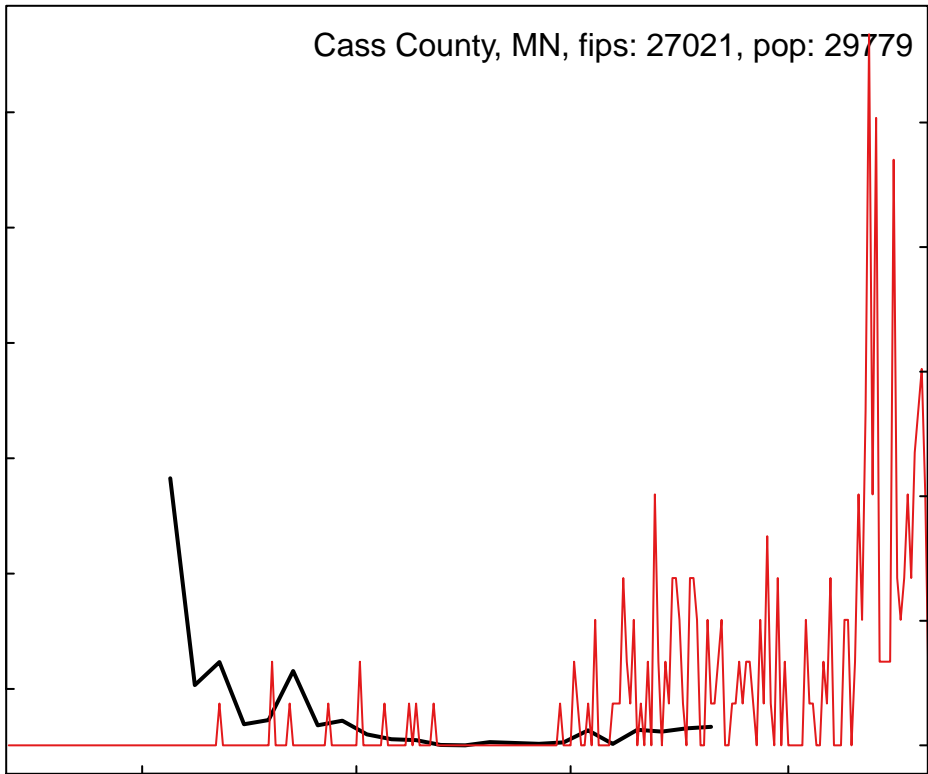

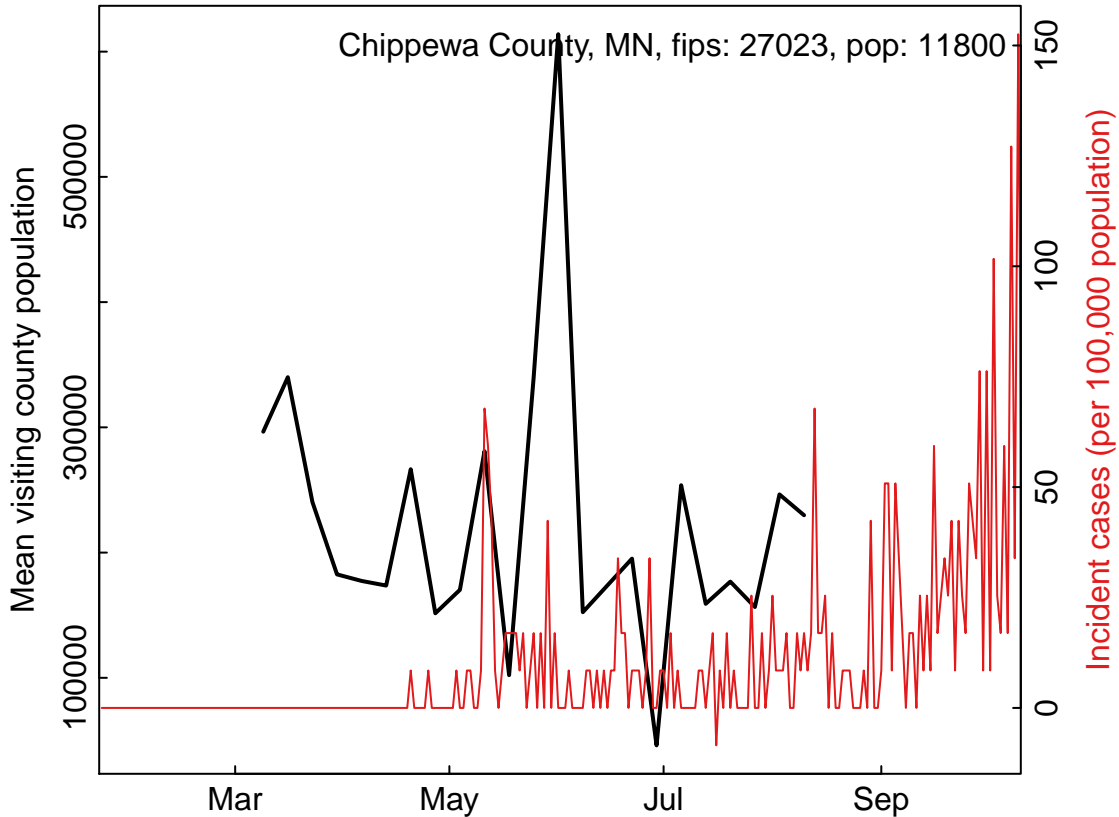

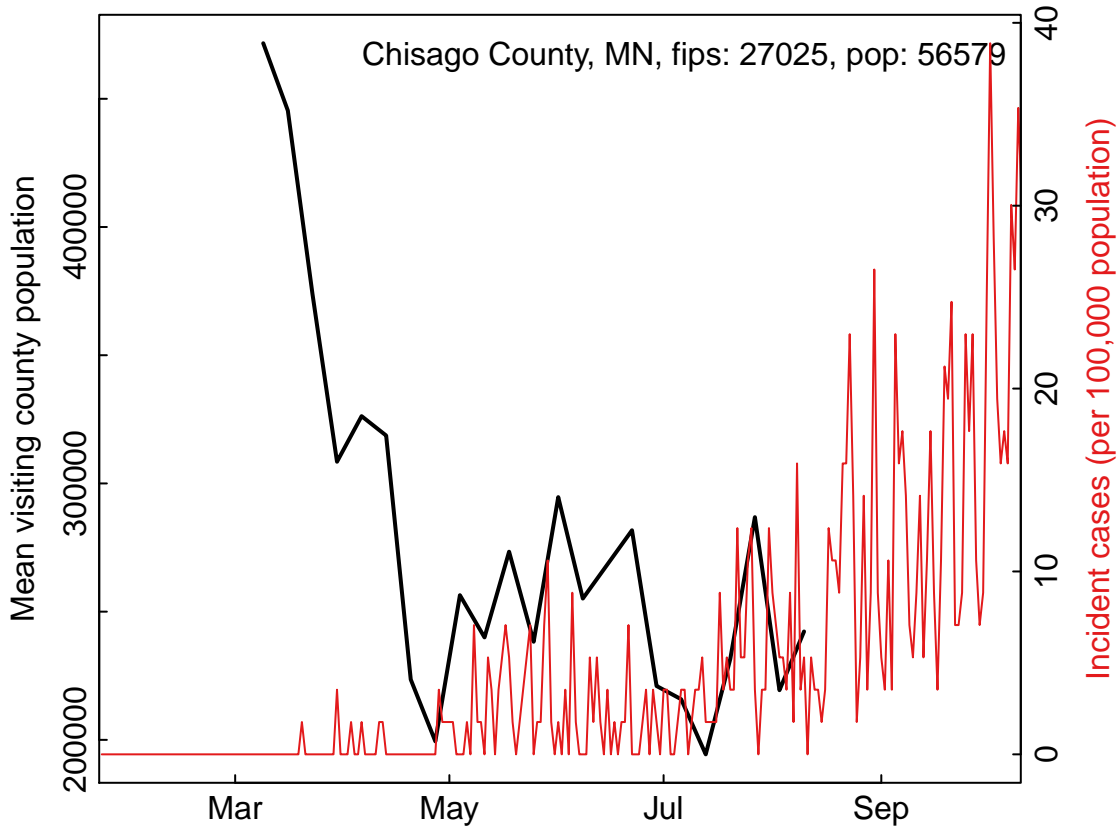

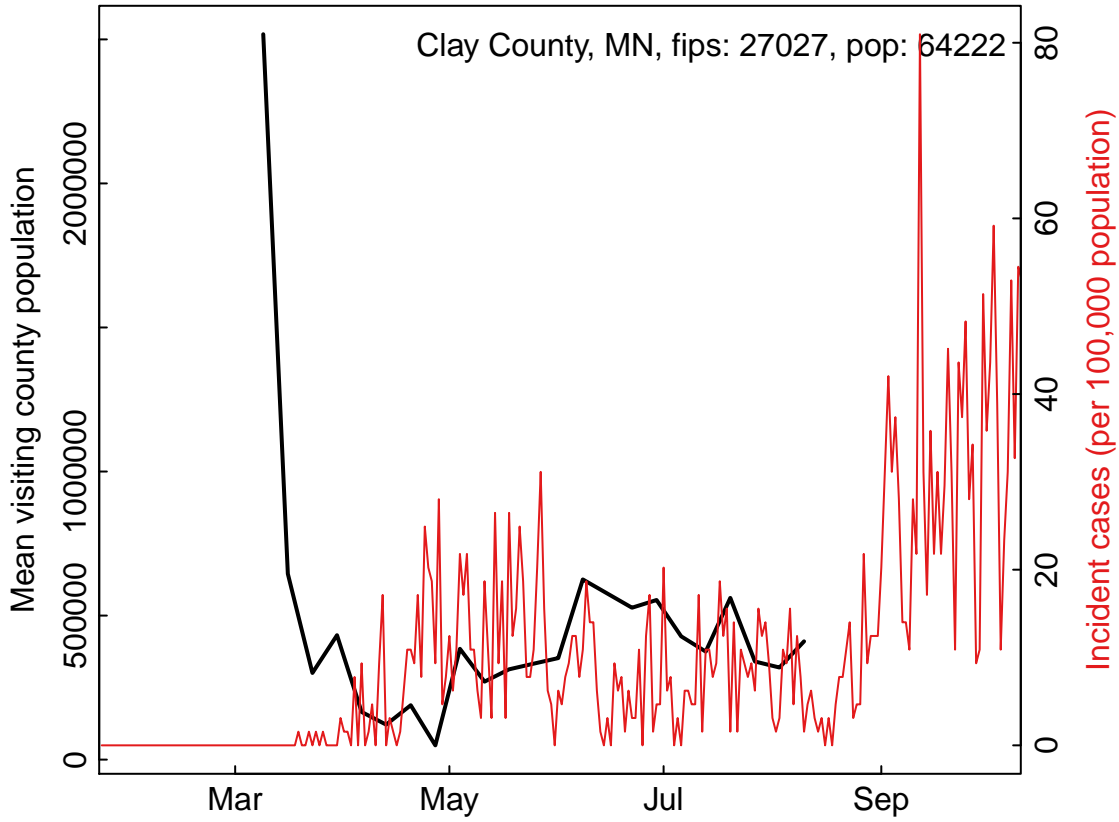

Clearwater County, MN, fips: 27029, pop: 8818

Mean visiting county population

2500000  
1500000  
500000  
0

Mar

May

Jul

Sep

40  
30  
20  
10  
0

Incident cases (per 100,000 population)

0

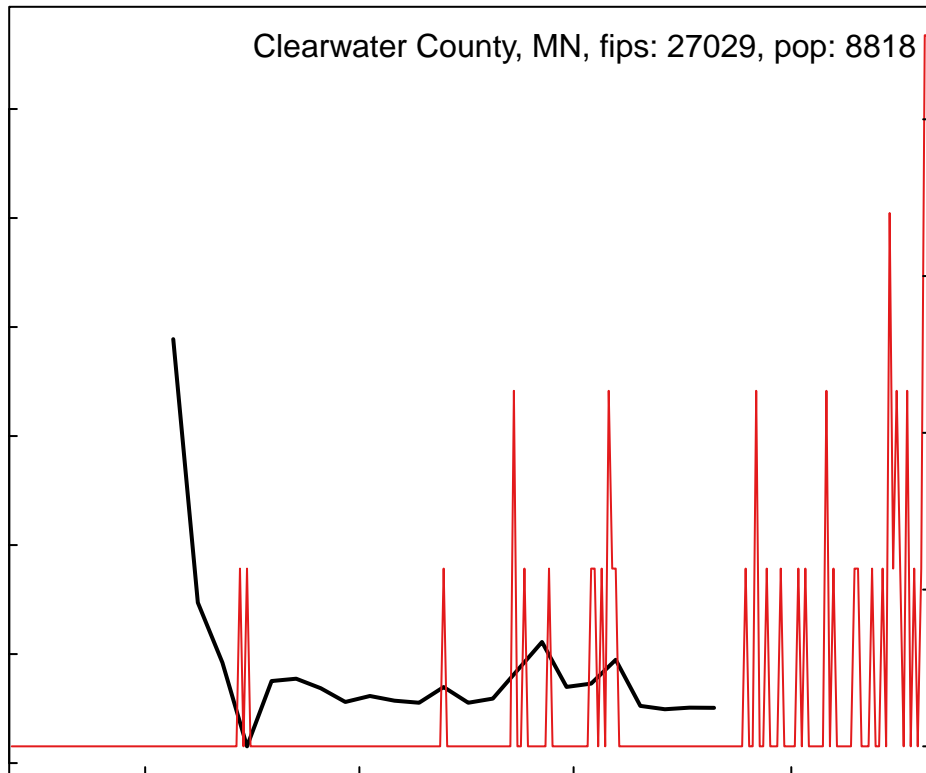

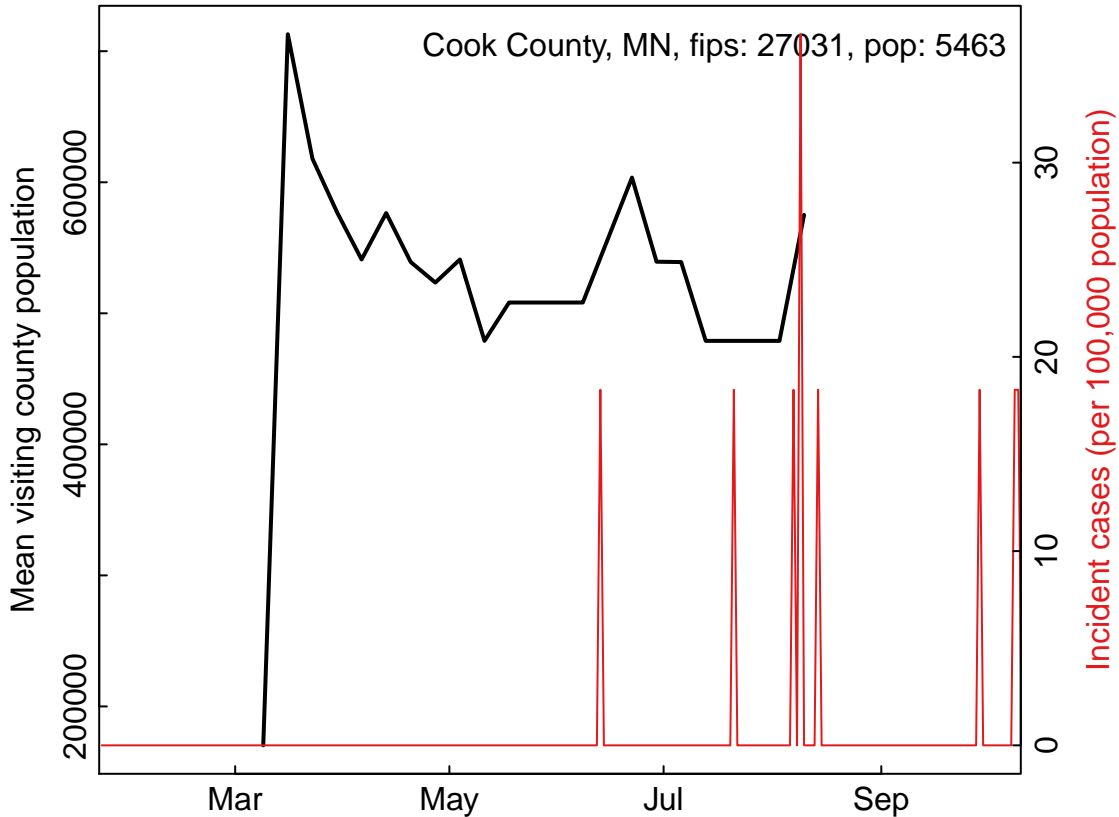

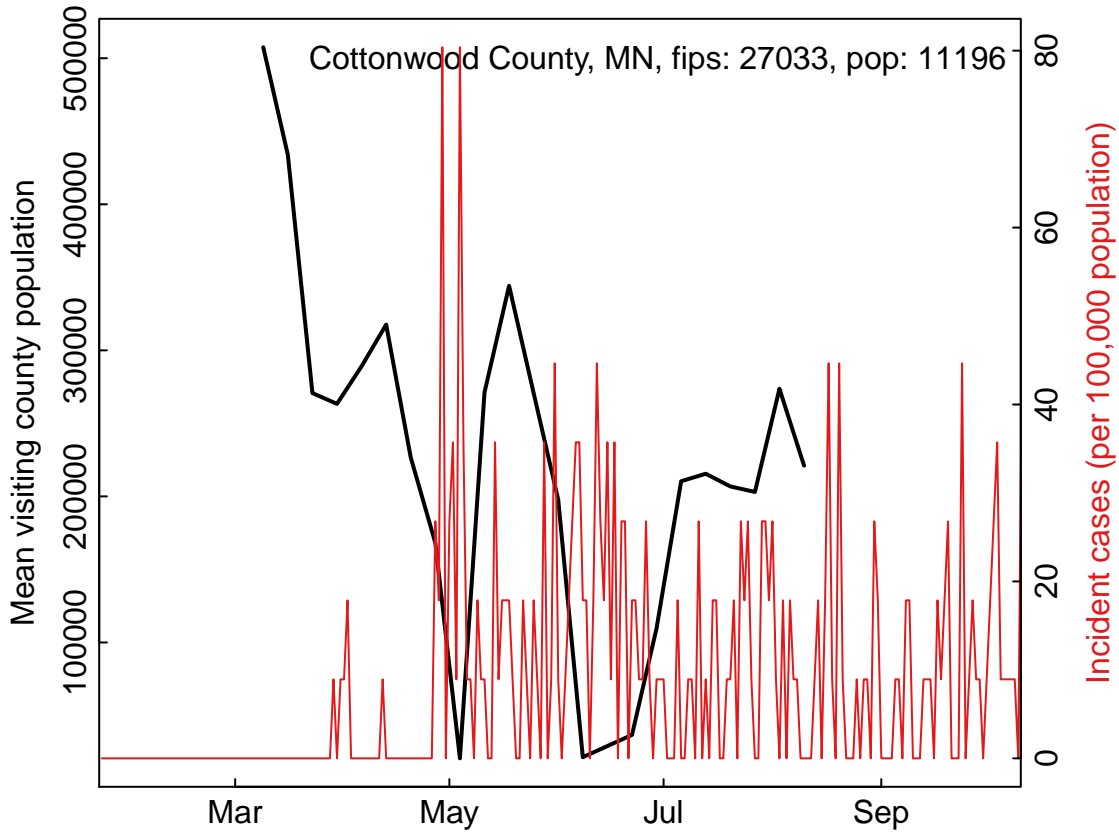

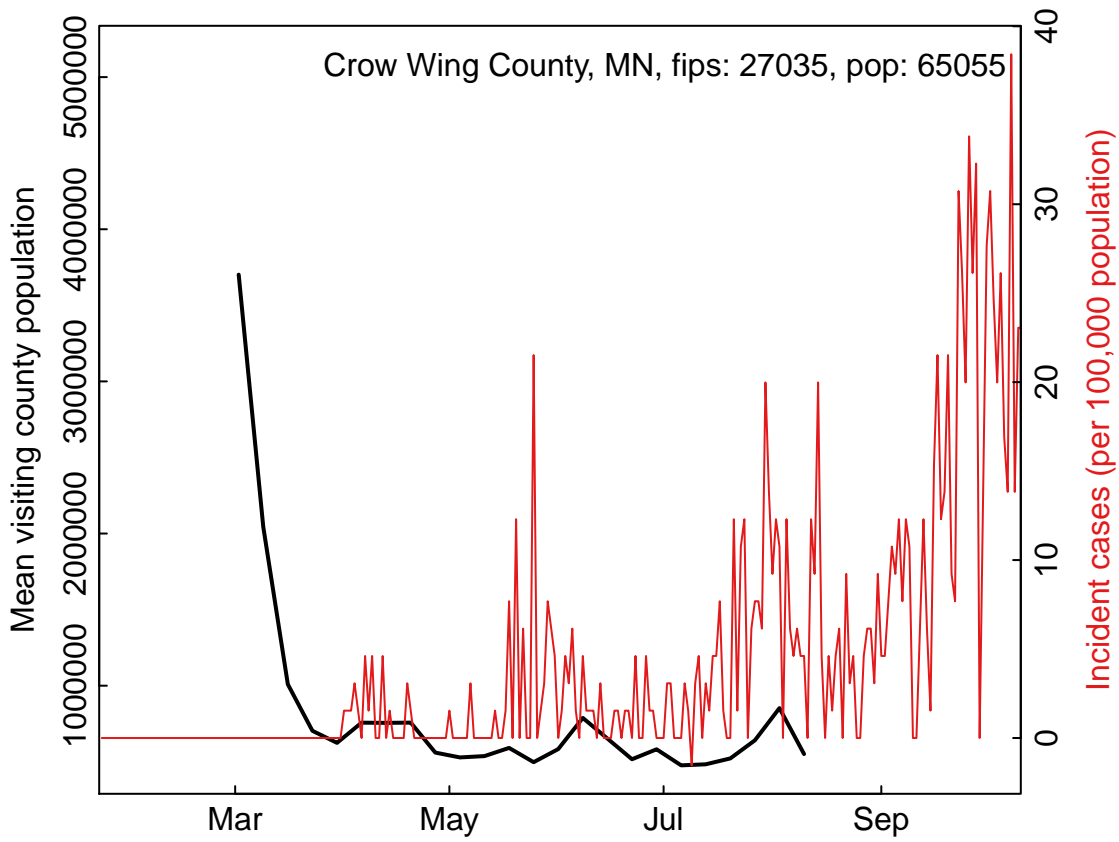



Dakota County, MN, fips: 27037, pop: 429021

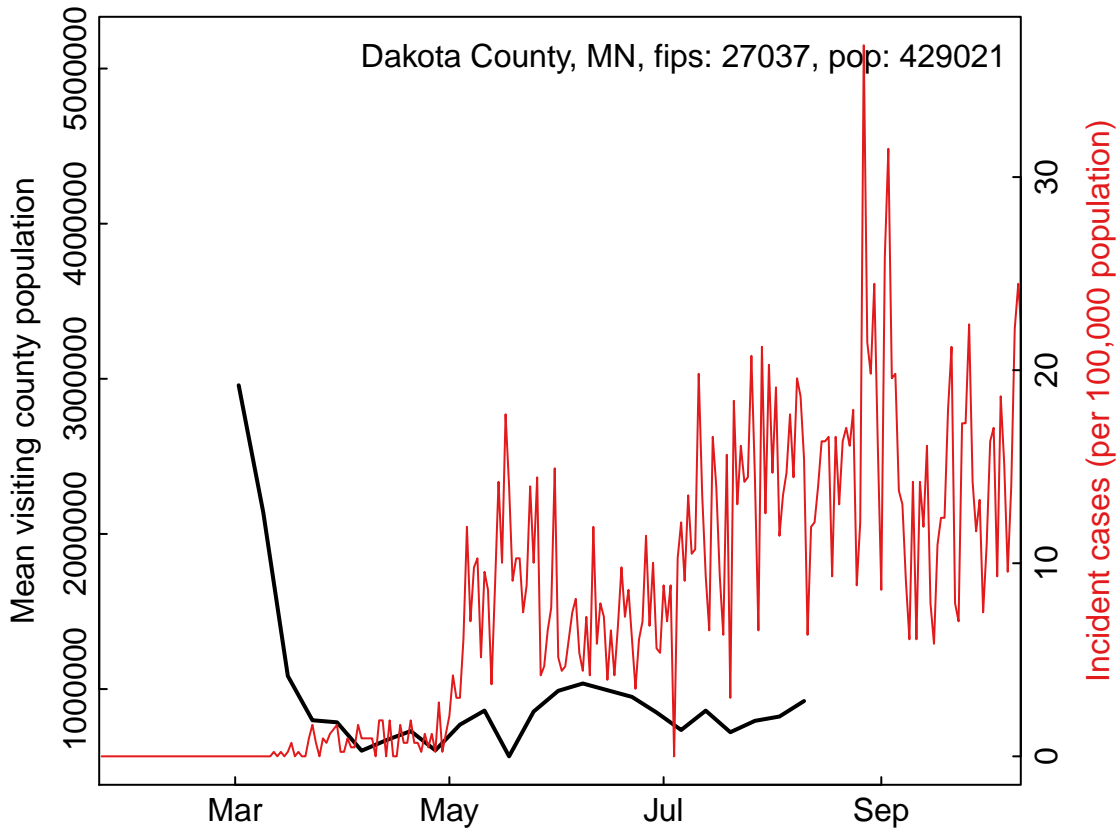

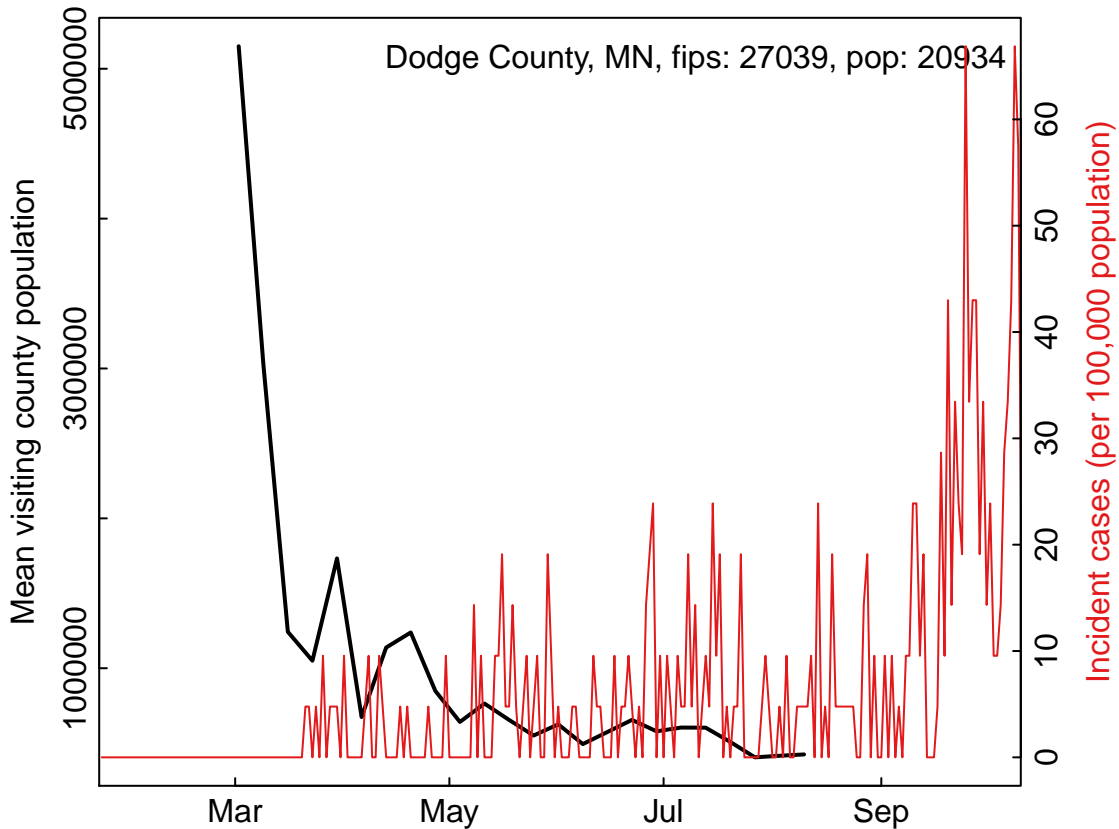

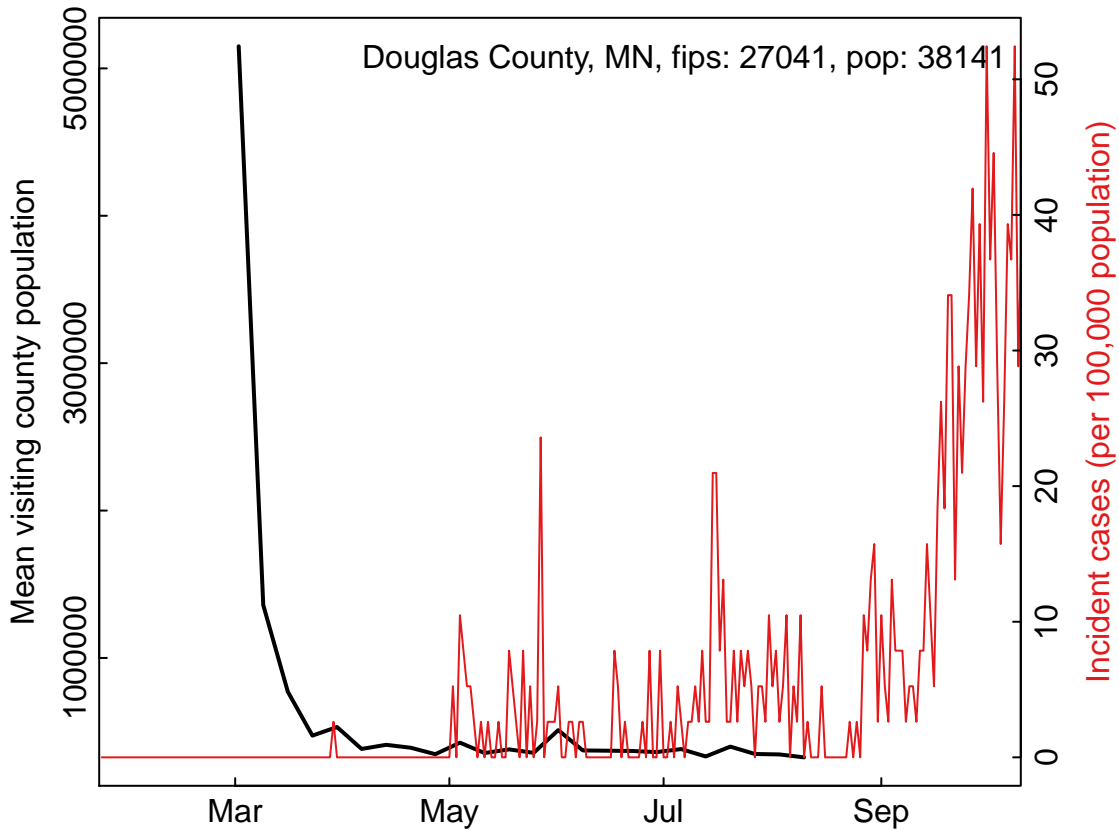

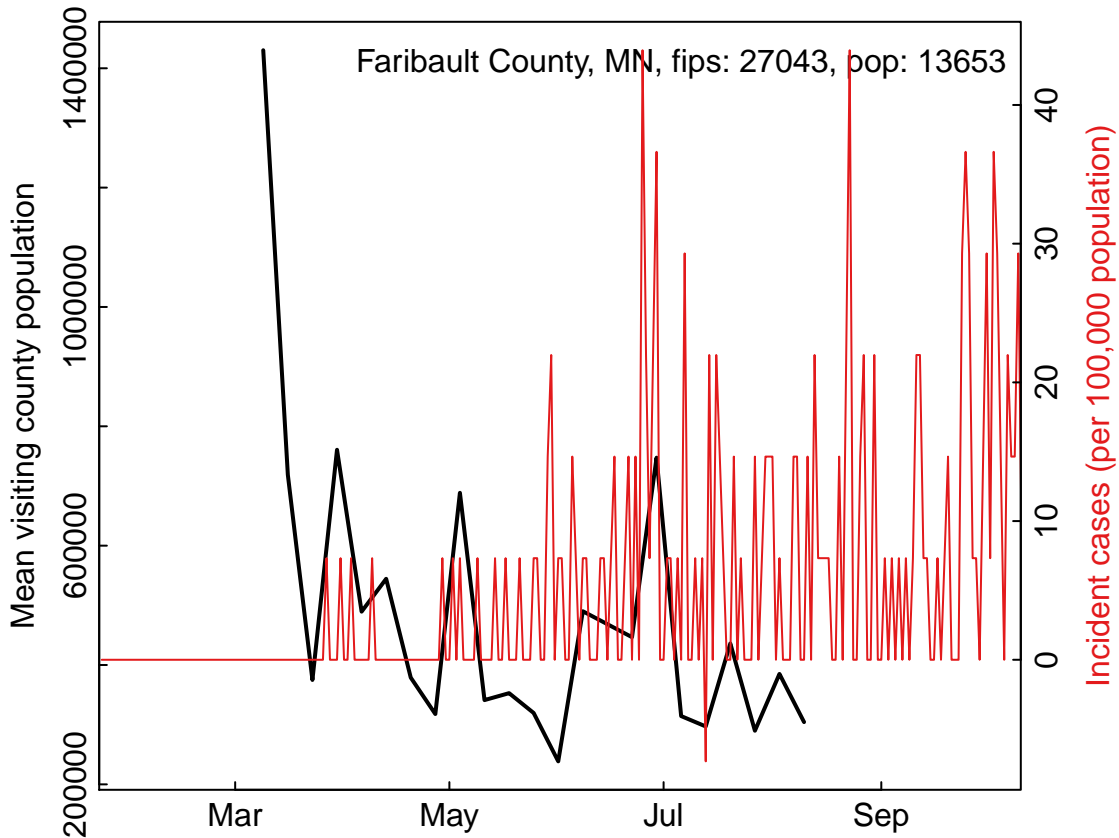

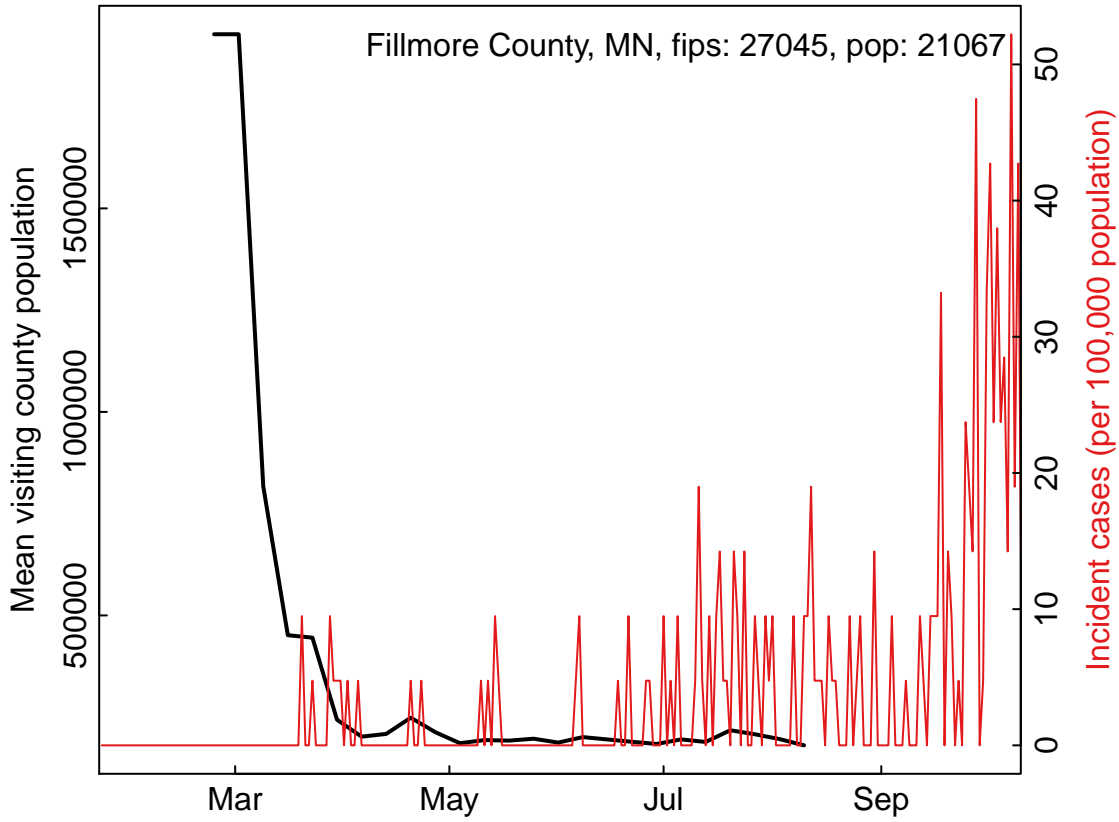

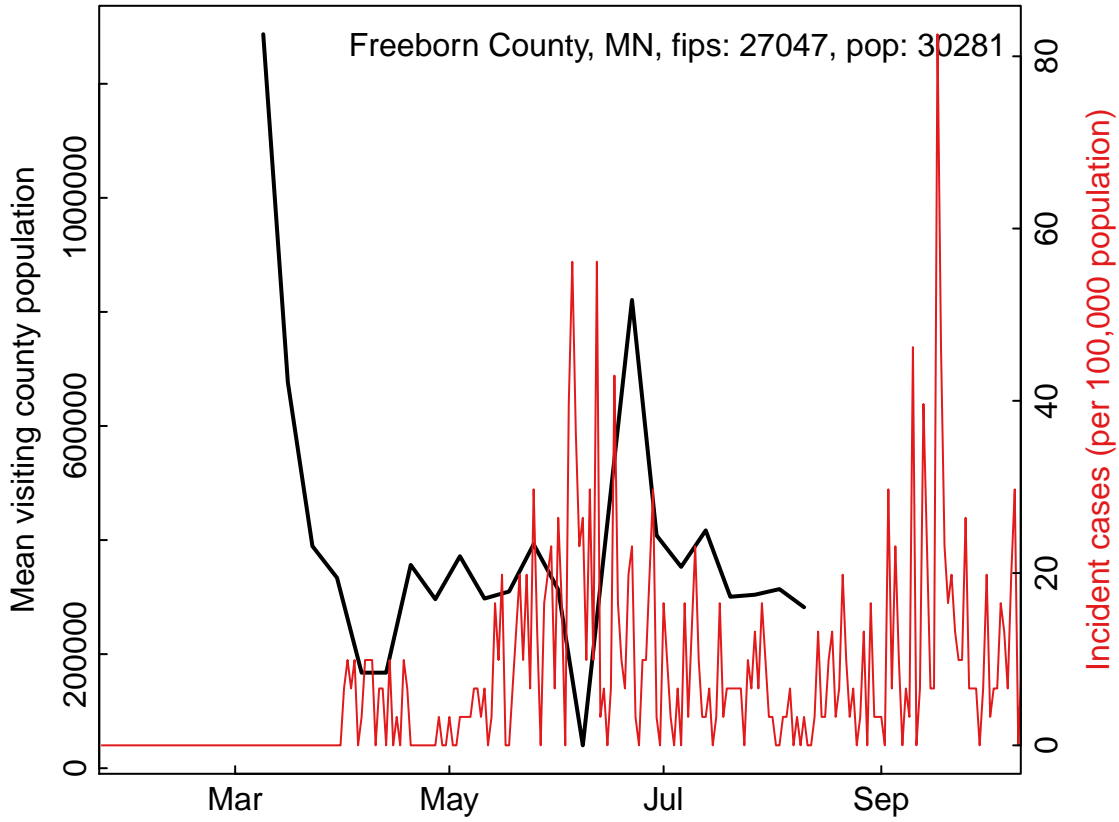

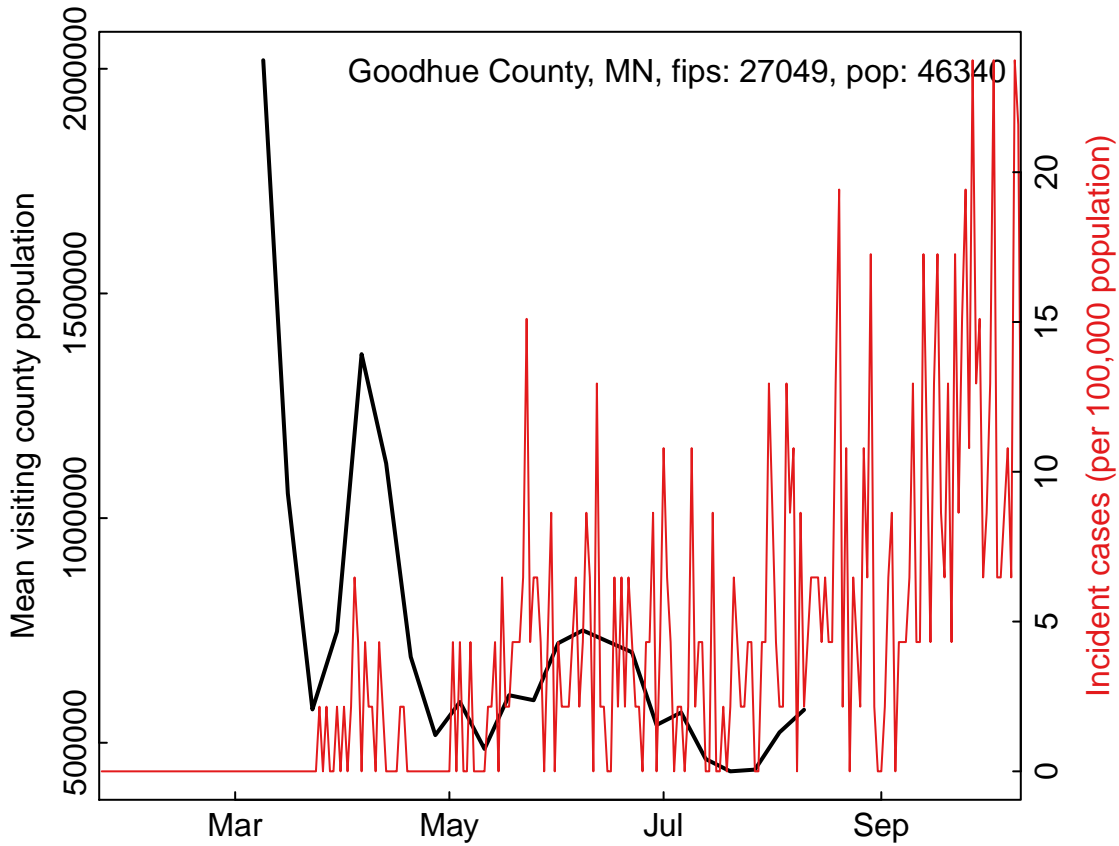

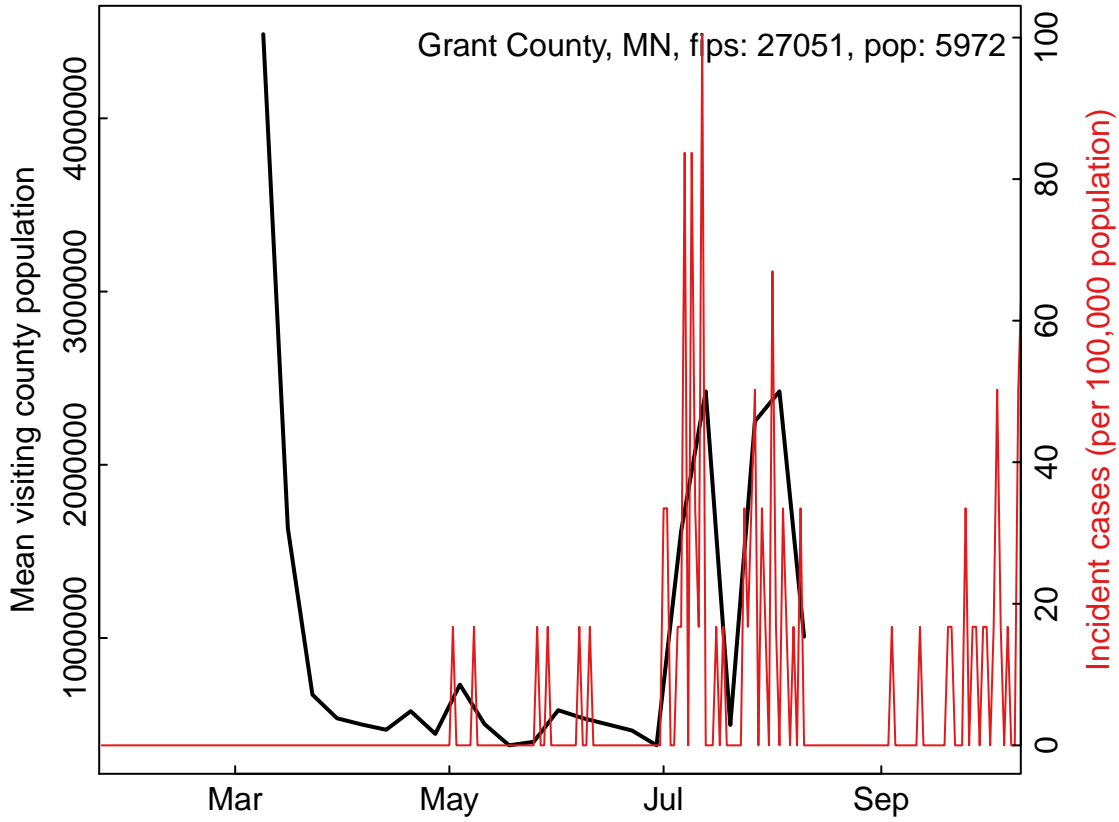



Hennepin County, MN, fips: 27053, pop: 1265843

Mean visiting county population

Incident cases (per 100,000 population)

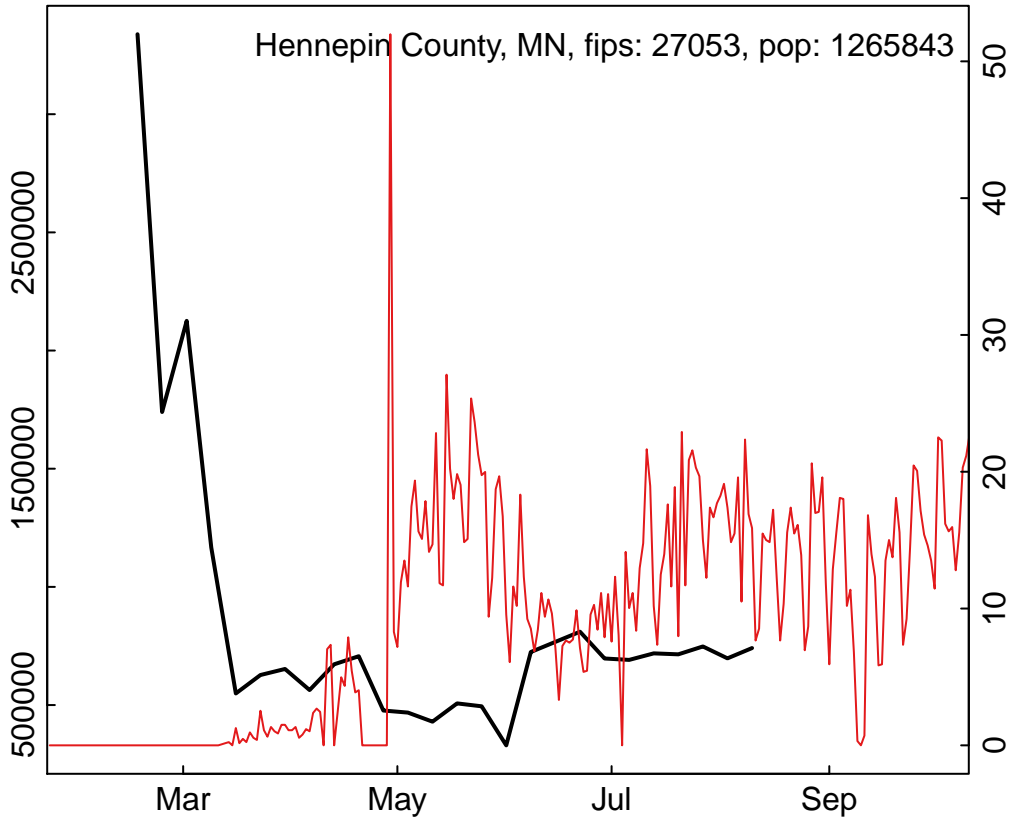

Houston County, MN, fips: 27055, pop: 18600

Mean visiting county population

200000  
300000  
400000  
500000

Mar

May

Jul

Sep

Incident cases (per 100,000 population)

0  
10  
20  
30

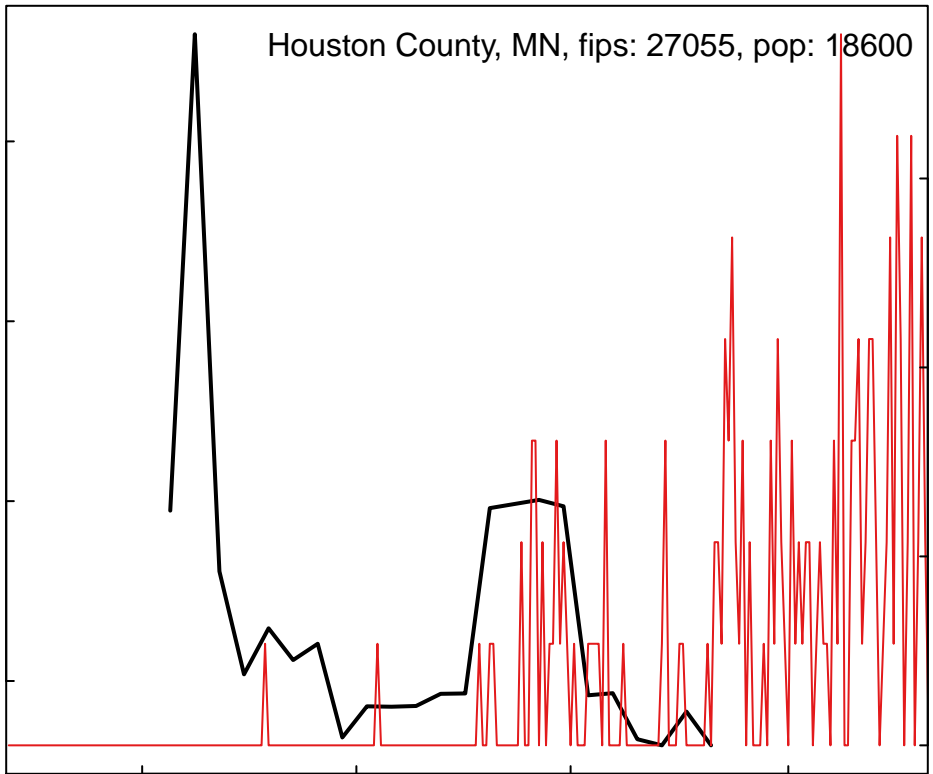

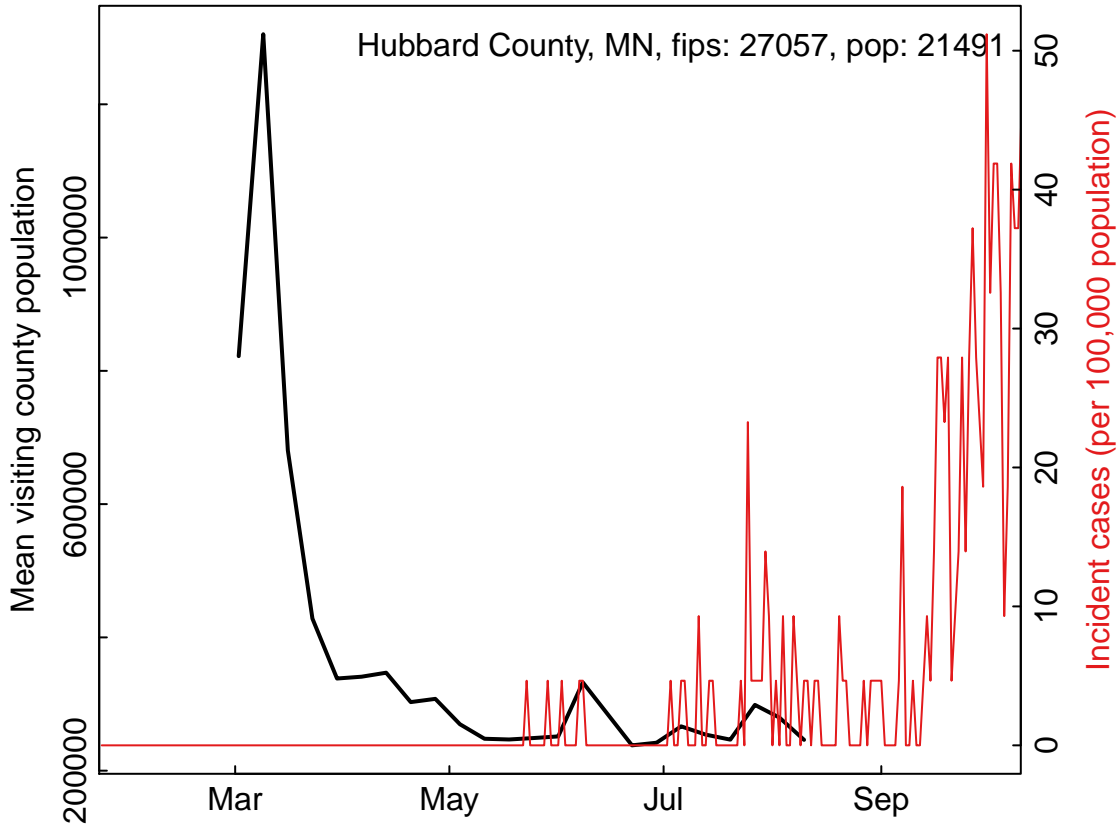

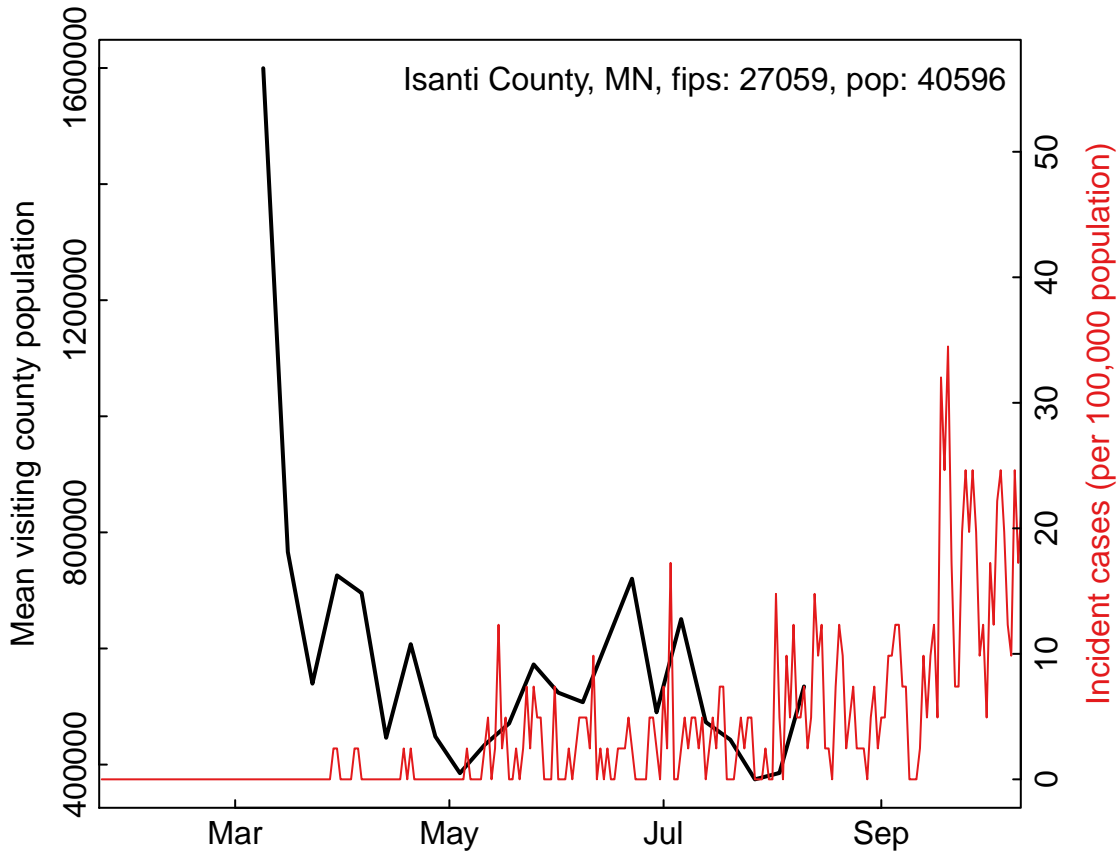

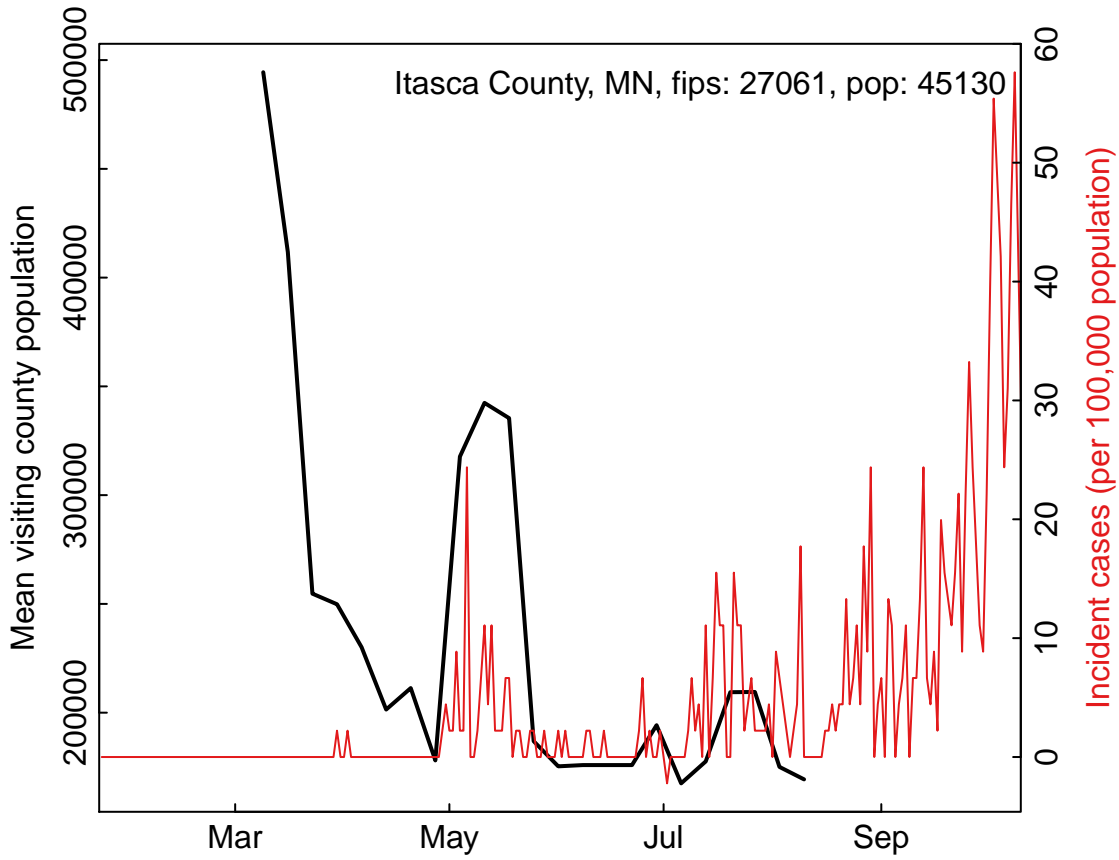

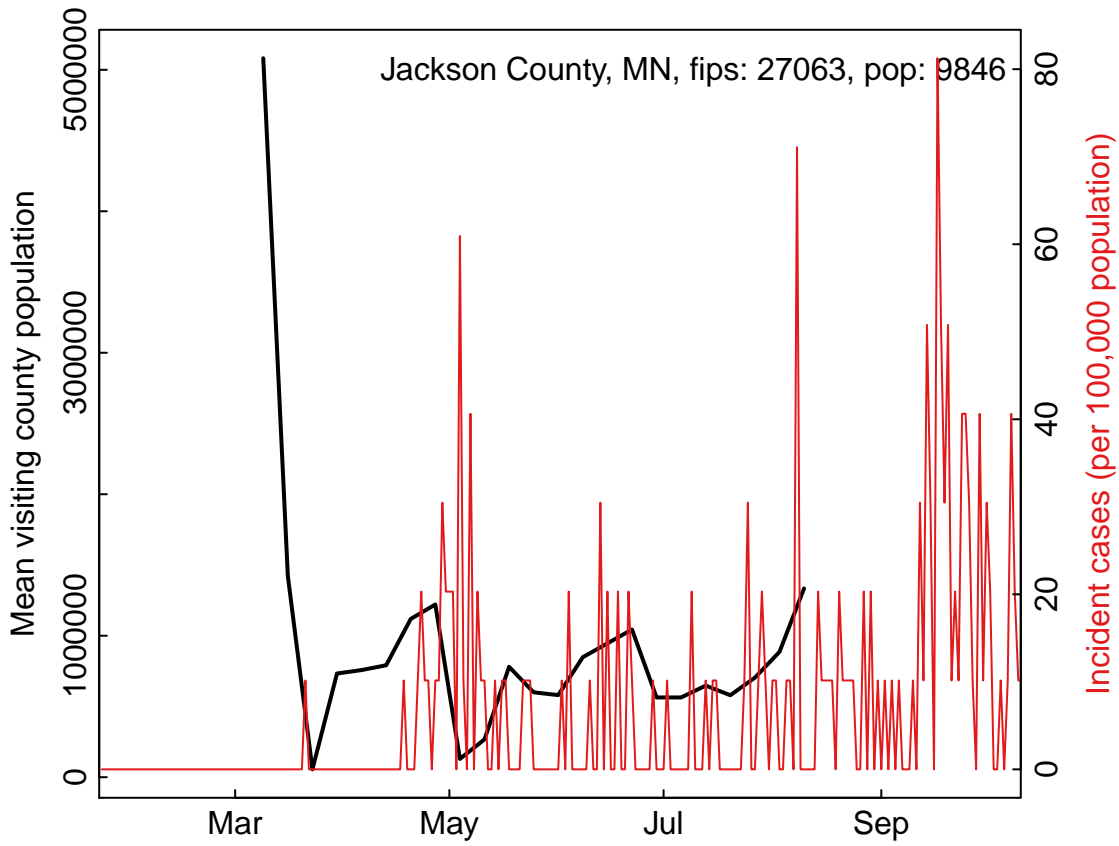

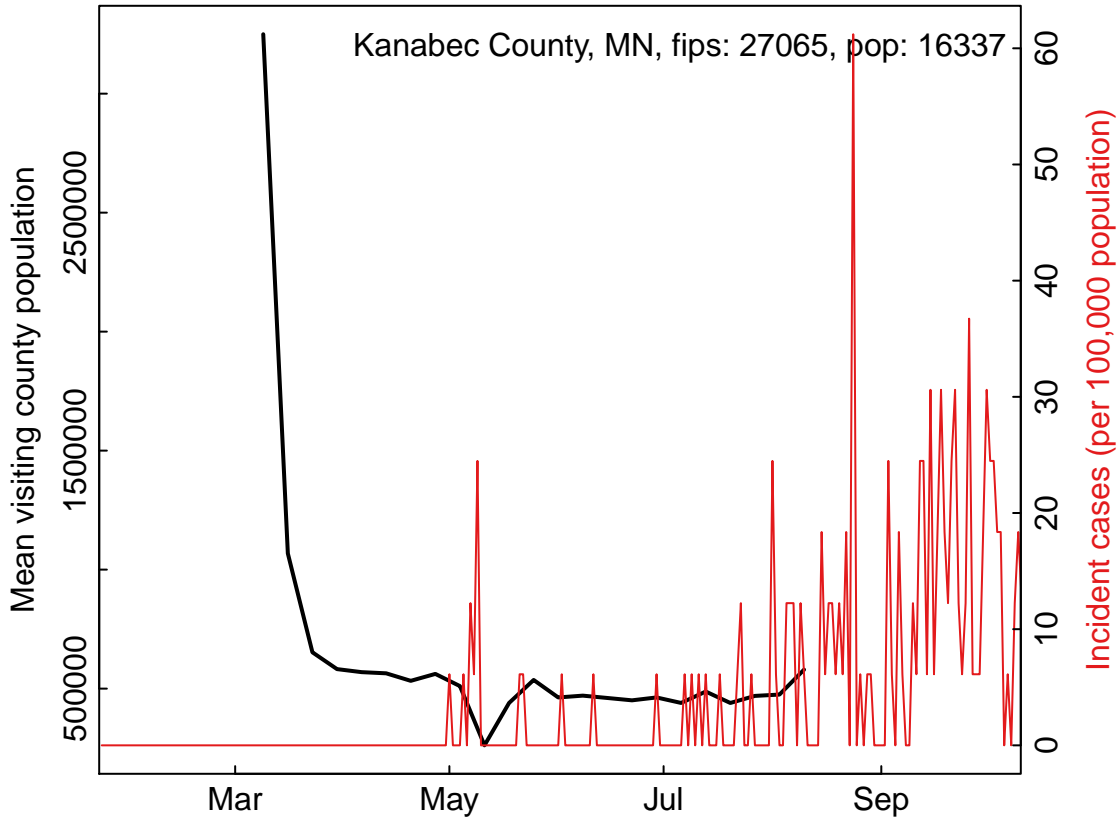

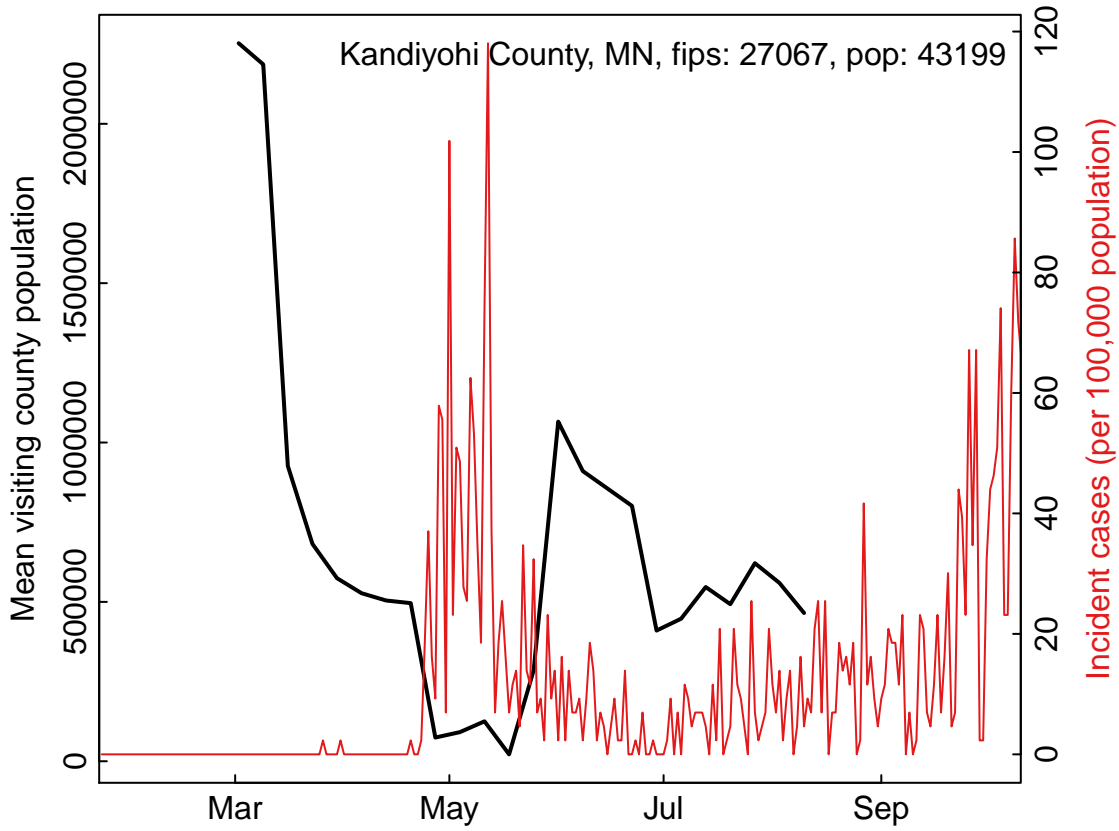



Kittson County, MN, fips: 27069, pop: 4298

Mean visiting county population

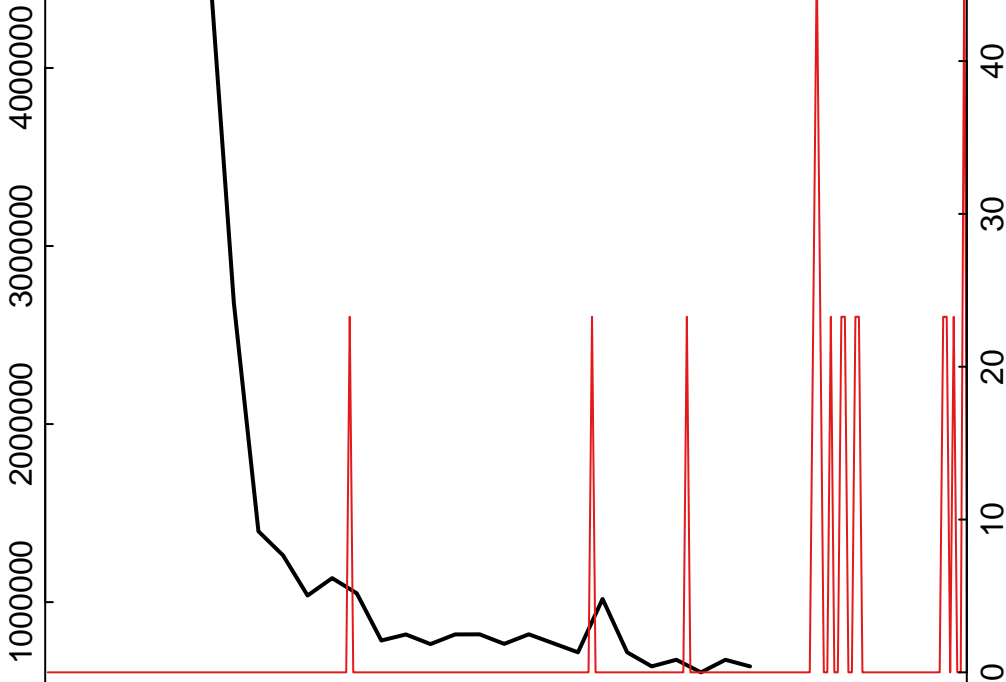

Incident cases (per 100,000 population)

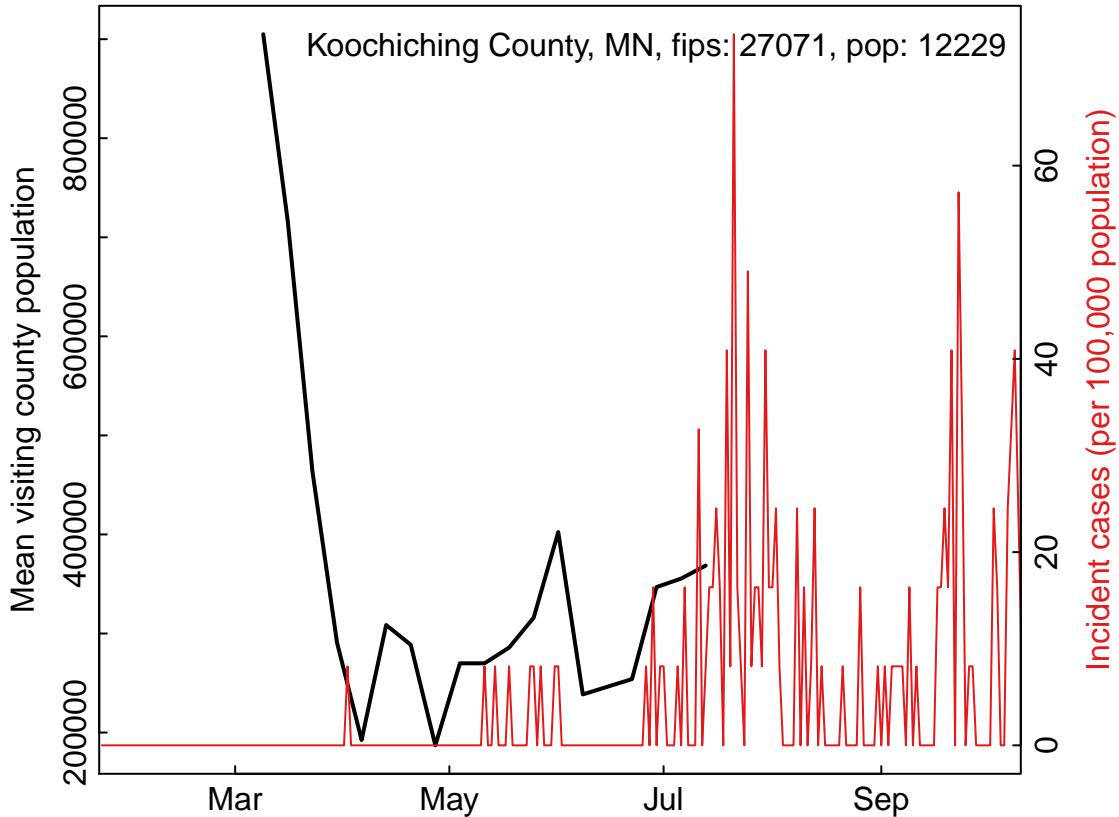

Lac qui Parle County, MN, fips: 27073, pop: 6623

Mean visiting county population

300000  
200000  
100000  
0

Mar May Jul Sep

Incident cases (per 100,000 population)

80  
60  
40  
20  
0

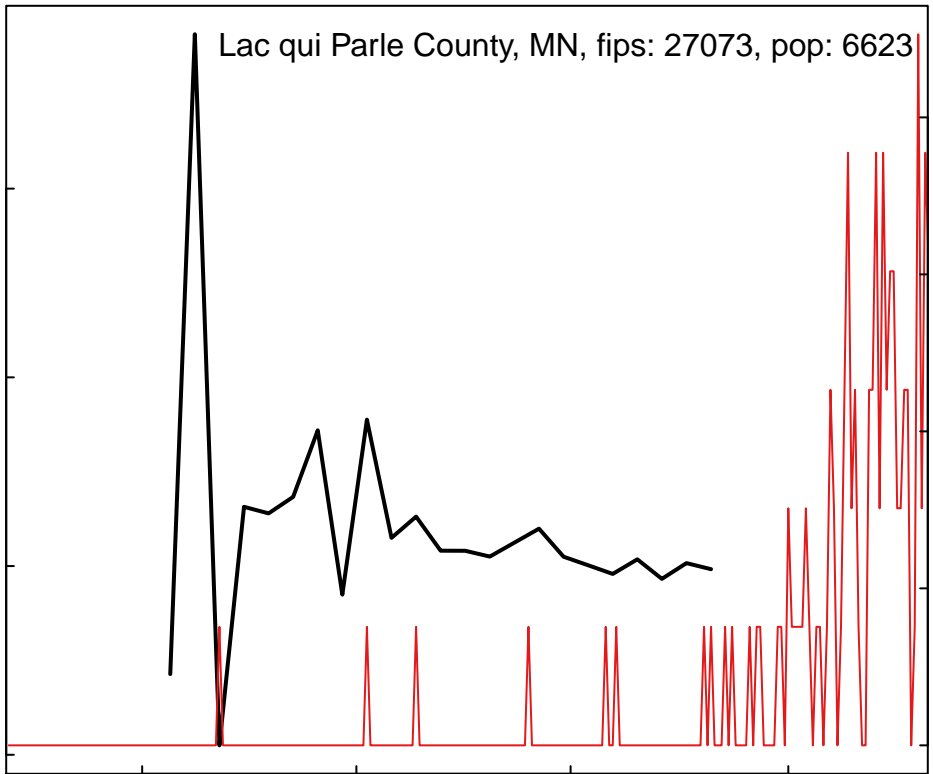

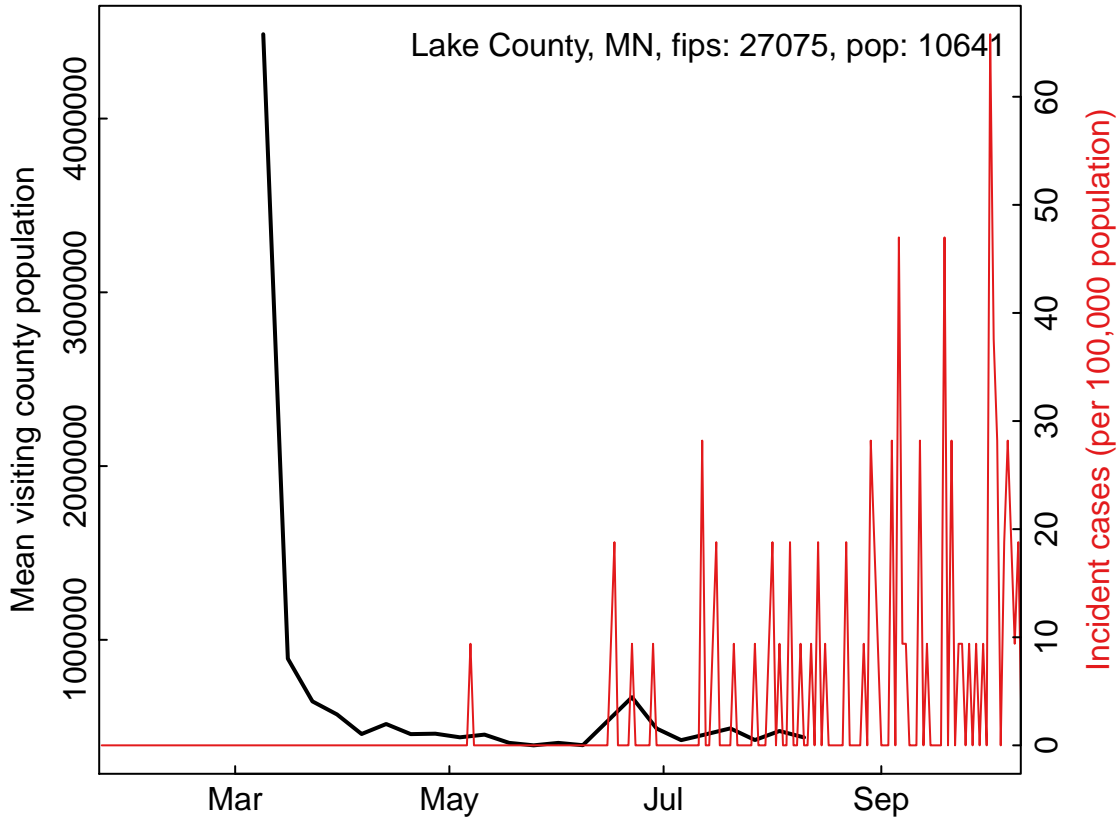

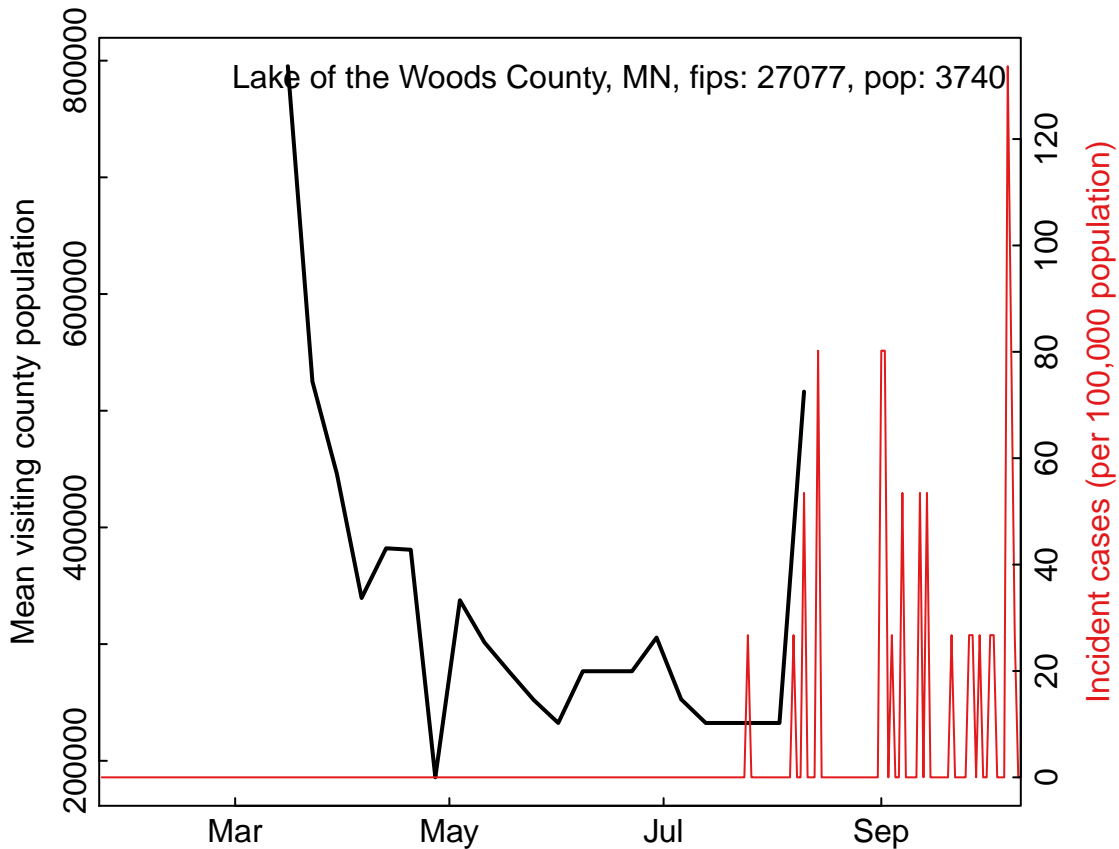

Le Sueur County, MN, fips: 27079, pop: 28887

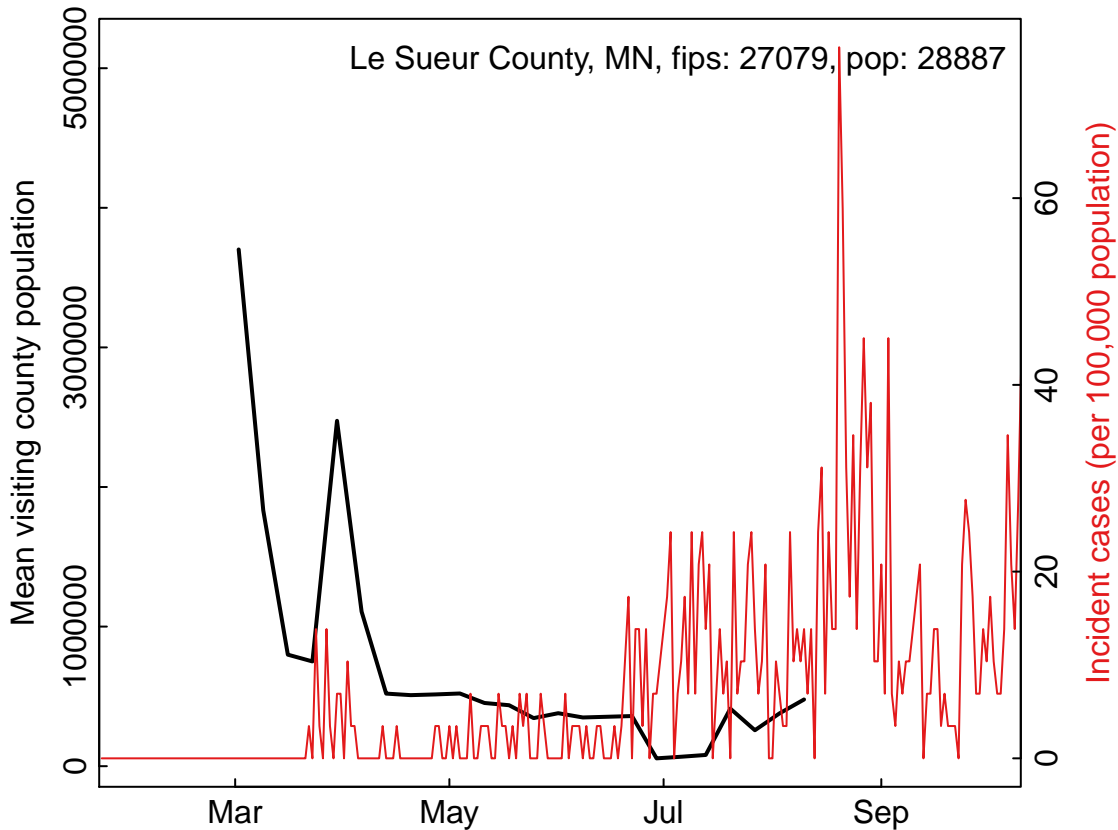

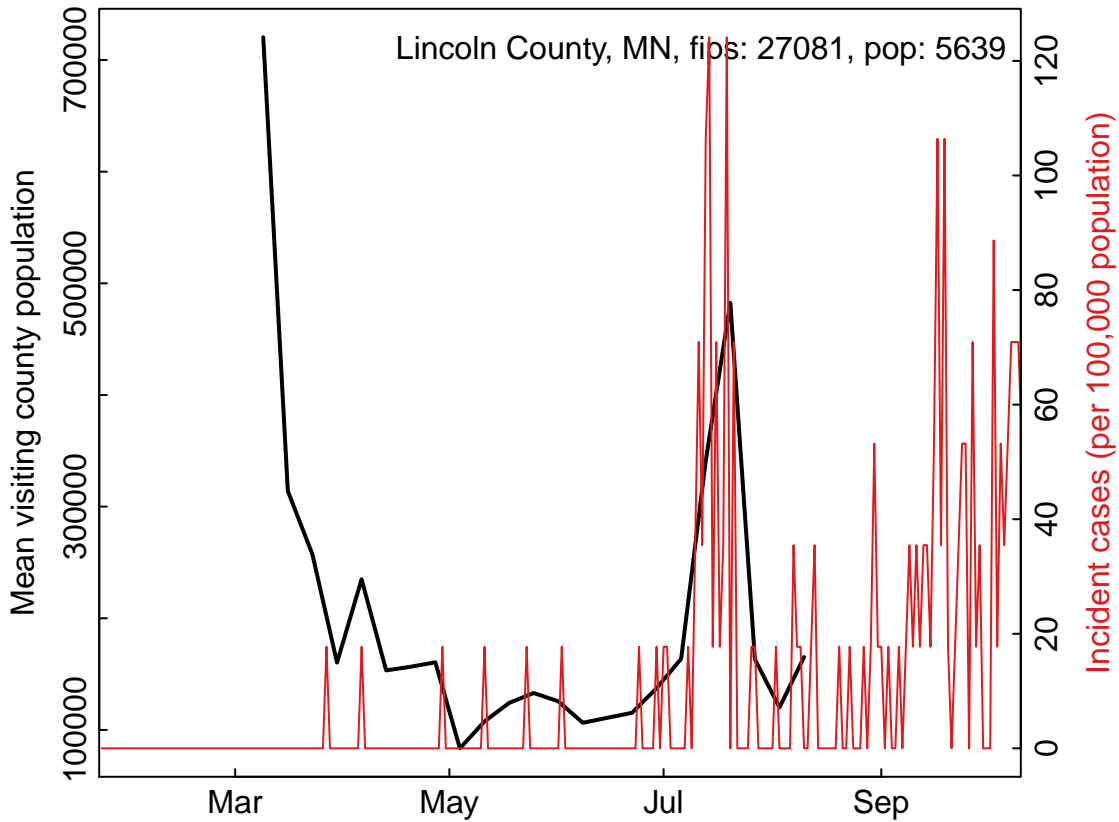

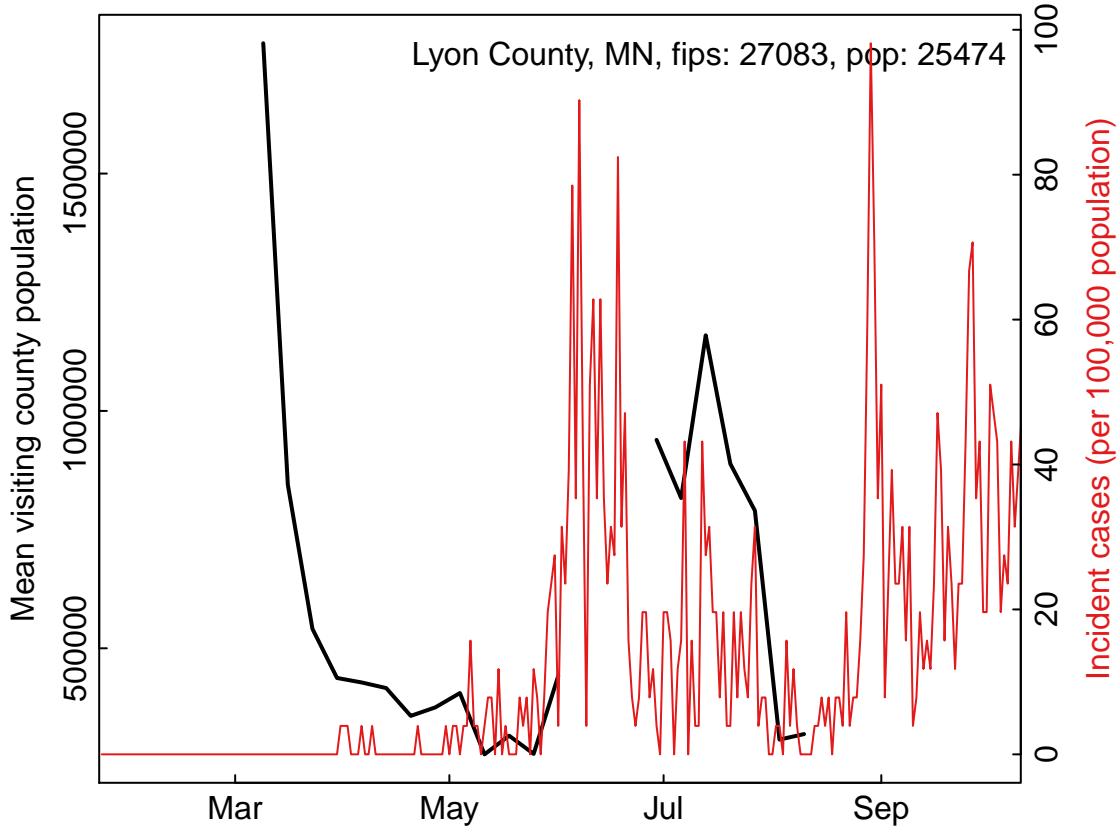



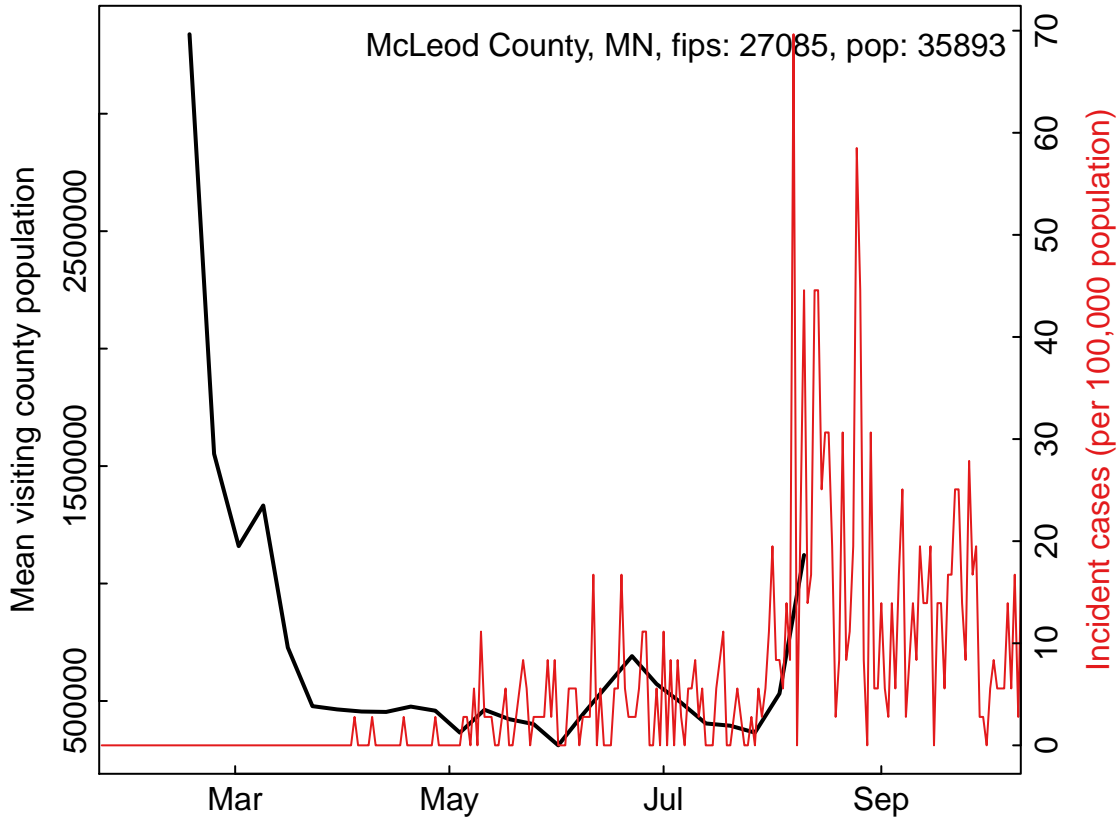

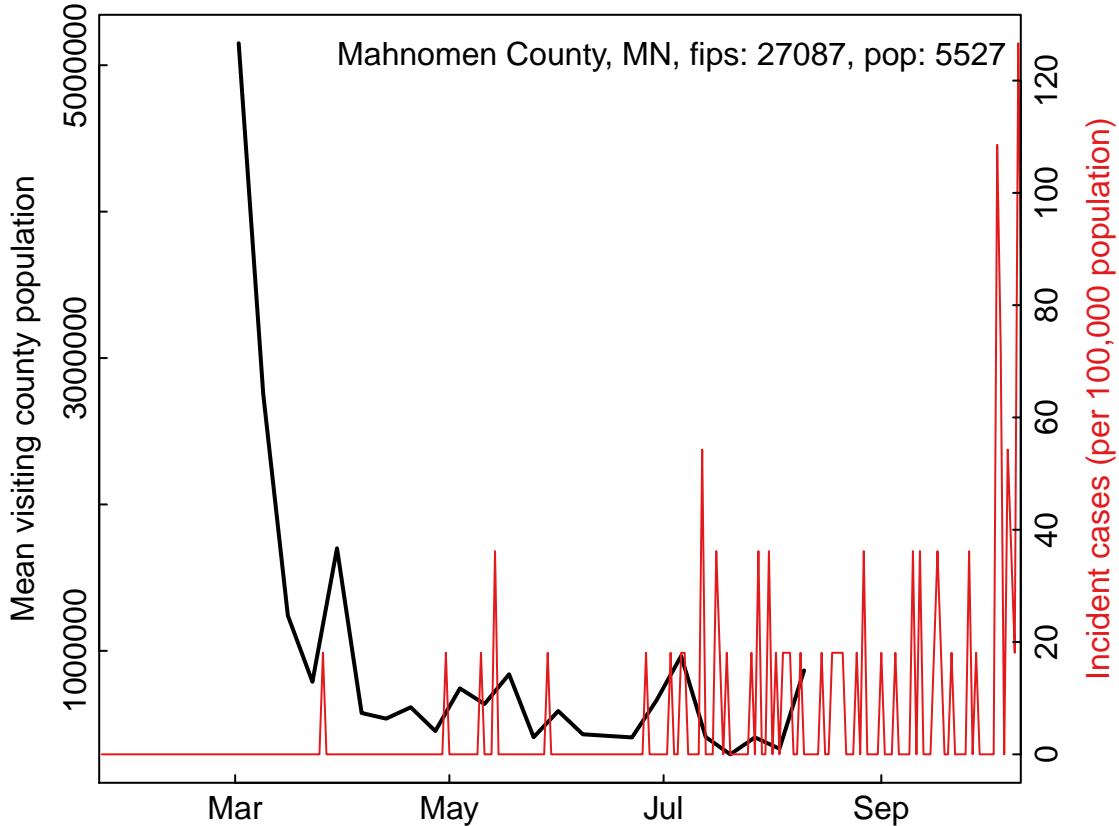

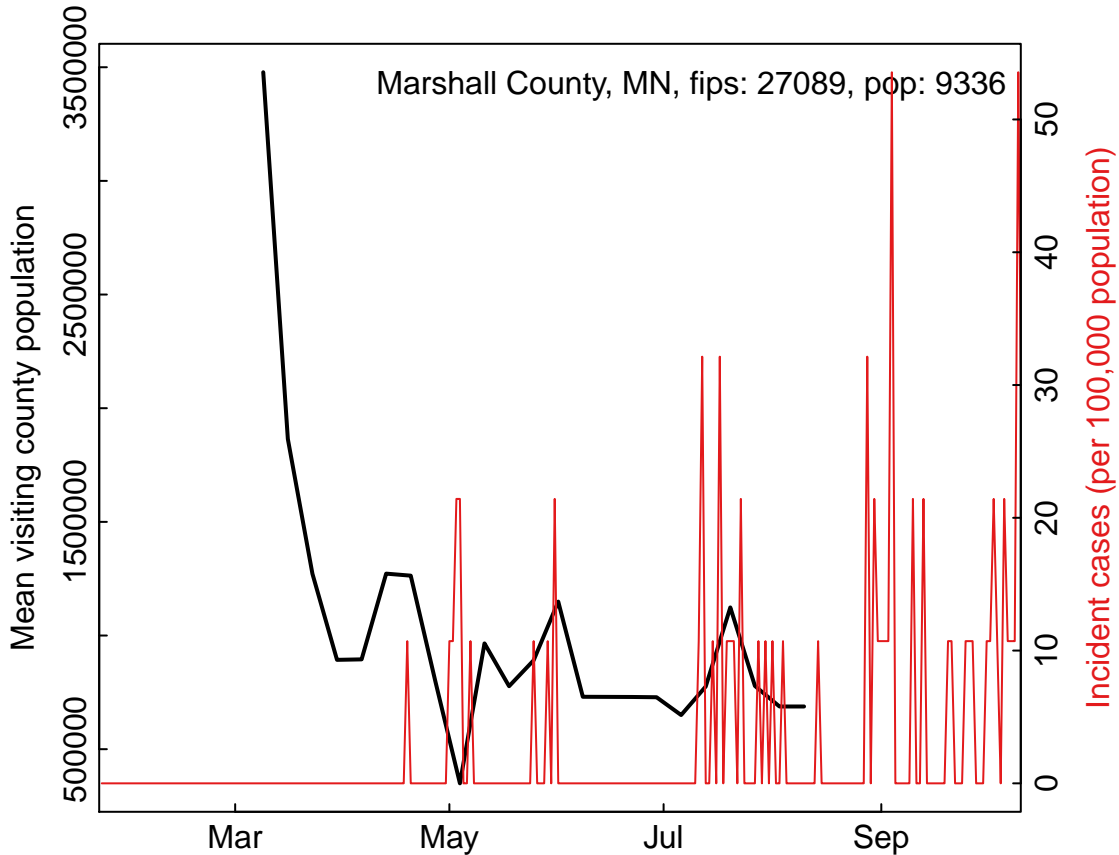

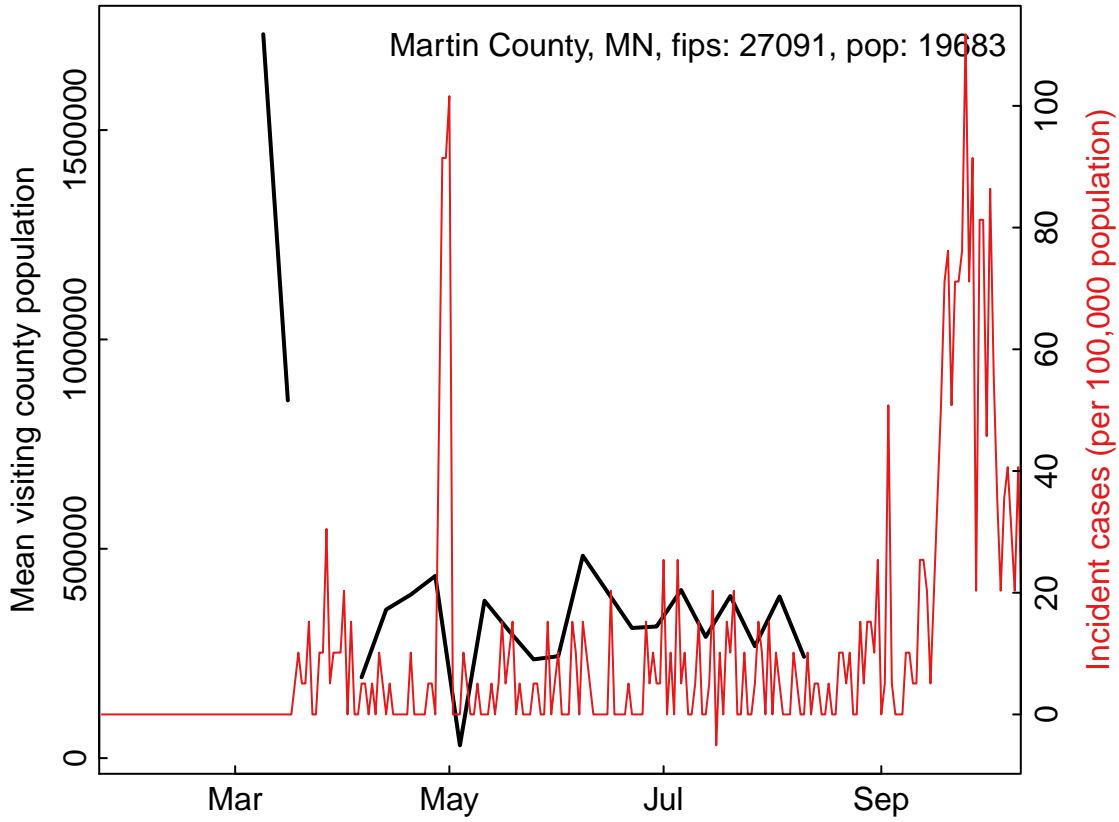

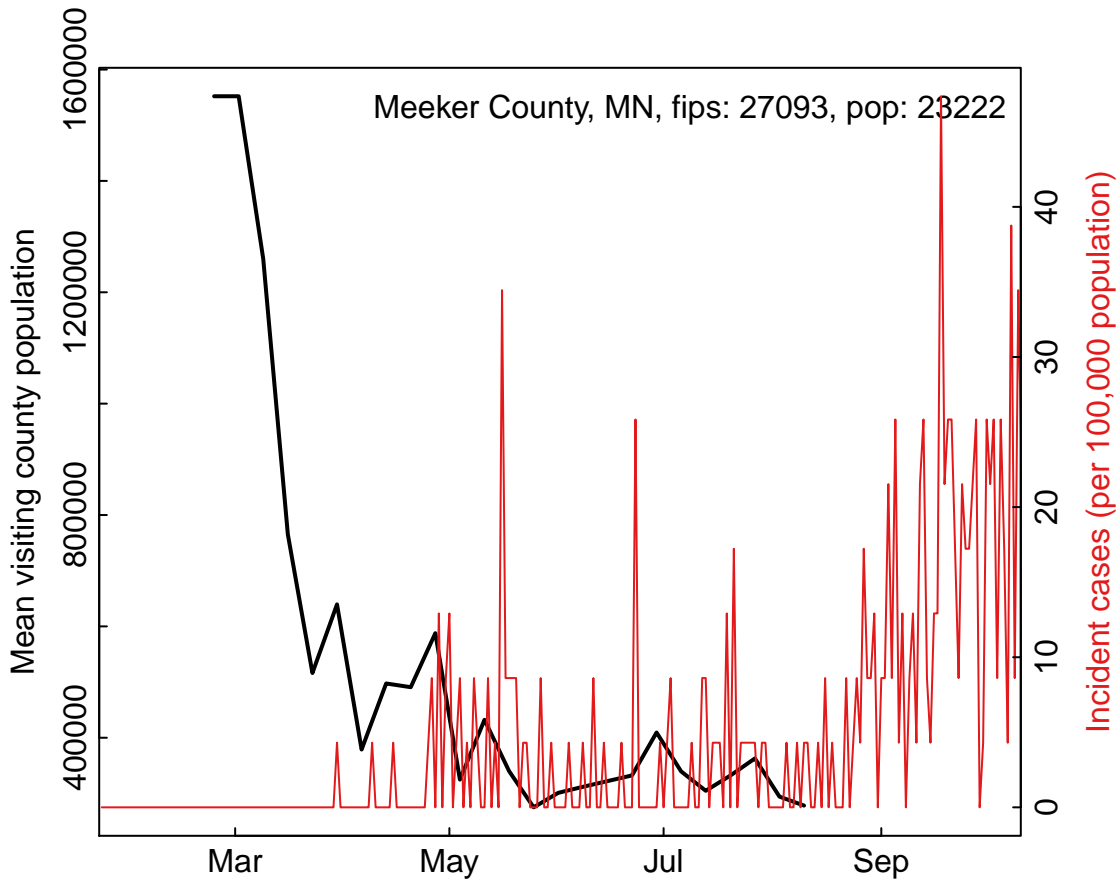

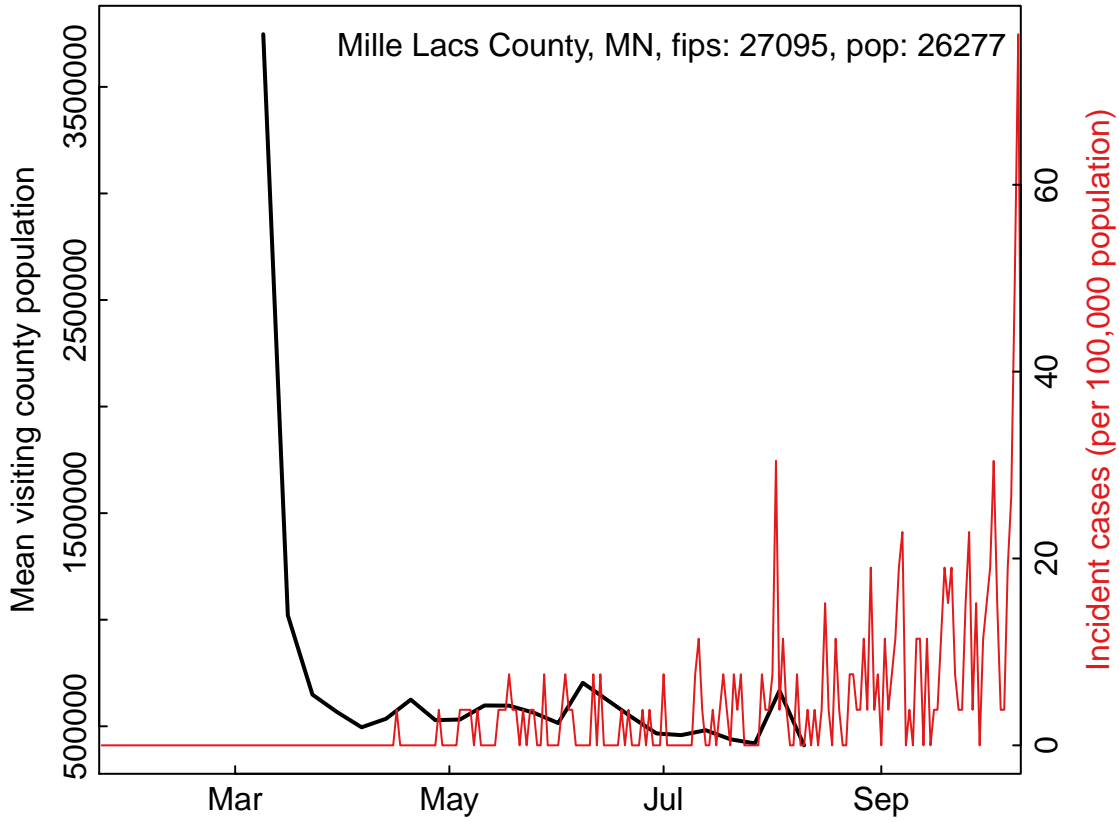

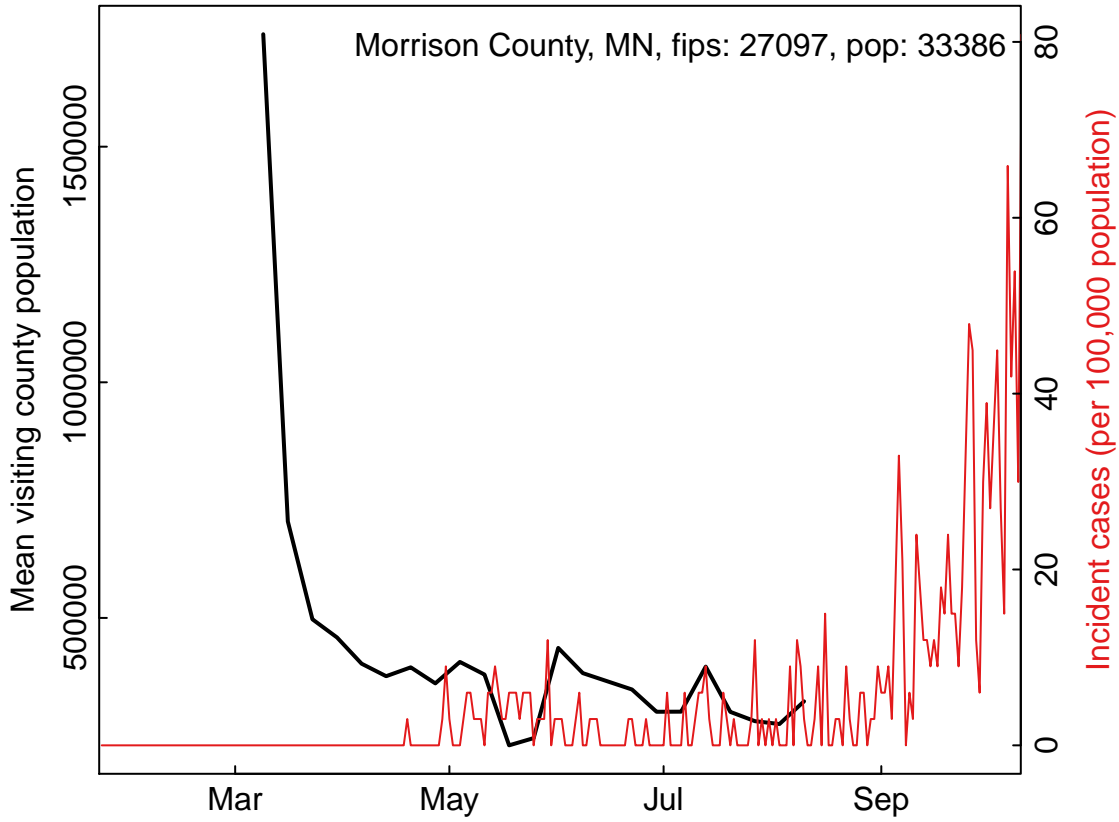

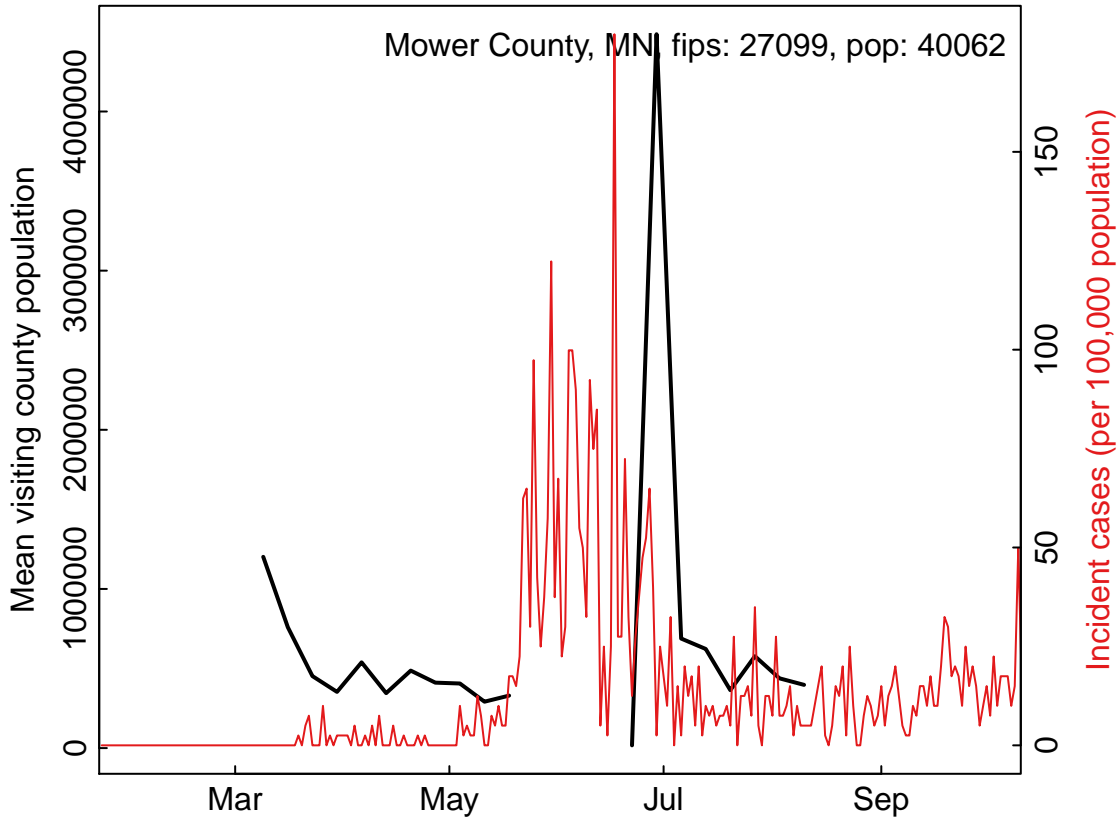



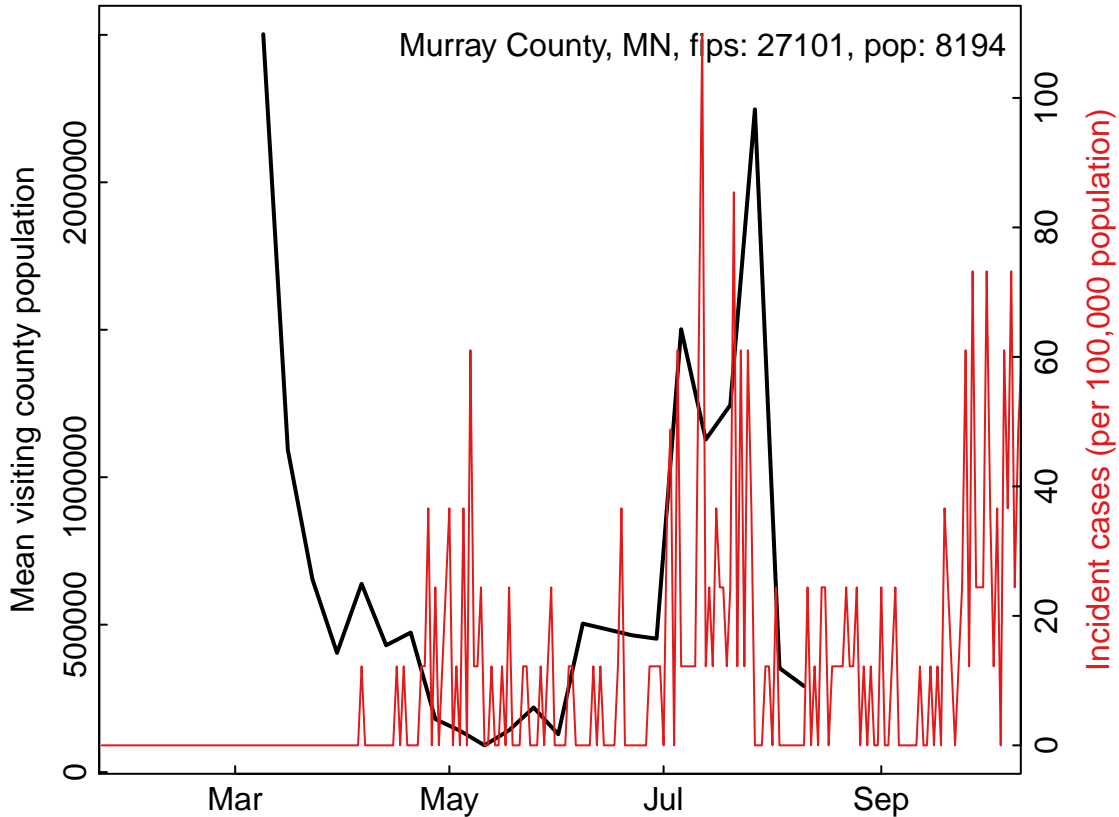

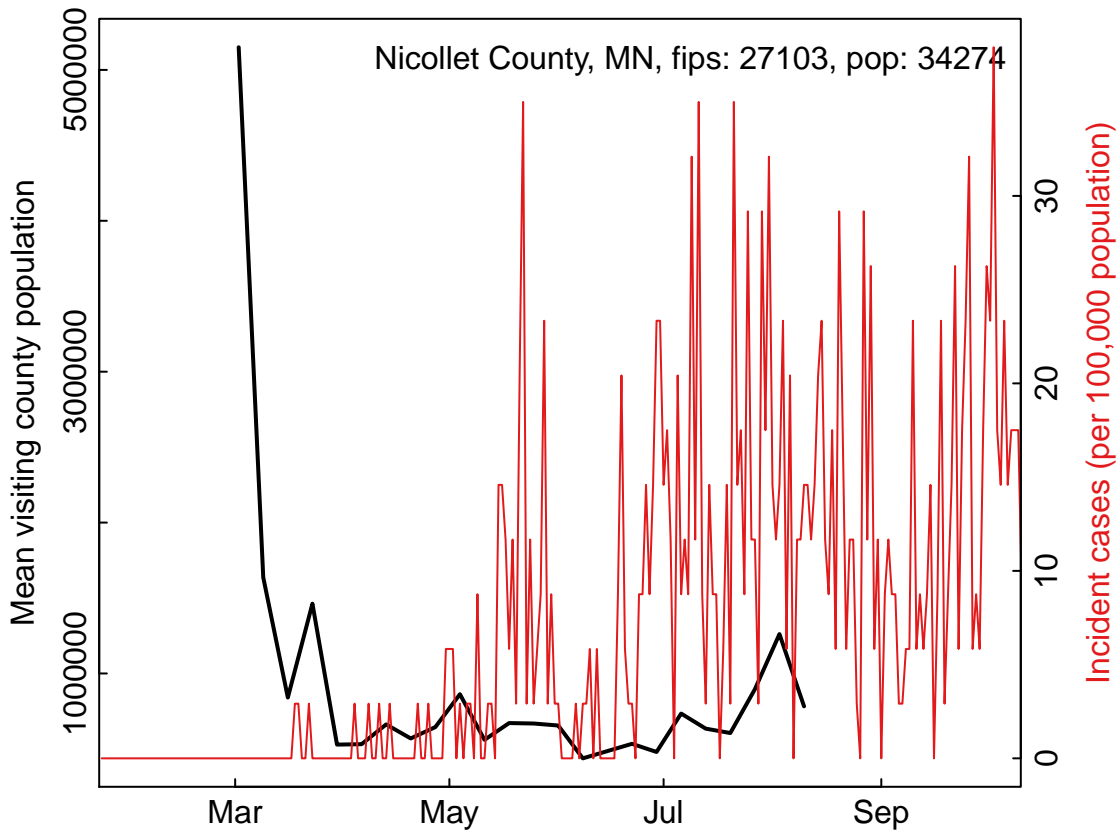

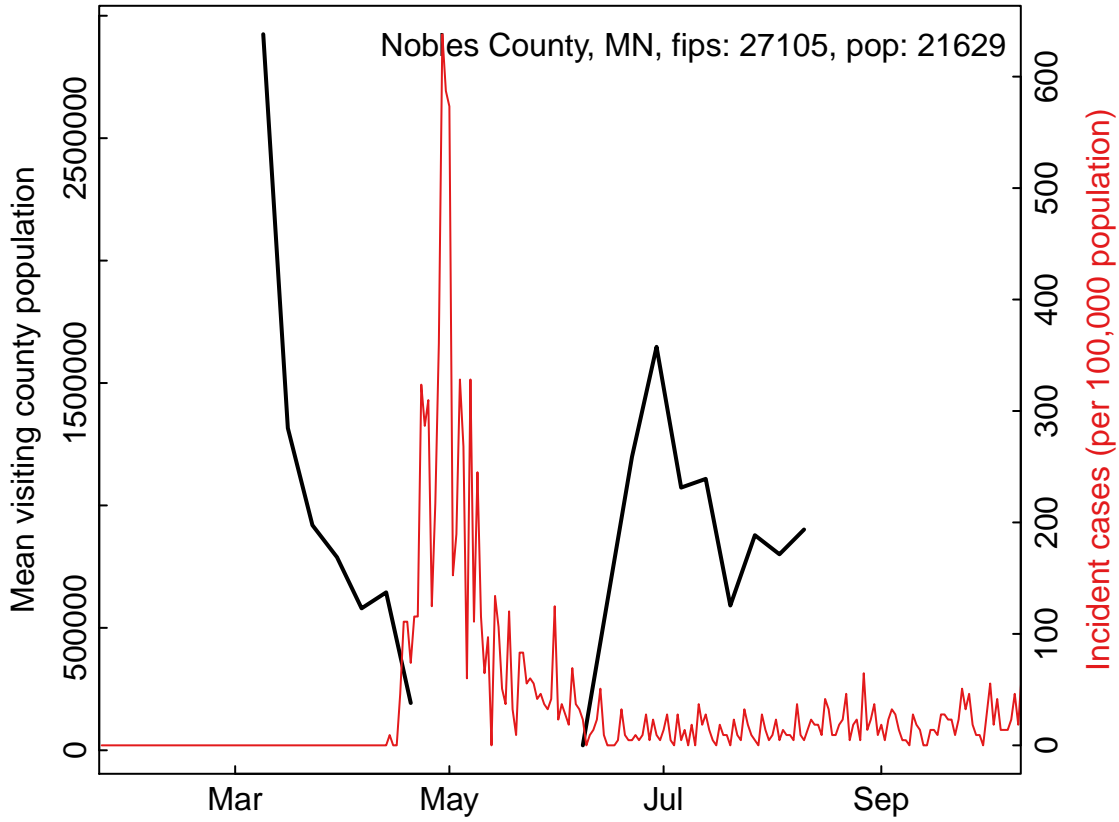

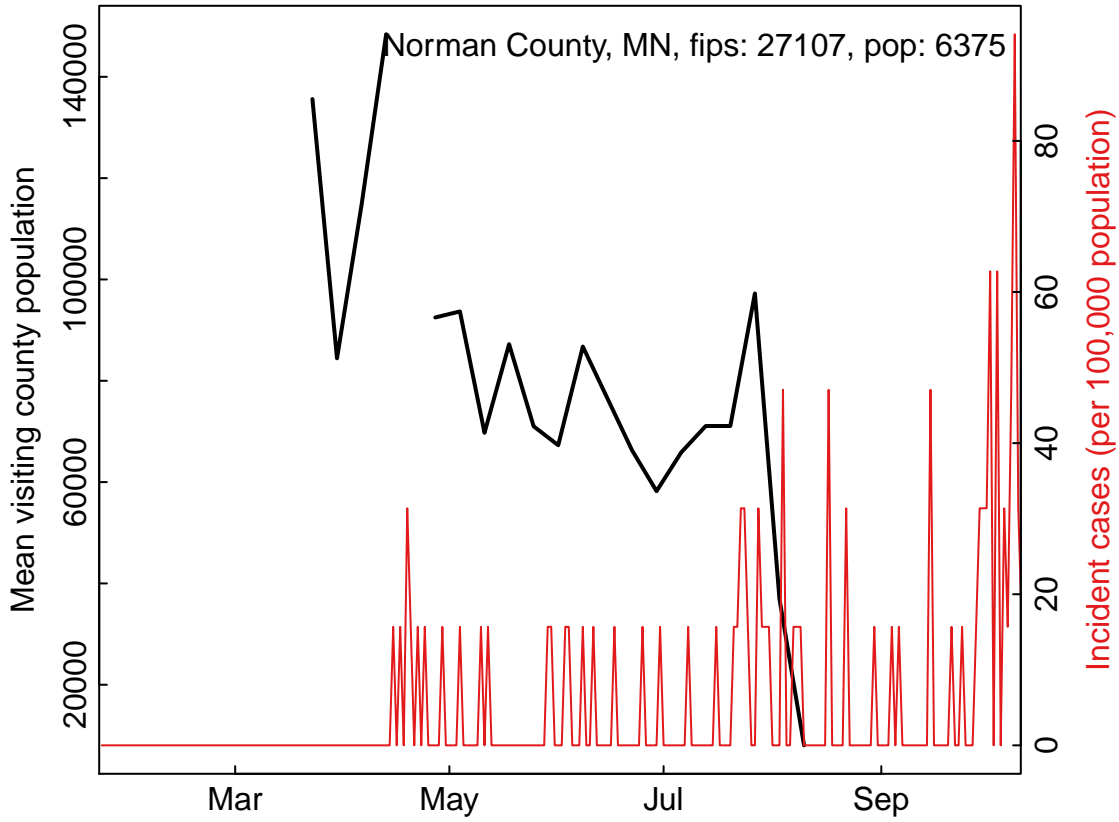

Olmsted County, MN, fips: 27109, pop: 158293

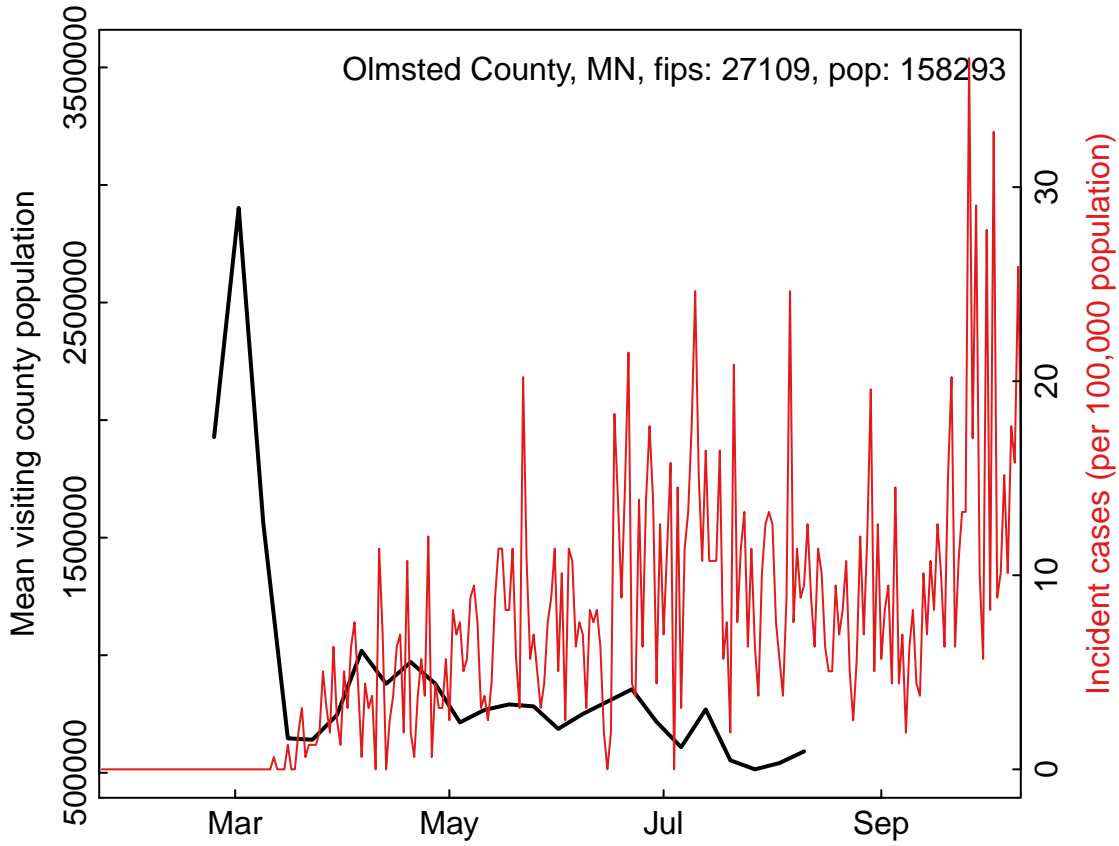

Otter Tail County, MN, fips: 27111, pop: 58746

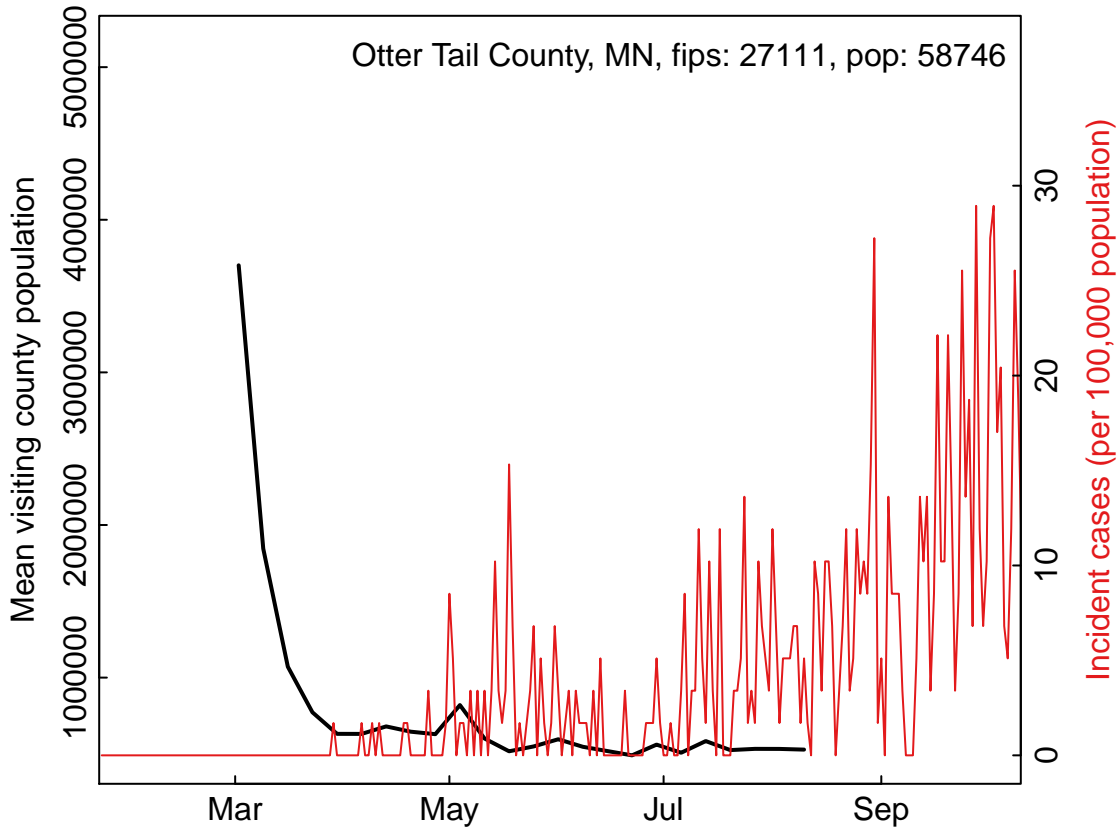

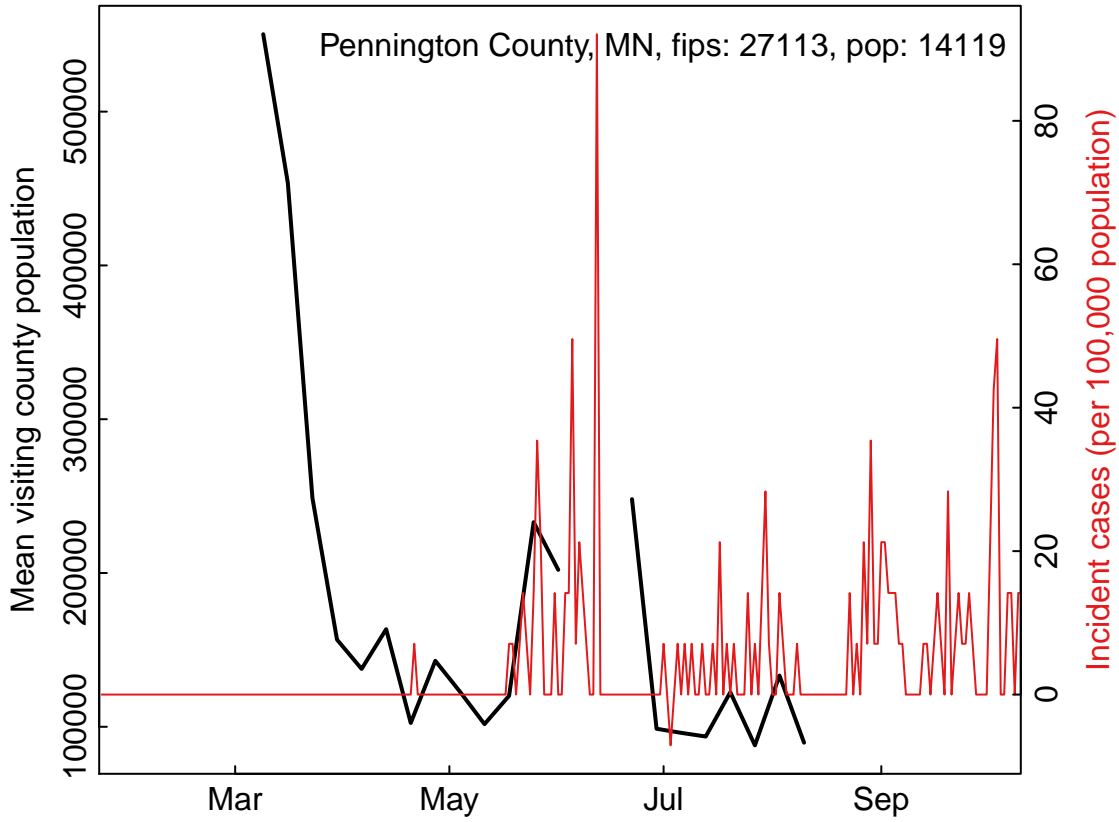

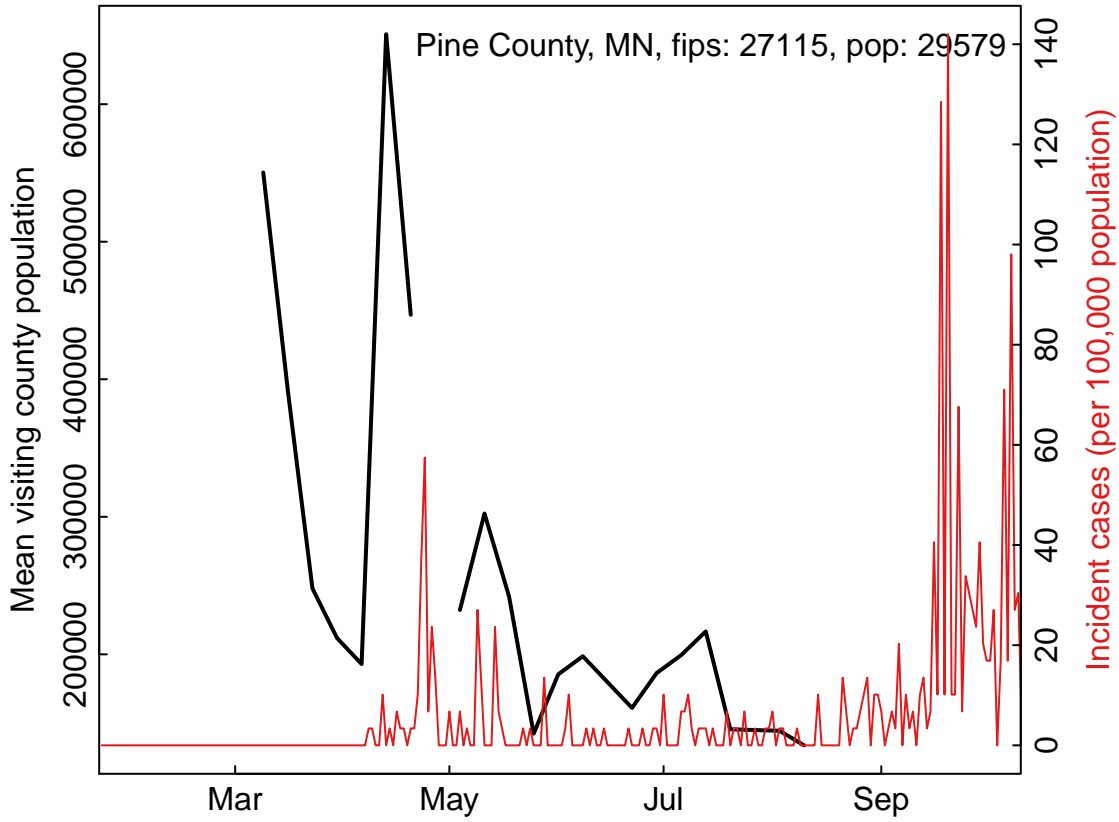



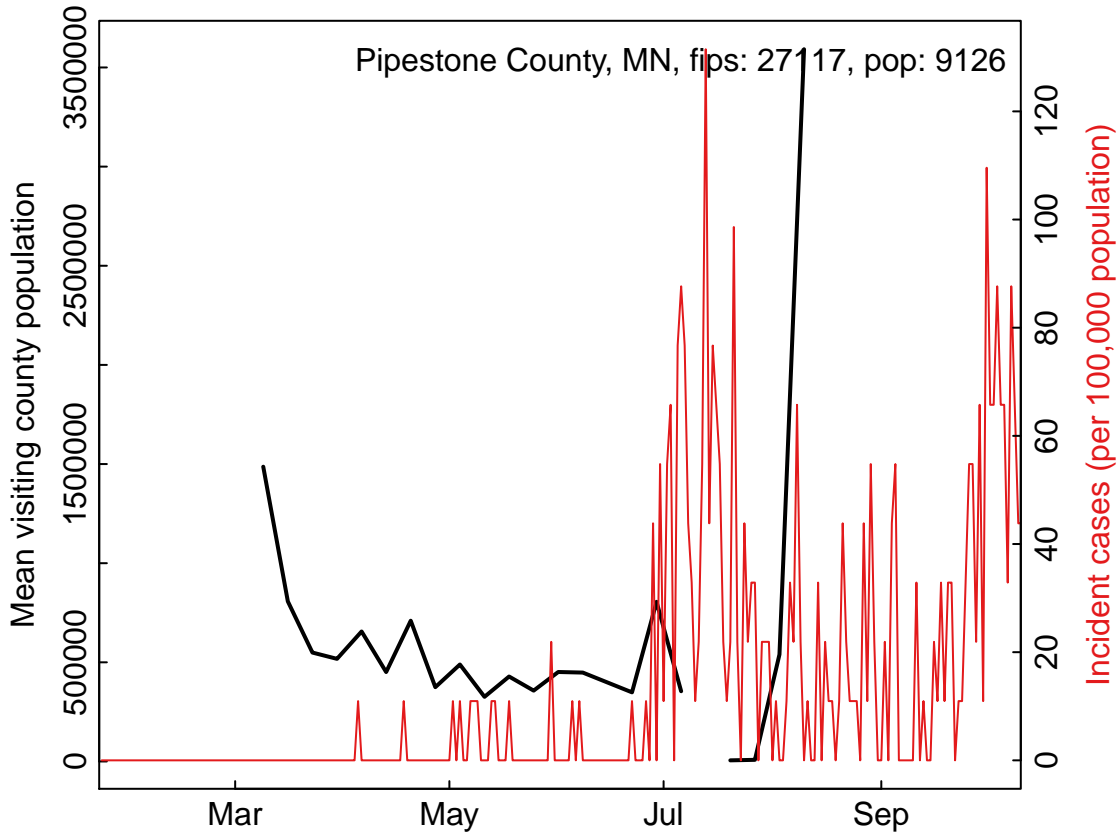

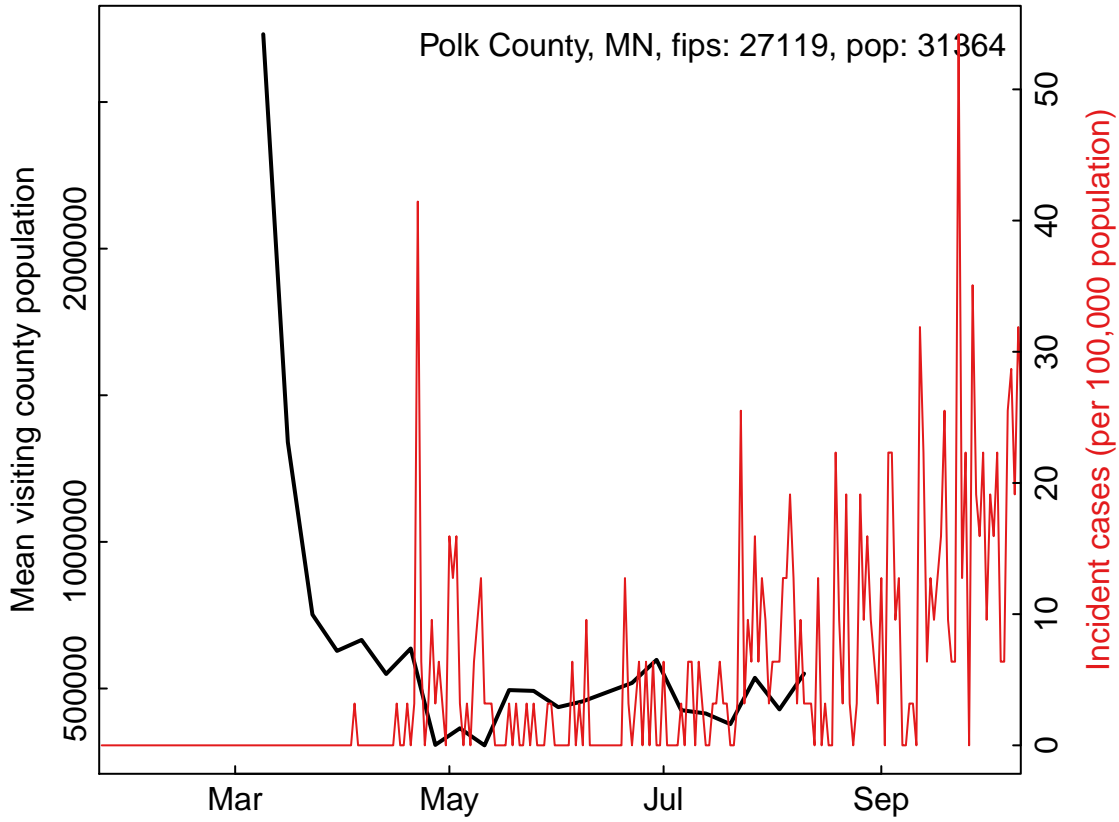

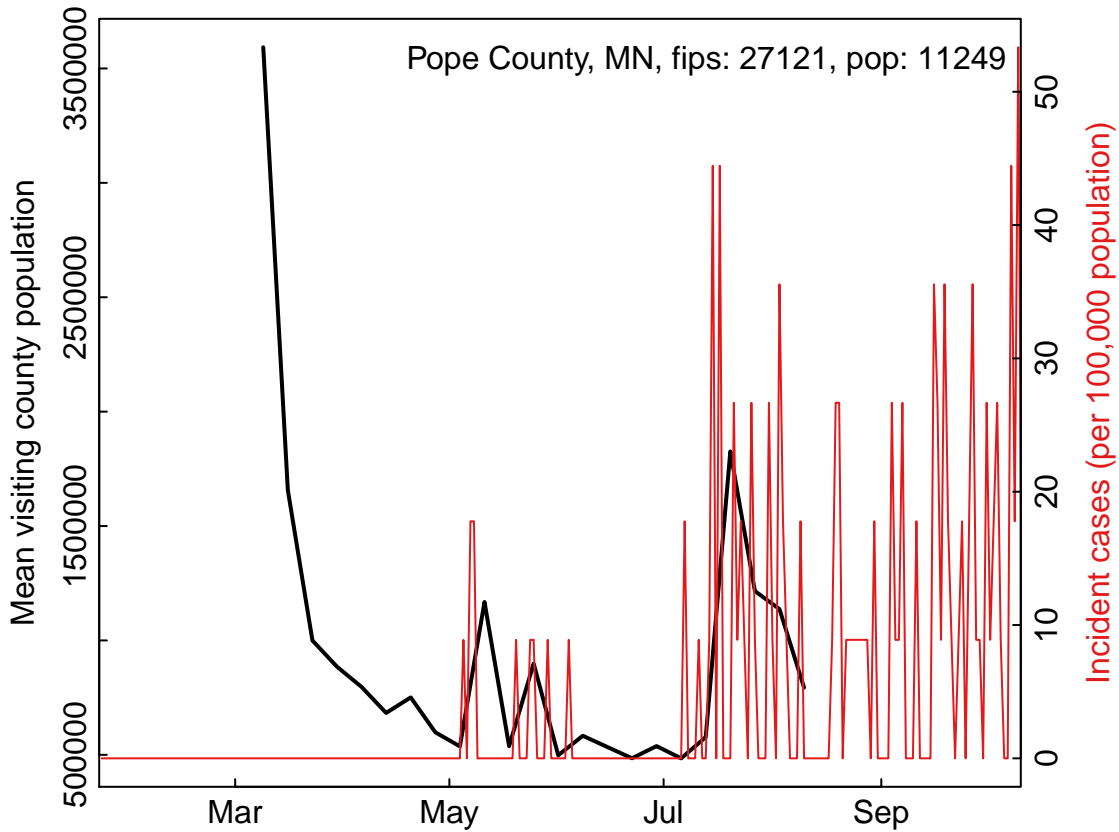

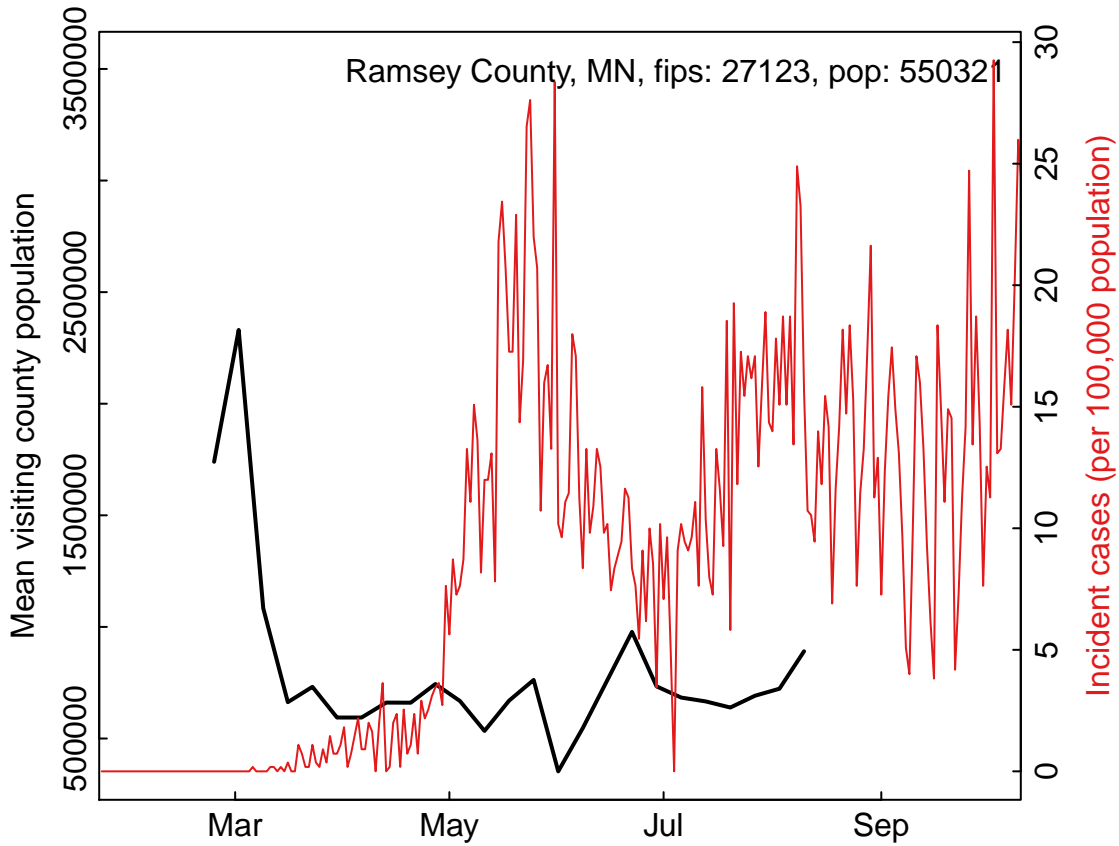

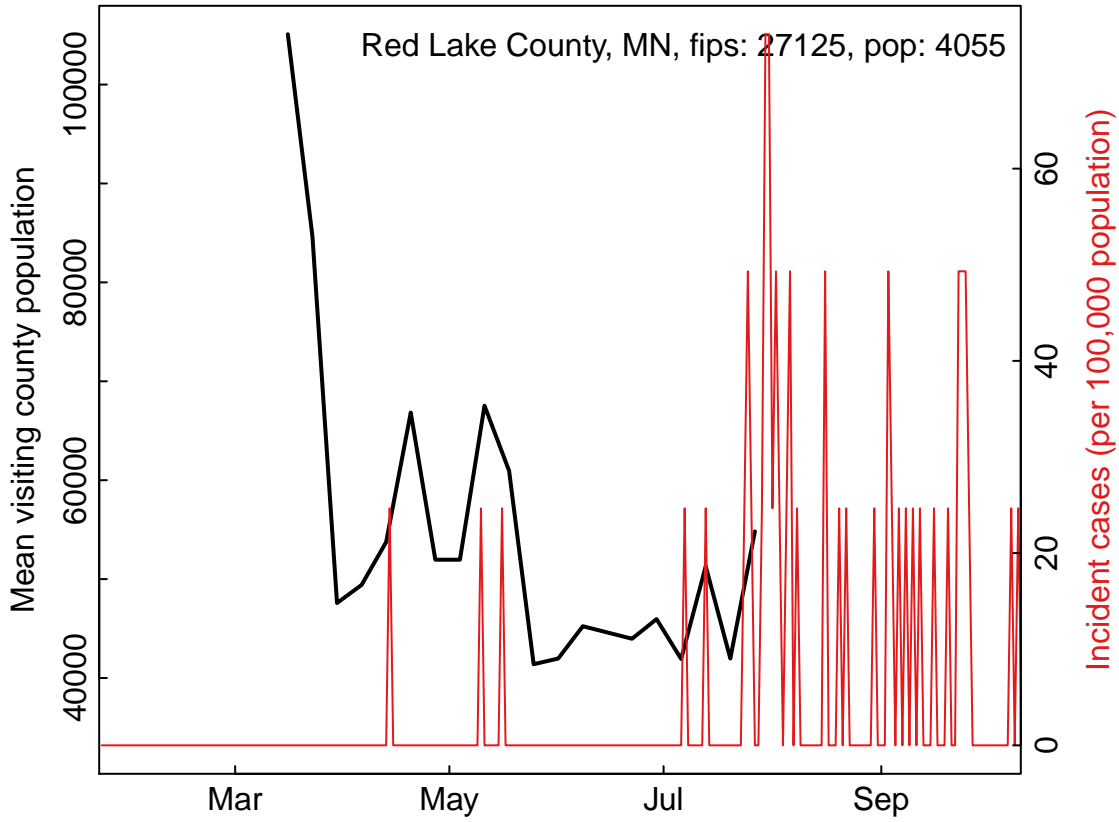

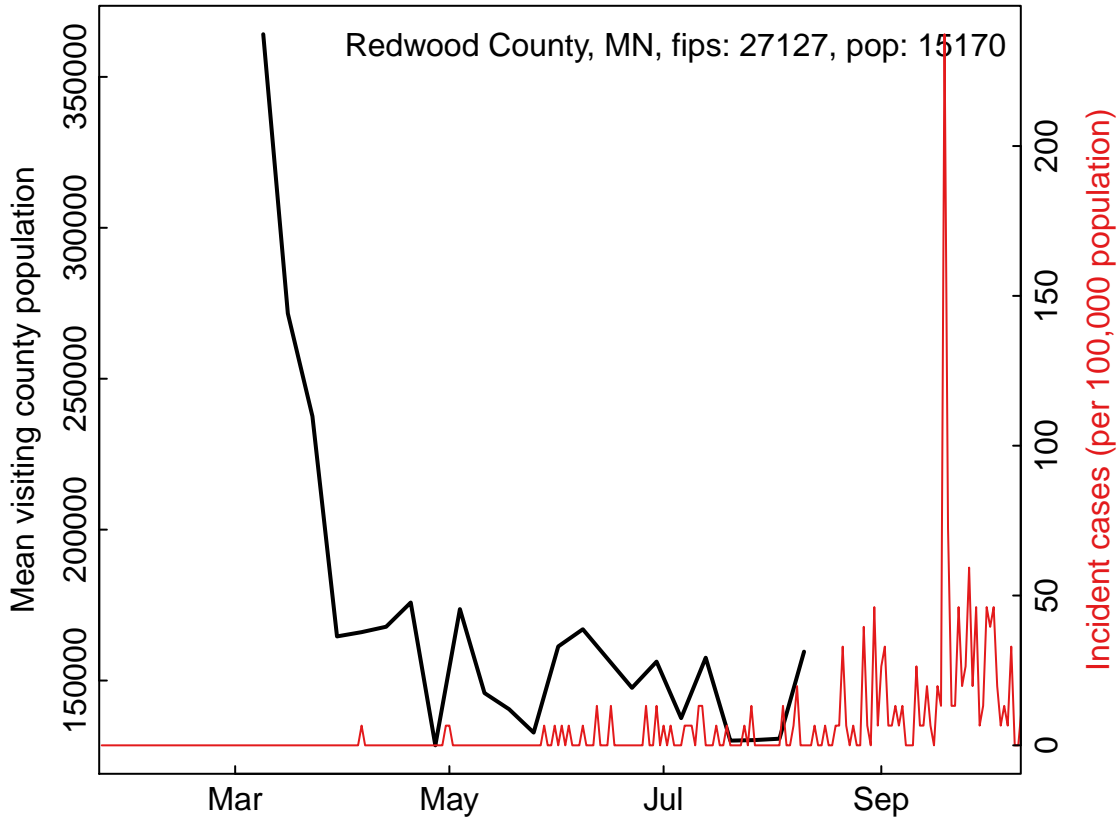

Renville County, MN, fips: 27129, pop: 14548

Mean visiting county population

2500000  
1500000  
500000

Mar

May

Jul

Sep

50  
40  
30  
20  
10  
0

Incident cases (per 100,000 population)

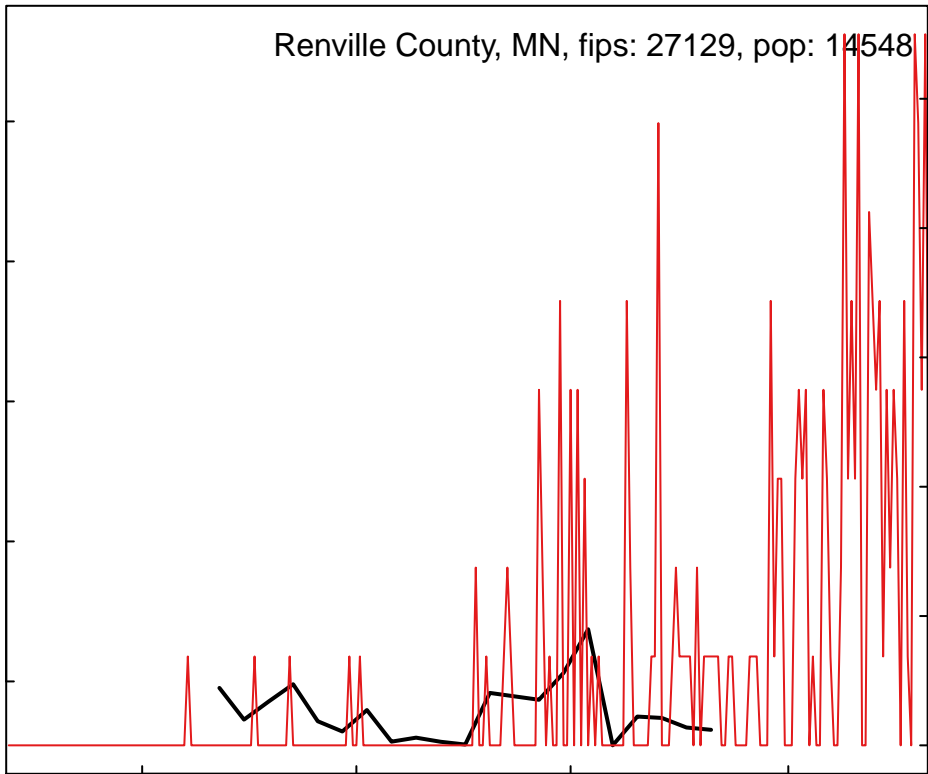

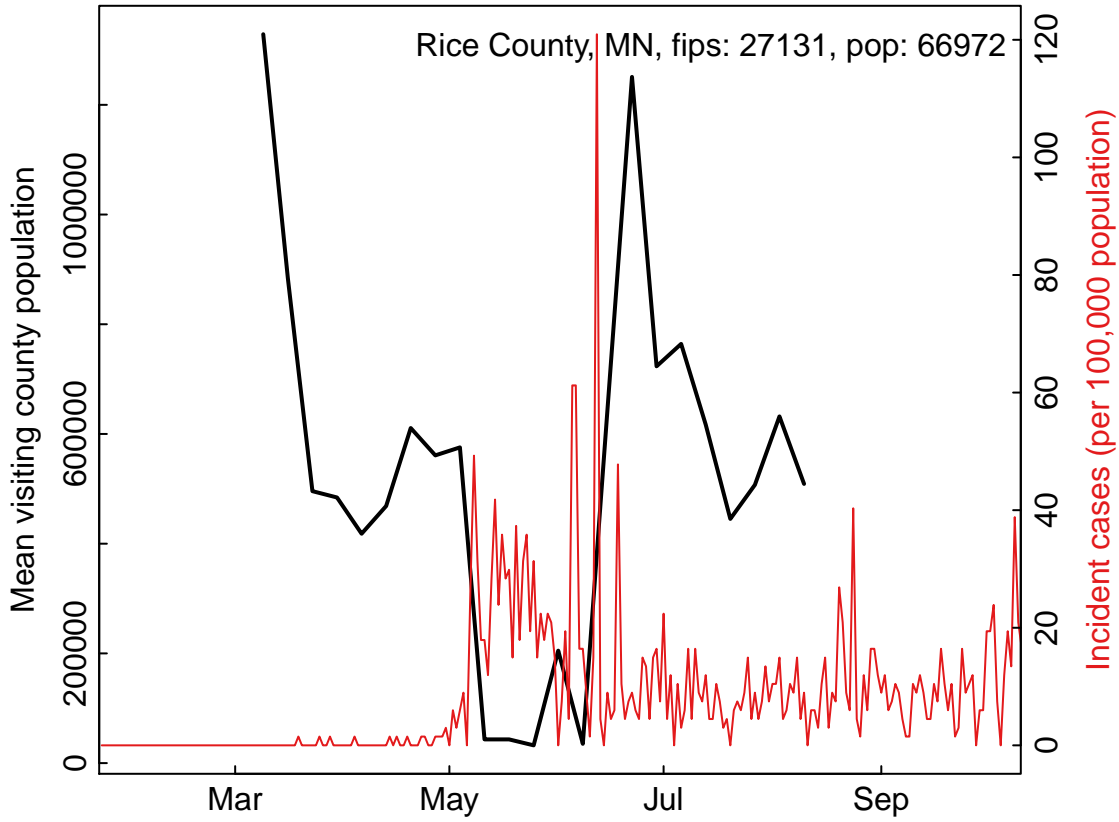



Rock County, MN, fips: 27133, pop: 9315

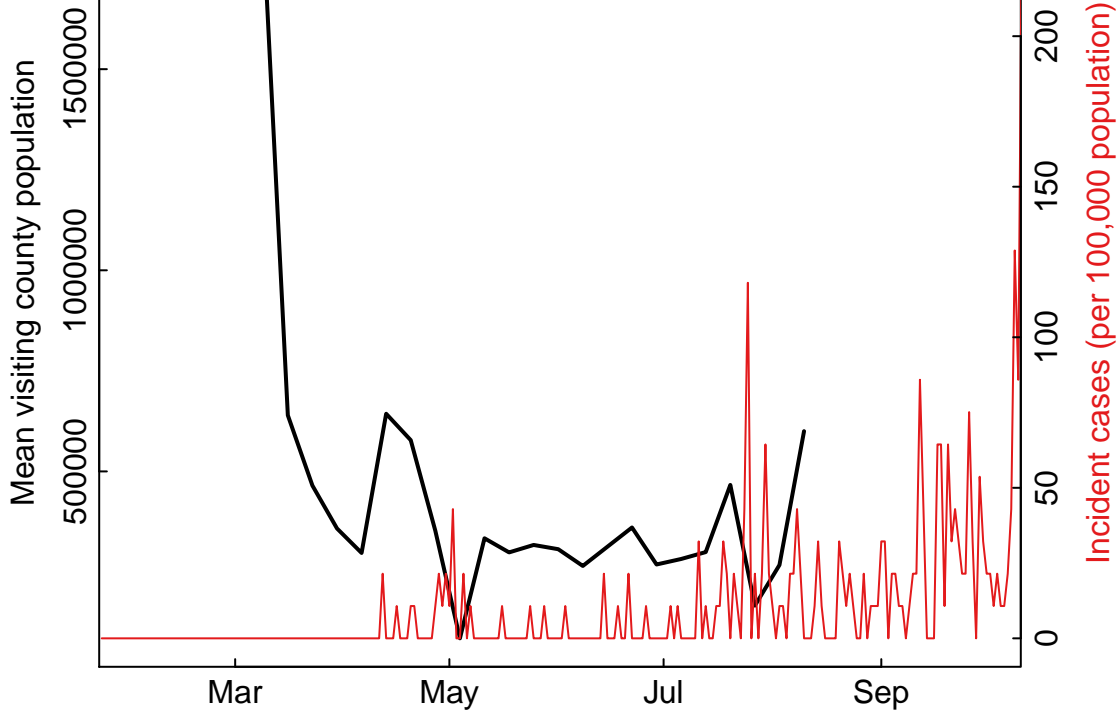

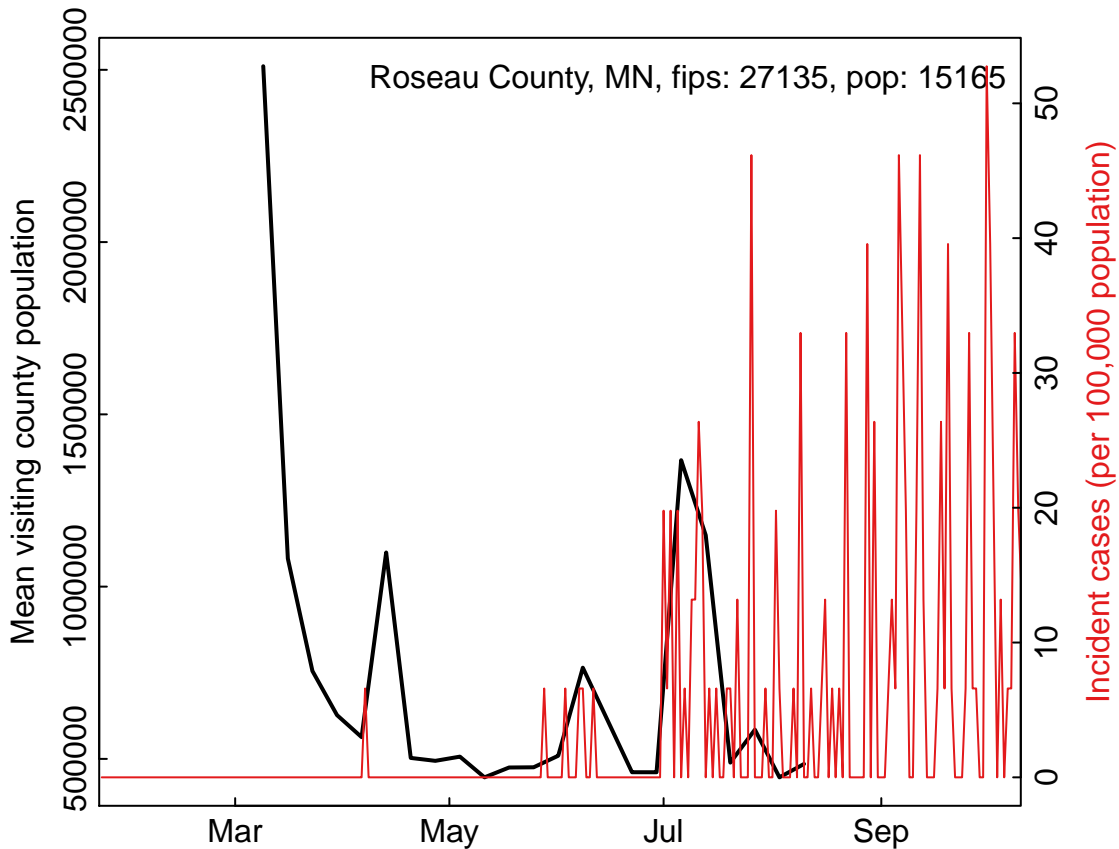

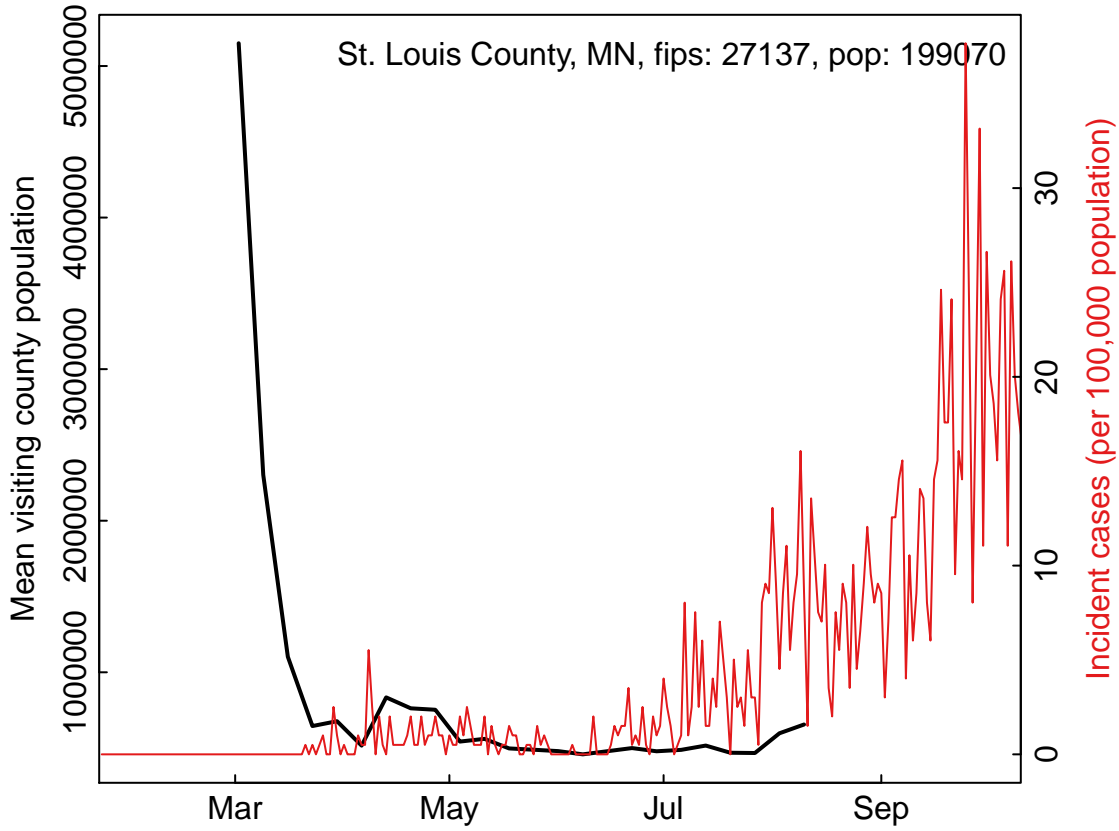

Scott County, MN, fips: 27139, pop: 149013

Mean visiting county population

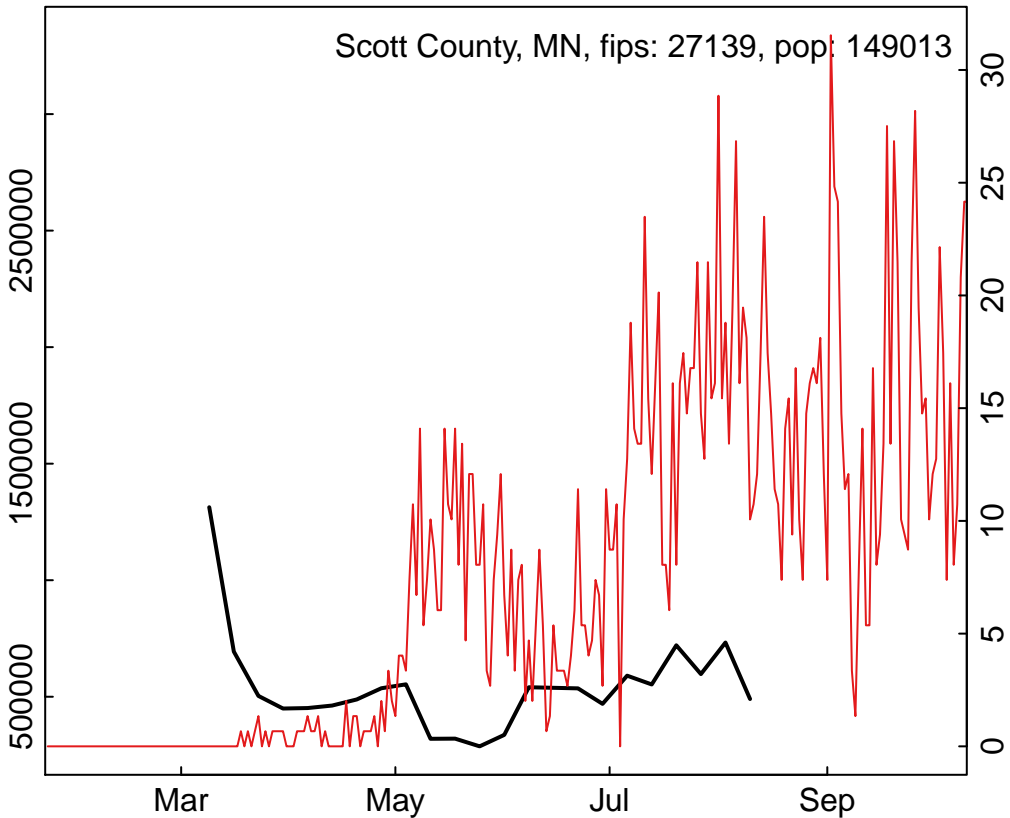

Incident cases (per 100,000 population)

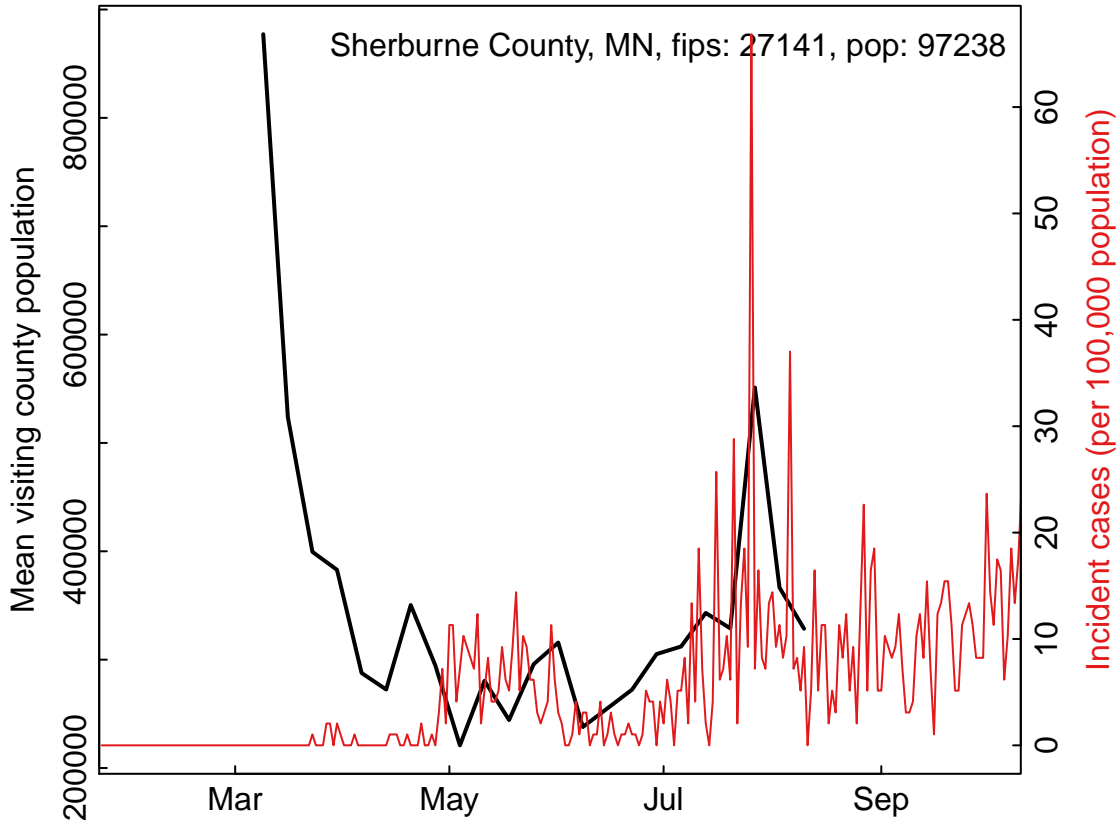

Sibley County, MN, fips: 27143, pop: 14865

Mean visiting county population

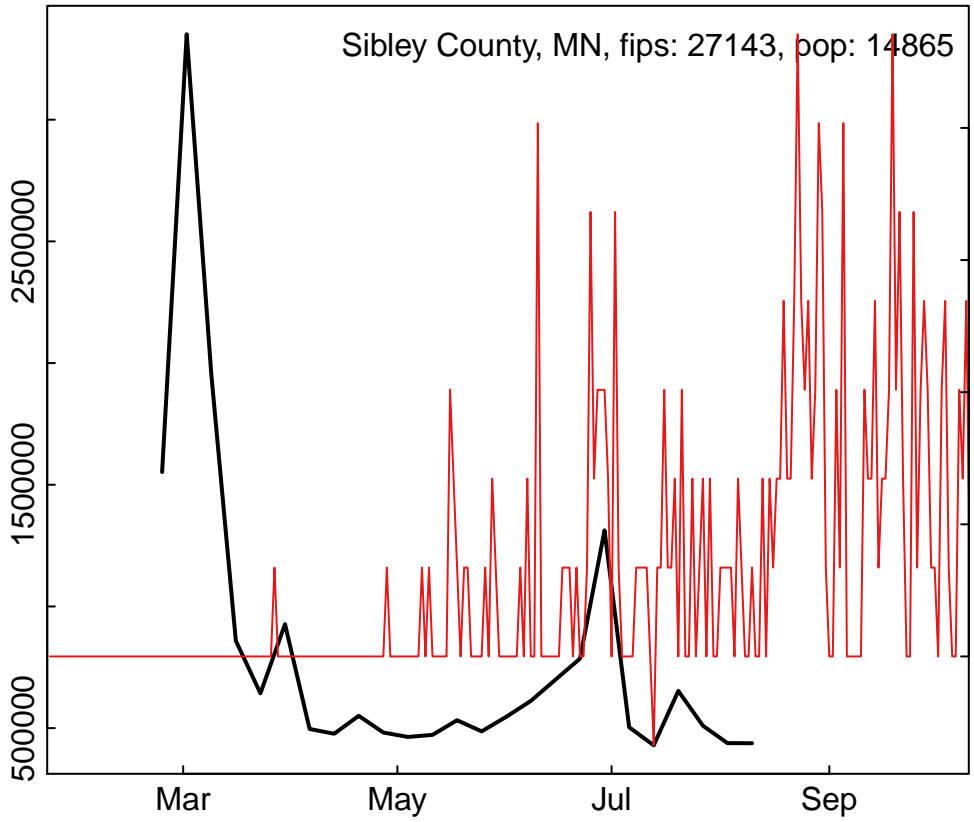

Incident cases (per 100,000 population)

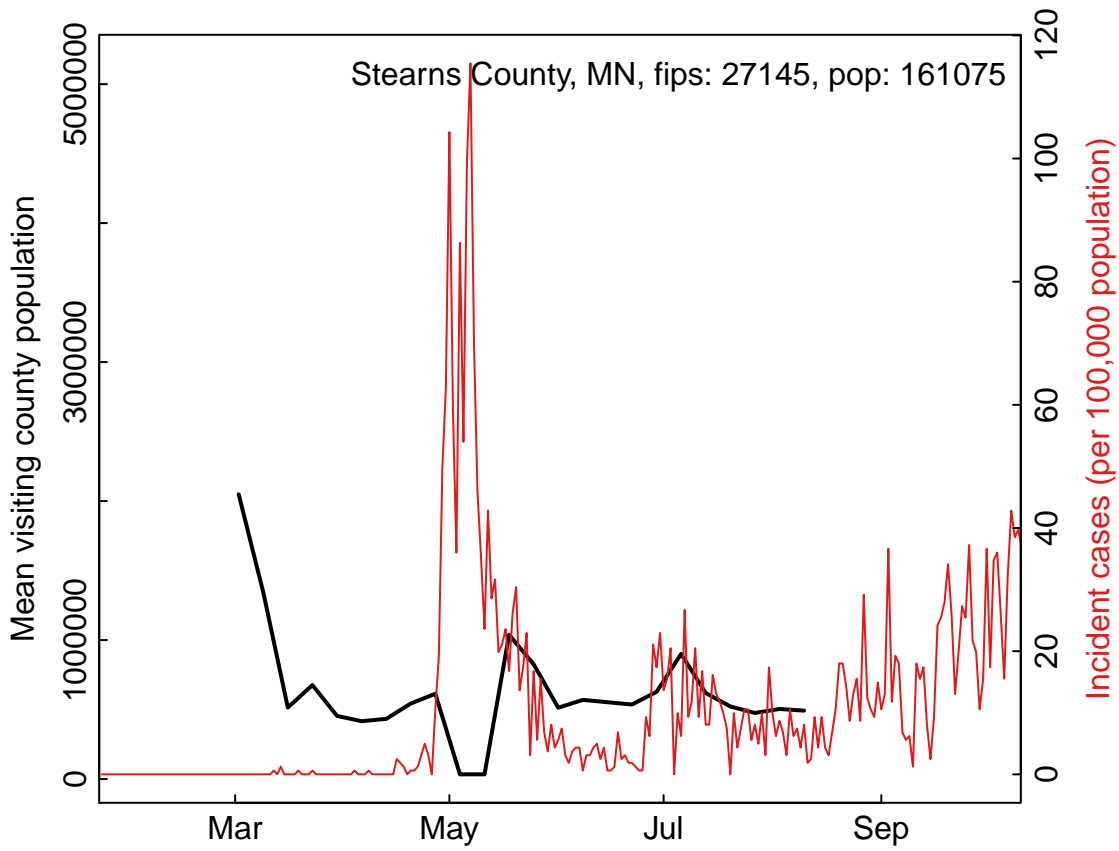

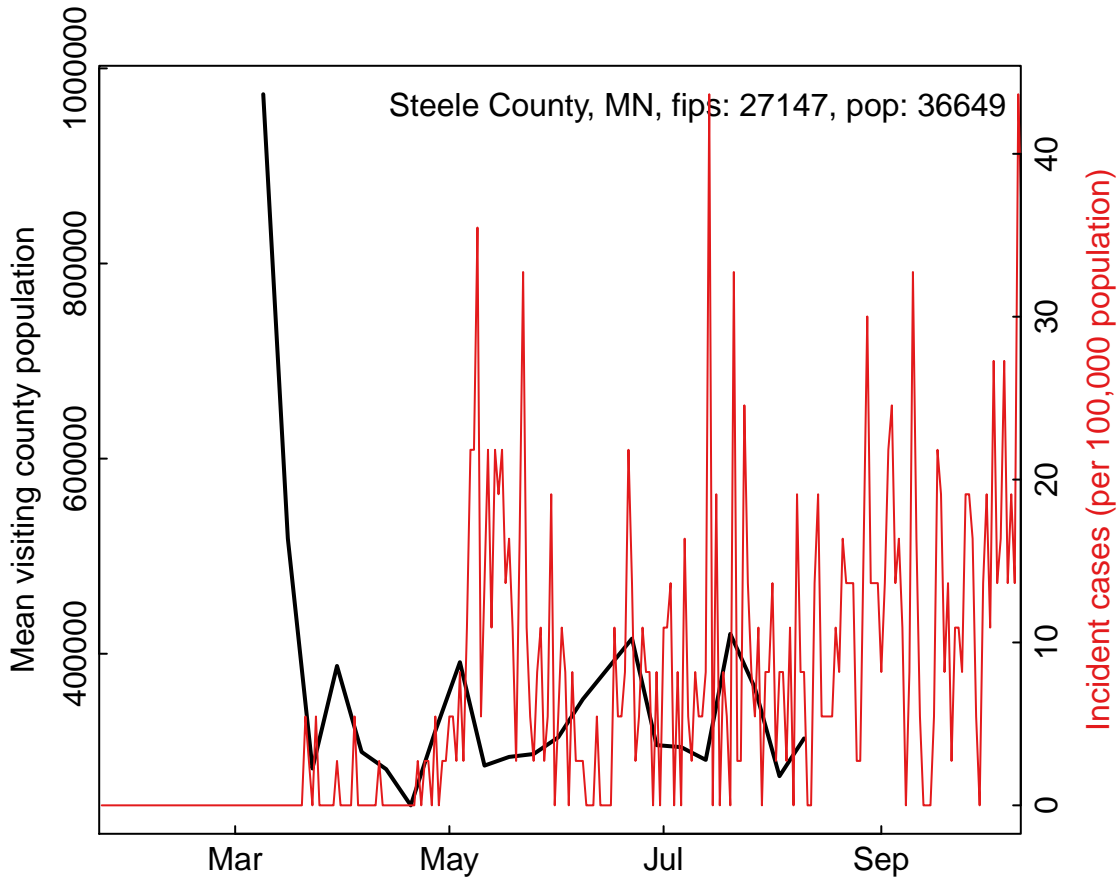



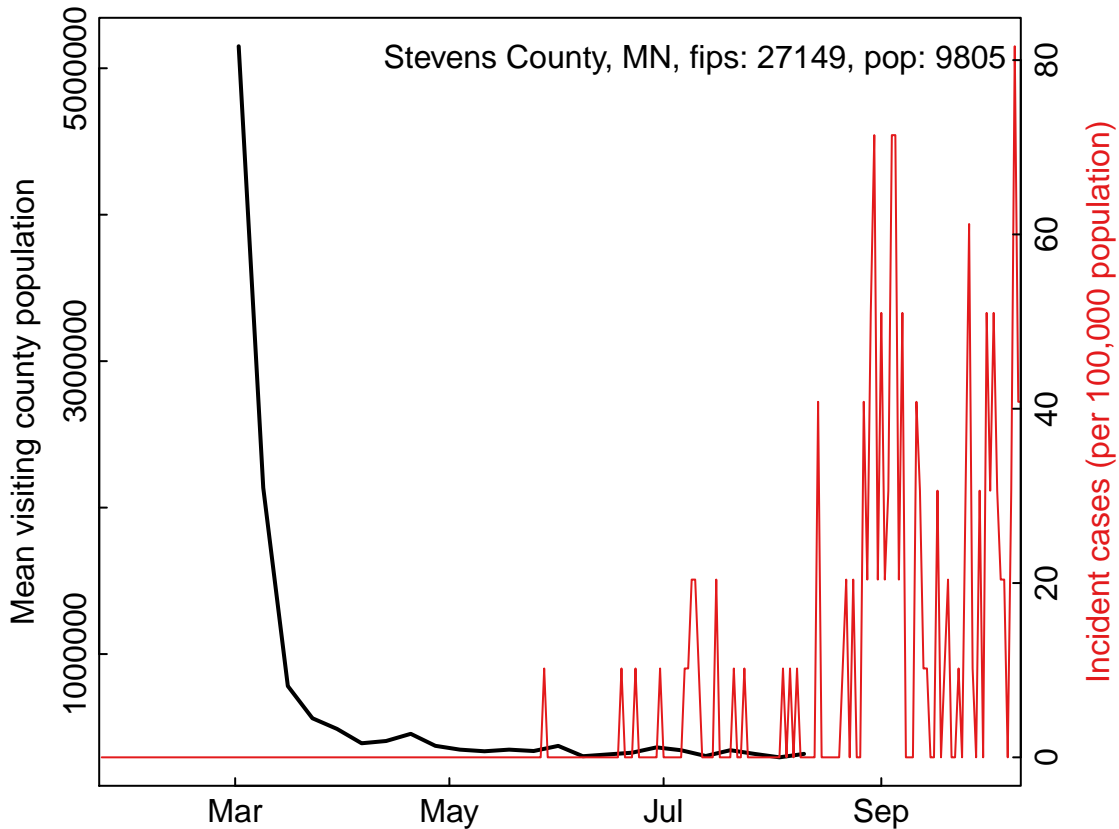

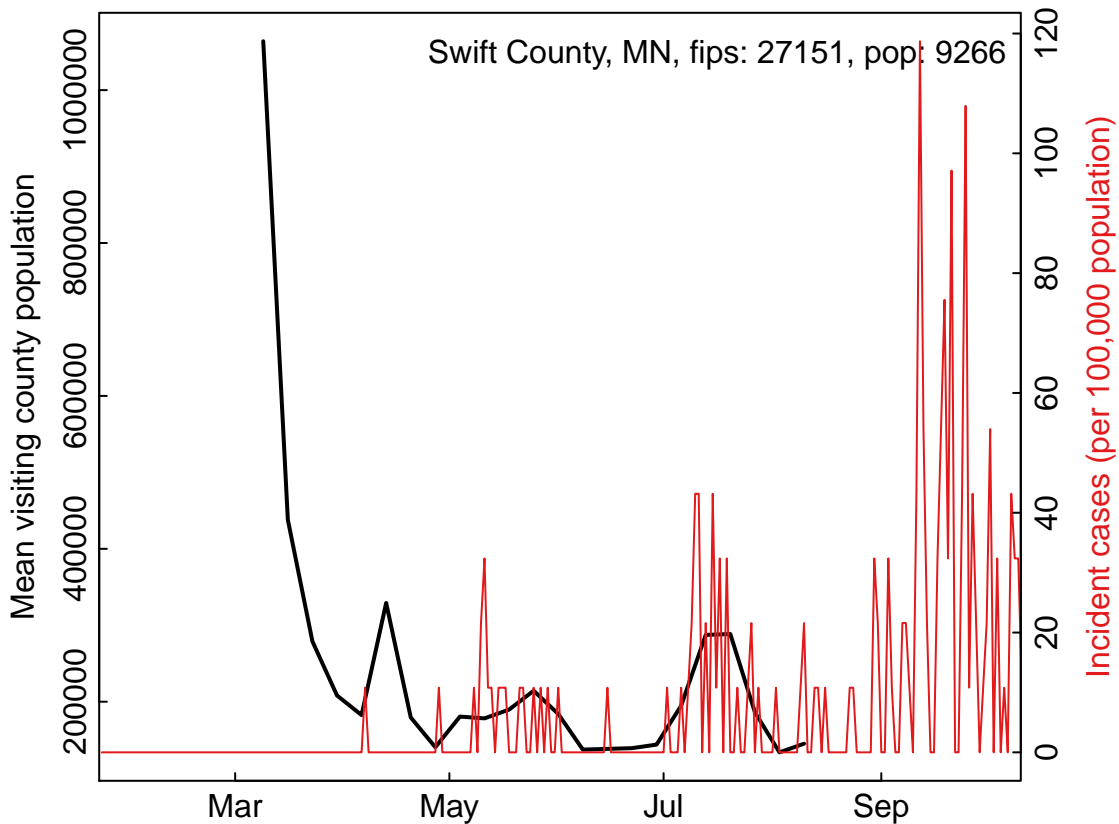

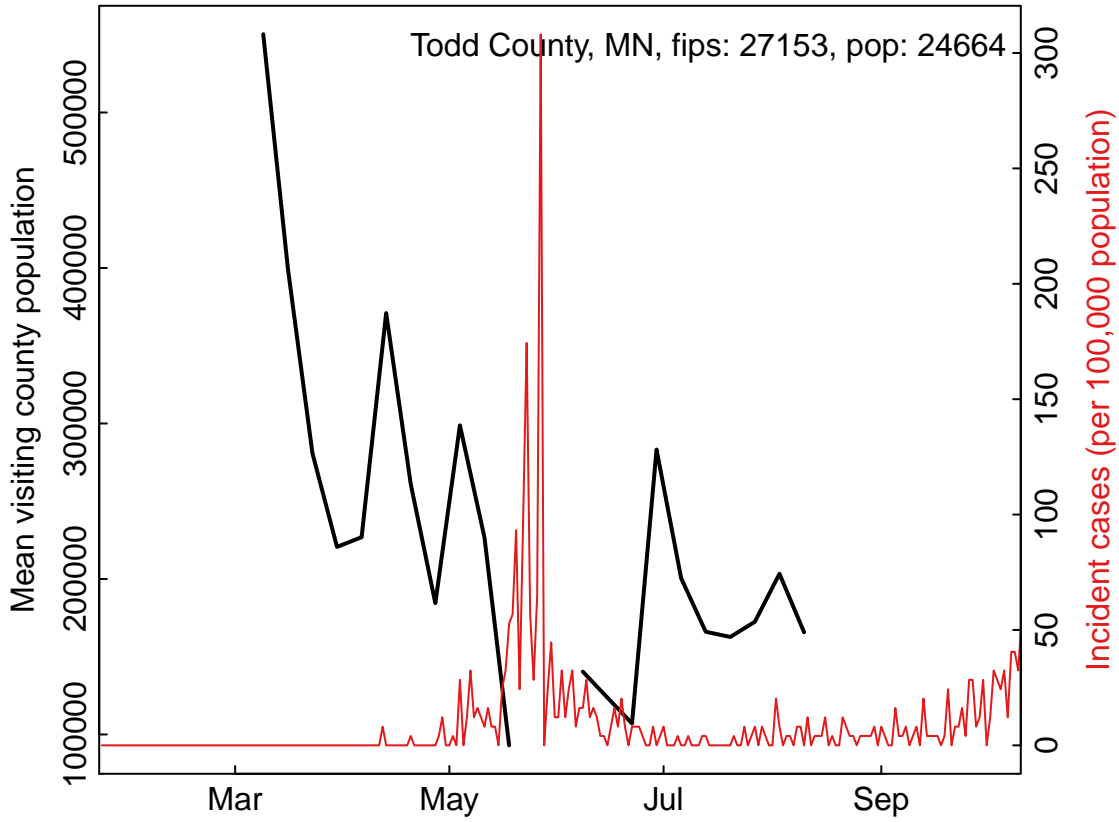

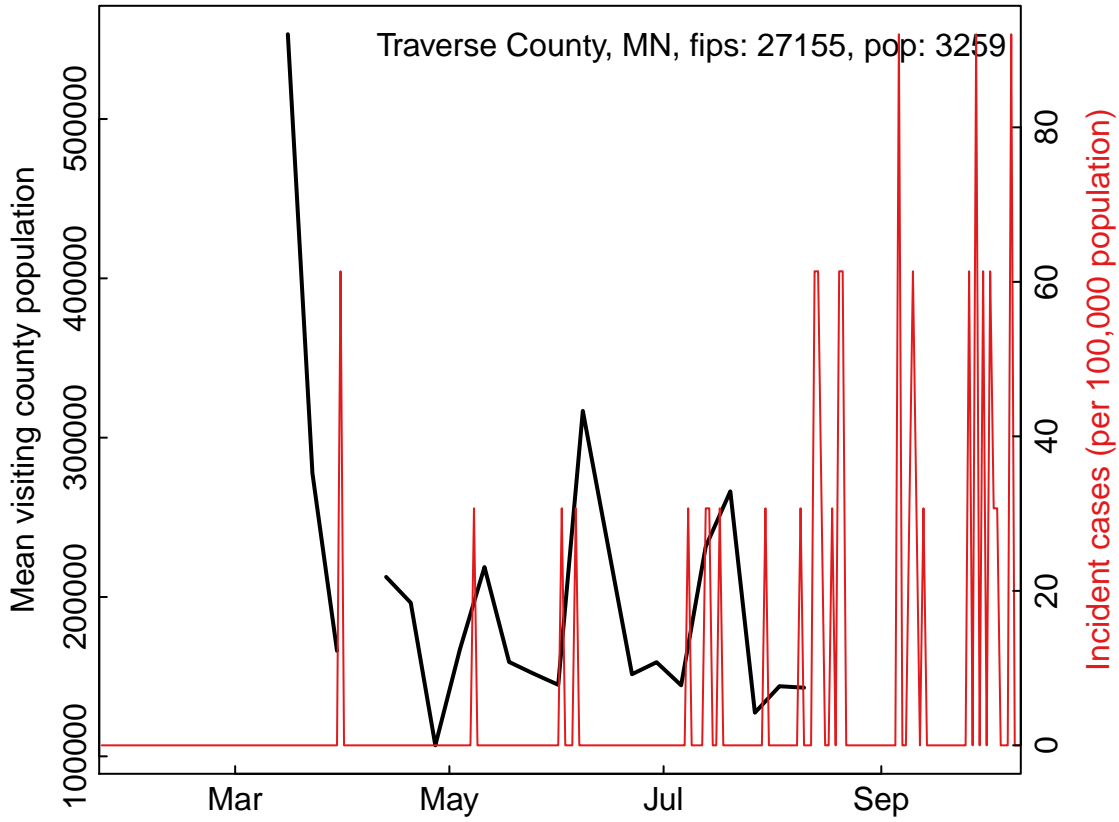

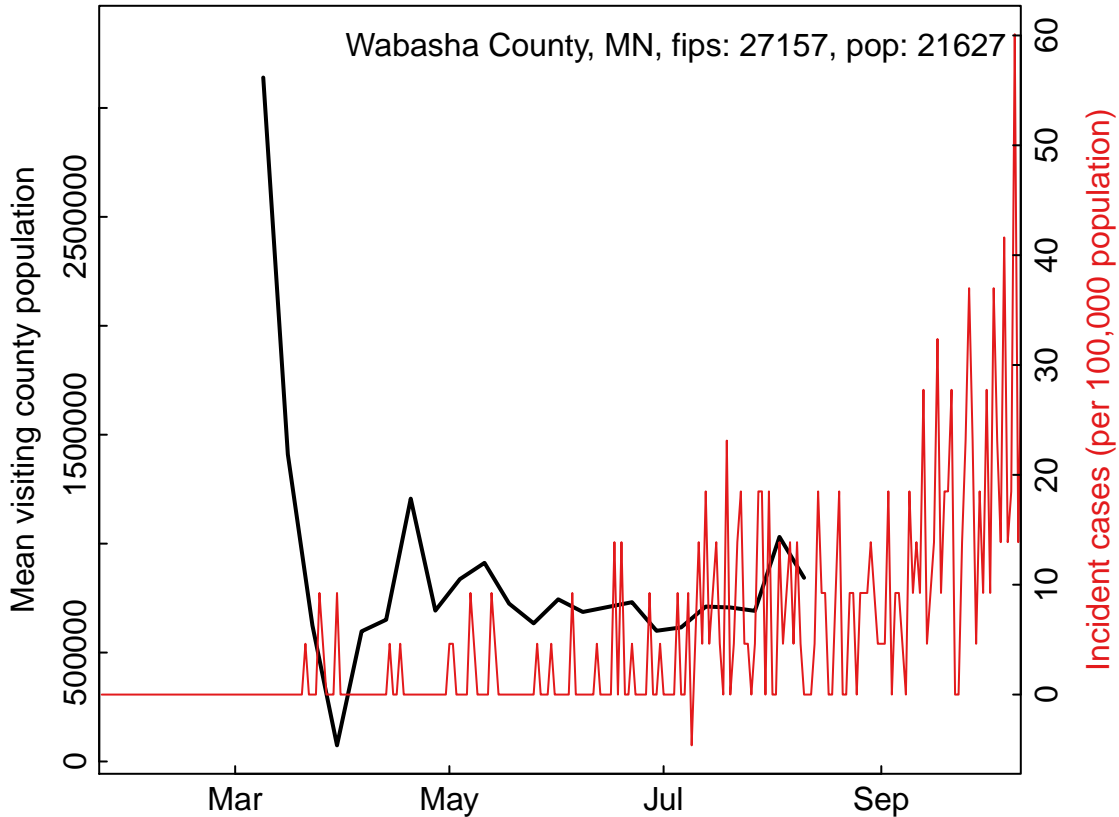

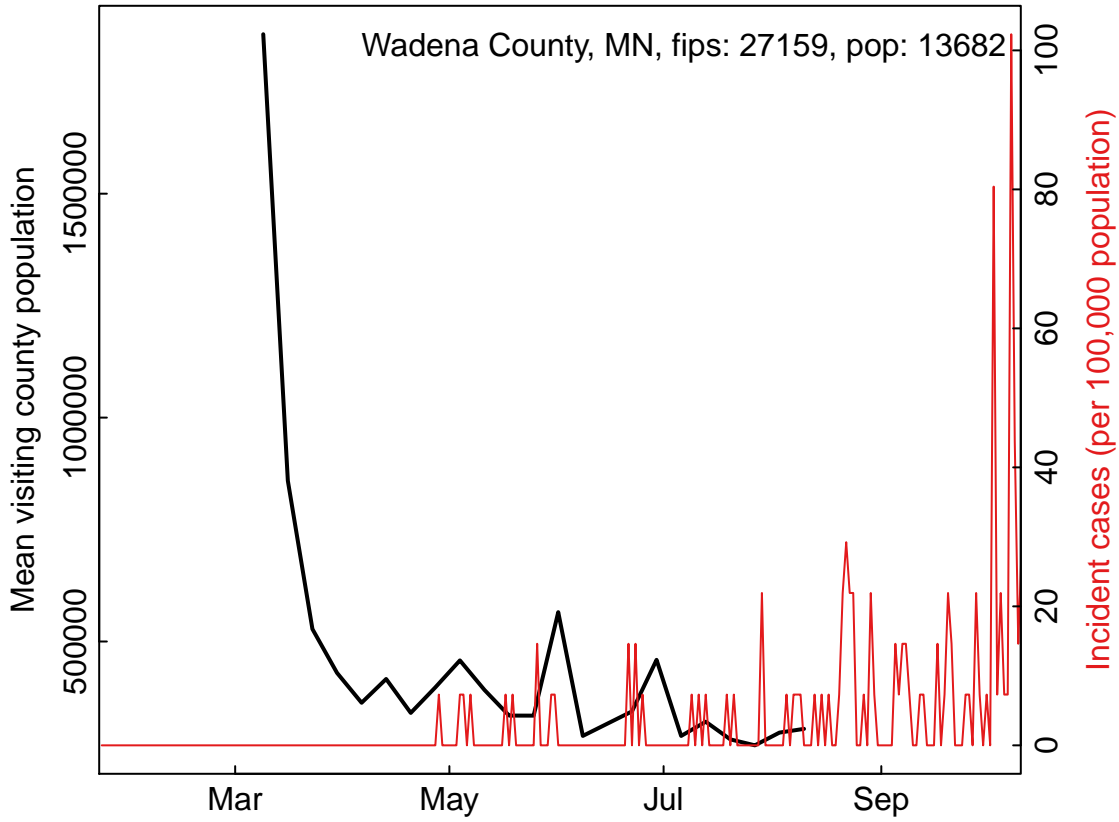

Waseca County, MN, fips: 27161, pop: 18612

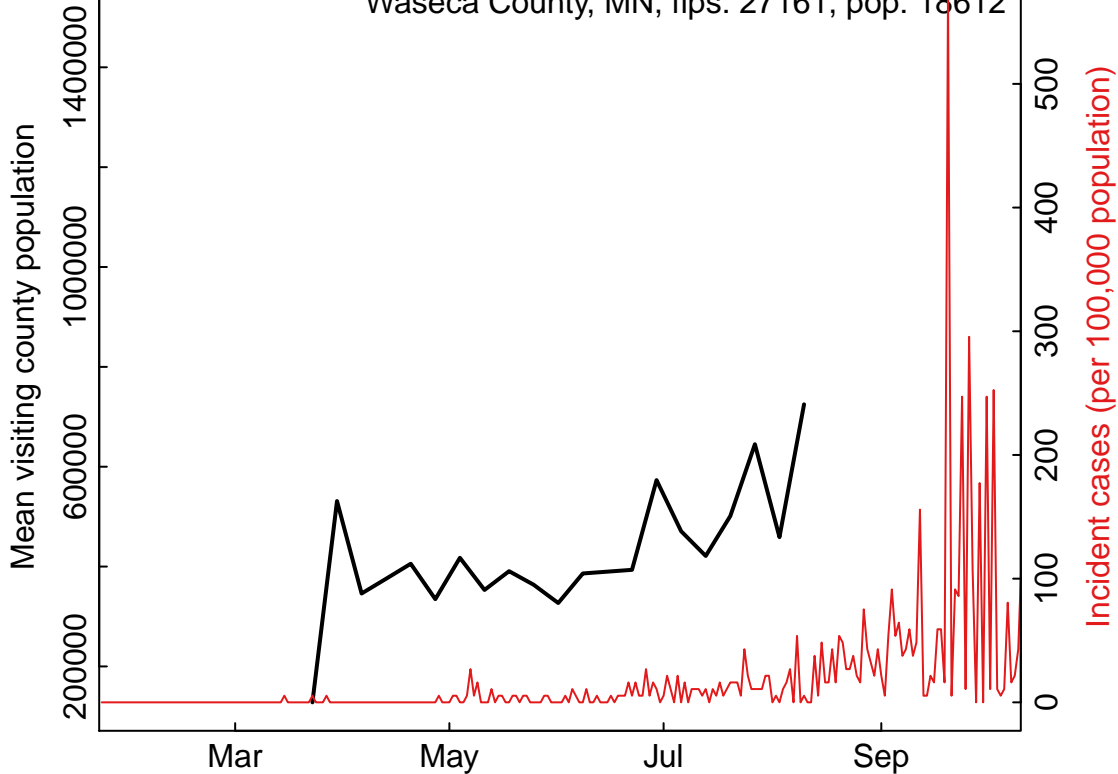

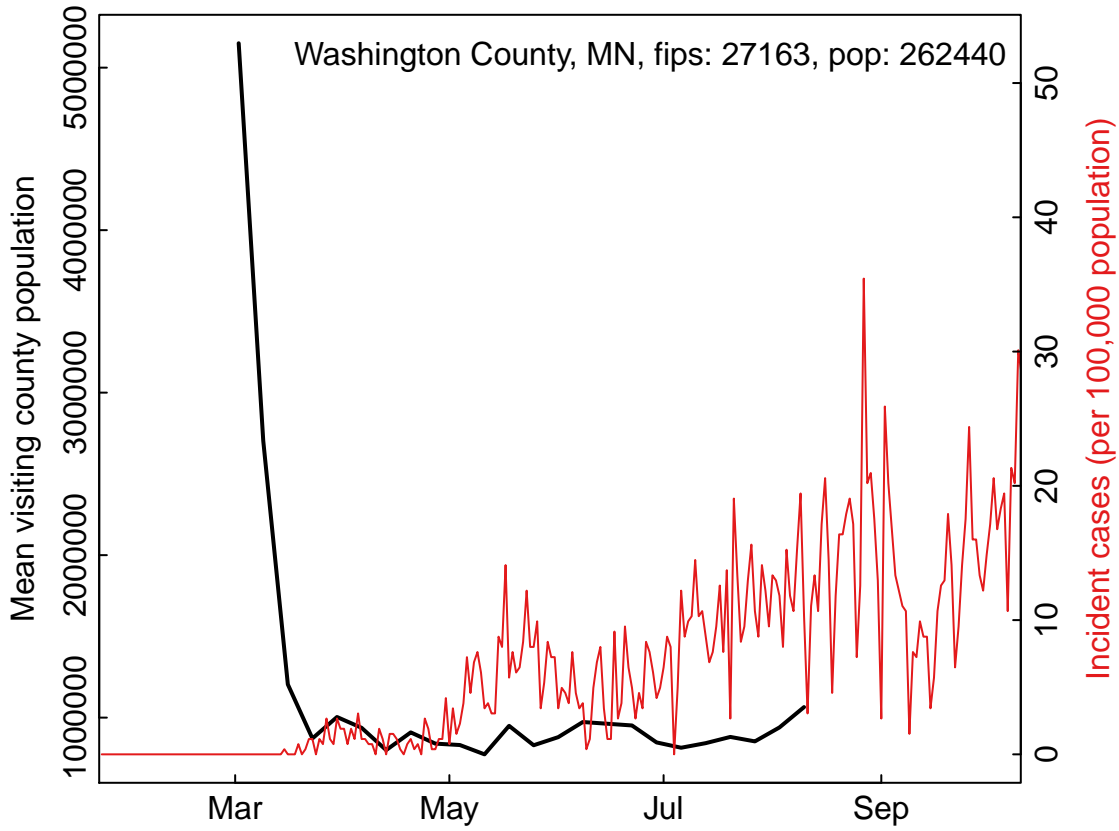



Watonwan County, MN, fips: 27165, pop: 10897

Mean visiting county population

Incident cases (per 100,000 population)

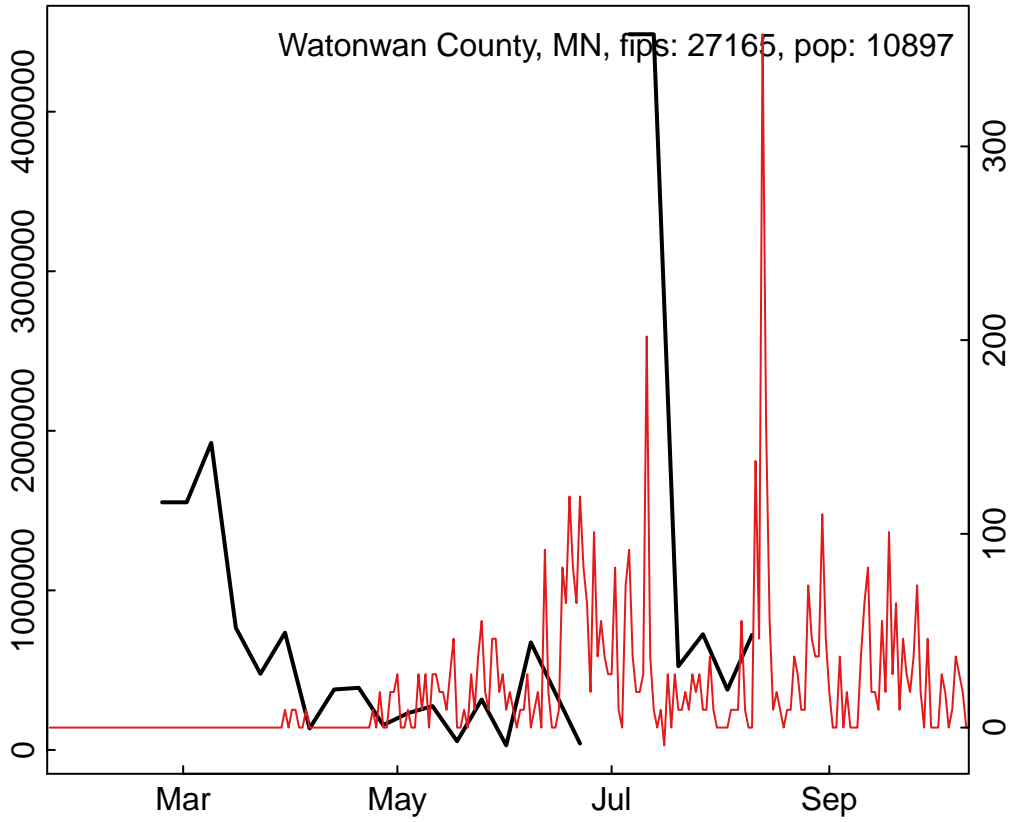

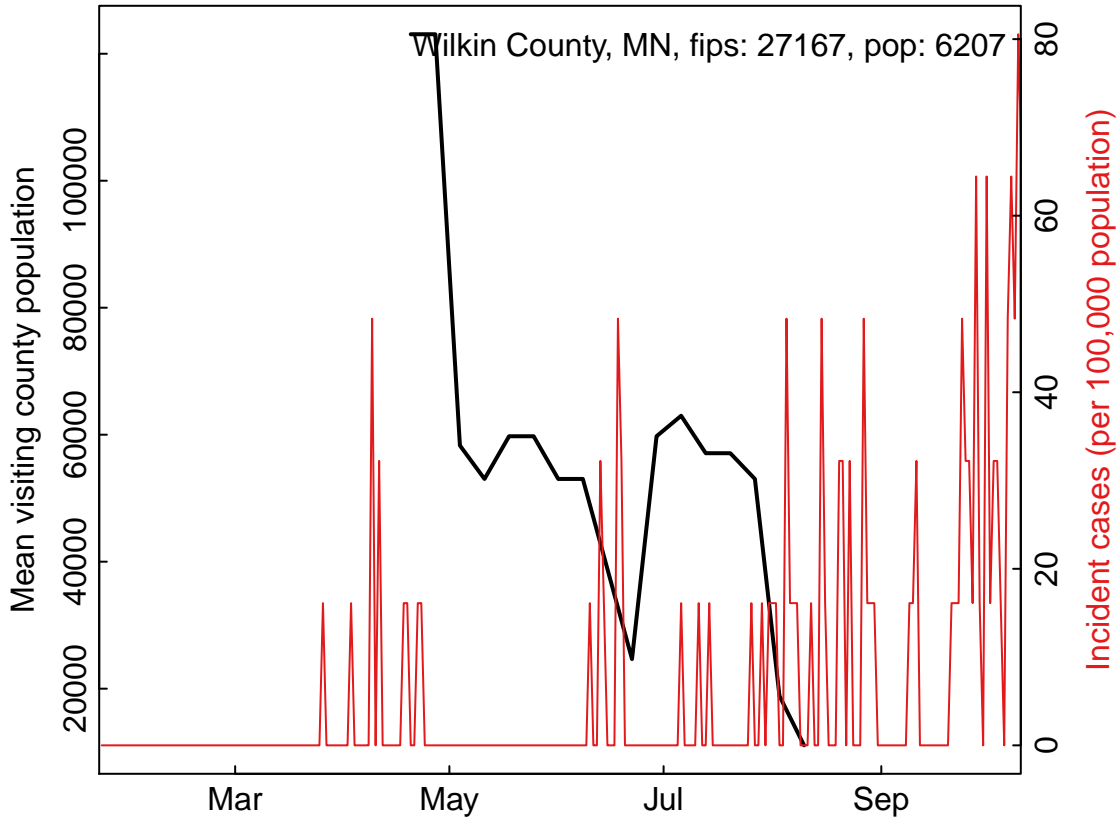

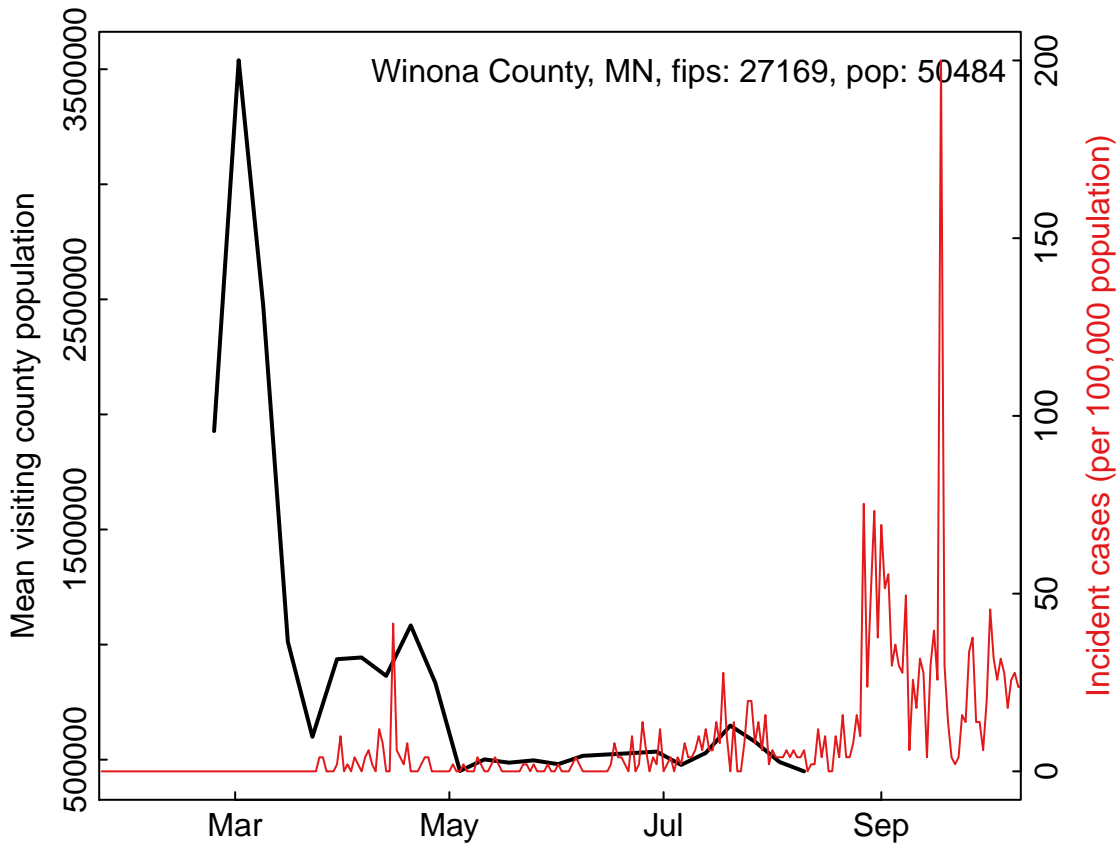

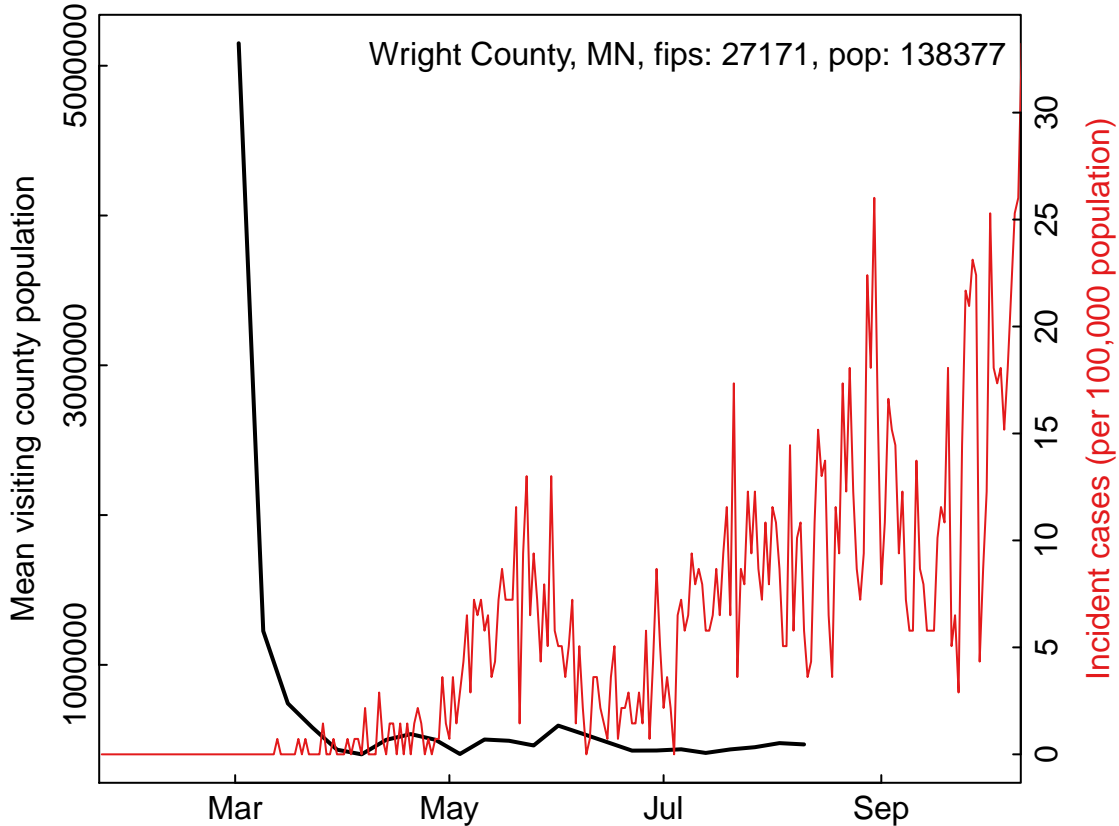

Yellow Medicine County, MN, fips: 27173, pop: 9709

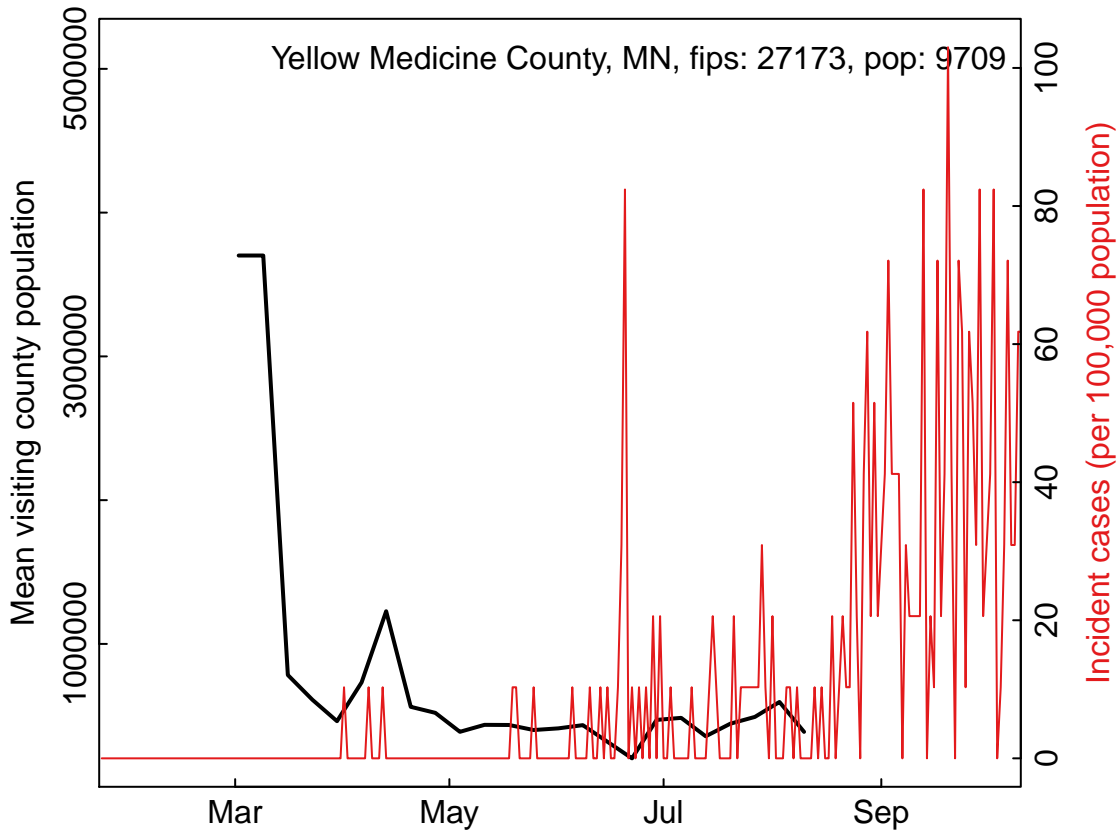

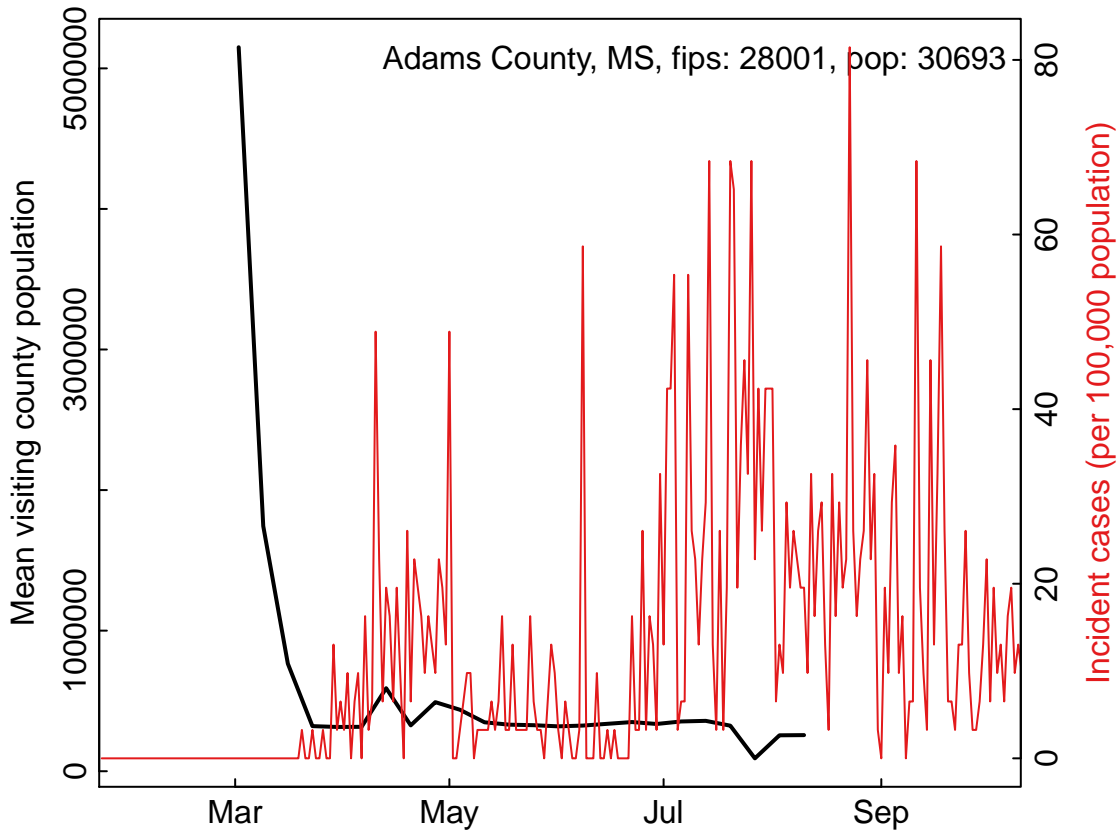

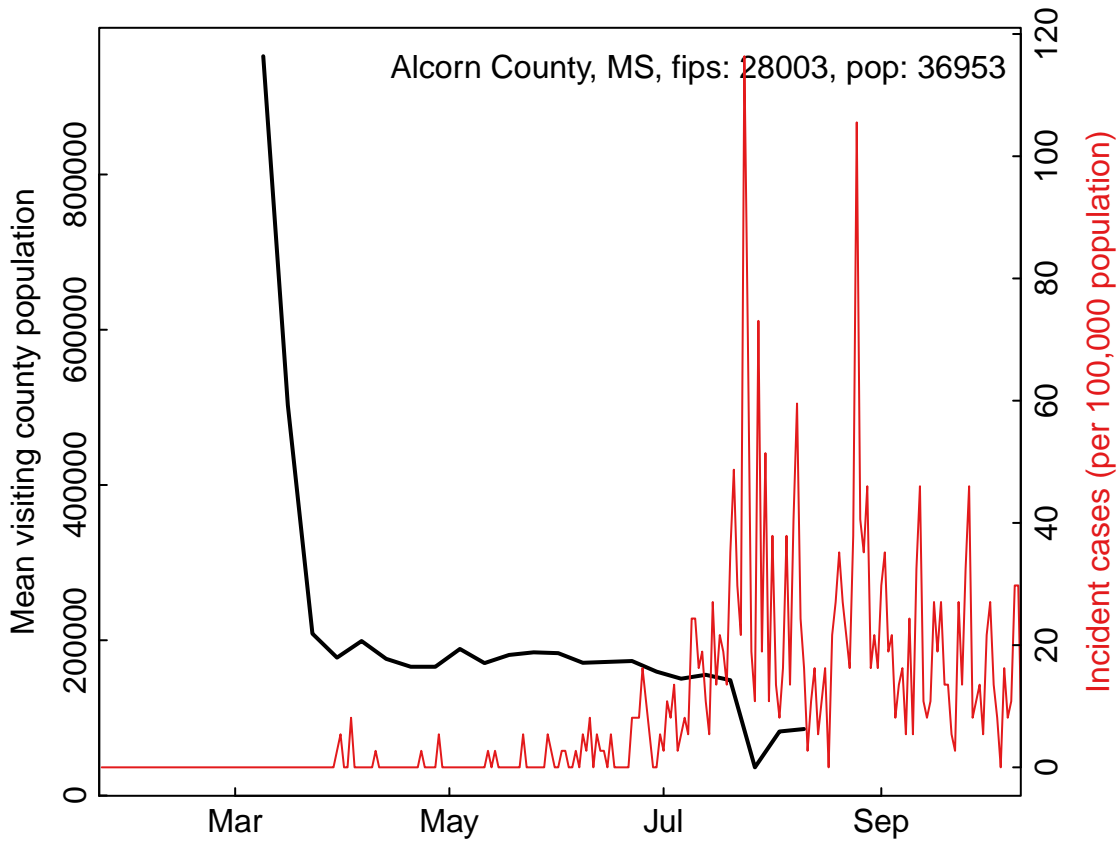

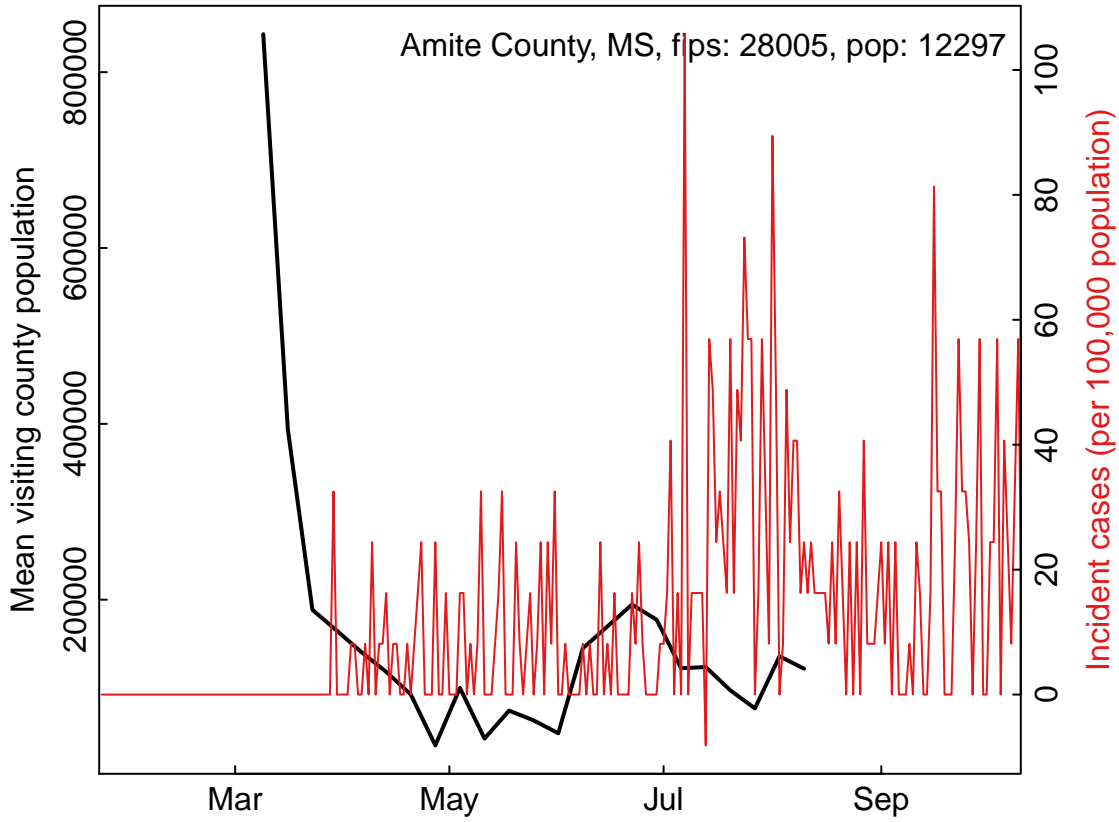



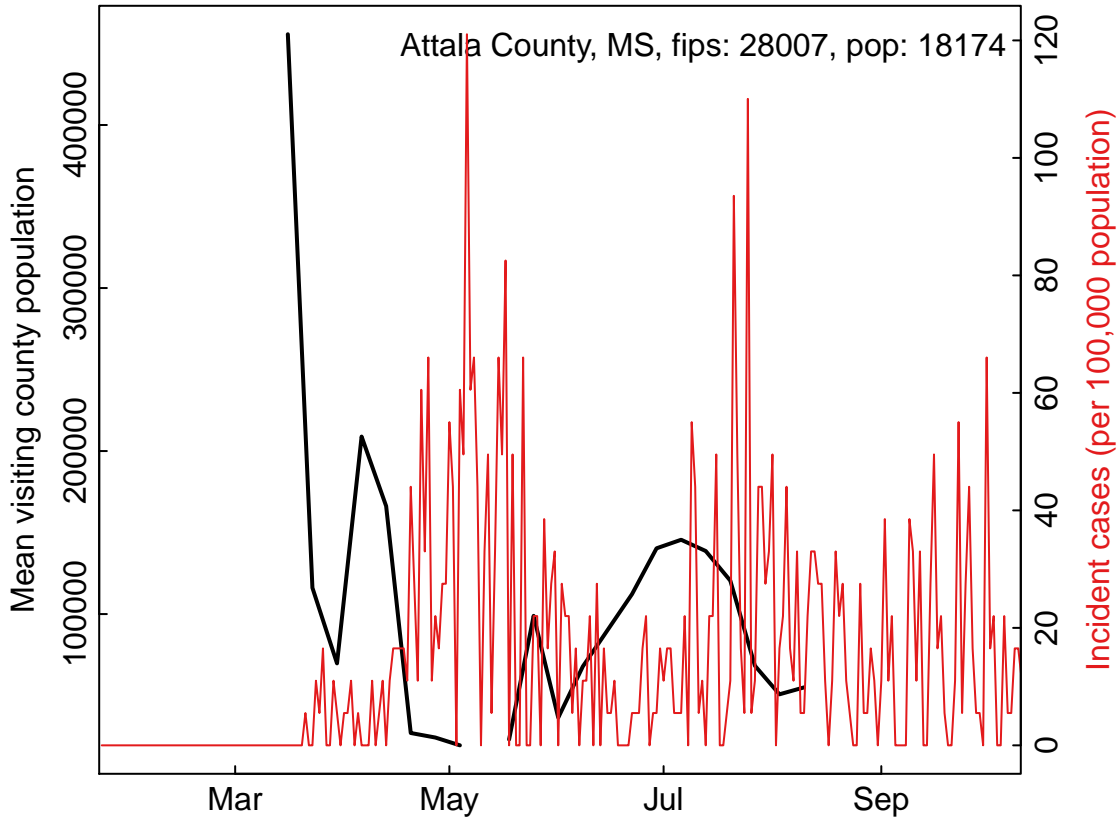

Benton County, MS, fips: 28009, pop: 8259

Mean visiting county population

800000  
600000  
400000  
200000  
0

Mar

May

Jul

Sep

150  
100  
50  
0

Incident cases (per 100,000 population)

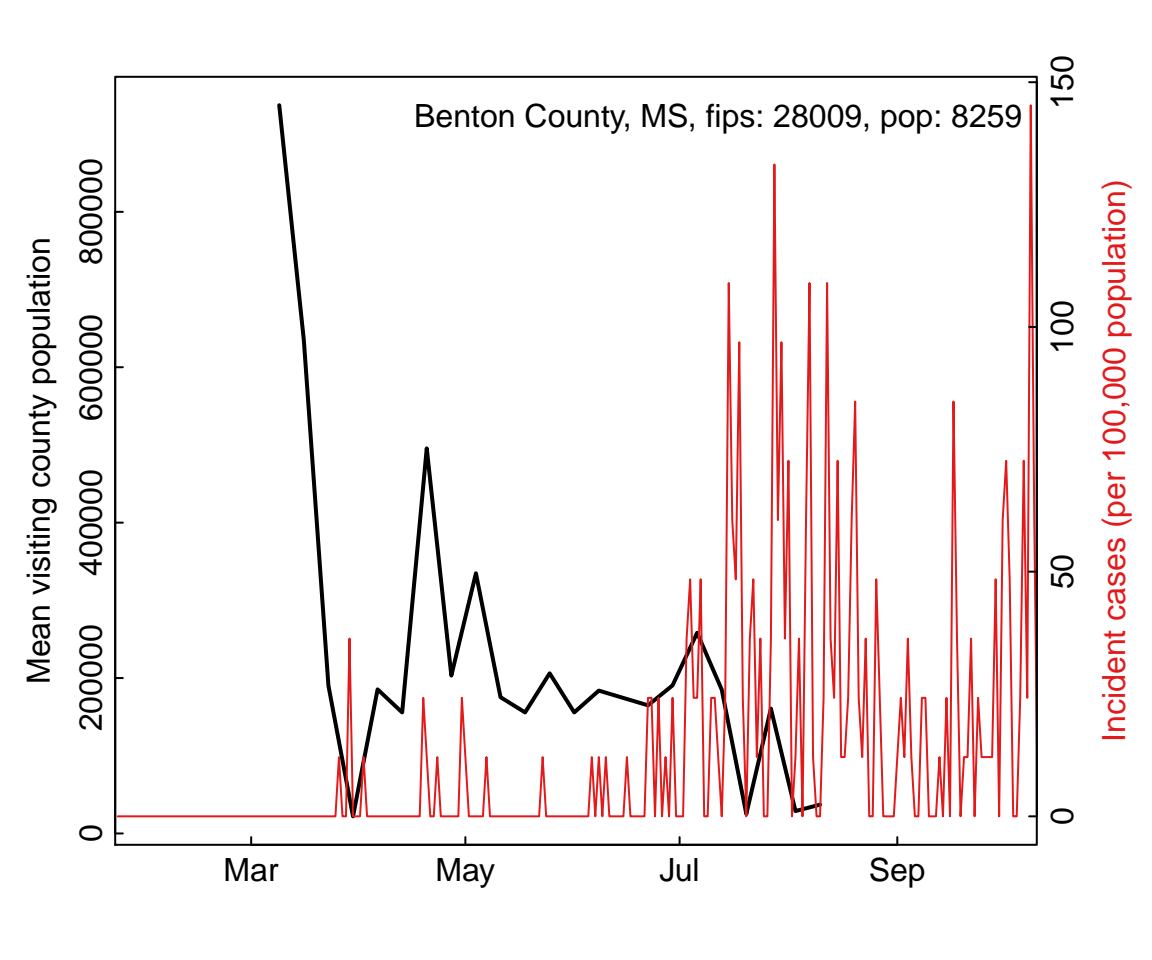

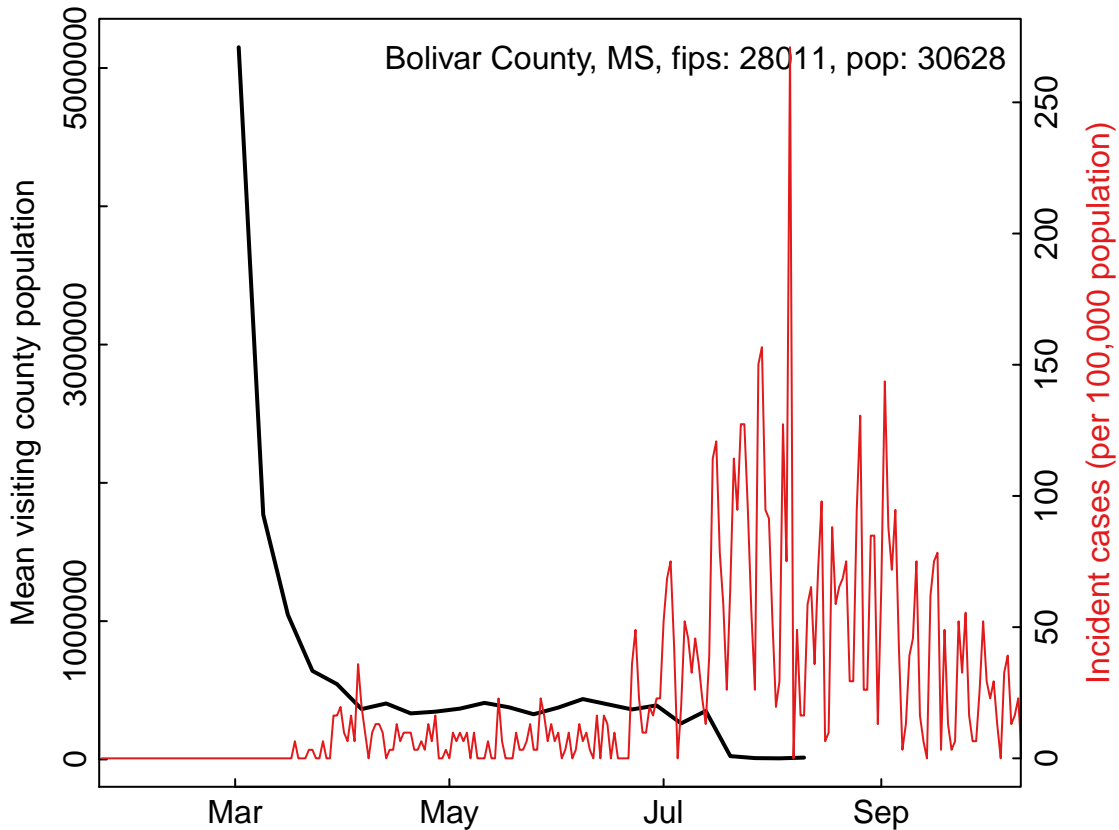

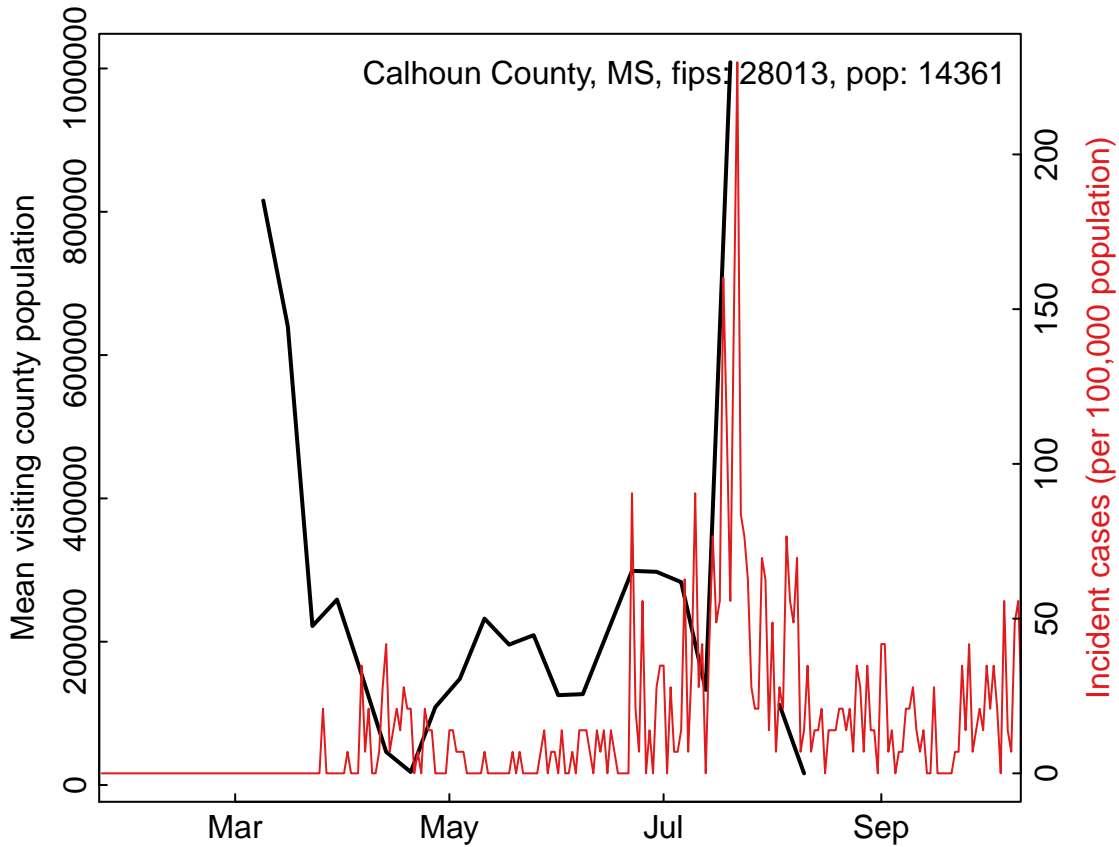

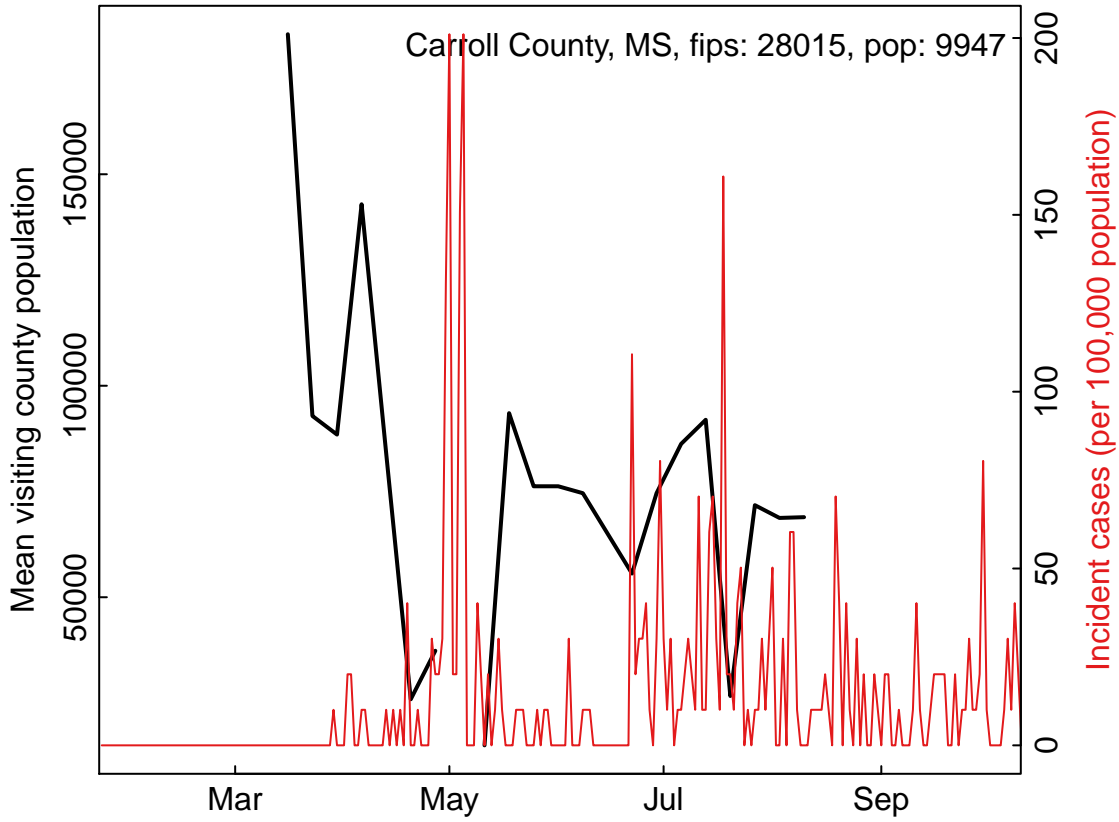

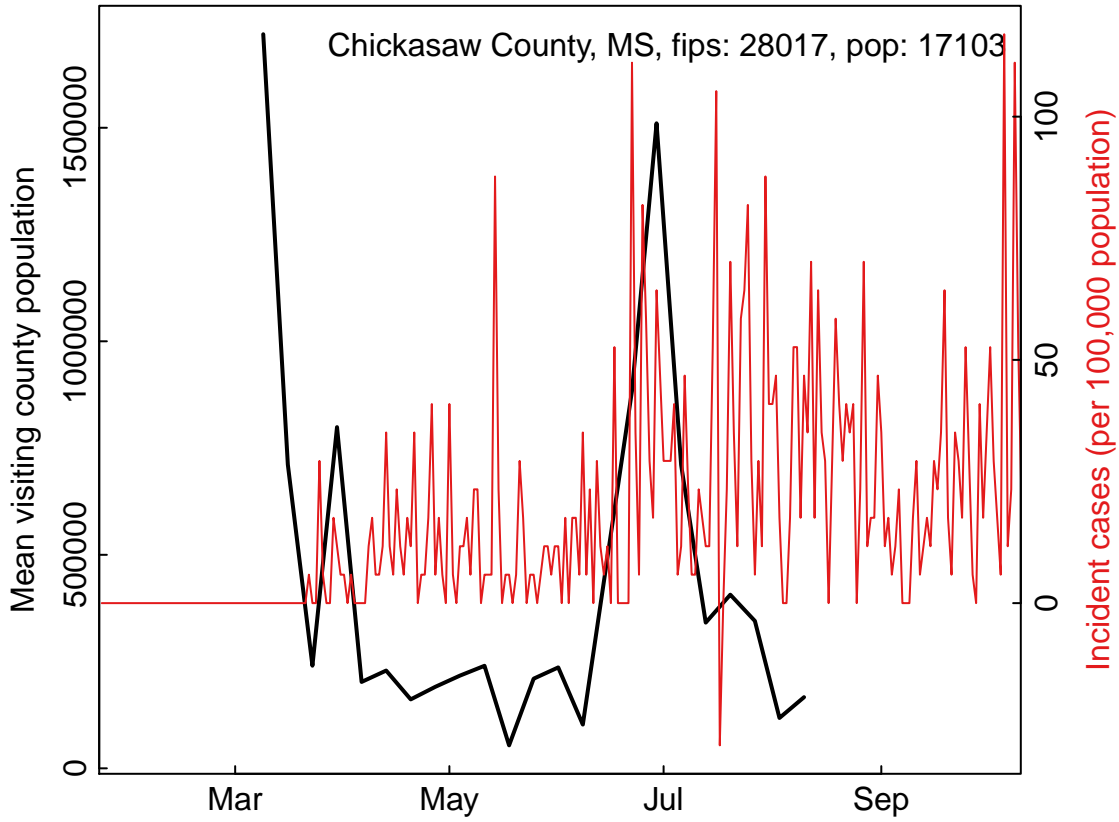

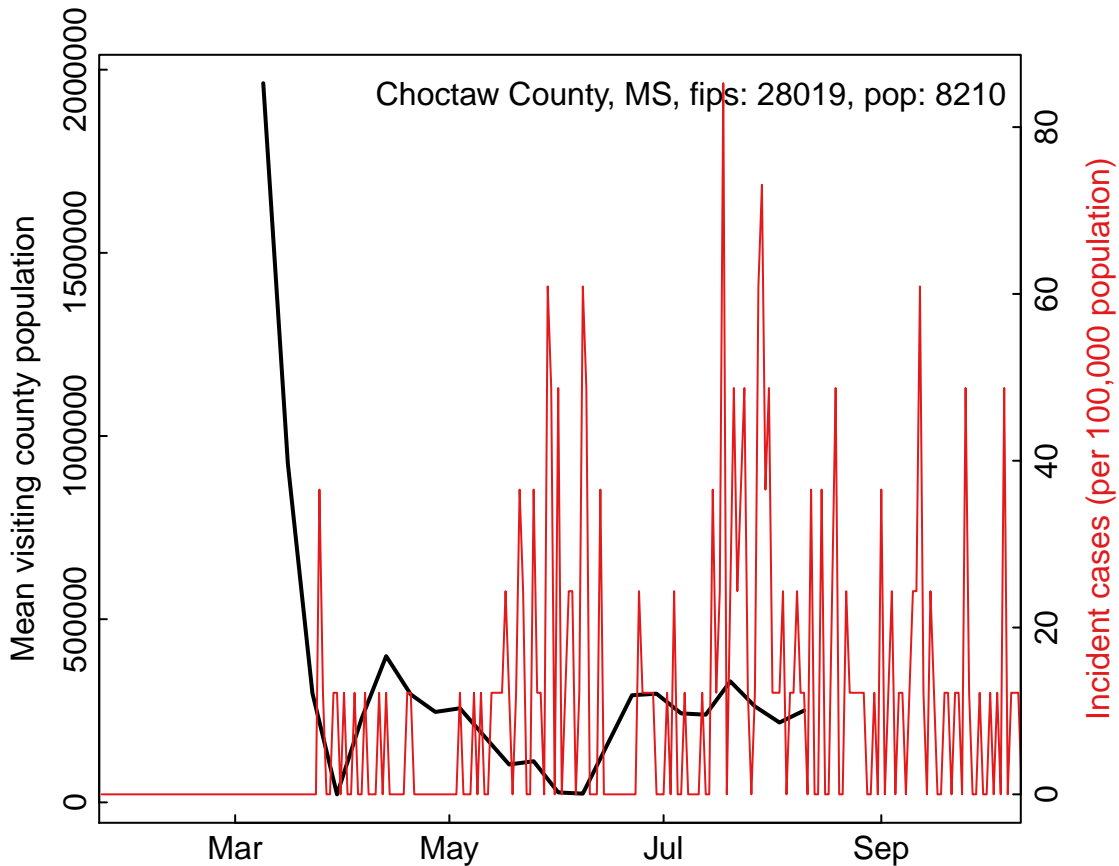

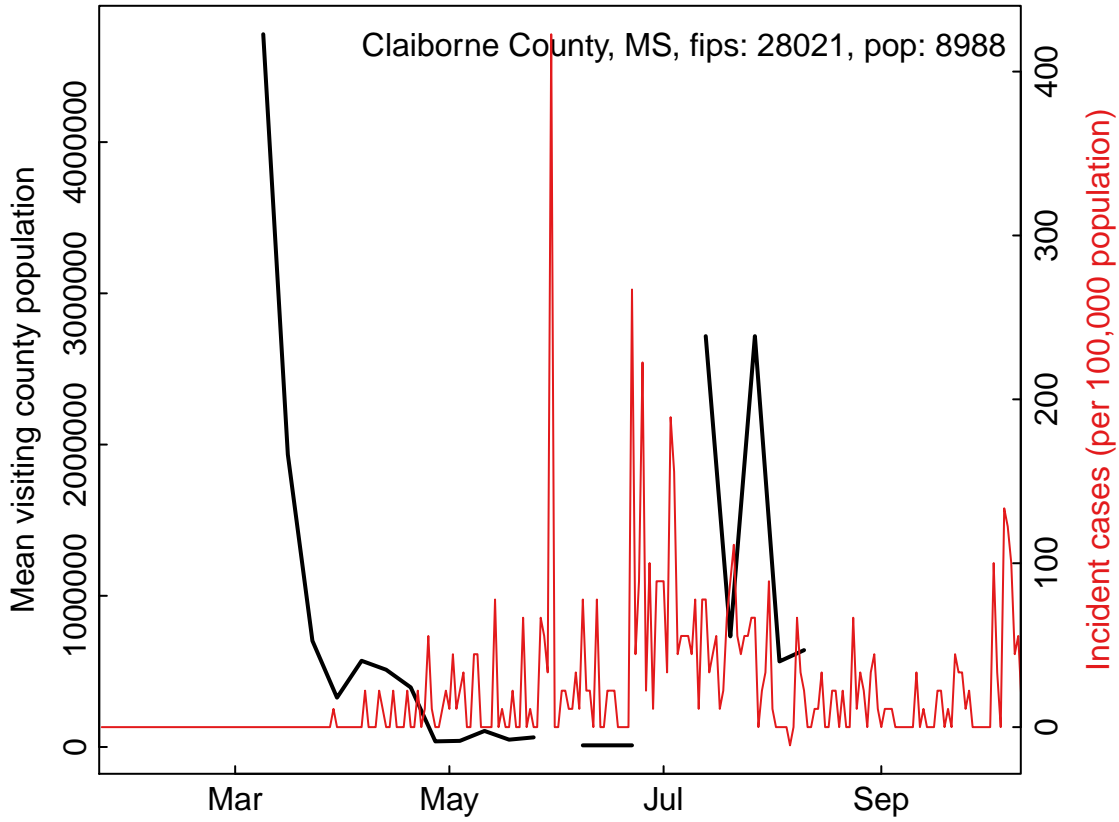



Clarke County, MS, fips: 28023, pop: 15541

Mean visiting county population

400000  
300000  
200000  
100000  
0

Mar

May

Jul

Sep

150  
100  
50  
0

Incident cases (per 100,000 population)

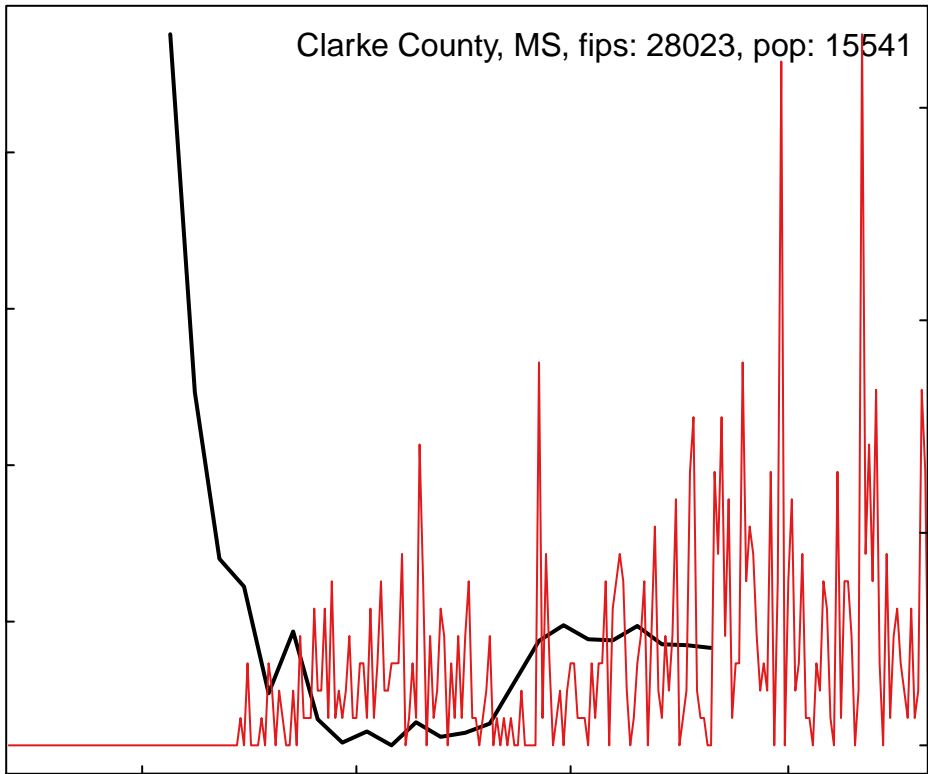

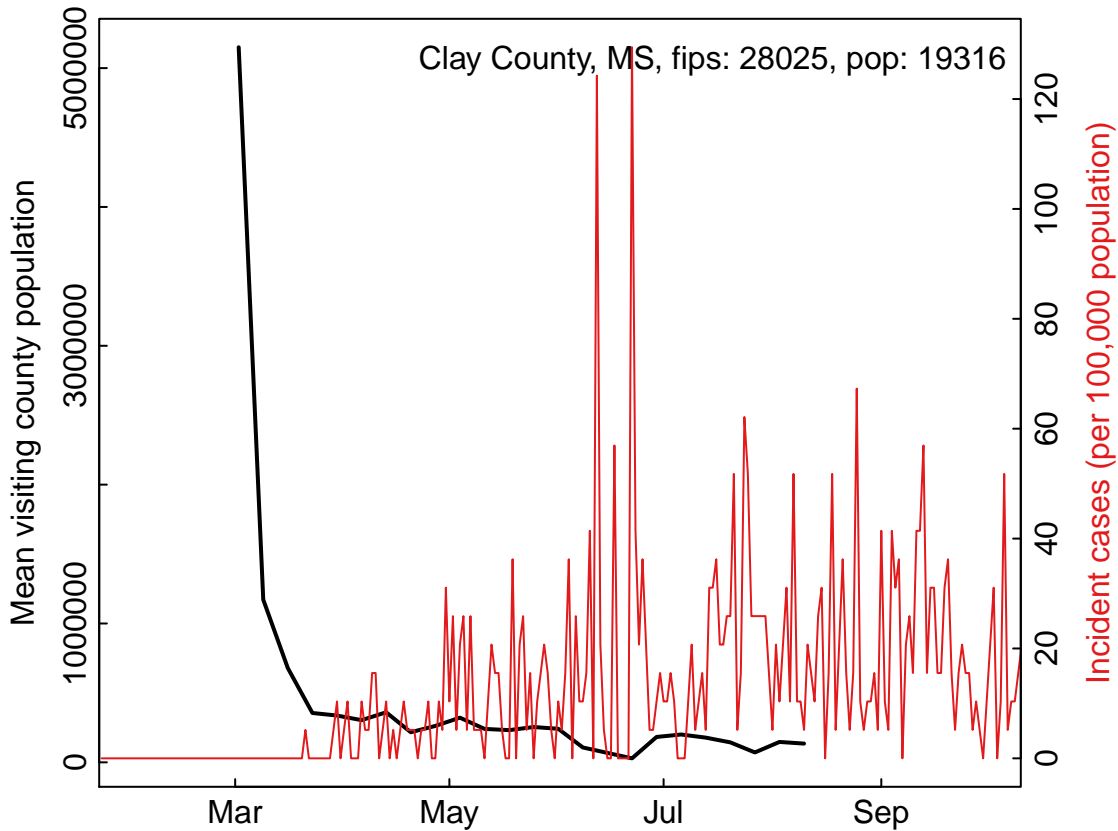

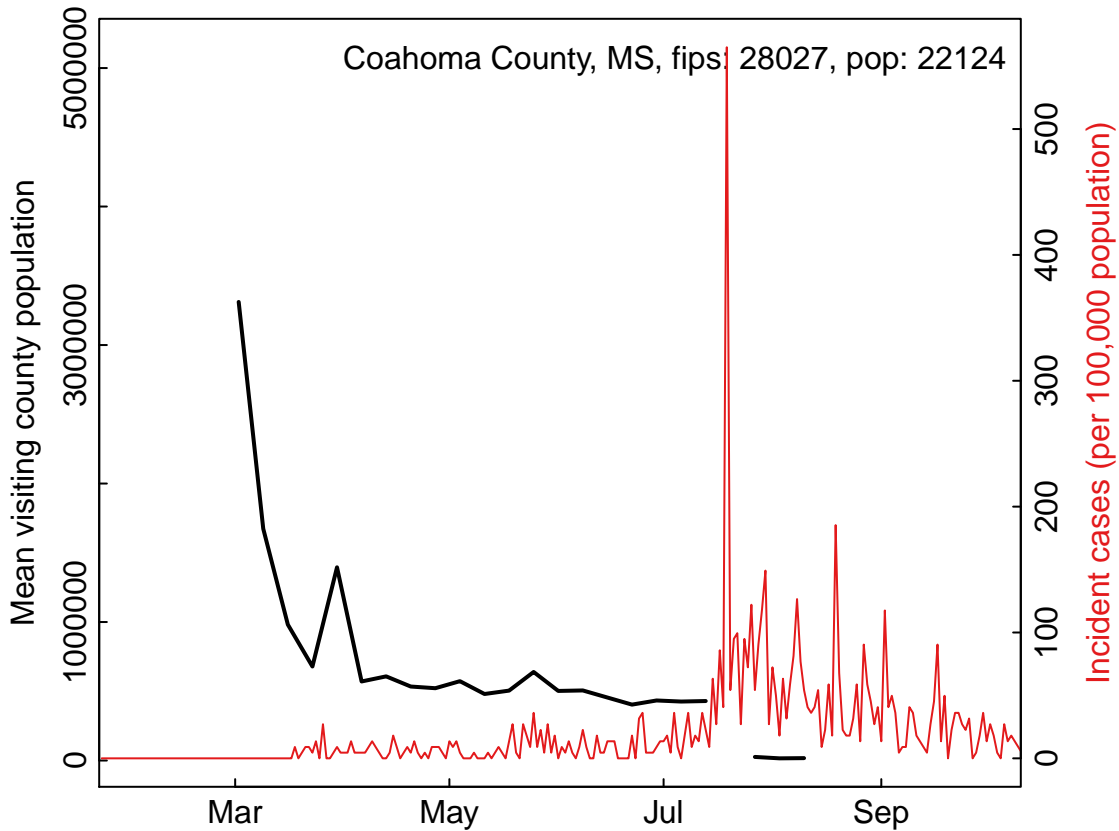

Copiah County, MS, fips: 28029, pop: 28065

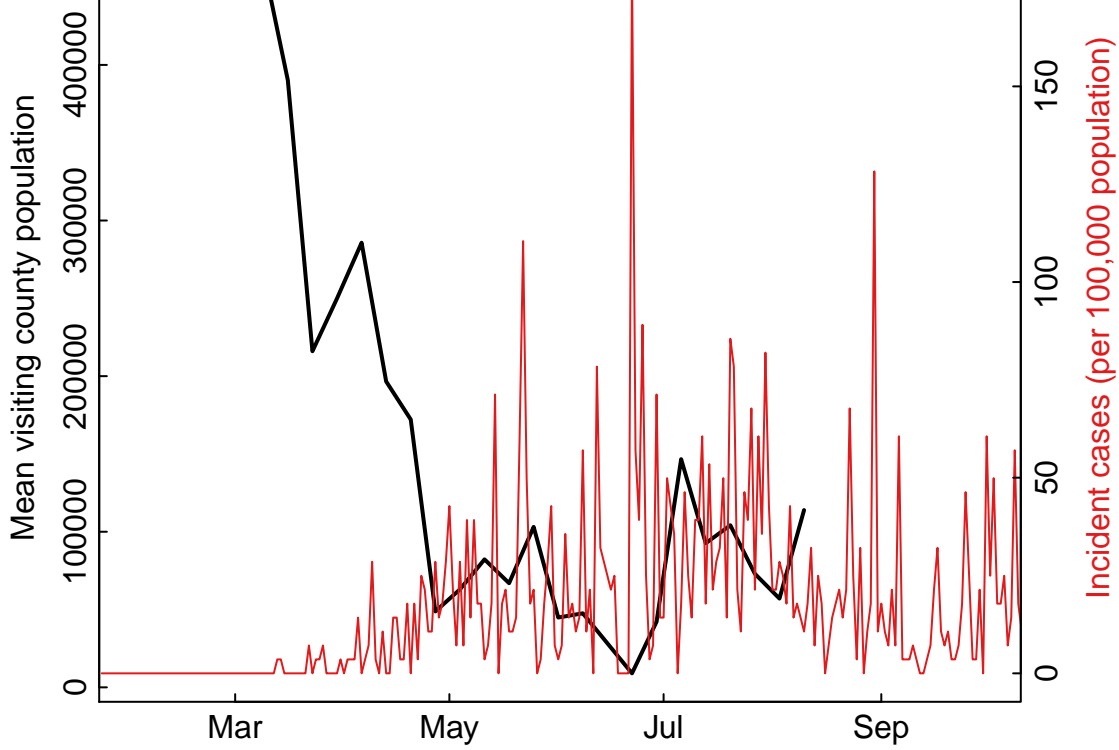

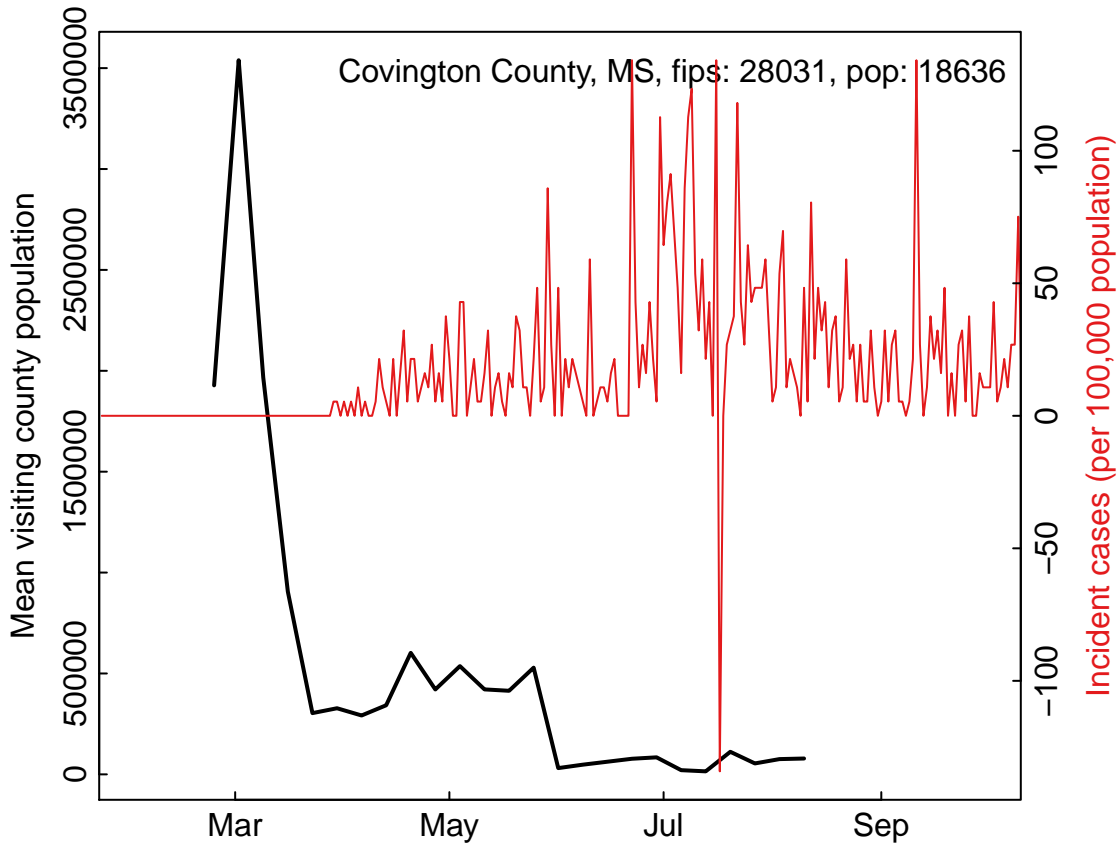

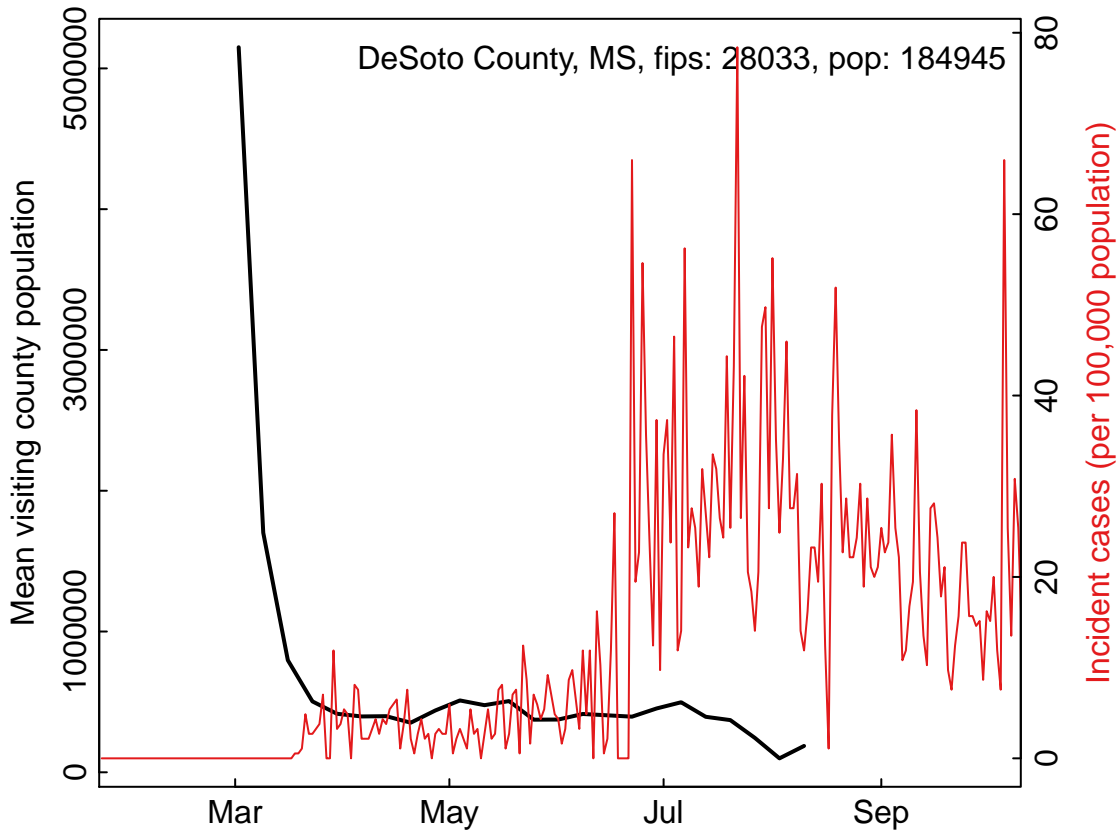

Forrest County, MS, fips: 28035, pop: 74897

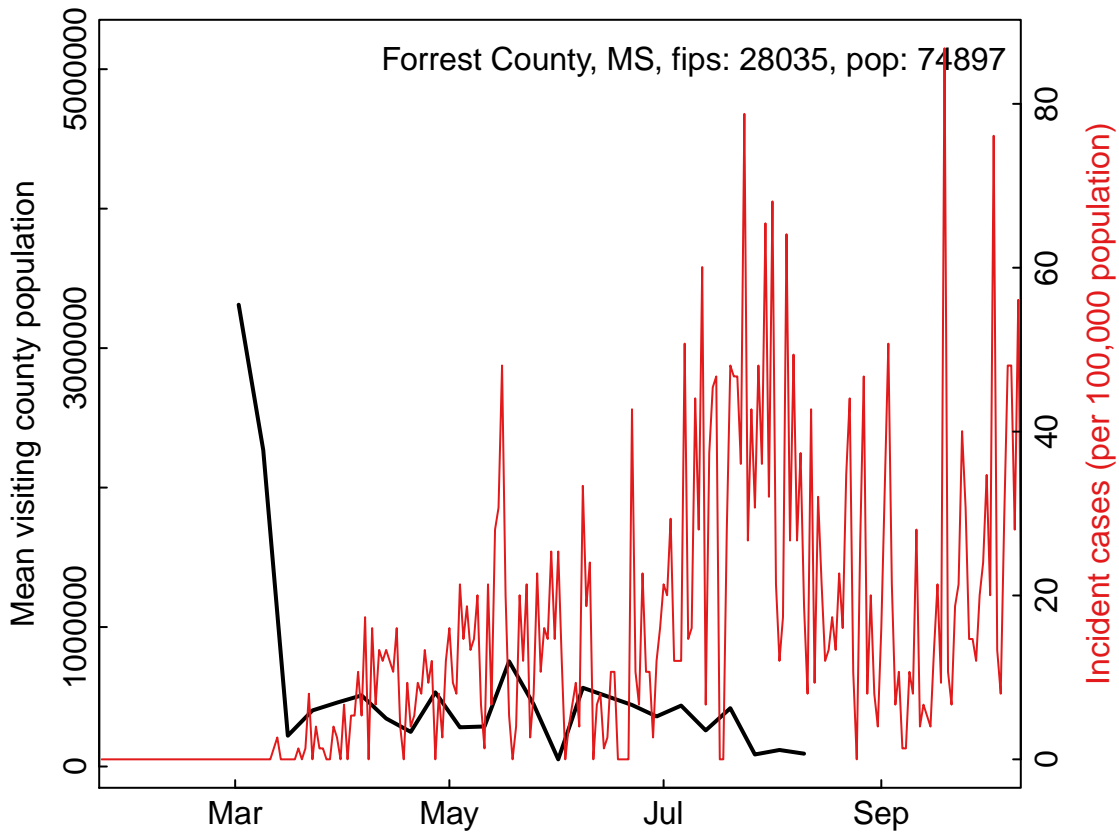

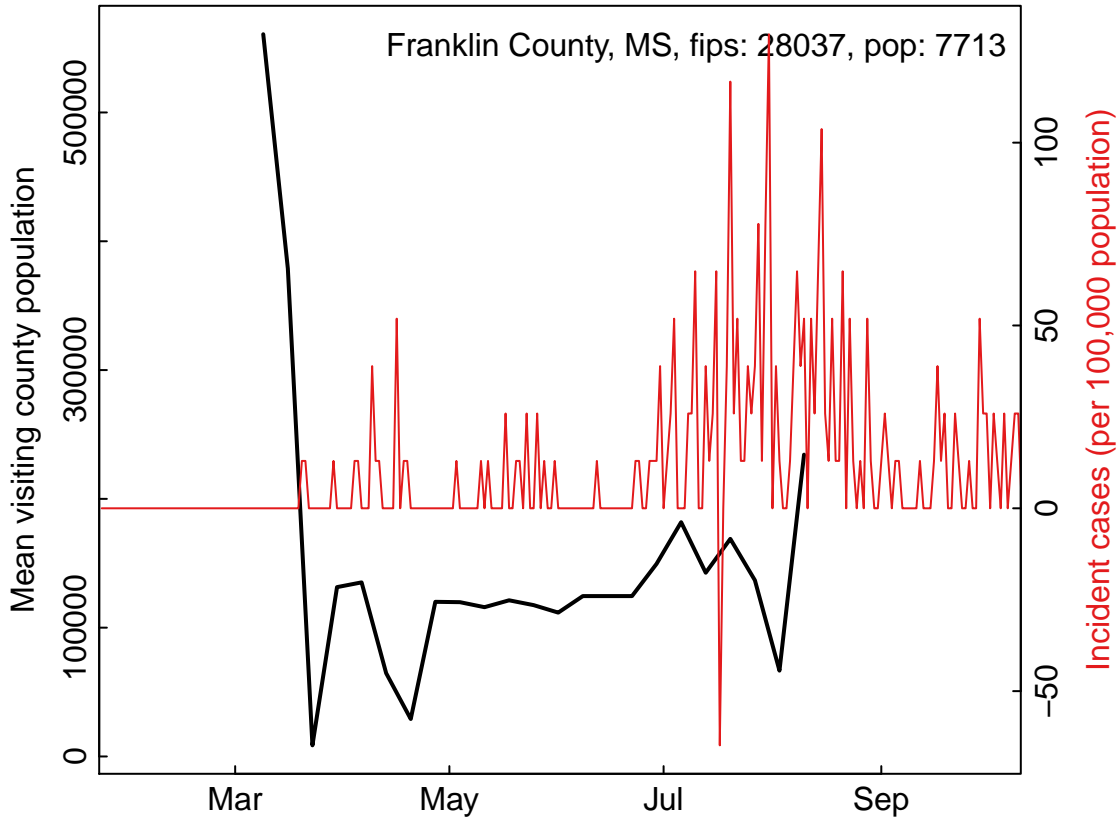



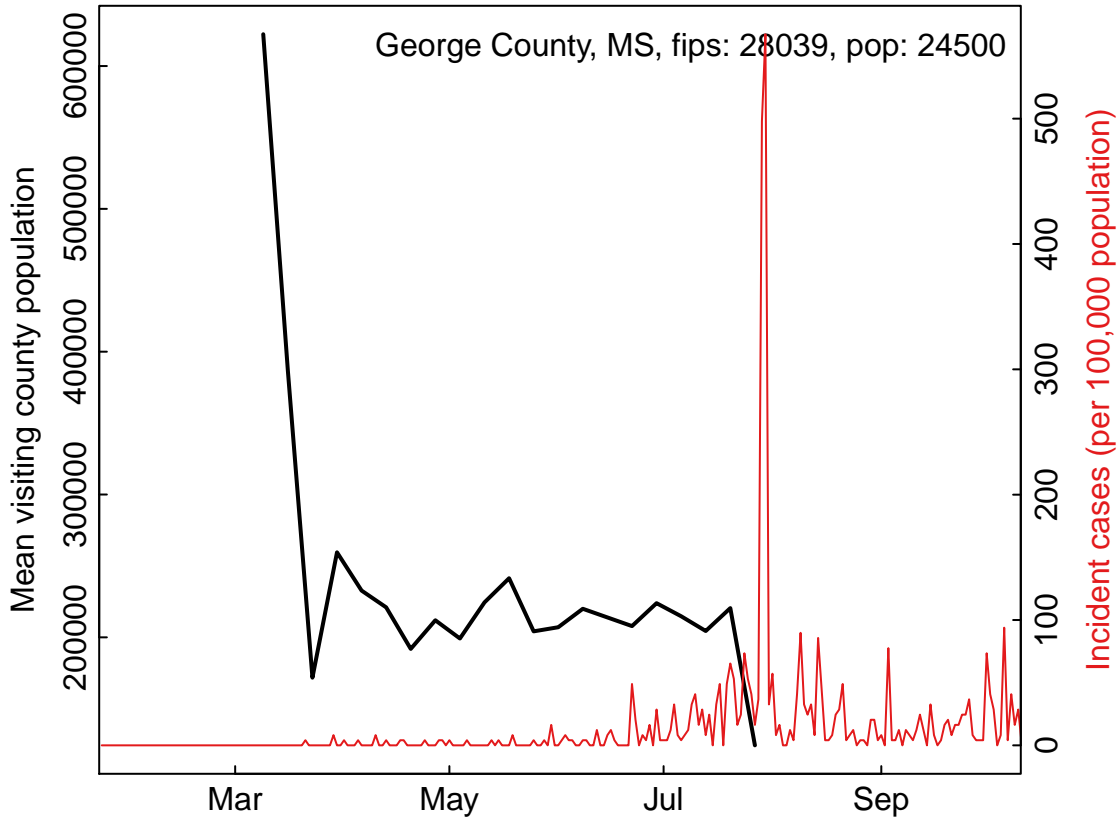

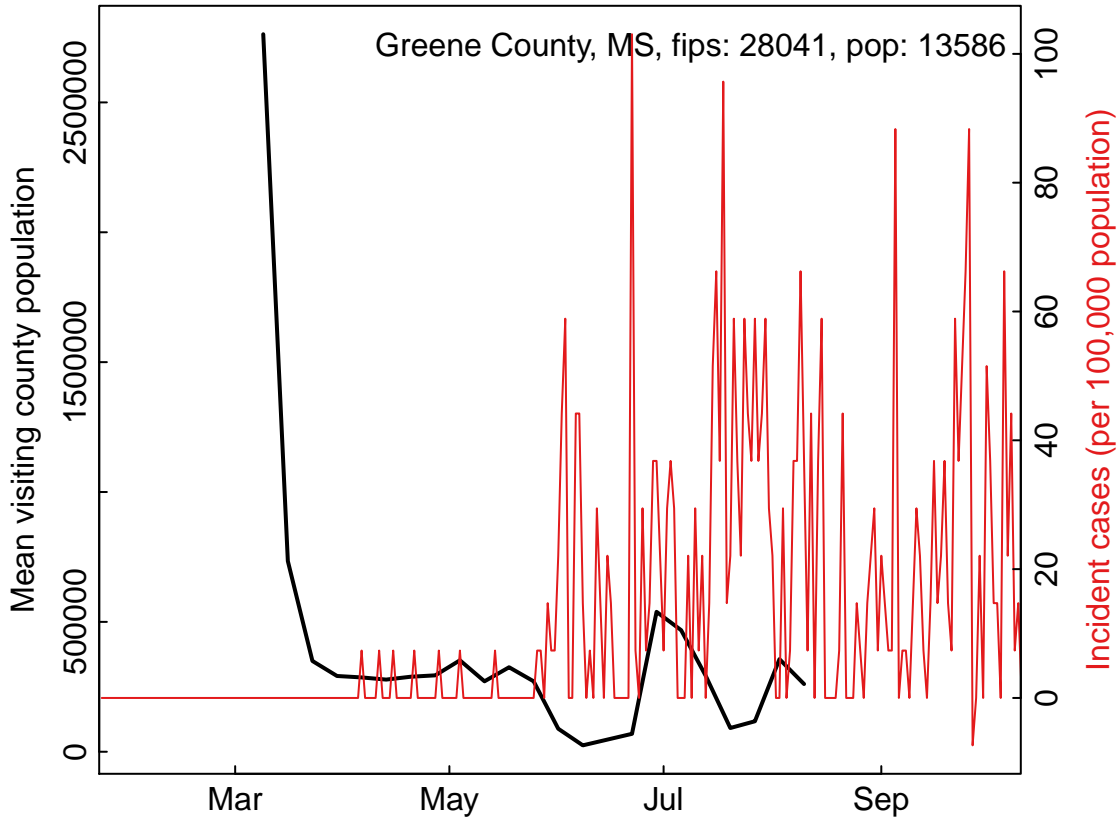

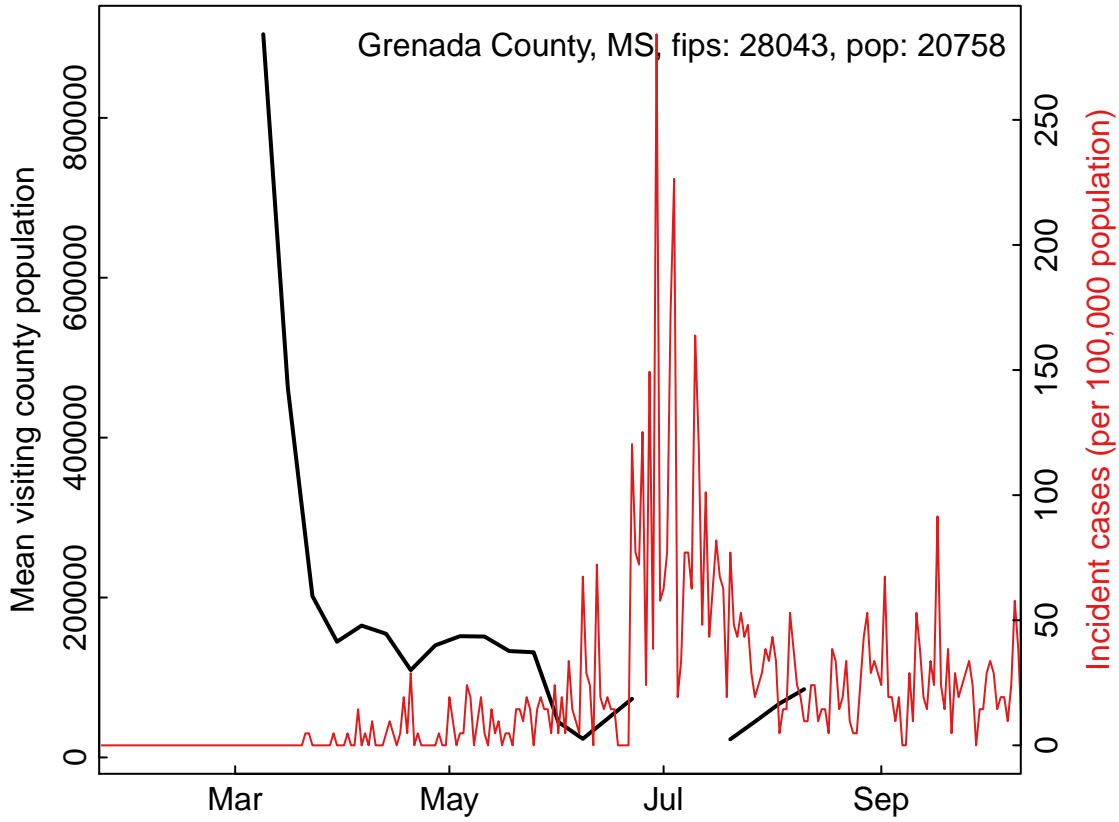

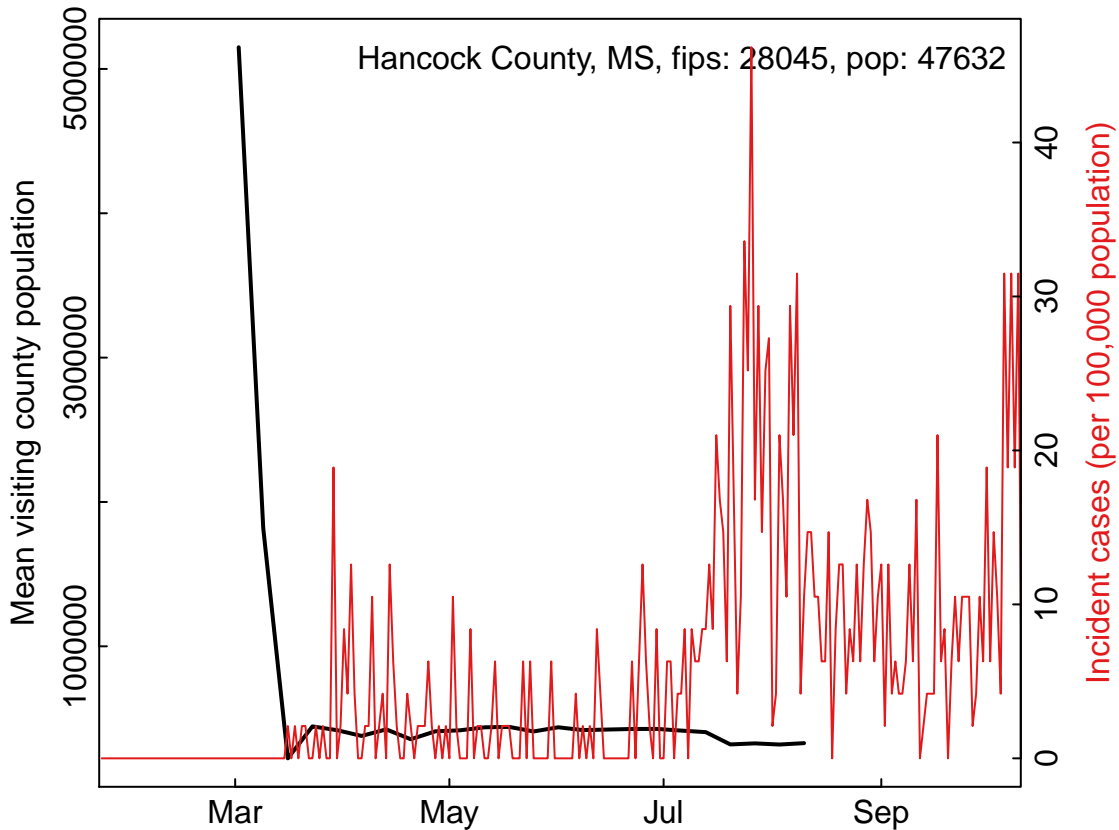

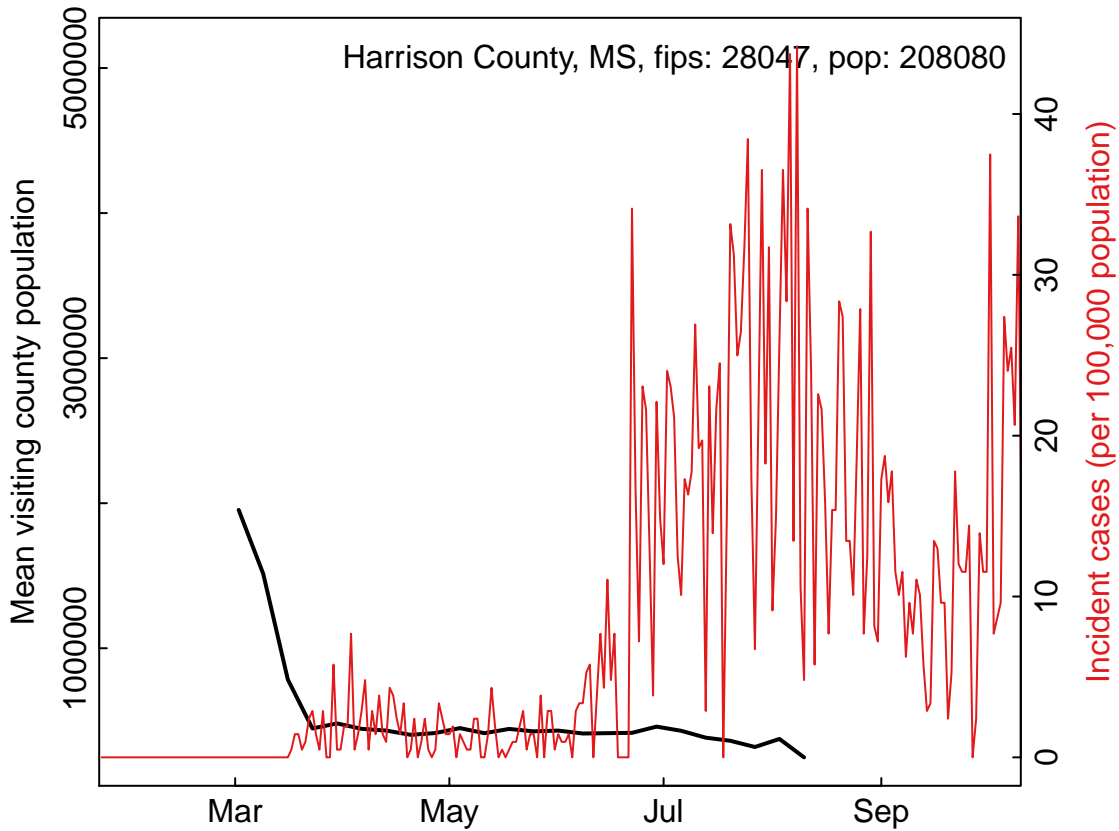

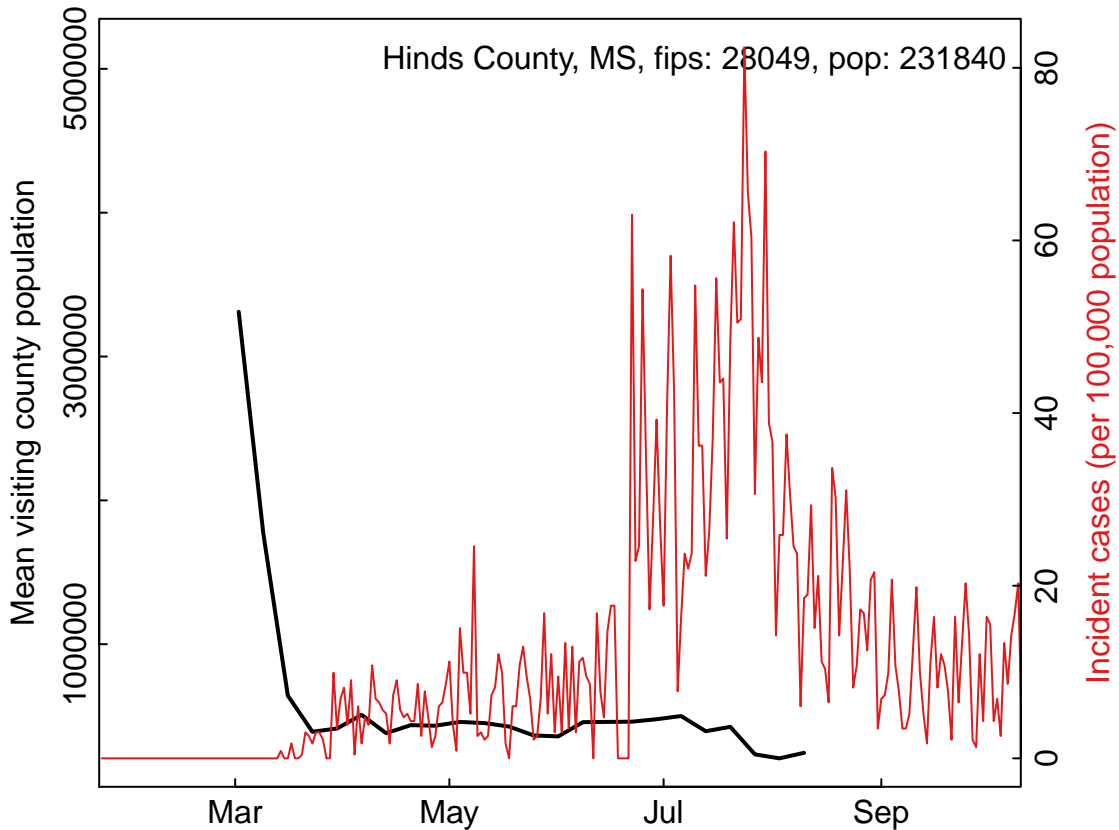

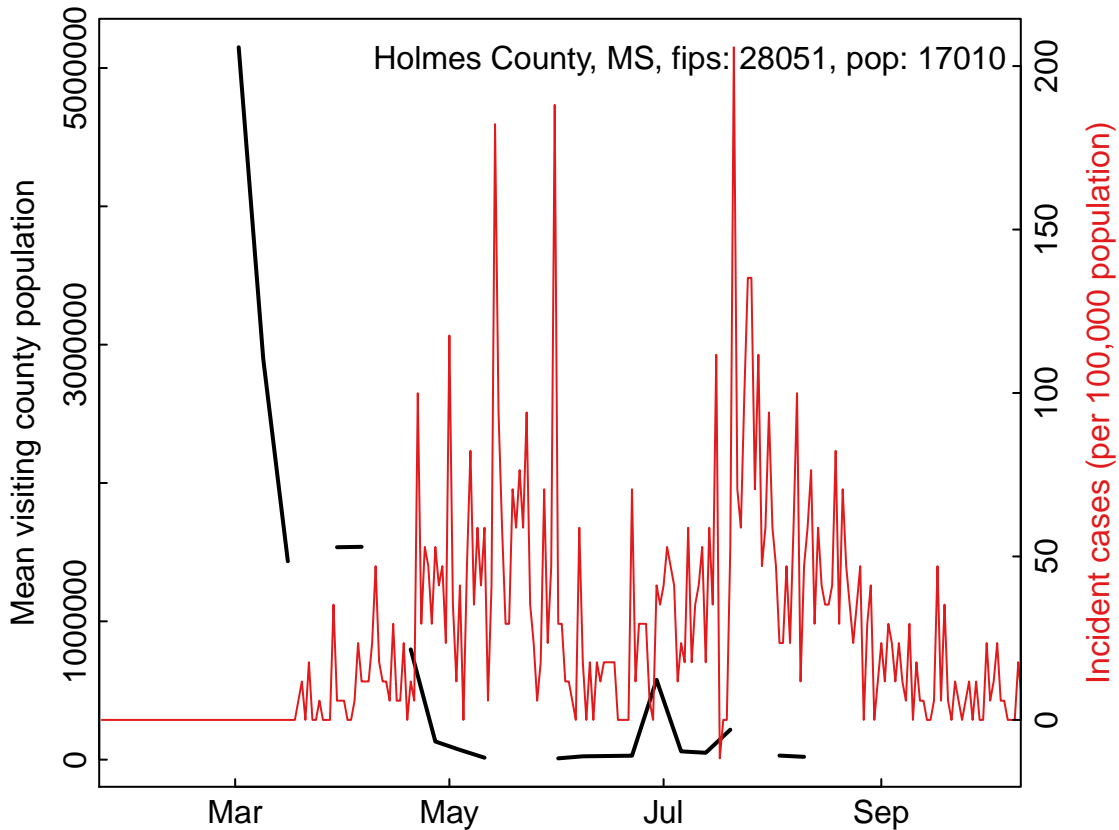

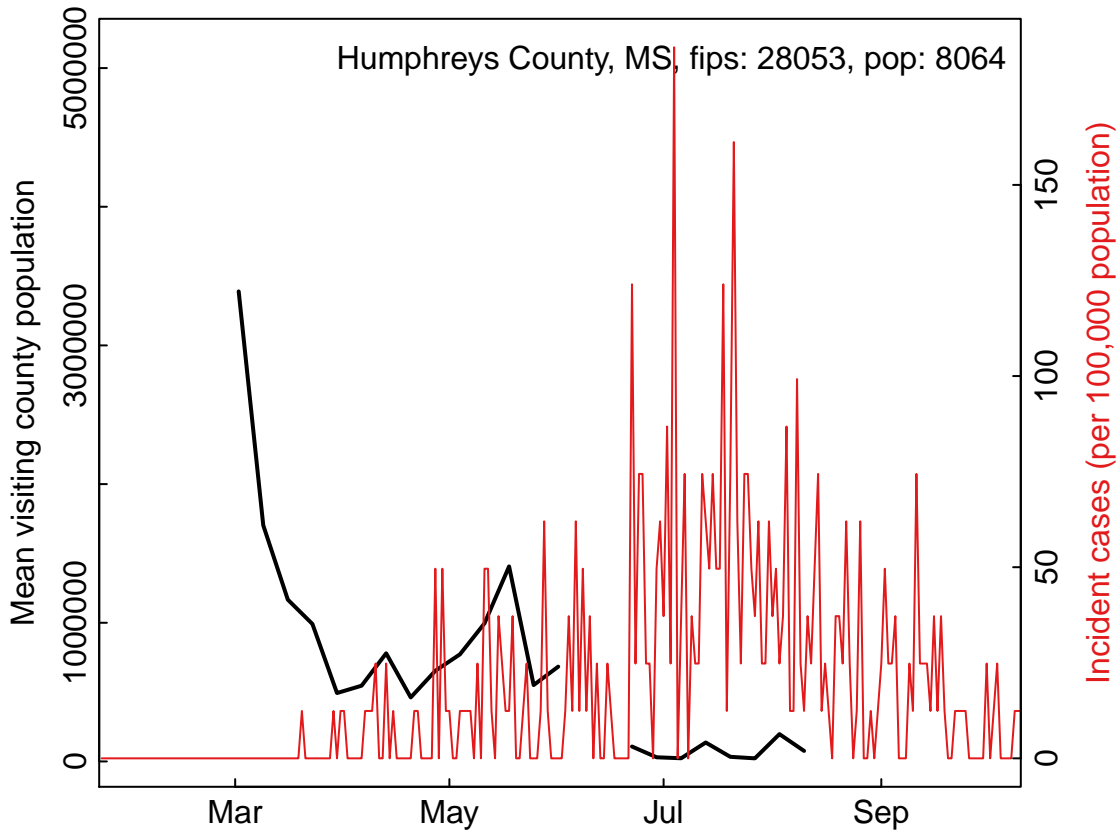



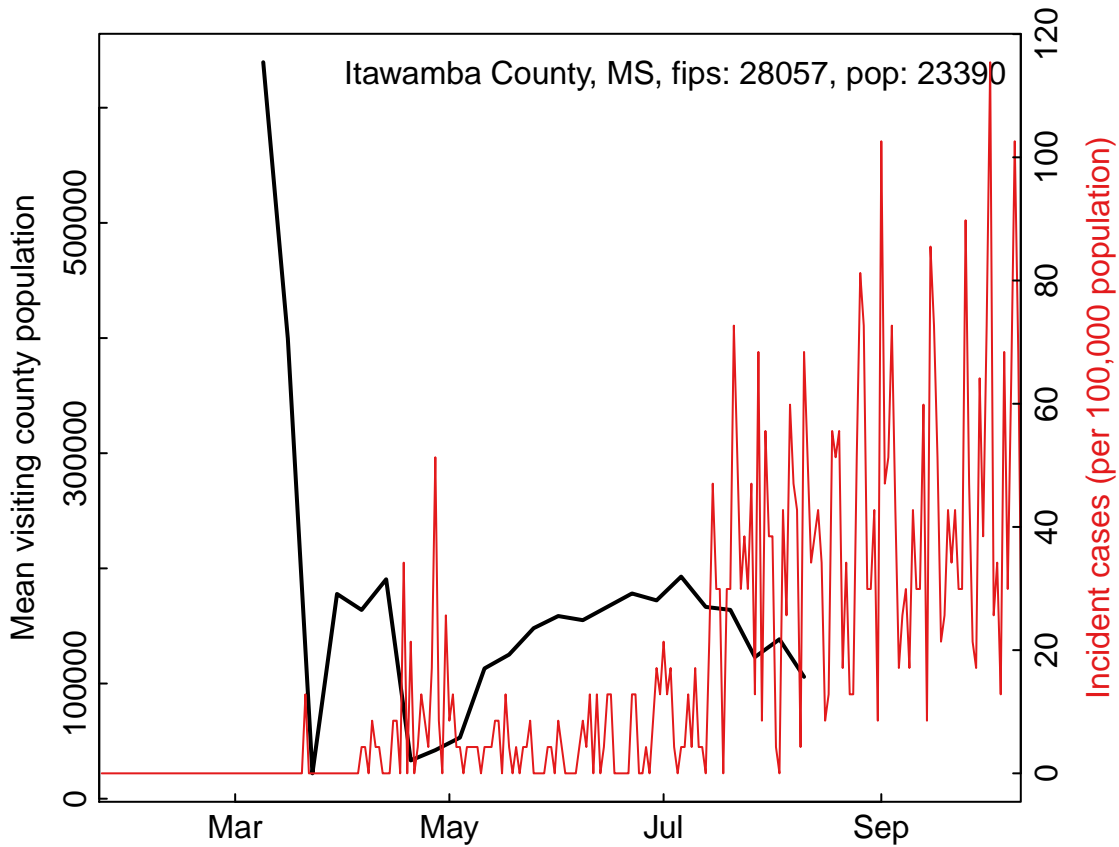

Jackson County, MS, fips: 28059, pop: 143617

Mean visiting county population

2500000  
1500000  
500000  
0

Mar May Jul Sep

Incident cases (per 100,000 population)

120  
100  
80  
60  
40  
20  
0

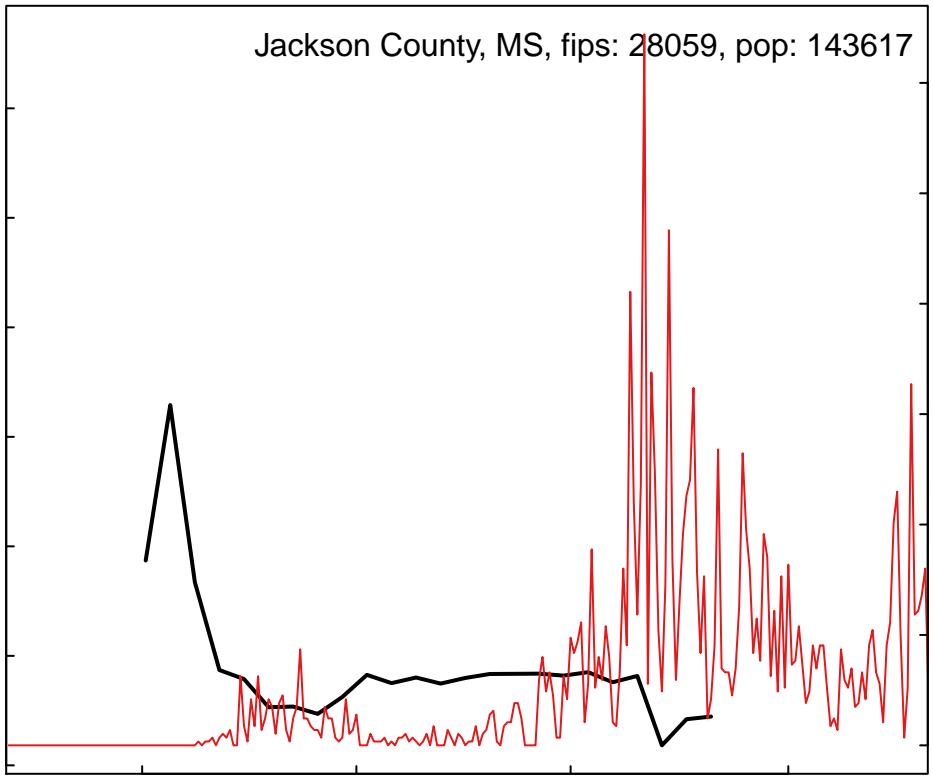

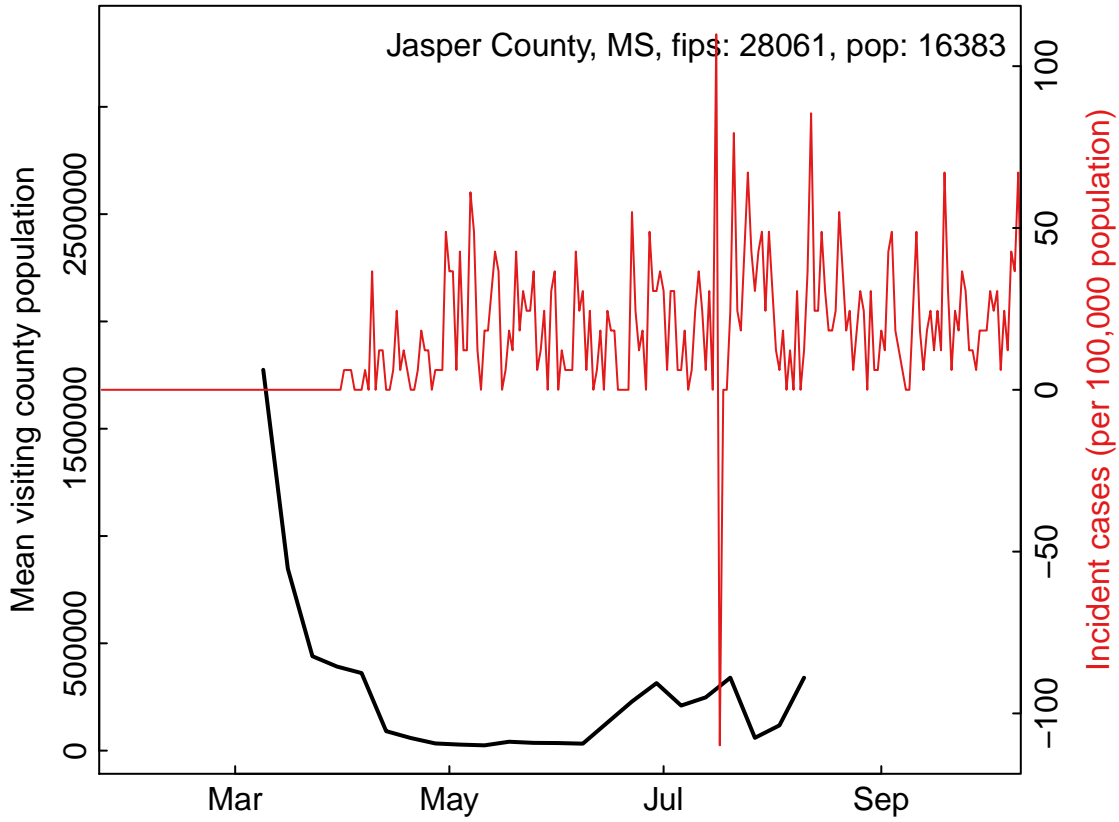

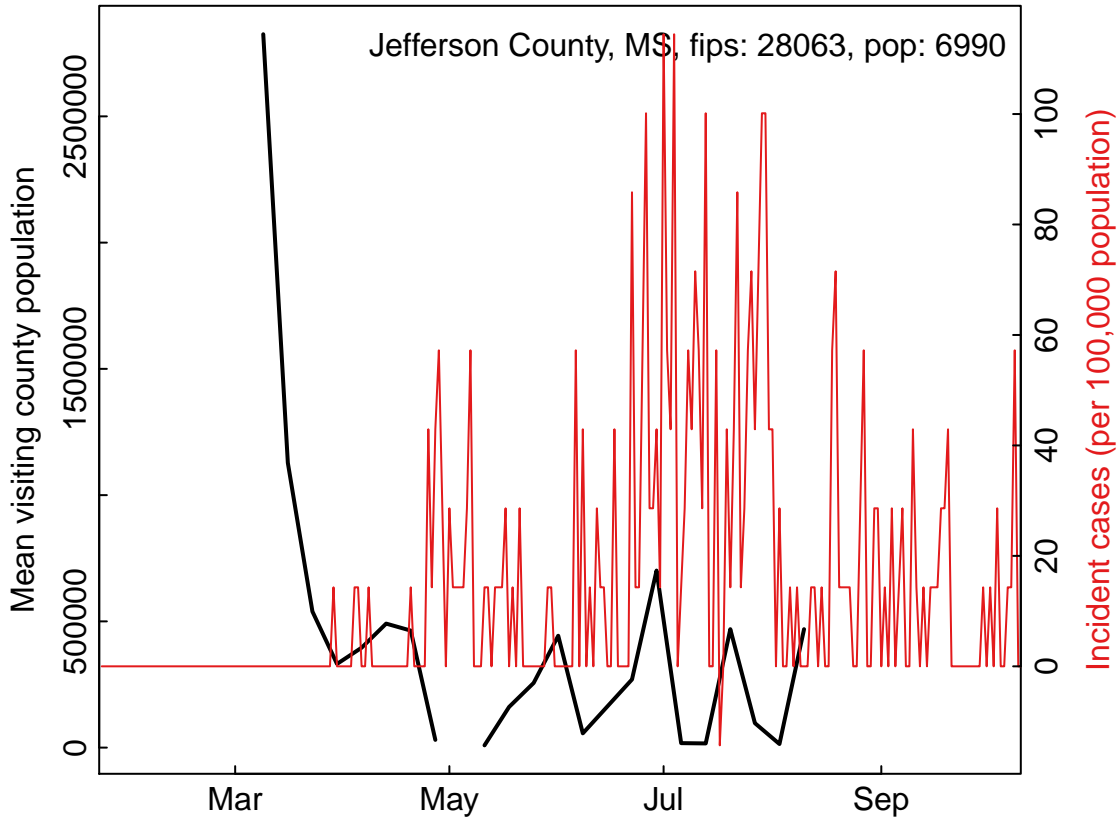

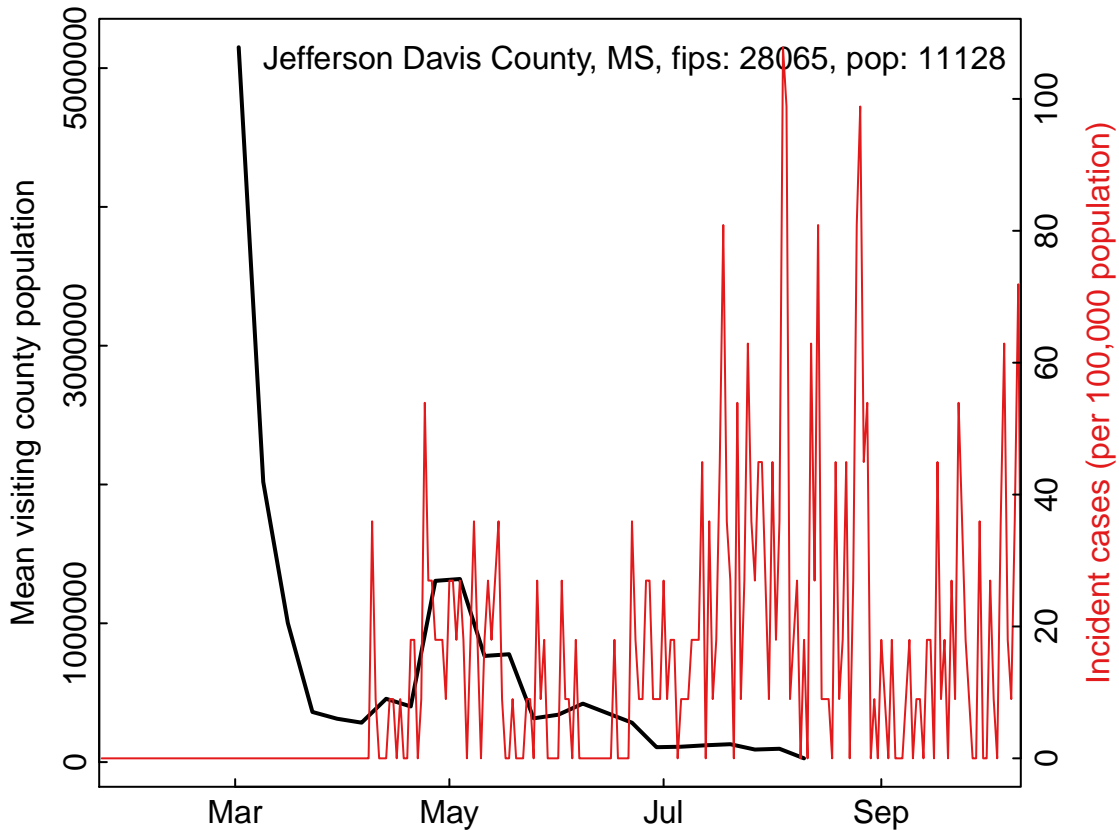

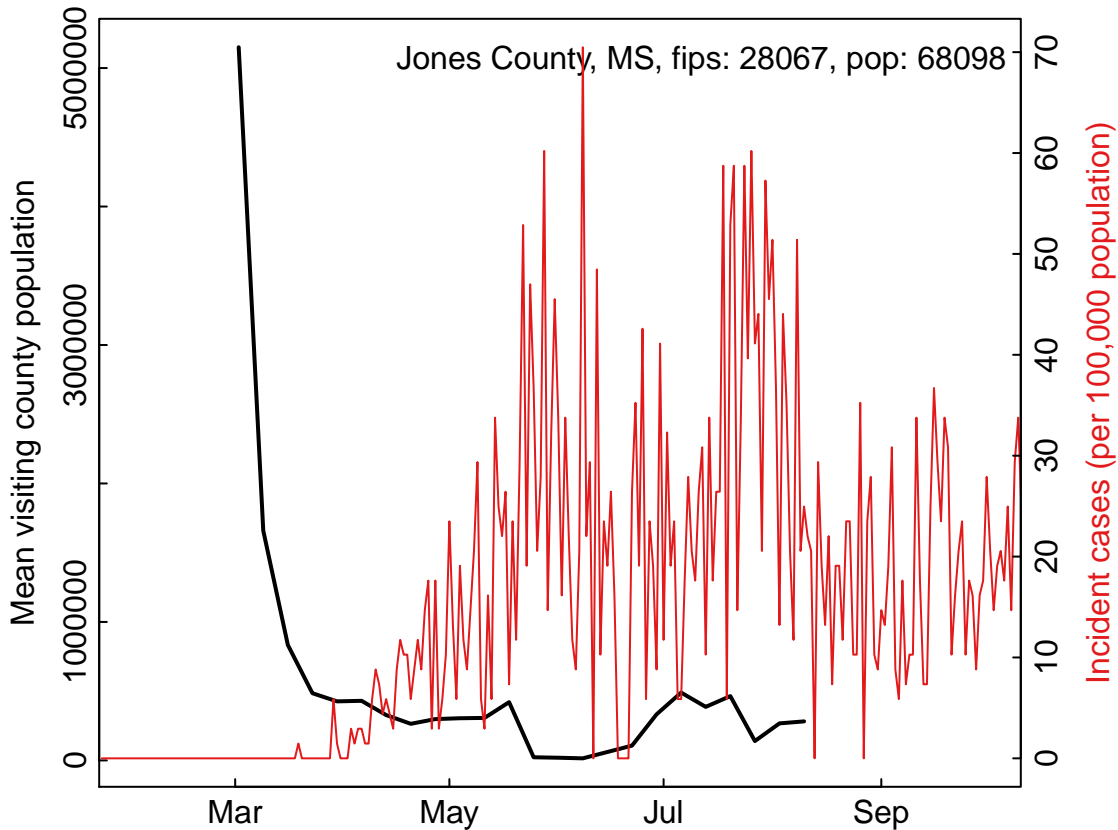

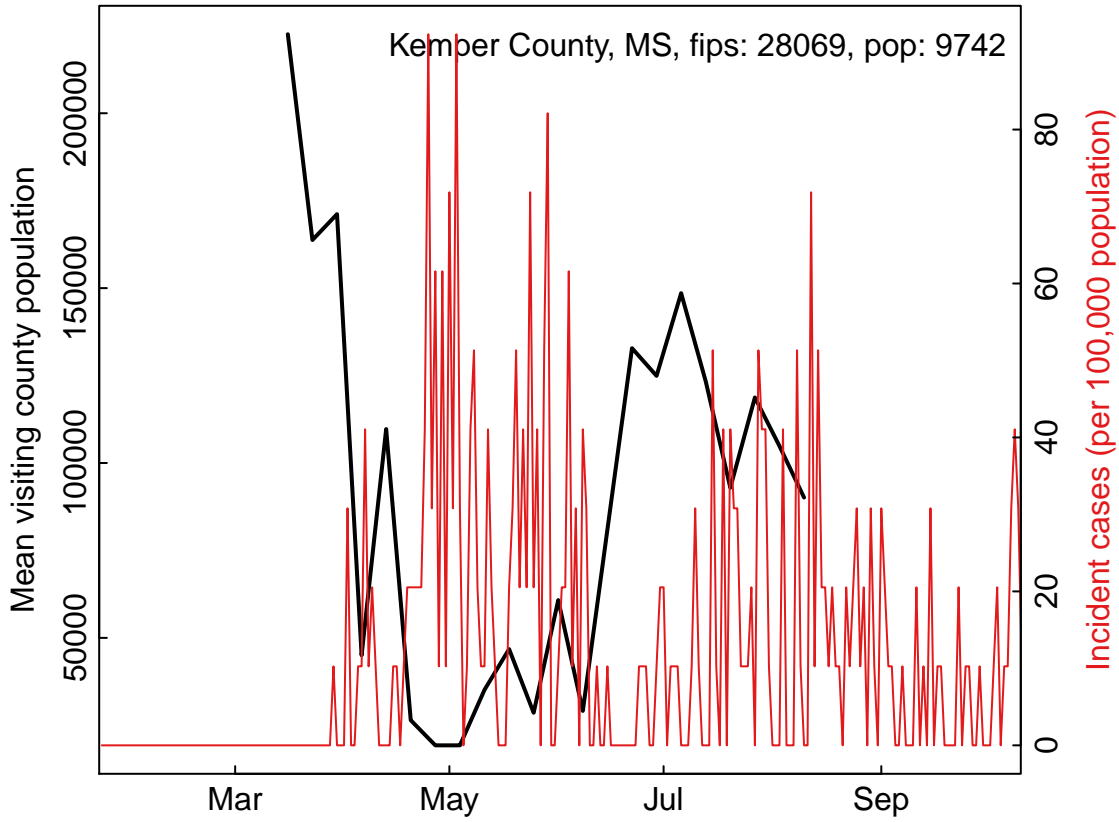

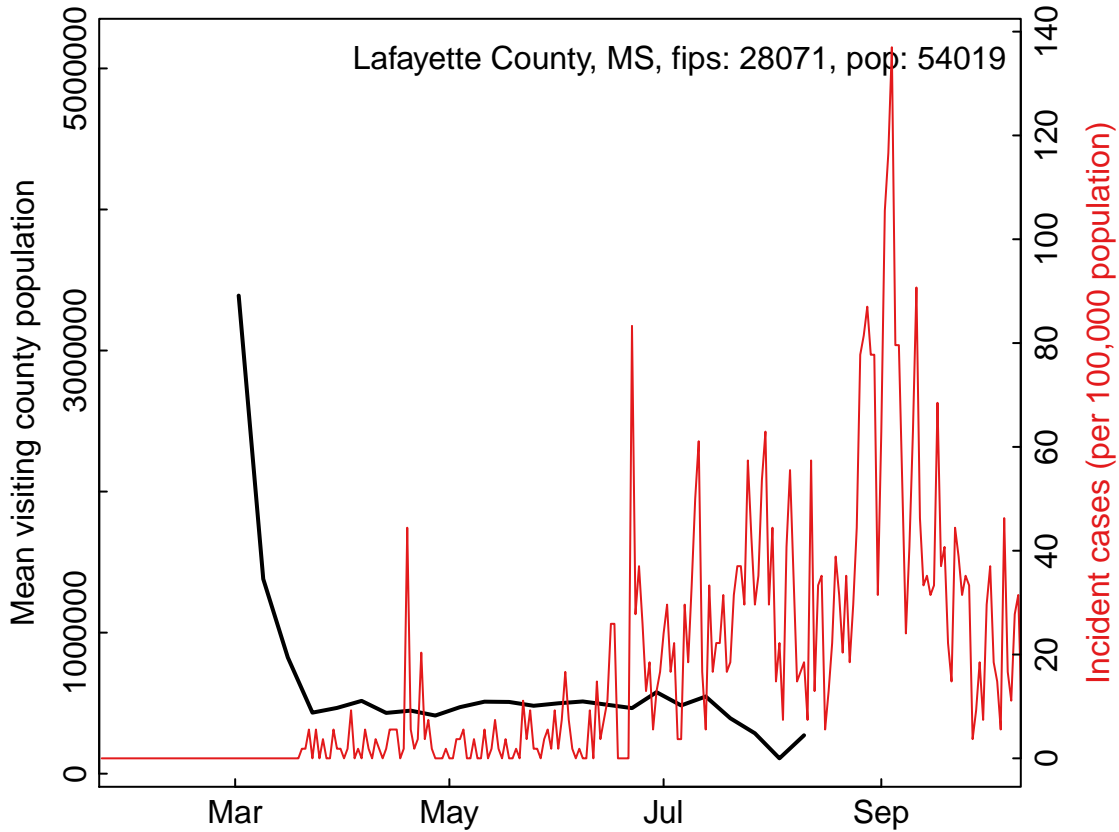



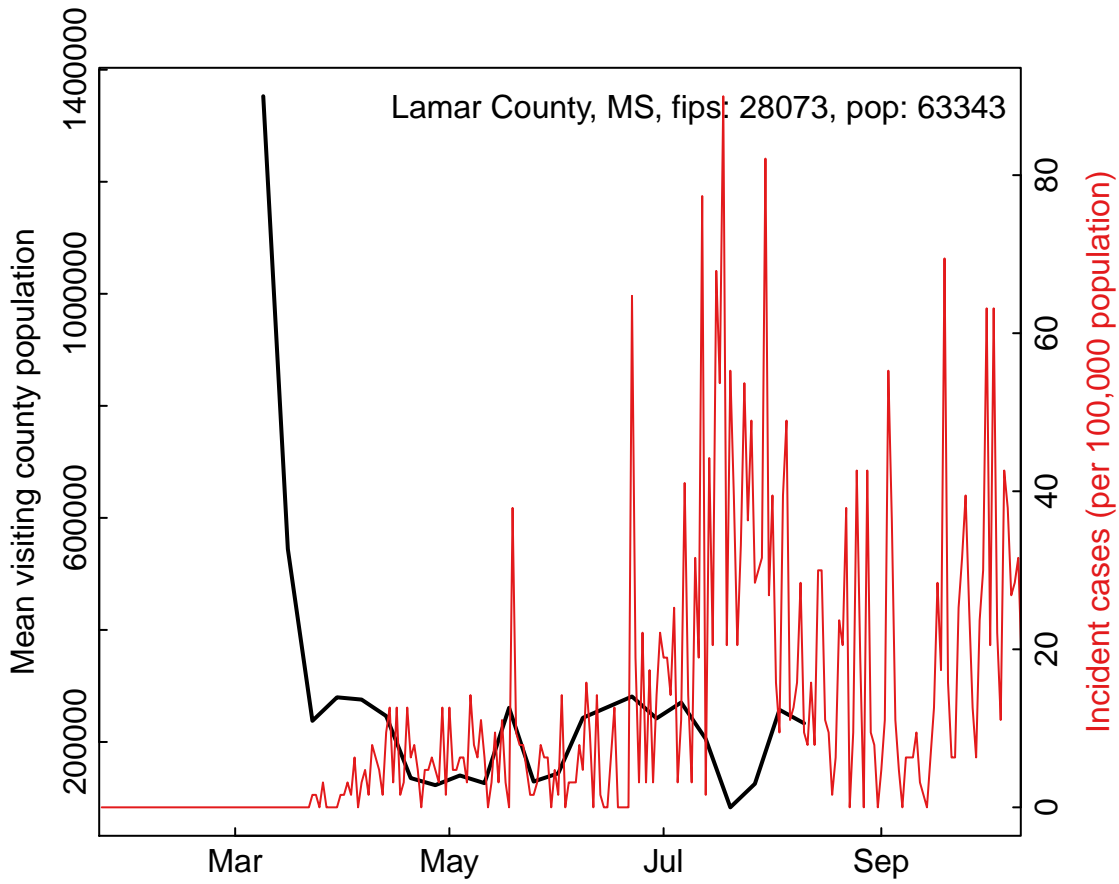

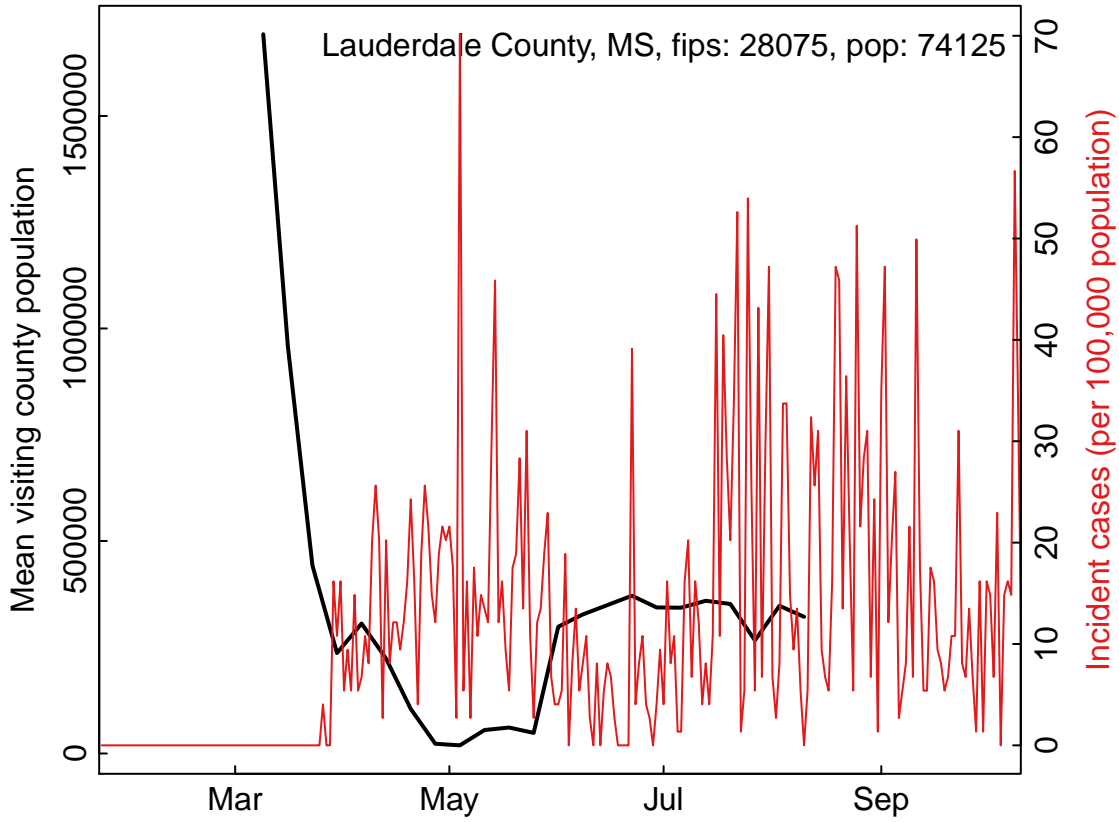

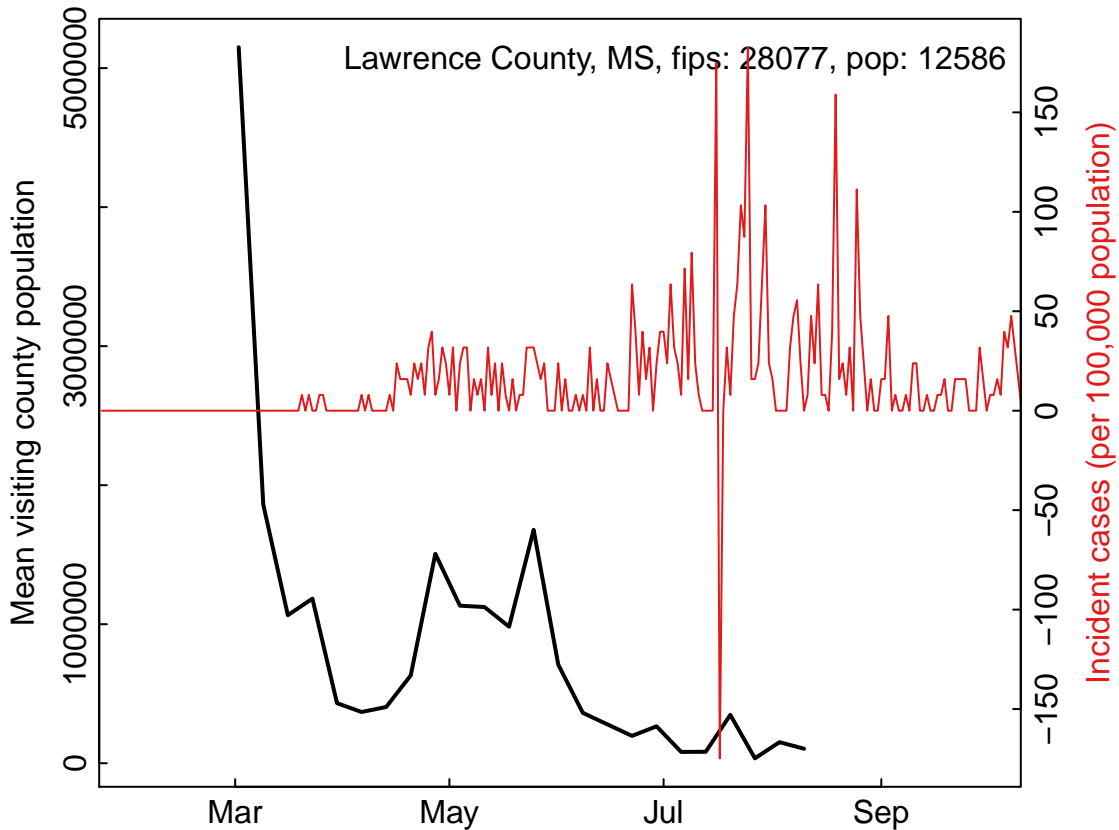

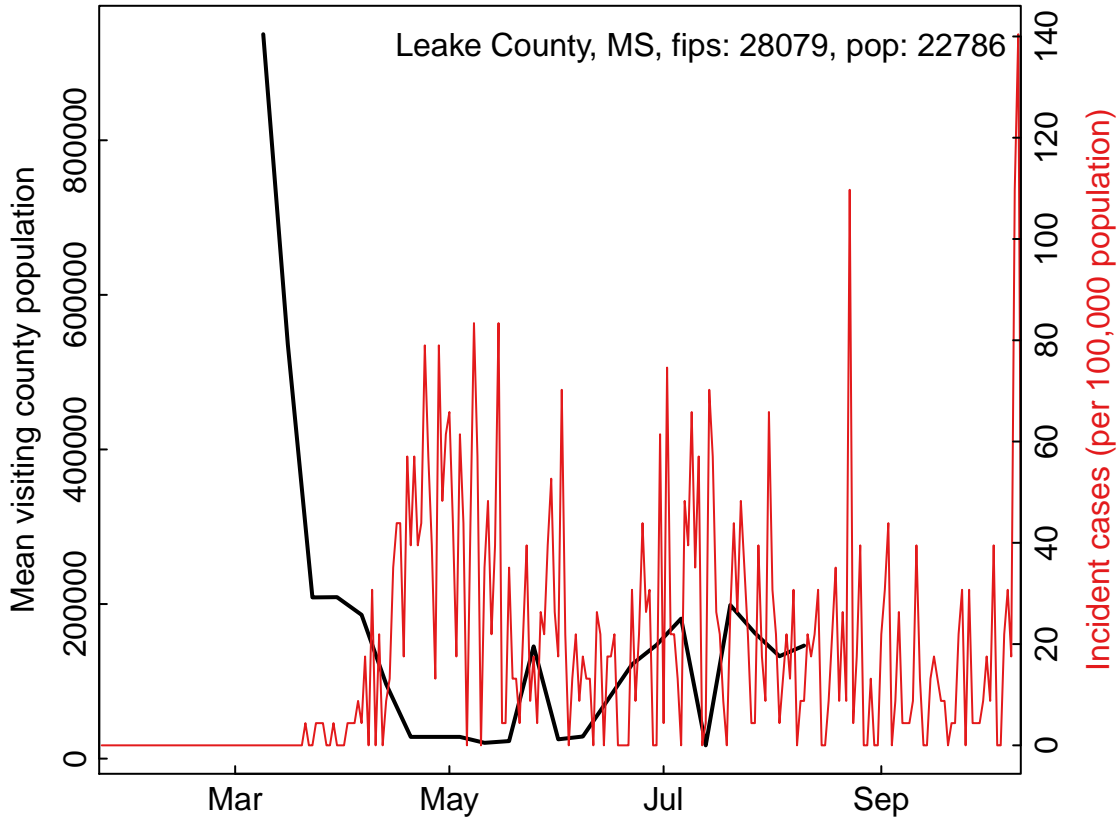

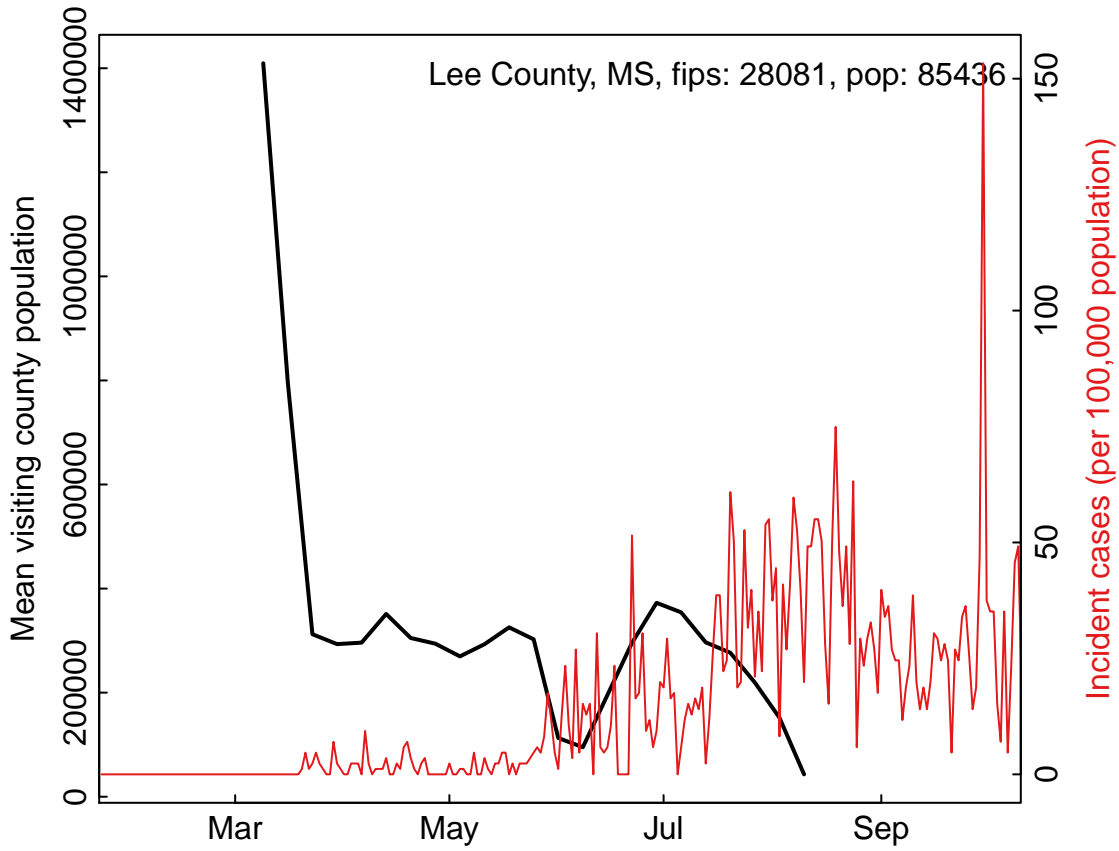

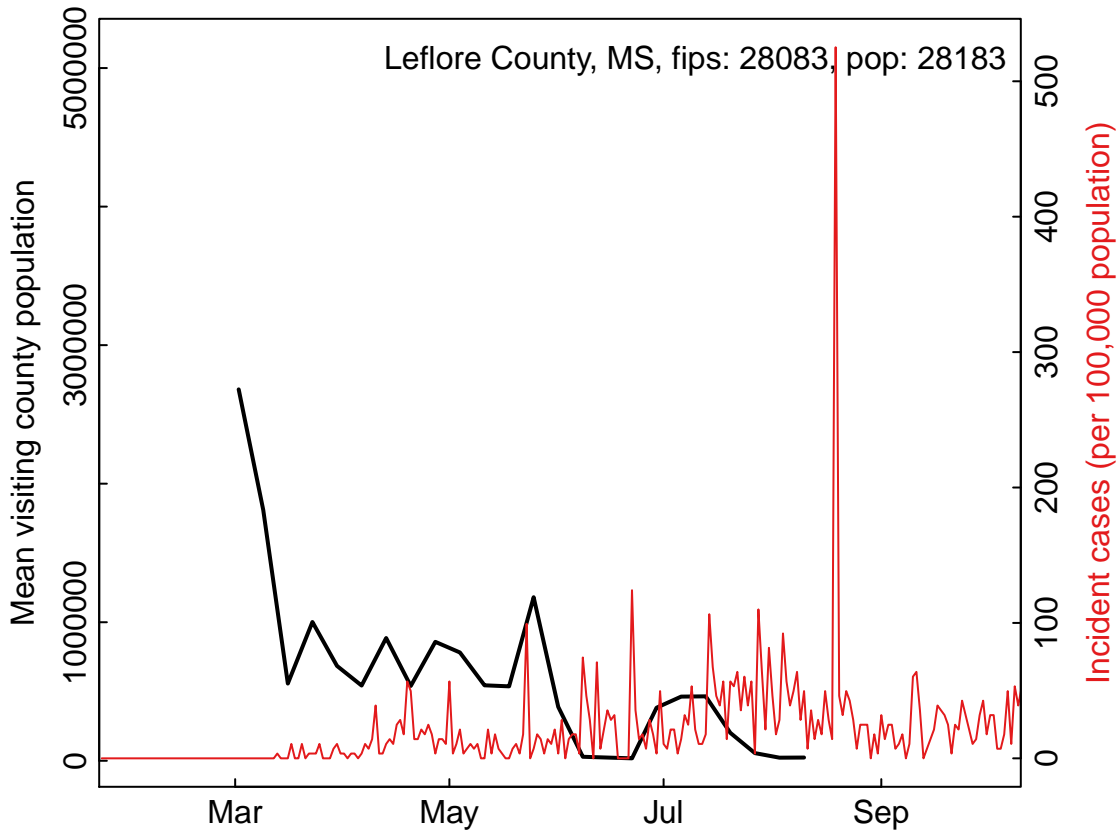

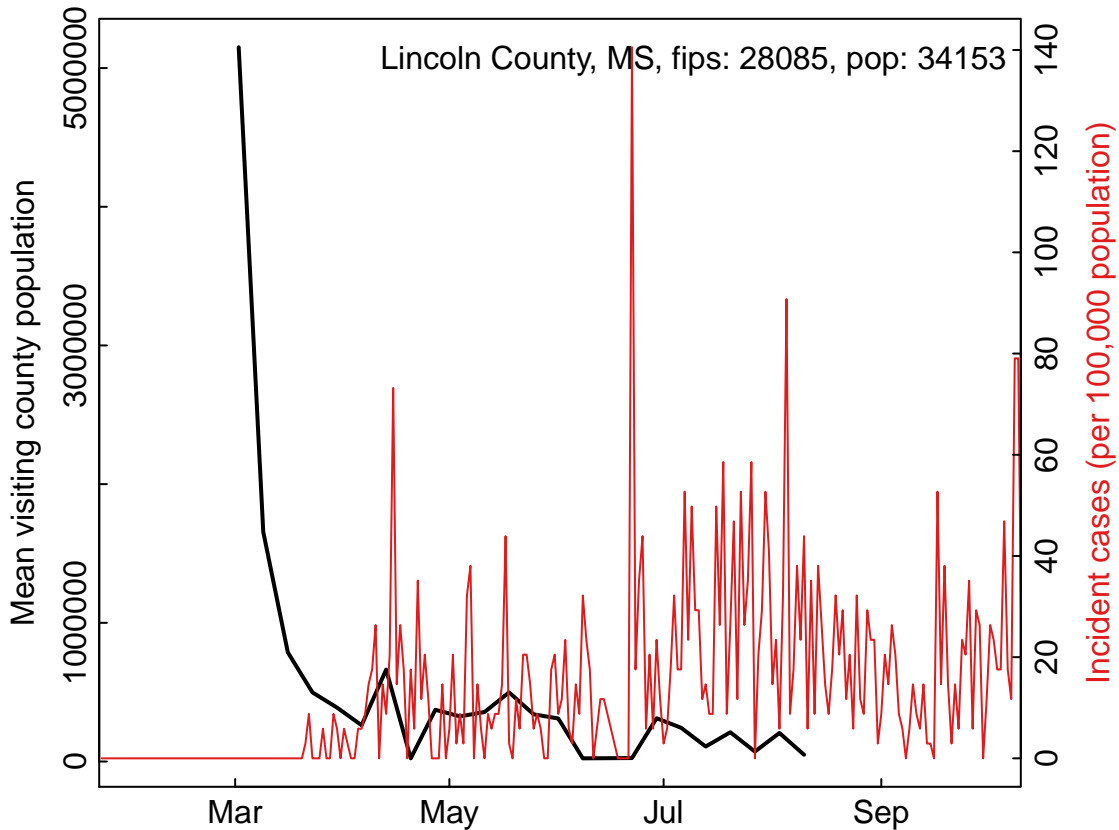

Lowndes County, MS, fips: 28087, pop: 58595

Mean visiting county population

2500000  
1500000  
500000  
0

Mar May Jul Sep

Incident cases (per 100,000 population)

120  
100  
80  
60  
40  
20  
0

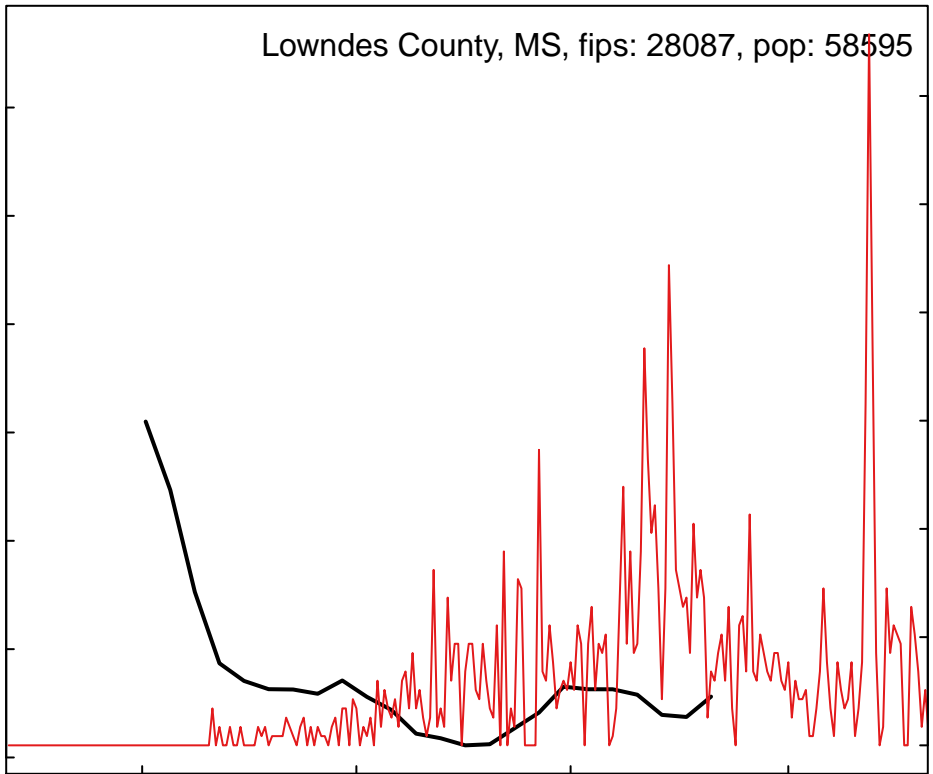



Madison County, MS, fips: 28089, pop: 106272

Mean visiting county population

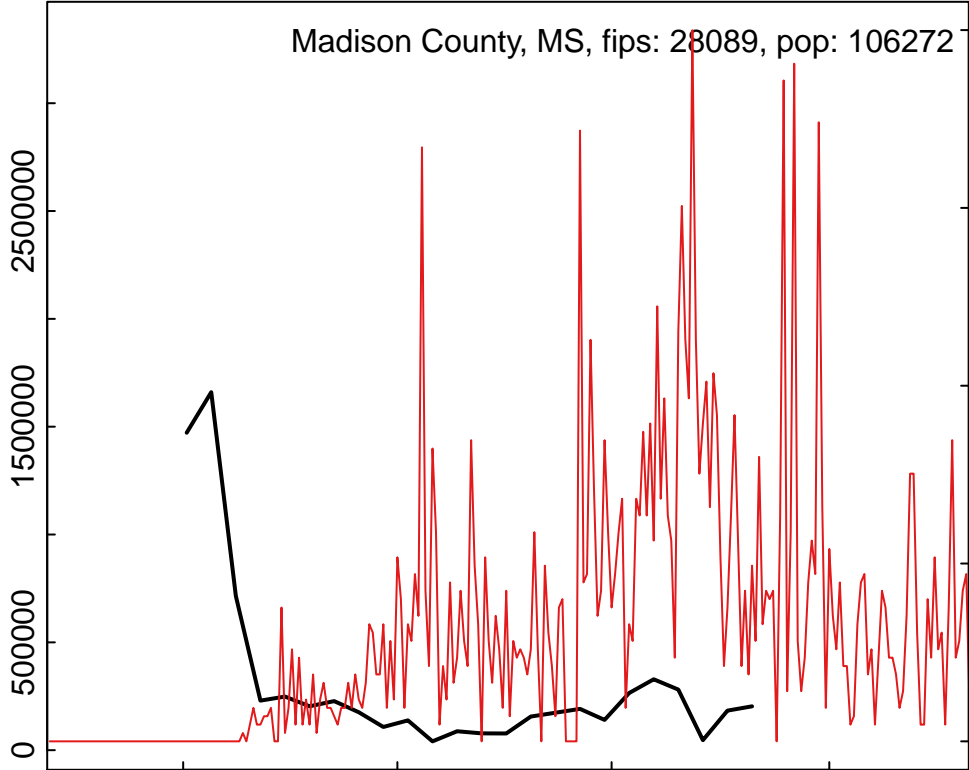

Incident cases (per 100,000 population)

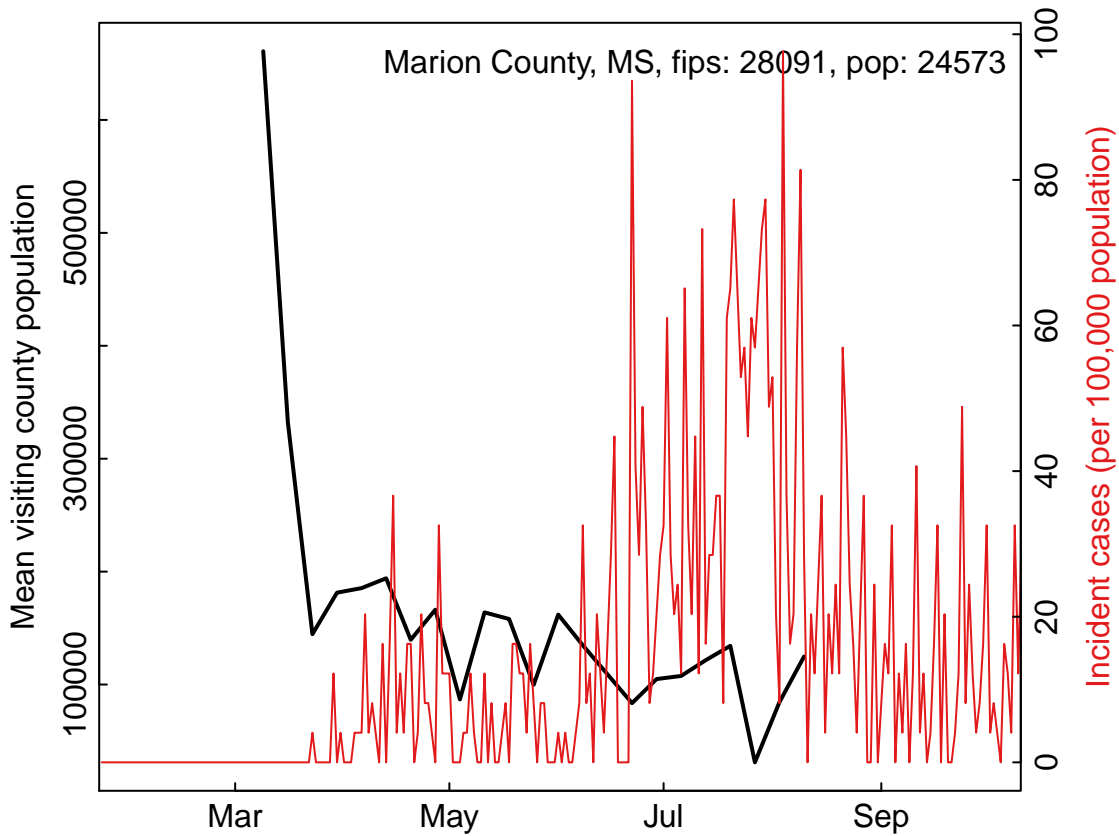

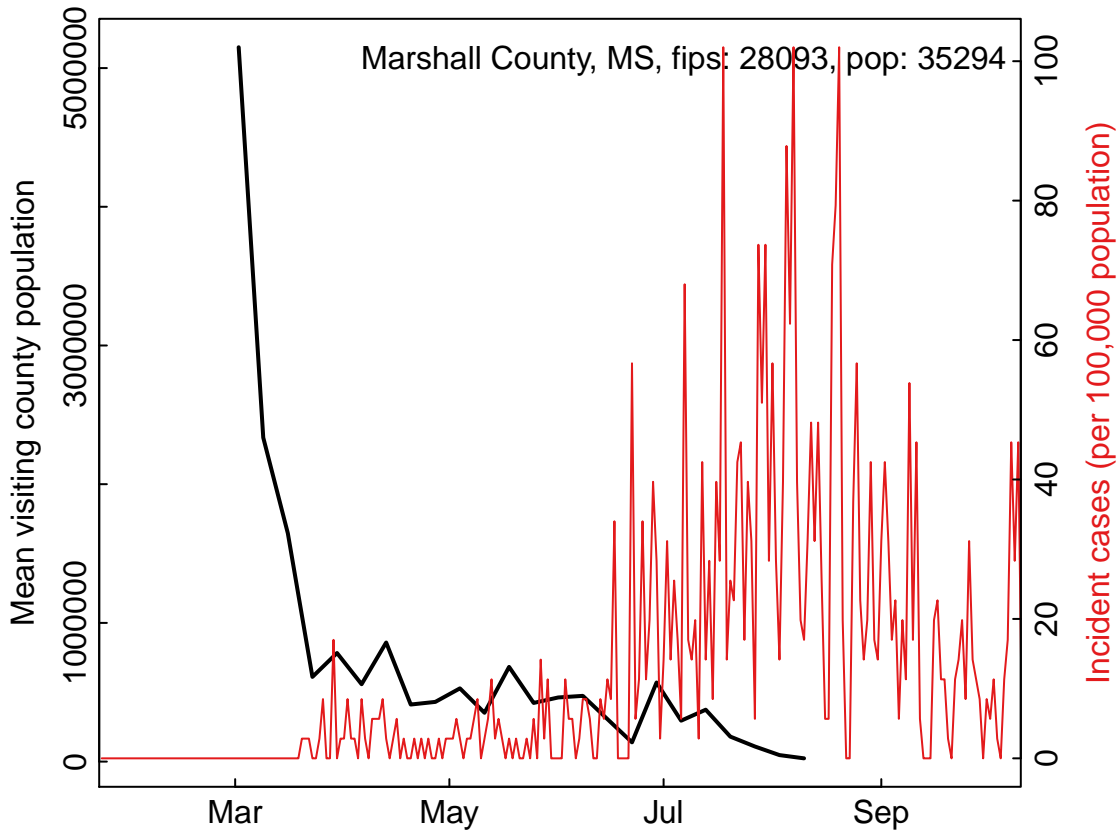

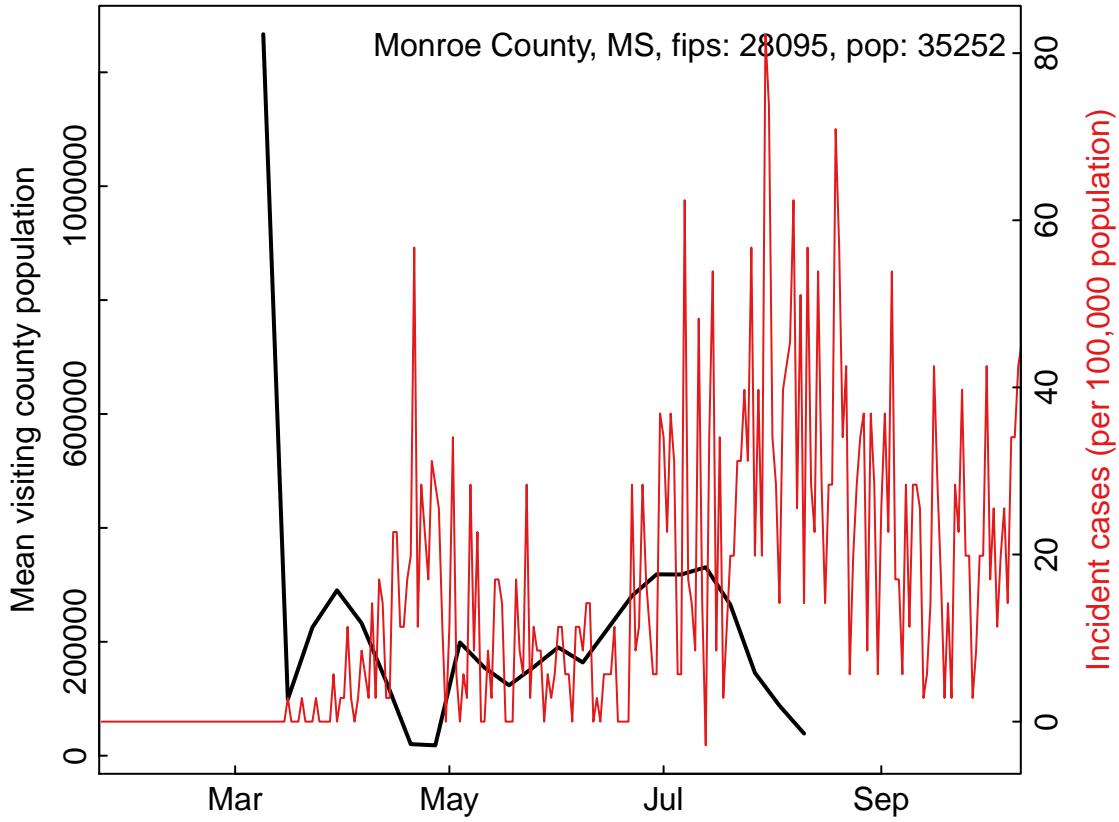

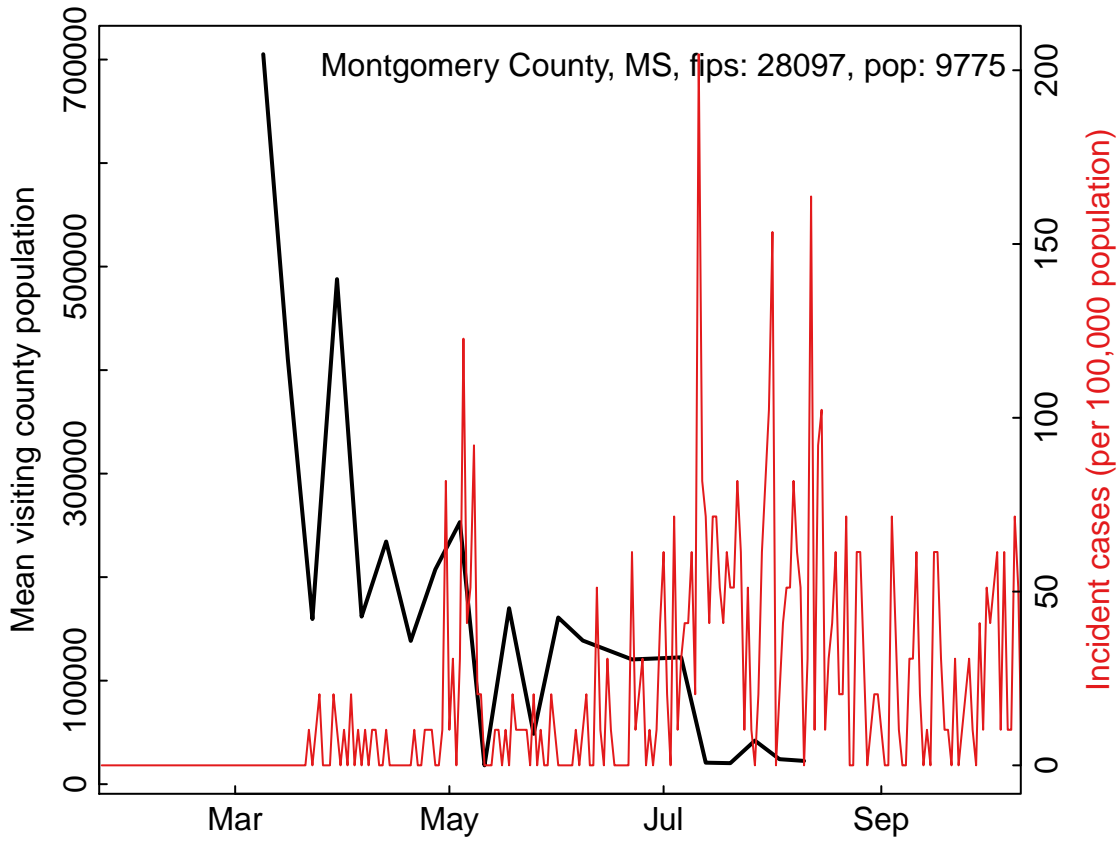

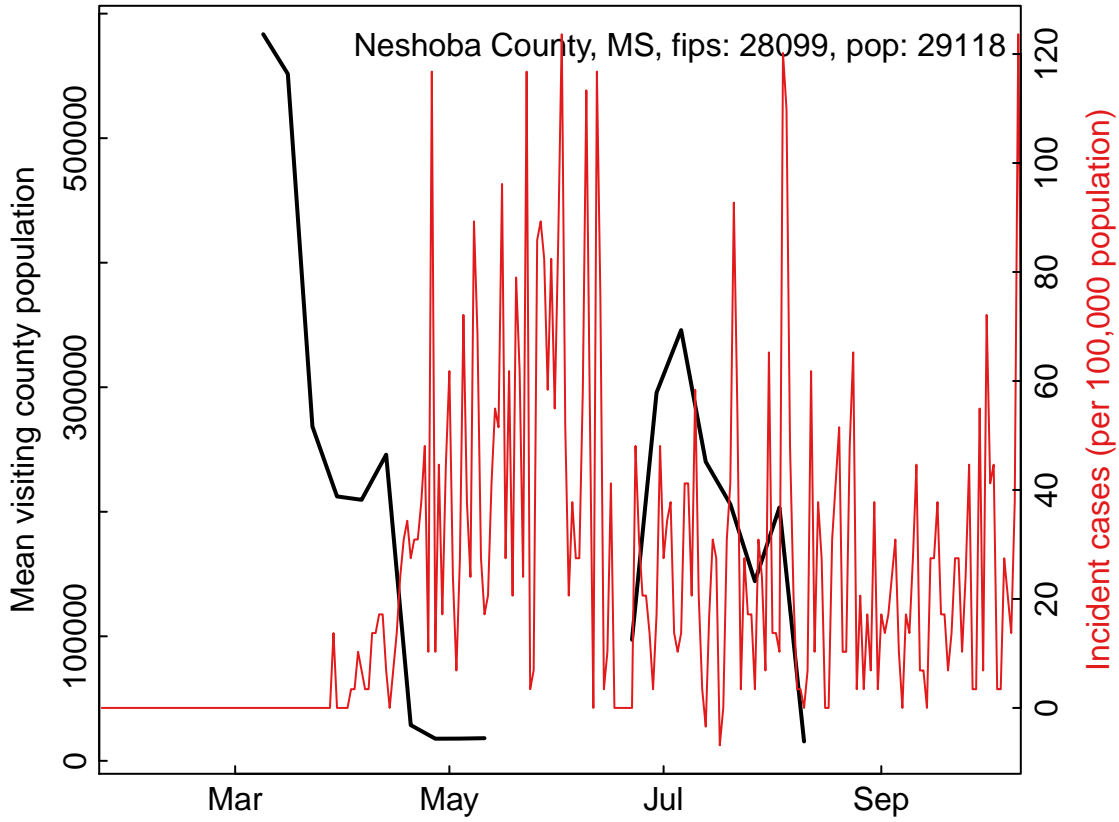

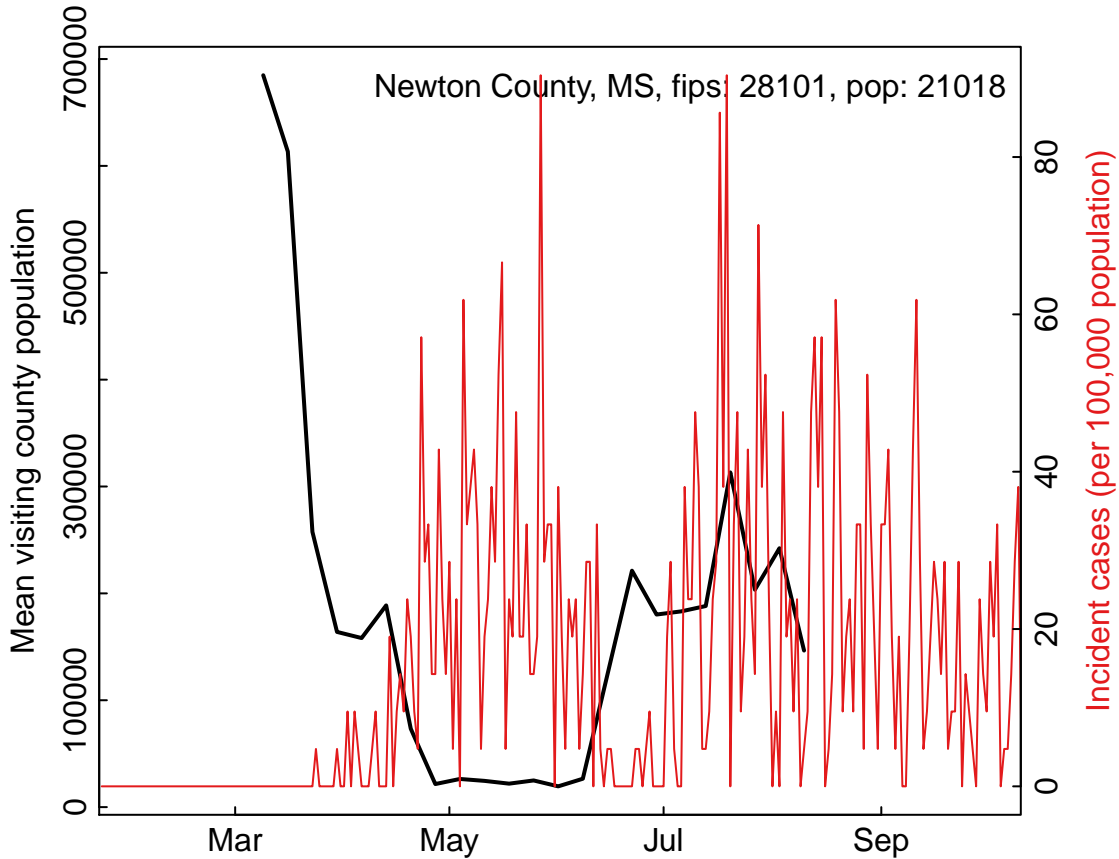

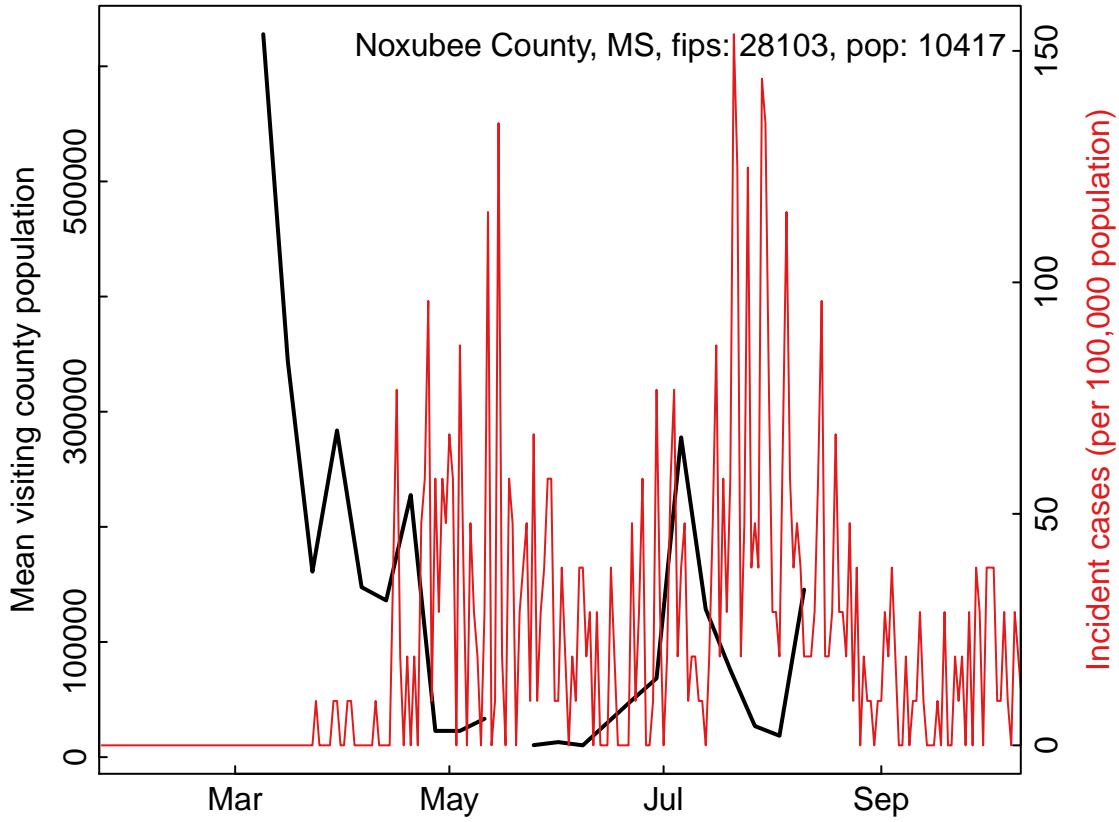



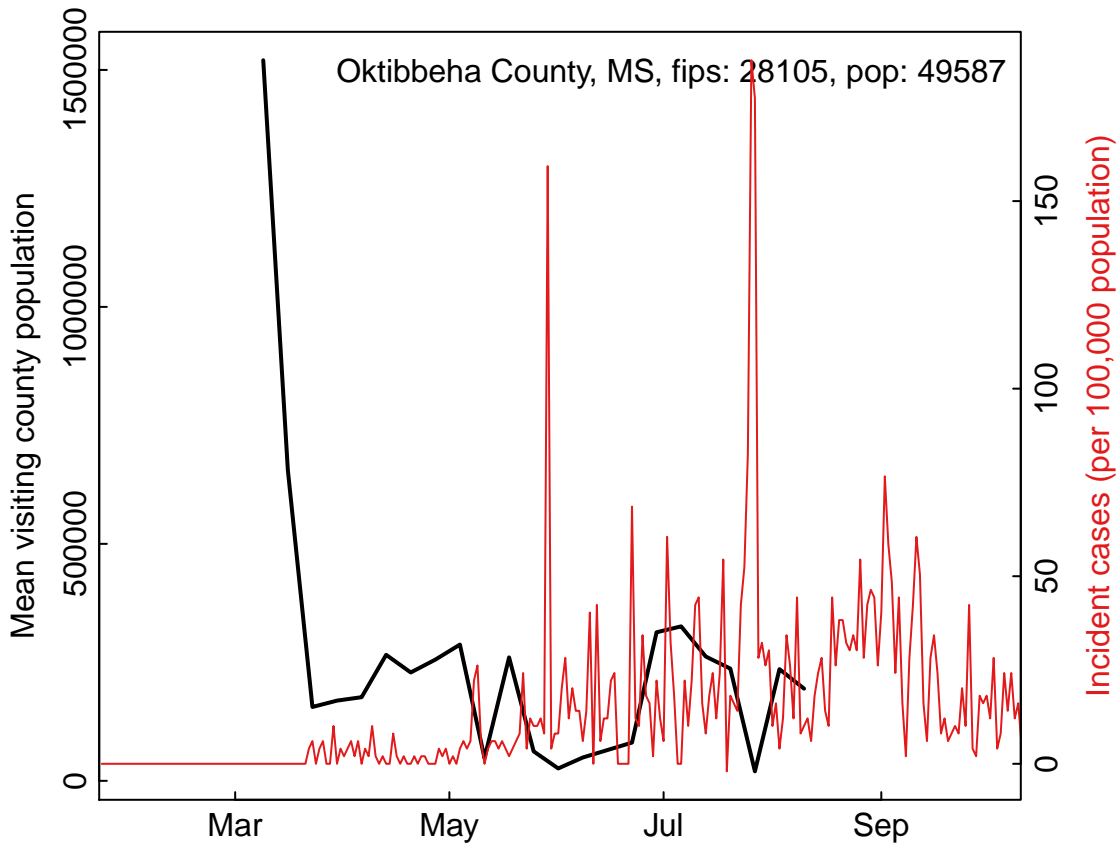

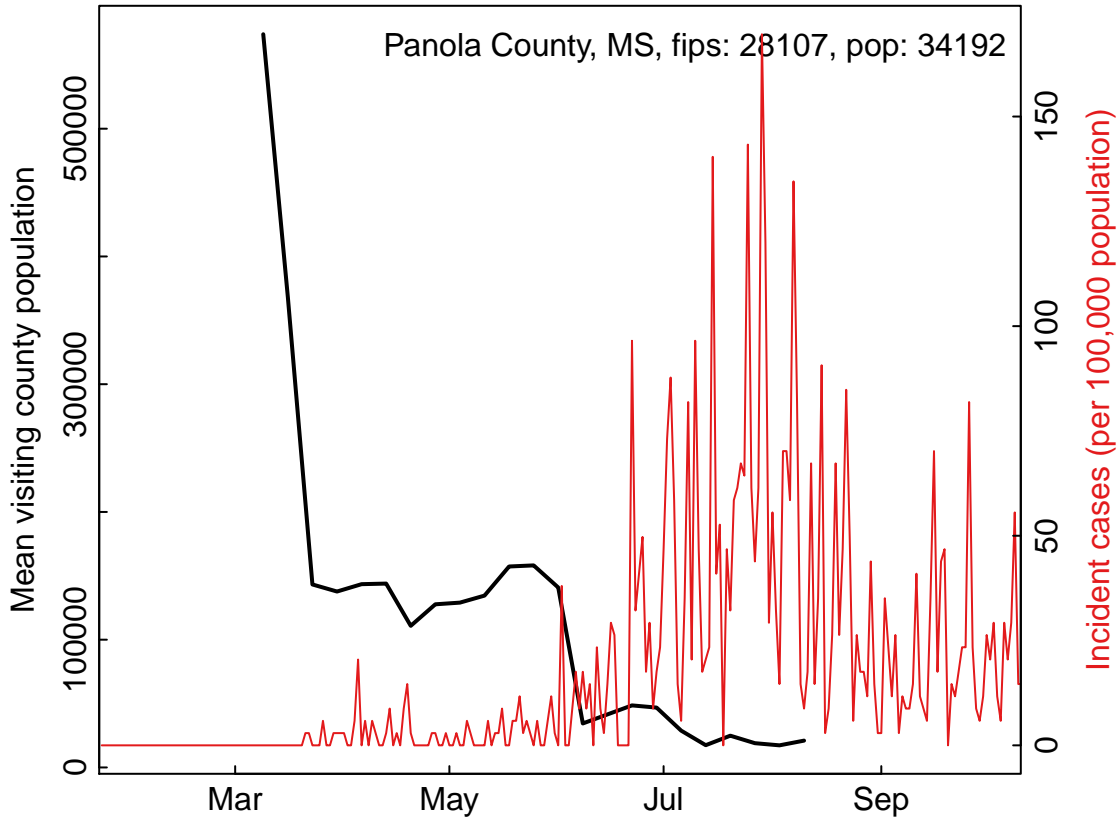

Pearl River County, MS, fips: 28109, pop: 55535

Mean visiting county population

2500000  
1500000  
500000

Mar

May

Jul

Sep

30  
20  
10  
0

Incident cases (per 100,000 population)

0

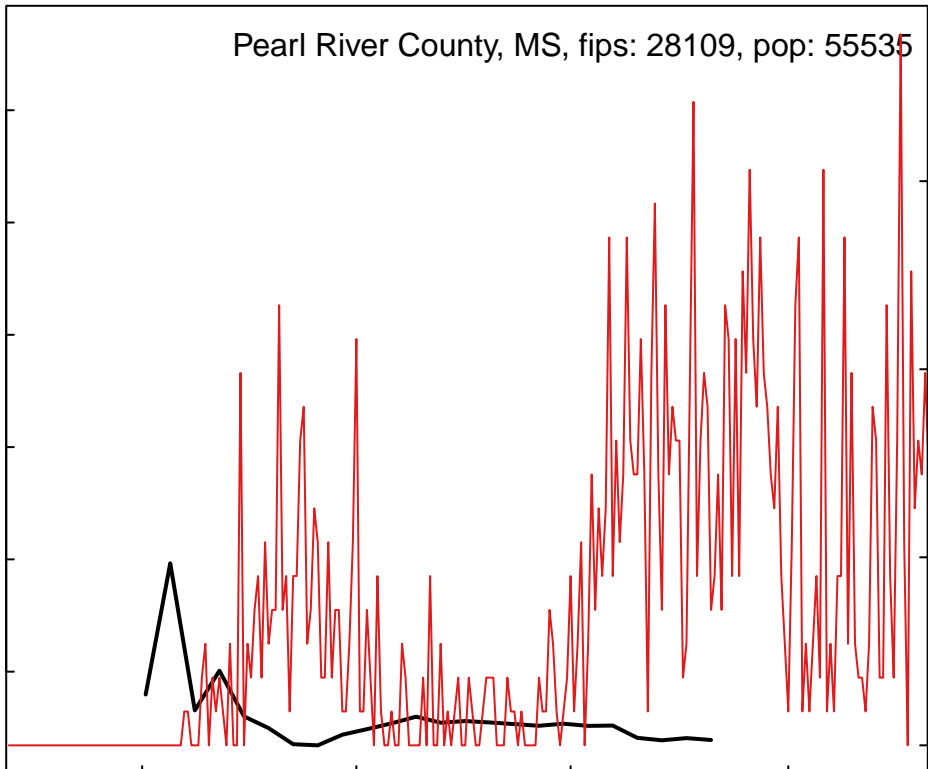

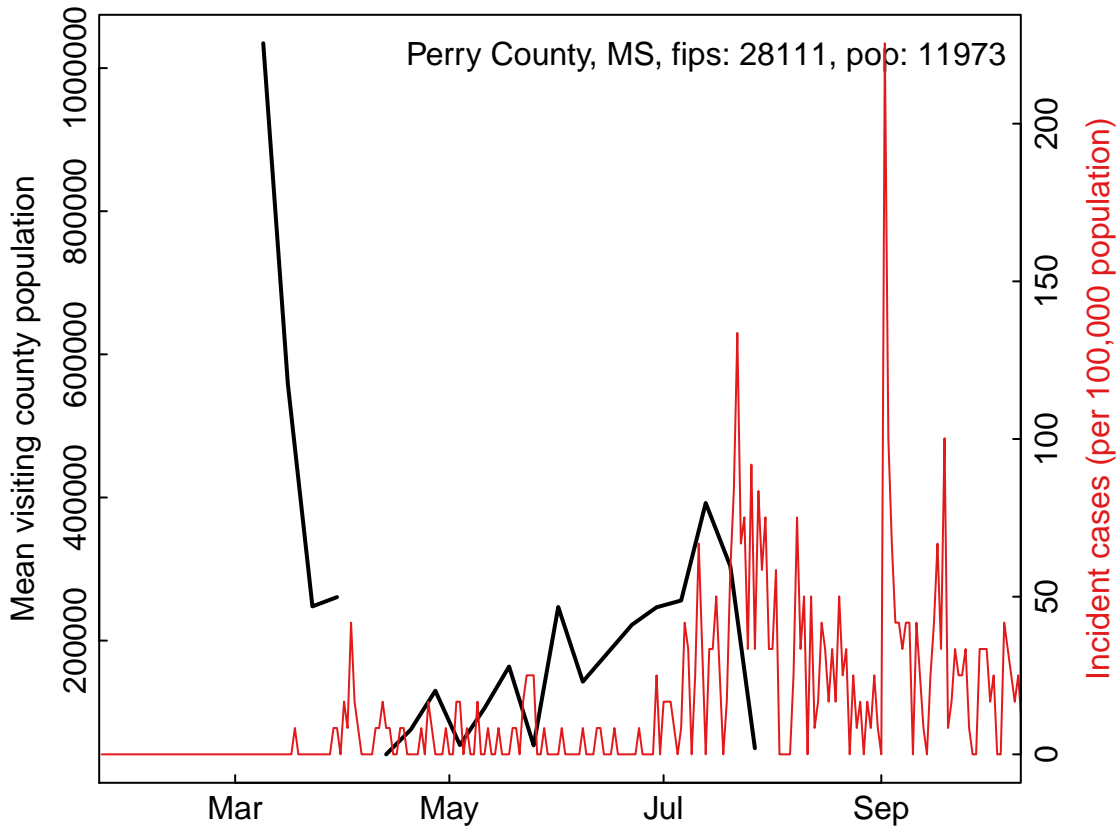

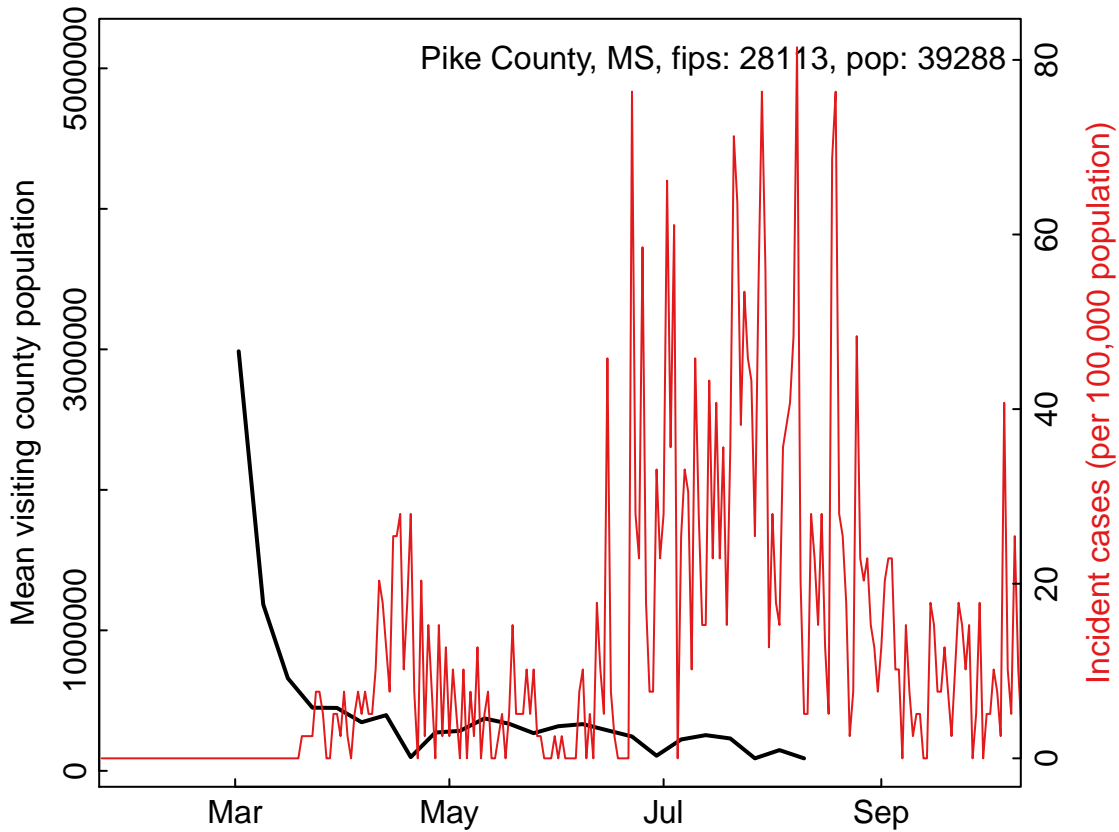

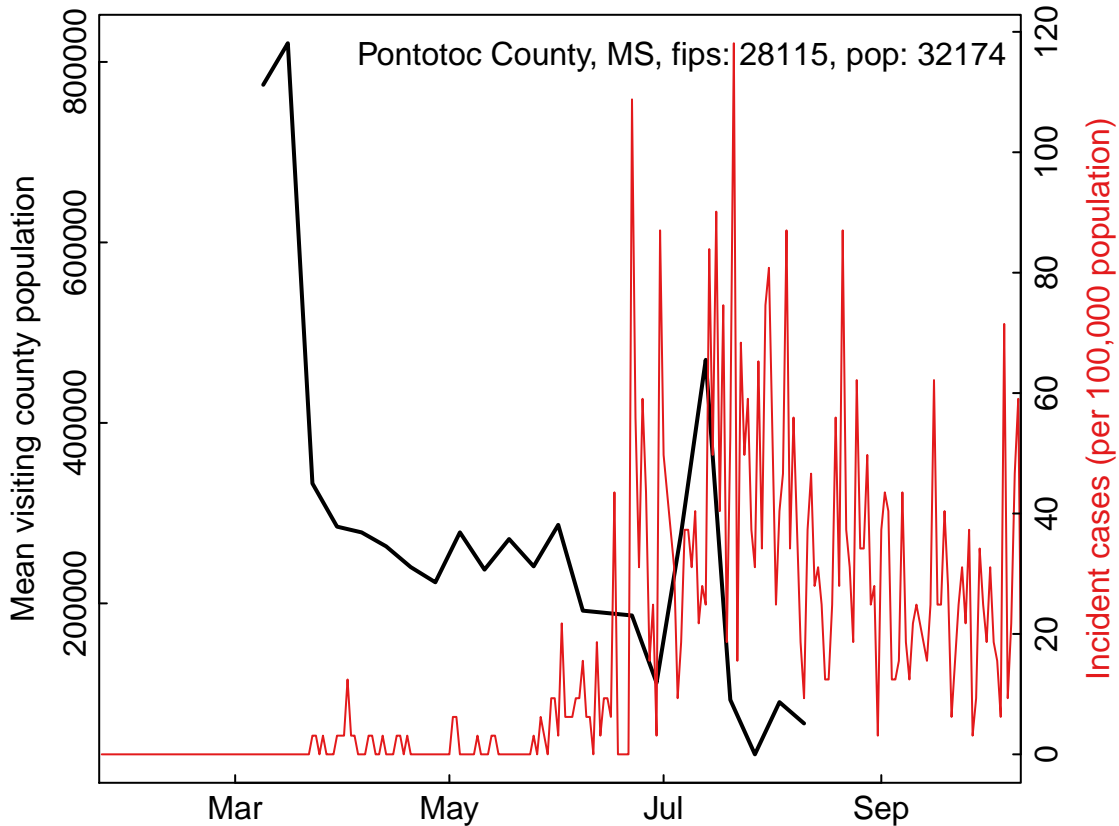

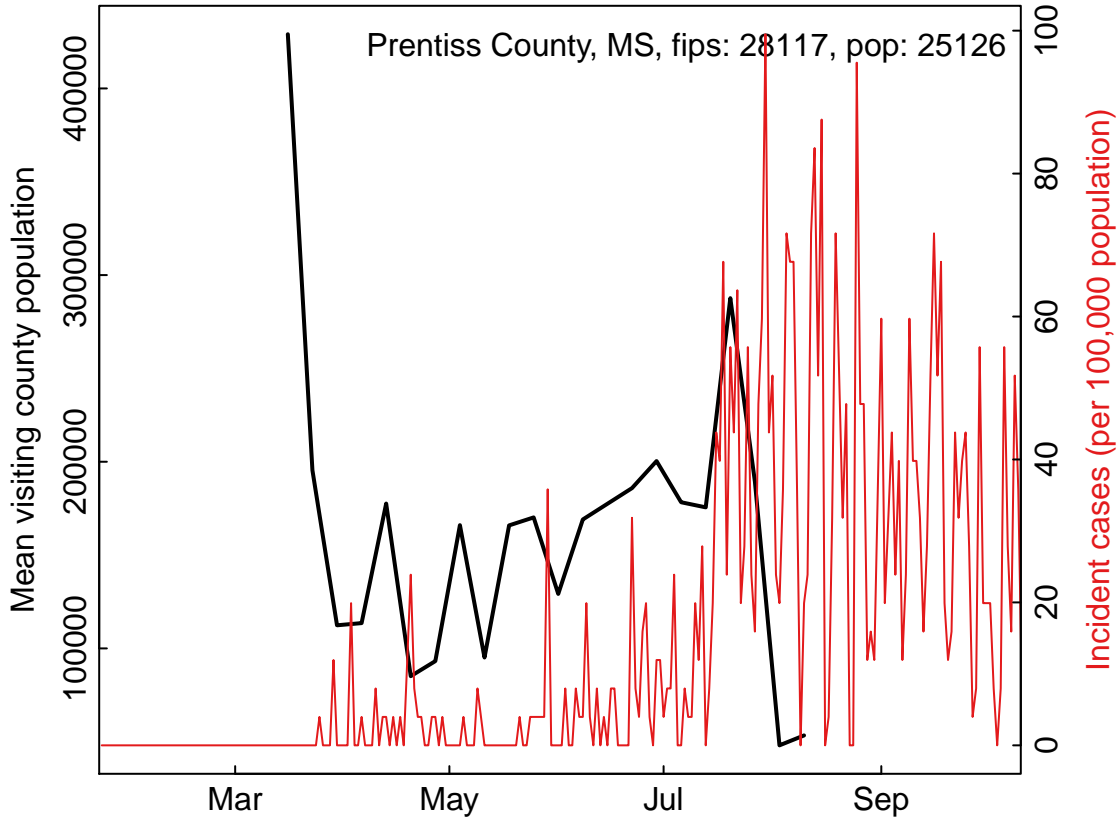

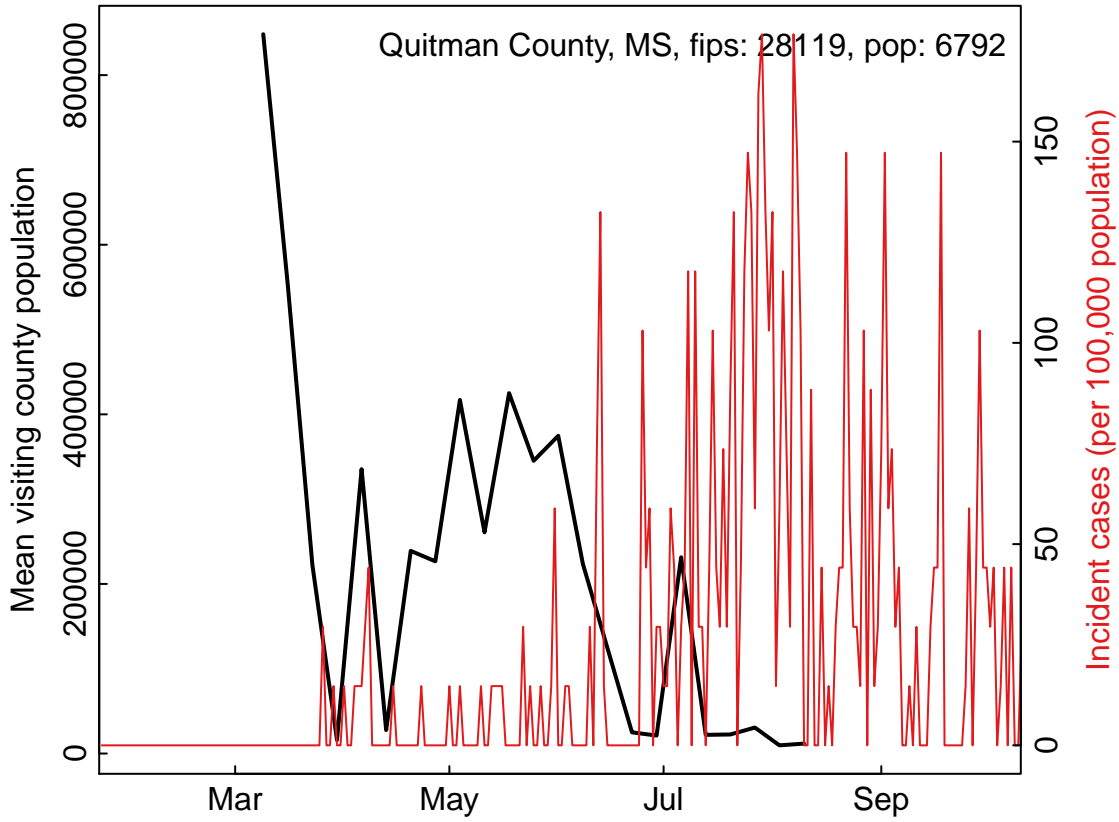



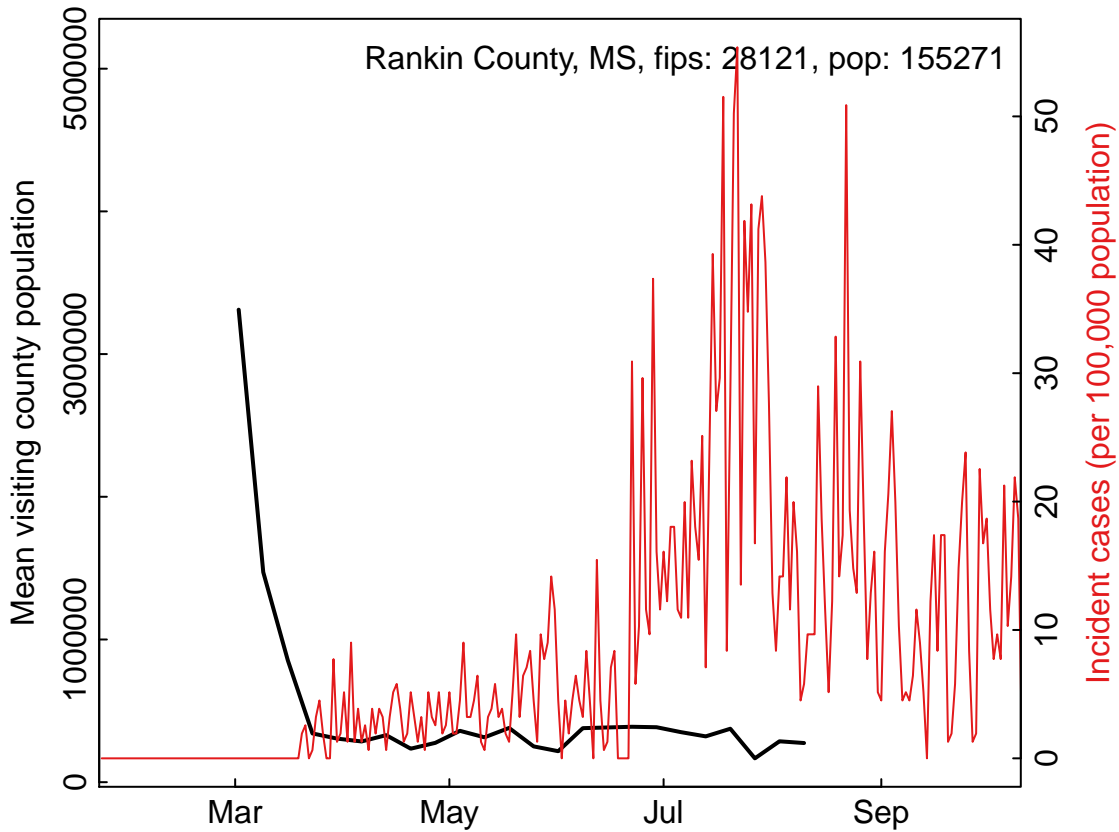

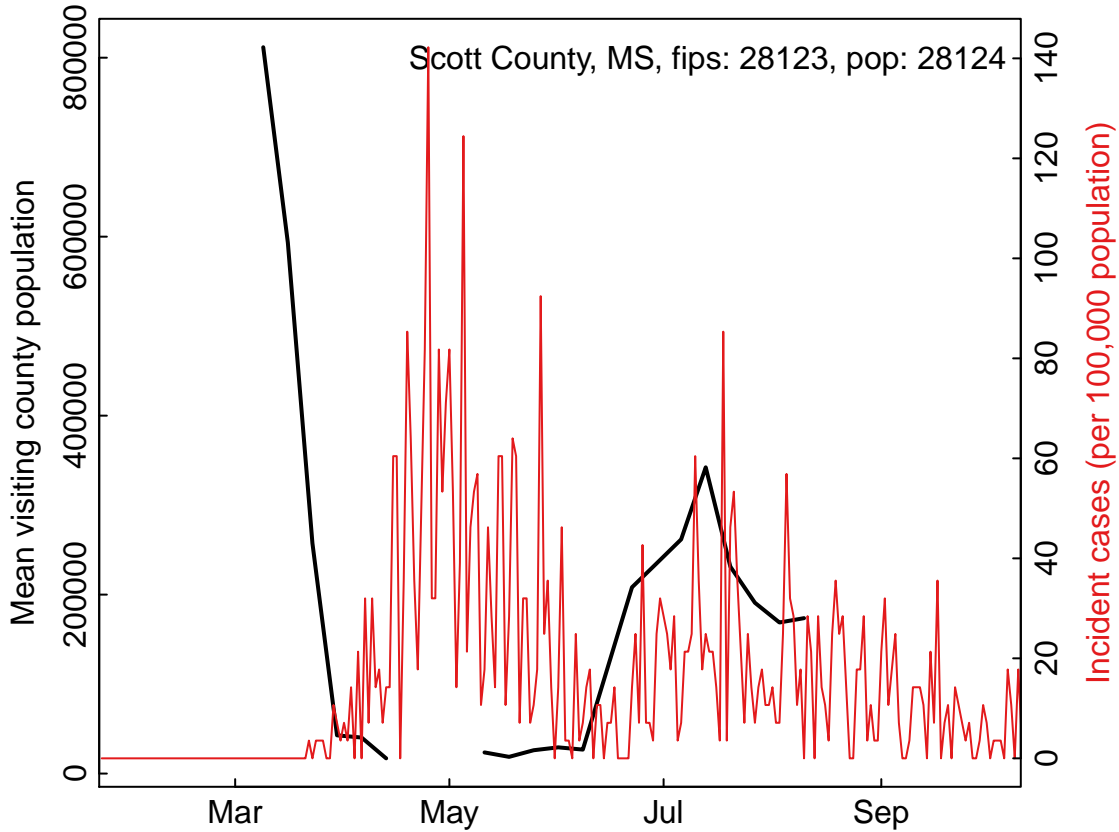

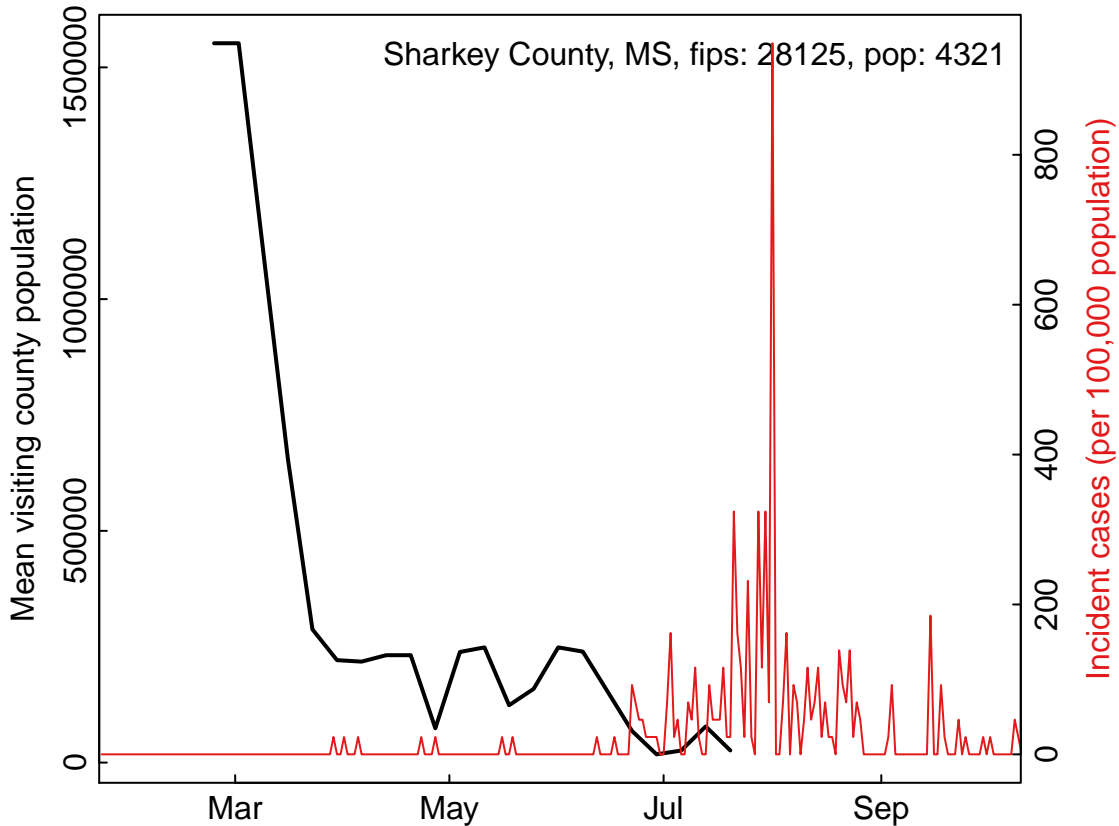

Simpson County, MS, fips: 28127, pop: 26658

Mean visiting county population

0  
200000  
400000  
600000  
800000

Mar

May

Jul

Sep

Incident cases (per 100,000 population)

0  
50  
100  
150

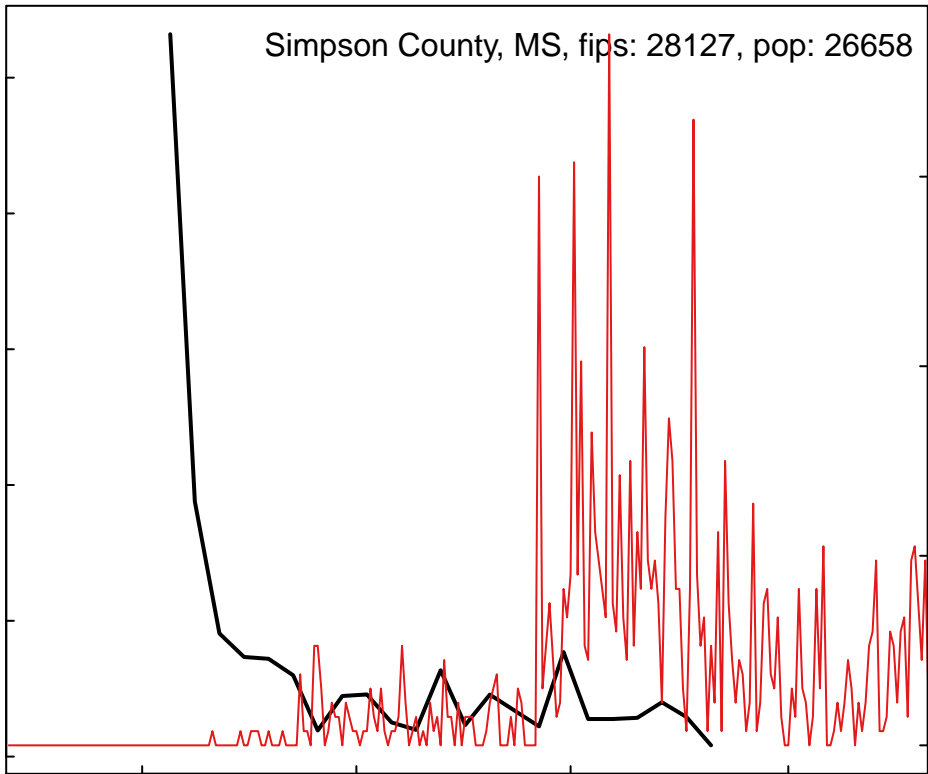

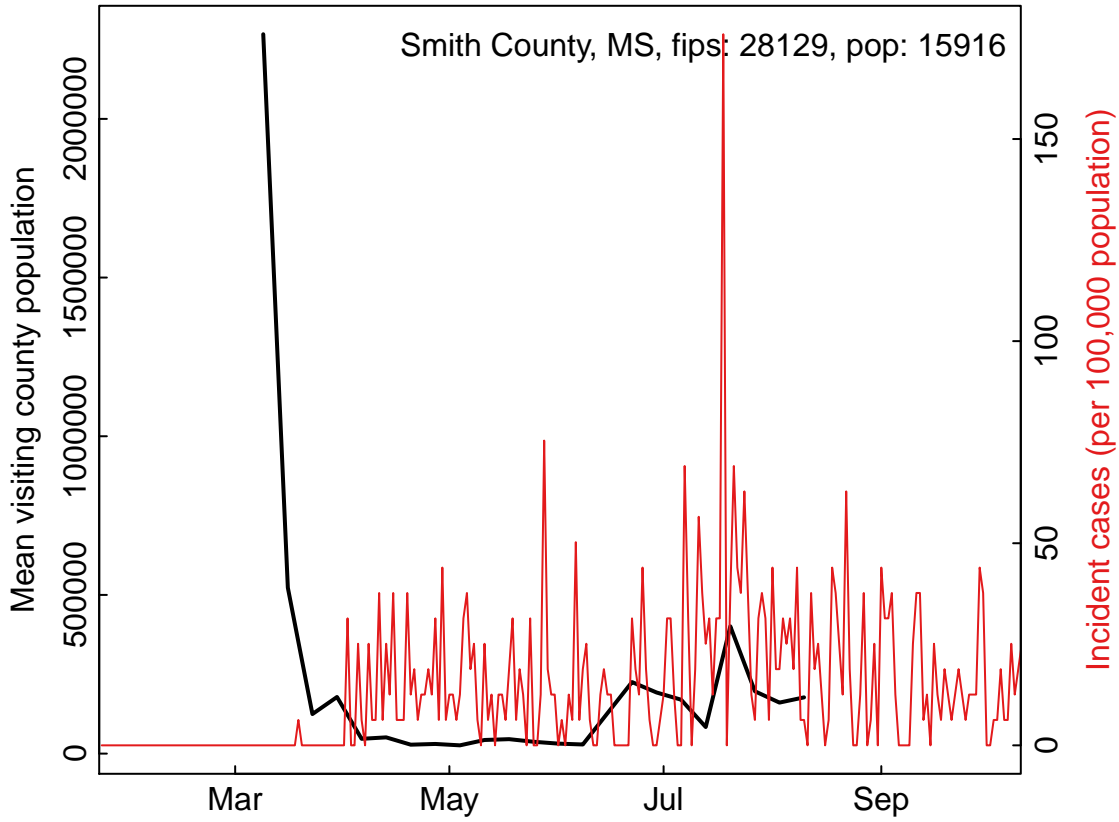

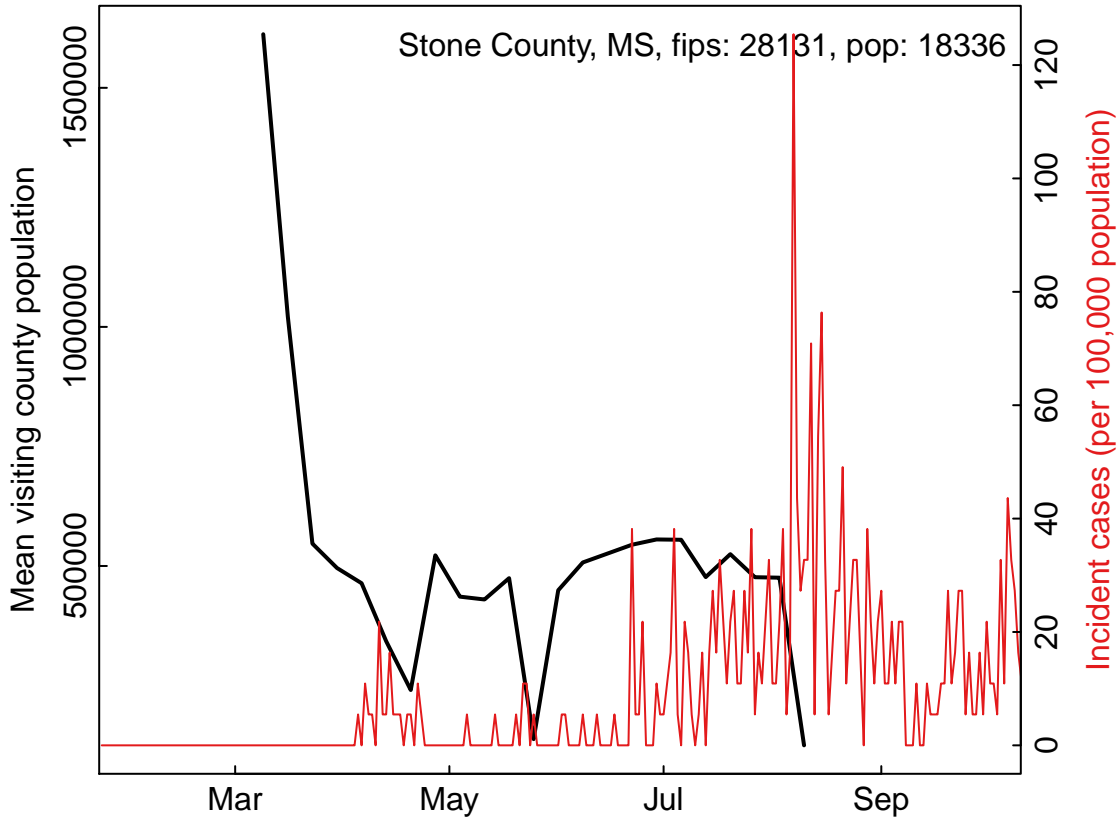

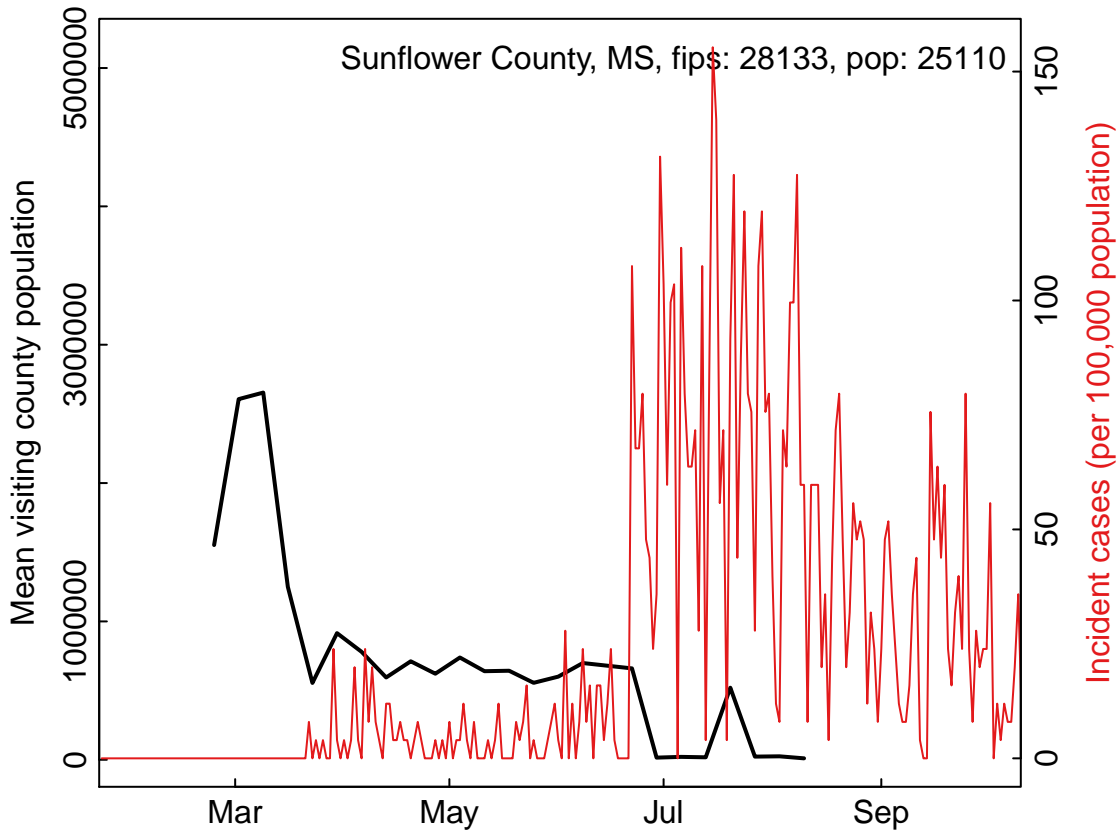

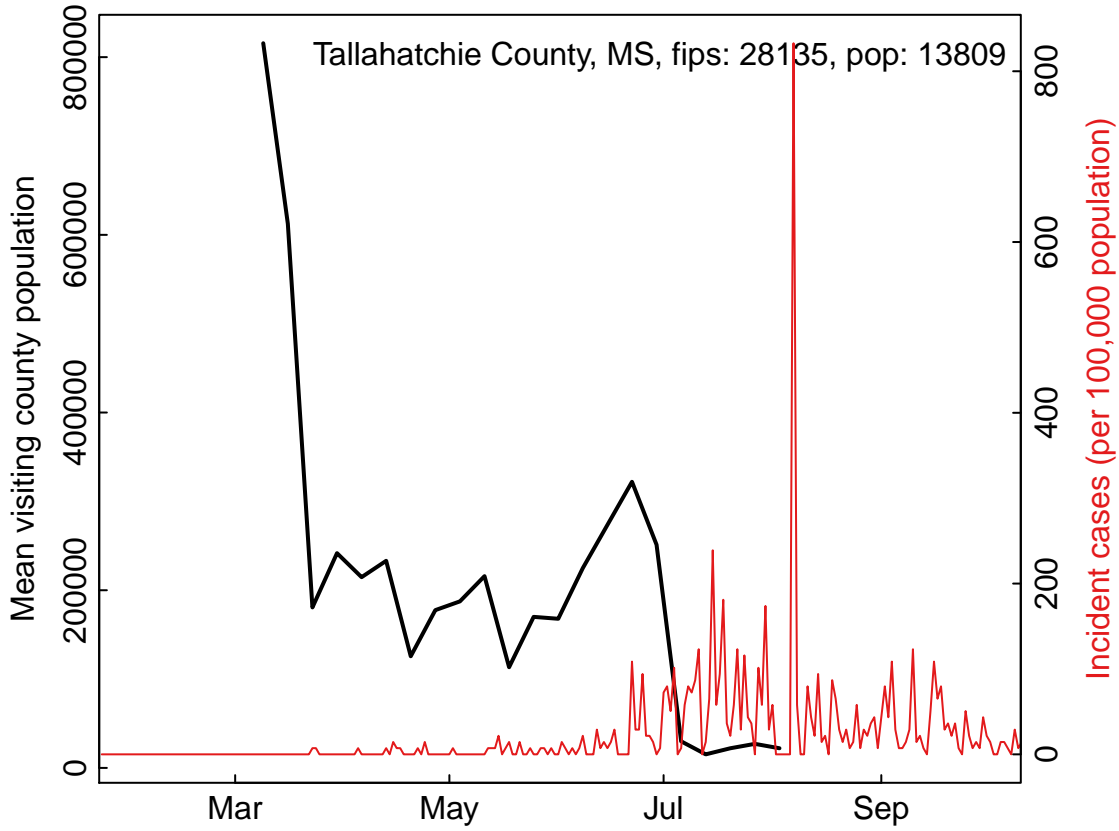



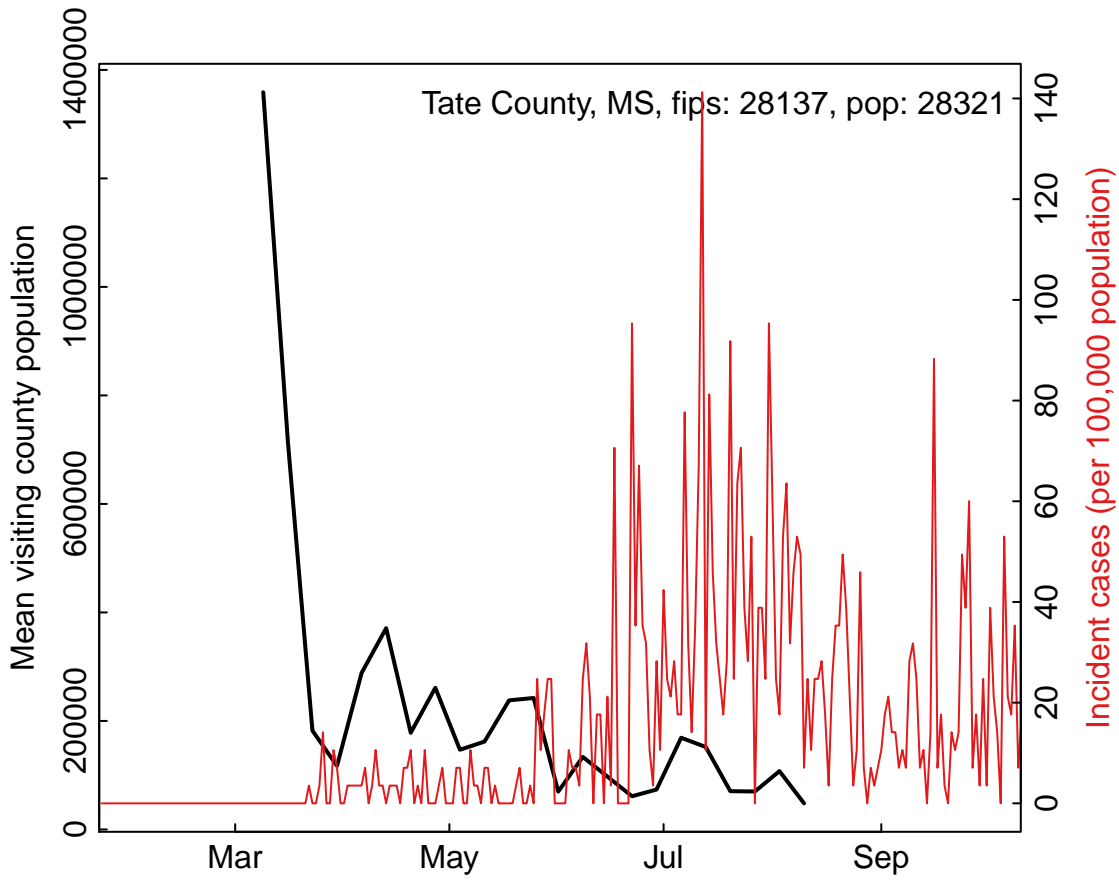

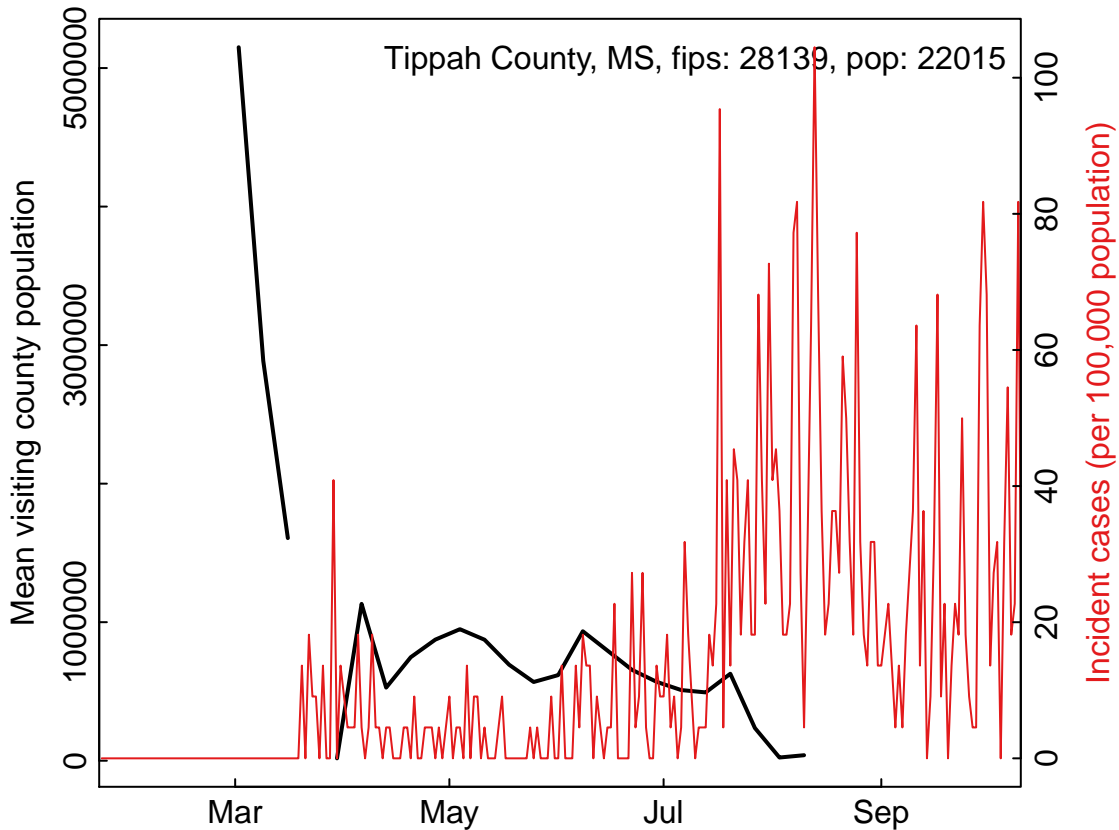

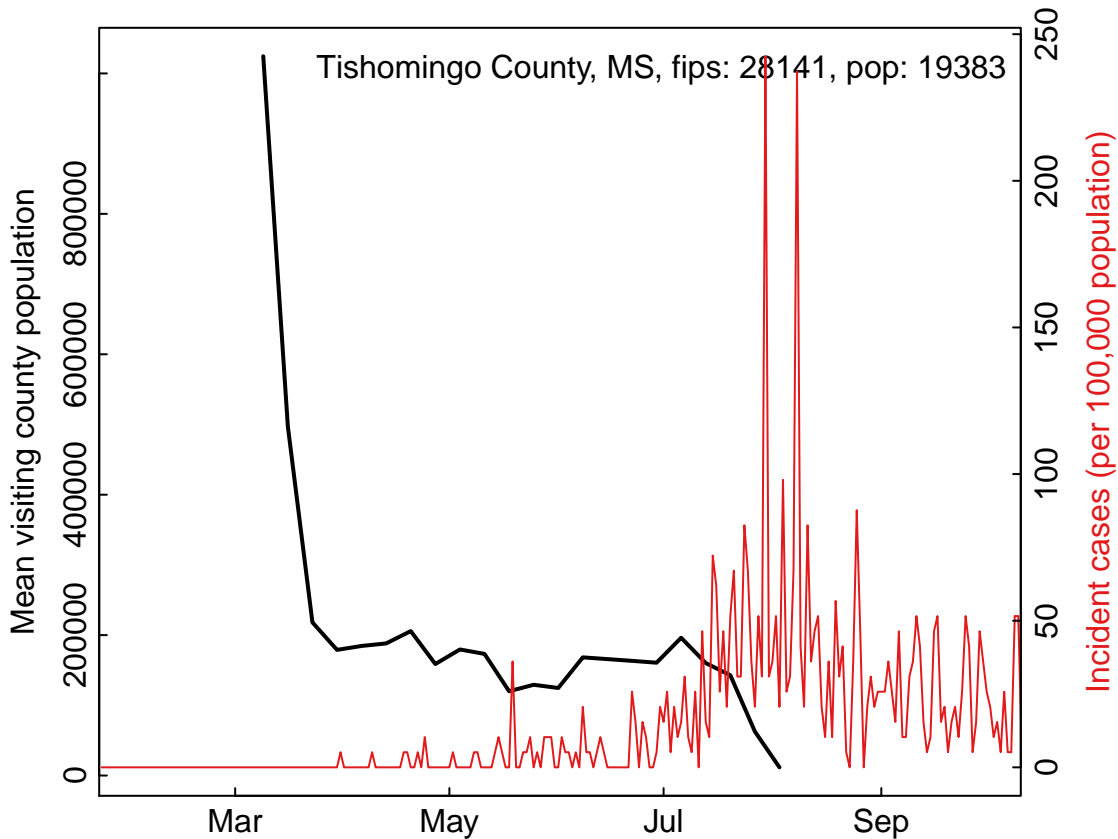

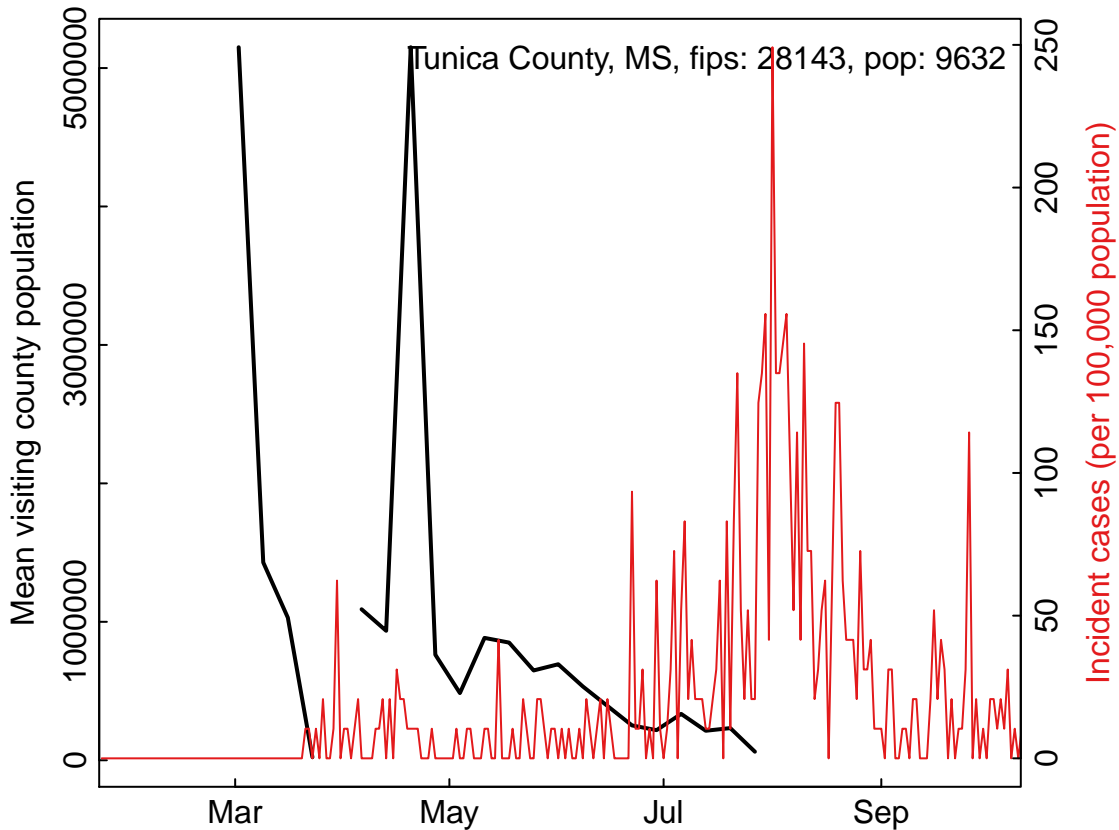

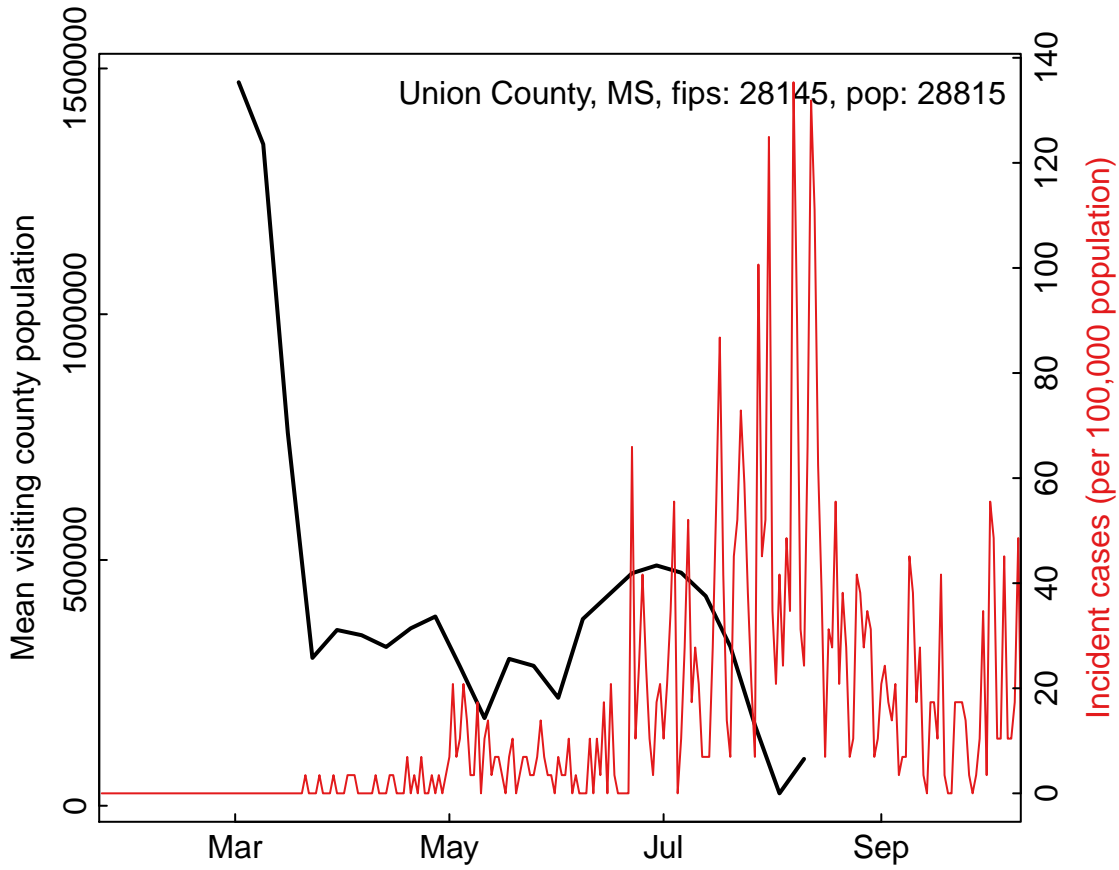

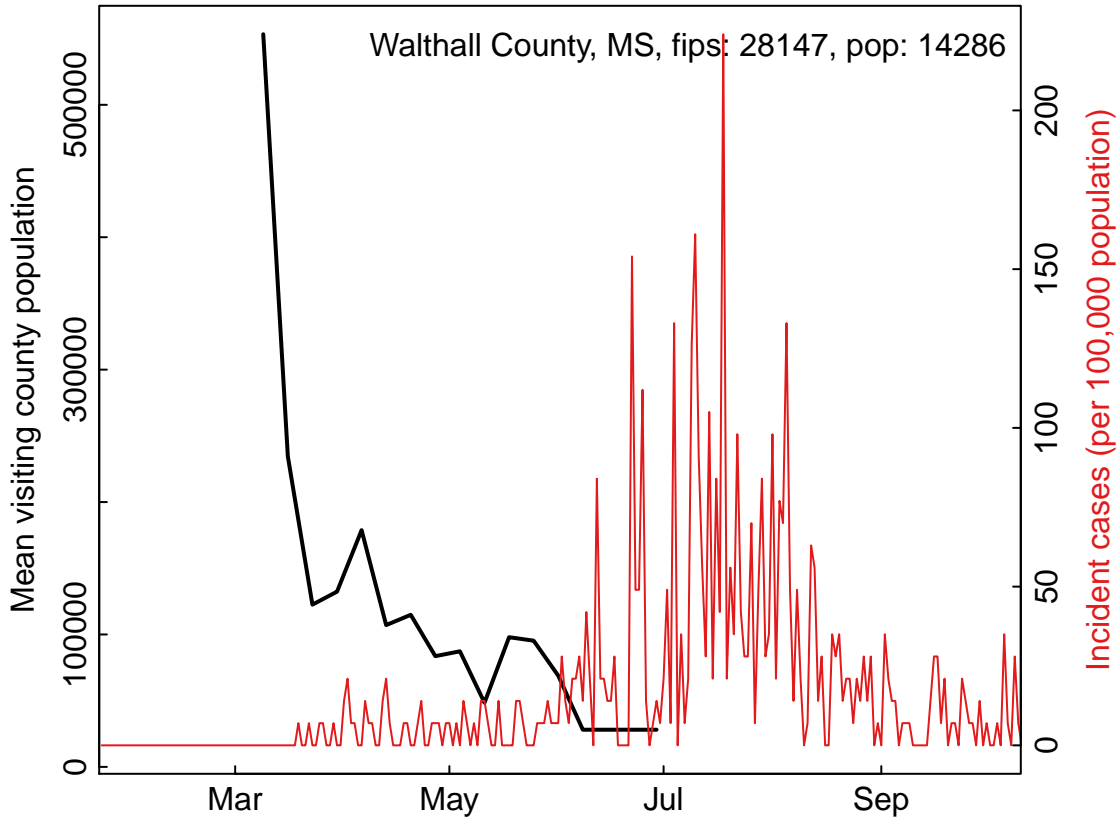

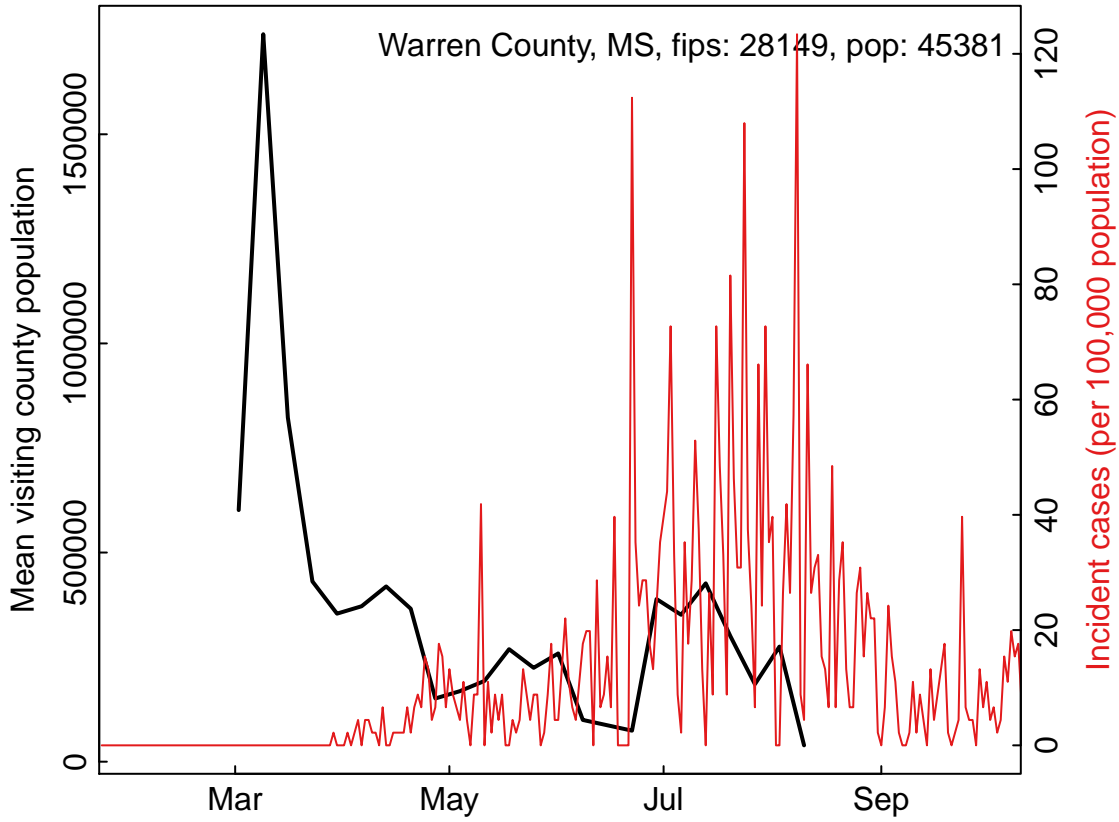

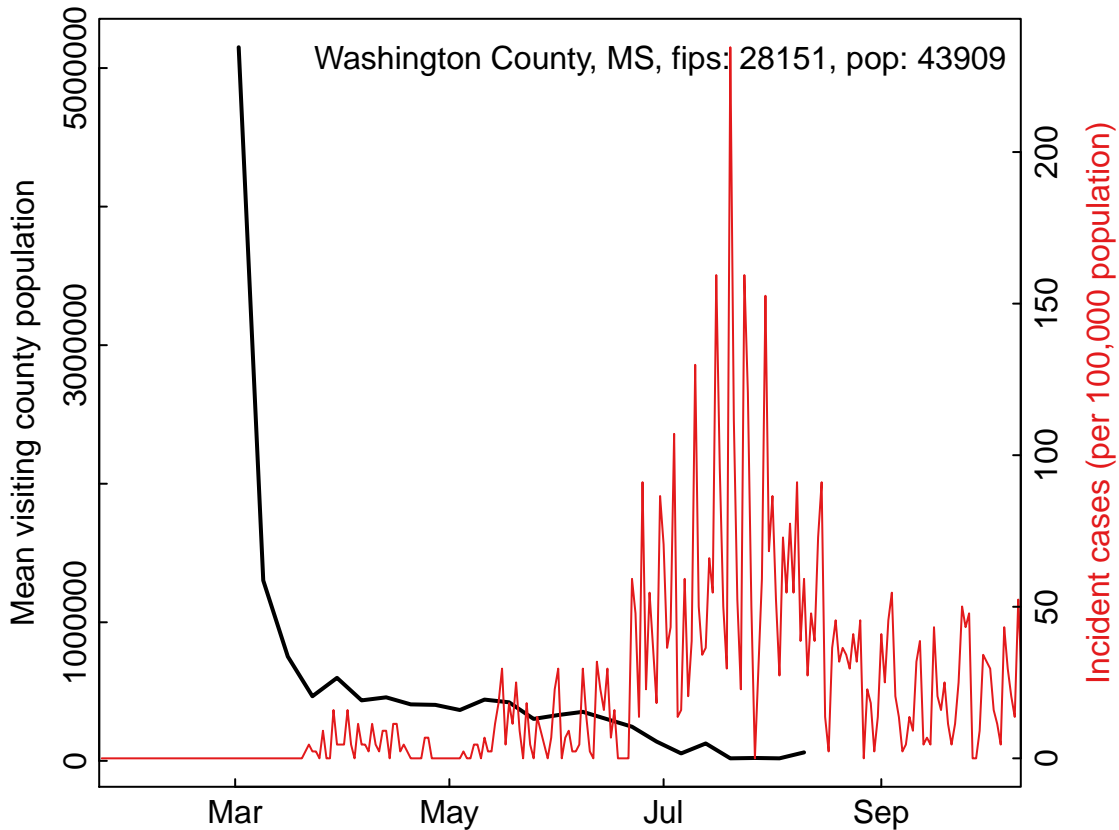



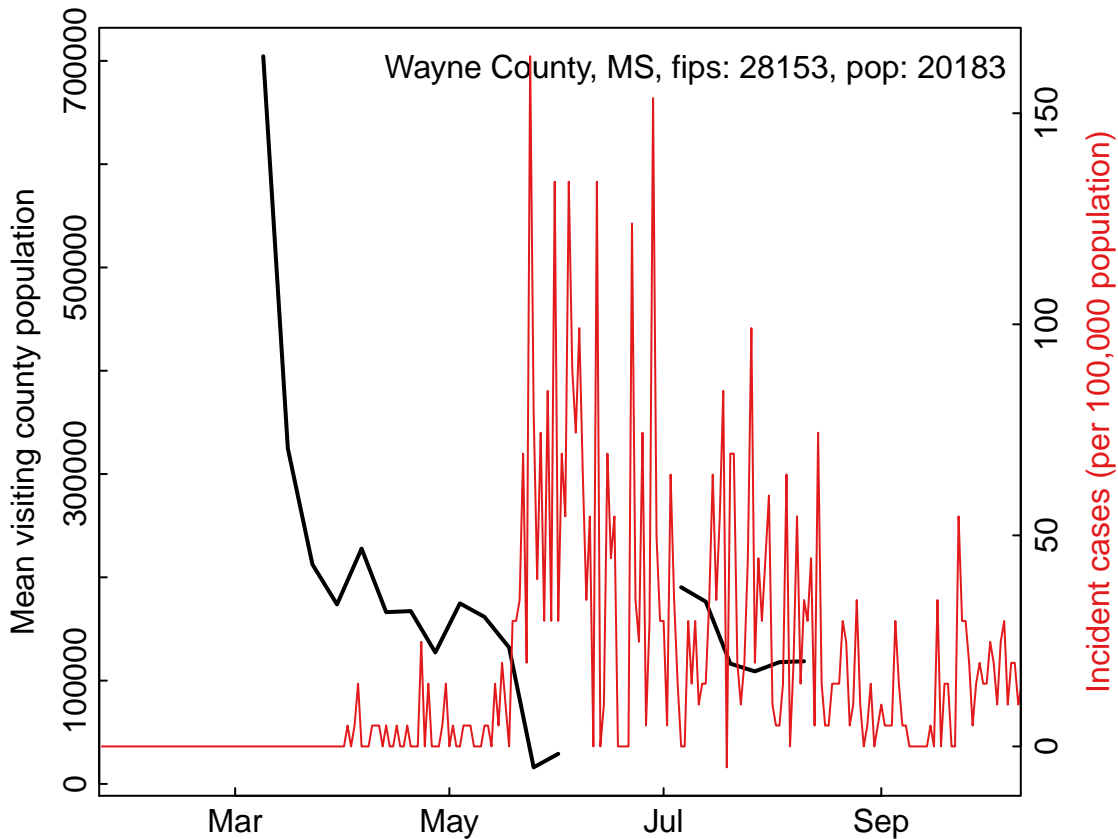

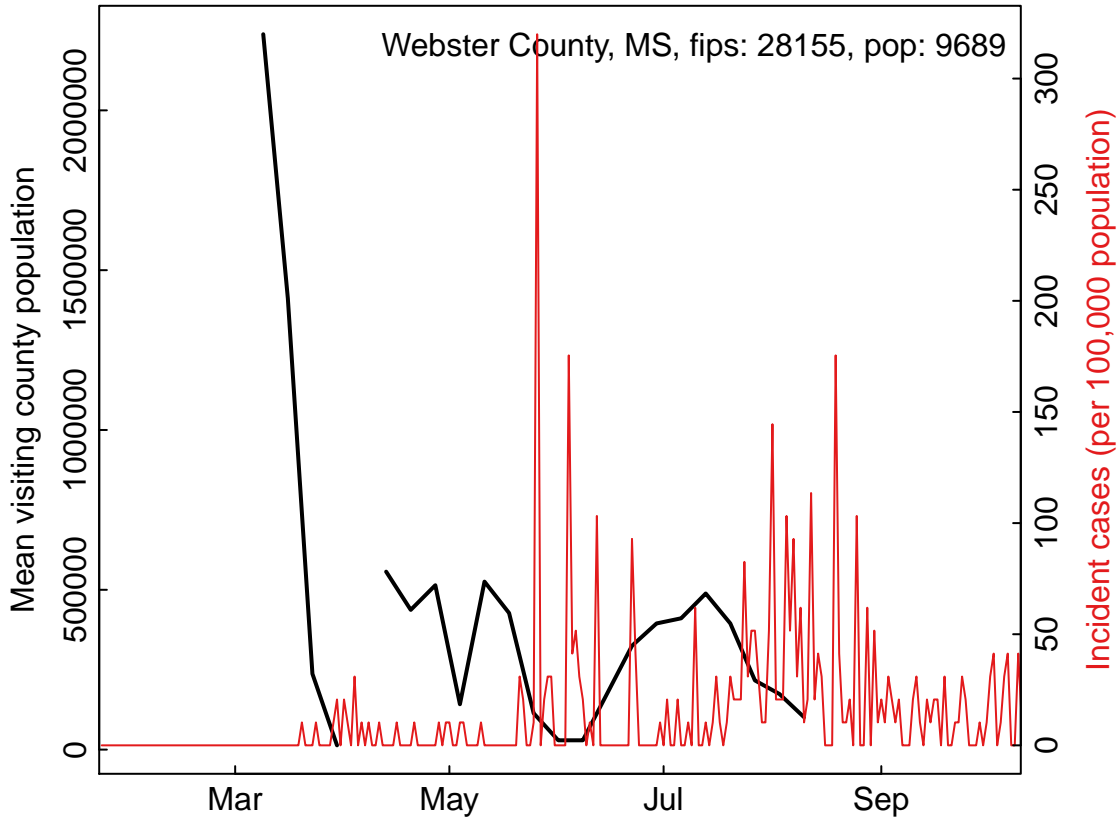

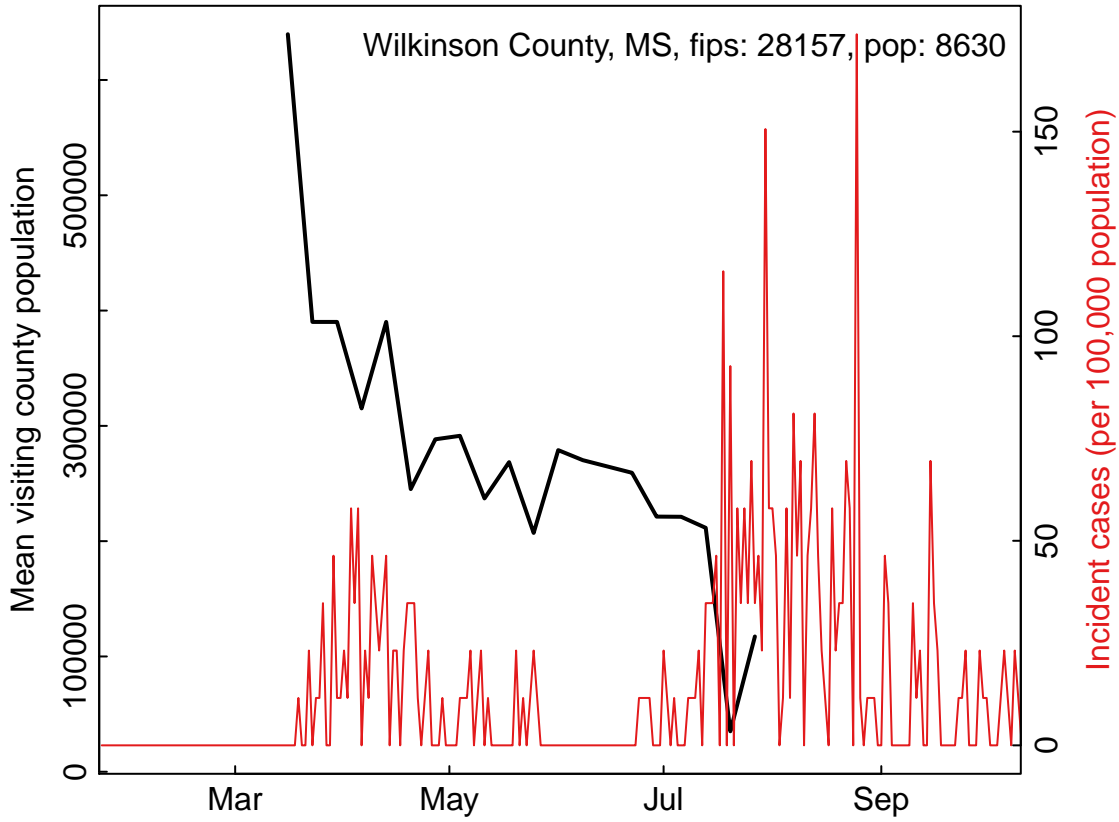

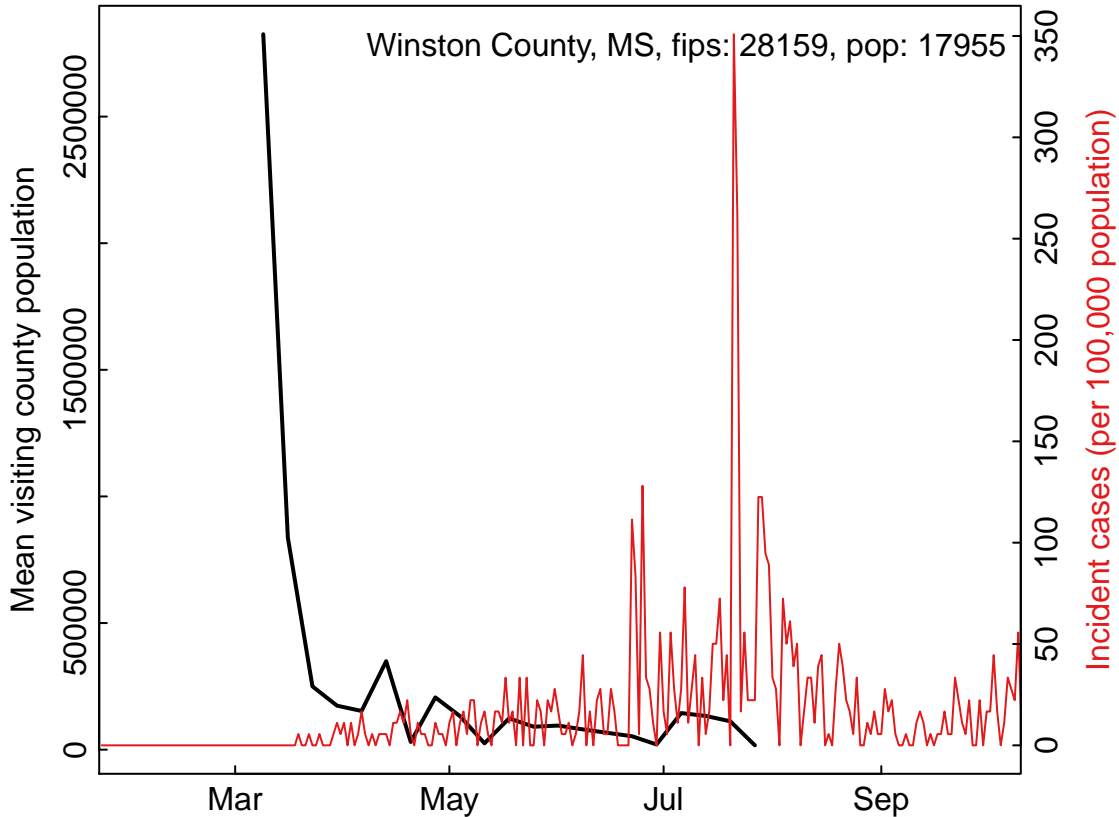

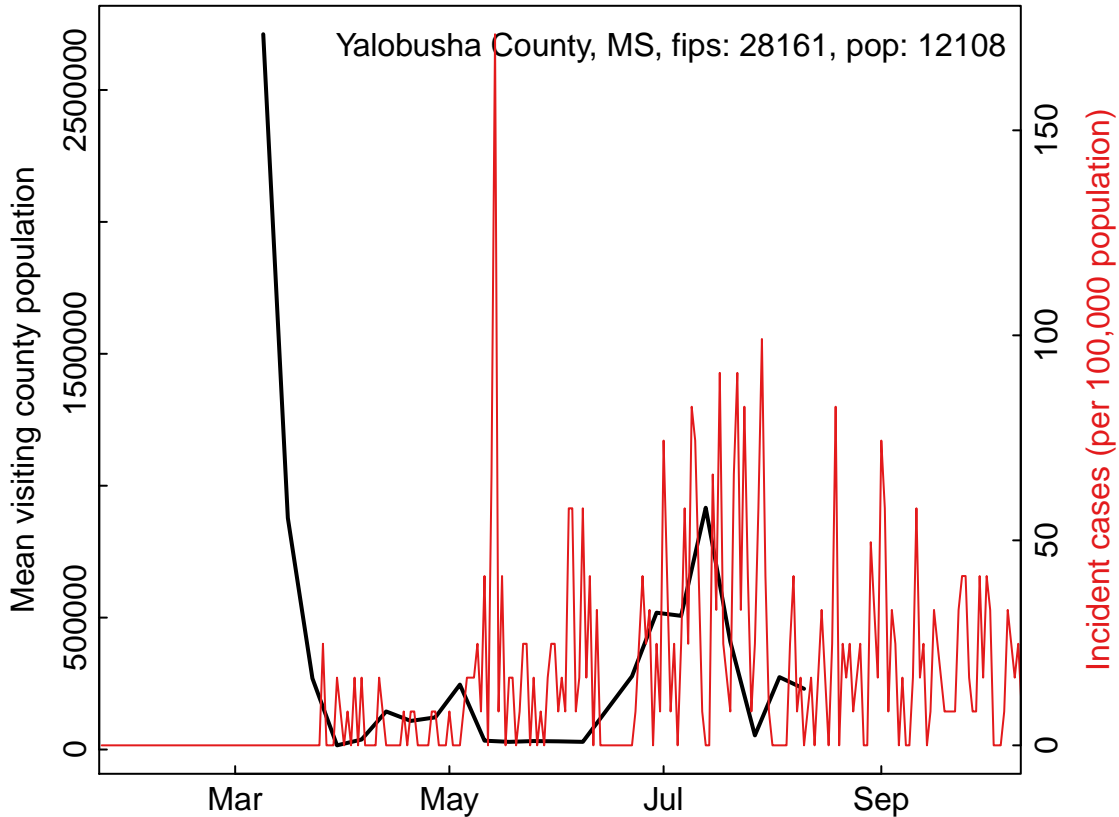

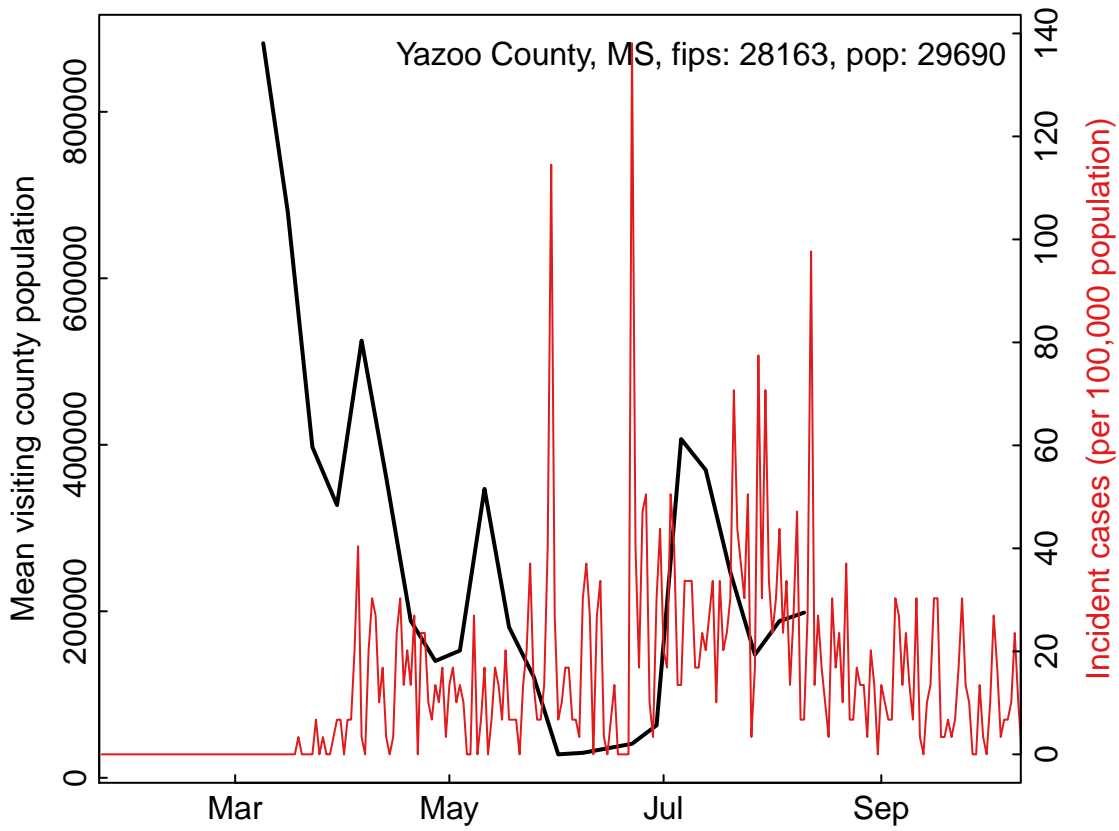

Adair County, MO, fips: 29001, pop: 25343

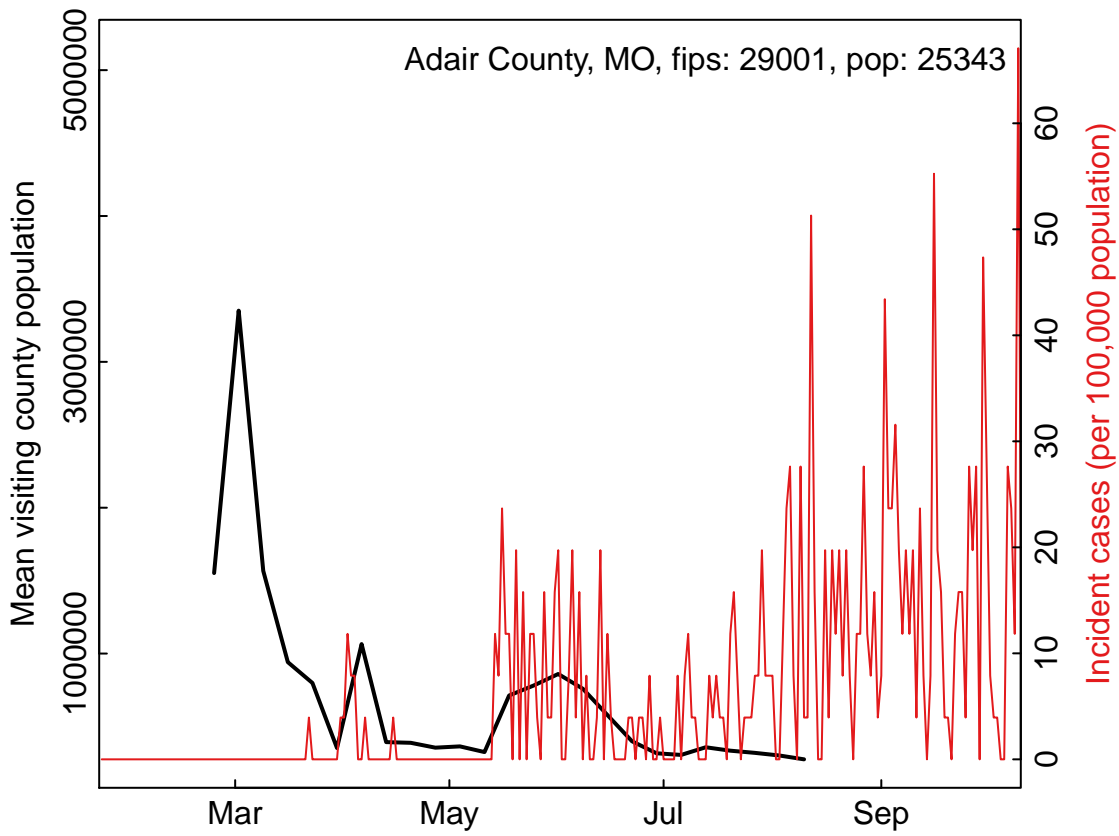

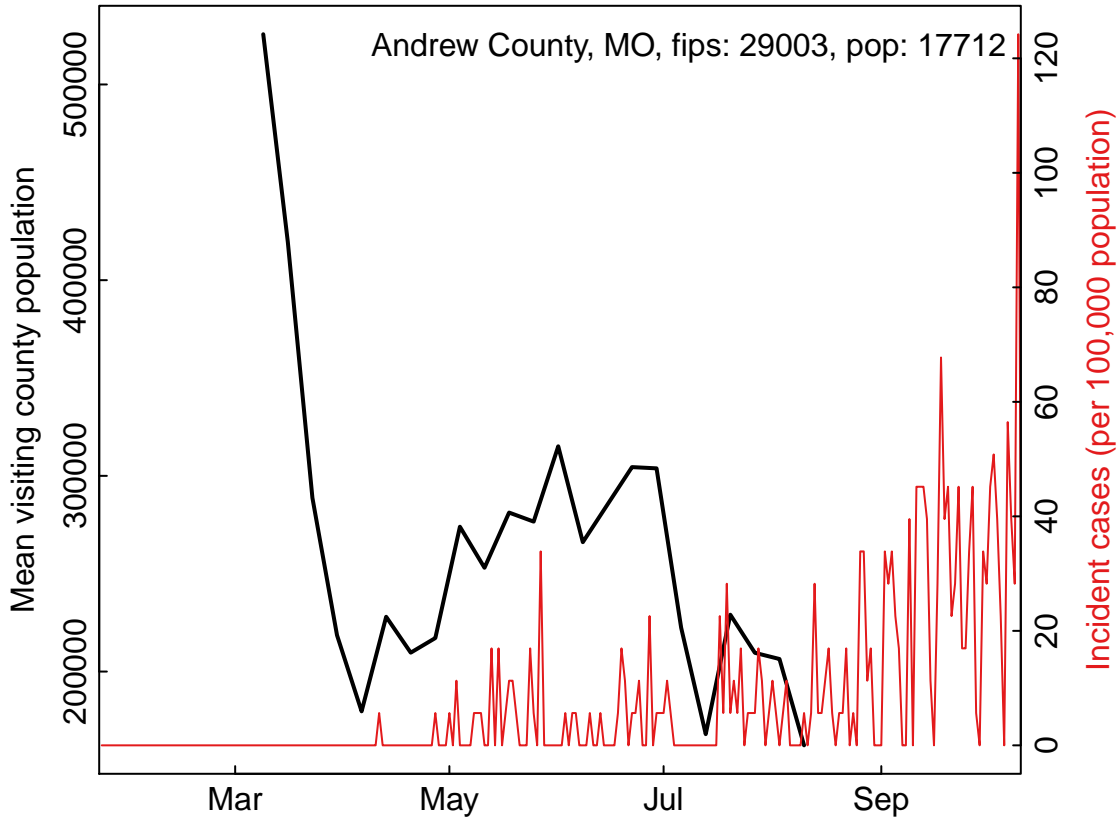



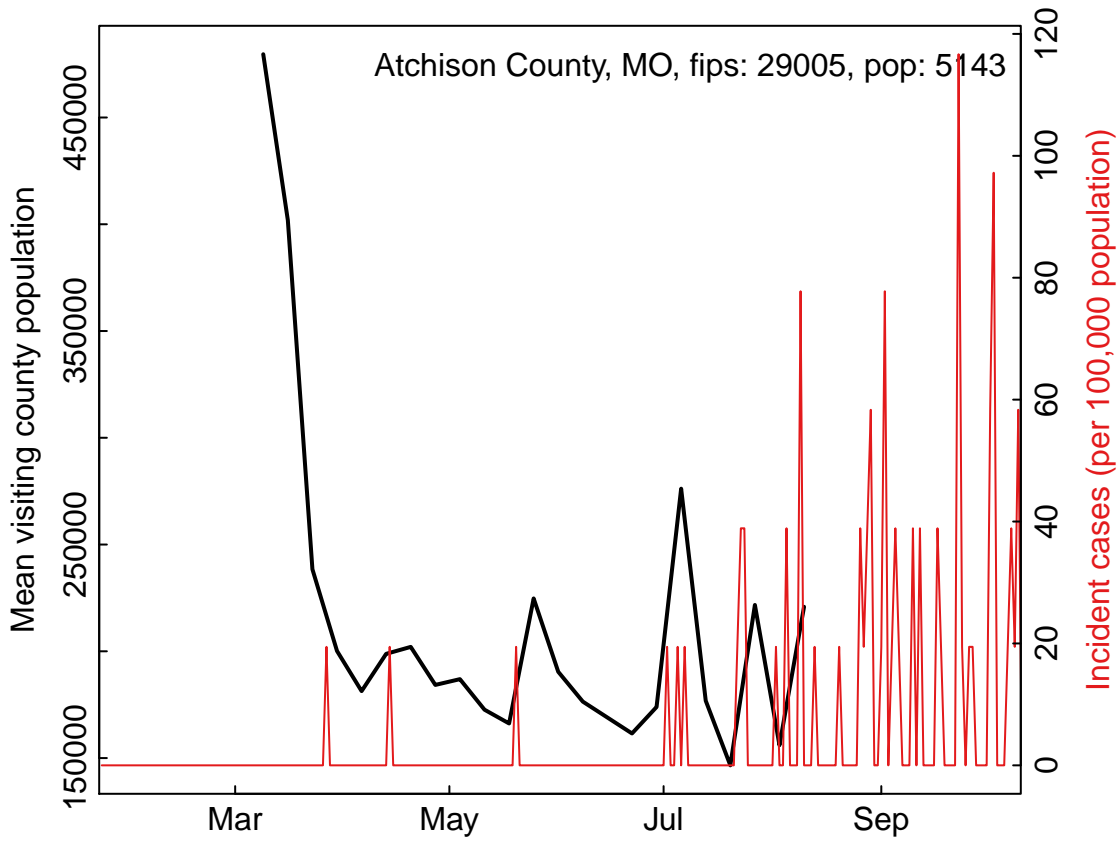

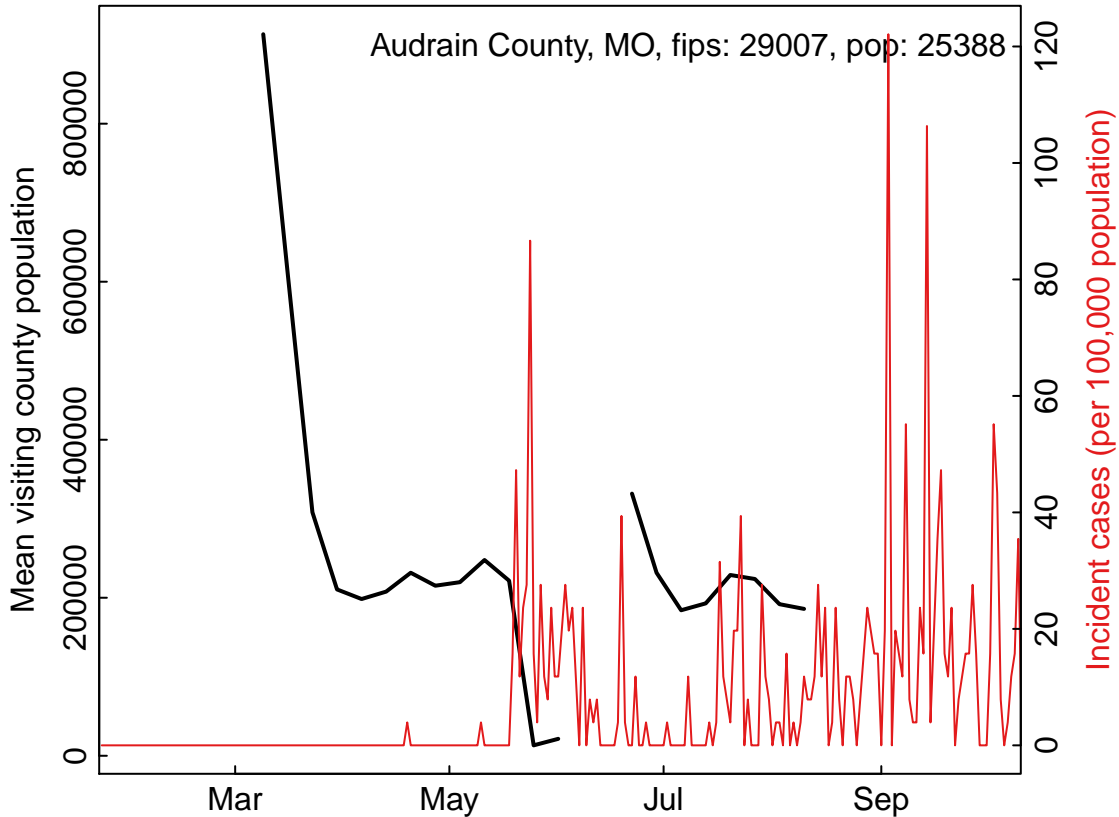

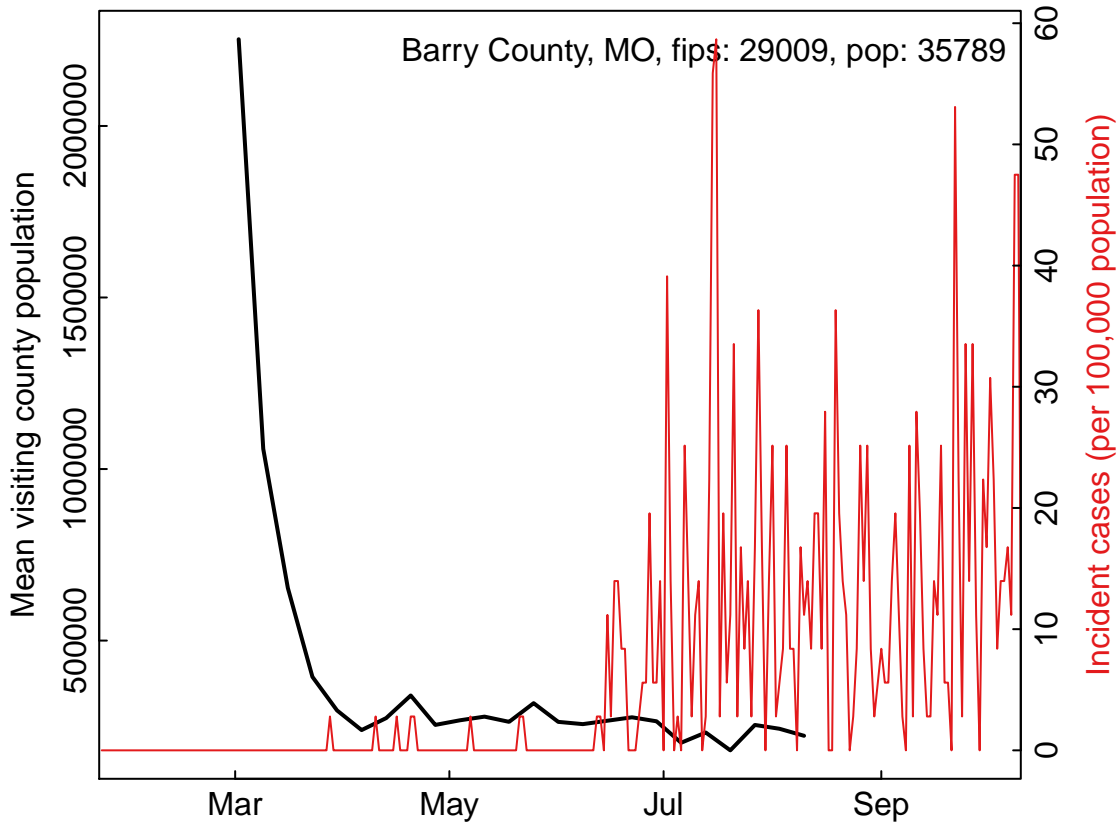

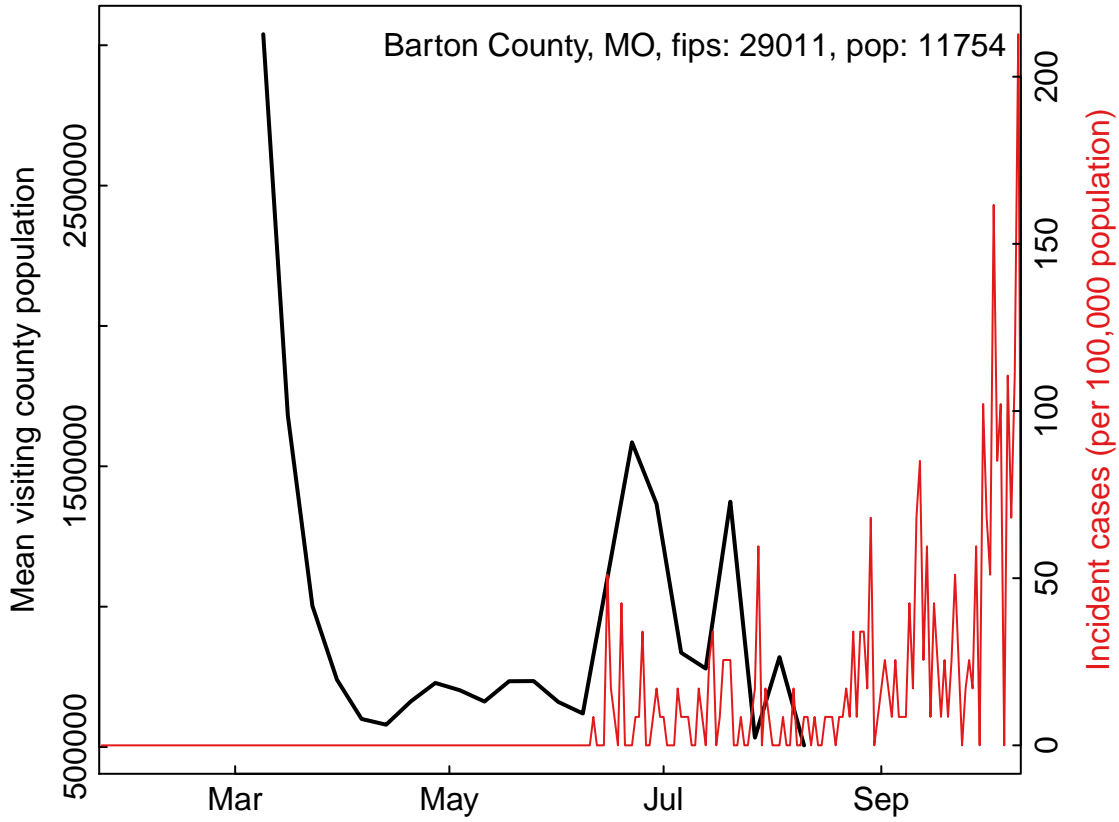

Bates County, MO, fips: 29013, pop: 16172

Mean visiting county population

2000000  
1000000  
500000

Mar

May

Jul

Sep

80  
60  
40  
20  
0

Incident cases (per 100,000 population)

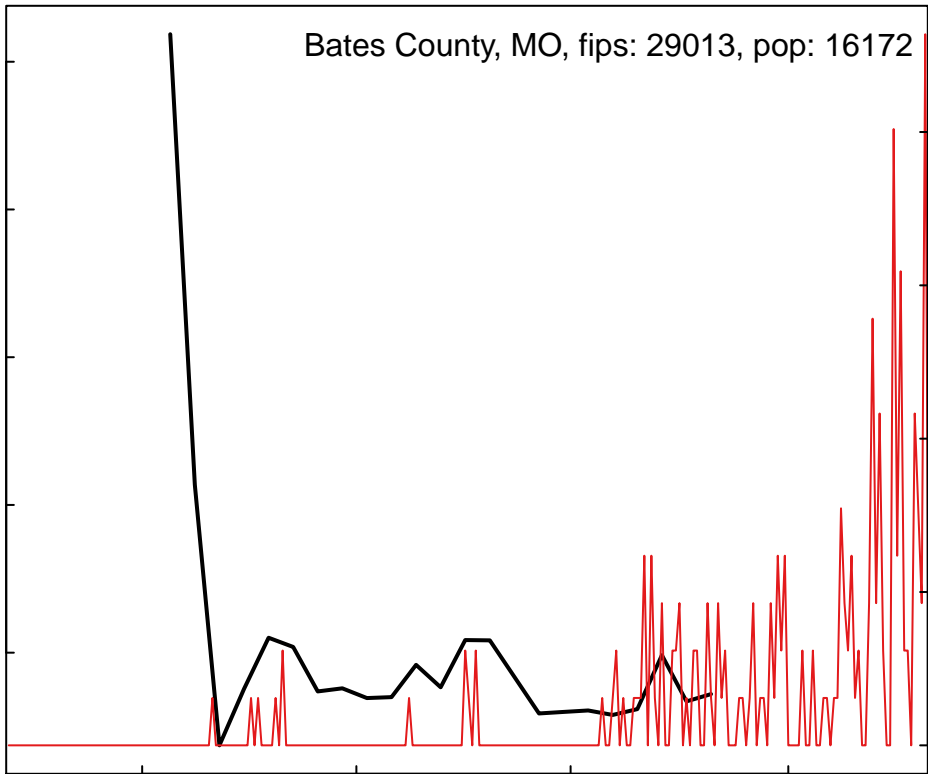

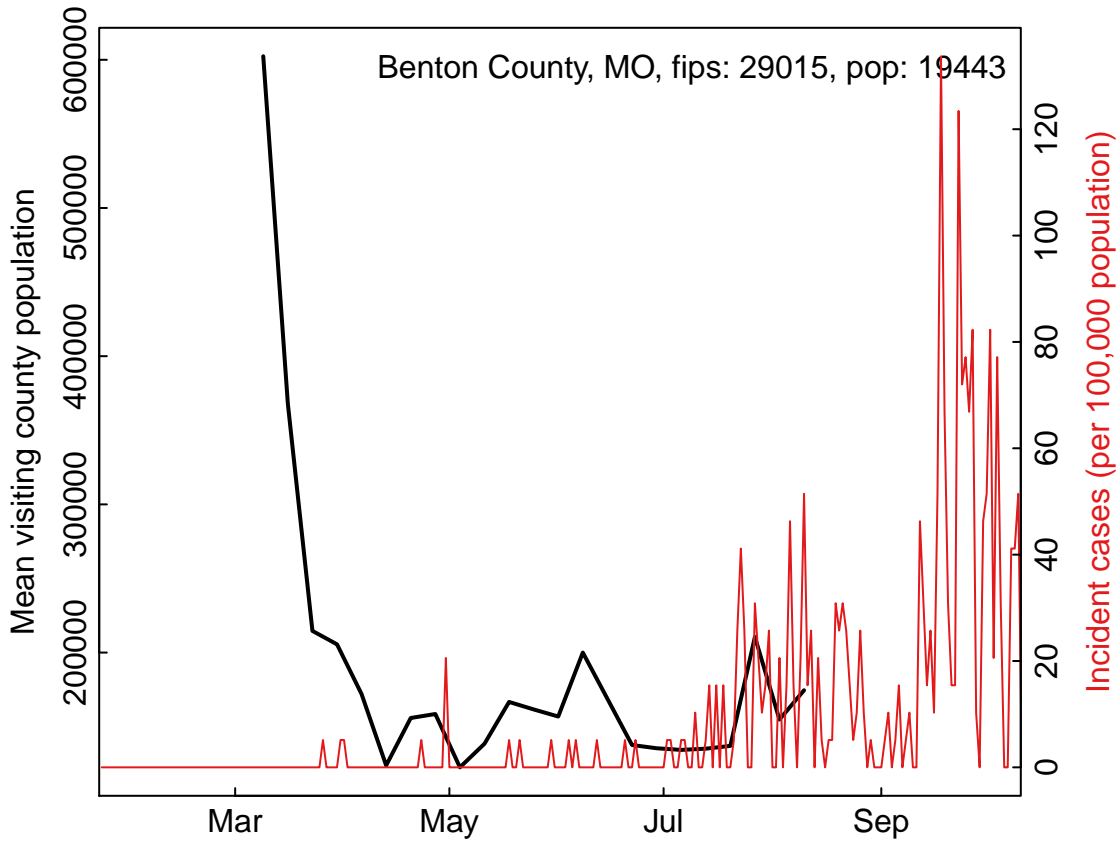

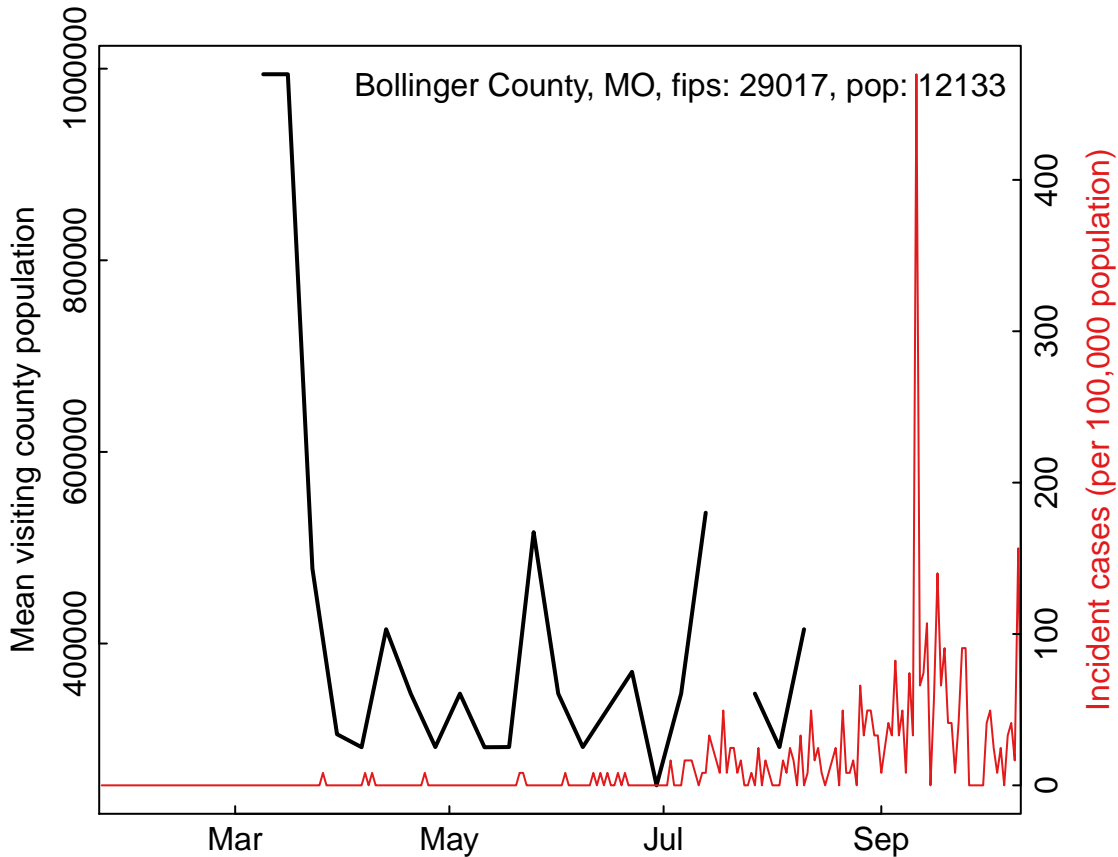

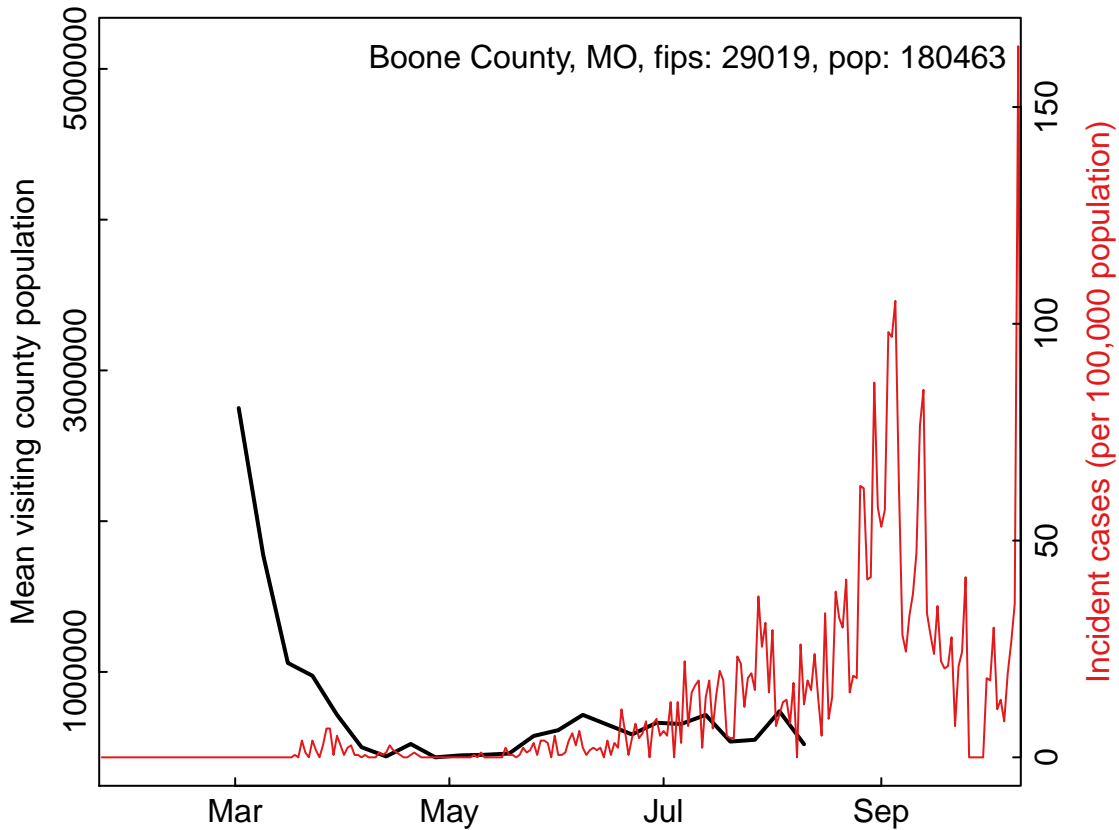



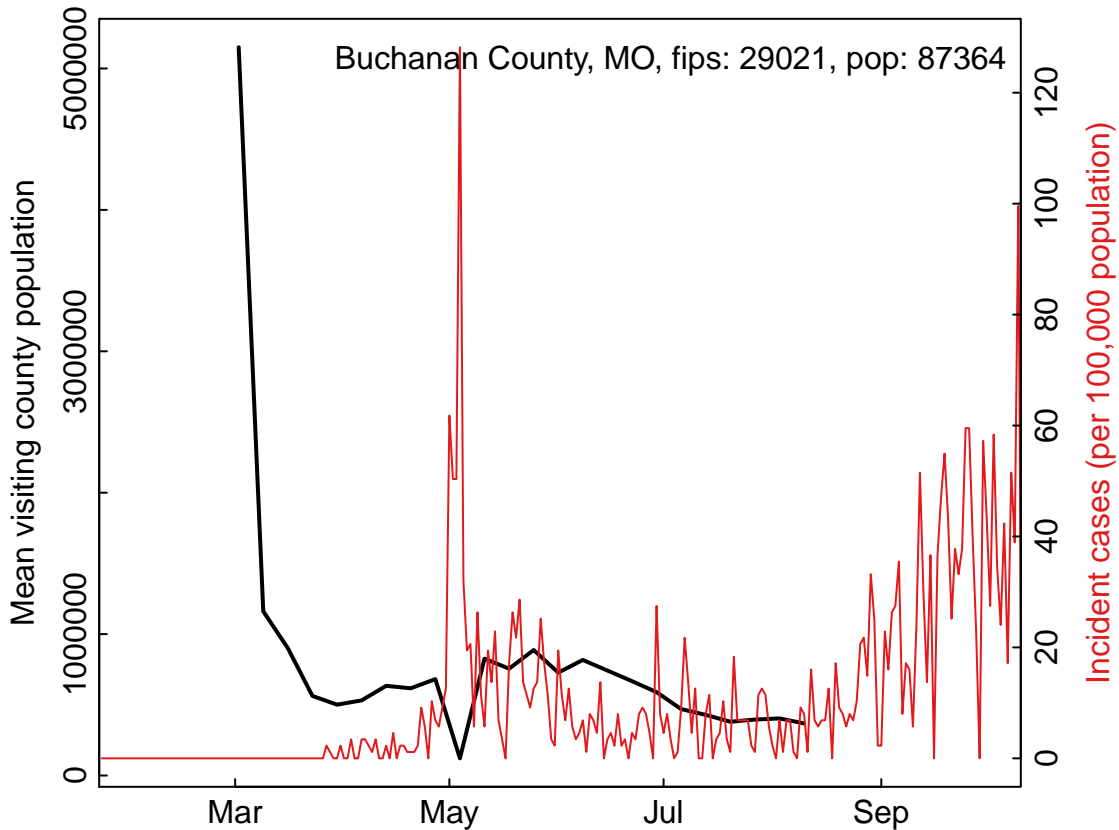

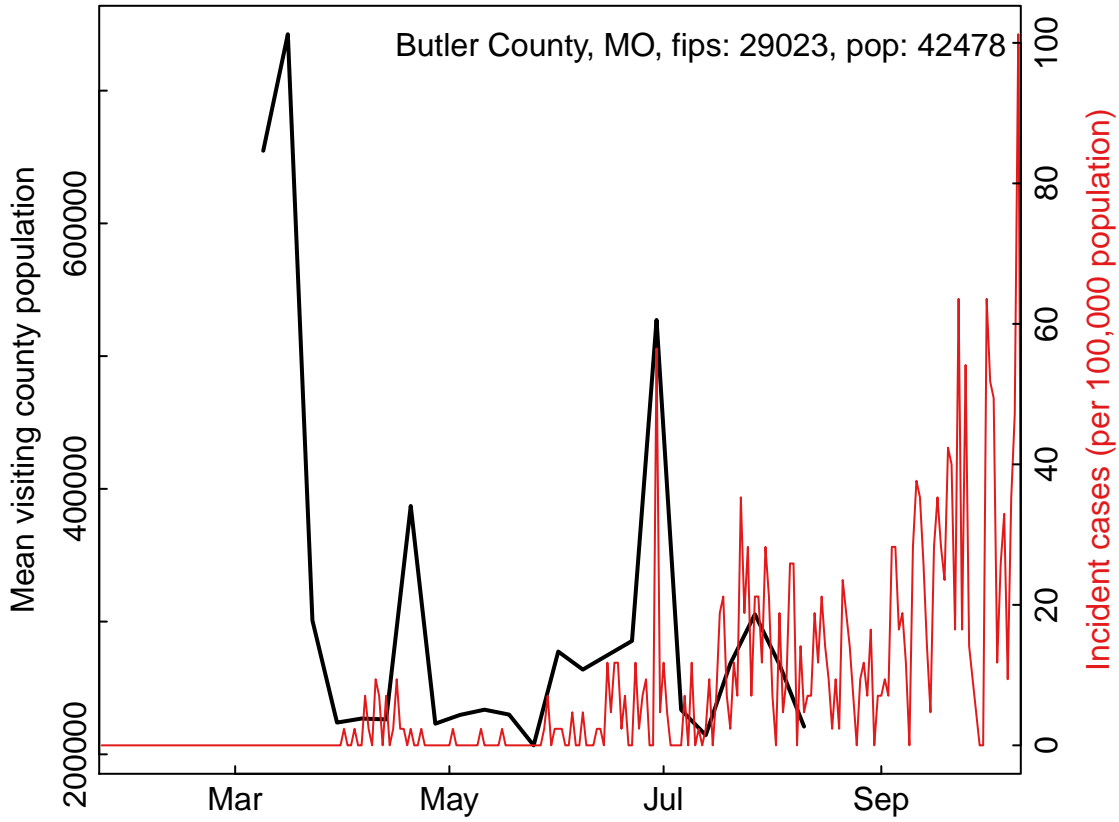

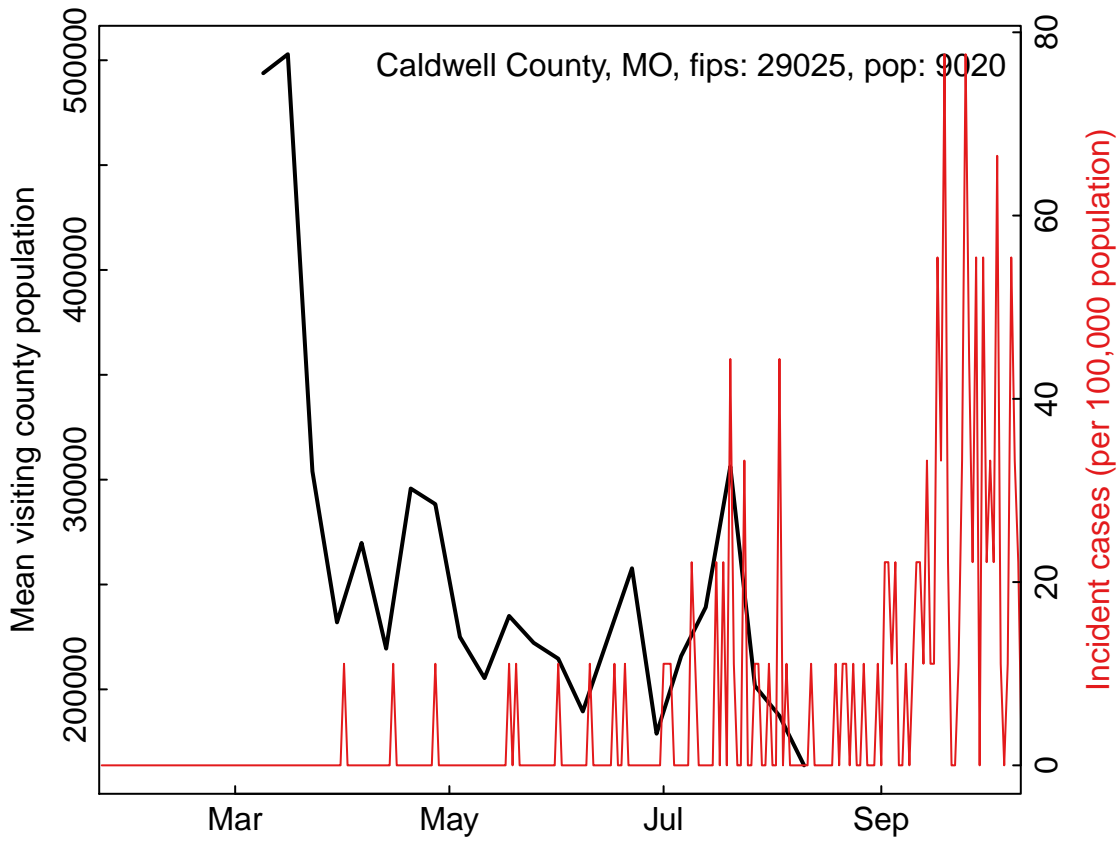

Callaway County, MO, fips: 29027, pop: 44743

Mean visiting county population

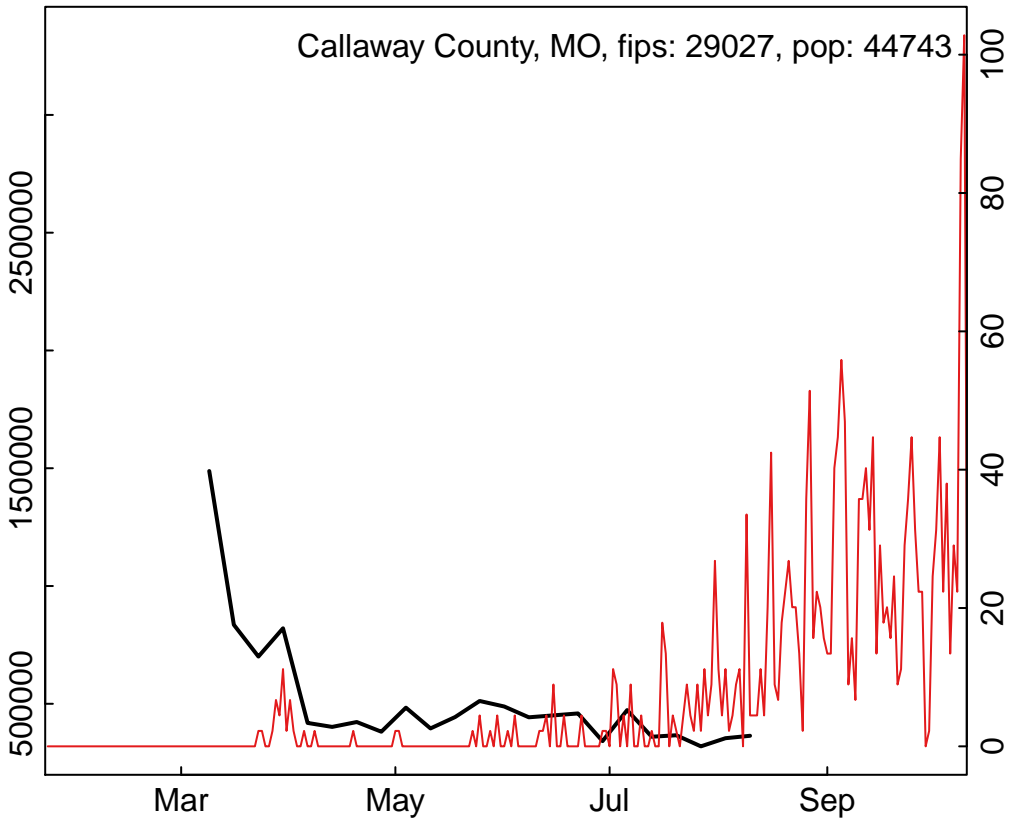

Incident cases (per 100,000 population)

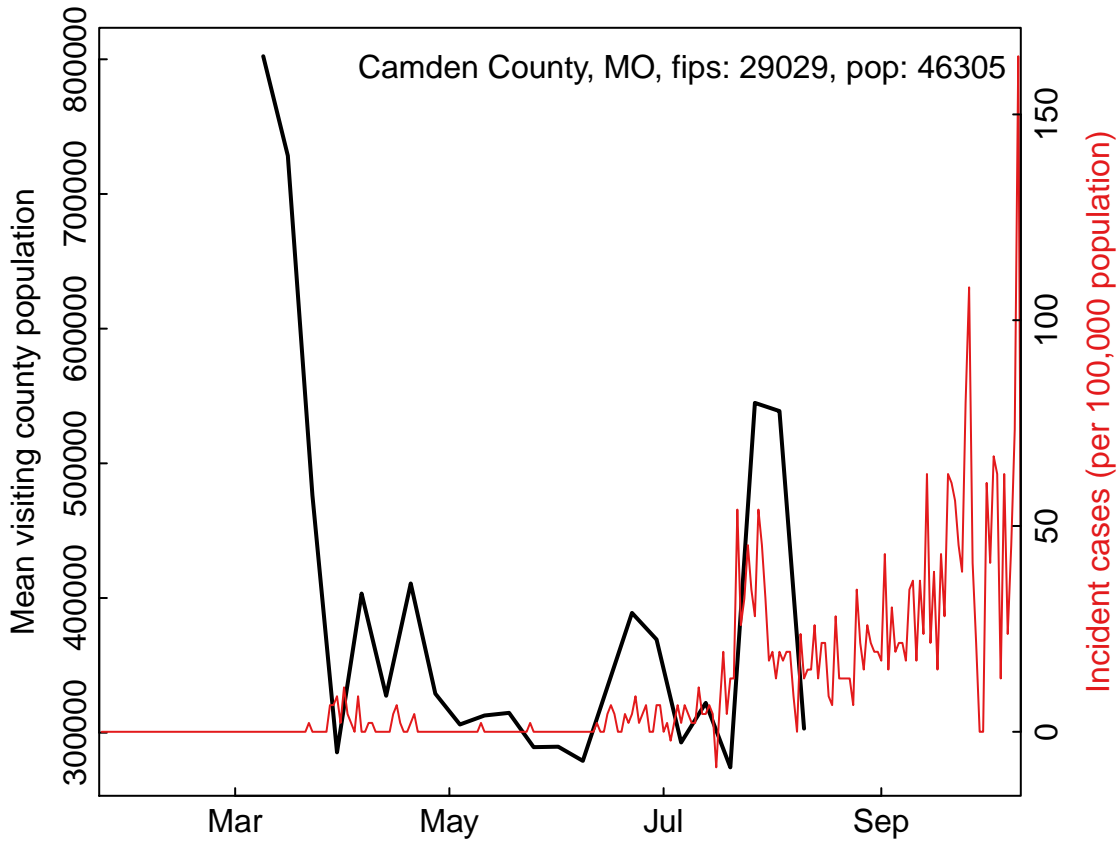

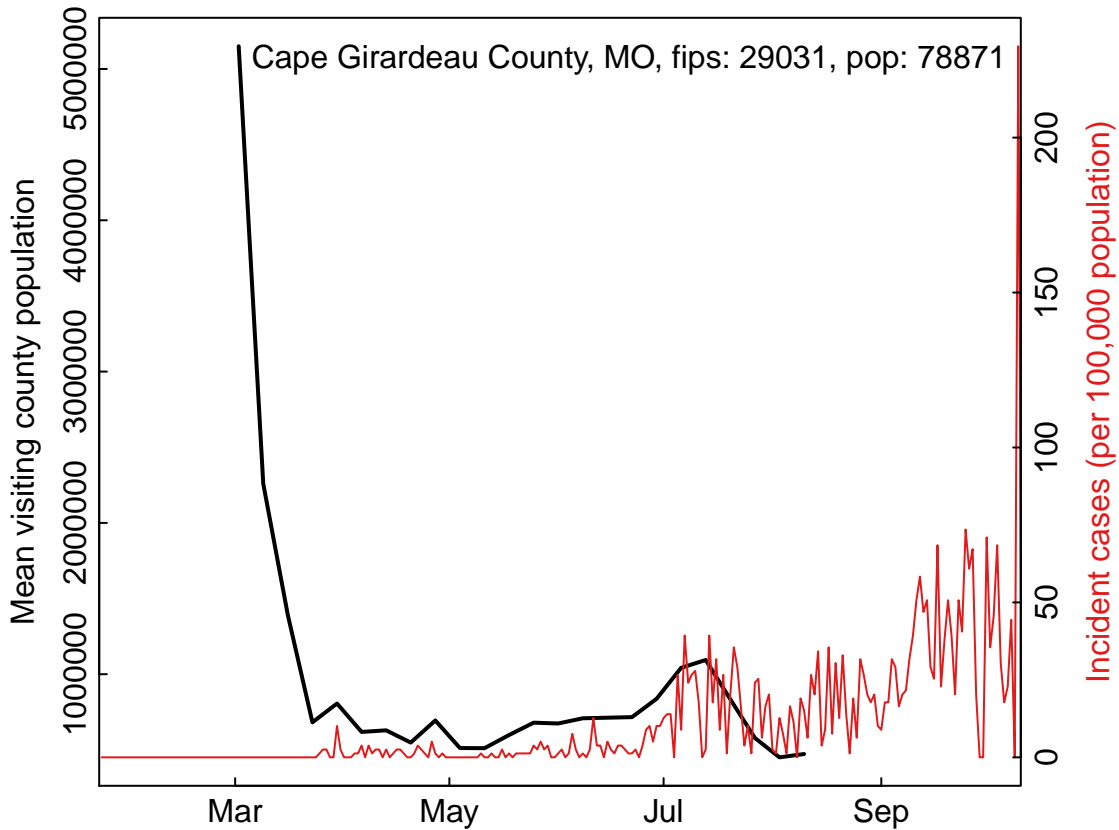

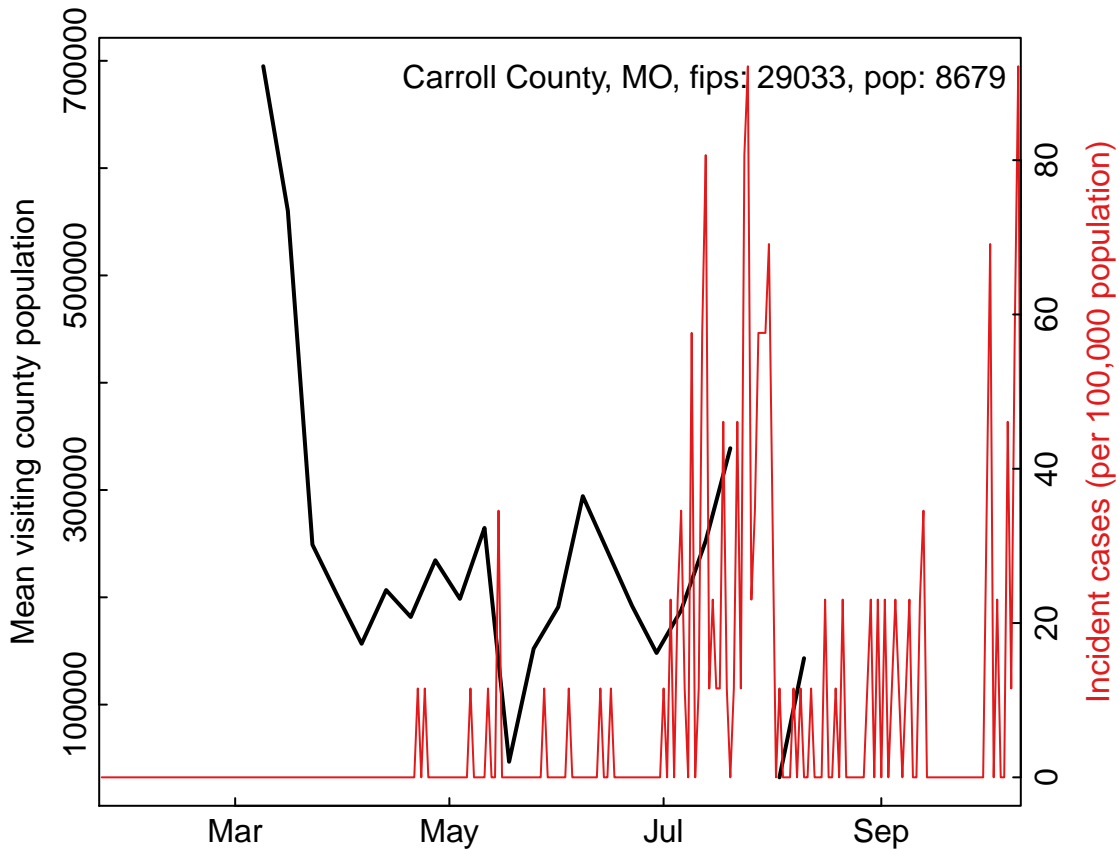

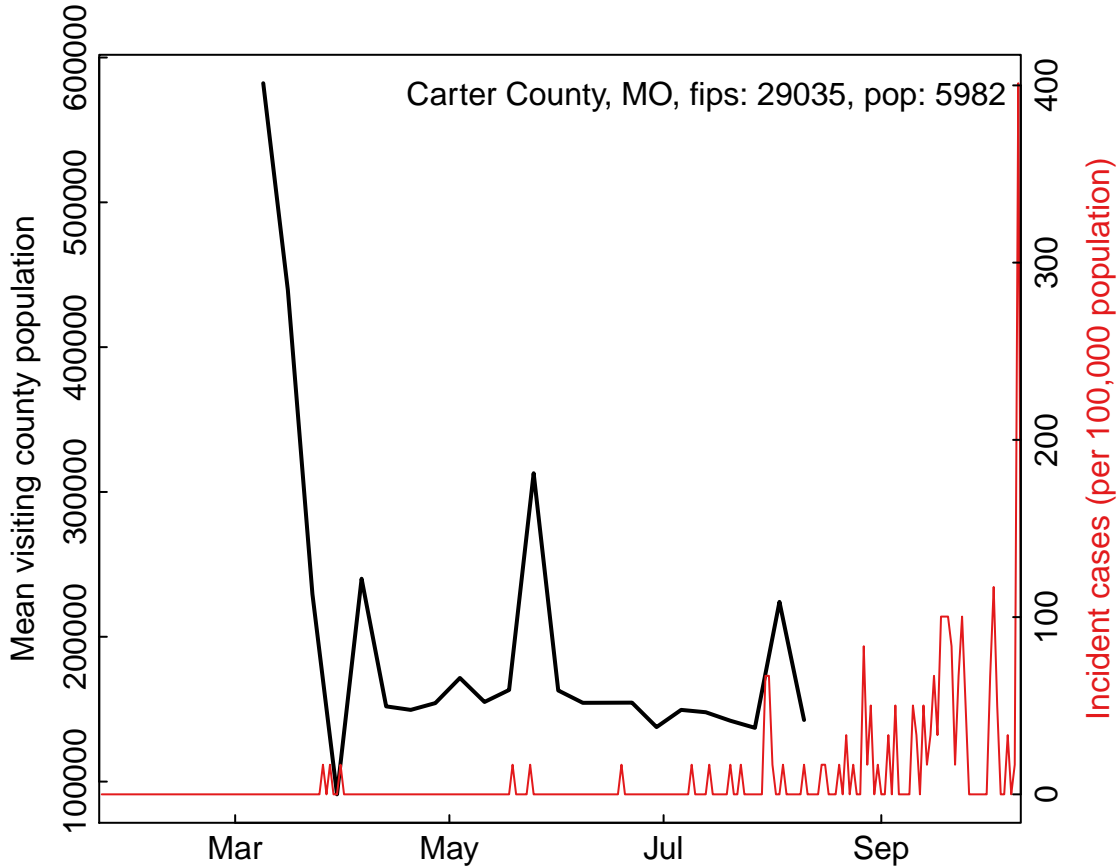



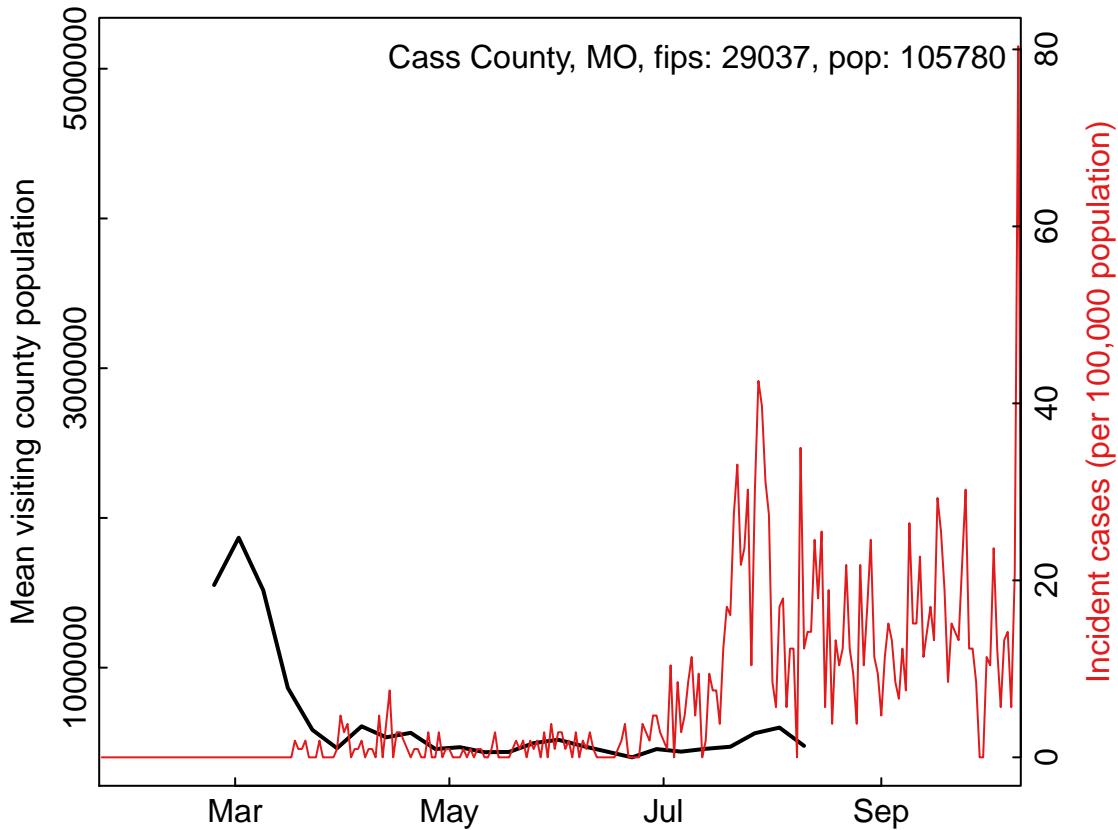

Cedar County, MO, fips: 29039, pop: 14349

Mean visiting county population

450000  
350000  
250000  
150000

Mar May Jul Sep

Incident cases (per 100,000 population)

120  
100  
80  
60  
40  
20  
0

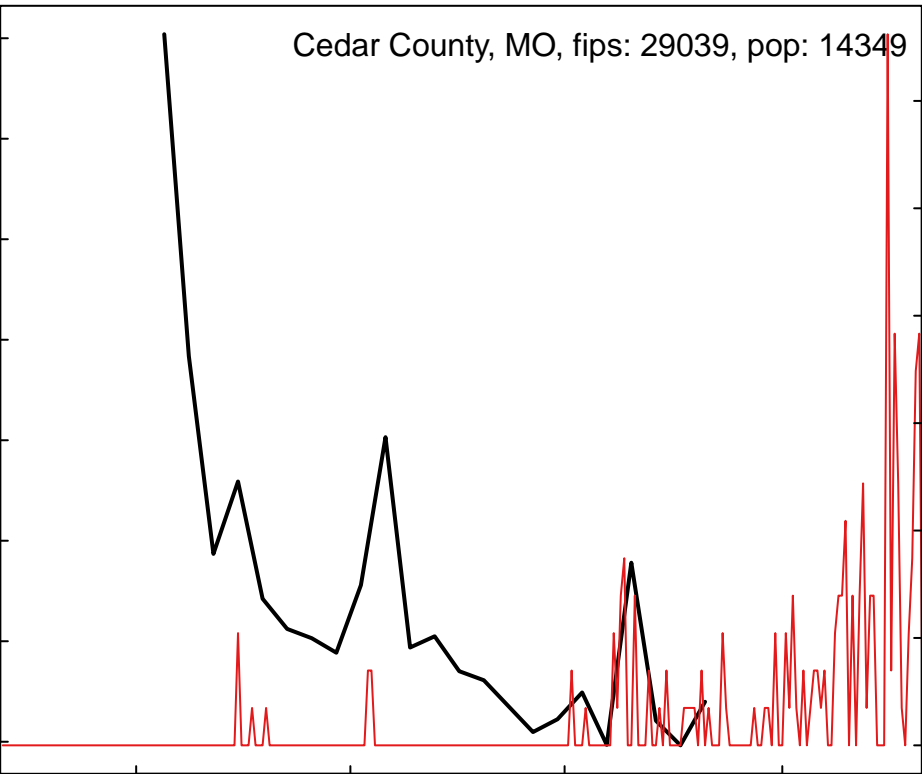

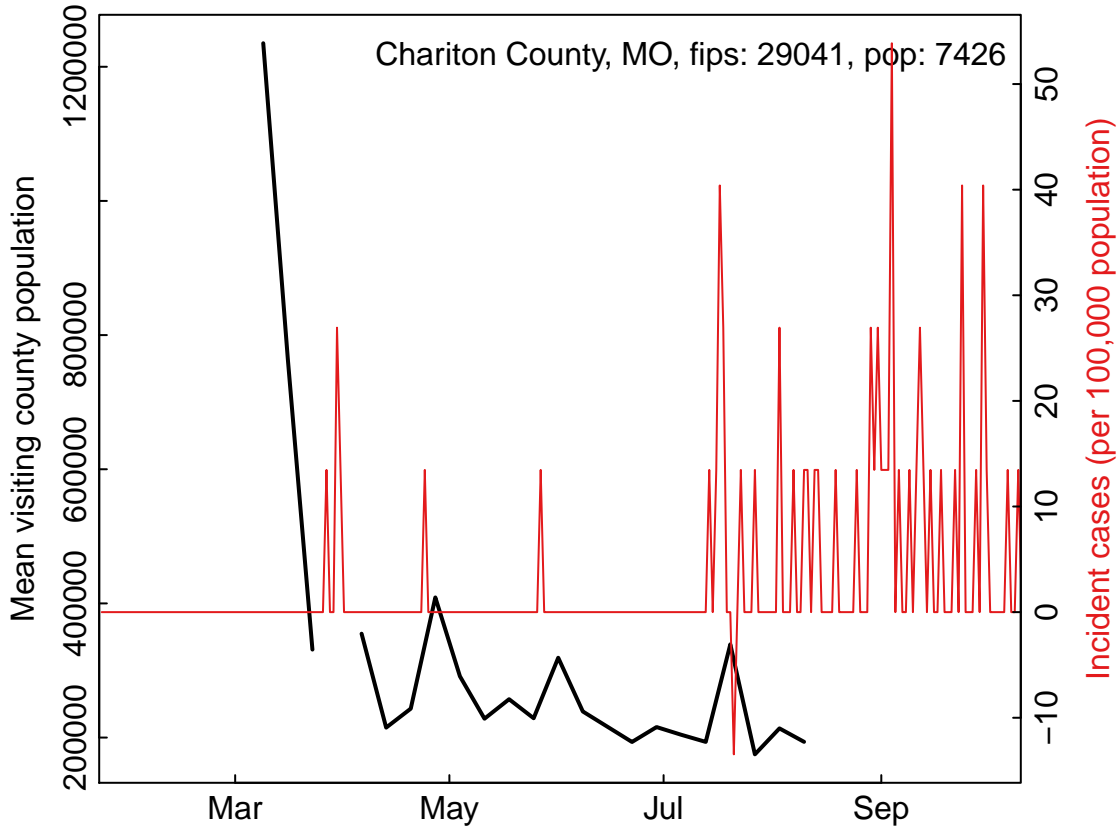

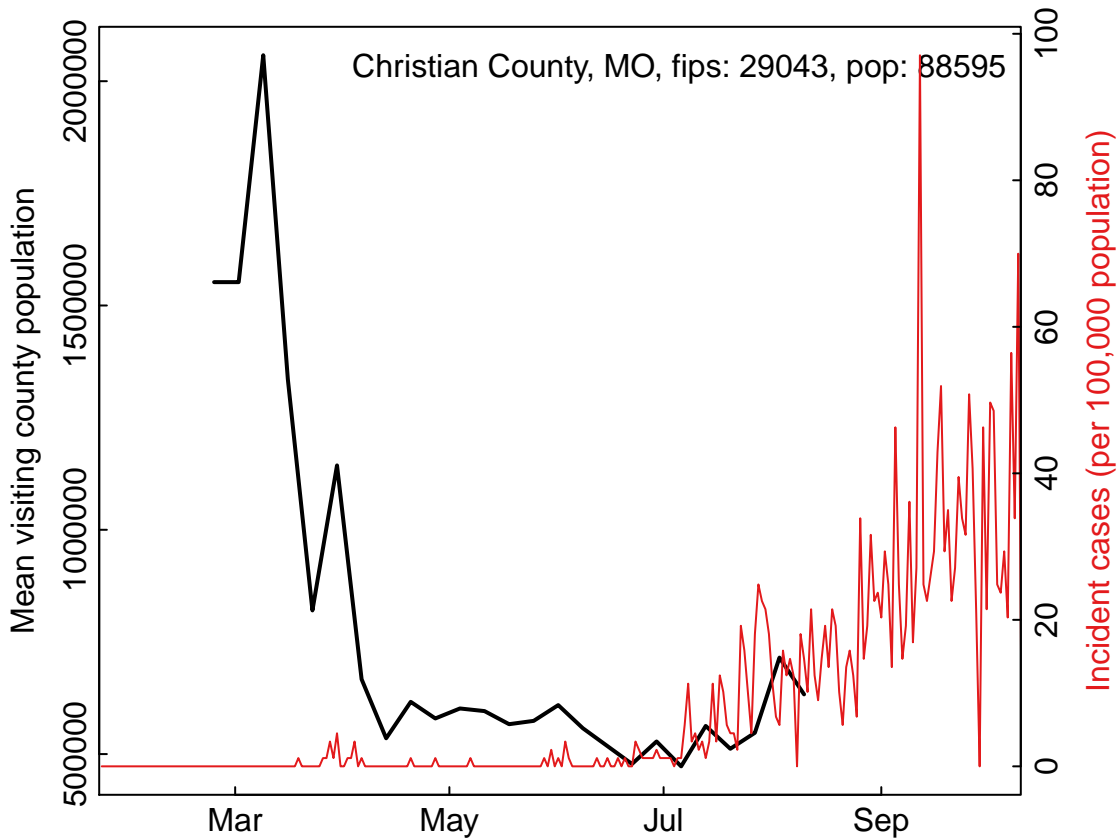

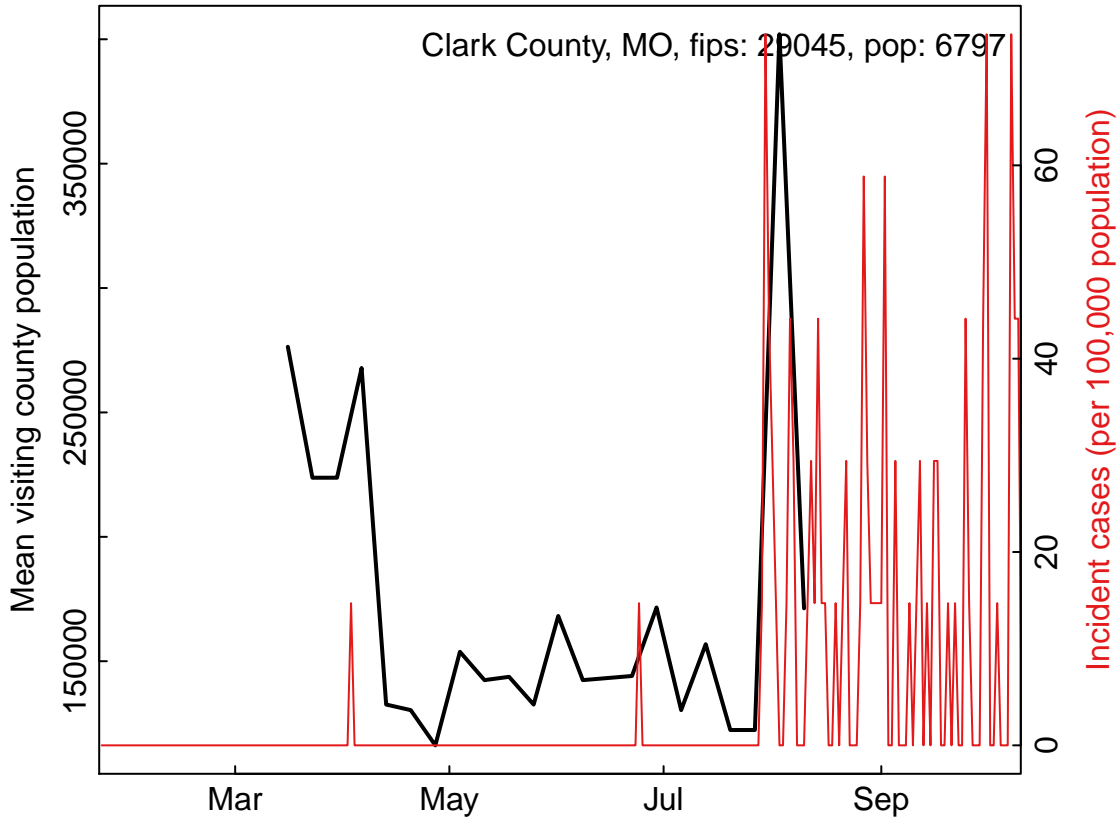

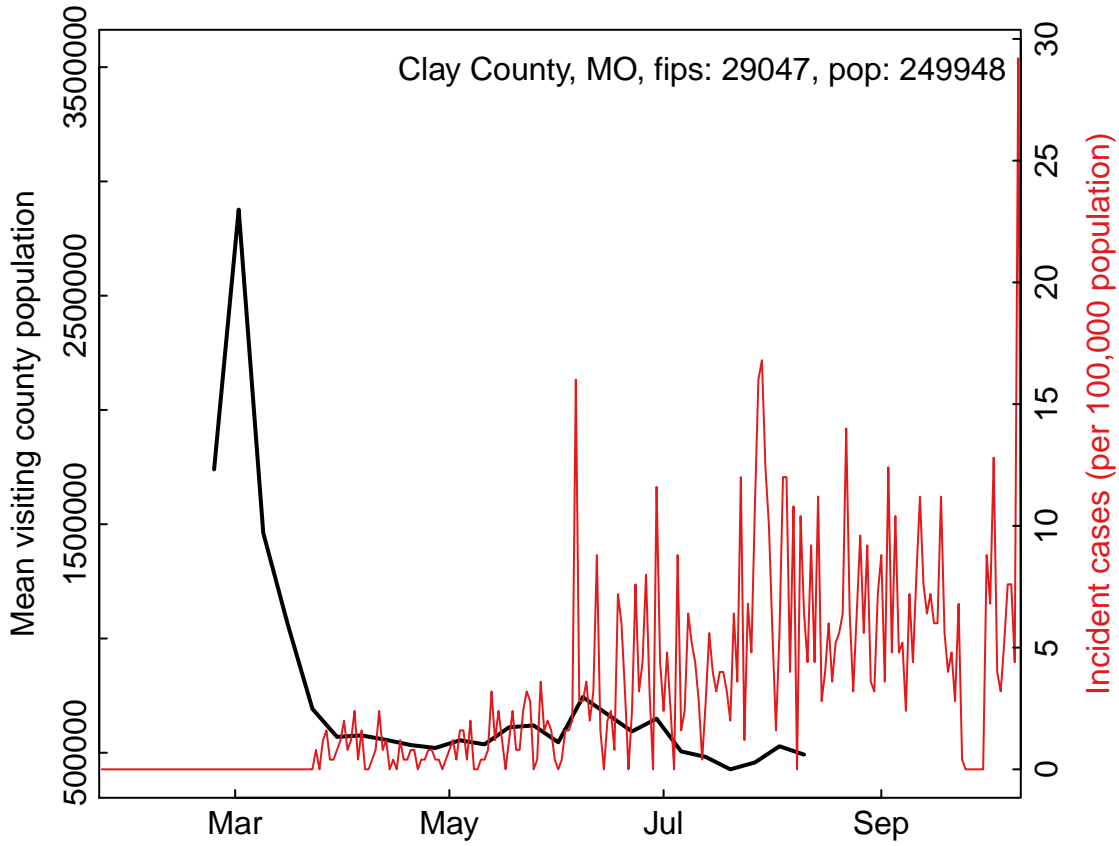

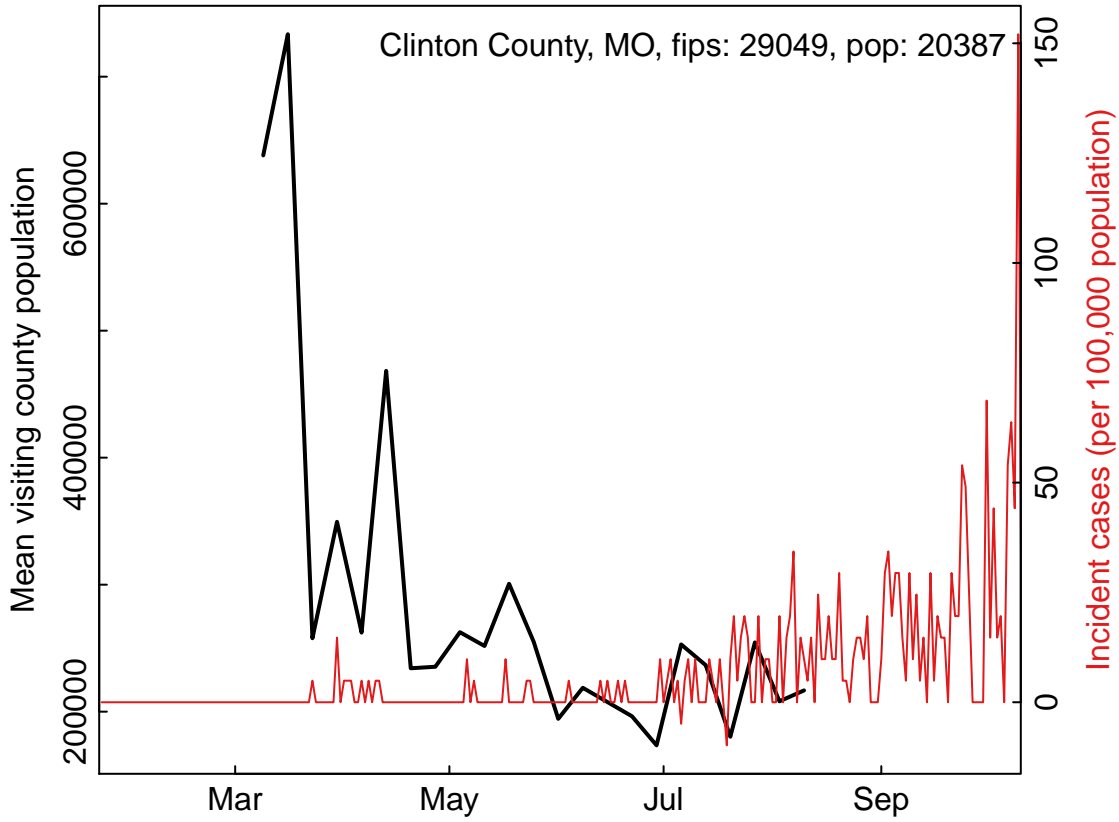

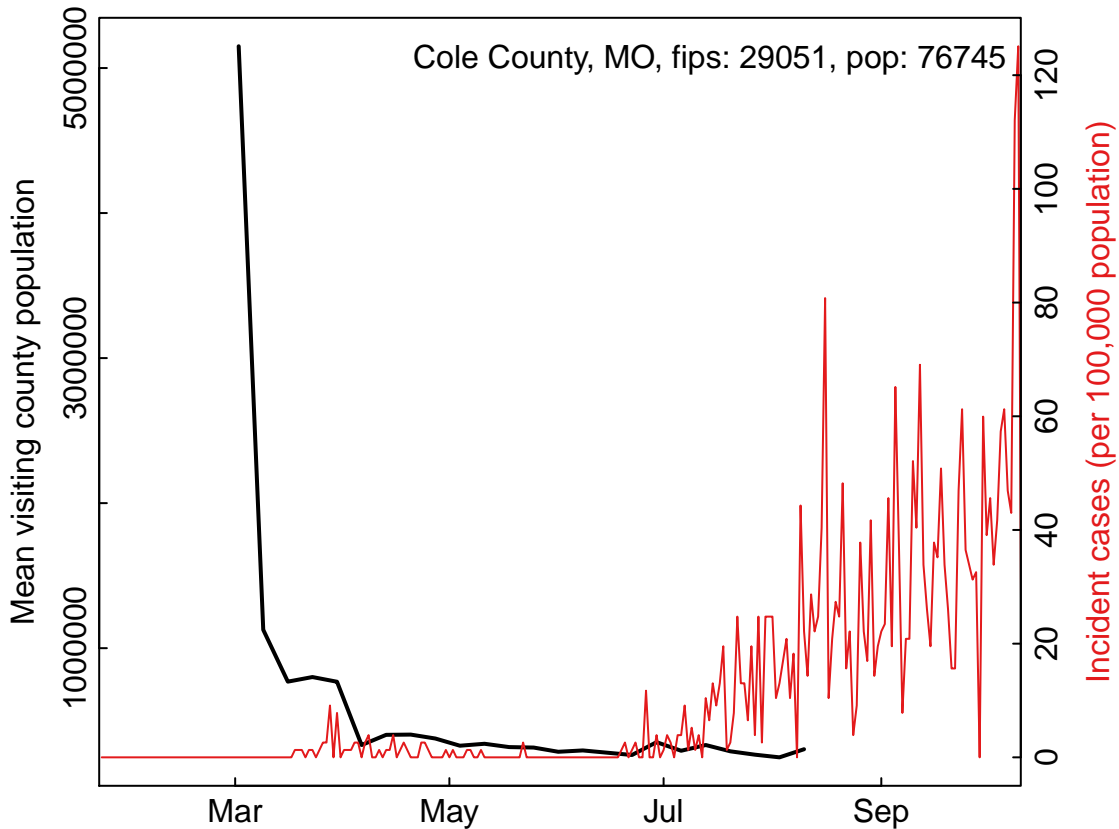



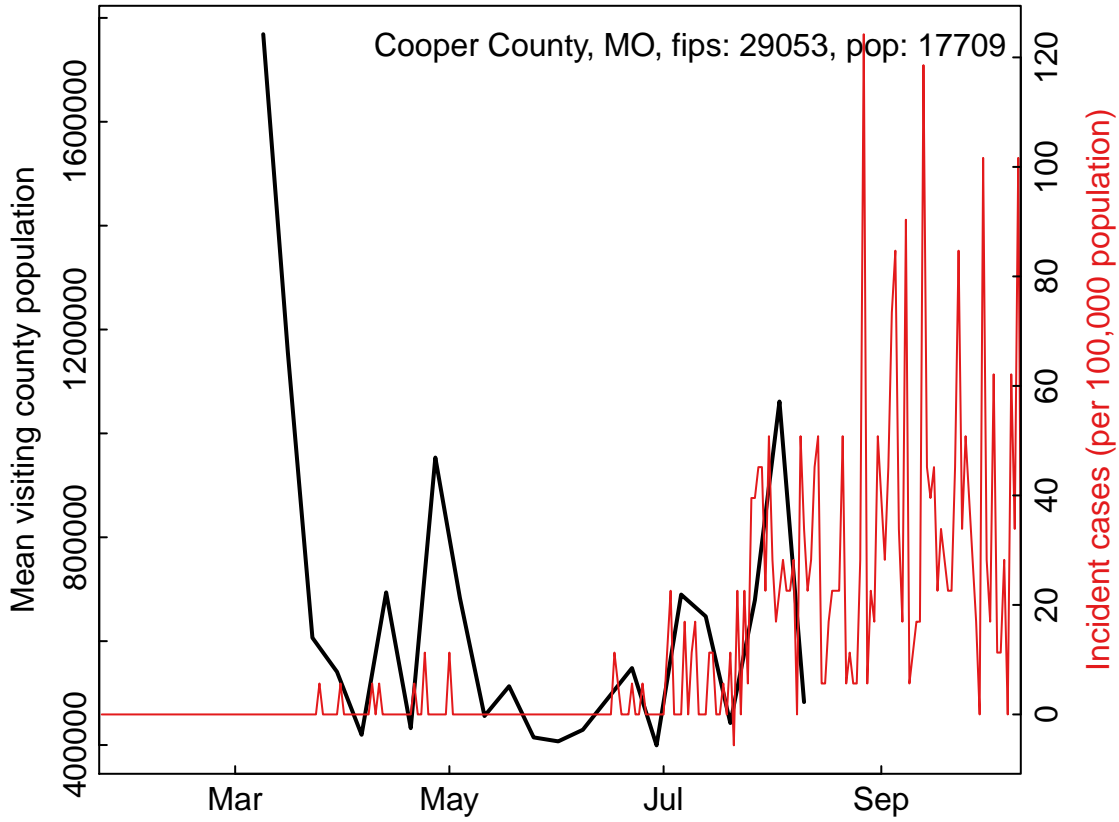

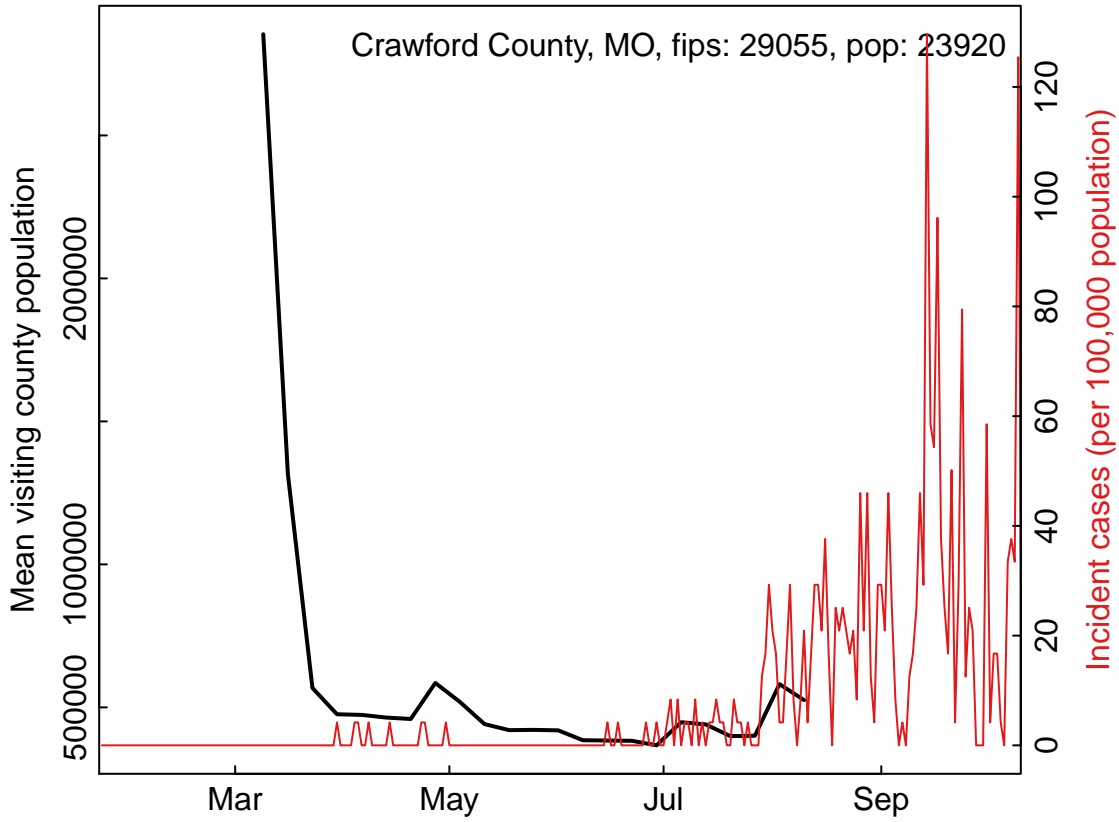

Dade County, MO, fips: 29057, pop: 7561

Mean visiting county population

500000  
1500000  
2500000

Mar

May

Jul

Sep

0  
50  
100  
150

Incident cases (per 100,000 population)

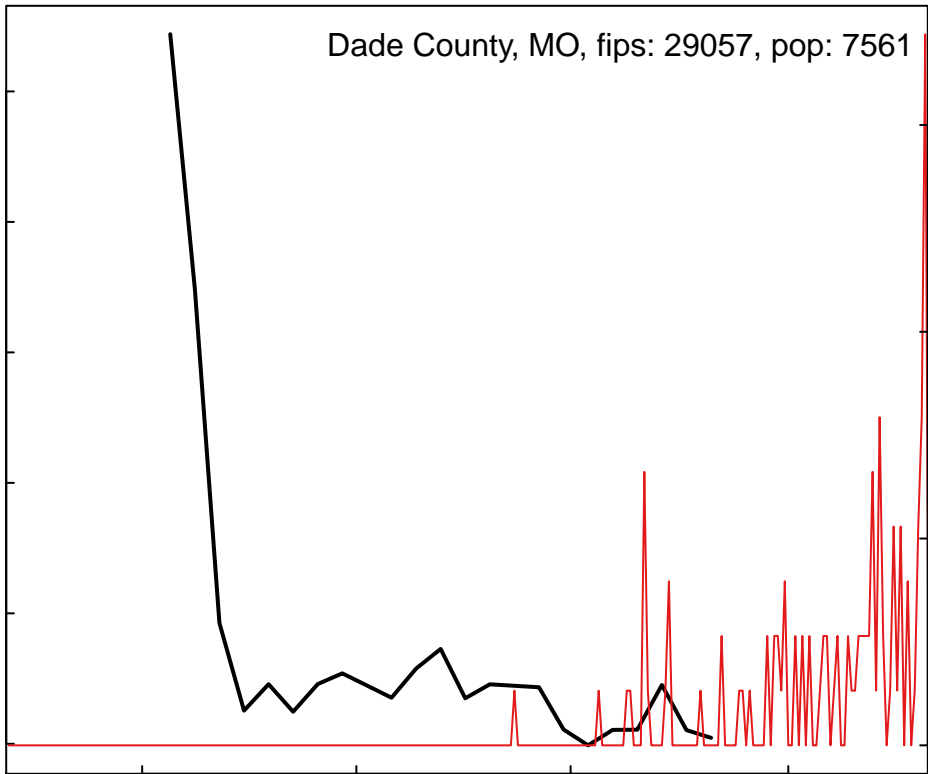

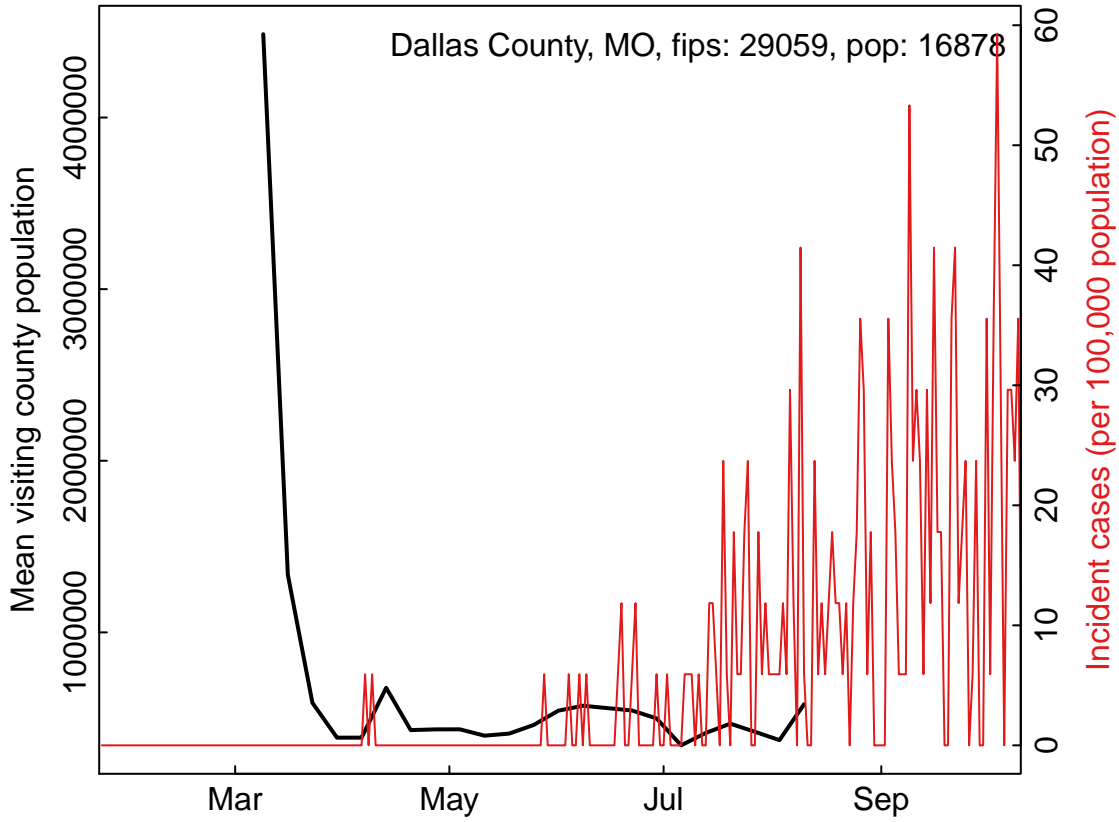

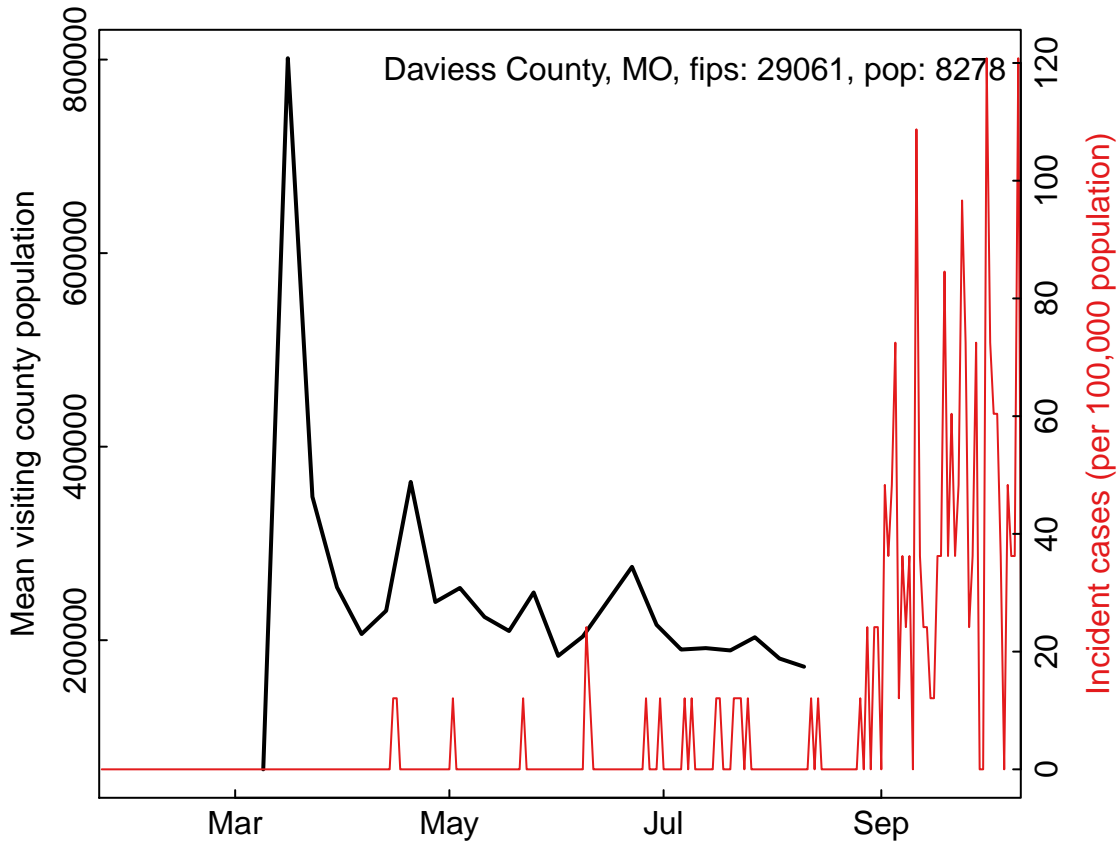

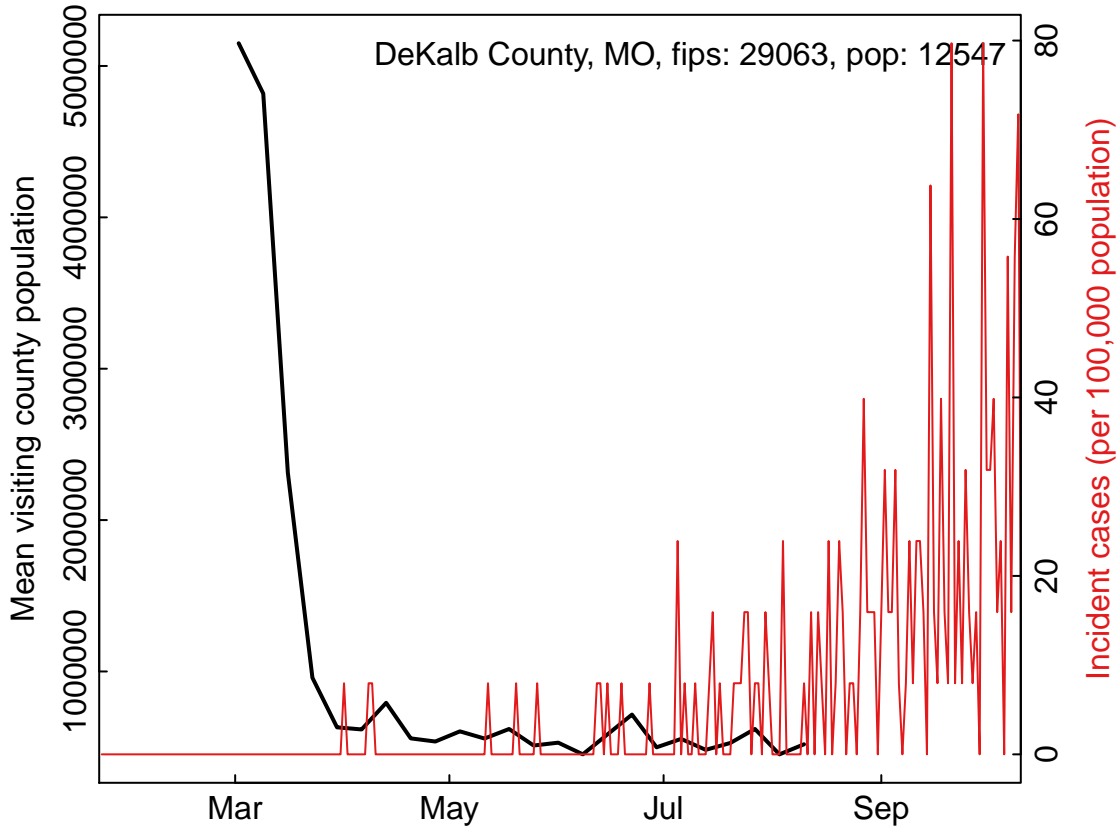

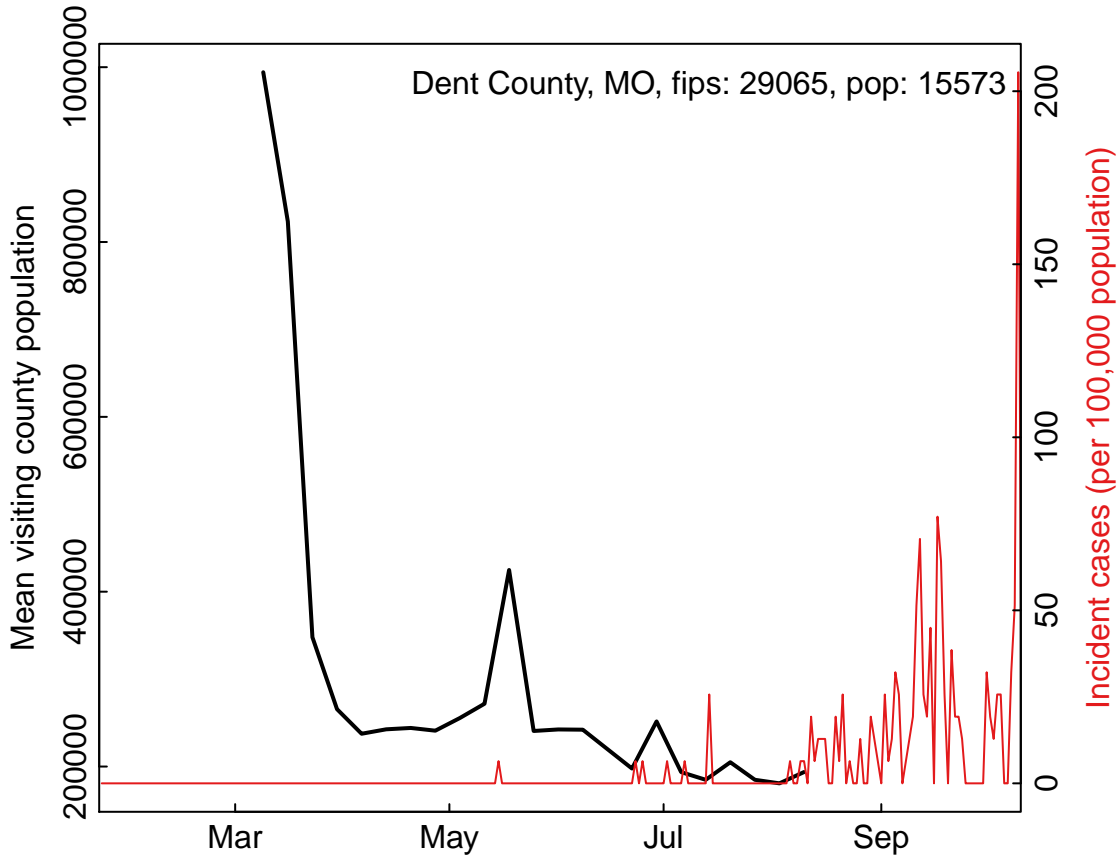

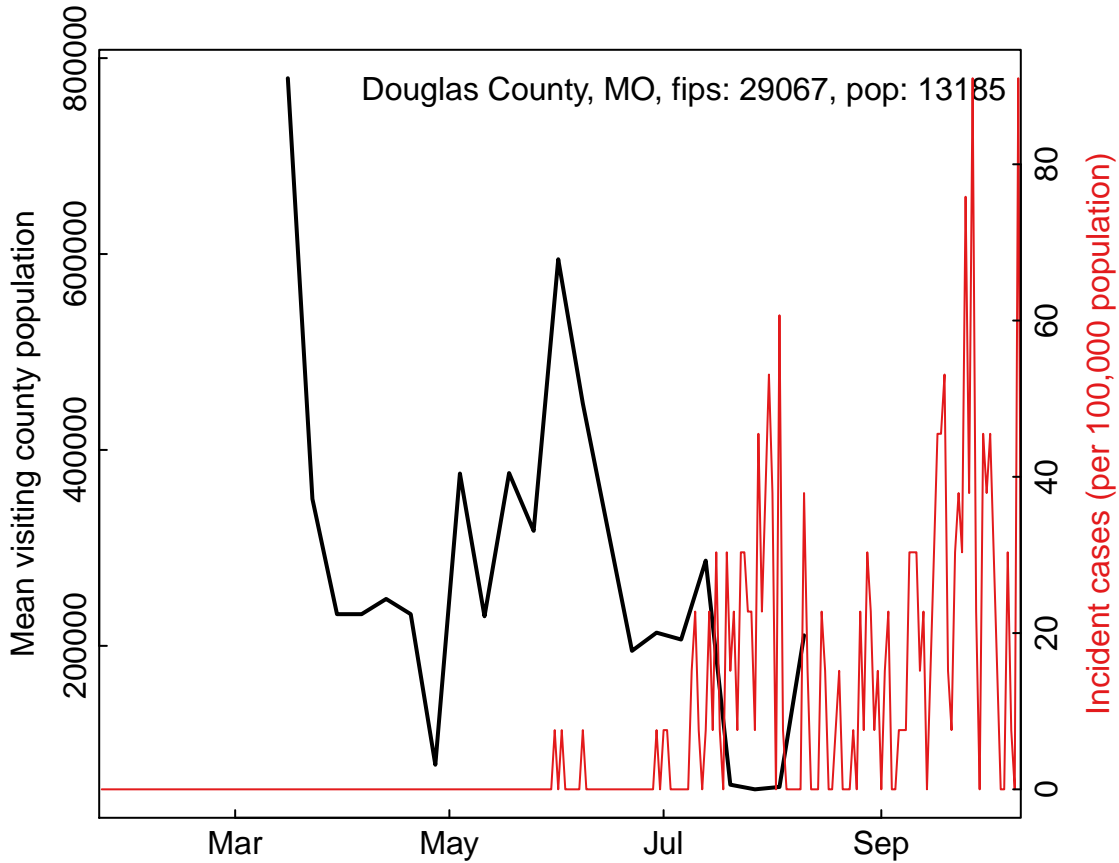



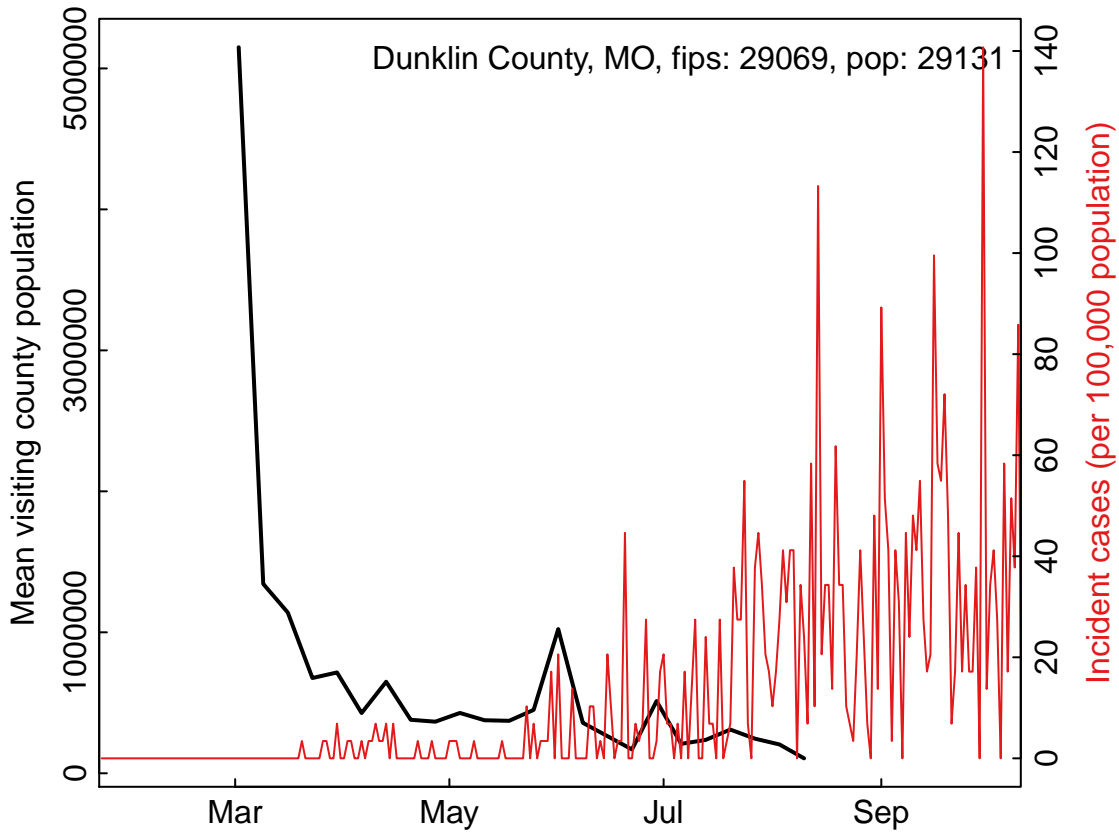

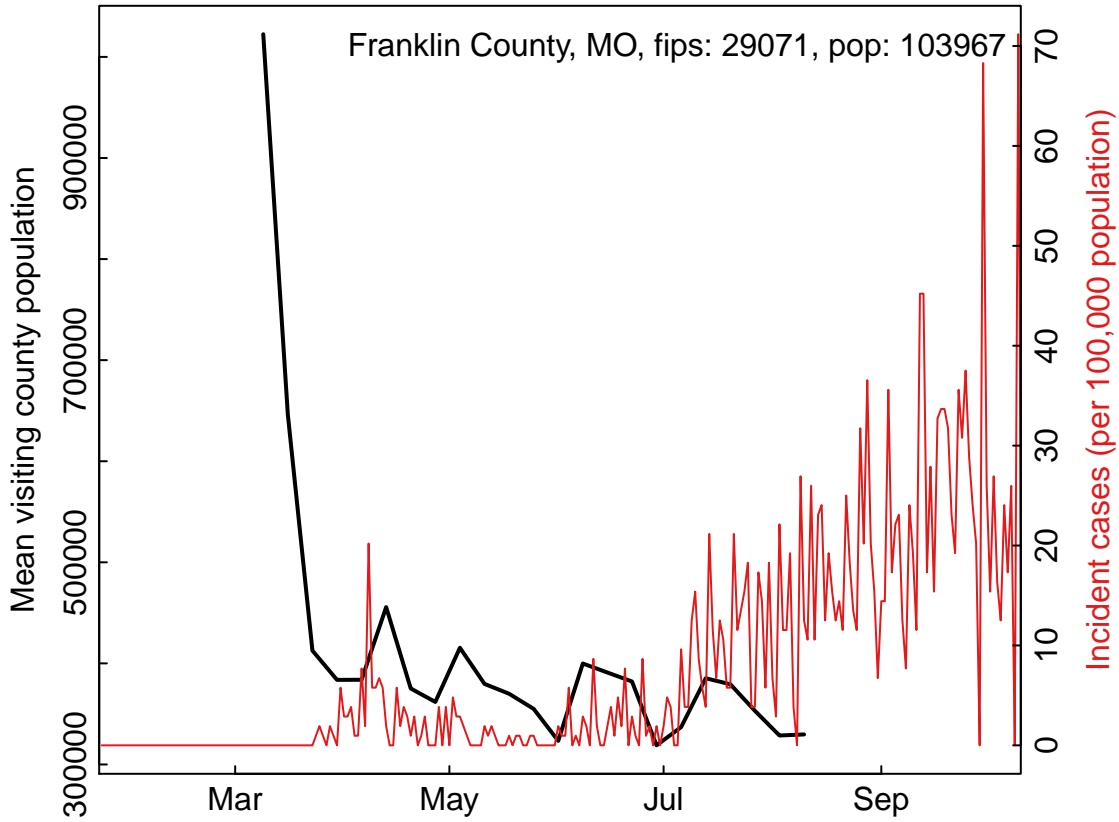

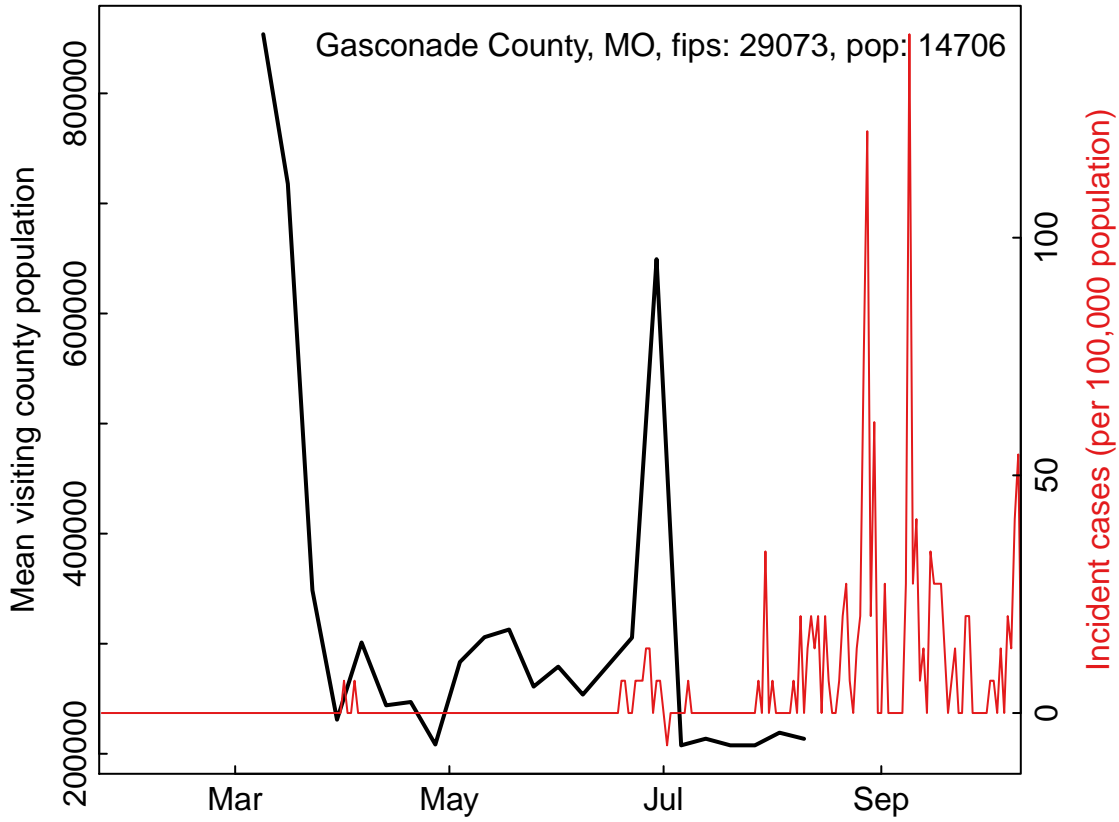

Gentry County, MO, fips: 29075, pop: 6571

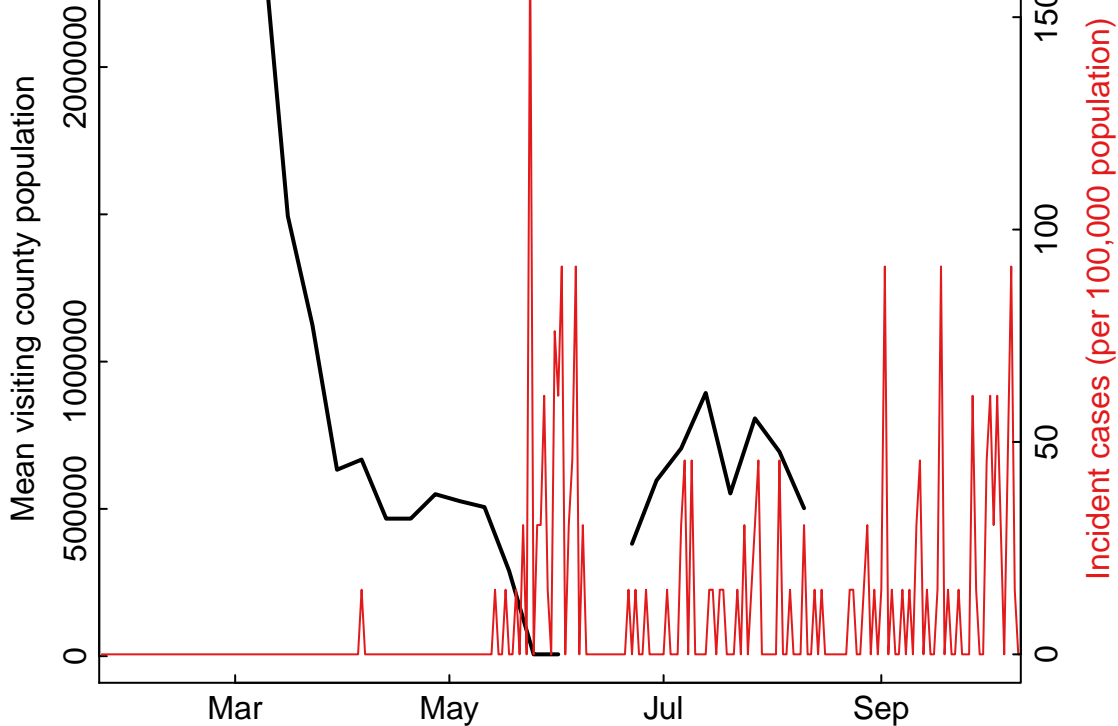

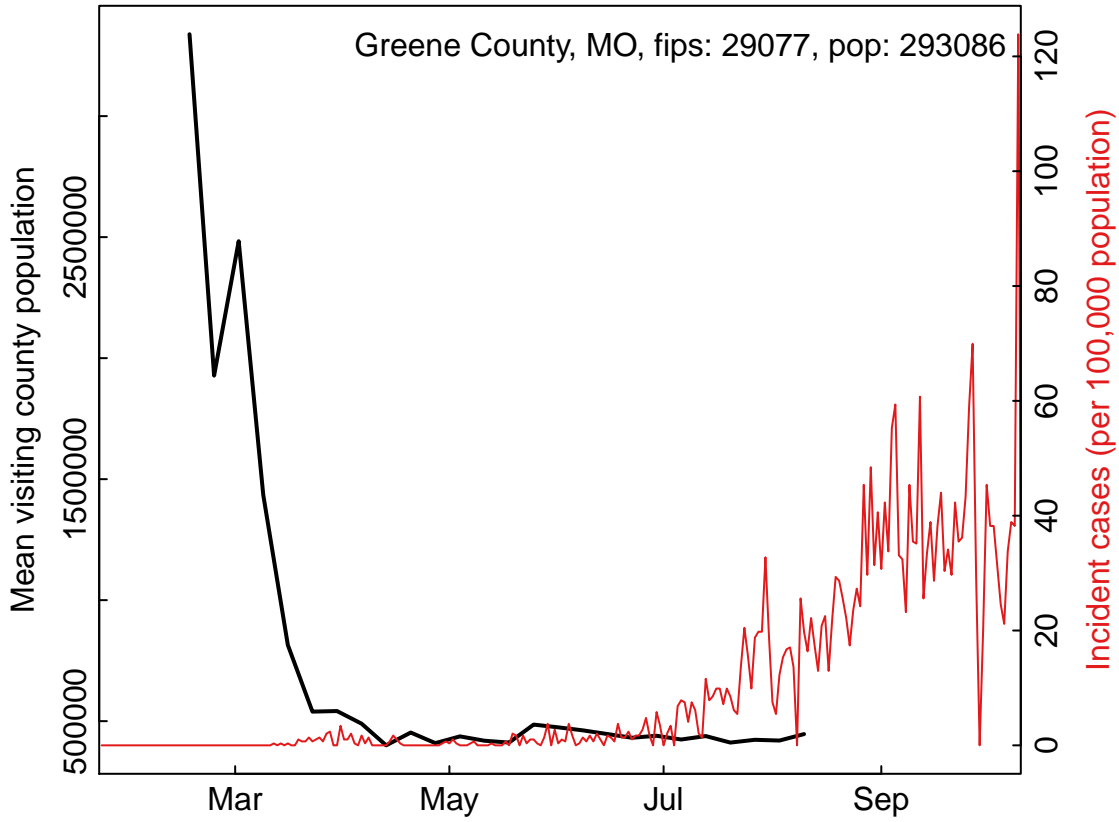

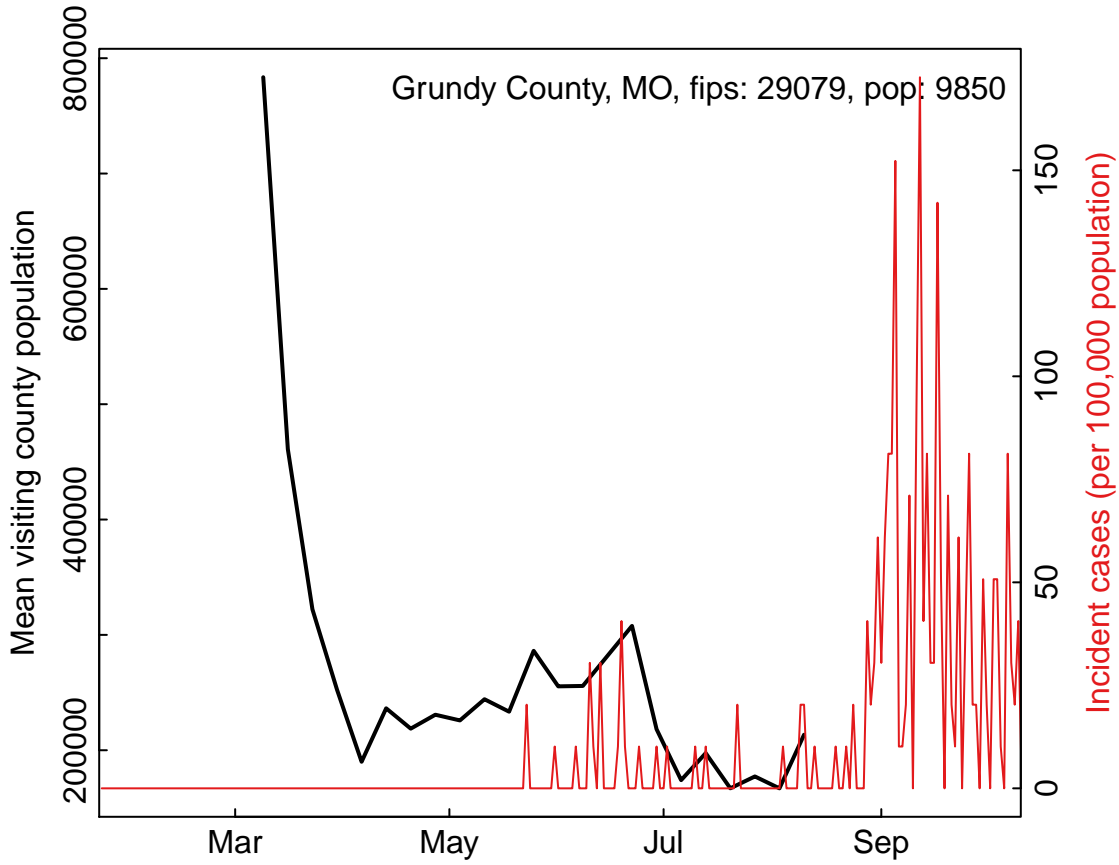

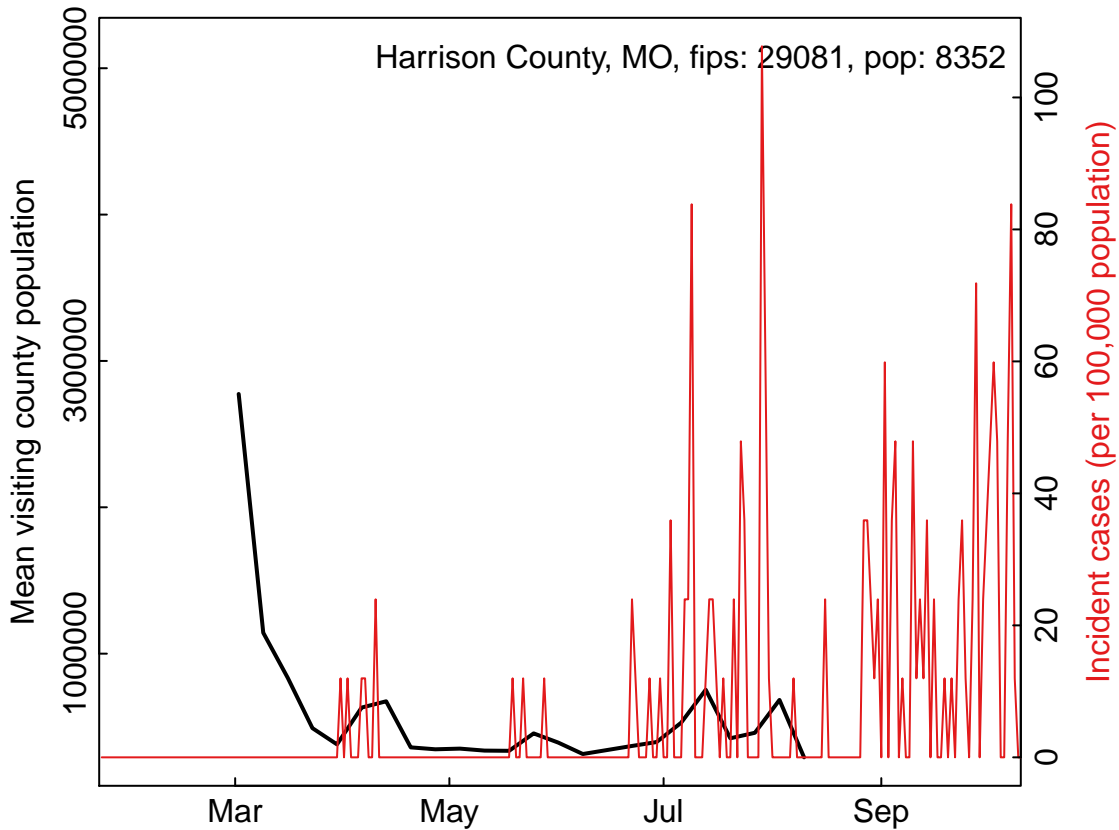

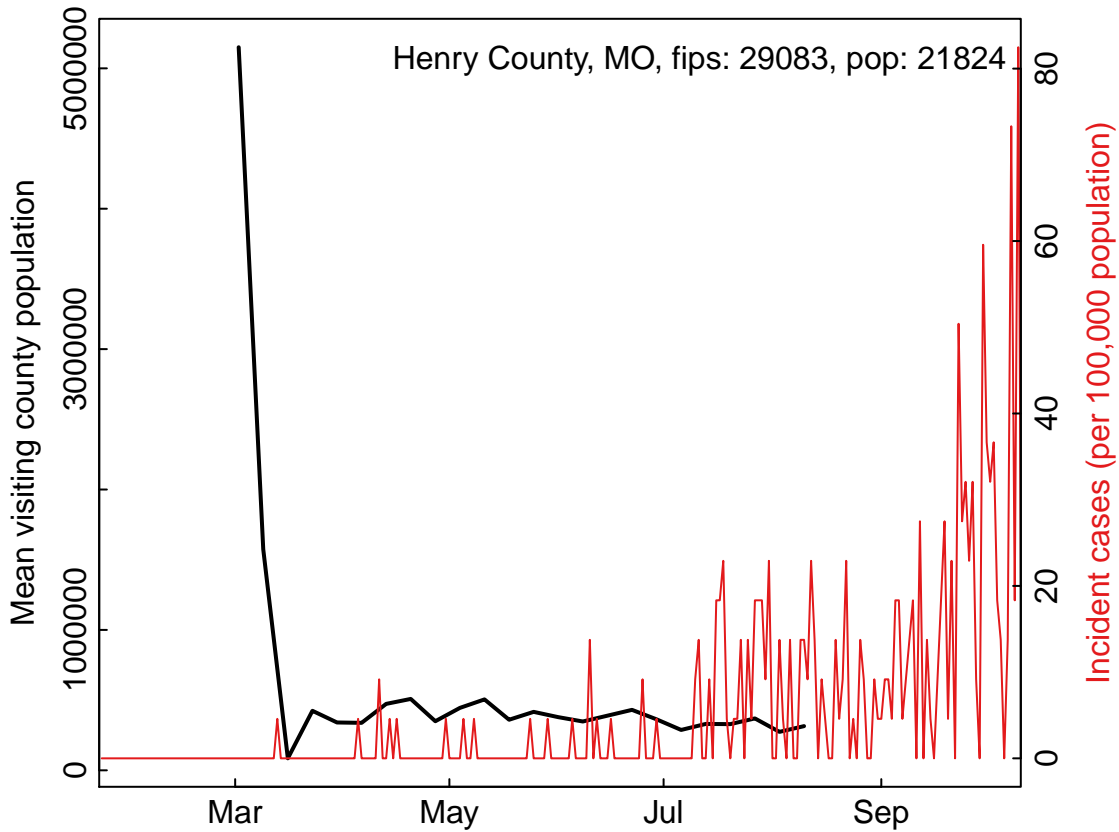



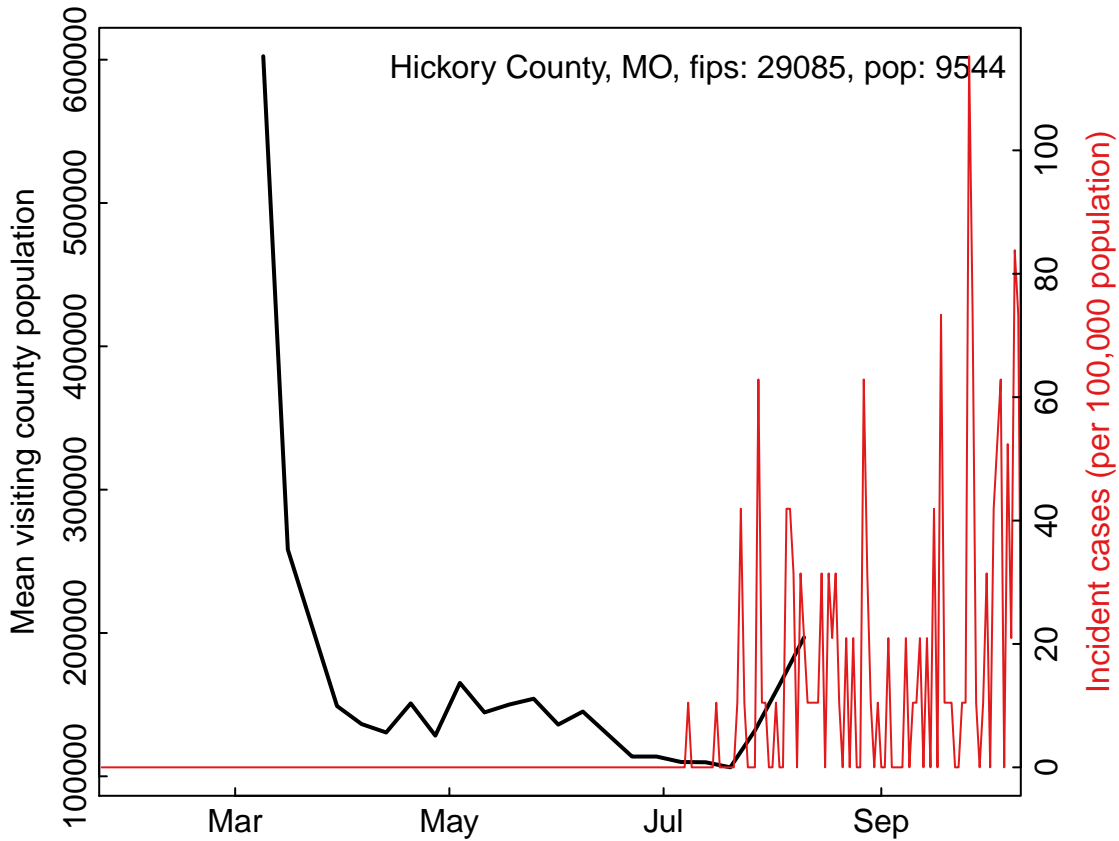

Holt County, MO, fips: 29087, pop: 4403

Mean visiting county population

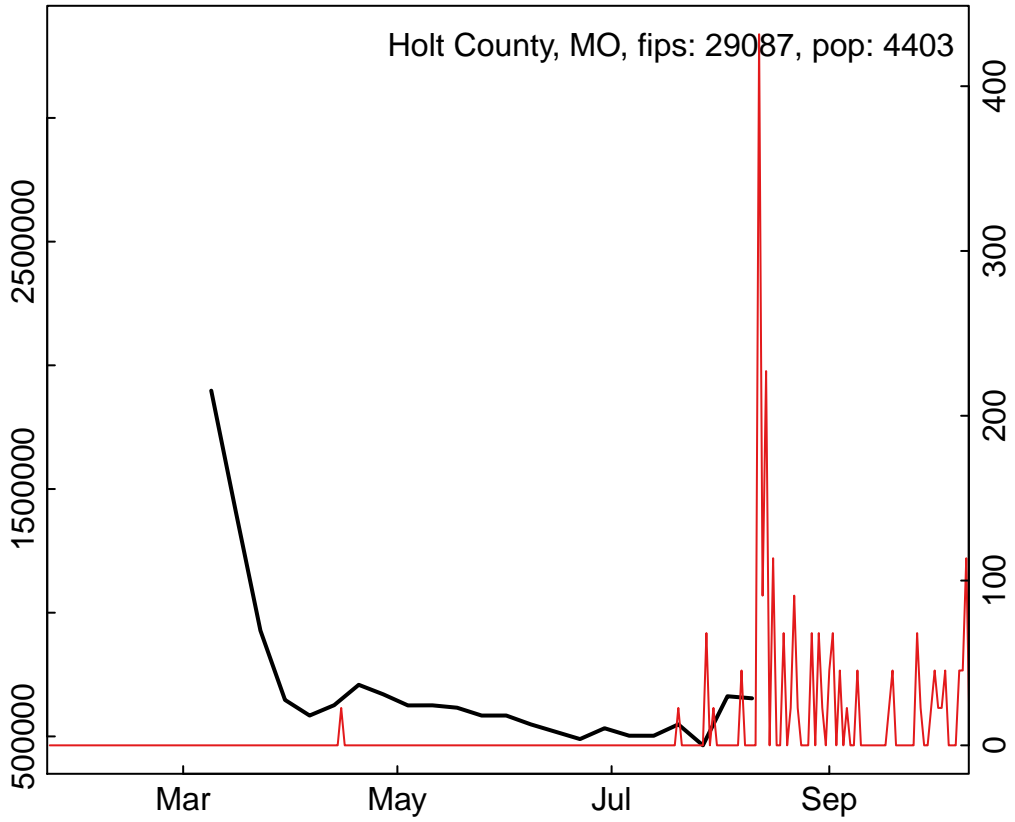

Incident cases (per 100,000 population)

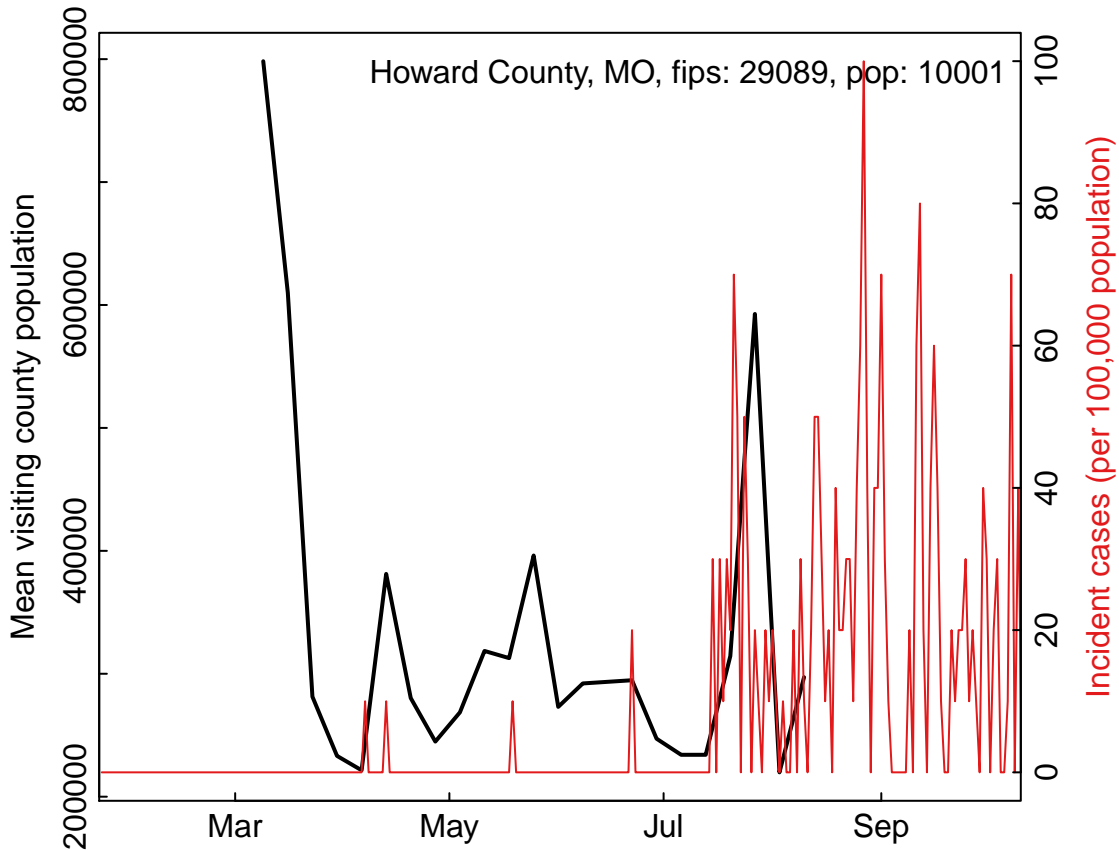

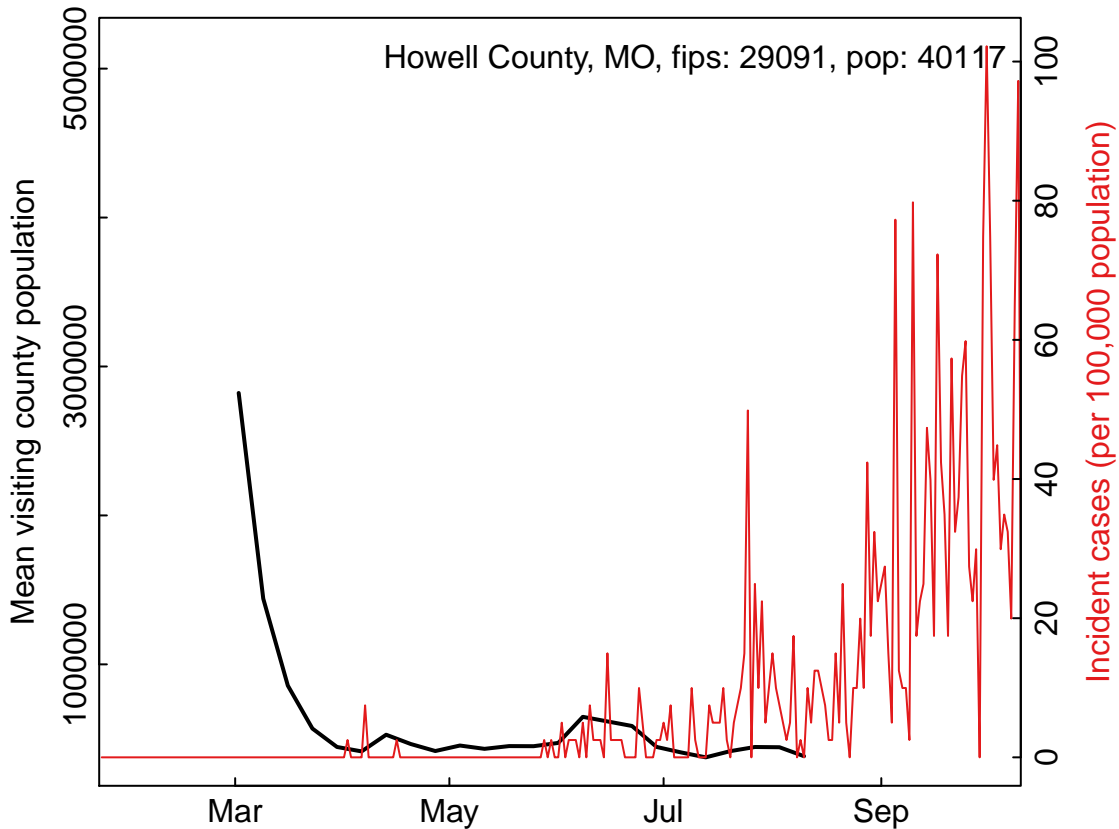

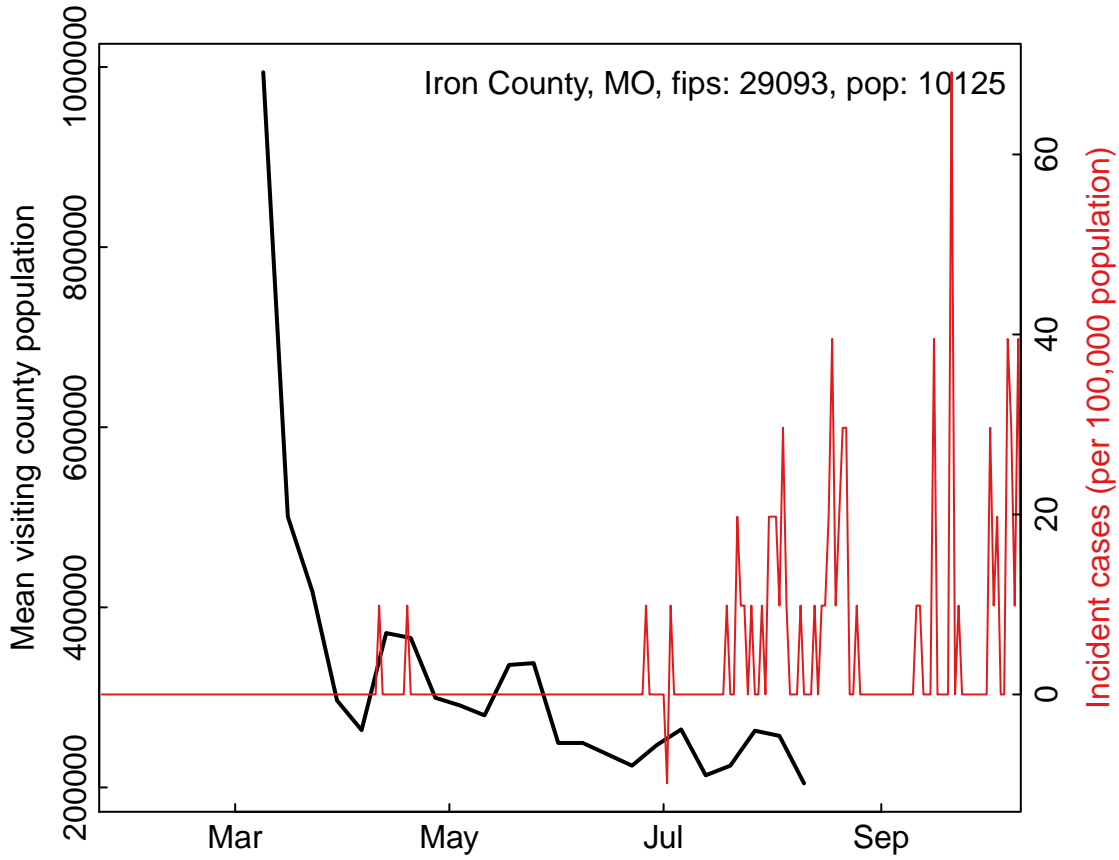

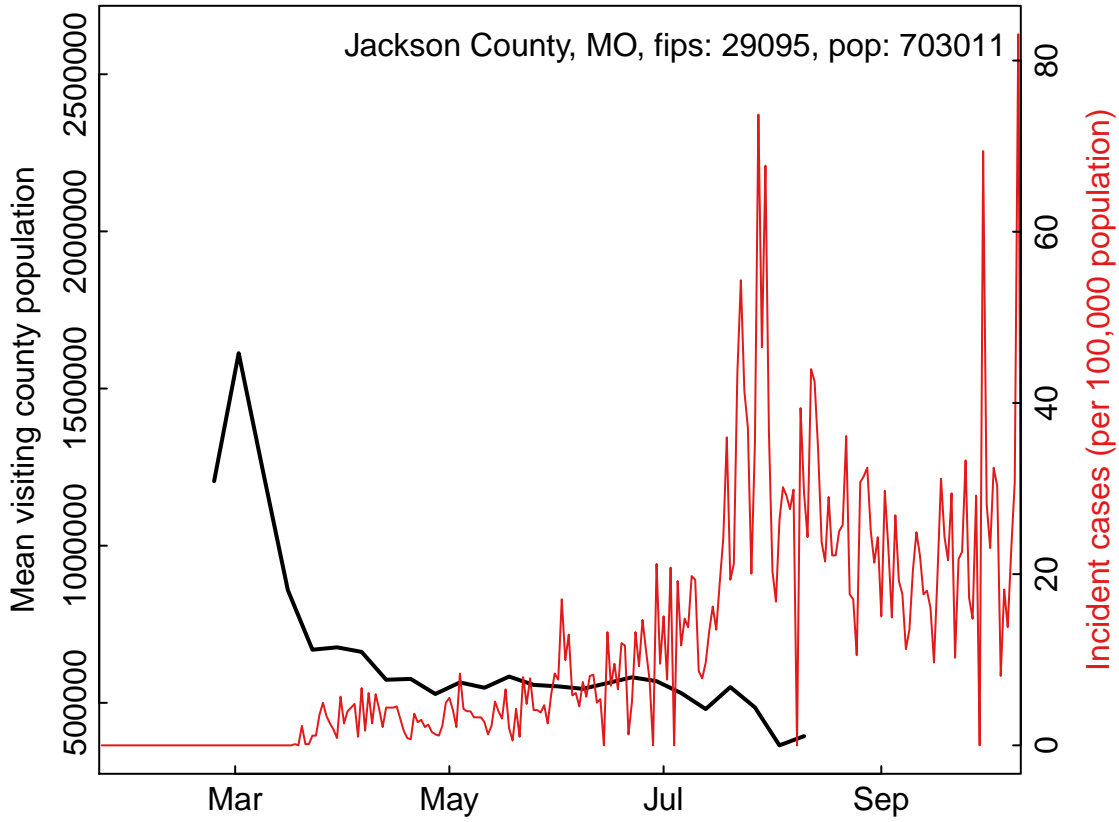

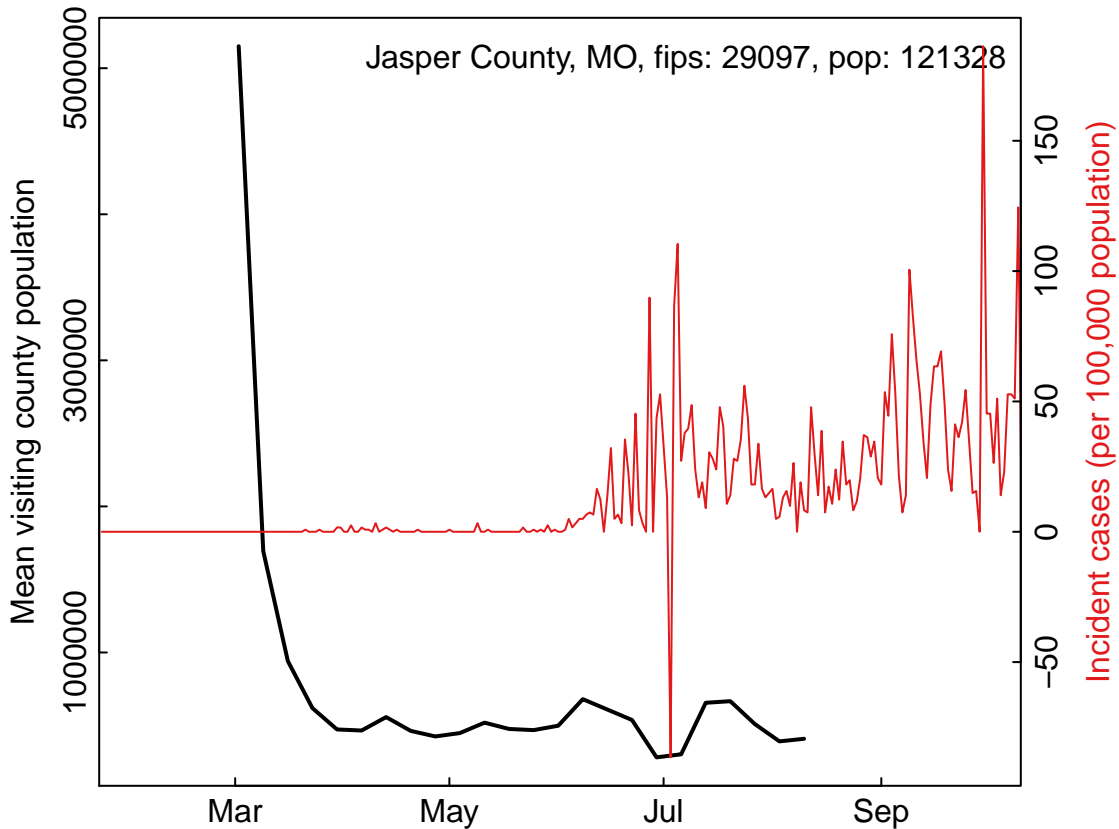

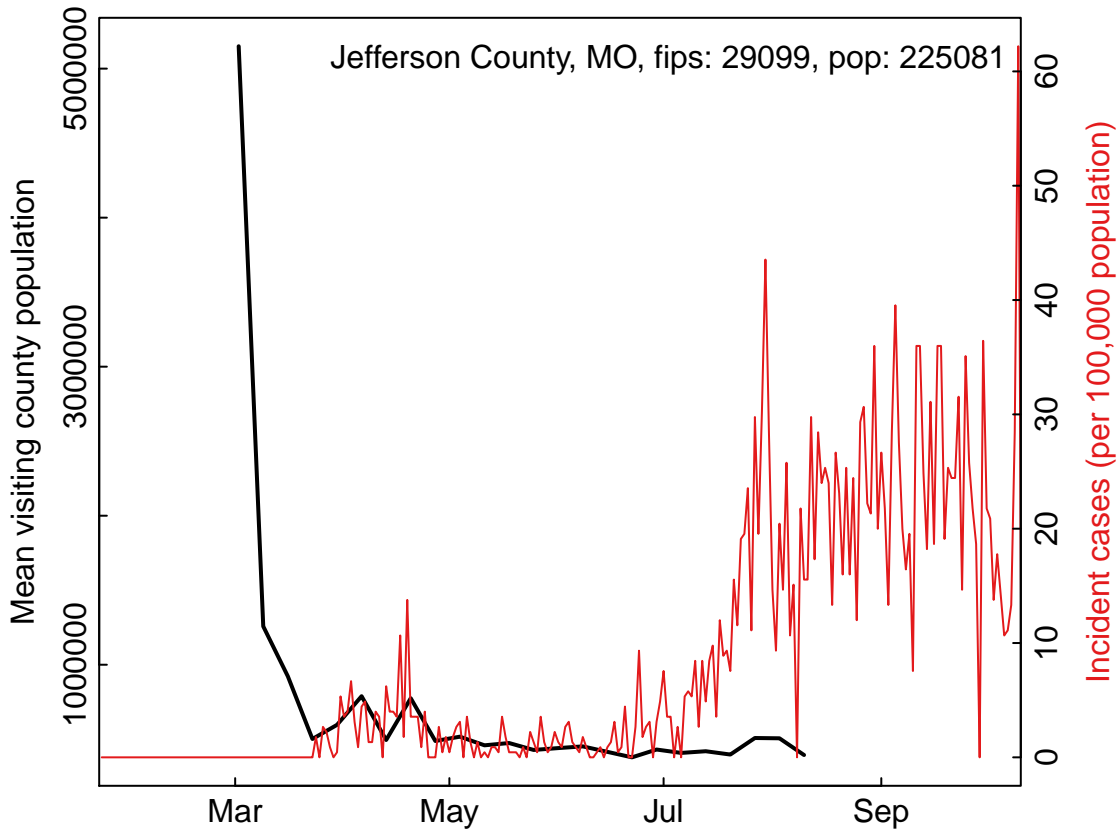



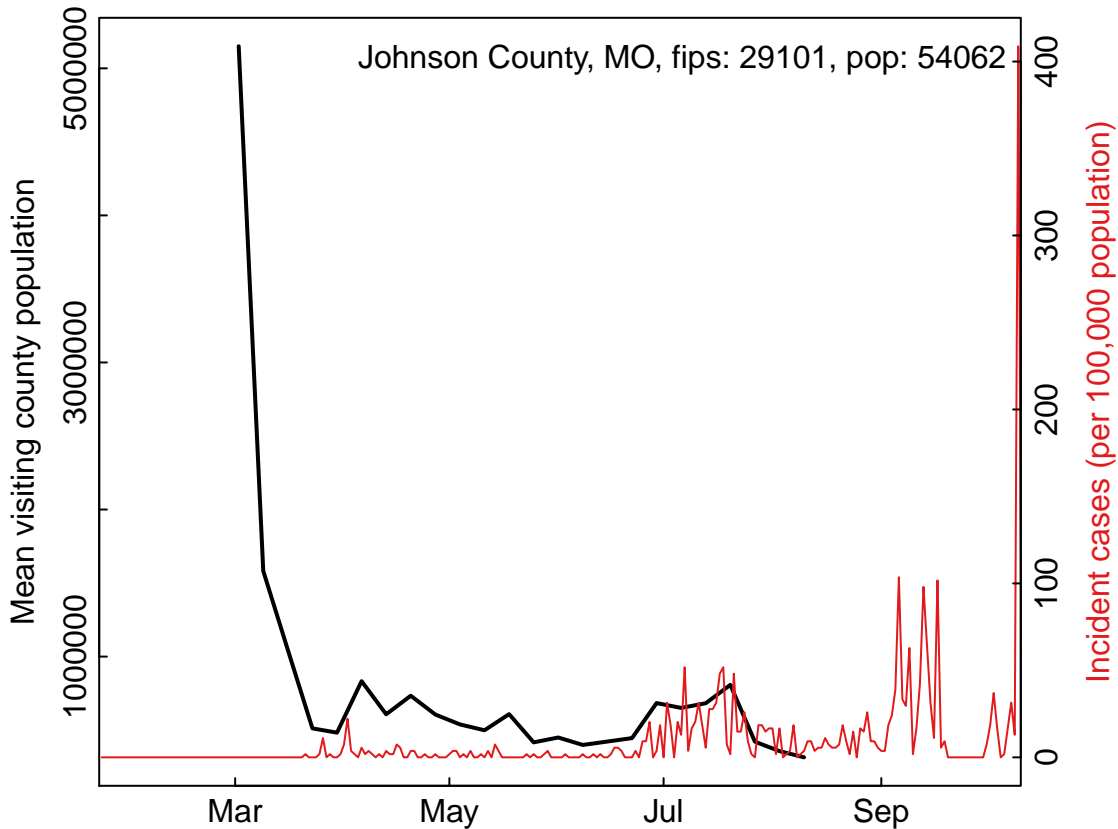

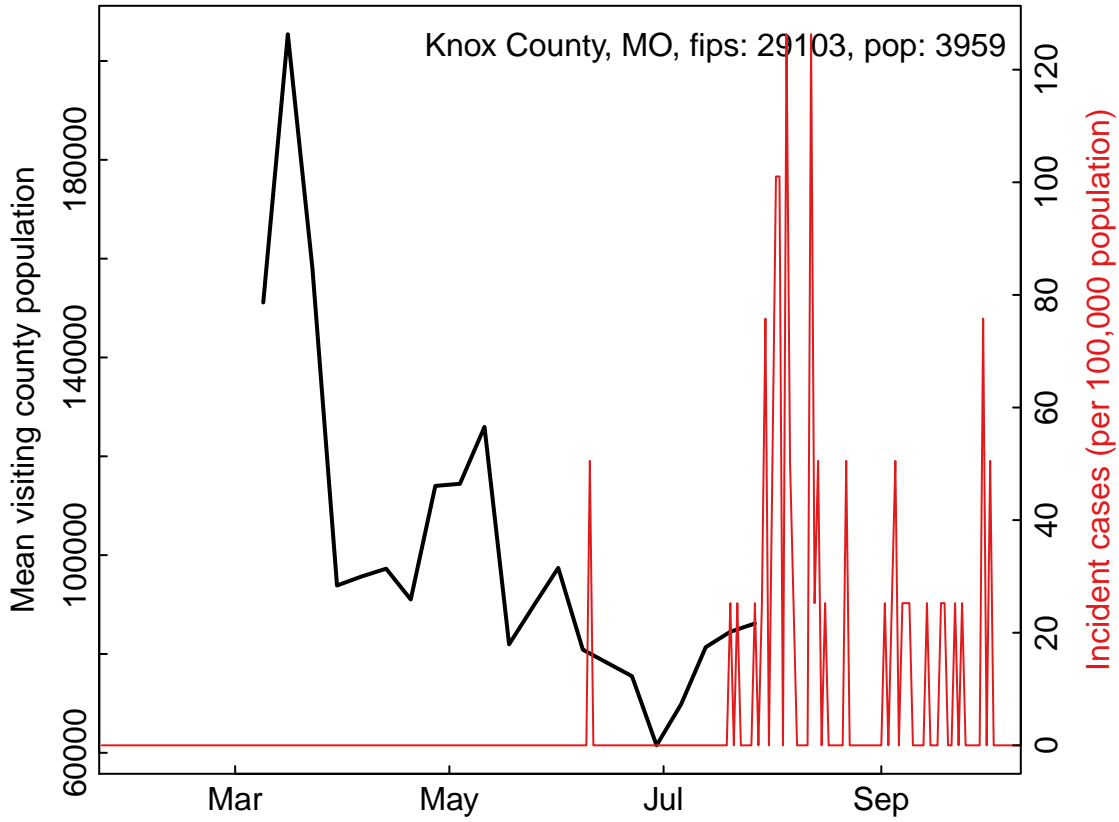

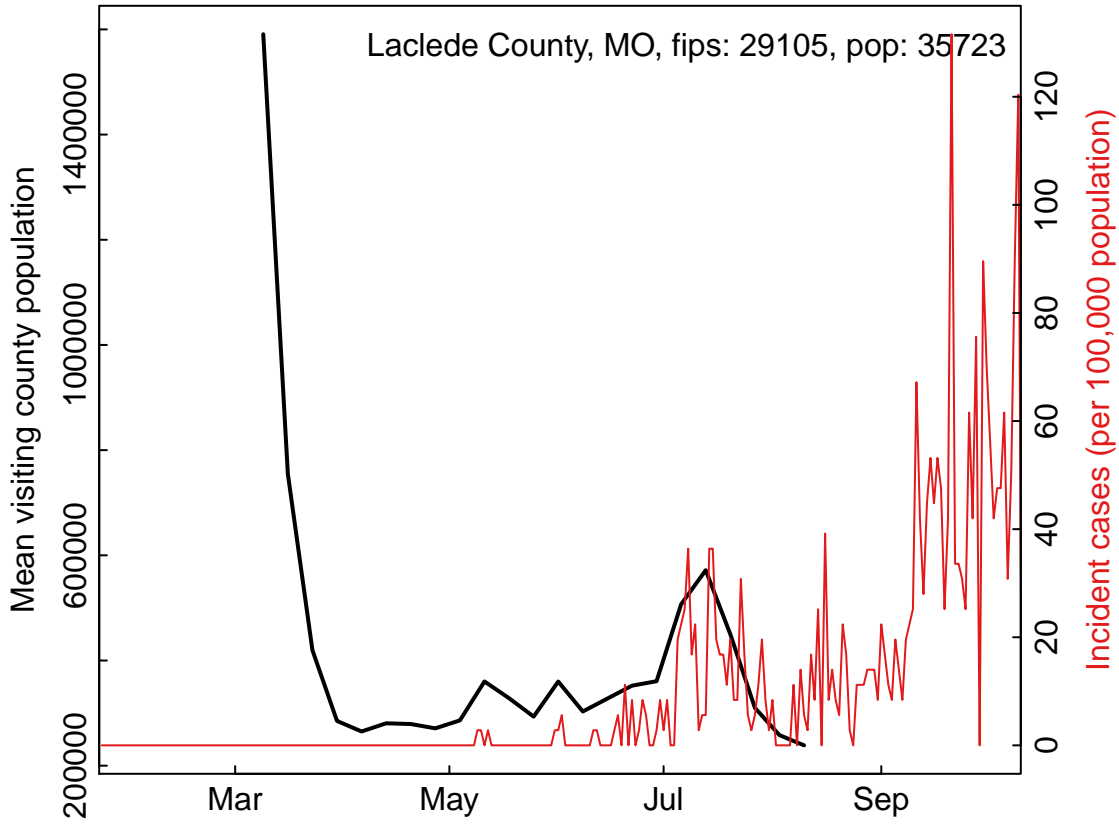

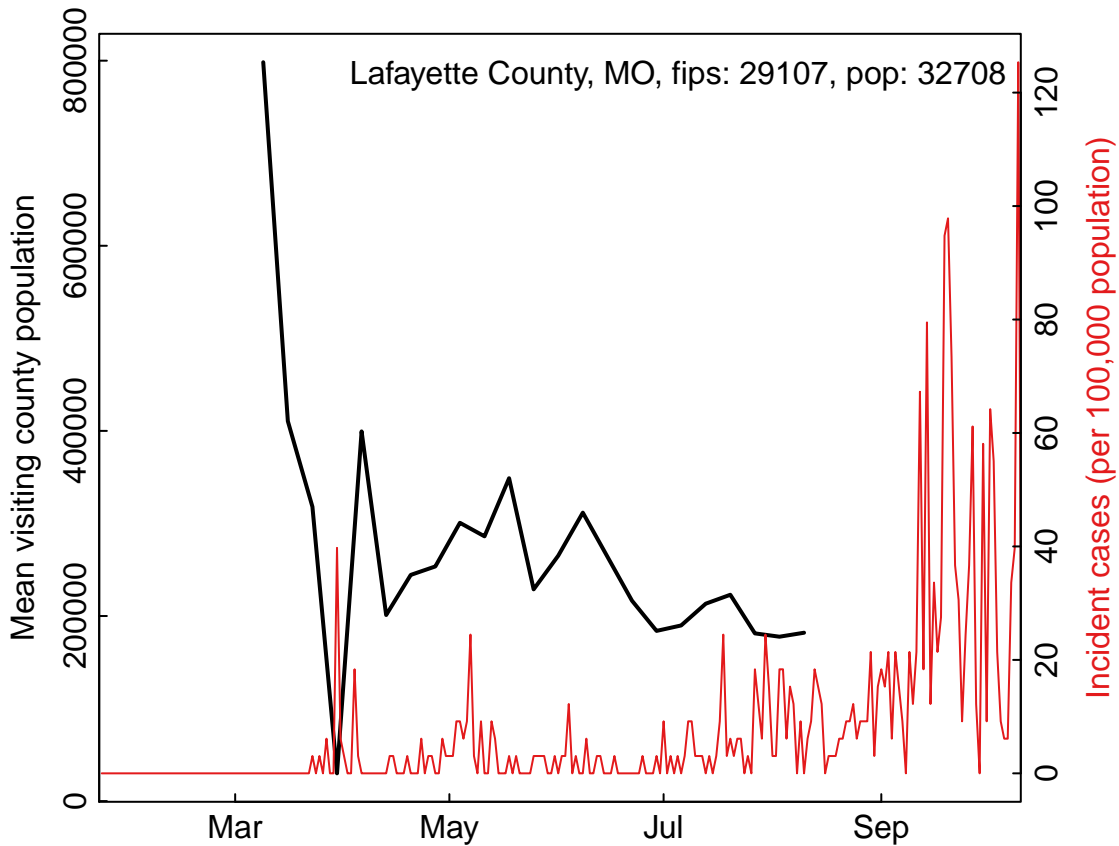

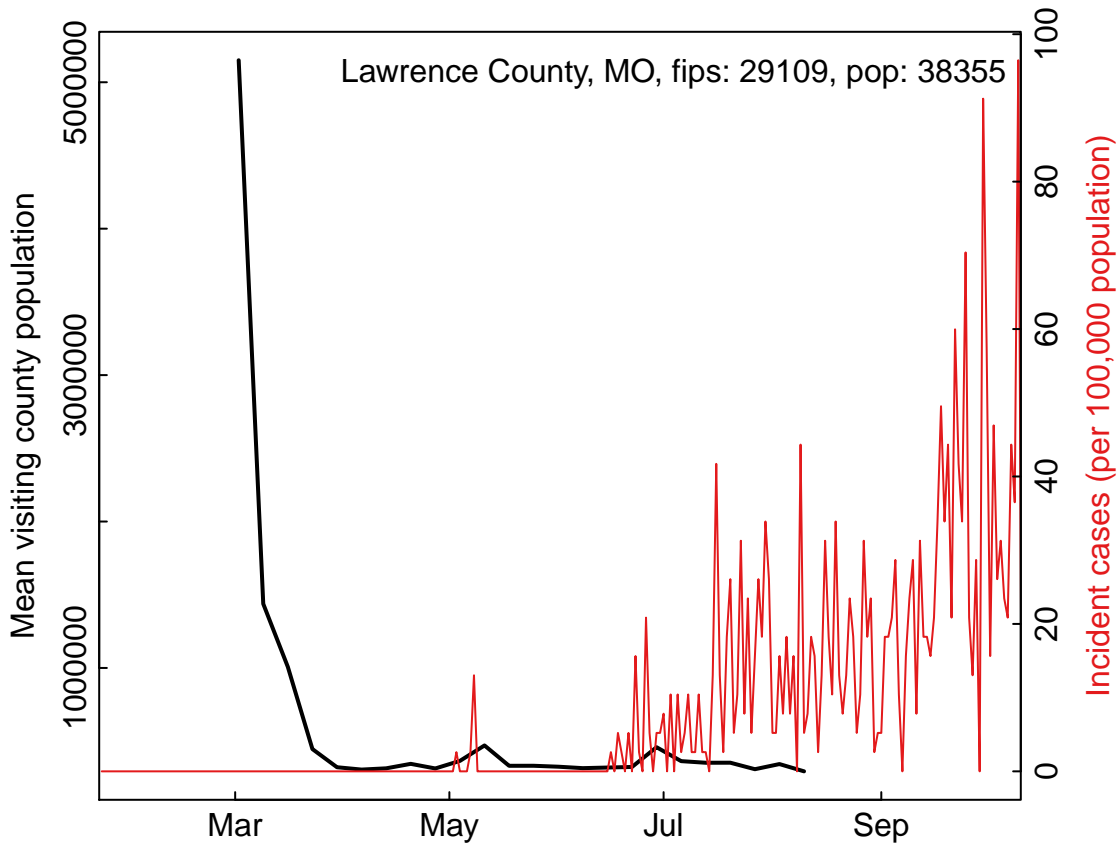

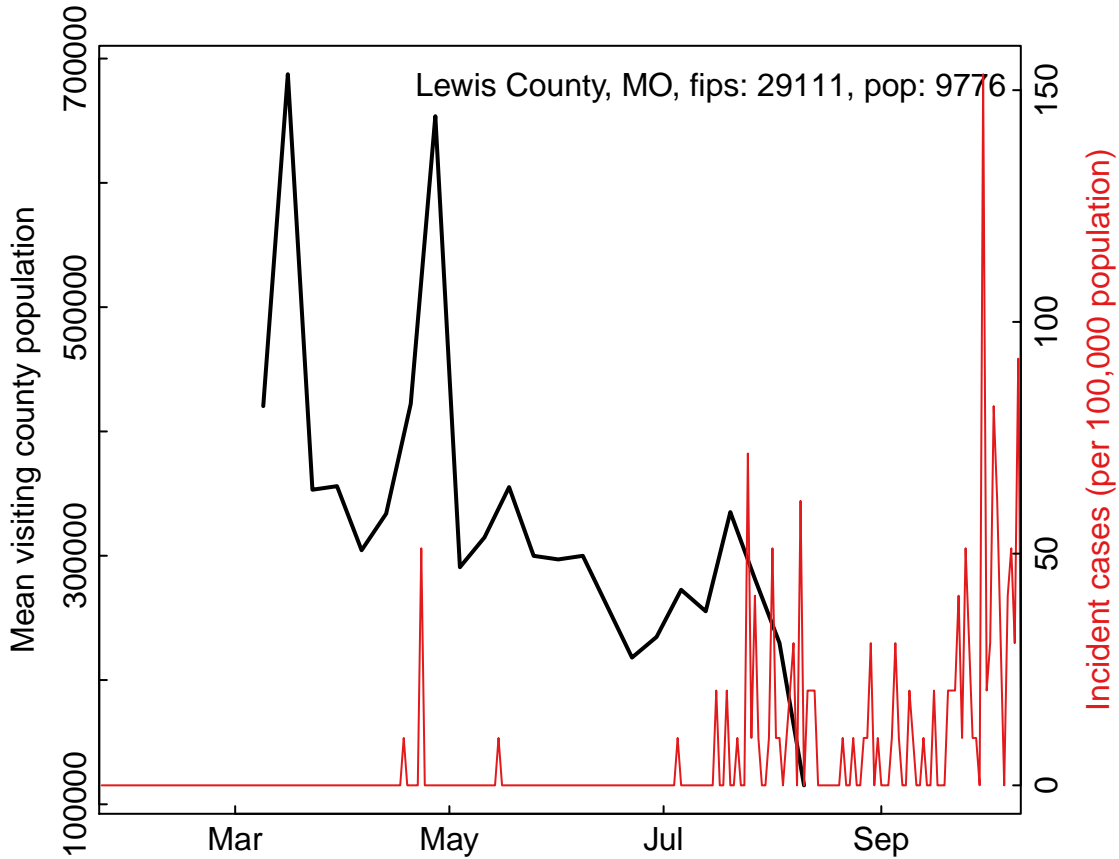

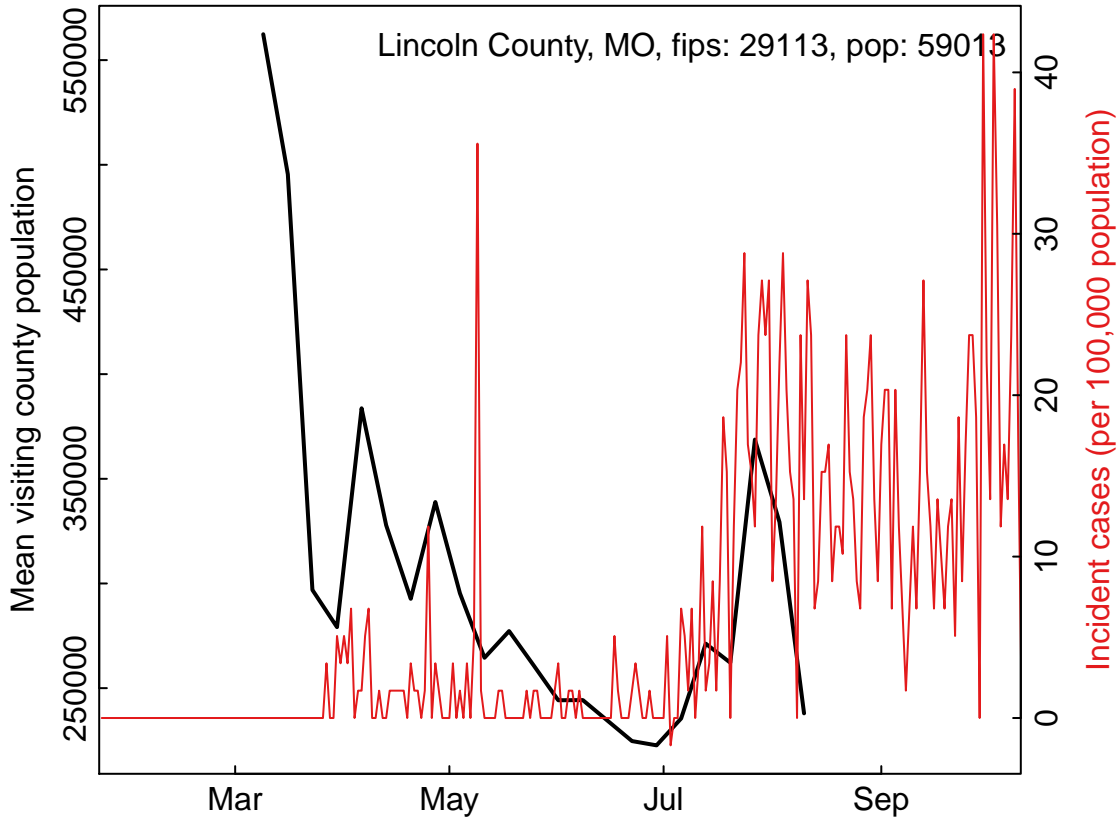

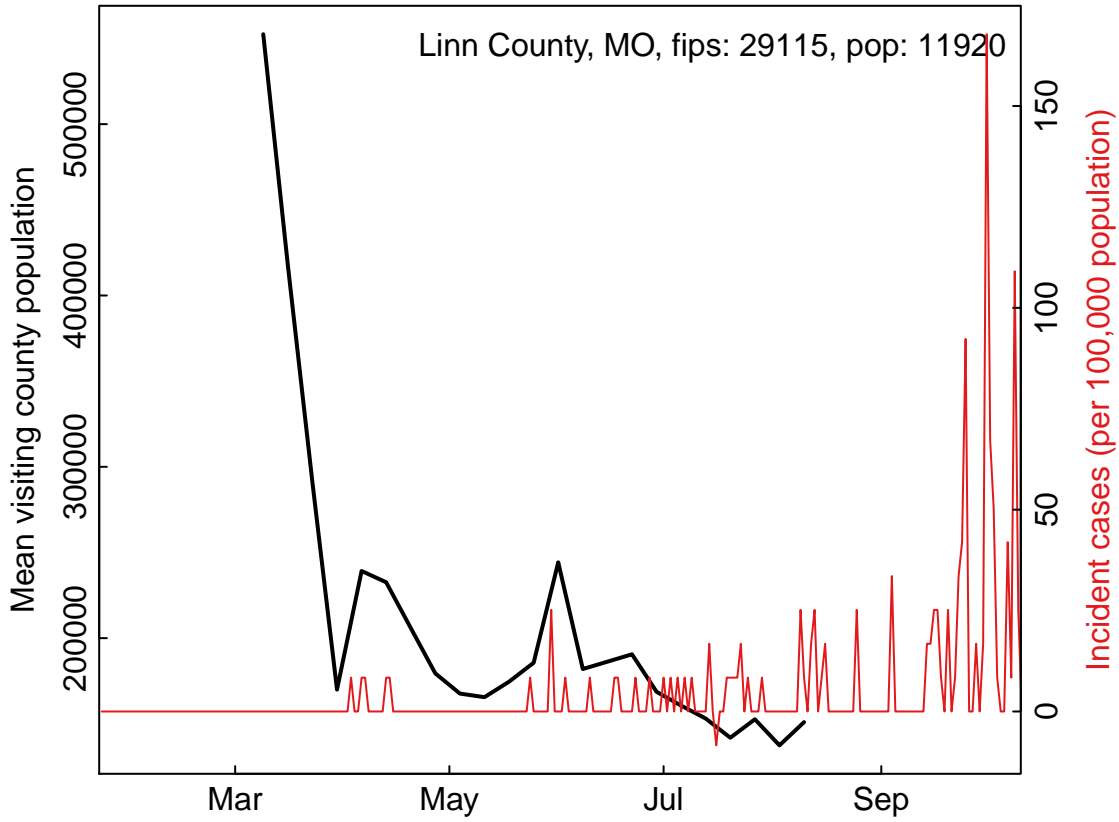



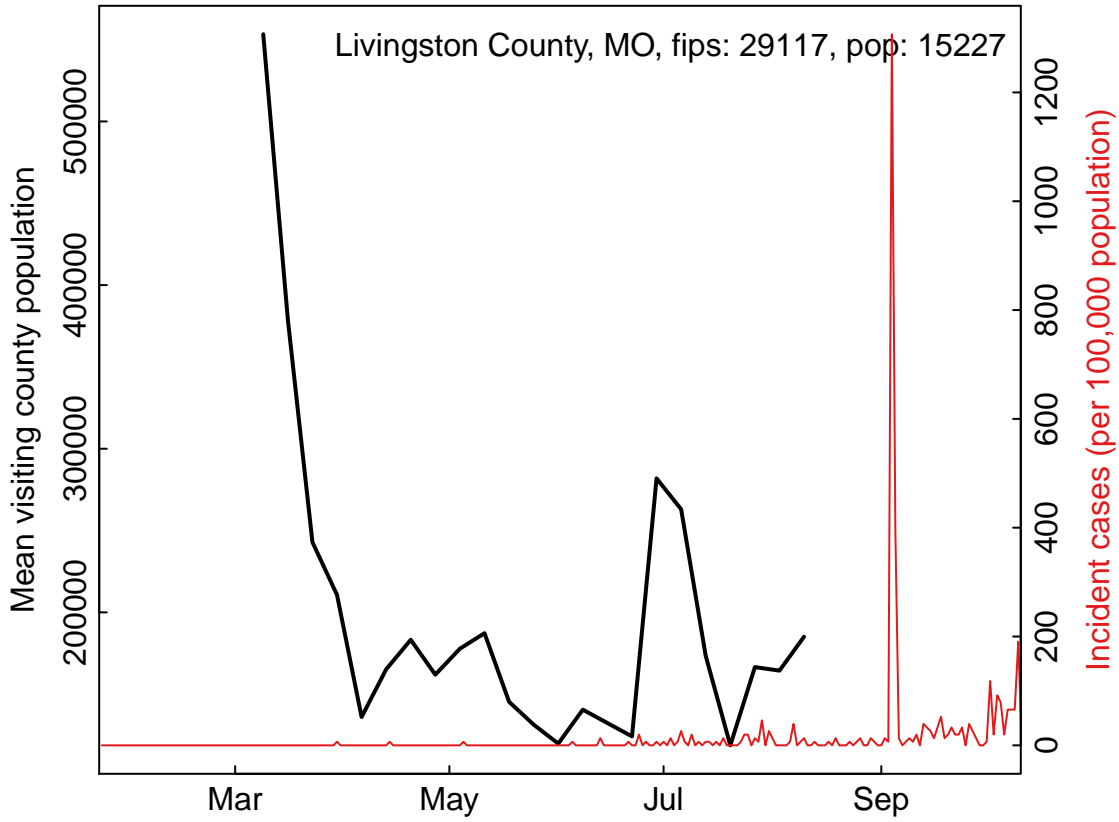

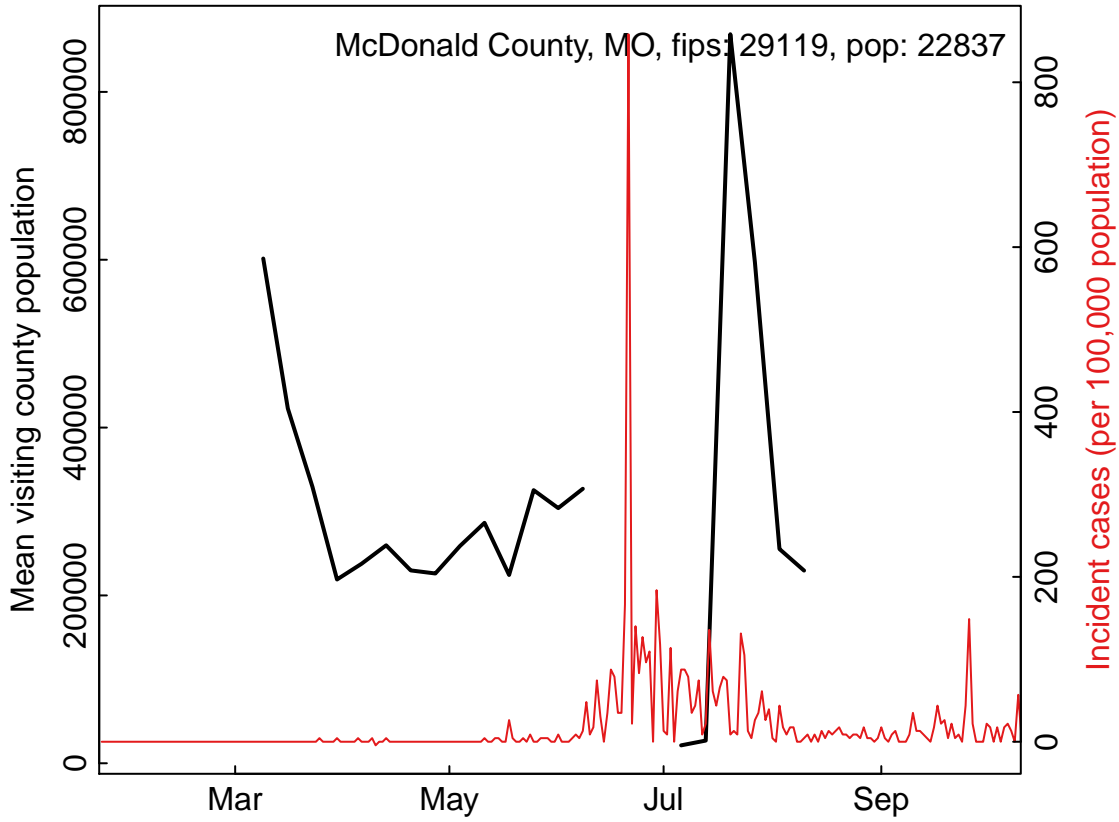

Macon County, MO, fips: 29121, pop: 15117

Mean visiting county population

1400000  
1000000  
600000  
200000

Mar

May

Jul

Sep

60  
40  
20  
0

Incident cases (per 100,000 population)

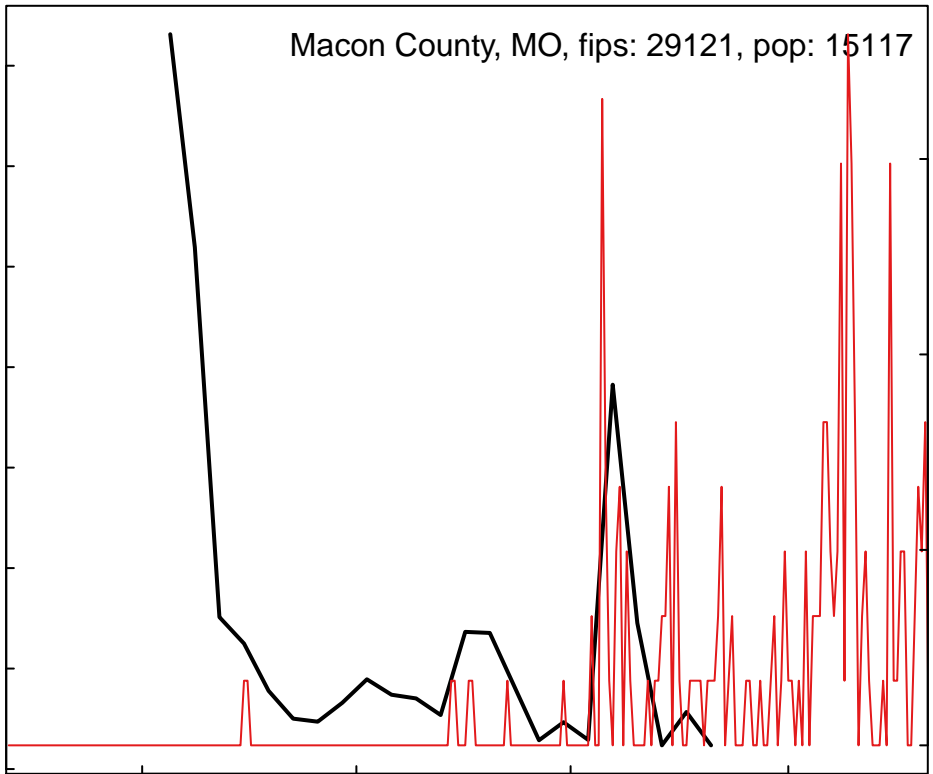

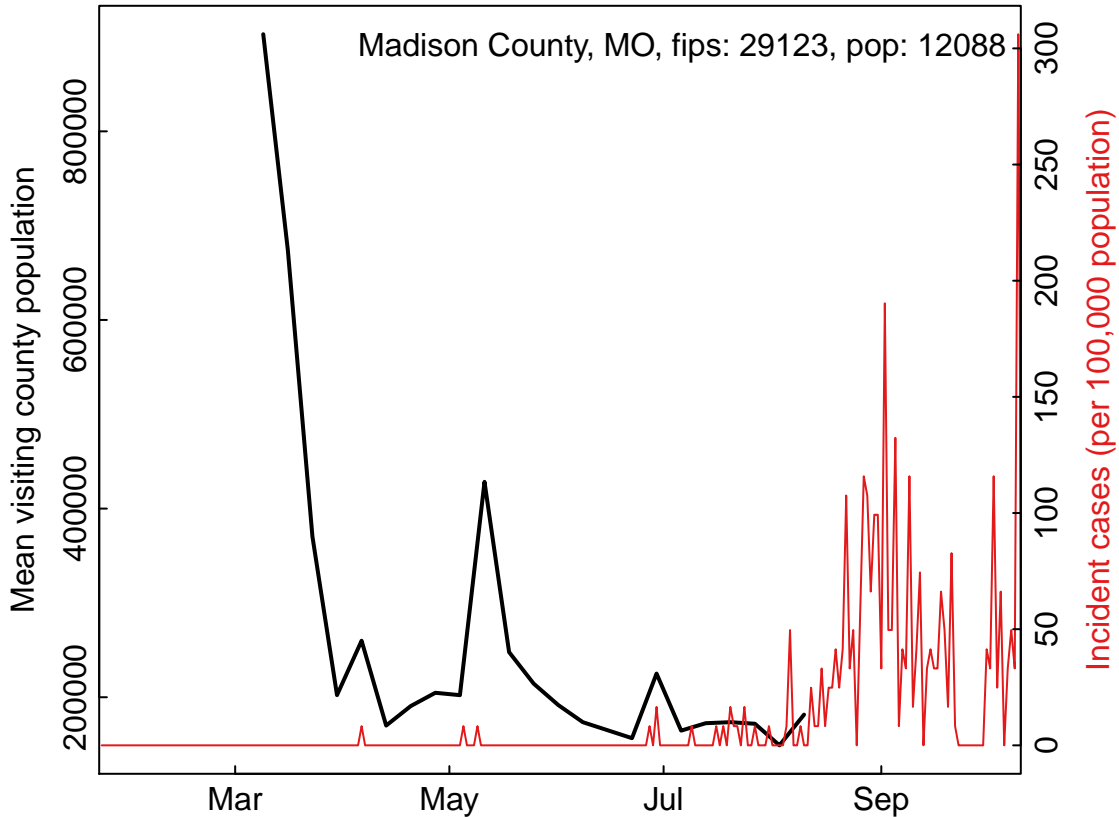

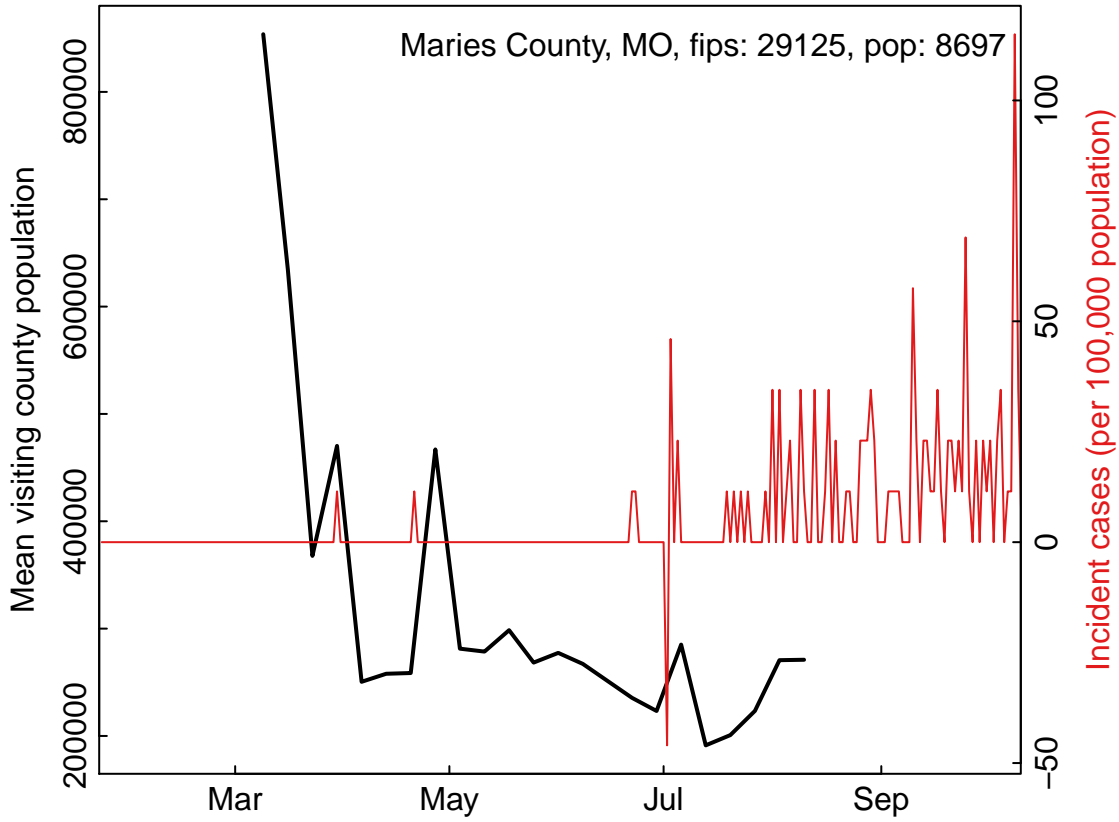

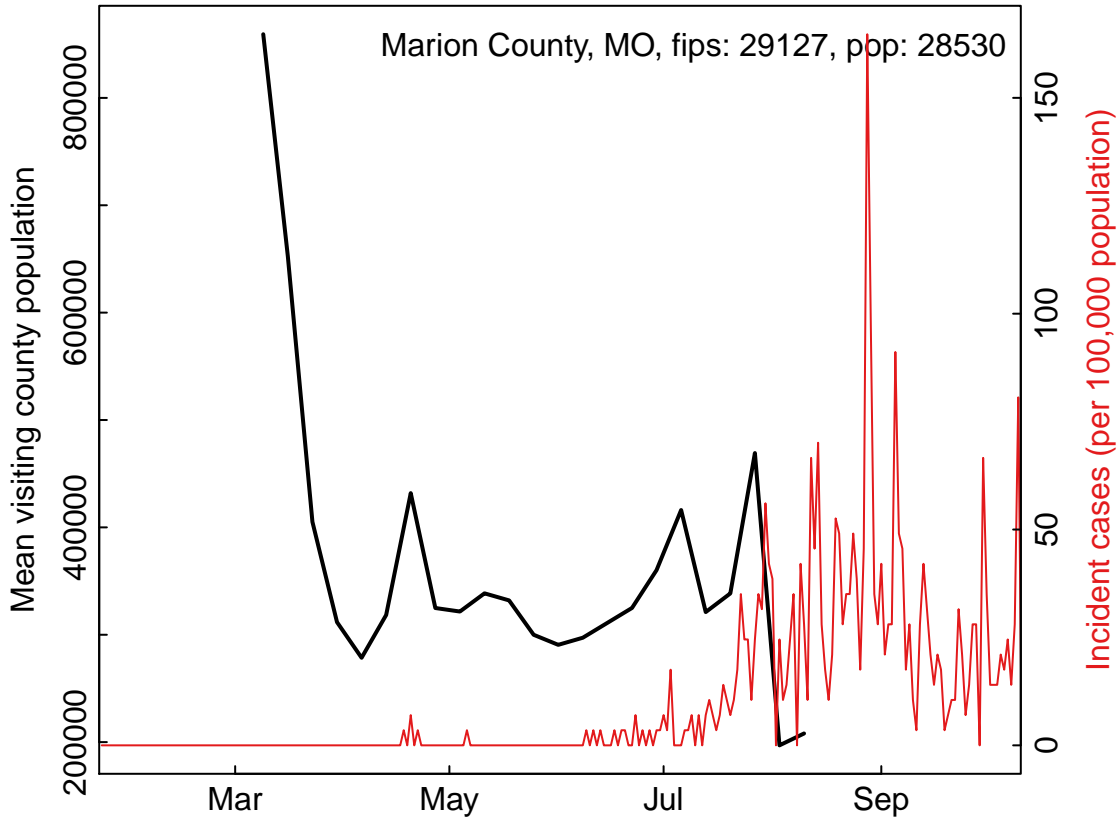

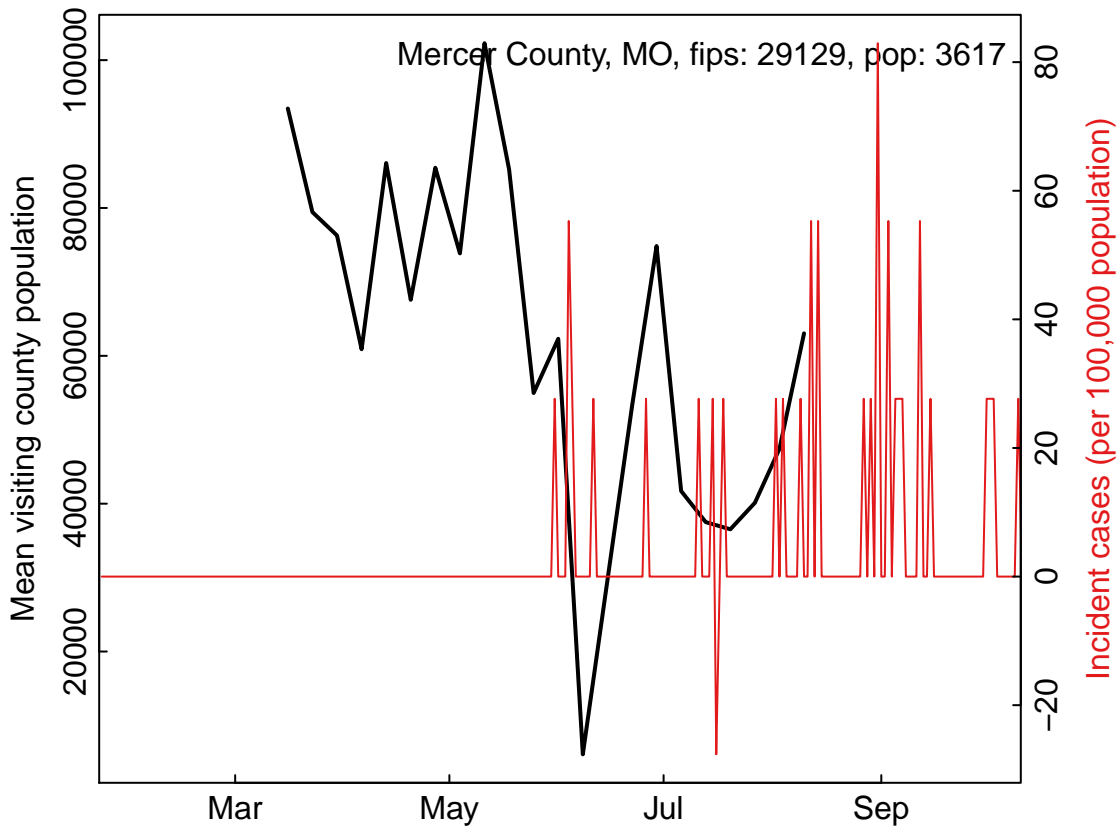

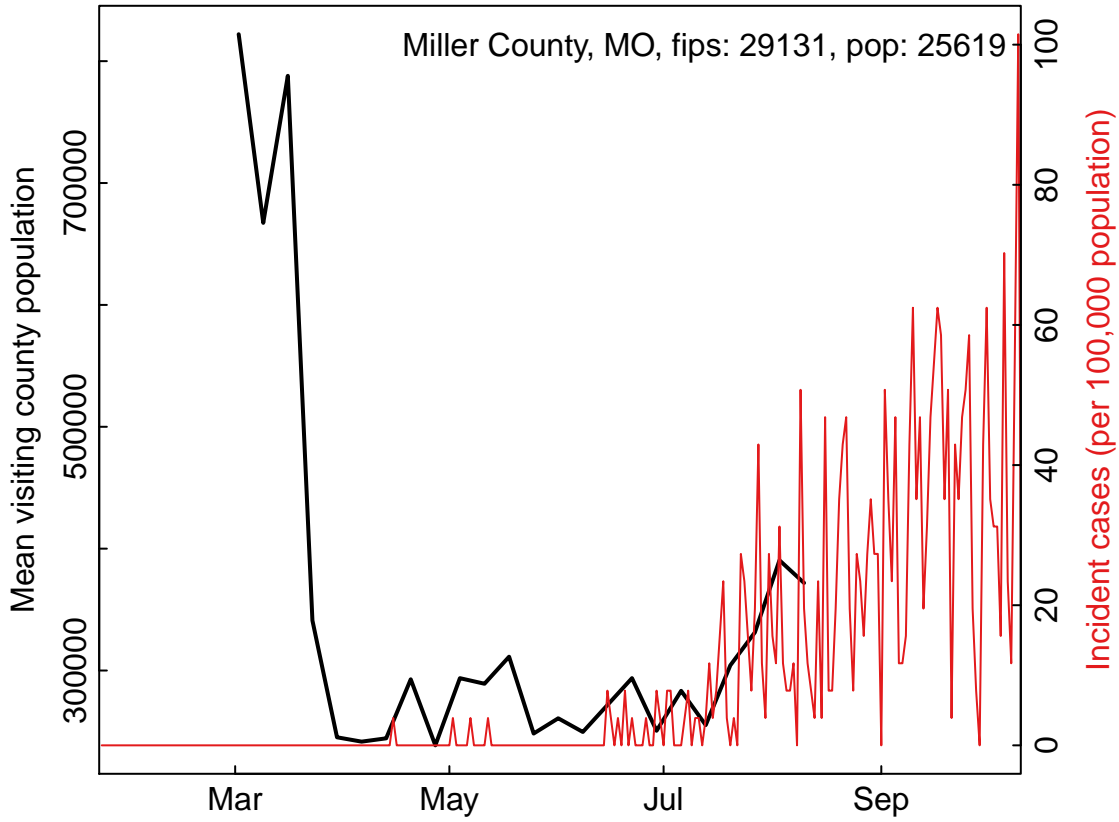



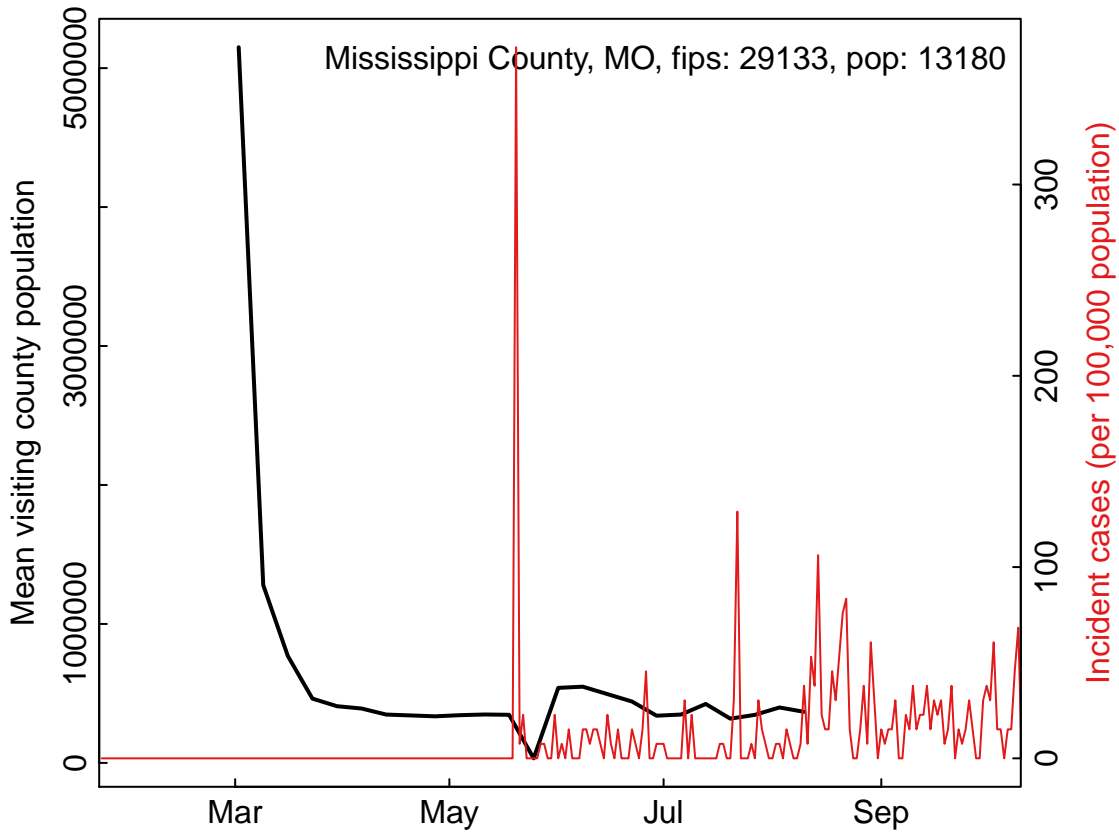

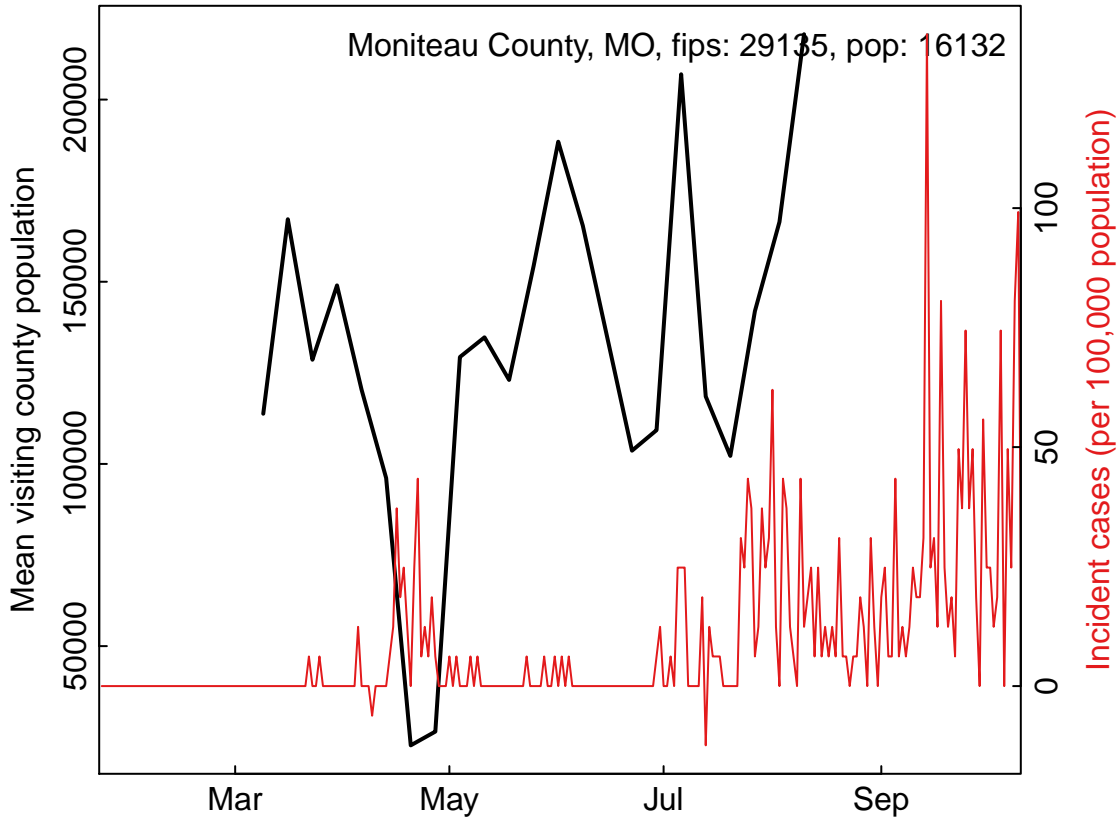

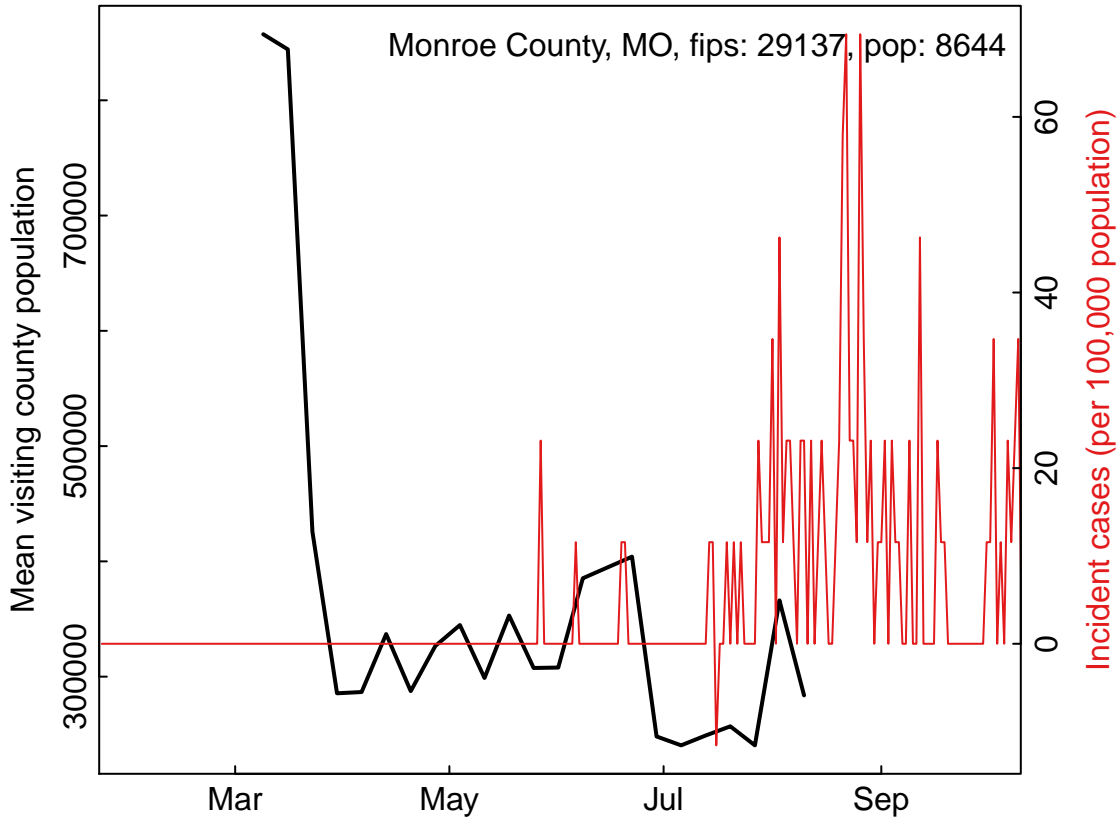

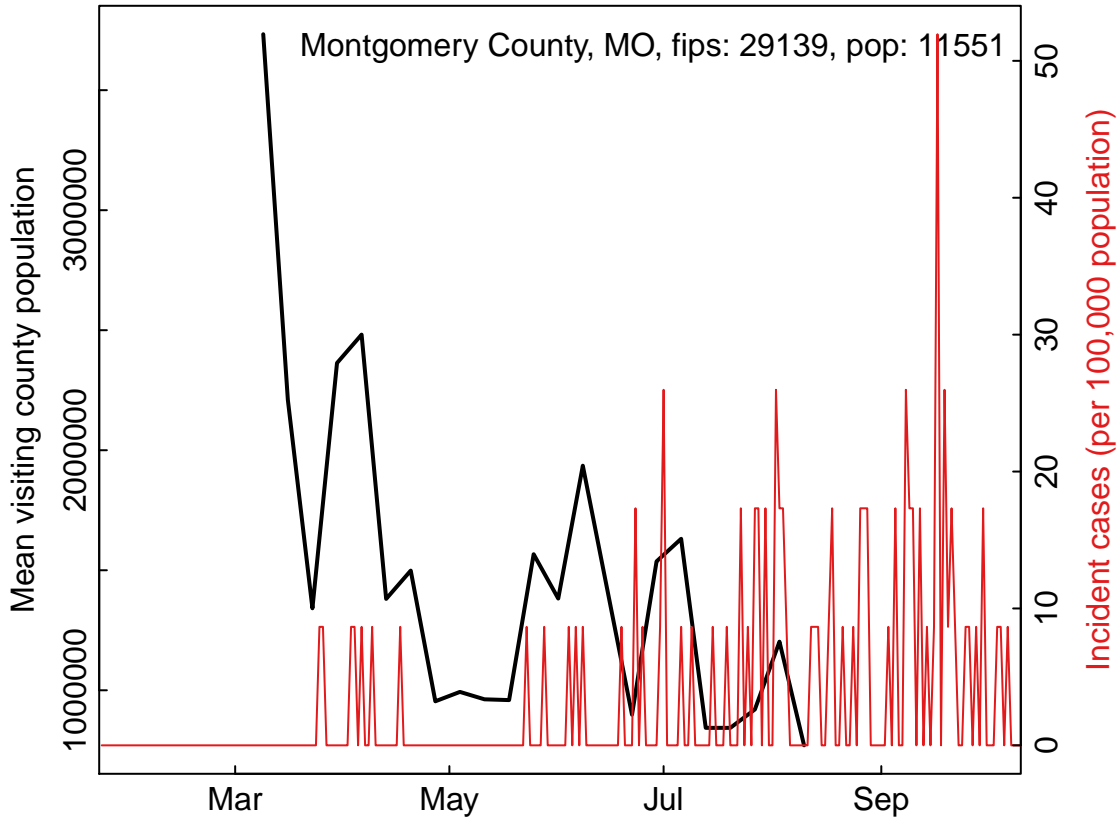

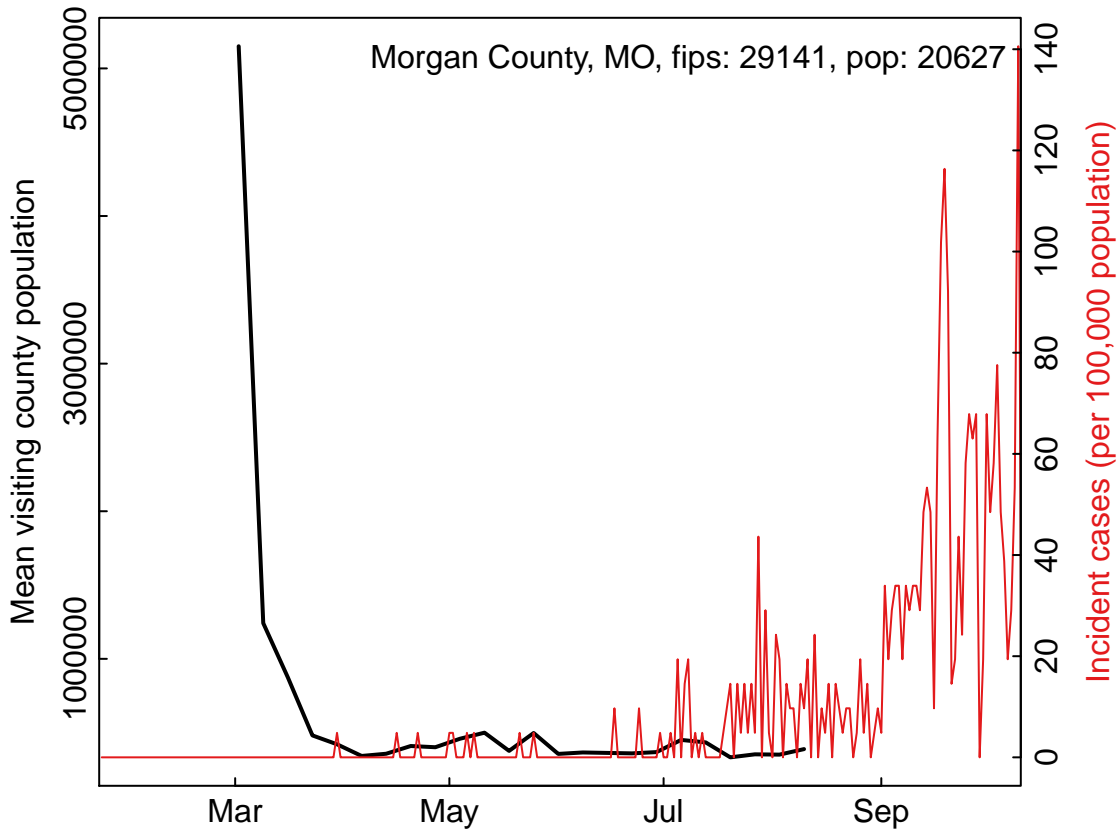

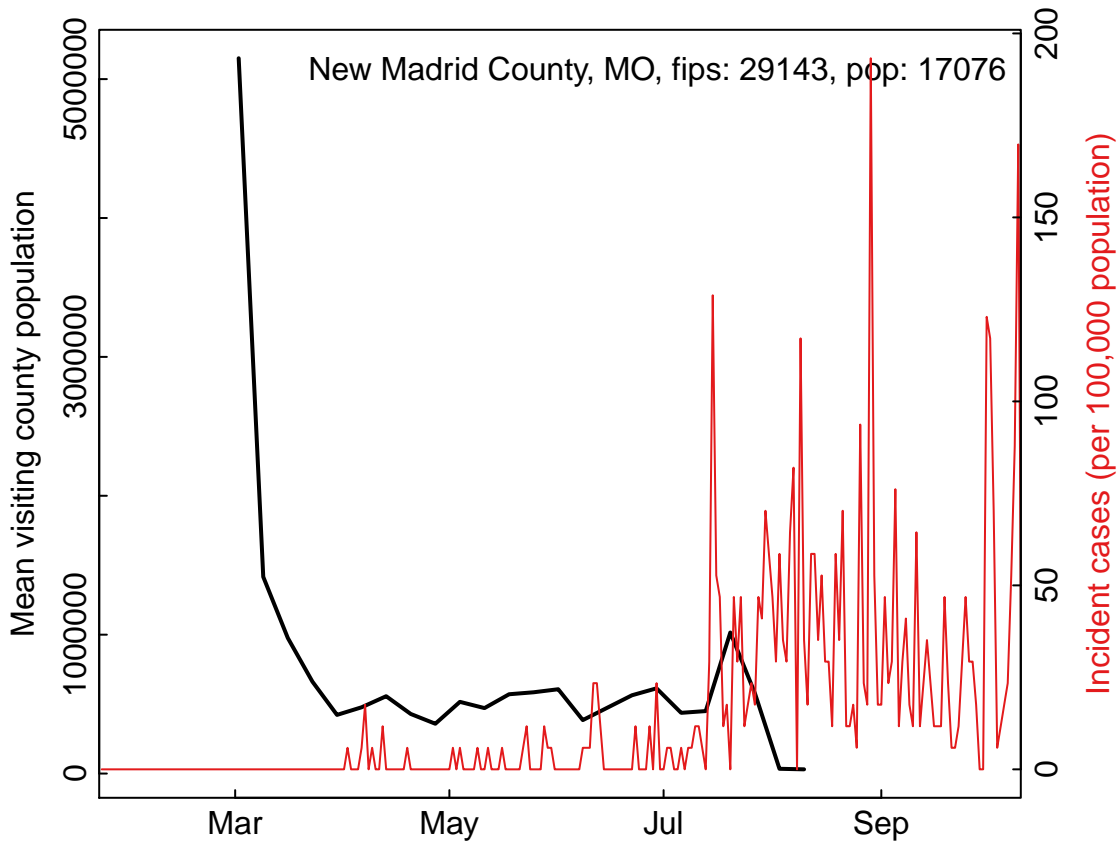

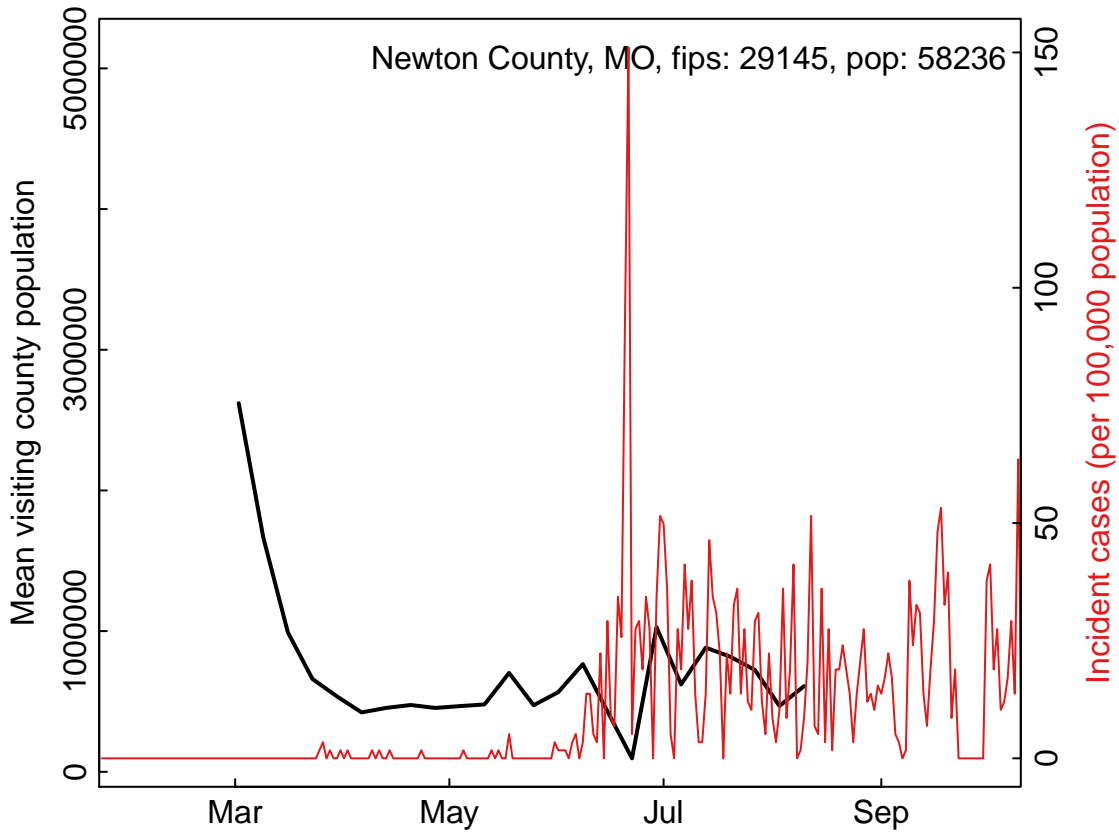

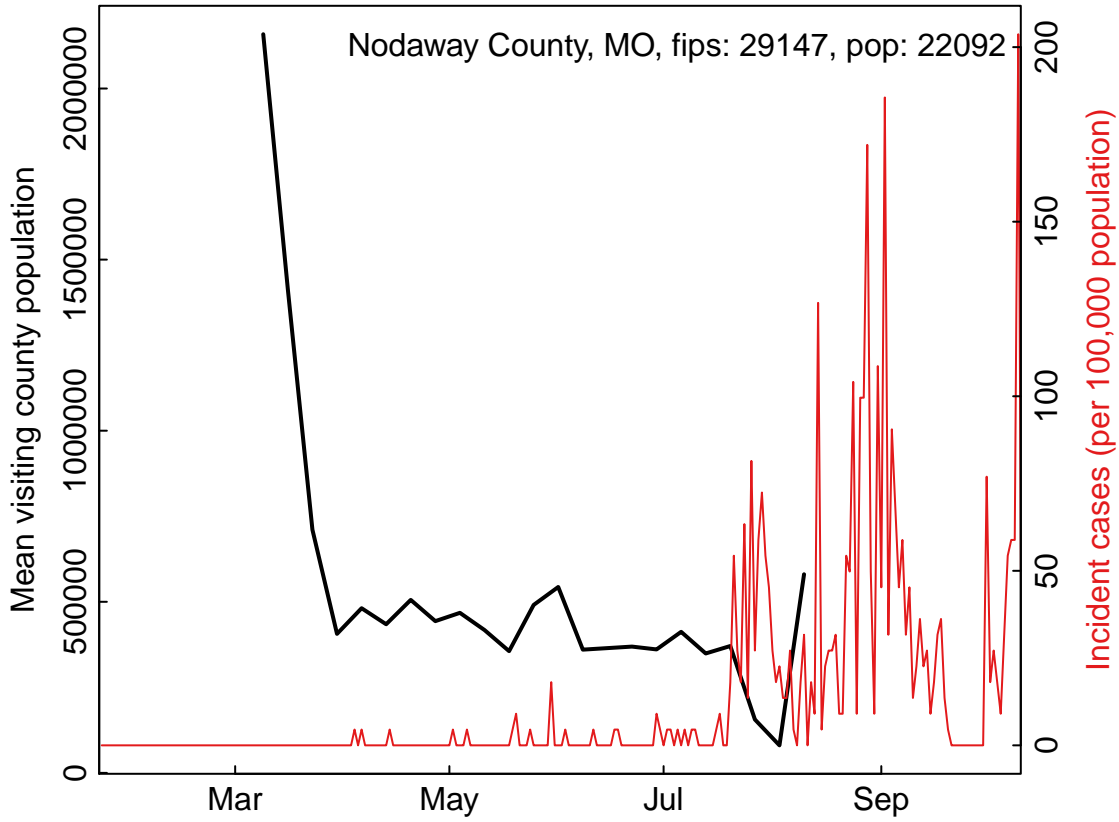



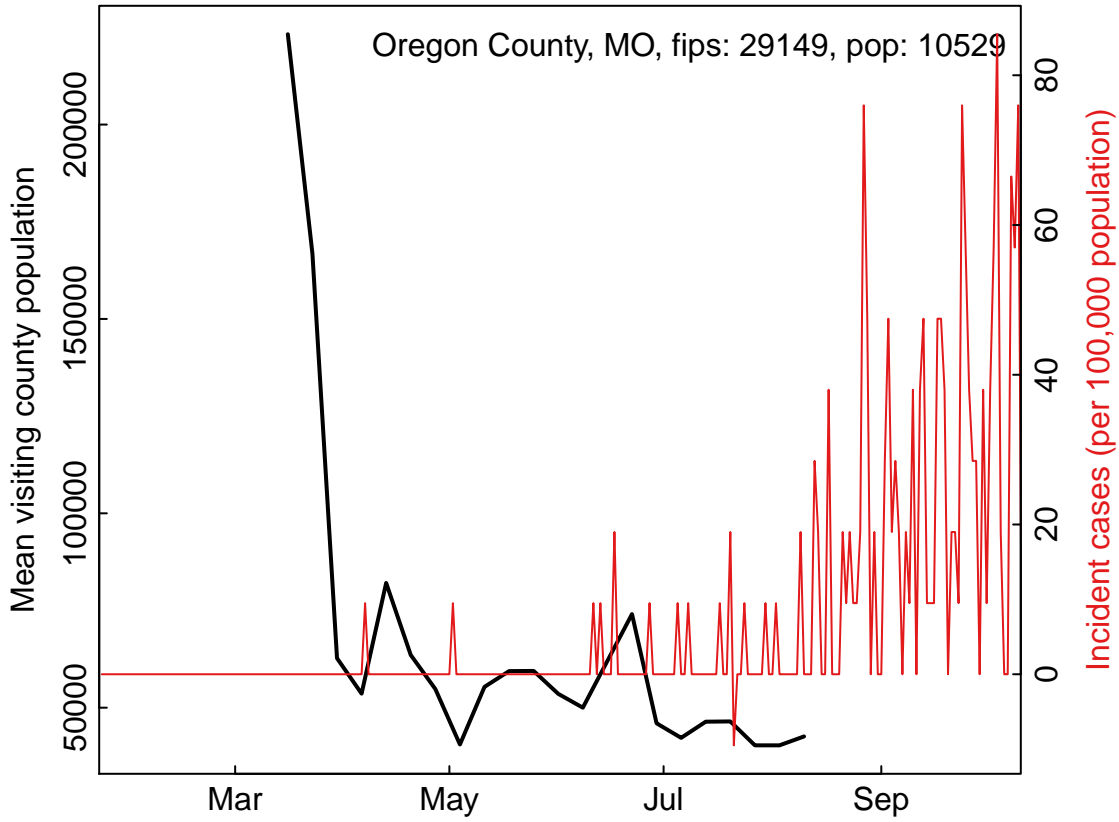

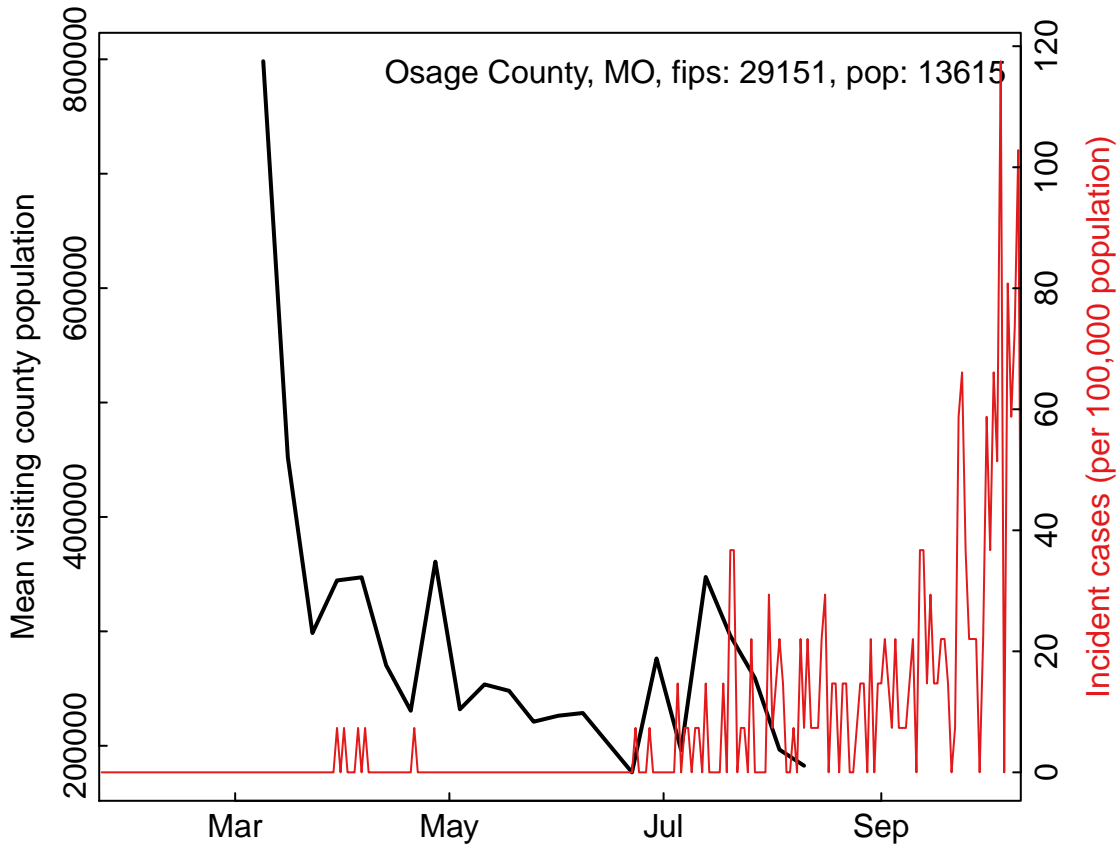

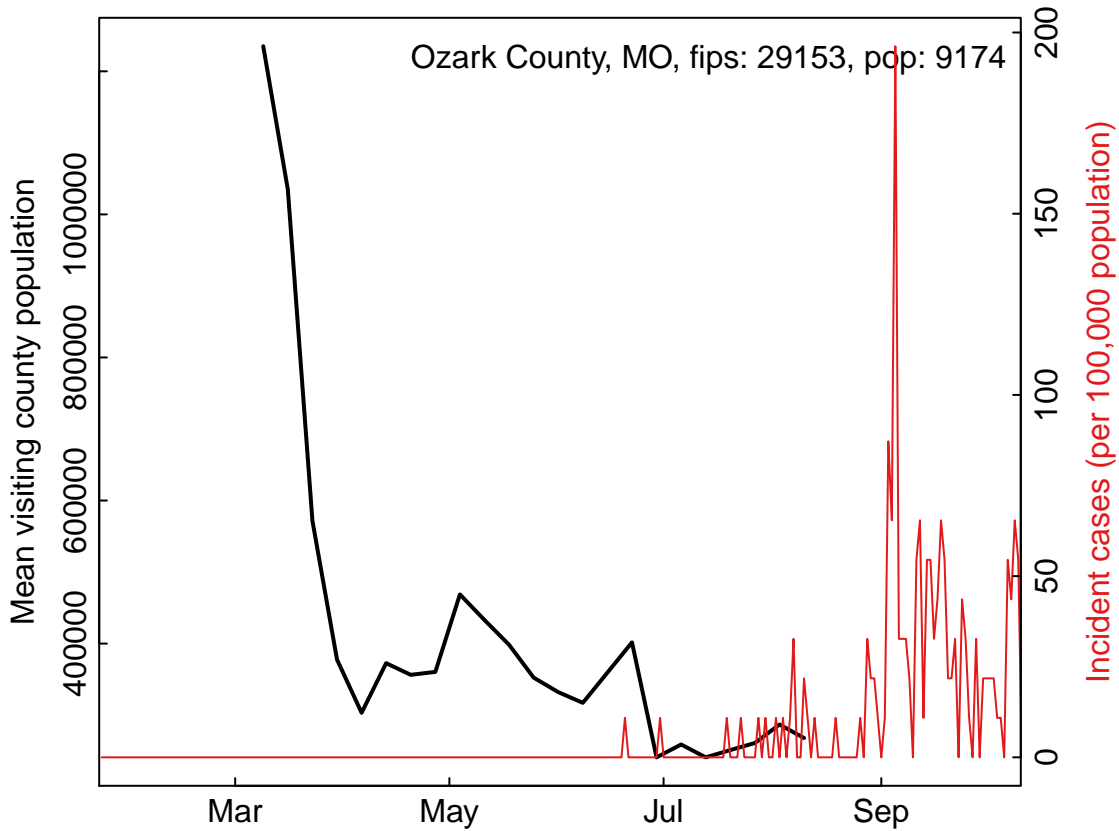

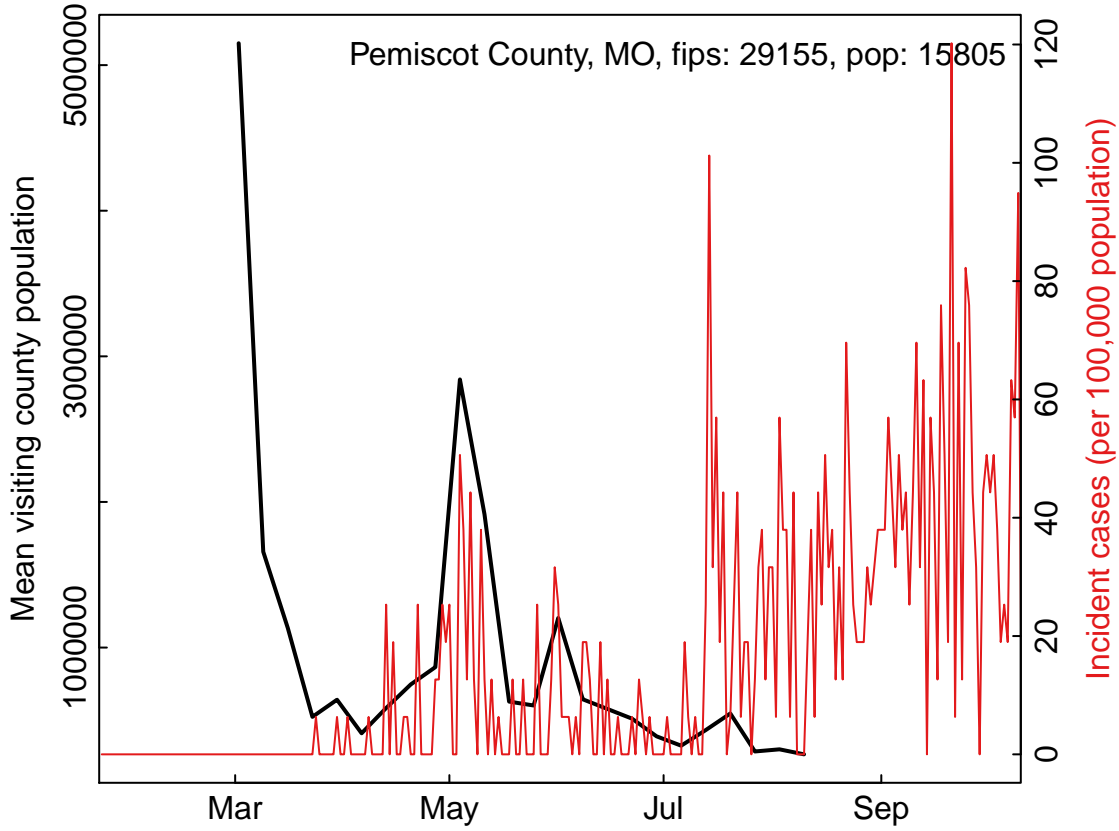

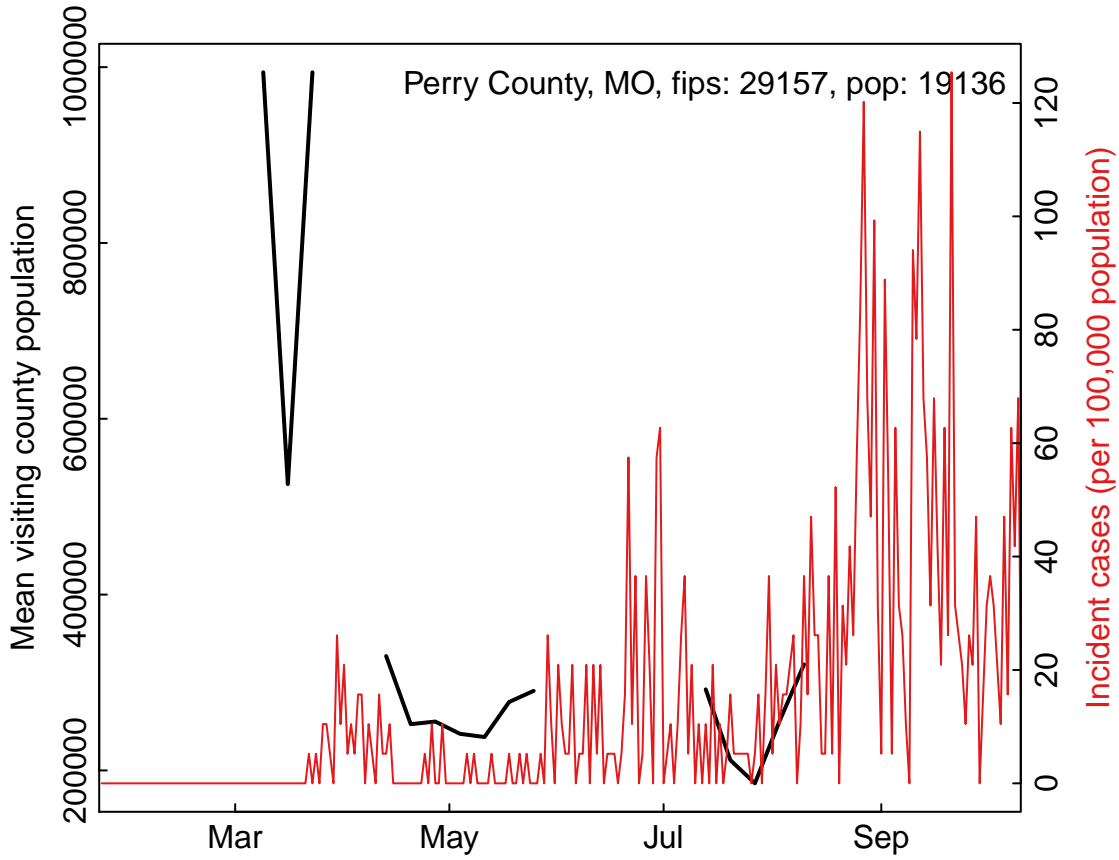

Pettis County, MO, fips: 29159, pop: 42339

Mean visiting county population

2500000  
1500000  
500000  
0

Mar May Jul Sep

Incident cases (per 100,000 population)

100  
80  
60  
40  
20  
0

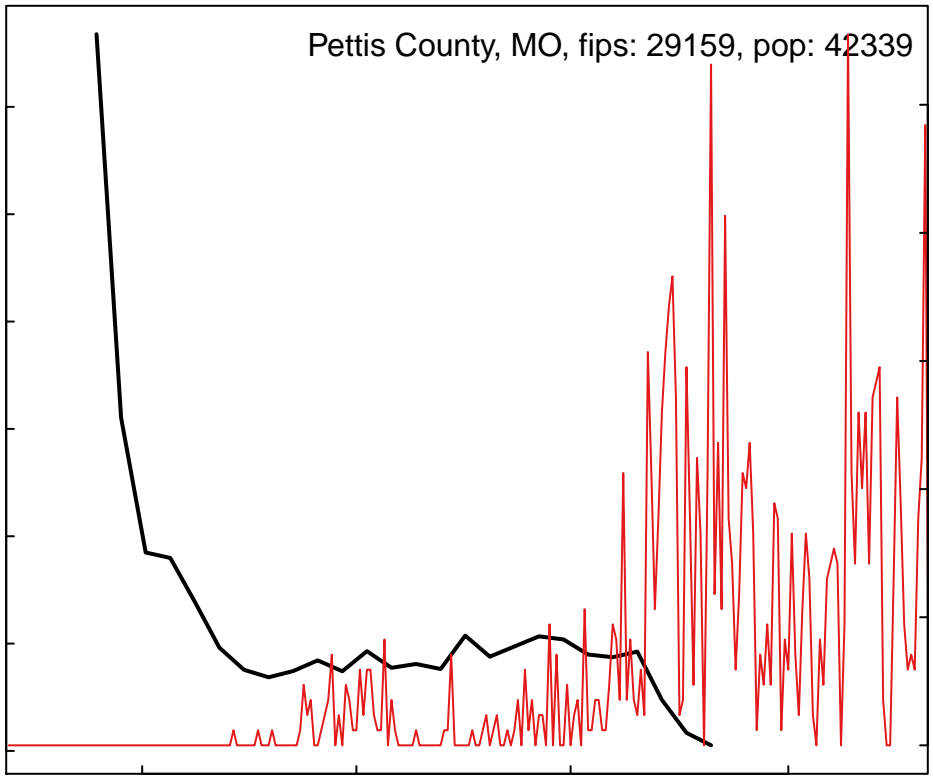

Phelps County, MO, fips: 29161, pop: 44573

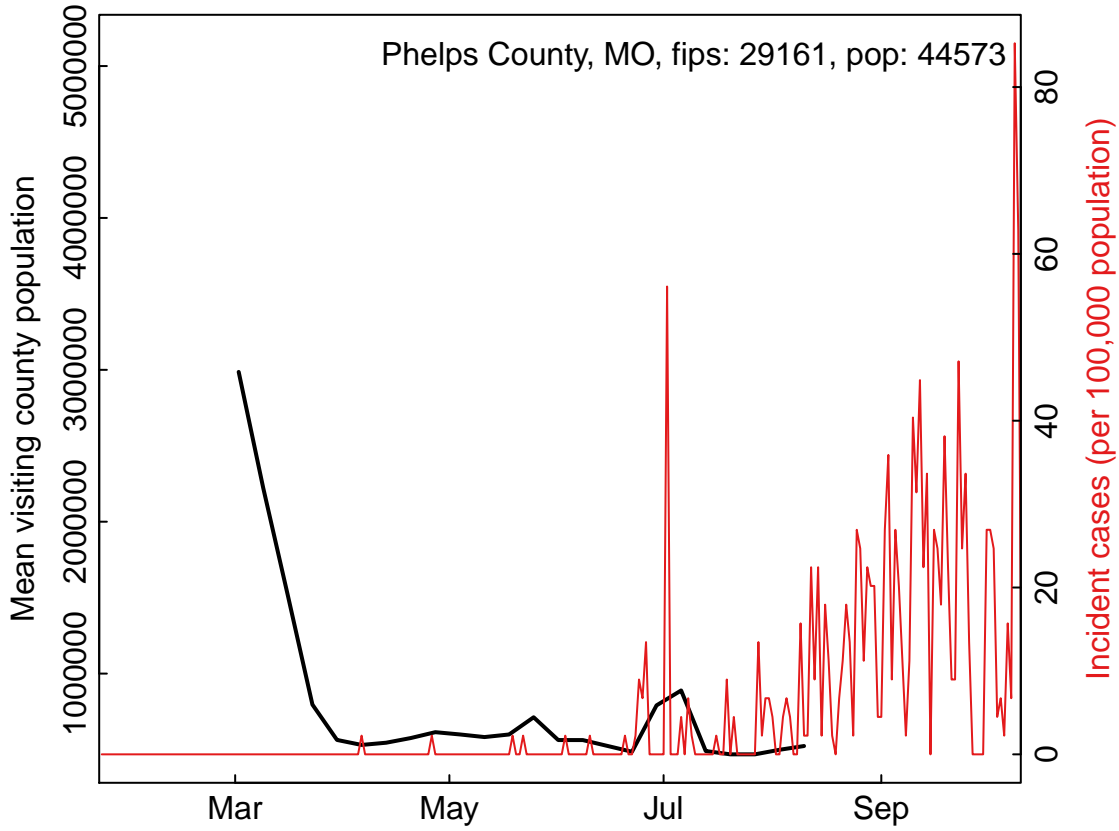

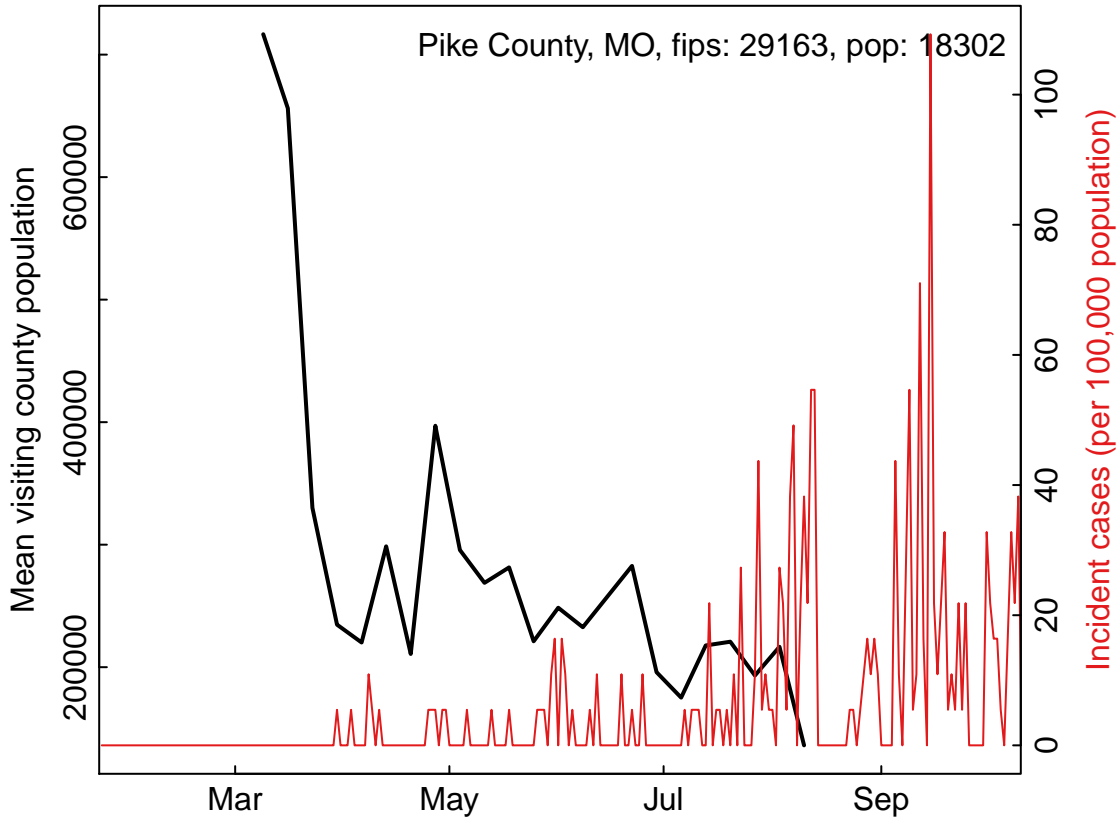



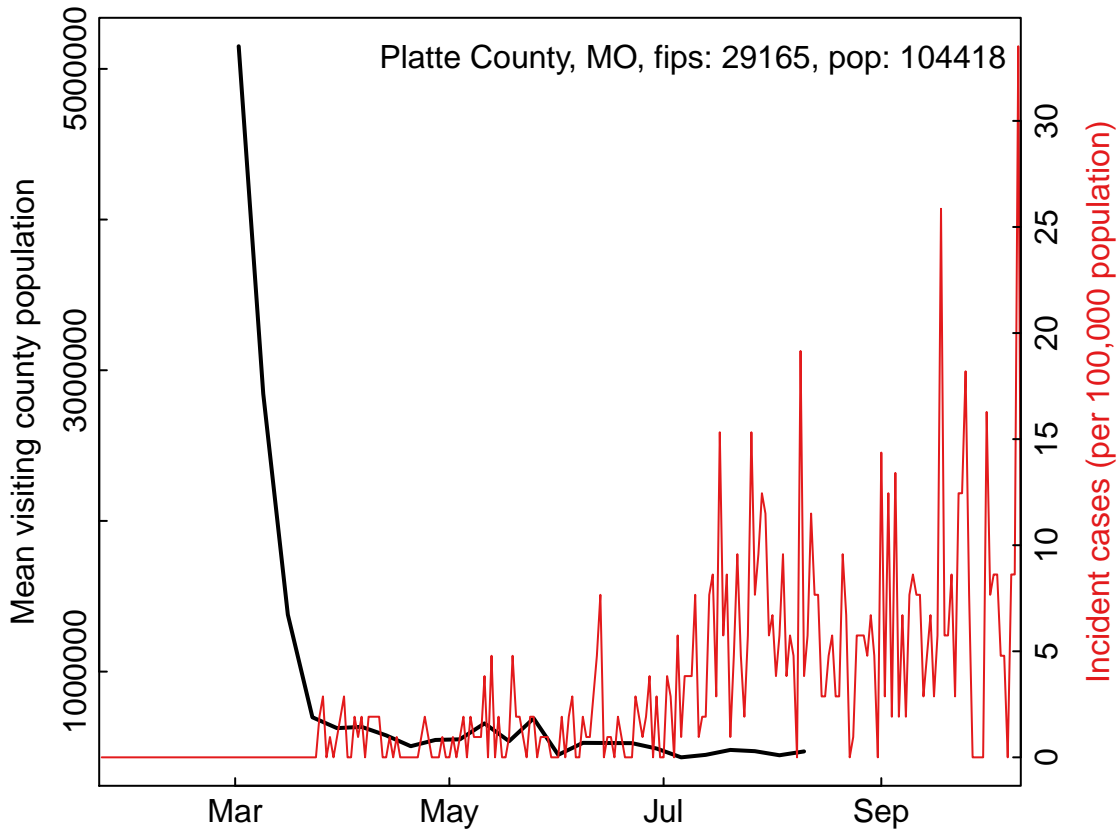

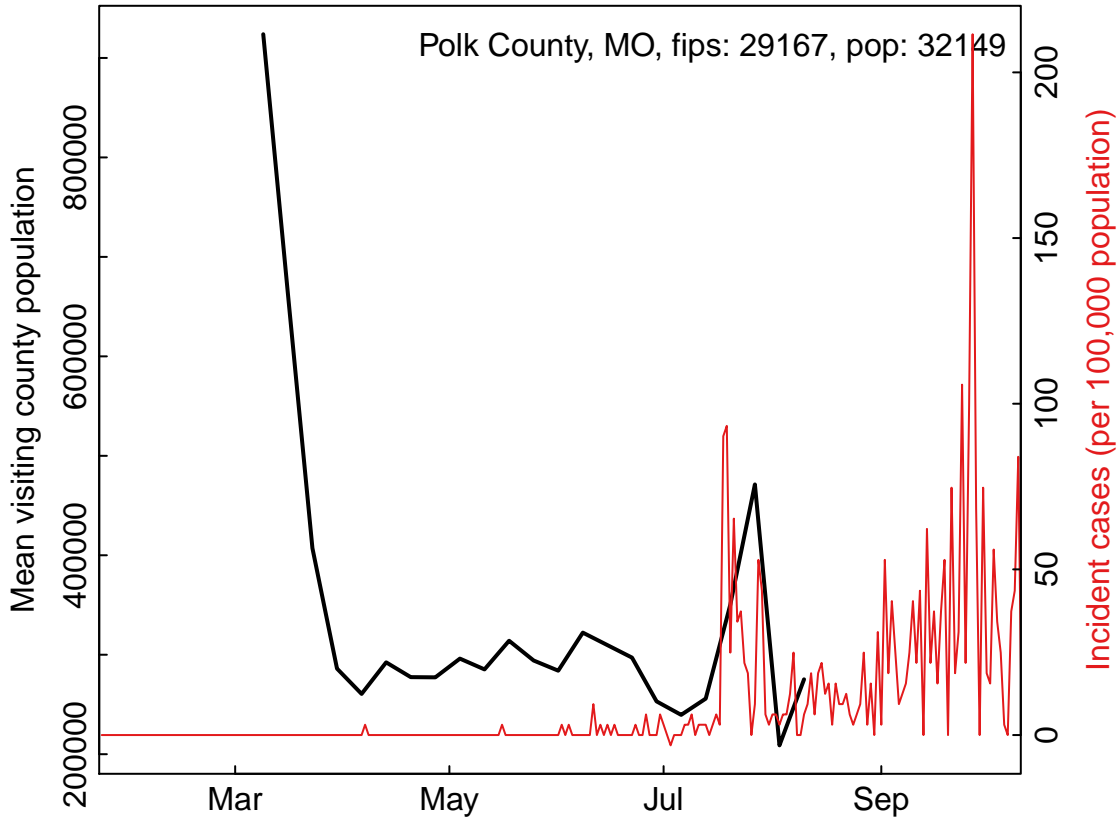

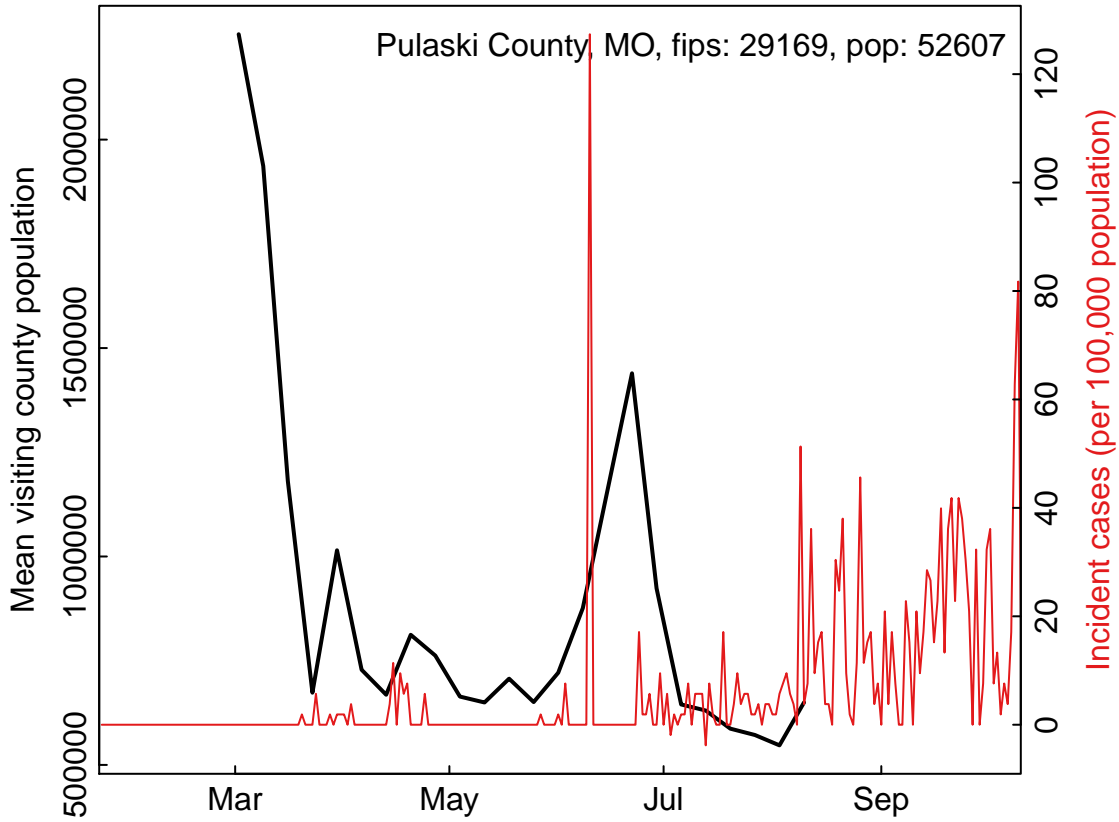

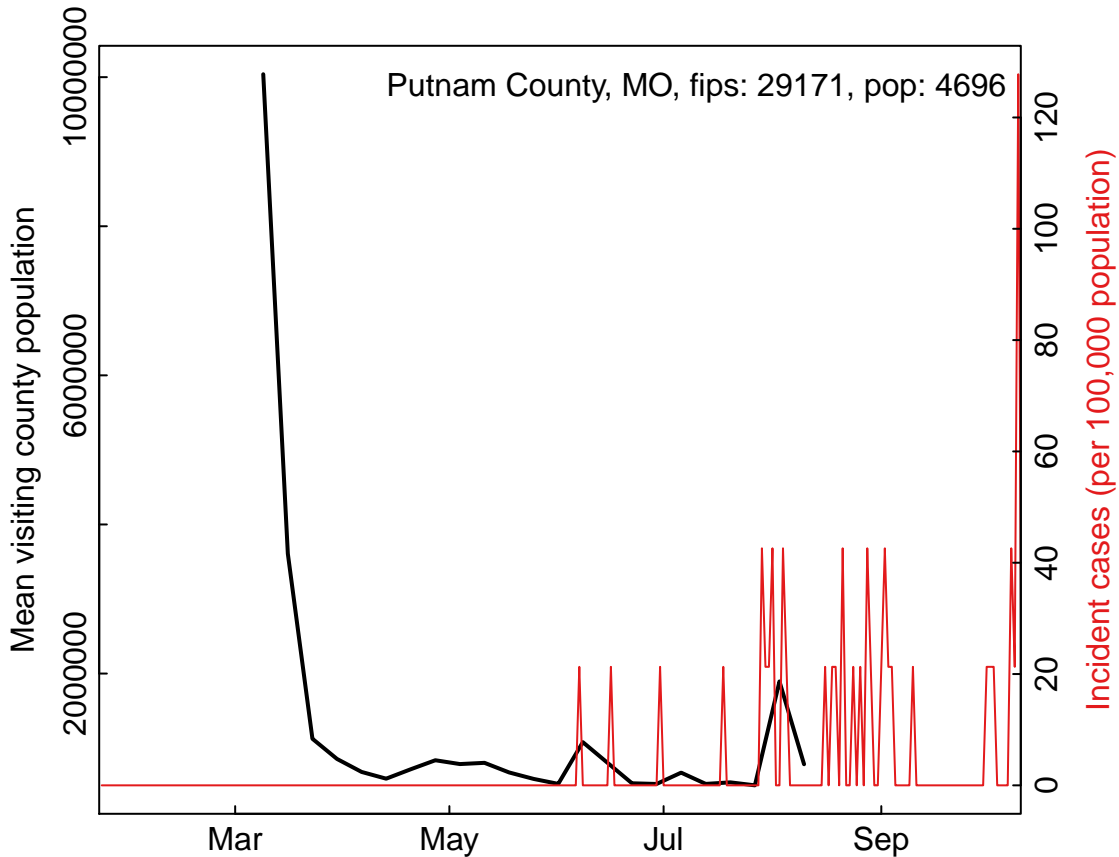

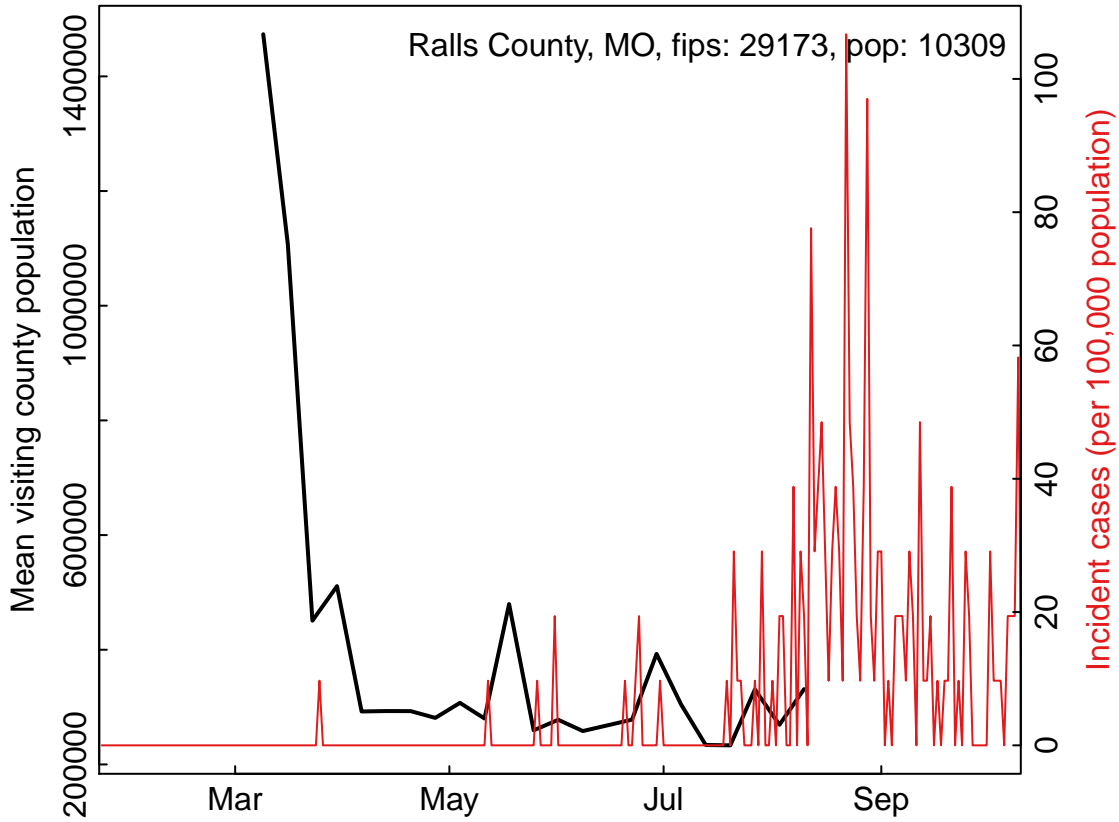

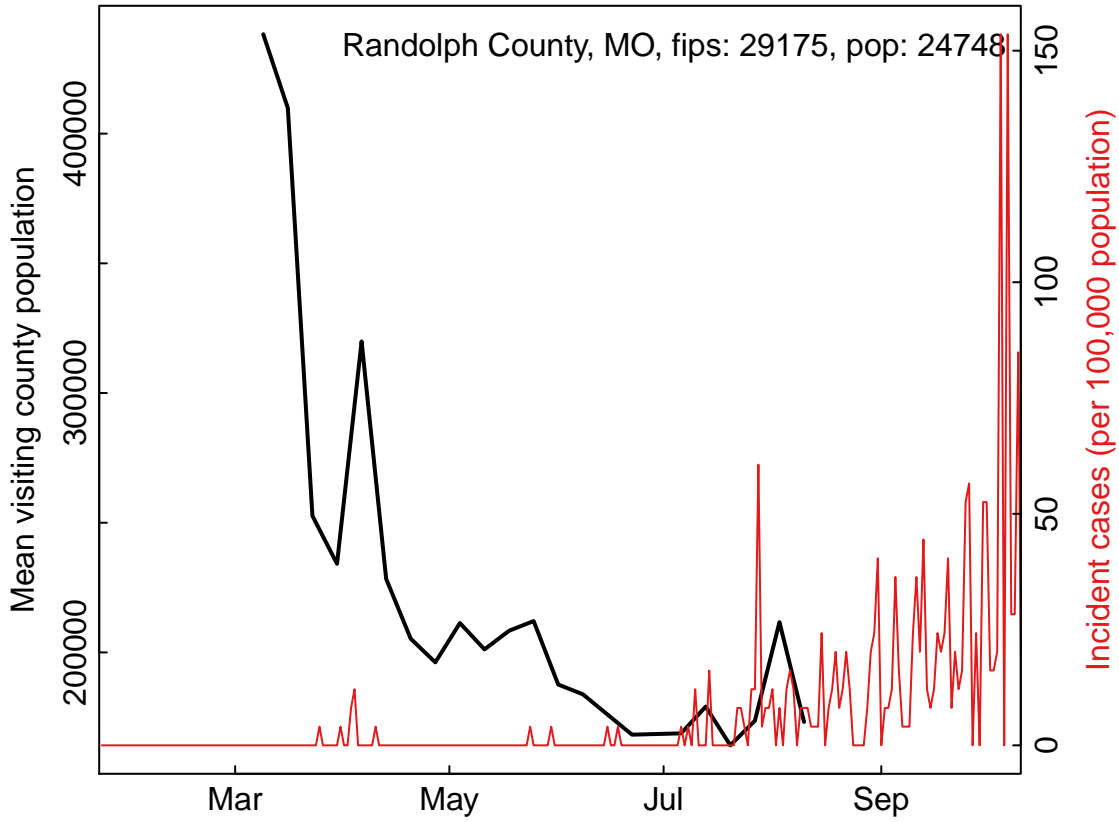

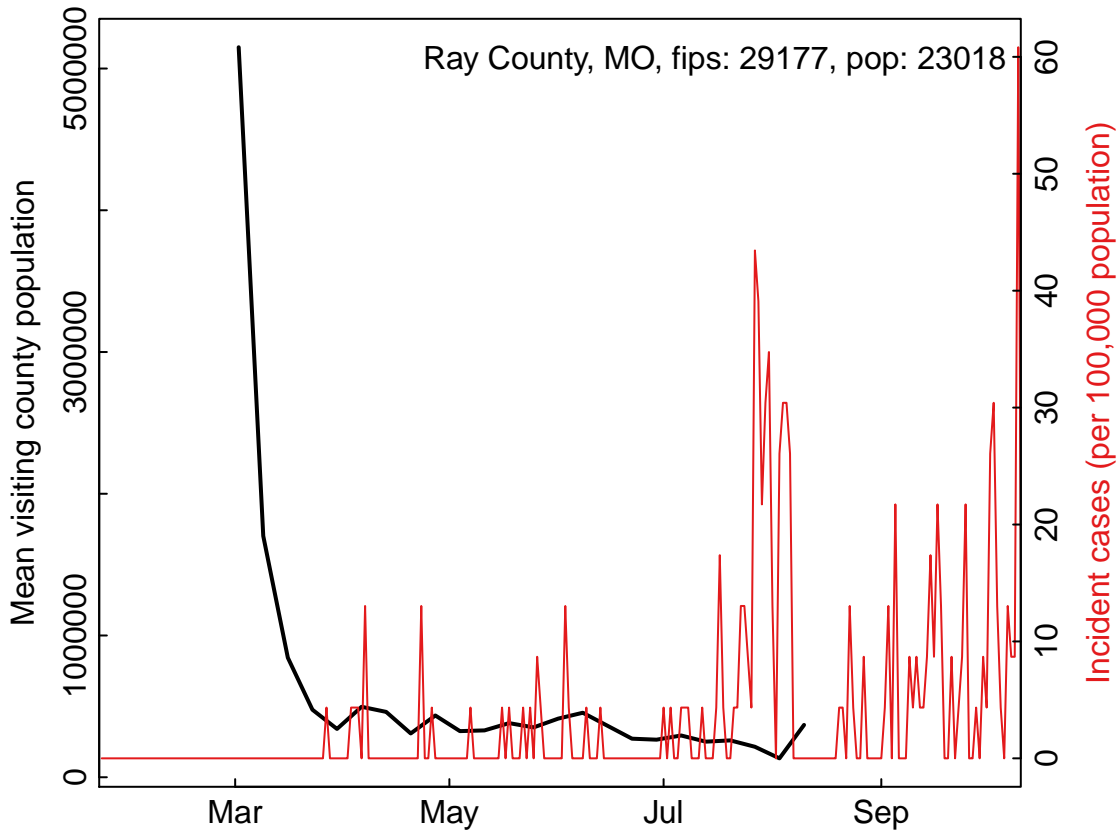

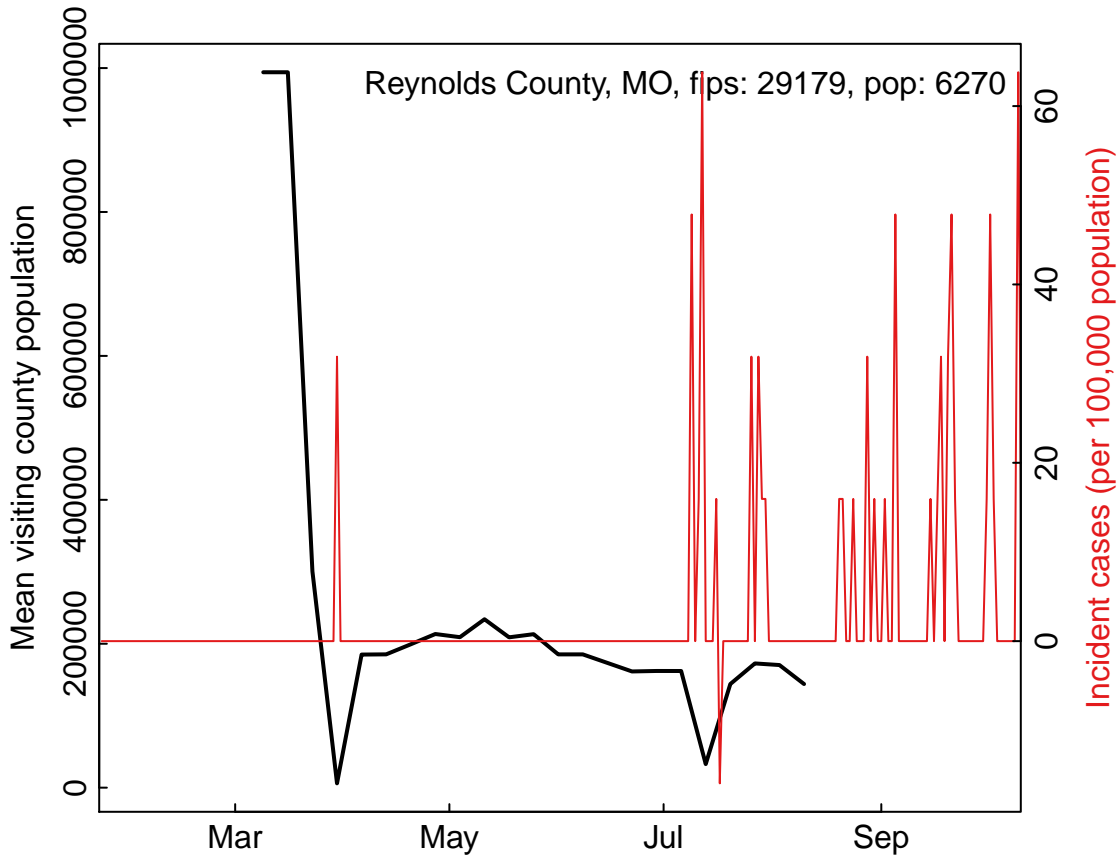



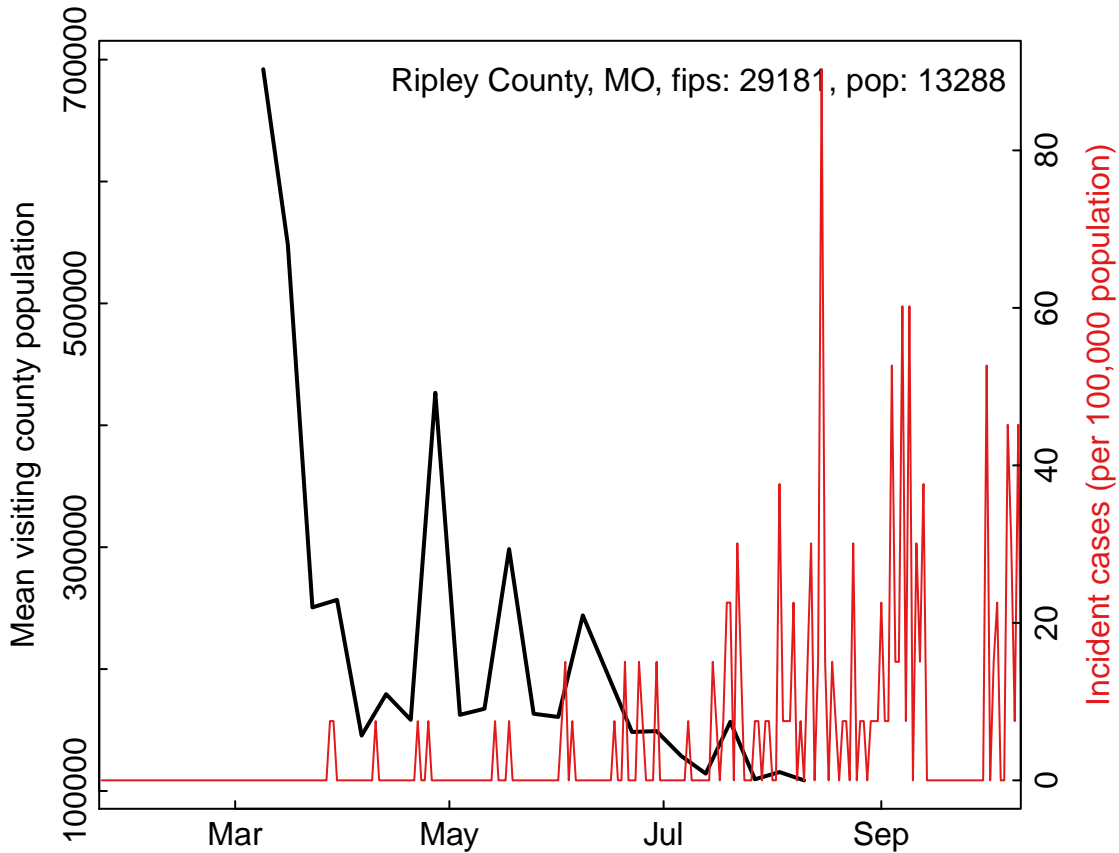

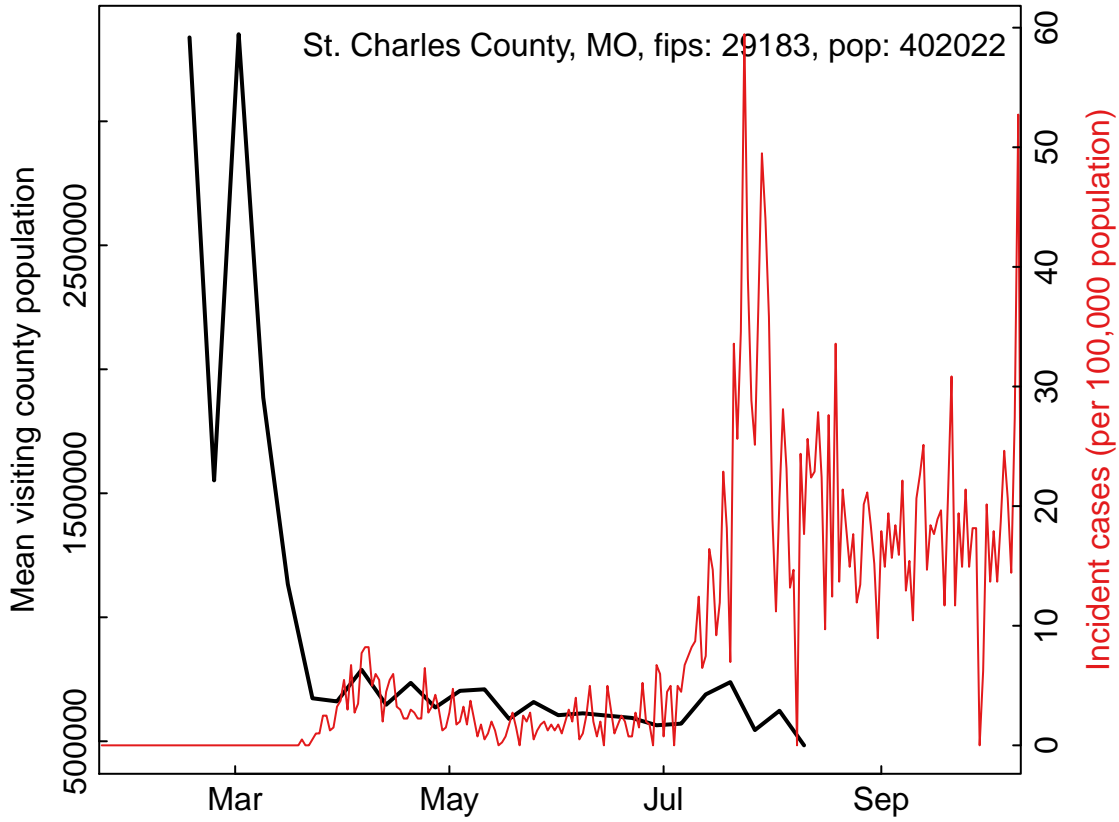

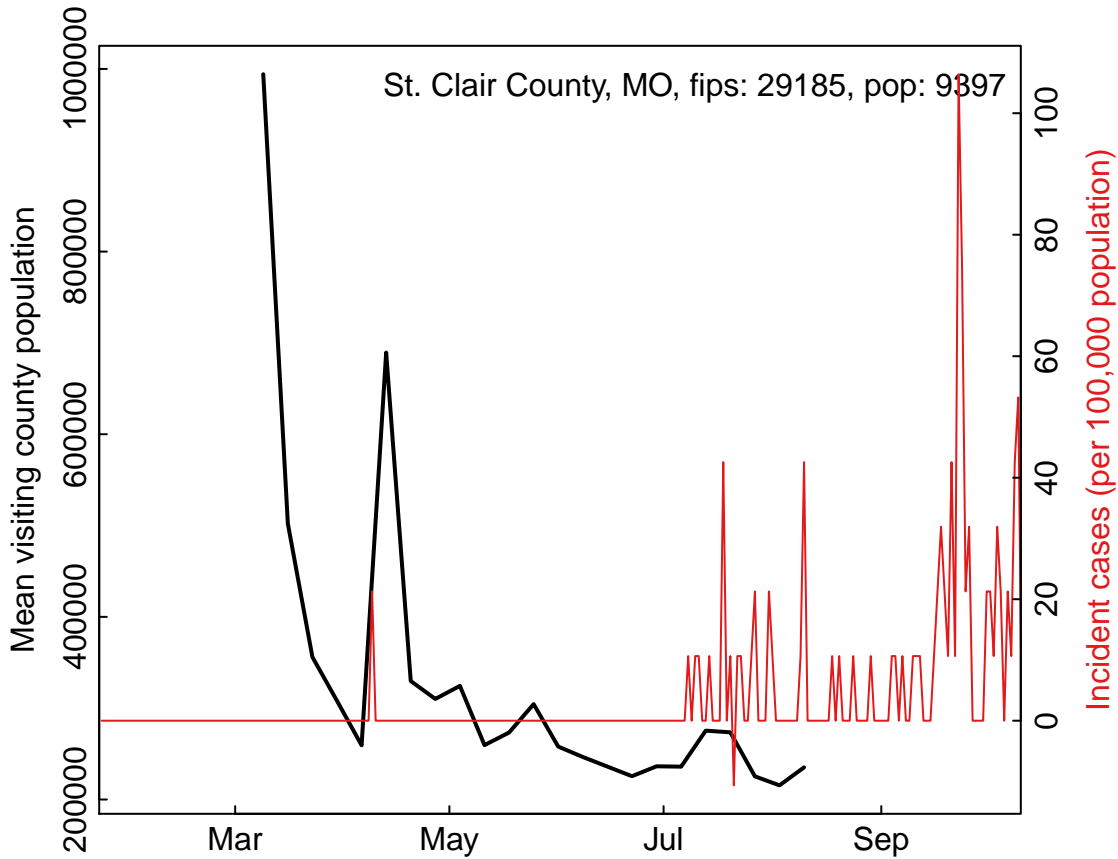

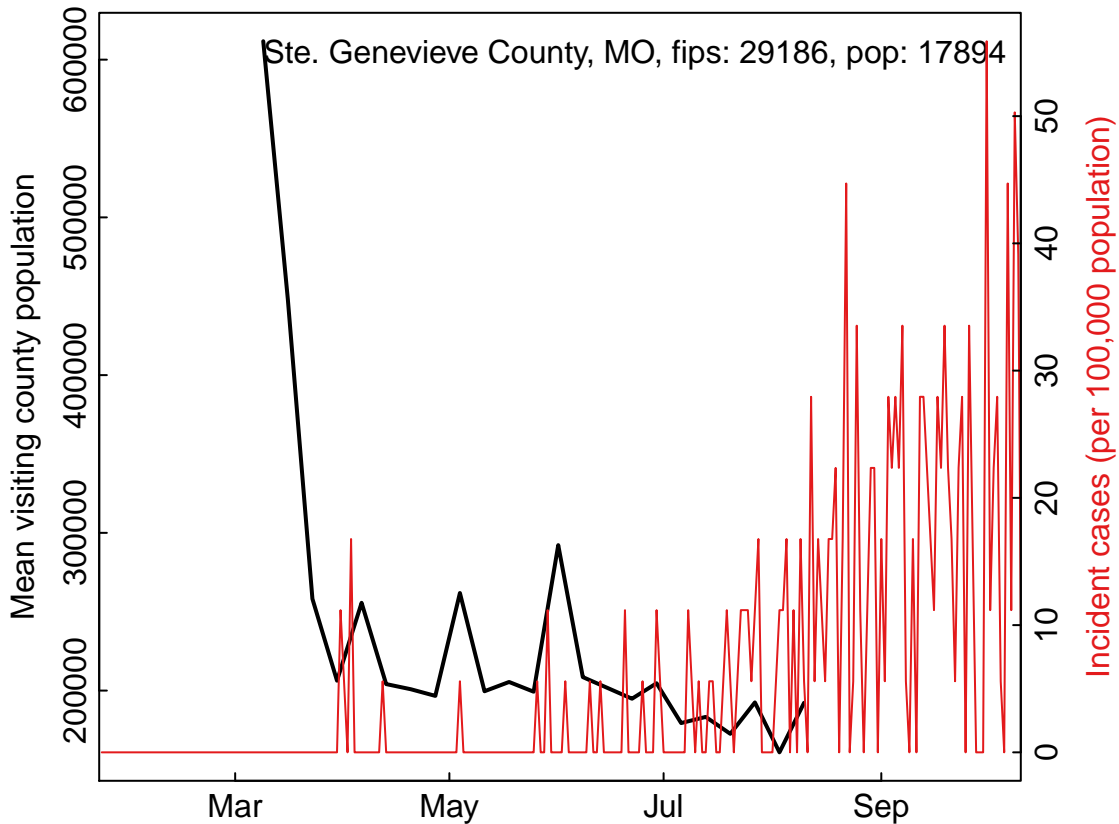

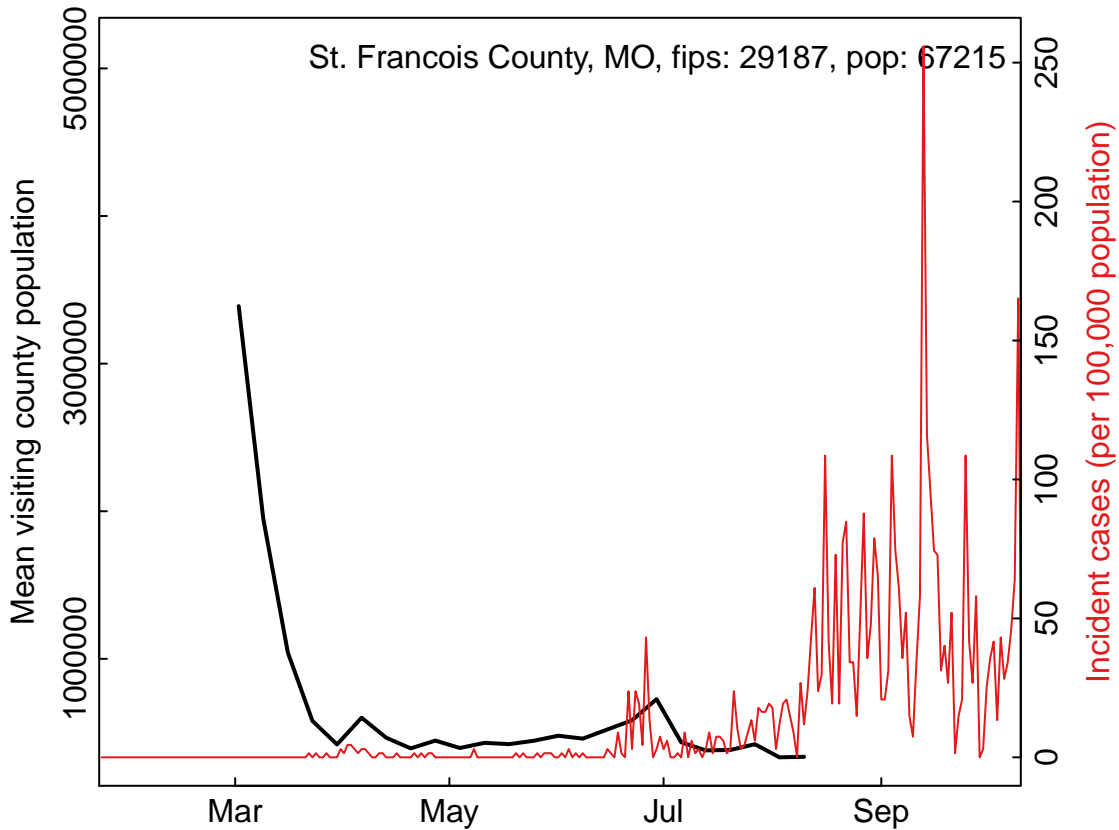

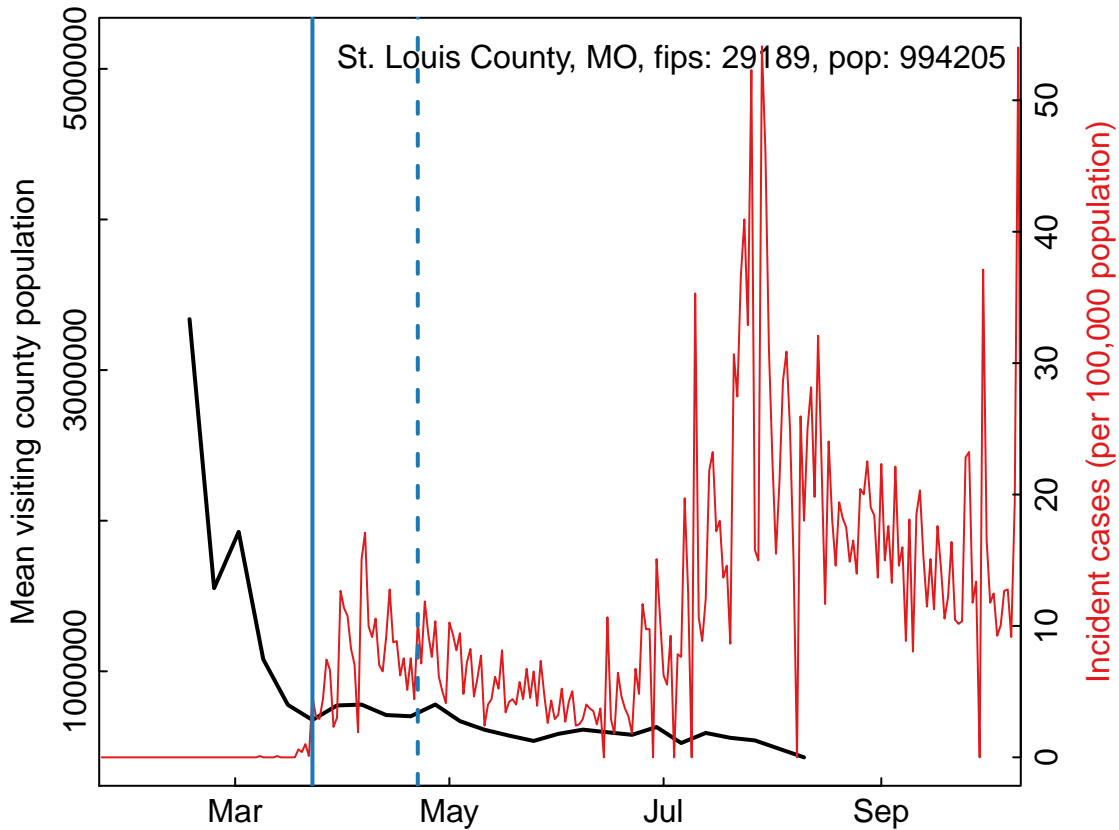

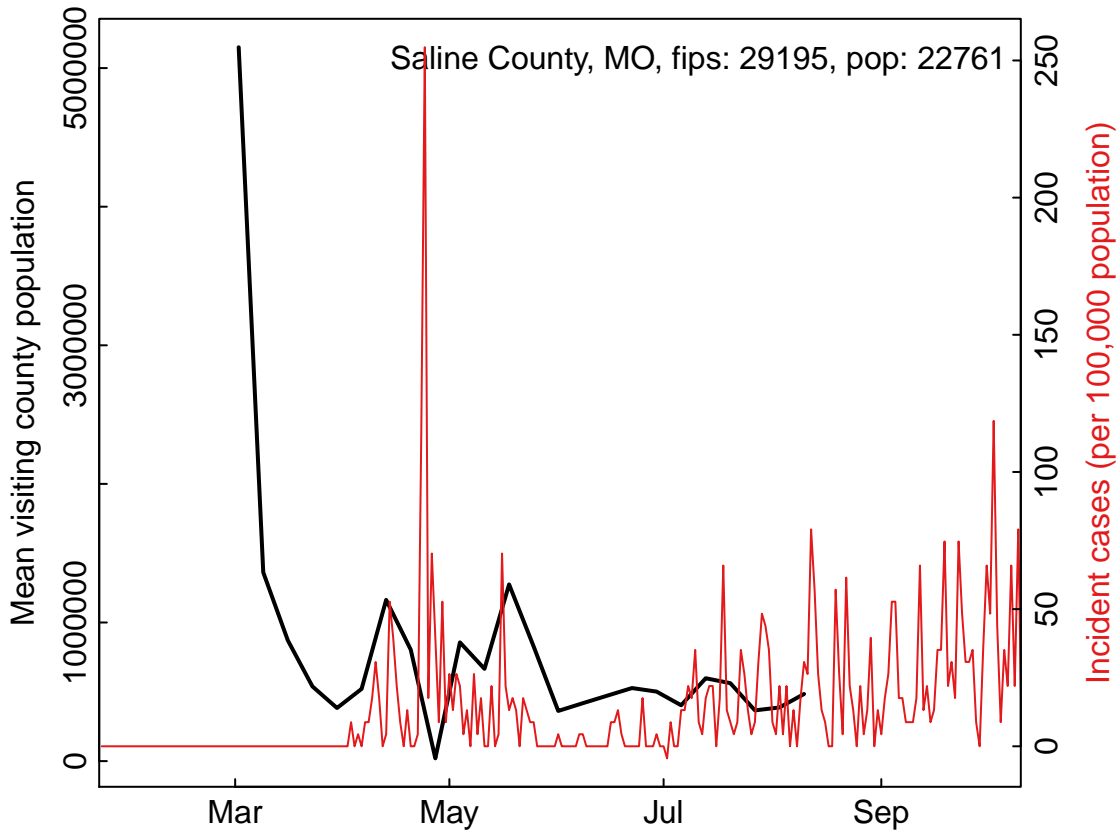

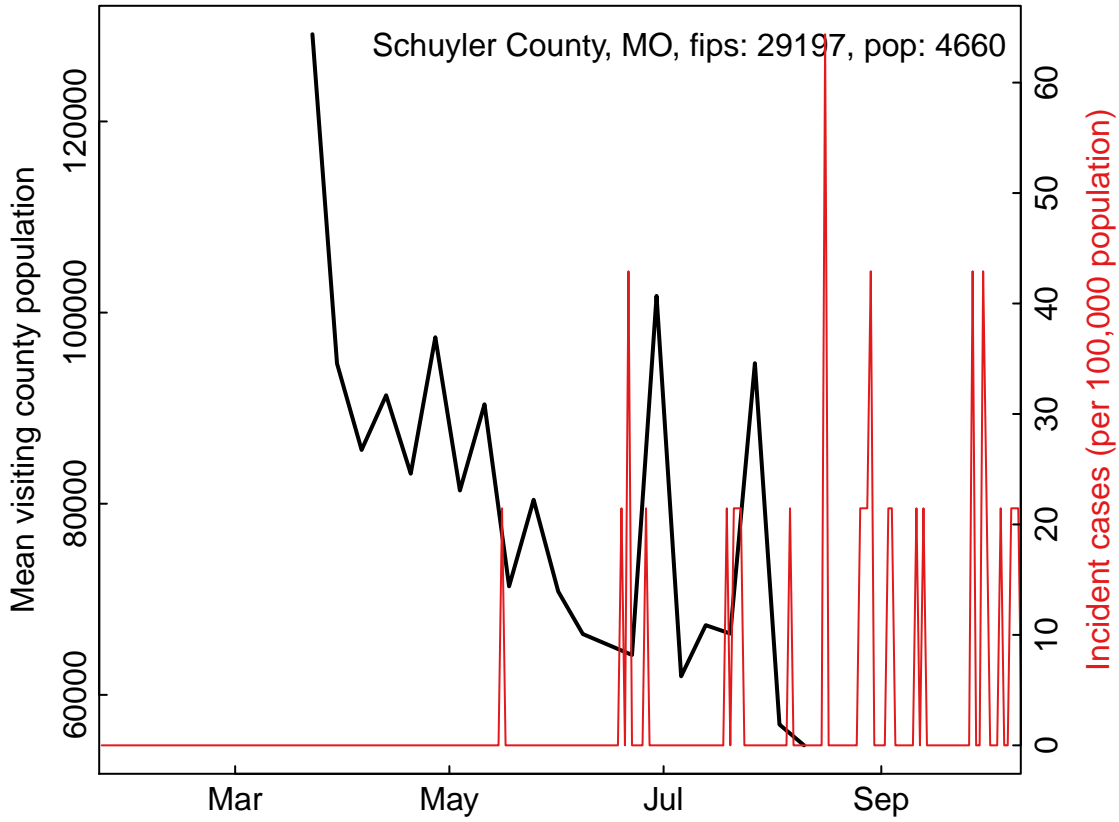



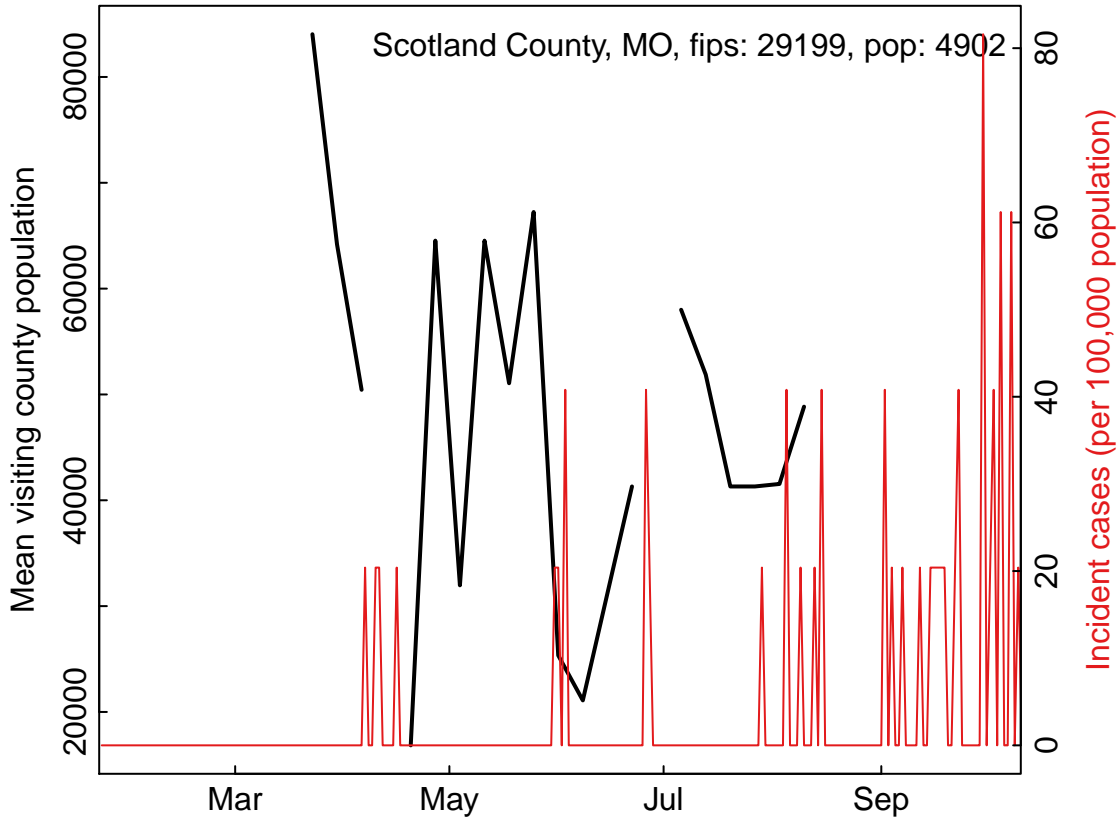

Scott County, MO, fips: 29201, pop: 38280

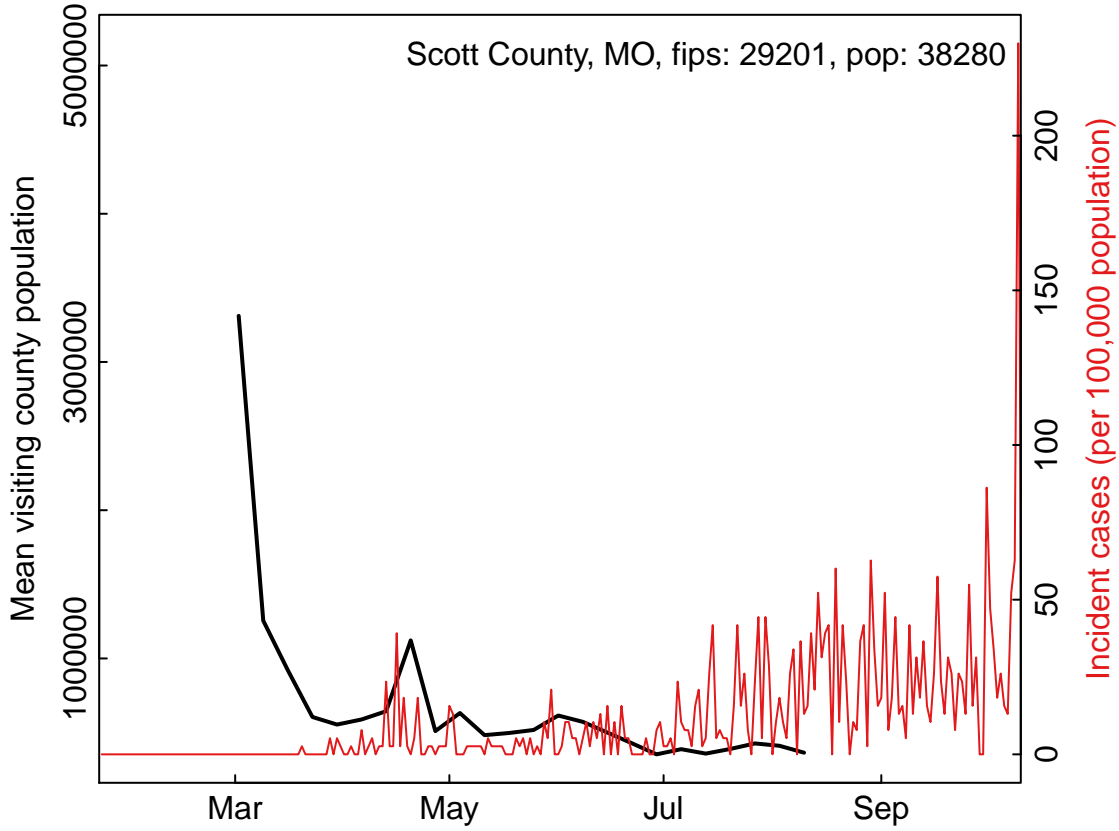

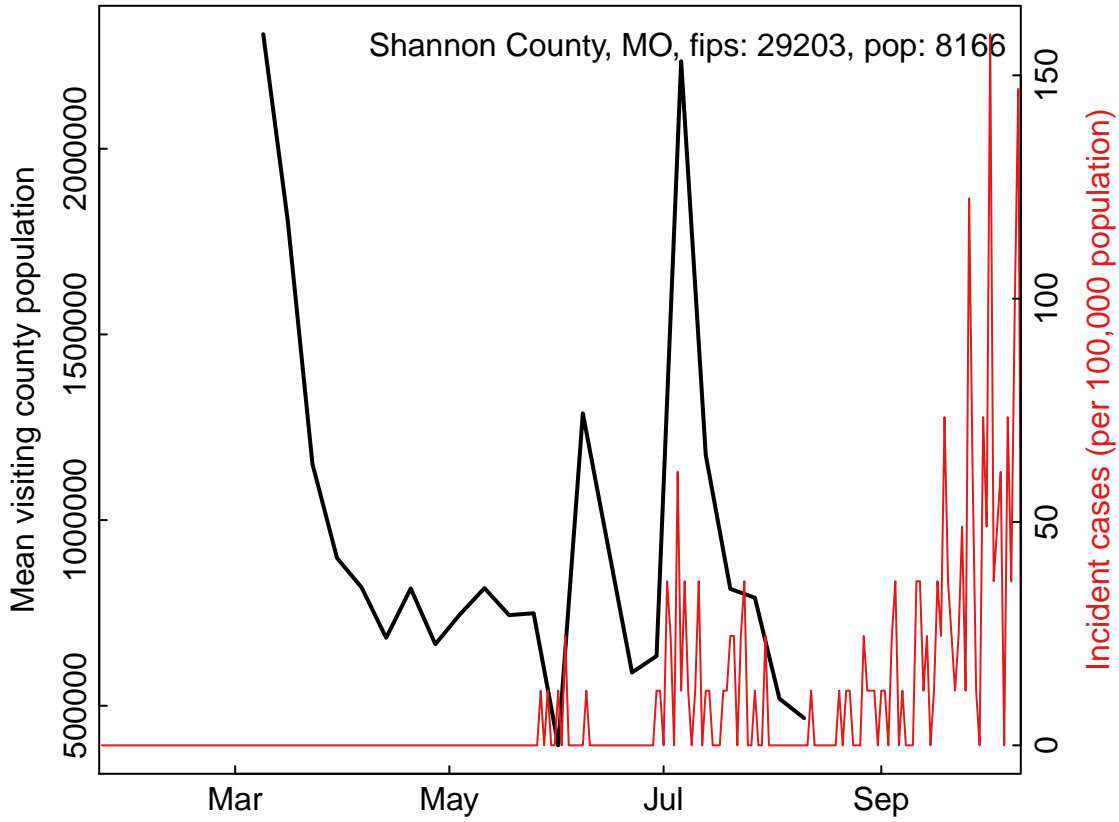

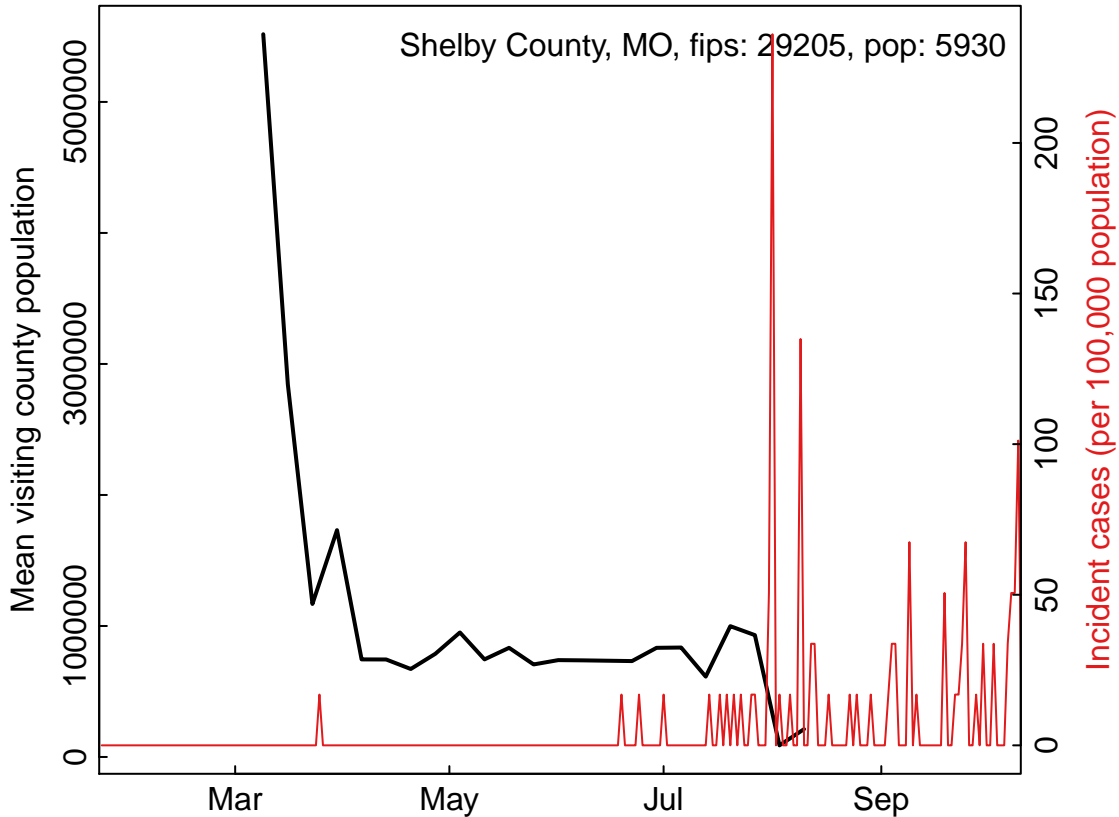

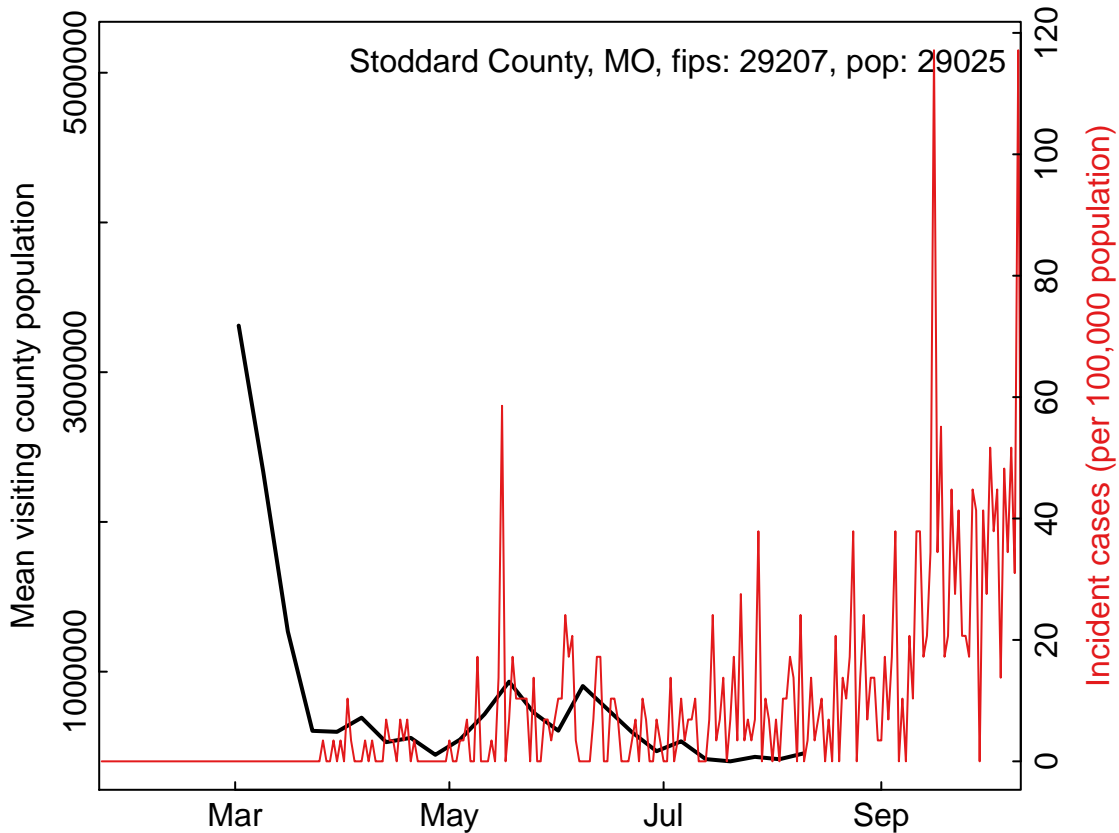

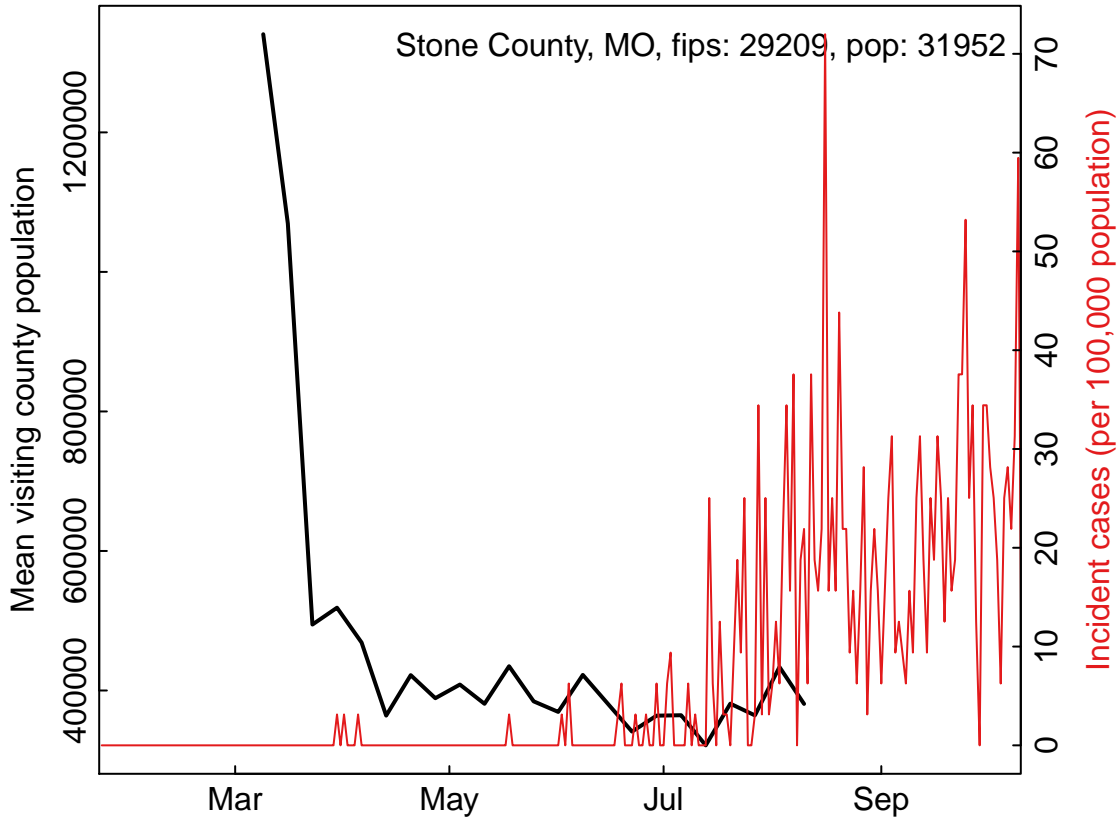

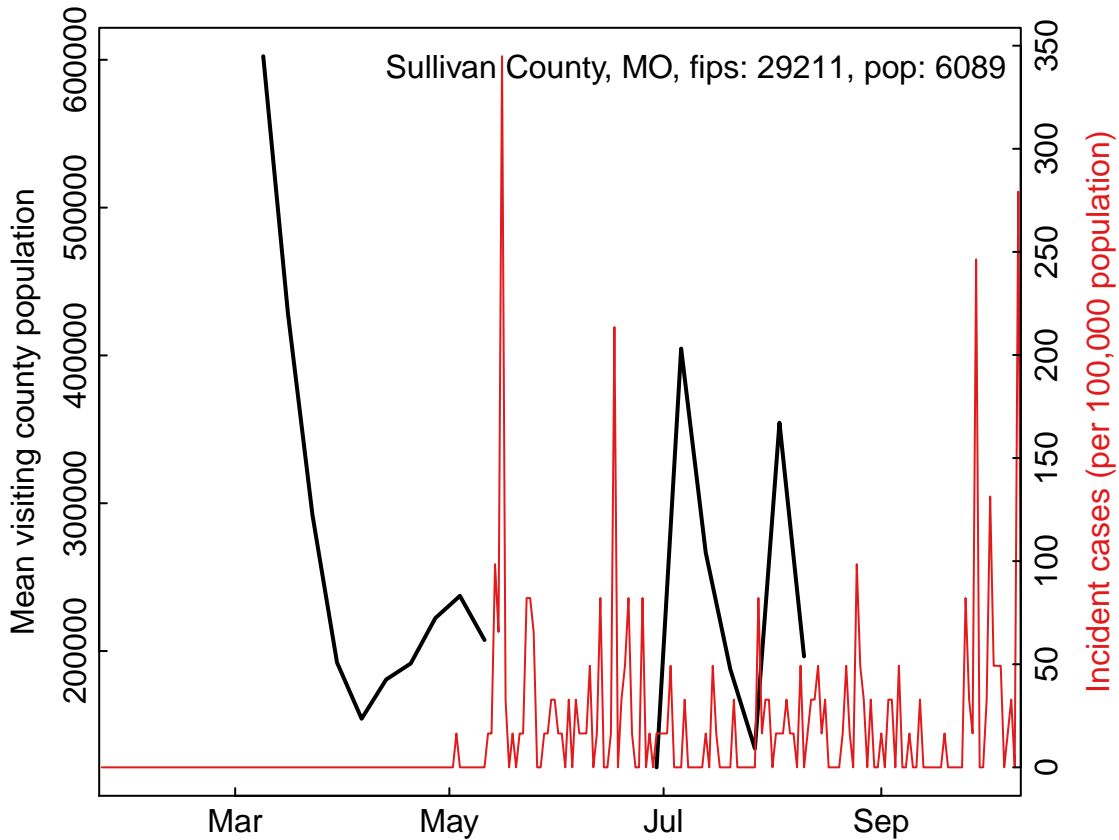

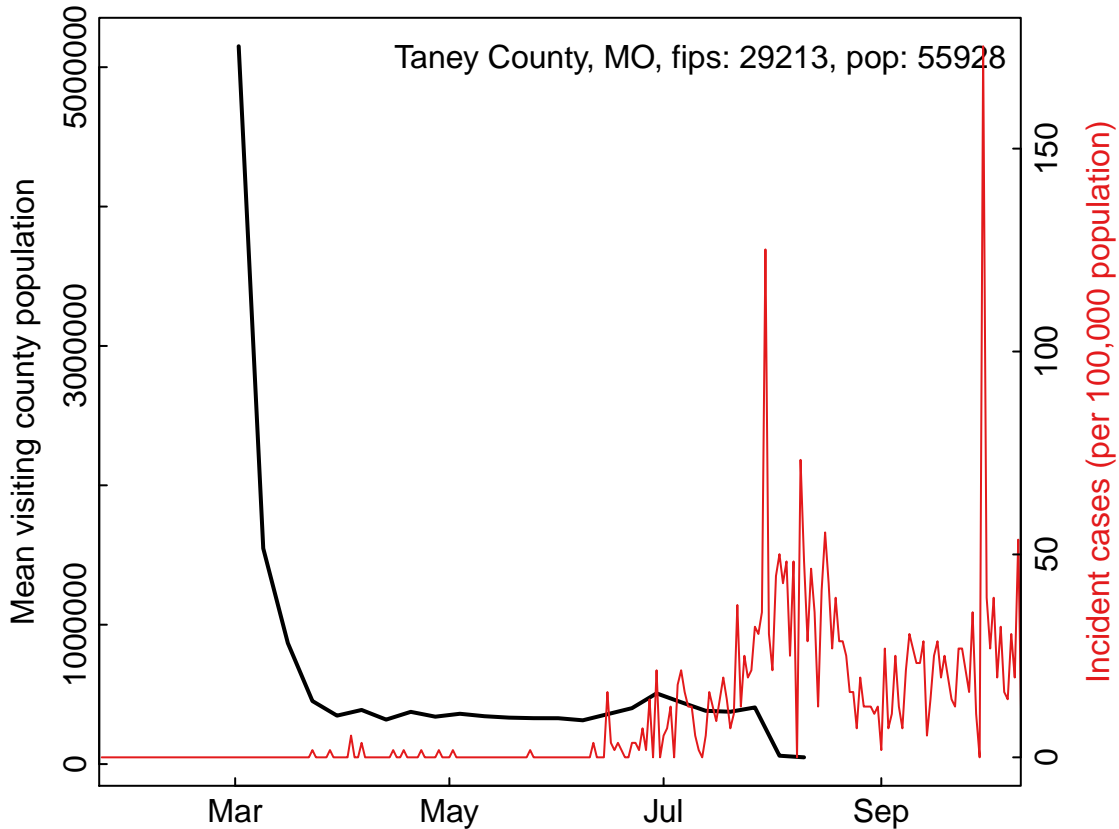



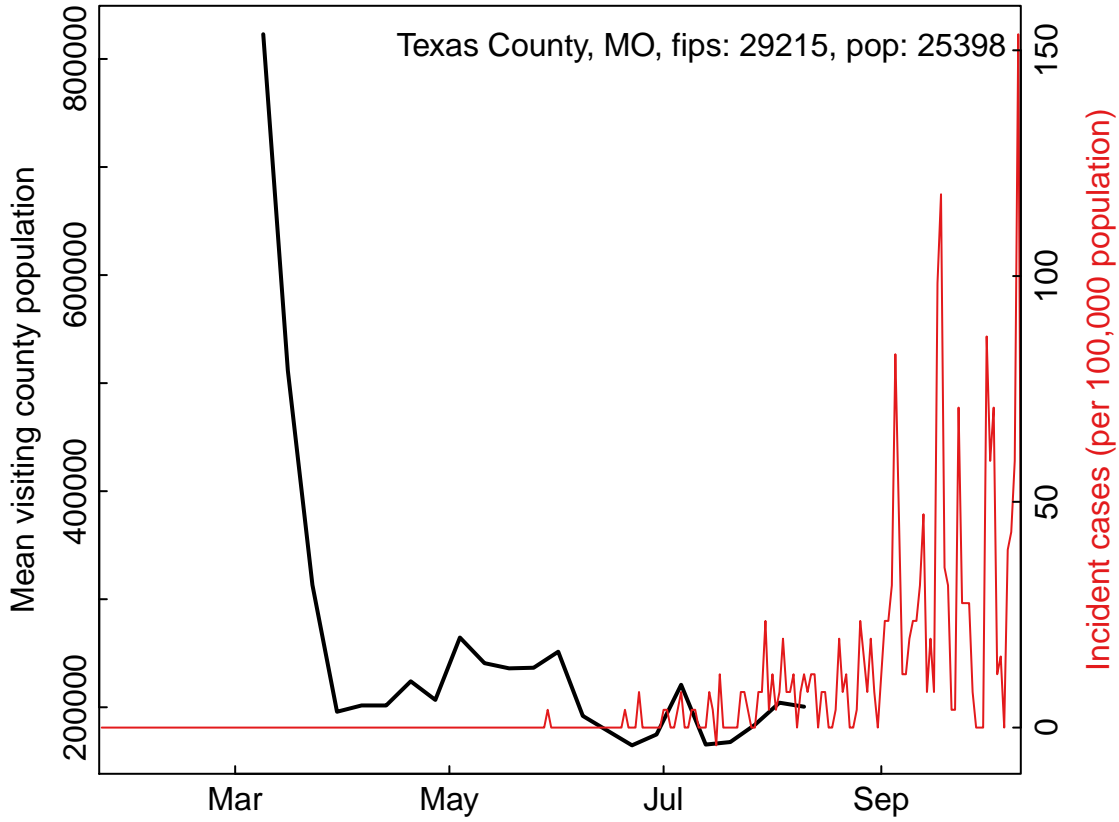

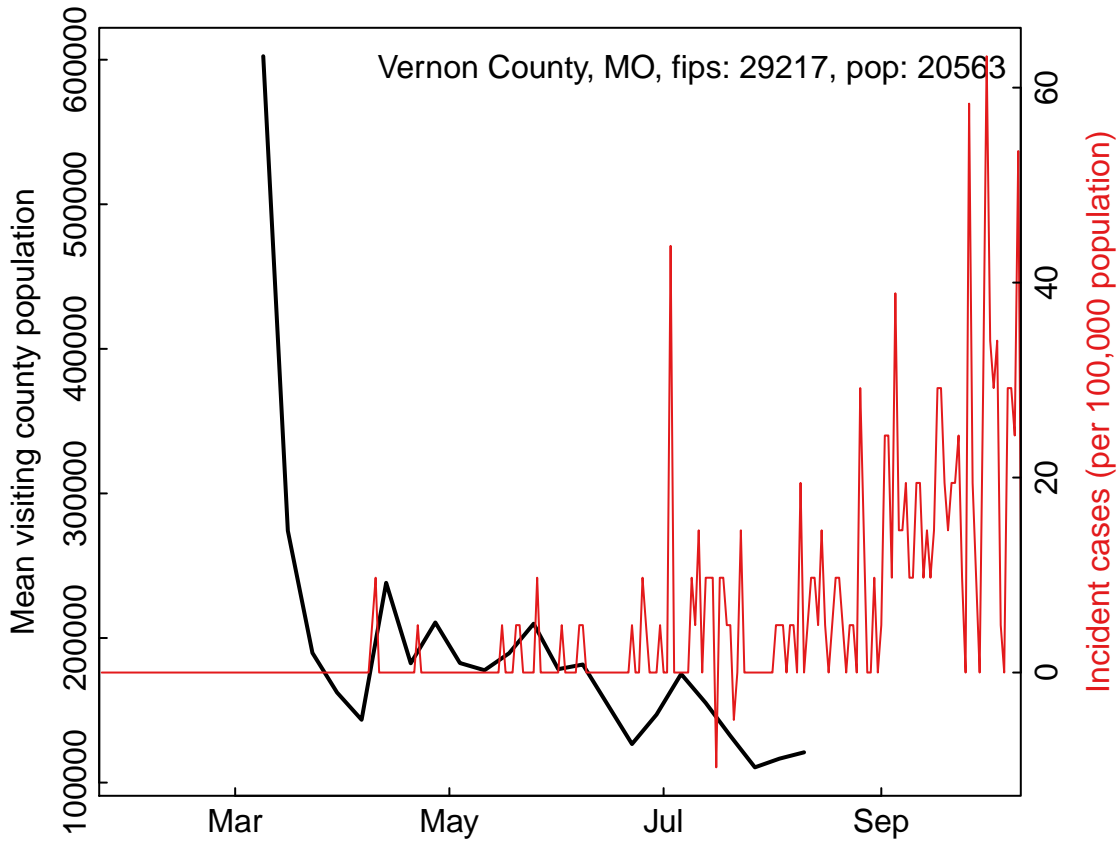

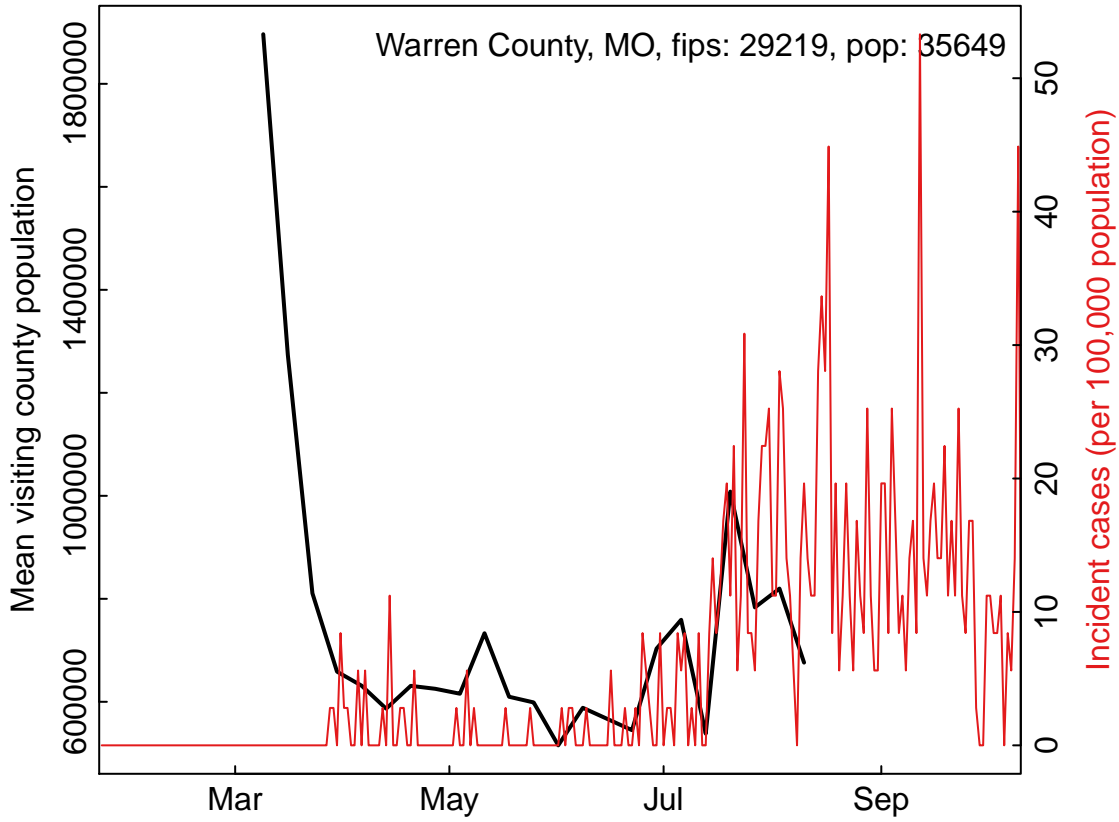

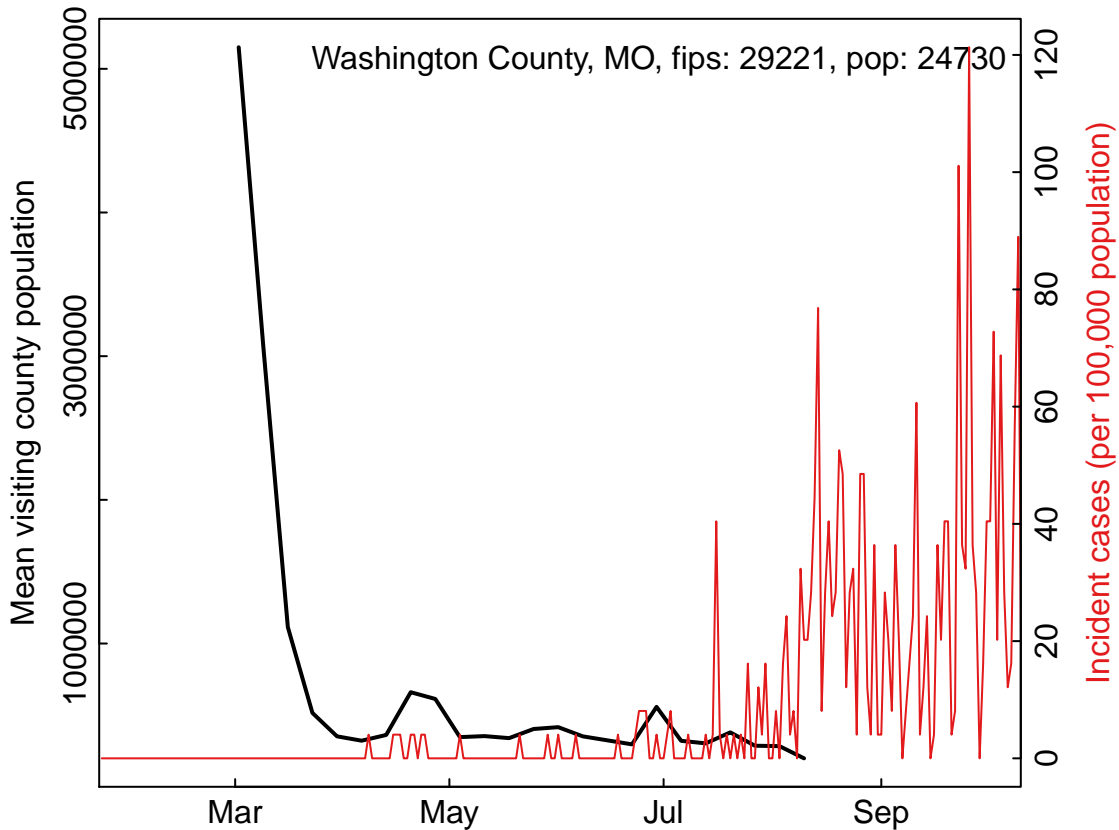

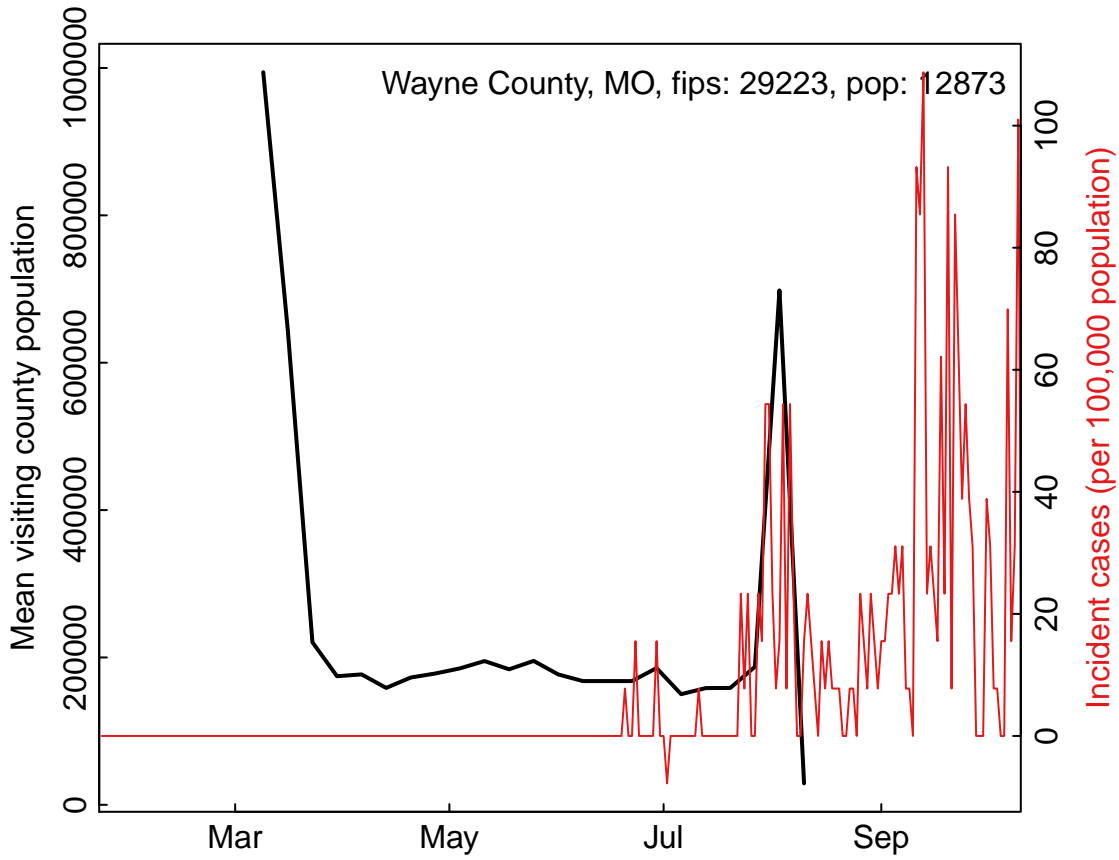

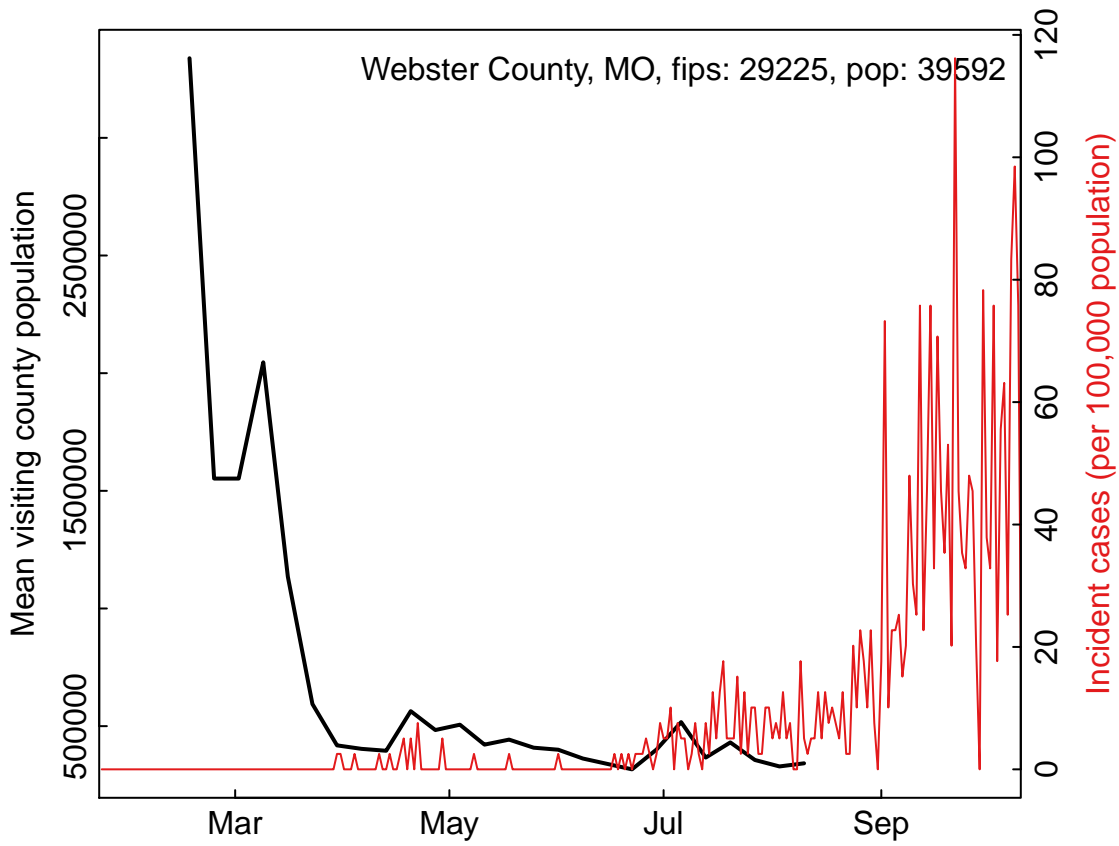

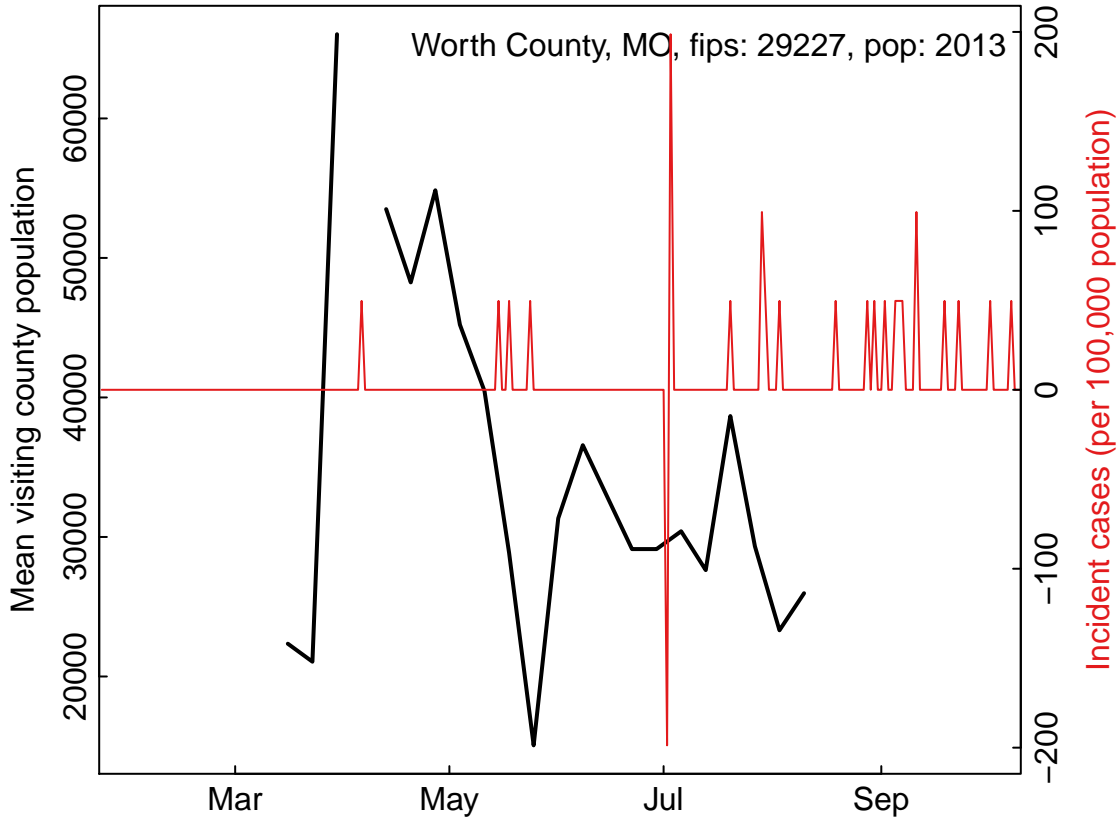

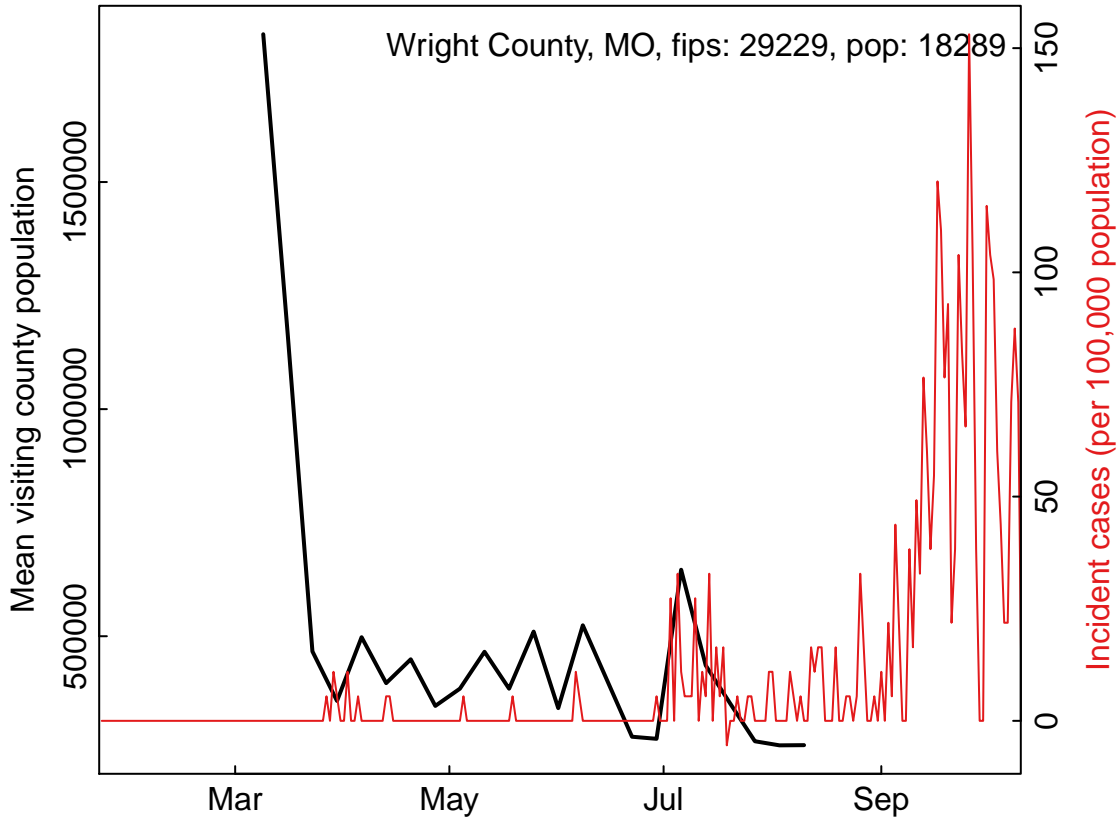



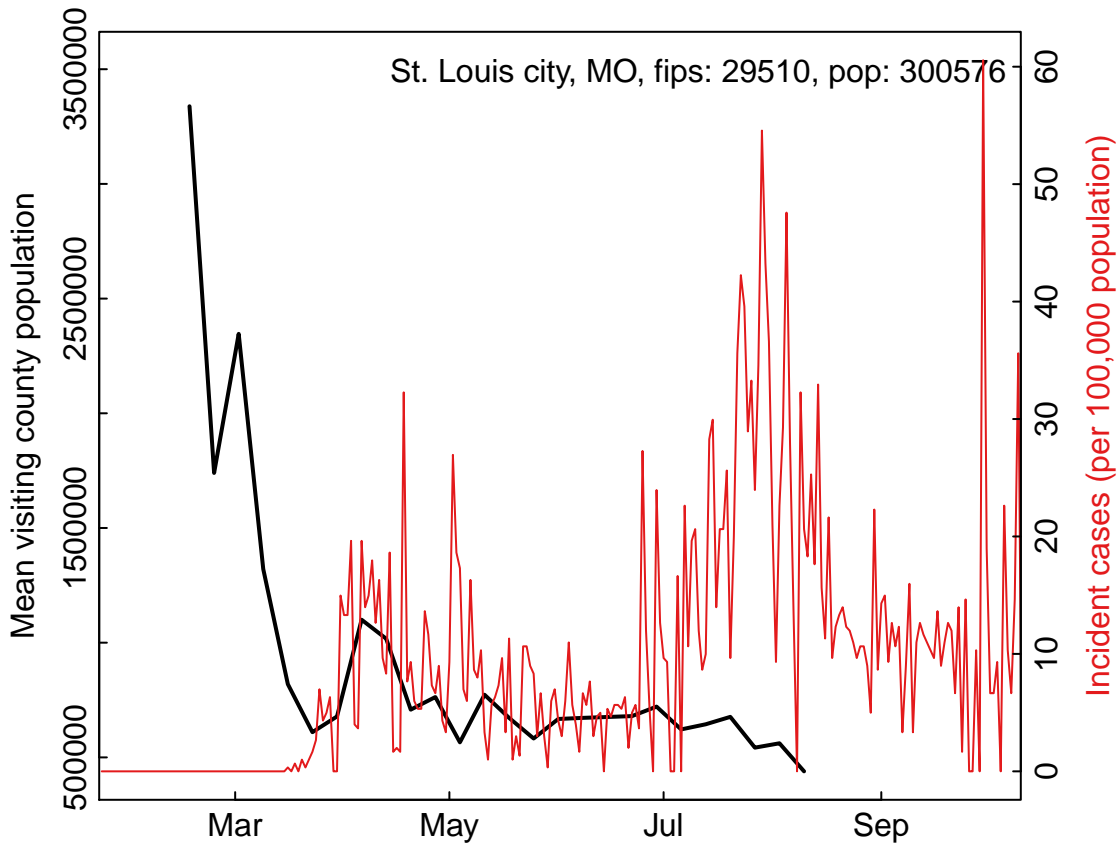

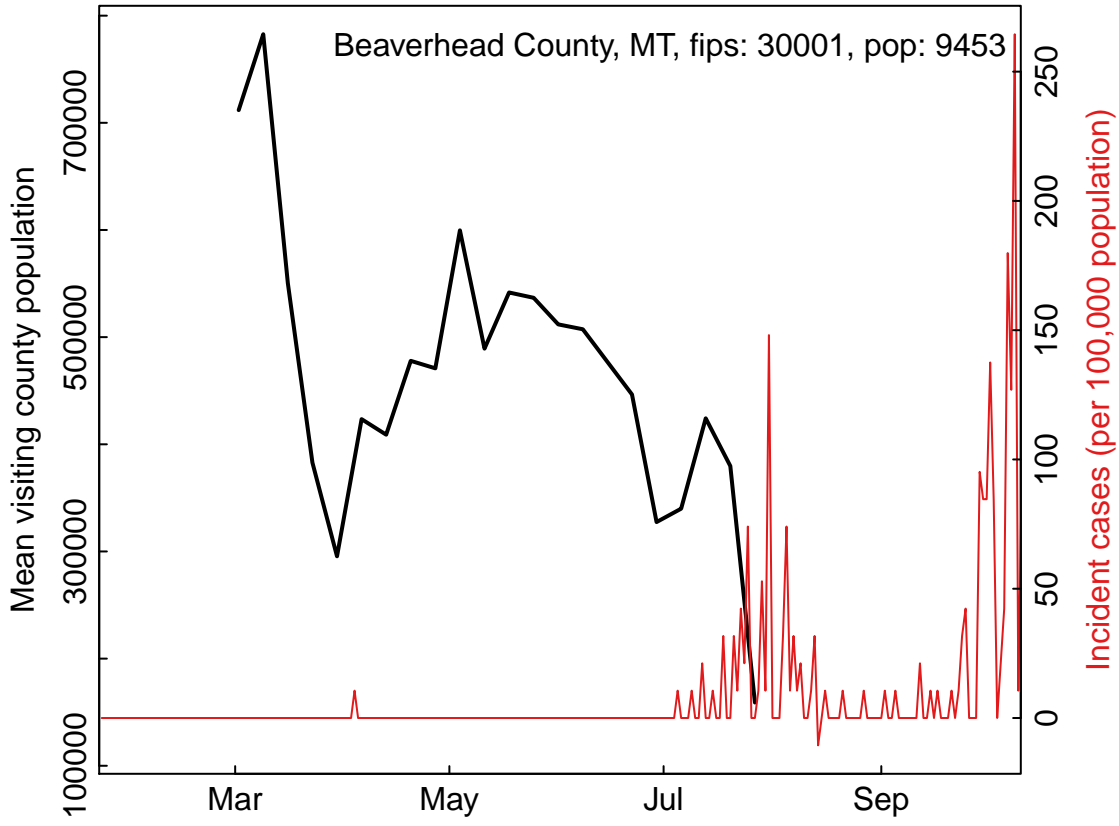

Big Horn County, MT, fips: 30003, pop: 13319

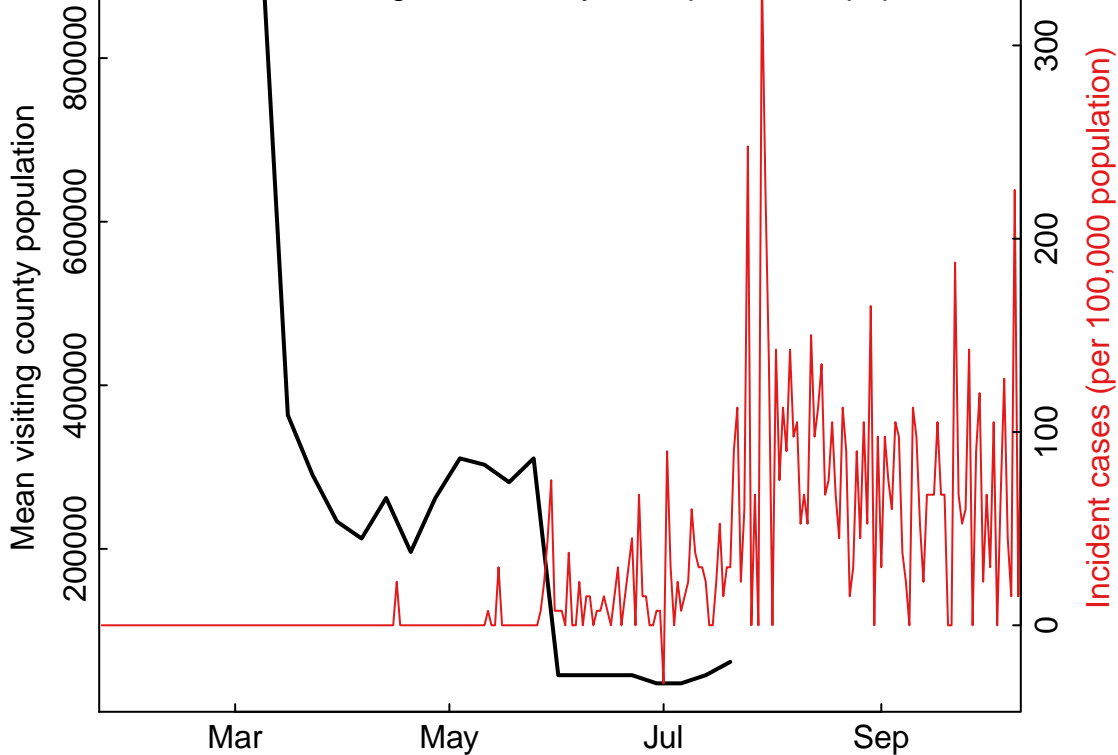

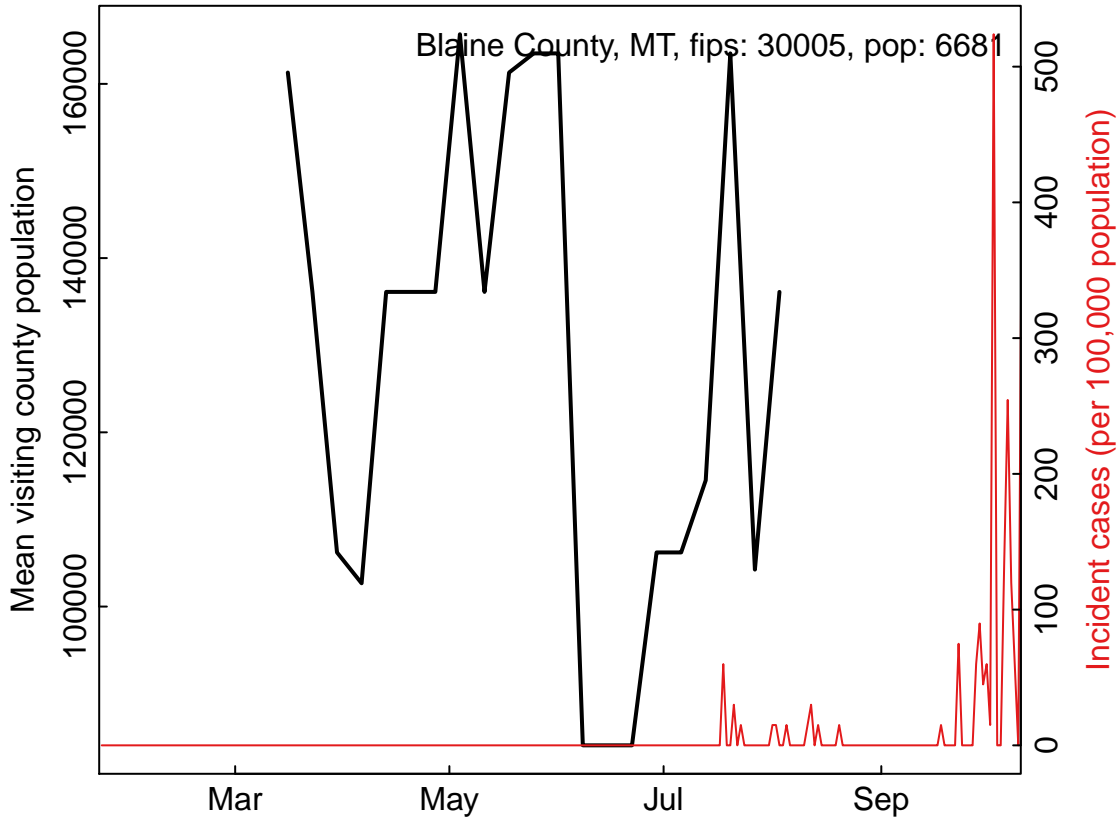

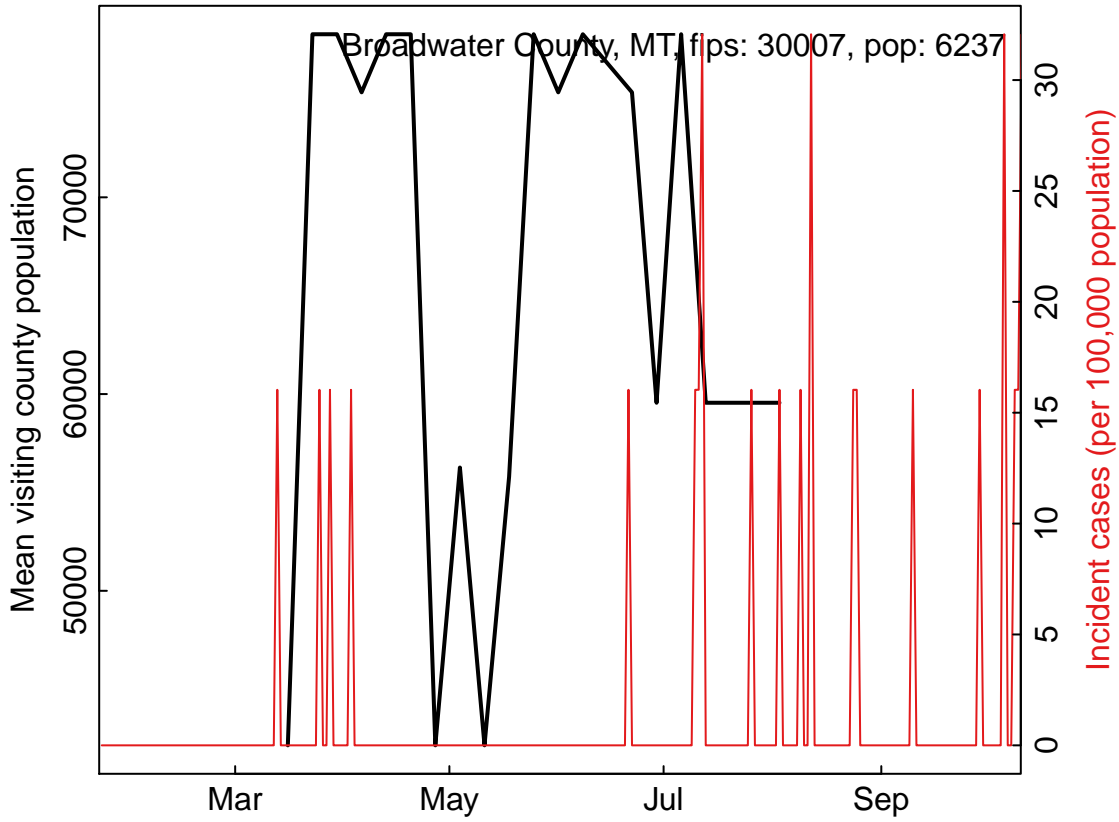

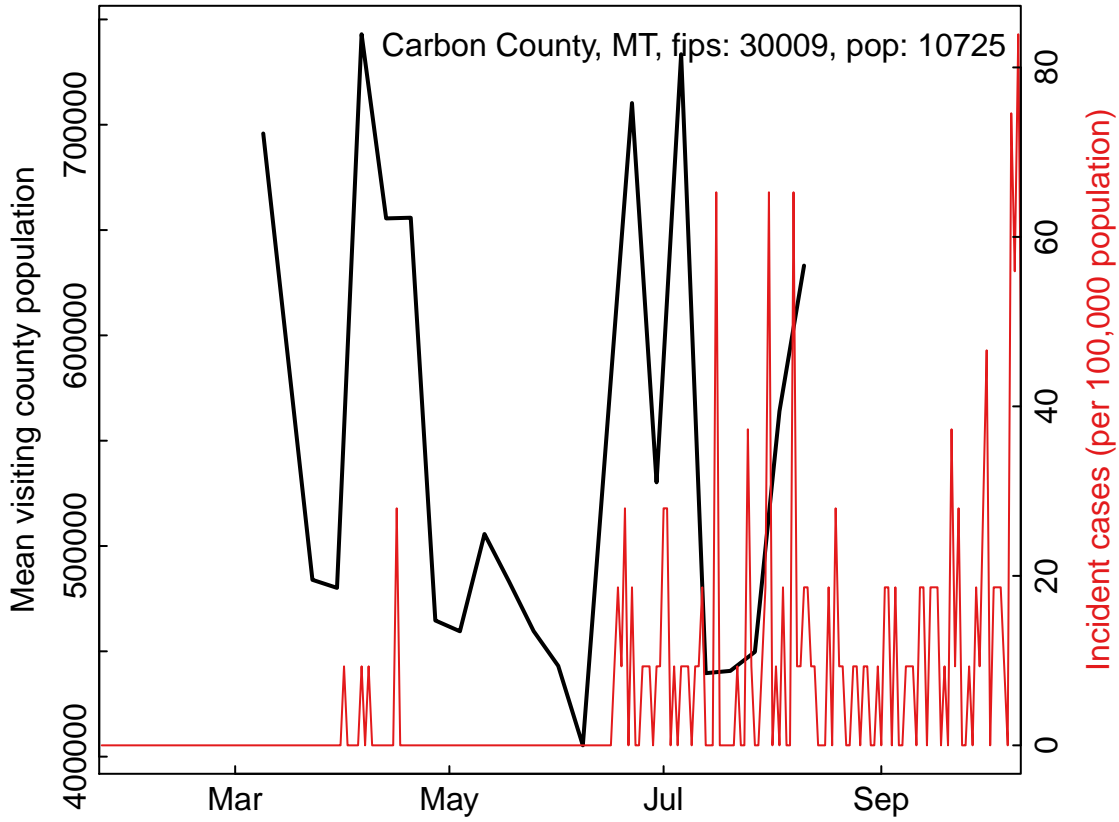

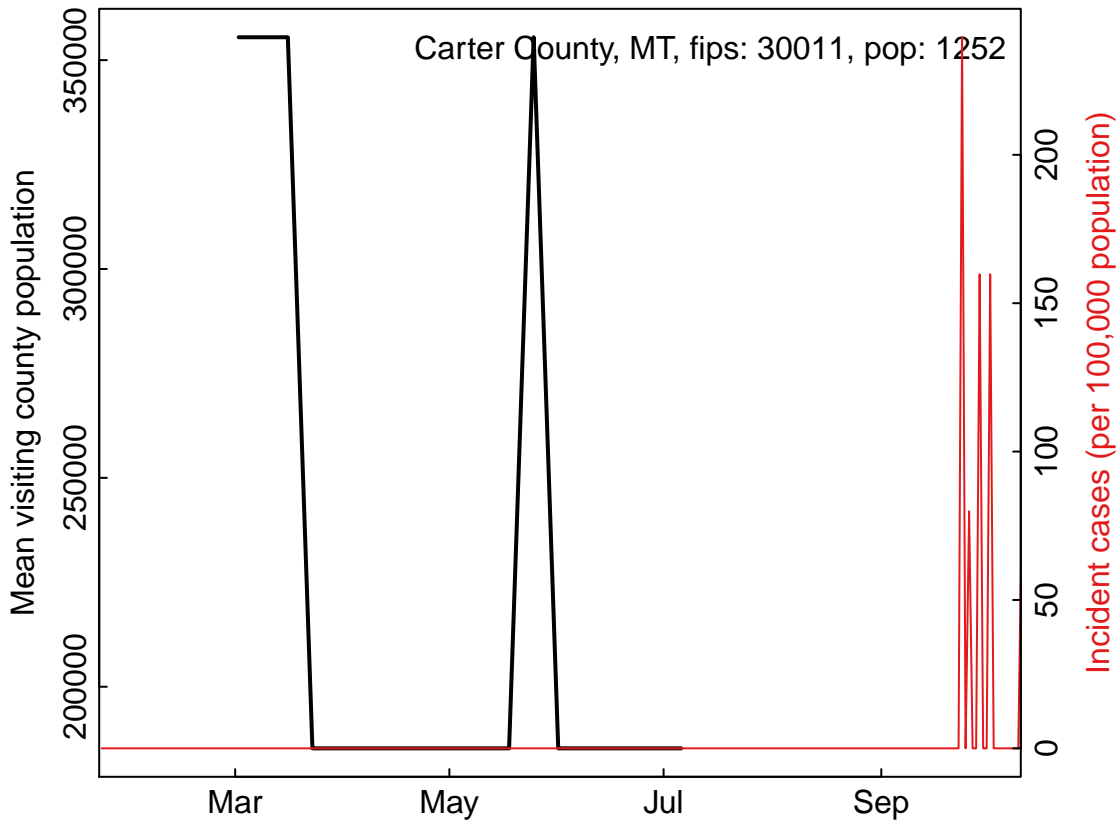

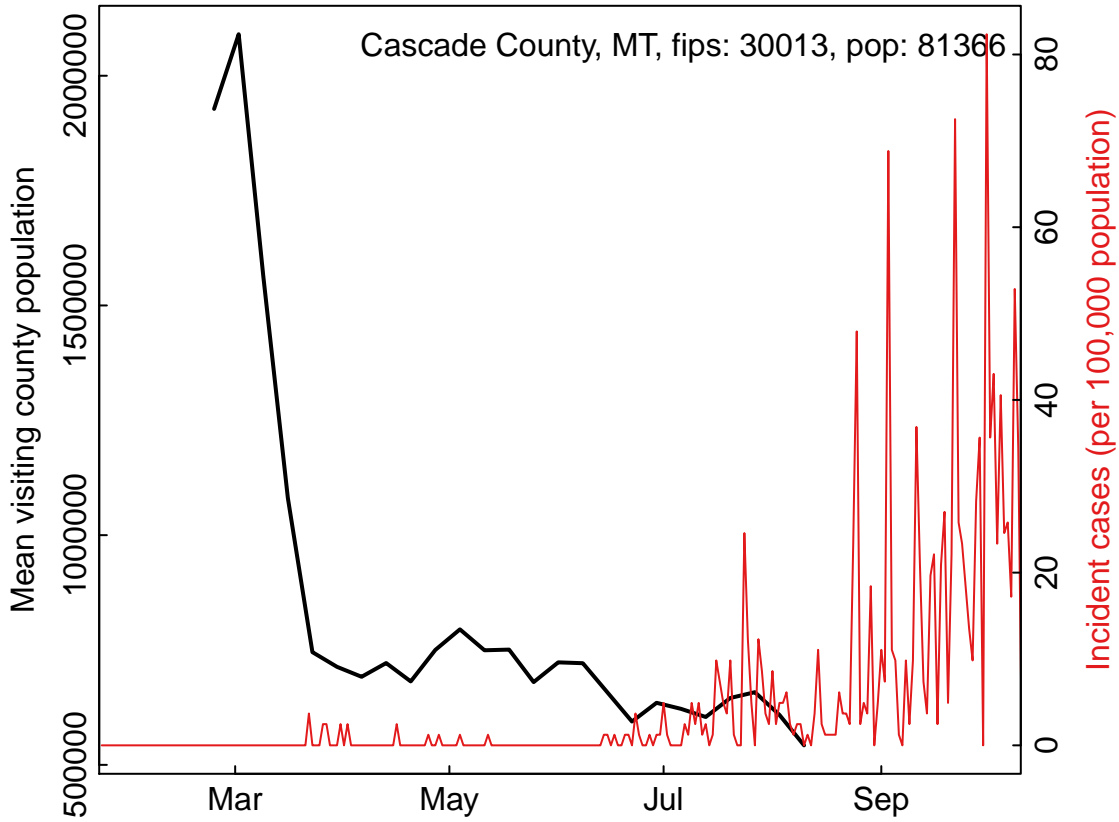



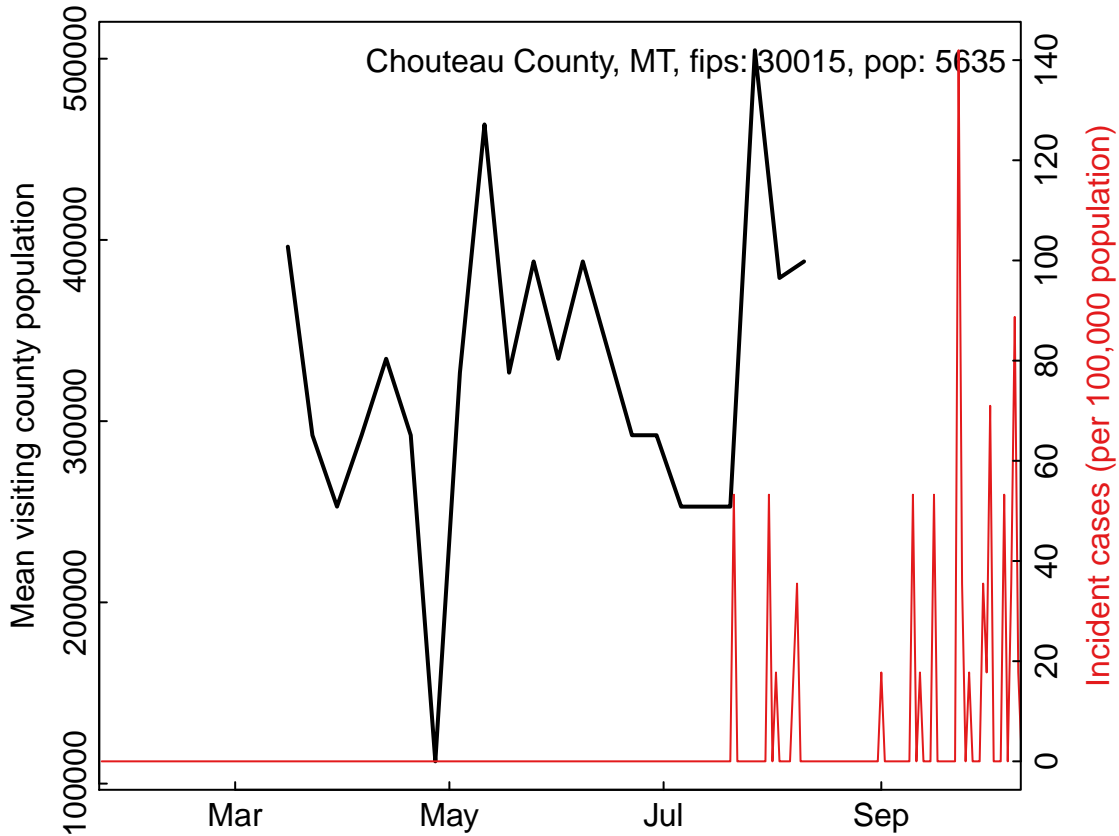

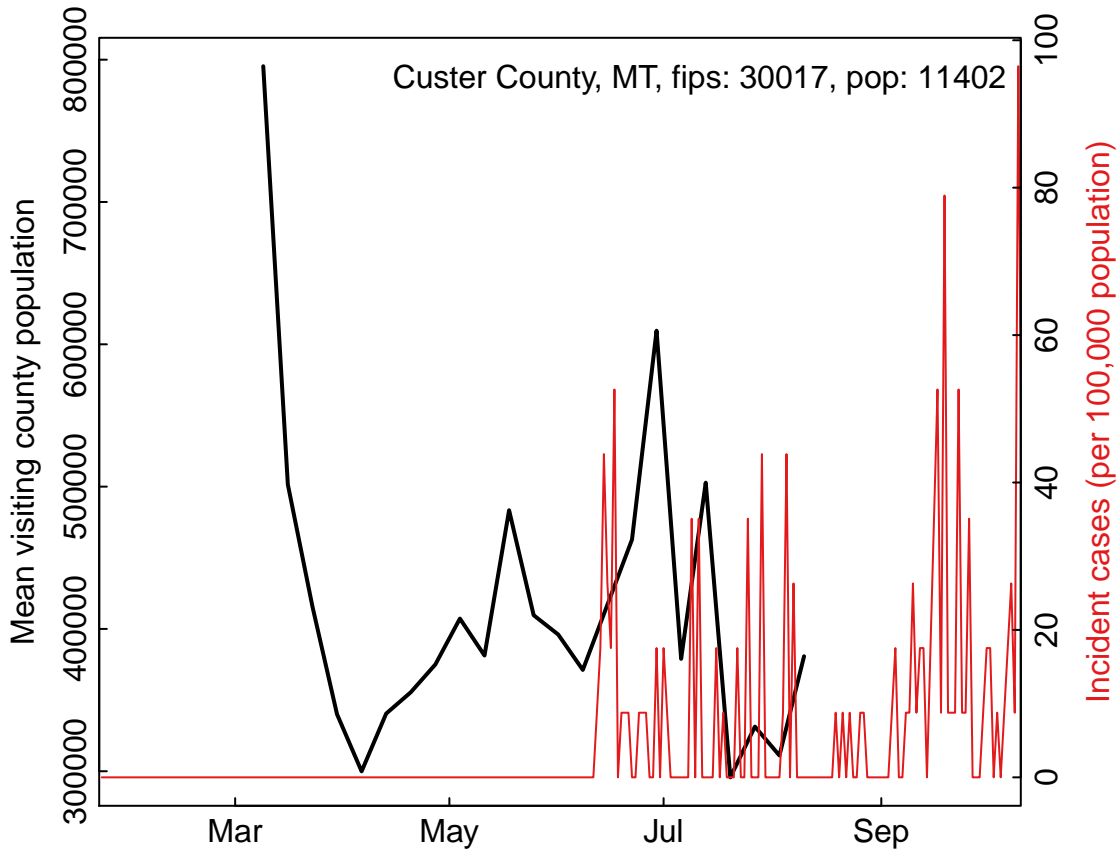

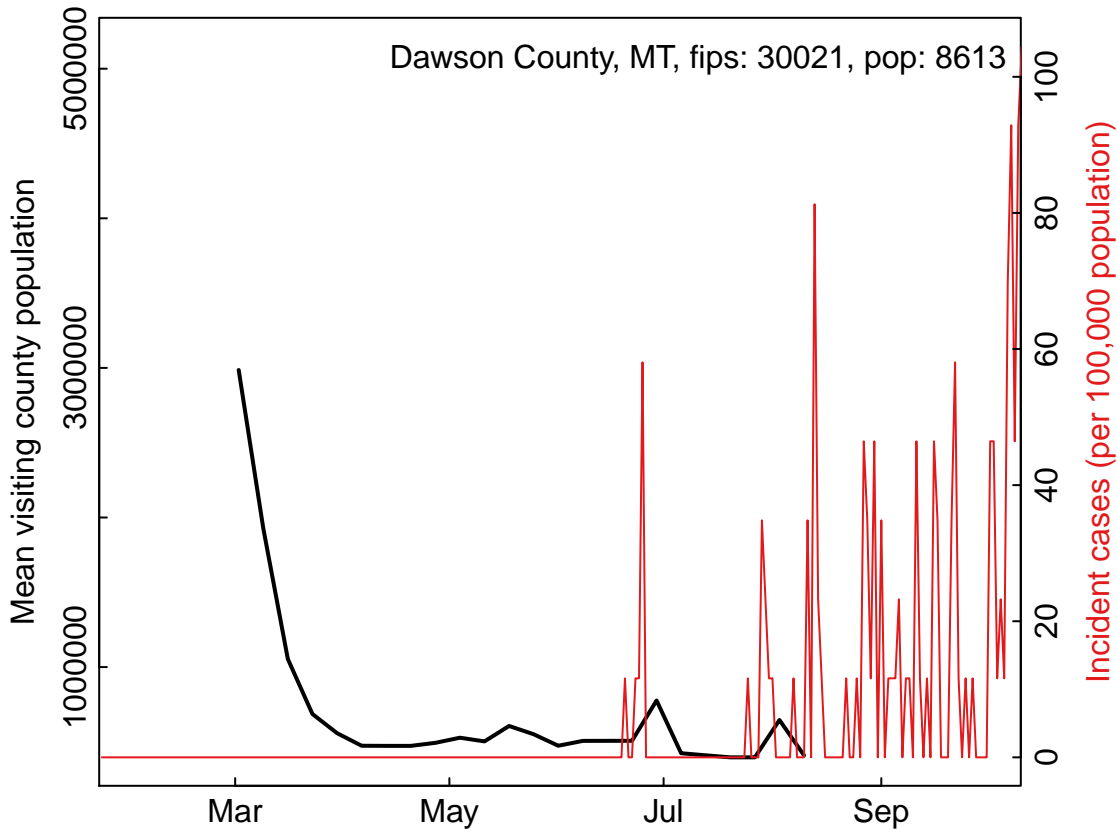

Deer Lodge County, MT, fips: 130023, pop: 9140

Mean visiting county population

500000  
400000  
300000

Mar

May

Jul

Sep

300  
250  
200  
150  
100  
50  
0

Incident cases (per 100,000 population)

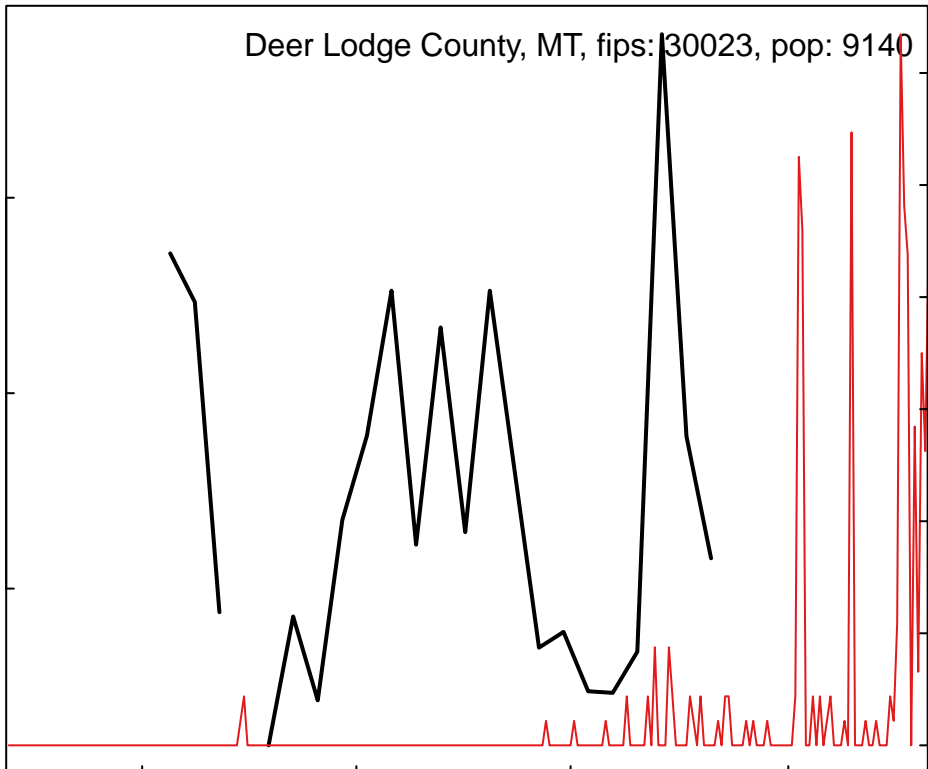

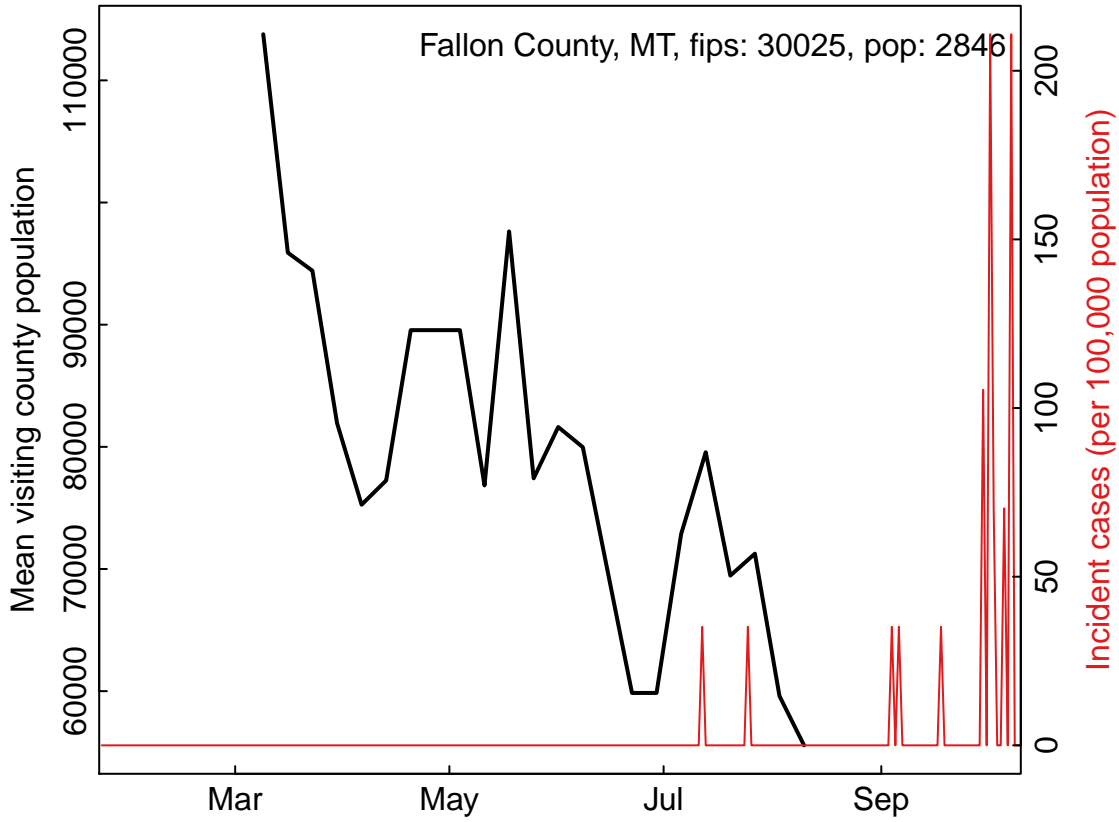

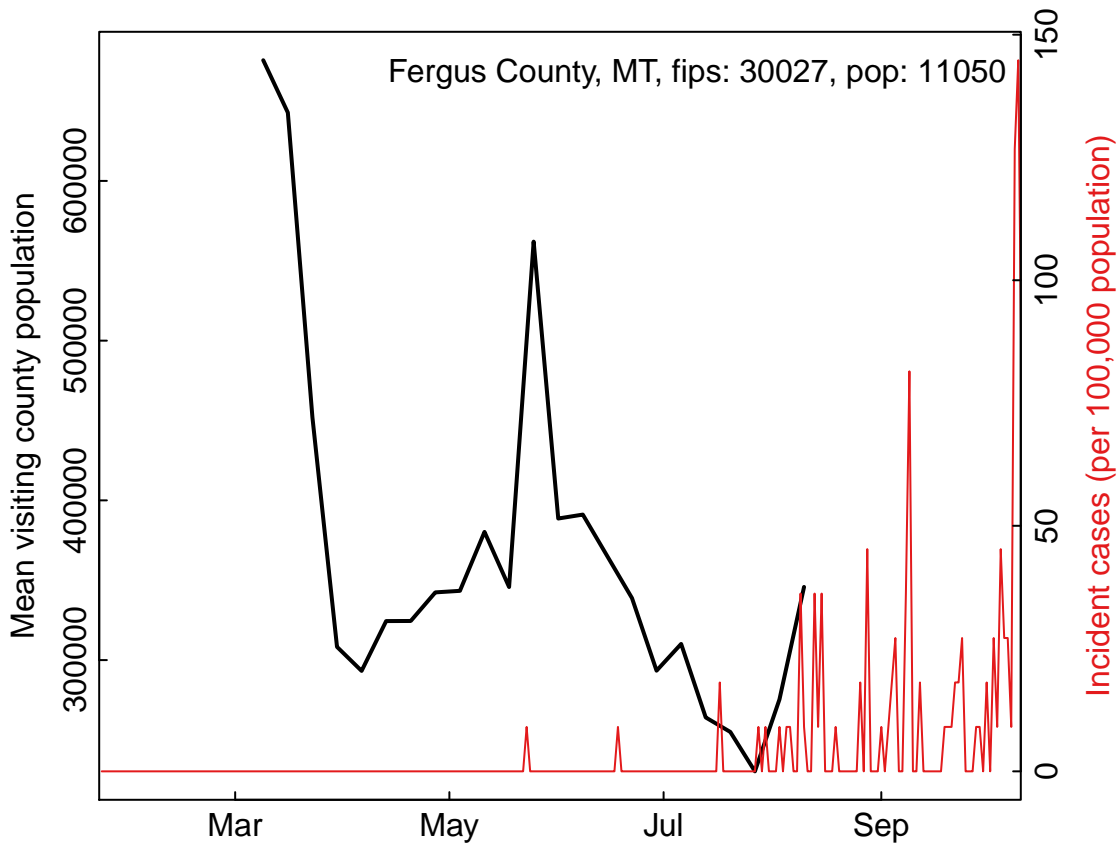

Flathead County, MT, fips: 30029, pop: 103806

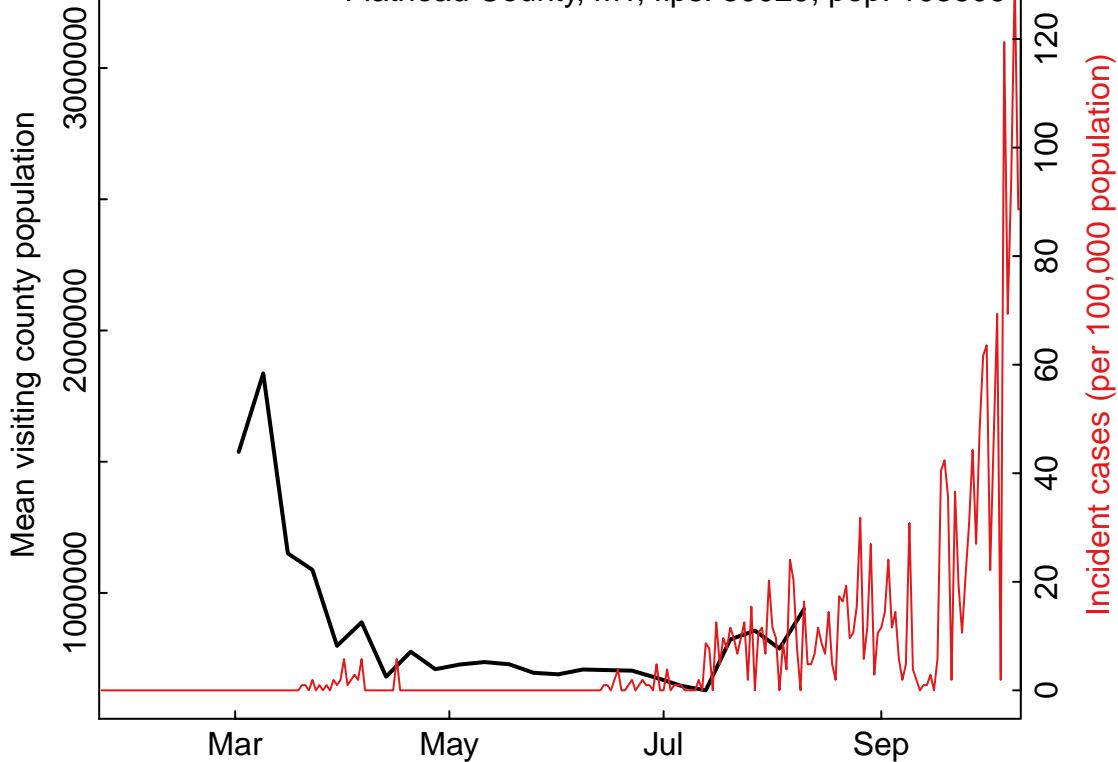

Gallatin County, MT, fips: 30031, pop: 114434

Mean visiting county population

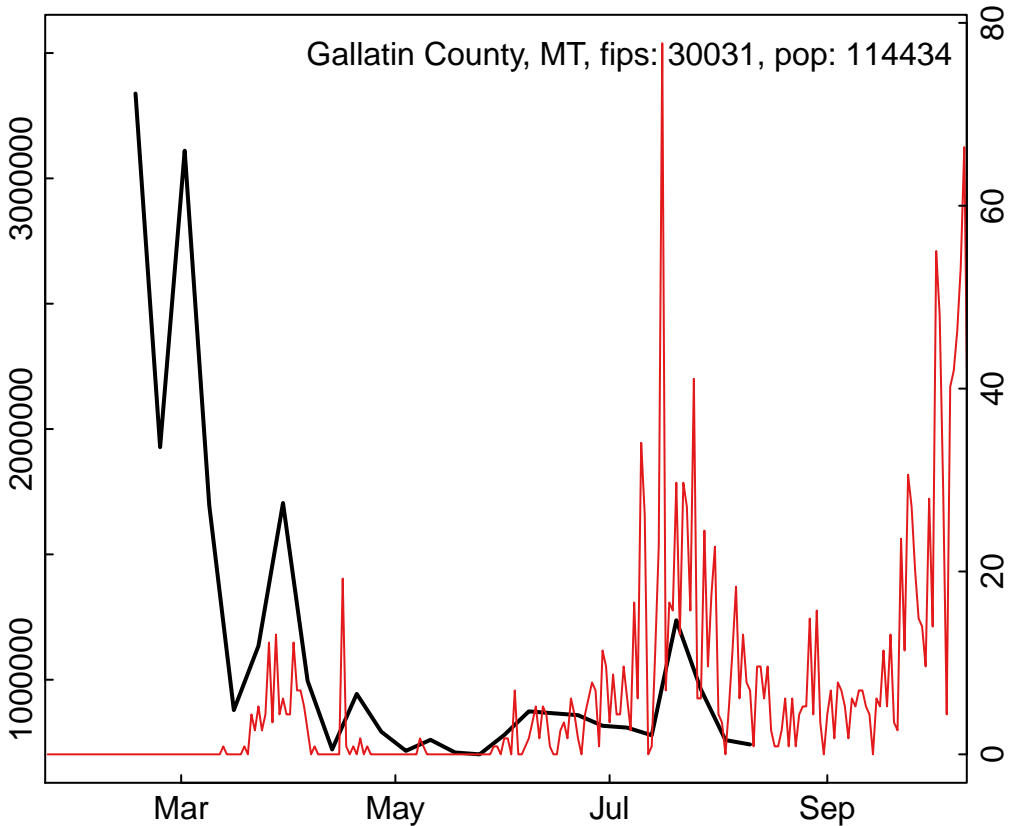

Incident cases (per 100,000 population)



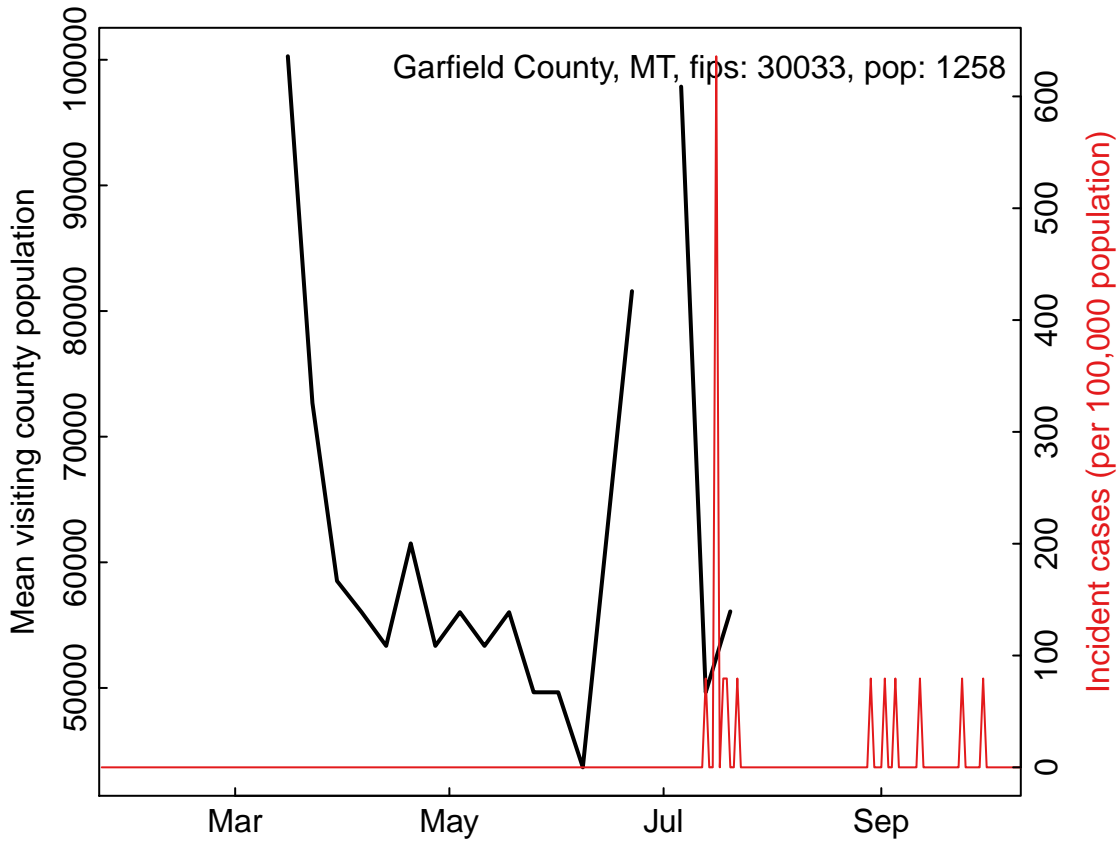

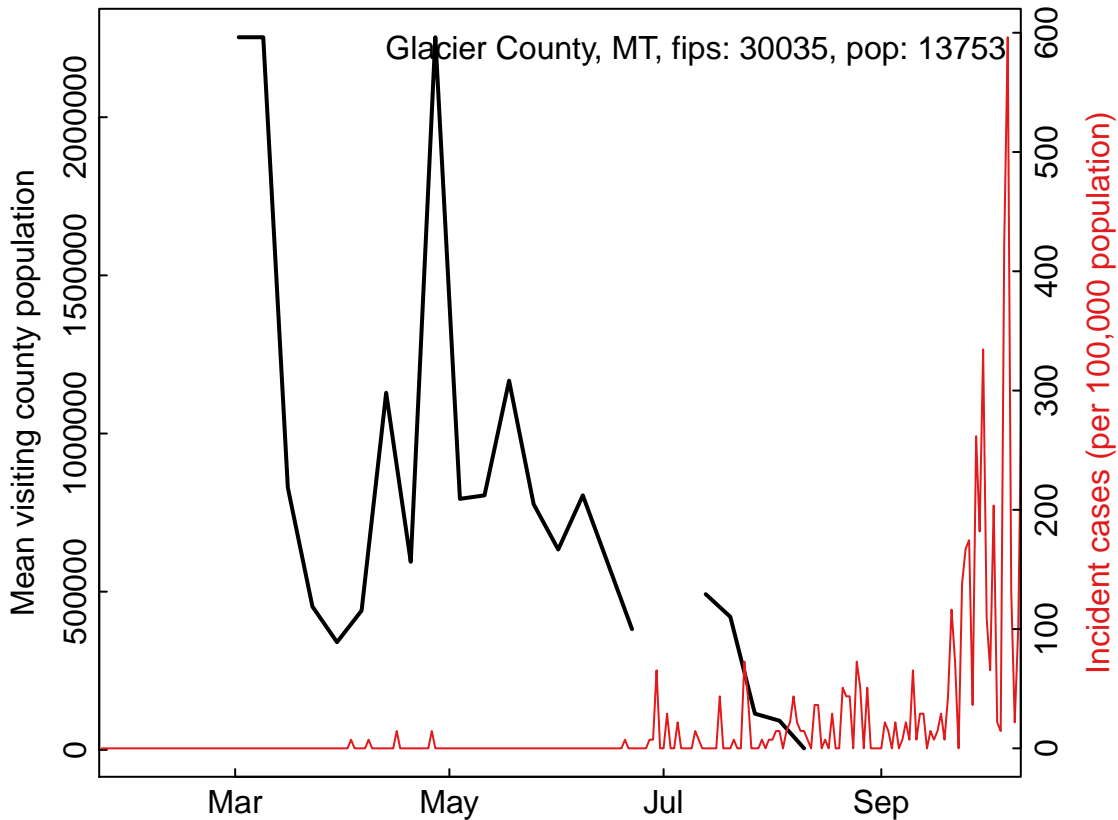

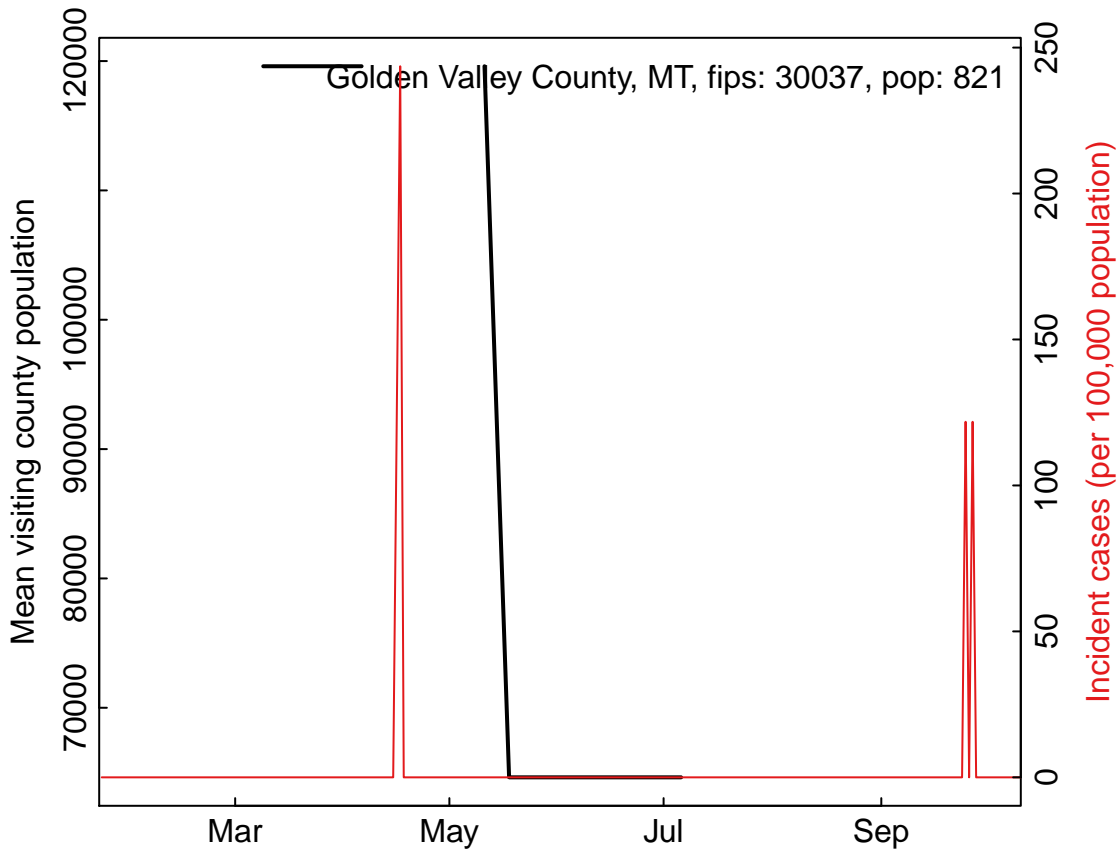

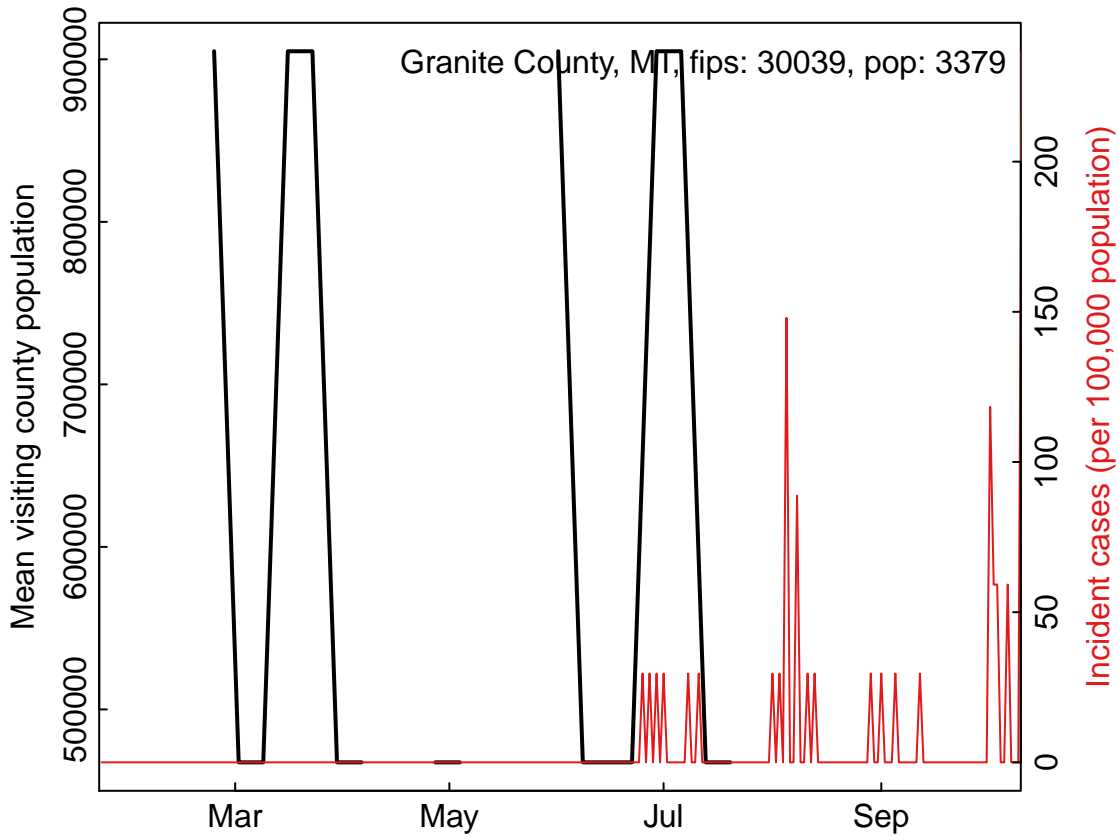

Hill County, MT, fips: 30041, pop: 16484

Mean visiting county population

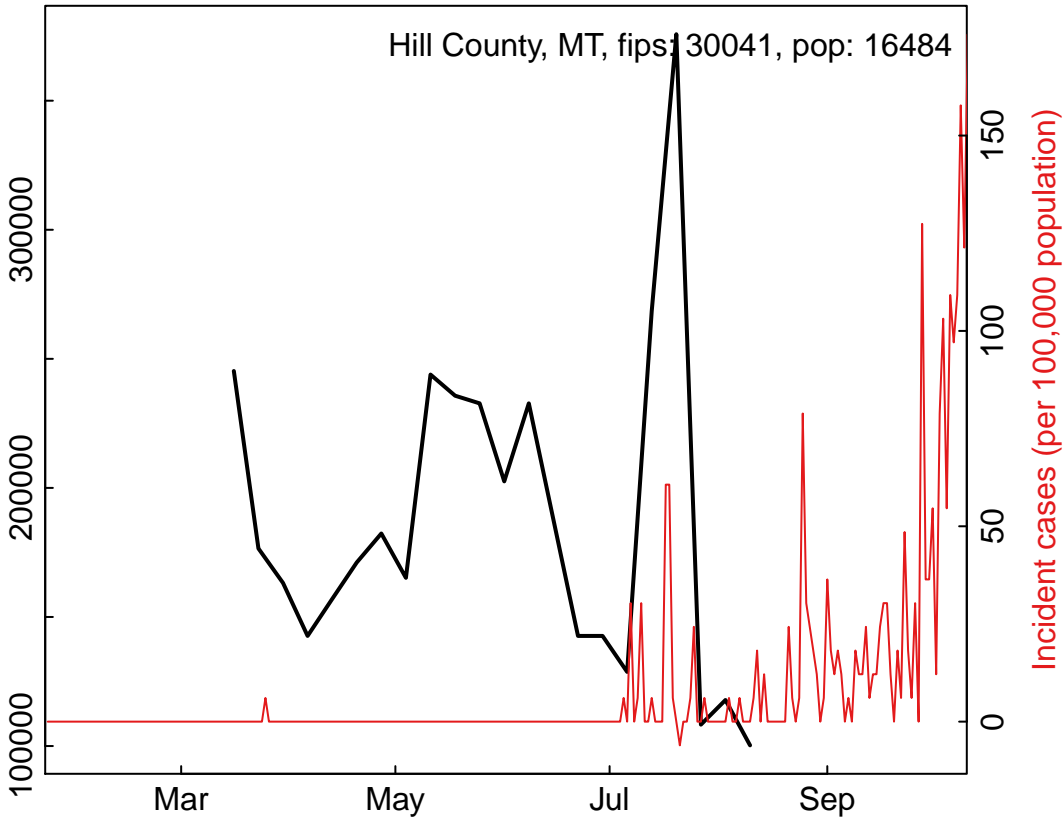

Incident cases (per 100,000 population)

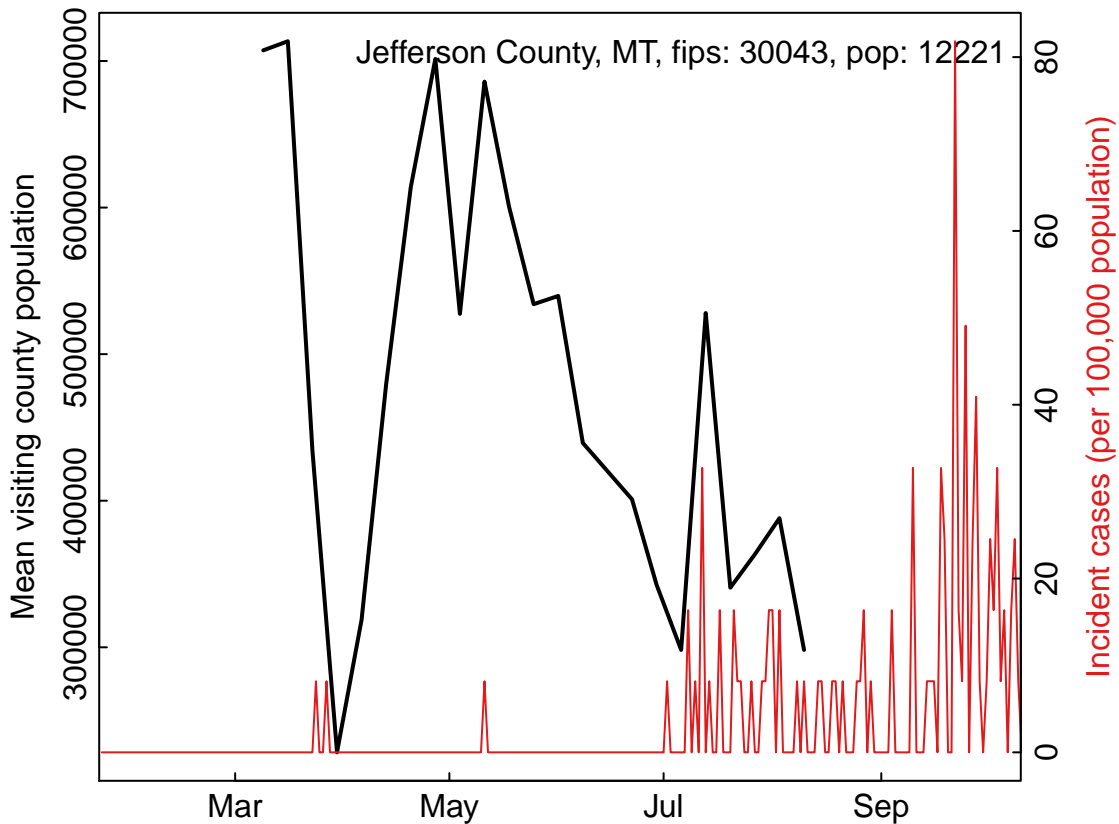

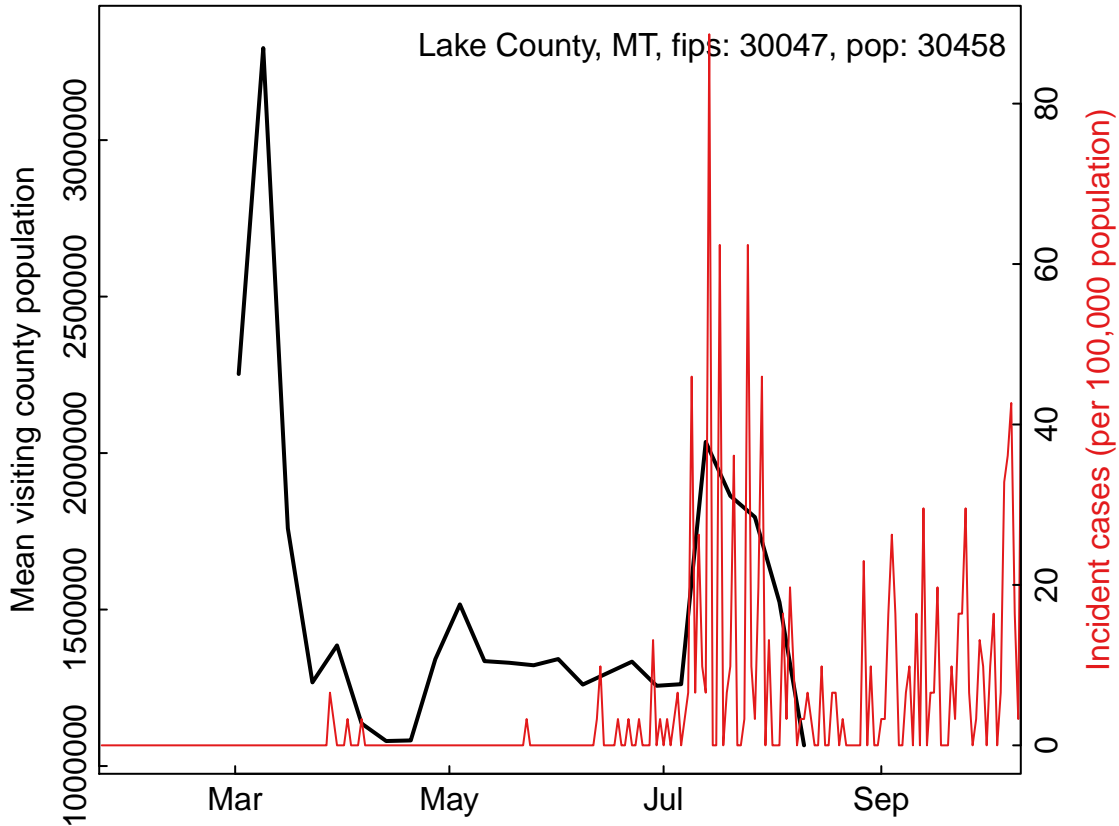

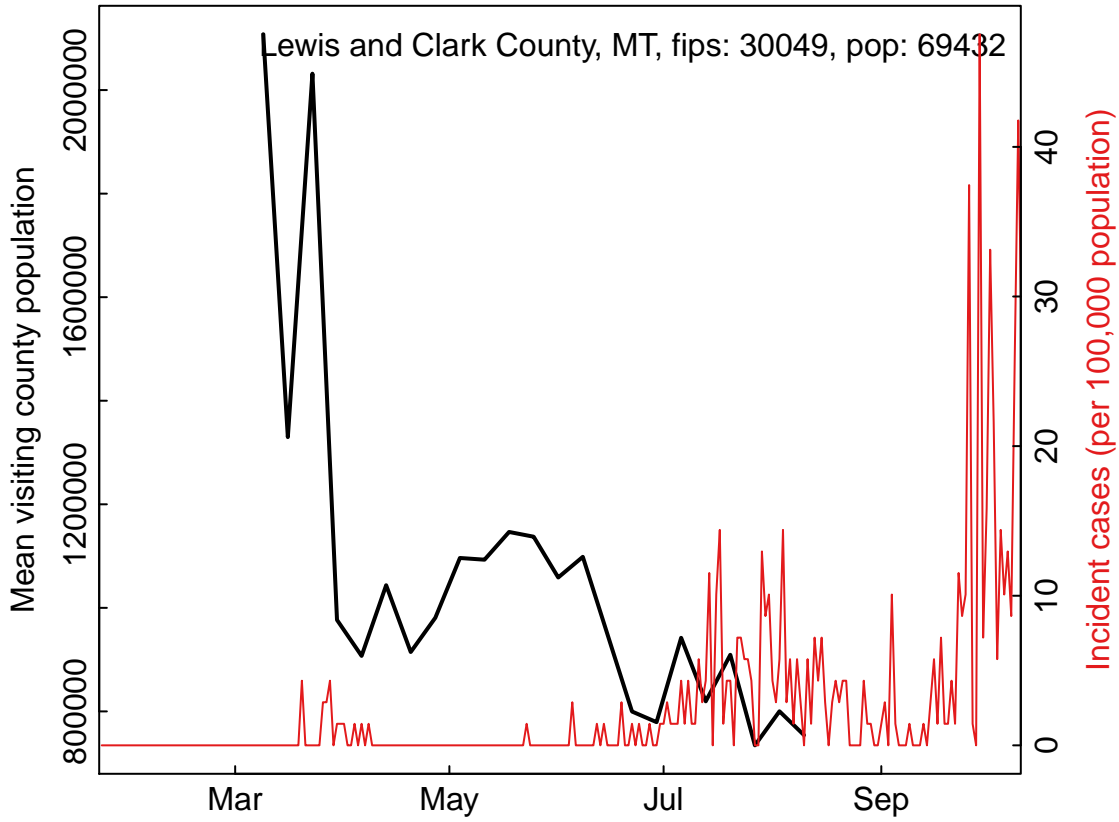



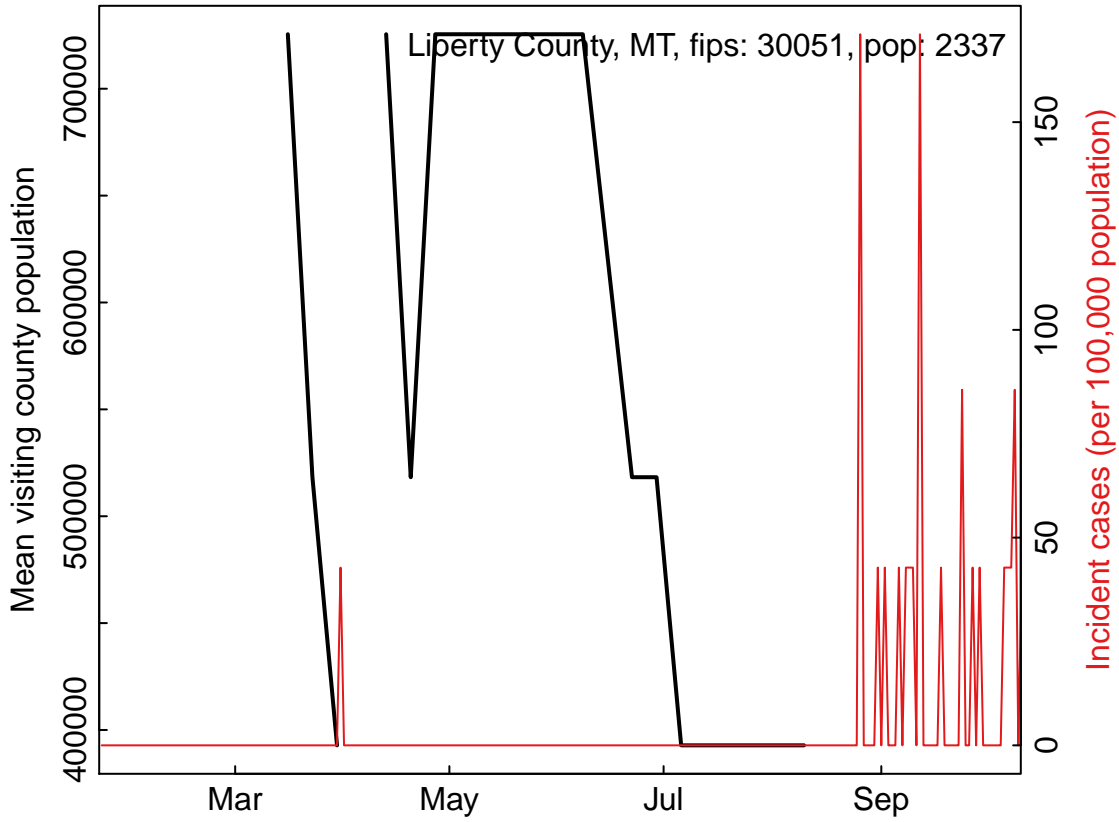

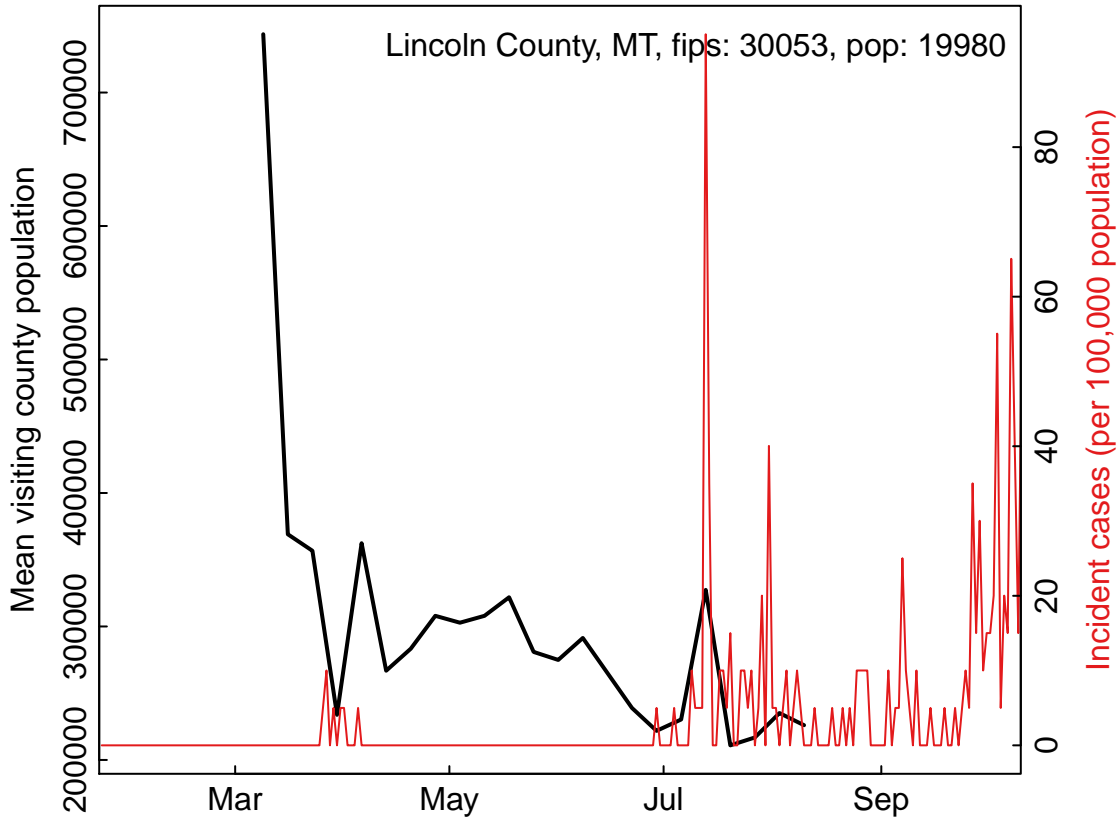

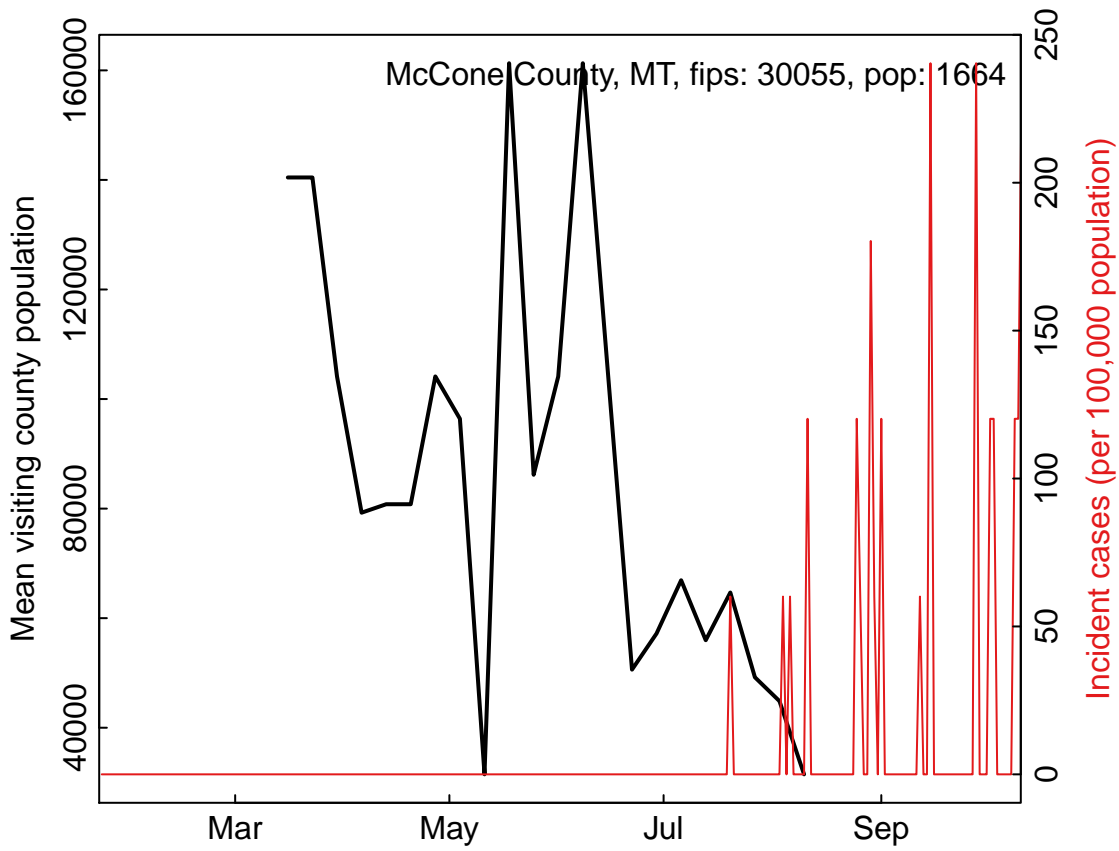

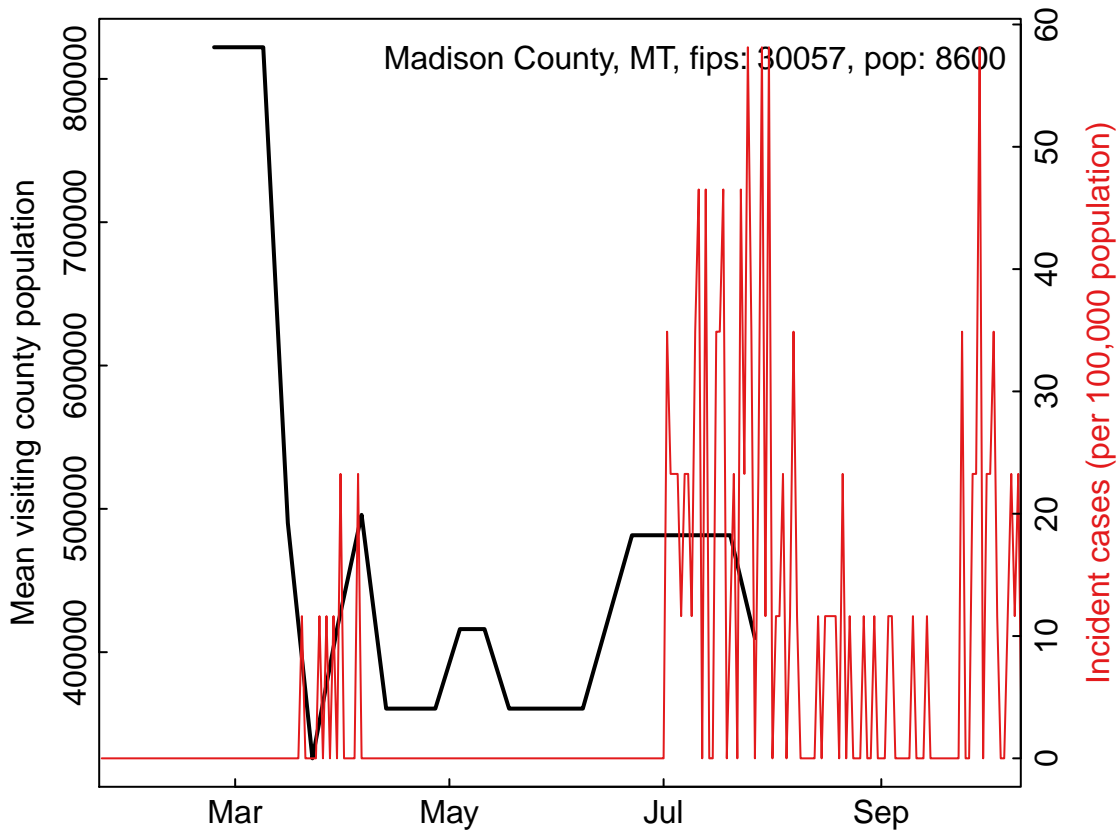

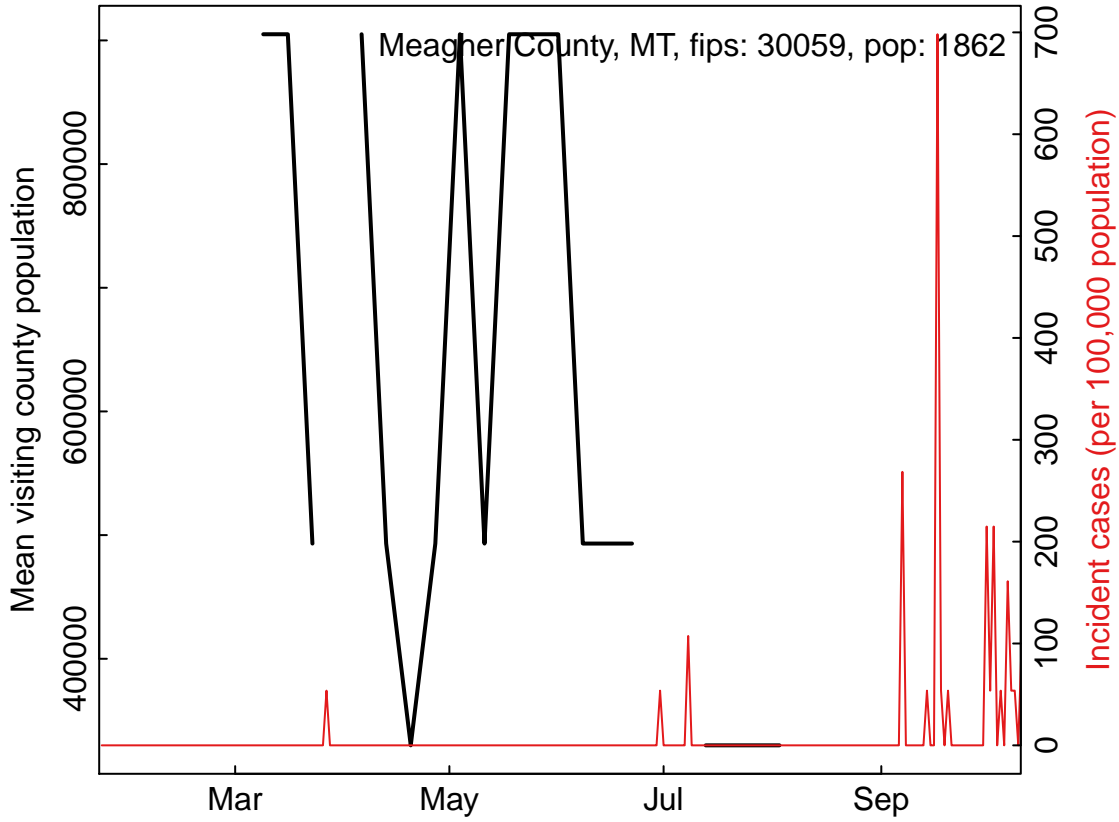

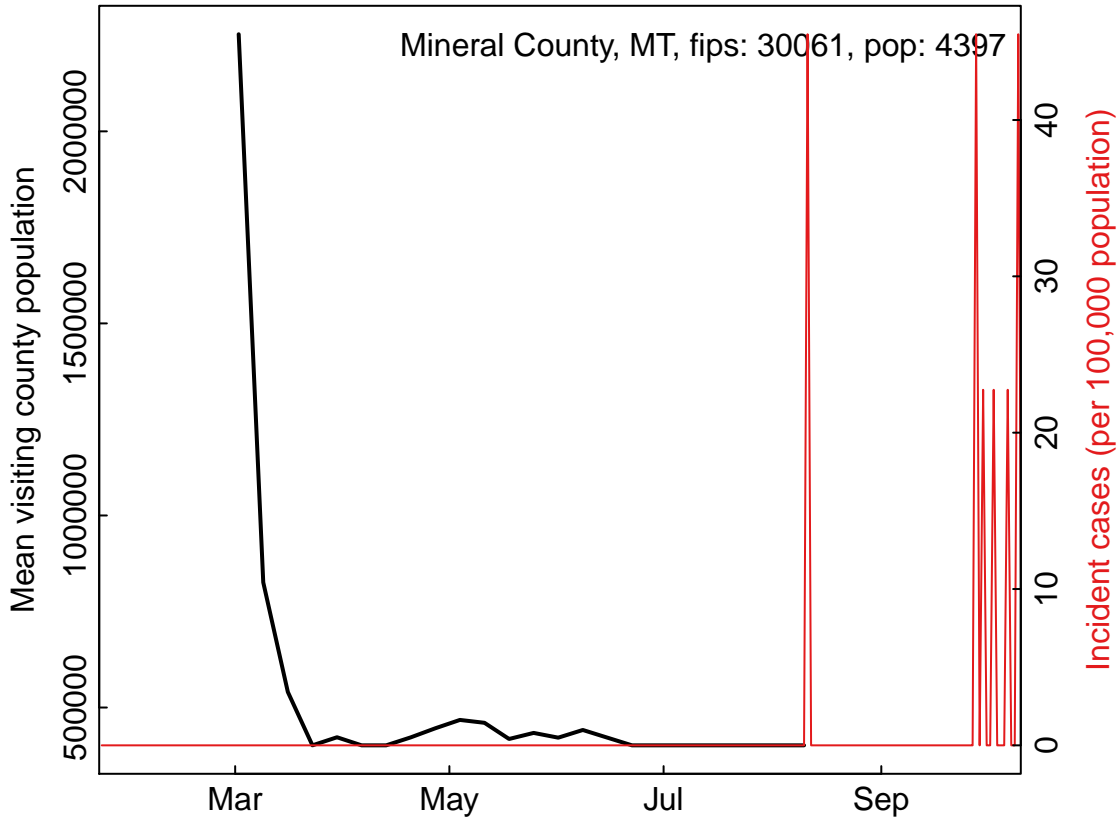

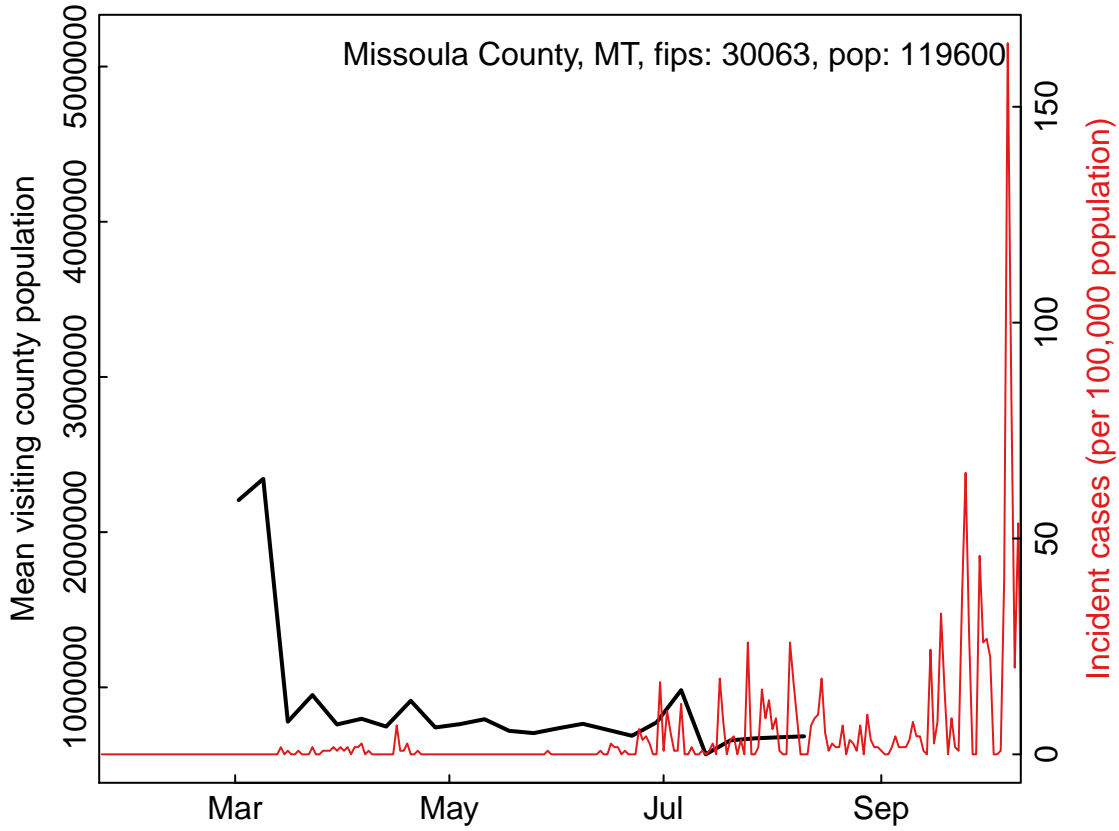

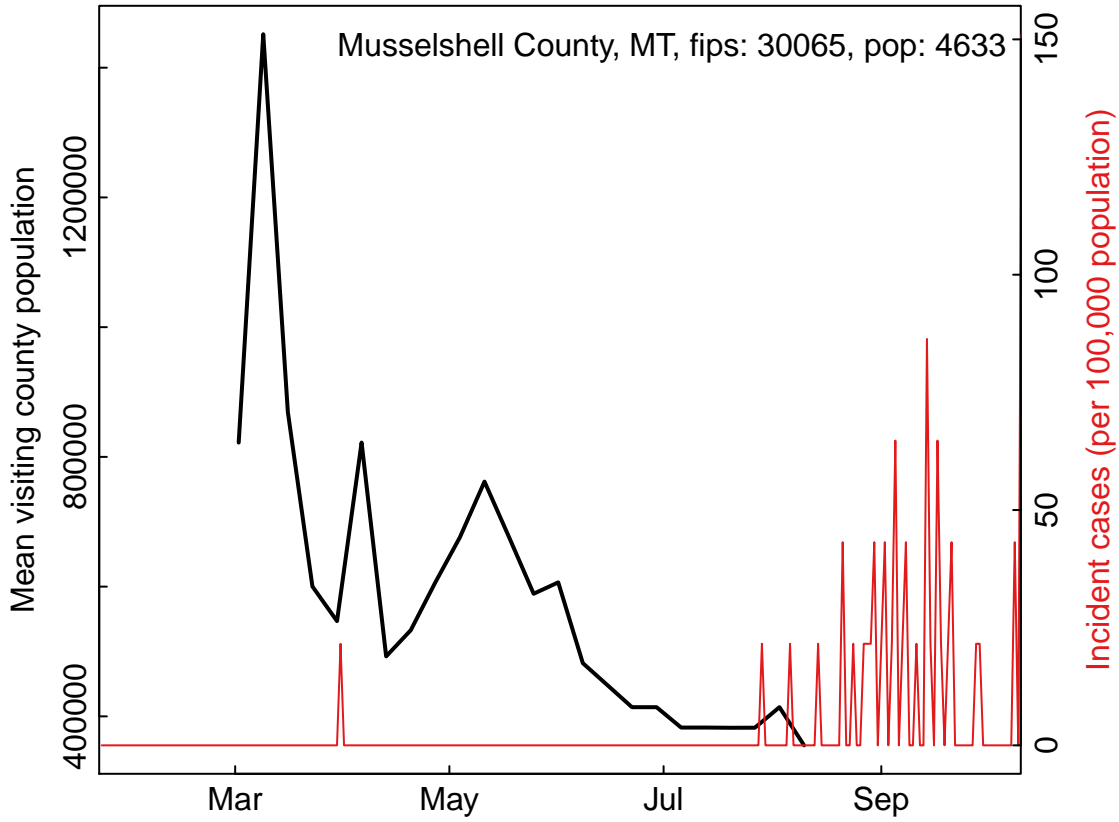



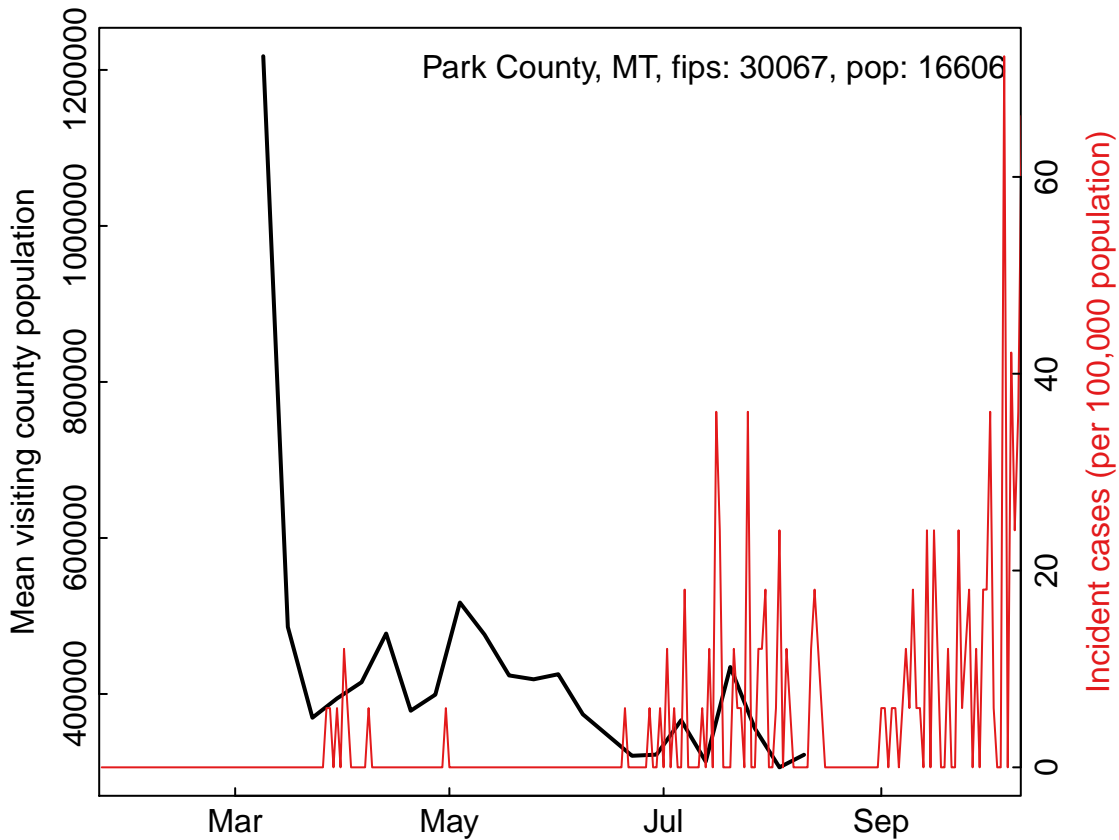

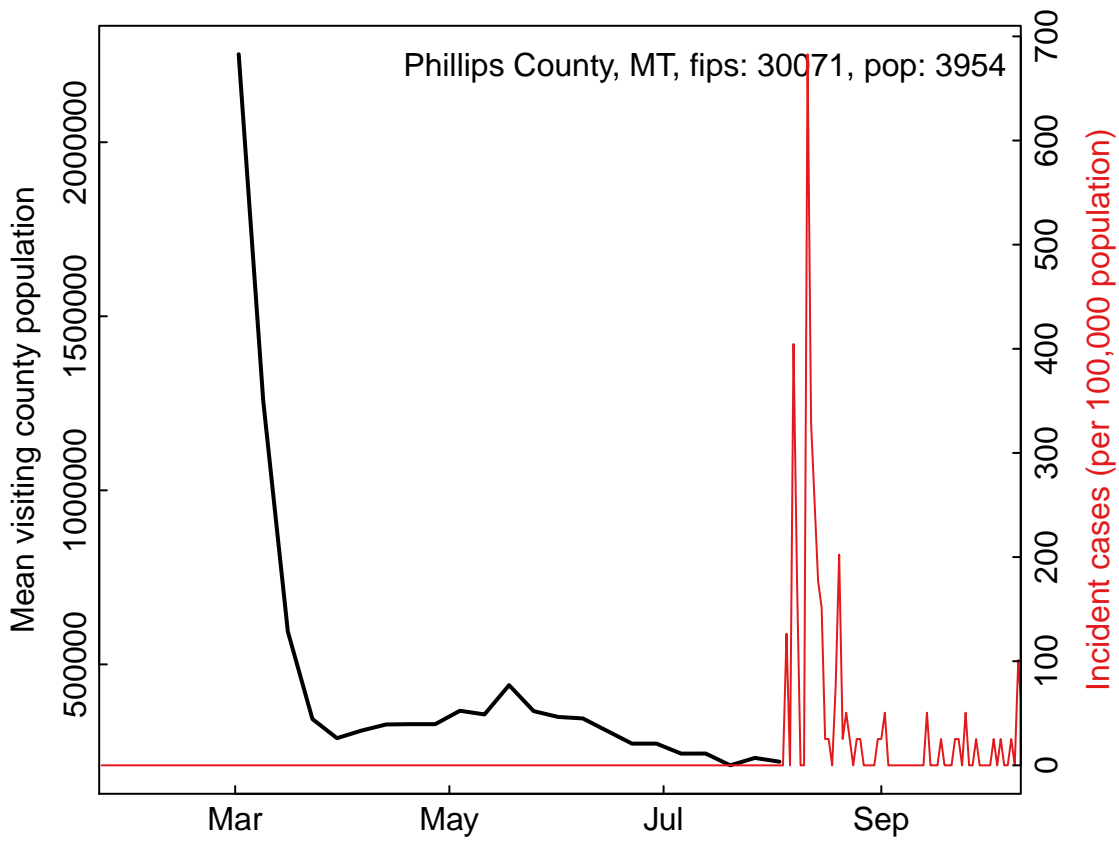

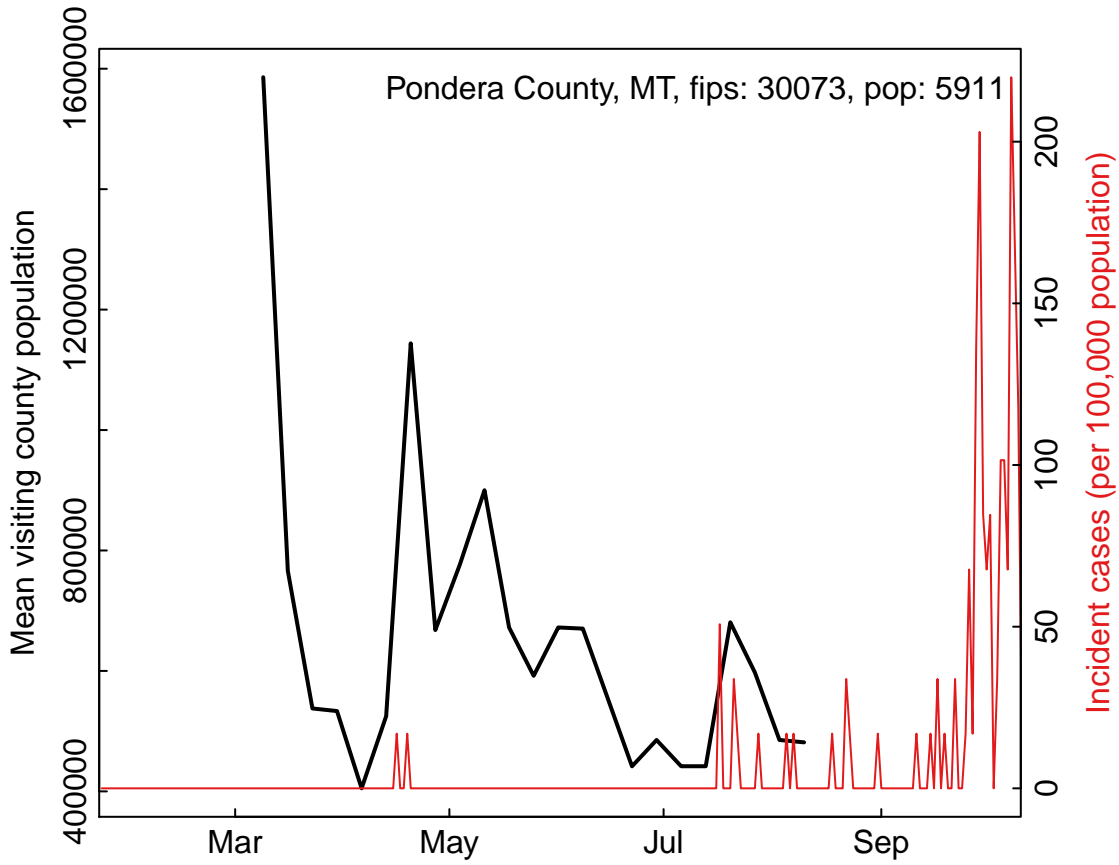

Powder River County, MT, fips: 30075, pop: 1682

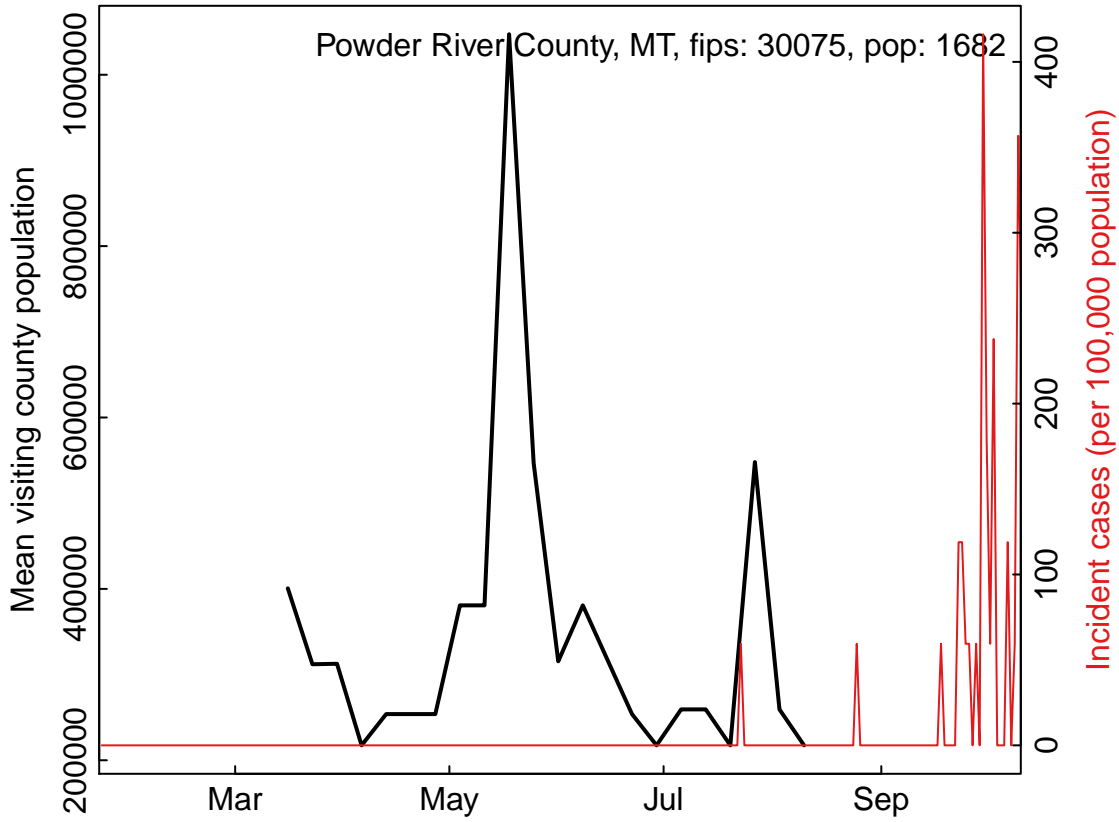

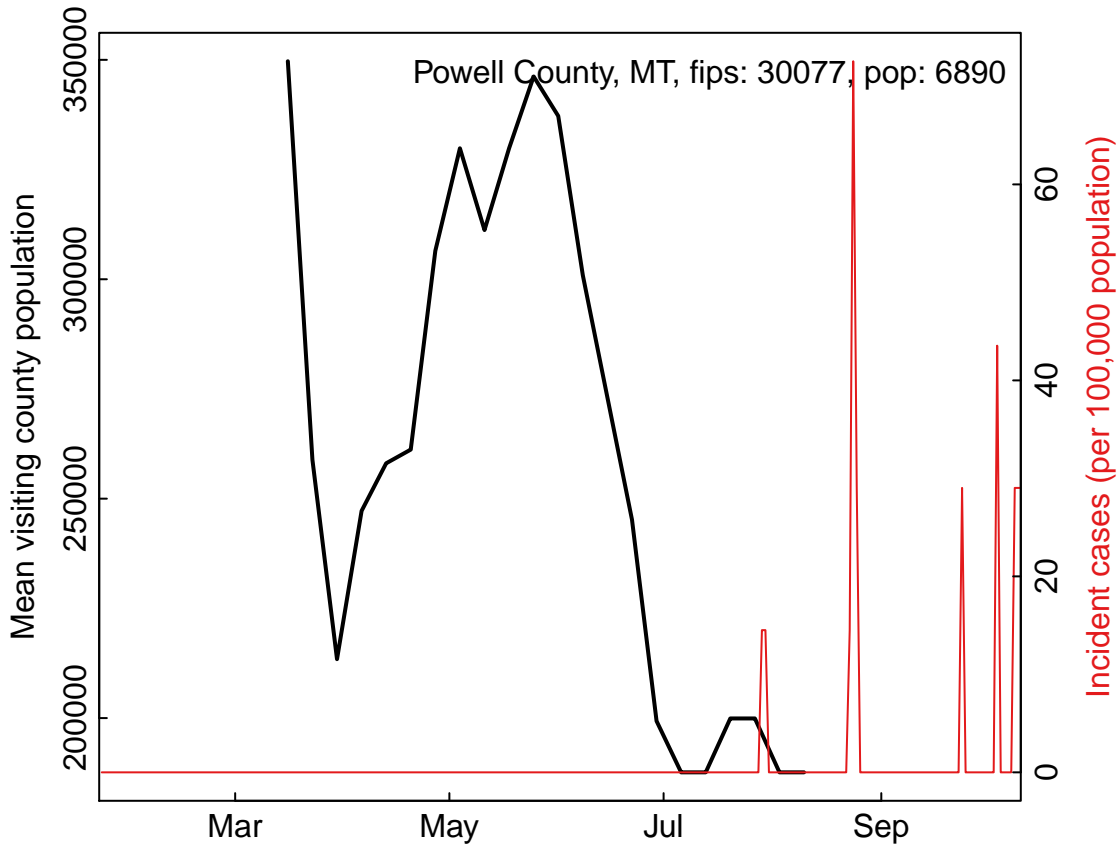

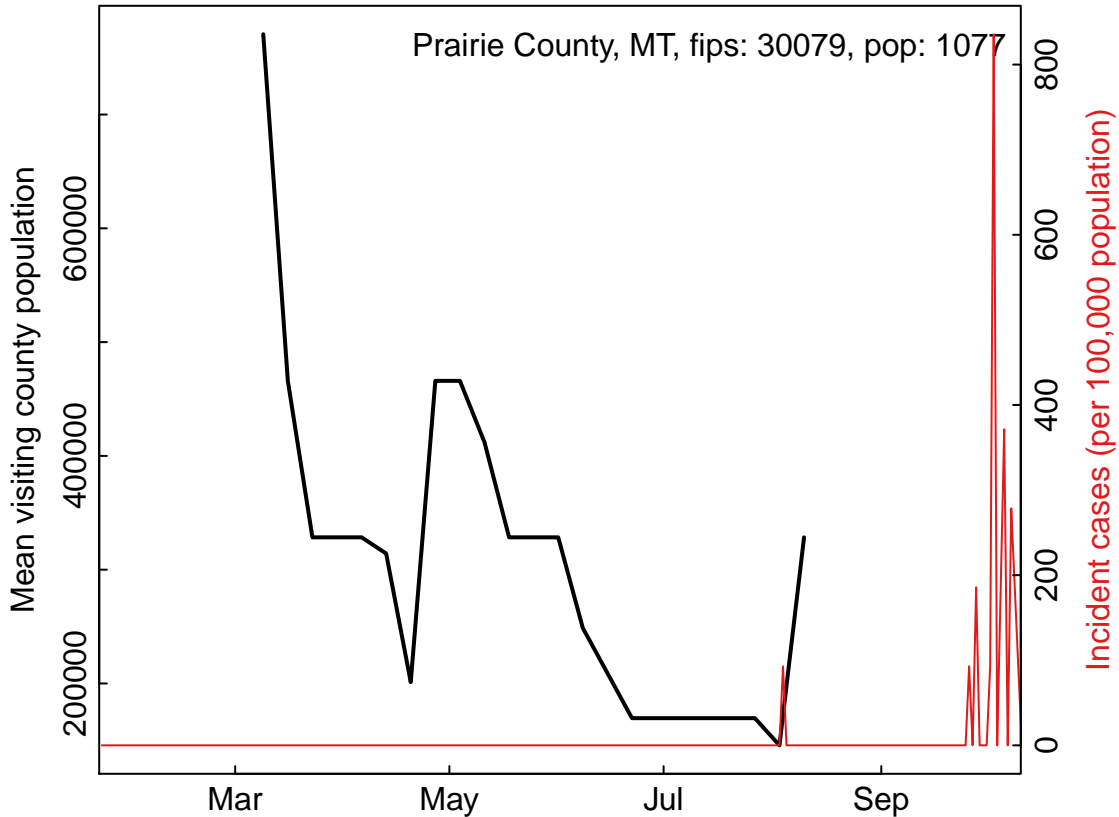

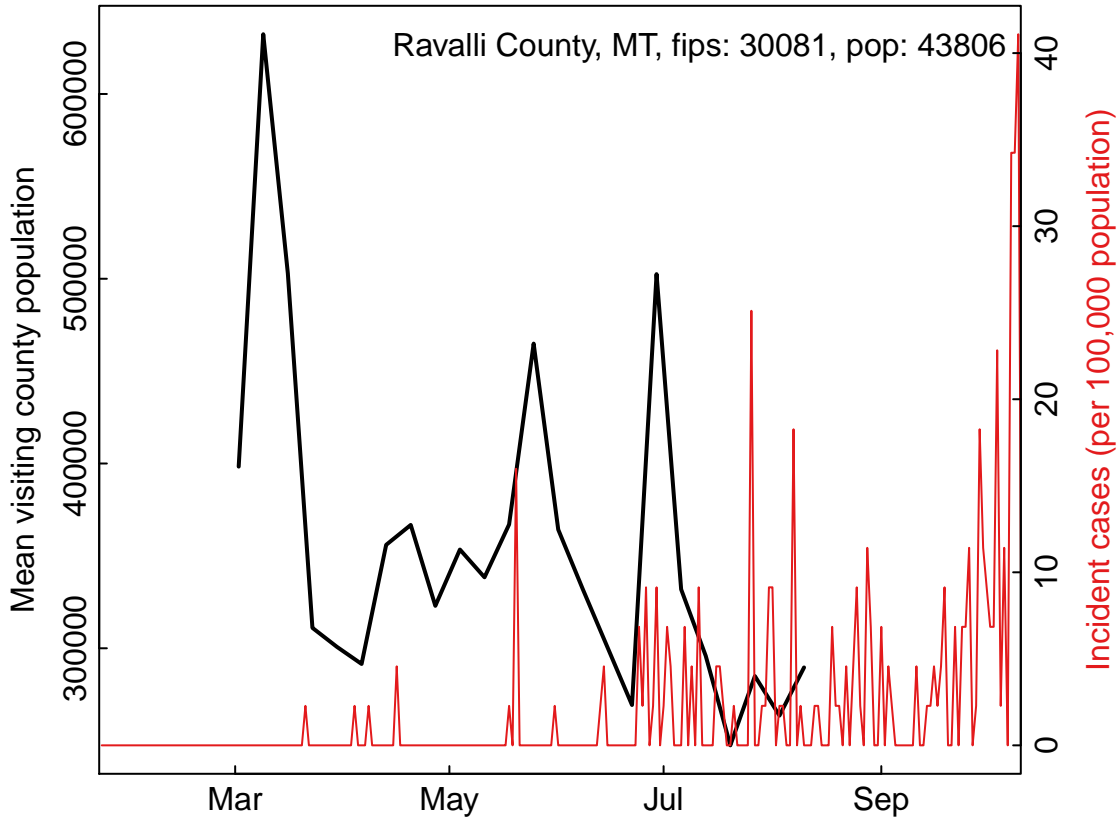

Richland County, MT, fips: 30083, pop: 10803

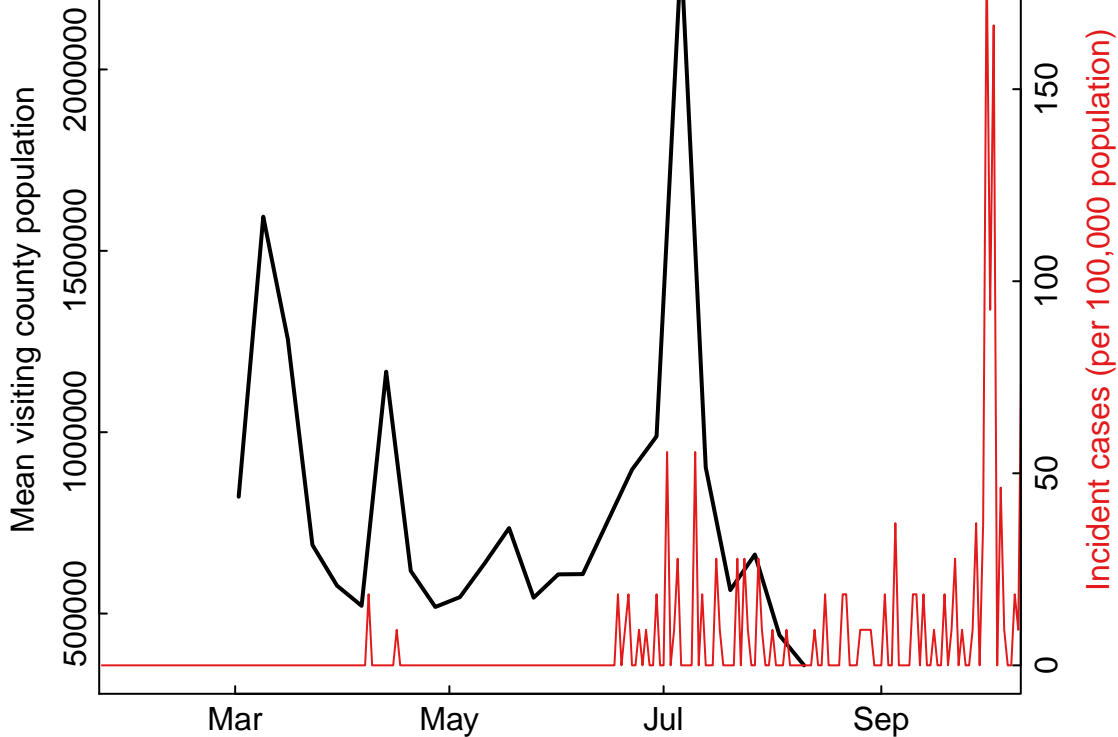



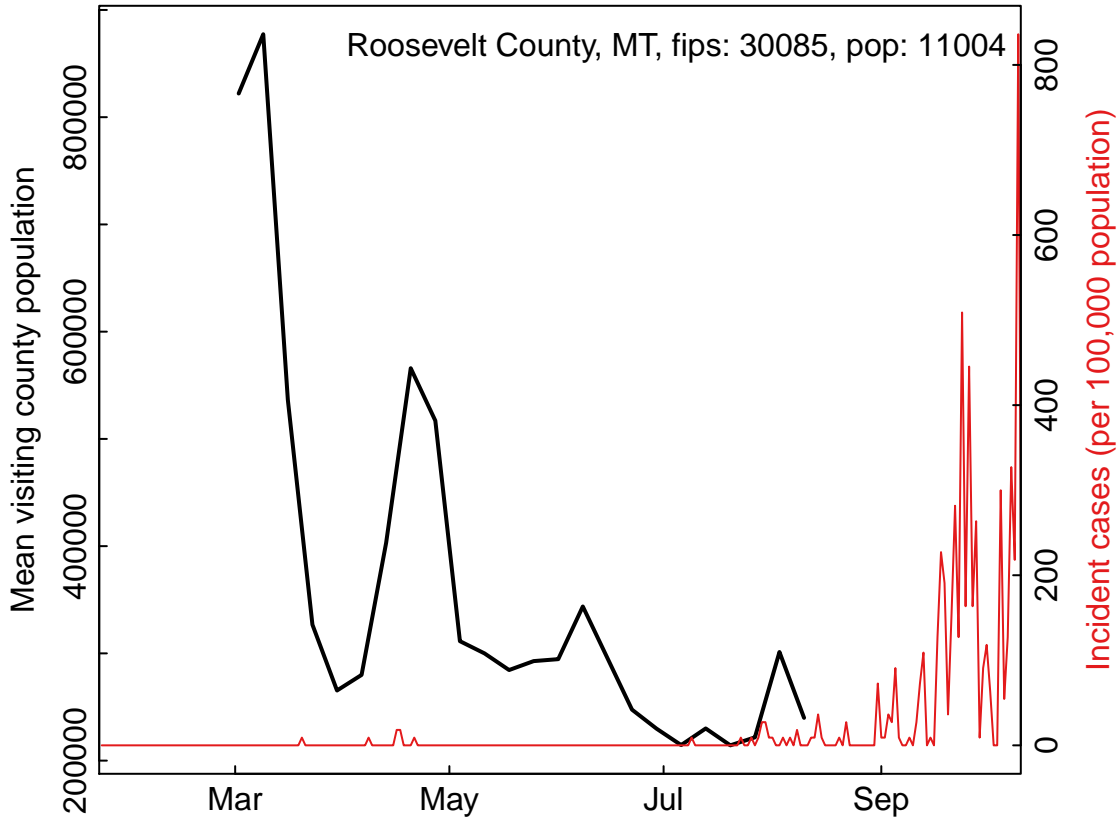

Rosebud County, MT, fips: 30087, pop: 8937

Mean visiting county population

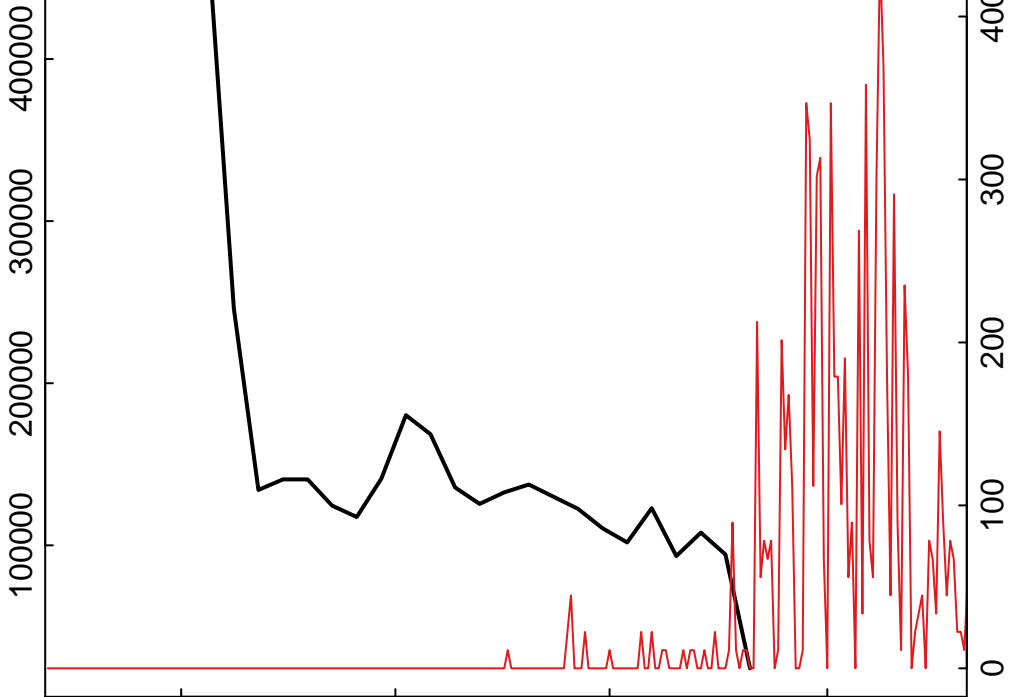

Incident cases (per 100,000 population)

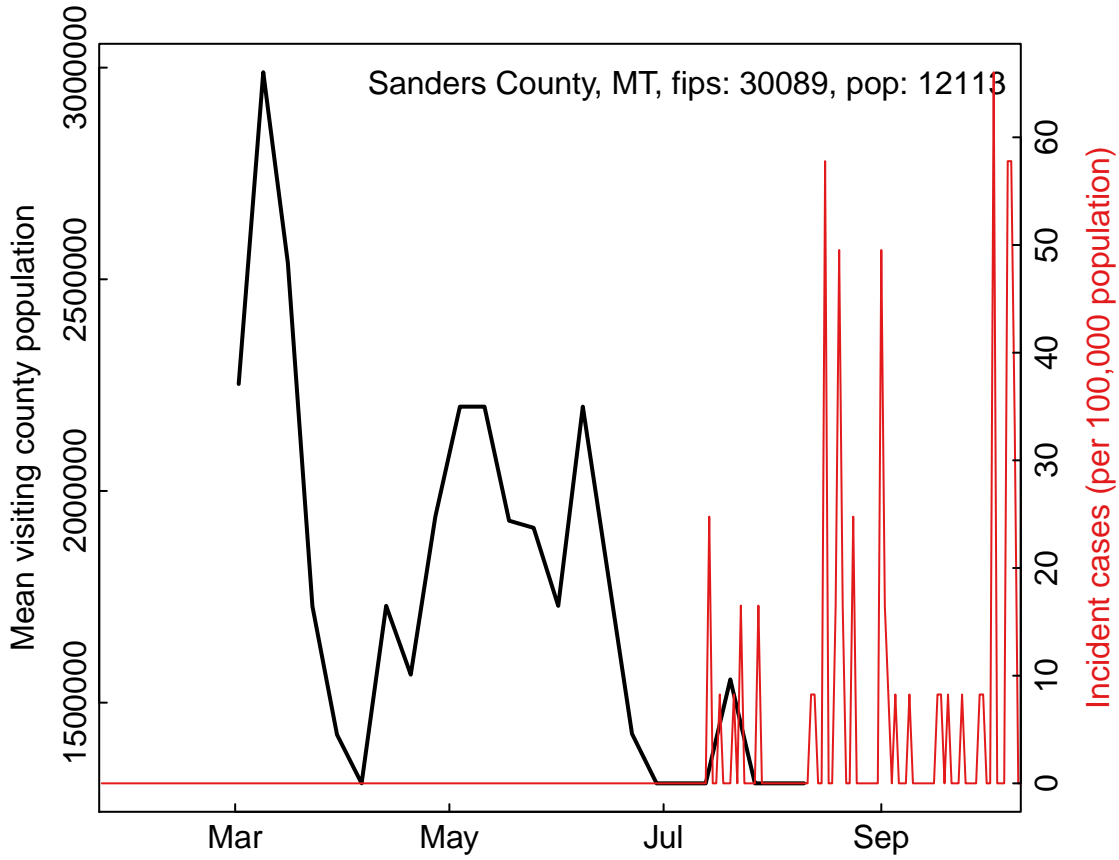

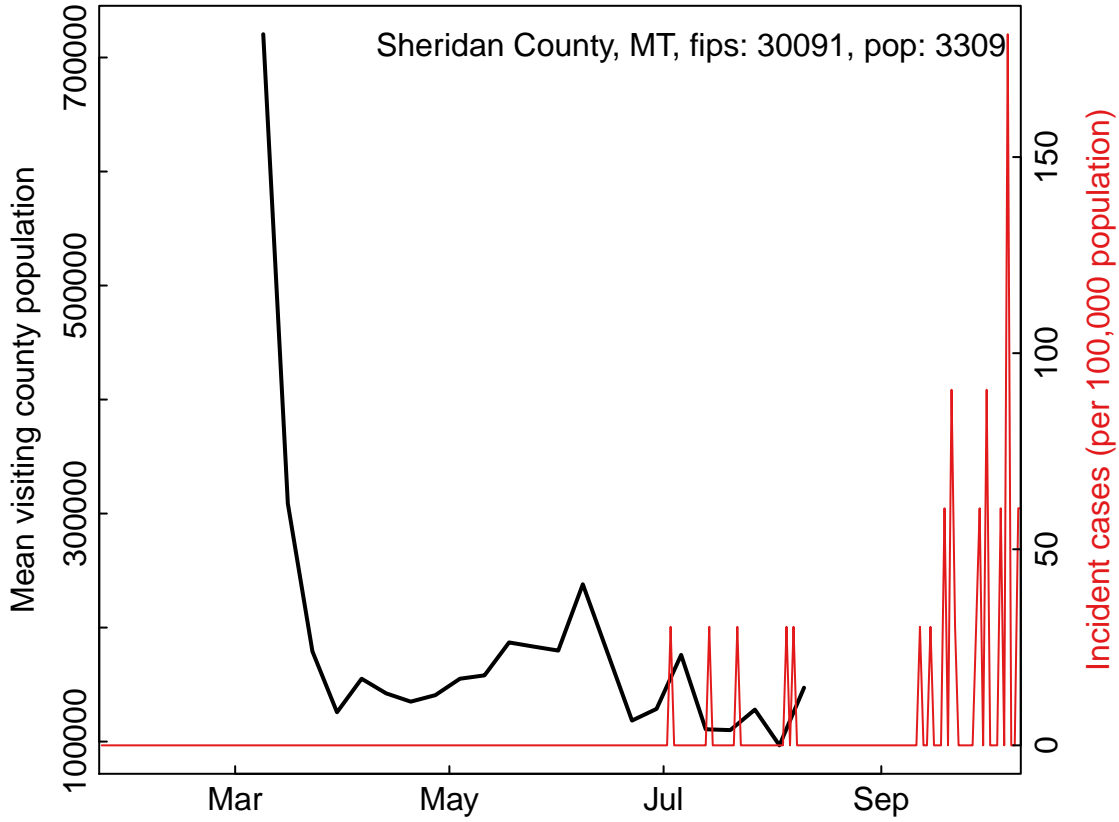

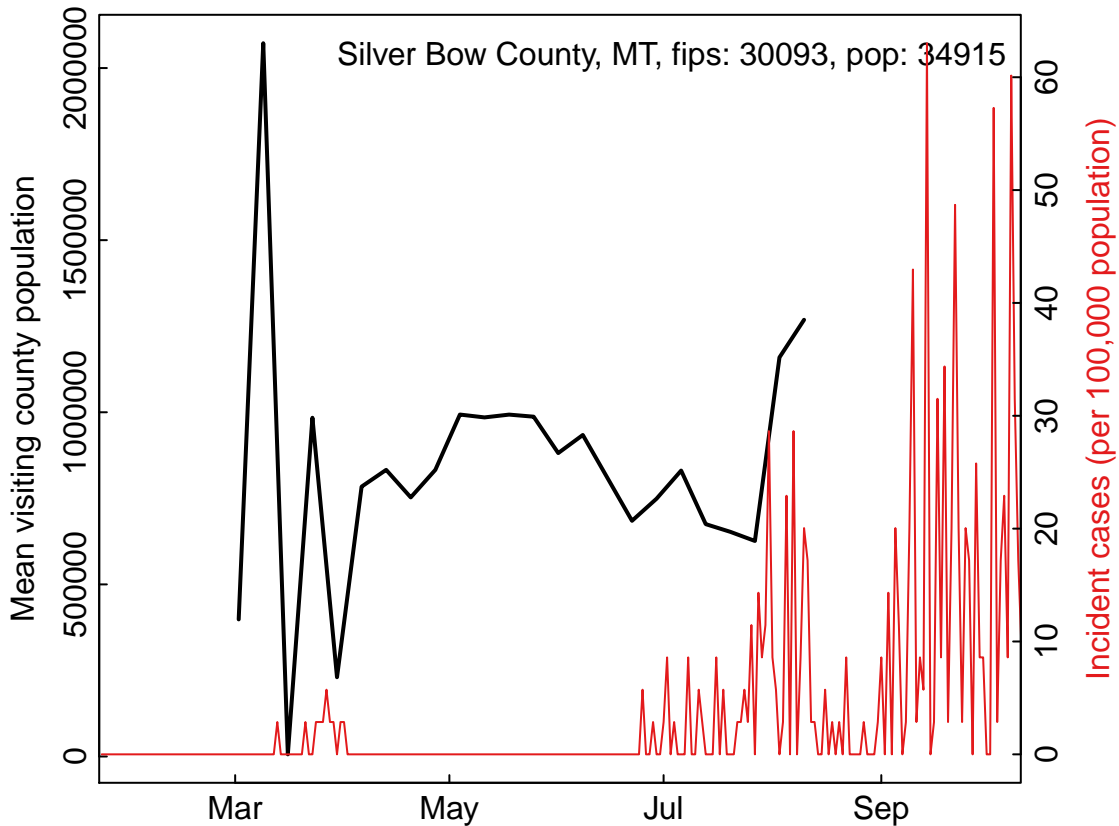

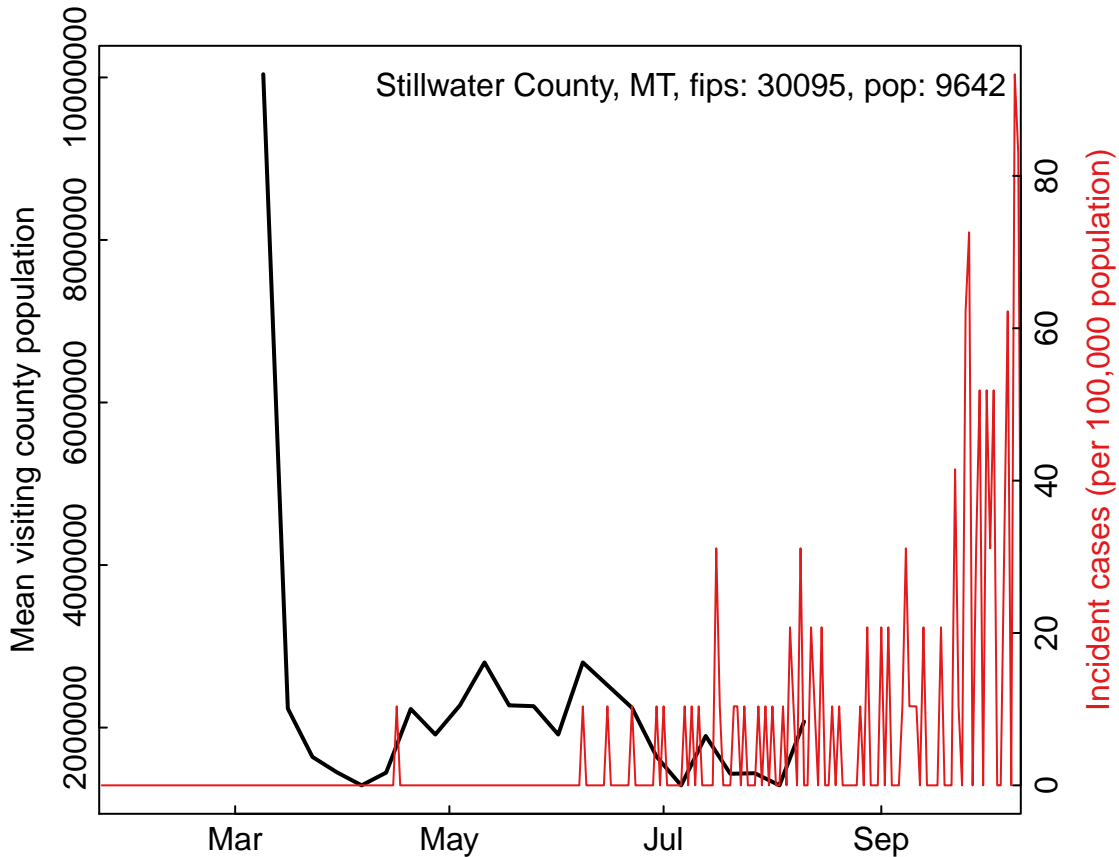

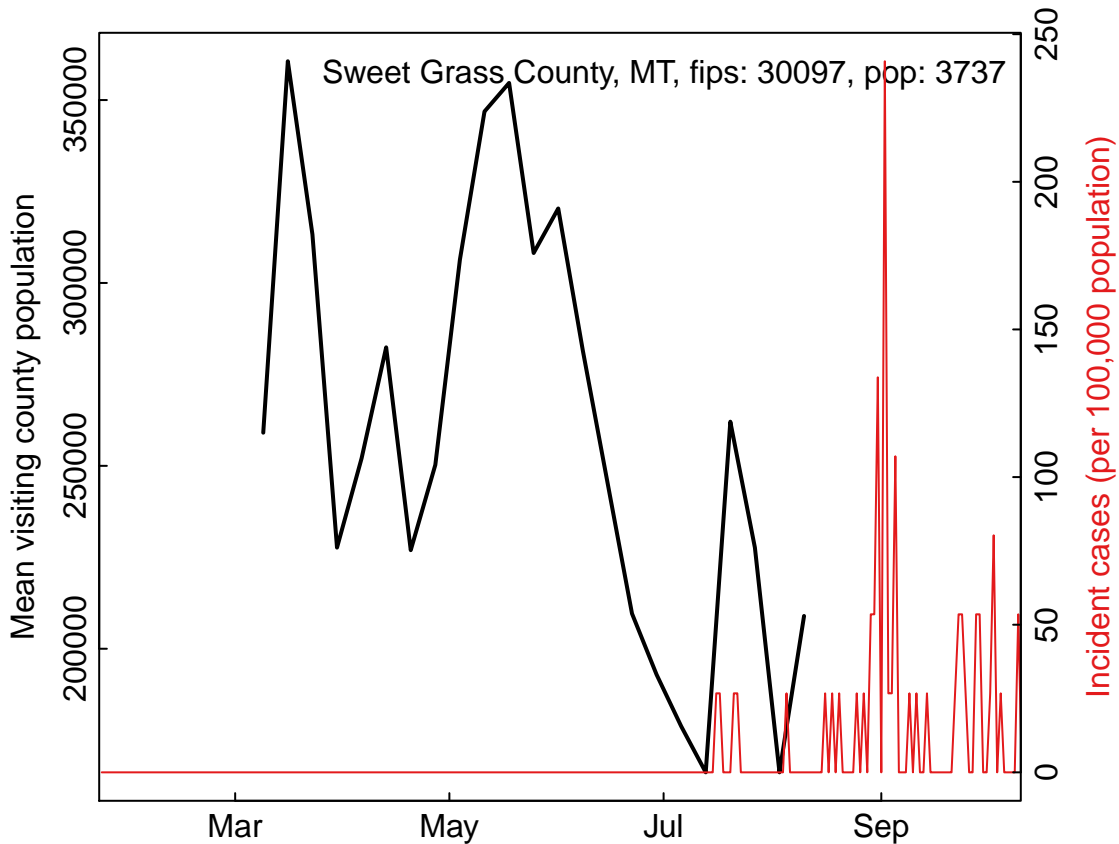

Teton County, MT, fips: 30099, pop: 6147

Mean visiting county population

Incident cases (per 100,000 population)

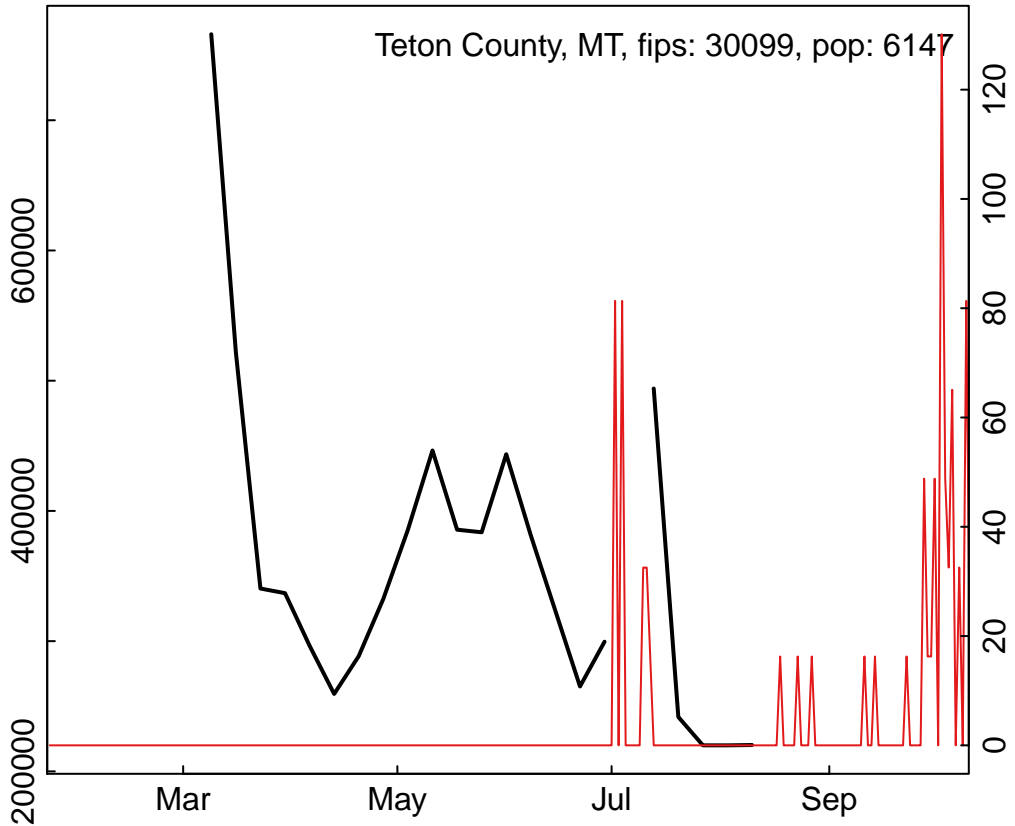



Toole County, MT, fips: 30101, pop: 4736

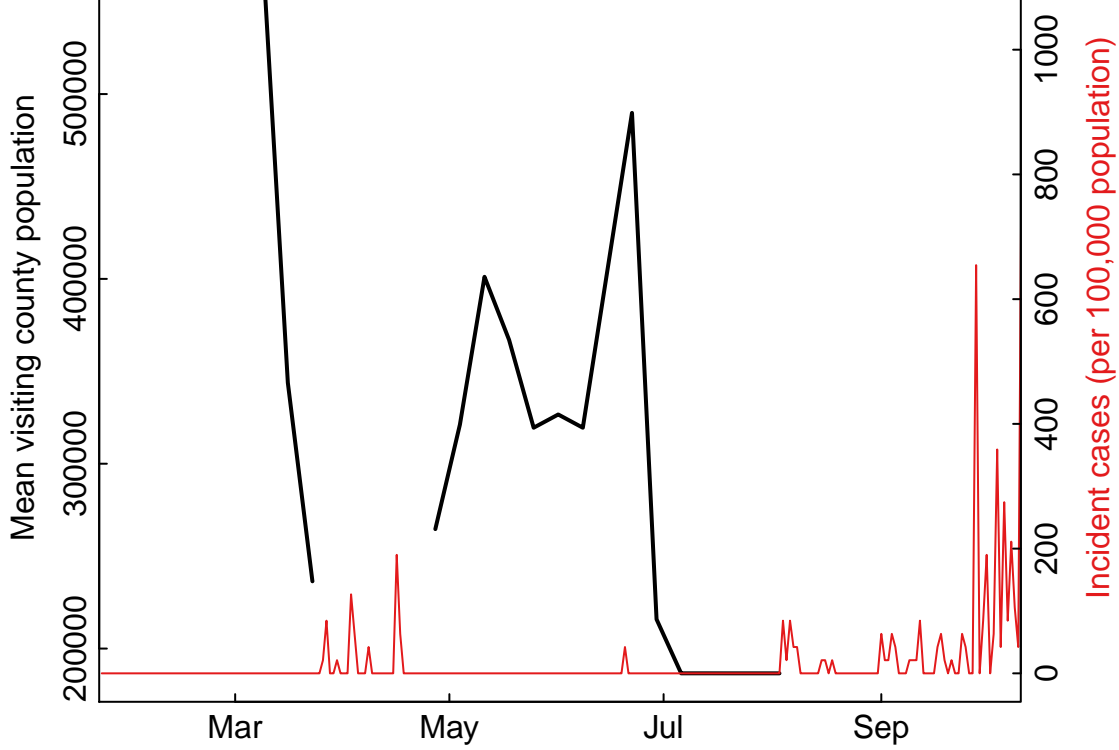

Valley County, MT, fips: 30105, pop: 7396

Mean visiting county population

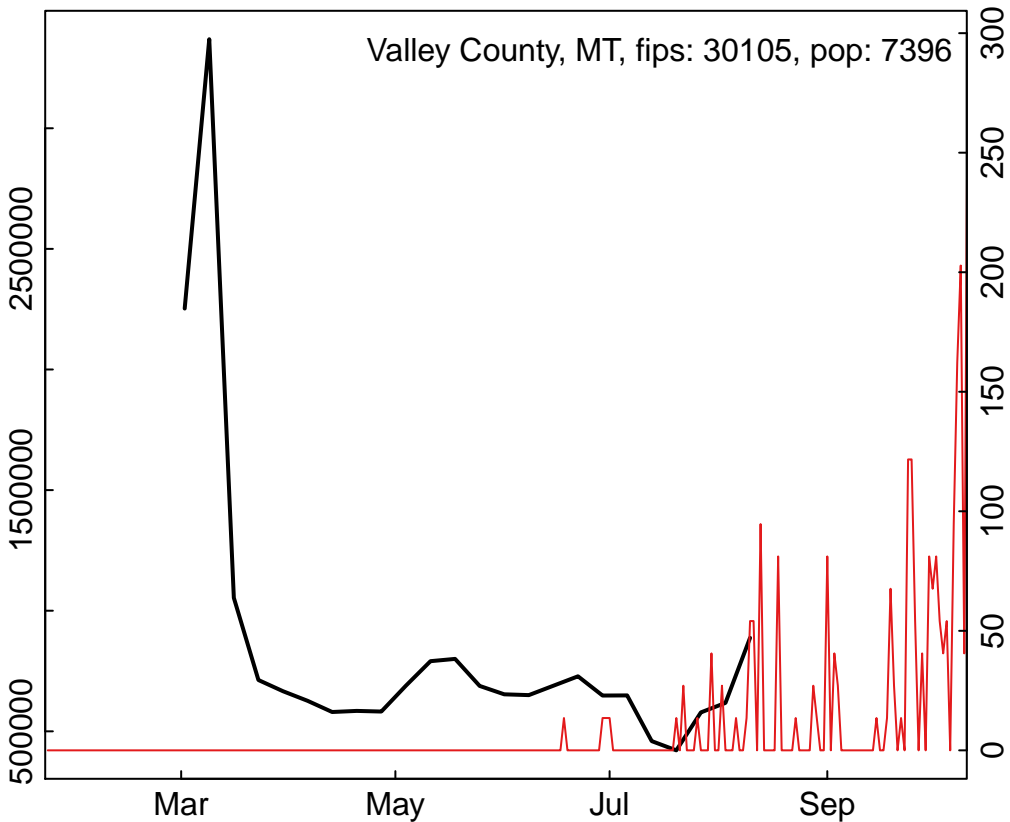

Incident cases (per 100,000 population)

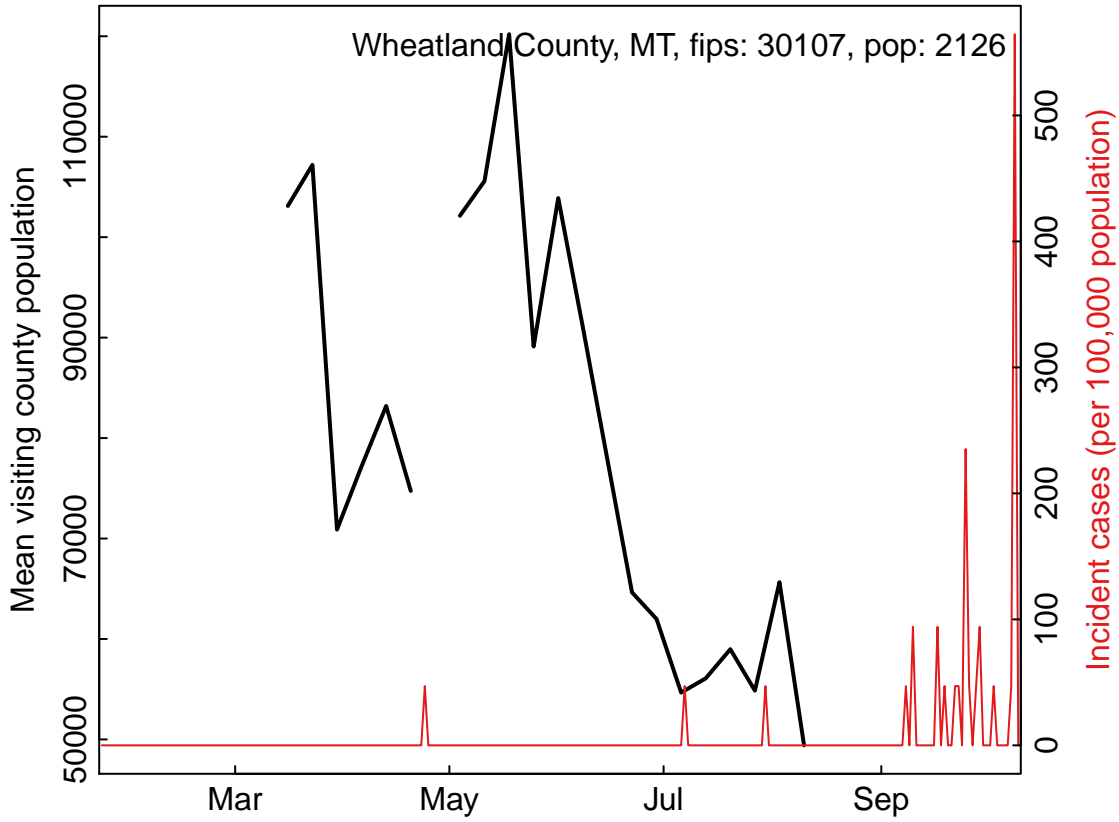

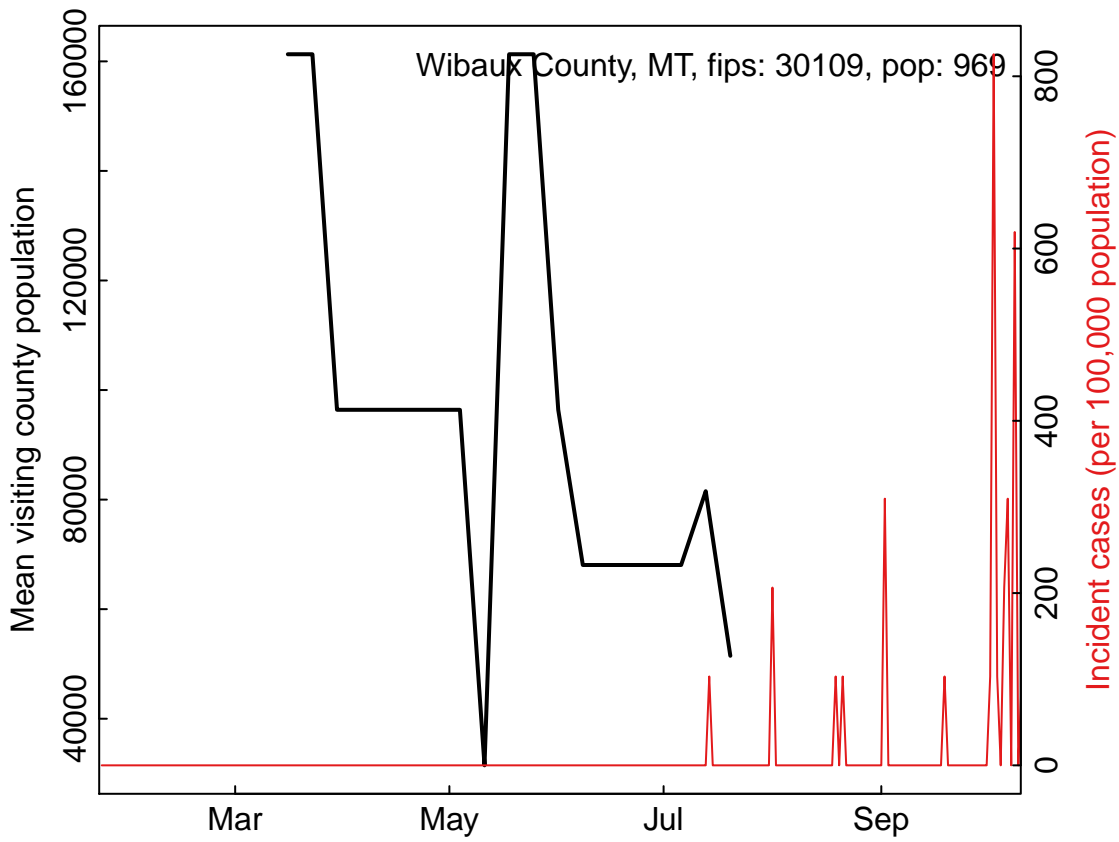

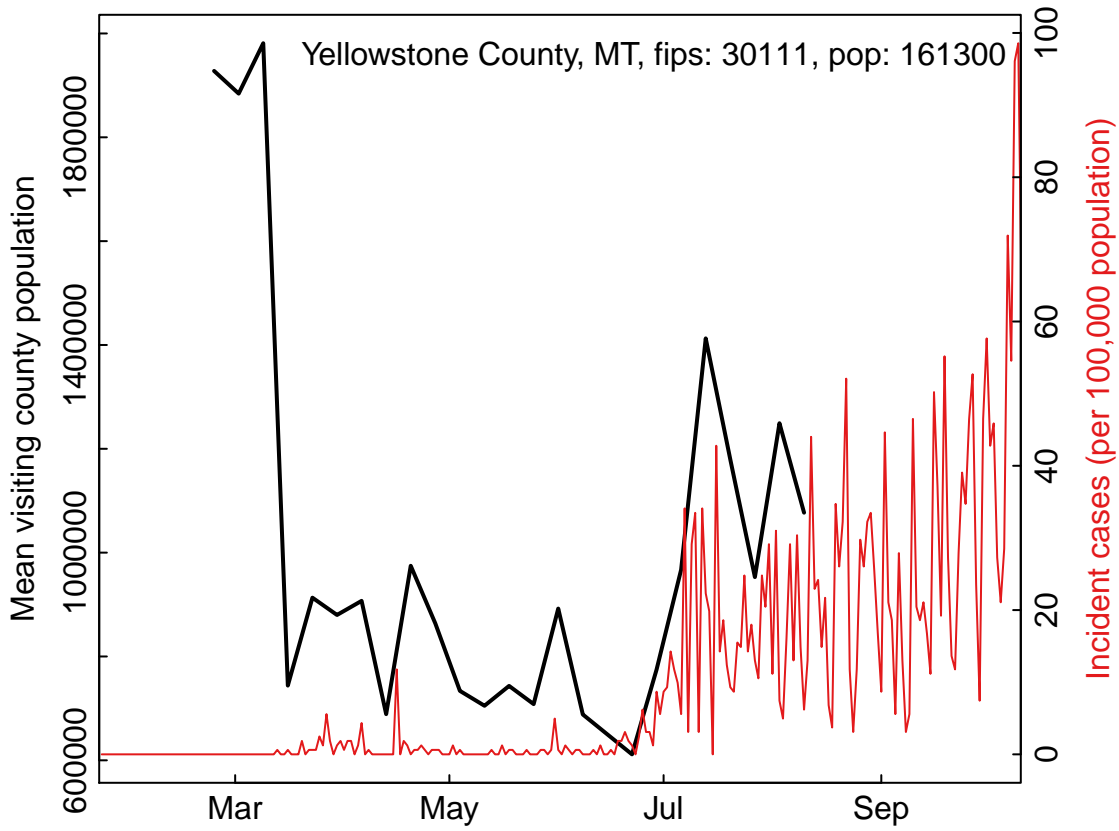

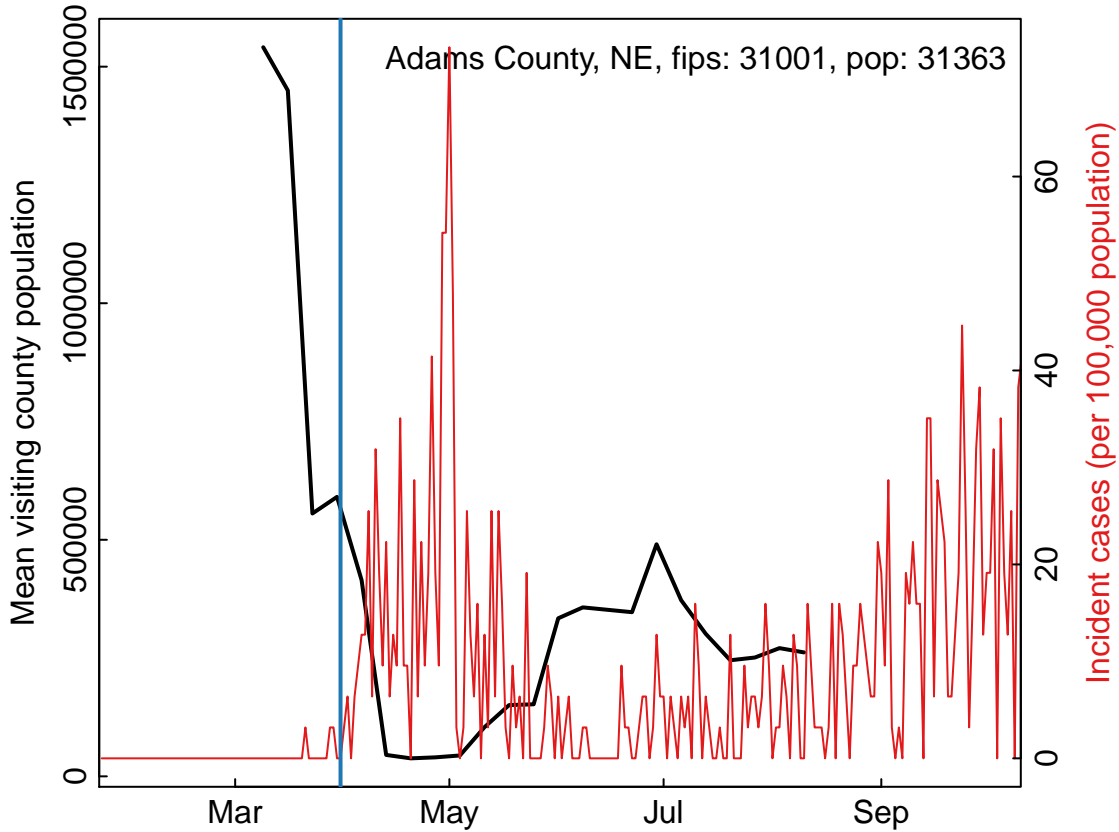

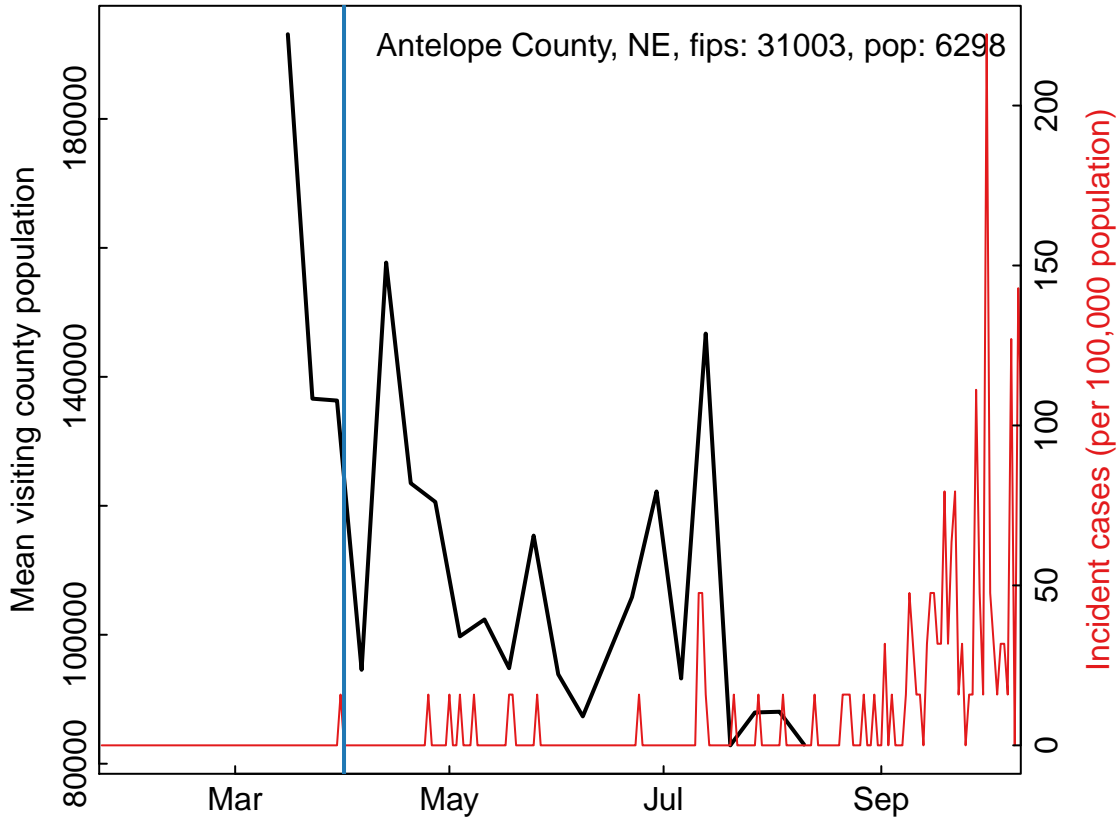

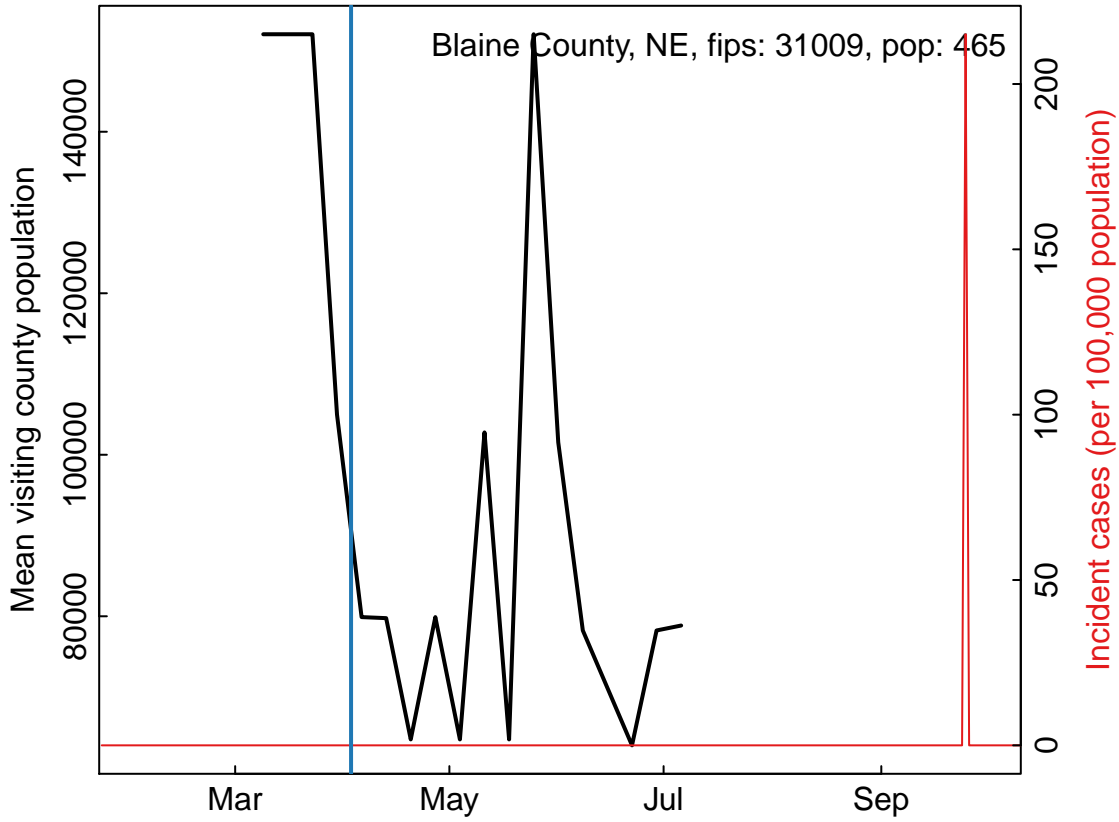



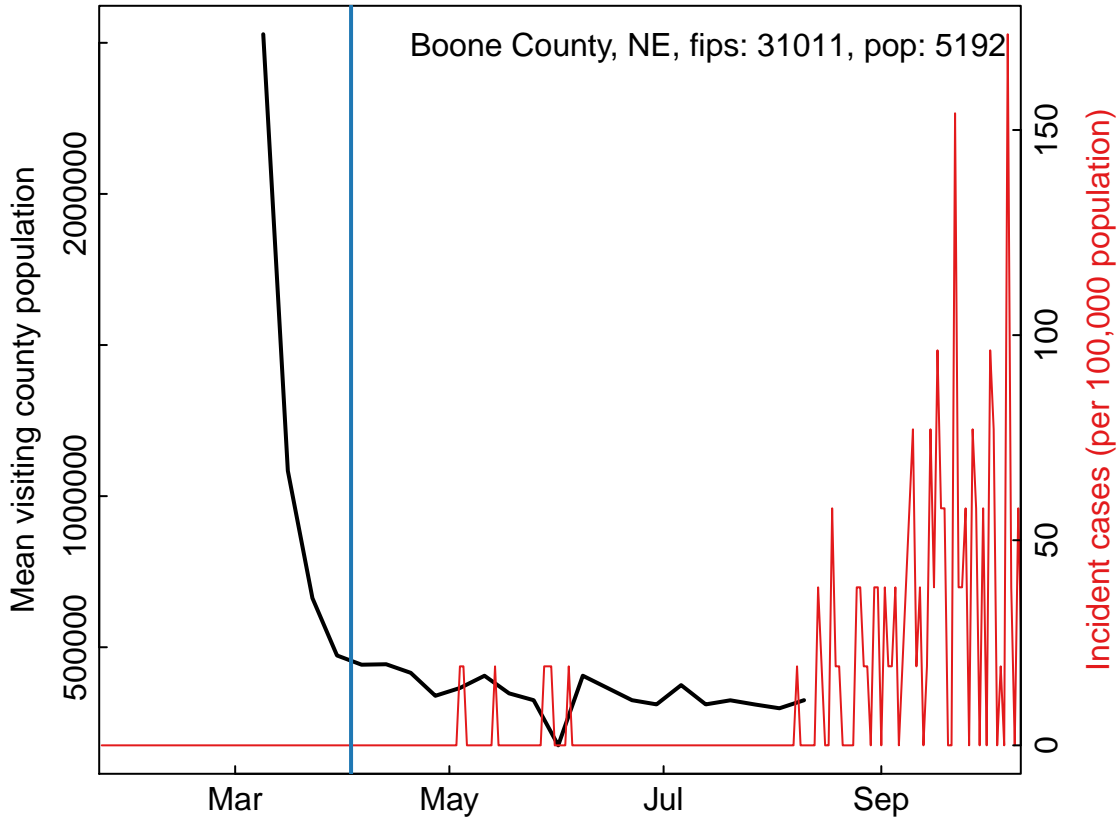

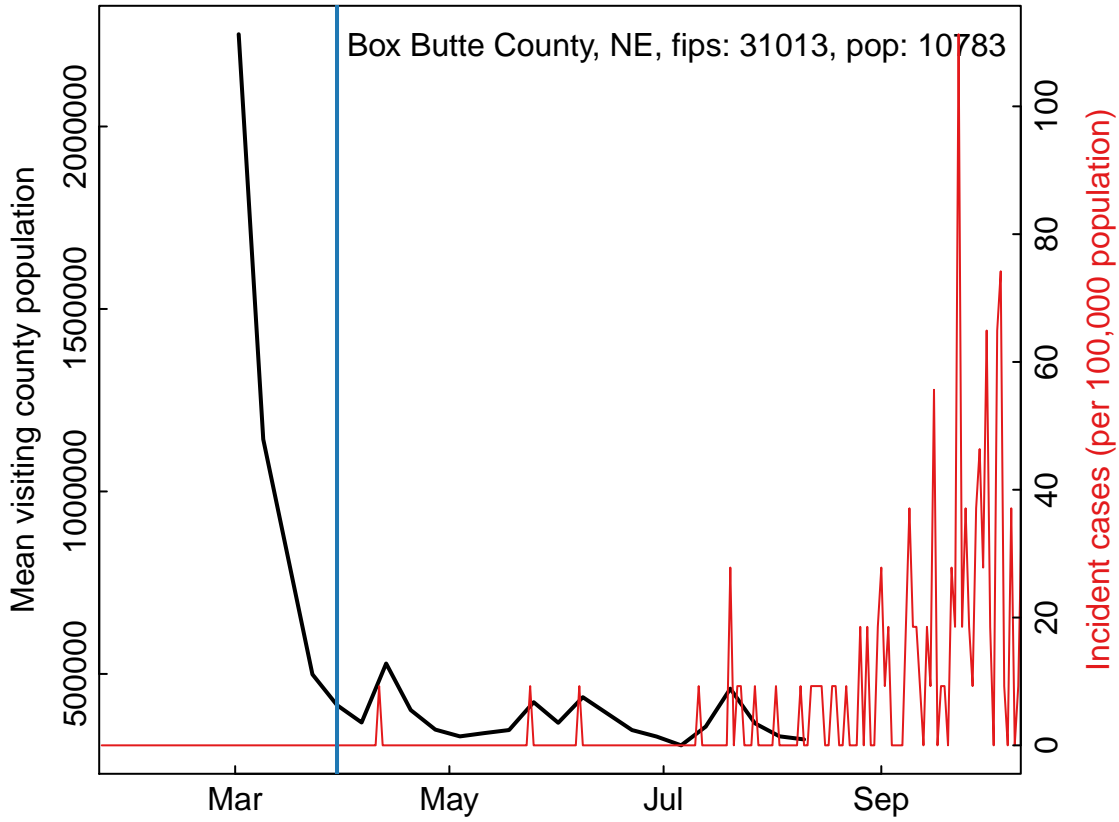

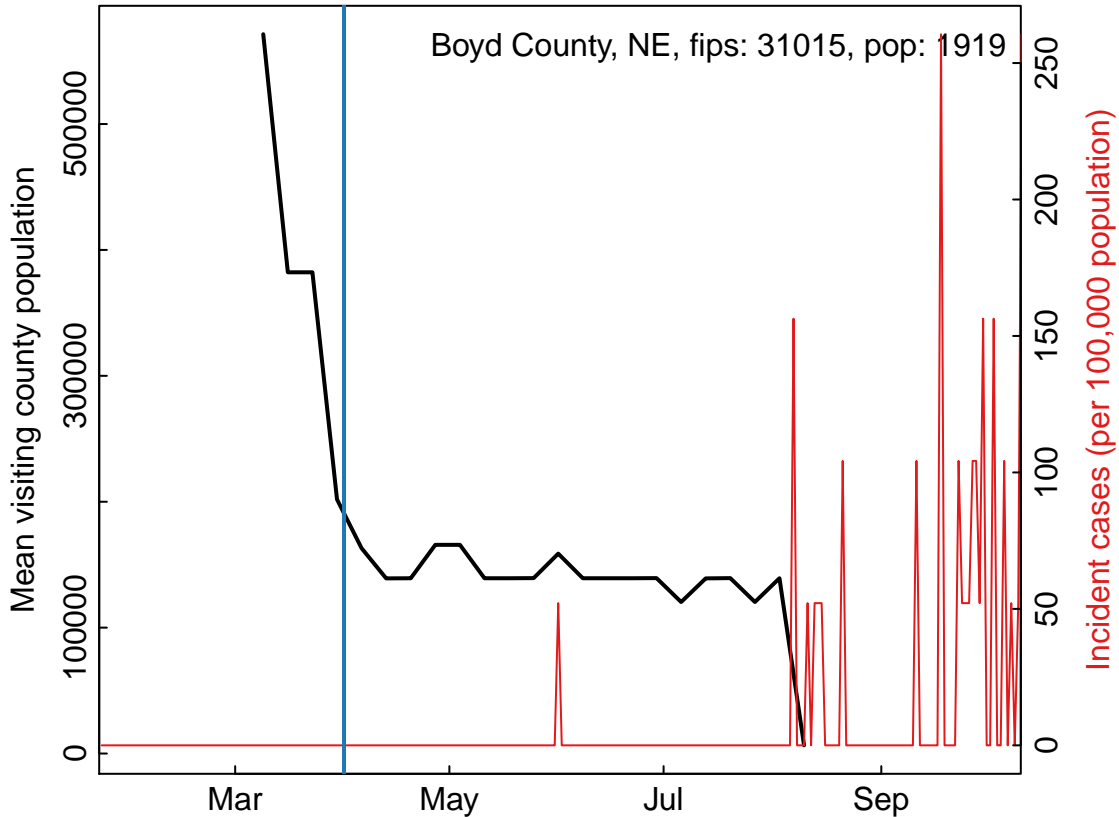

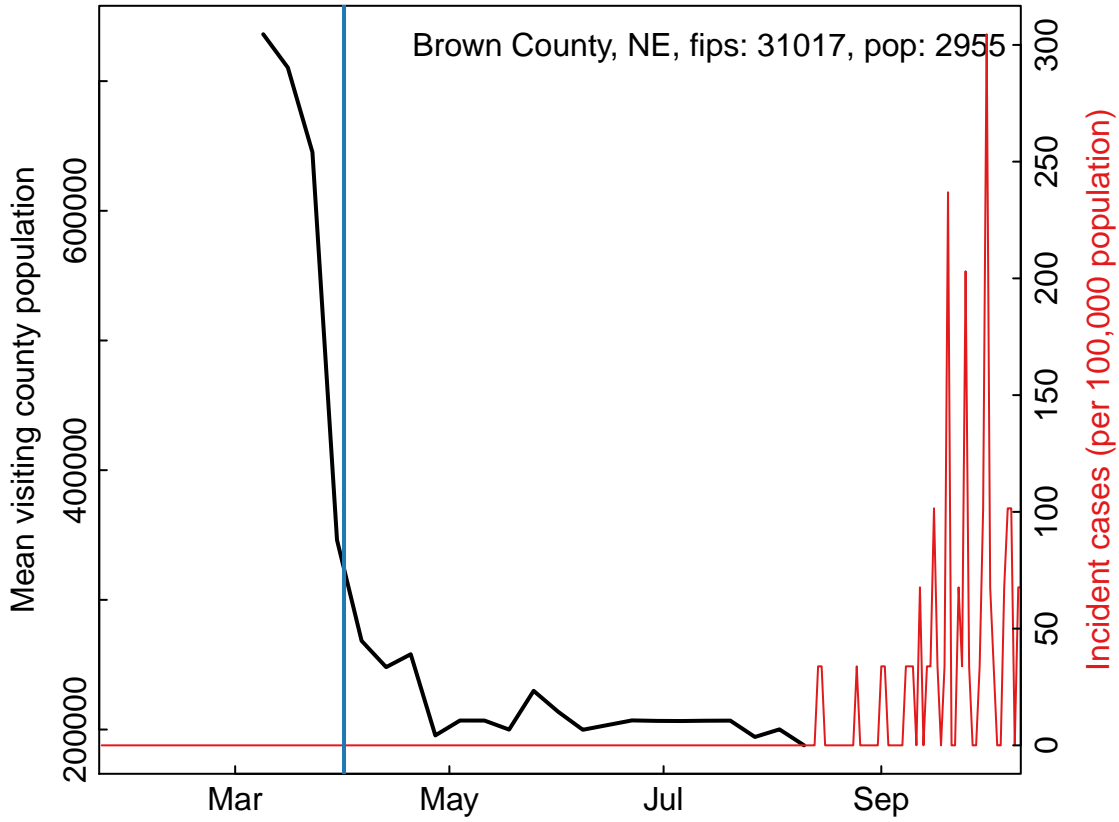

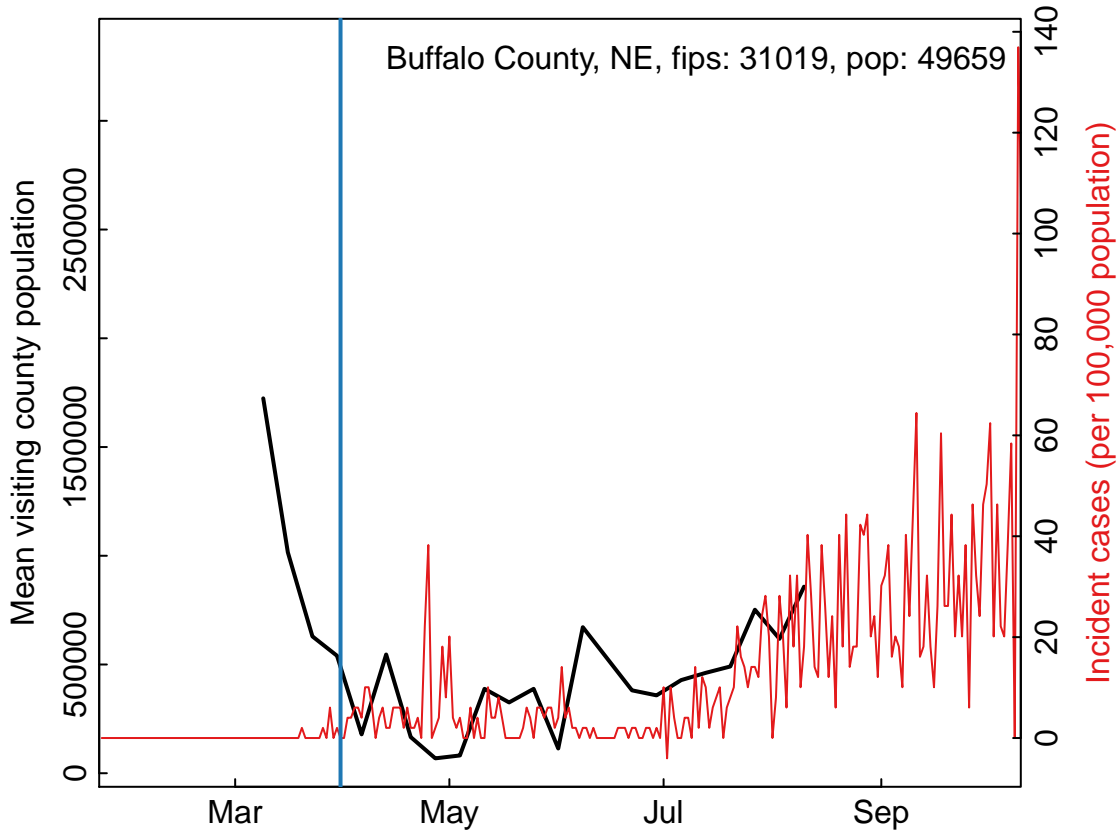

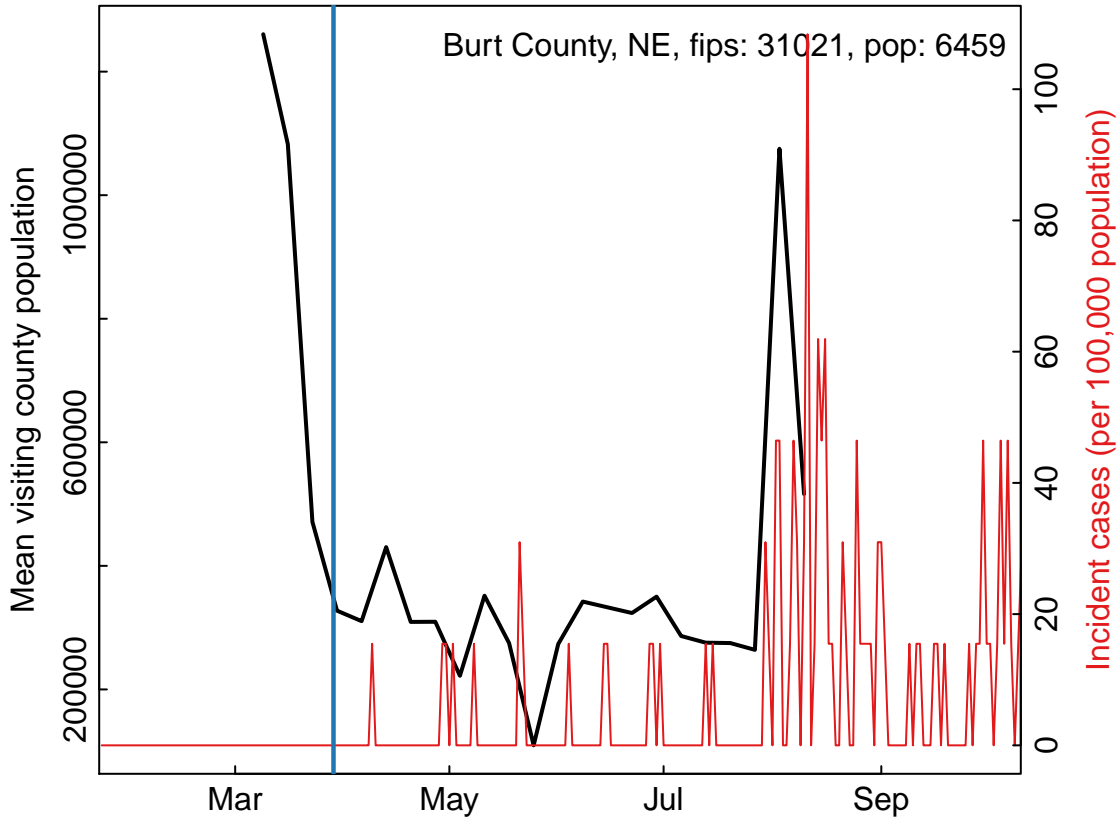

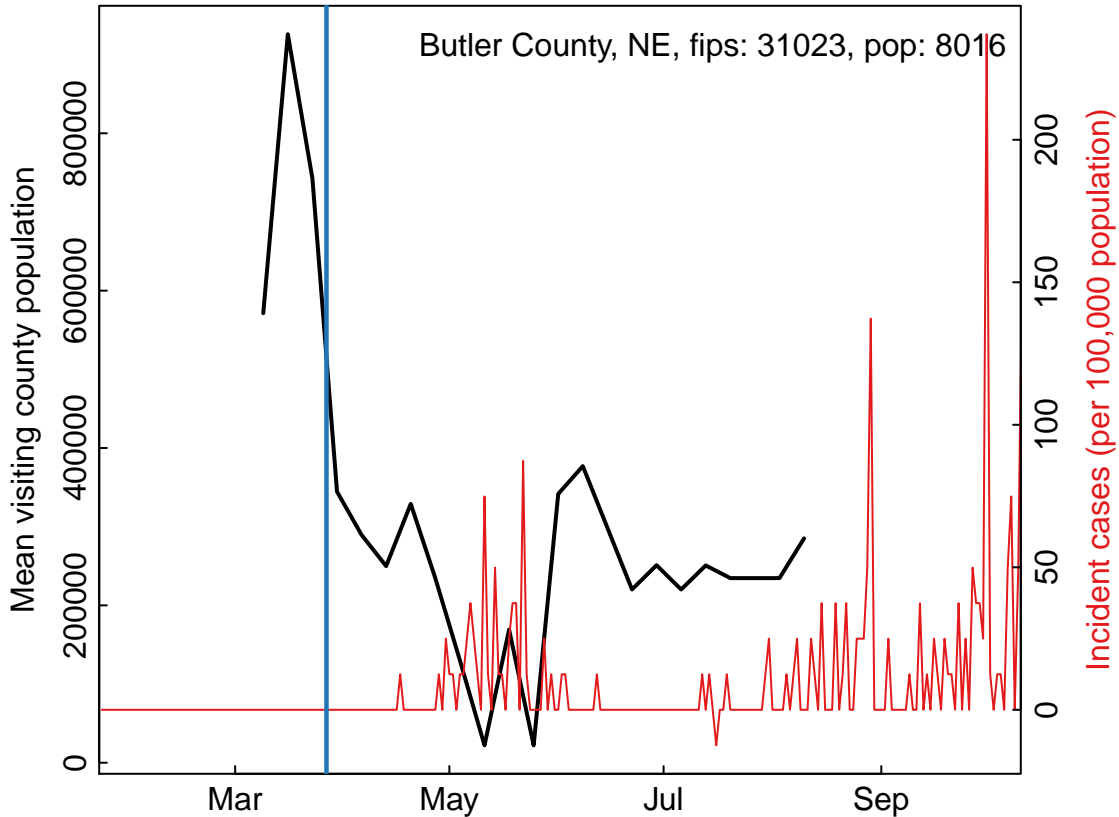

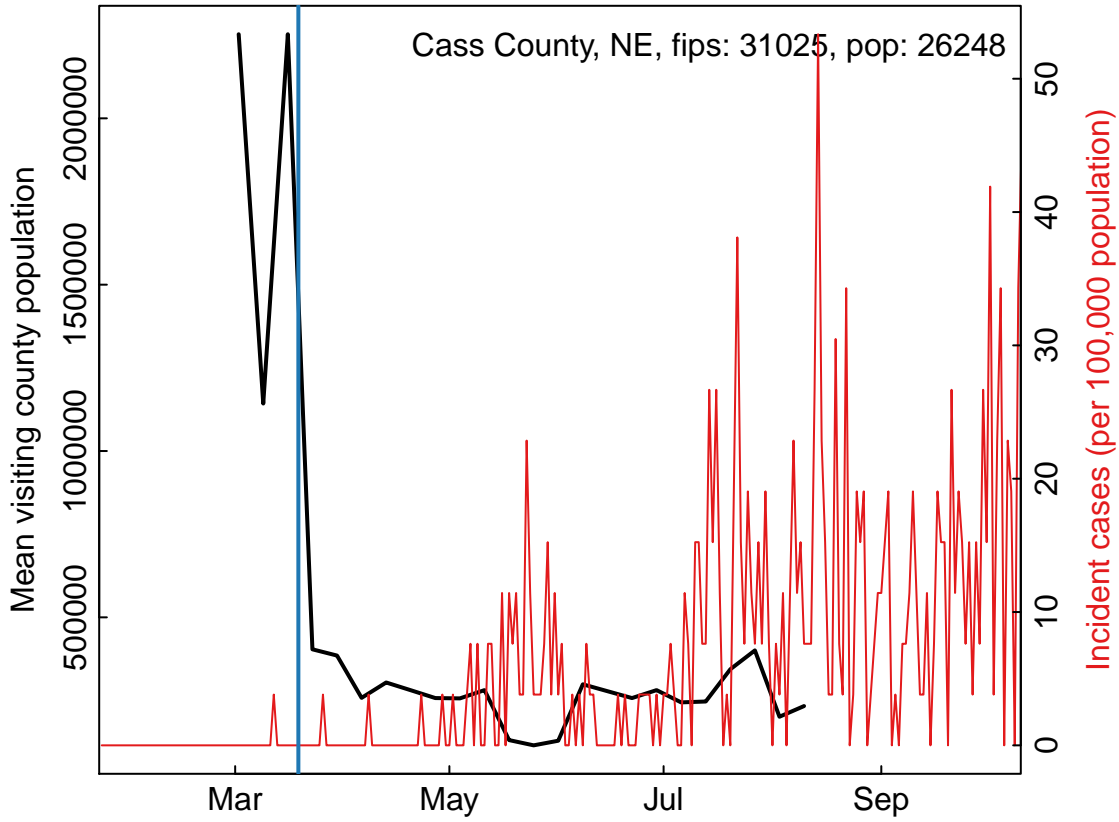



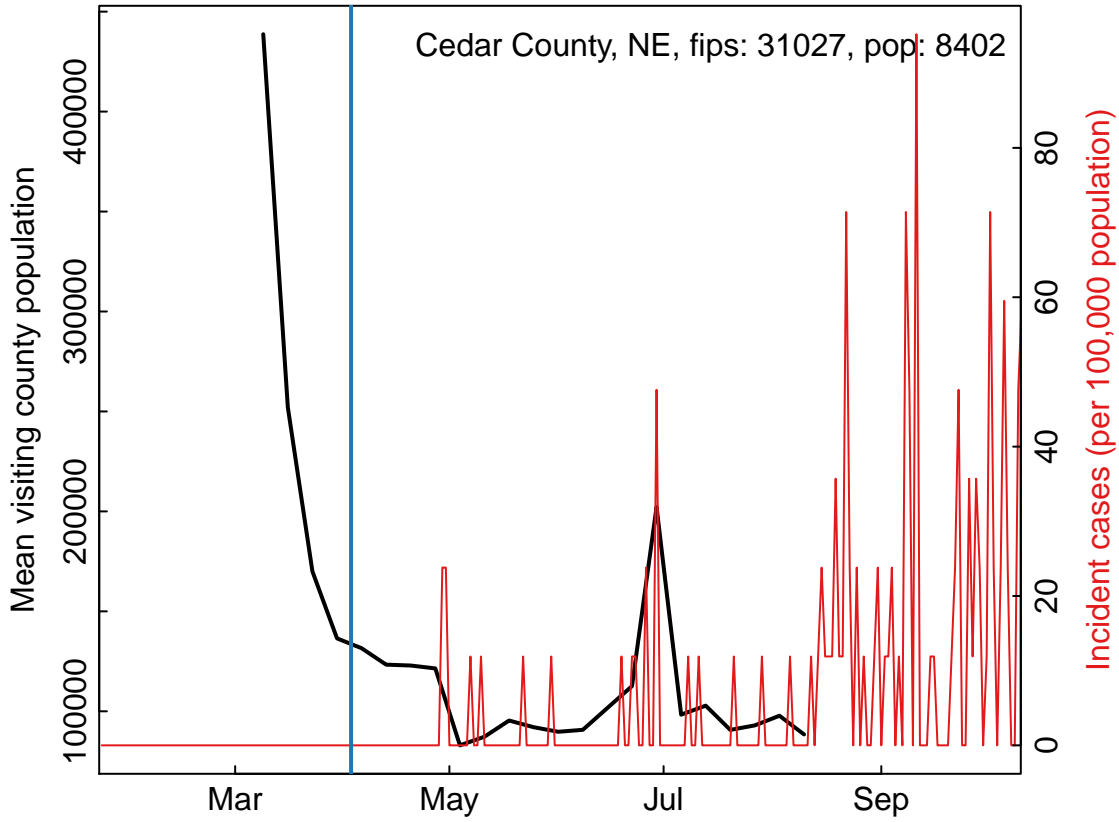

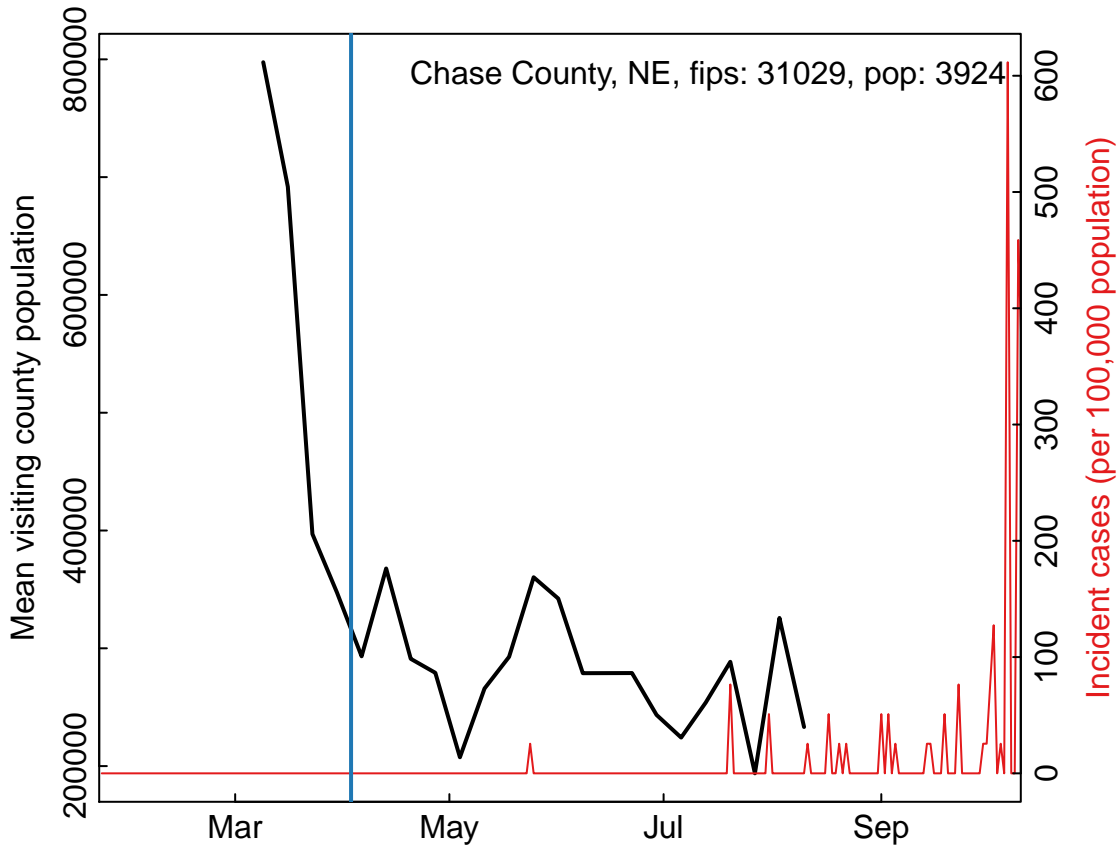

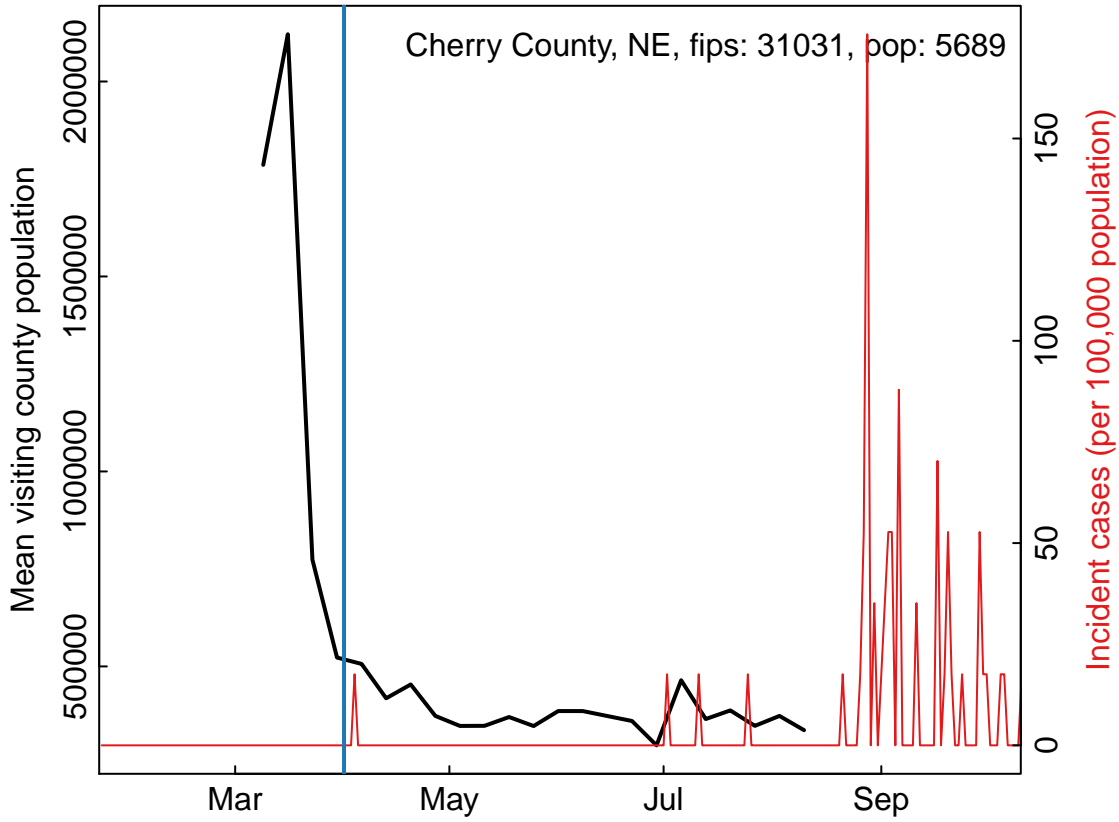

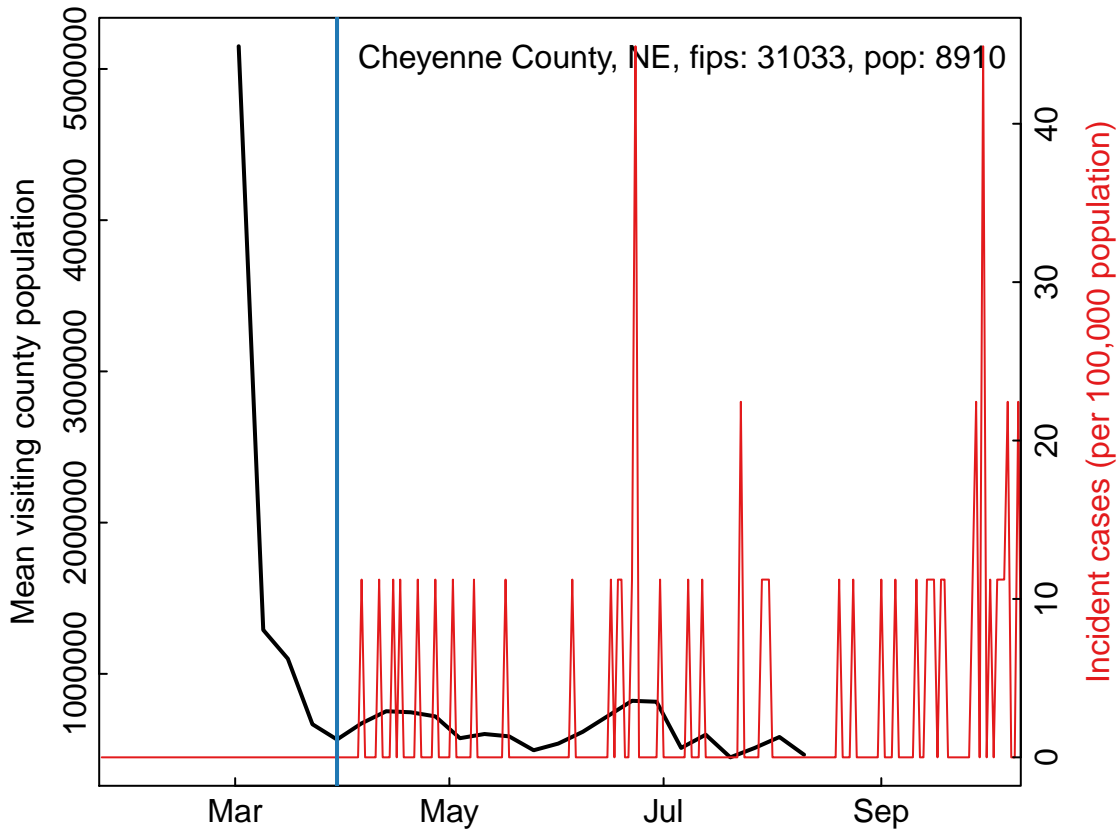

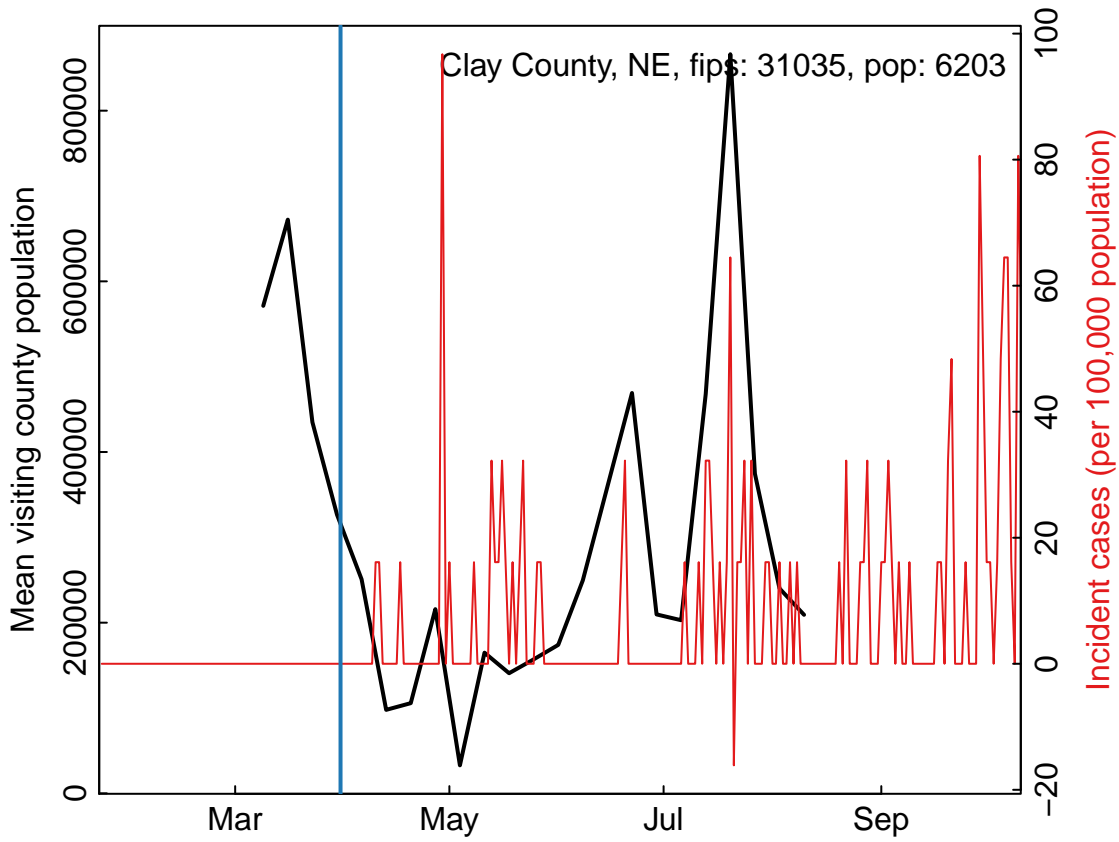

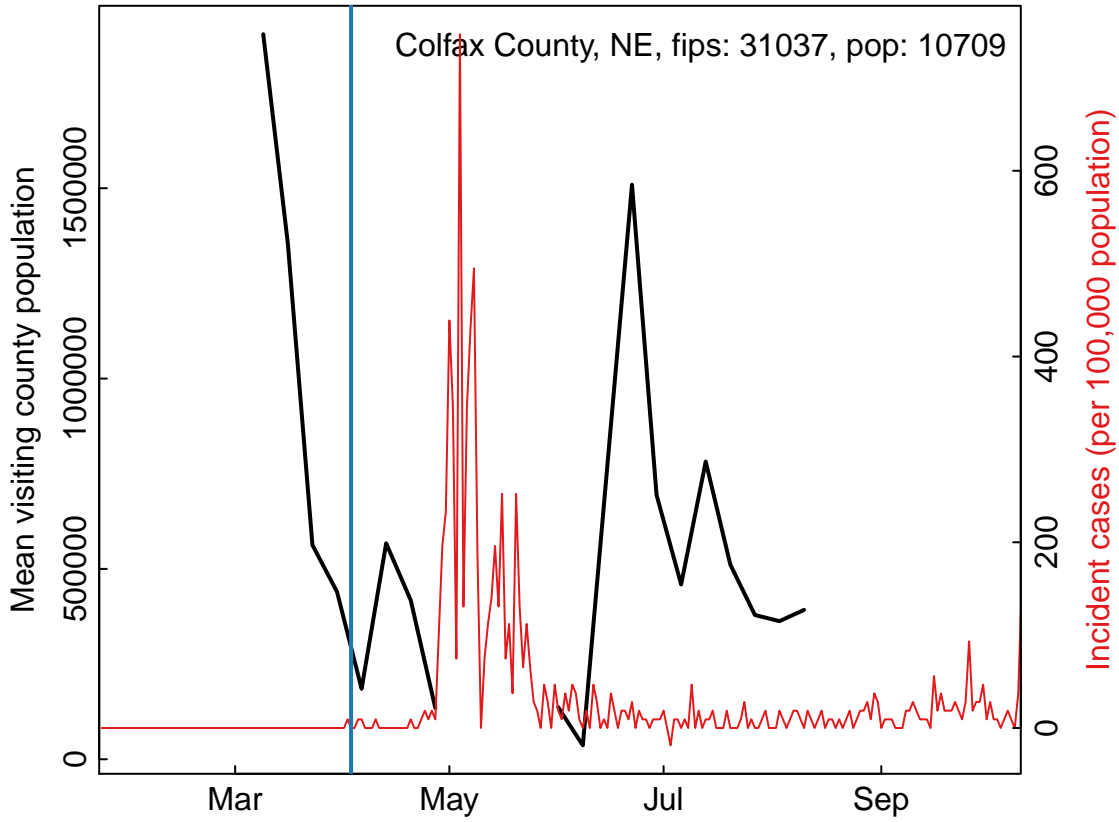

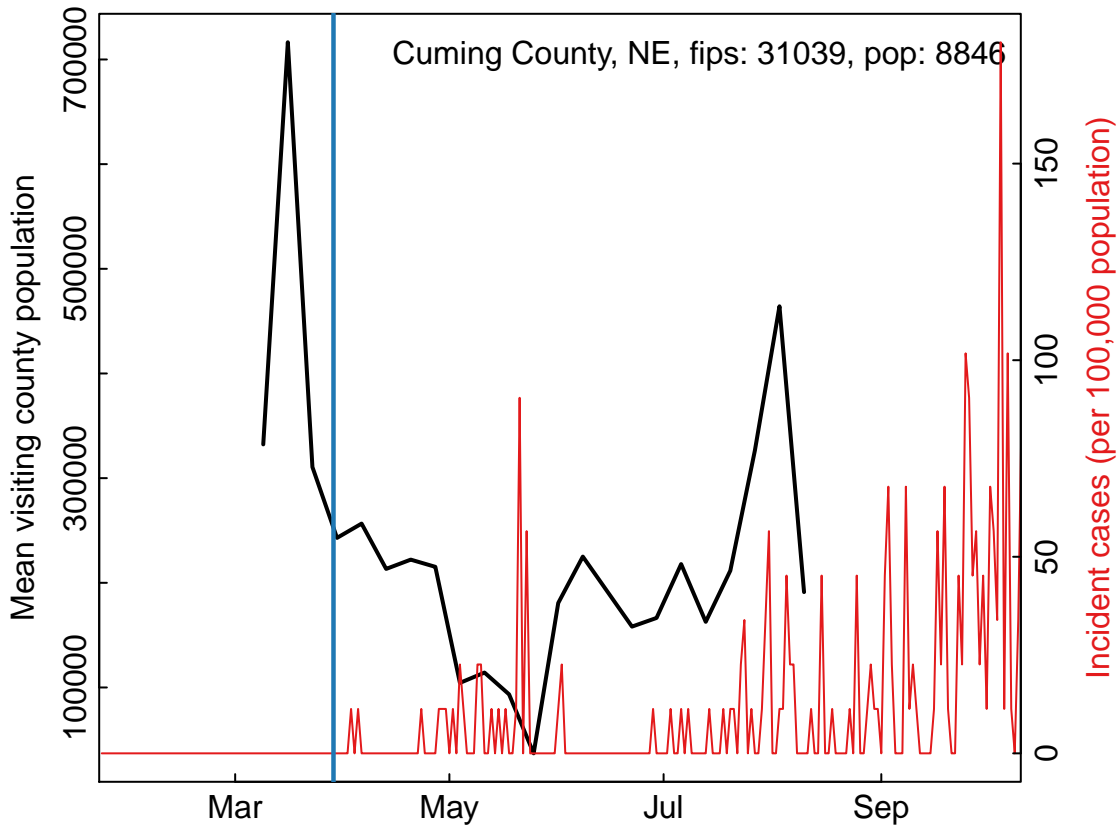

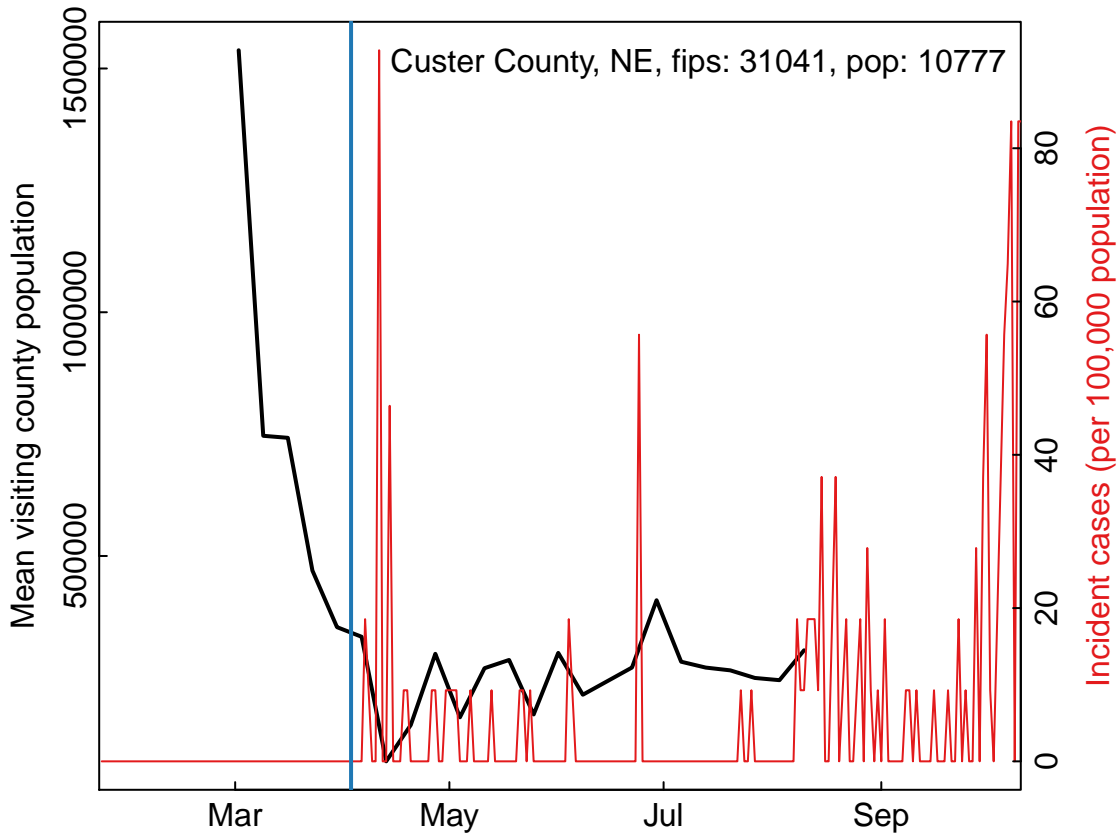



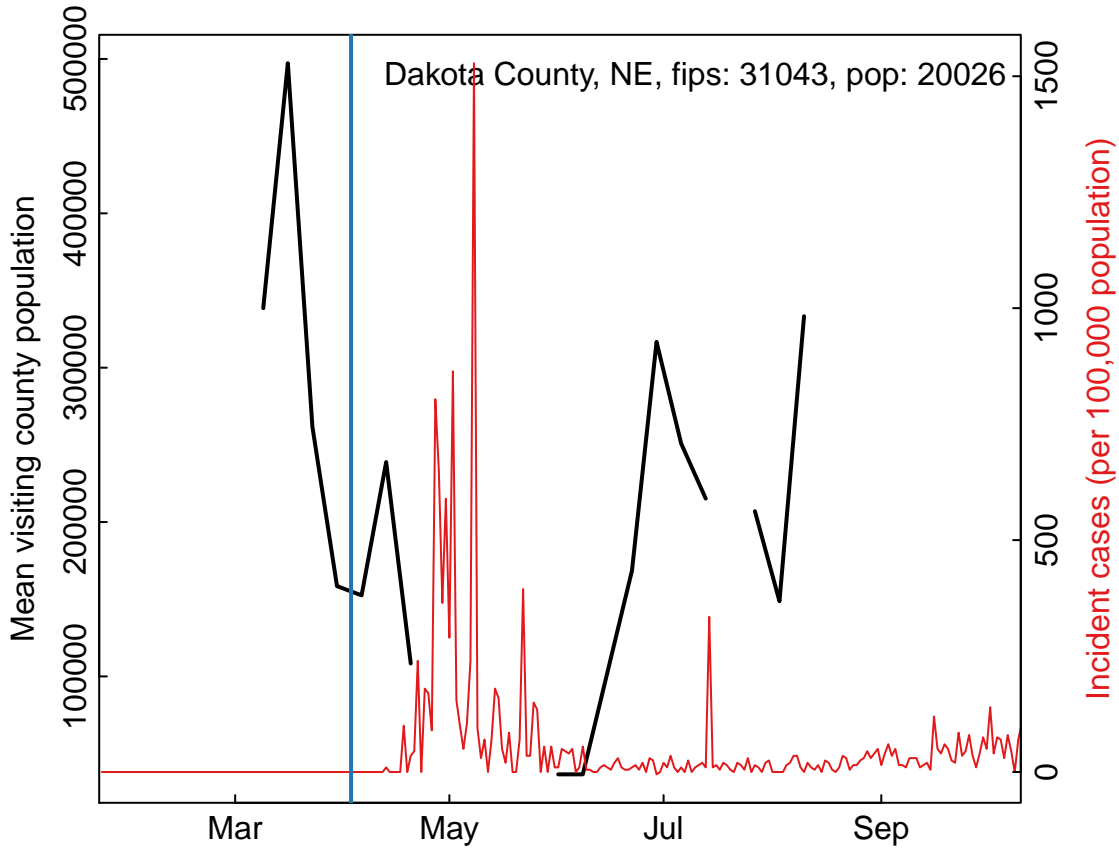

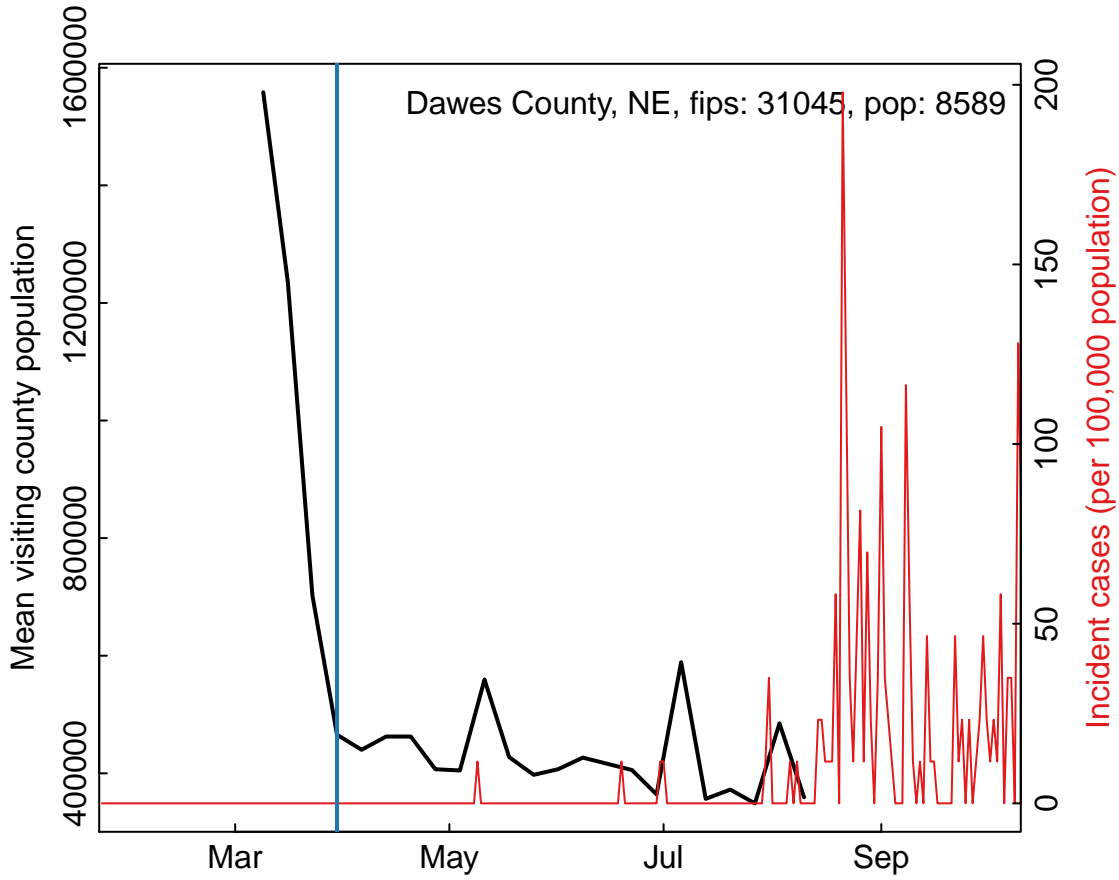

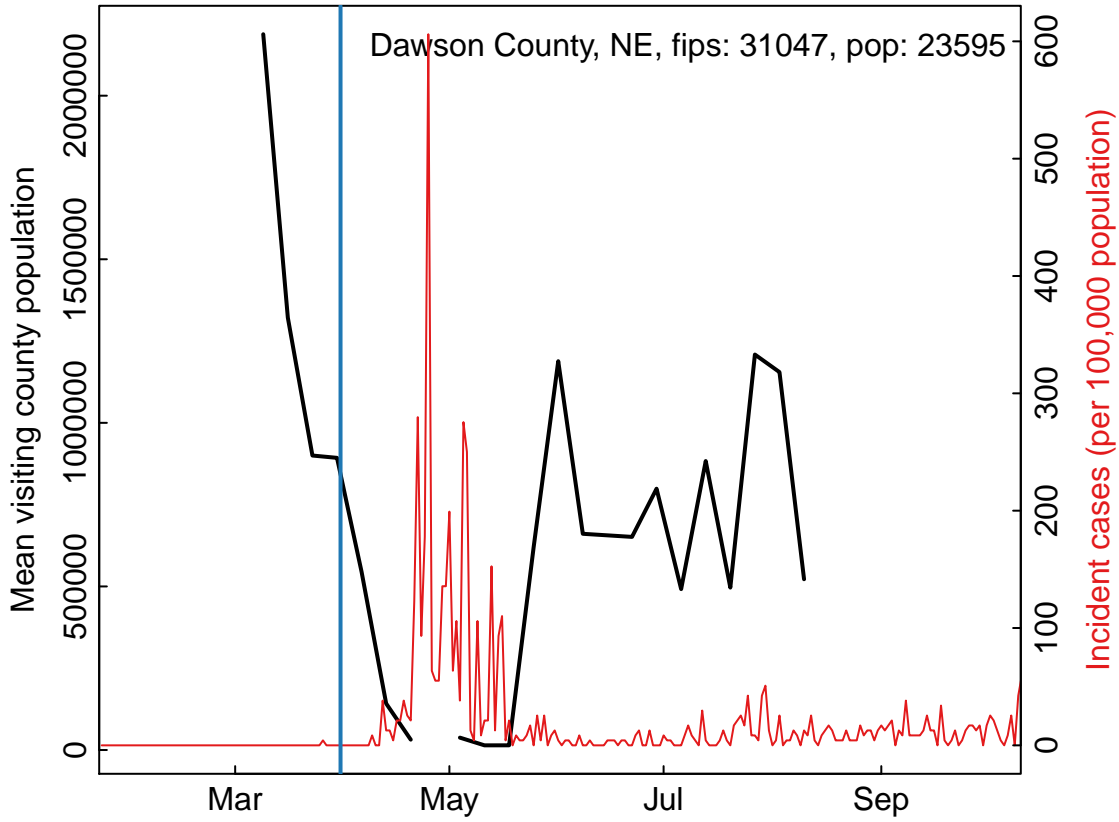

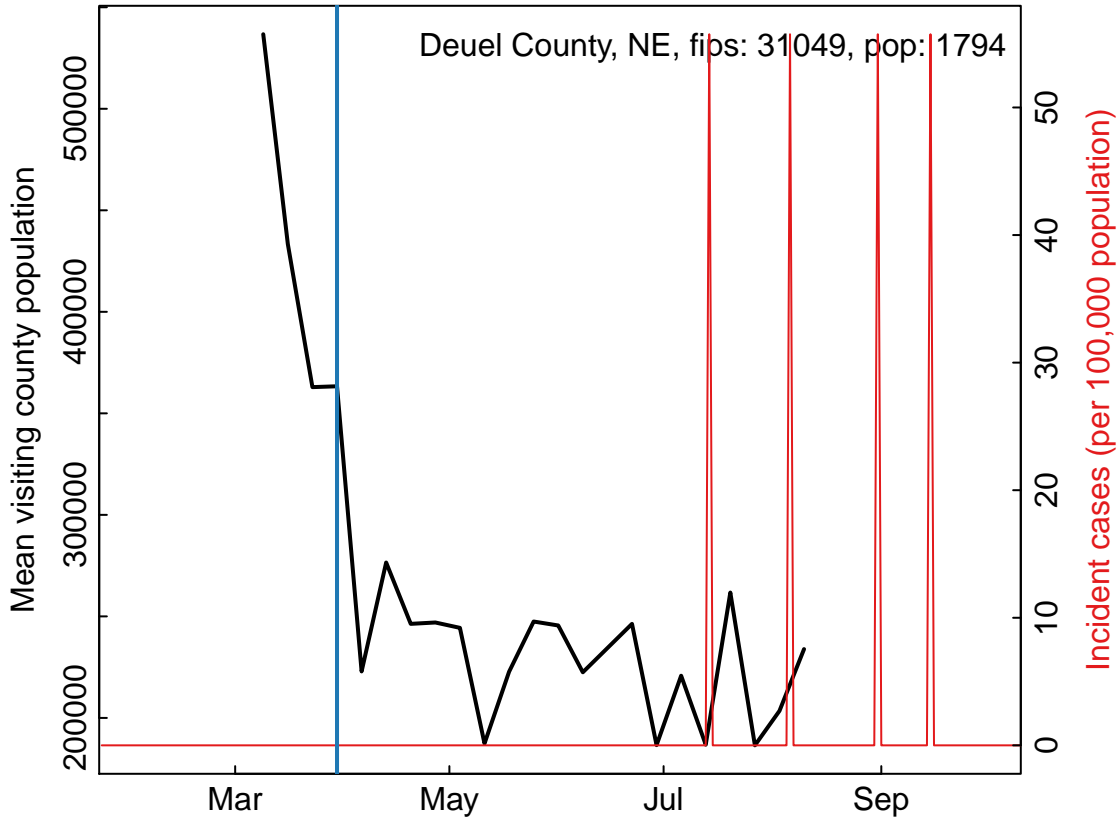

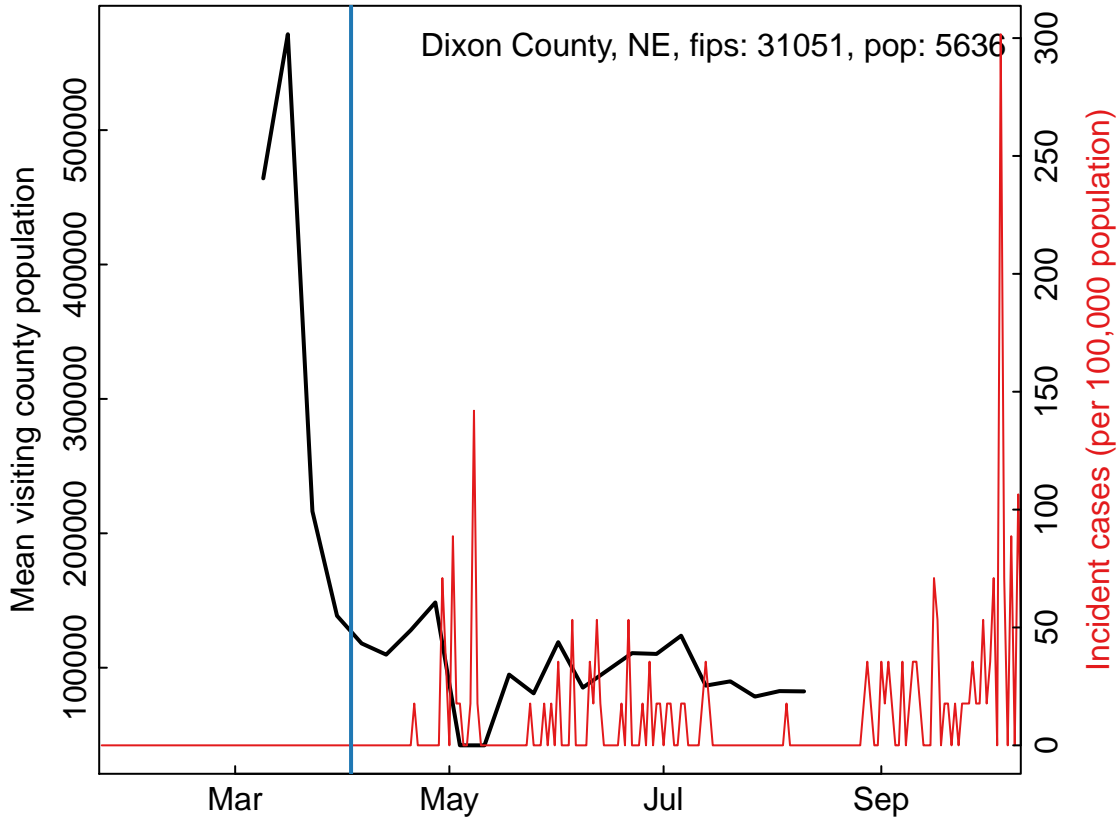

Dodge County, NE, fips: 31053, pop: 36565

Mean visiting county population

2500000  
1500000  
500000  
0

Mar

May

Jul

Sep

100  
80  
60  
40  
20  
0

Incident cases (per 100,000 population)

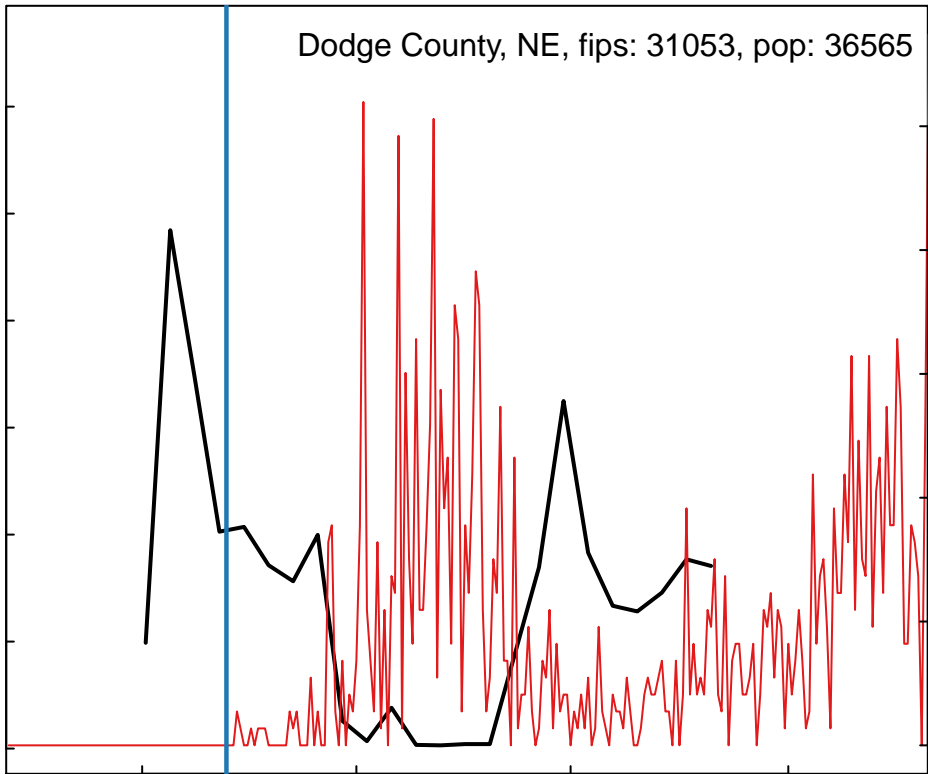

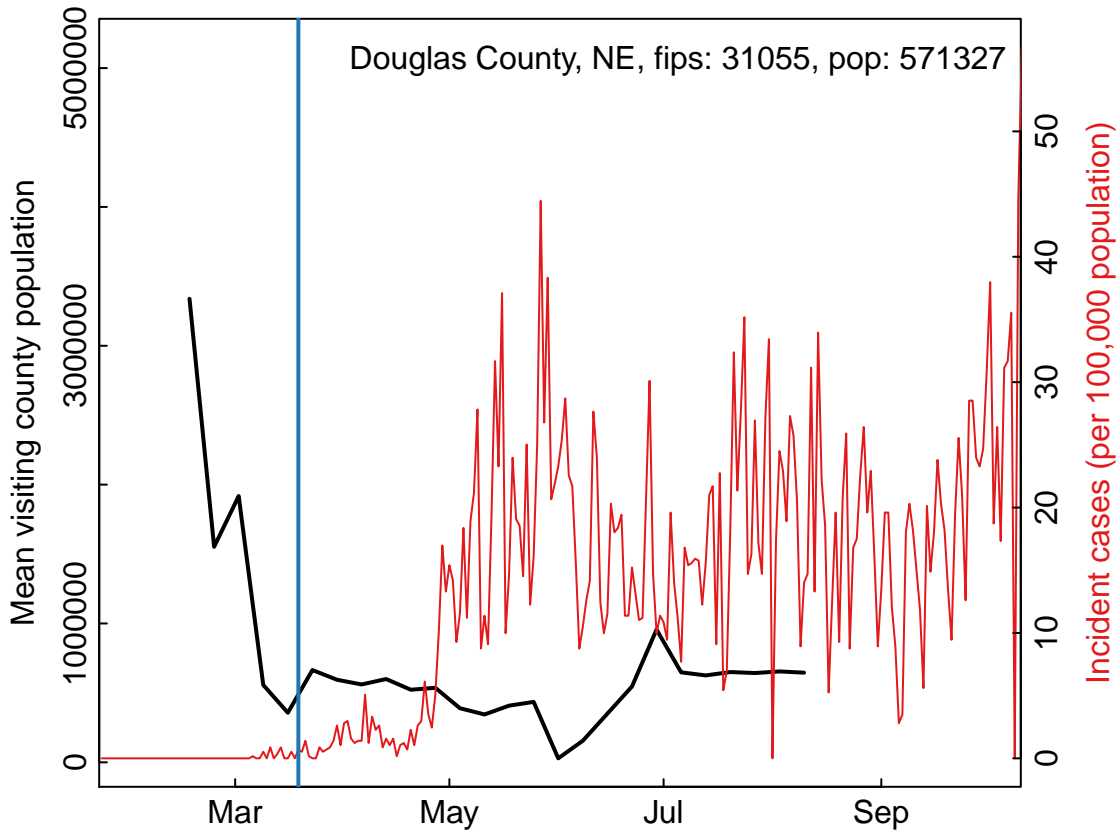

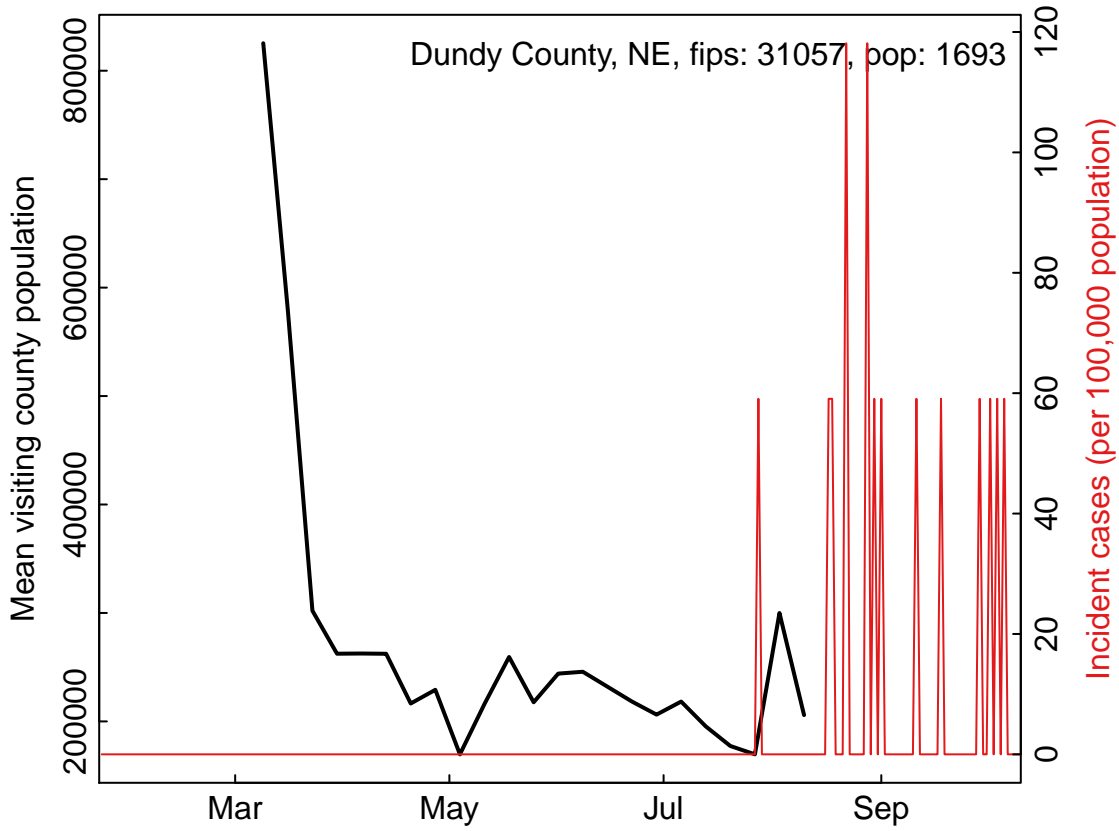



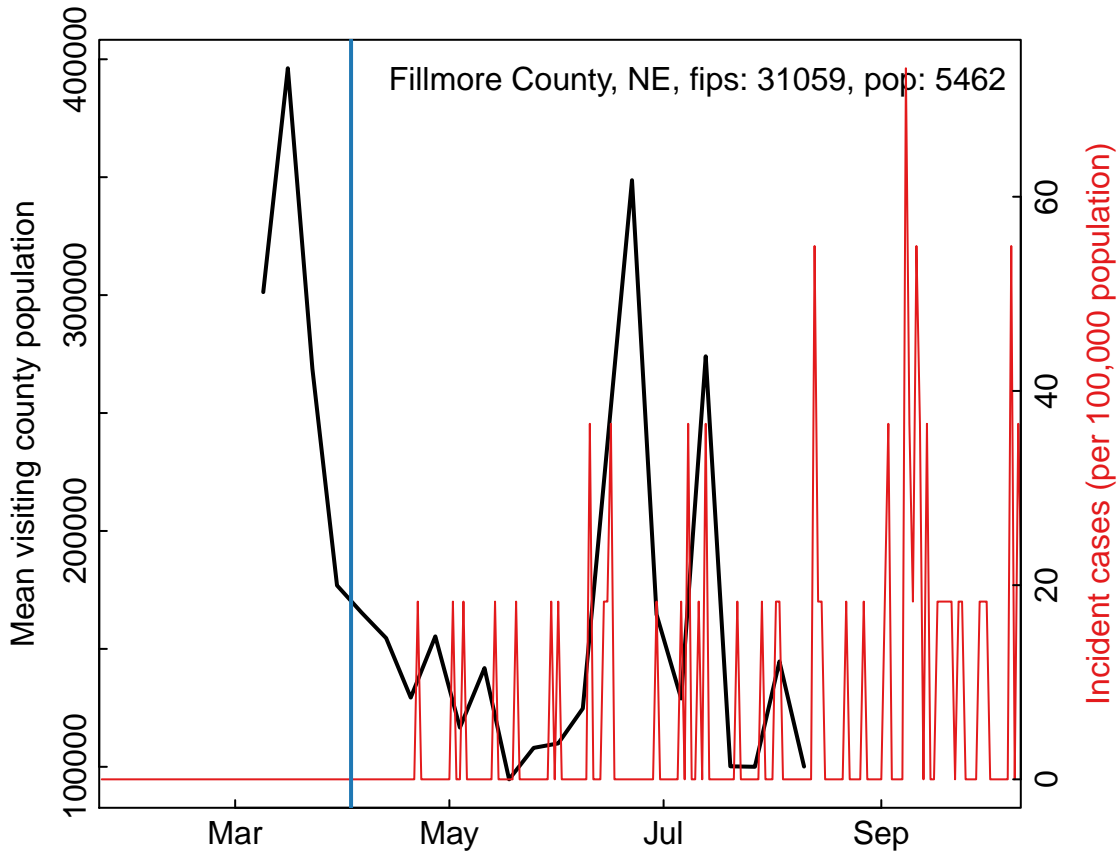

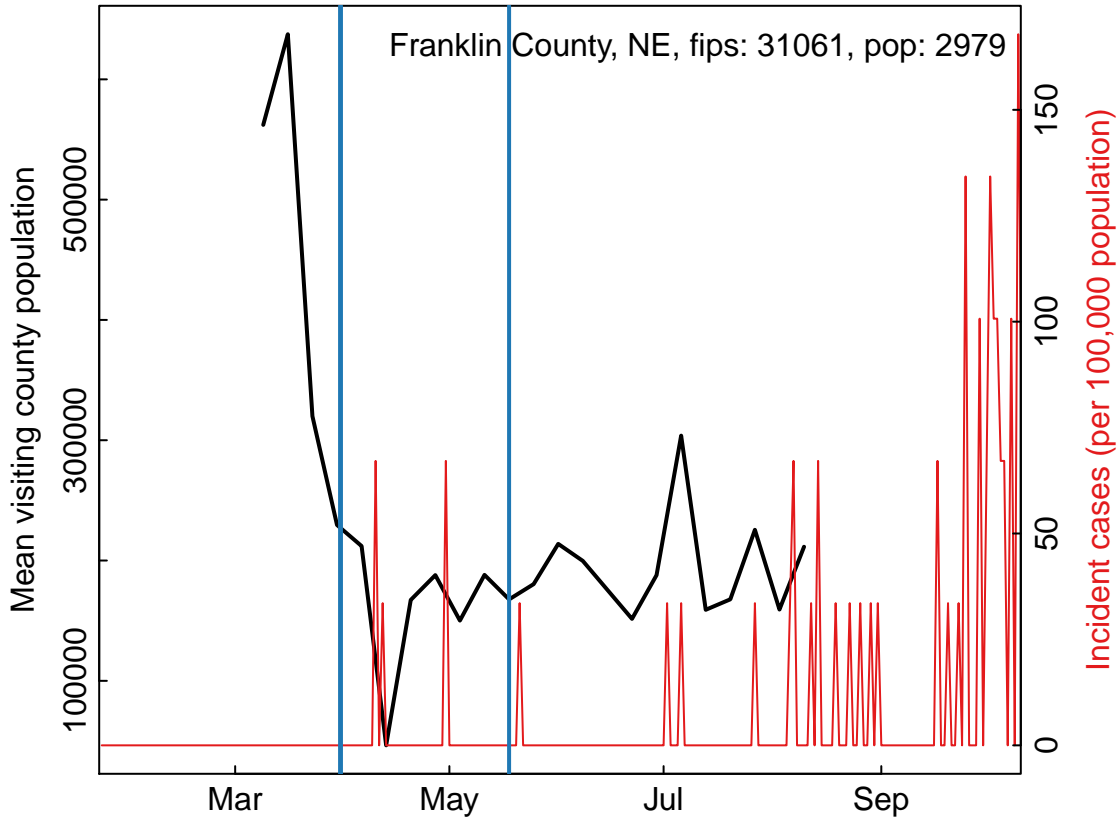

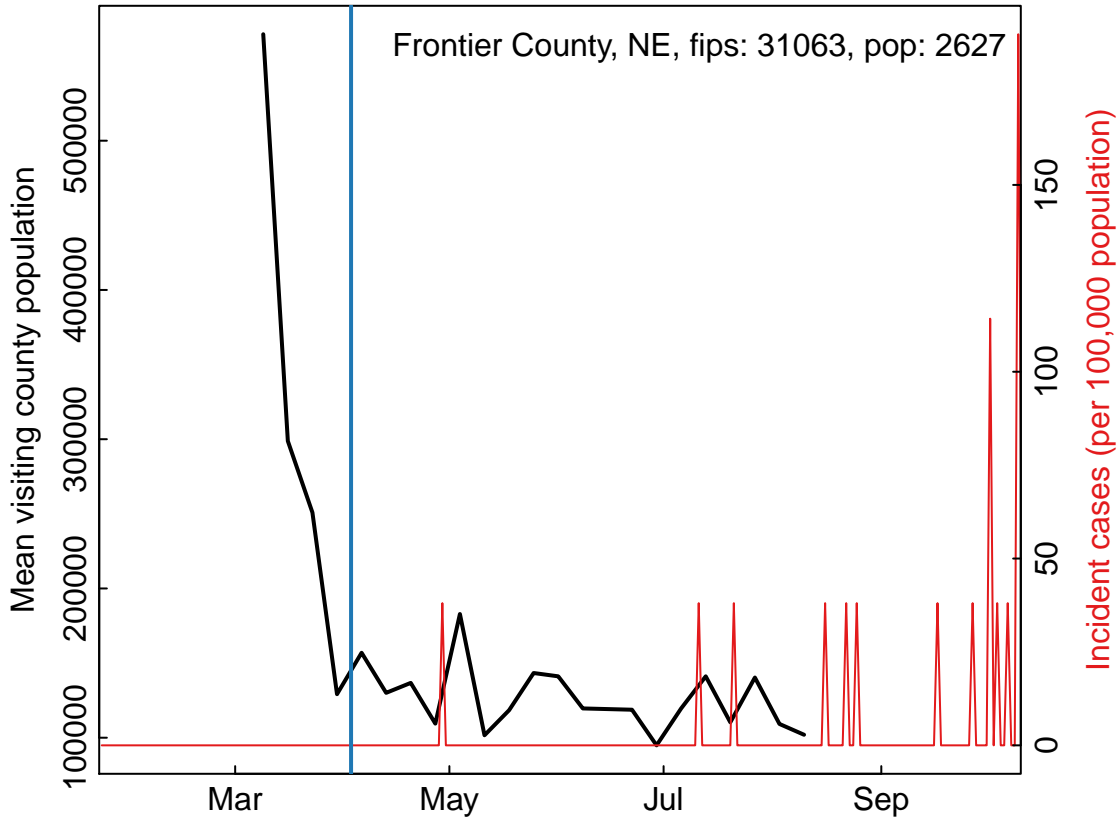

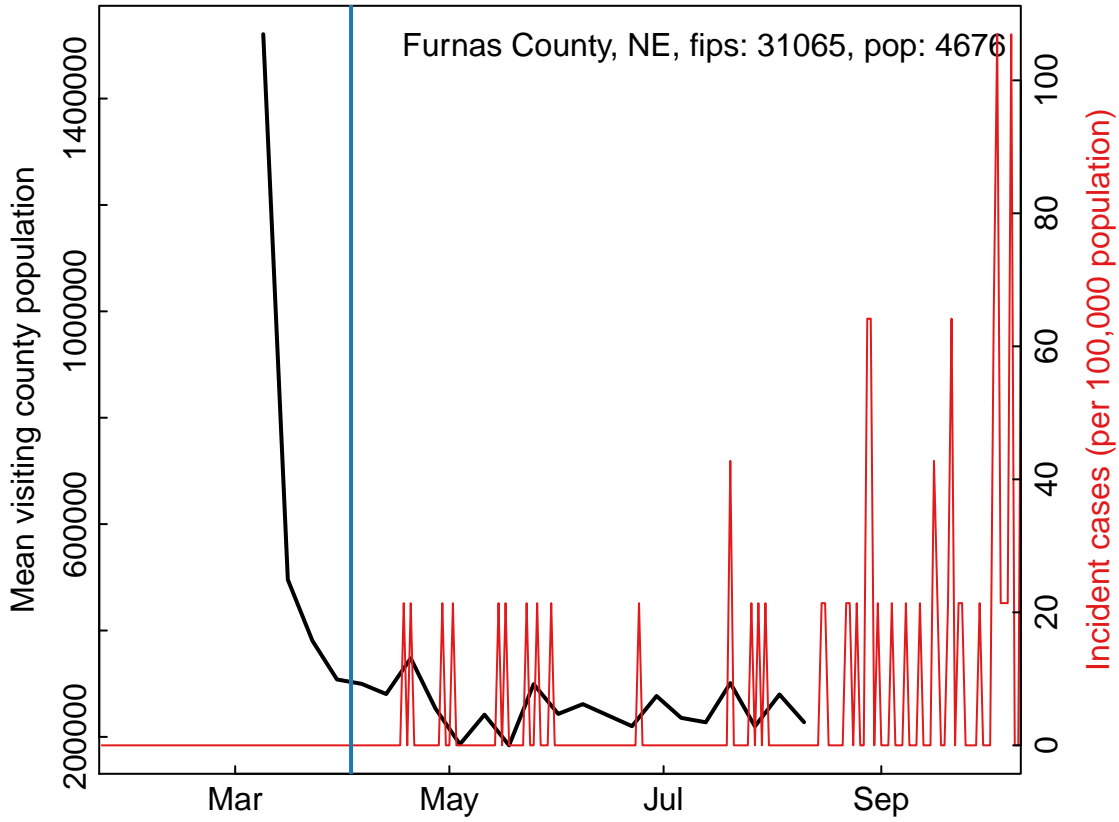

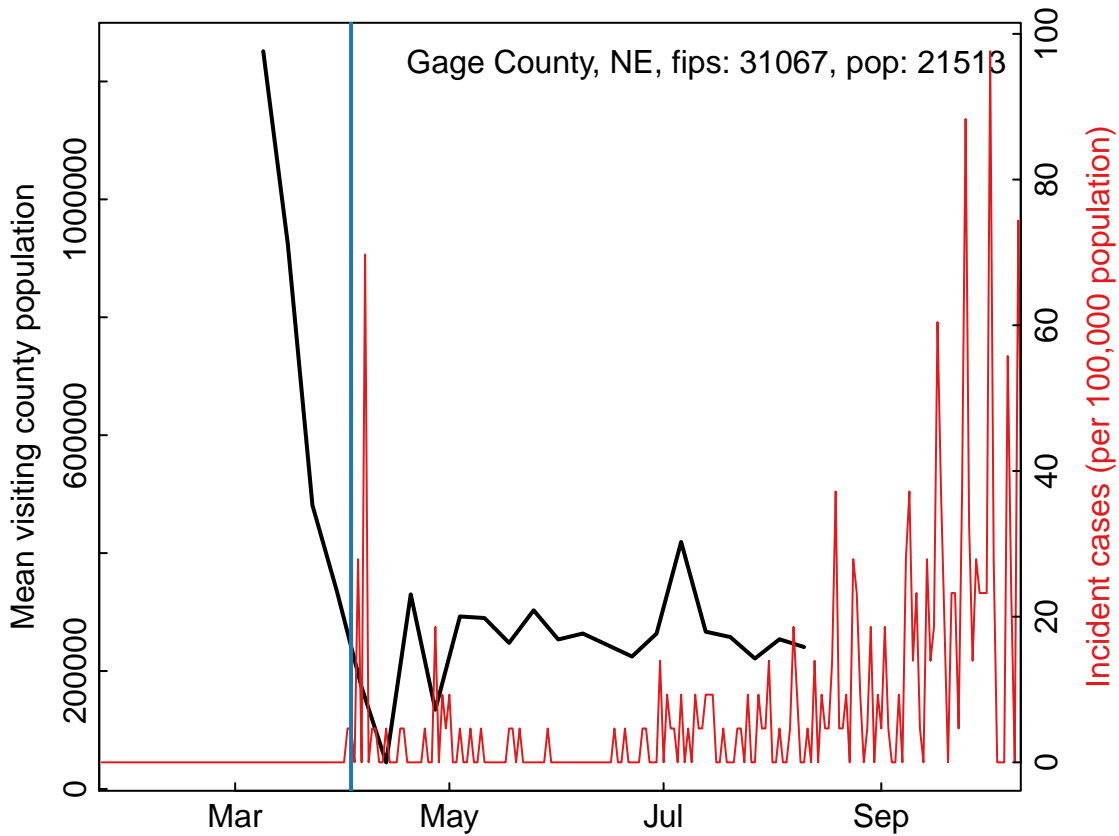

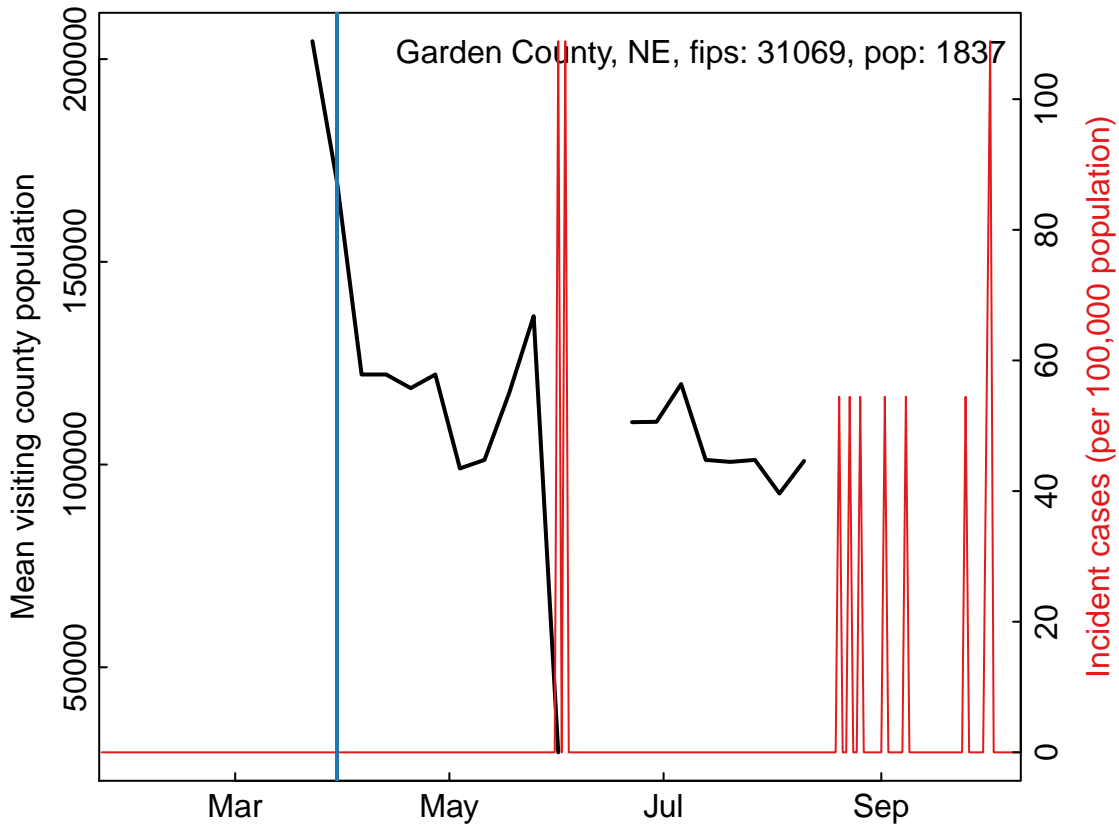

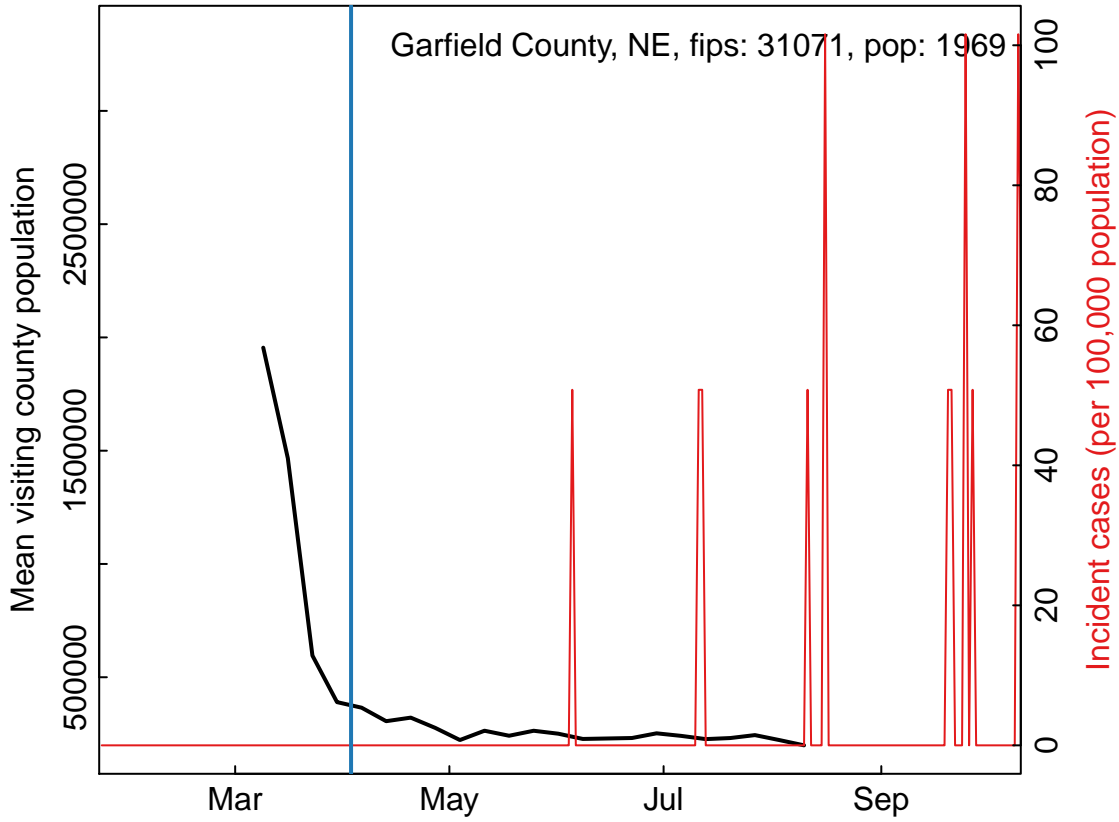

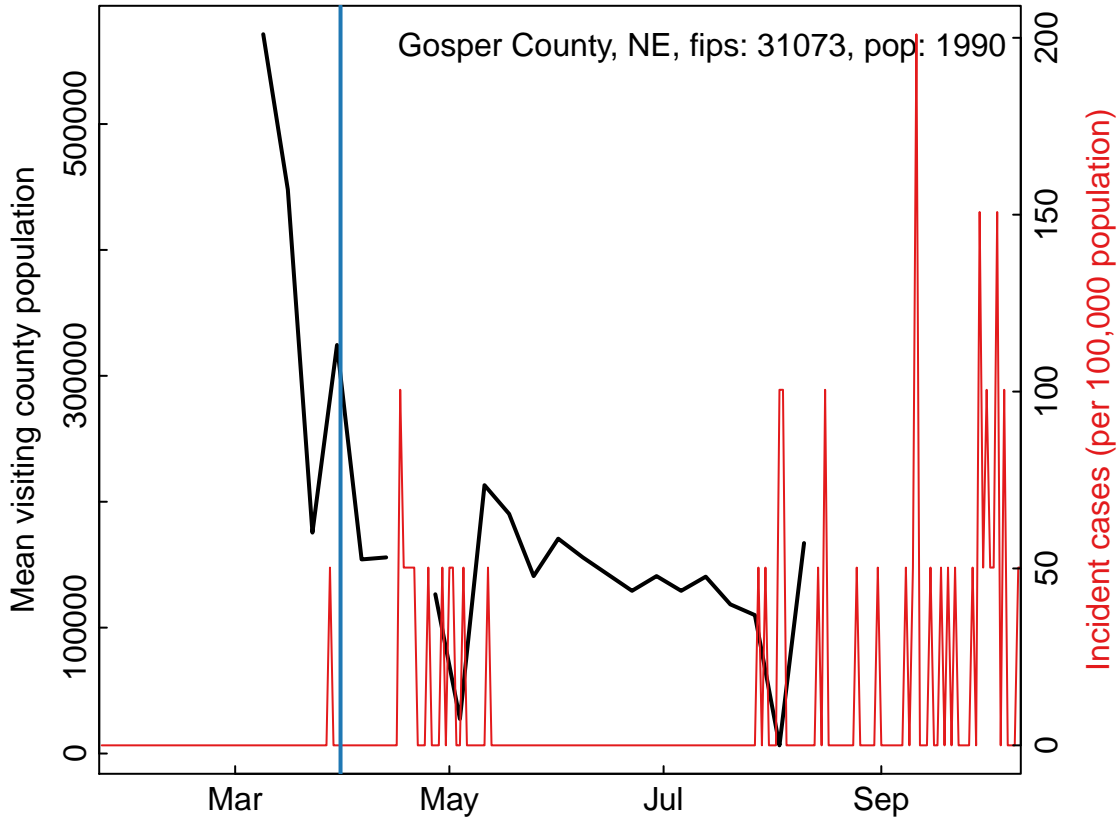



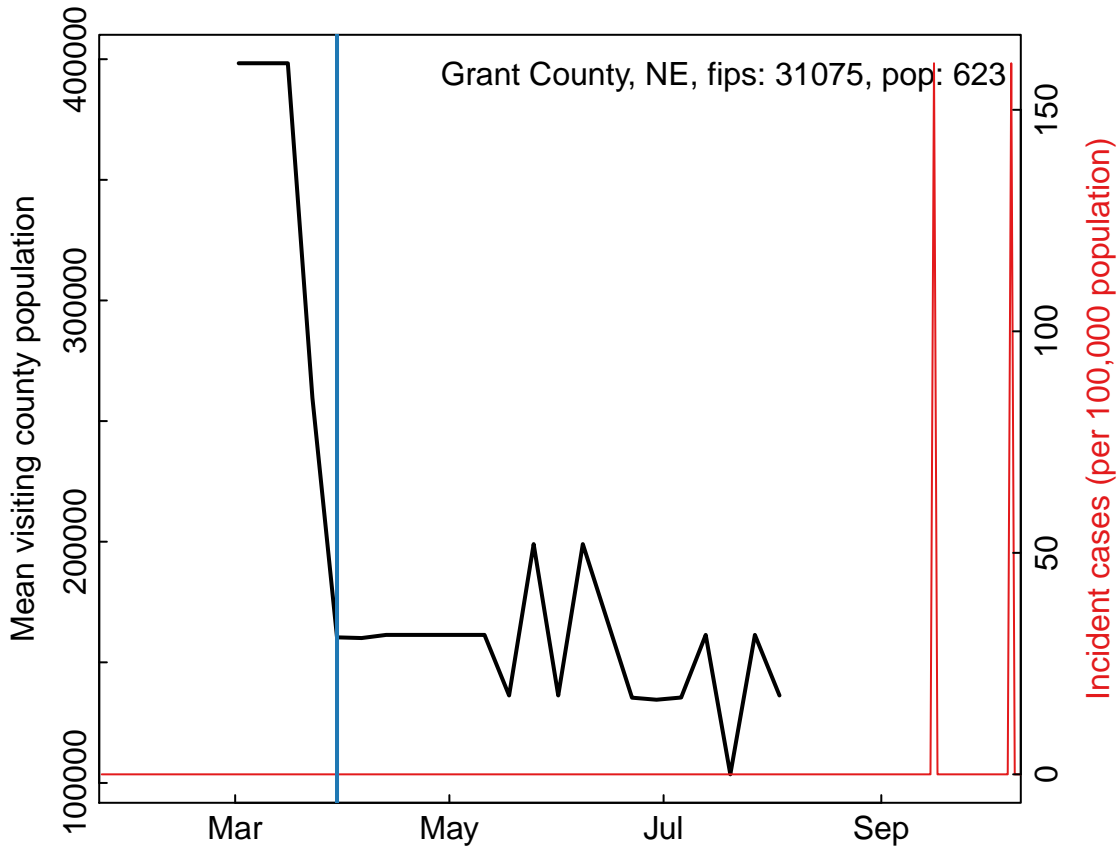

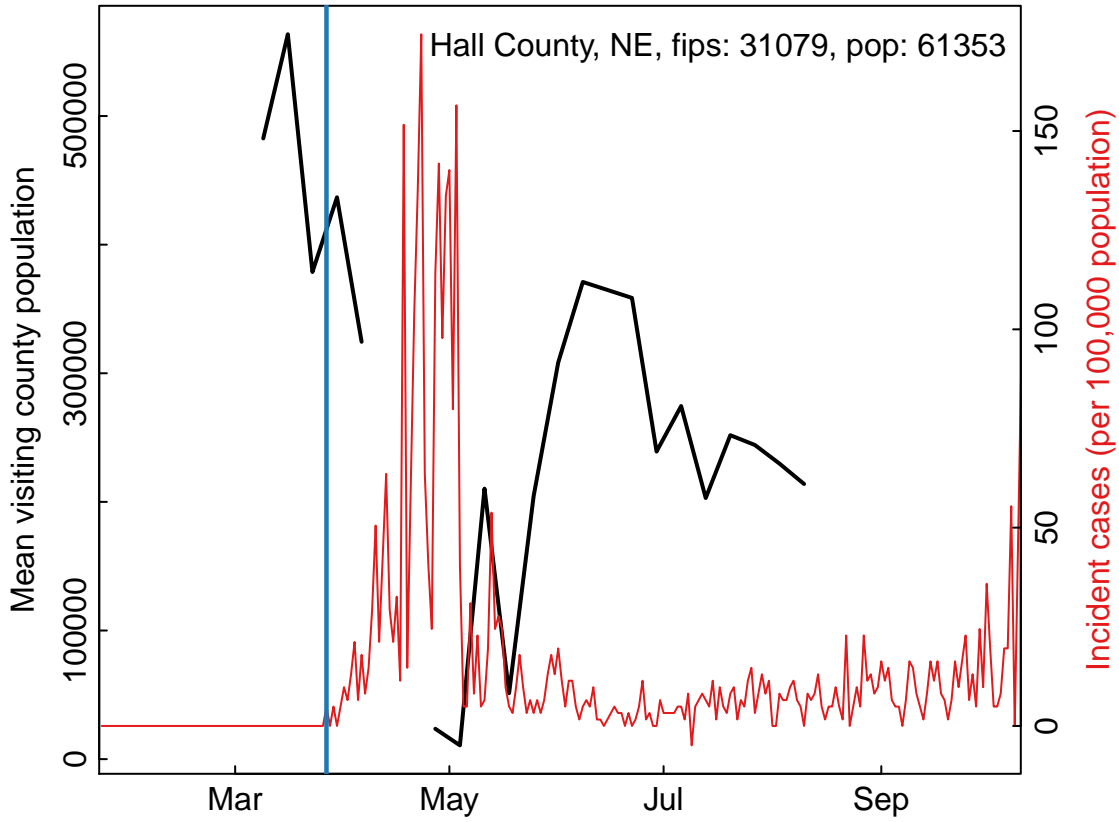

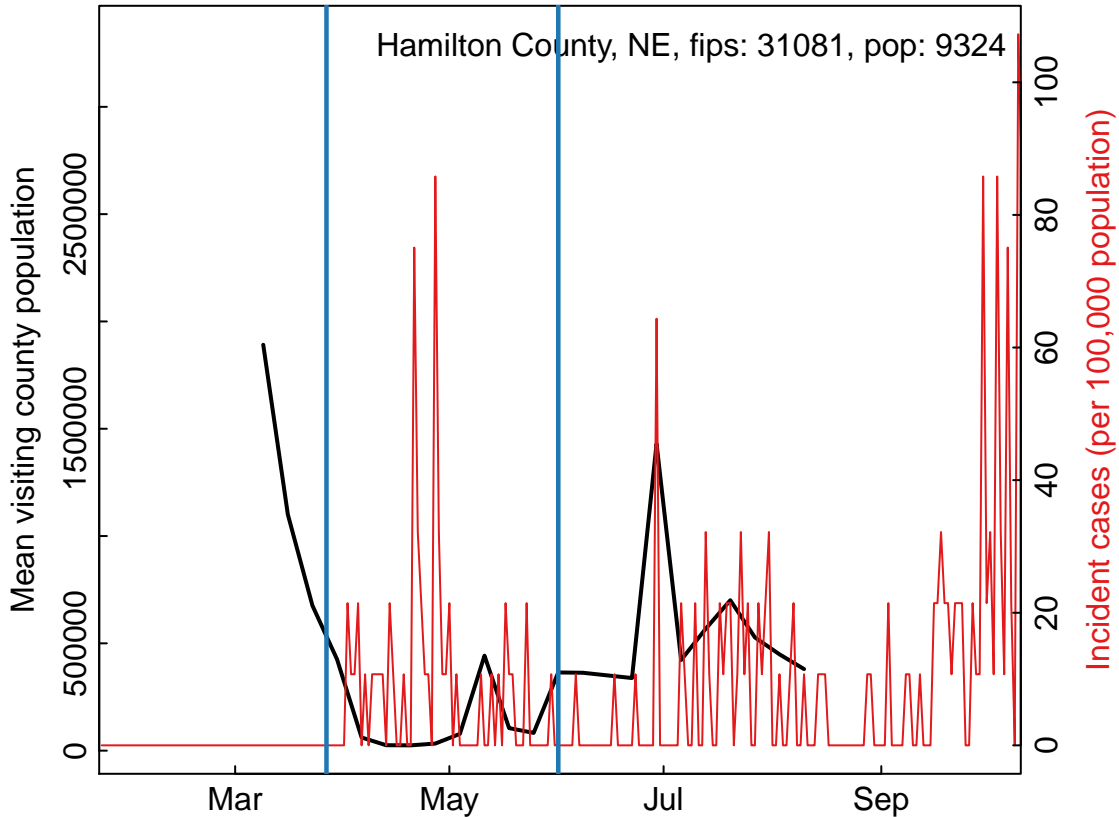

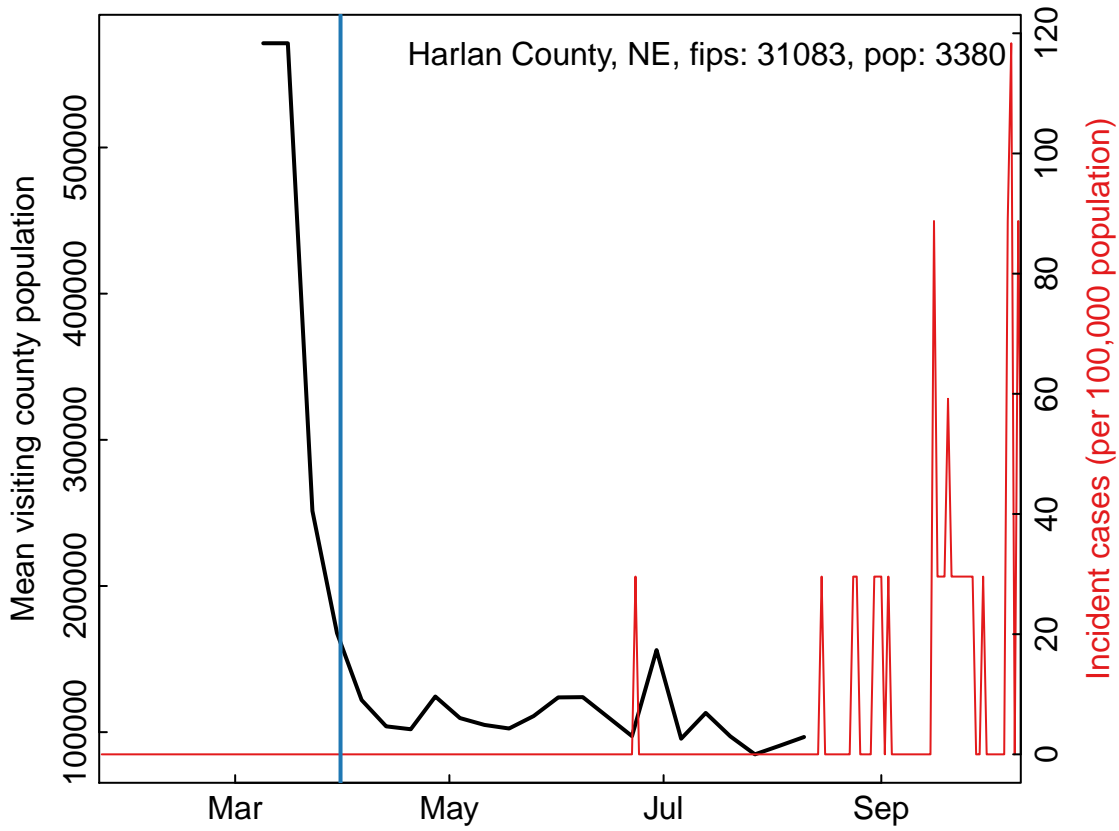

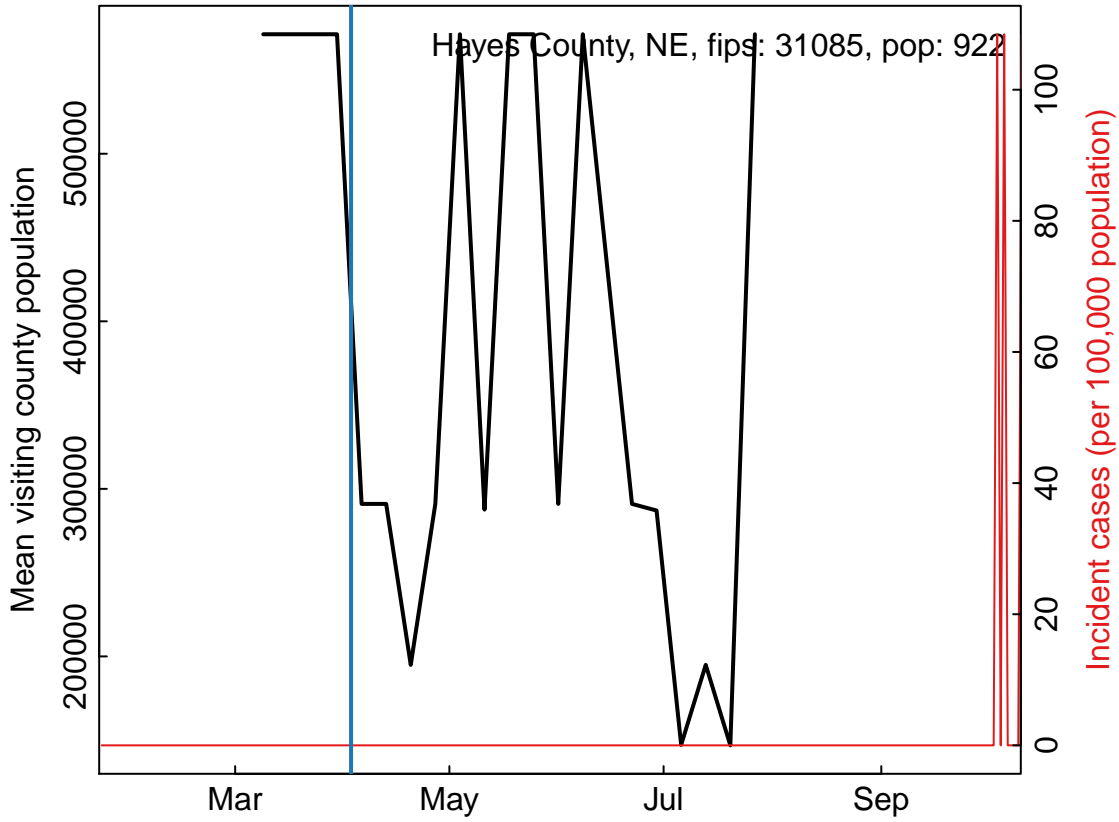

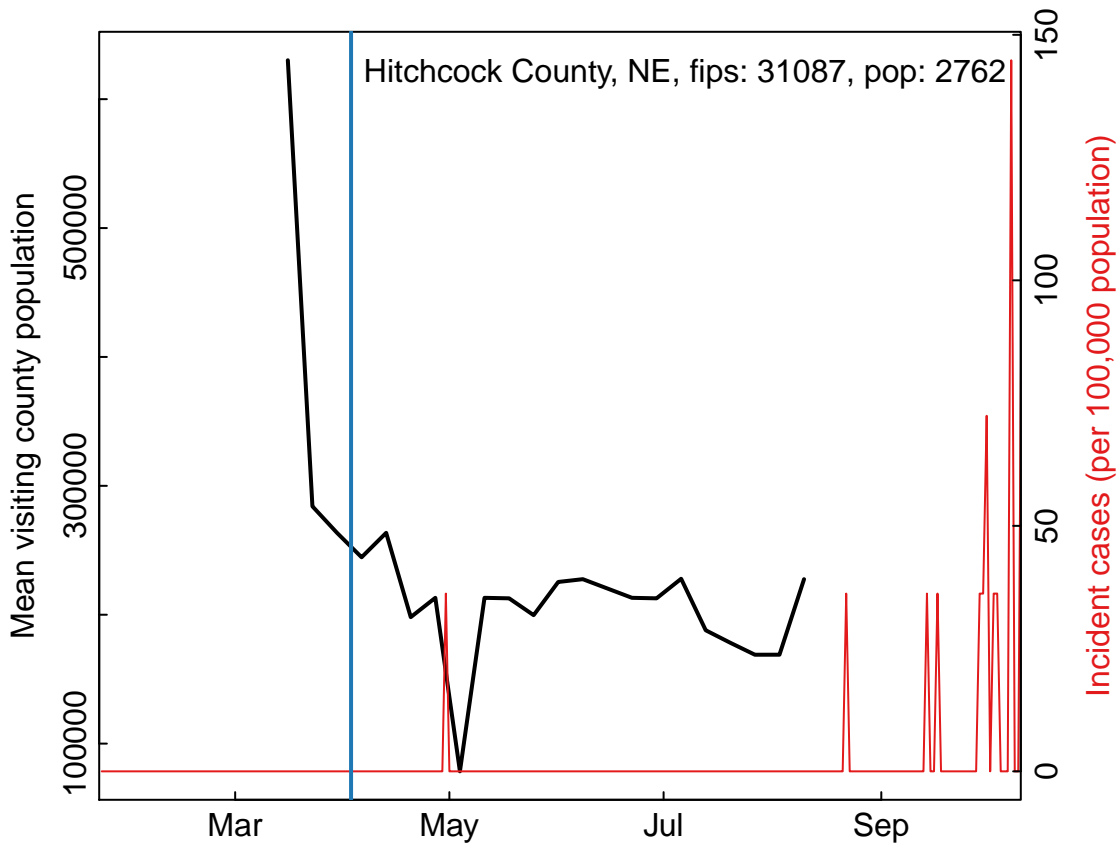

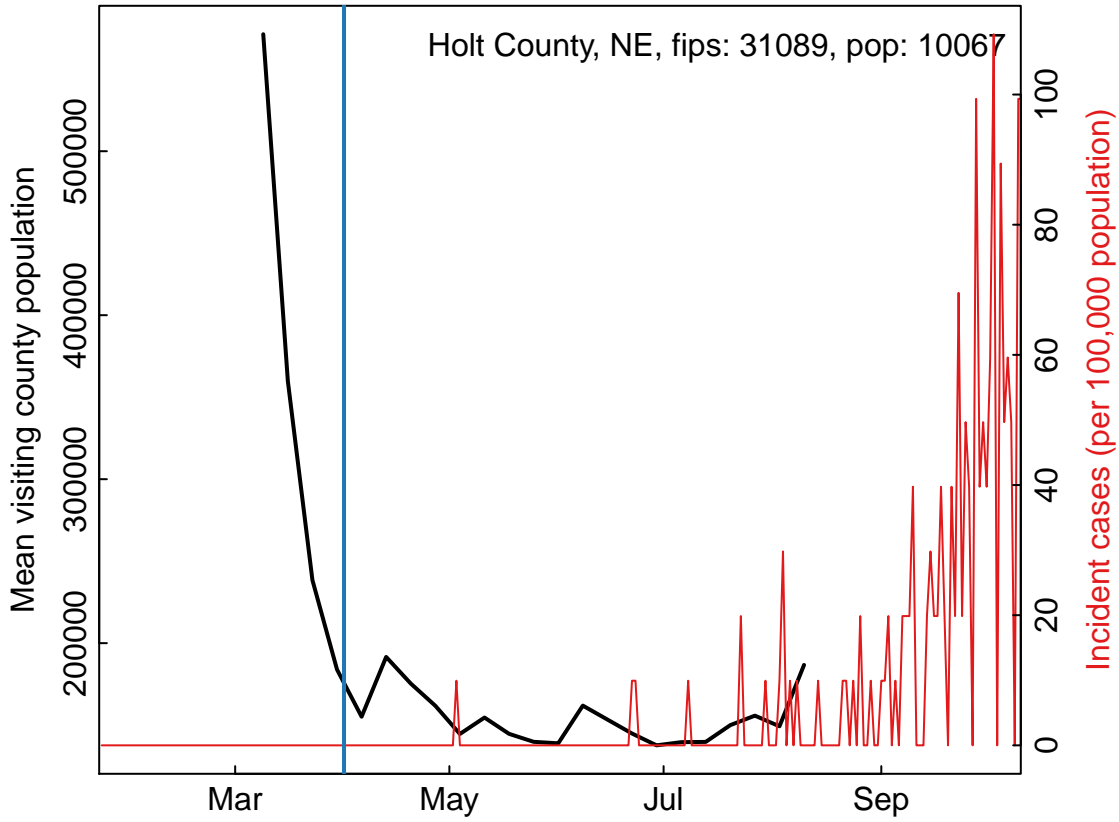

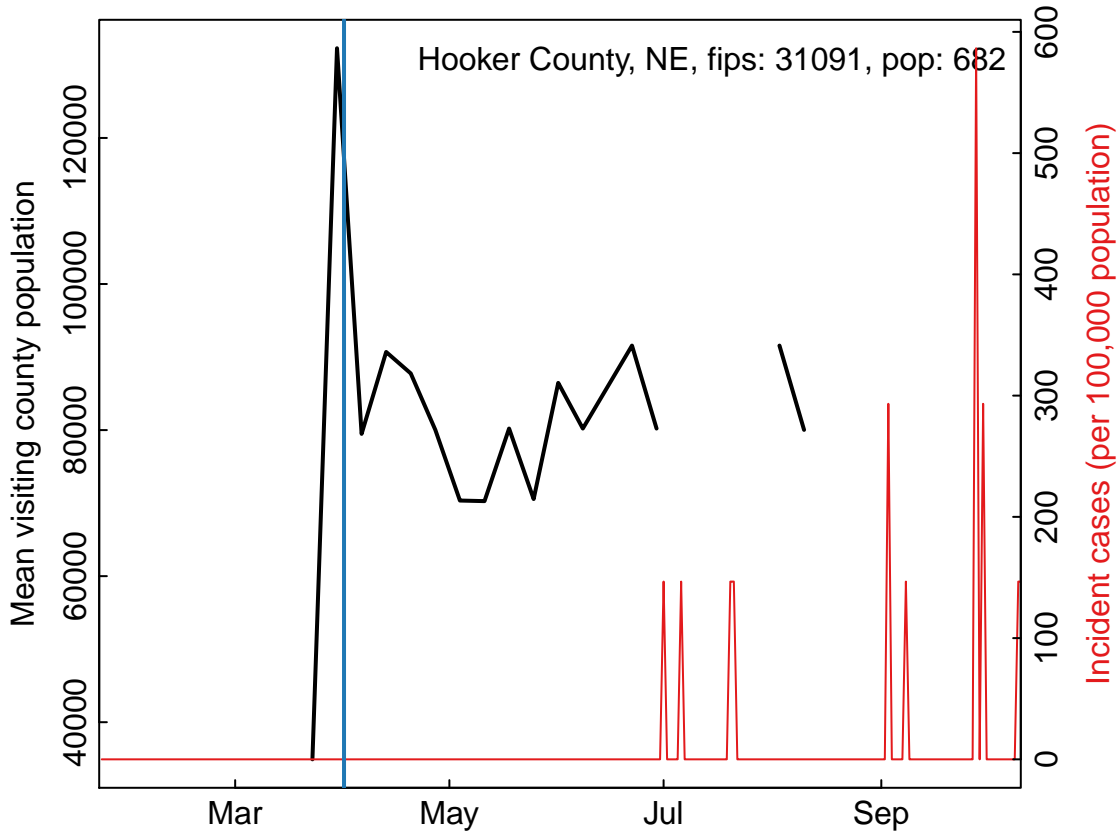



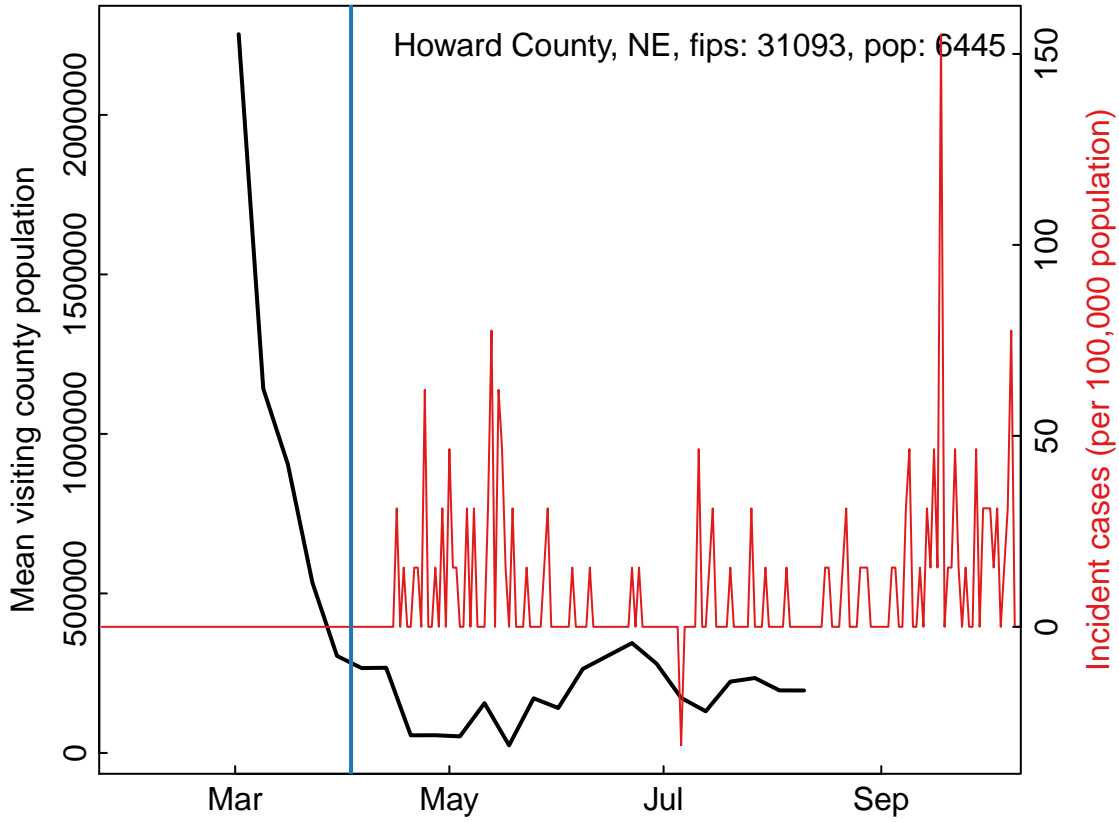



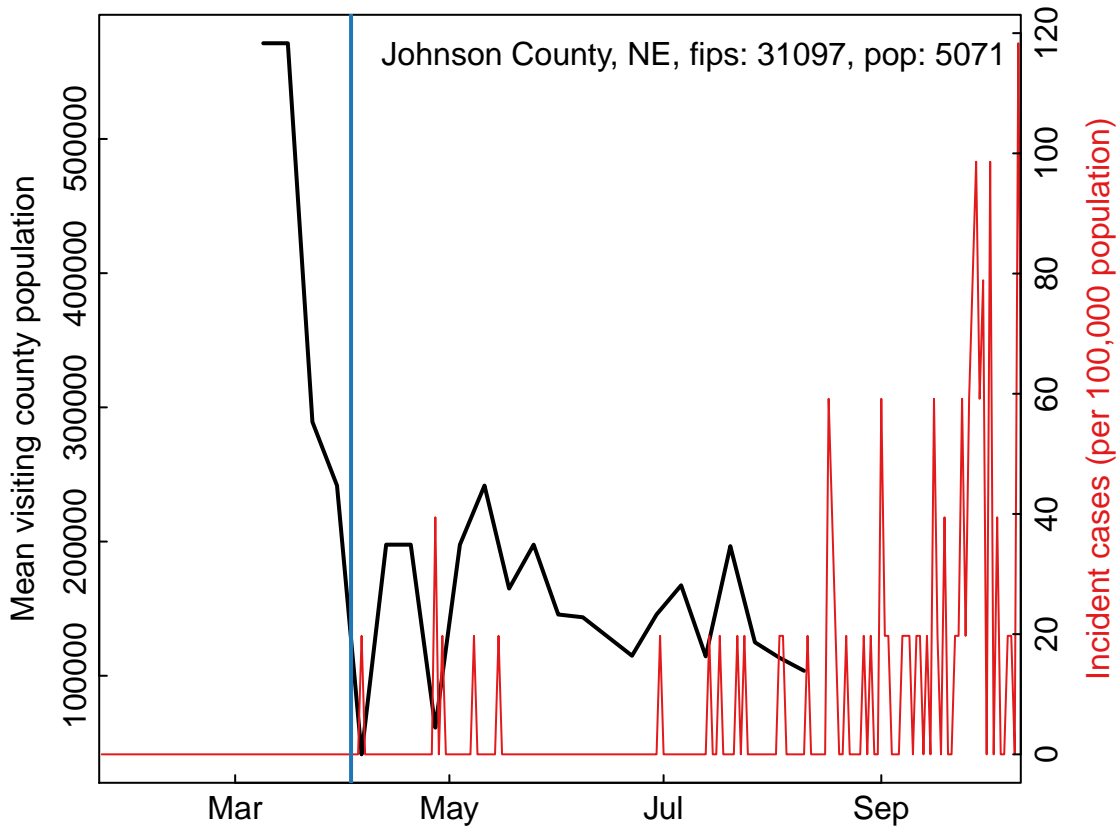

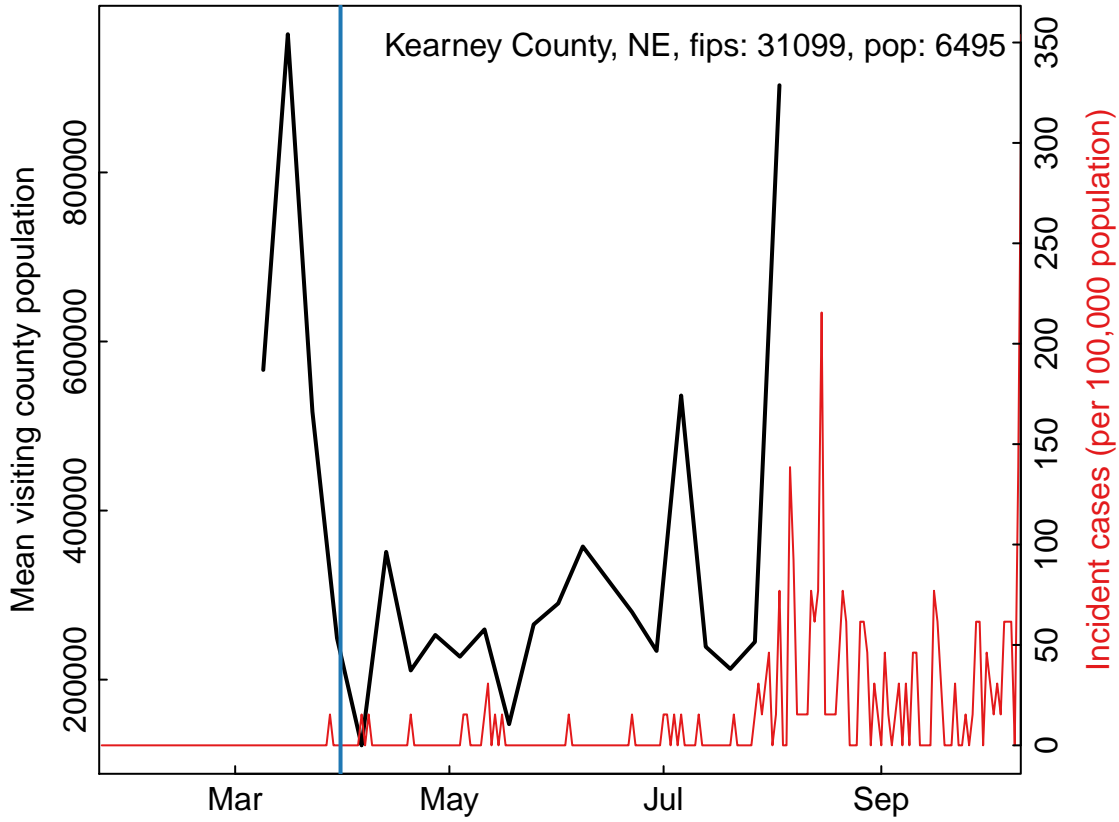

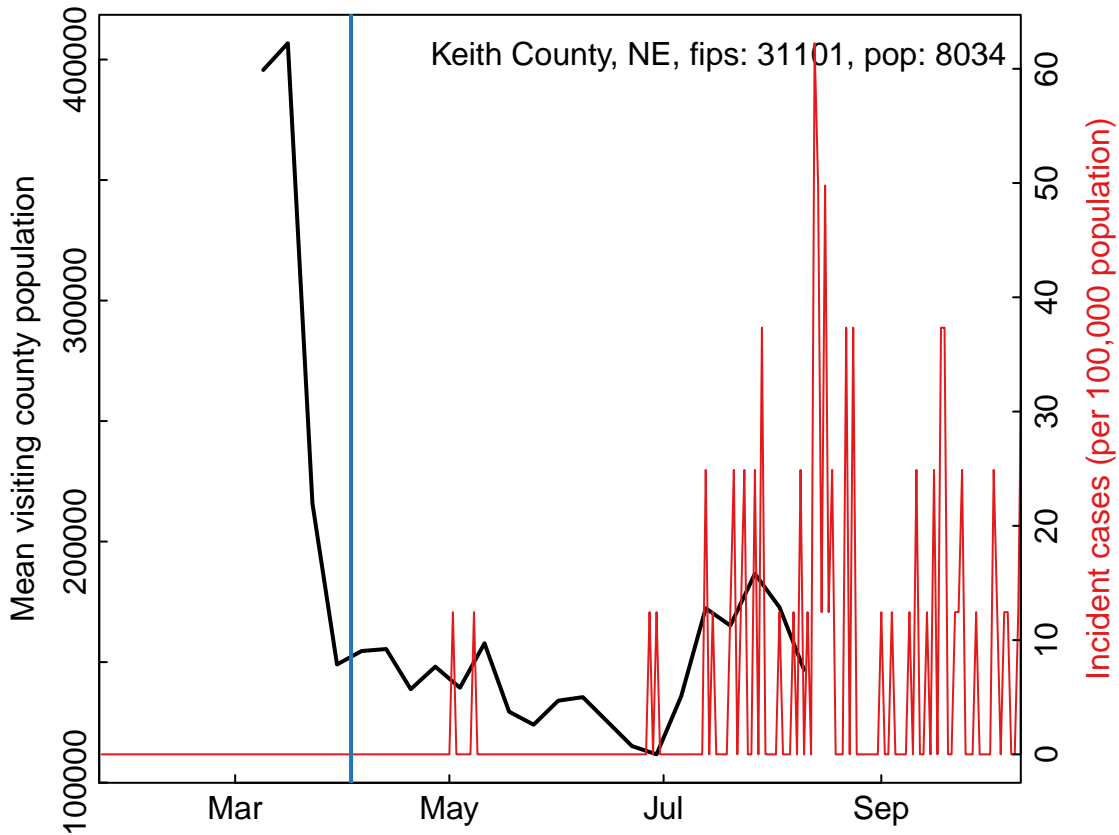

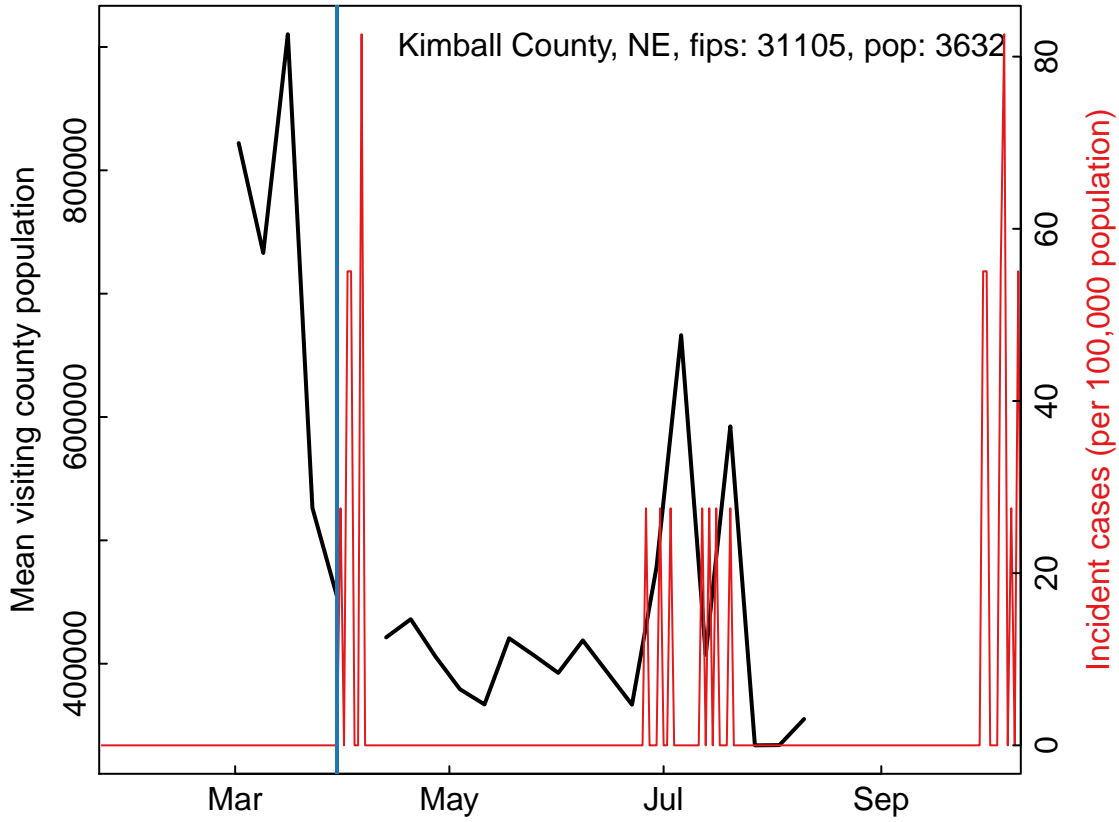

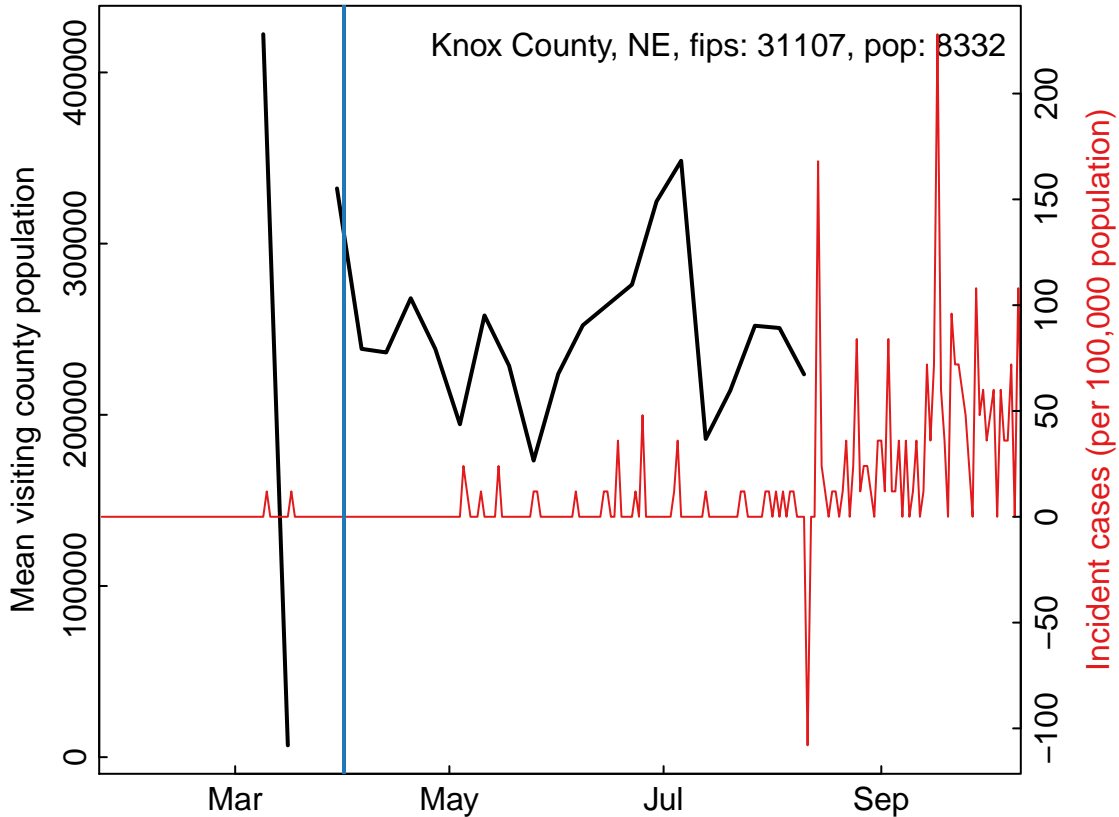

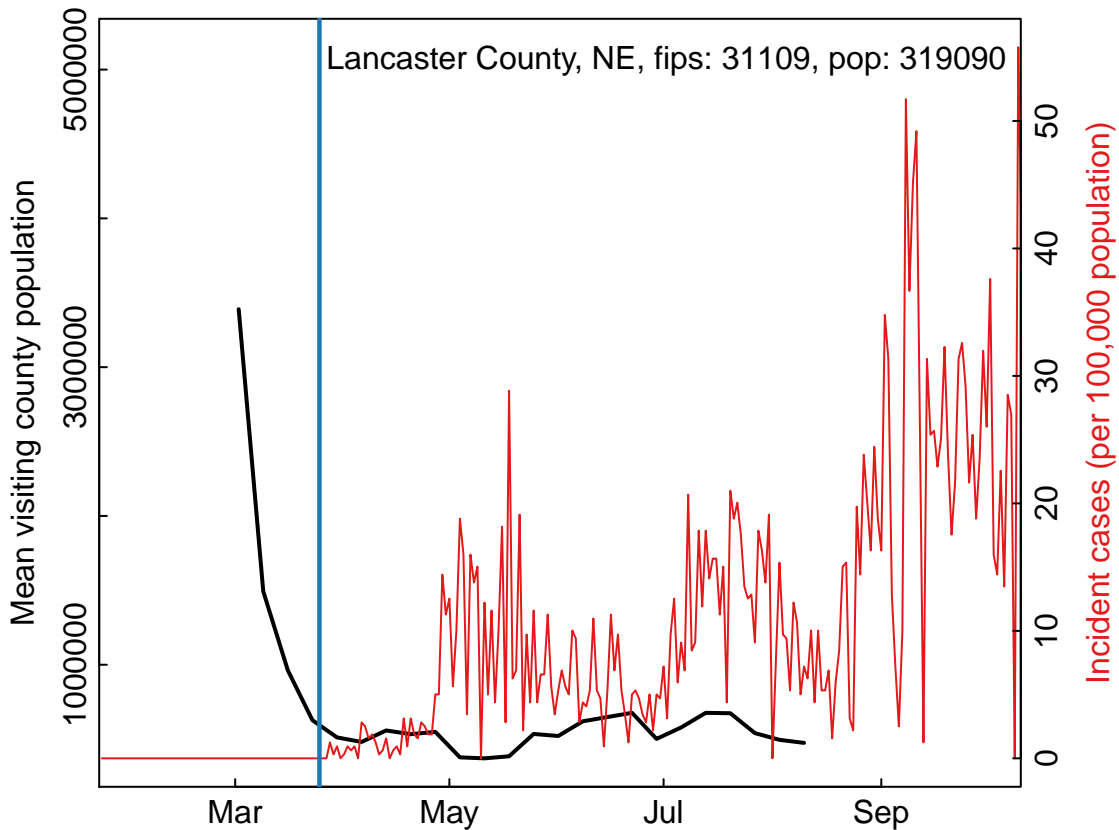



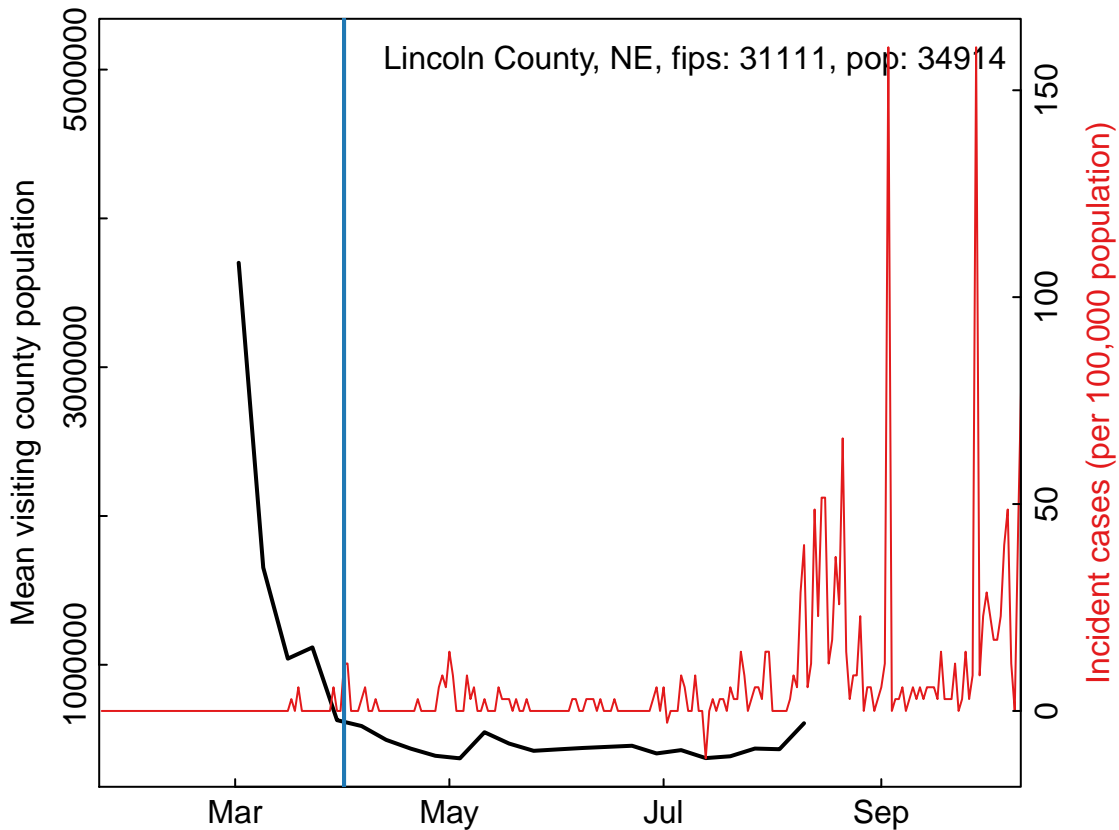

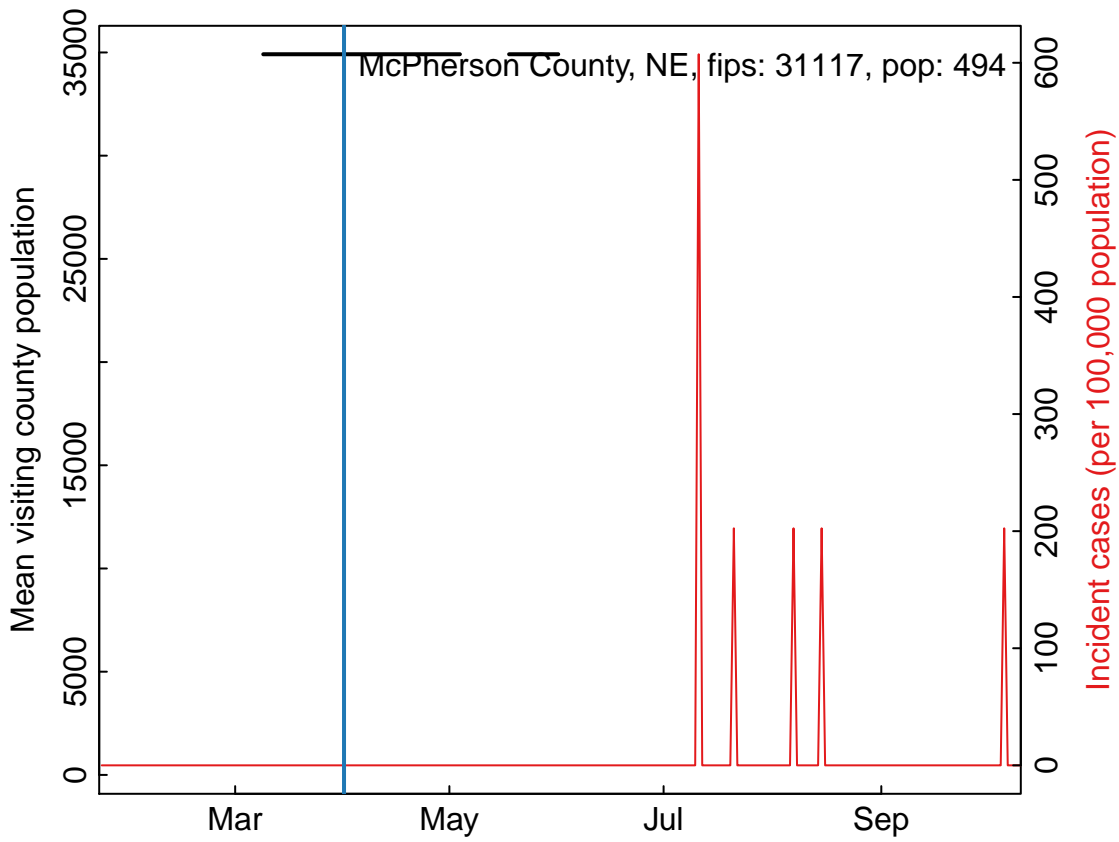

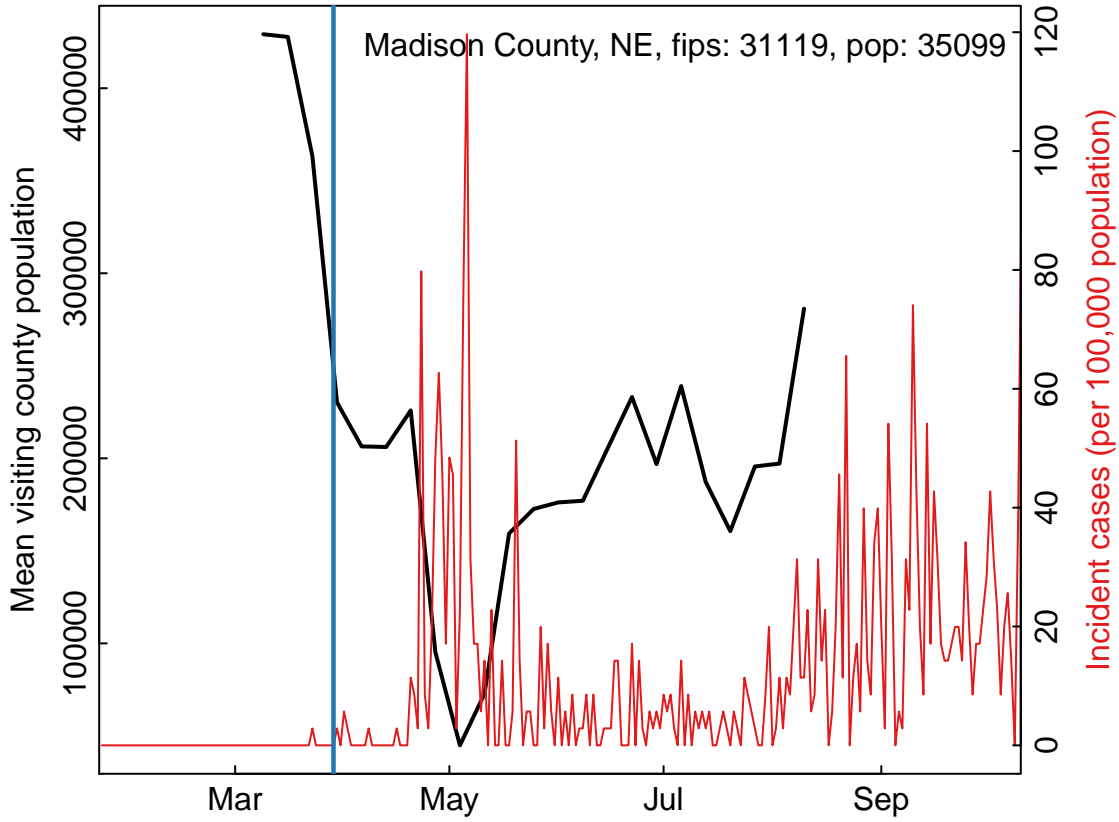

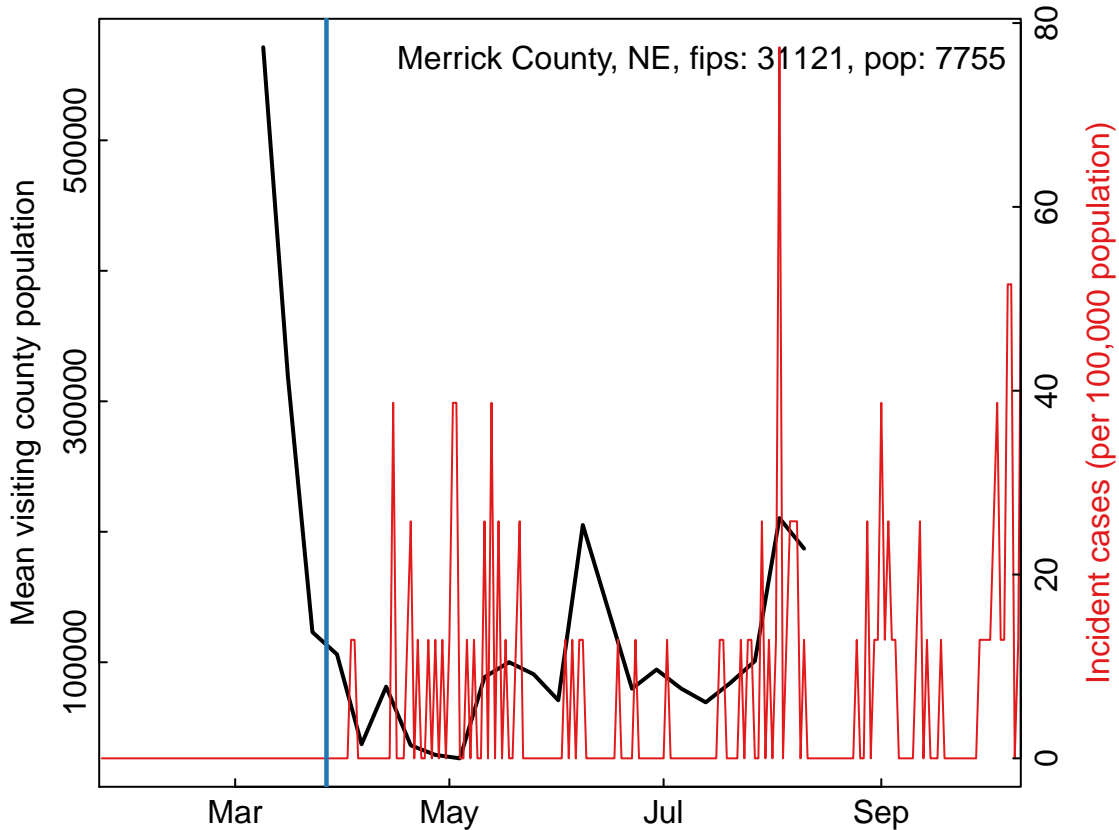

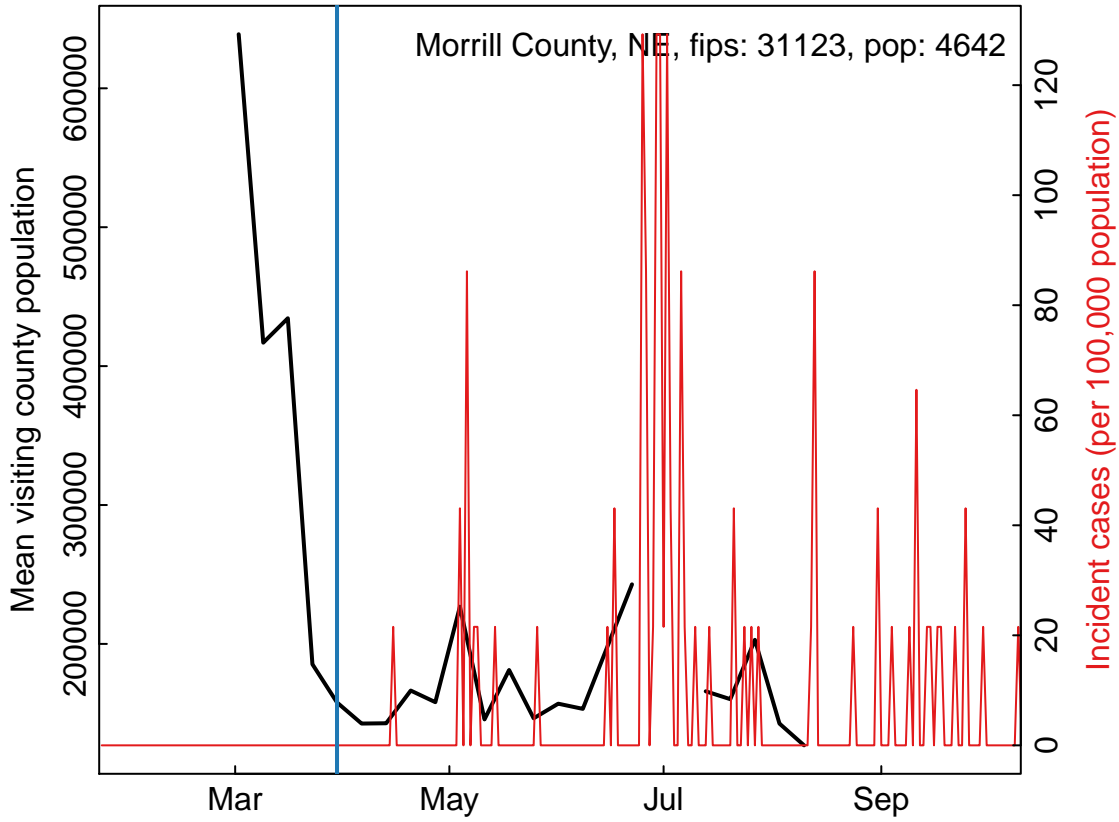

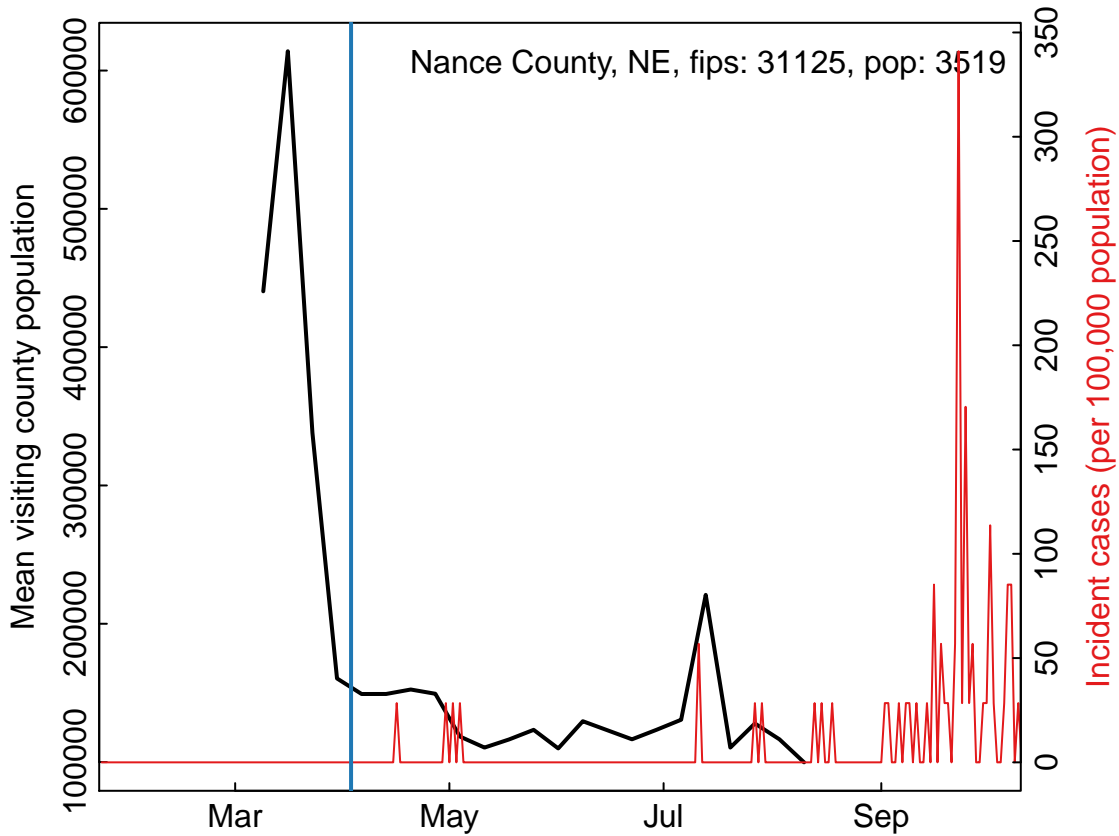

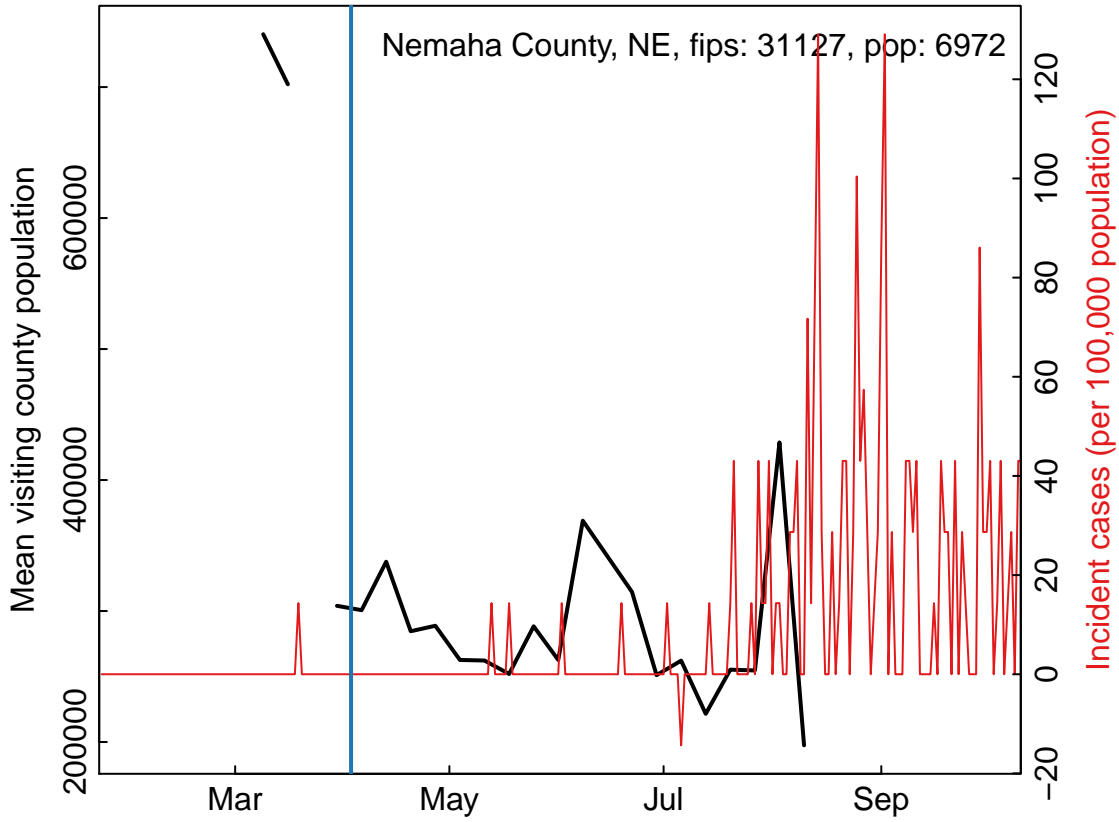

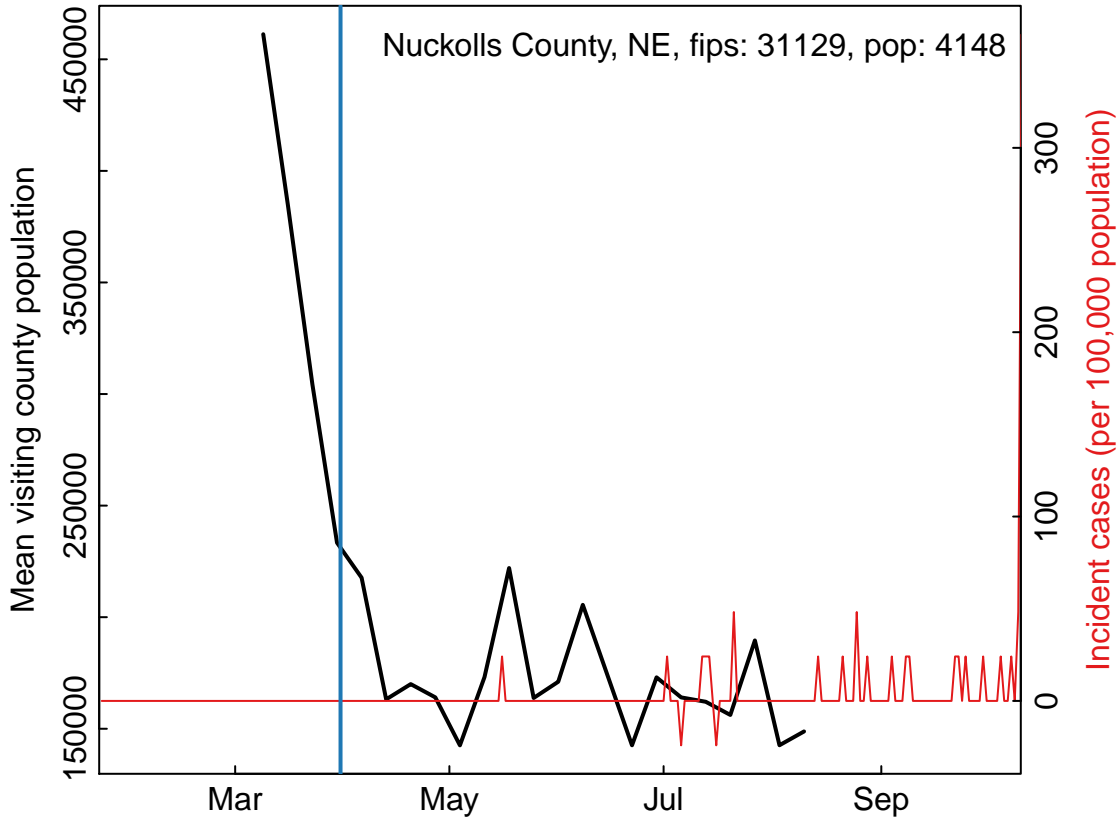



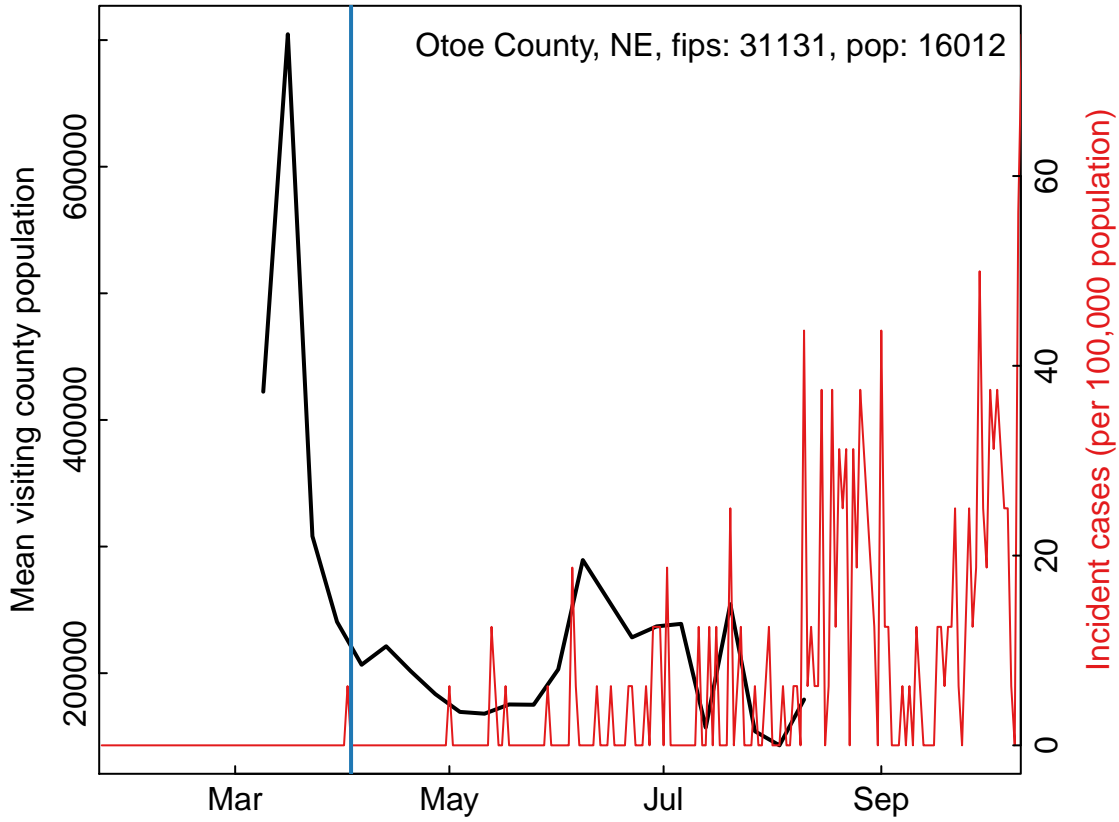

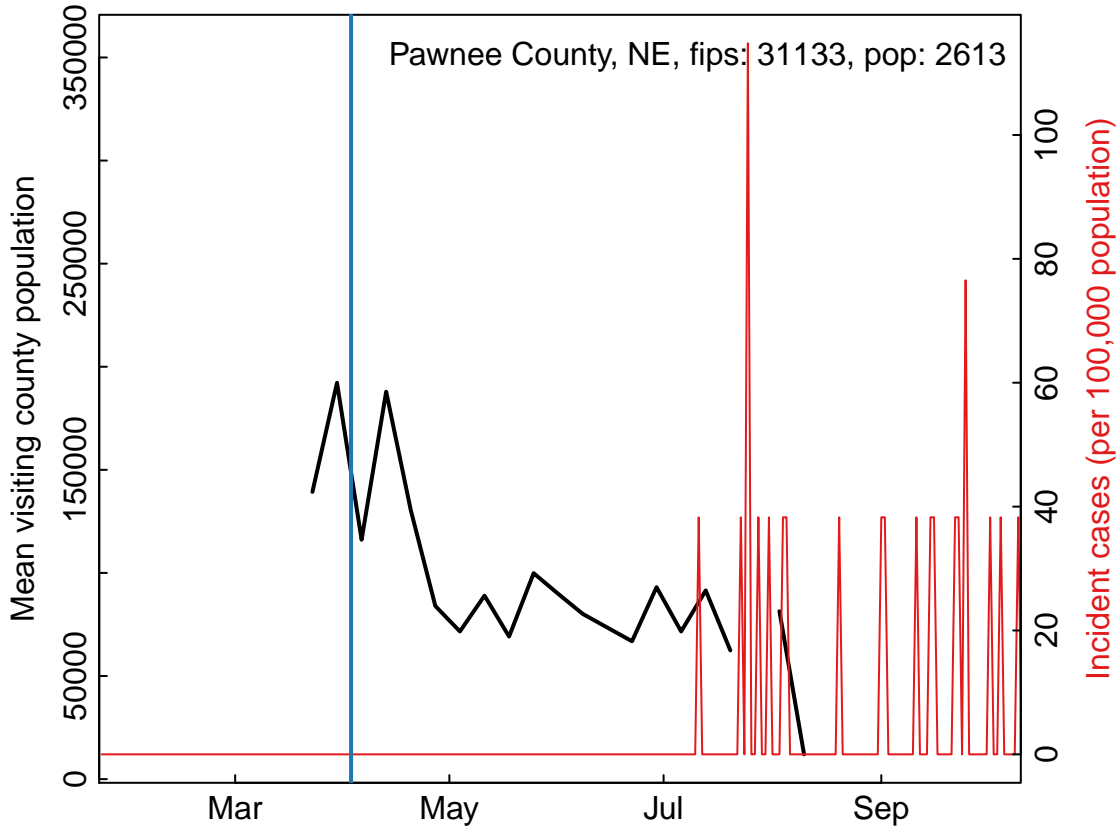

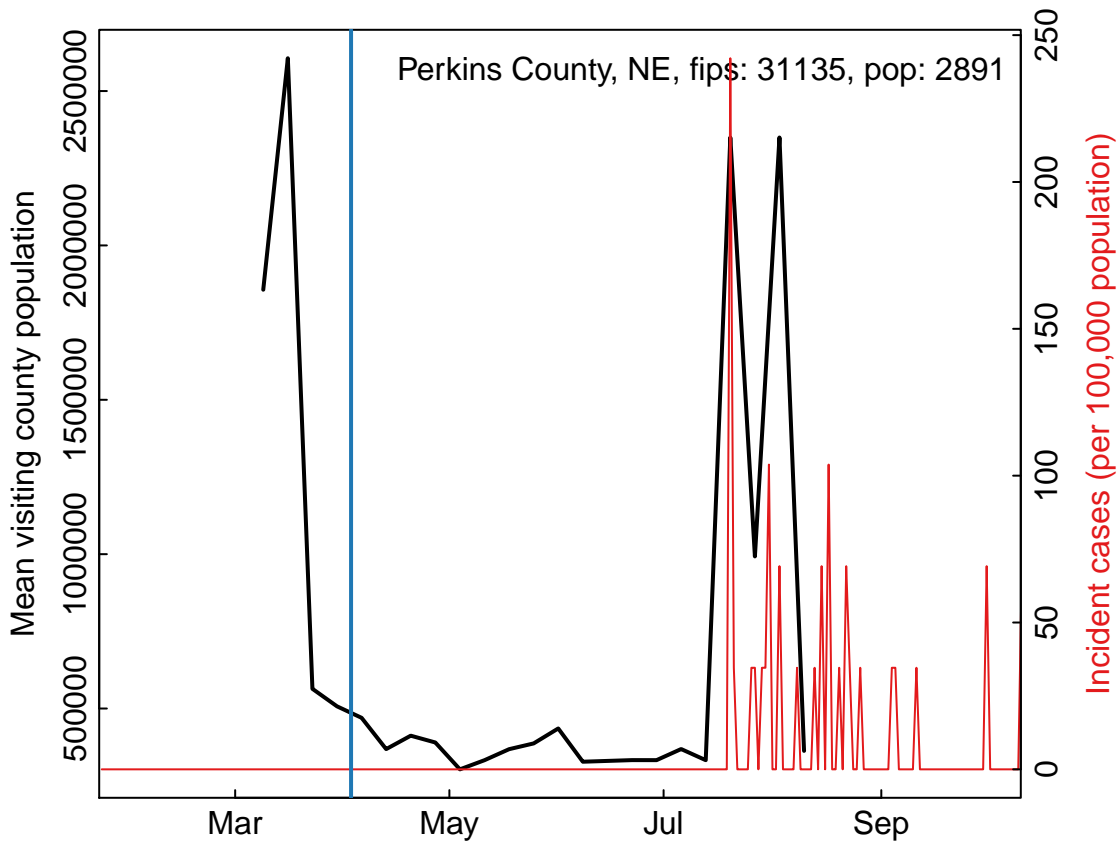

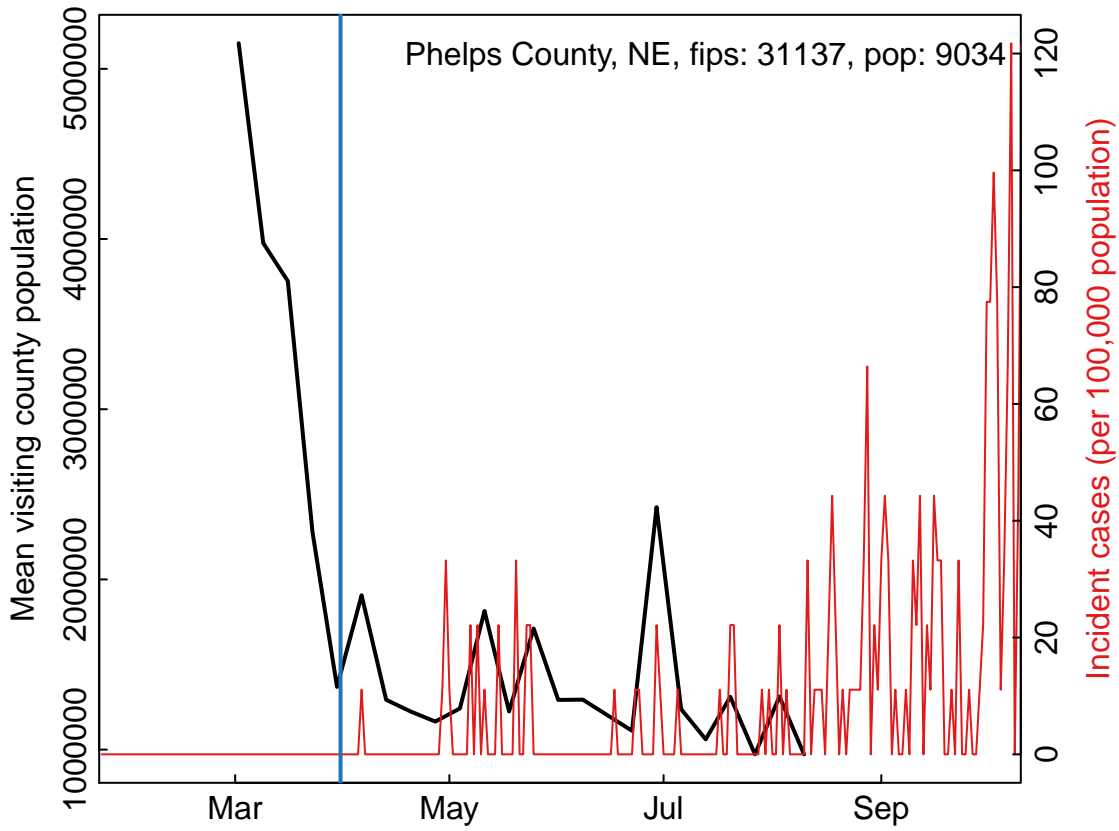

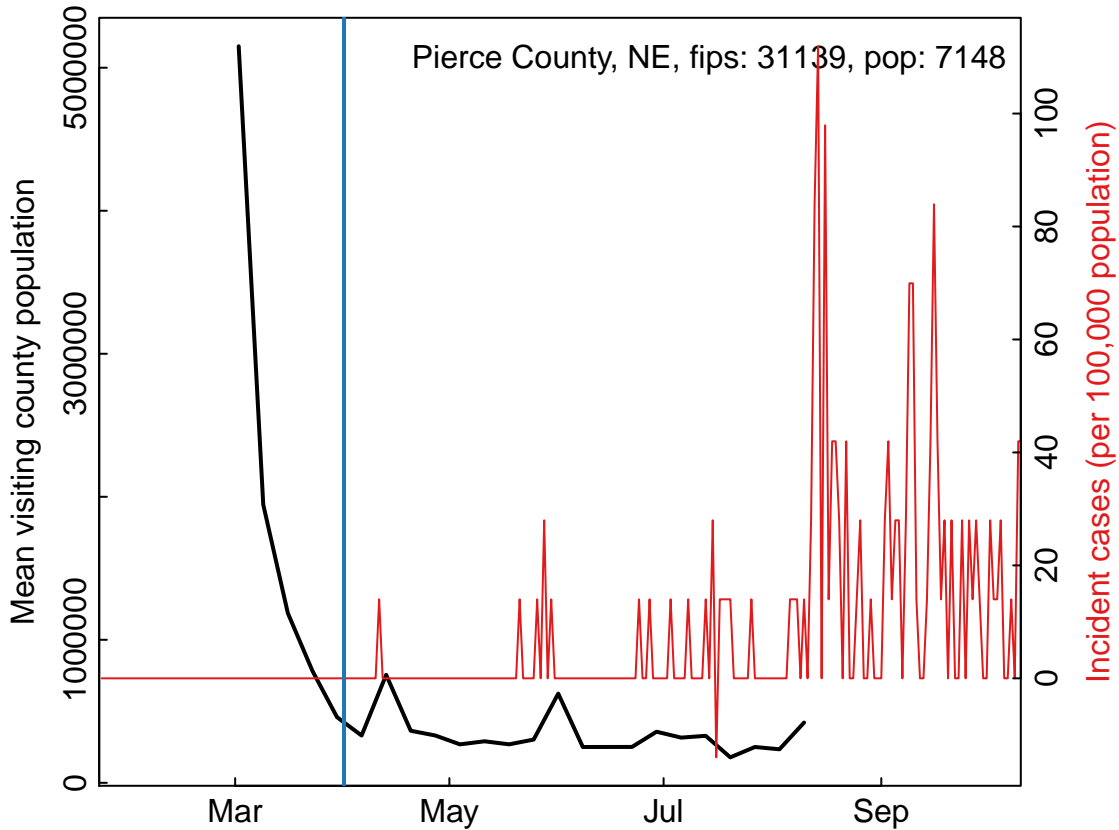

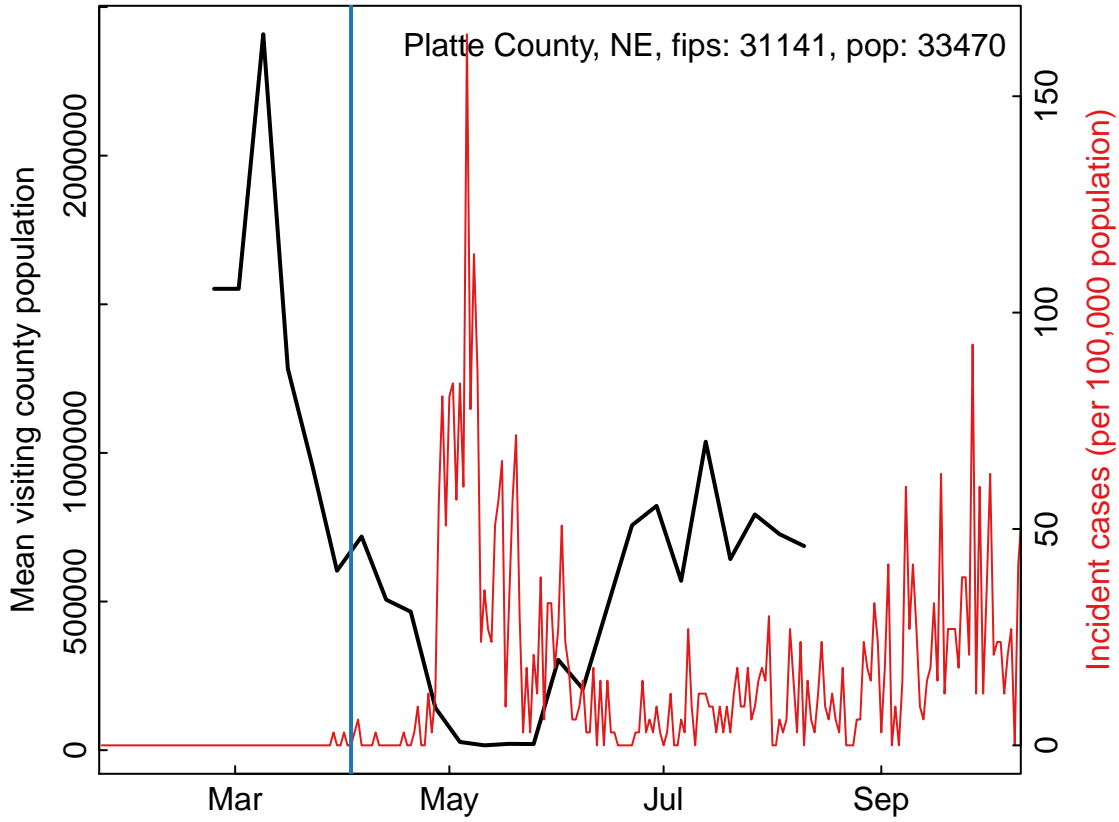

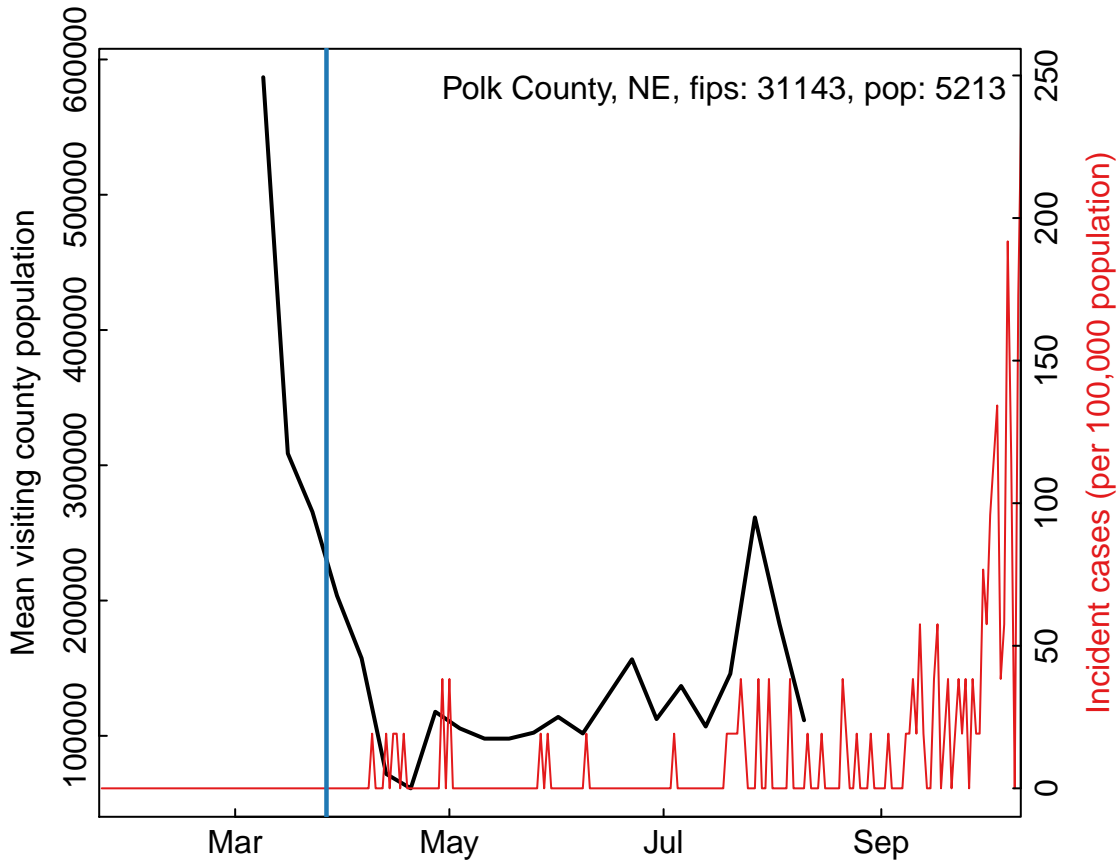

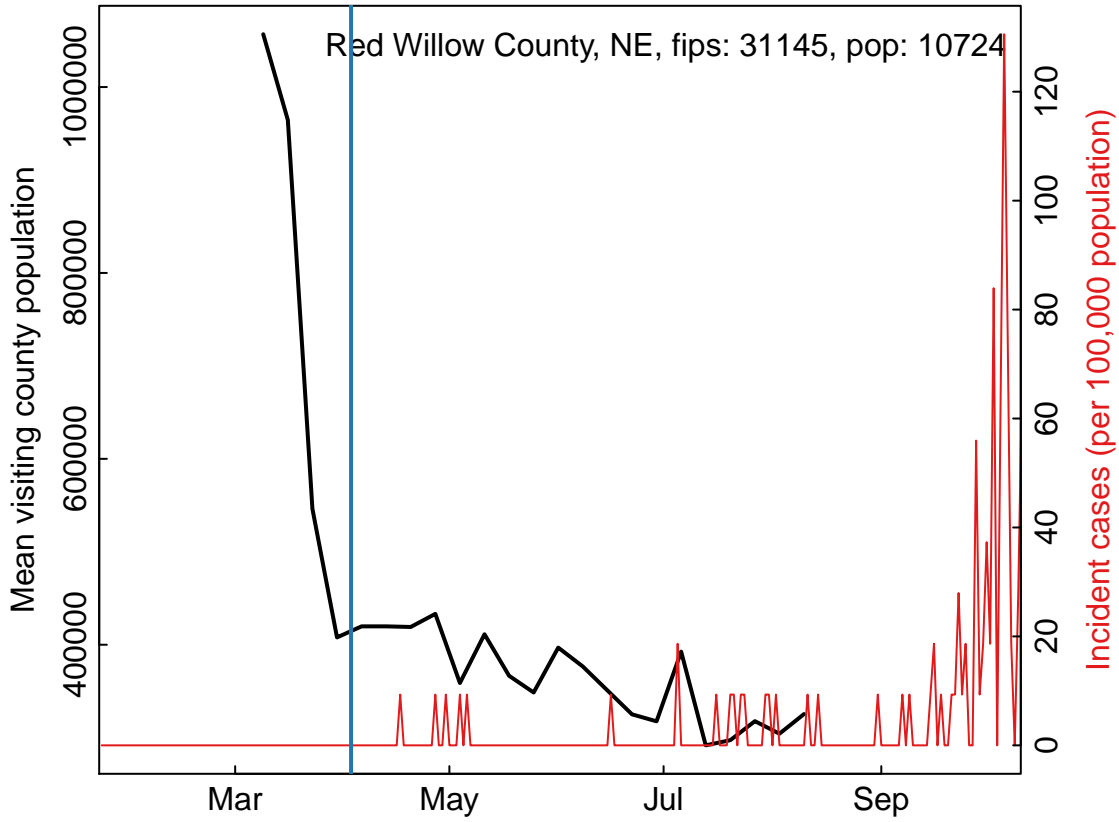



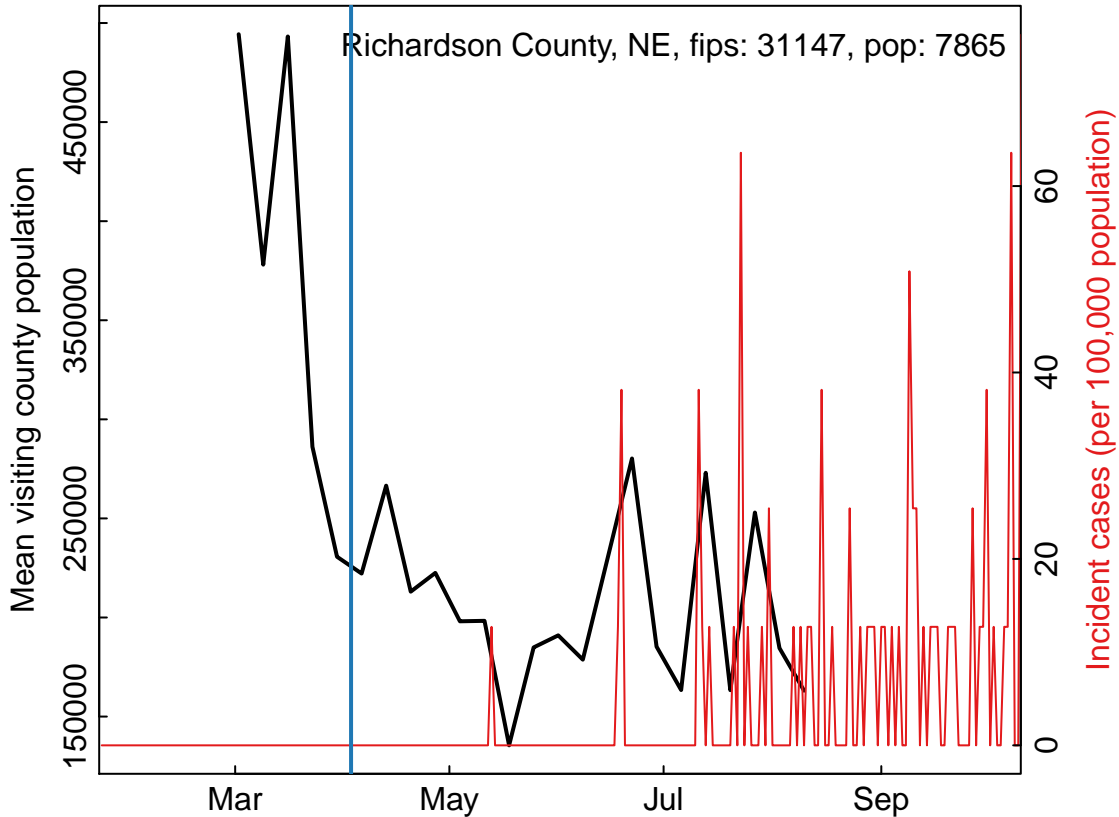

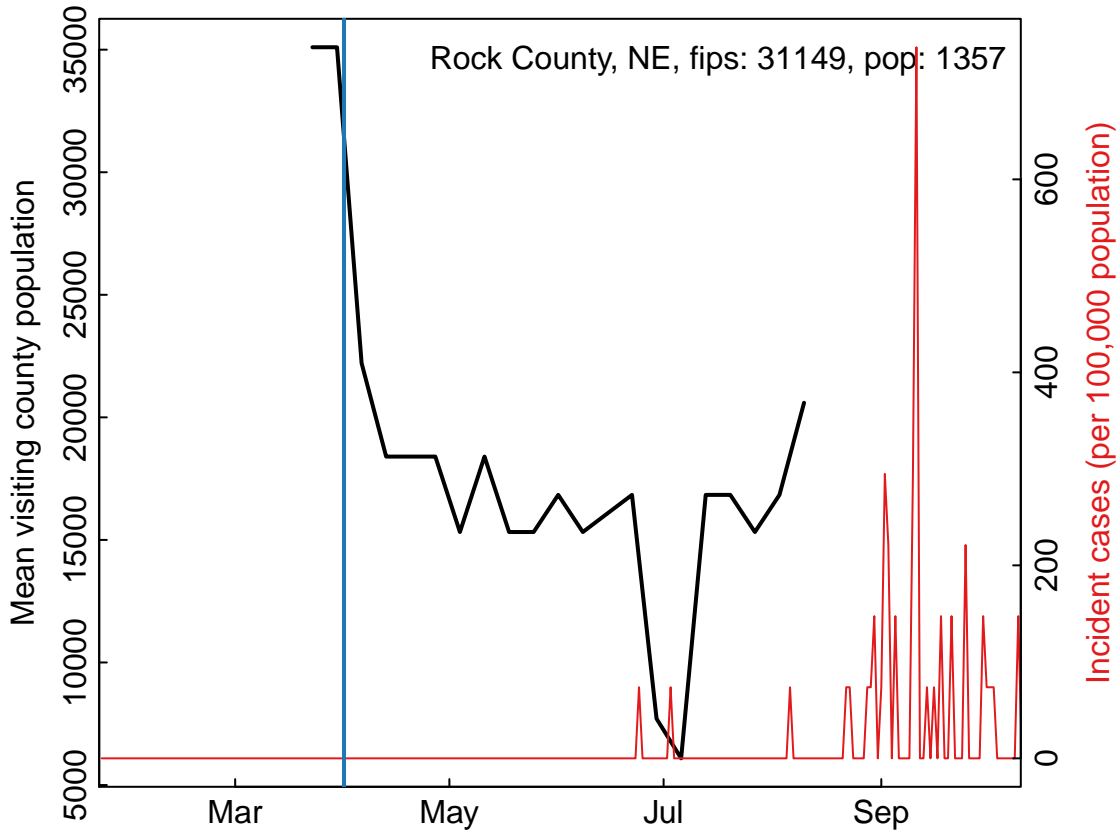

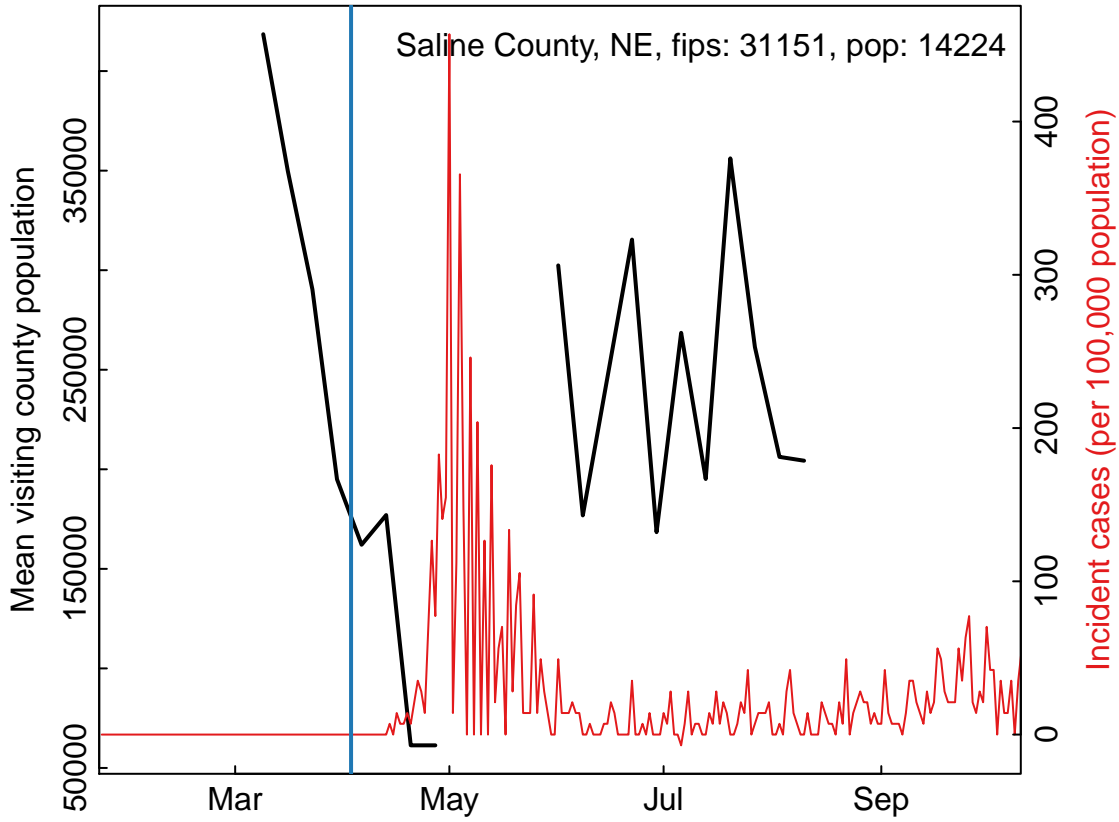

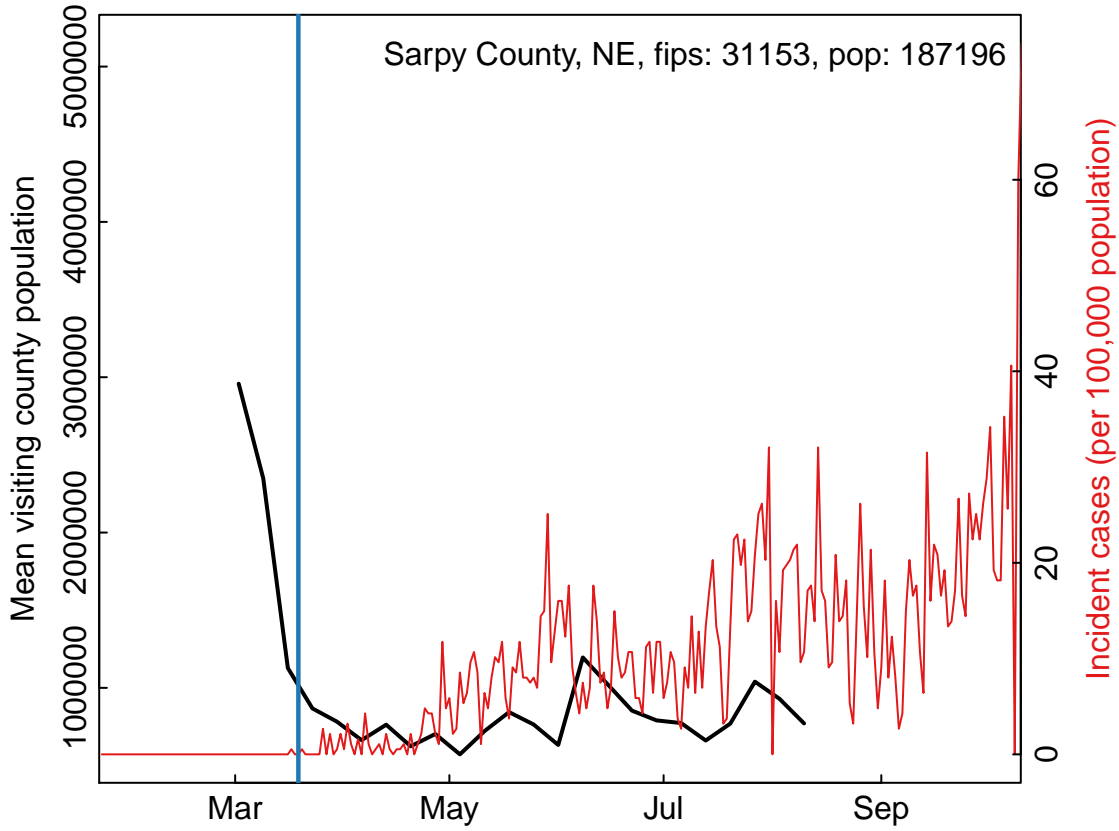

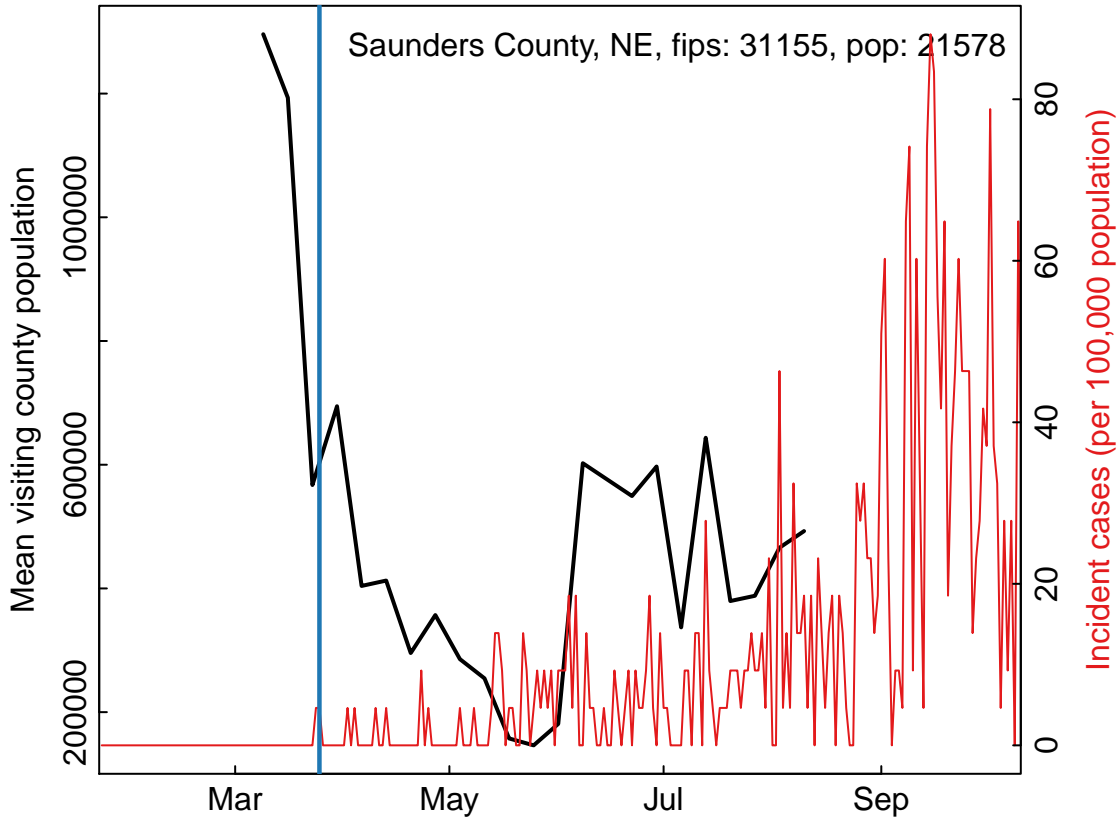

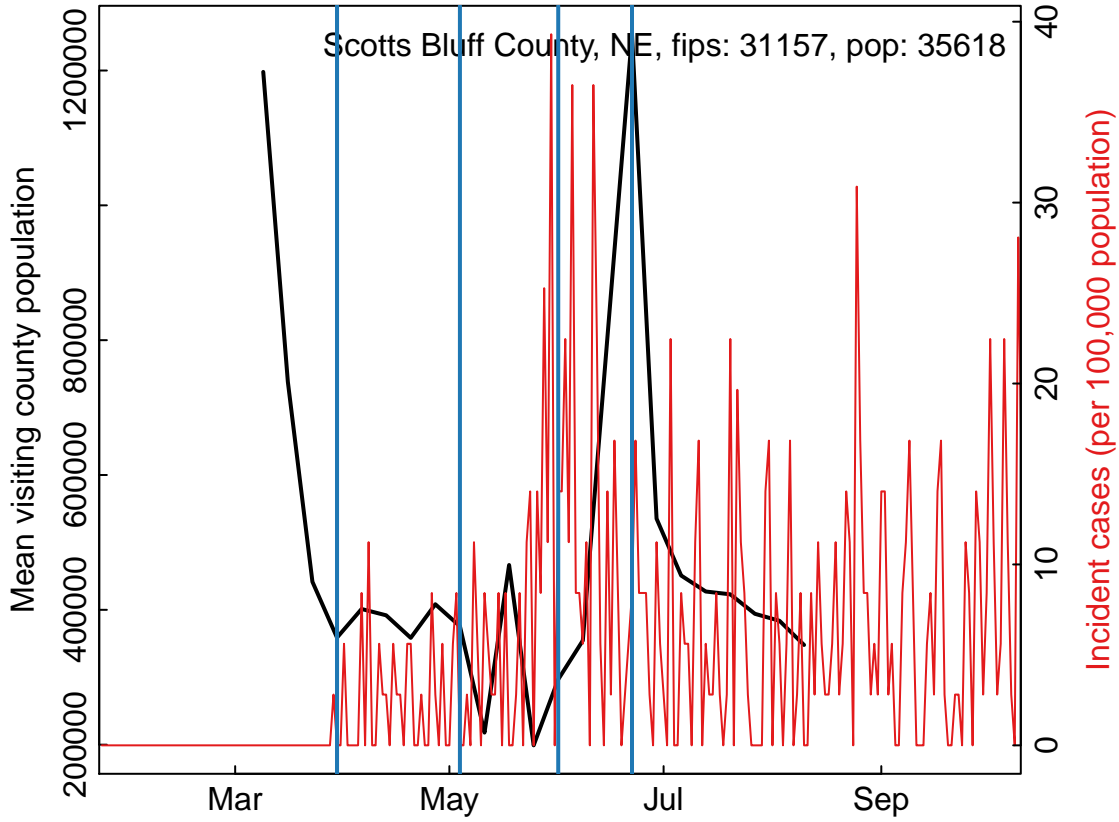

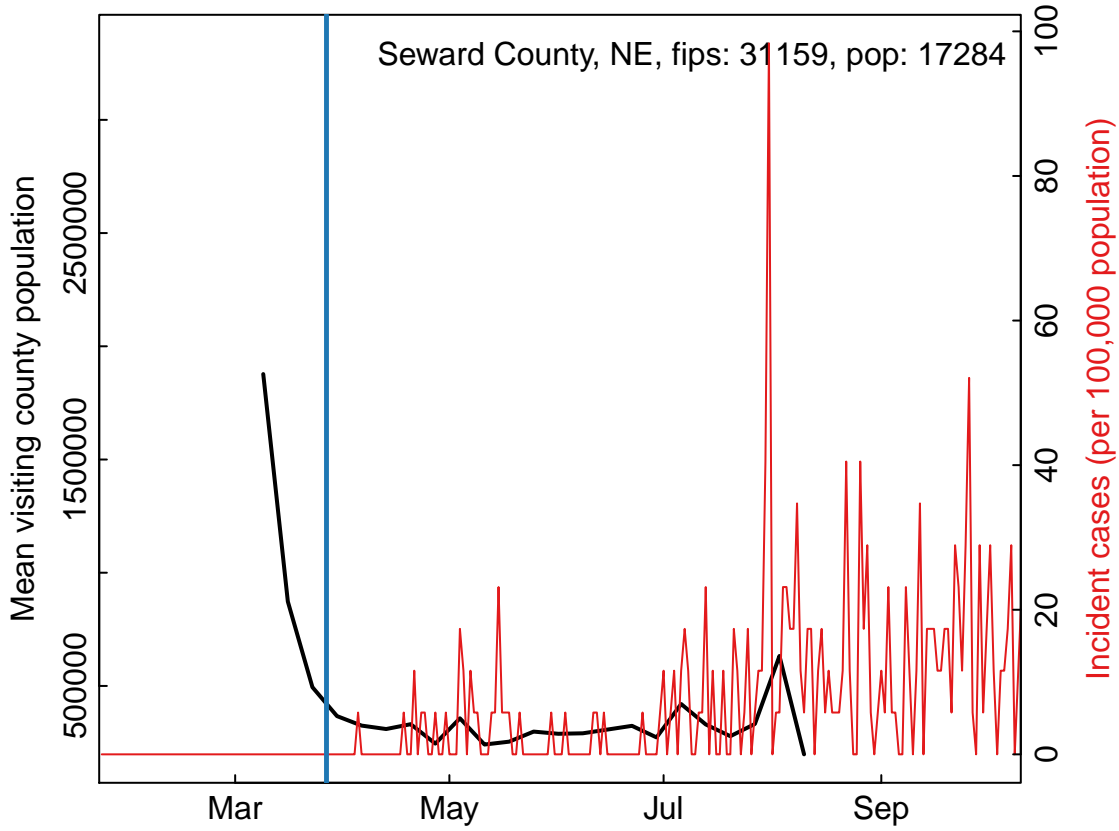

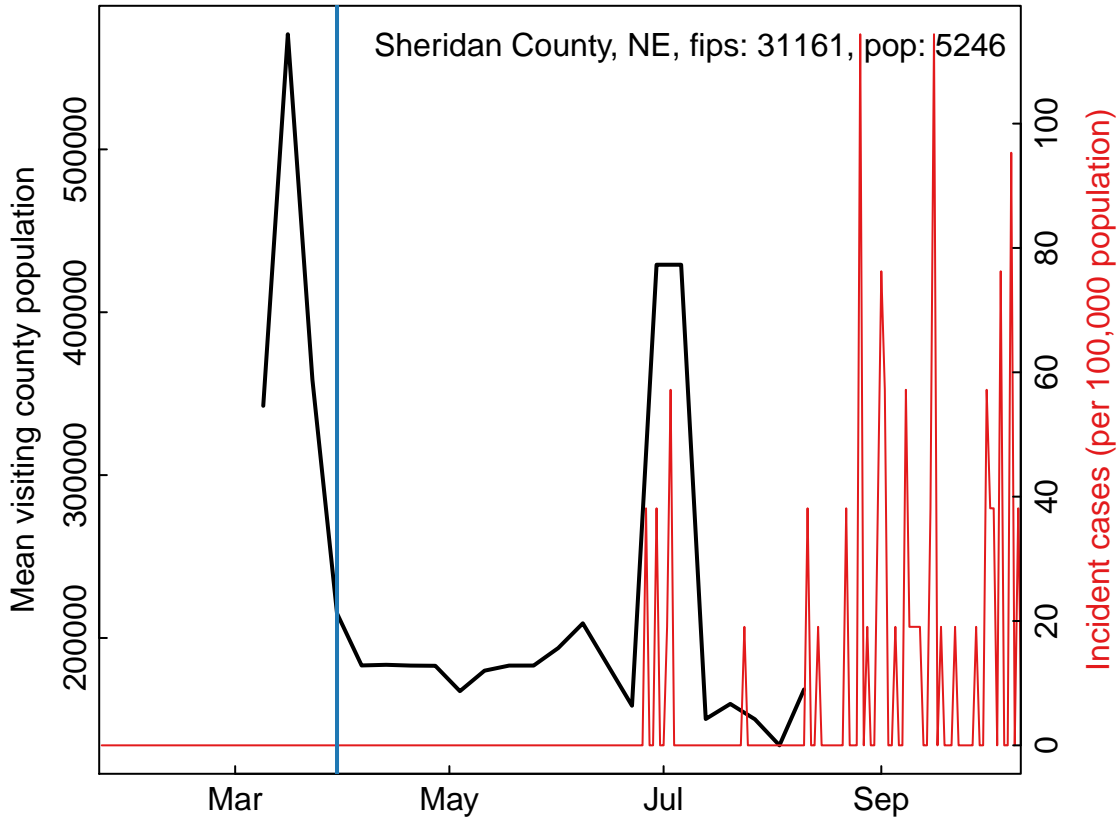



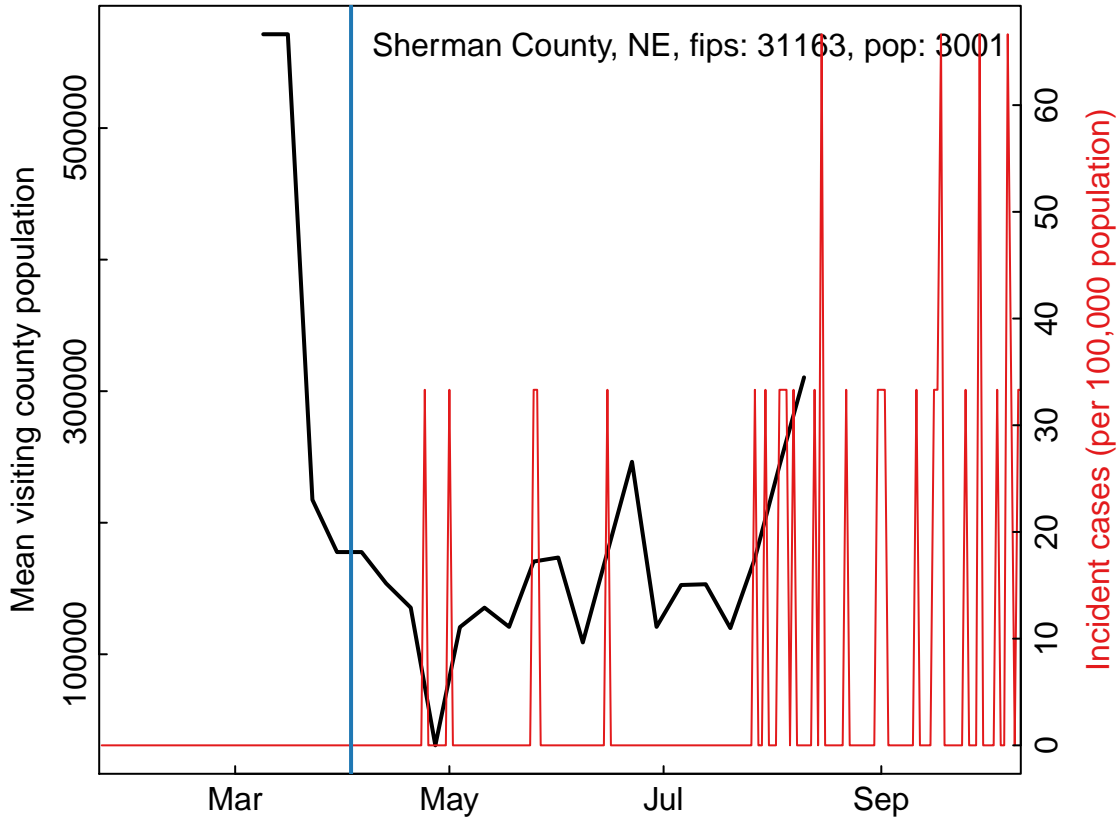

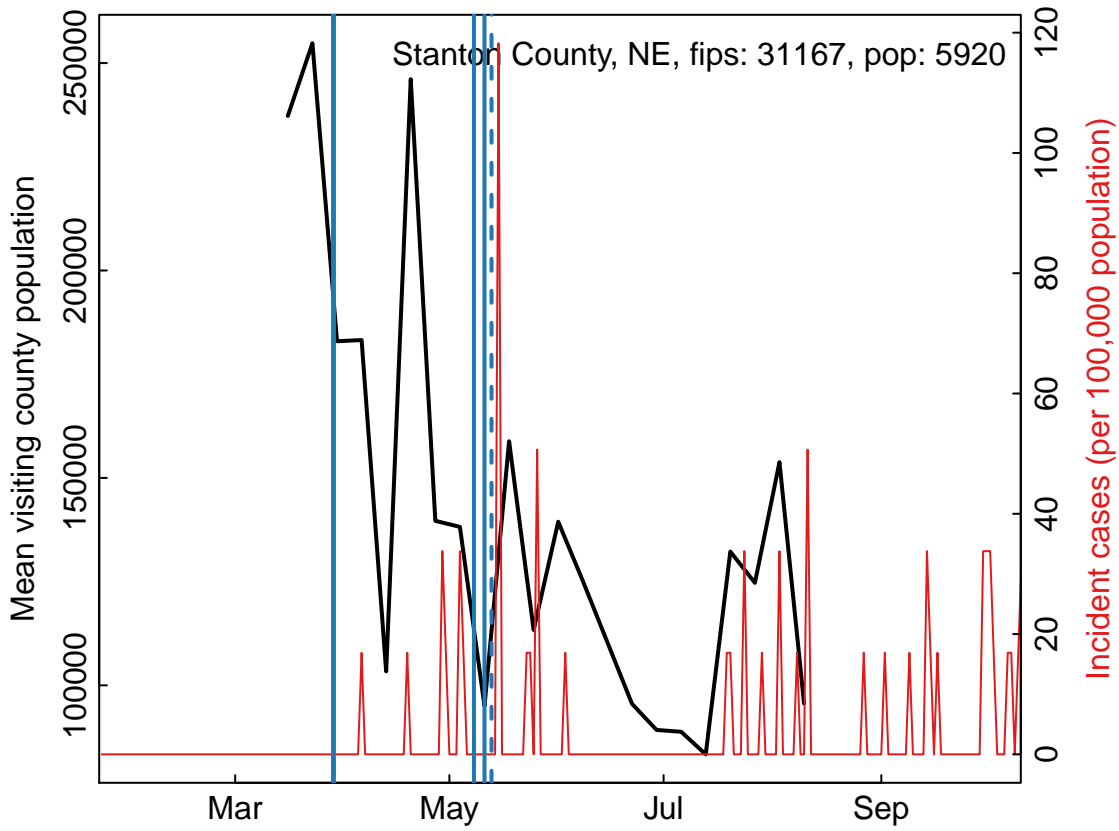

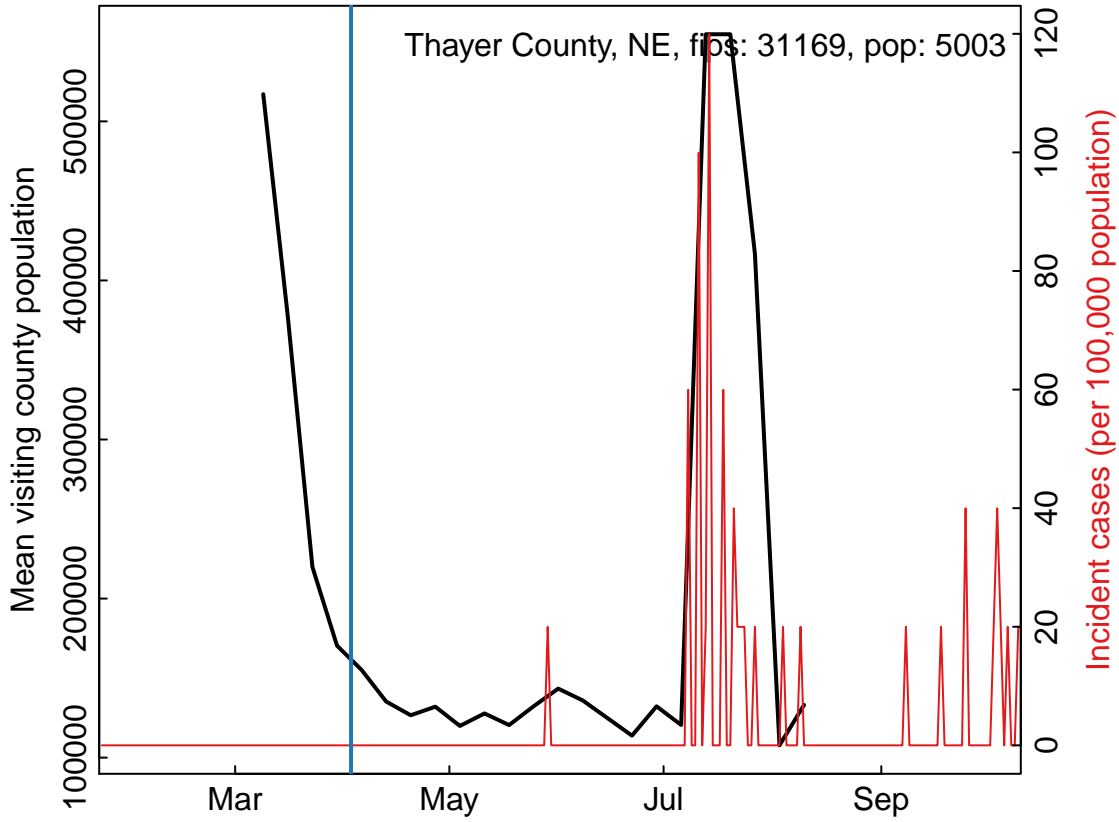

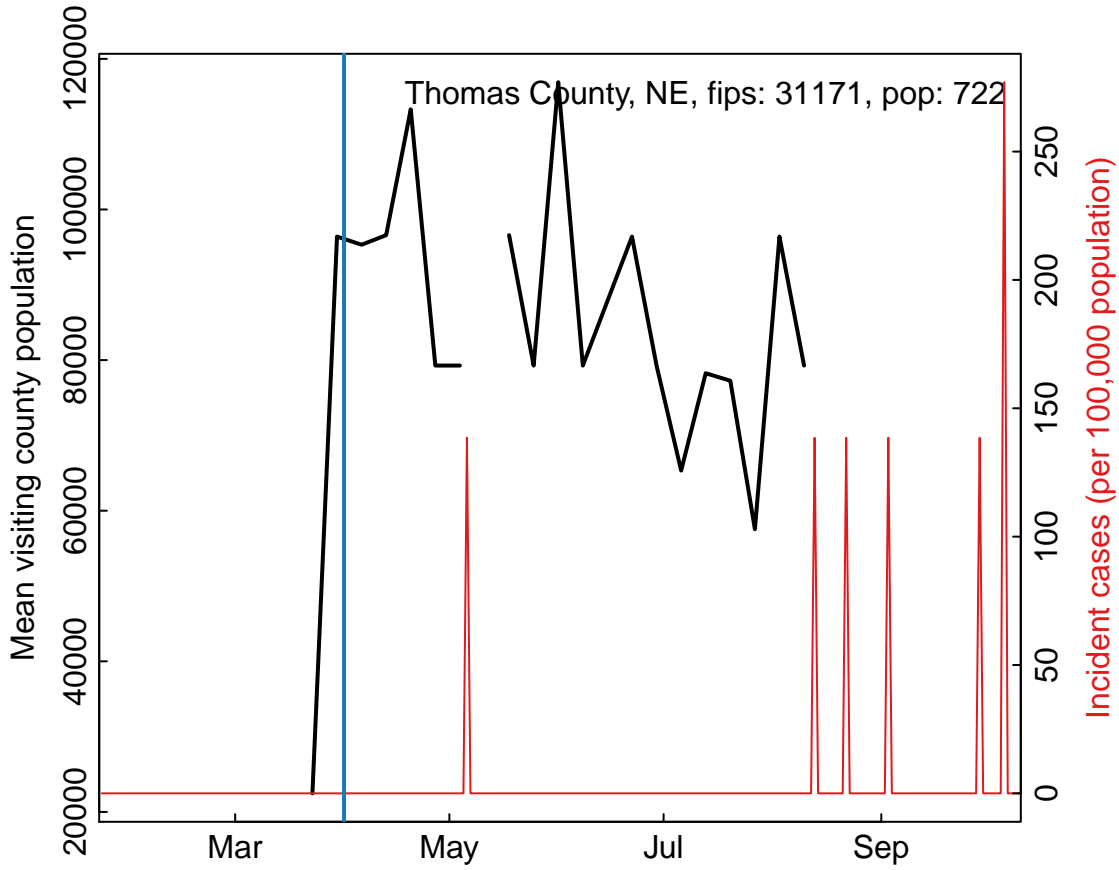

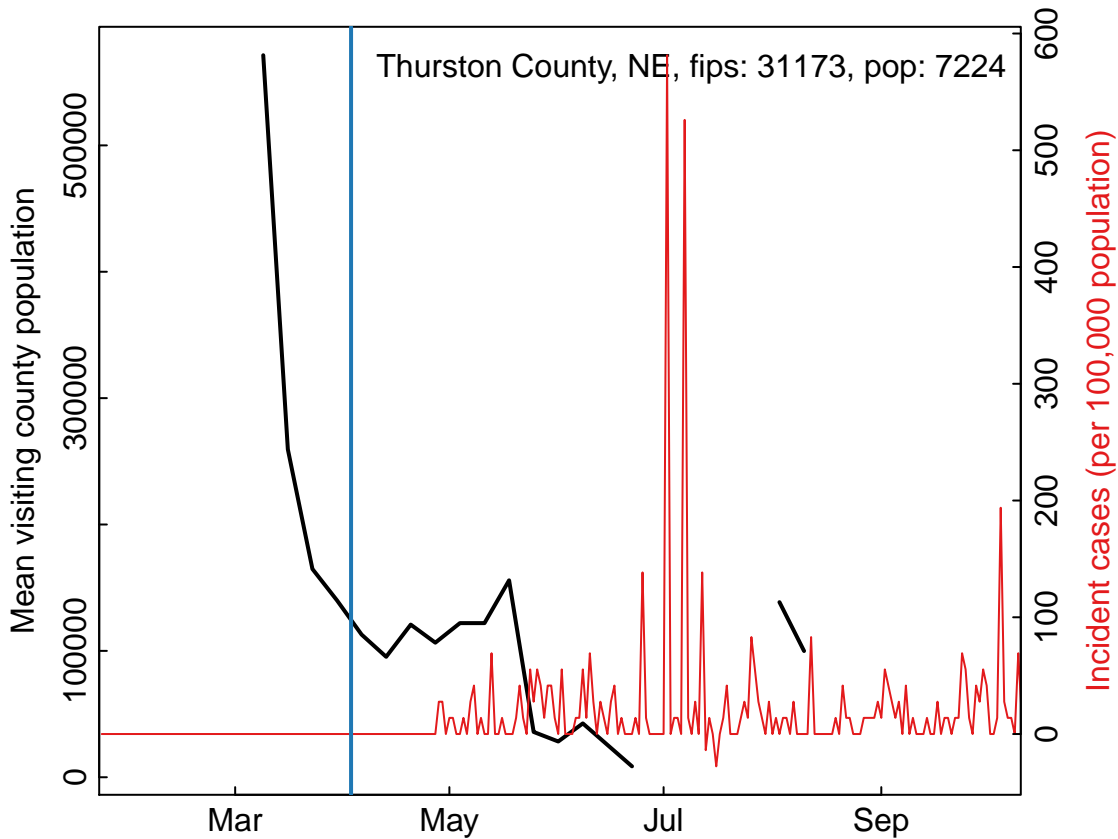

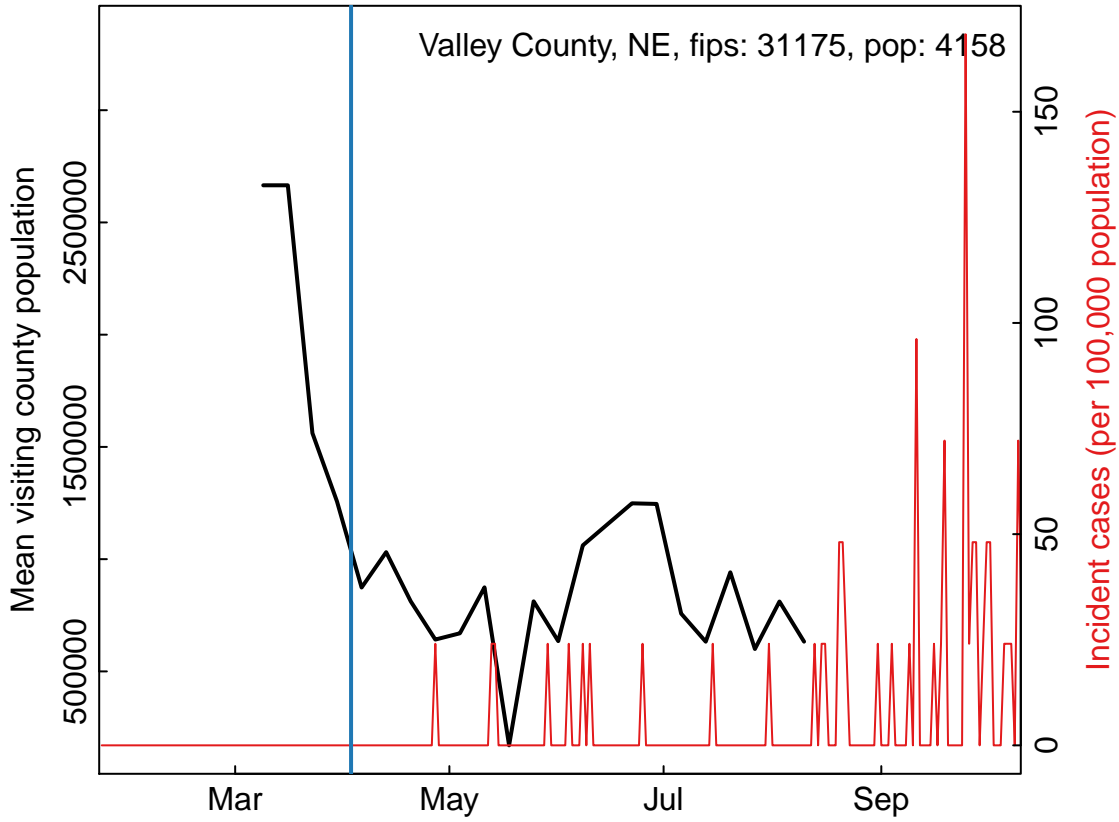

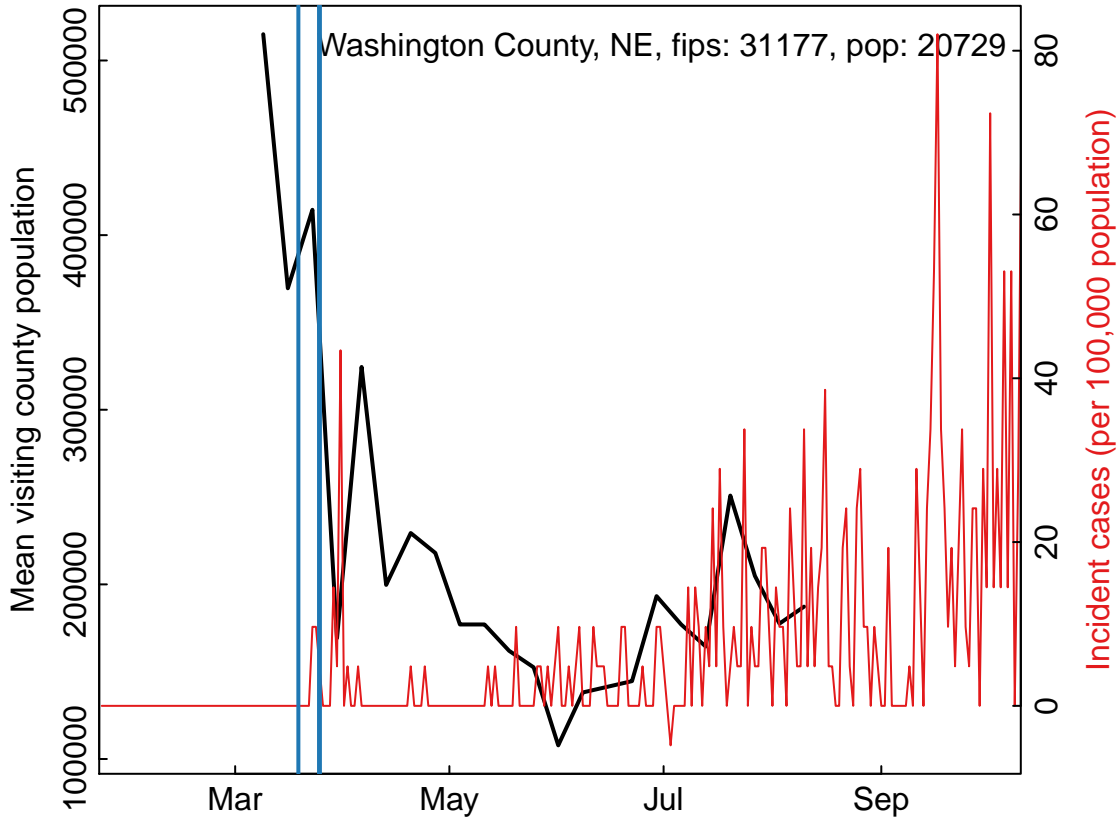

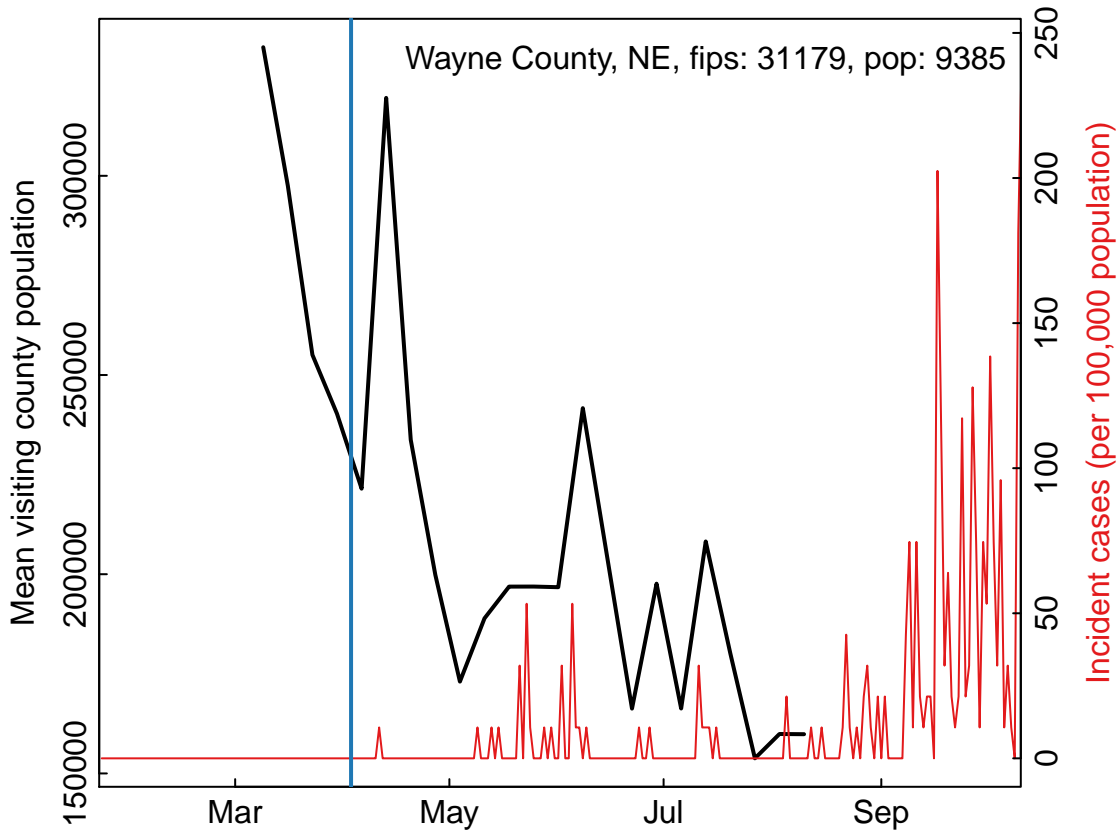



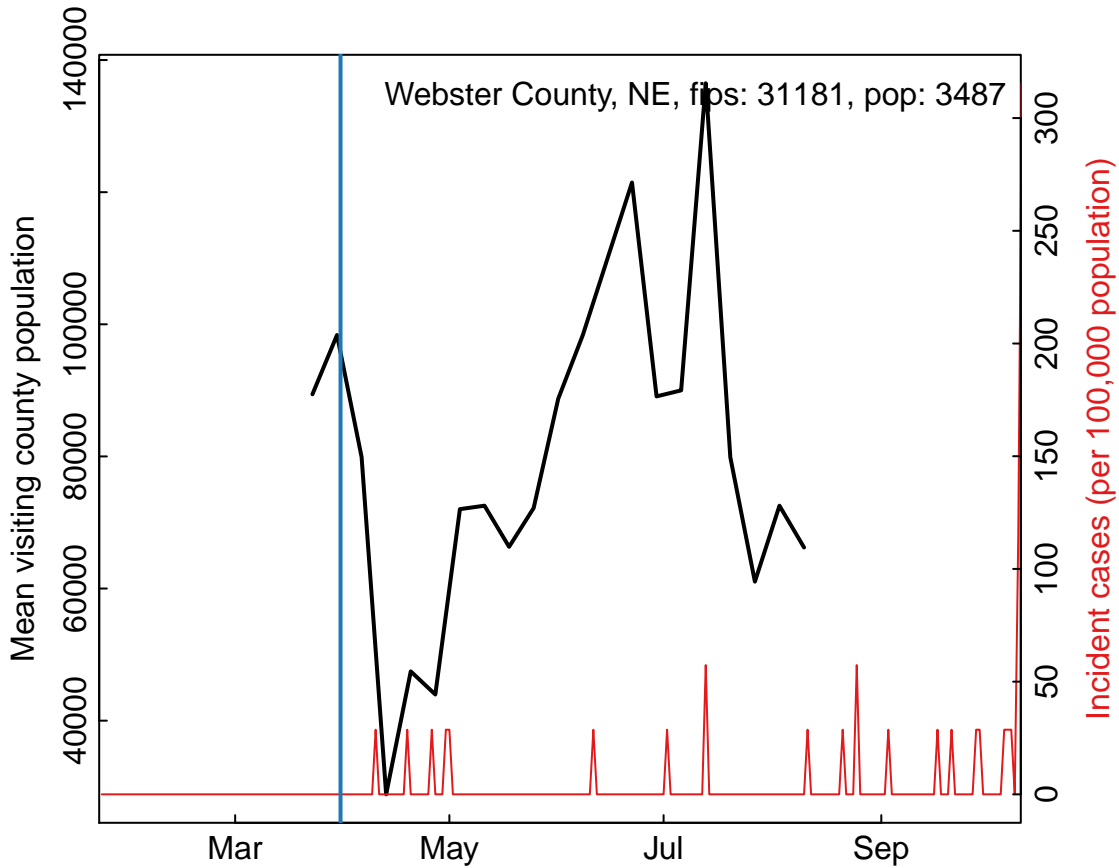

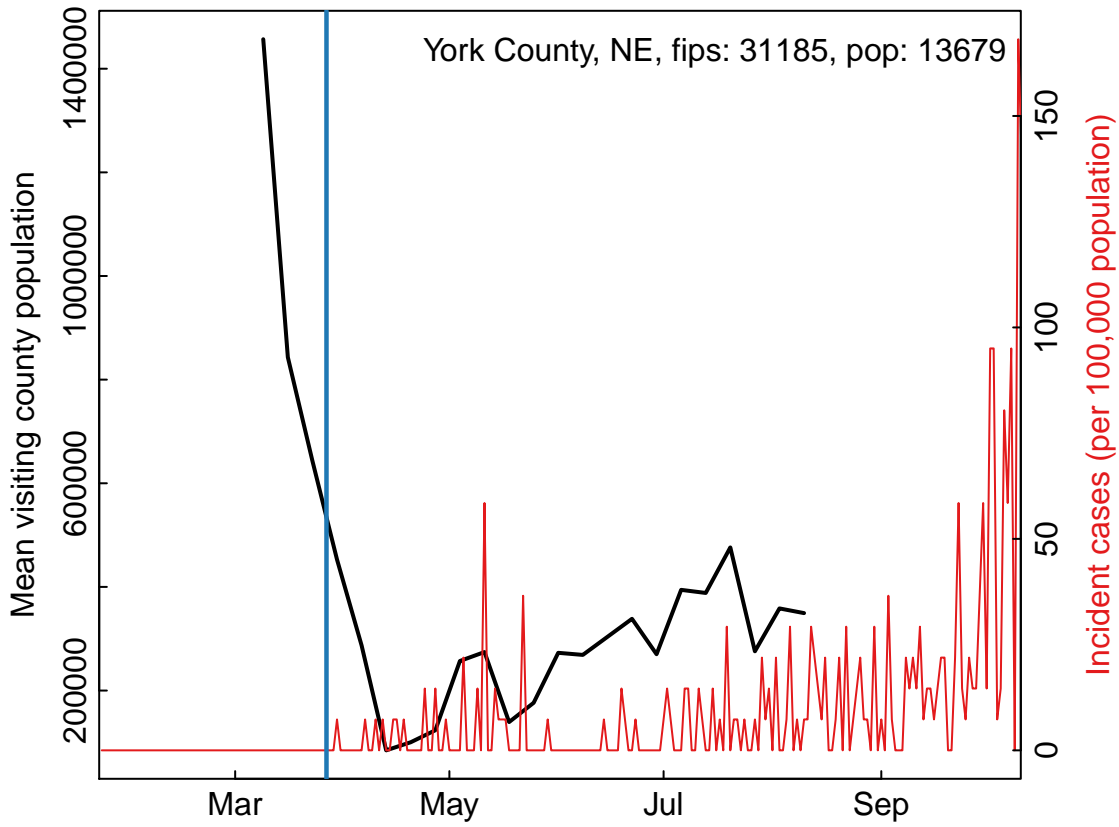

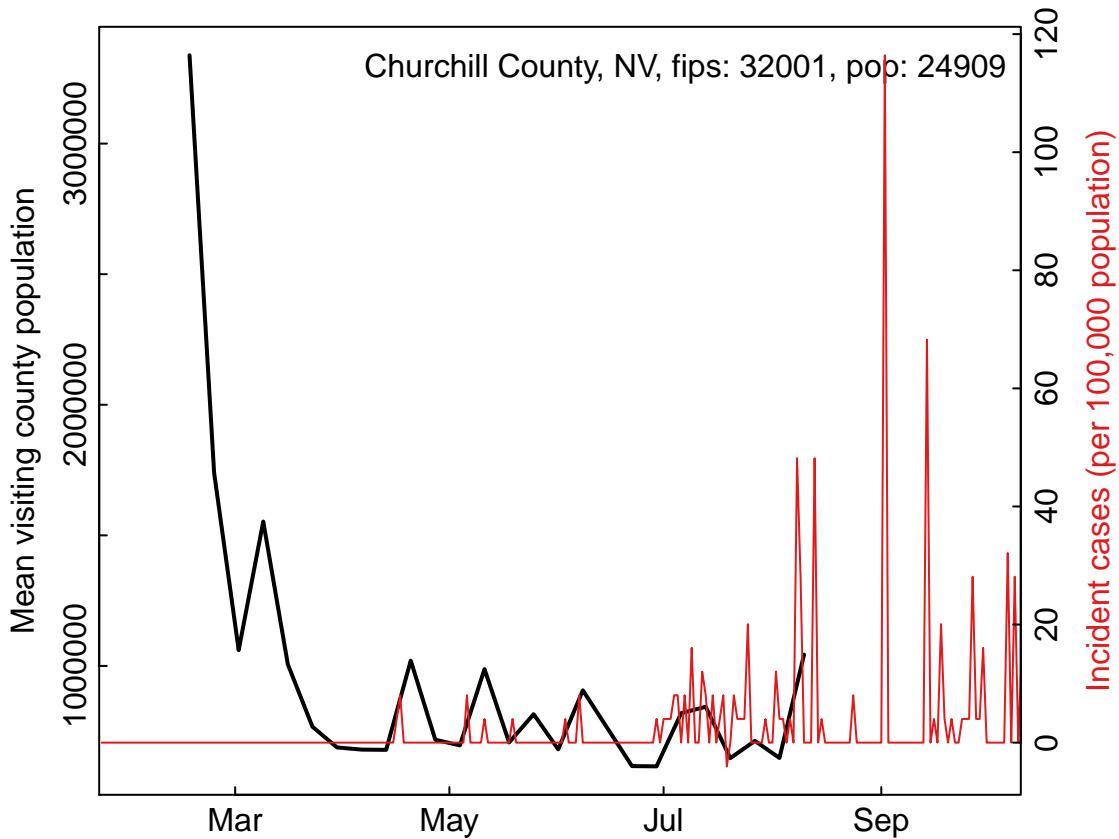

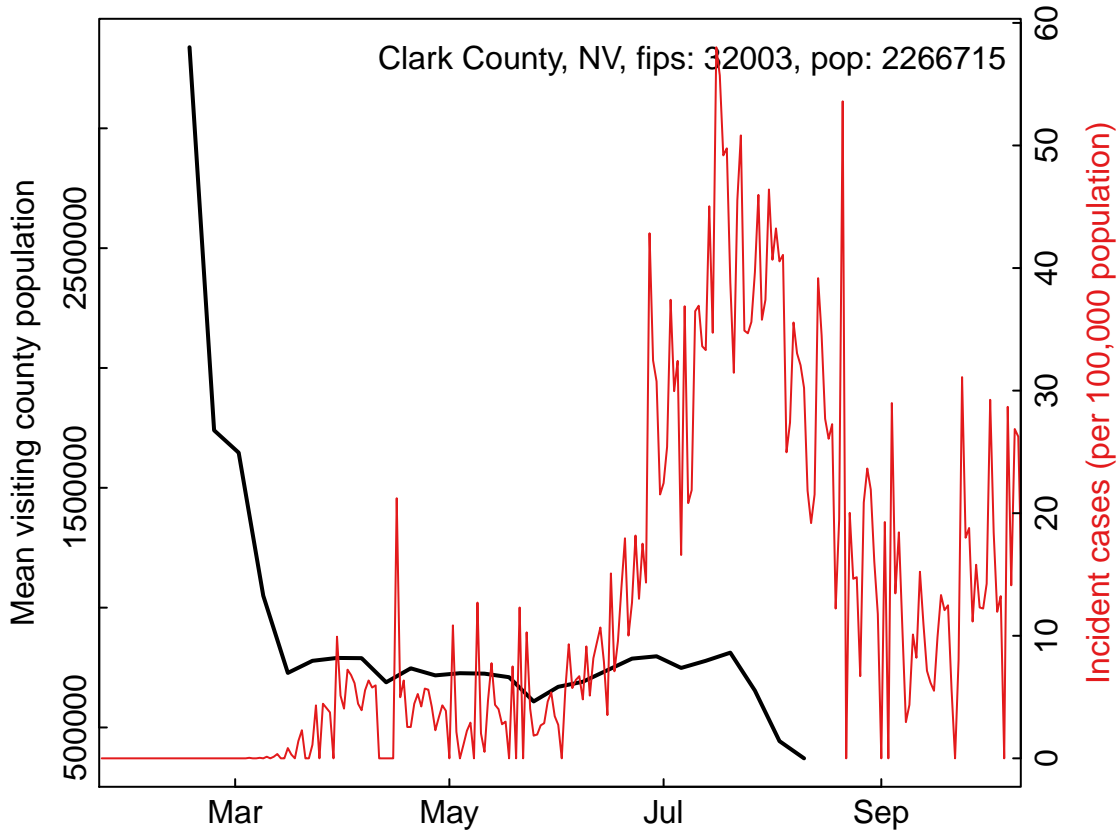

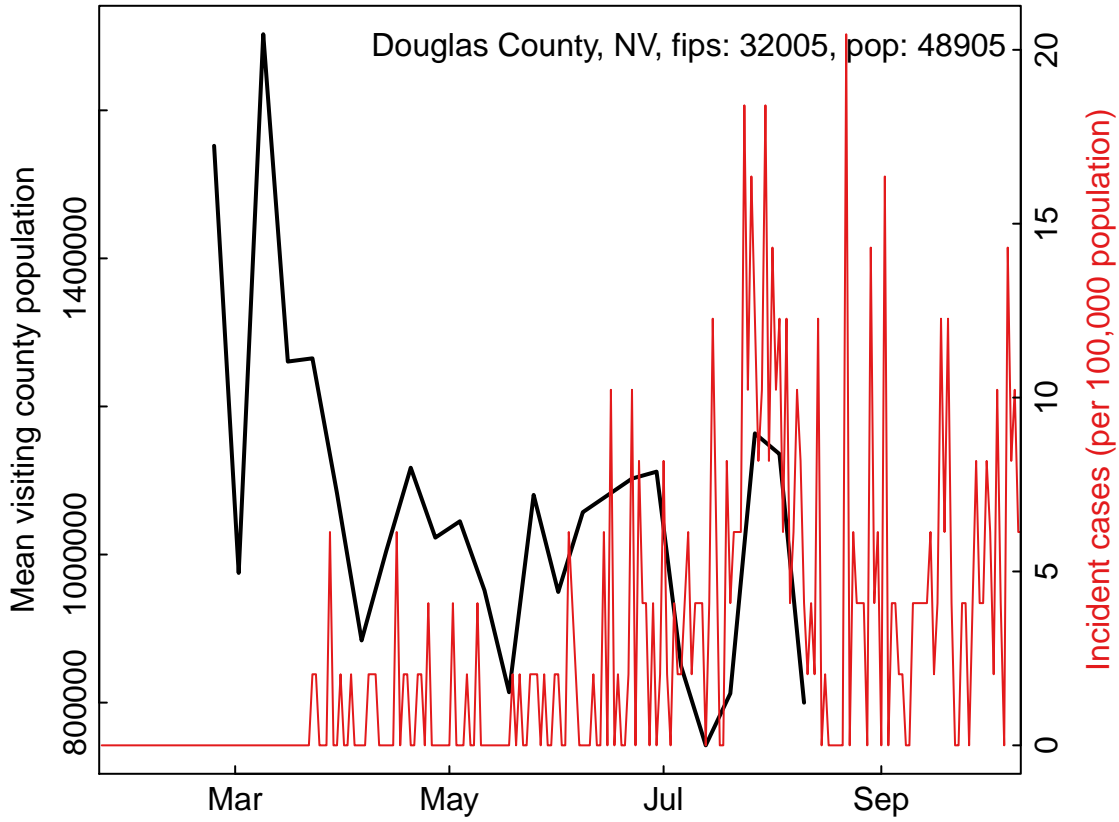

Elko County, NV, fips: 32007, pop: 52778

Mean visiting county population

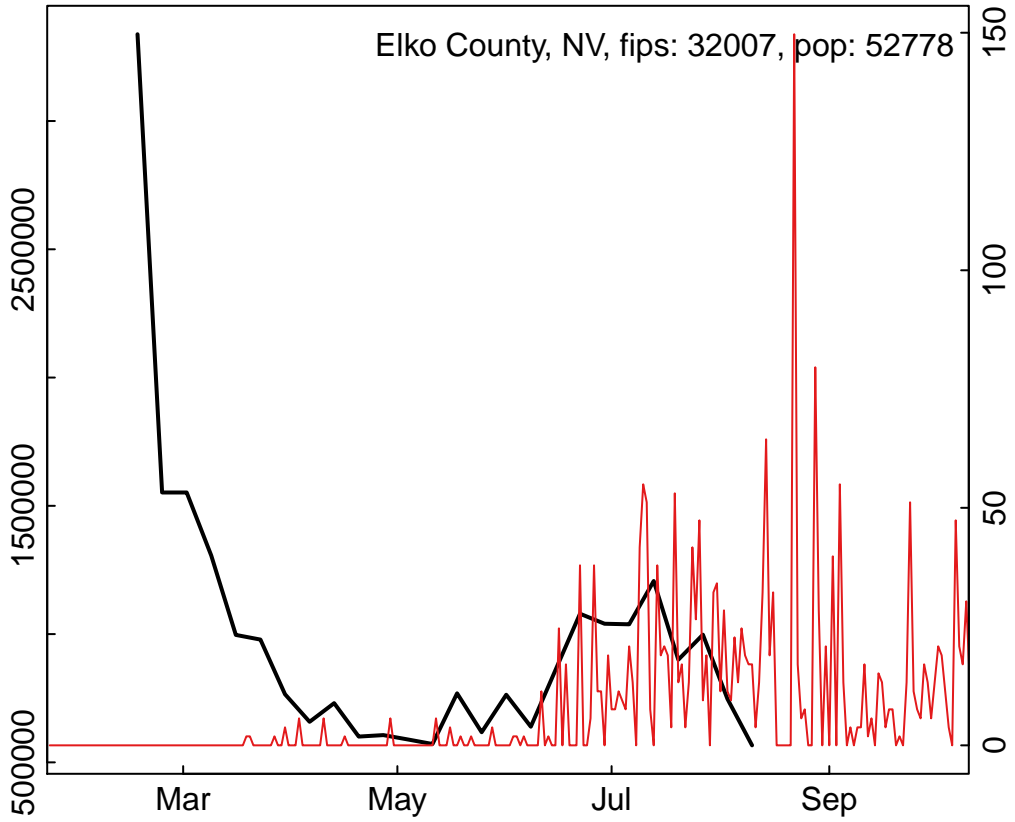

Incident cases (per 100,000 population)

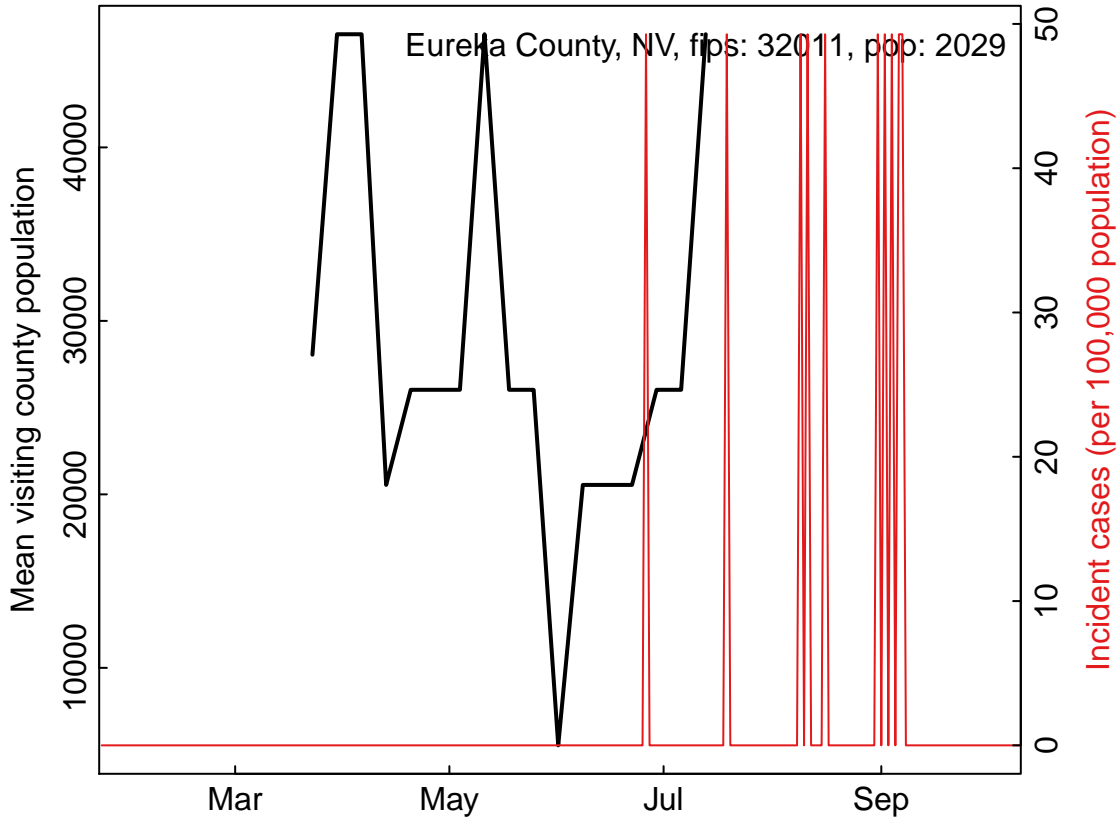

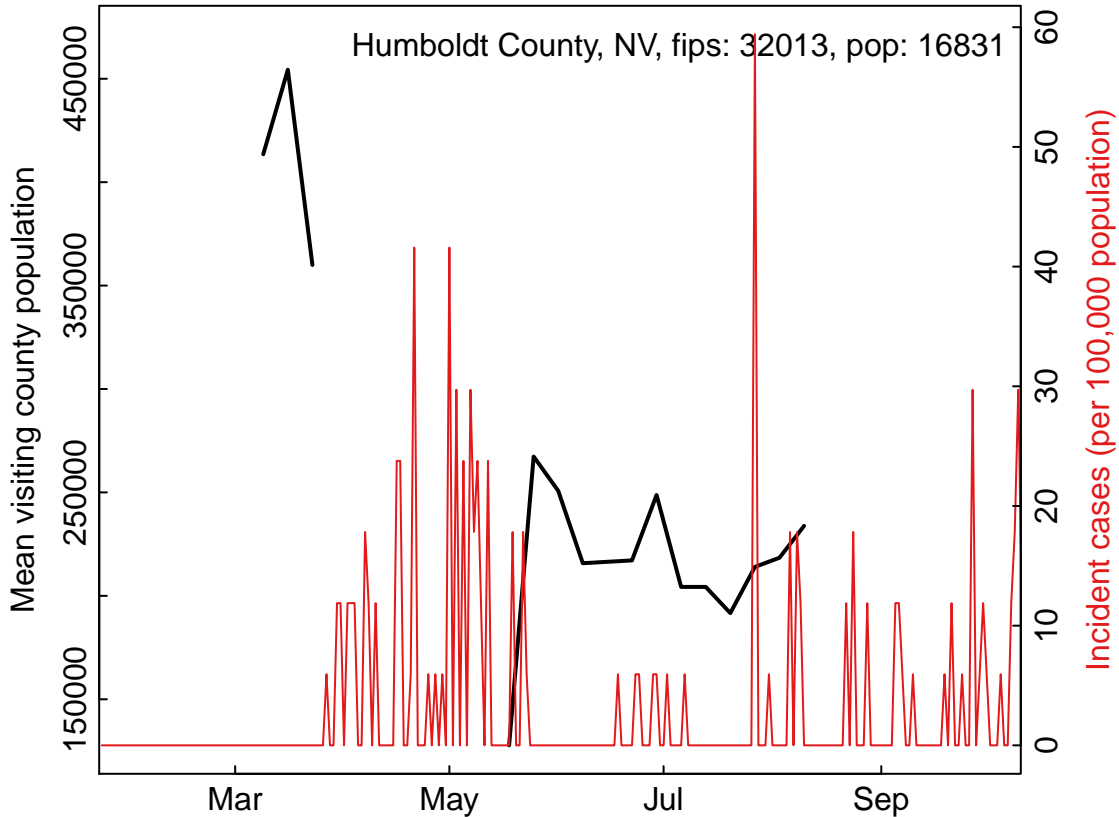



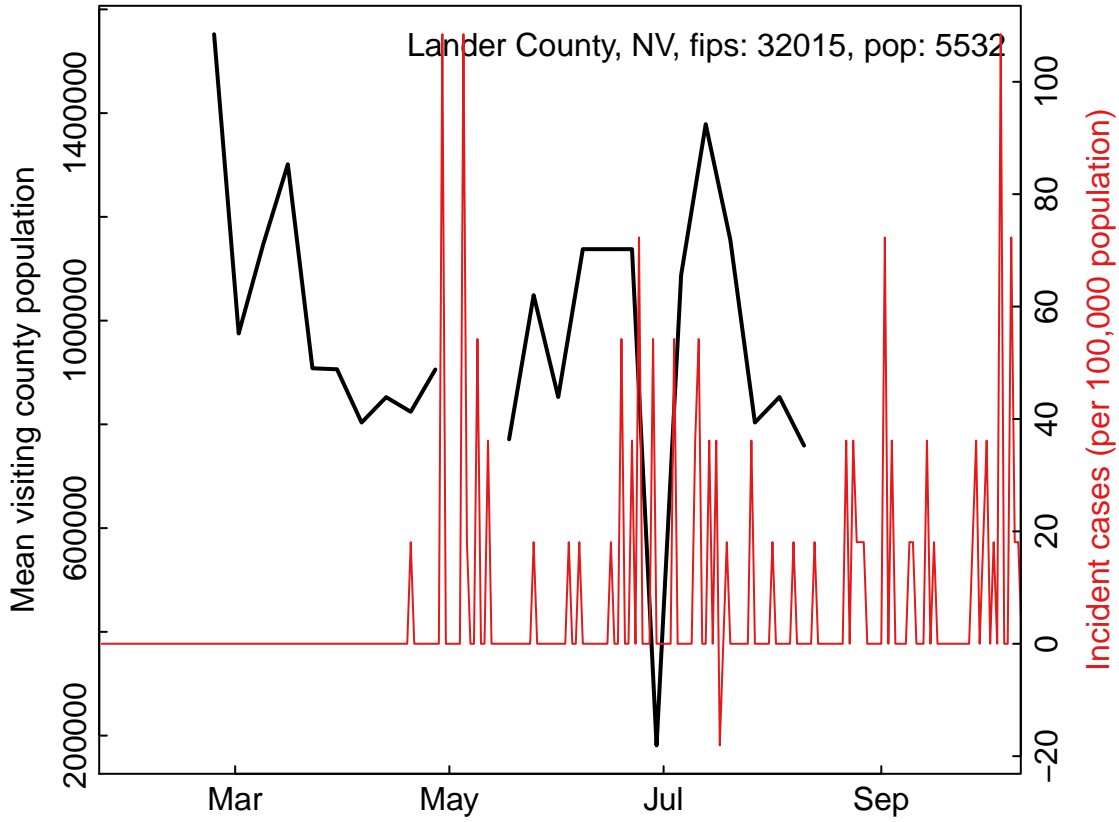

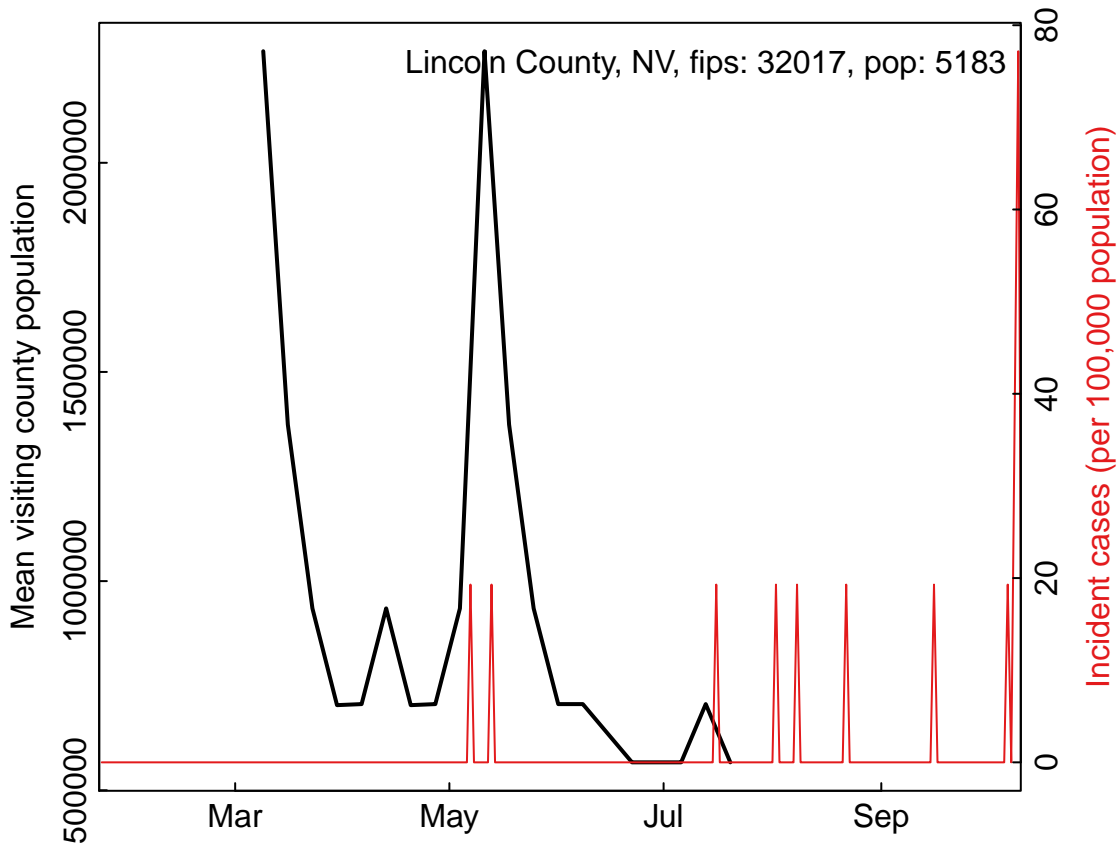

Lyon County, NV, fips: 32019, pop: 57510

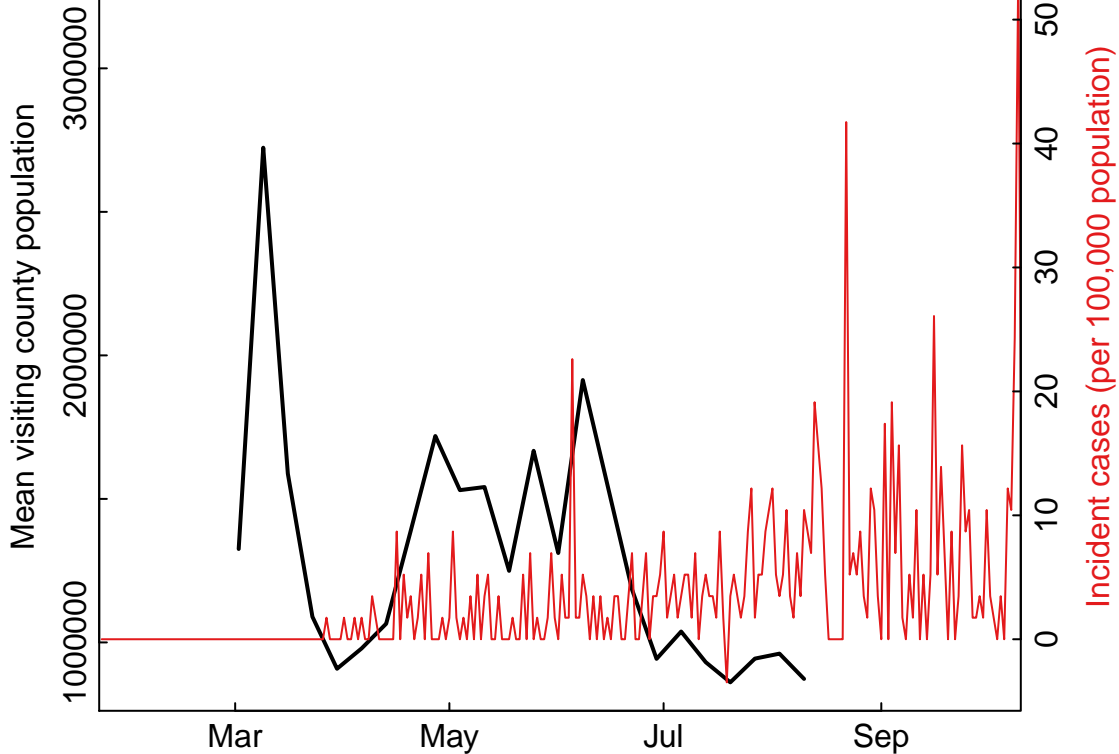

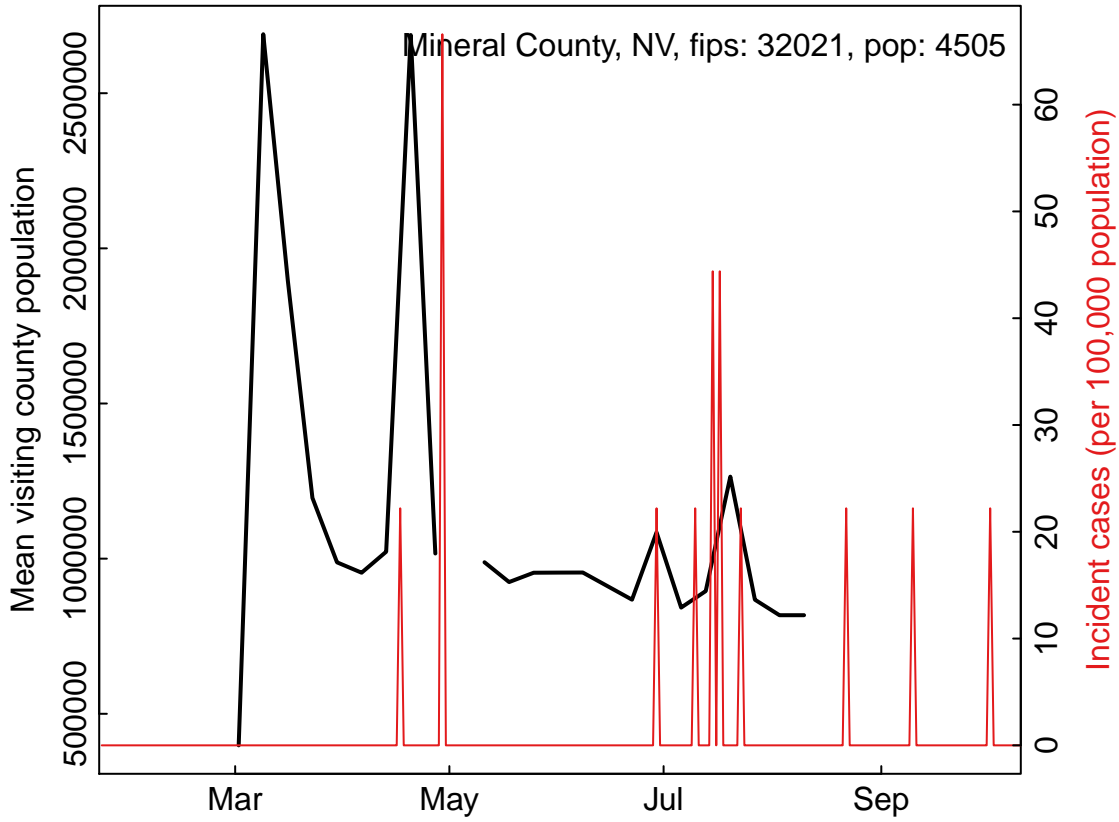

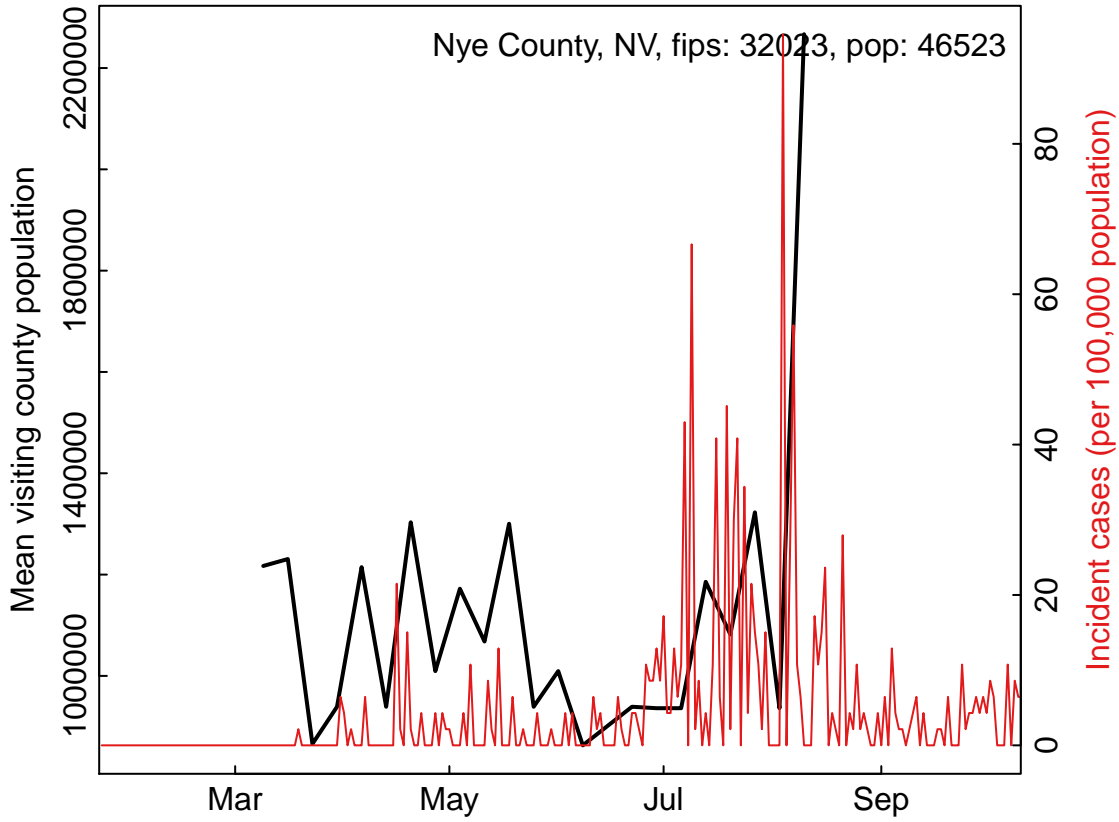

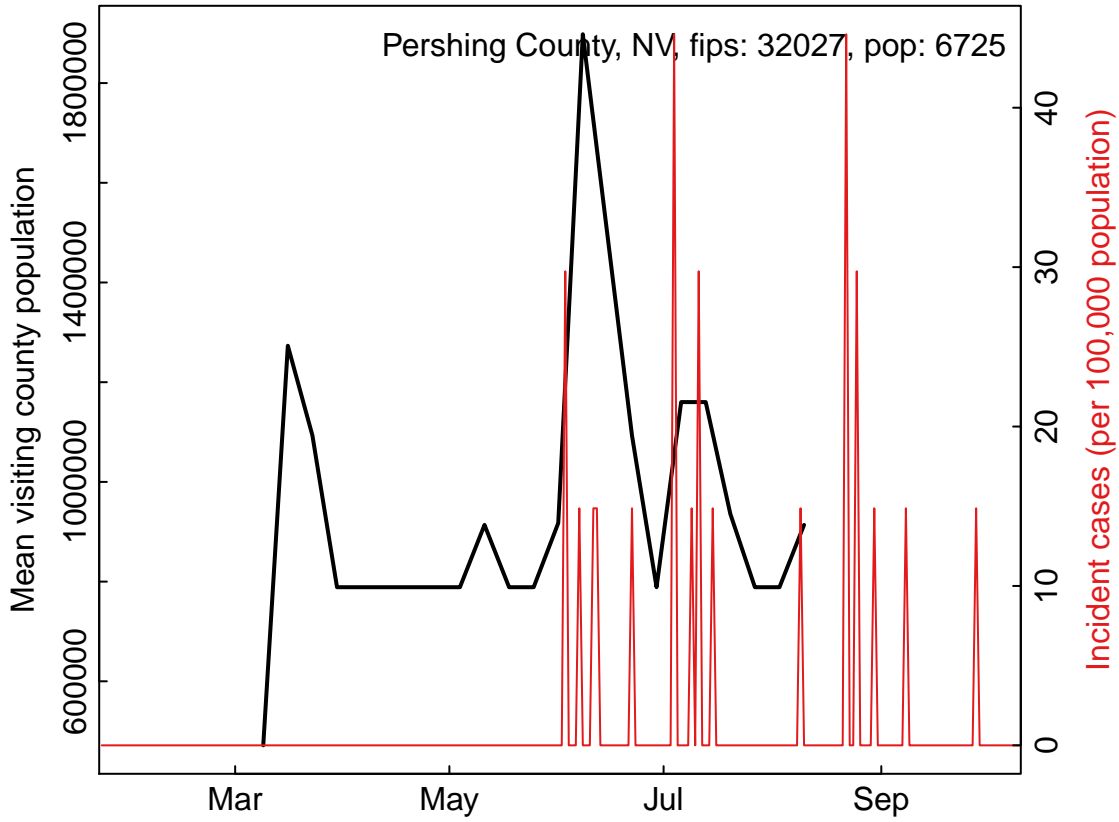

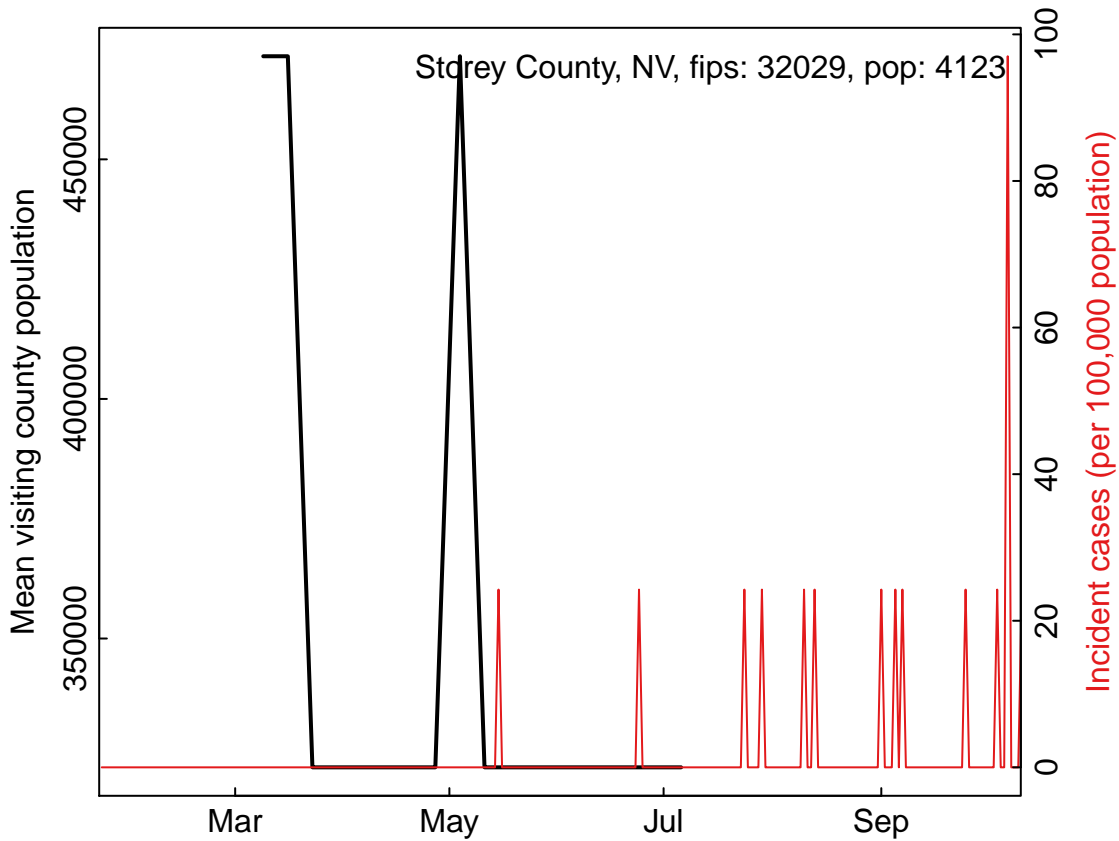

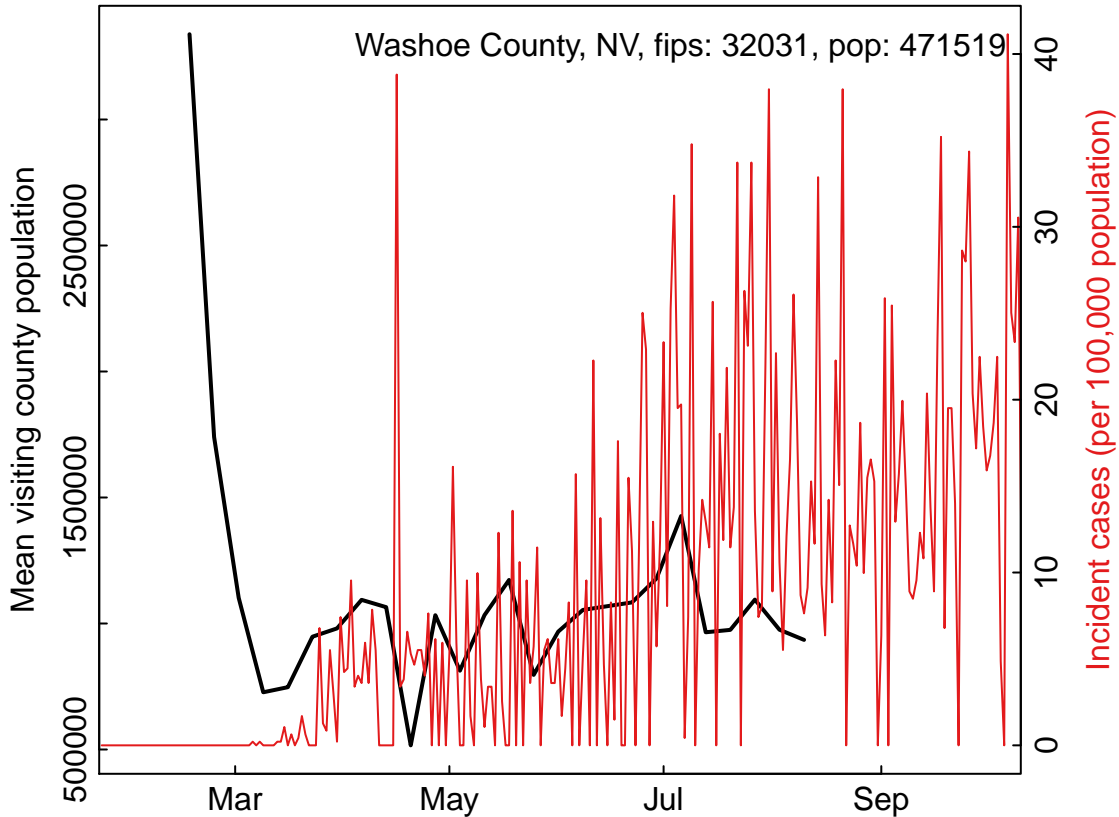



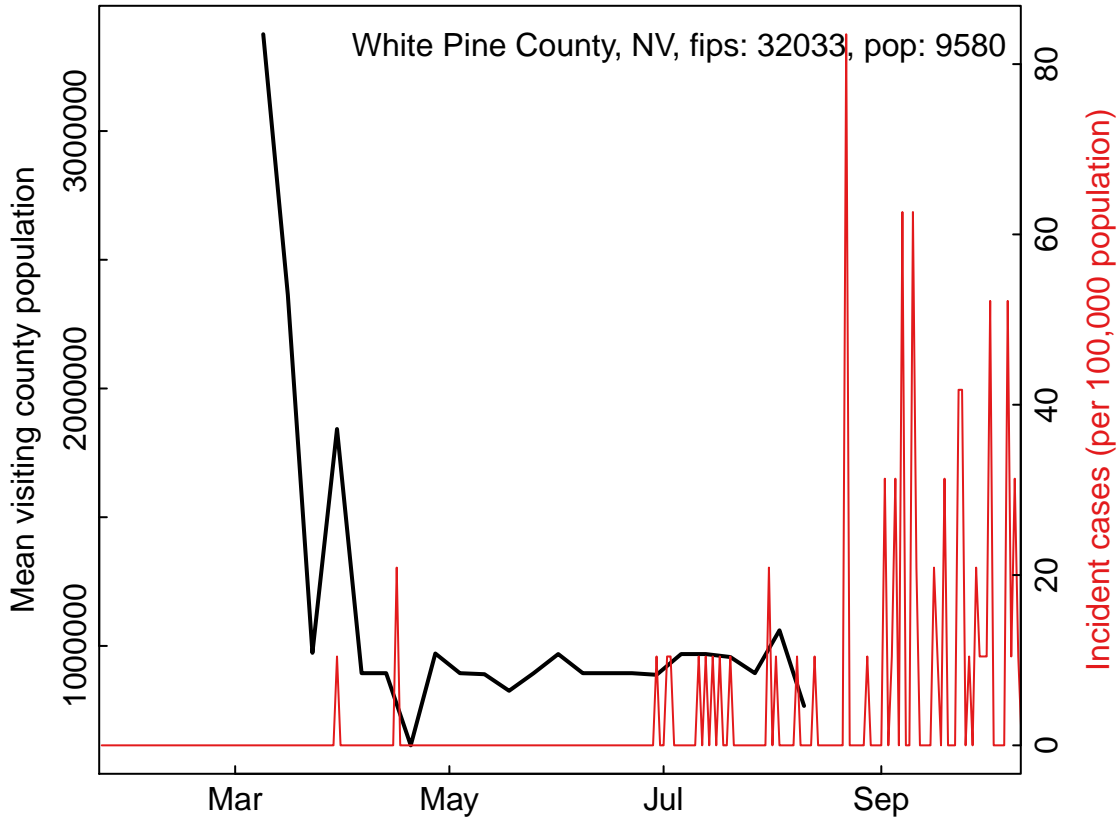

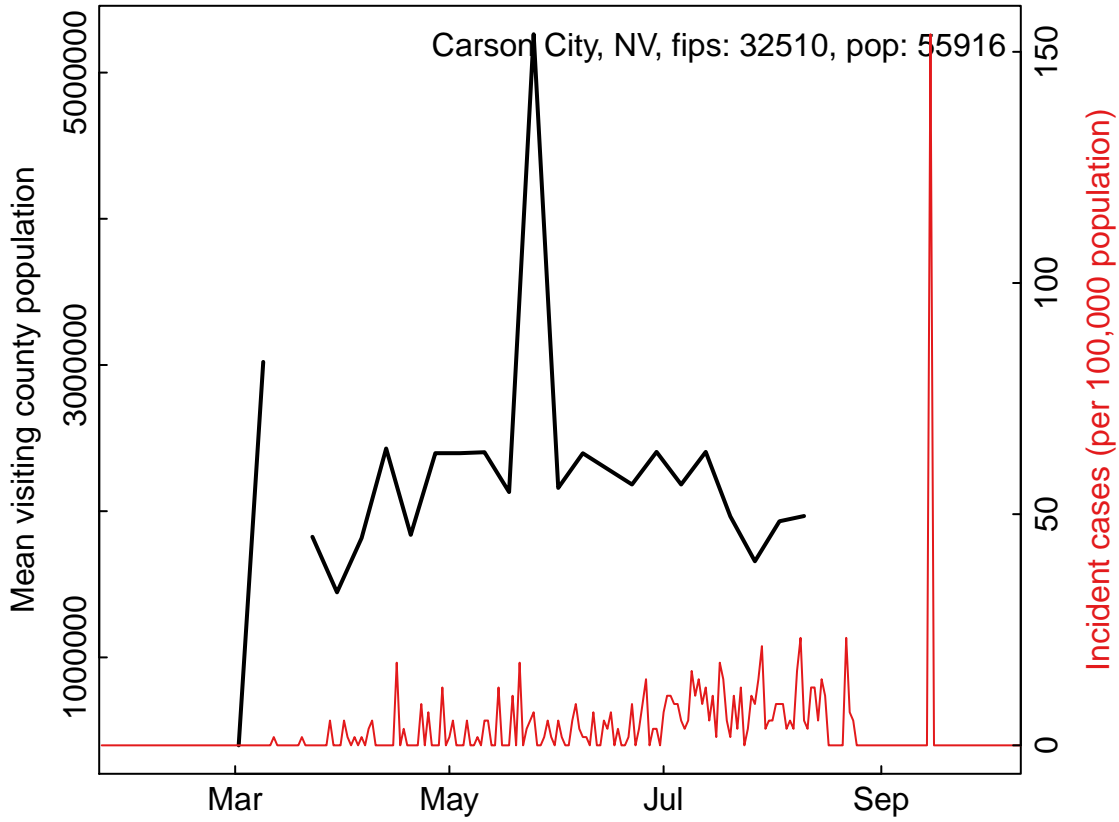

Belknap County, NH, fips: 33001, pop: 61303

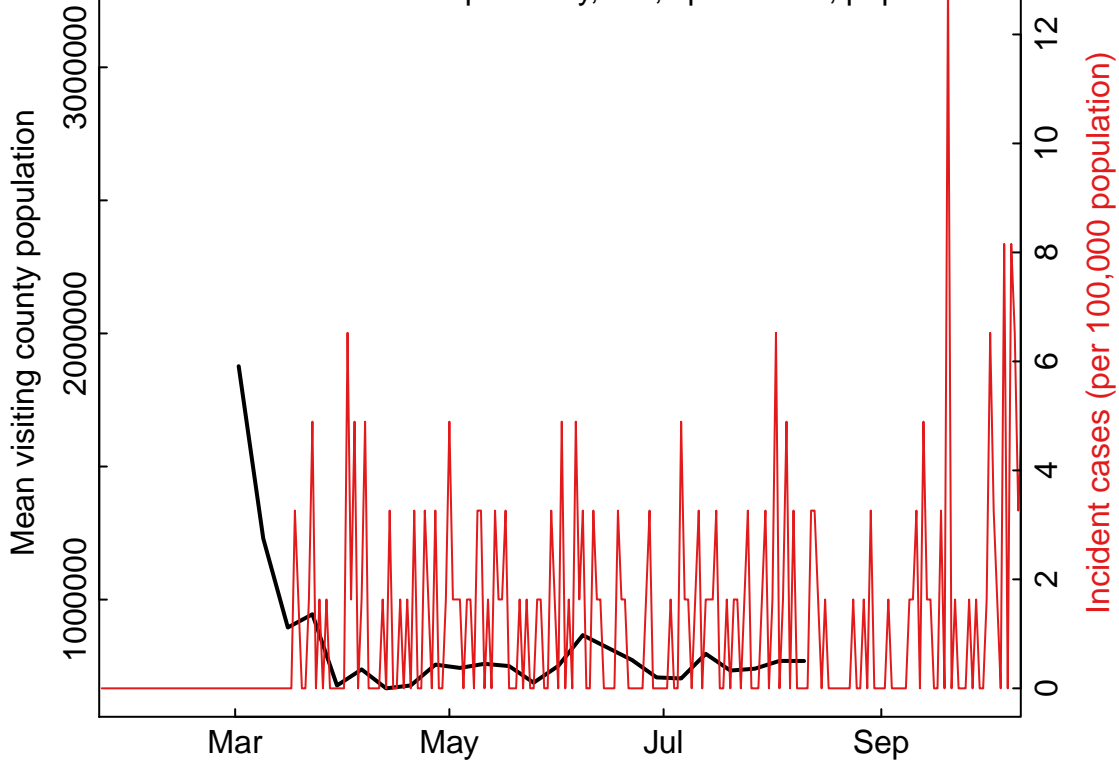

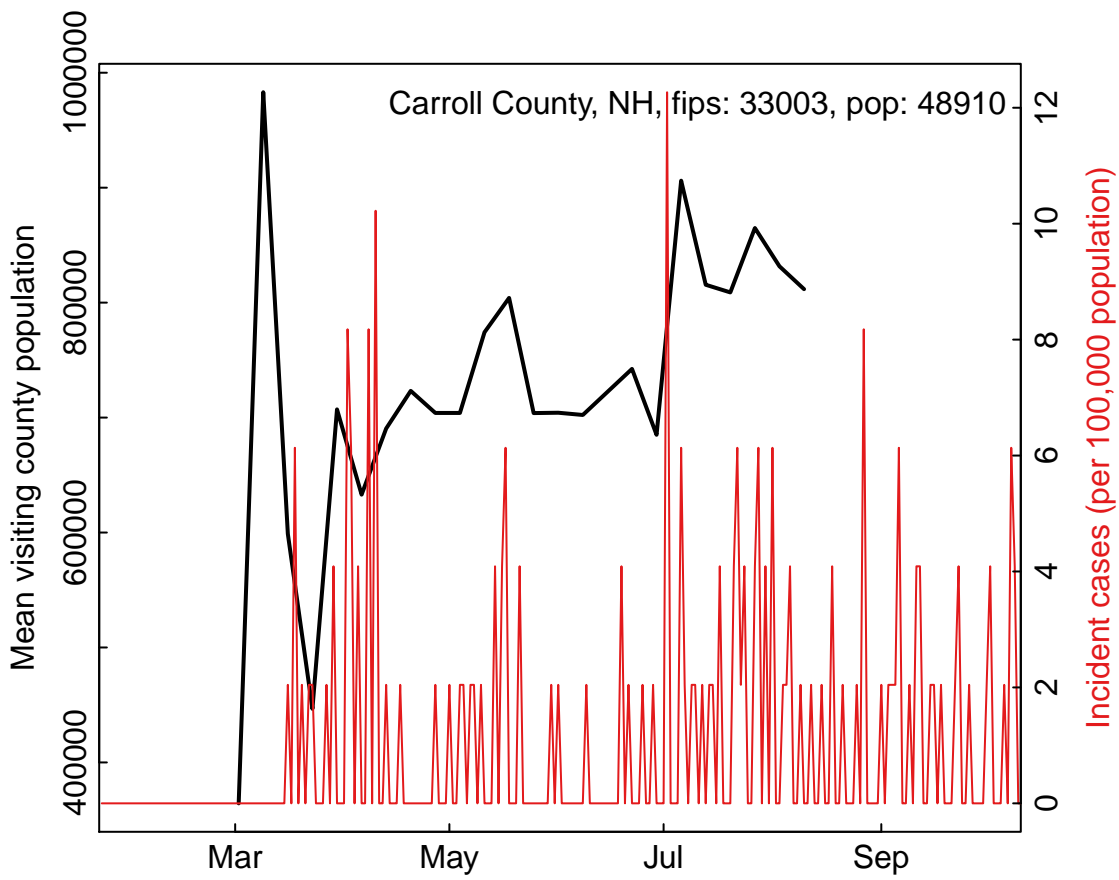



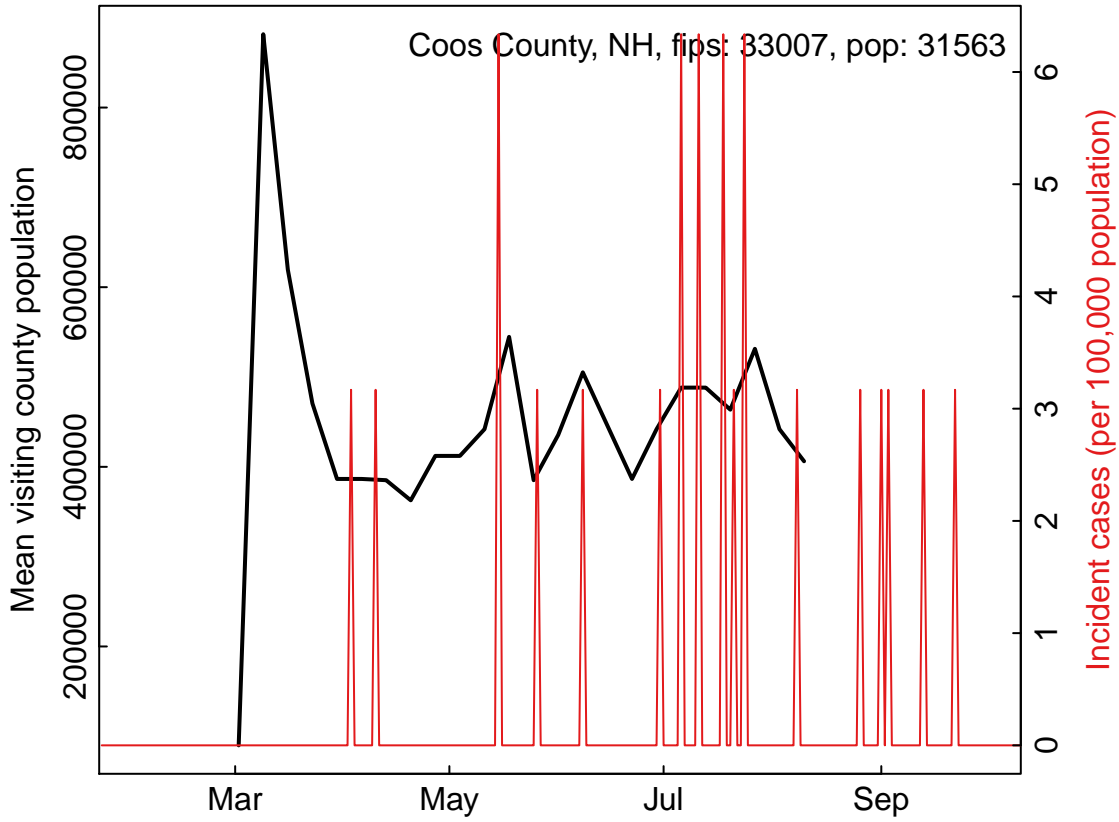

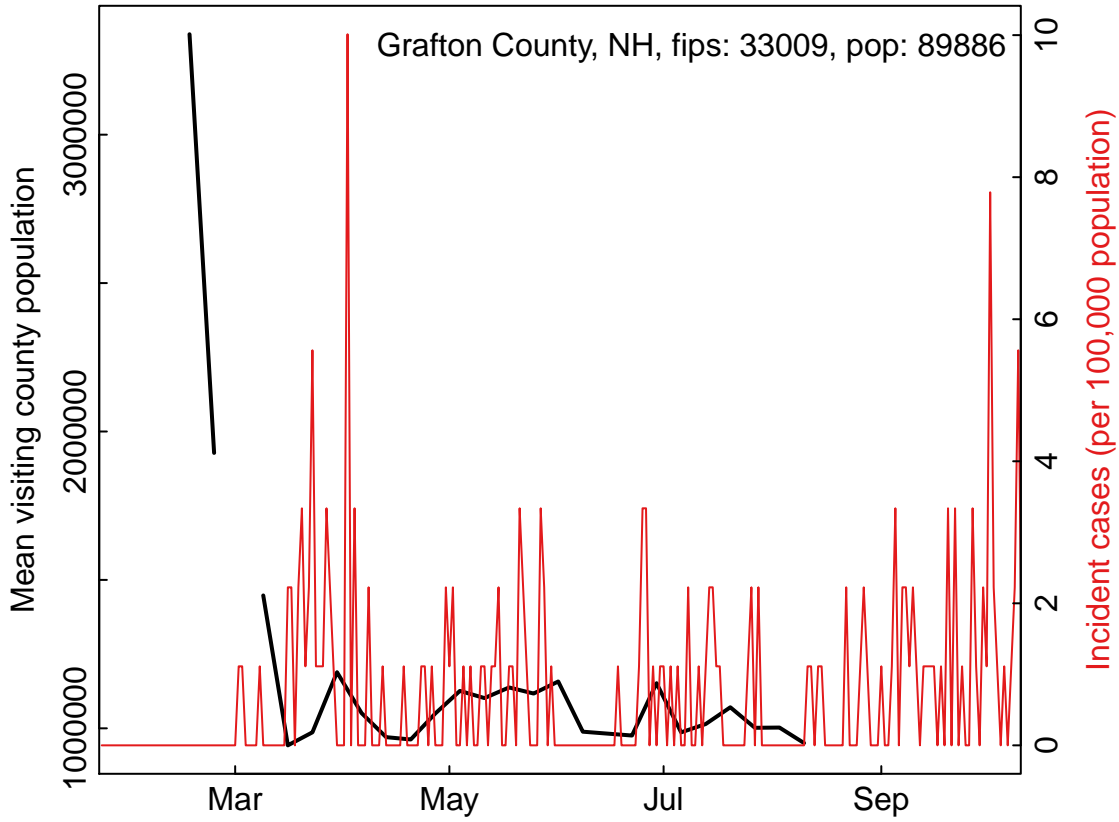

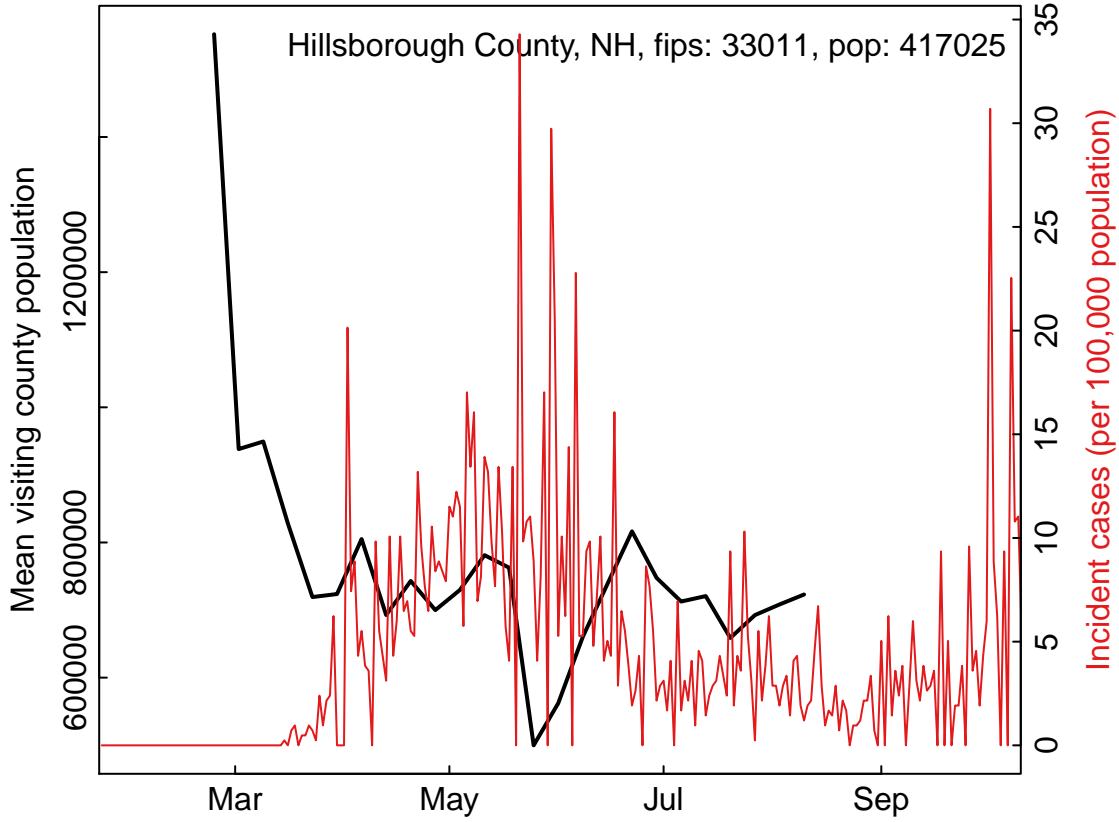



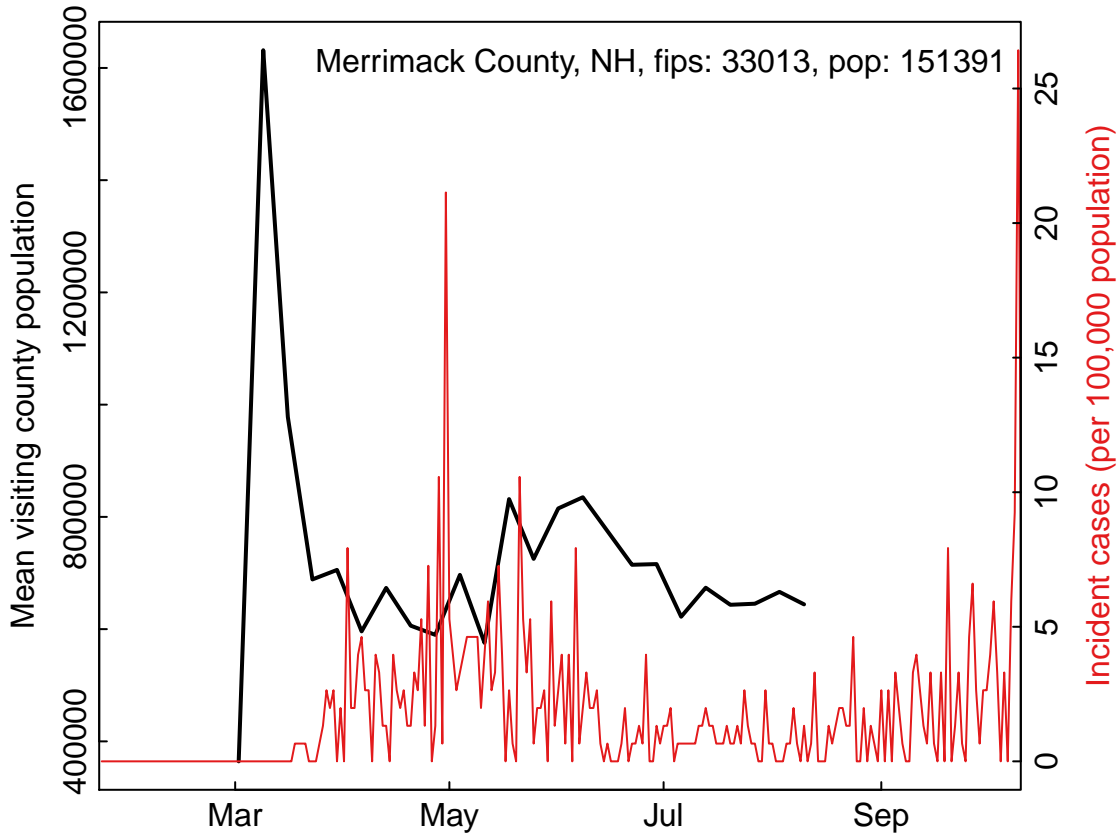

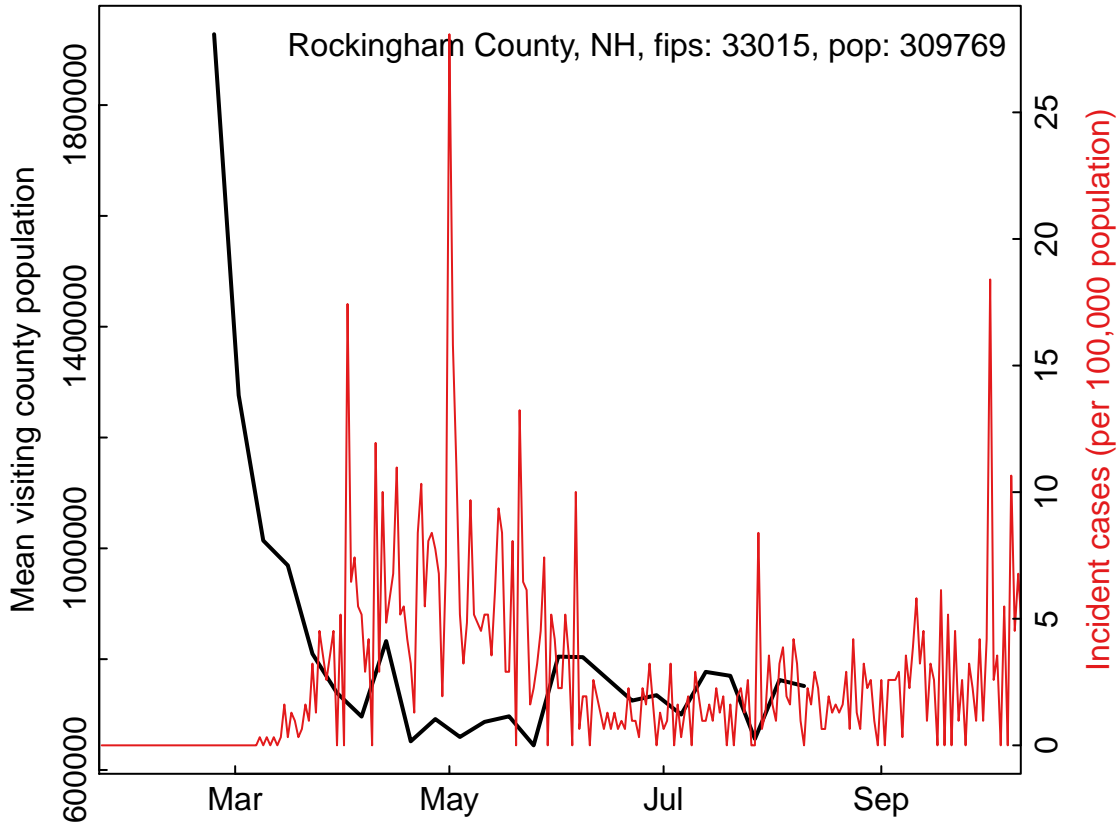

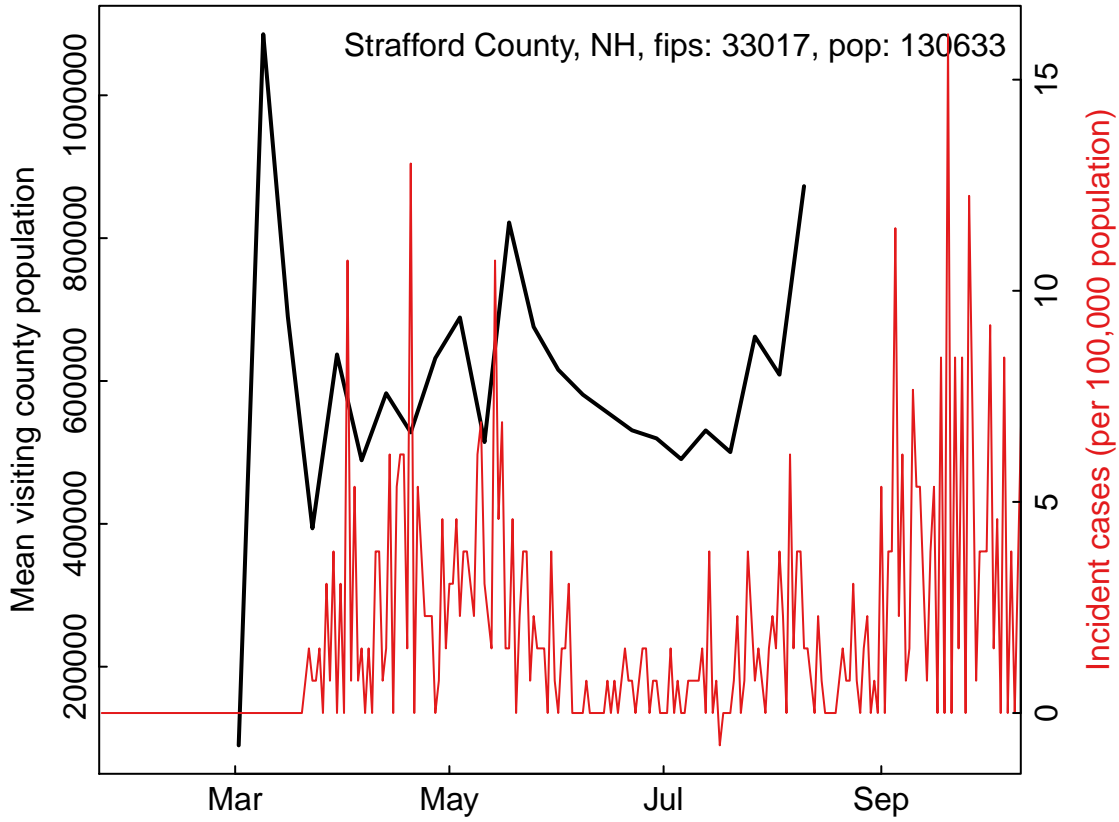

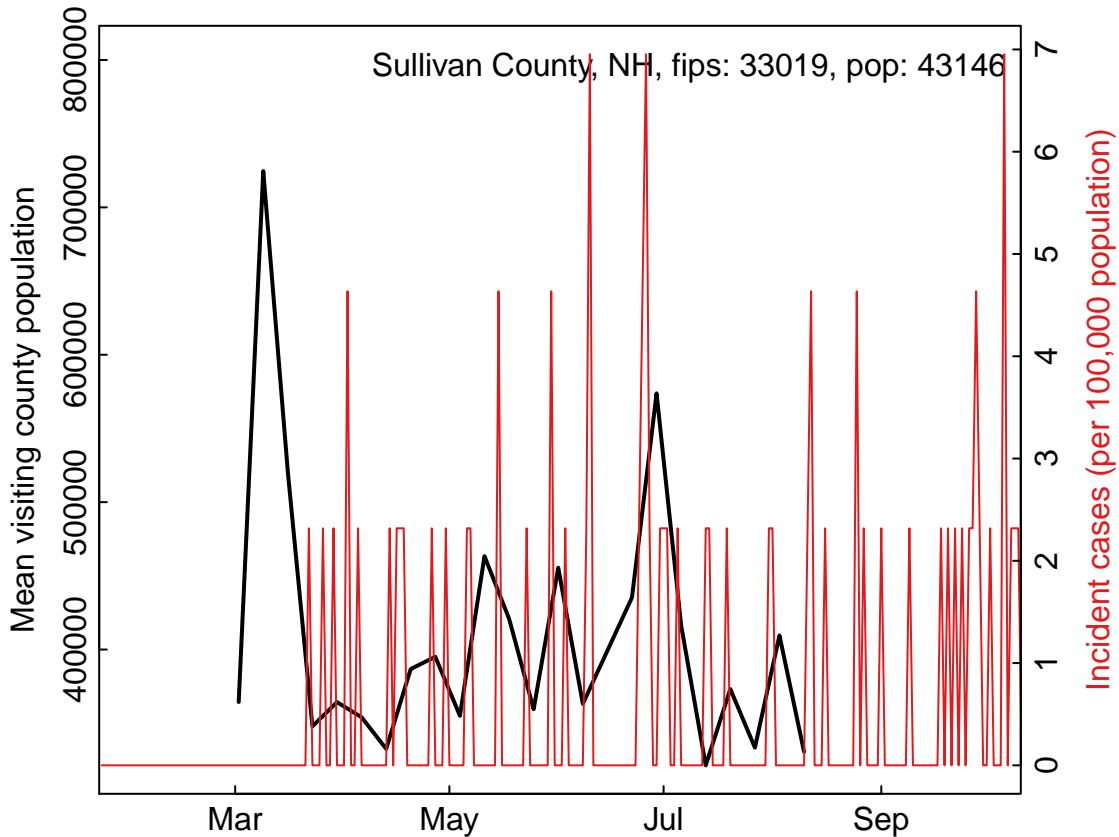

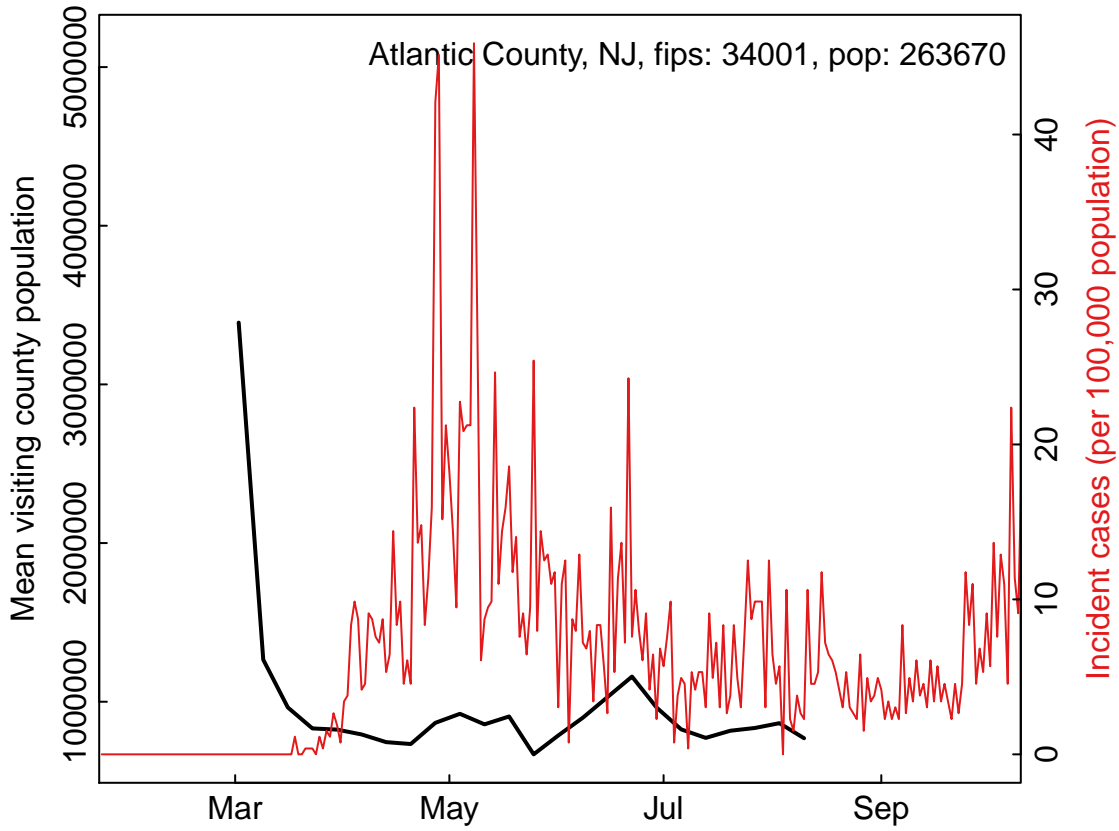

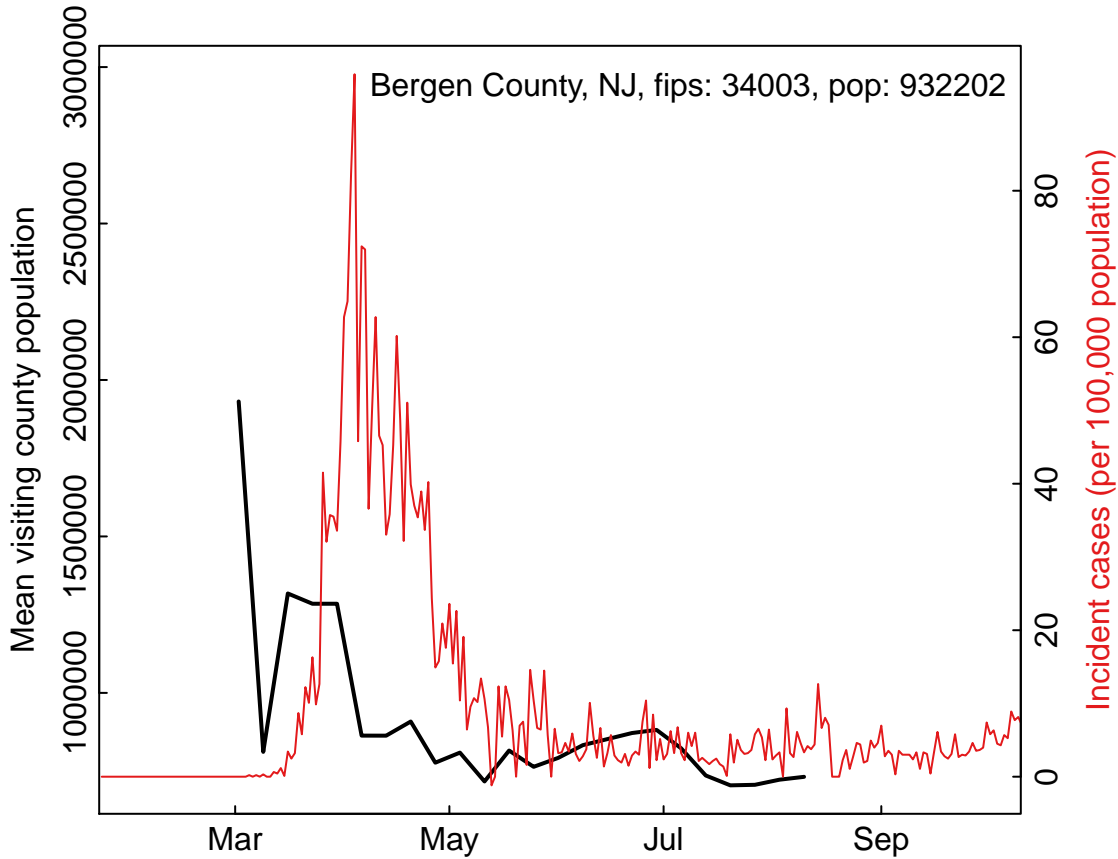

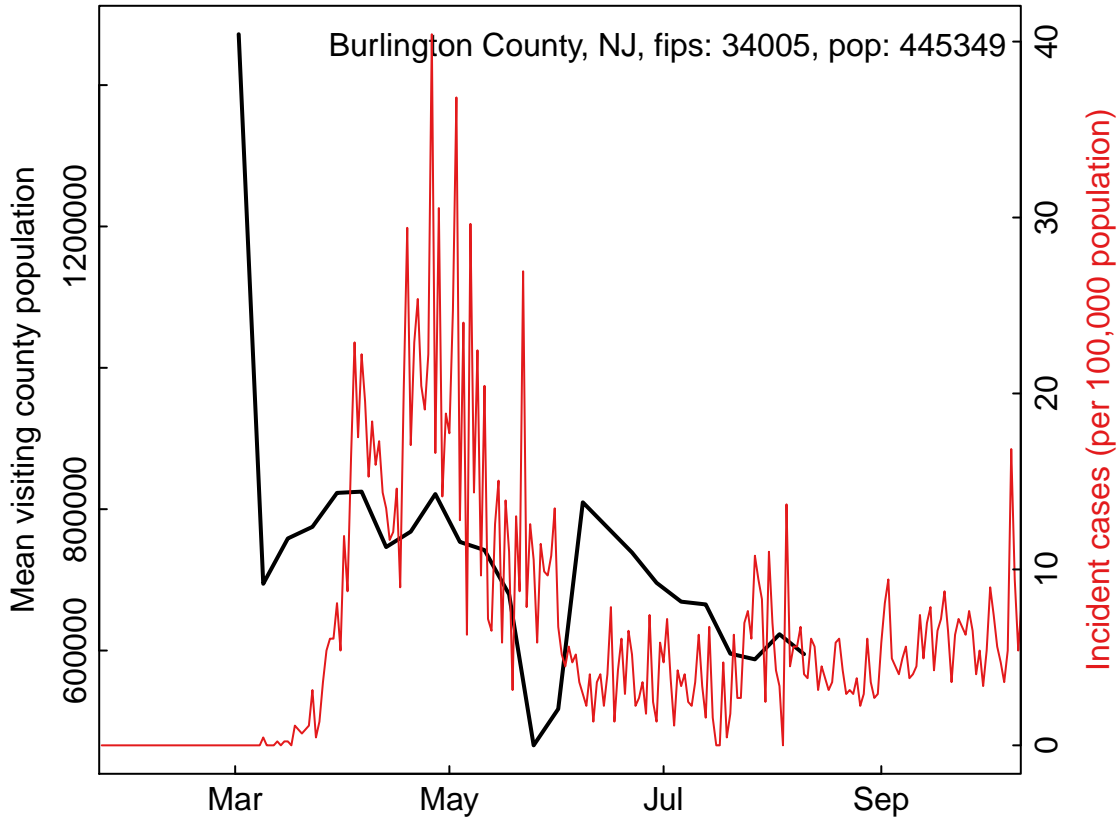

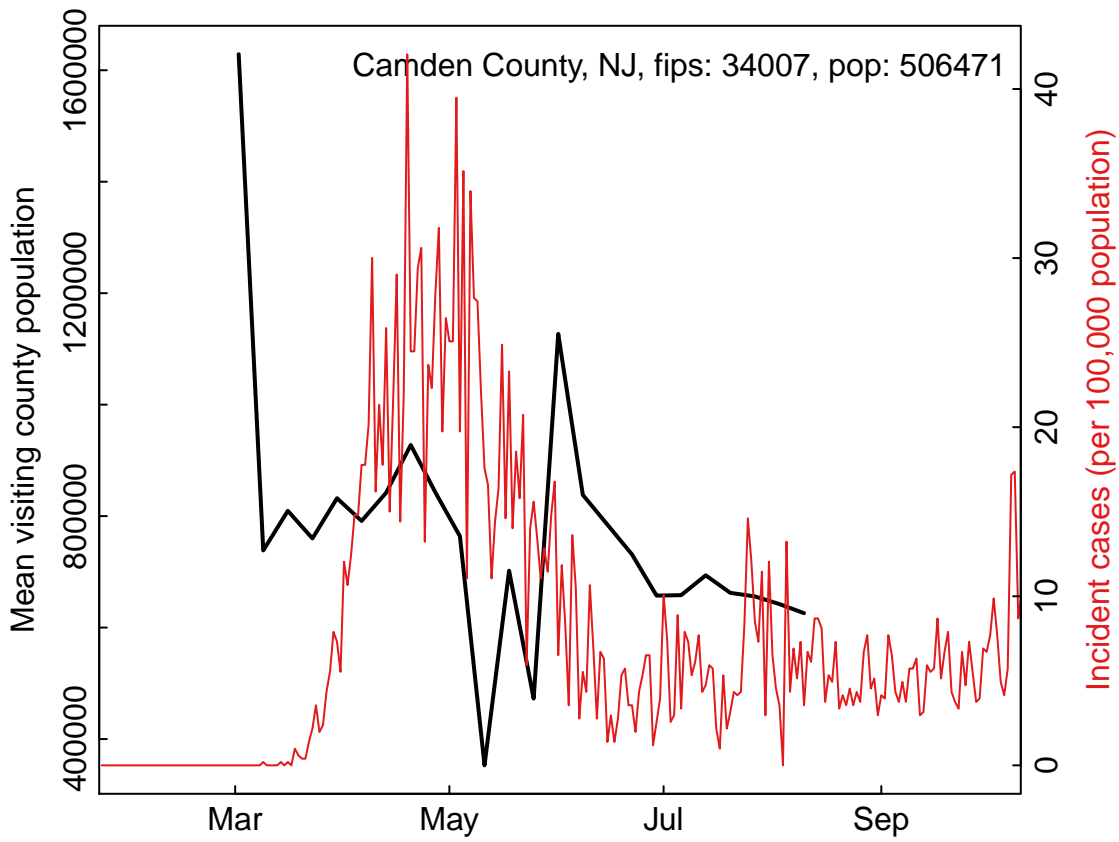



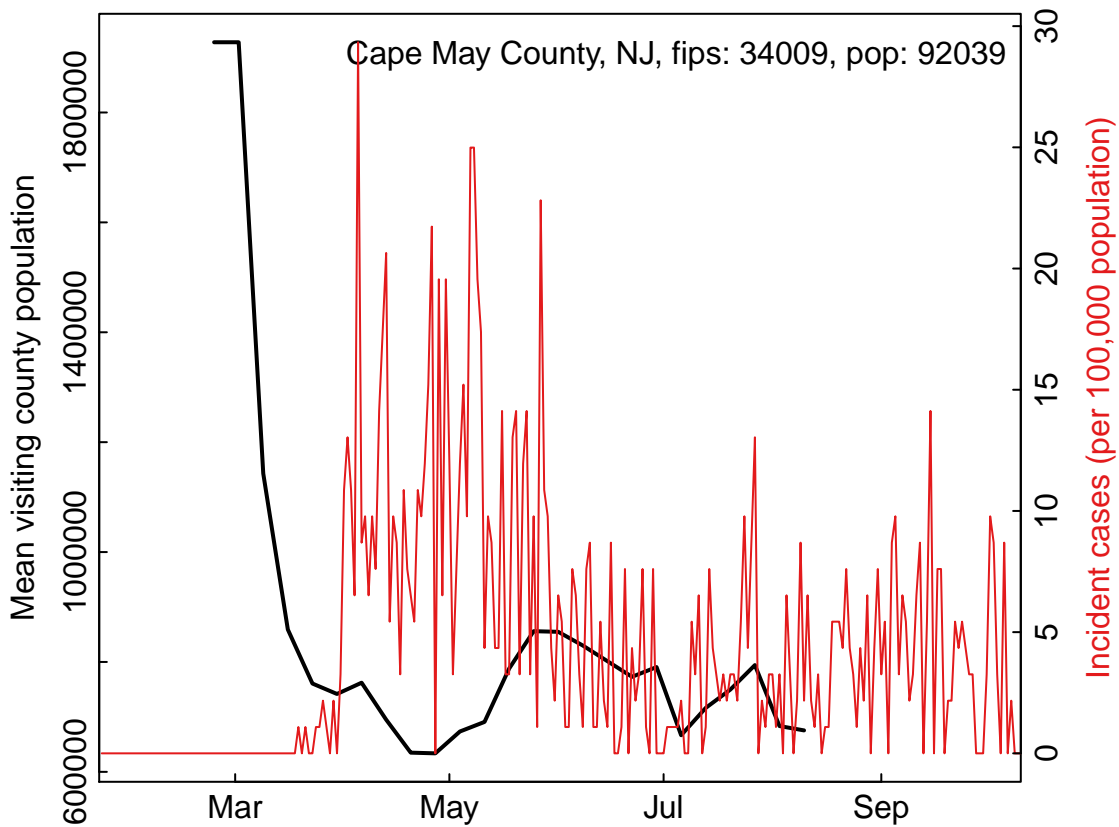

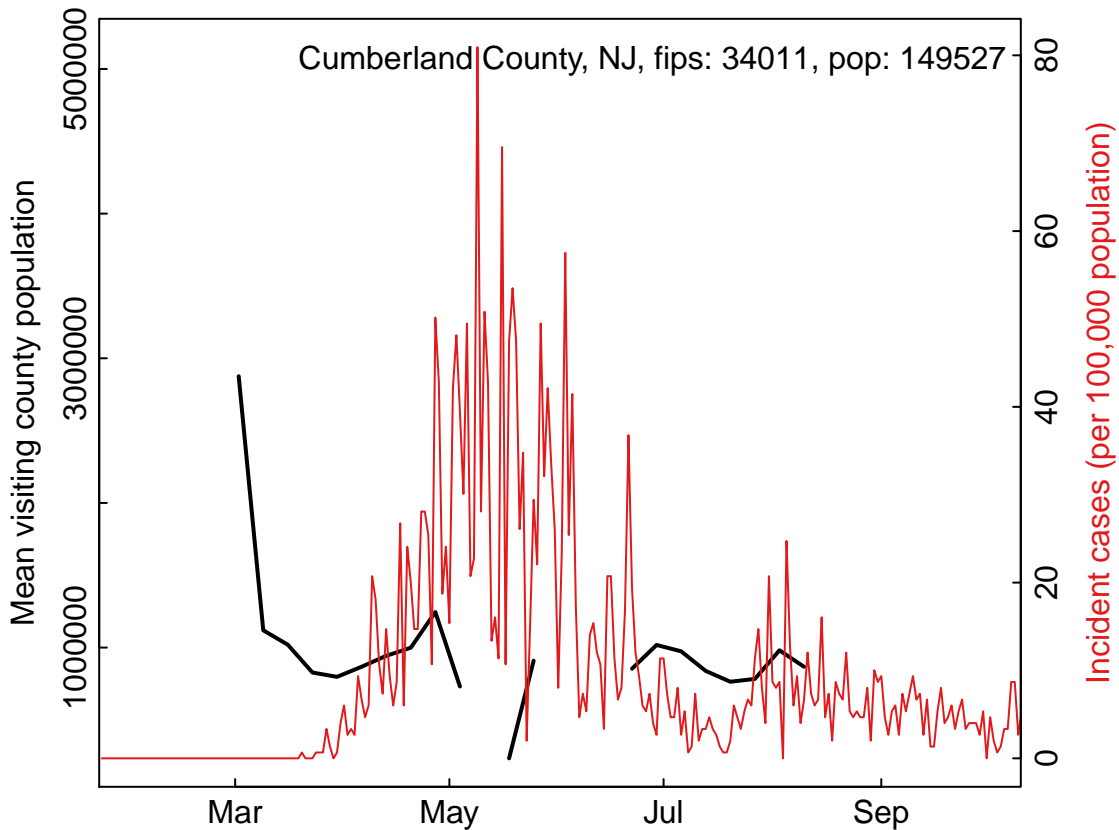

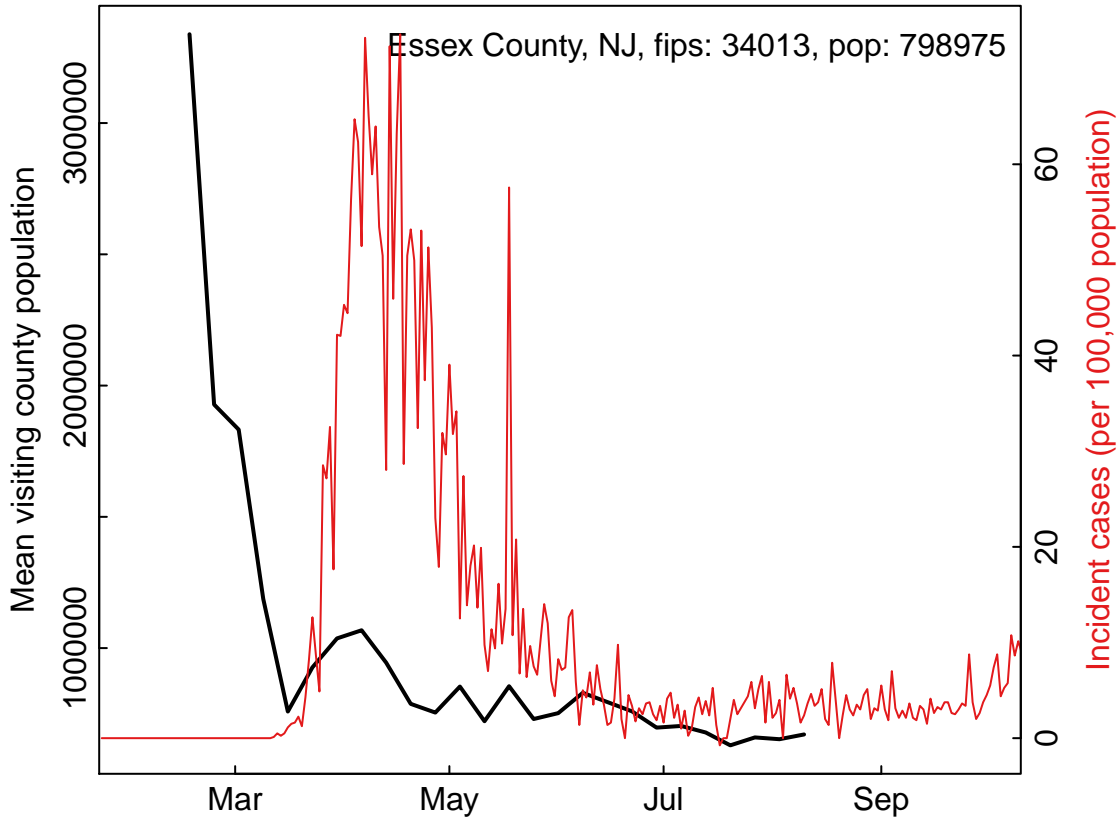

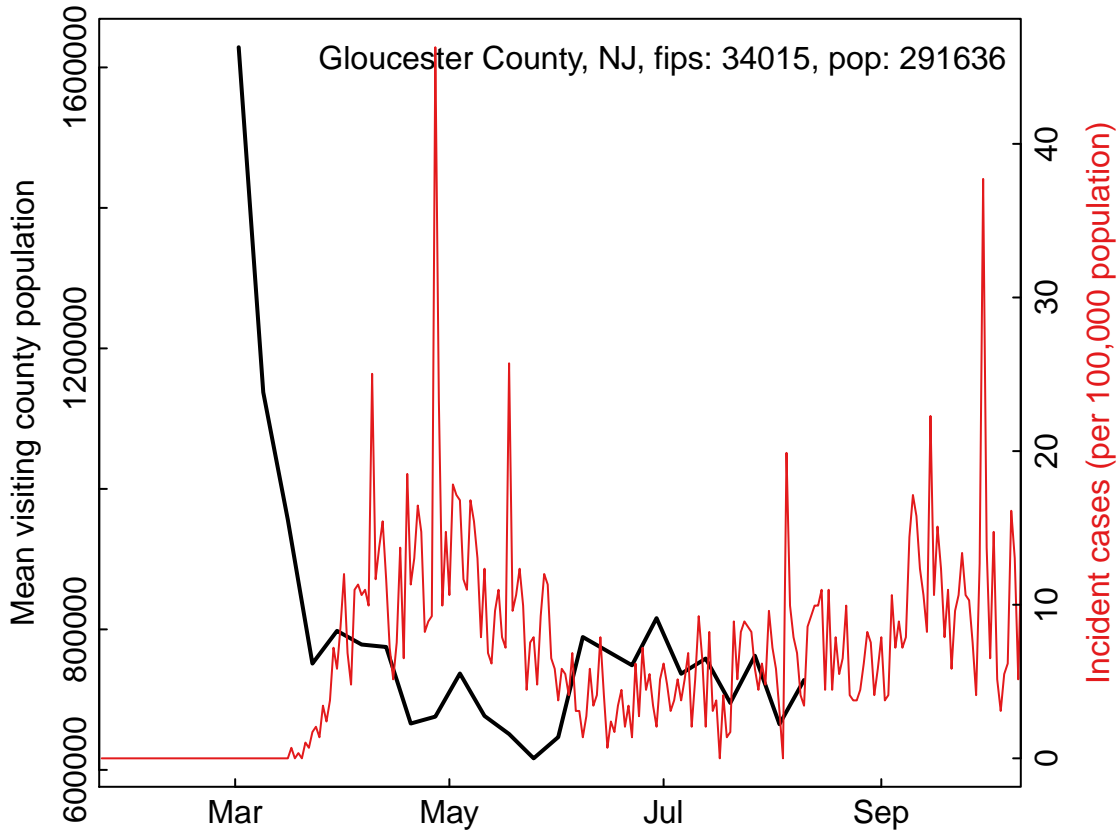

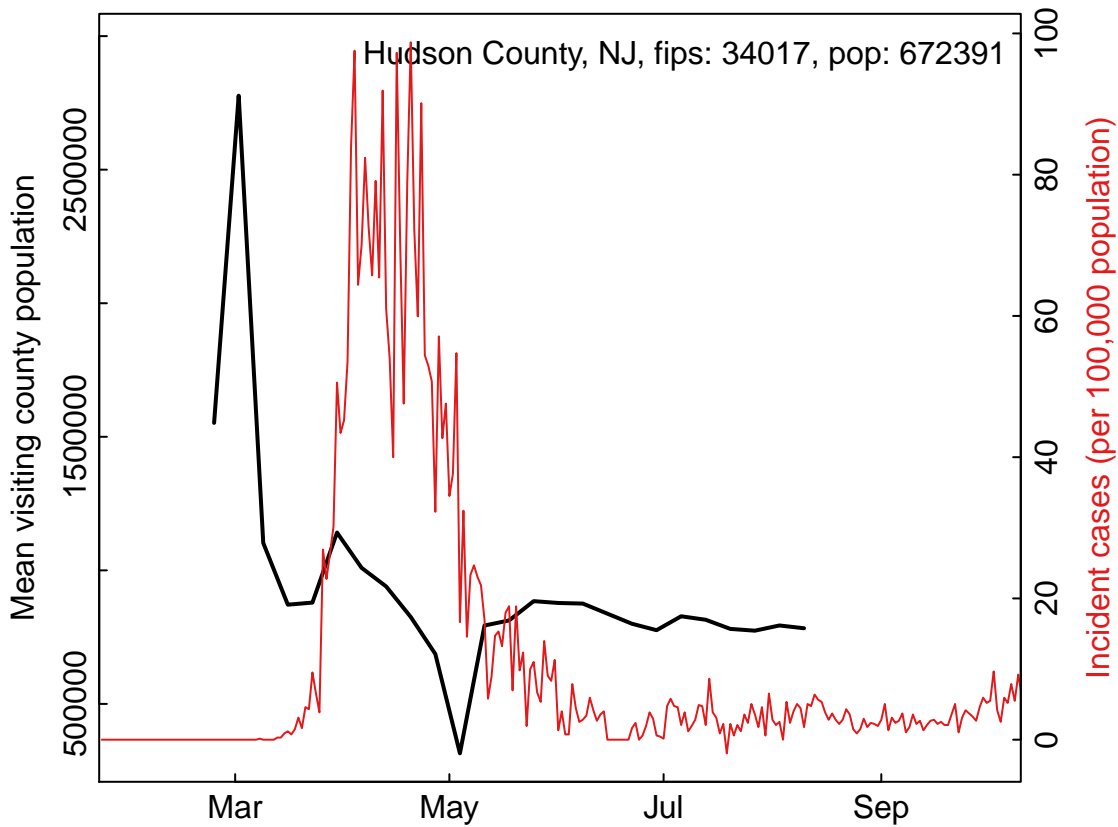

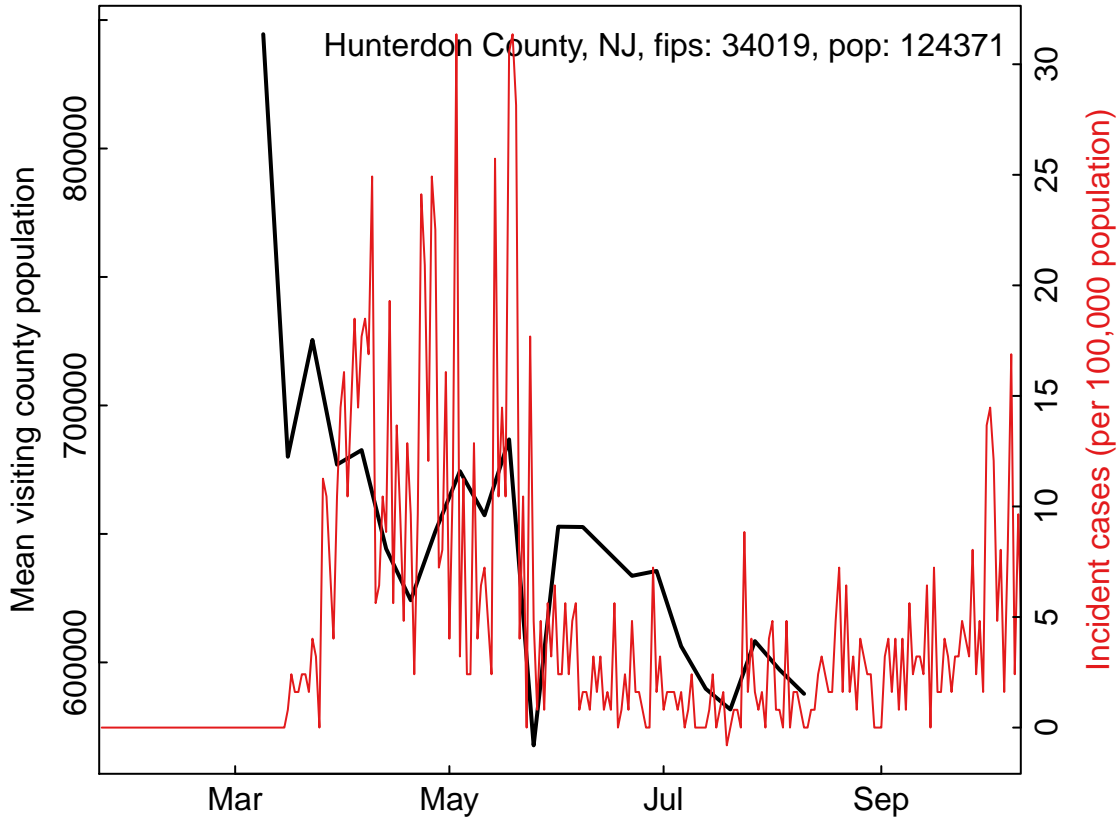

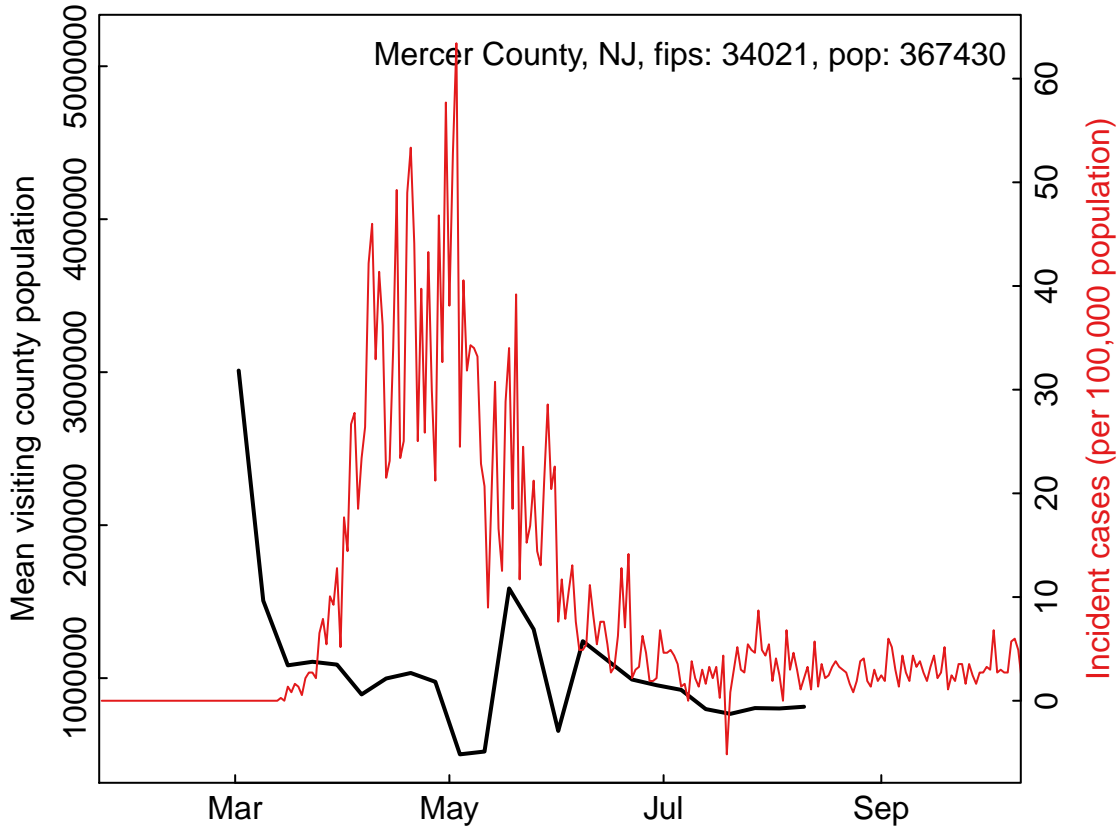

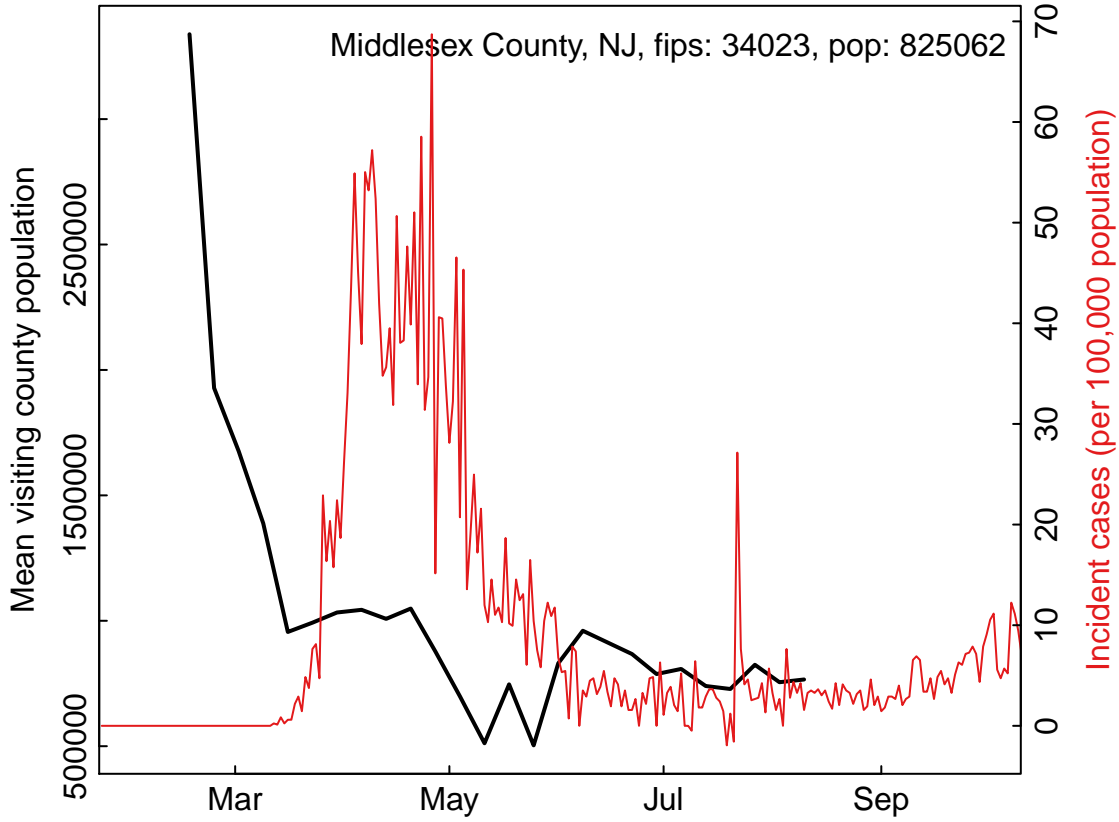



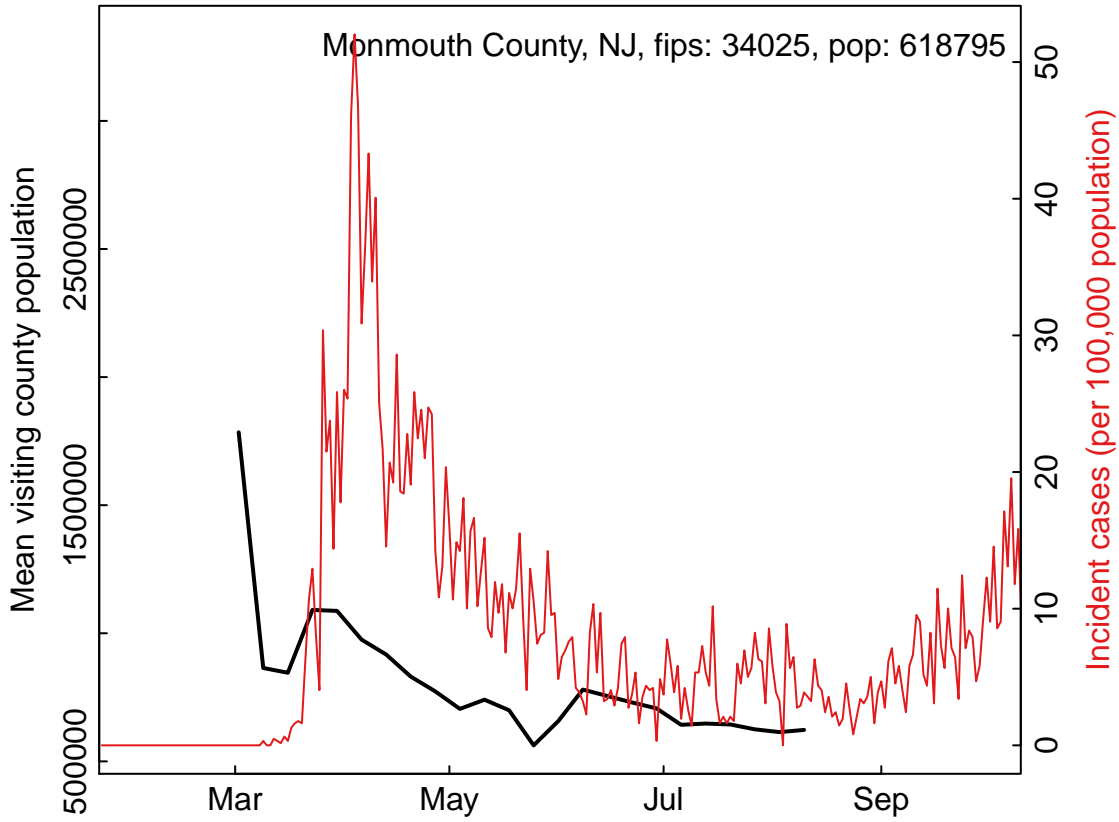

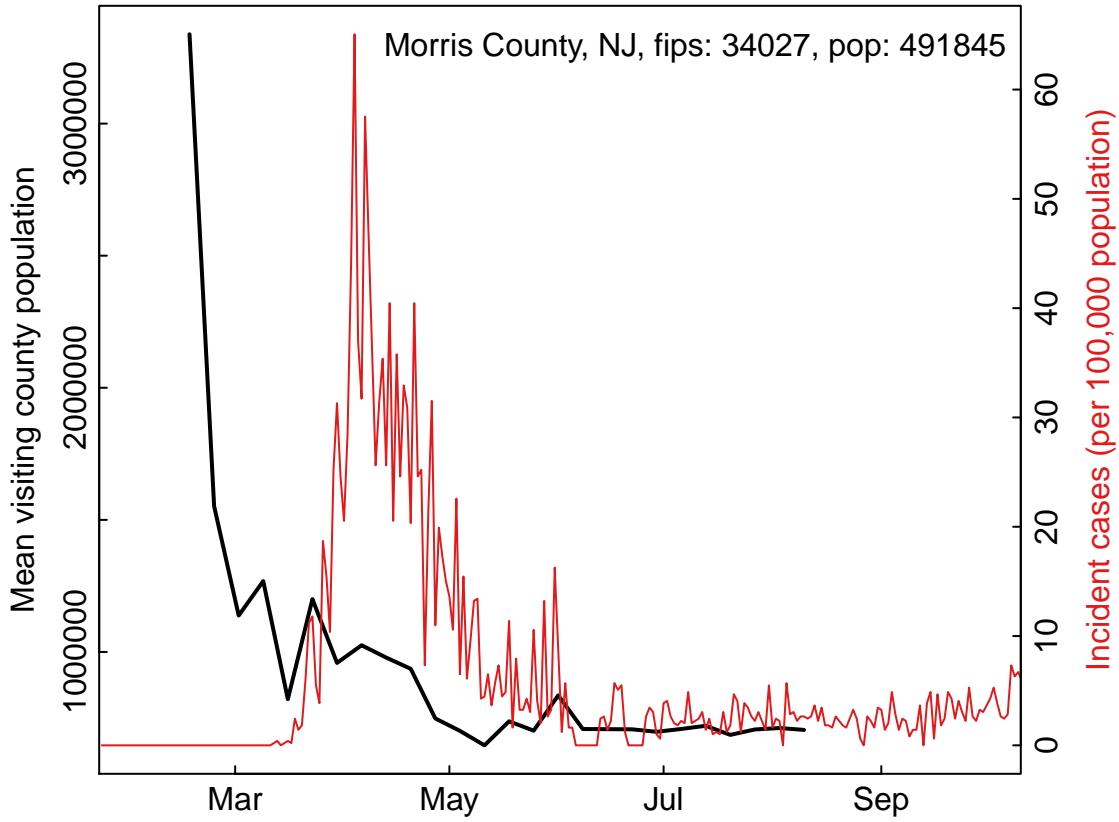

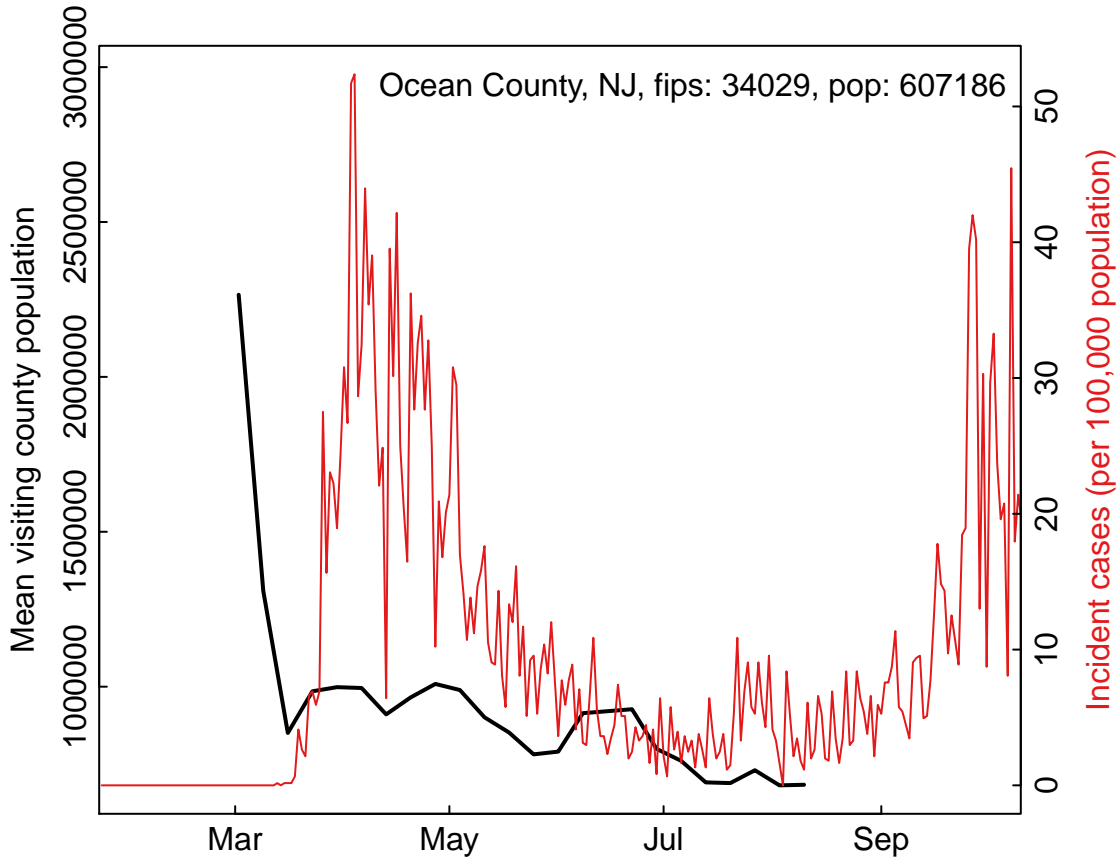

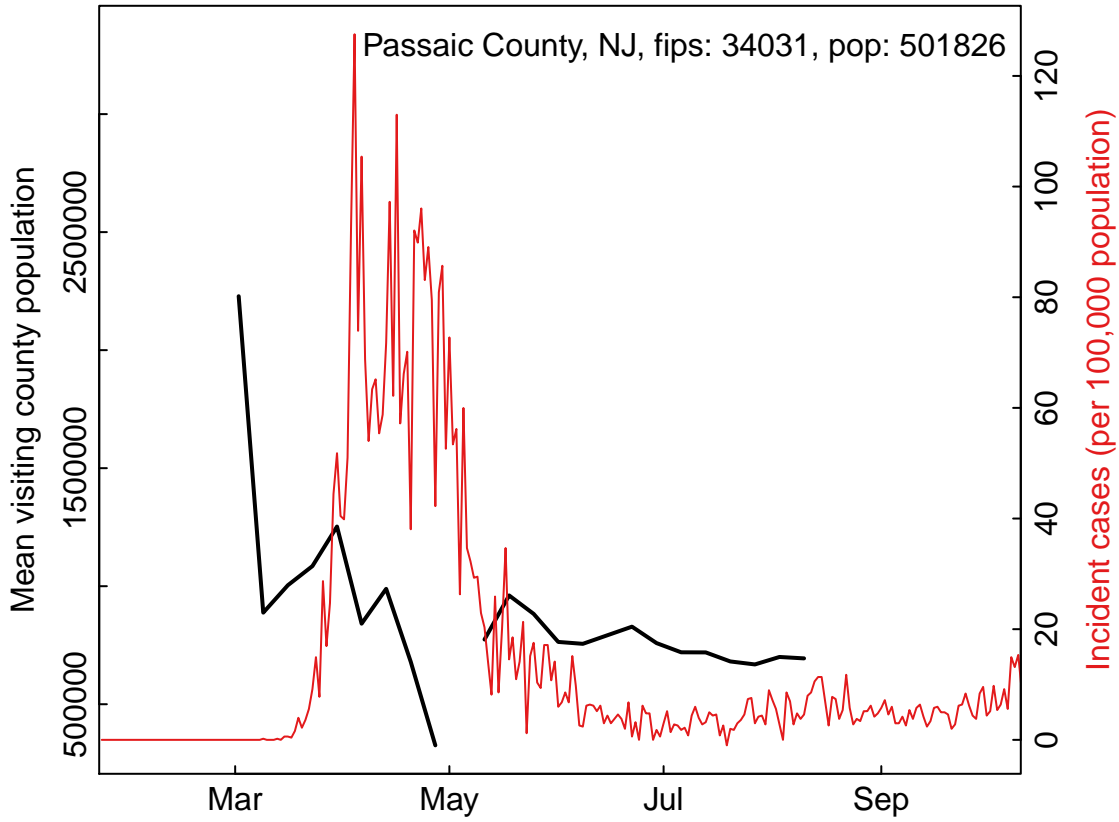

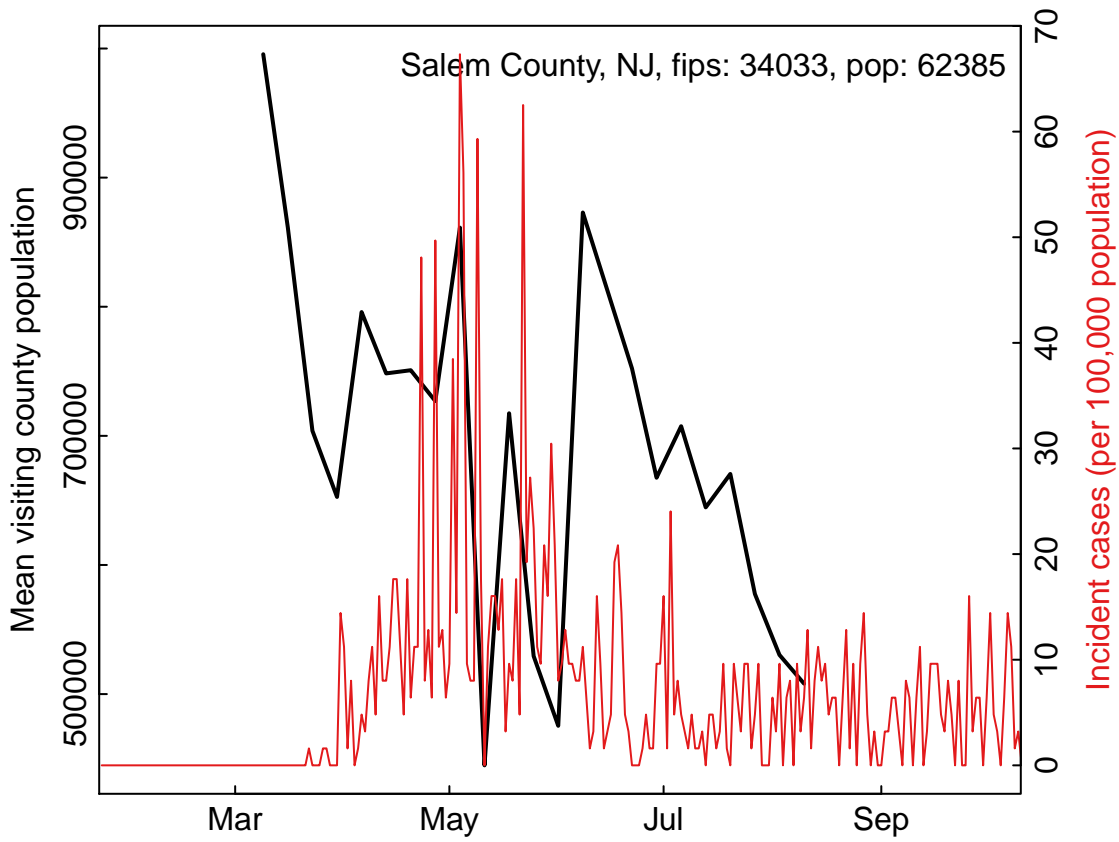

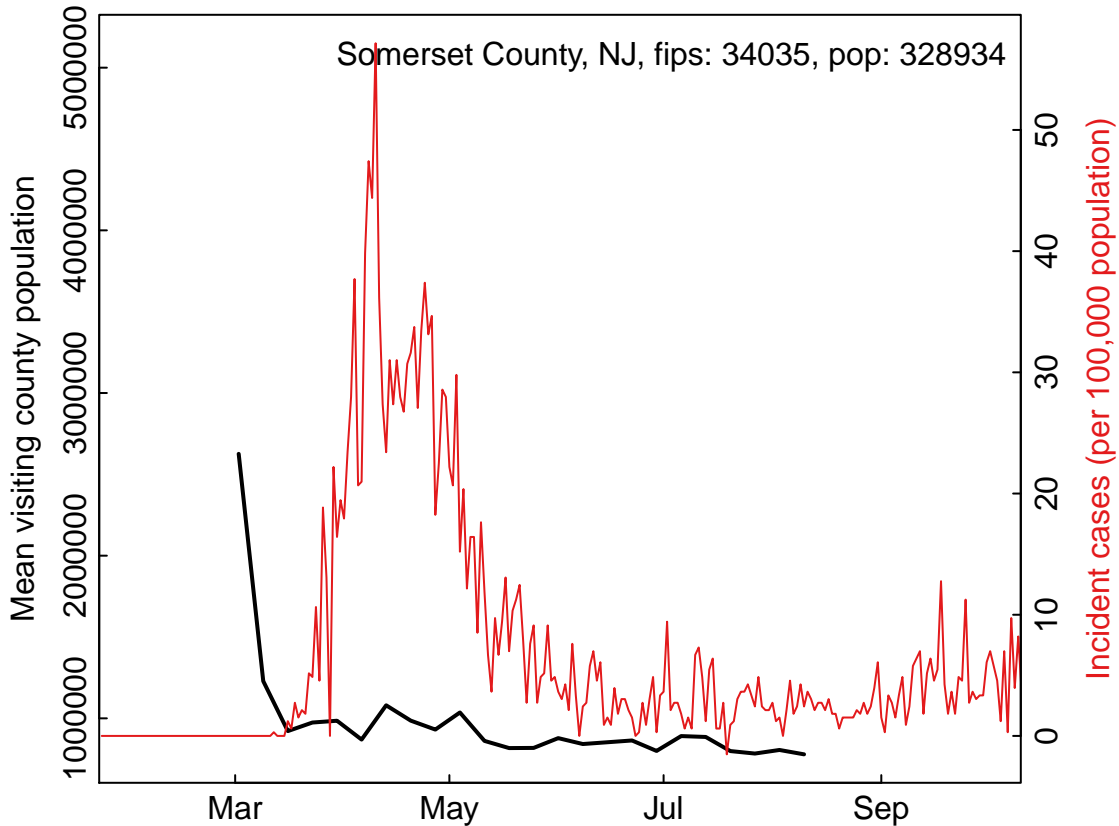

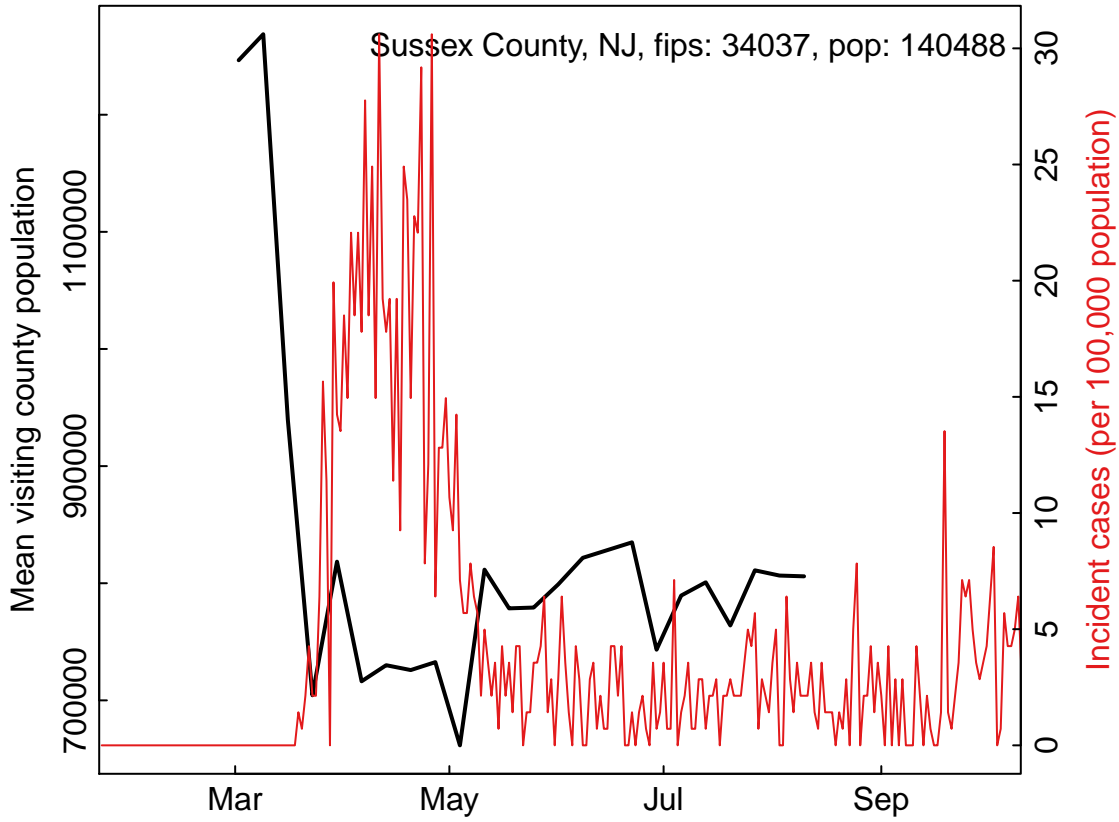

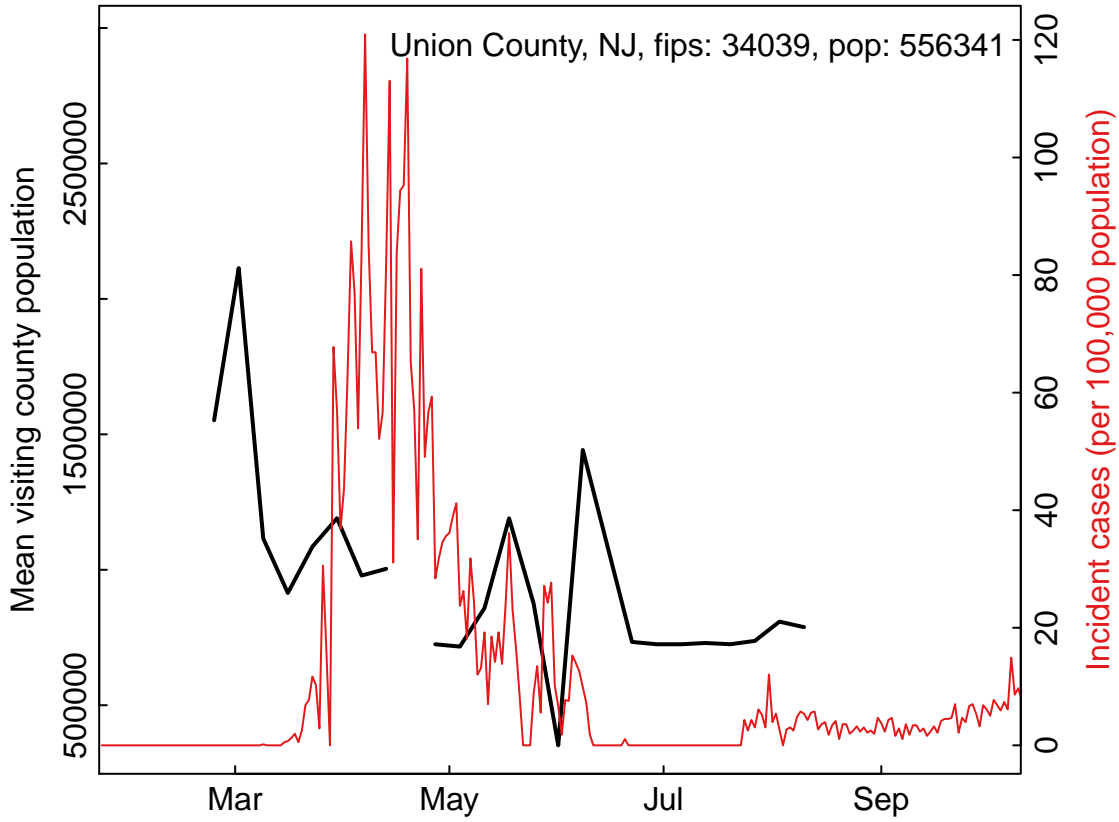



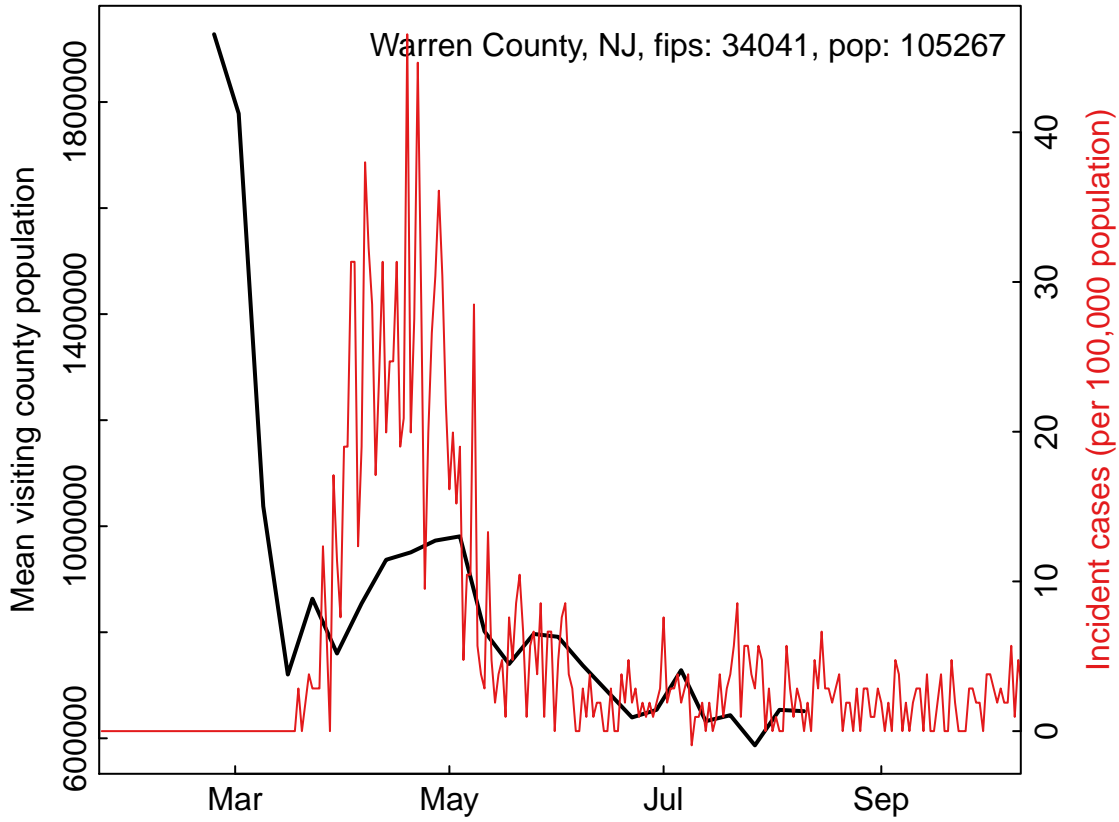

Bernalillo County, NM, fips: 35001, pop: 679121

Mean visiting county population

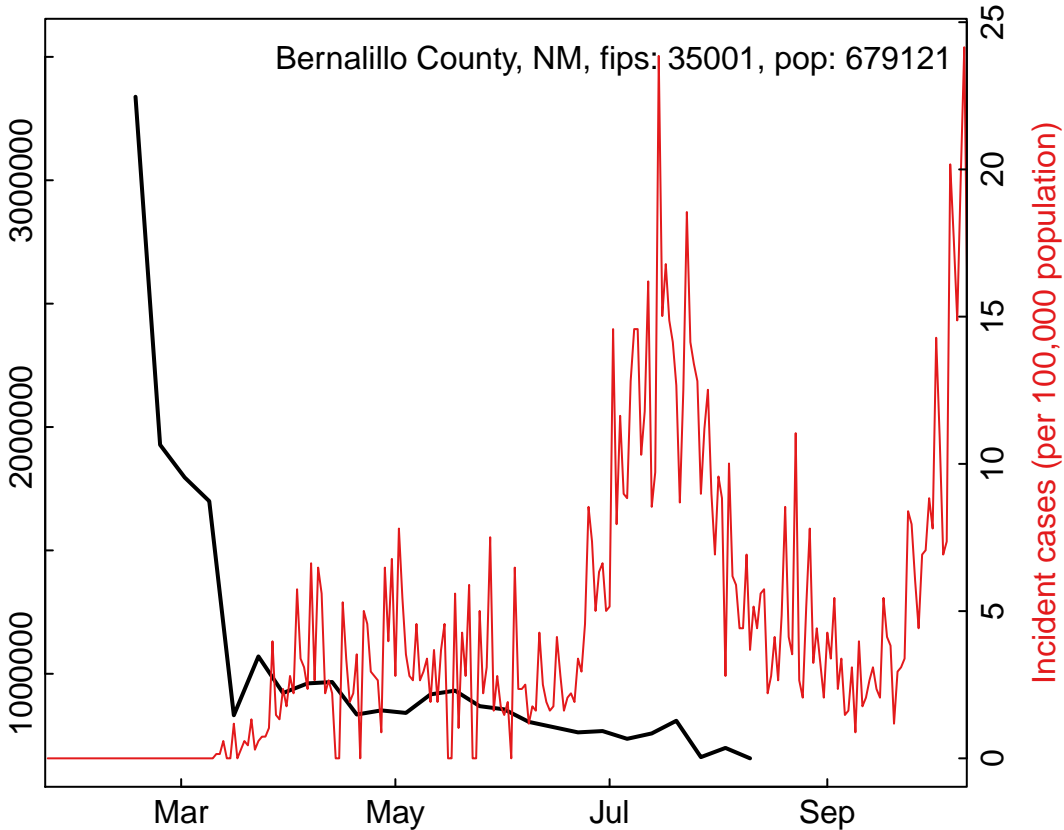

Incident cases (per 100,000 population)

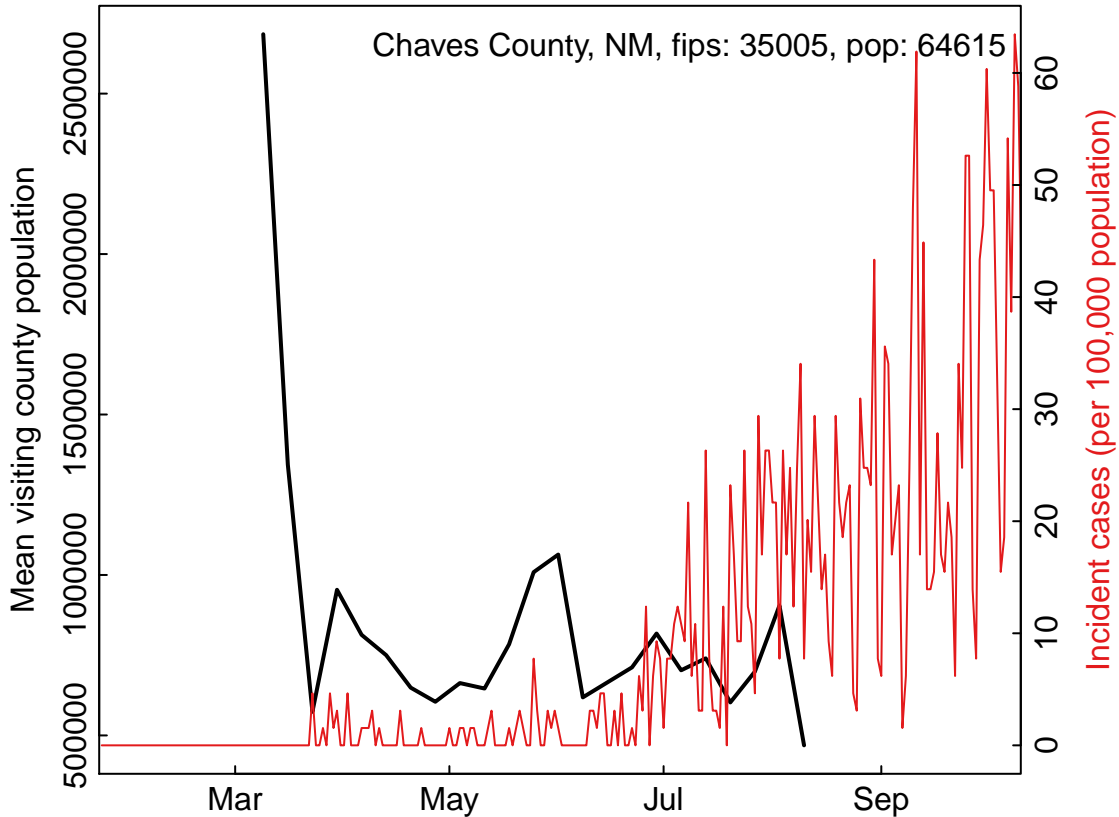

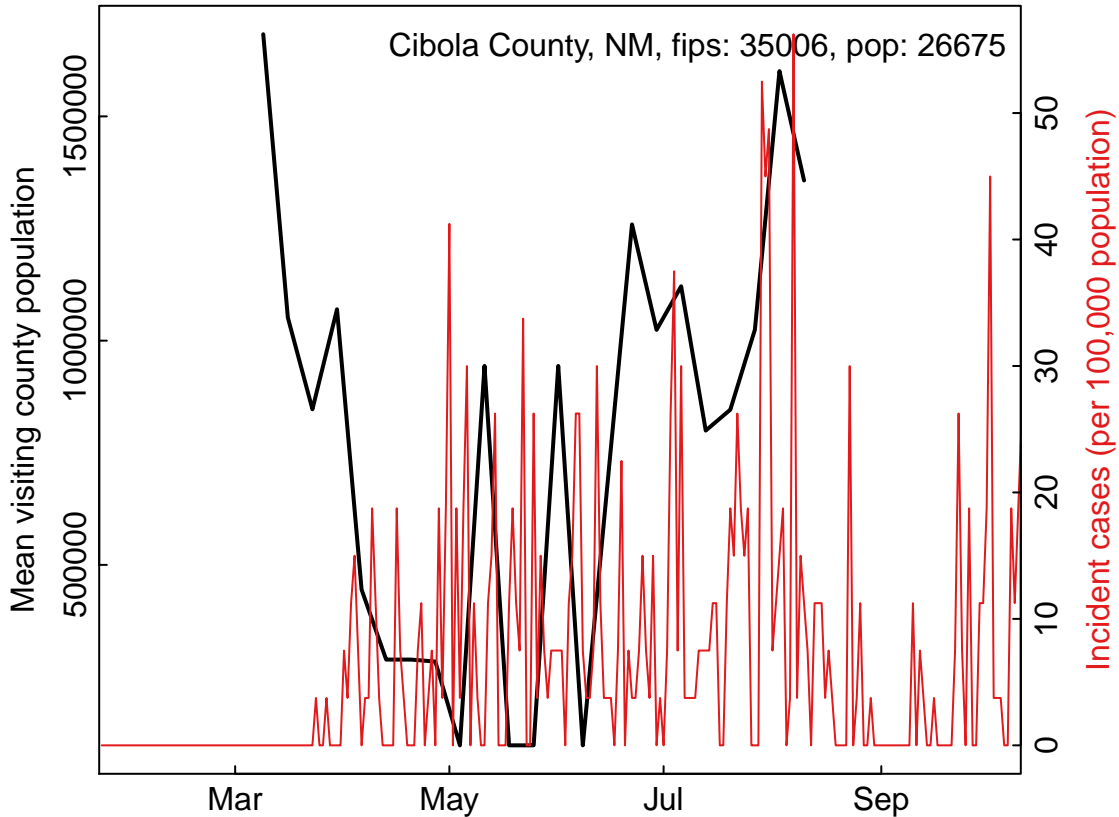

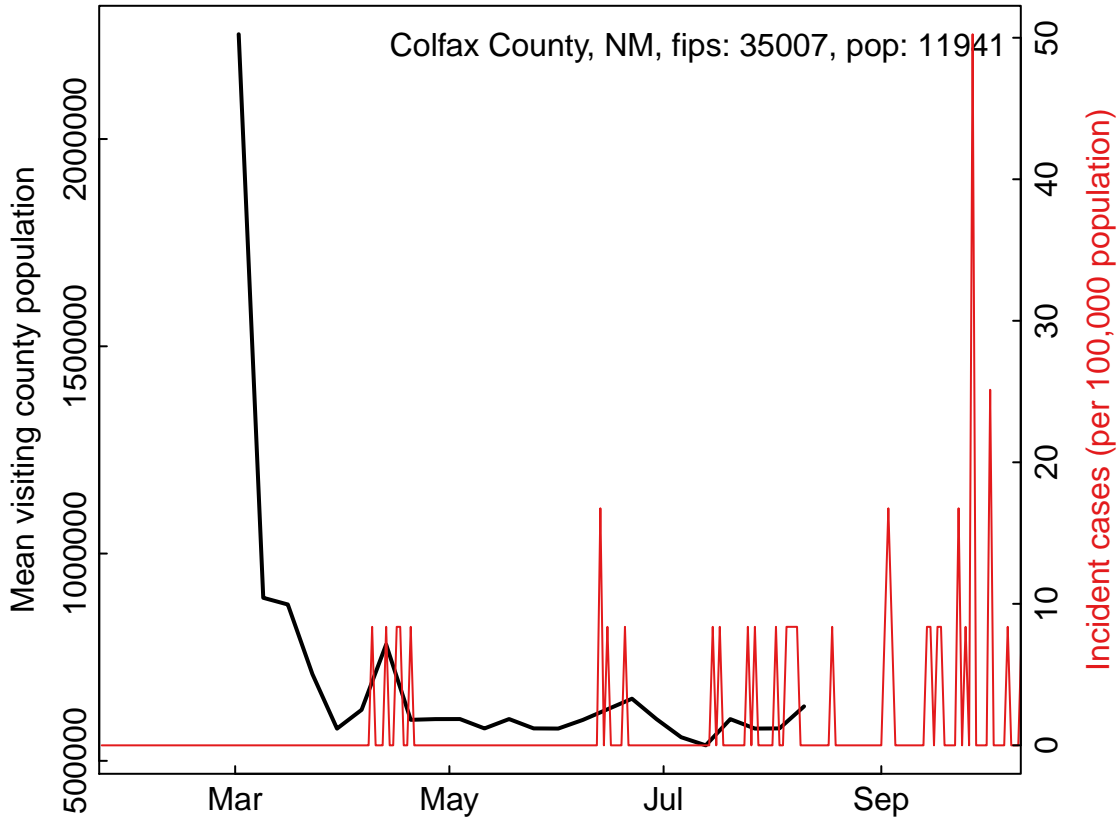

Curry County, NM, fips: 35009, pop: 48954

Mean visiting county population

2500000  
1500000  
500000

Mar May Jul Sep

Incident cases (per 100,000 population)

120  
100  
80  
60  
40  
20  
0

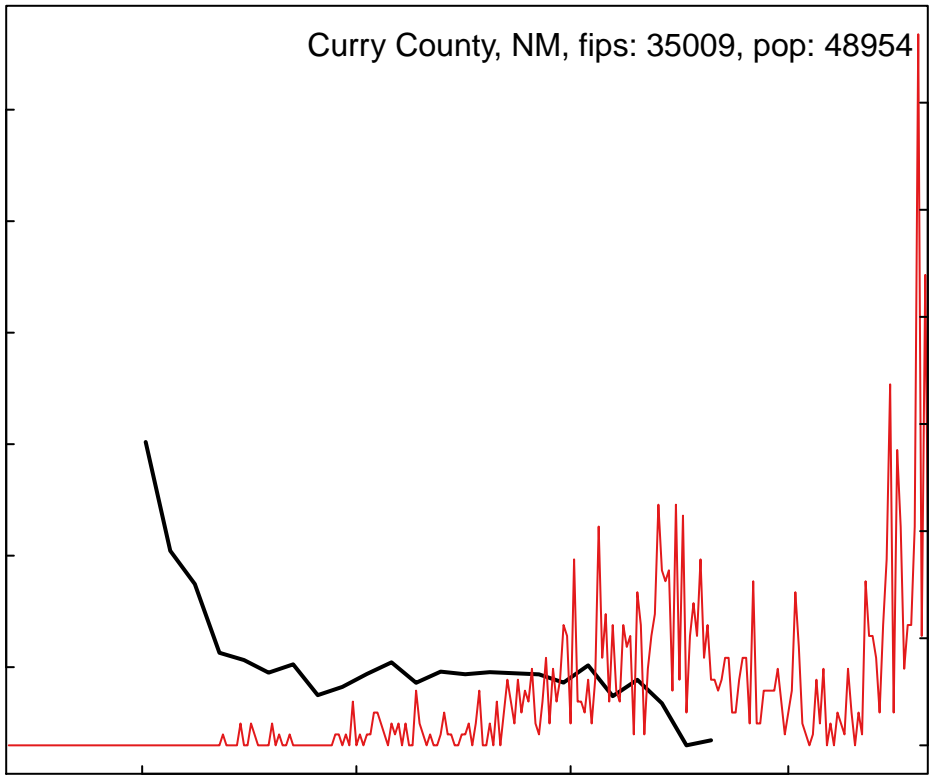

De Baca County, NM, fips: 35011, pop: 1748

Mean visiting county population

500000  
1500000  
2500000

Mar

May

Jul

Sep

Incident cases (per 100,000 population)

0  
10  
20  
30  
40  
50

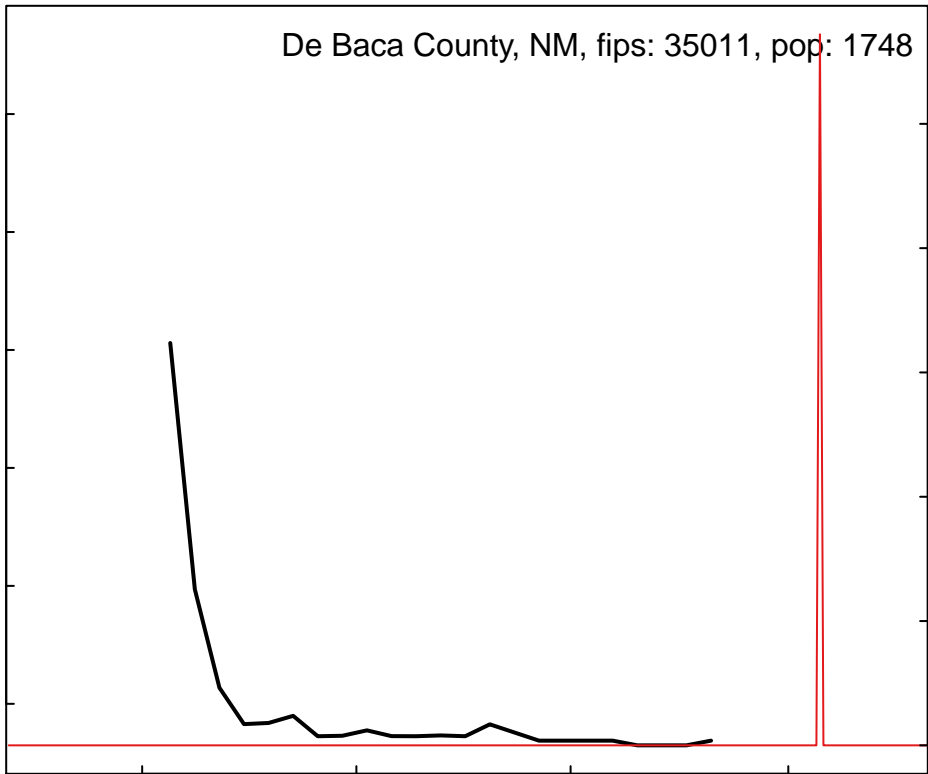

Dona Ana County, NM, fips: 35013, pop: 218195

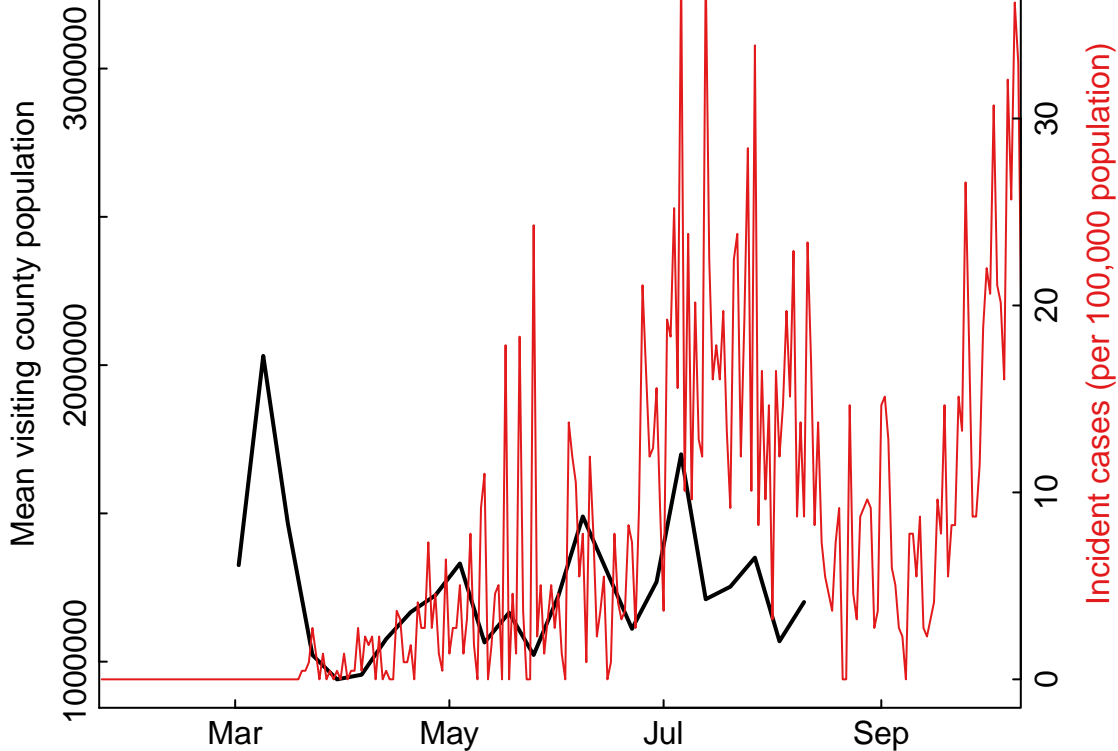



Eddy County, NM, fips: 35015, pop: 58460

Mean visiting county population

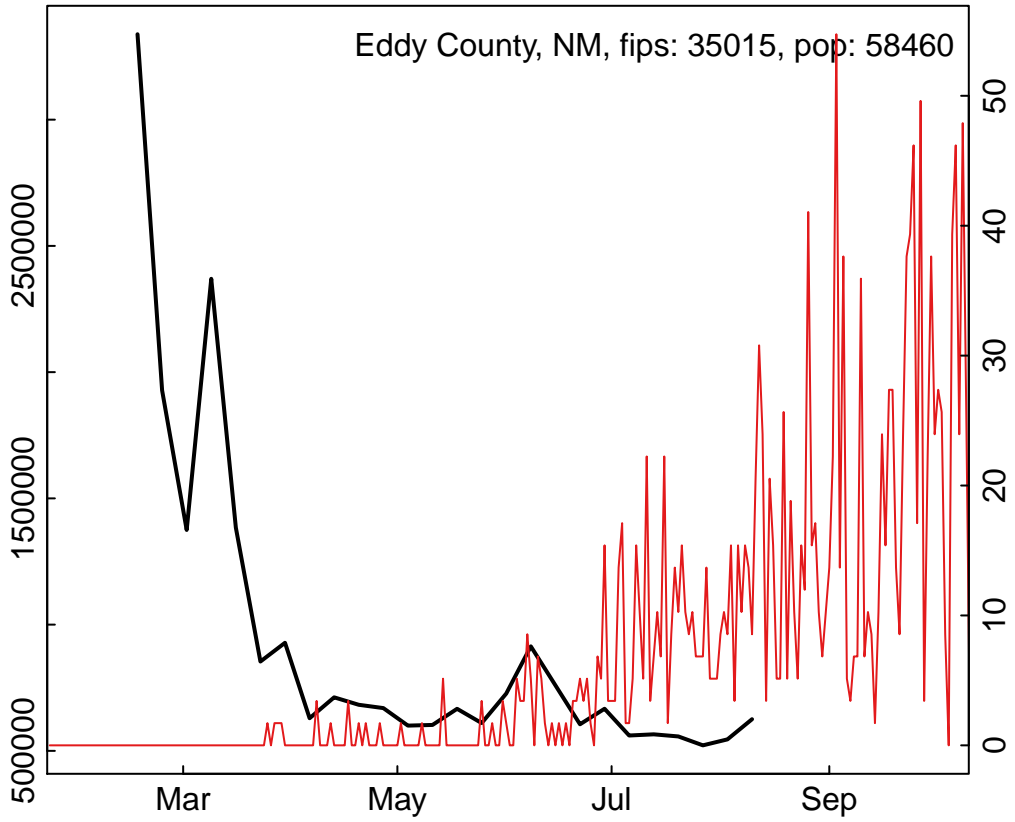

Incident cases (per 100,000 population)

Grant County, NM, fips: 35017, pop: 26998

Mean visiting county population

3000000  
2000000  
1000000

Mar May Jul Sep

Incident cases (per 100,000 population)

30  
25  
20  
15  
10  
5  
0

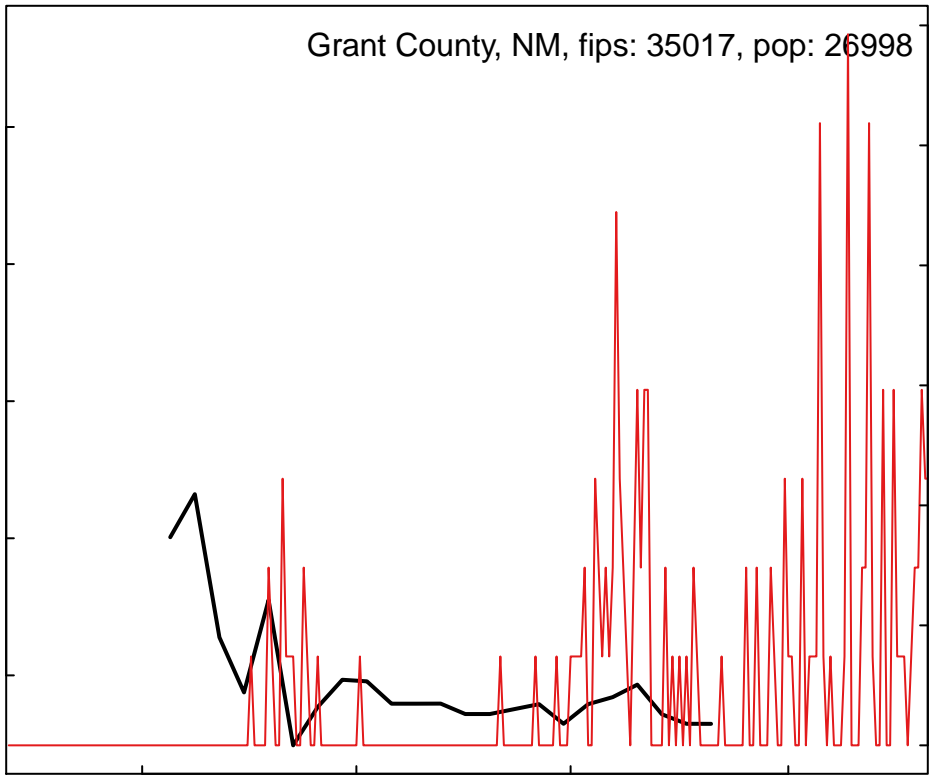

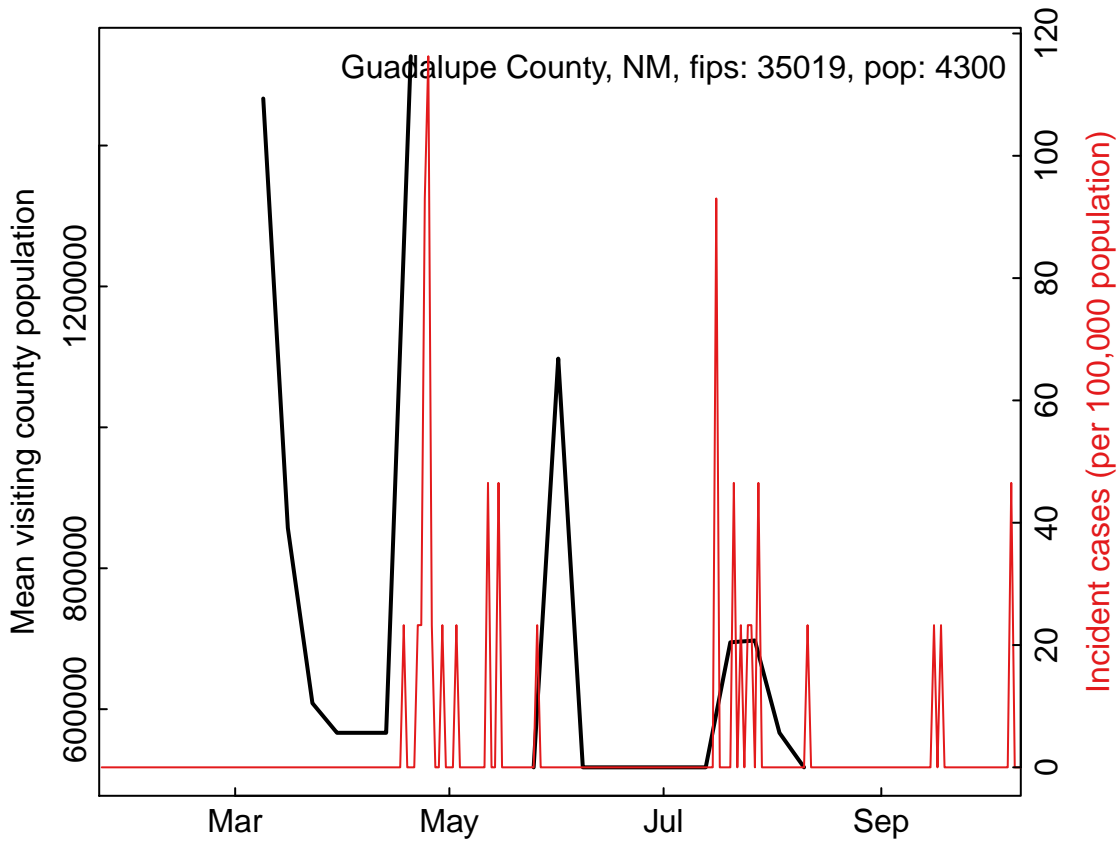

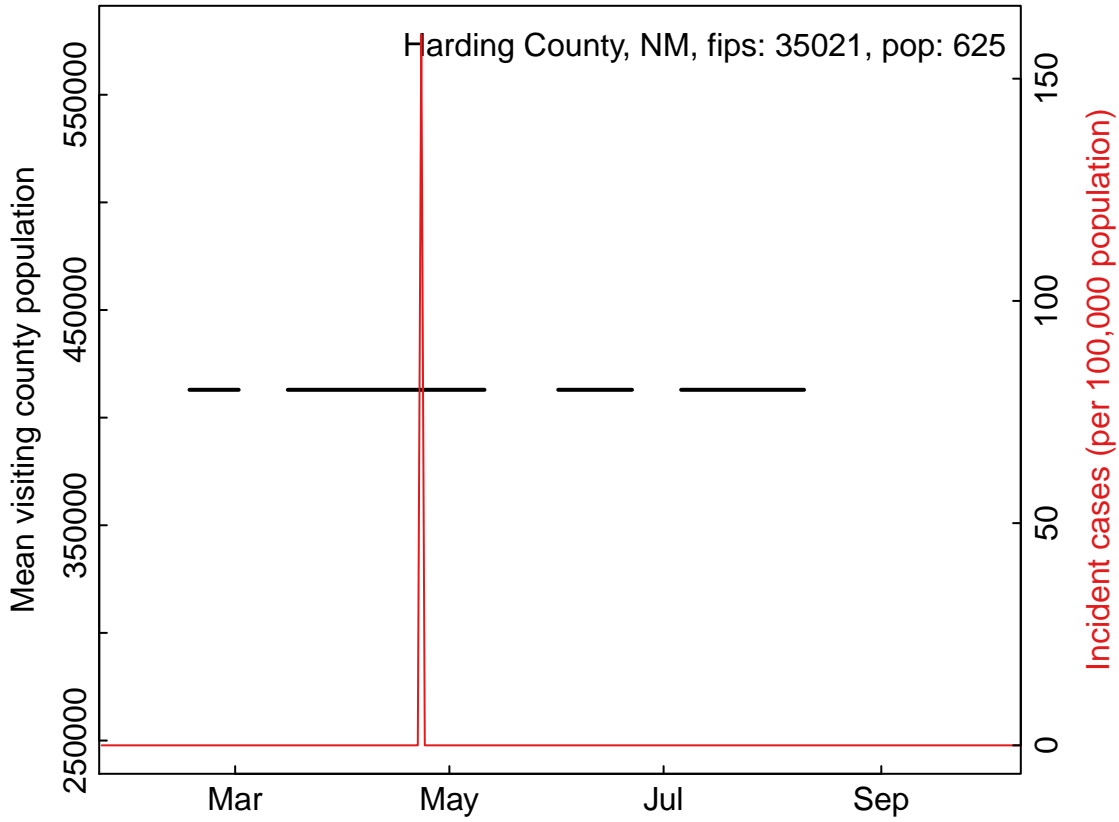

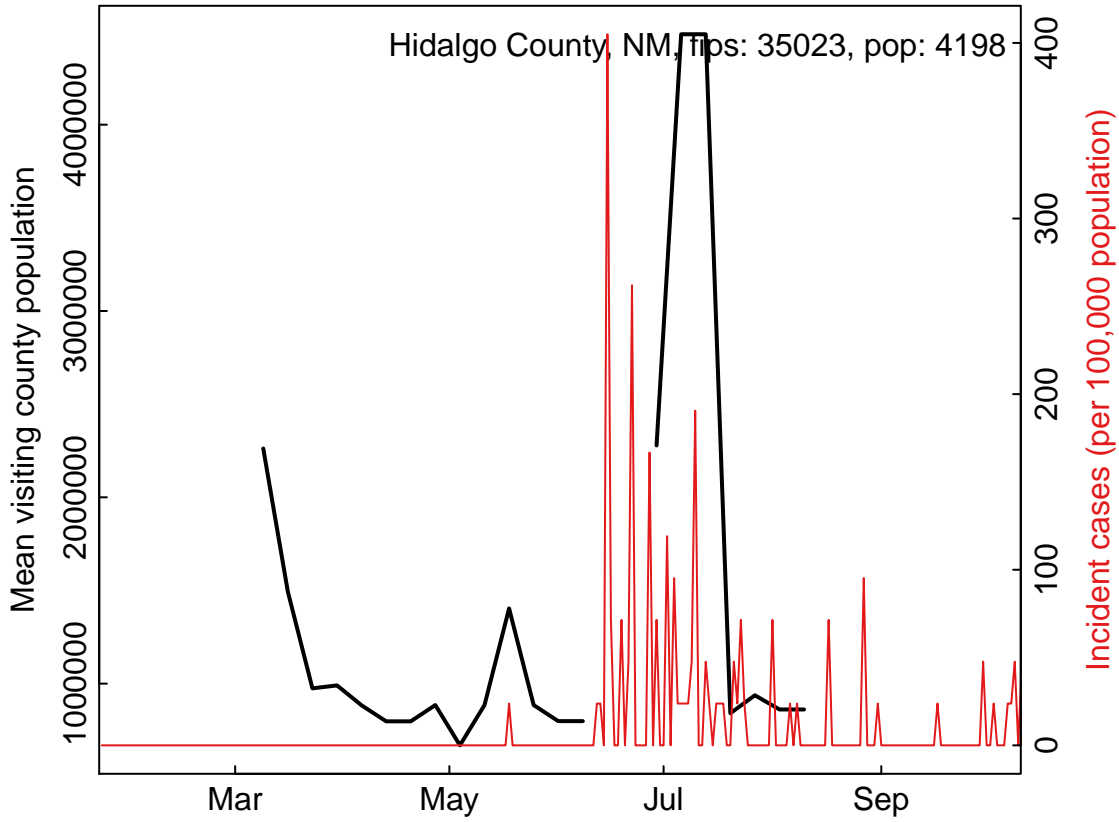

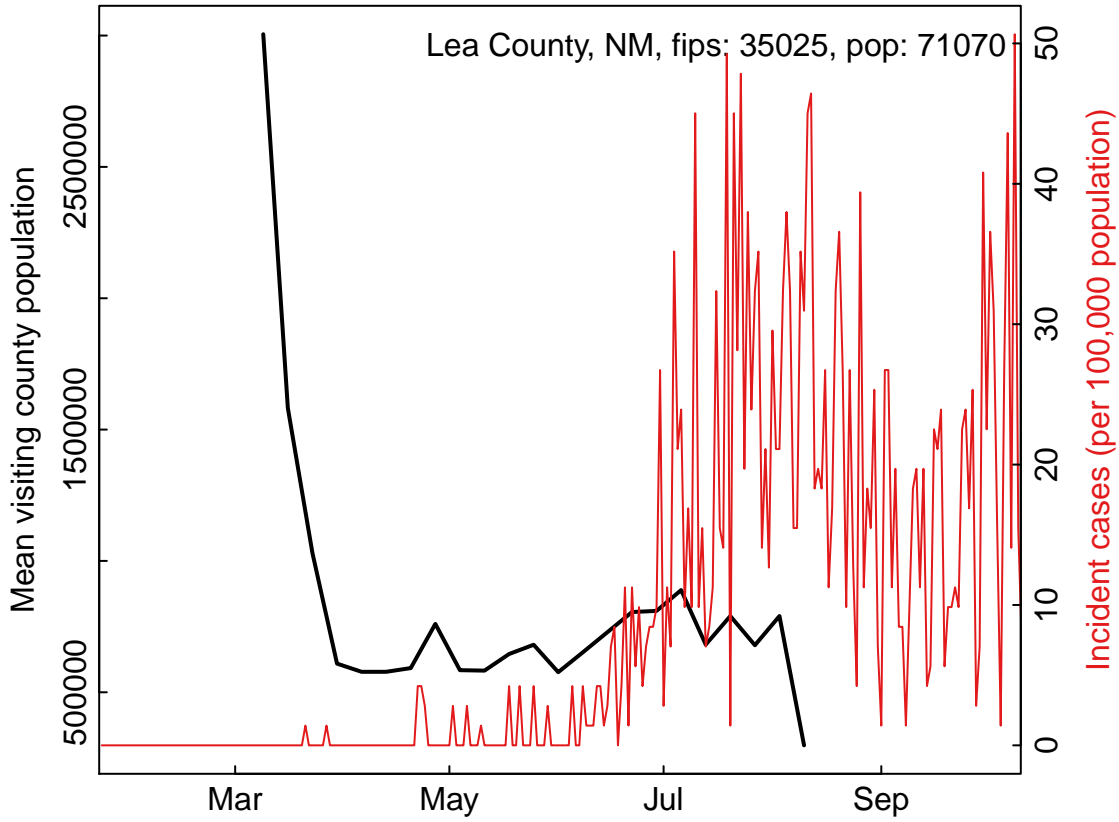

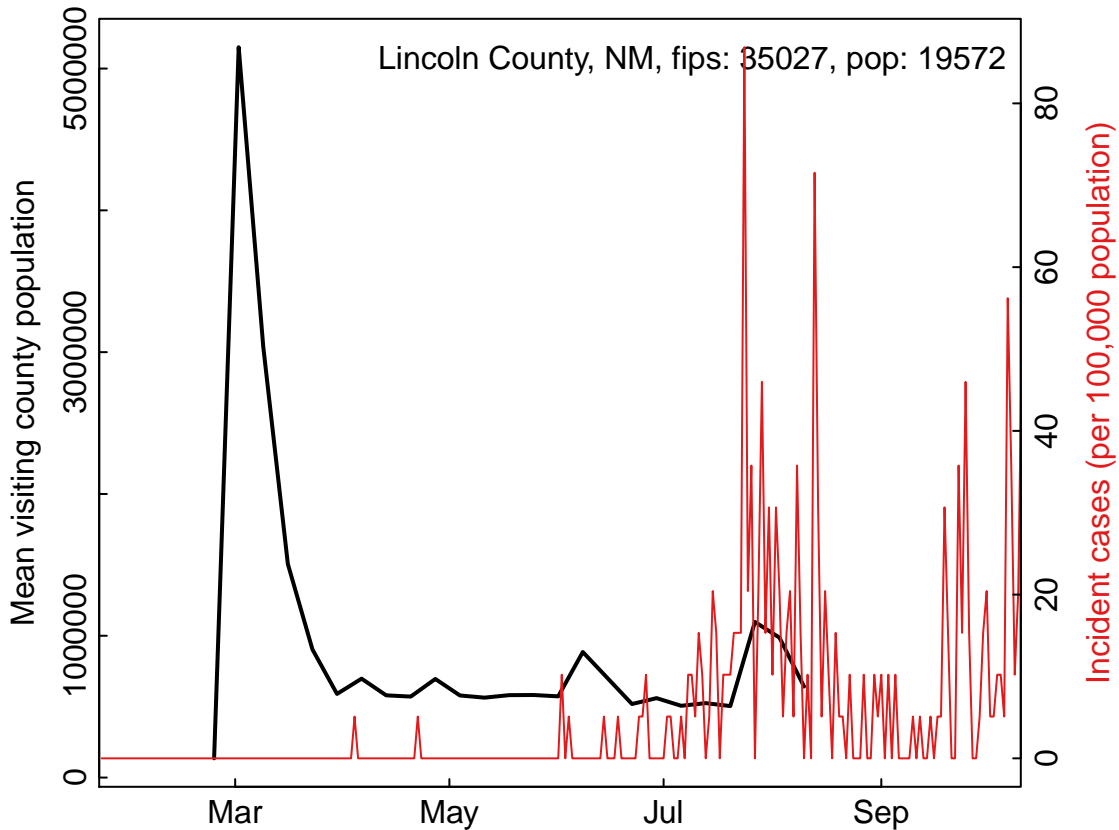

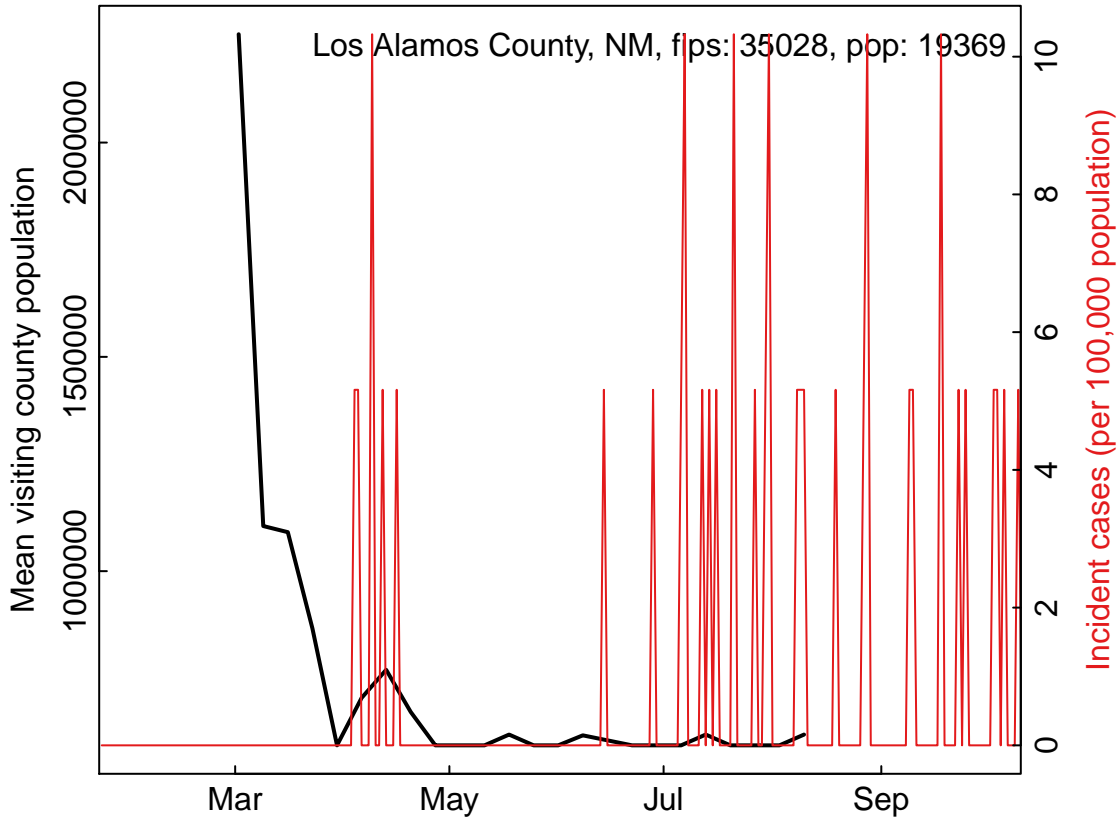



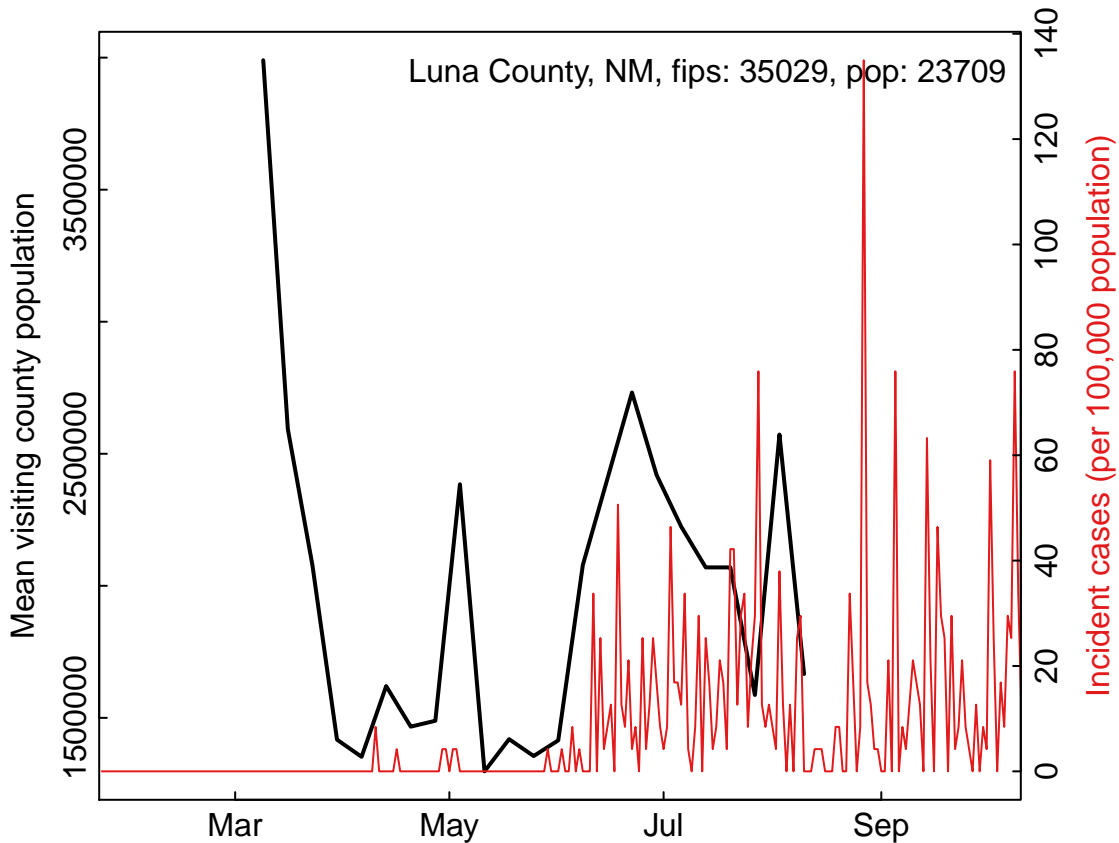

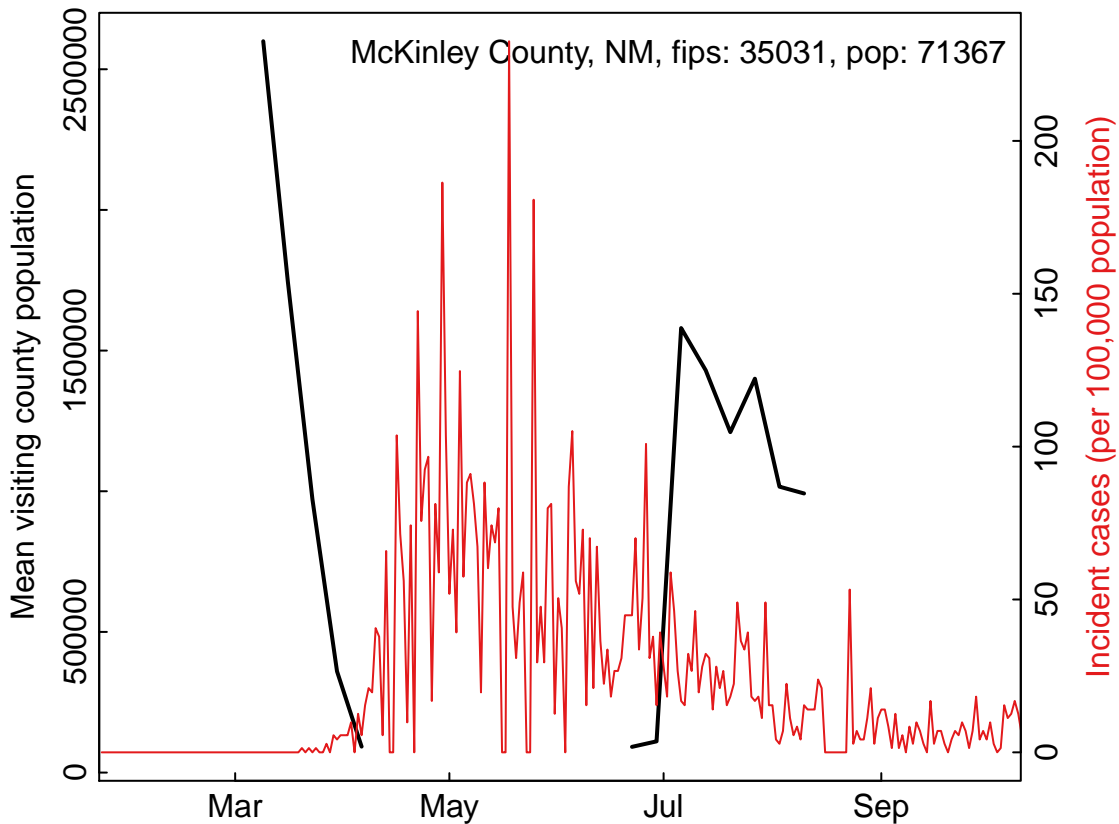

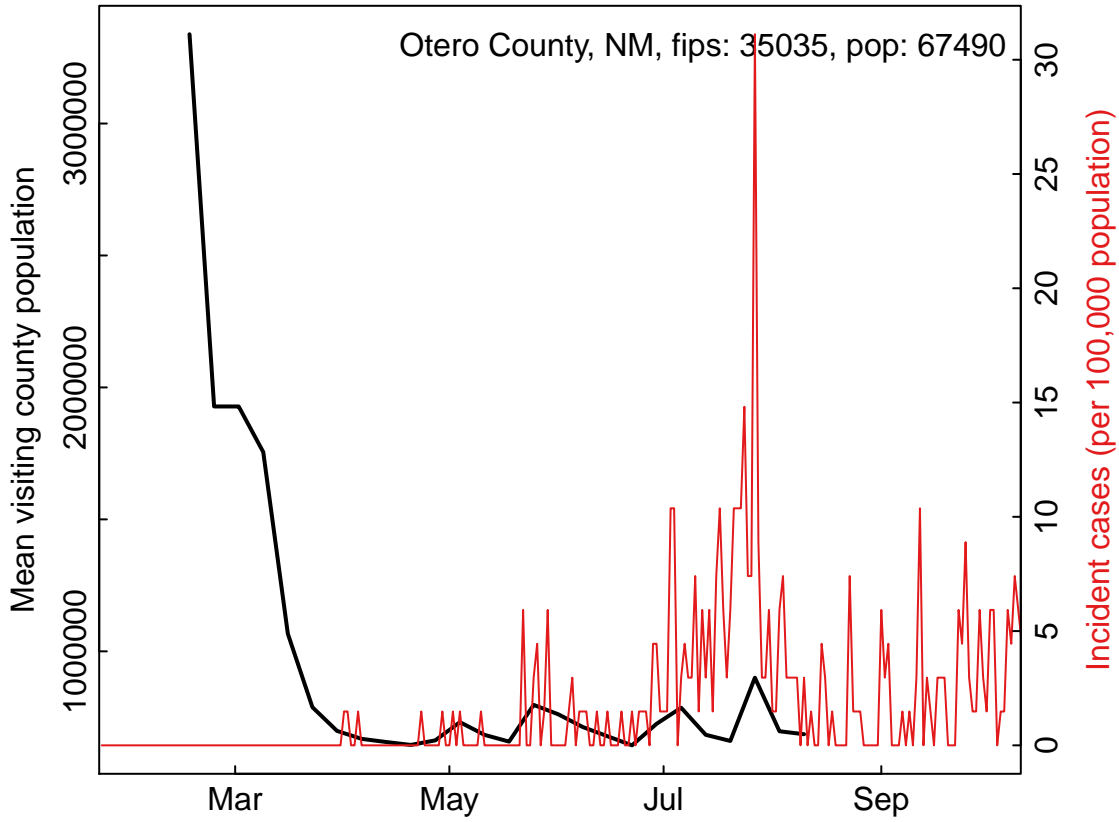

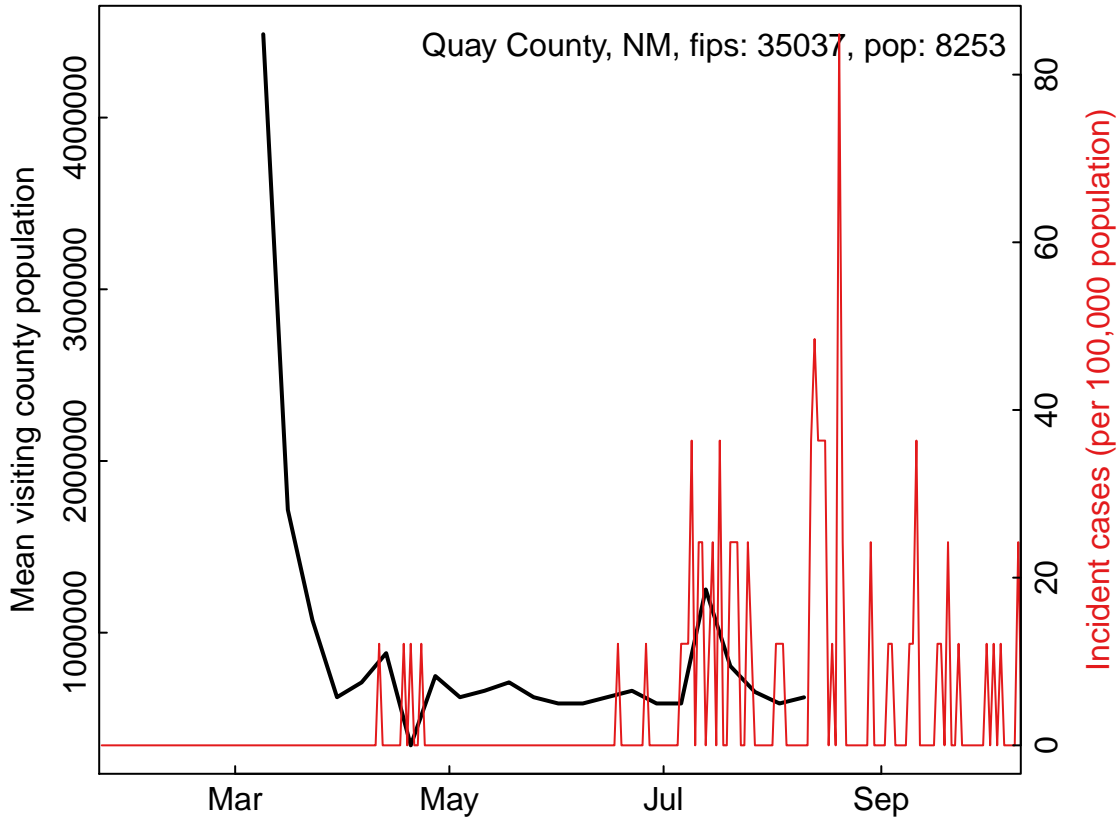

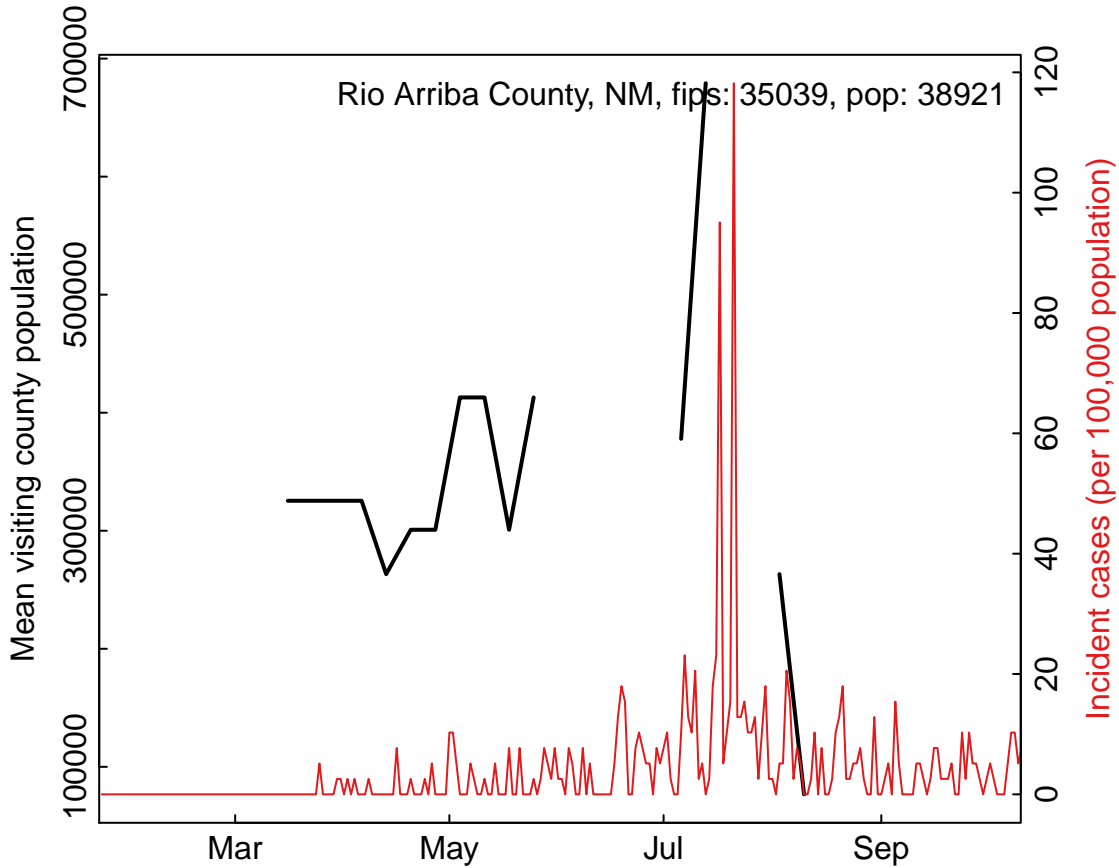

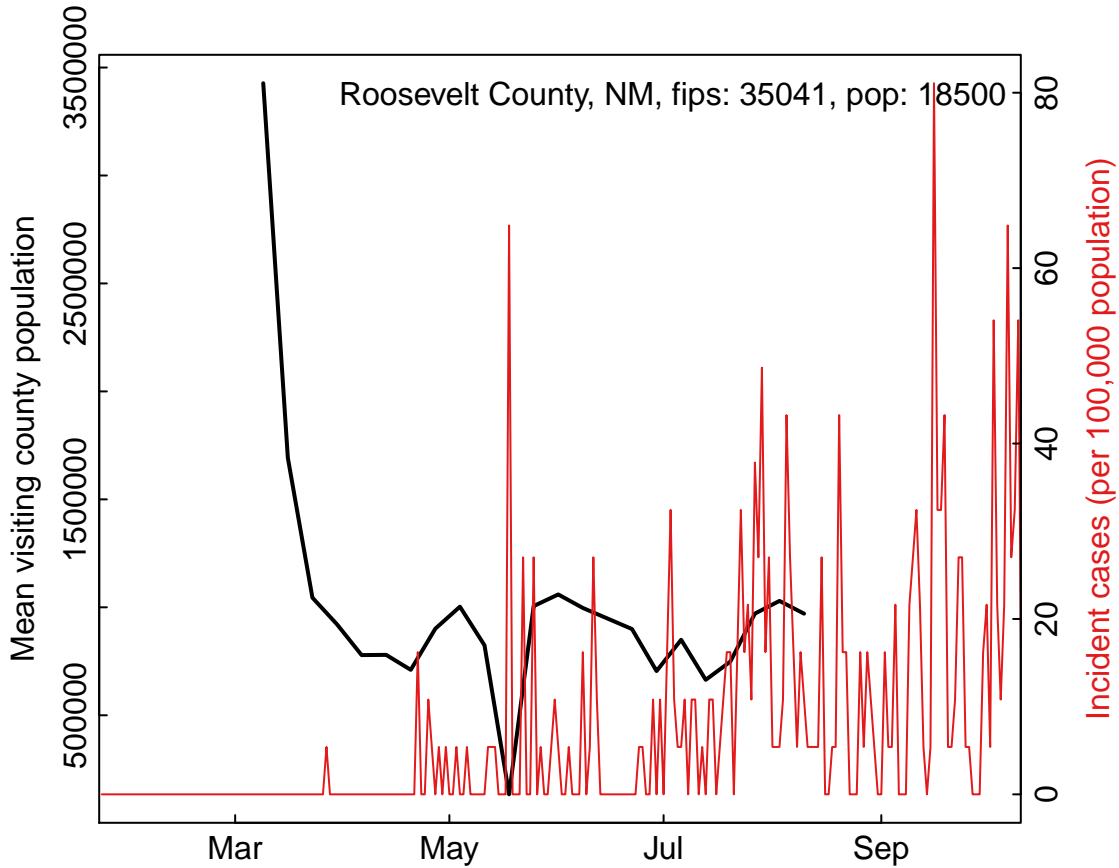

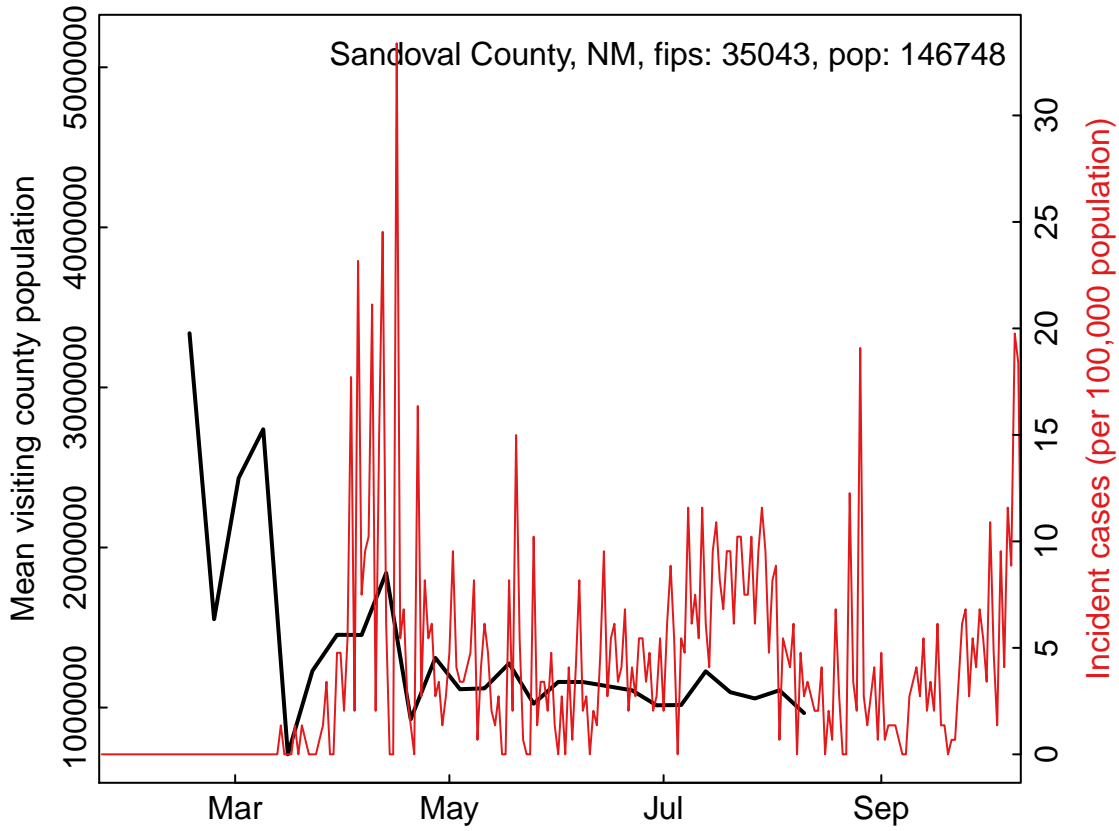

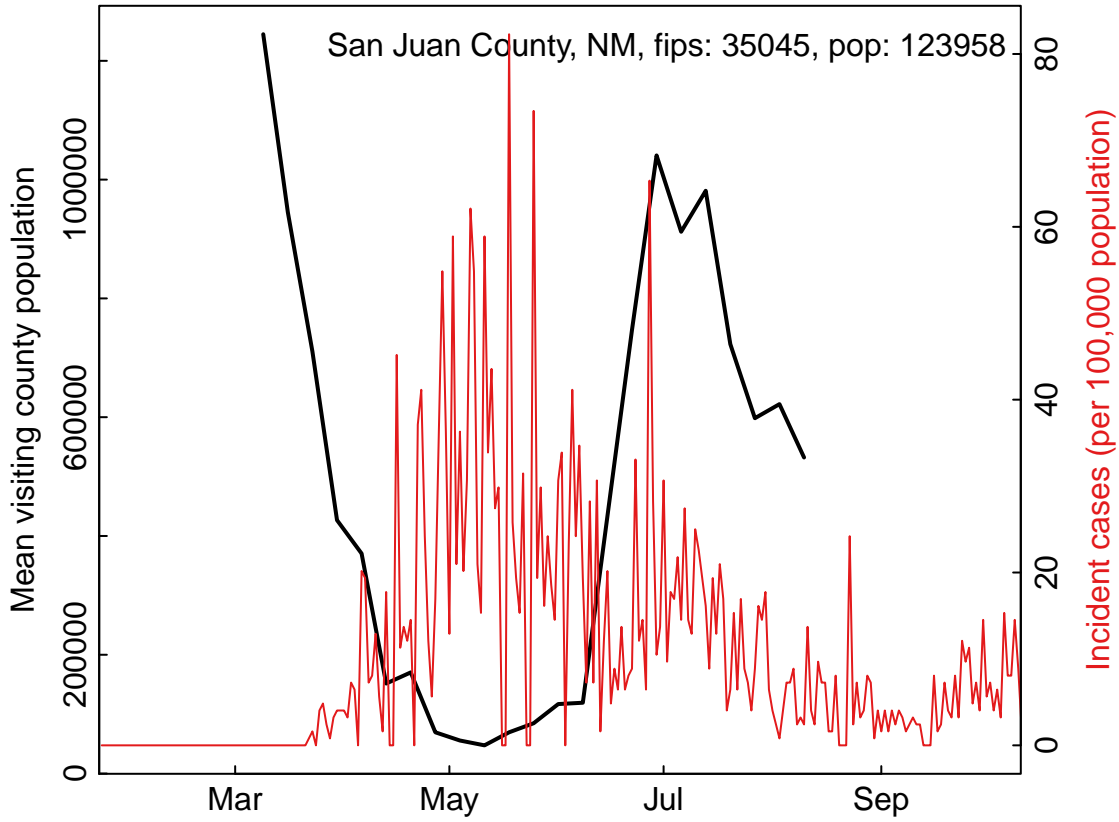



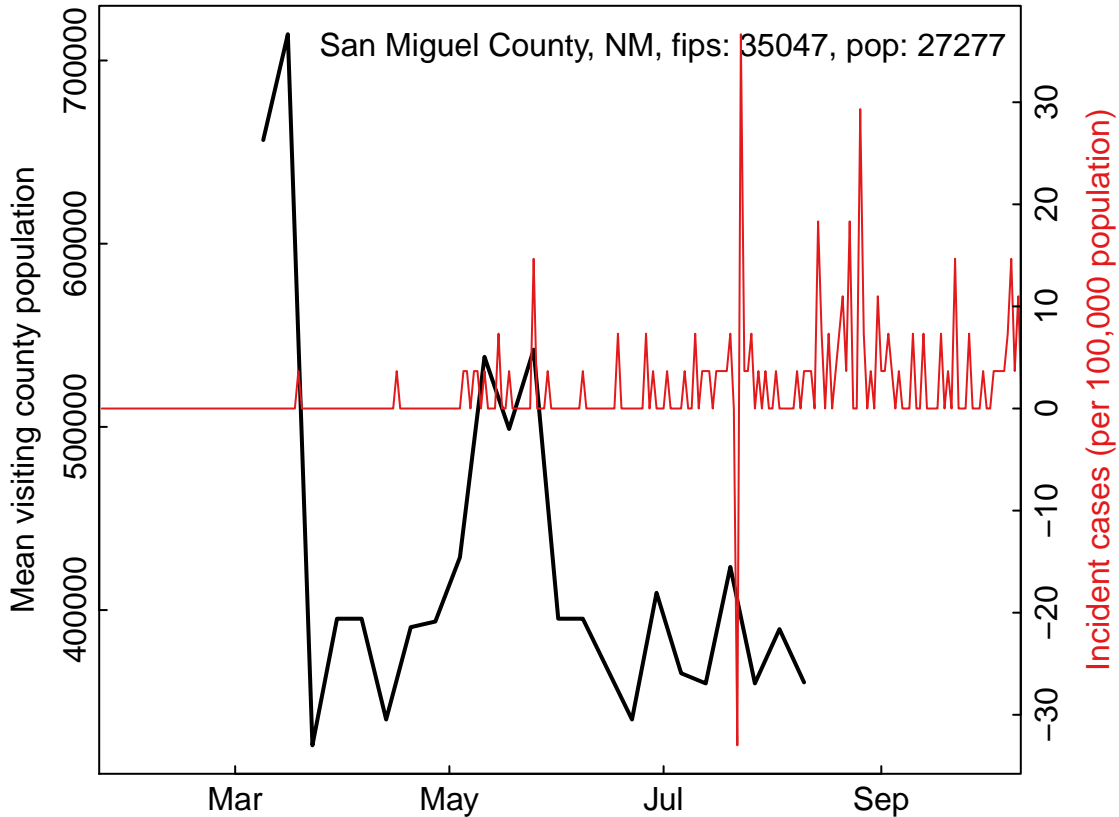

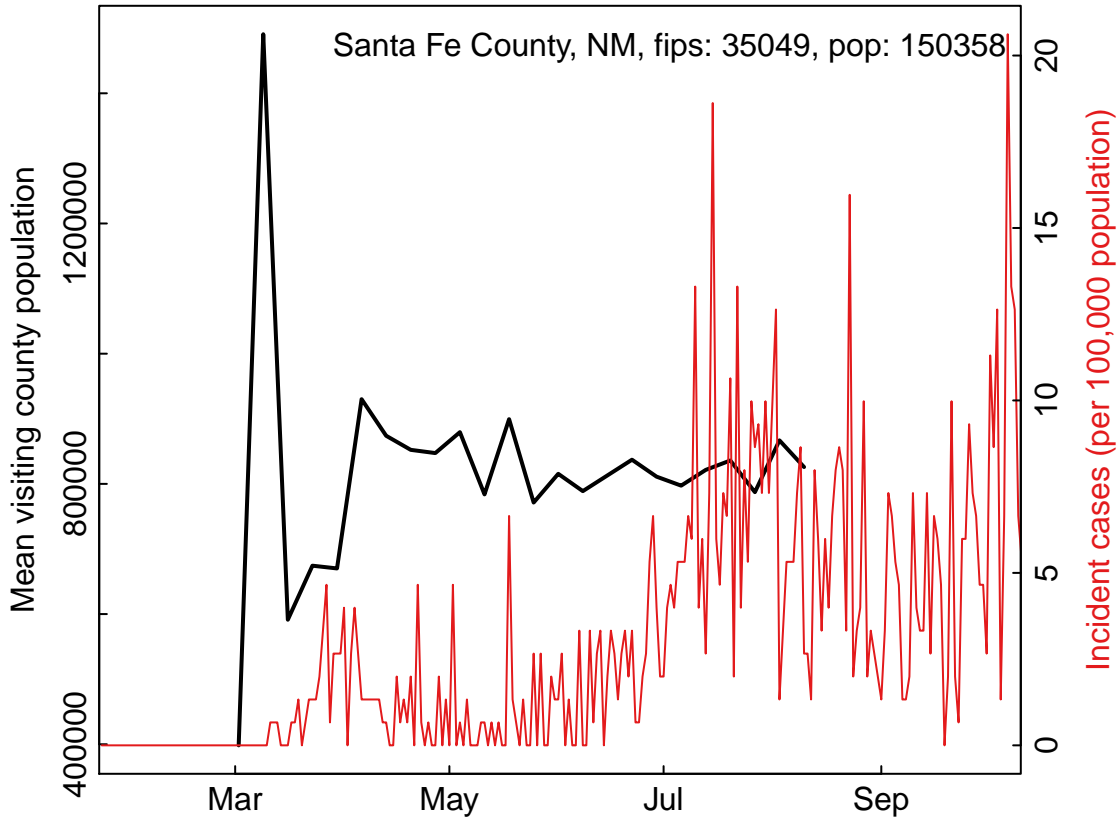

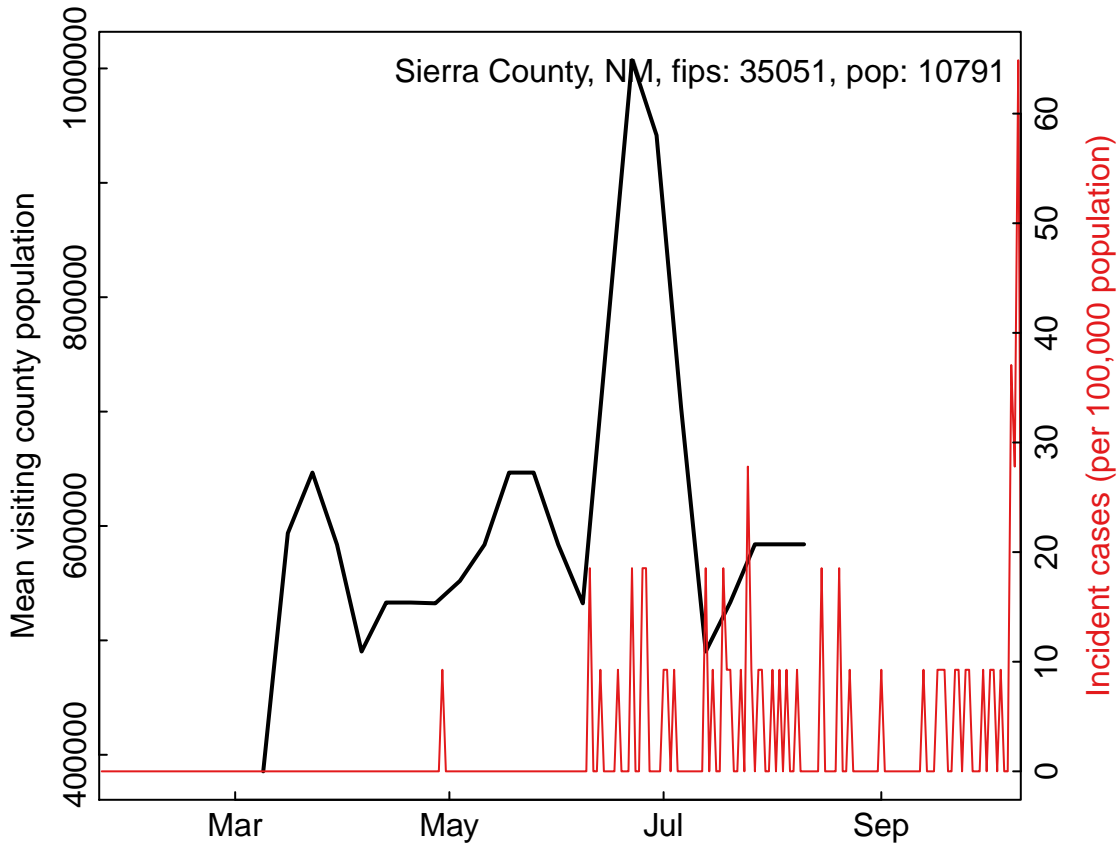

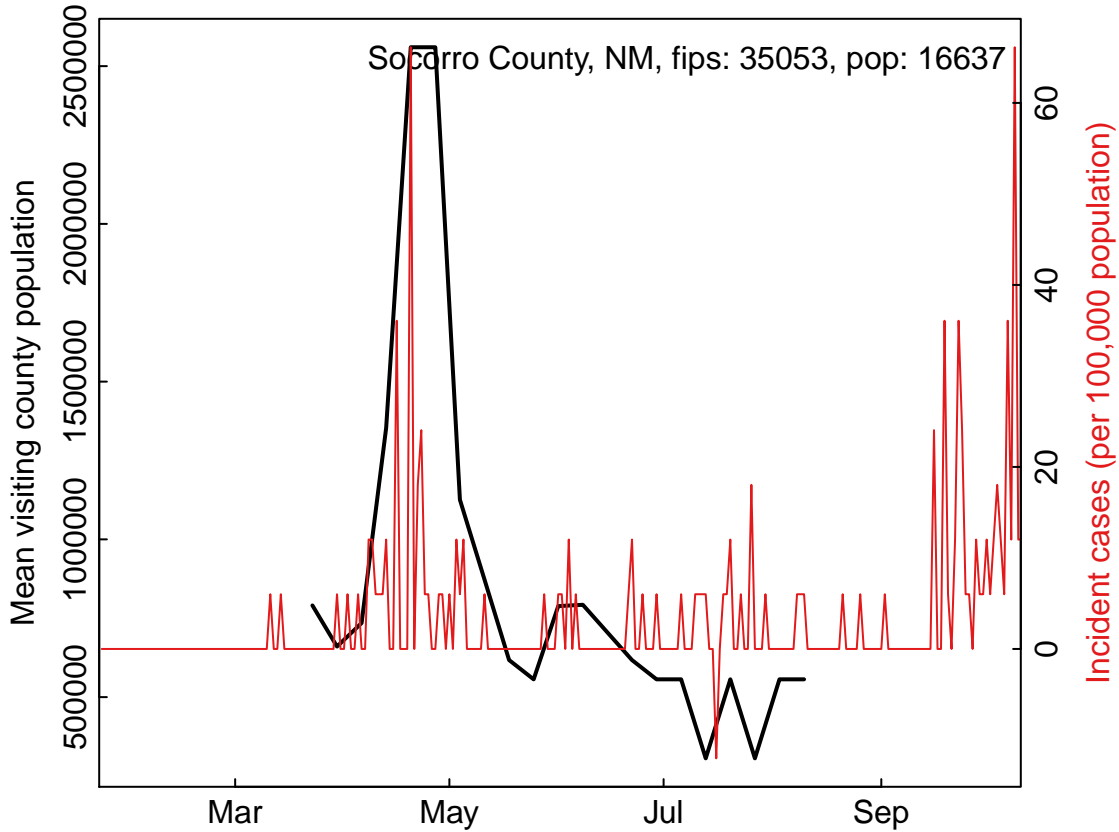

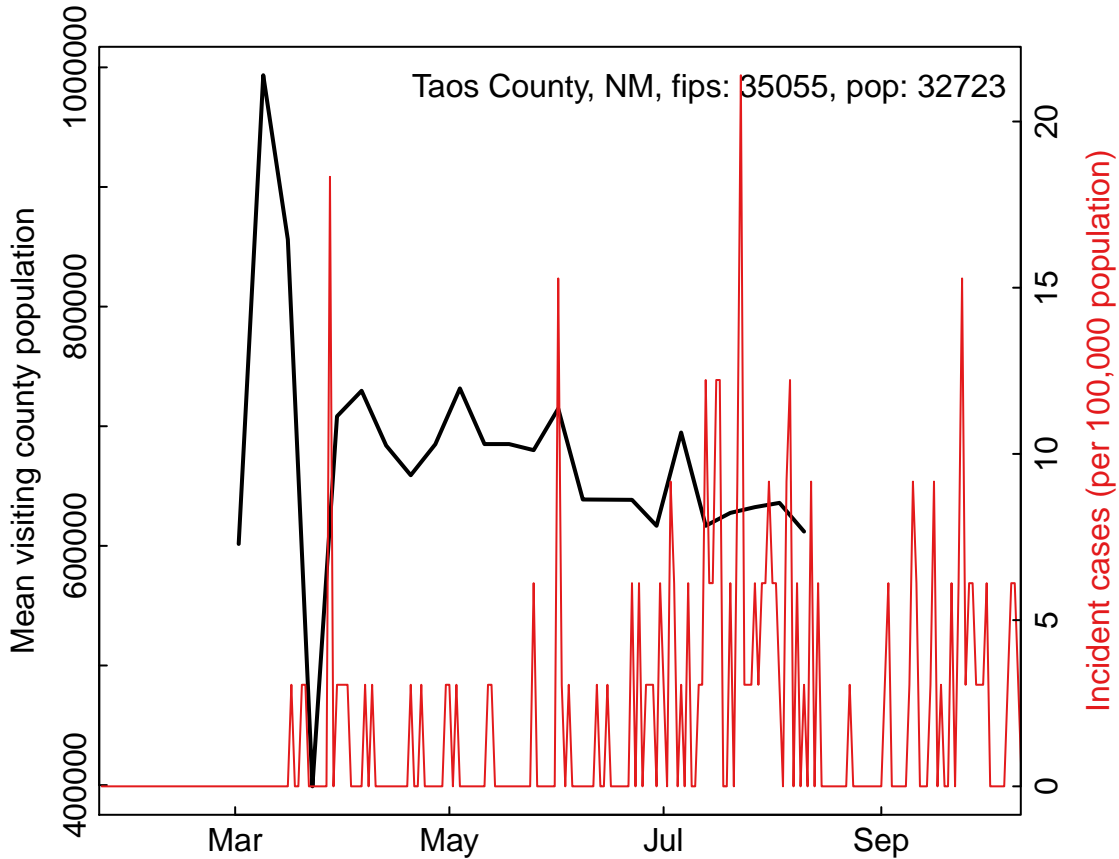

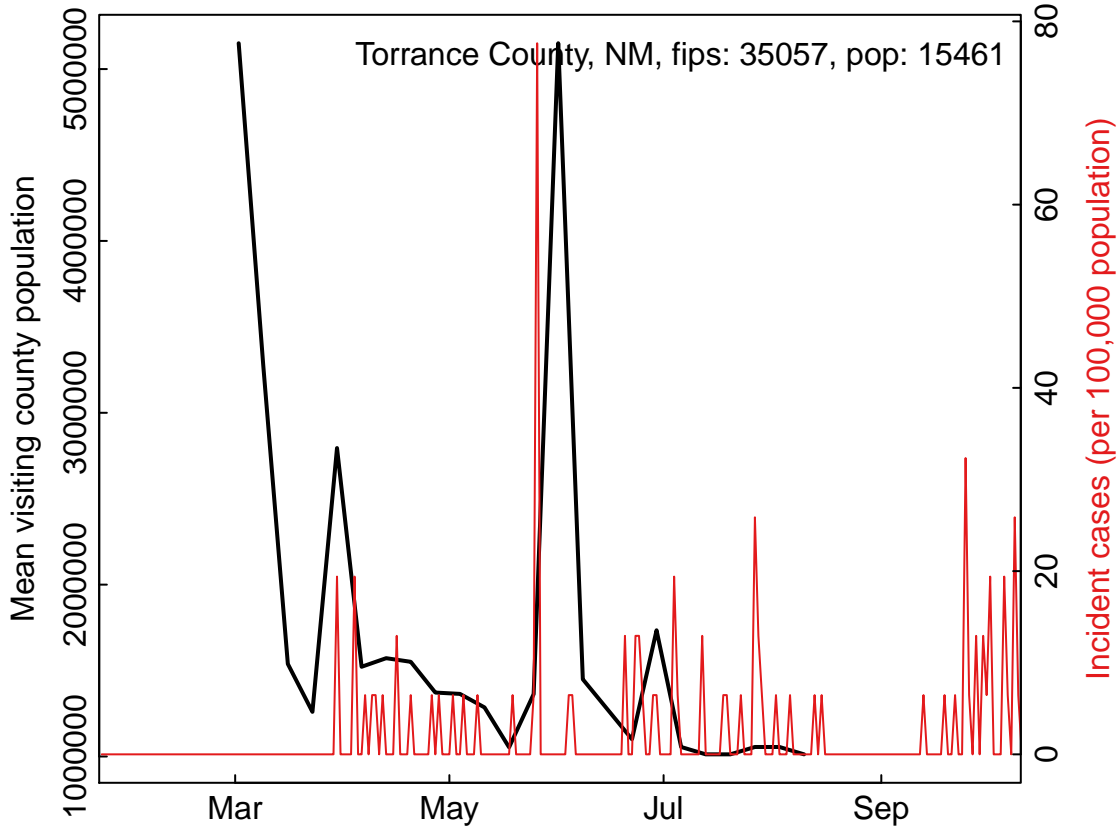

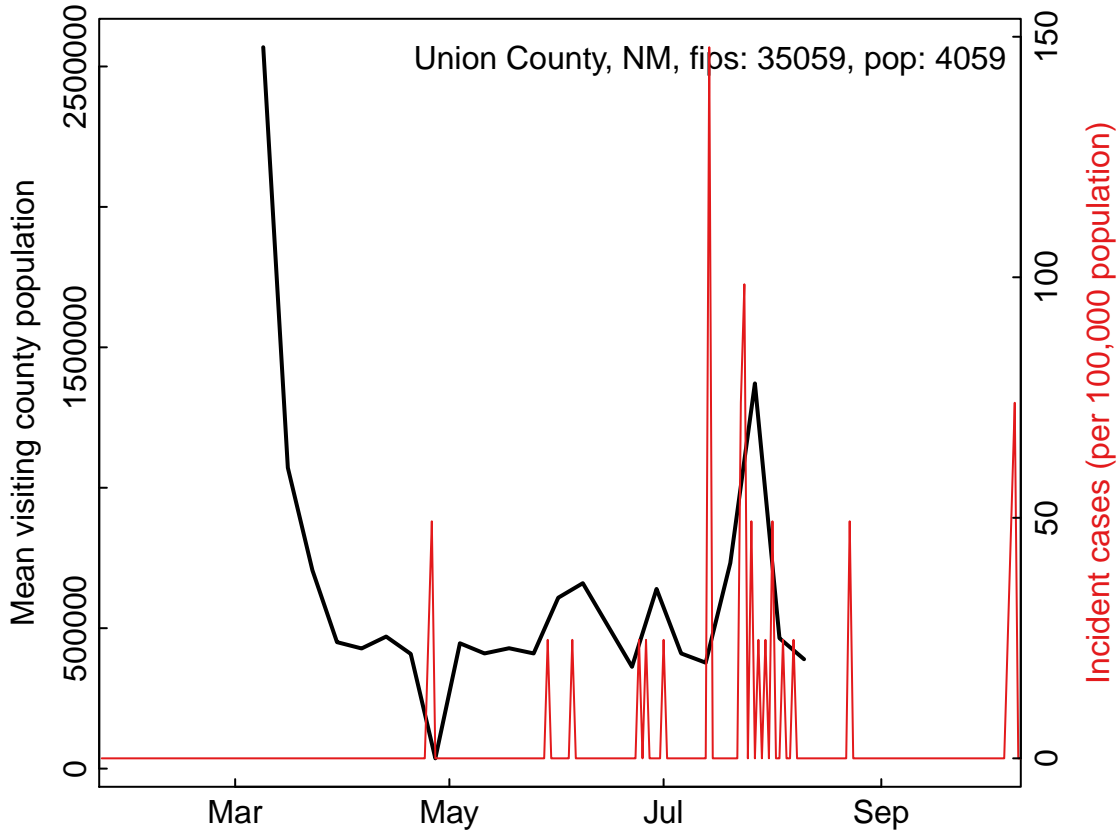

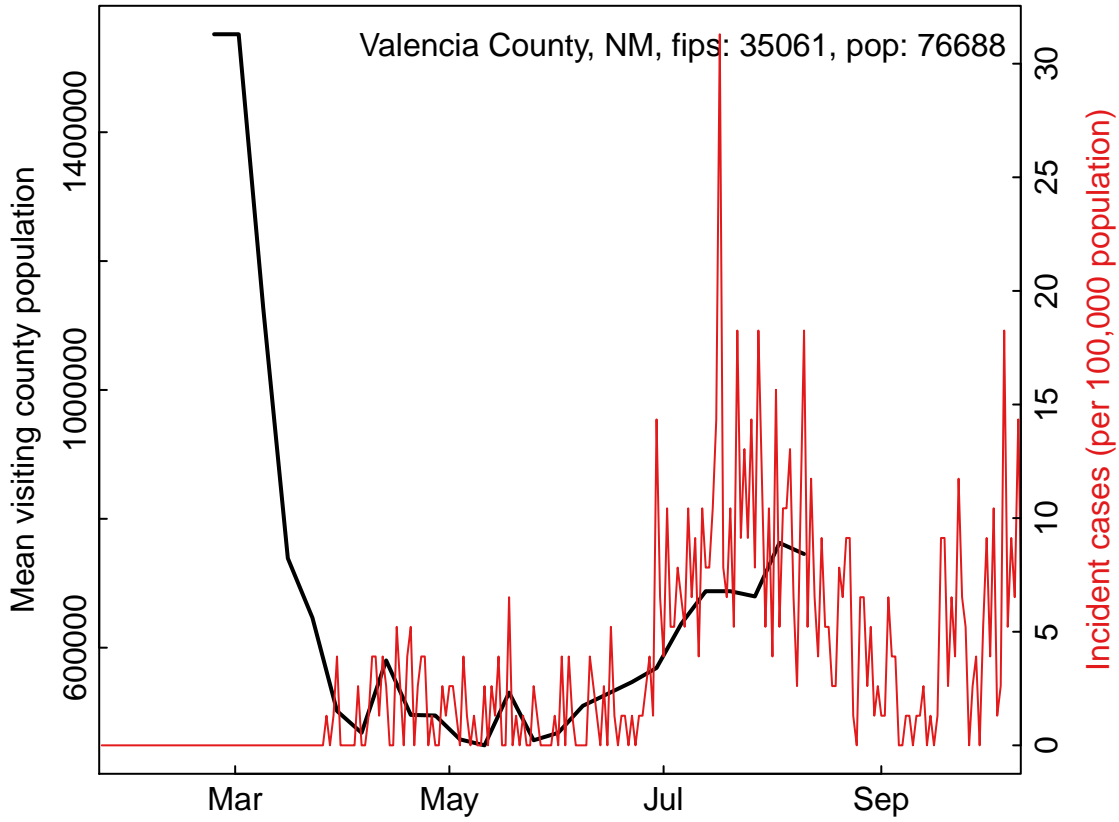



Albany County, NY, fips: 36001, pop: 305506

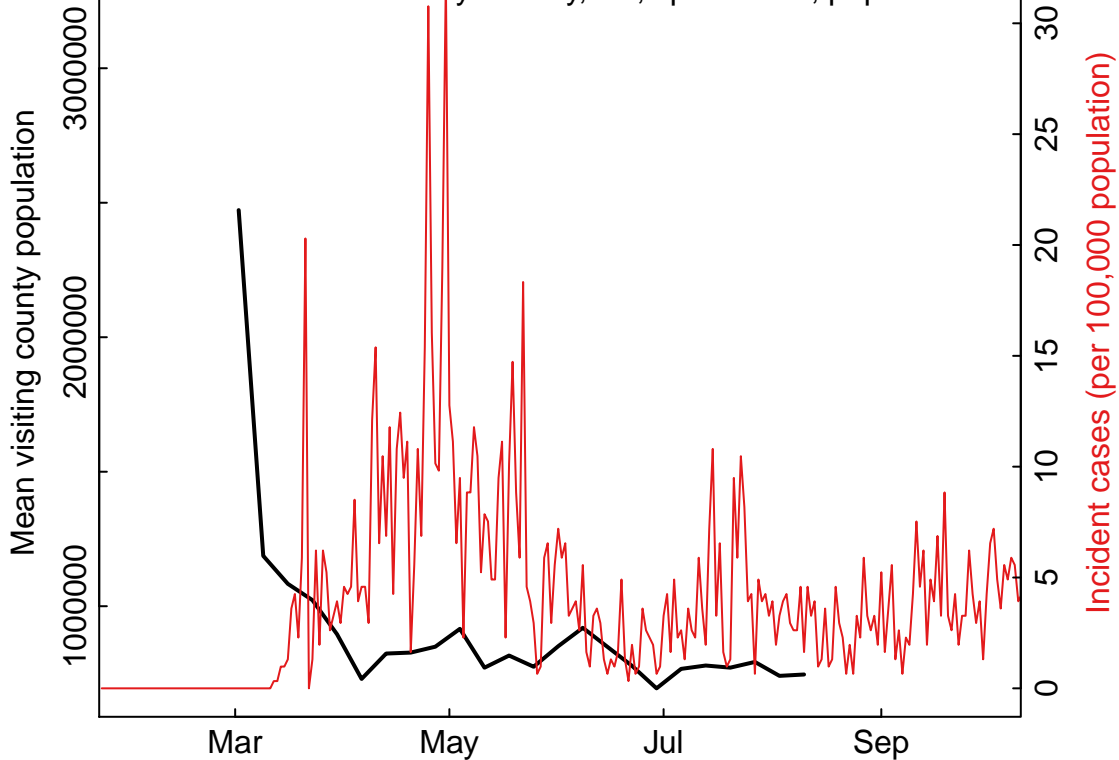

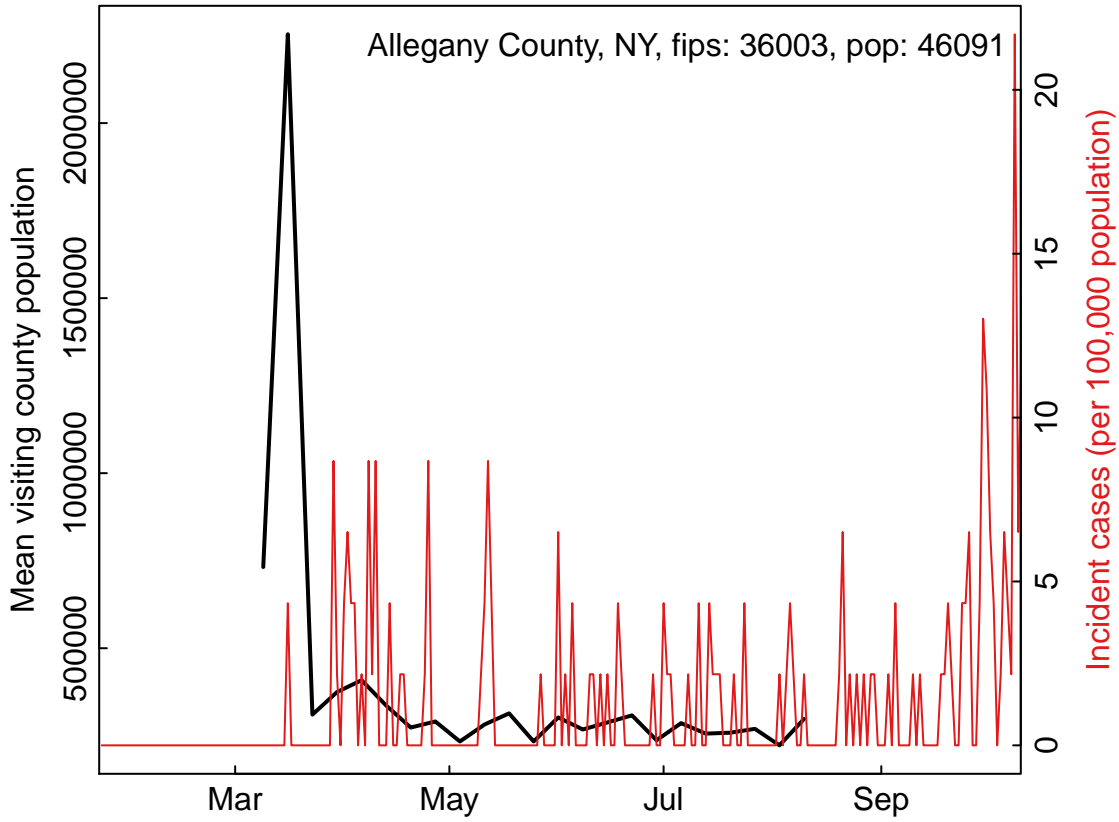

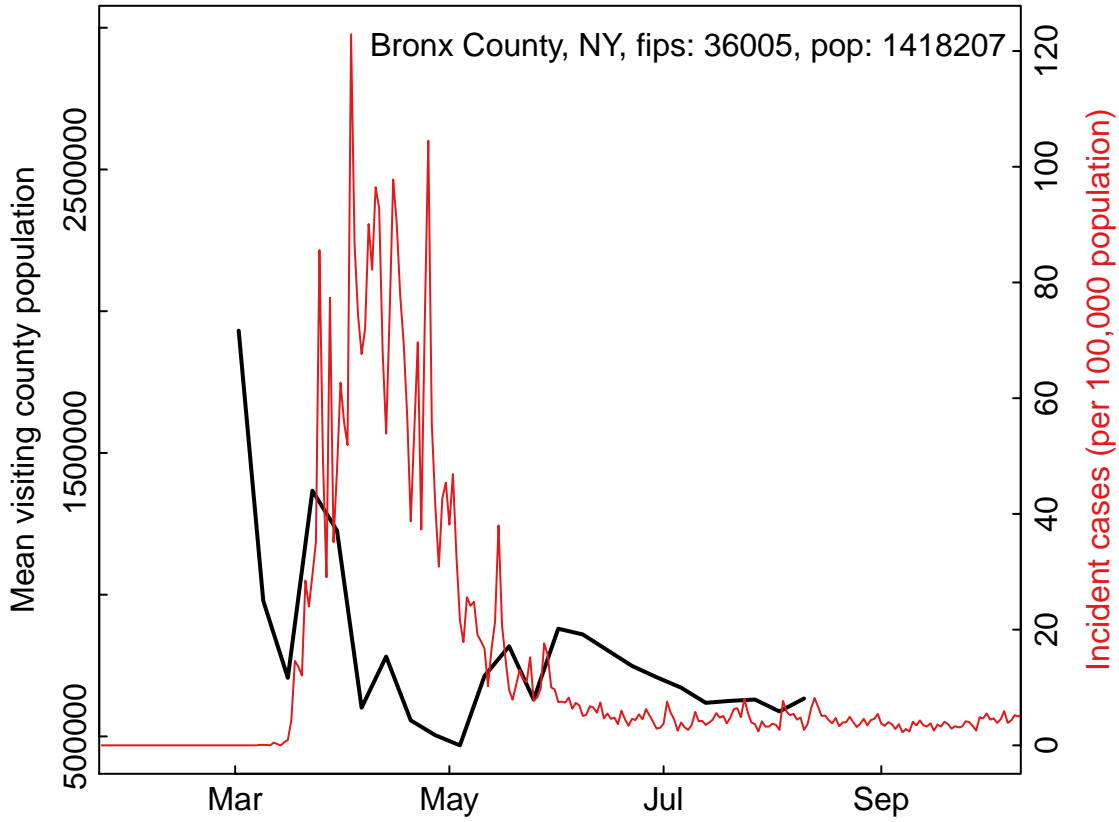

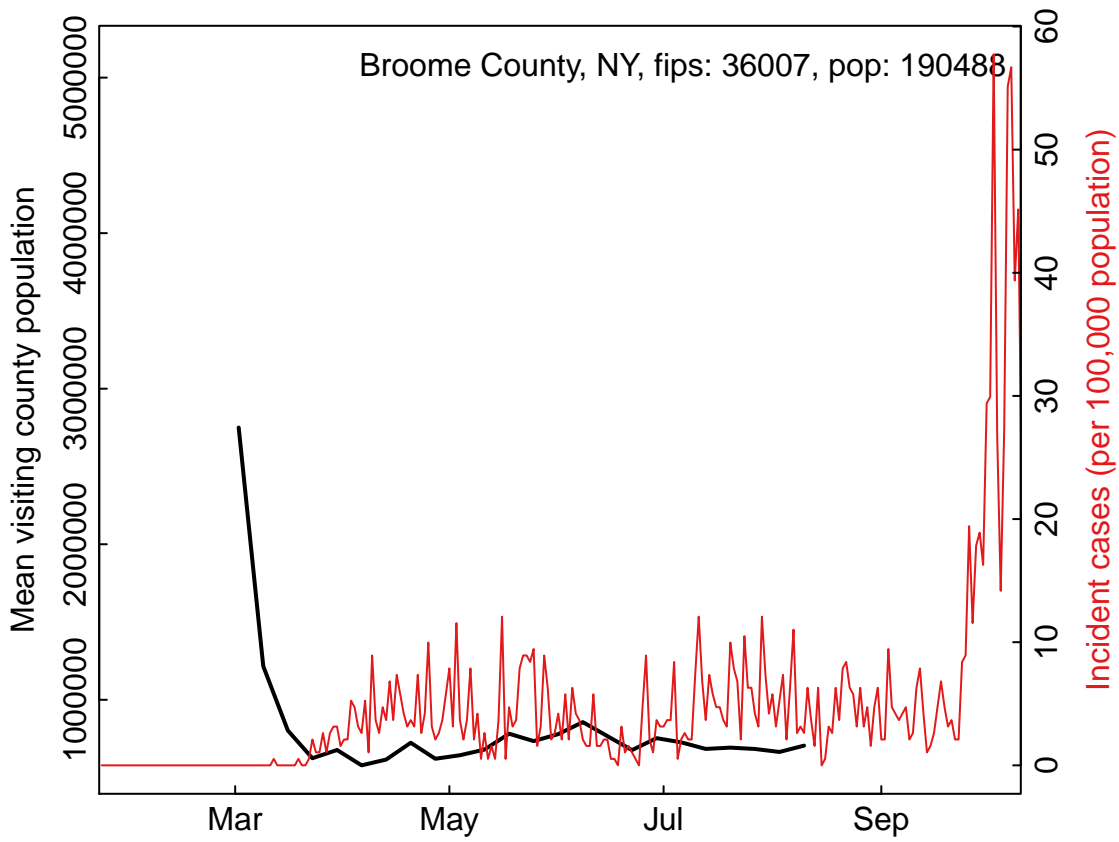

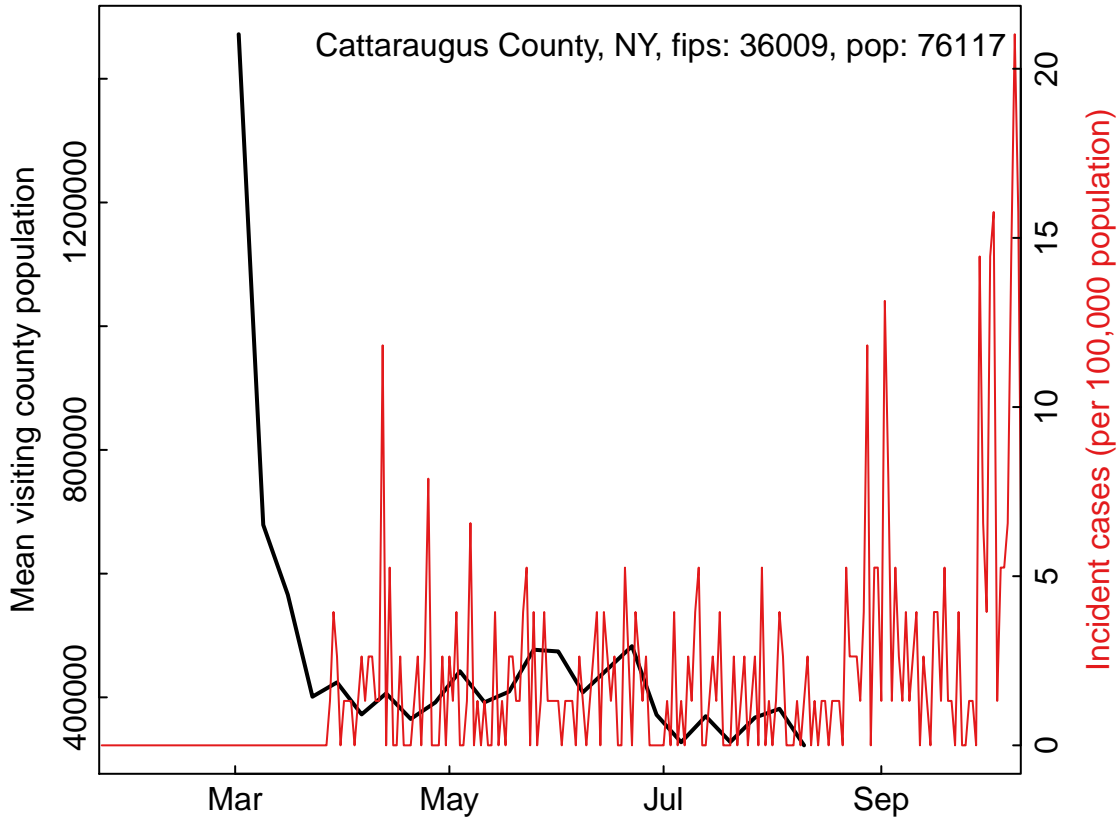

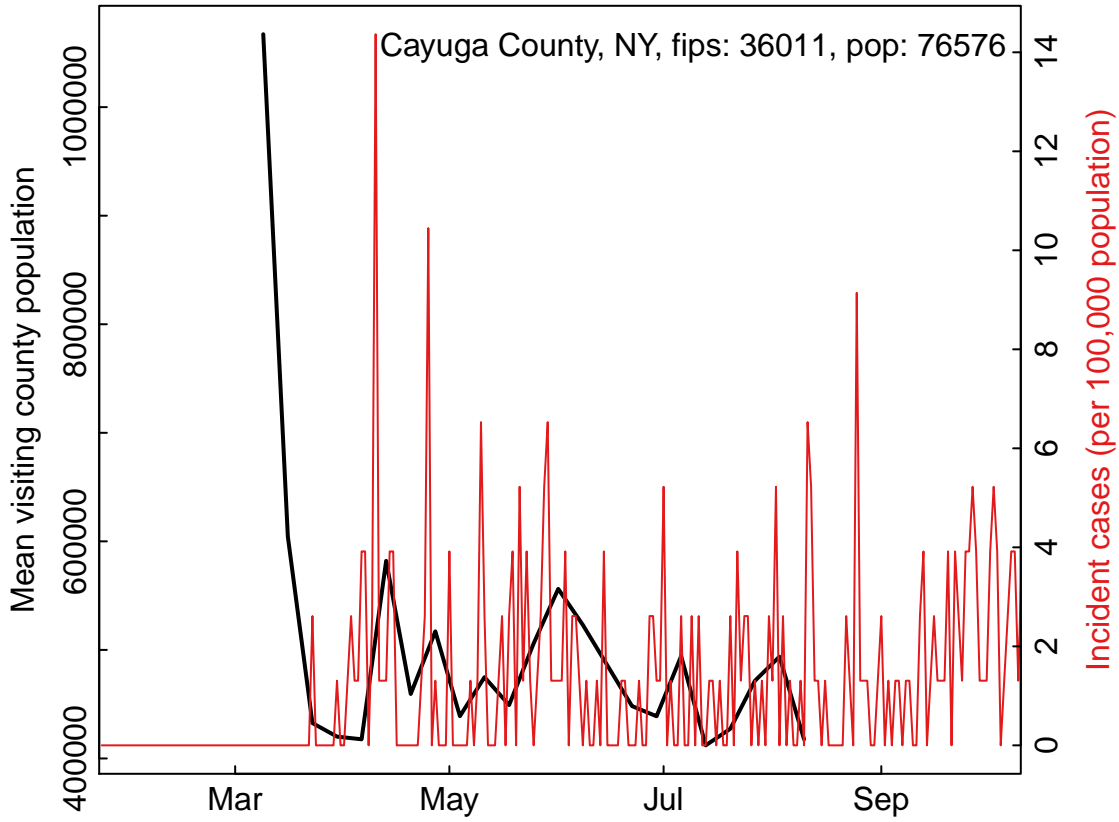

Chautauqua County, NY, fips: 36013, pop: 126903

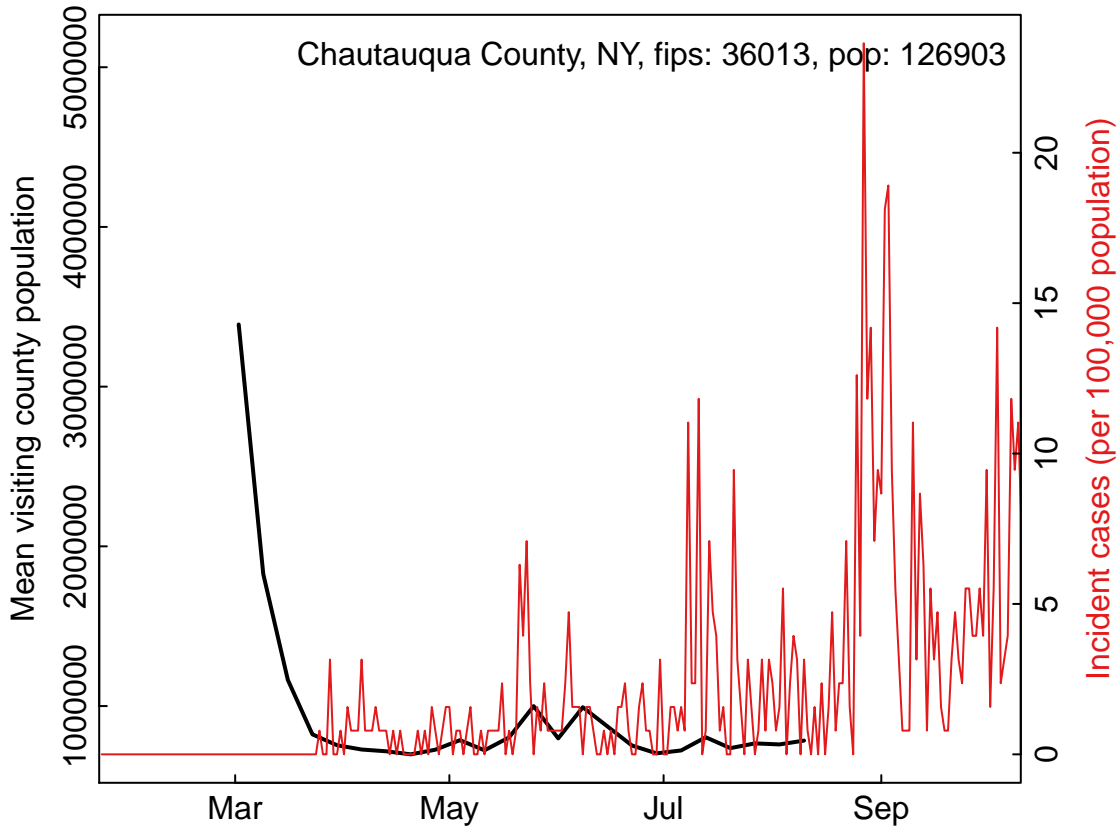

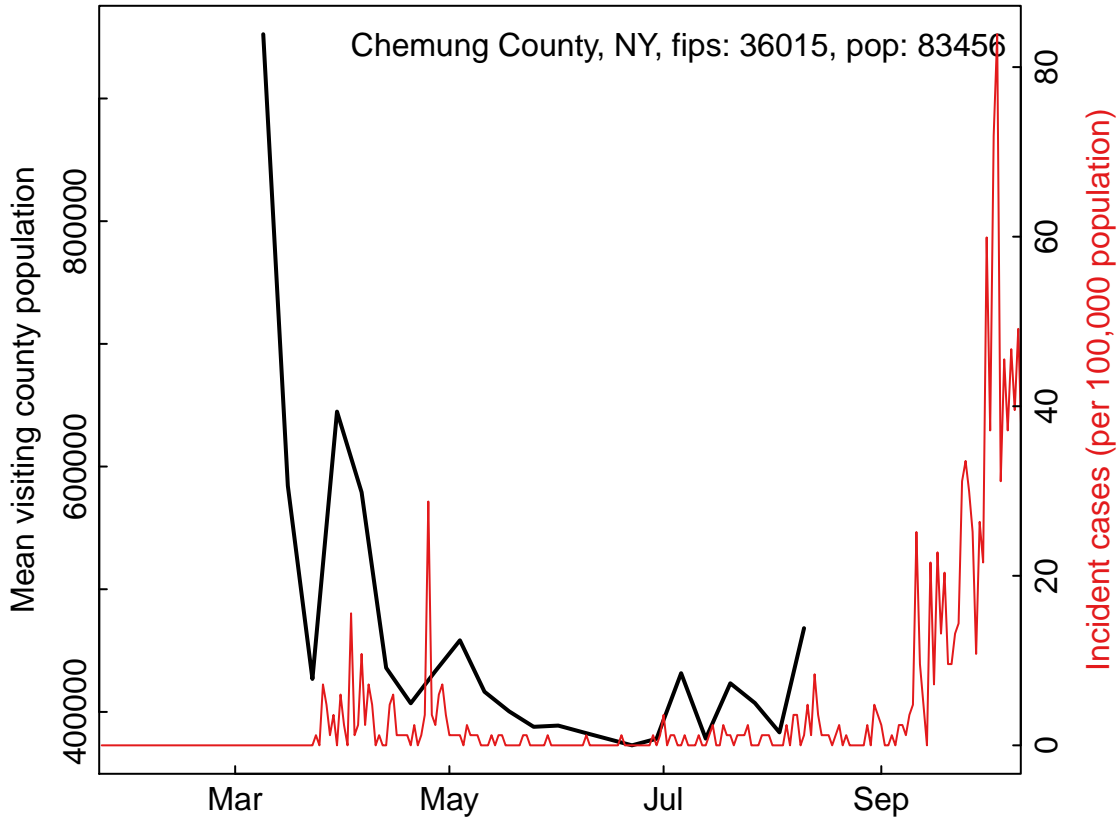



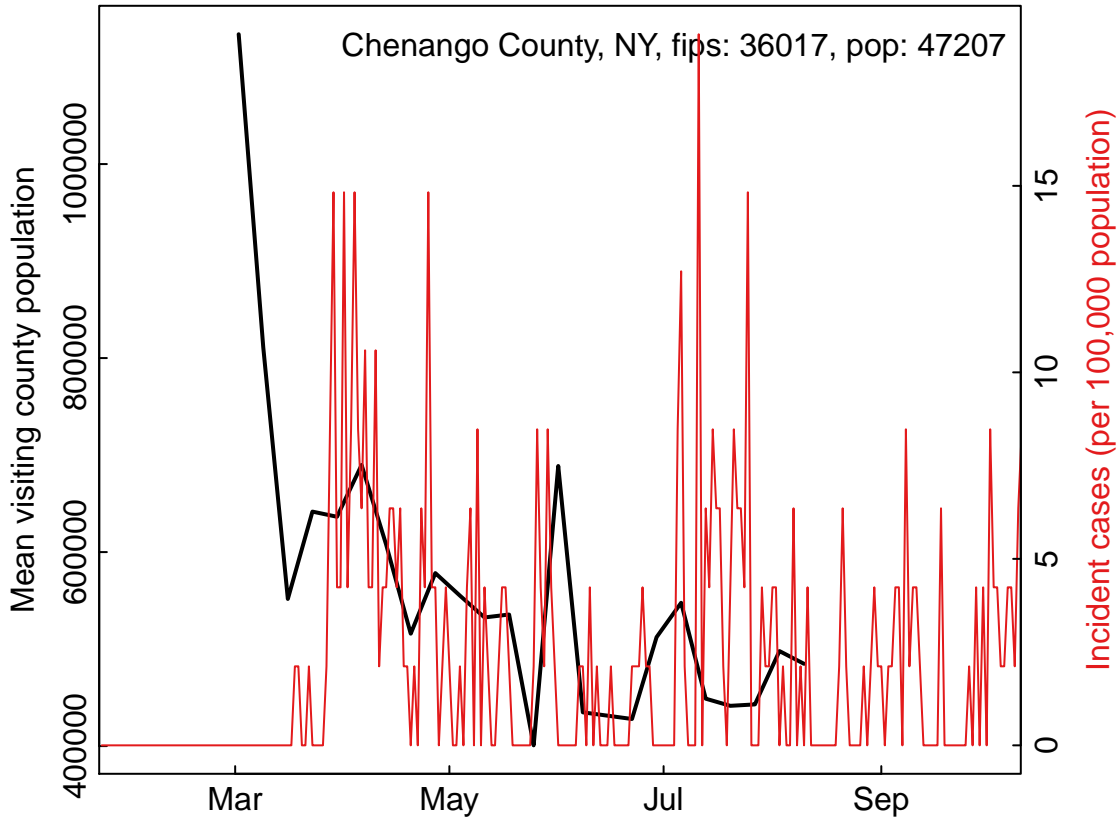

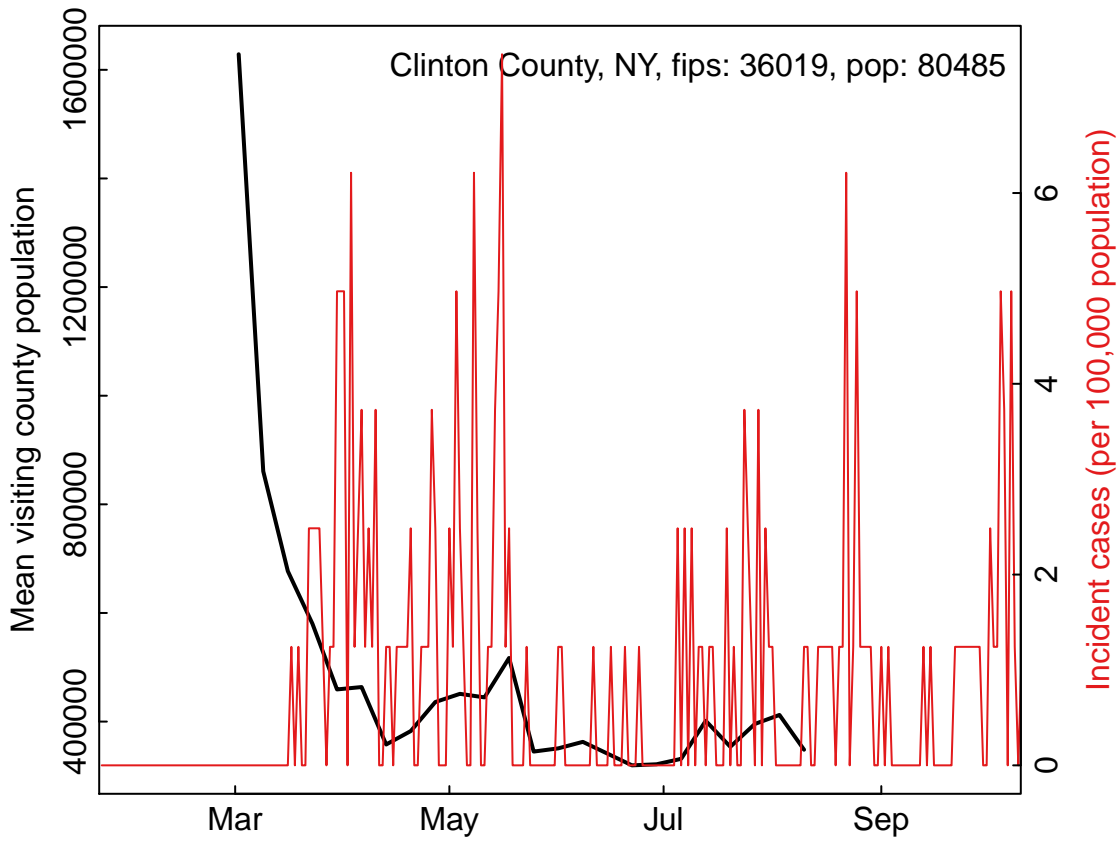

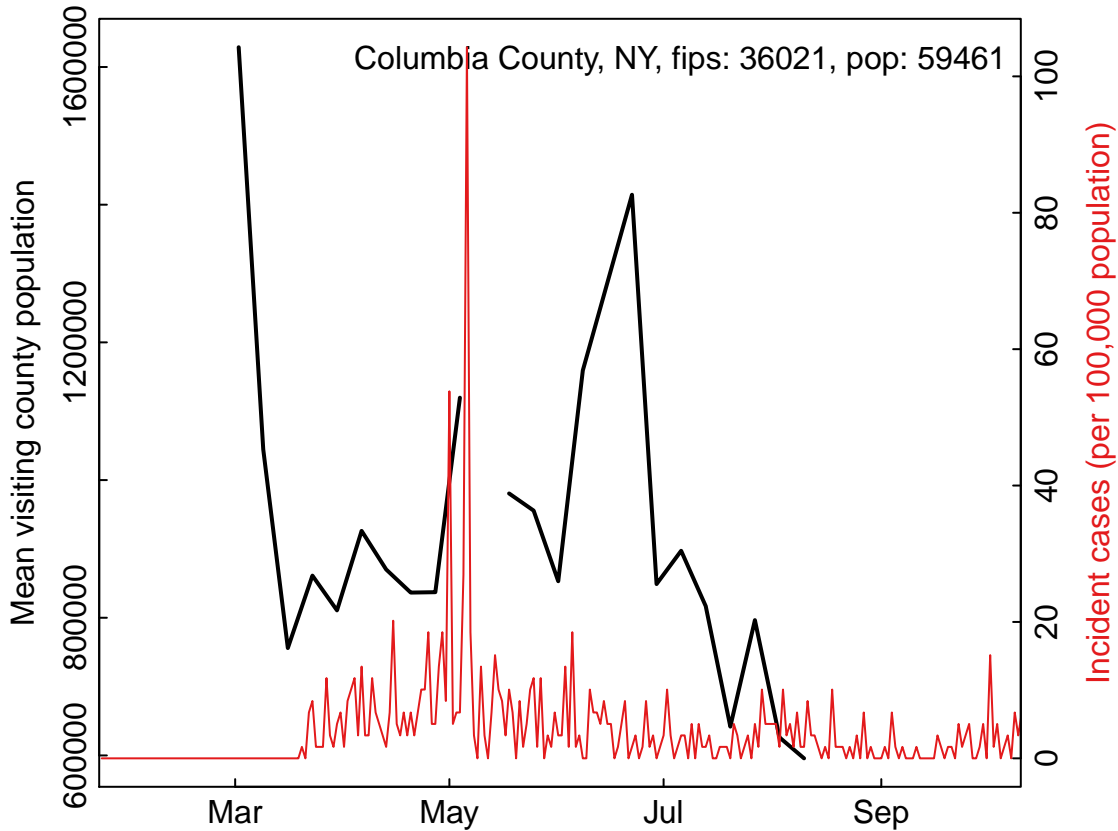

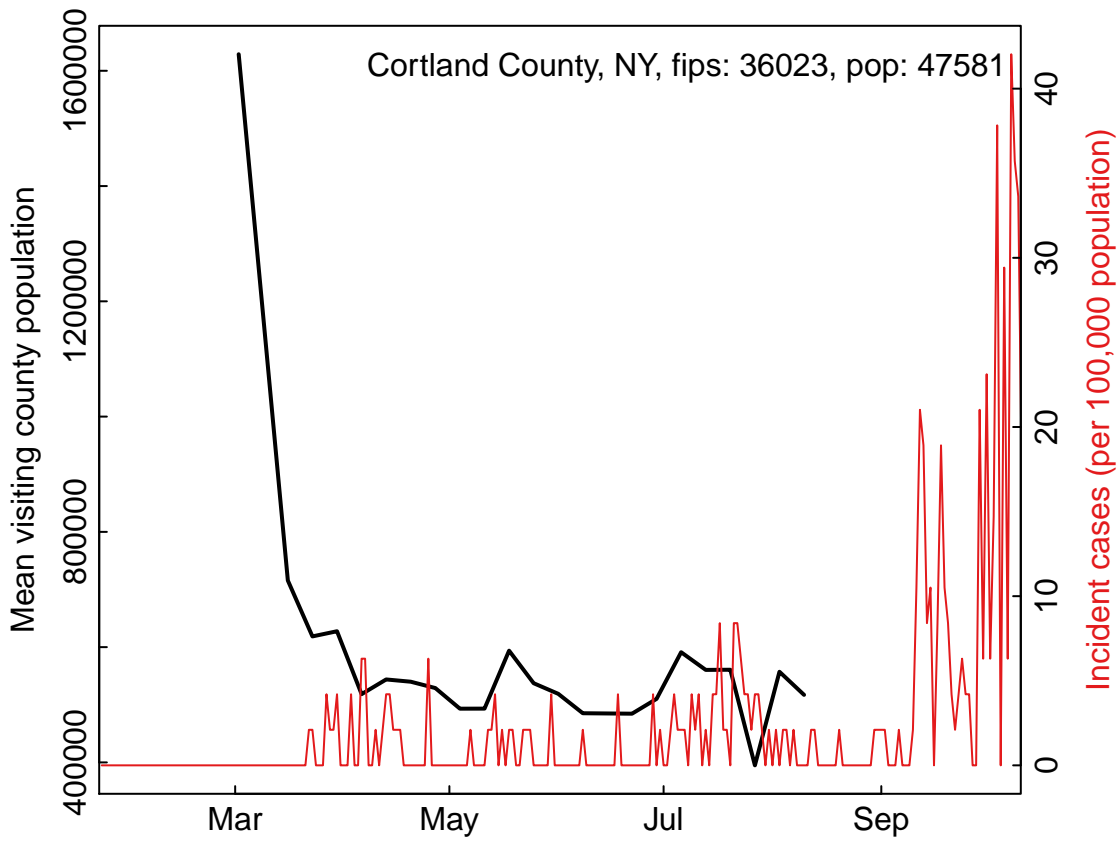

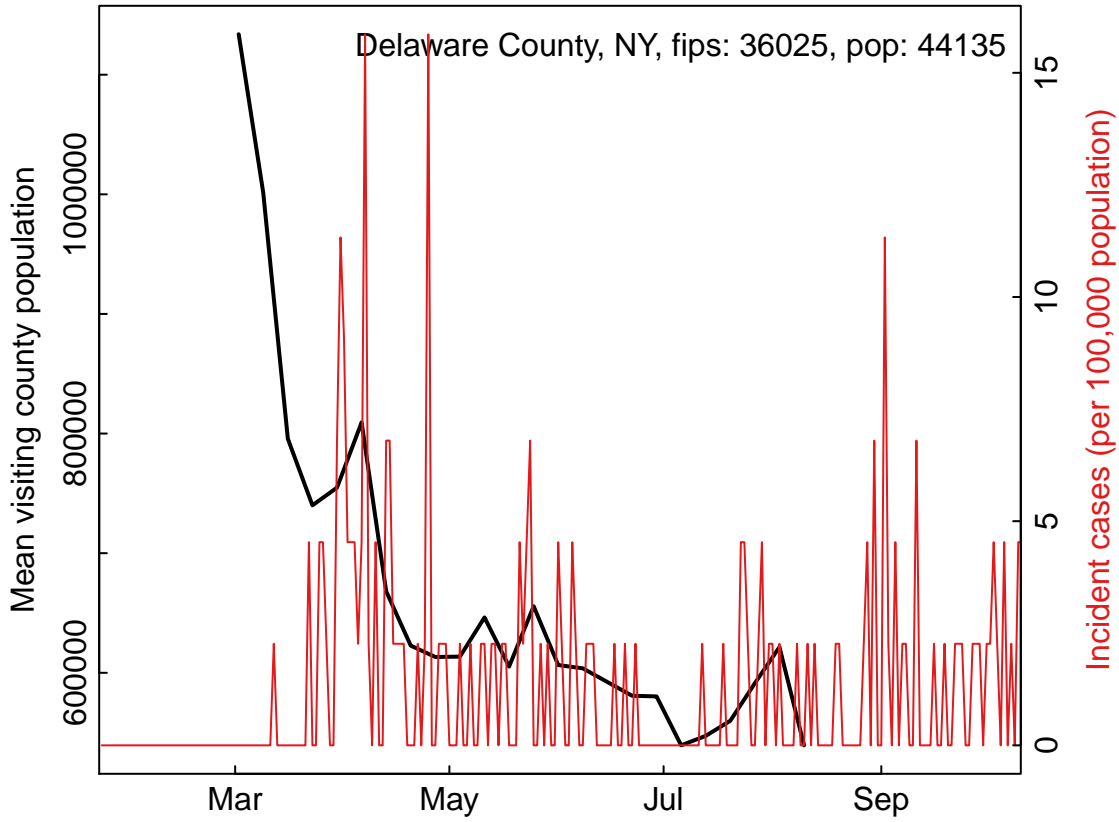

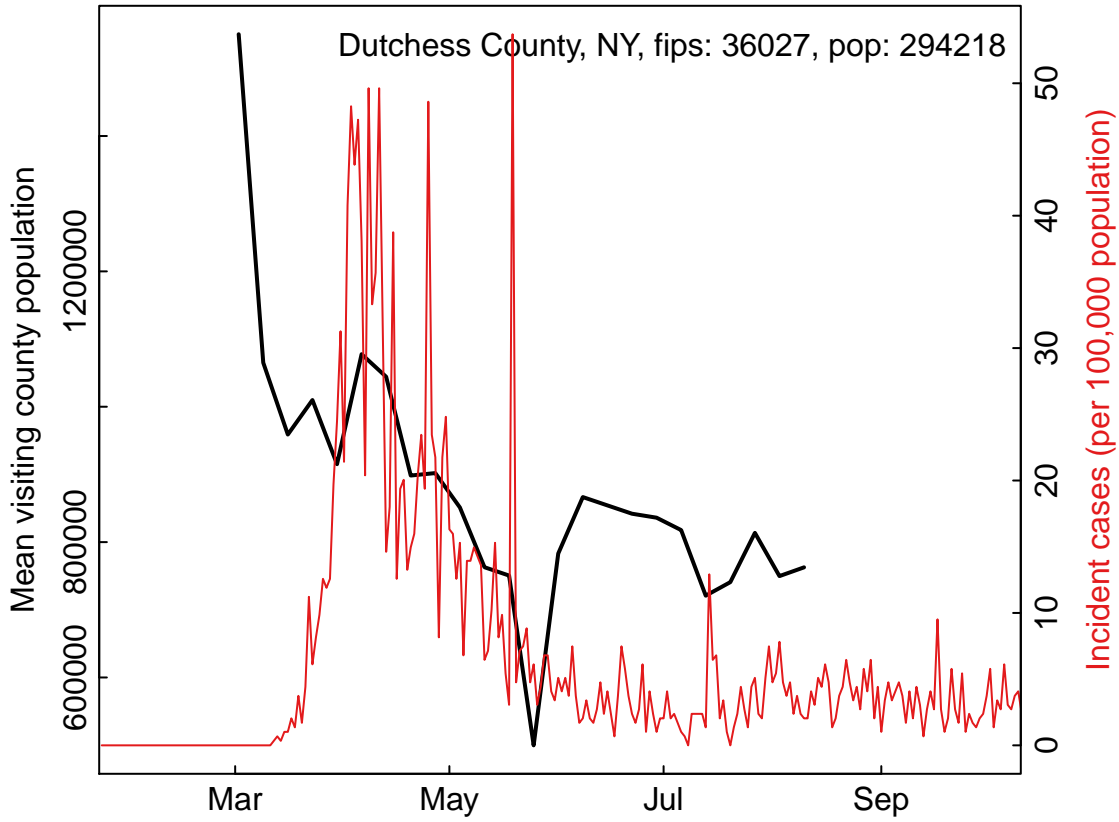

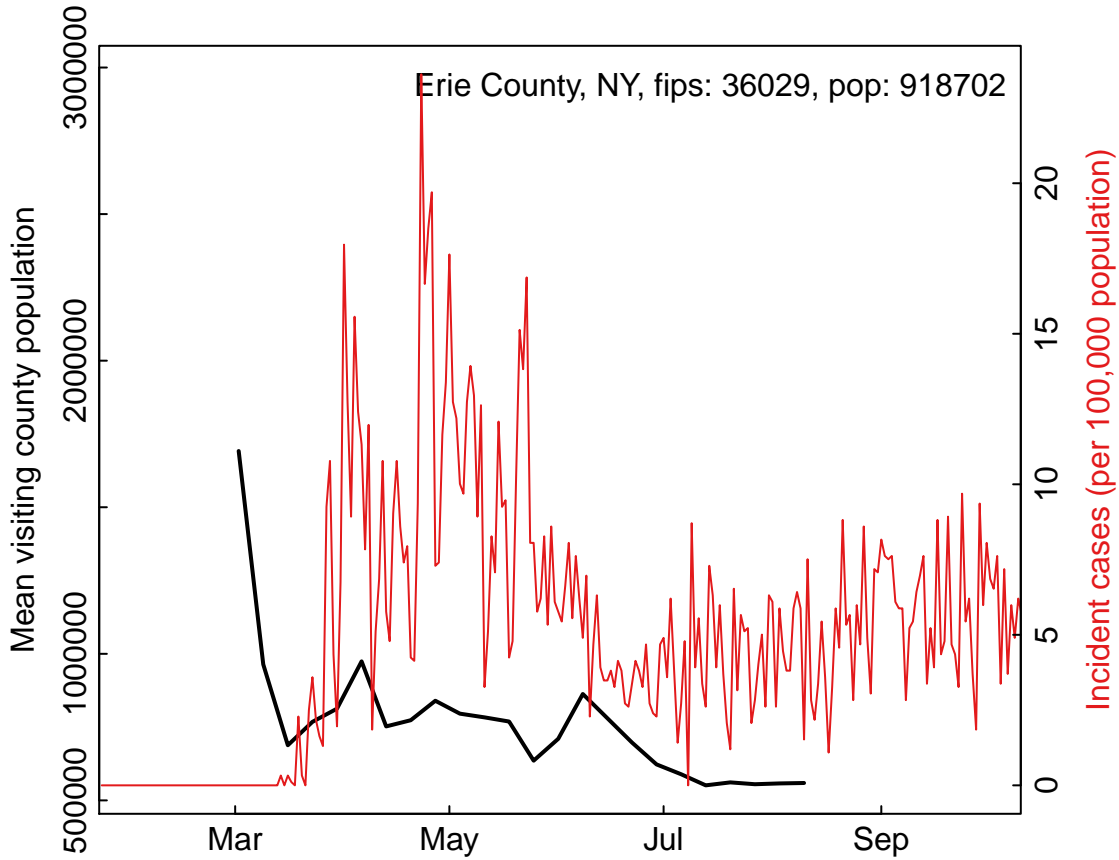

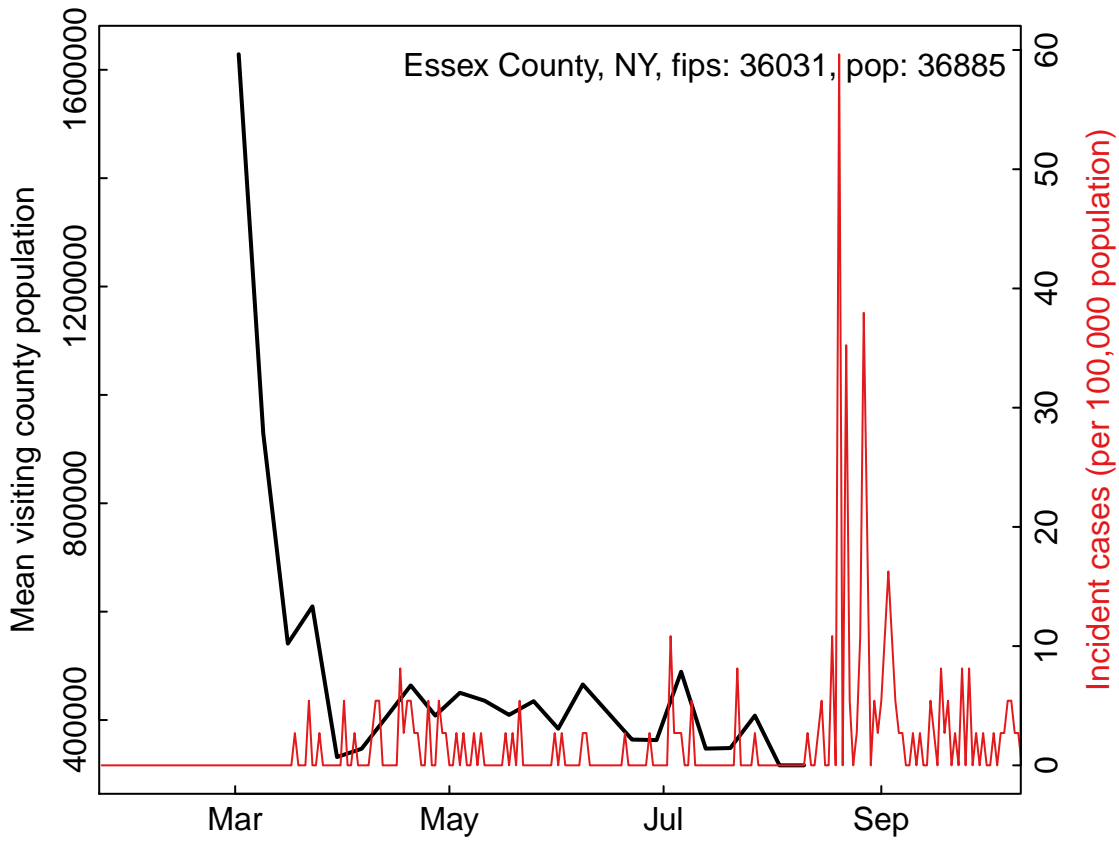



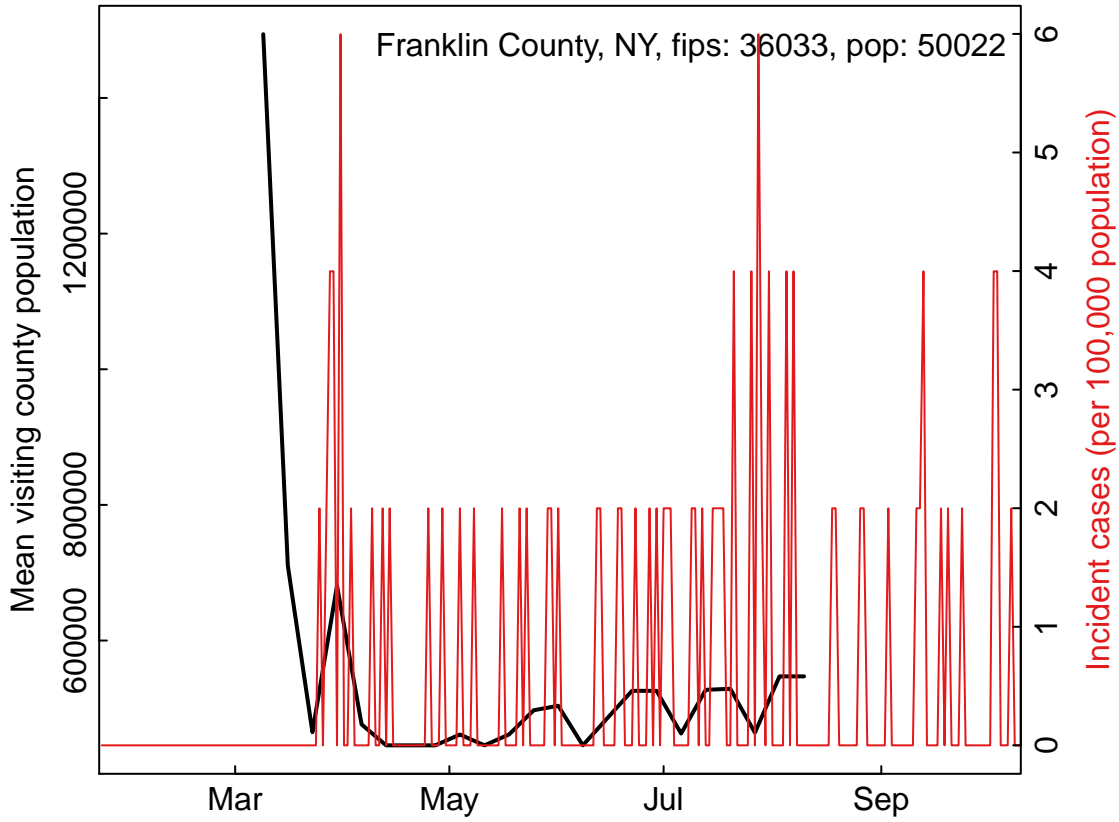

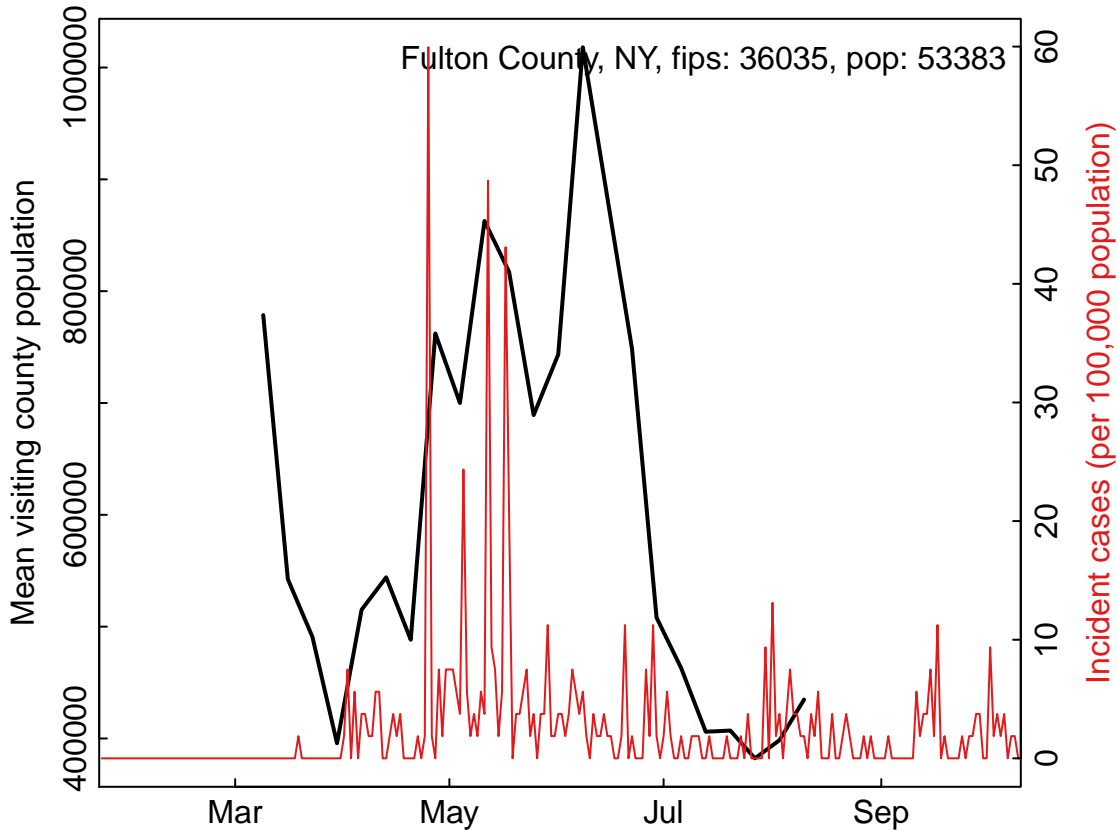

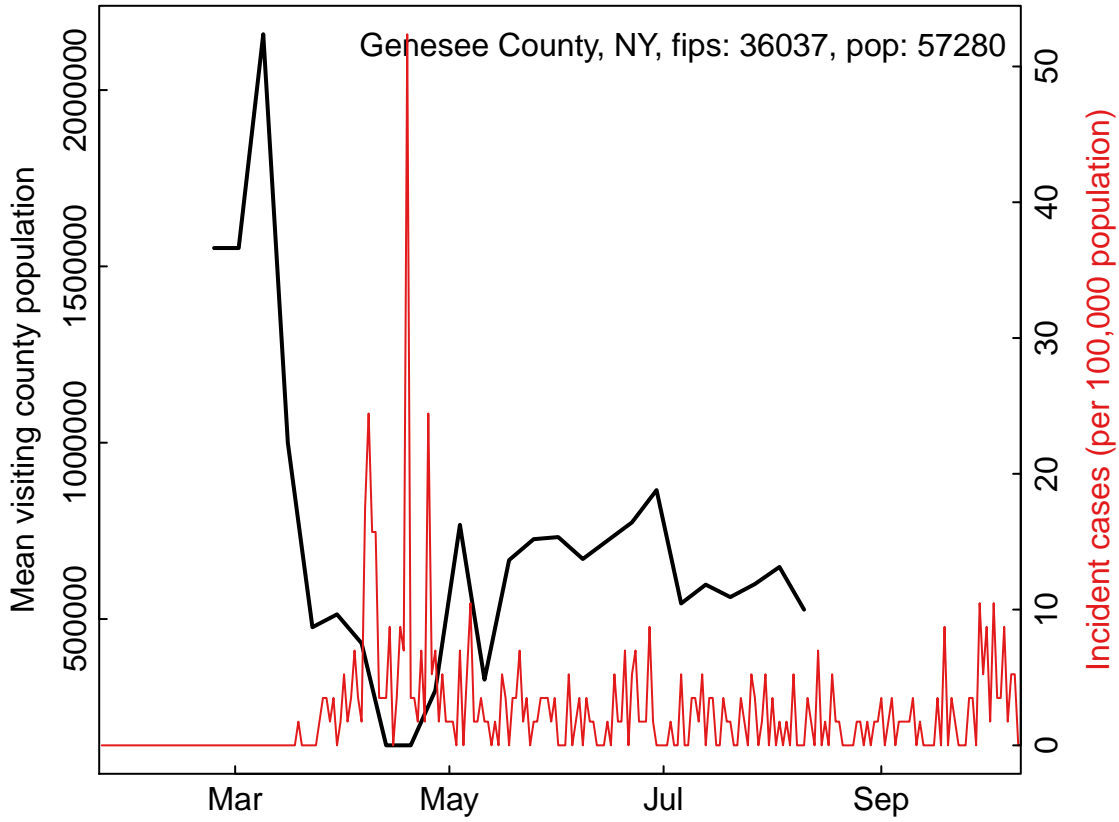

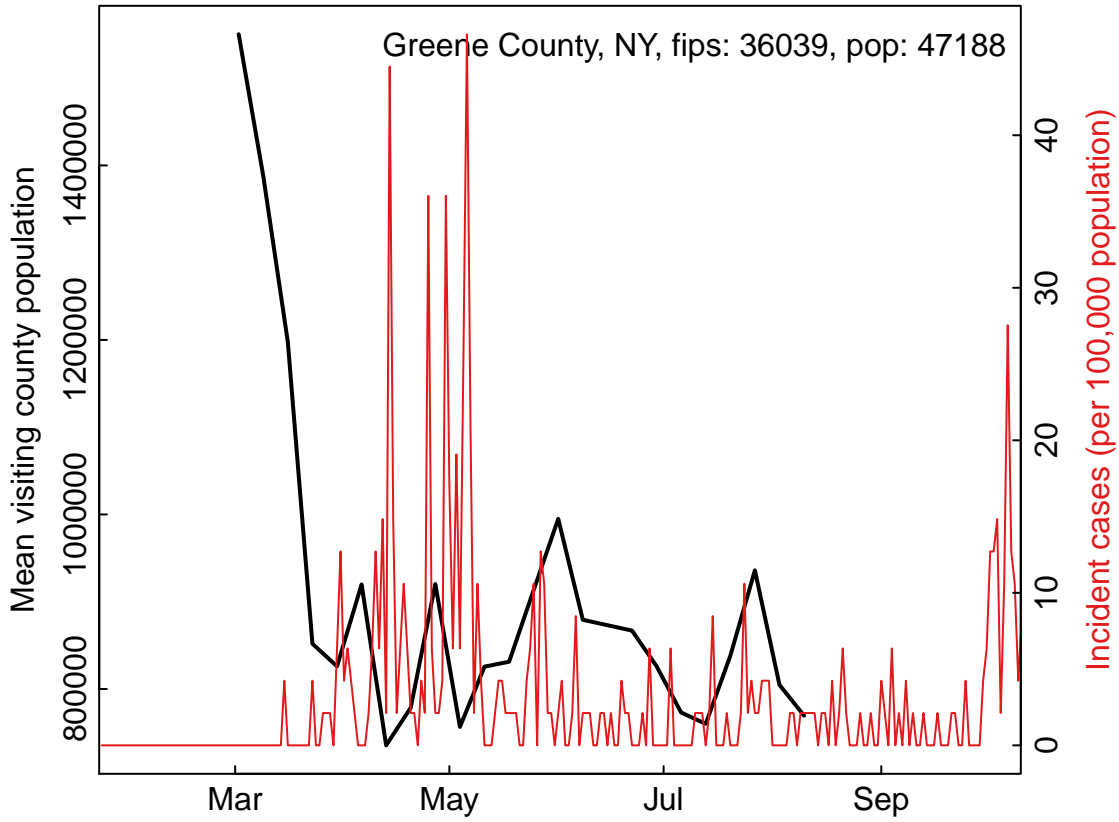

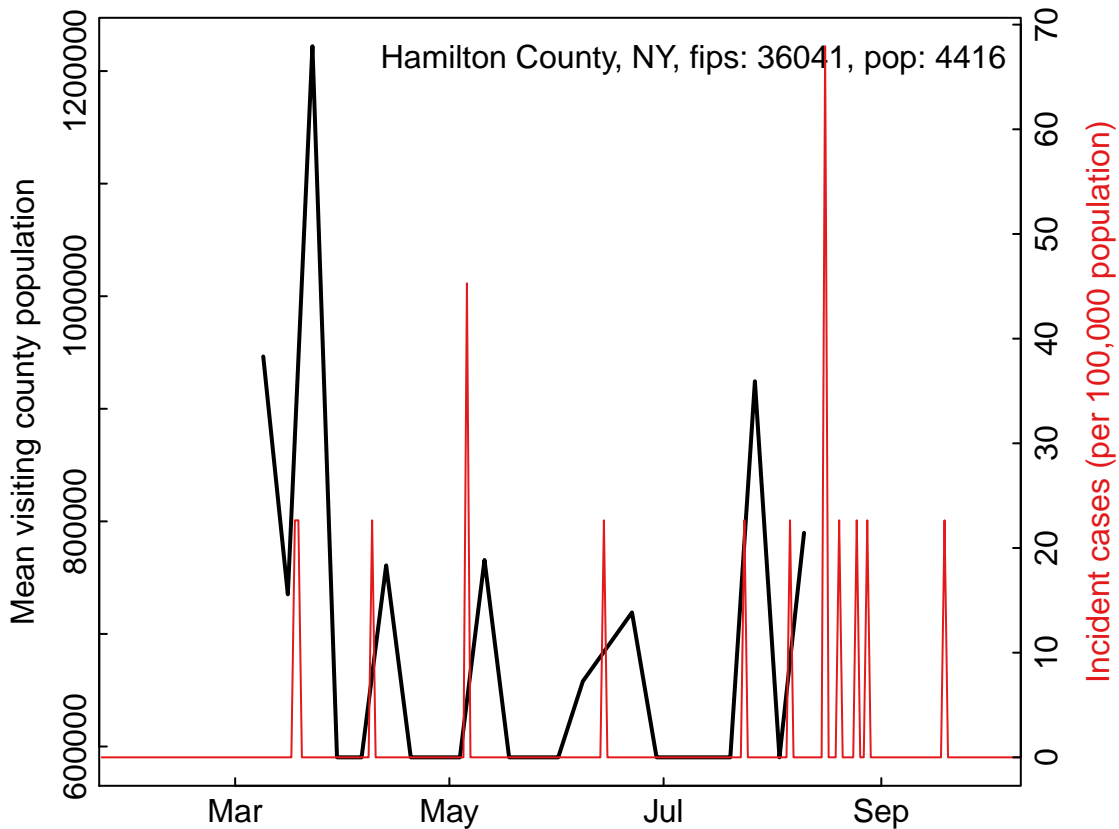

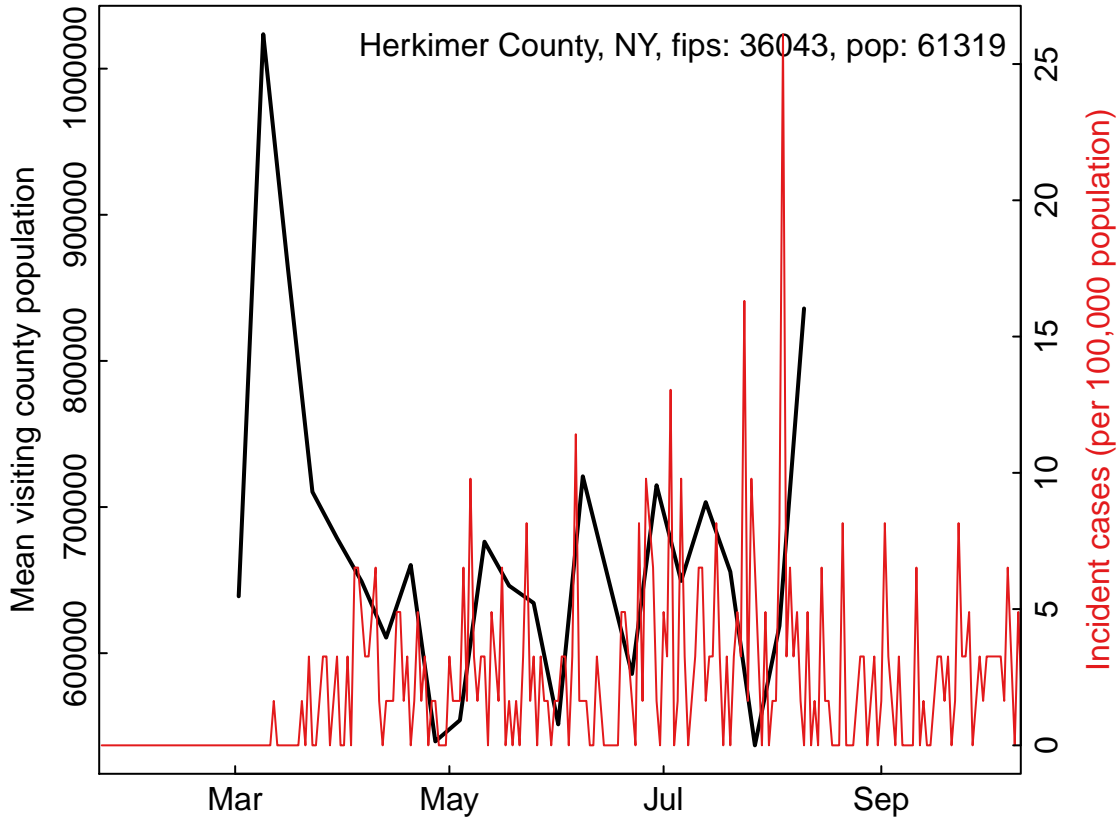

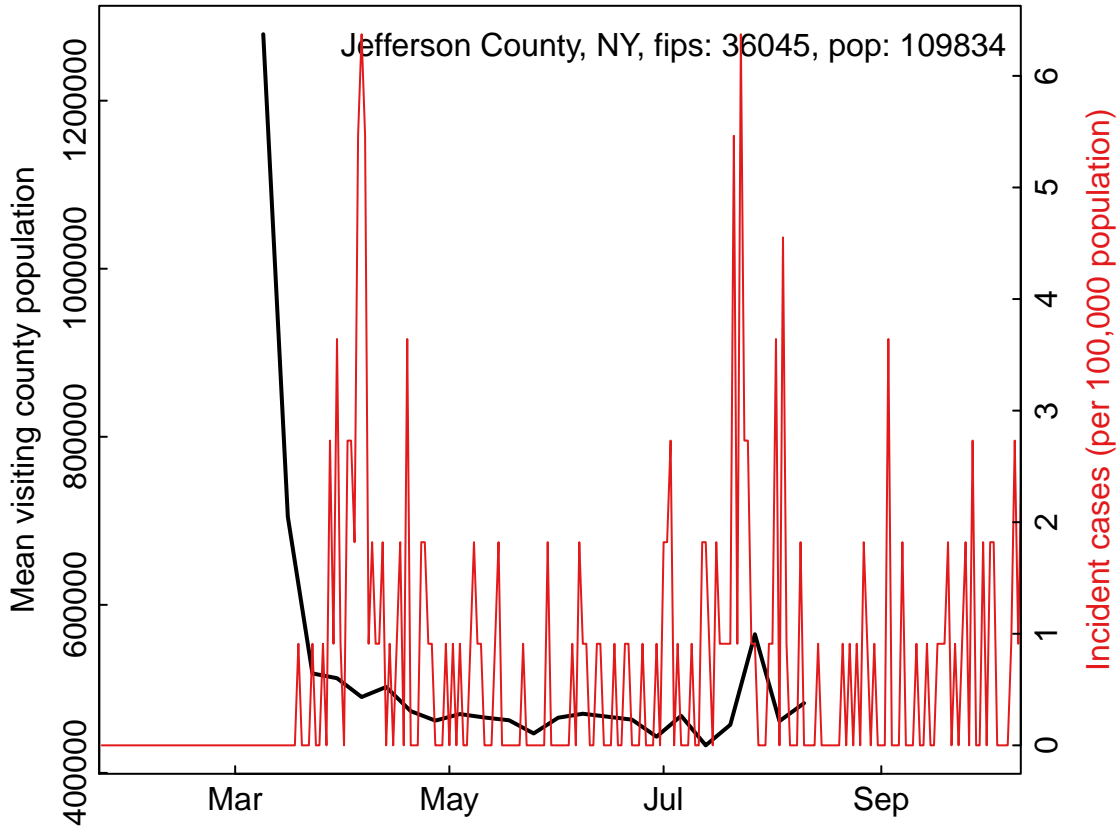

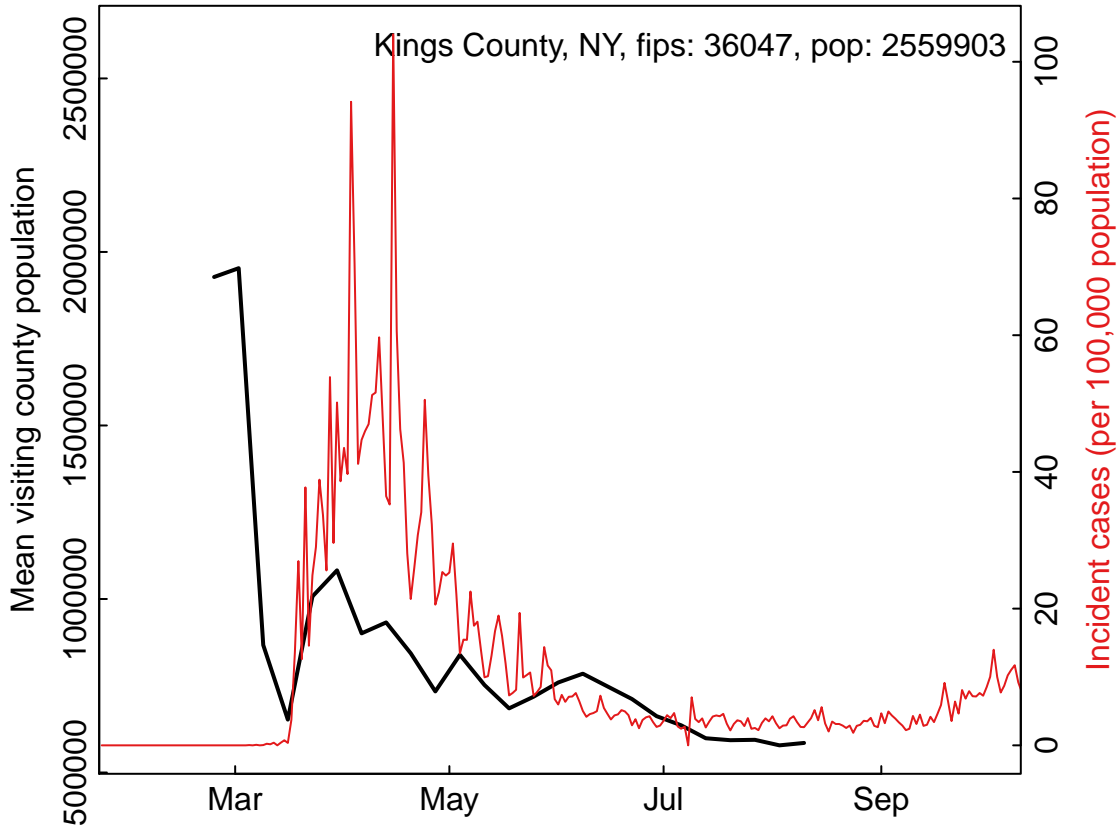



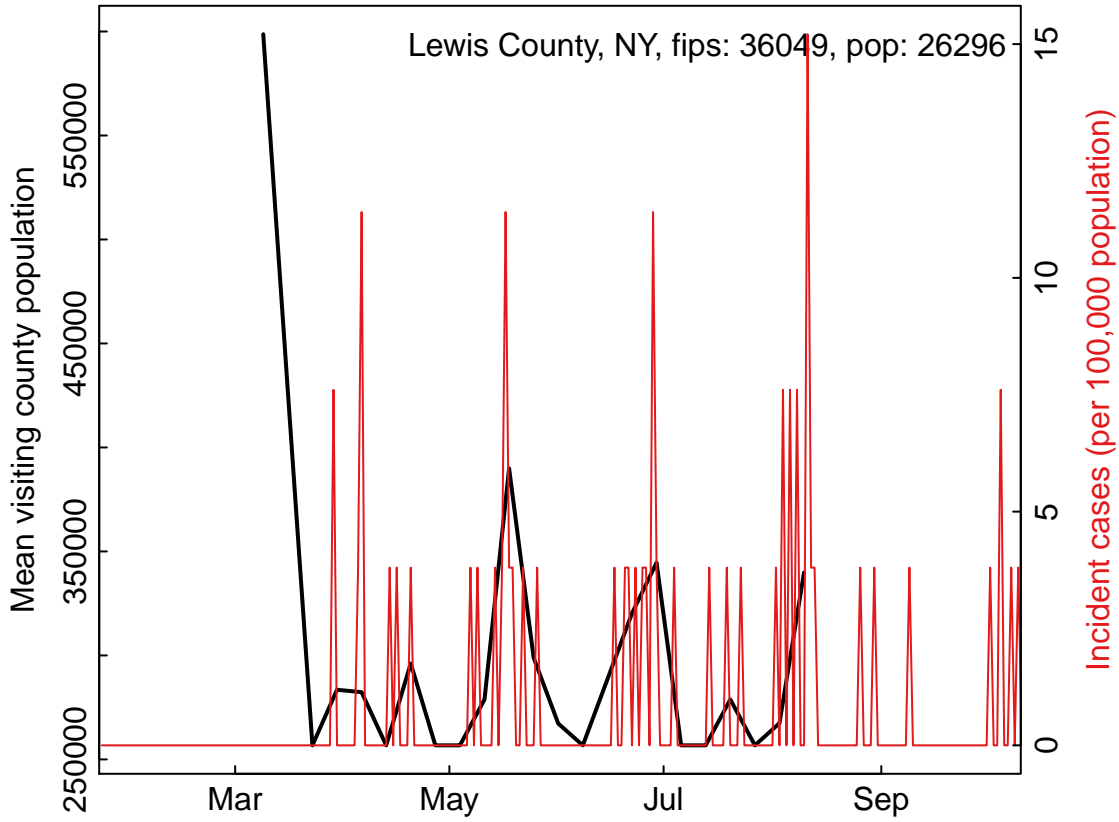

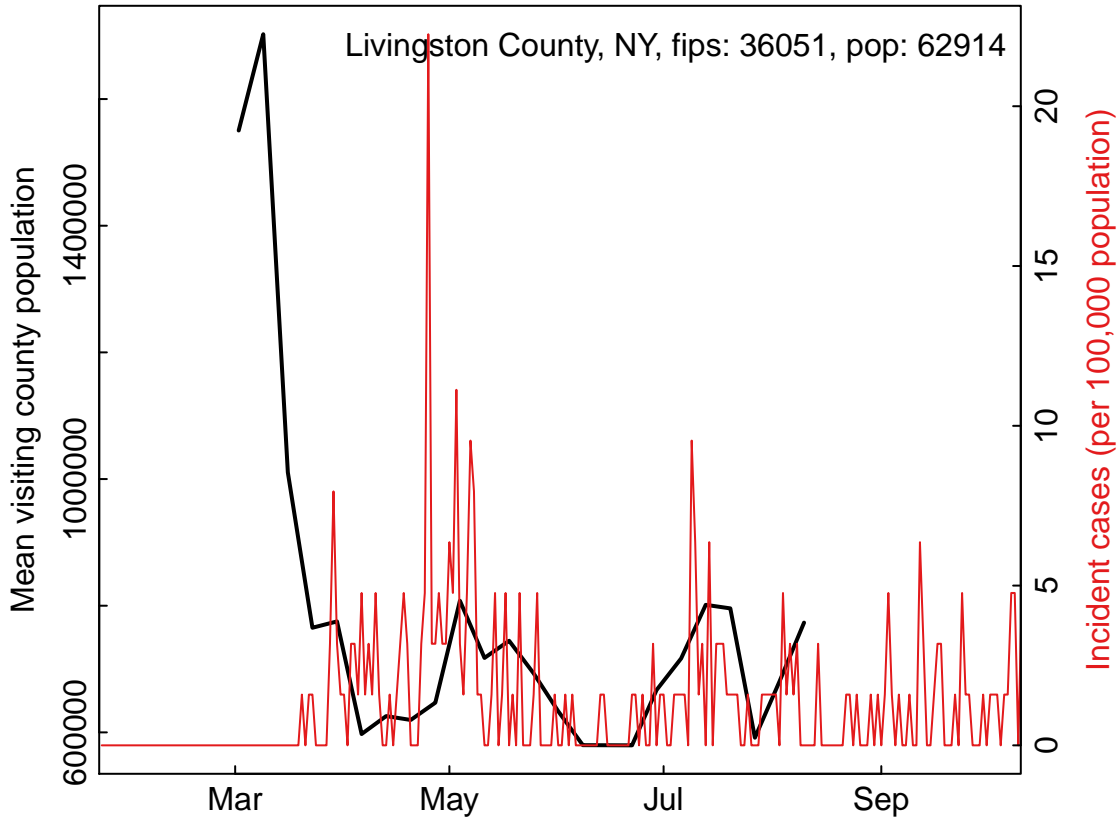

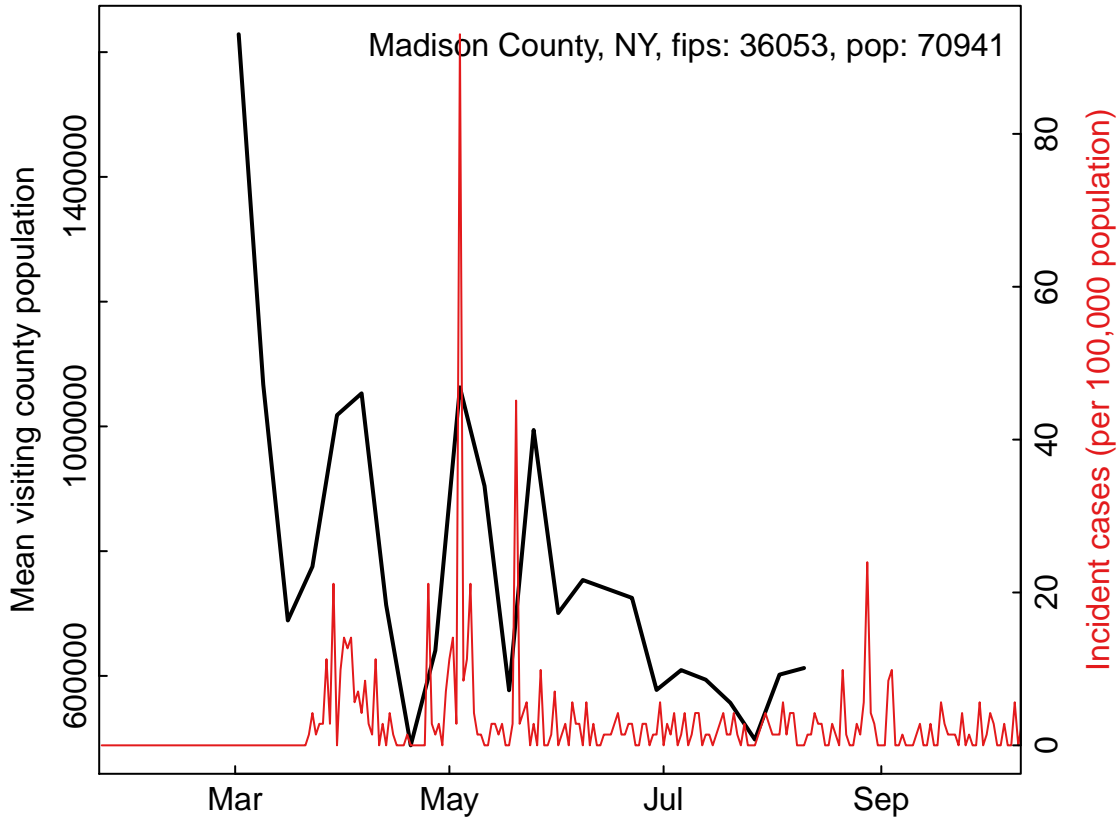

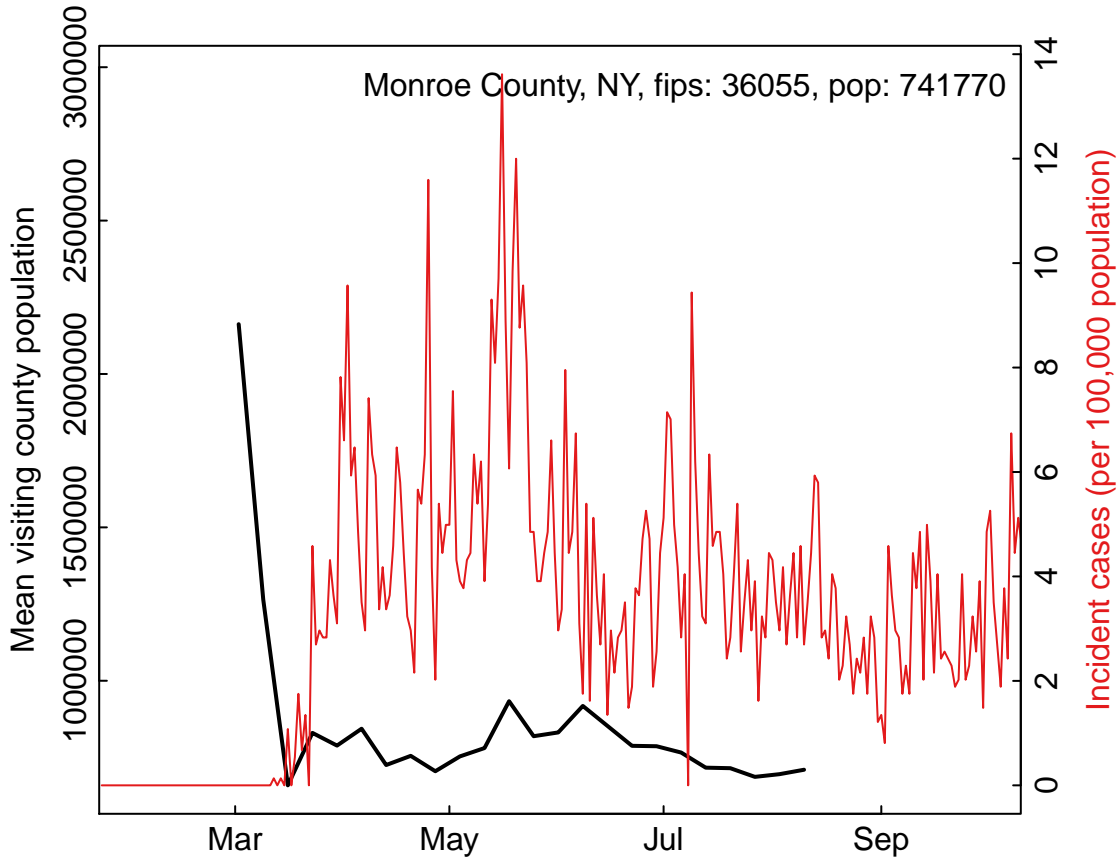

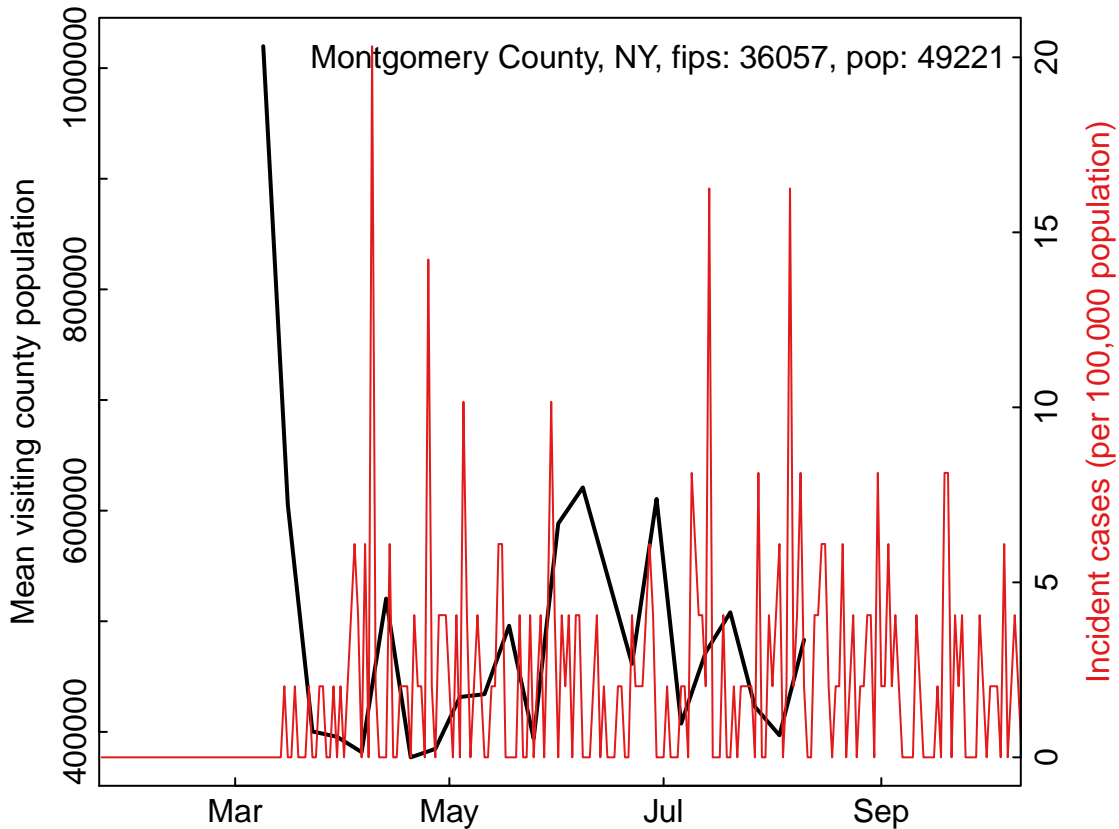

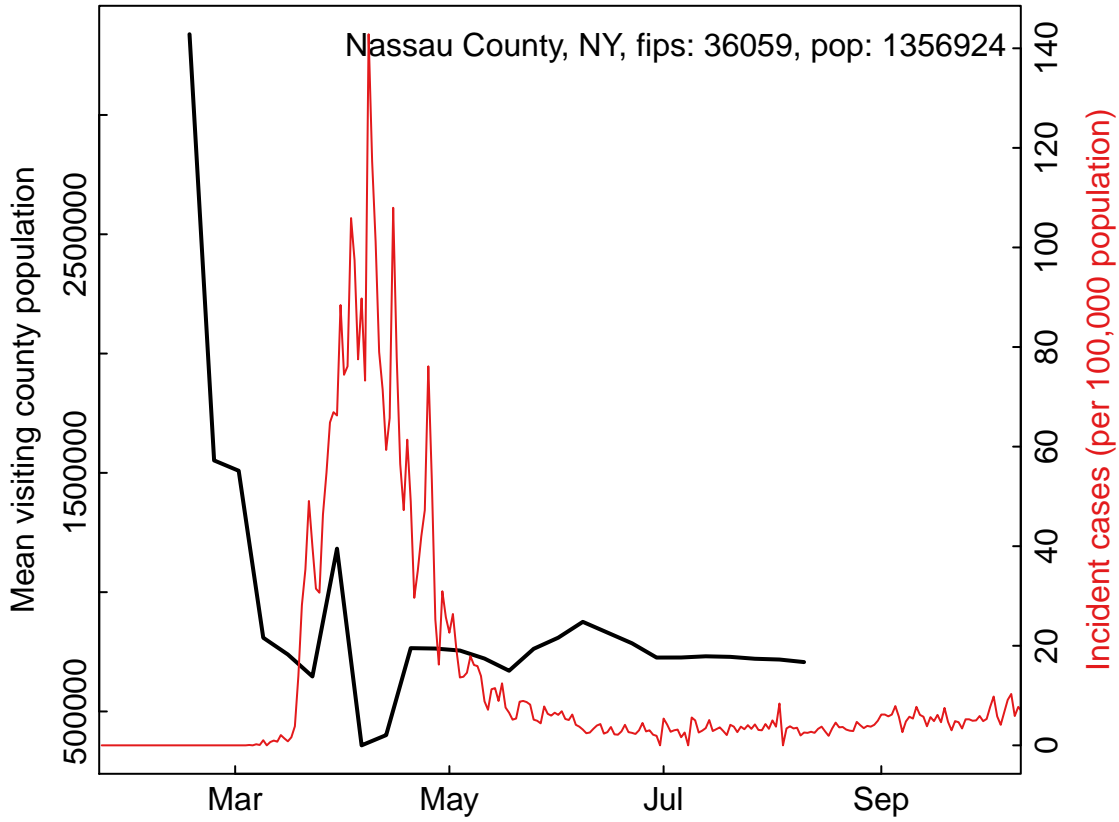

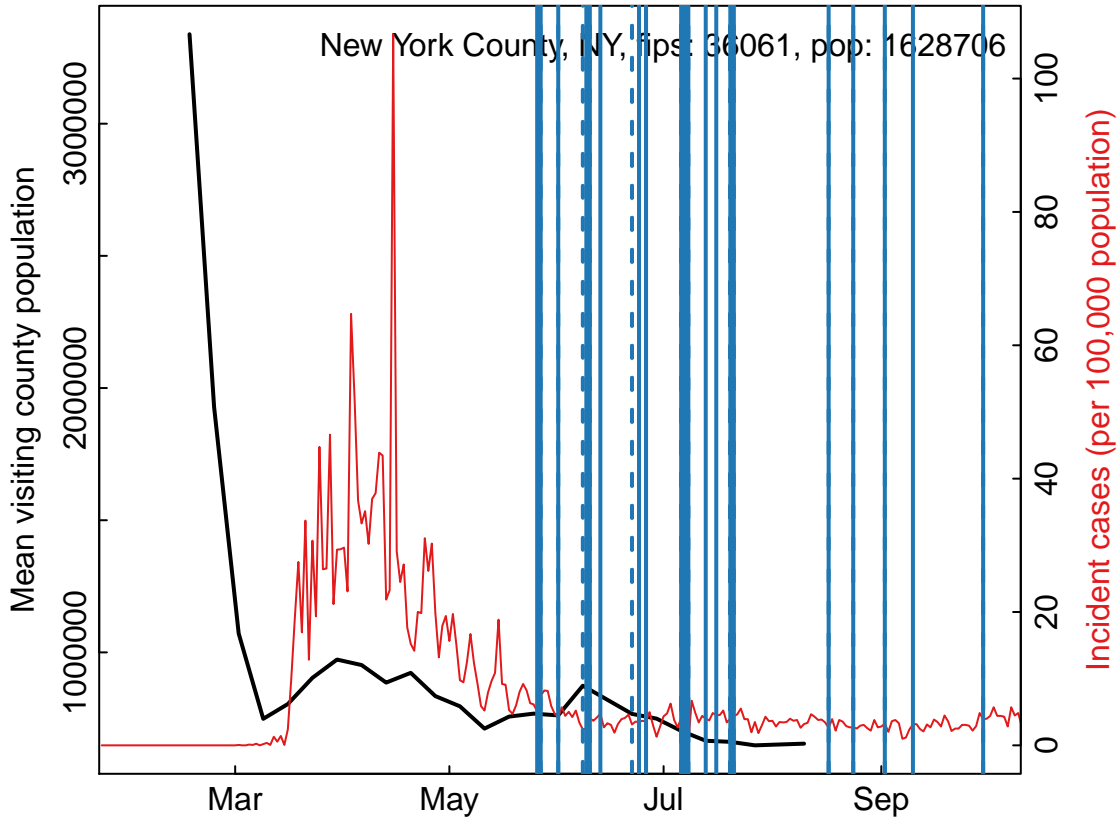

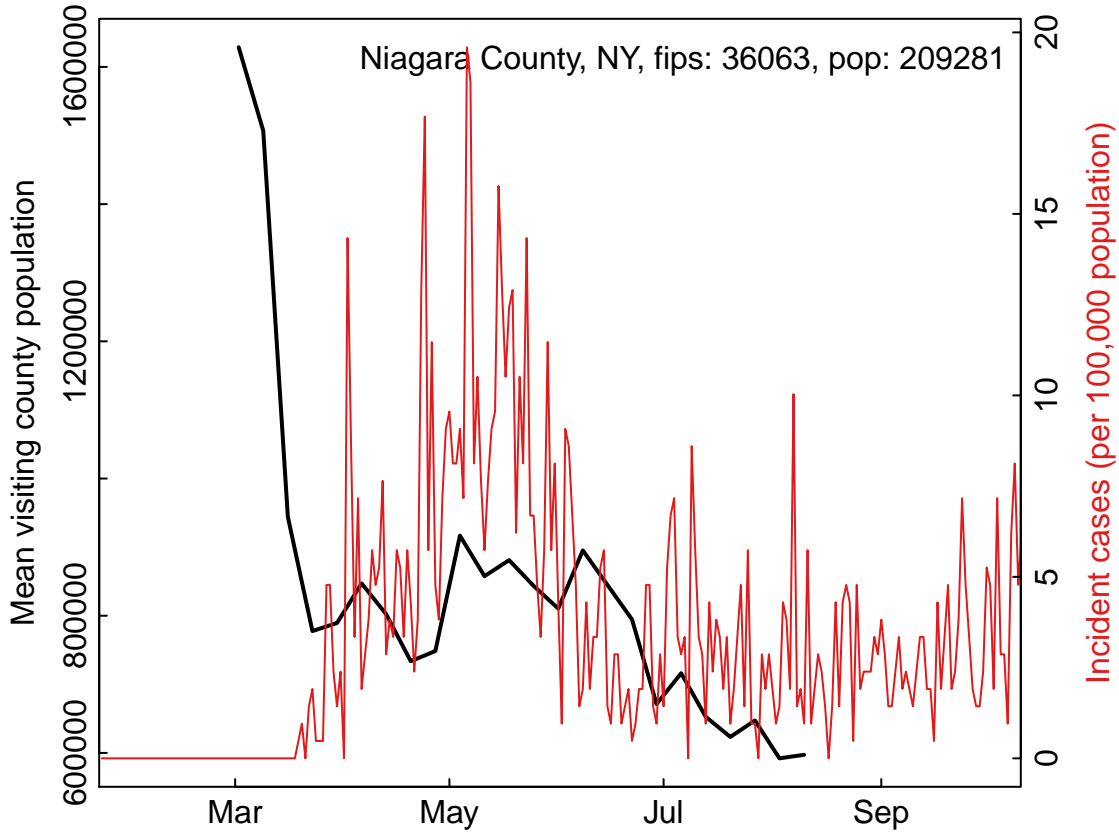



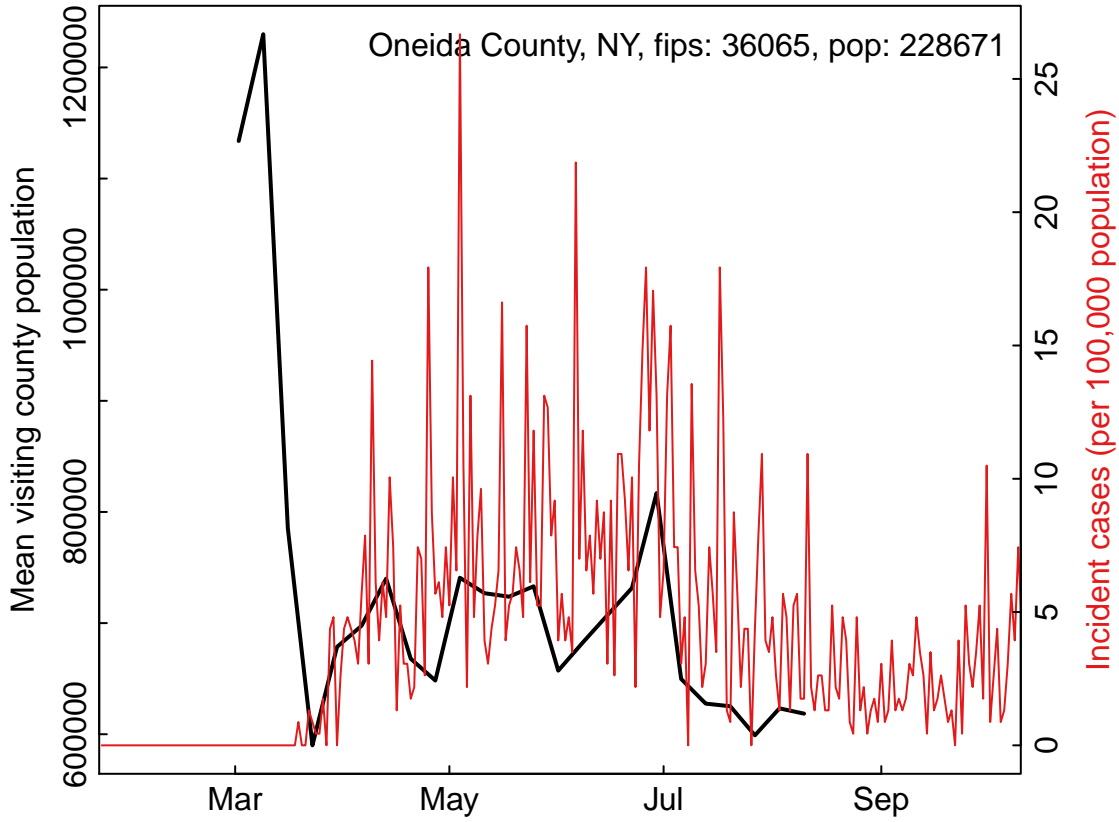

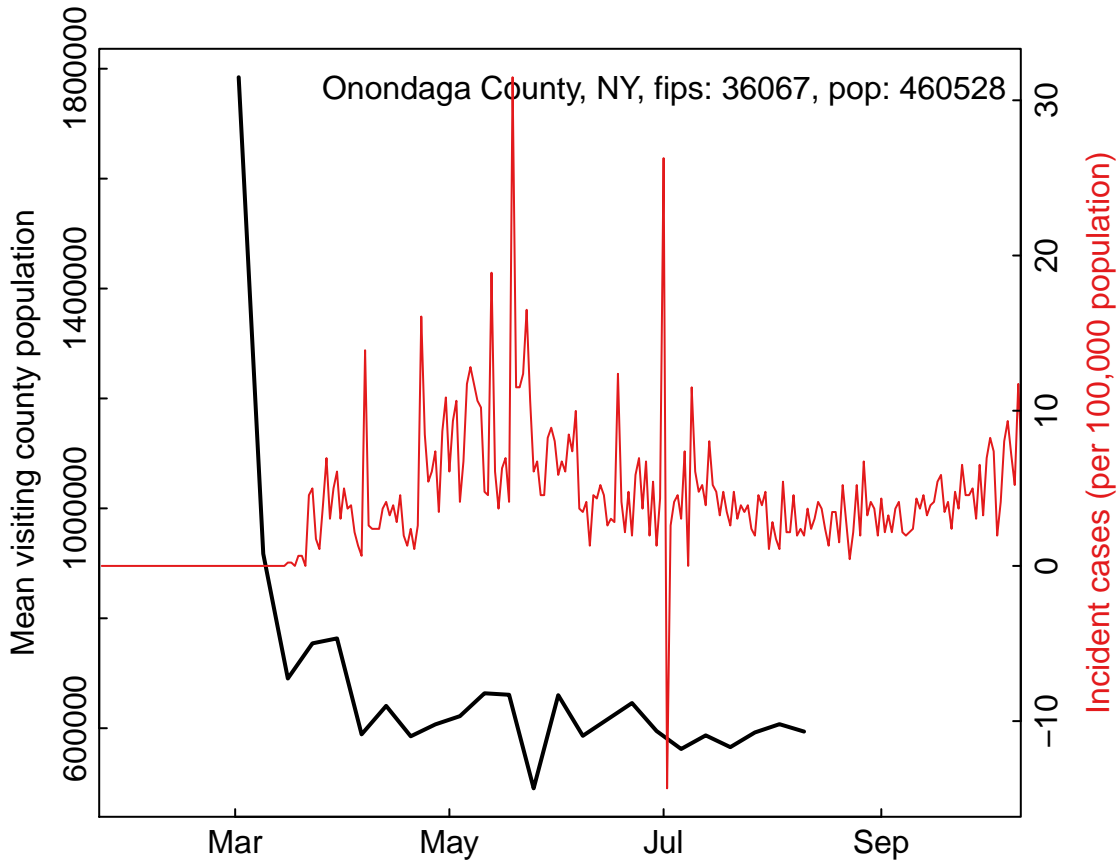

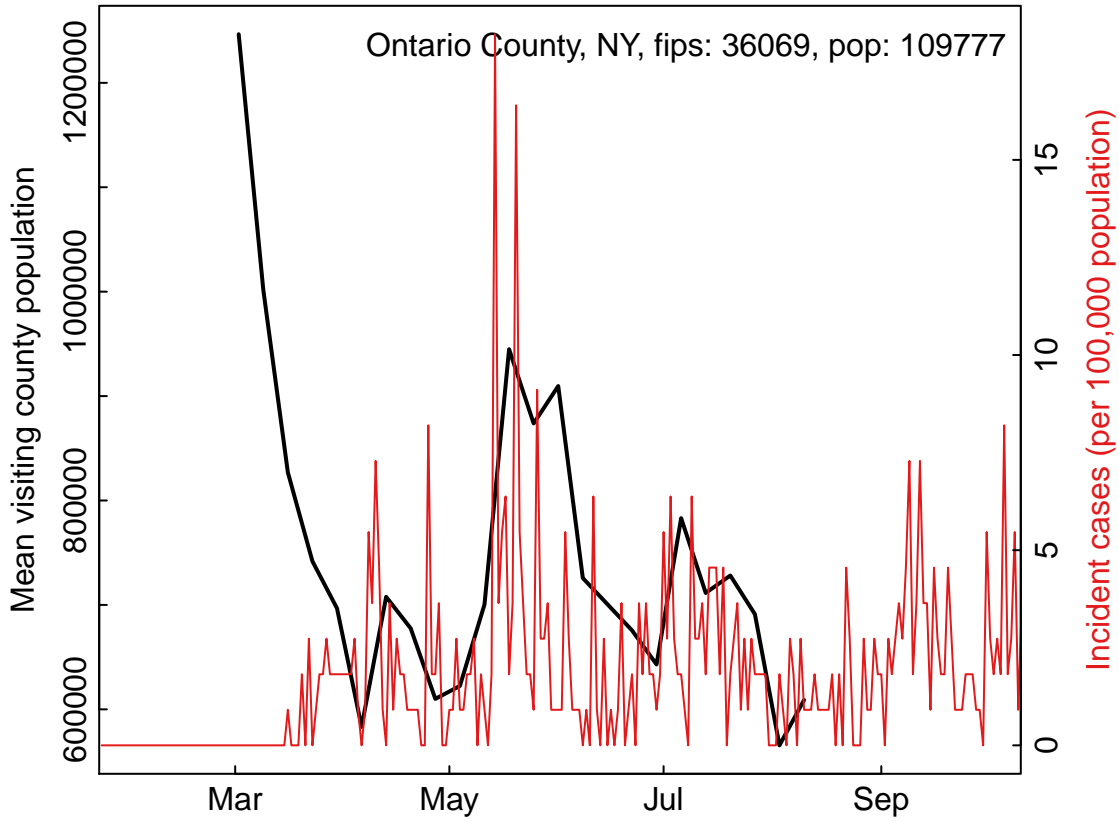

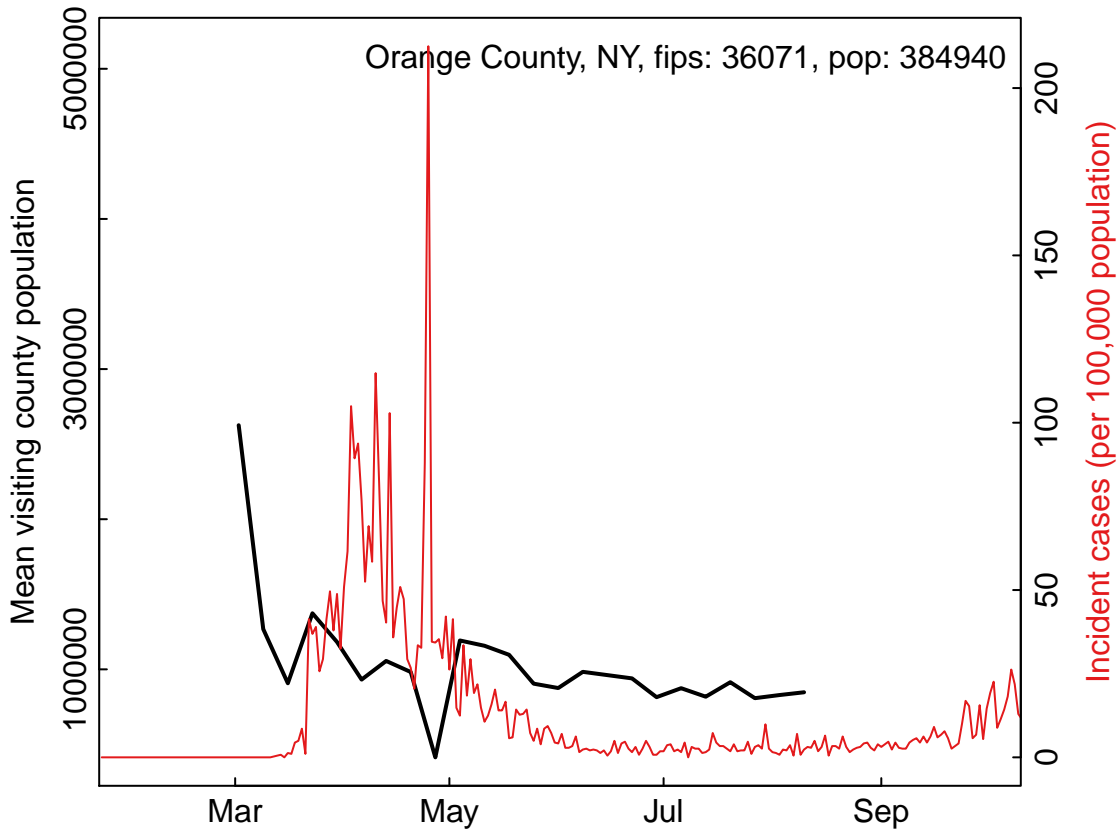

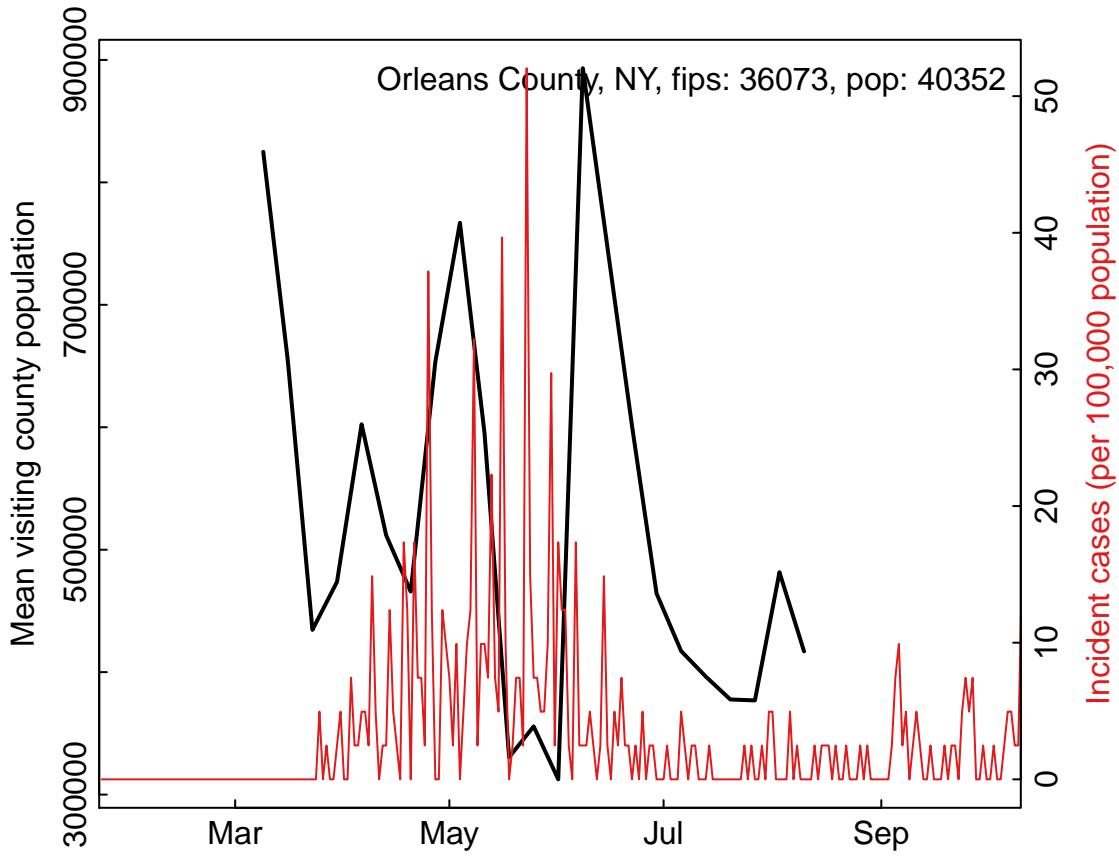

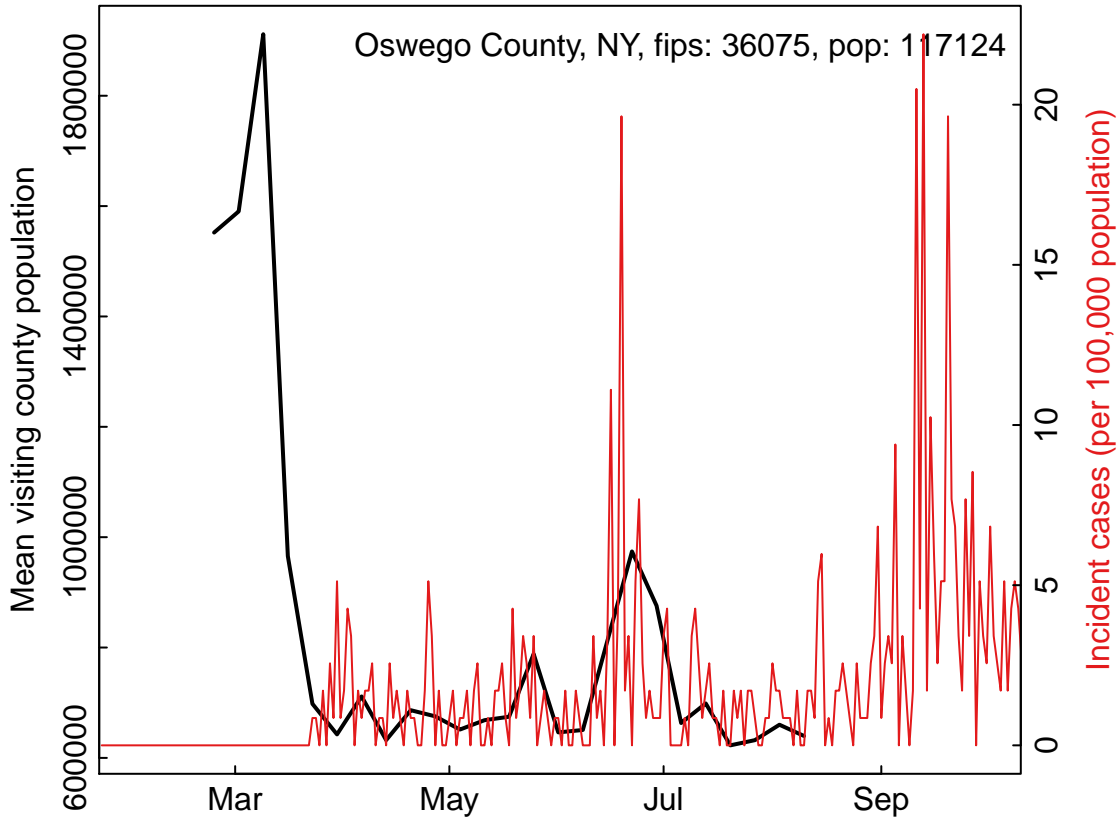

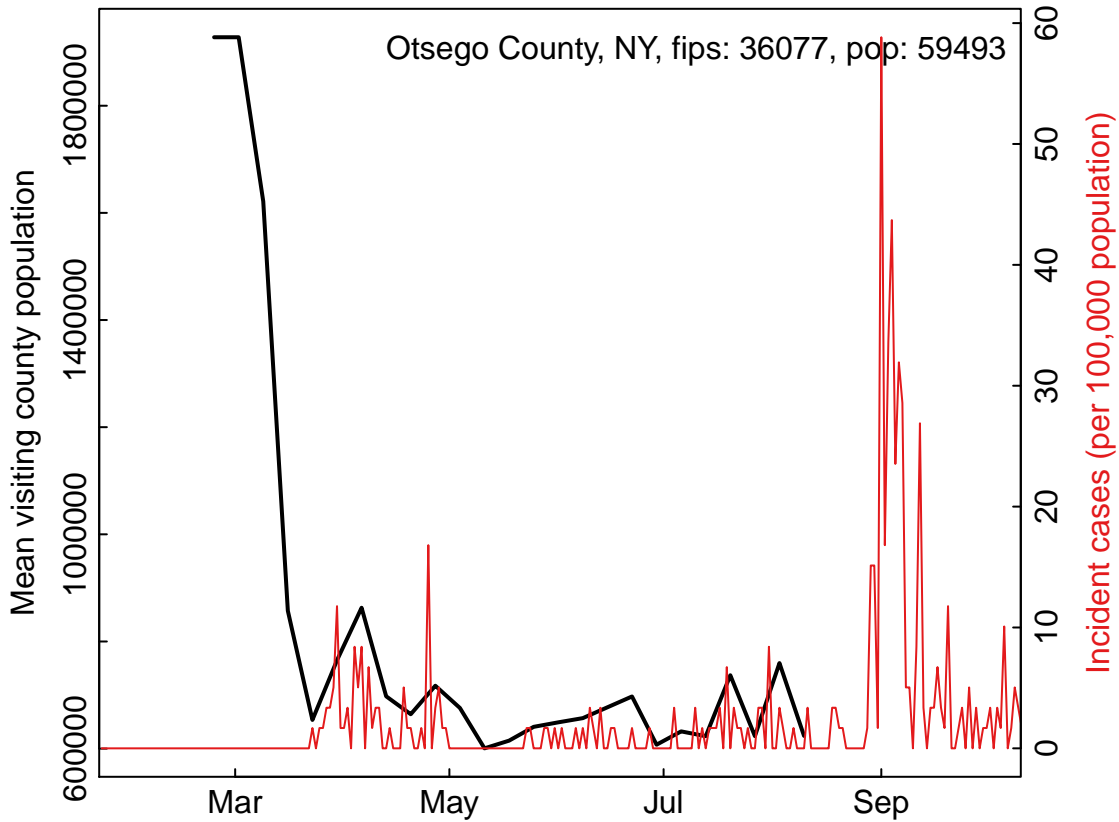

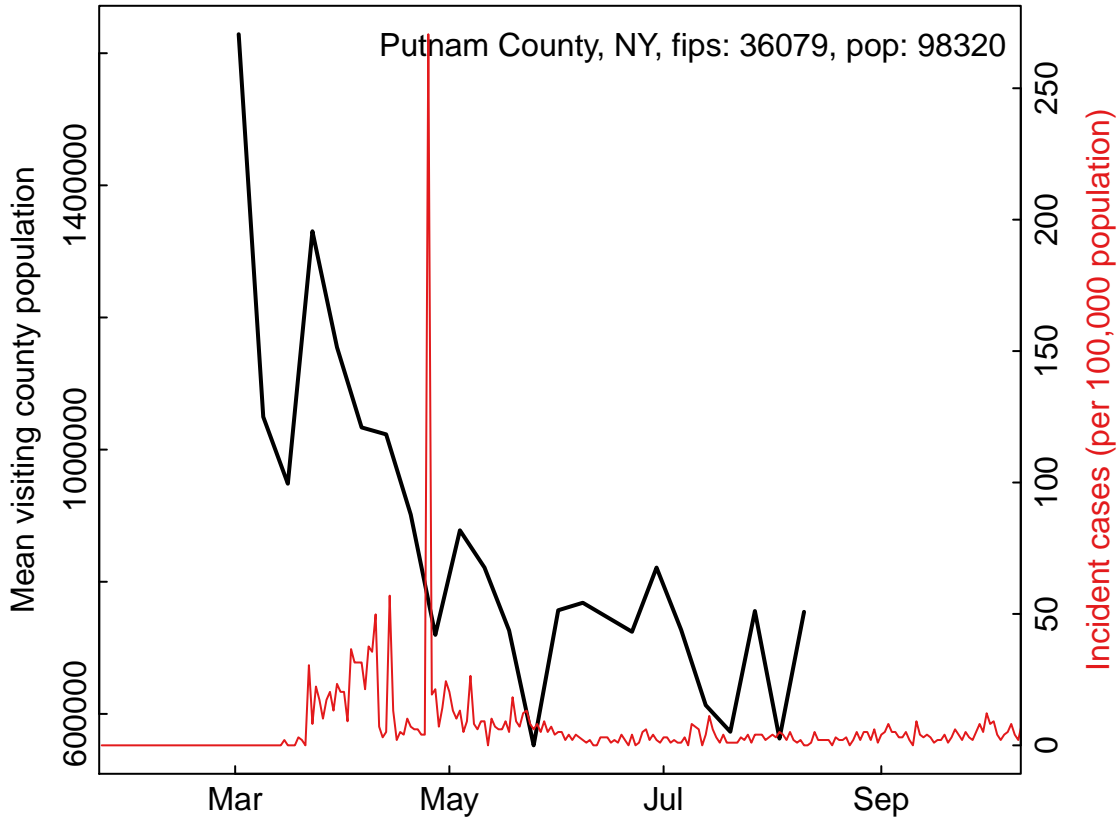



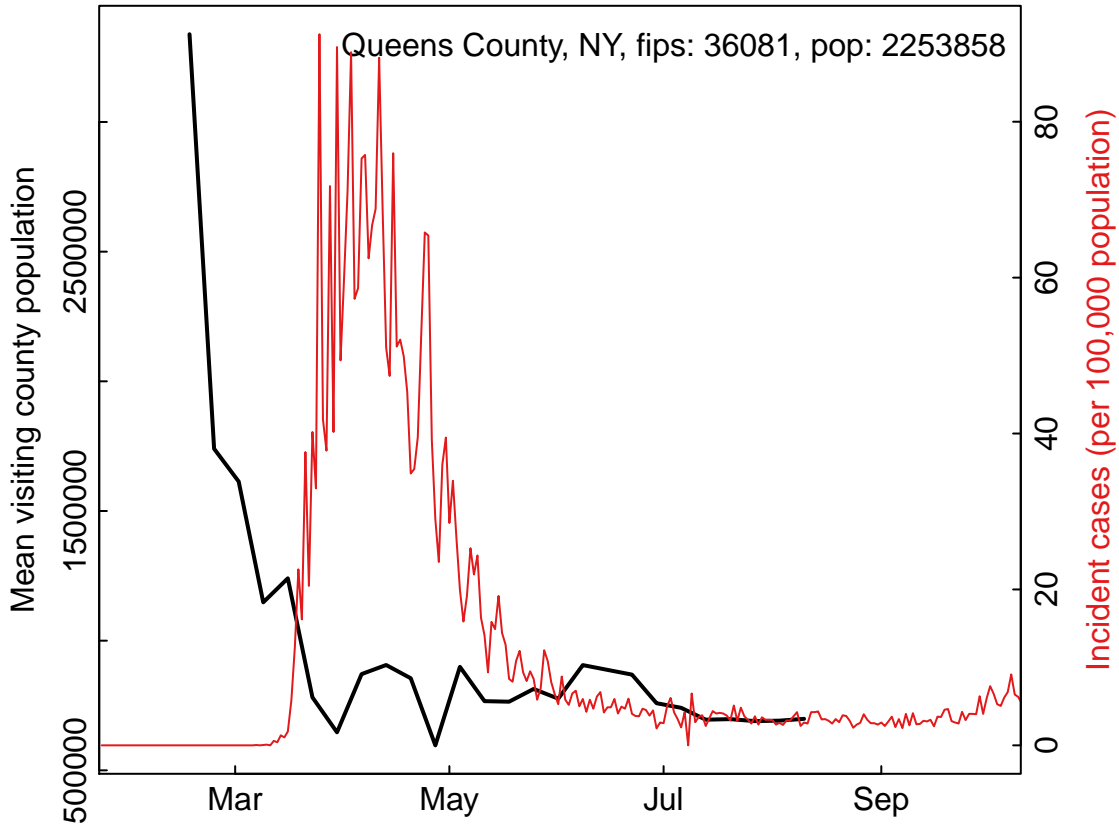

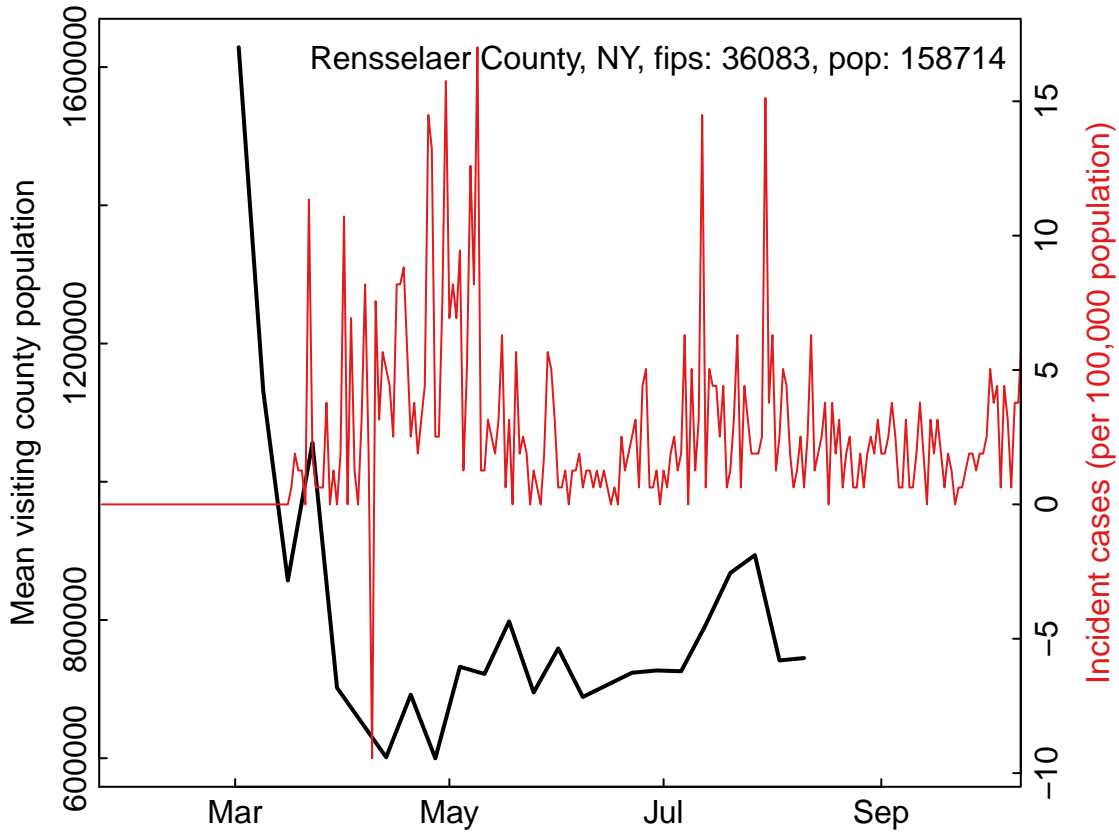

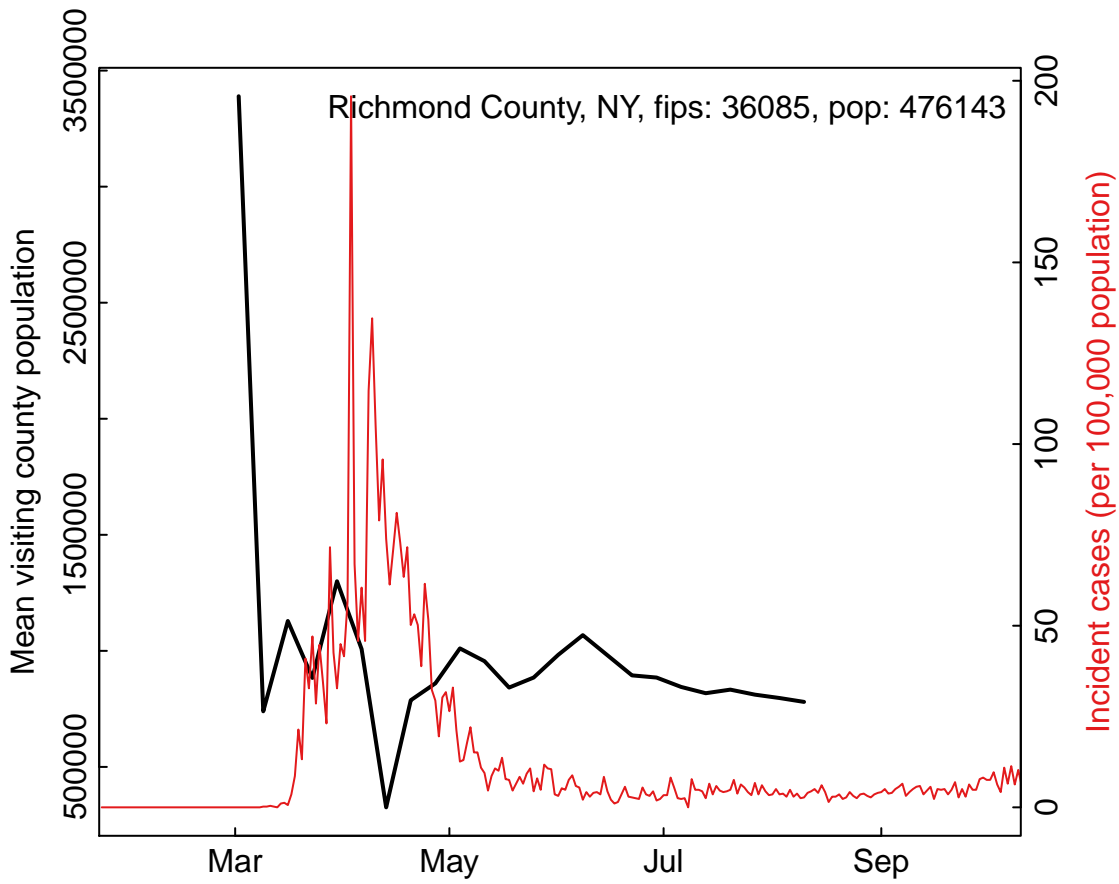

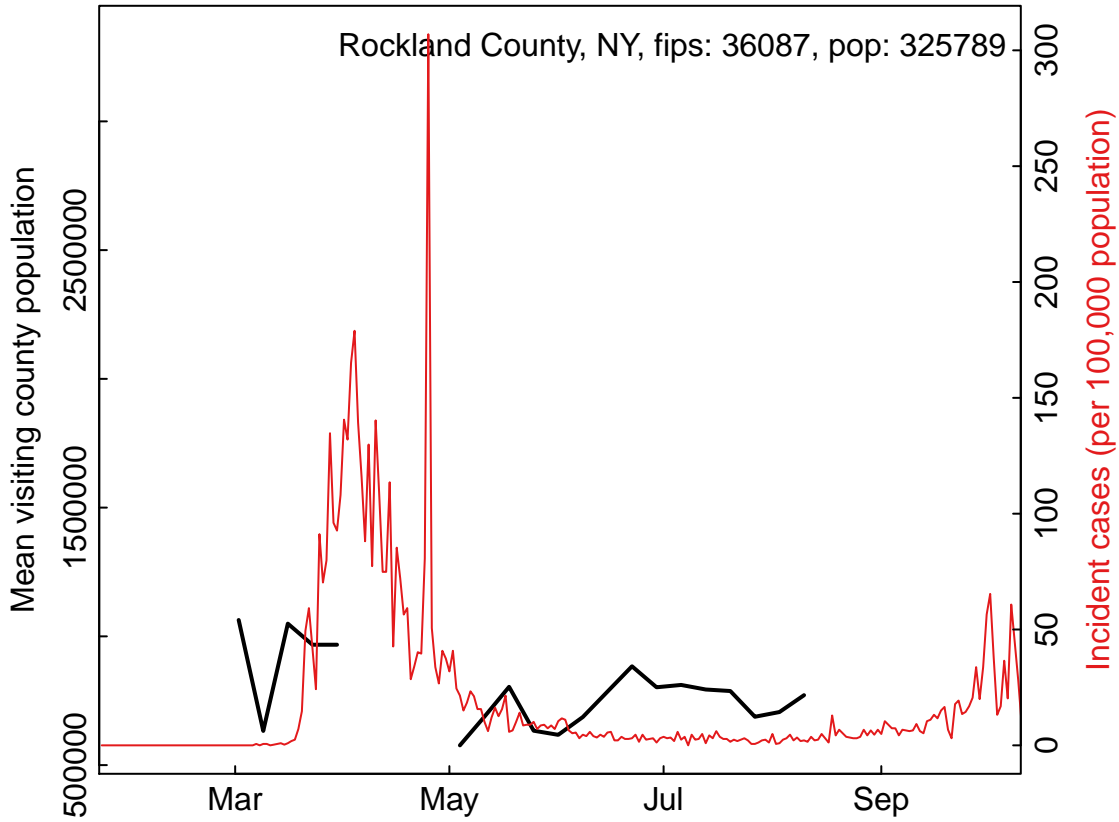

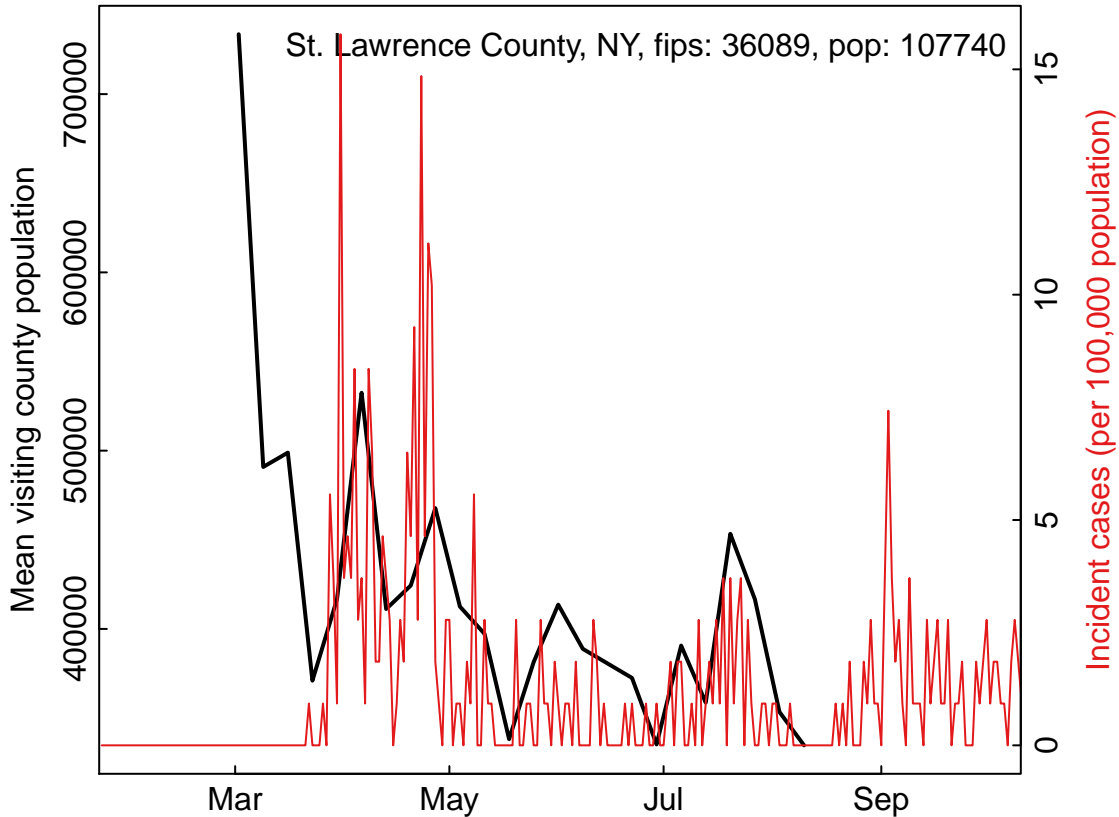

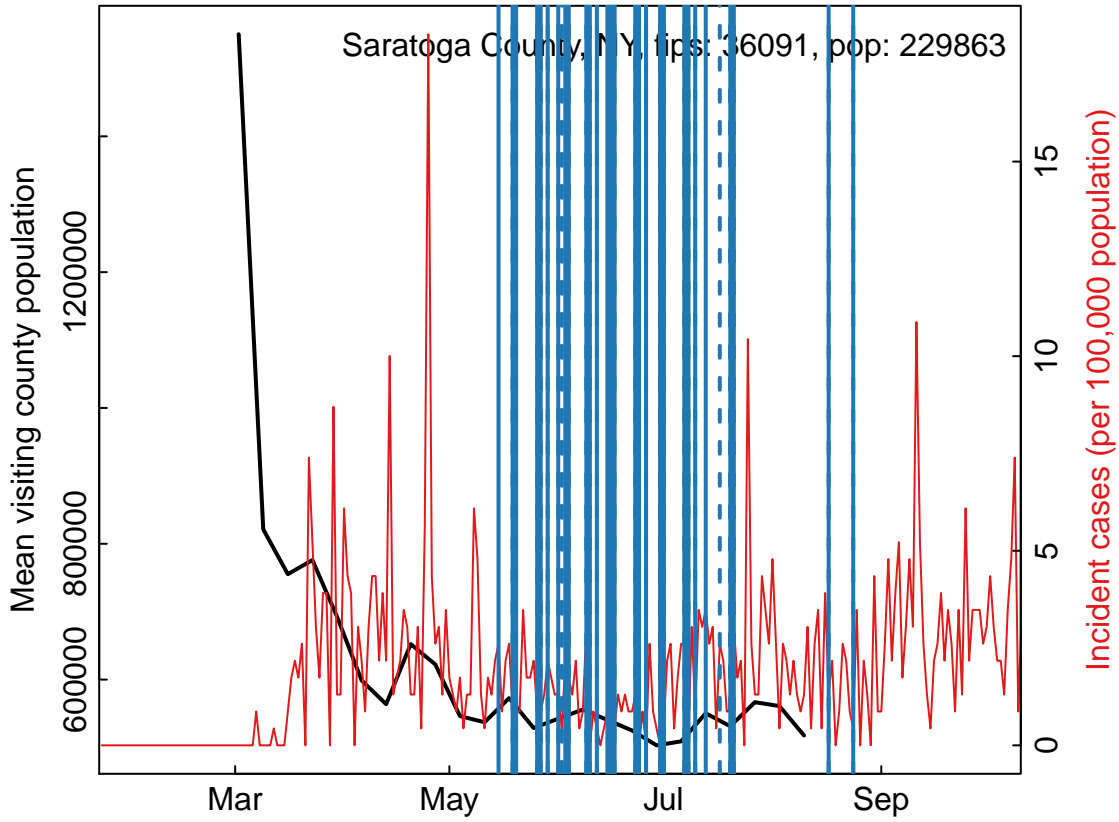

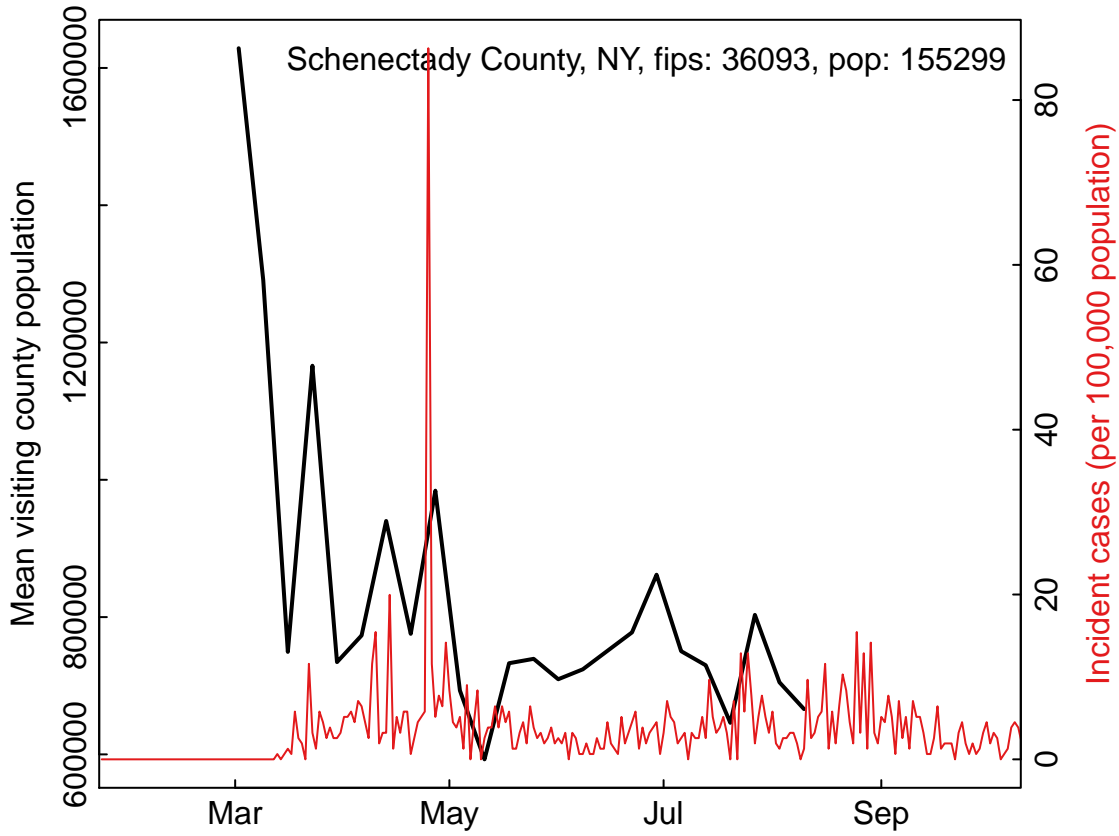

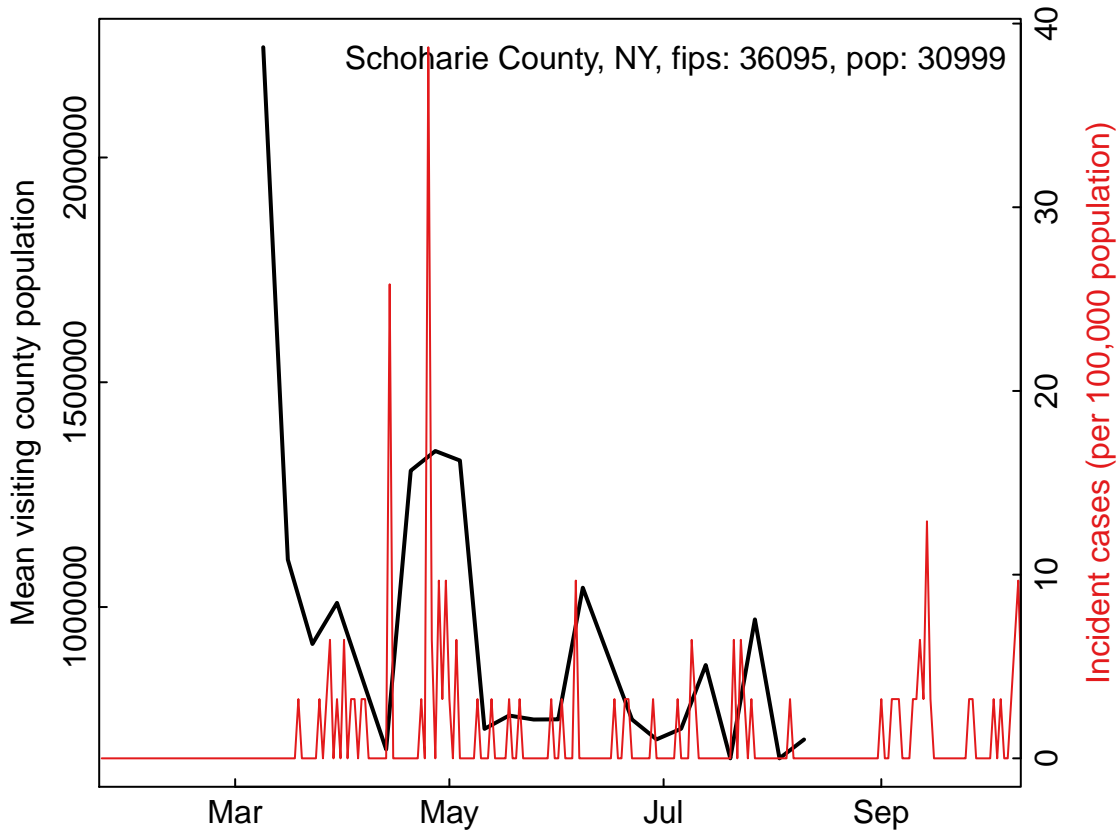



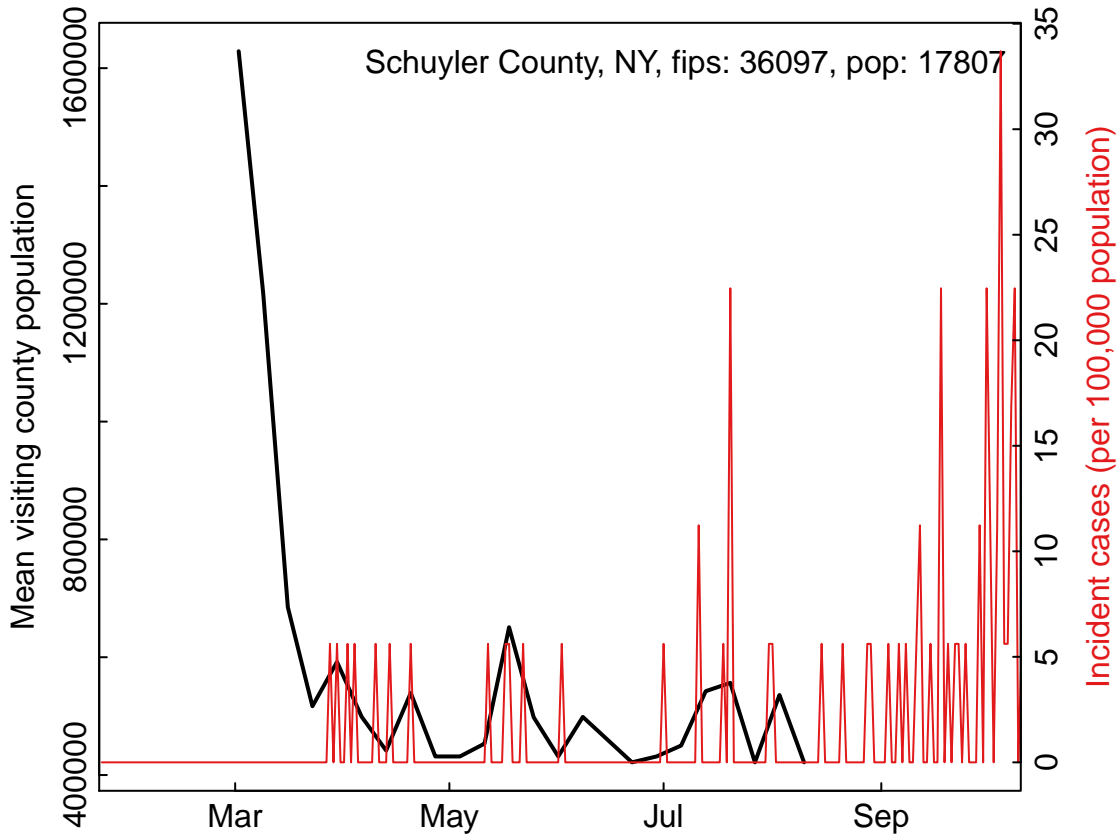

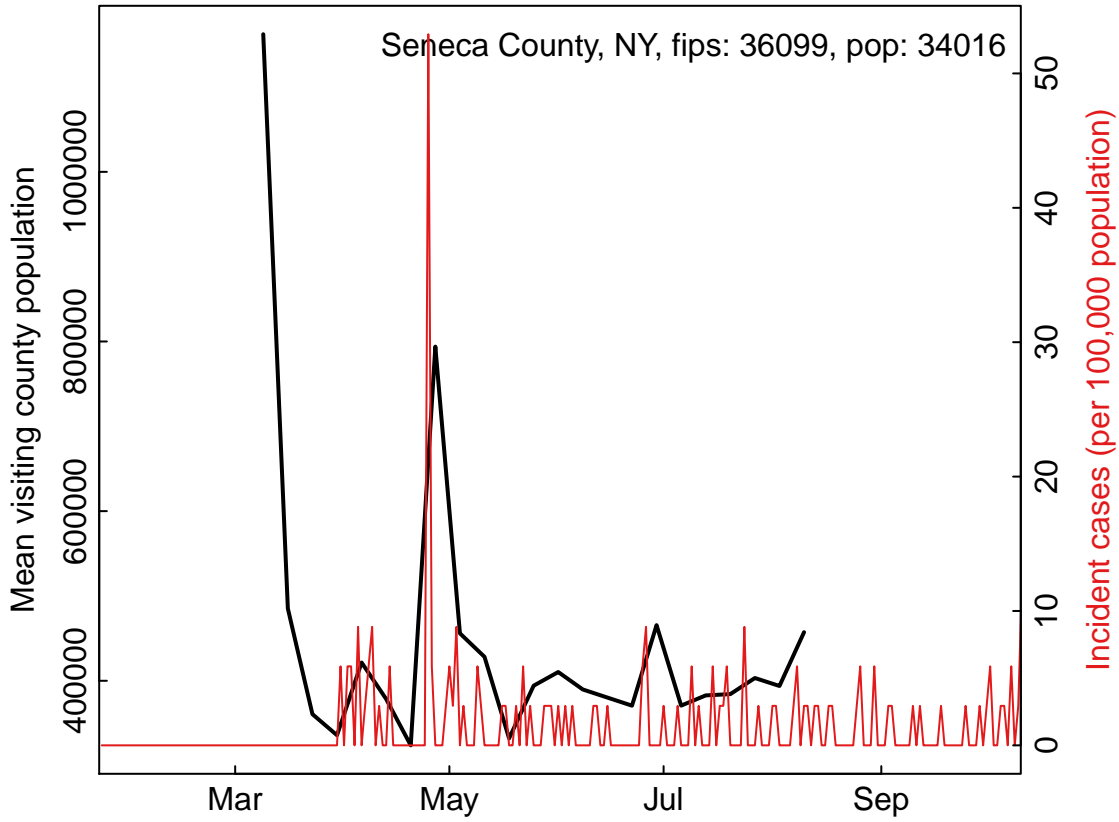

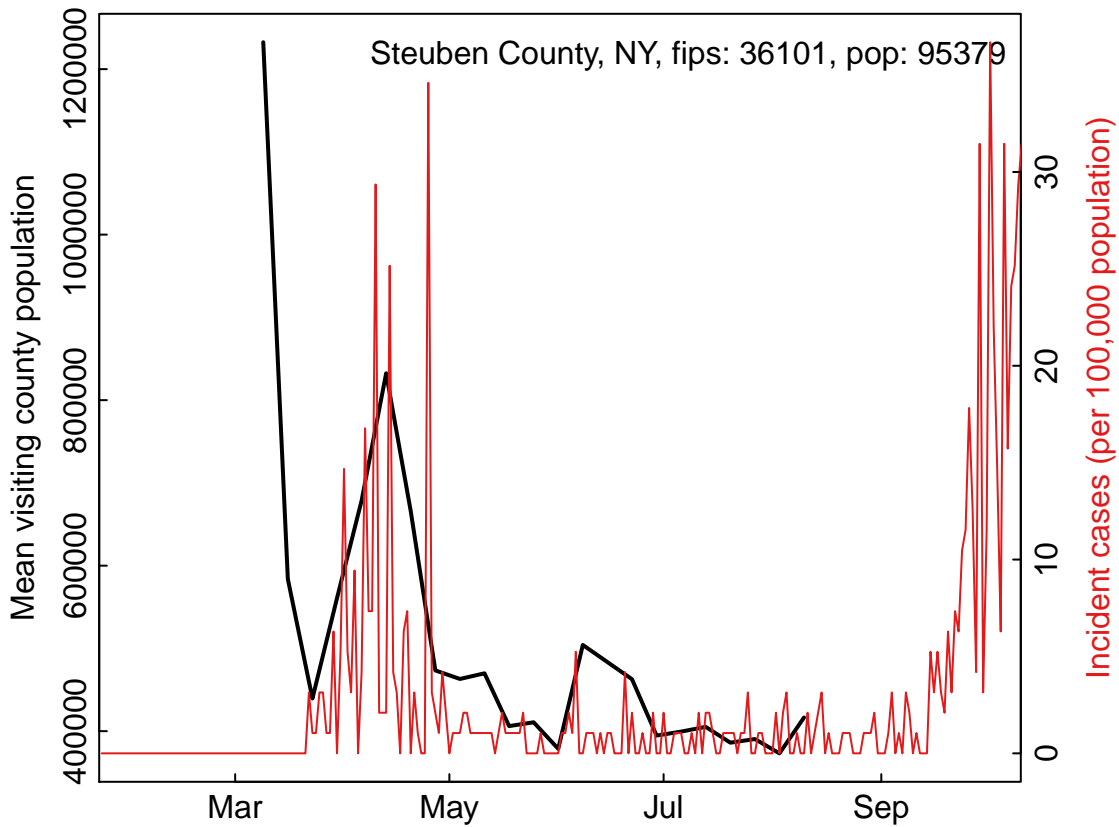

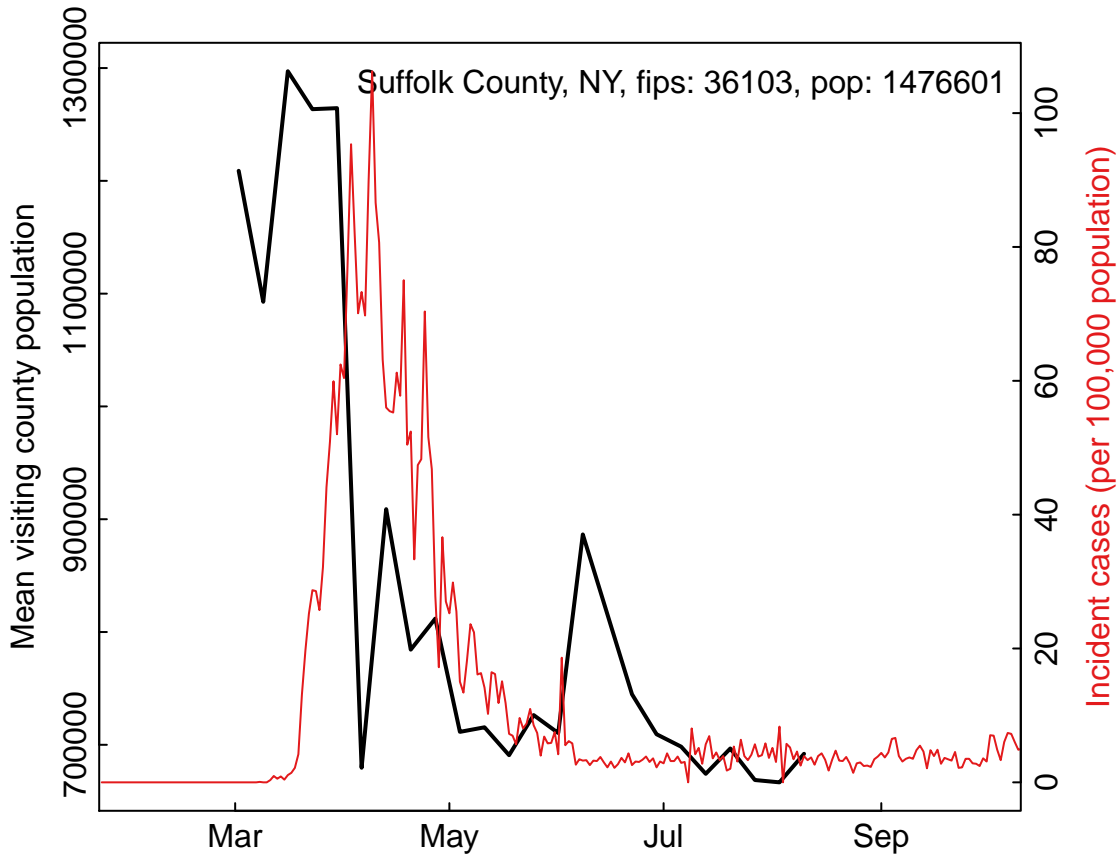

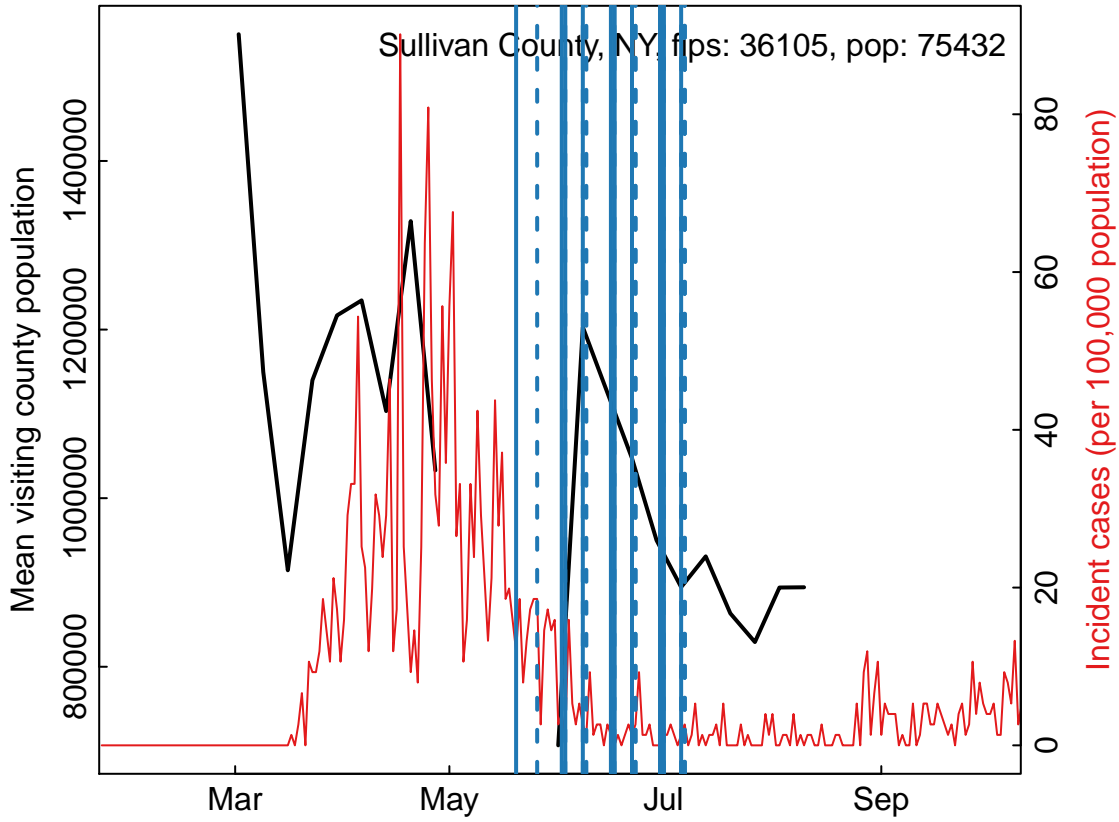

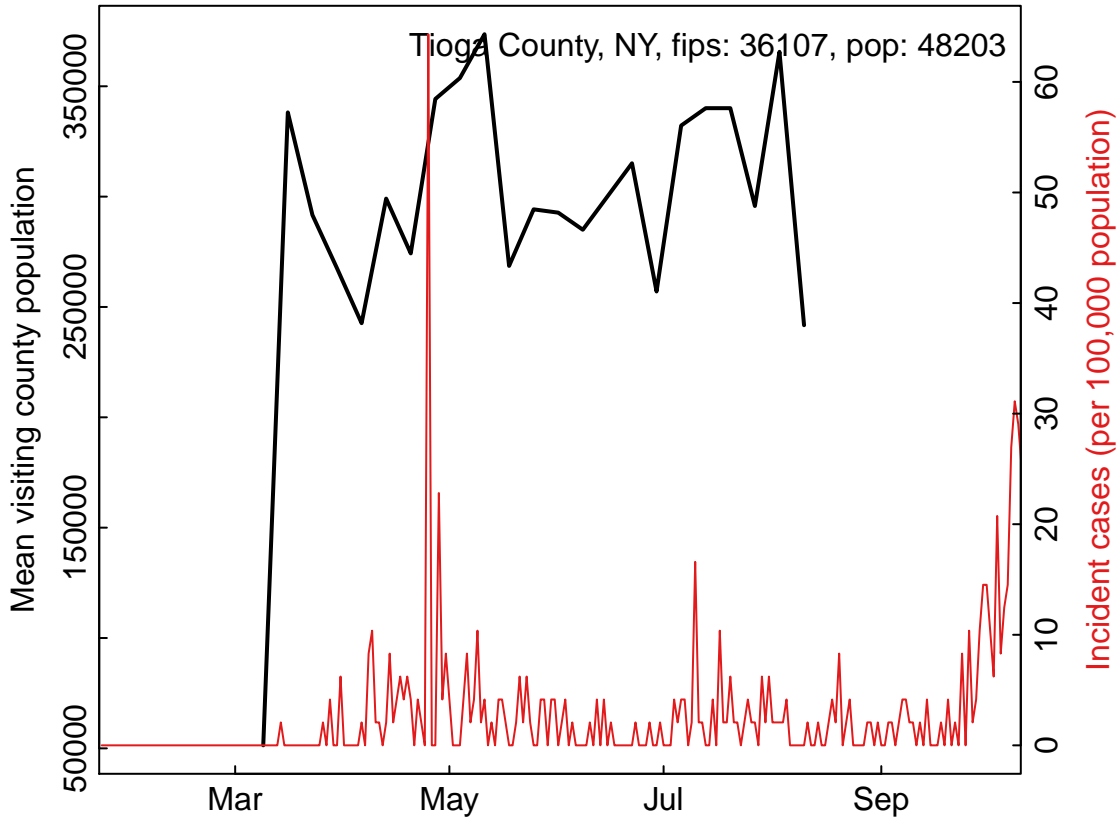

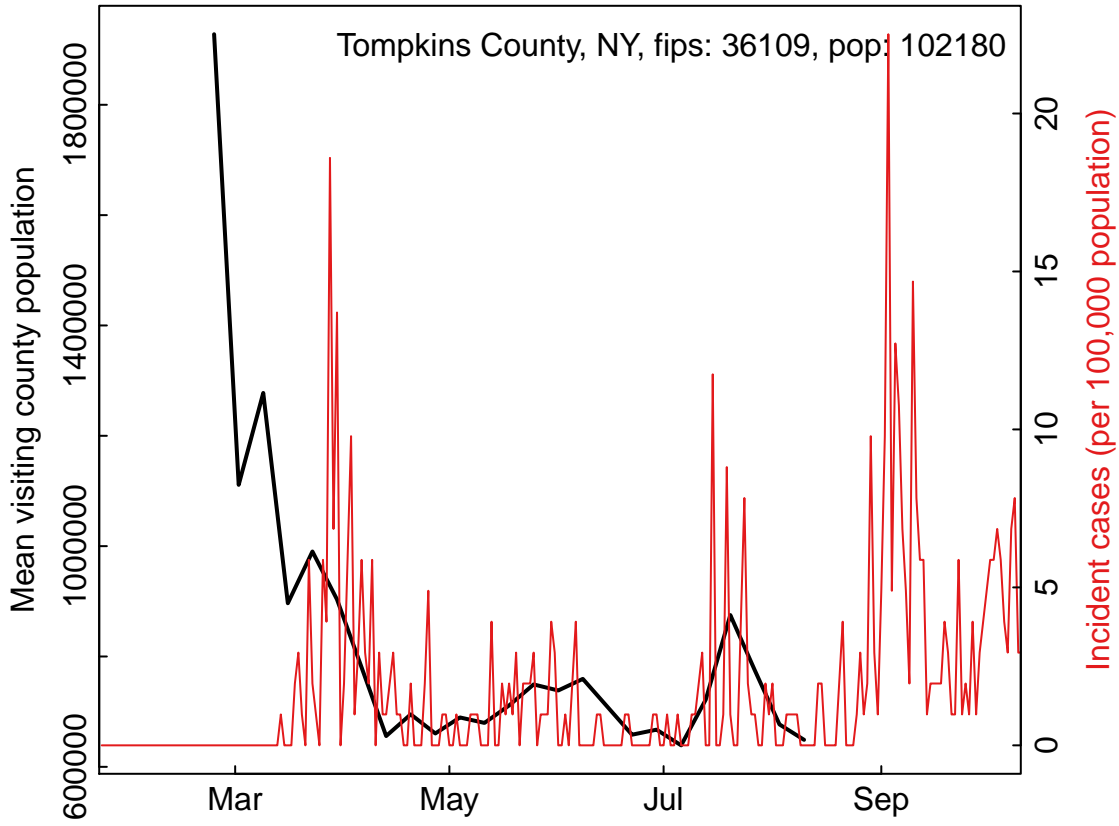

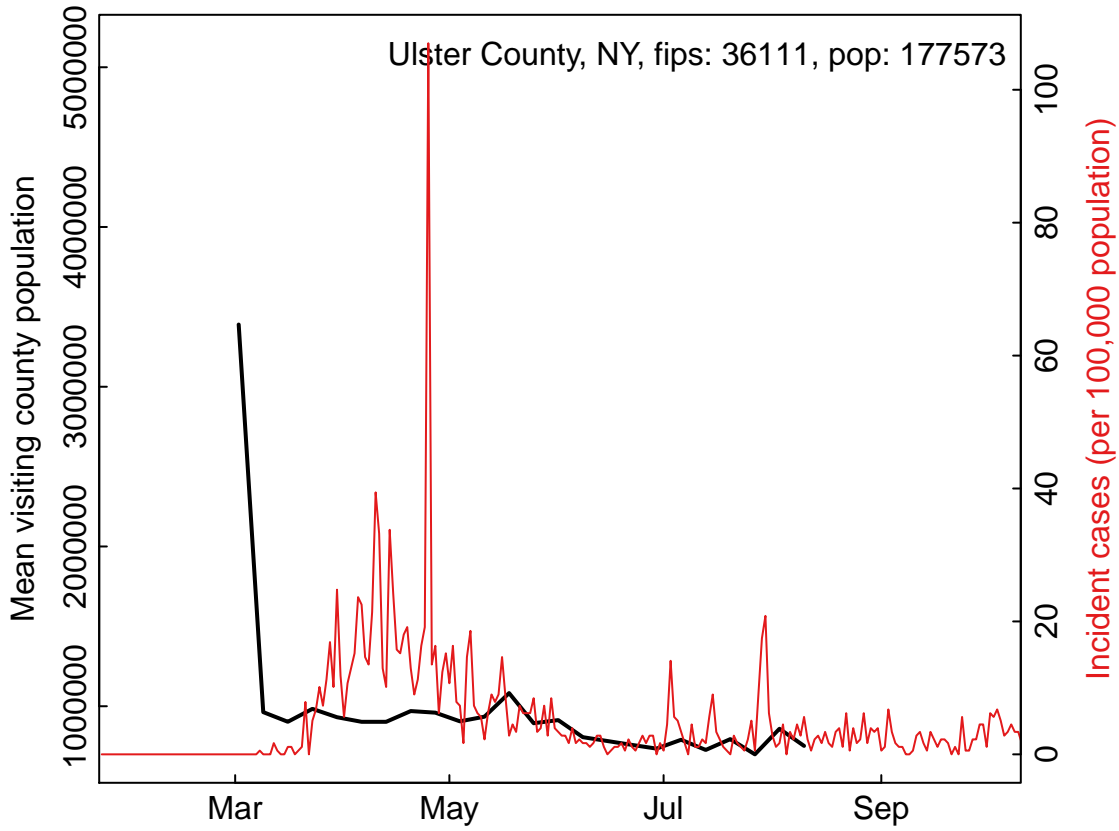



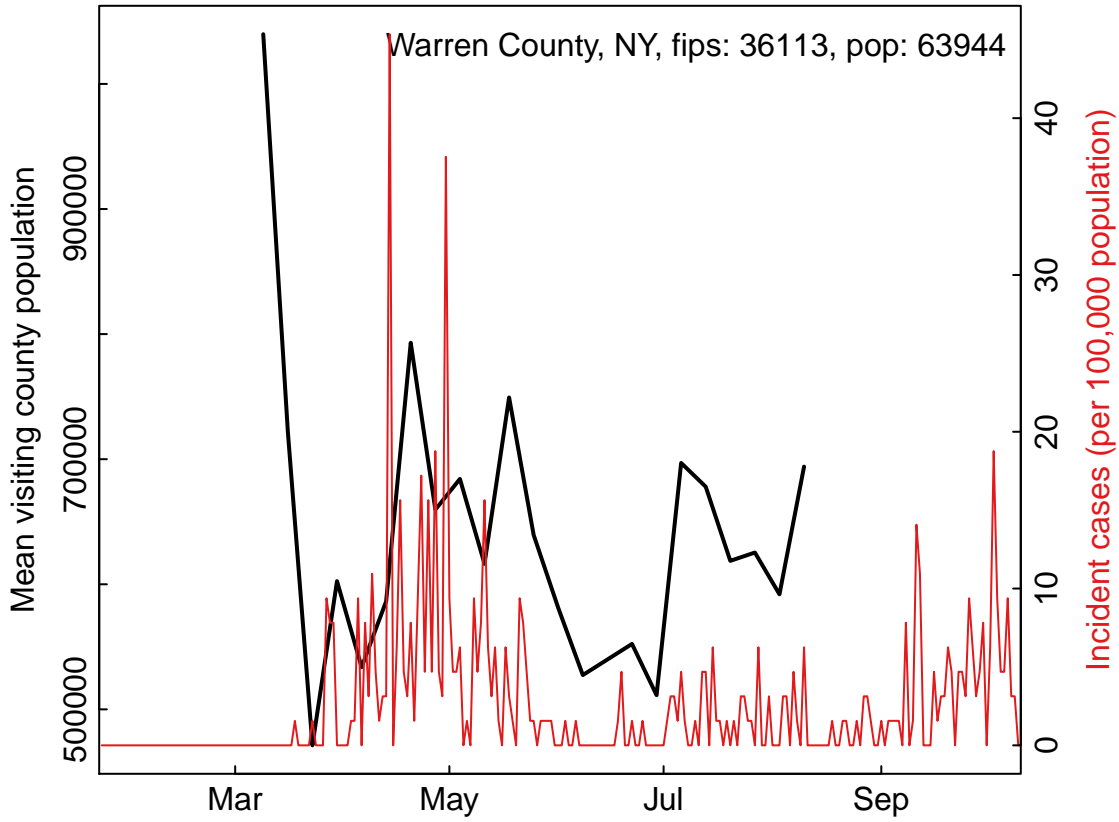

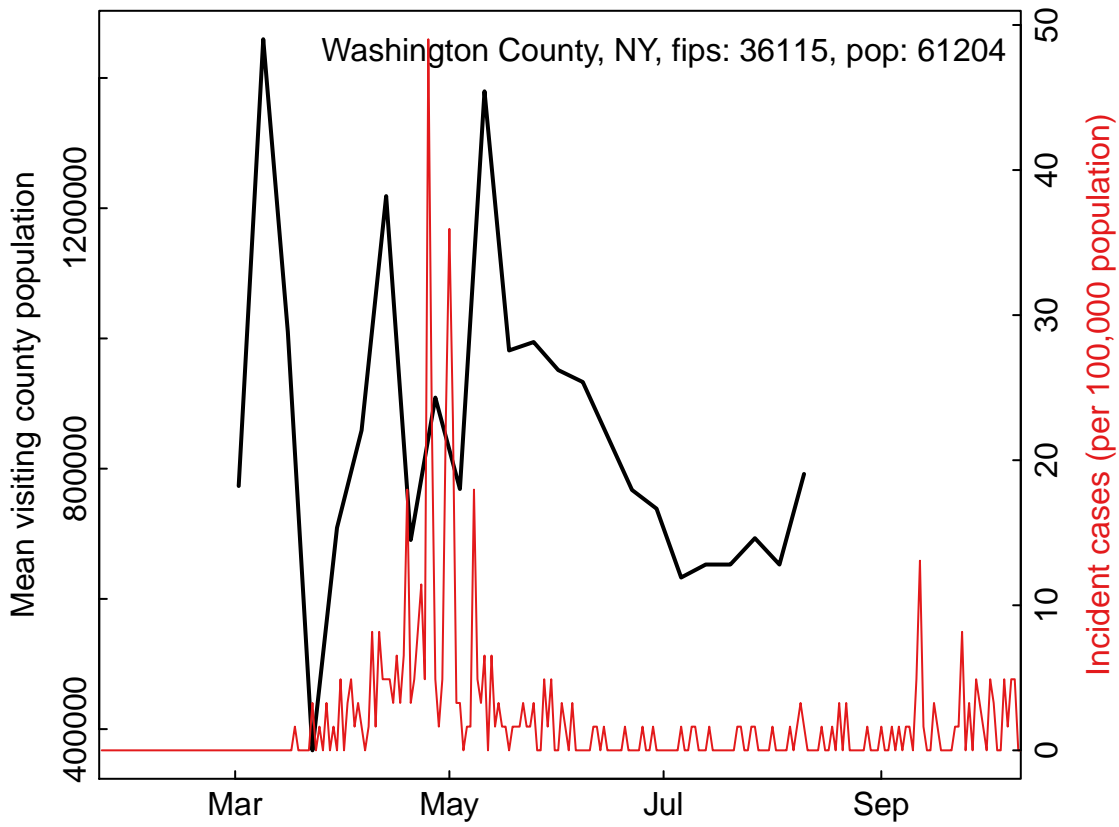

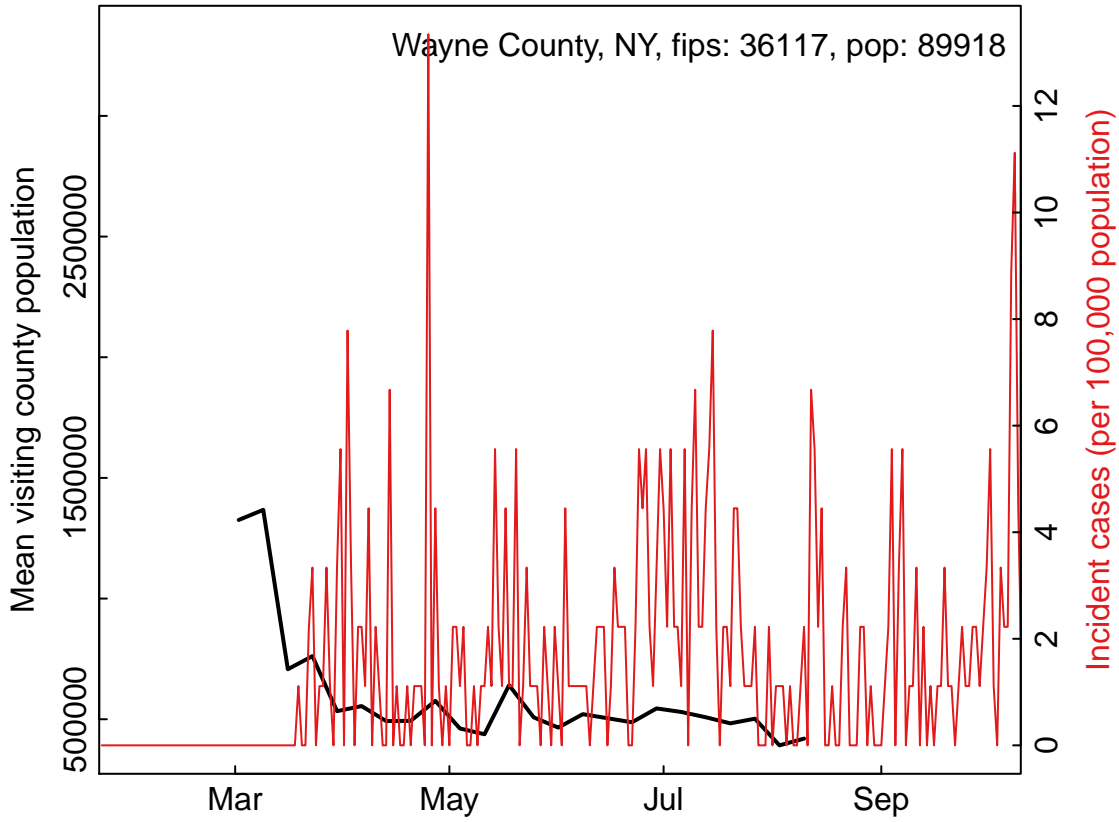

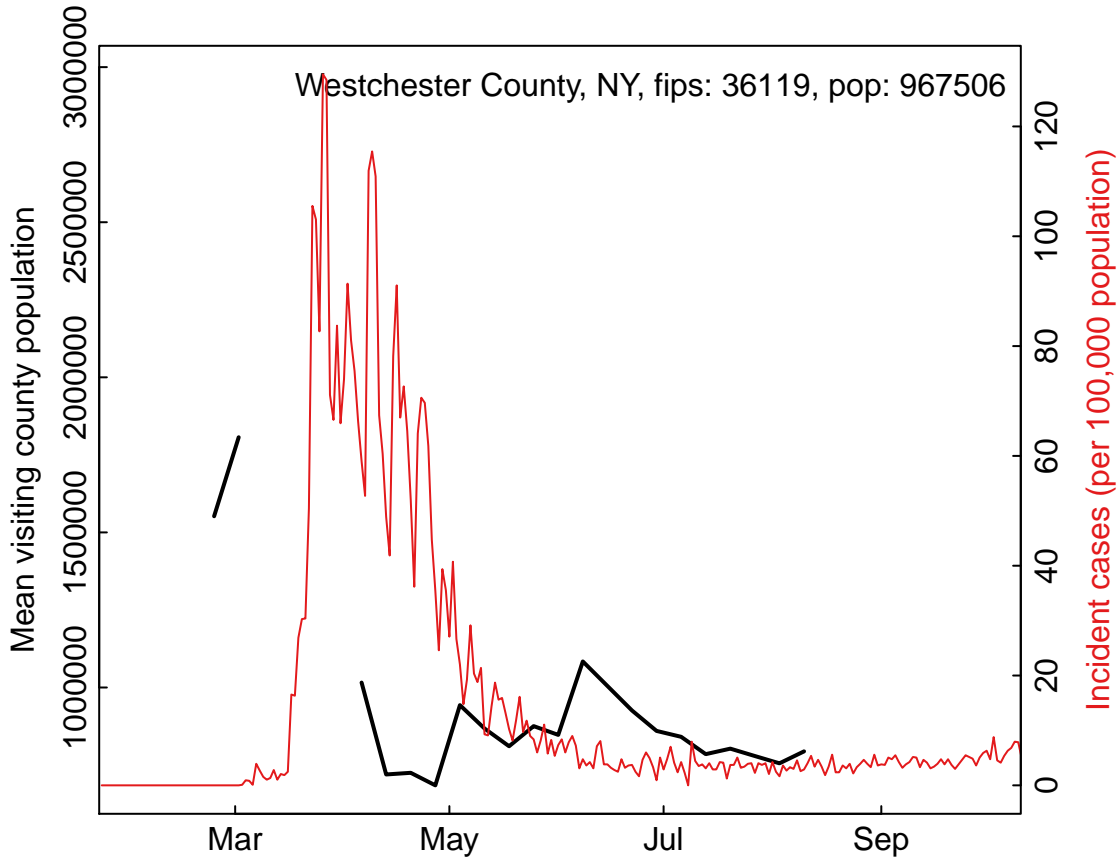

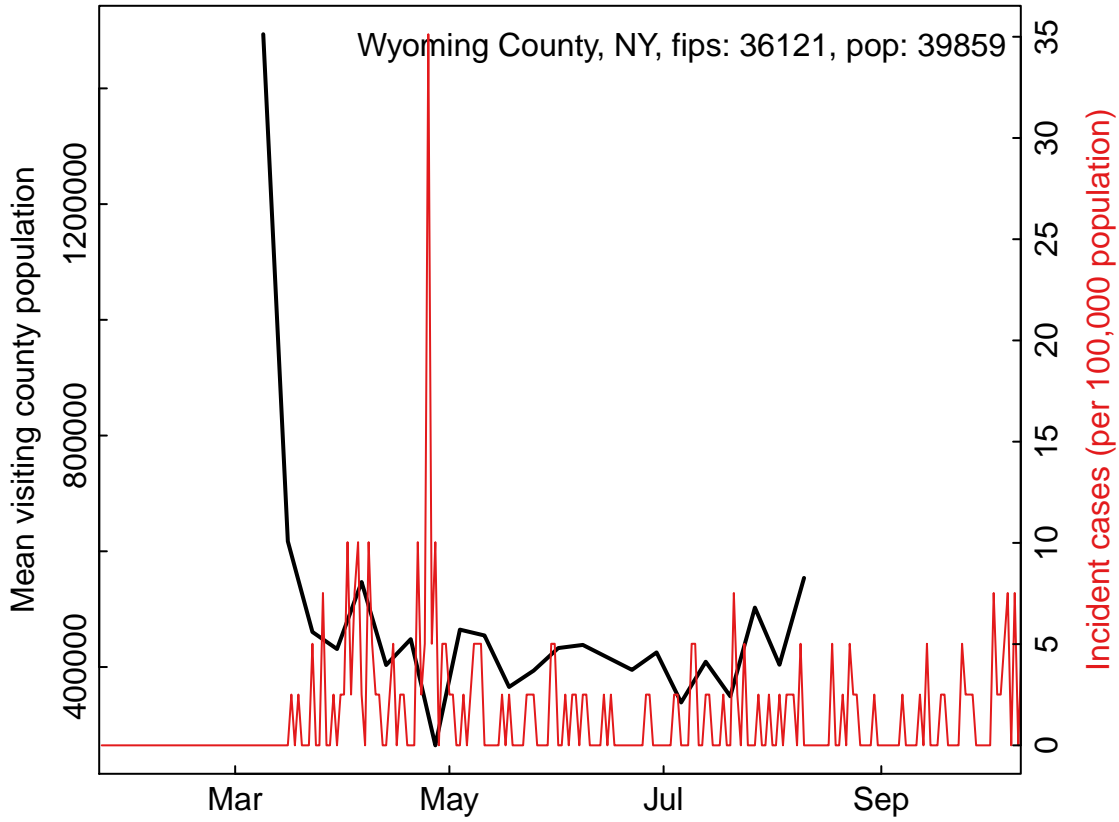

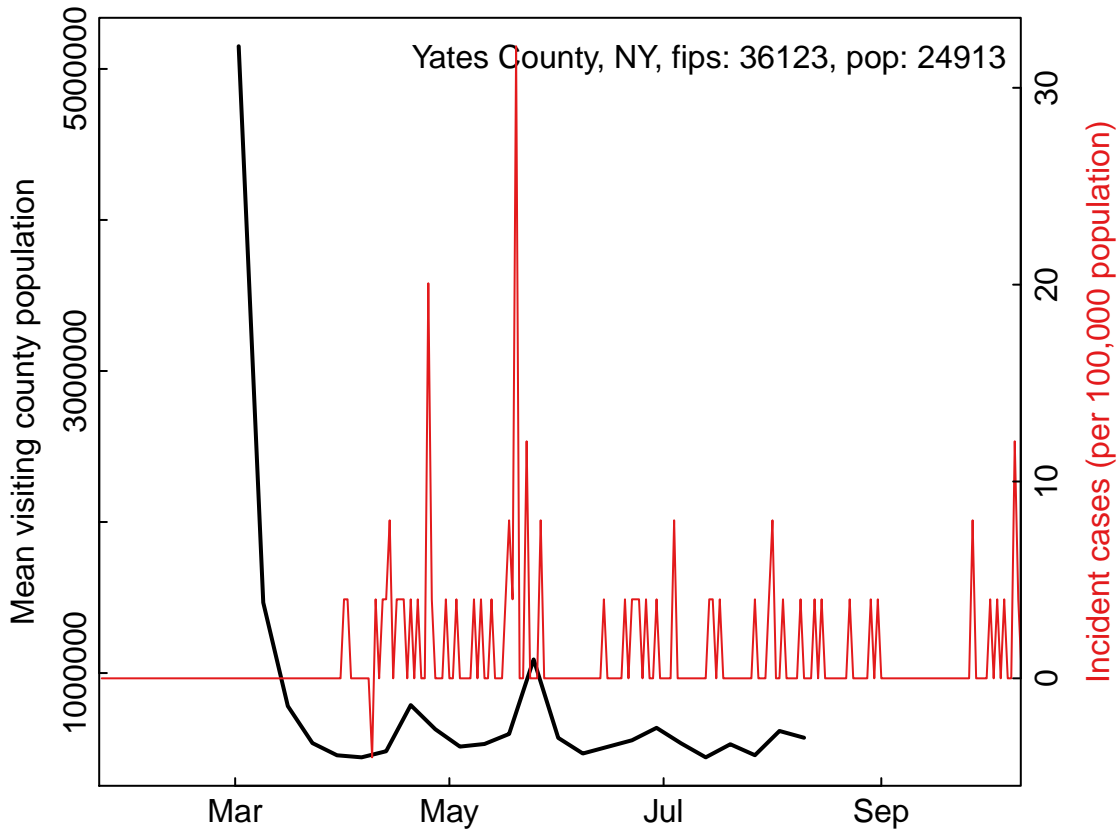

Alamance County, NC, fips: 37001, pop: 169509

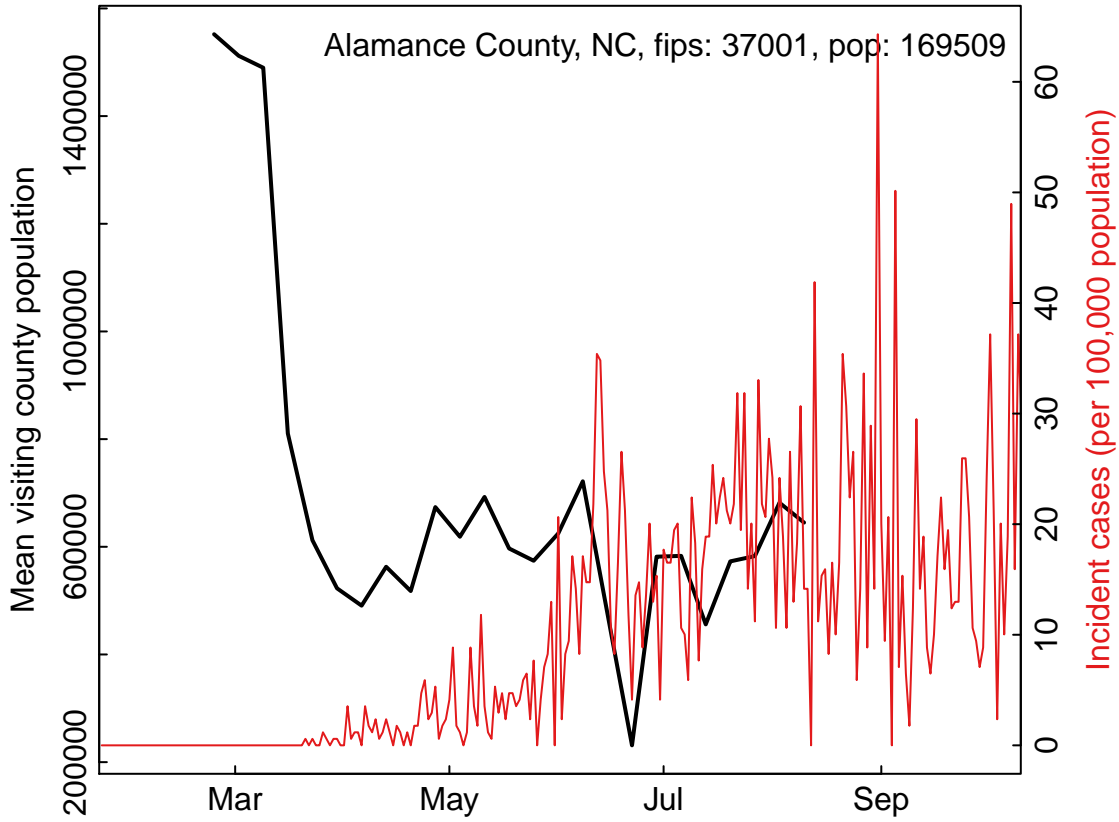

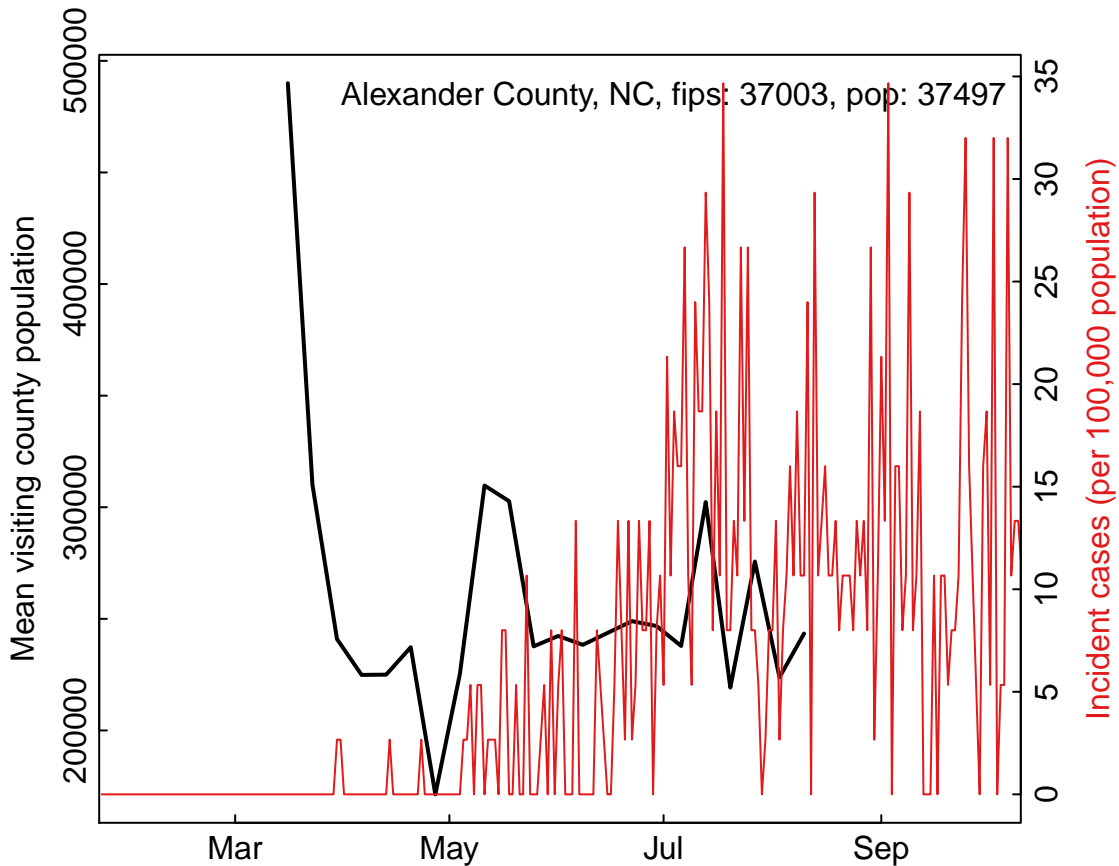



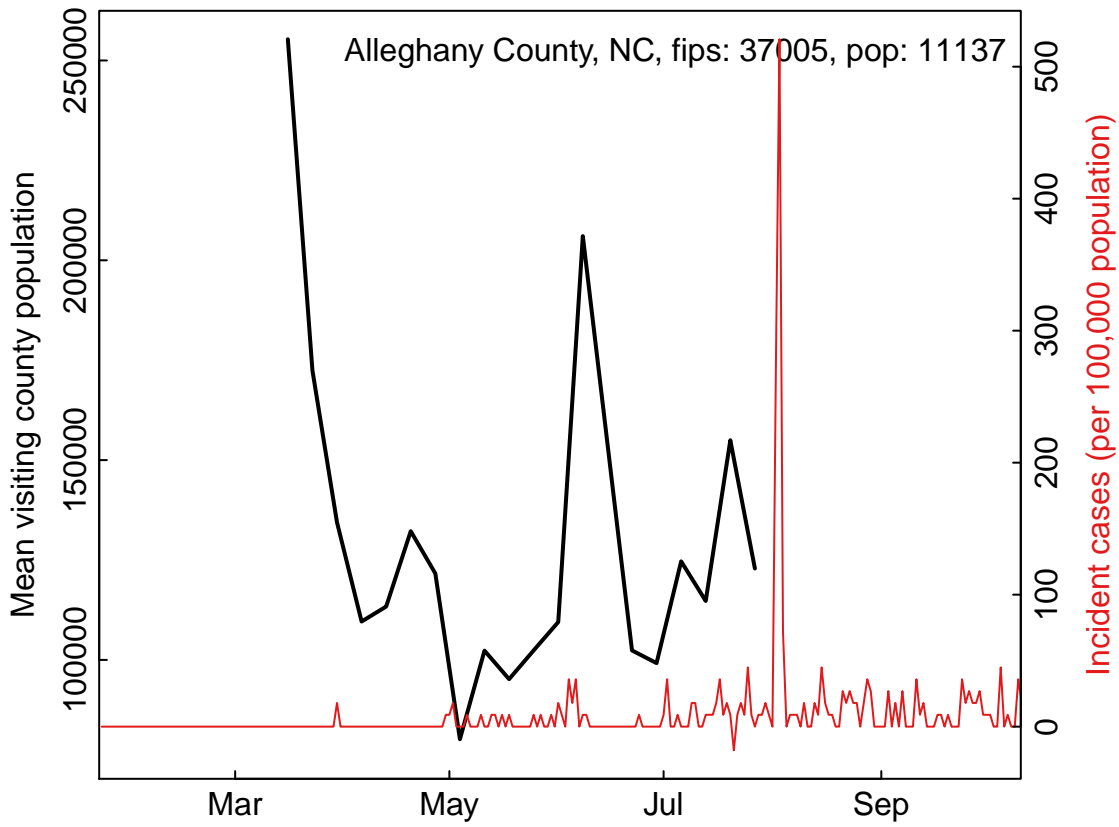

Anson County, NC, fips: 37007, pop: 24446

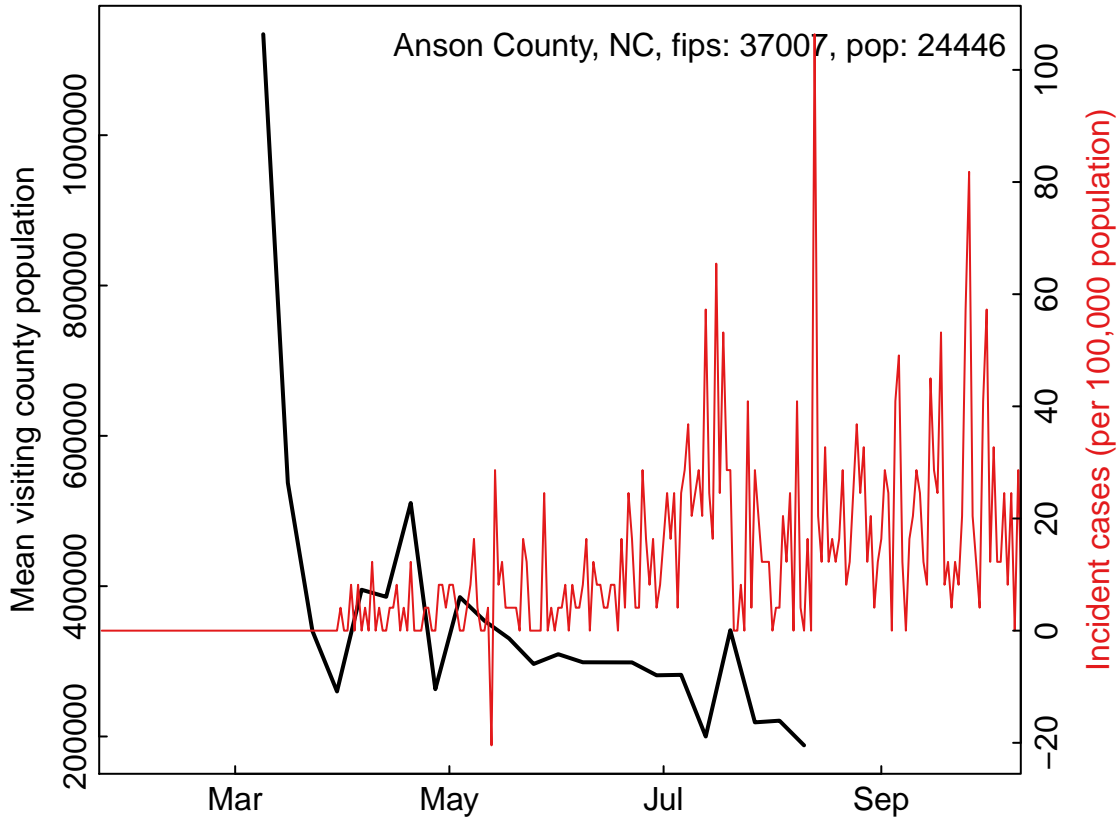

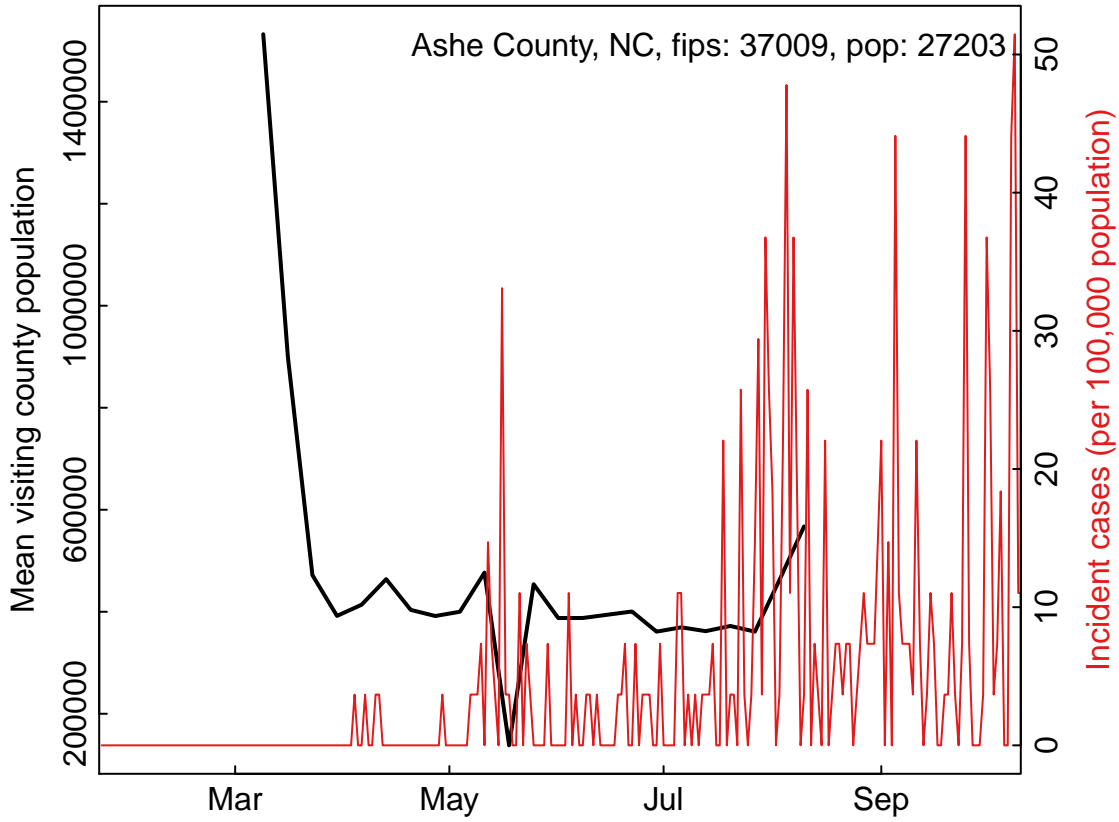

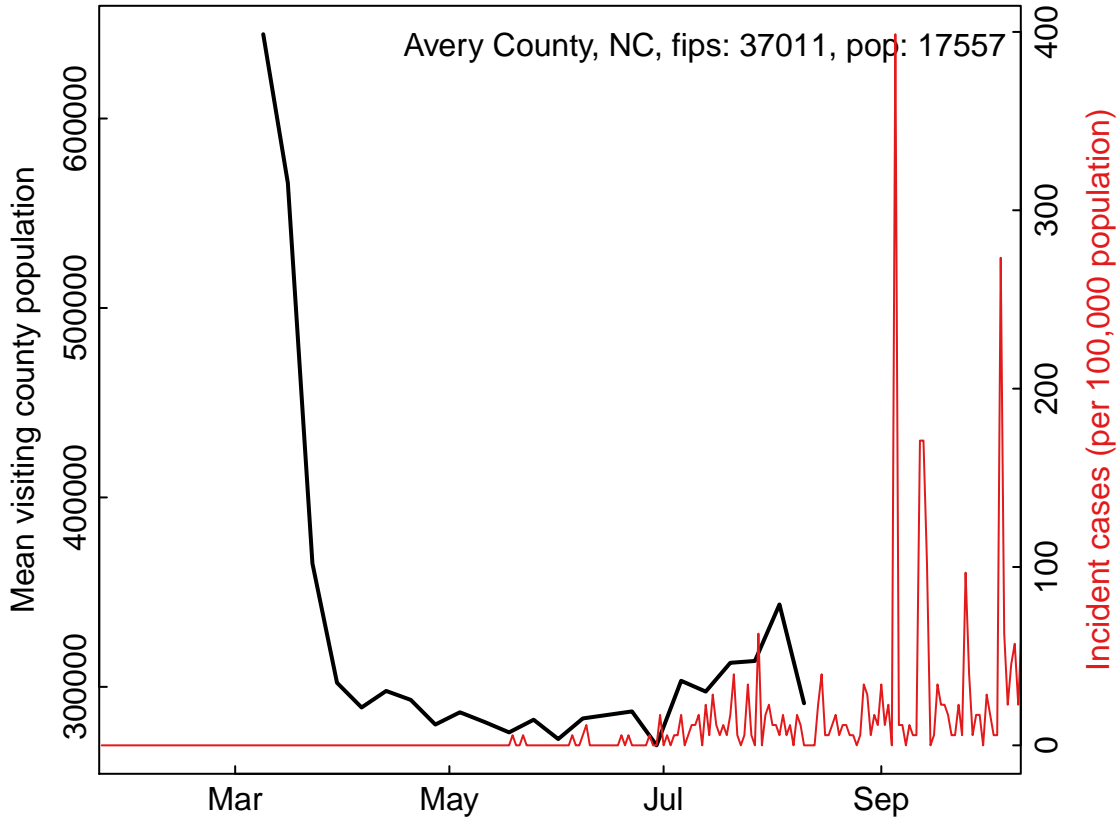

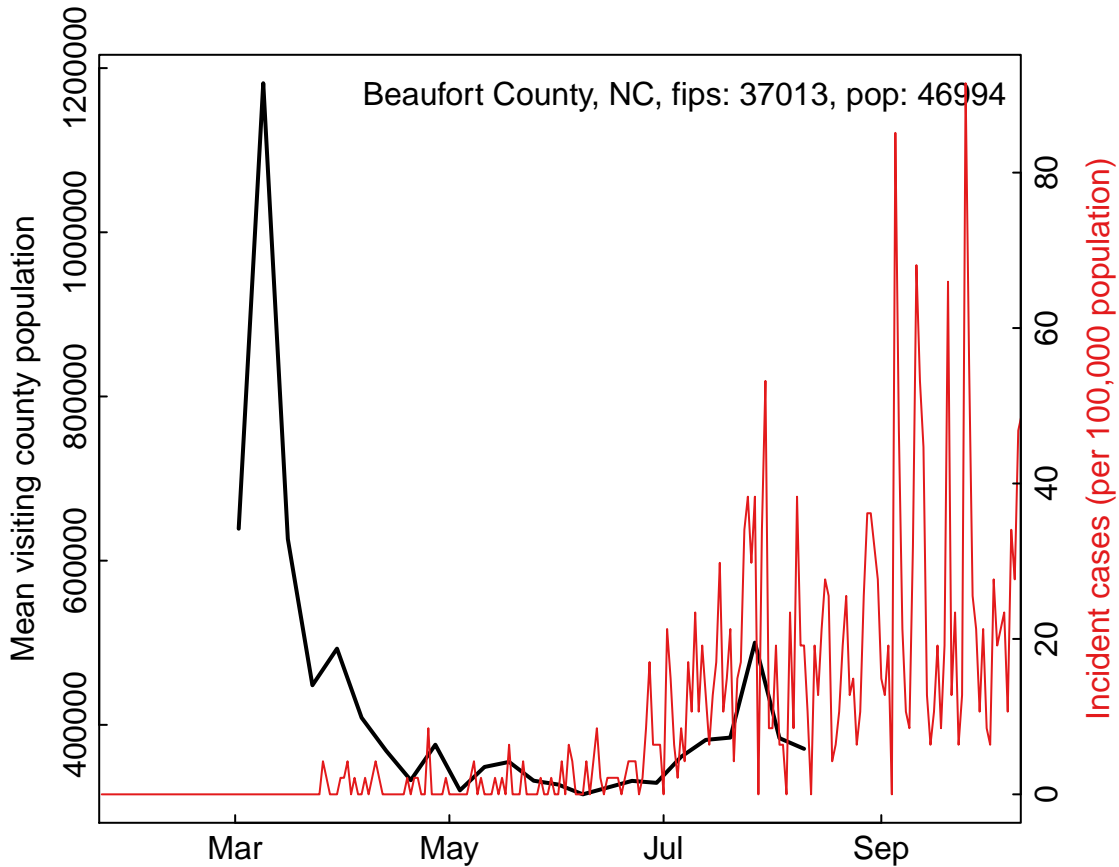

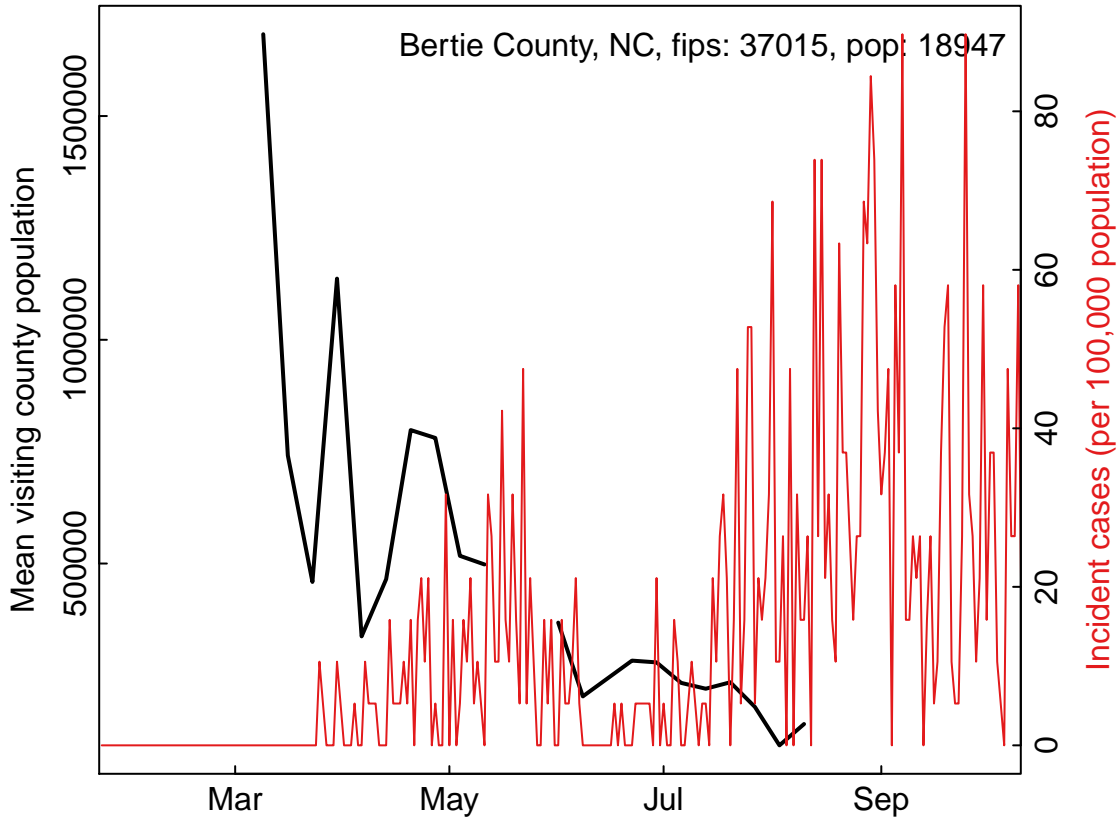

Bladen County, NC, fips: 37017, pop: 32722

Mean visiting county population

1000000  
600000  
200000

Mar

May

Jul

Sep

150  
100  
50  
0

Incident cases (per 100,000 population)

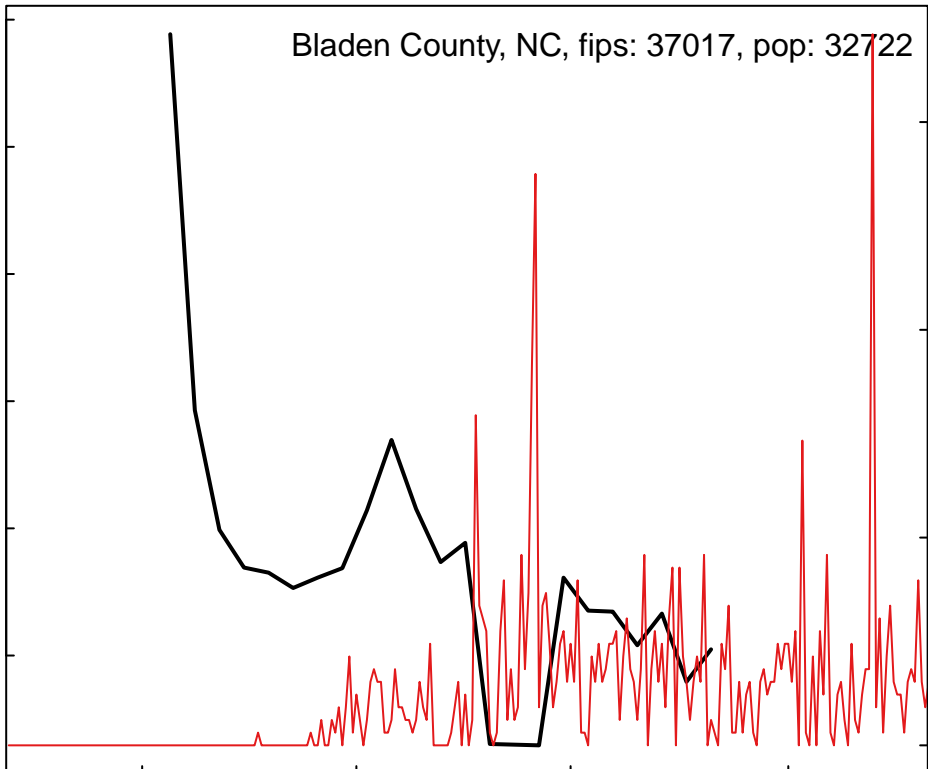

Brunswick County, NC, fips: 37019, pop: 142820

Mean visiting county population

400000  
800000  
1200000

Mar

May

Jul

Sep

0  
5  
10  
15  
20  
25  
30

Incident cases (per 100,000 population)

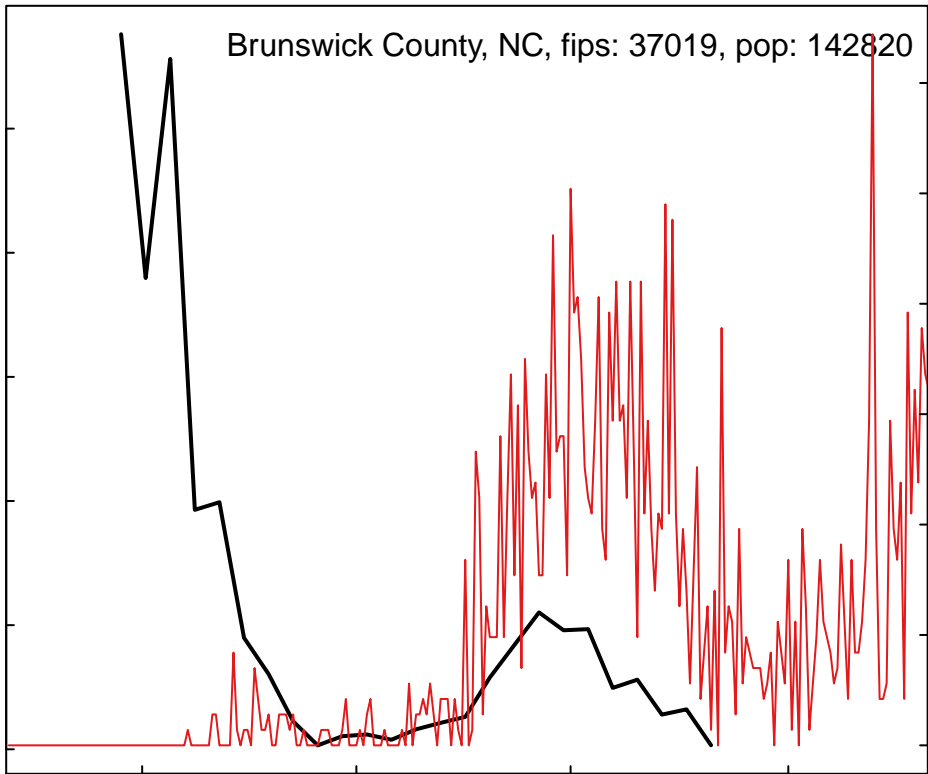



Buncombe County, NC, fips: 37021, pop: 261191

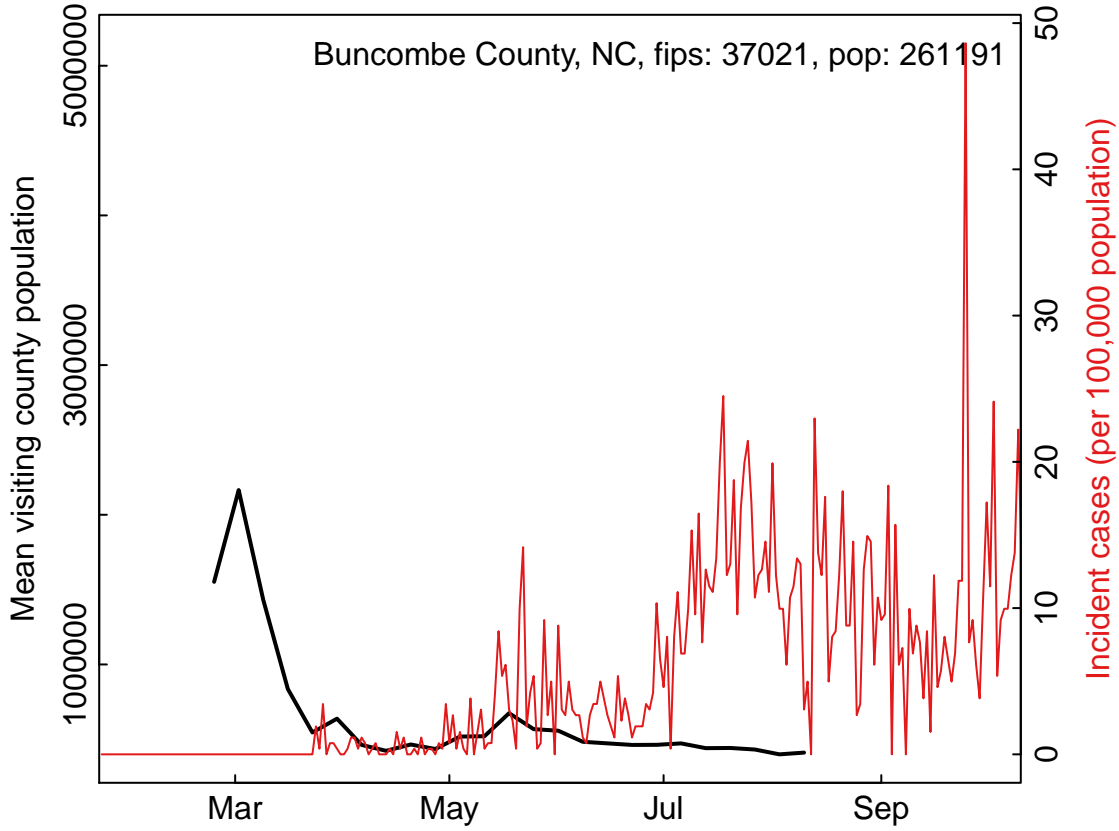

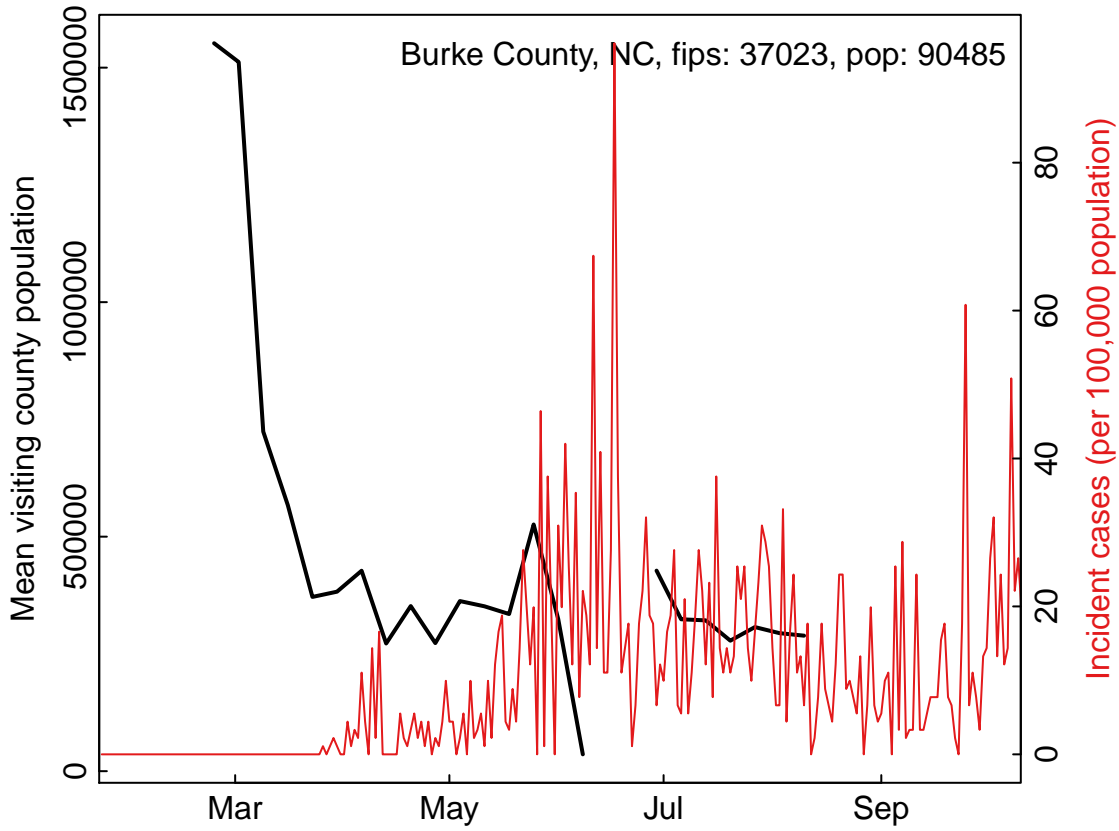

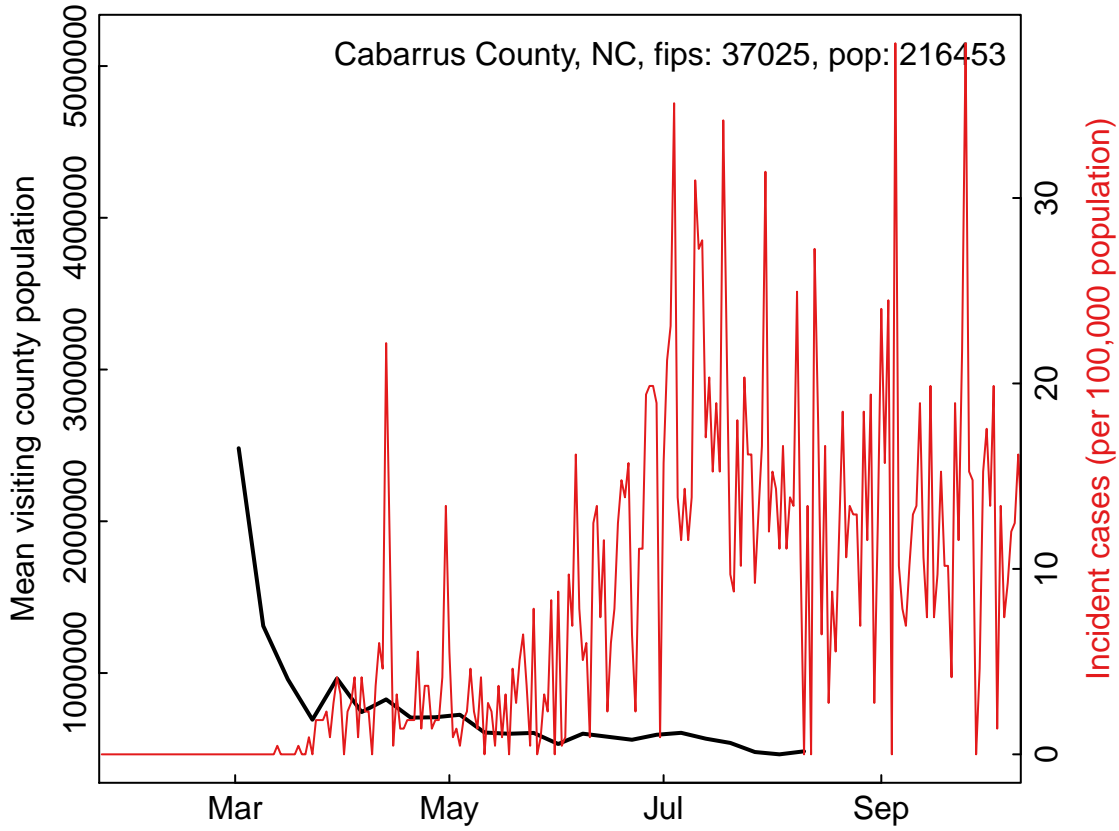

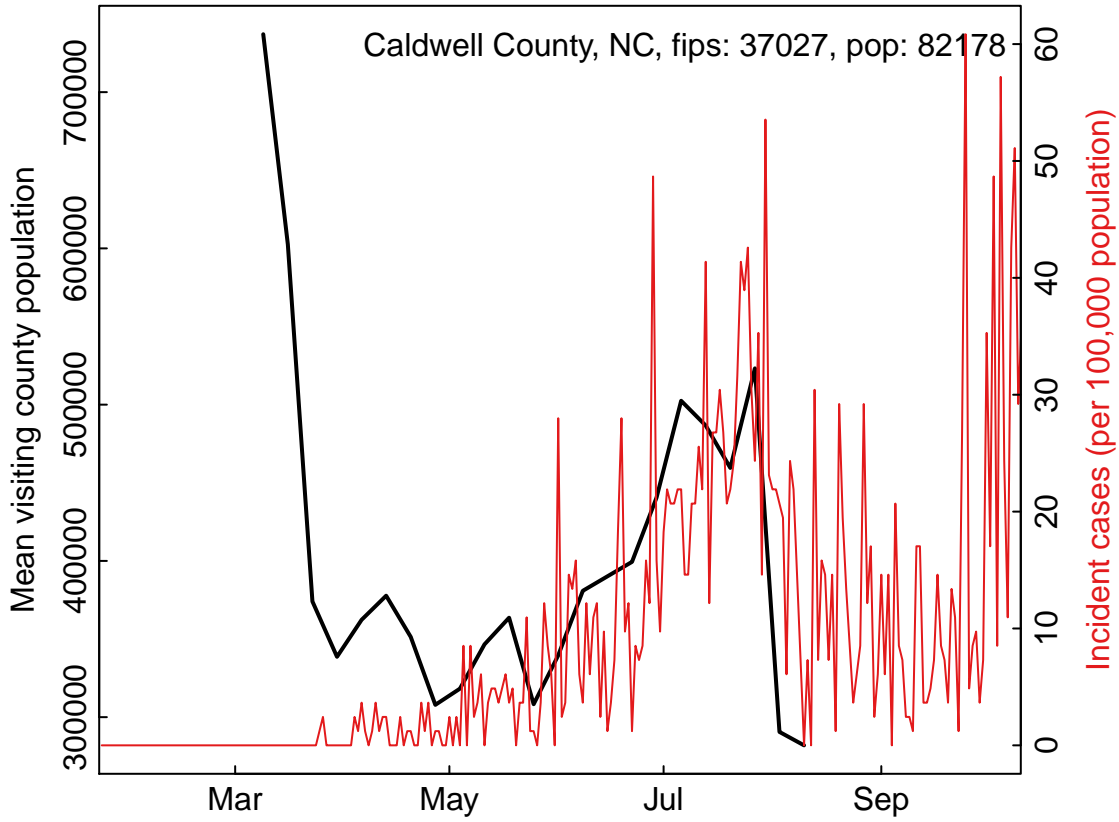

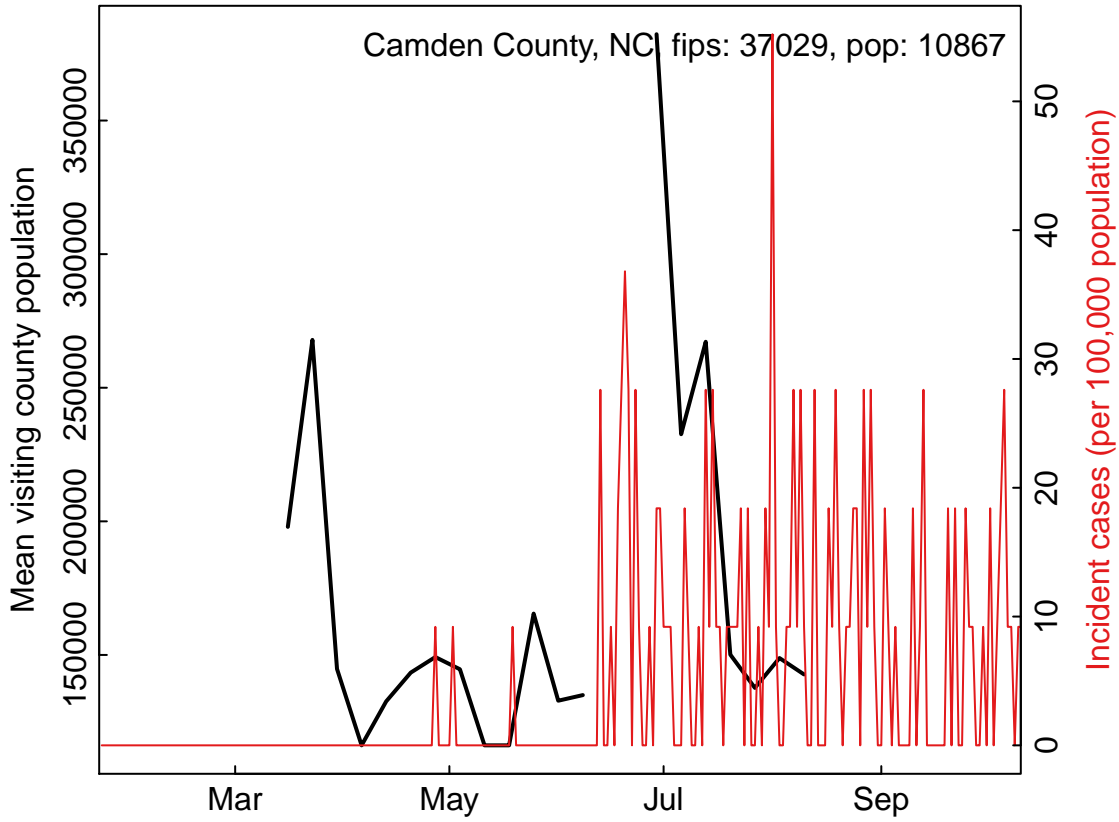

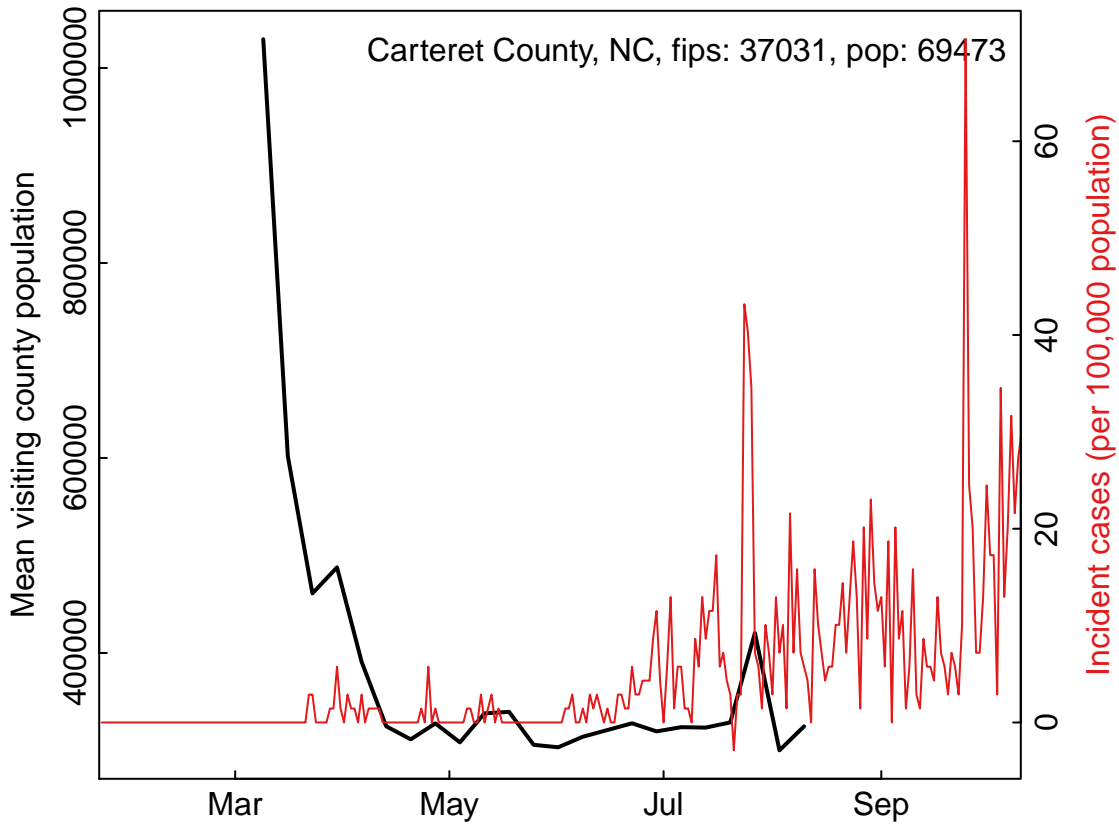

Caswell County, NC, fips: 37033, pop: 22604

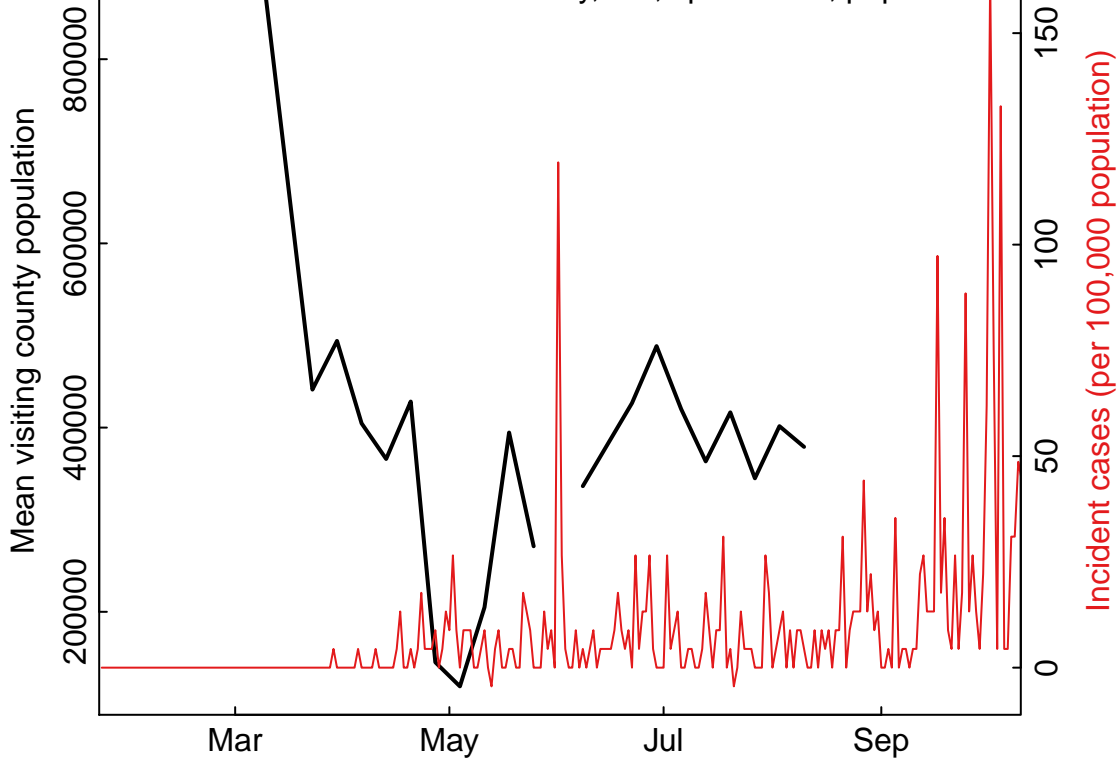

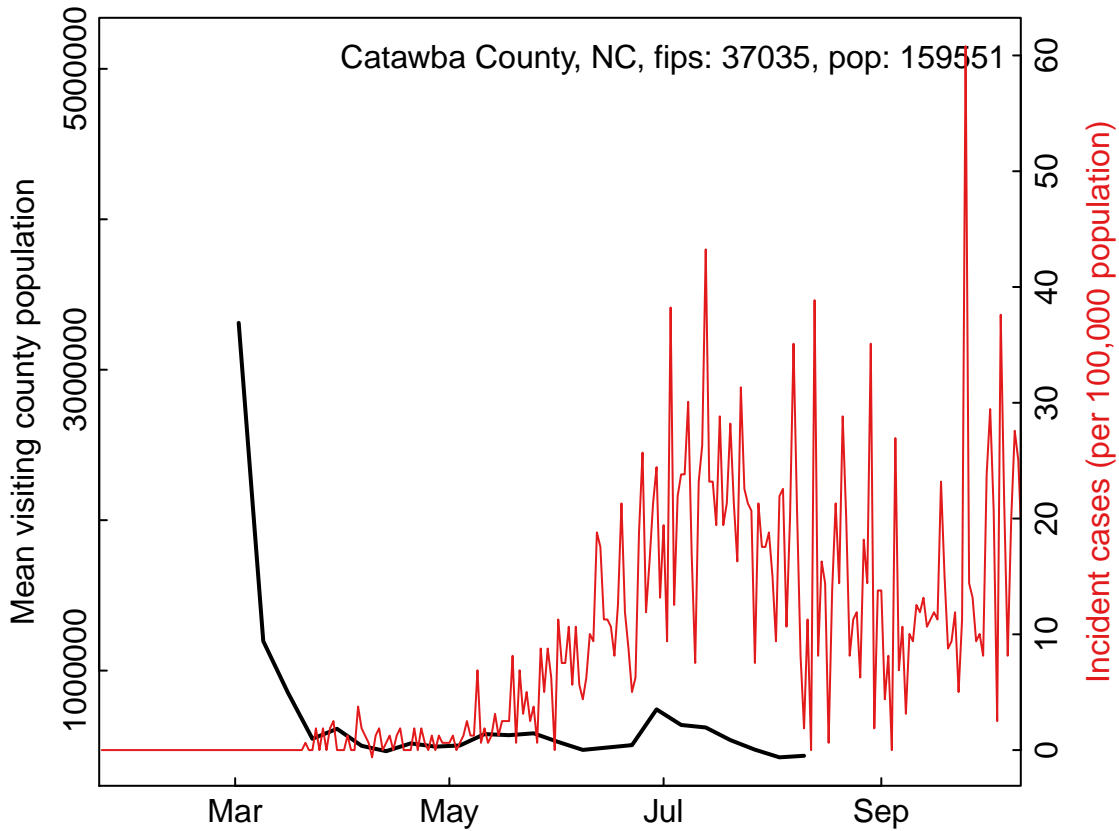



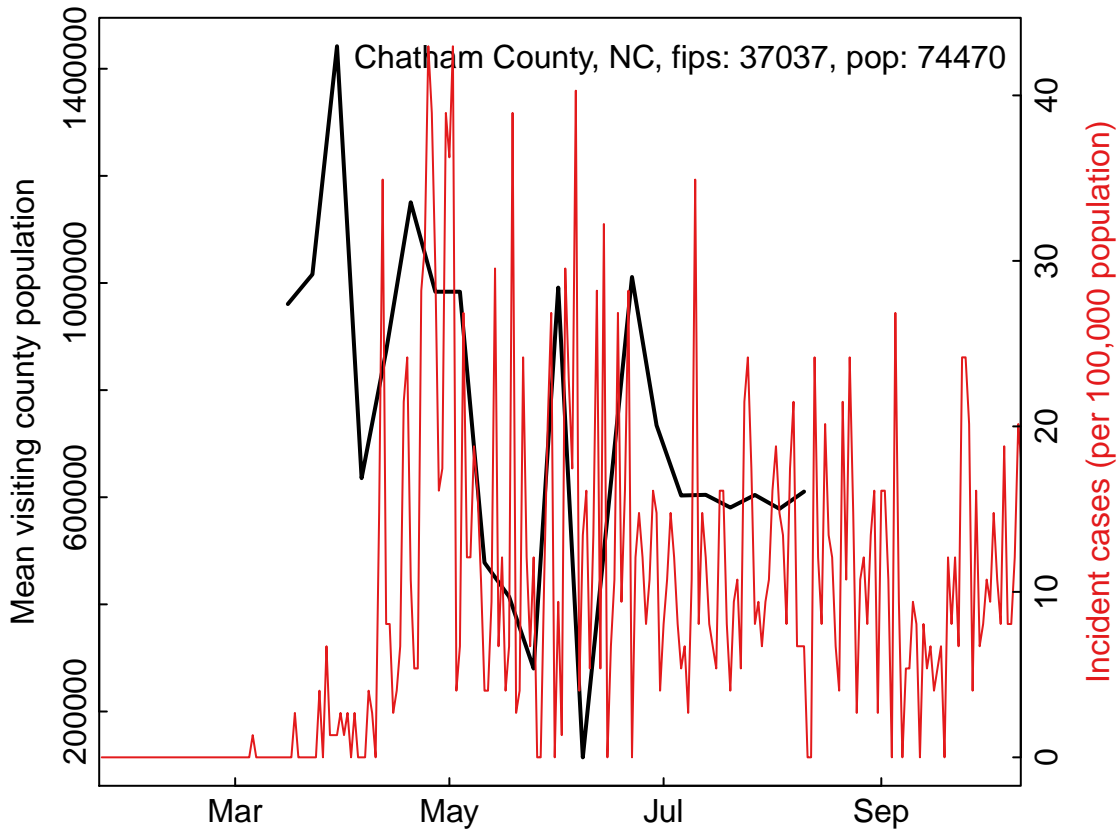

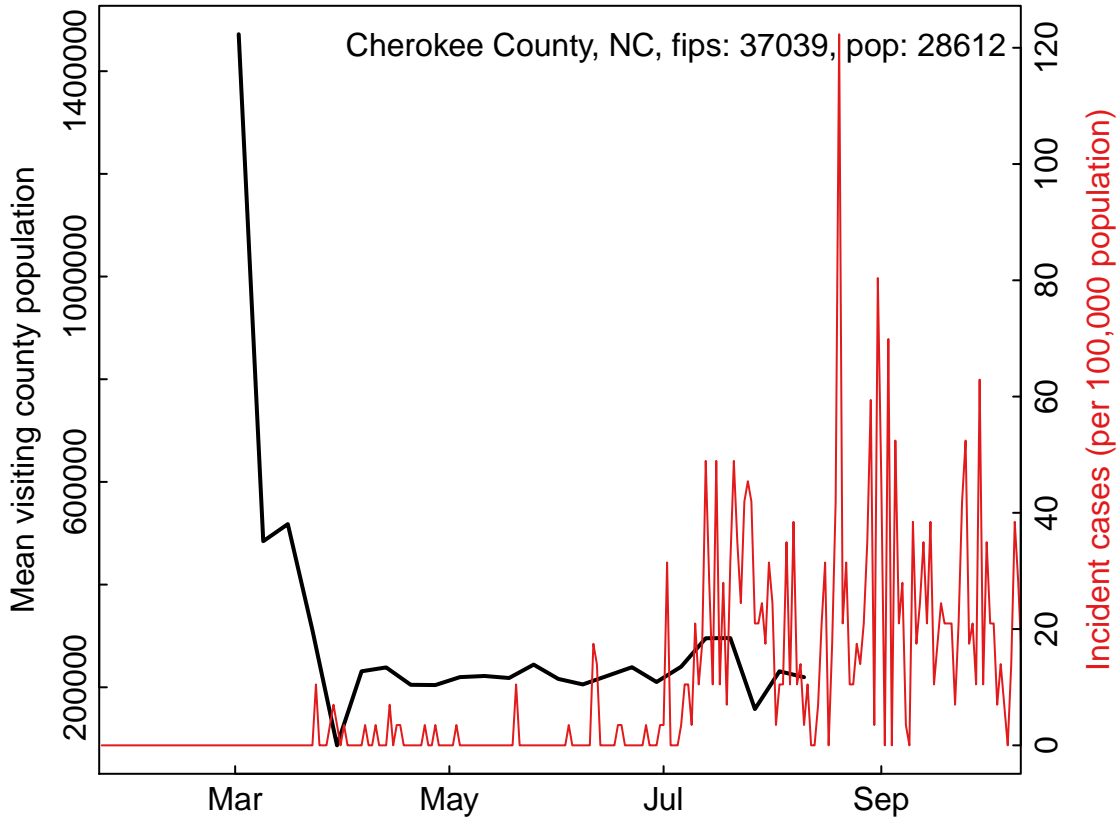

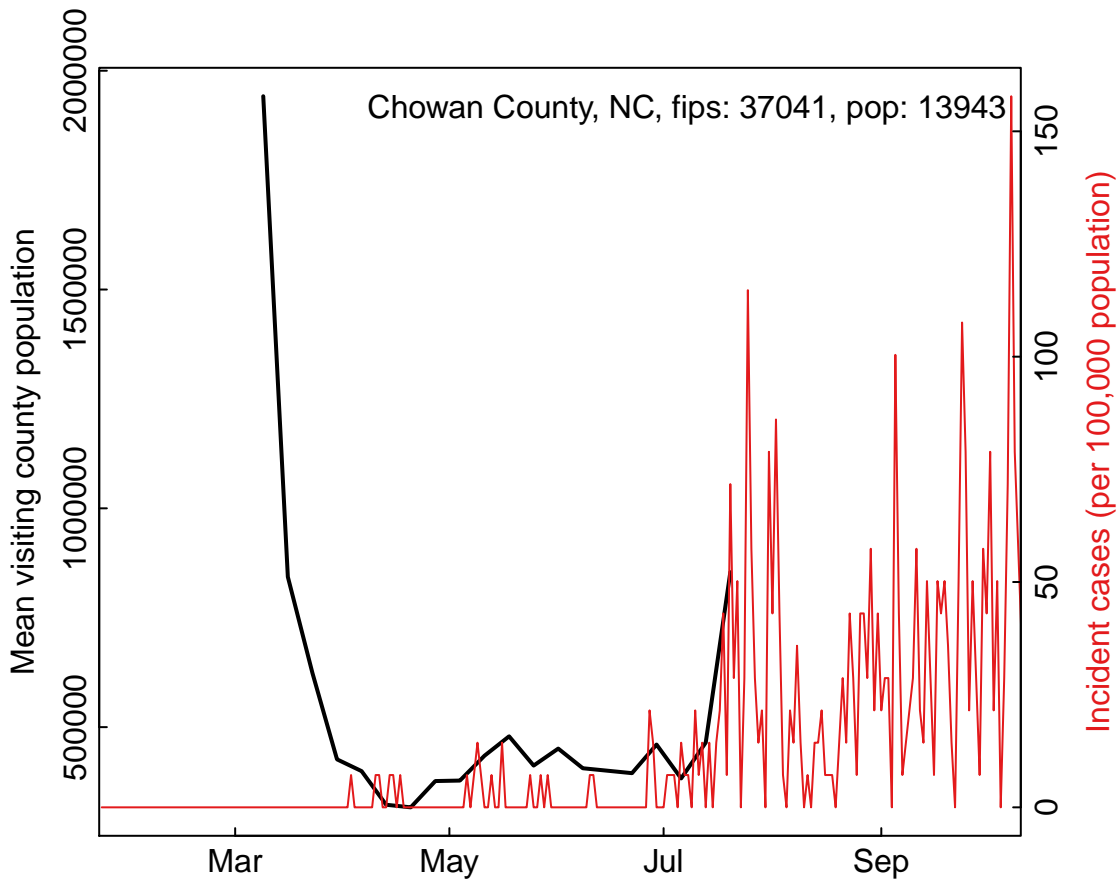

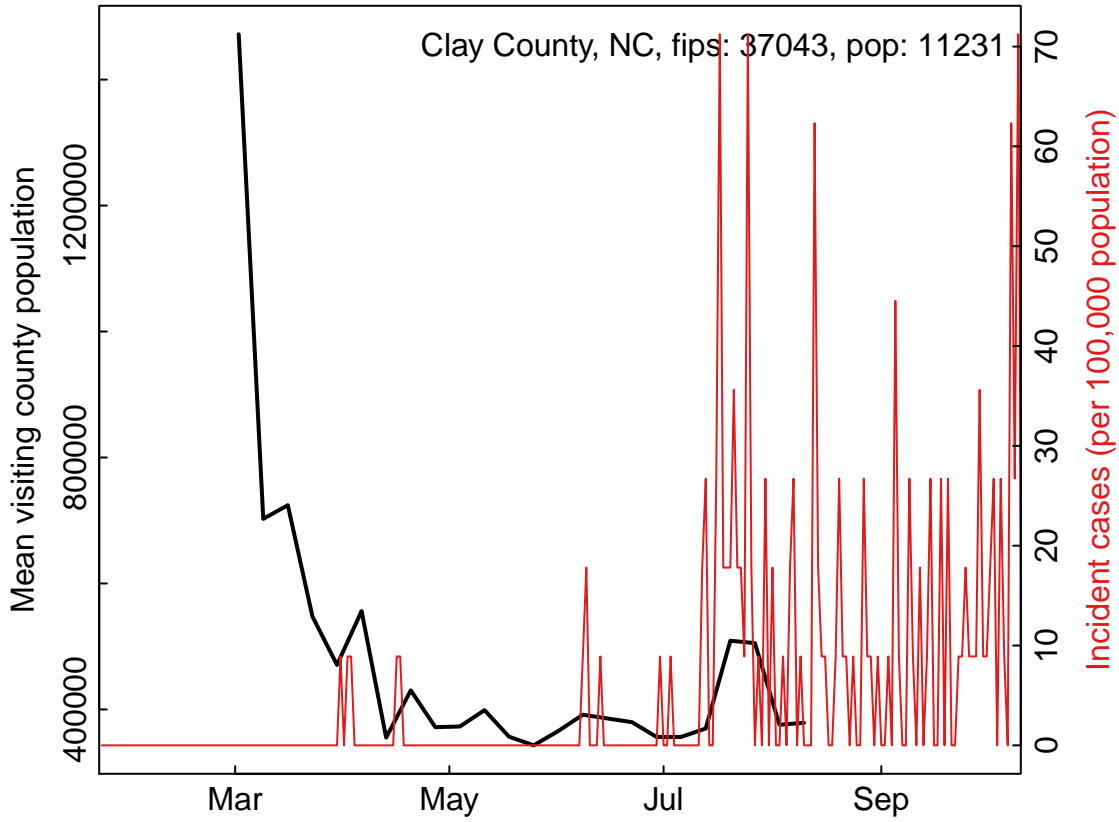

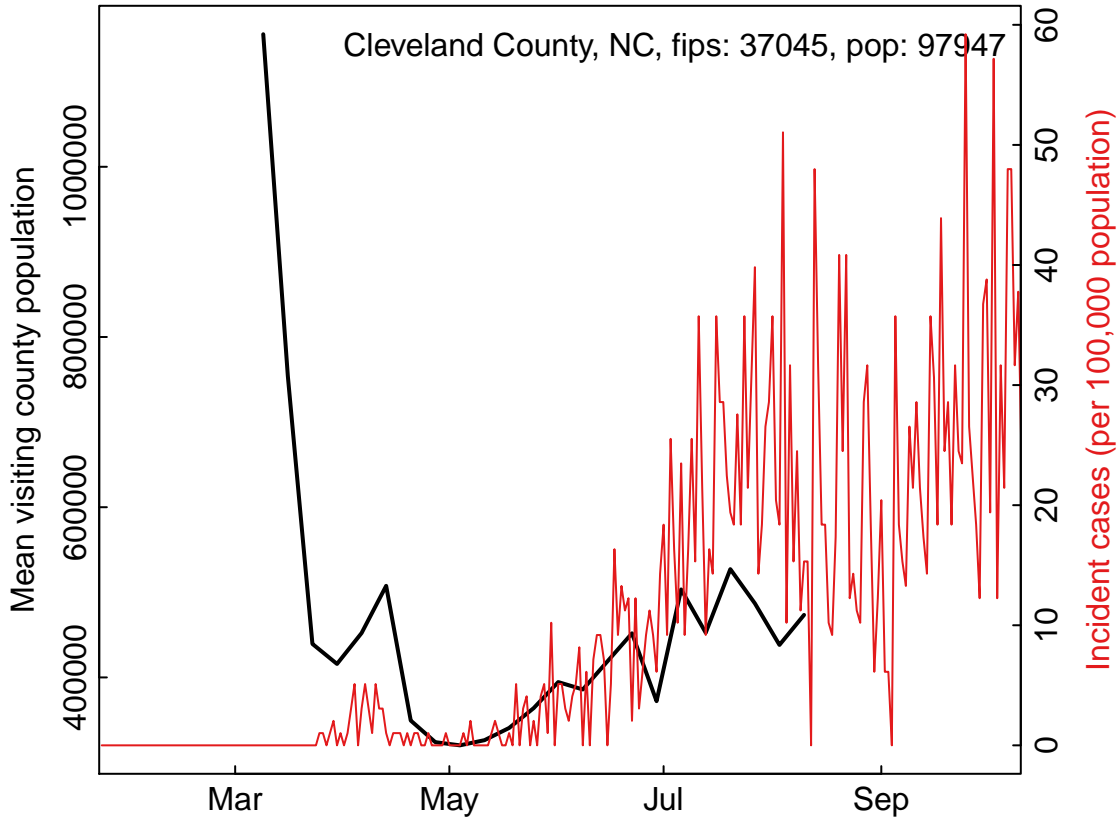

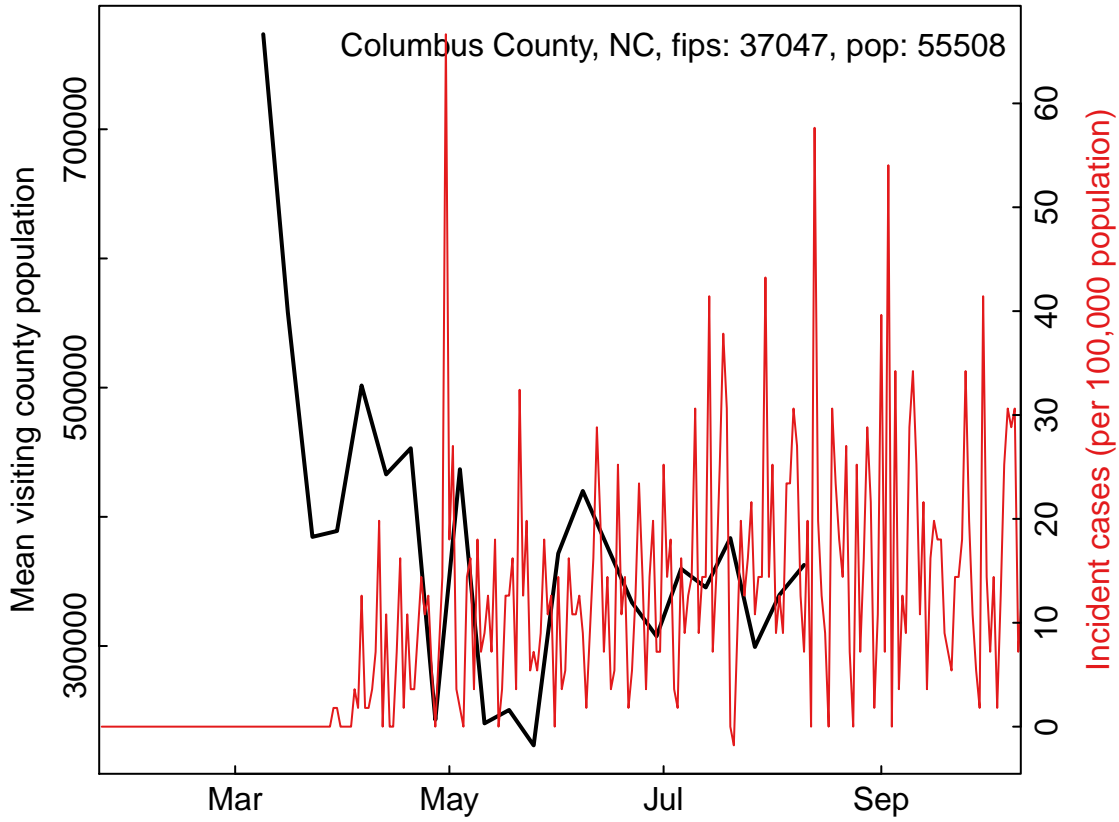

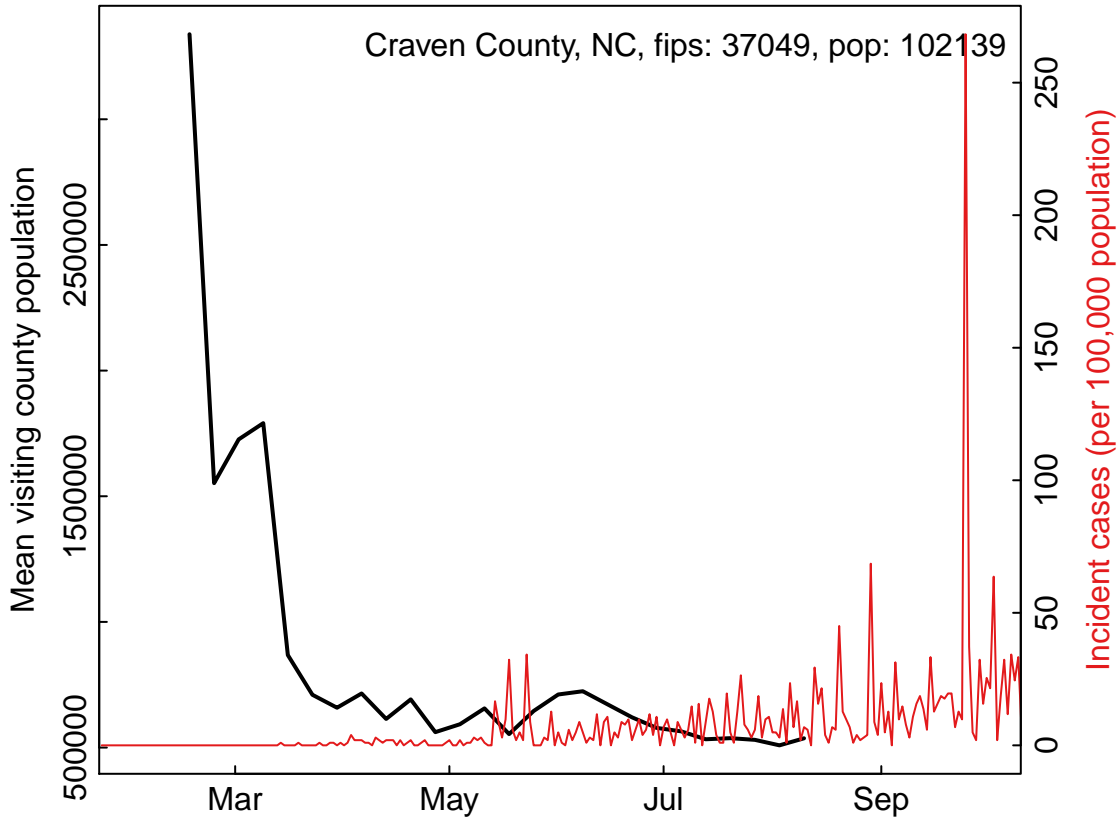

Cumberland County, NC, fips: 37051, pop: 335509

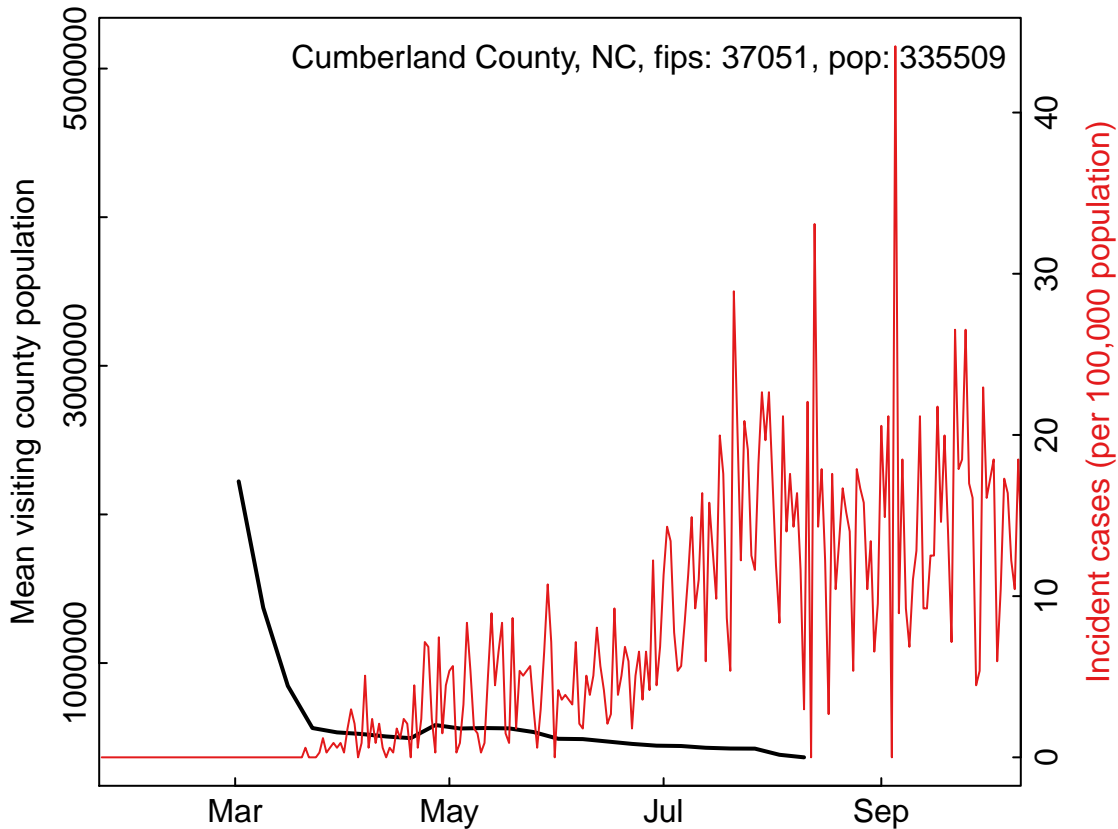



Currituck County, NC, fips: 37053, pop: 27763

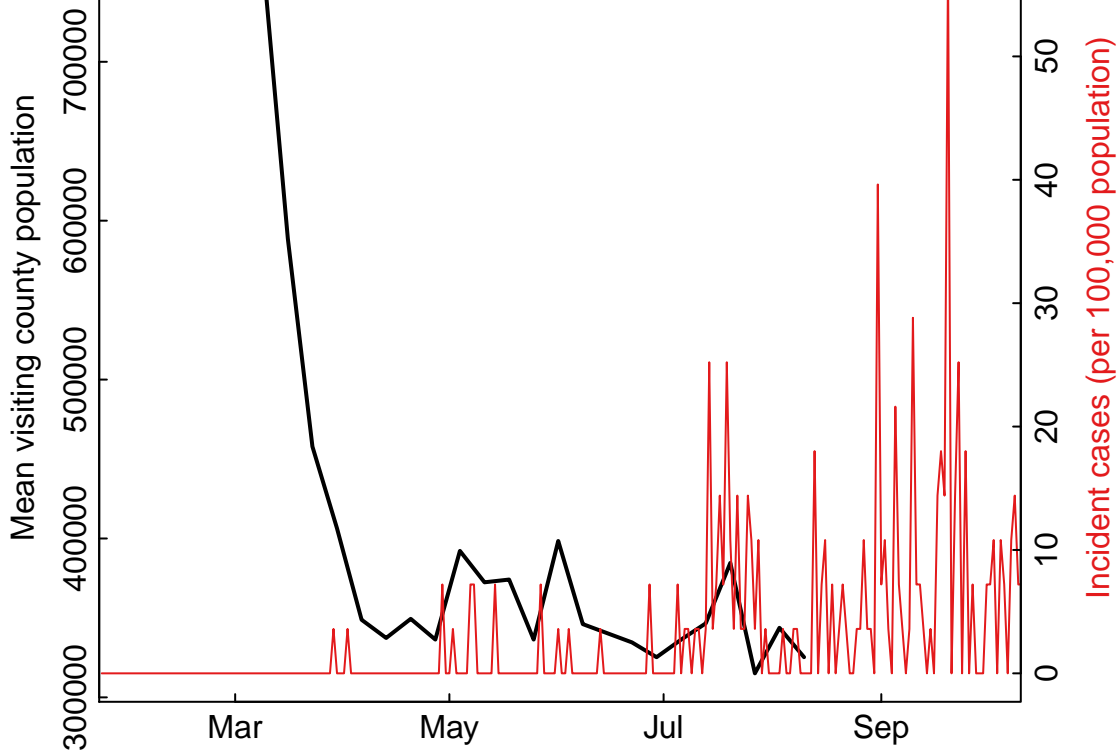

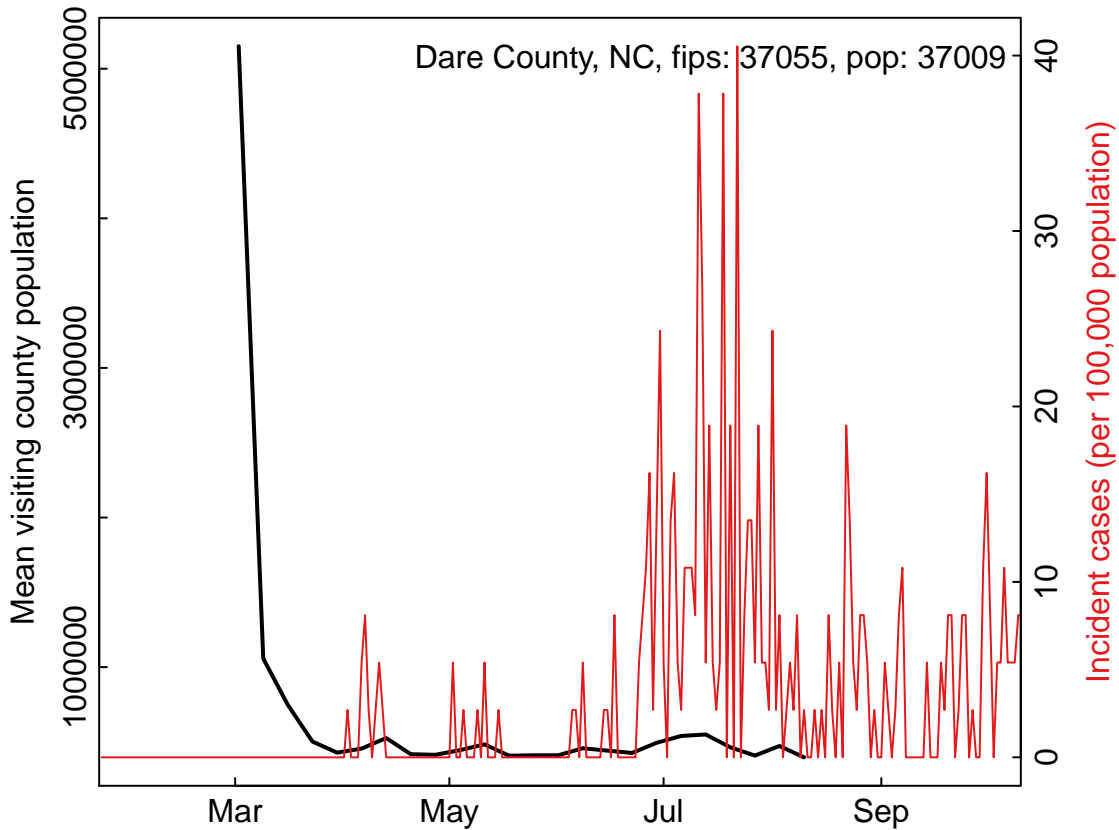

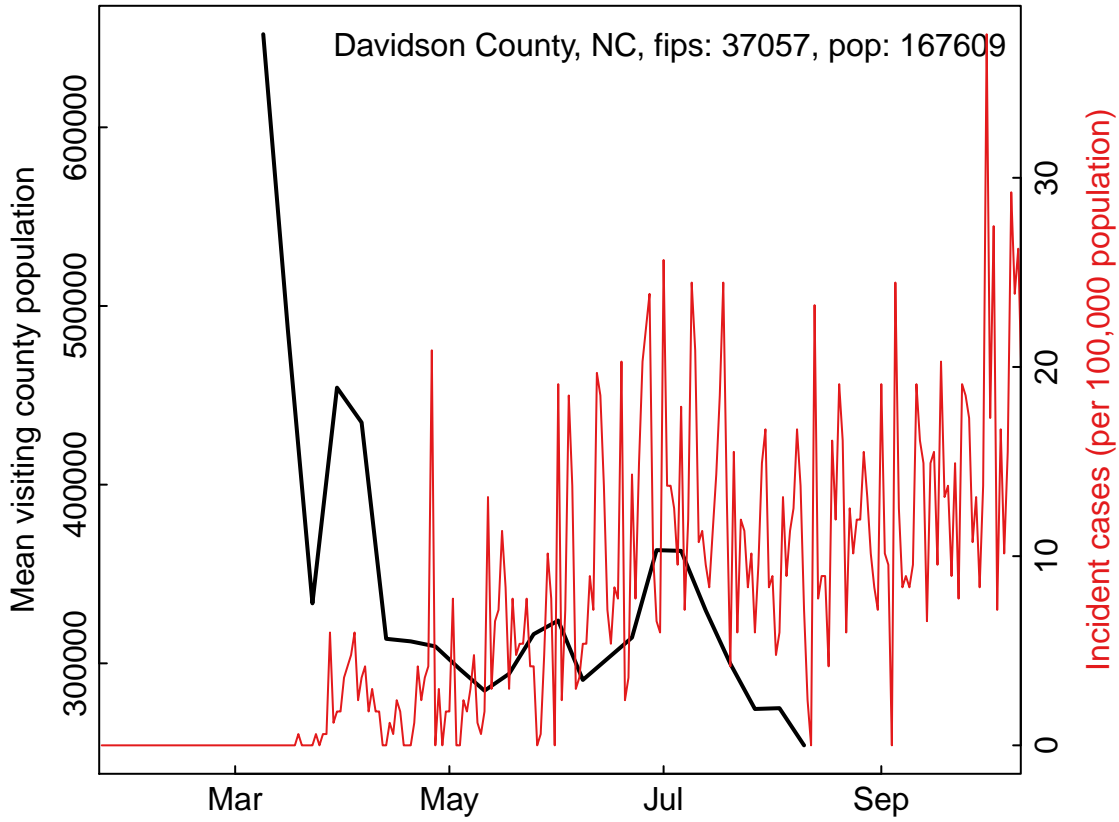

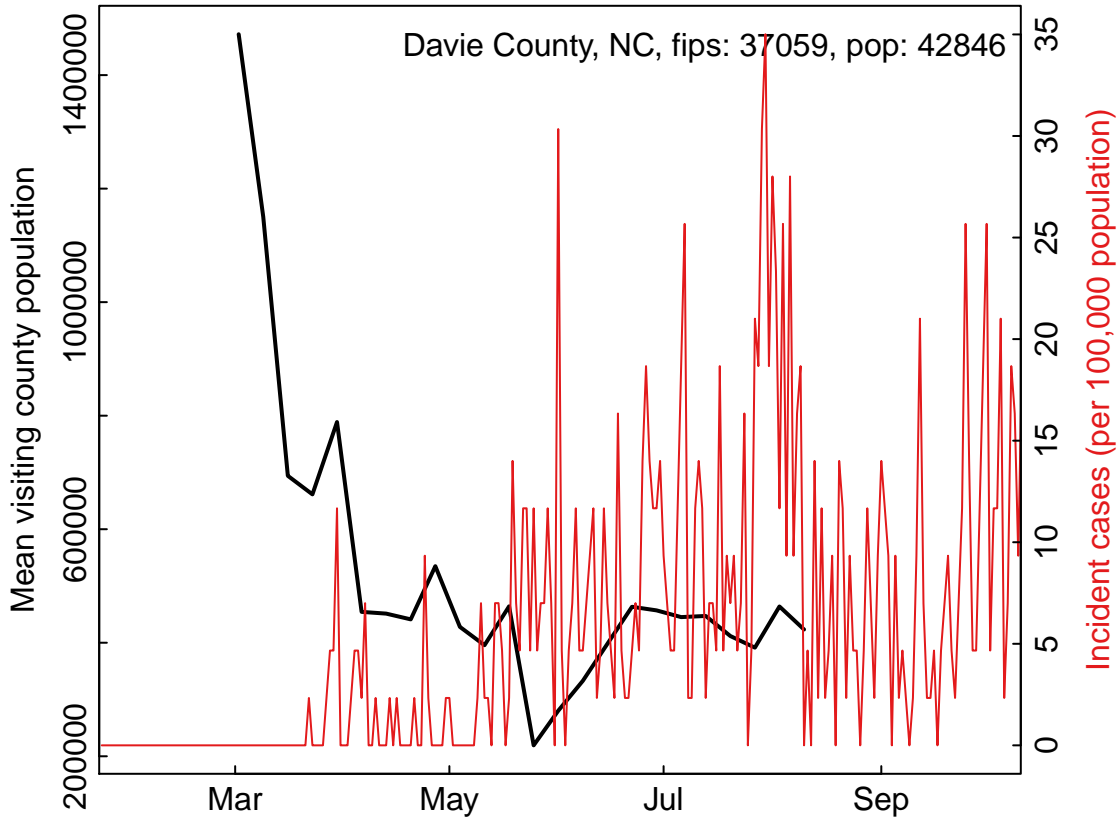

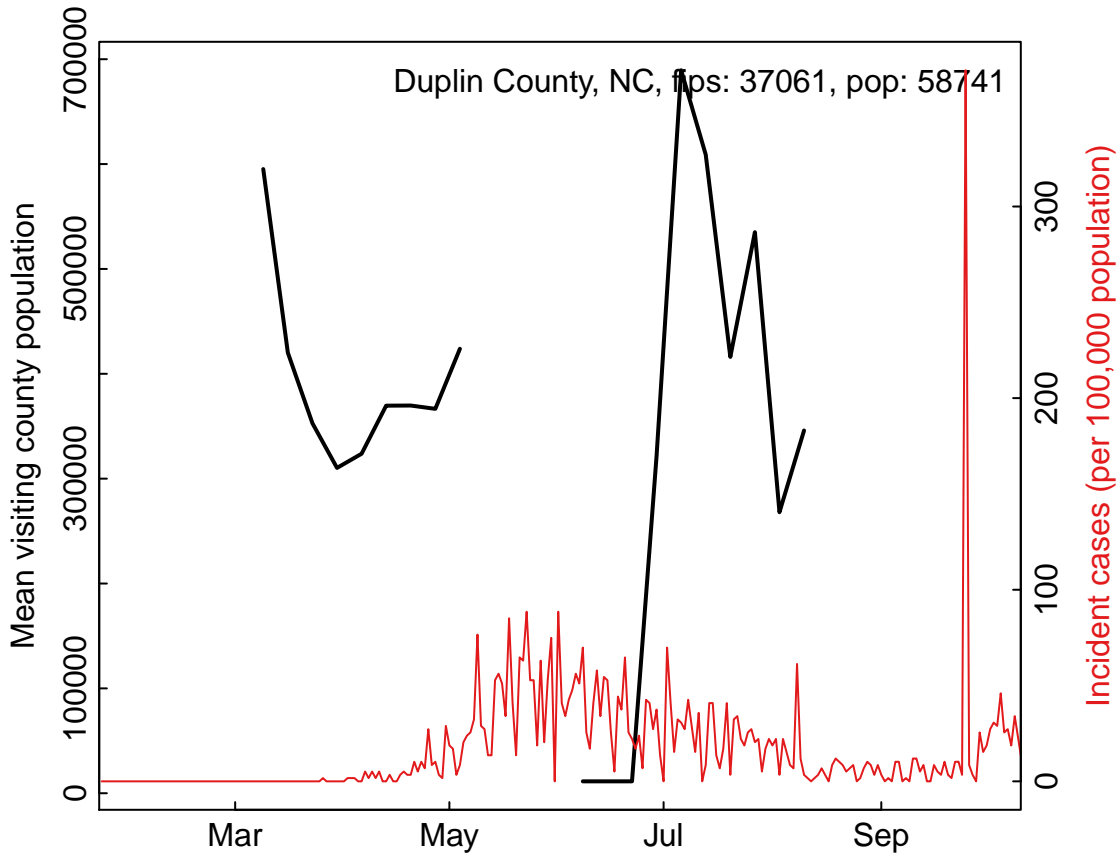

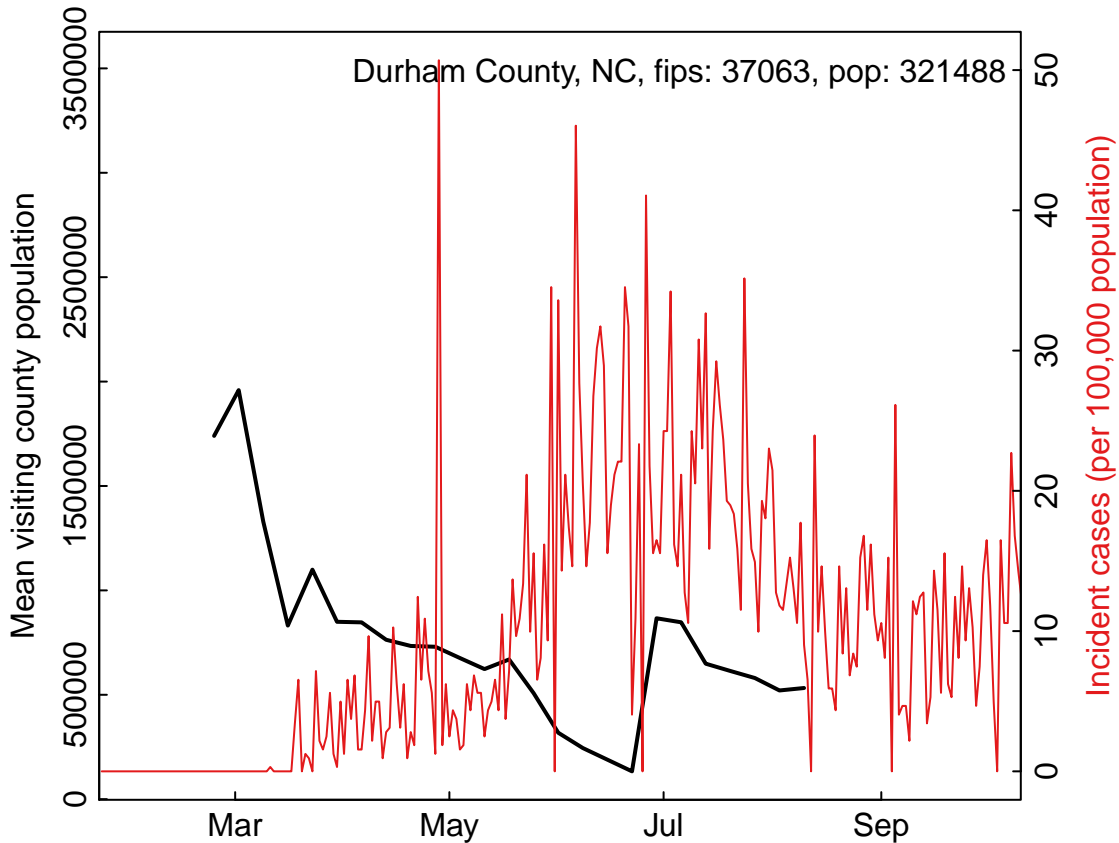

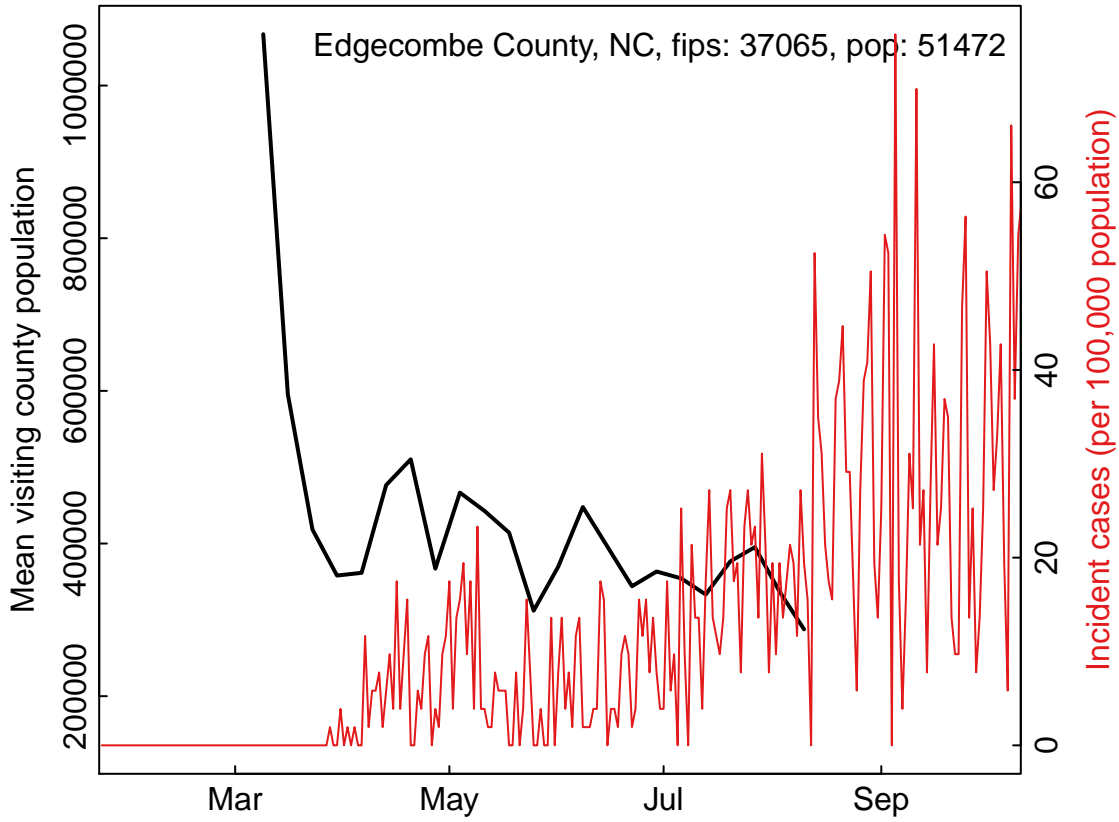

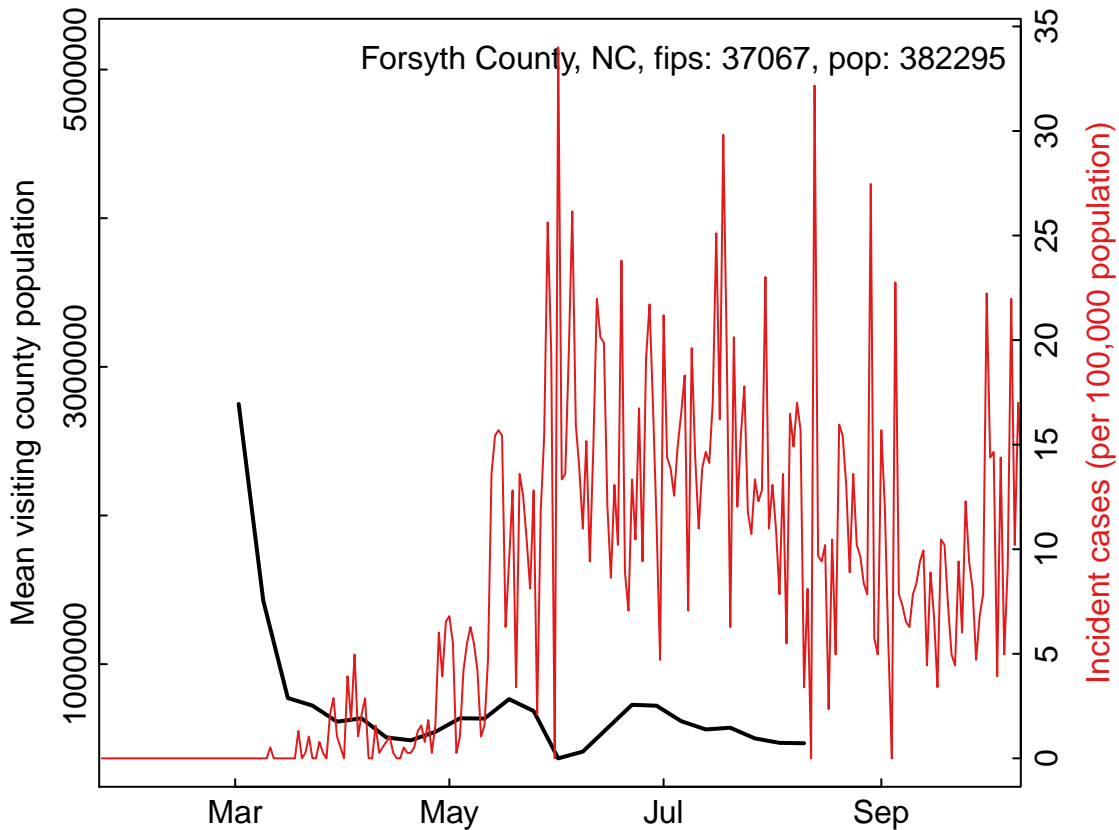



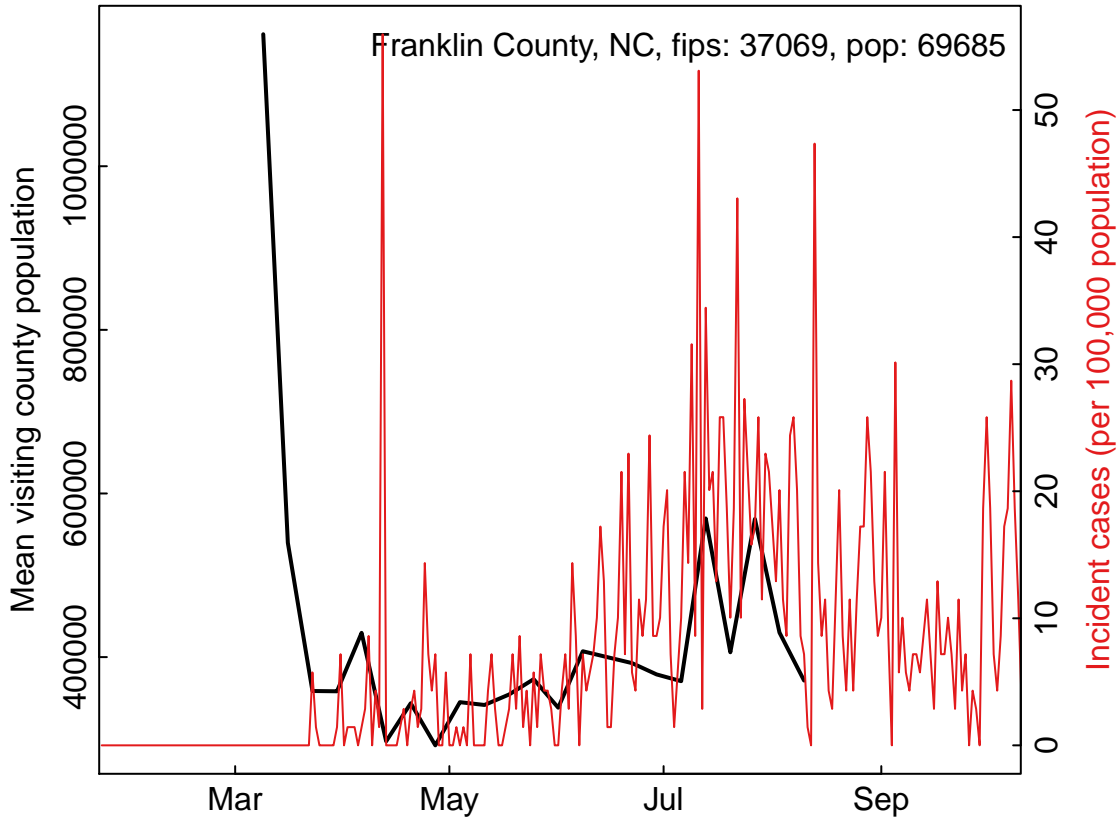

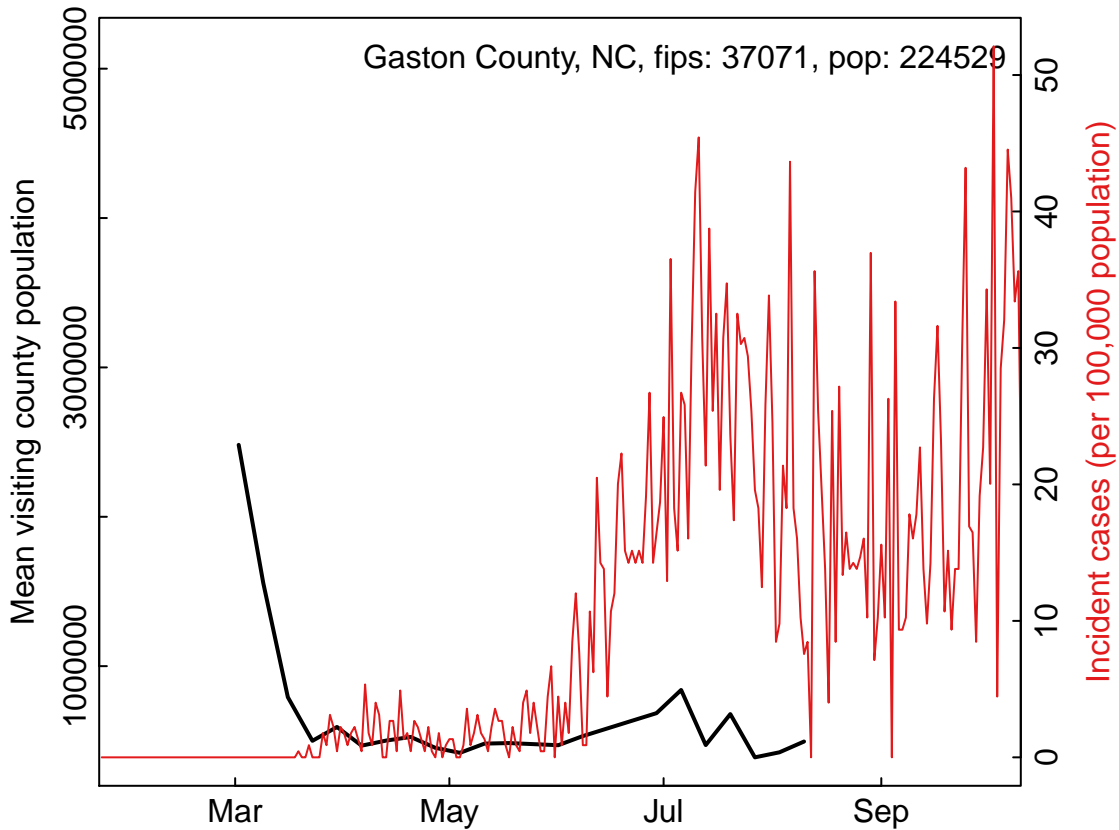

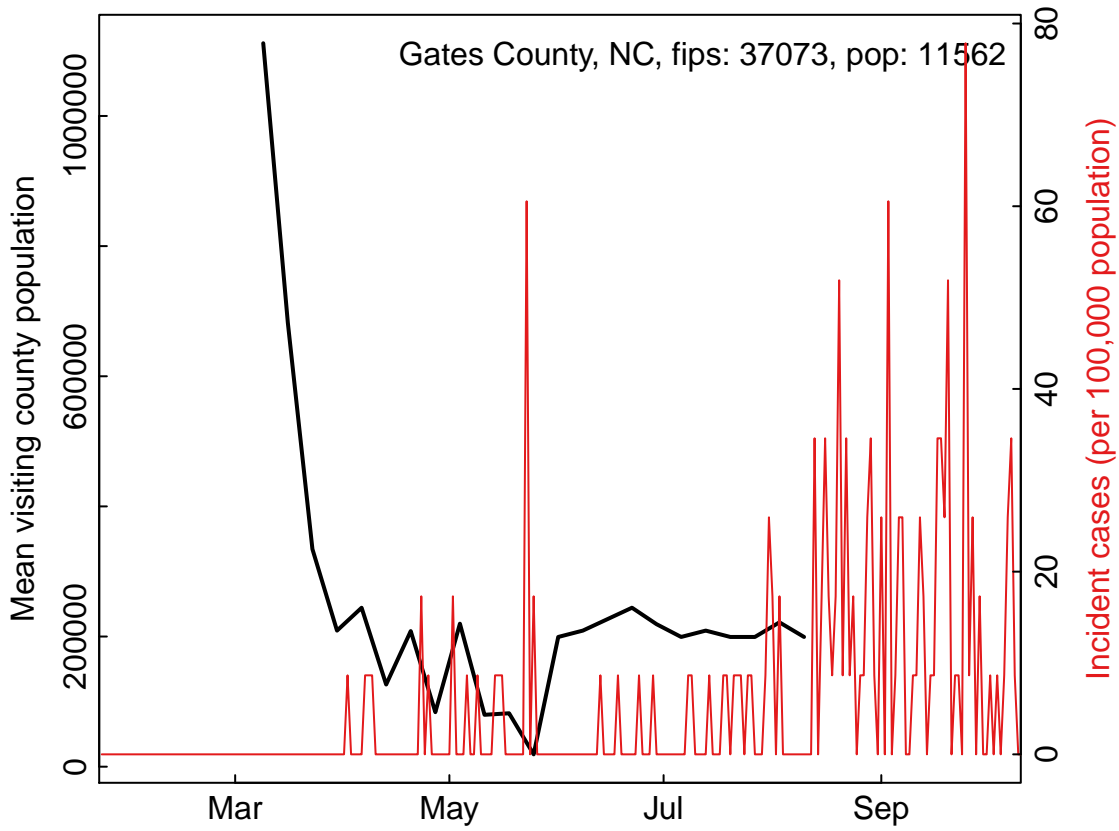

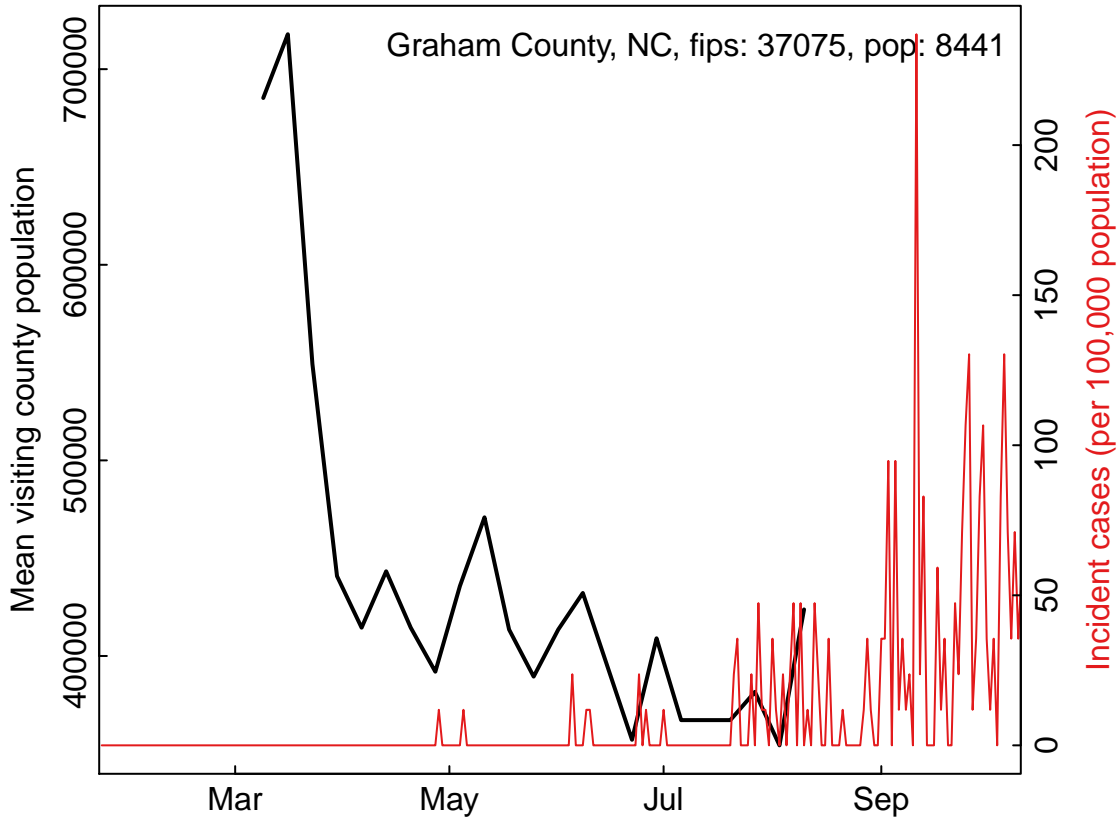

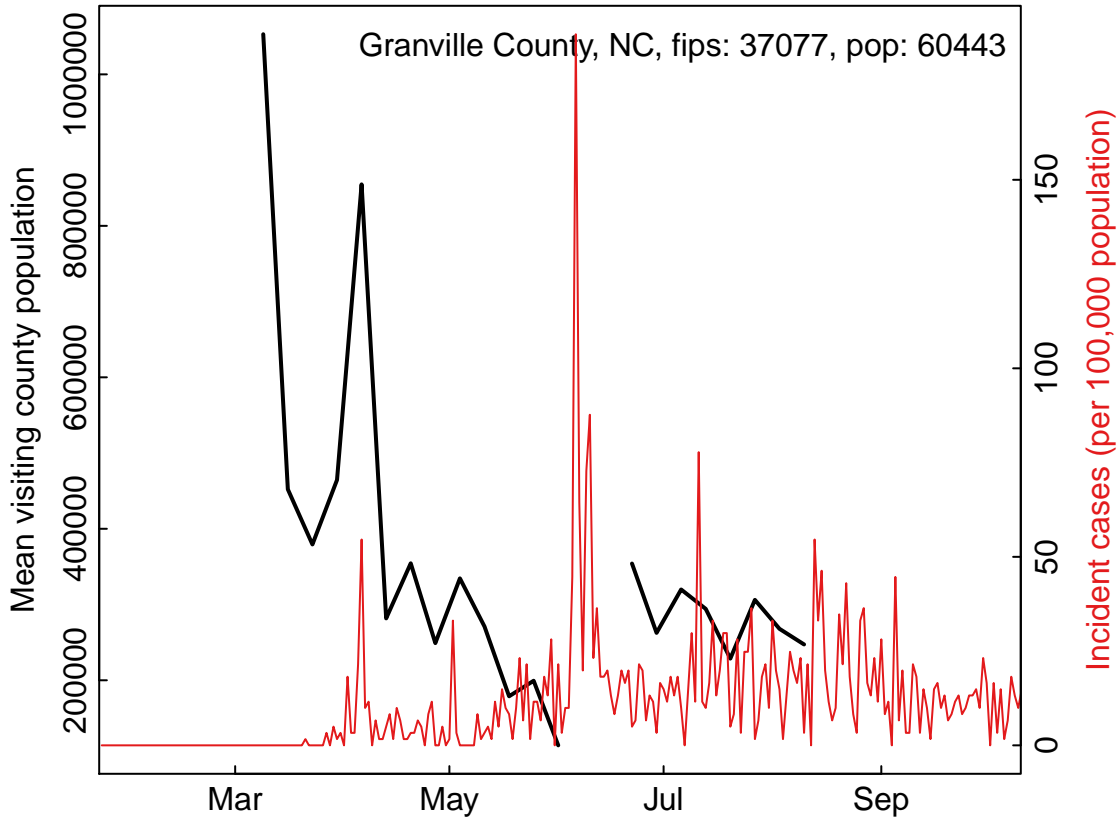

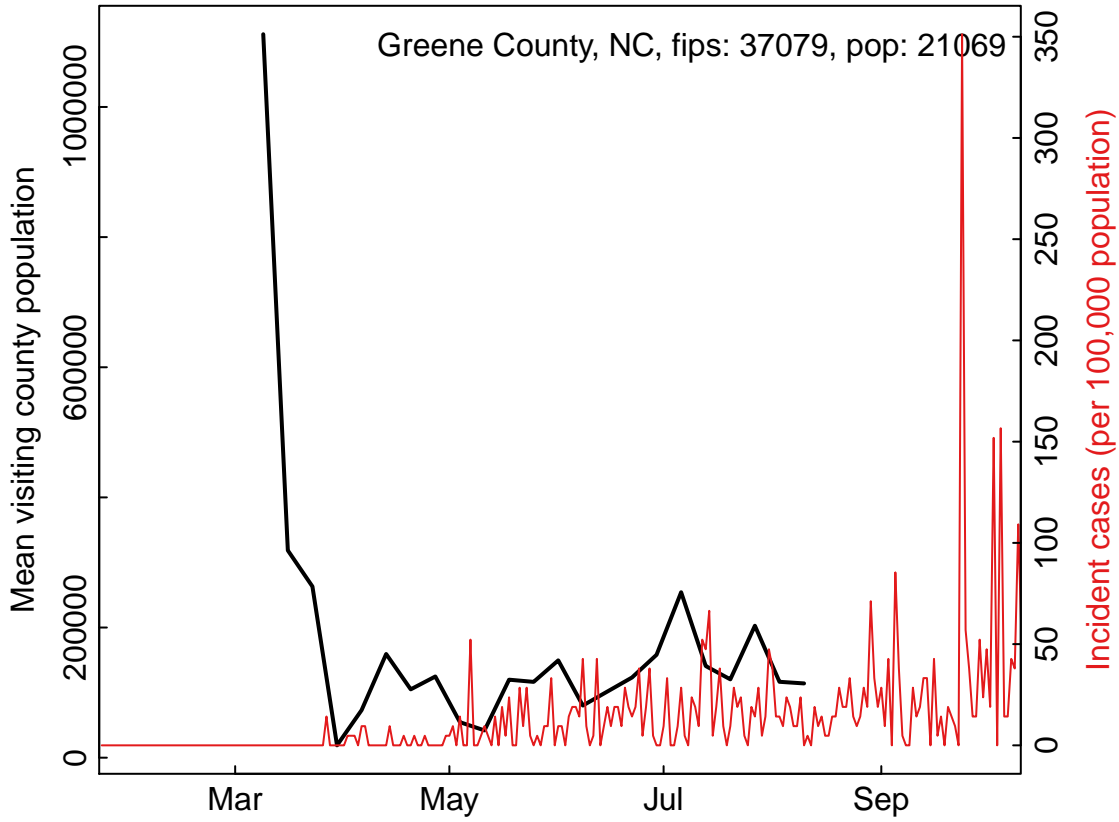

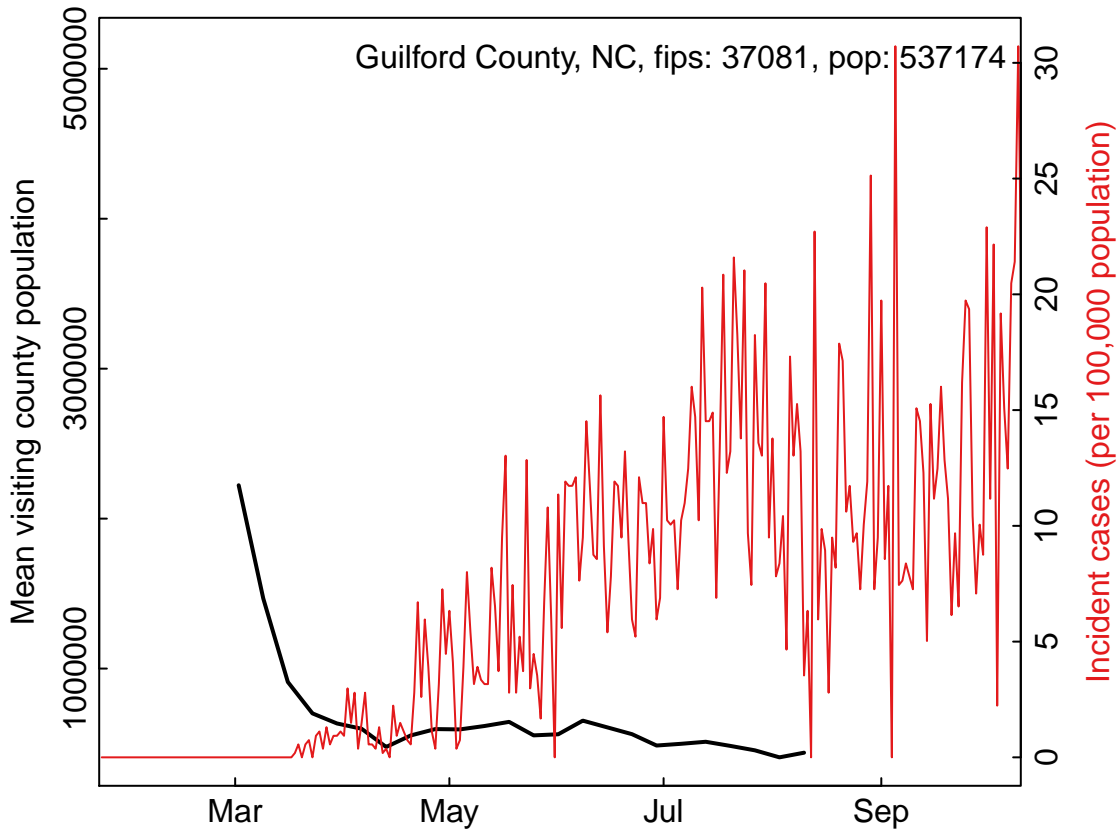

Halifax County, NC, fips: 37083, pop: 50010

Mean visiting county population

2500000  
1500000  
500000

Mar

May

Jul

Sep

80  
60  
40  
20  
0

Incident cases (per 100,000 population)

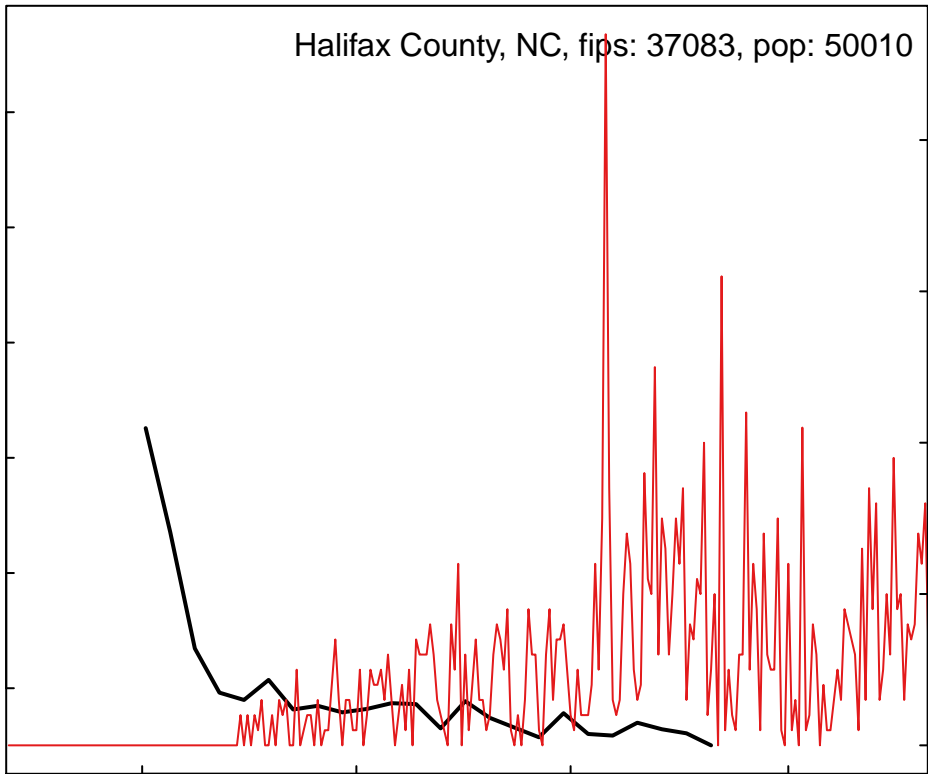



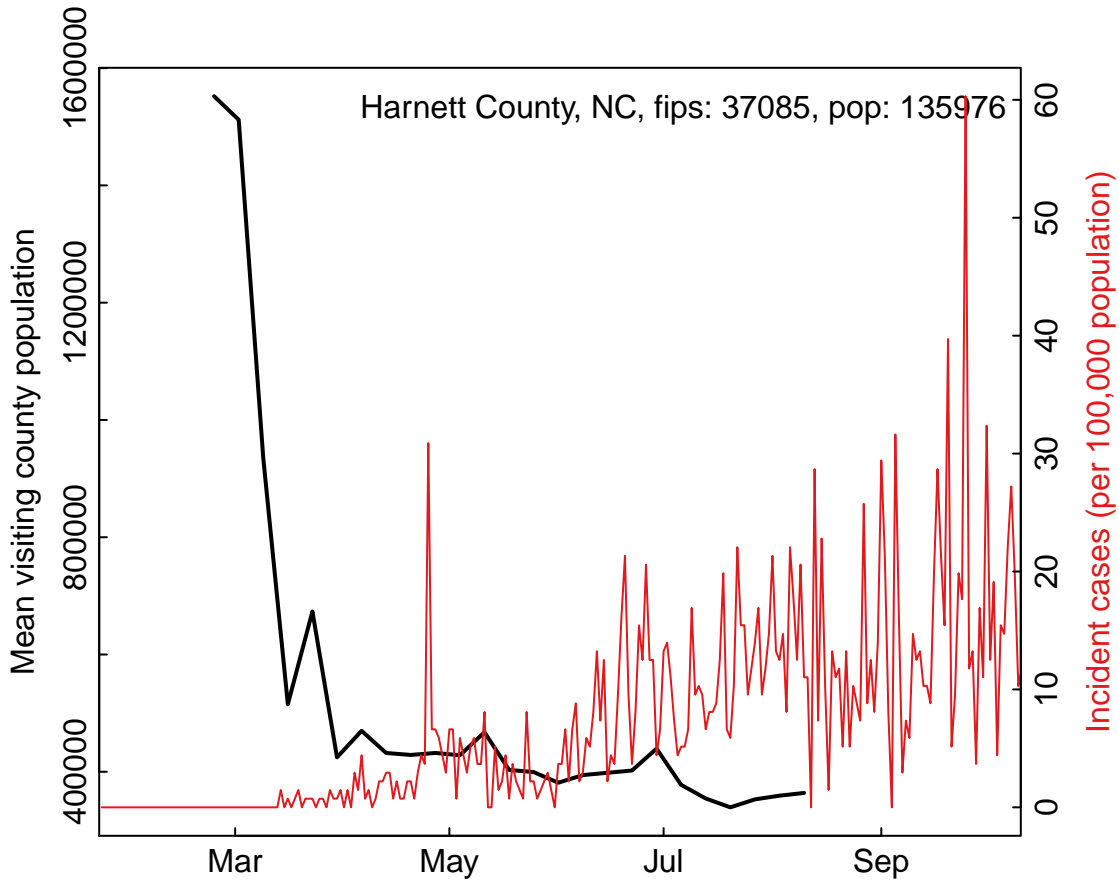

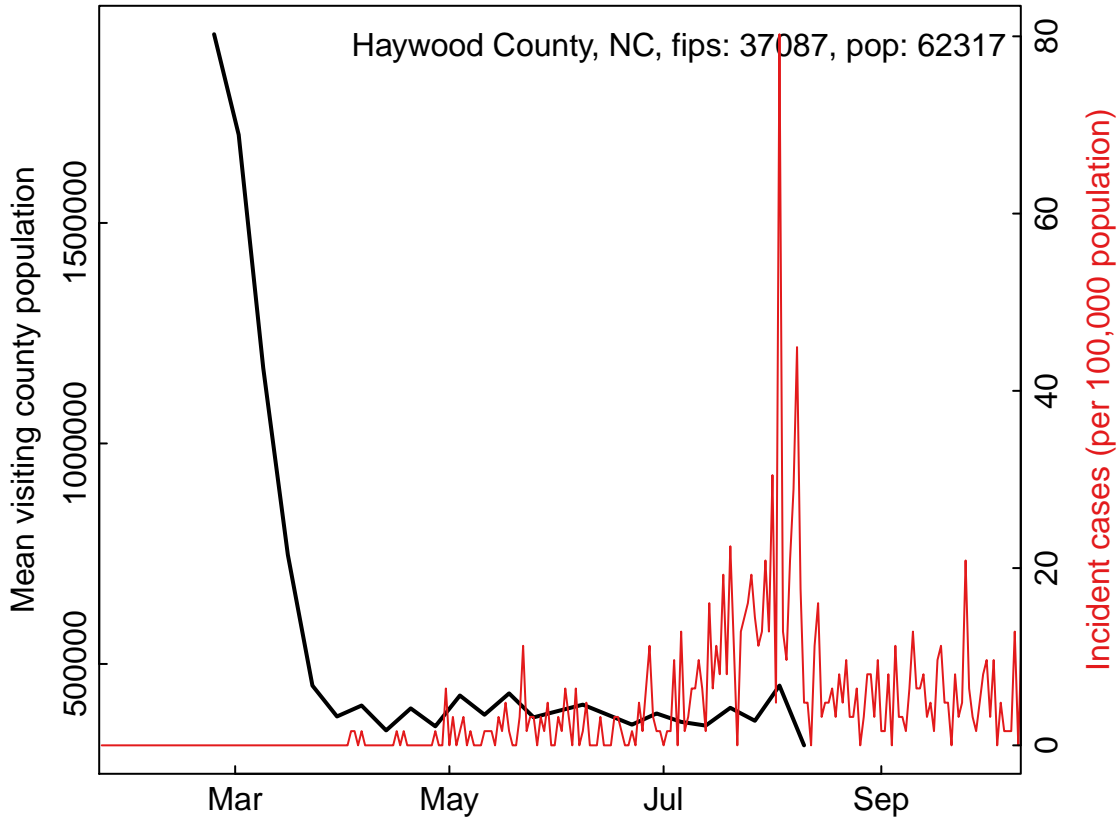

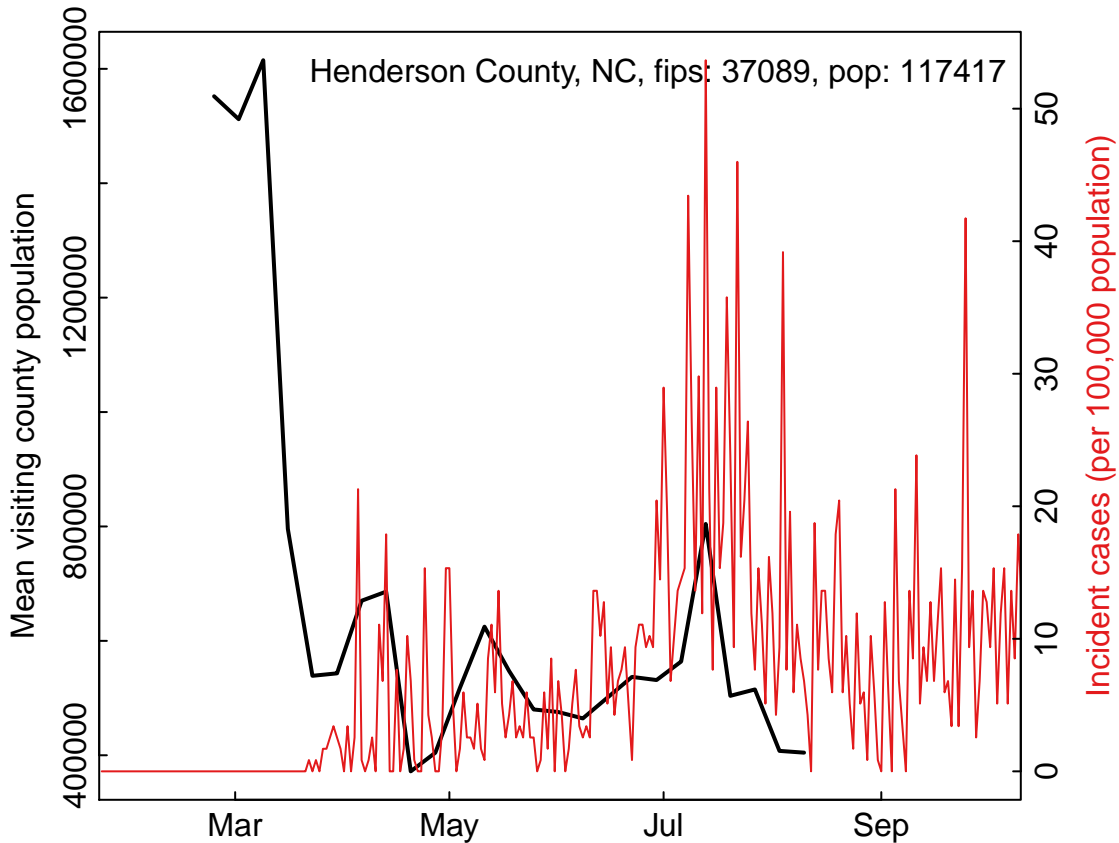

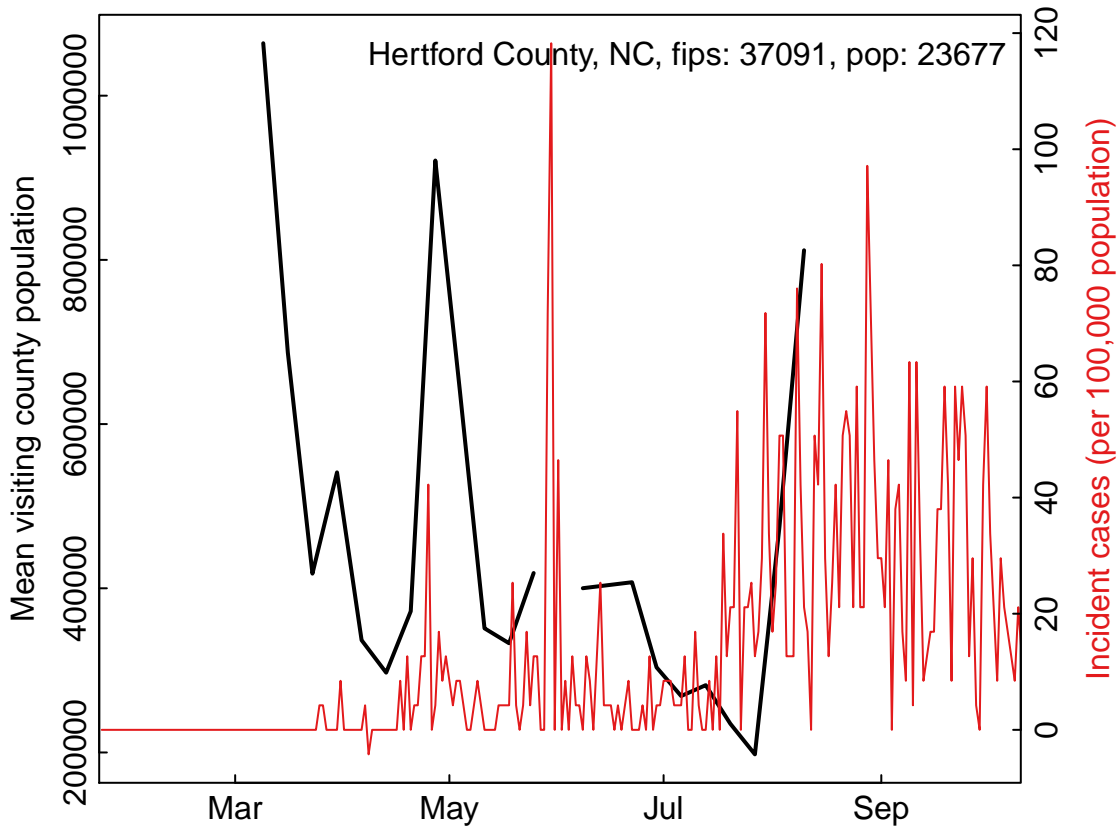

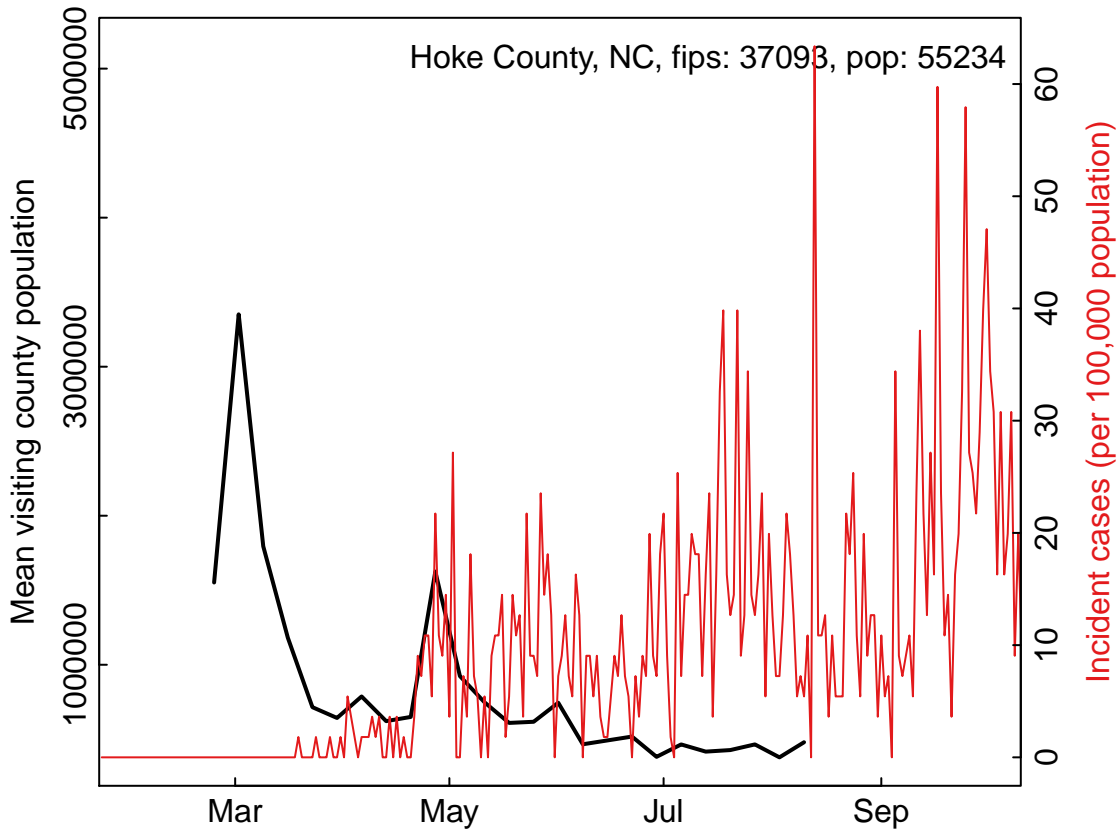

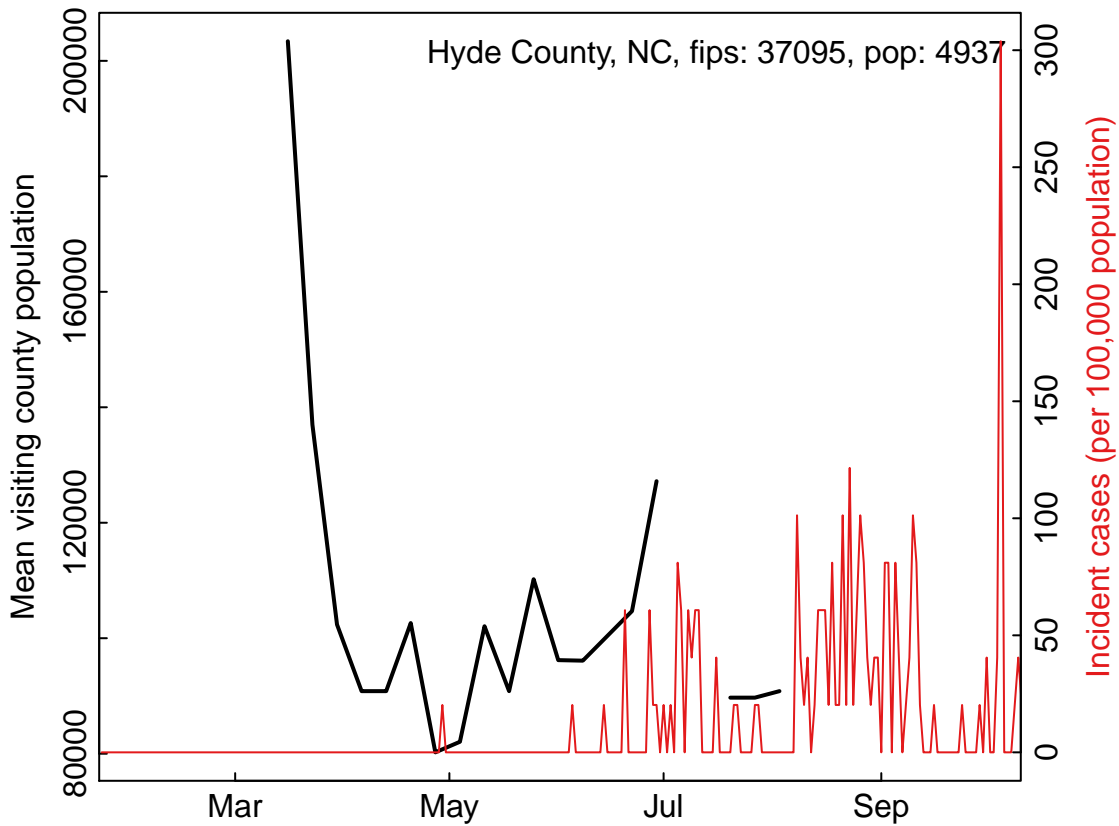

Iredell County, NC, fips: 37097, pop: 181806

Mean visiting county population

500000  
1500000  
2500000

Mar

May

Jul

Sep

0  
50  
100  
150

Incident cases (per 100,000 population)

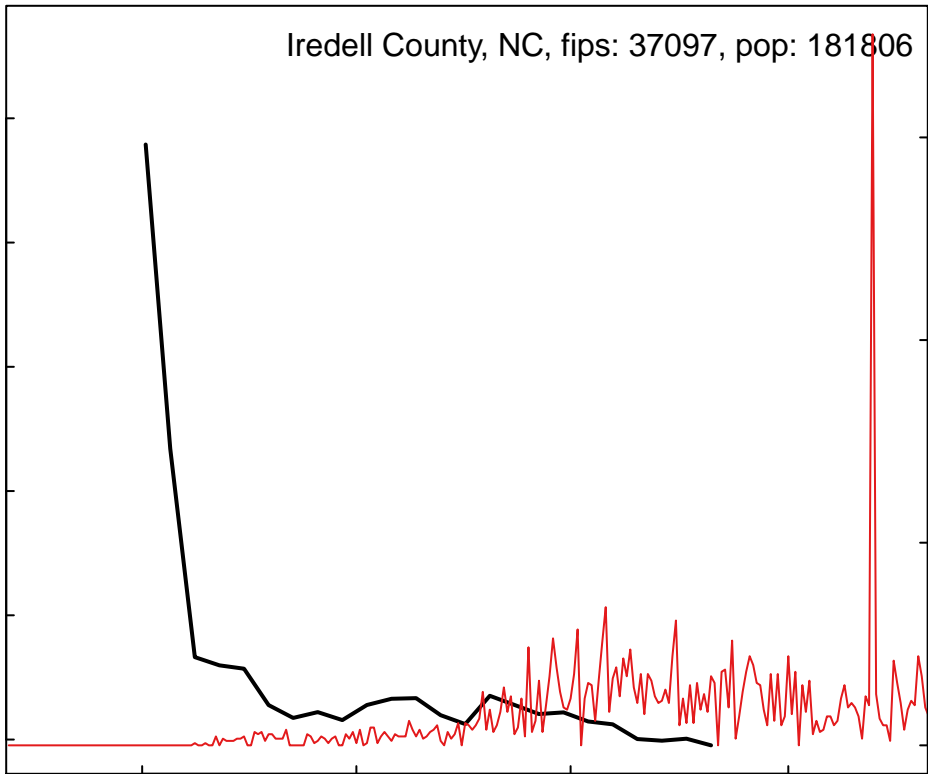

Jackson County, NC, fips: 37099, pop: 43938

Mean visiting county population

1200000  
800000  
400000

Mar

May

Jul

Sep

200  
150  
100  
50  
0

Incident cases (per 100,000 population)

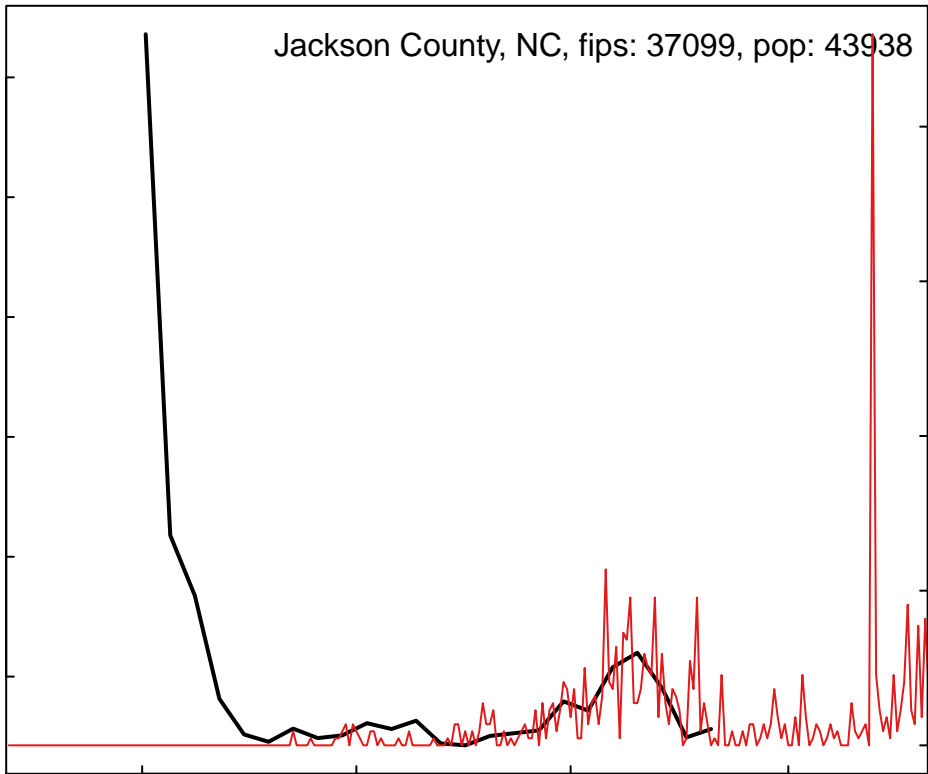



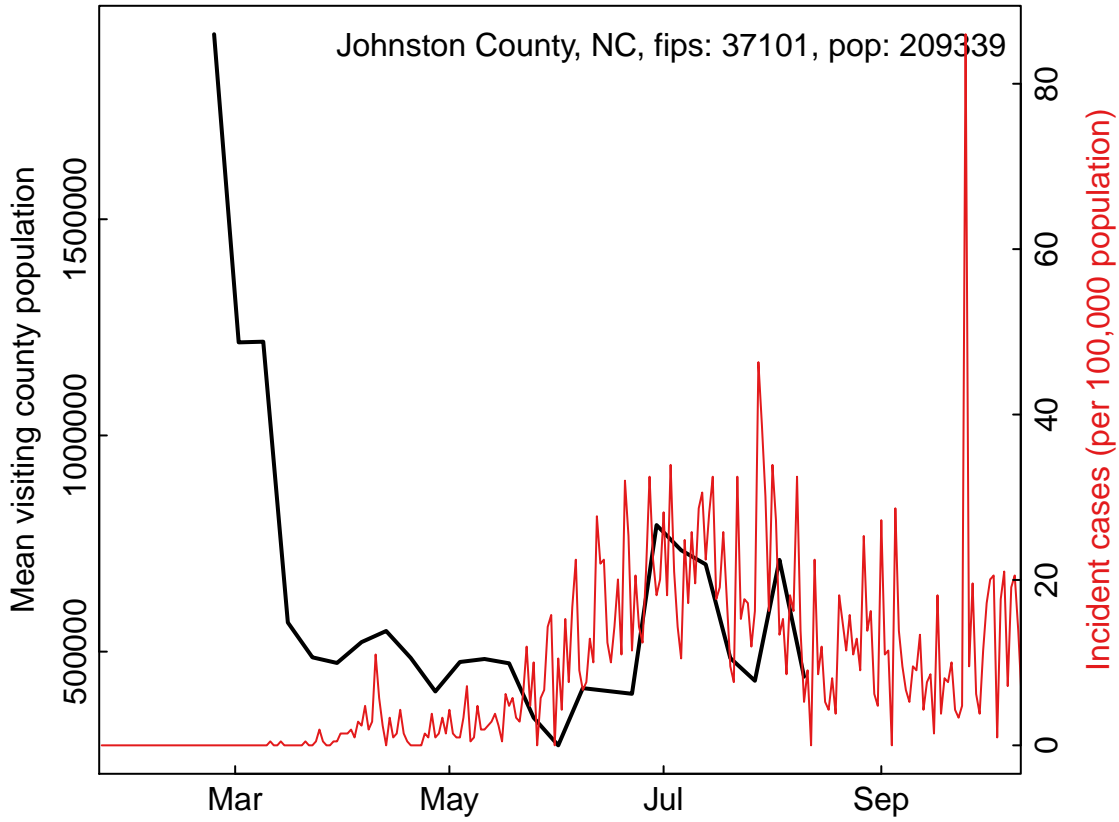

Jones County, NC, fips: 37103, pop: 9419

Mean visiting county population

Incident cases (per 100,000 population)

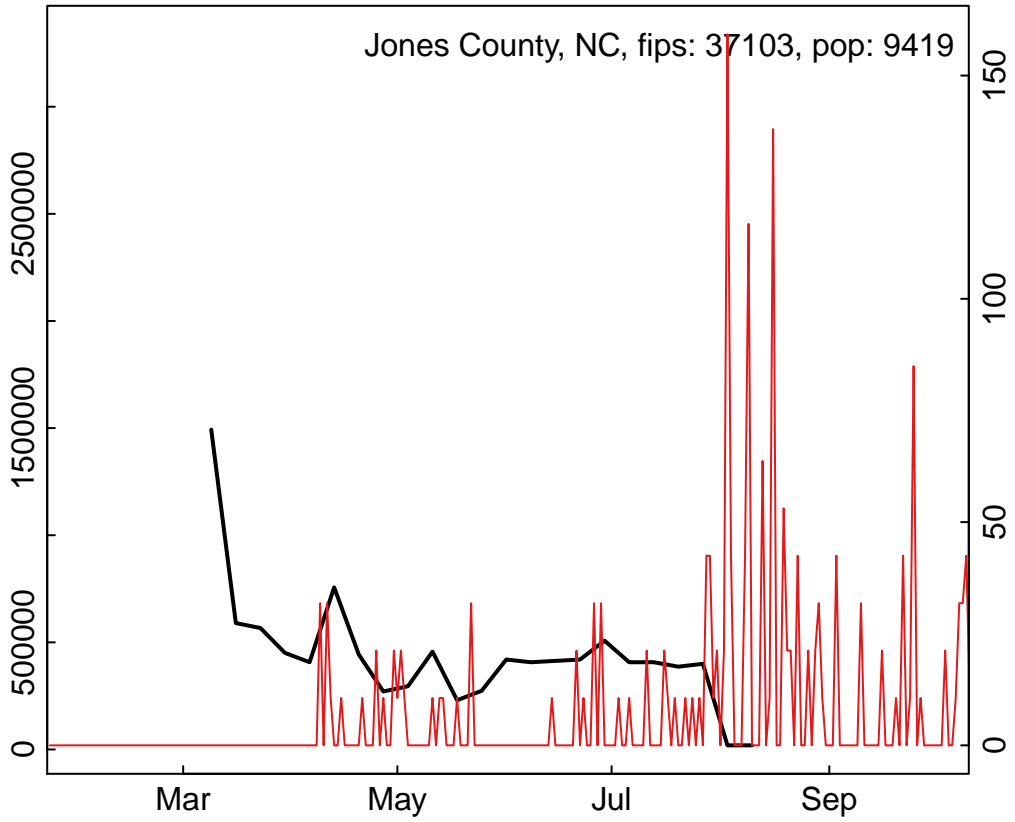

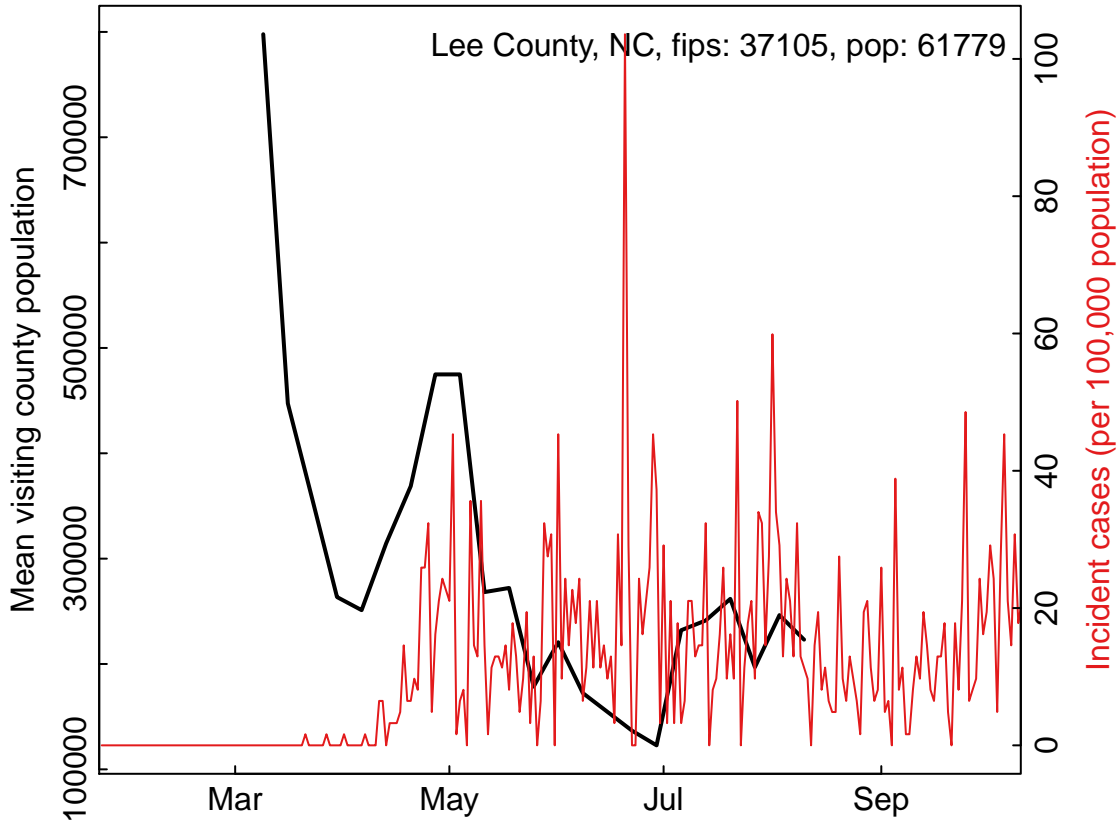

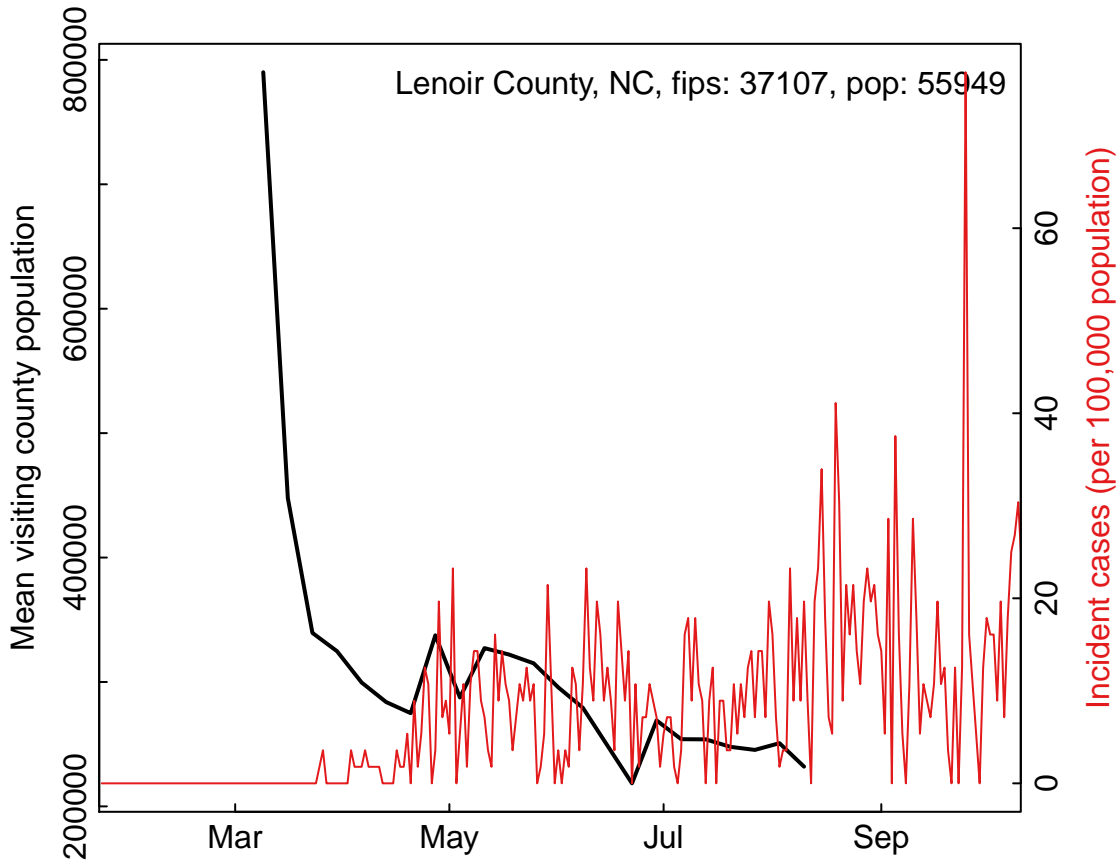

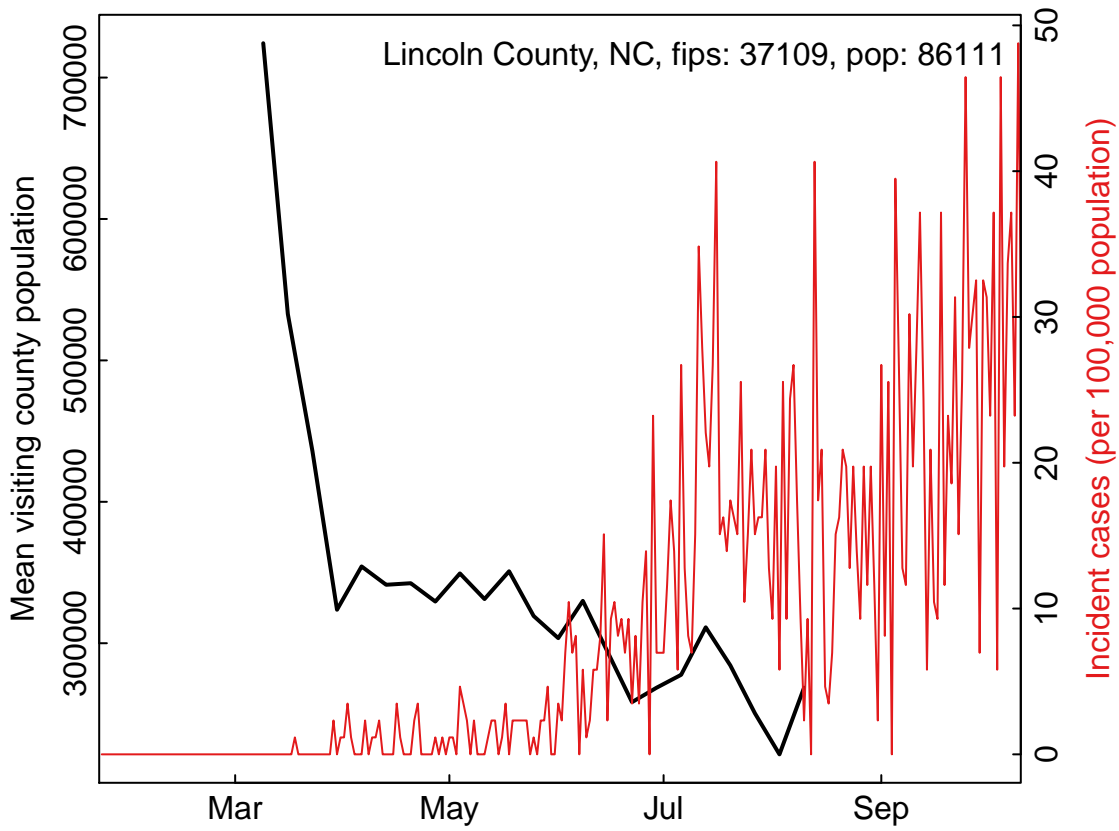

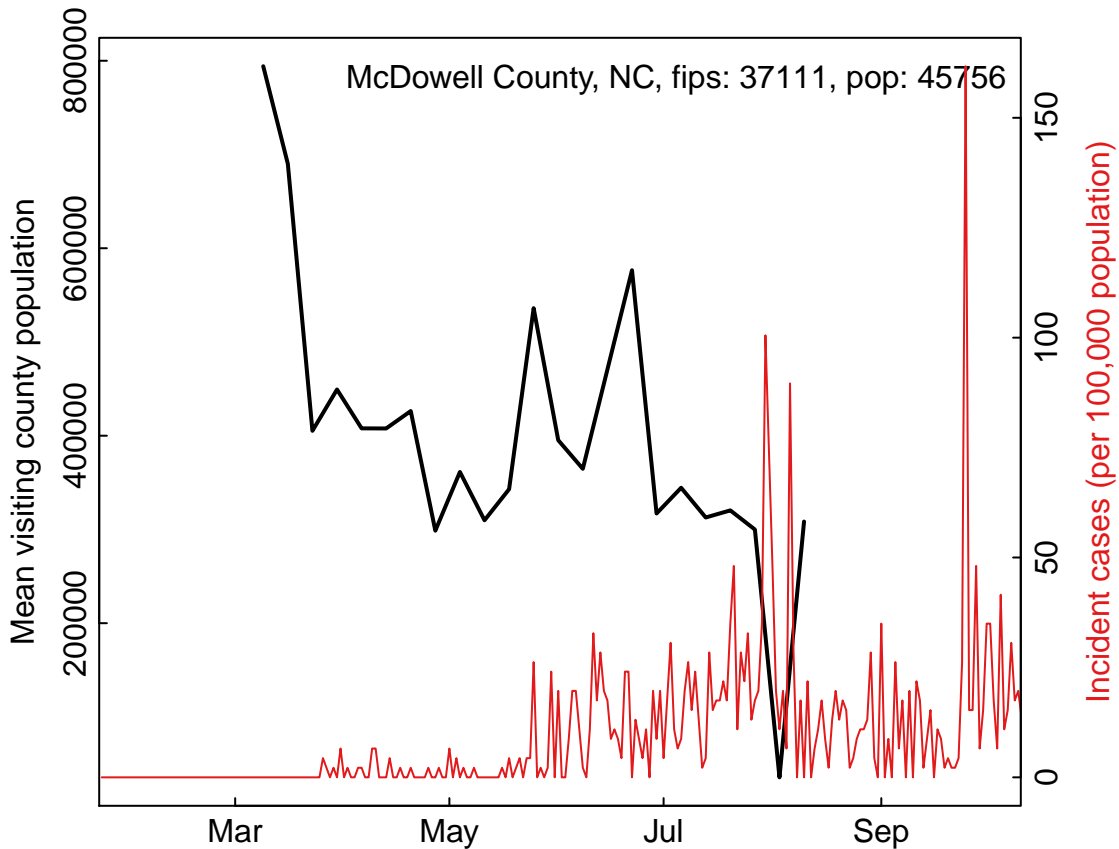

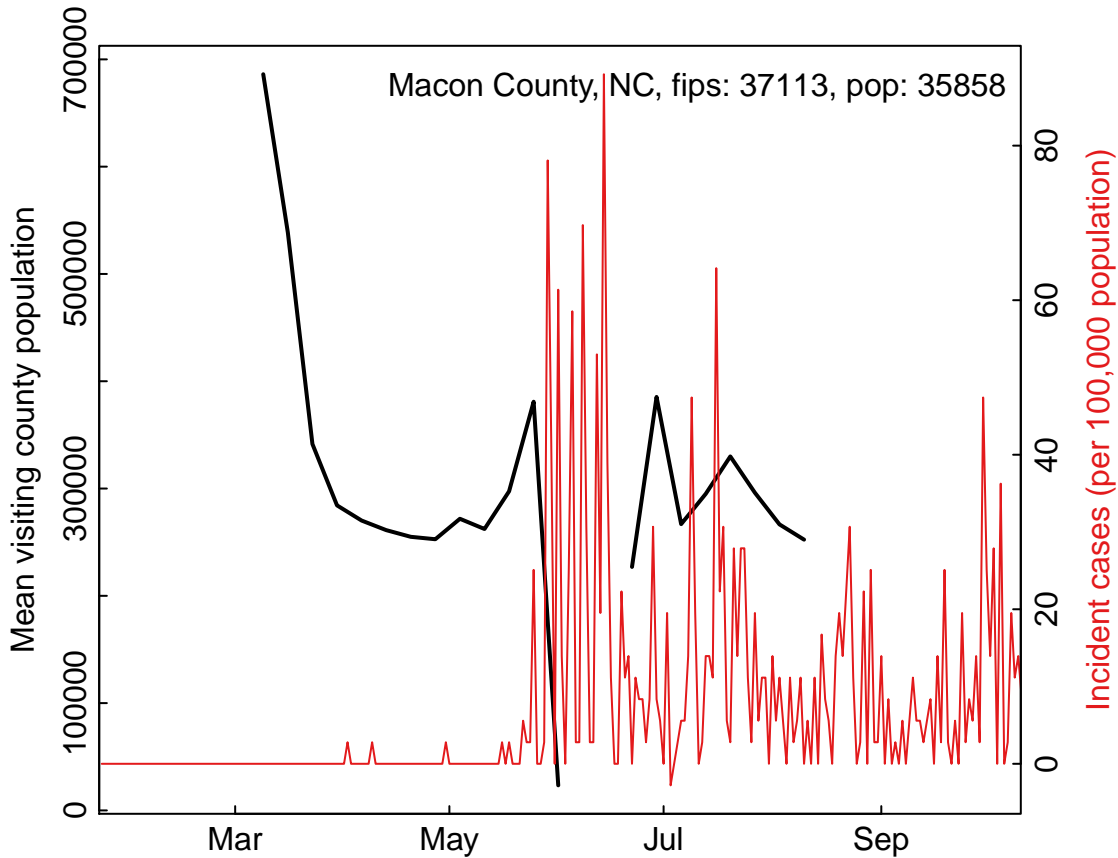

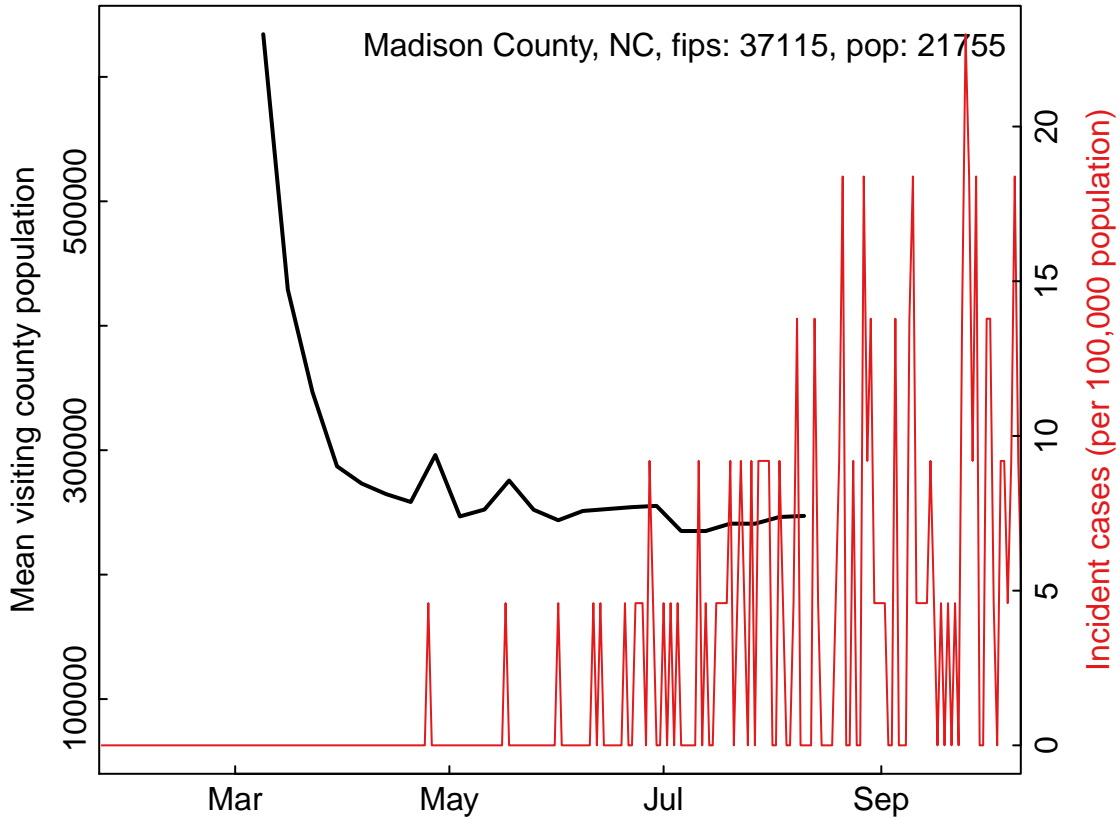



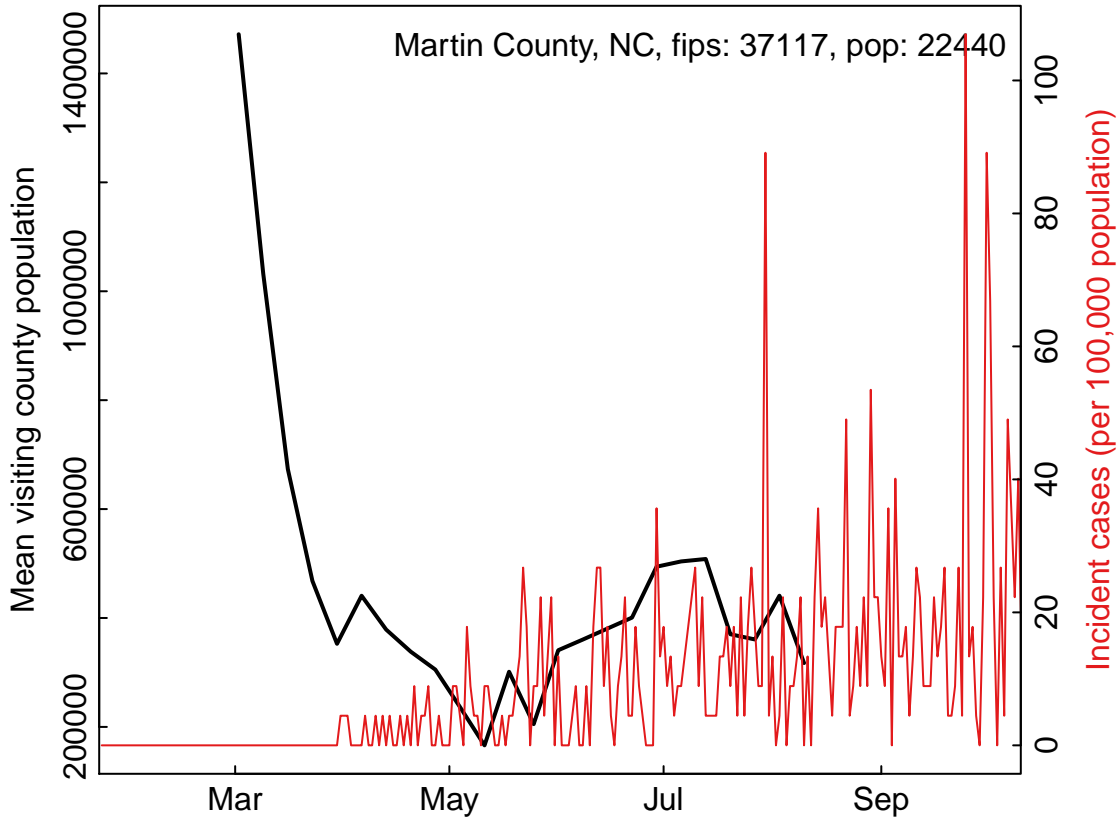

Mecklenburg County, NC, fips: 37119, pop: 1110356

Mean visiting county population

Incident cases (per 100,000 population)

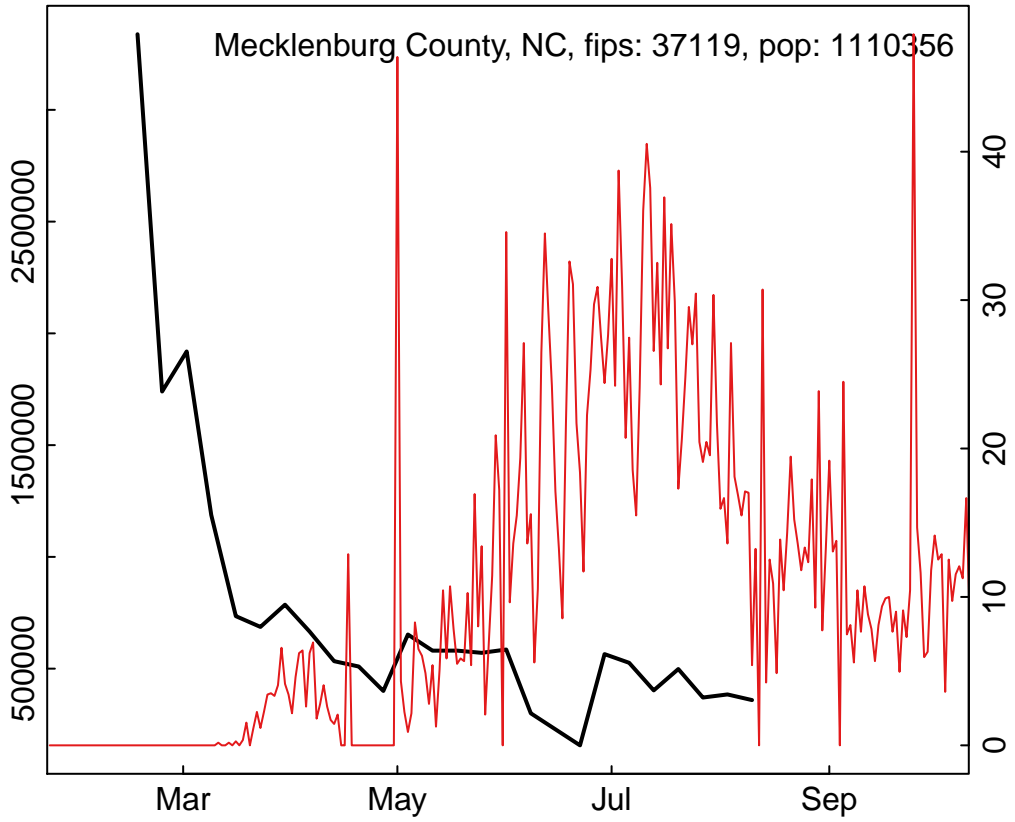

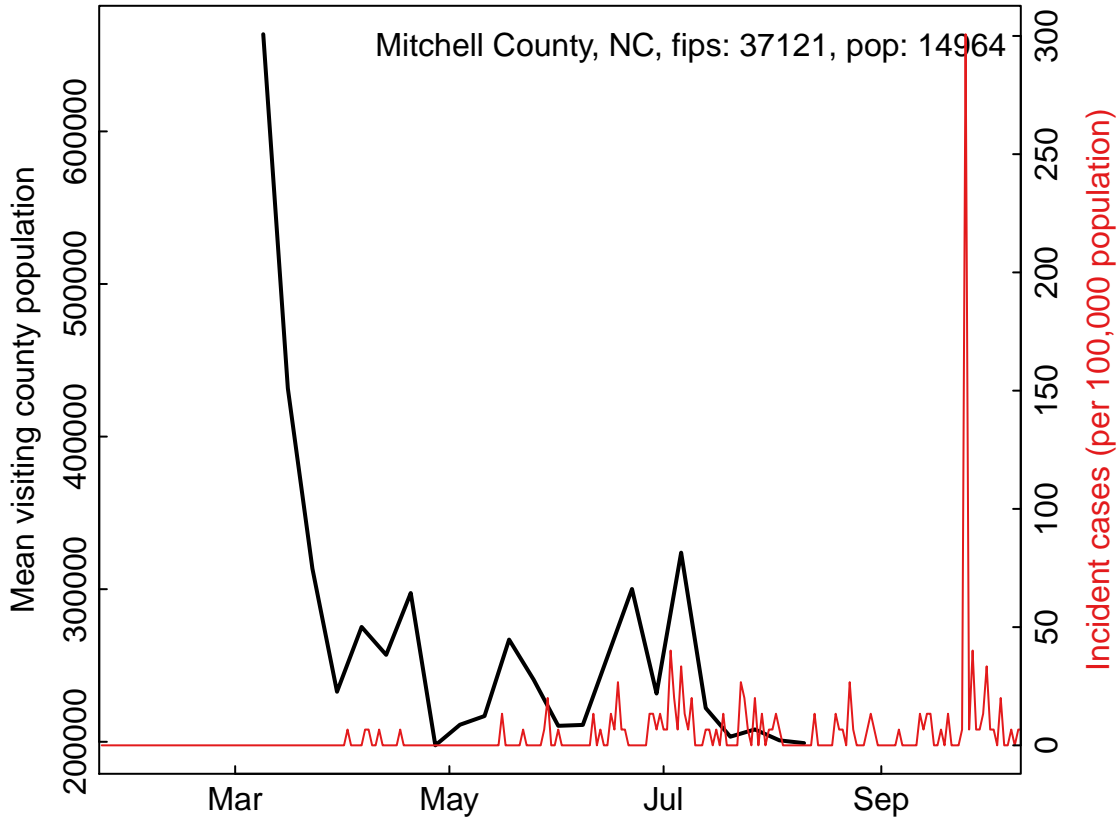

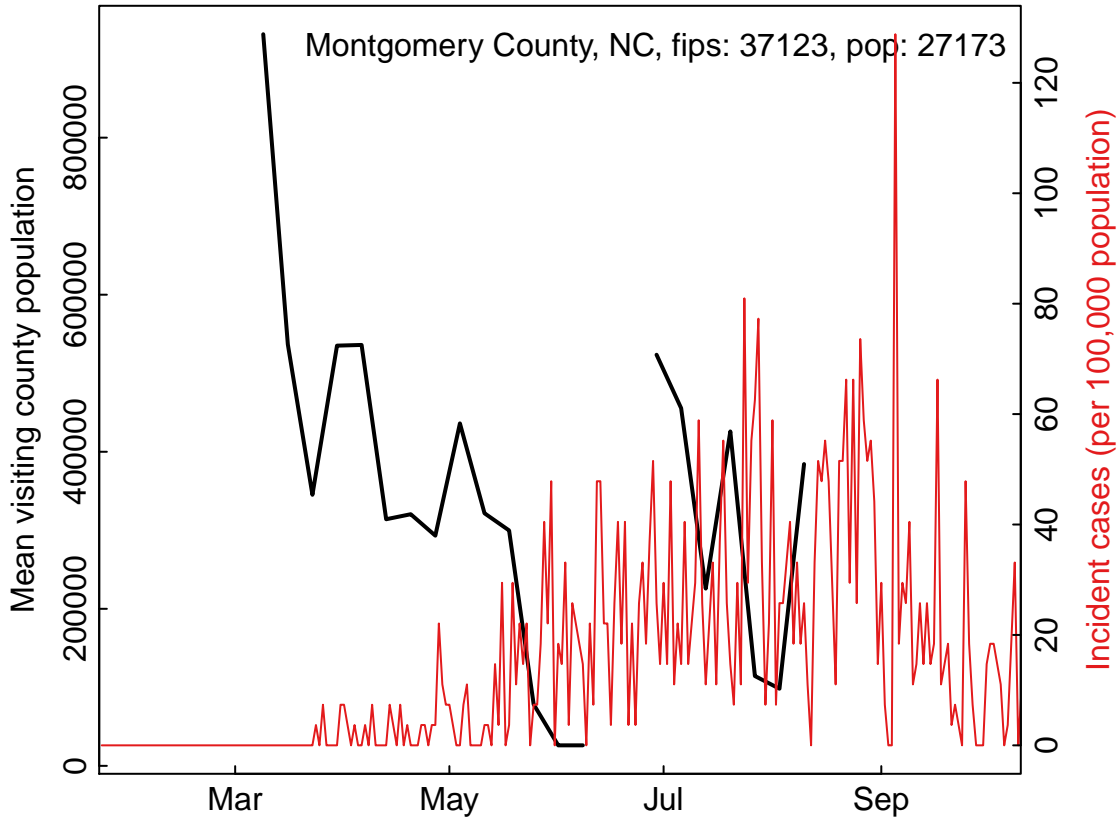

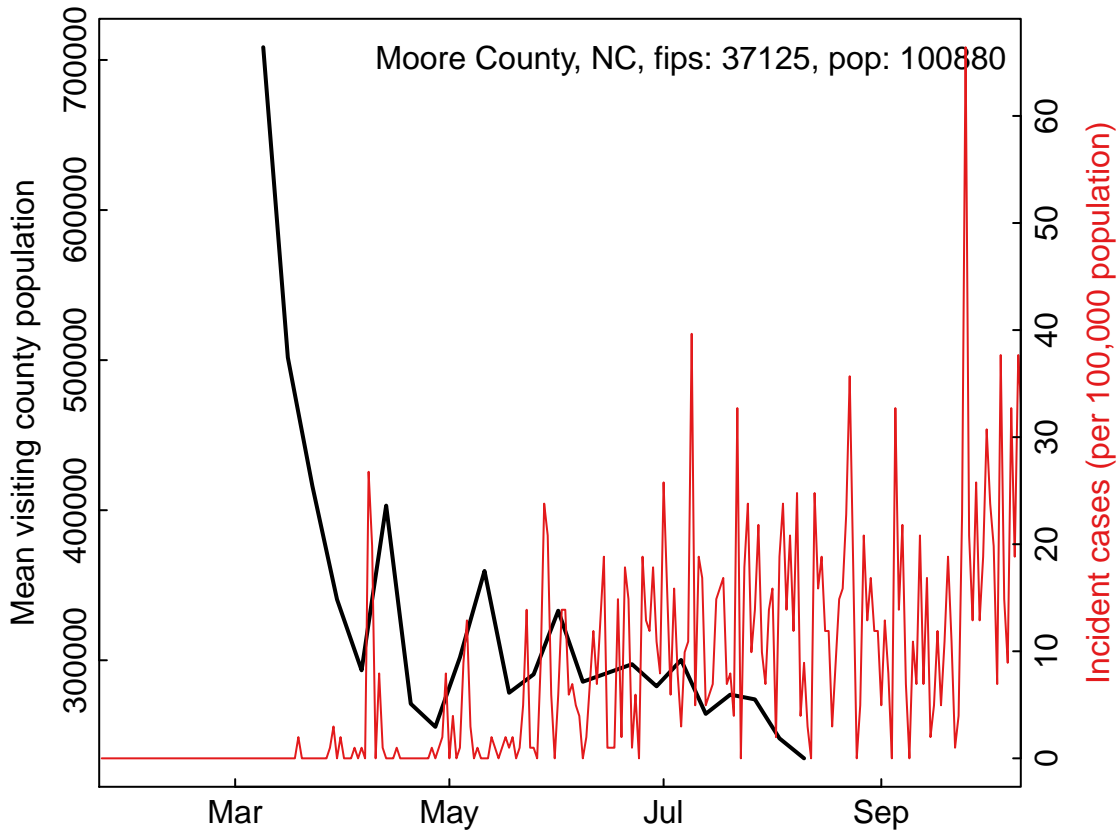

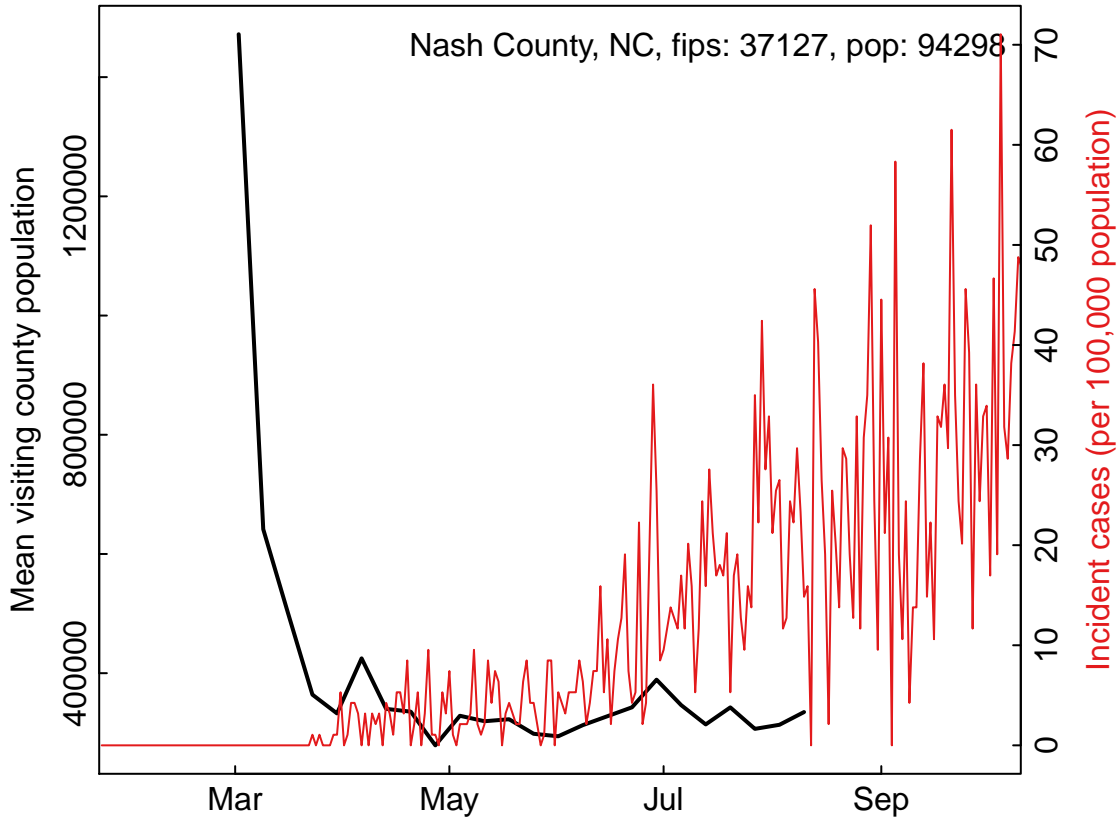

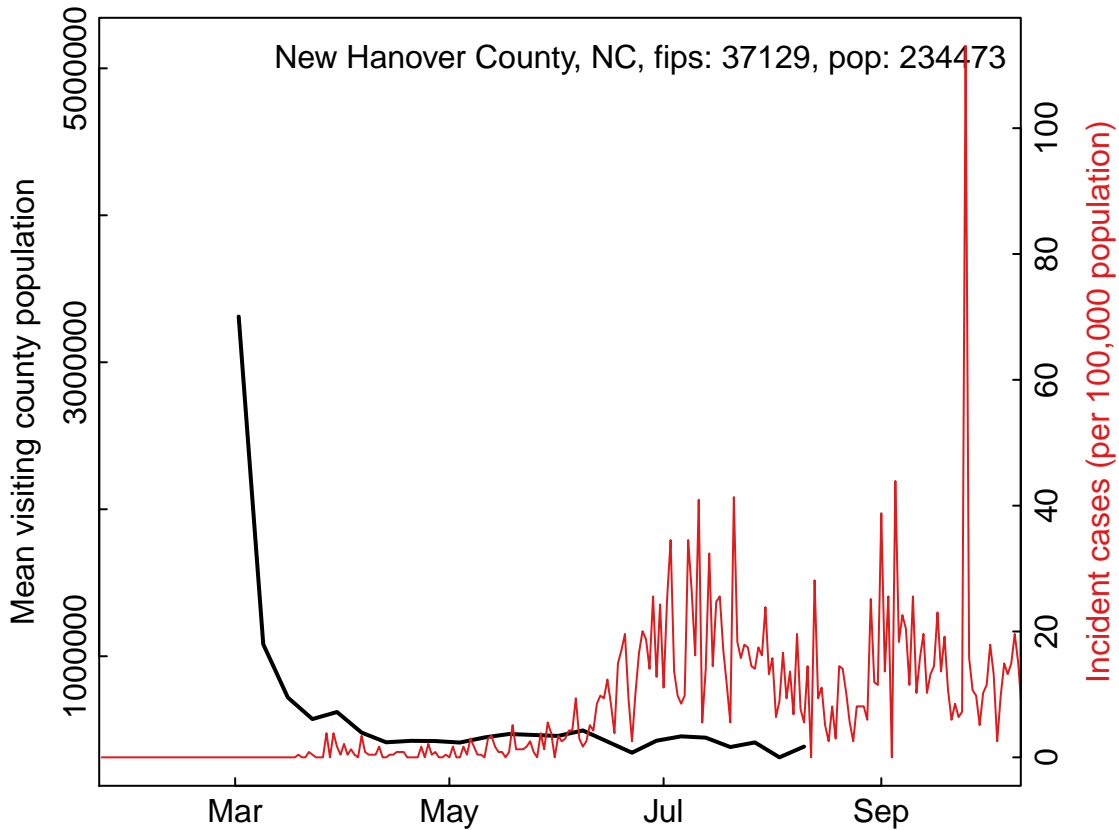

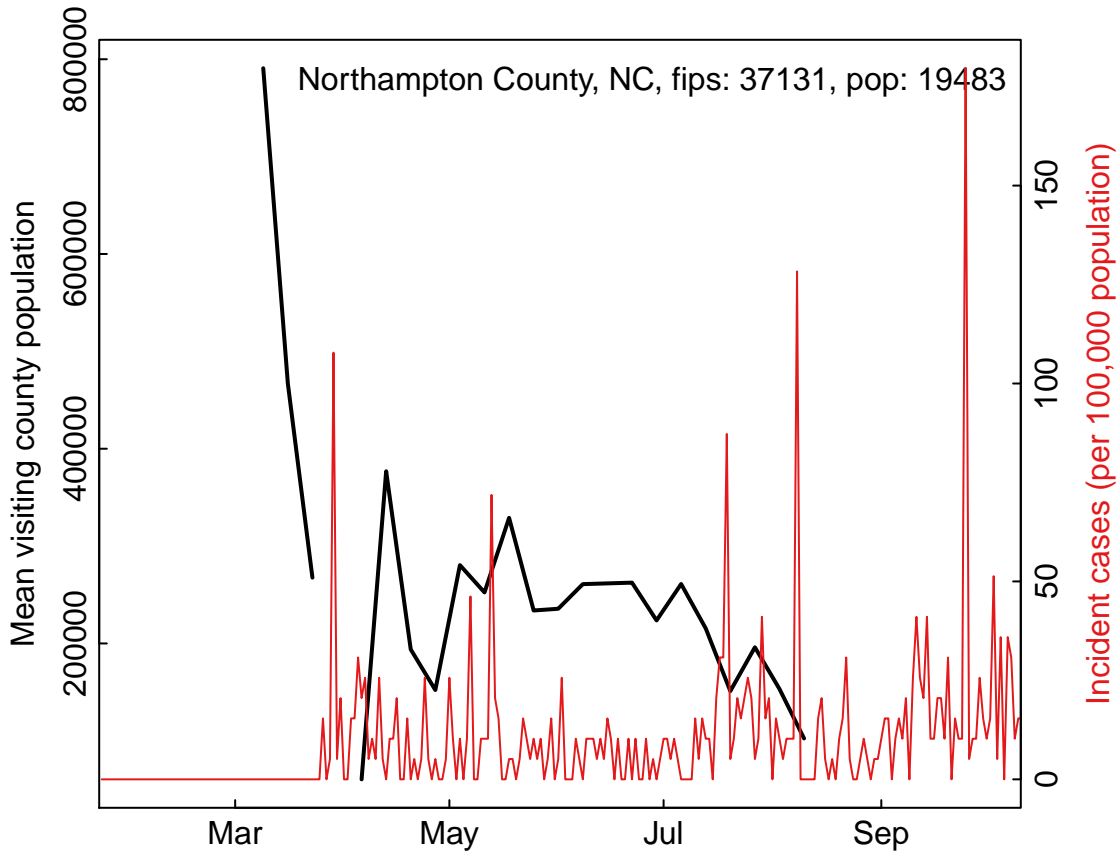



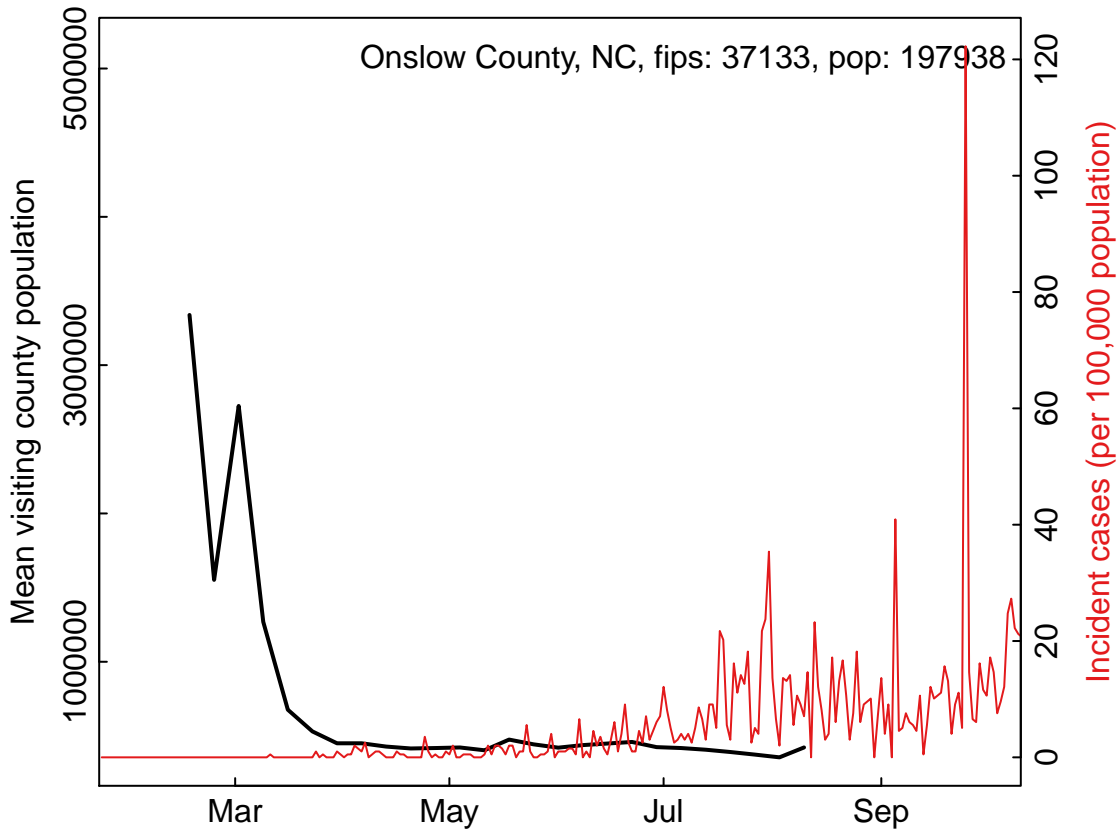

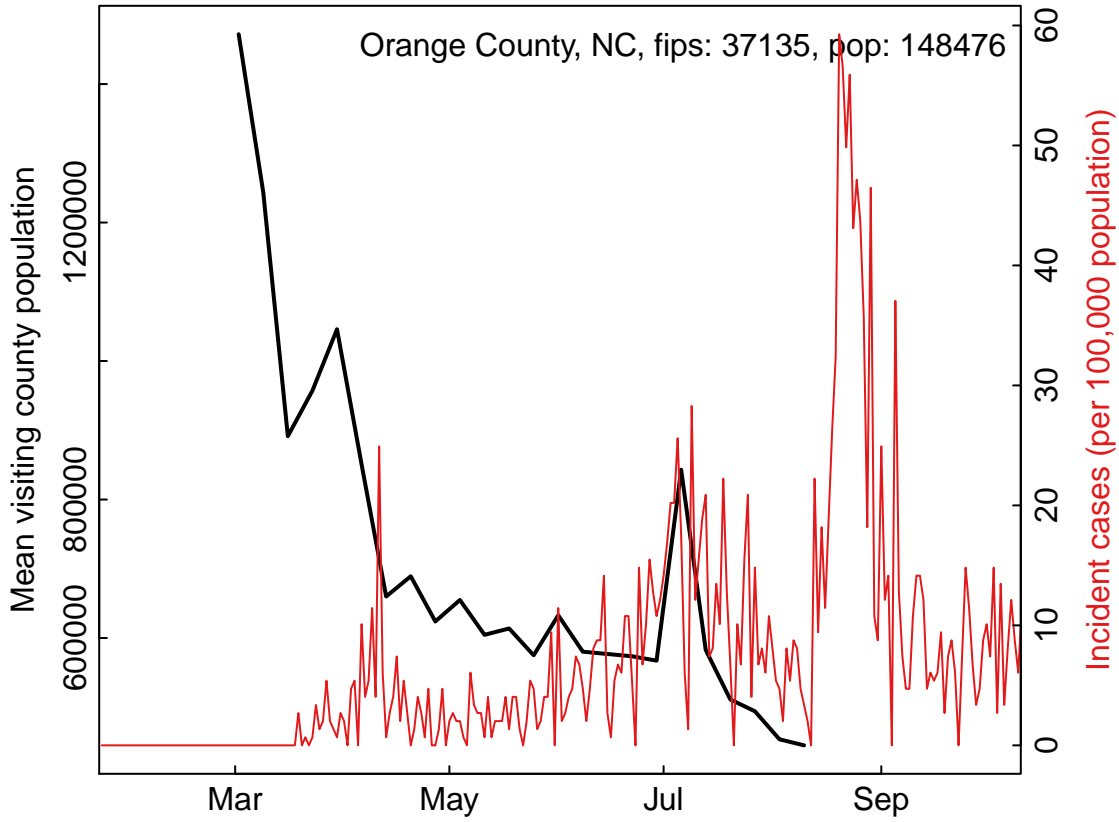

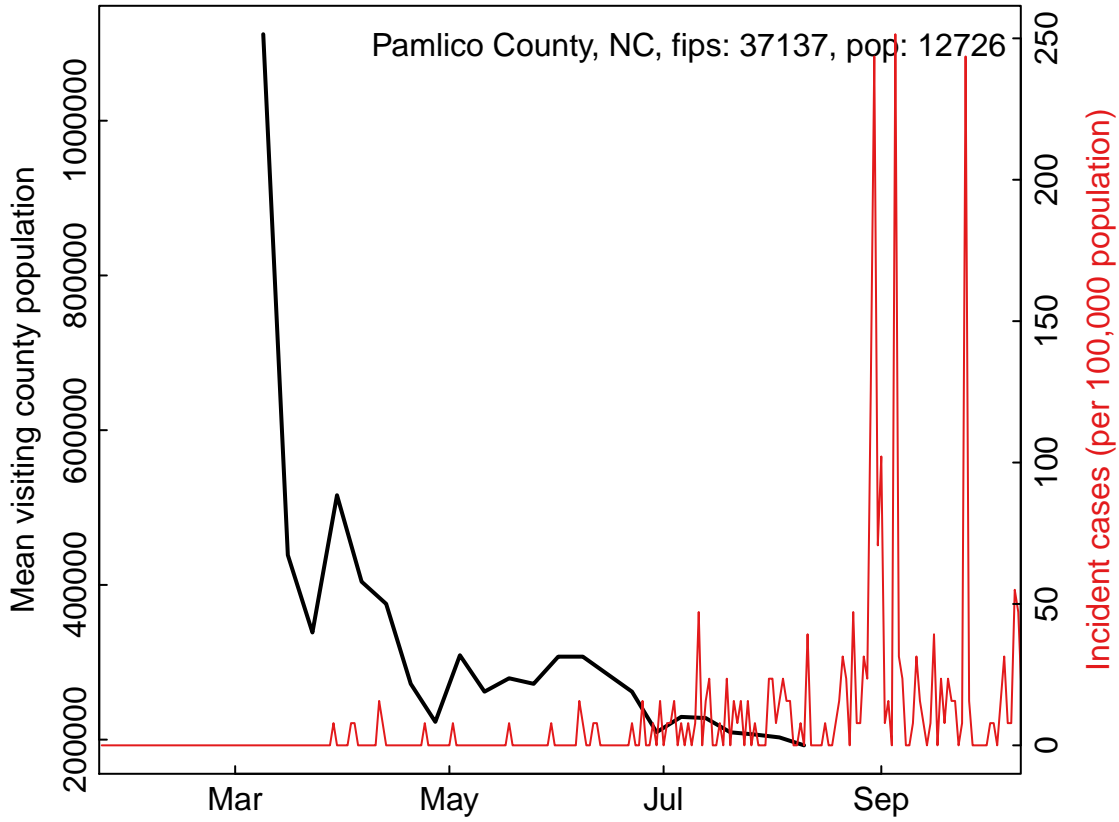

Pasquotank County, NC, fips: 37139, pop: 39824

Mean visiting county population

400000  
800000  
1200000

Mar

May

Jul

Sep

0  
20  
40  
60  
80

Incident cases (per 100,000 population)

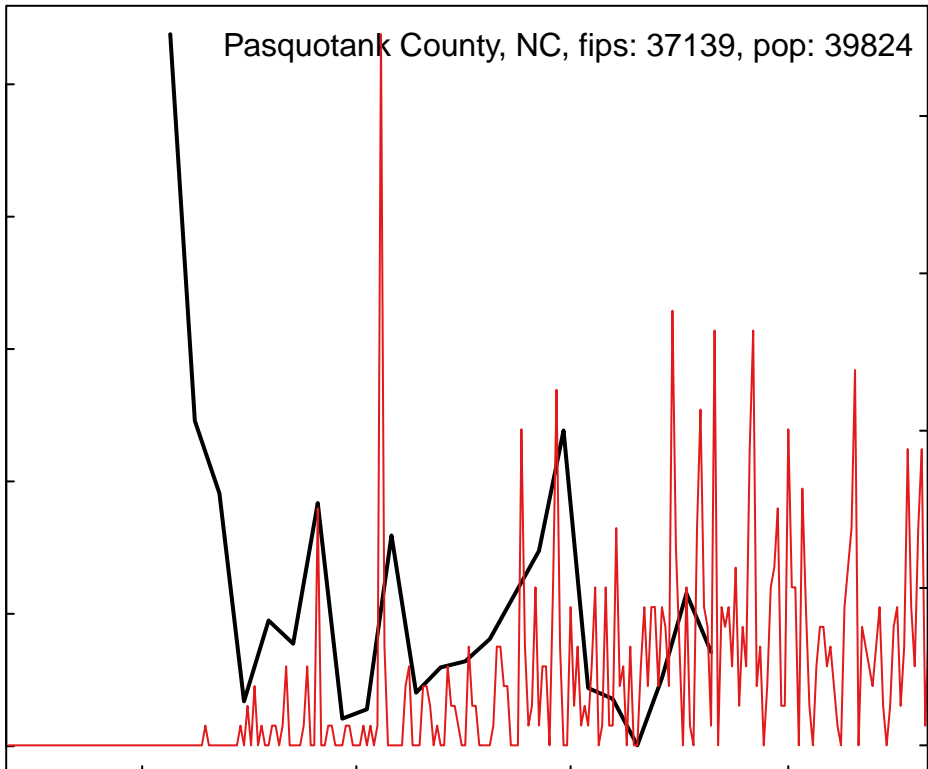

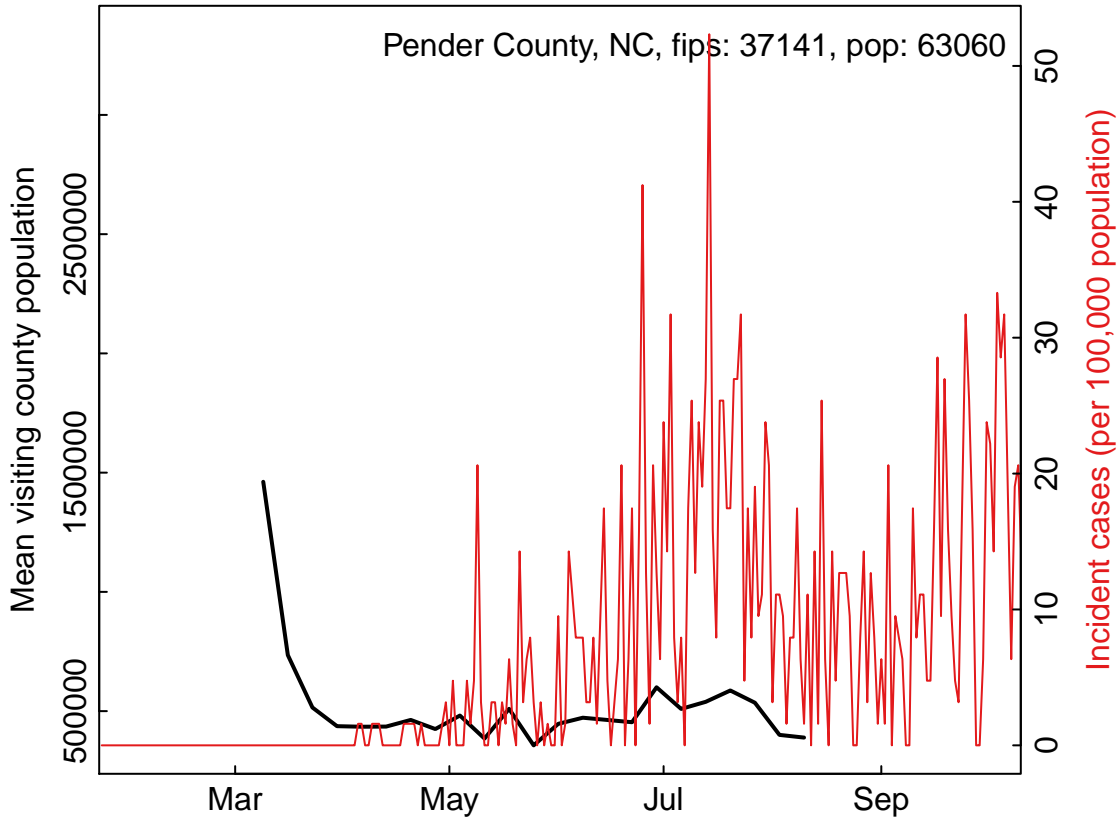

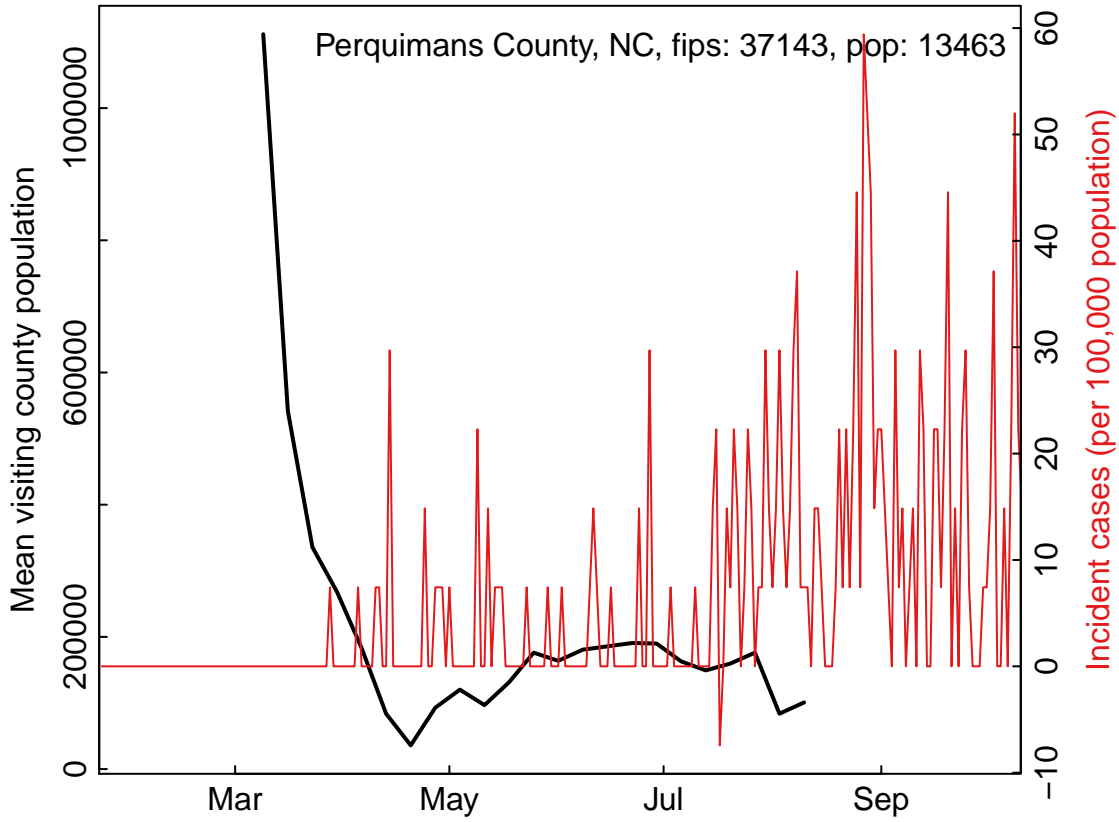

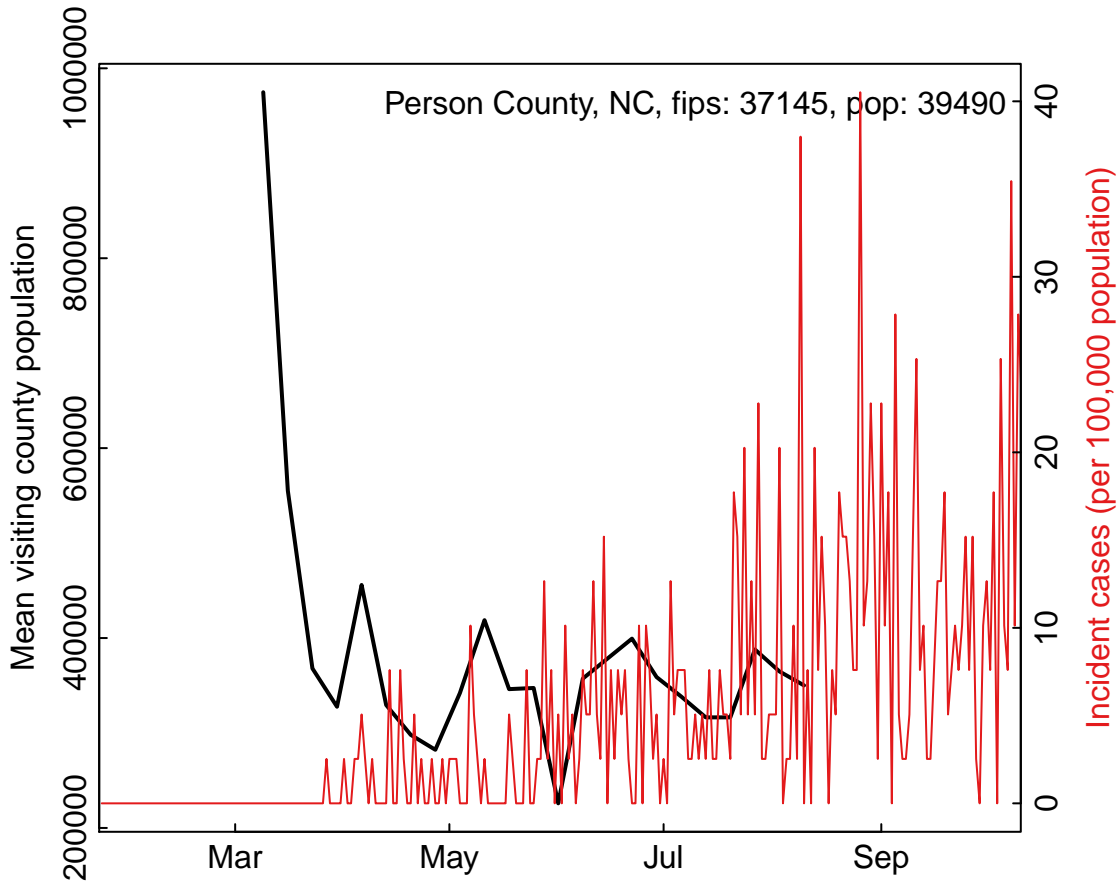

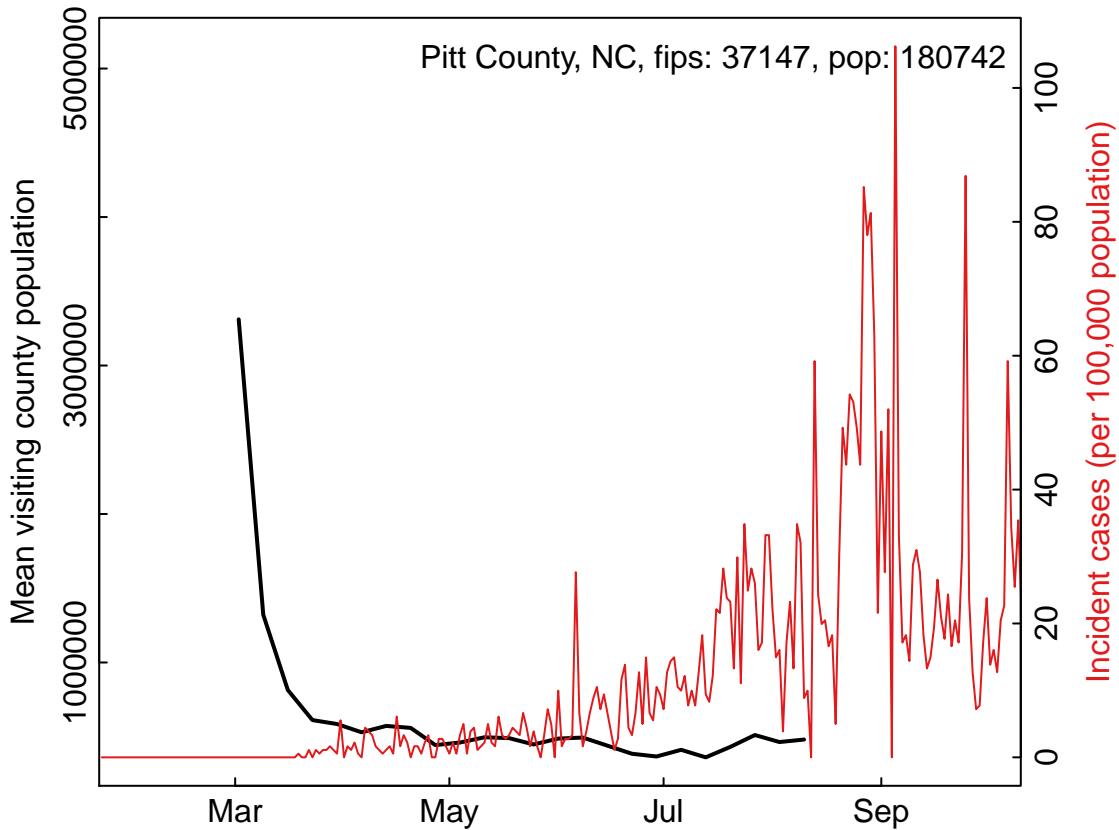



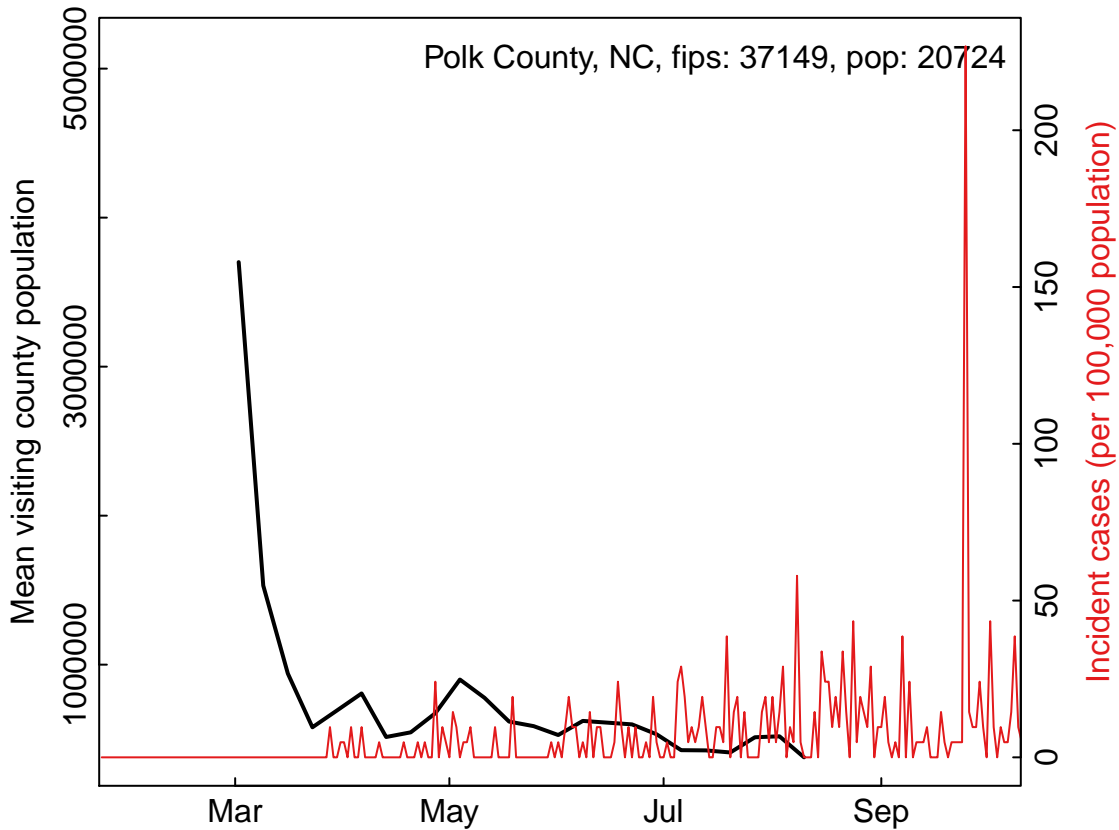

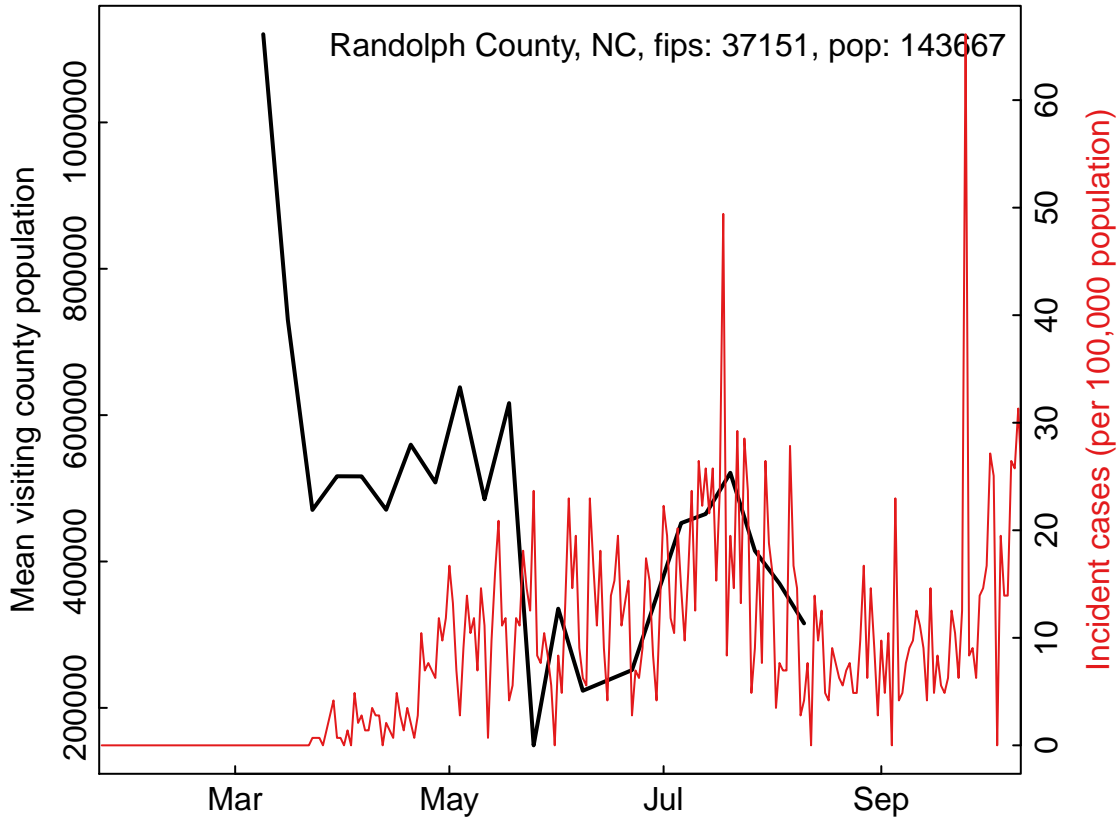

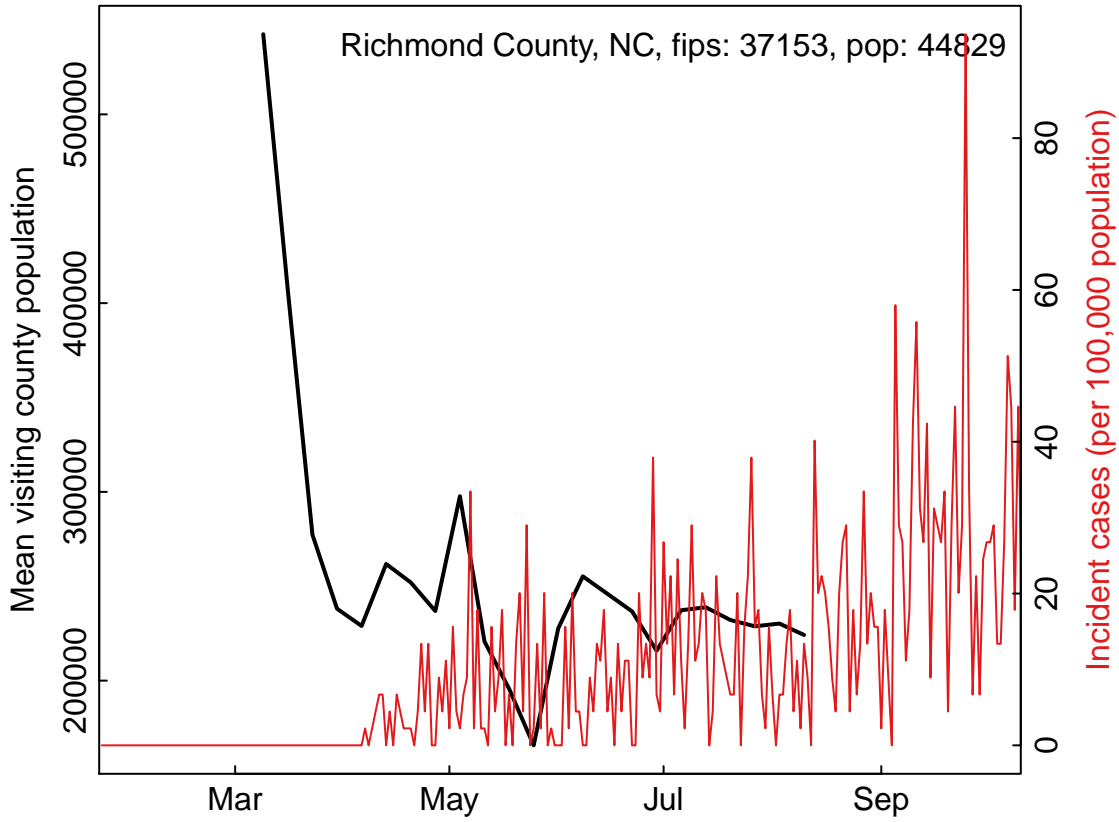

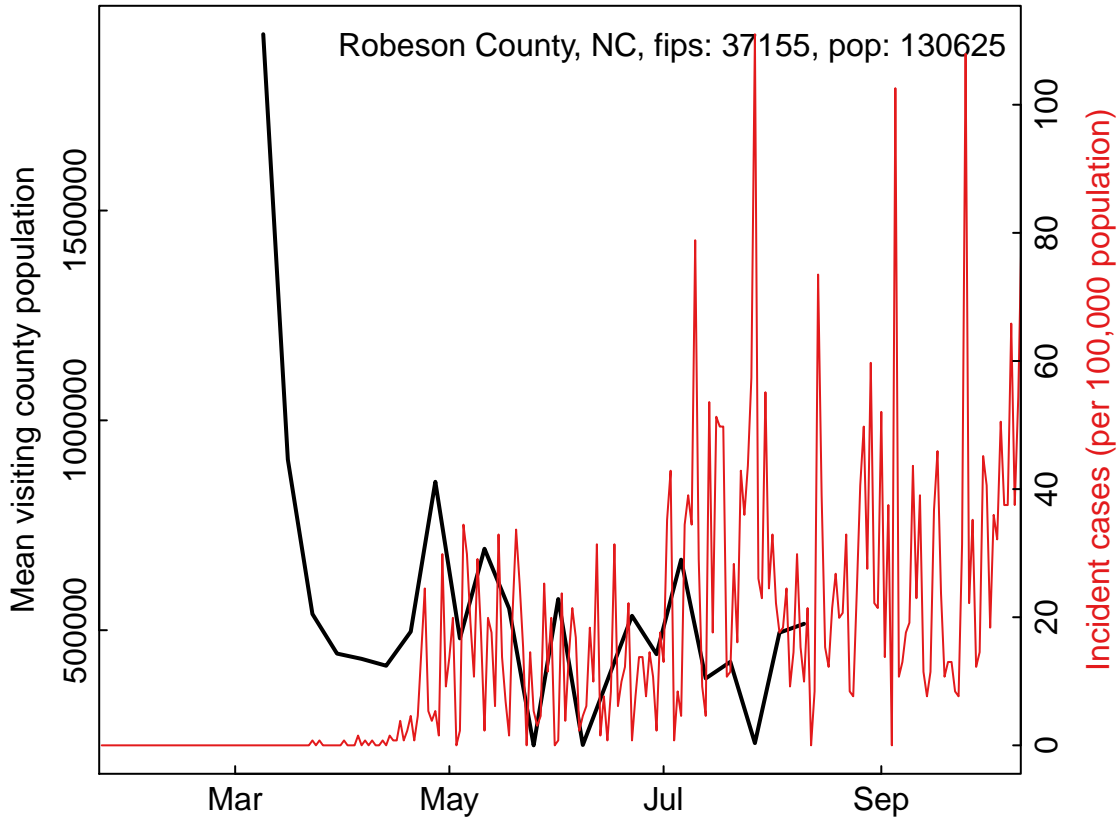

Rockingham County, NC, fips: 37157, pop: 91010

Mean visiting county population

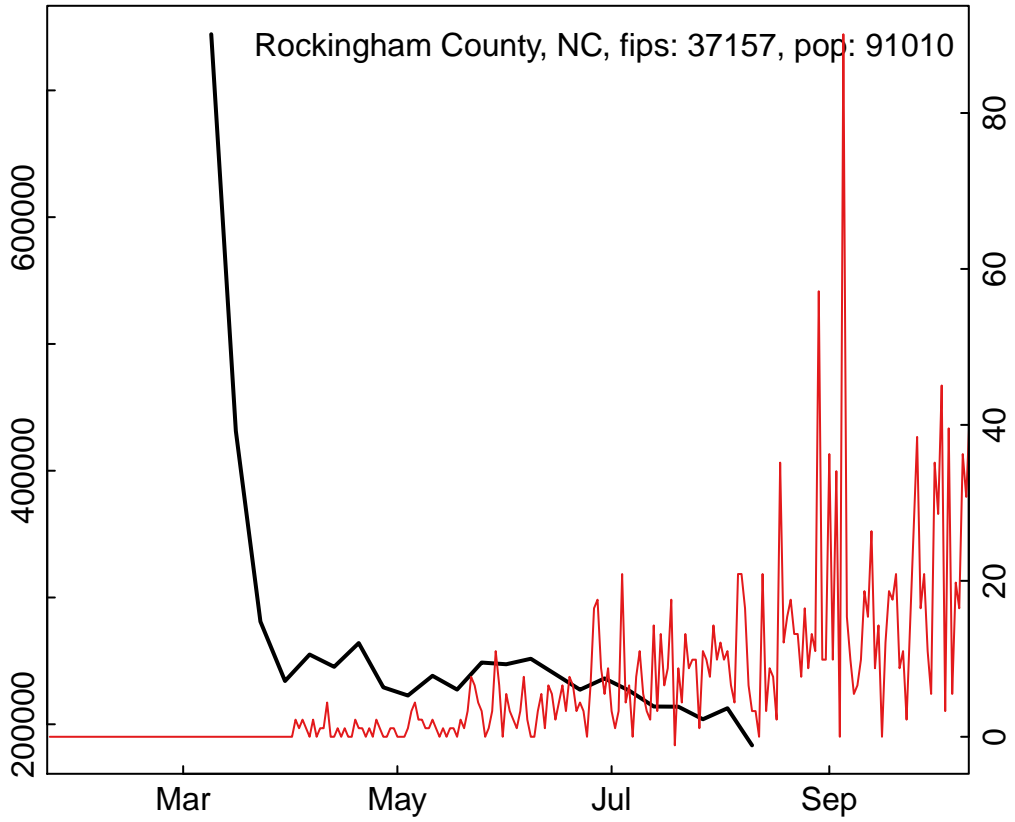

Incident cases (per 100,000 population)

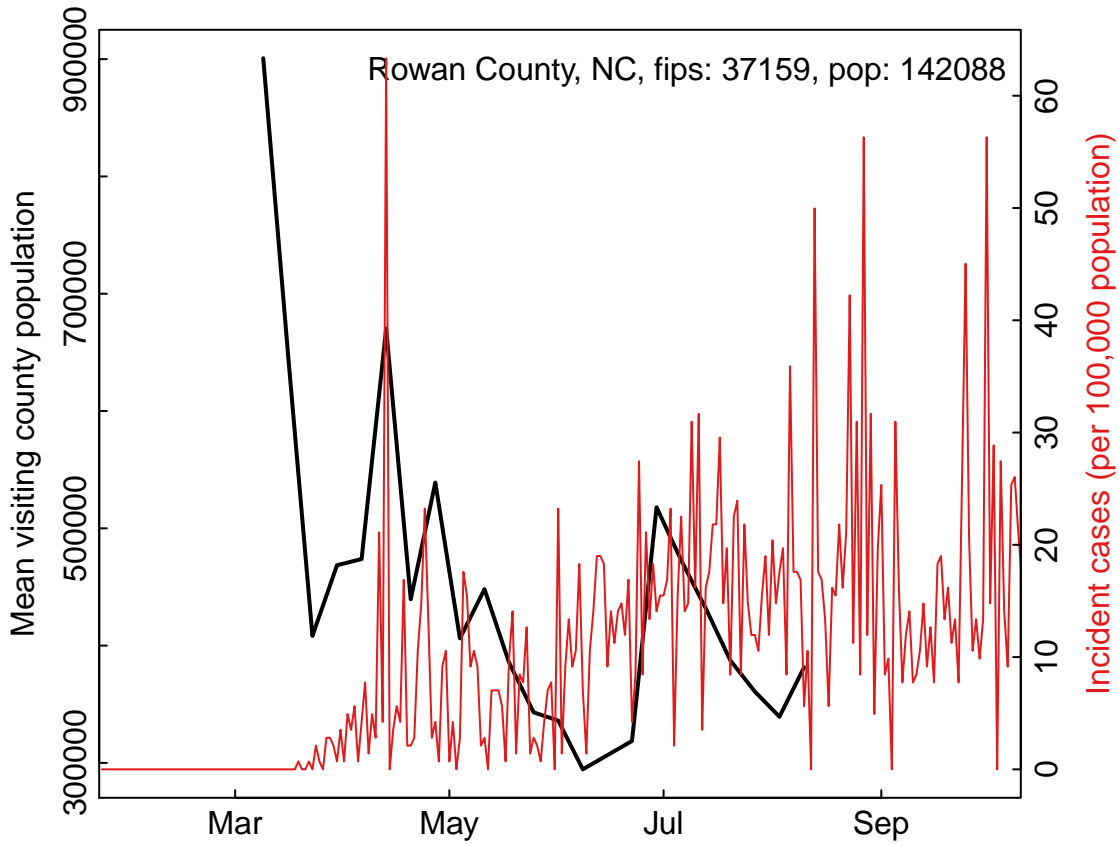

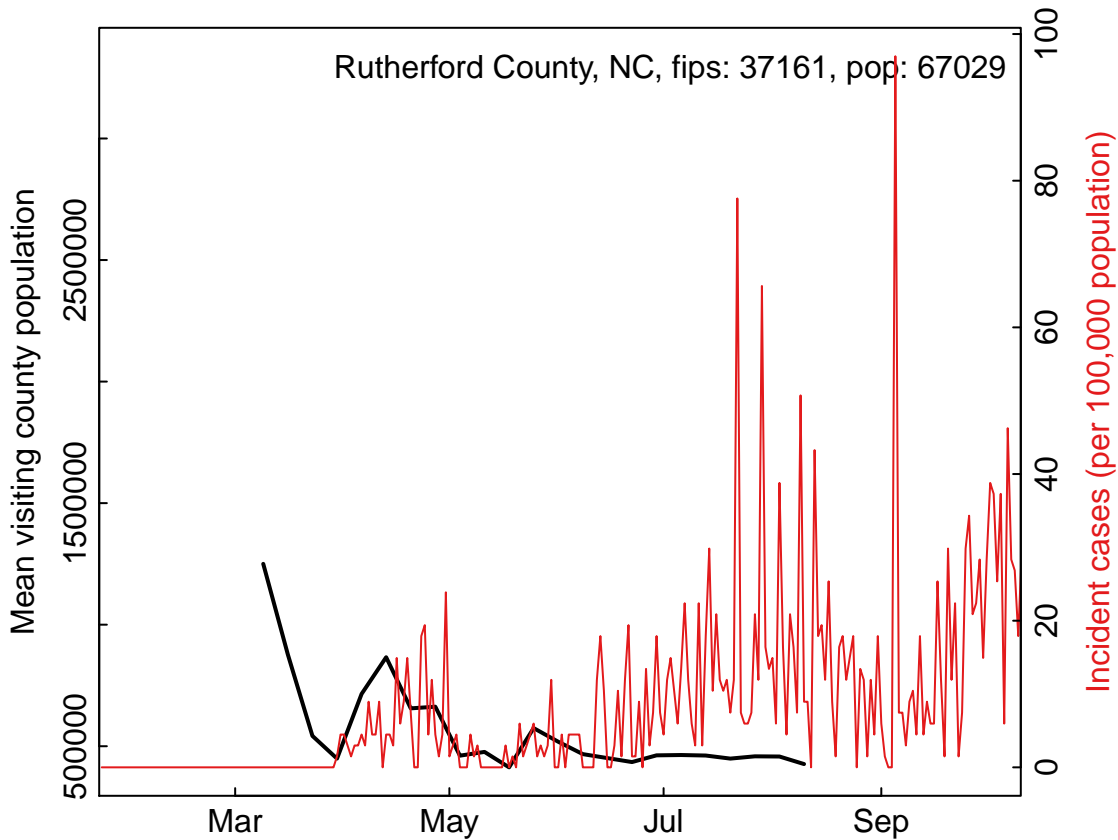

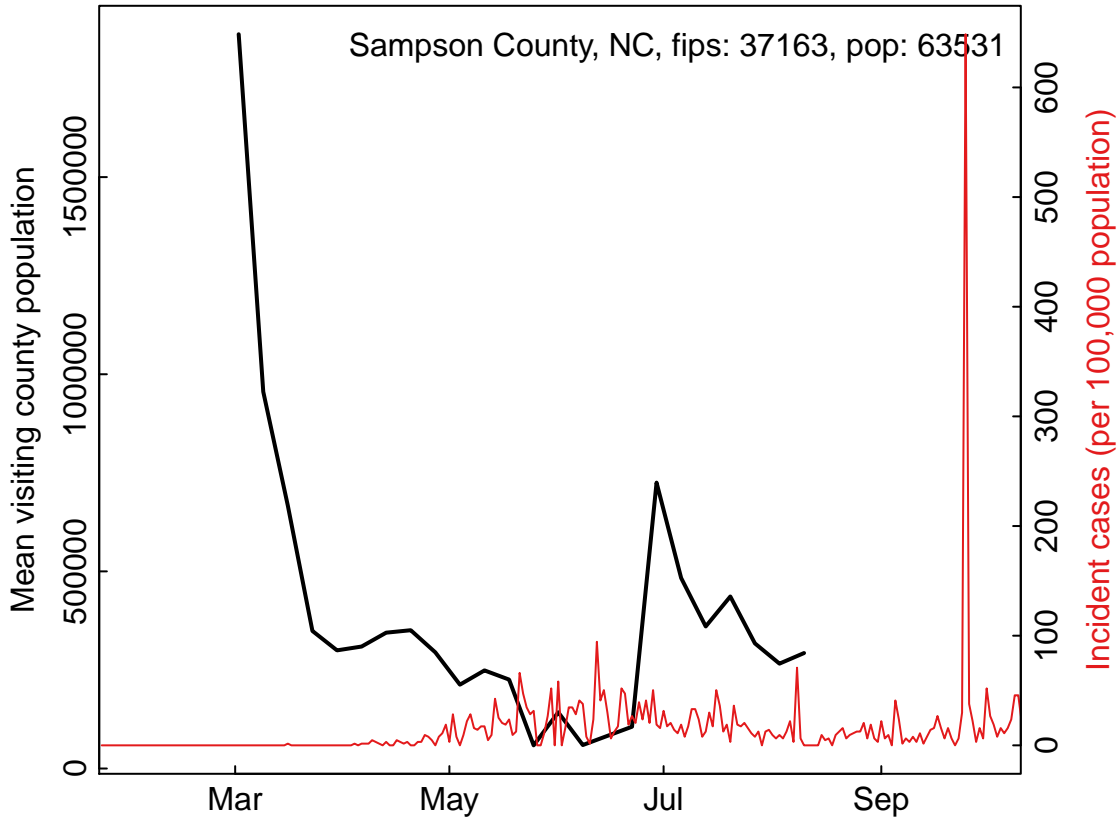



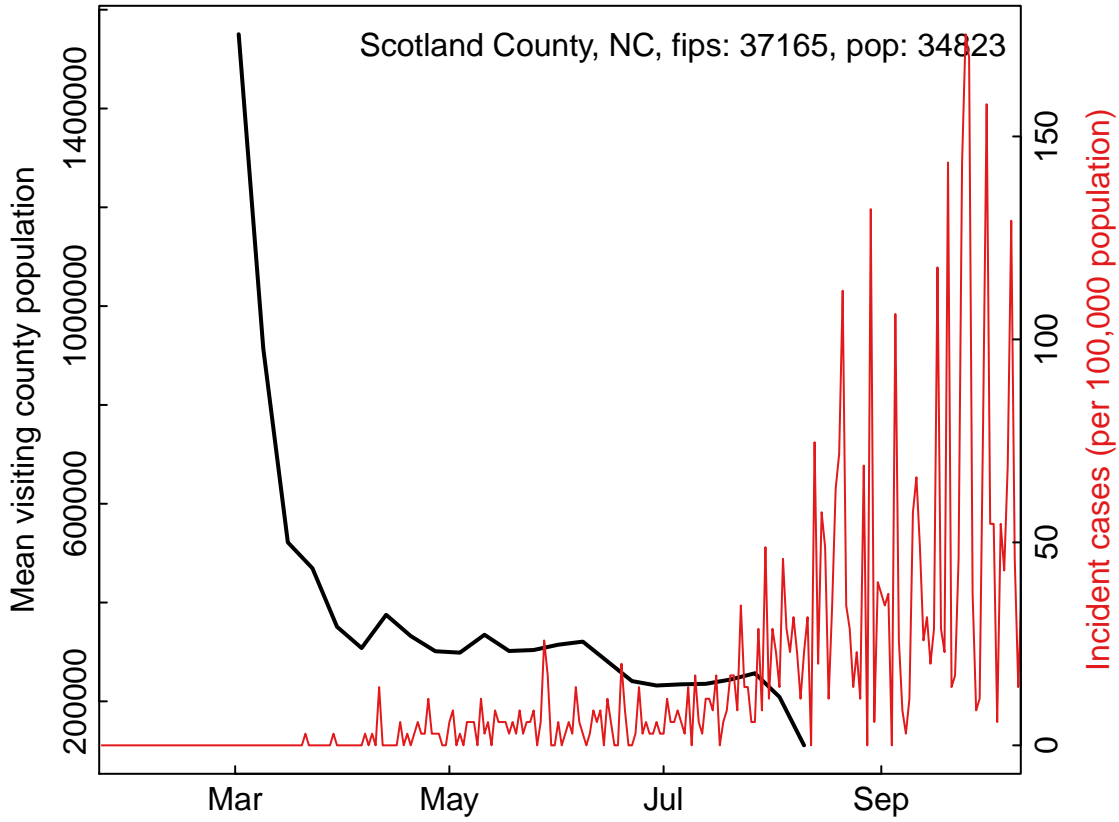

Stanly County, NC, fips: 37167, pop: 62806

Mean visiting county population

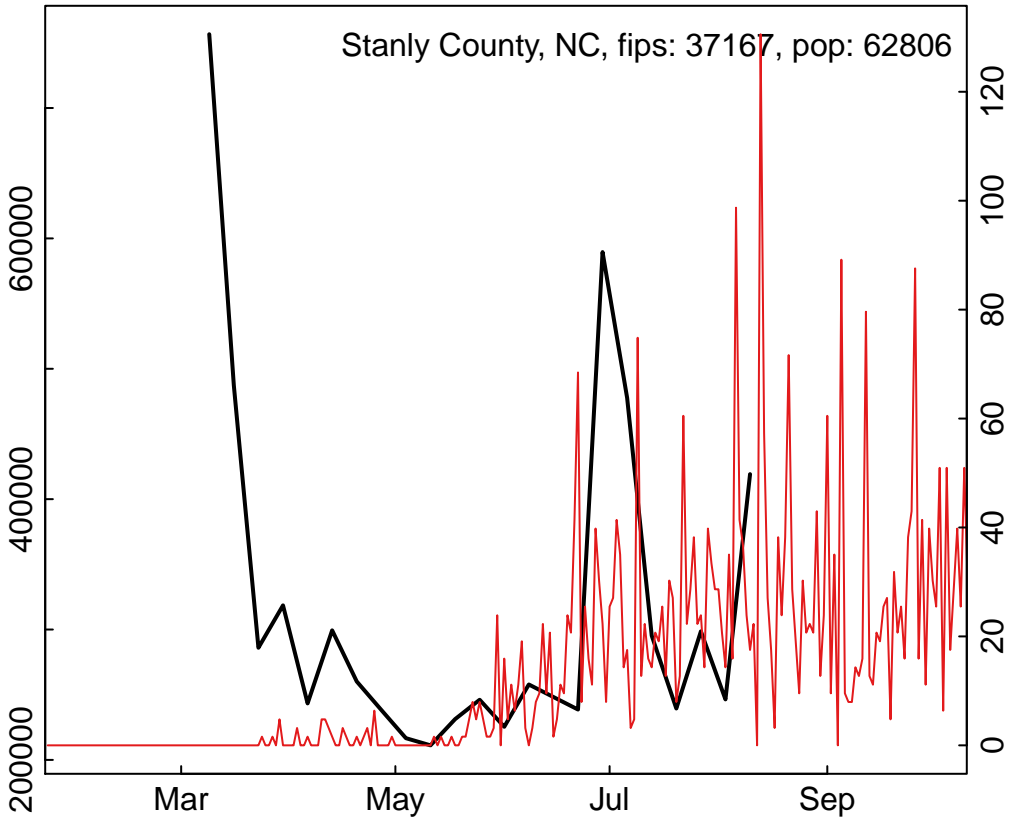

Incident cases (per 100,000 population)

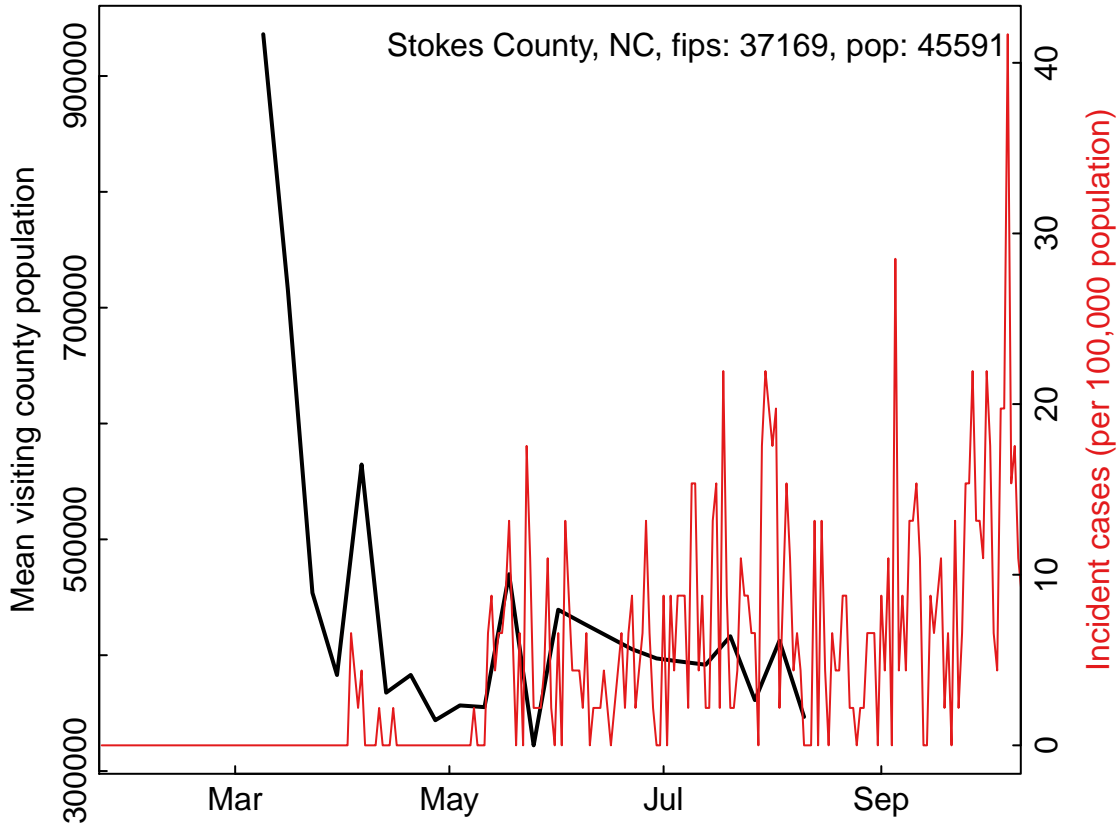

Surry County, NC, fips: 37171, pop: 71783

Mean visiting county population

300000  
400000  
500000  
600000

Mar

May

Jul

Sep

0  
10  
20  
30  
40

Incident cases (per 100,000 population)

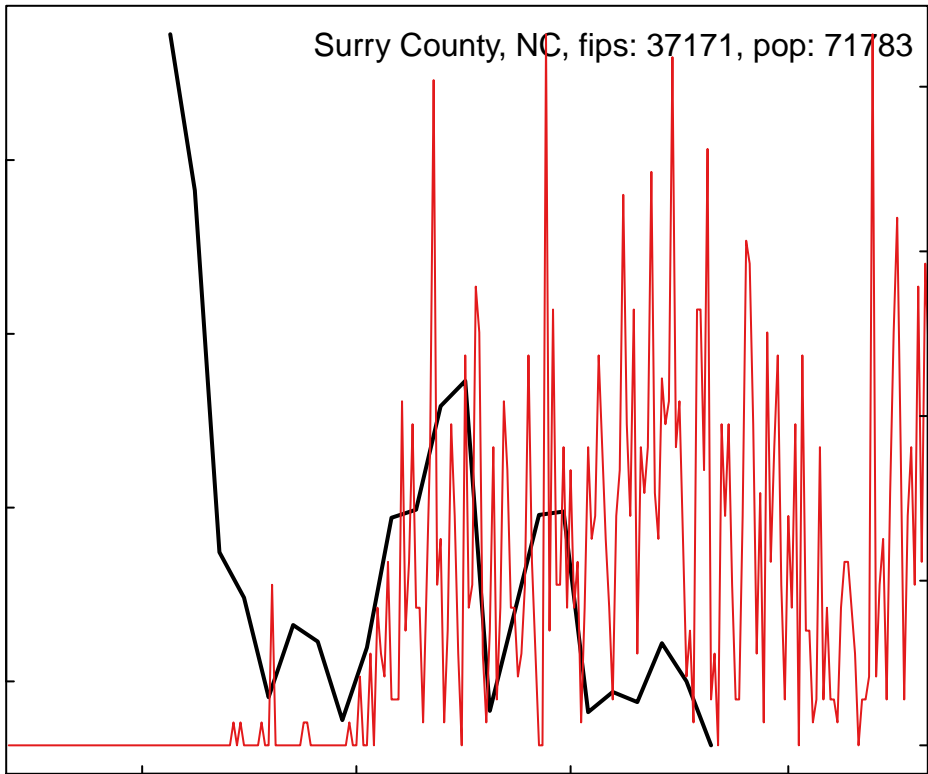

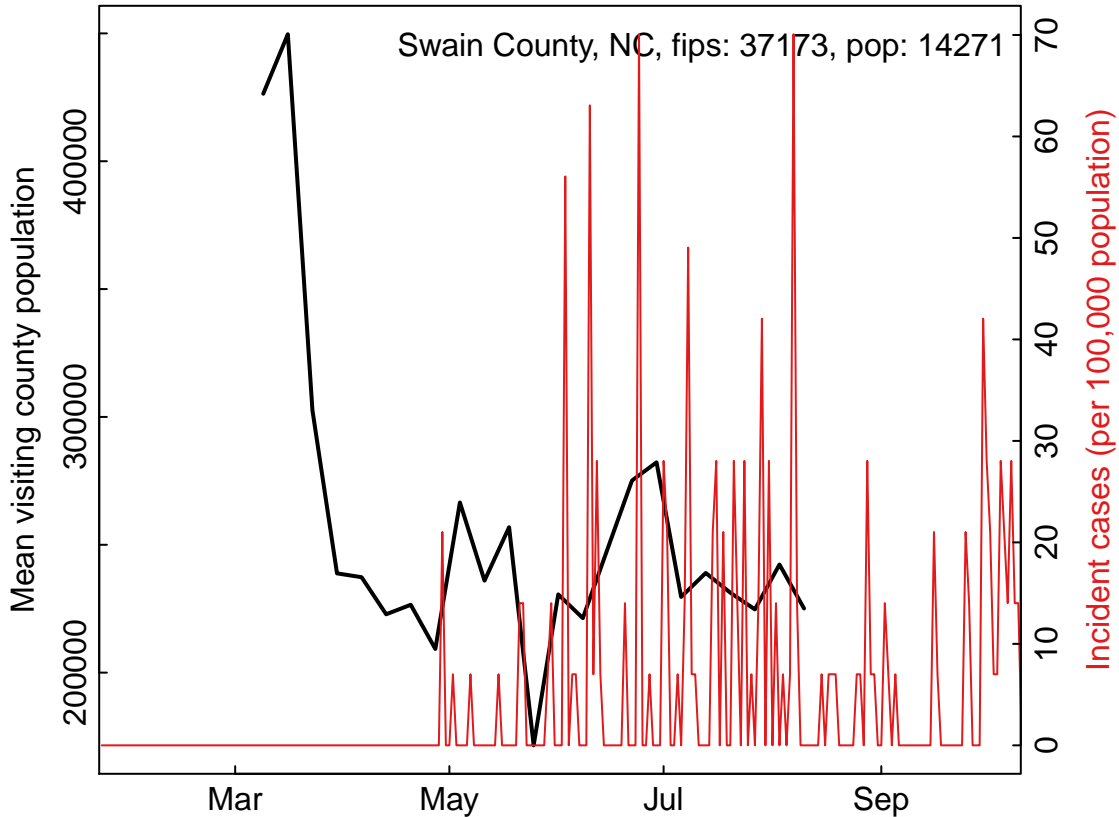

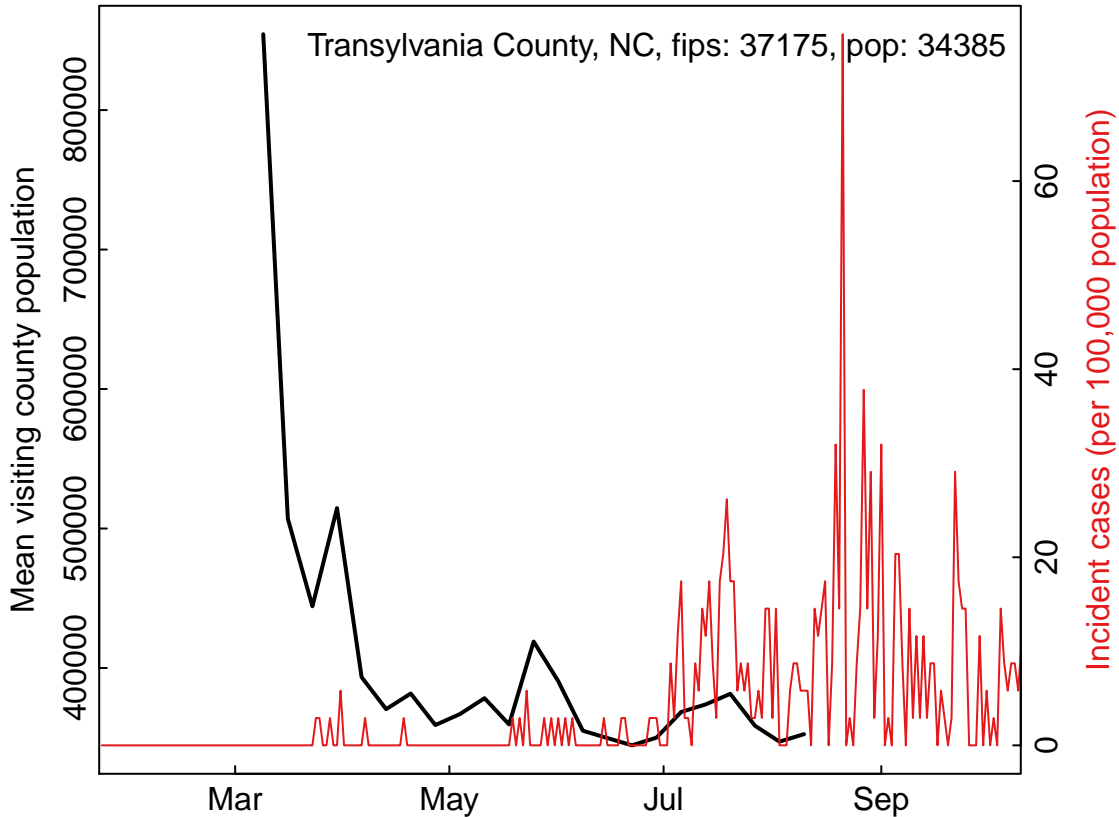

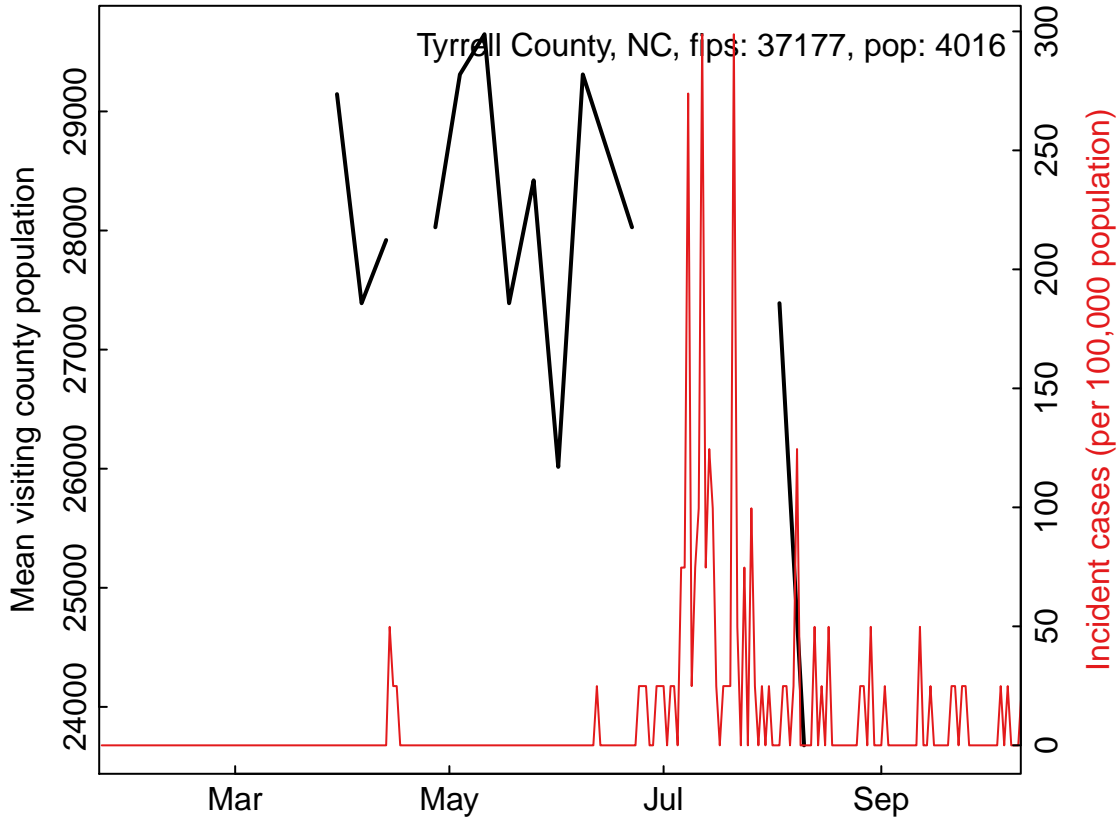

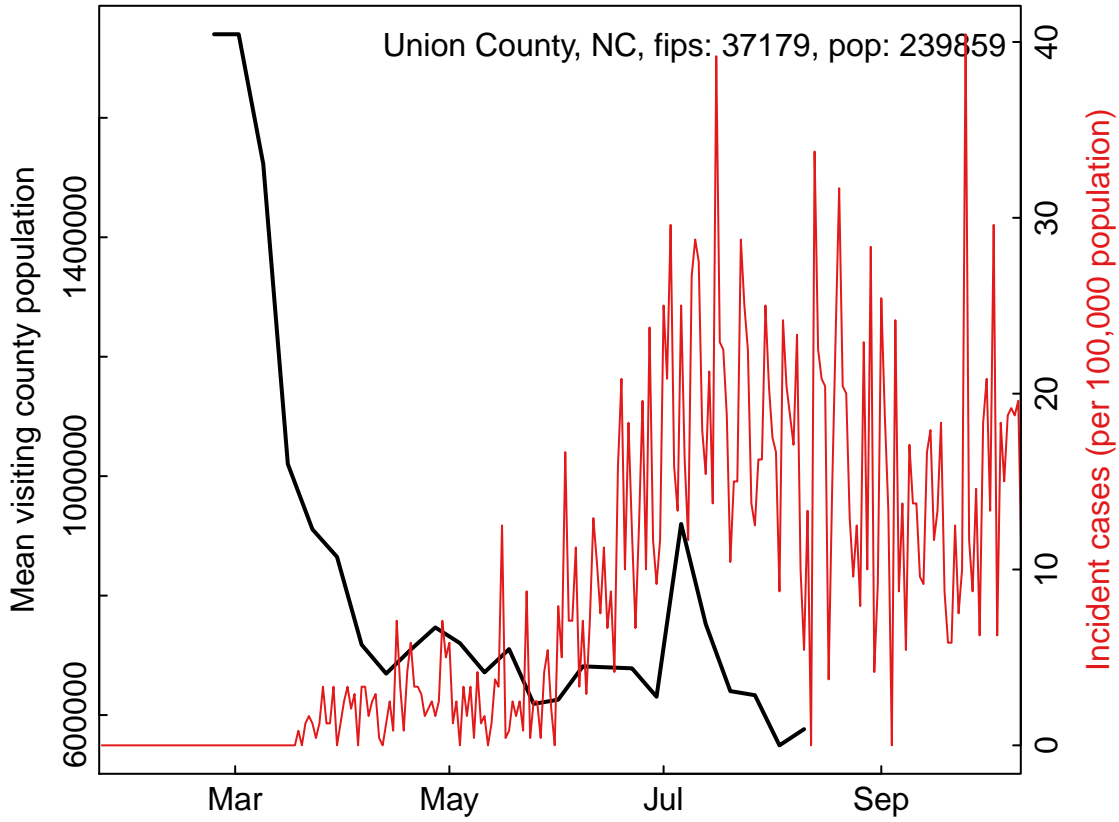



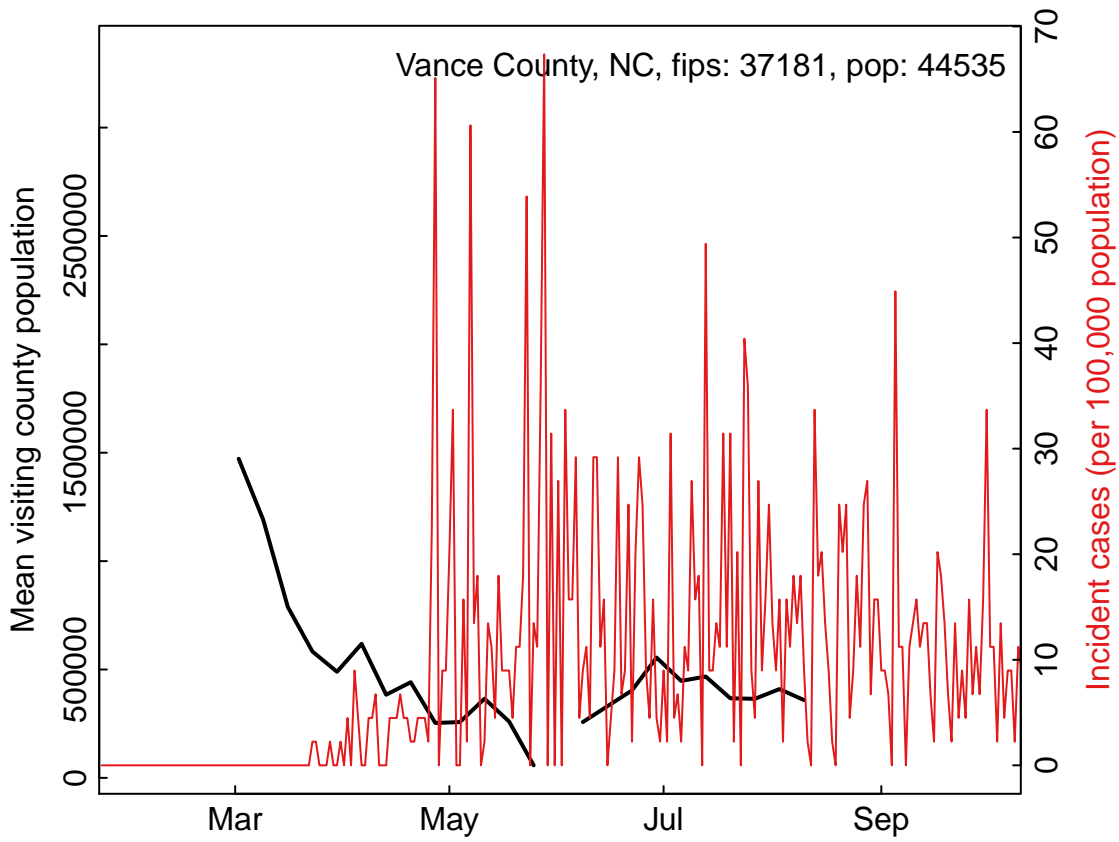

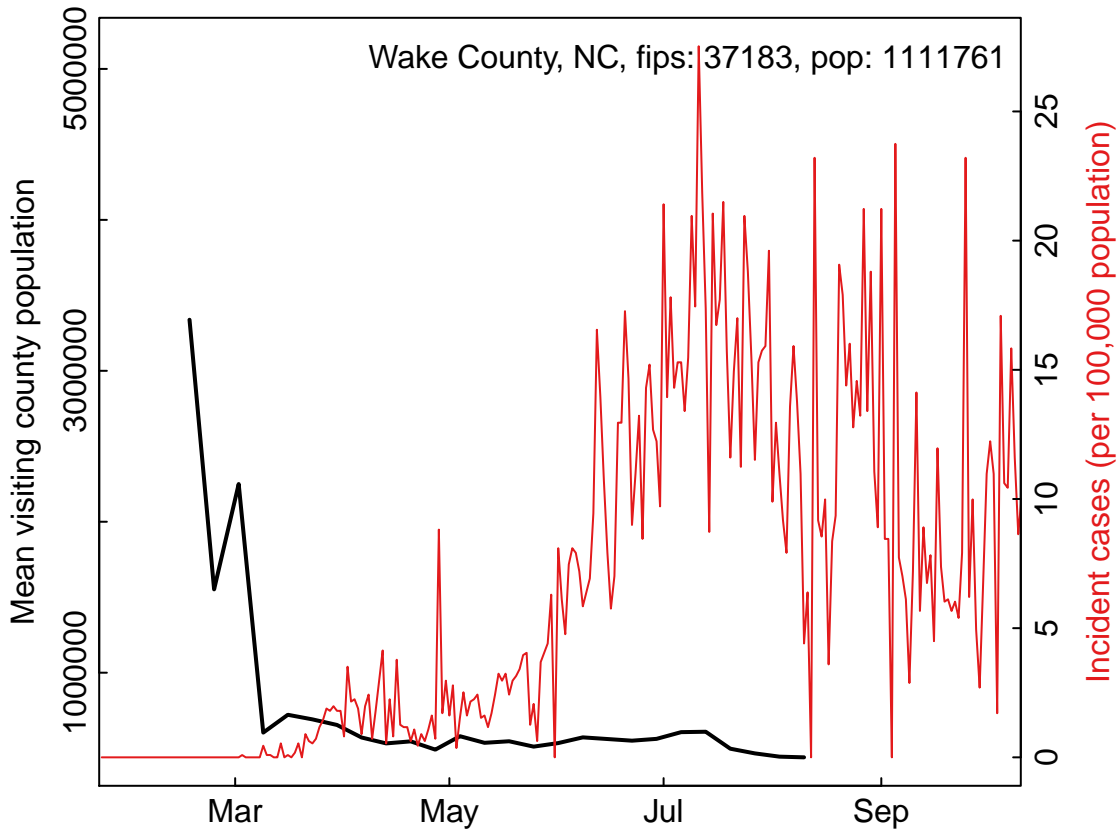

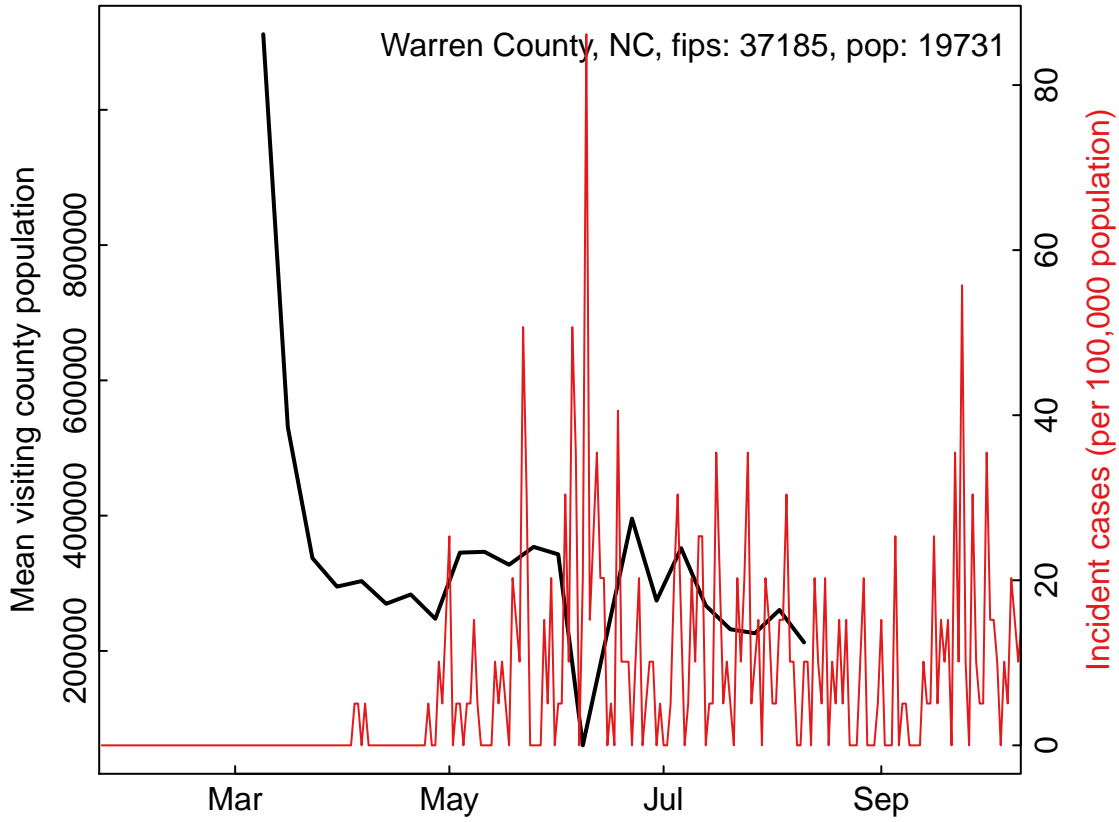

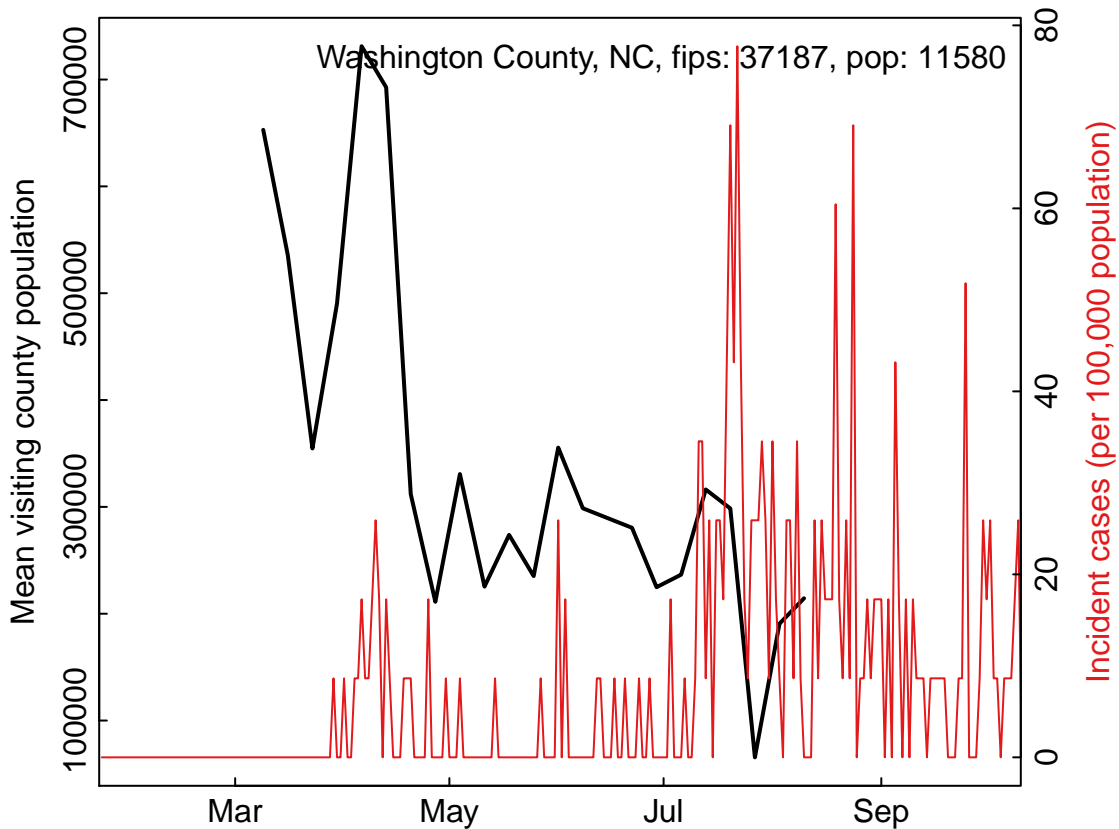

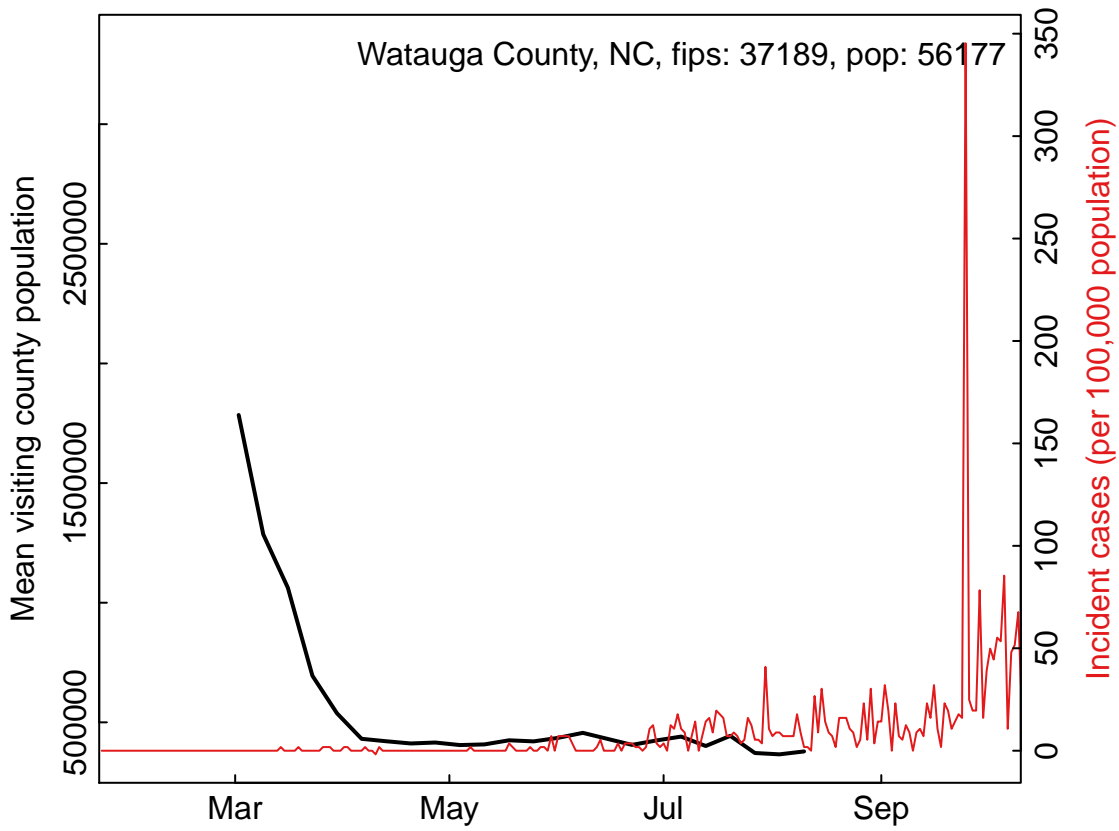

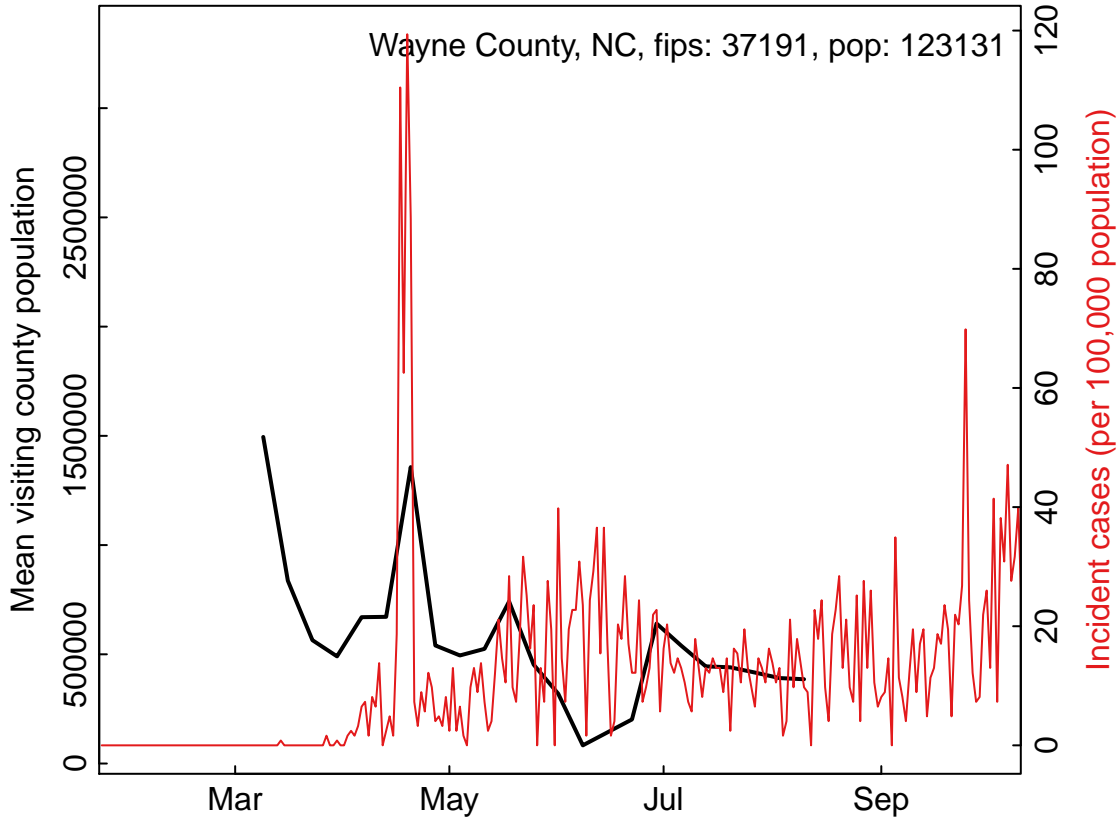

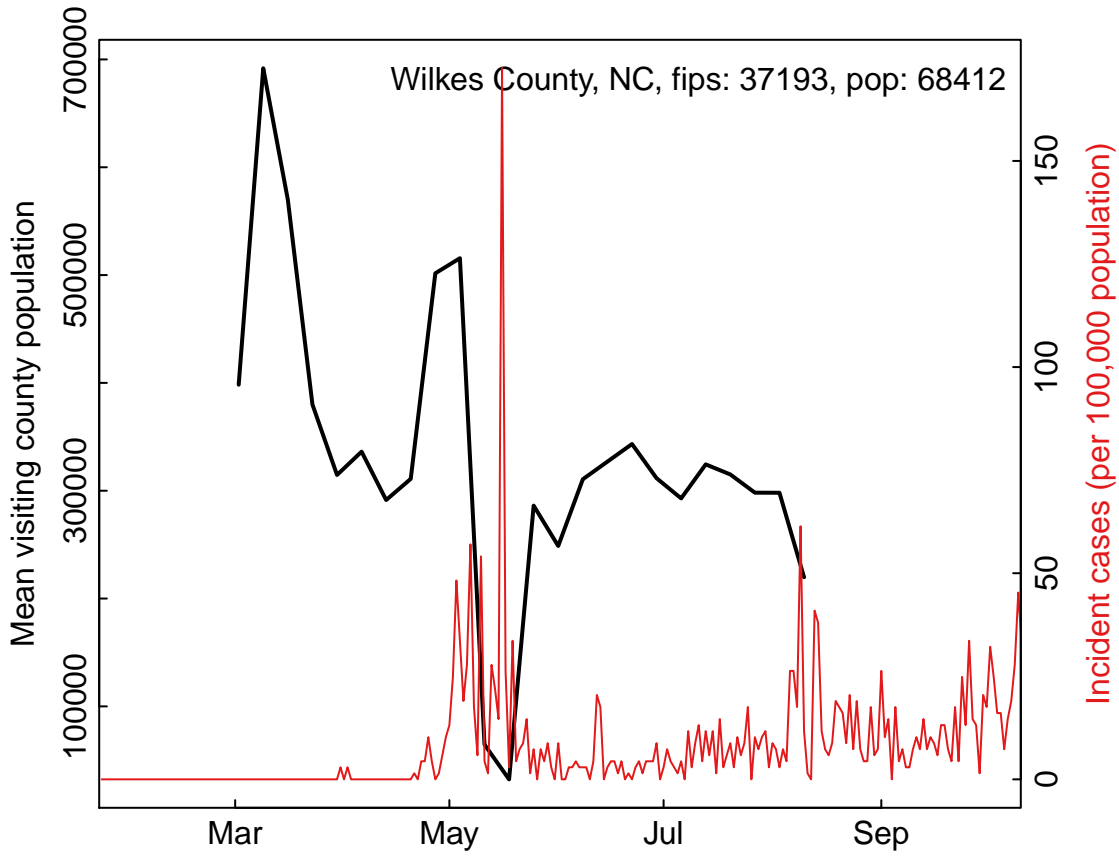

Wilson County, NC, fips: 37195, pop: 81801

Mean visiting county population

Incident cases (per 100,000 population)

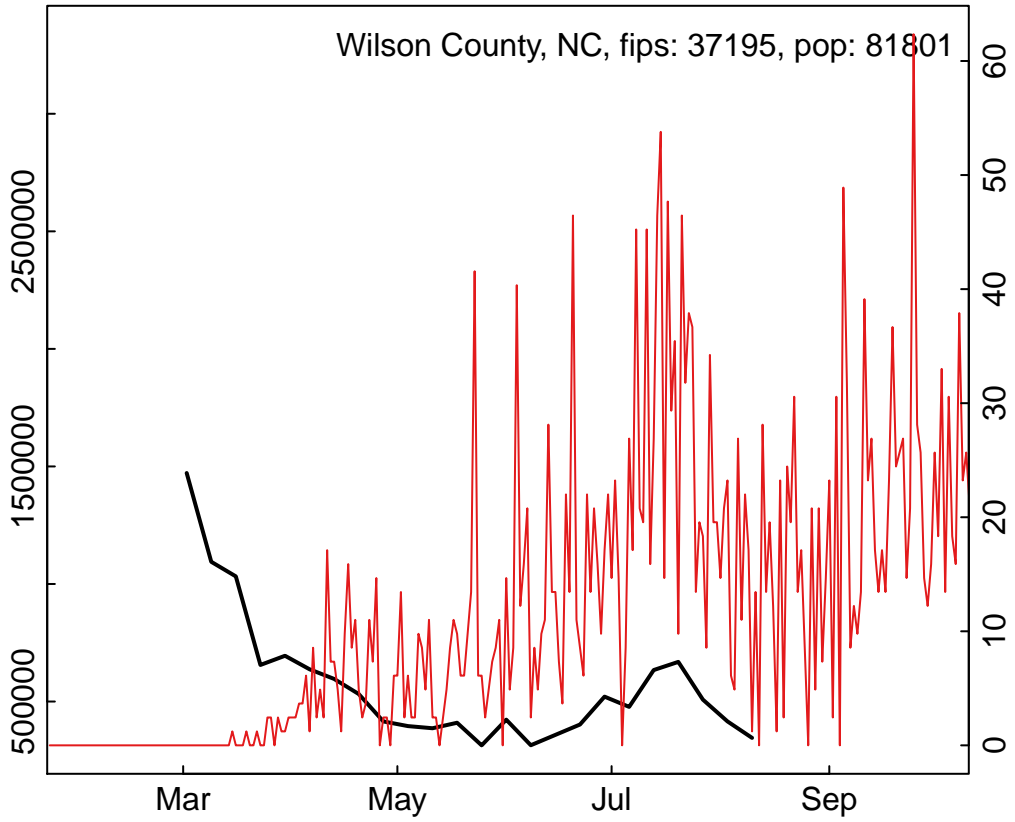



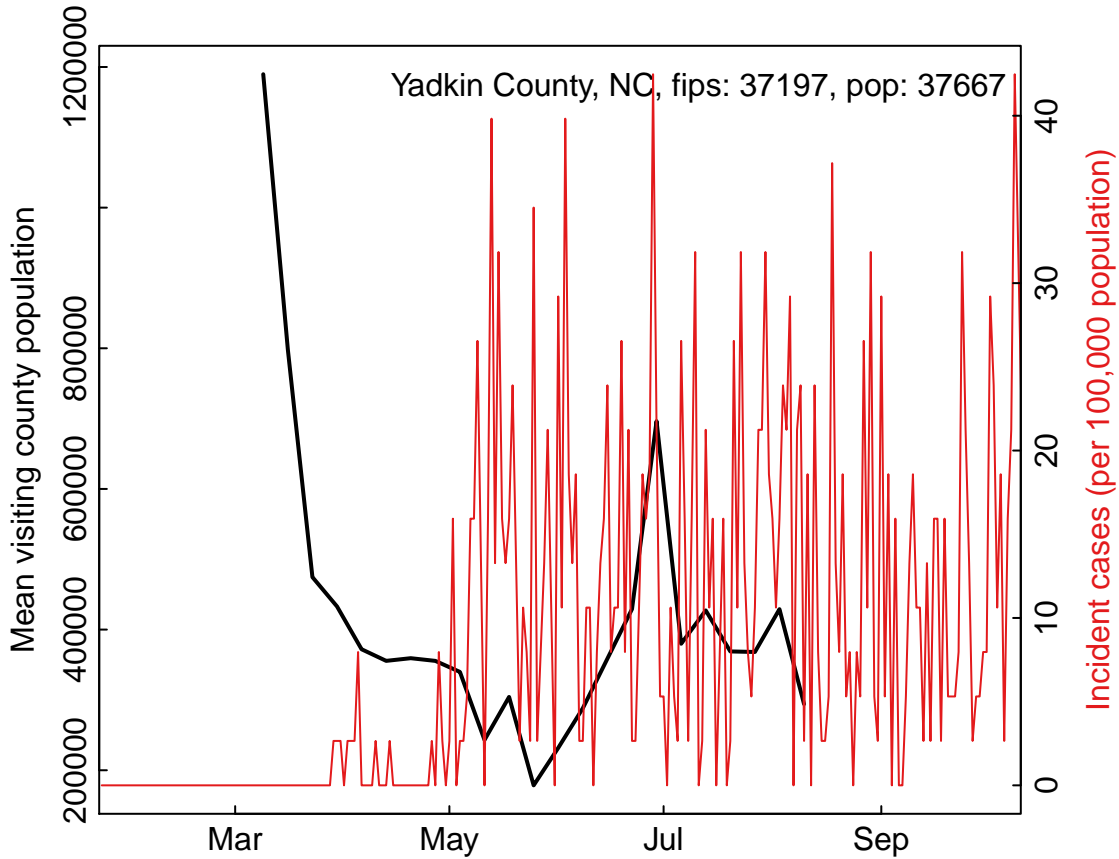

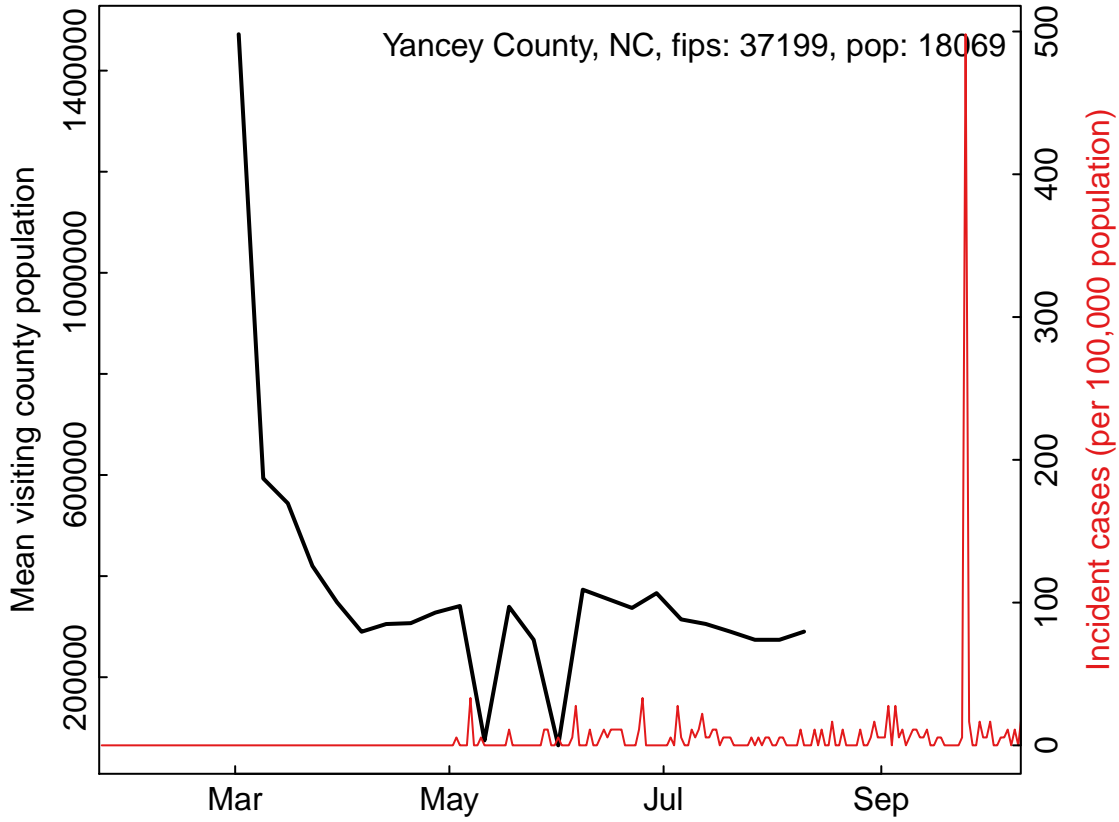

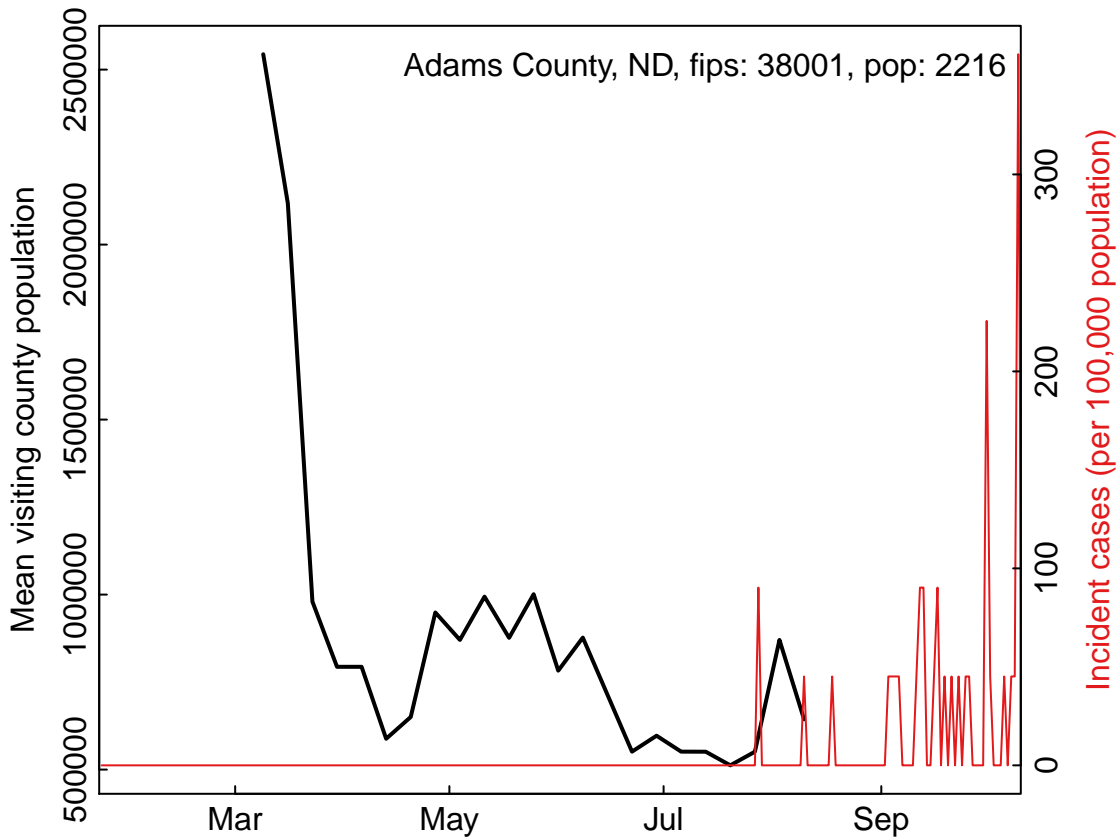

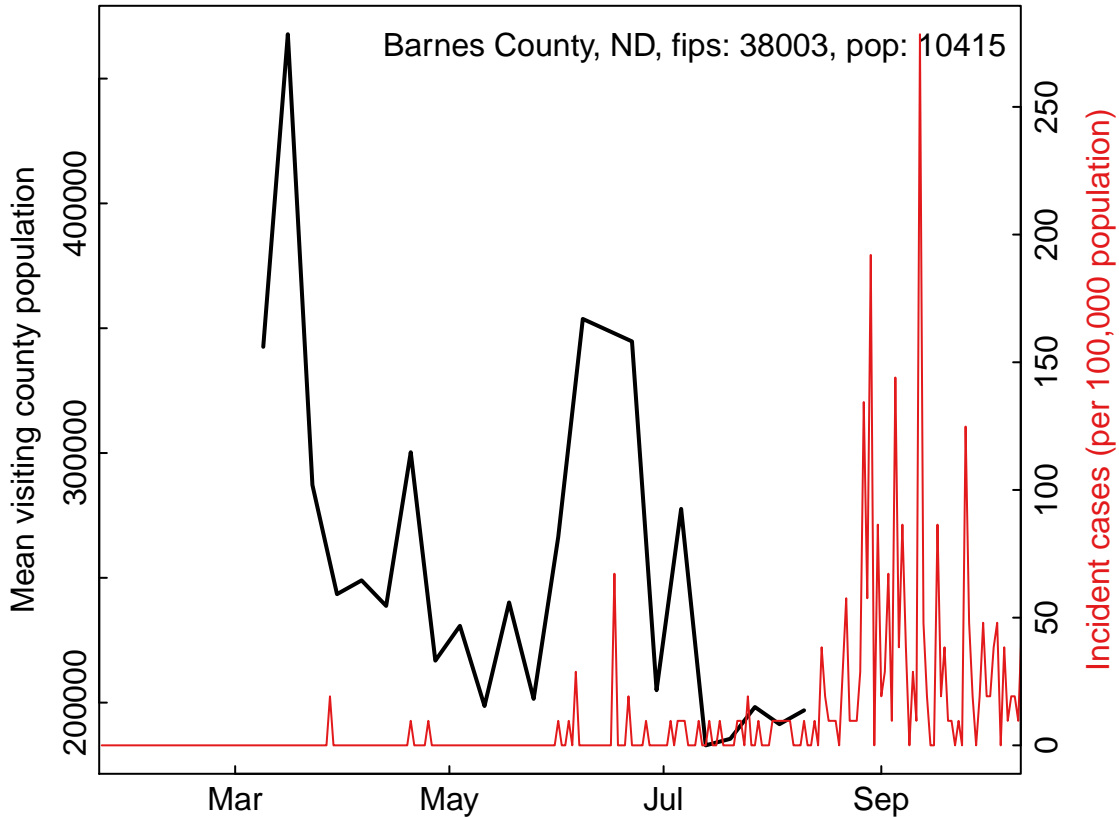

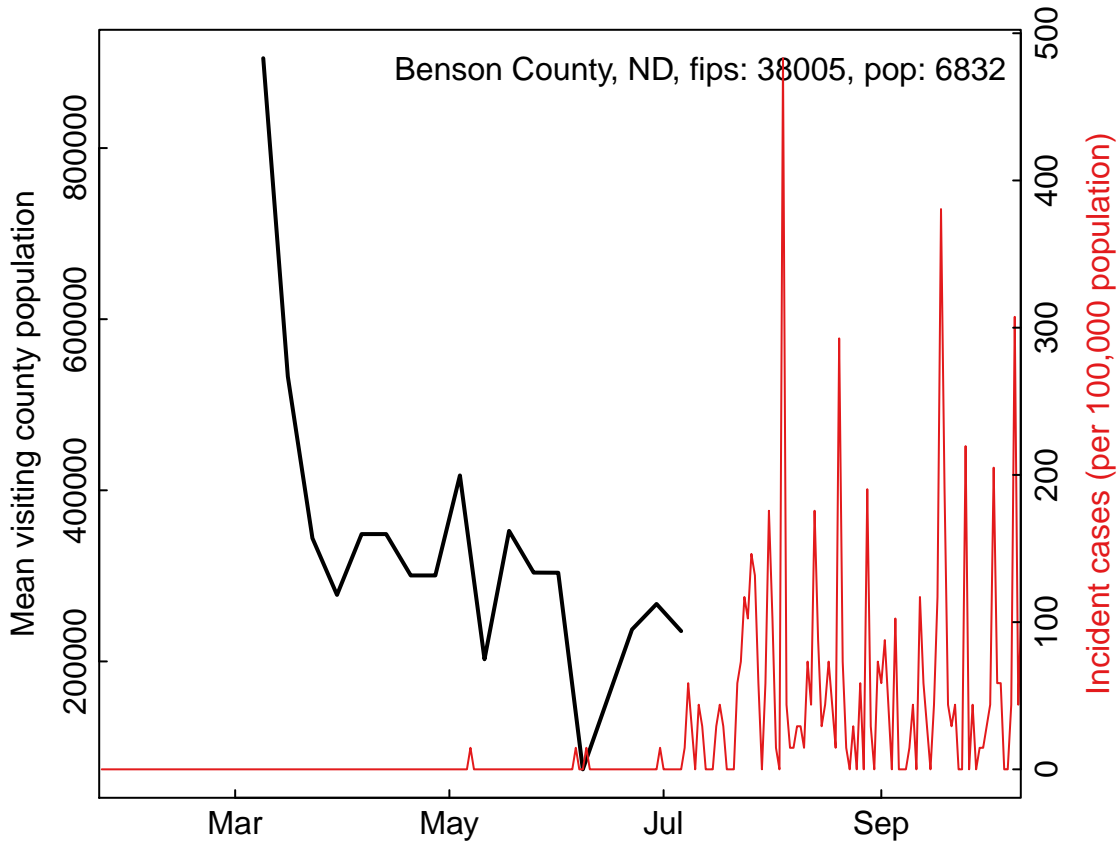

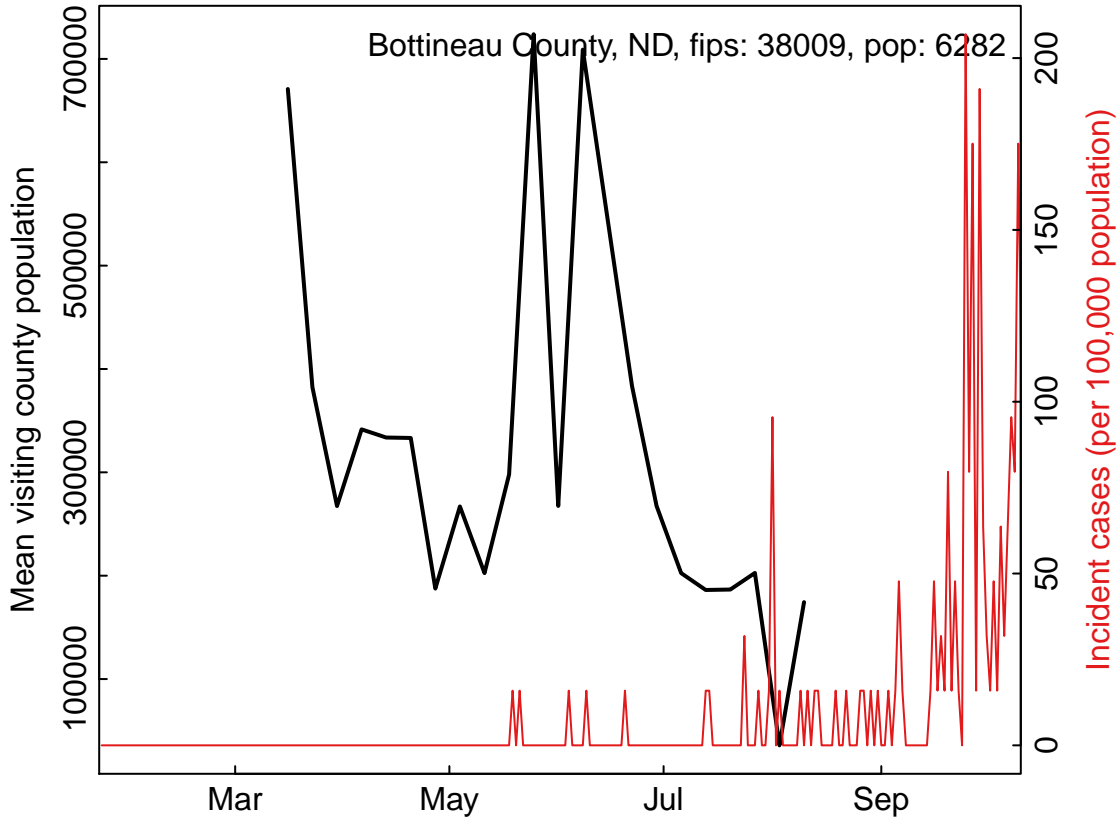

Bowman County, ND, fips: 38011, pop: 3024

Mean visiting county population

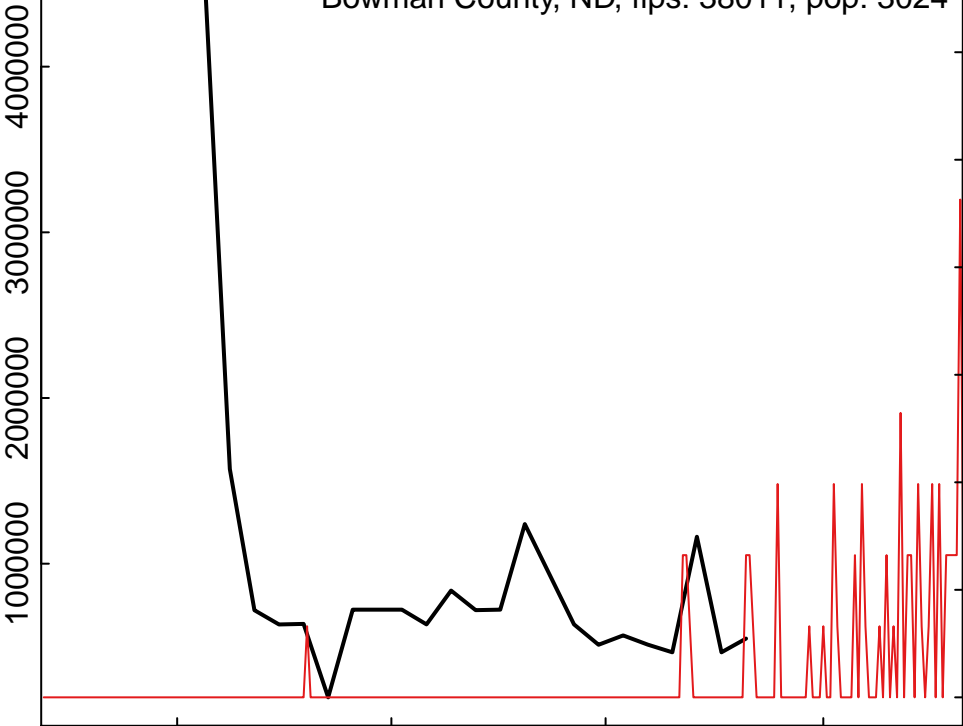

Incident cases (per 100,000 population)

Burleigh County, ND, fips: 38015, pop: 95626

Mean visiting county population

2500000  
1500000  
500000  
0

Mar

May

Jul

Sep

150  
100  
50  
0

Incident cases (per 100,000 population)

0

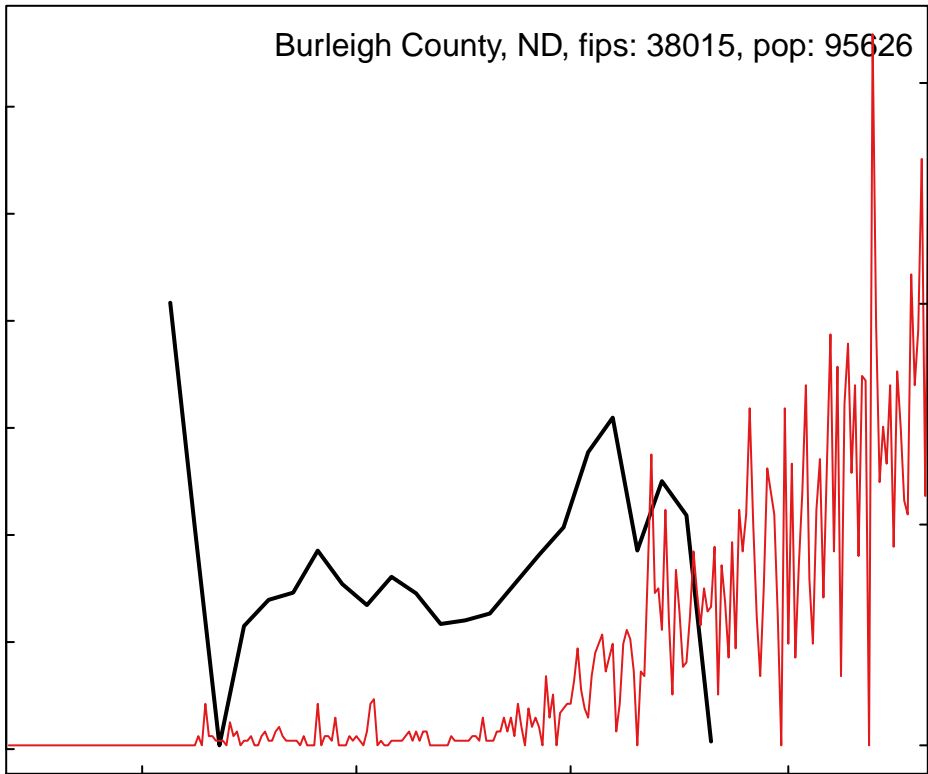



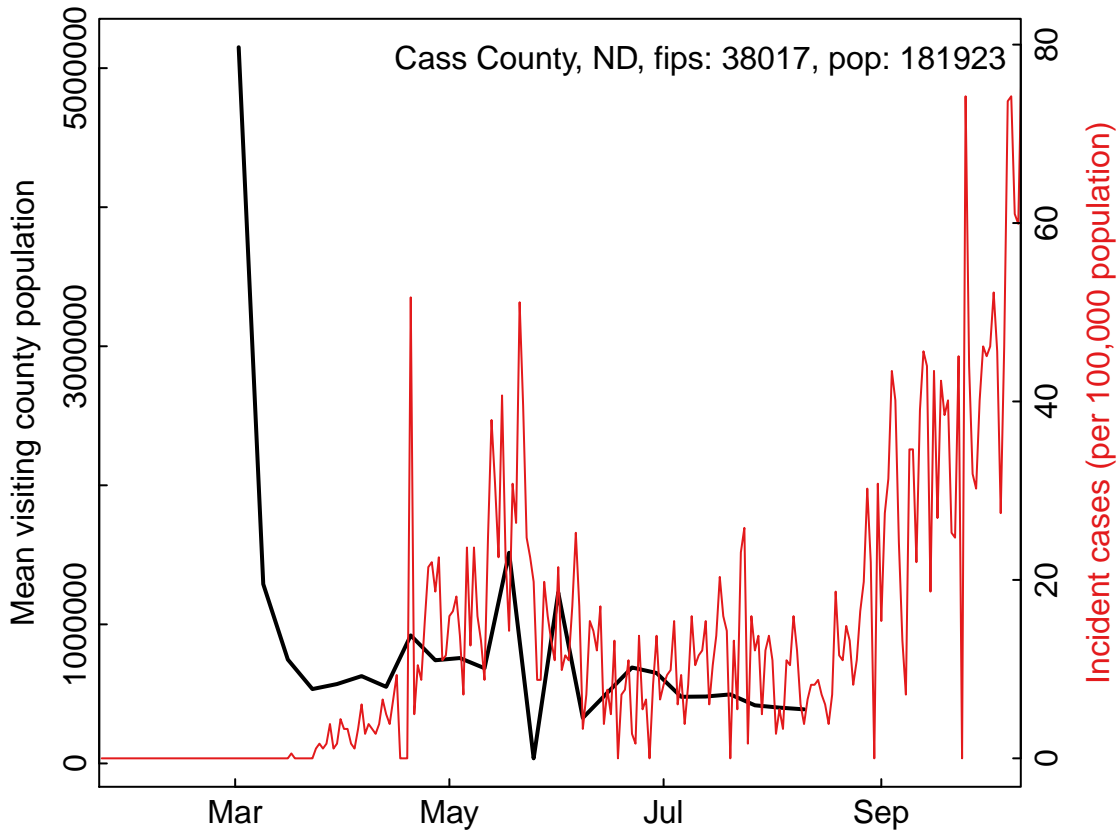

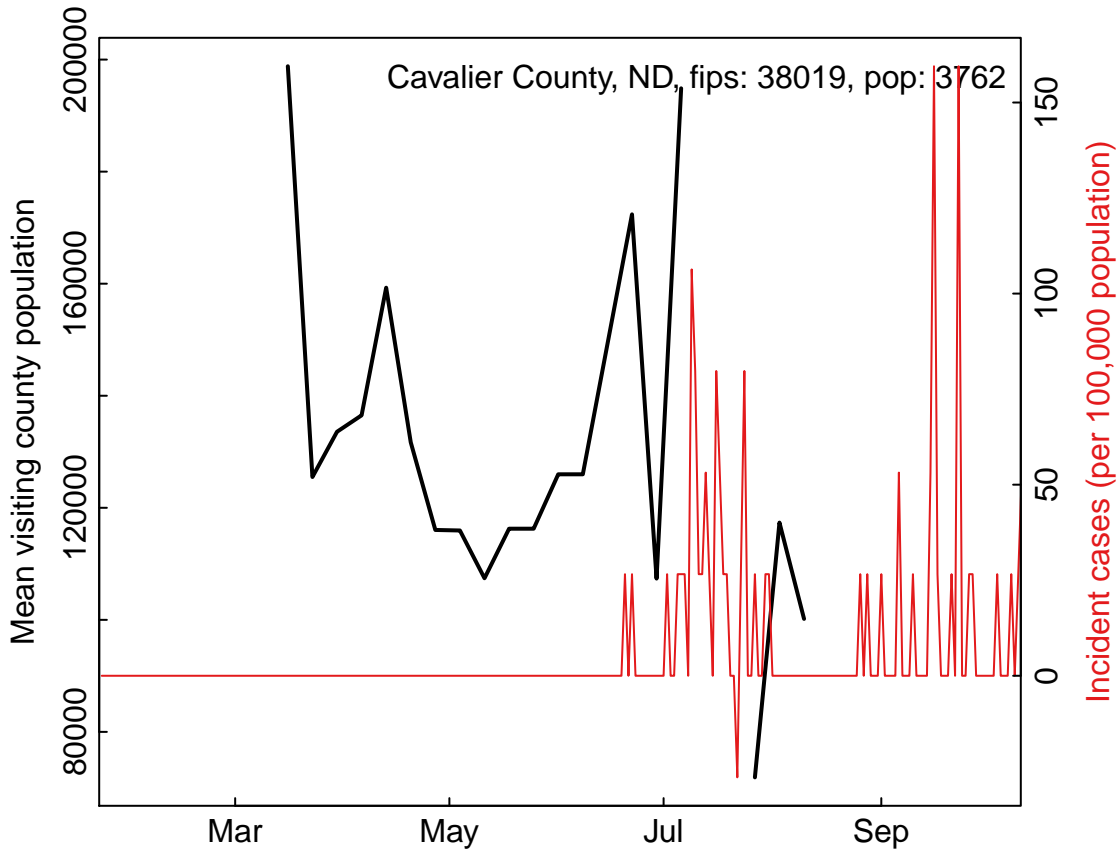

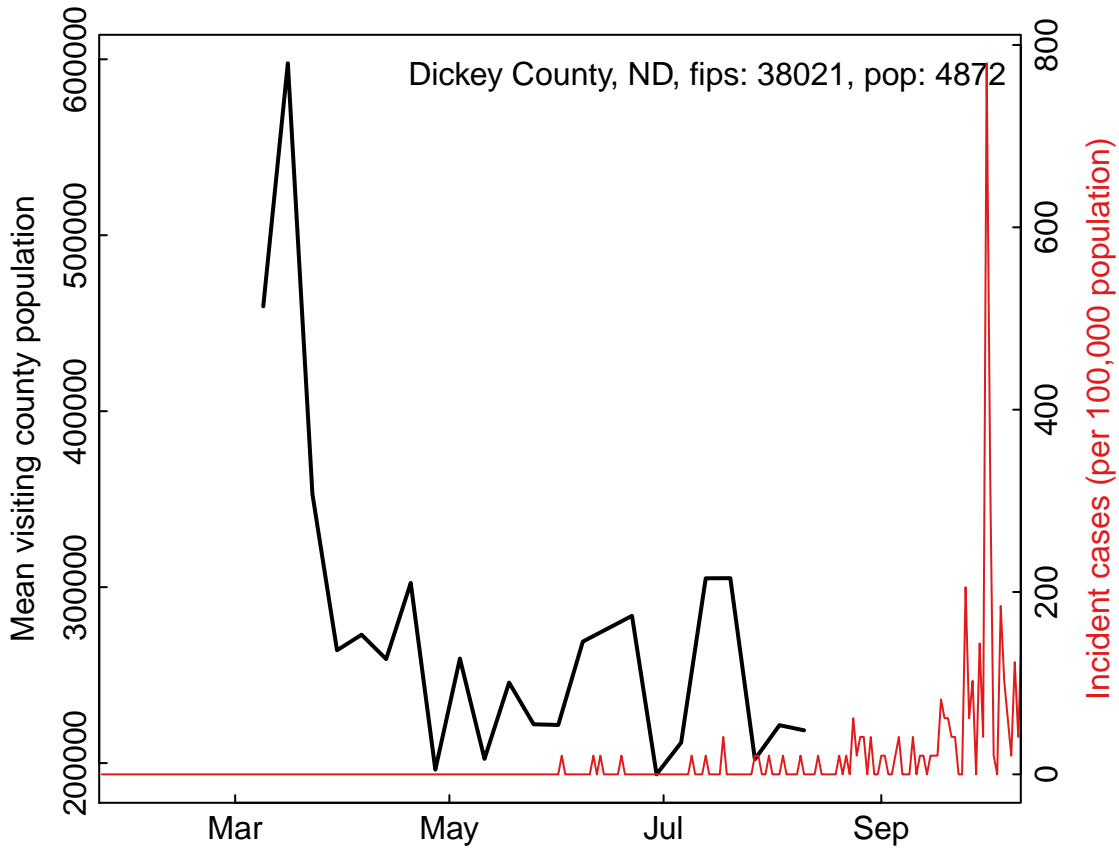

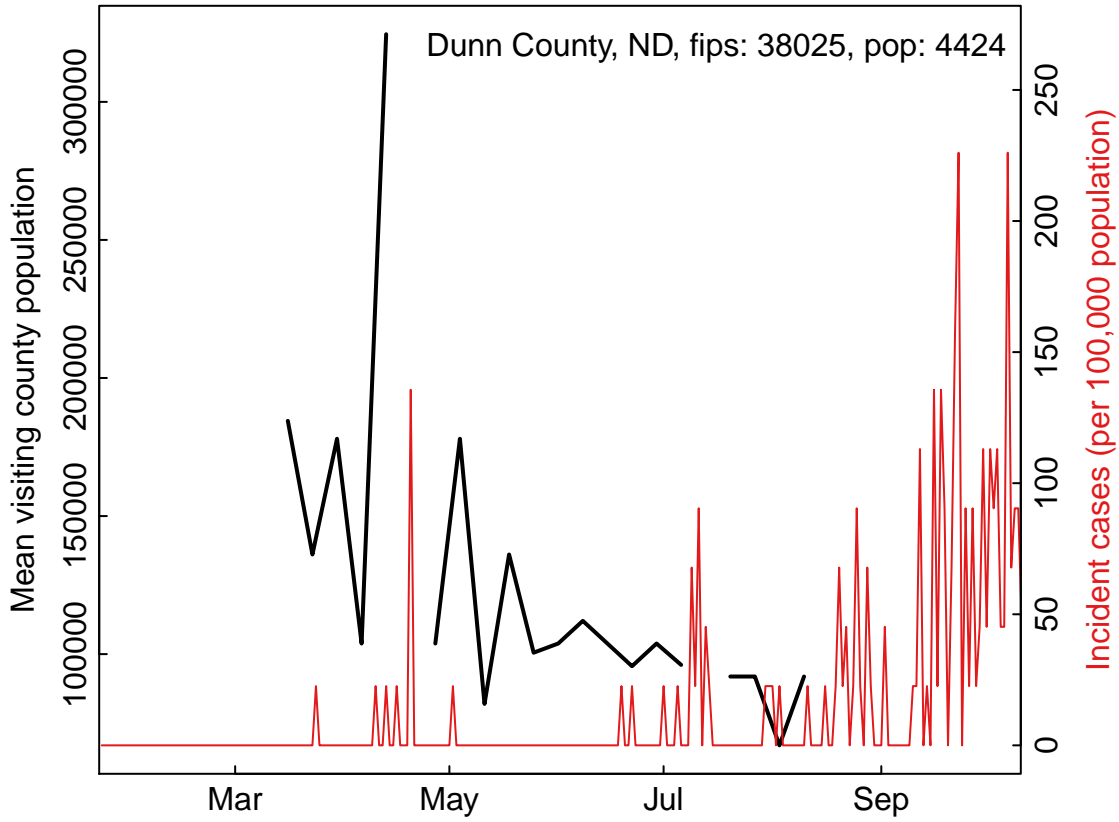

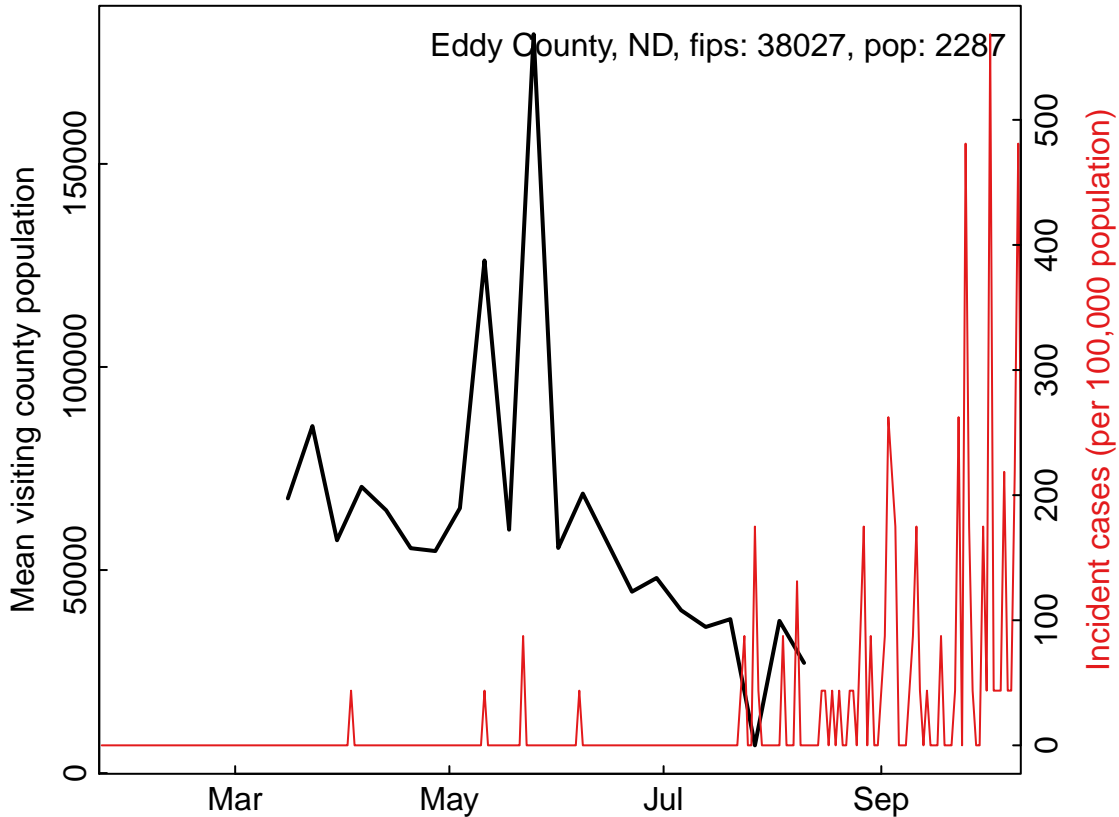

Emmons County, ND, fips: 38029, pop: 3241

Mean visiting county population

1000000  
600000  
200000

Mar May Jul Sep

Incident cases (per 100,000 population)

600  
400  
200  
0

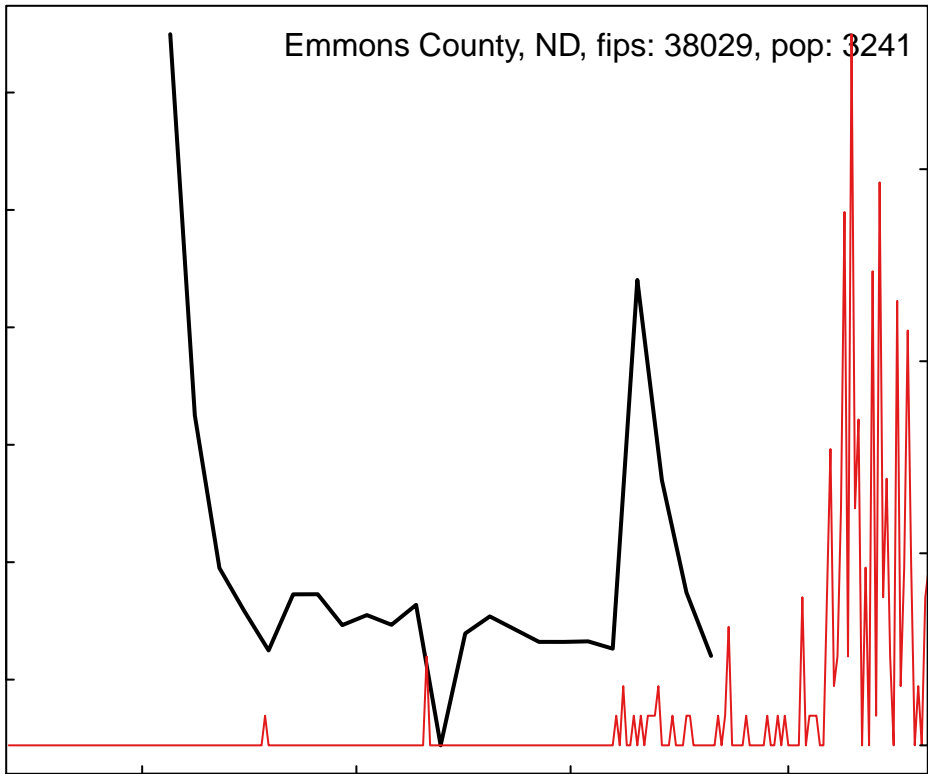

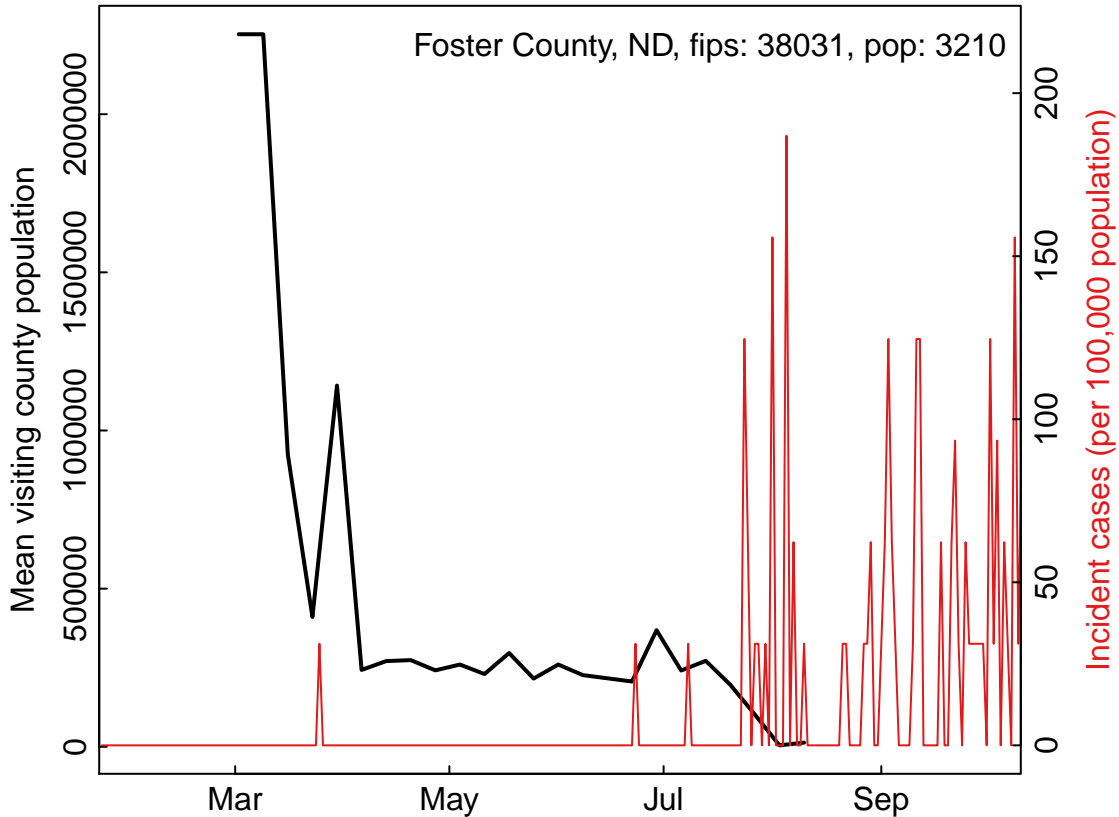

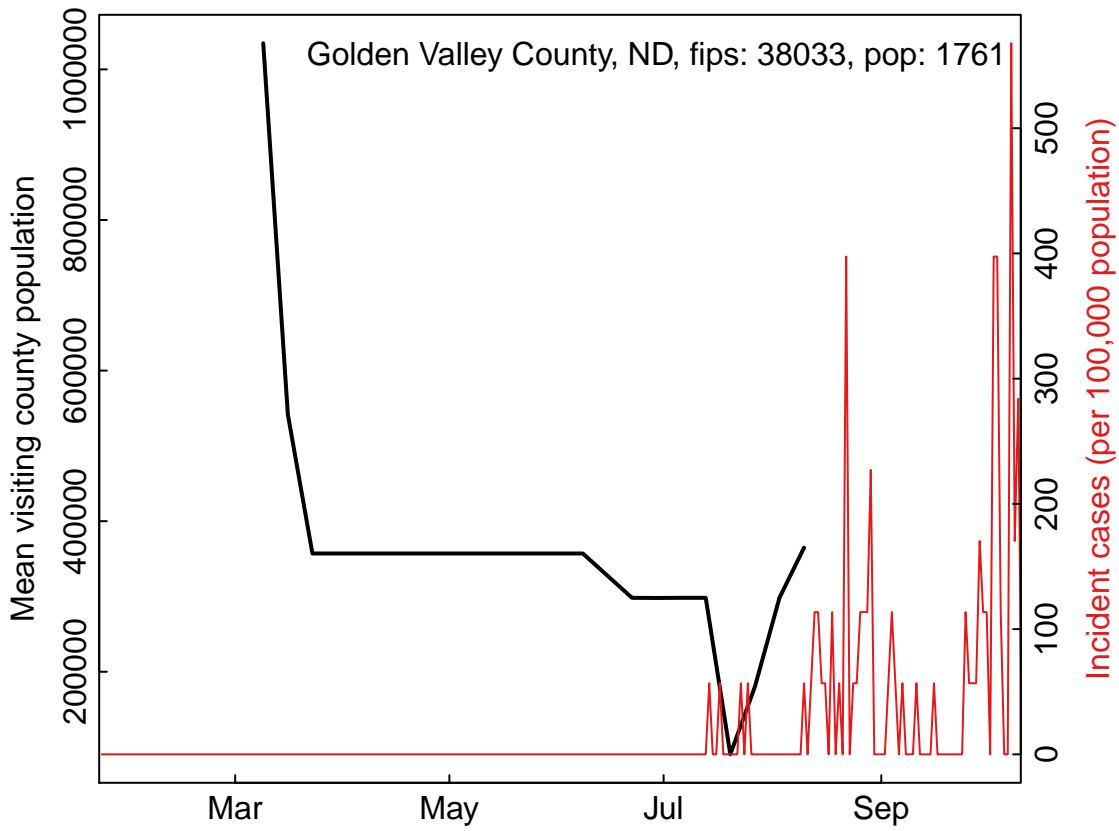



Grand Forks County, ND, fips: 38035, pop: 69451

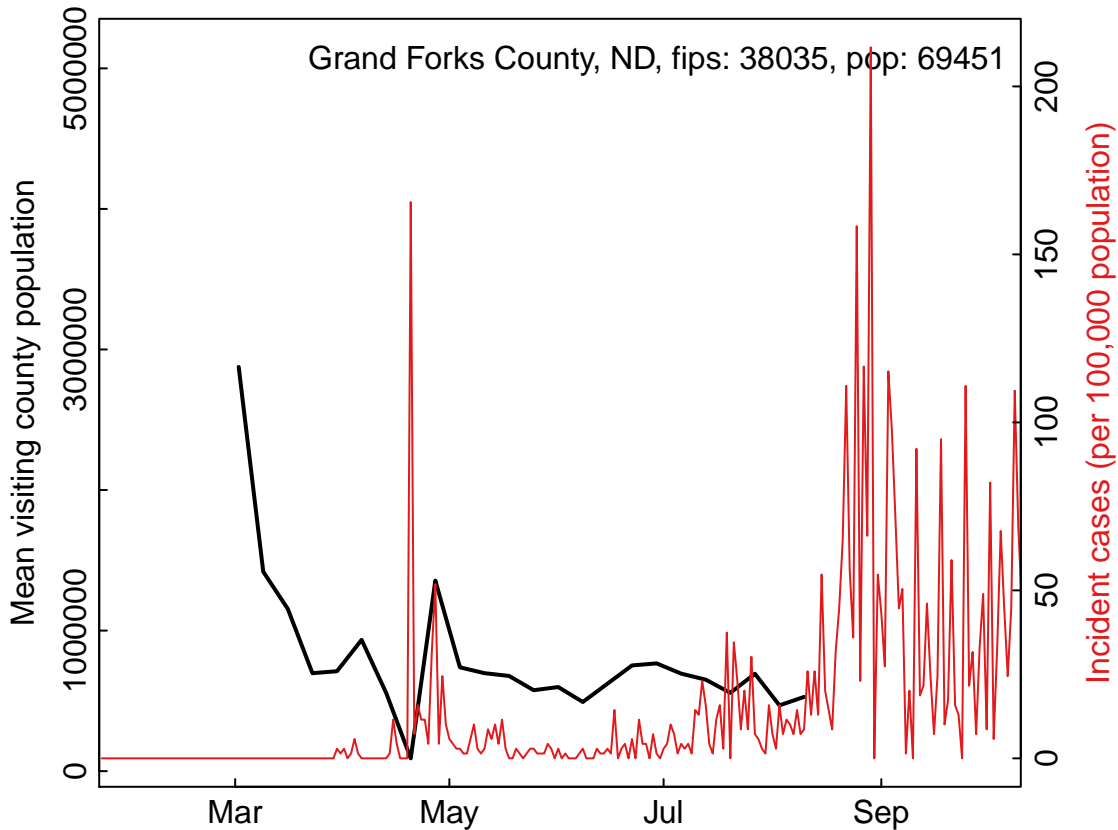

Grant County, ND, fips: 38037, pop: 2274

Mean visiting county population

1000000  
600000  
200000  
0

Mar May Jul Sep

Incident cases (per 100,000 population)

150  
100  
50  
0

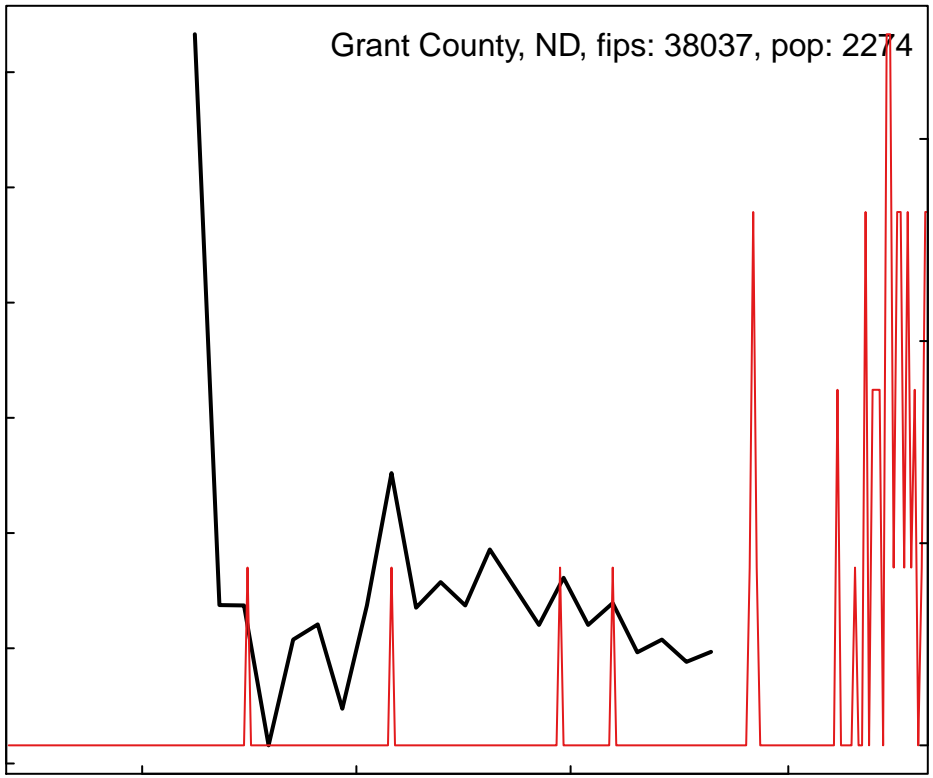

Mean visiting county population

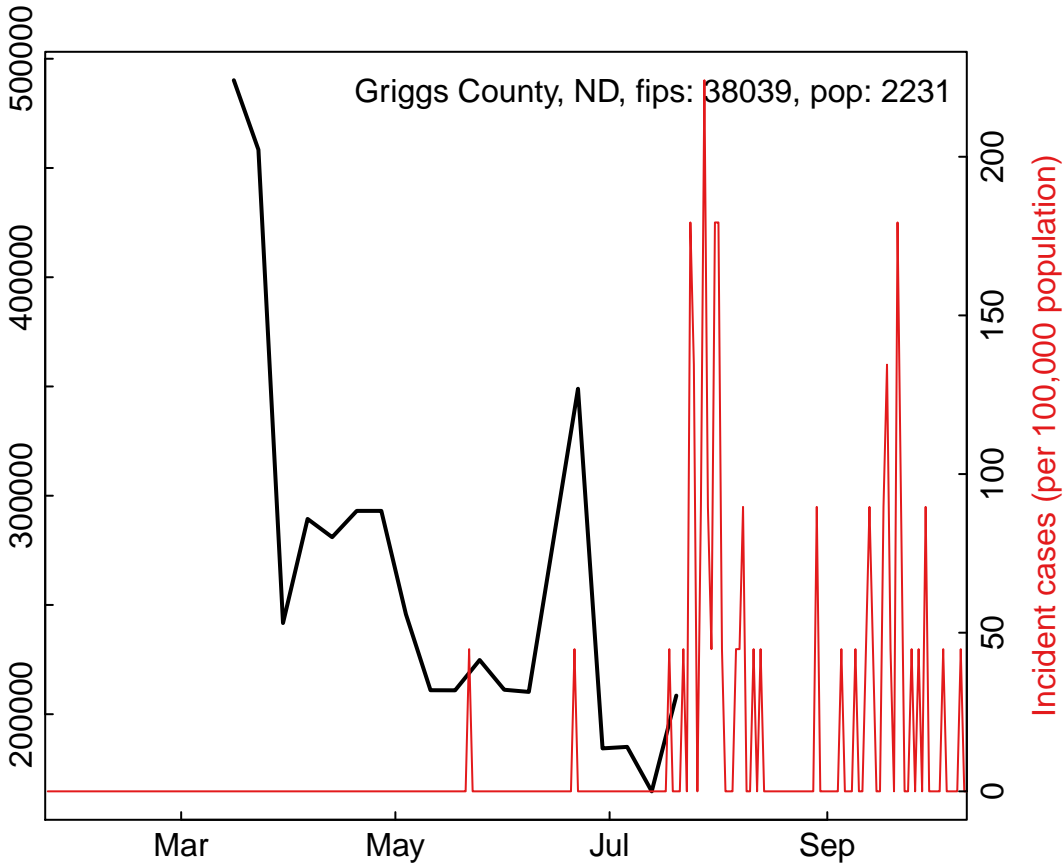

Hettinger County, ND, fips: 38041, pop: 2499

Mean visiting county population

100000  
80000  
60000  
40000

Mar

May

Jul

Sep

150  
100  
50  
0

Incident cases (per 100,000 population)

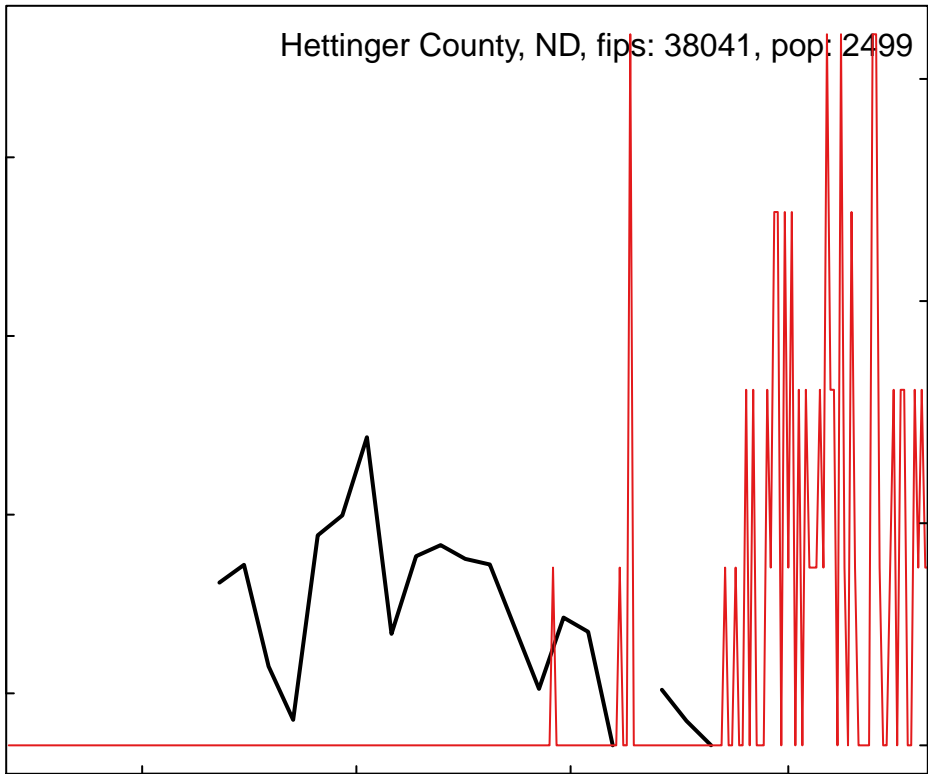

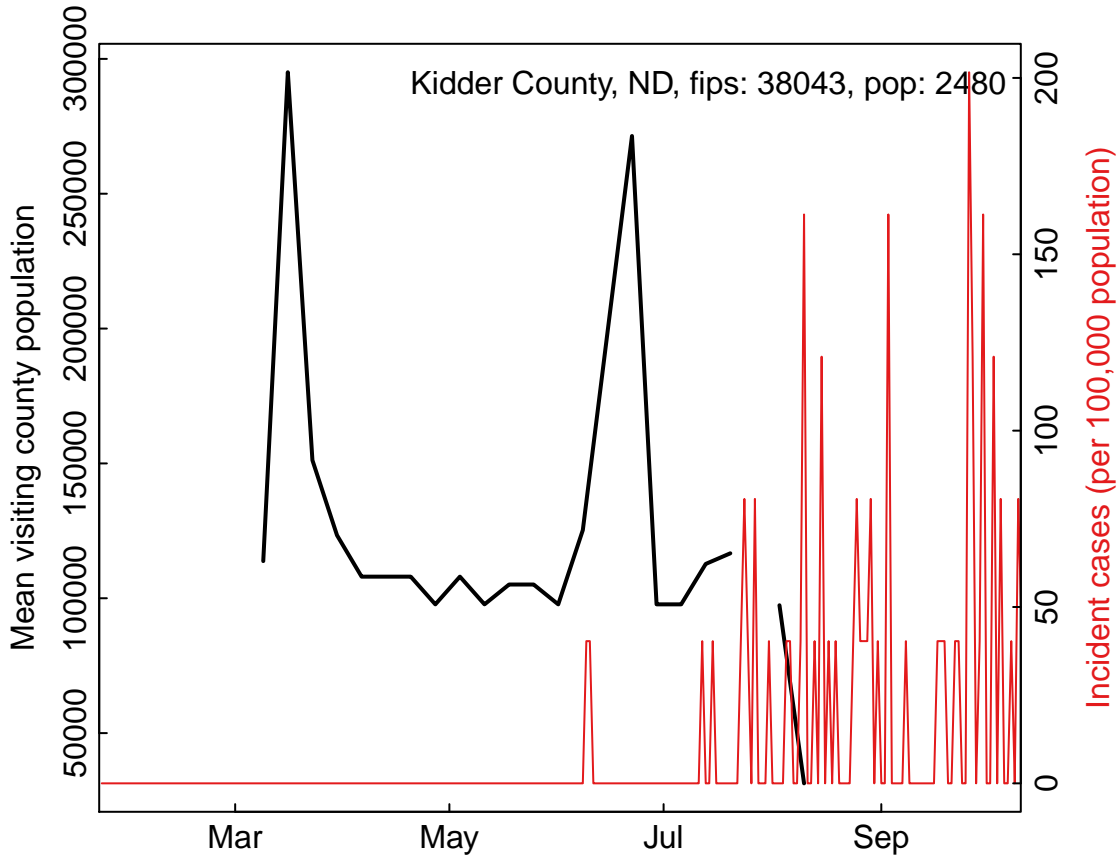

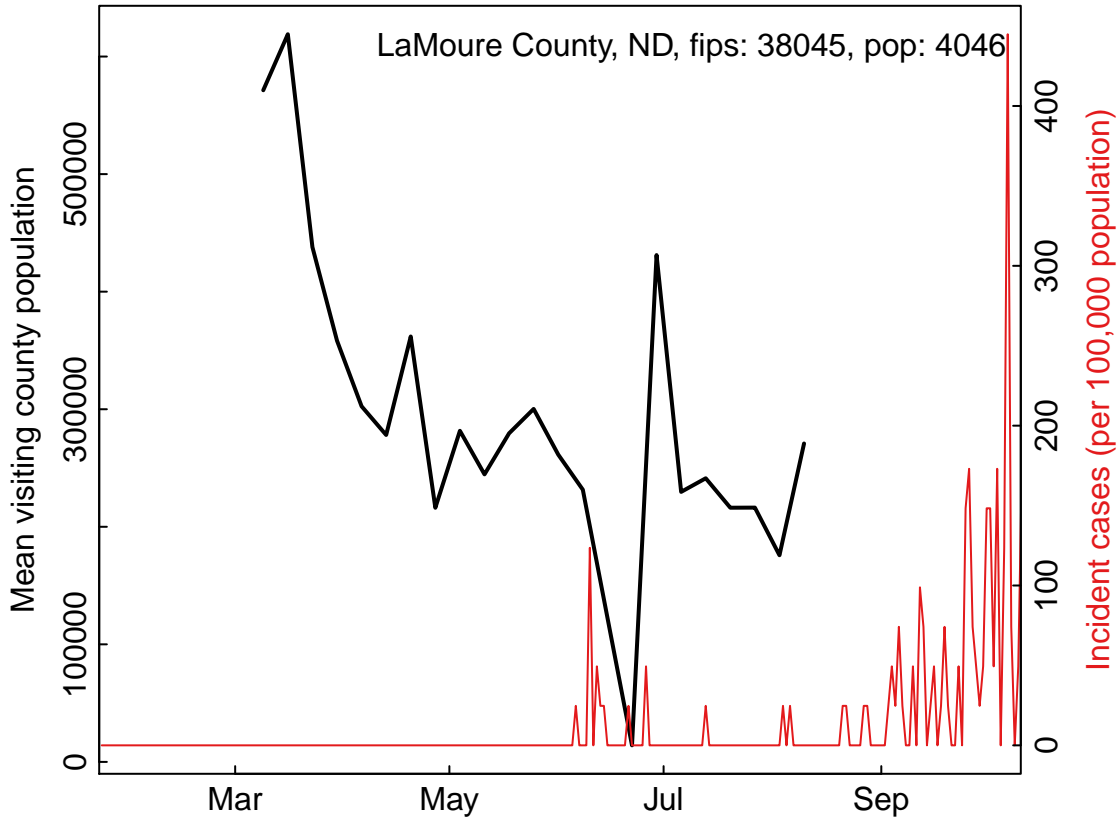

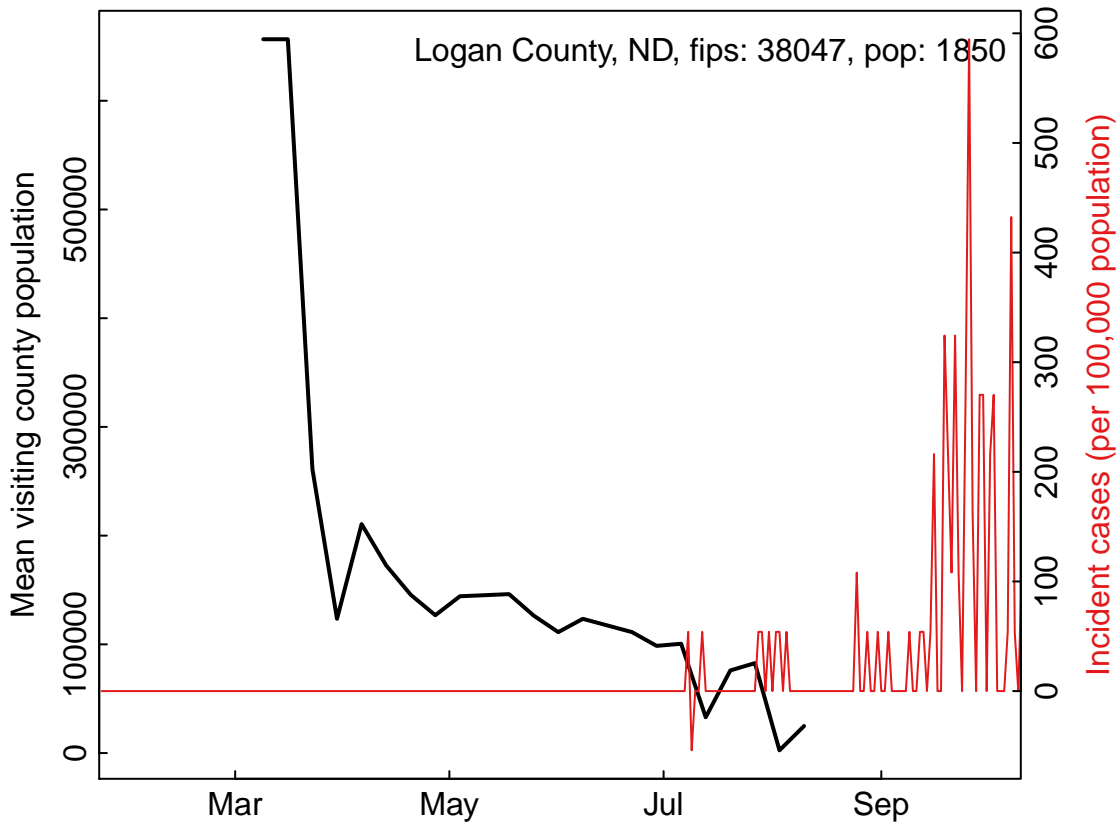

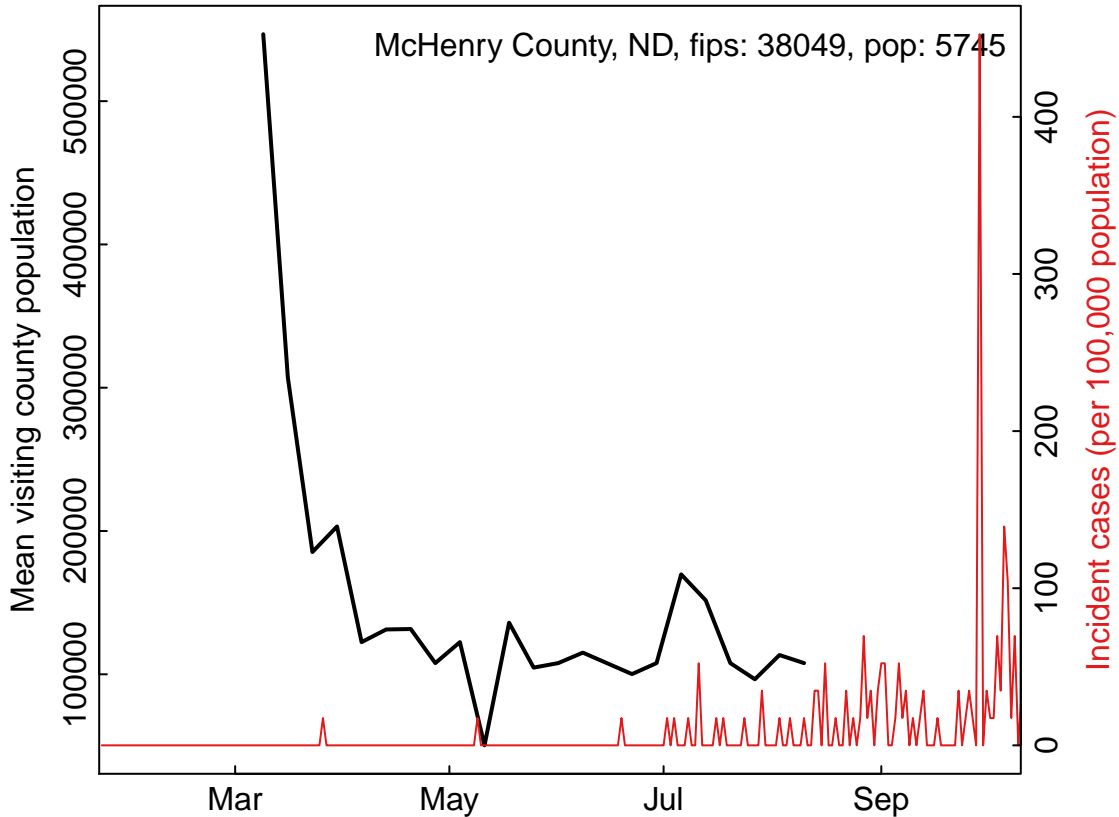



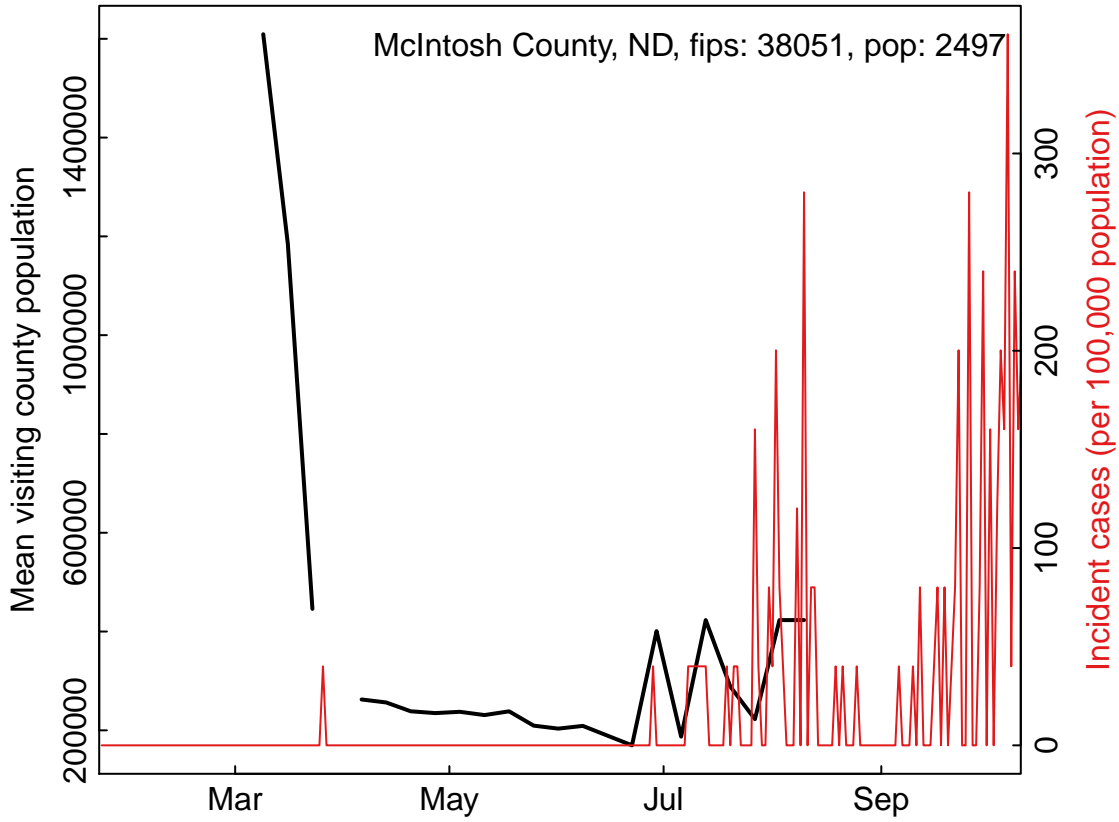

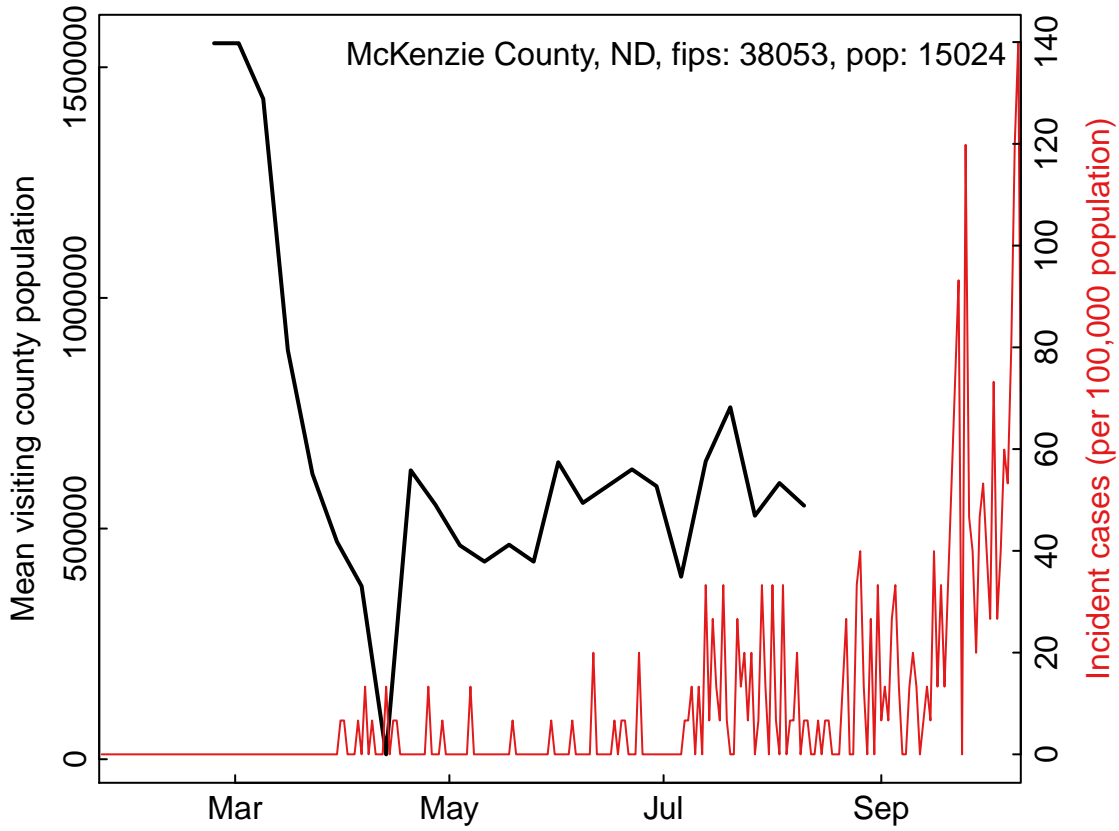

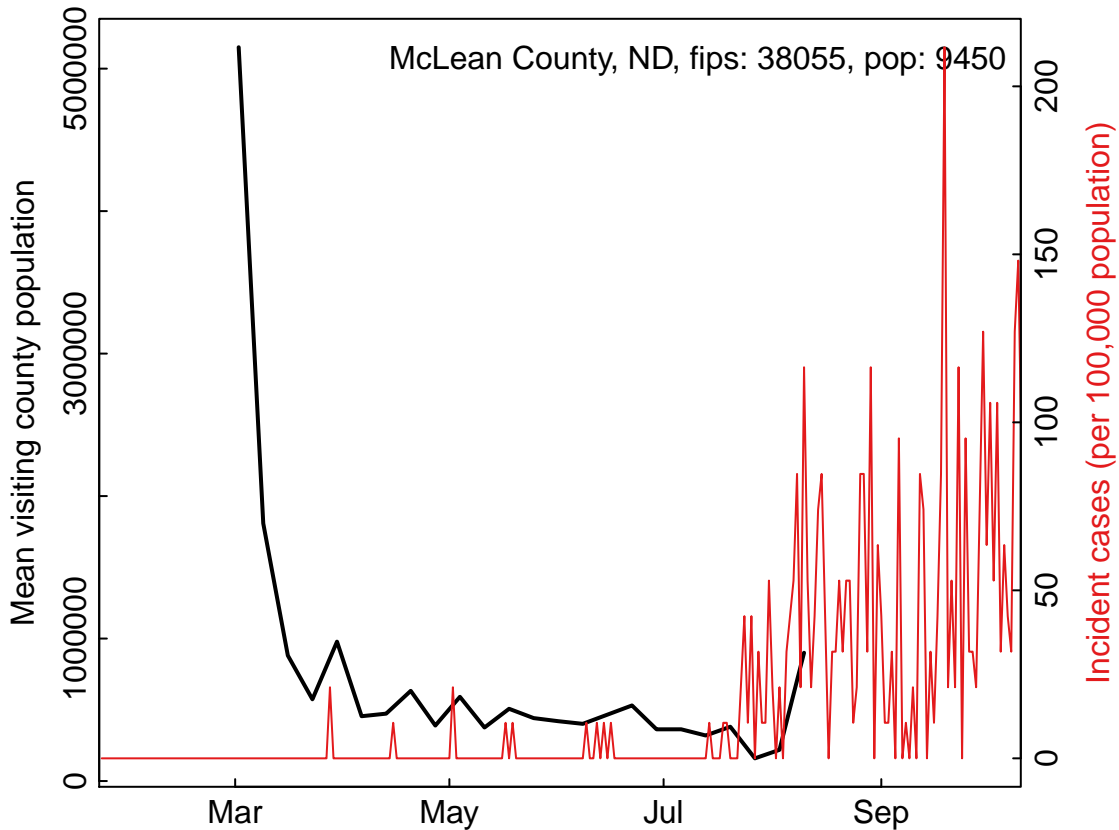

Mercer County, ND, fips: 38057, pop: 8187

Mean visiting county population

1200000  
800000  
400000

Mar

May

Jul

Sep

Incident cases (per 100,000 population)

300  
250  
200  
150  
100  
50  
0

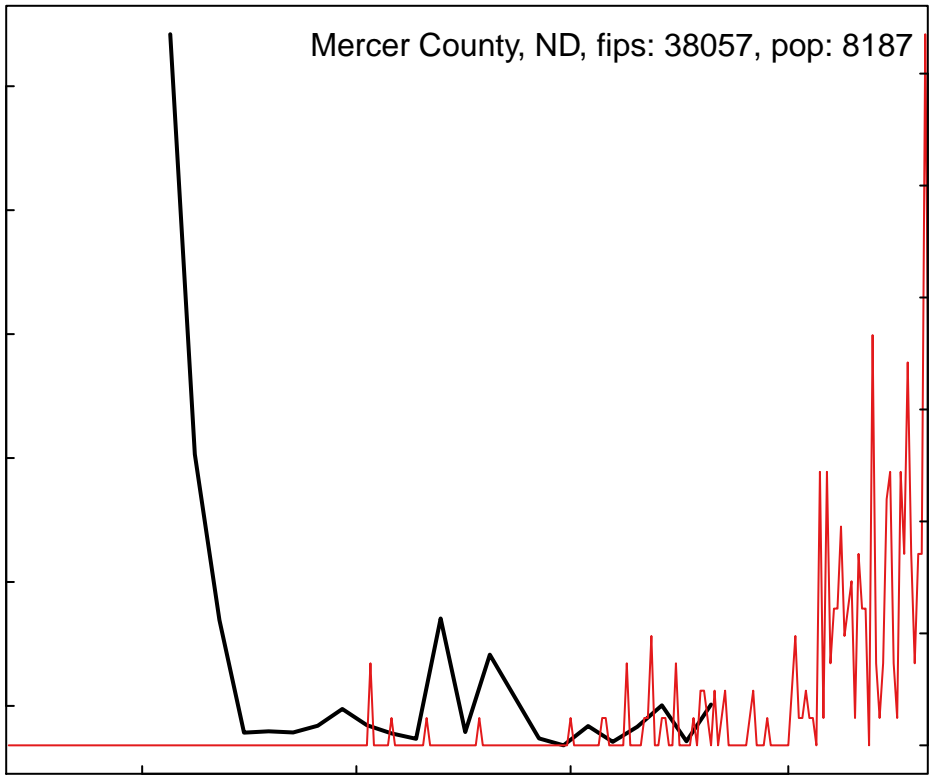

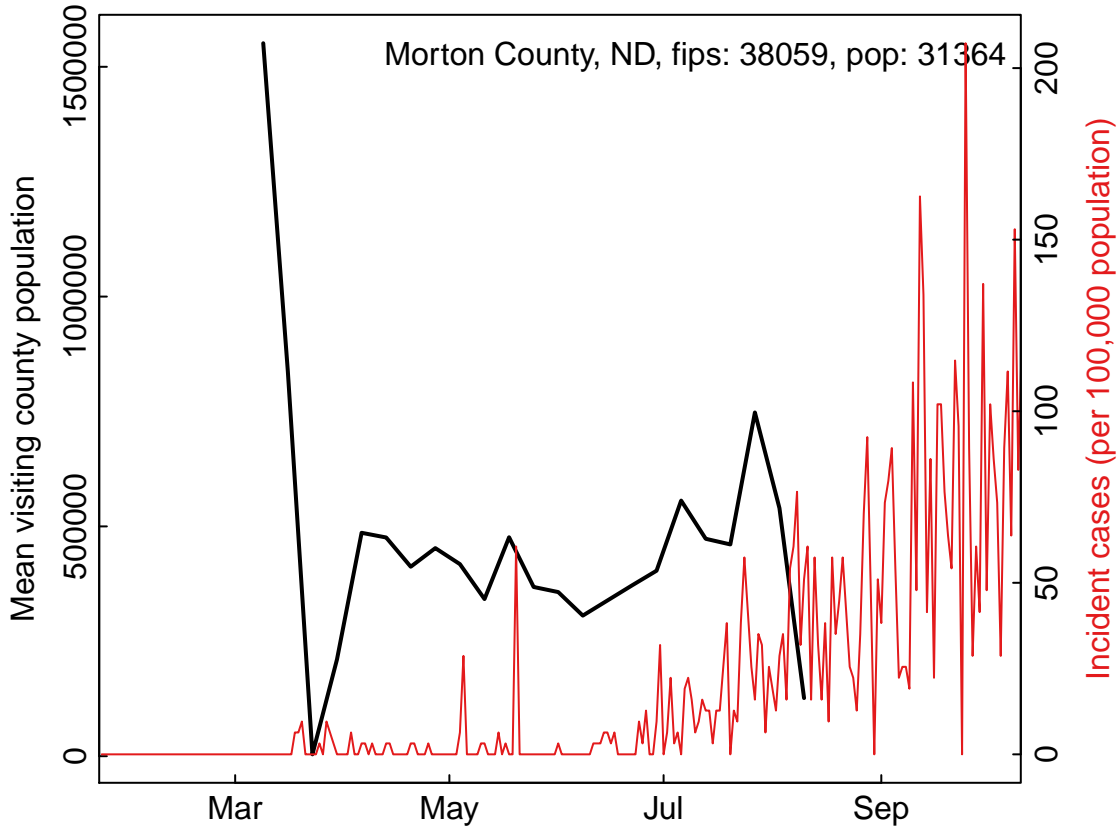

Mountrail County, ND fips: 38061, pop: 10545

Mean visiting county population

Incident cases (per 100,000 population)

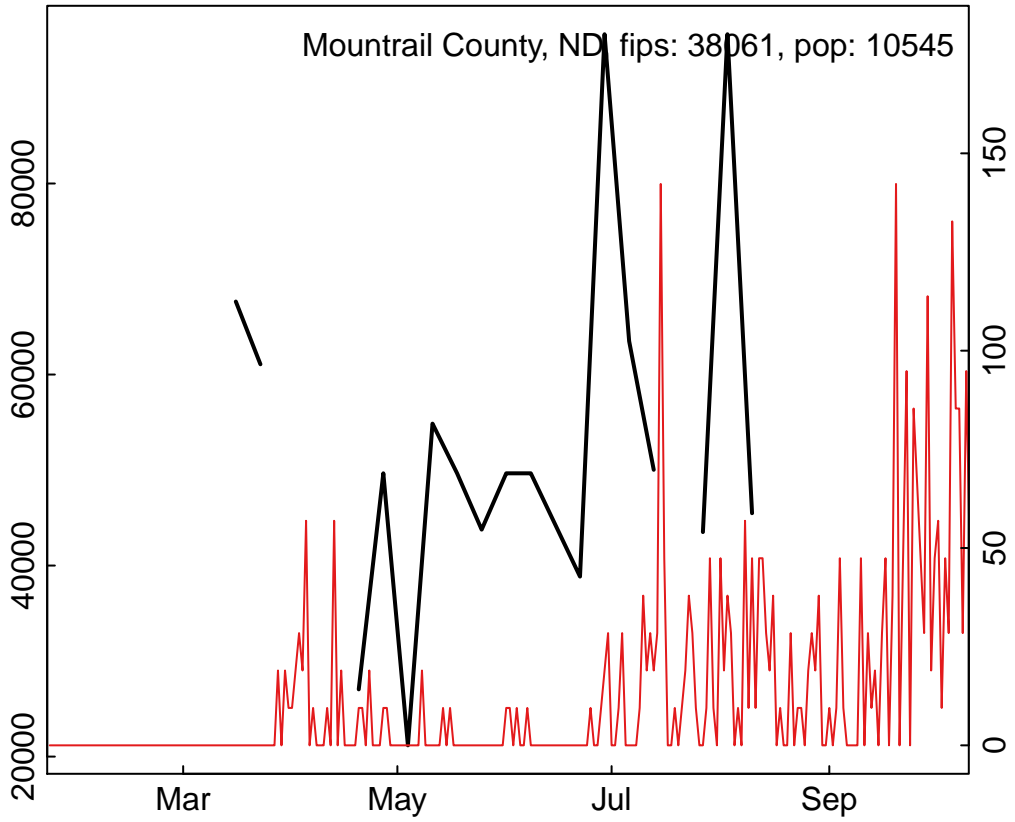

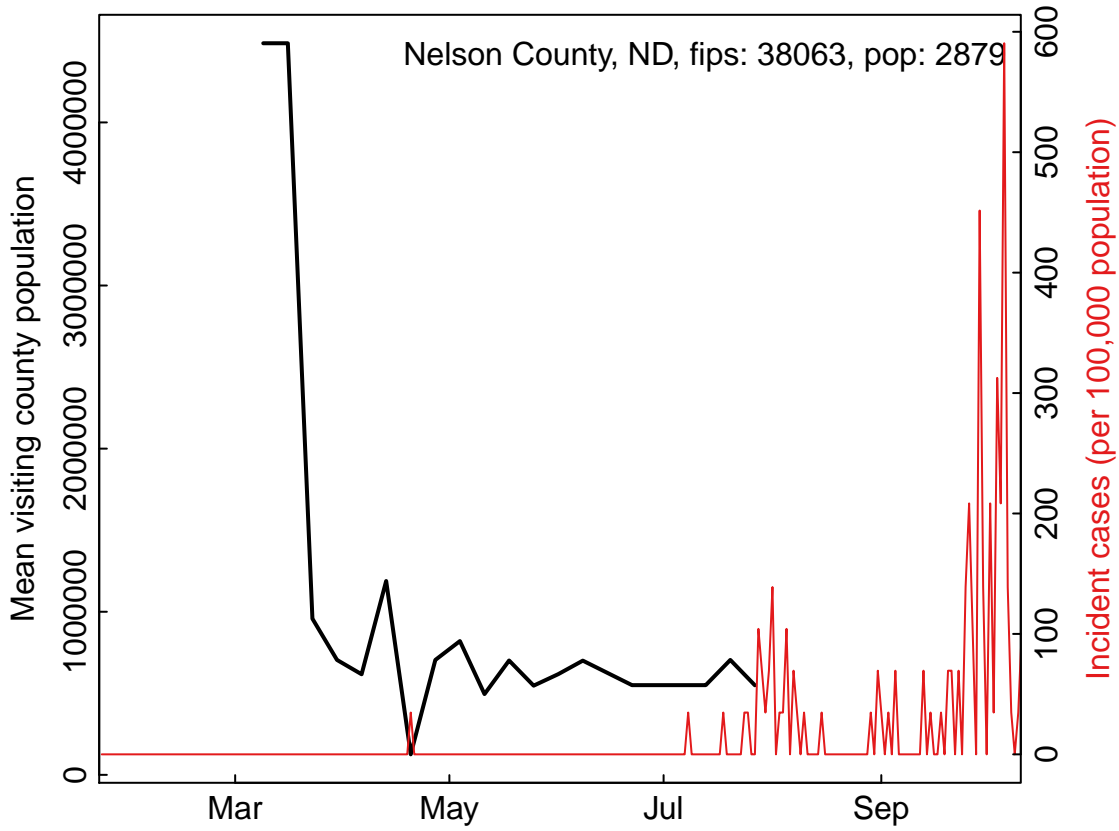

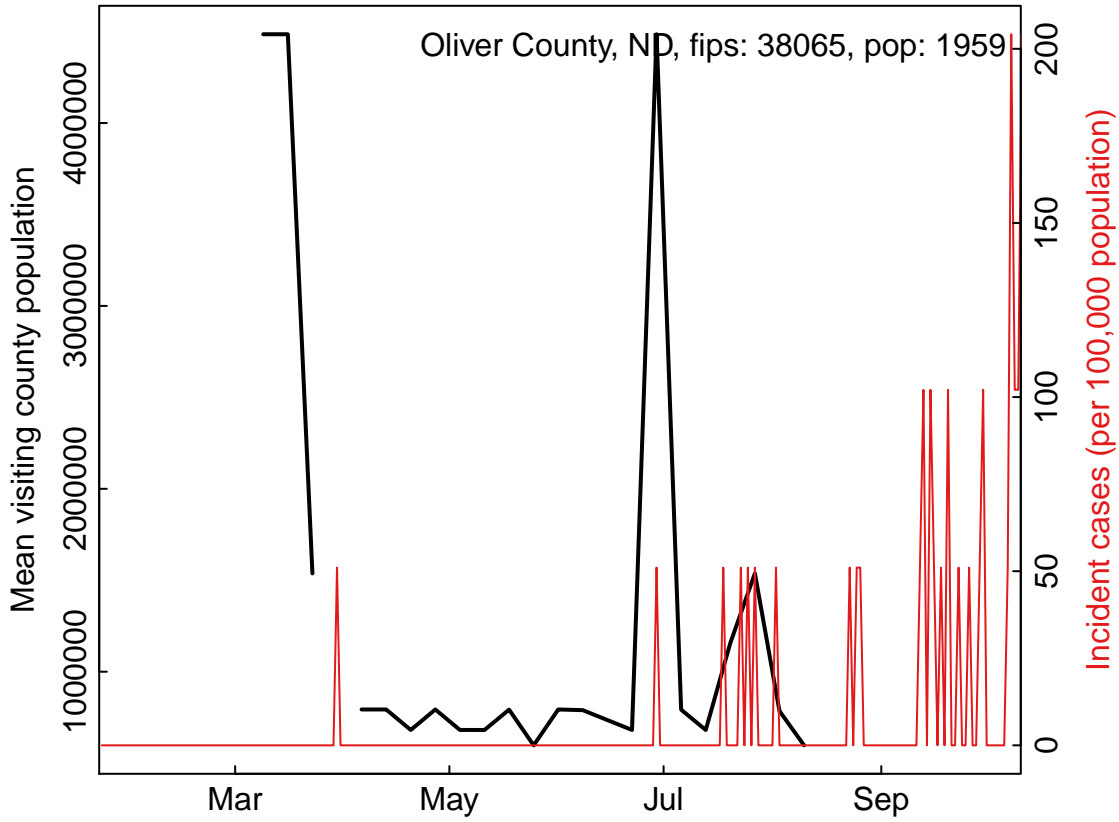



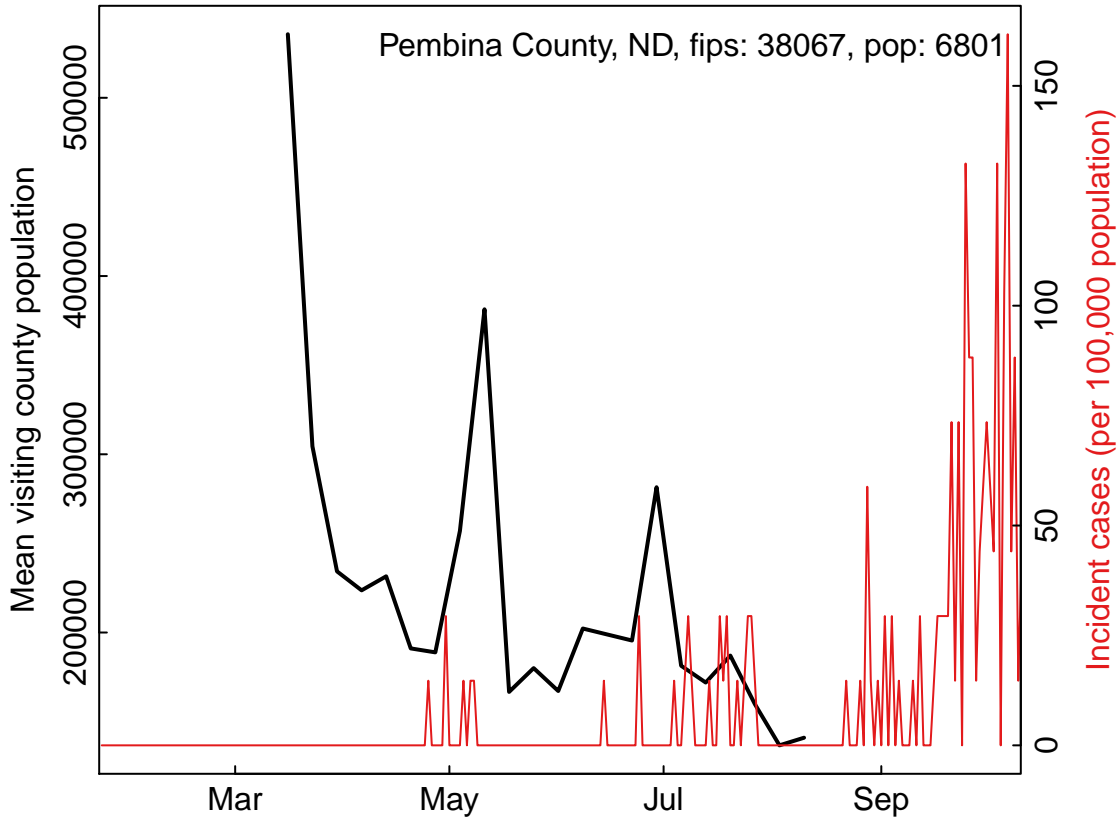

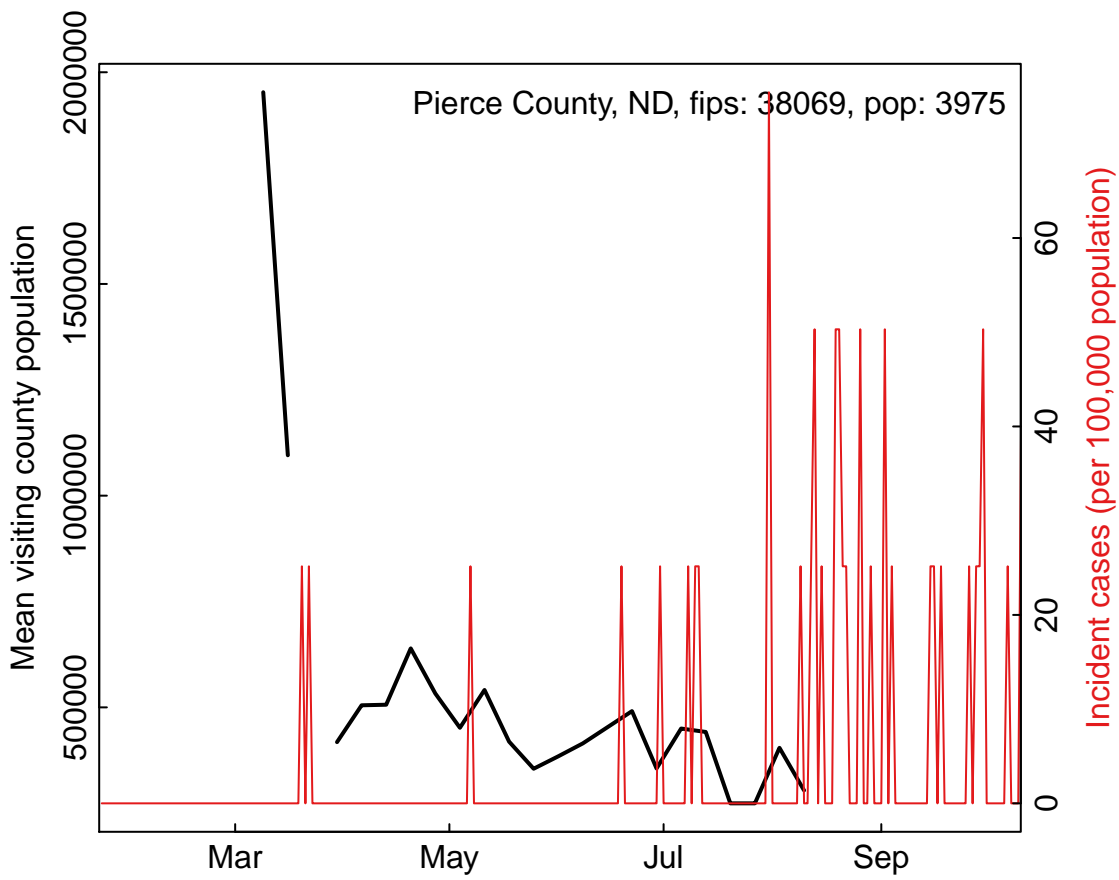

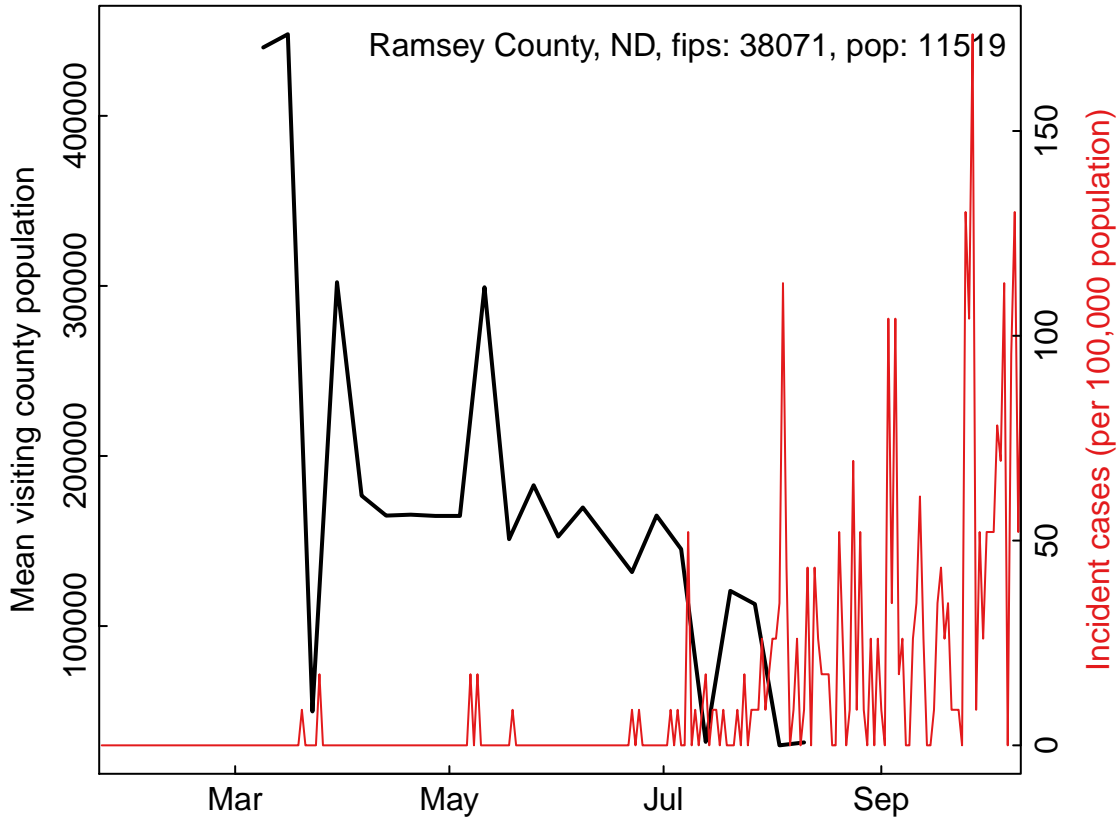

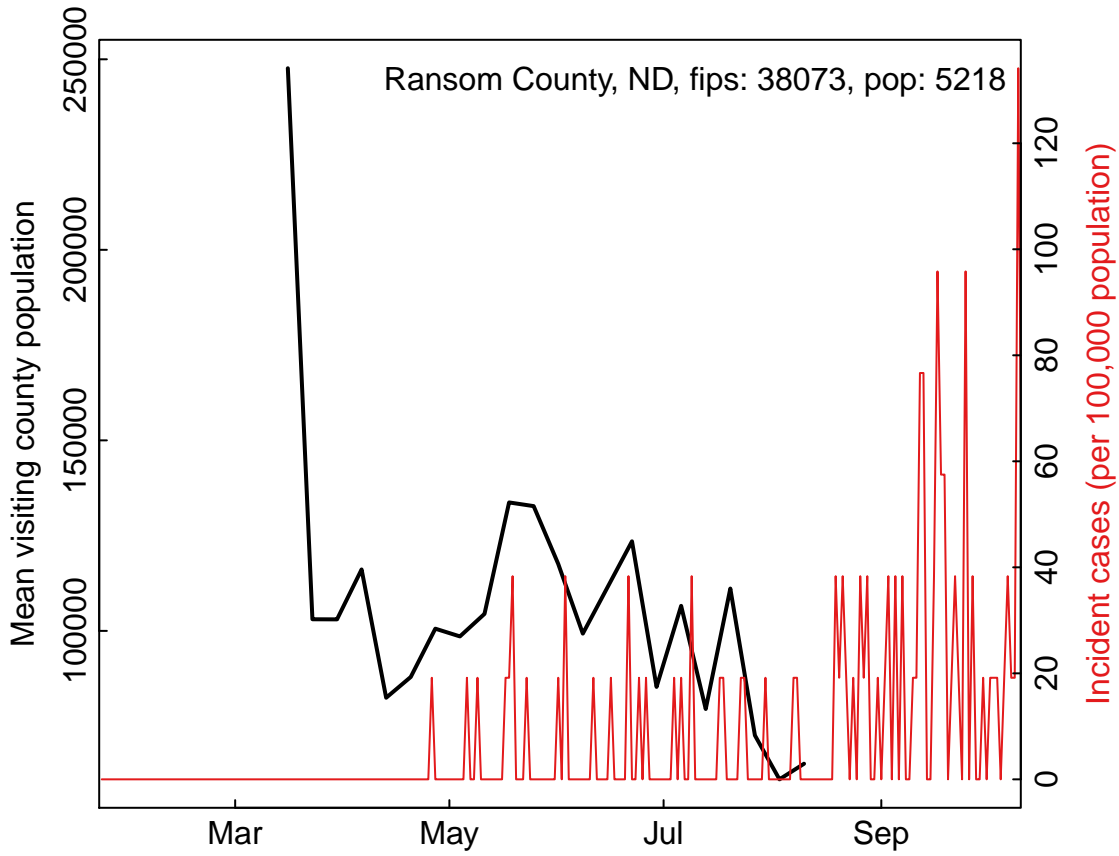

Renville County, ND, fips: 38075, pop: 23327

Mean visiting county population

60000  
50000  
40000  
30000

Mar

May

Jul

Sep

400  
300  
200  
100  
0

Incident cases (per 100,000 population)

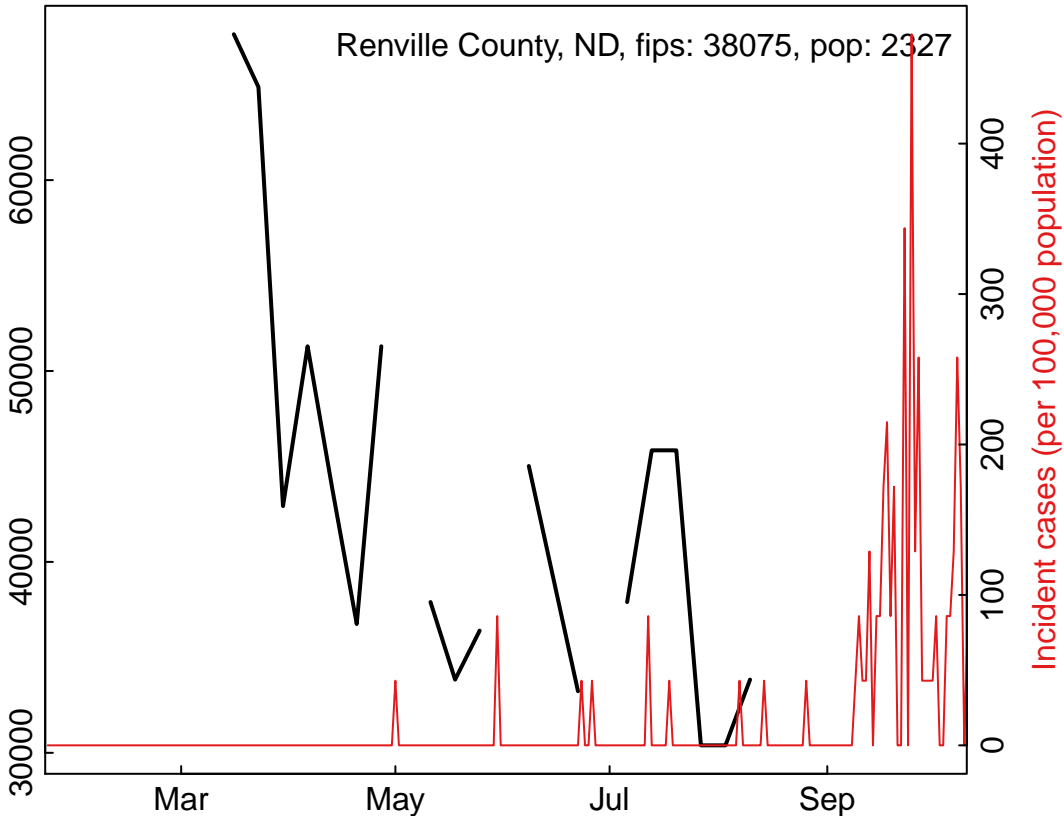

Richland County, ND, fips: 38077, pop: 16177

Mean visiting county population

1500000  
1000000  
500000

Mar

May

Jul

Sep

60  
50  
40  
30  
20  
10  
0

Incident cases (per 100,000 population)

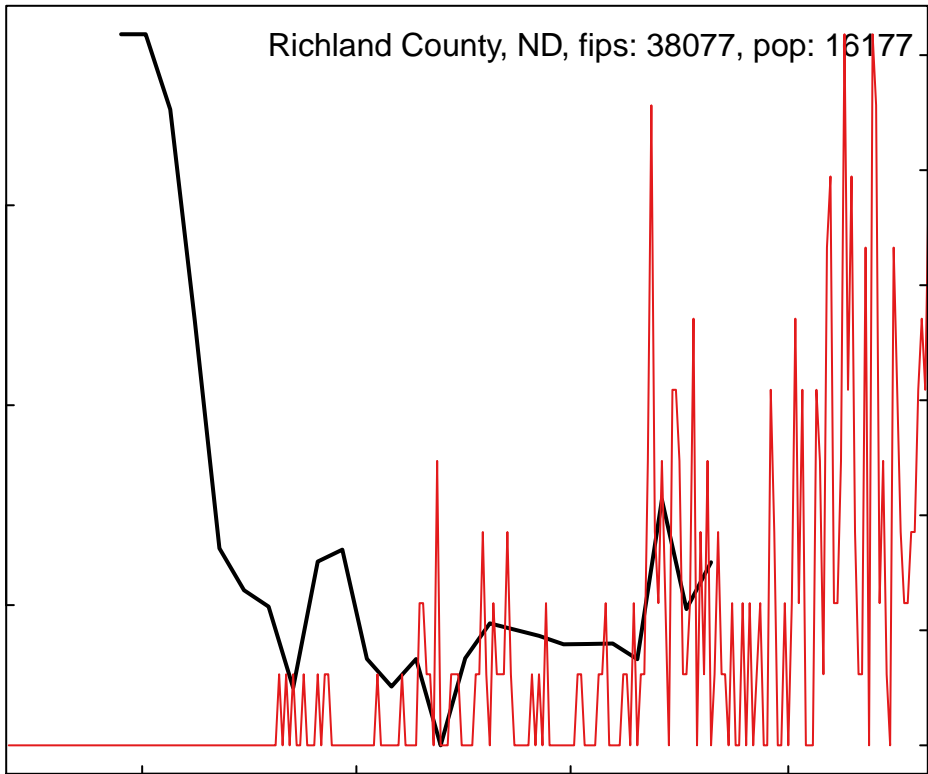

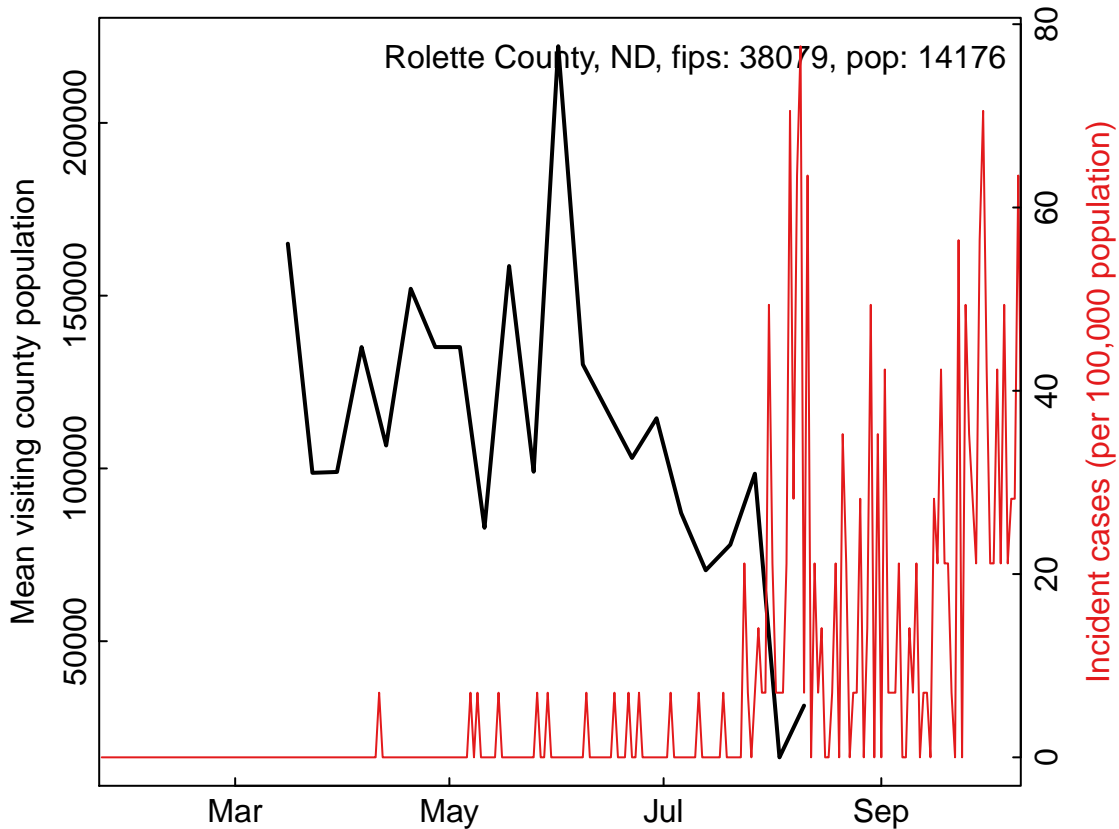

Sargent County, ND, fips: 38081, pop: 3898

Mean visiting county population

600000  
500000  
400000  
300000

Mar

May

Jul

Sep

300  
250  
200  
150  
100  
50  
0

Incident cases (per 100,000 population)

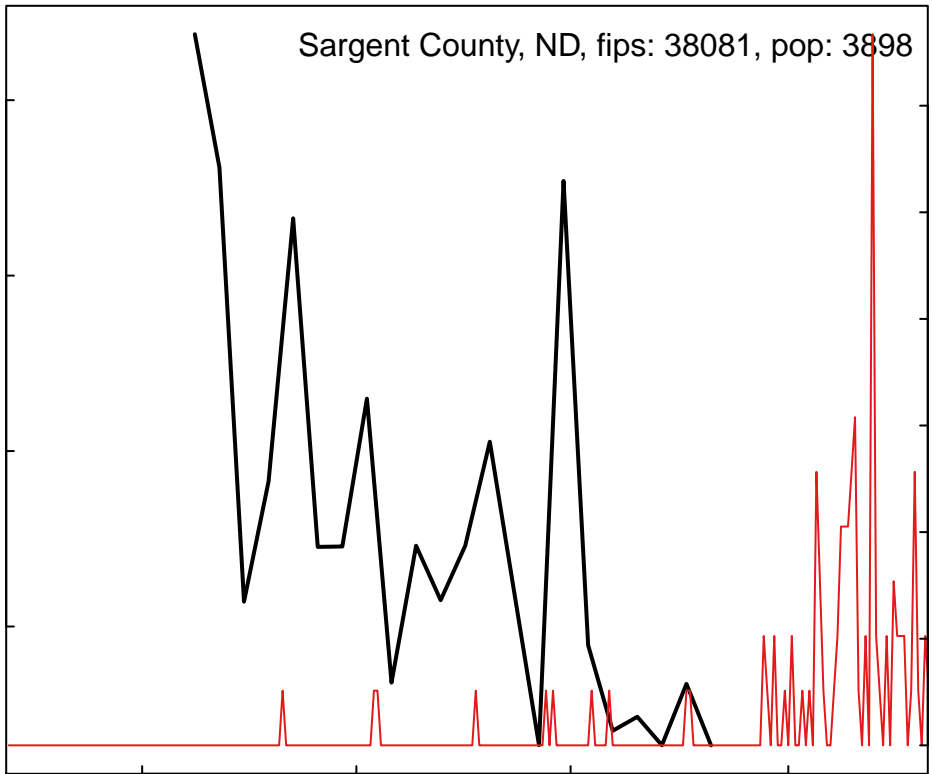



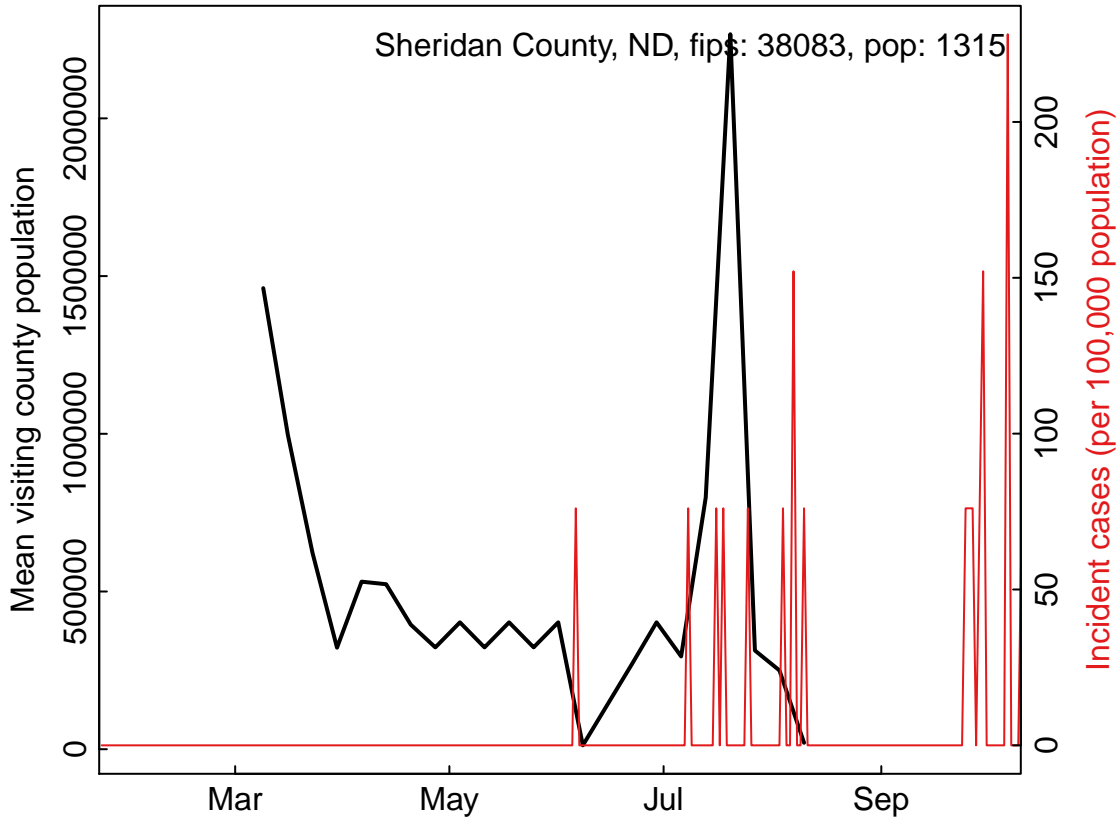

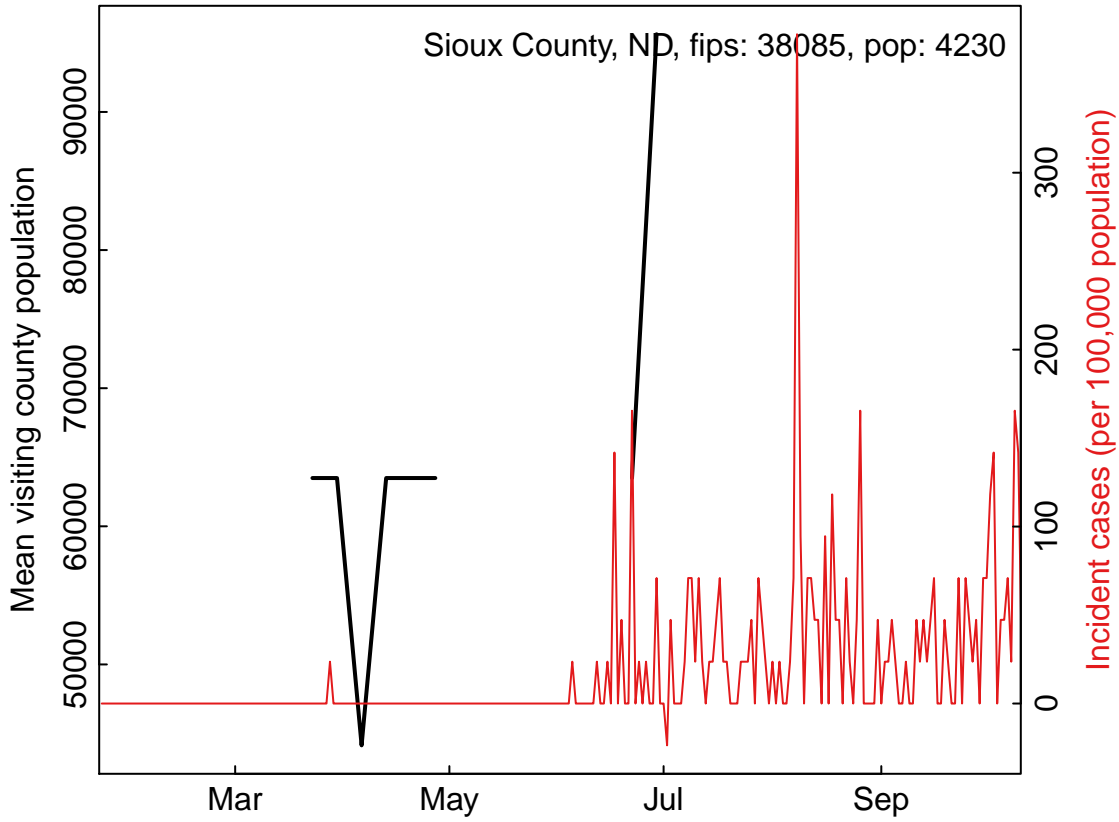

Stark County, ND, fips: 38089, pop: 31489

Mean visiting county population

2500000  
1500000  
500000  
0

Mar May Jul Sep

Incident cases (per 100,000 population)

400  
300  
200  
100  
0

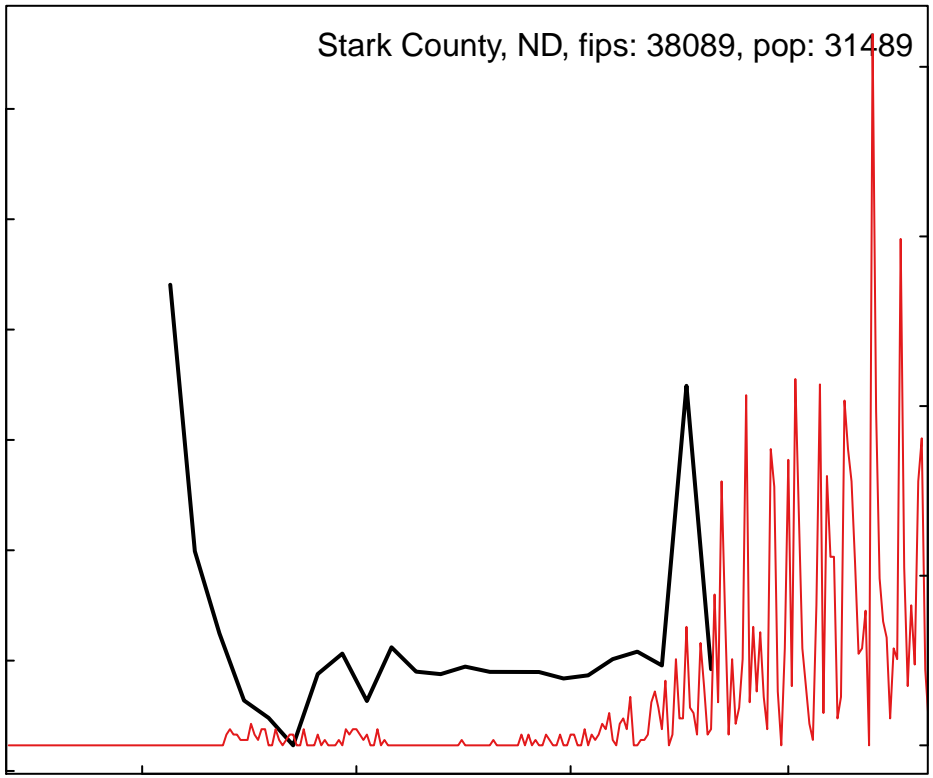

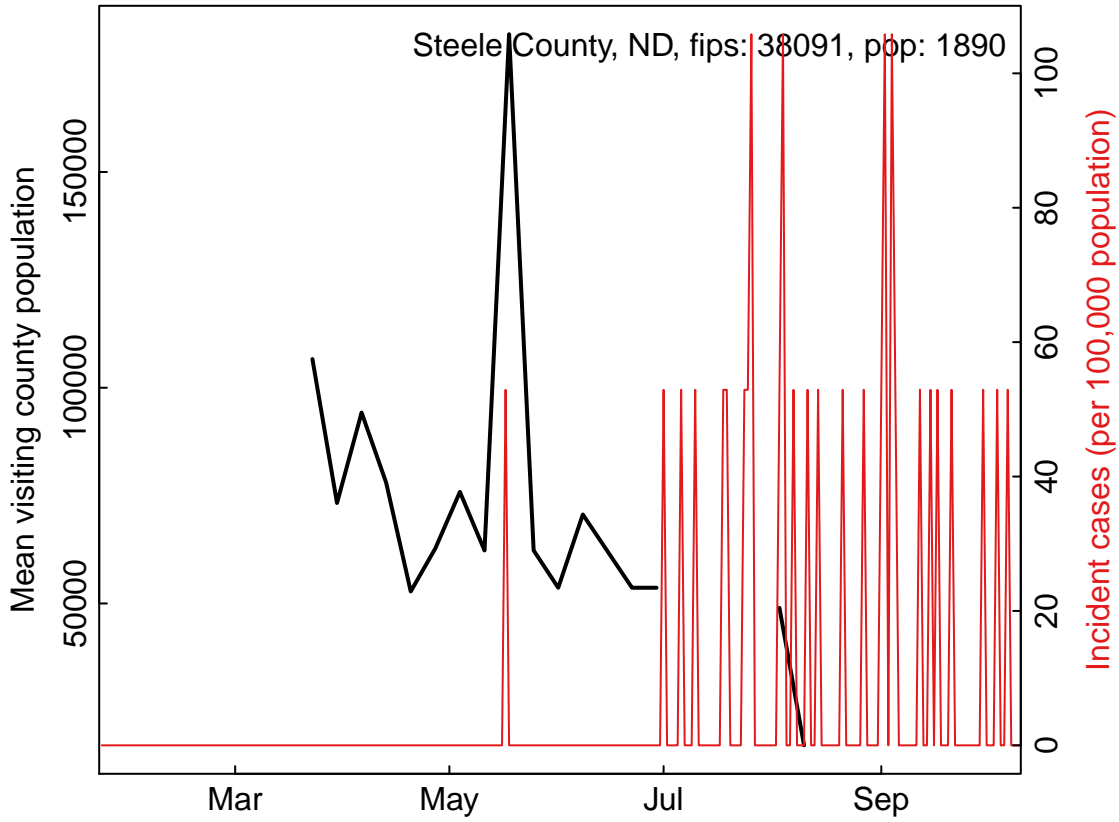

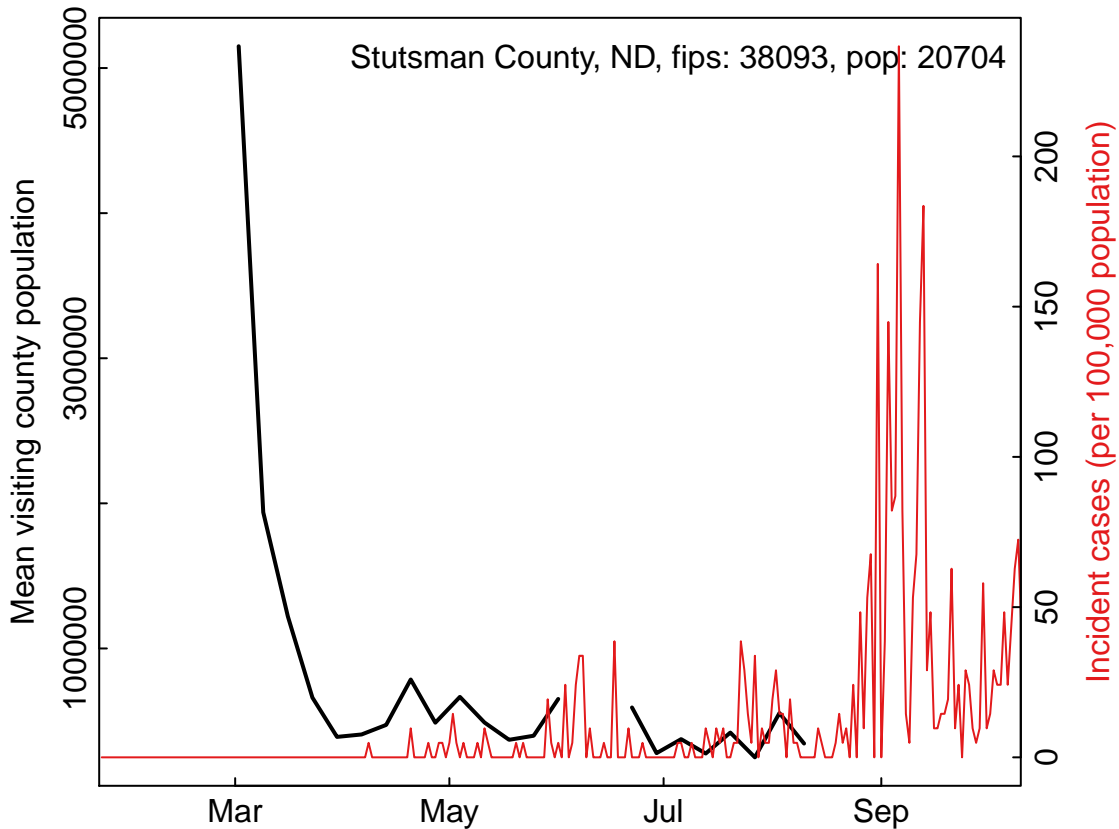

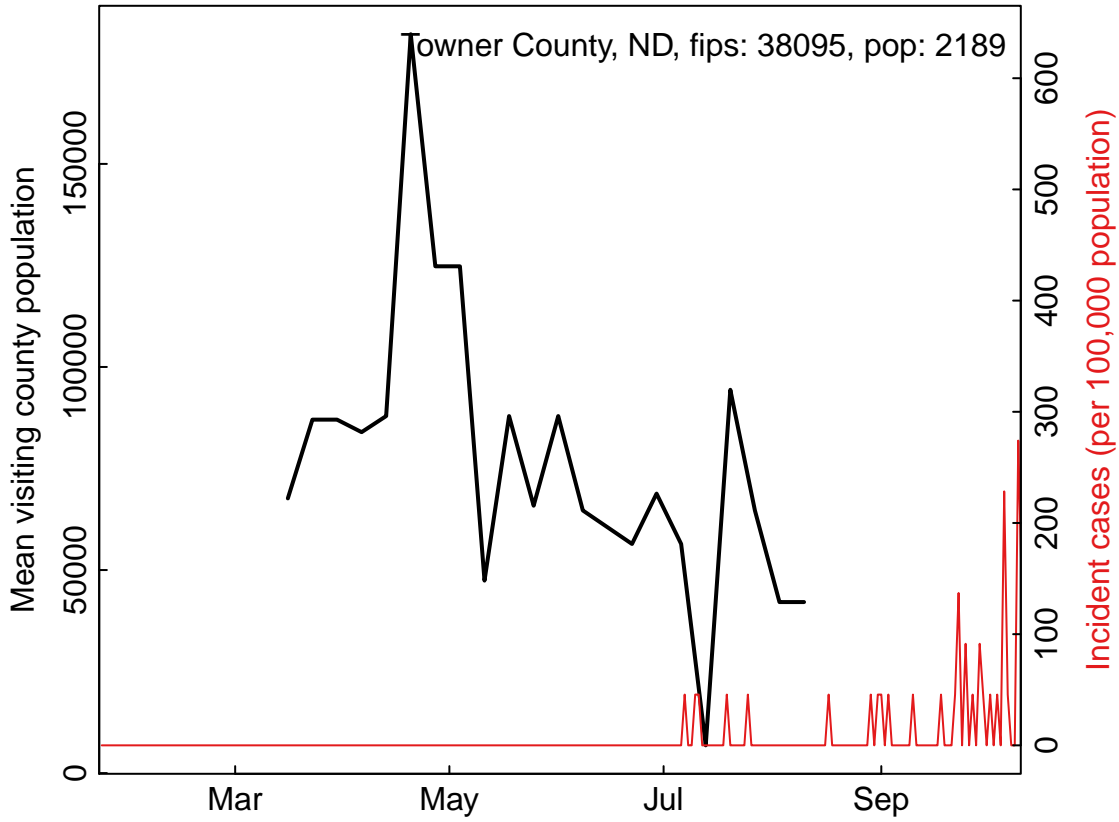

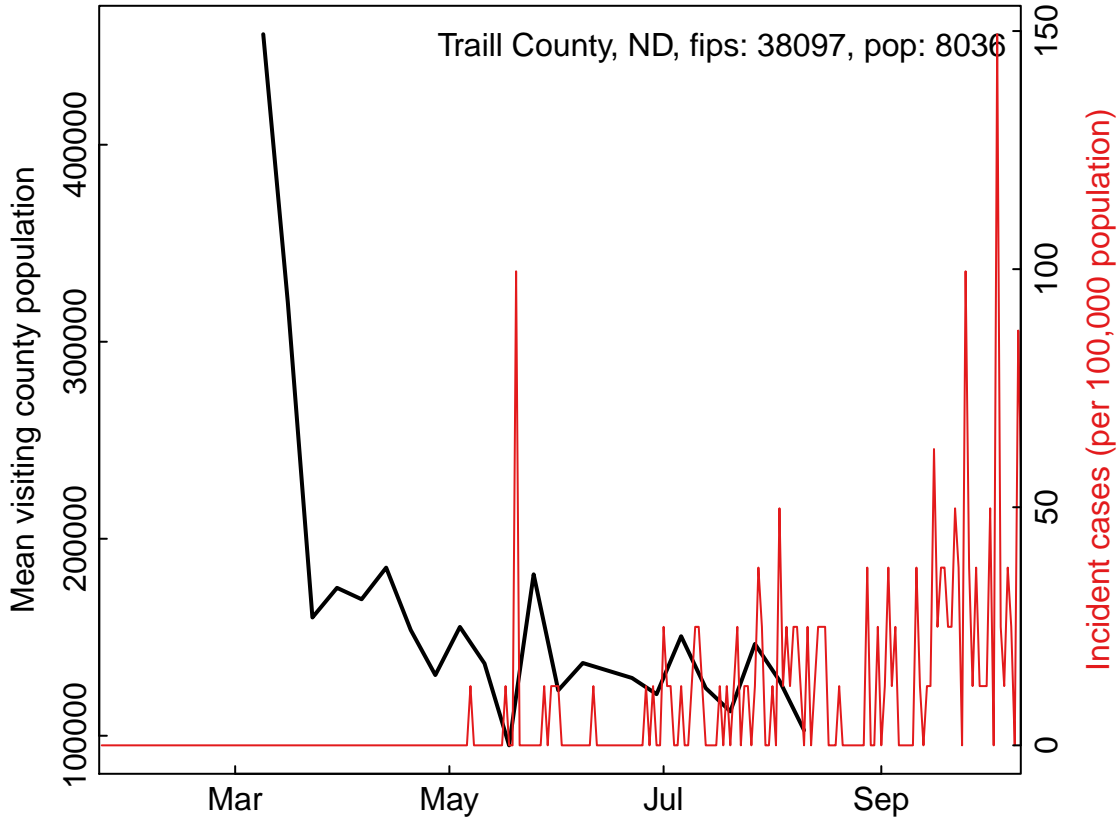

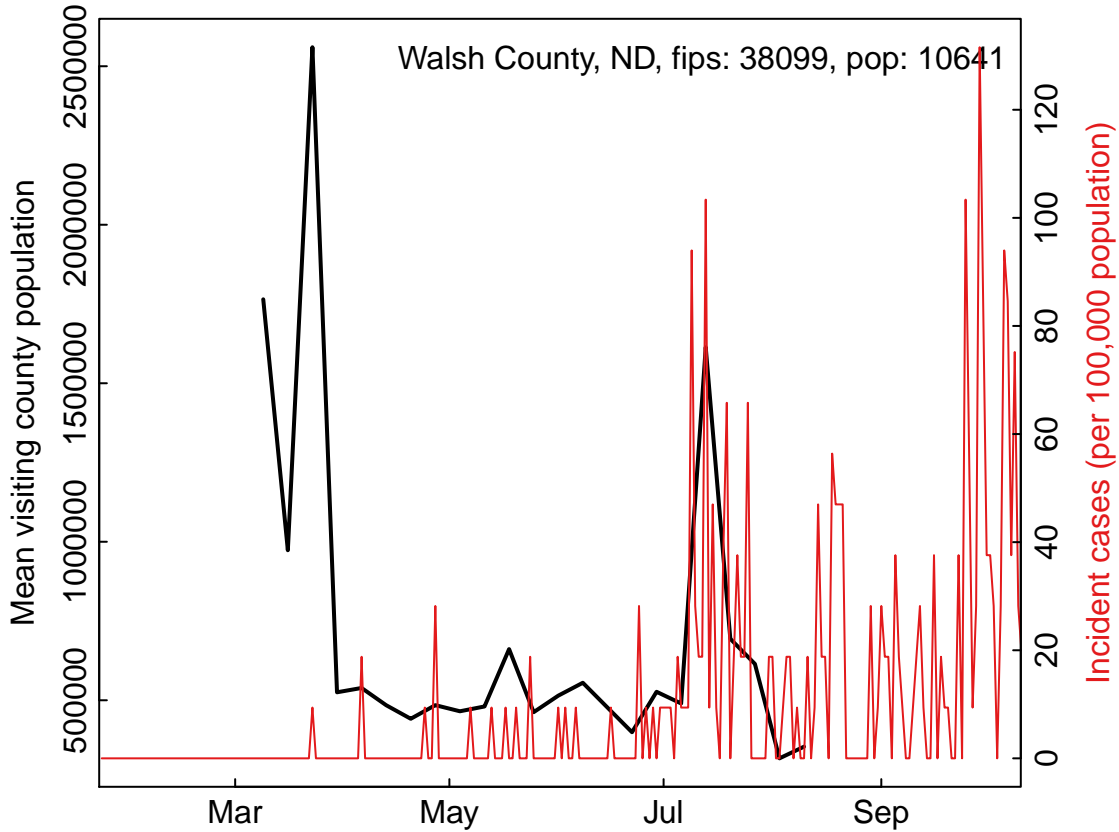



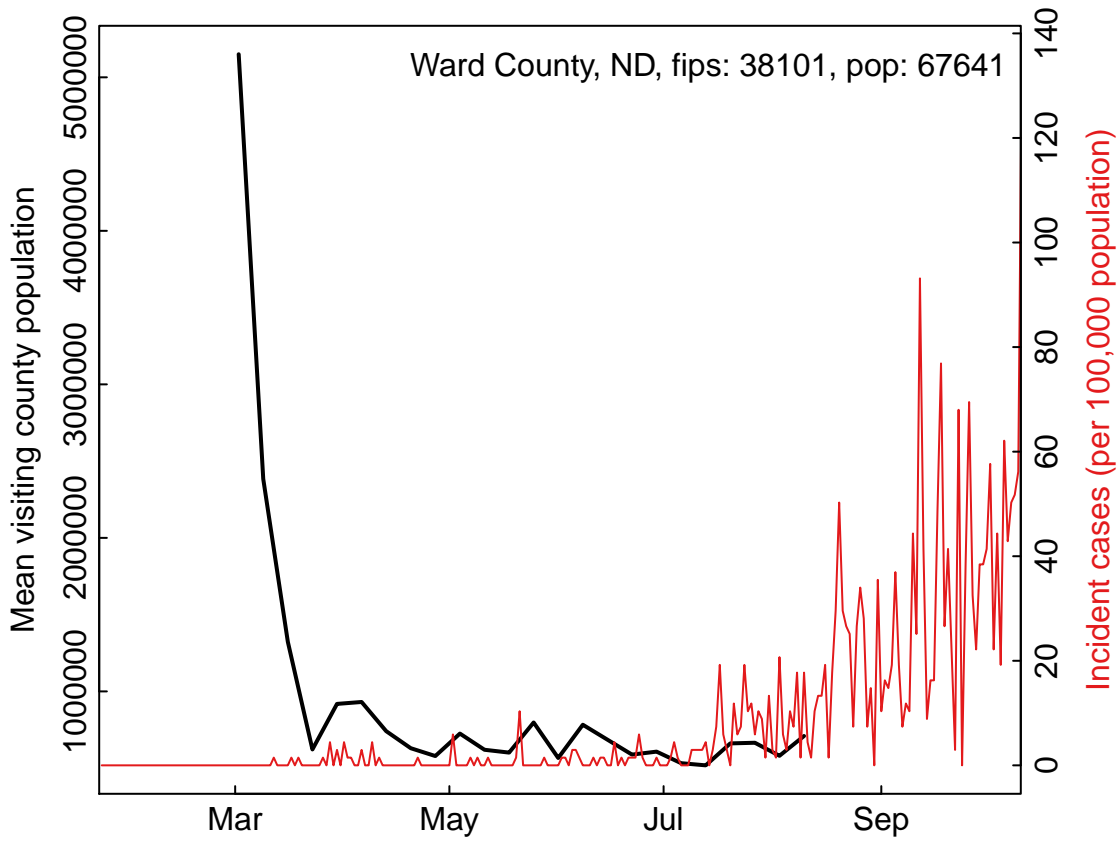

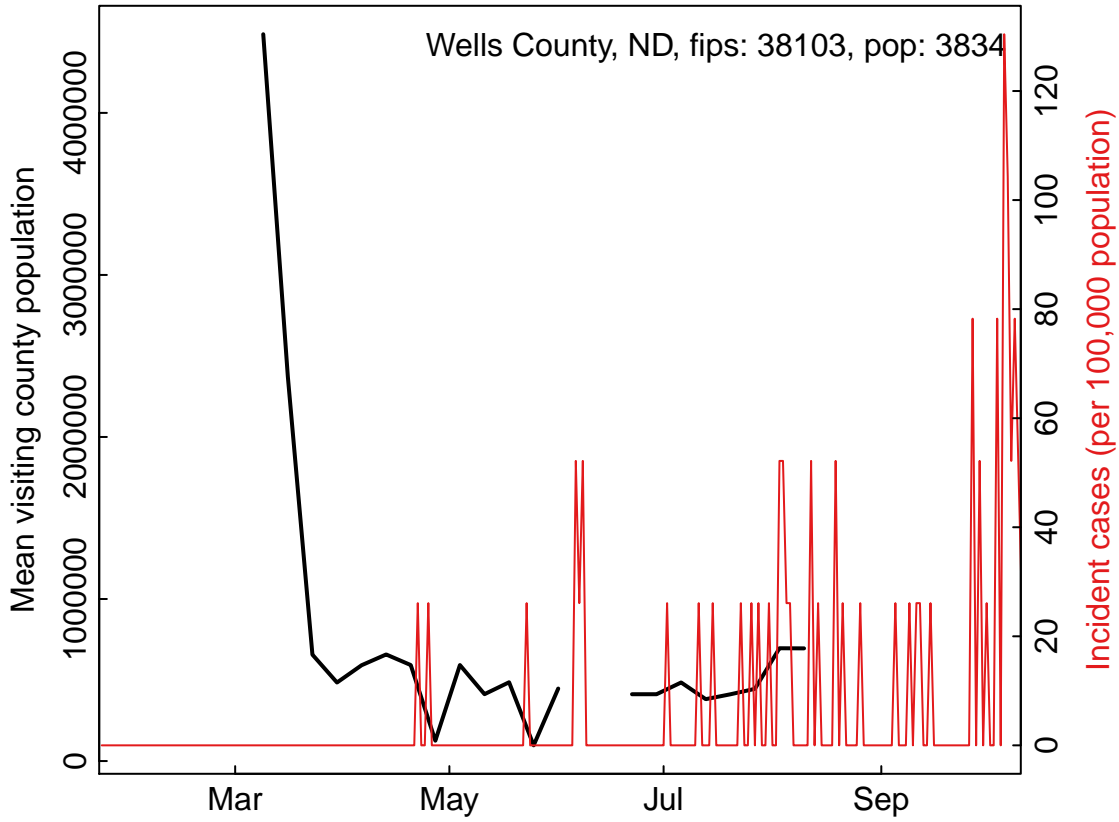

Williams County, ND, fips: 38105, pop: 37589

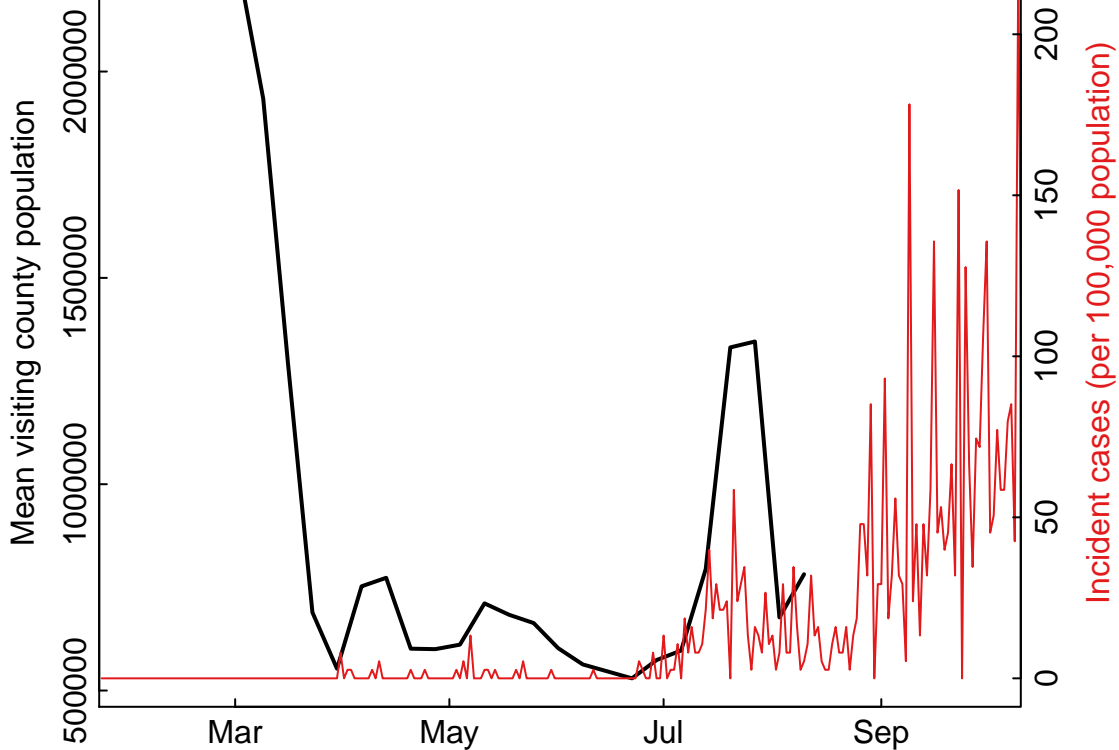

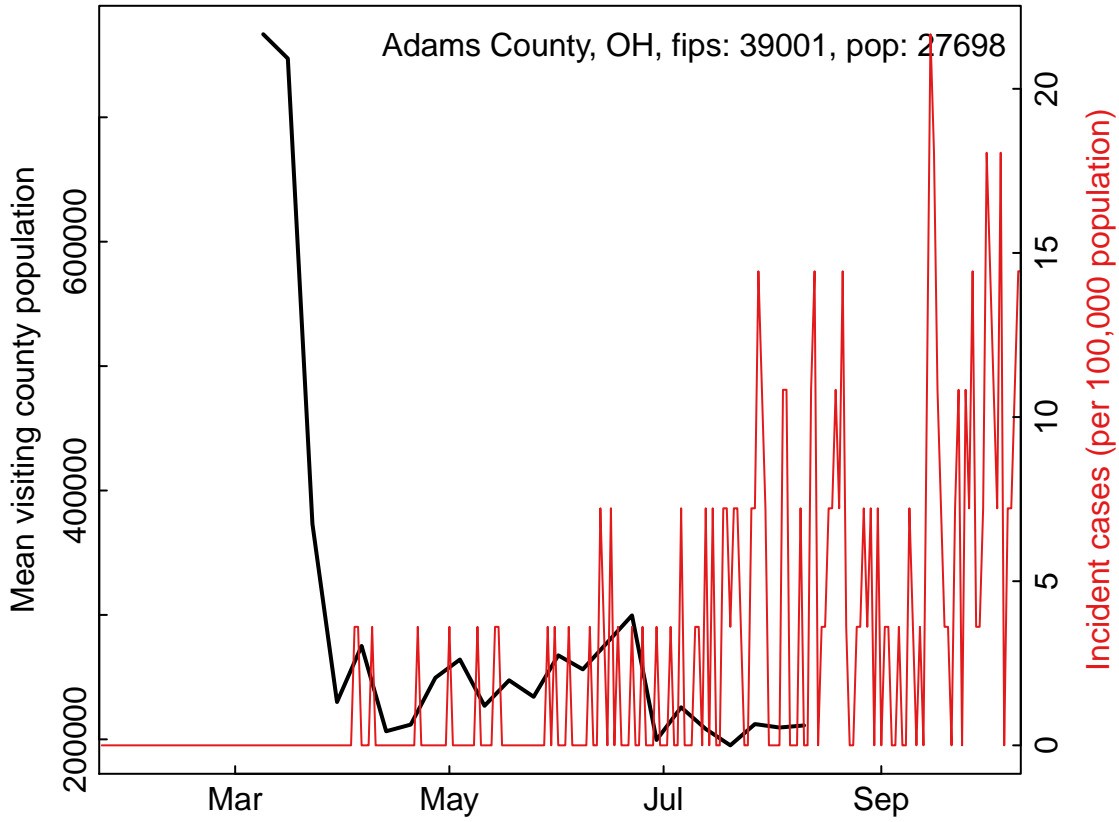

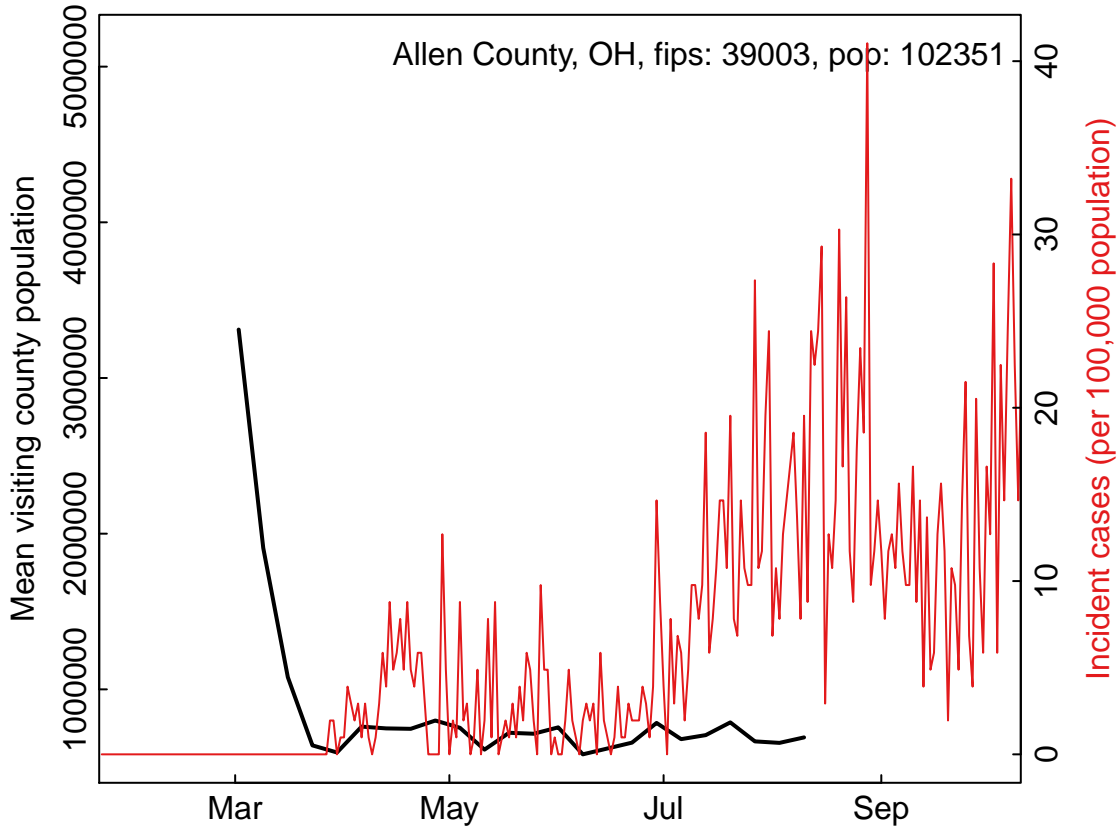

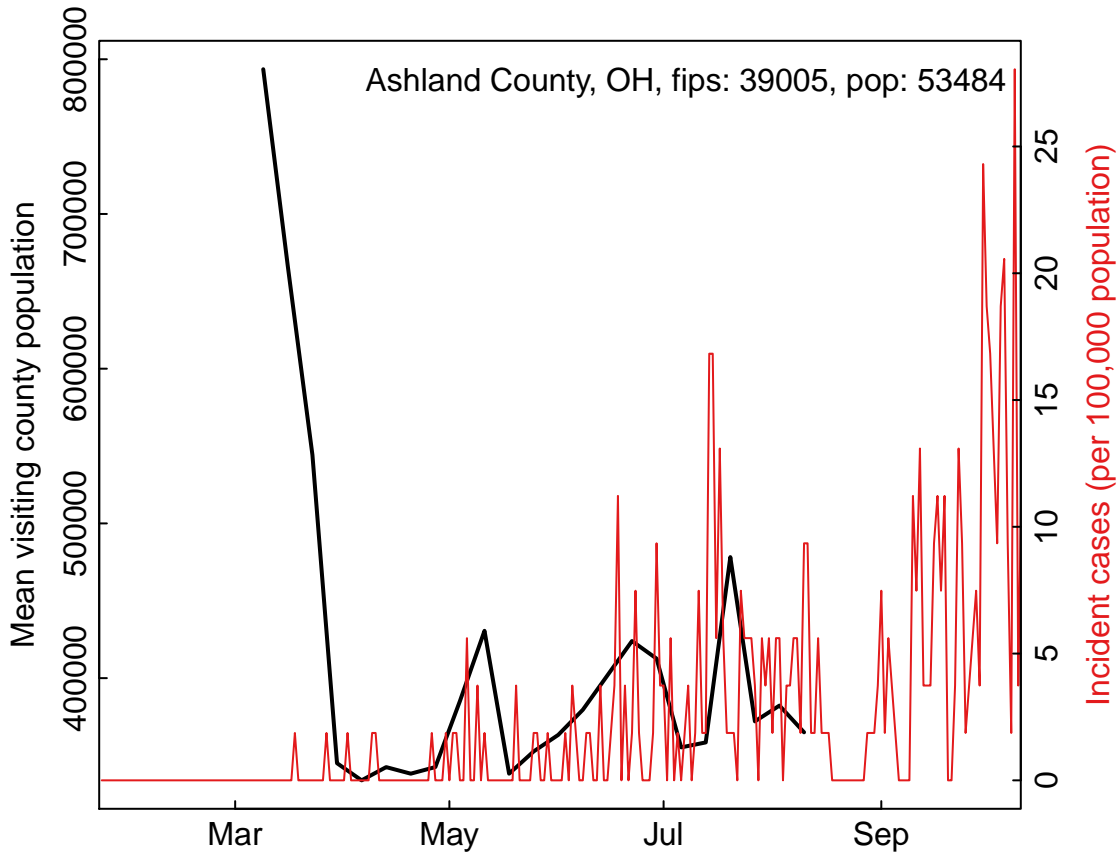

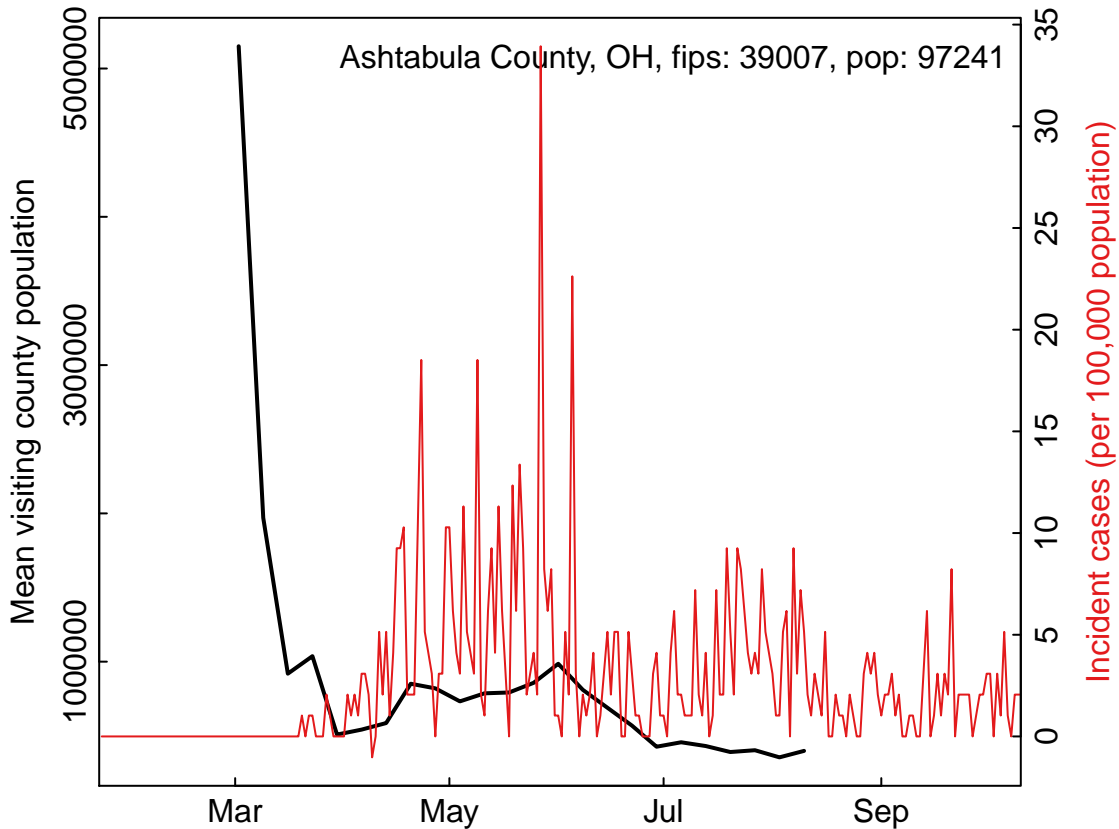

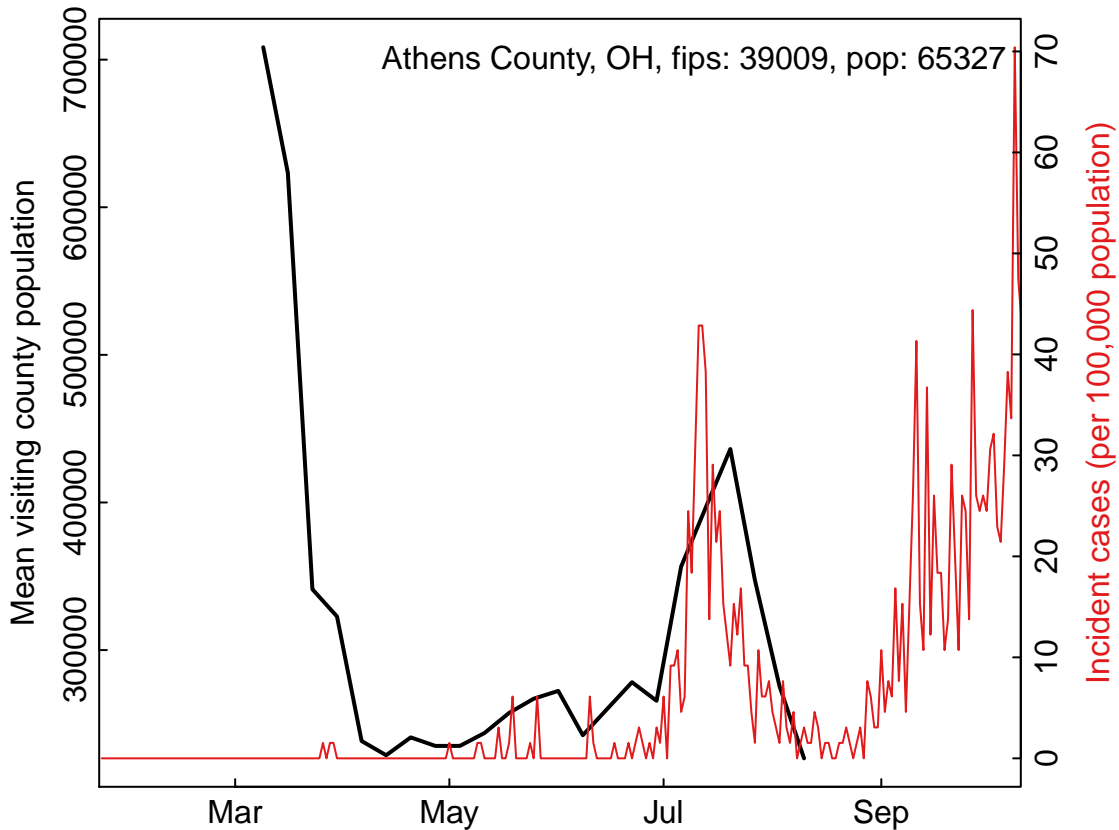



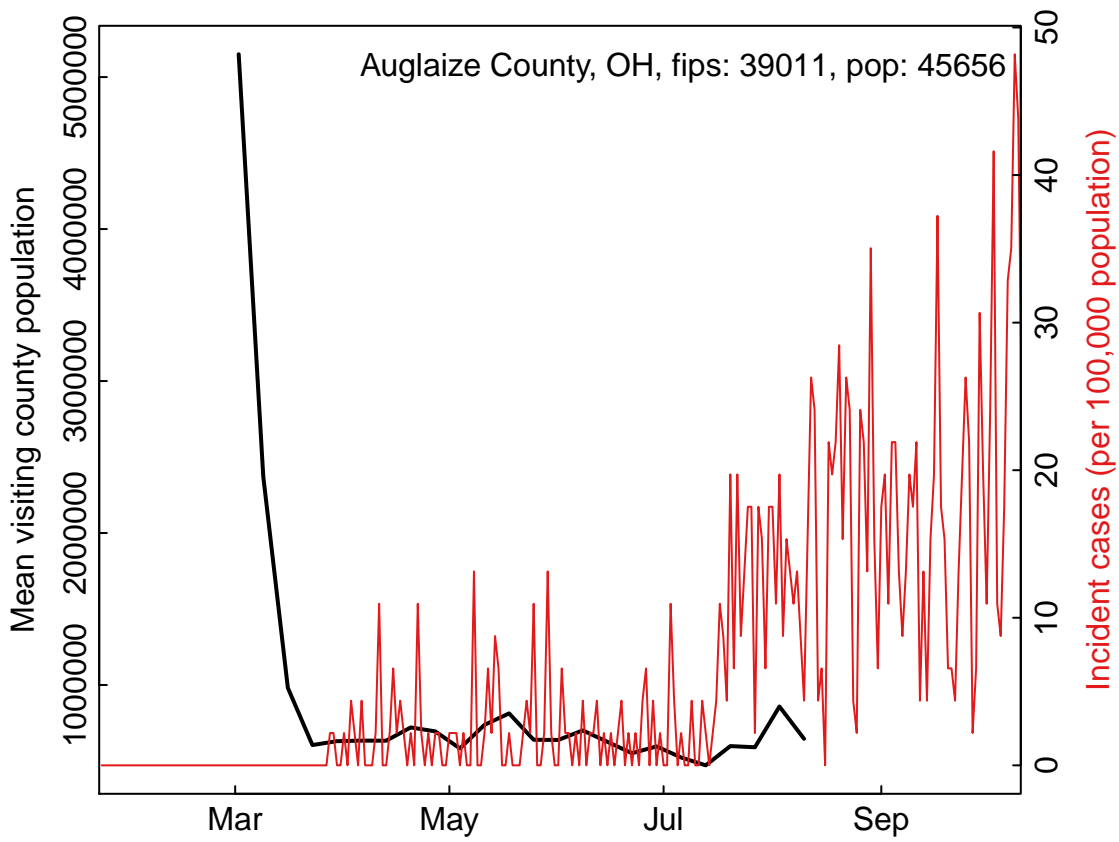

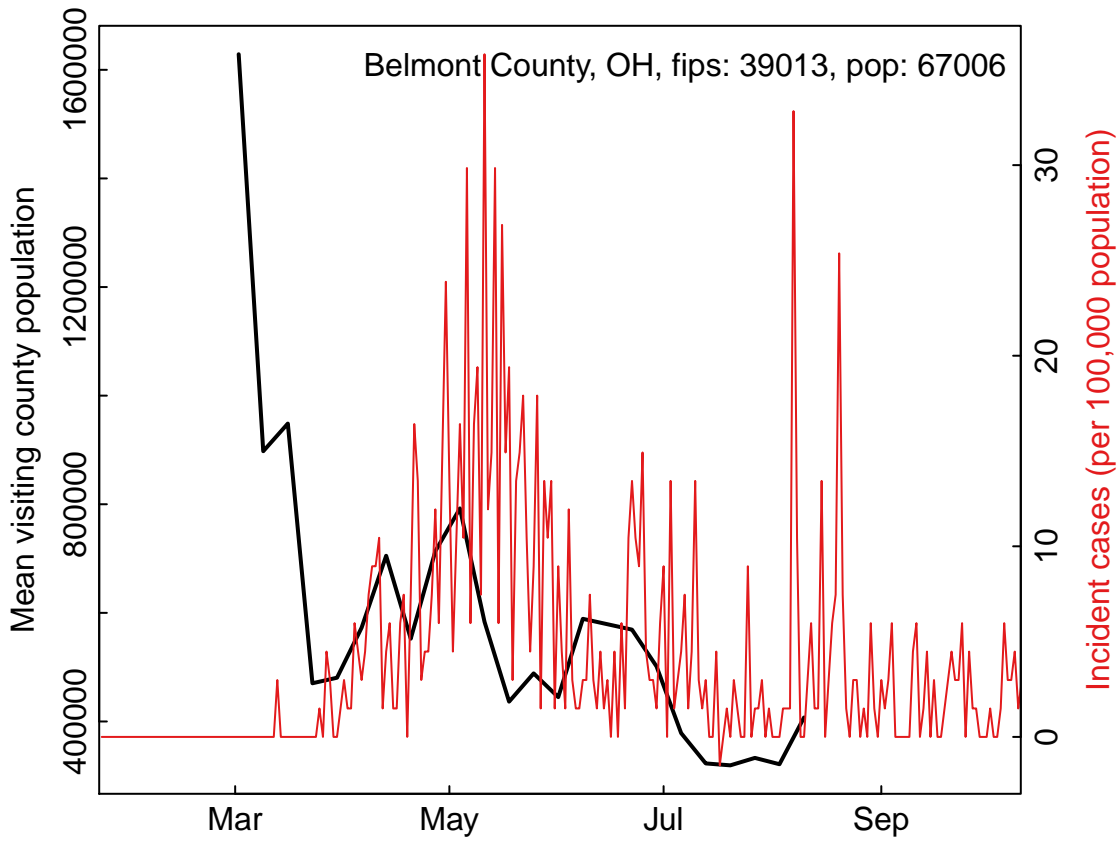

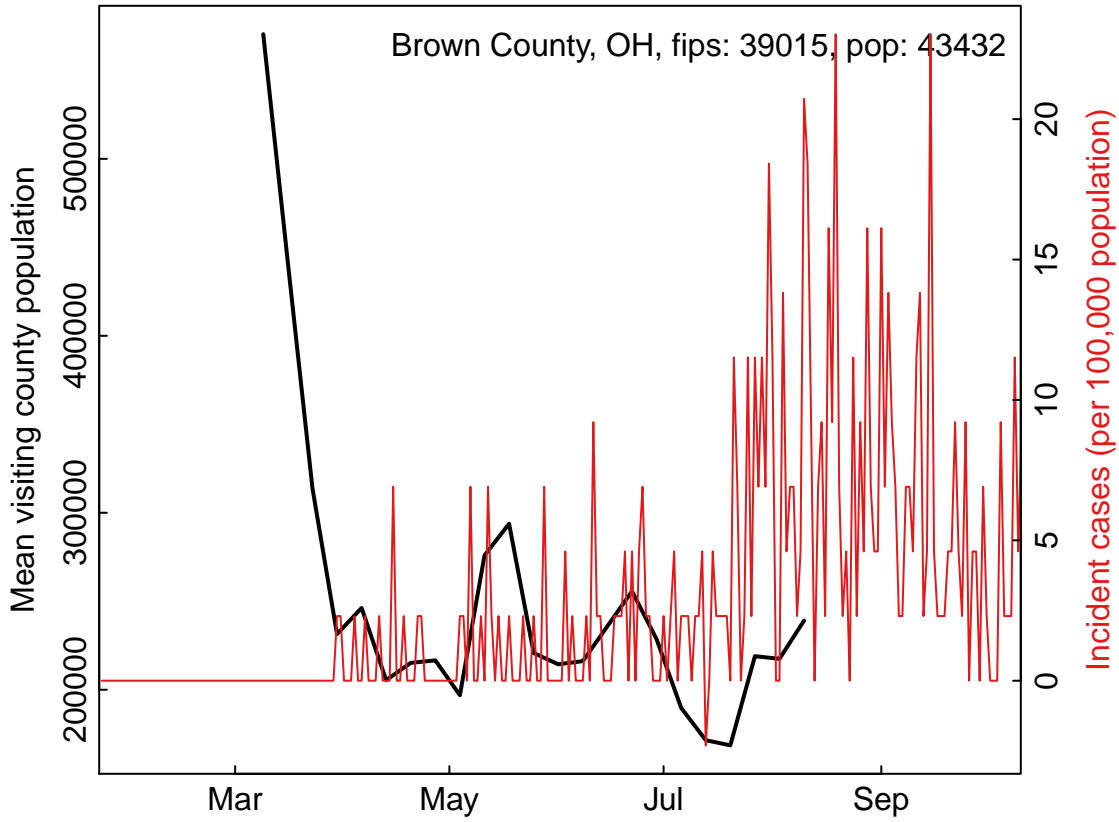

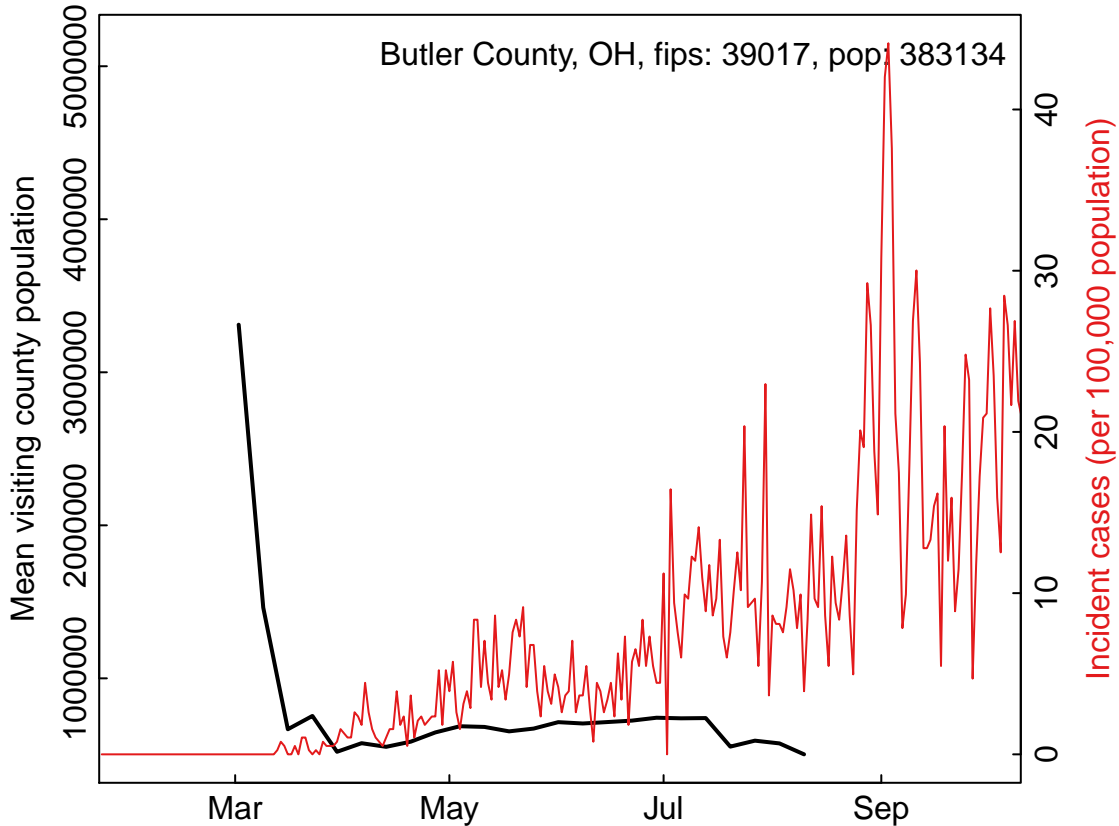

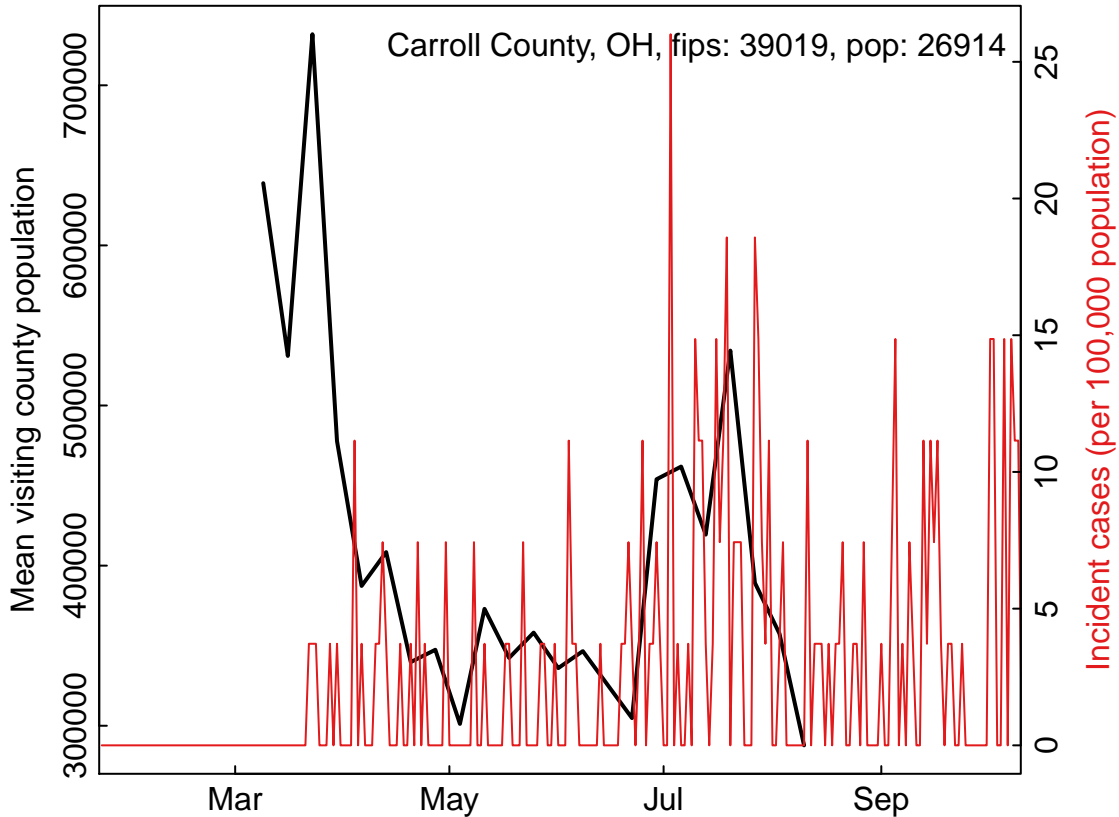

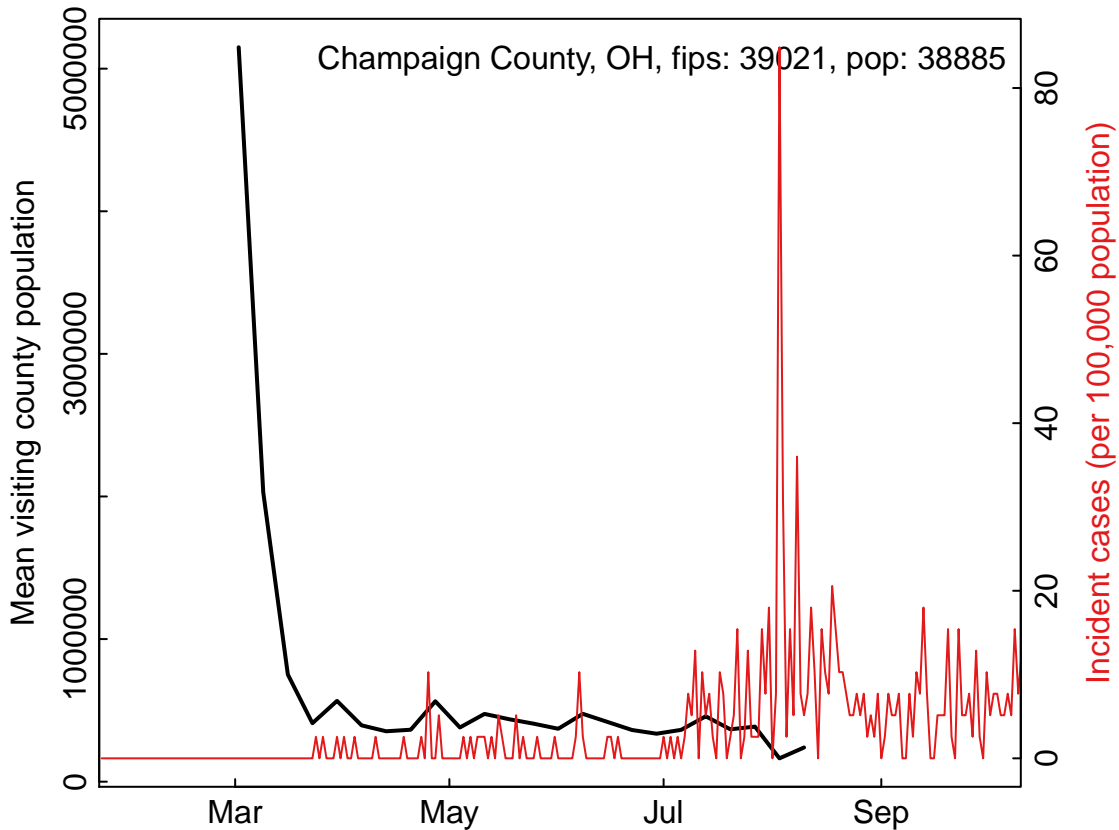

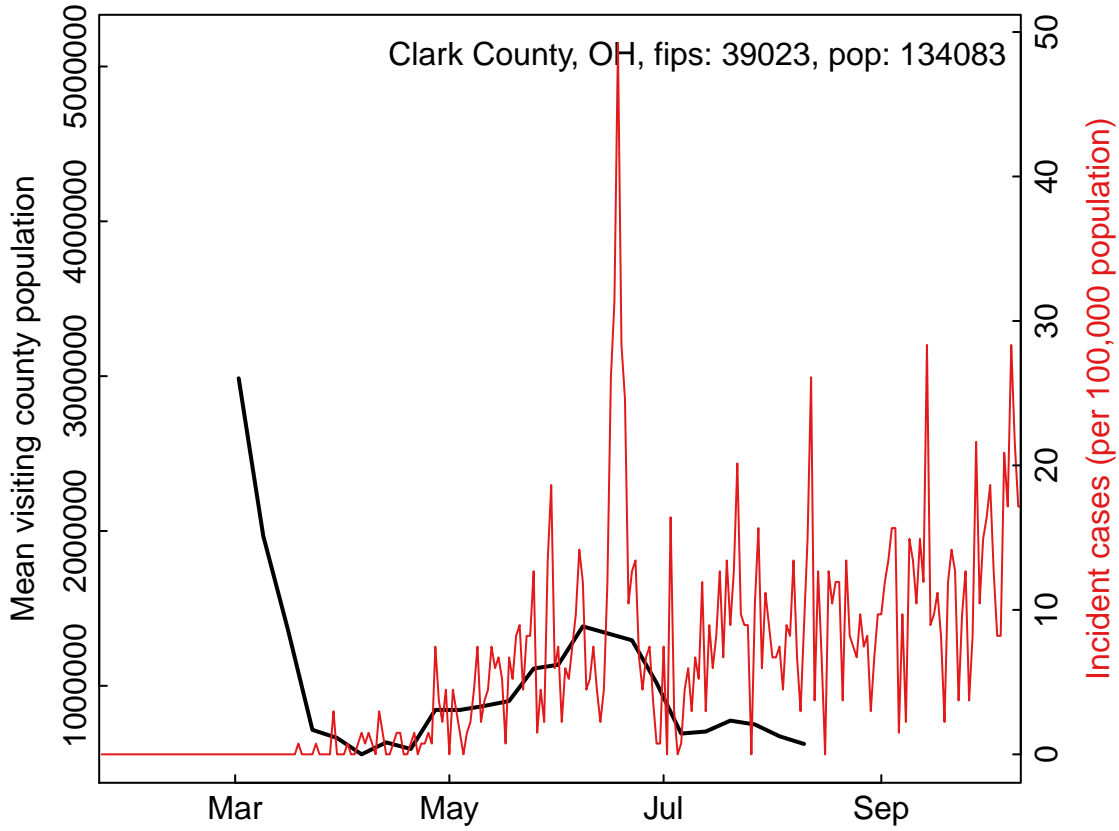

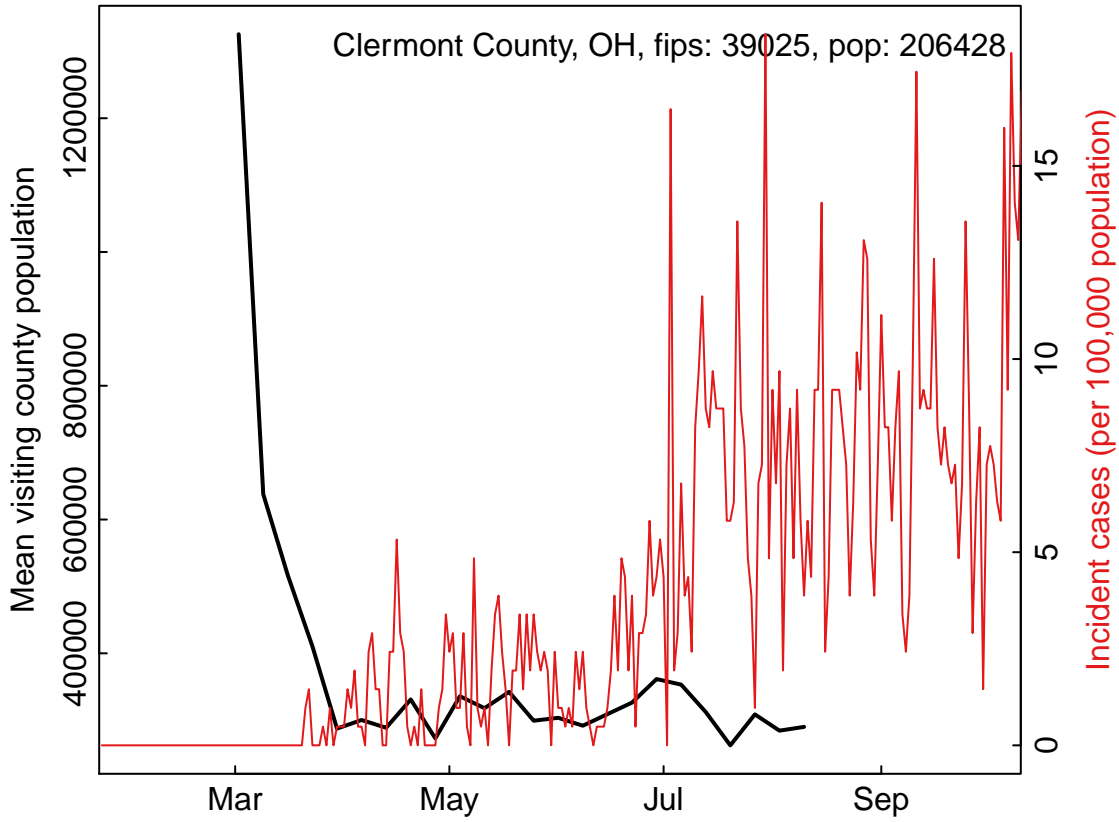



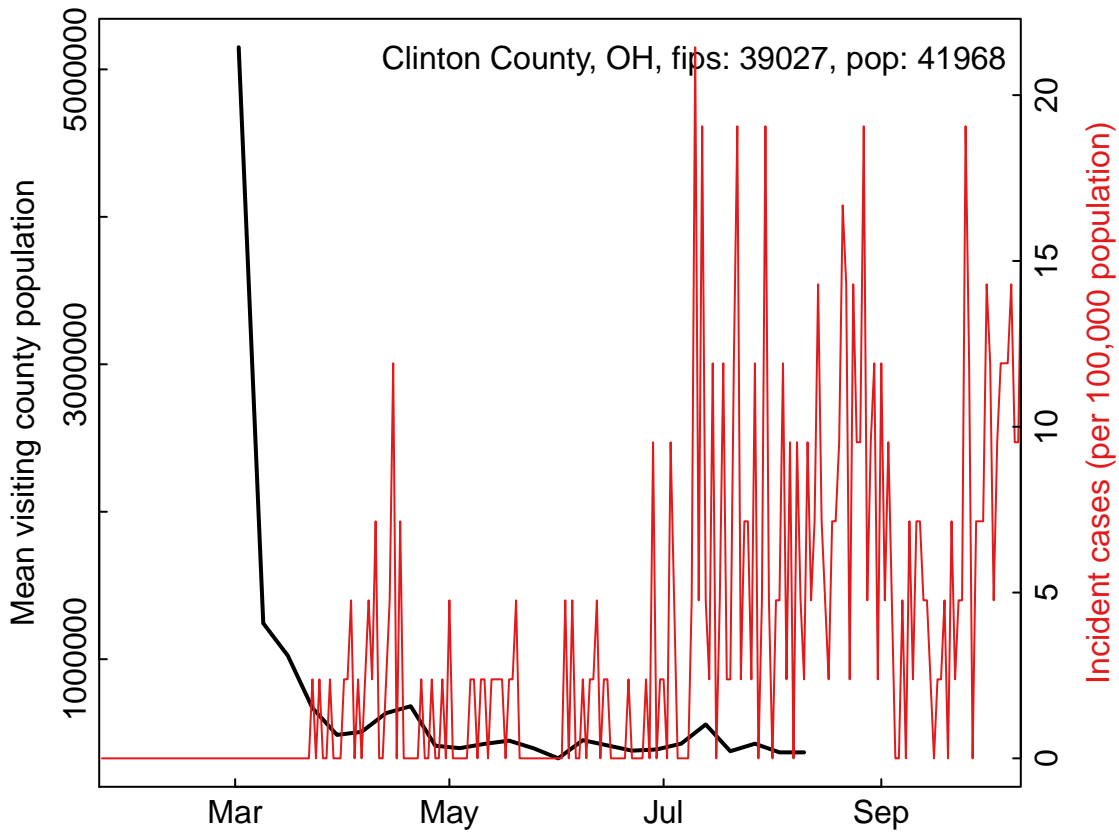

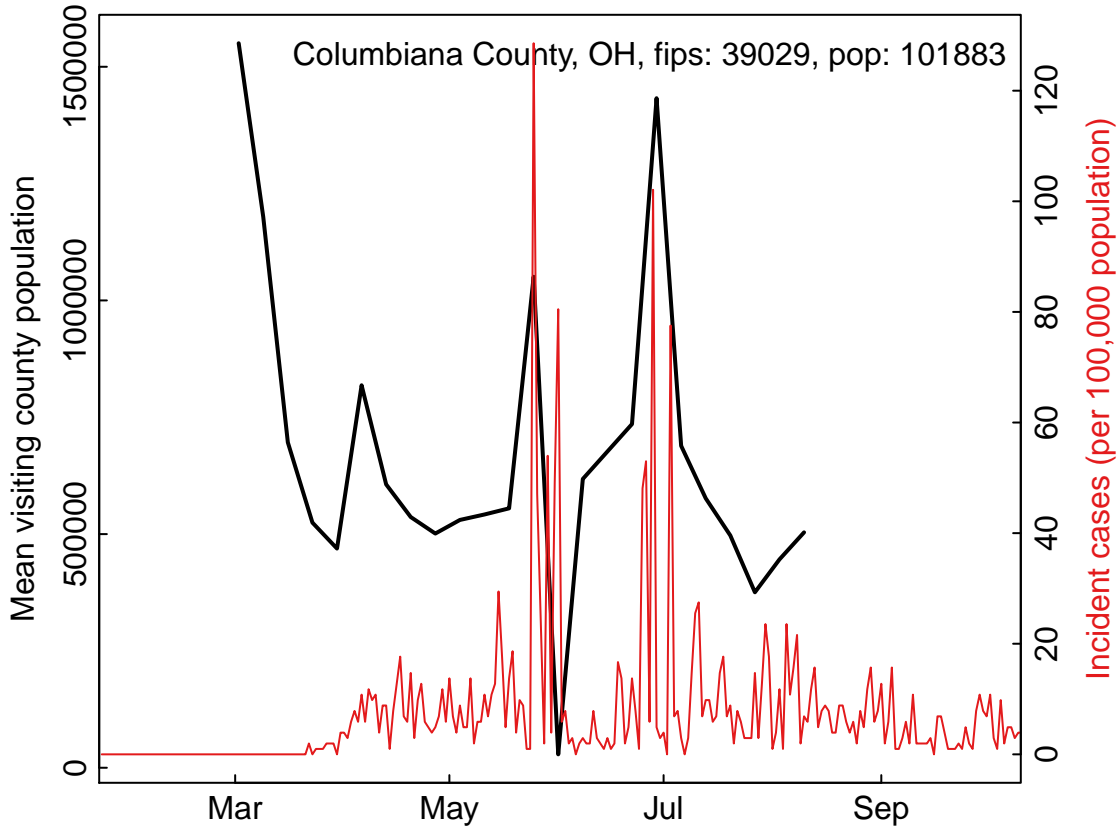

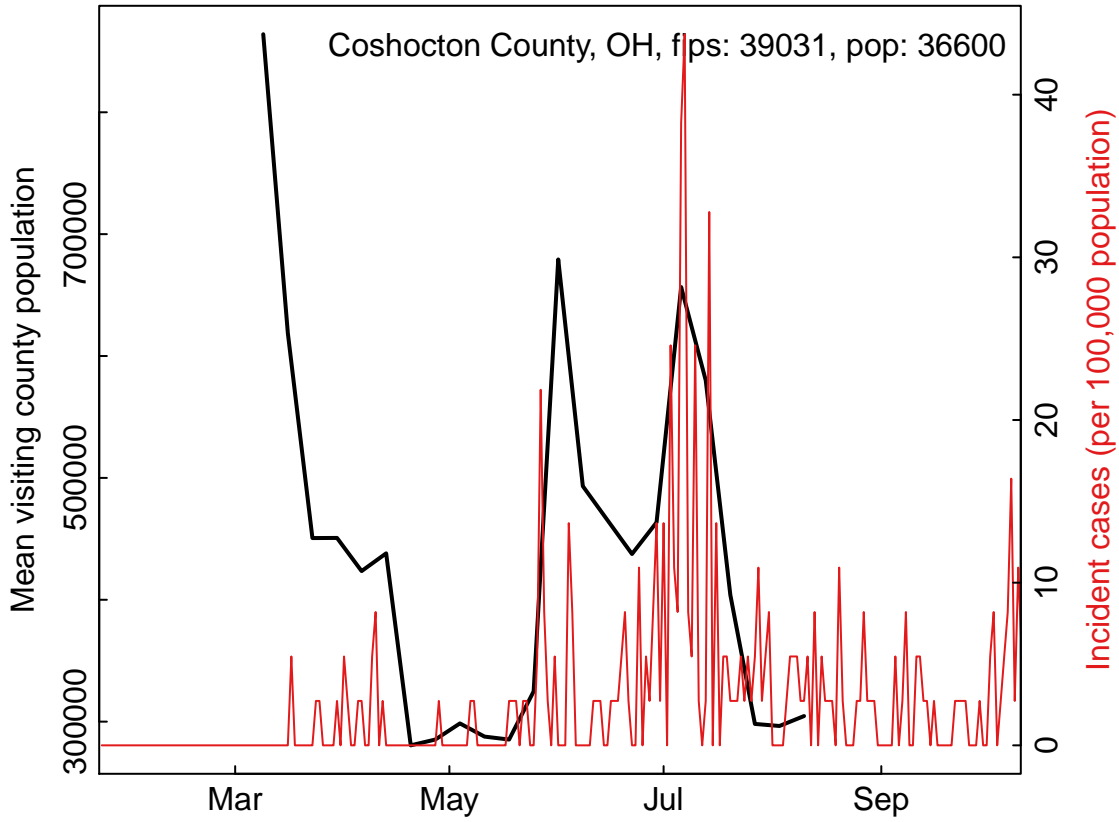

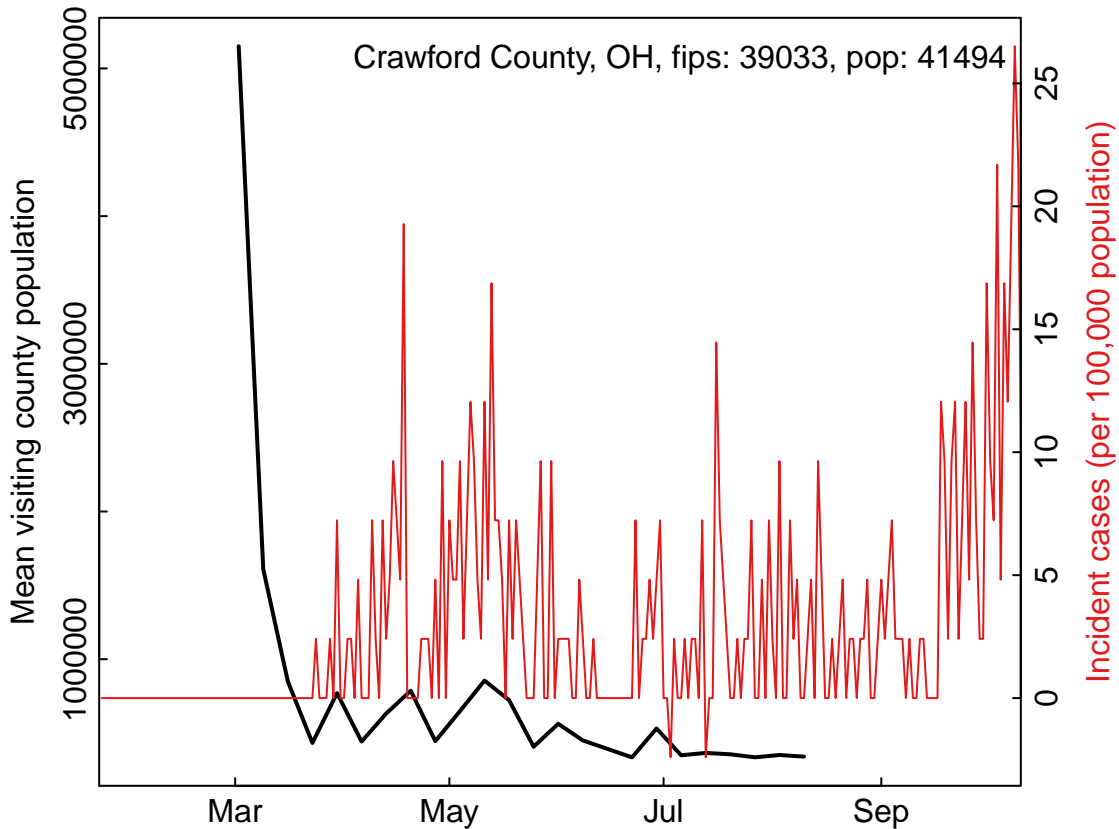

Cuyahoga County, OH, fips: 39035, pop: 1235072

Mean visiting county population

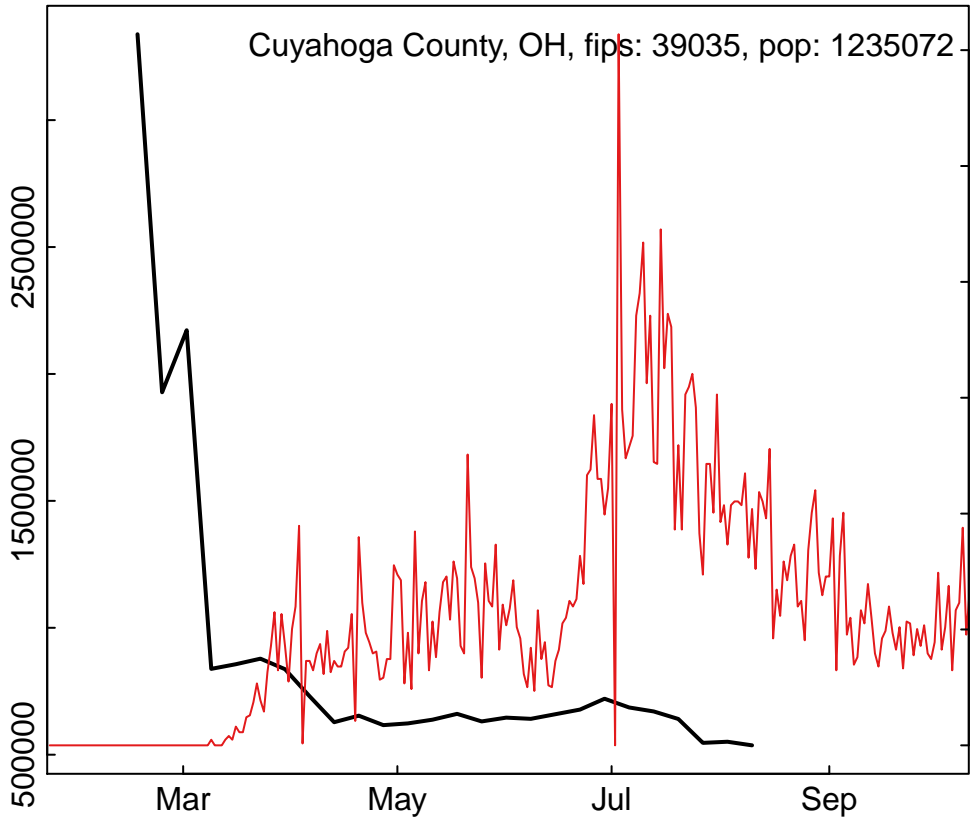

Incident cases (per 100,000 population)

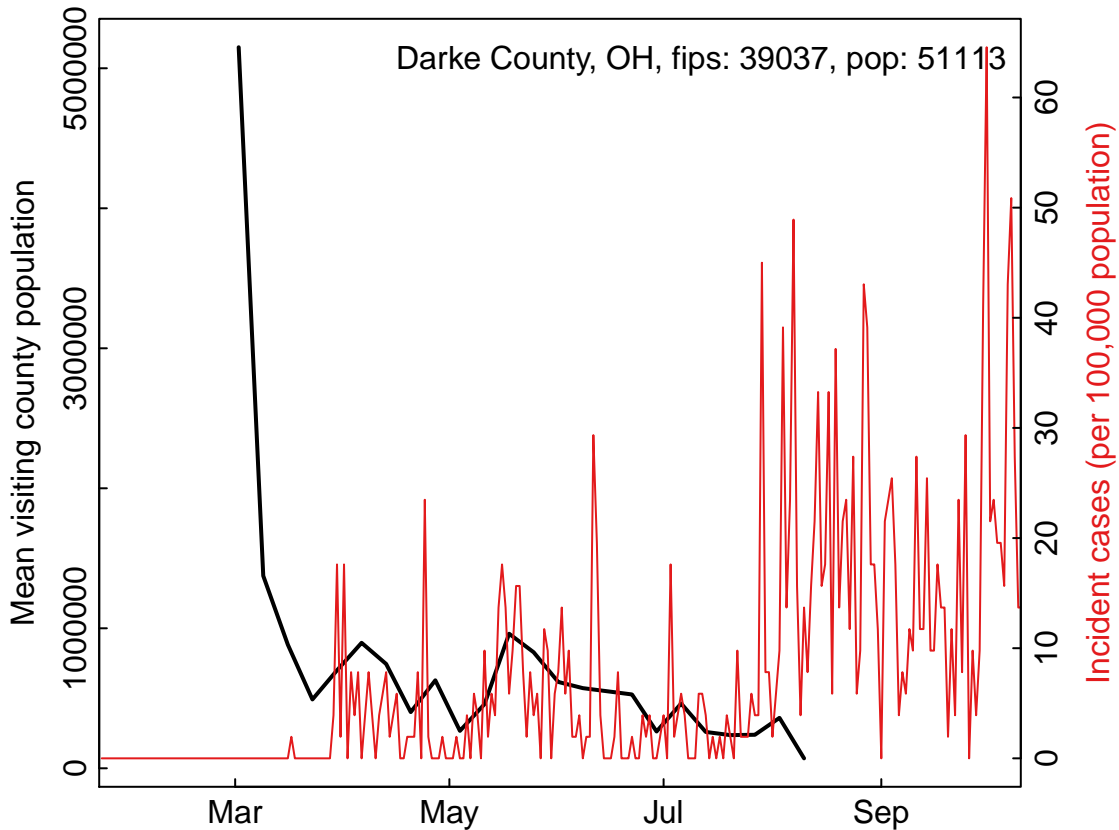

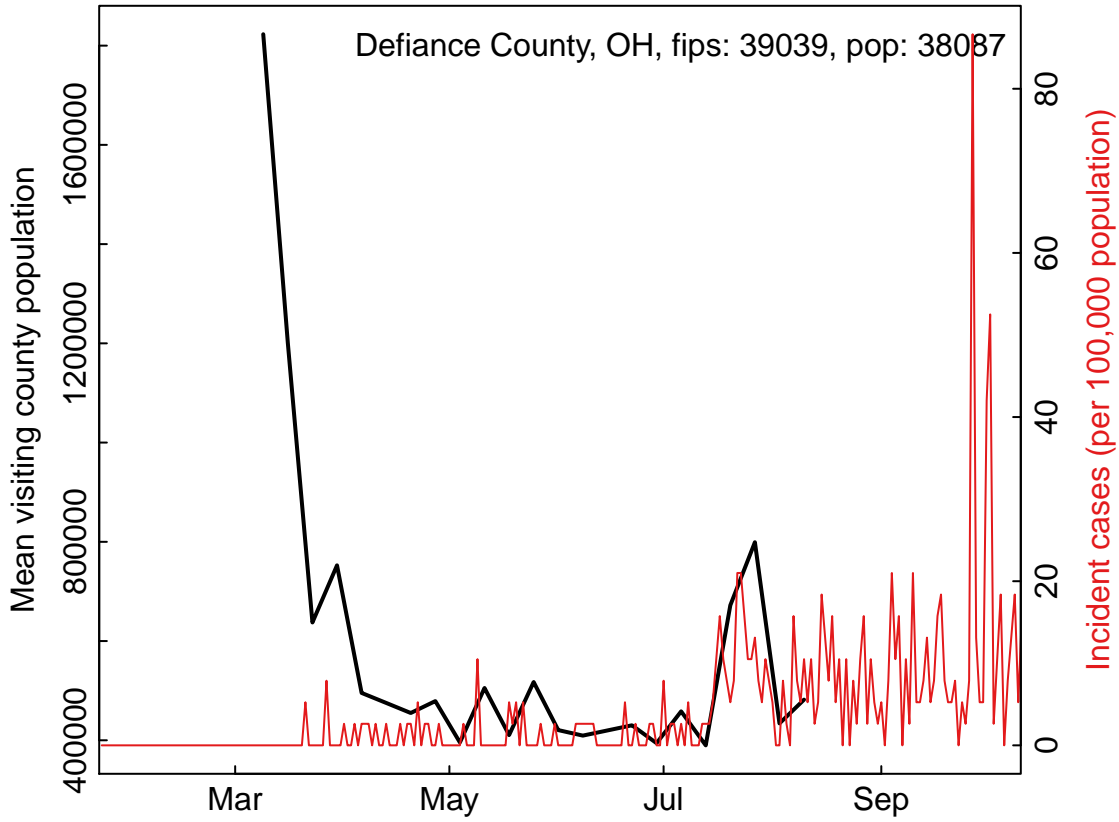

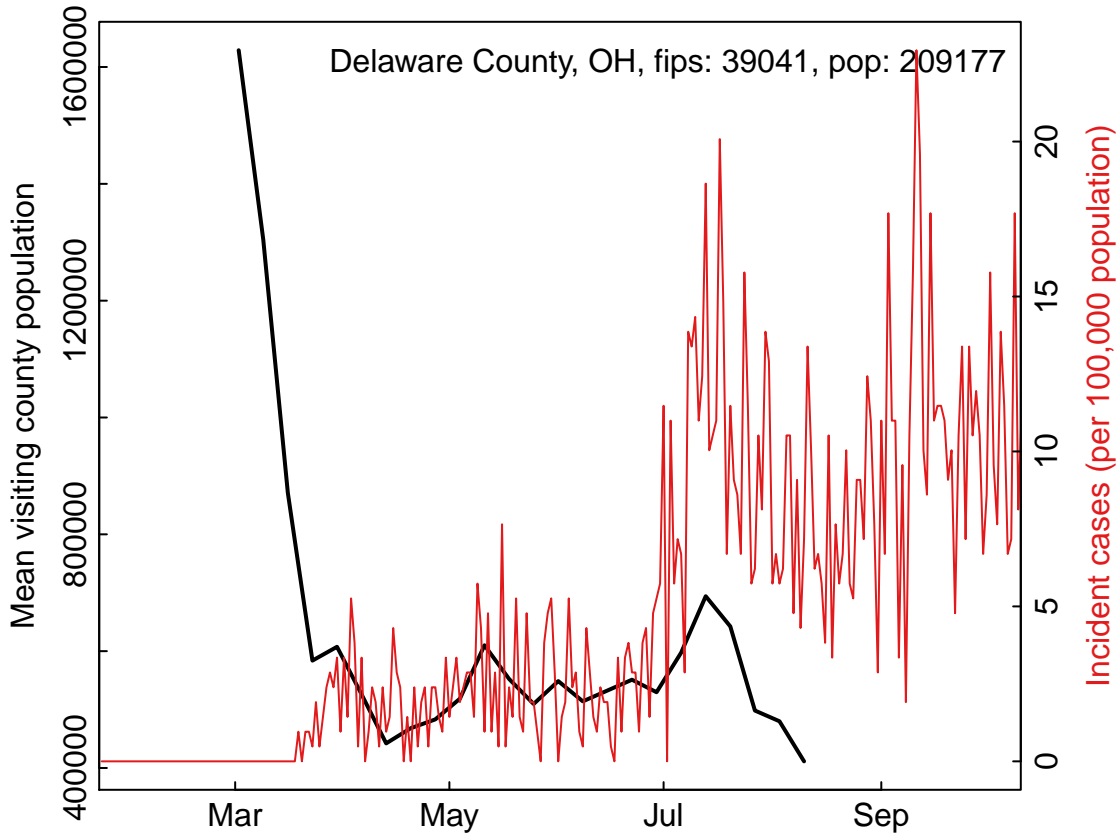



Erie County, OH, fips: 39043, pop: 74266

Mean visiting county population

1500000  
1000000  
500000

Mar May Jul Sep

Incident cases (per 100,000 population)

30  
20  
10  
0

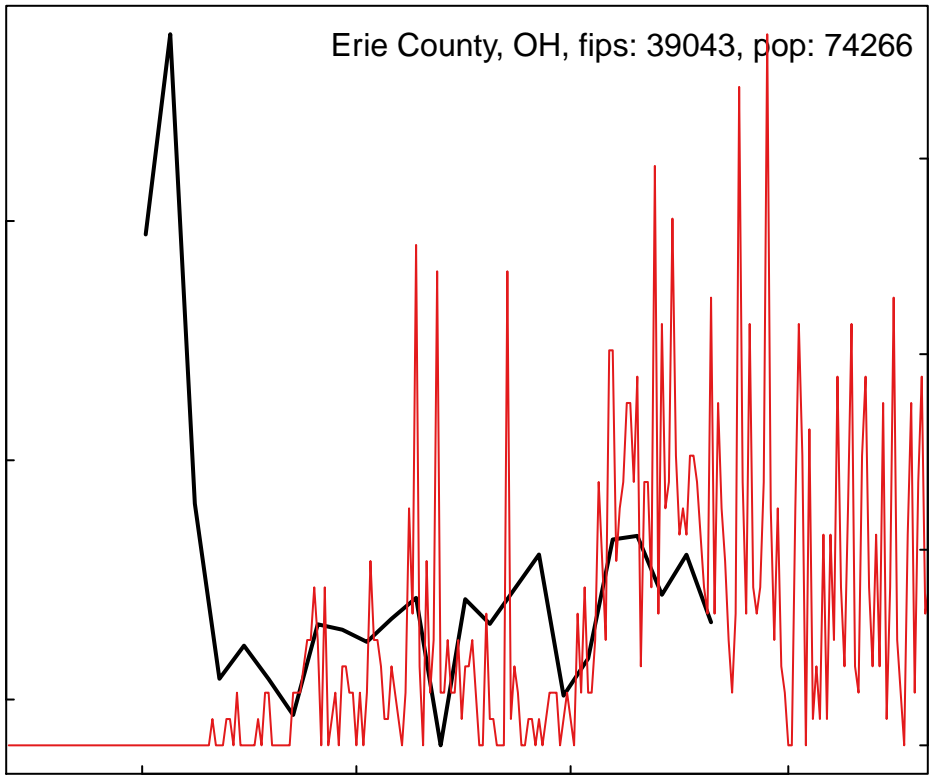

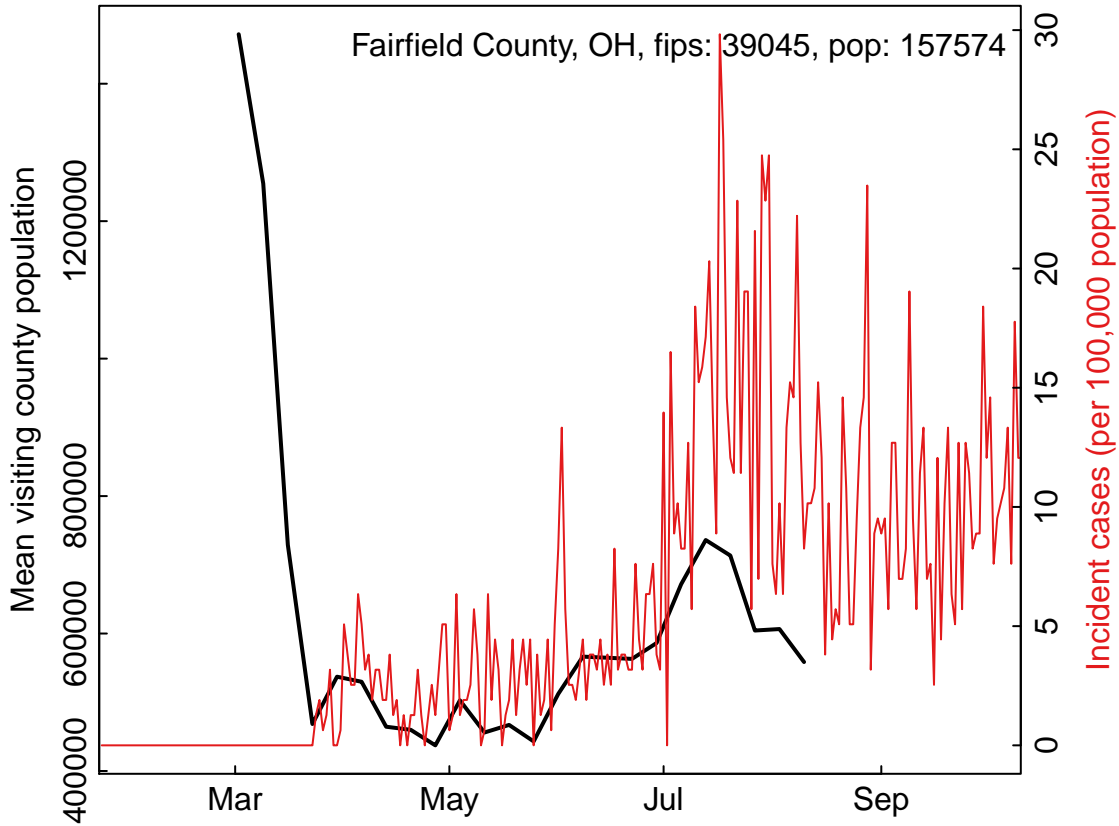

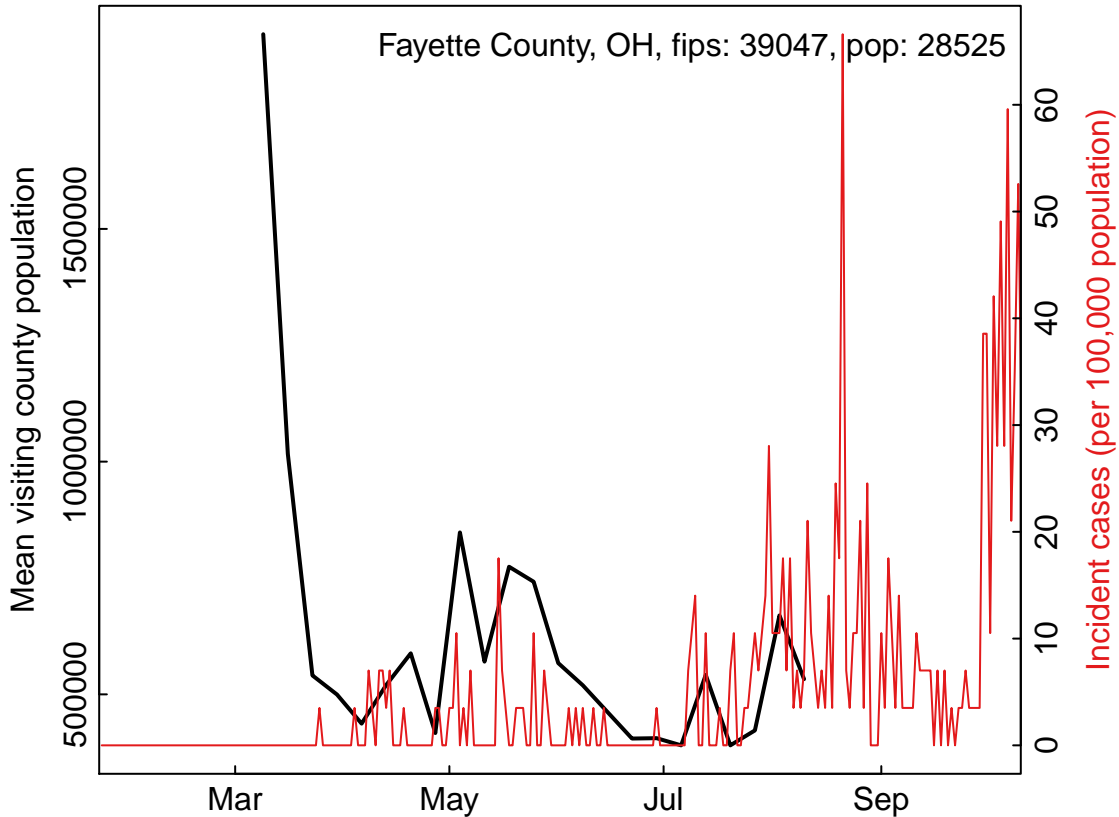

Franklin County, OH, fips: 39049, pop: 1316756

Mean visiting county population

500000  
1500000  
2500000

Mar

May

Jul

Sep

Incident cases (per 100,000 population)

0  
10  
20  
30

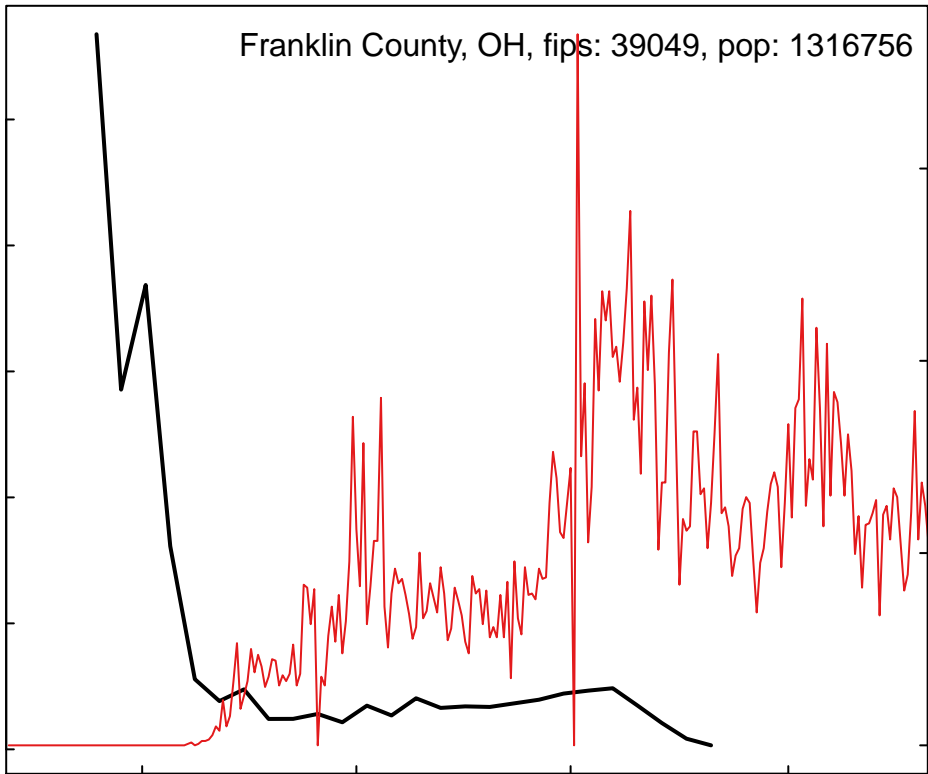

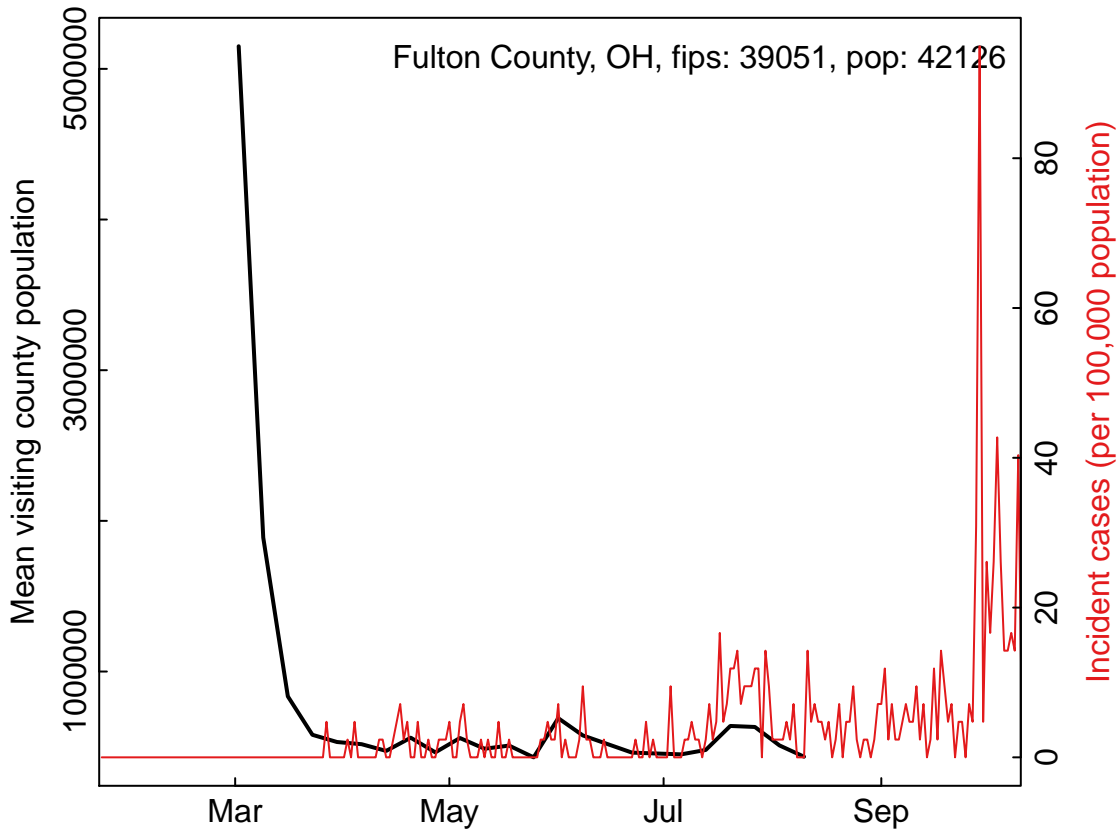

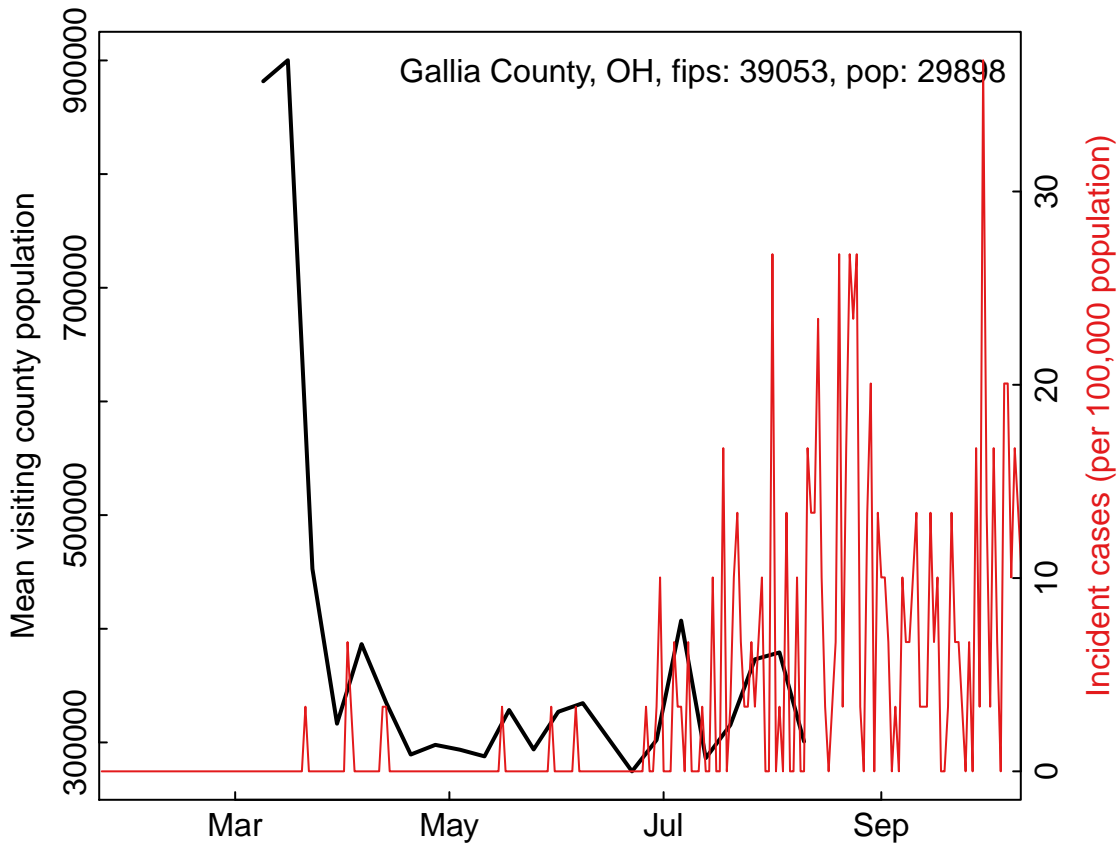

Geauga County, OH, fips: 39055, pop: 93649

Mean visiting county population

700000  
500000  
300000

Mar May Jul Sep

Incident cases (per 100,000 population)

15  
10  
5  
0

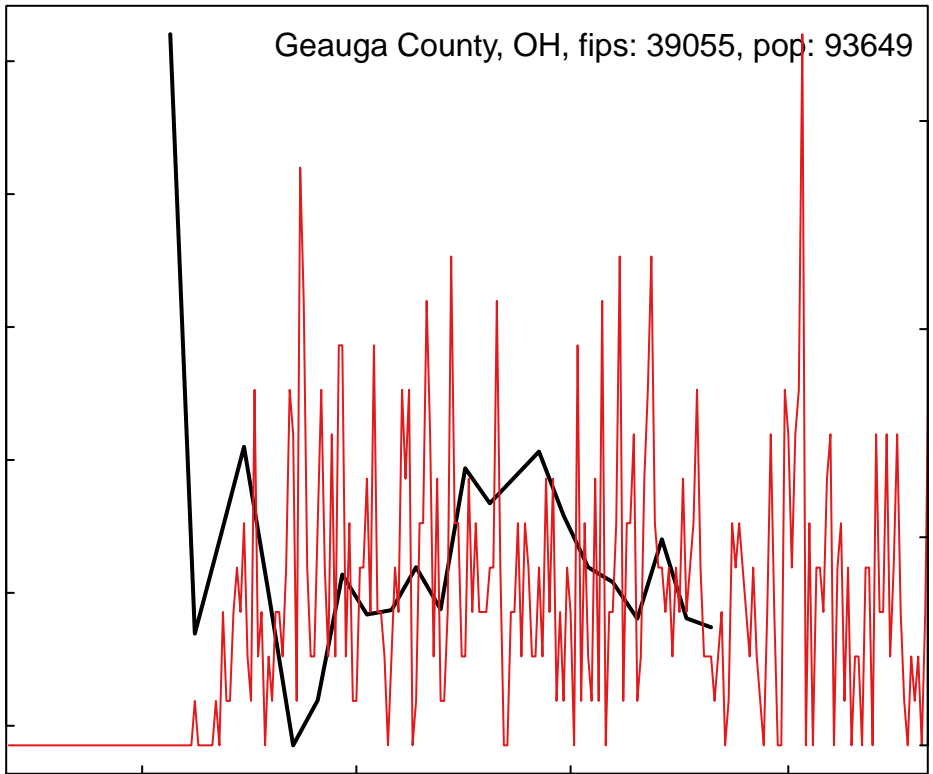

Greene County, OH, fips: 39057, pop: 168937

Mean visiting county population

500000  
1500000  
2500000

Mar

May

Jul

Sep

0  
5  
10  
15  
20  
25  
30

Incident cases (per 100,000 population)

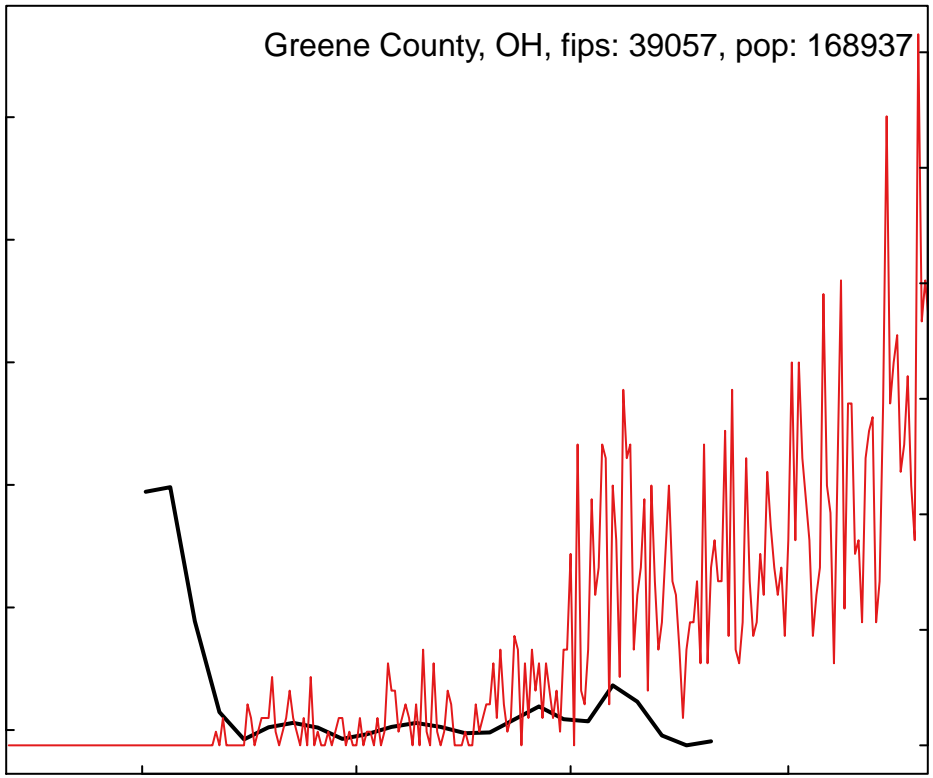



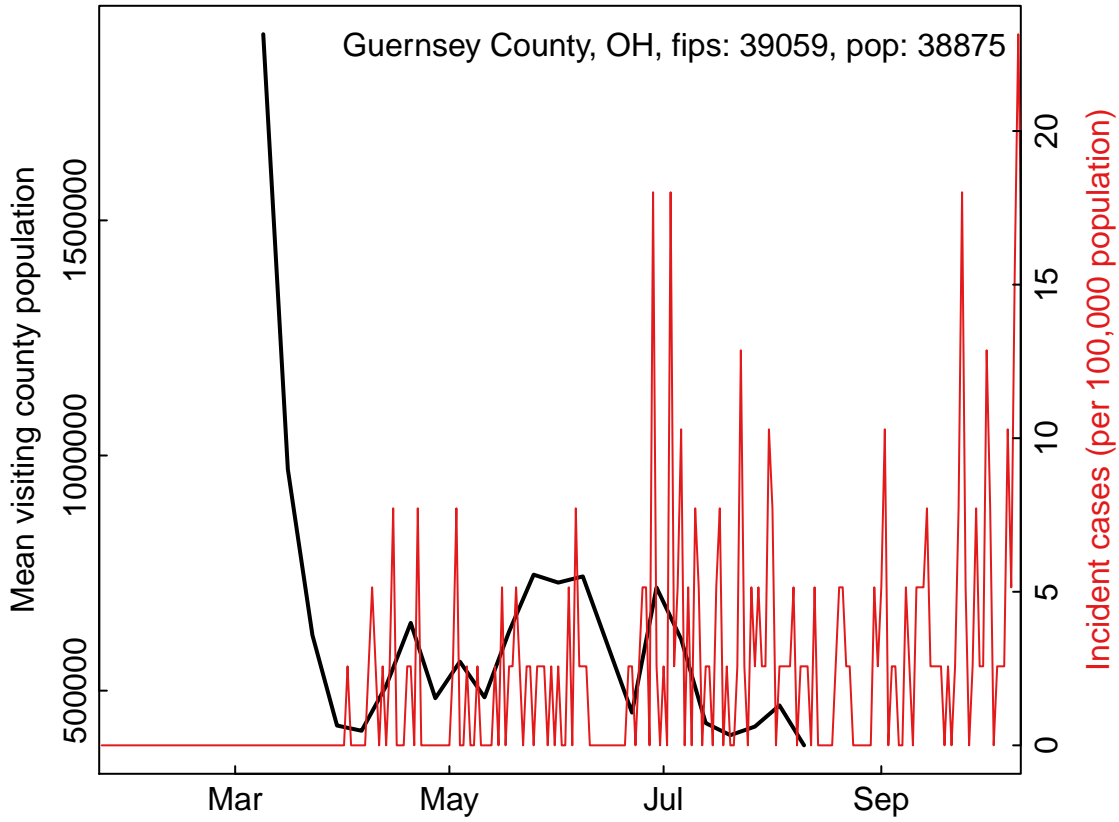

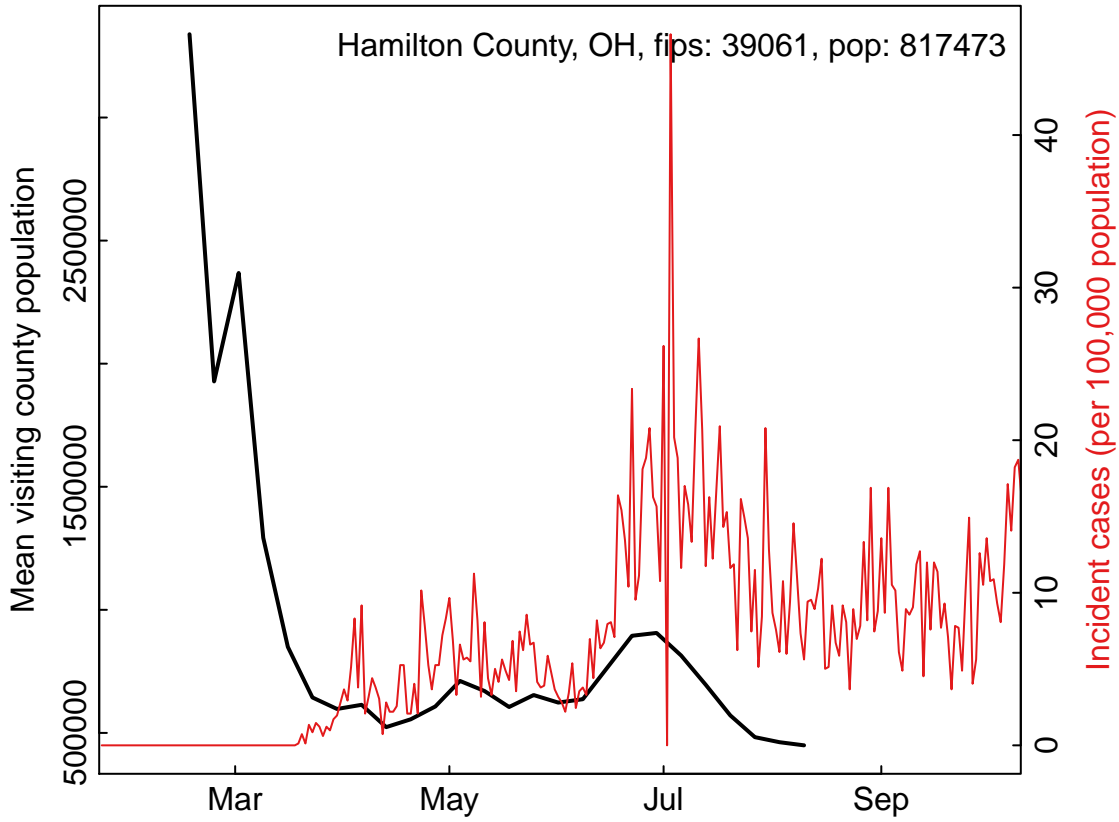

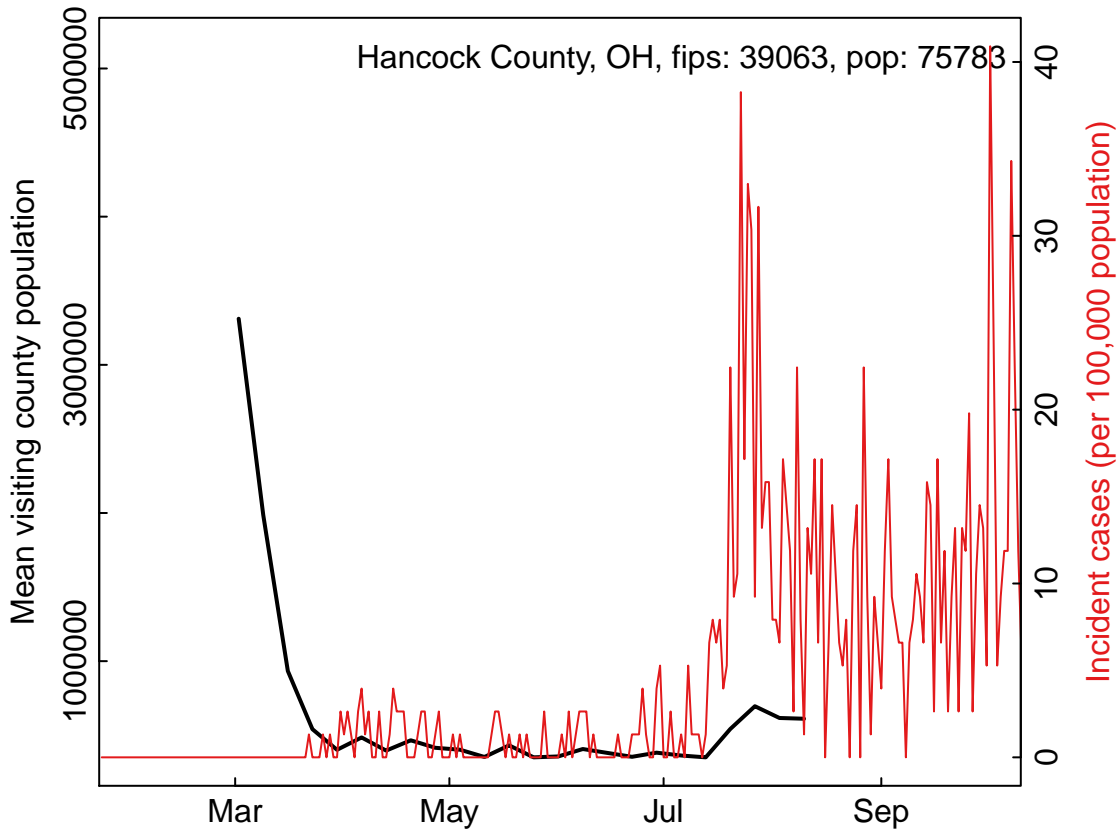

Hardin County, OH, fips: 39065, pop: 31365

Mean visiting county population

1200000  
800000  
400000

Mar

May

Jul

Sep

40  
30  
20  
10  
0

Incident cases (per 100,000 population)

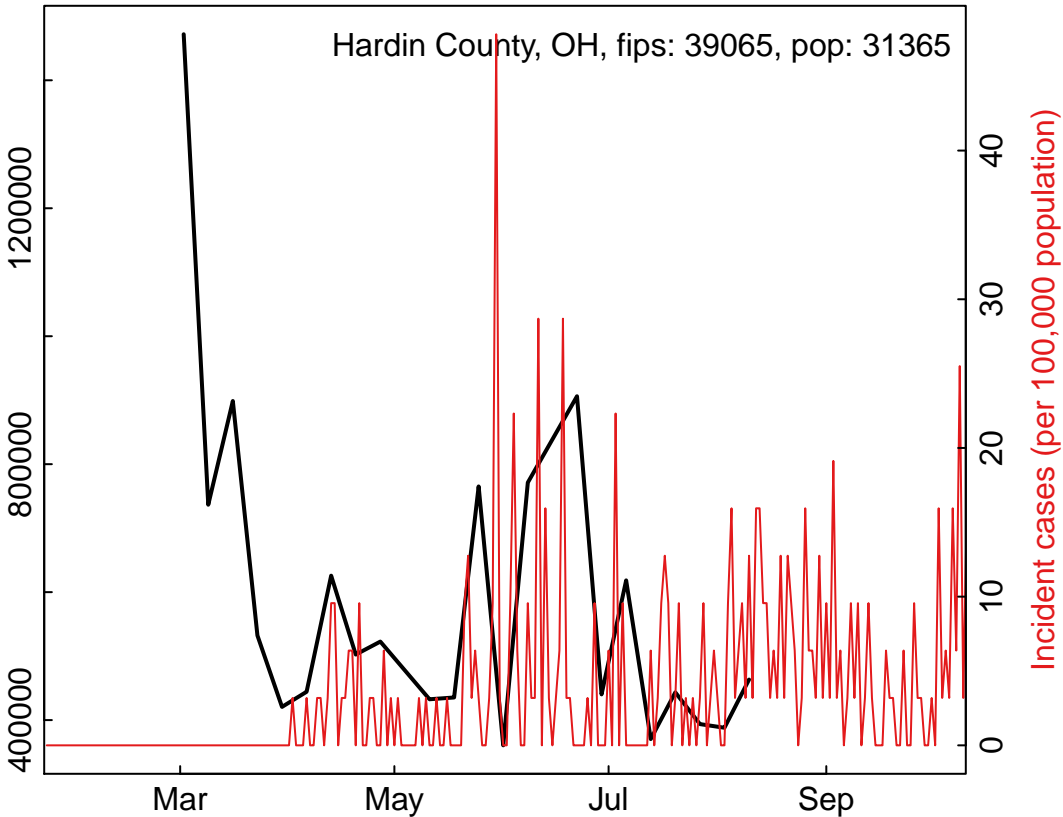

Harrison County, OH, fips: 39067, pop: 15040

Mean visiting county population

400000  
600000  
800000  
1000000

Mar

May

Jul

Sep

0  
20  
40  
60  
Incident cases (per 100,000 population)

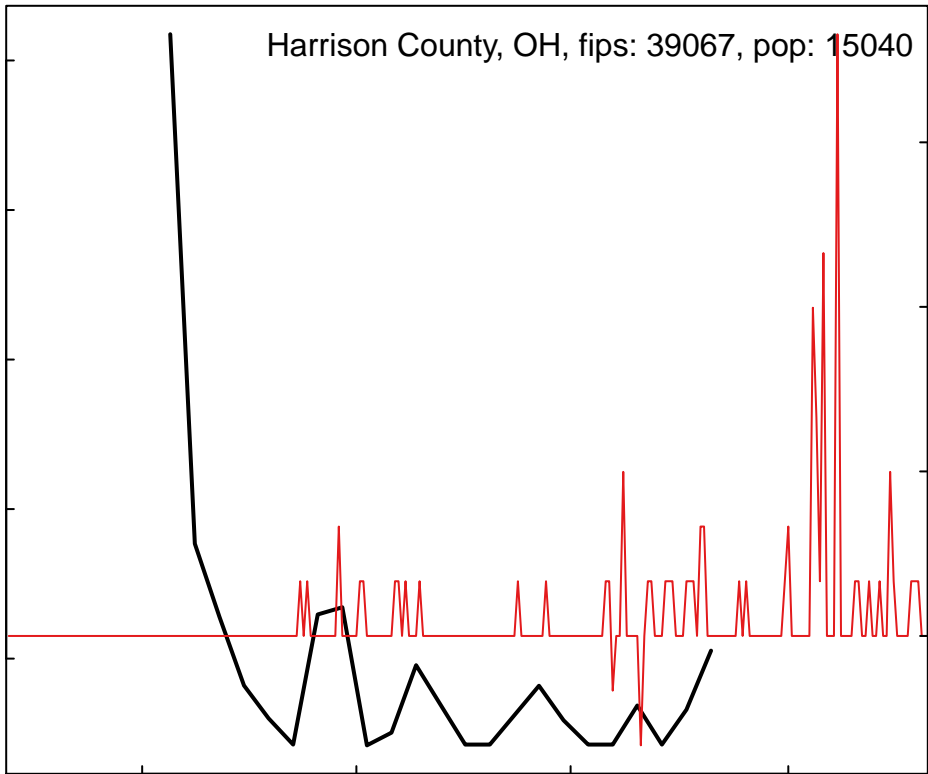

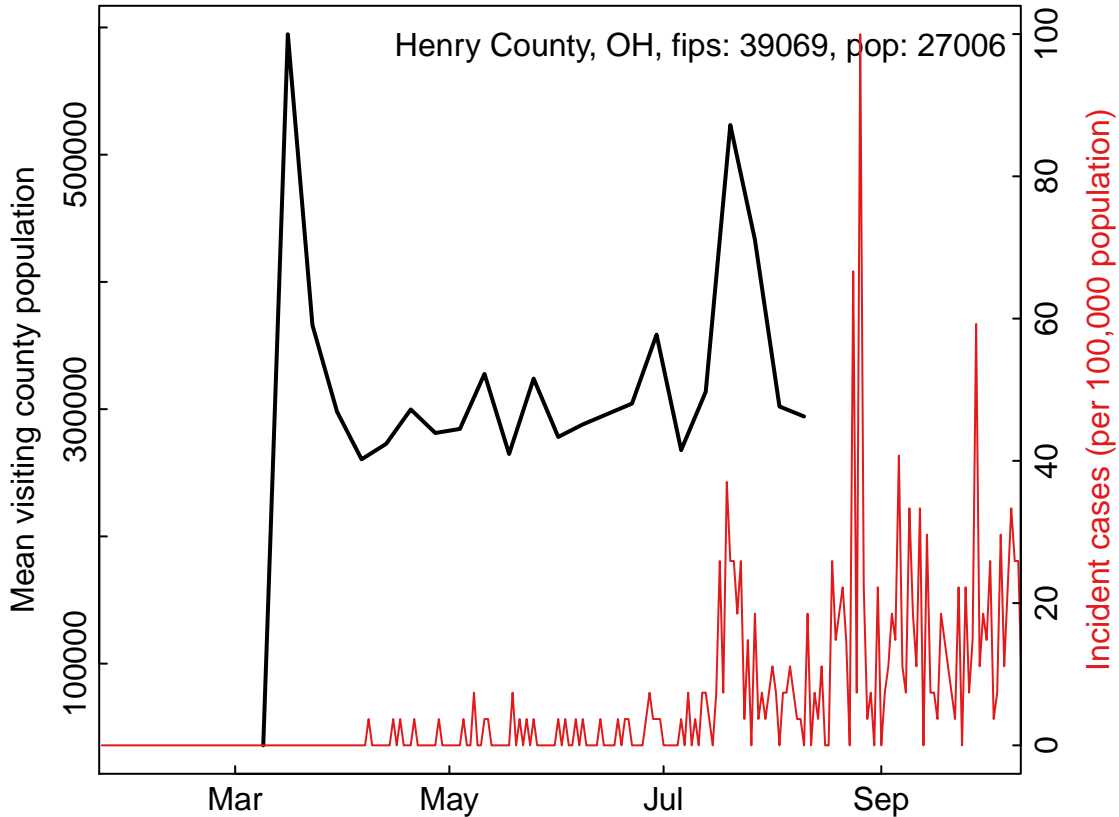

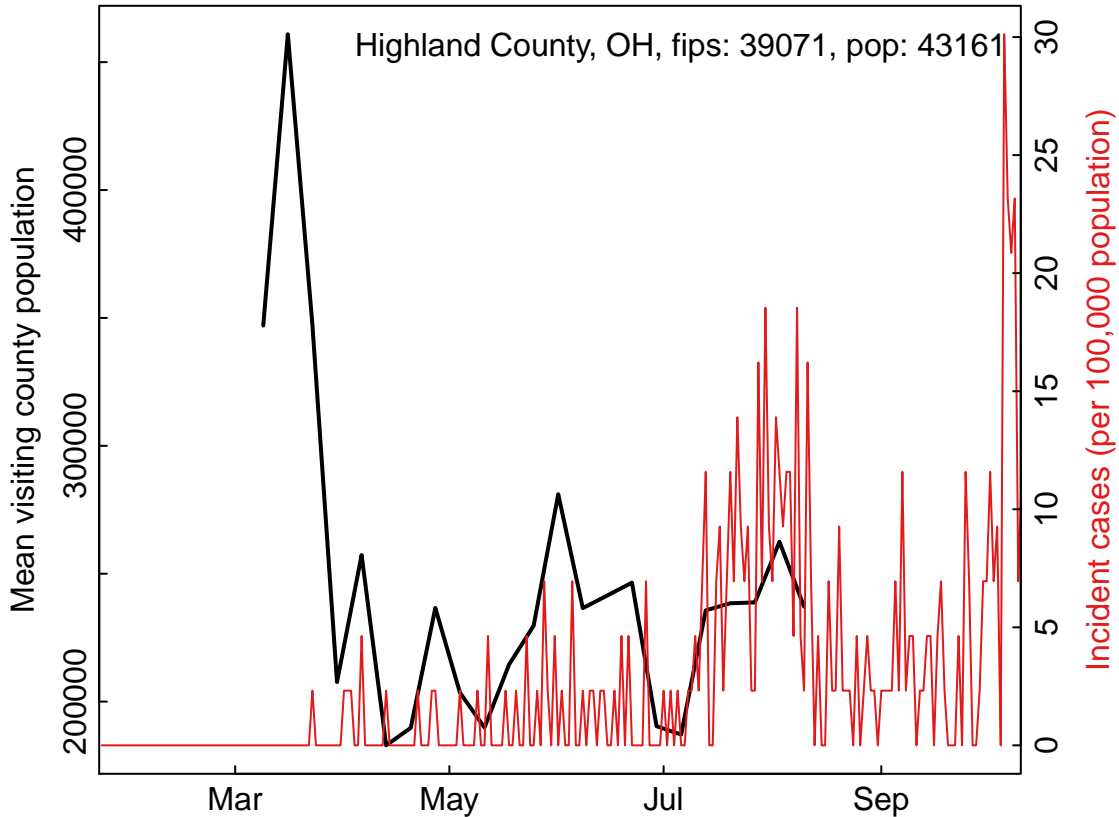

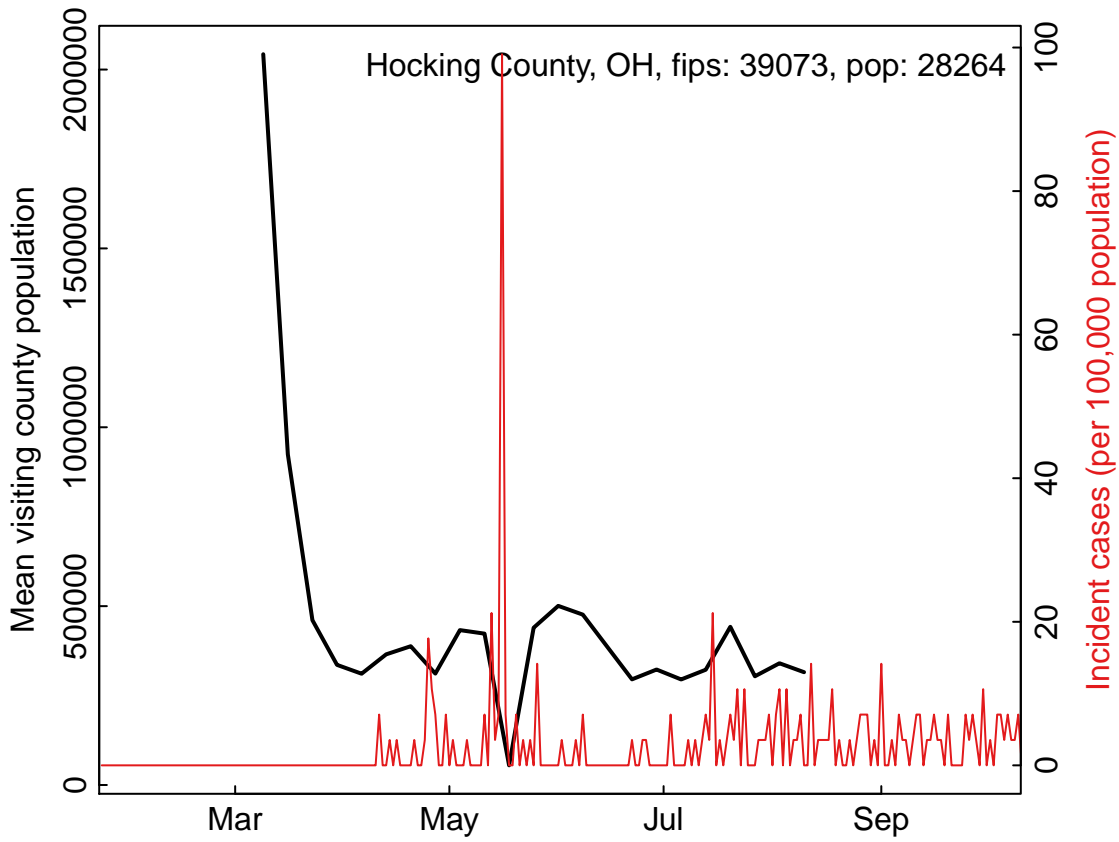



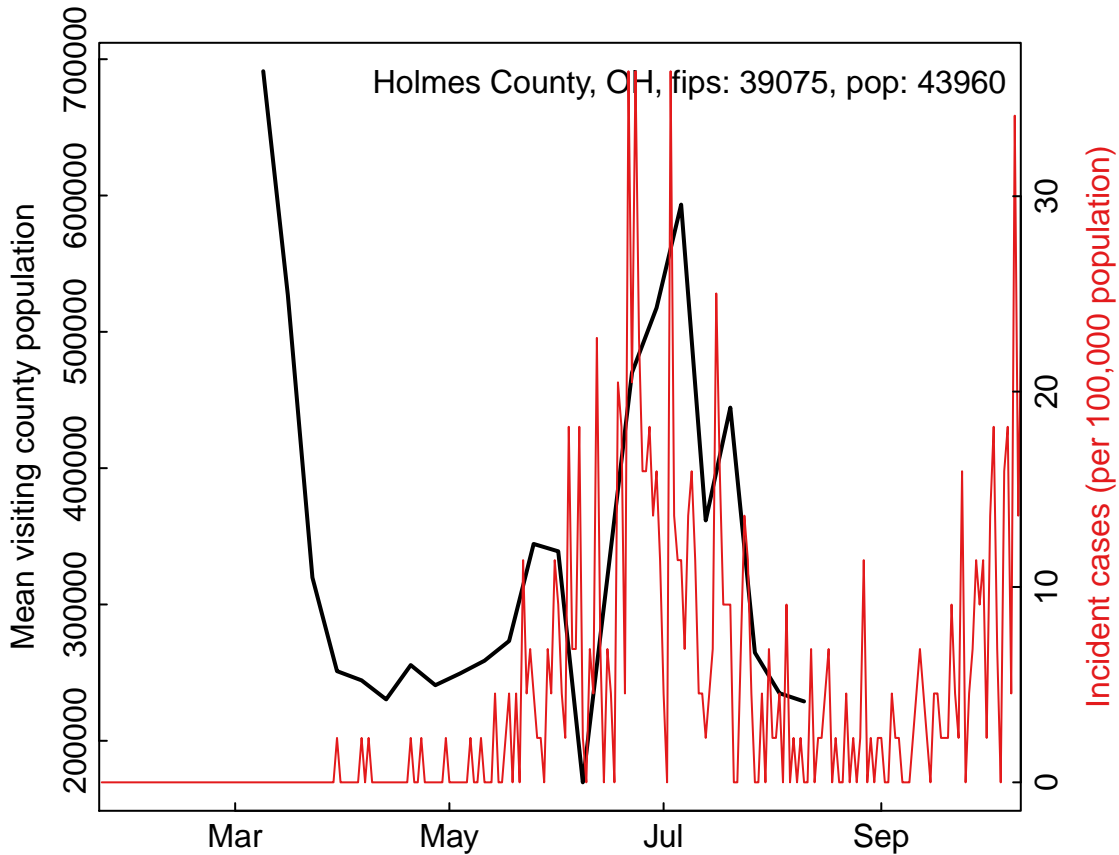

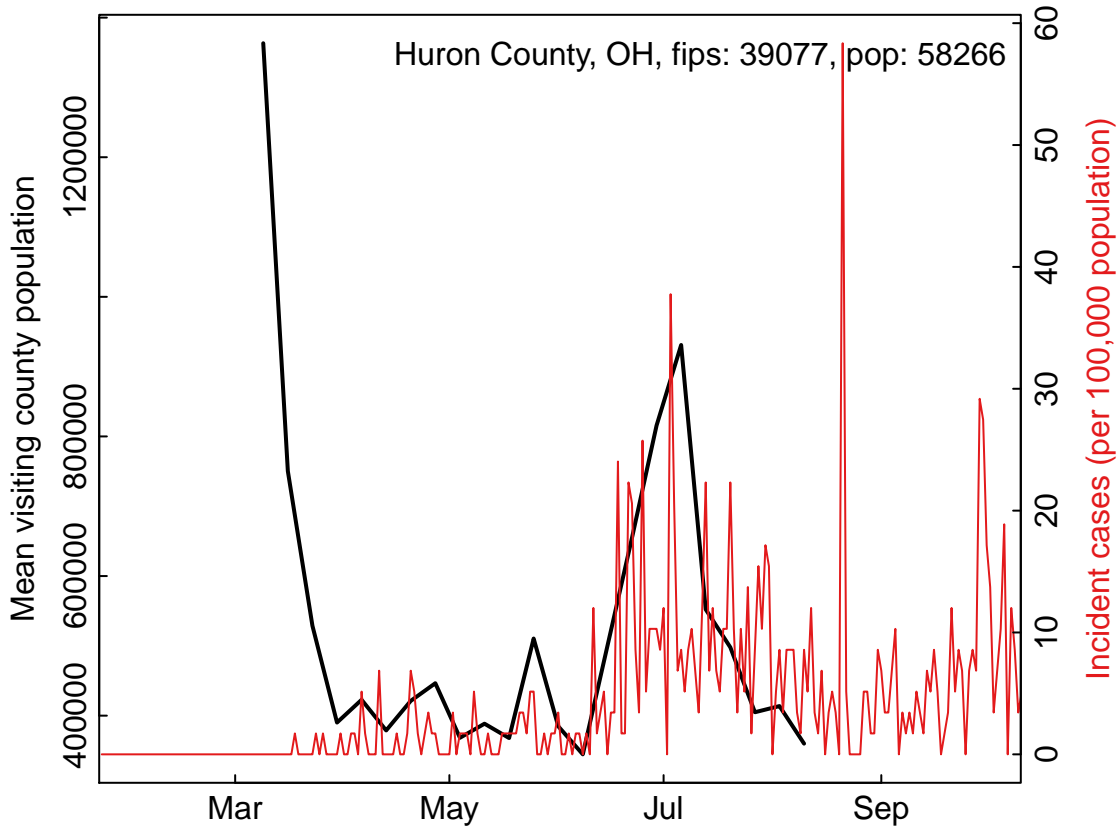

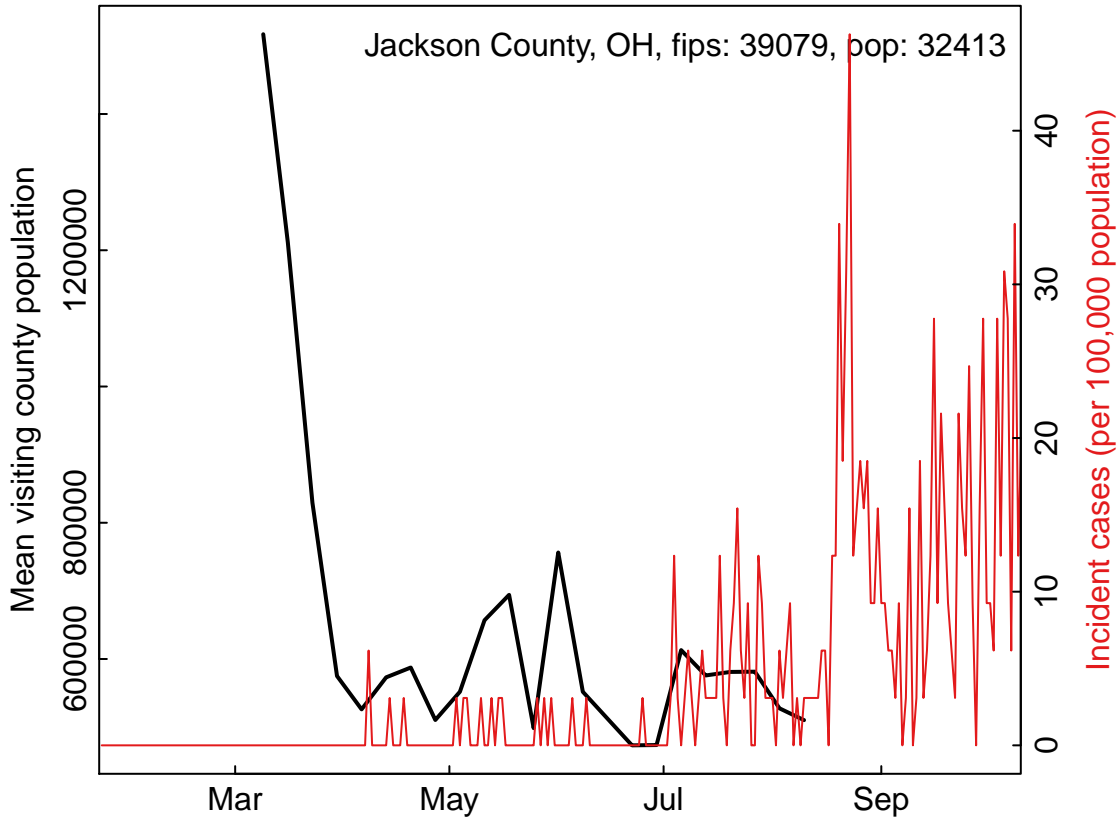

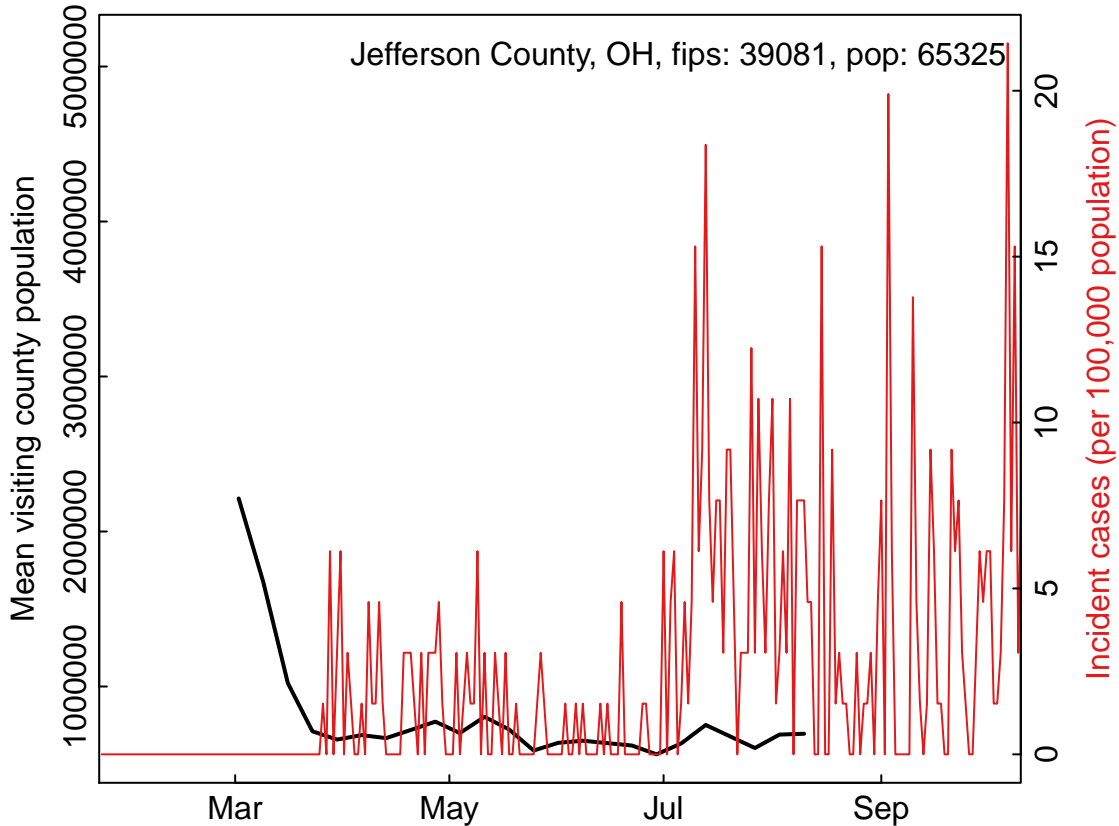

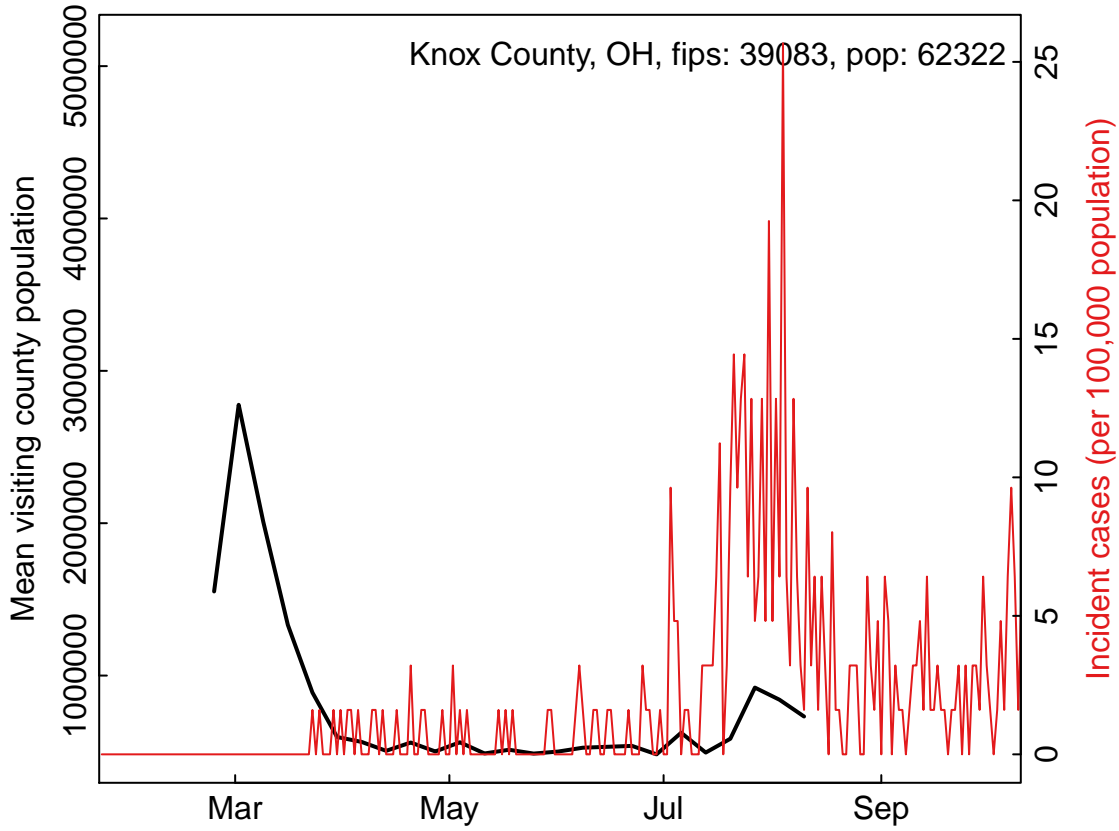

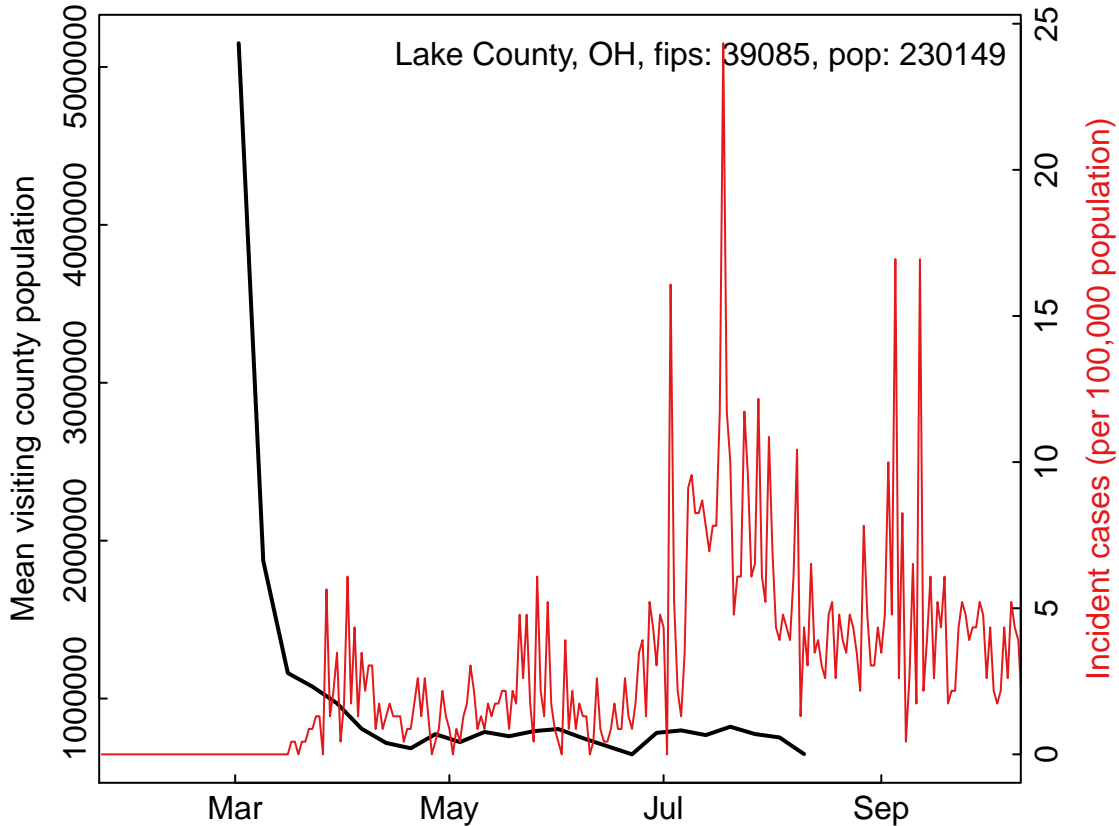

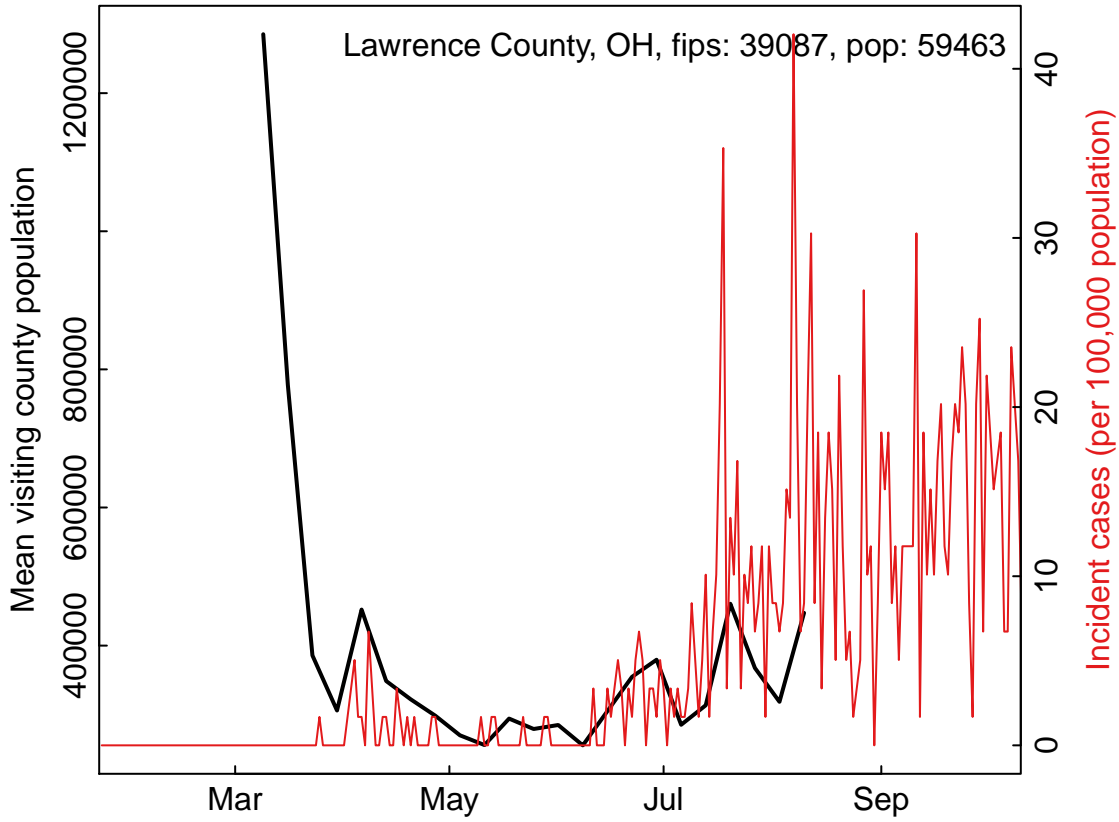

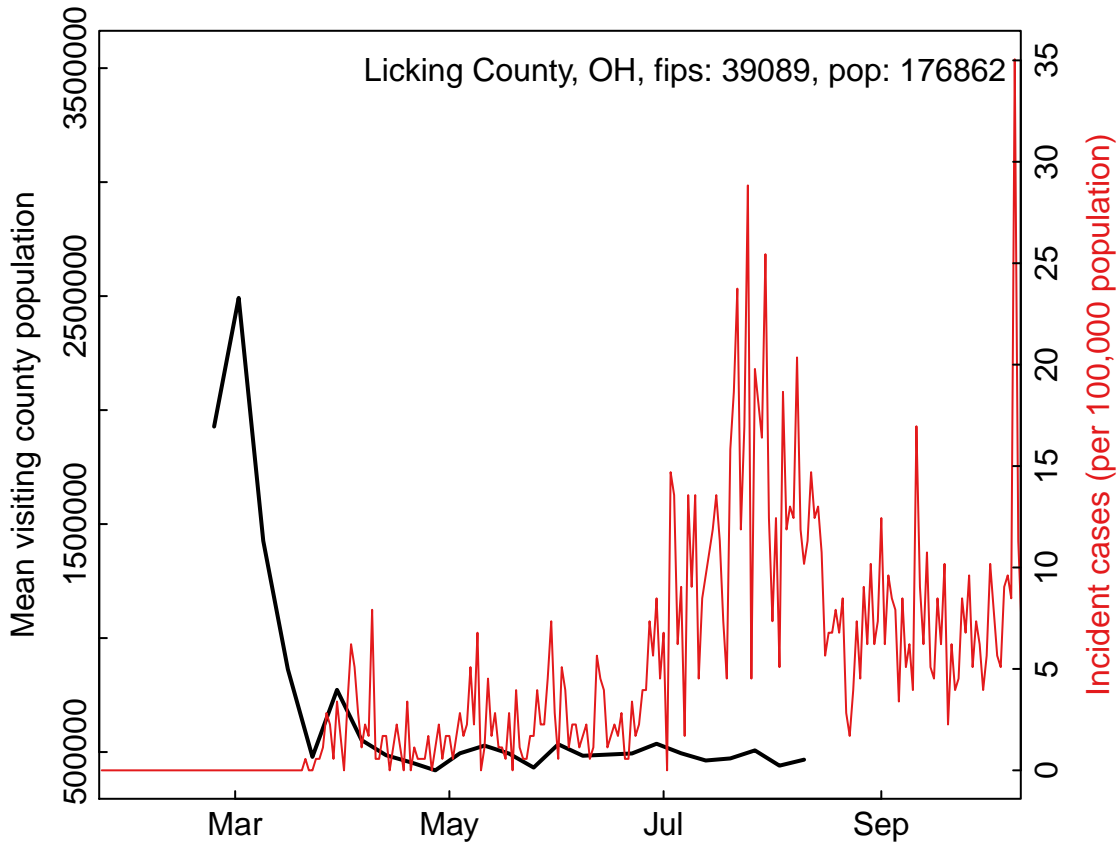



Mean visiting county population

700000  
600000  
500000  
400000  
300000

Mar

May

Jul

Sep

Logan County, OH, fips: 39091, pop: 45672

15  
10  
5  
0  
Incident cases (per 100,000 population)

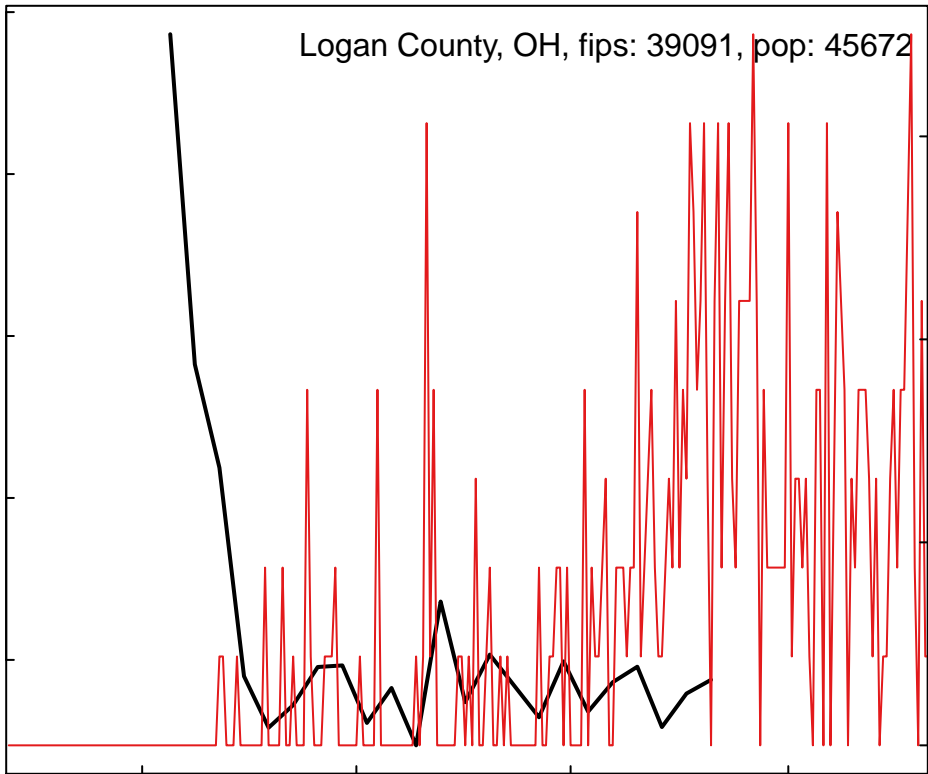

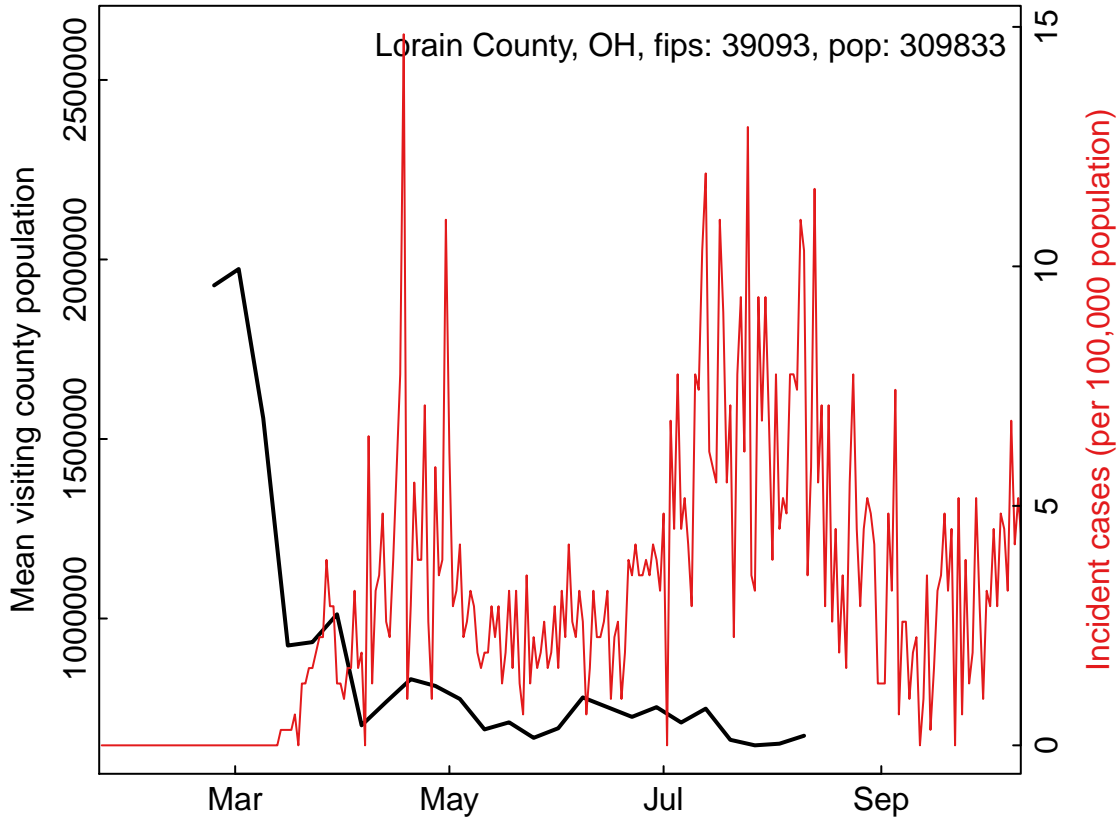

Lucas County, OH, fips: 39095, pop: 428348

Mean visiting county population

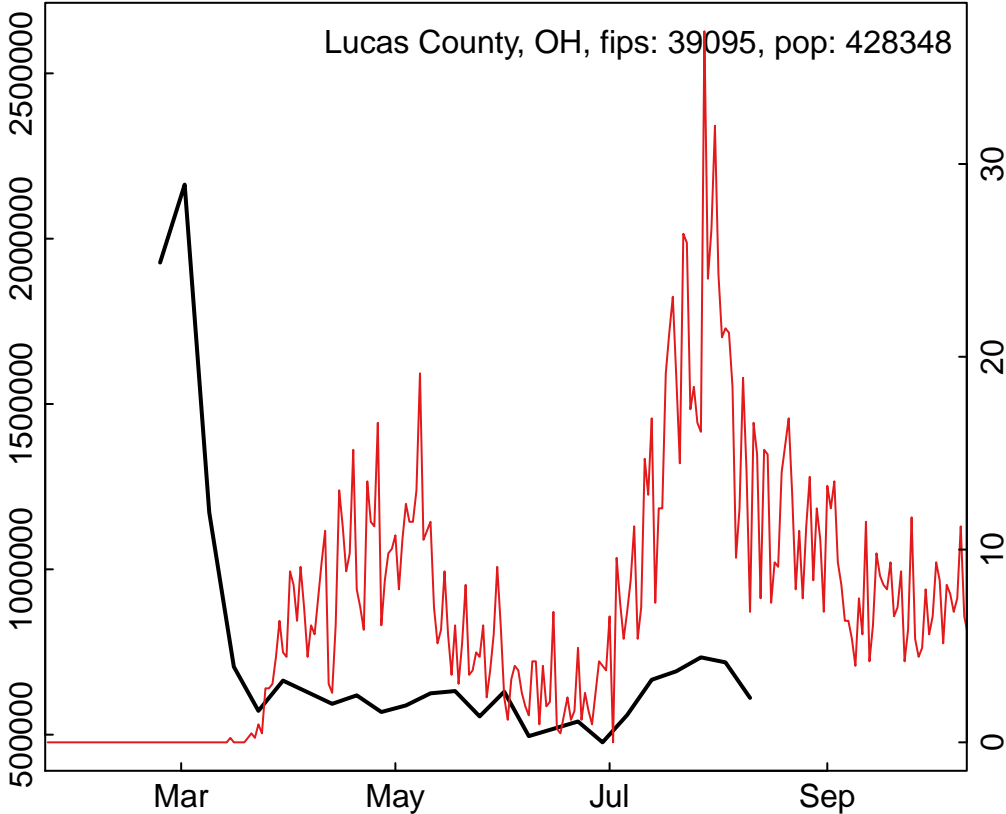

Incident cases (per 100,000 population)

Madison County, OH, fips: 39097, pop: 44731

Mean visiting county population

500000  
1500000  
2500000

Mar May Jul Sep

Incident cases (per 100,000 population)

0  
50  
100  
150  
200

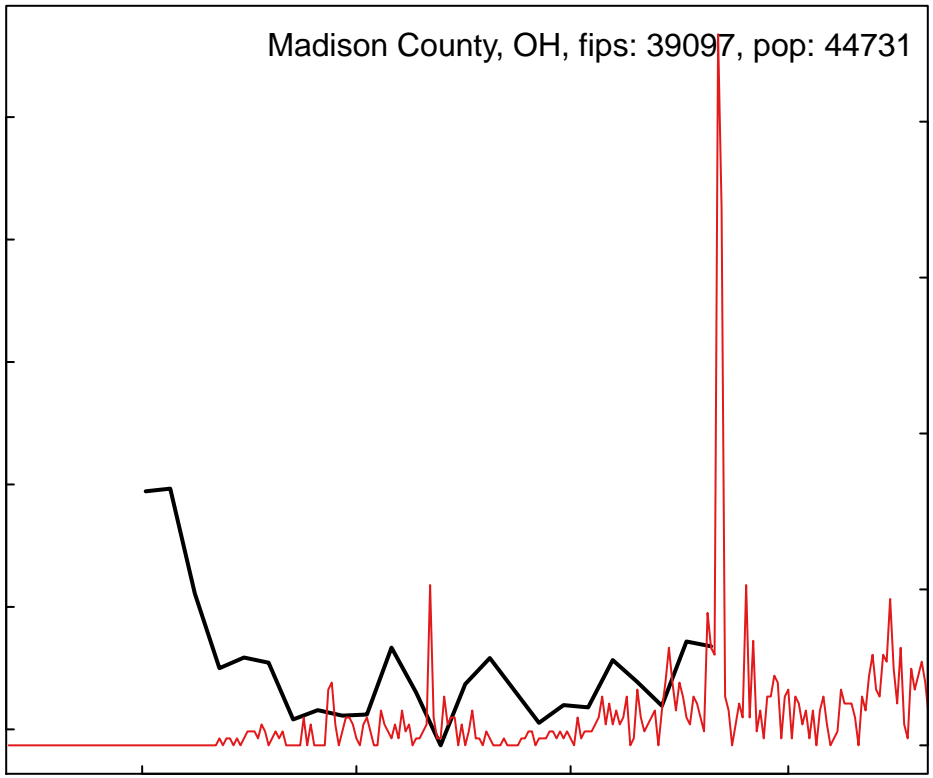

Mahoning County, OH, fips: 39099, pop: 228683

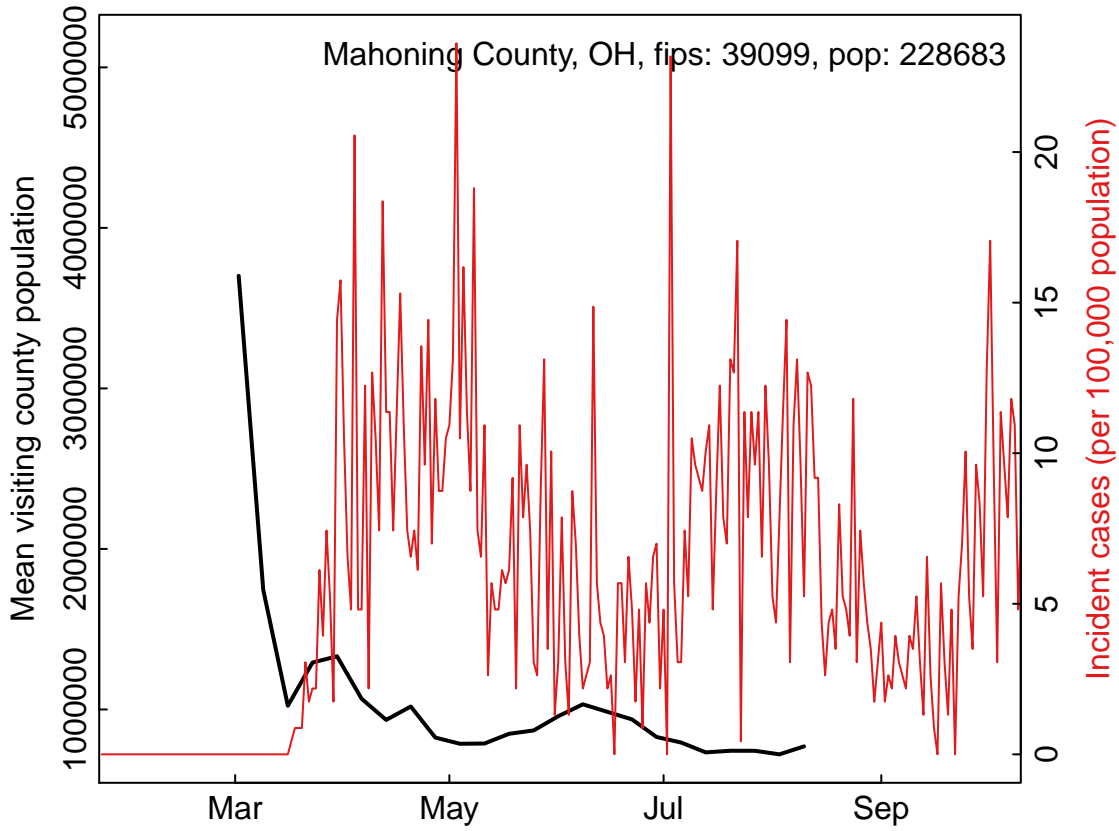

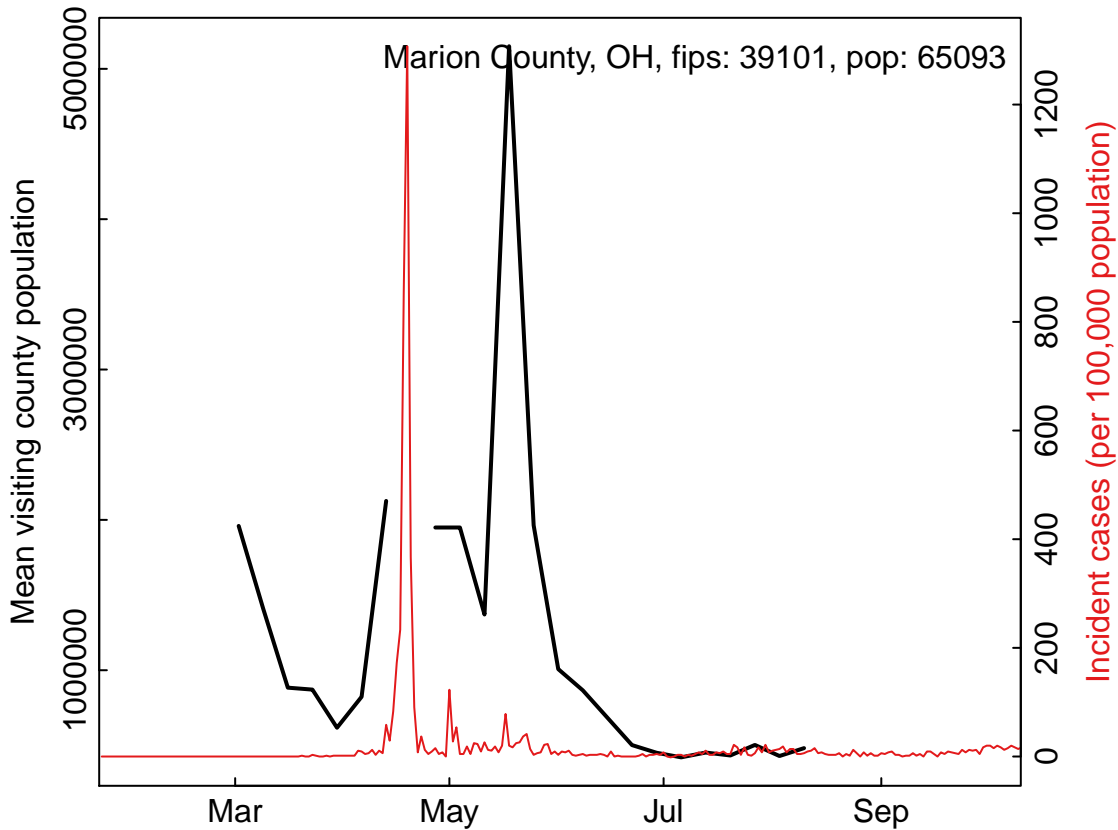

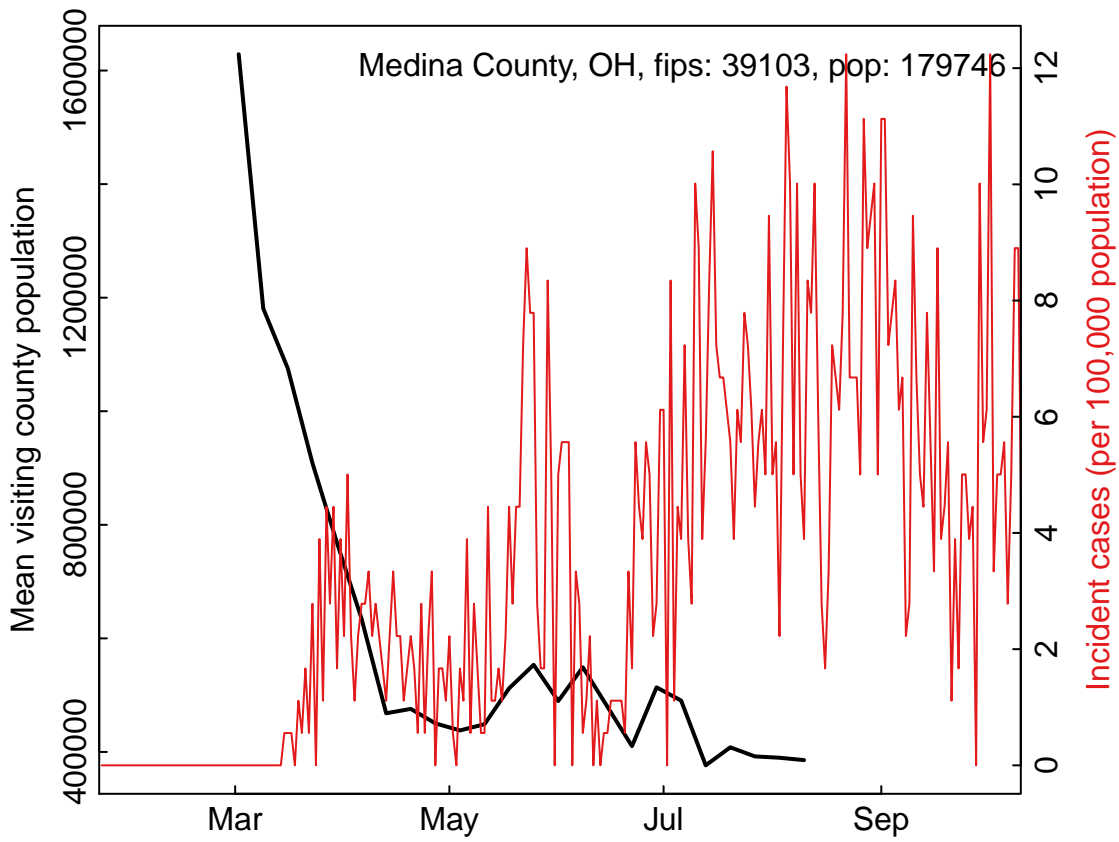

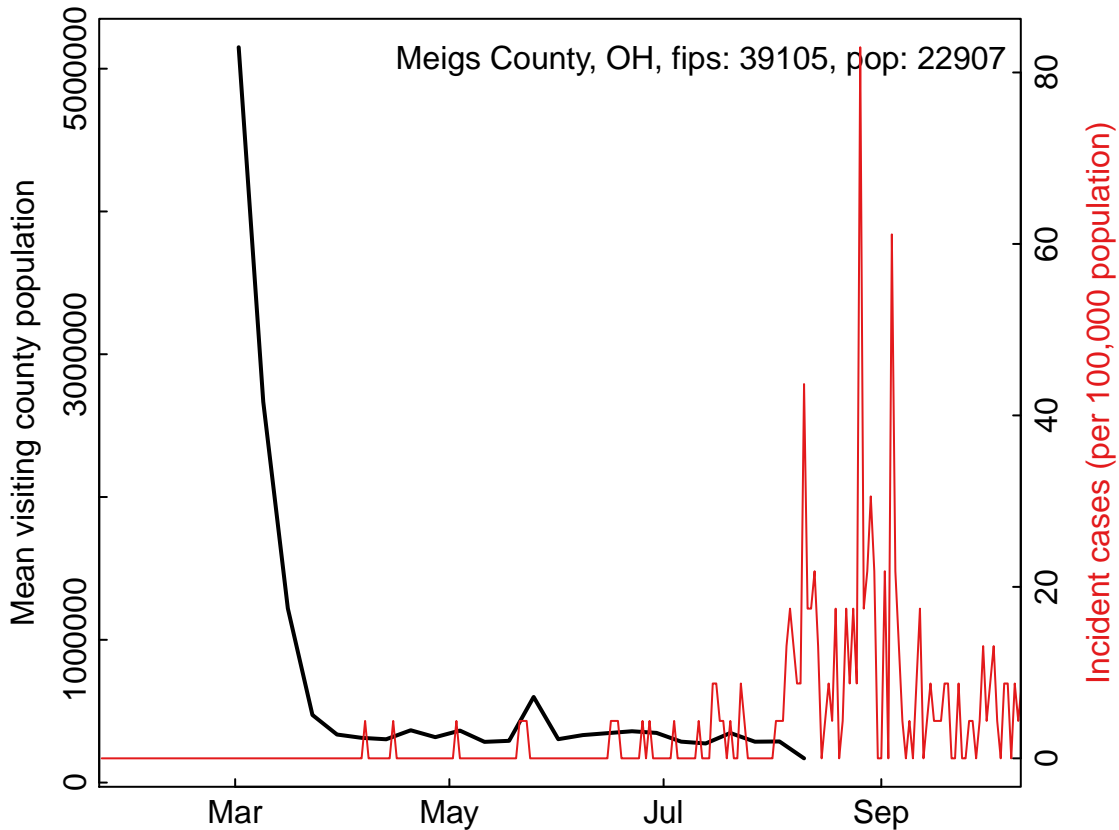



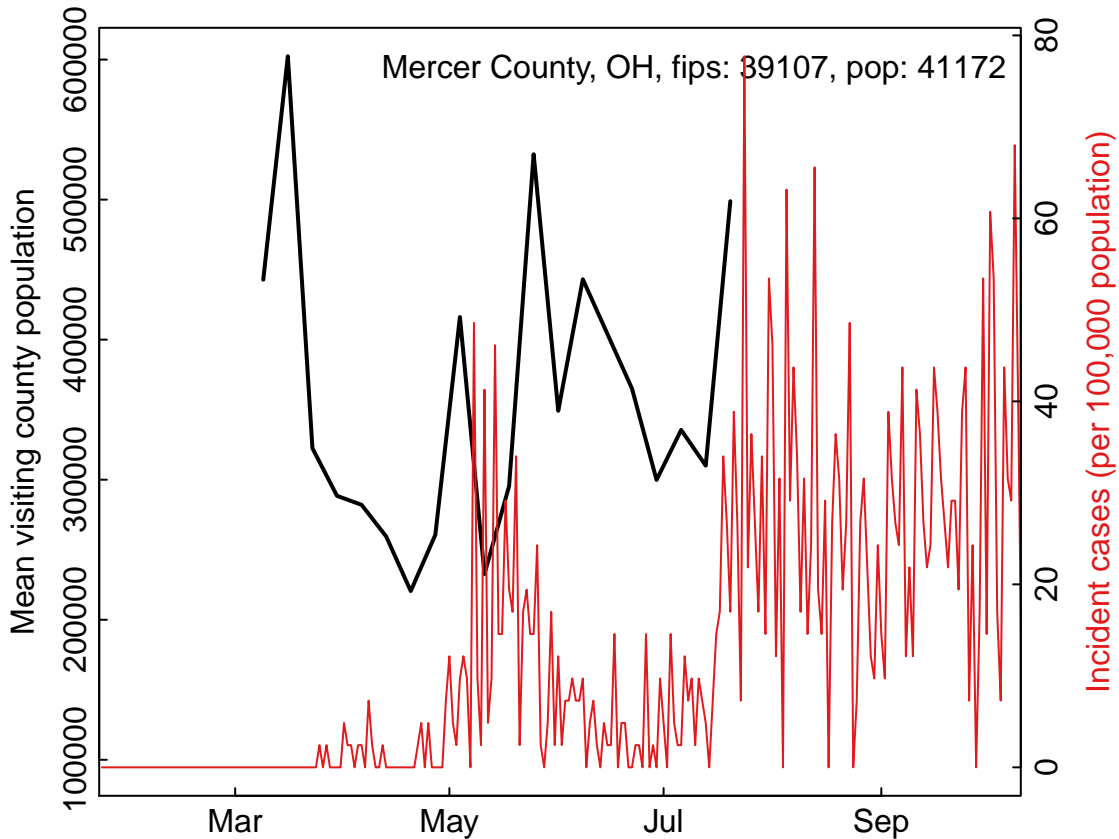

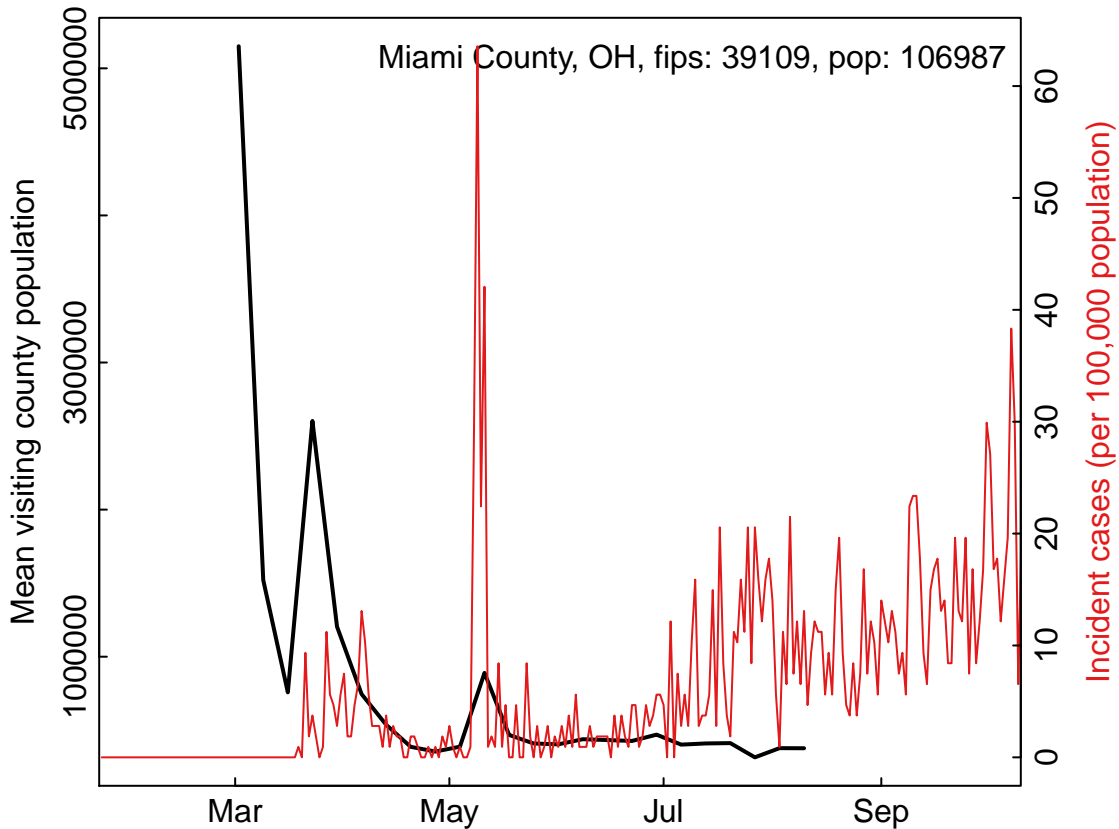

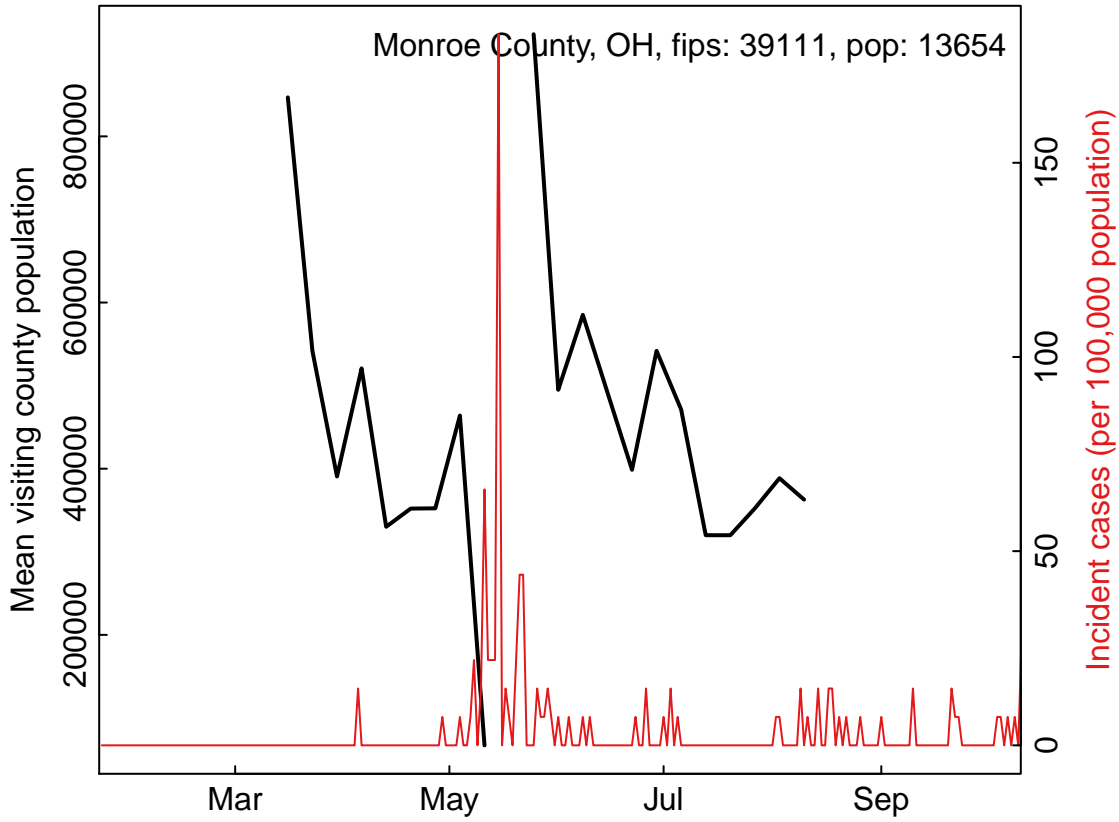

Montgomery County, OH, fips: 39113, pop: 531687

Mean visiting county population

3500000  
2500000  
1500000  
500000

Mar

May

Jul

Sep

Incident cases (per 100,000 population)

50  
40  
30  
20  
10  
0

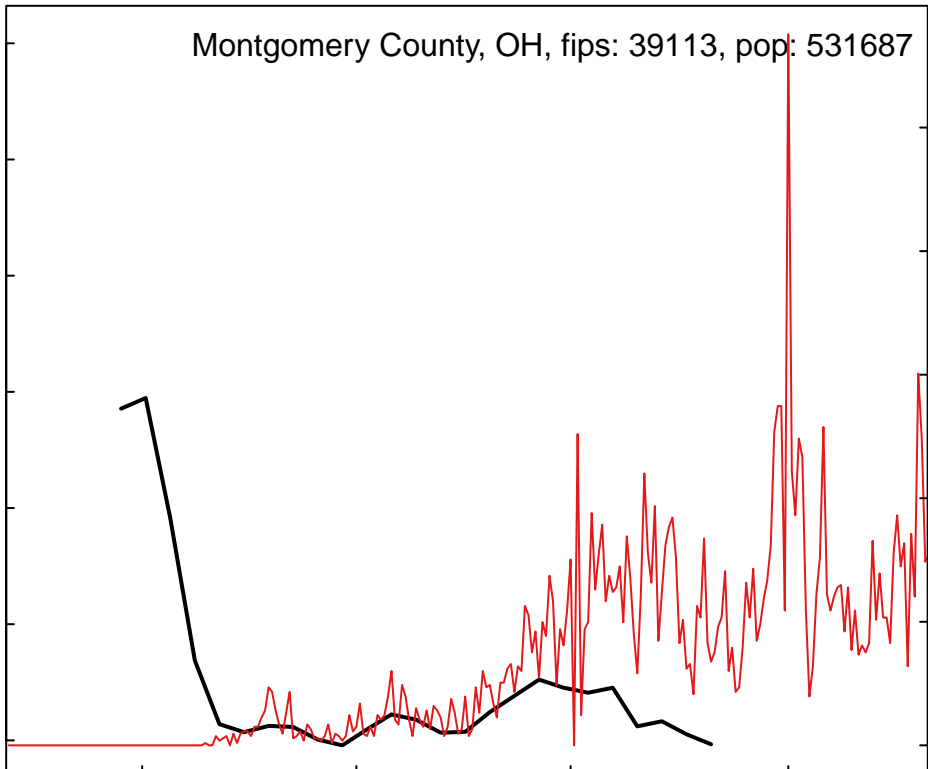

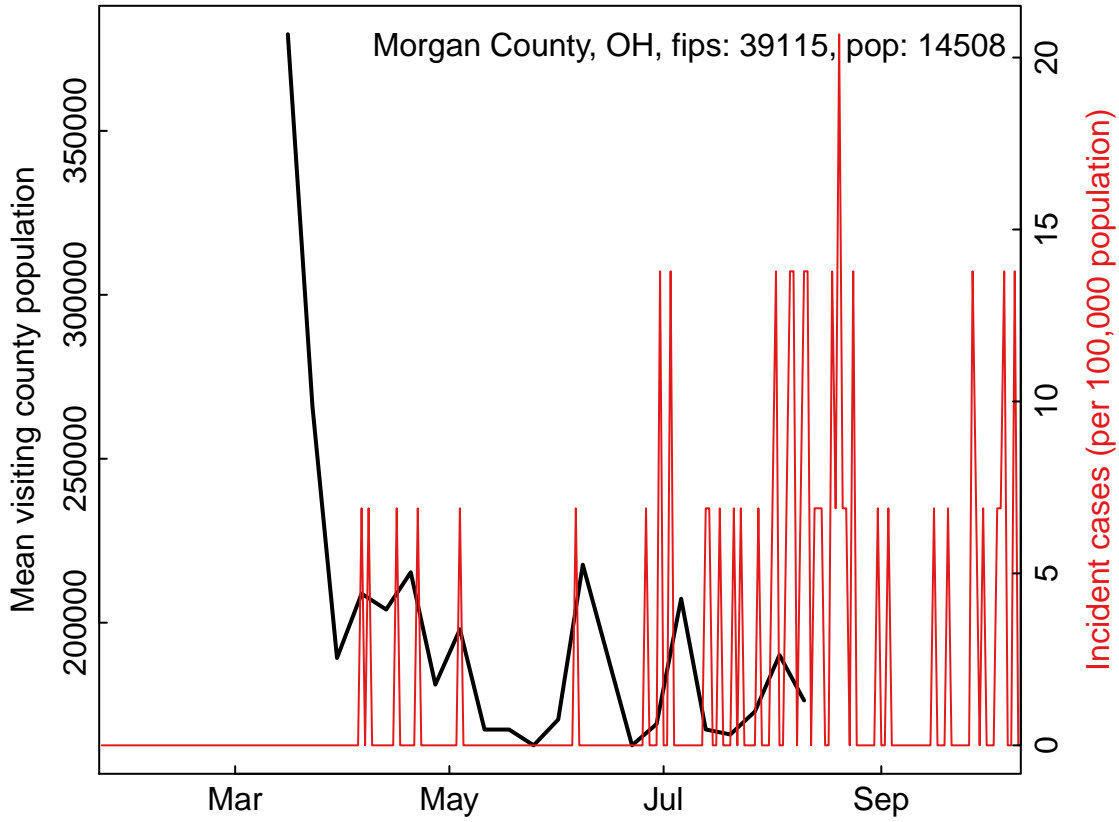

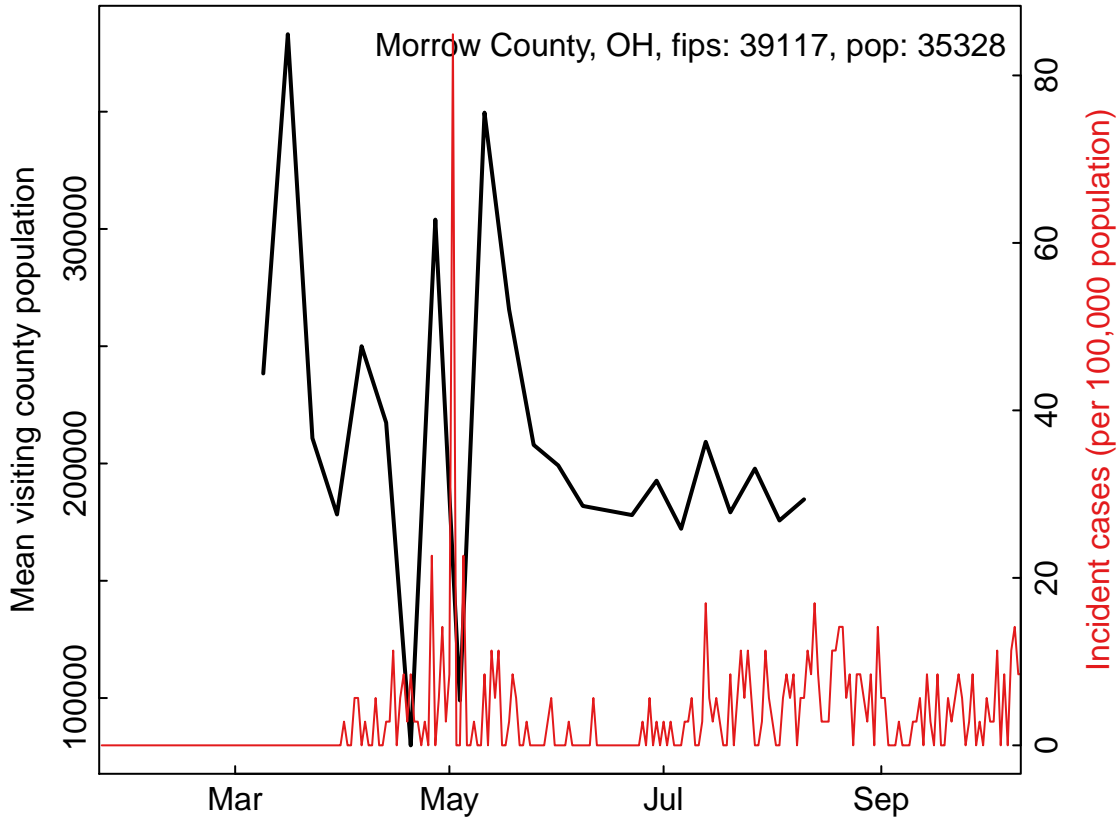

Mean visiting county population

1000000  
800000  
600000  
400000

Mar

May

Jul

Sep

Muskingum County, OH, fips: 39119, pop: 86215

30  
20  
10  
0  
Incident cases (per 100,000 population)

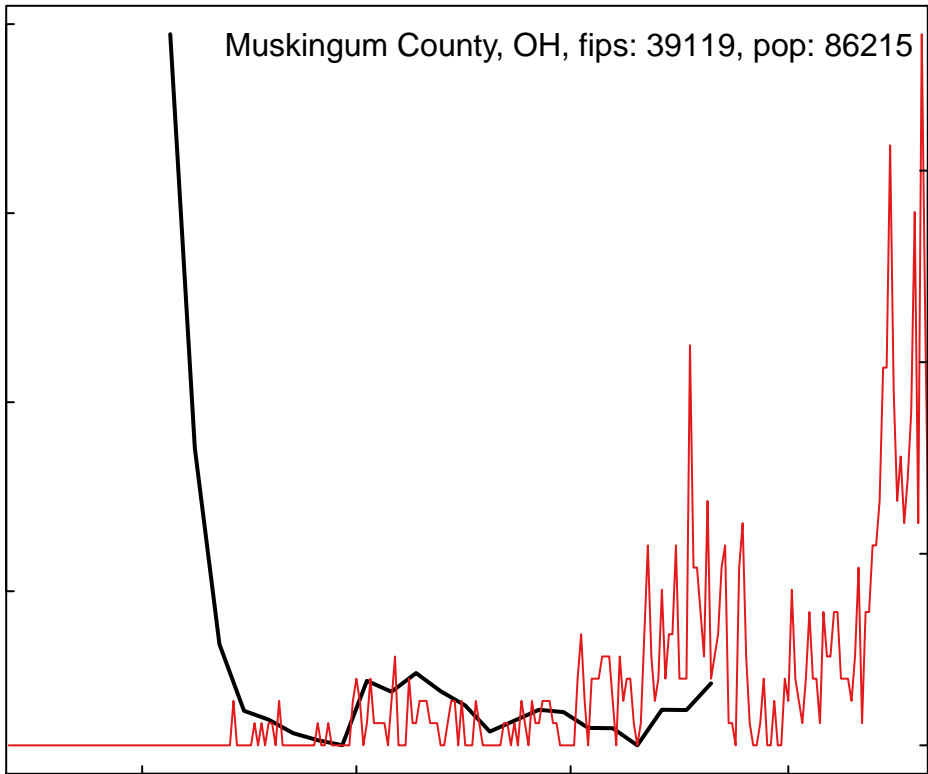

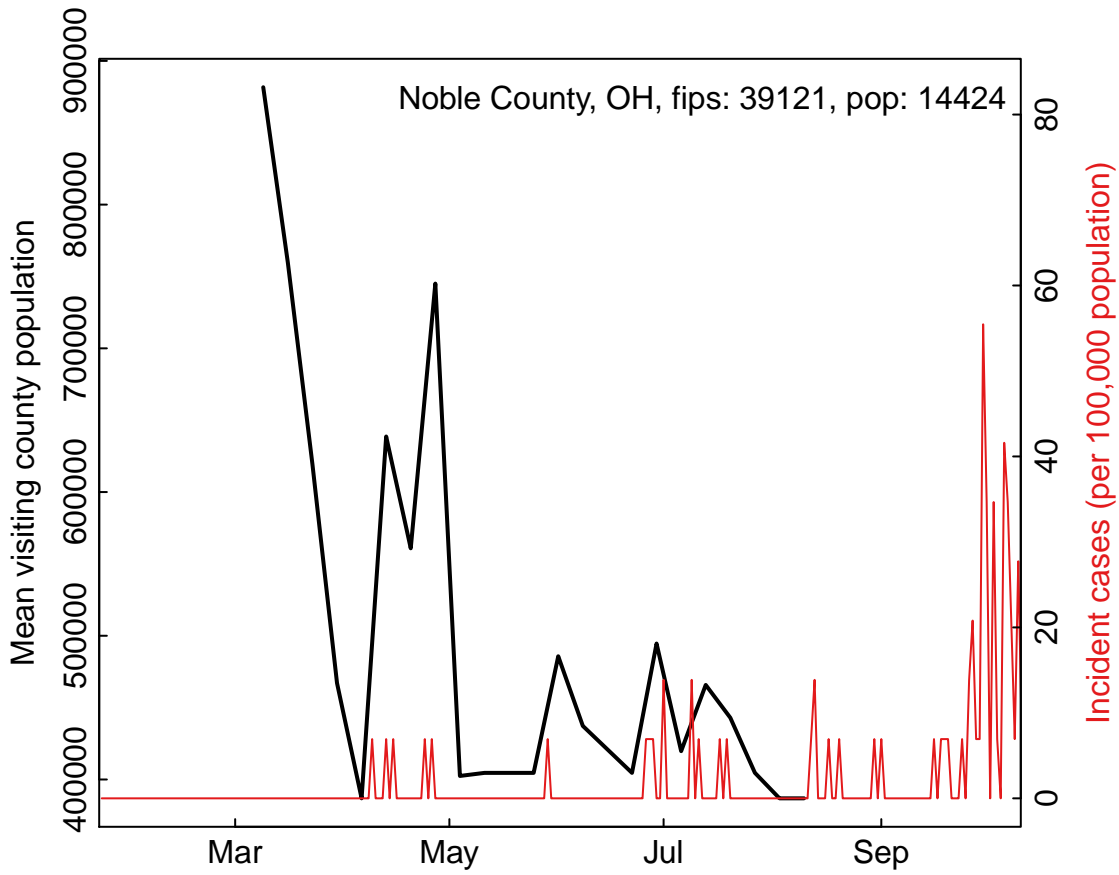



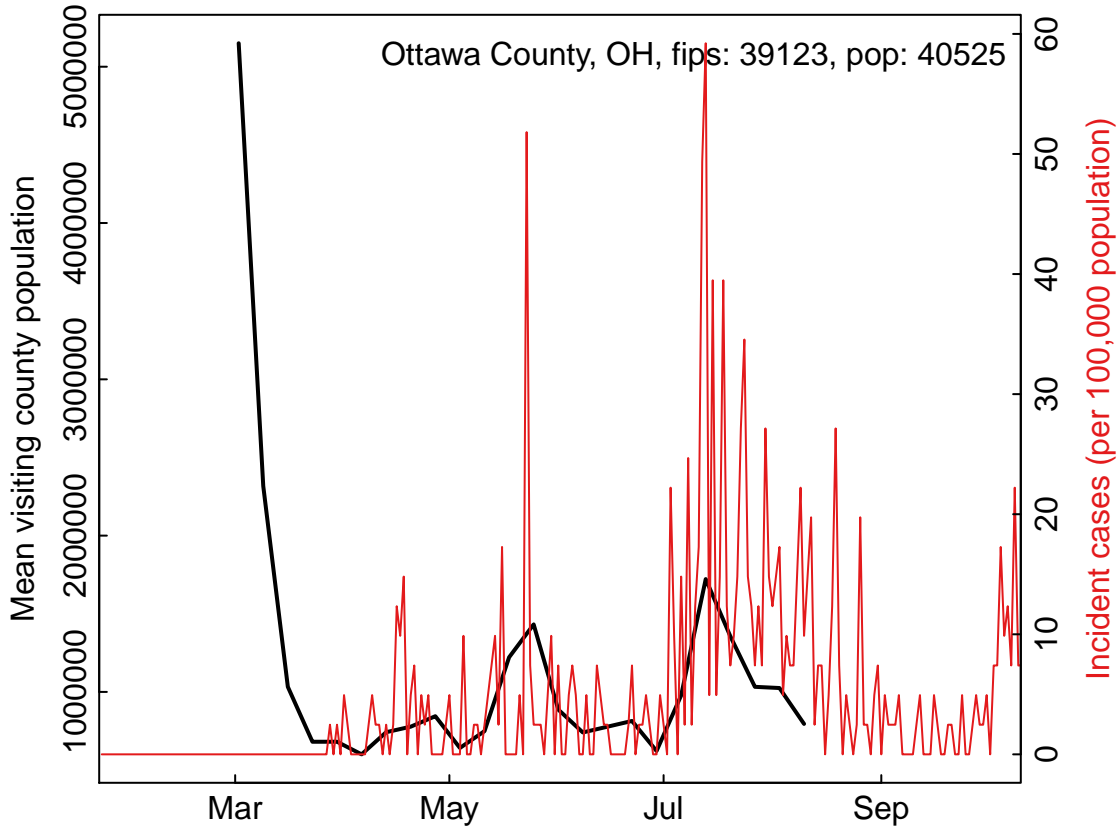

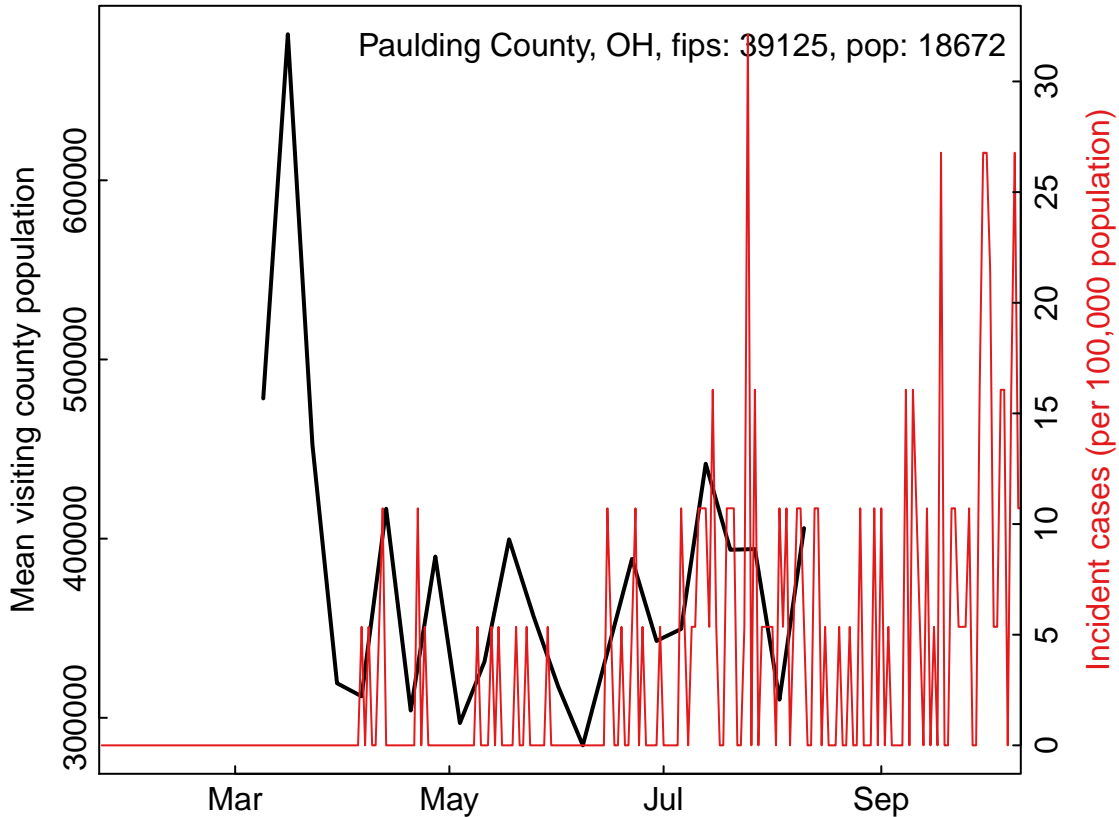

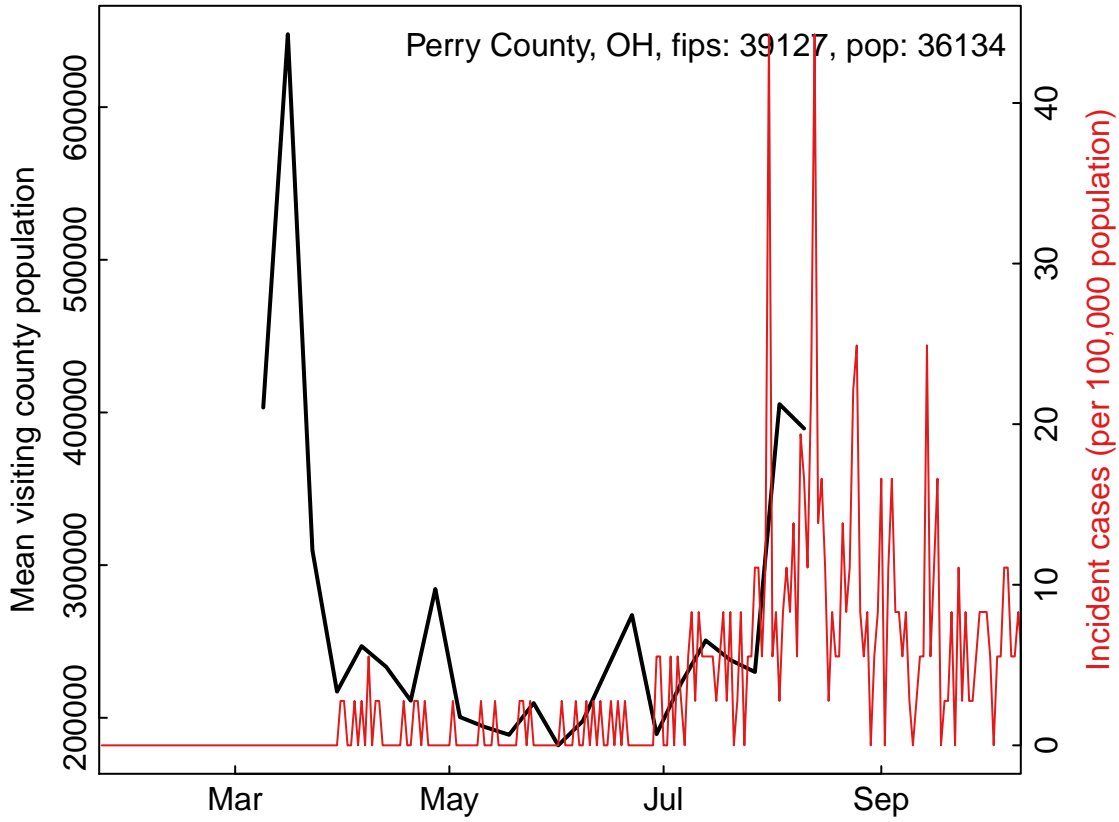

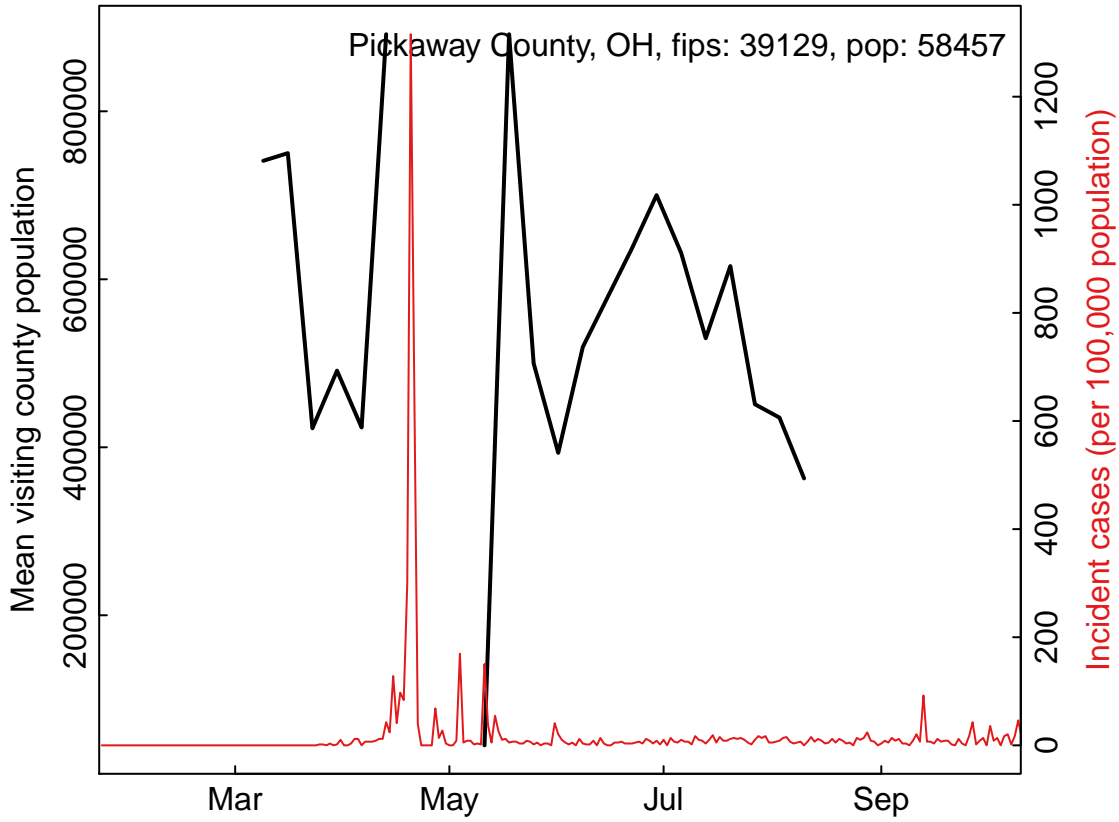

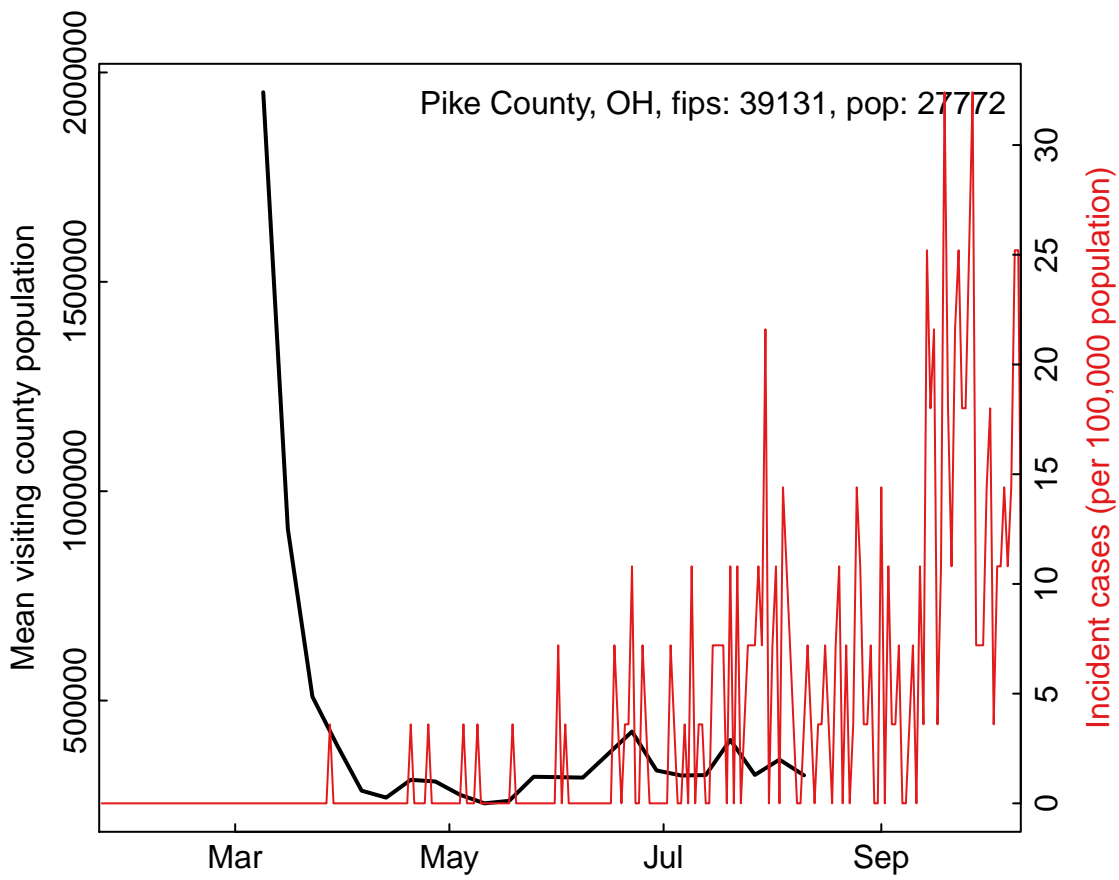

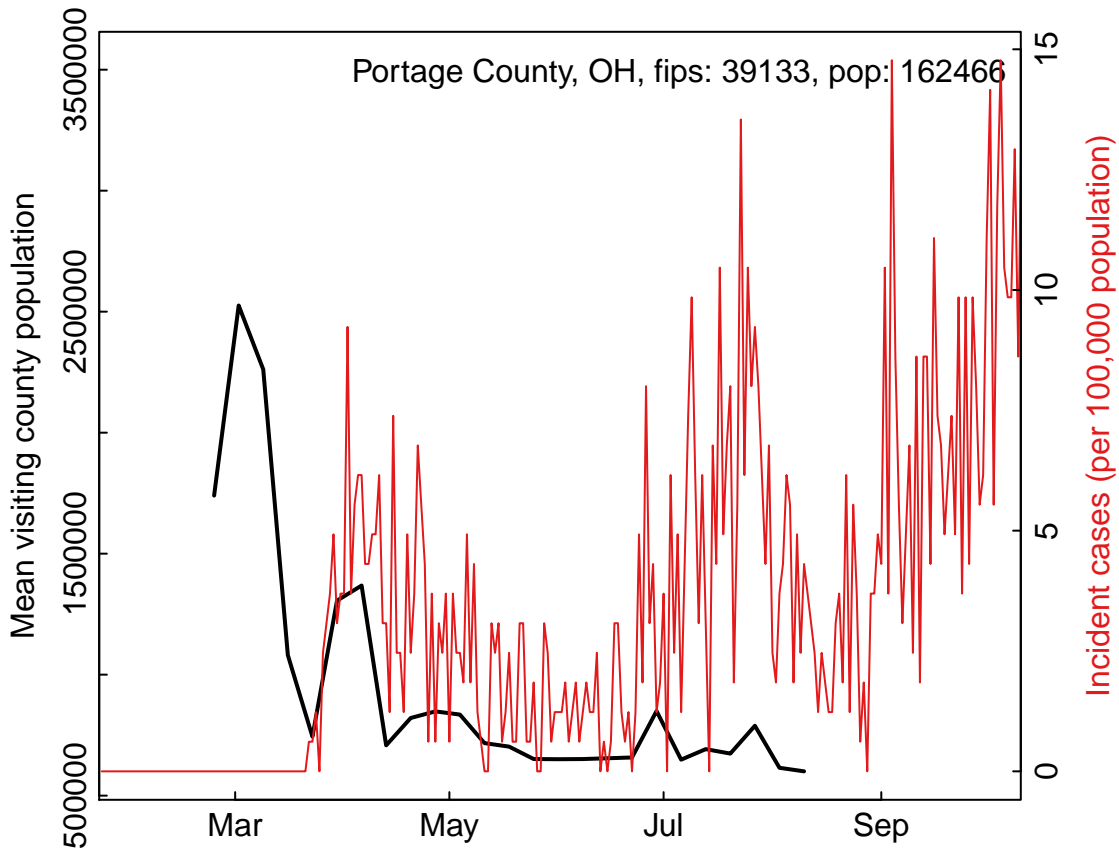

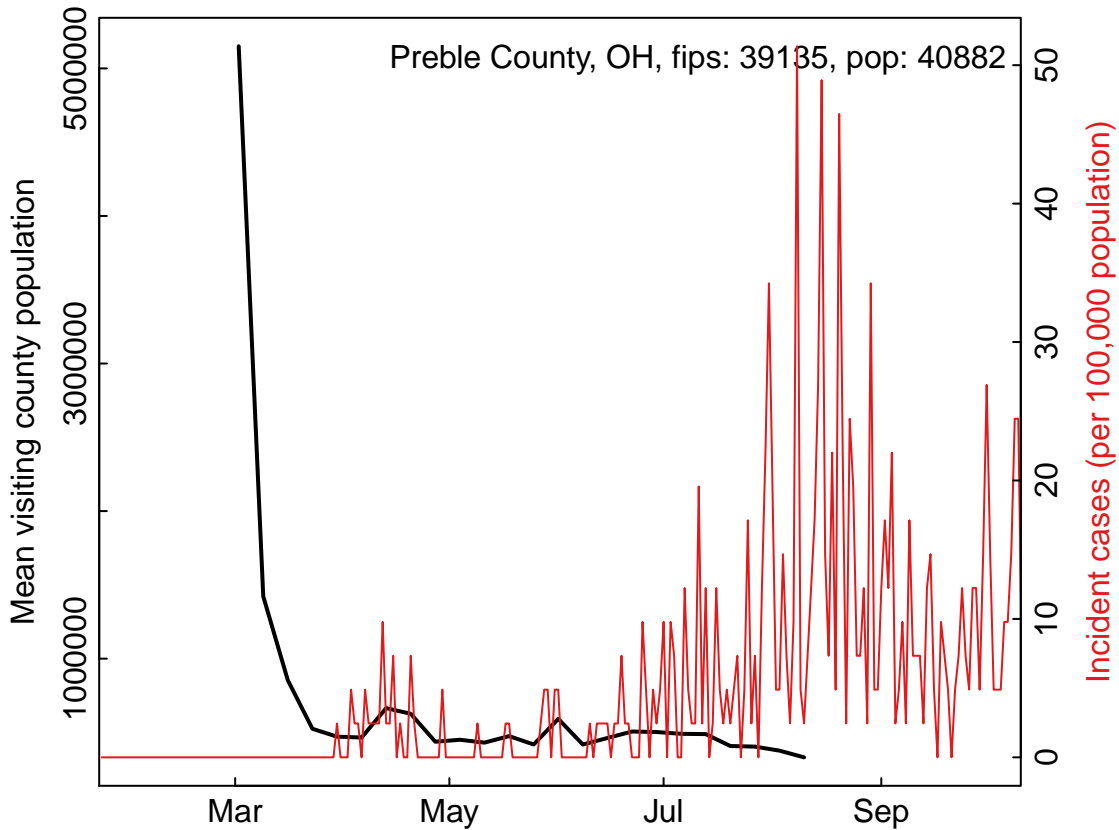

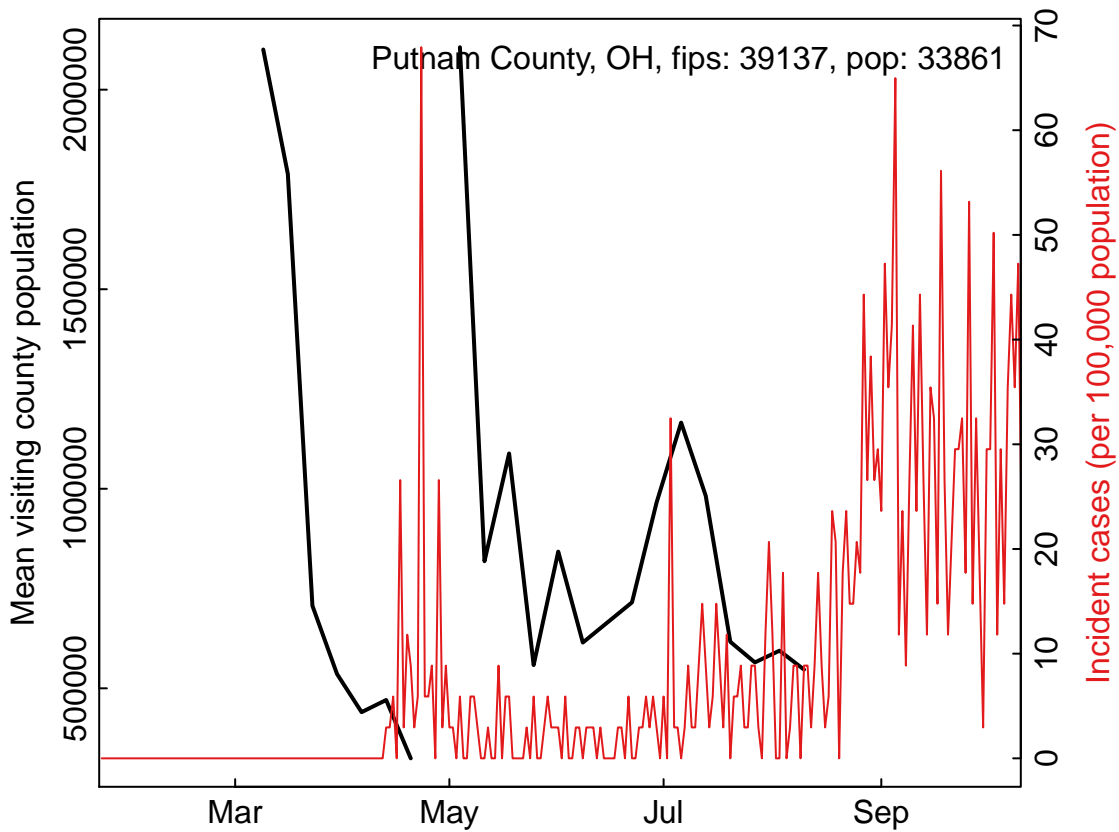



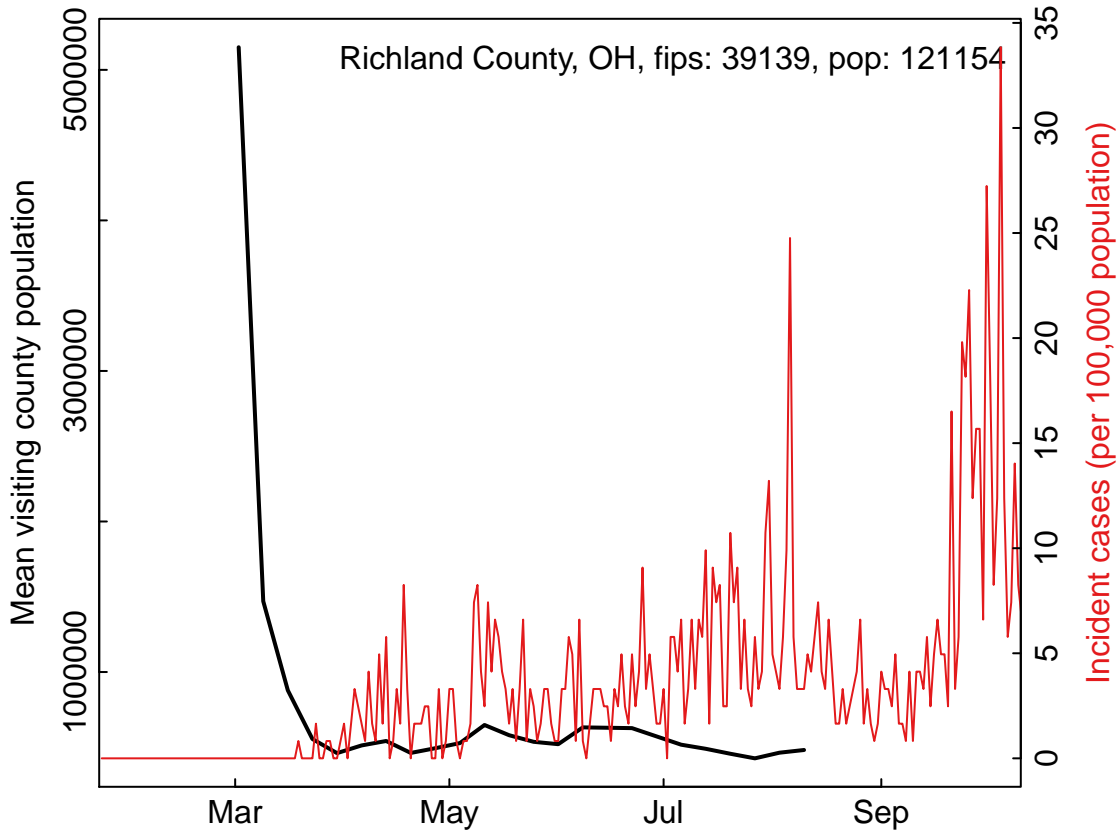

Ross County, OH, fips: 39141, pop: 76666

Mean visiting county population

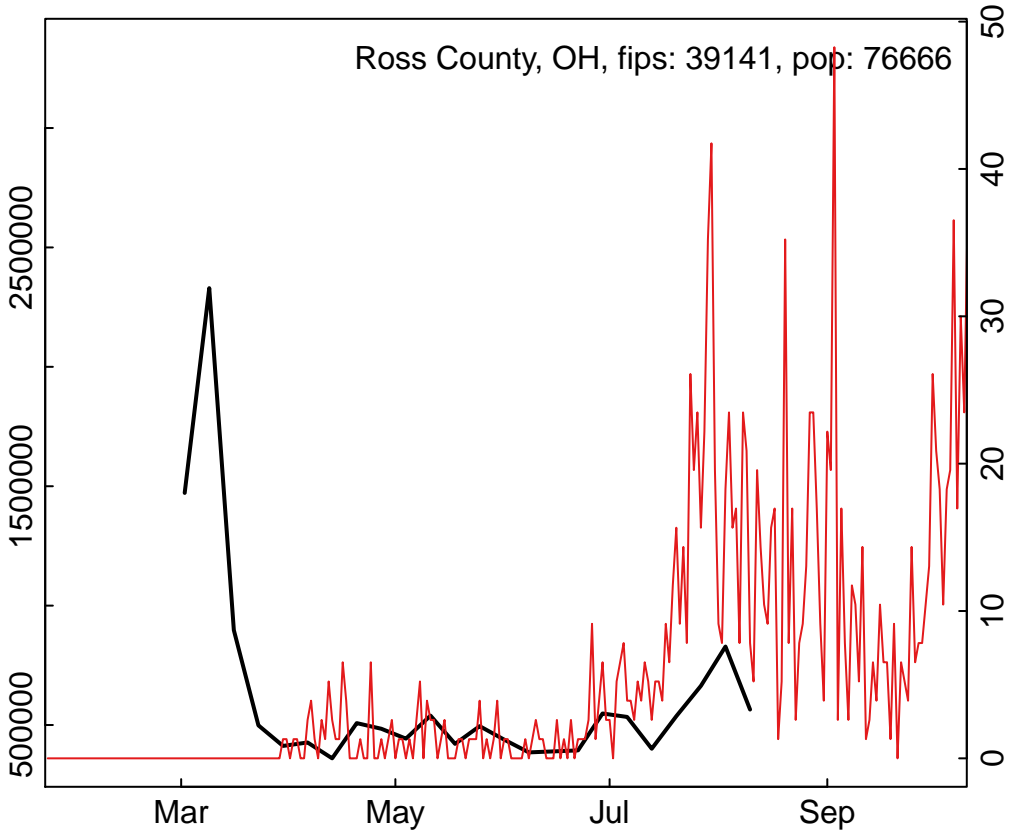

Incident cases (per 100,000 population)

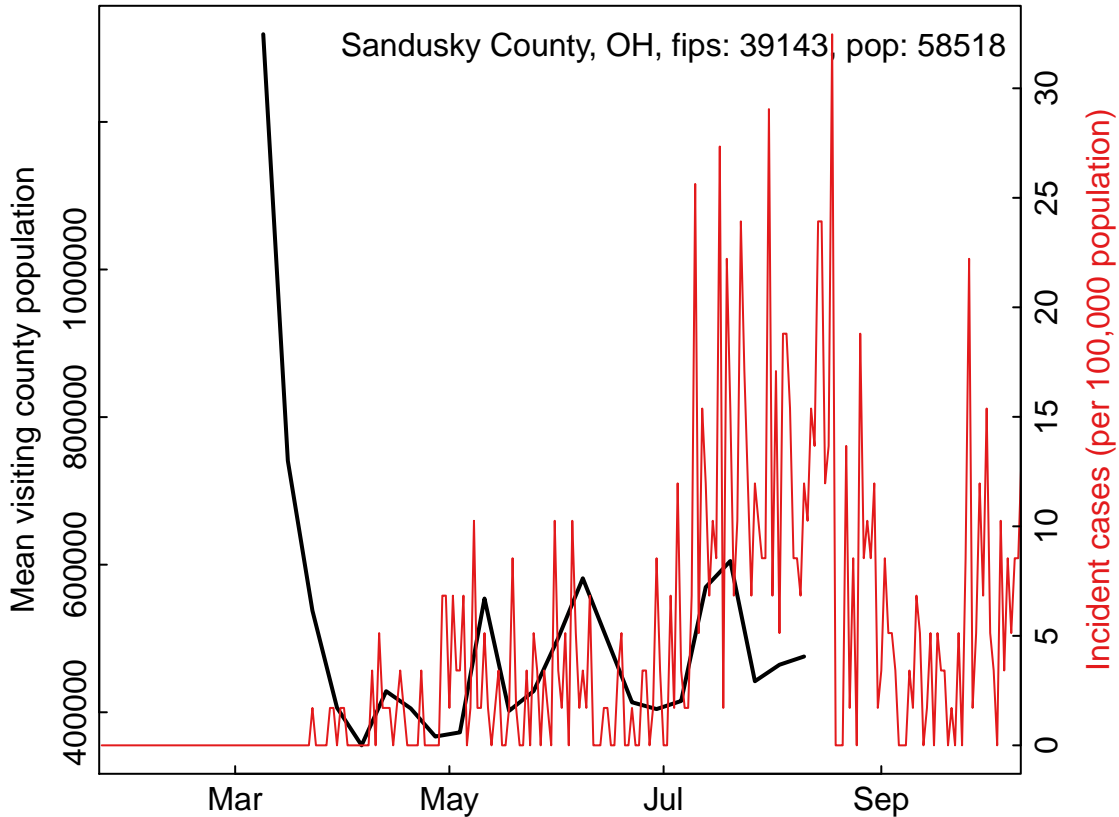

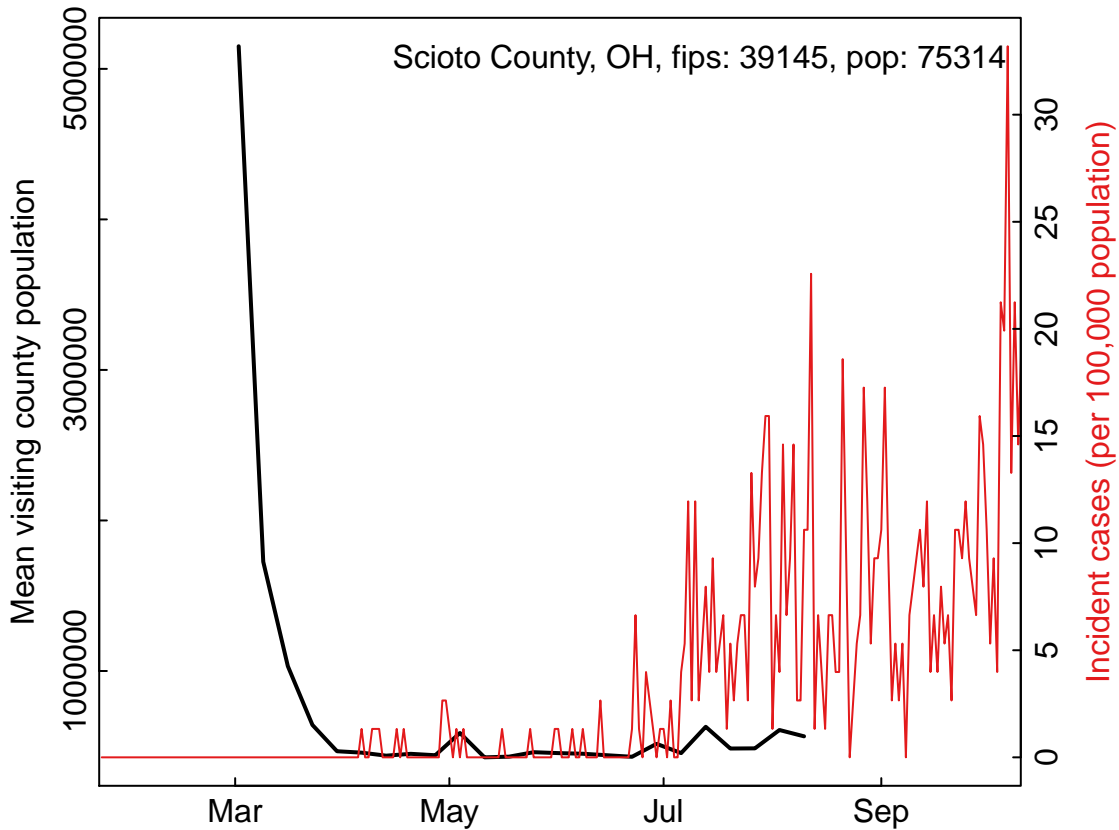

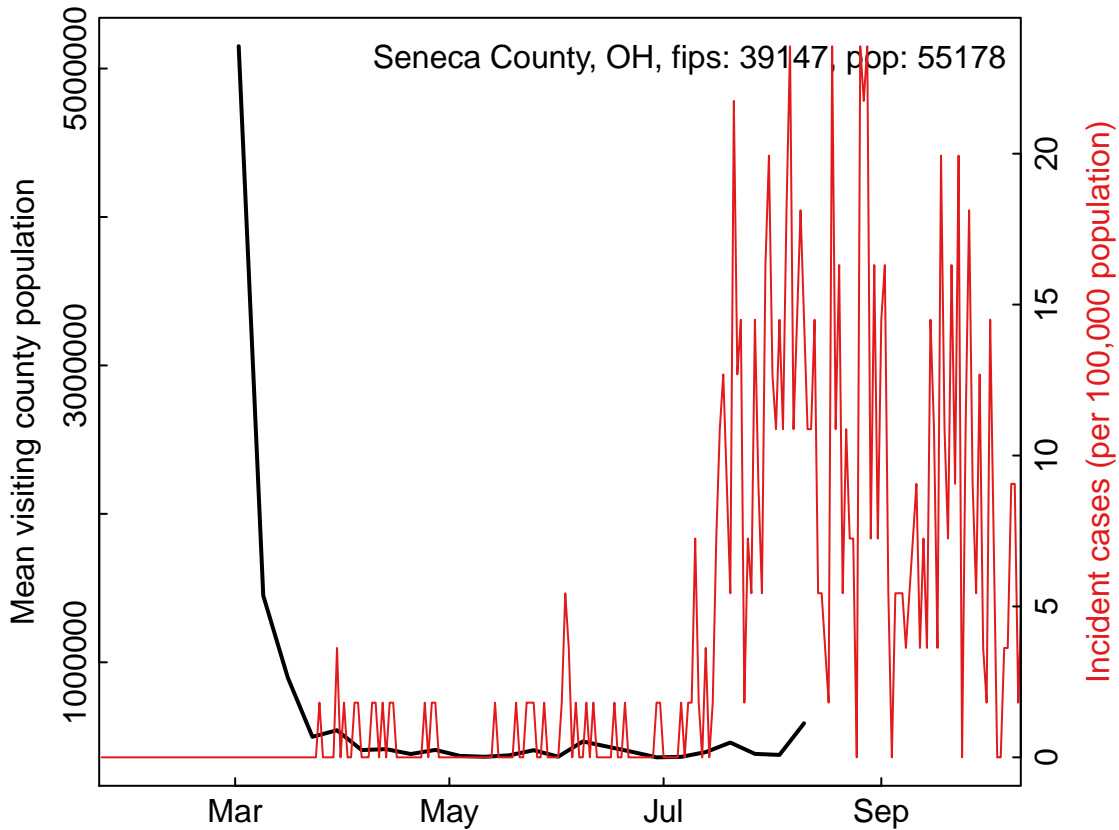

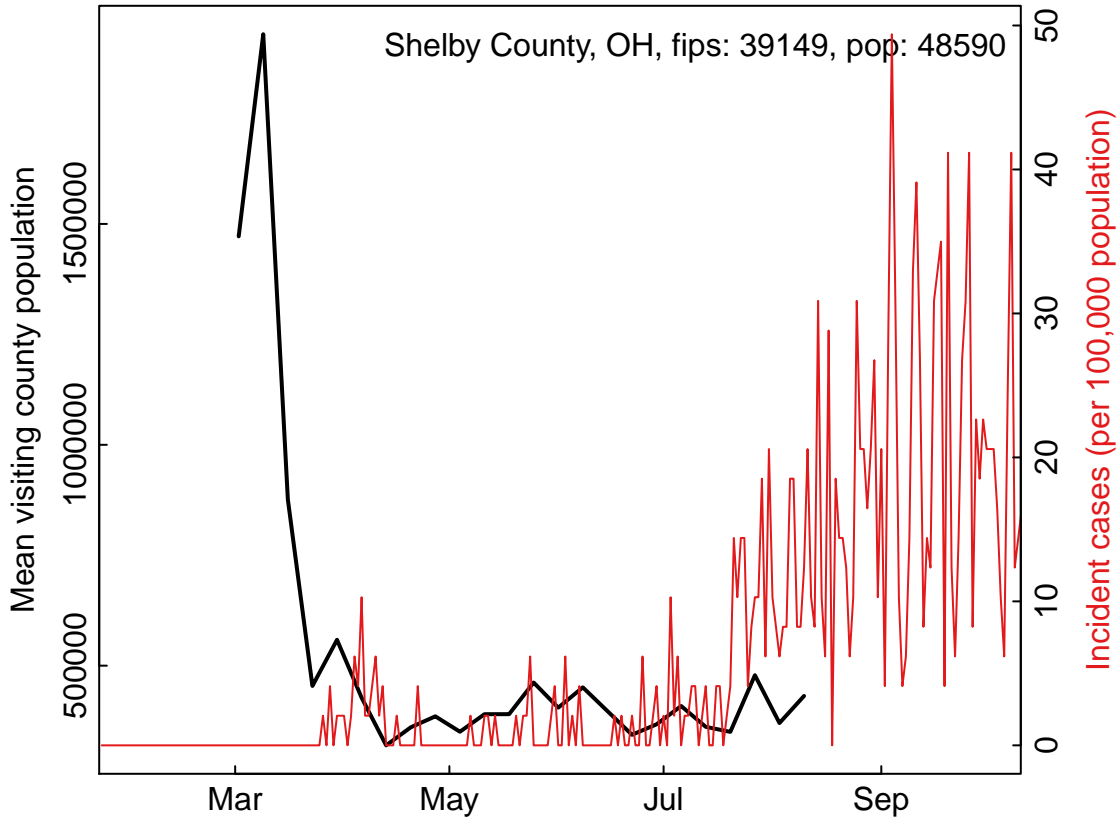

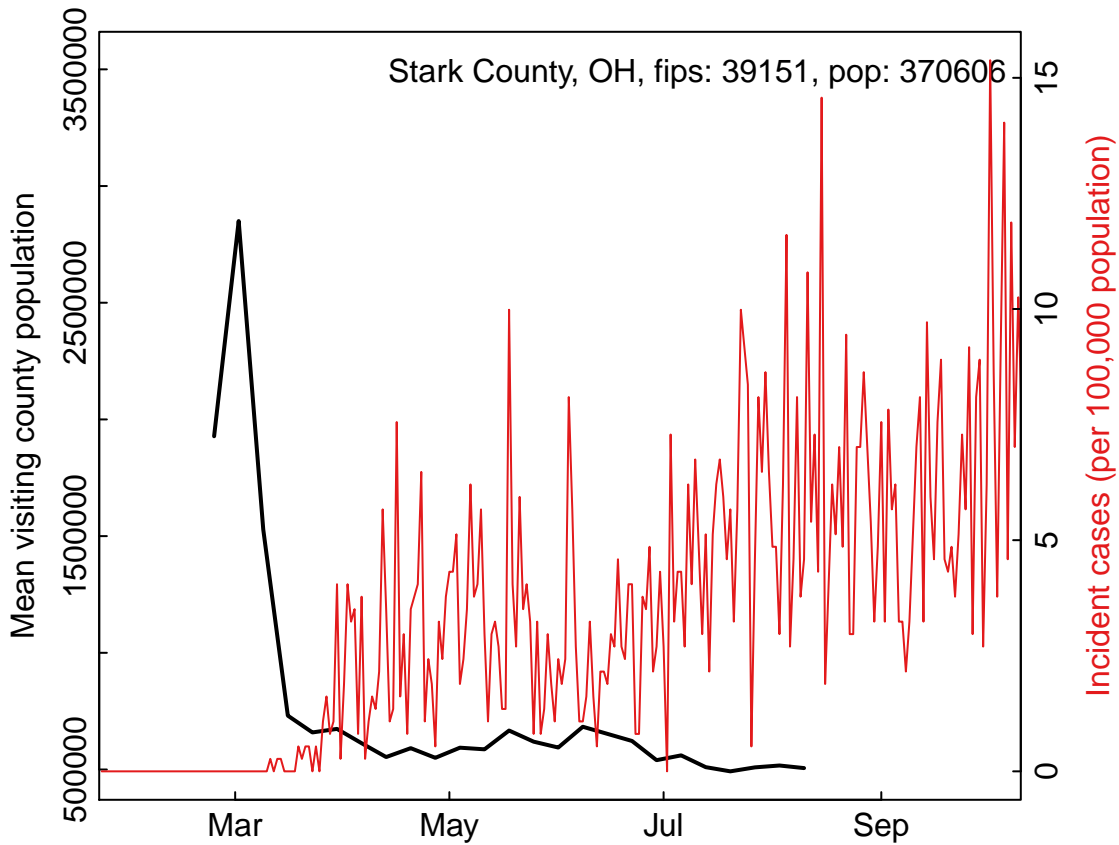

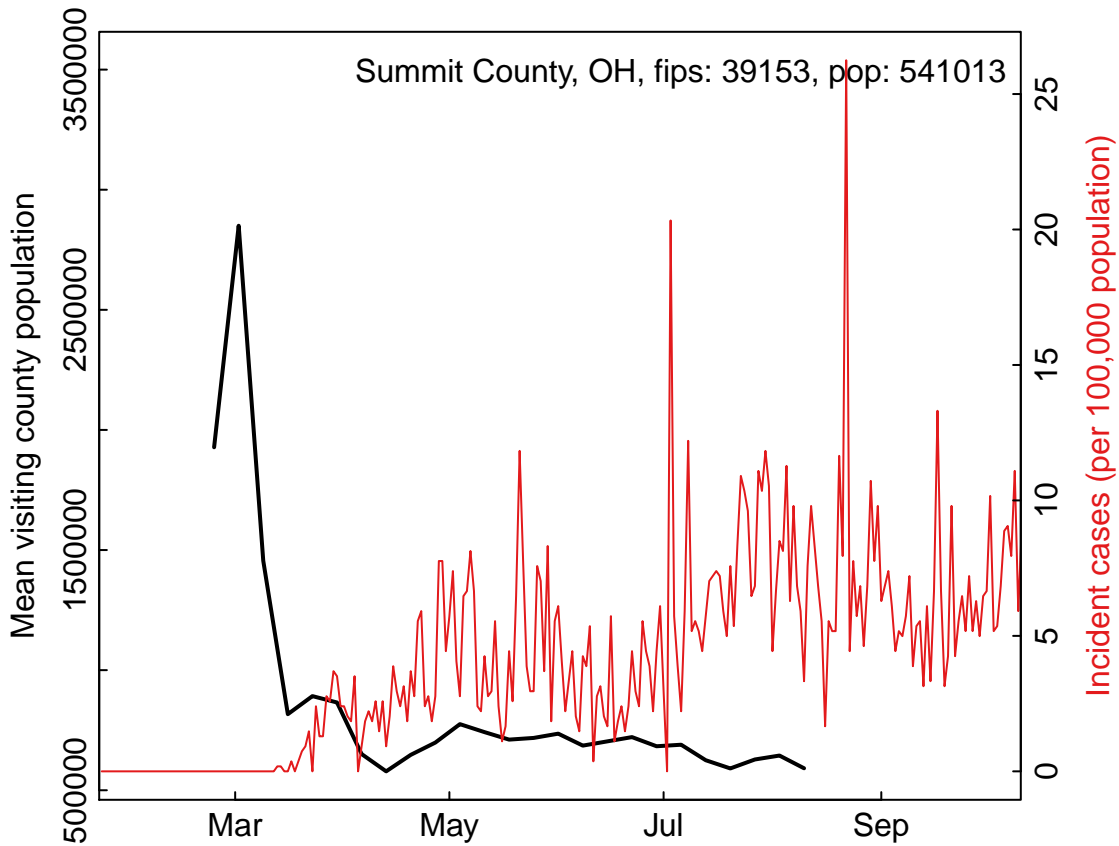



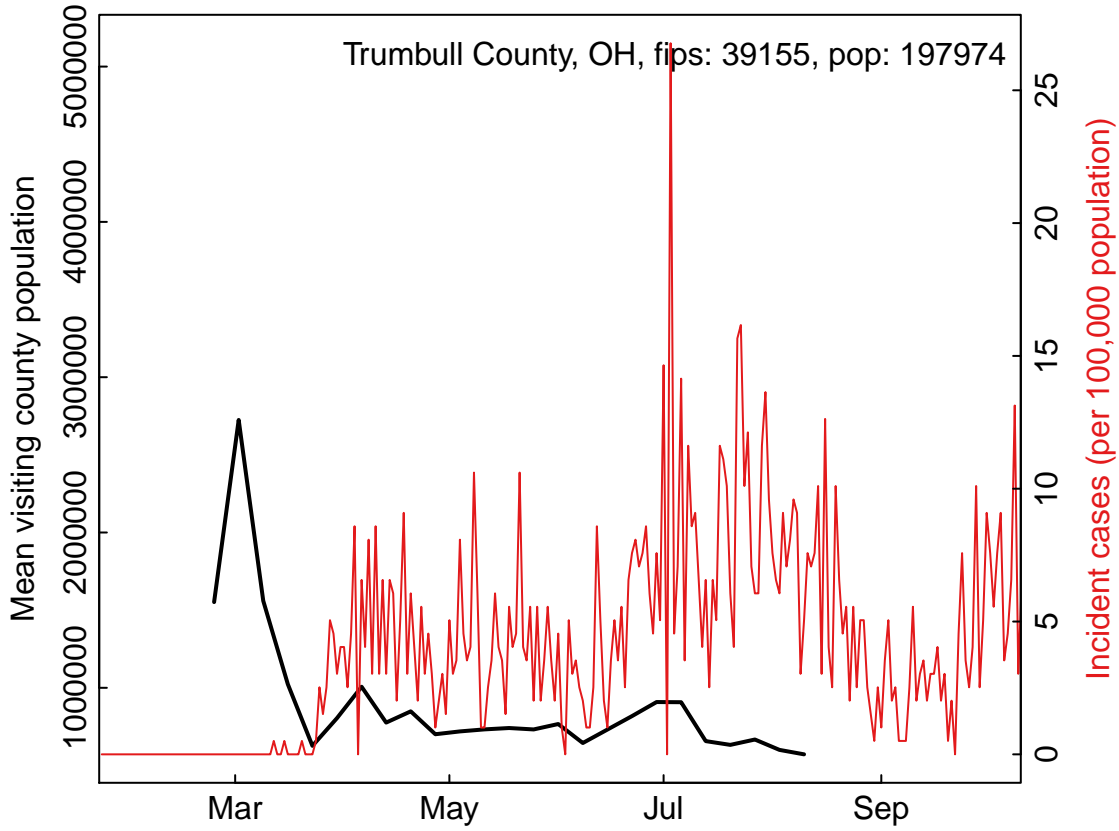

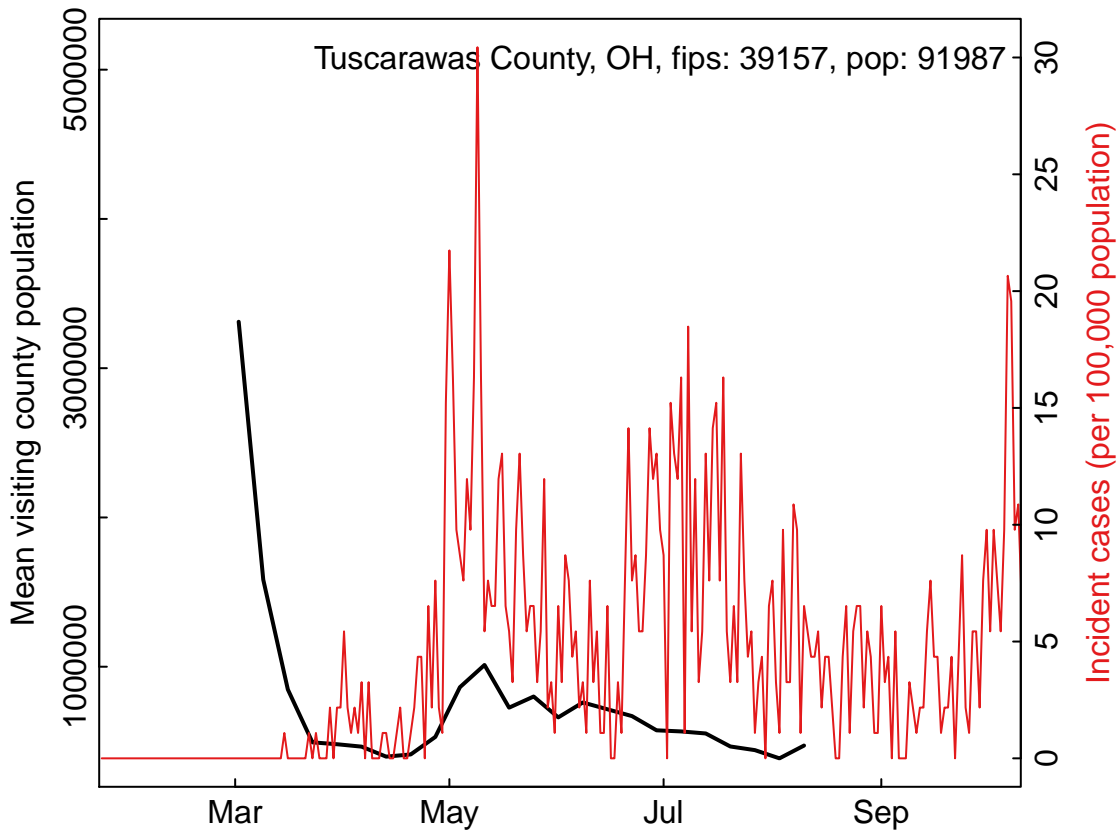

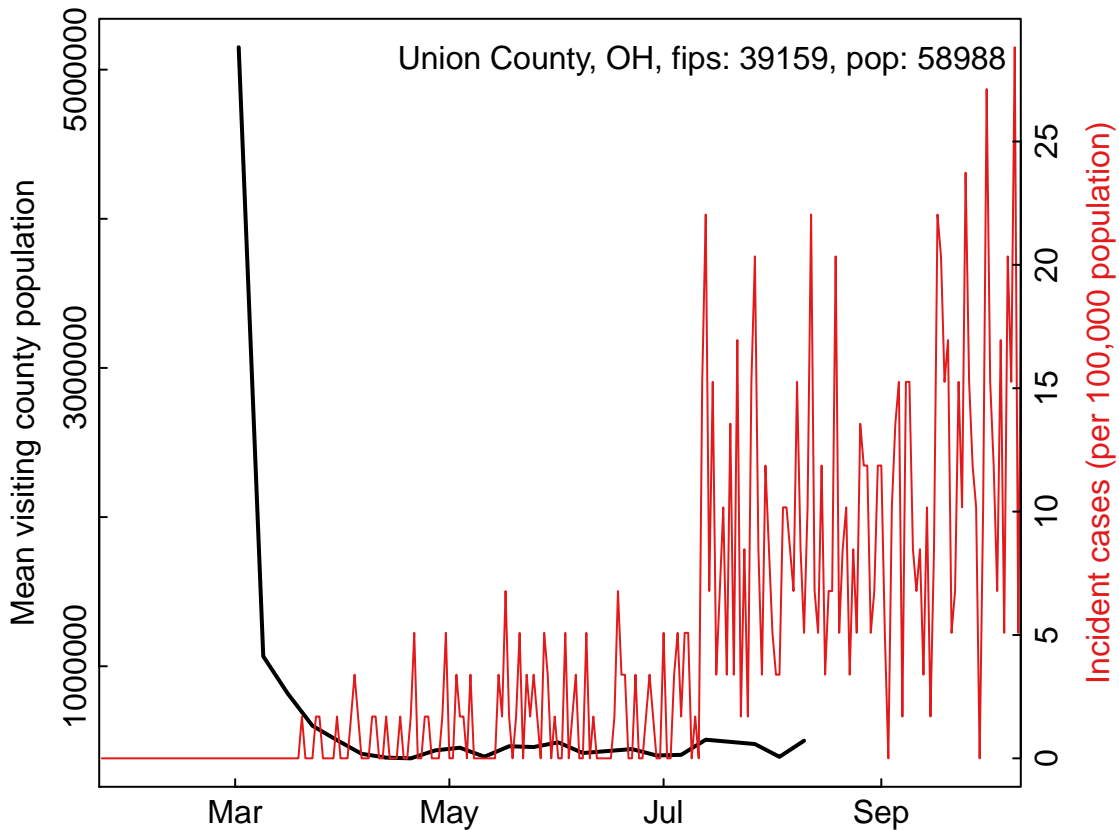

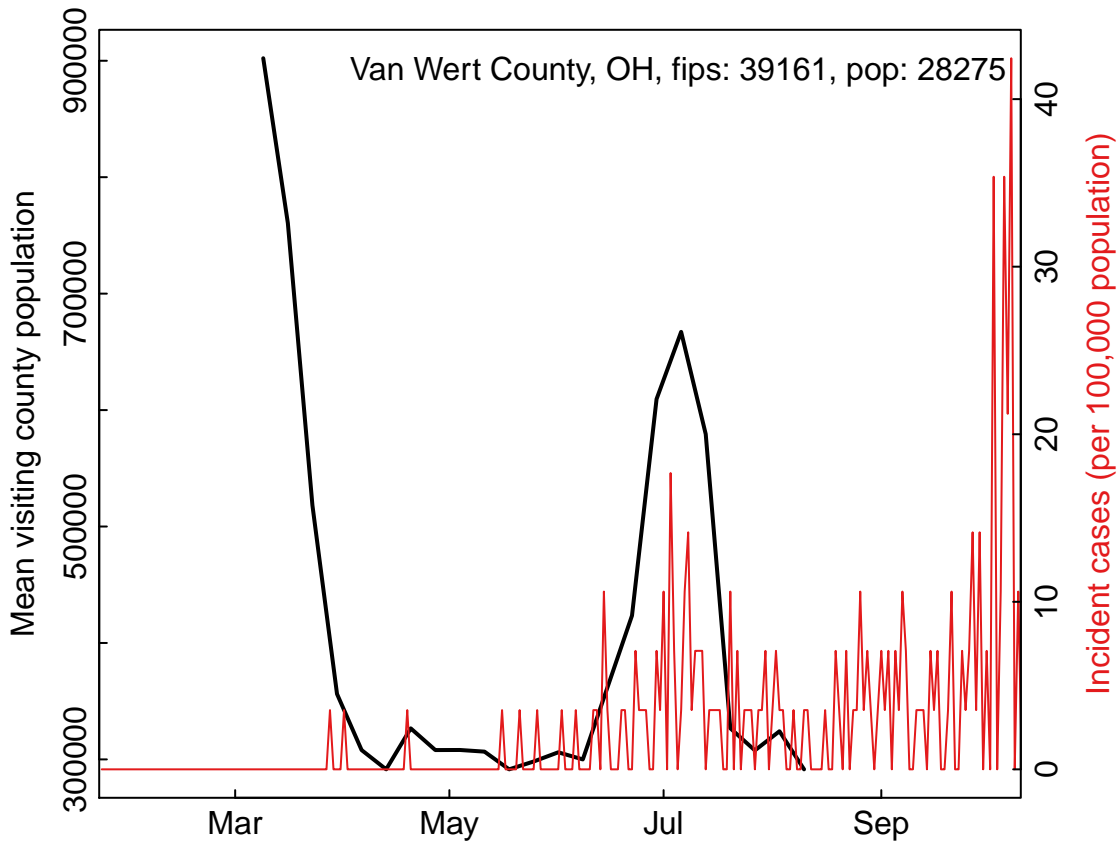

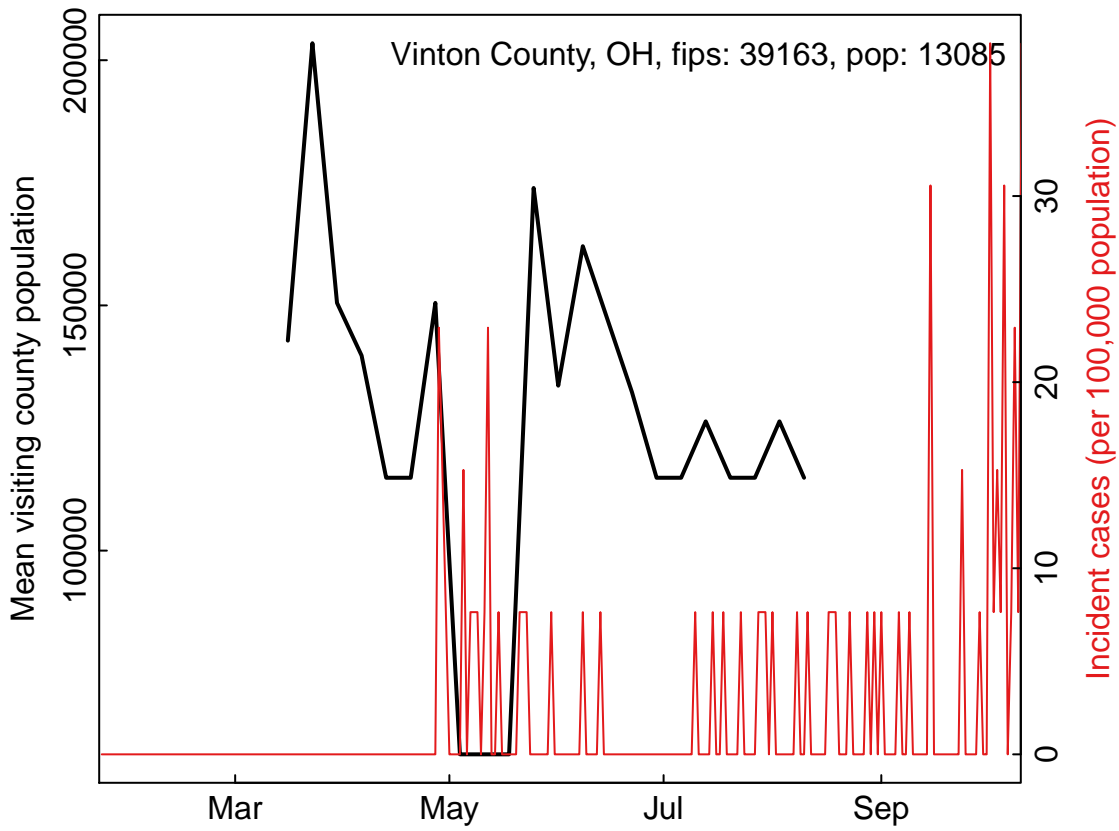

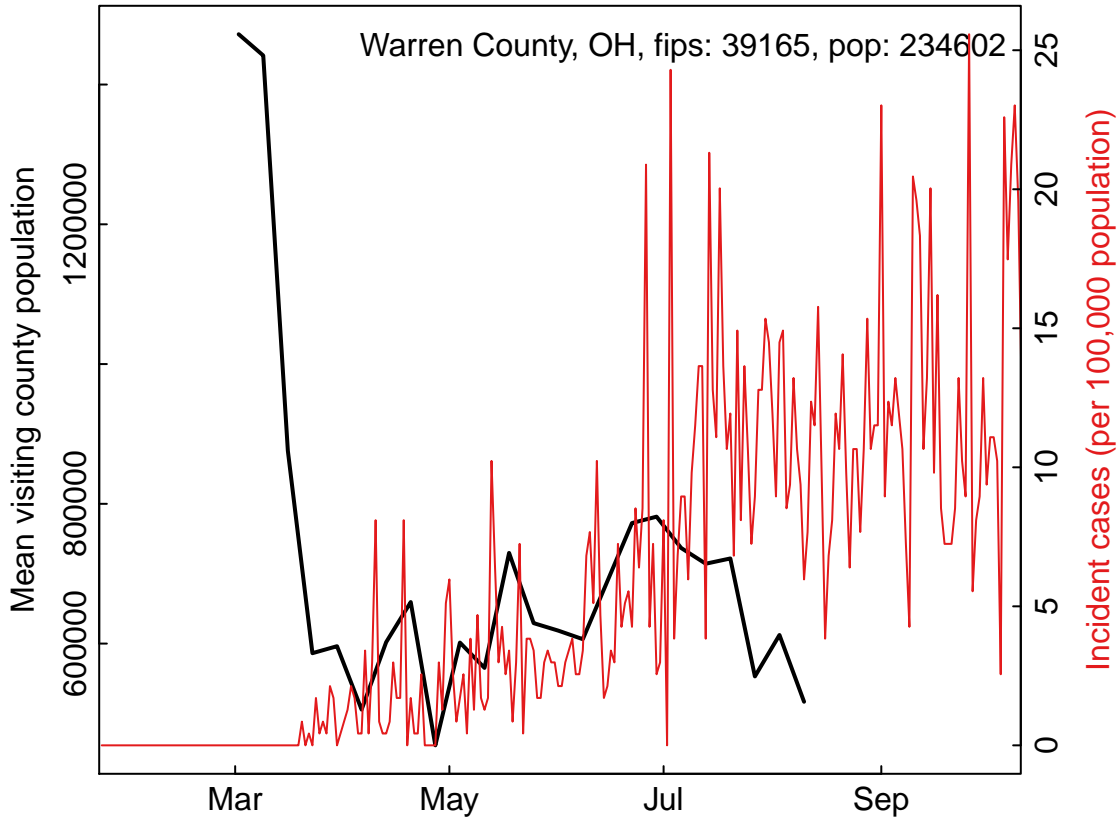

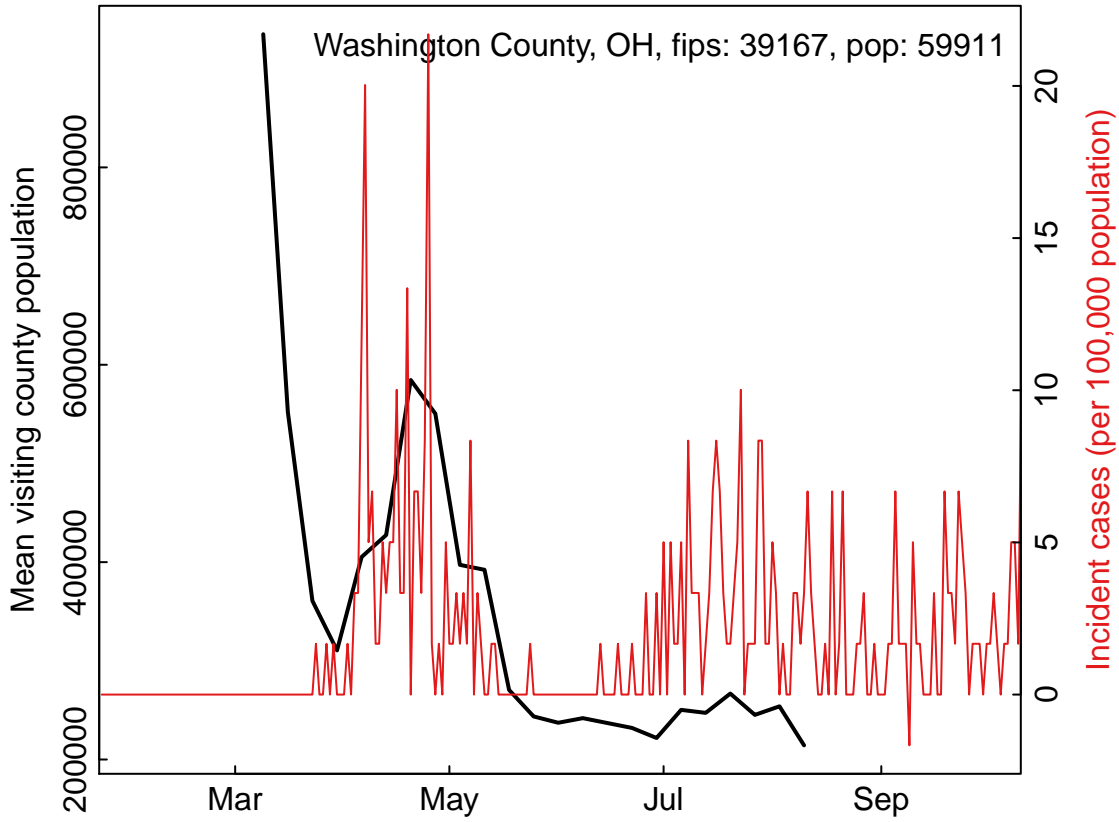

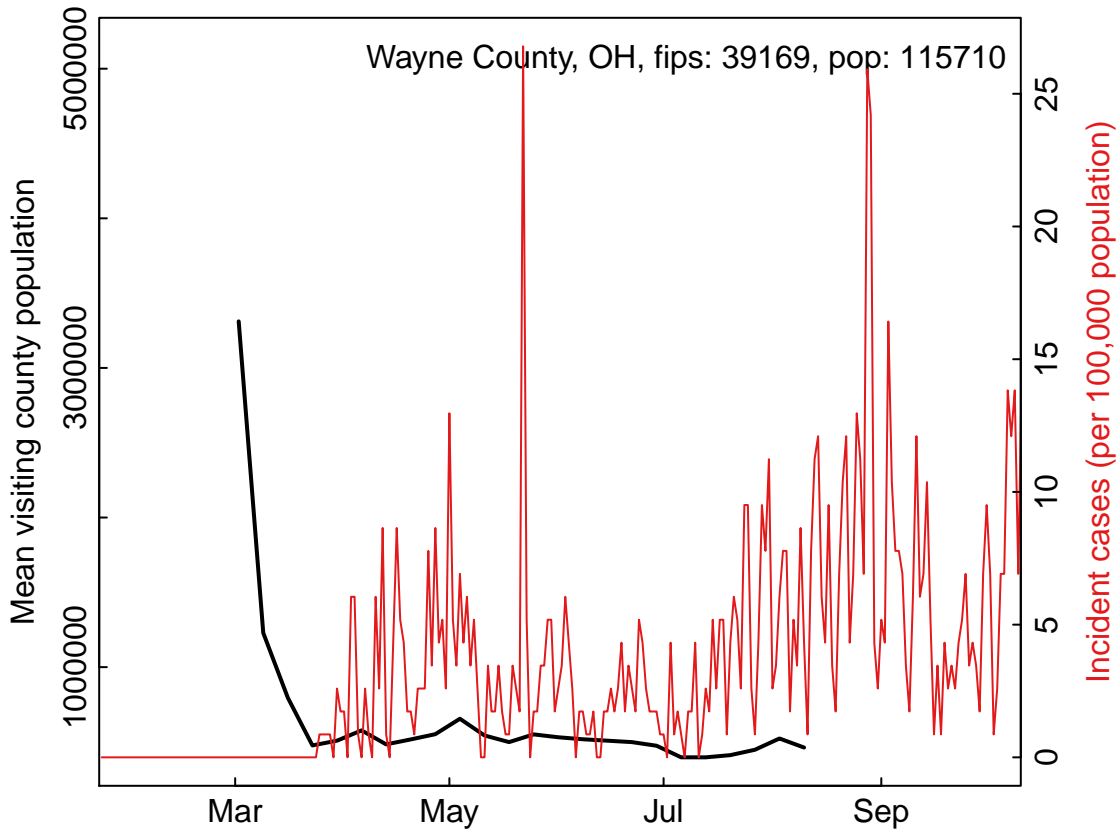



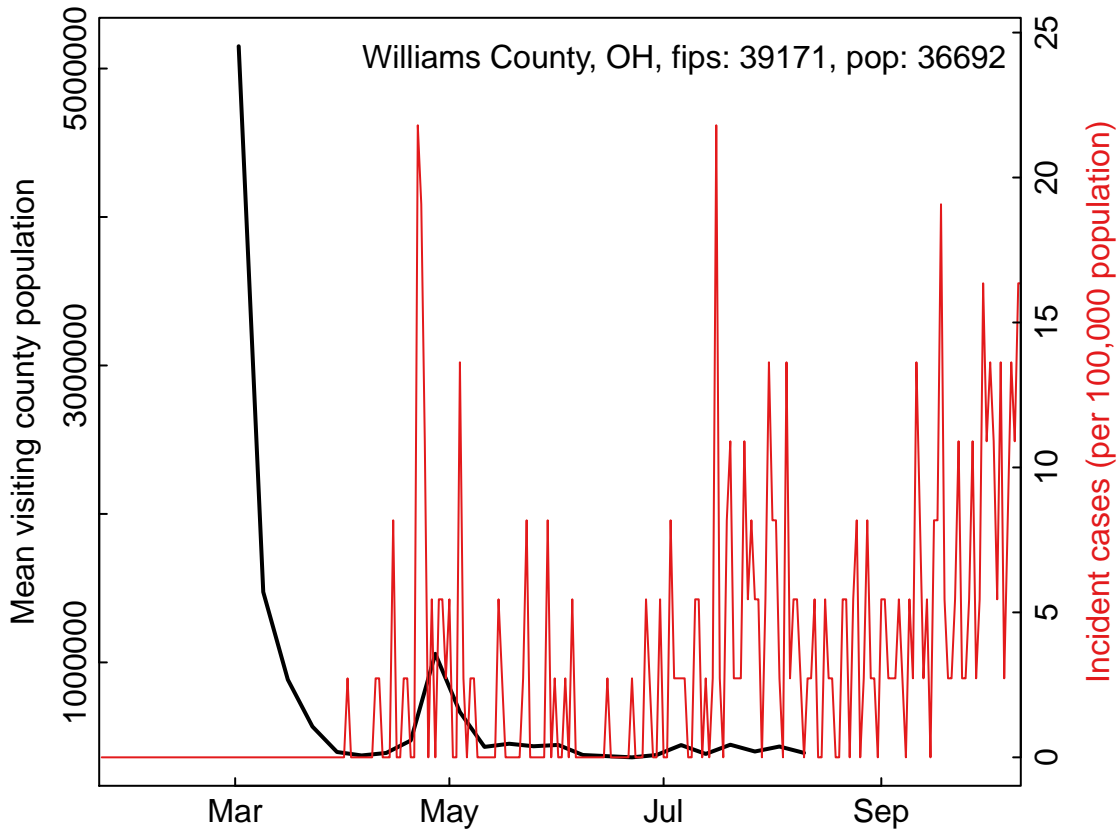

Wood County, OH, fips: 39173, pop: 130817

Mean visiting county population

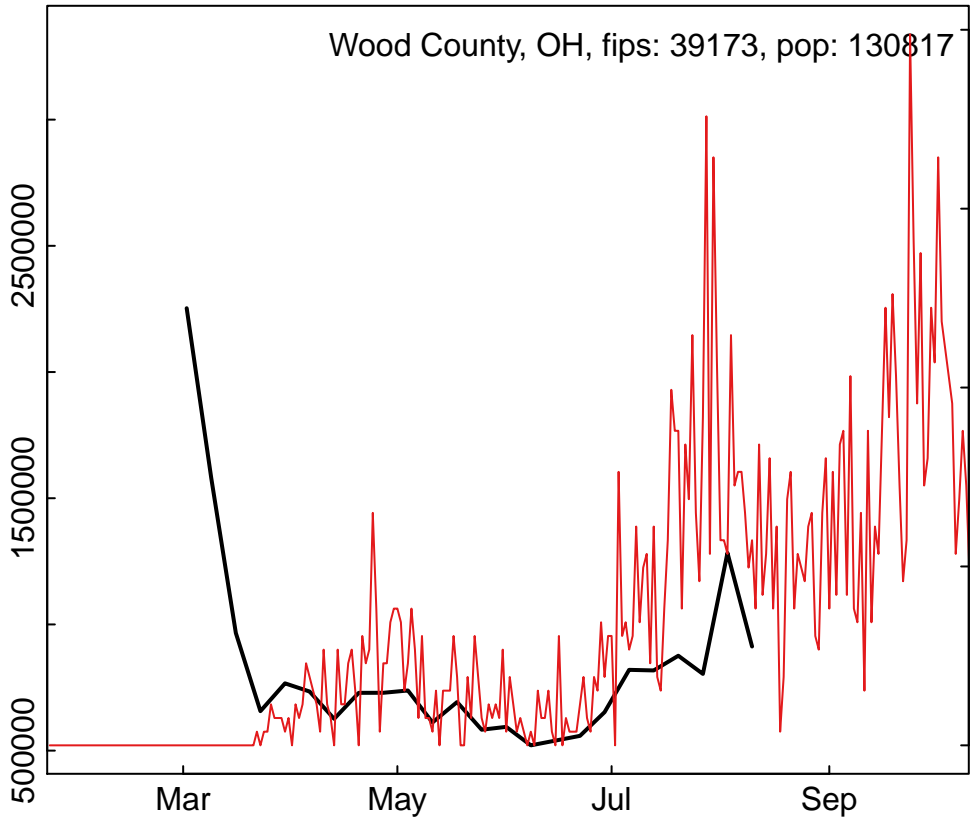

Incident cases (per 100,000 population)

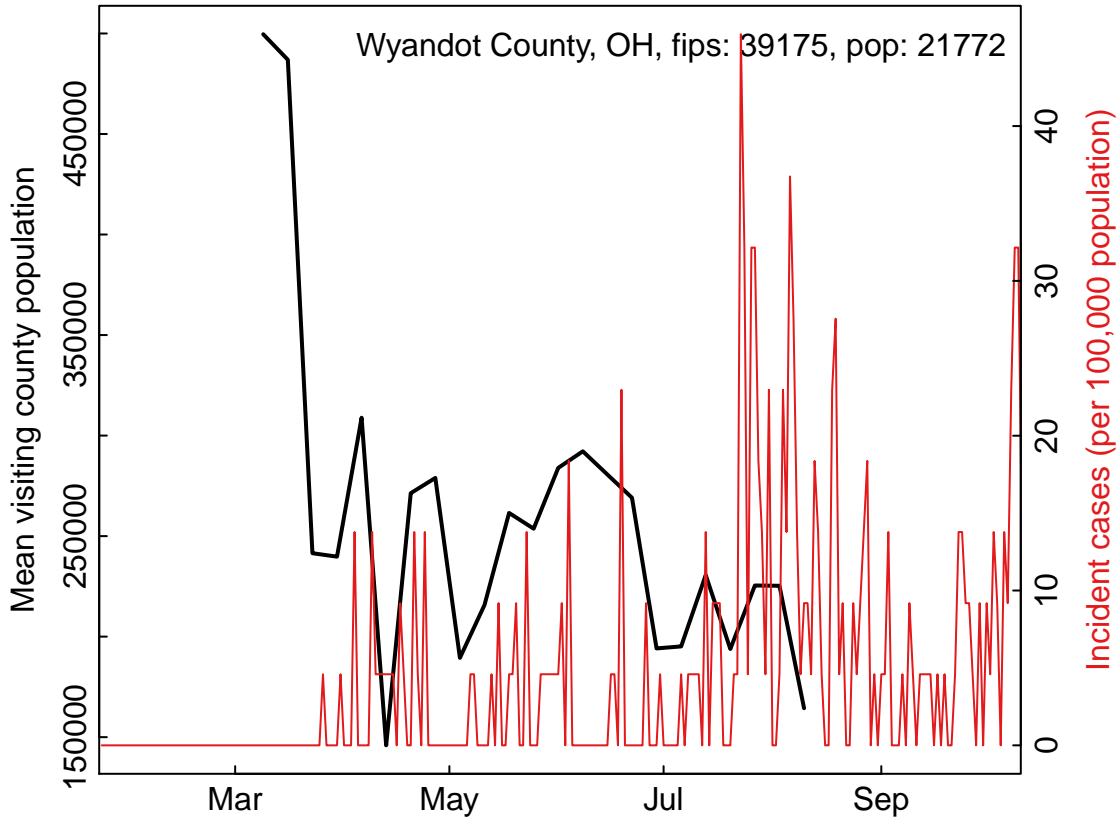

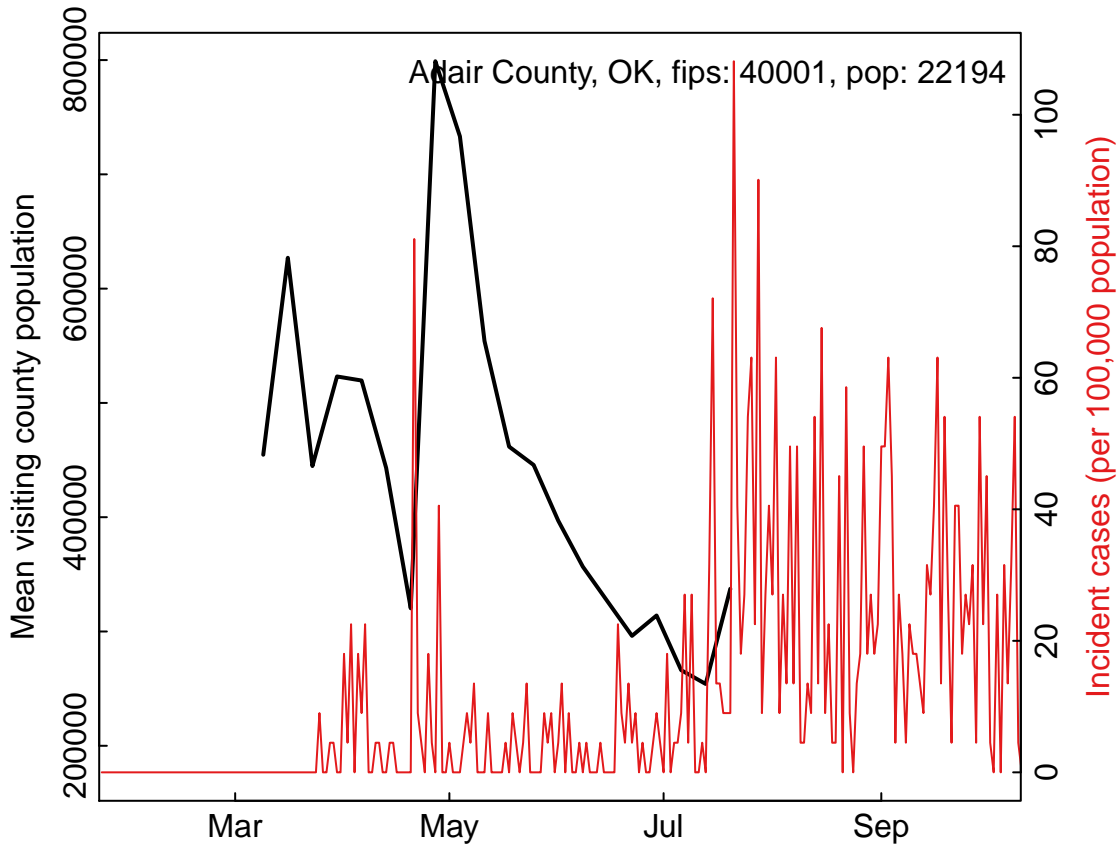

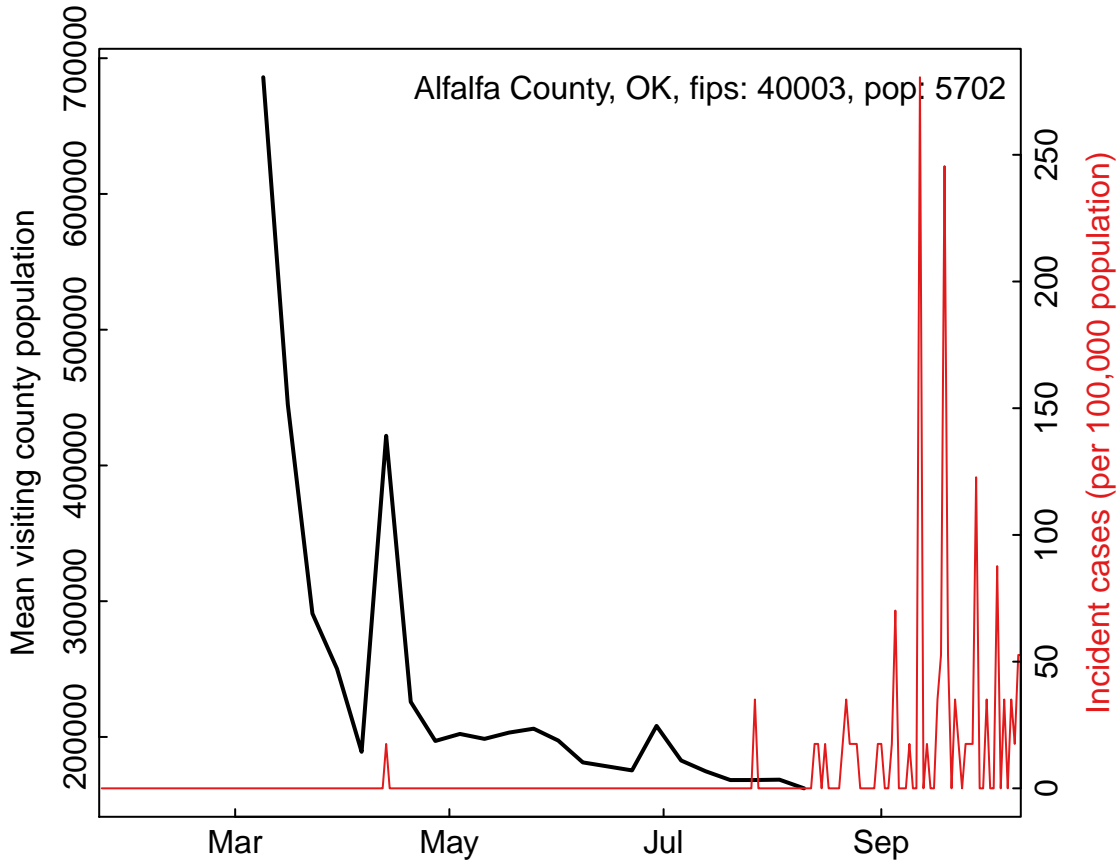

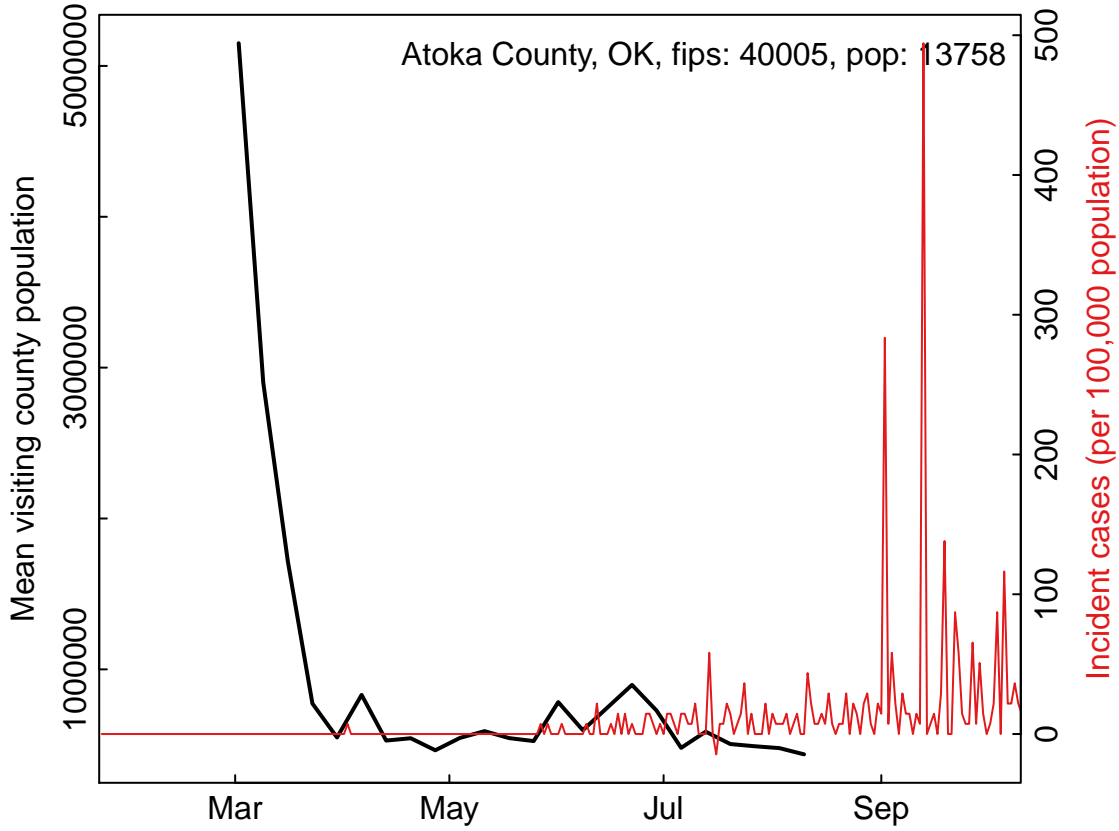

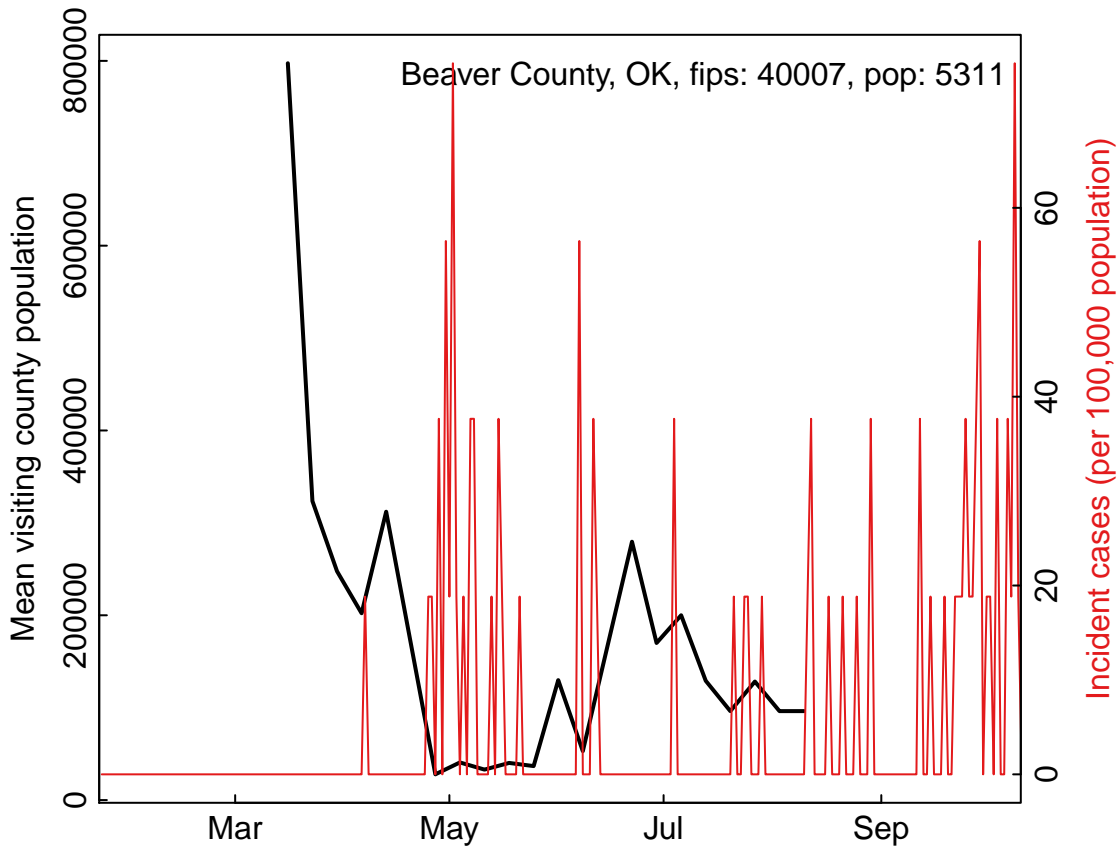

Beckham County, OK, fips: 40009, pop: 21859

Mean visiting county population

2500000  
1500000  
500000

Mar

May

Jul

Sep

400  
300  
200  
100  
0

Incident cases (per 100,000 population)

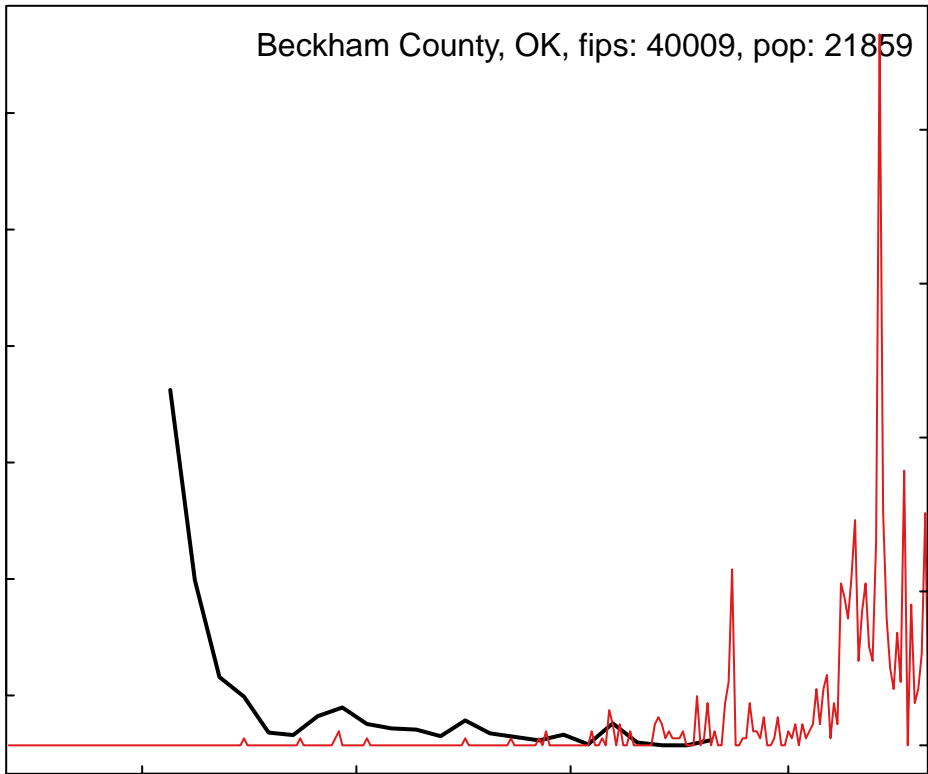



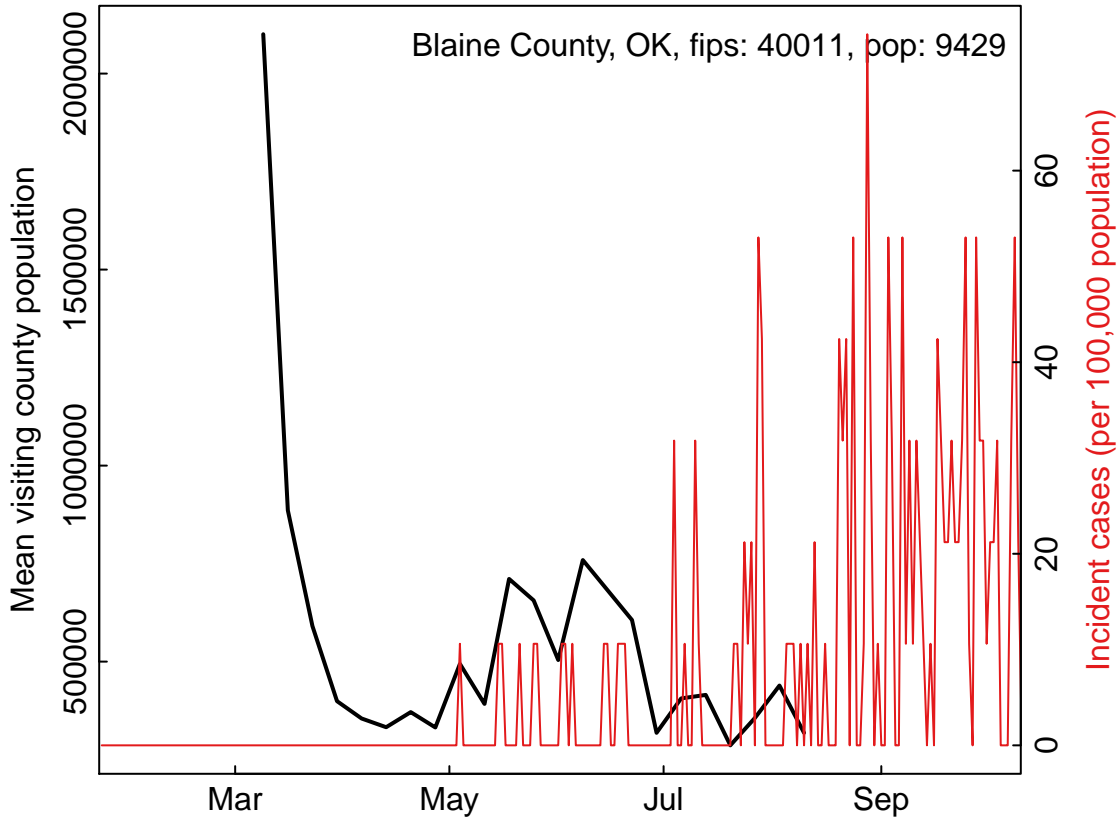

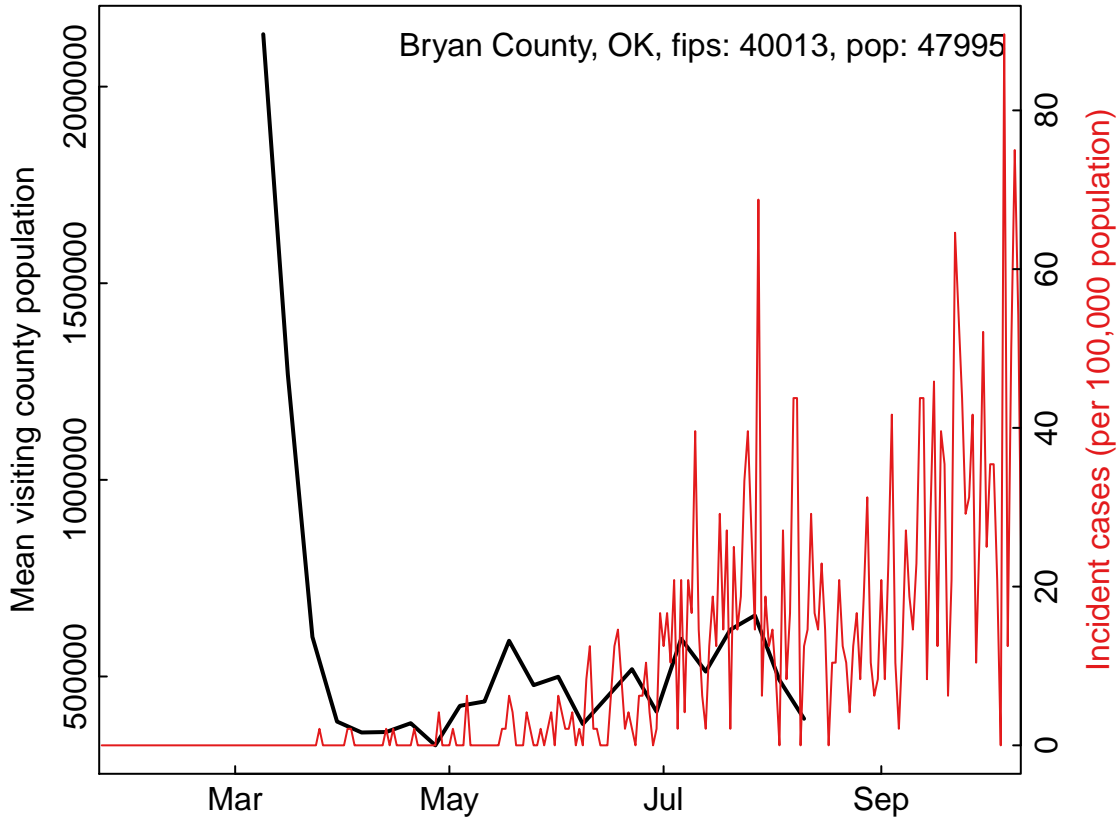

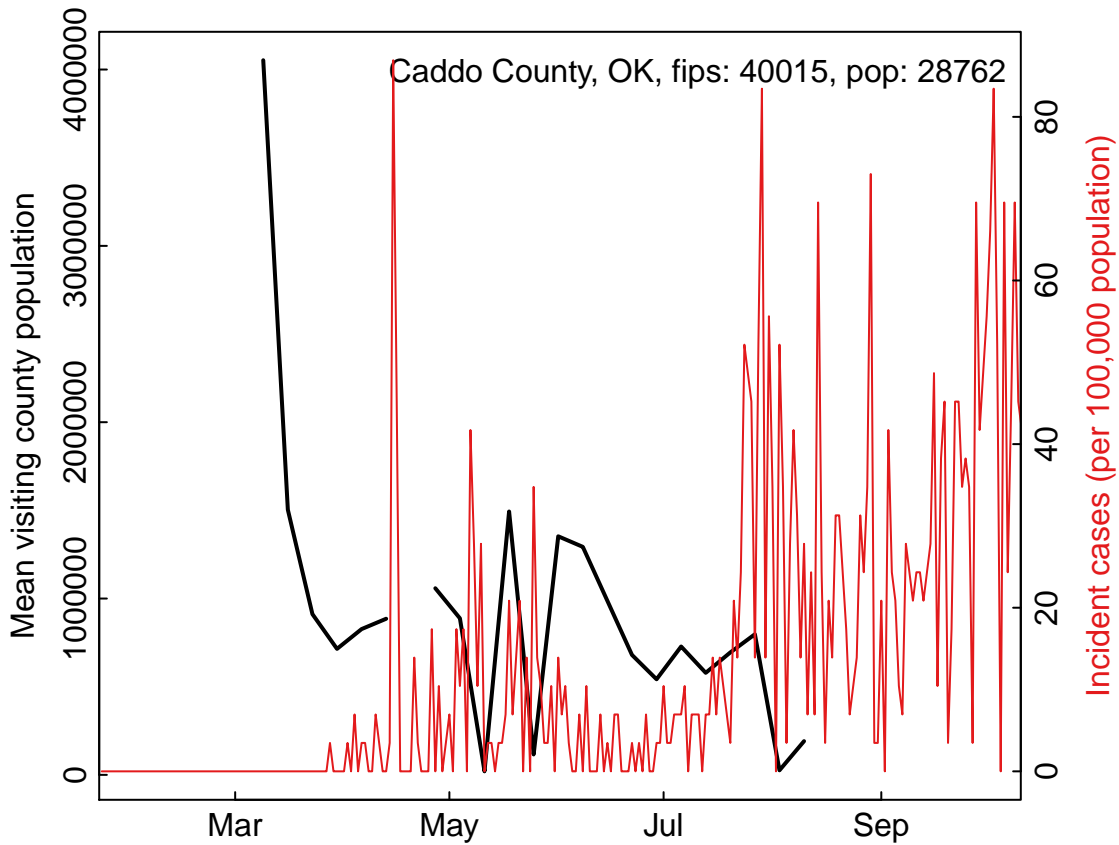

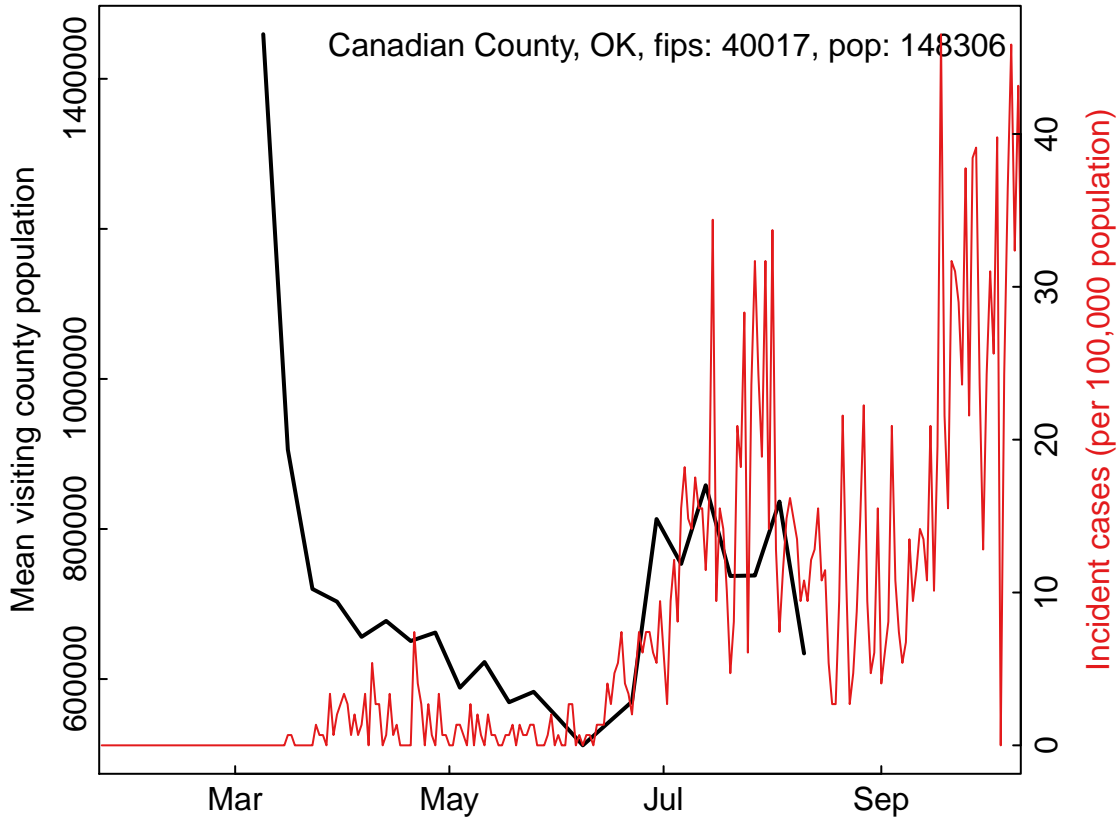

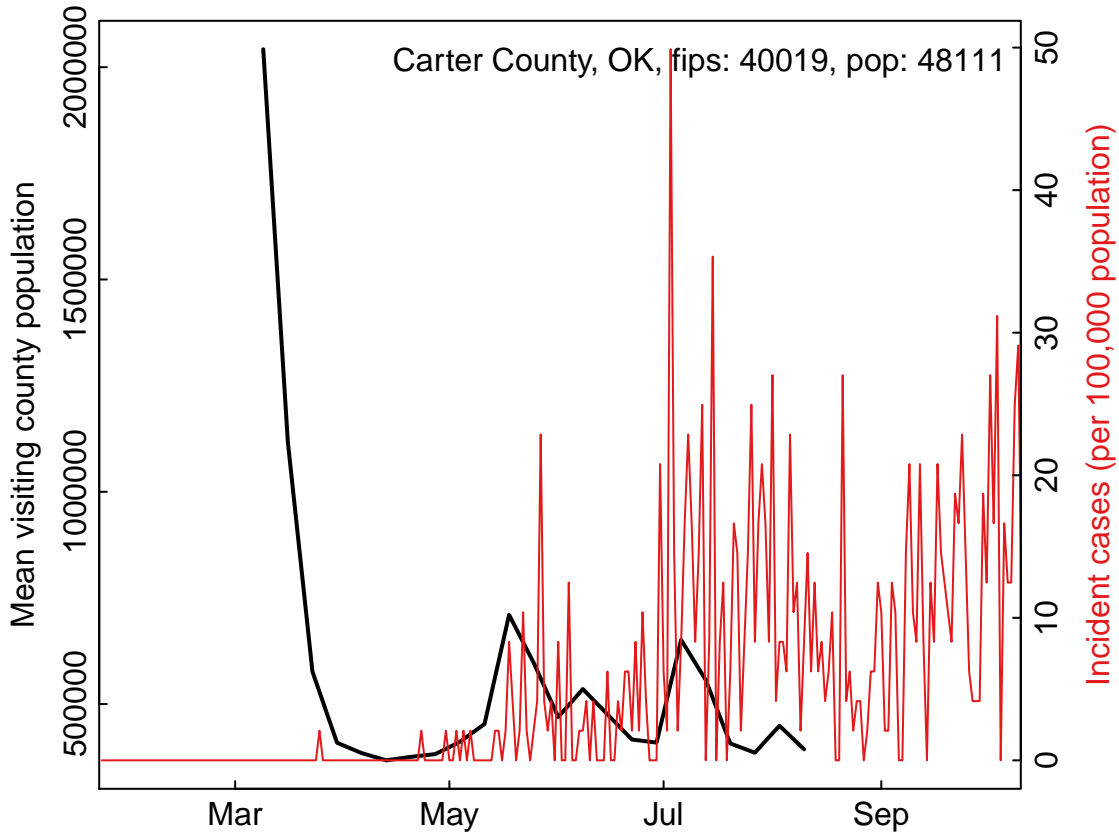

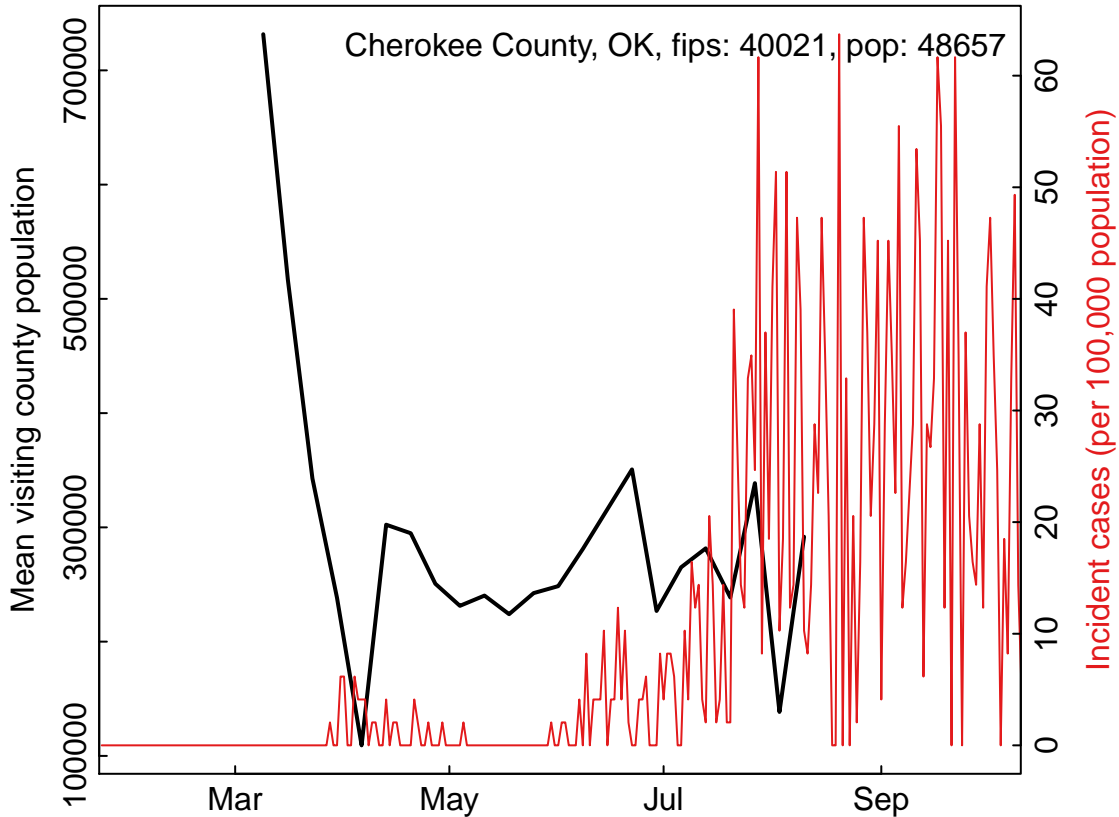

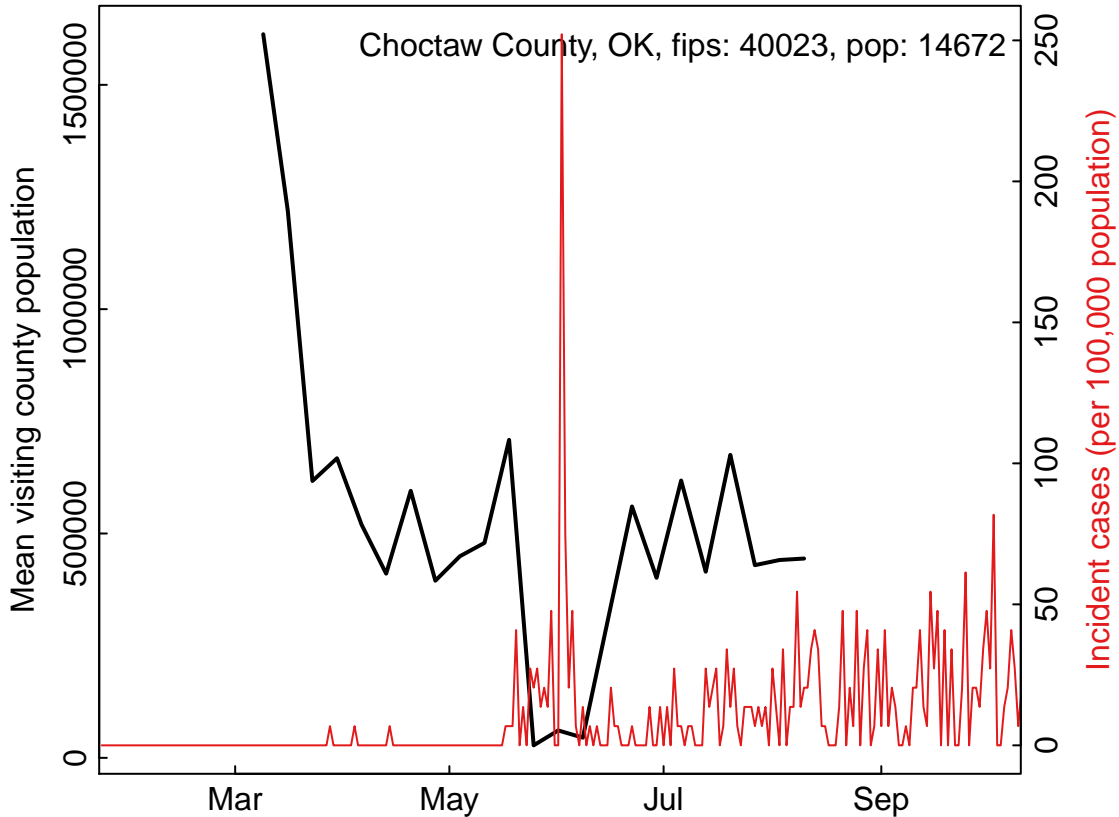

Cimarron County, OK, fips: 40025, pop: 2137

Mean visiting county population

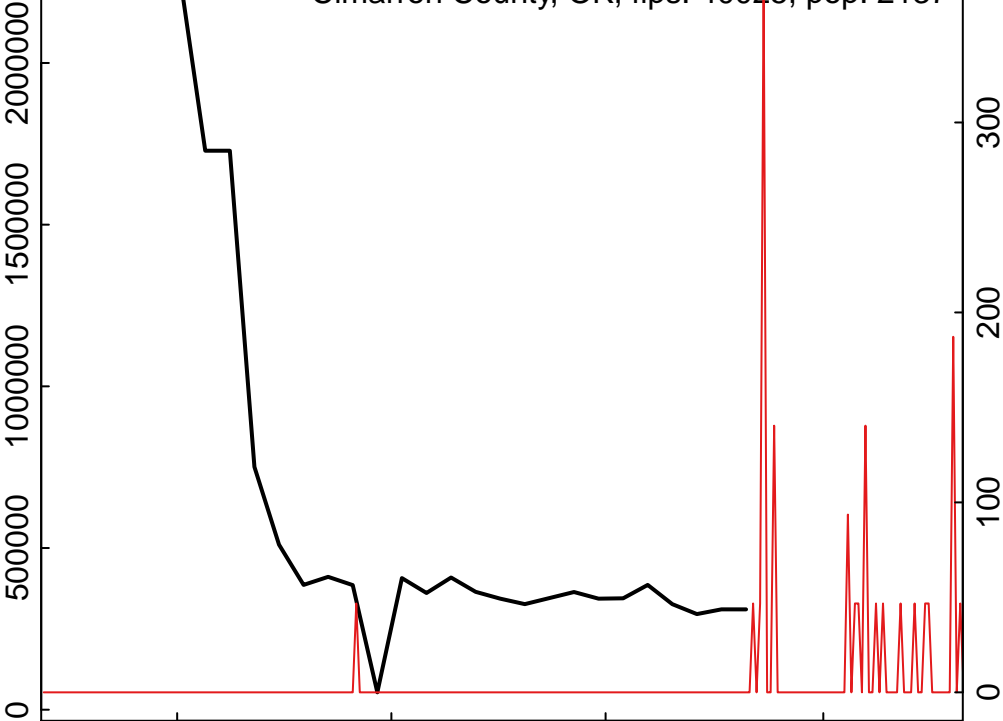

Incident cases (per 100,000 population)



Cleveland County, OK, fips: 40027, pop: 284014

Mean visiting county population

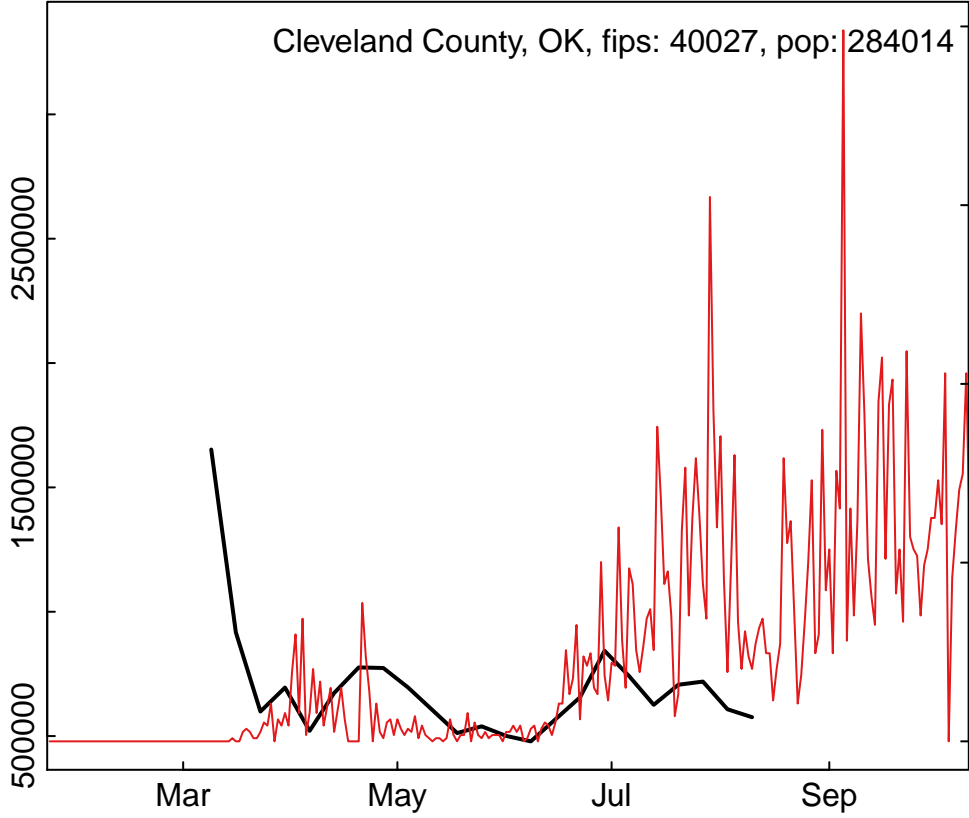

Incident cases (per 100,000 population)

Mean visiting county population

500000  
400000  
300000  
200000  
100000  
0

Coal County, OK, fips: 40029, pop: 5495

Mar

May

Jul

Sep

60  
40  
20  
0  
Incident cases (per 100,000 population)

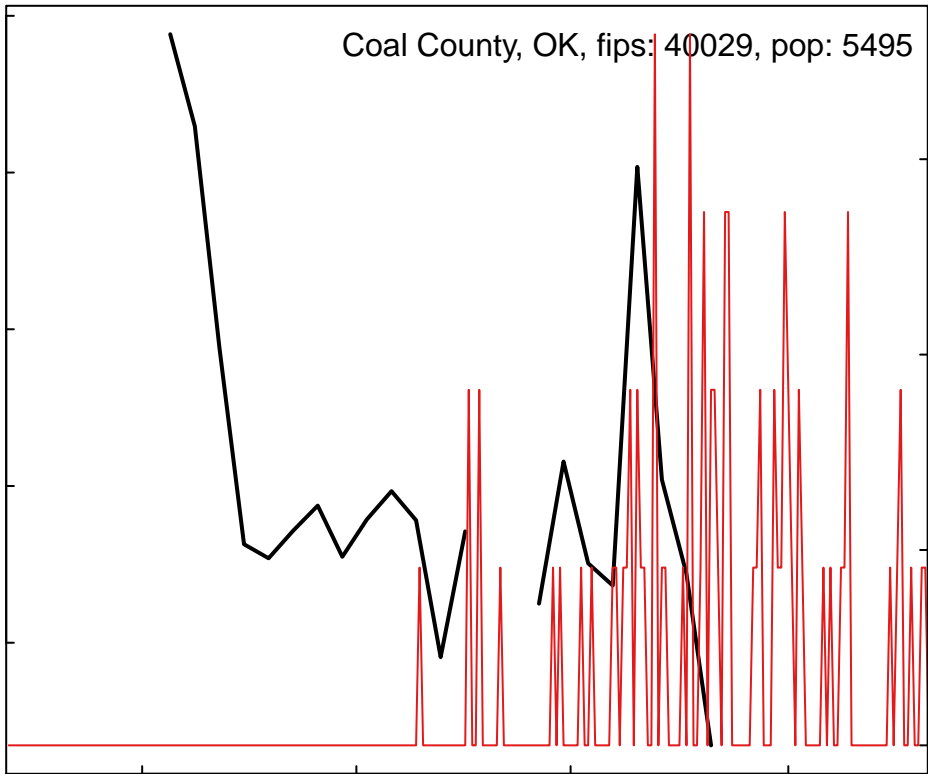

Comanche County, OK, fips: 40031, pop: 120749

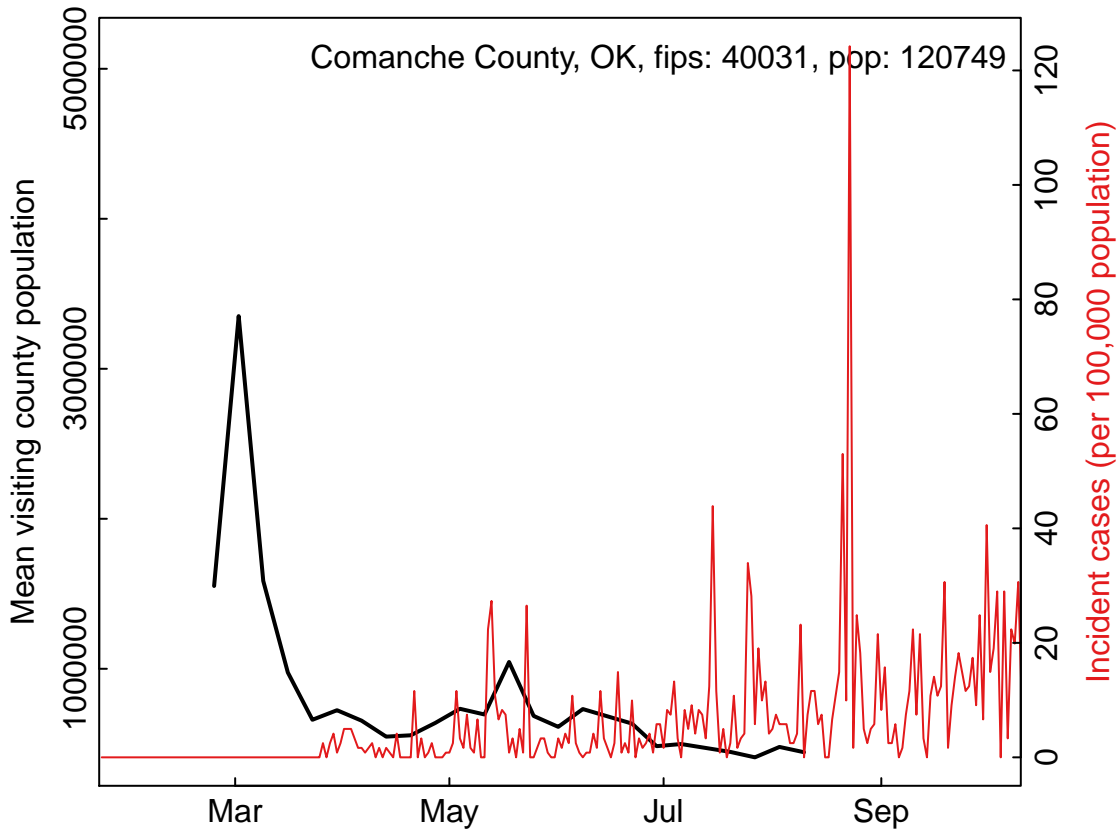

Cotton County, OK, fips: 40033, pop: 5666

Mean visiting county population

1500000  
1000000  
500000

Mar

May

Jul

Sep

100

50

0

Incident cases (per 100,000 population)

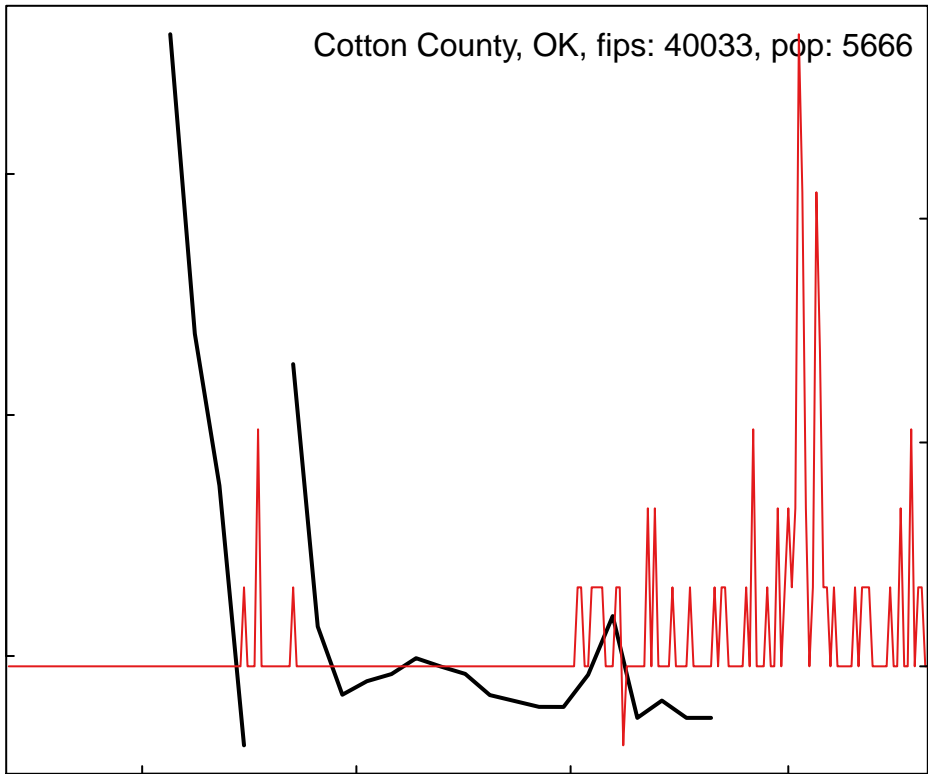

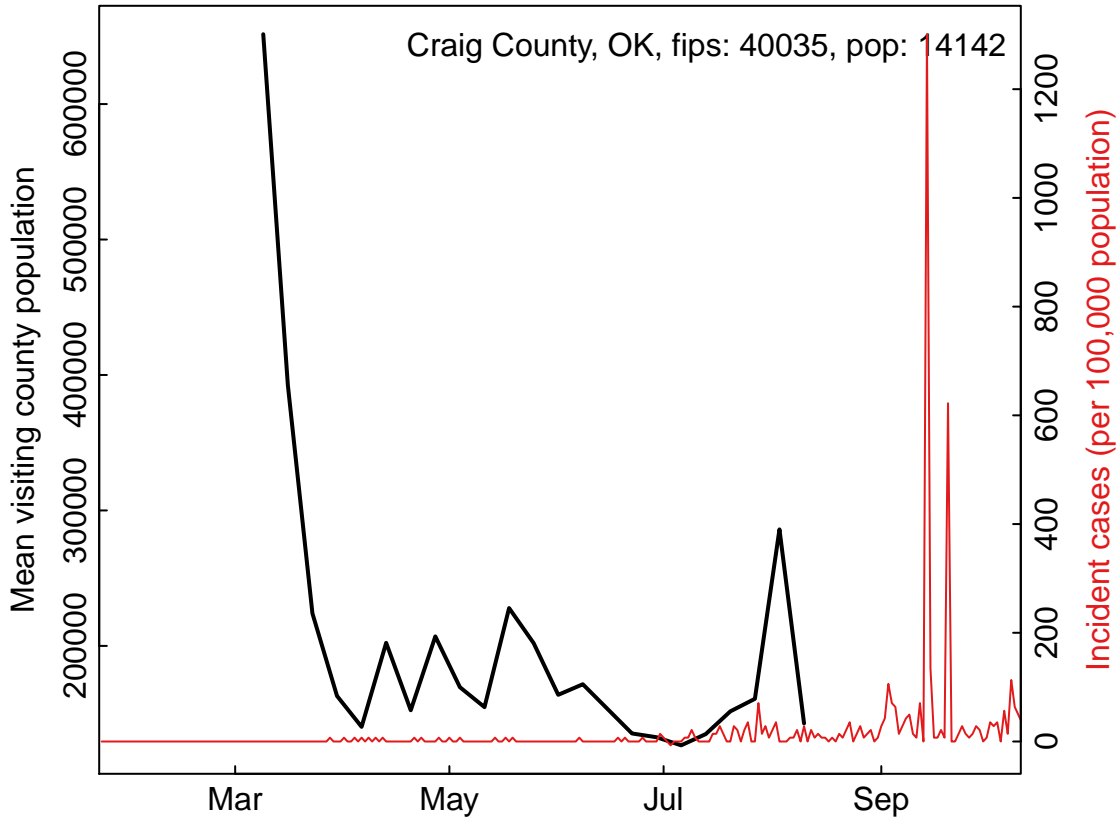

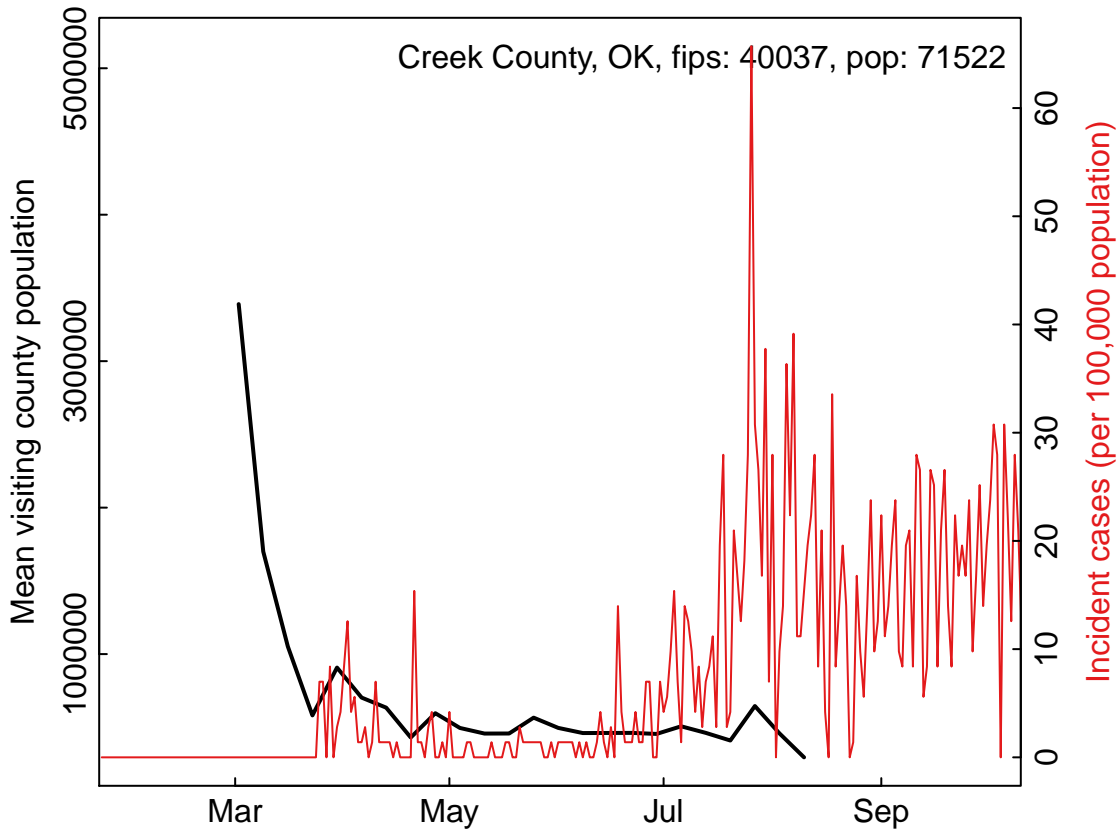

Custer County, OK, fips: 40039, pop: 29003

Mean visiting county population

500000 1500000 2500000

Mar

May

Jul

Sep

0 50 100 150  
Incident cases (per 100,000 population)

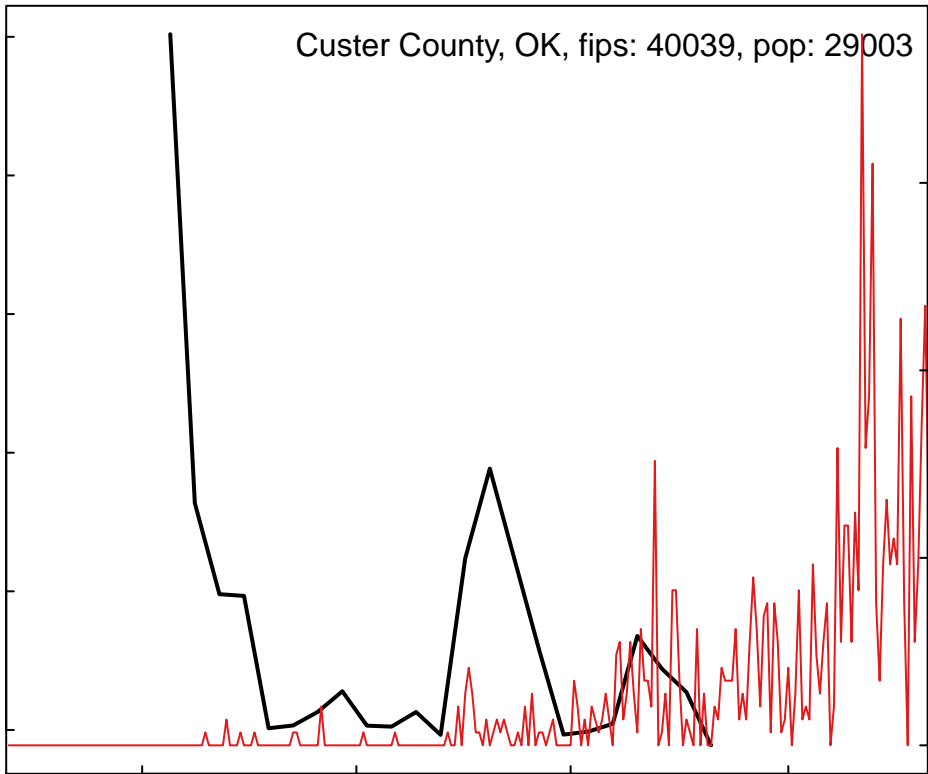

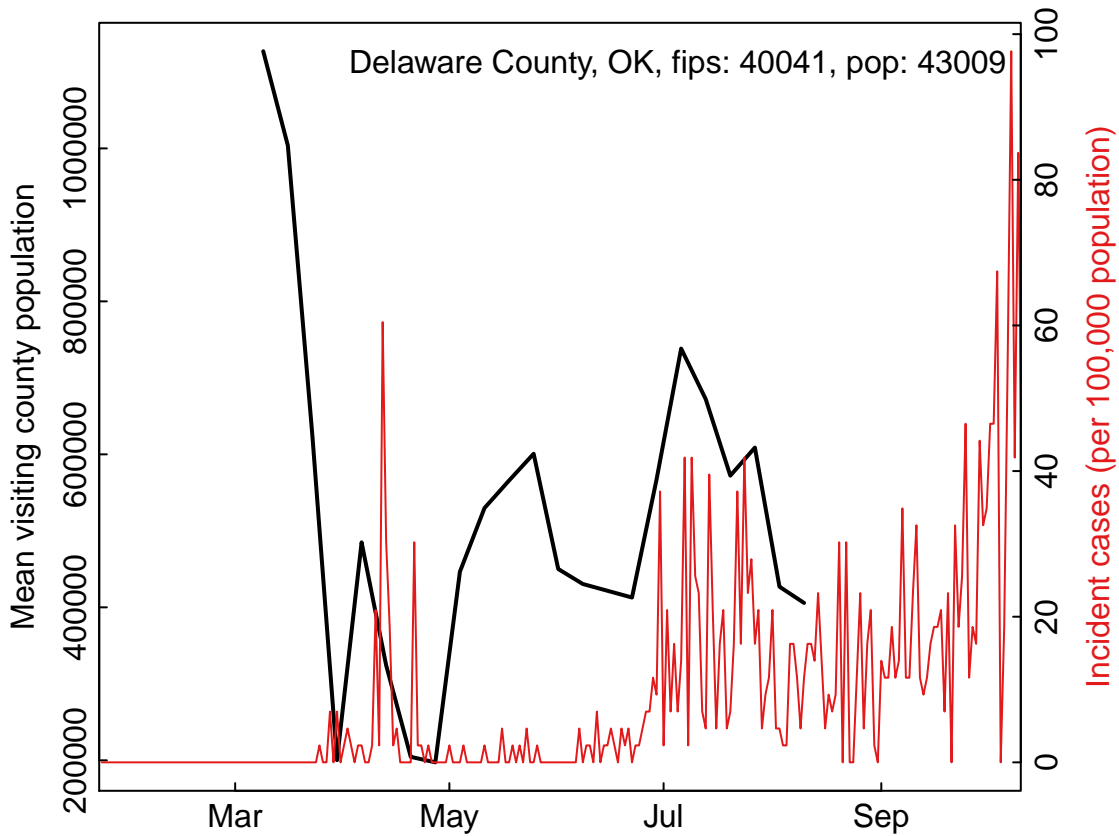



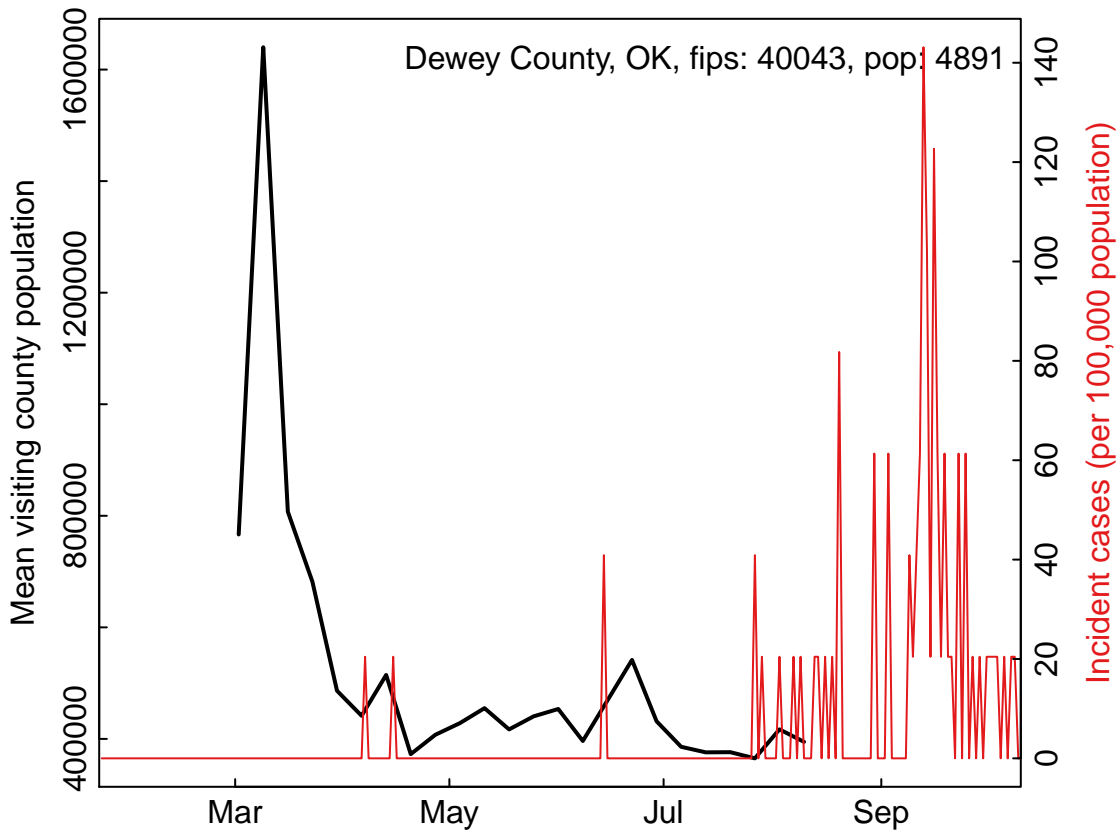

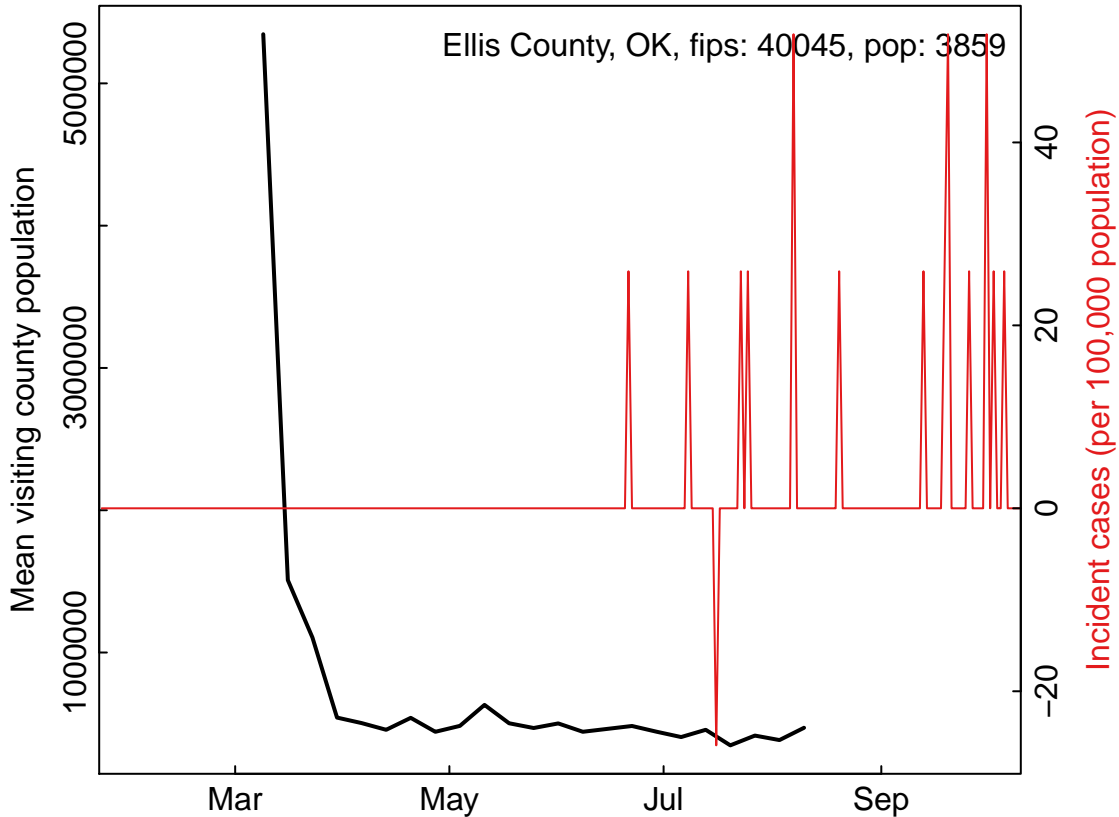

Garfield County, OK, fips: 40047, pop: 61056

Mean visiting county population

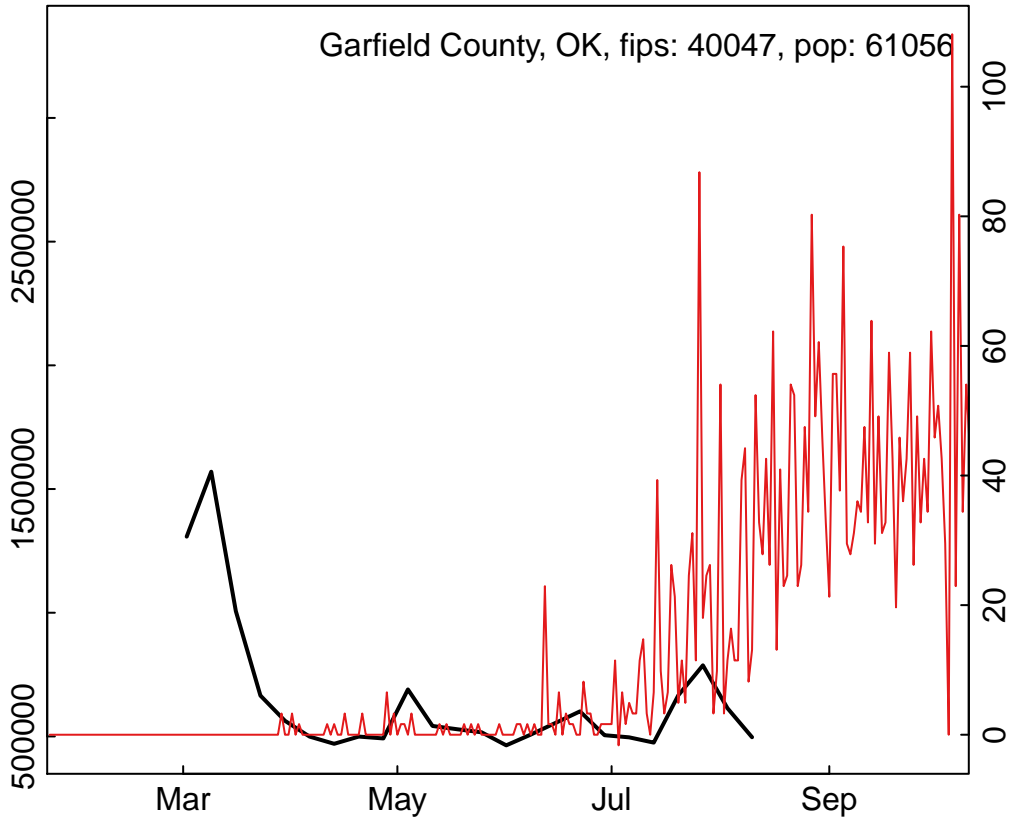

Incident cases (per 100,000 population)

Garvin County, OK, fips: 40049, pop: 27711

Mean visiting county population

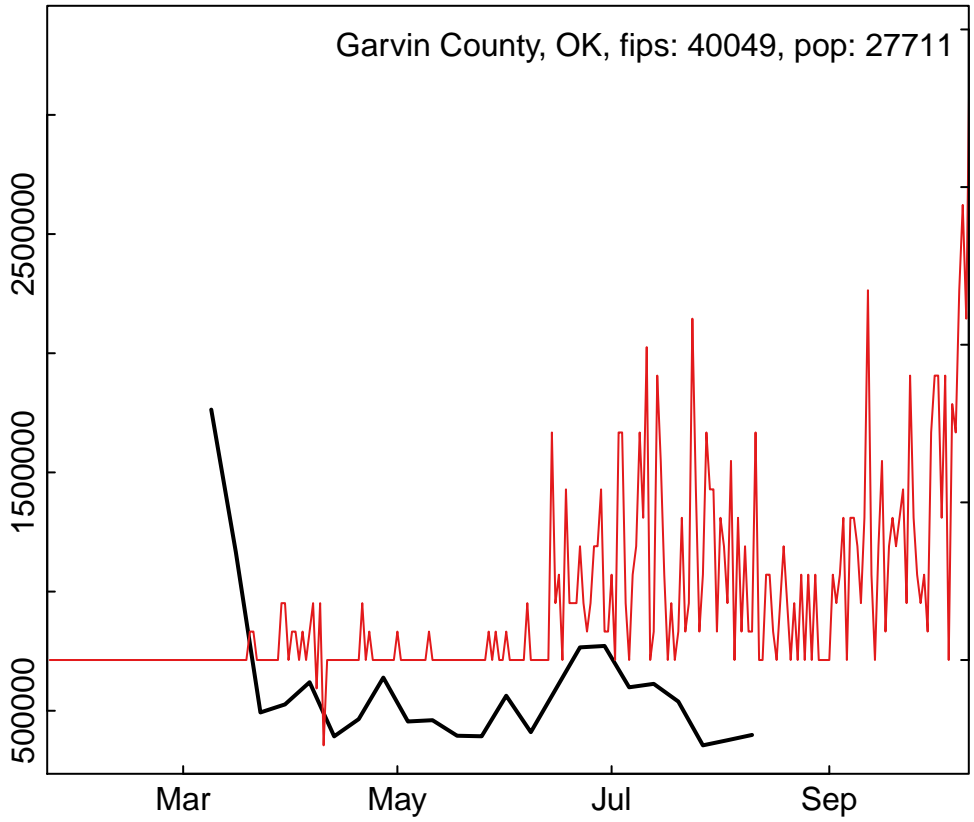

Incident cases (per 100,000 population)

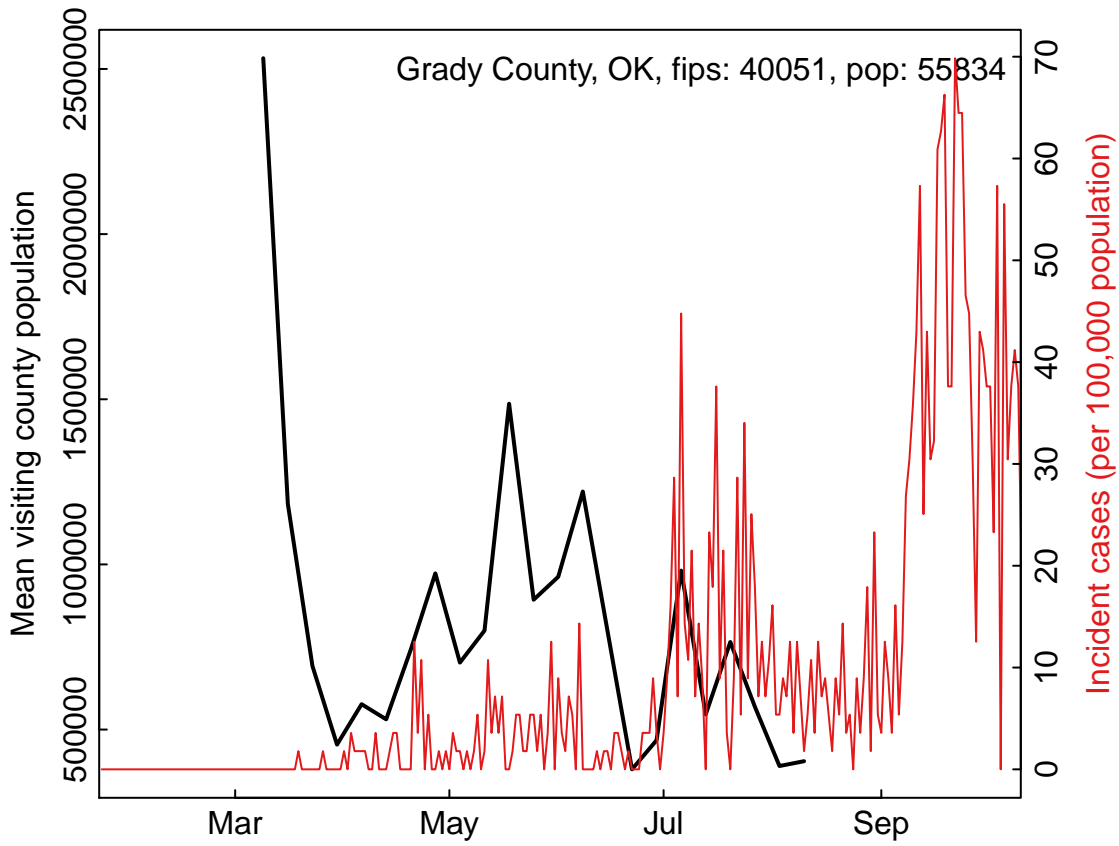

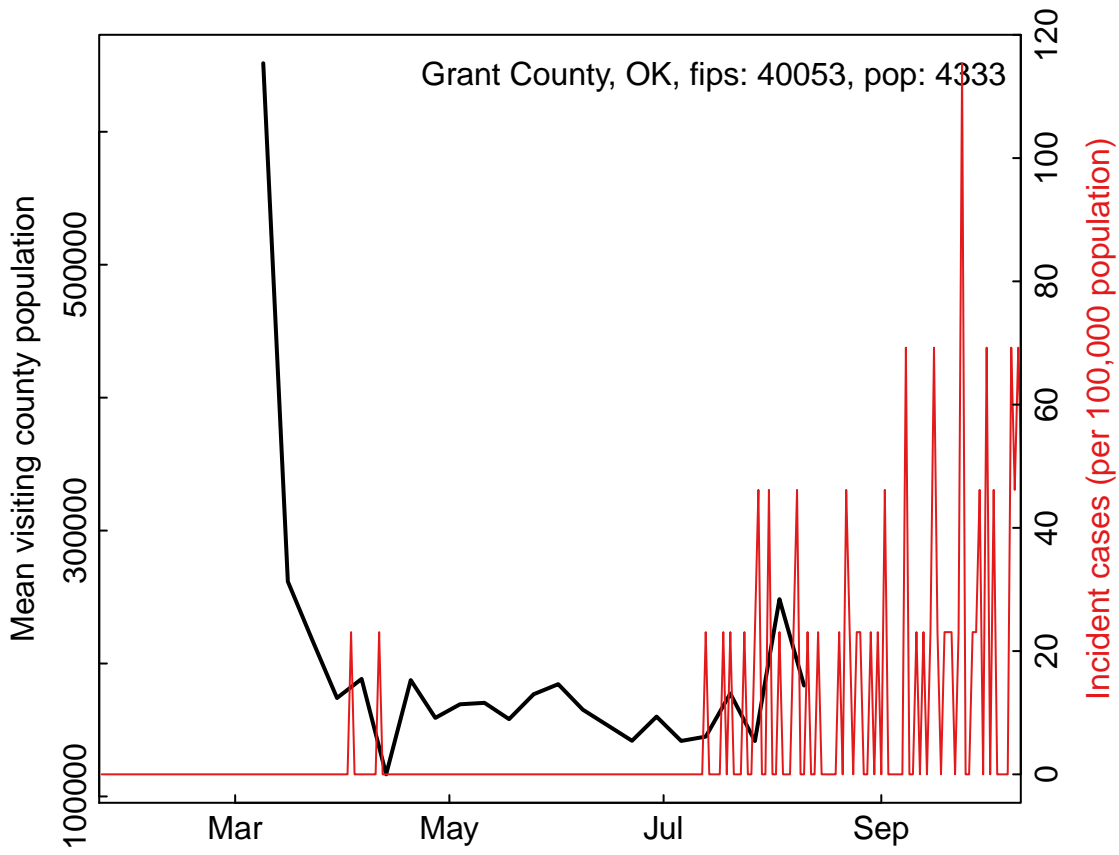

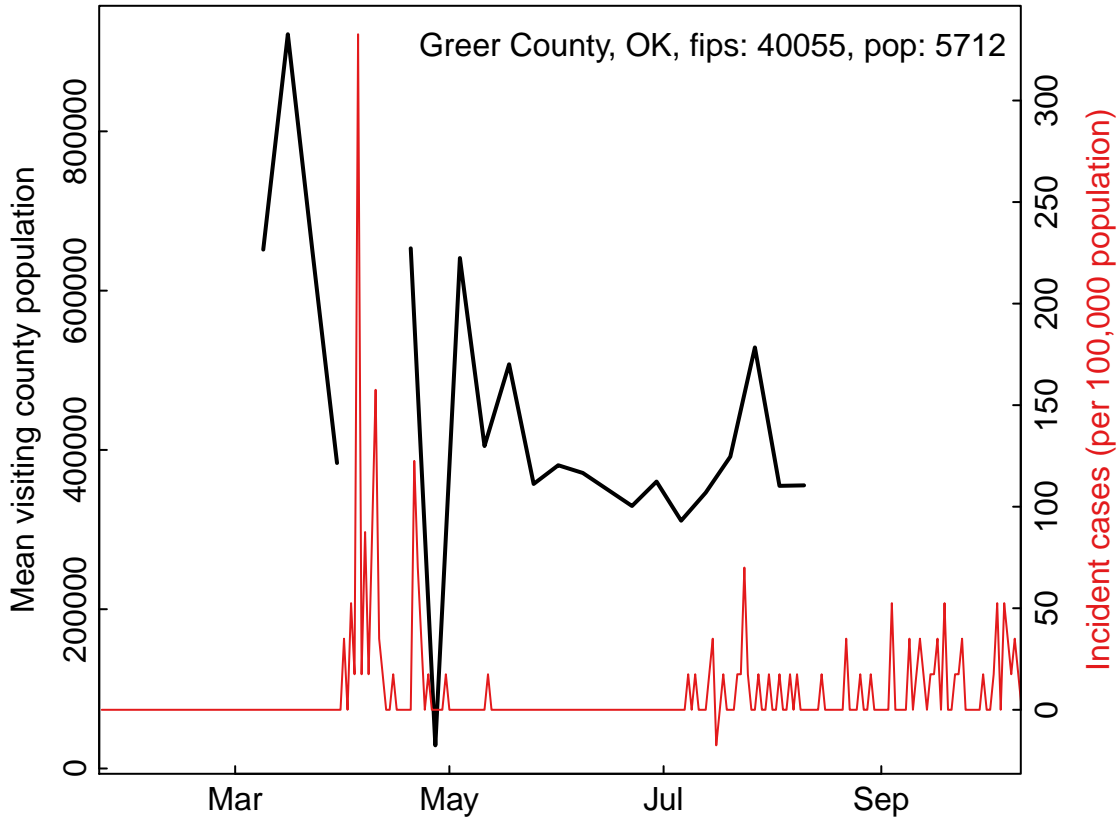

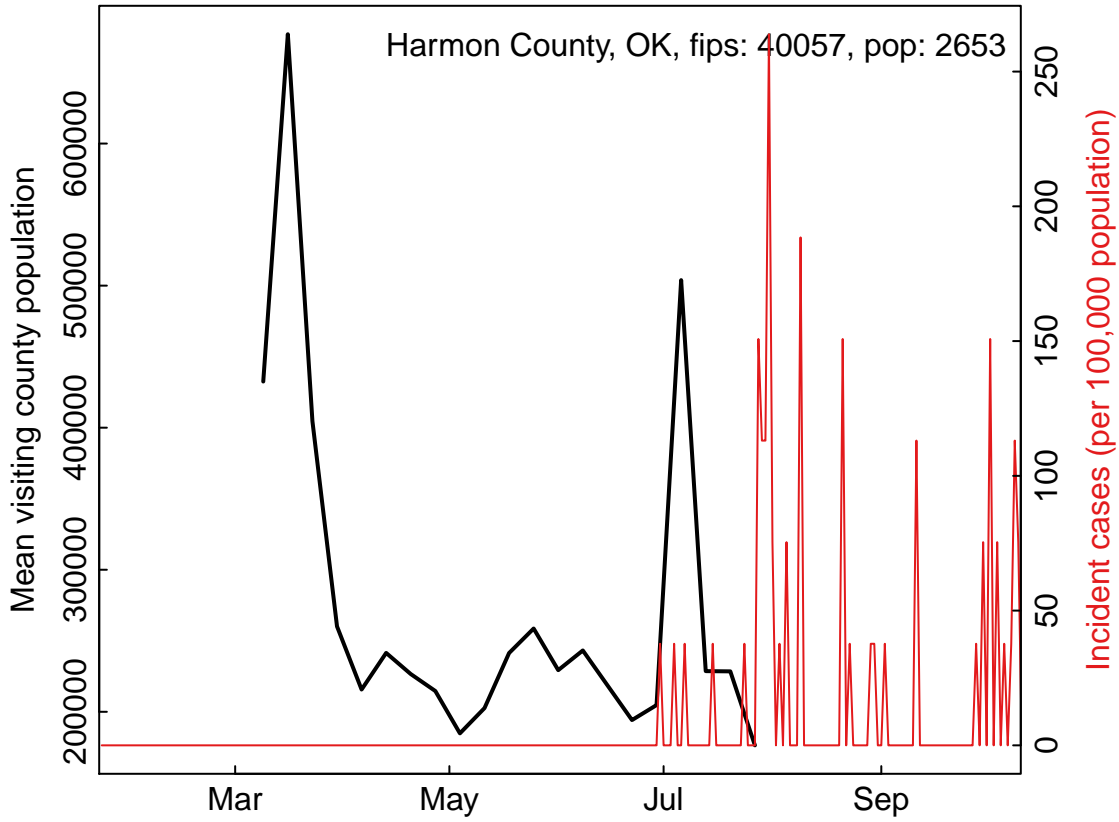



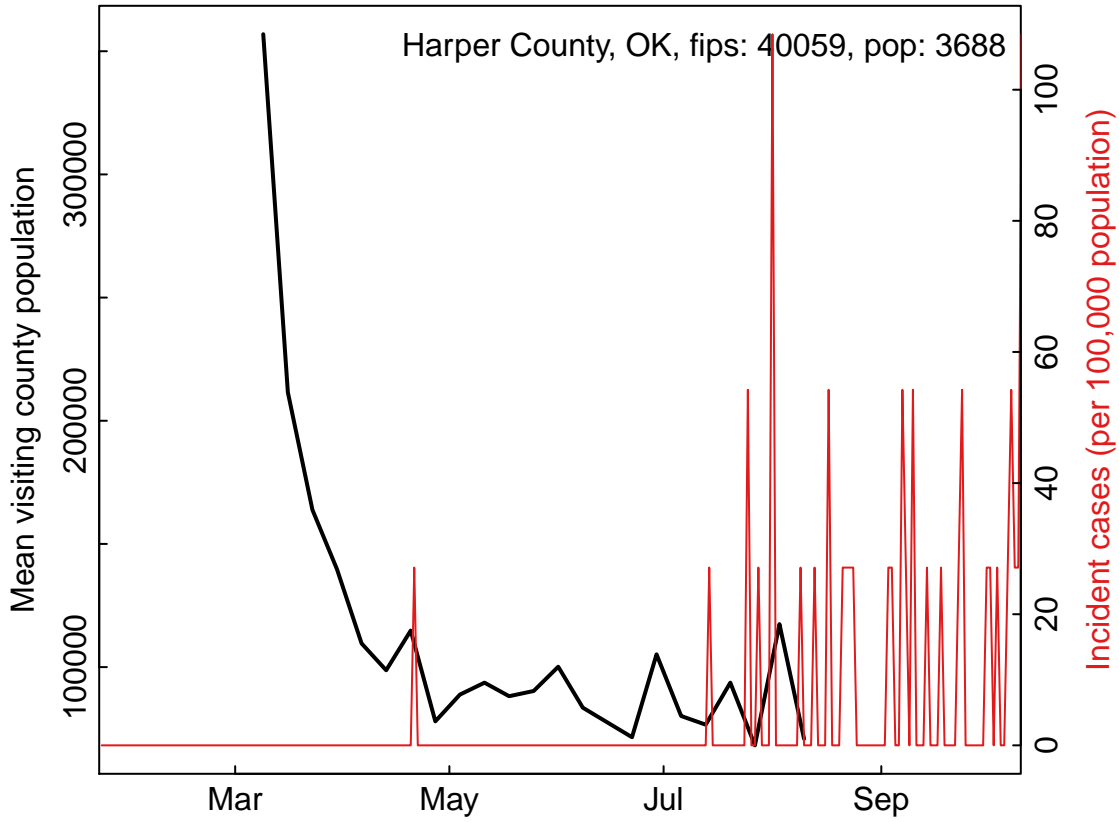

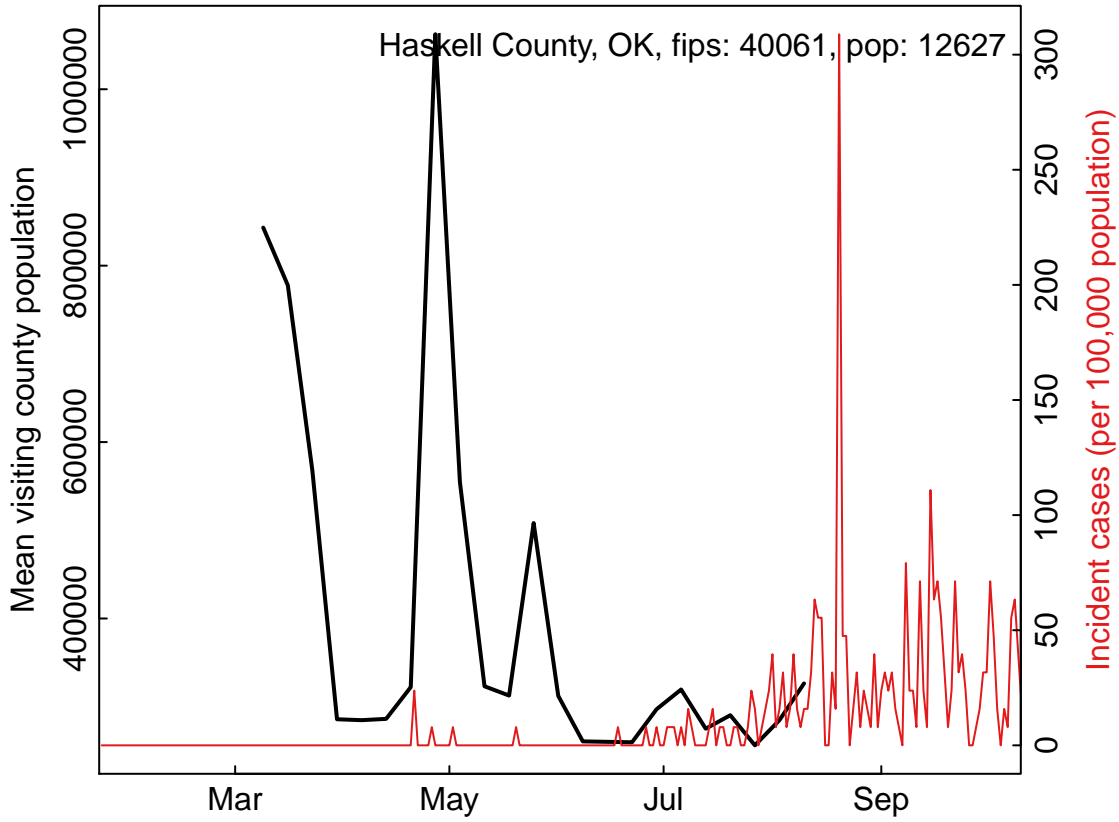

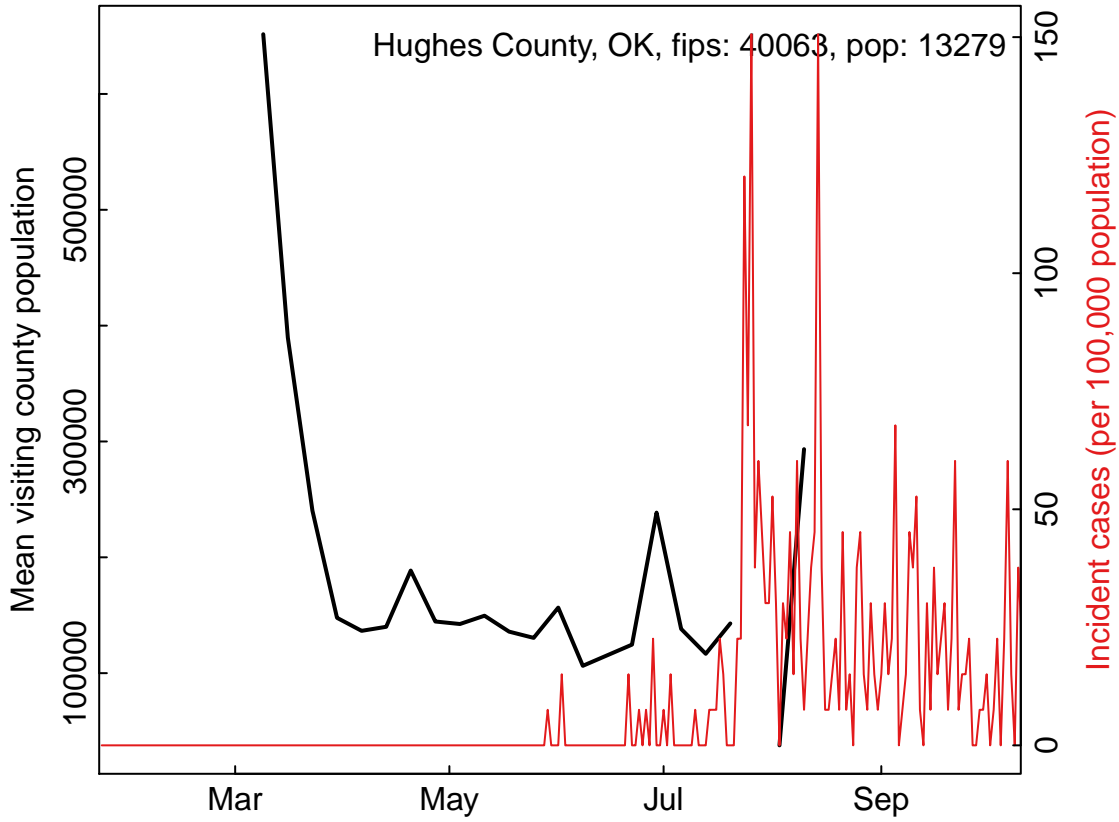

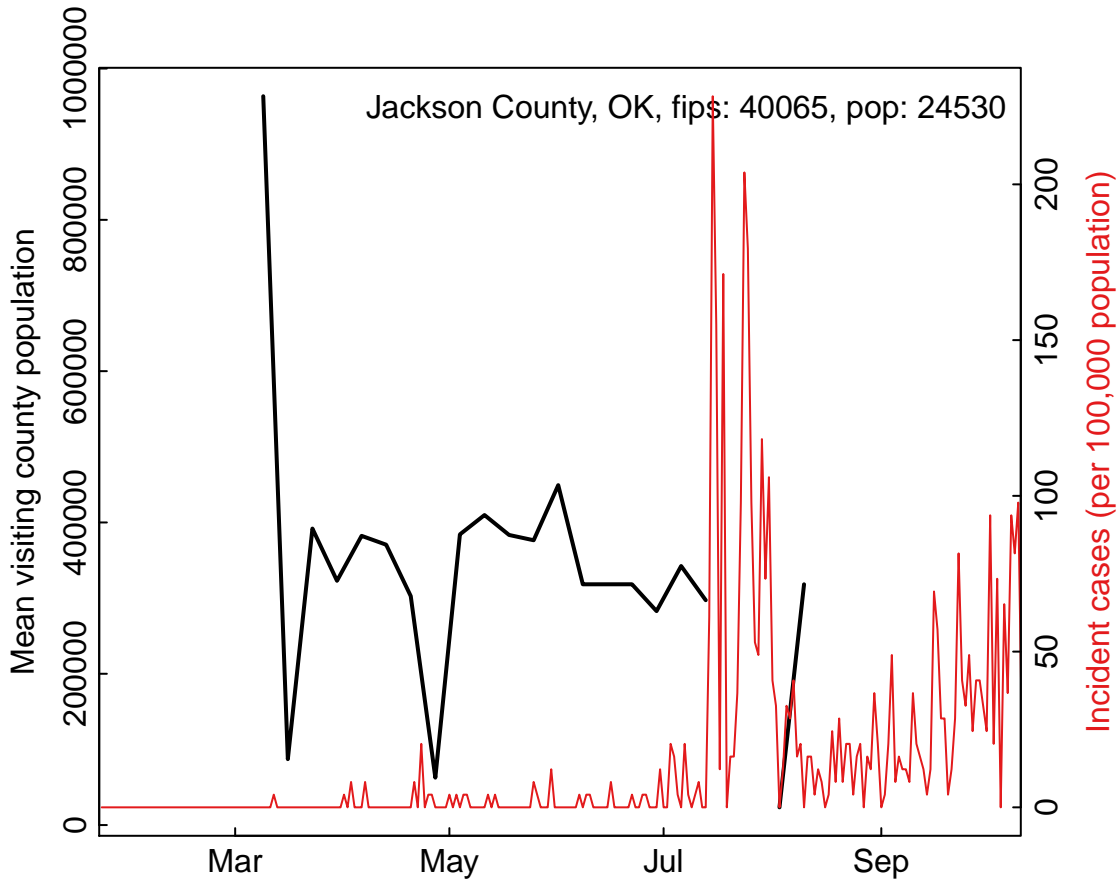

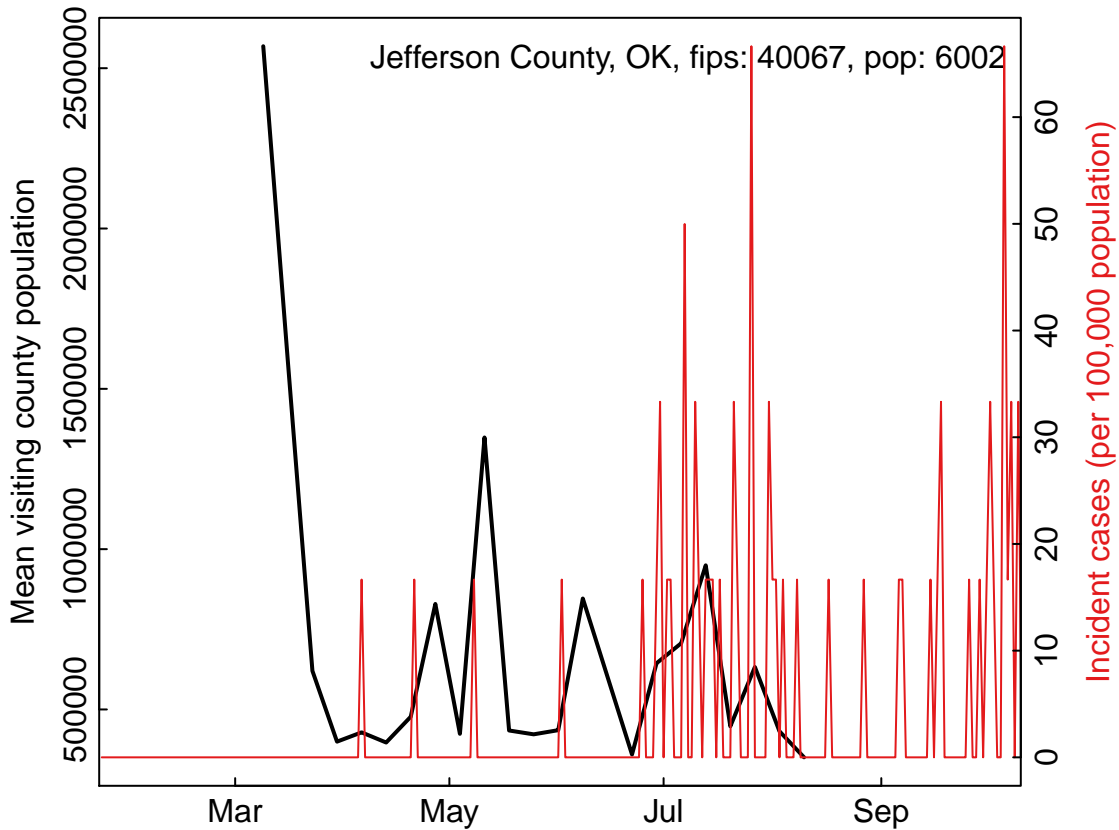

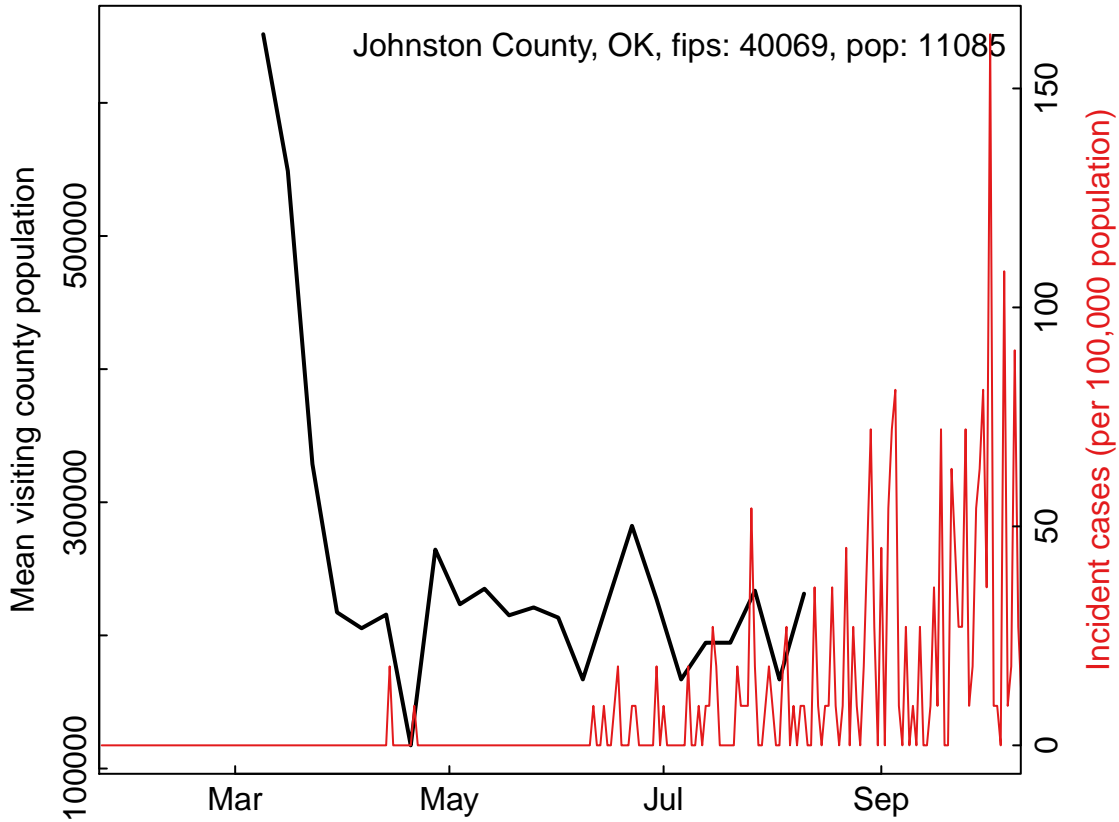

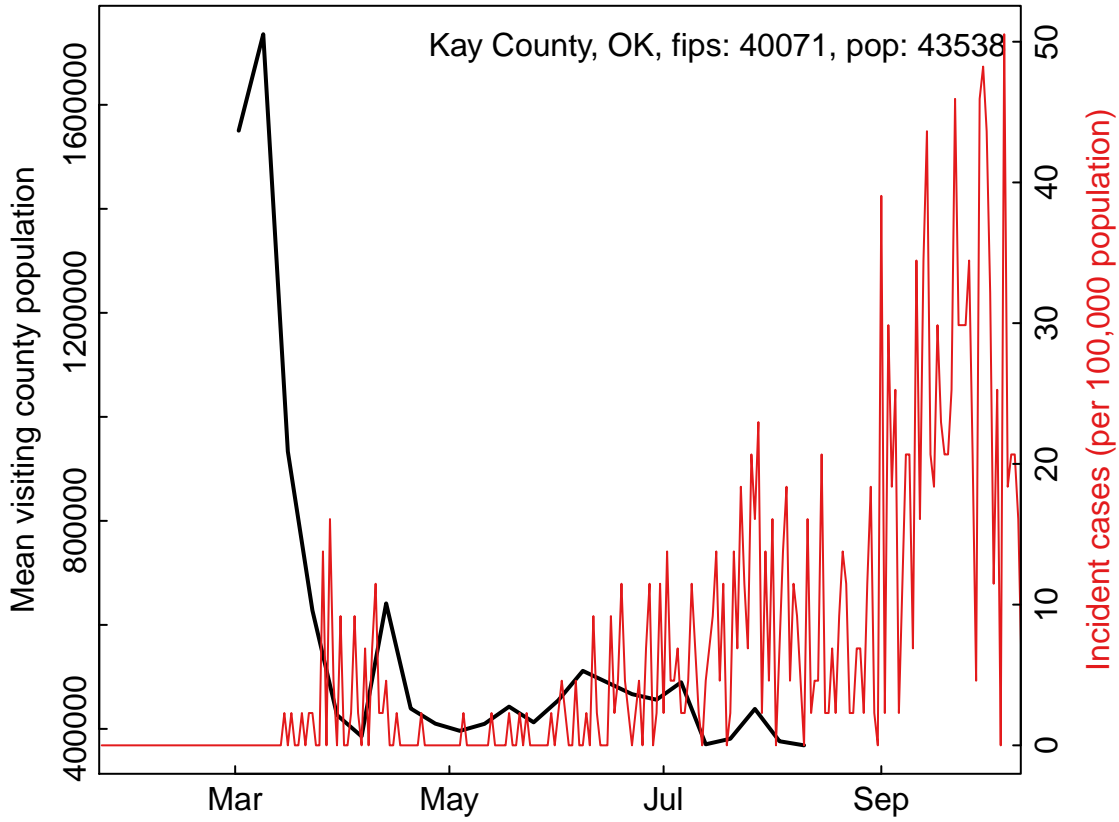

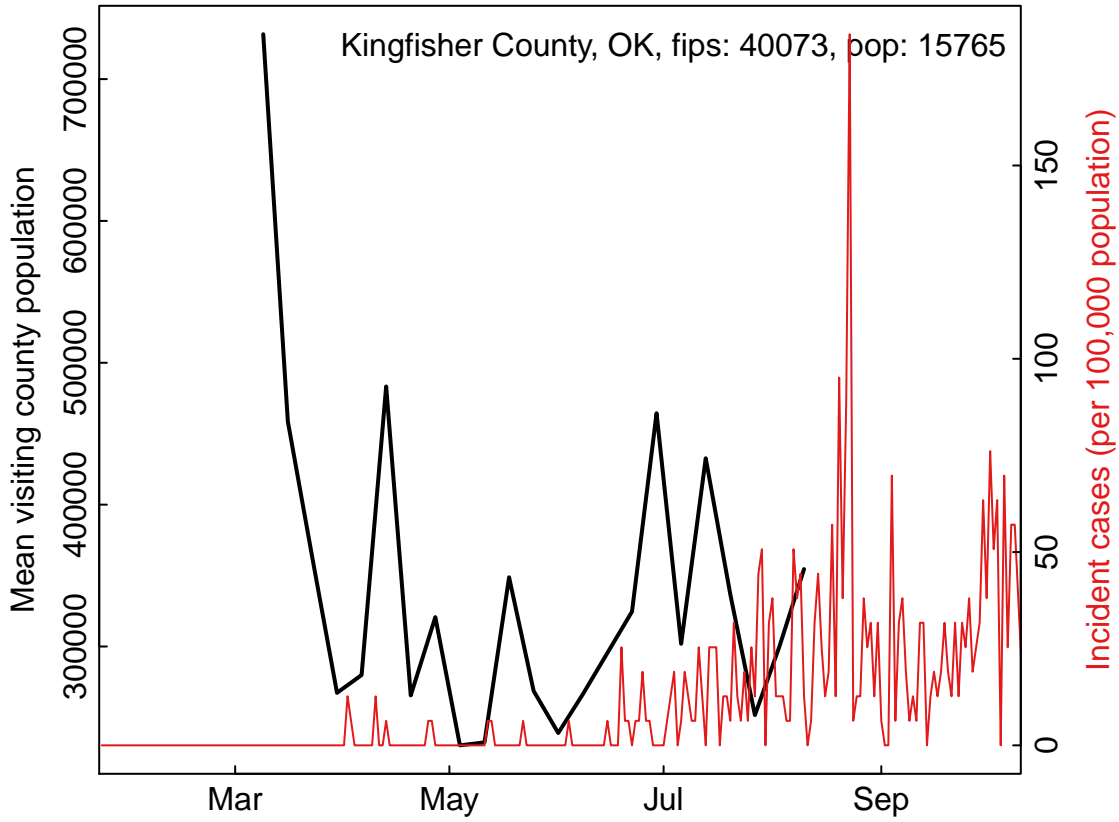



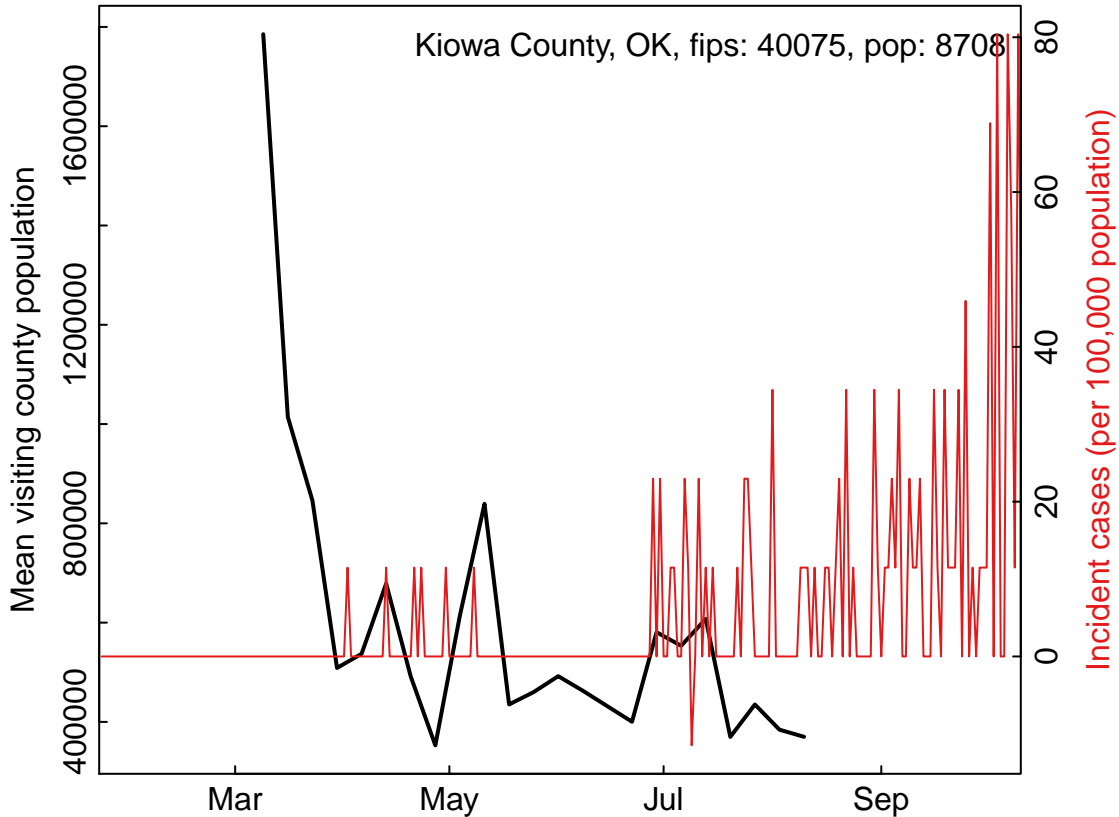

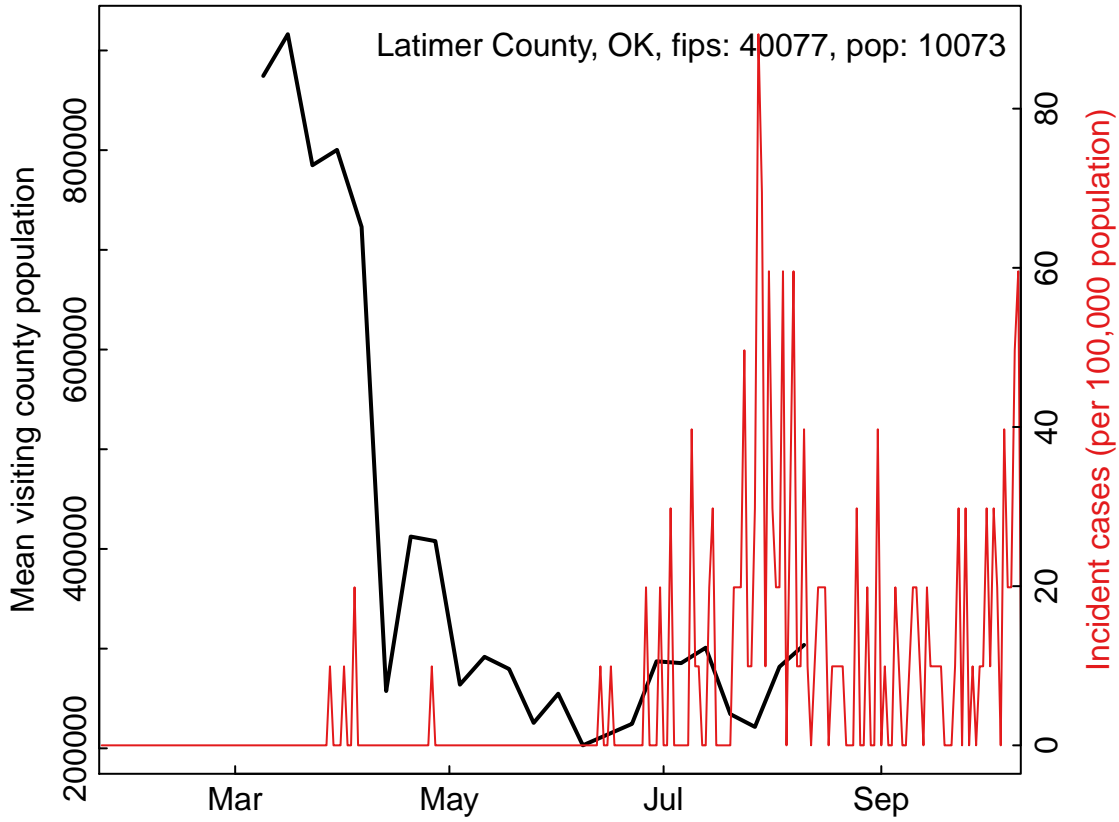

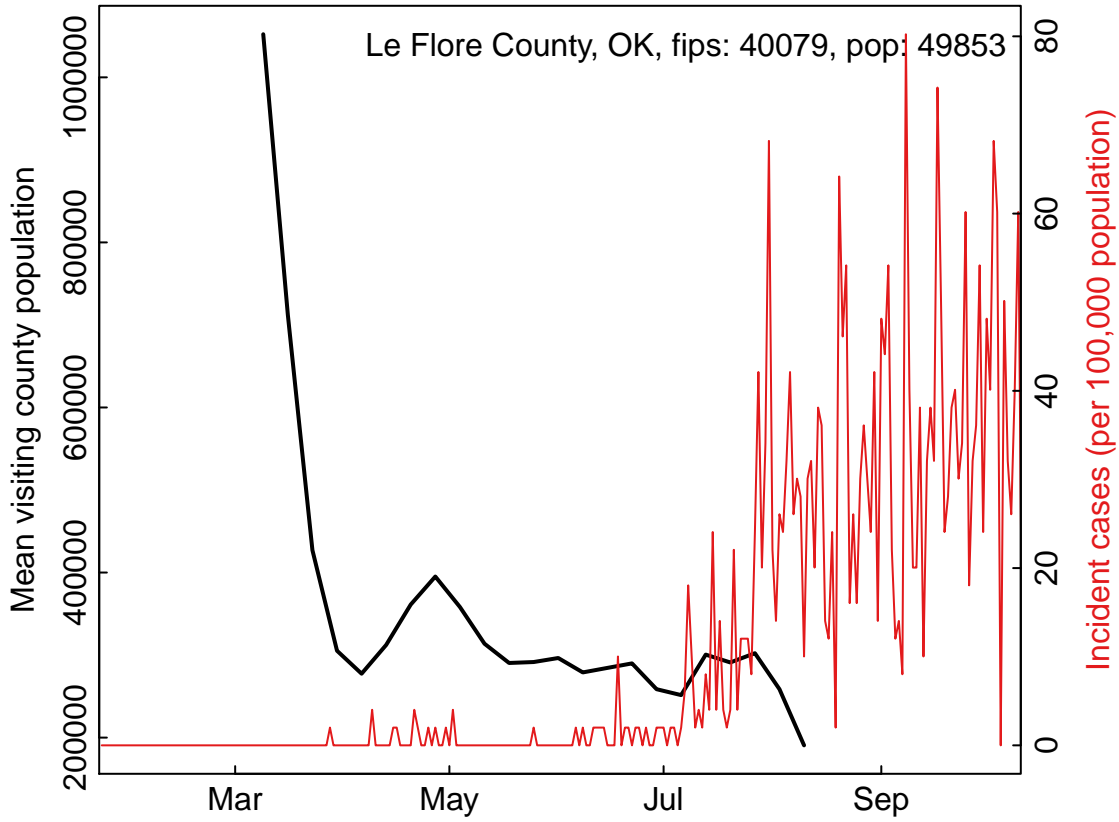

Lincoln County, OK, fips: 40081, pop: 34877

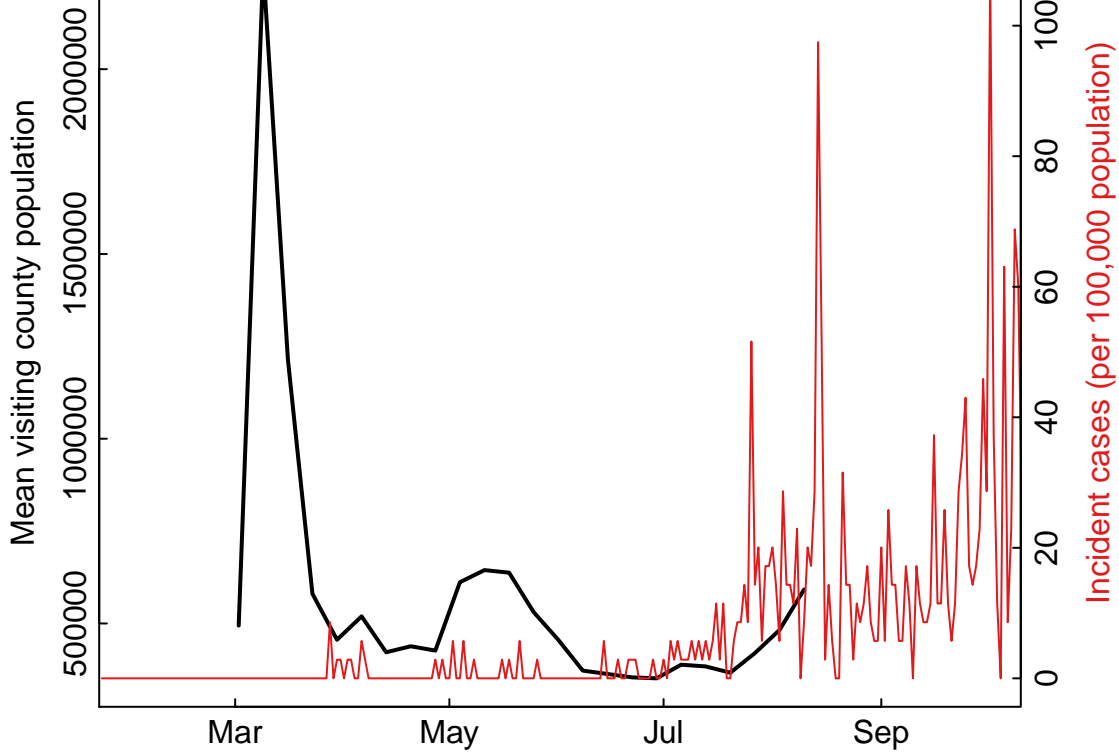

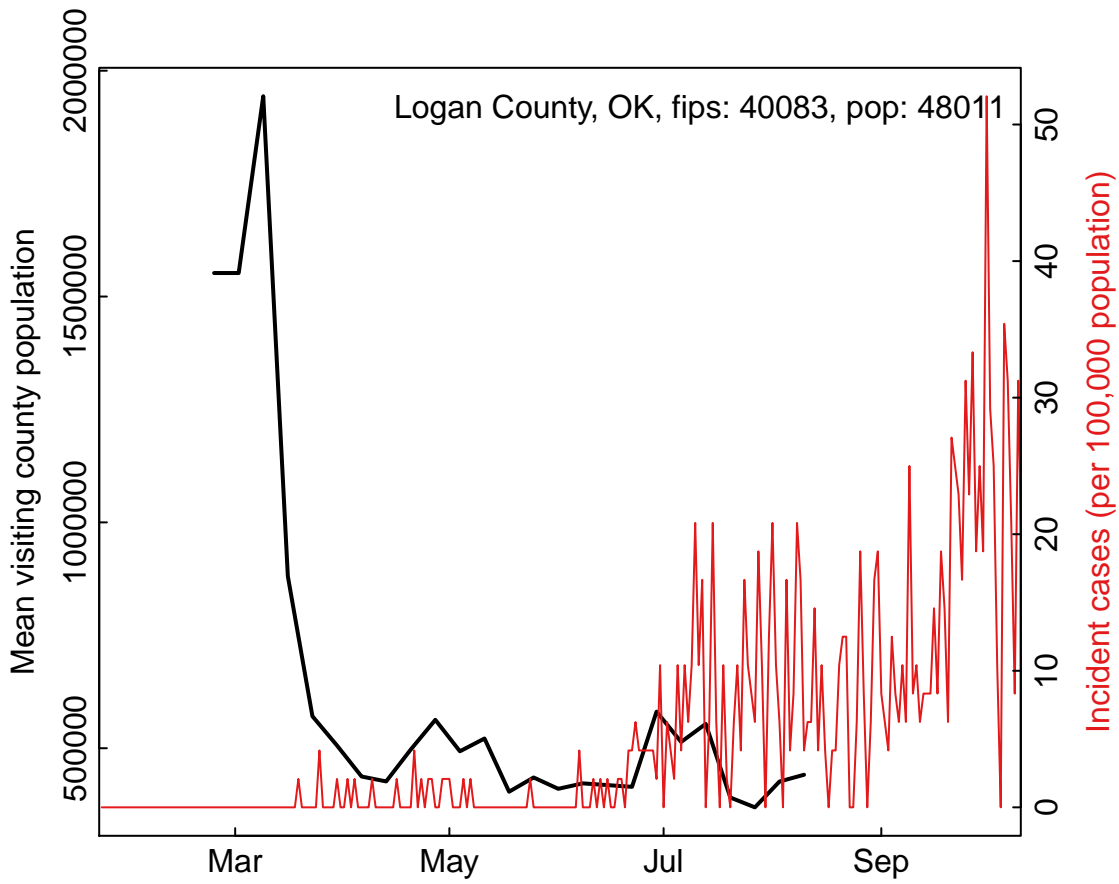

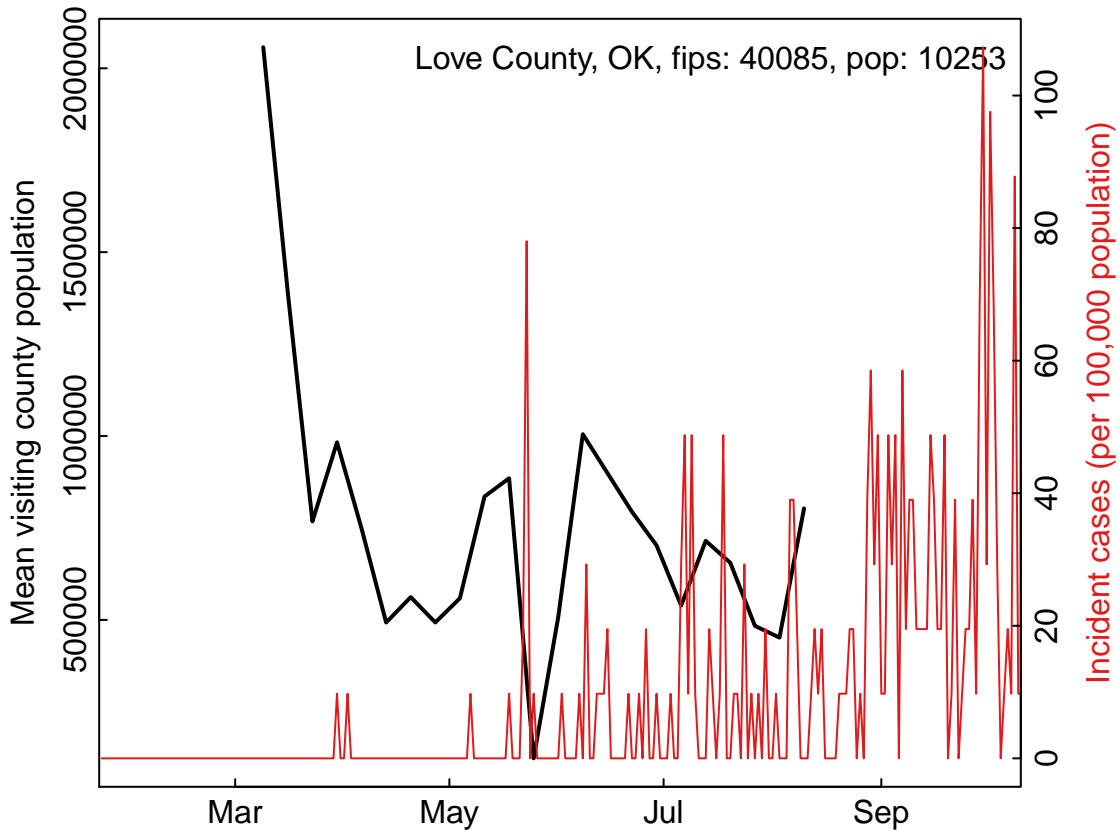

McClain County, OK, fips: 40087, pop: 40474

Mean visiting county population

1500000  
1000000  
500000

Mar

May

Jul

Sep

60  
40  
20  
0

Incident cases (per 100,000 population)

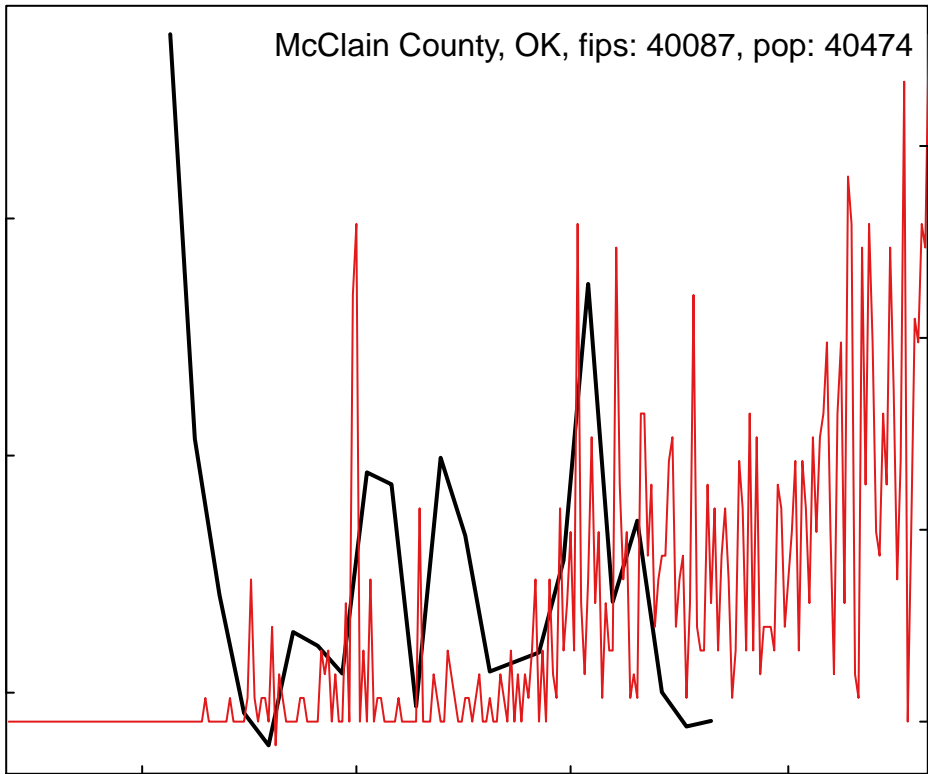

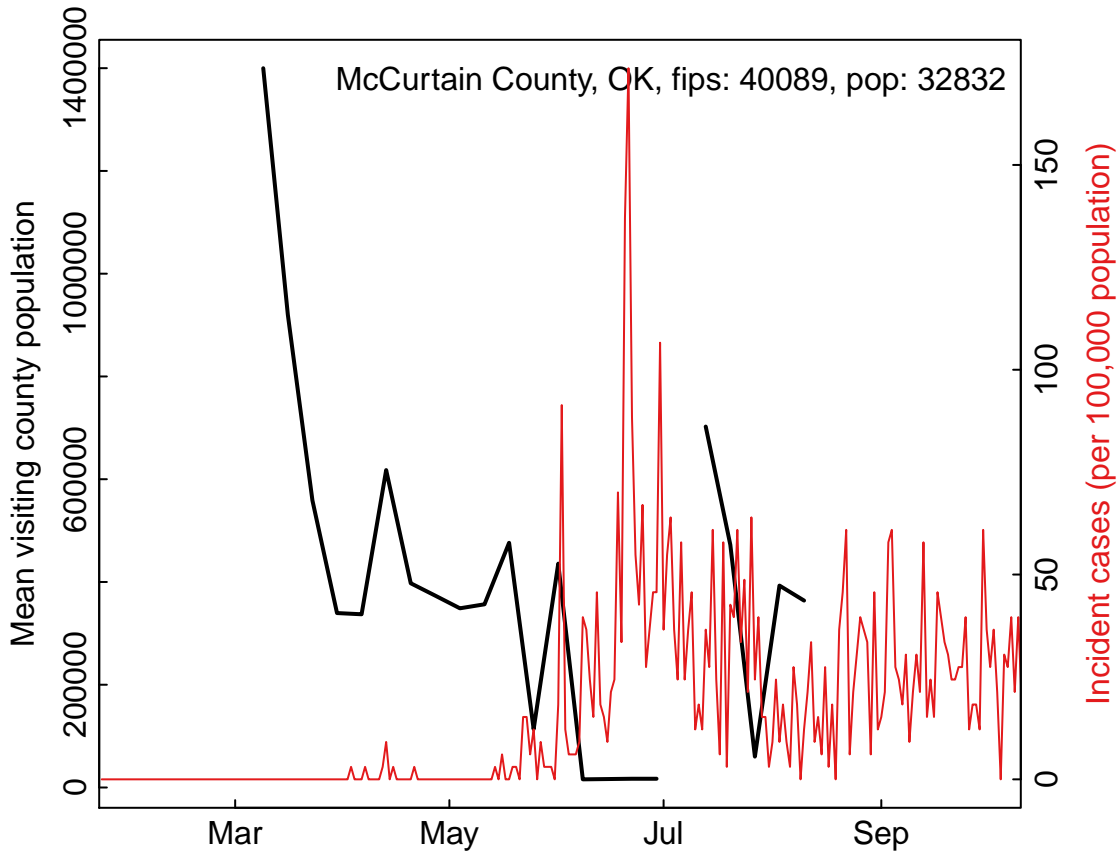



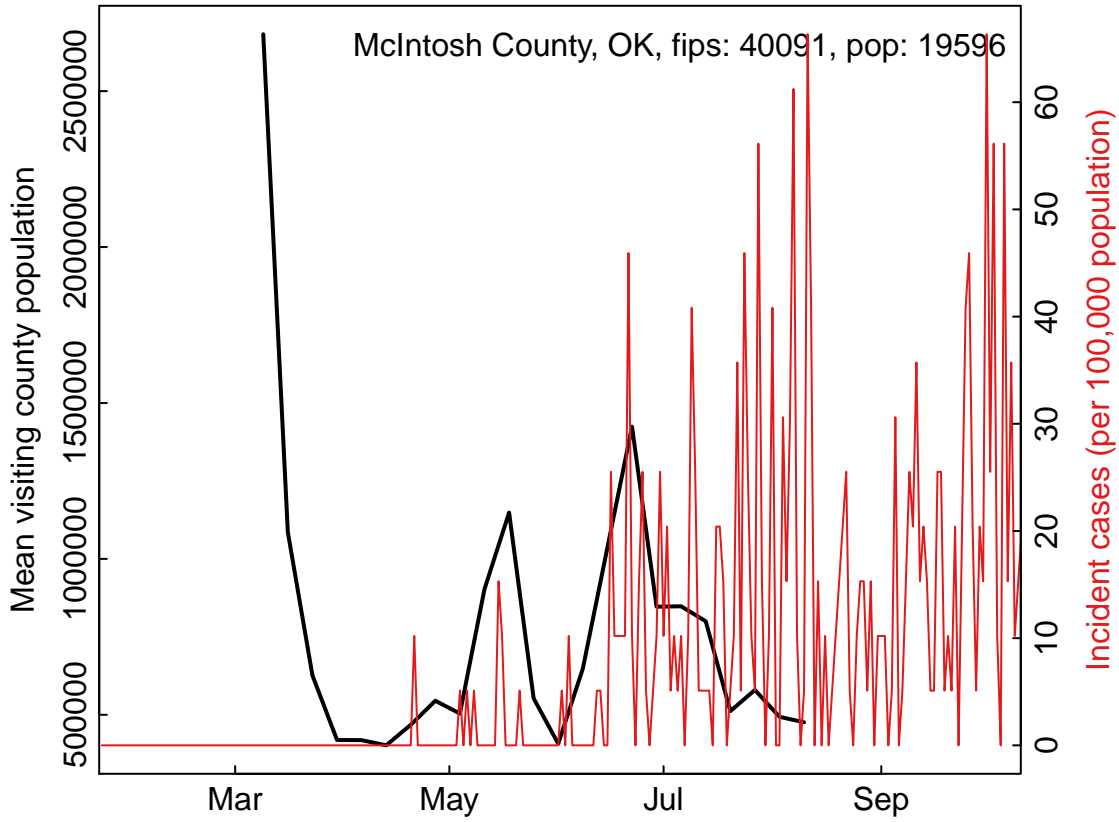

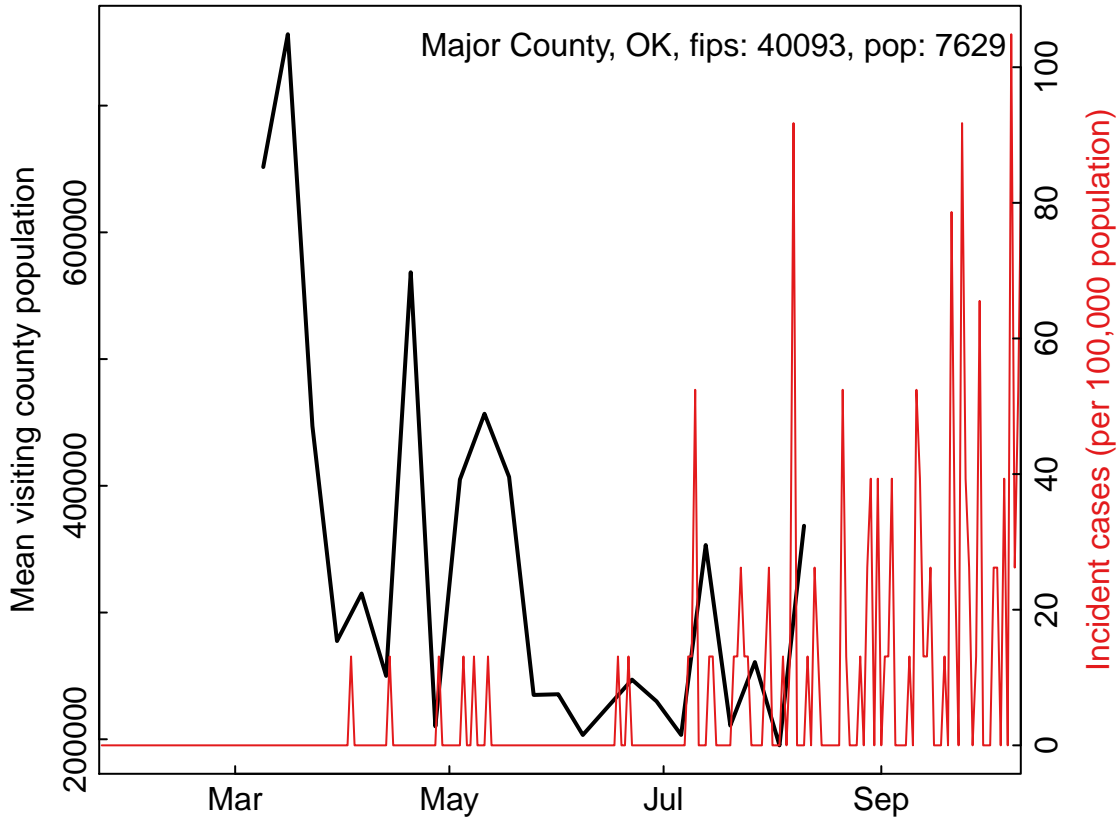

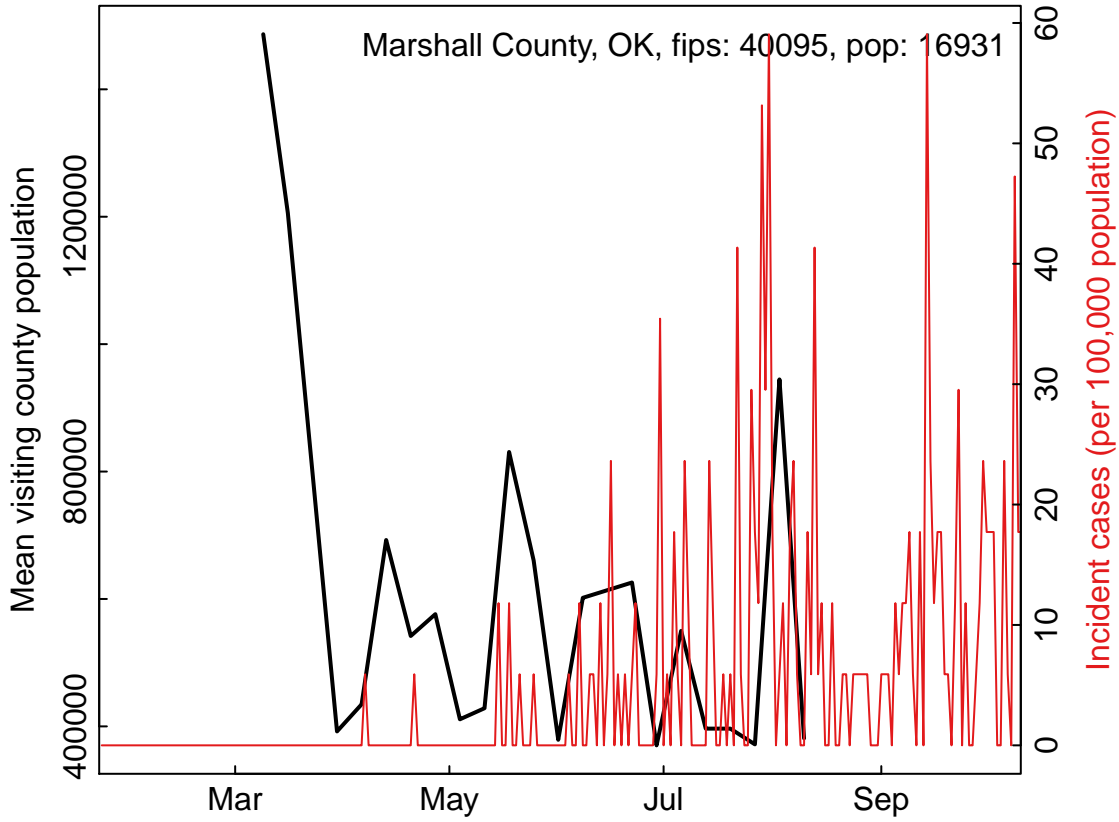

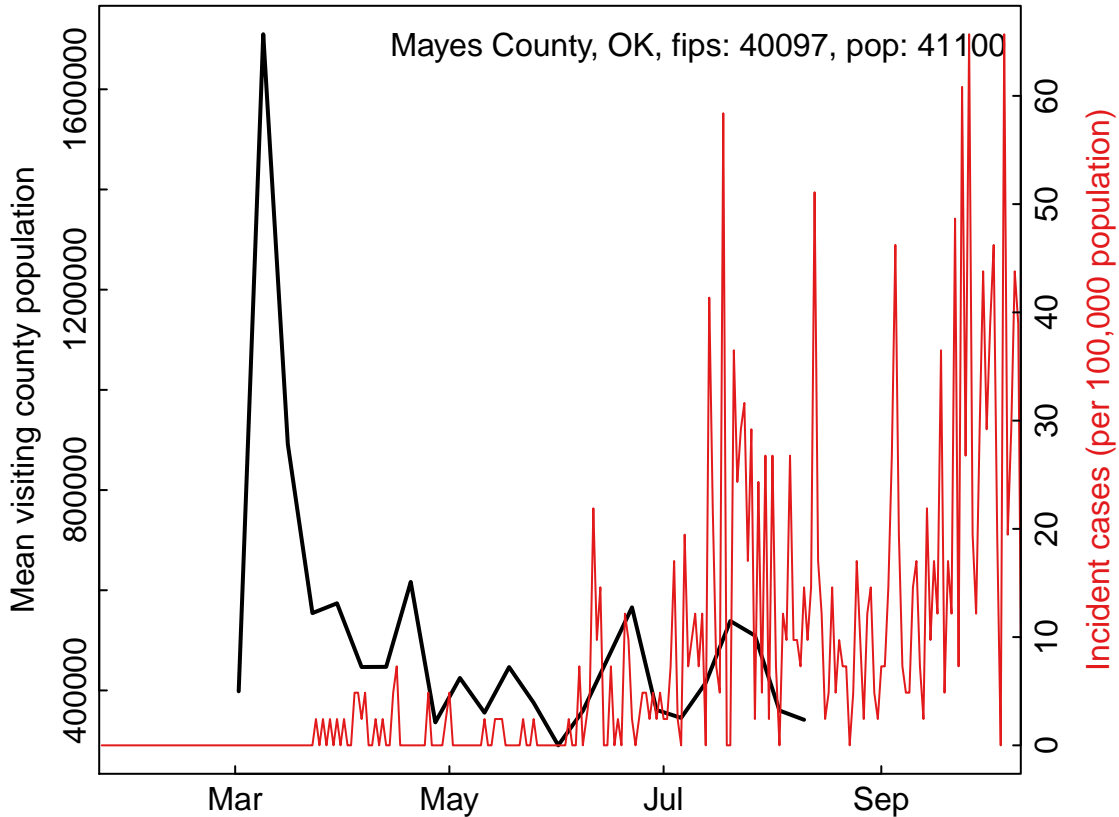

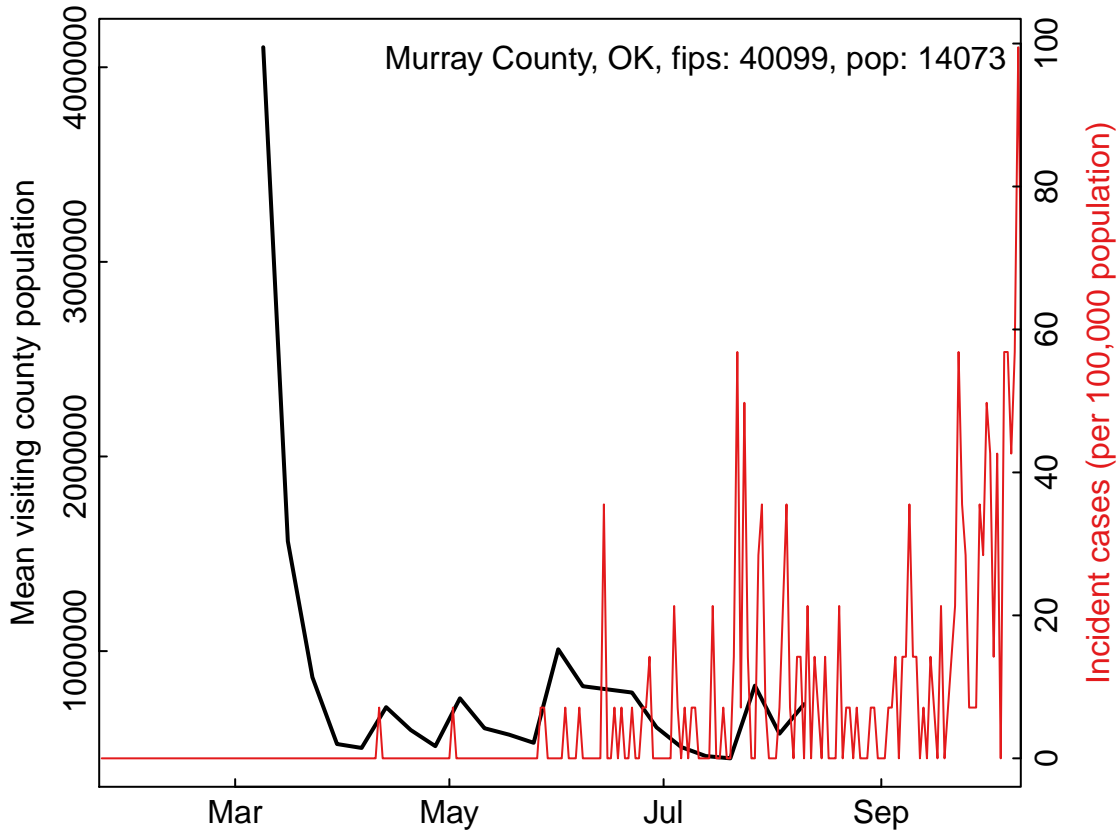

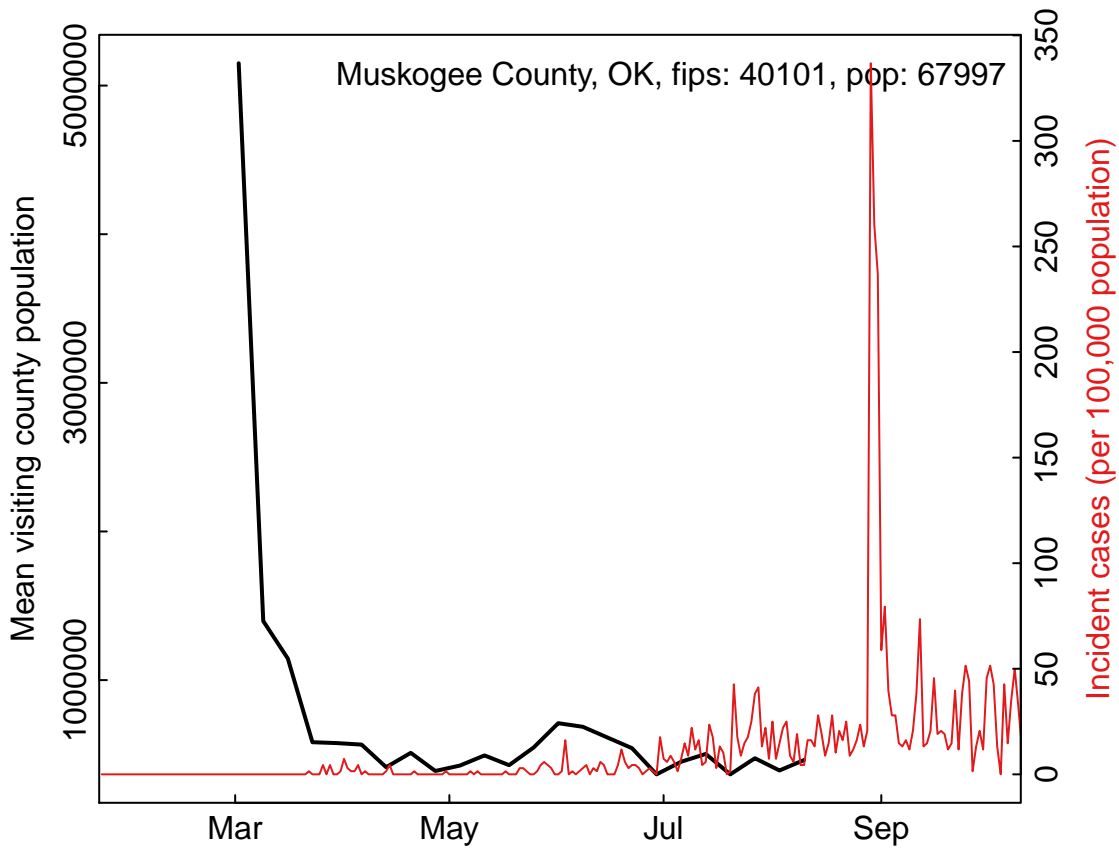

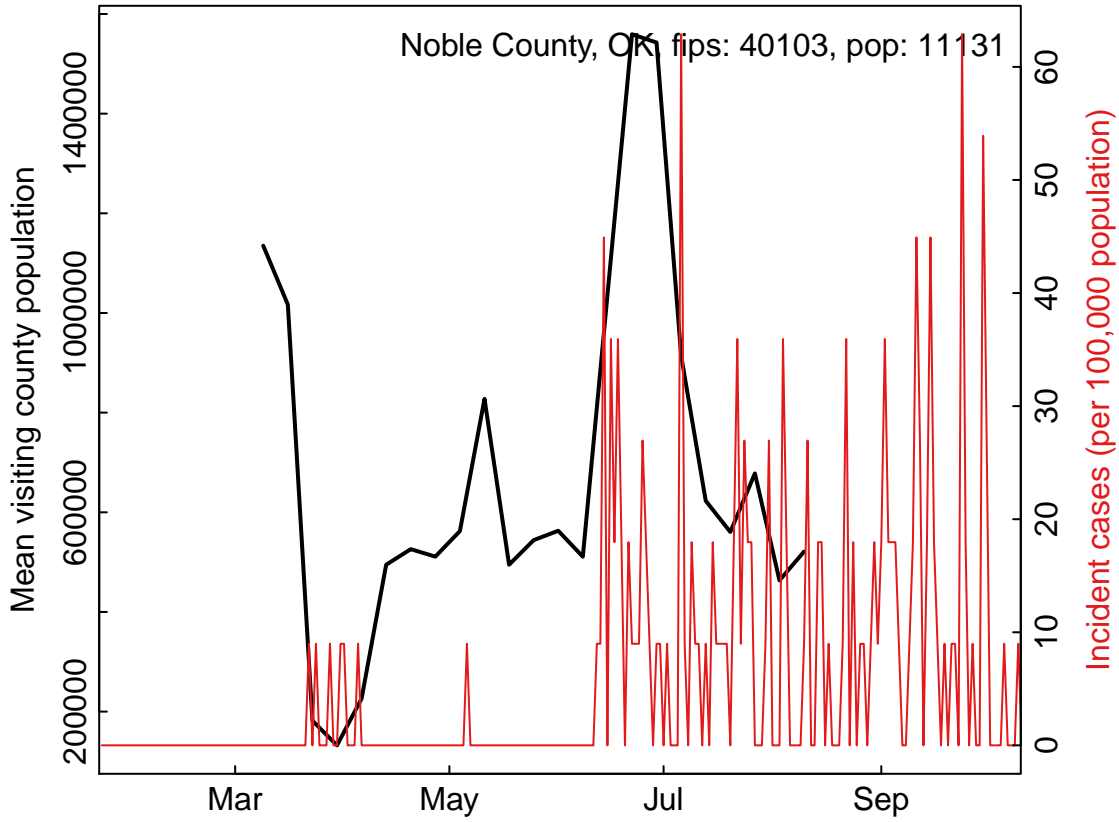

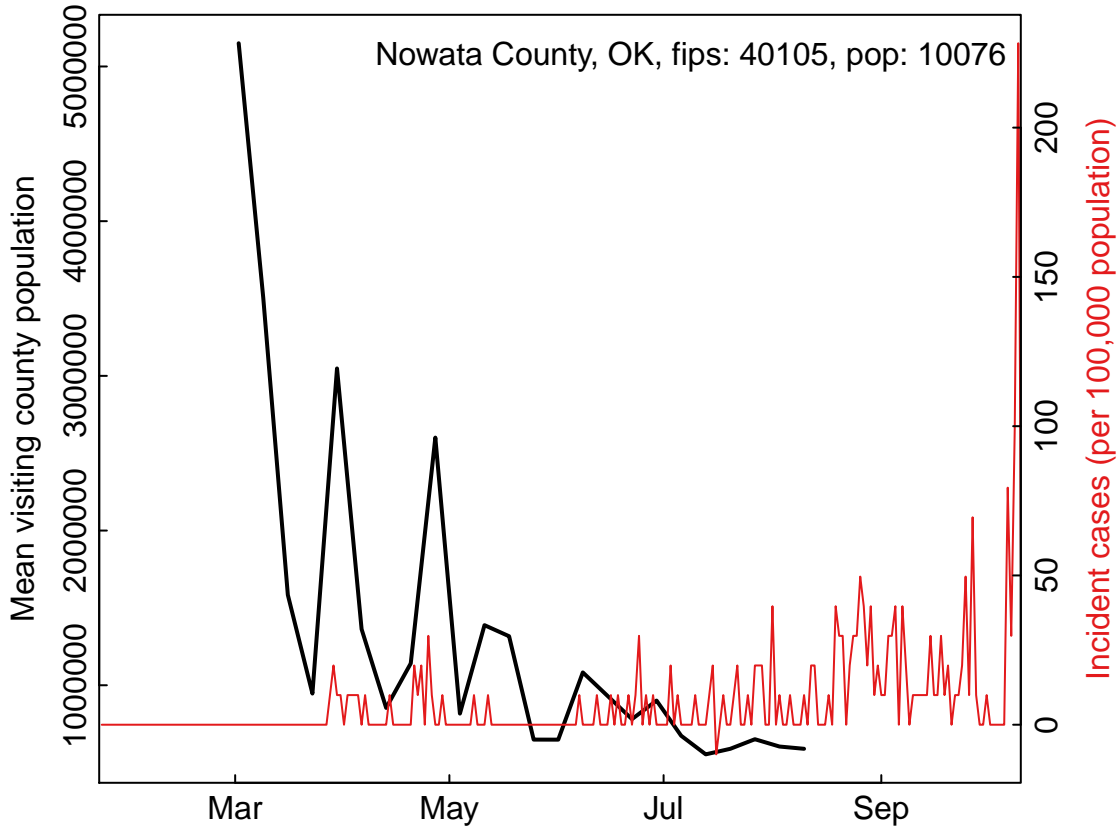



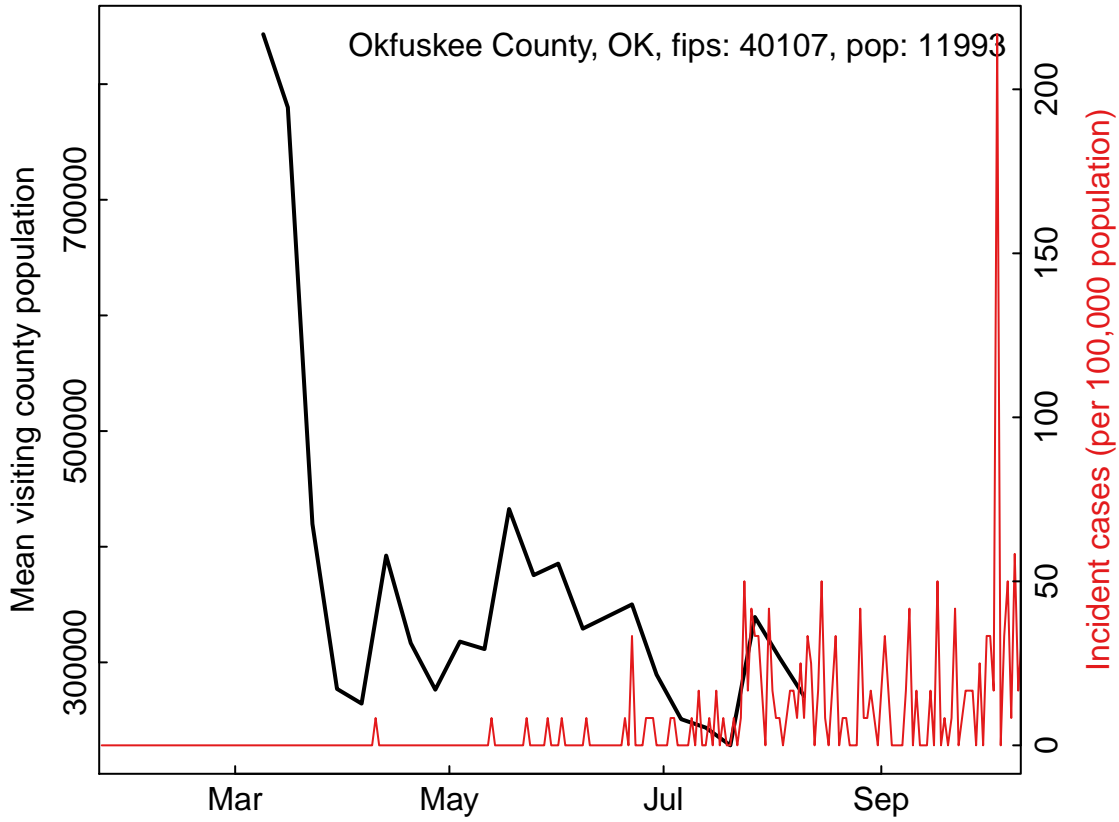

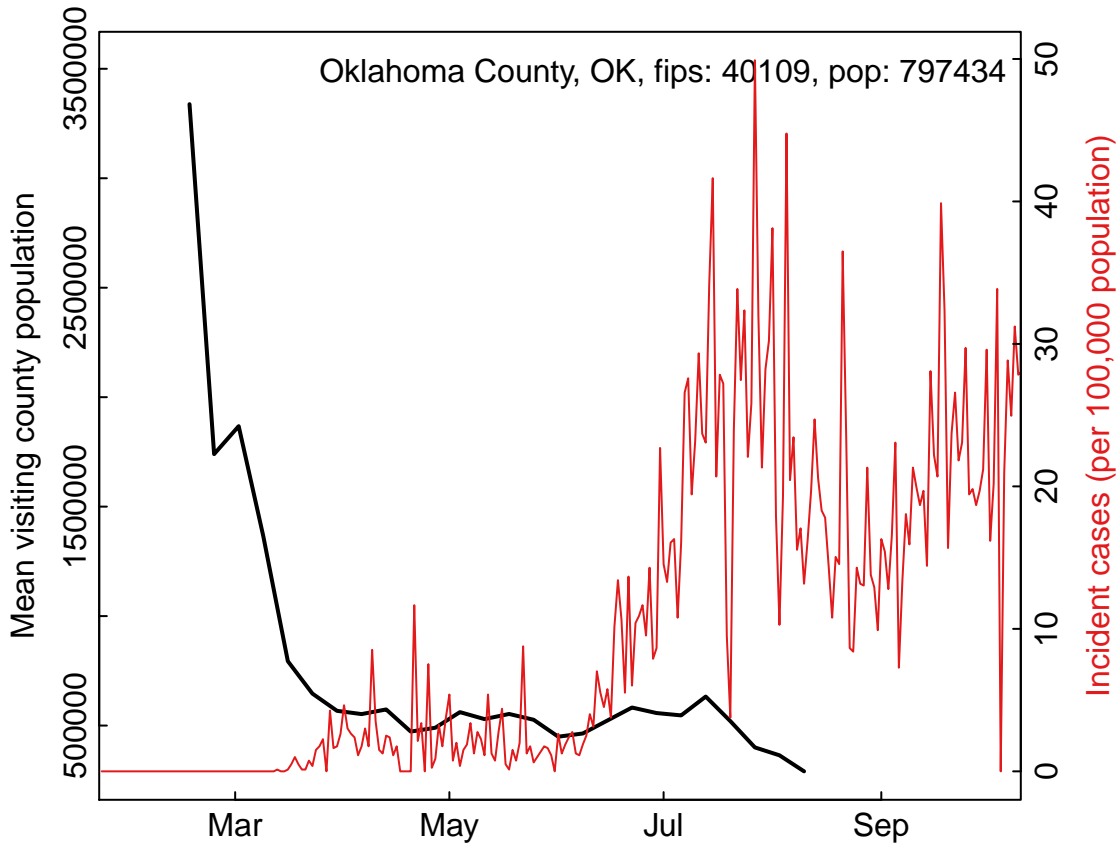

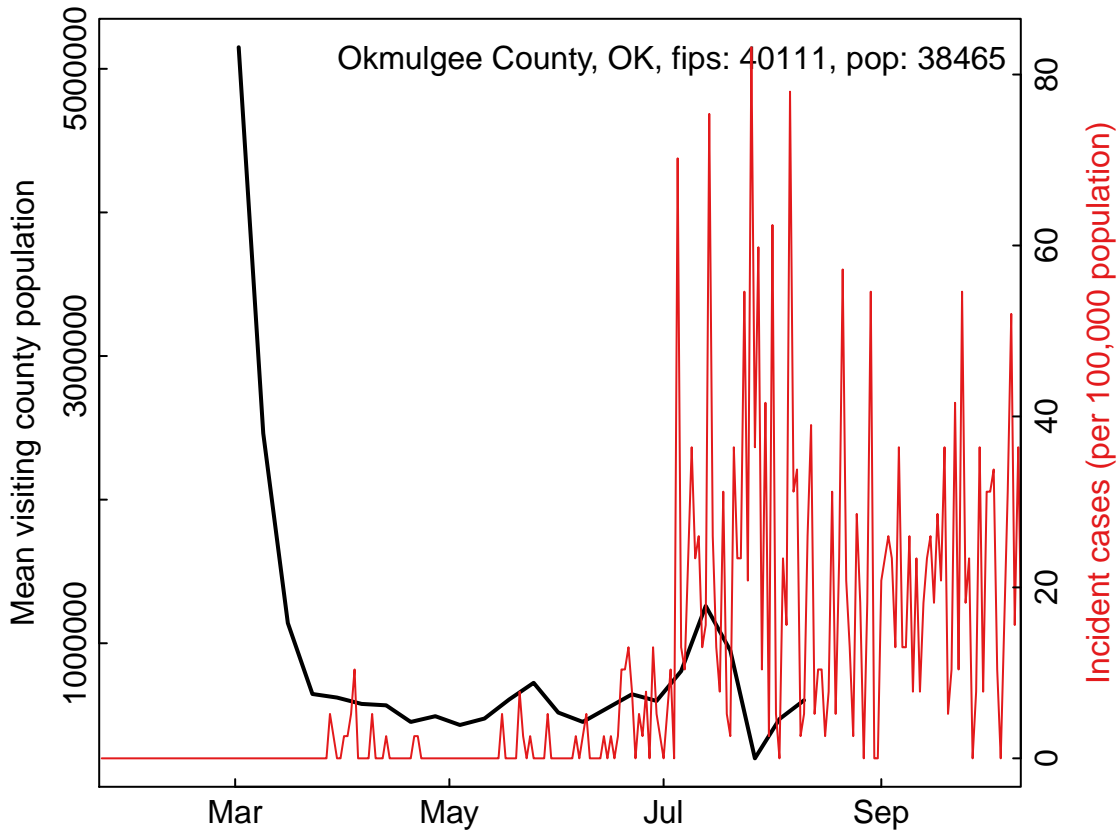

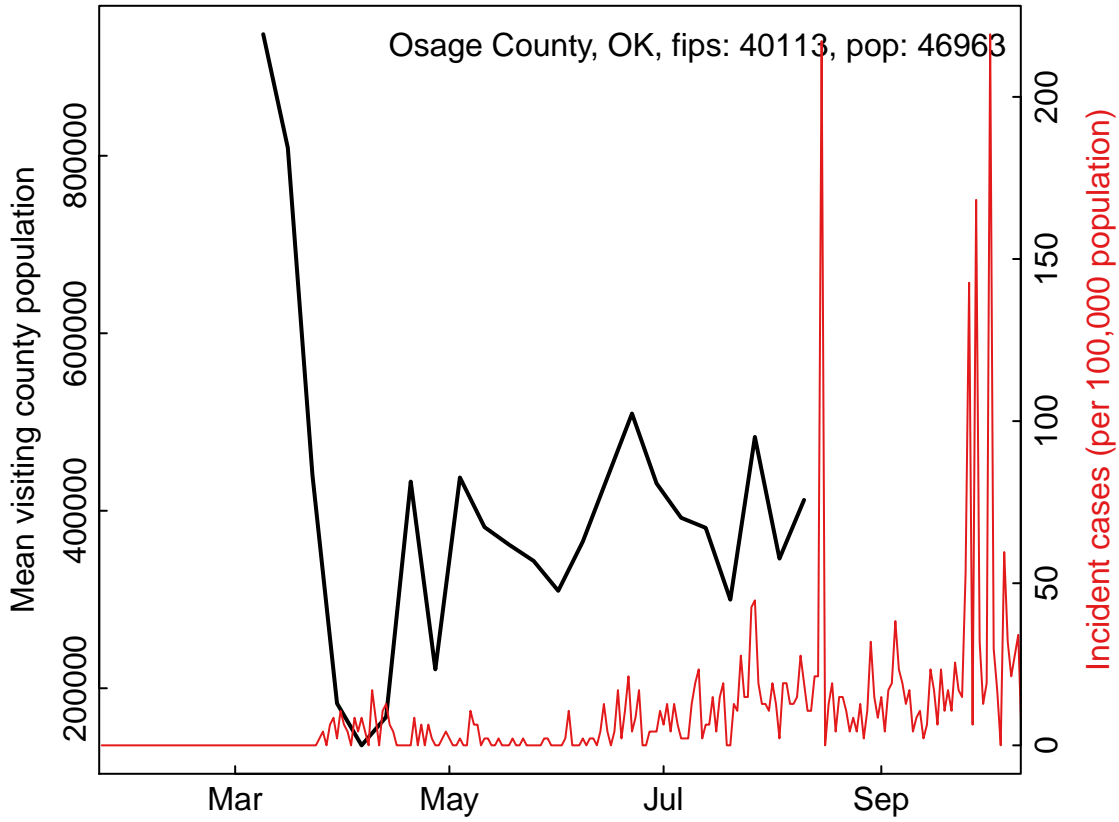

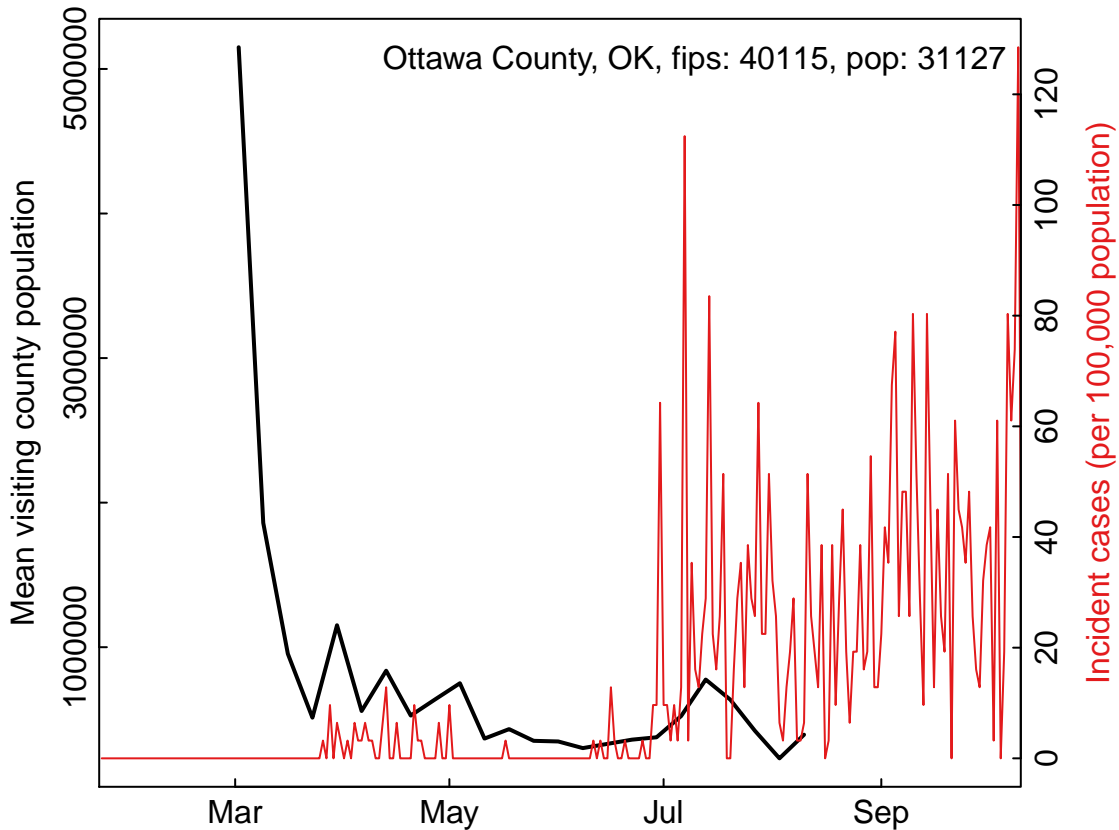

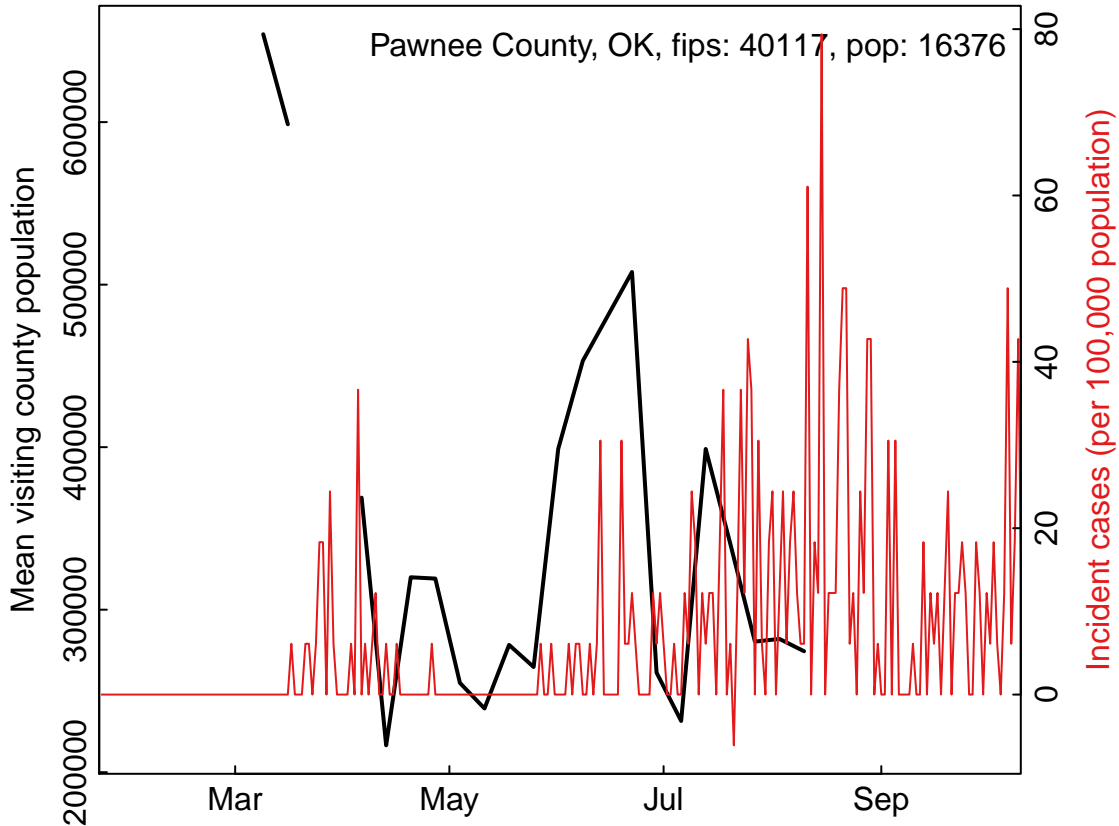

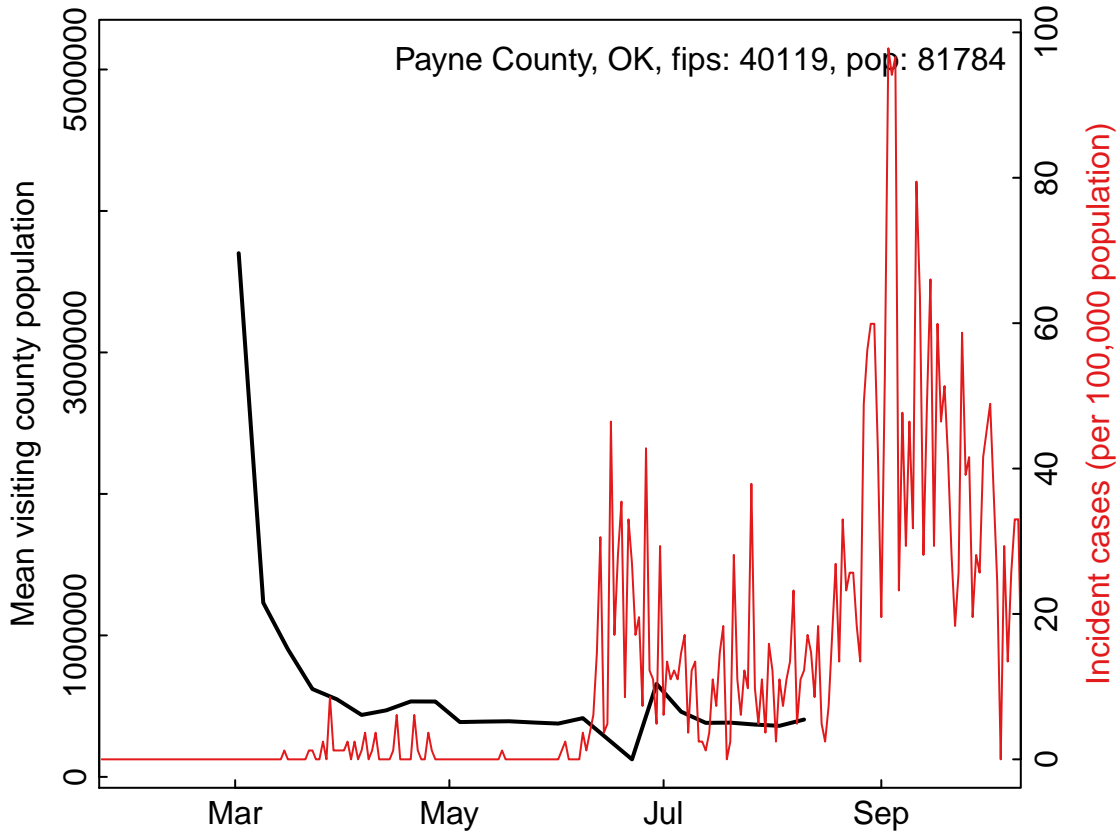

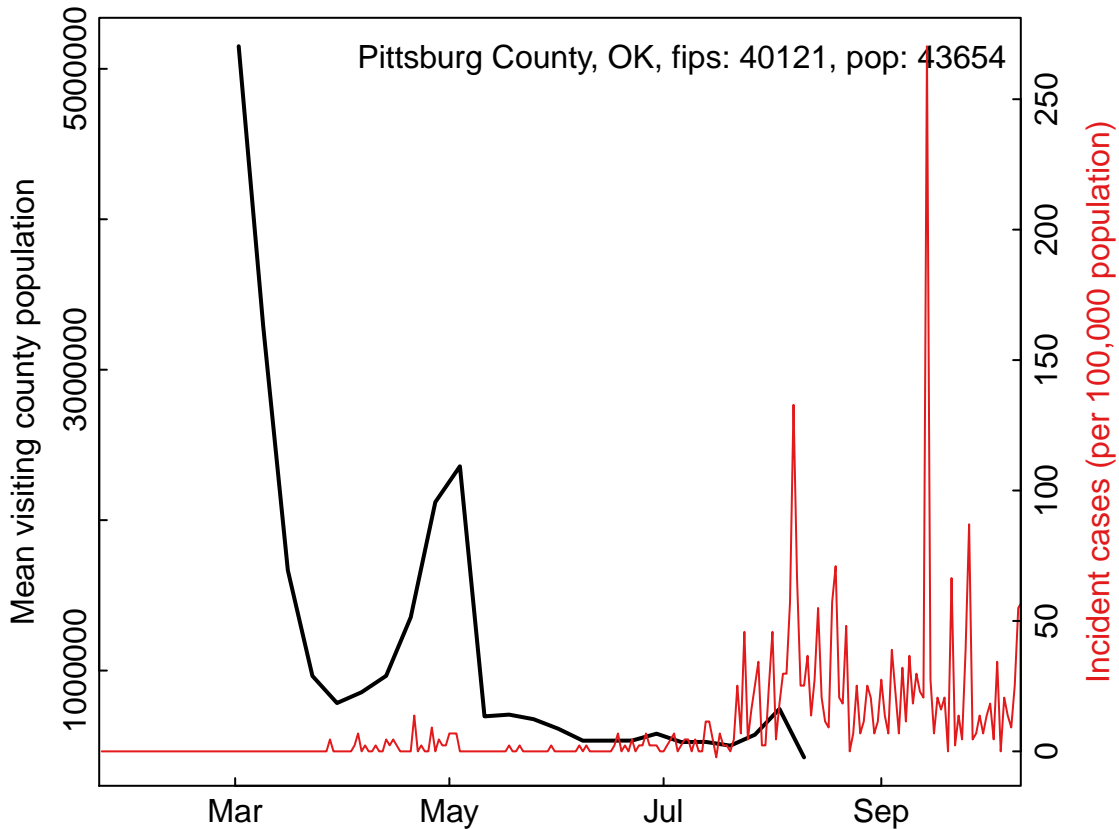



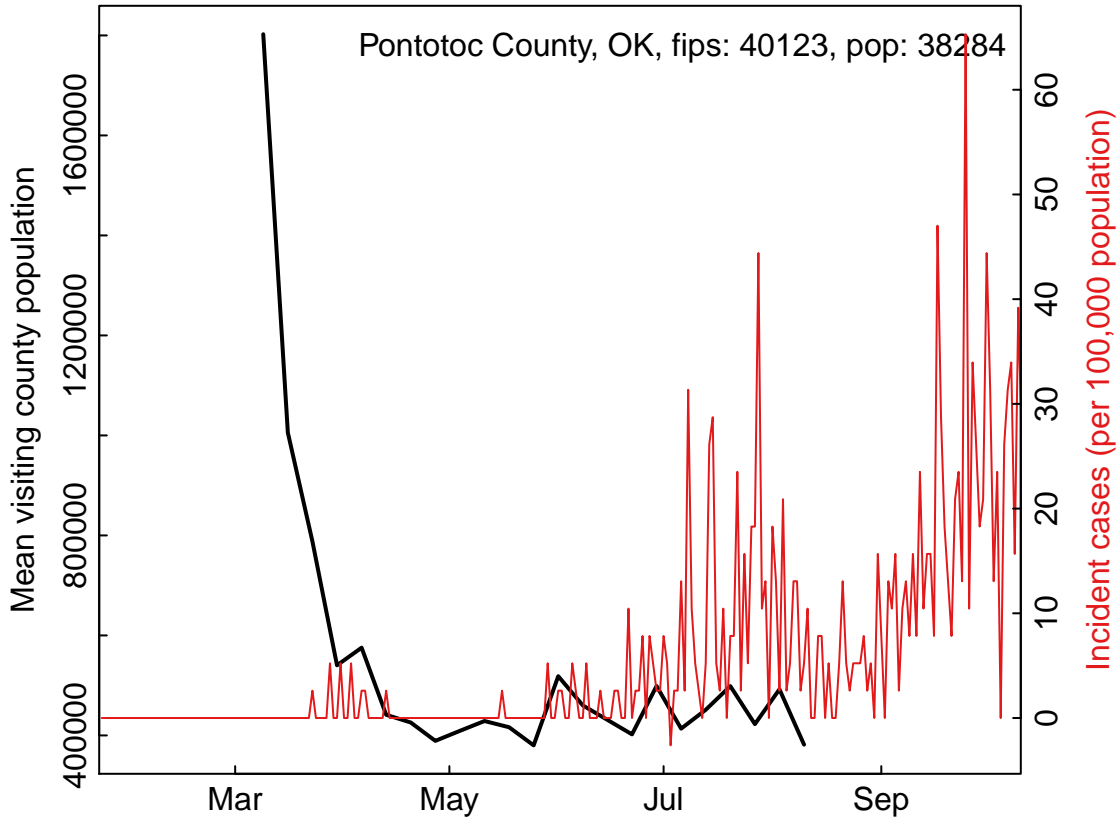

Pottawatomie County, OK, fips: 40125, pop: 72592

Mean visiting county population

500000  
1500000  
2500000

Mar

May

Jul

Sep

0  
20  
40  
60  
80  
100  
120

Incident cases (per 100,000 population)

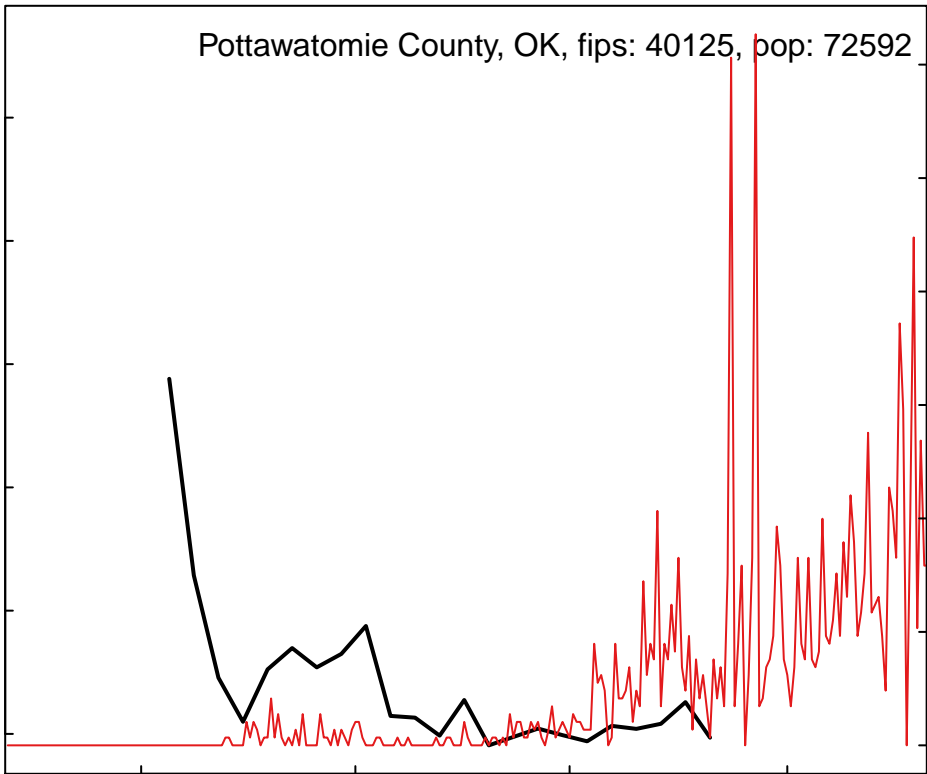

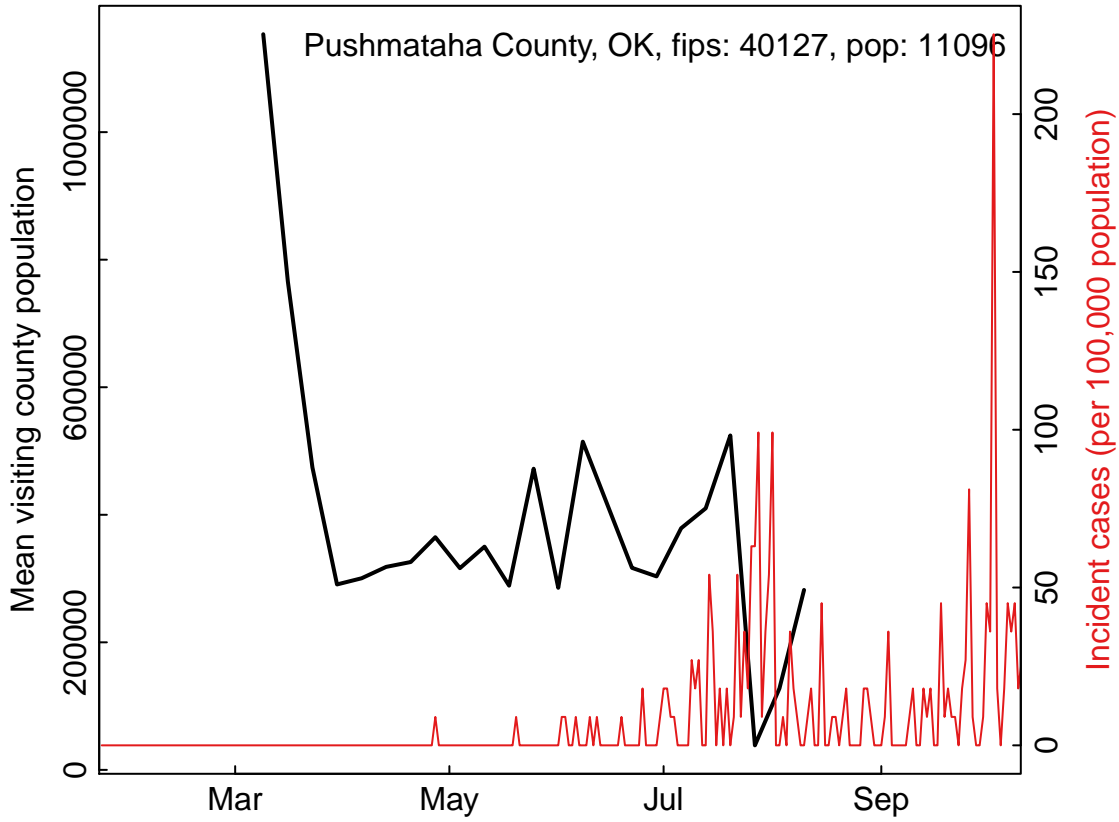

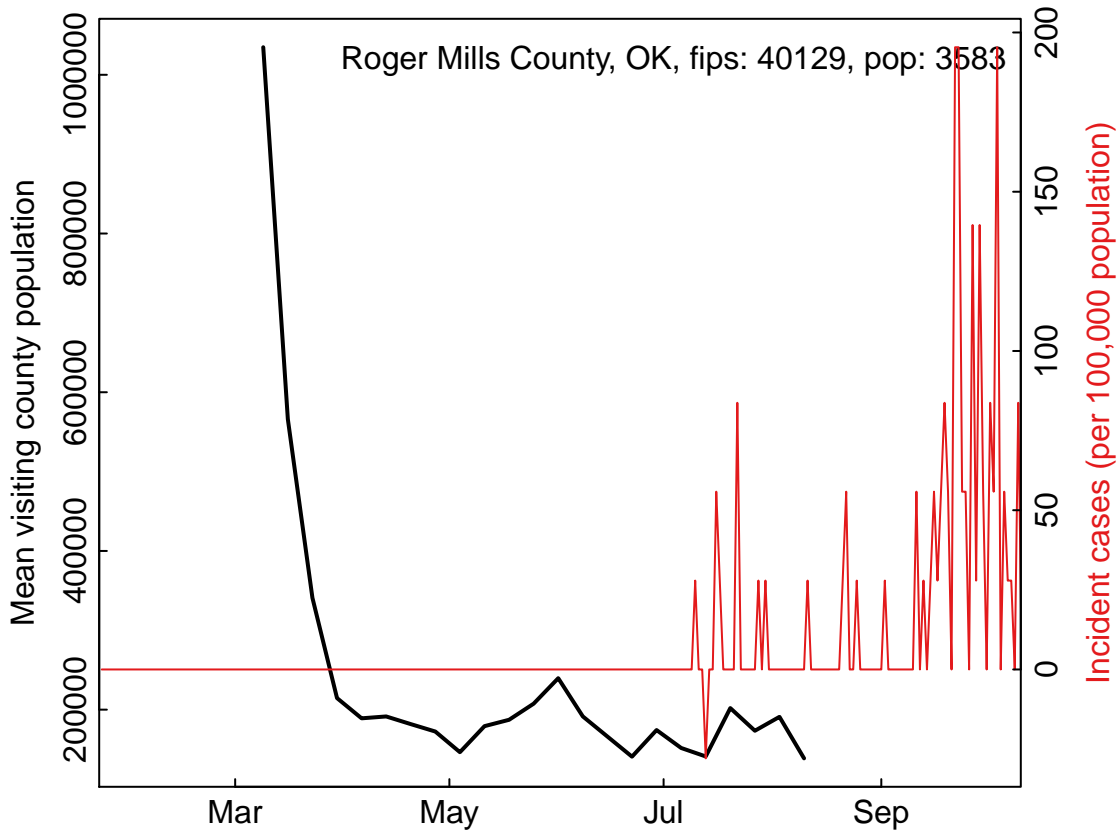

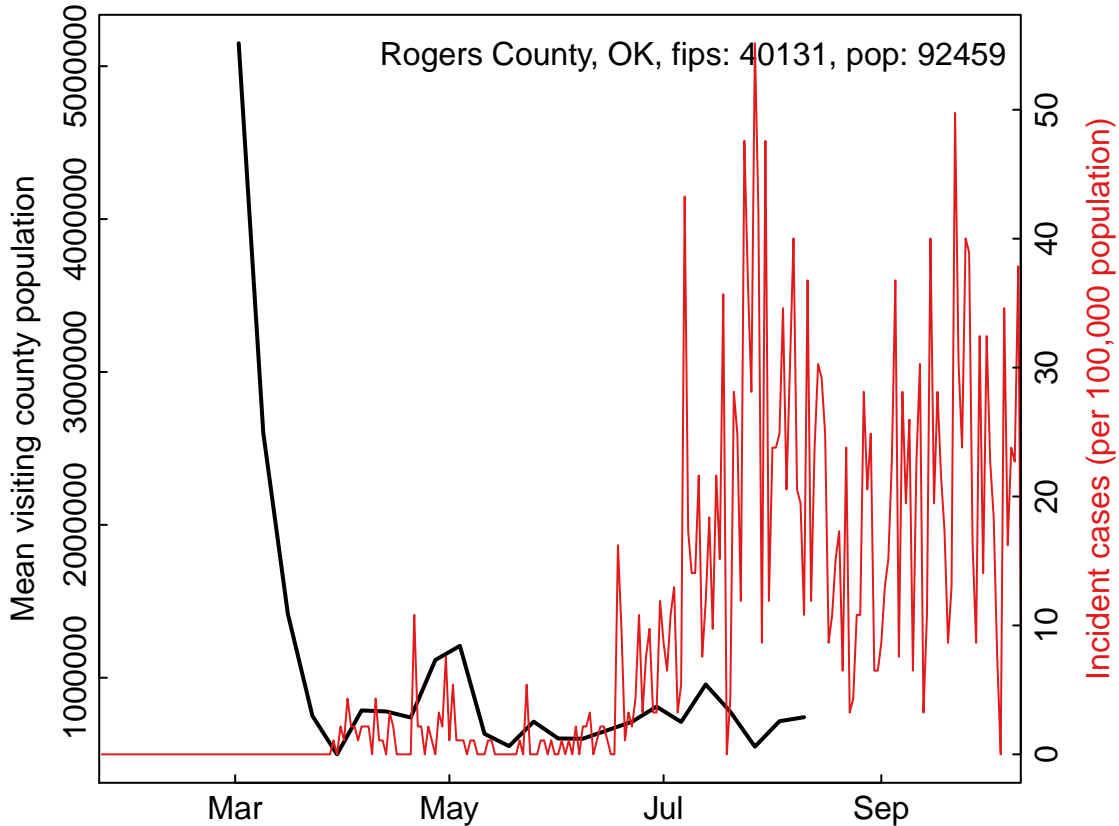

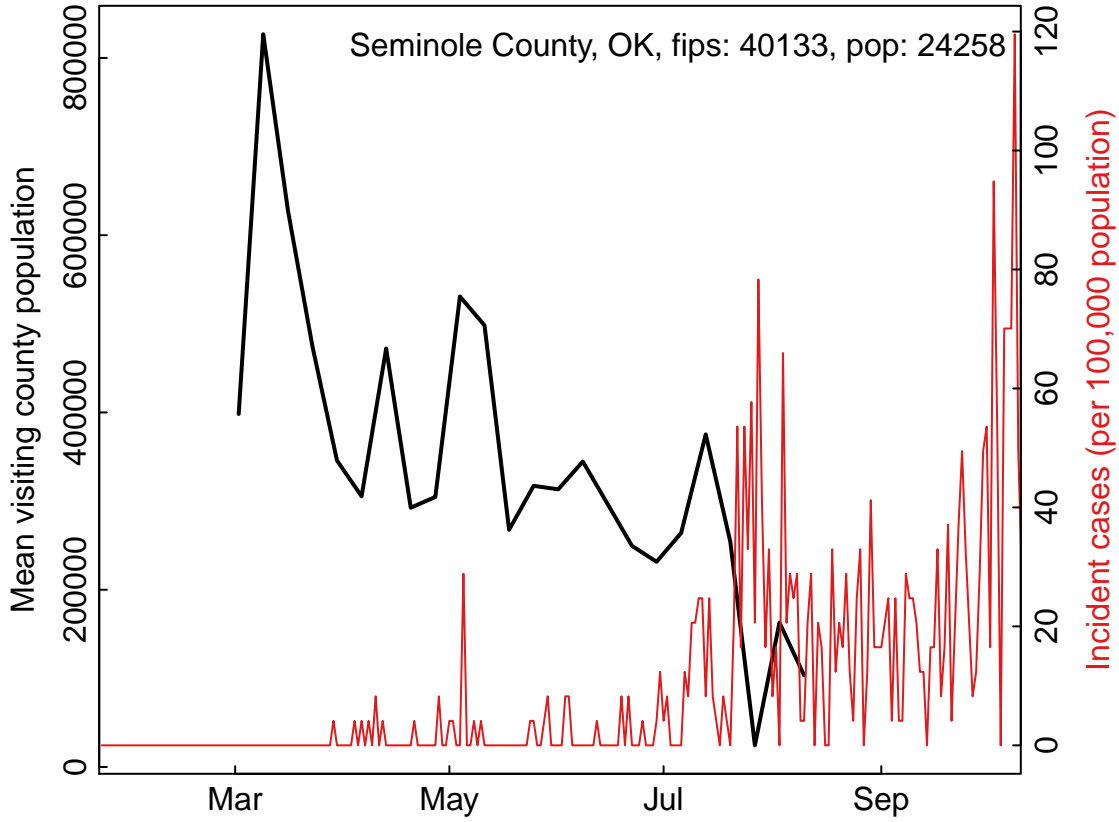

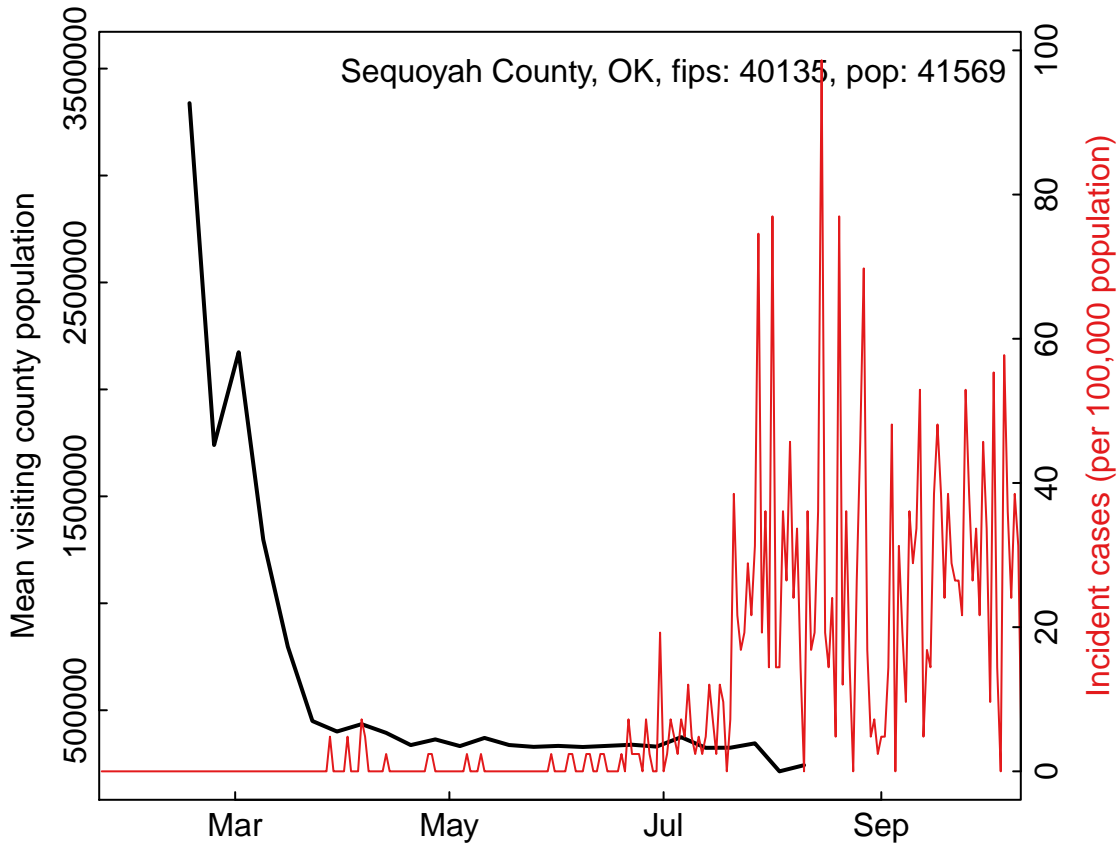

Stephens County, OK, fips: 40137, pop: 43143

Mean visiting county population

400000  
600000  
800000  
1000000

Mar

May

Jul

Sep

0  
10  
20  
30  
40

Incident cases (per 100,000 population)

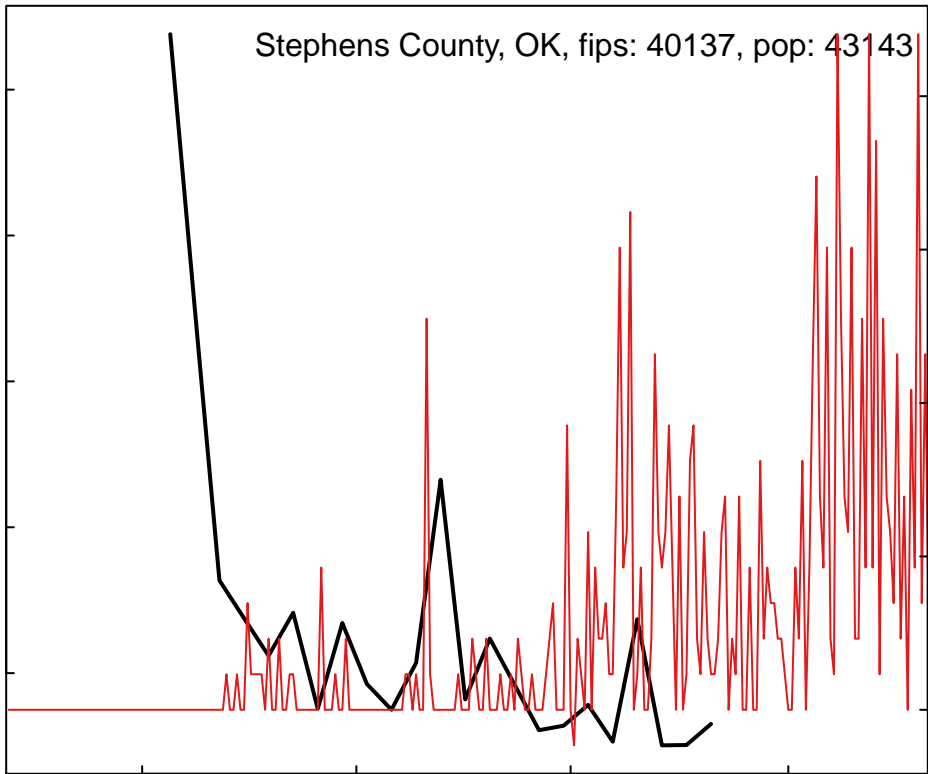



Texas County, OK, fips: 40139, pop: 19983

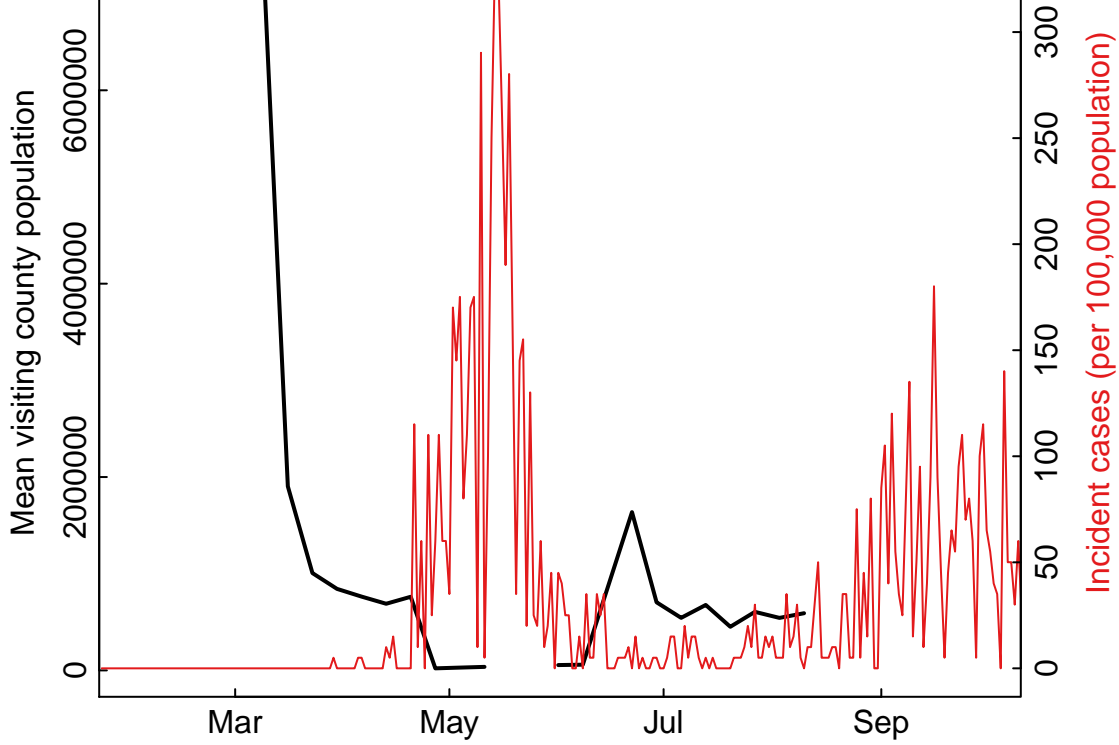

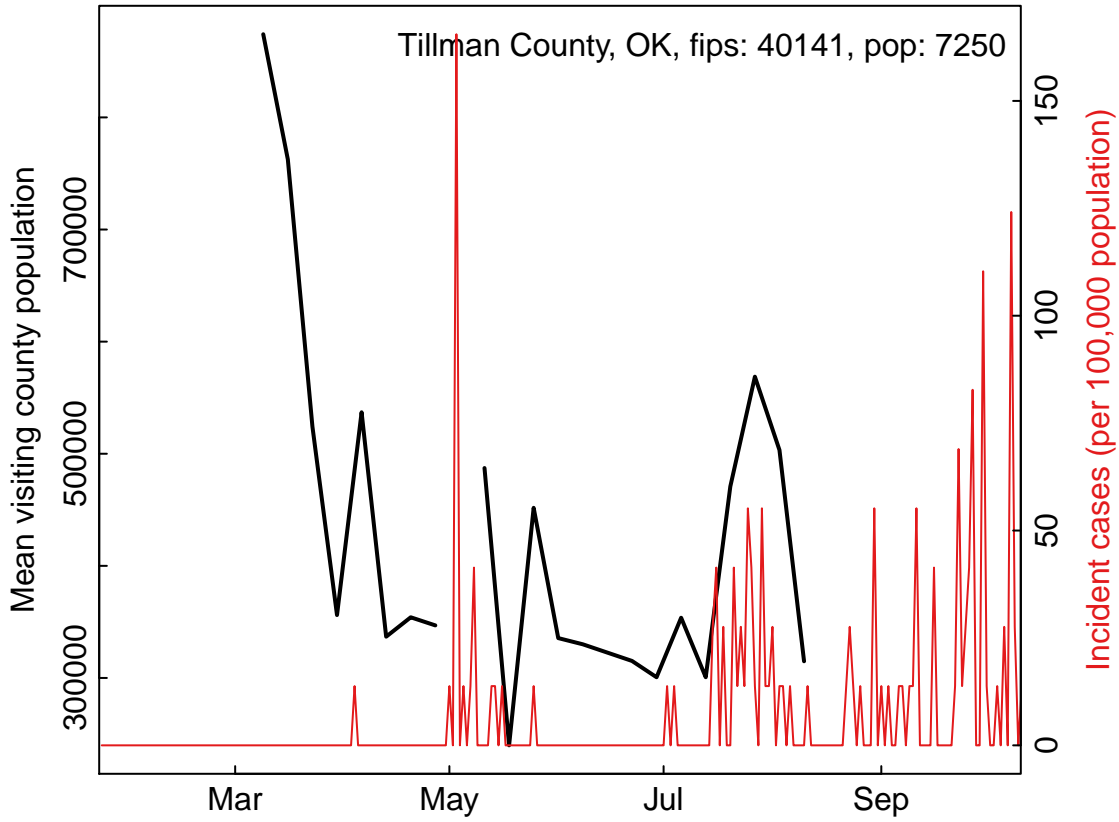

Tulsa County, OK, fips: 40143, pop: 651552

Mean visiting county population

2500000  
1500000  
500000

Mar

May

Jul

Sep

50  
40  
30  
20  
10  
0

Incident cases (per 100,000 population)

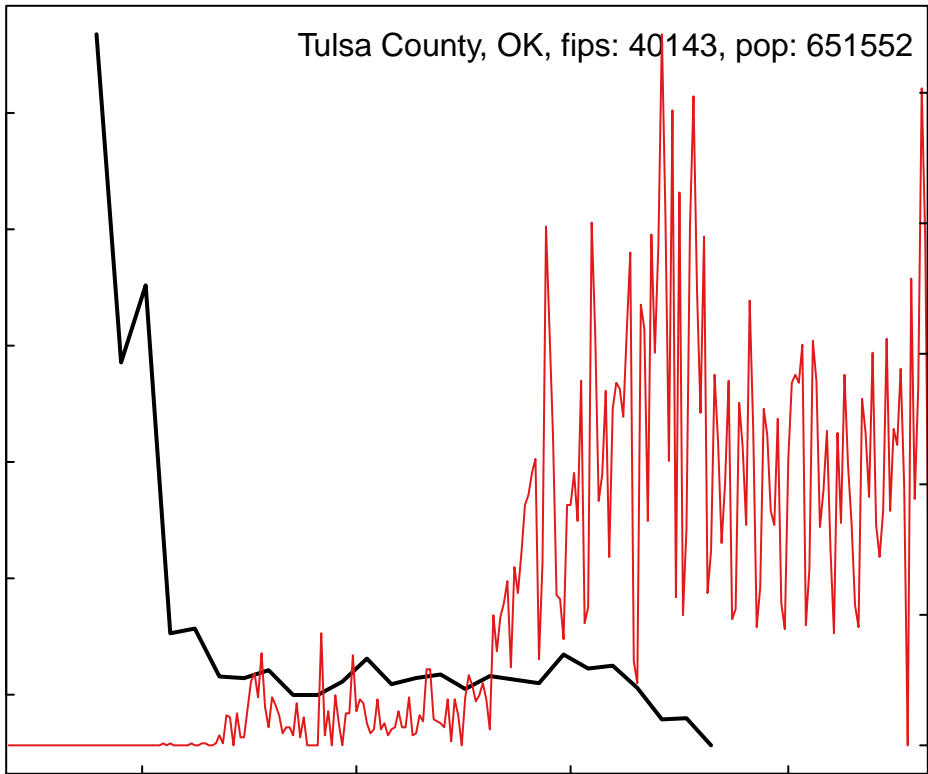

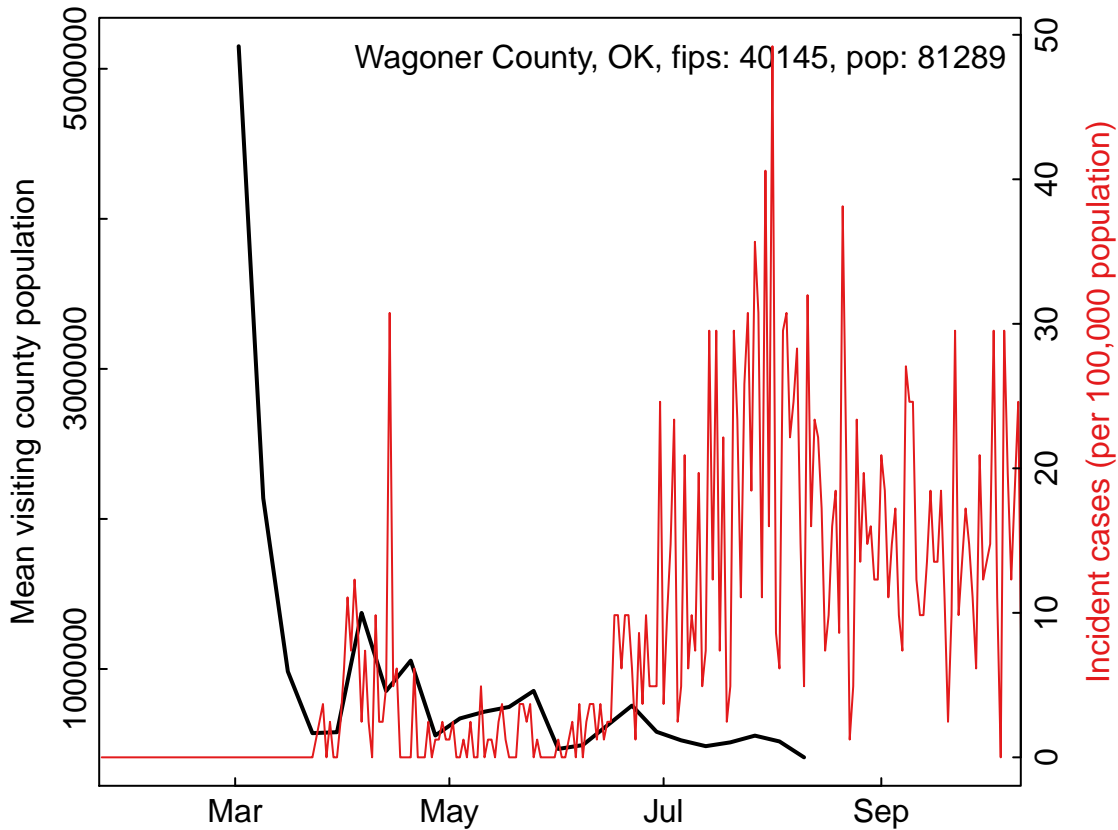

Washington County, OK, fips: 40147, pop: 51527

Mean visiting county population

2500000  
1500000  
500000

Mar

May

Jul

Sep

120  
100  
80  
60  
40  
20  
0

Incident cases (per 100,000 population)

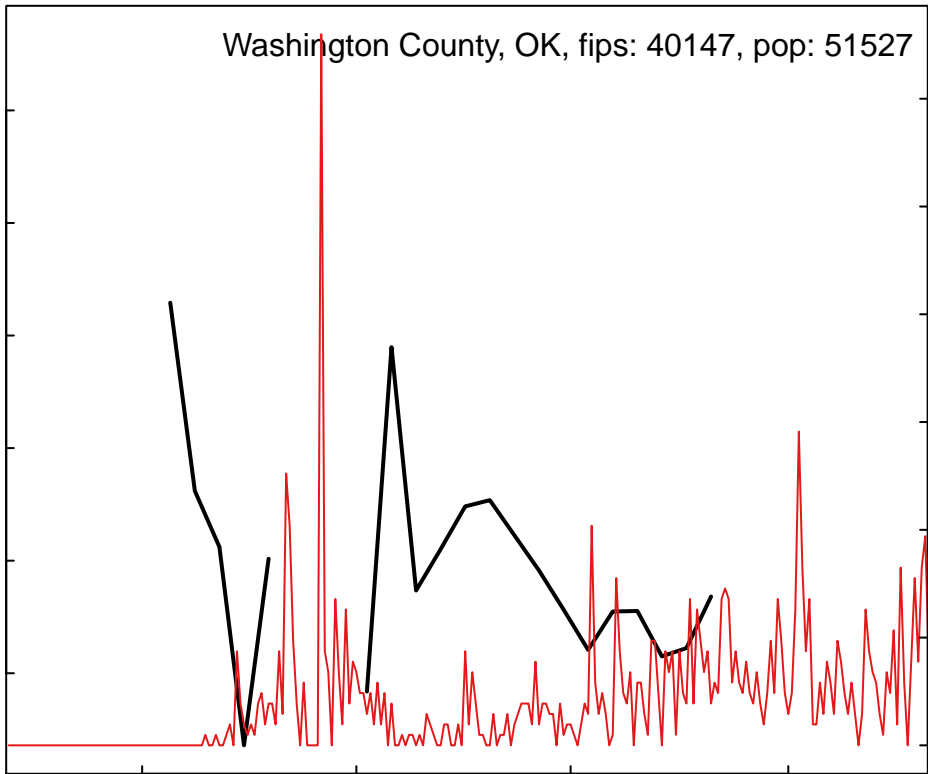

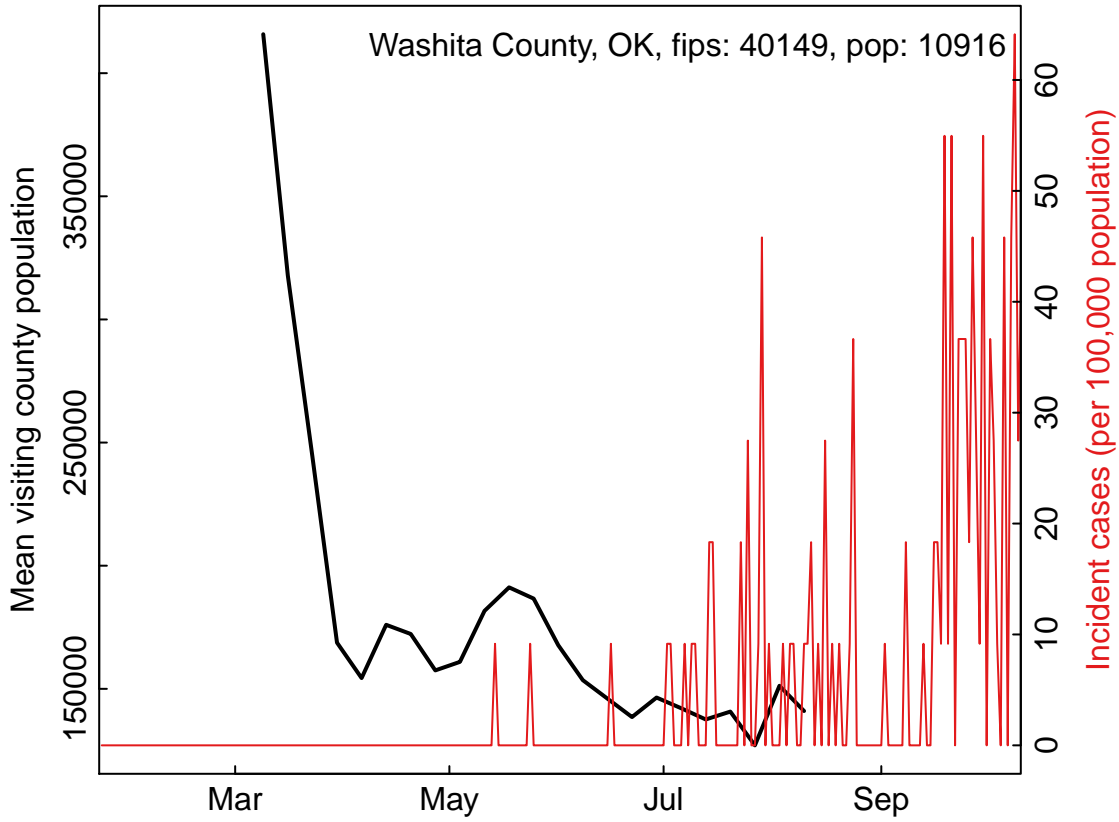

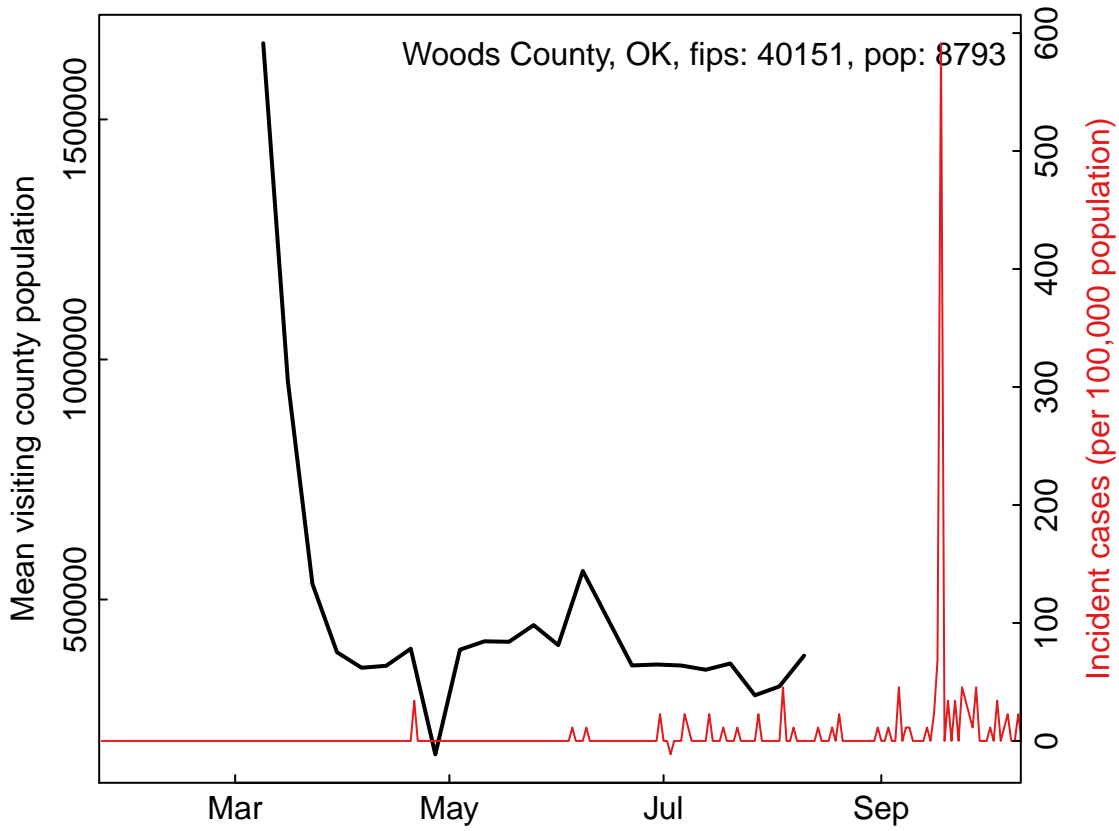

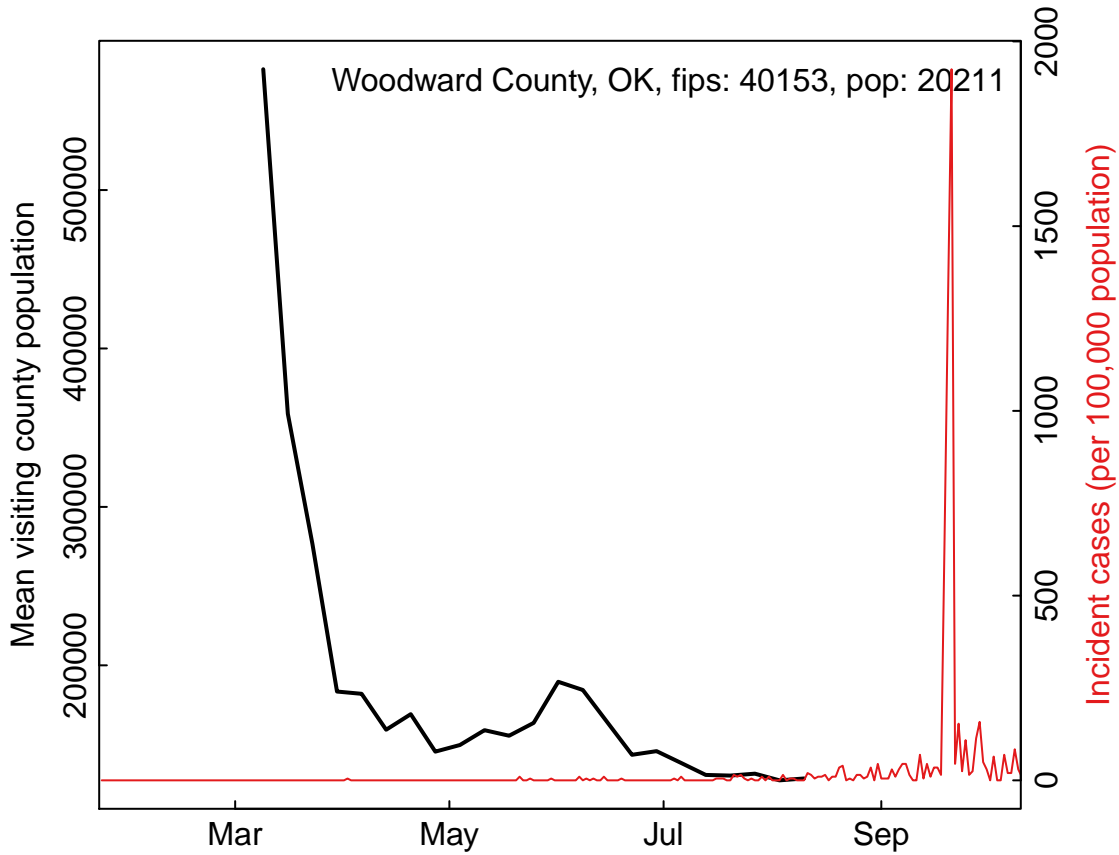



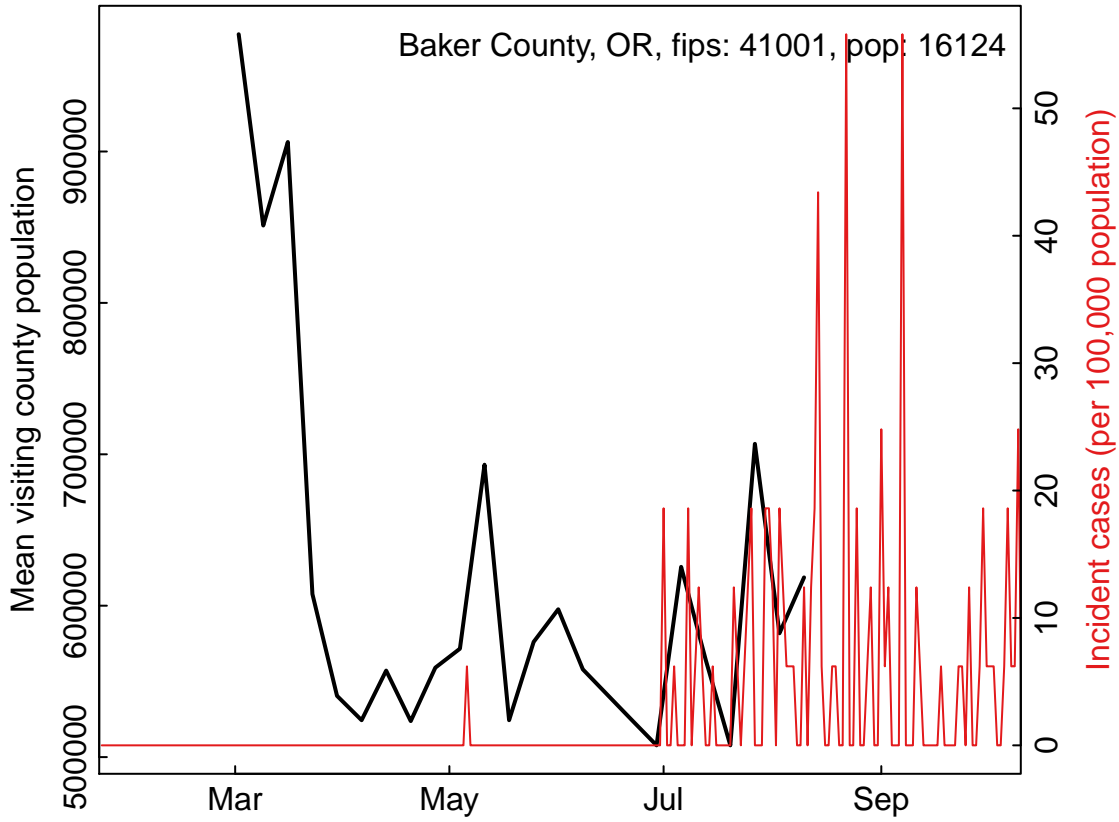

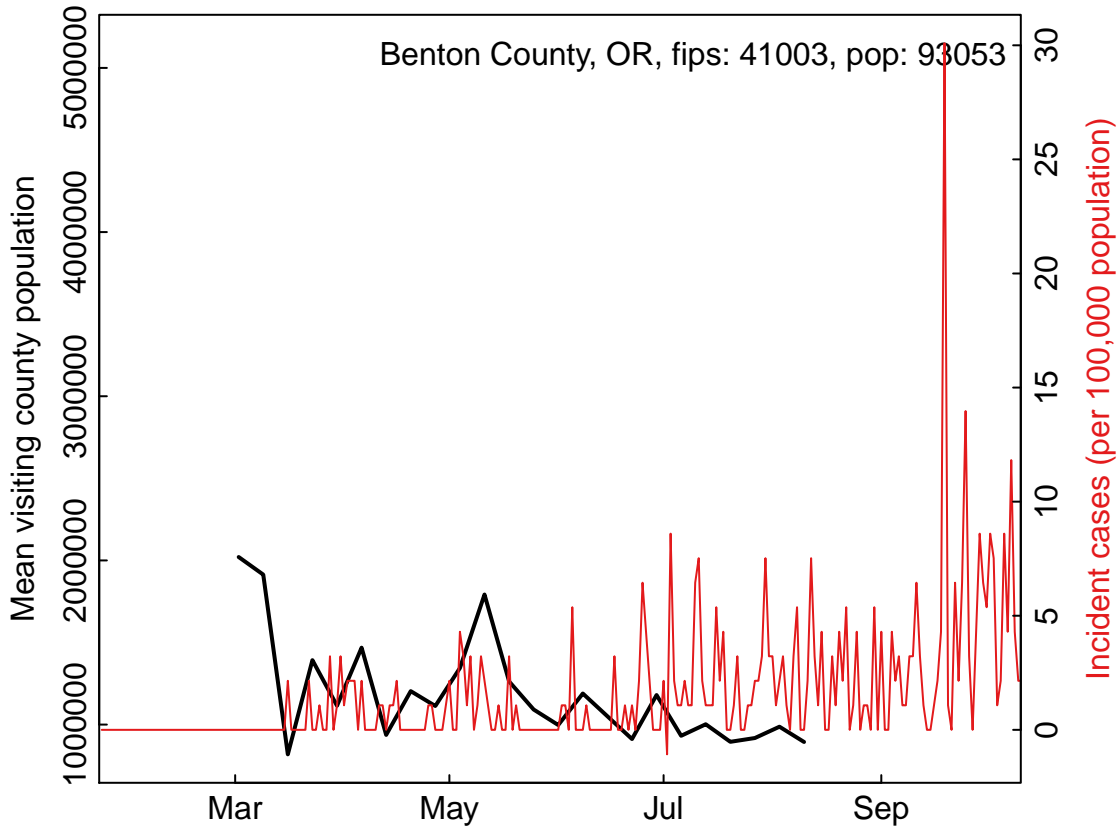

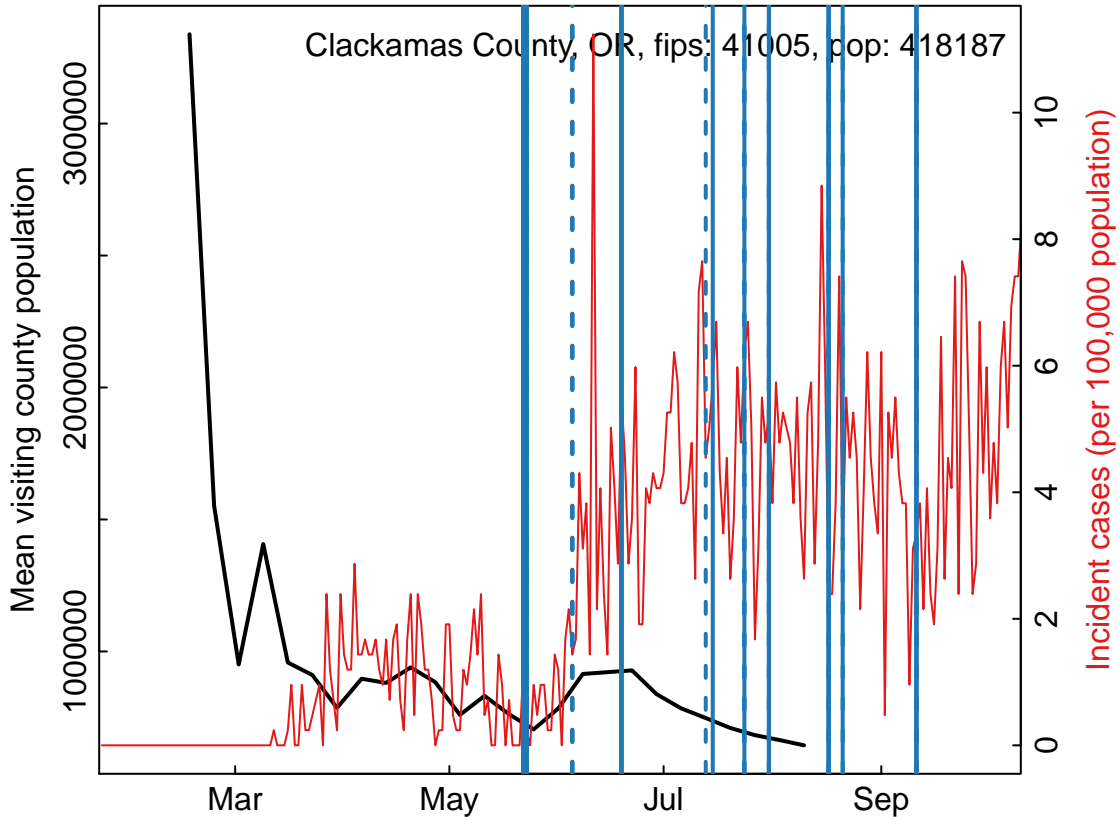

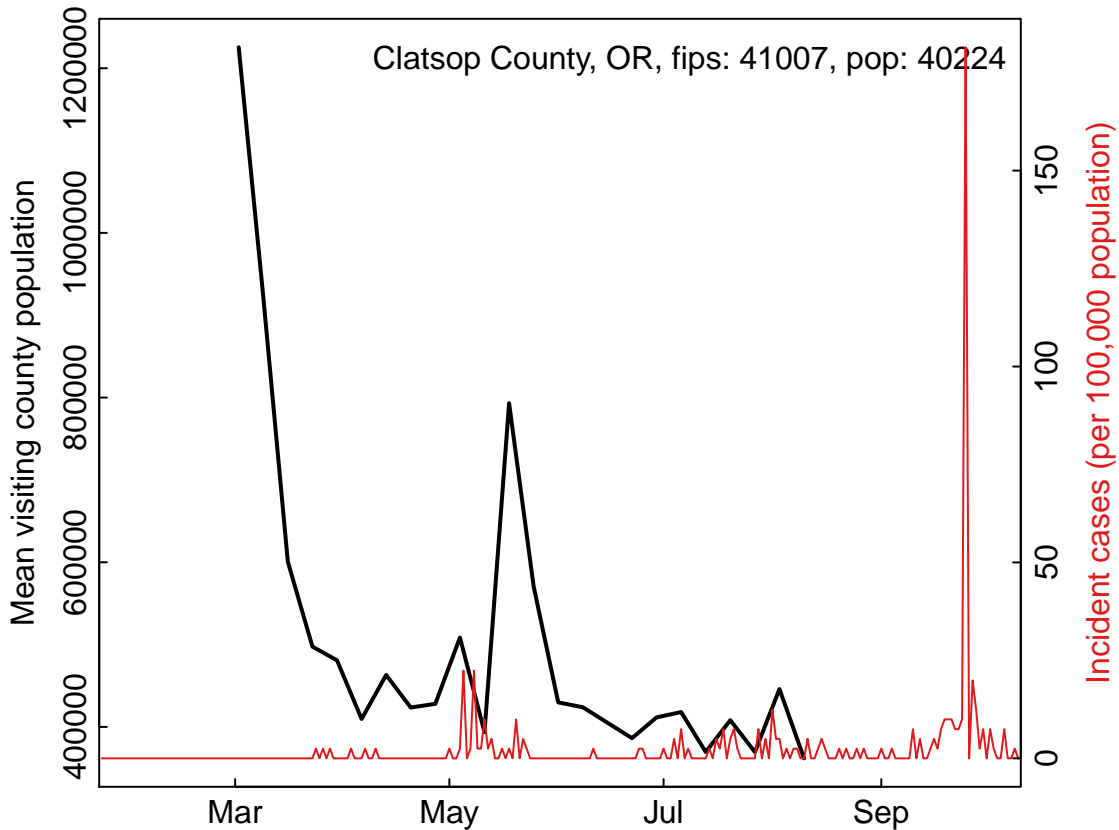

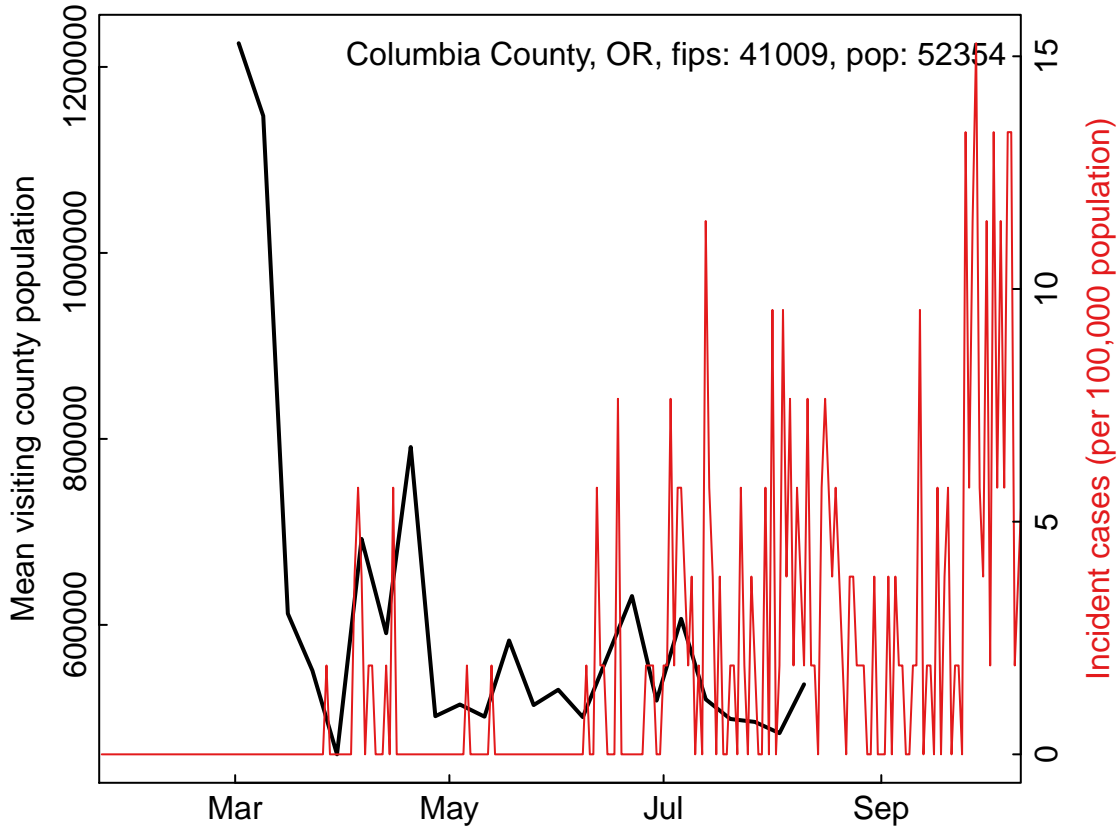

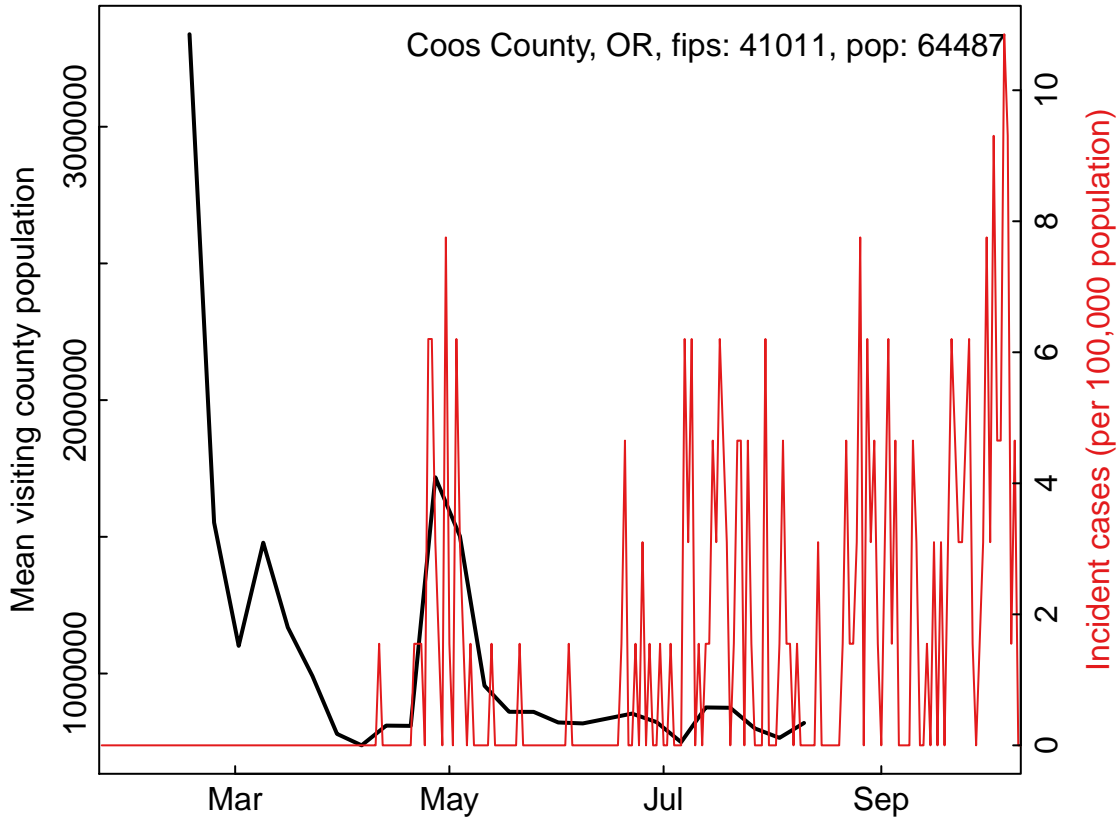

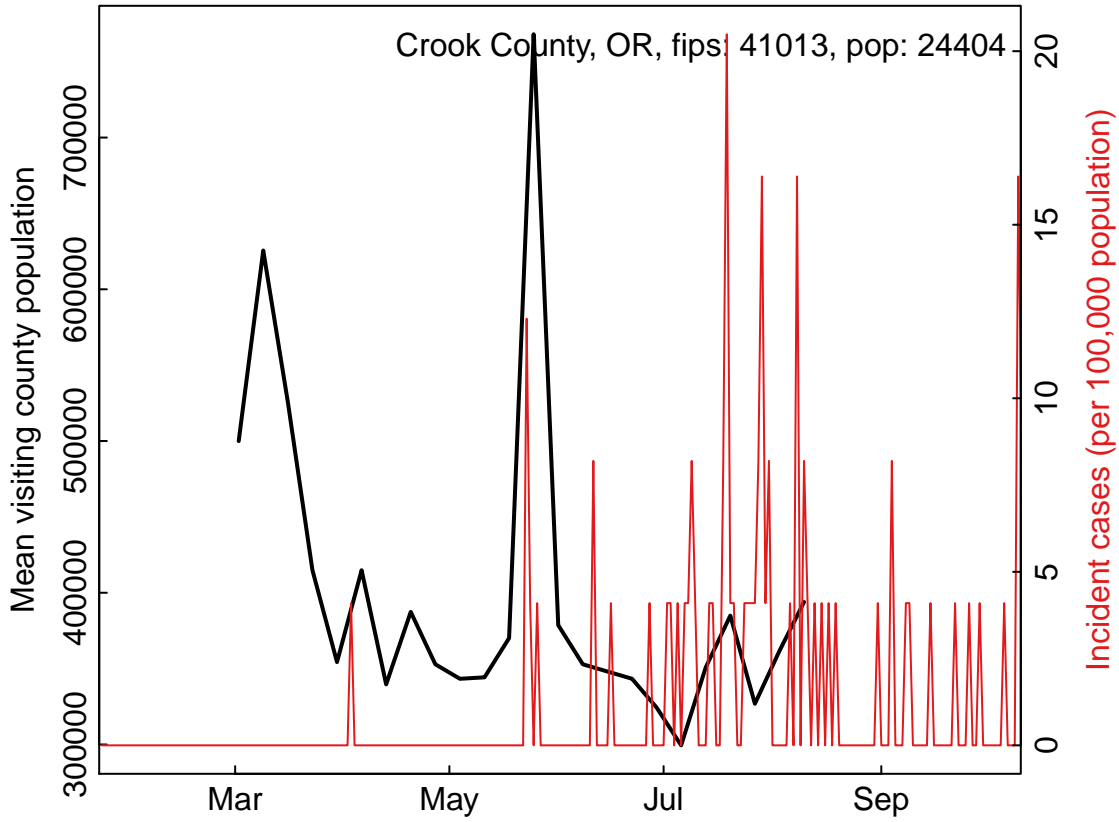

Curry County, OR, fips: 41015, pop: 22925

Mean visiting county population

1800000  
1400000  
1000000  
600000

Mar

May

Jul

Sep

40  
30  
20  
10  
0

Incident cases (per 100,000 population)

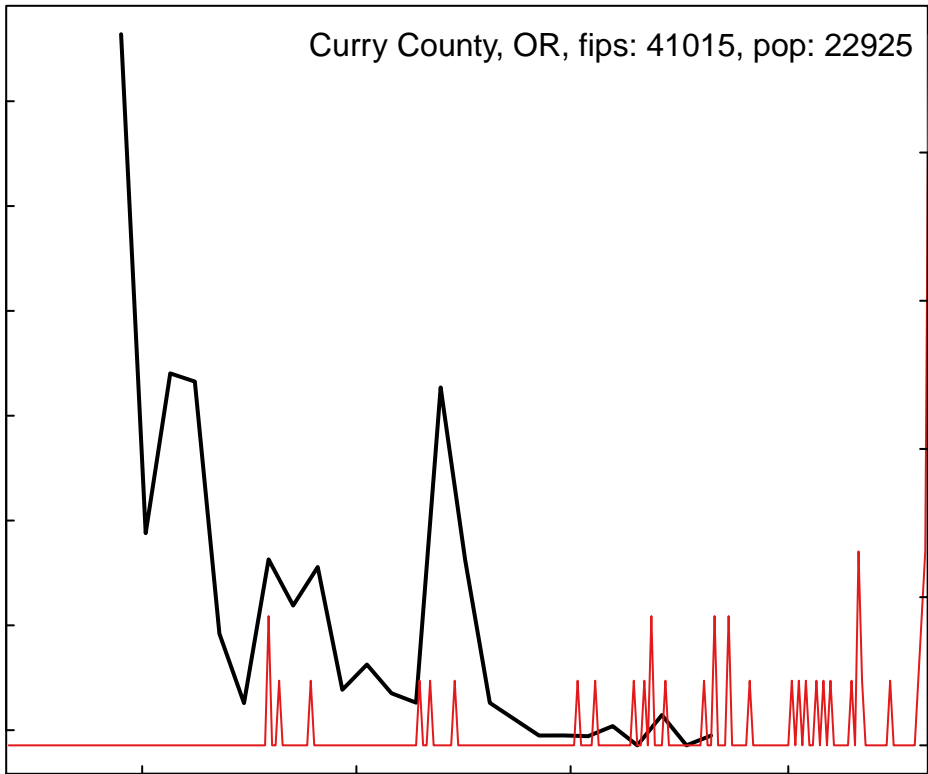



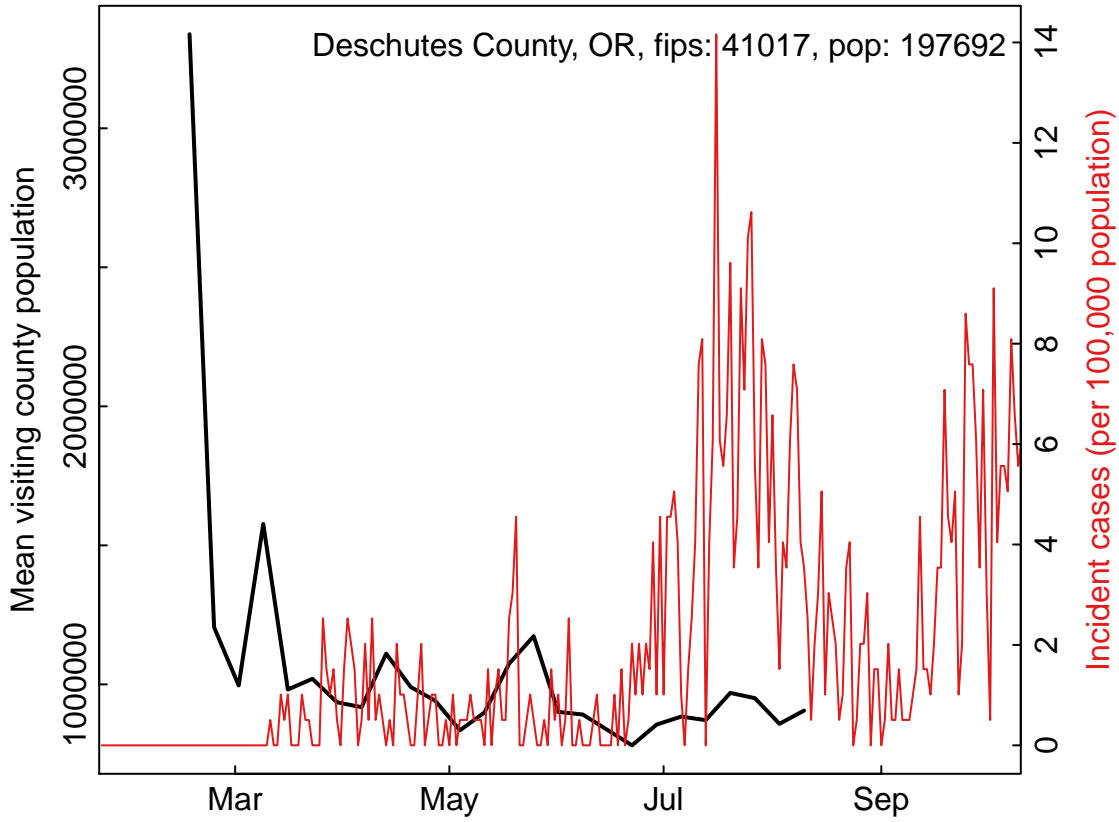

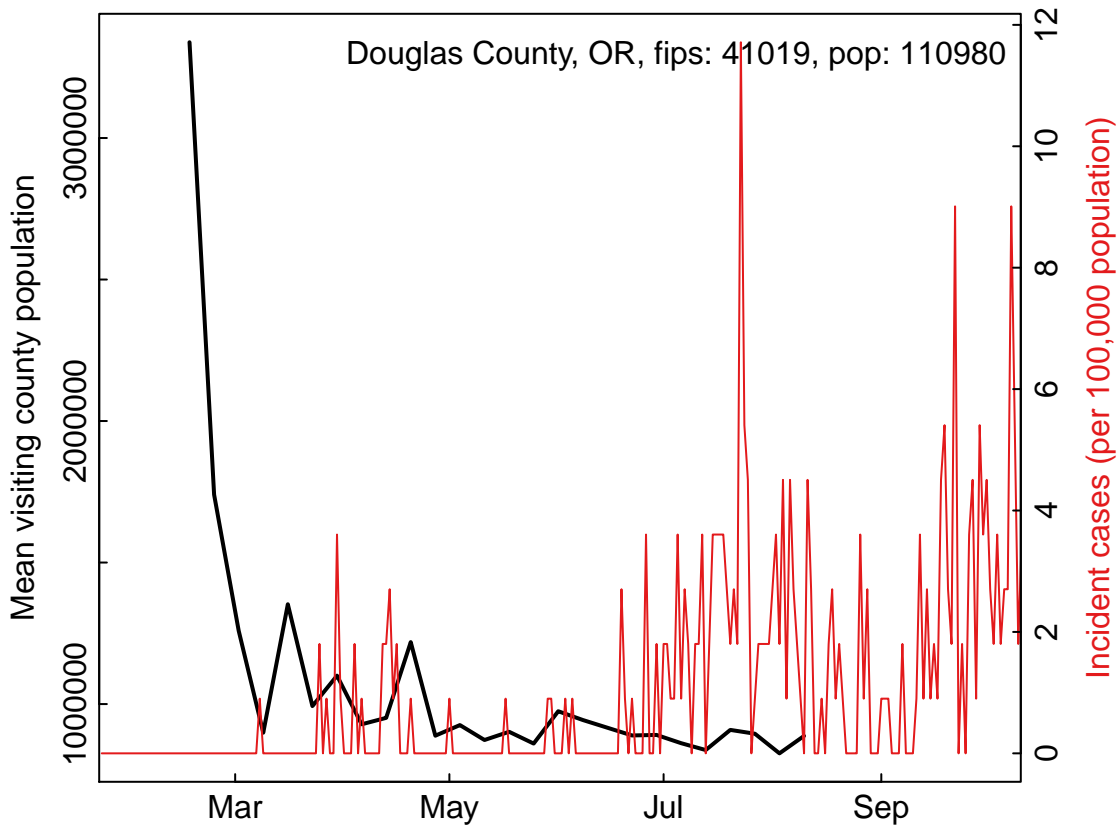

Gilliam County, OR, fips: 41021, pop: 1912

Mean visiting county population

700000  
600000  
500000  
400000

Mar

May

Jul

Sep

100  
80  
60  
40  
20  
0

Incident cases (per 100,000 population)

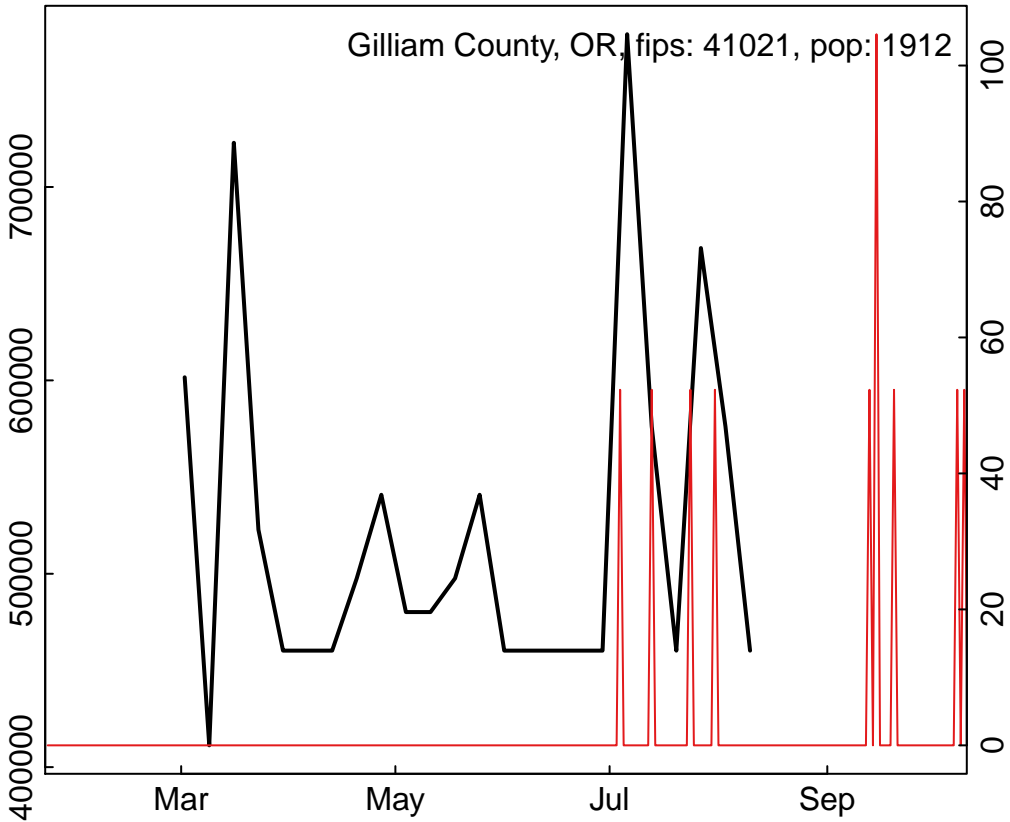

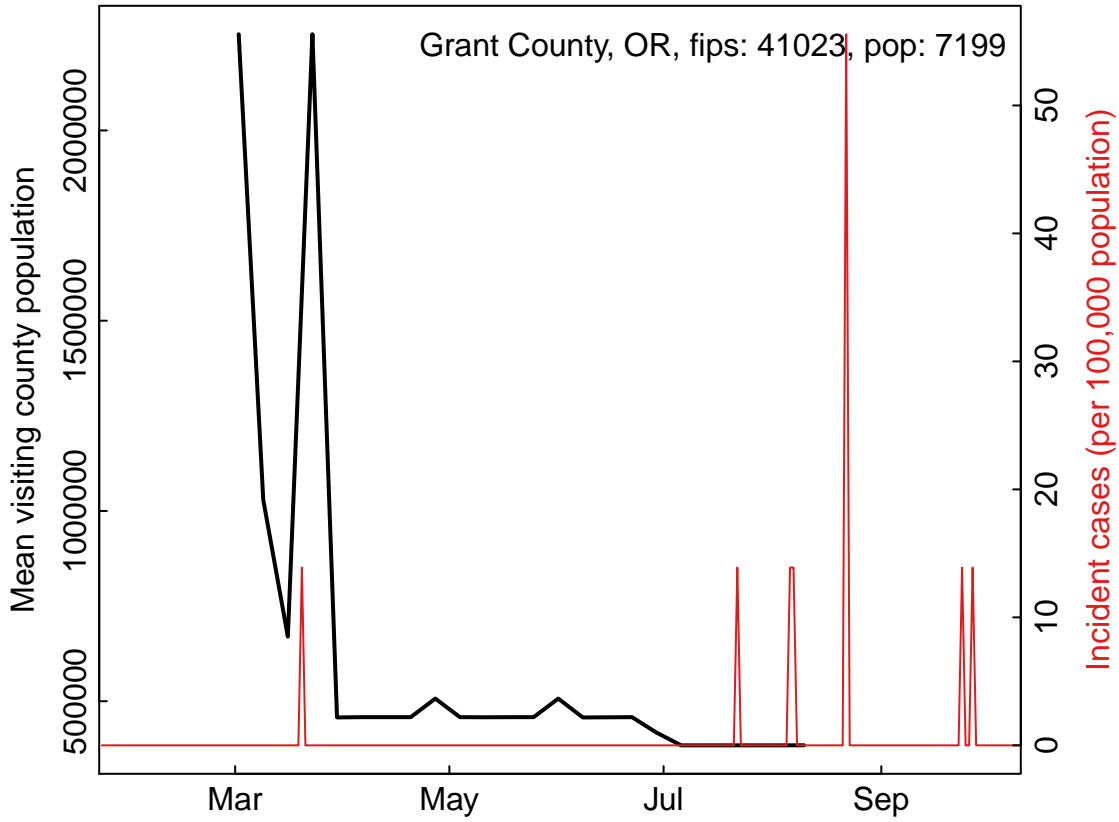

Harney County, OR, fips: 41025, pop: 7393

Mean visiting county population

1400000  
1000000  
600000

Mar

May

Jul

Sep

25  
20  
15  
10  
5  
0

Incident cases (per 100,000 population)

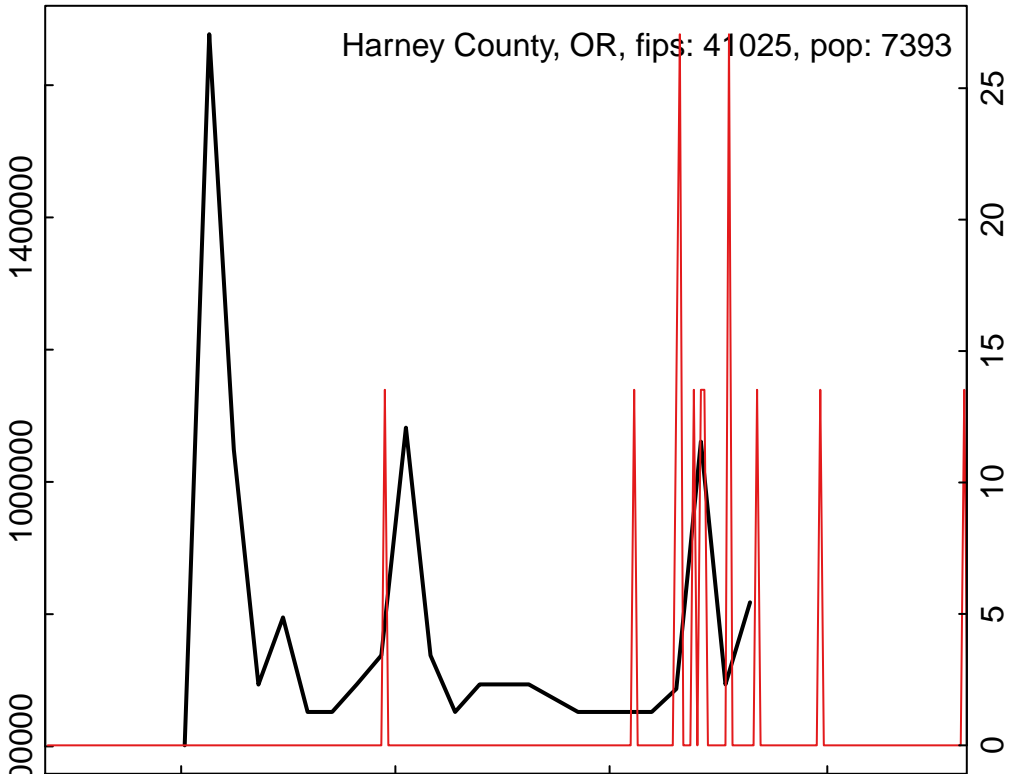

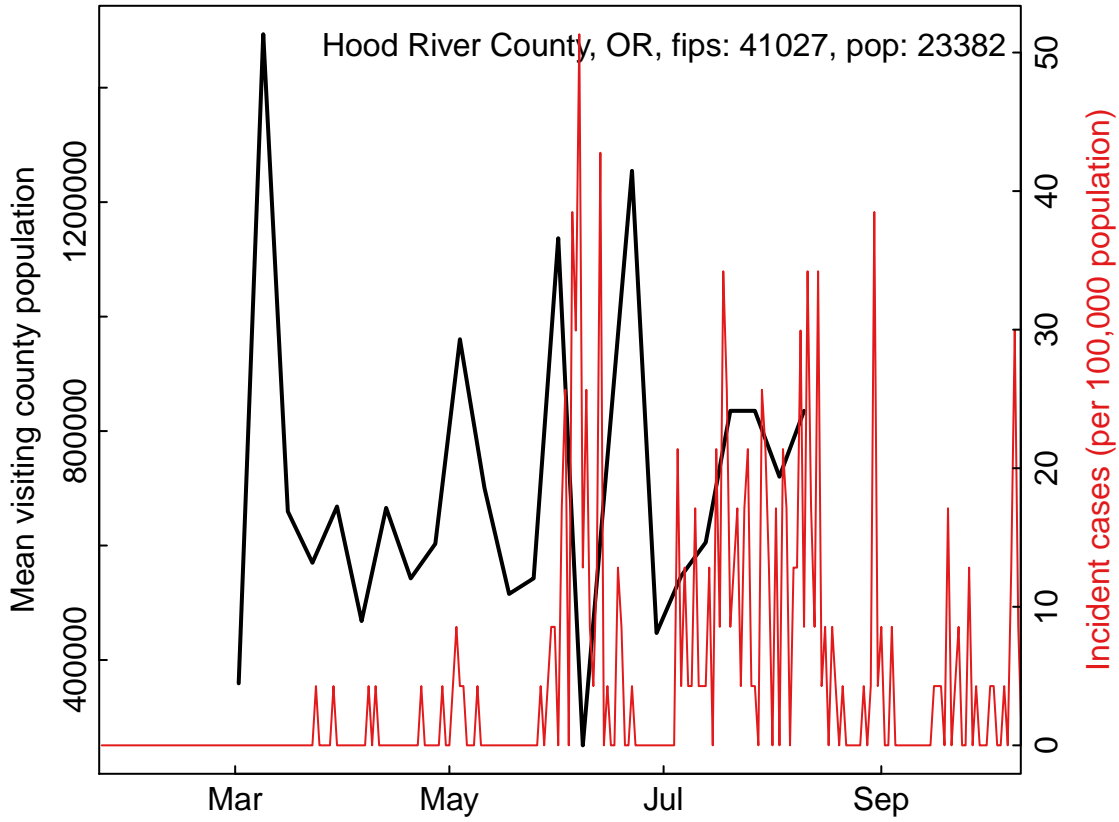

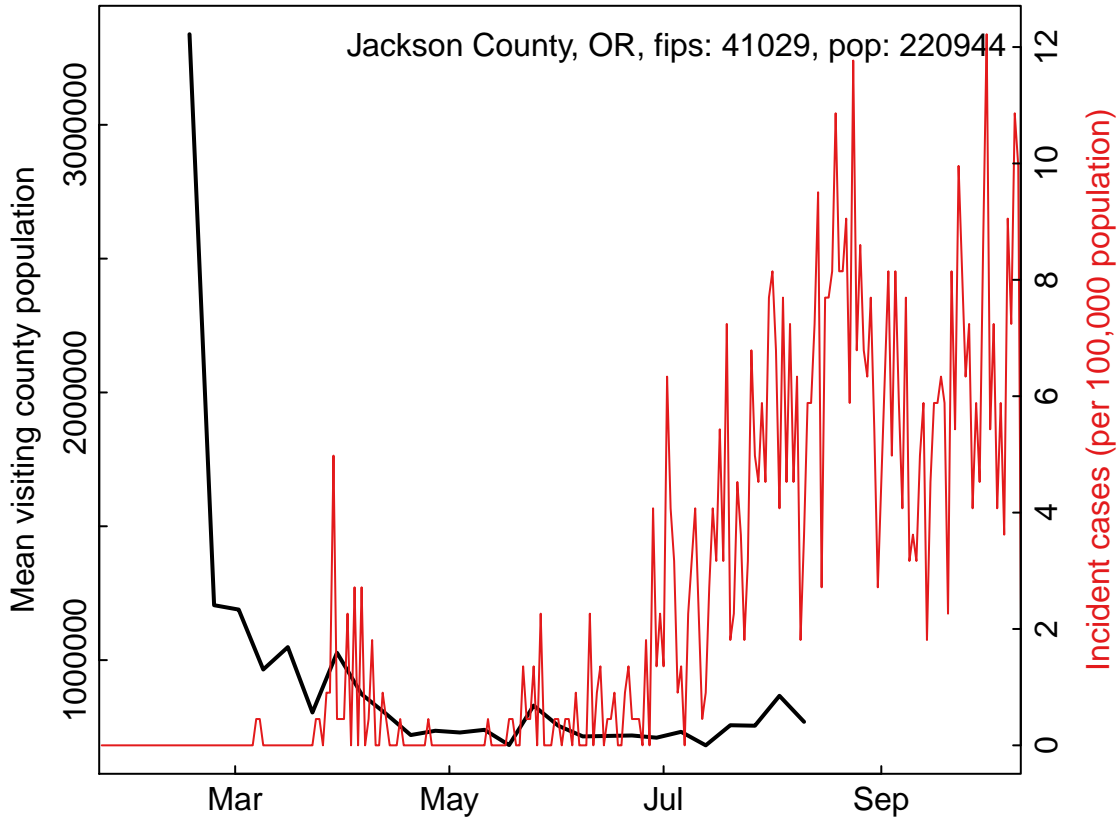

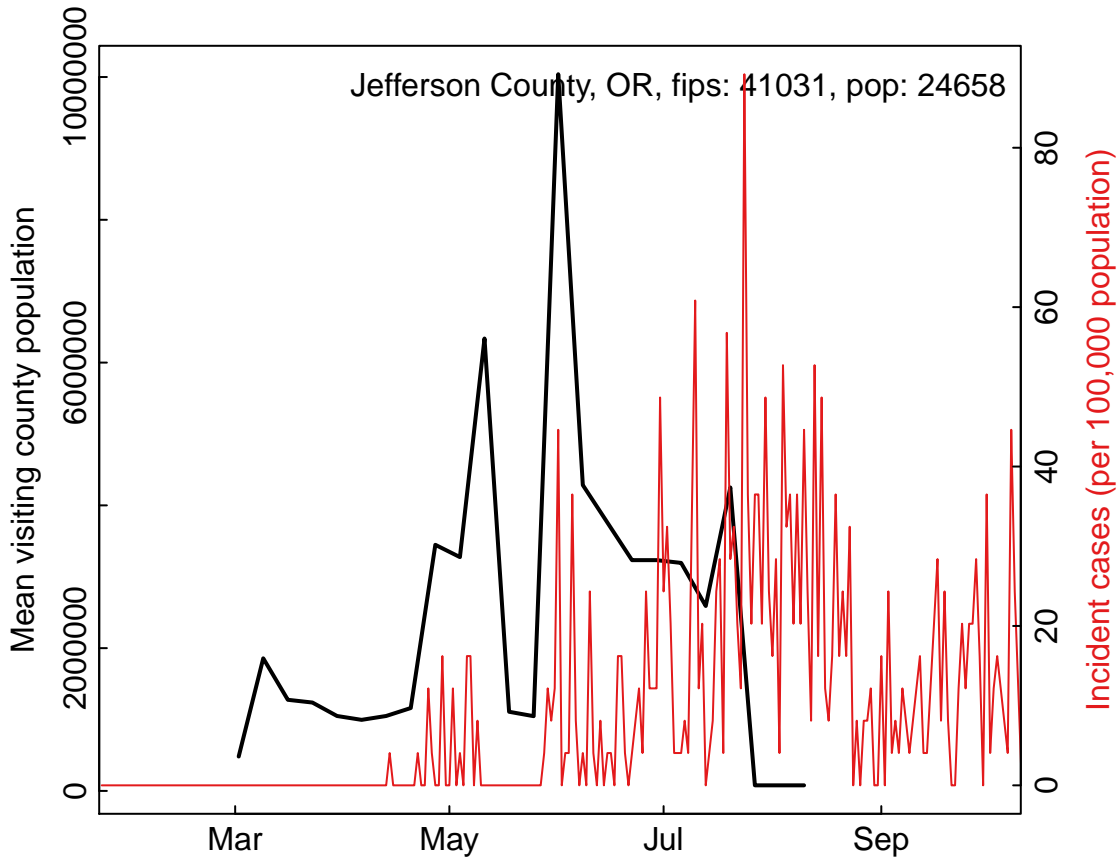



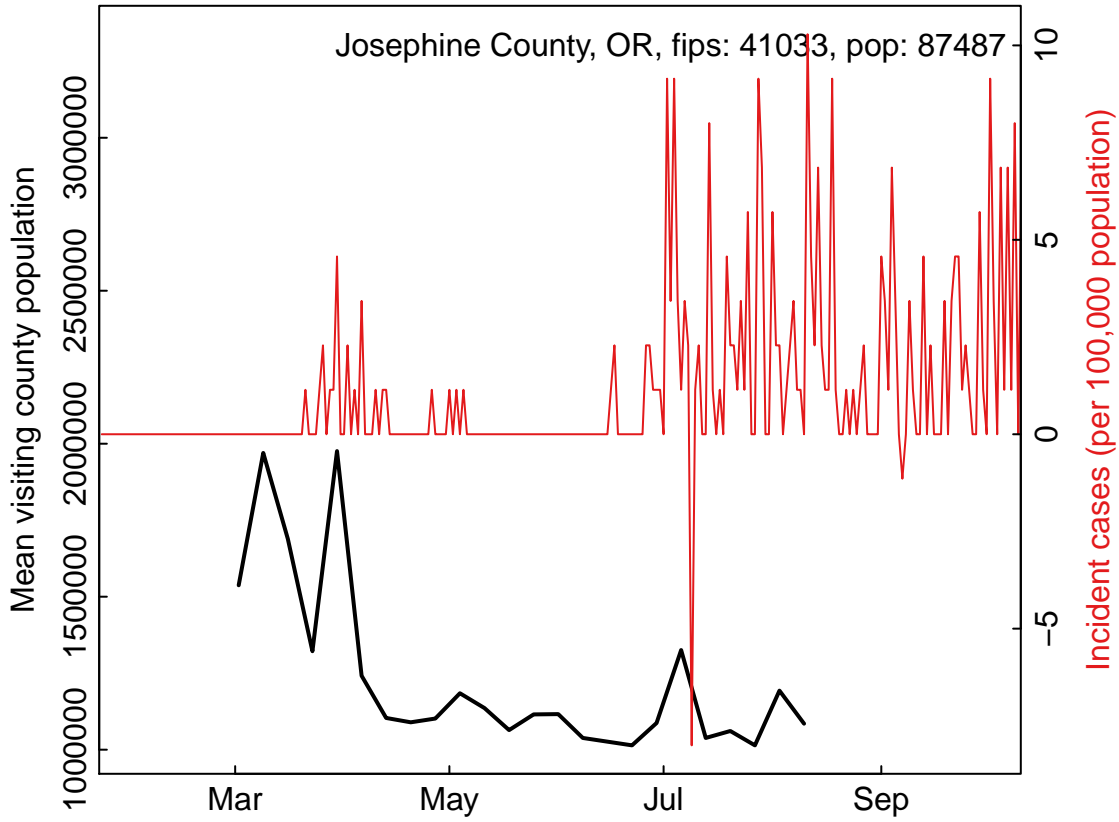

Klamath County, OR, fips: 41035, pop: 68238

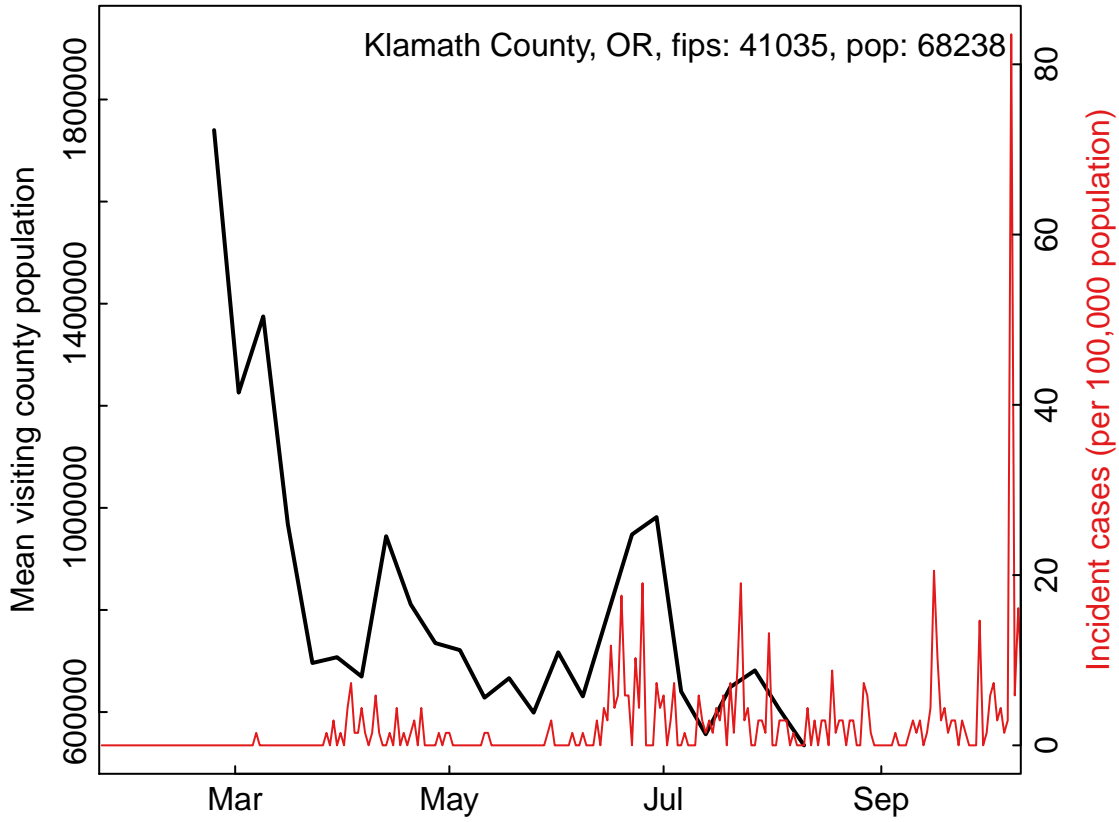

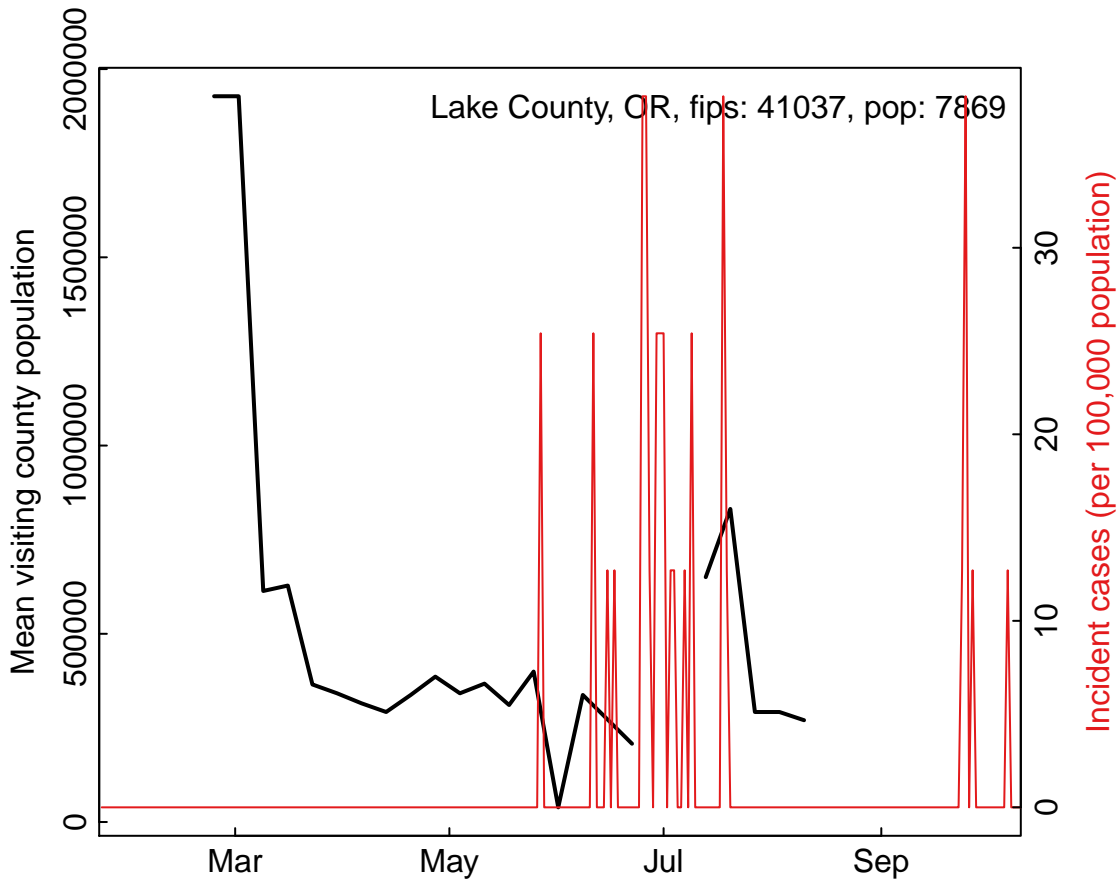



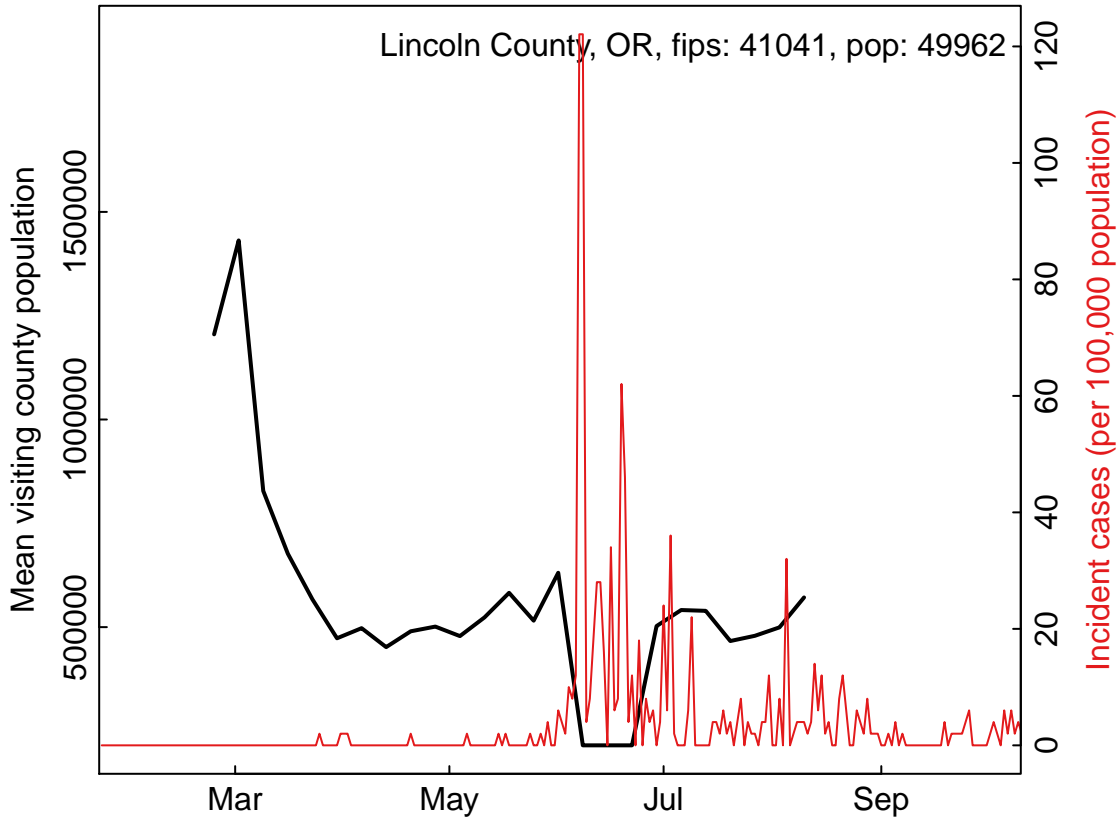

Linn County, OR, fips: 41043, pop: 129749

Mean visiting county population

500000  
1500000  
2500000

Mar

May

Jul

Sep

Incident cases (per 100,000 population)

0  
5  
10  
15  
20

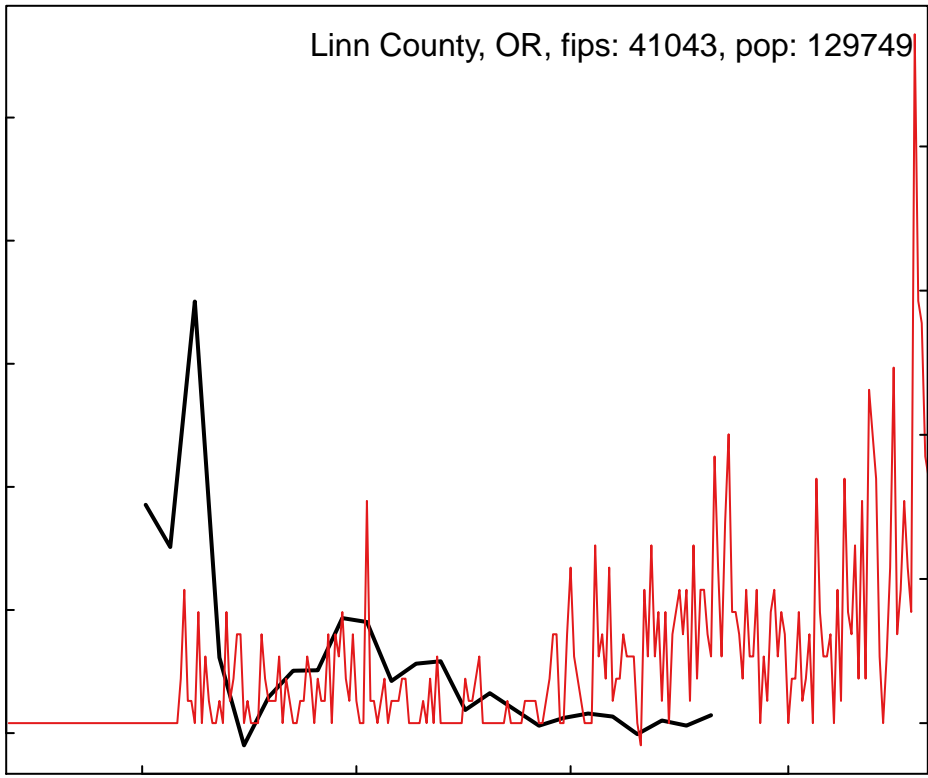

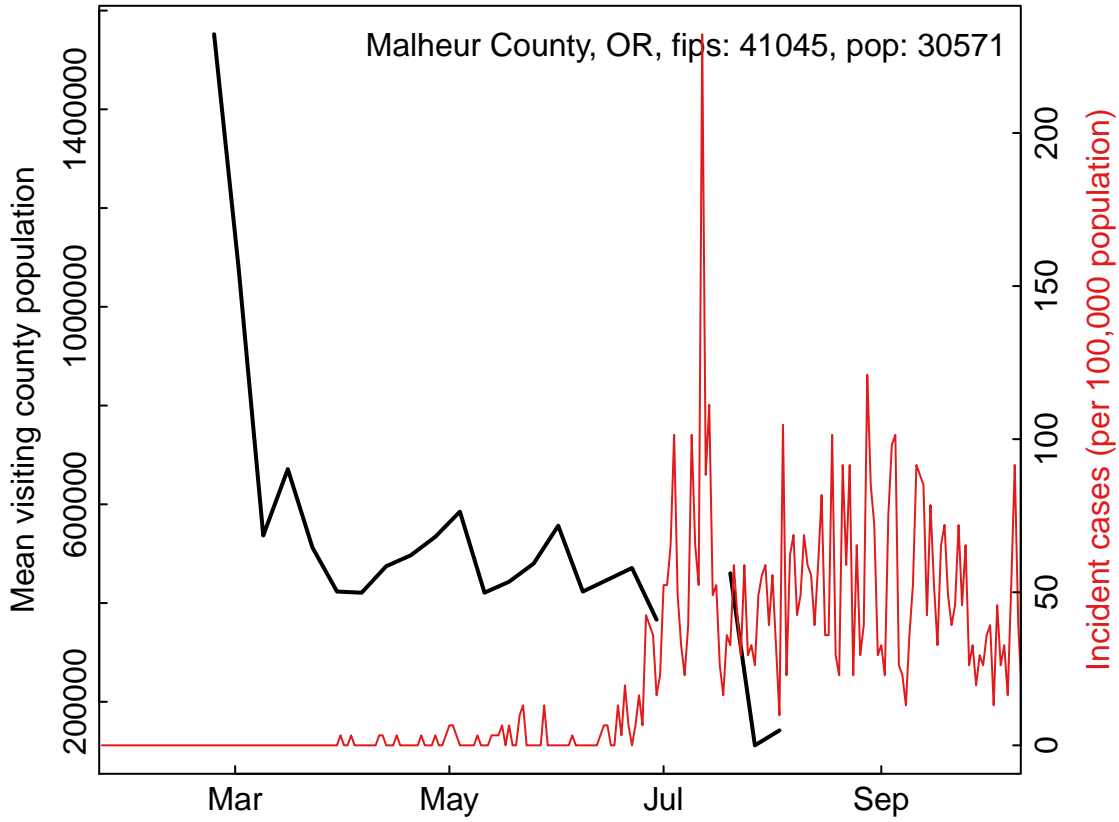

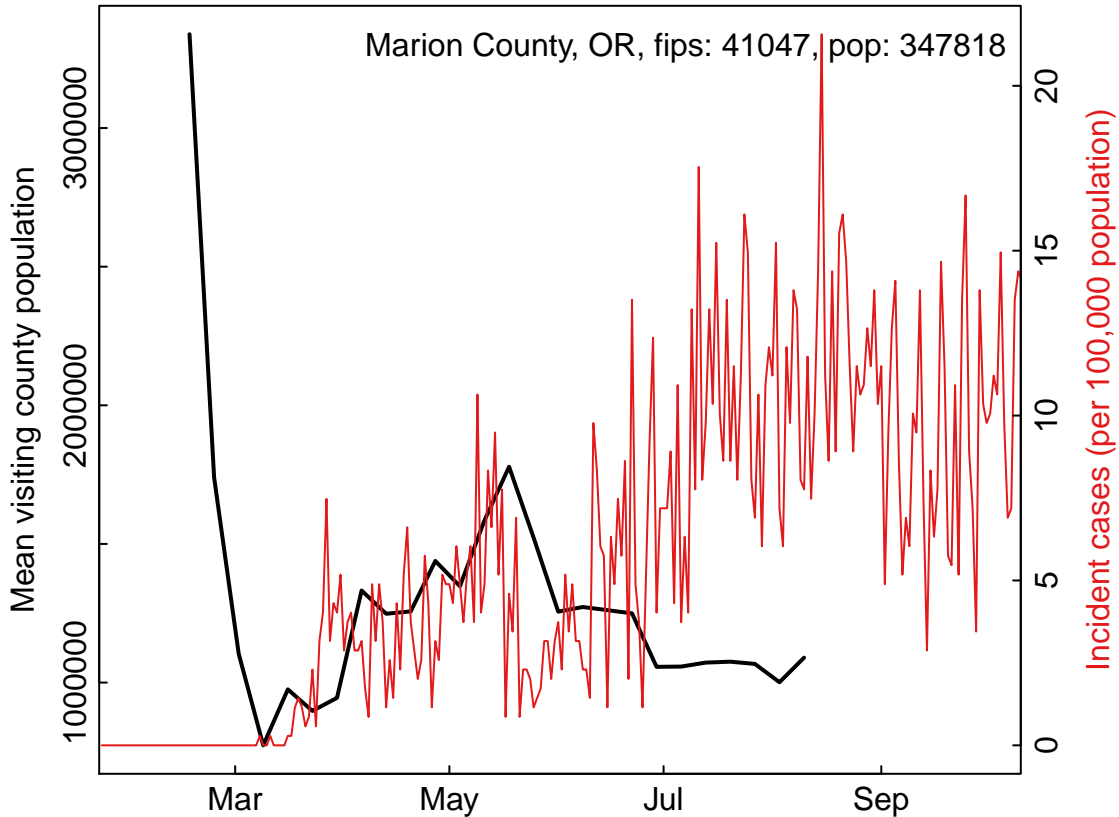



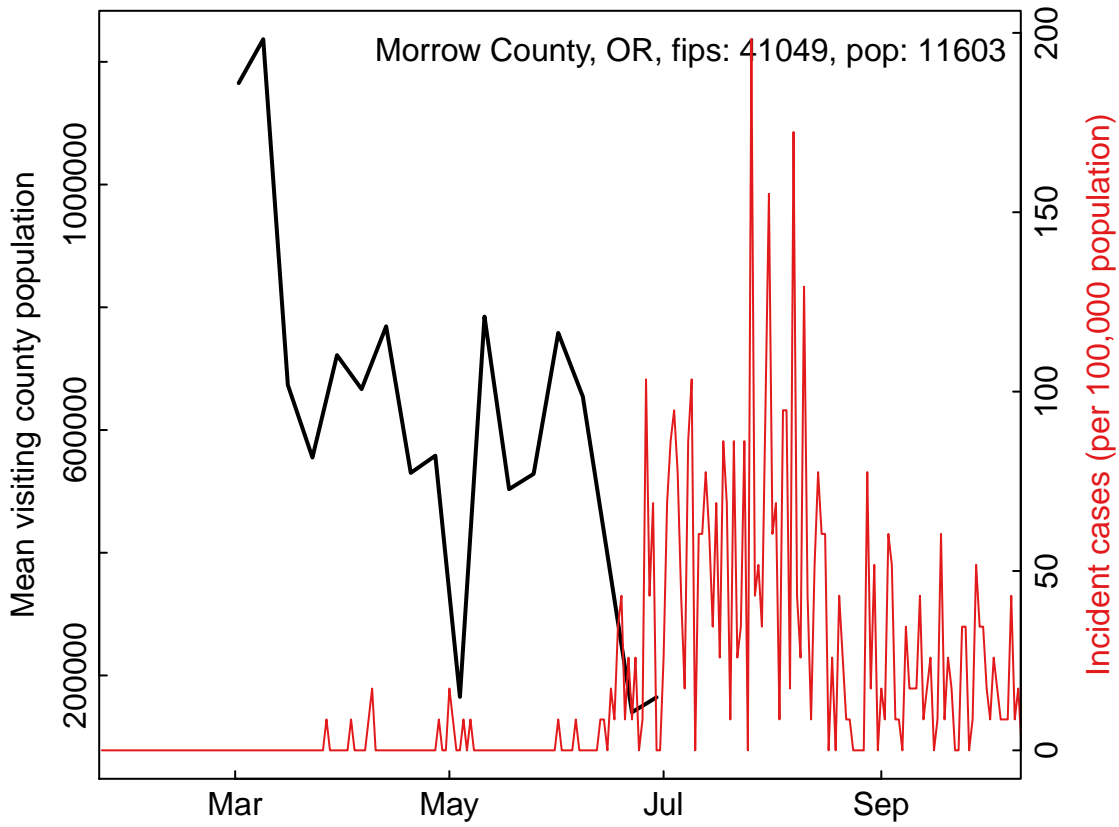

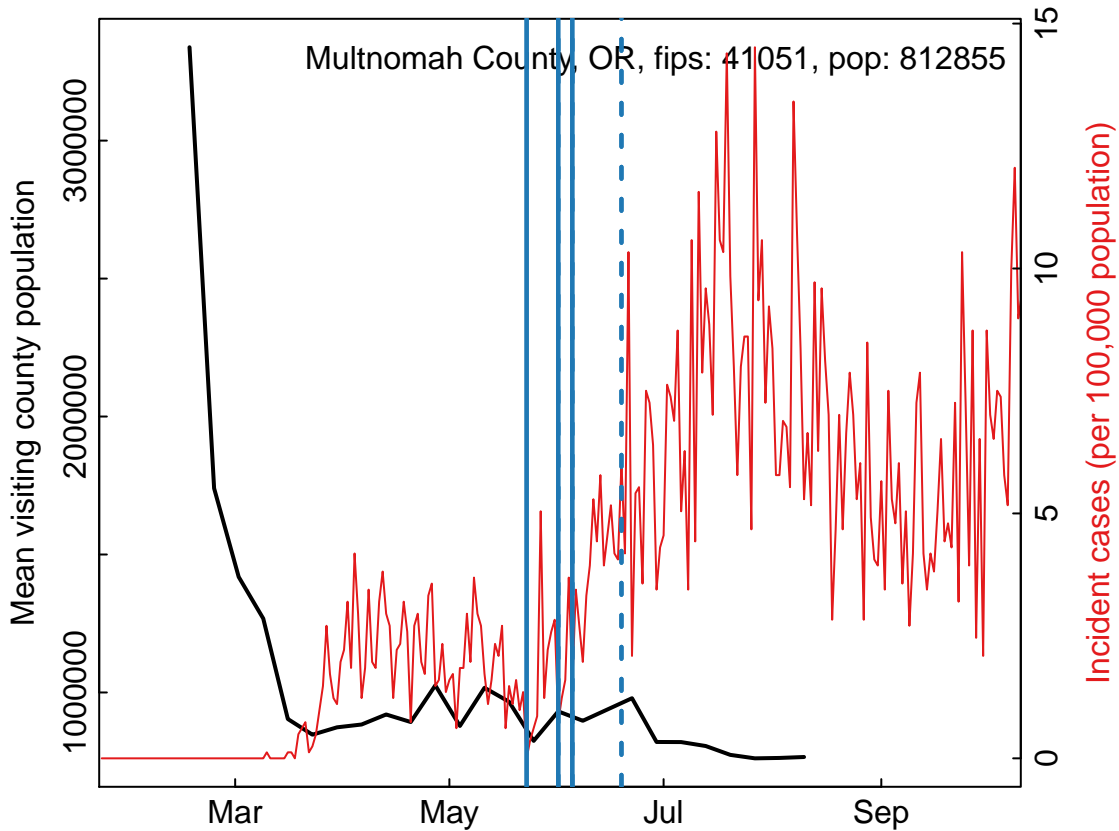

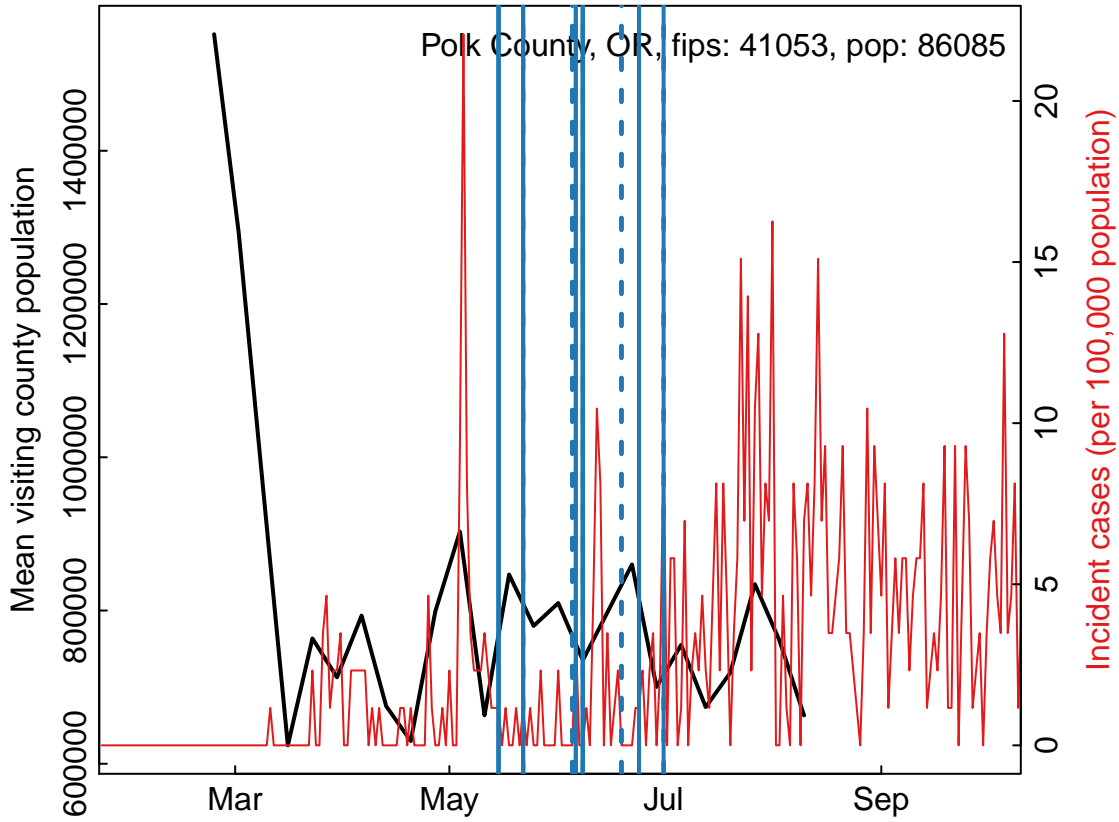

Sherman County, OR, fips: 41055, pop: 1780

Mean visiting county population

70000  
60000  
50000  
40000

Mar

May

Jul

Sep

200  
150  
100  
50  
0

Incident cases (per 100,000 population)

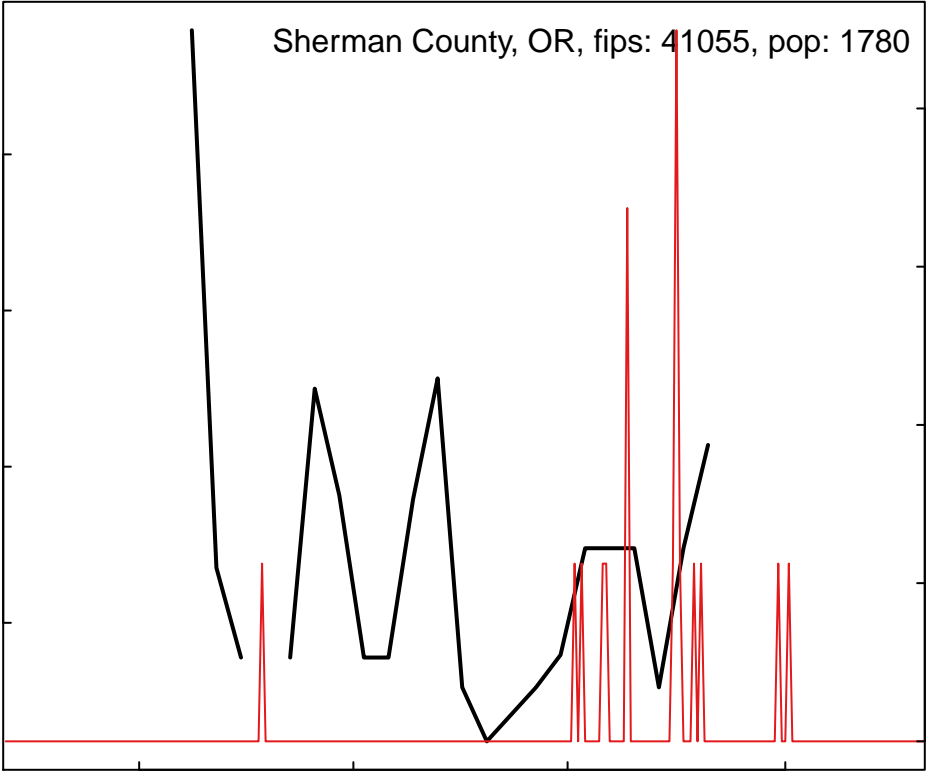

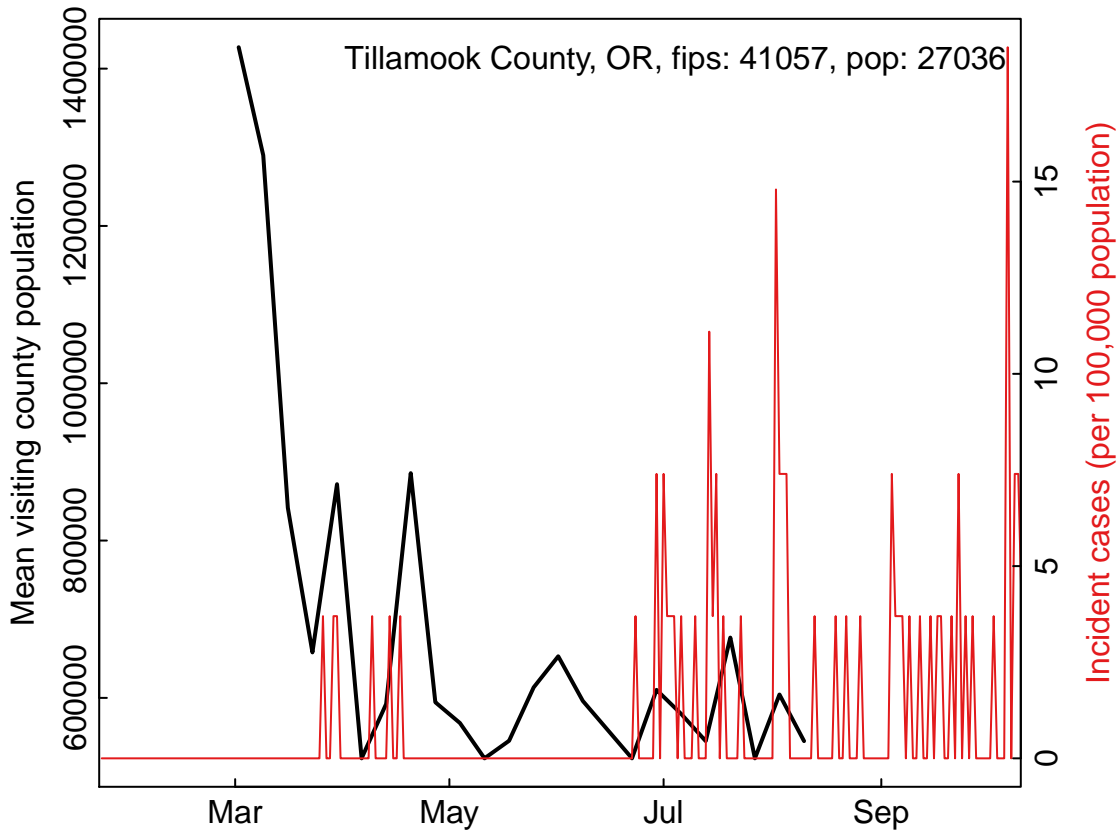

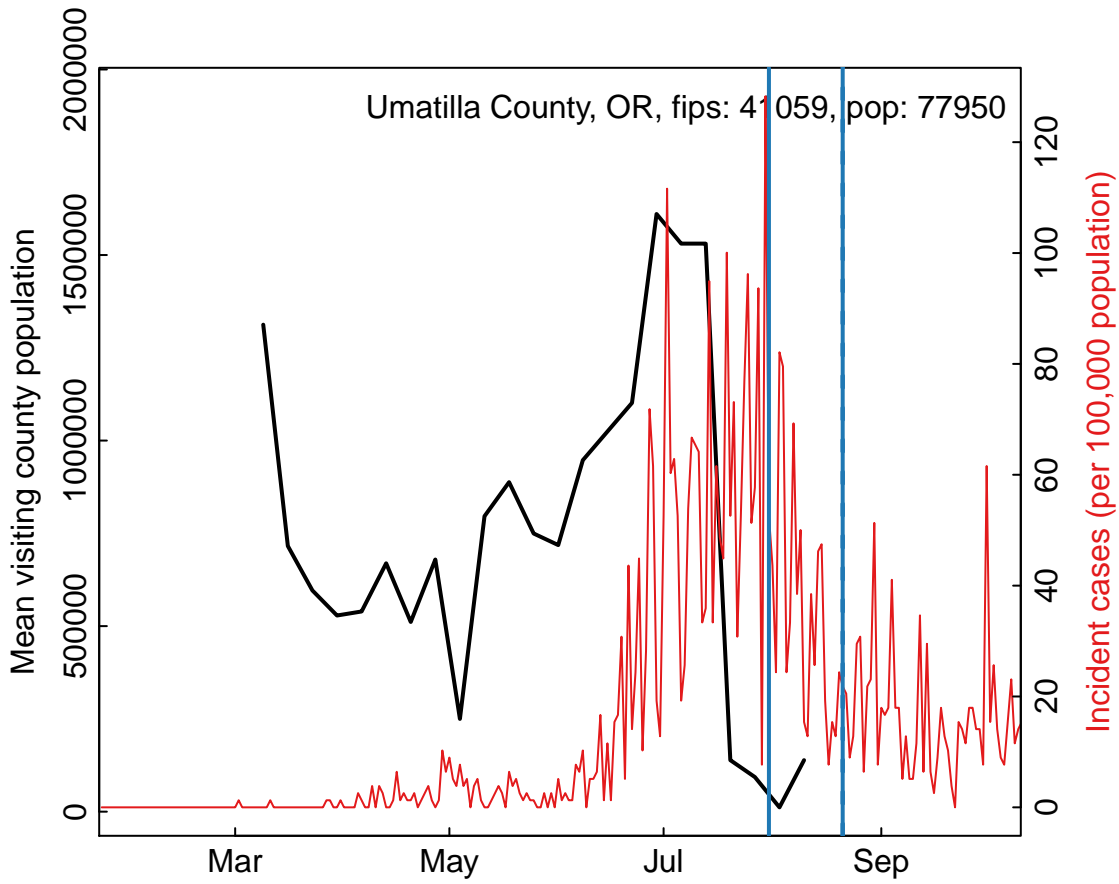

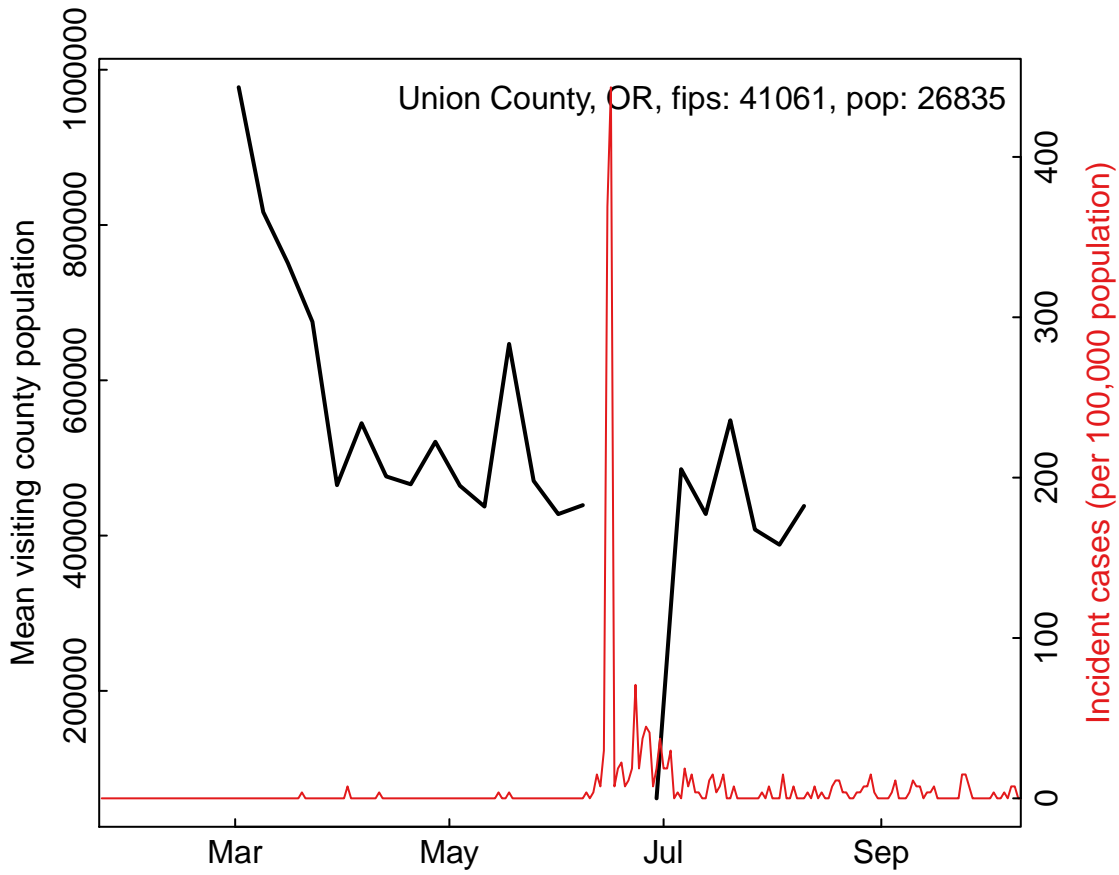

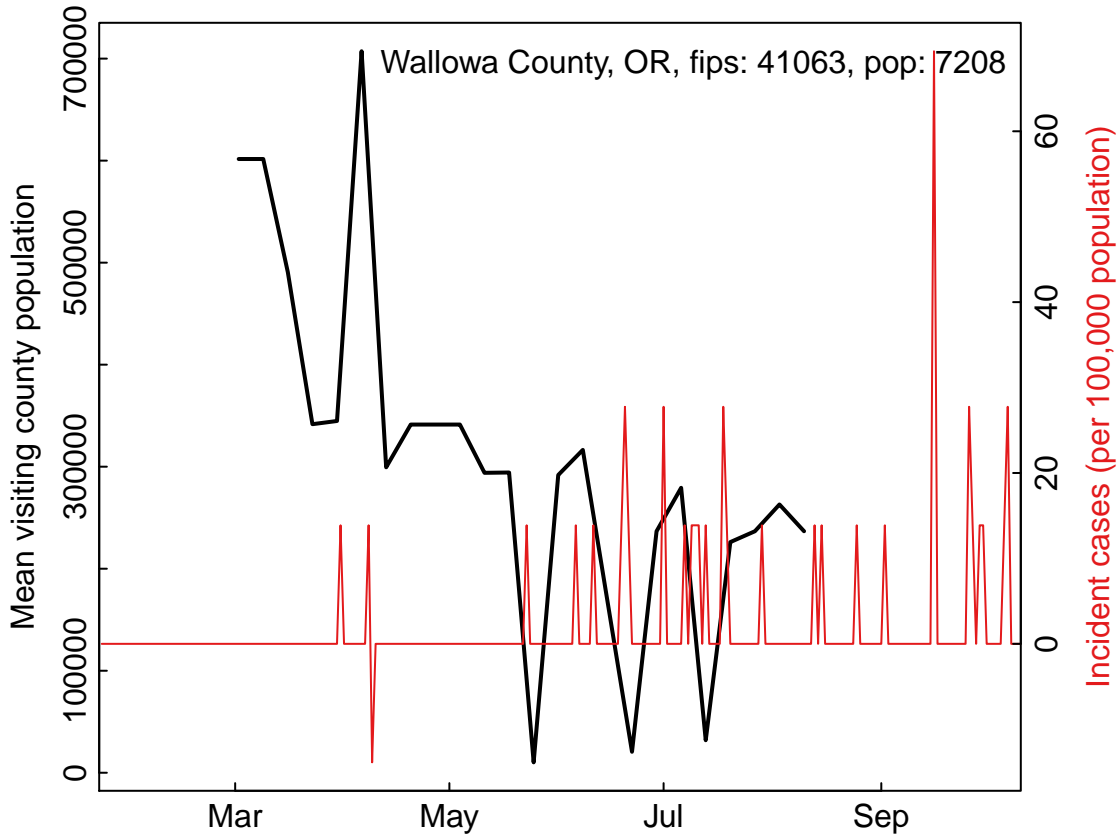



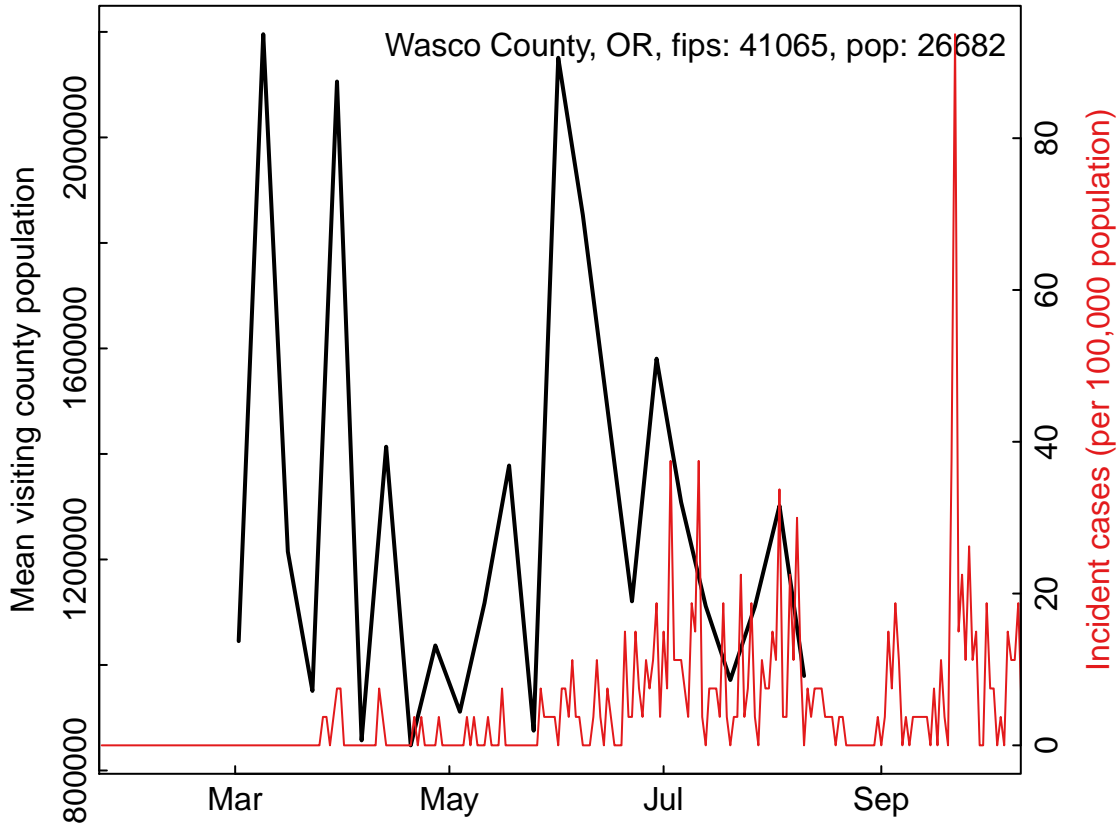

Washington County, OR, fips: 41067, pop: 601592

Mean visiting county population

3000000  
2000000  
1000000

Mar

May

Jul

Sep

12  
10  
8  
6  
4  
2  
0

Incident cases (per 100,000 population)

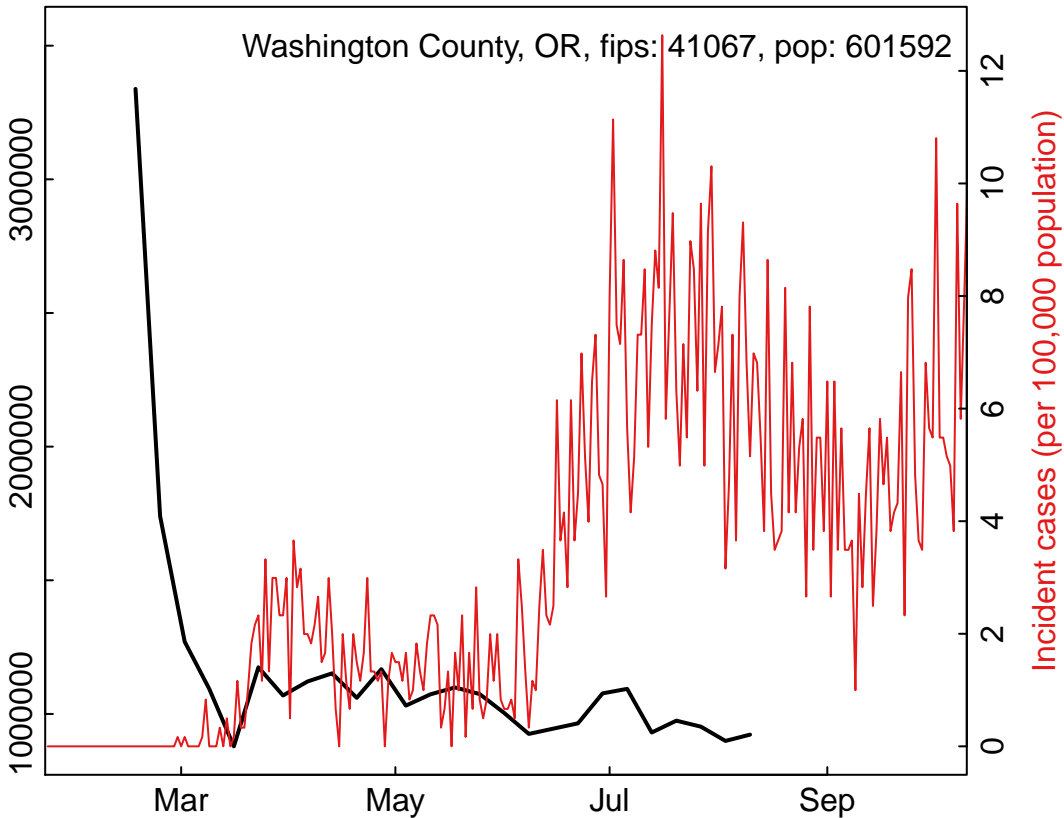

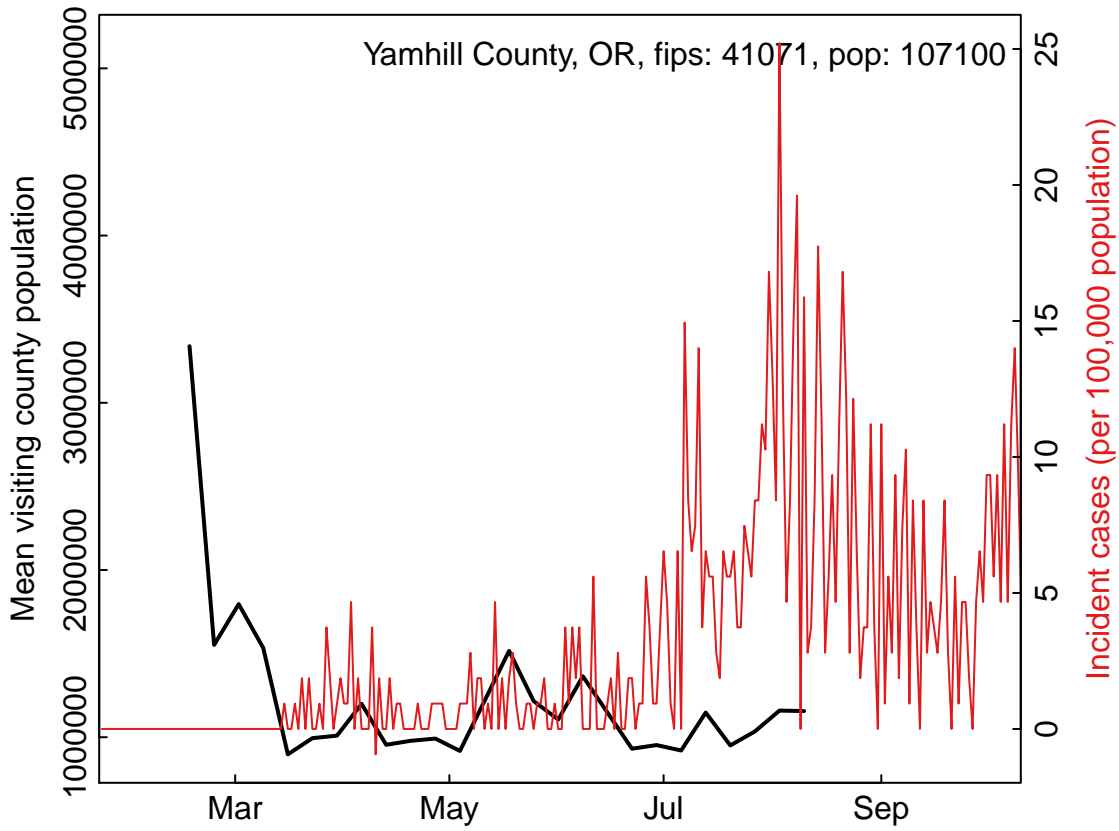

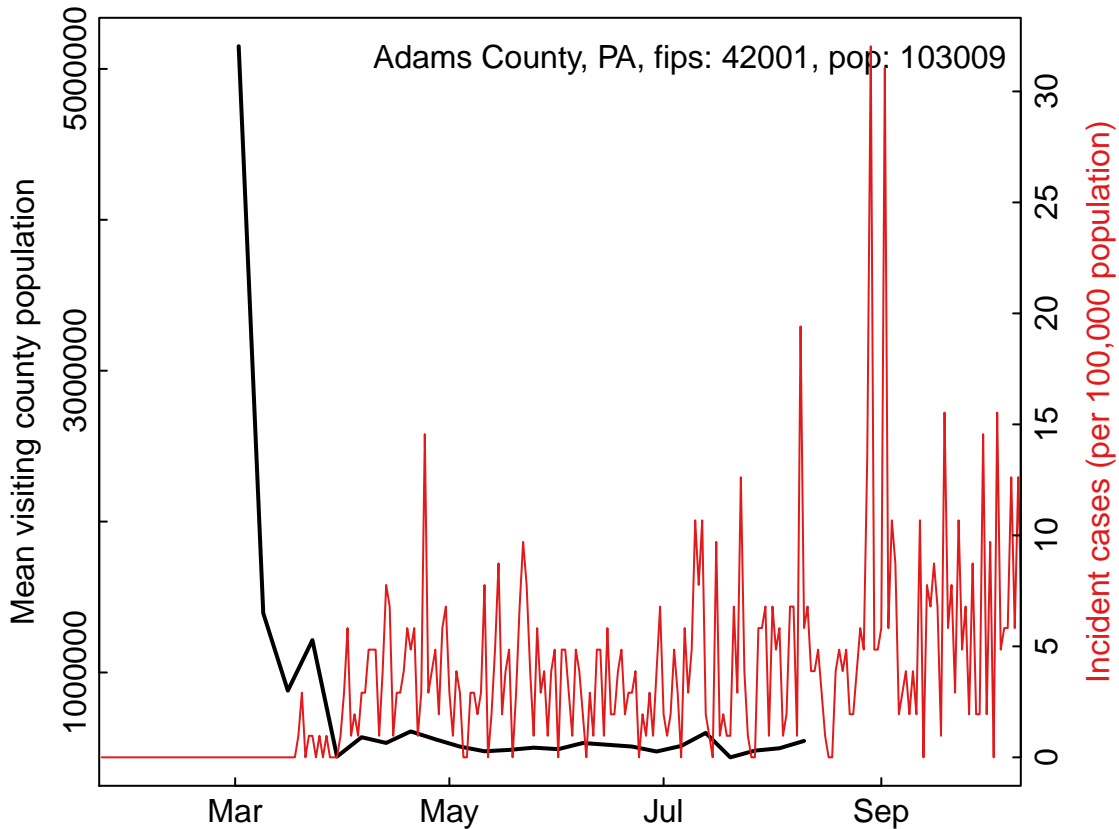

Allegheny County, PA, fips: 42003, pop: 1216045

Mean visiting county population

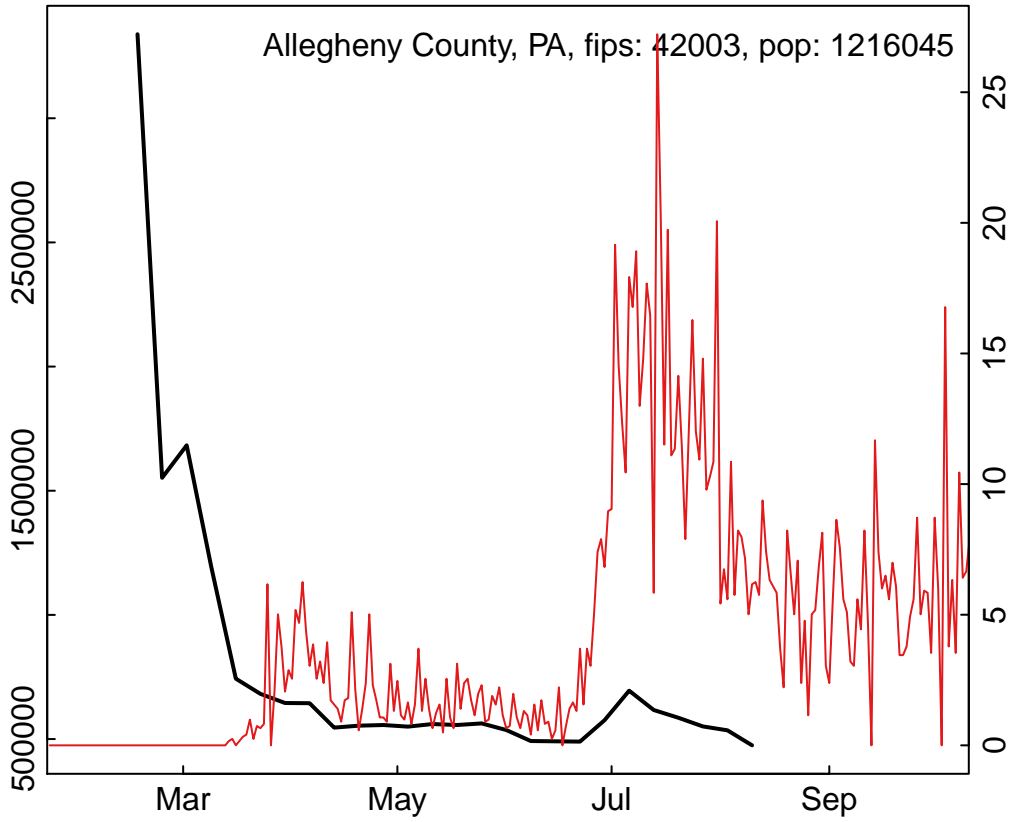

Incident cases (per 100,000 population)

Armstrong County, PA, fips: 42005, pop: 64735

Mean visiting county population

400000  
600000  
800000  
1000000

Mar

May

Jul

Sep

0  
5  
10  
15  
20  
25

Incident cases (per 100,000 population)

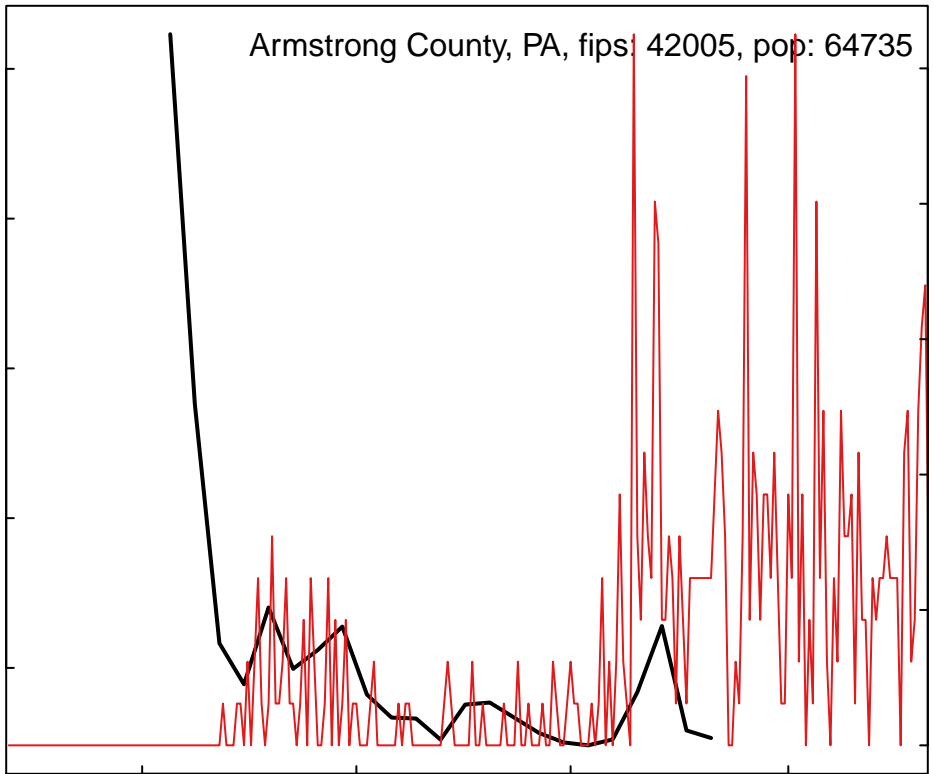

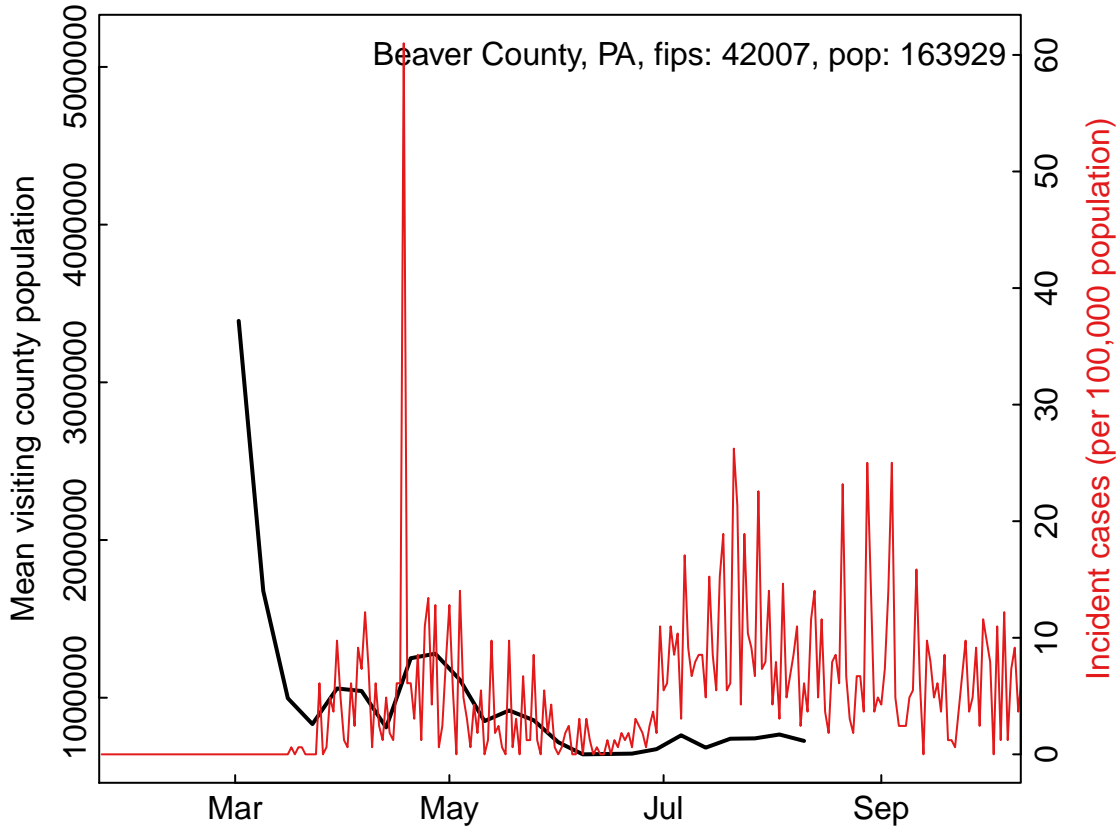

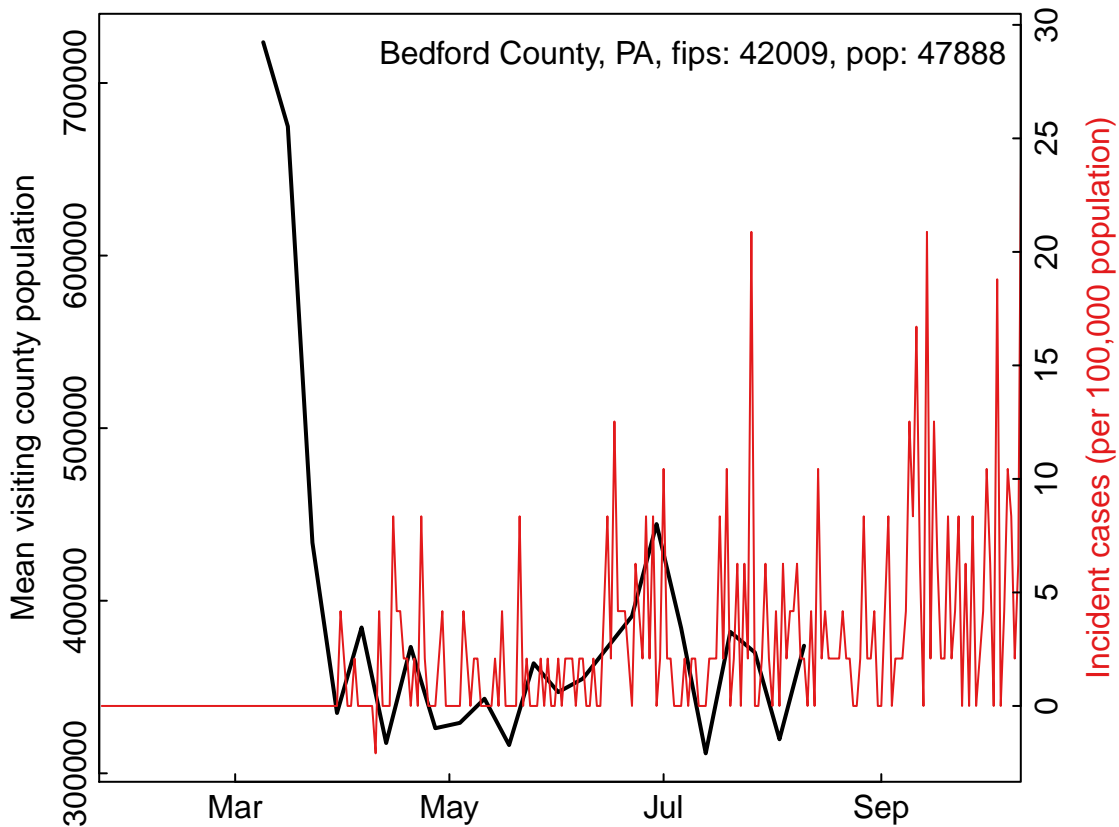



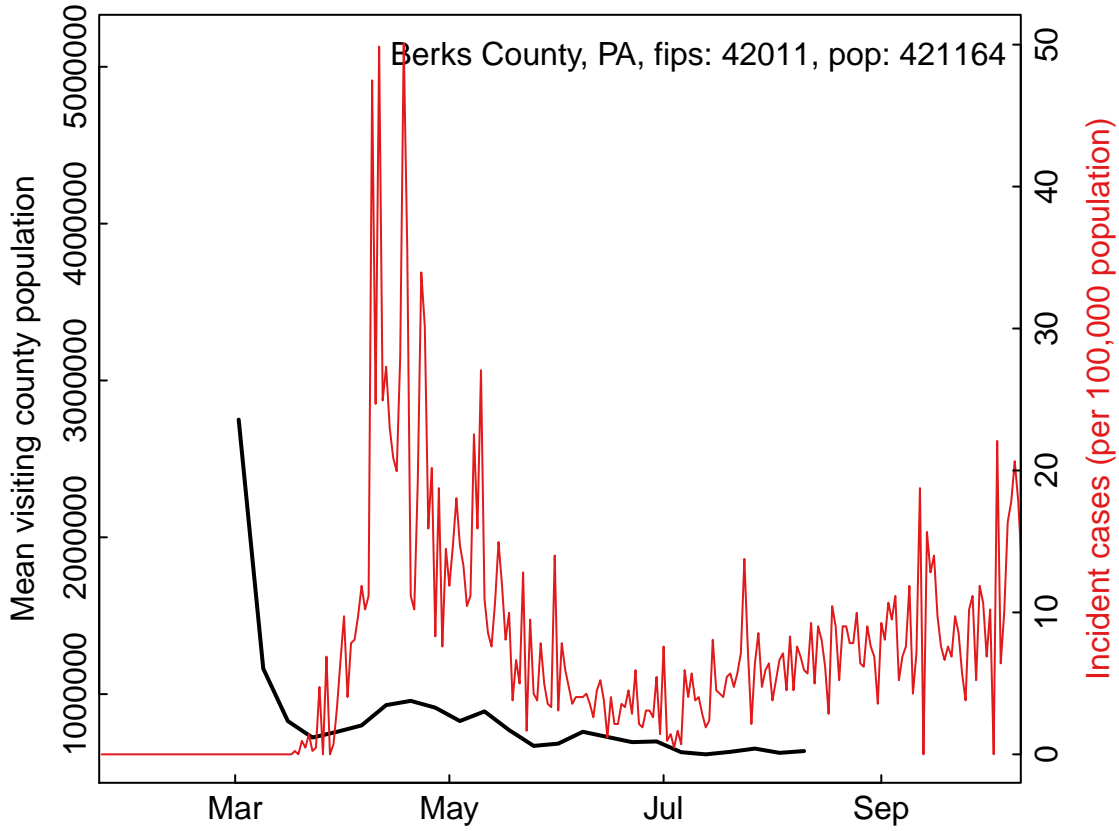

Blair County, PA, fips: 42013, pop: 121829

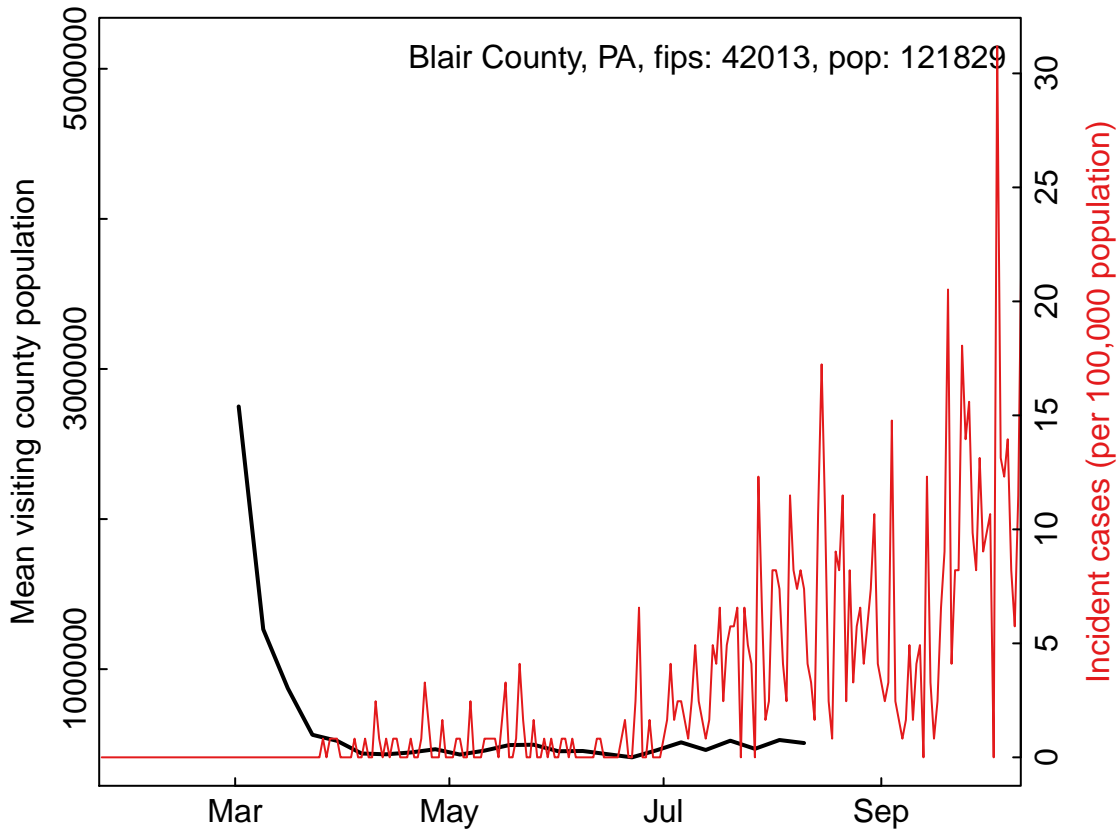

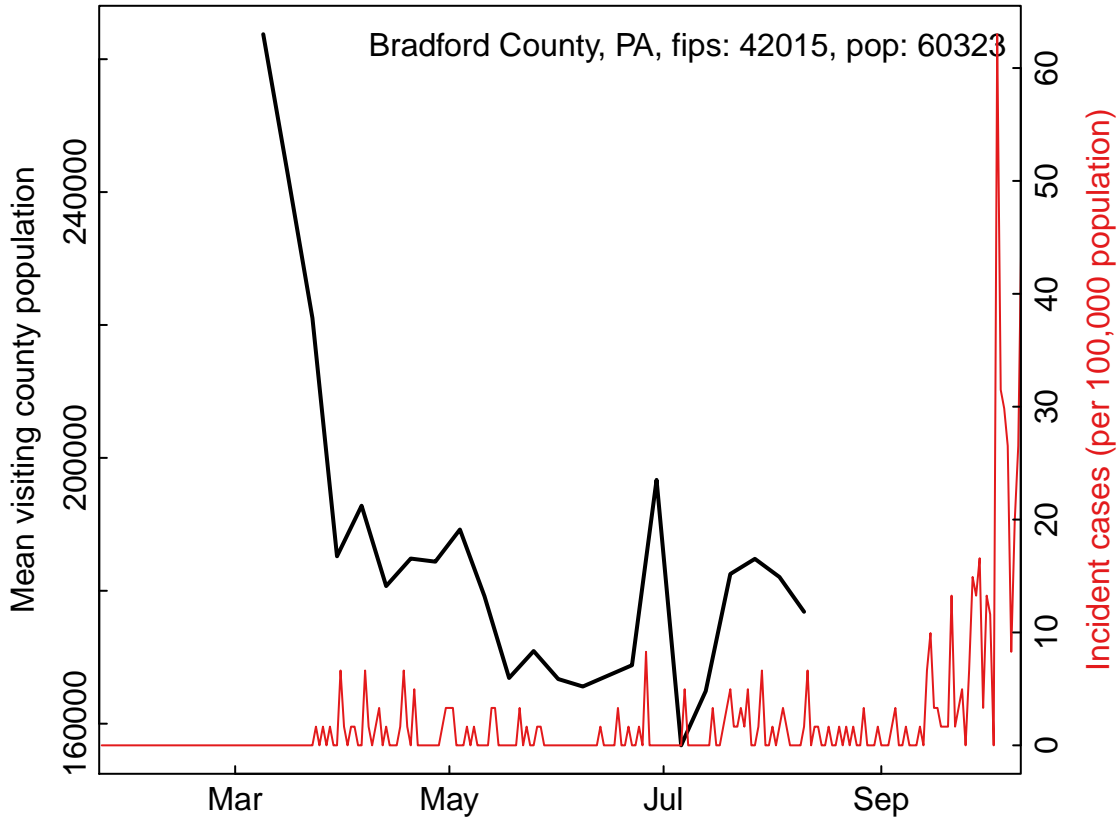

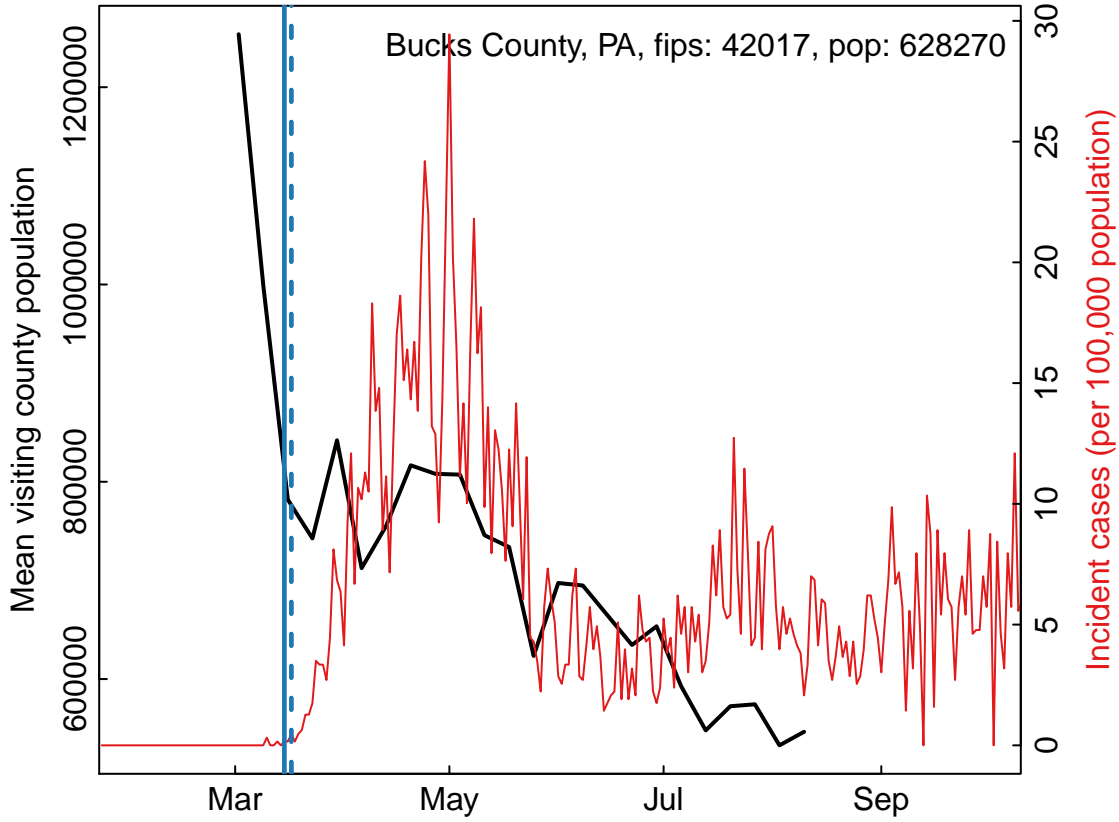

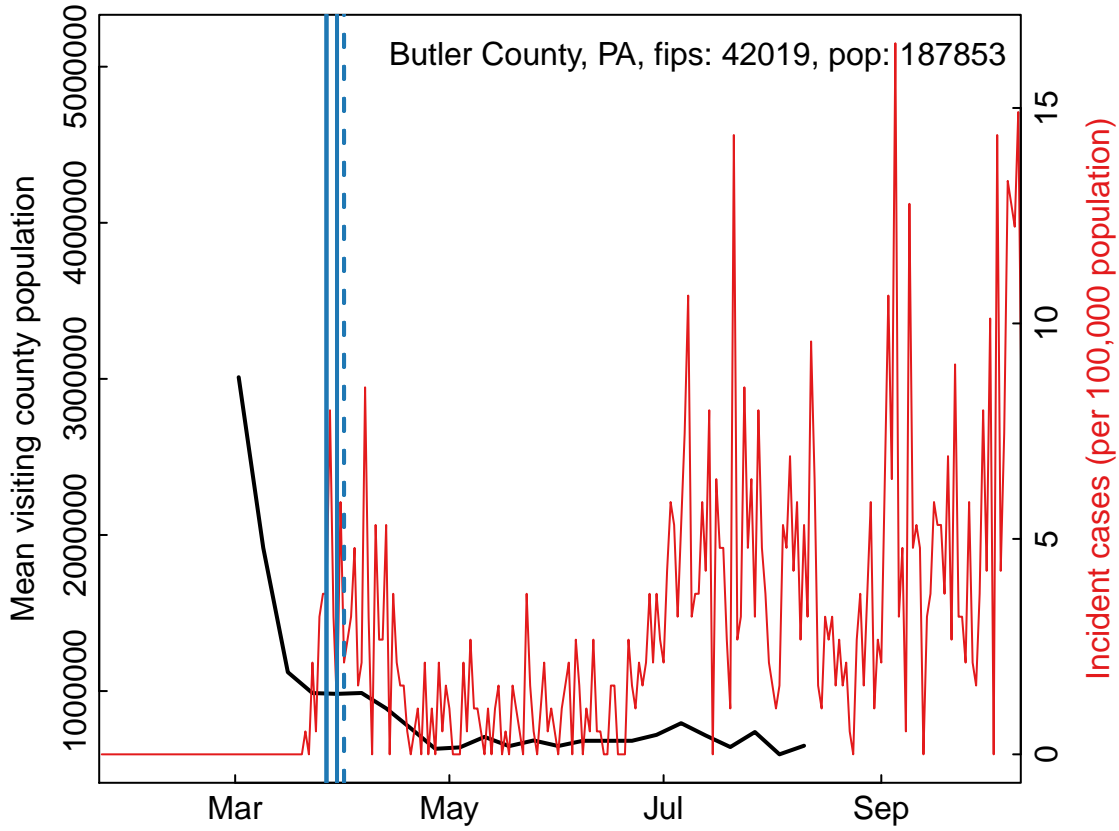

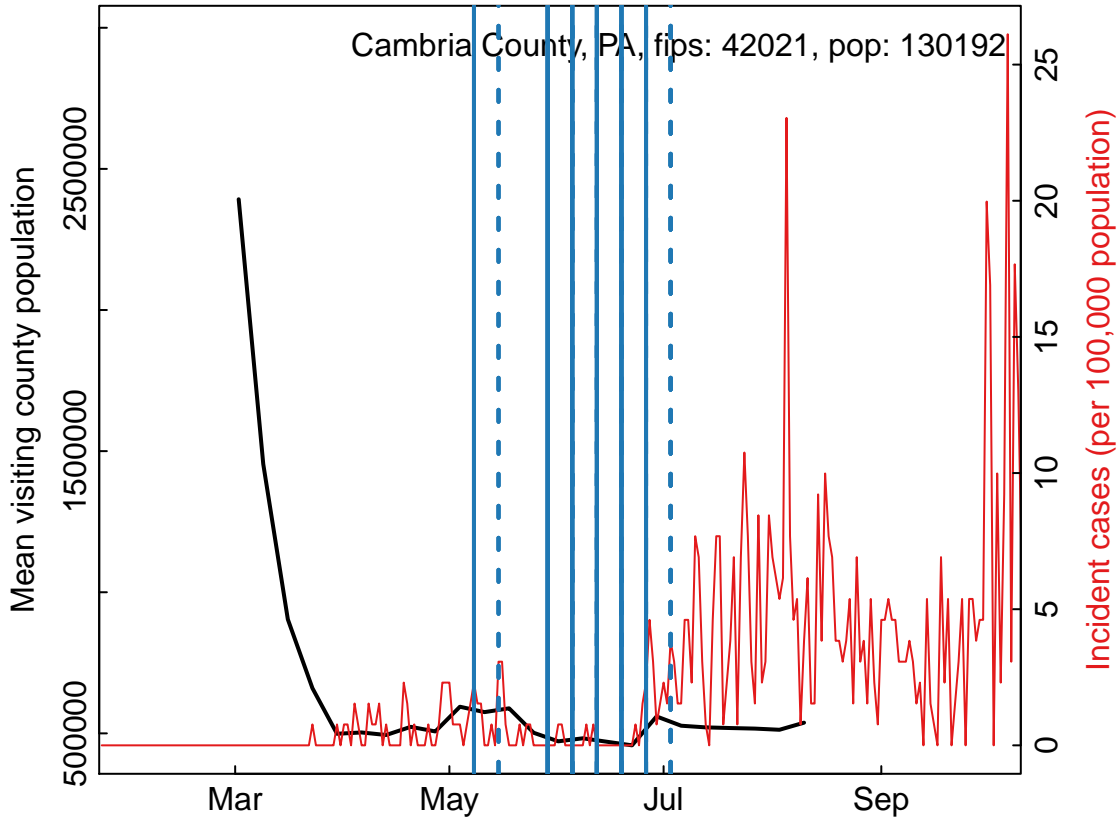

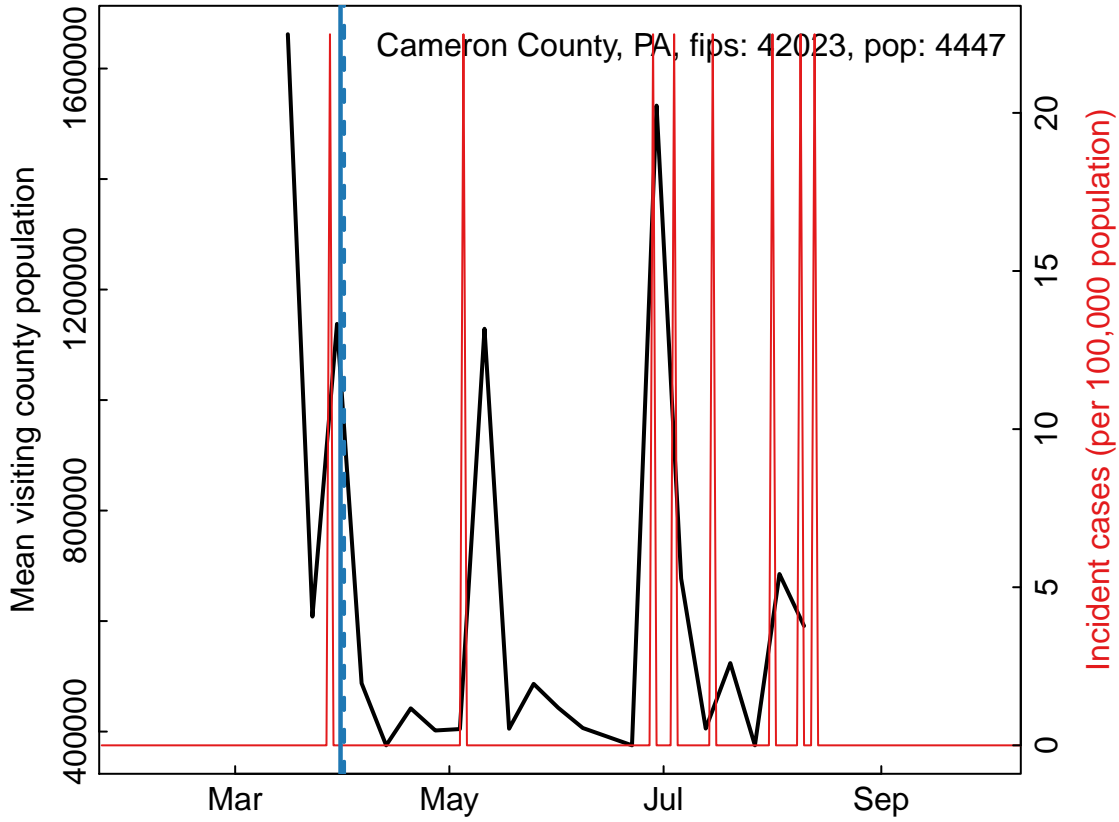

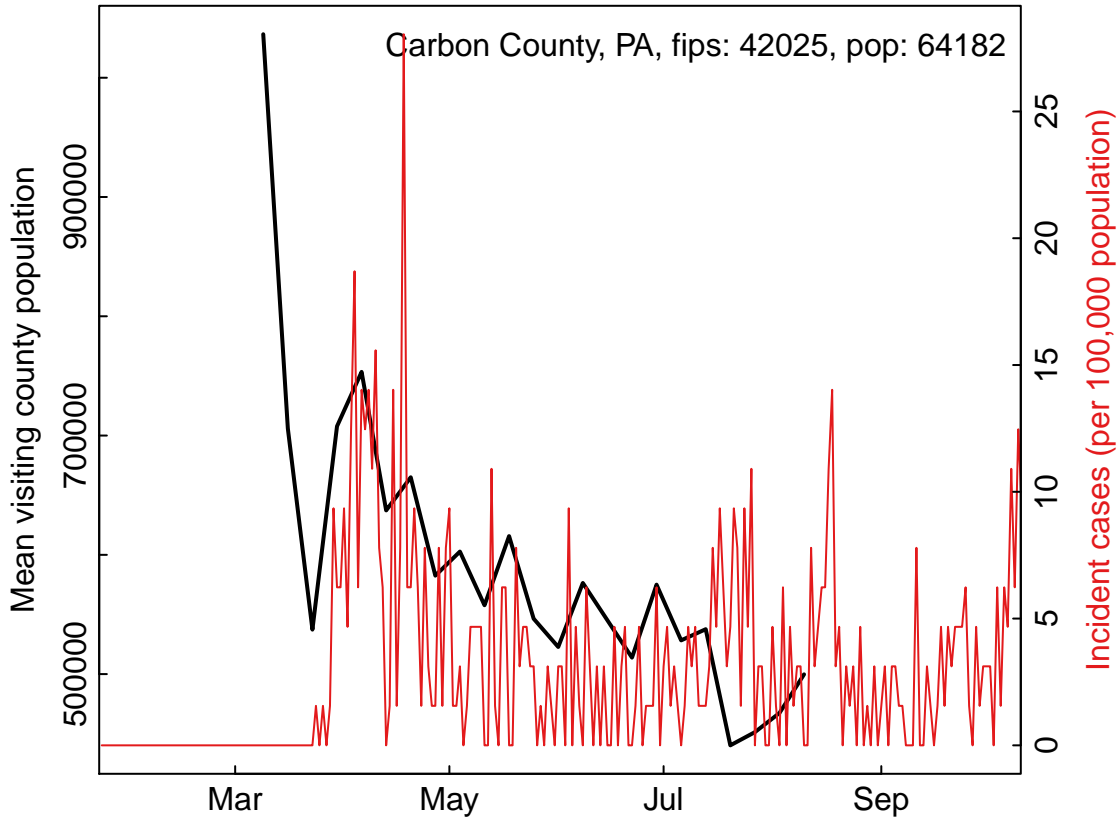



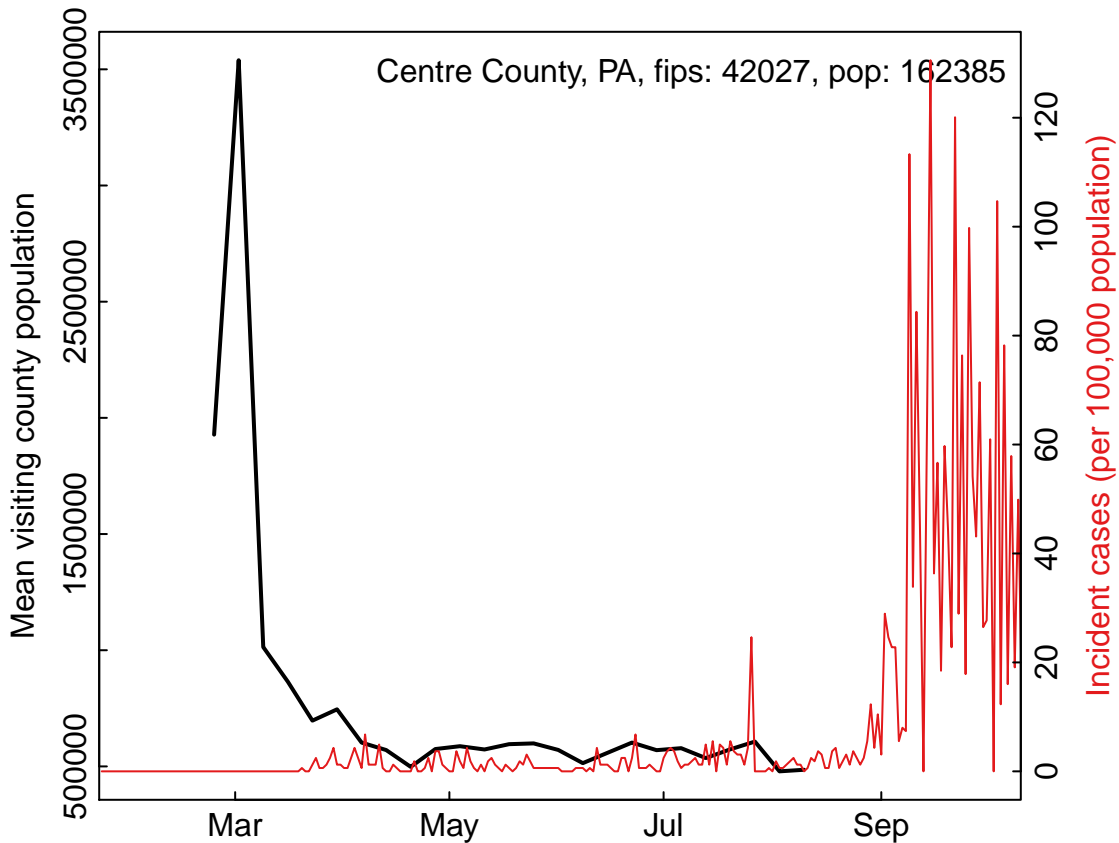

Chester County, PA, fips: 42029, pop: 524989

Mean visiting county population

1800000  
1400000  
1000000  
600000

Mar

May

Jul

Sep

15  
10  
5  
0

Incident cases (per 100,000 population)

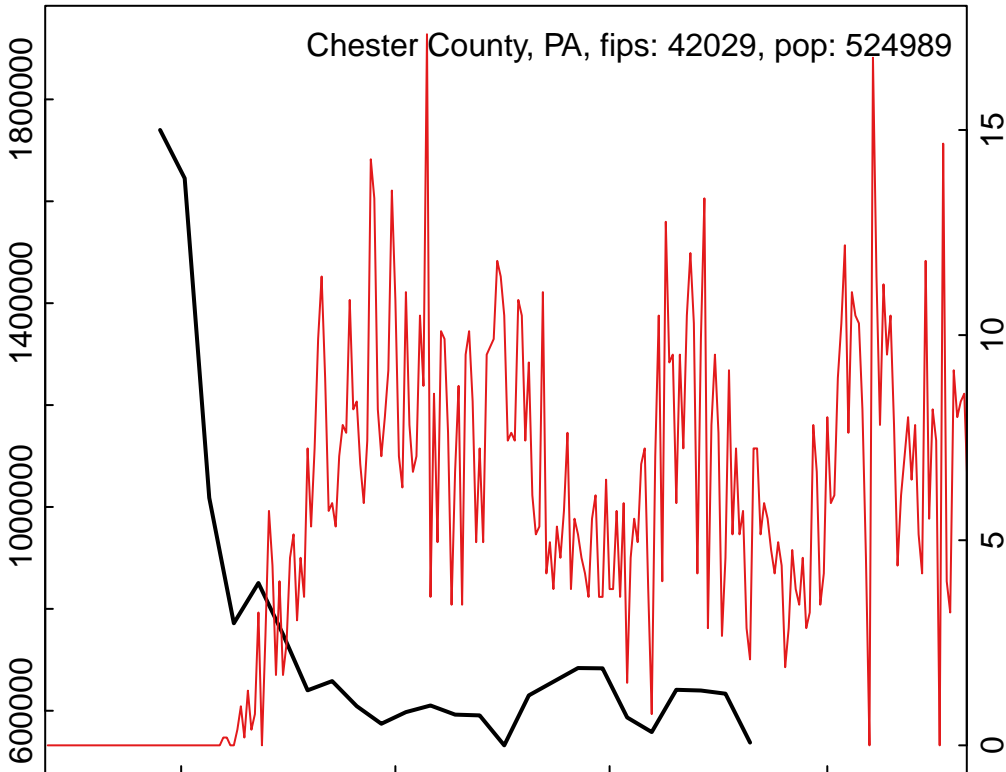

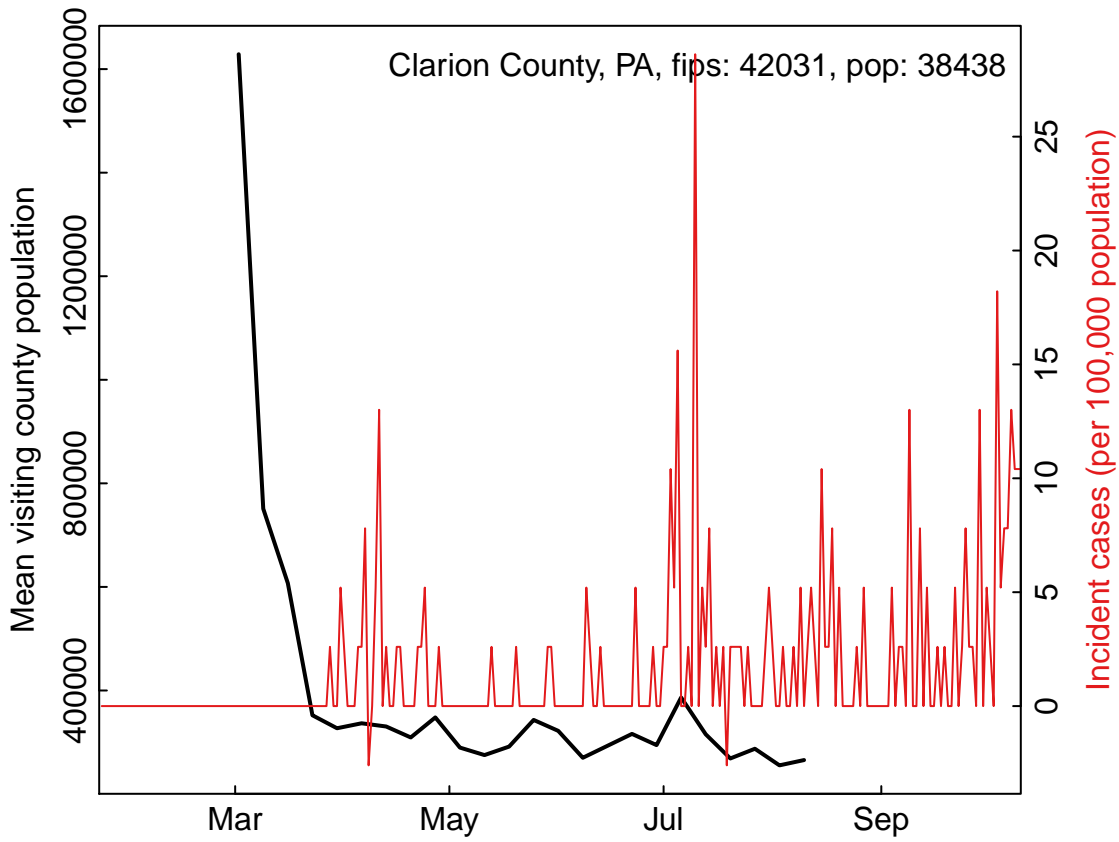

Clearfield County, PA, fips: 42033, pop: 79255

Mean visiting county population

300000  
400000  
500000  
600000  
700000

Mar

May

Jul

Sep

Incident cases (per 100,000 population)

0  
5  
10  
15

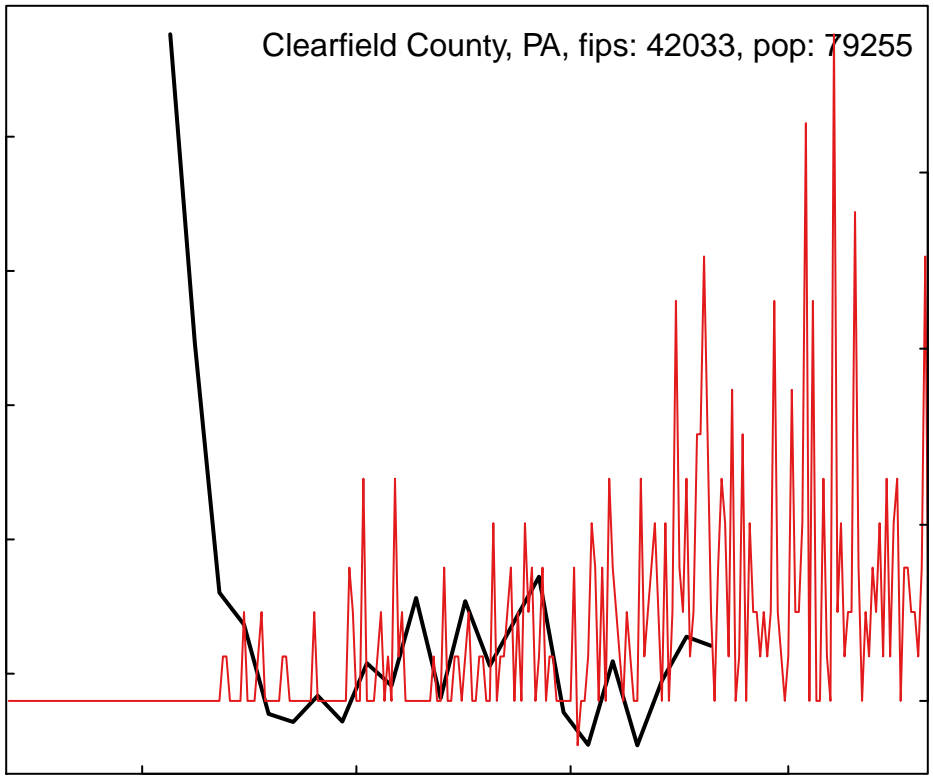

Mean visiting county population

700000  
600000  
500000  
400000  
300000

Mar

May

Jul

Sep

Clinton County, PA, fips: 42035, pop: 38632

Incident cases (per 100,000 population)

20  
15  
10  
5  
0

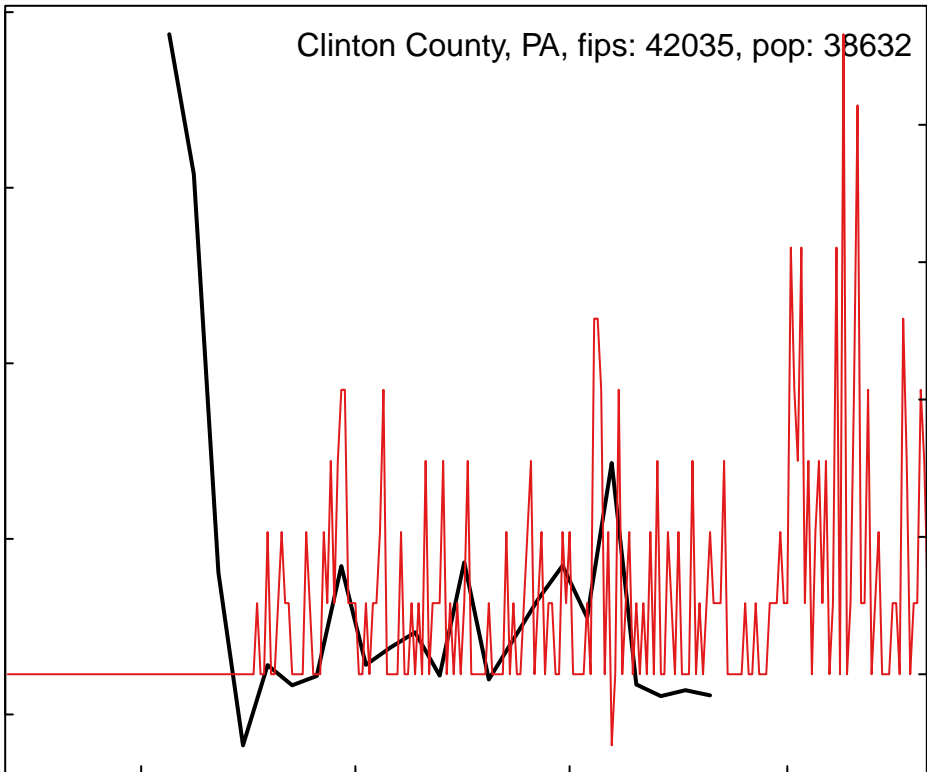

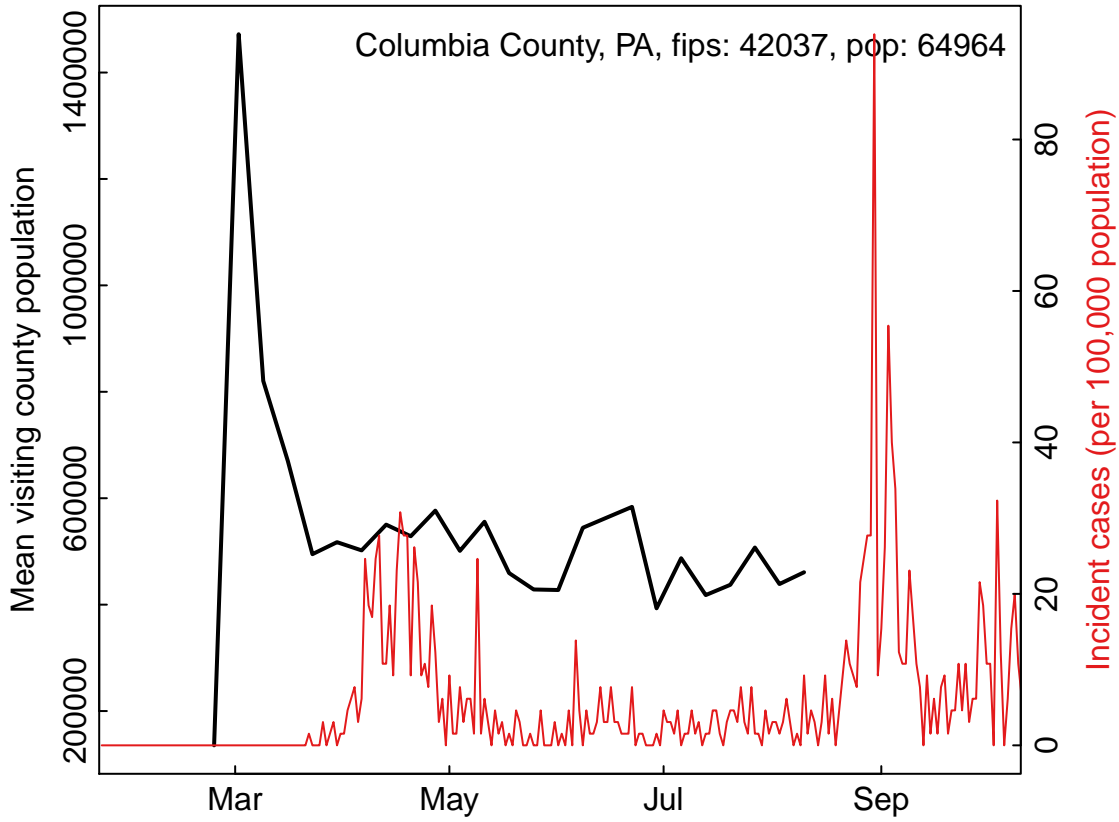

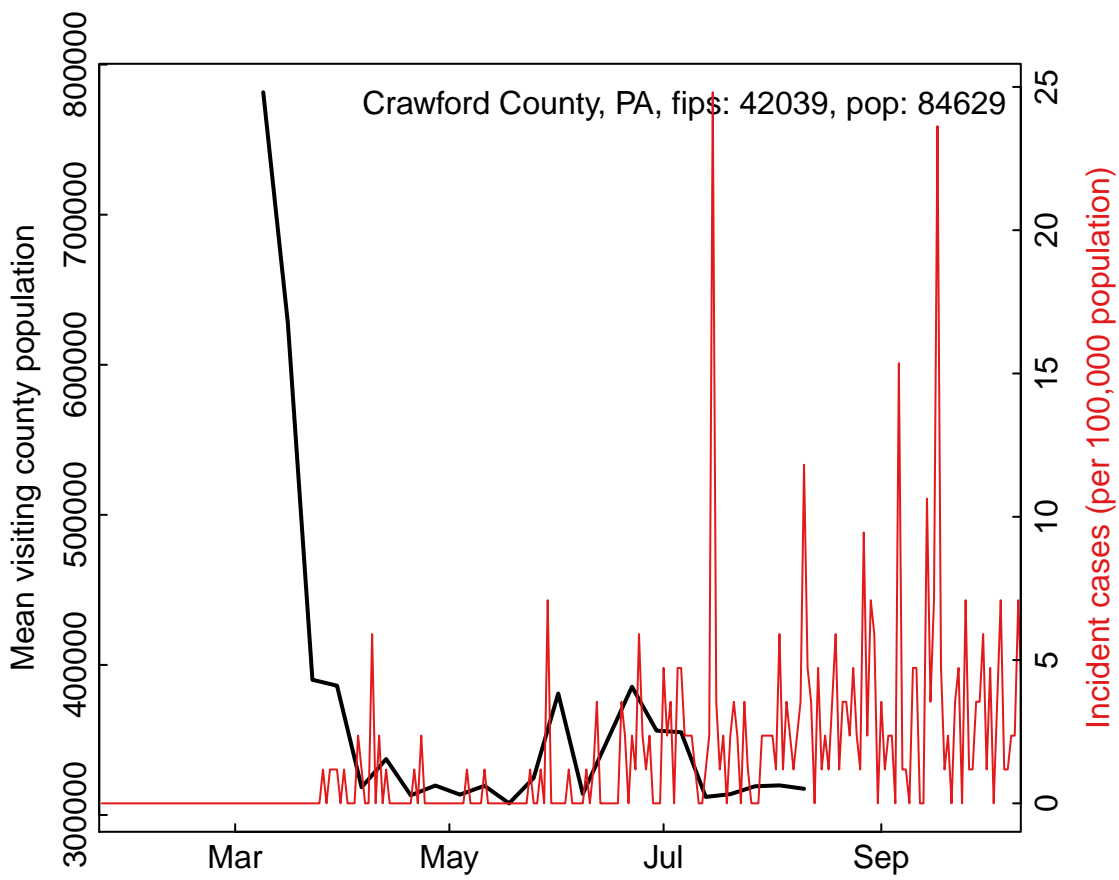

Cumberland County, PA, fips: 42041, pop: 253370

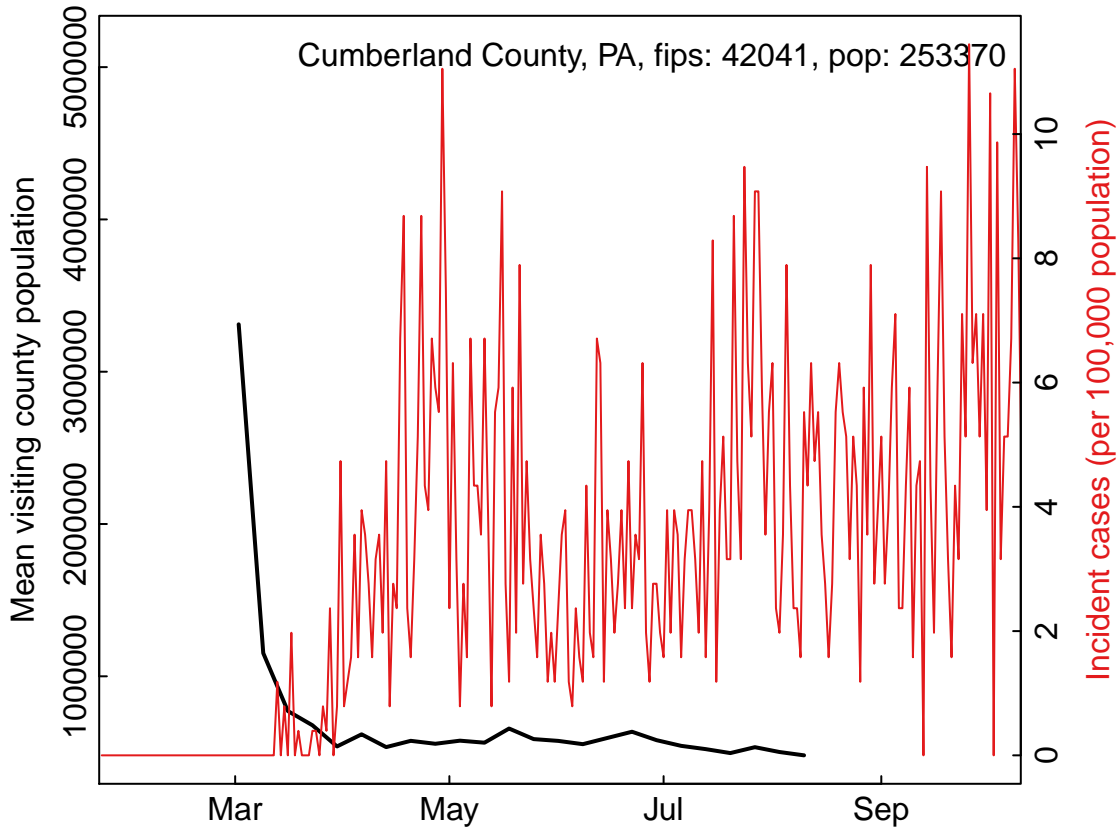



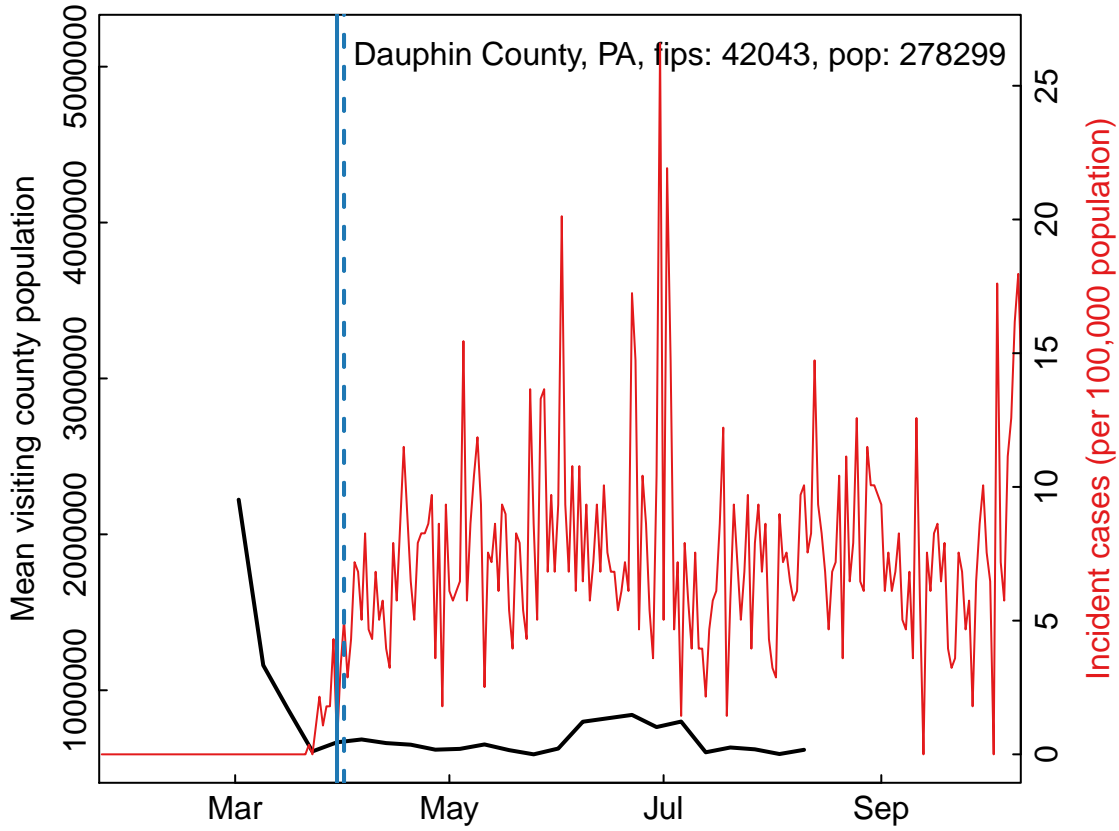

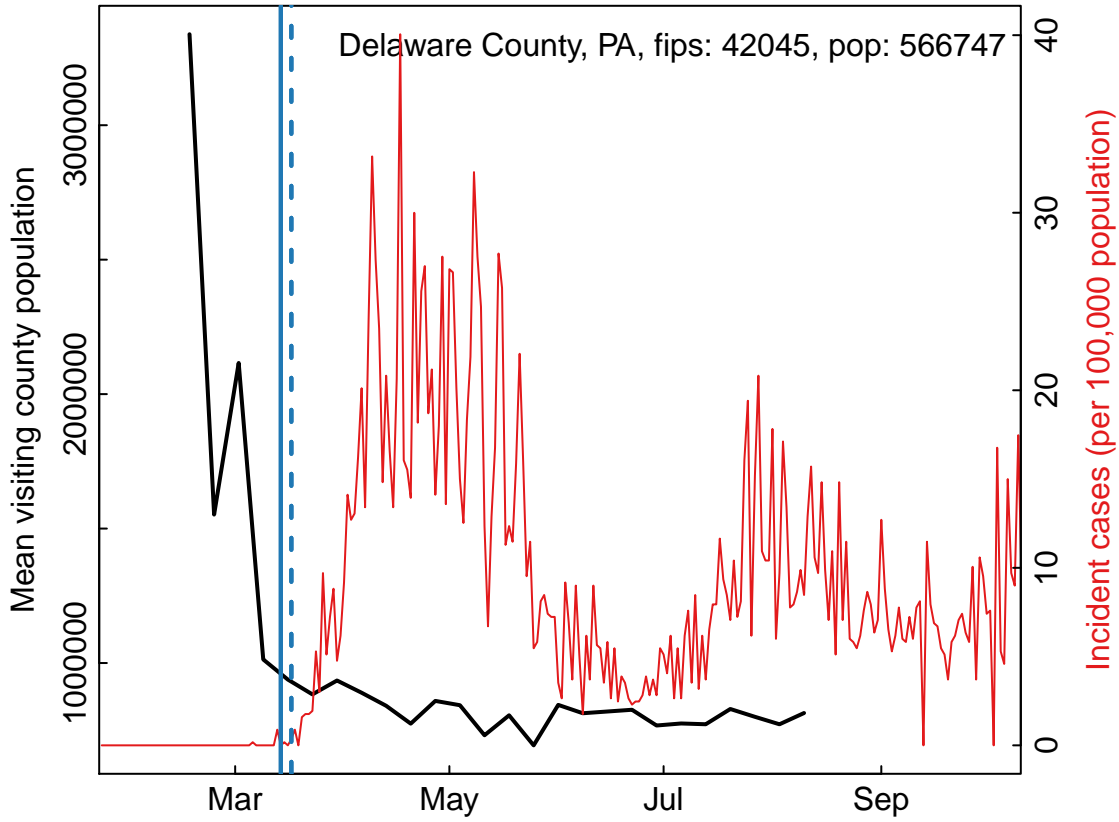

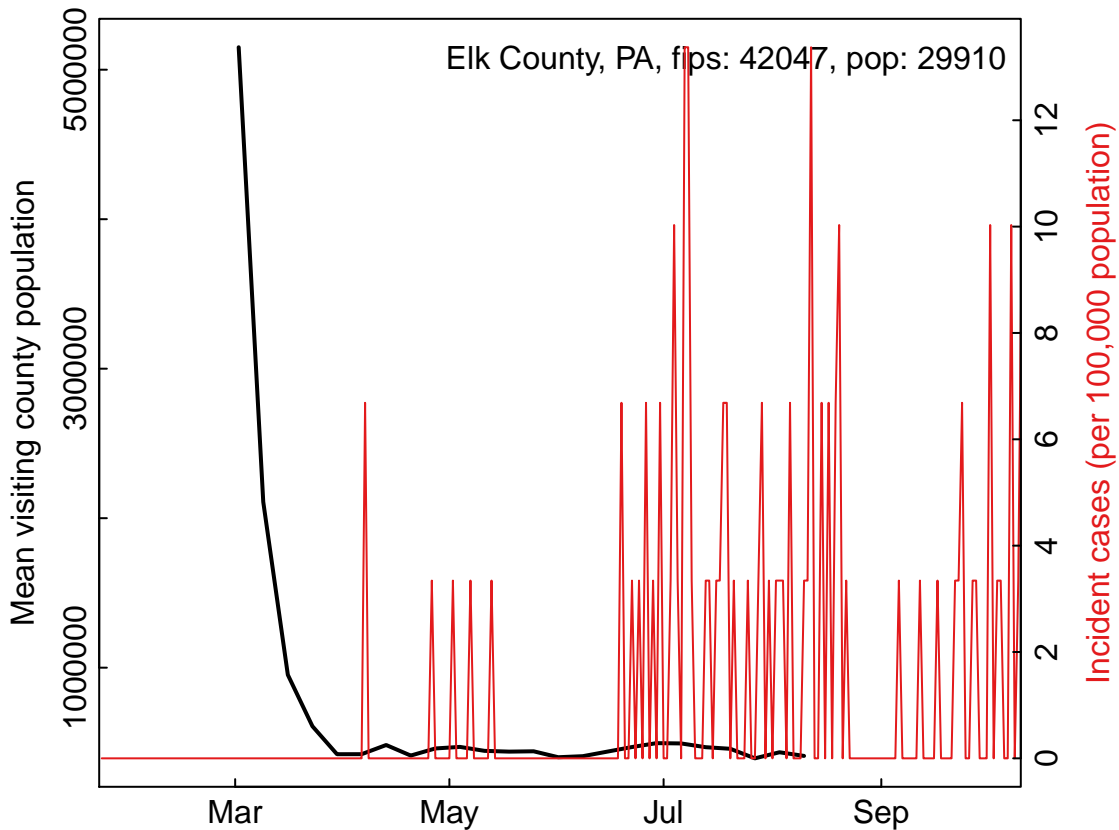

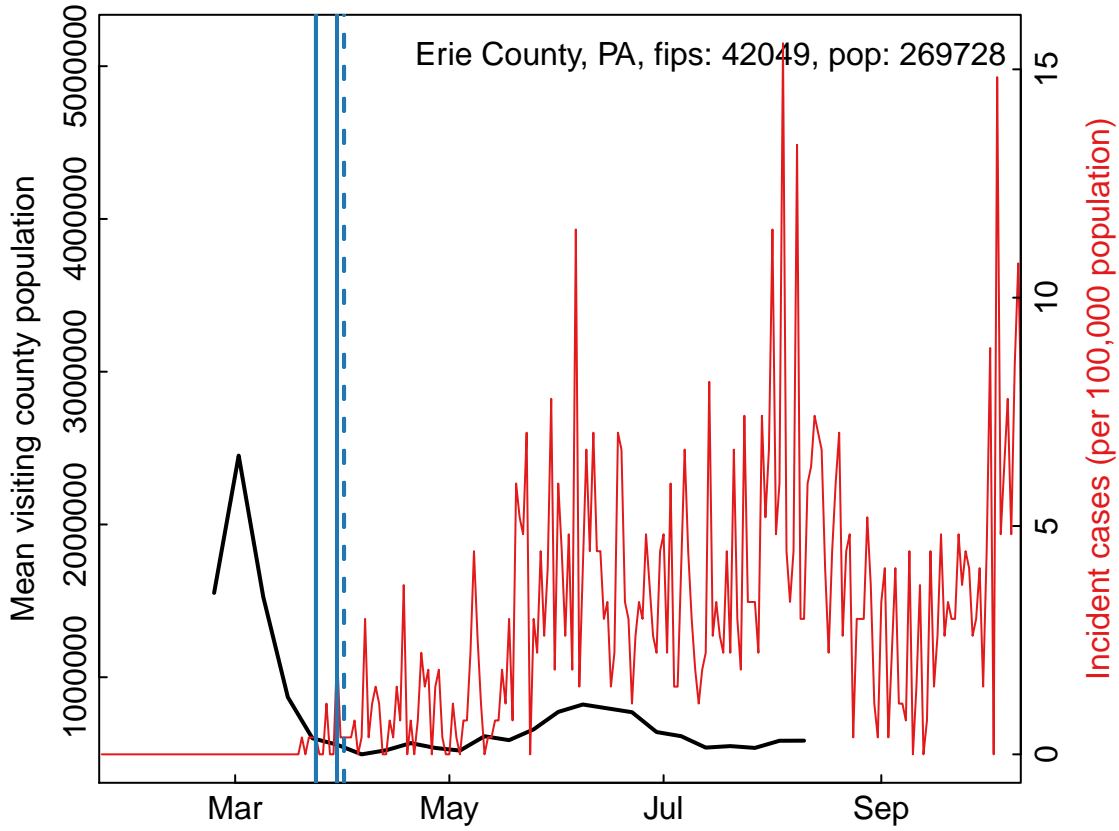

Fayette County, PA, fips: 42051, pop: 129274

Mean visiting county population

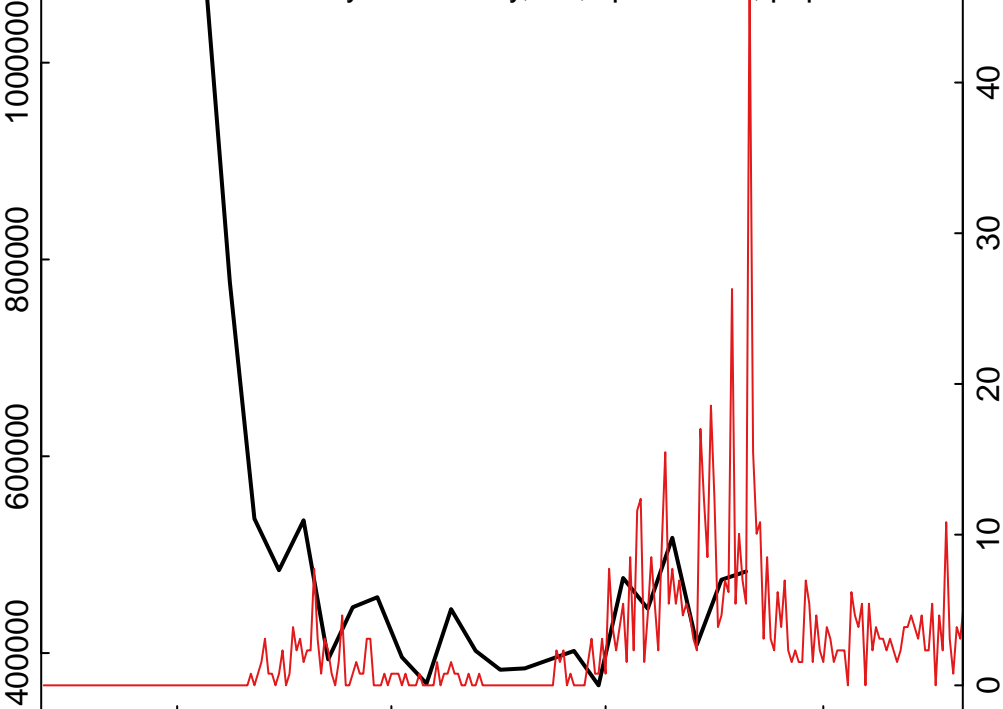

Incident cases (per 100,000 population)

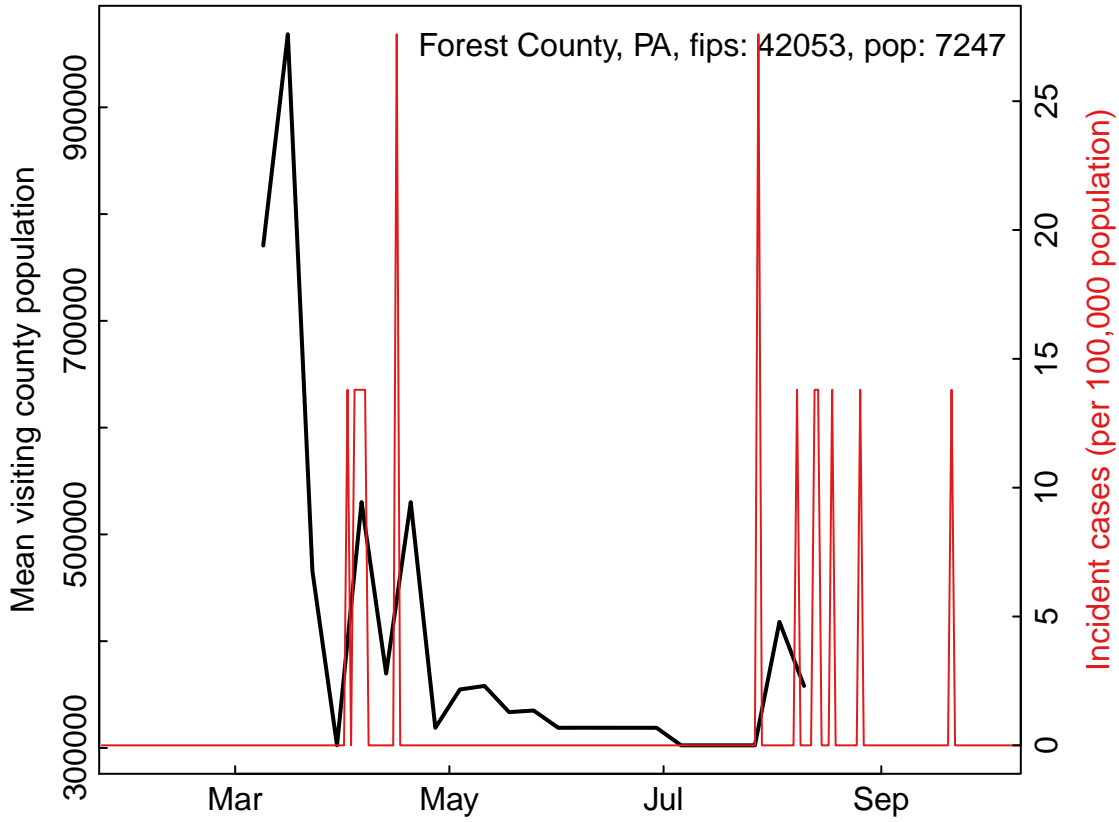

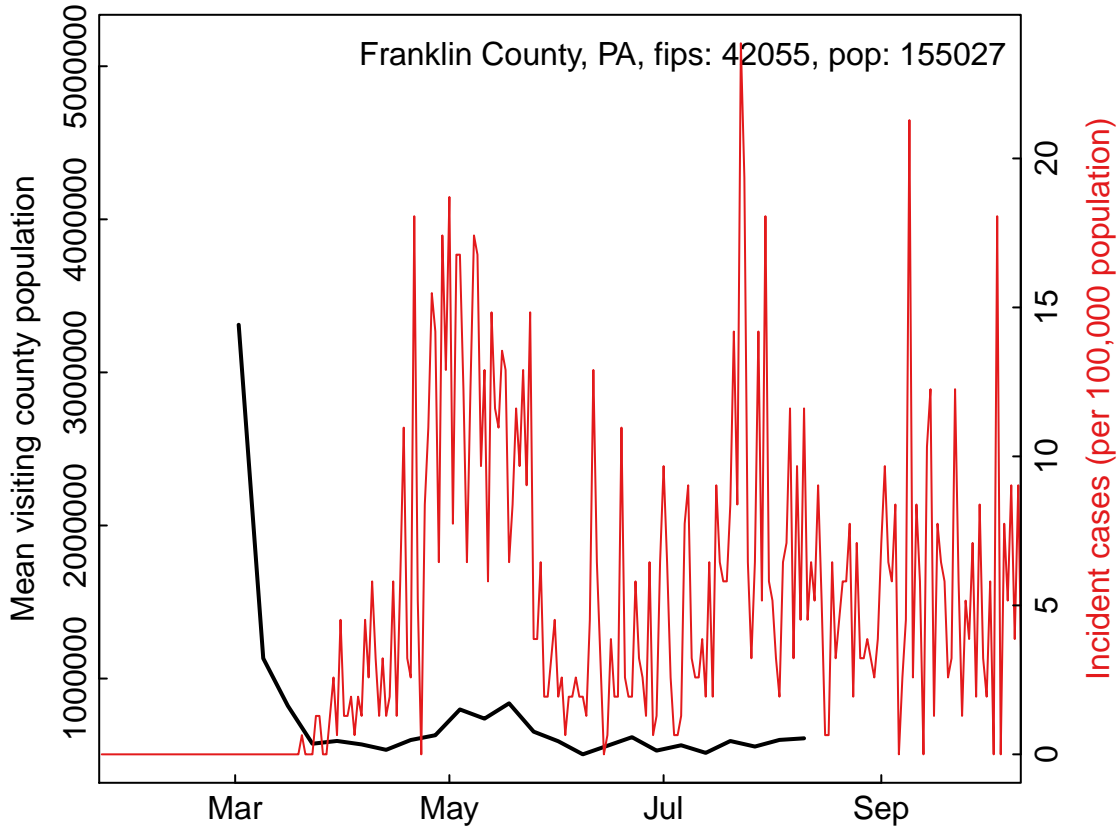

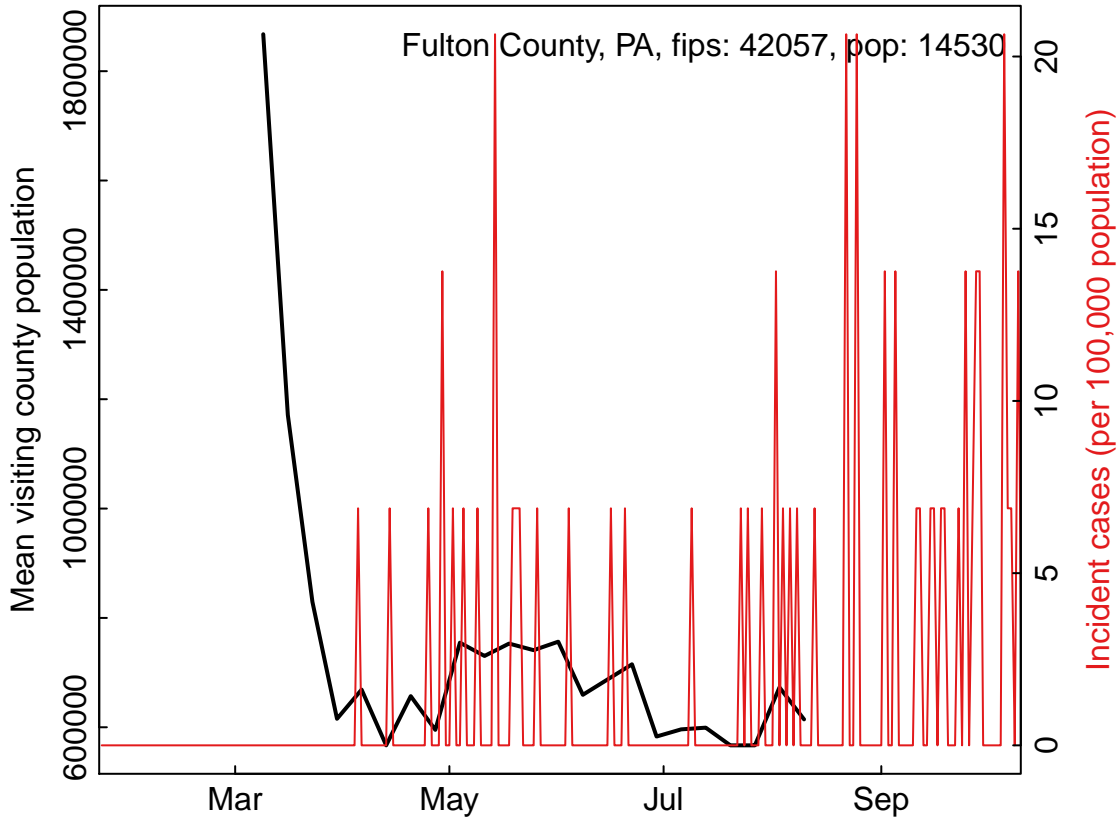



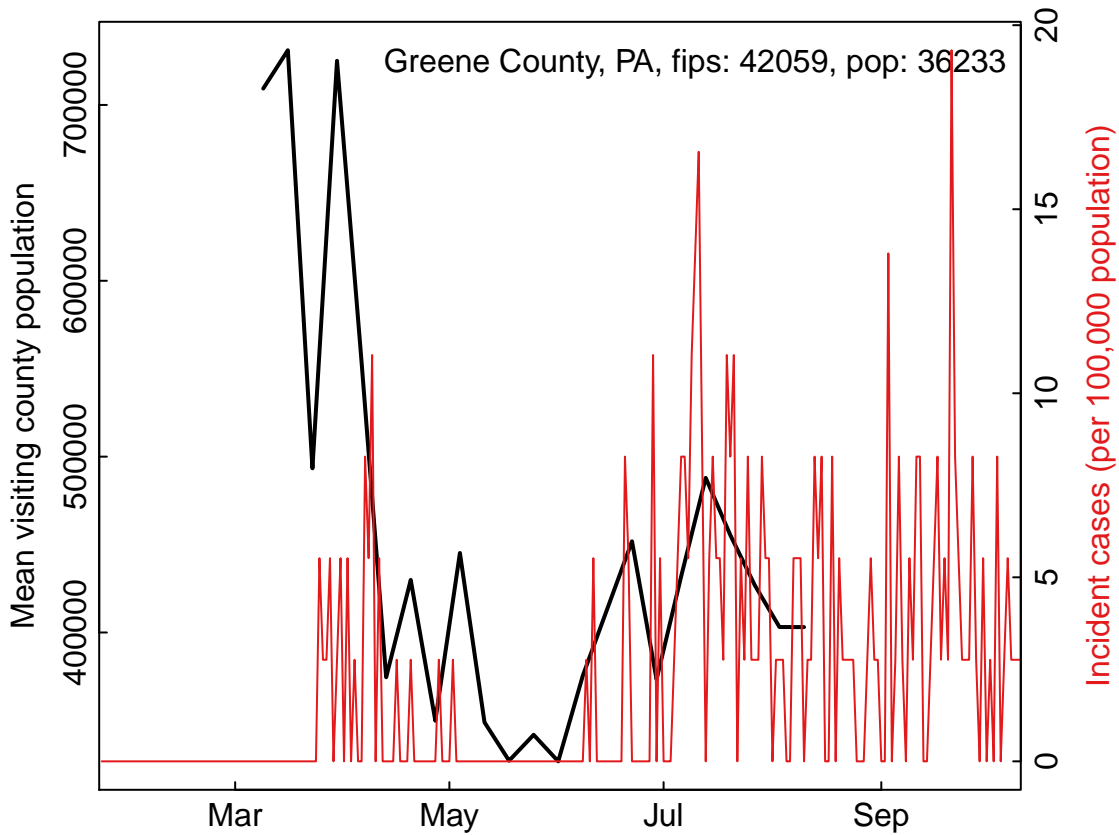

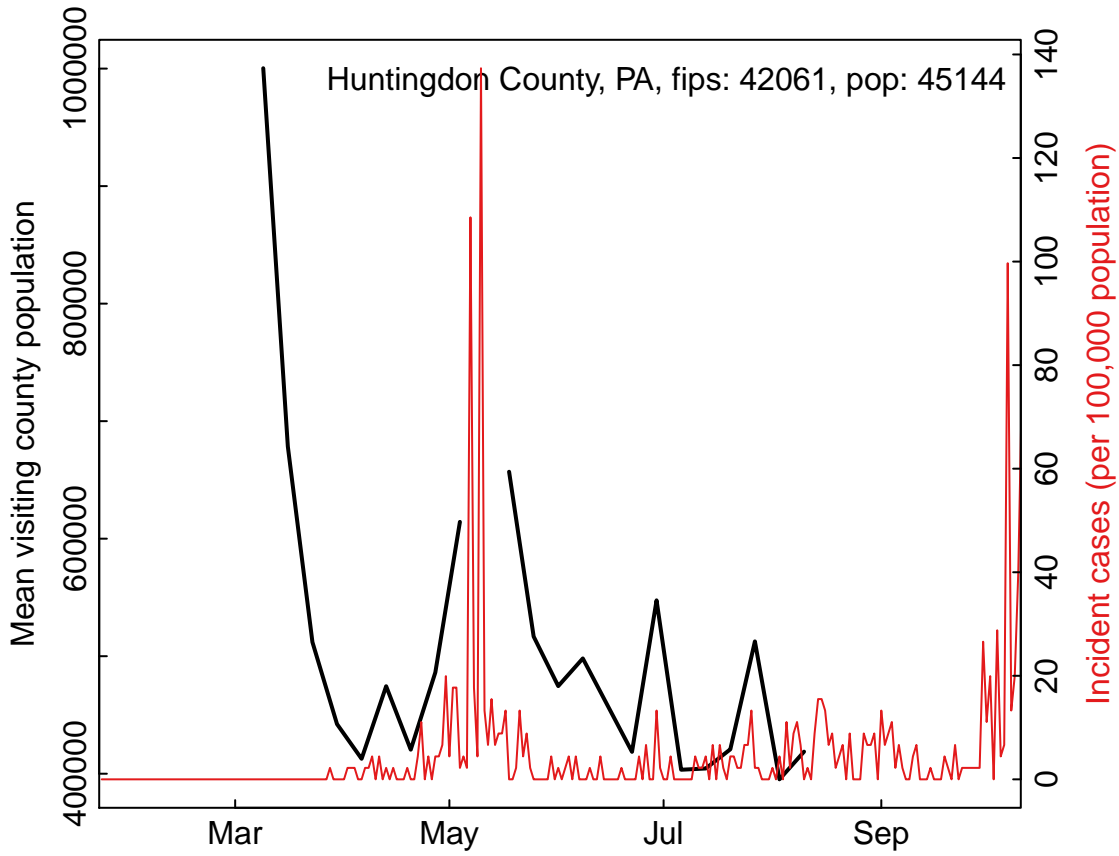

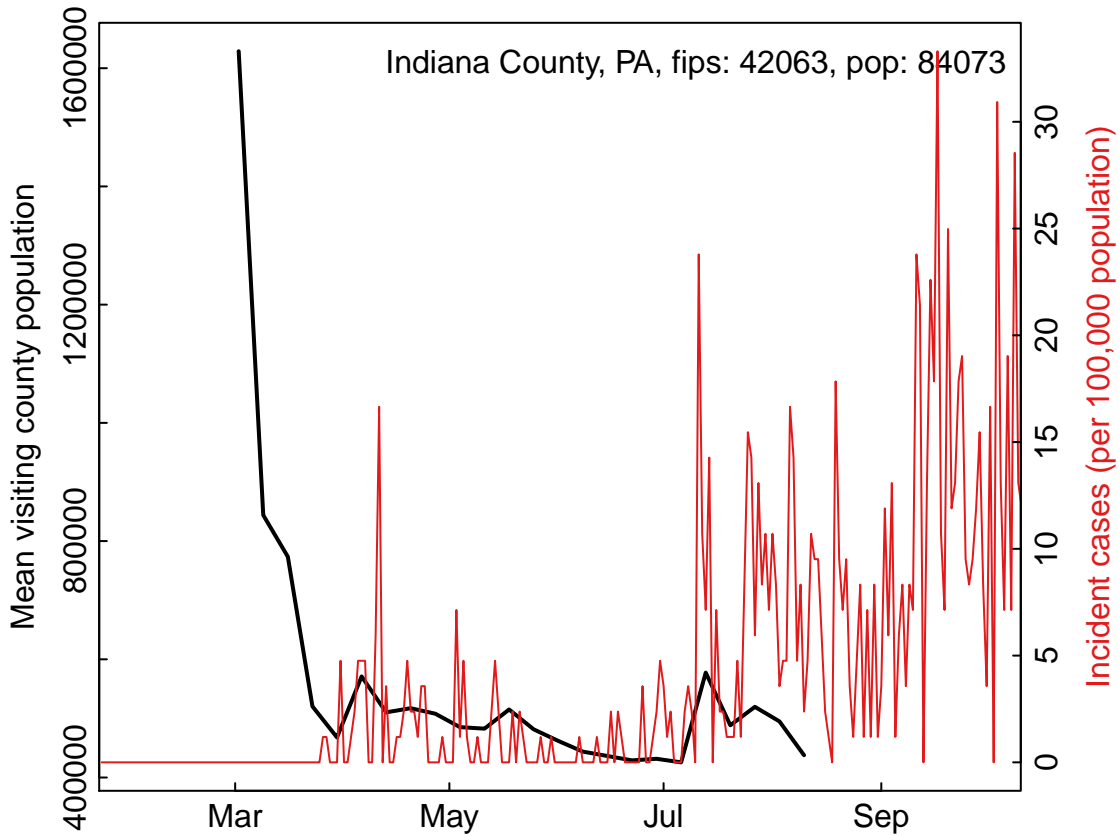

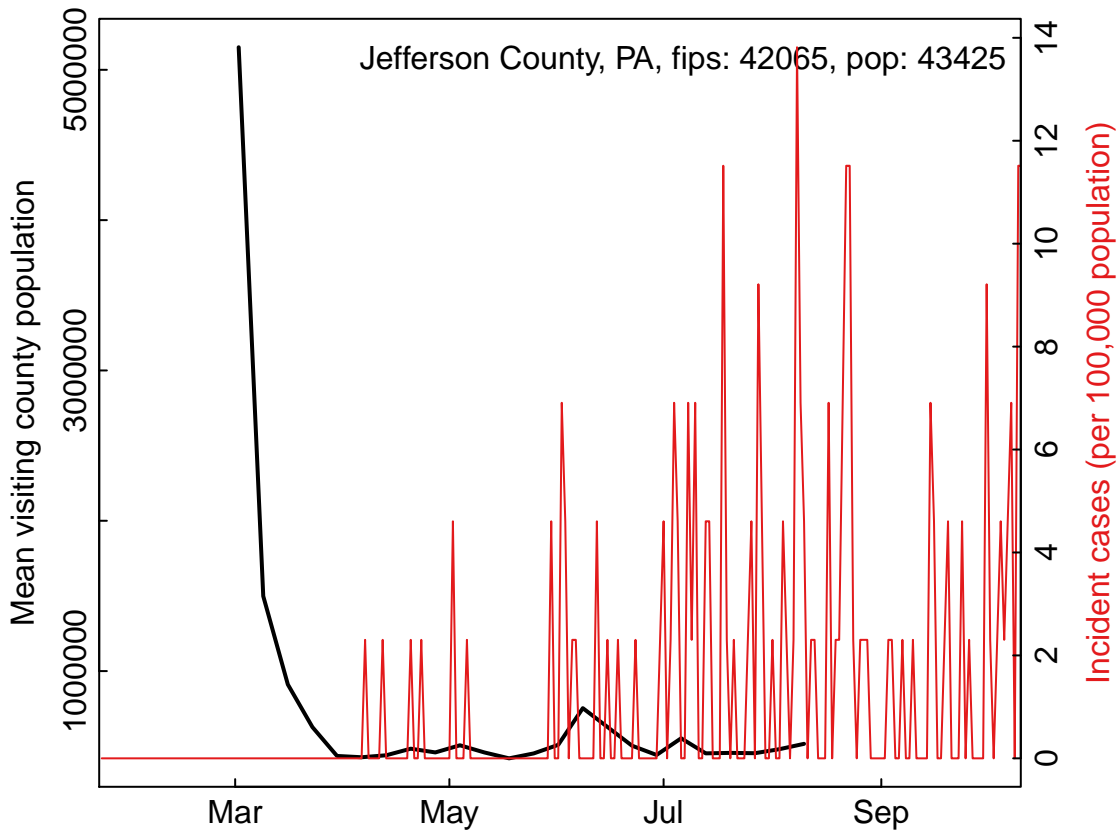

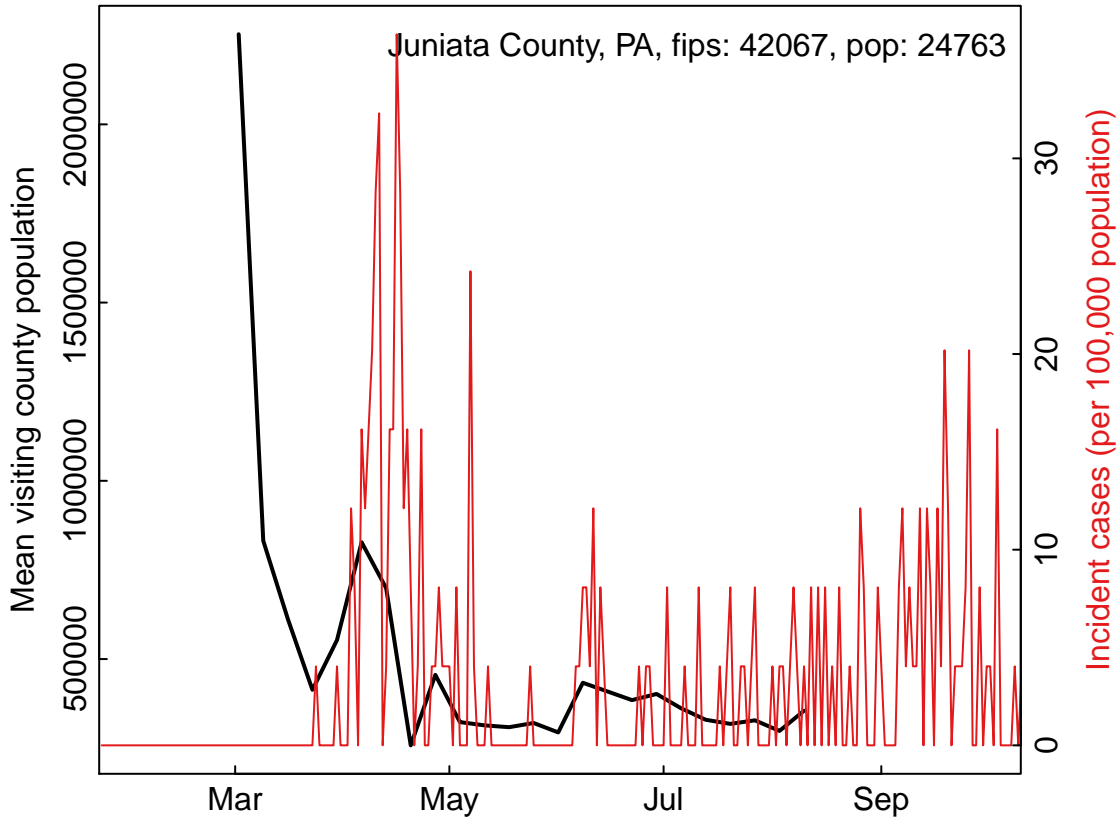

Lackawanna County, PA, fips: 42069, pop: 209674

Mean visiting county population

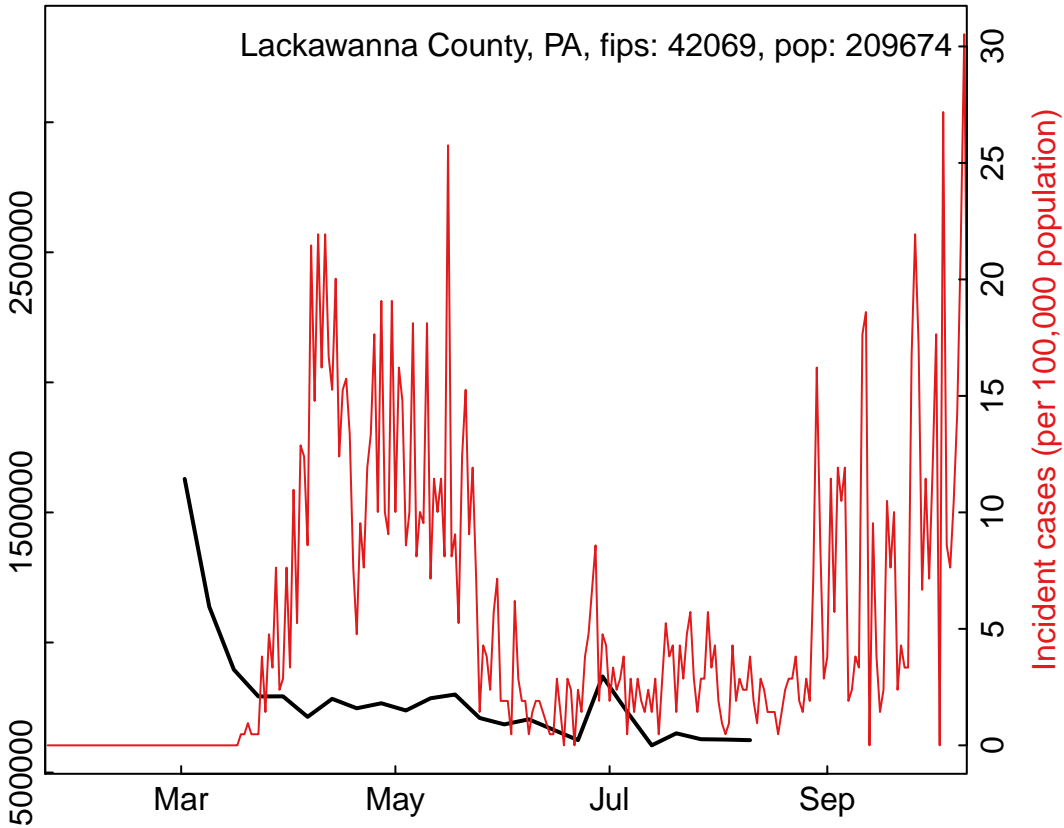

Incident cases (per 100,000 population)

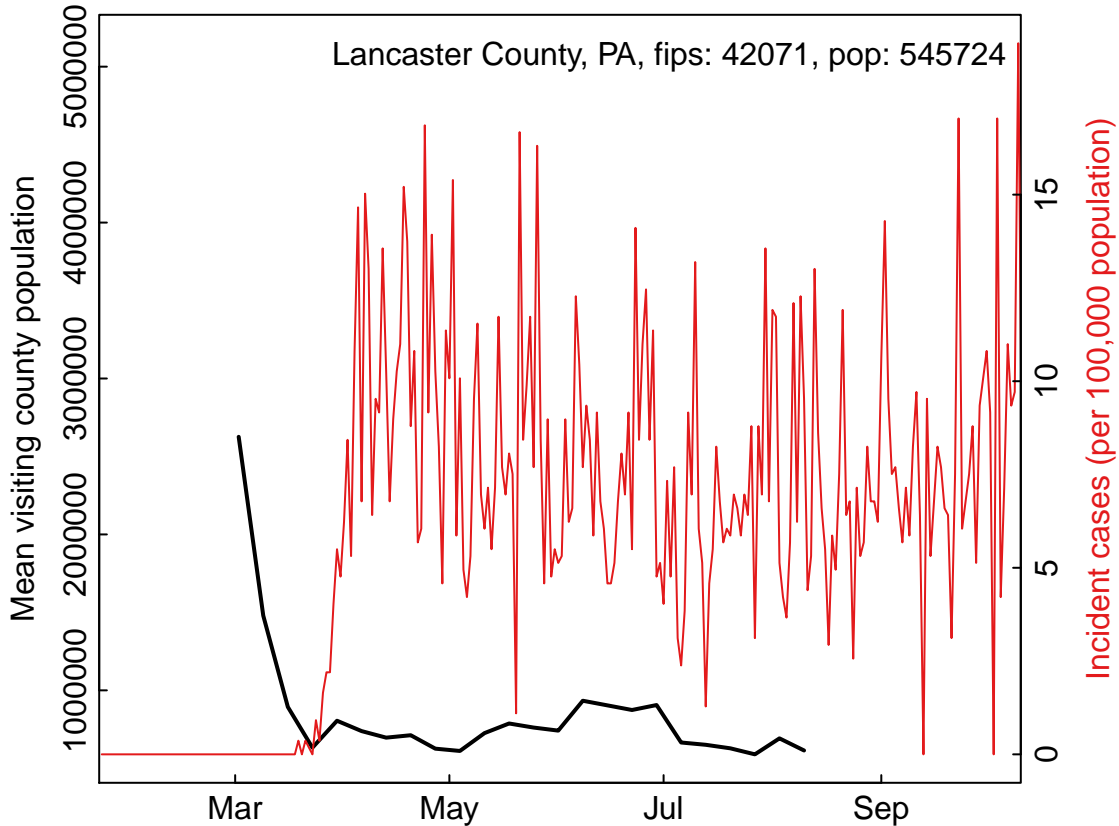

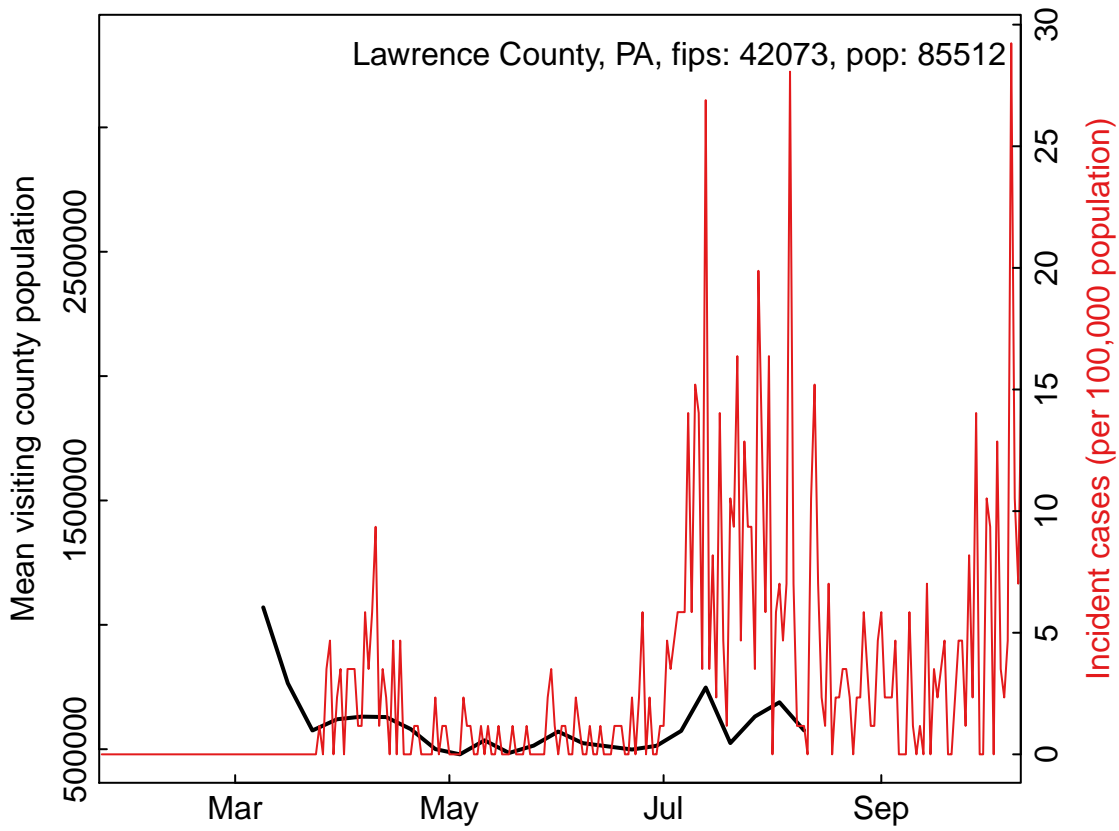



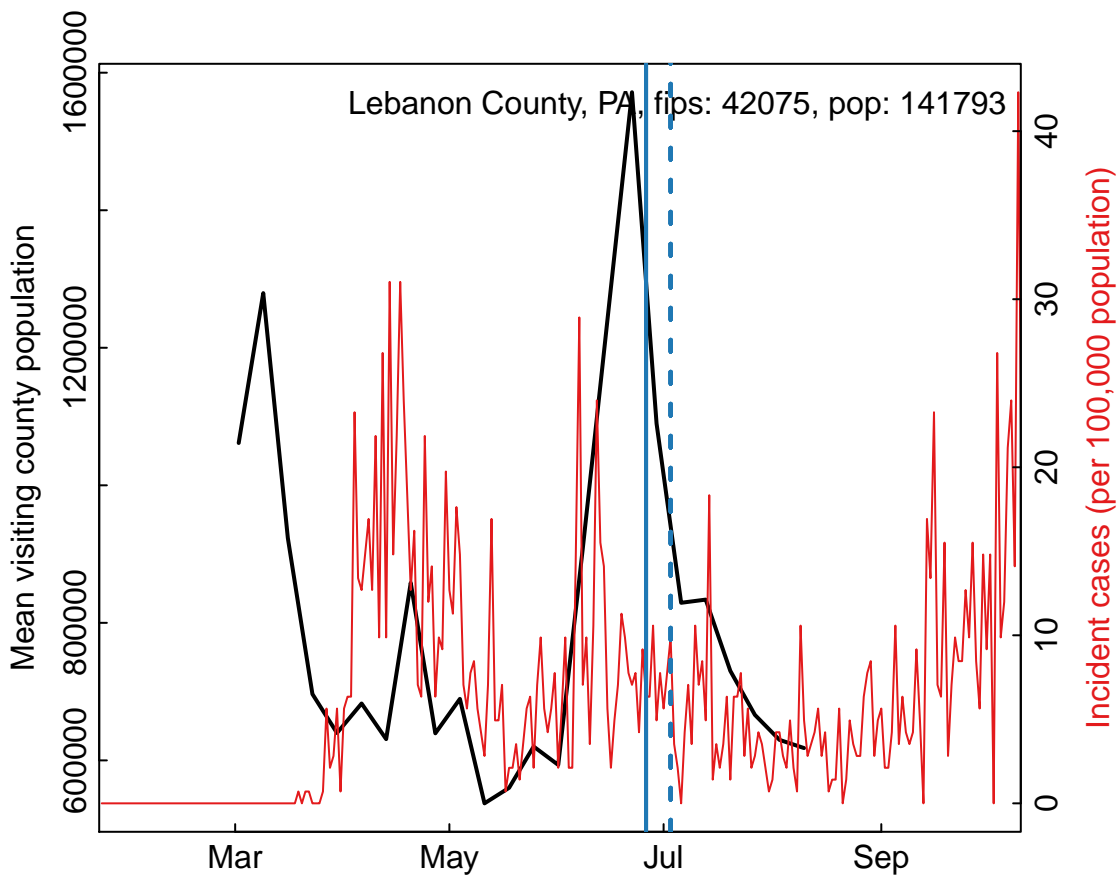

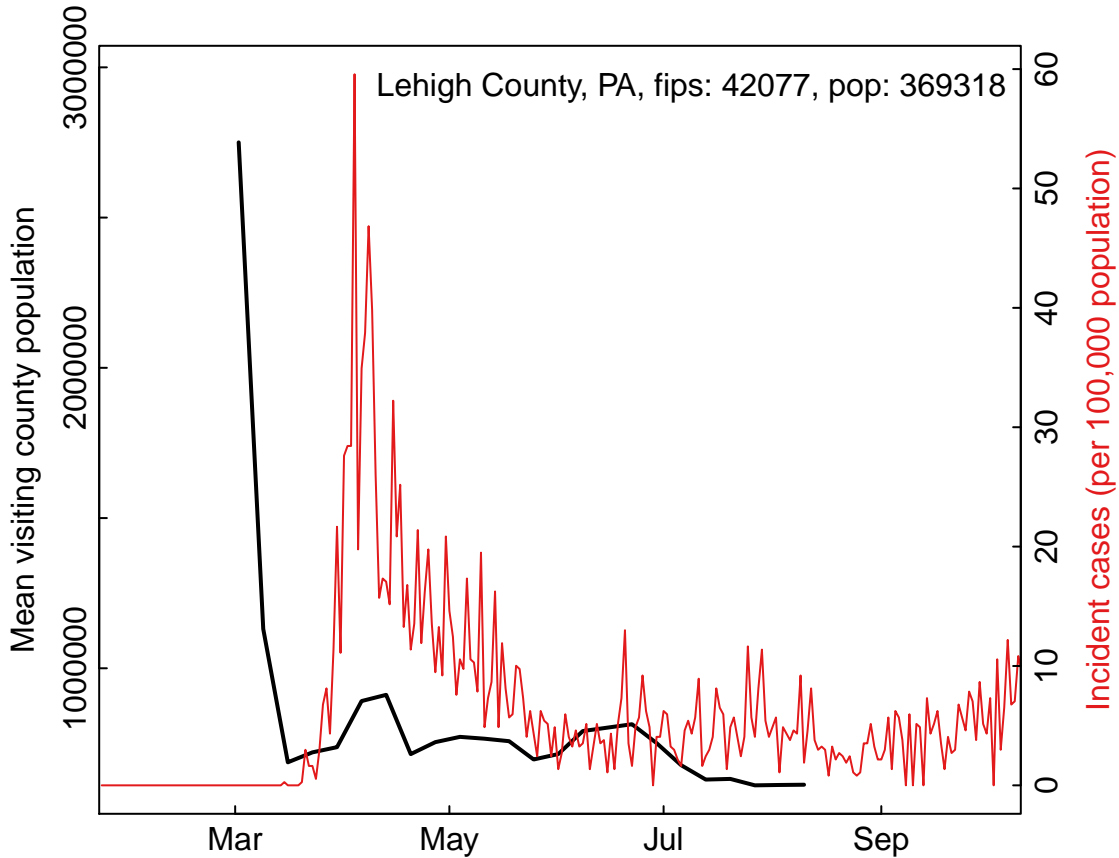

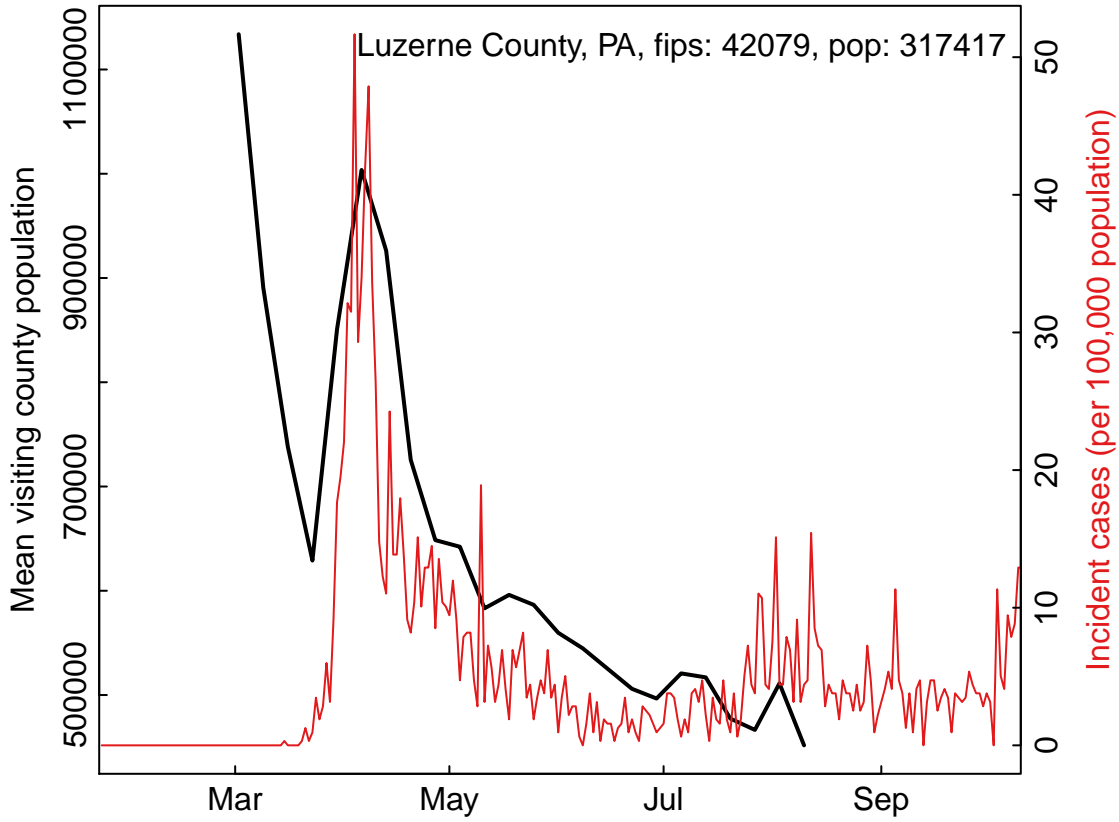

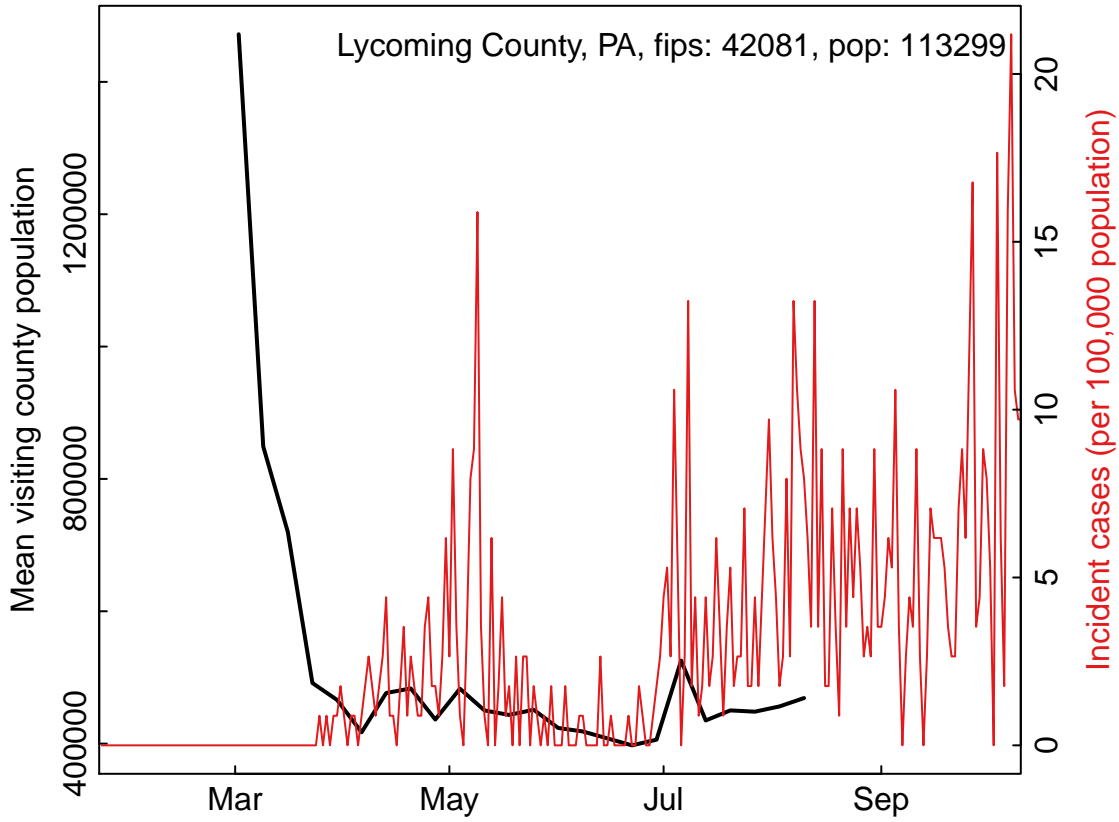

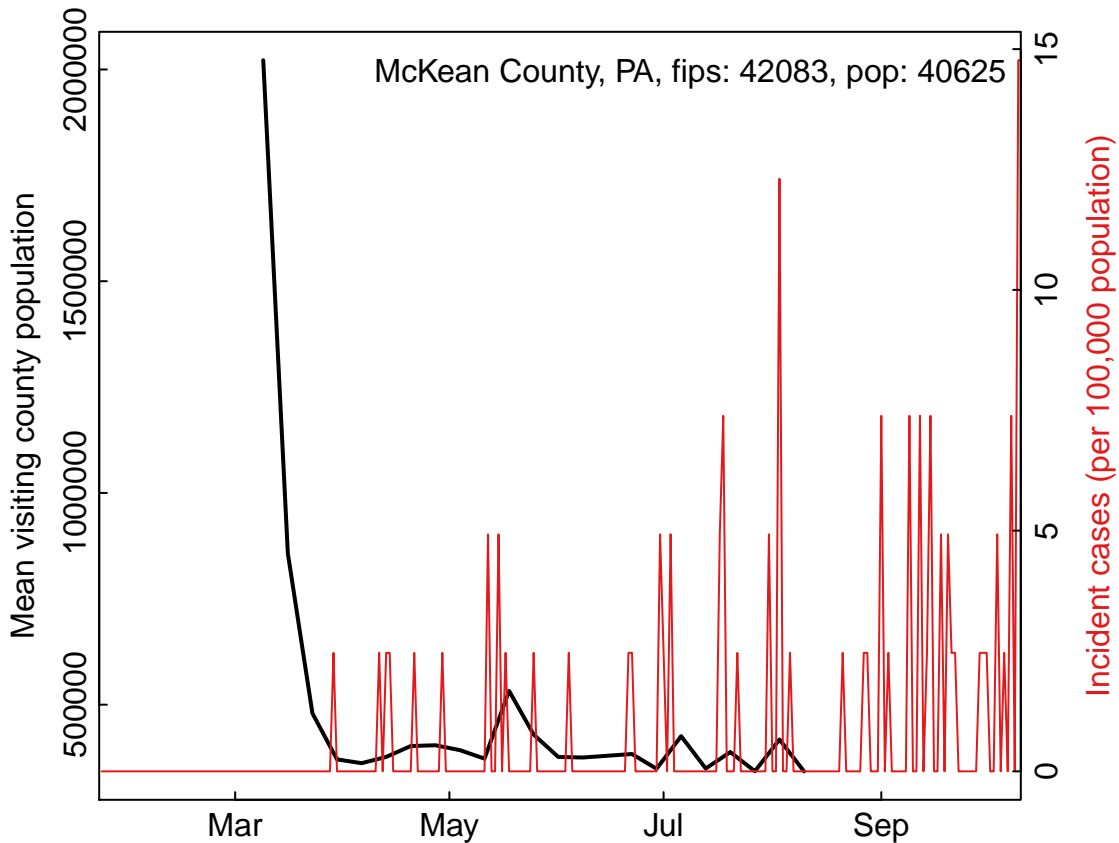

Mercer County, PA, fips: 42085, pop: 109424

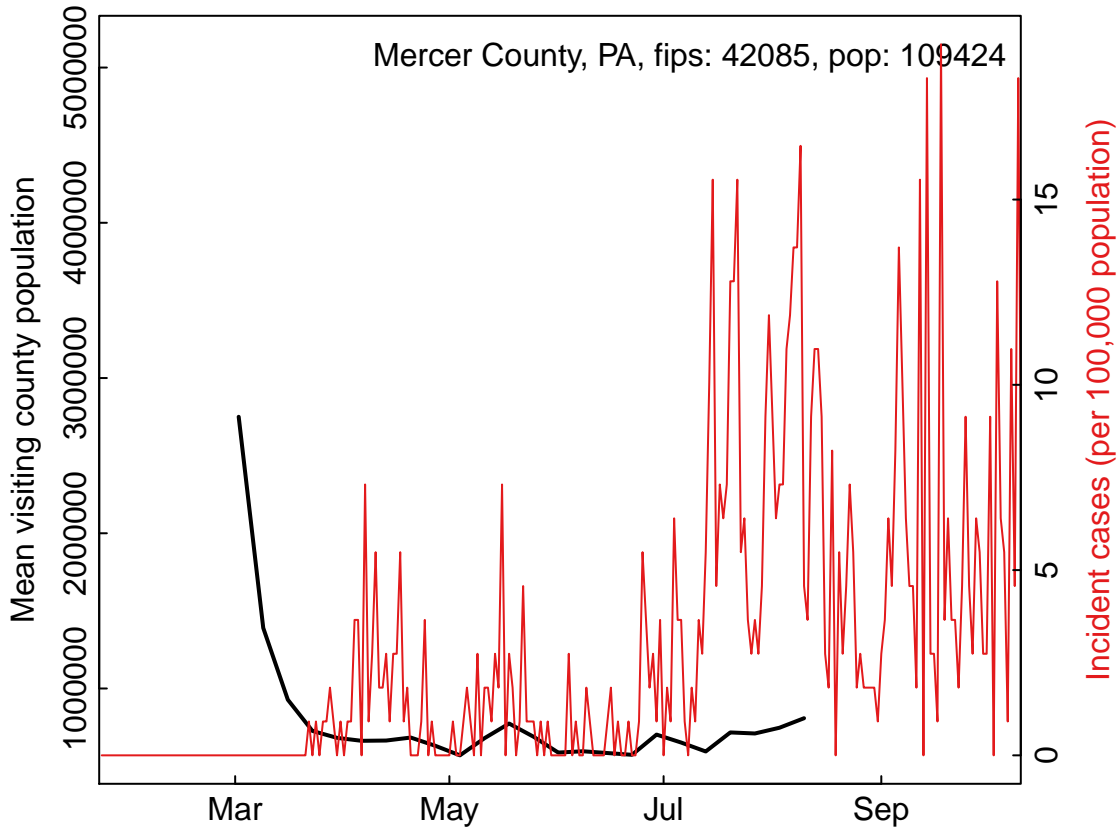

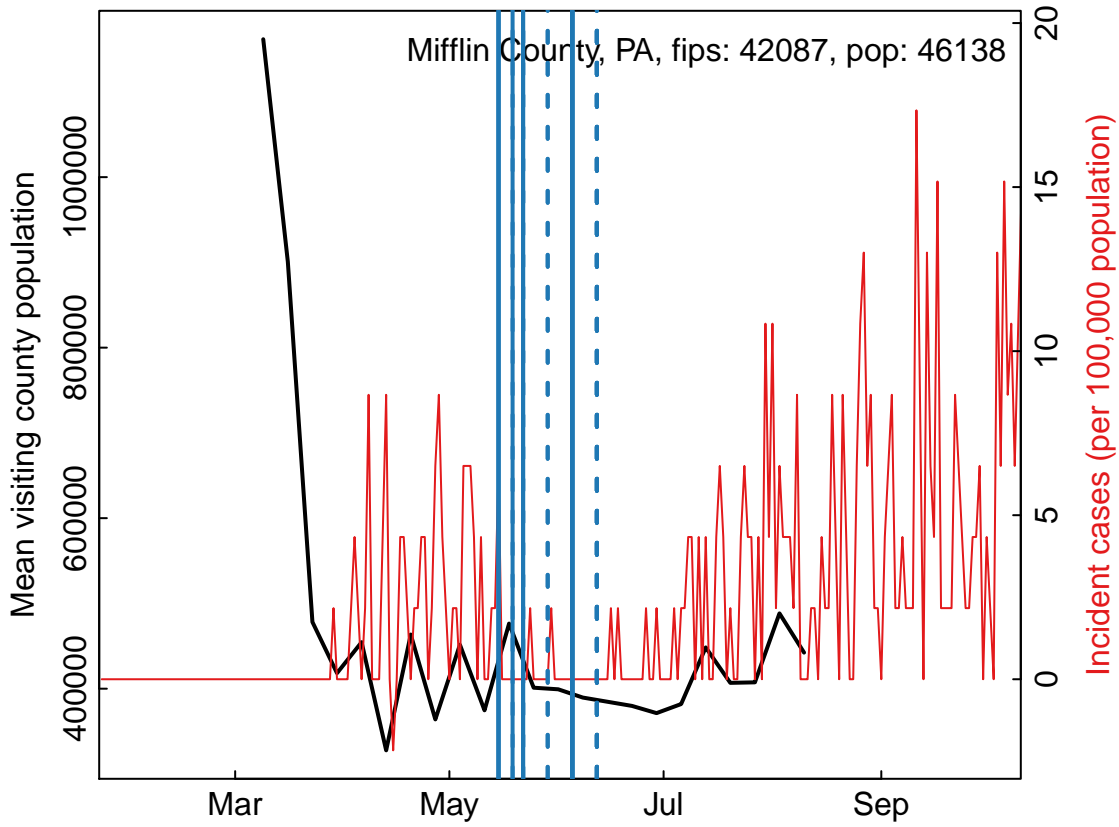

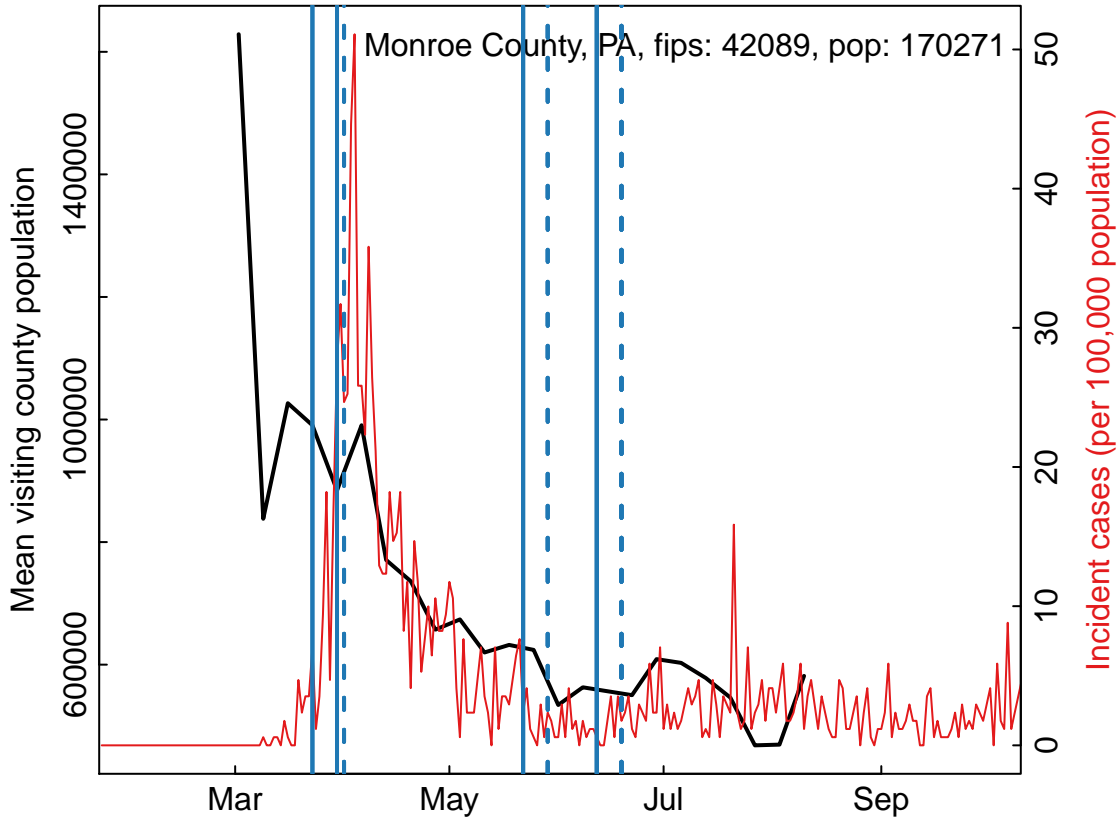



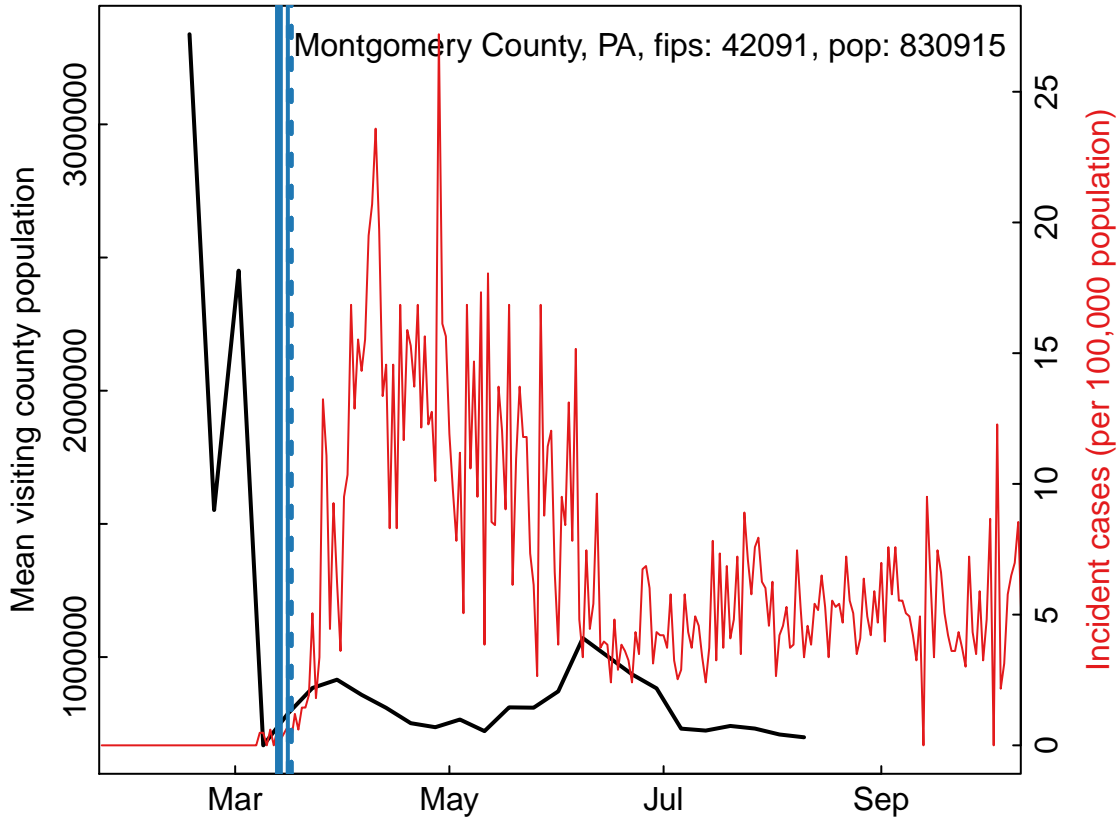

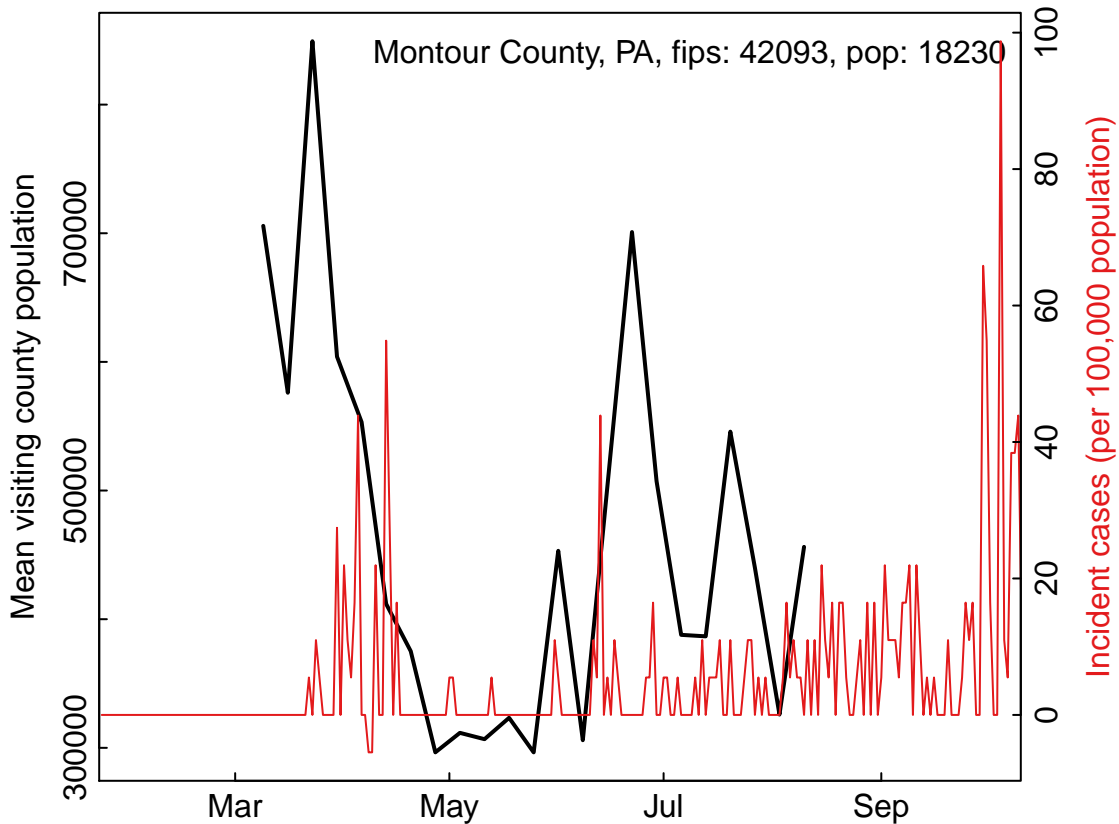

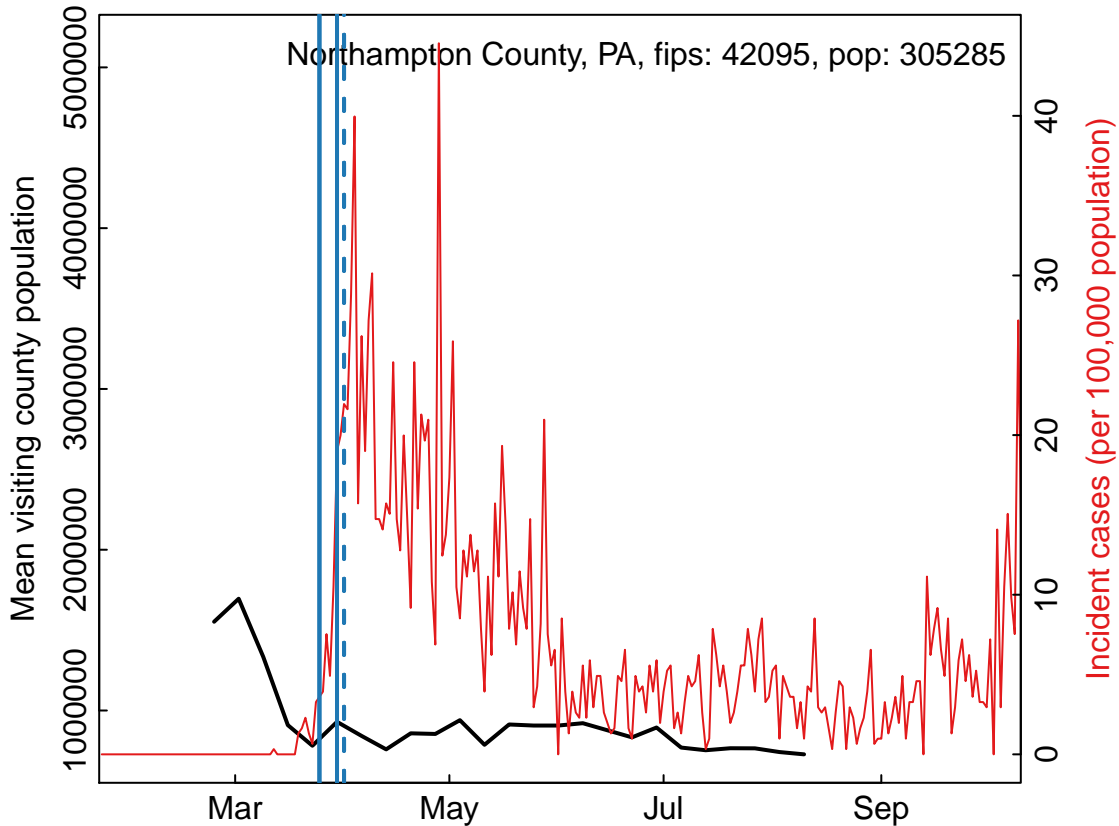

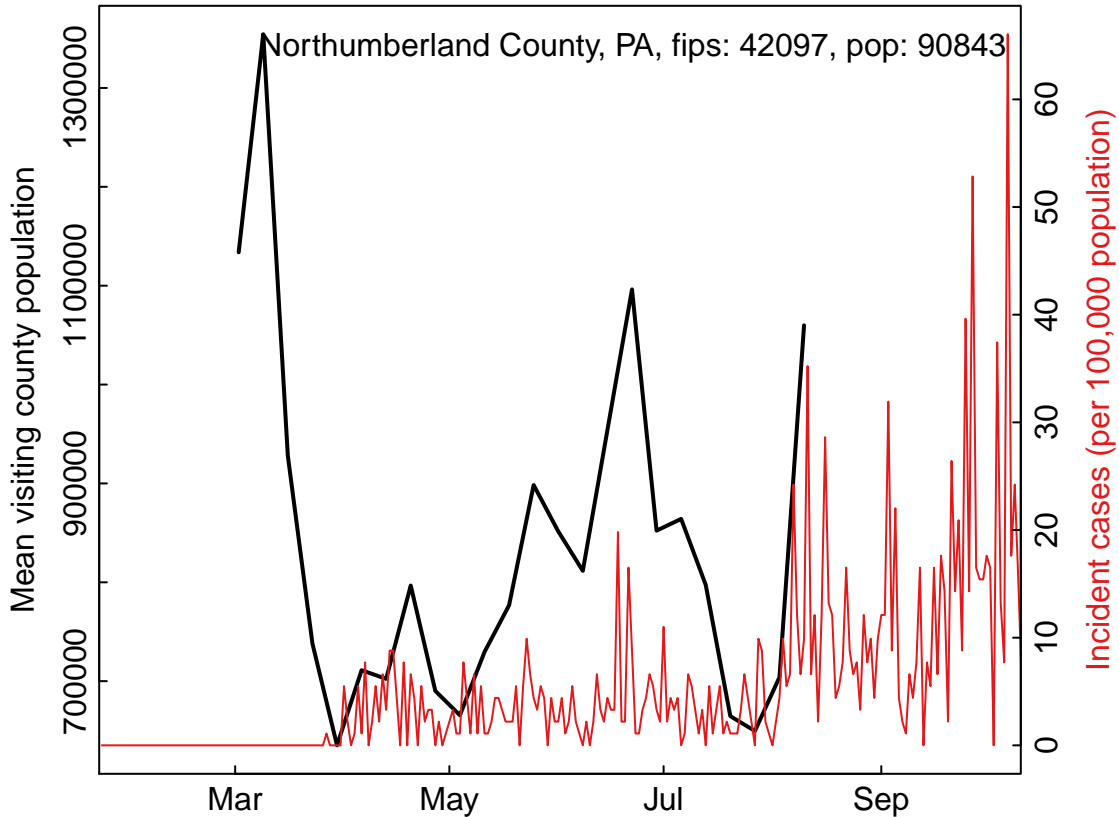

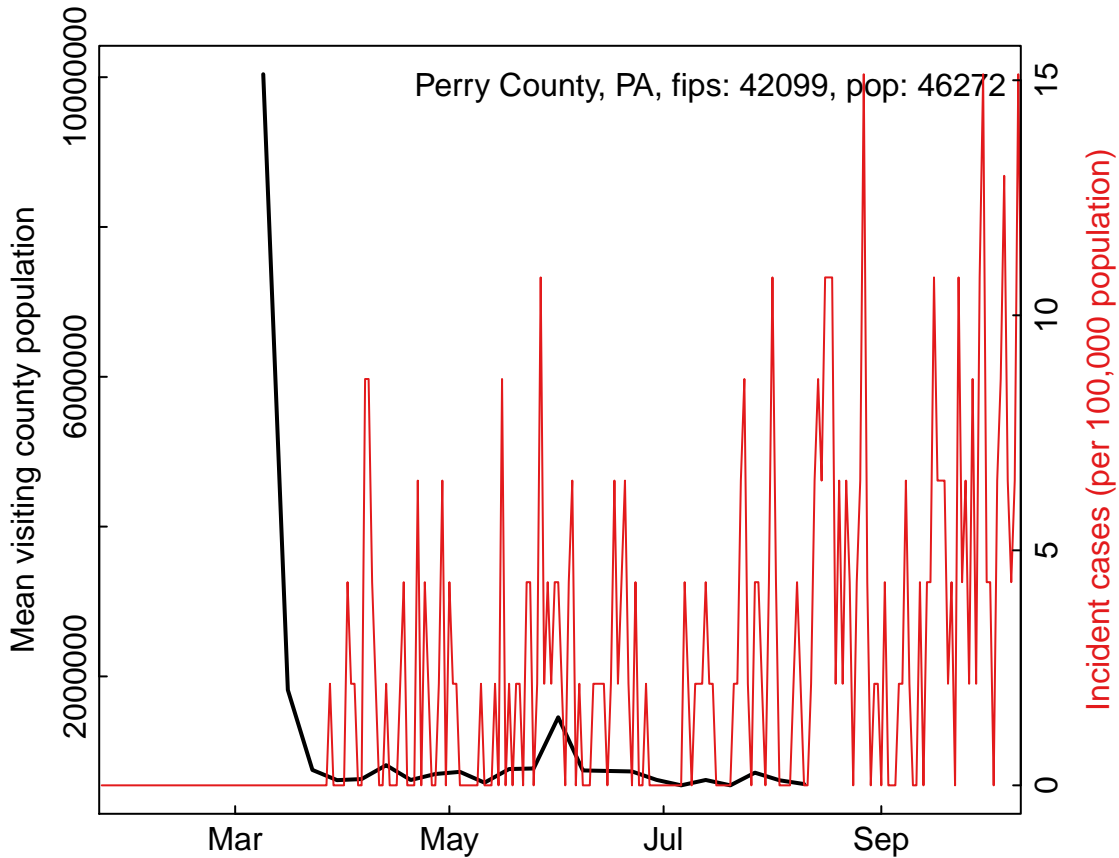

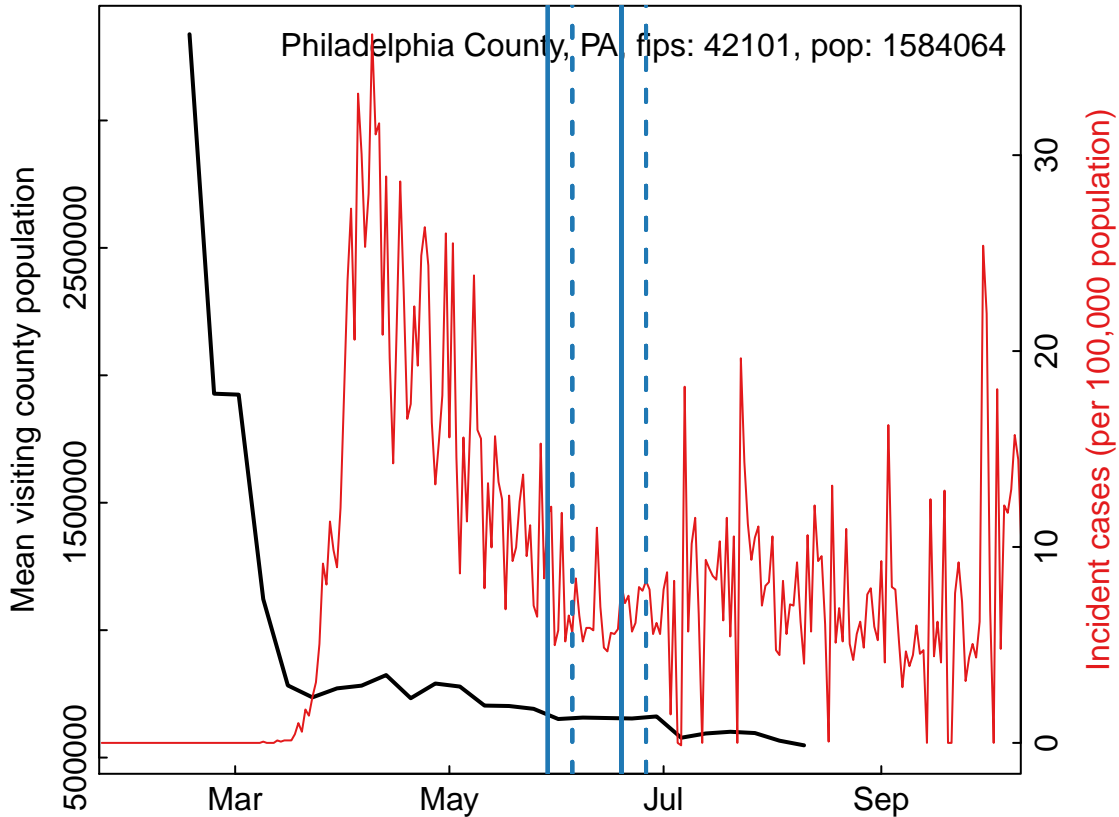

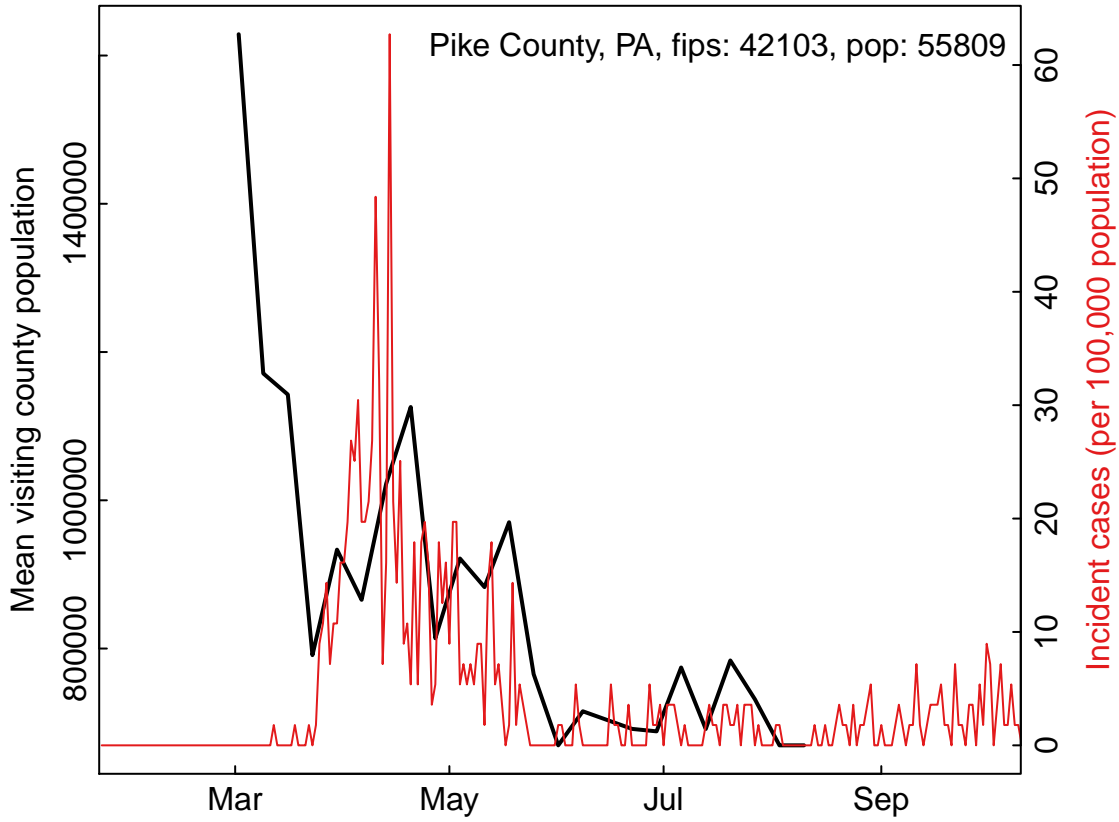

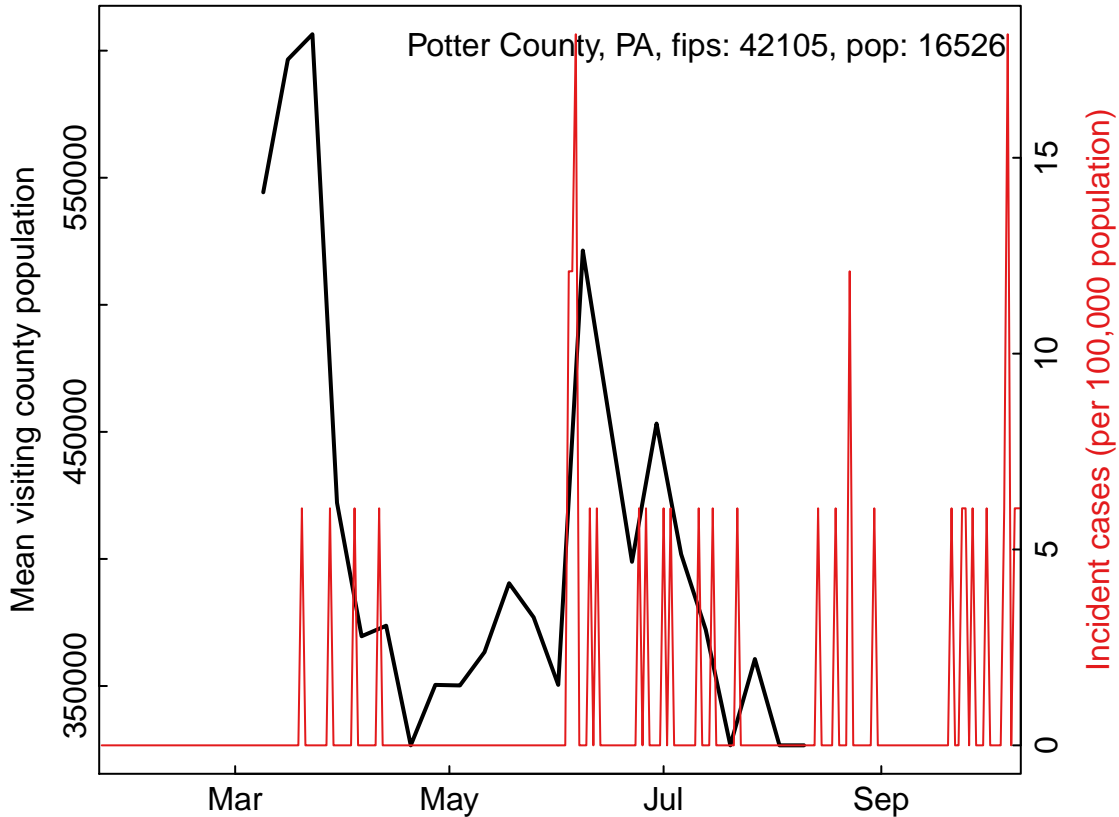



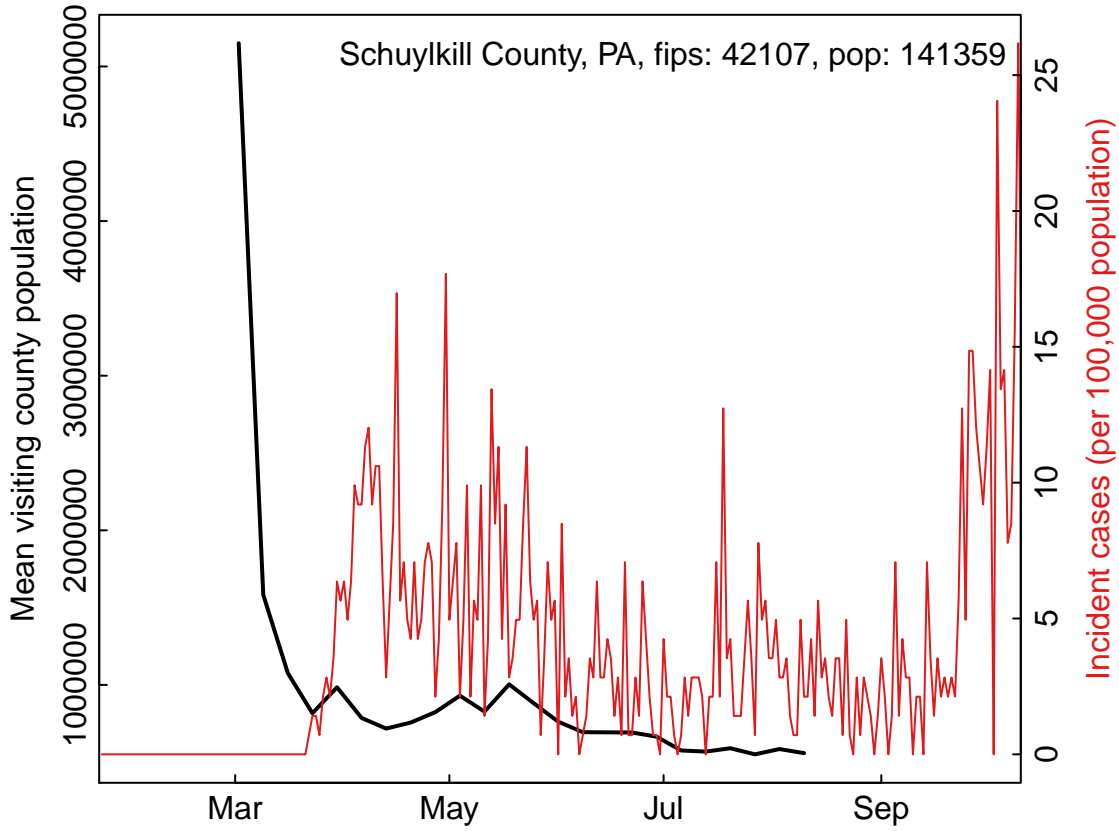

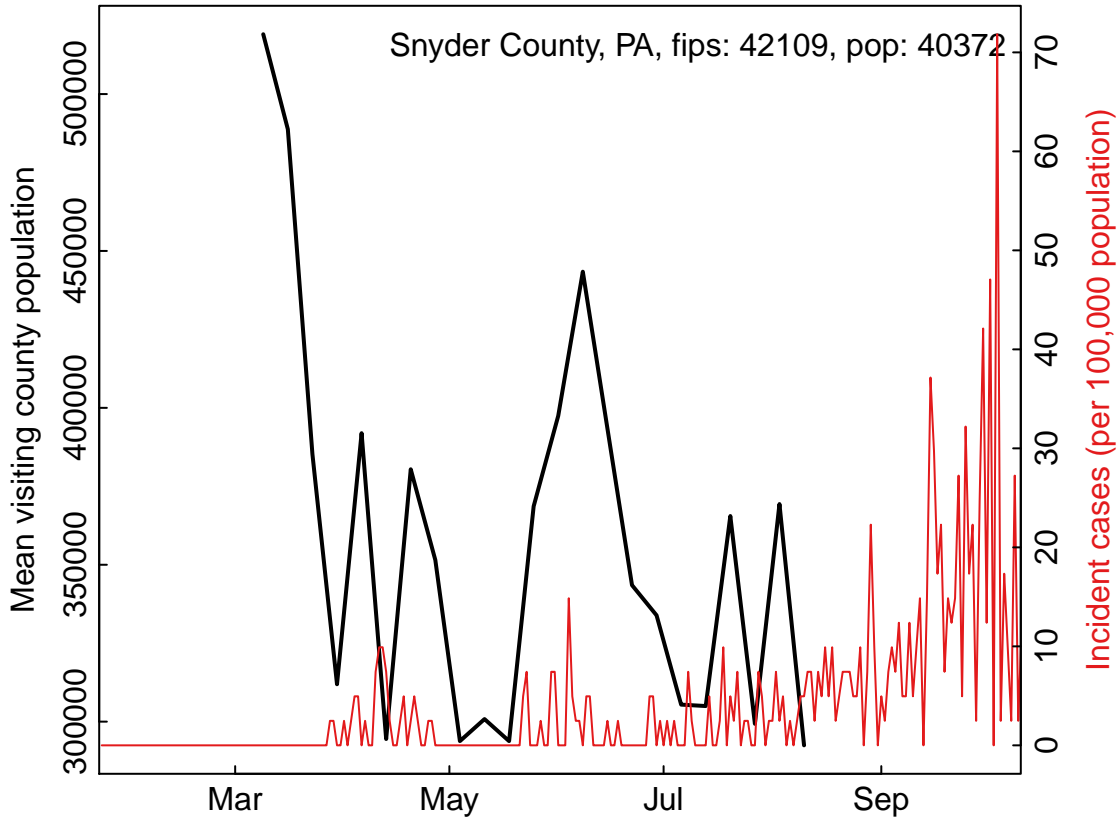

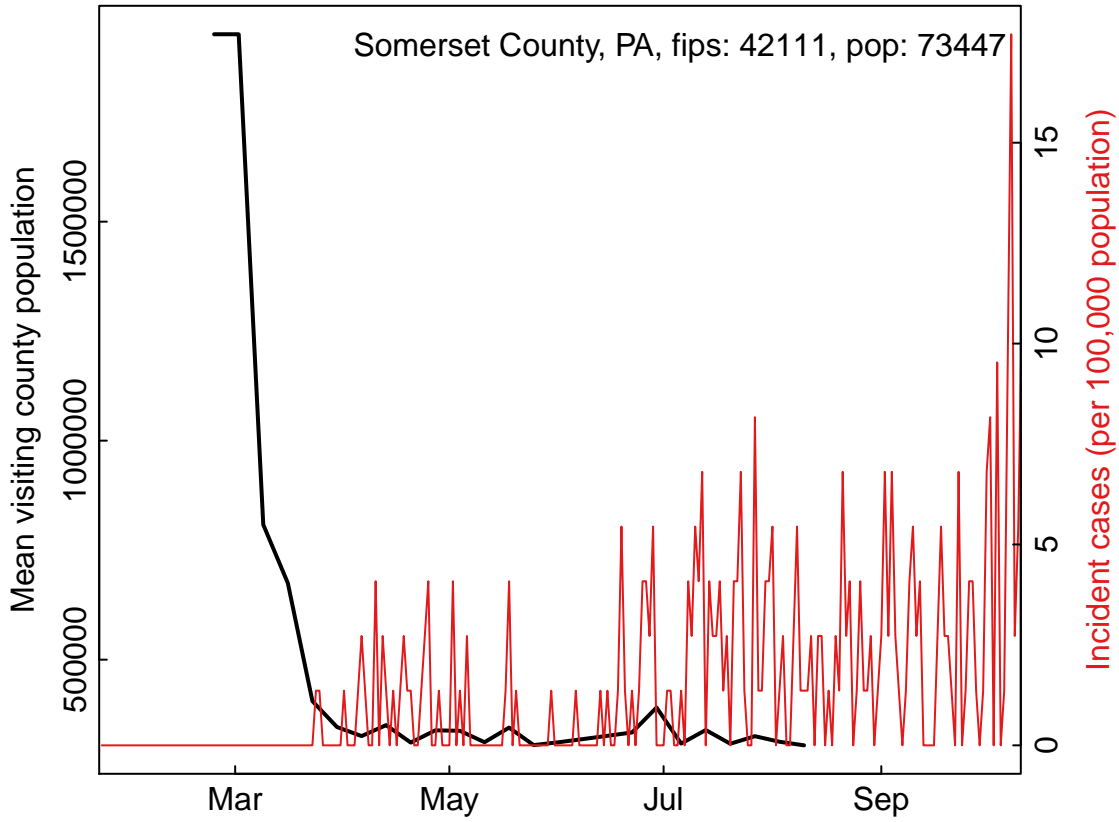

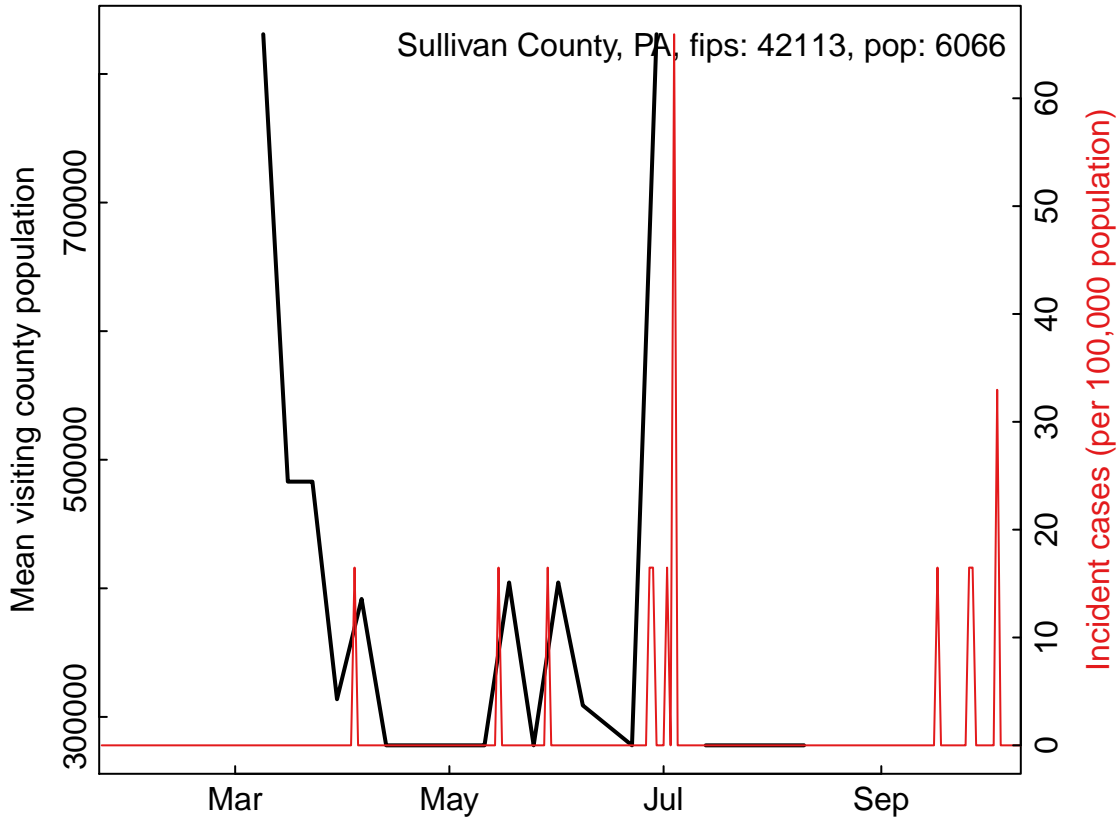

Susquehanna County, PA, fips: 42115, pop: 40328

Mean visiting county population

400000  
600000  
800000  
1000000

Mar

May

Jul

Sep

Incident cases (per 100,000 population)

0  
10  
20  
30

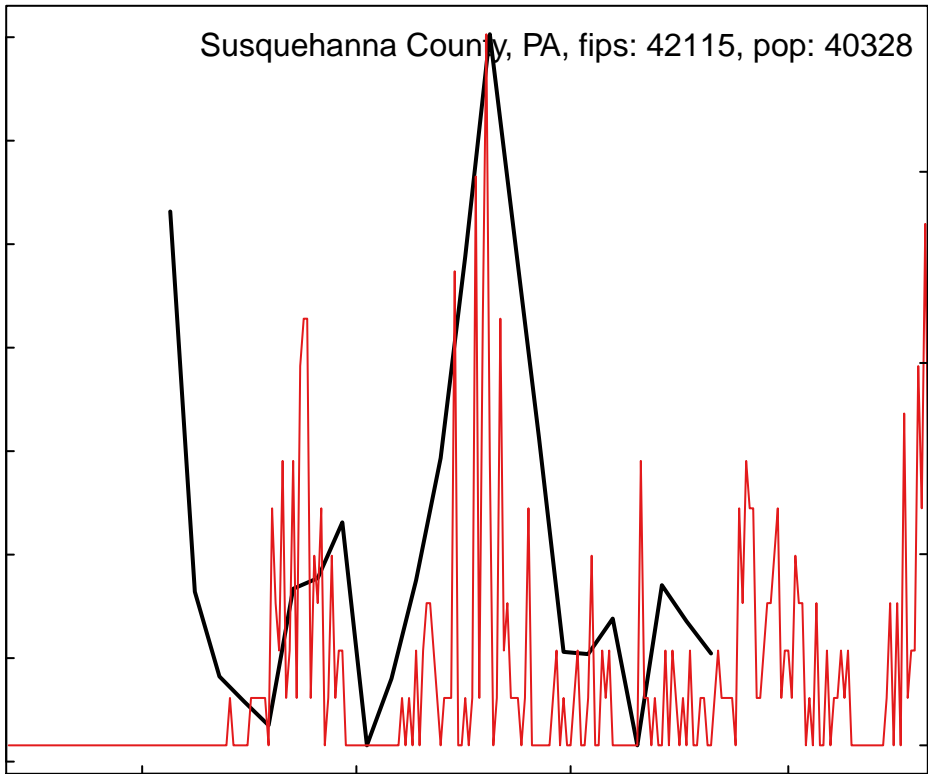

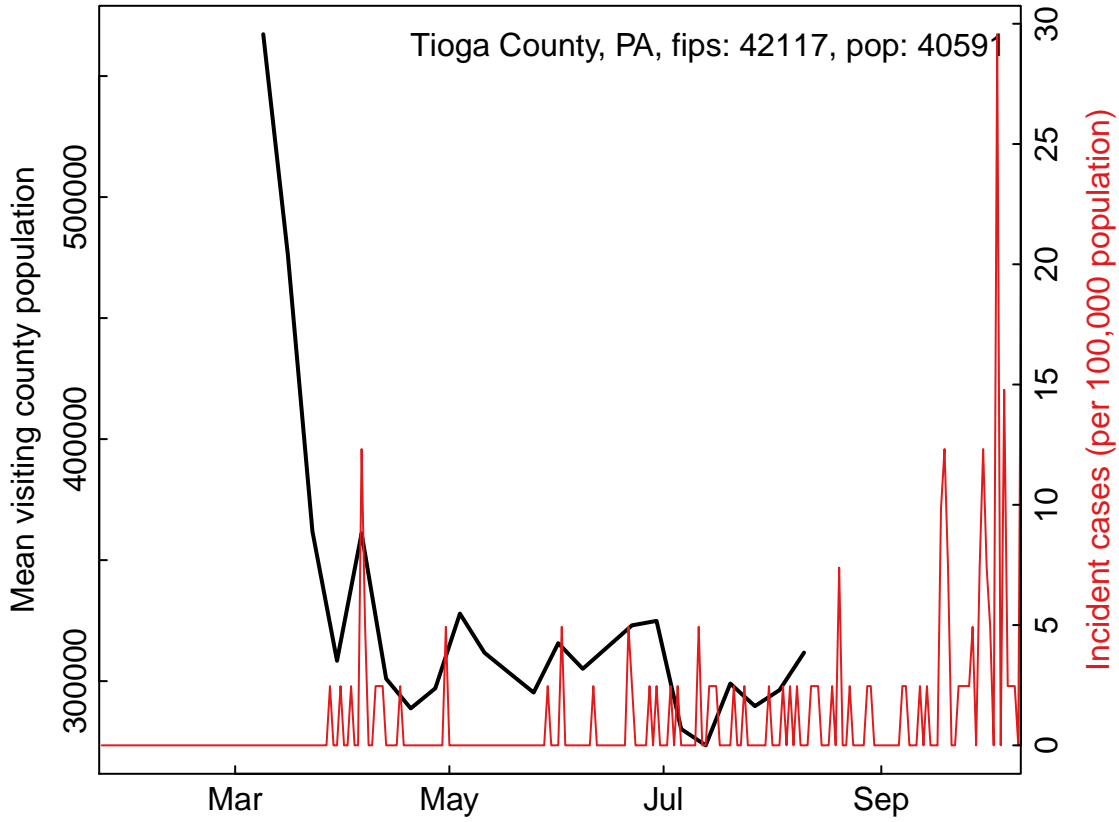

Union County, PA, fips: 42119, pop: 44923

Mean visiting county population

2500000  
1500000  
500000

Mar

May

Jul

Sep

150

100

50

0

Incident cases (per 100,000 population)

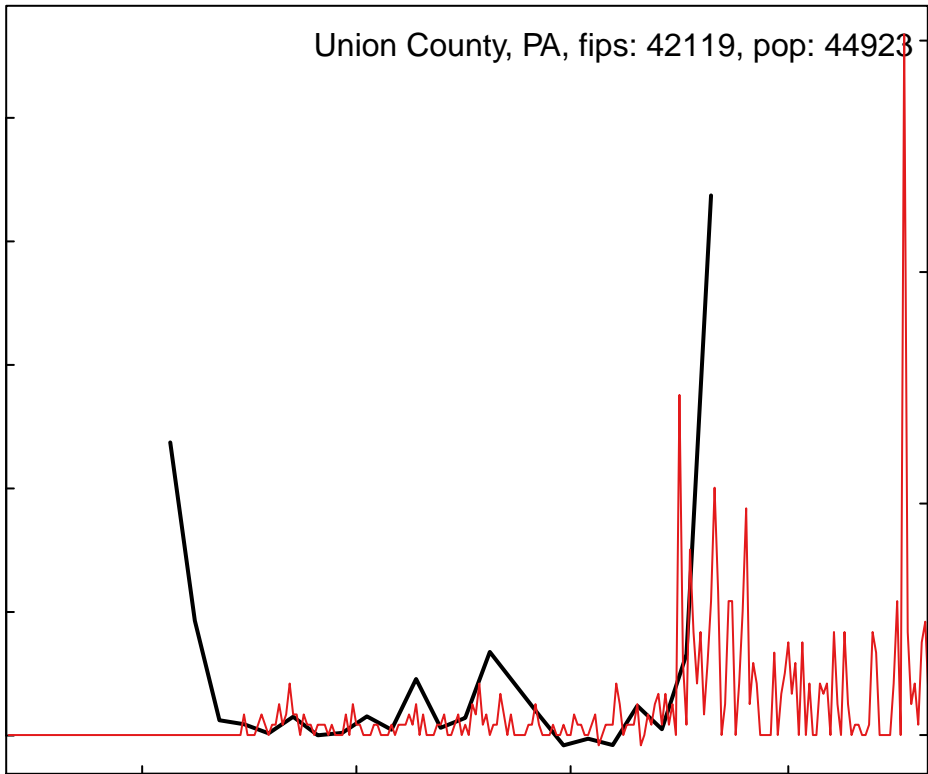

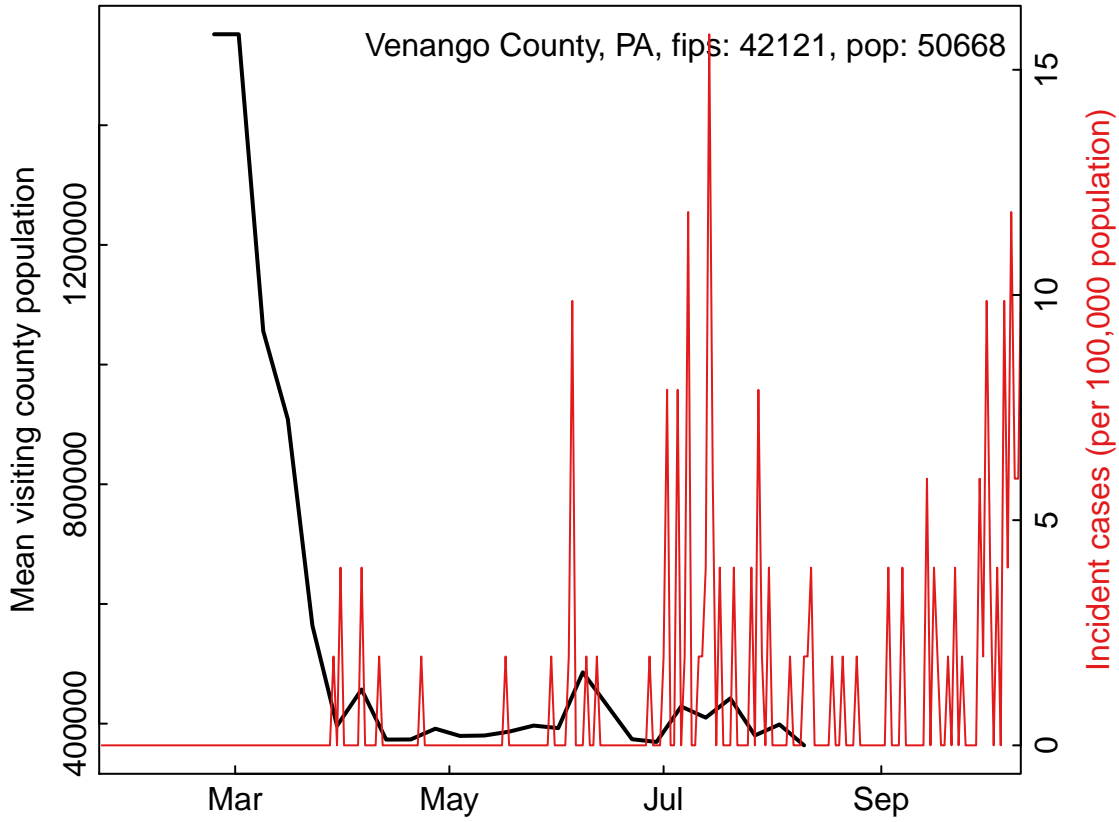



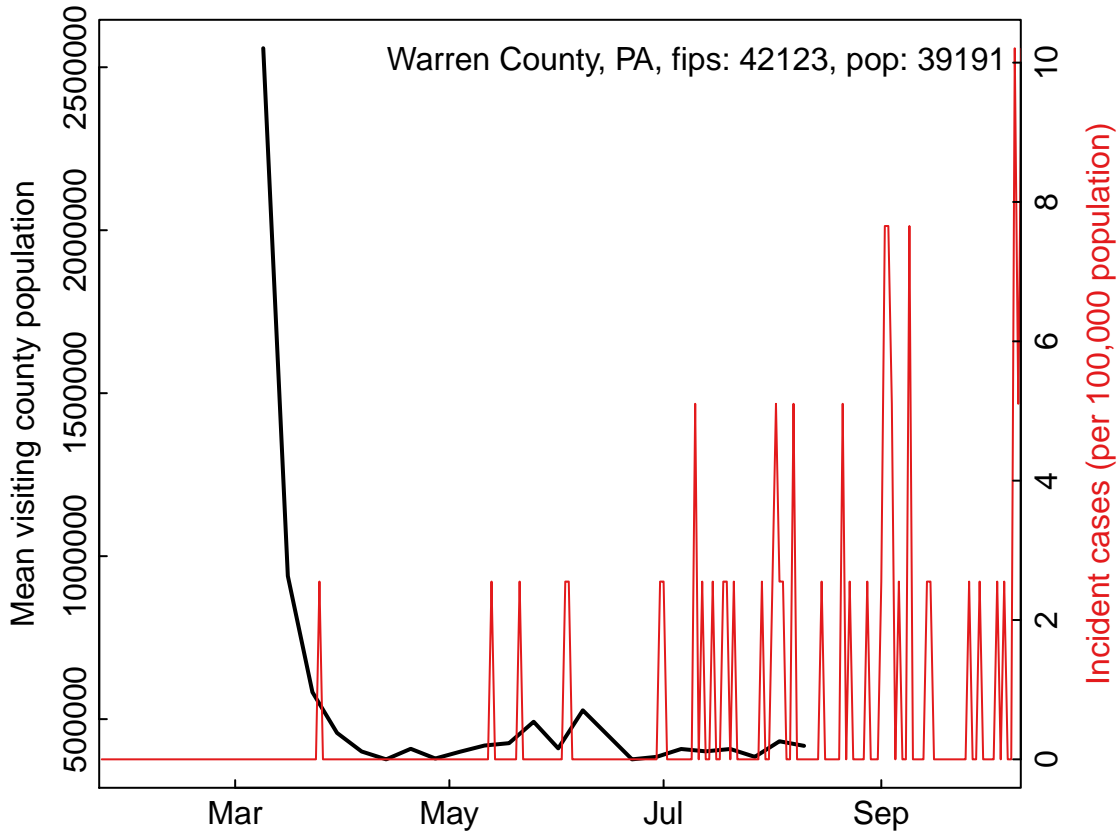

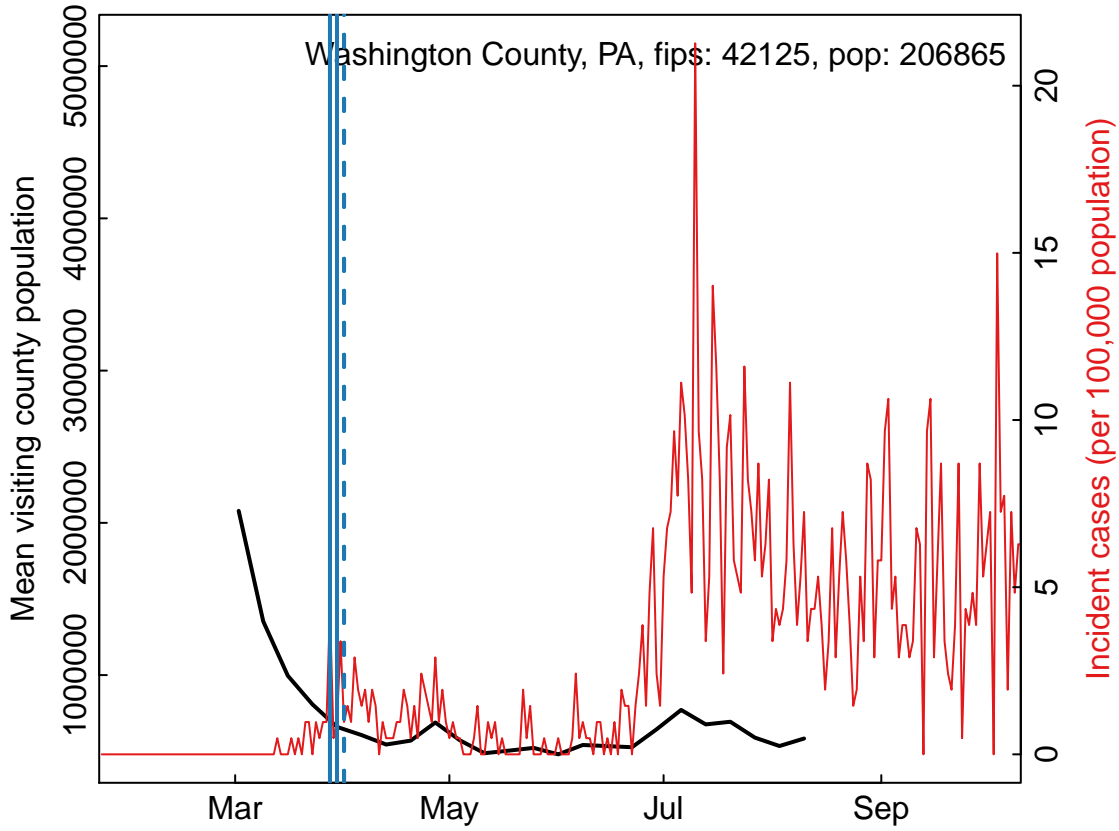

Wayne County, PA, fips: 42127, pop: 51361

Mean visiting county population

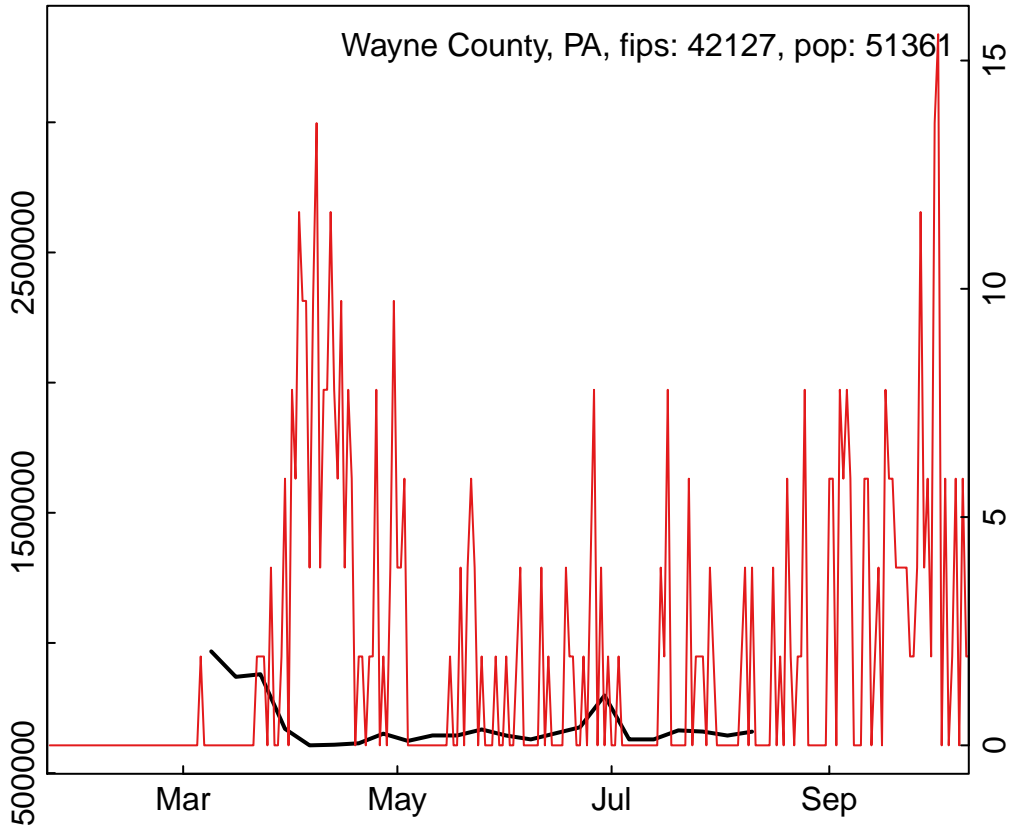

Incident cases (per 100,000 population)

Westmoreland County, PA, fips: 42129, pop: 348899

Mean visiting county population

500000  
1500000  
2500000

Mar May Jul Sep

Incident cases (per 100,000 population)

0 5 10 15 20 25

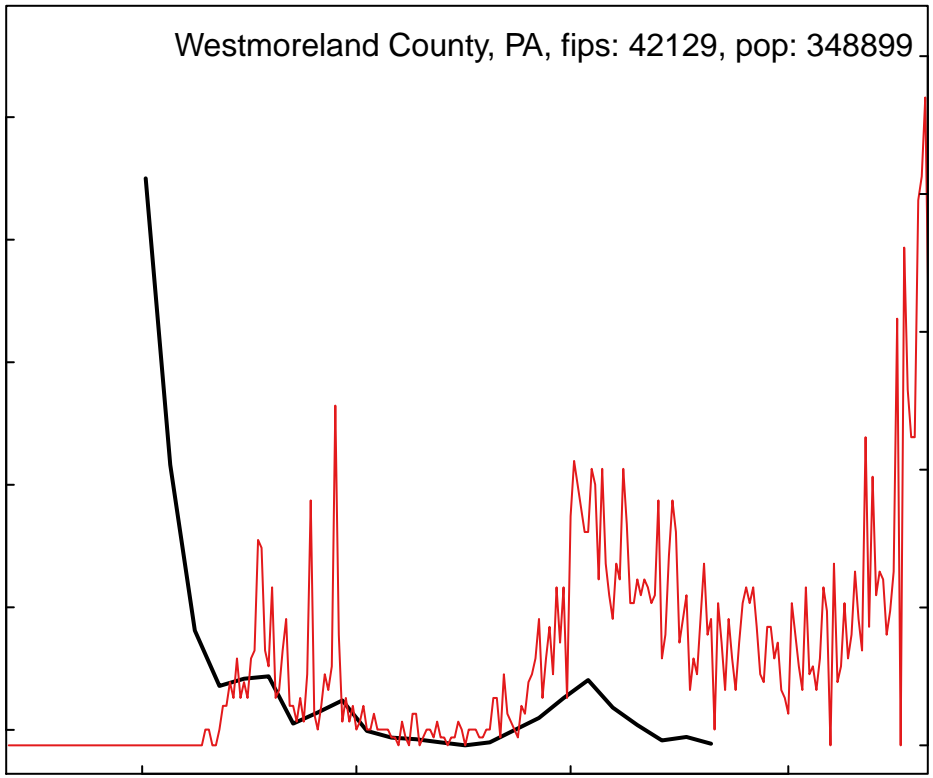

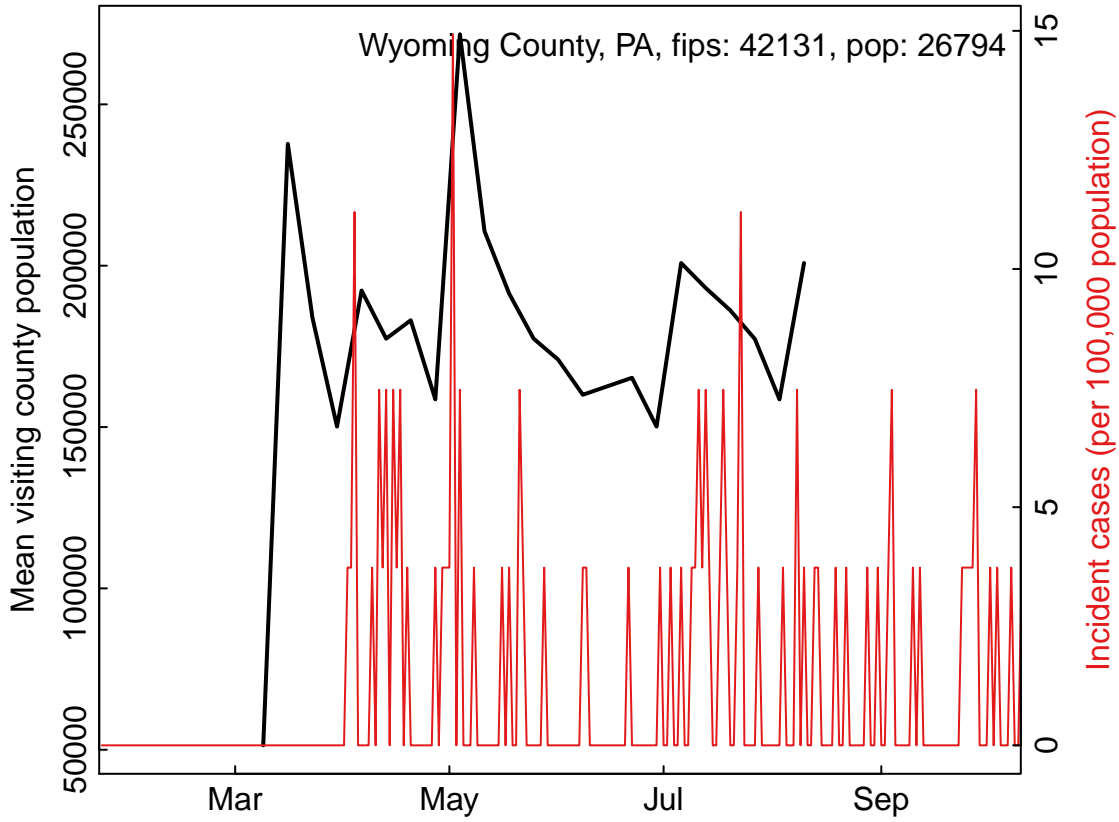

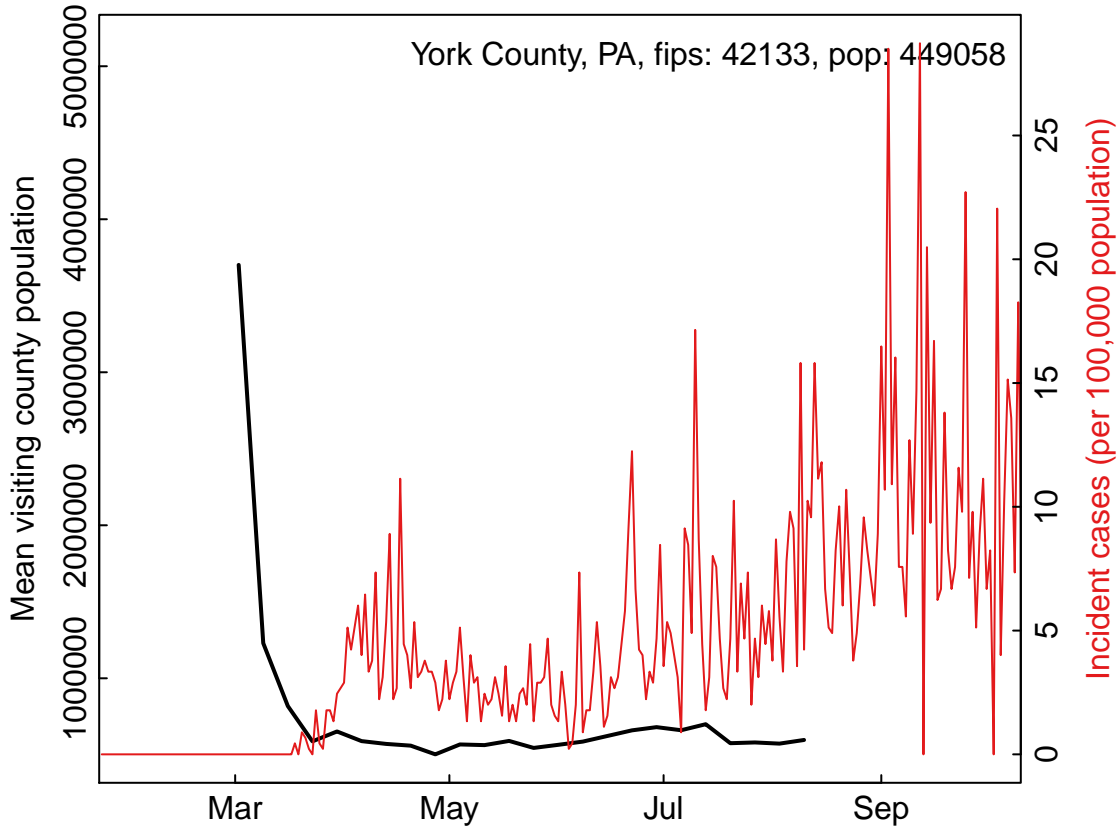

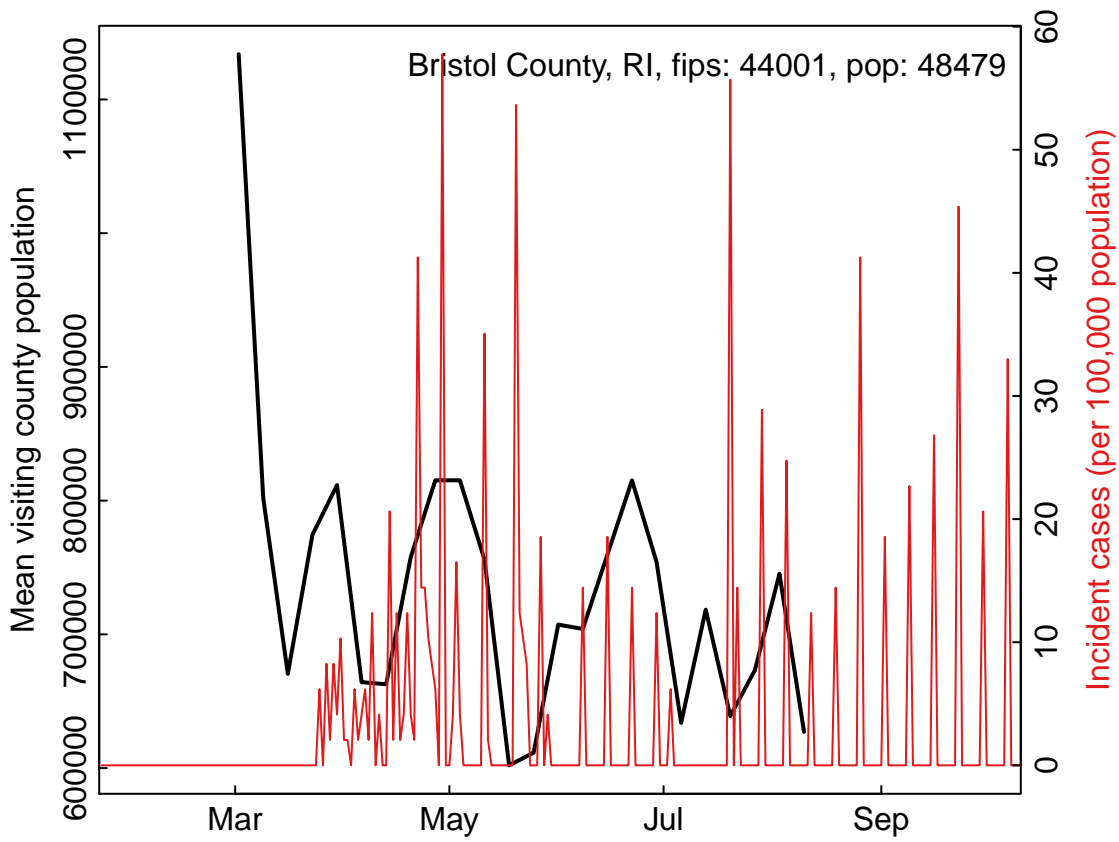

Kent County, RI, fips: 44003, pop: 164292

Mean visiting county population

600000  
800000  
1000000  
1200000  
1400000

Mar May Jul Sep

Incident cases (per 100,000 population)

0  
20  
40  
60  
80

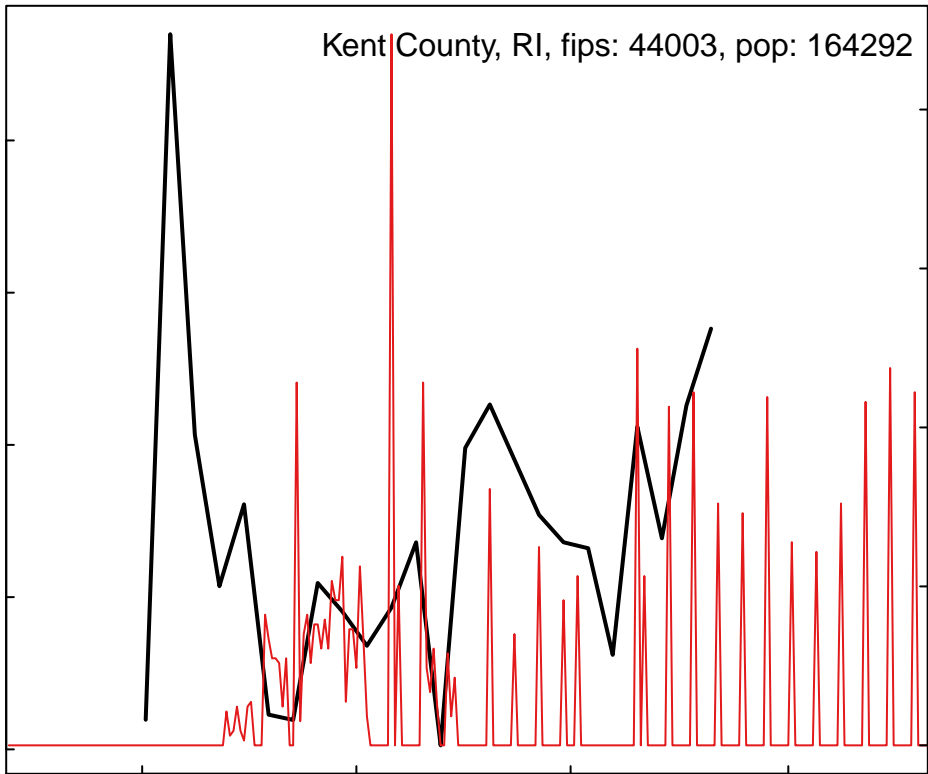



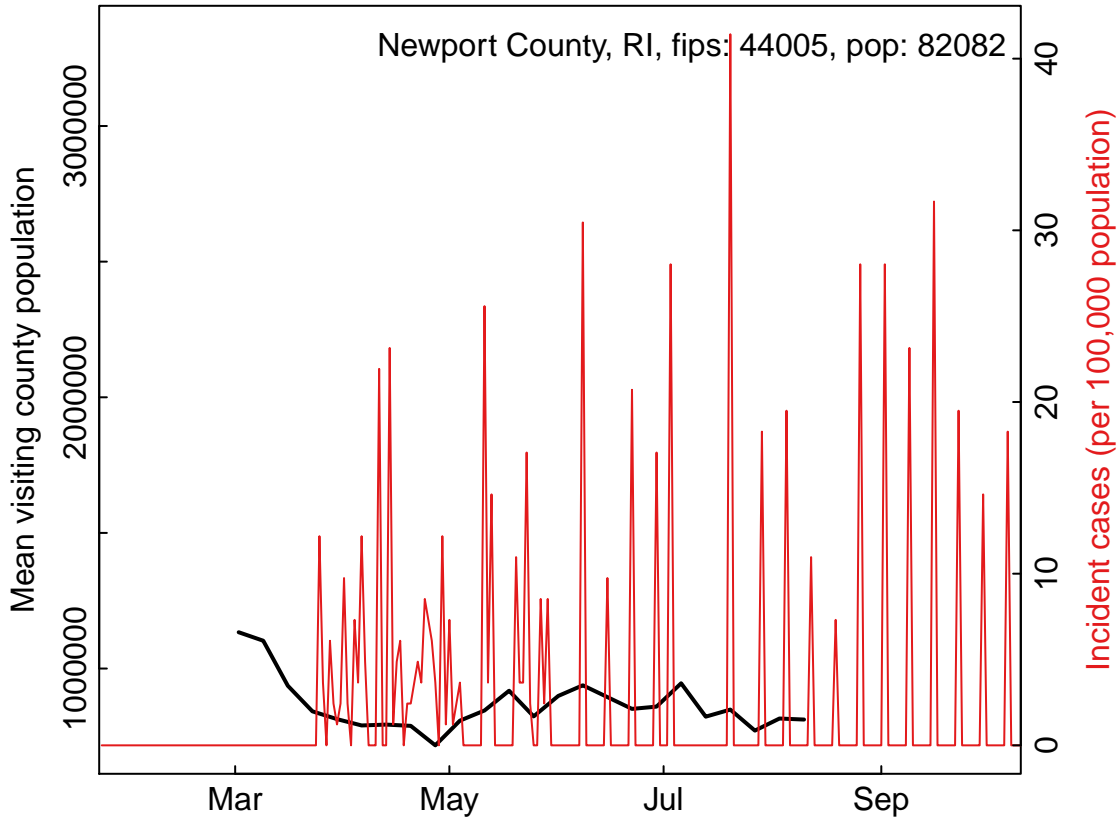

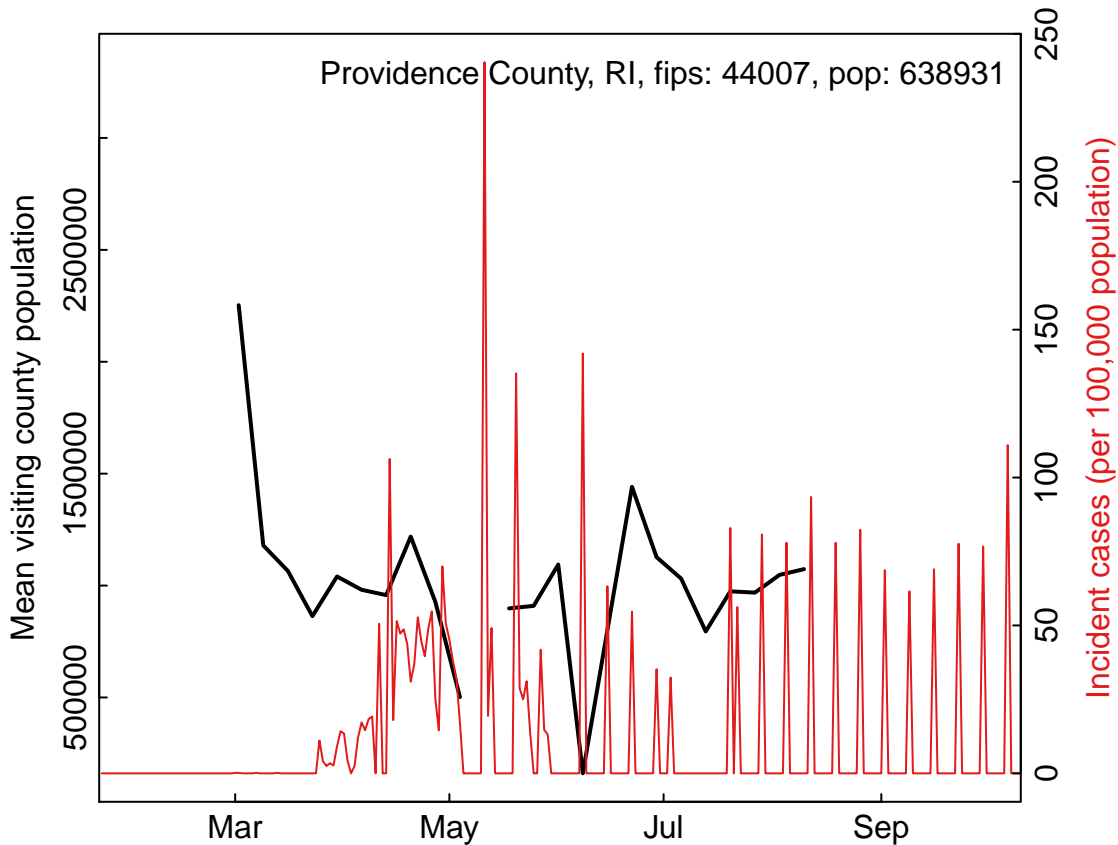

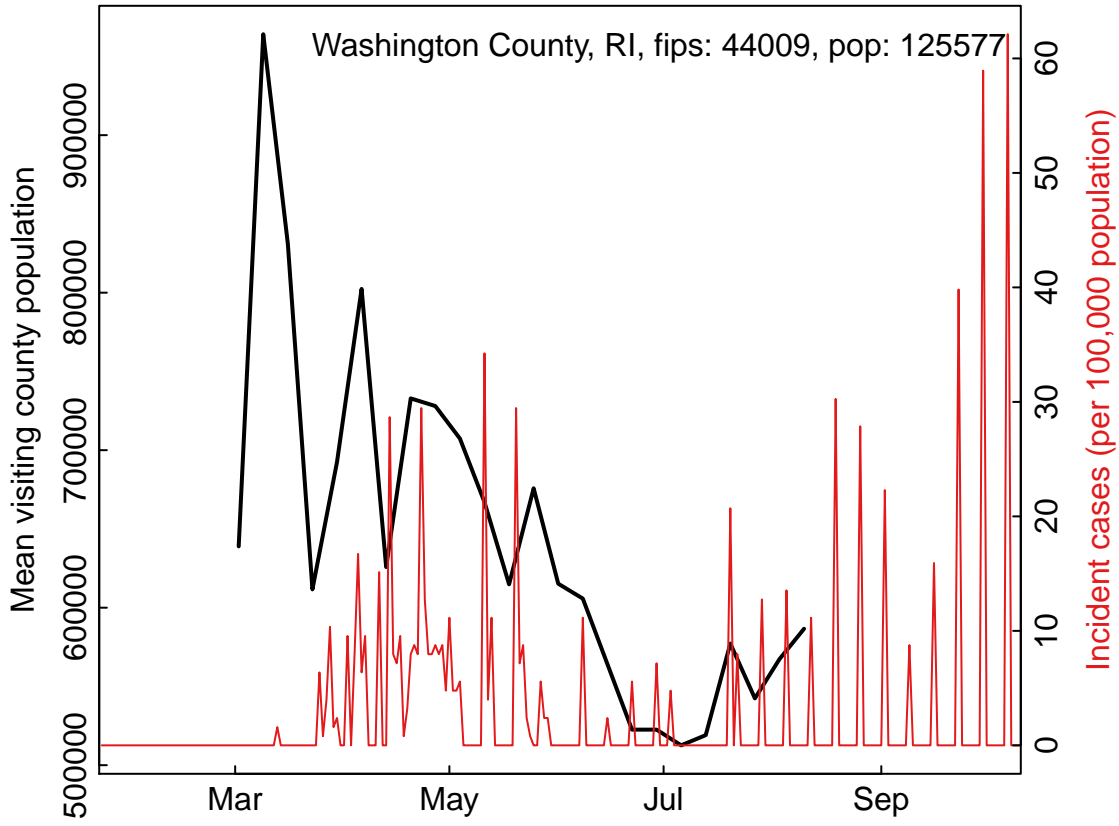

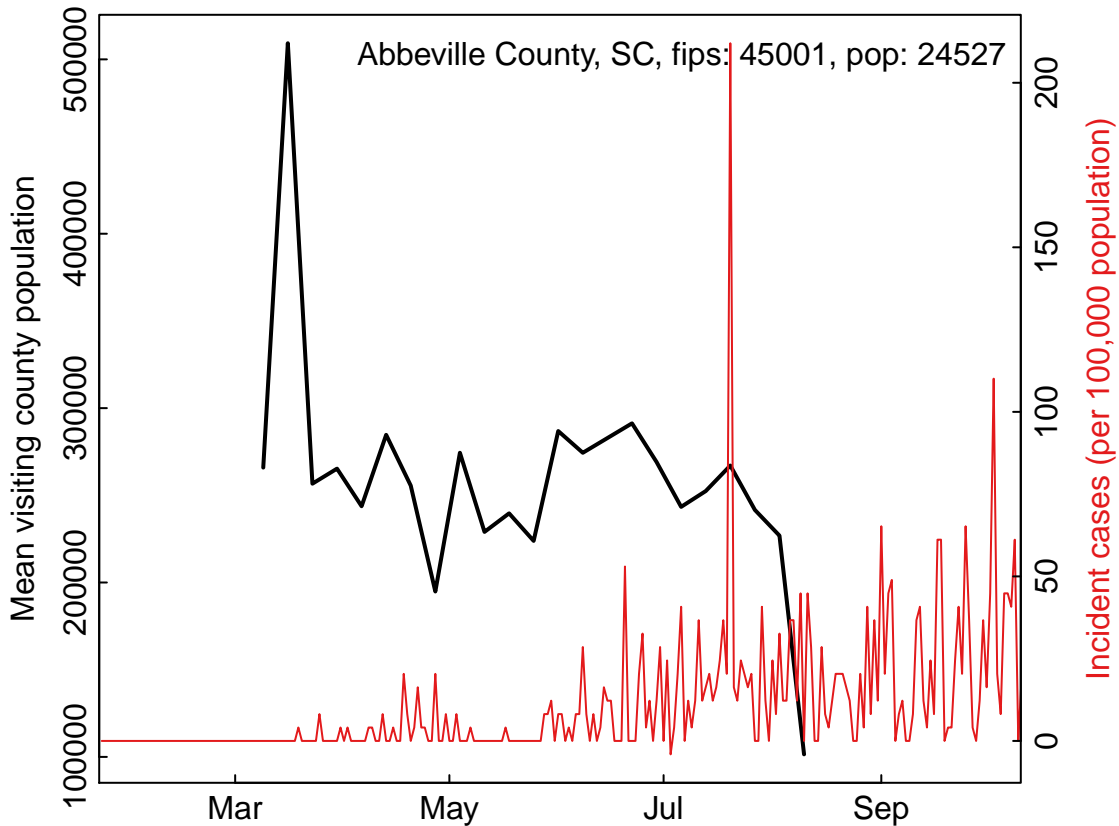

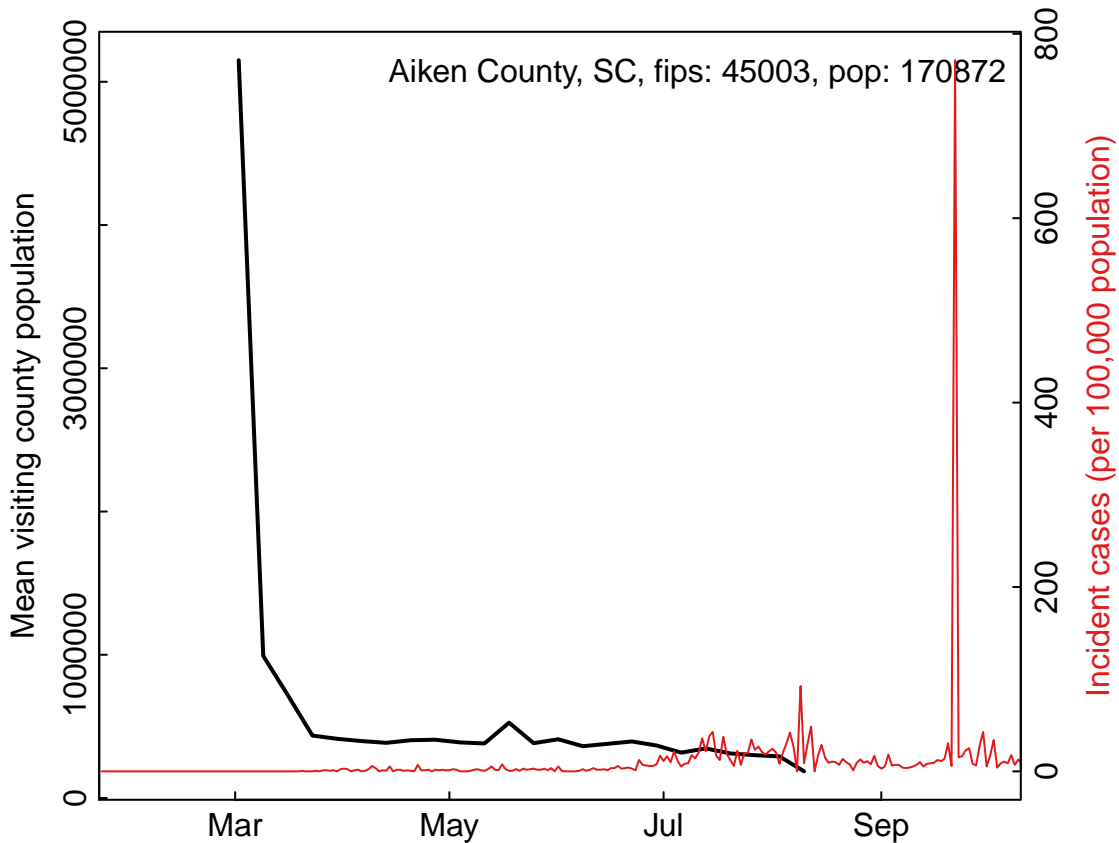

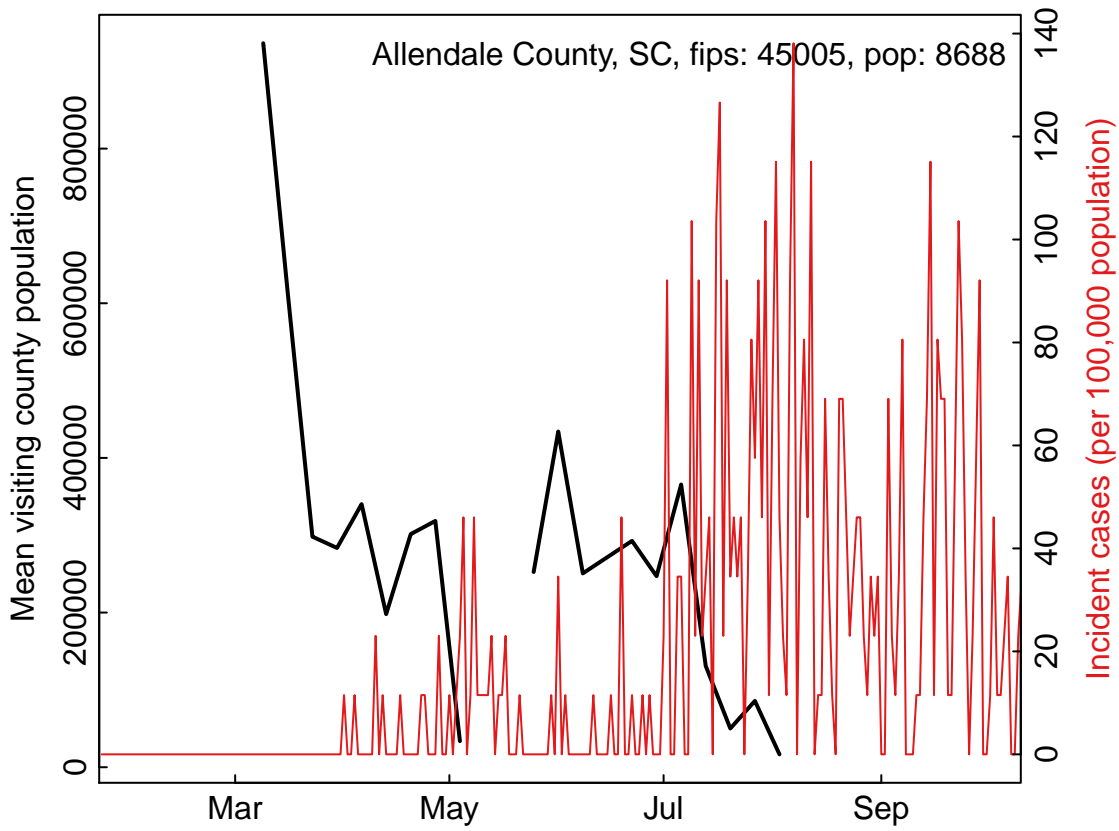

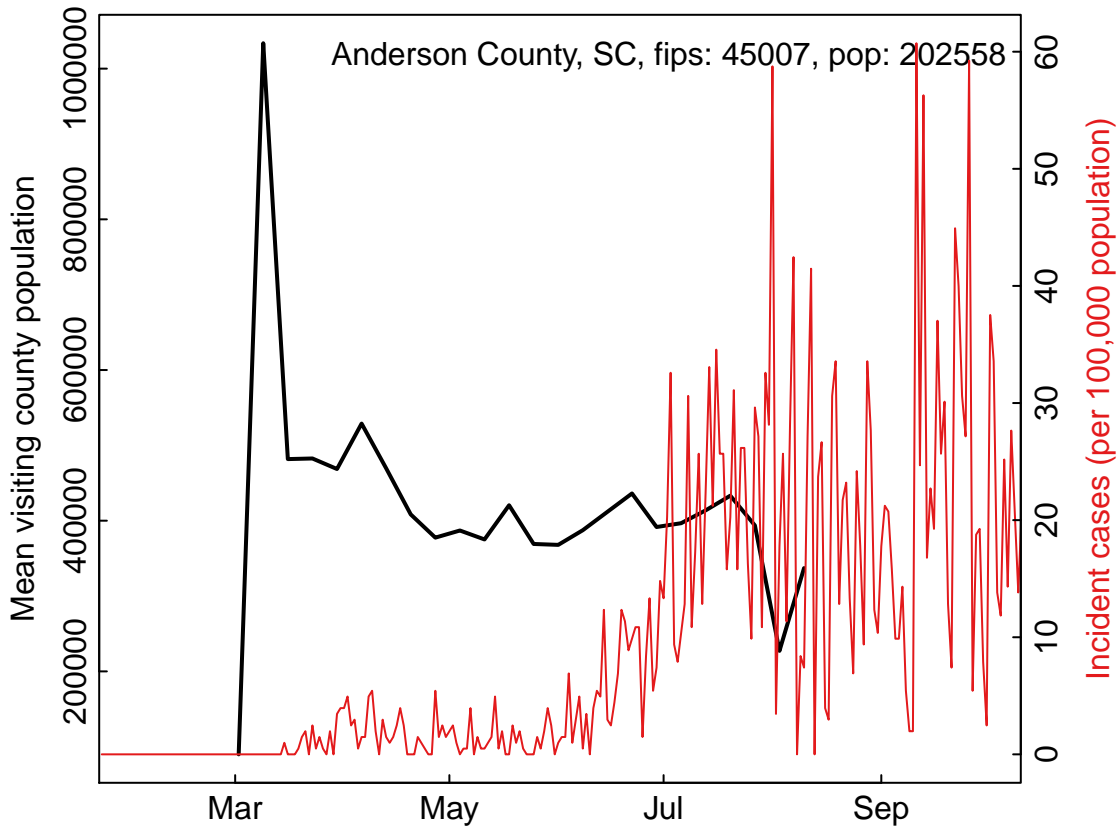

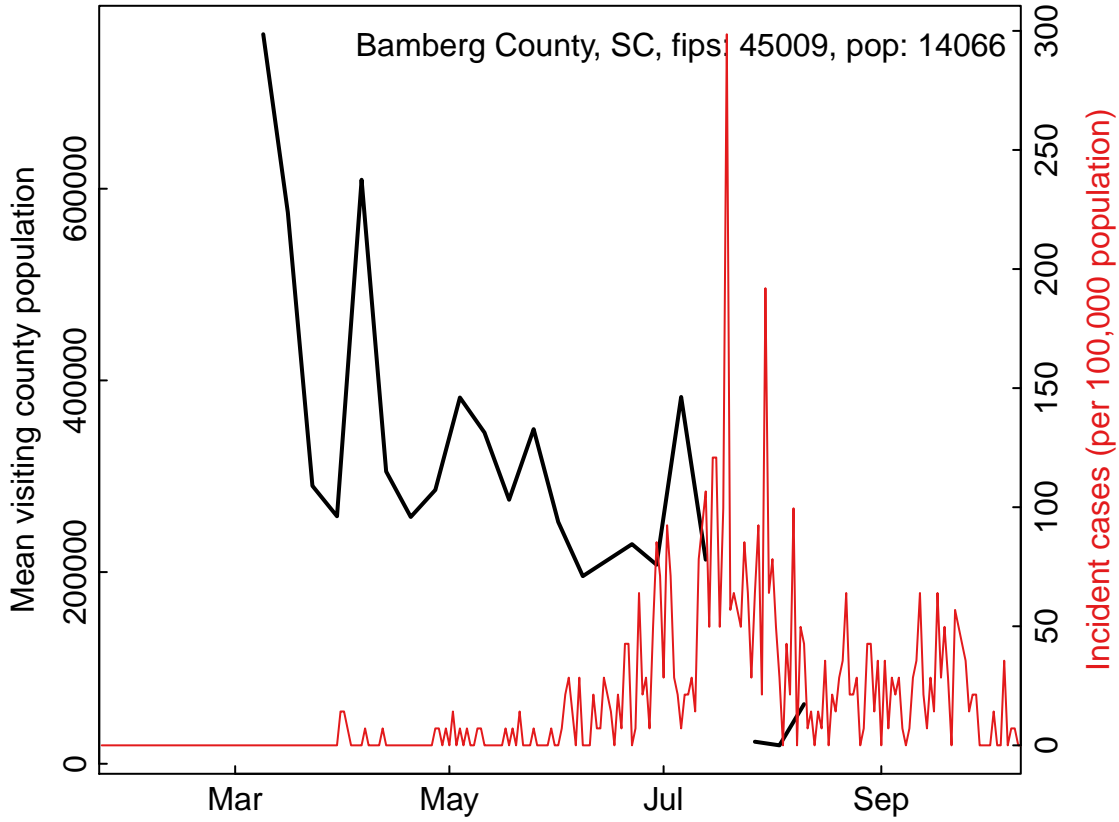



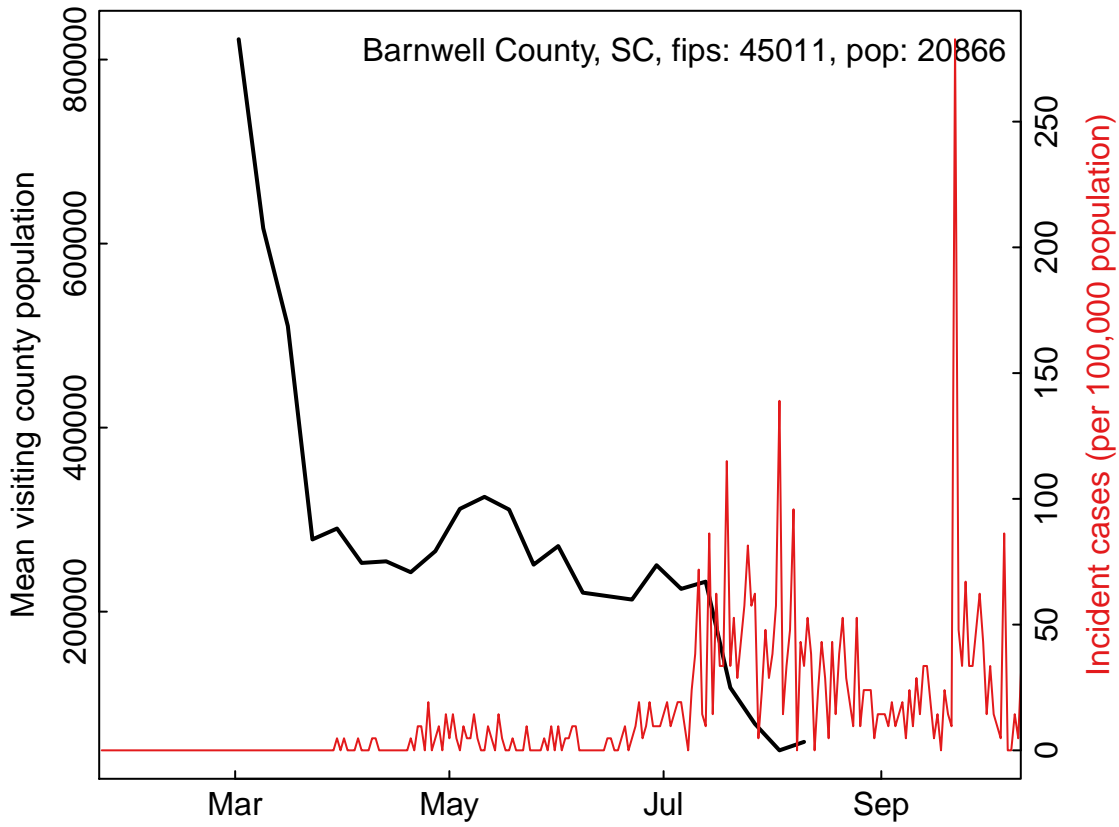

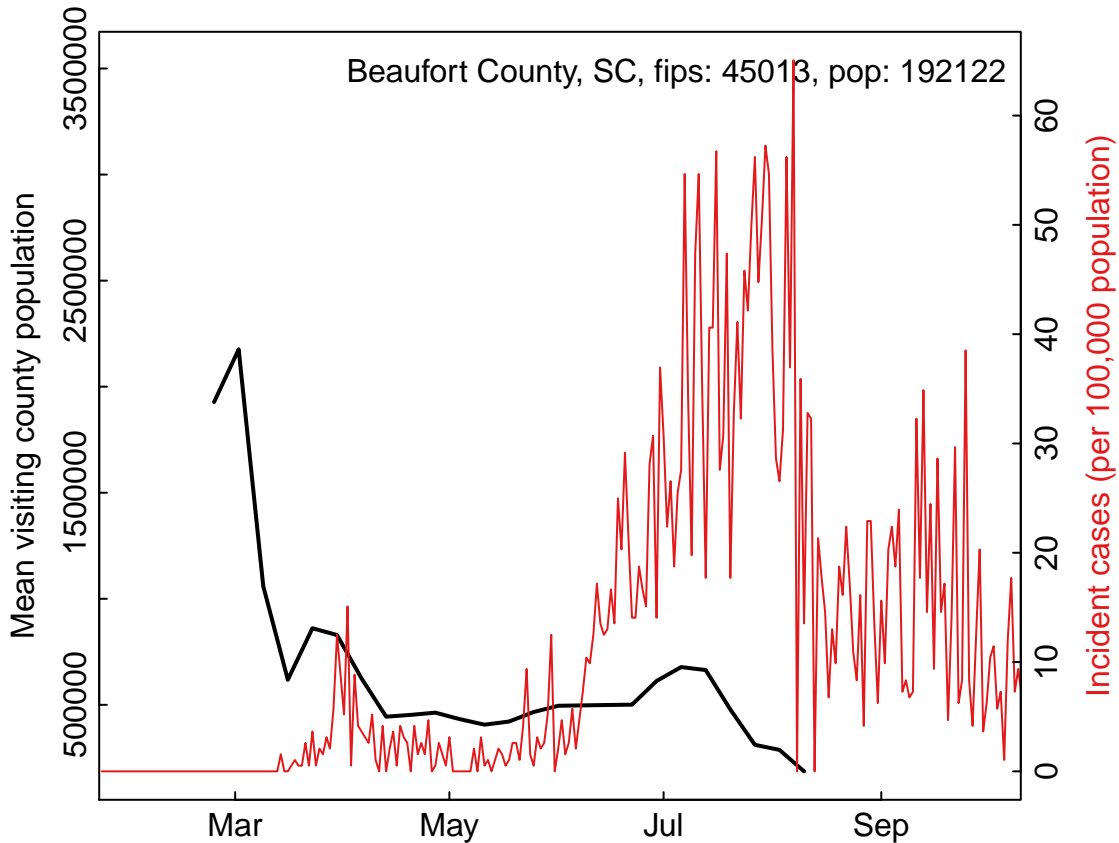

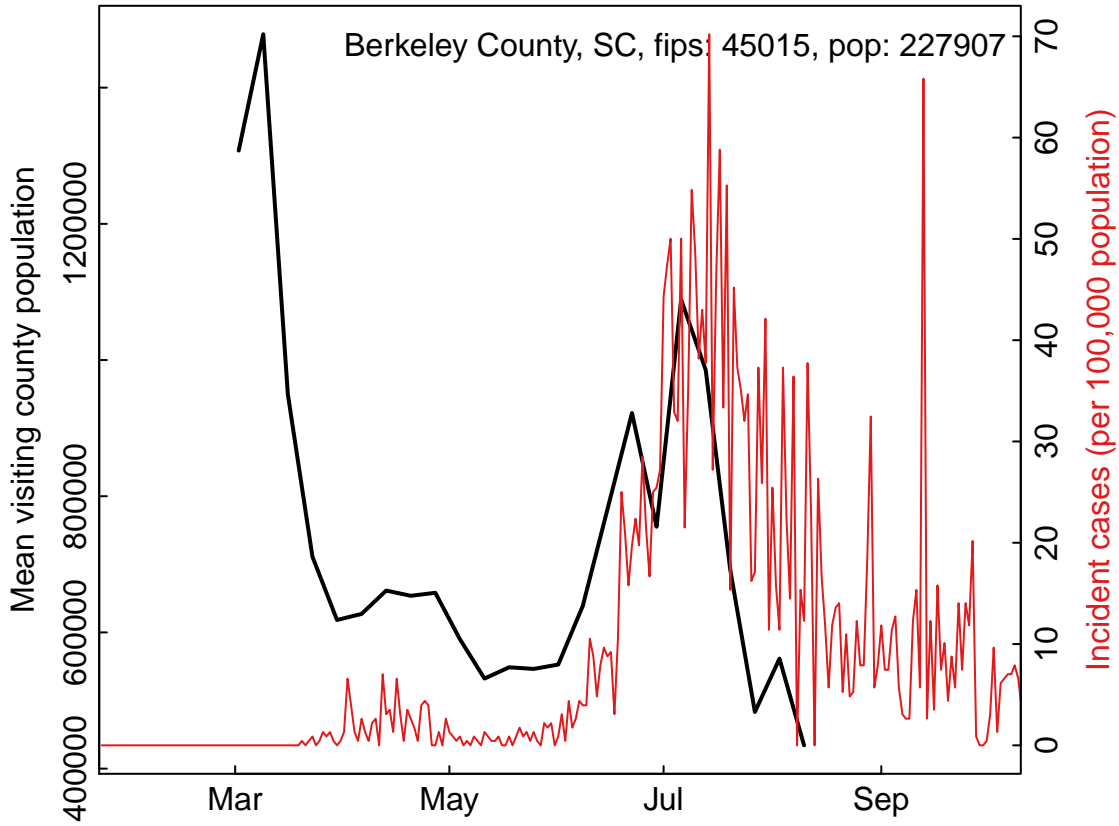

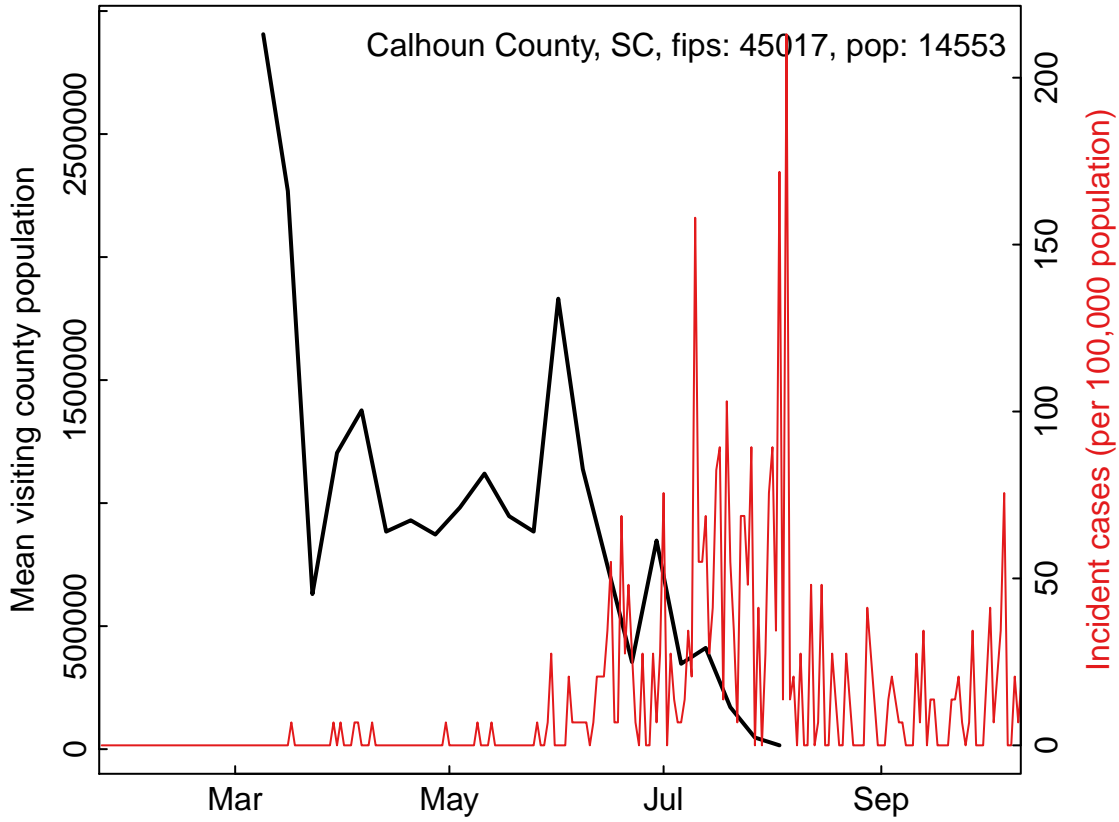

Charleston County, SC, fips: 45019, pop: 411406

Mean visiting county population

0  
500000  
1500000  
2500000

Mar

May

Jul

Sep

0  
20  
40  
60  
80  
100

Incident cases (per 100,000 population)

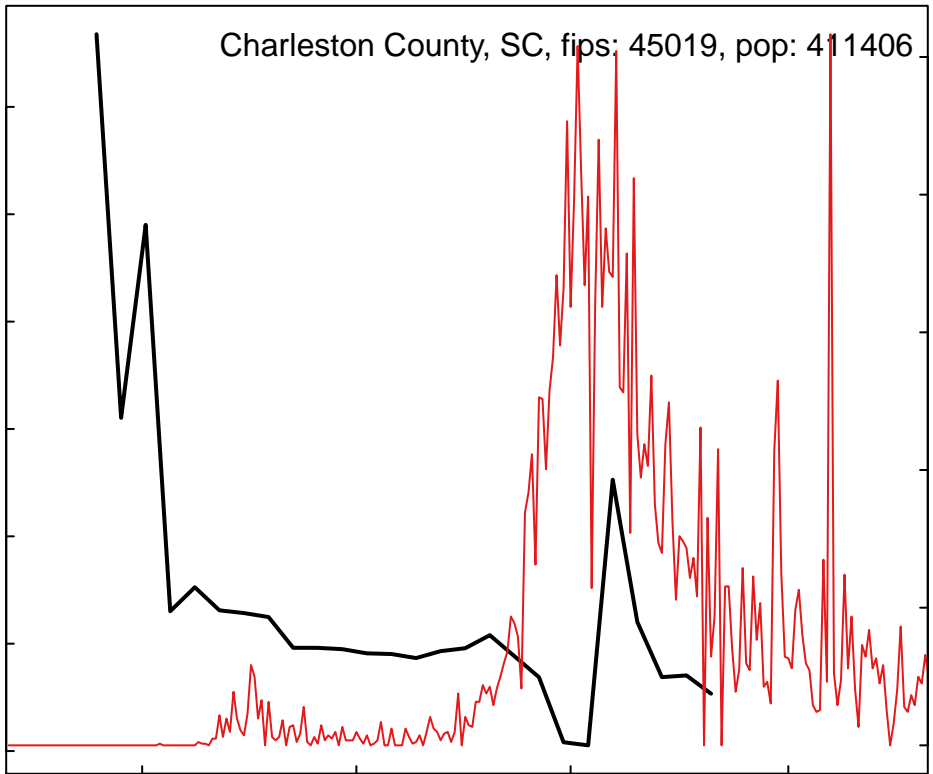

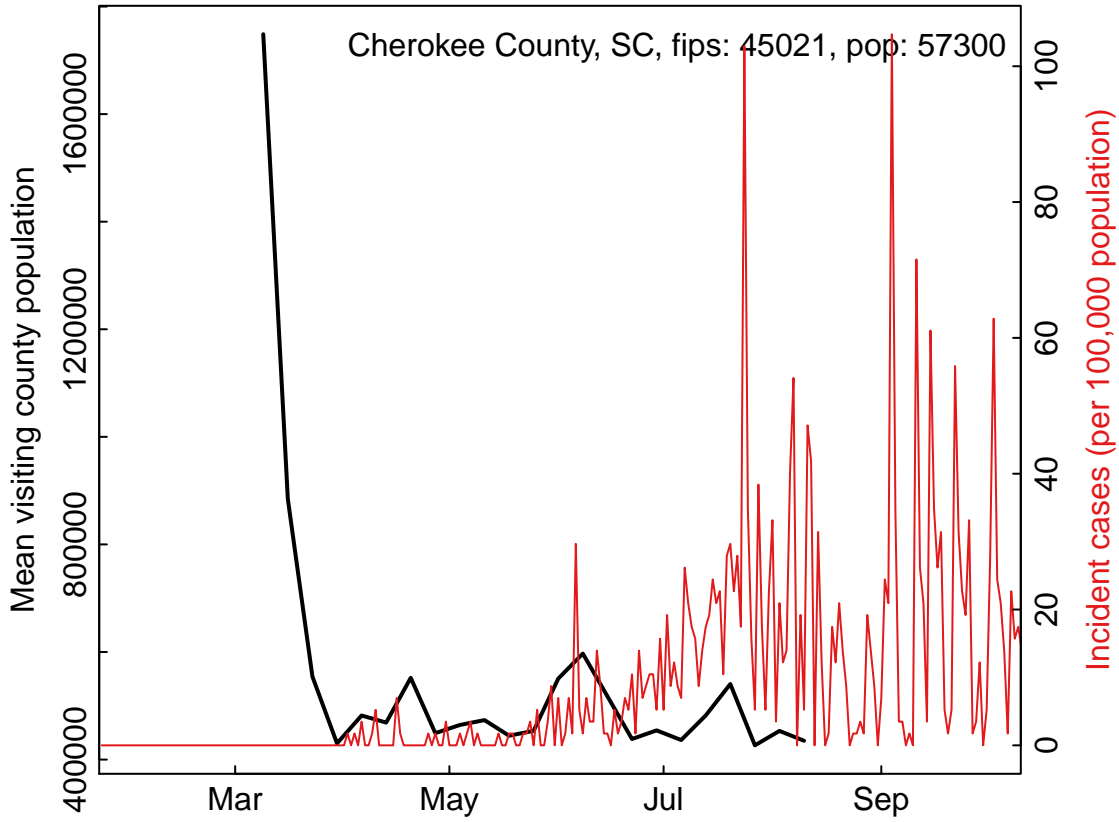

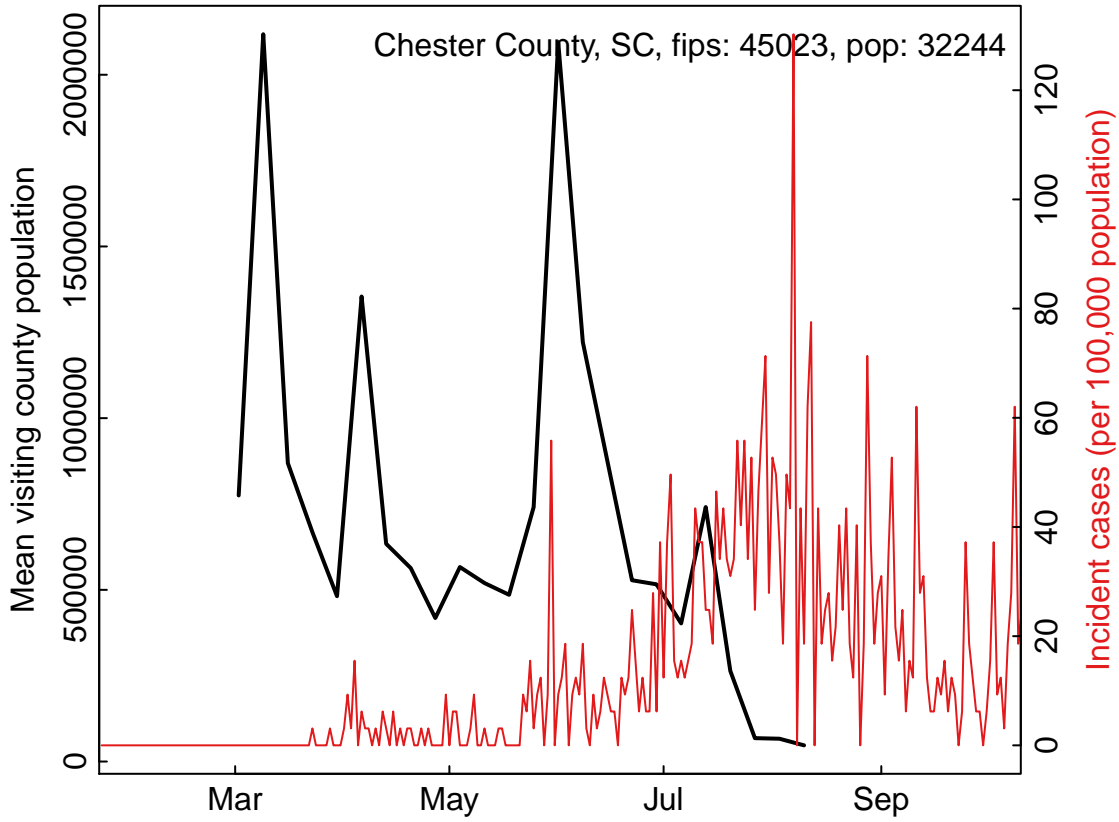

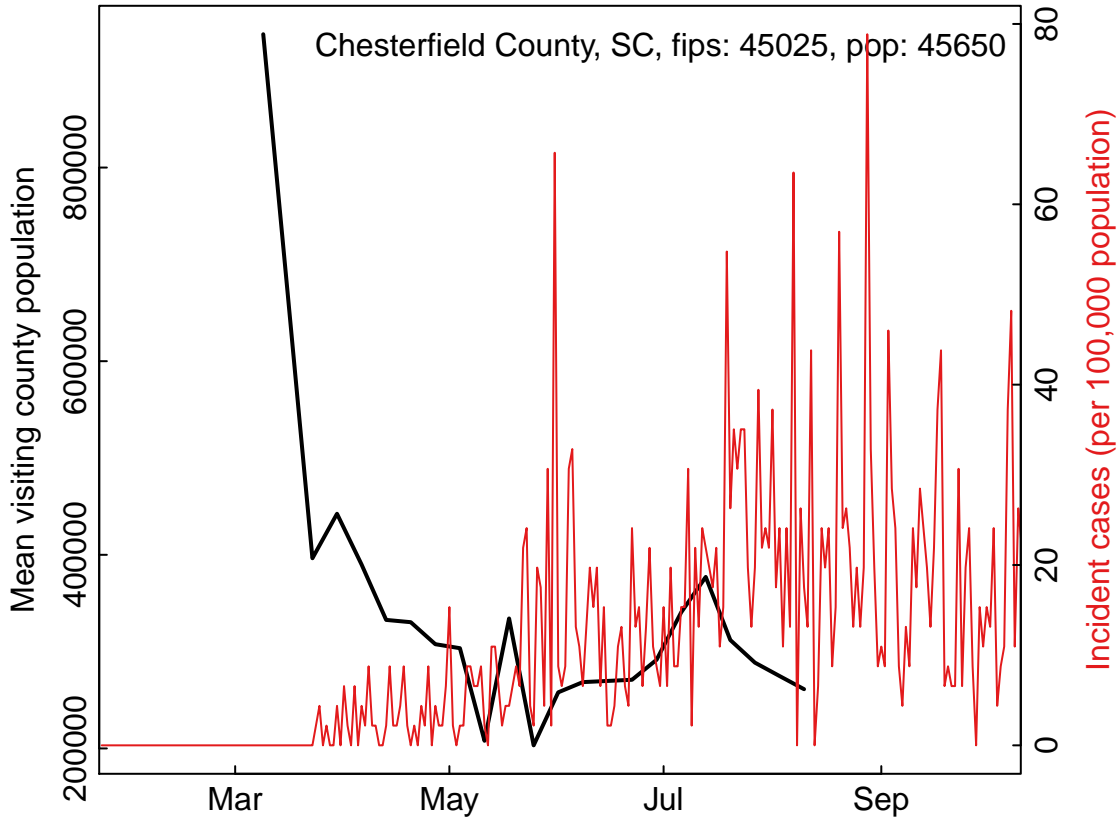



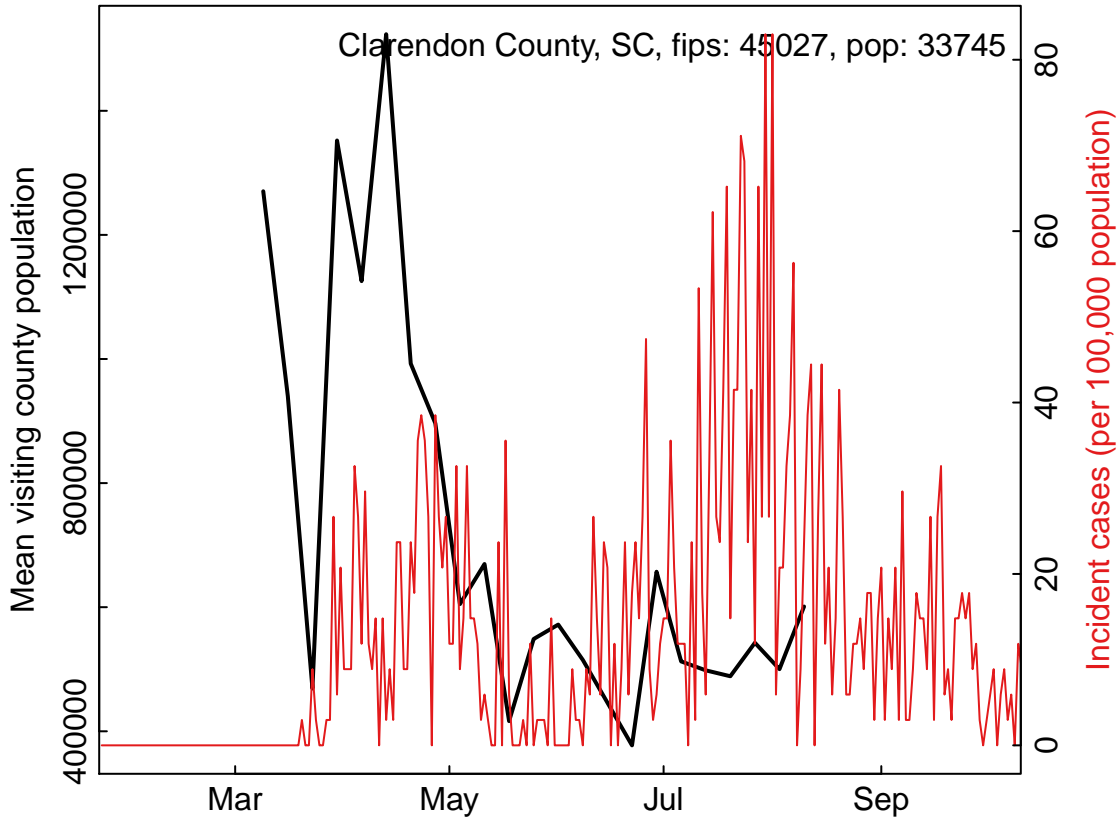

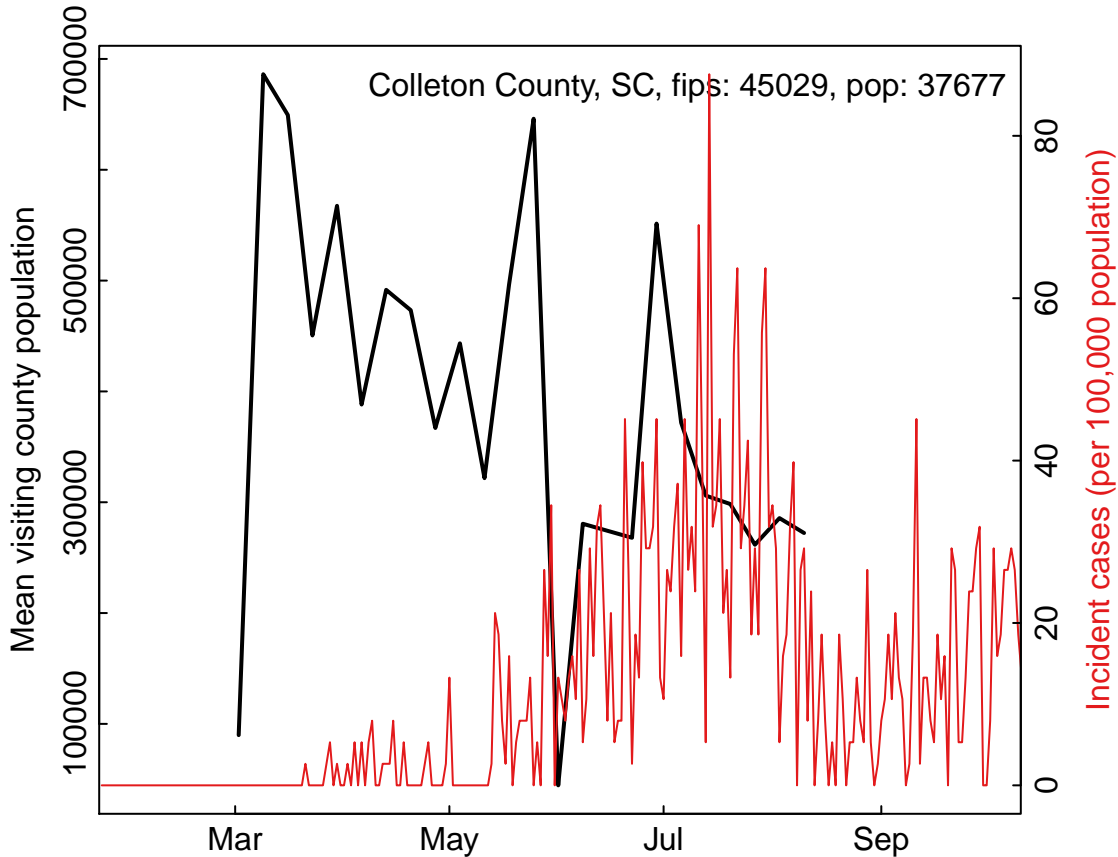

Darlington County, SC, fips: 45031, pop: 66618

Mean visiting county population

2500000  
1500000  
500000  
0

Mar May Jul Sep

Incident cases (per 100,000 population)

100  
80  
60  
40  
20  
0

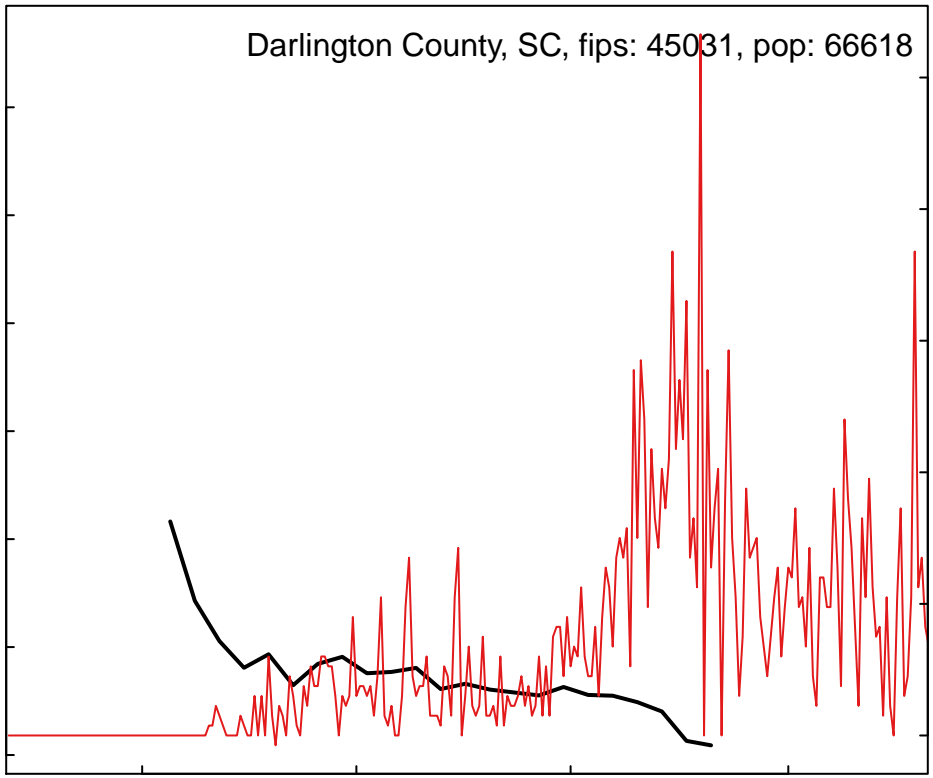

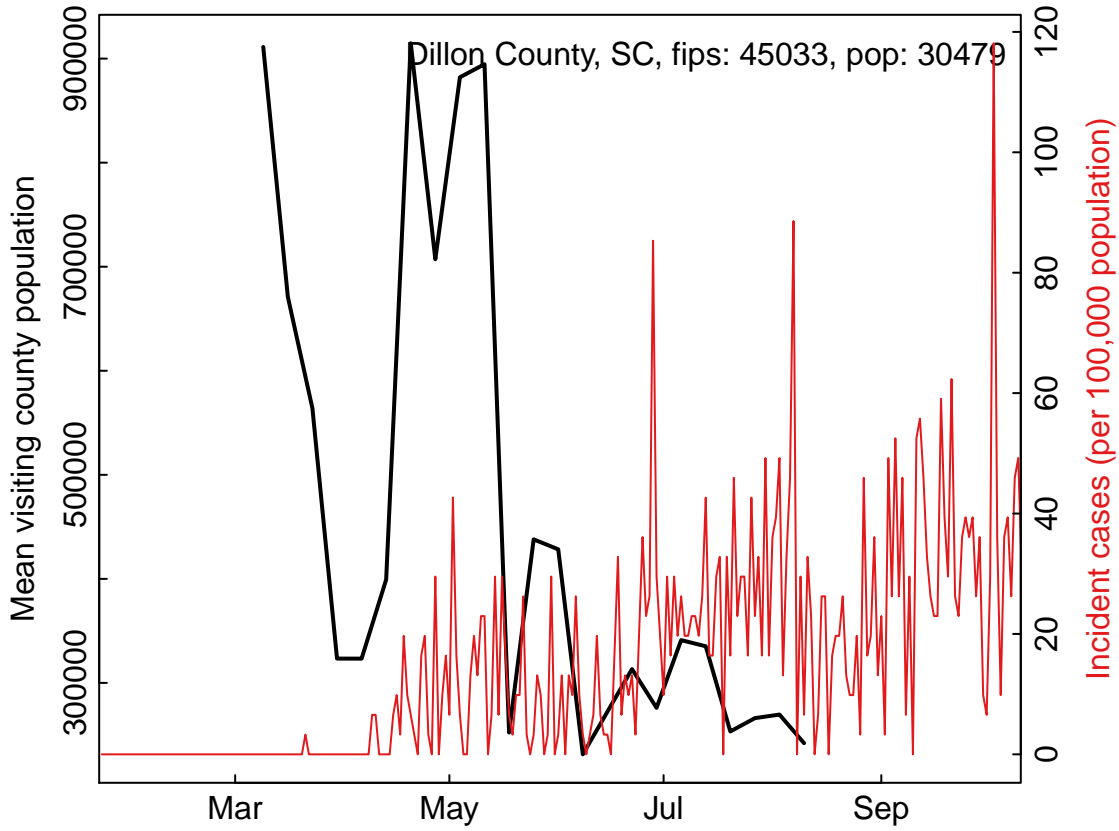

Dorchester County, SC, fips: 45035, pop: 162809

Mean visiting county population

Incident cases (per 100,000 population)

800000  
600000  
400000

80  
60  
40  
20  
0

Mar May Jul Sep

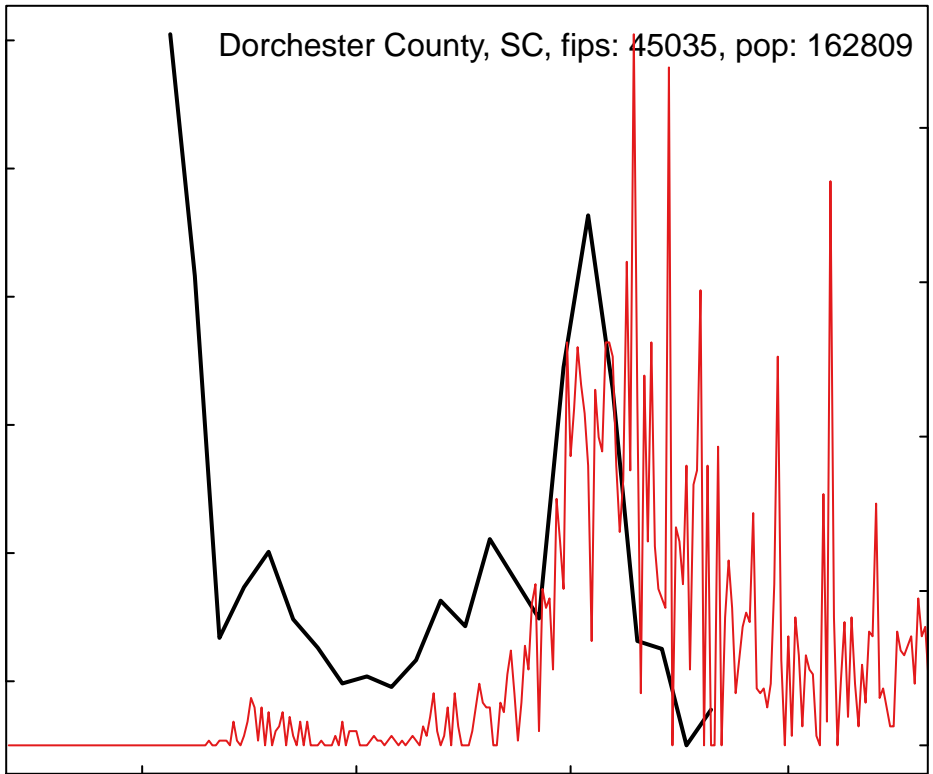

Edgefield County, SC, fips: 45037, pop: 27260

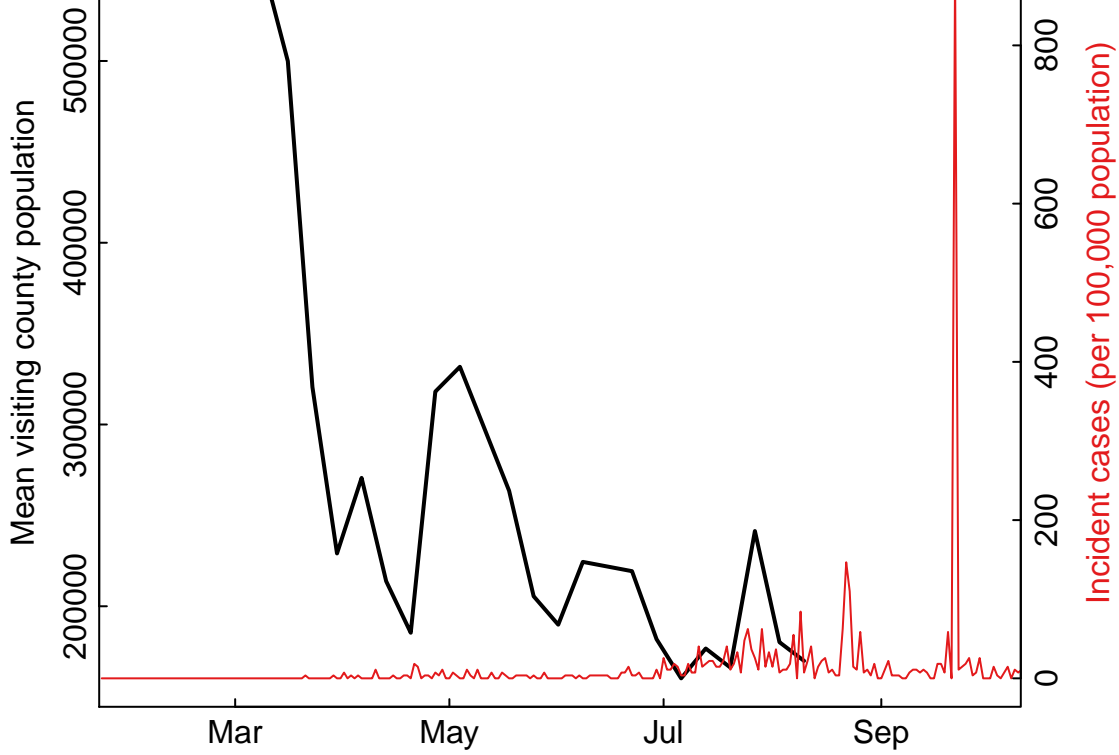

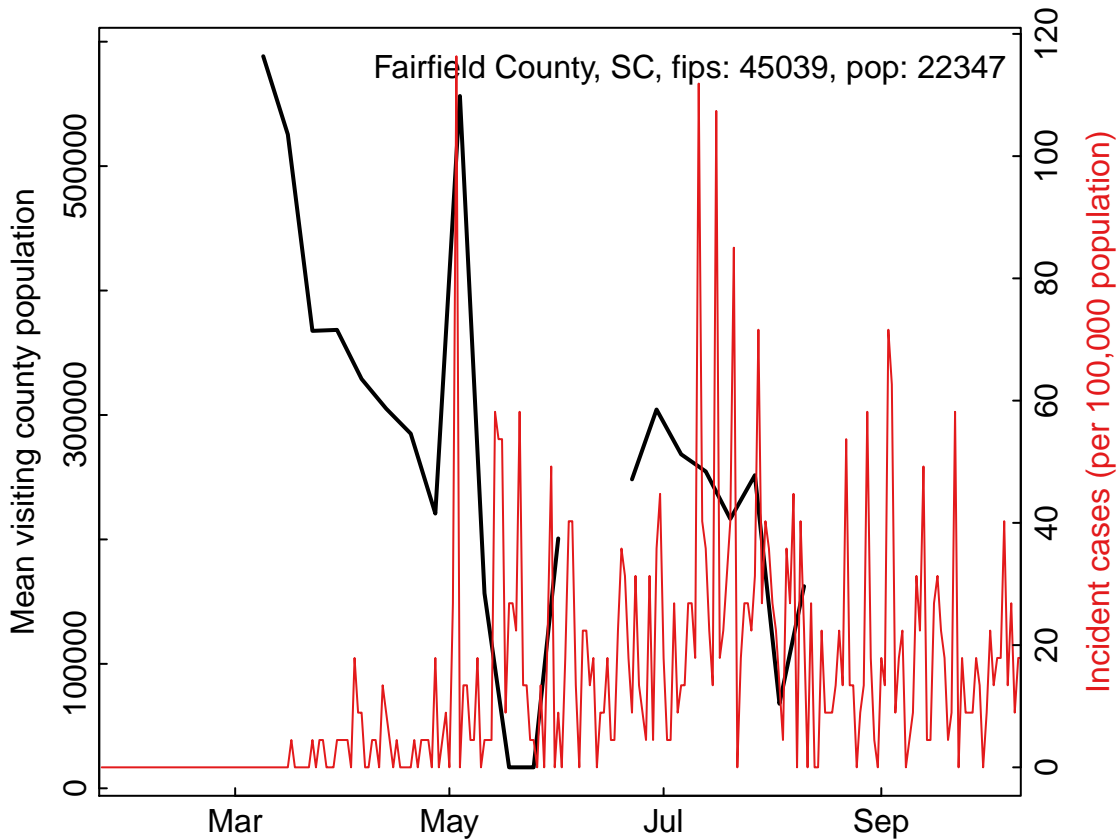

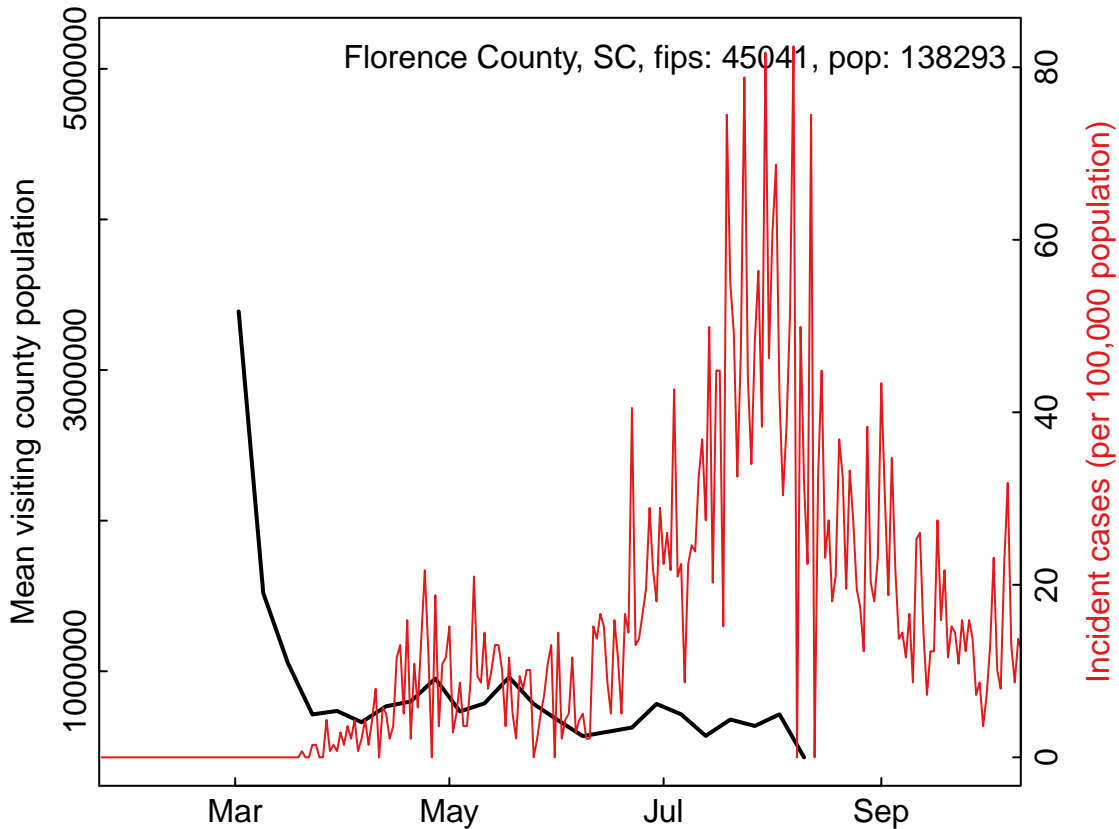



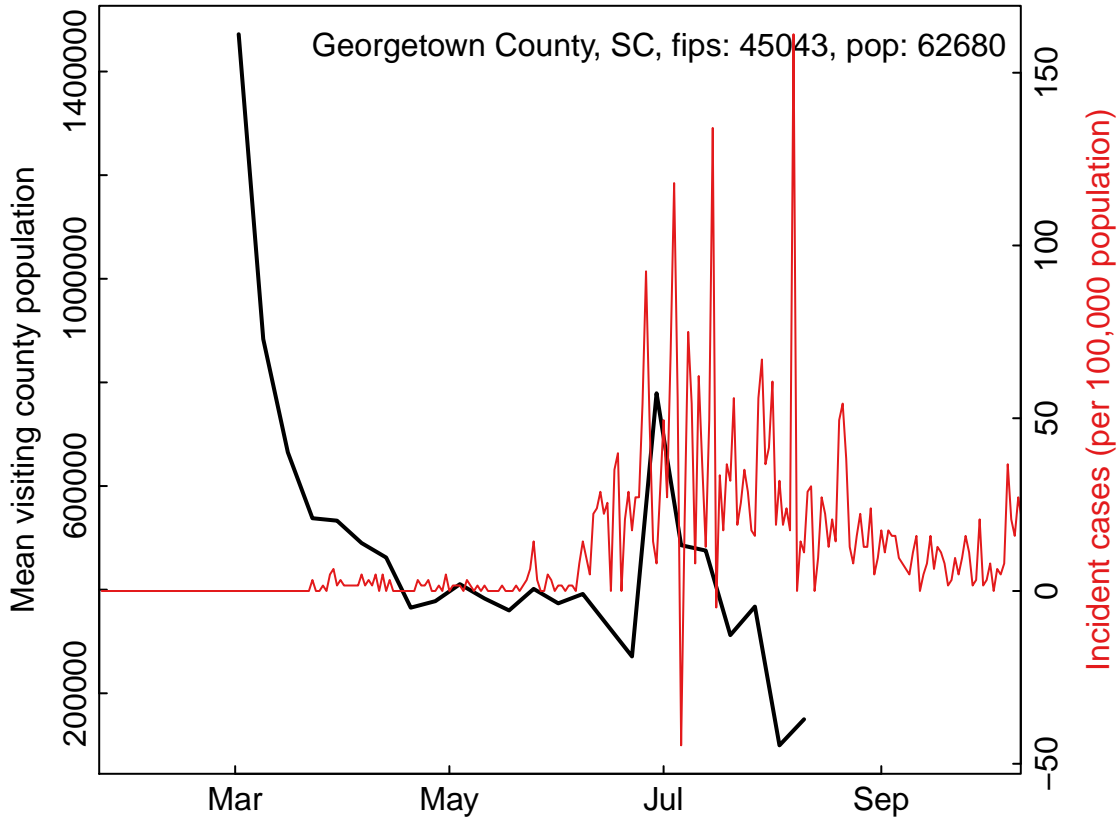

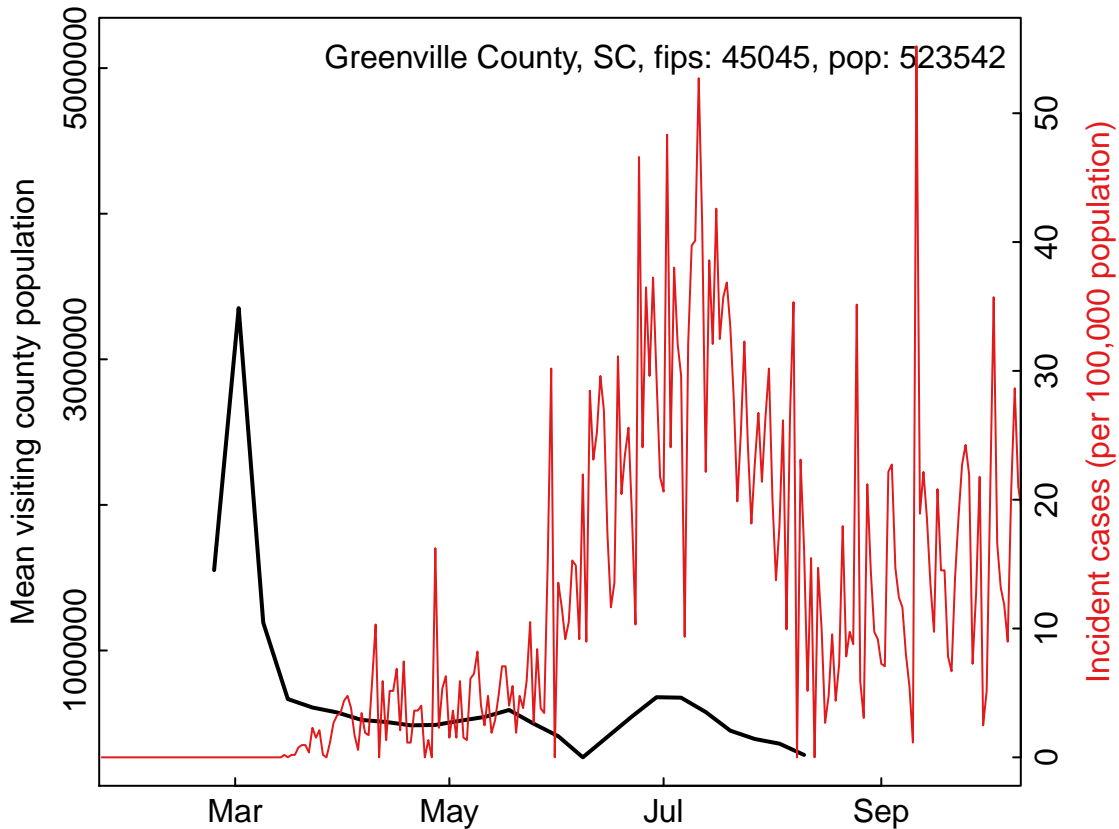

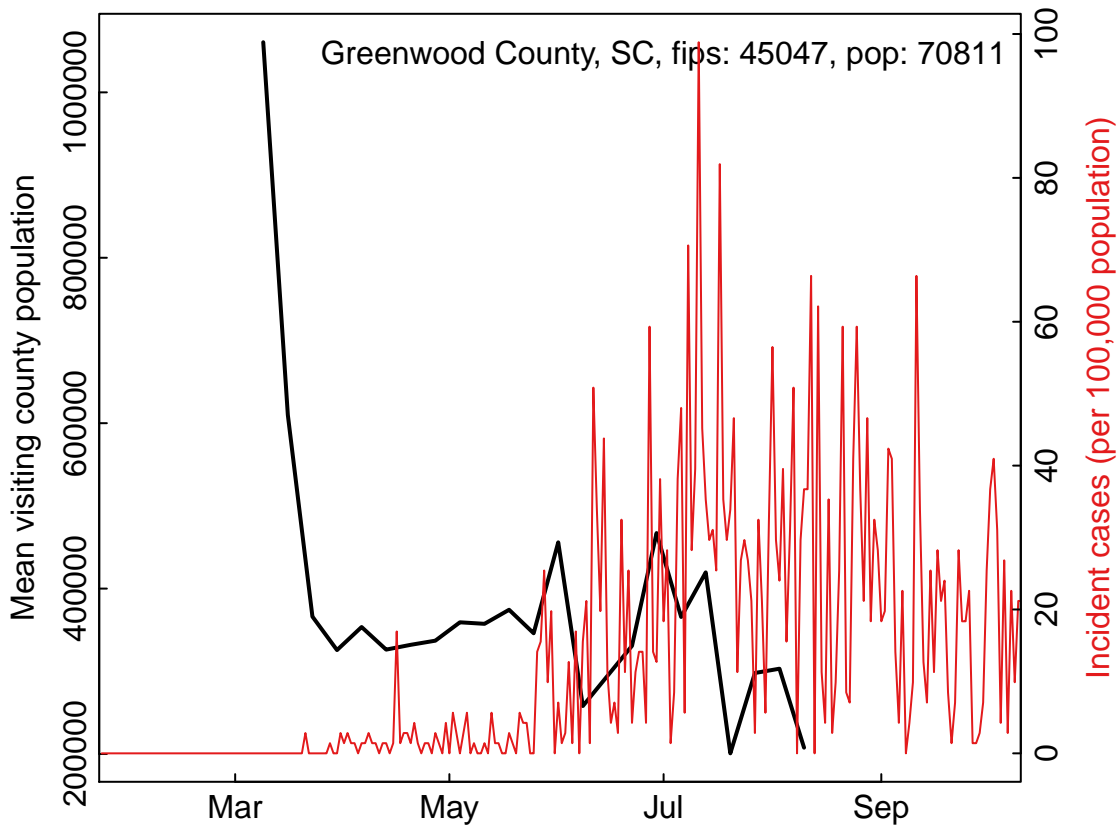

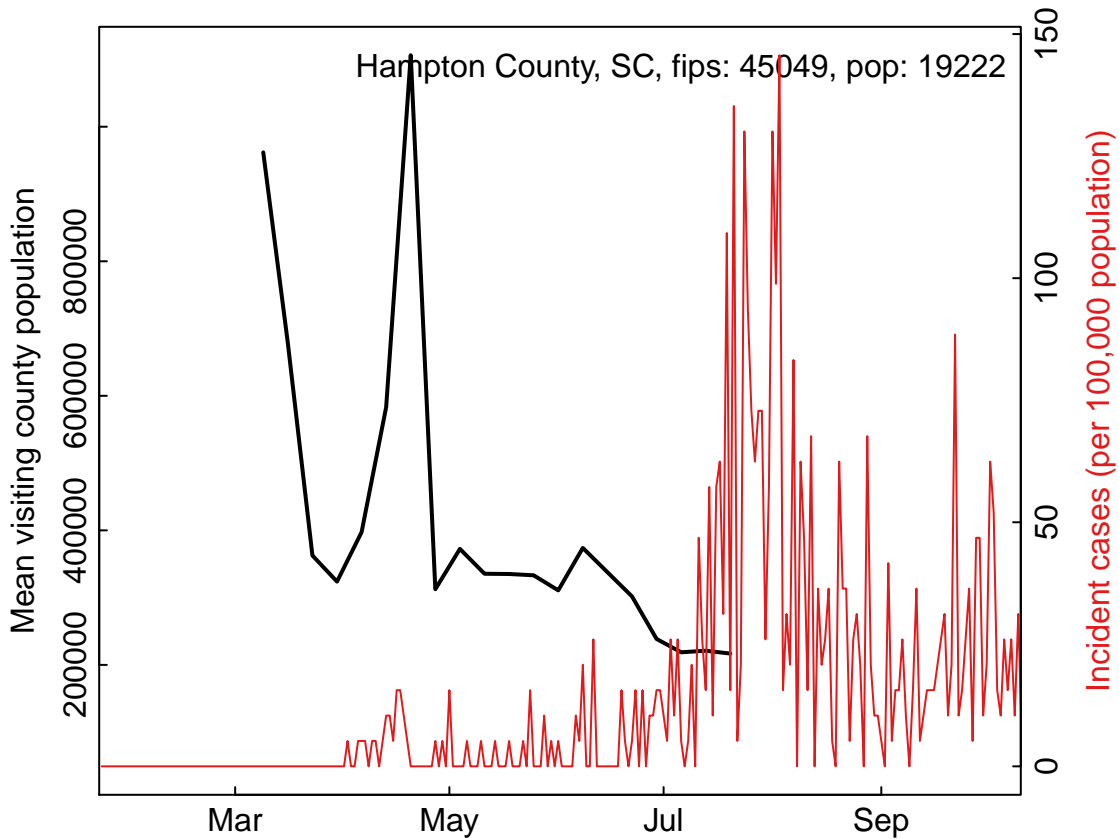

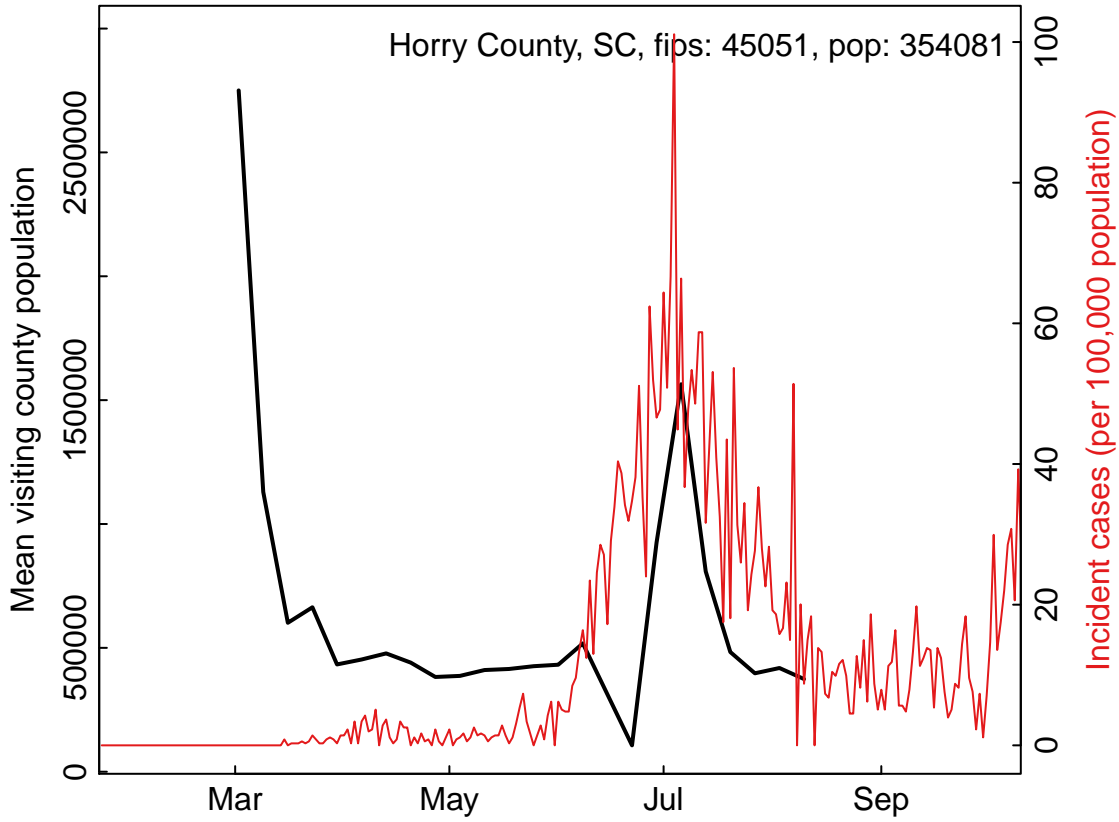

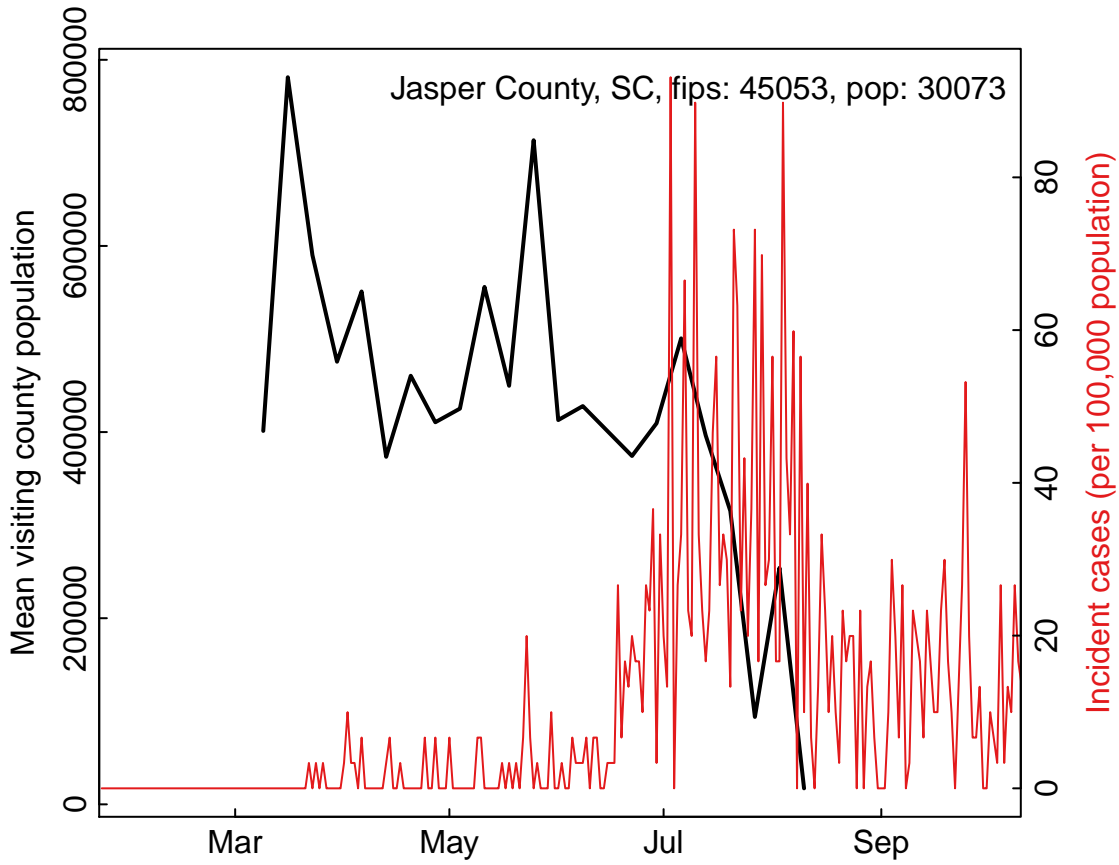

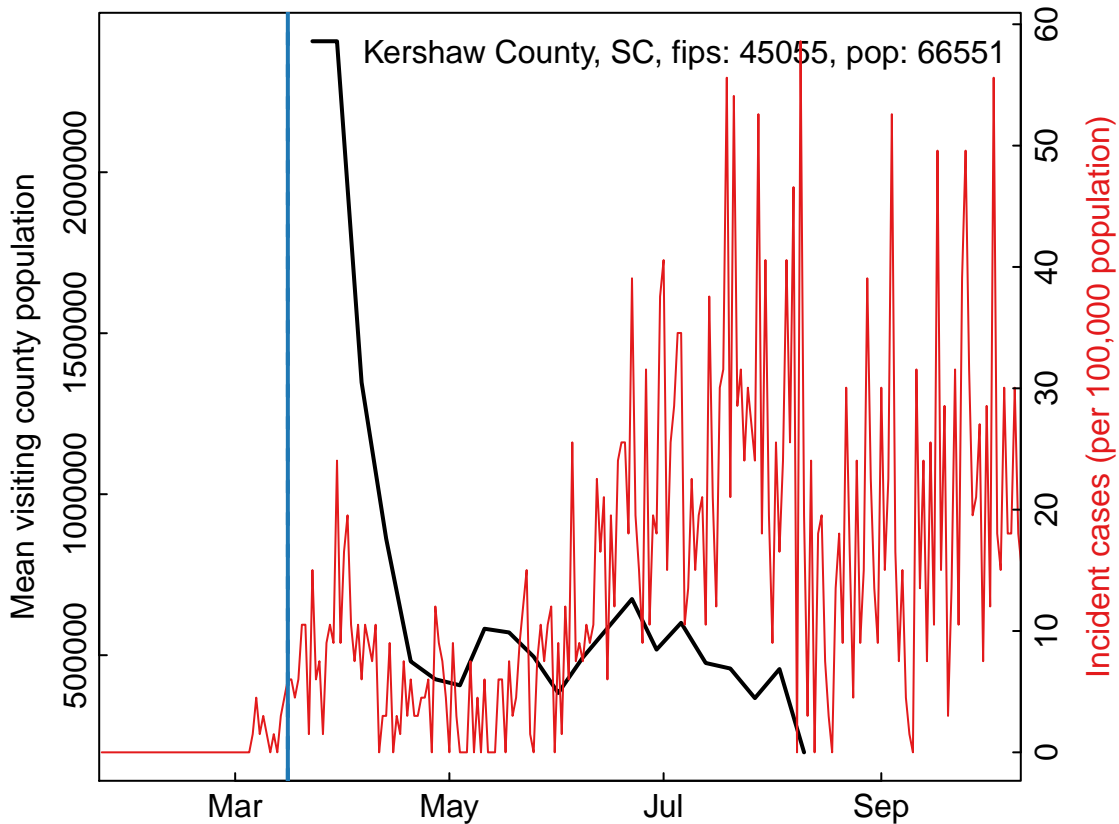

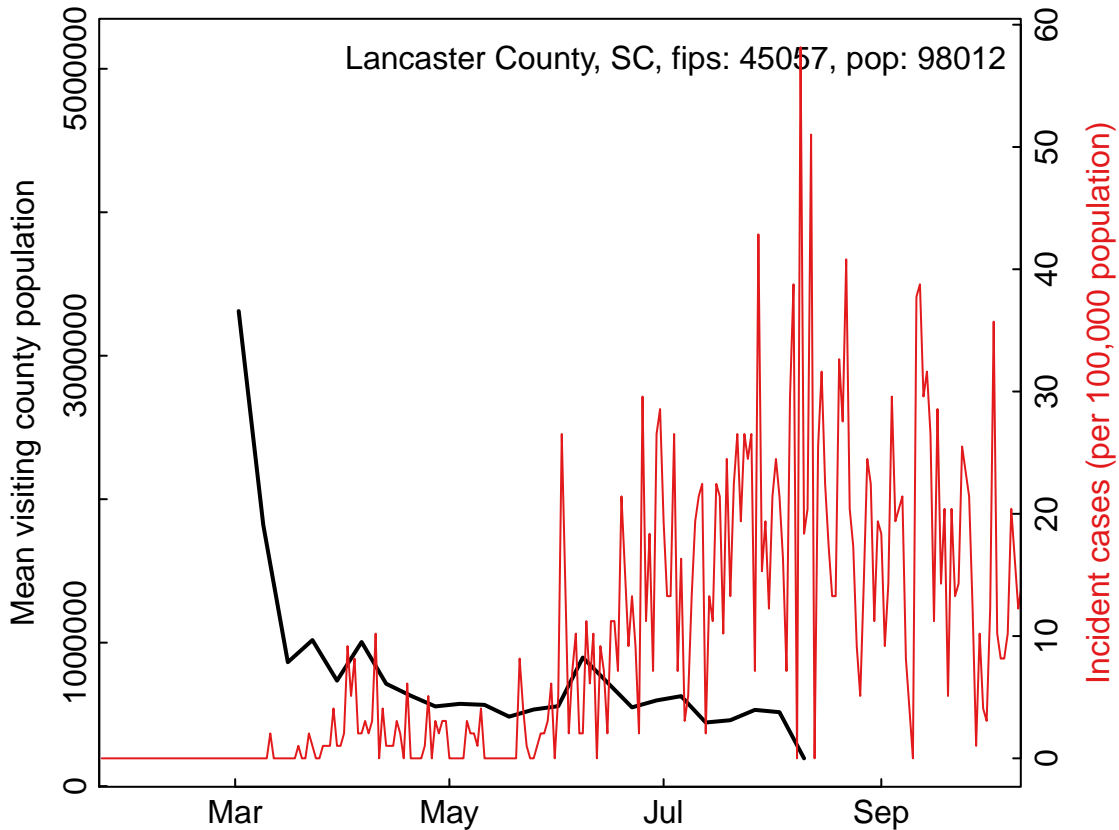



Laurens County, SC, fips: 45059, pop: 67493

Mean visiting county population

2500000  
1500000  
500000

Mar

May

Jul

Sep

Incident cases (per 100,000 population)

60  
40  
20  
0

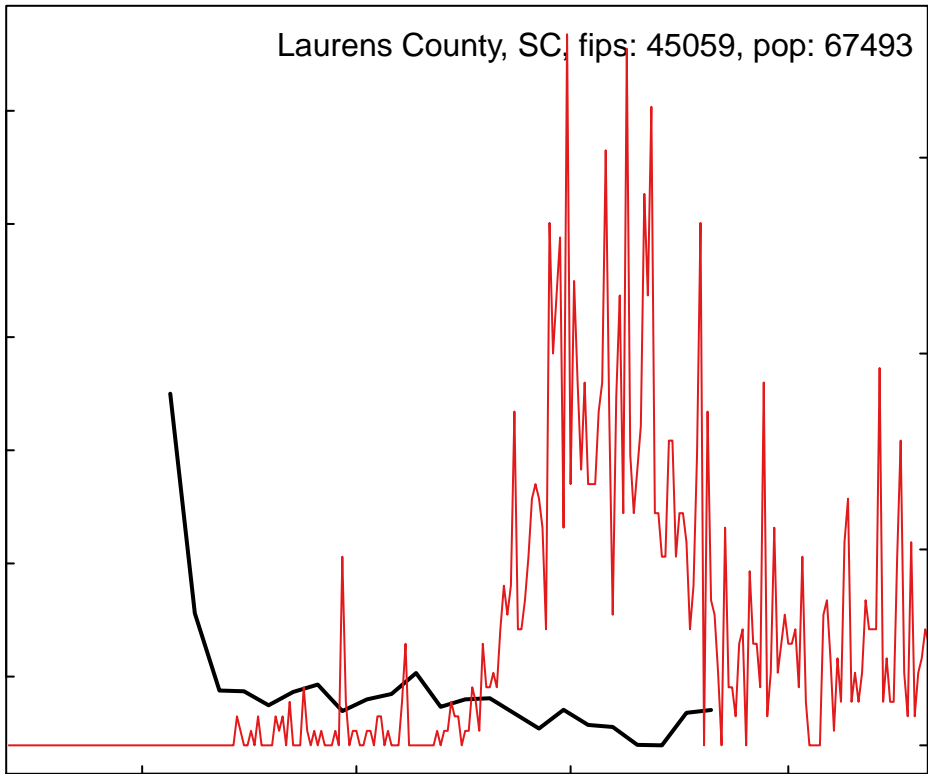

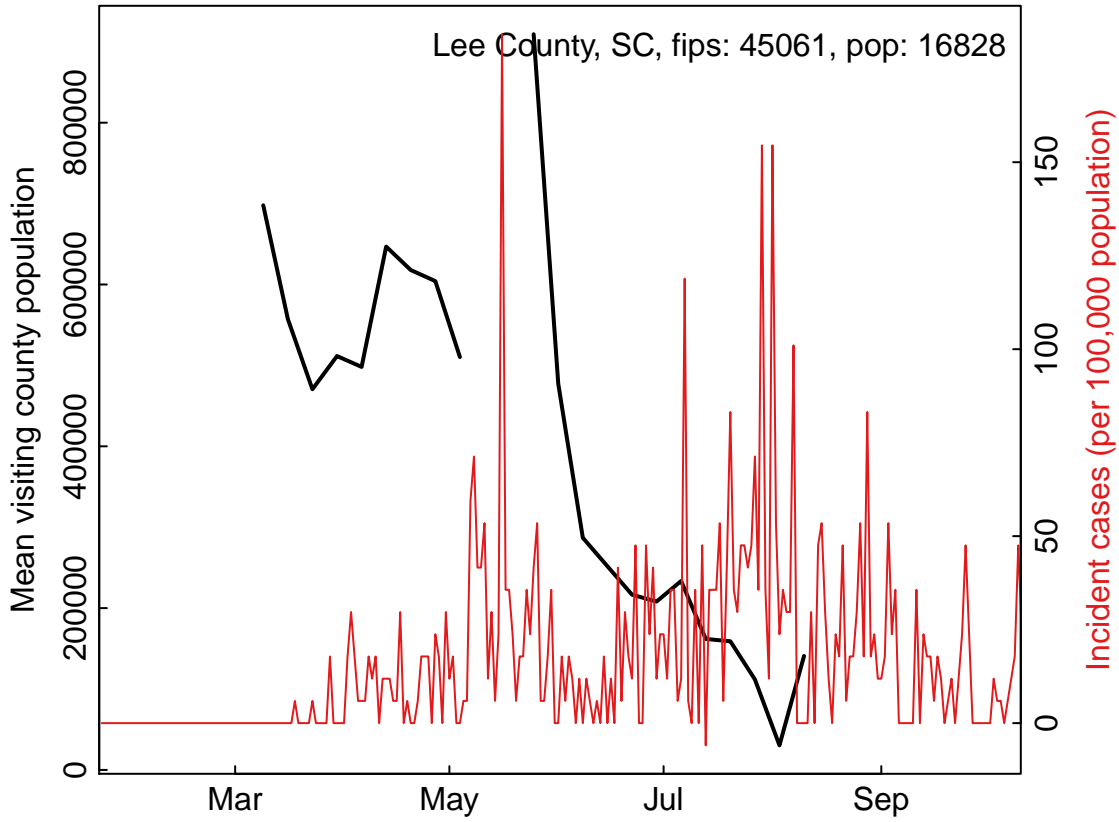

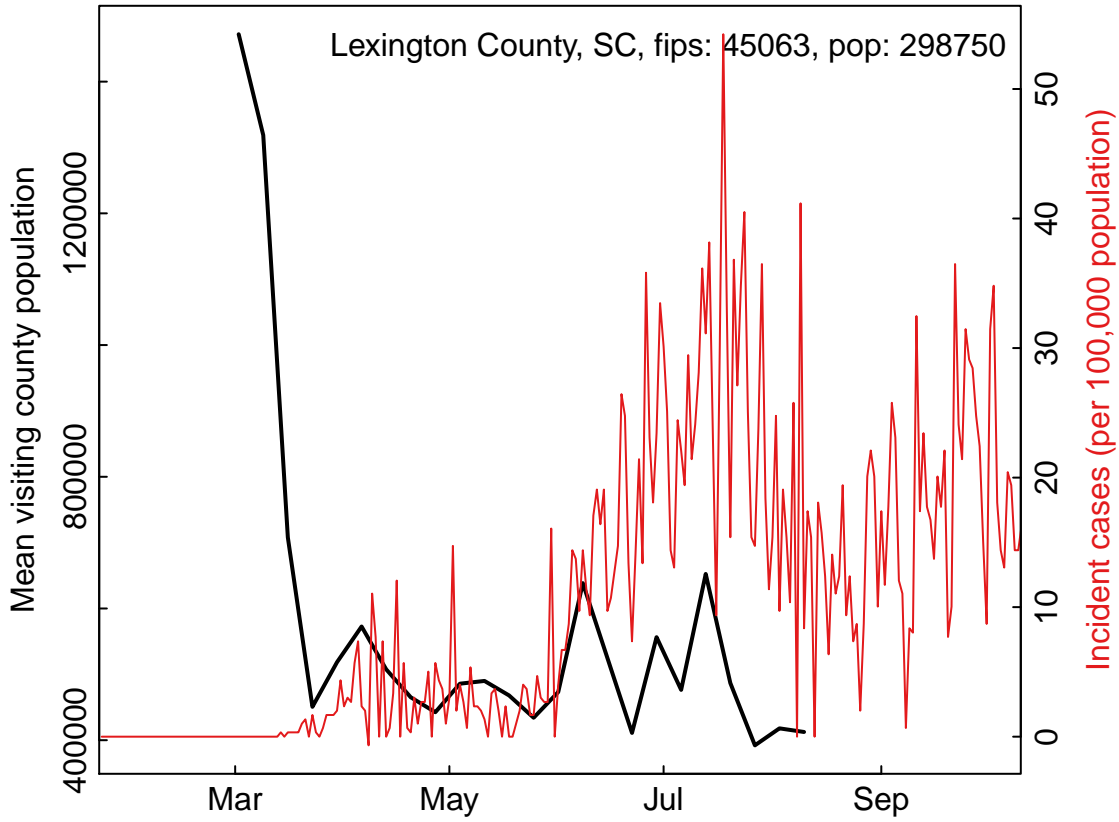

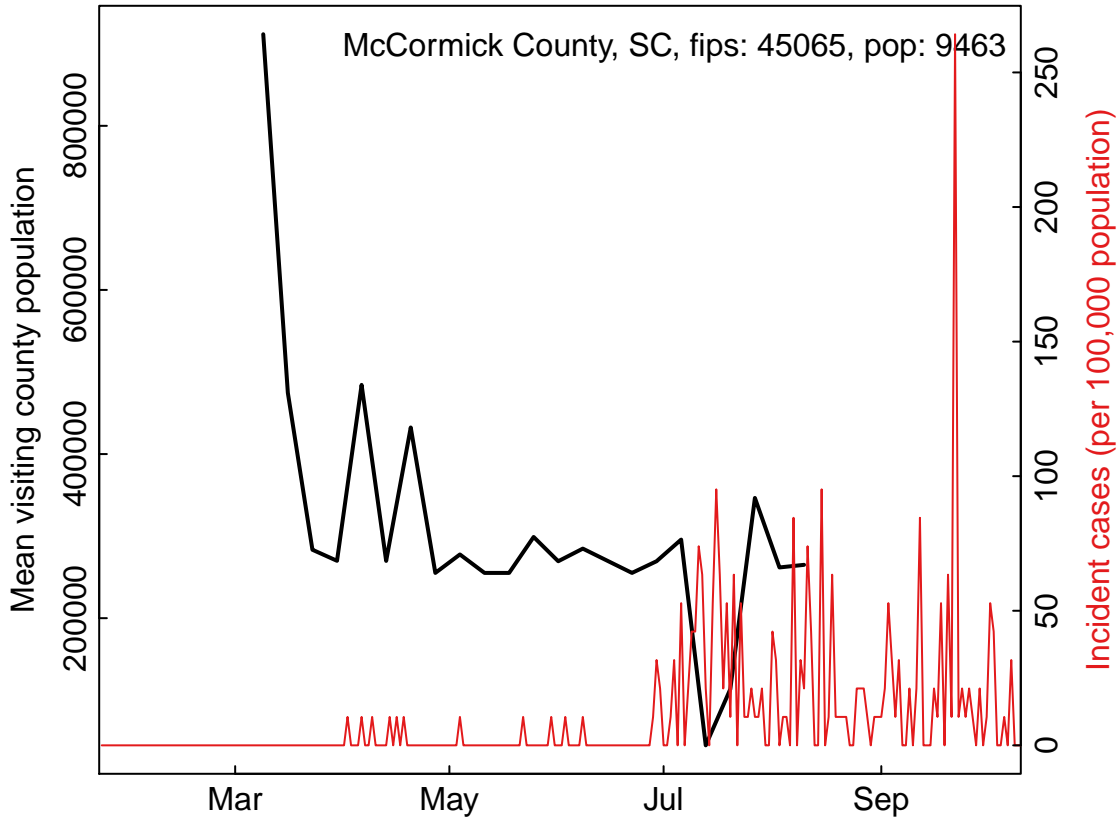

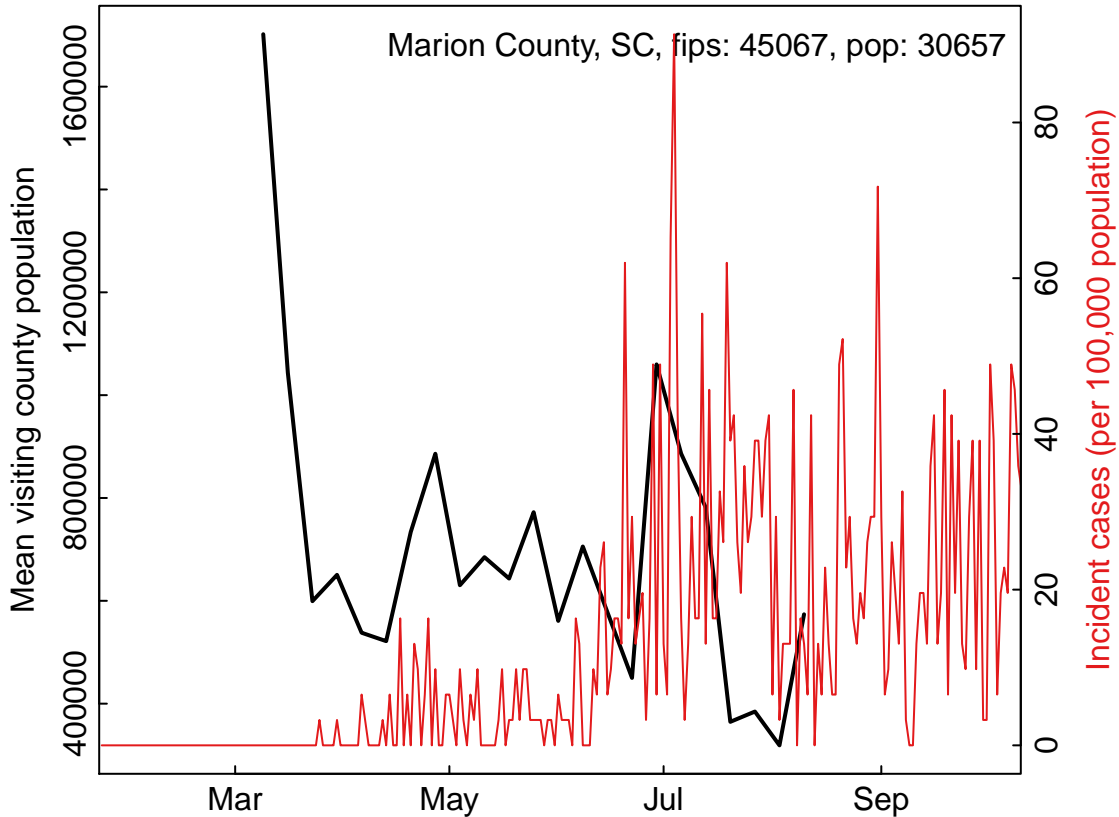

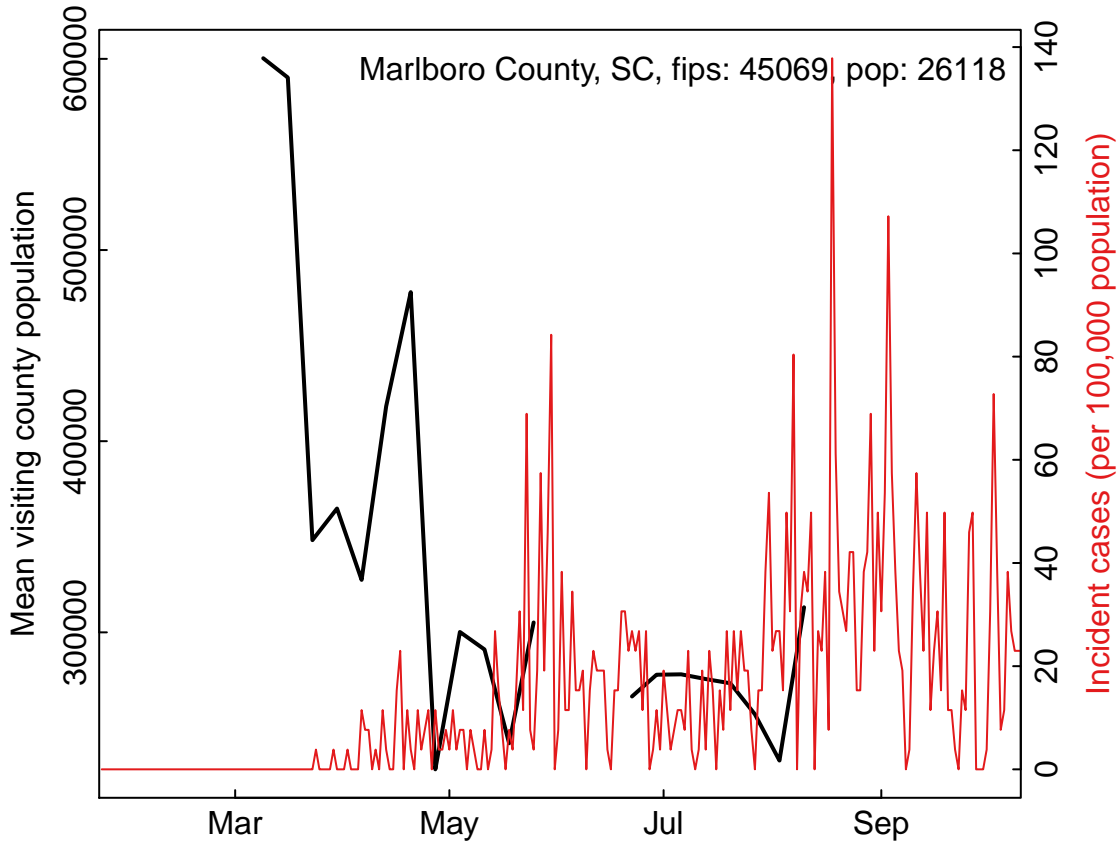

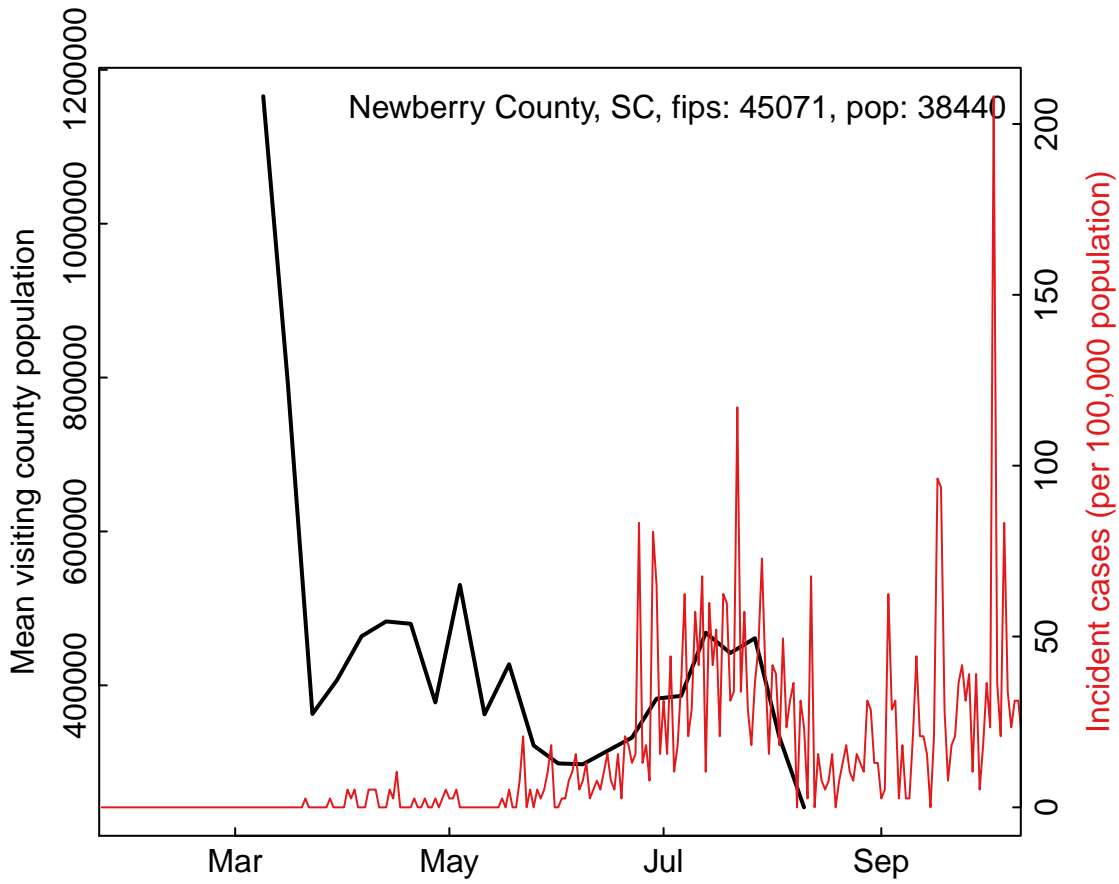

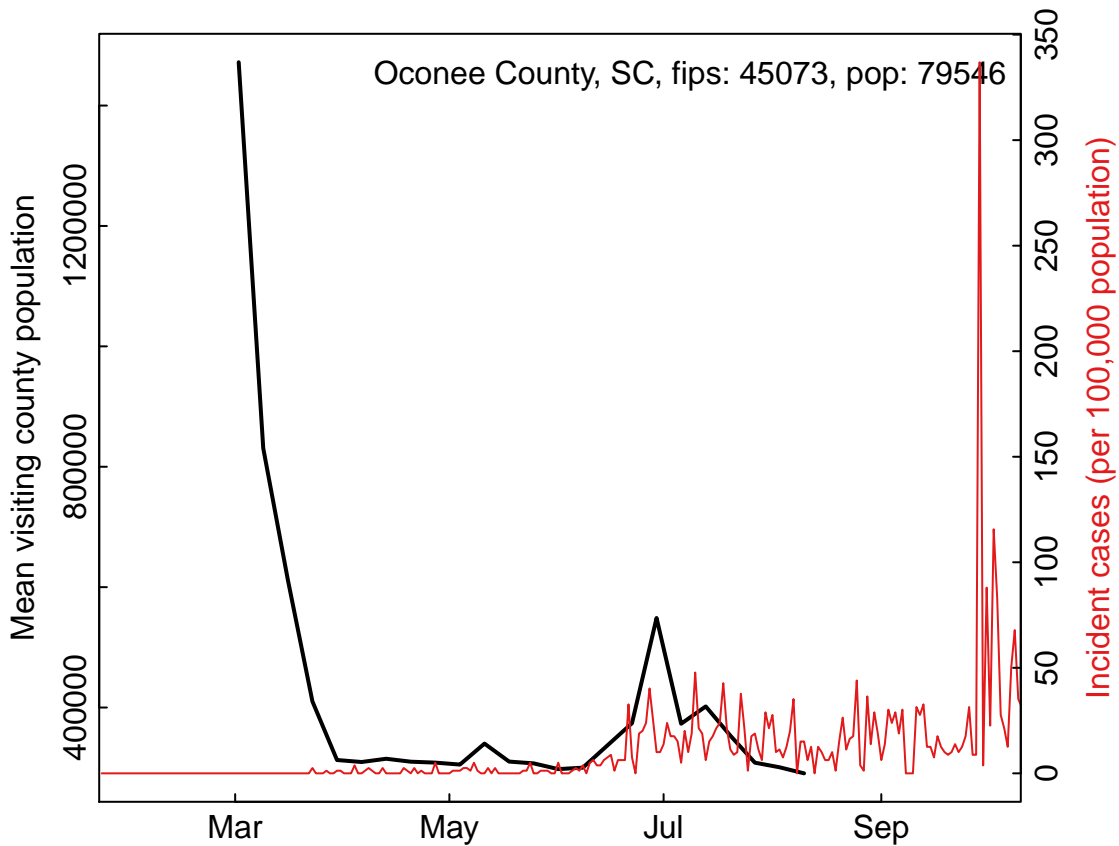



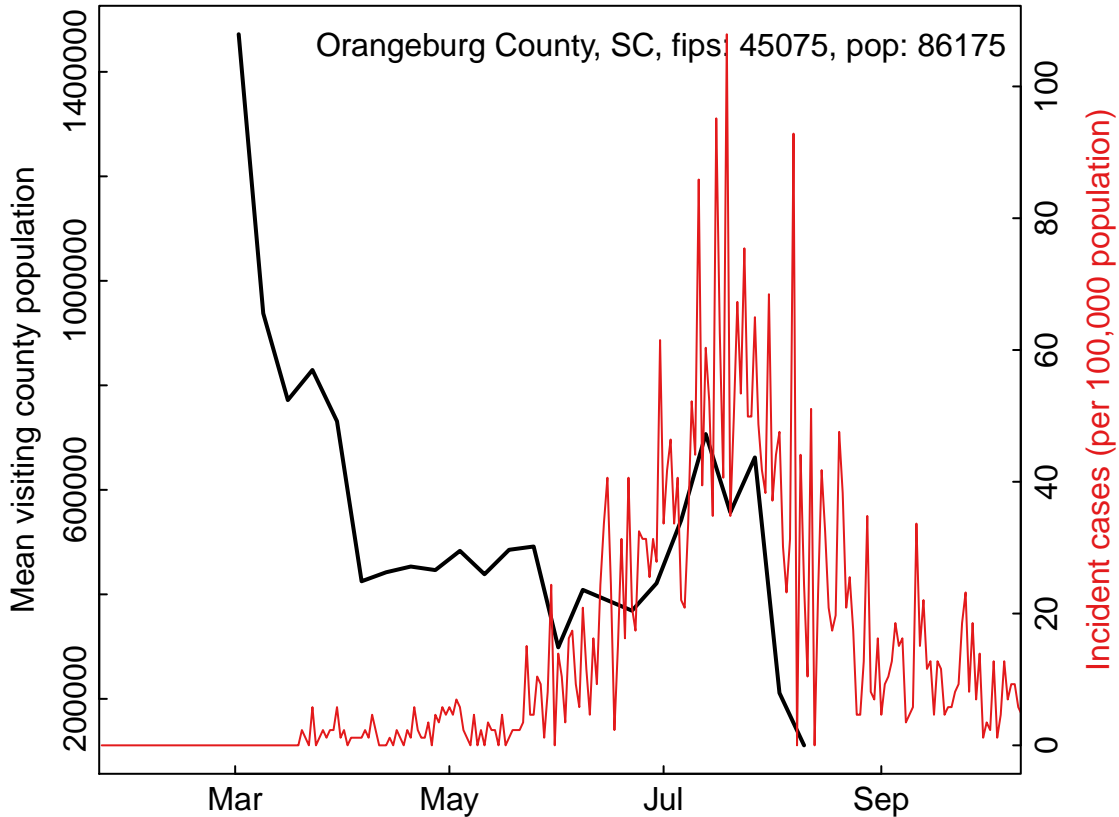

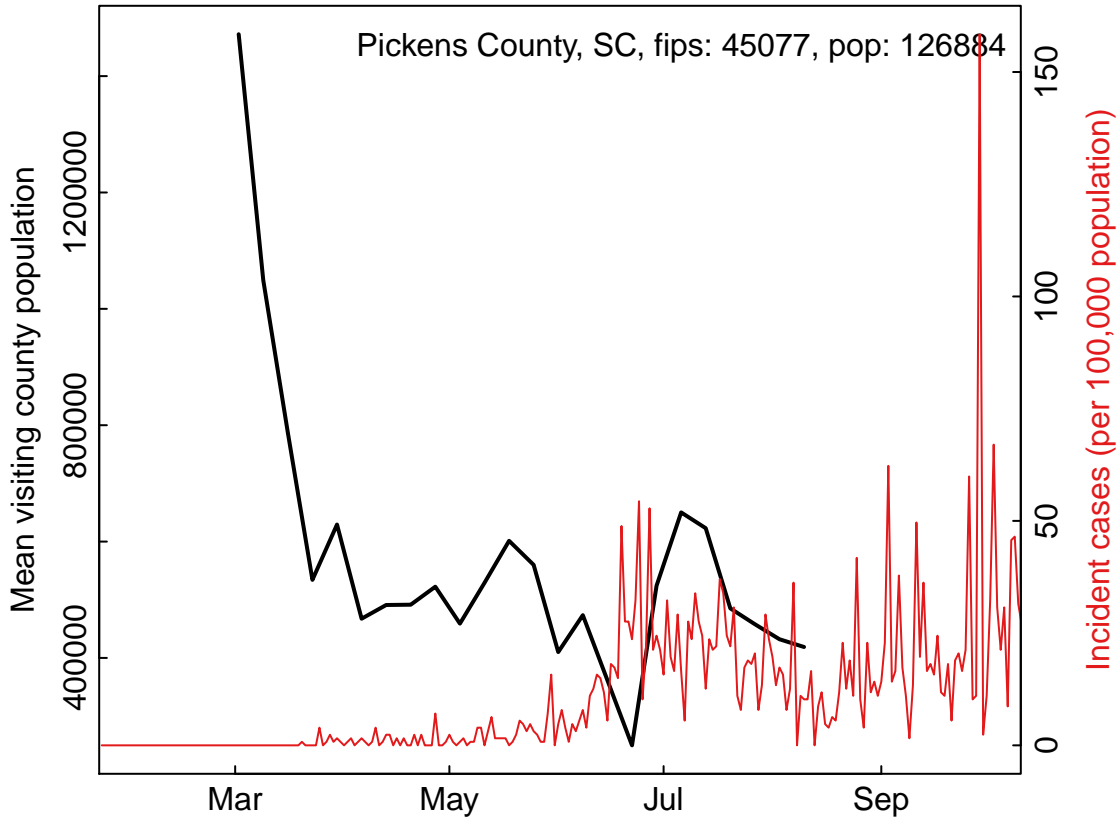

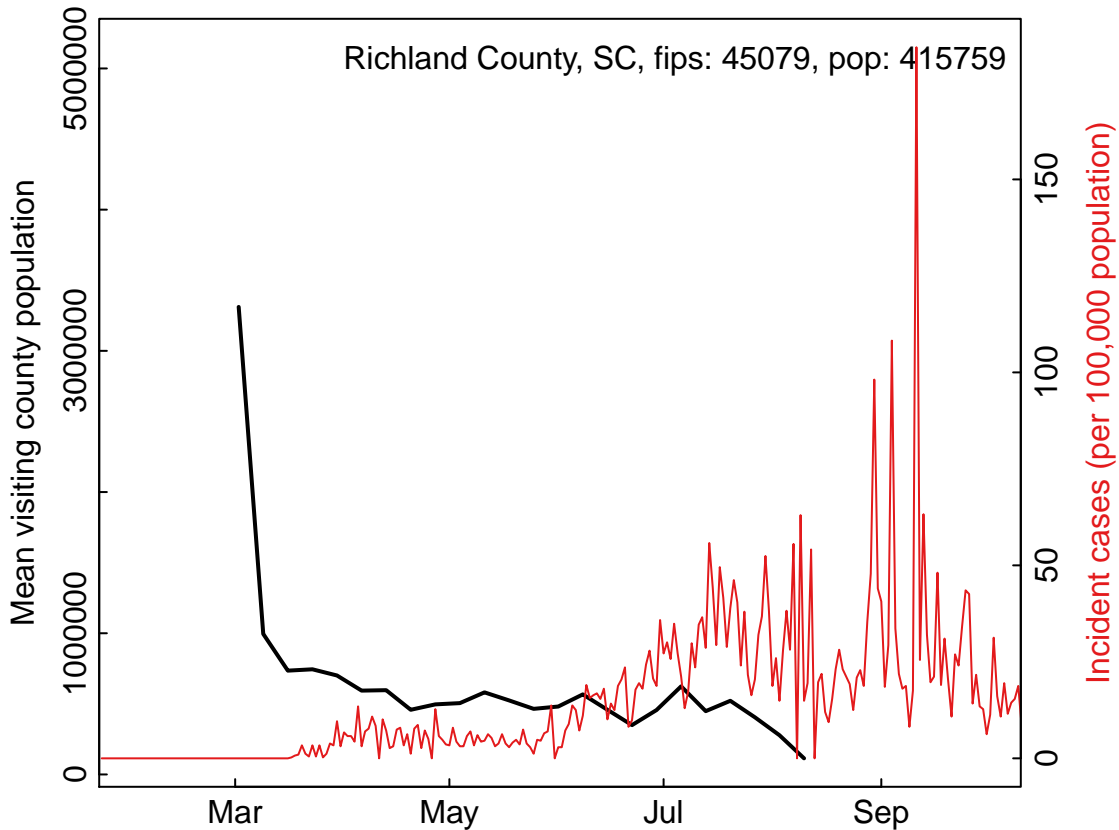

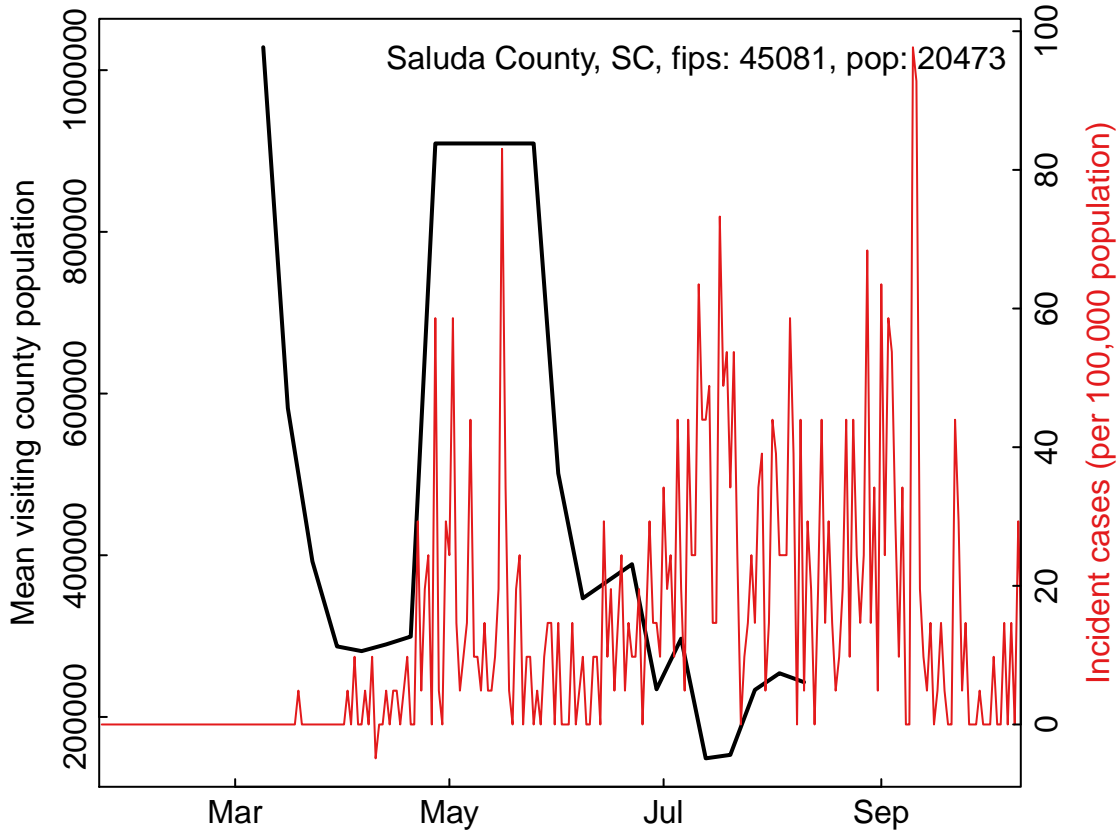

Spartanburg County, SC, fips: 45083, pop: 319785

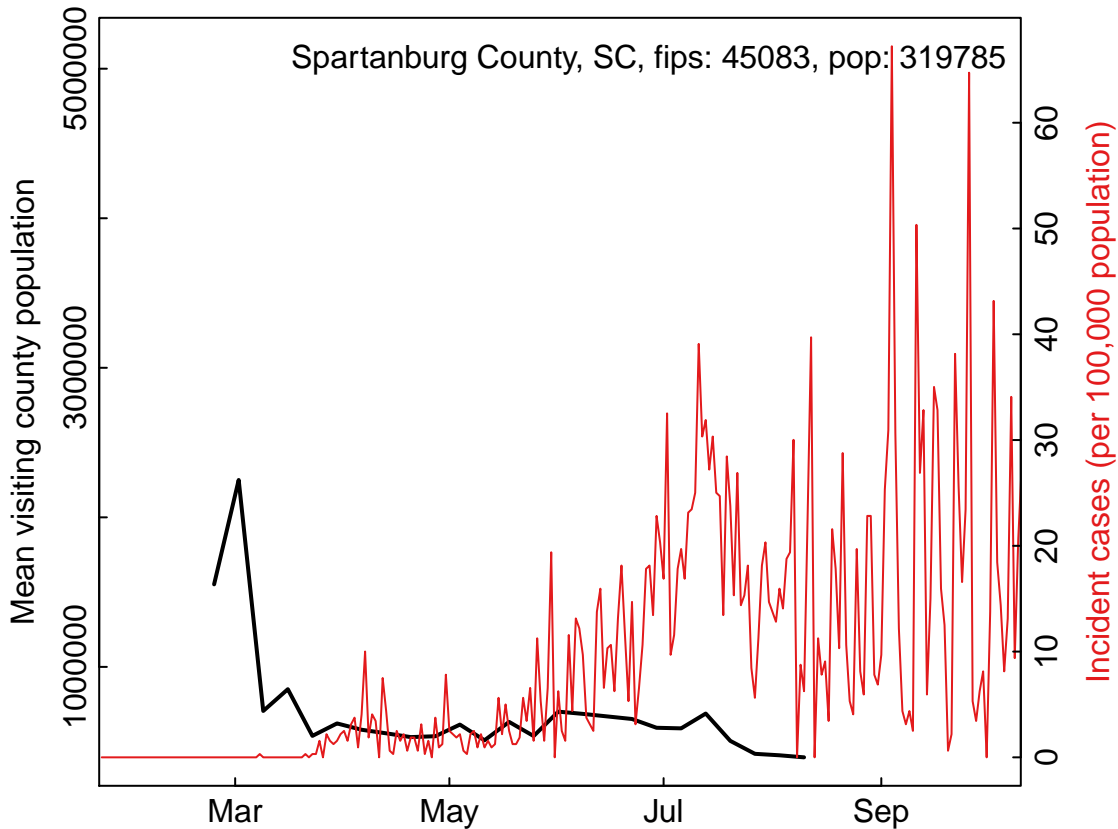

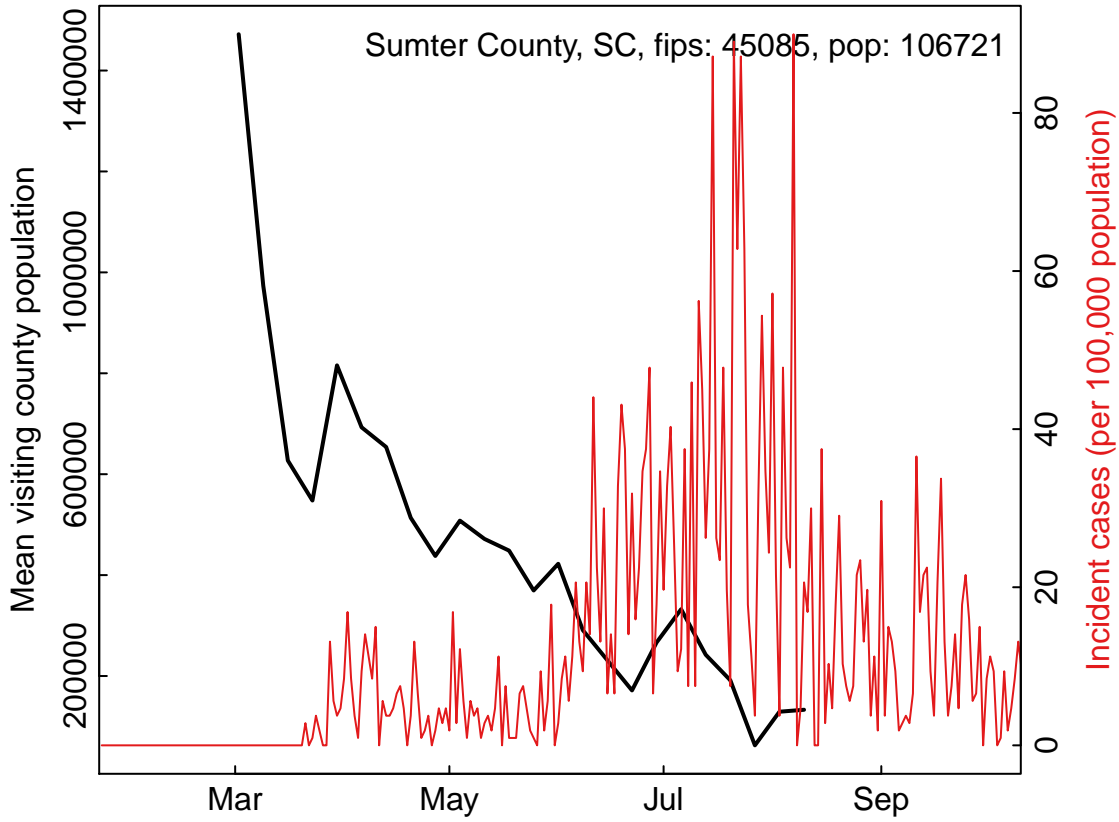

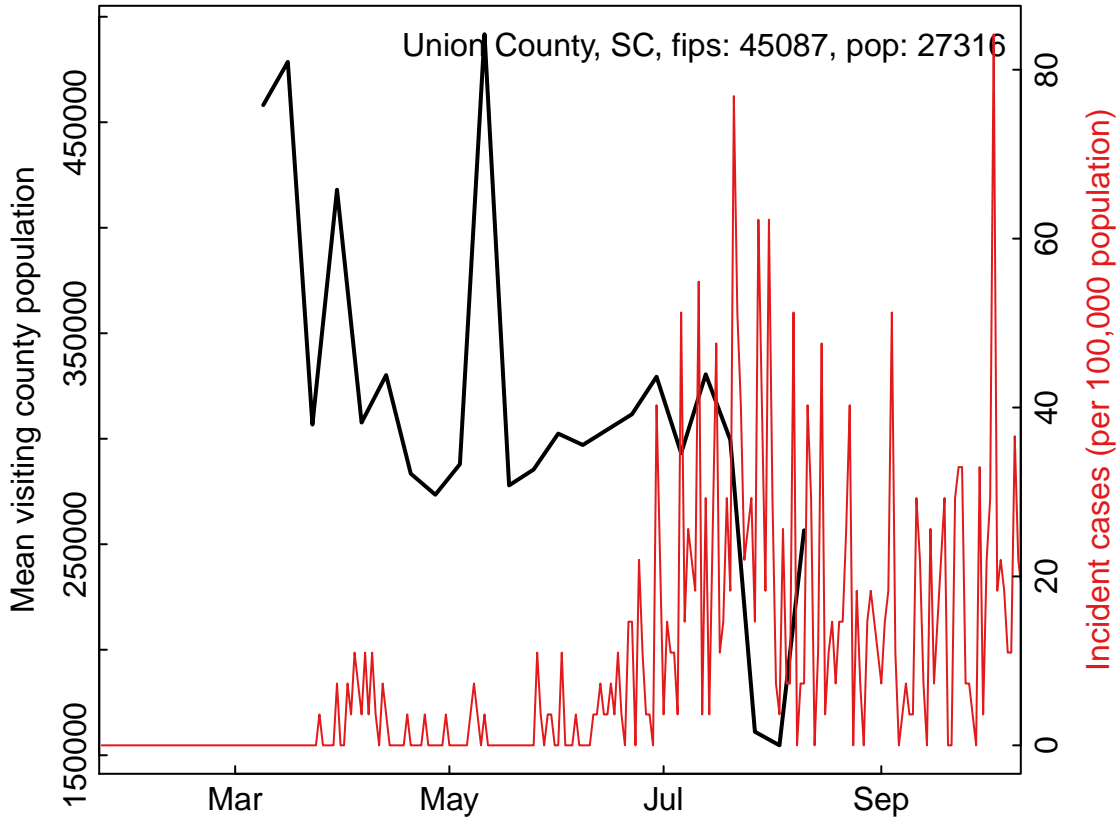

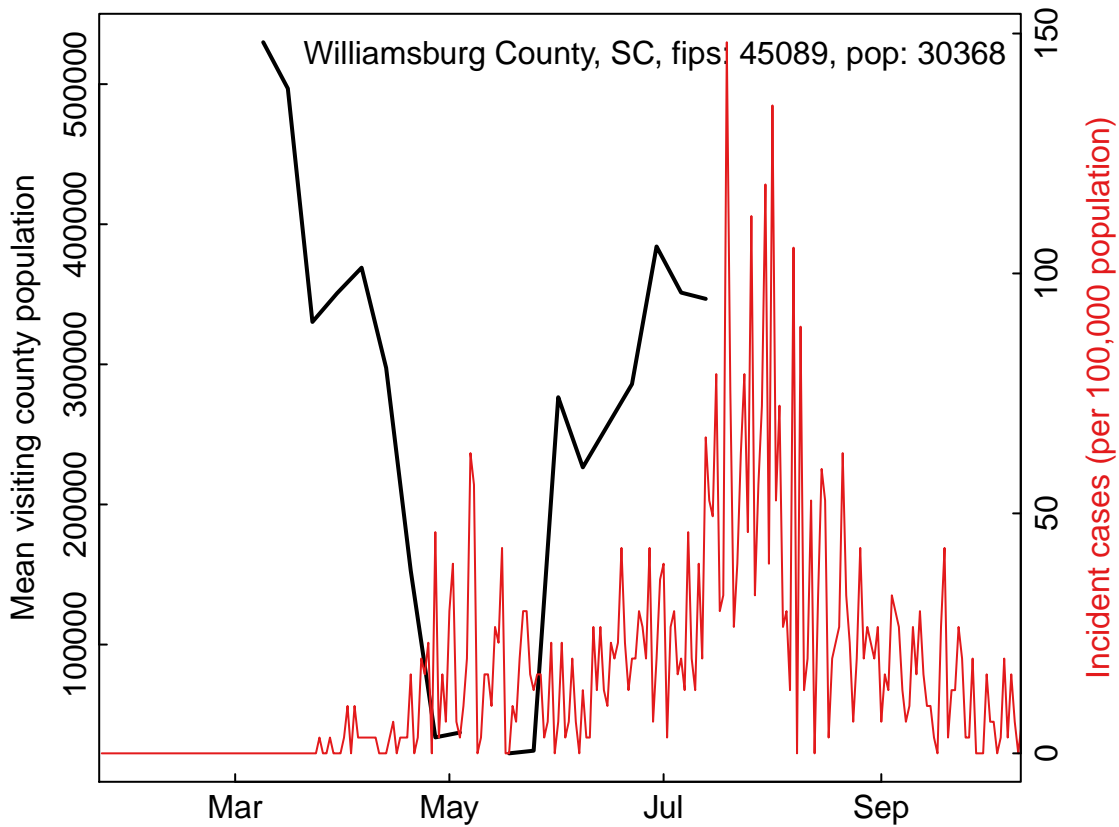



York County, SC, fips: 45091, pop: 280979

Mean visiting county population

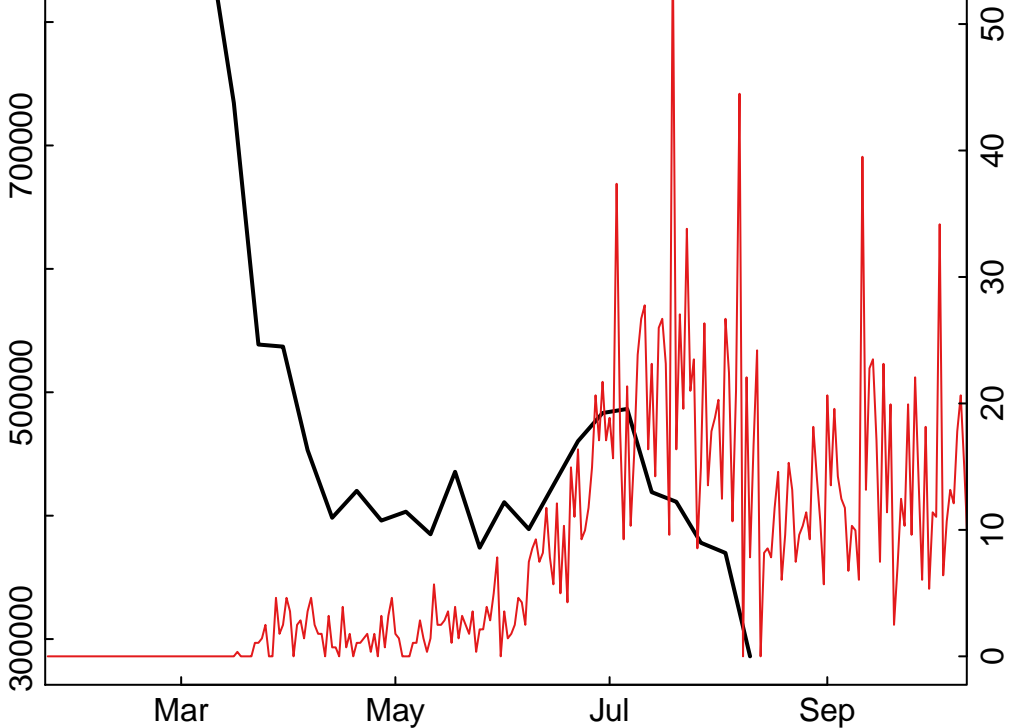

Incident cases (per 100,000 population)

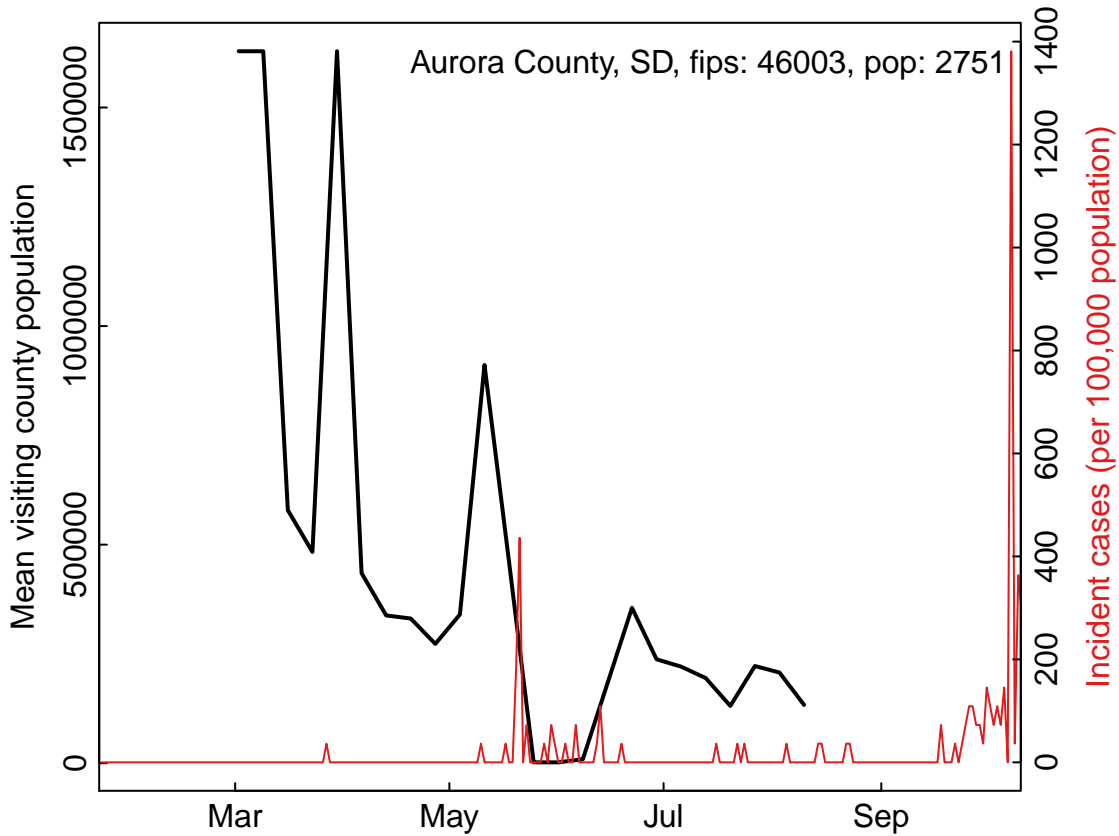

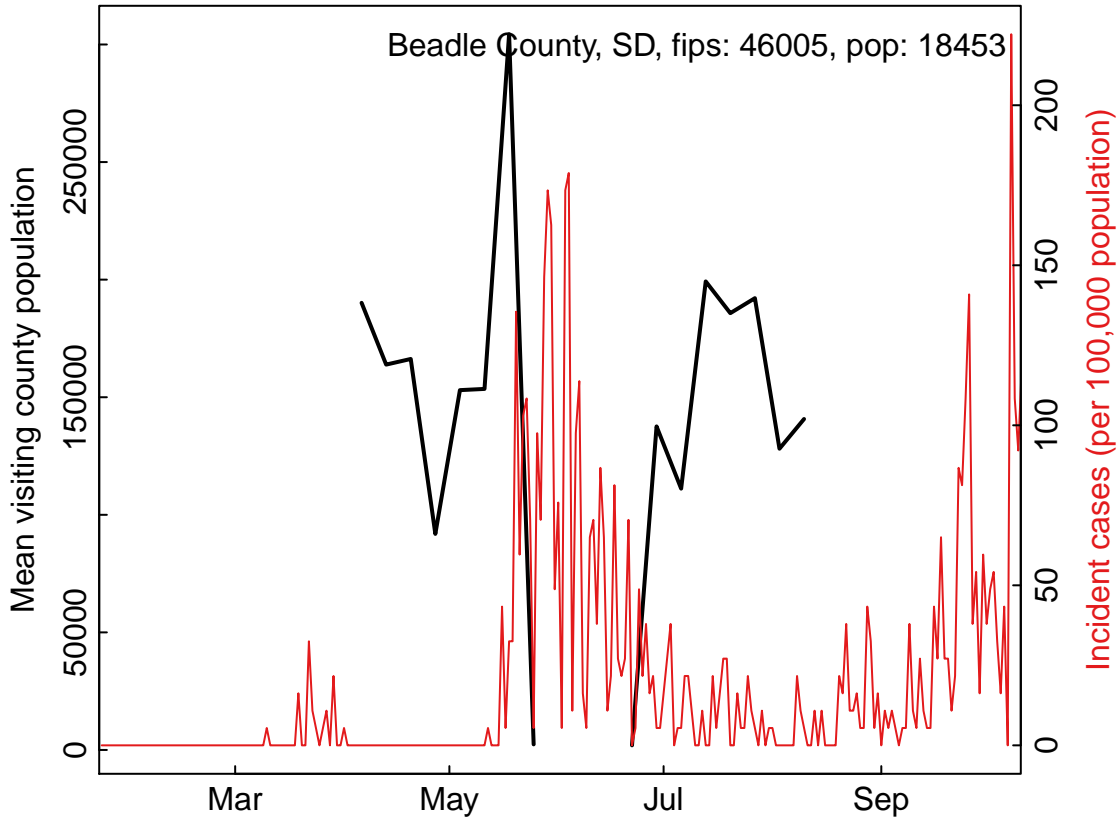

Bennett County, SD, fips: 46007, pop: 3365

Mean visiting county population

100000  
80000  
60000  
40000

Mar

May

Jul

Sep

350  
300  
250  
200  
150  
100  
50  
0

Incident cases (per 100,000 population)

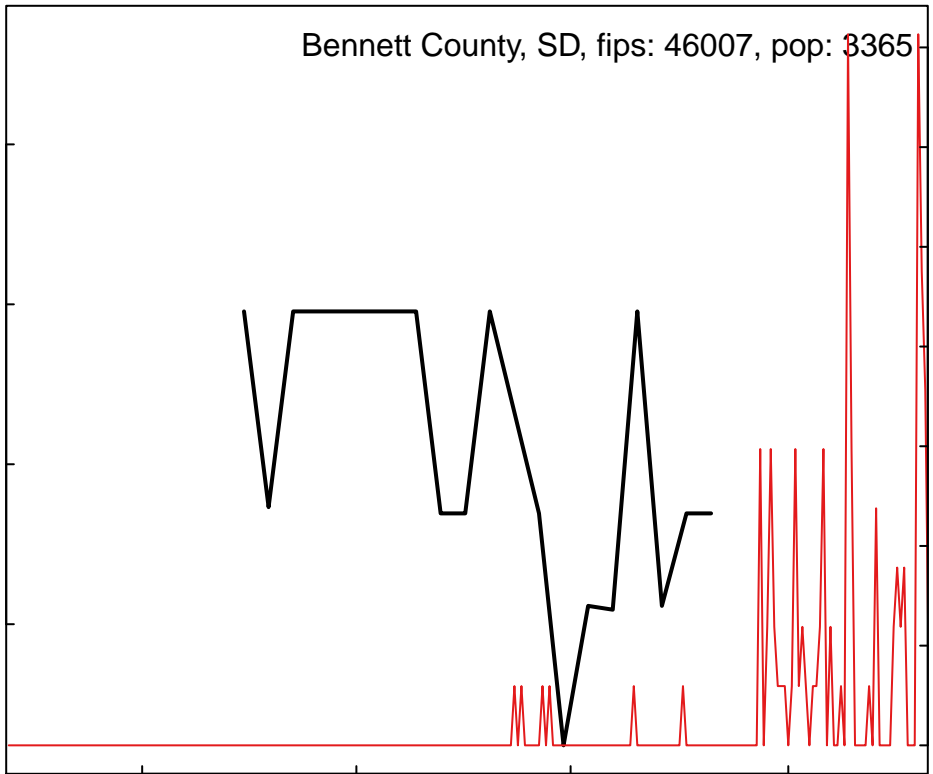

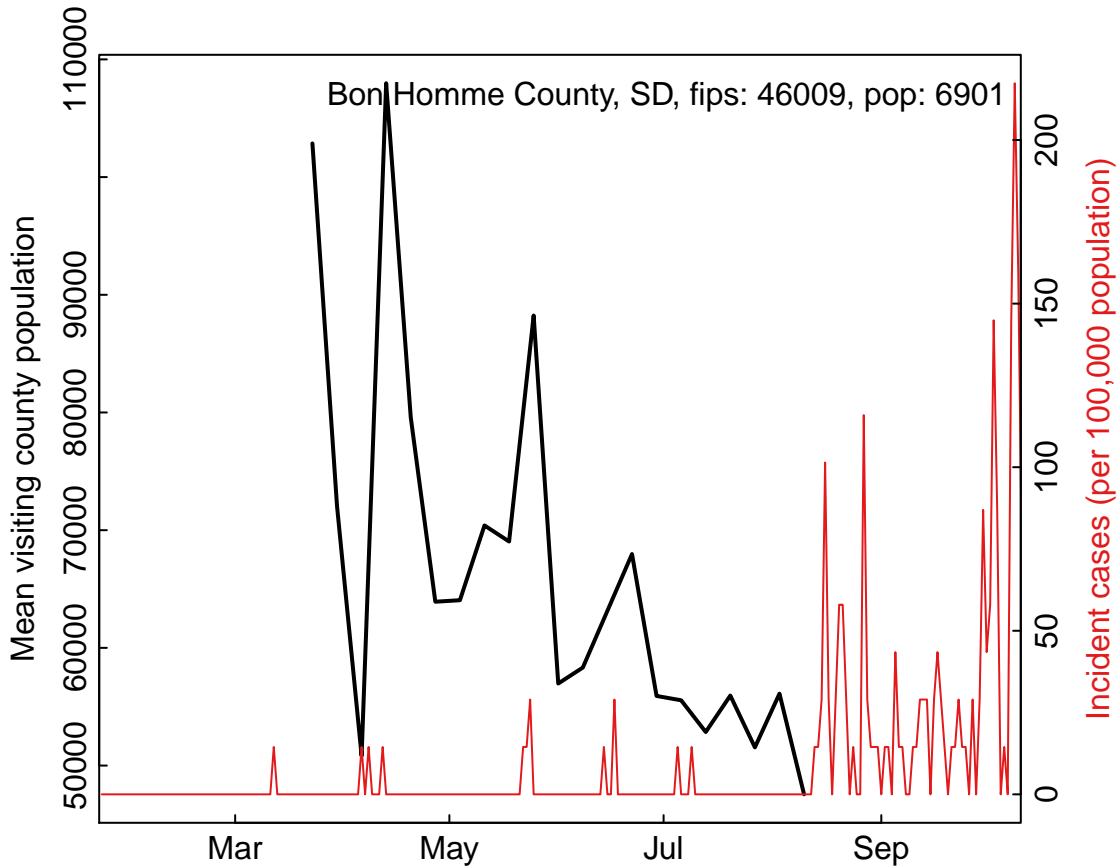

Brookings County, SD, fips: 46011, pop: 35077

Mean visiting county population

500000  
1500000  
2500000

Mar May Jul Sep

Incident cases (per 100,000 population)

0 20 40 60 80 100 120

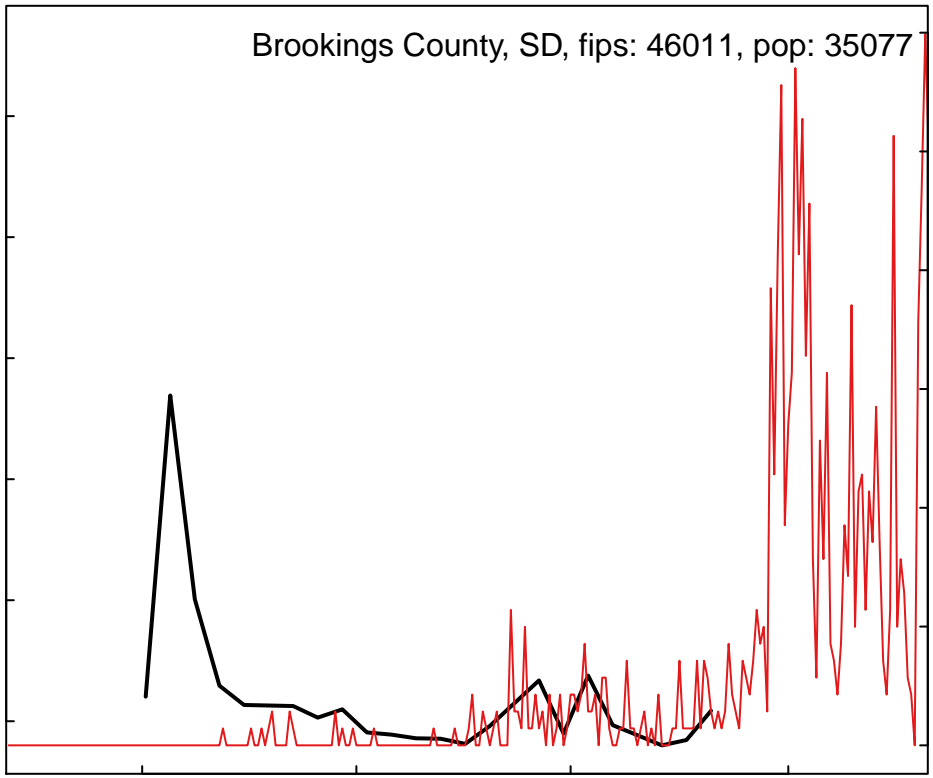

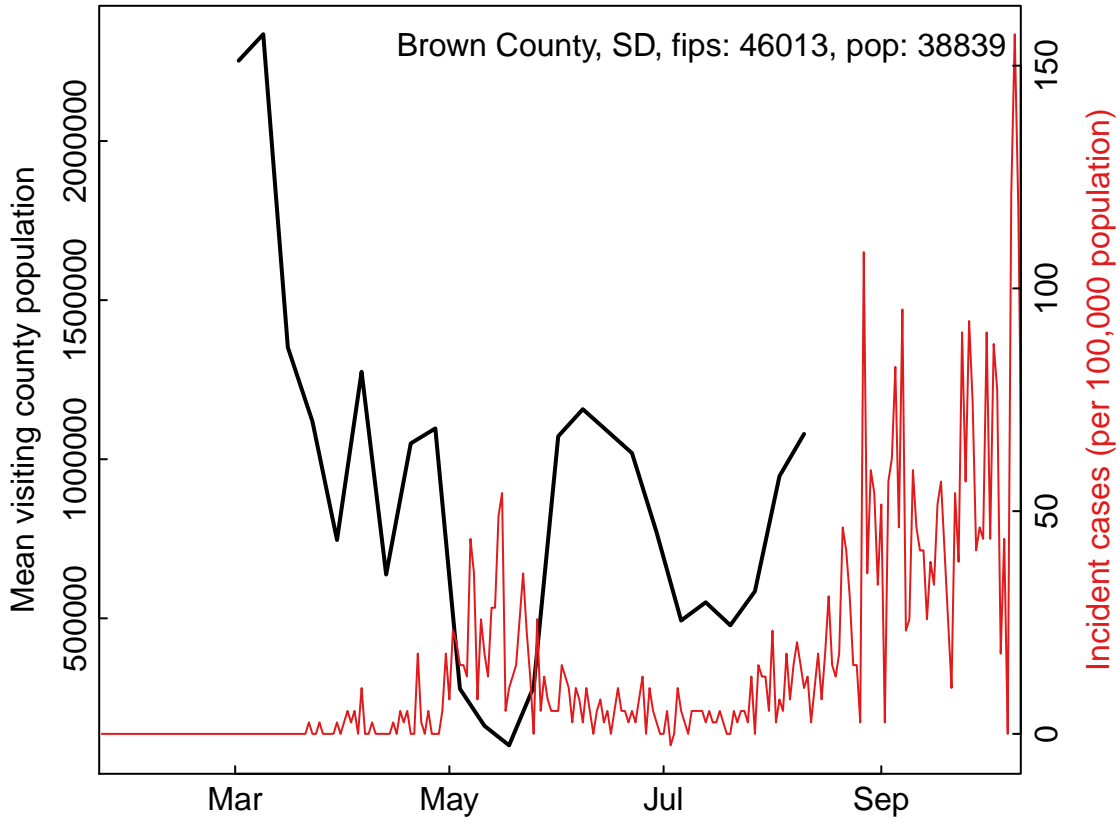

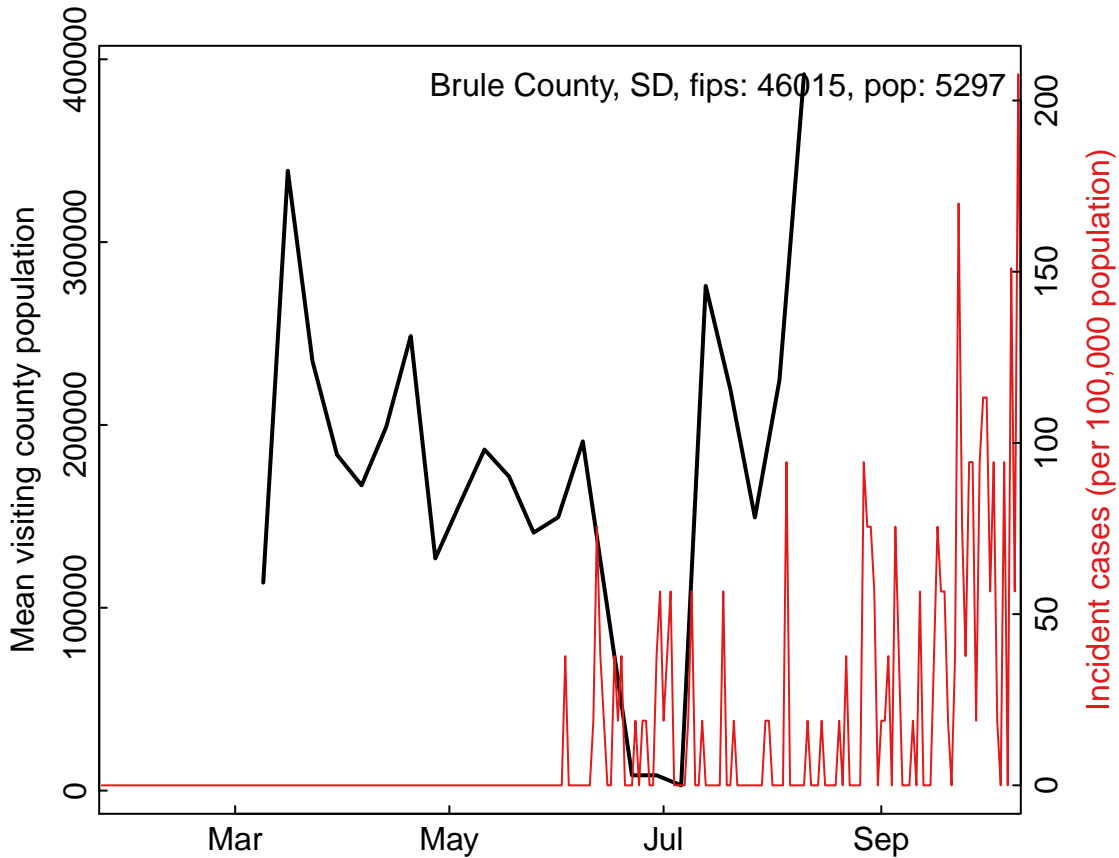



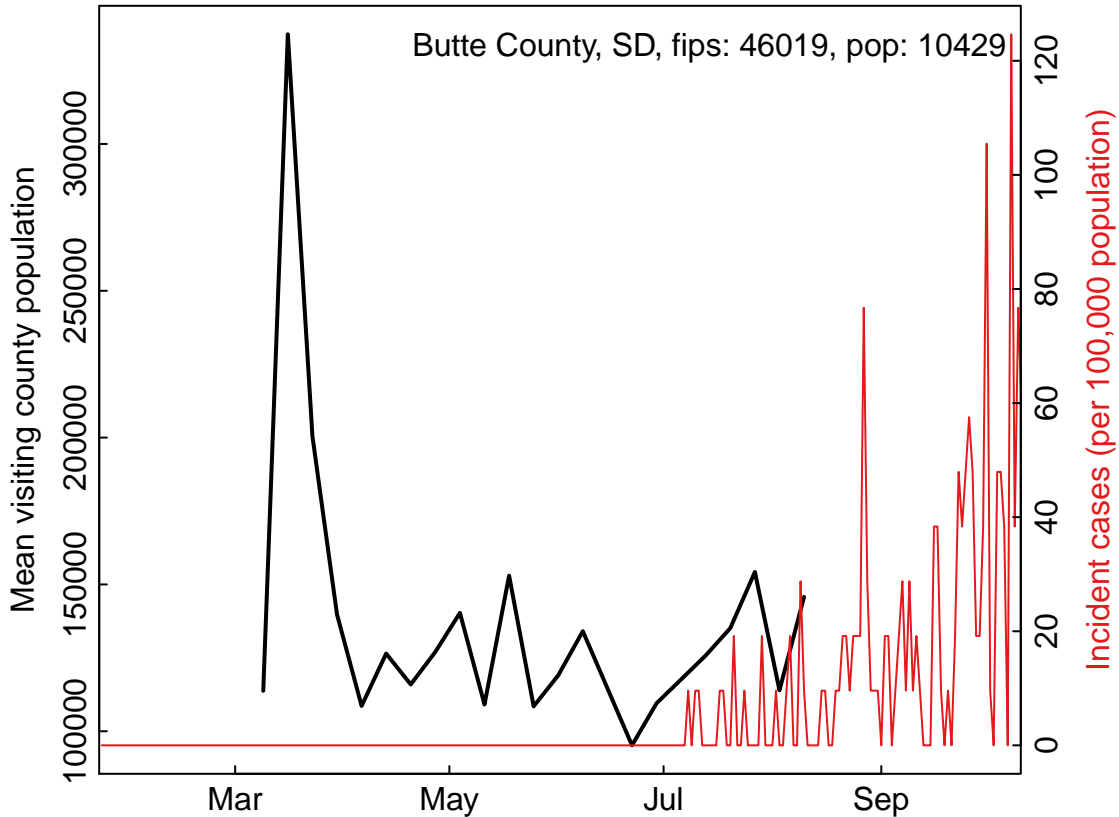

Campbell County, SD, fips: 46021, pop: 1376

Mean visiting county population

600000  
400000  
200000

Mar

May

Jul

Sep

300  
200  
100  
0  
Incident cases (per 100,000 population)

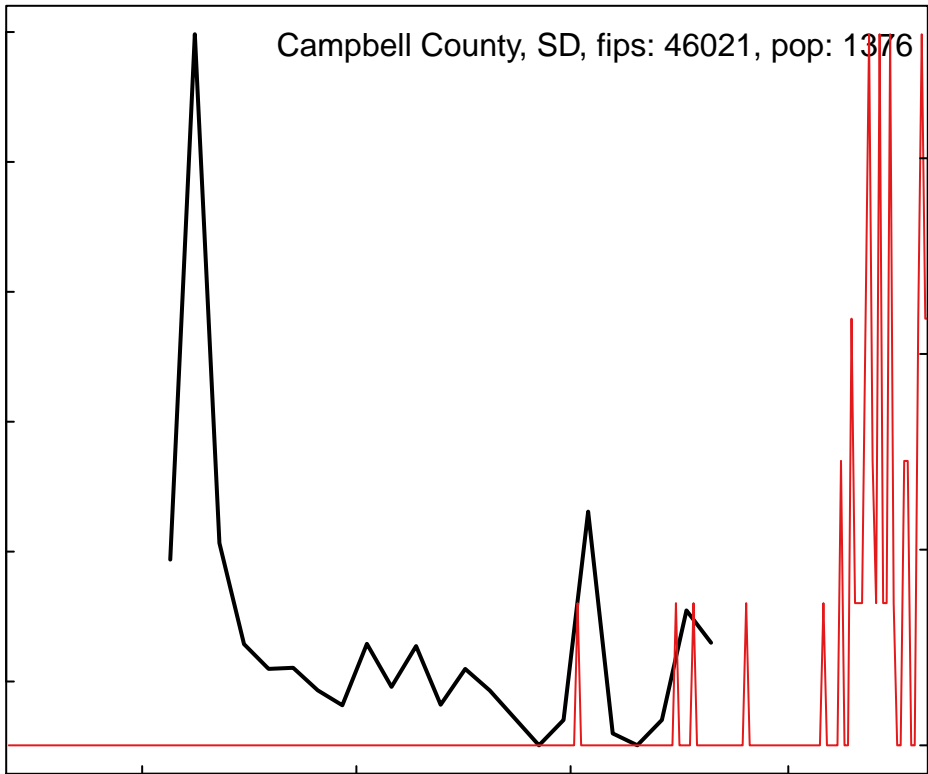

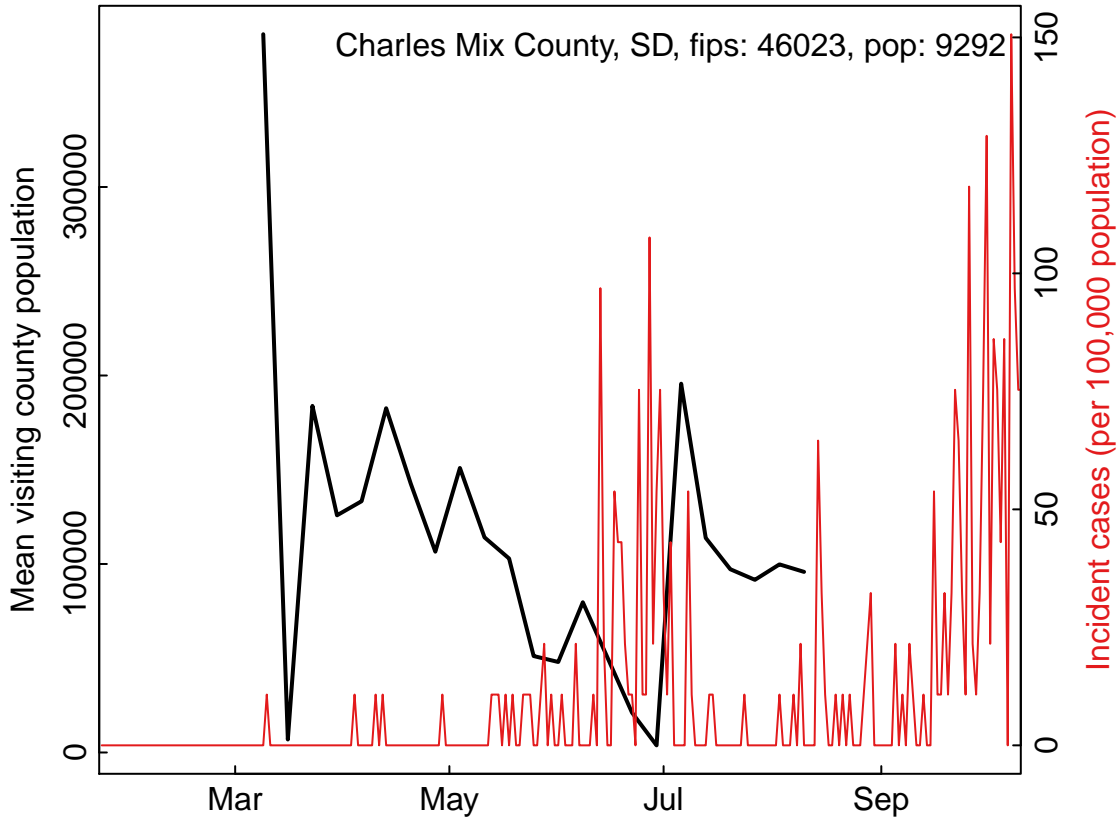



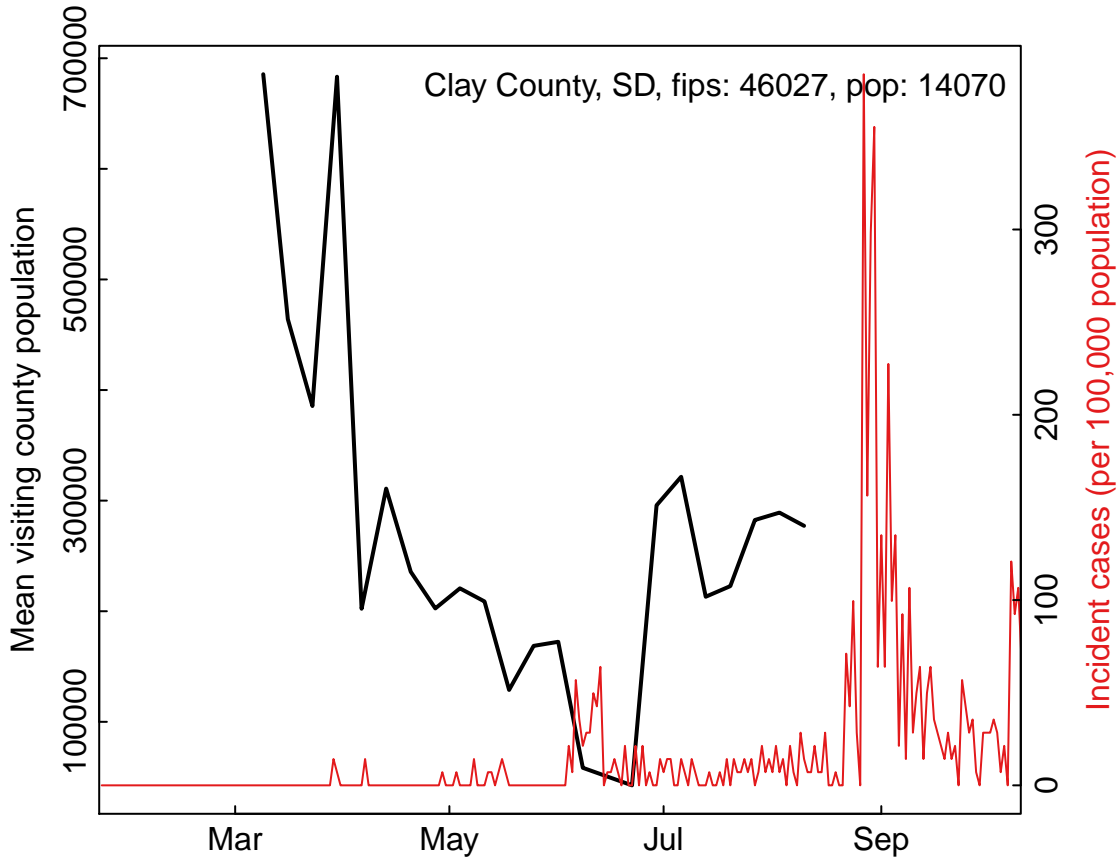

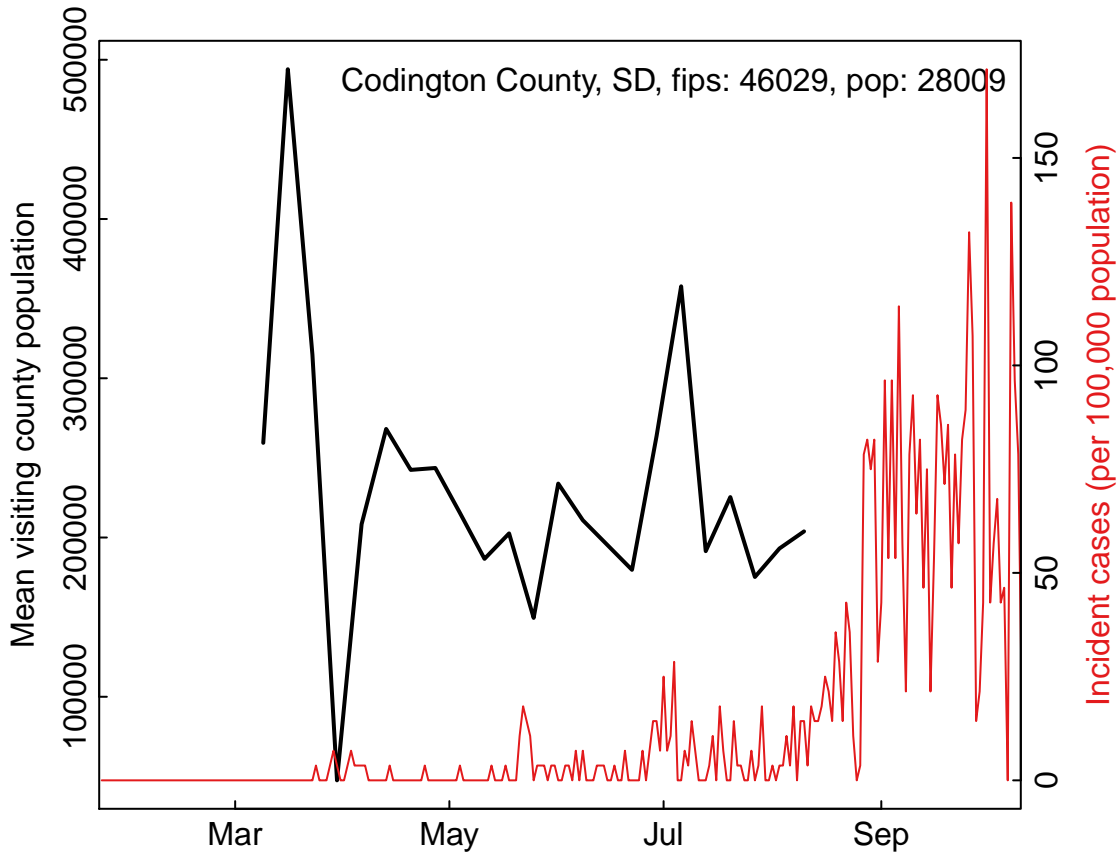

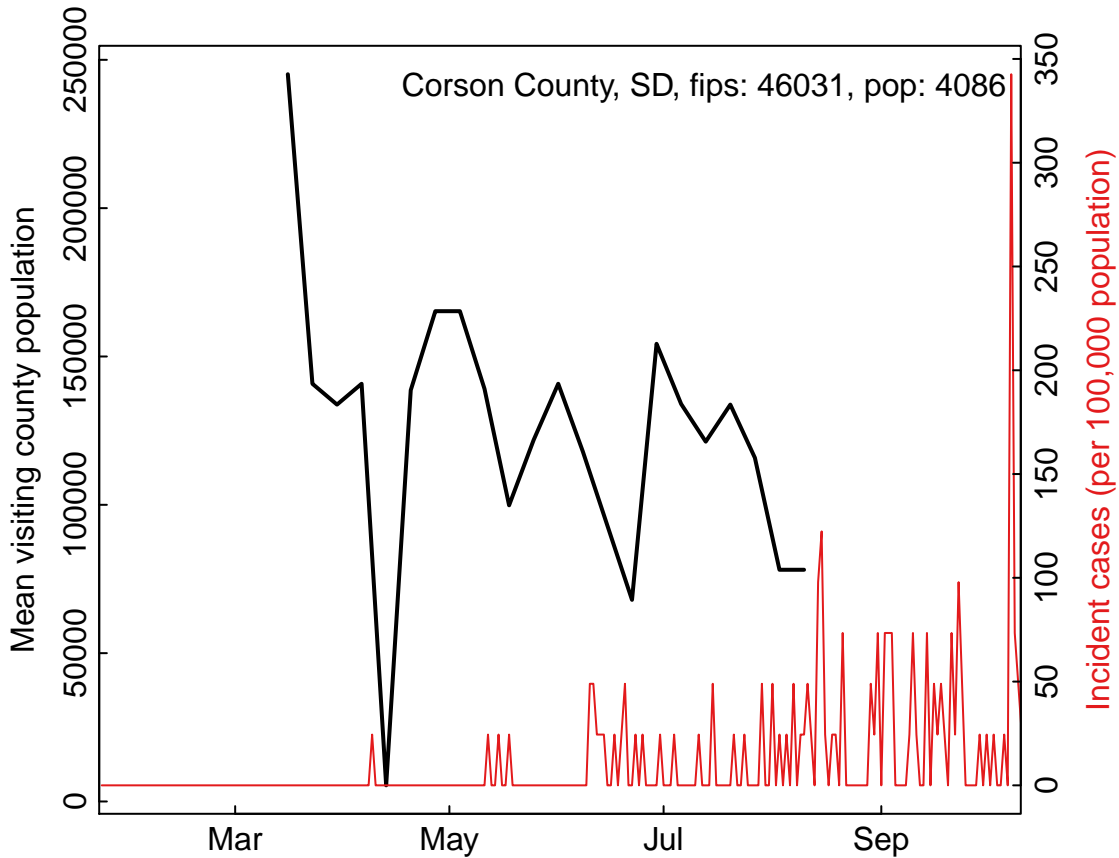

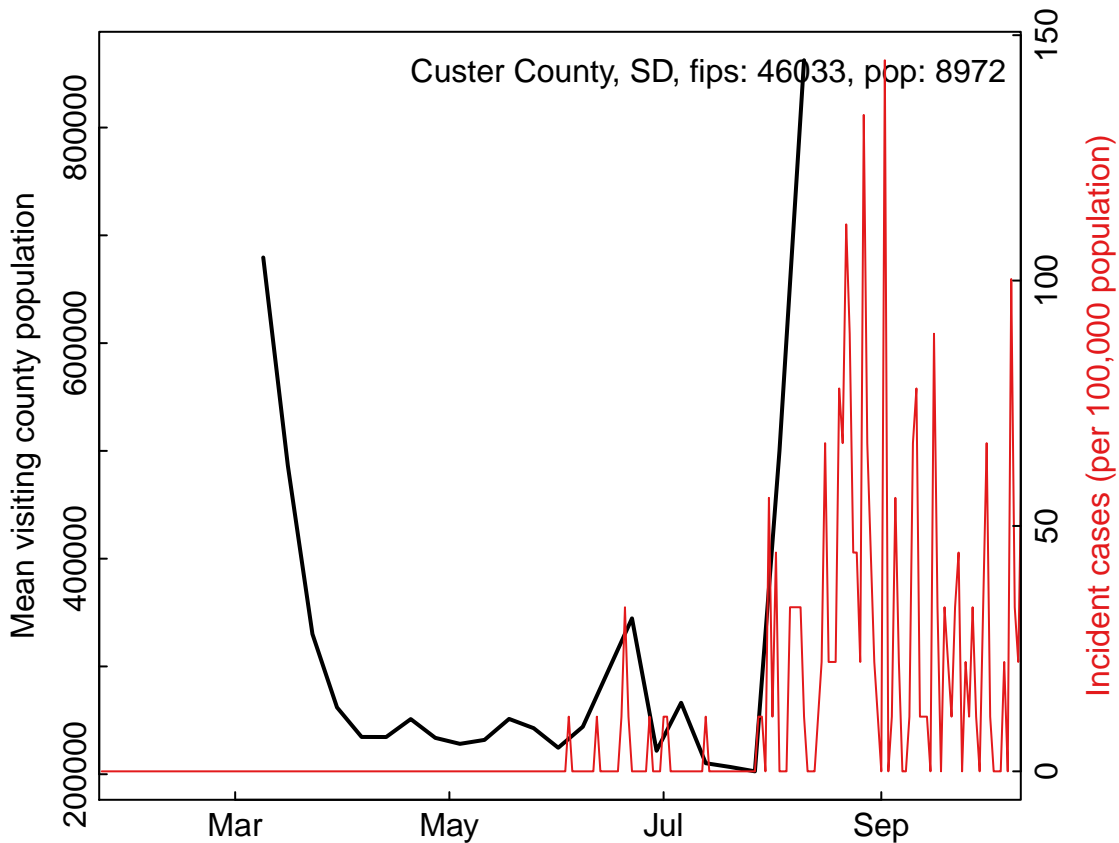



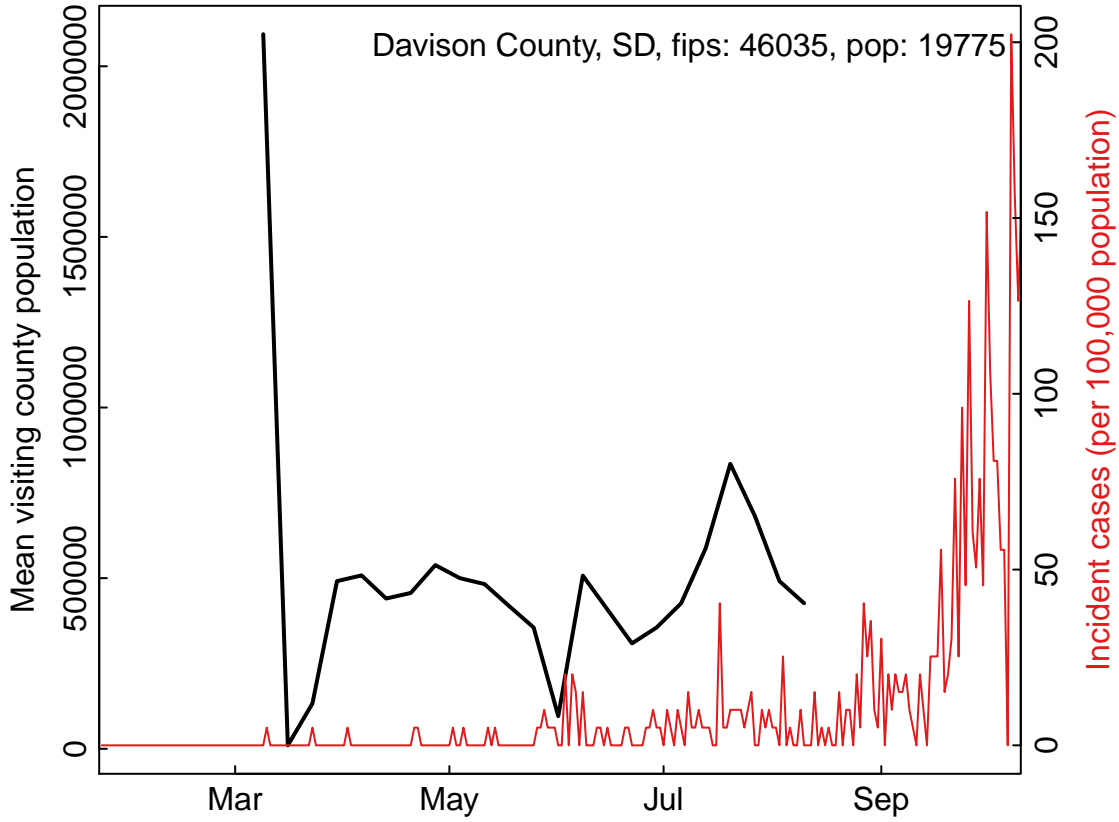

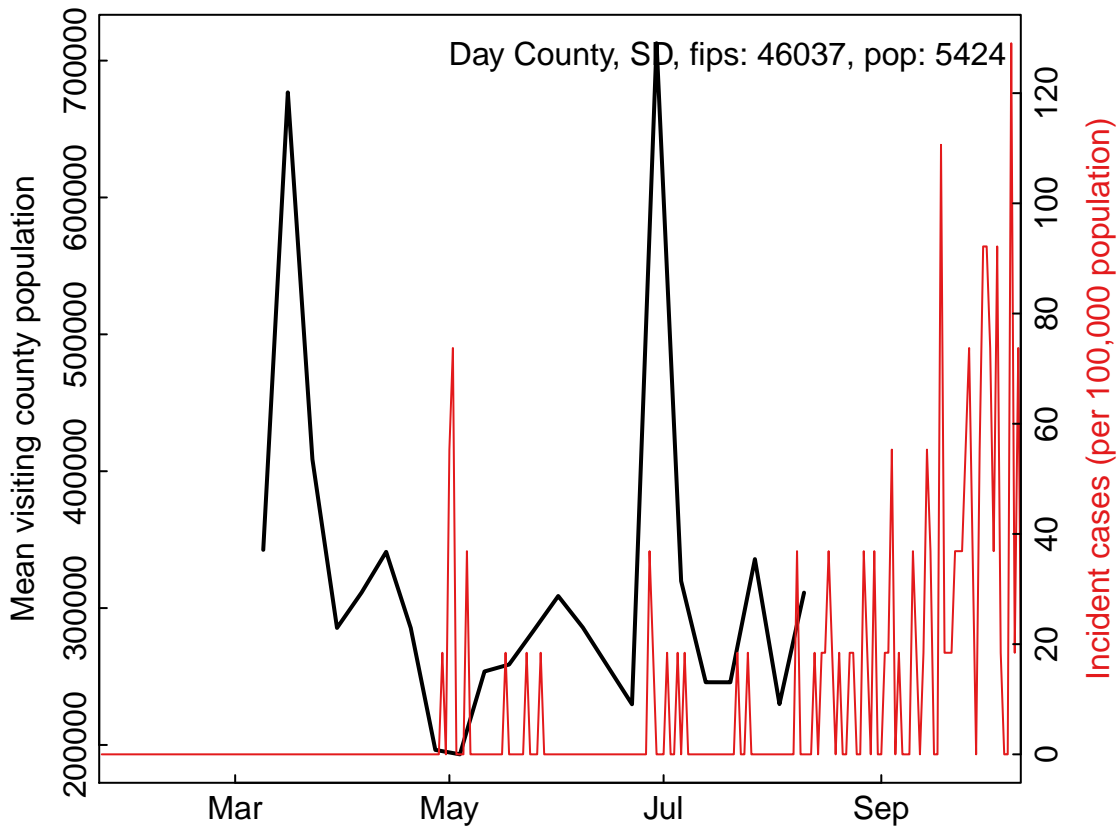

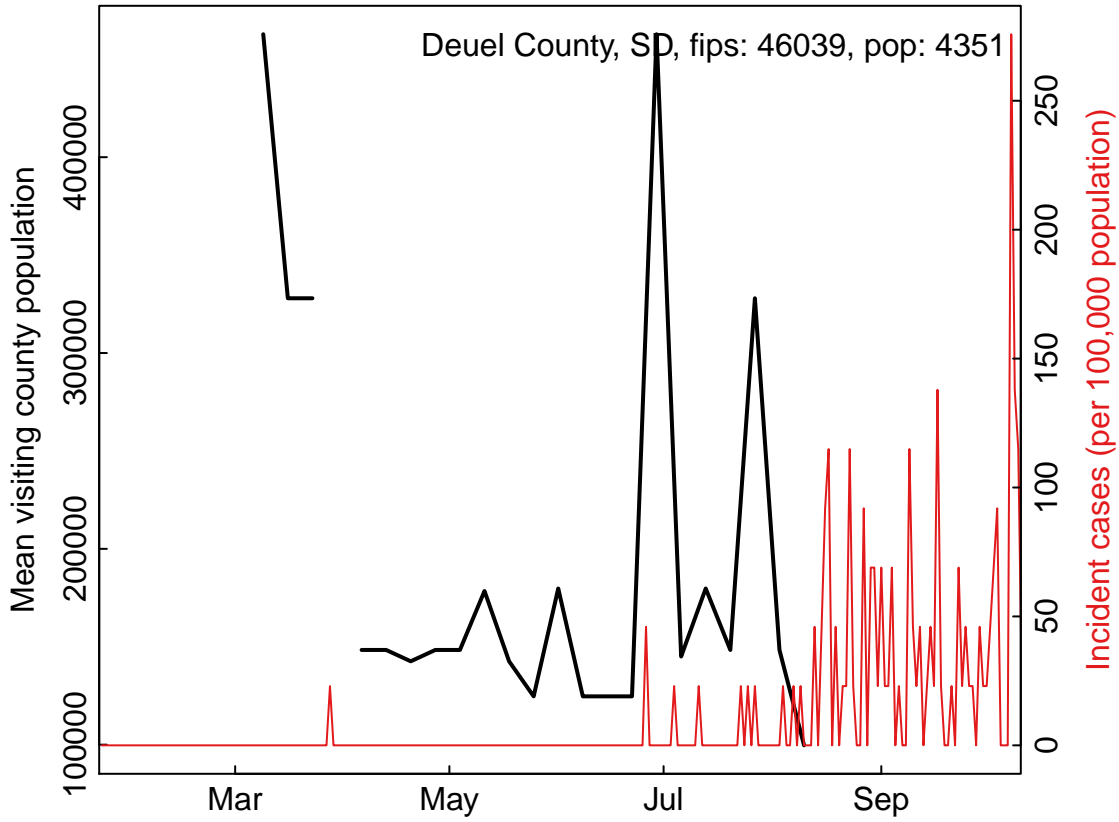

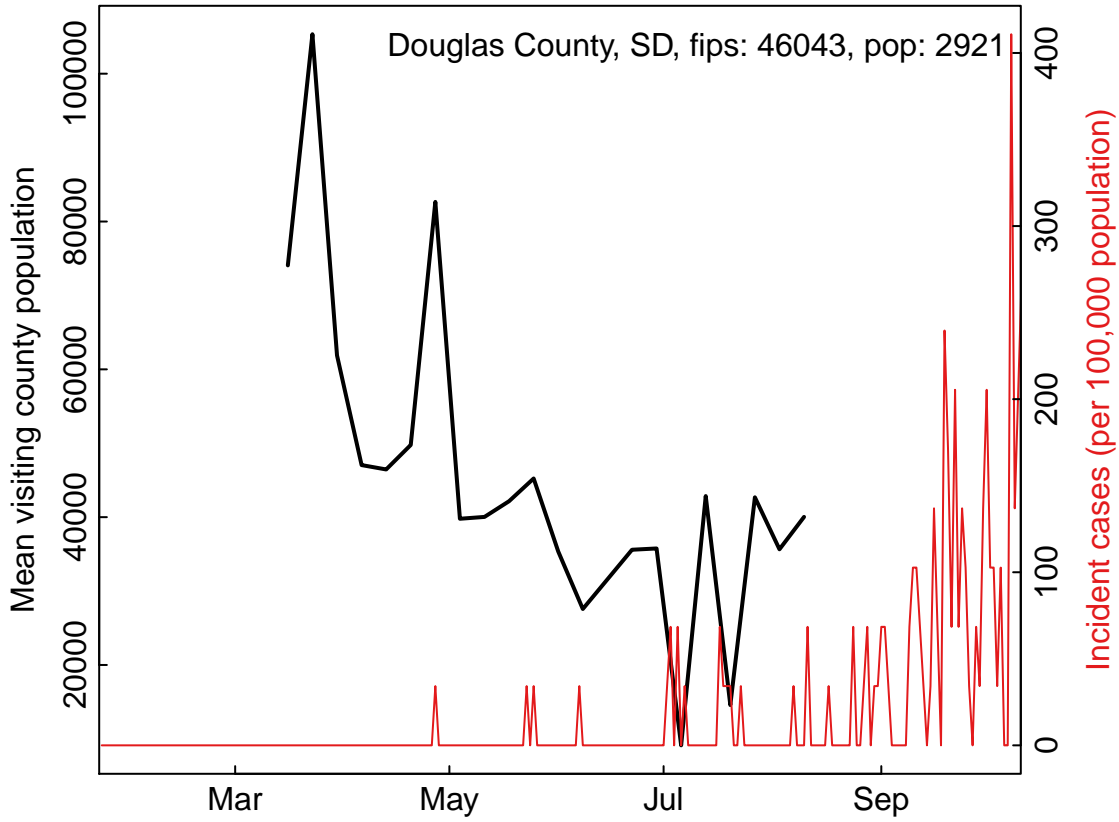

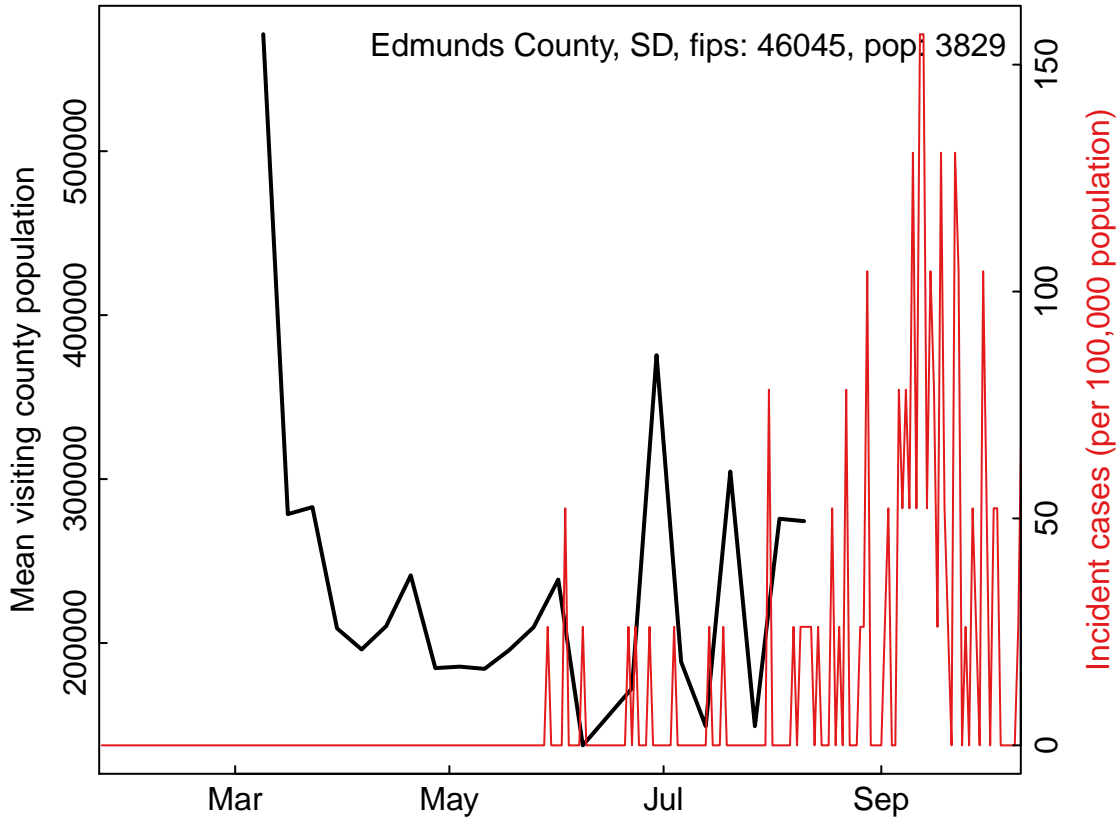

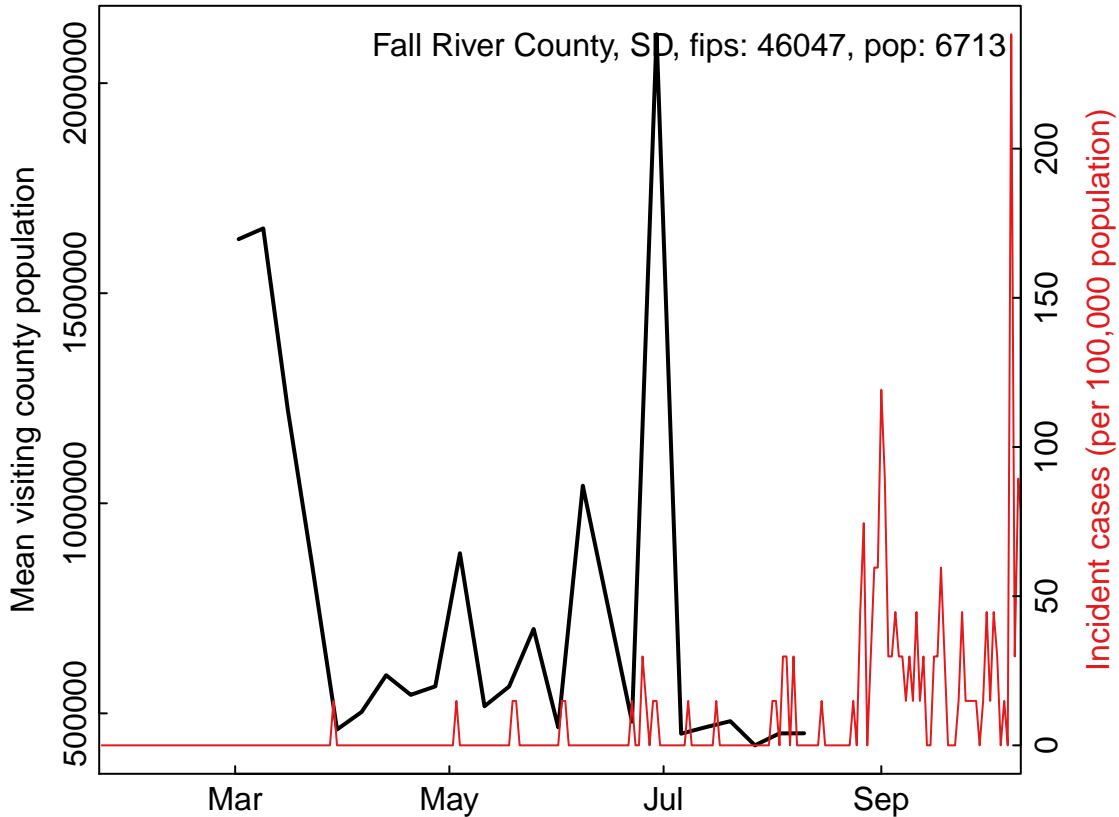

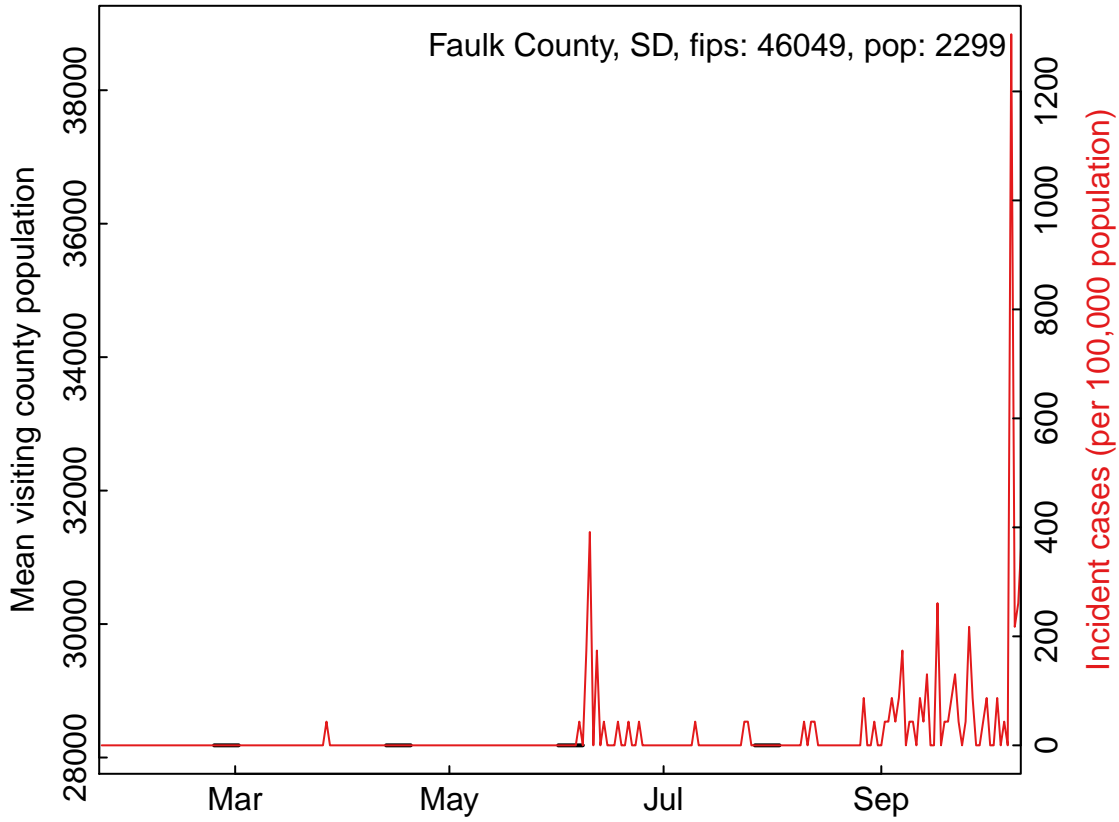

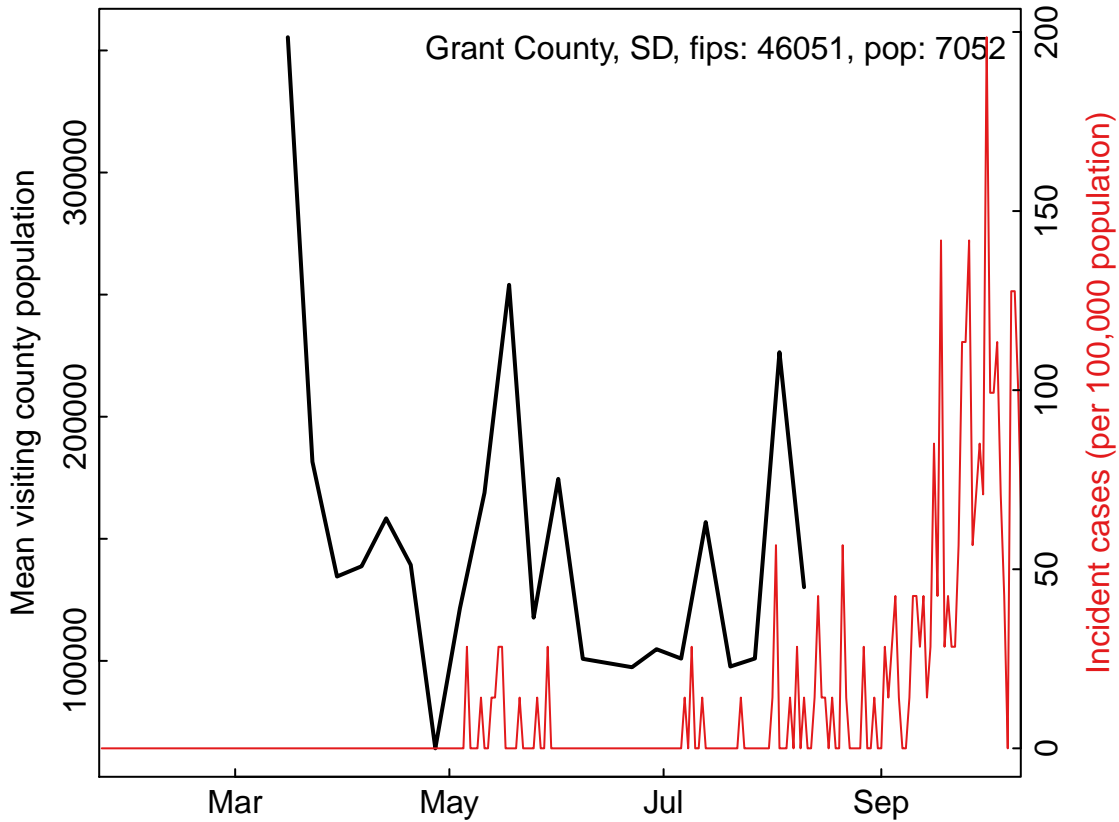



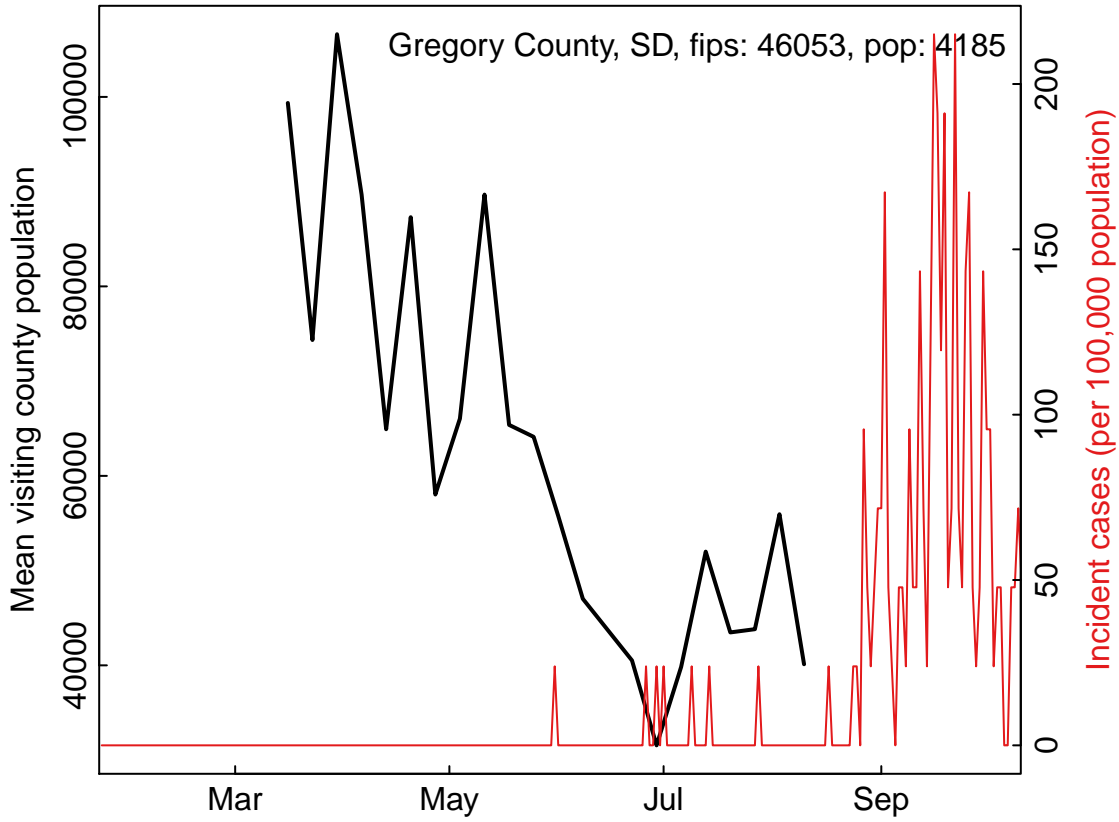

Haakon County, SD, fips: 46055, pop: 1899

Mean visiting county population

20000  
40000  
60000  
80000  
100000

Mar

May

Jul

Sep

Incident cases (per 100,000 population)

0  
50  
100  
150  
200

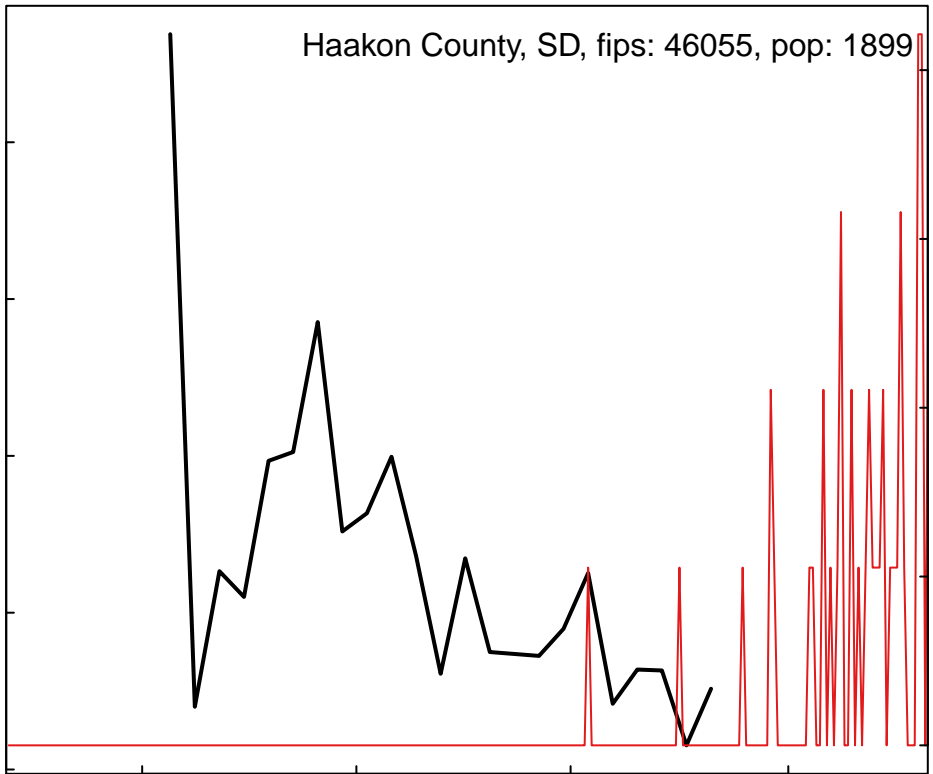

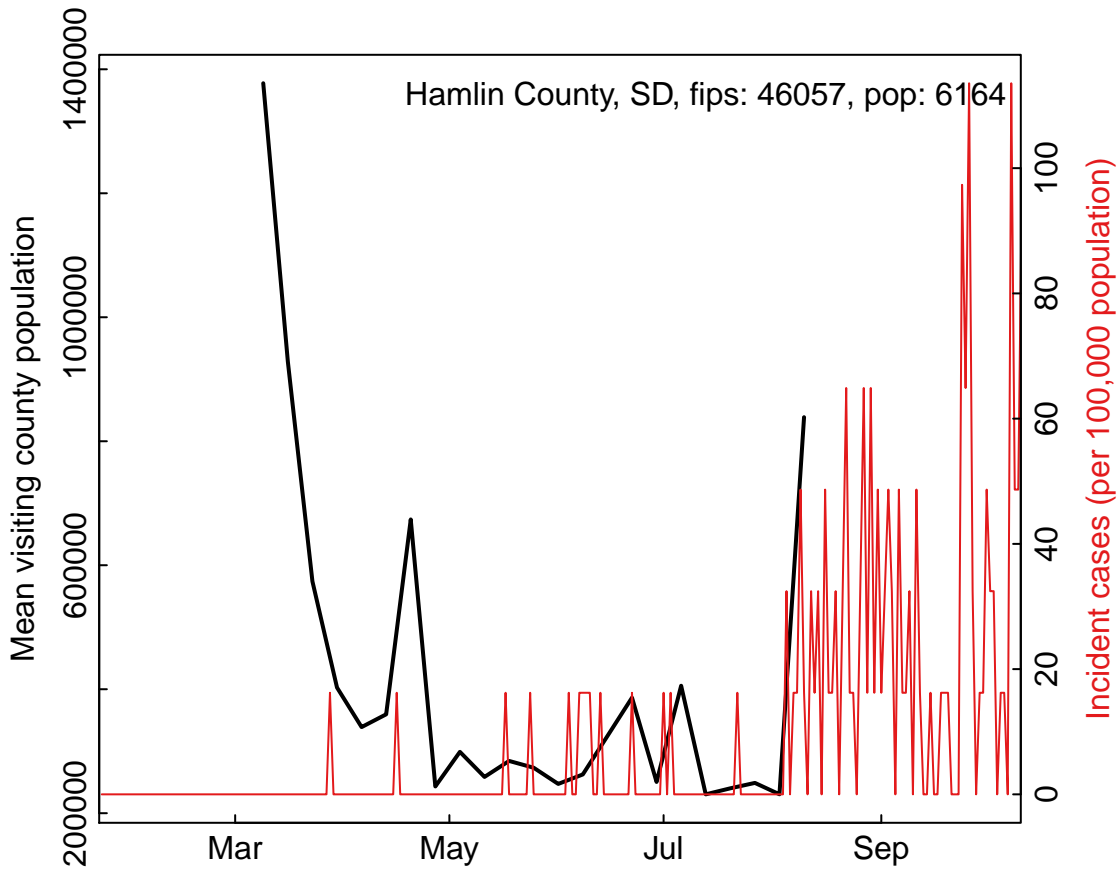

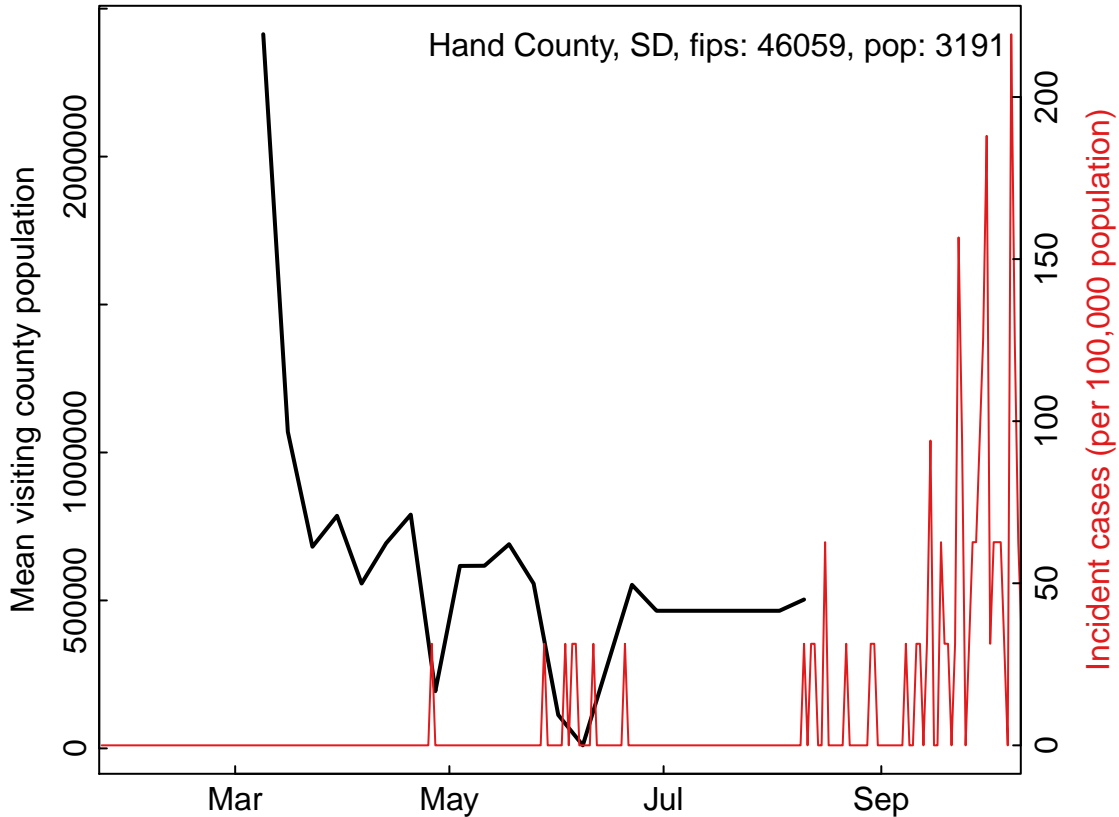

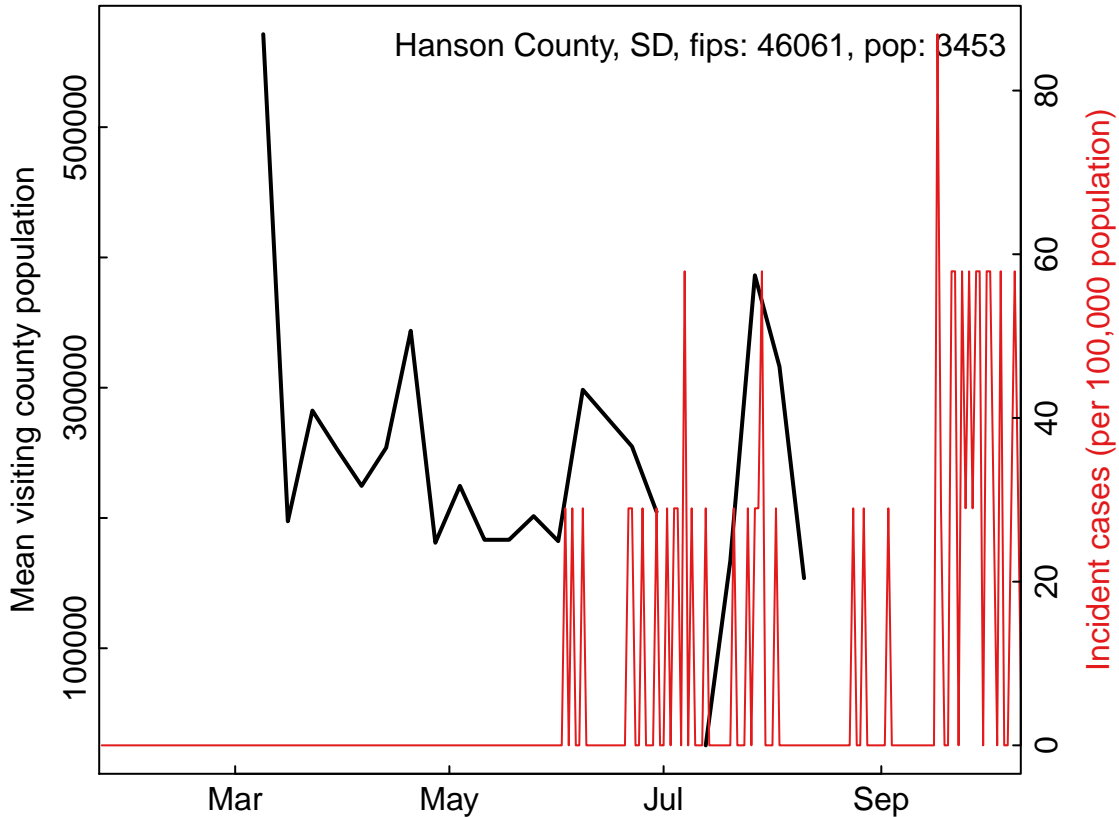

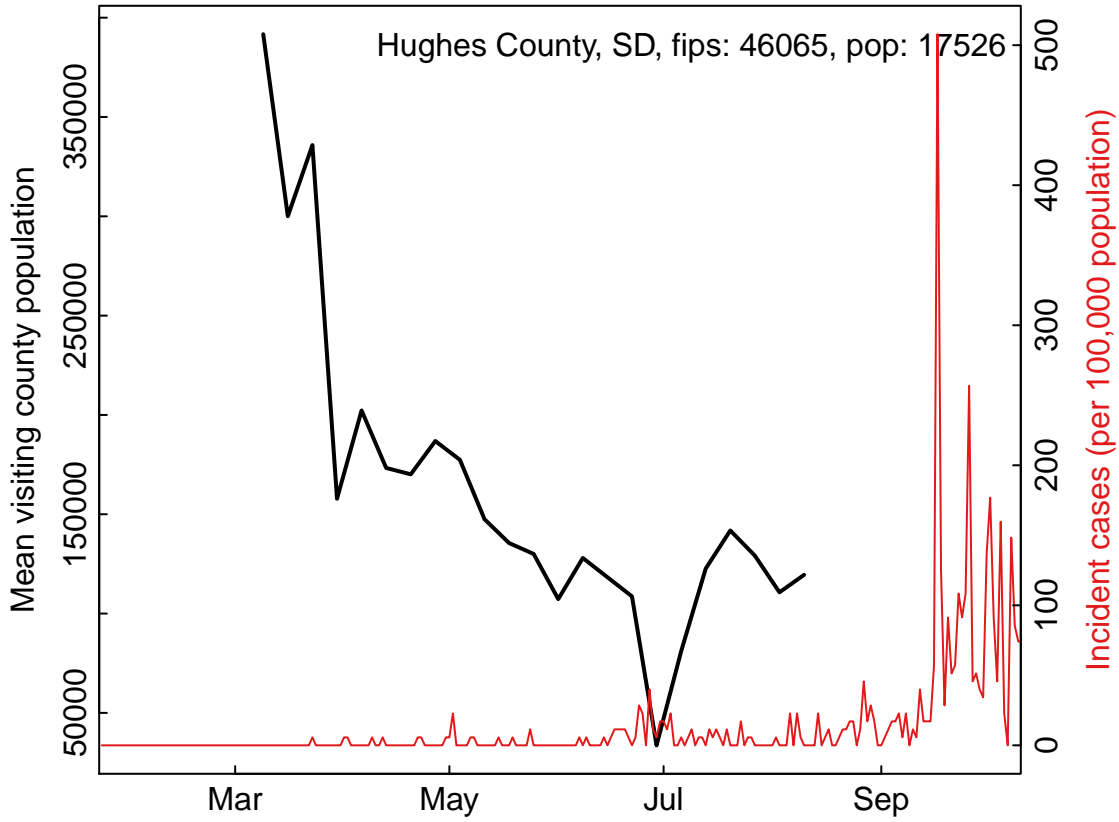

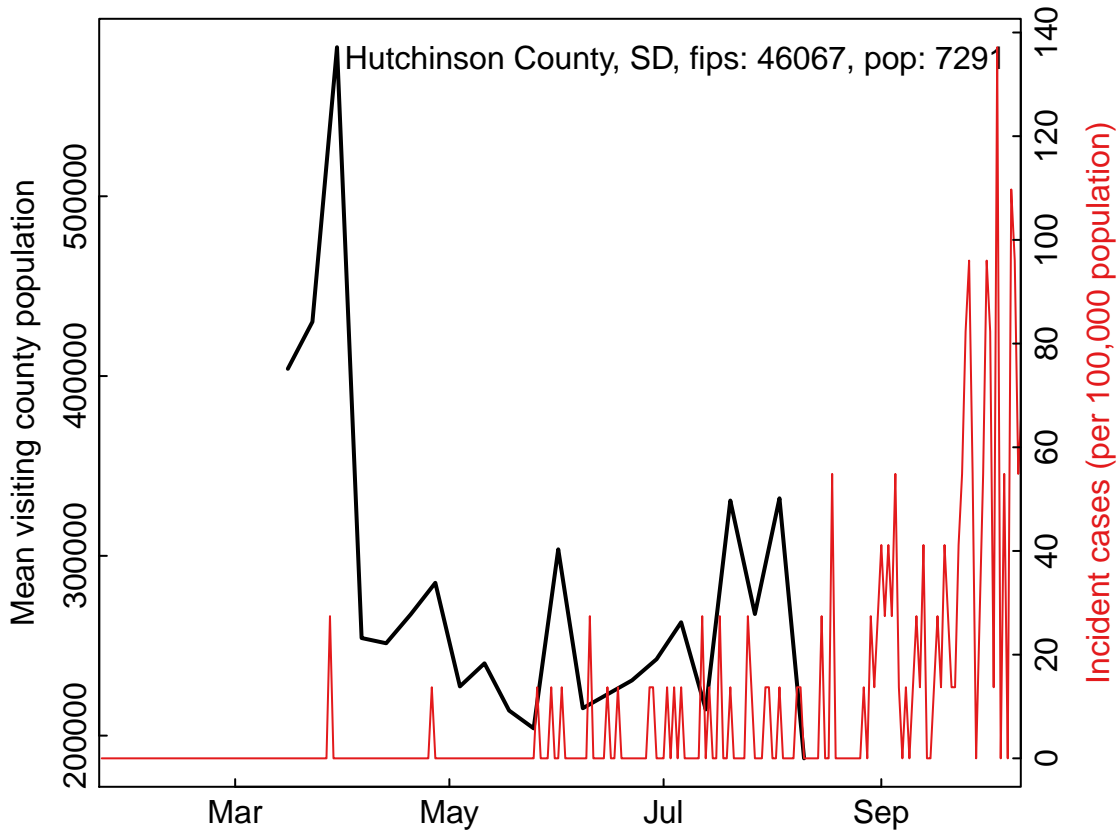

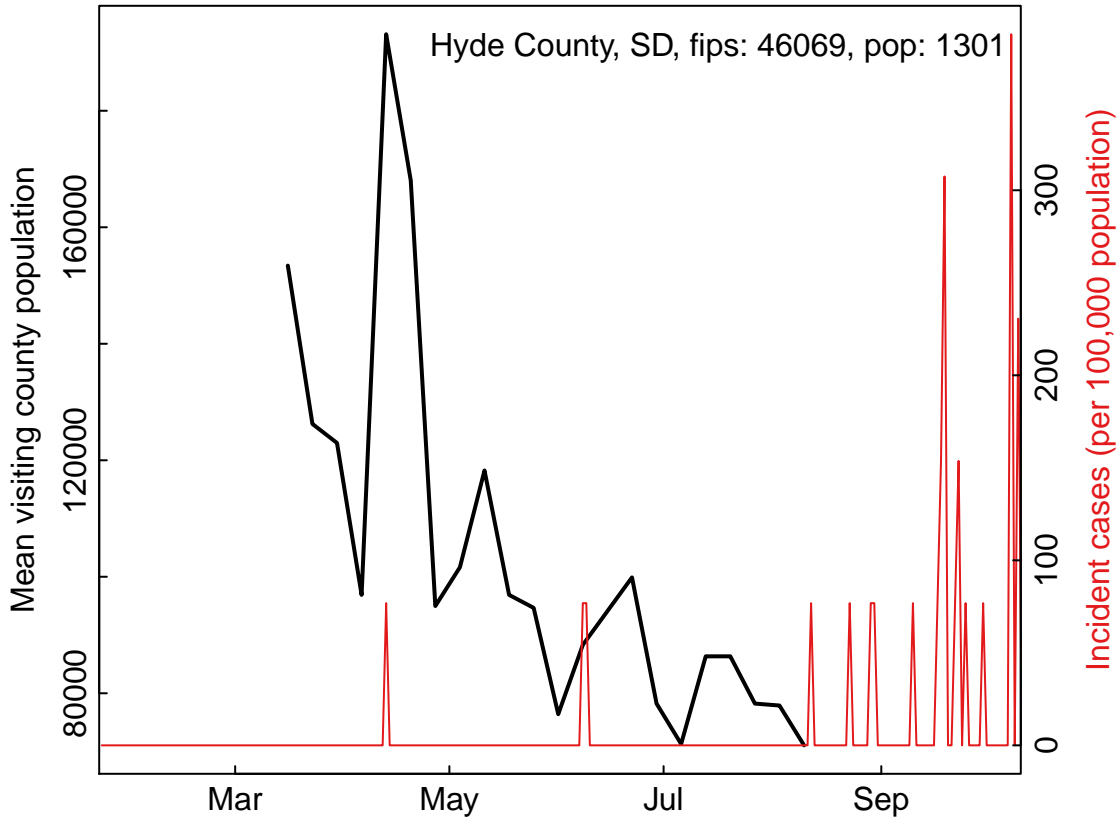



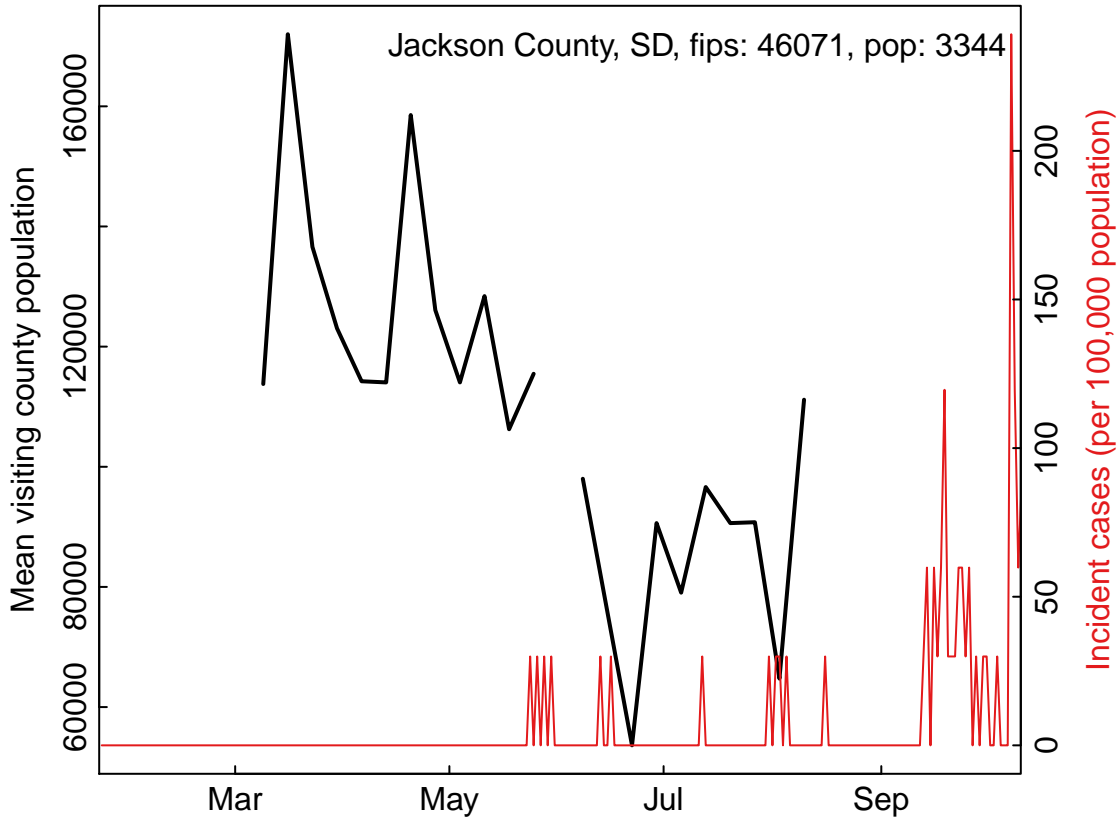

Jerauld County, SD, fips: 46073, pop: 2013

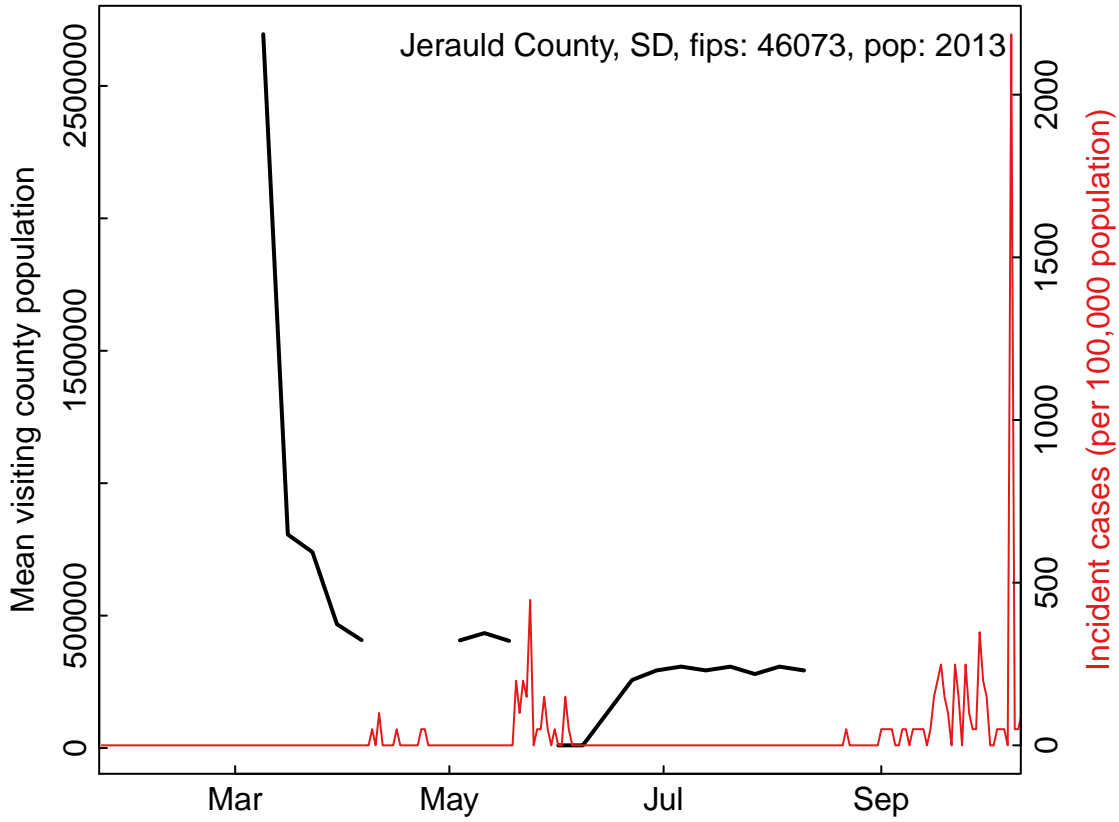

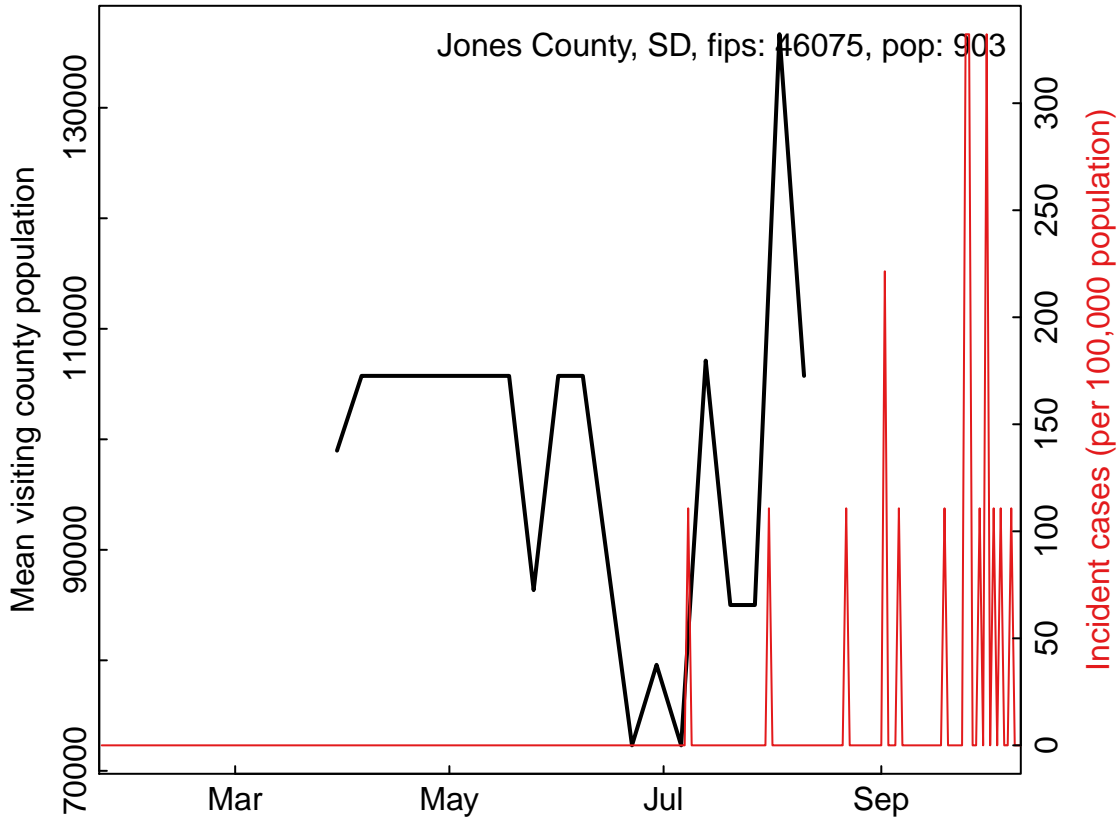

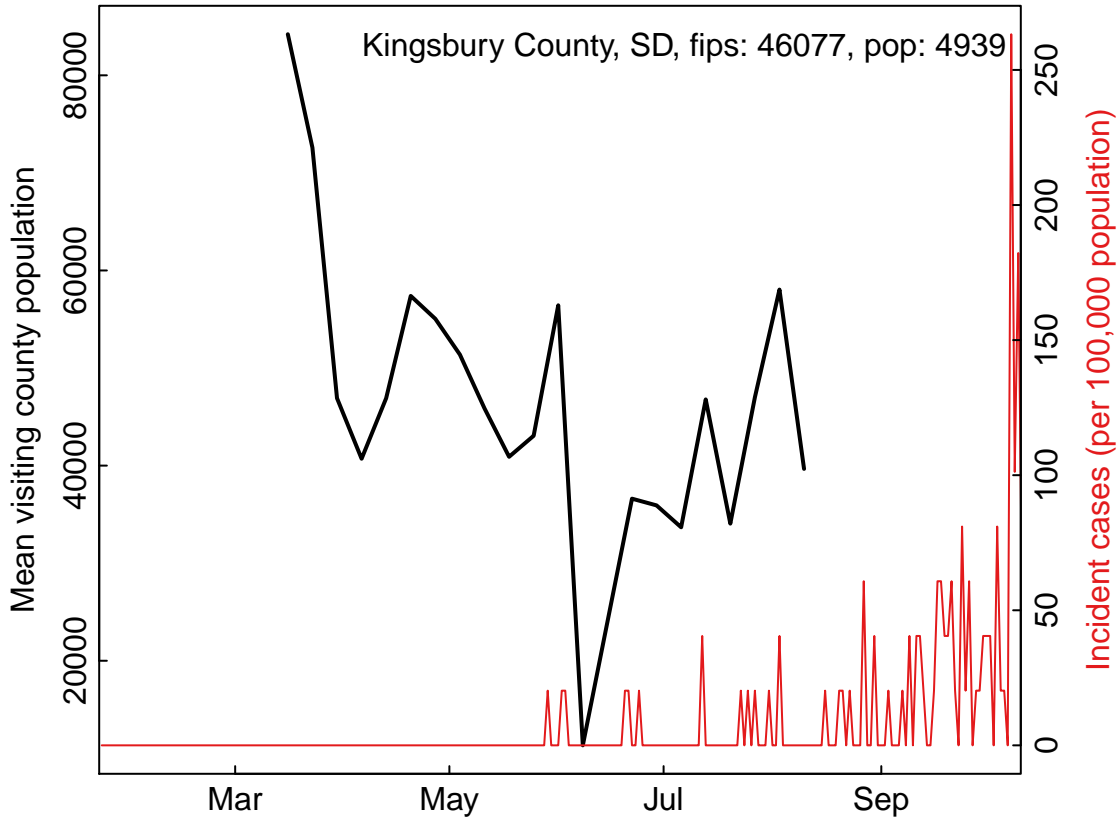

Lake County, SD, fips: 46079, pop: 12797

Mean visiting county population

Incident cases (per 100,000 population)

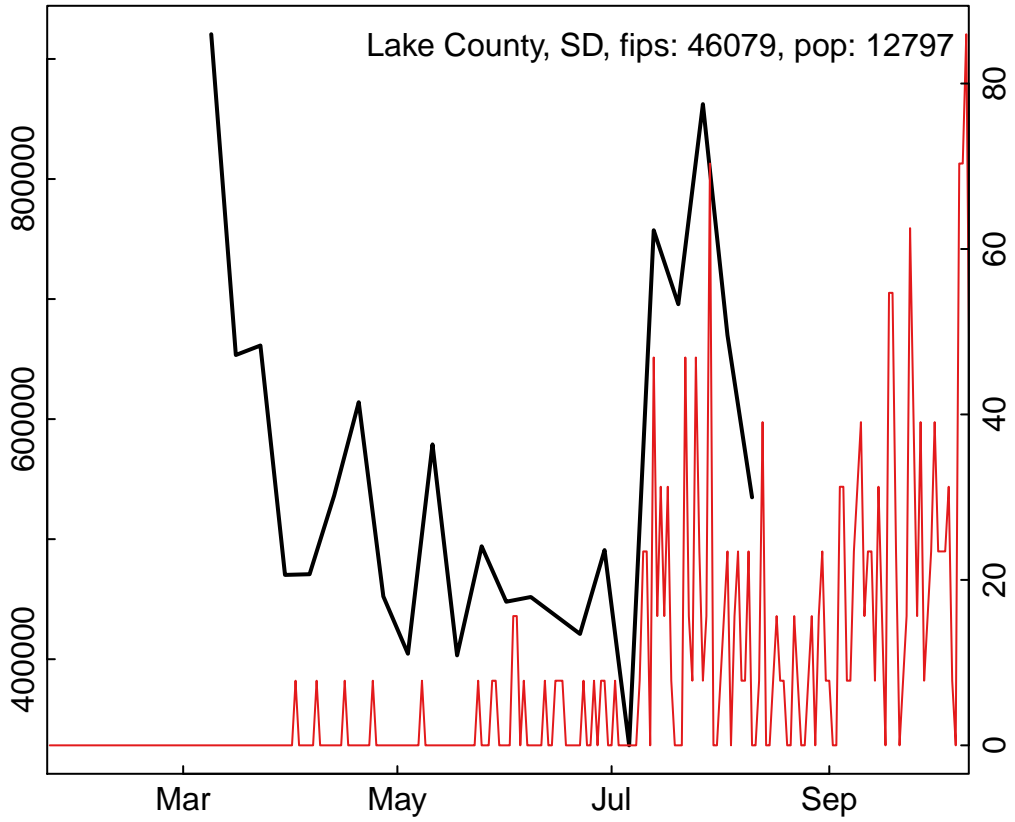

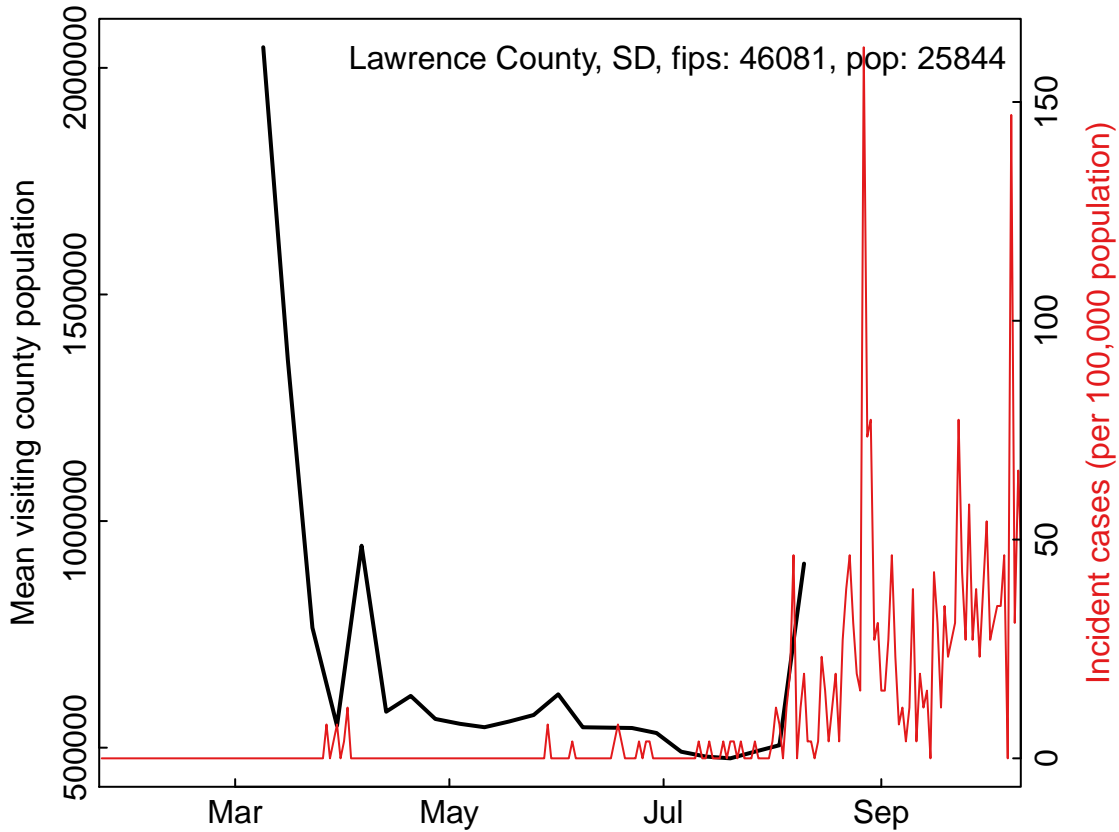

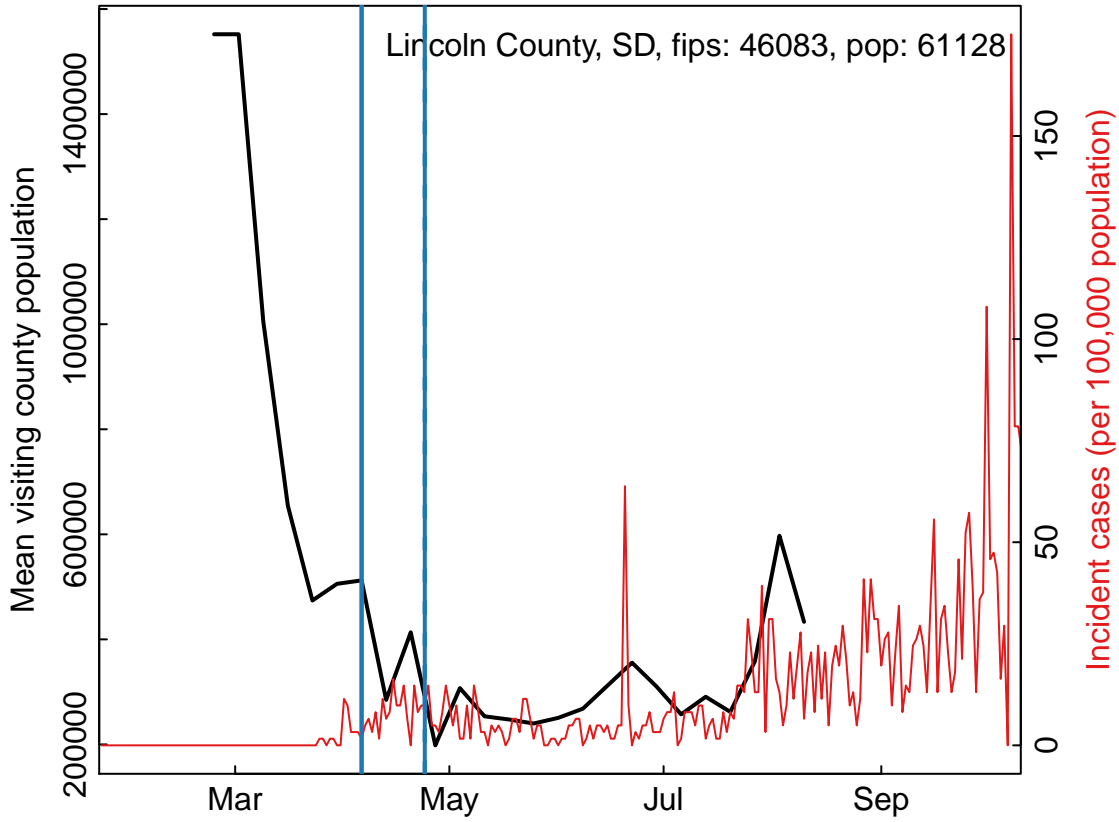

Lyman County, SD, fips: 46085, pop: 3781

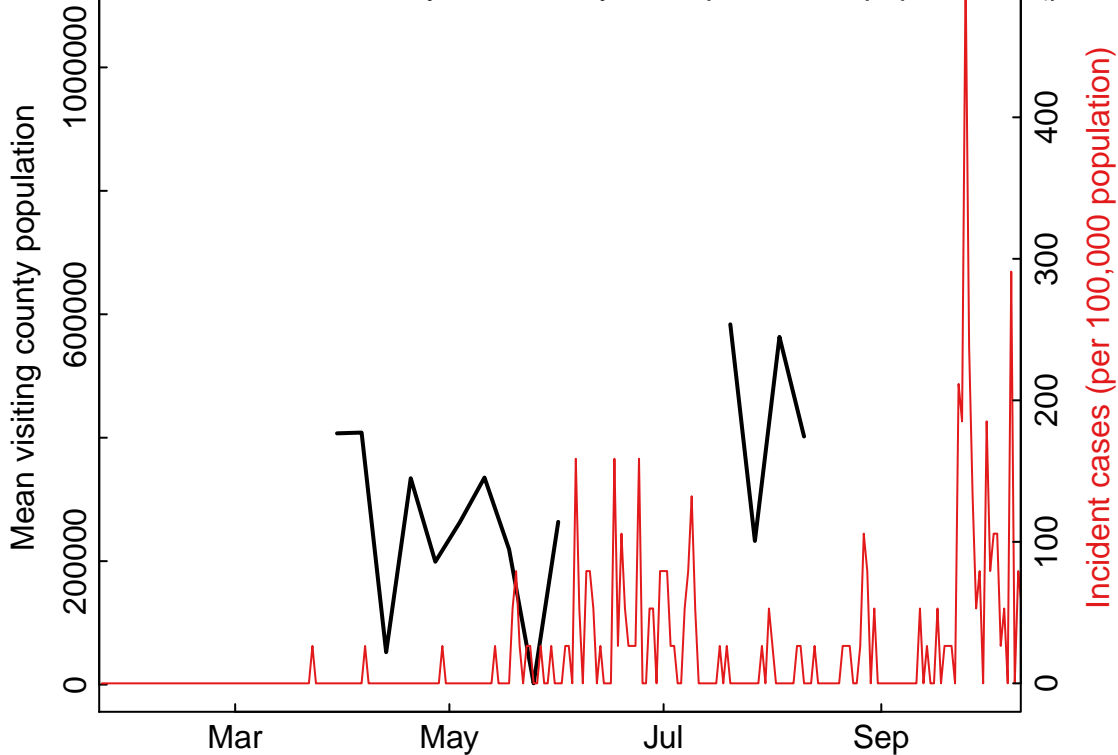



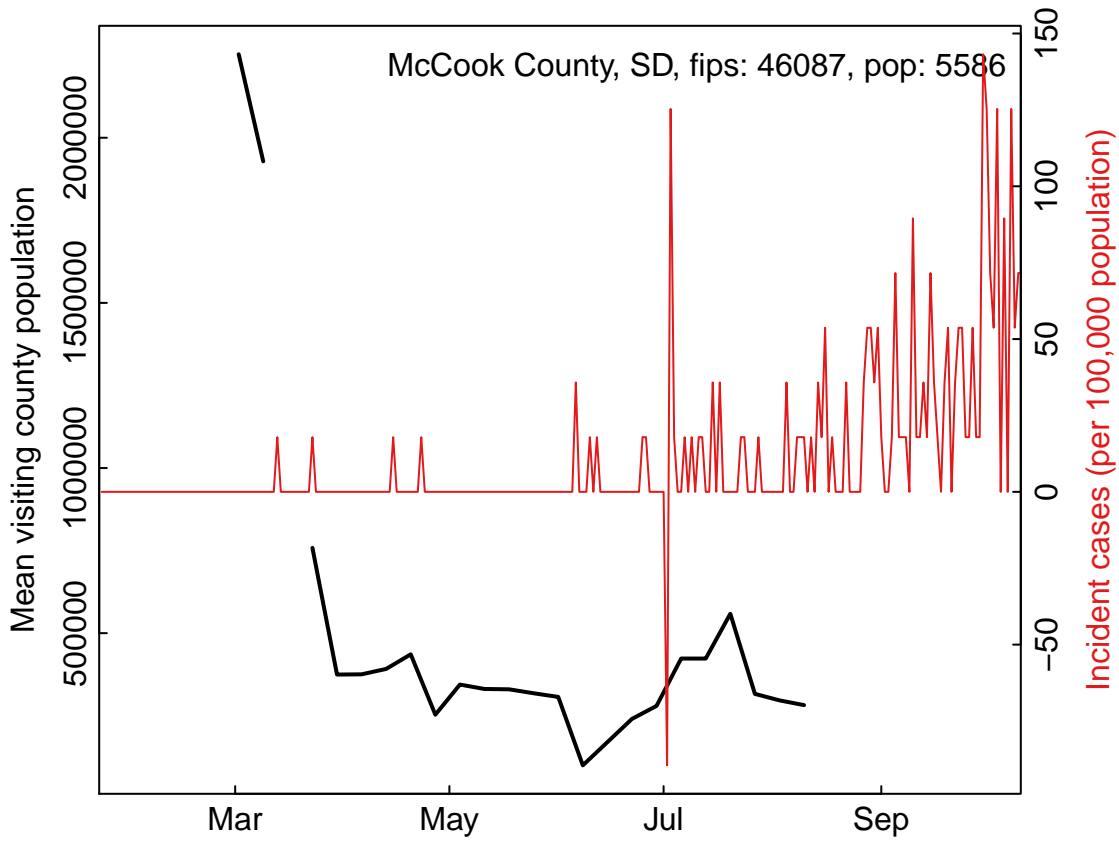

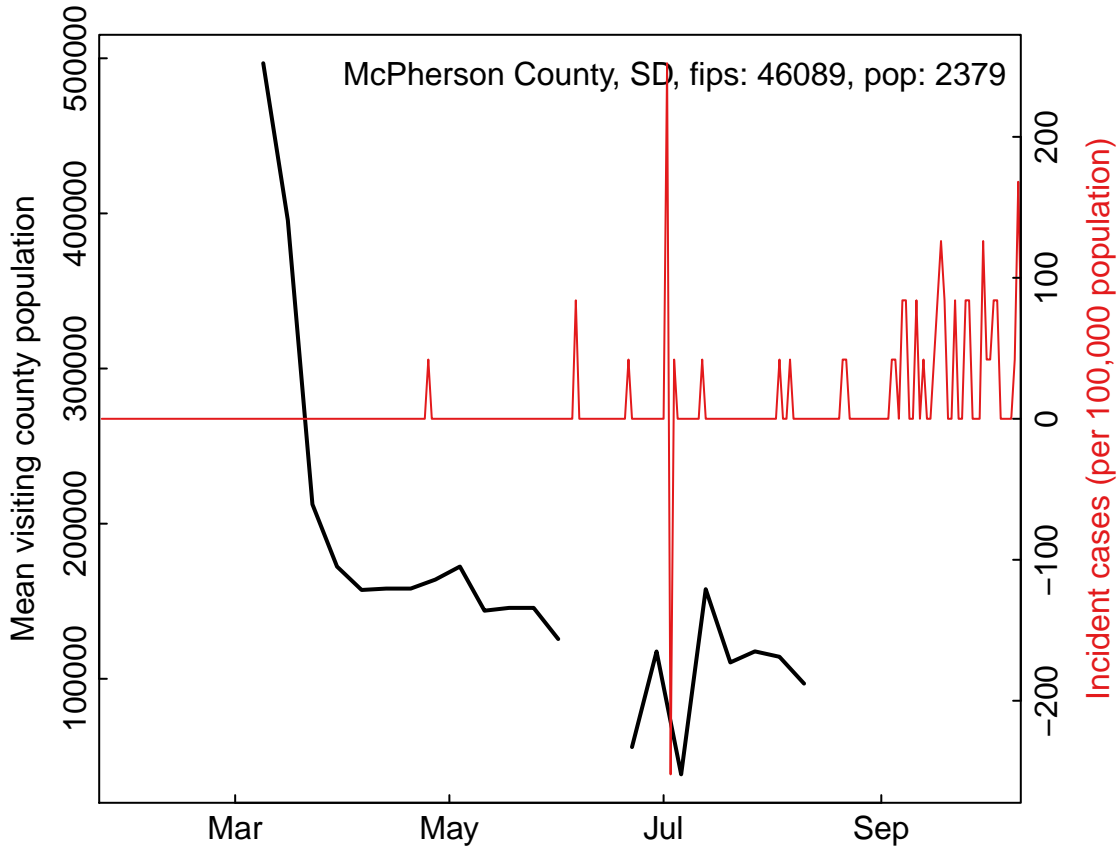

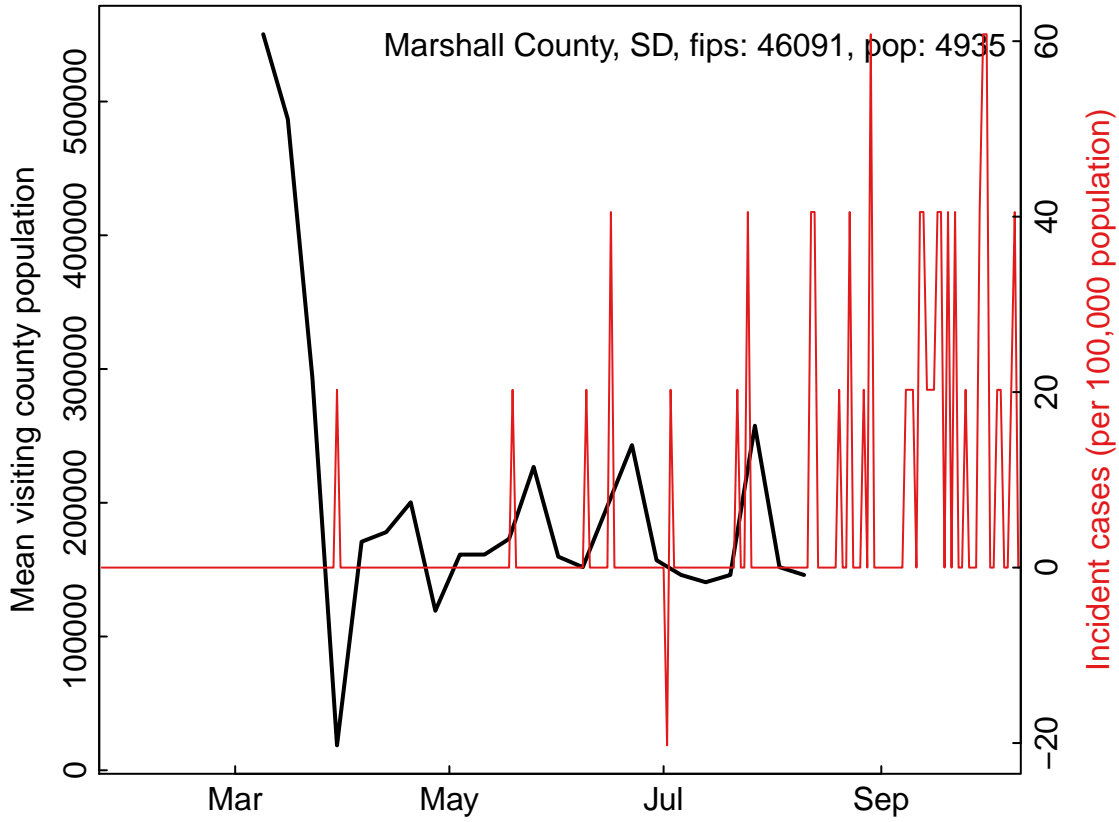

Meade County, SD, fips: 46093, pop: 28332

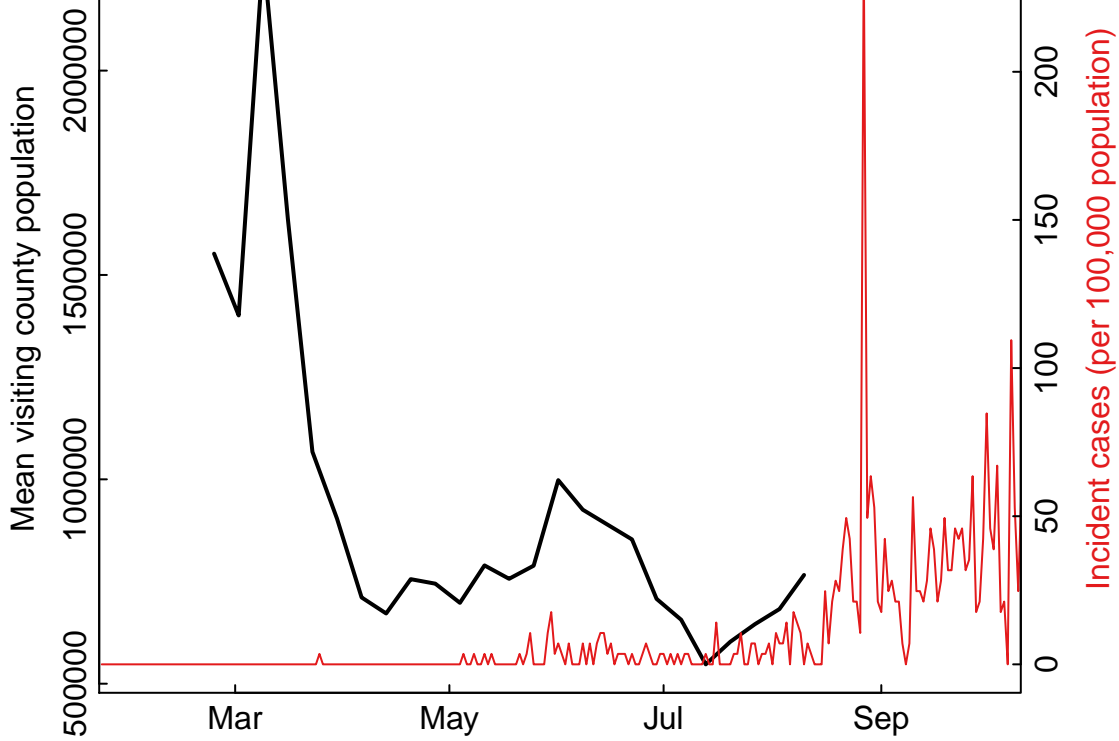

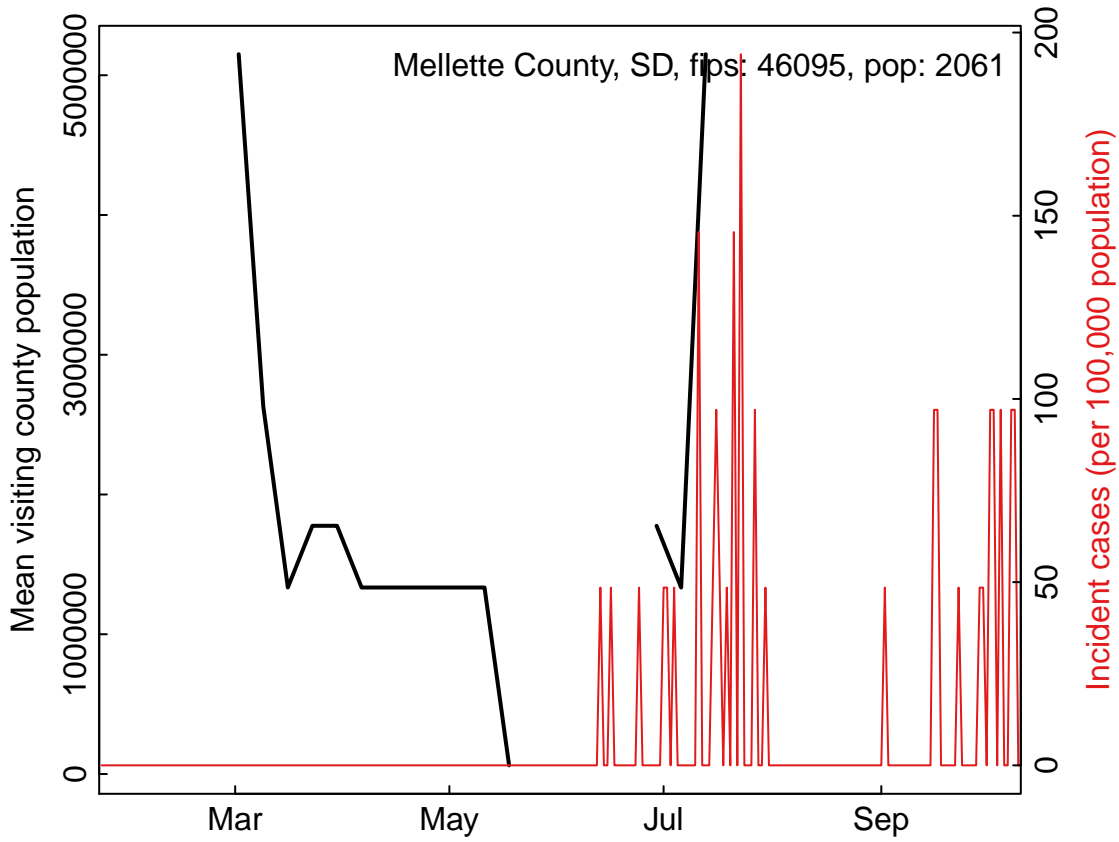

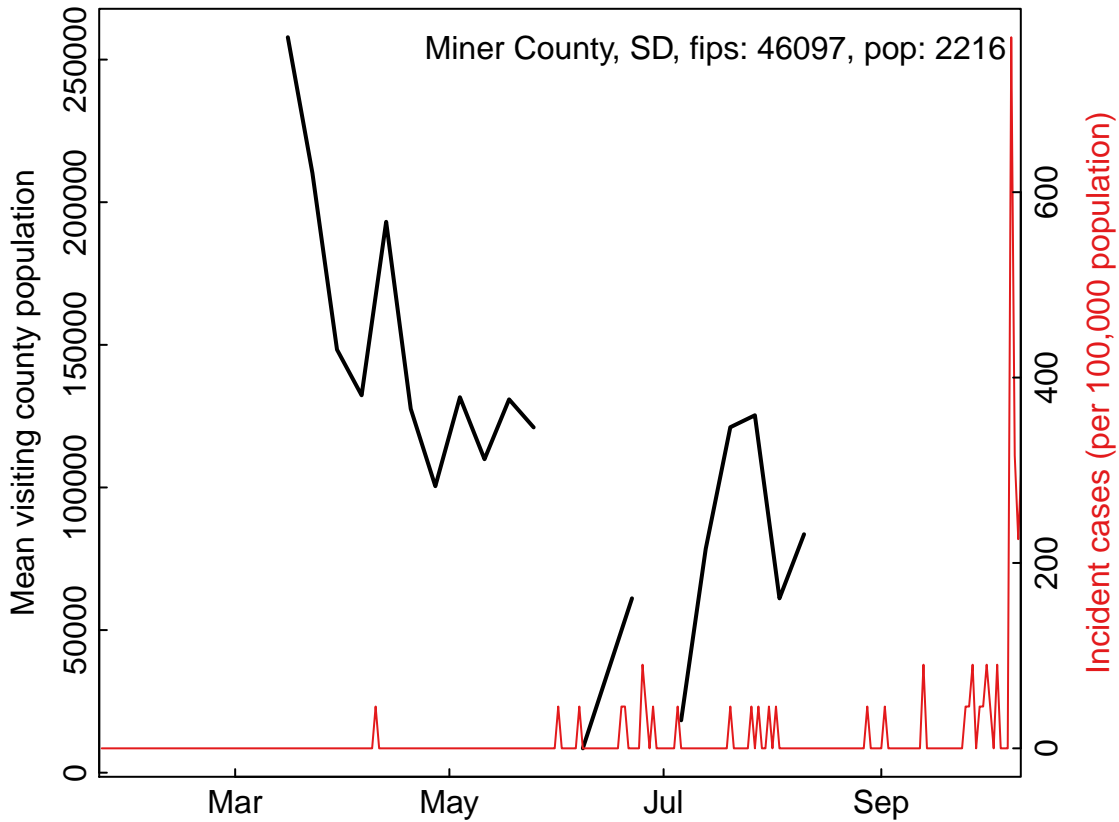

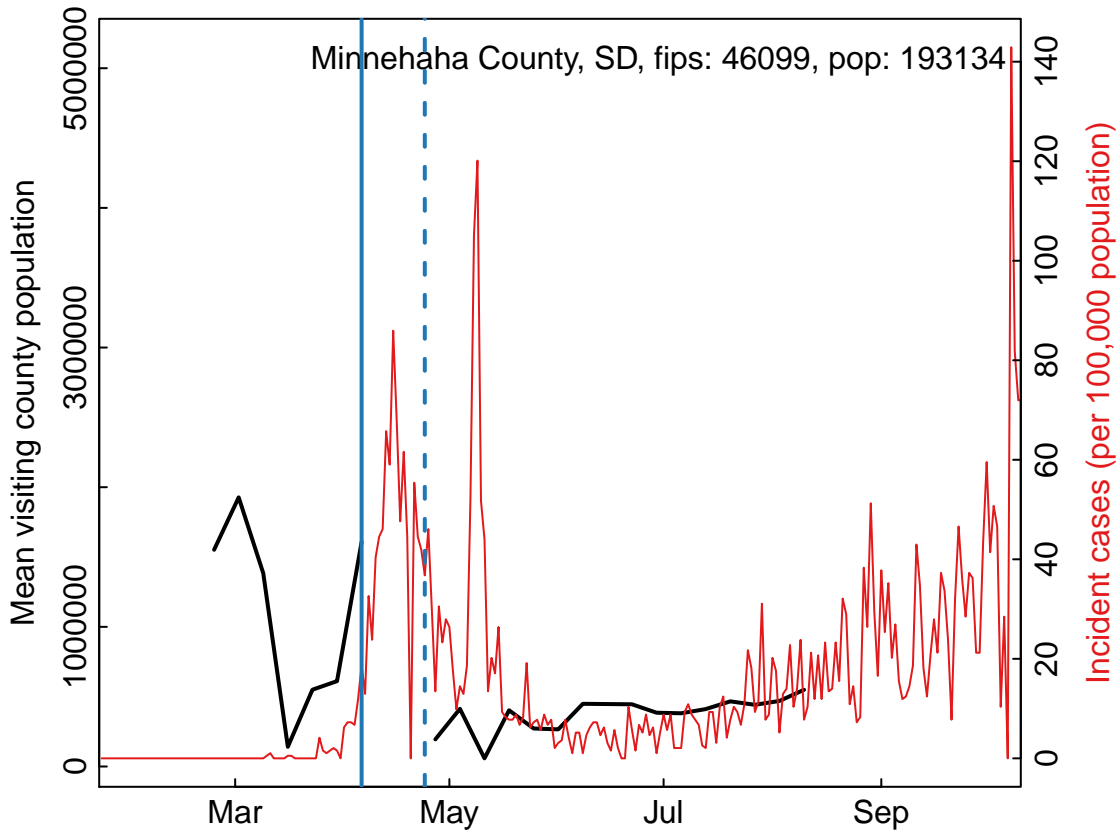

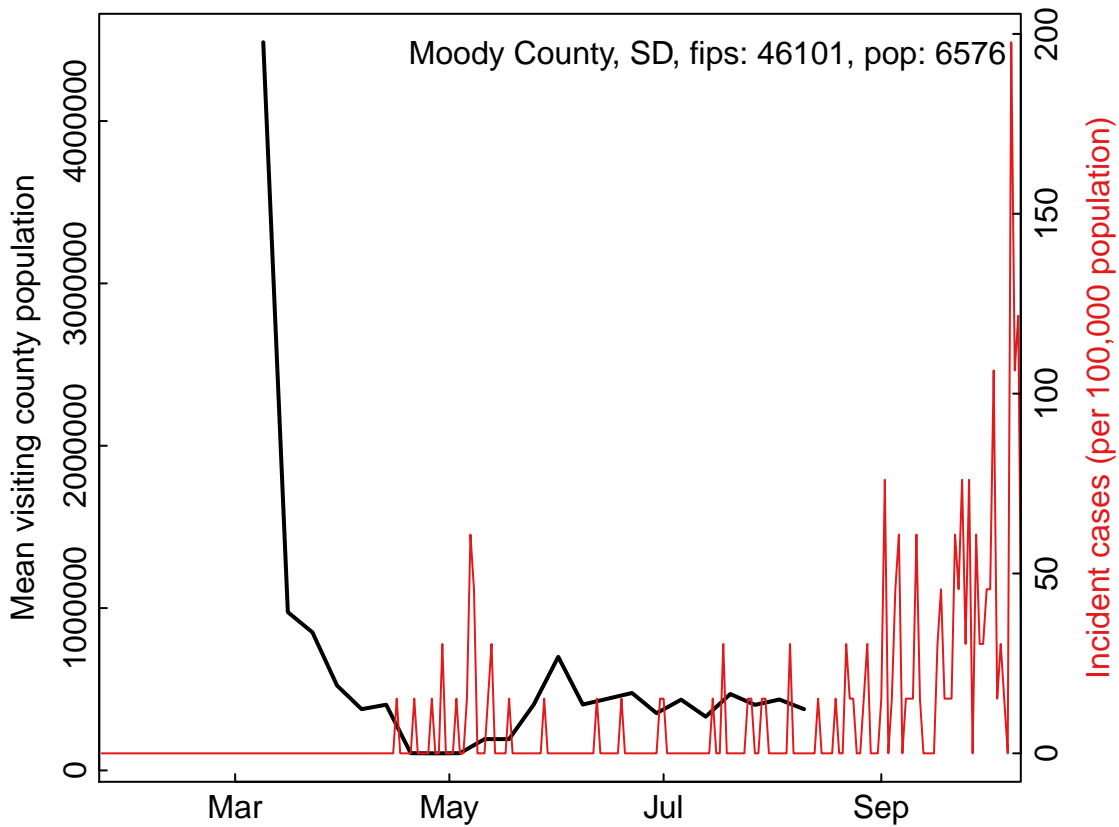



Pennington County, SD, fips: 46103, pop: 113775

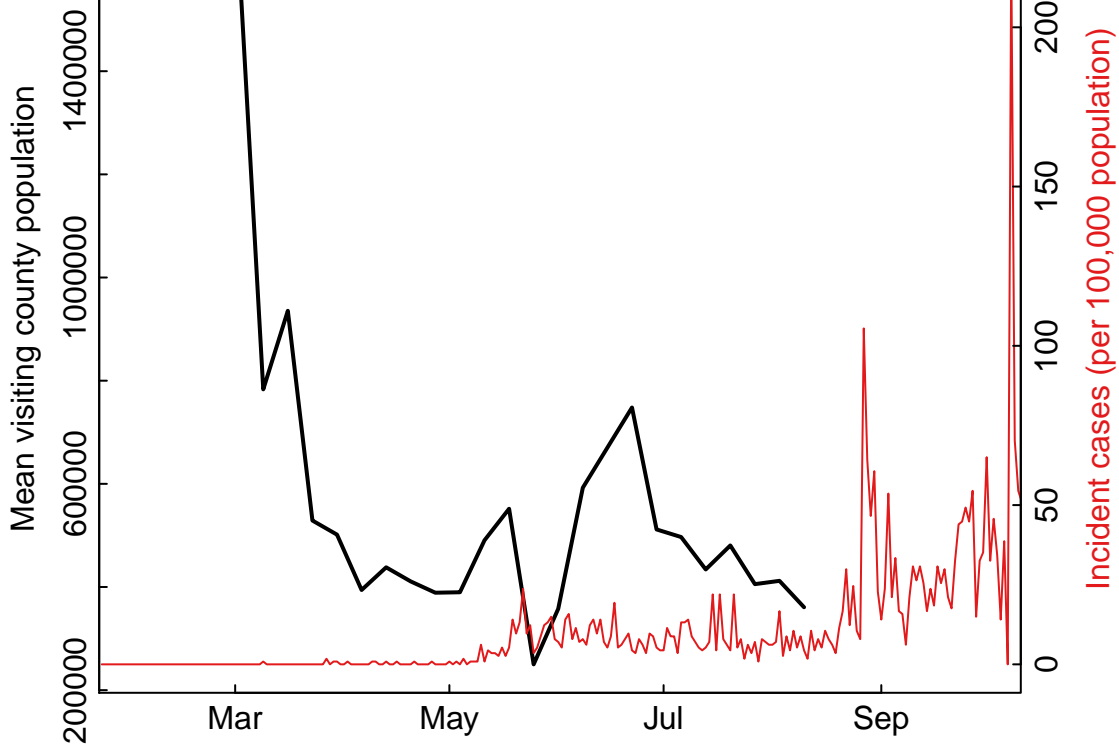

Perkins County, SD, fips: 46105, pop: 2865

Mean visiting county population

220000  
180000  
140000  
100000

Mar May Jul Sep

Incident cases (per 100,000 population)

150  
100  
50  
0

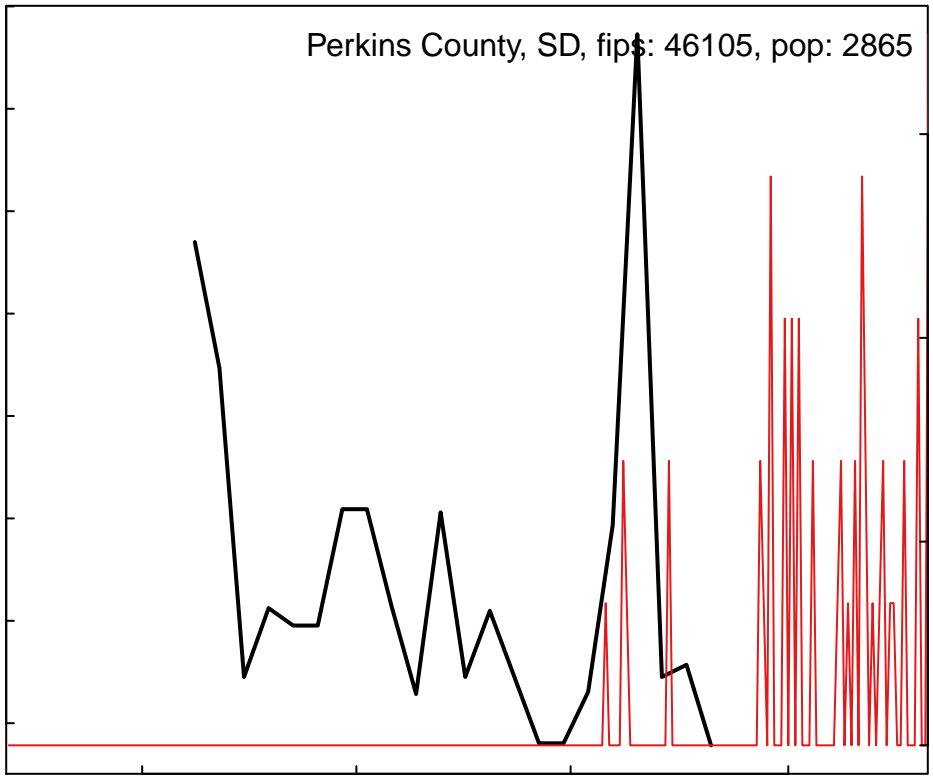

Potter County, SD, fips: 46107, pop: 2153

Mean visiting county population

2000000  
4000000  
6000000  
8000000

Mar

May

Jul

Sep

400  
300  
200  
100  
0

Incident cases (per 100,000 population)

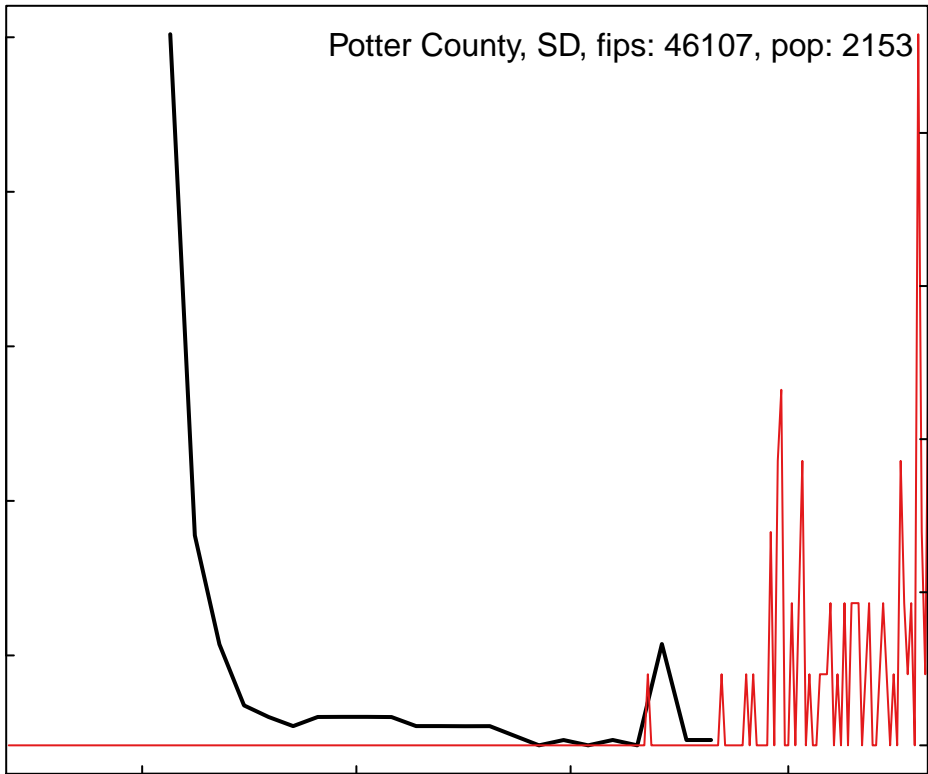

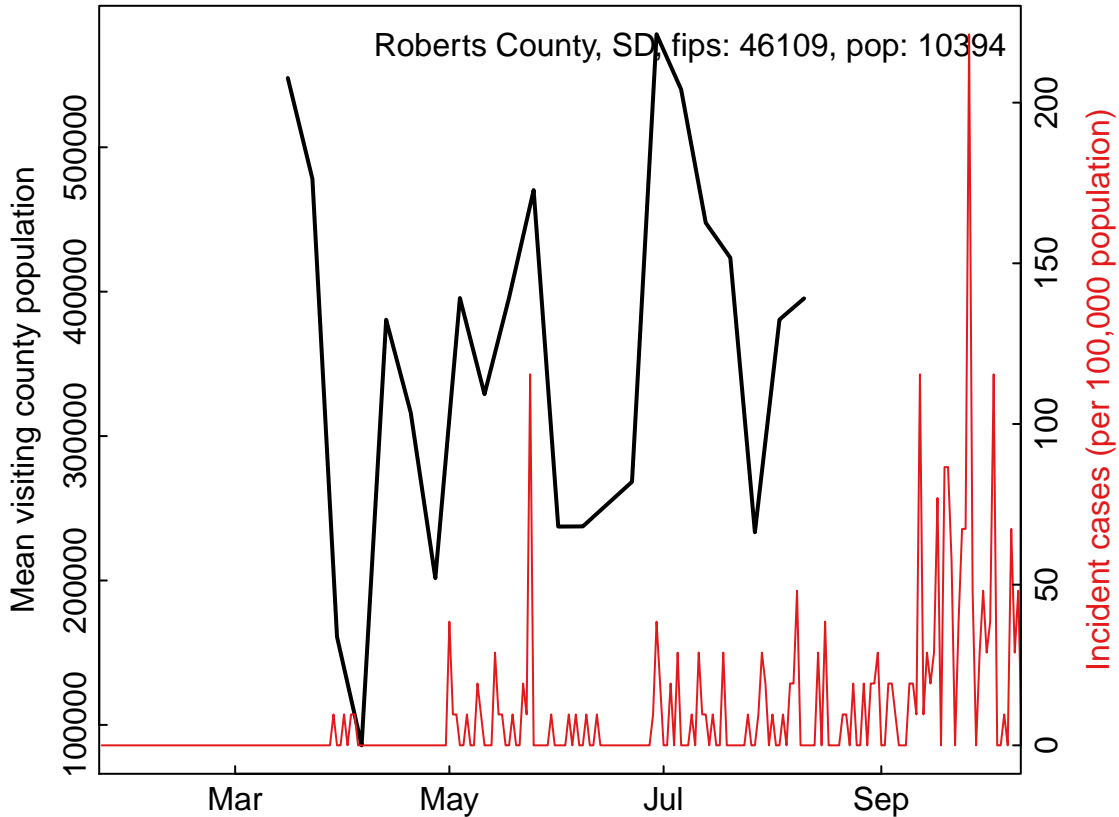

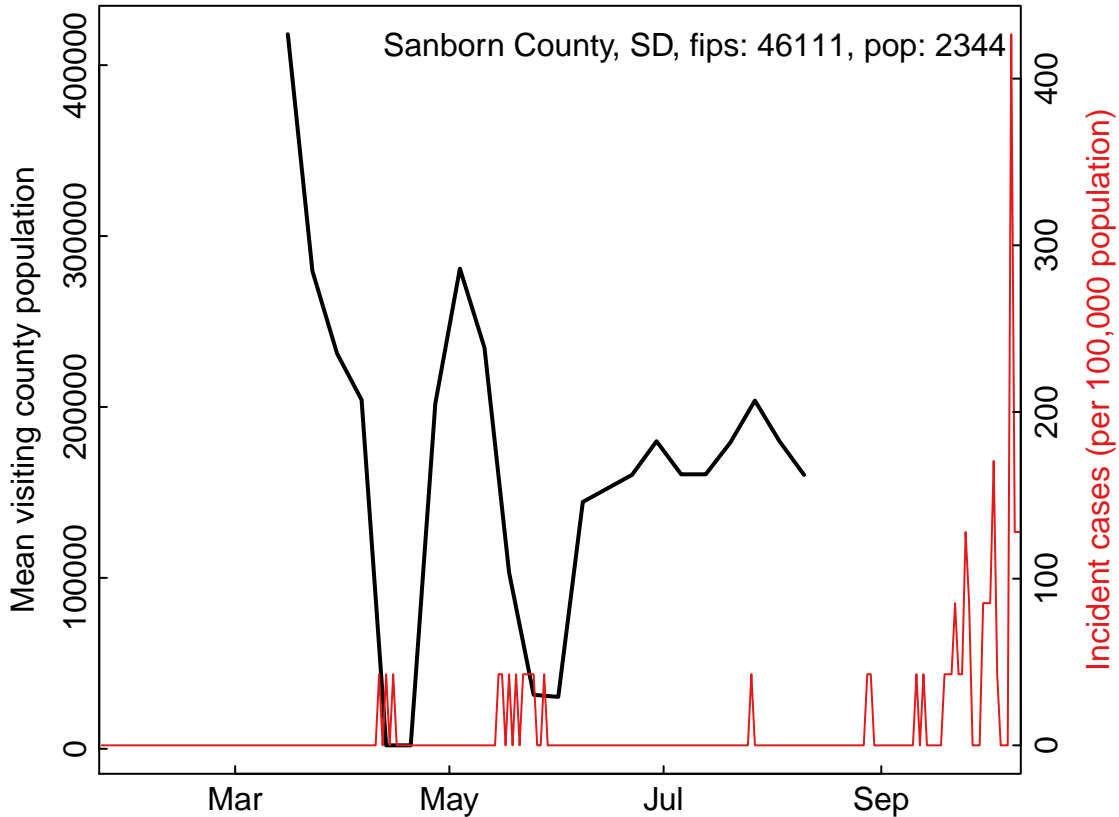

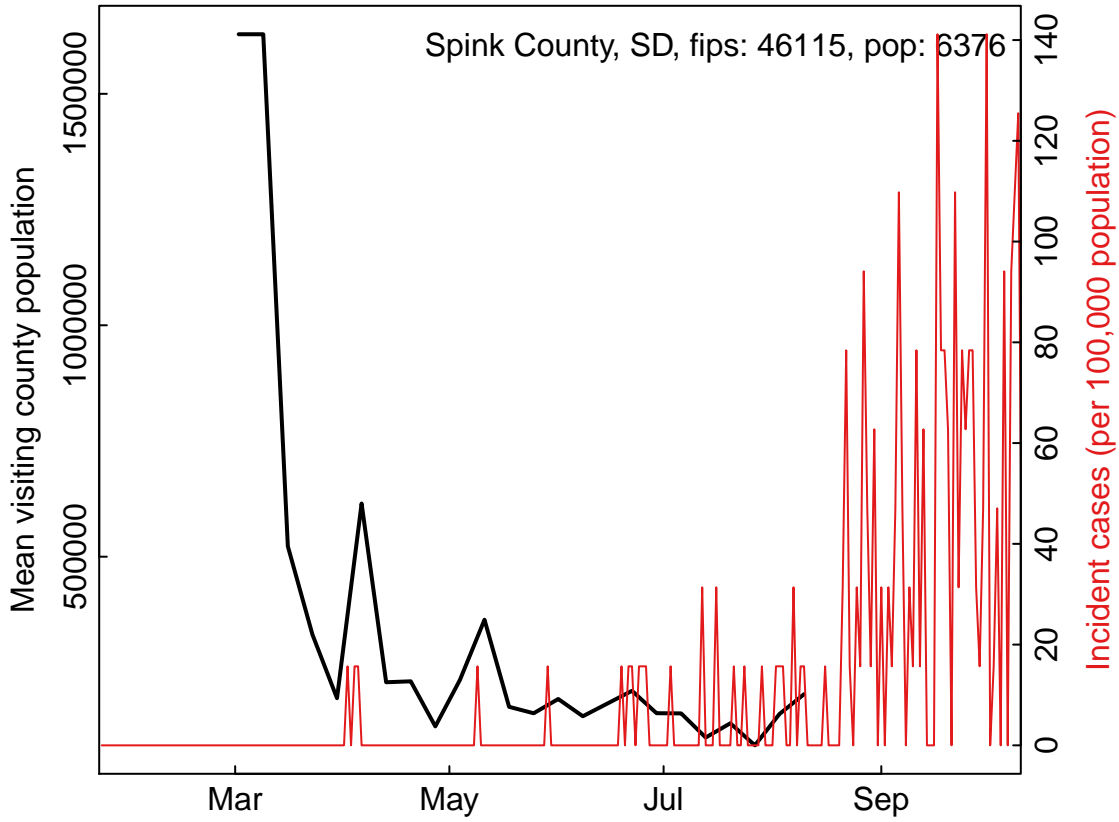

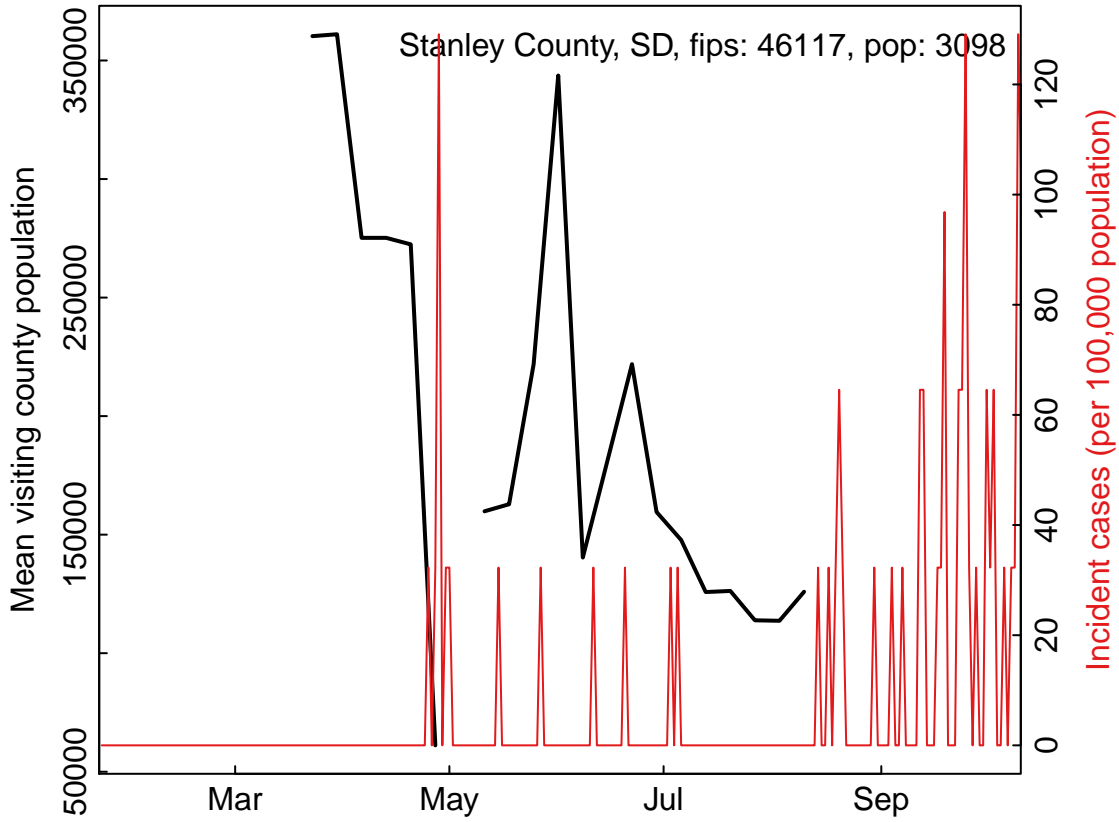

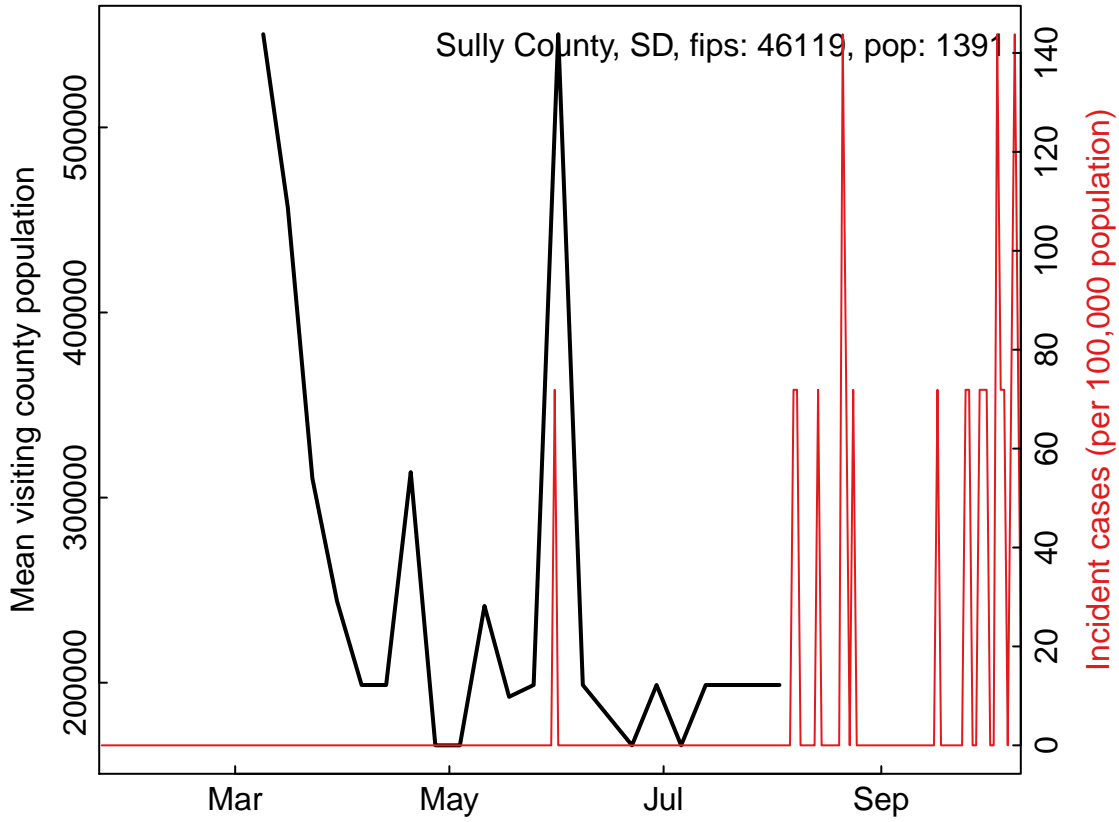



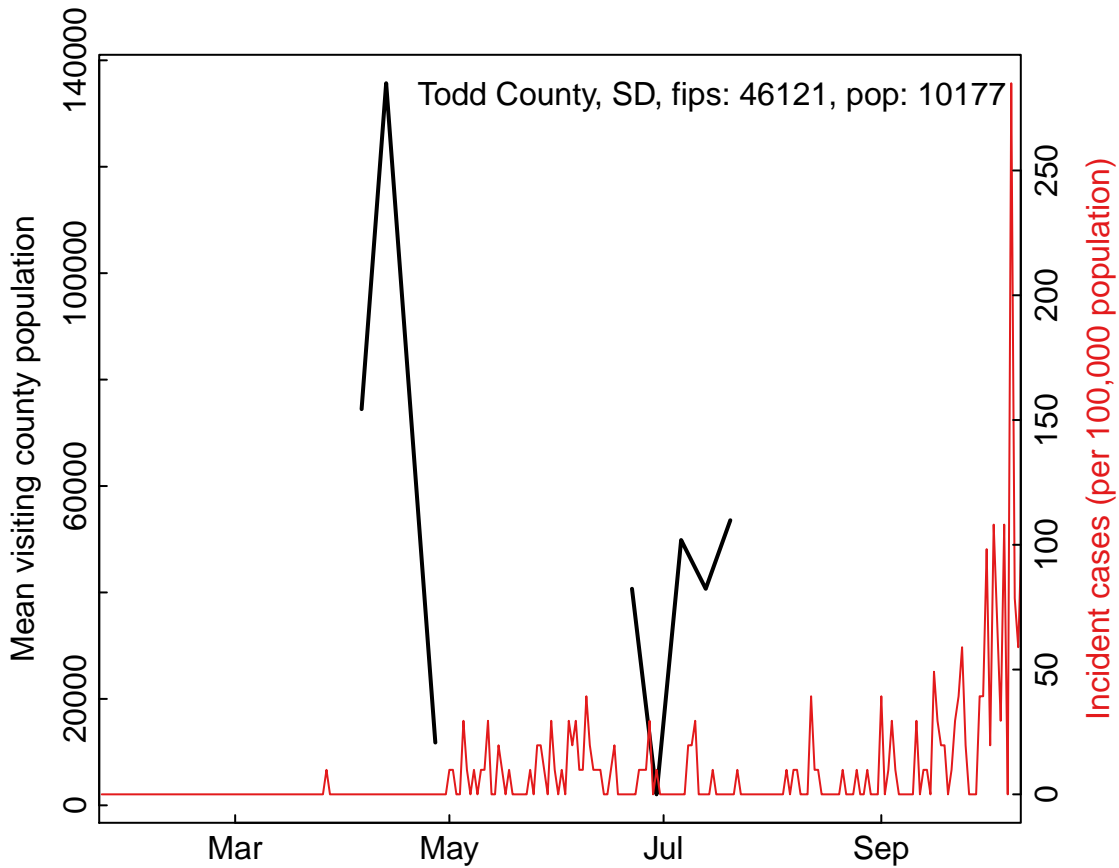

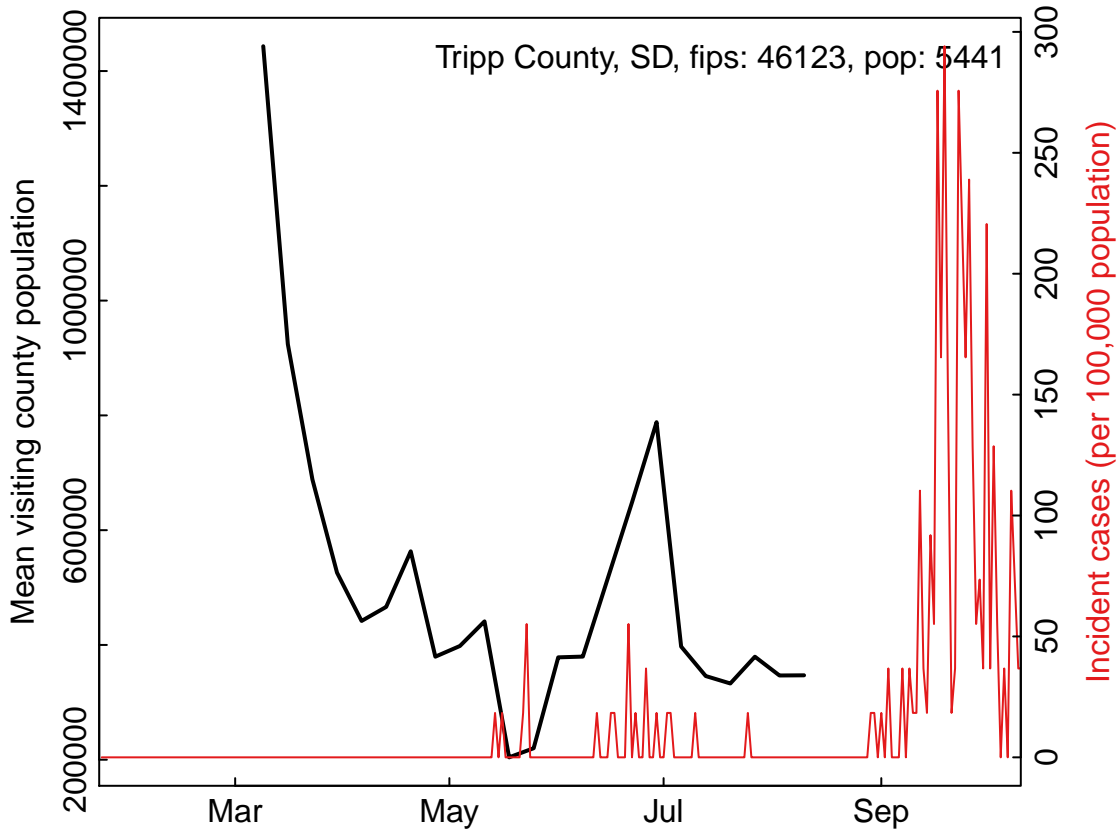

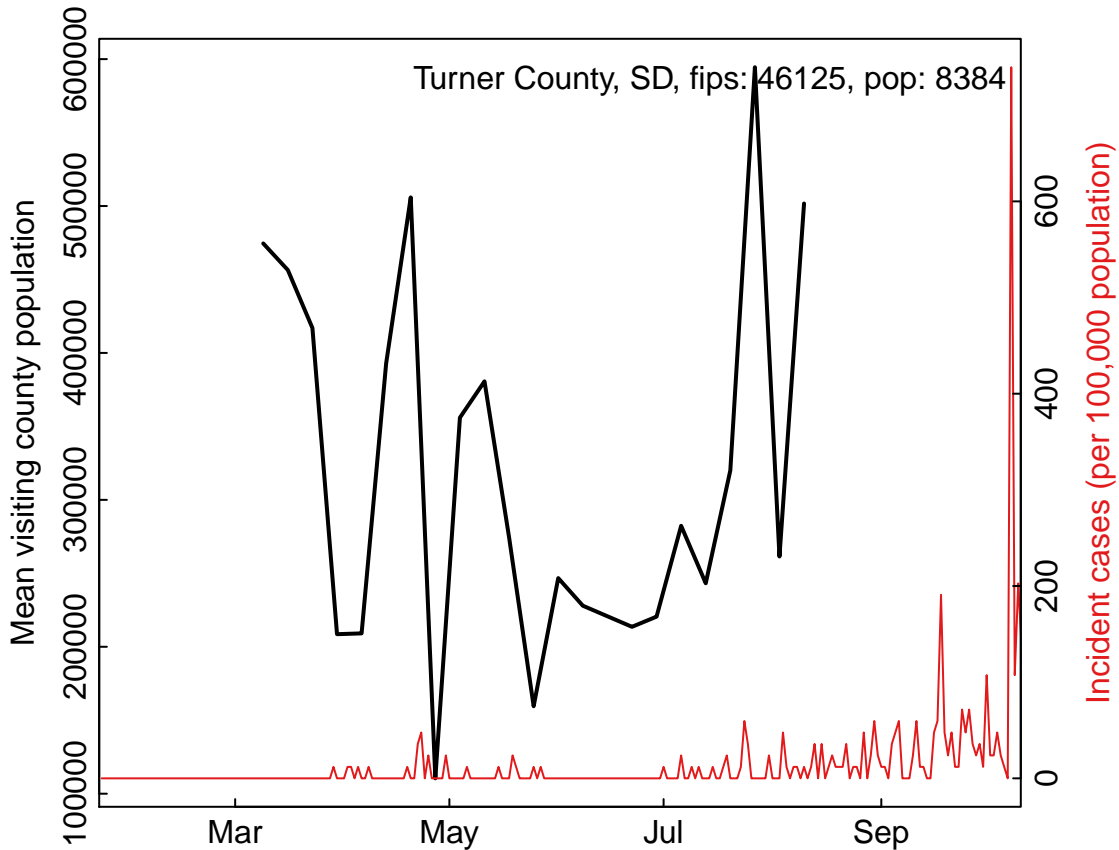

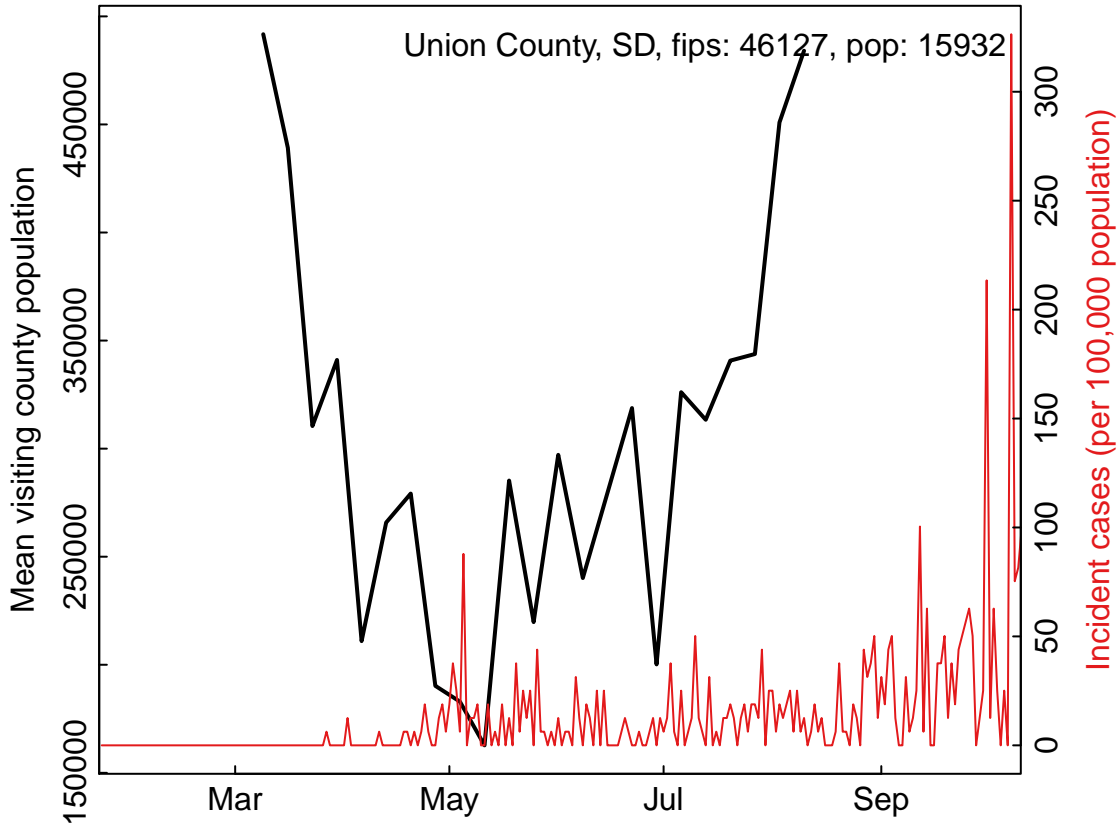

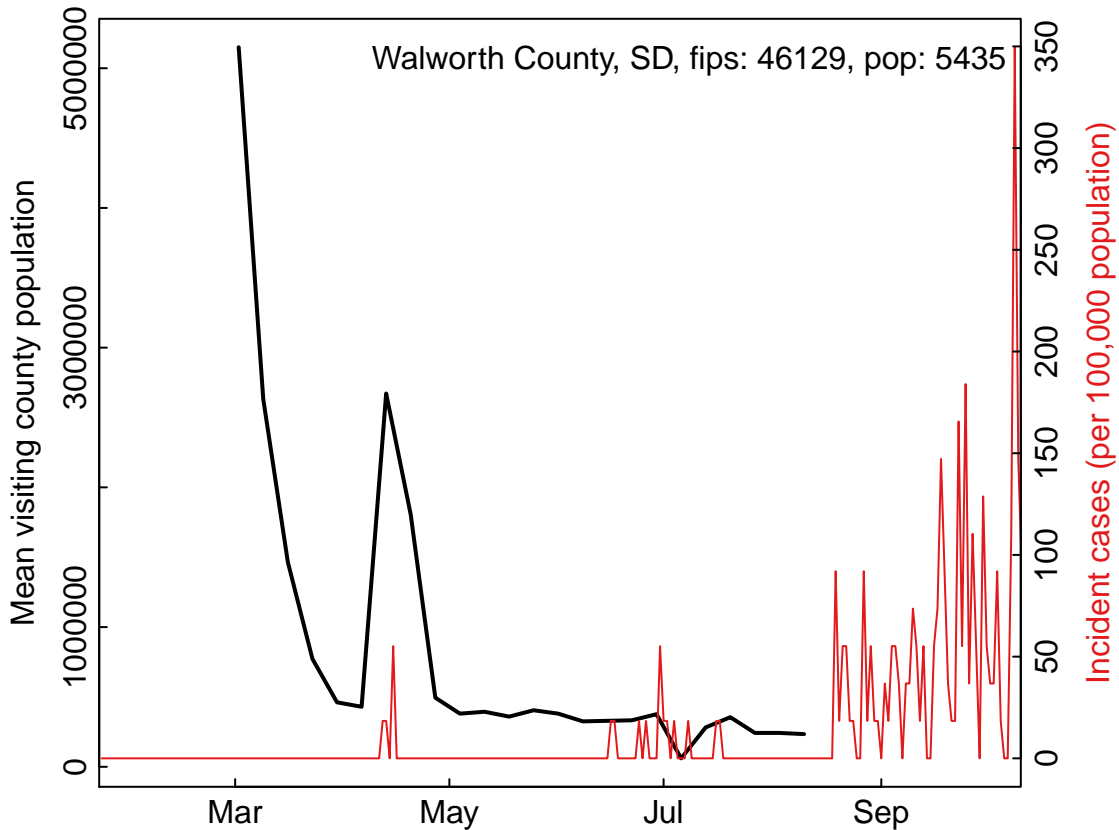

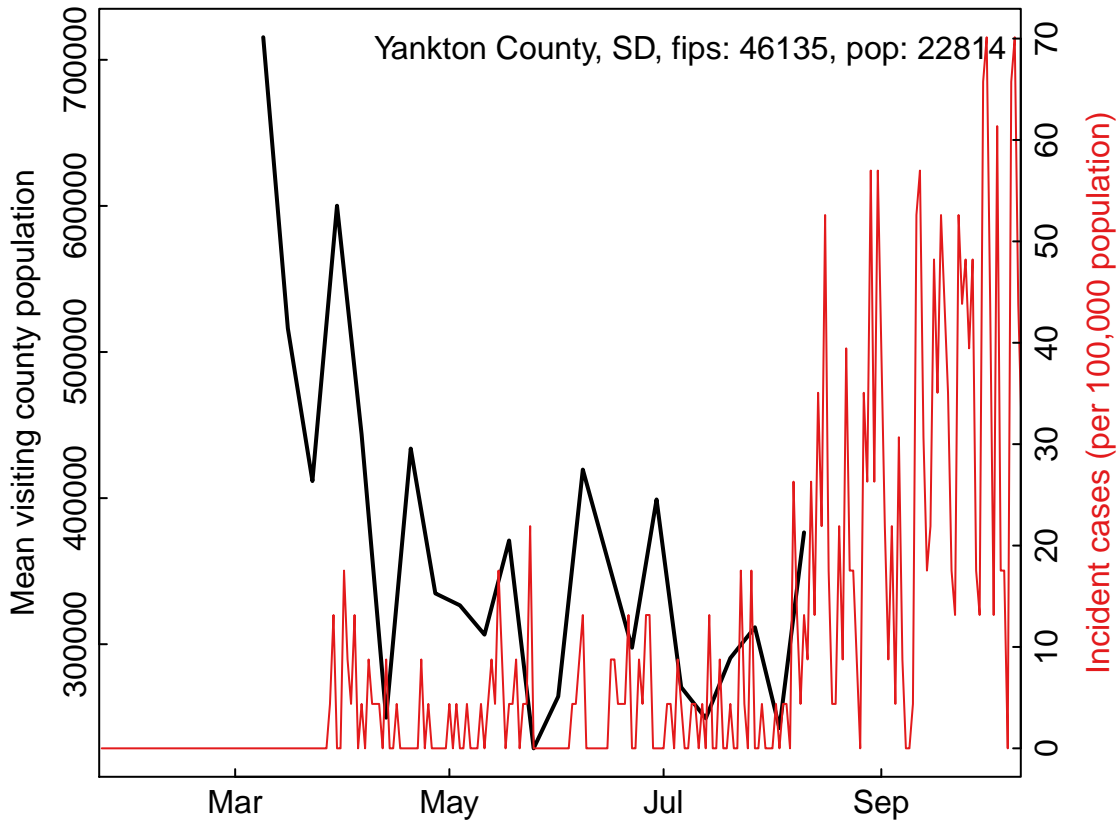

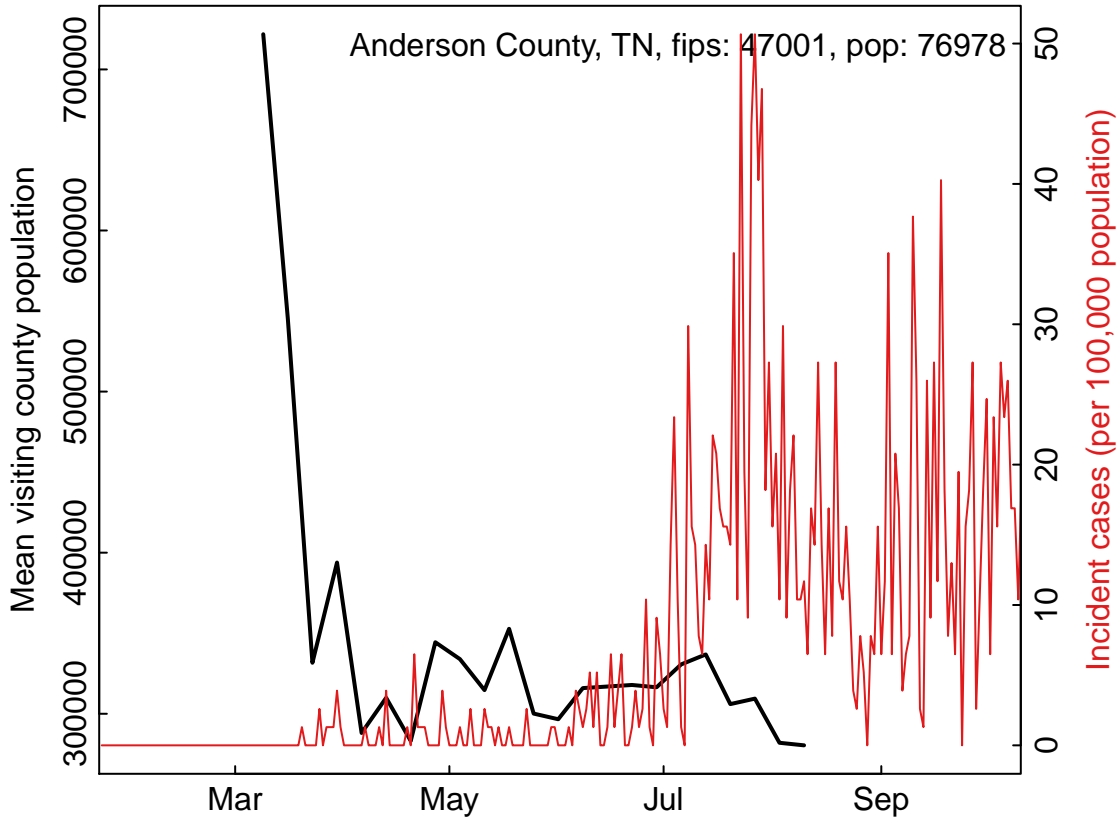

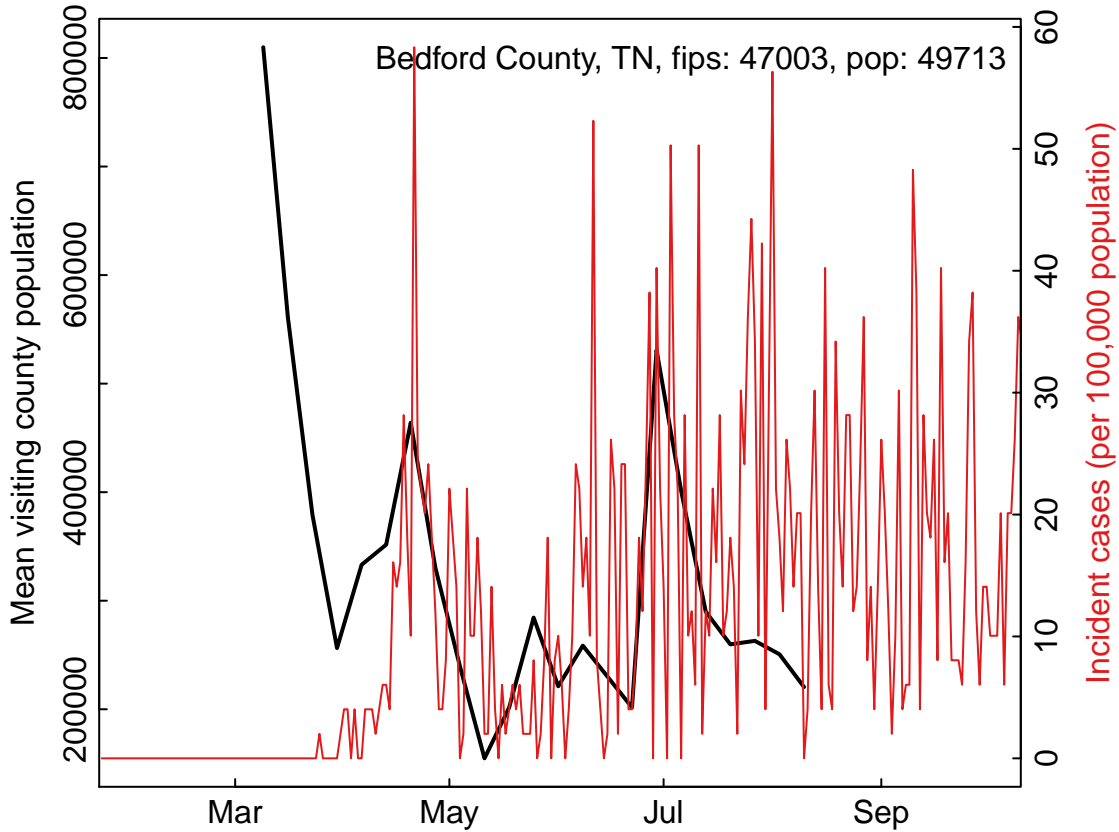



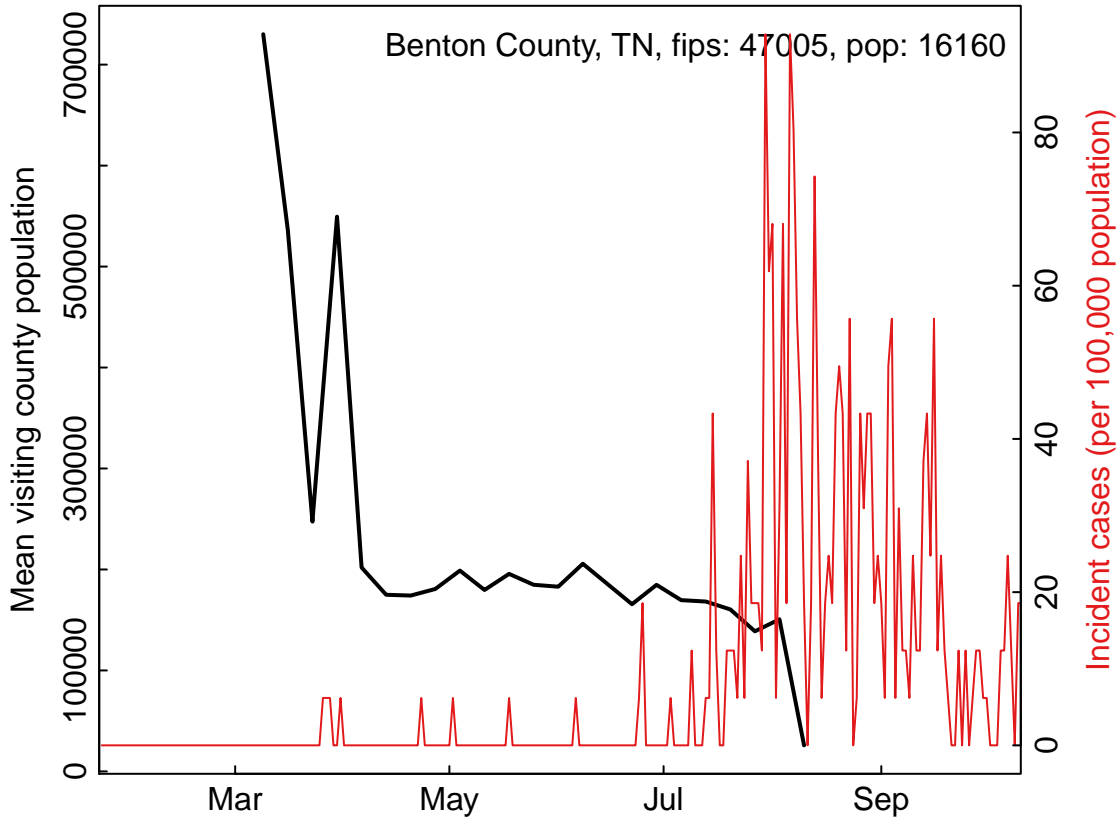

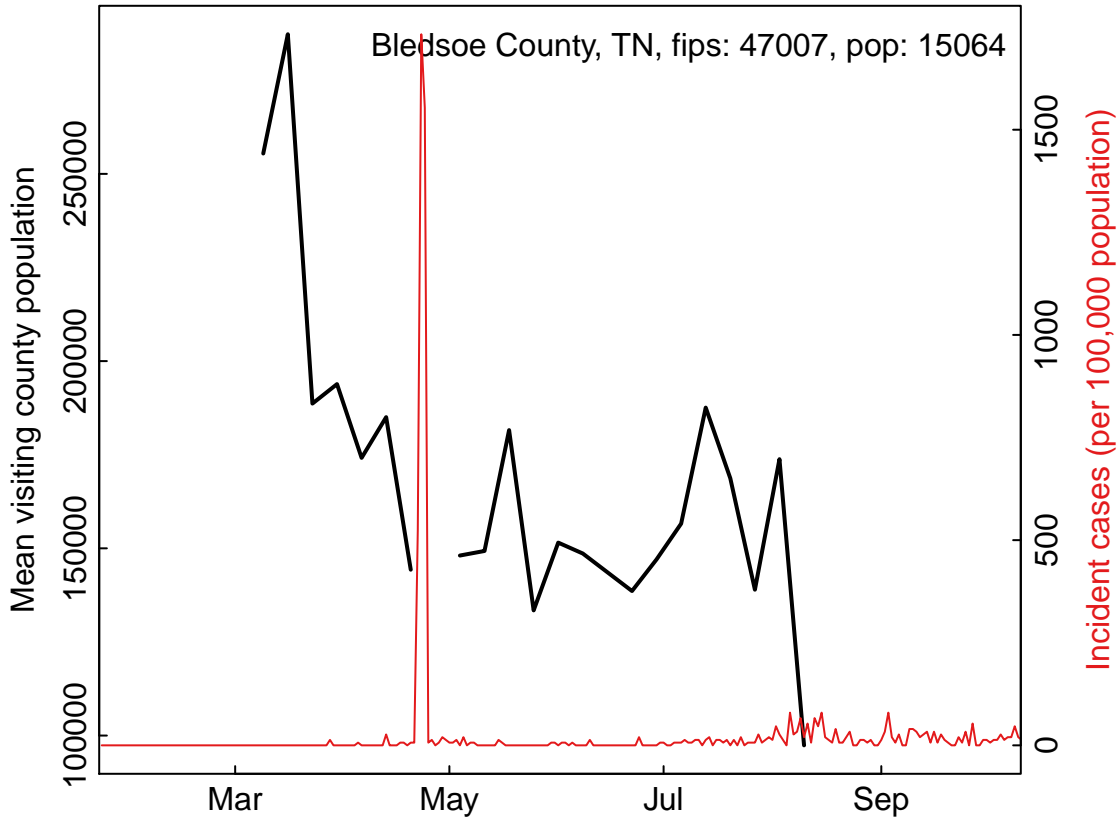

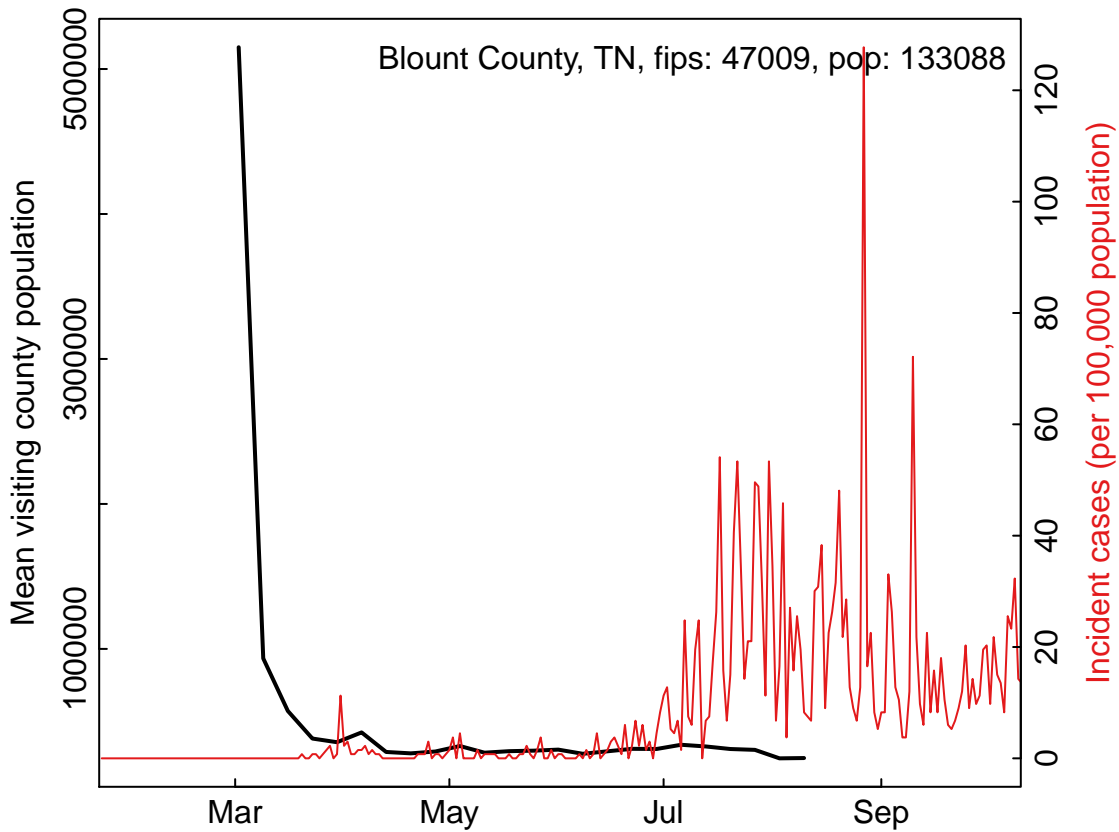

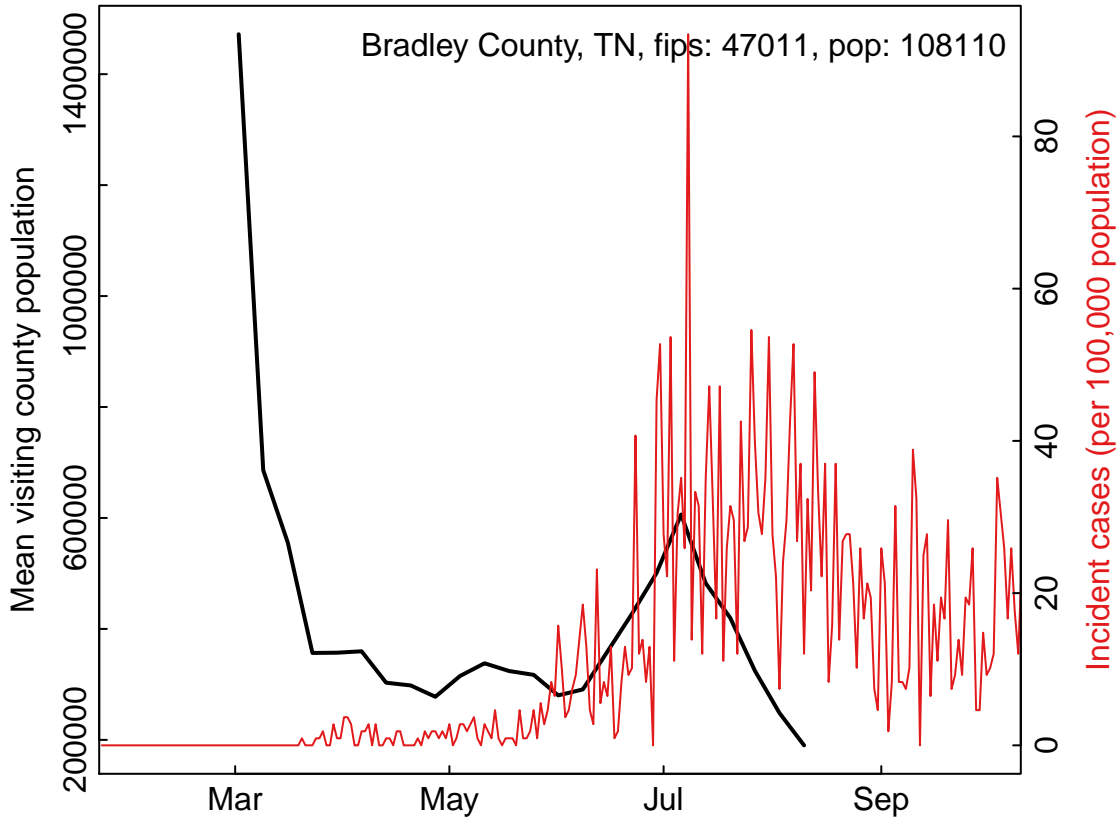

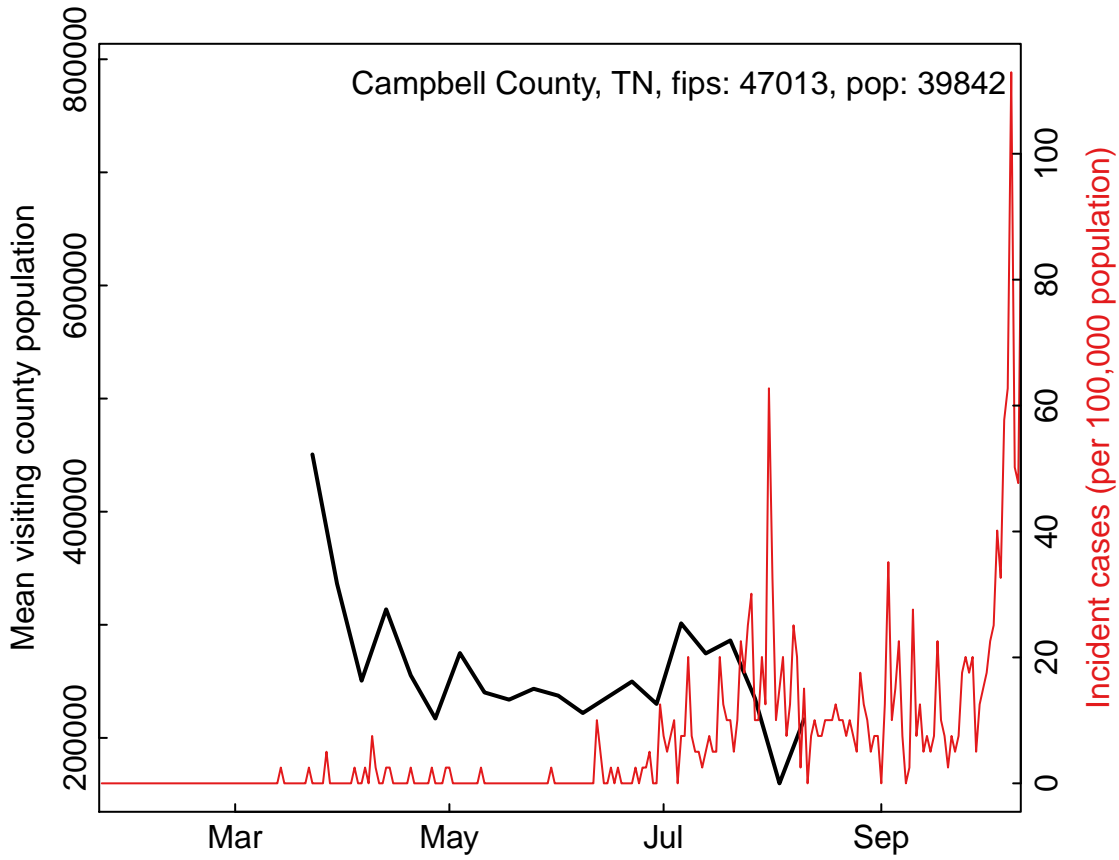

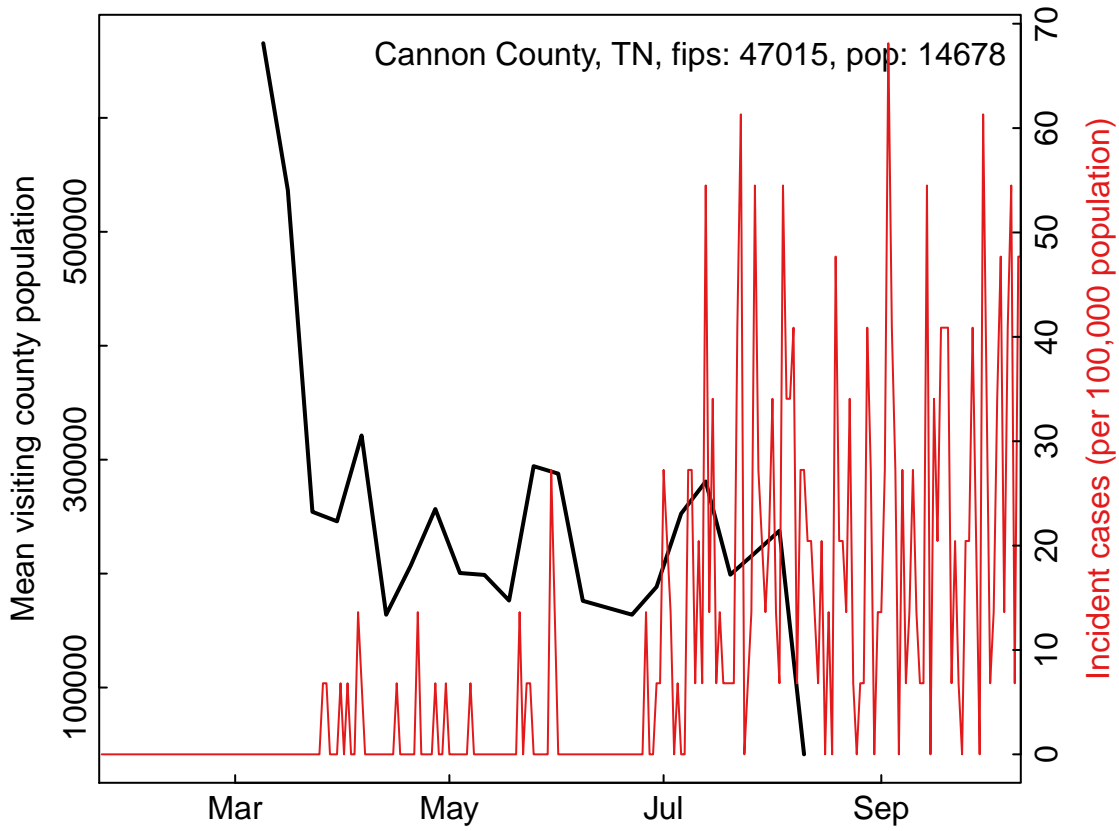

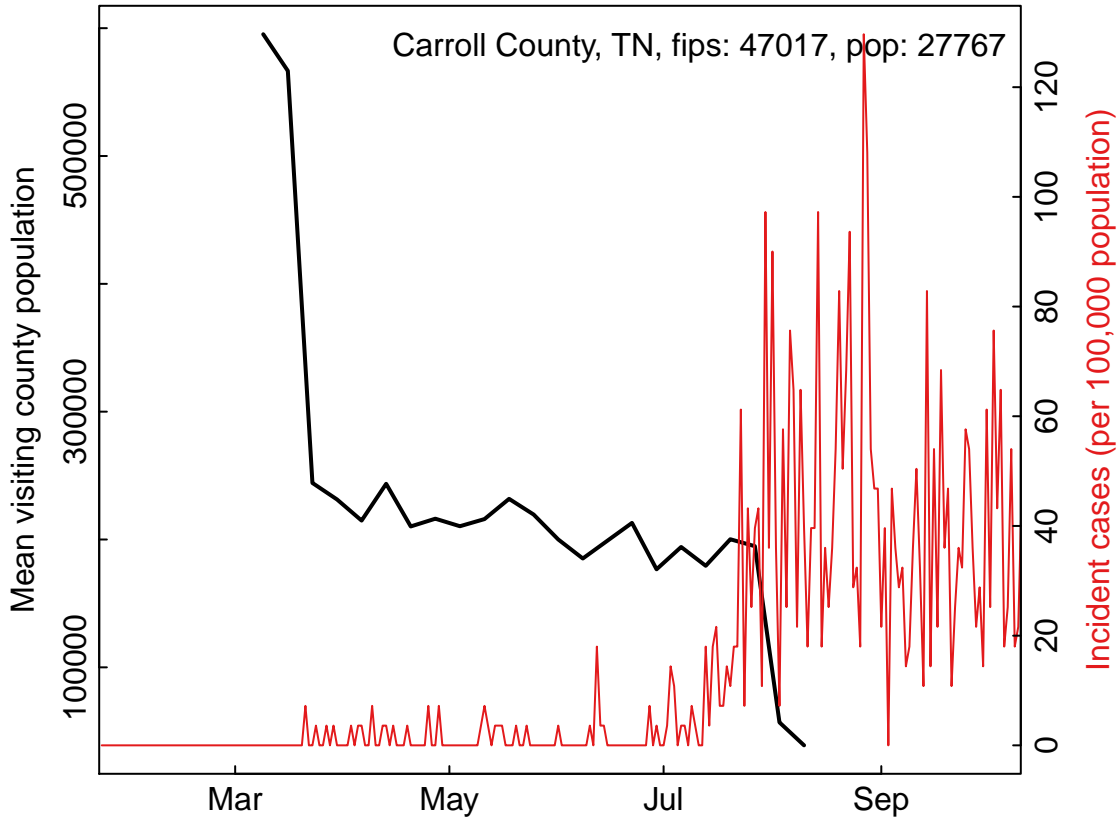

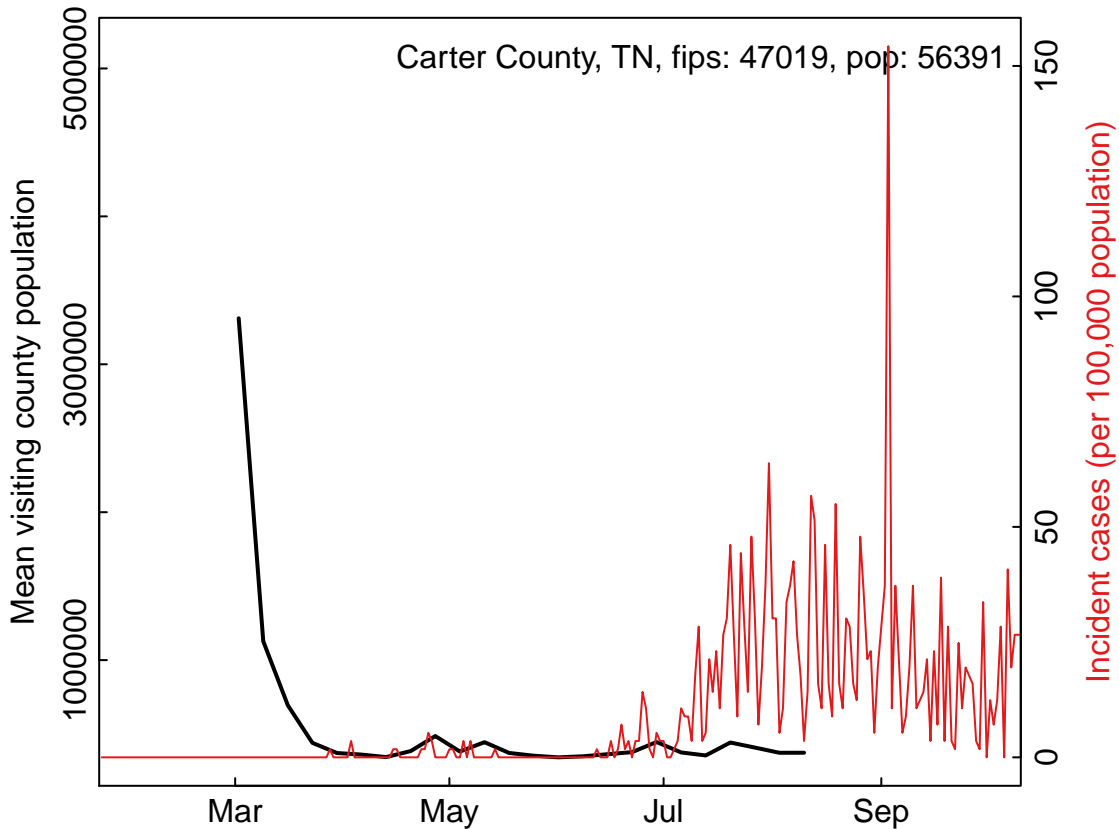



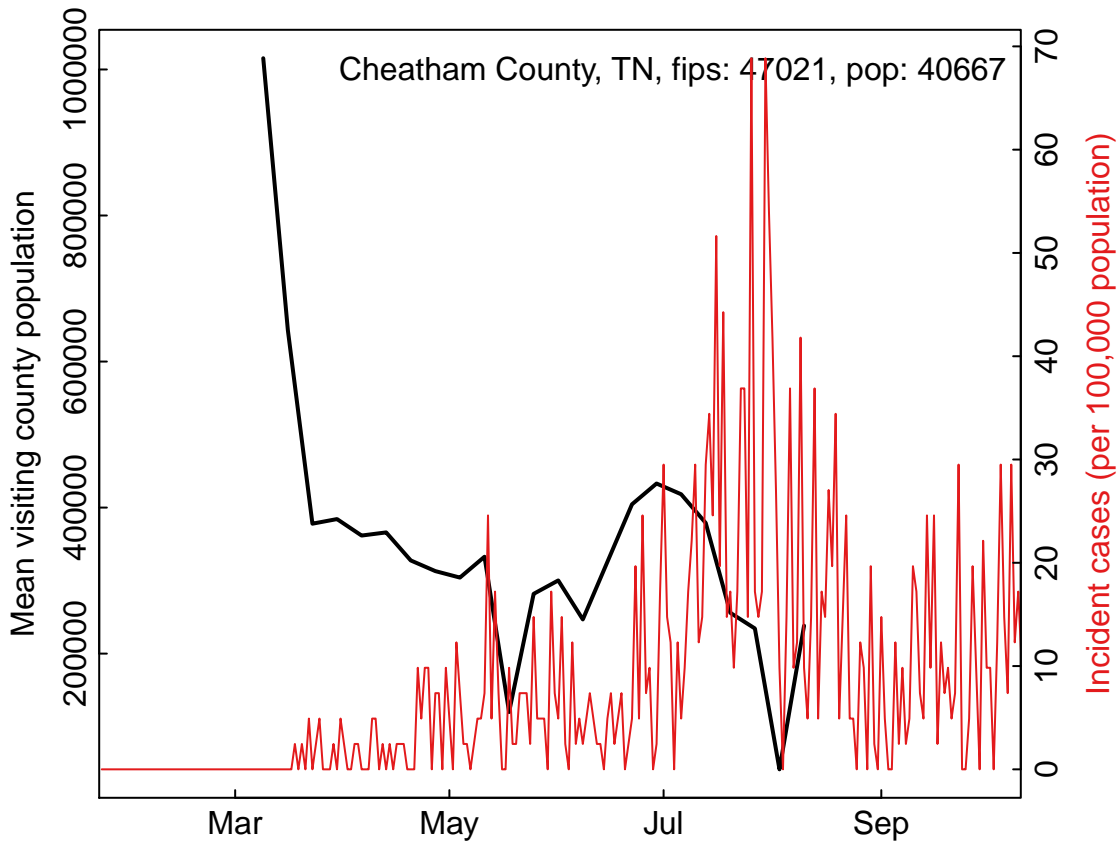

Chester County, TN, fips: 47023, pop: 17297

Mean visiting county population

2500000  
1500000  
500000

Mar

May

Jul

Sep

250  
200  
150  
100  
50  
0

Incident cases (per 100,000 population)

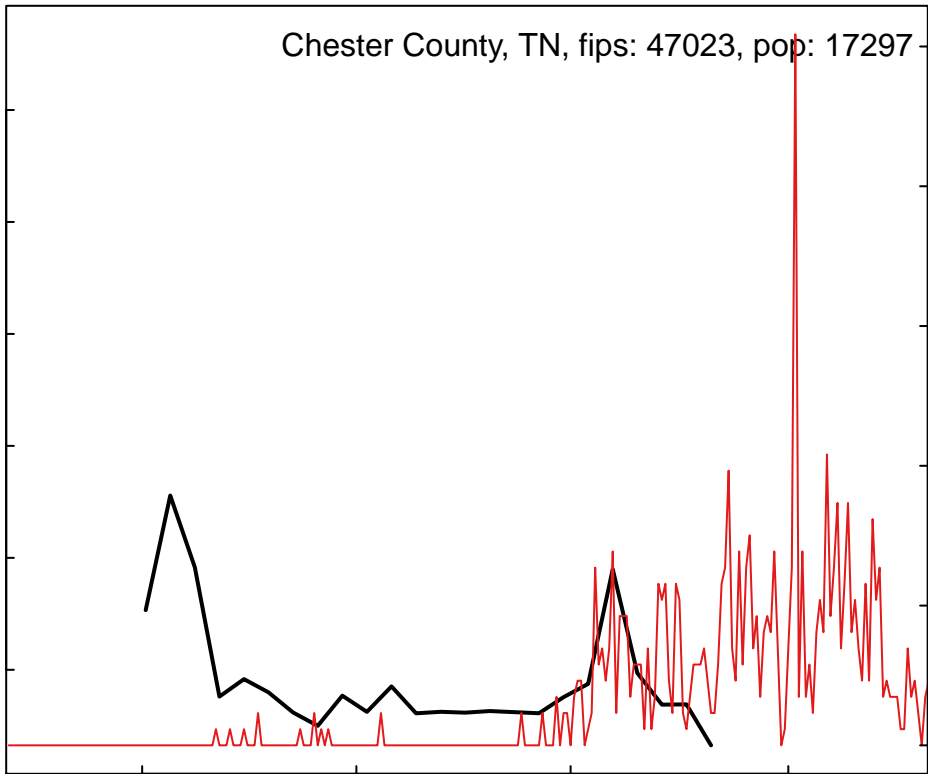

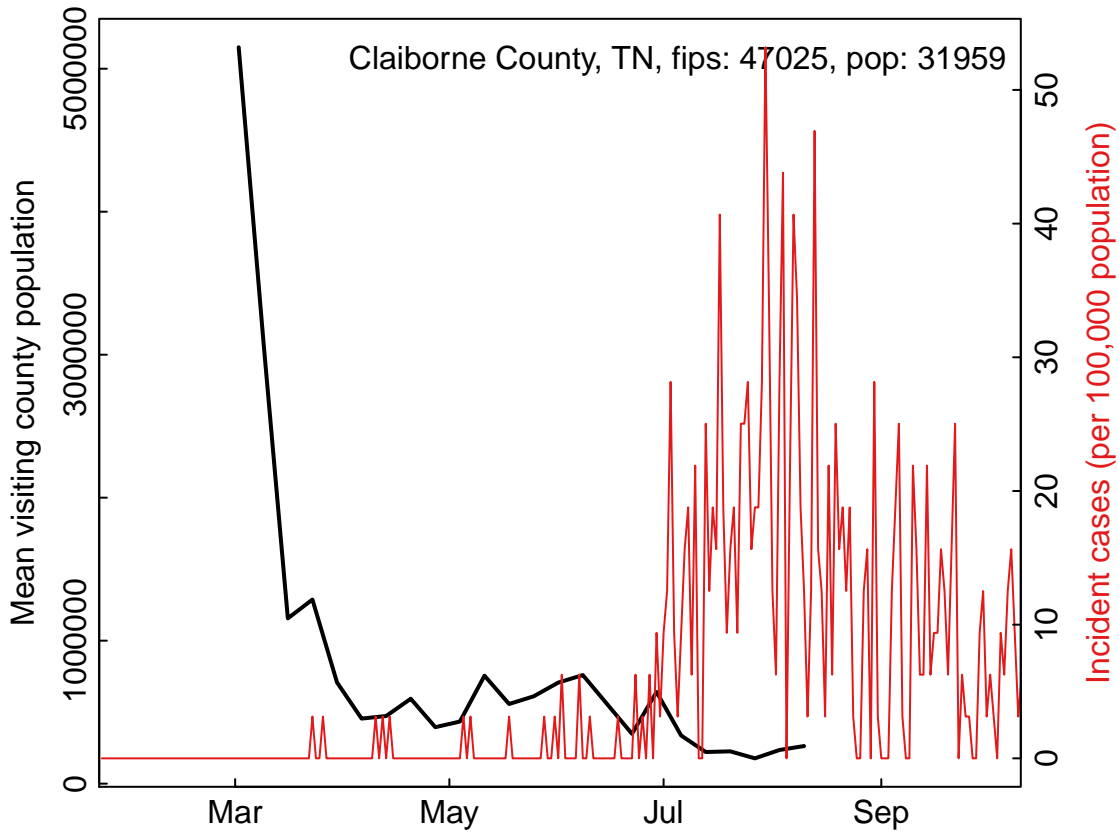

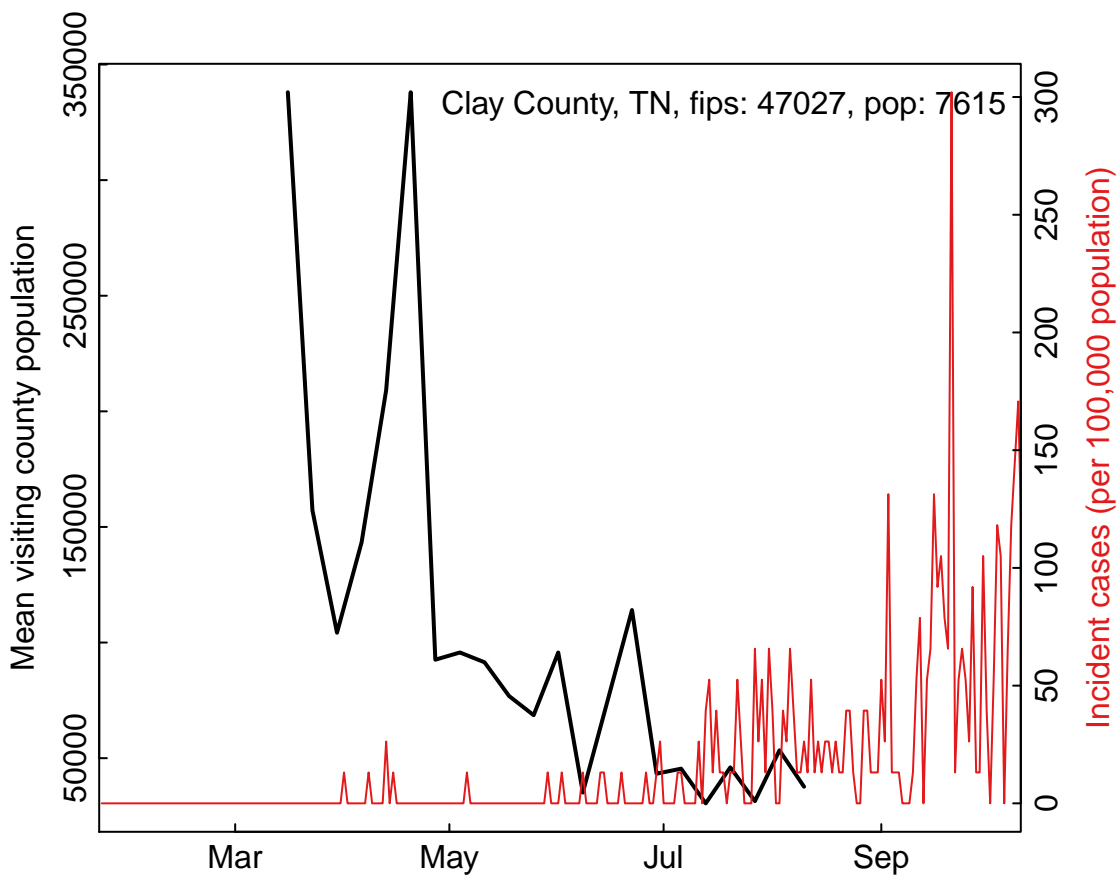

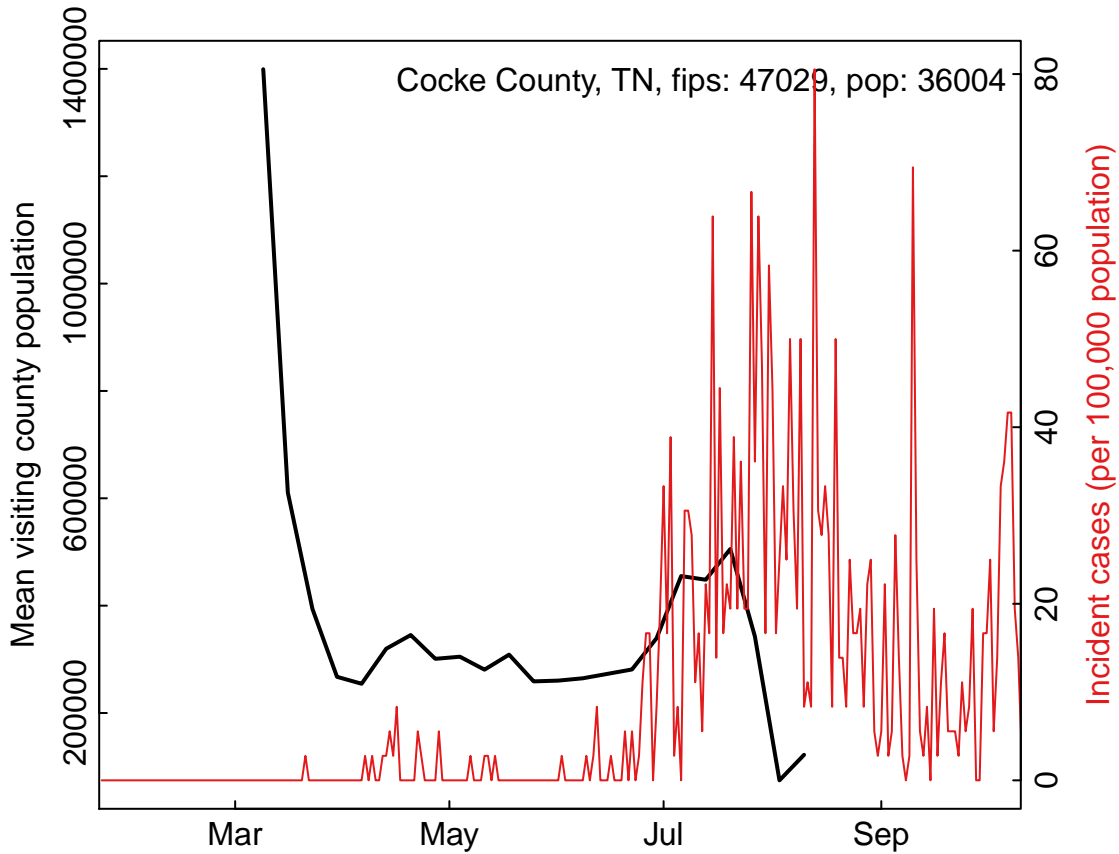

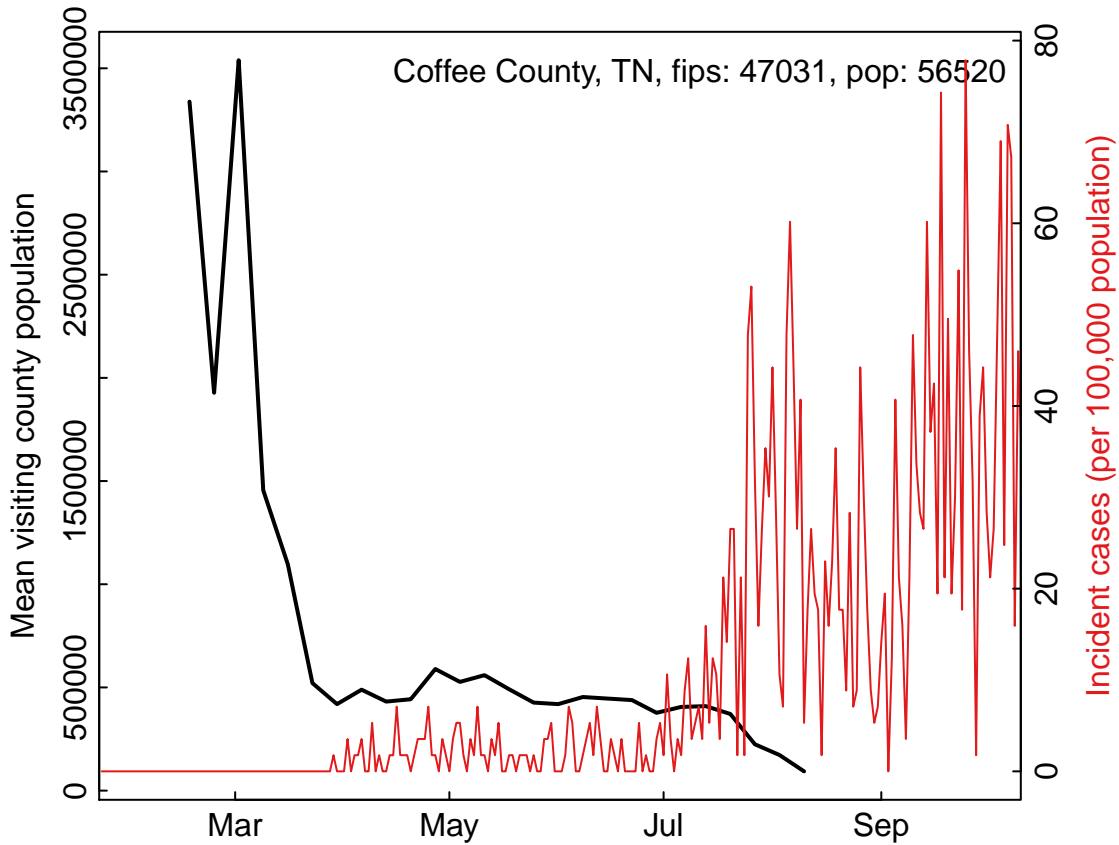

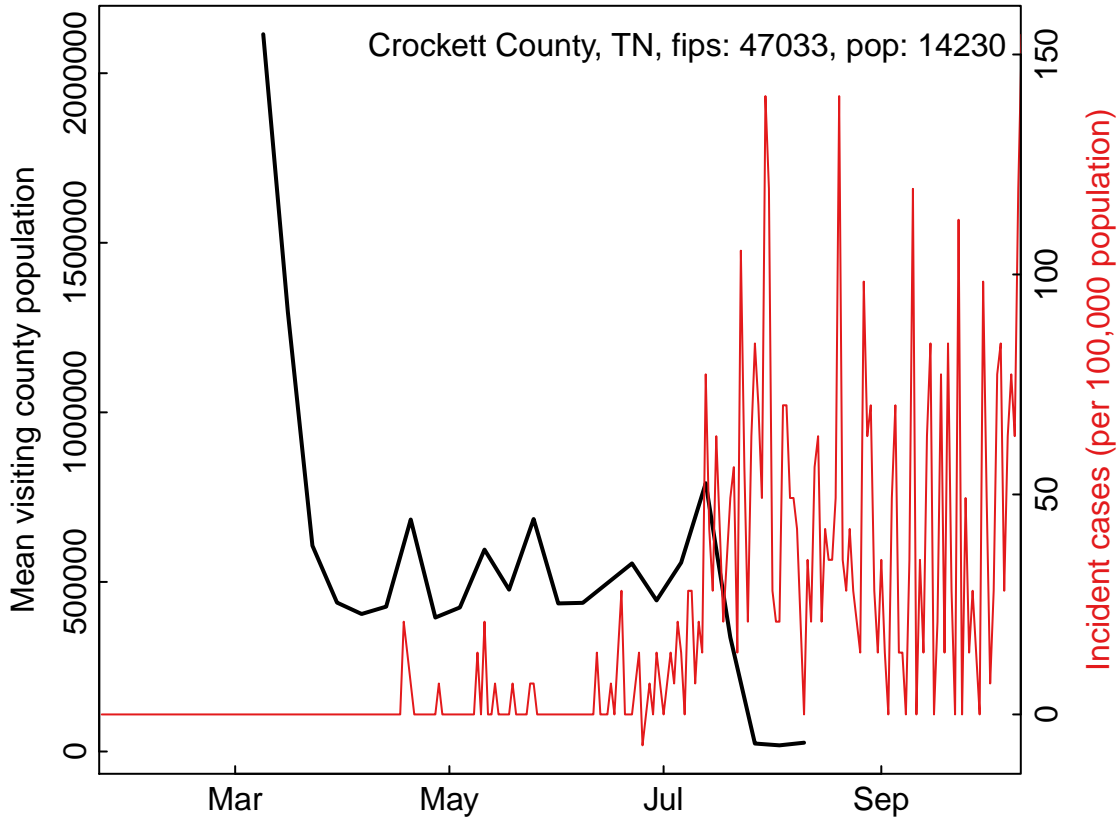

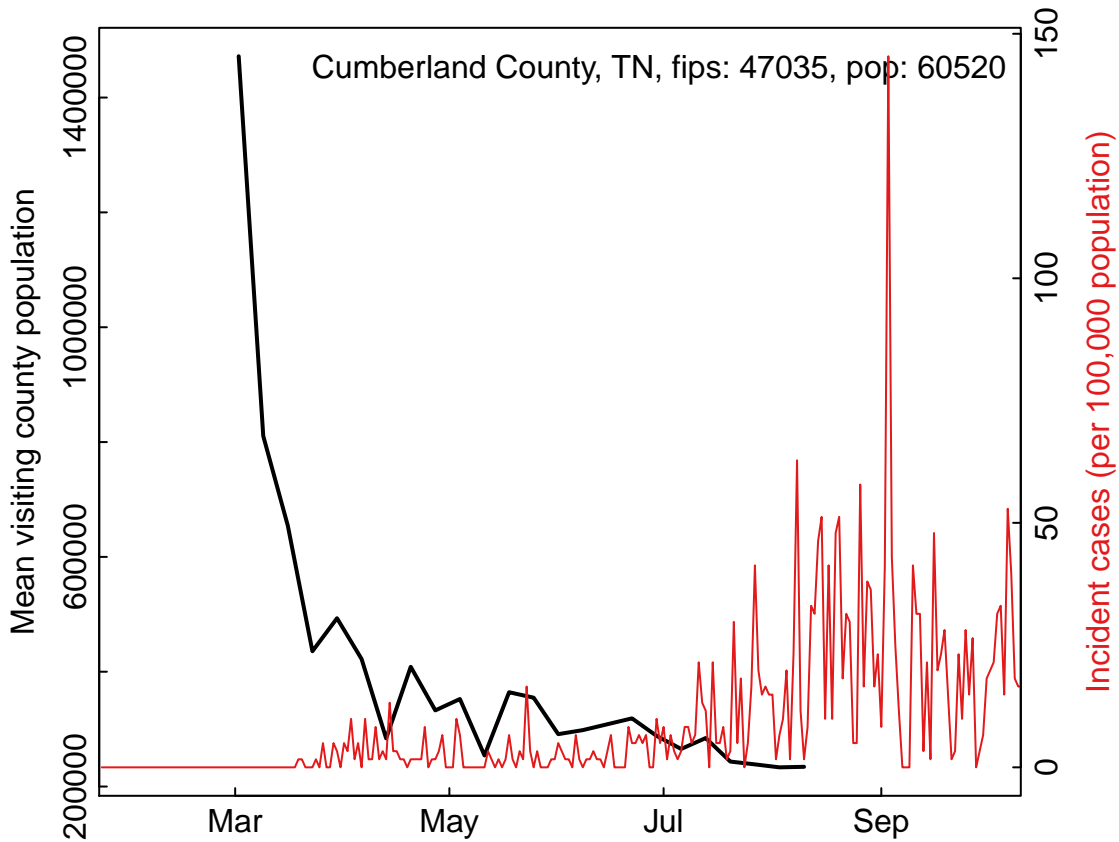



Davidson County, TN, fips: 47037, pop: 694144

Mean visiting county population

Incident cases (per 100,000 population)

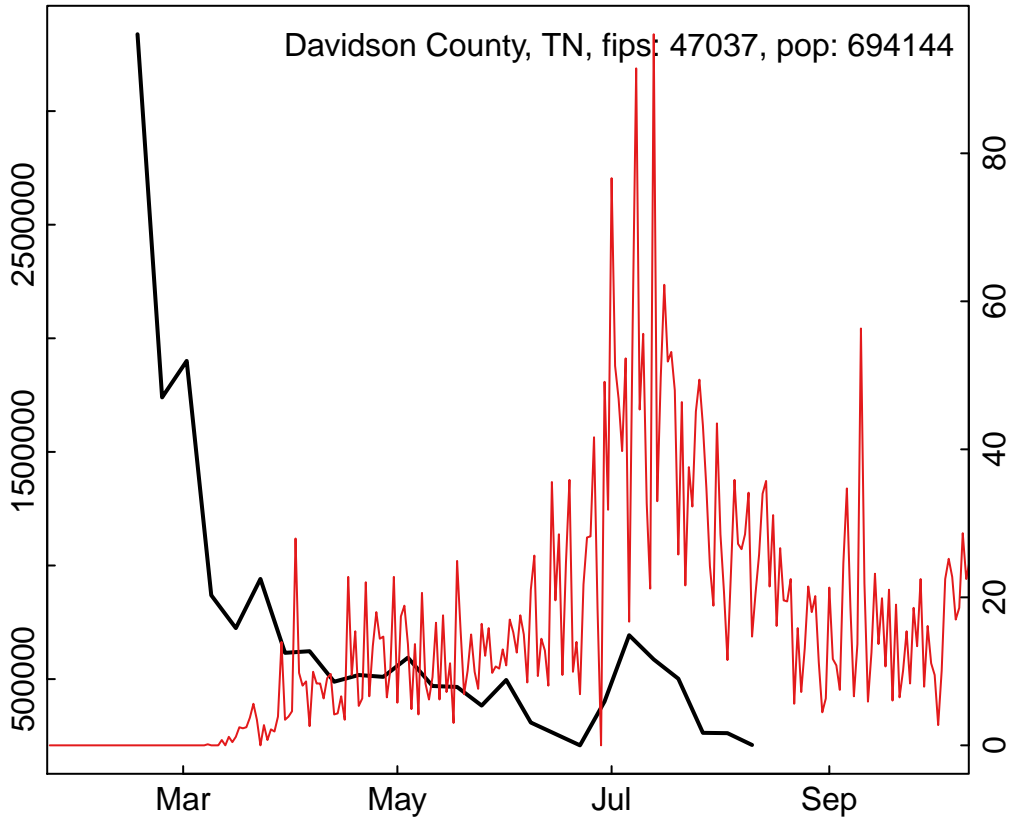

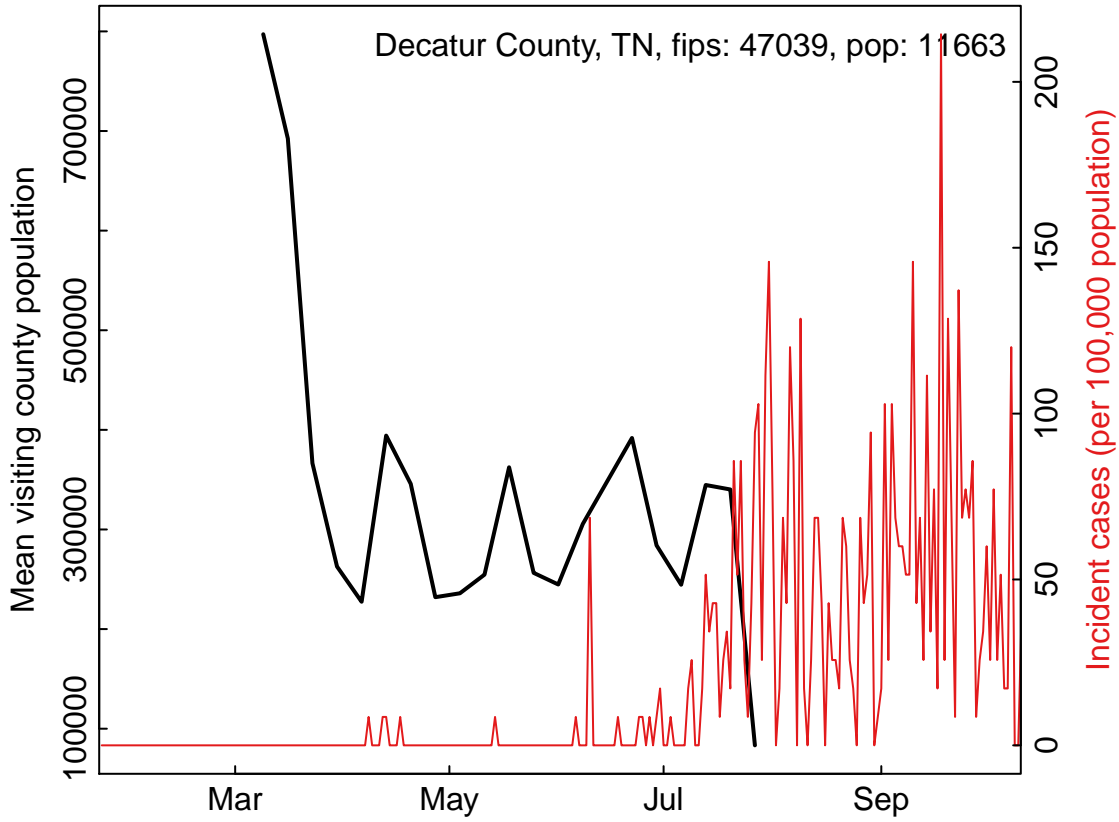

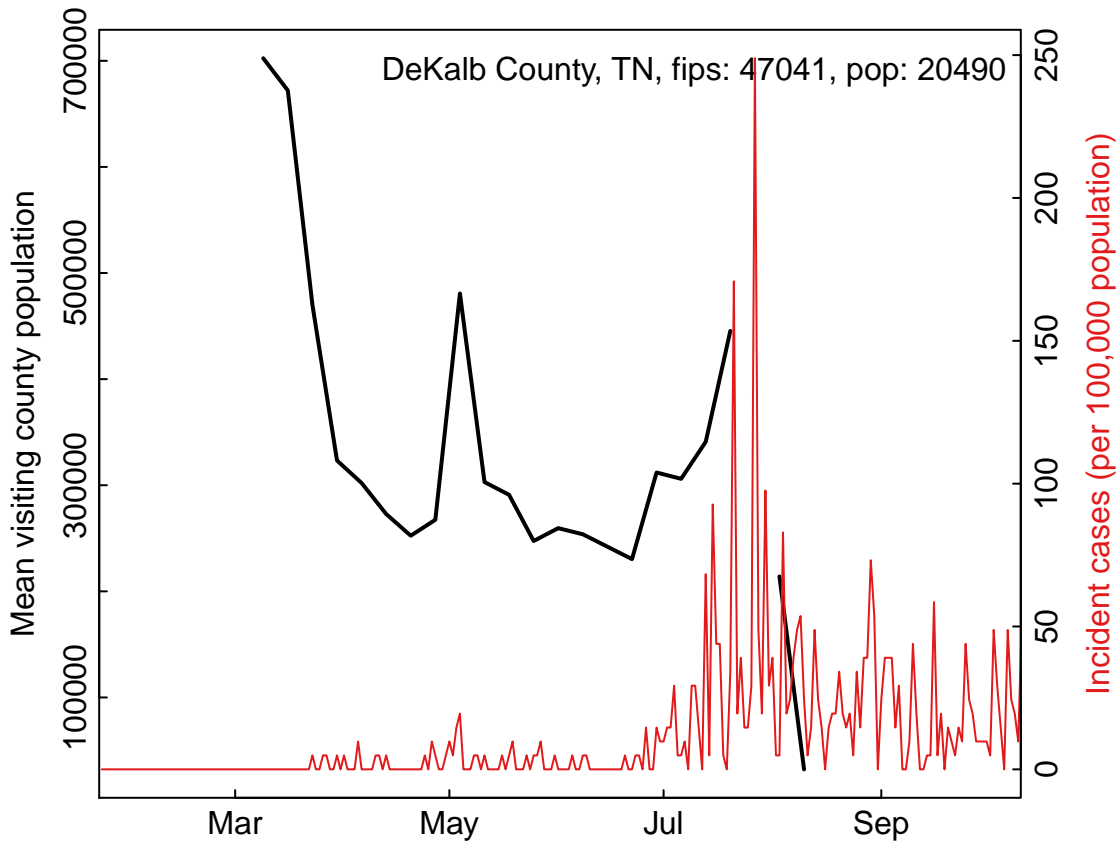

Dickson County, TN, fips: 47043, pop: 53948

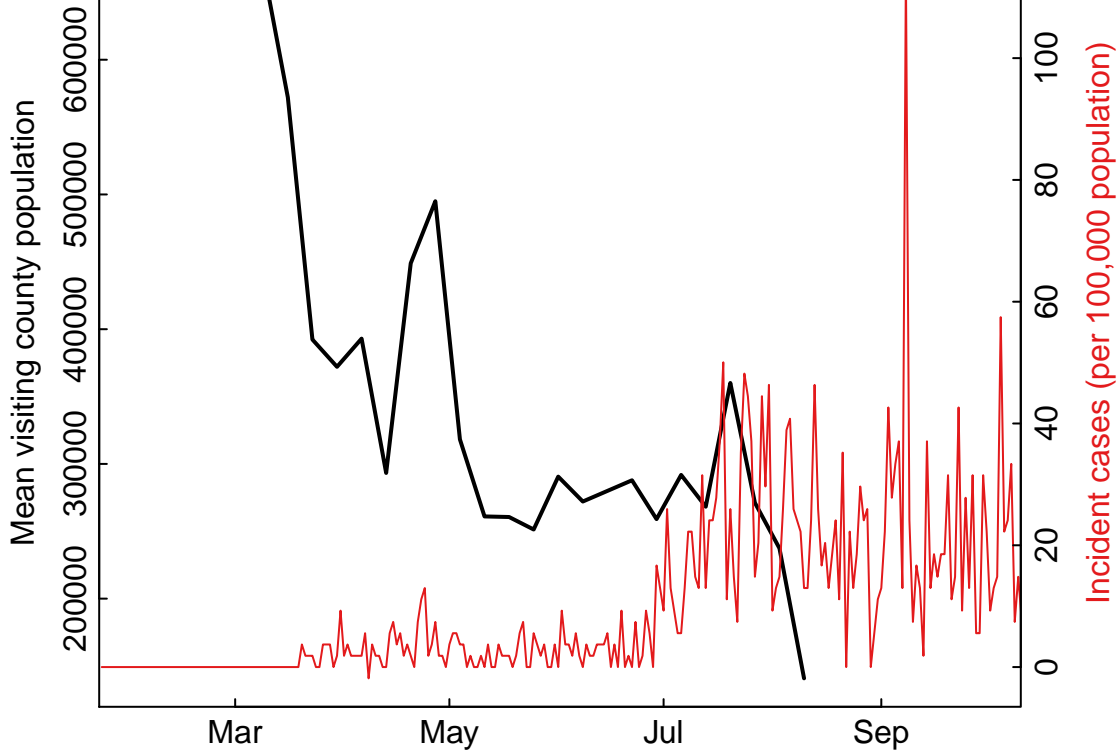

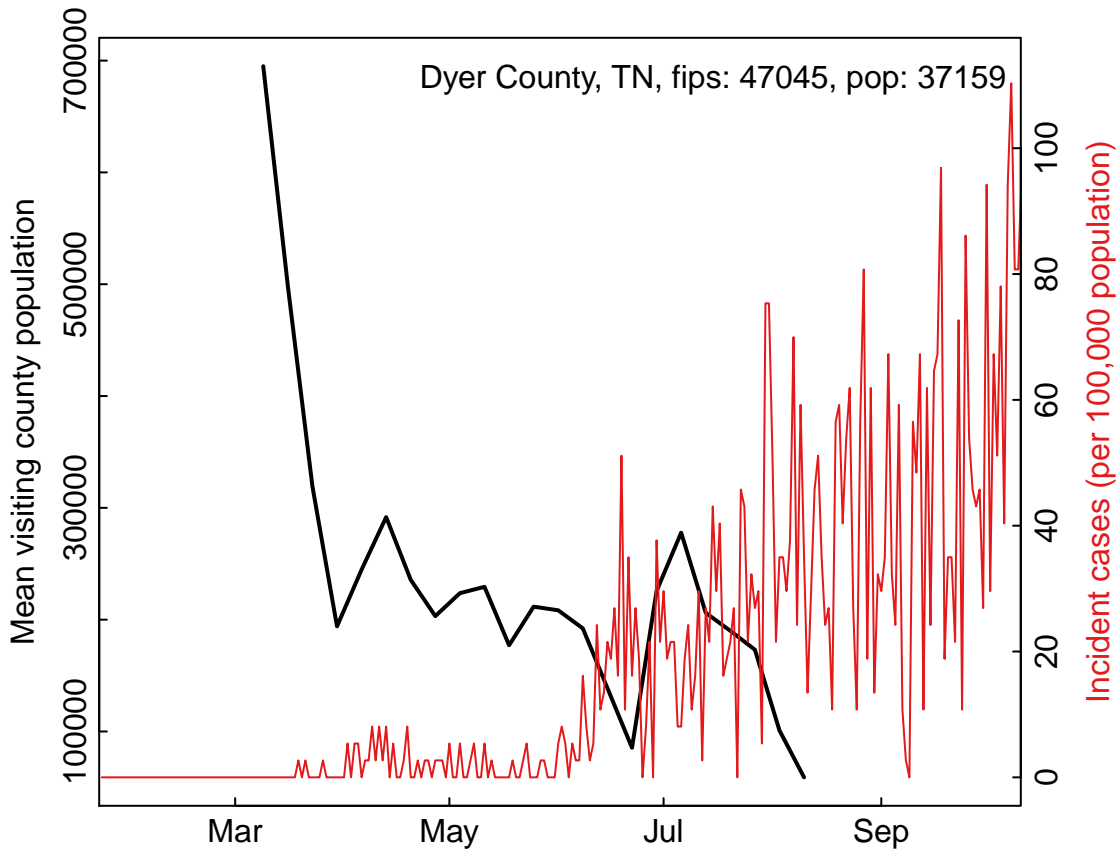

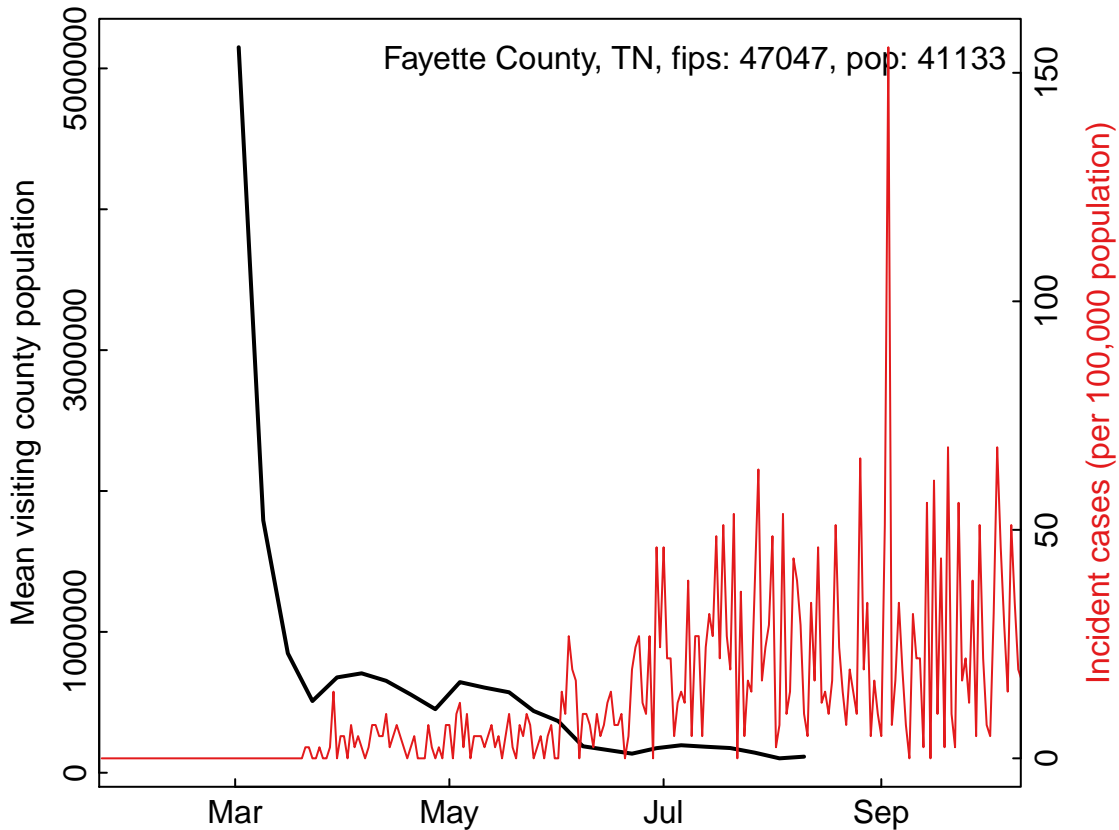

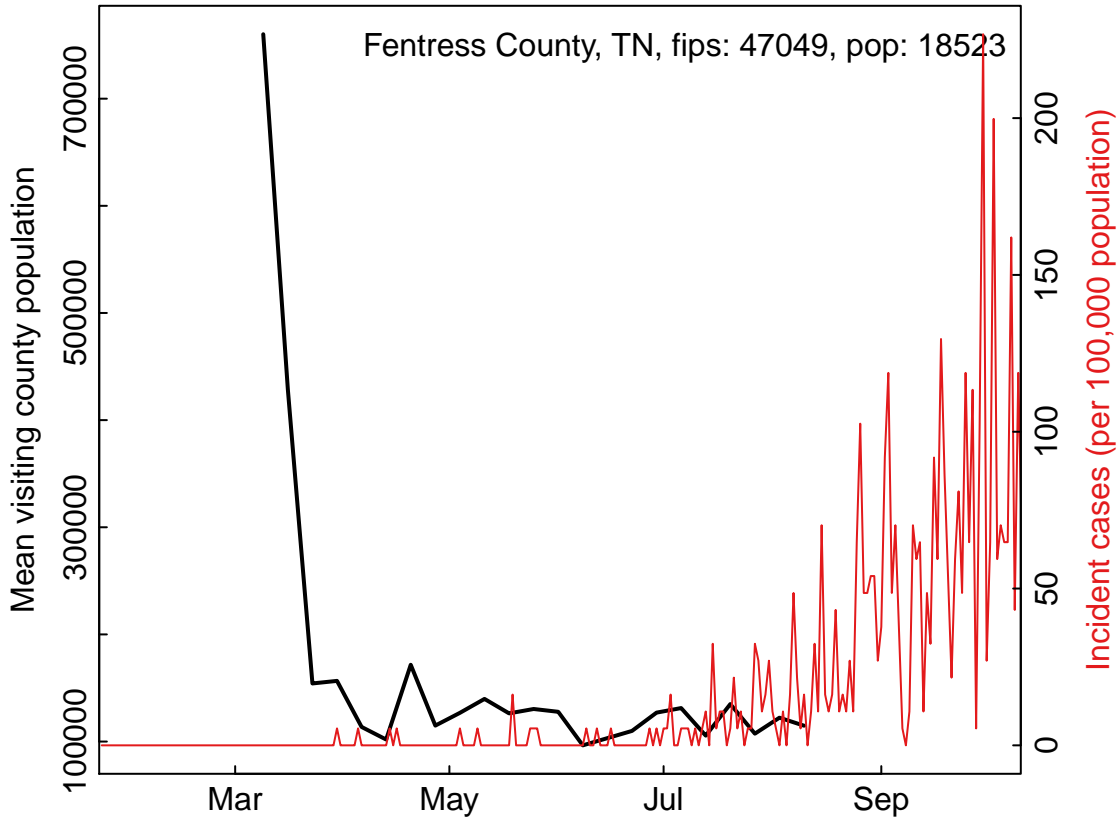

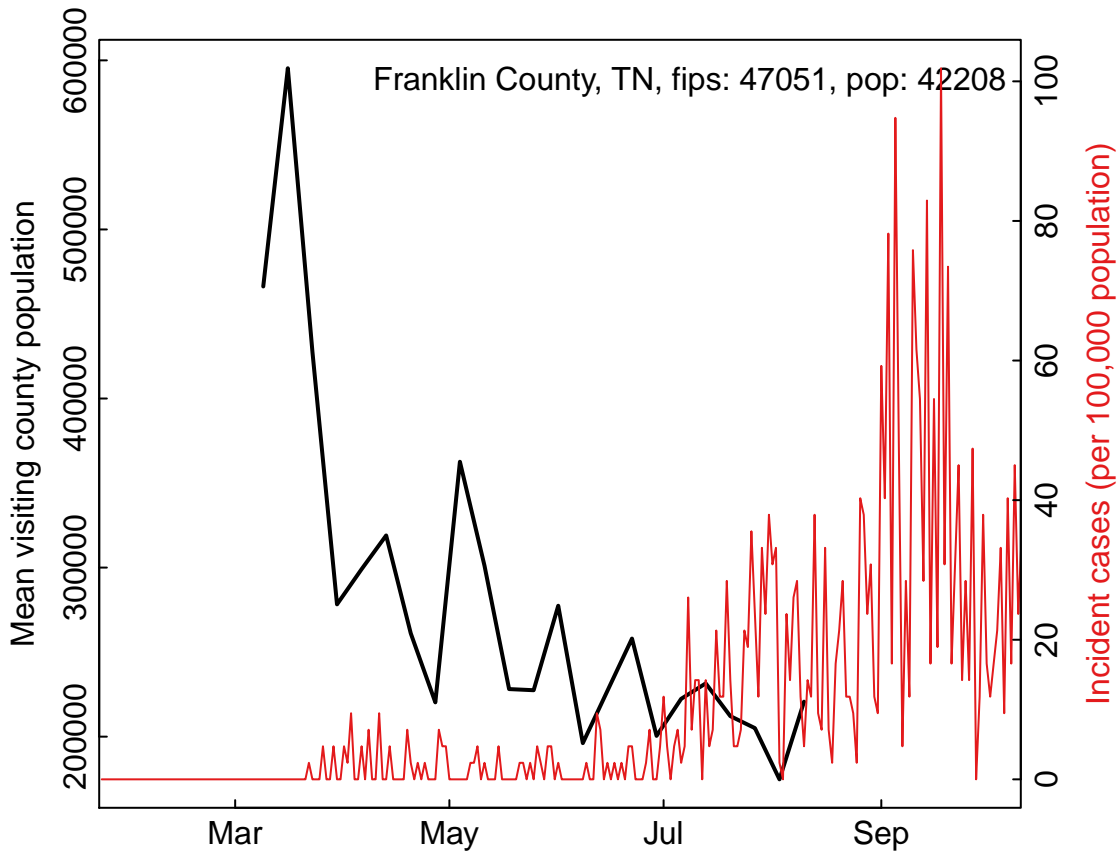



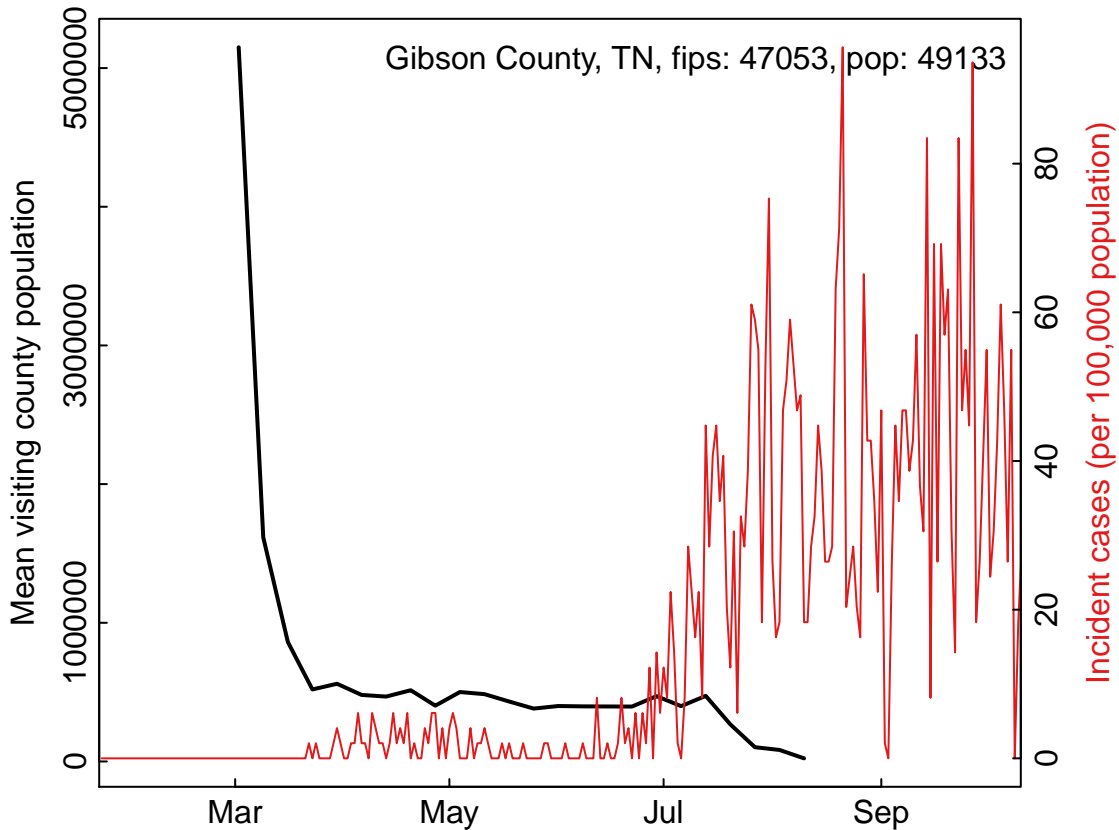

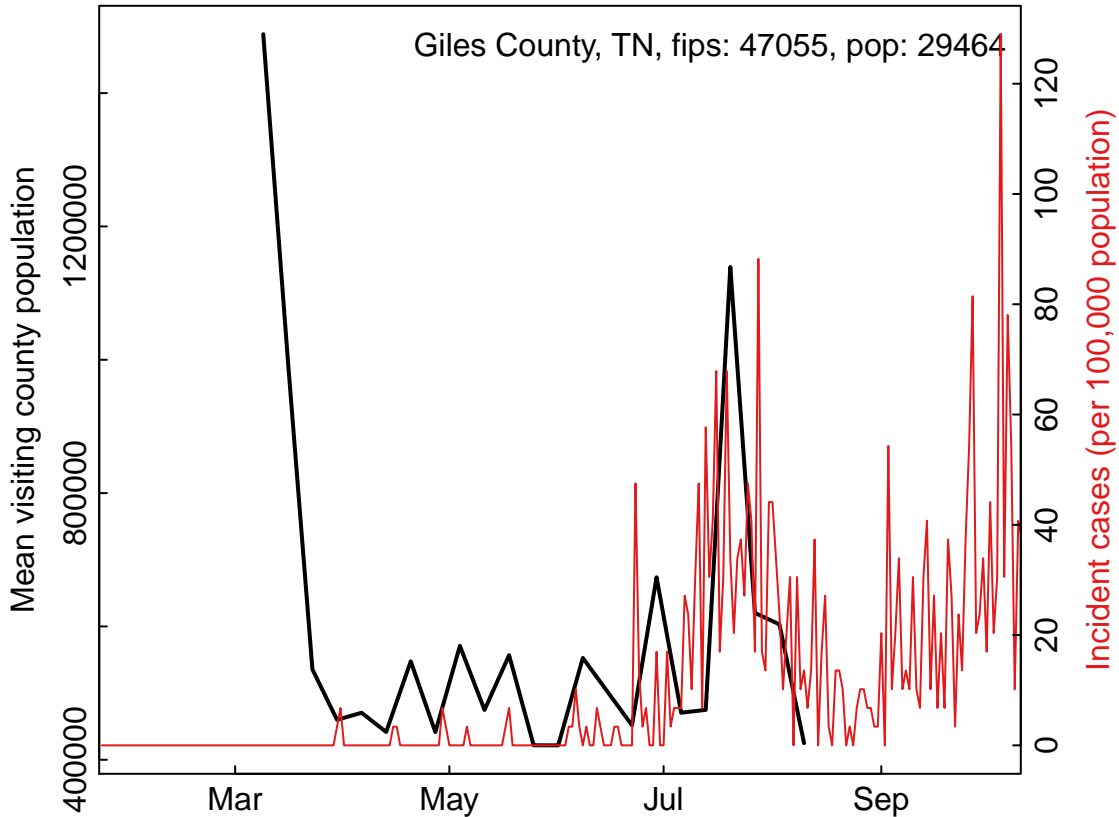

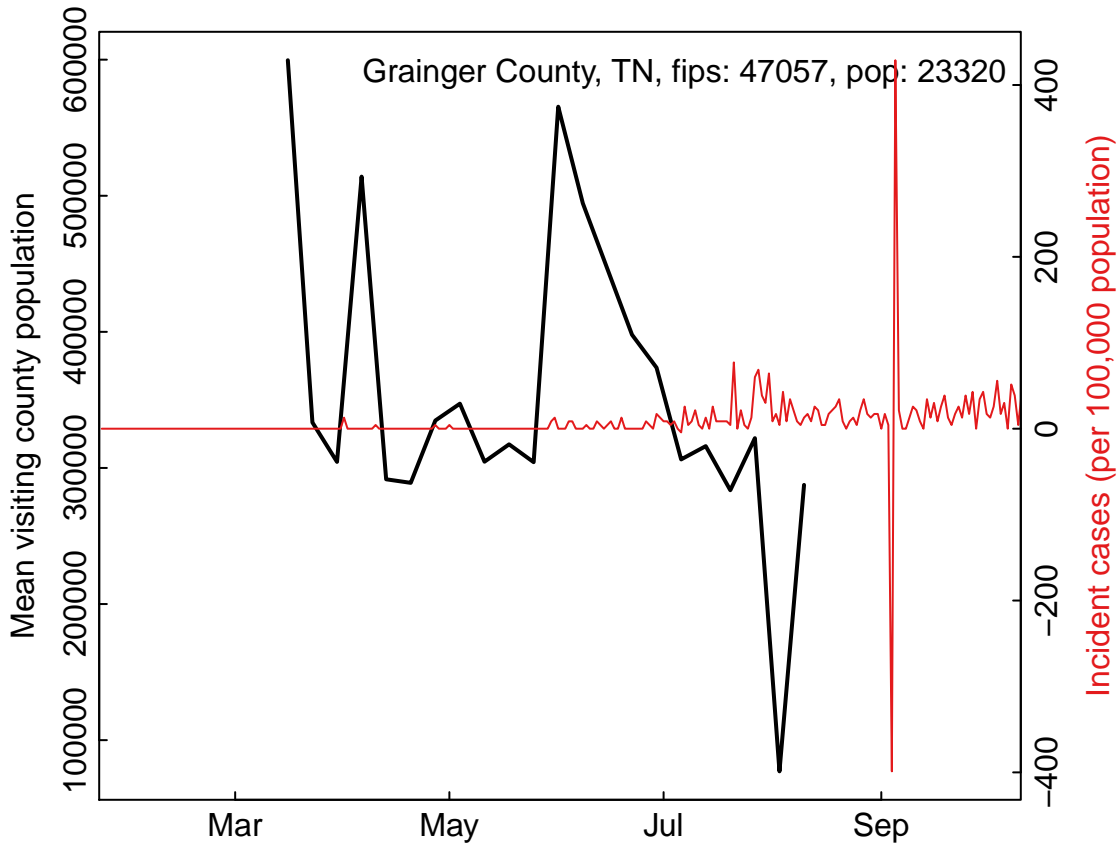

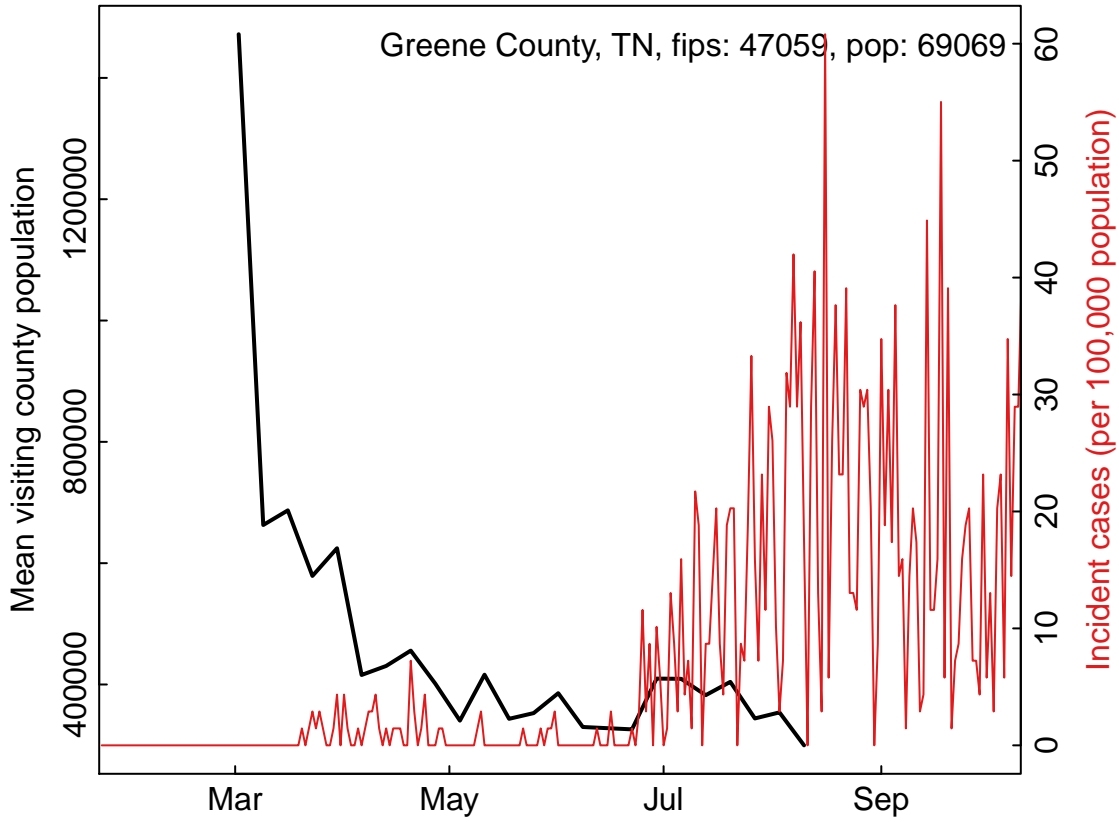

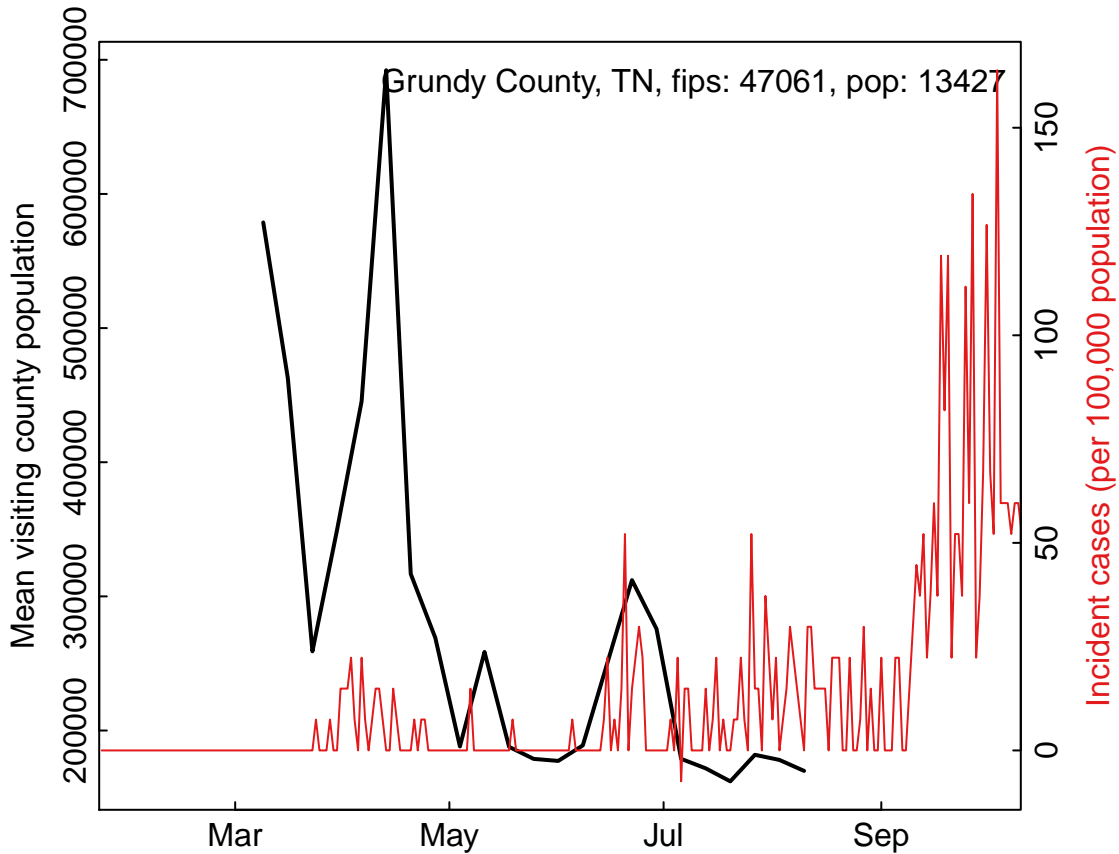

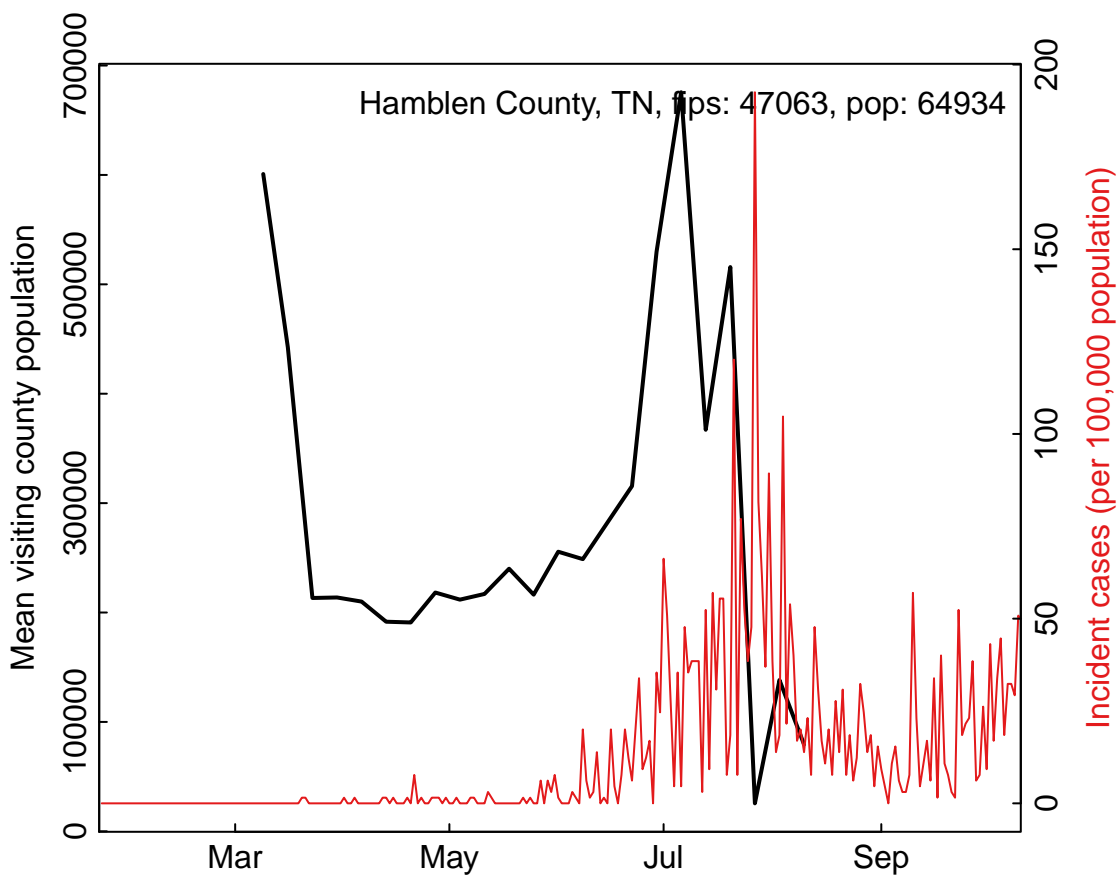

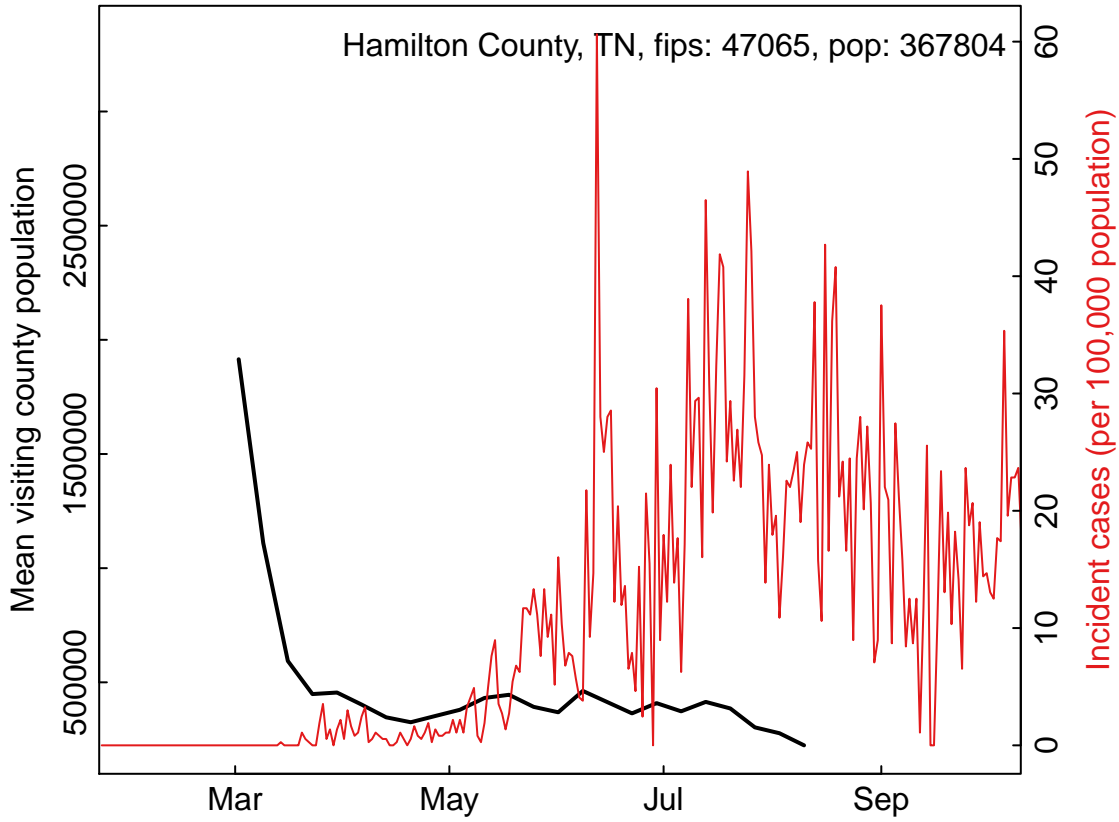

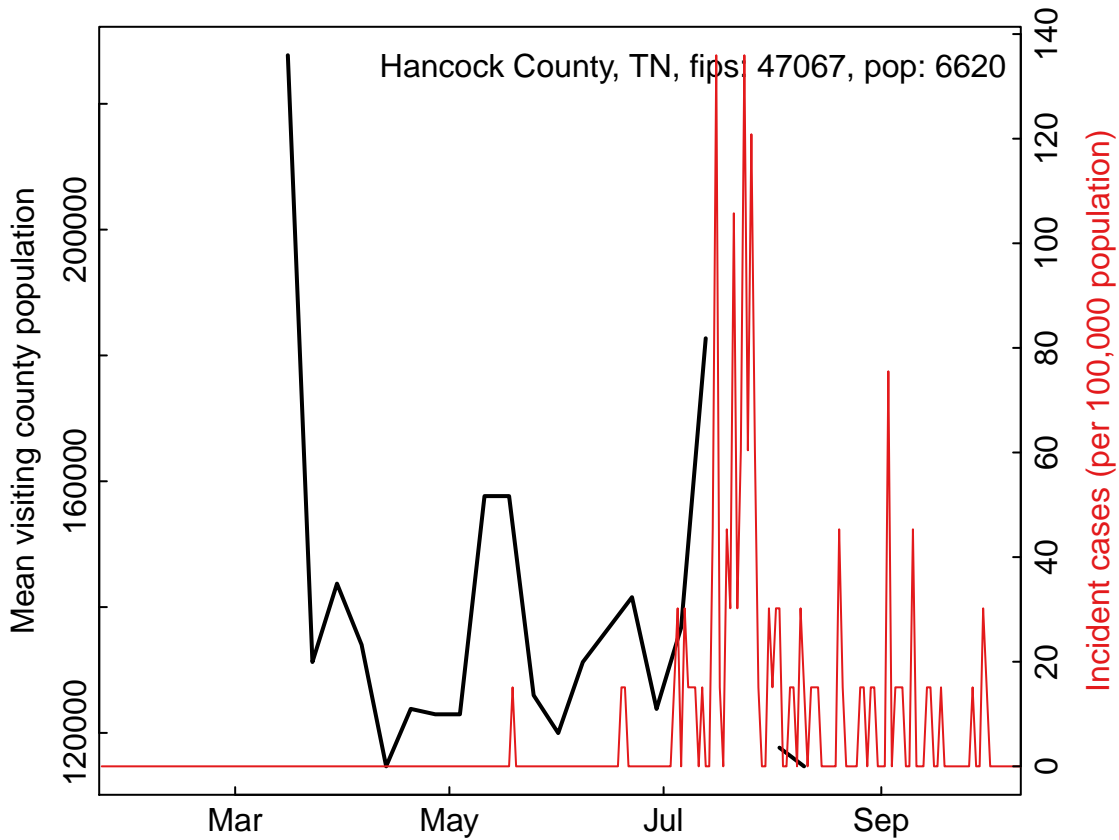



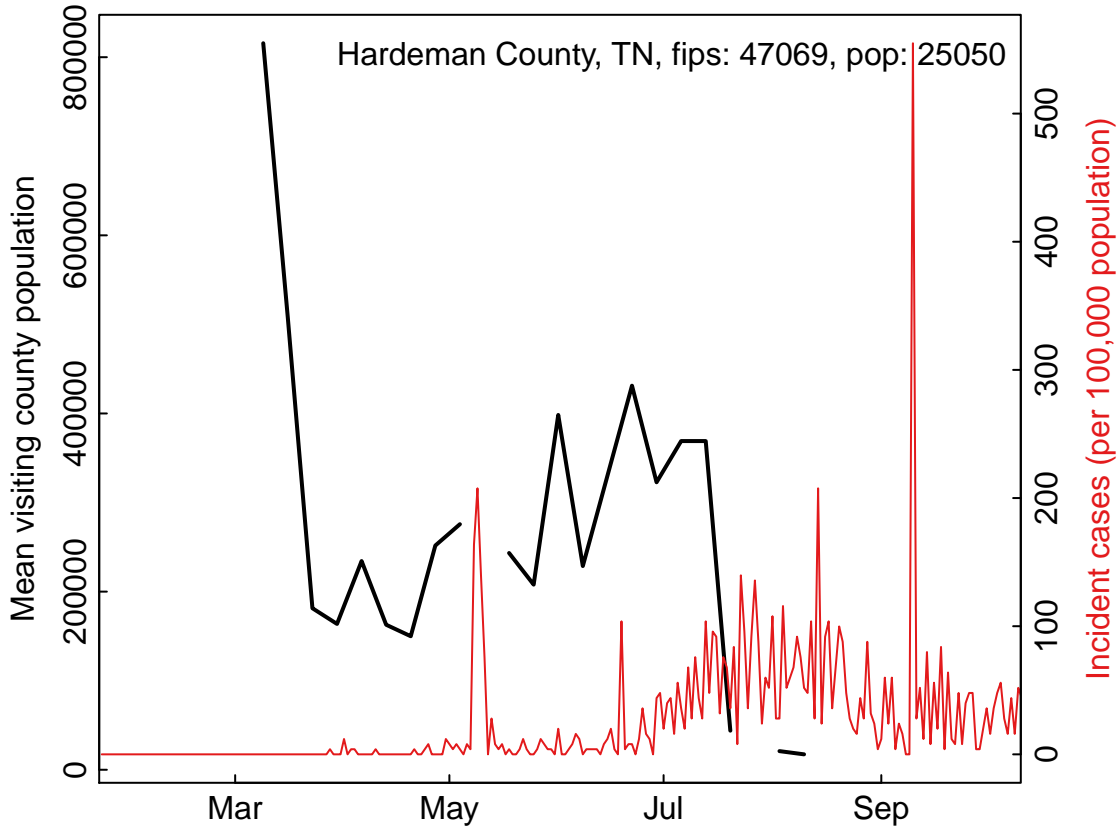

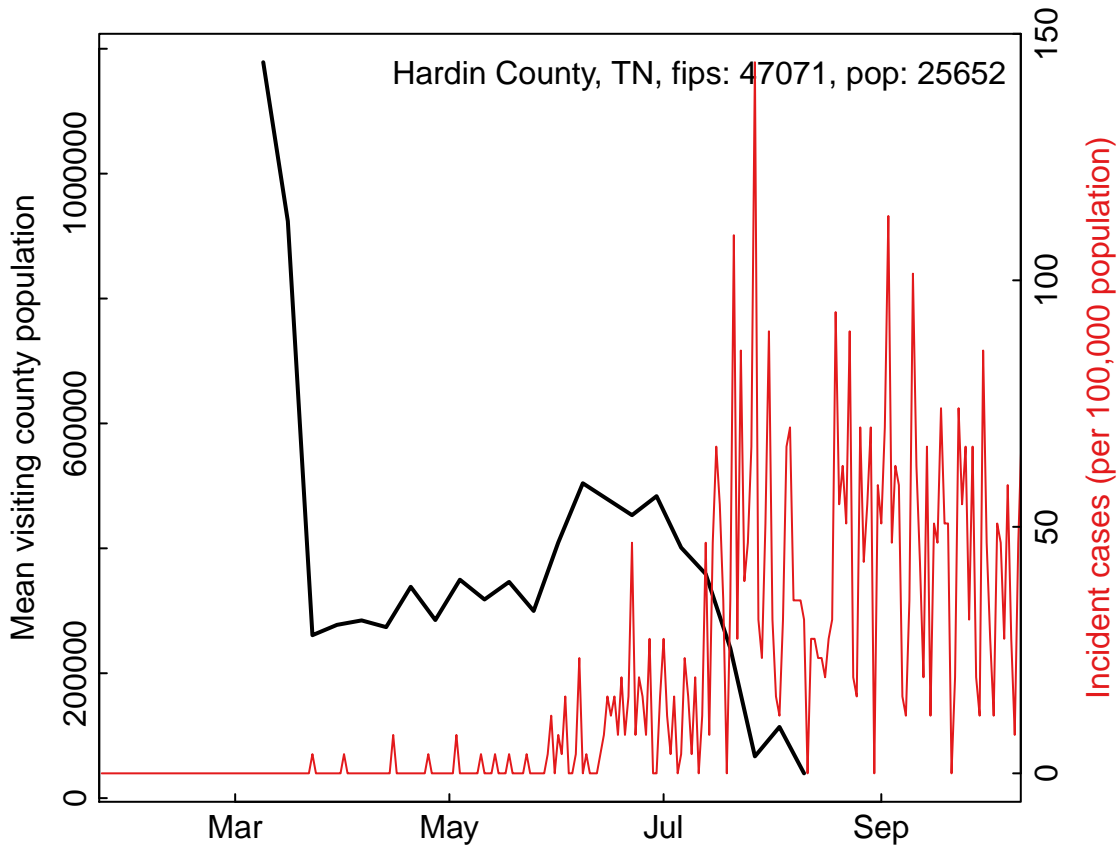

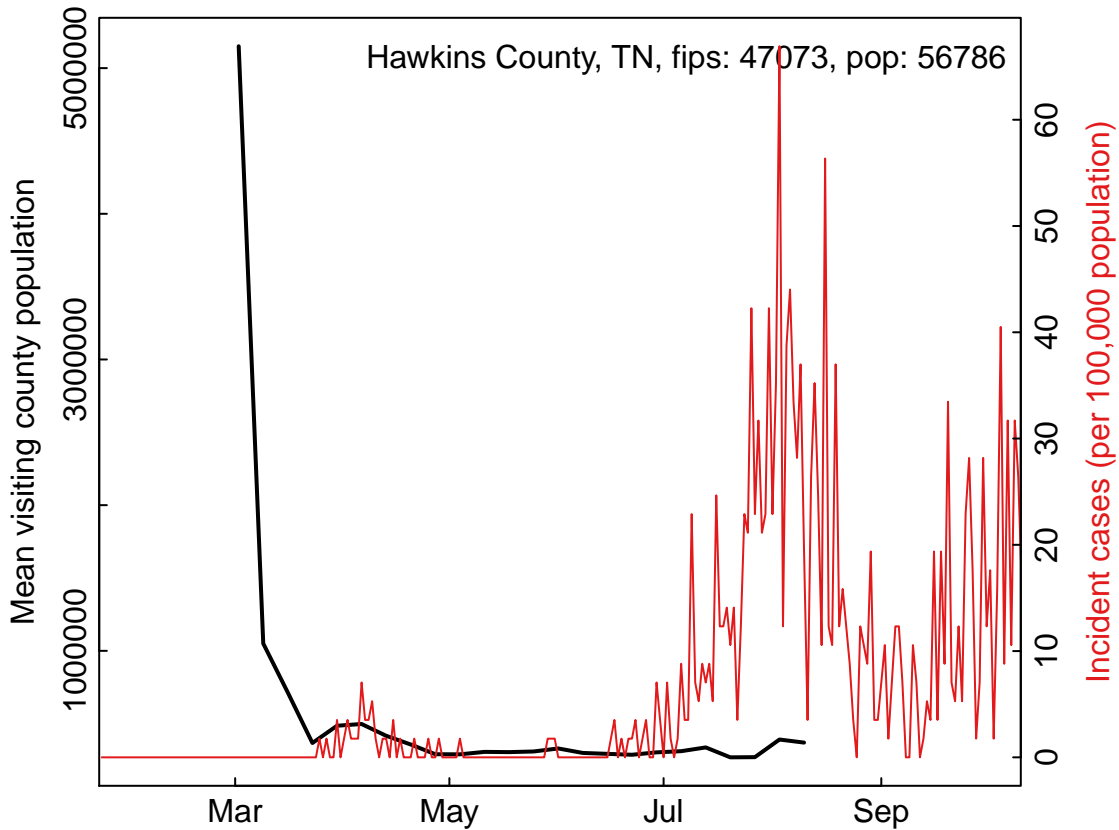

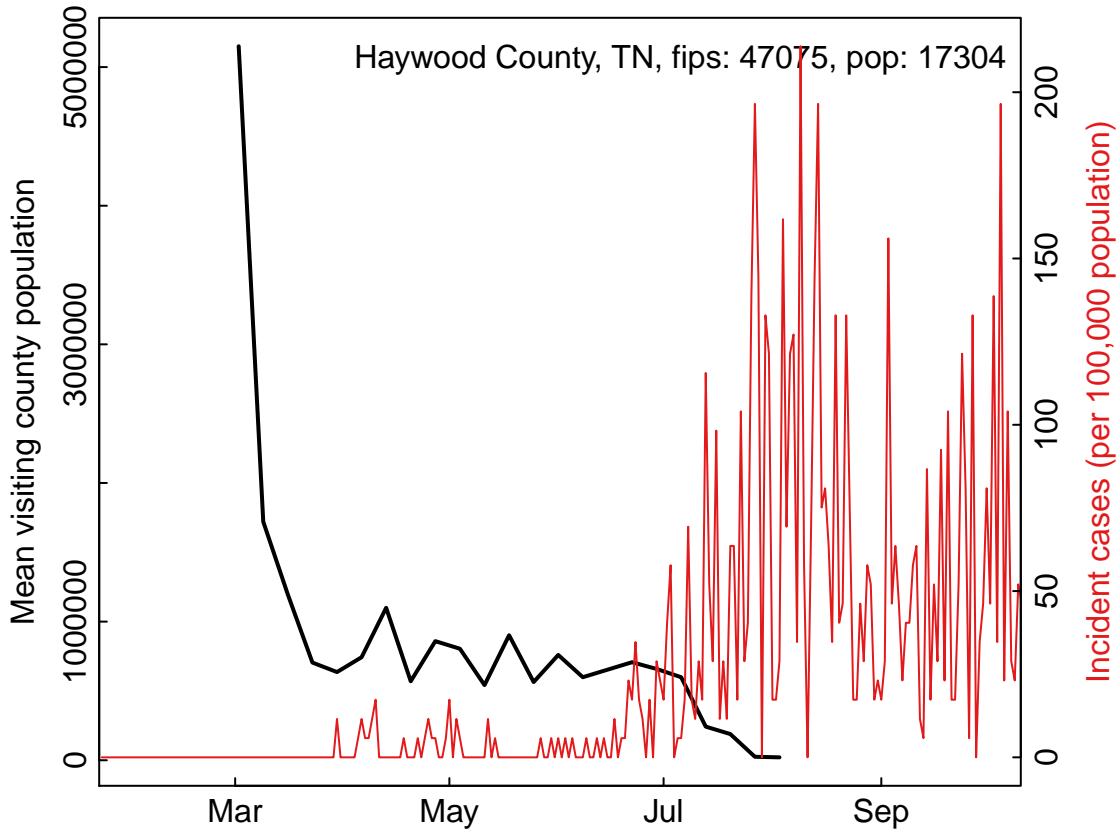

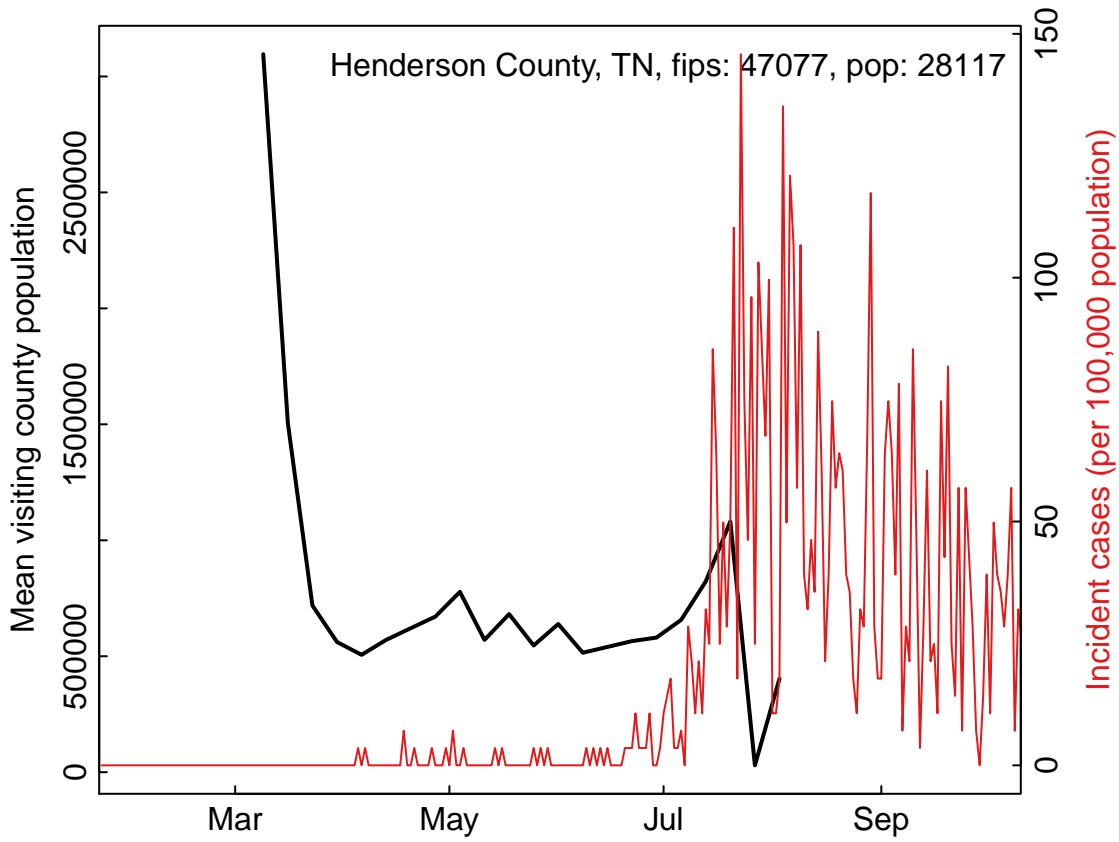

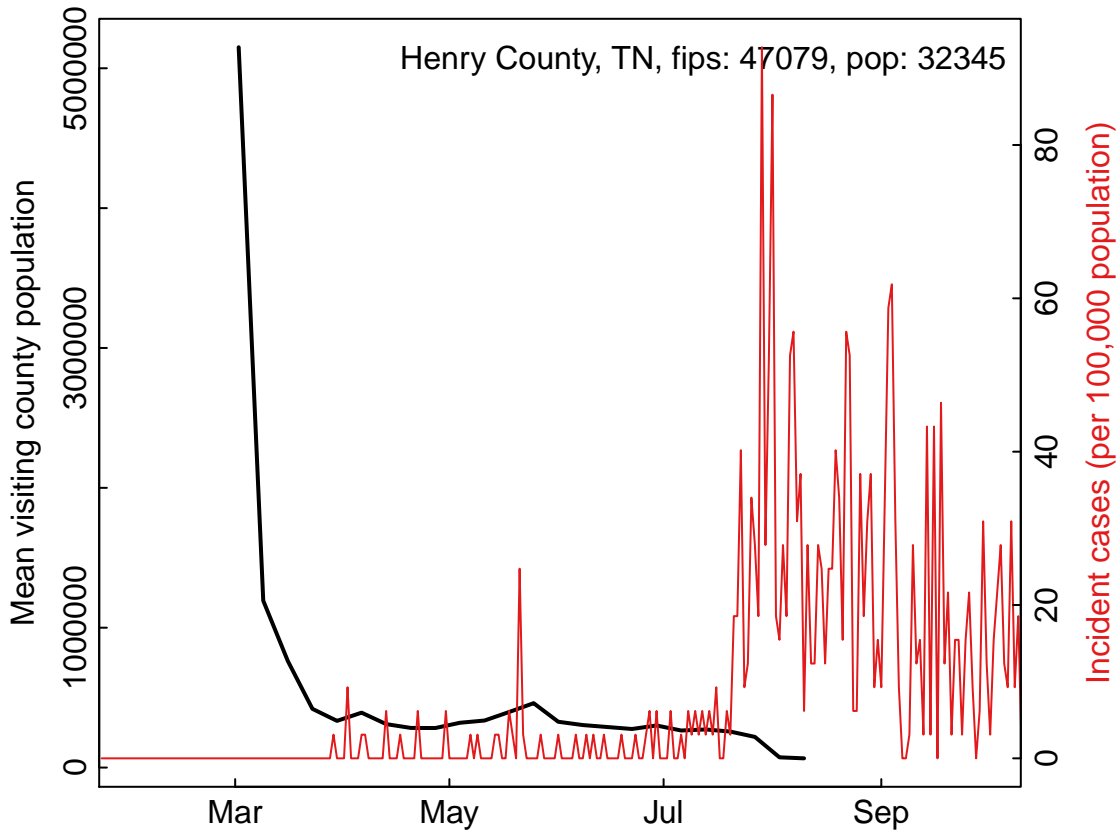

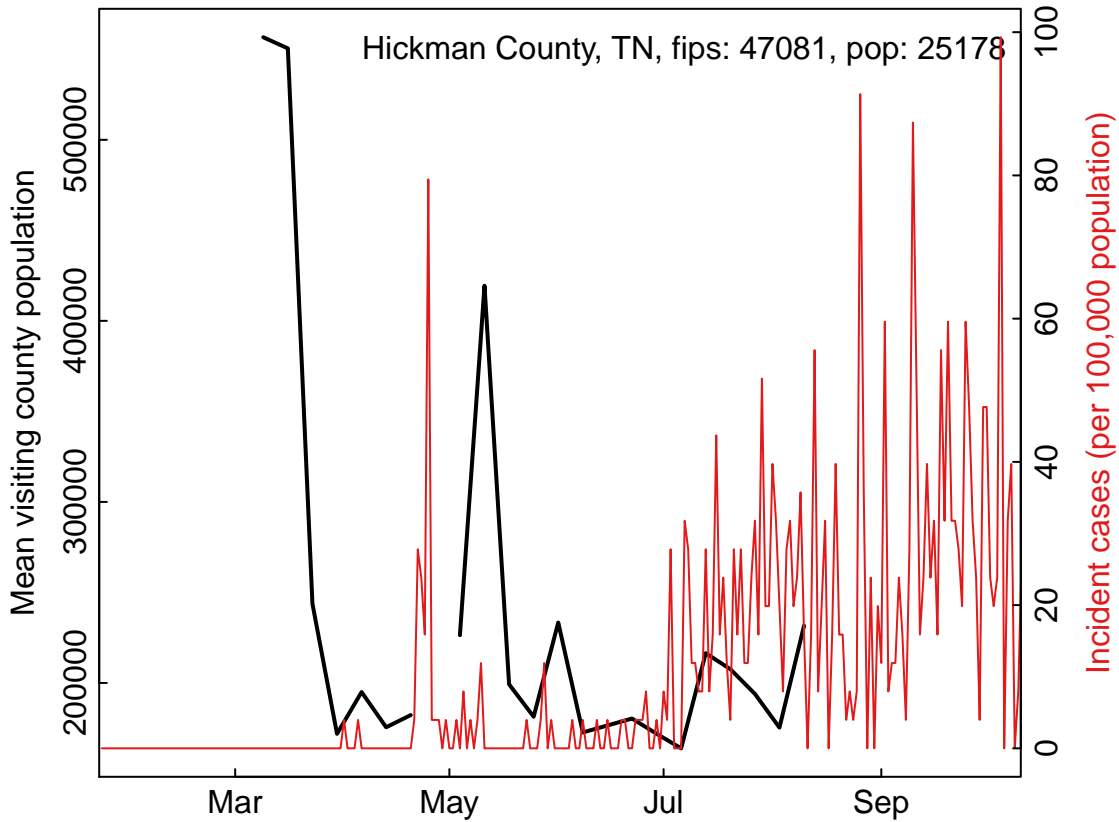

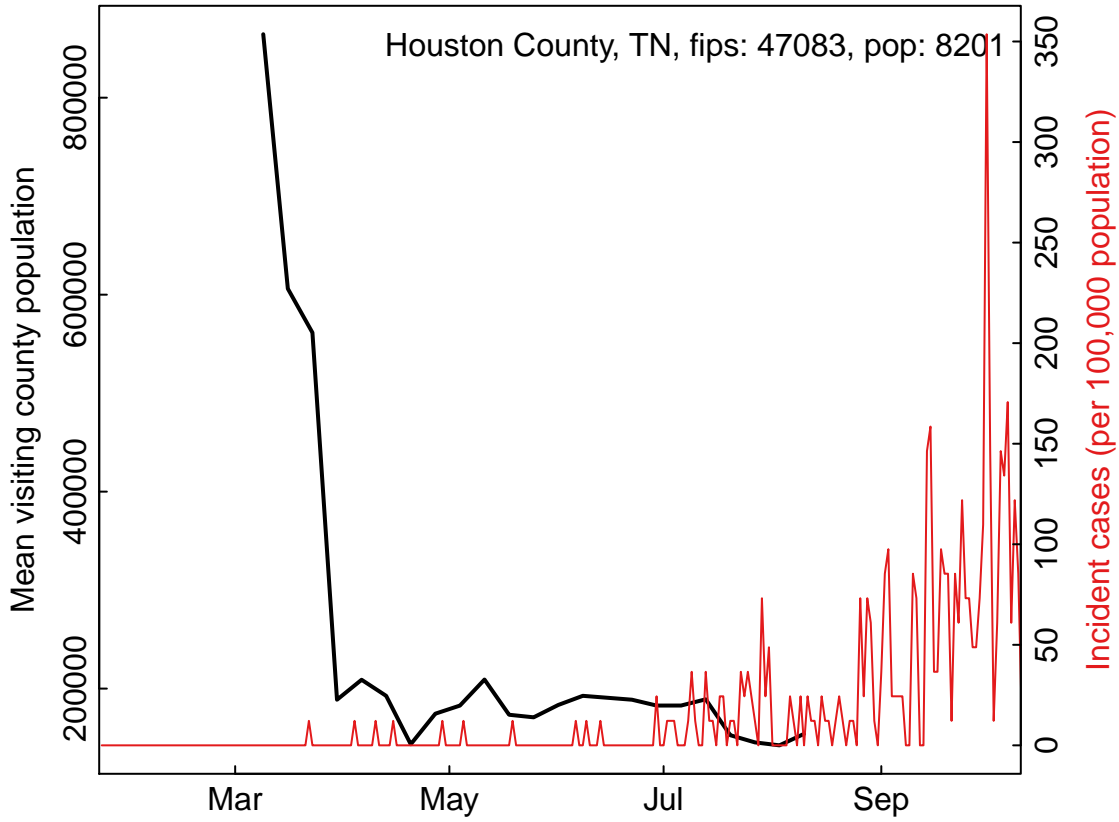



Humphreys County, TN, fips: 47085, pop: 18582

Mean visiting county population

500000  
400000  
300000  
200000  
100000

Mar

May

Jul

Sep

Incident cases (per 100,000 population)

60  
40  
20  
0

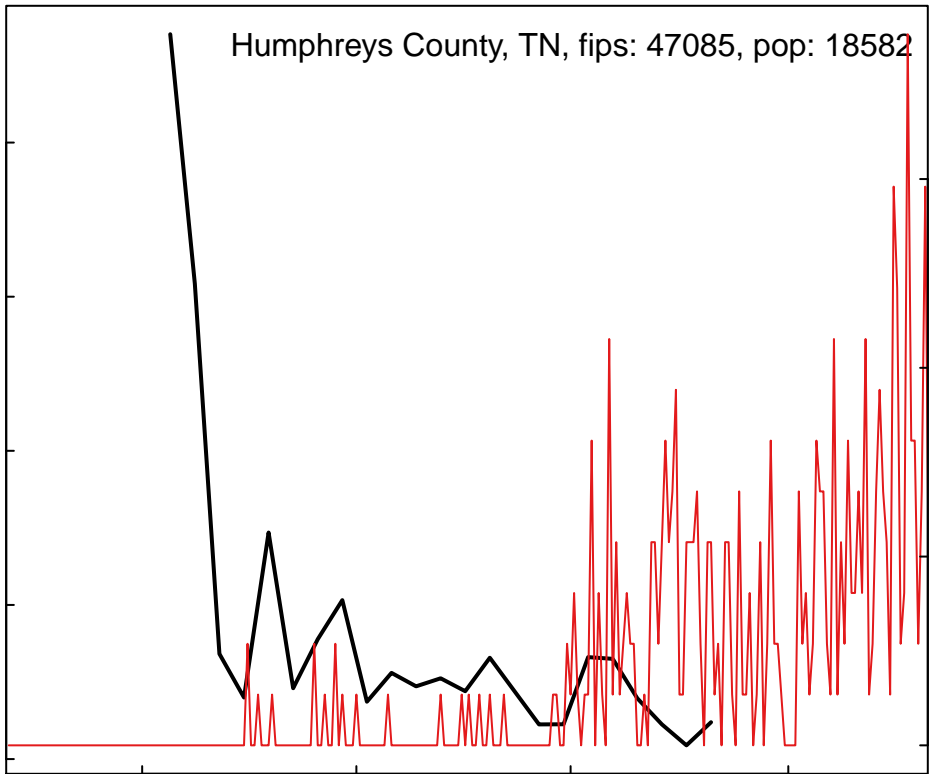

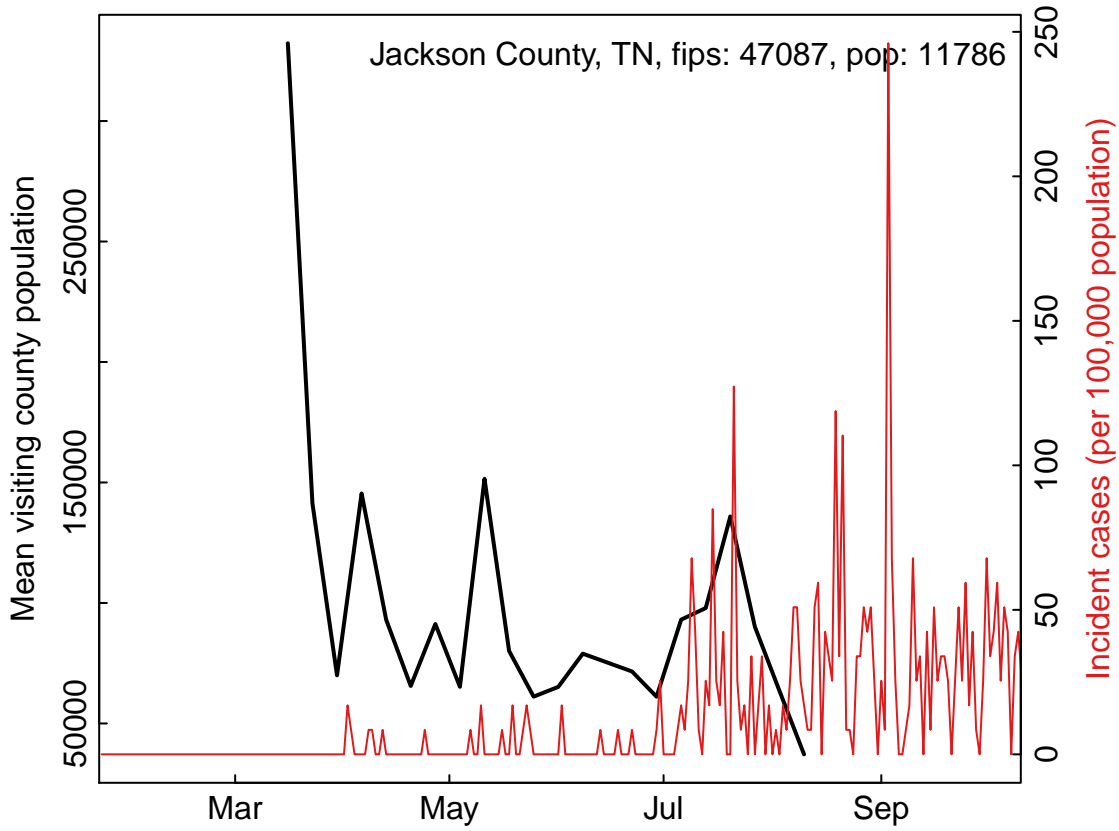

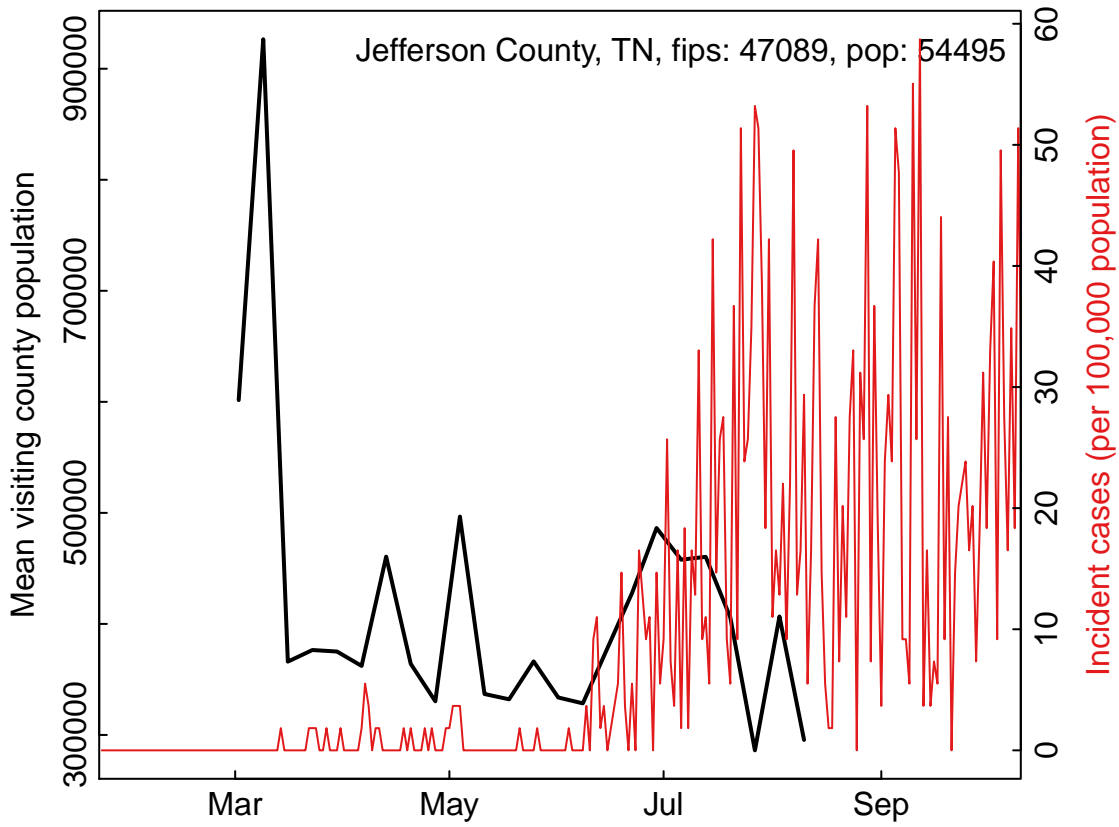

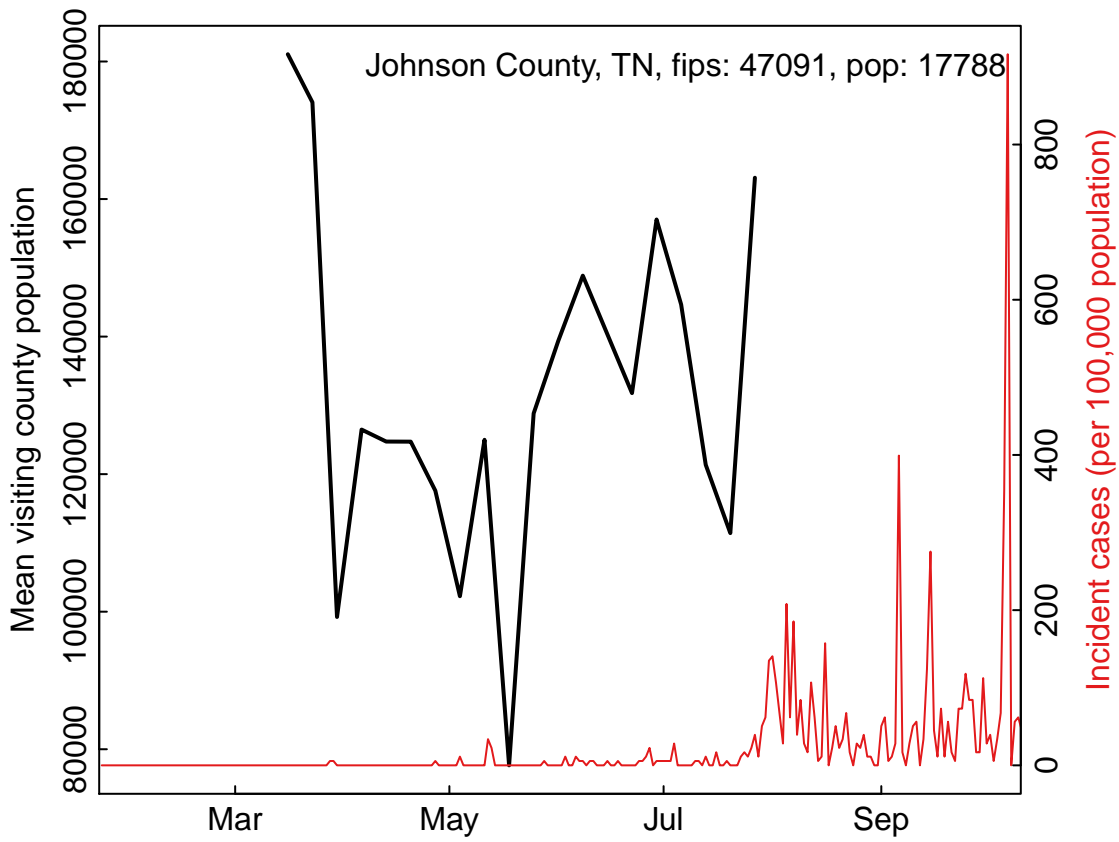

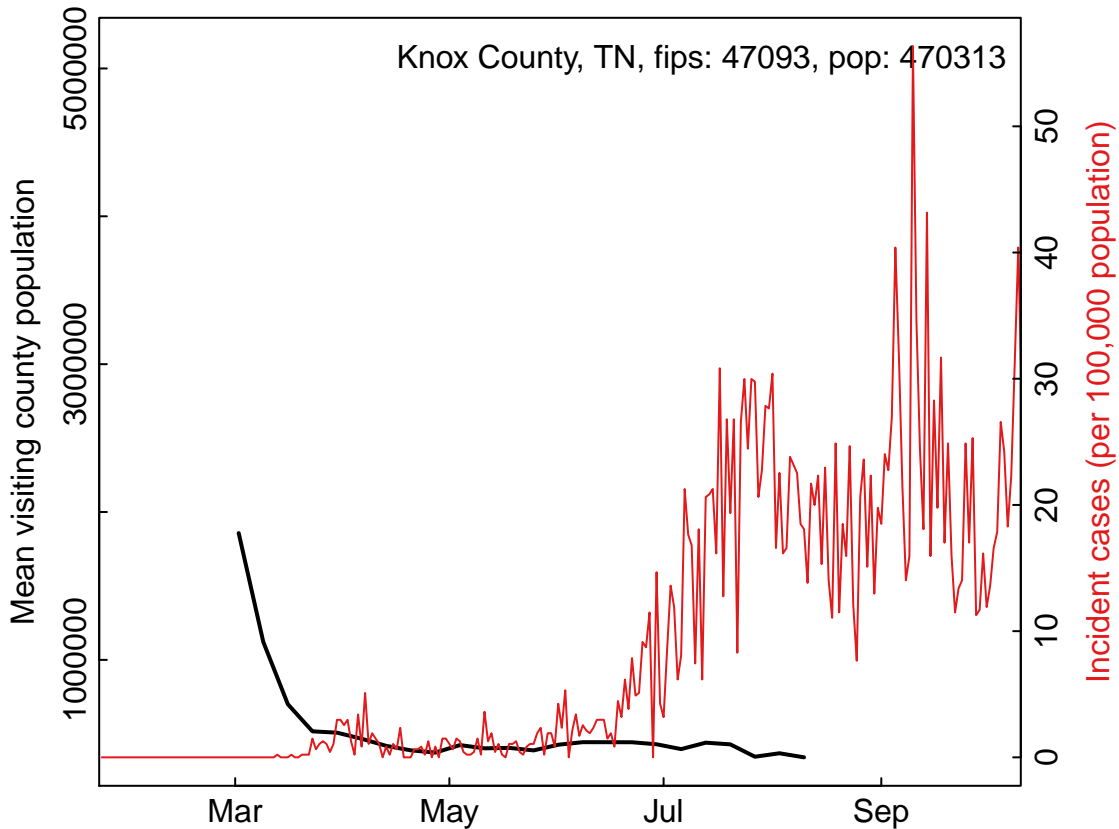

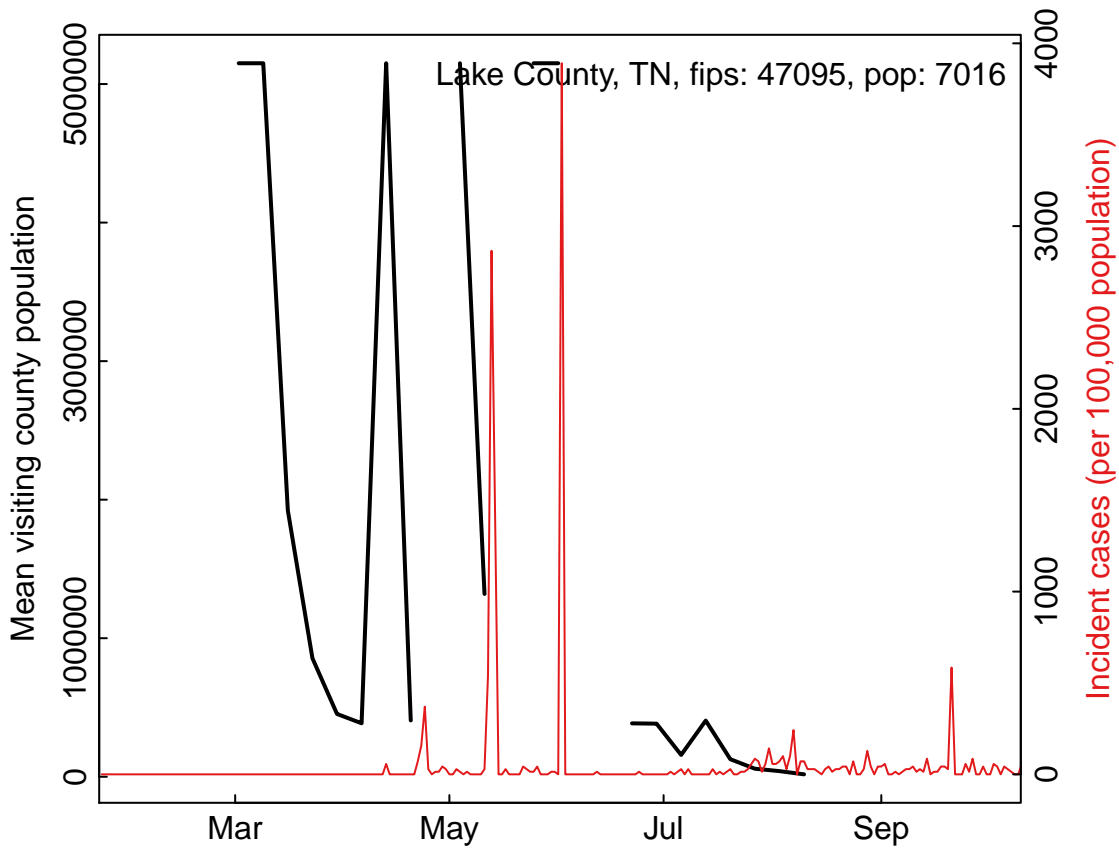

Lauderdale County, TN, fips: 47097, pop: 25633

Mean visiting county population

600000  
400000  
200000  
0

Mar

May

Jul

Sep

300  
250  
200  
150  
100  
50  
0

Incident cases (per 100,000 population)

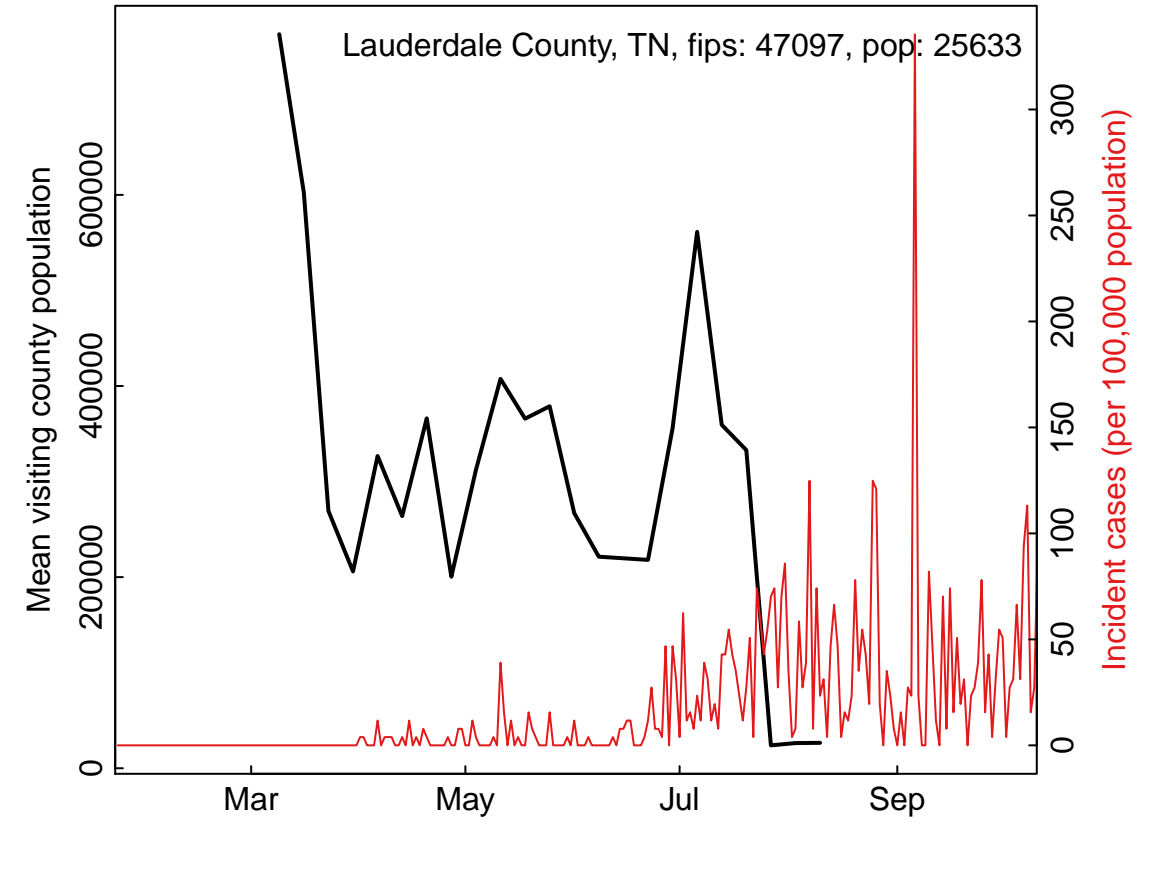

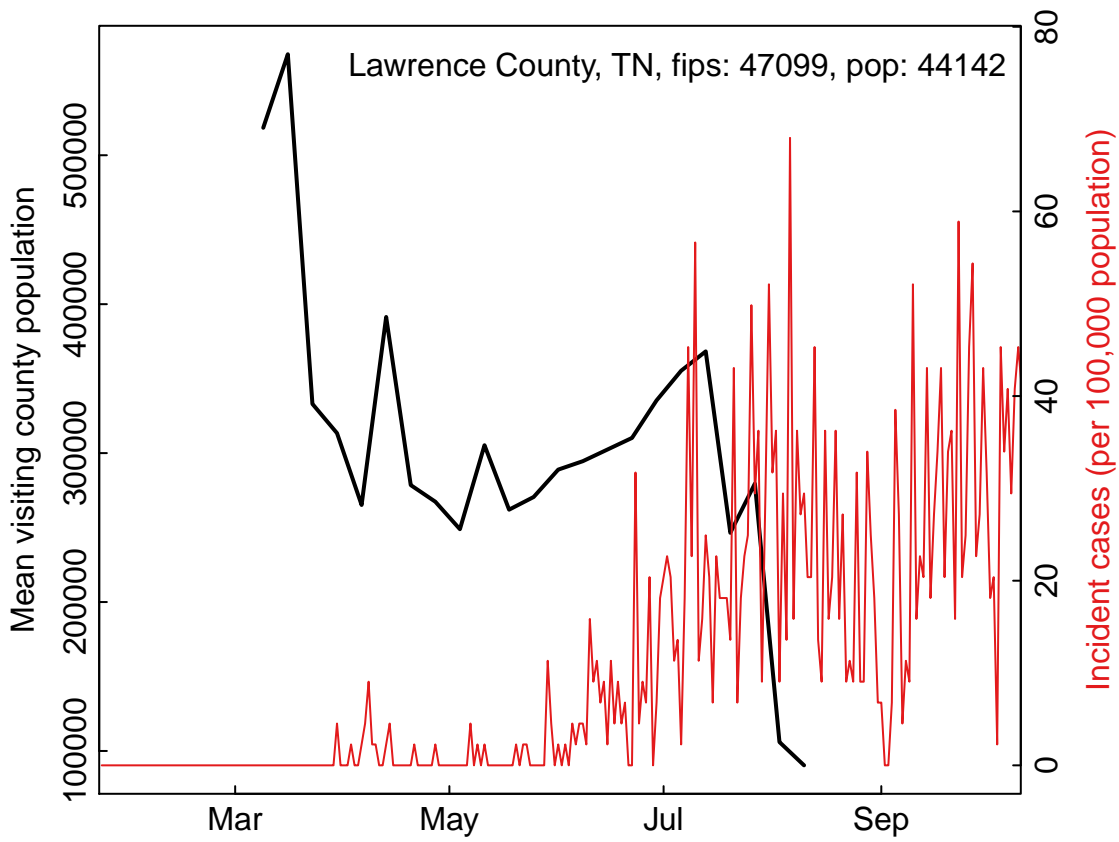



Lewis County, TN, fips: 47101, pop: 12268

Mean visiting county population

Incident cases (per 100,000 population)

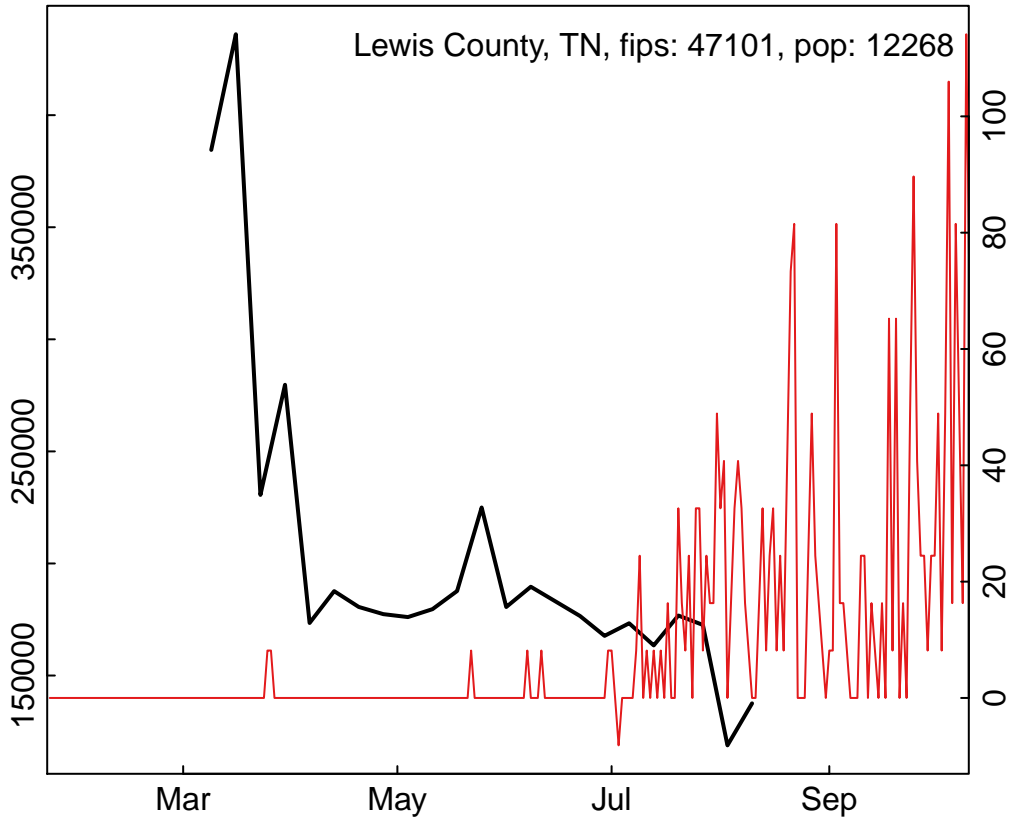

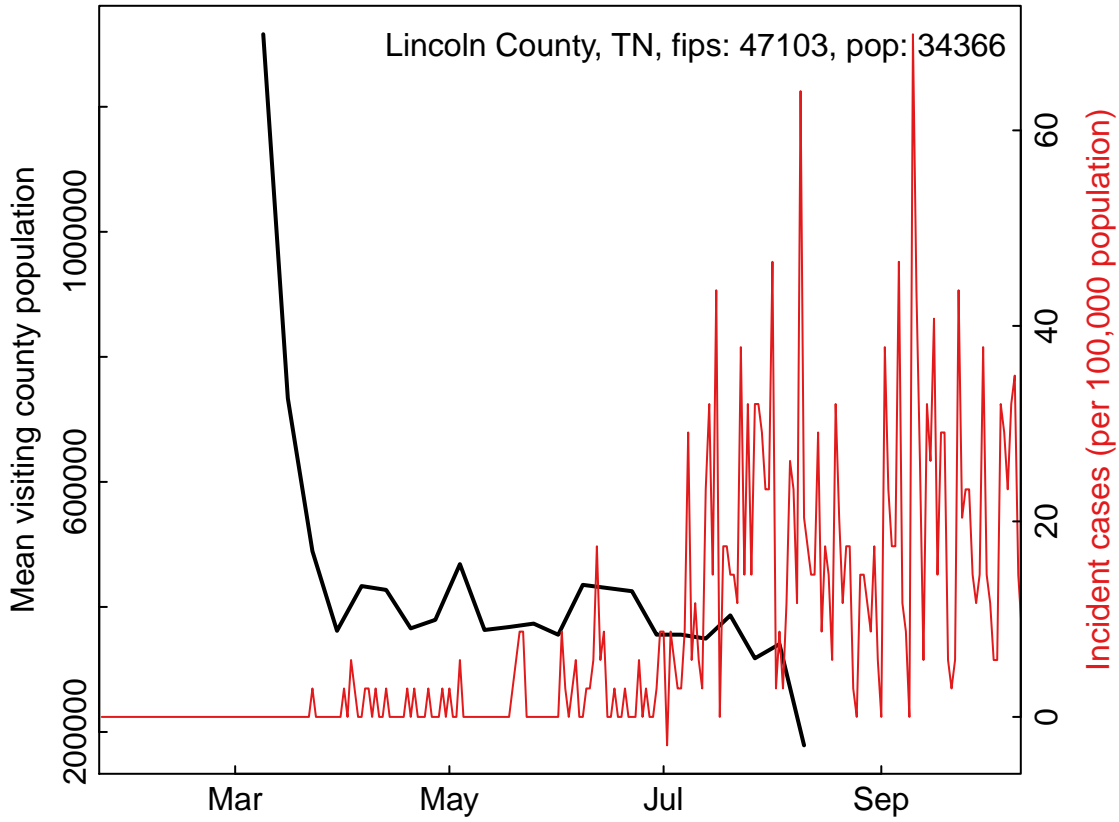

Loudon County, TN, fips: 47105, pop: 54068

Mean visiting county population

2500000  
1500000  
500000

Mar

May

Jul

Sep

80  
60  
40  
20  
0

Incident cases (per 100,000 population)

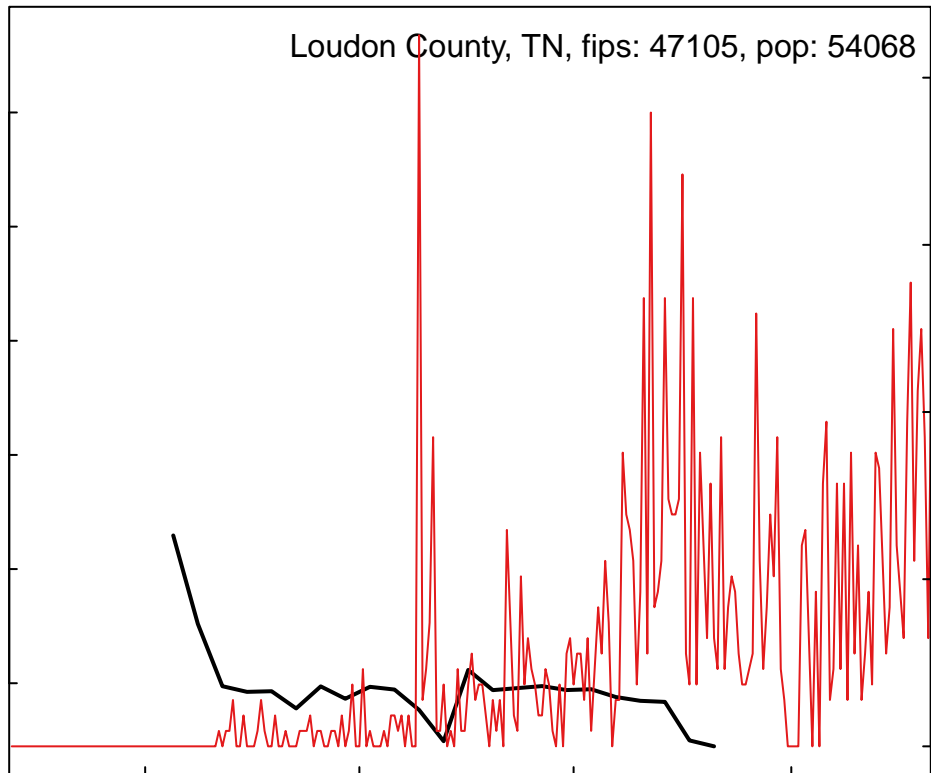

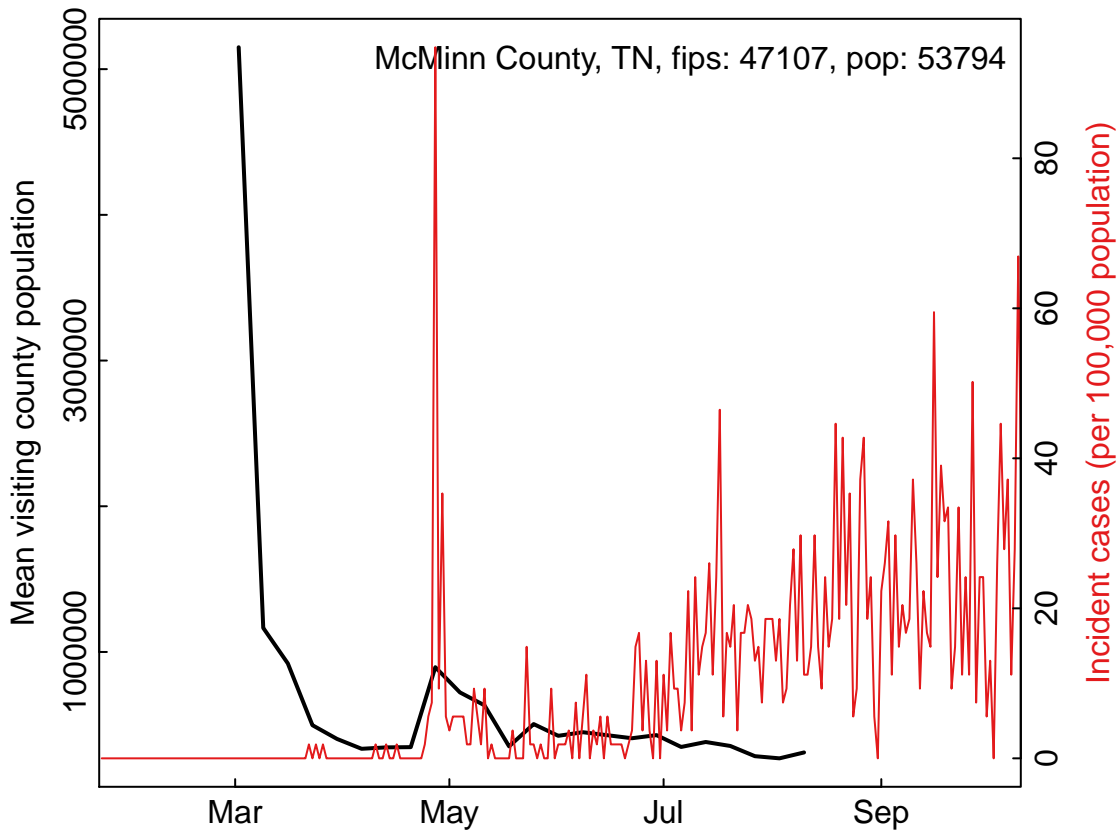

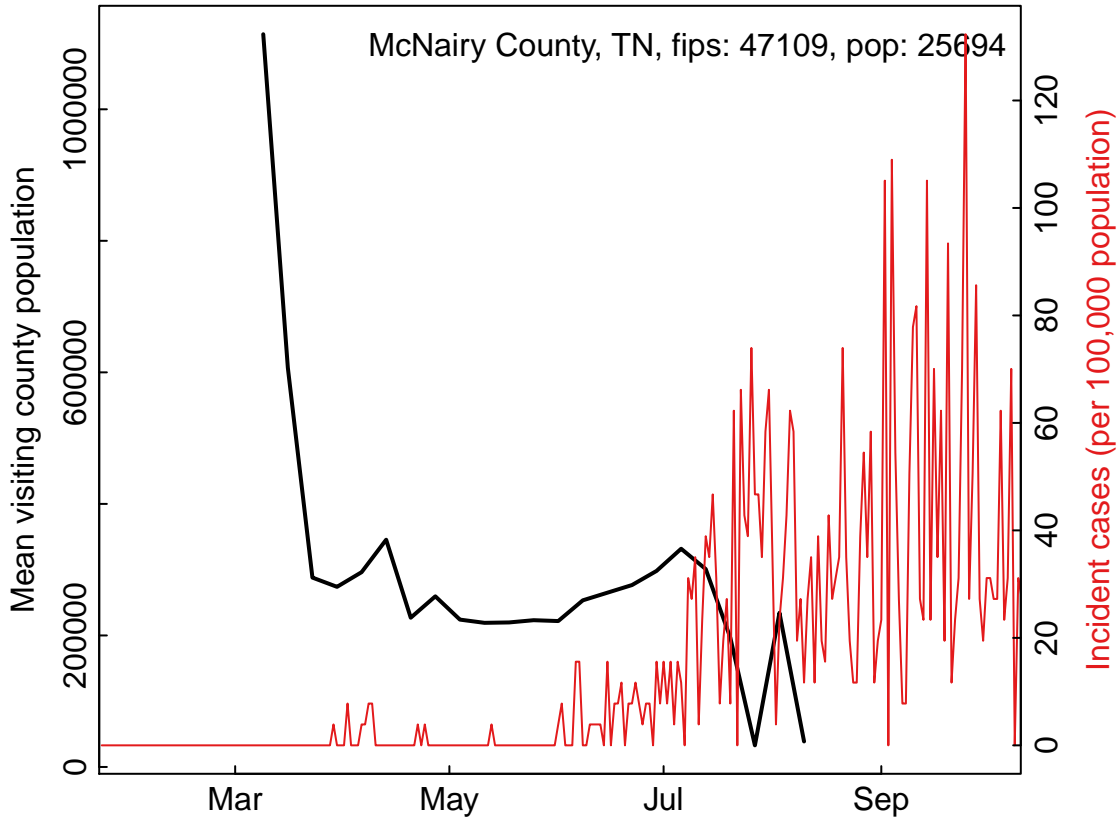

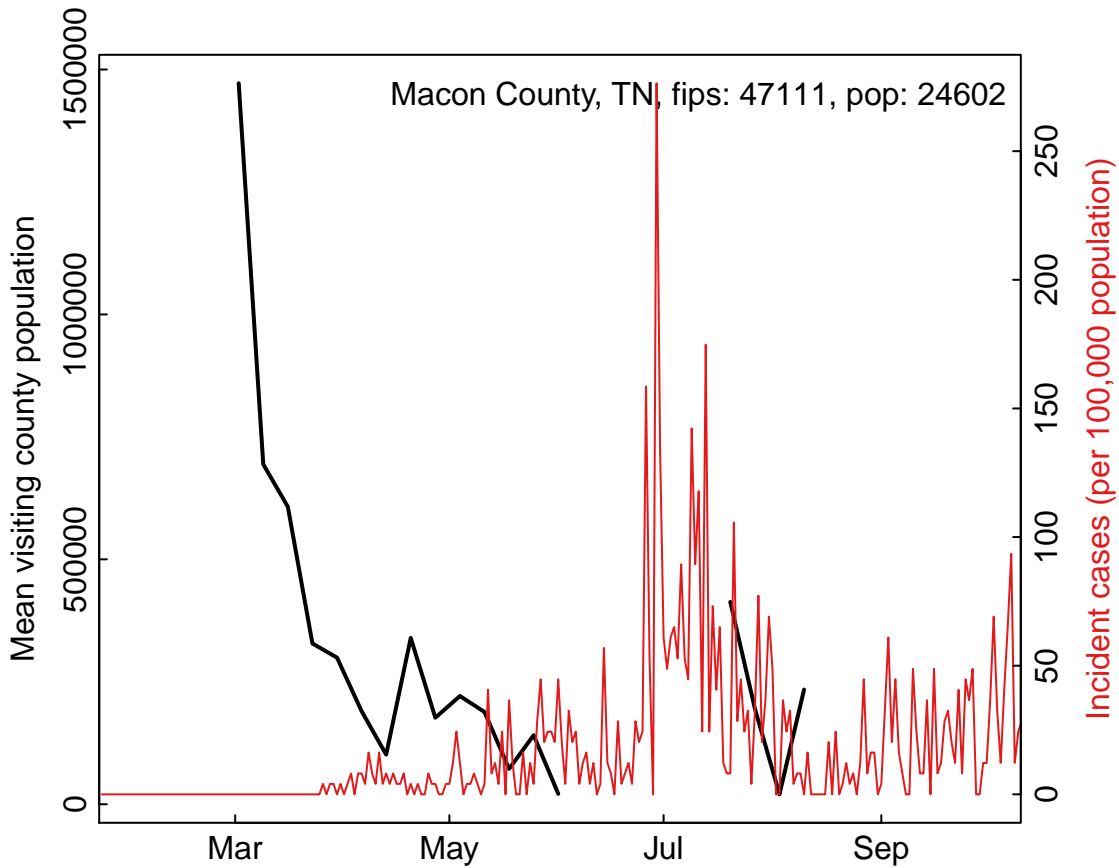

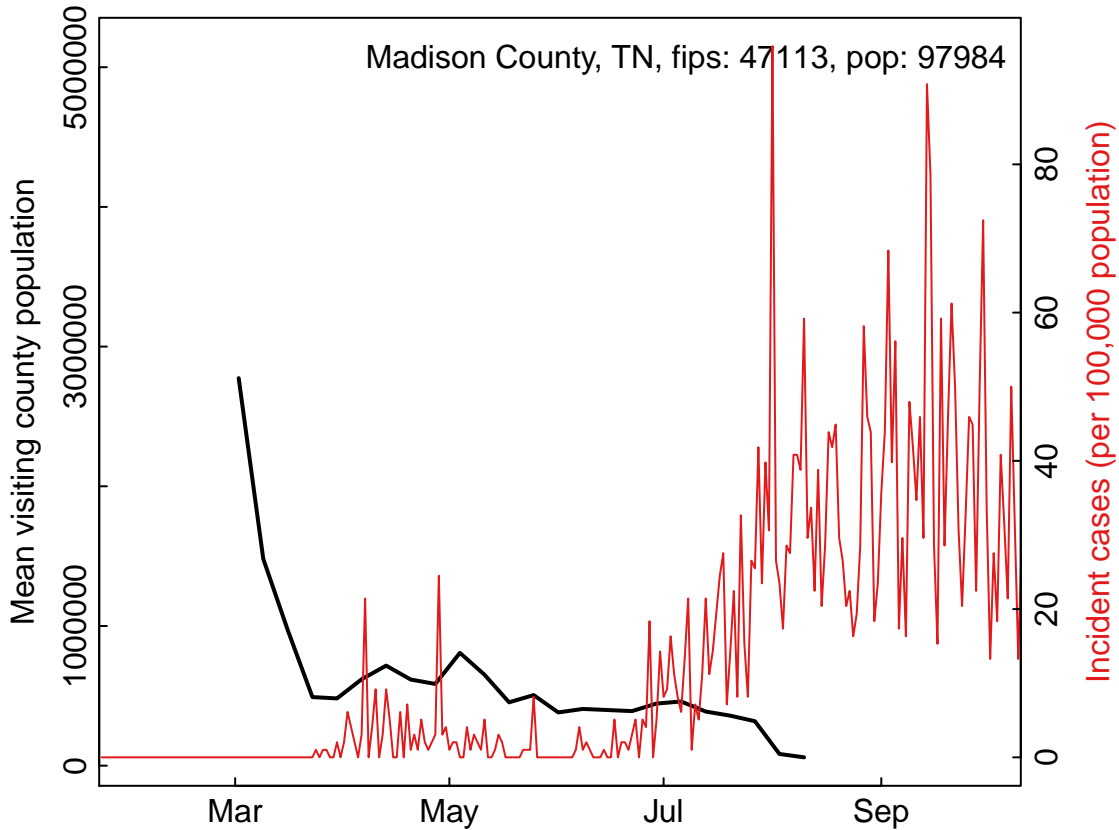

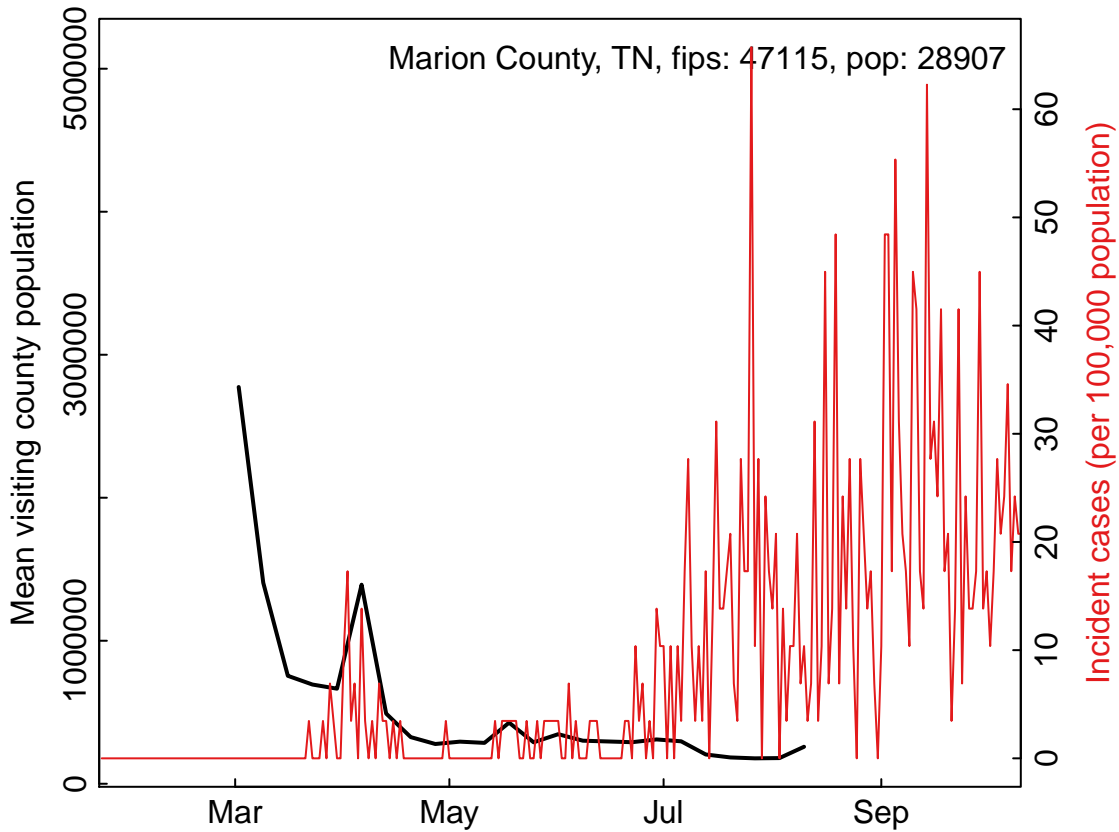



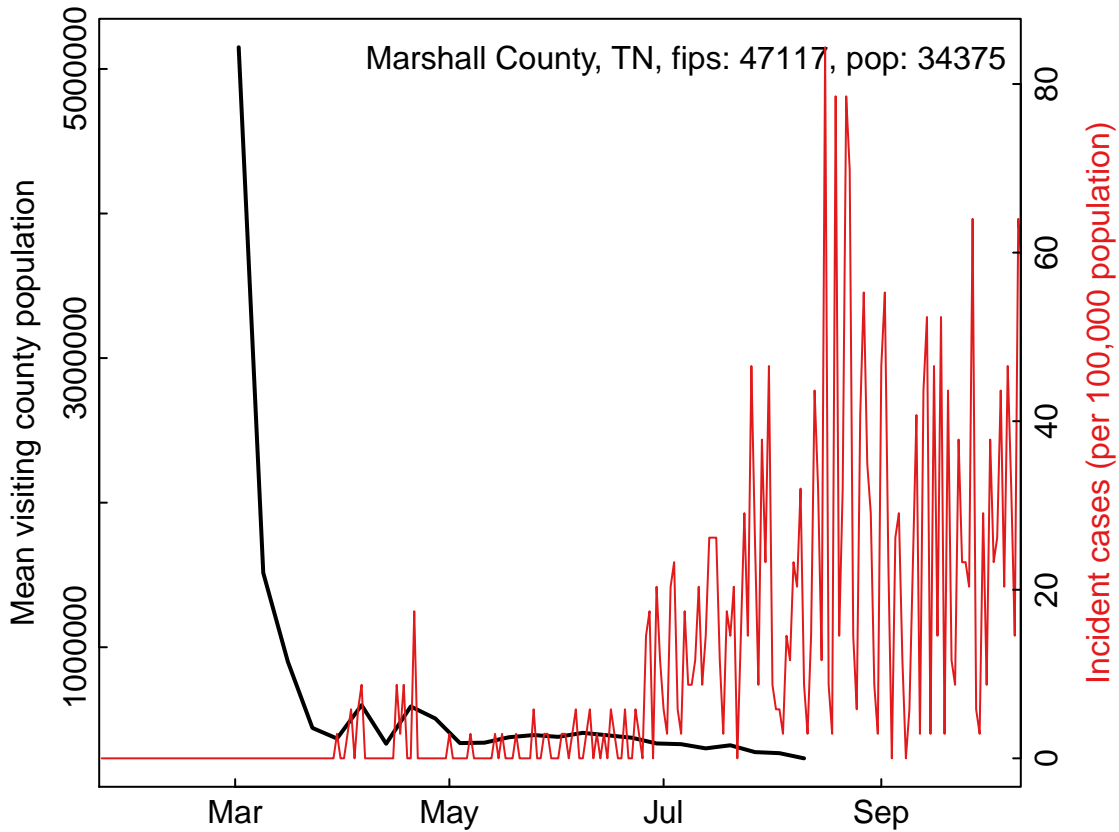

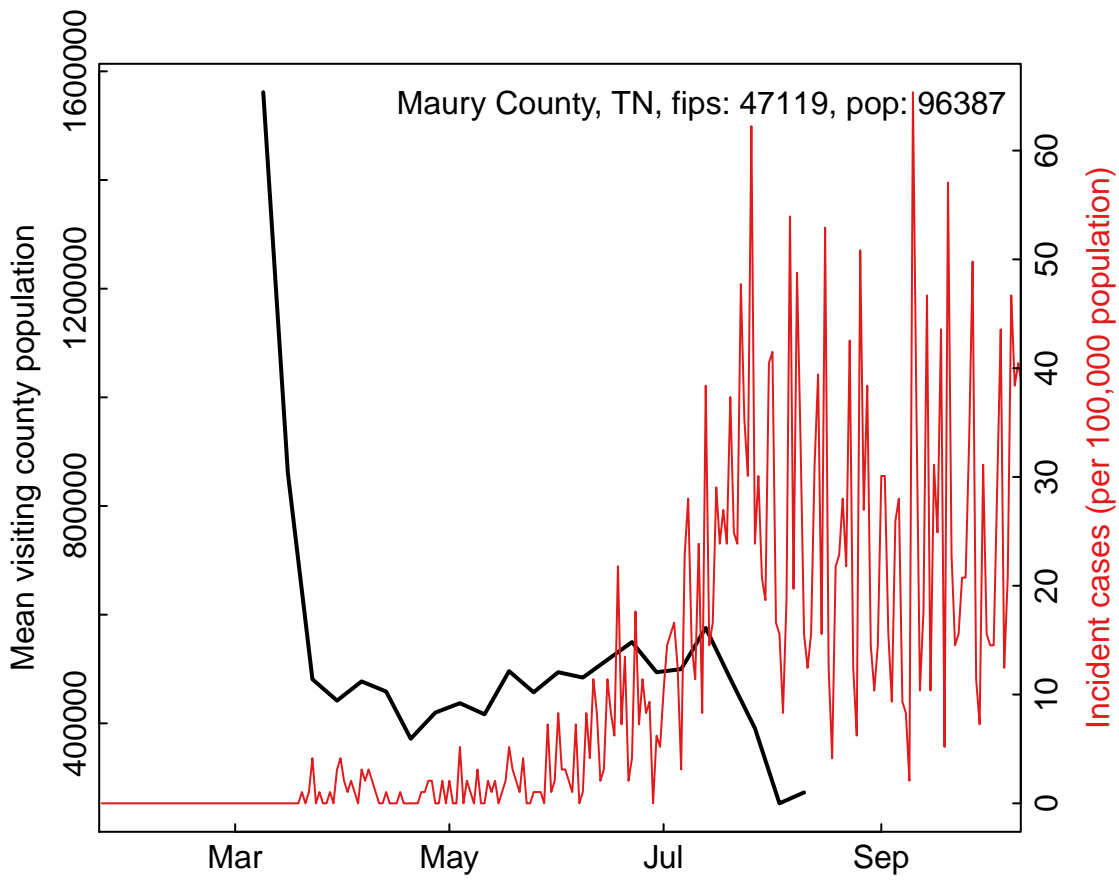

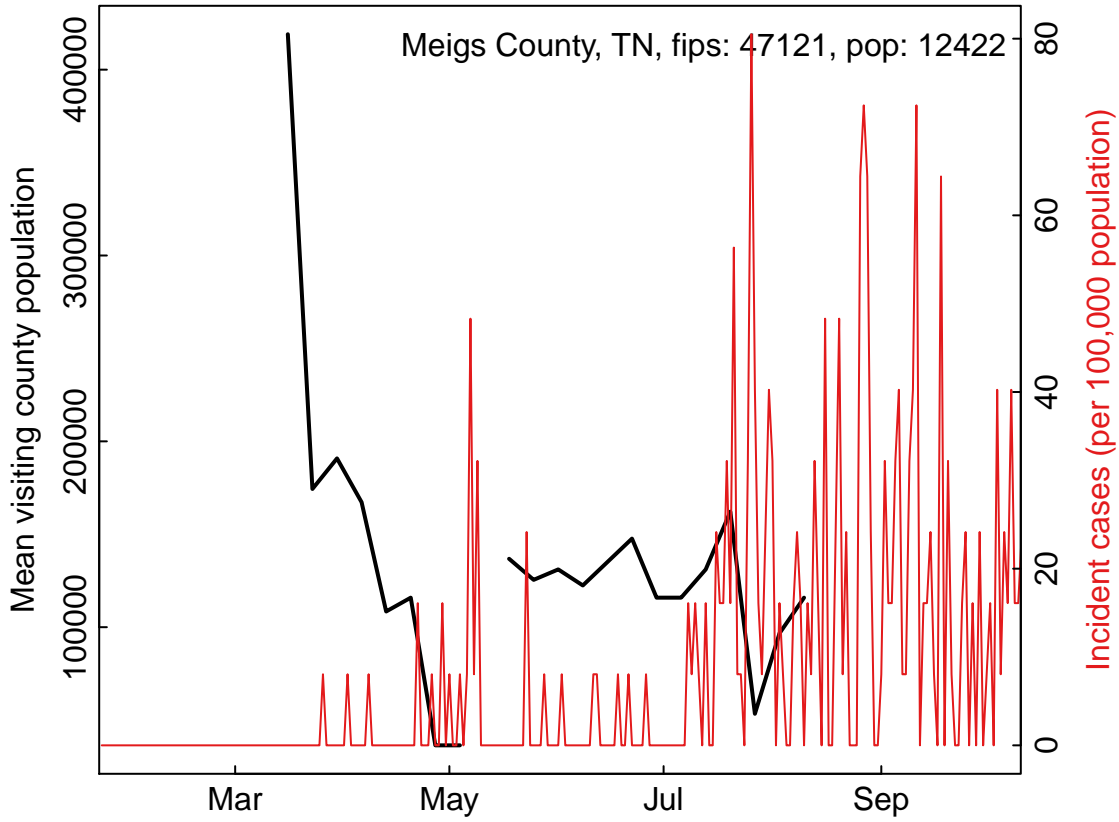

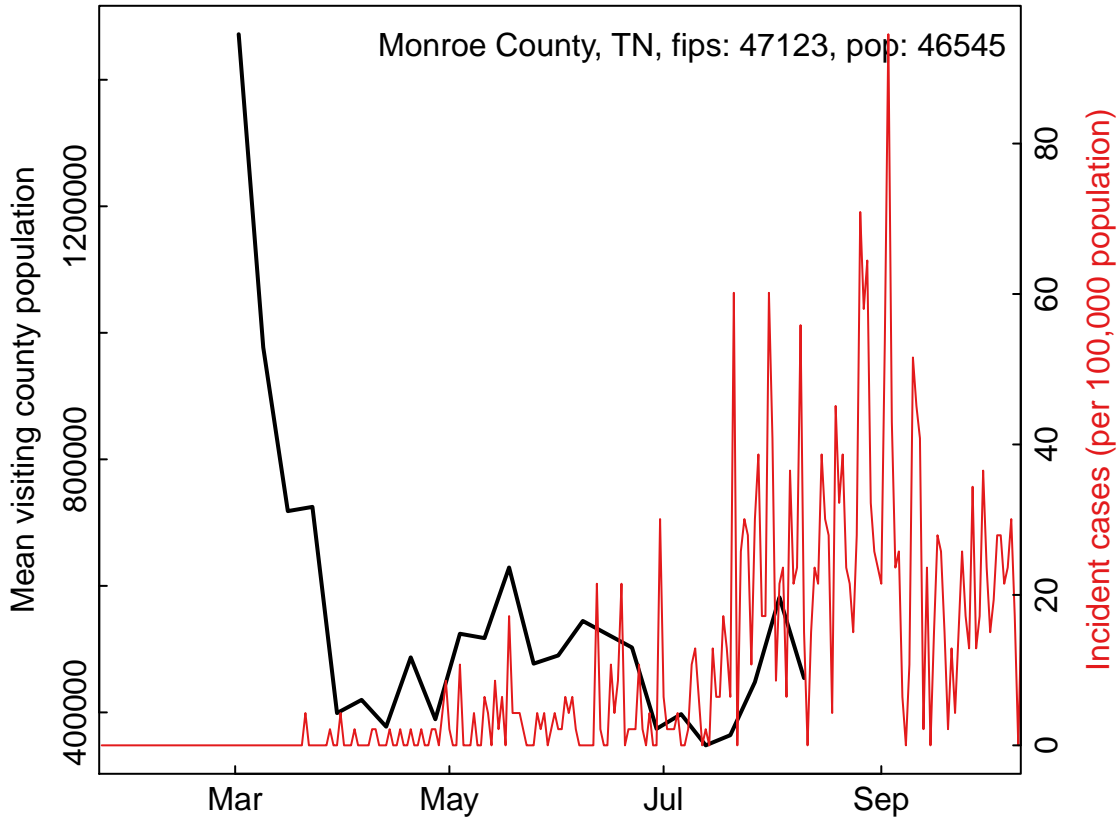

Montgomery County, TN, fips: 47125, pop: 208993

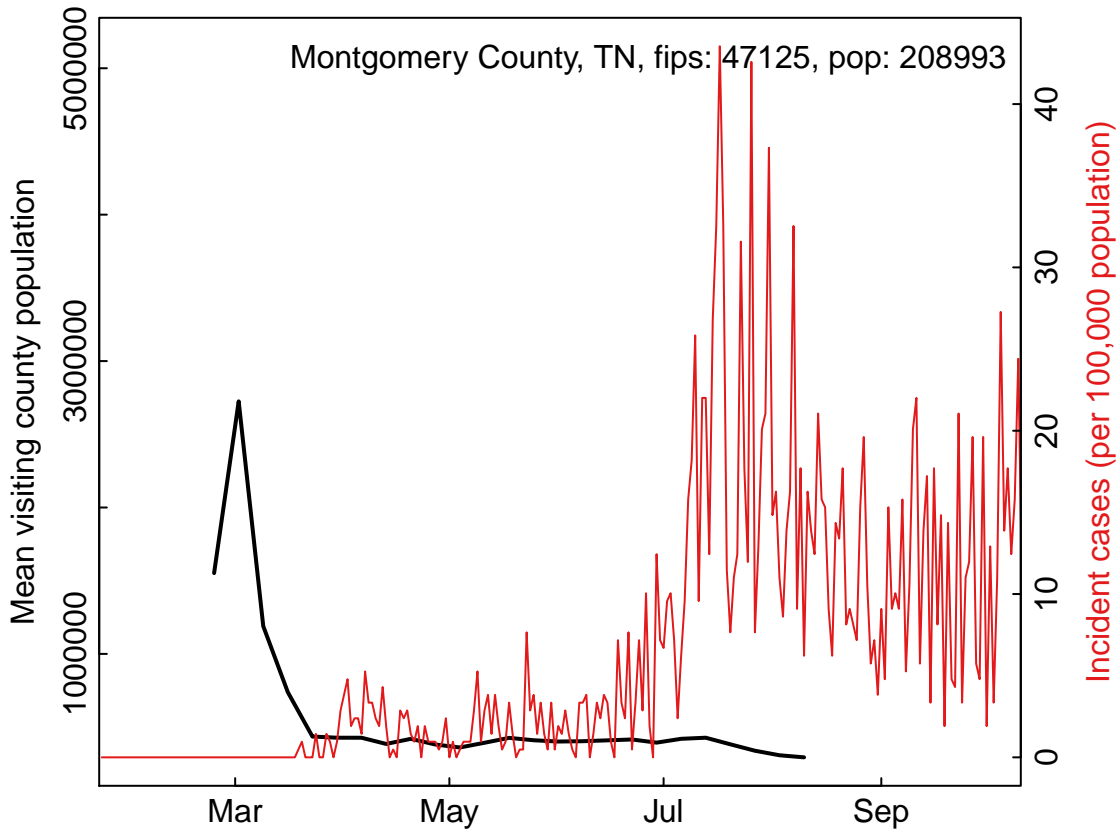

Moore County, TN, fips: 47127, pop: 6488

Mean visiting county population

600000  
400000  
200000

Mar May Jul Sep

Incident cases (per 100,000 population)

250  
200  
150  
100  
50  
0

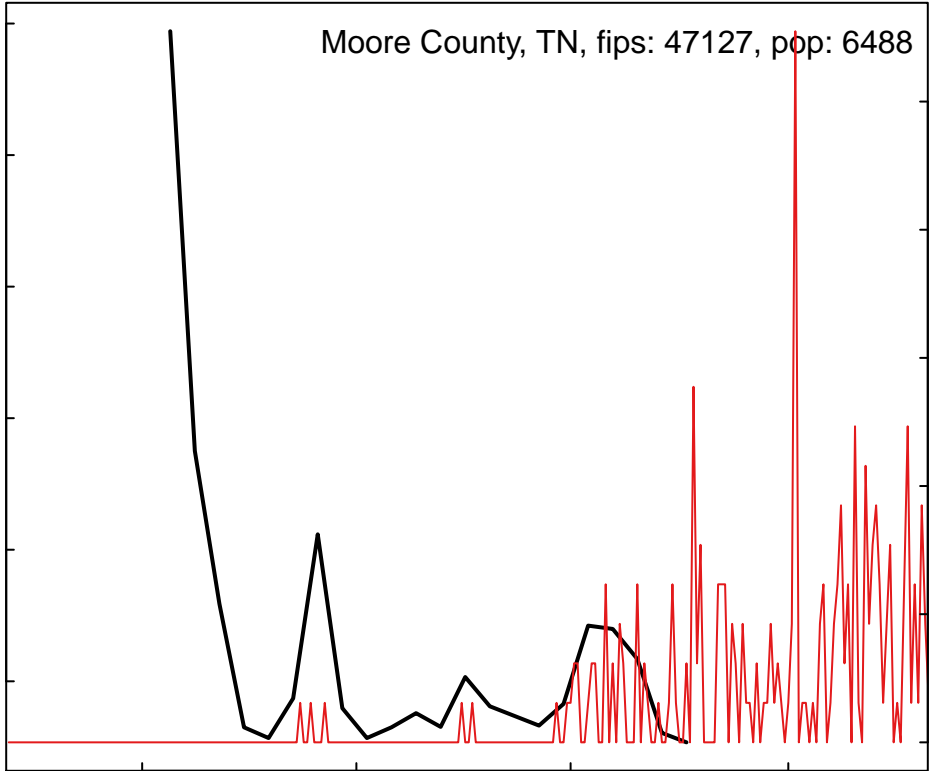

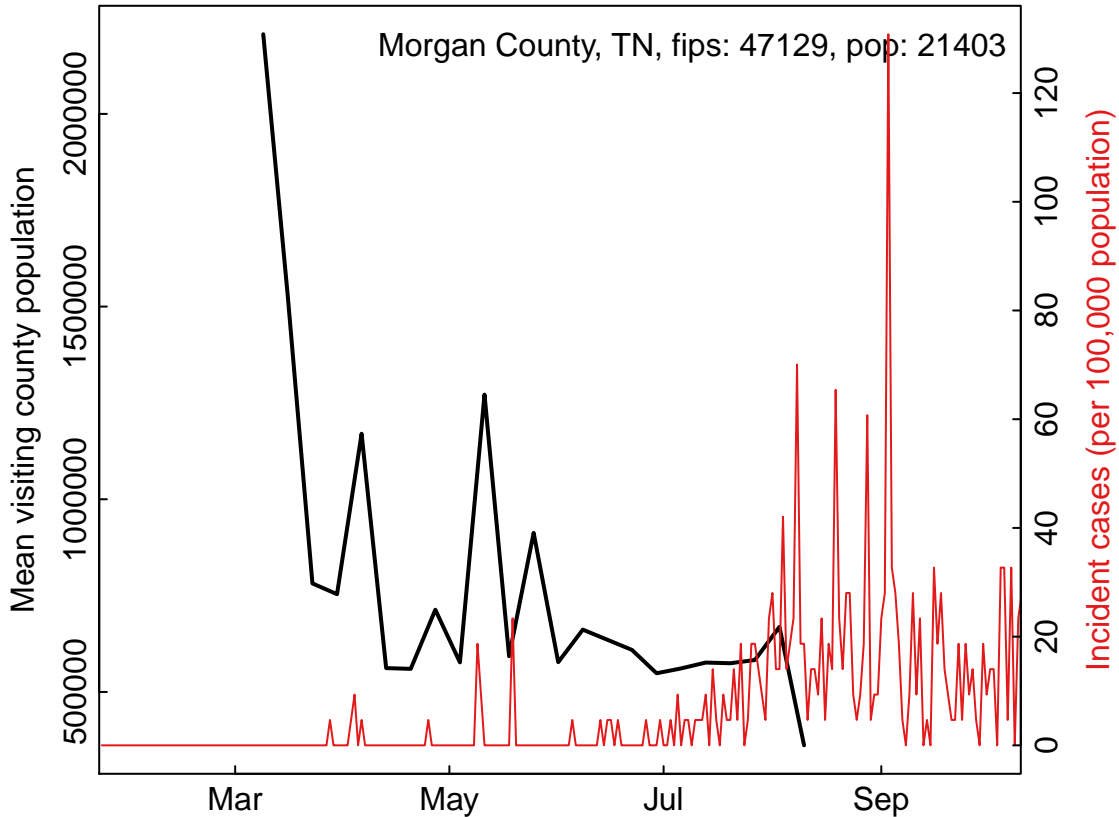

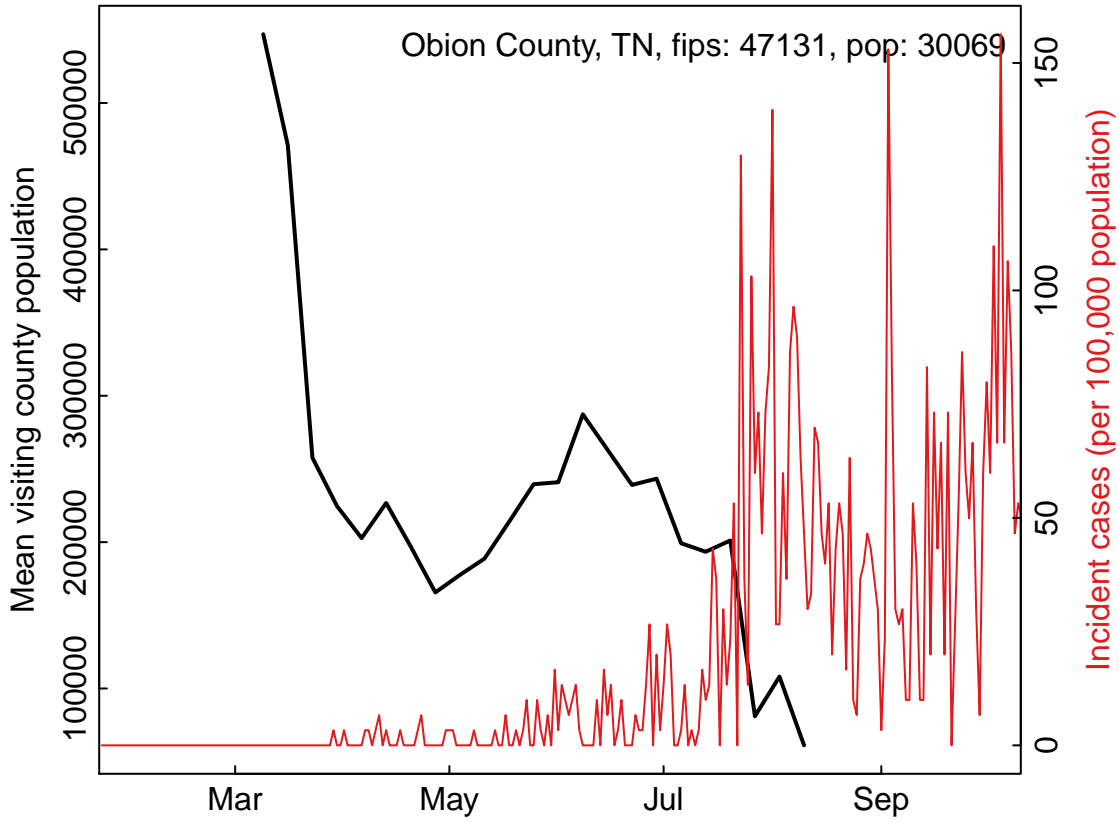



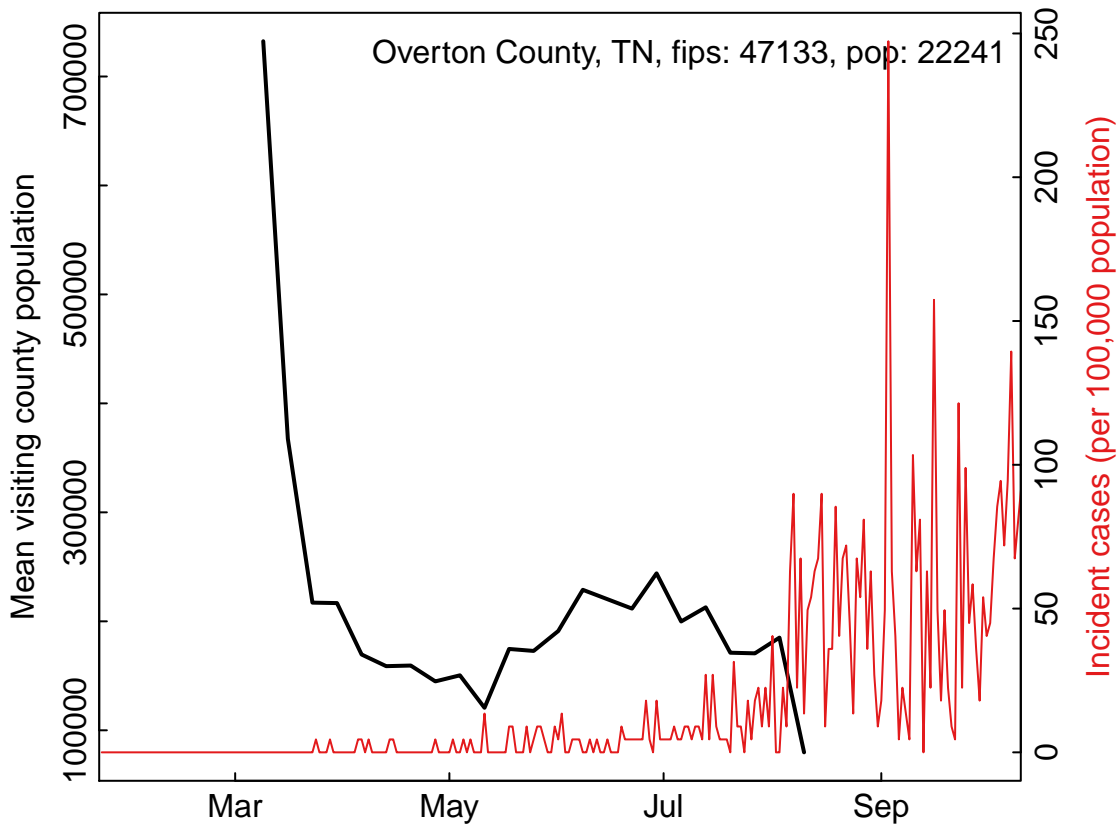

Perry County, TN, fips: 47135, pop: 8076

Mean visiting county population

100000  
200000  
300000  
400000  
500000

Mar

May

Jul

Sep

0  
20  
40  
60  
80

Incident cases (per 100,000 population)

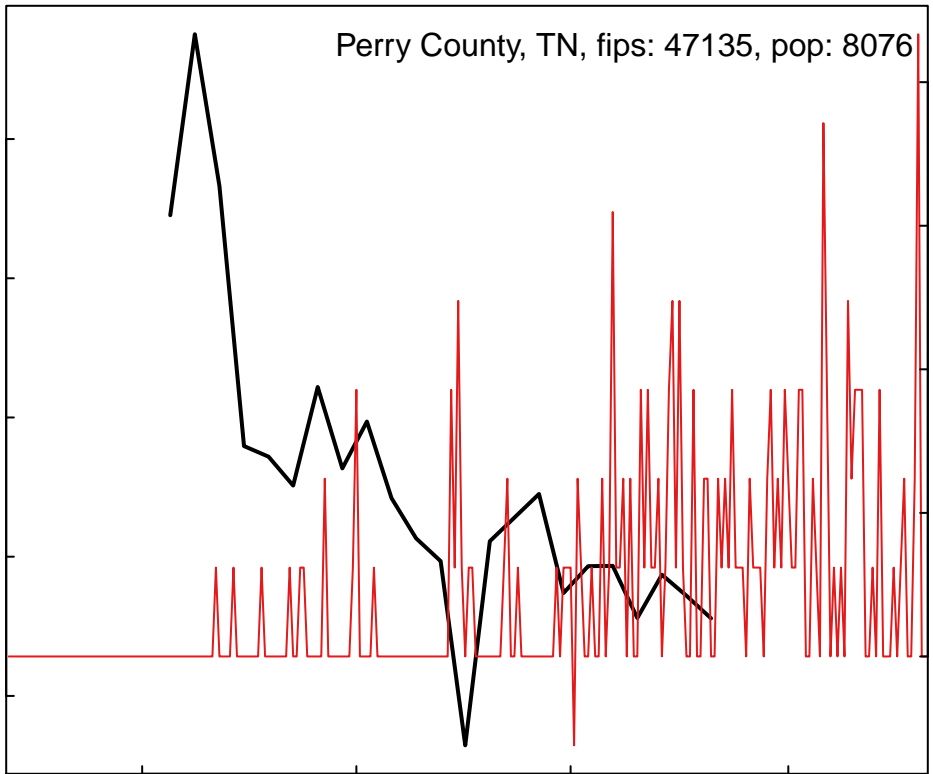

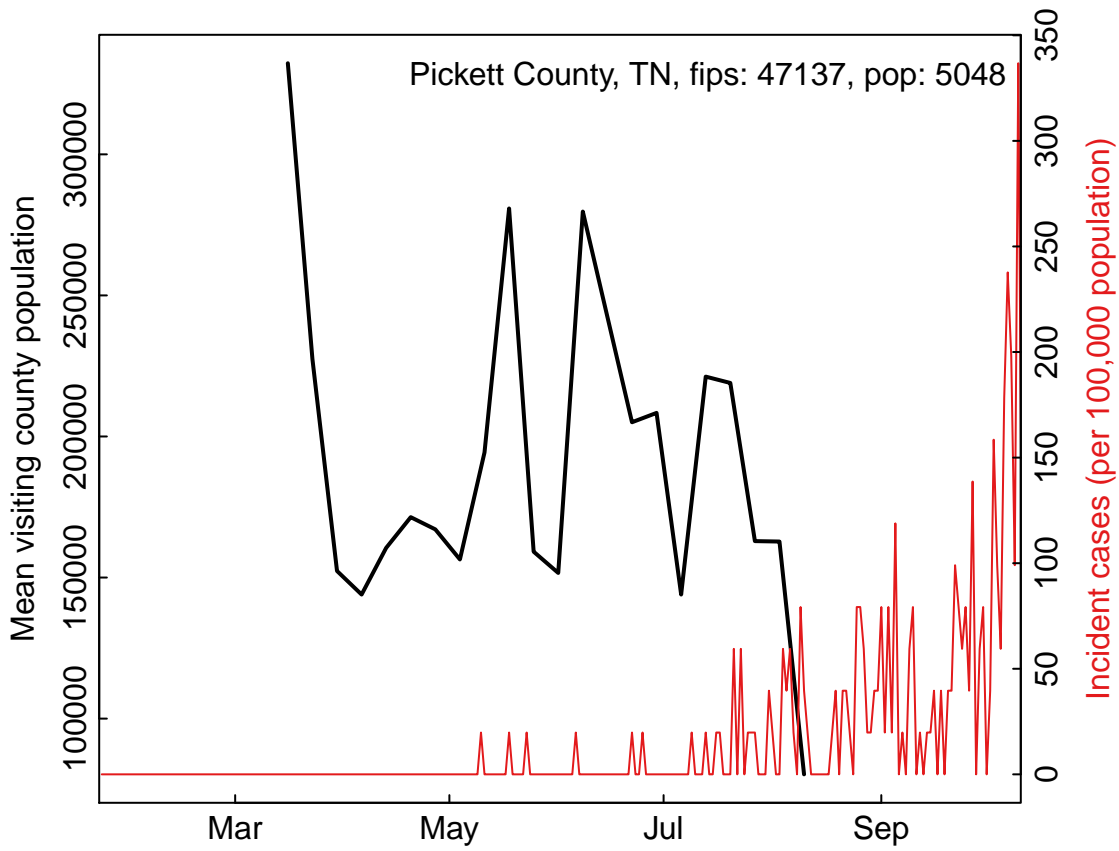

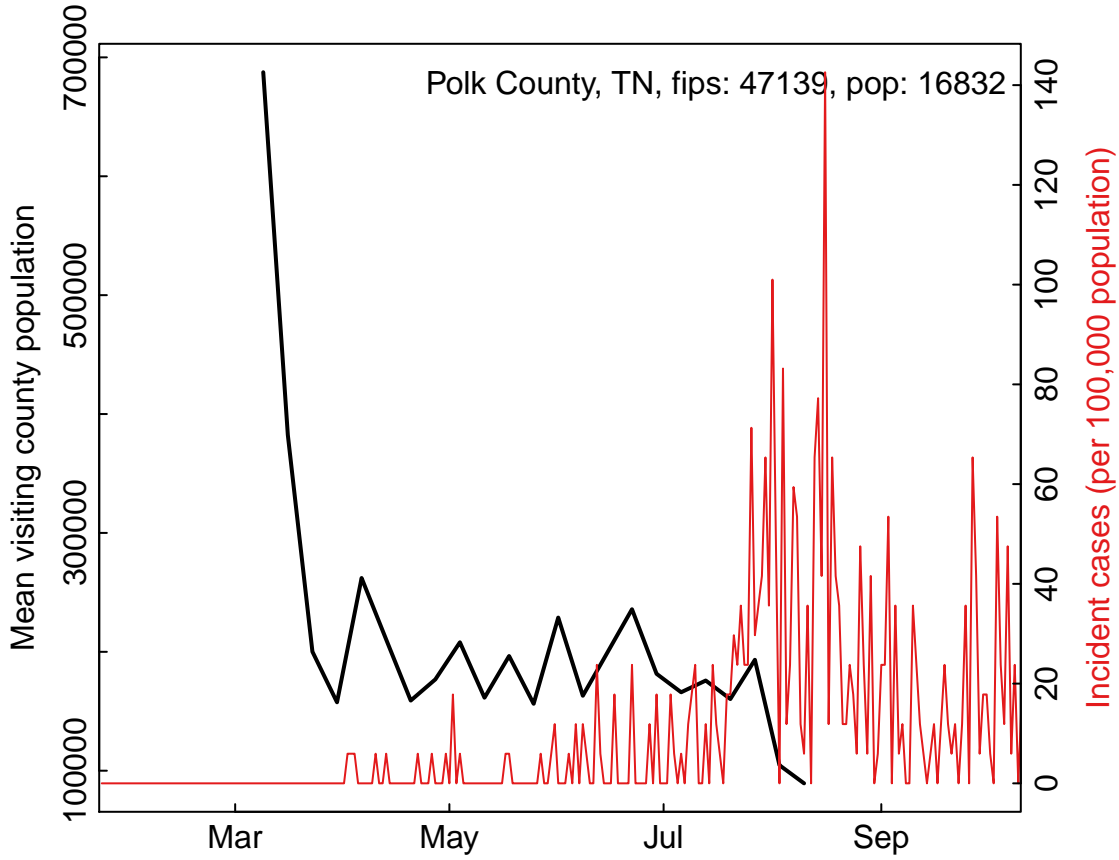

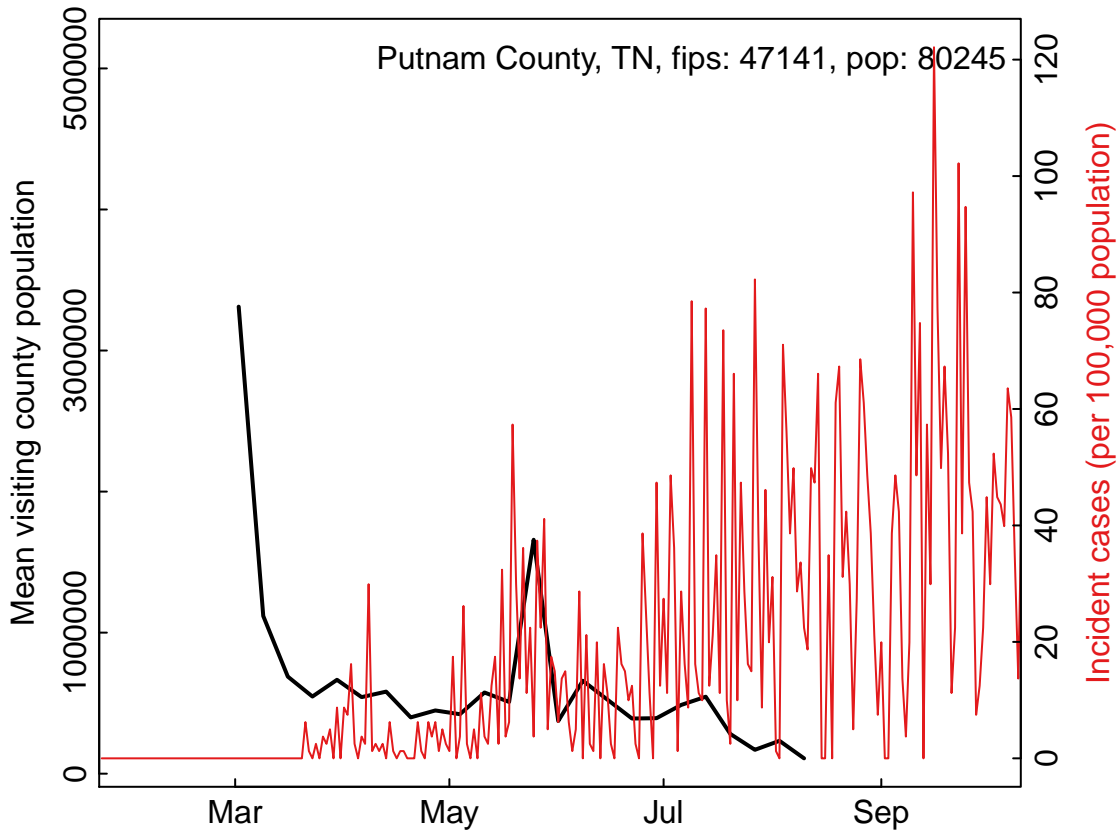

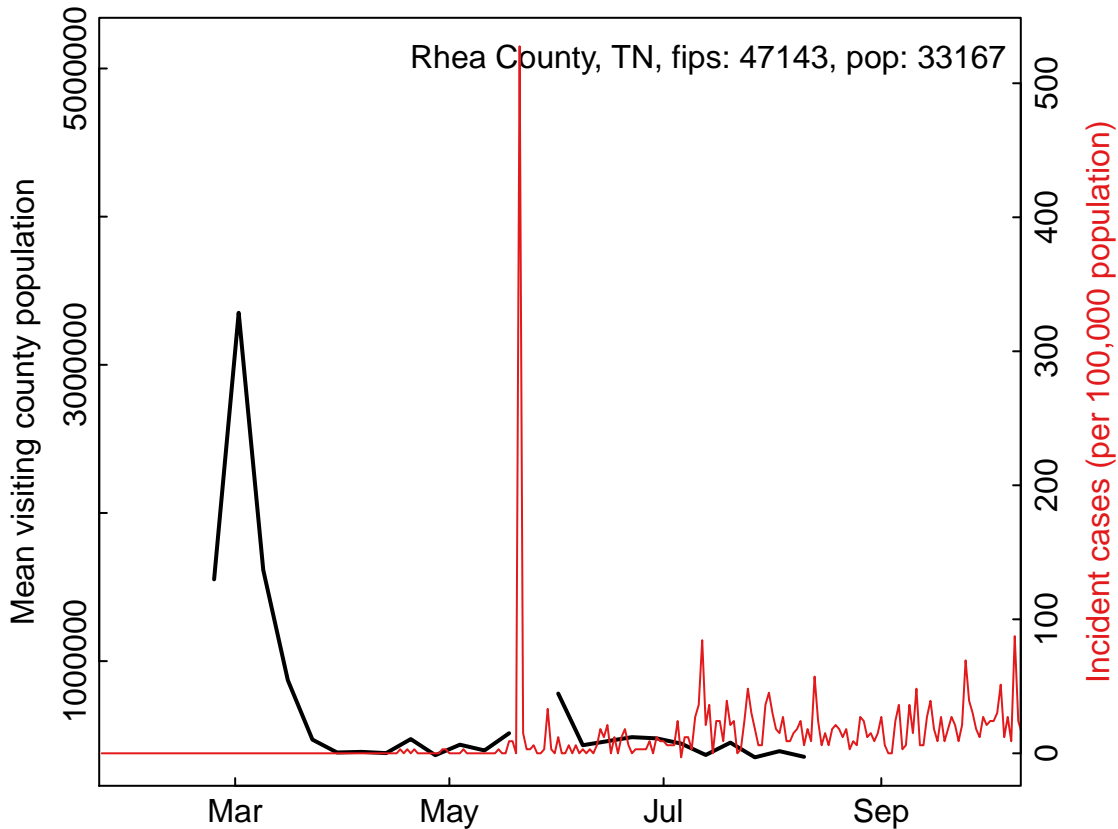

Roane County, TN, fips: 47145, pop: 53382

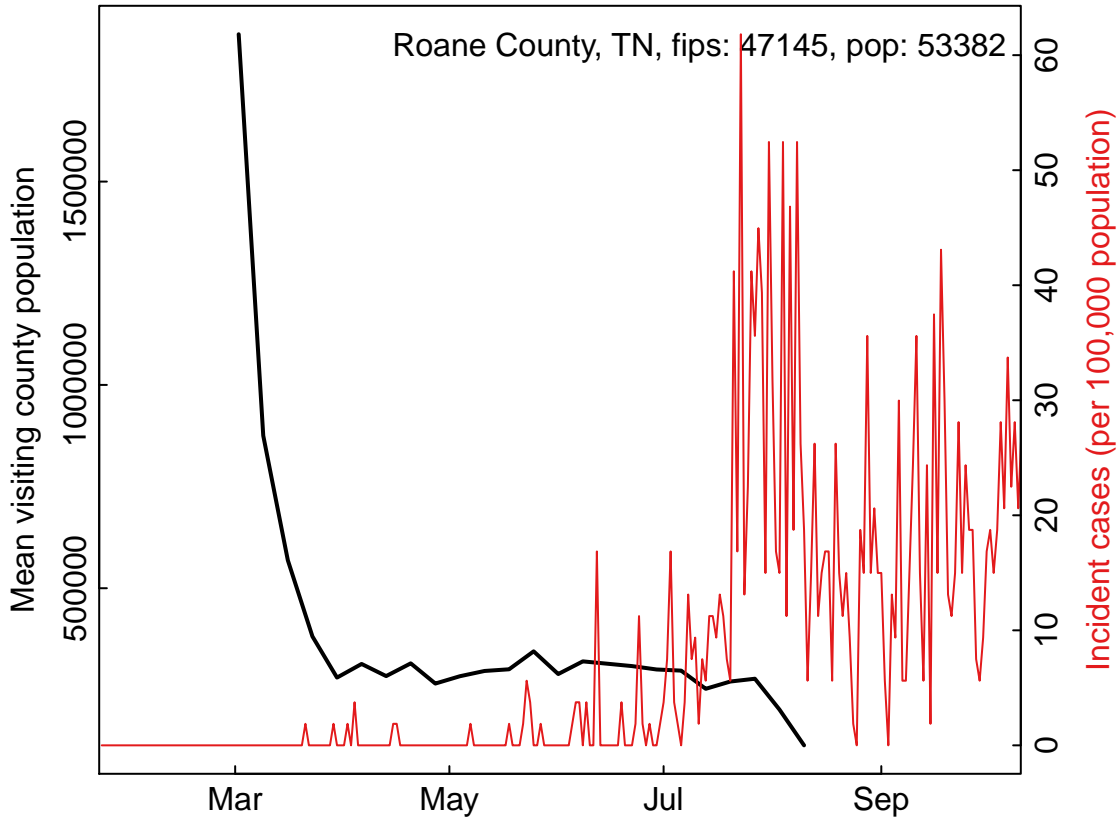

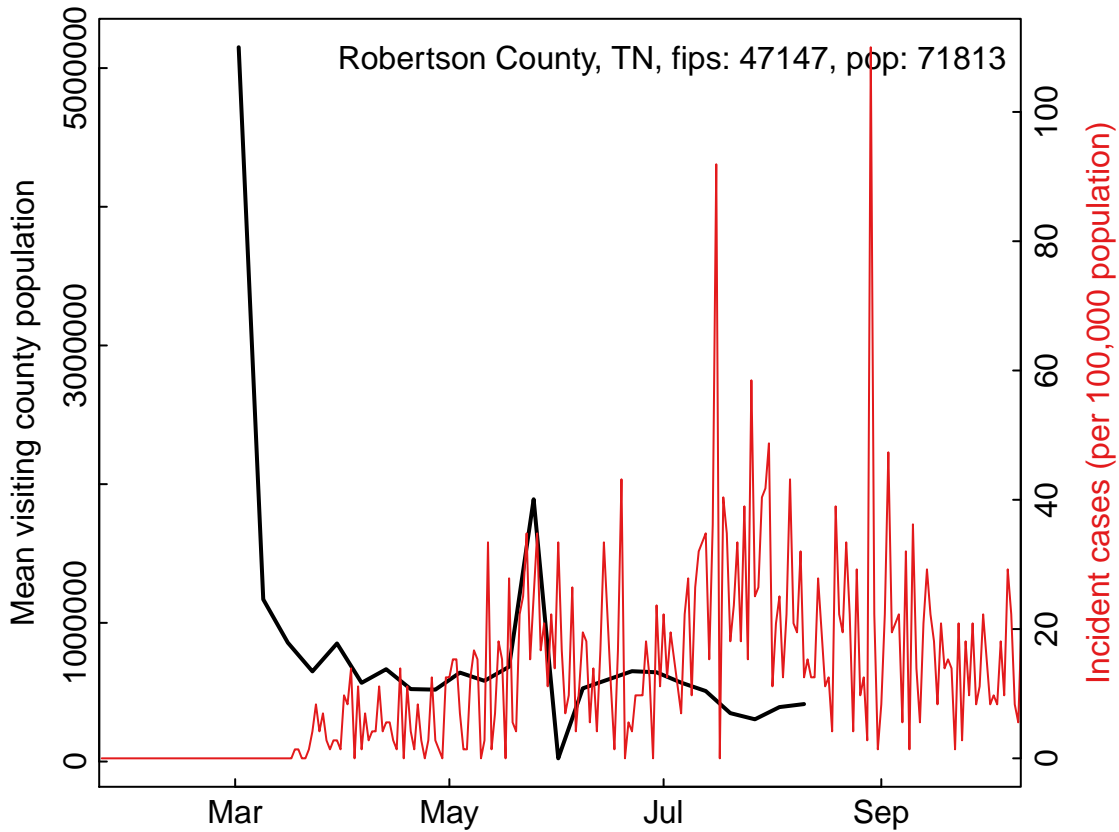



Rutherford County, TN, fips: 47149, pop: 332285

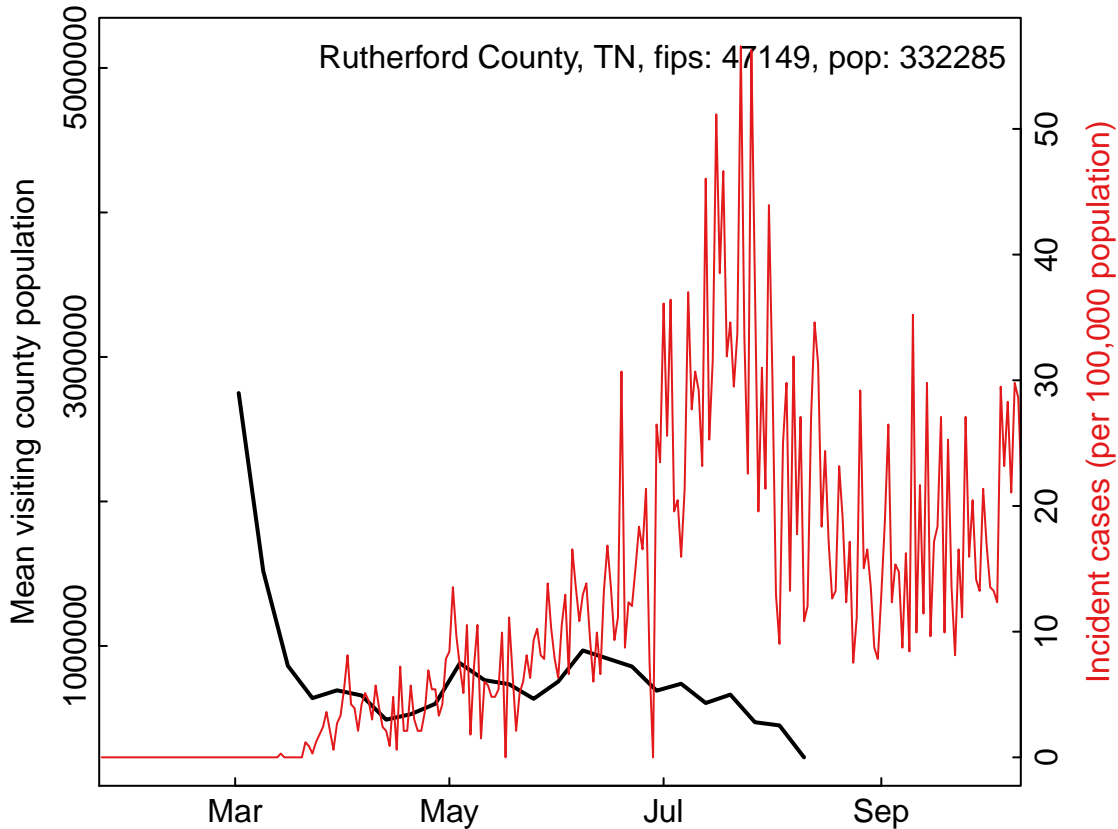

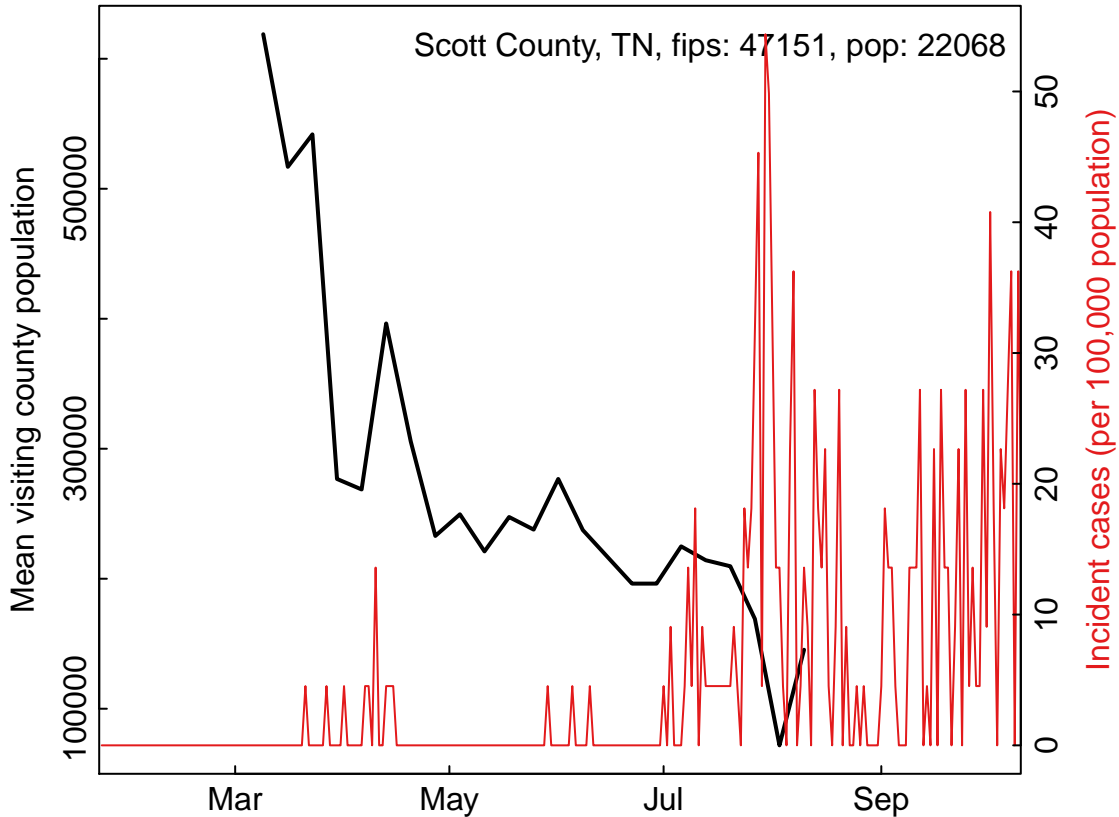

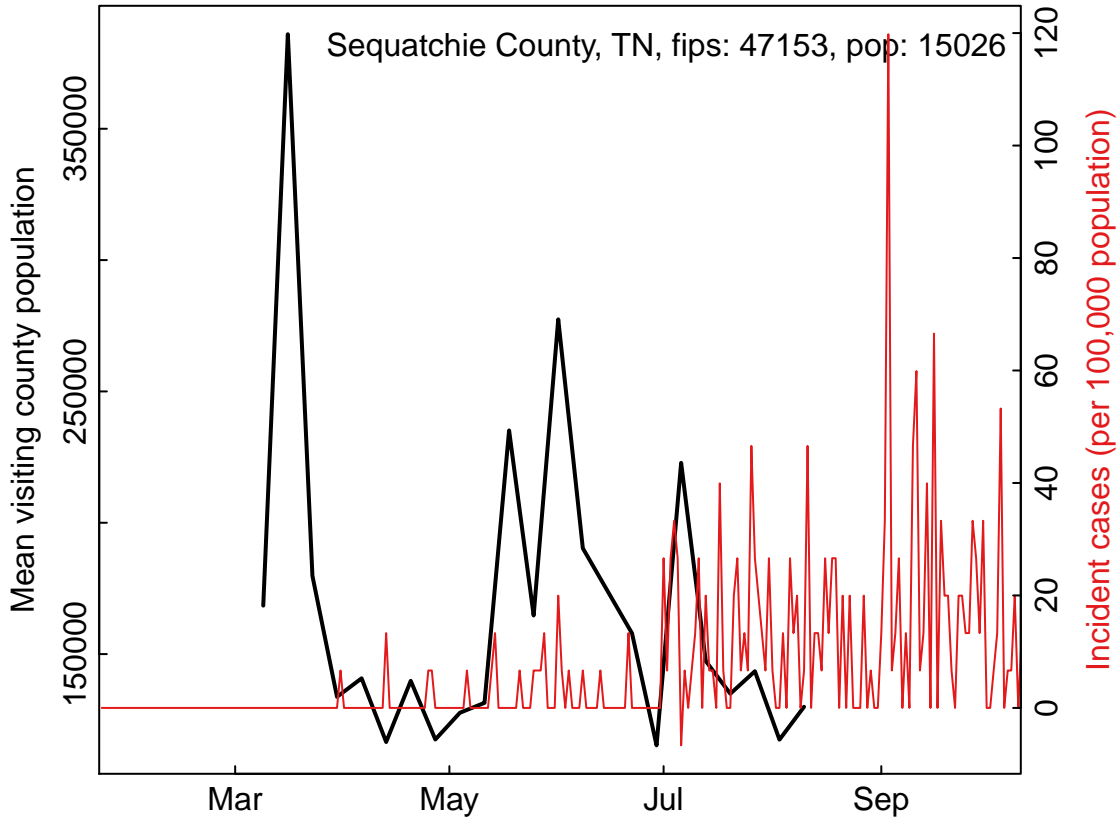

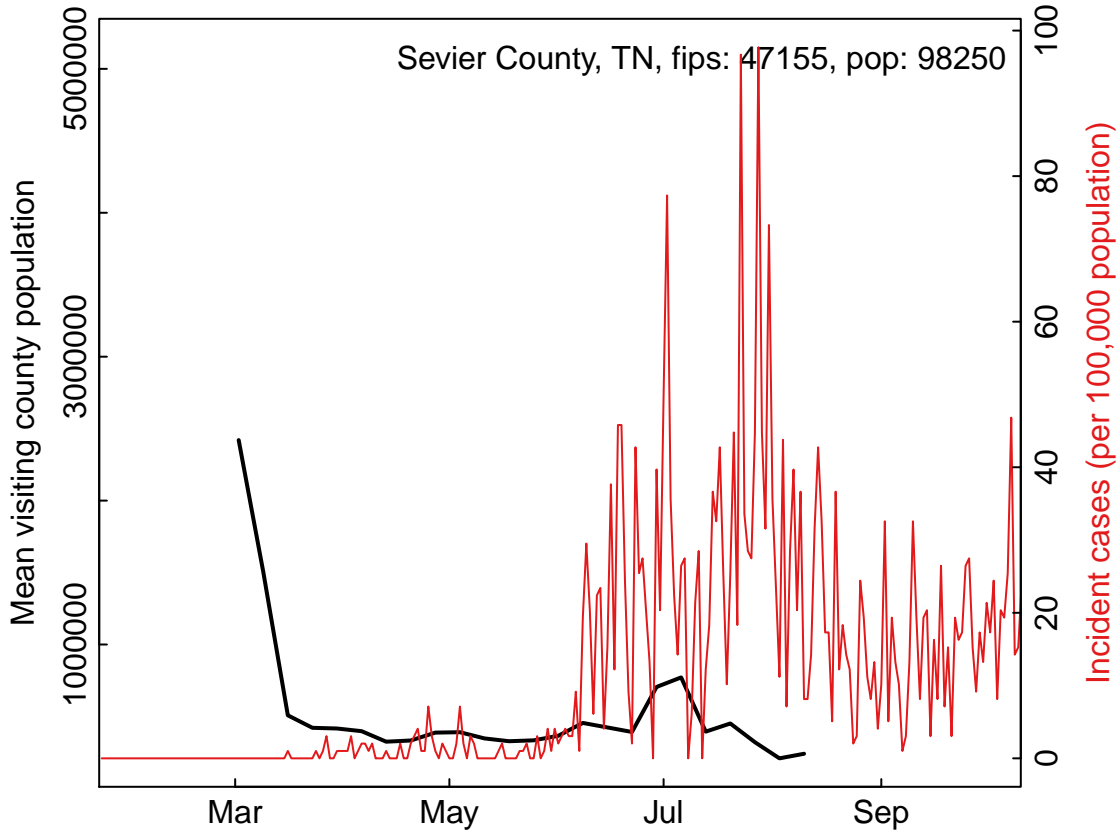

Shelby County, TN, fips: 47157, pop: 937166

Mean visiting county population

Incident cases (per 100,000 population)

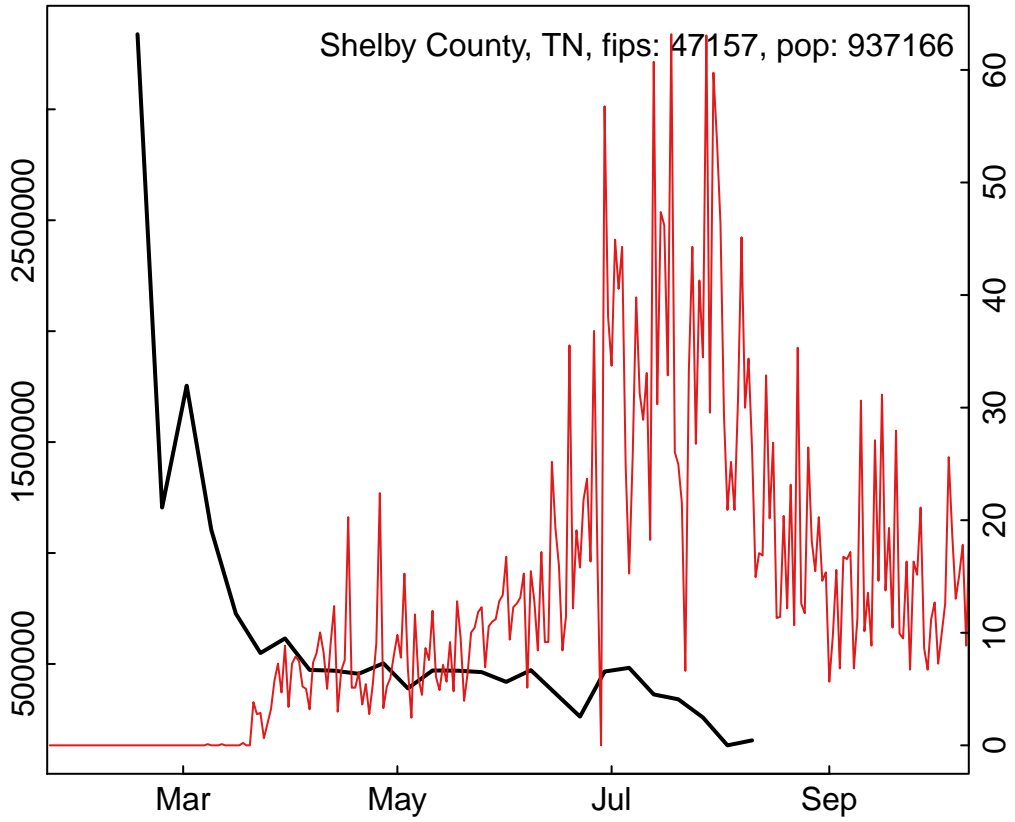

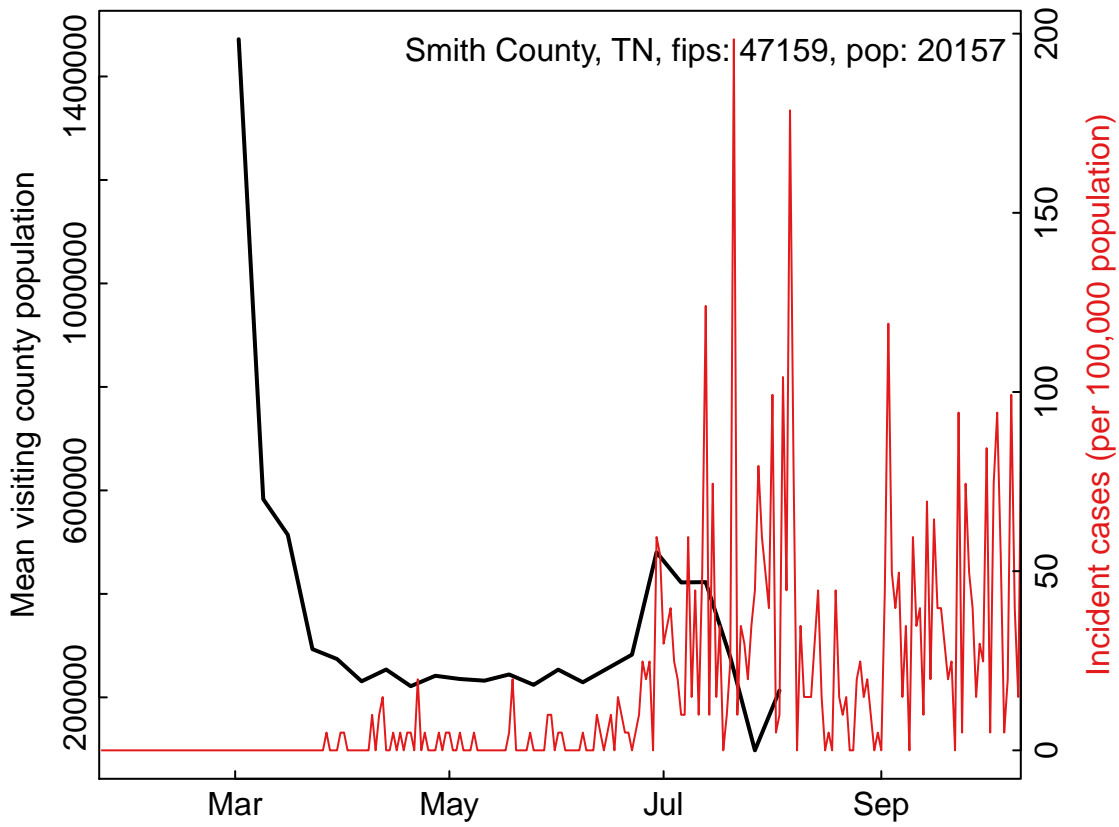

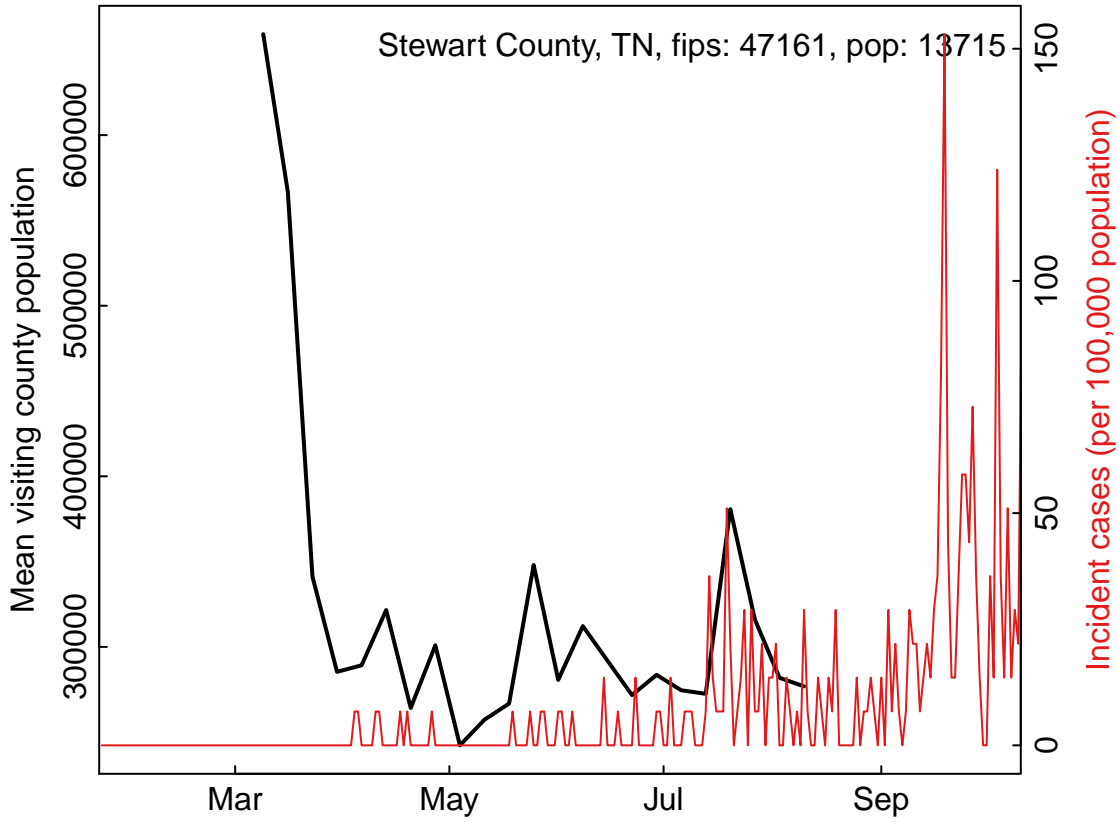

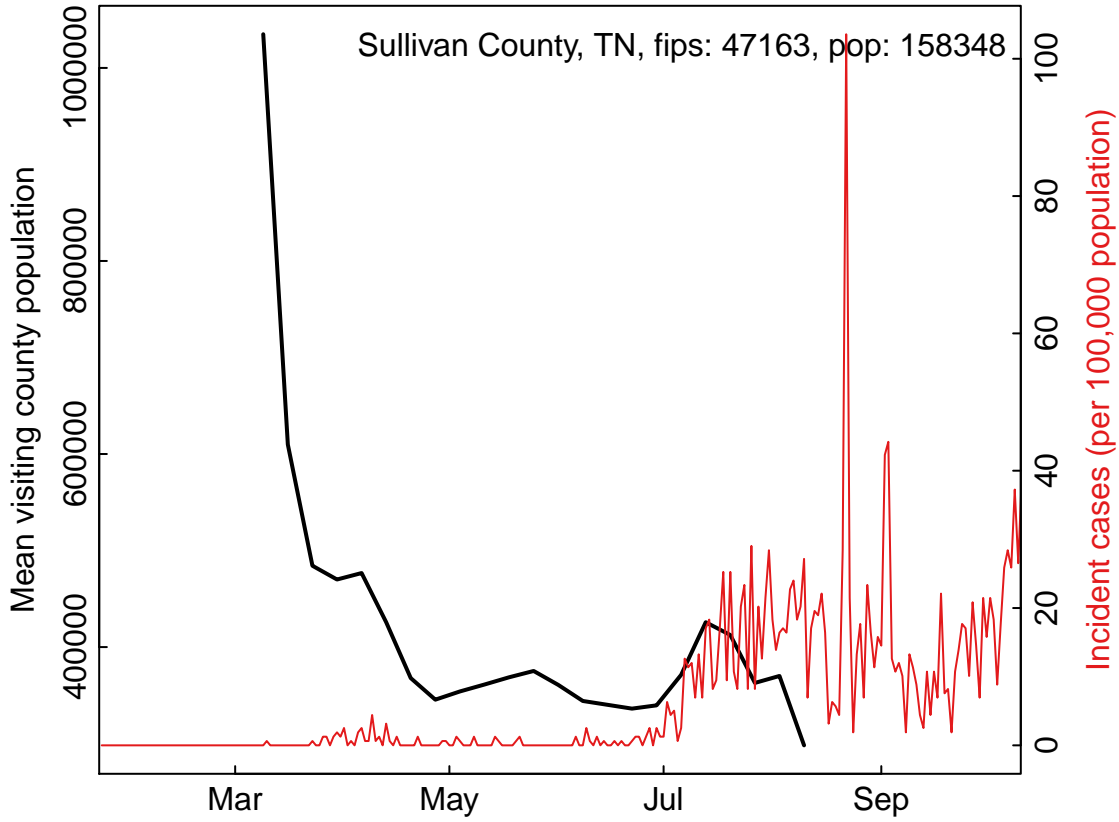



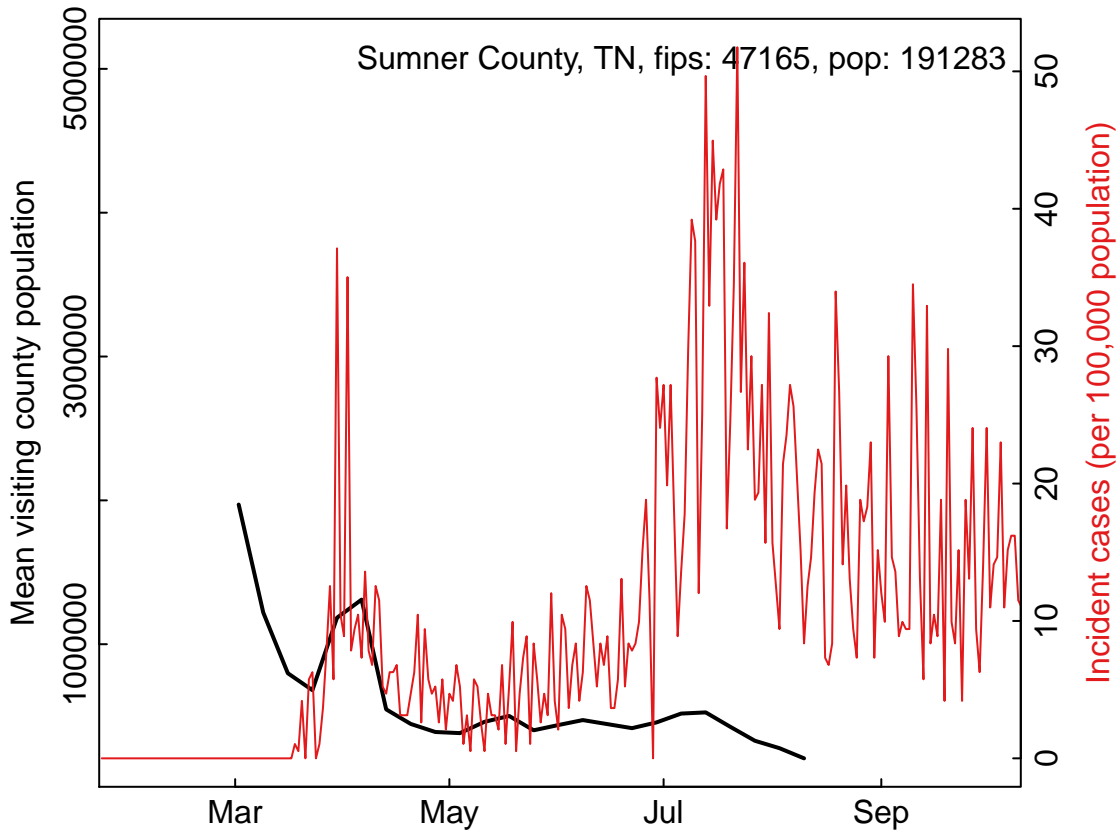

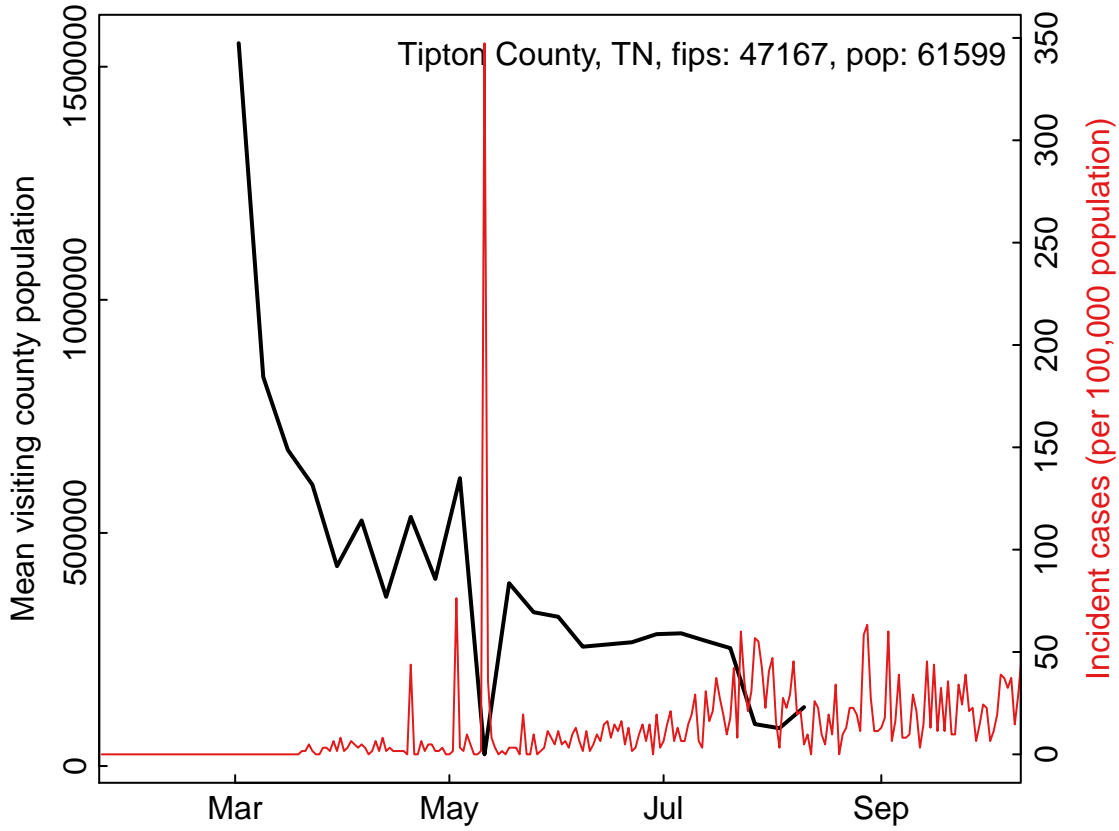

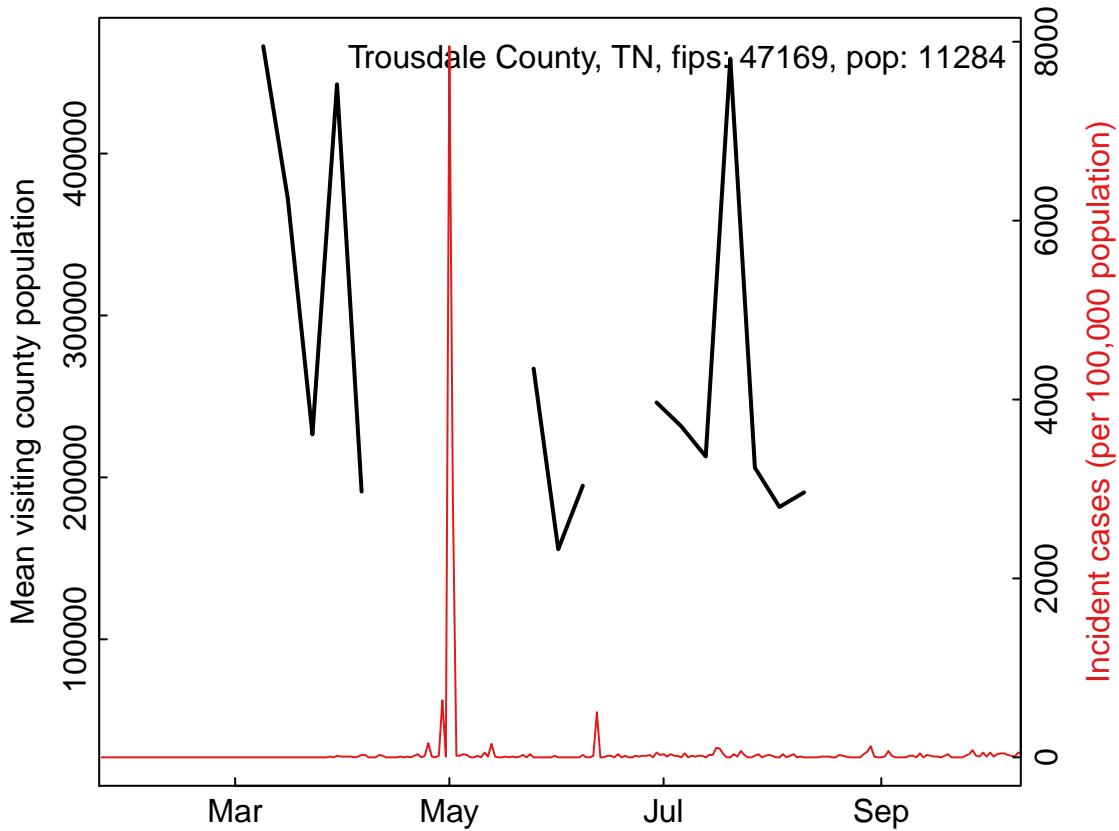

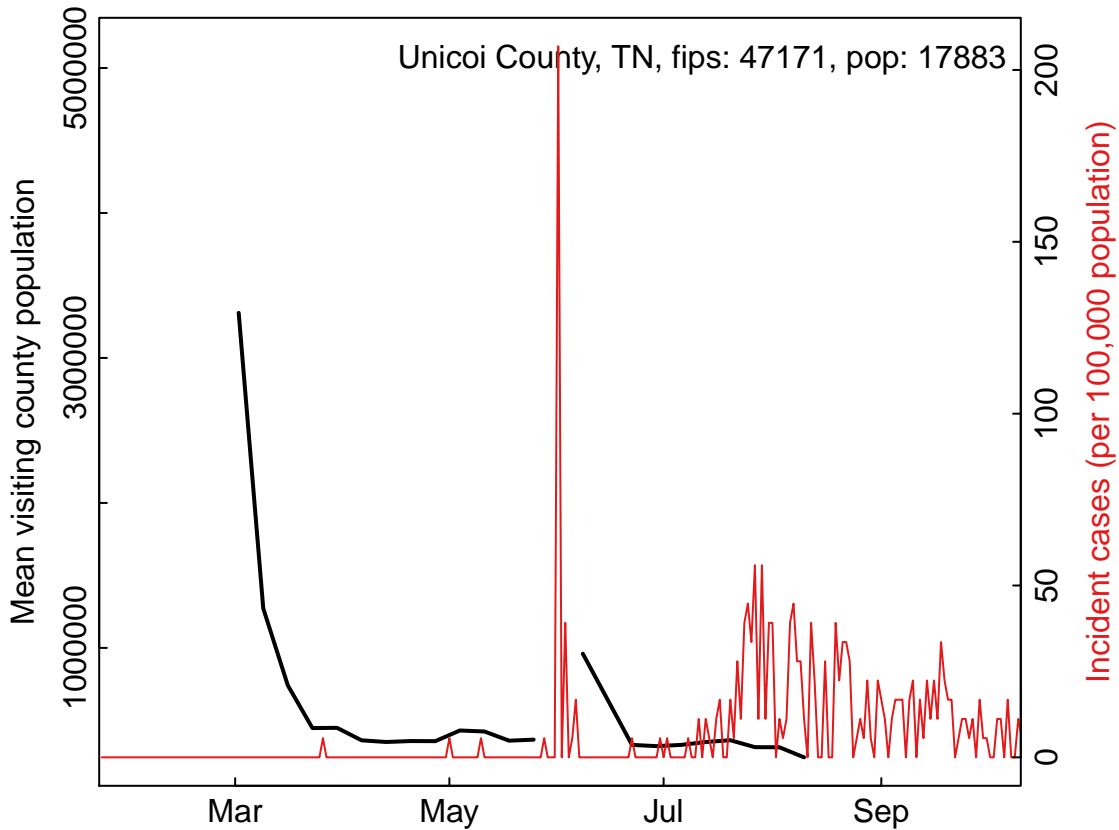

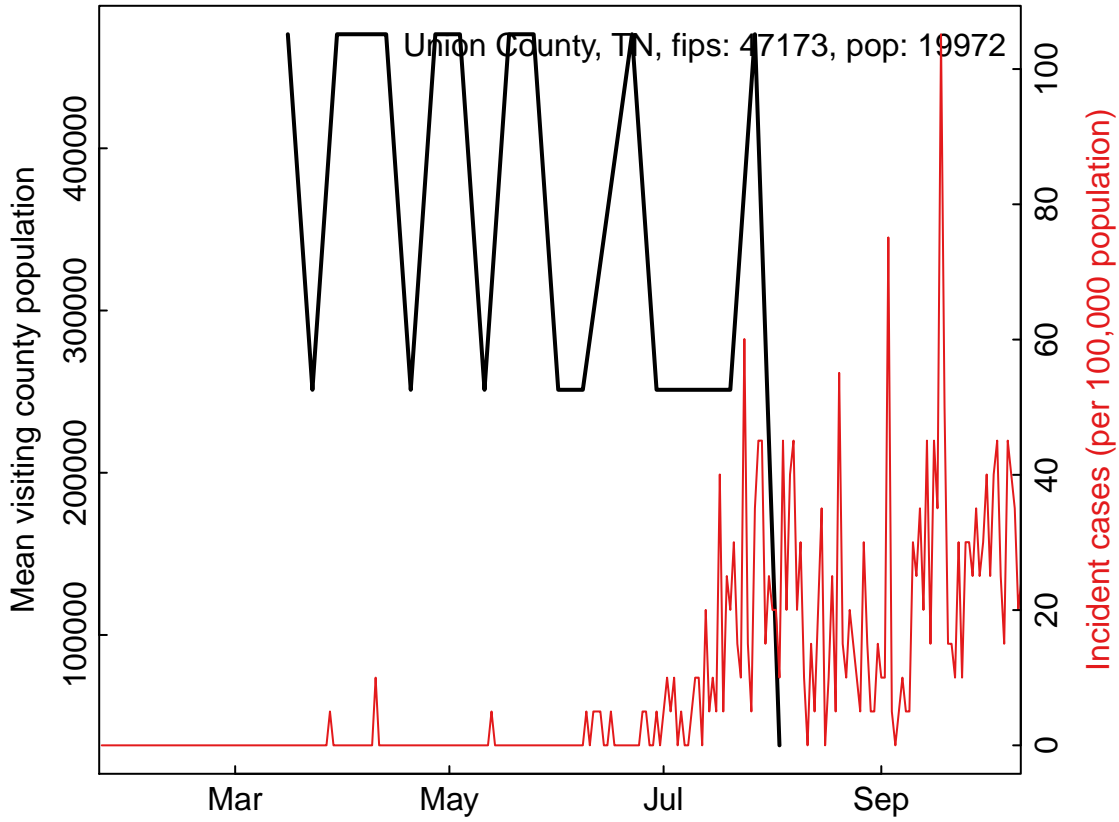

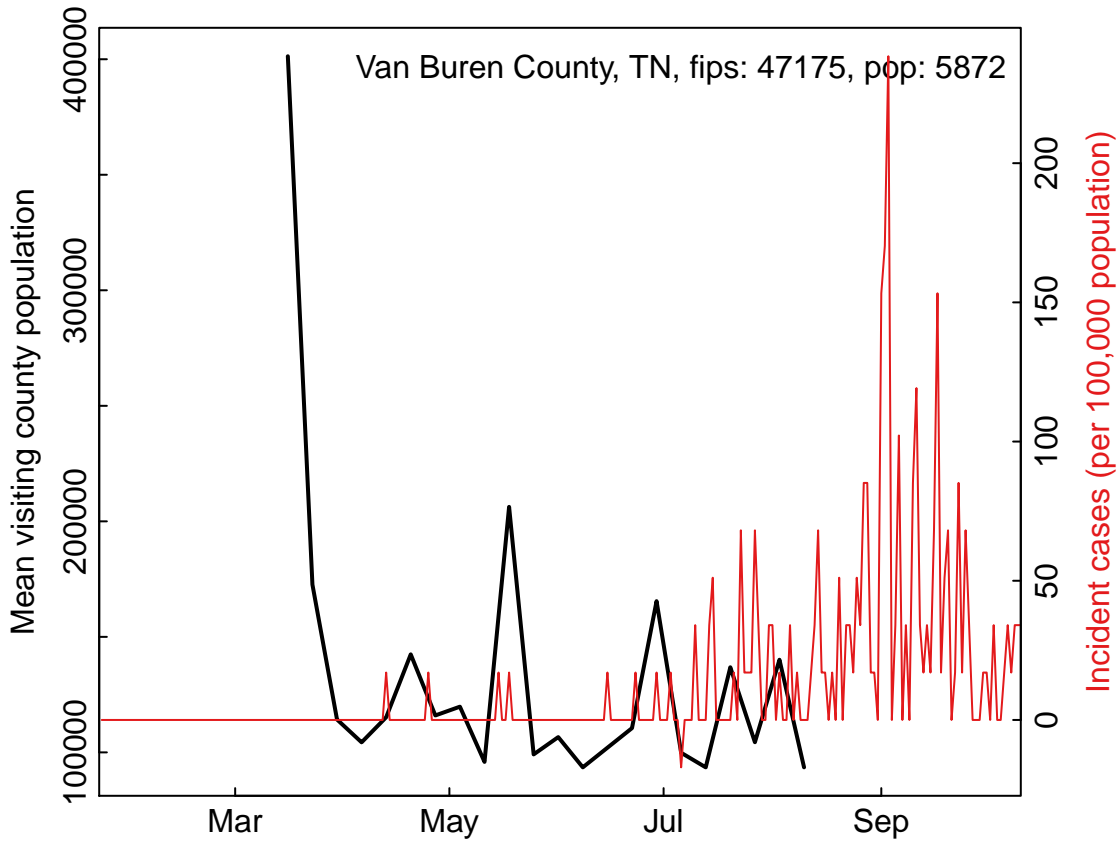

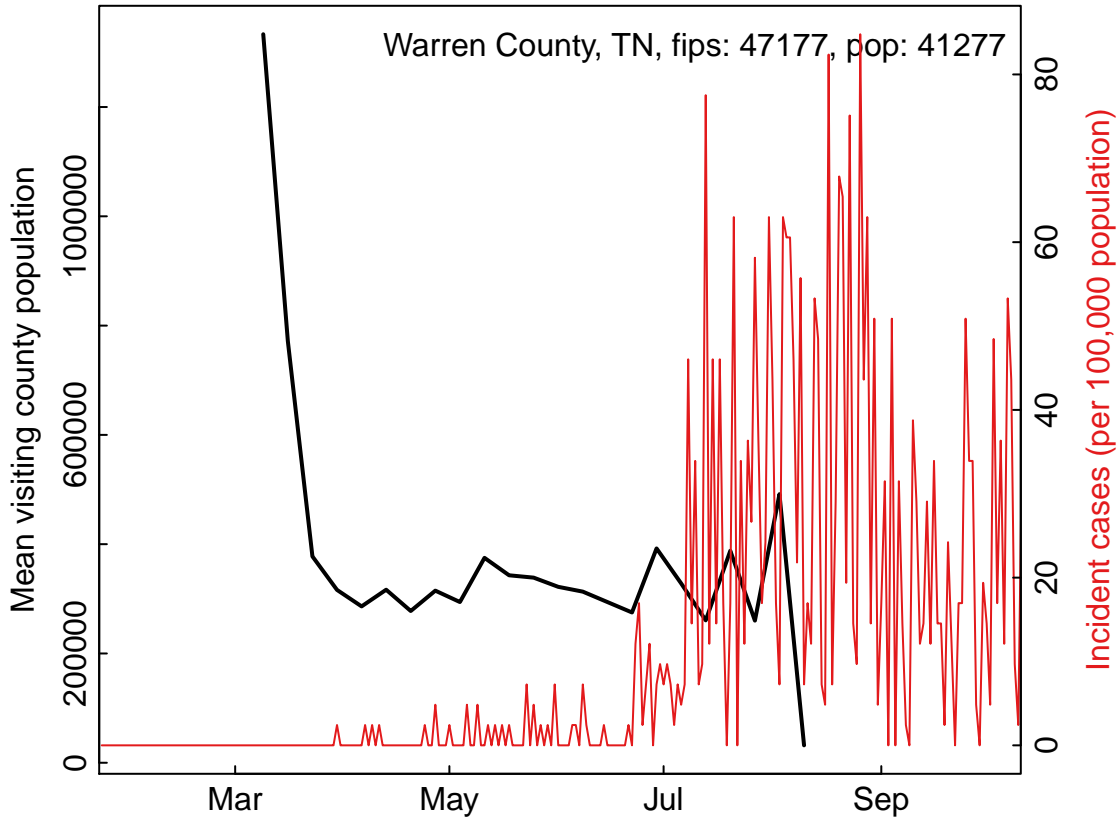

Washington County, TN, fips: 471179, pop: 129375

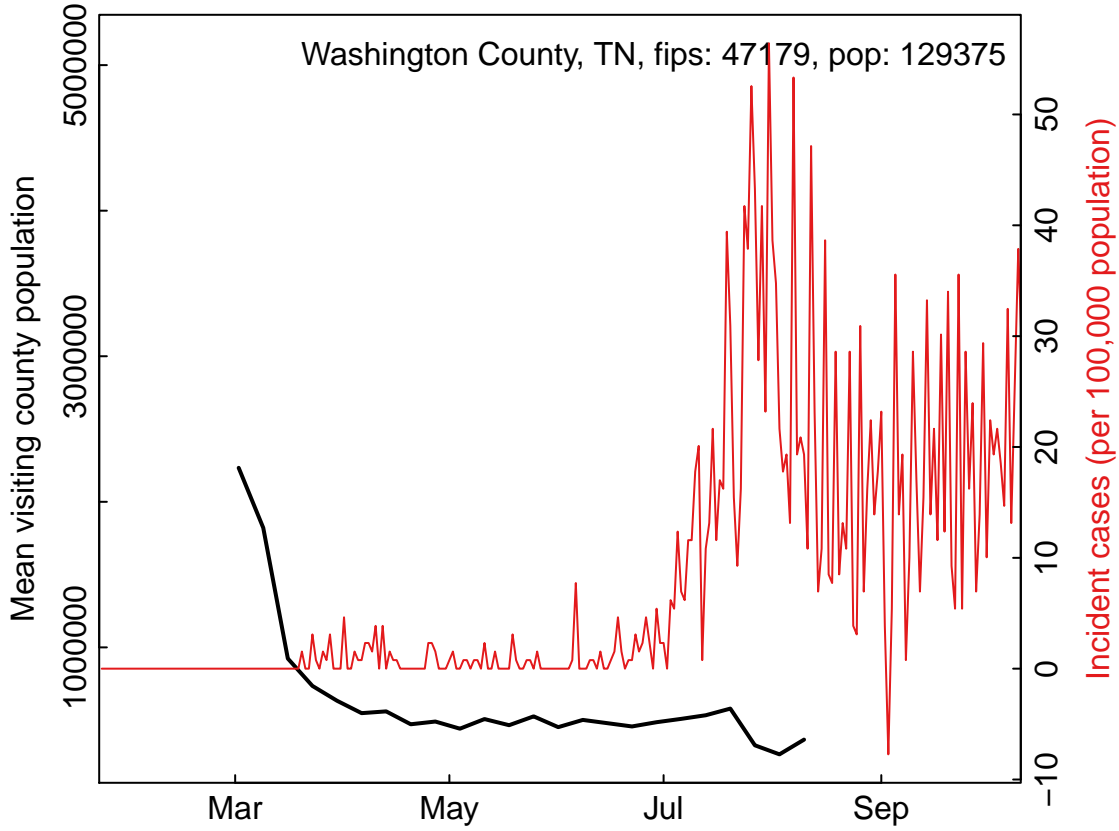



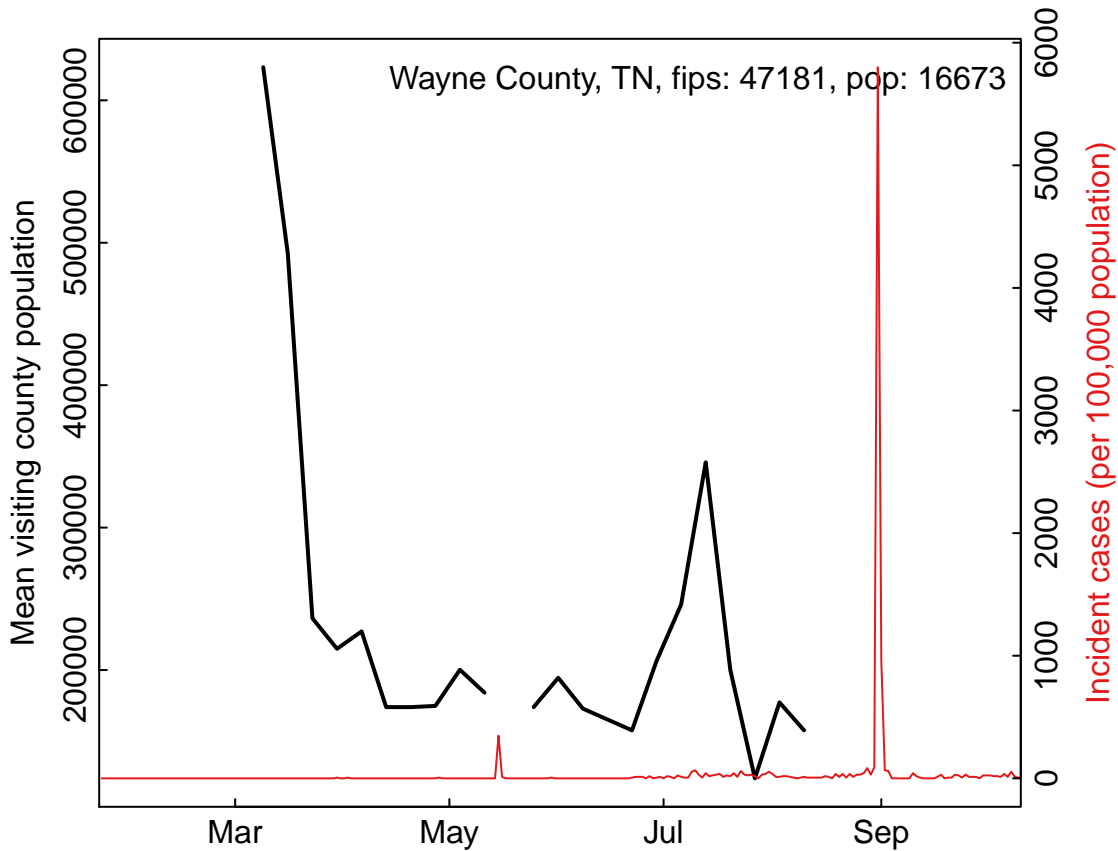

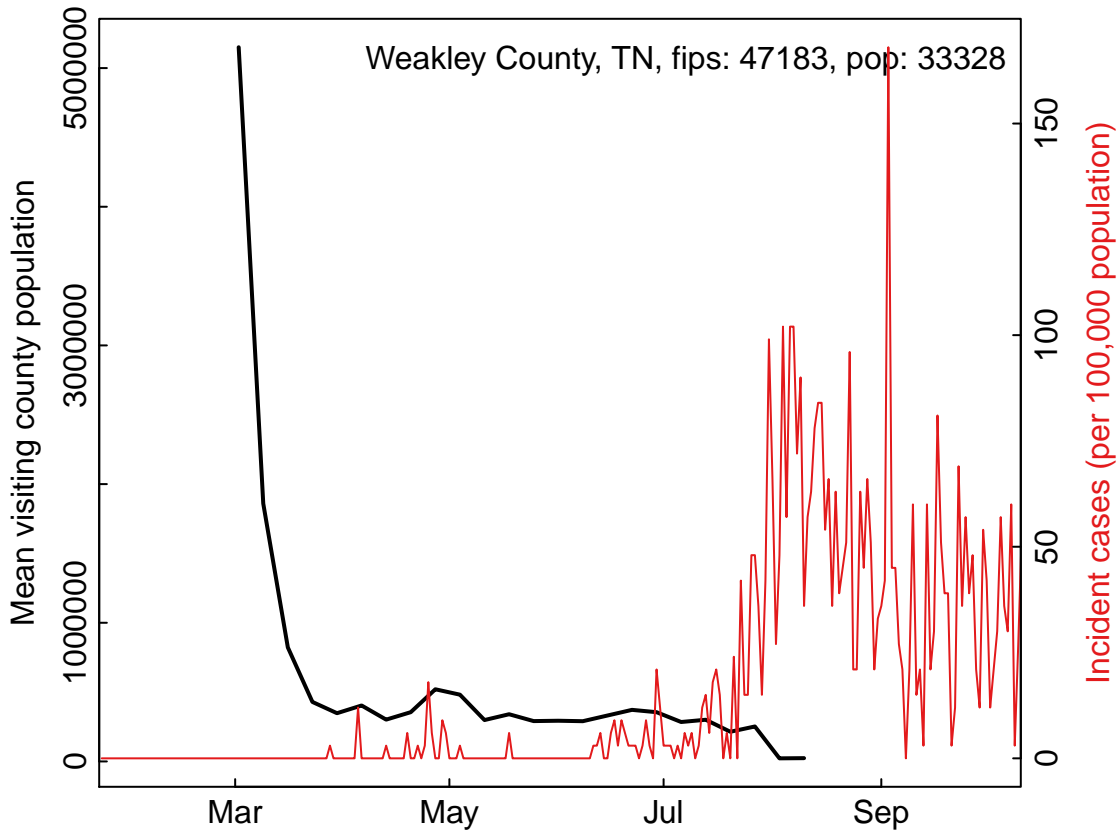

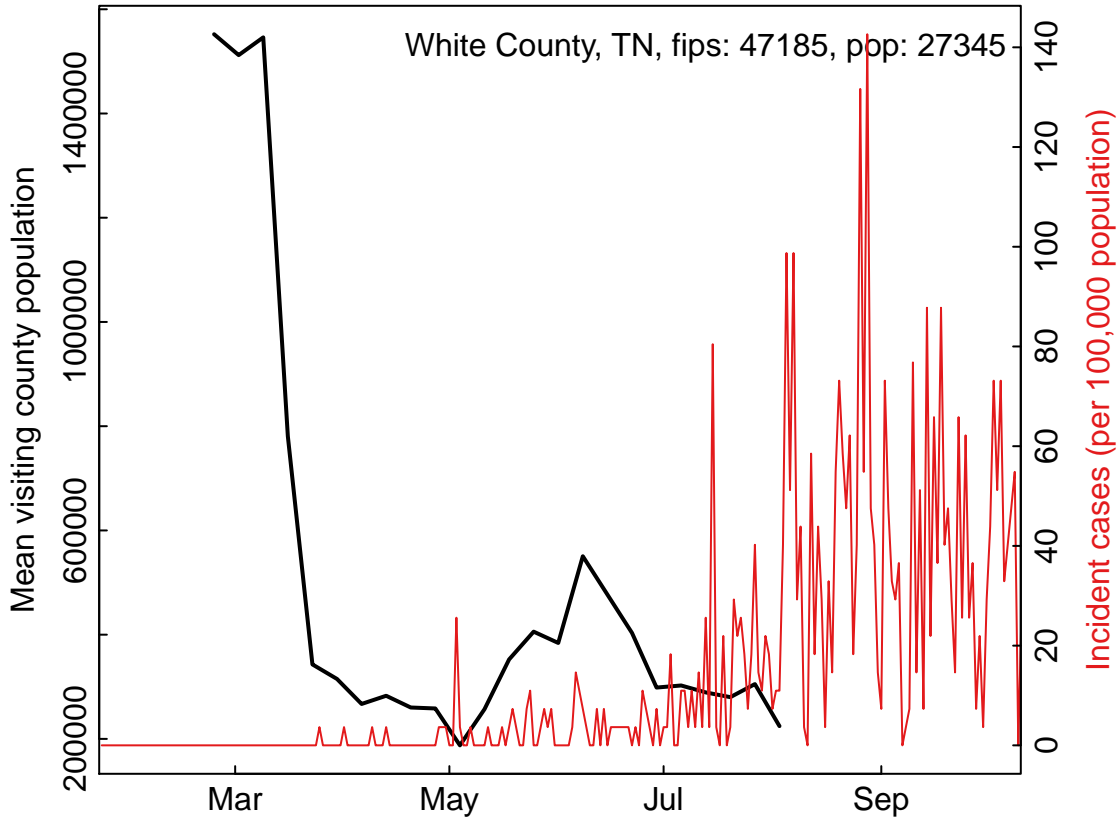

Williamson County, TN, fips: 47187, pop: 238412

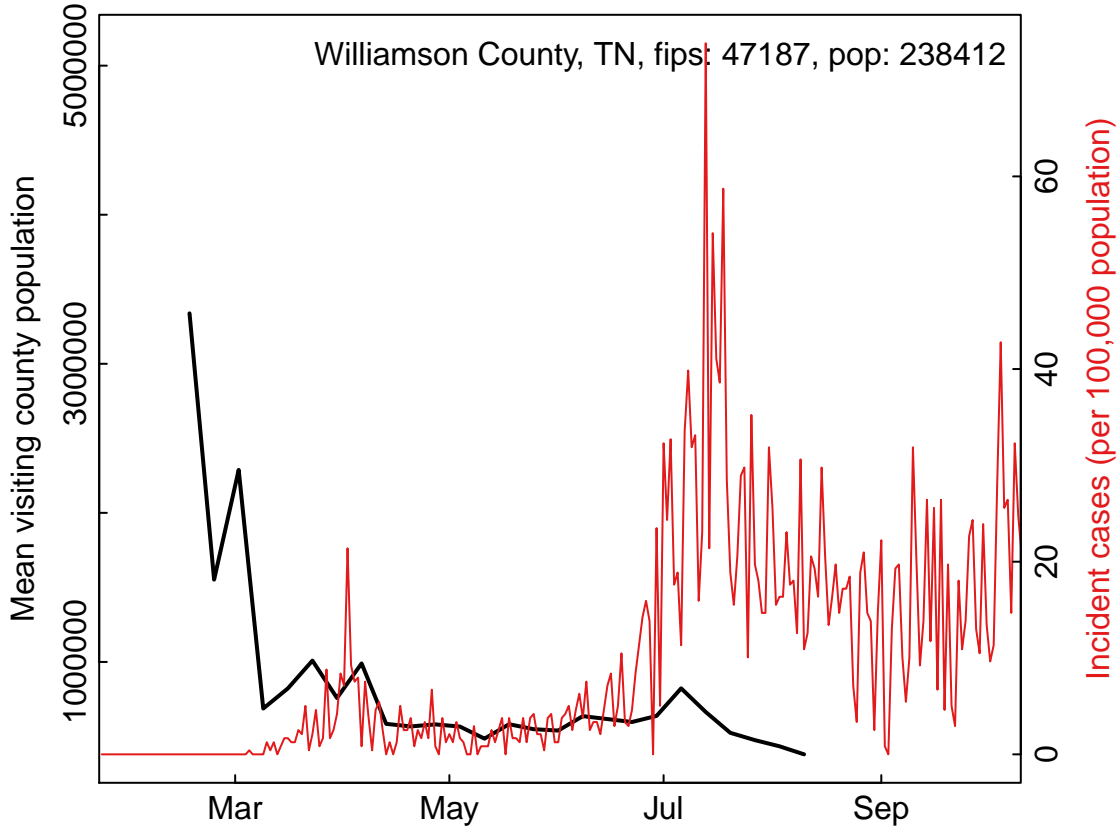

Wilson County, TN, fips: 47189, pop: 144657

Mean visiting county population

2500000  
1500000  
500000

Mar

May

Jul

Sep

60  
50  
40  
30  
20  
10  
0

Incident cases (per 100,000 population)

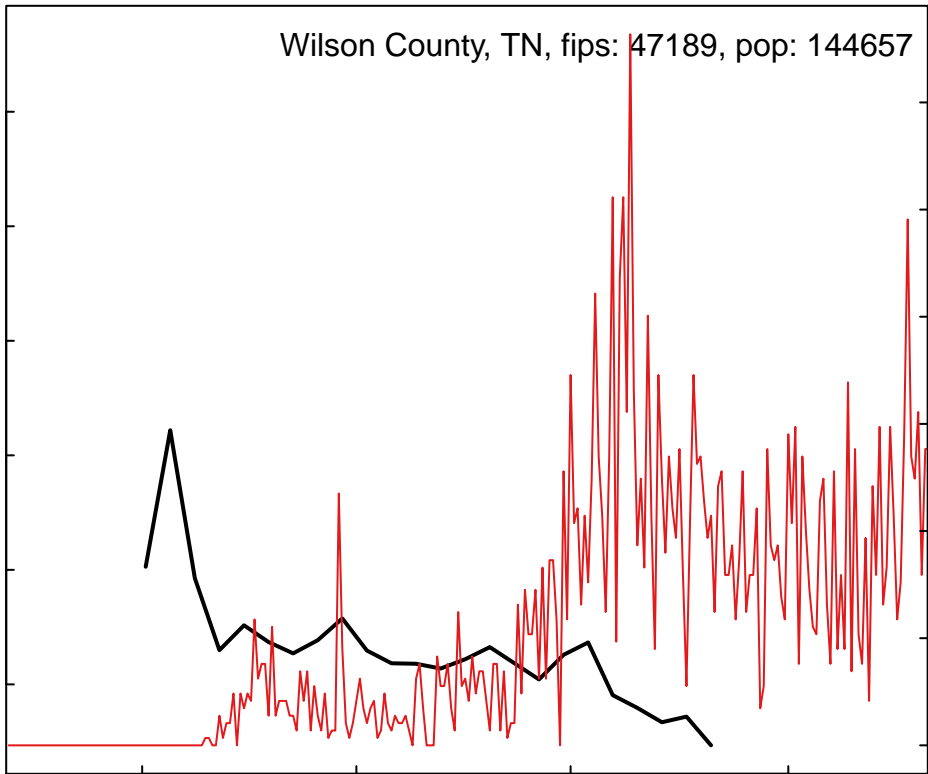

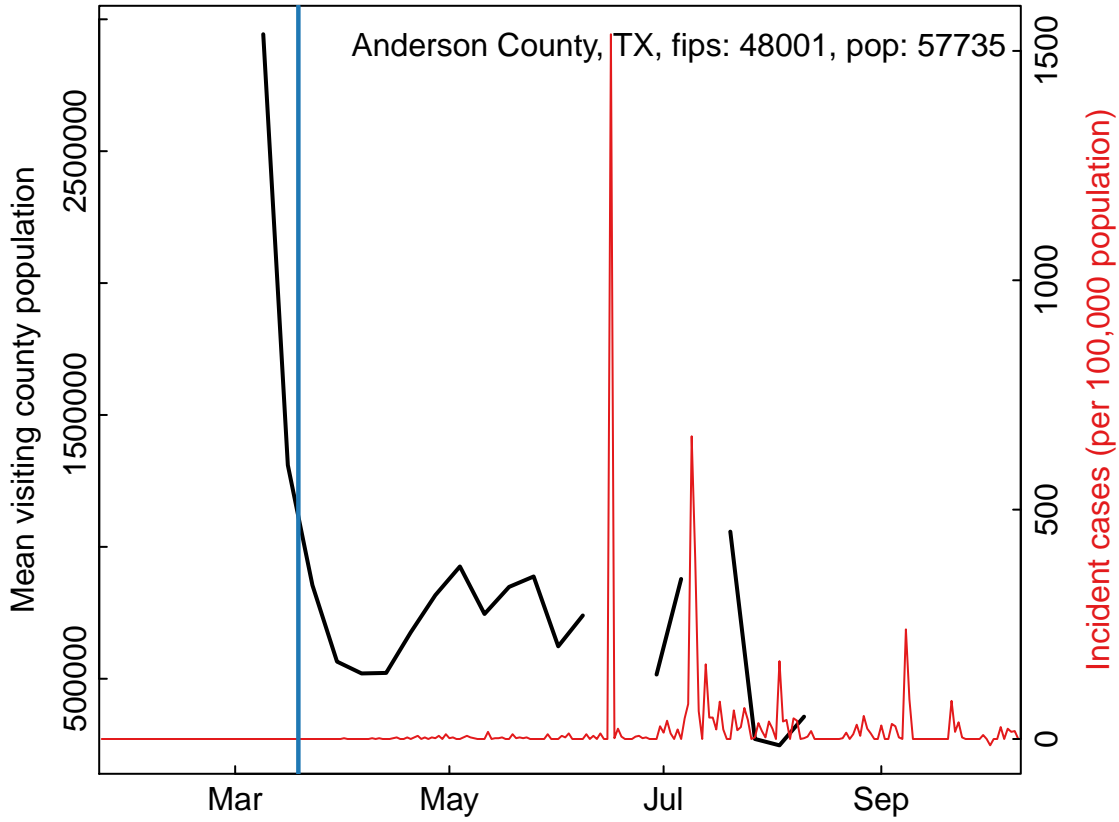

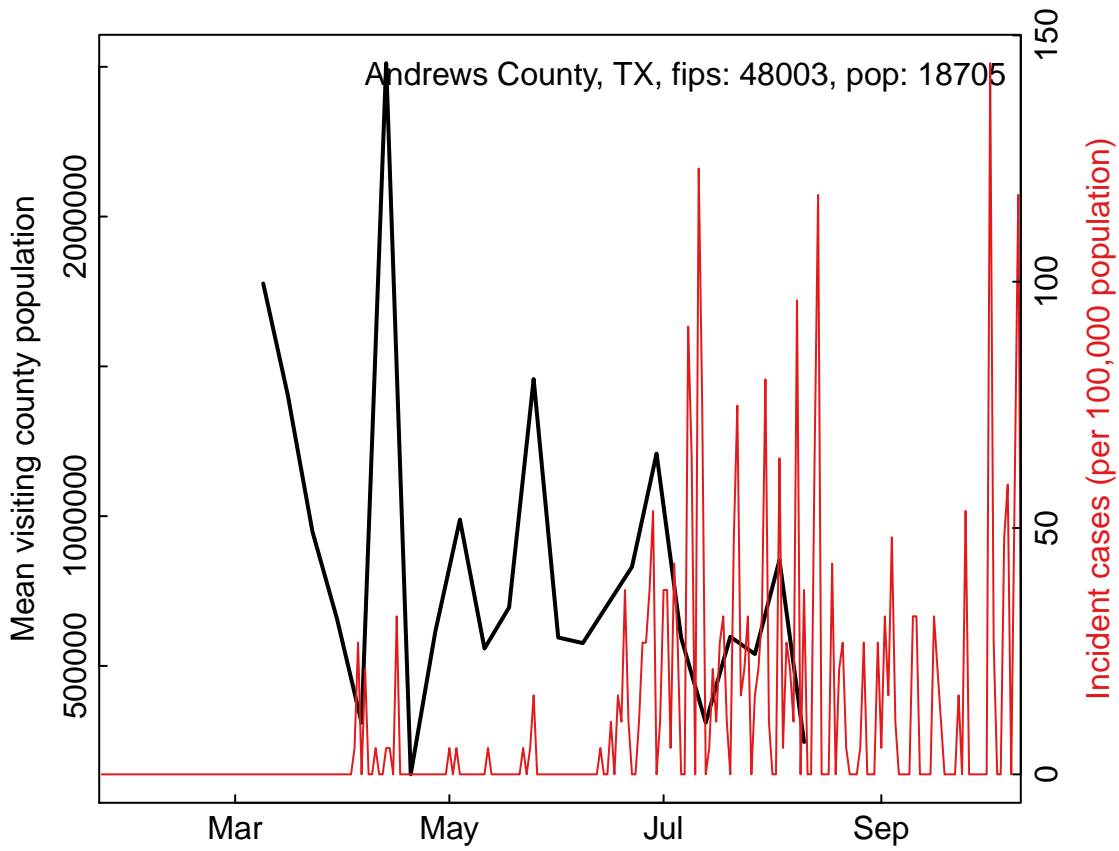

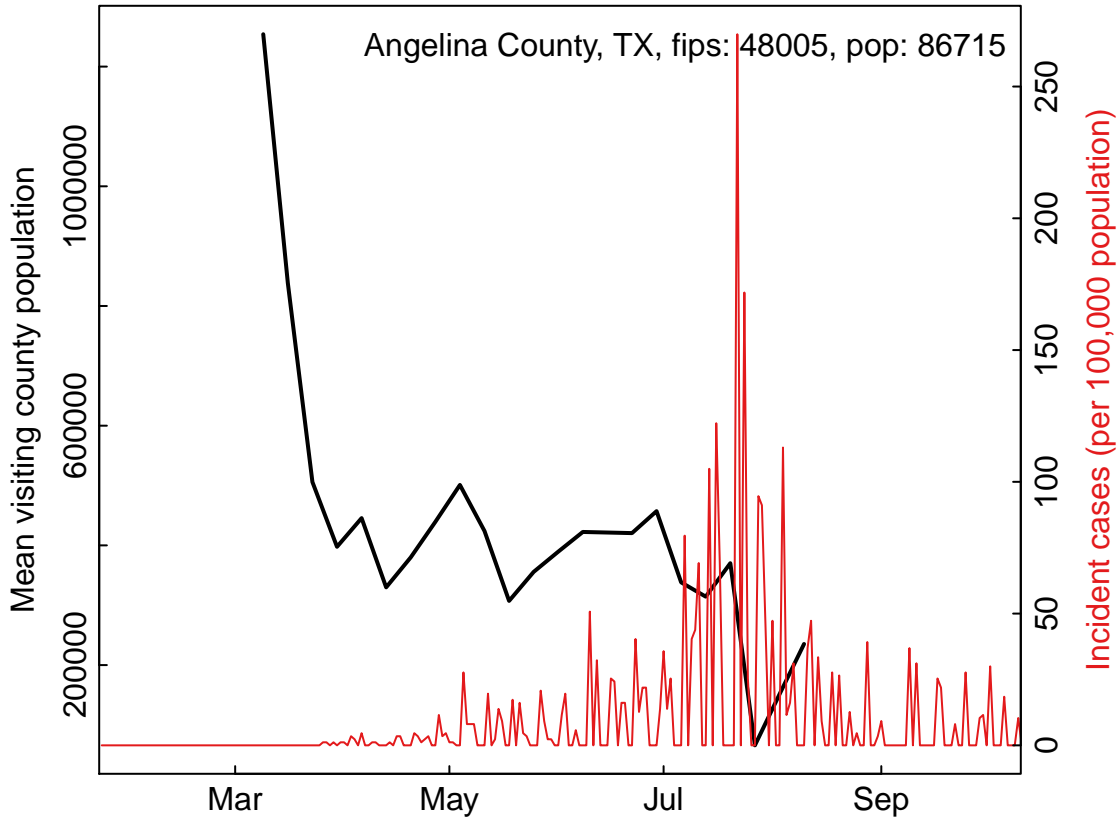



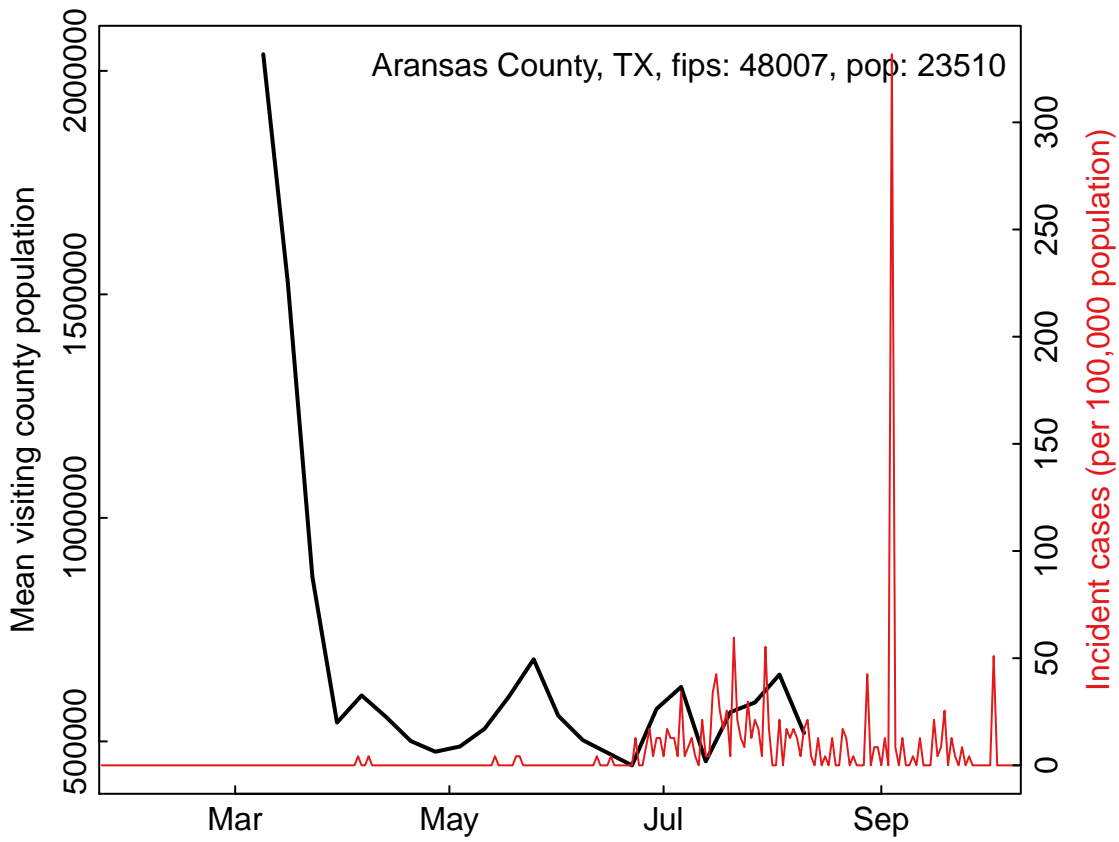

Archer County, TX, fips: 48009, pop: 8553

Mean visiting county population

Incident cases (per 100,000 population)

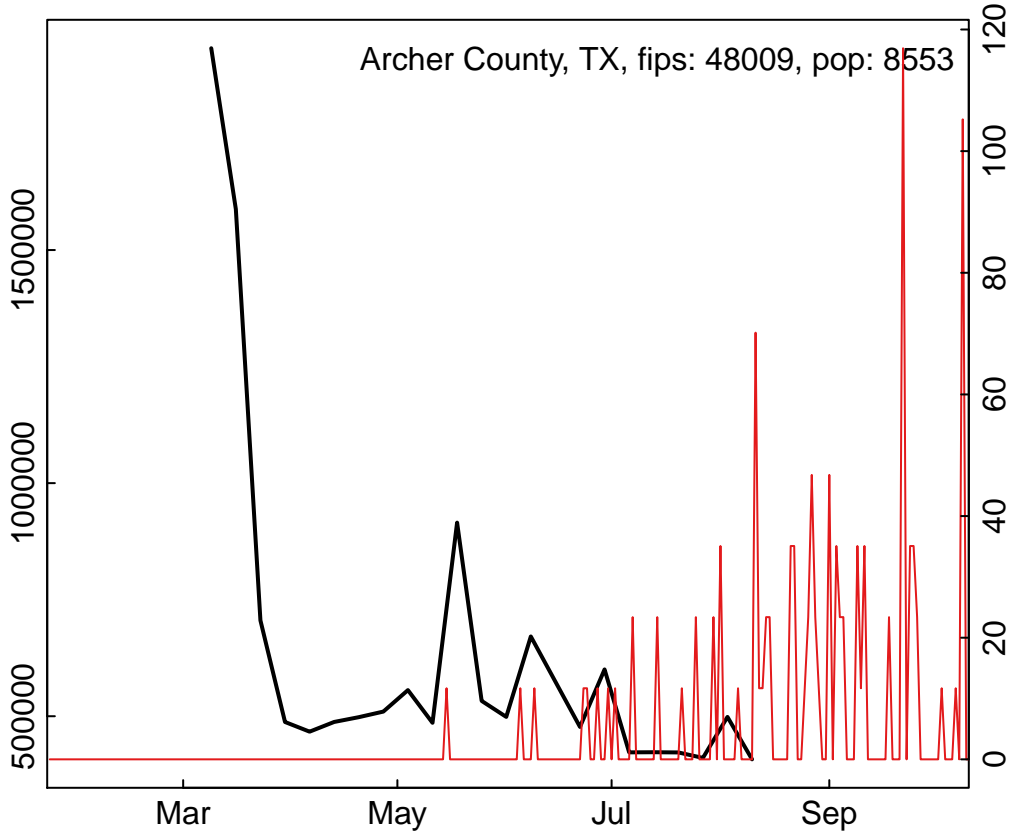



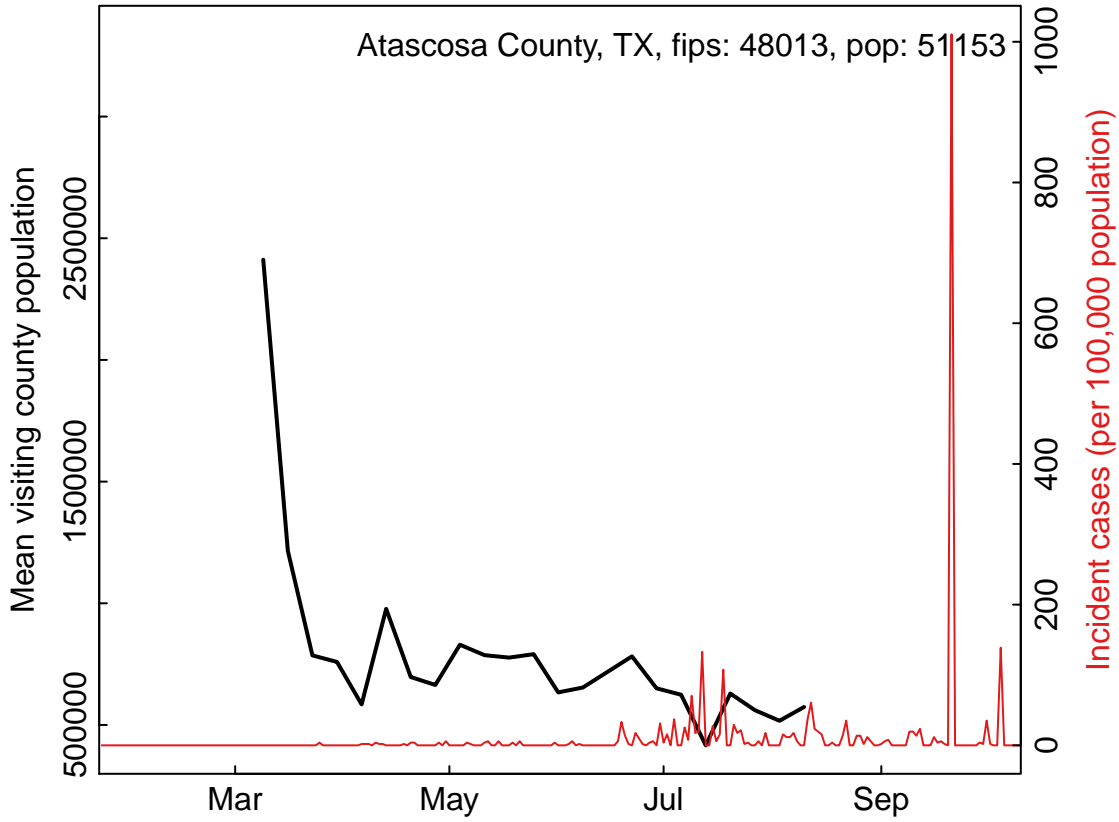

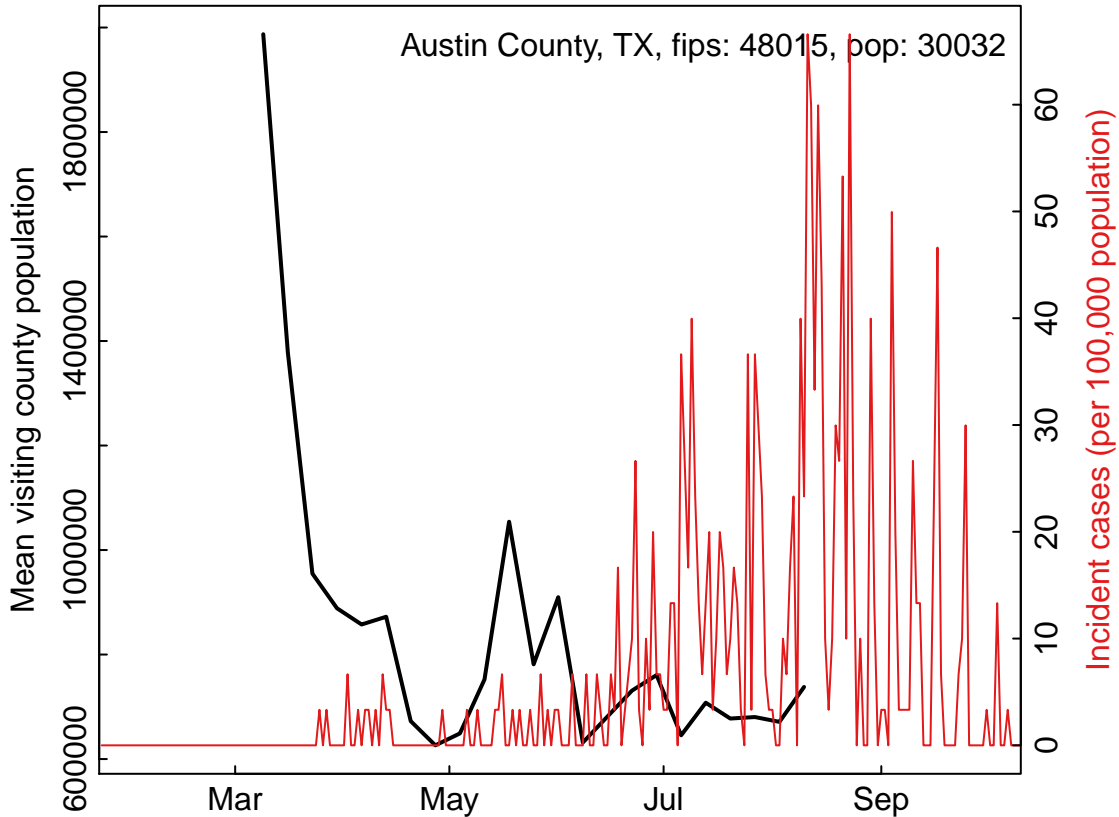

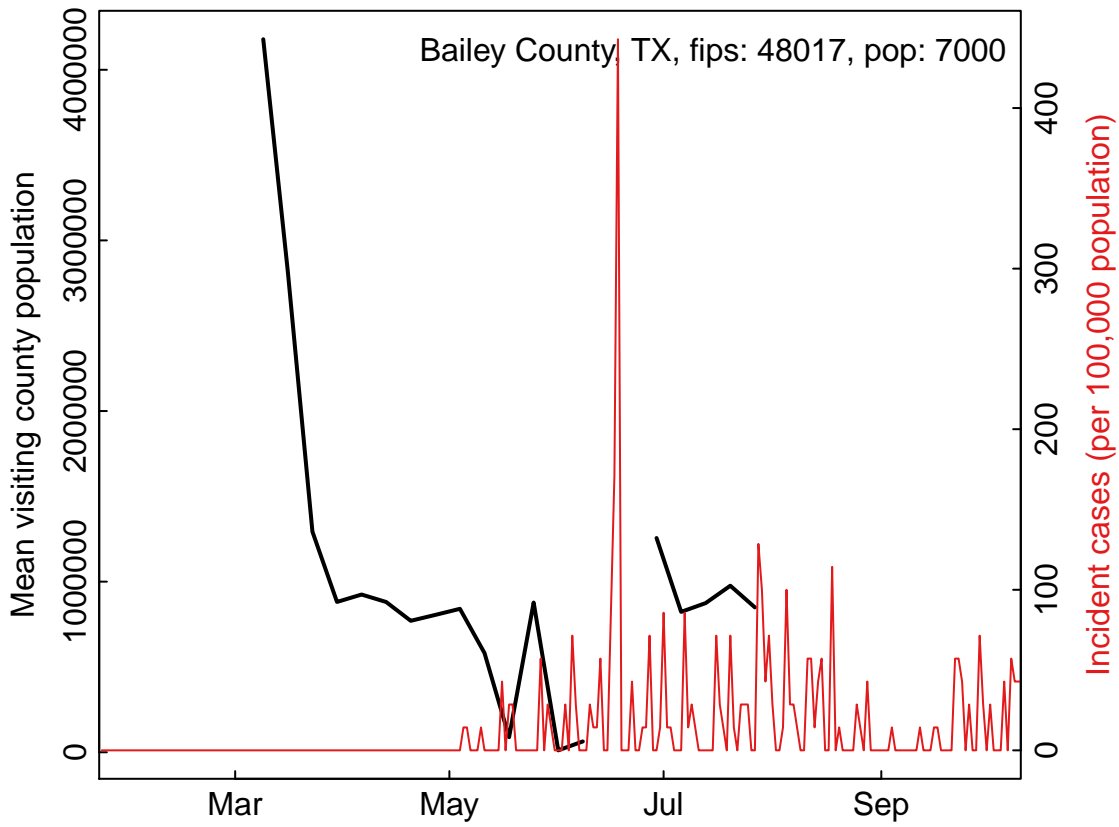

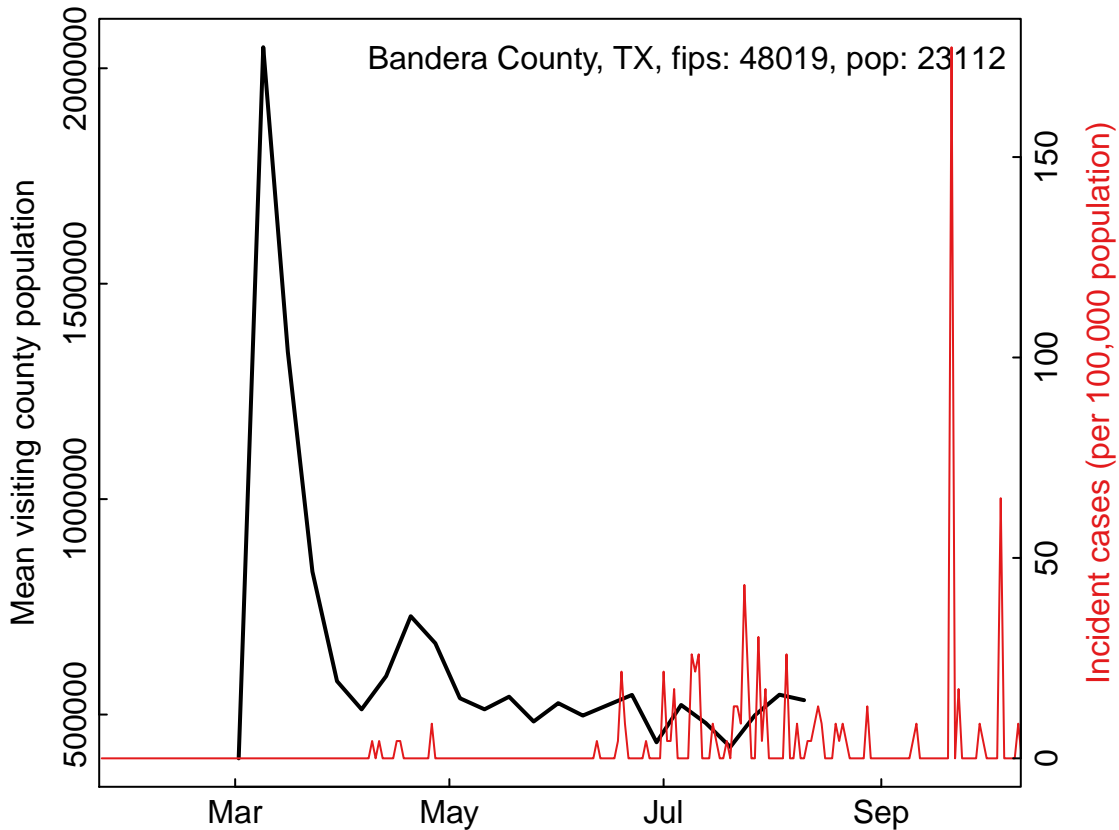

Bastrop County, TX, fips: 48021, pop: 88723

Mean visiting county population

500000  
1500000  
2500000

Mar

May

Jul

Sep

0  
20  
40  
60  
80  
100

Incident cases (per 100,000 population)

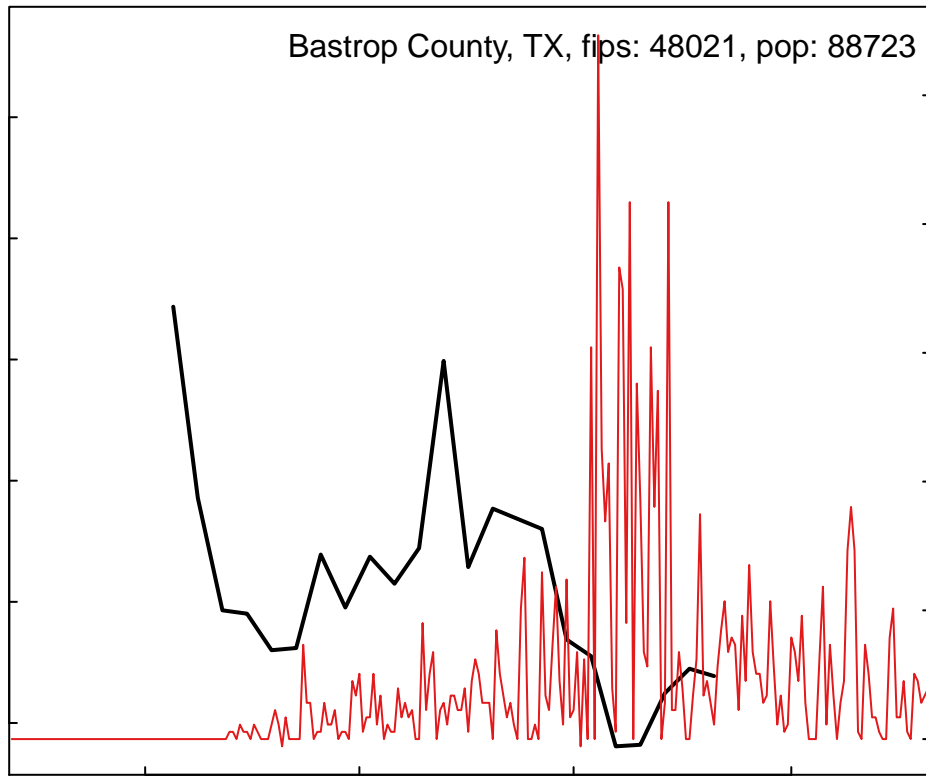



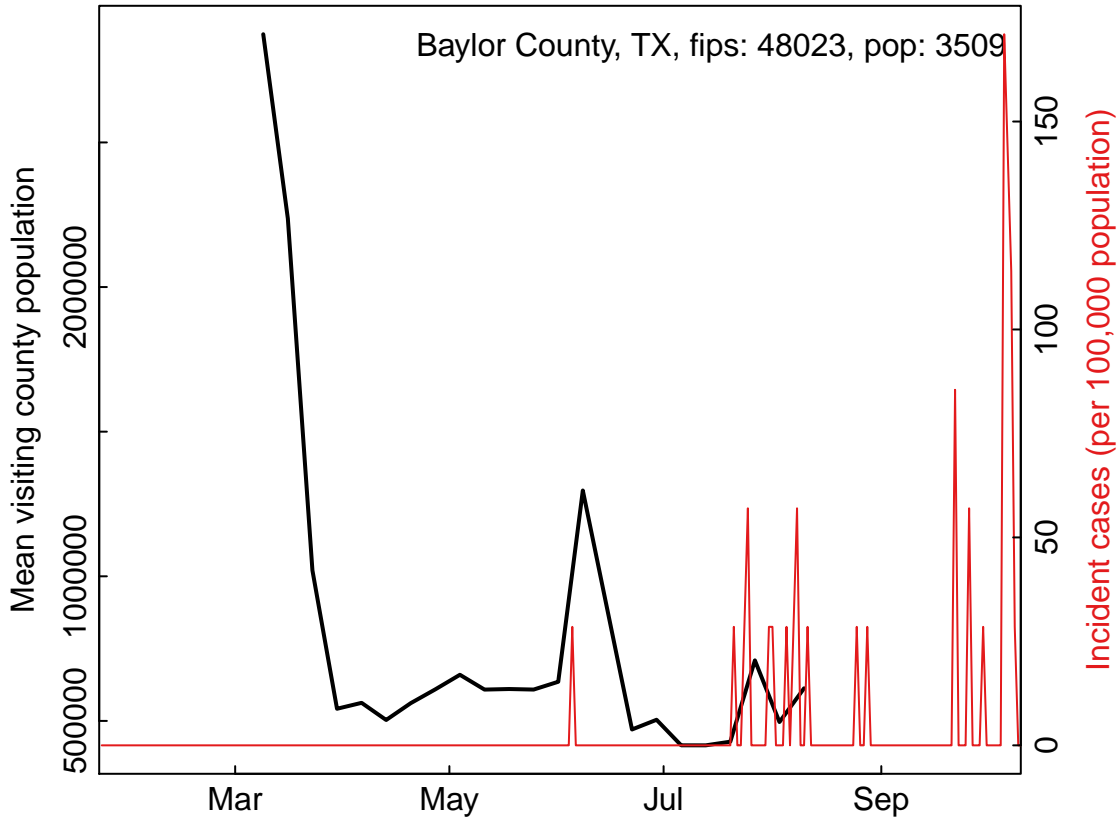

Bee County, TX, fips: 48025, pop: 32565

Mean visiting county population

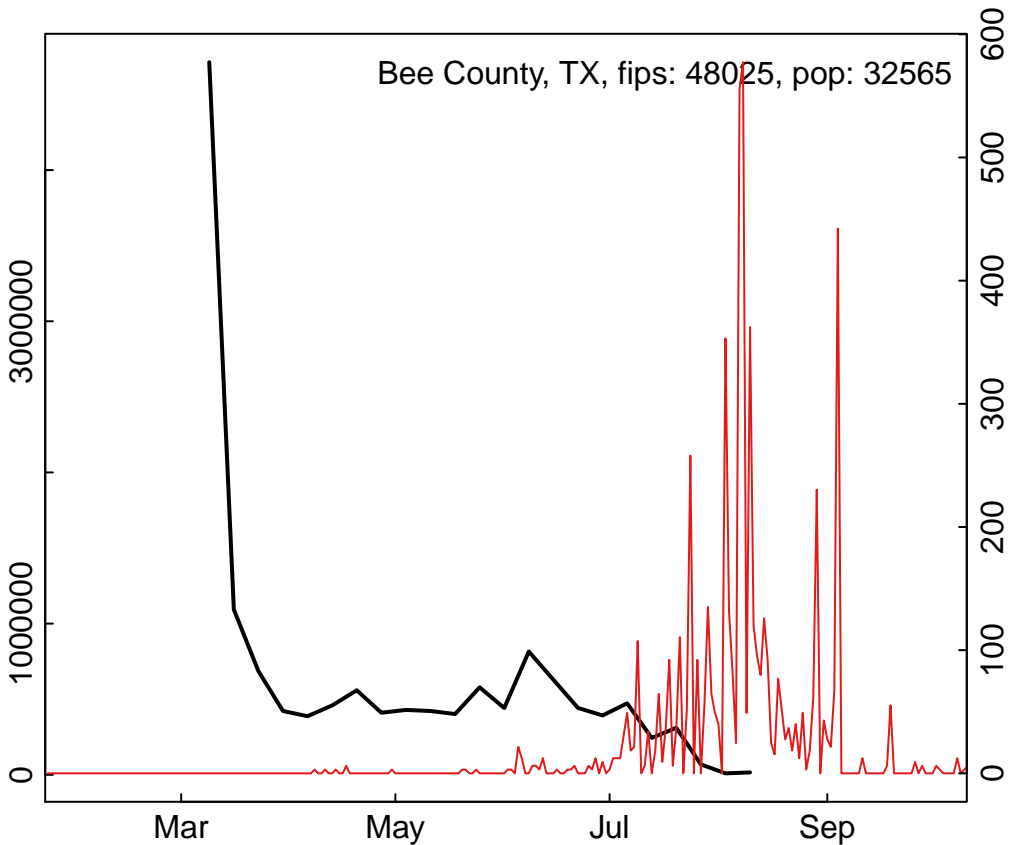

Incident cases (per 100,000 population)

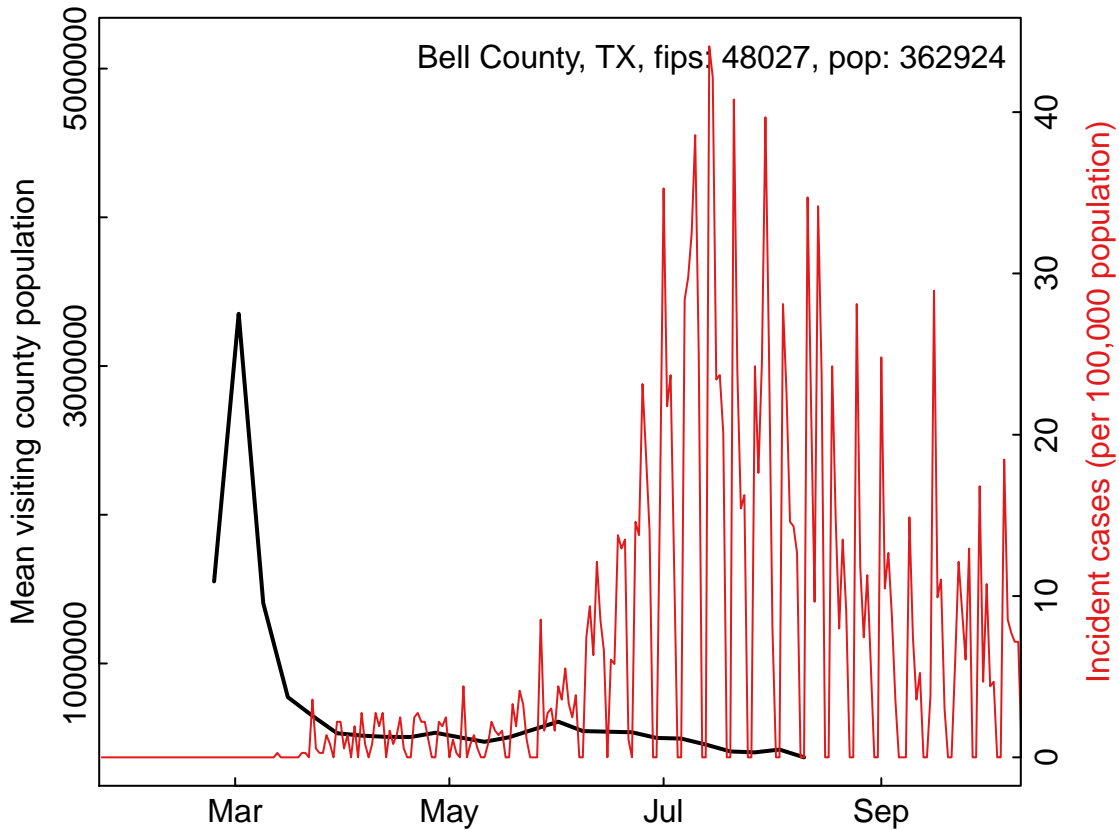

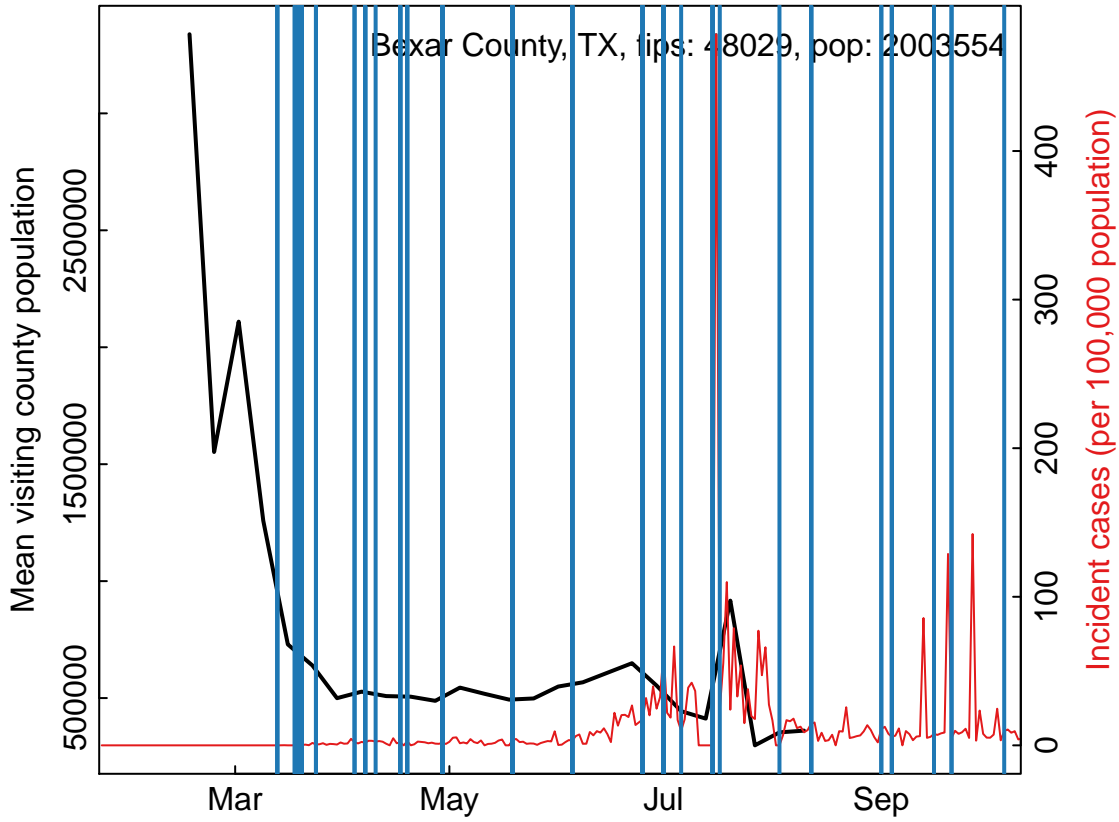

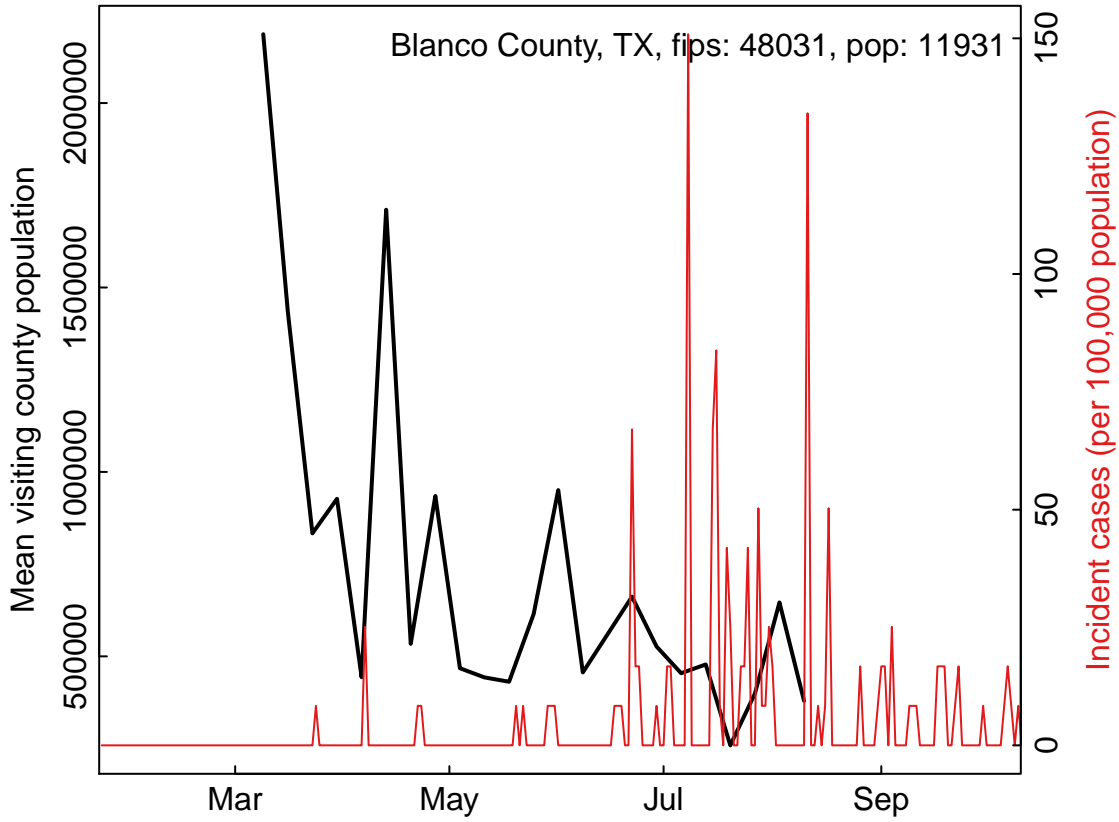

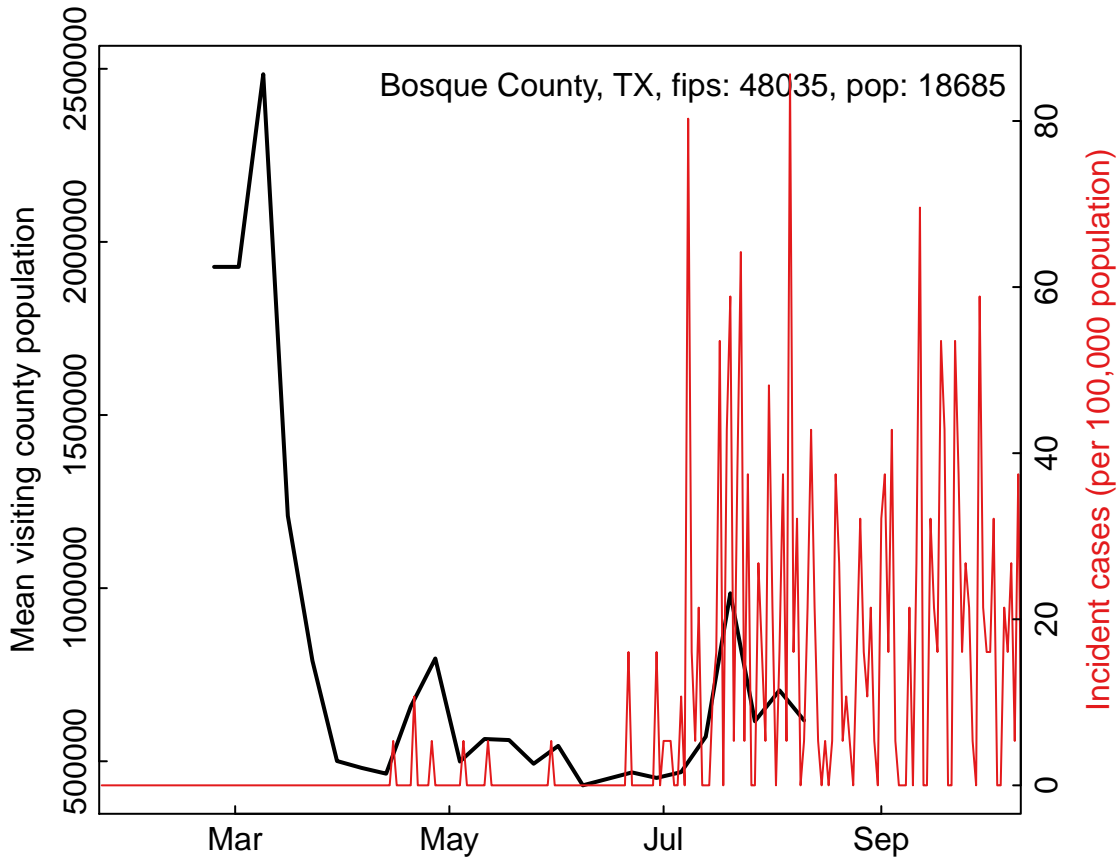

Bowie County, TX, fips: 48037, pop: 93245

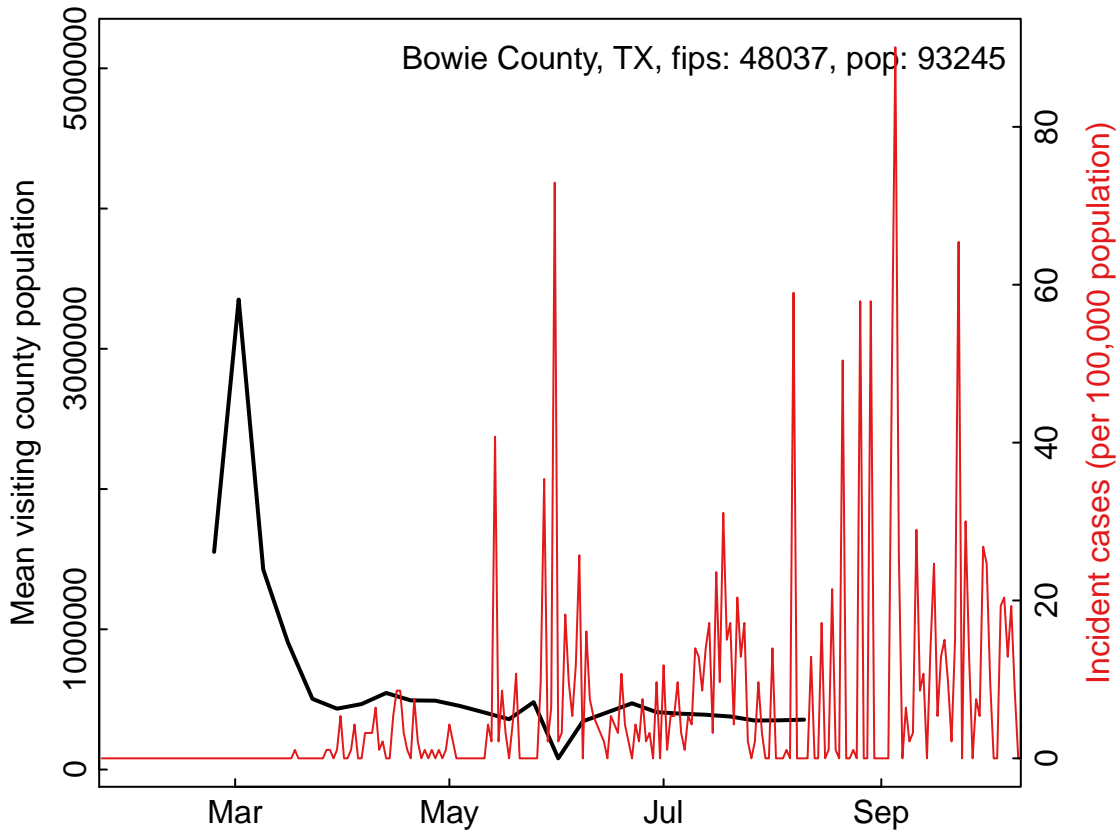

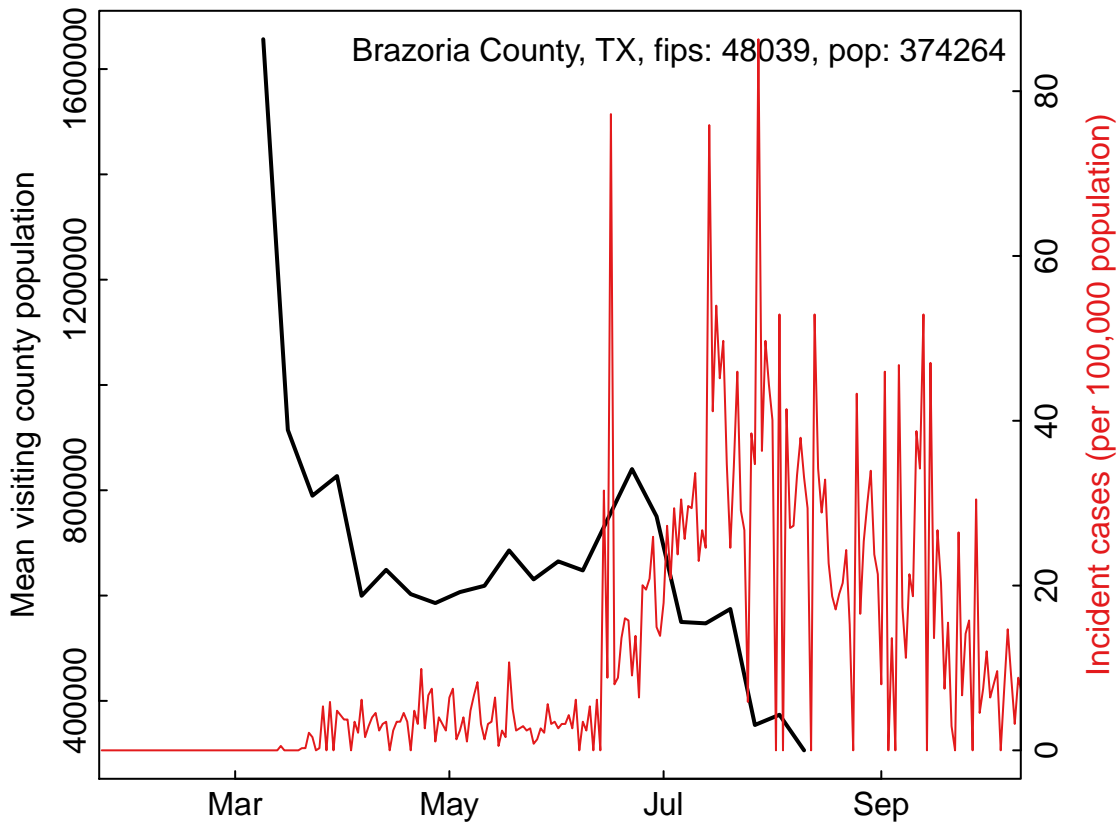



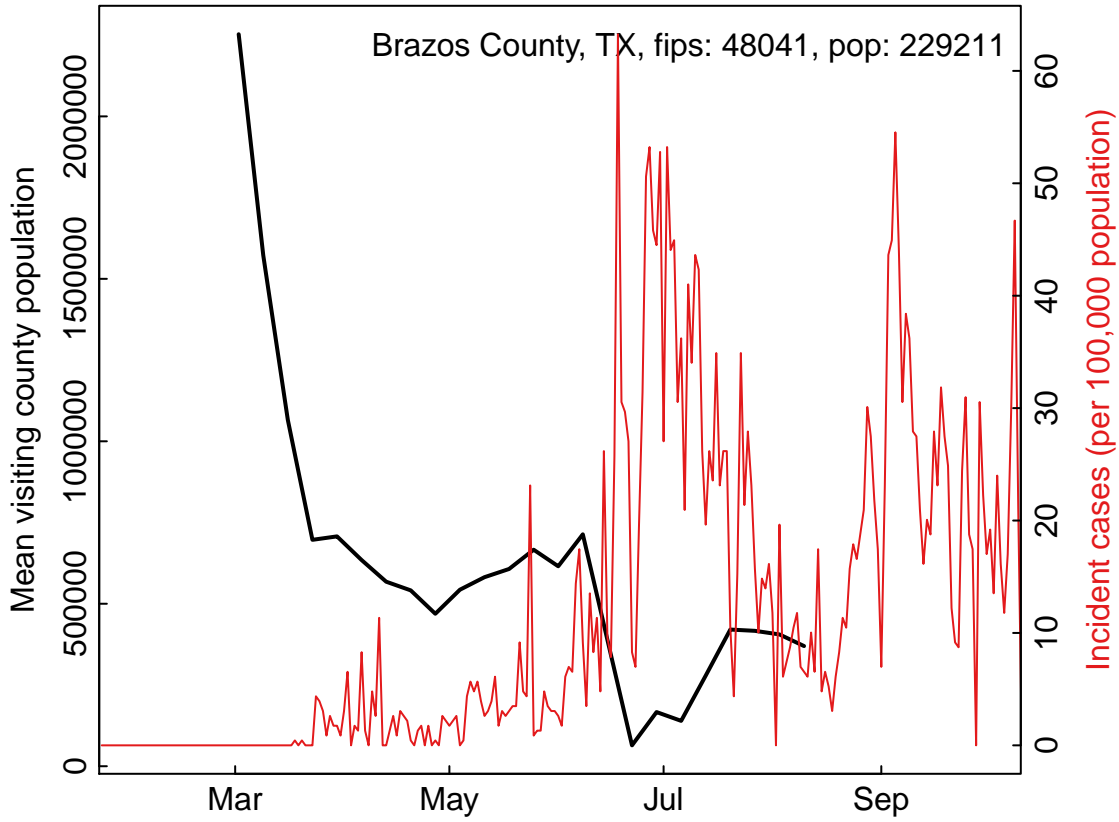

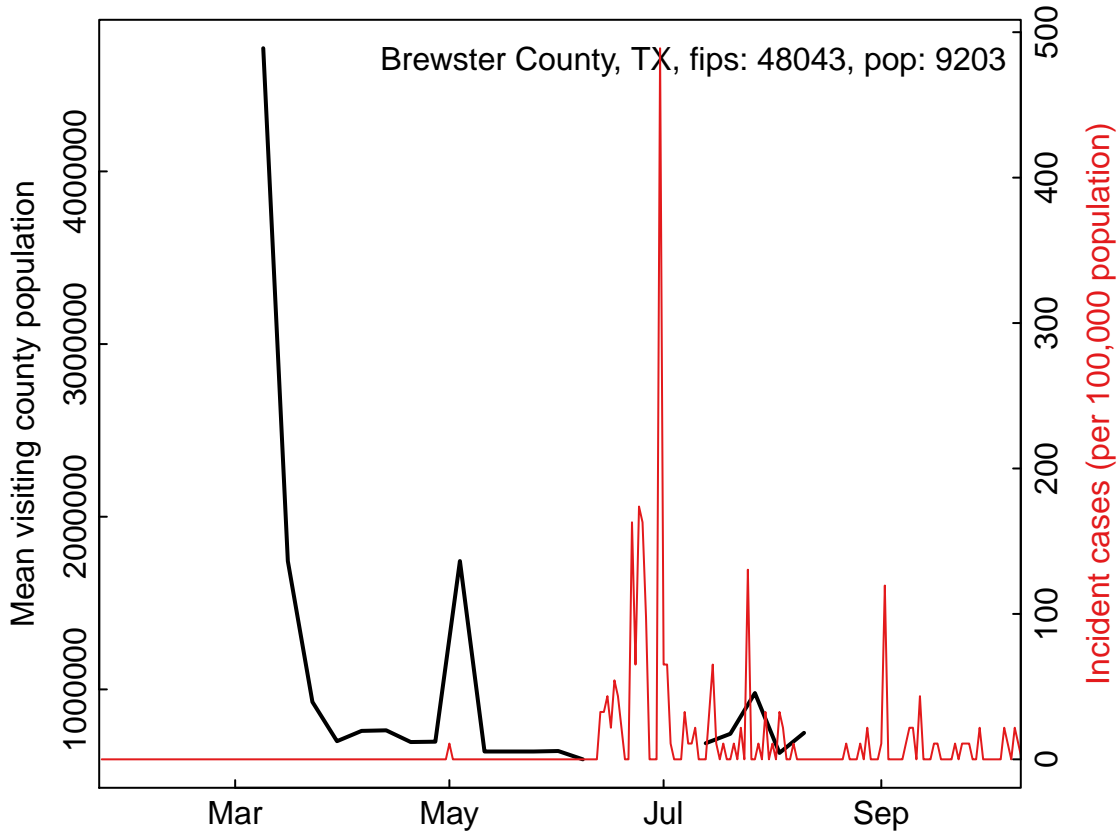

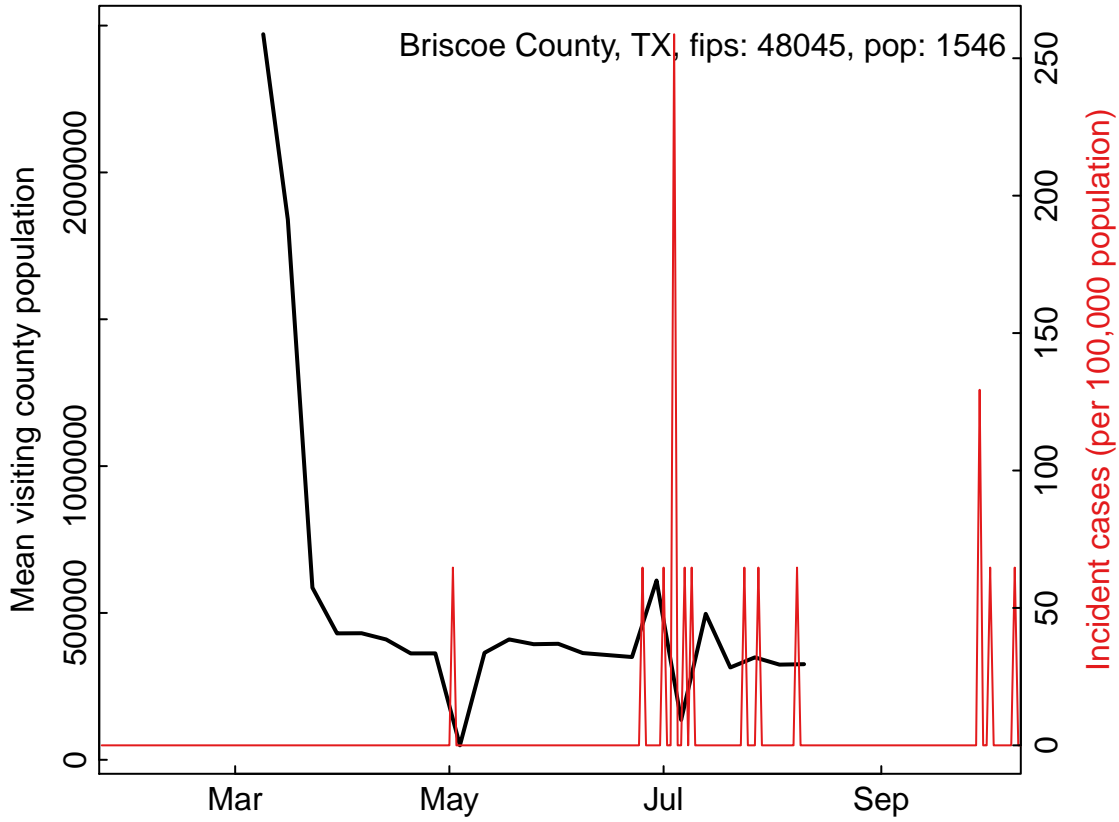

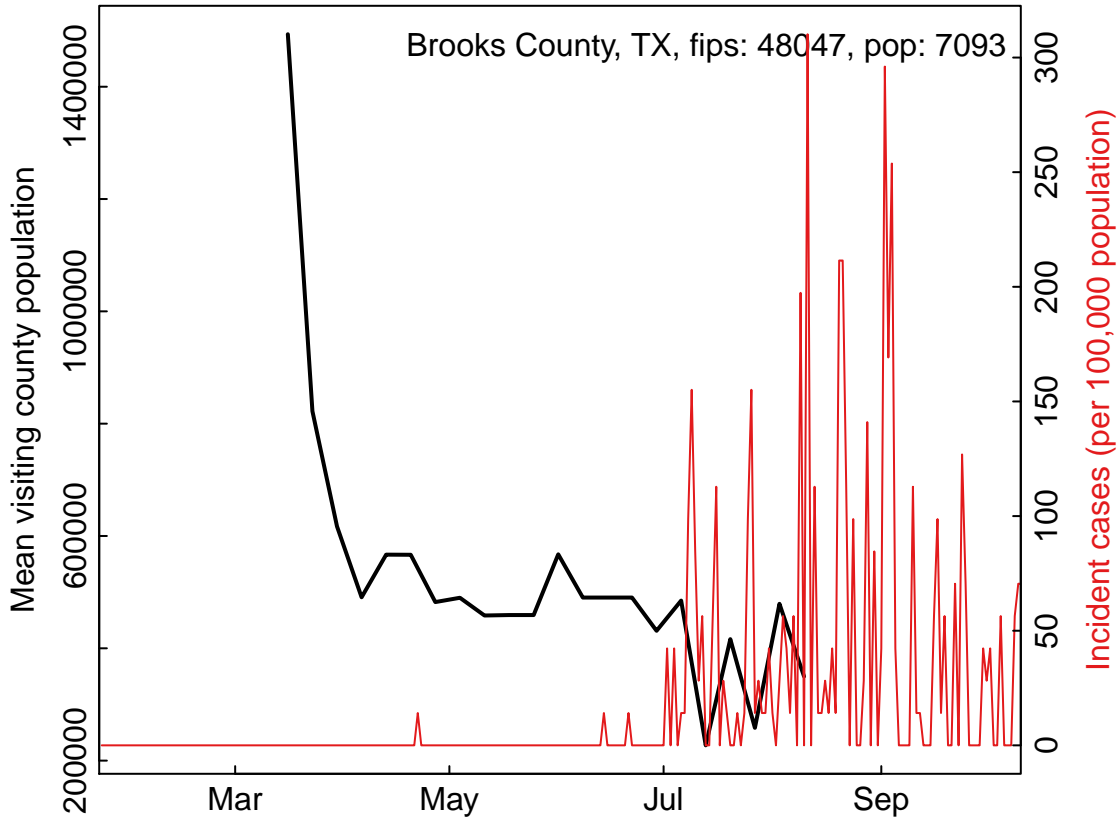

Brown County, TX, fips: 48049, pop: 37864

Mean visiting county population

2000000  
1500000  
1000000  
500000  
0

Incident cases (per 100,000 population)

150  
100  
50  
0

Mar May Jul Sep

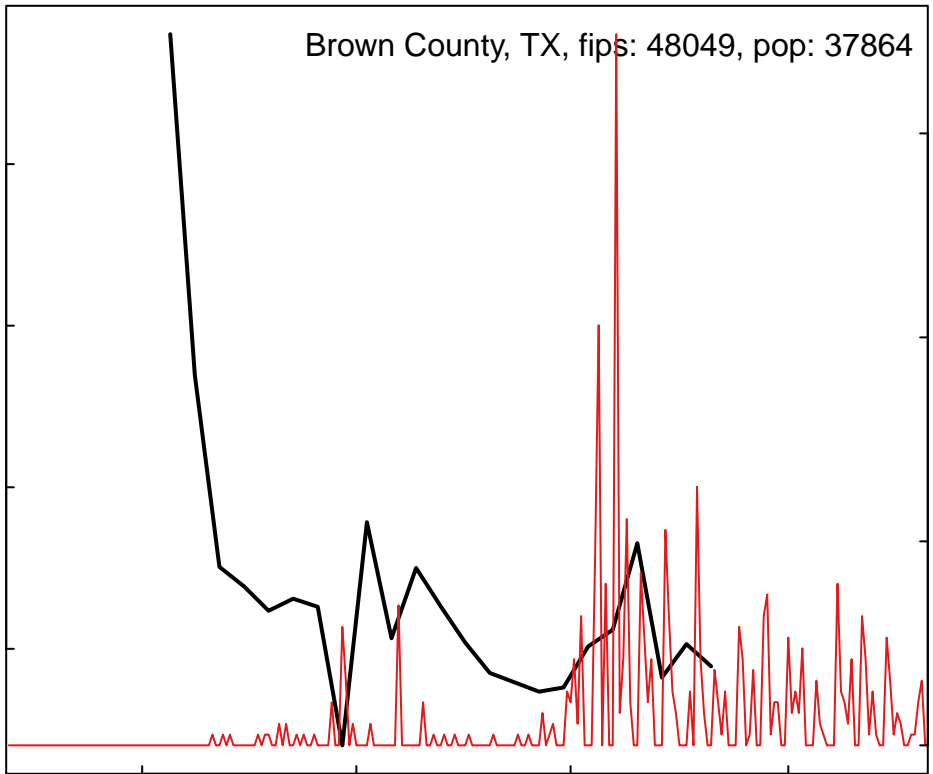

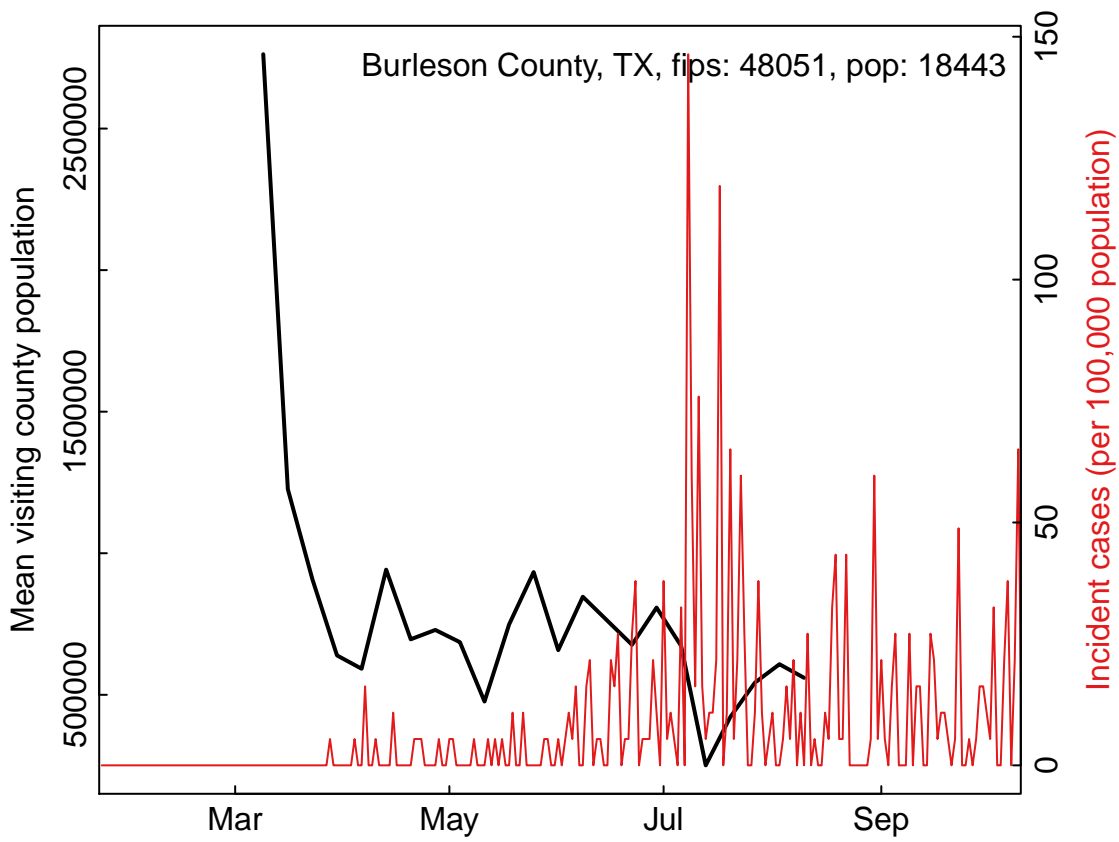

Burnet County, TX, fips: 48053, pop: 48155

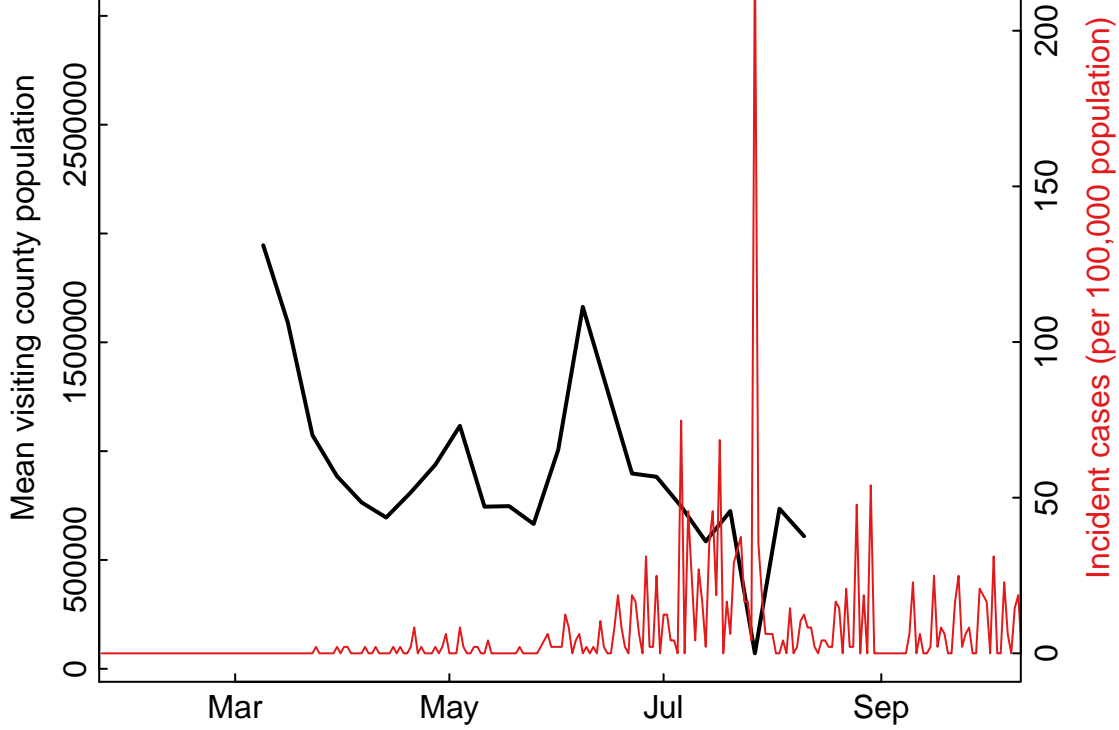

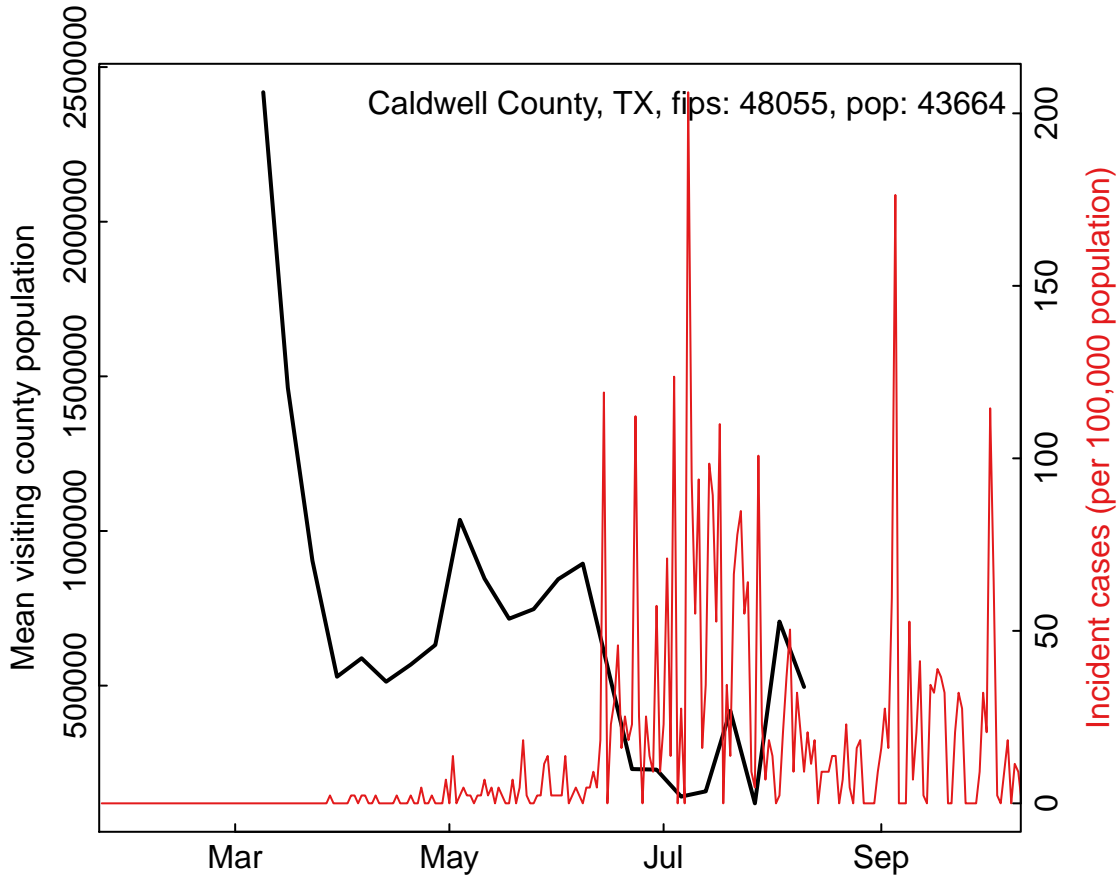



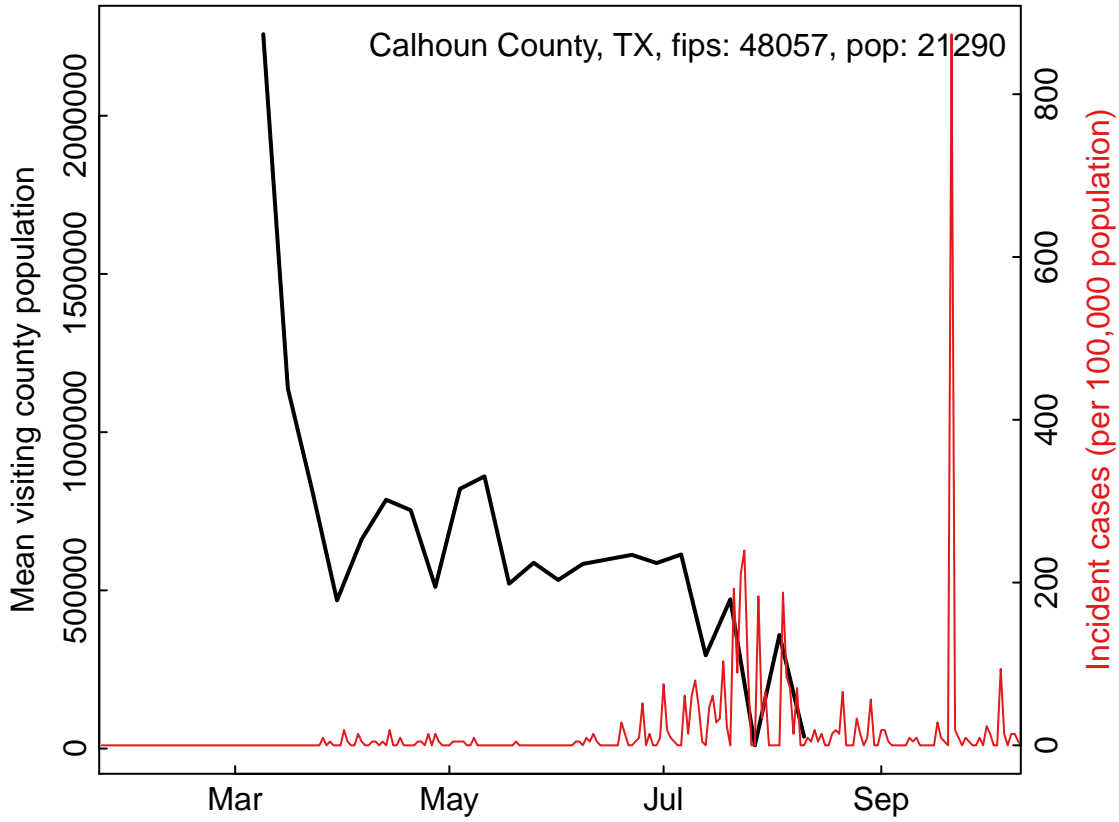

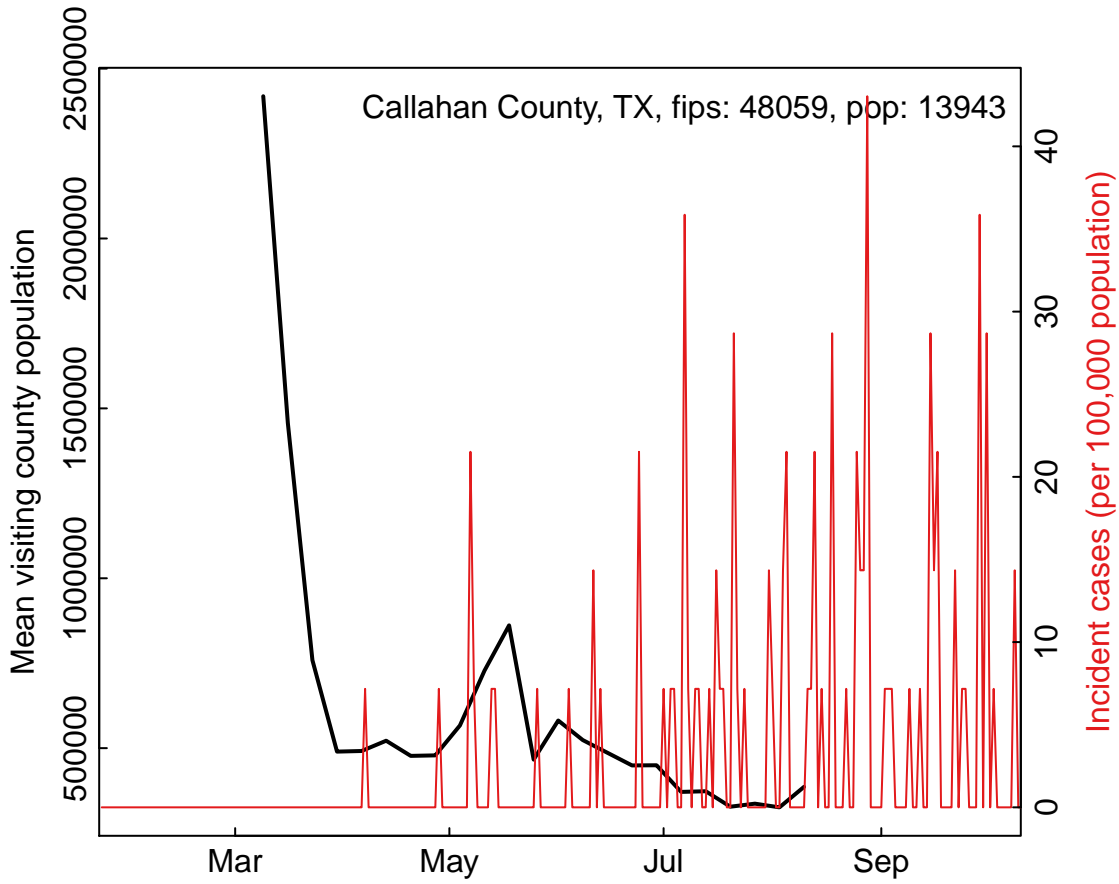

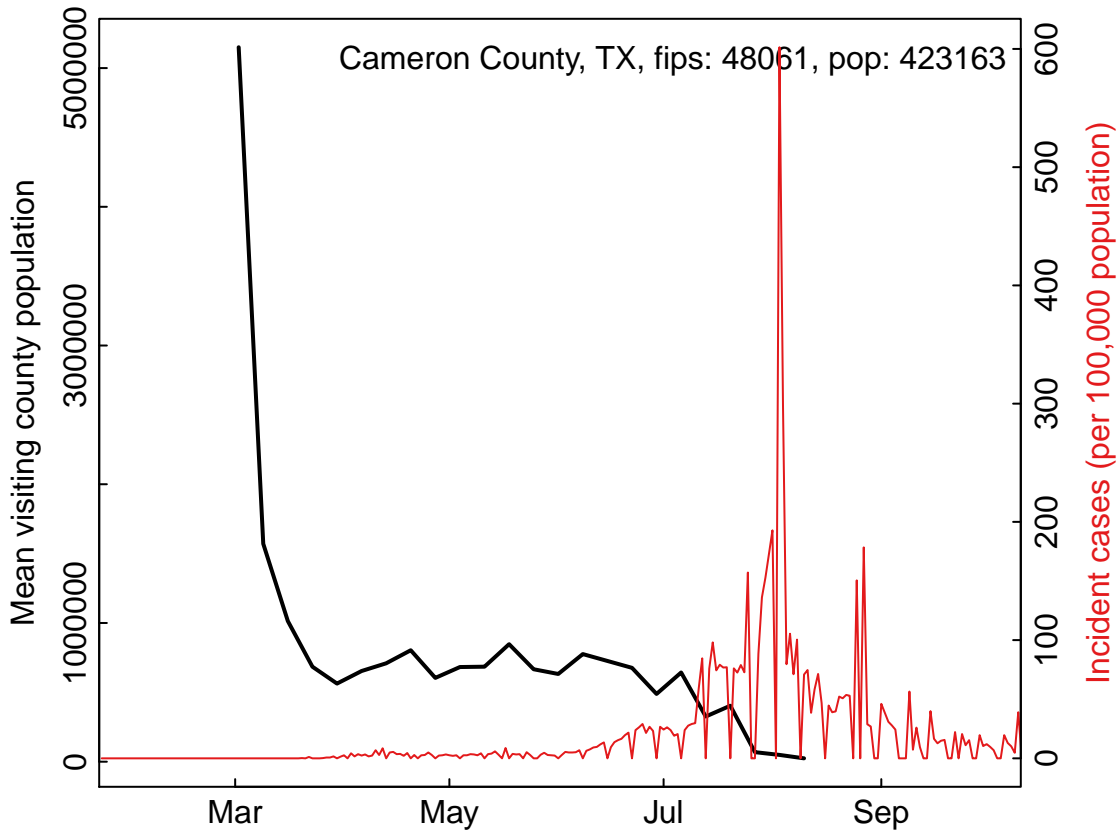

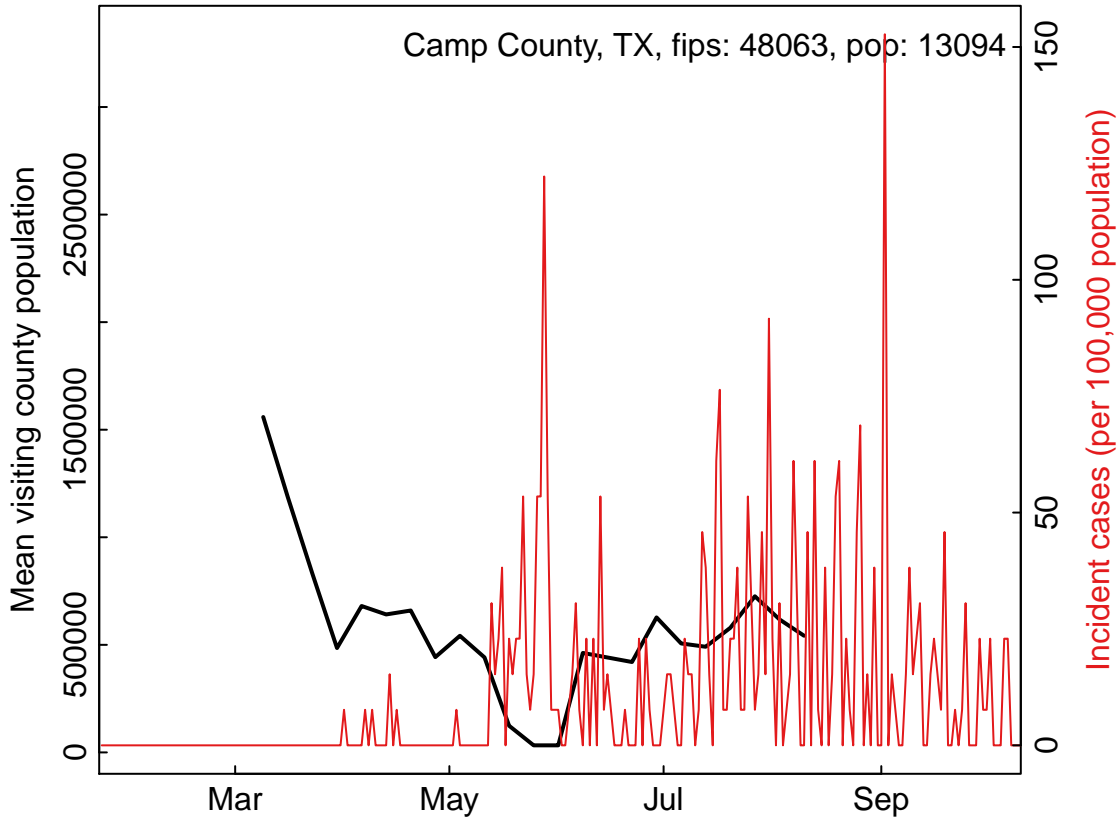

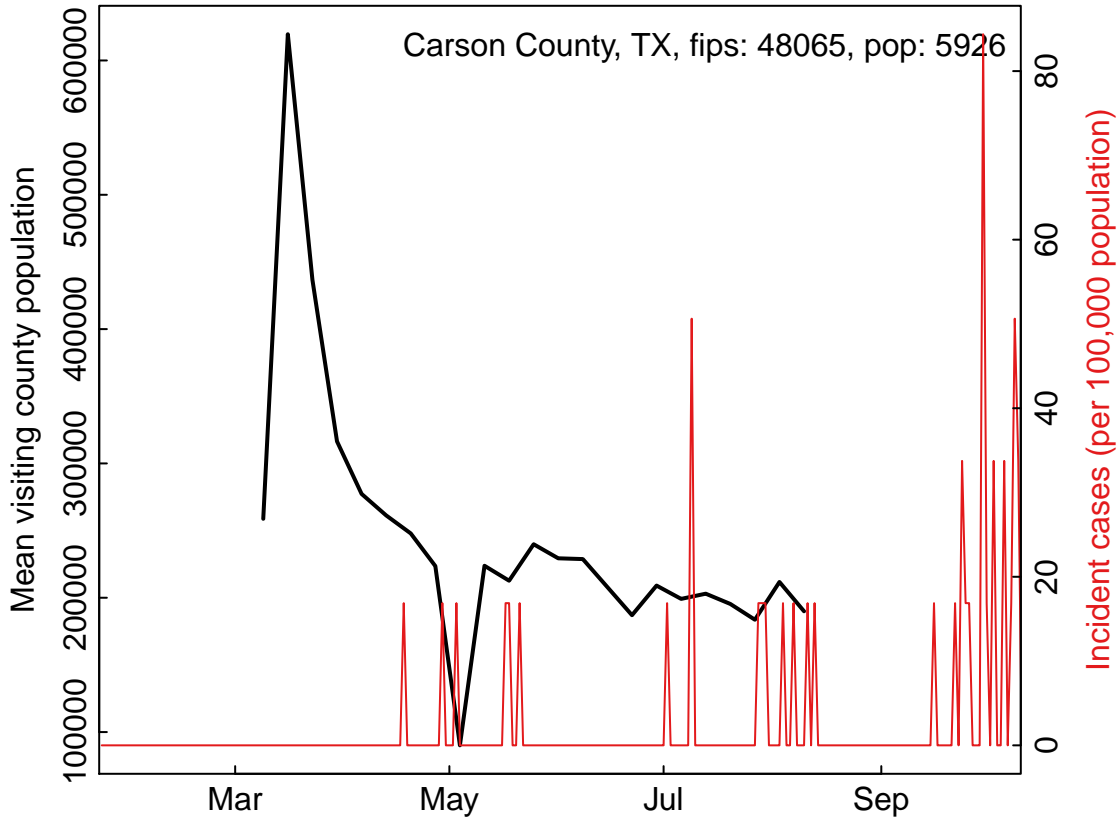

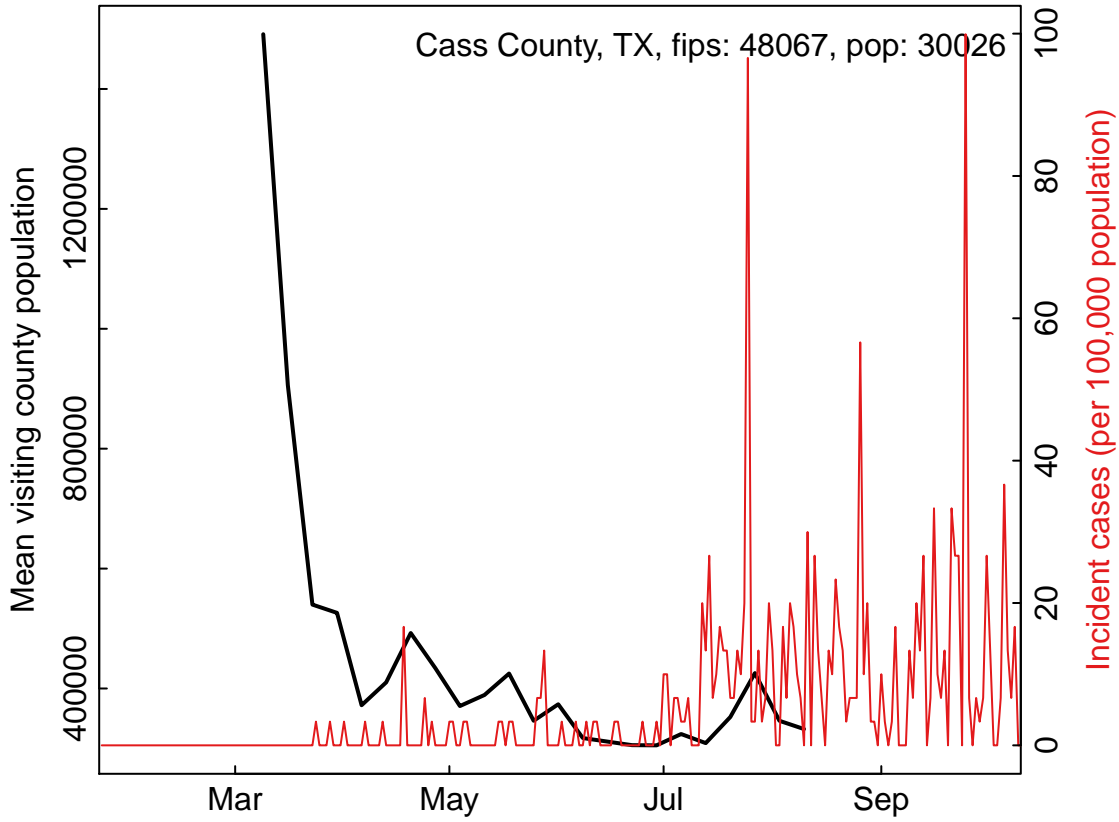

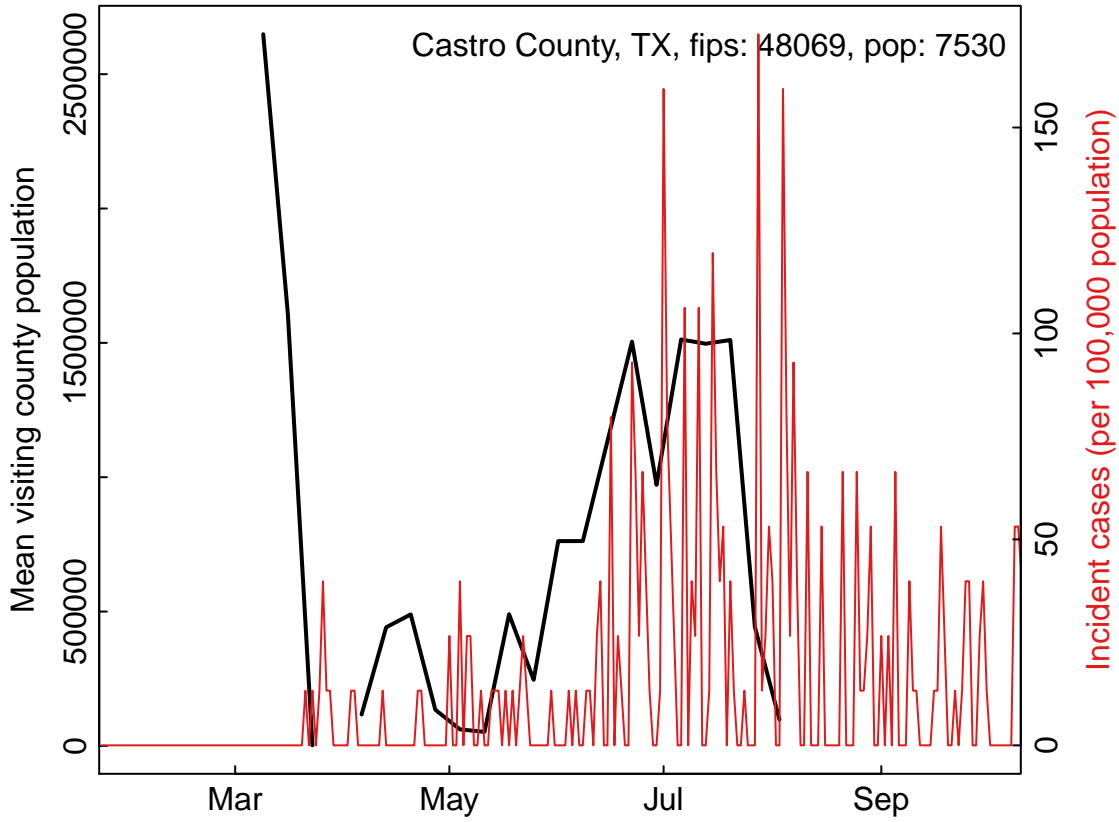

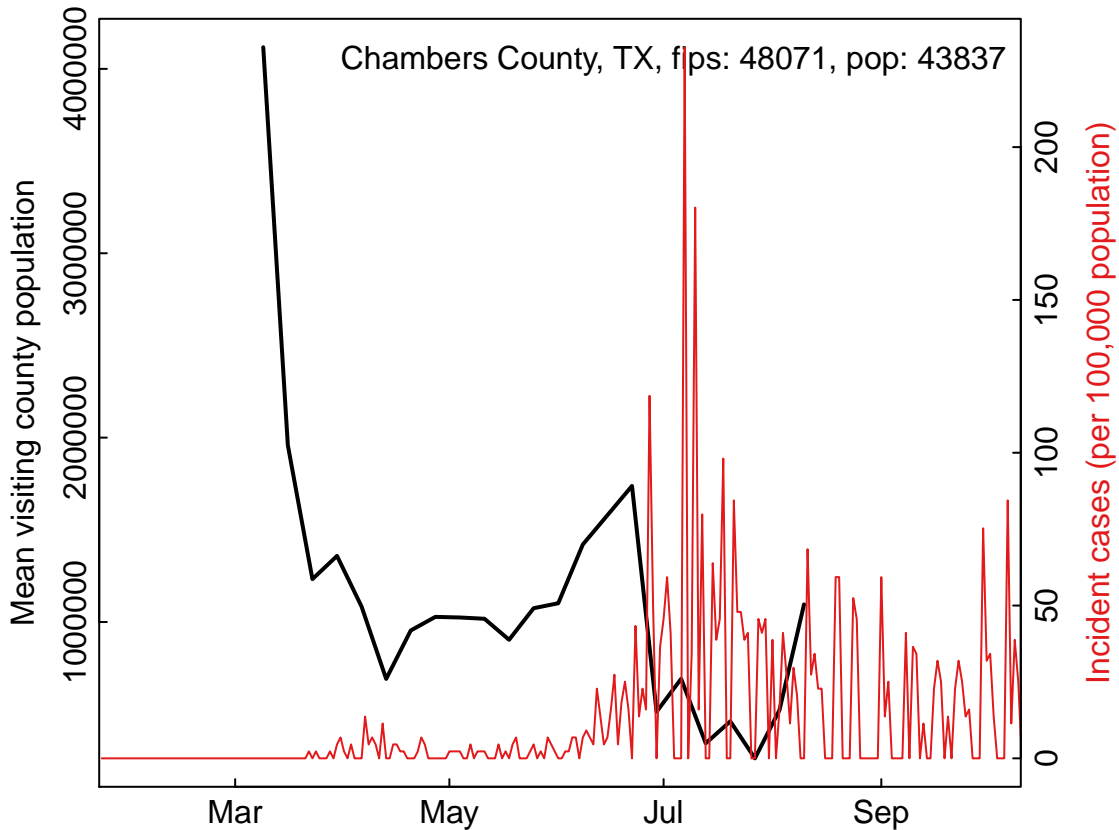



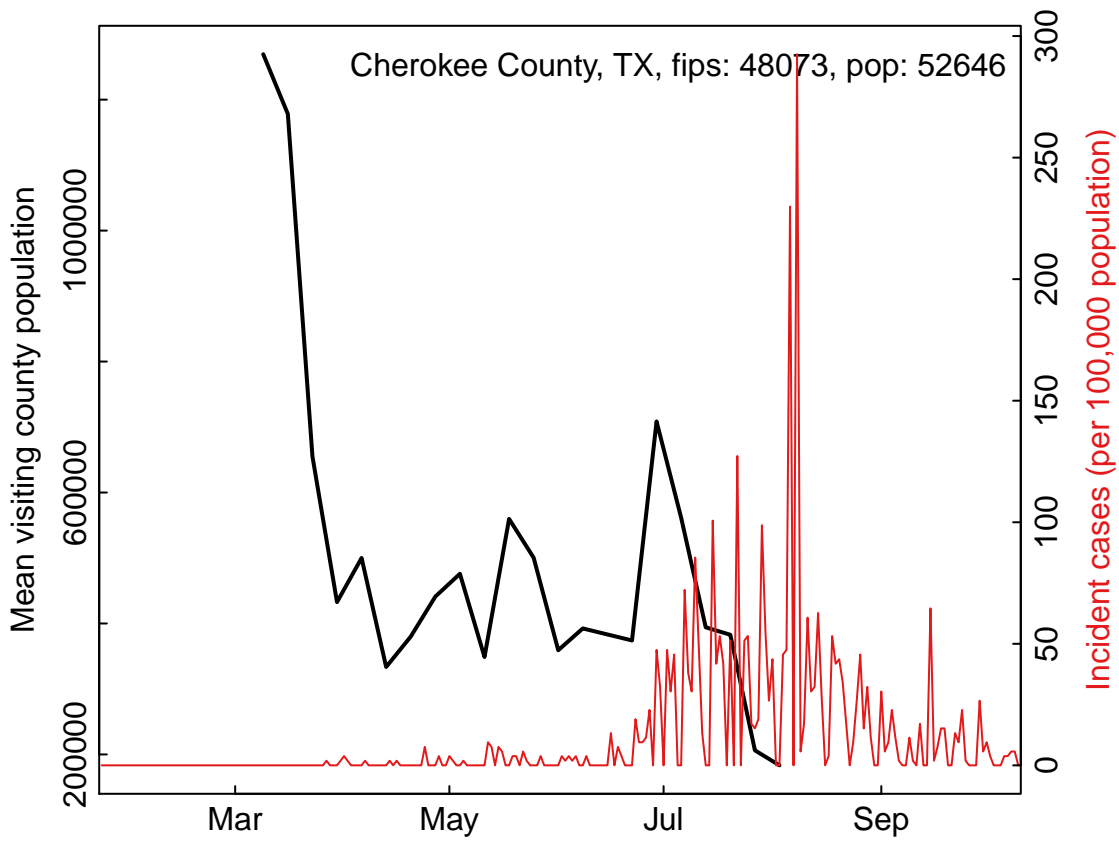

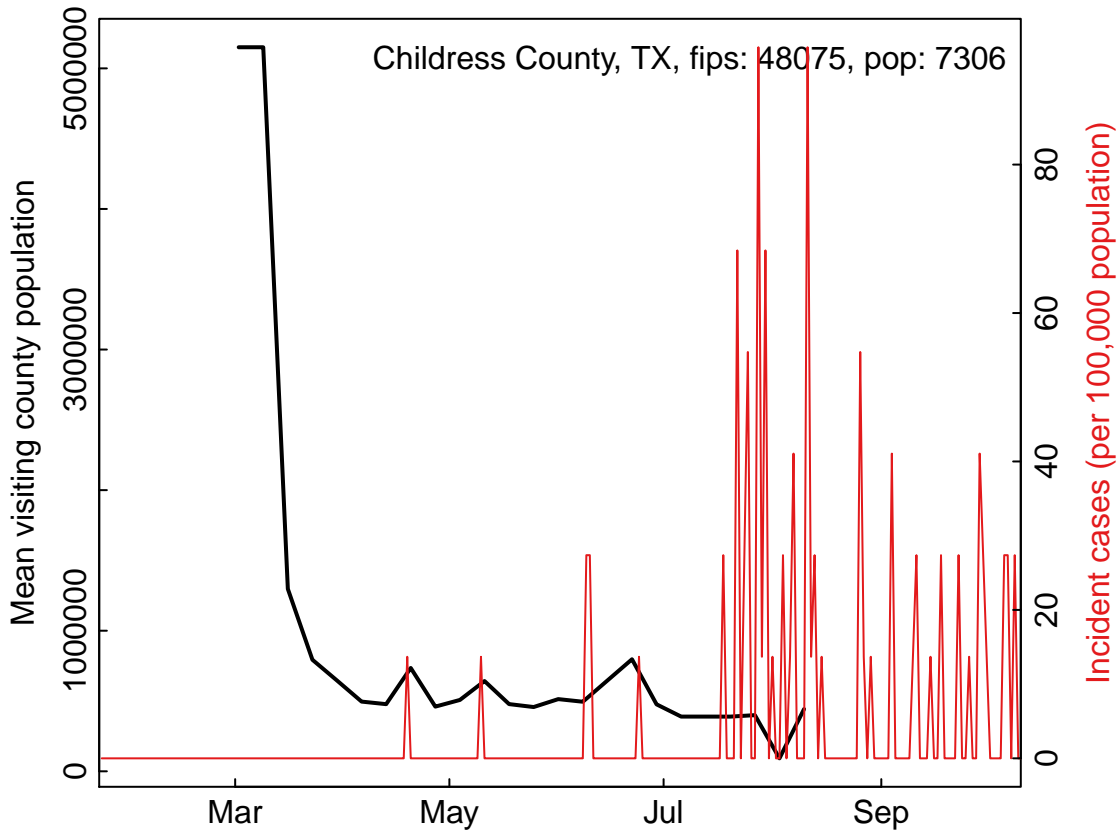

Clay County, TX, fips: 48077, pop: 10471

Mean visiting county population

1400000  
1000000  
600000

Mar

May

Jul

Sep

60  
40  
20  
0

Incident cases (per 100,000 population)

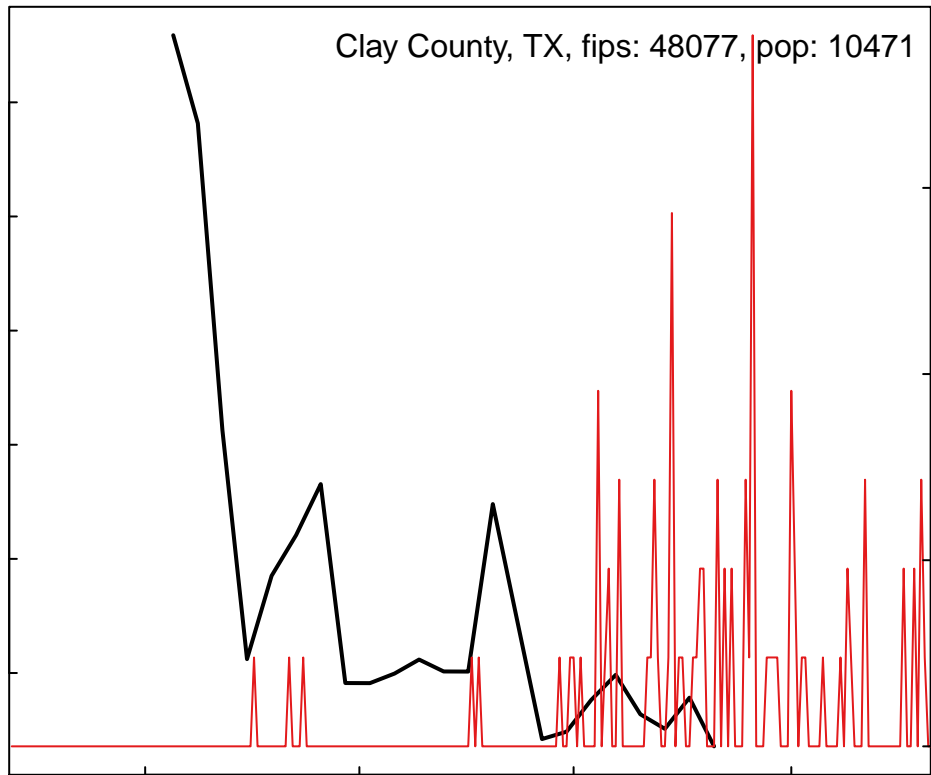

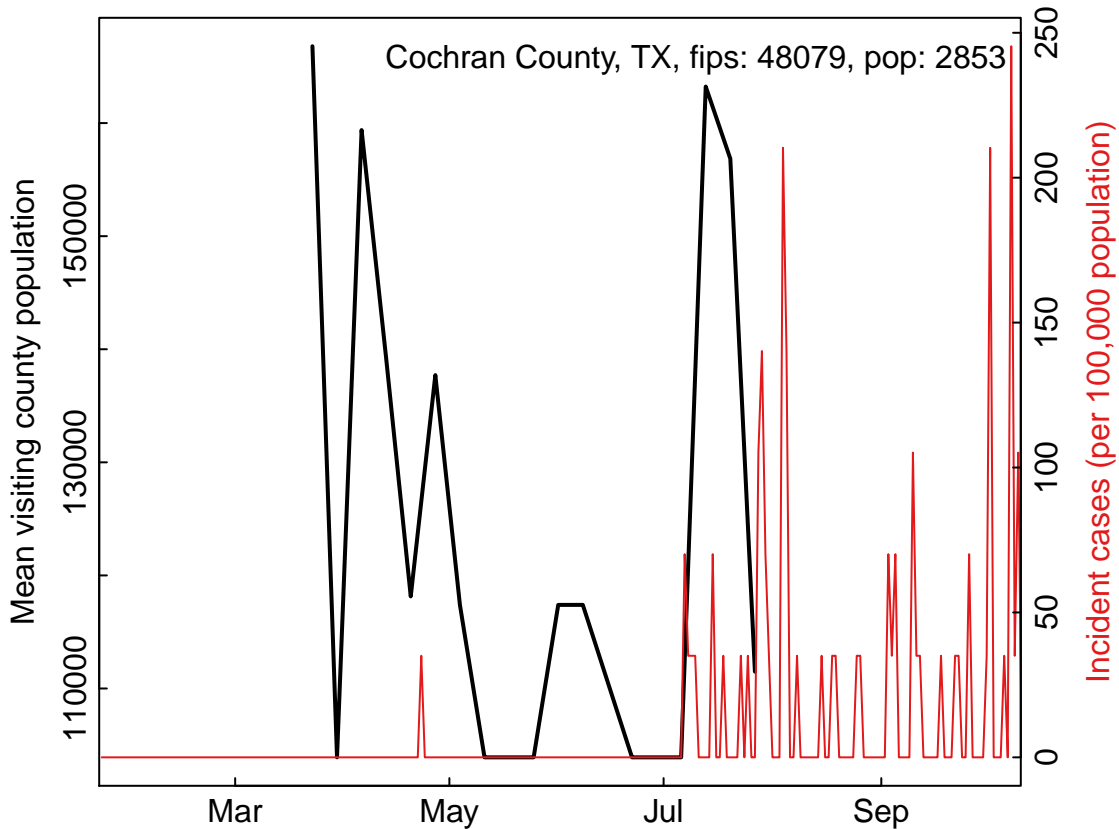

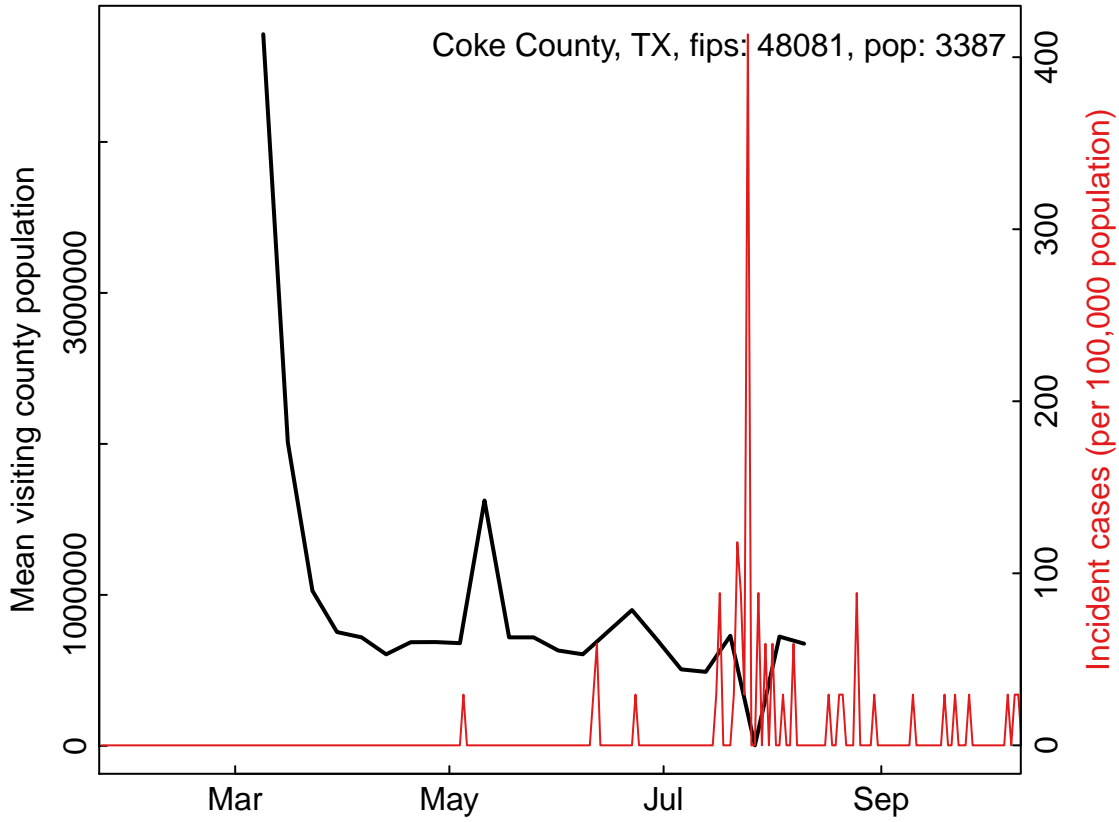

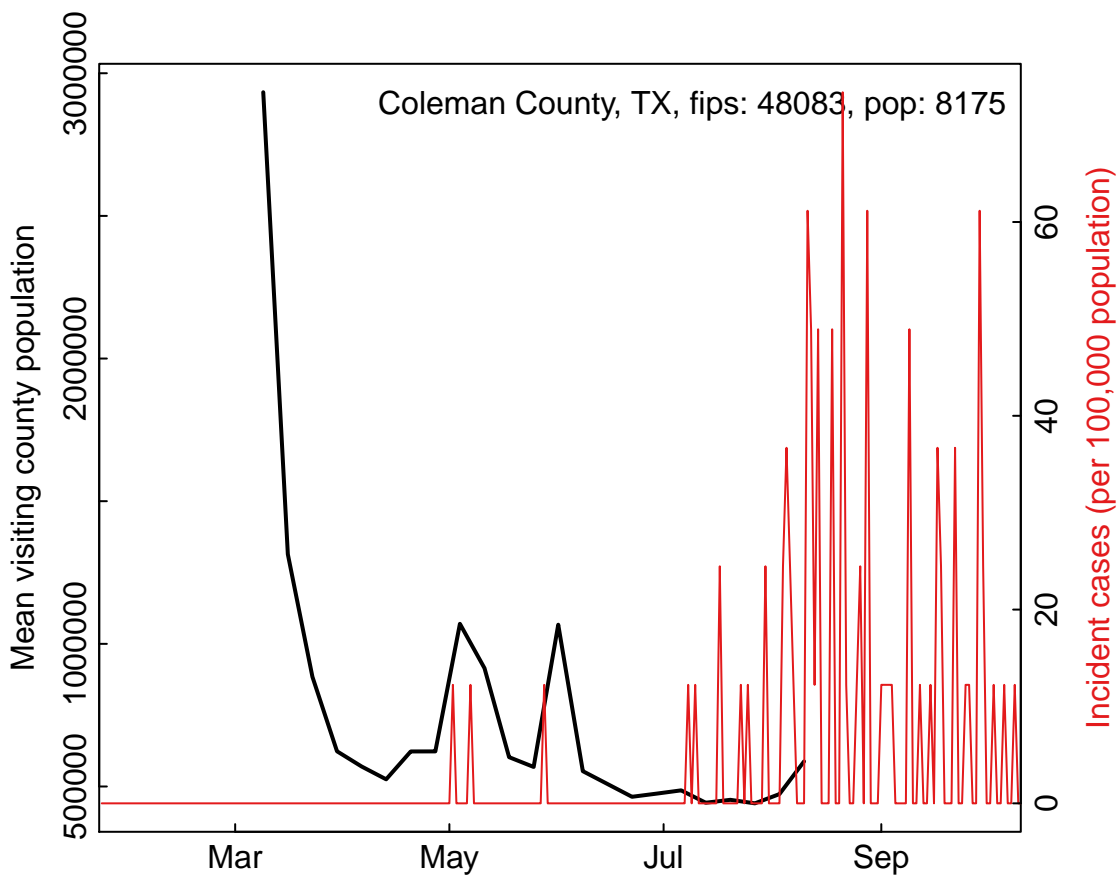

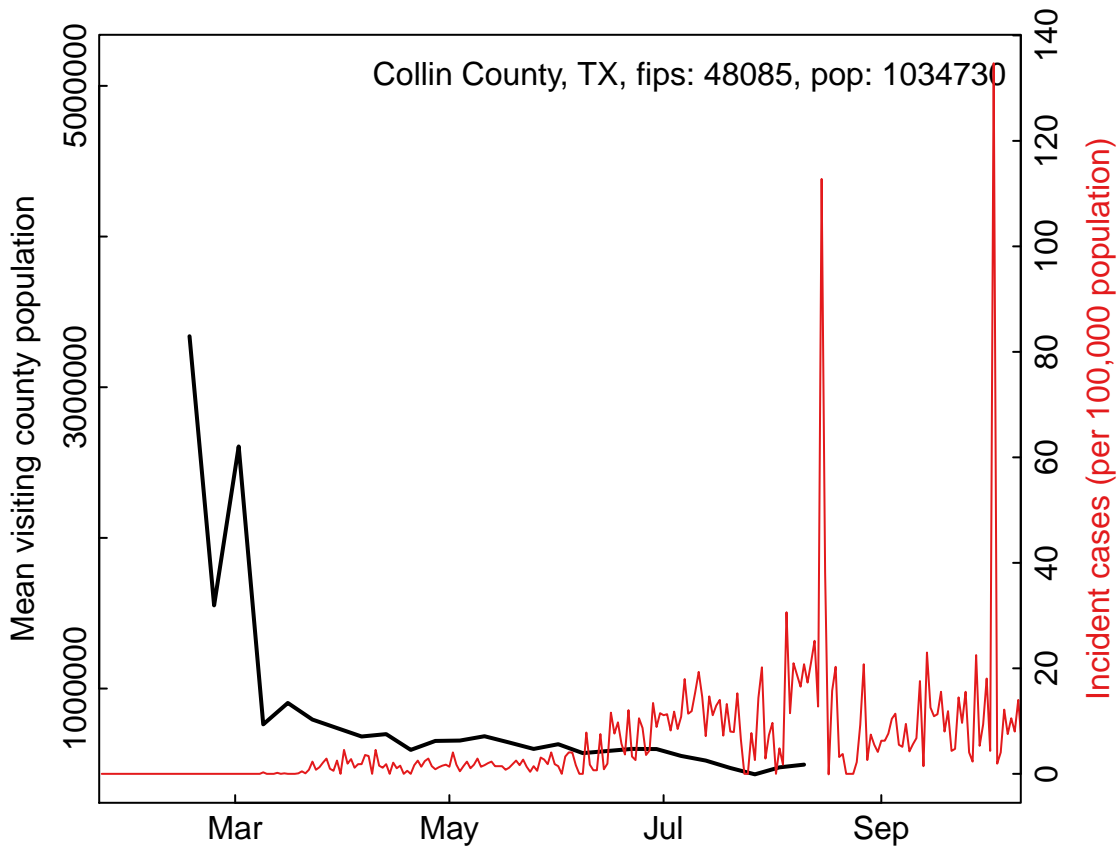

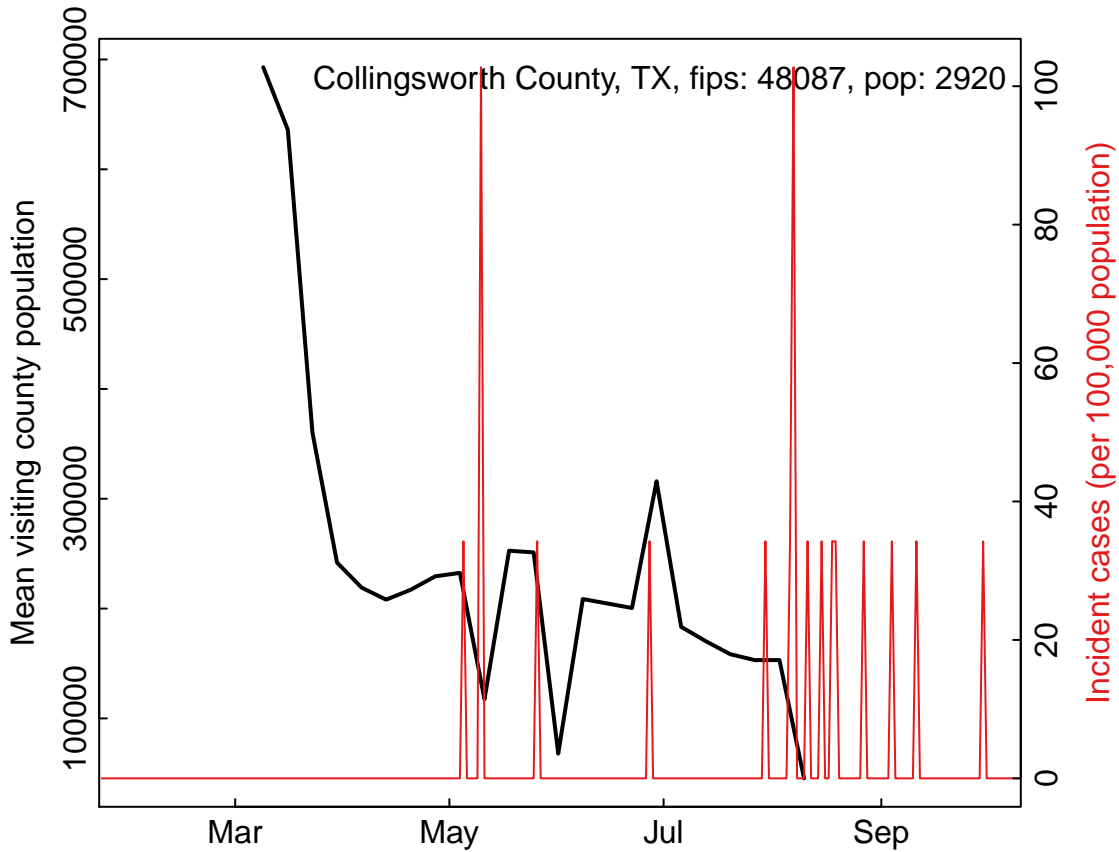



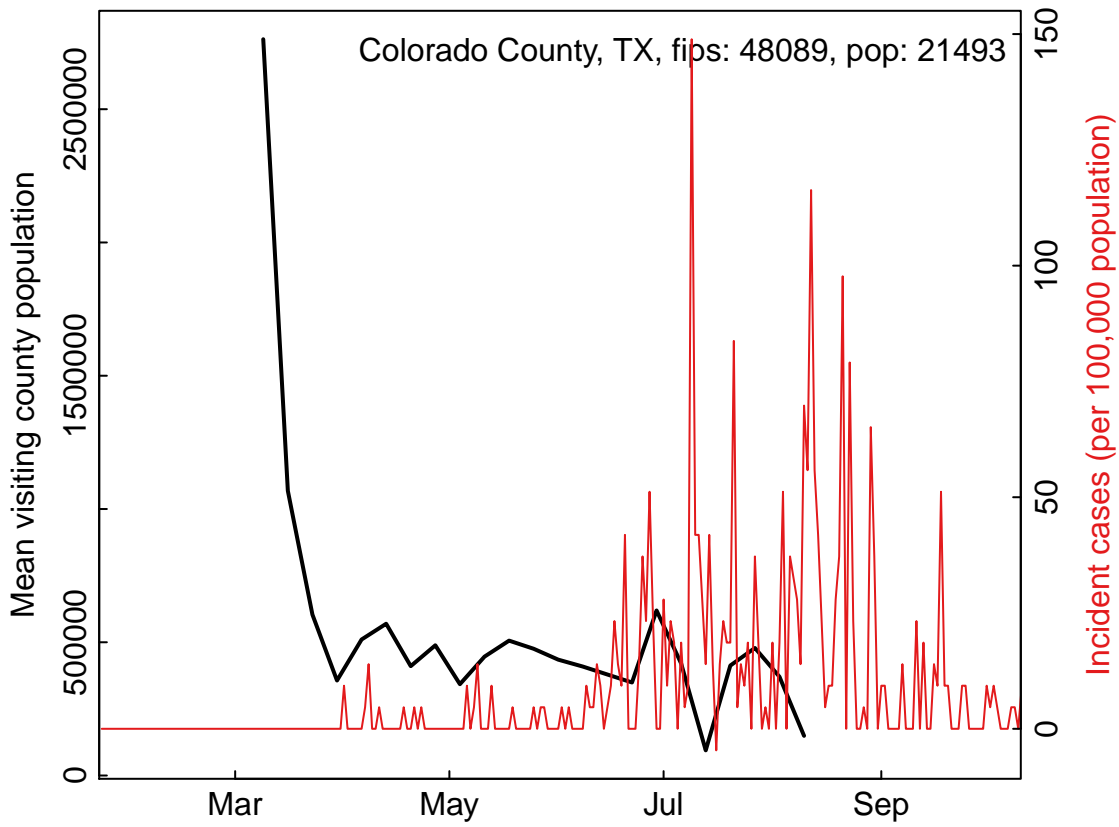

Comal County, TX, fips: 48091, pop: 156209

Mean visiting county population

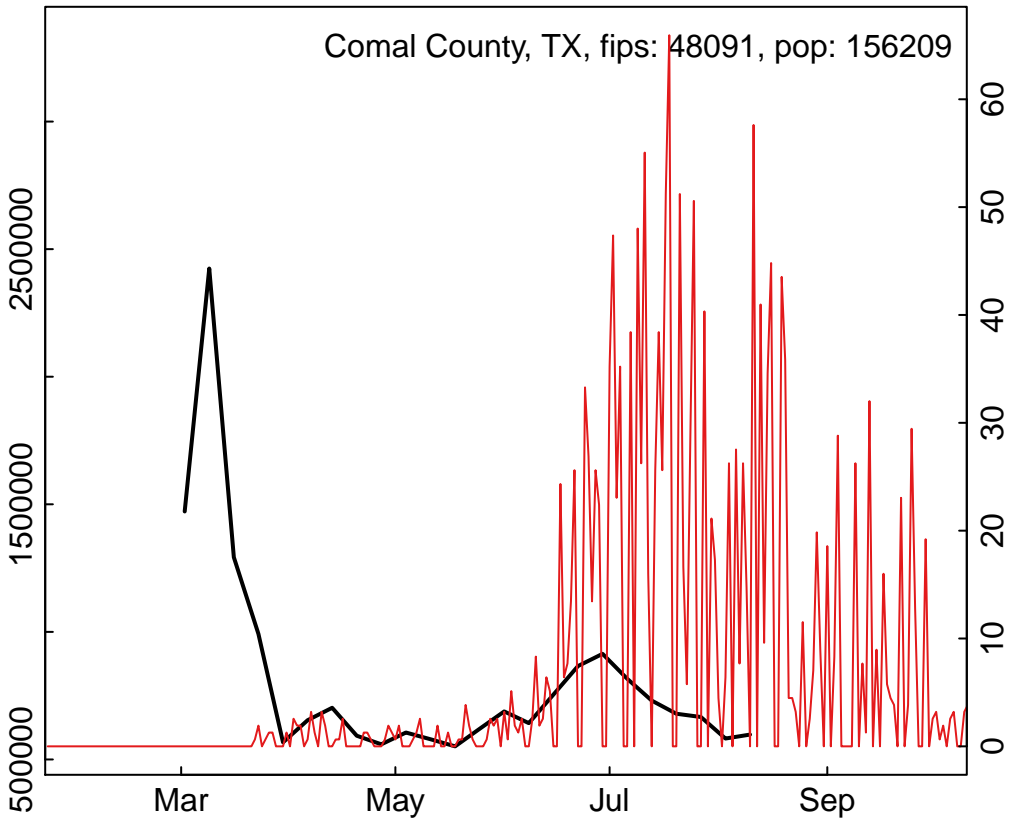

Incident cases (per 100,000 population)

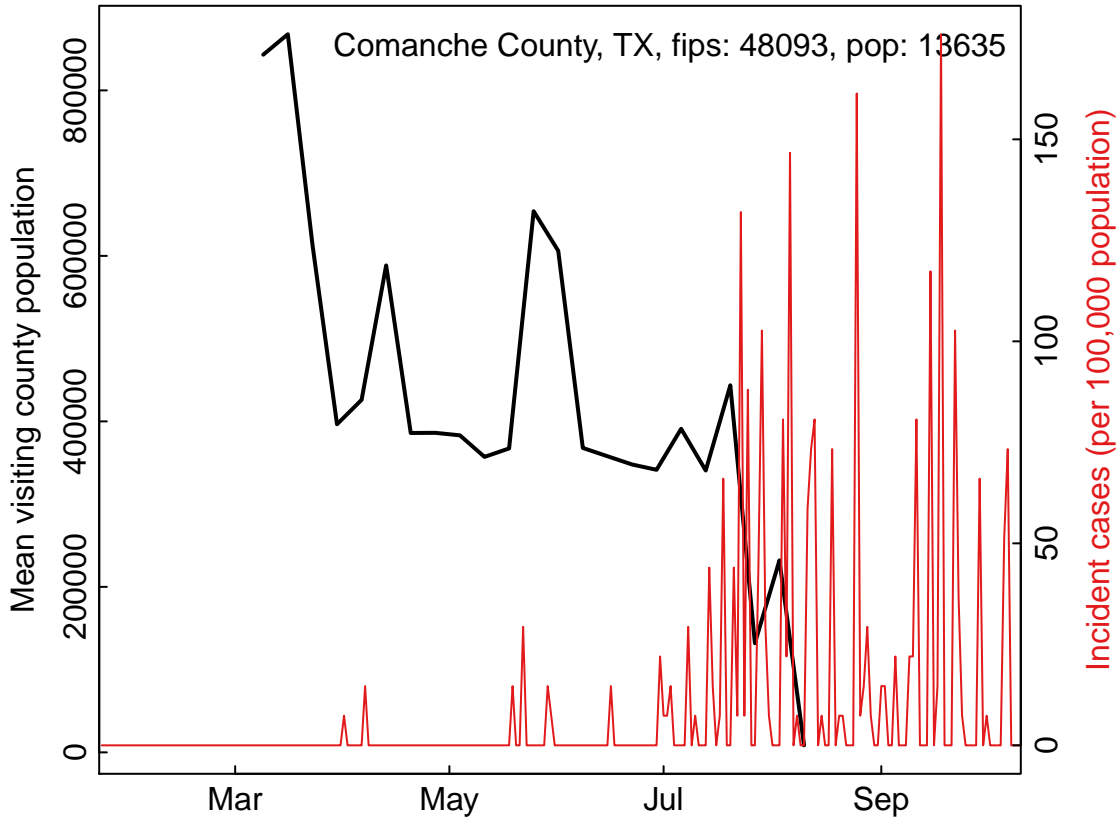

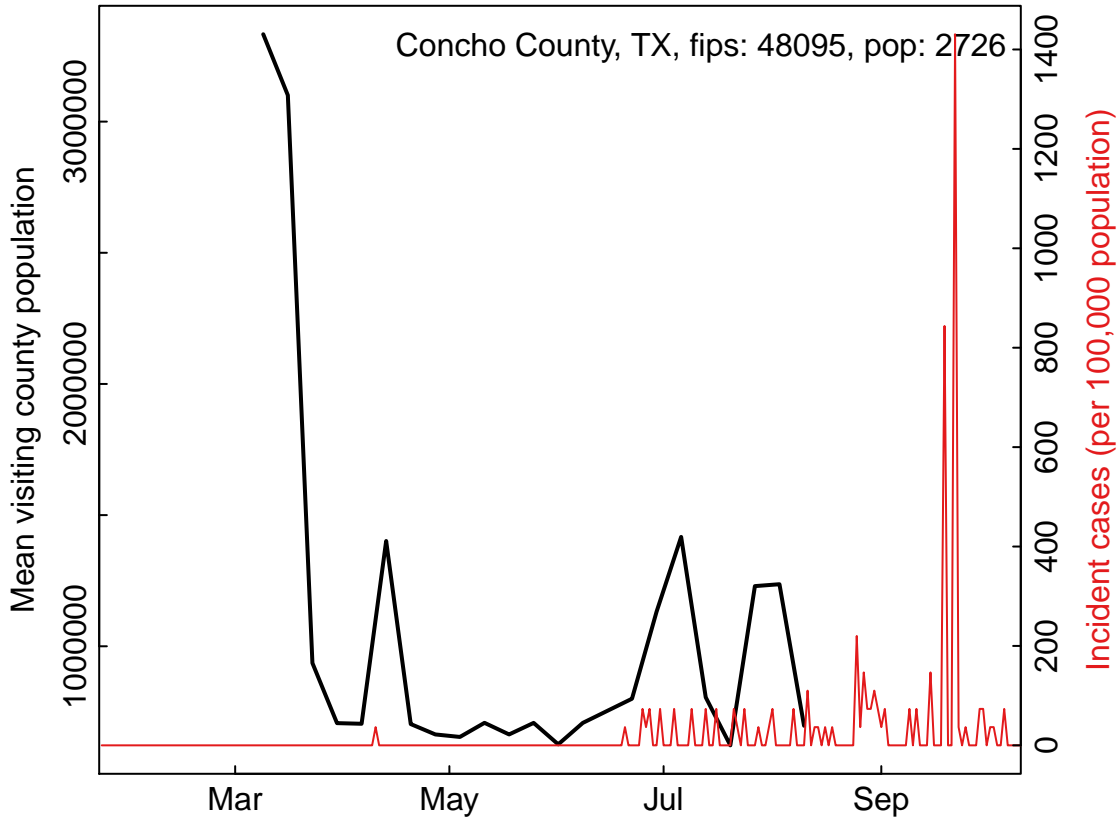

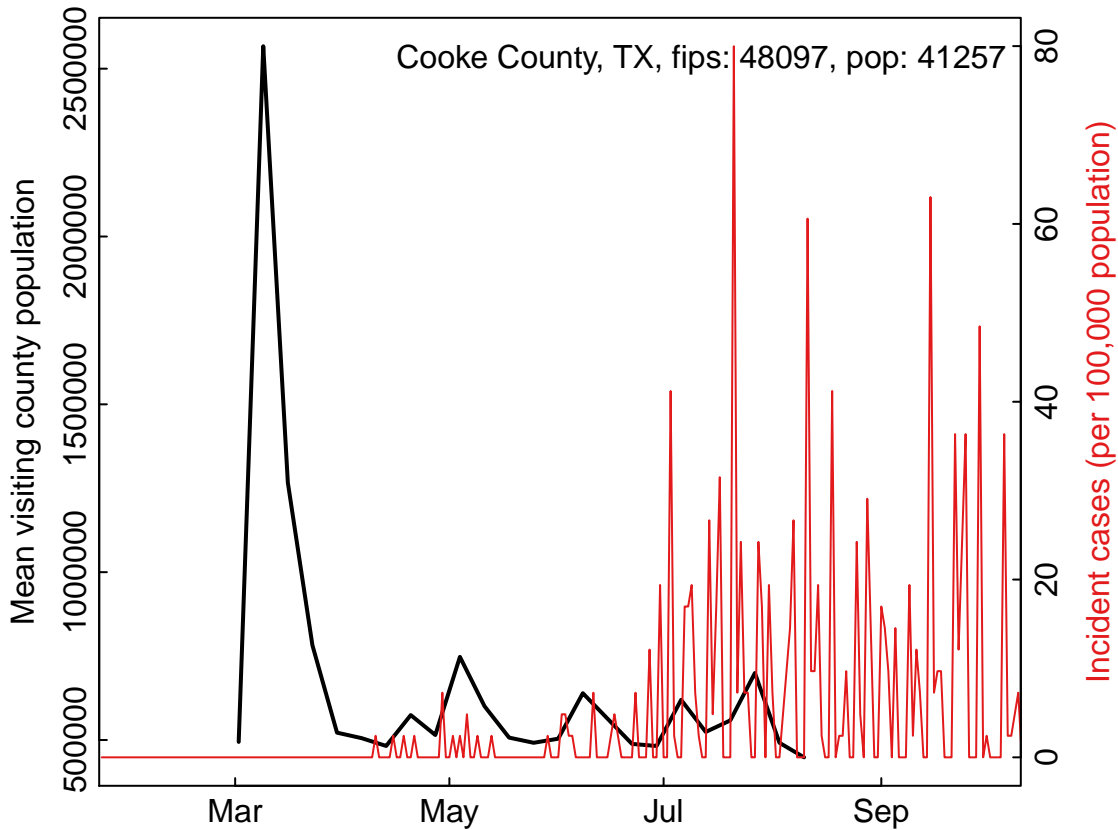

Coryell County, TX, fips: 48099, pop: 75951

Mean visiting county population

1200000  
800000  
400000

Mar May Jul Sep

Incident cases (per 100,000 population)

300  
200  
100  
0

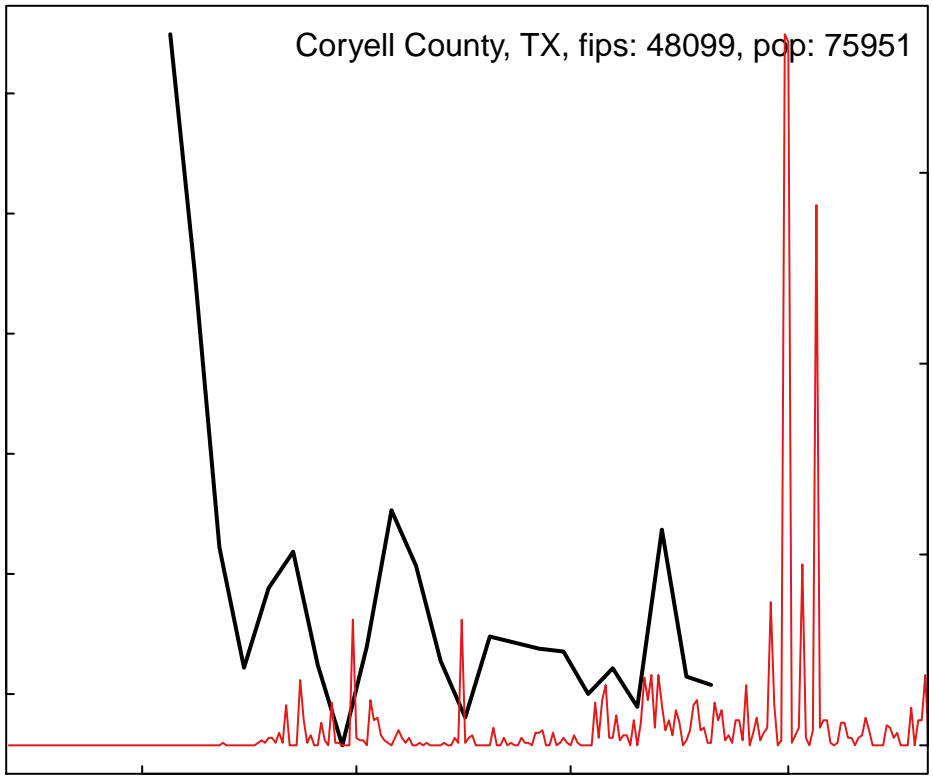



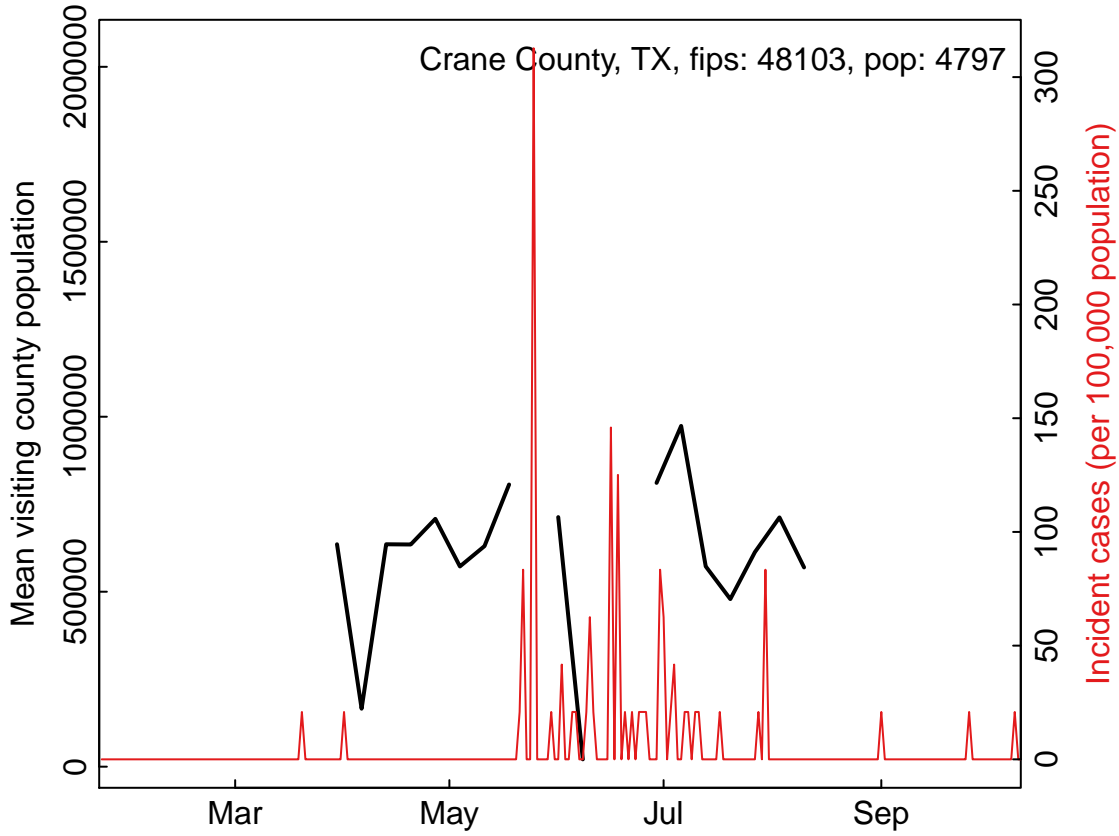



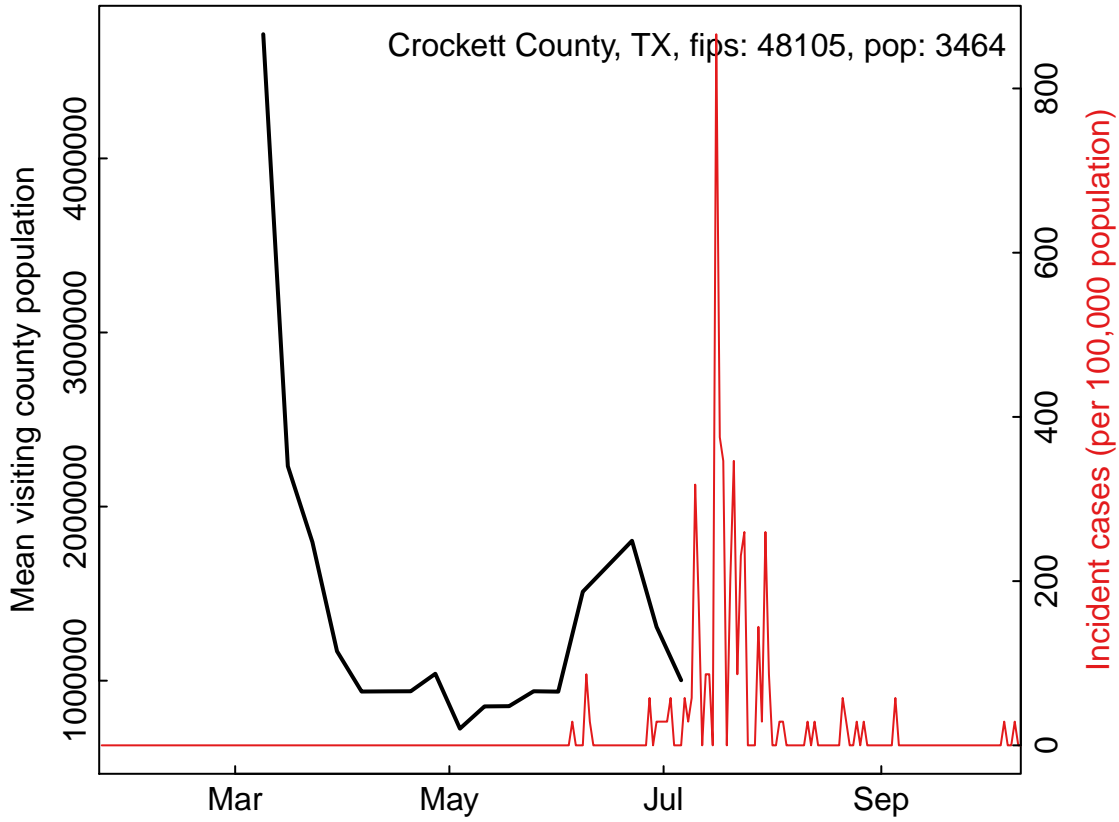

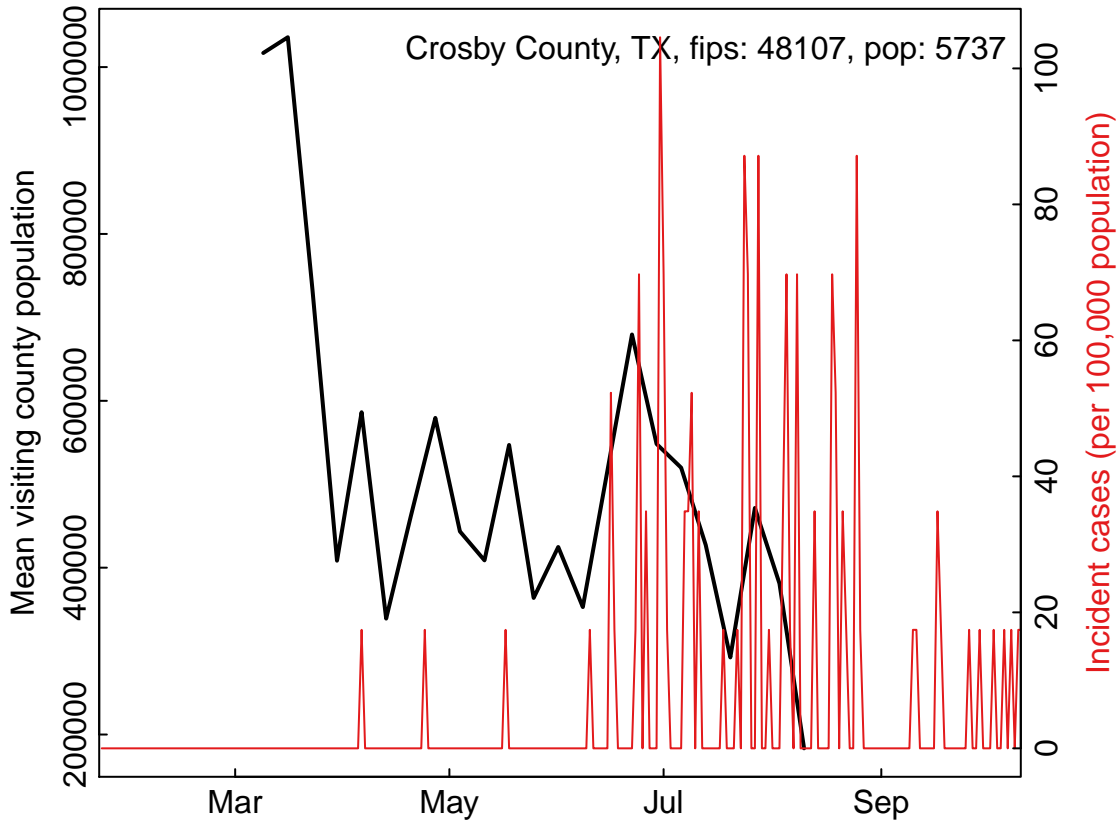

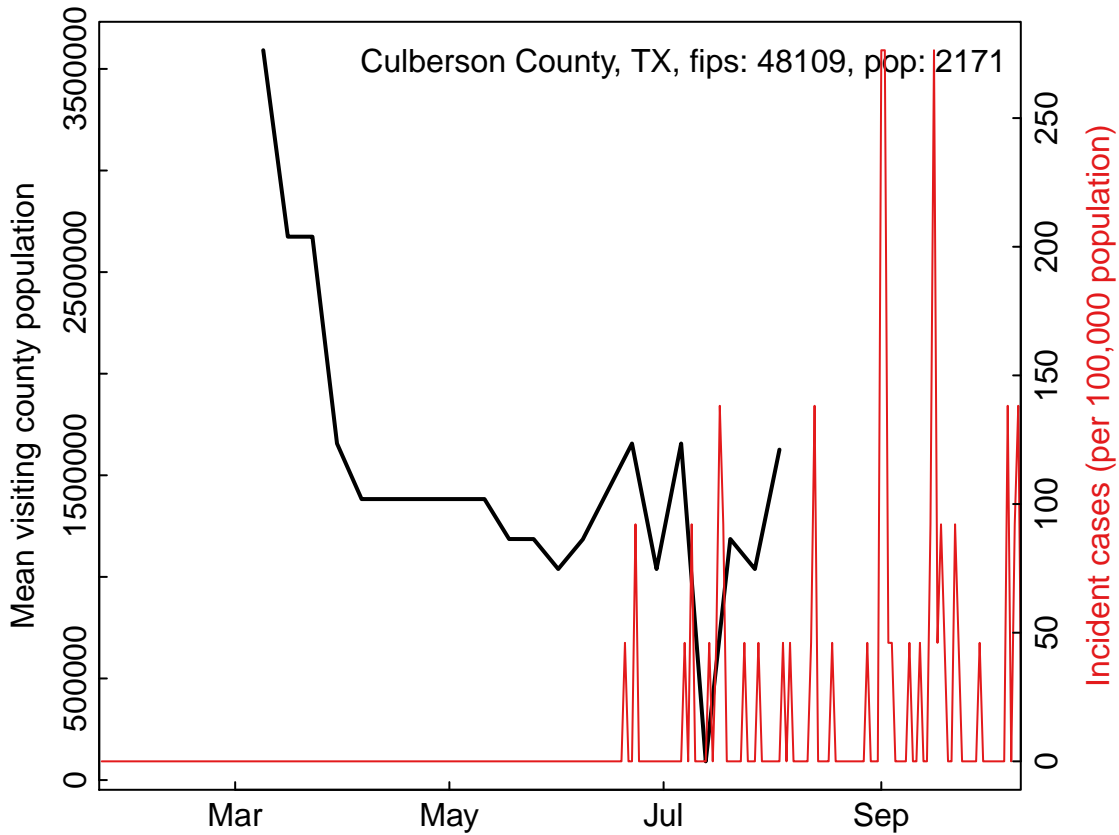

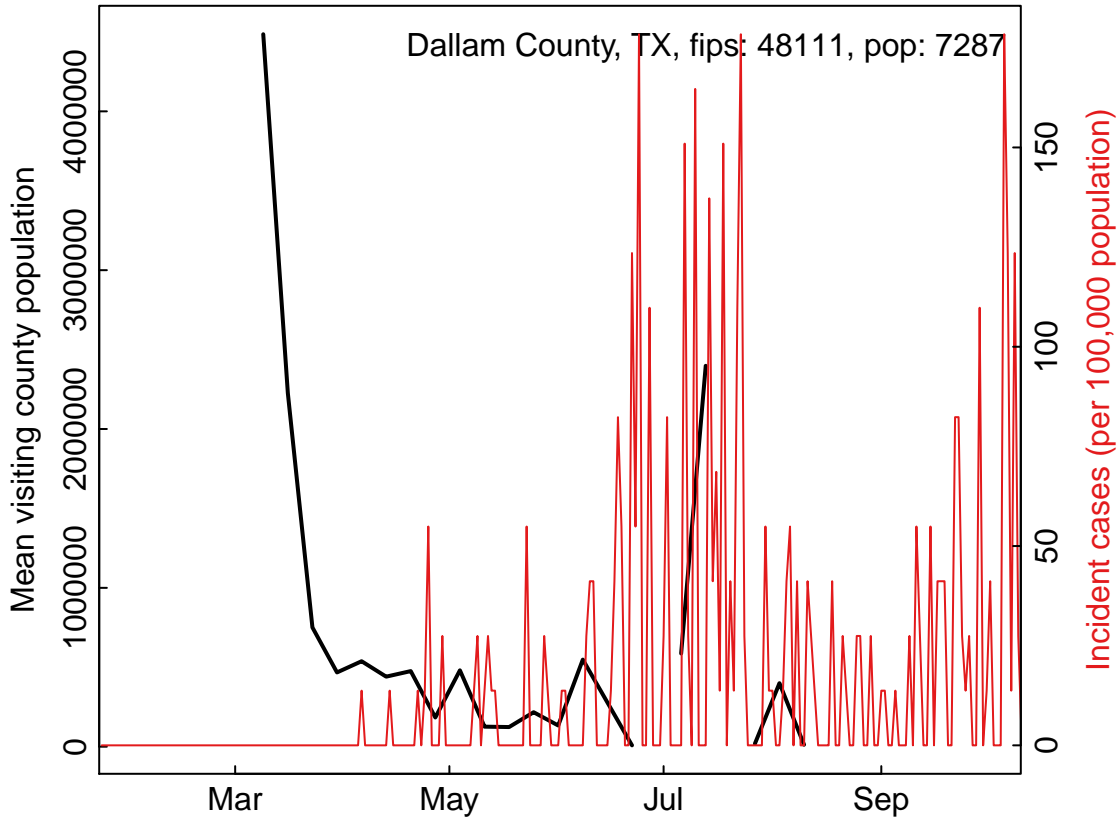

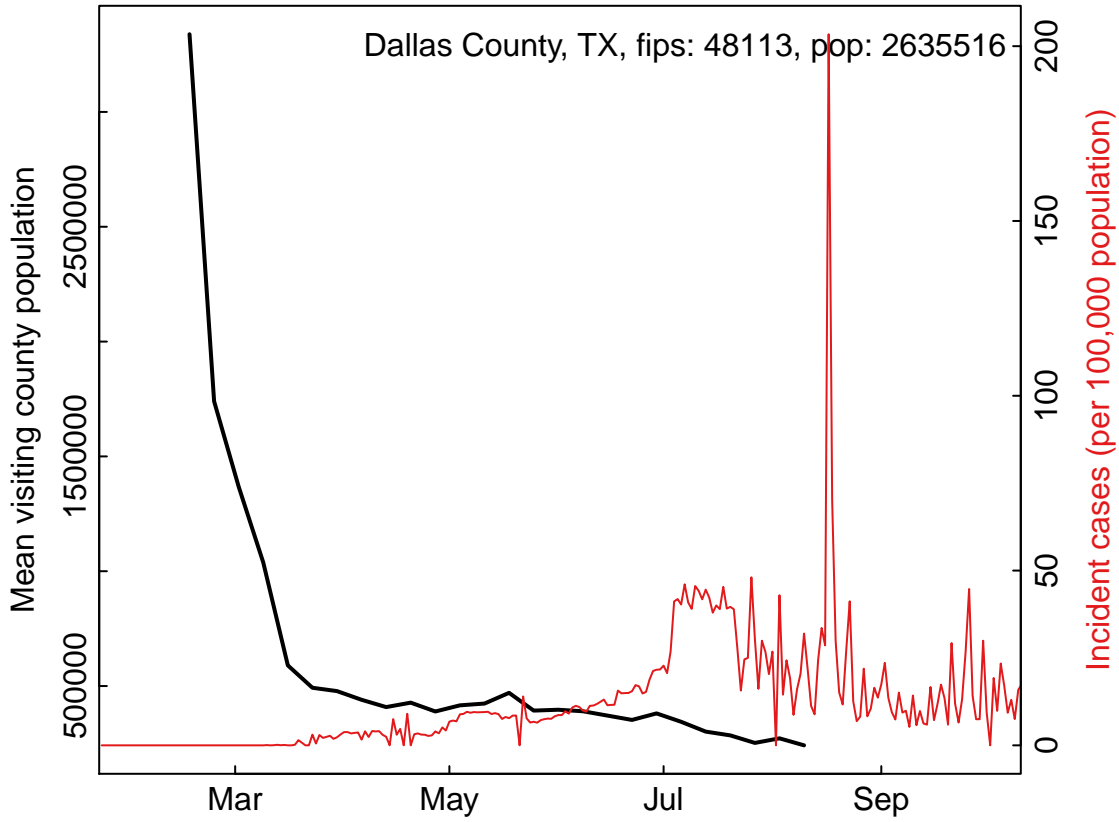

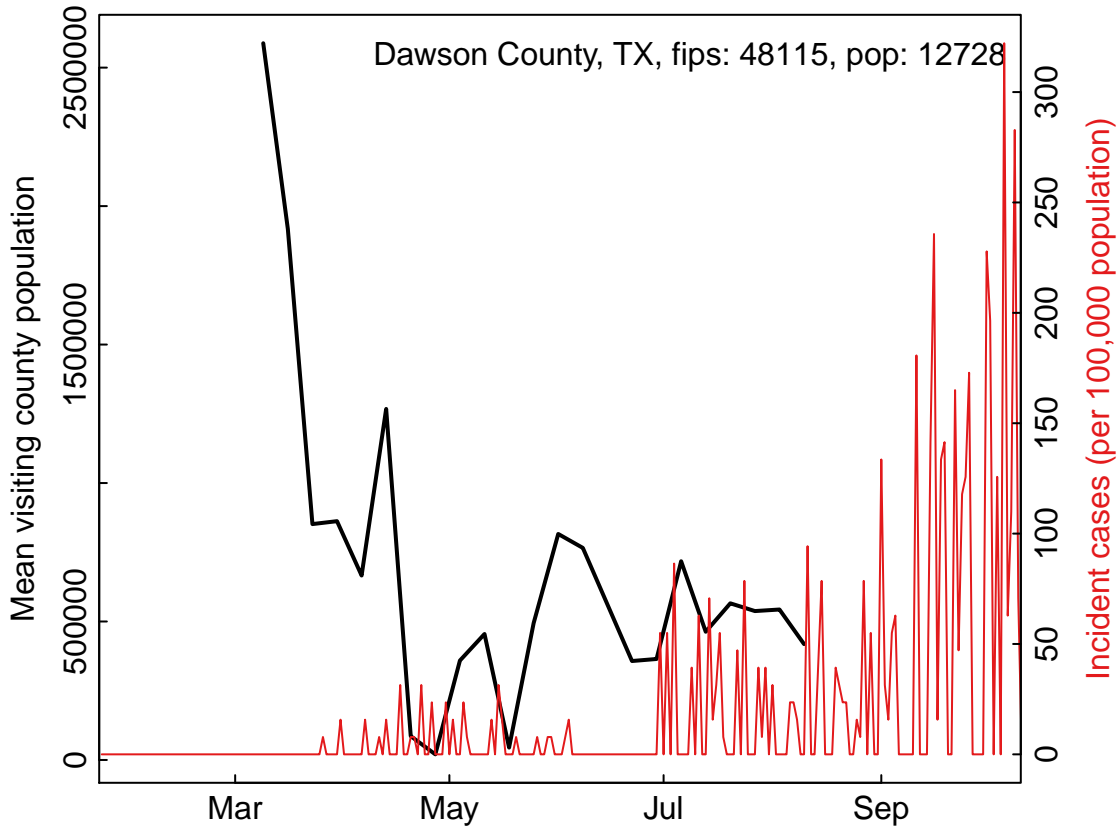

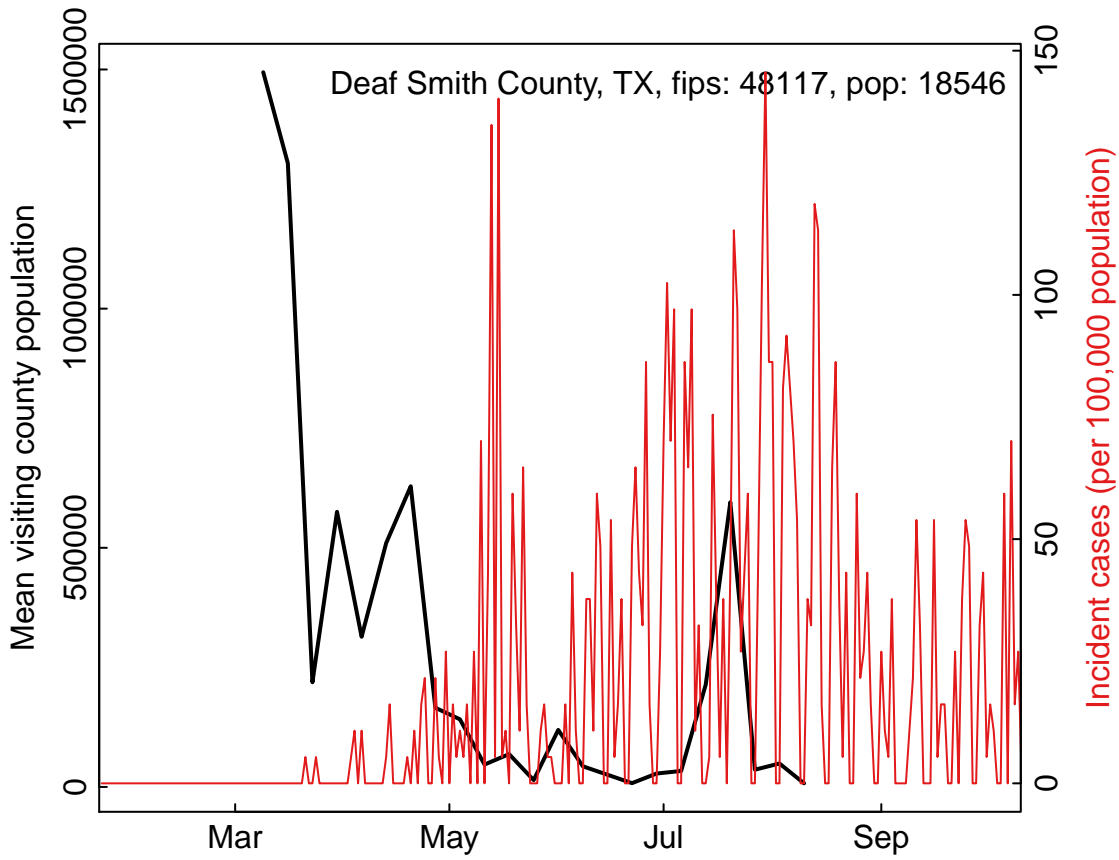

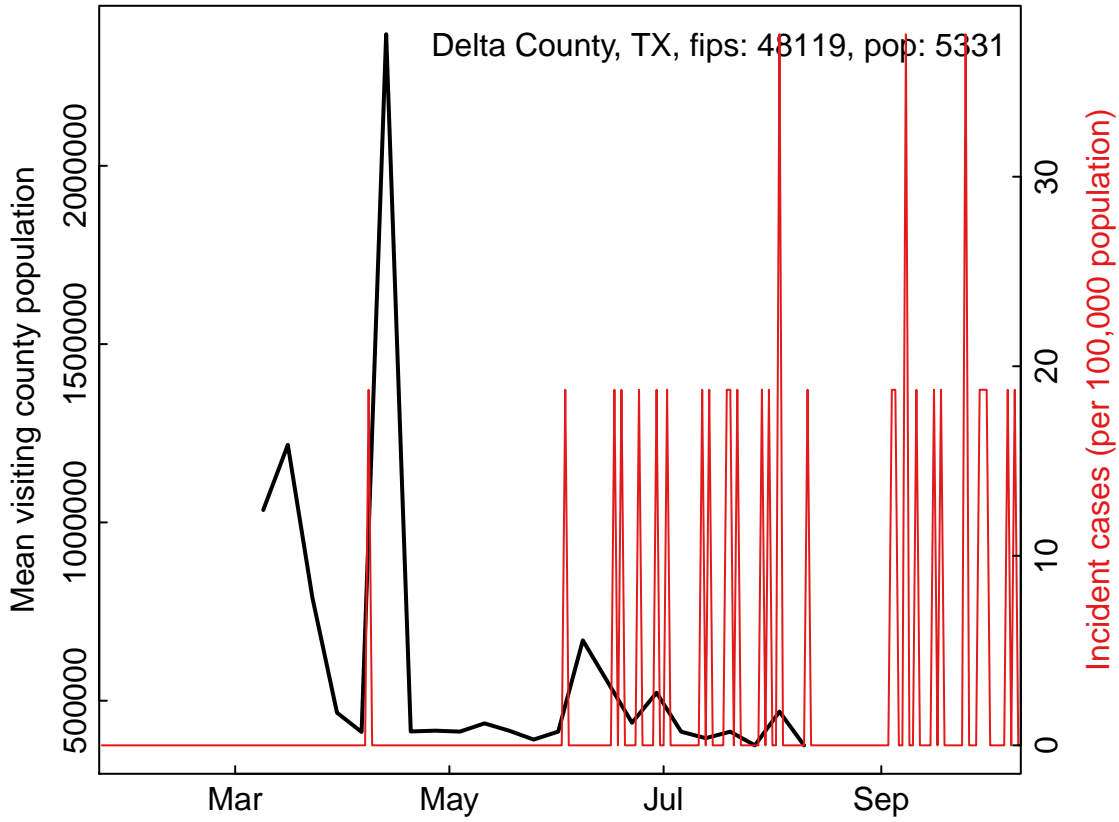



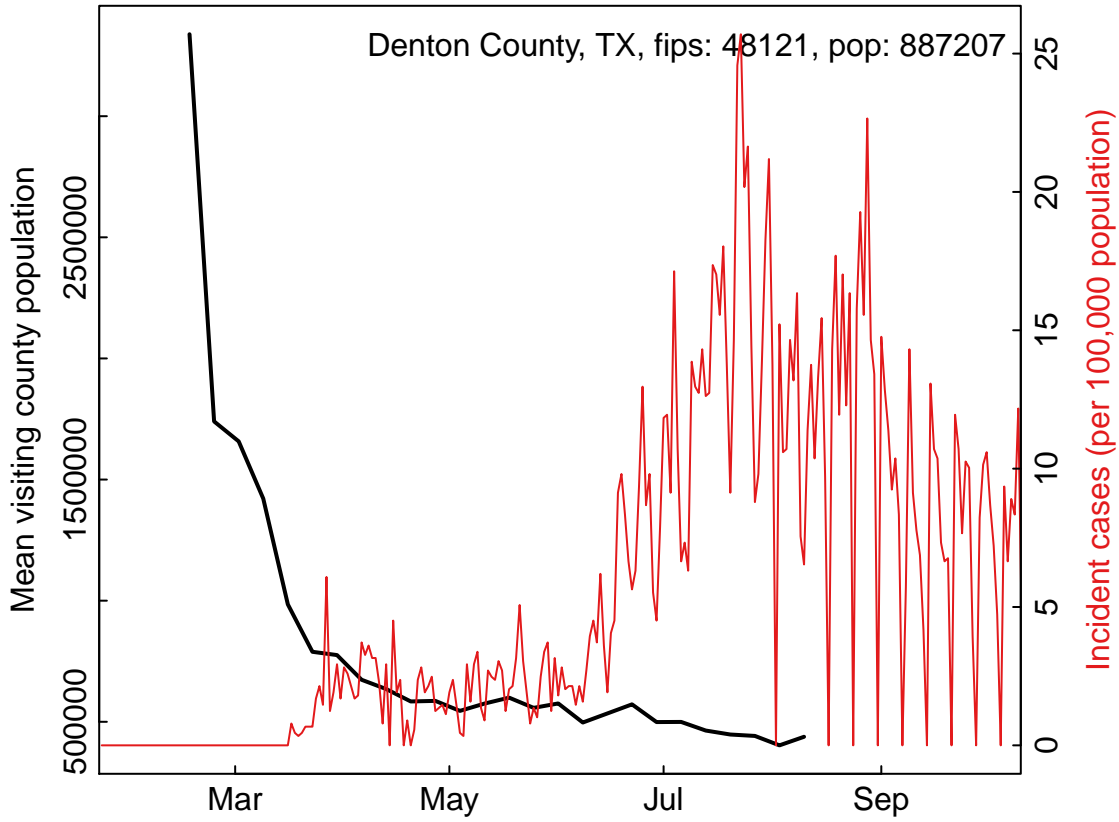

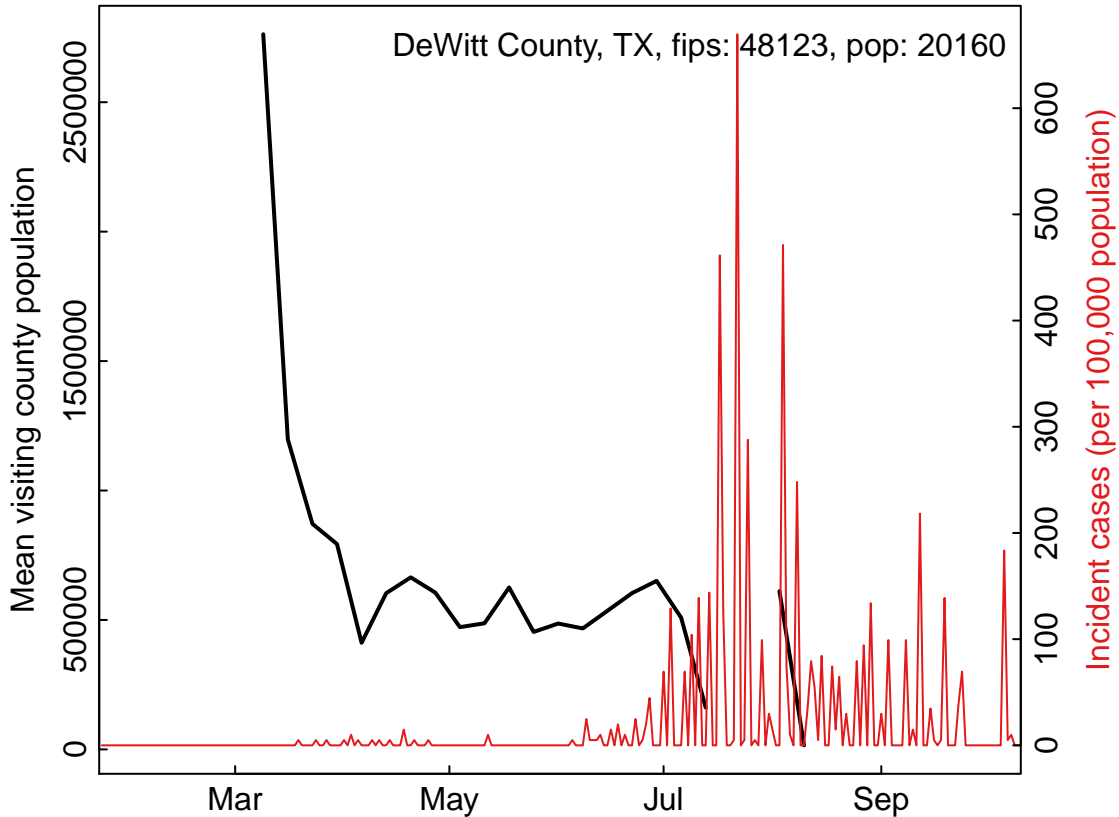

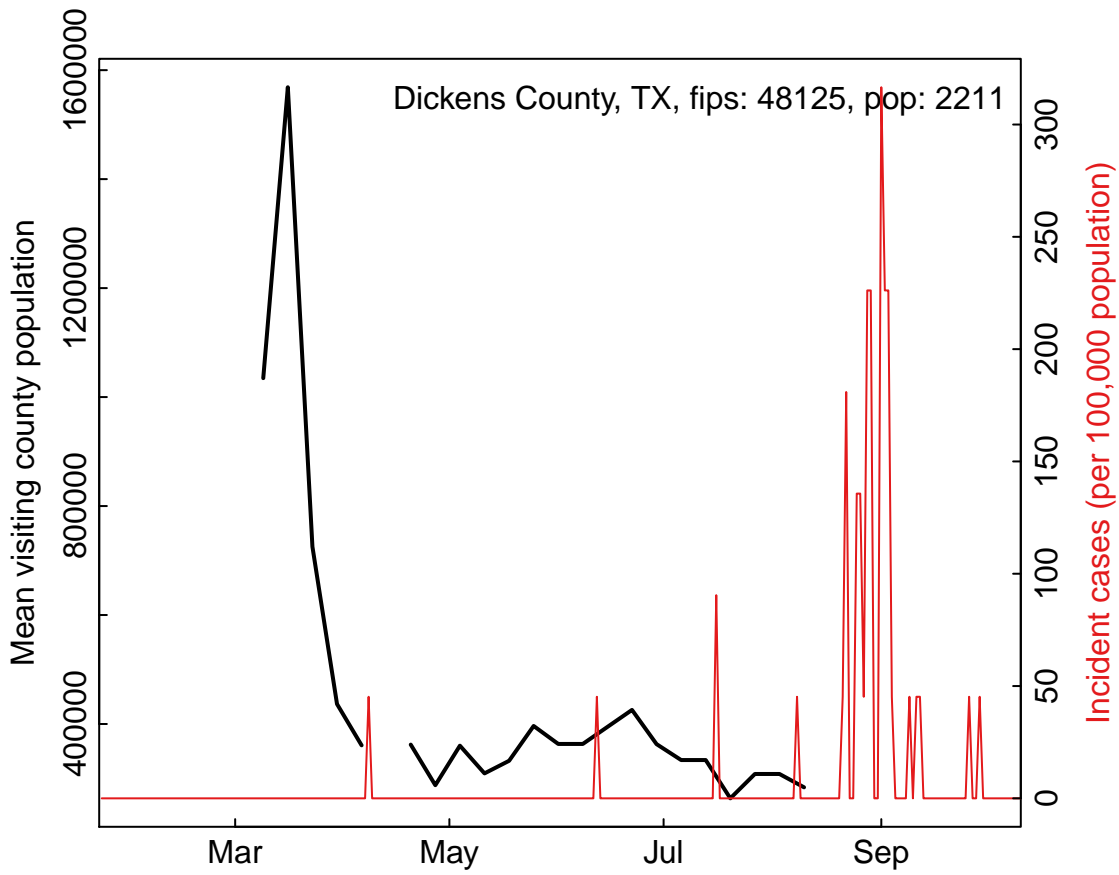

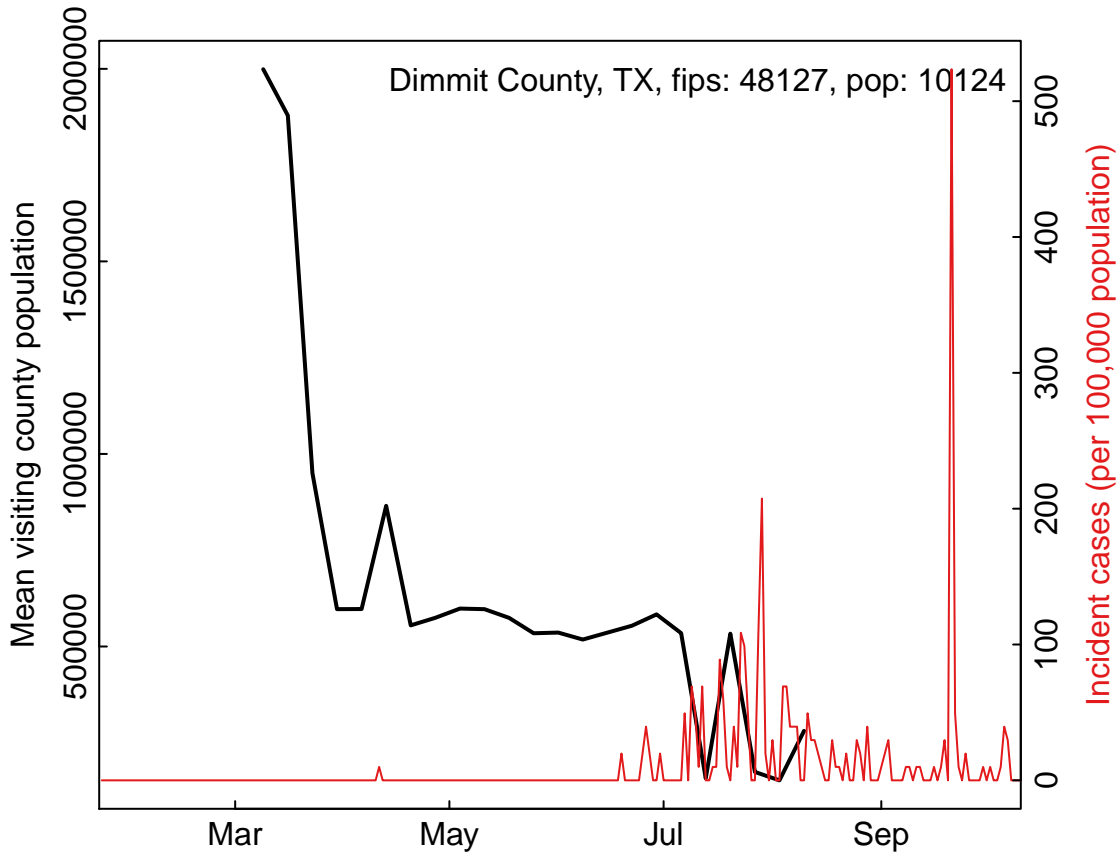

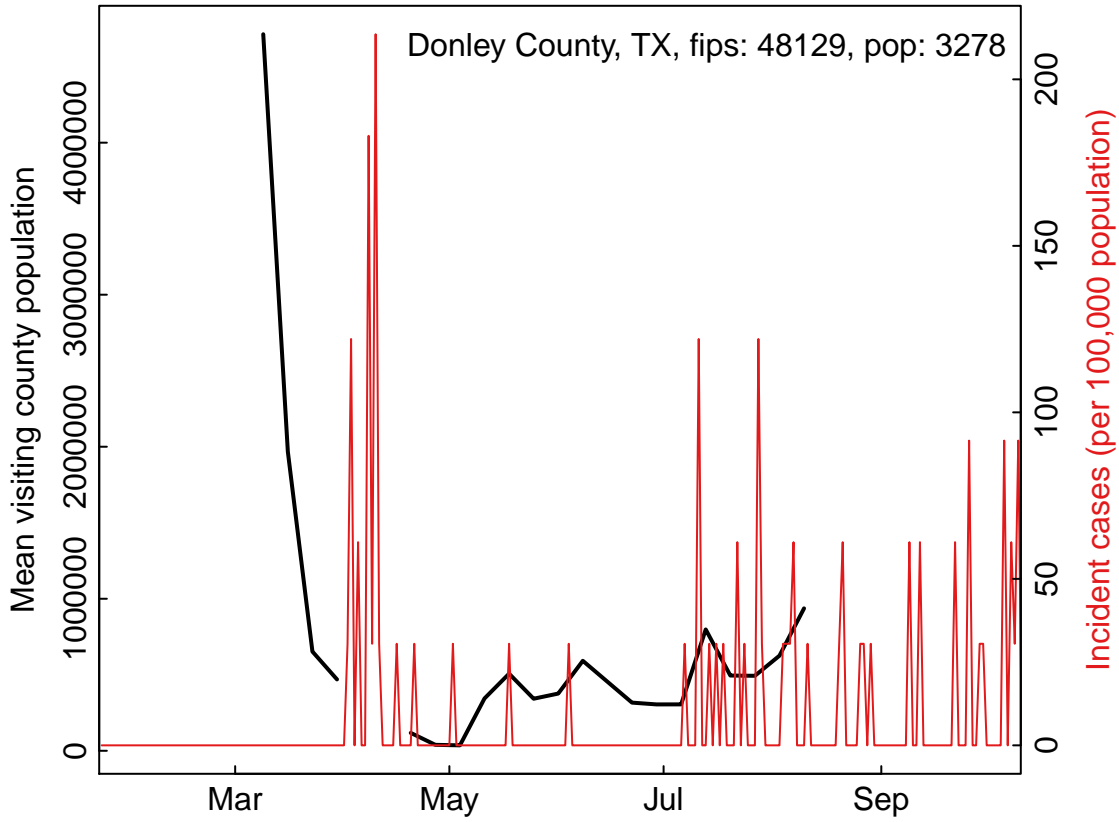

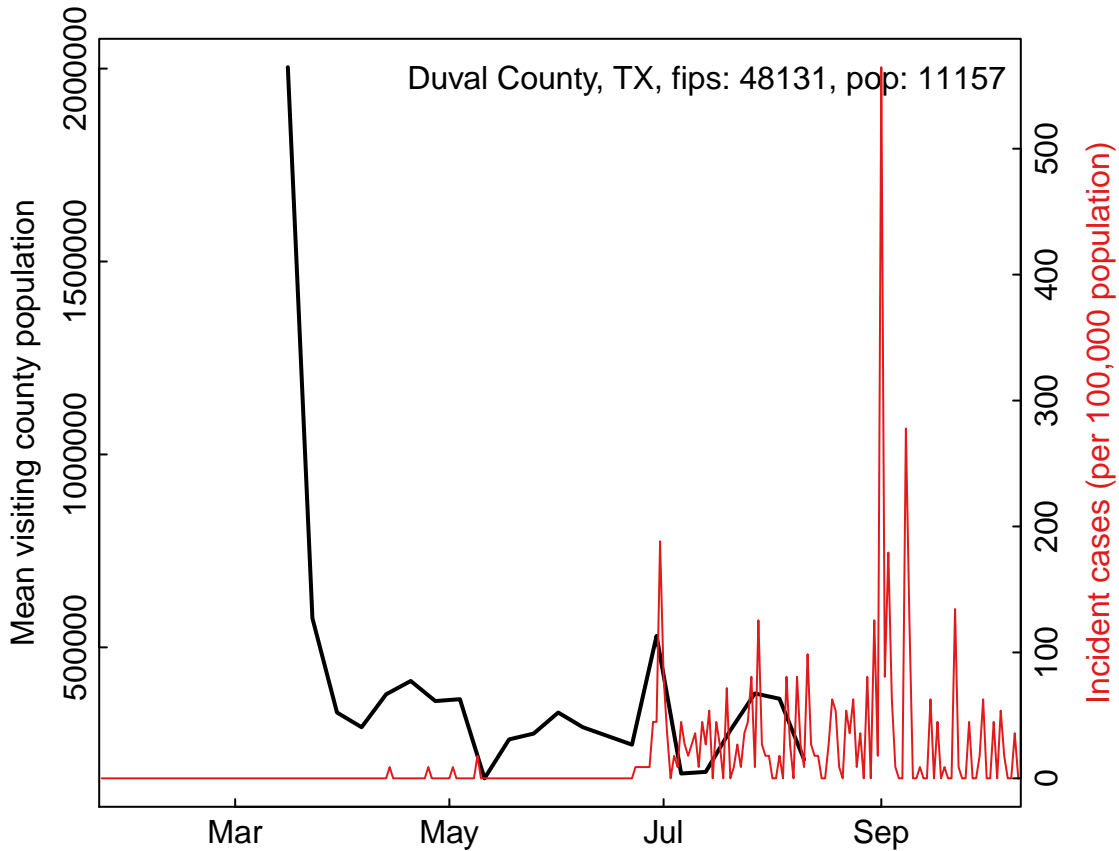

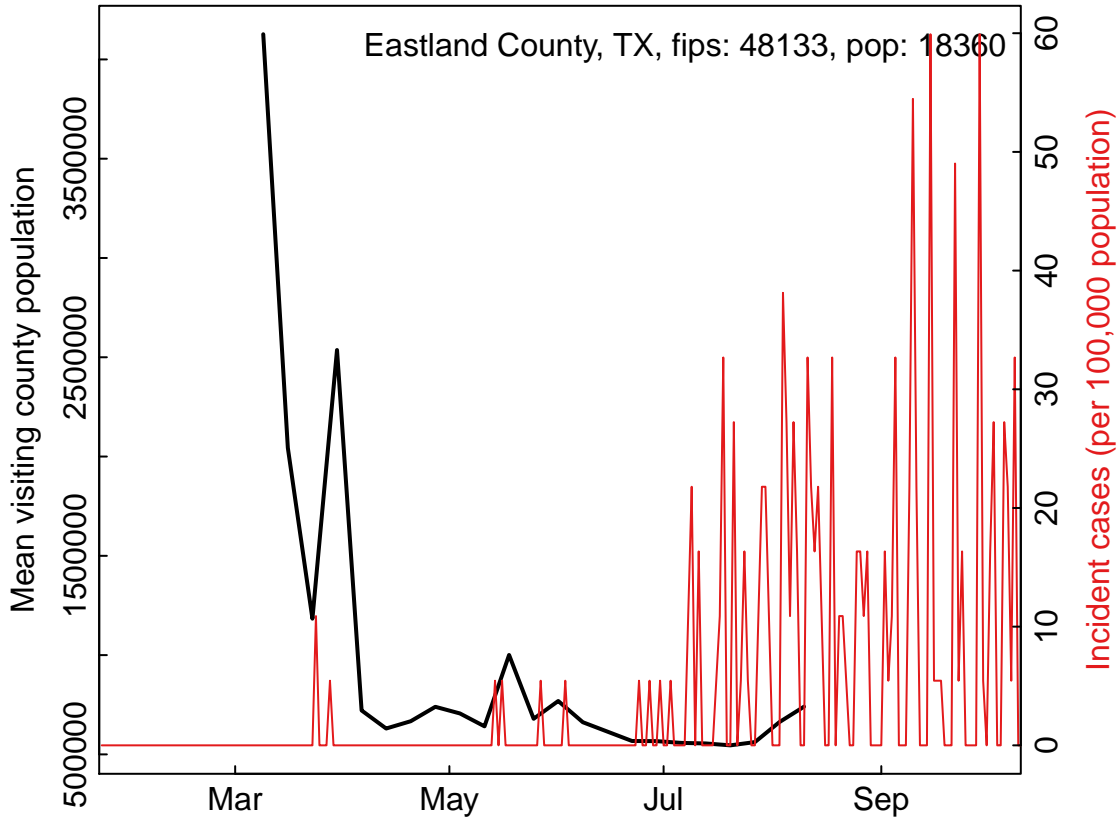

Ector County, TX, fips: 481135, pop: 166223

Mean visiting county population

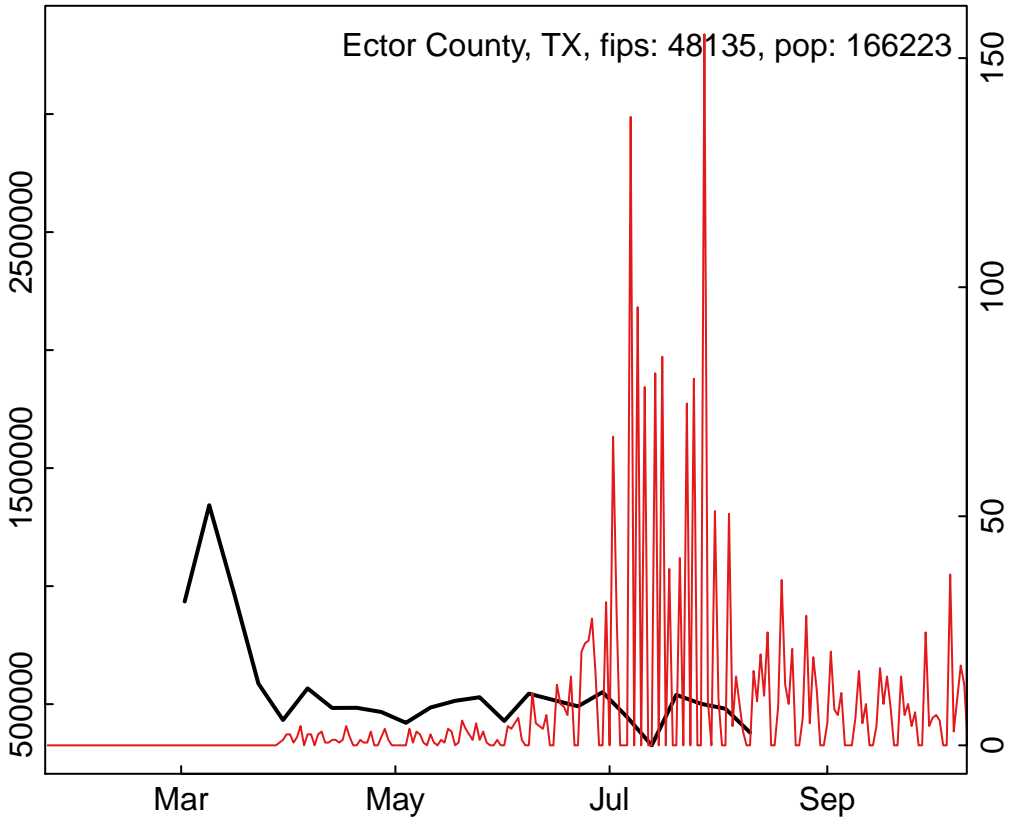

Incident cases (per 100,000 population)



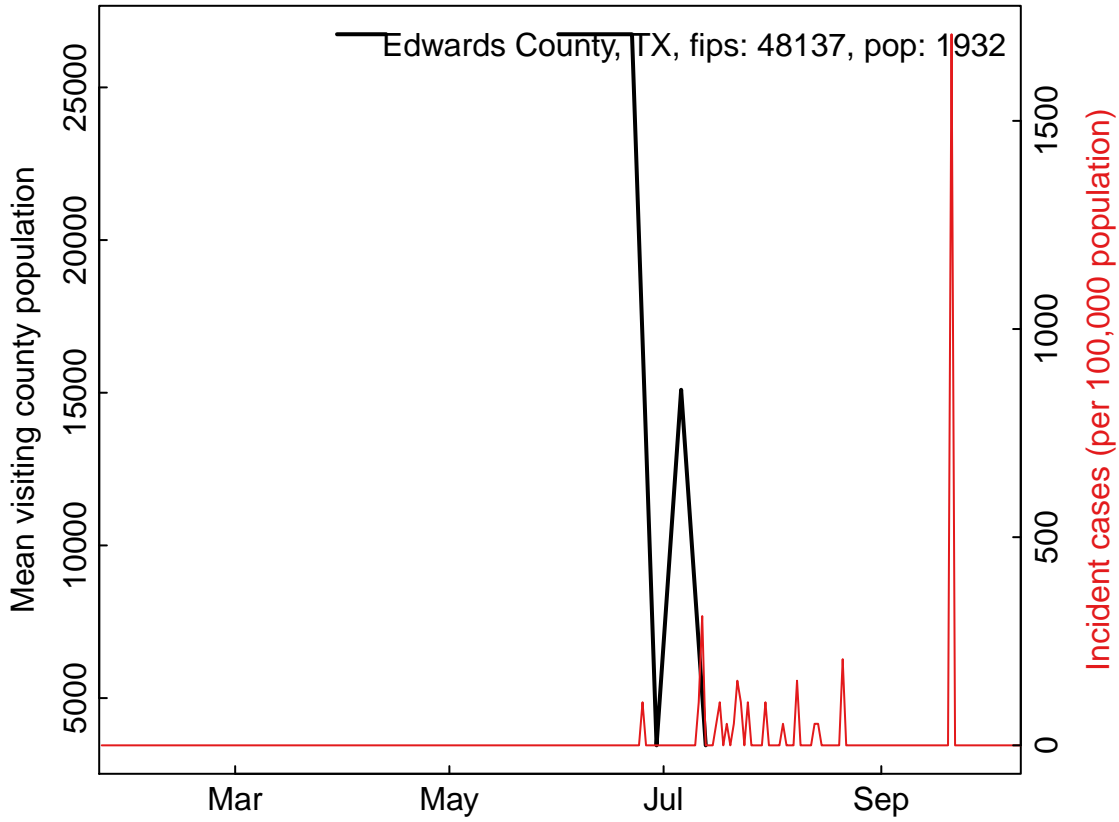

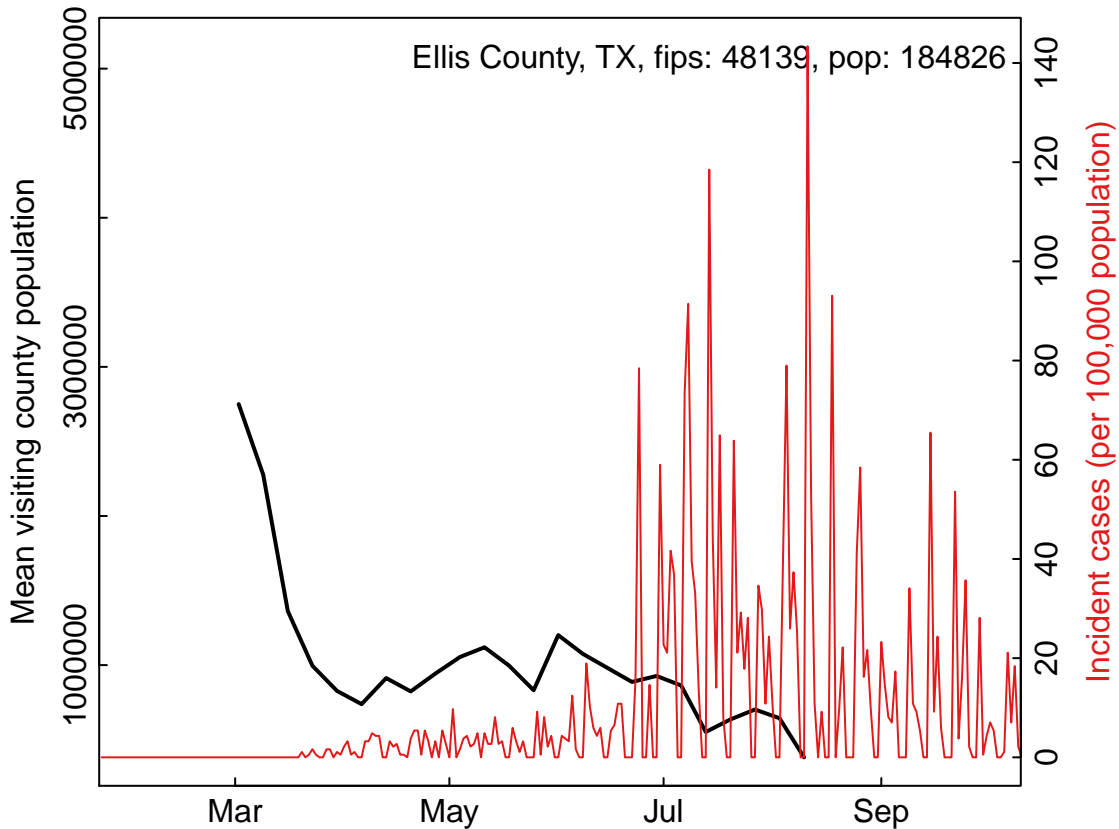

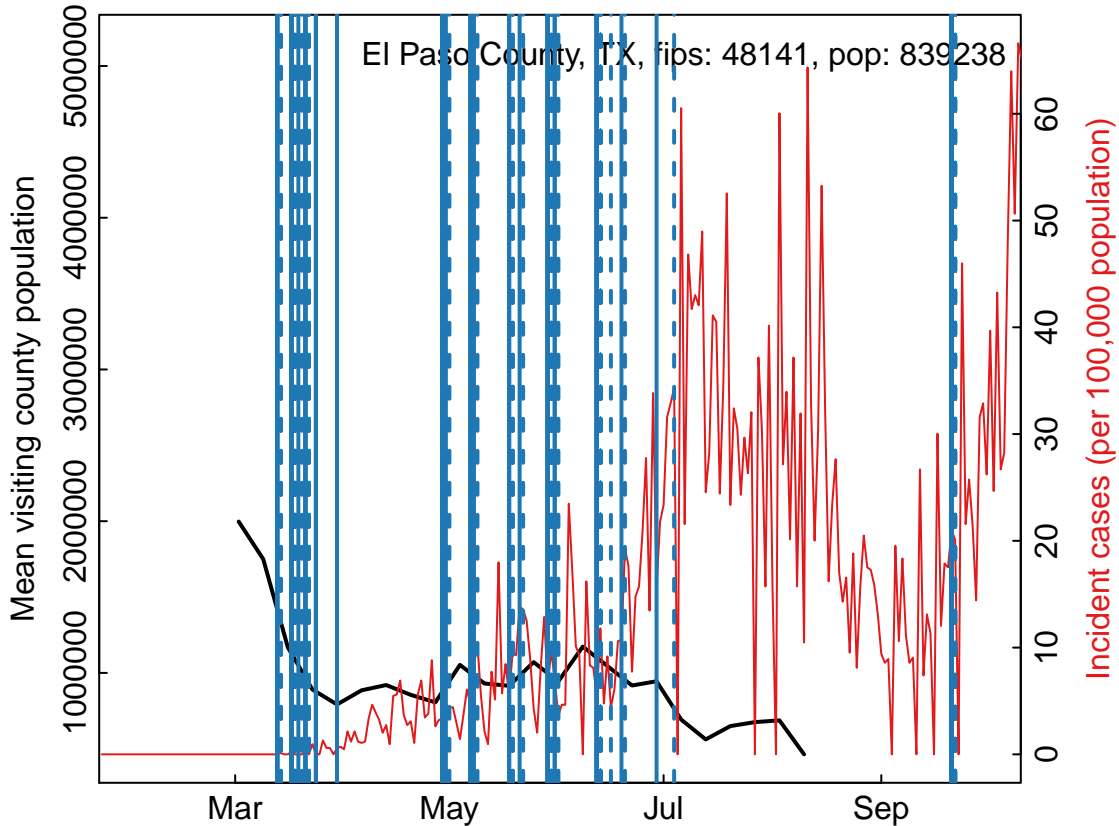

Erath County, TX, fips: 48143, pop: 42698

Mean visiting county population

1500000  
1000000  
500000

Mar

May

Jul

Sep

80  
60  
40  
20  
0

Incident cases (per 100,000 population)

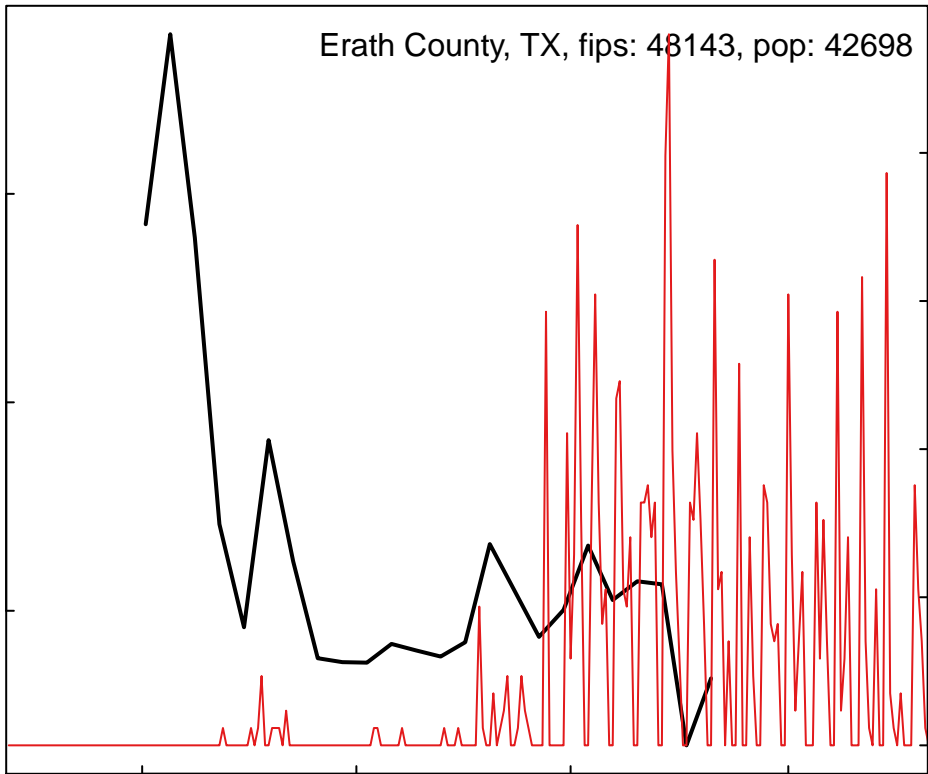

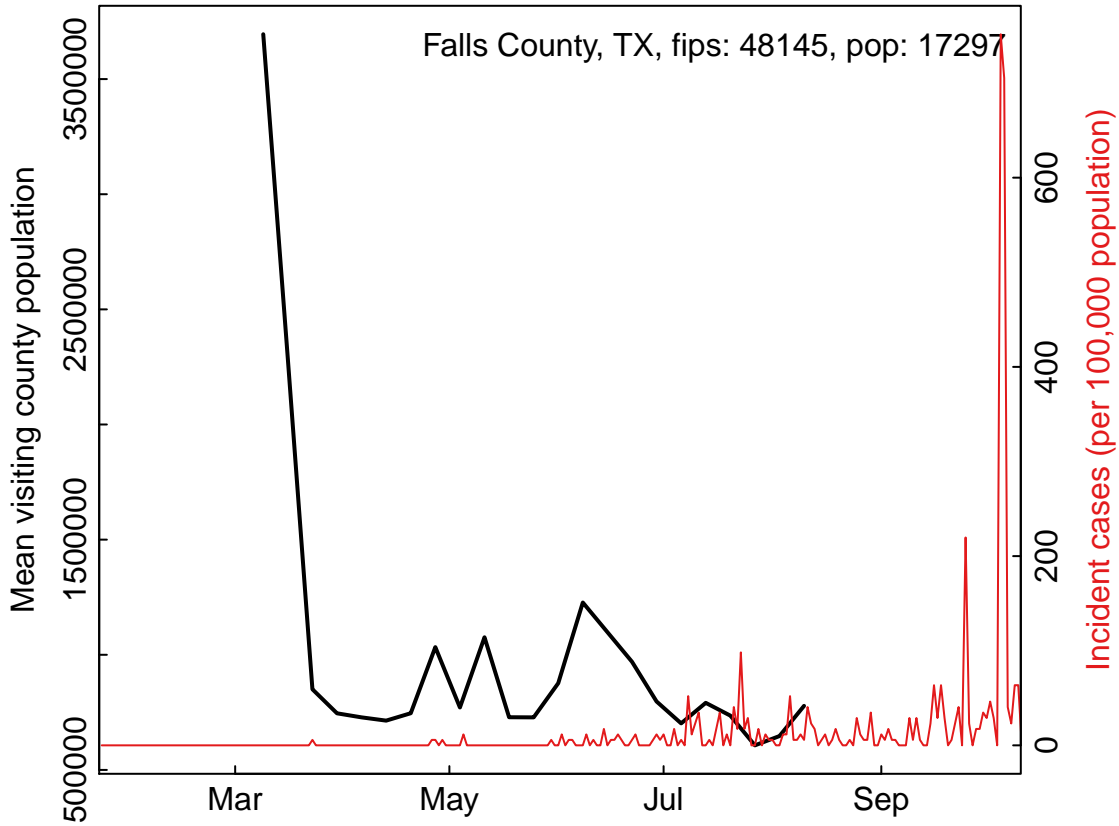

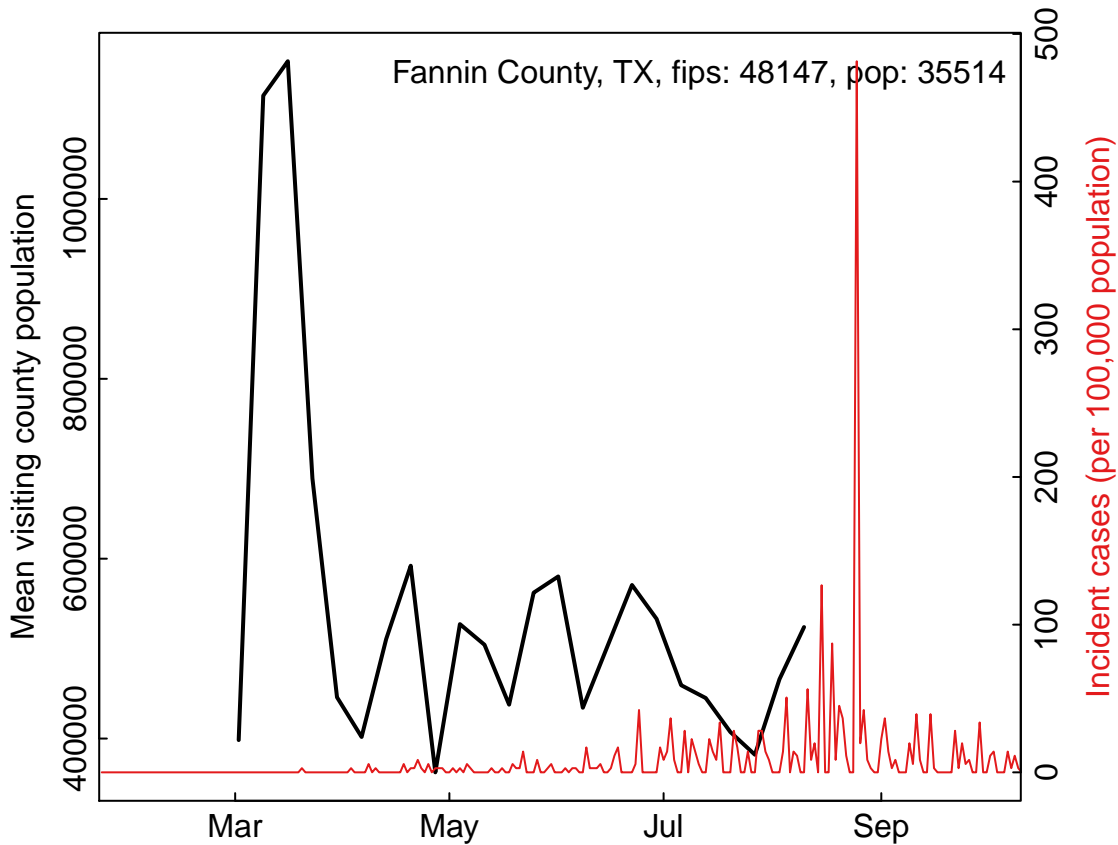

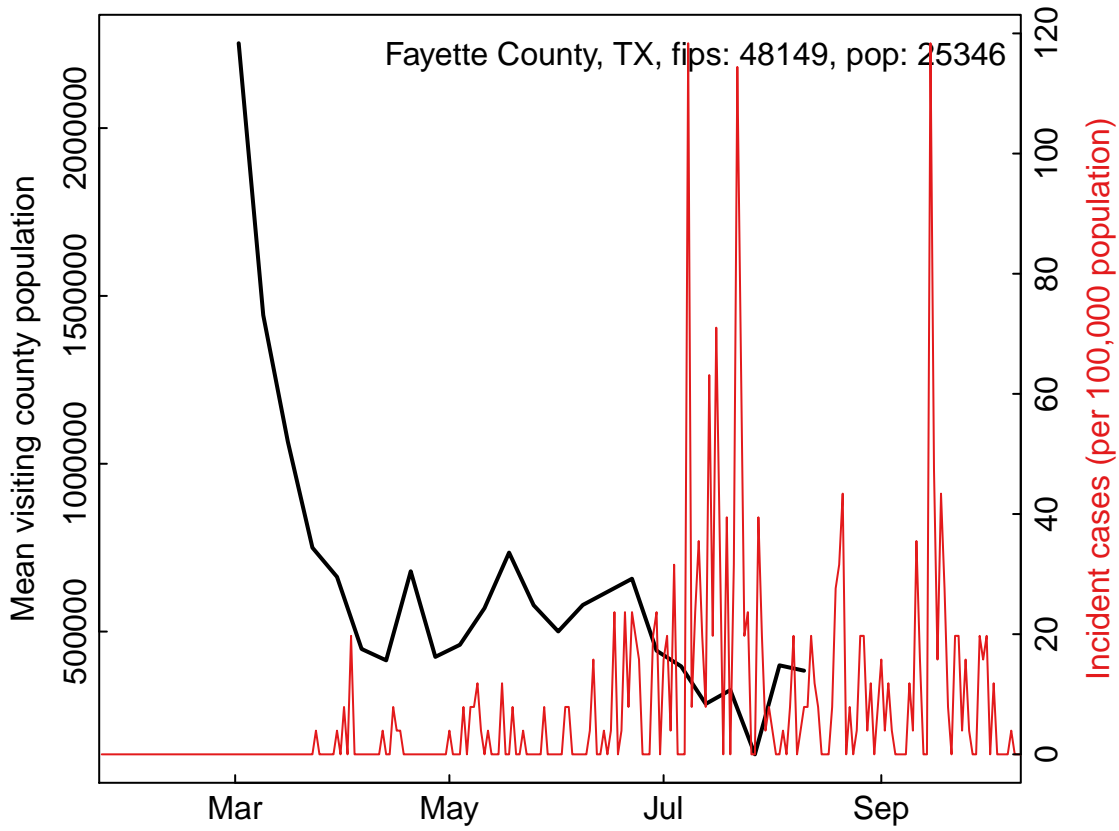

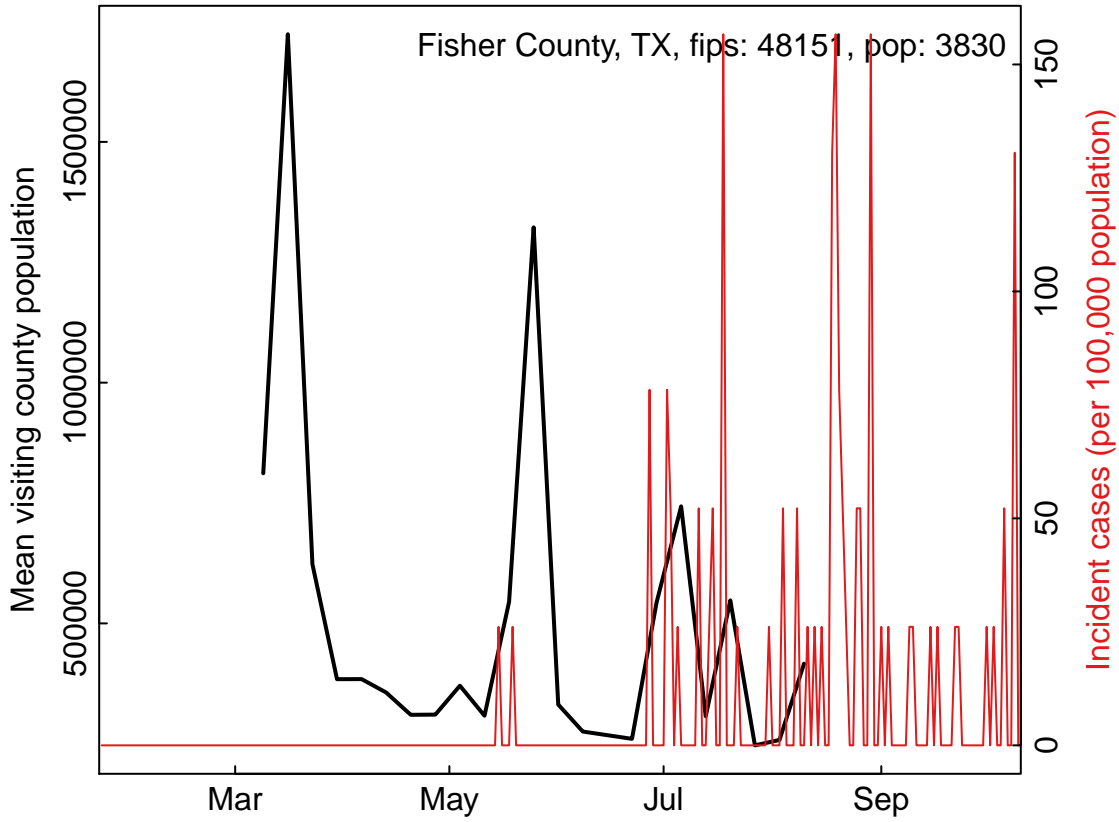



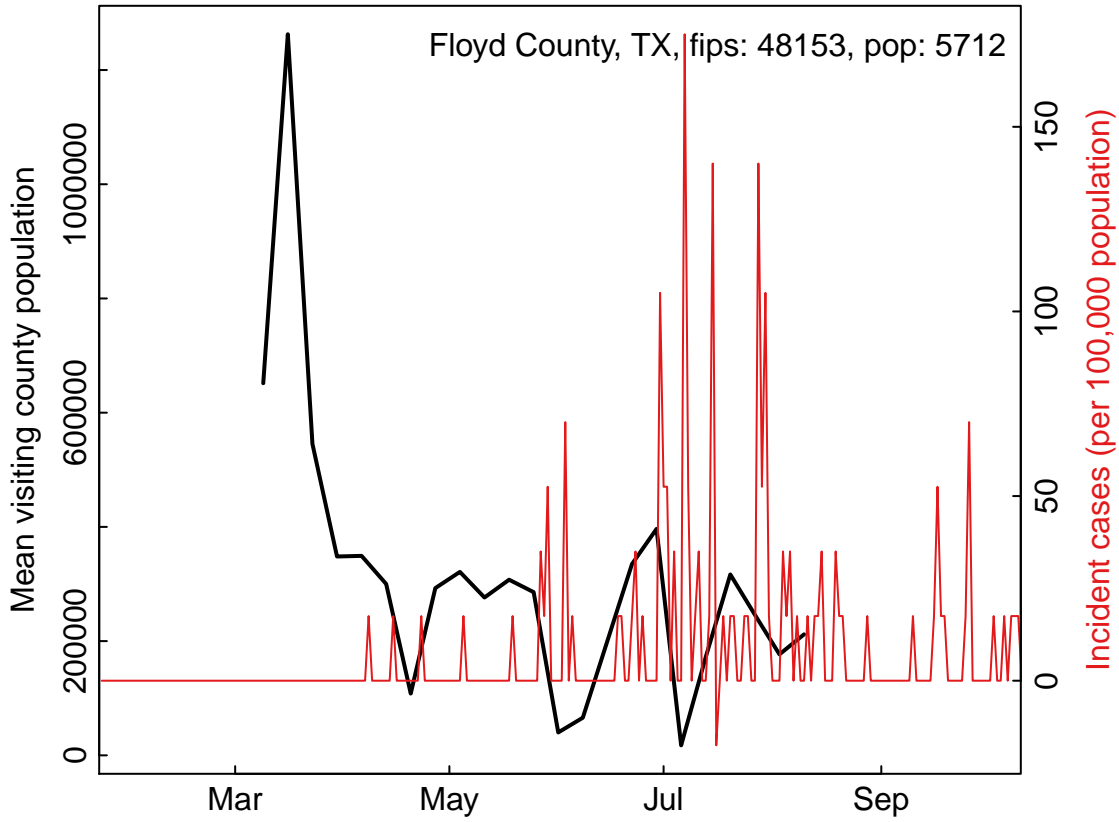

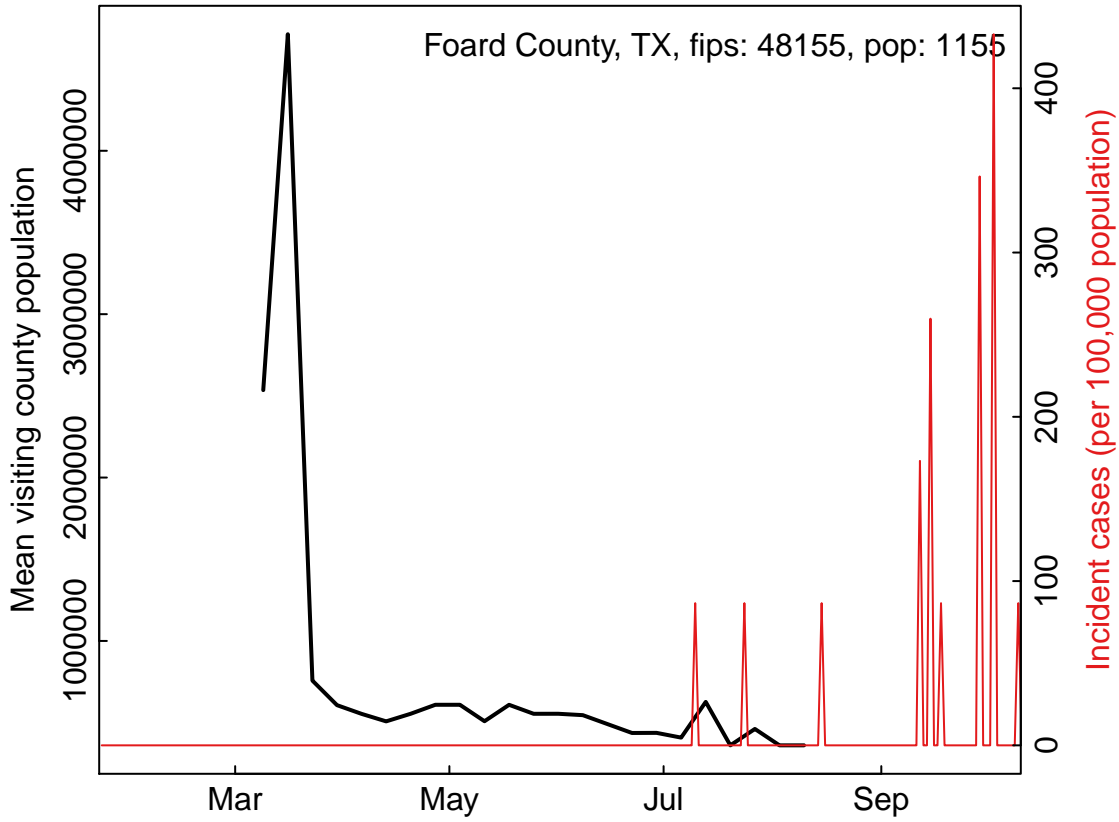

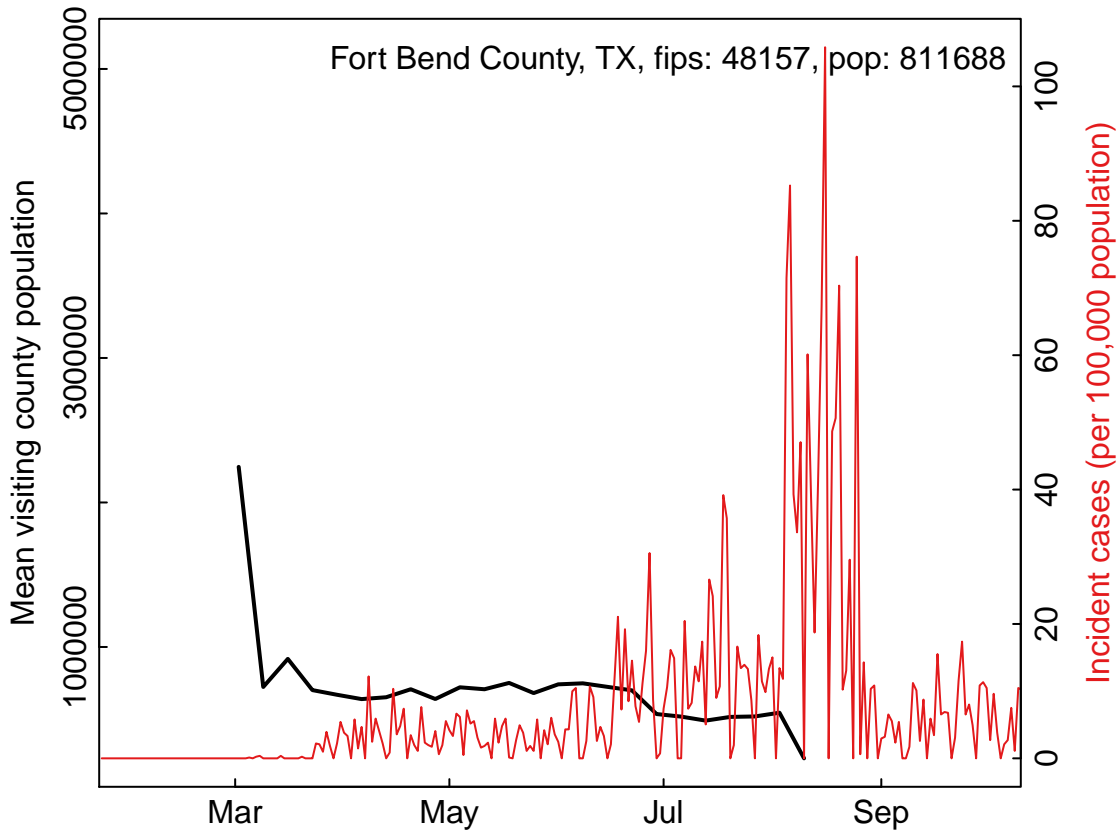

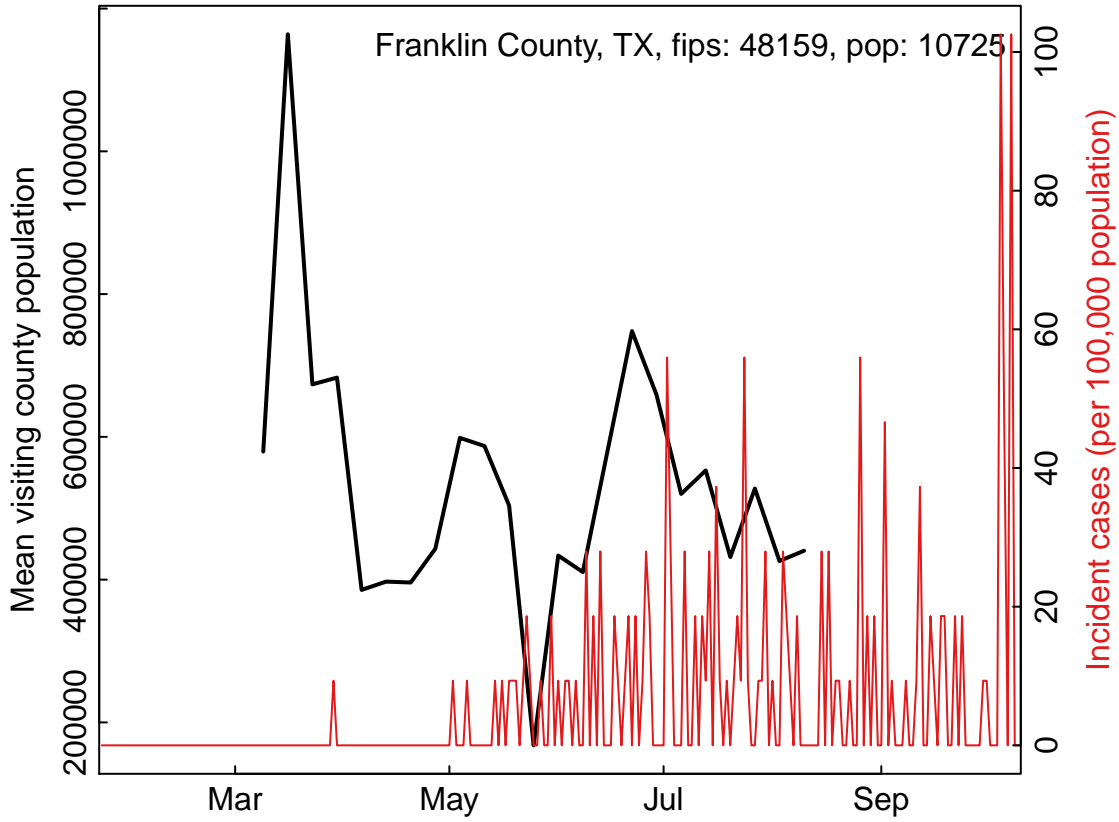

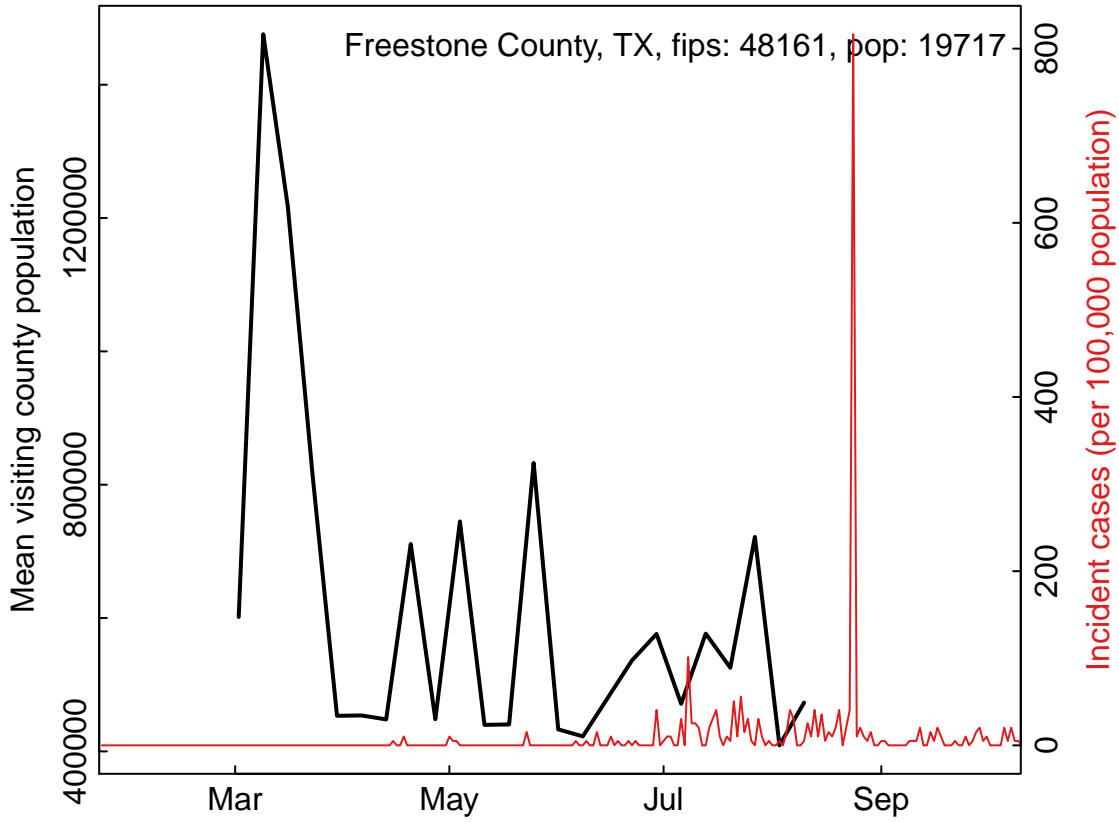

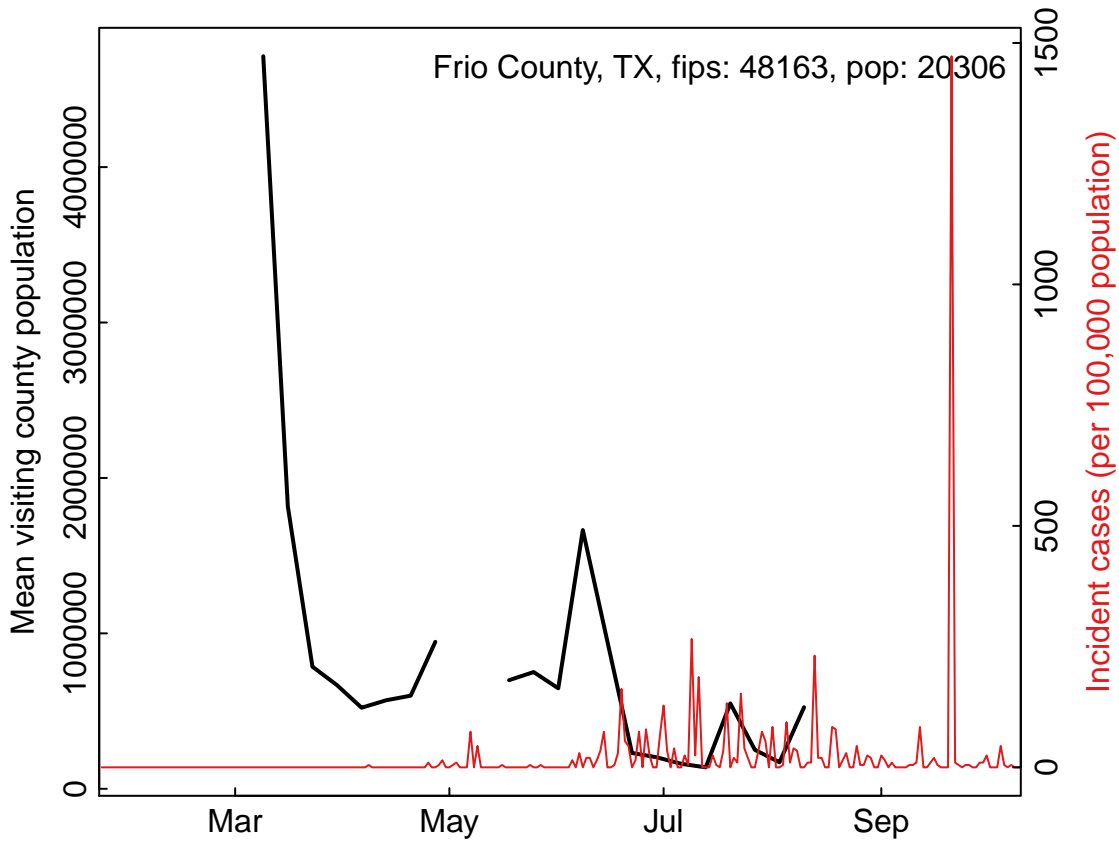

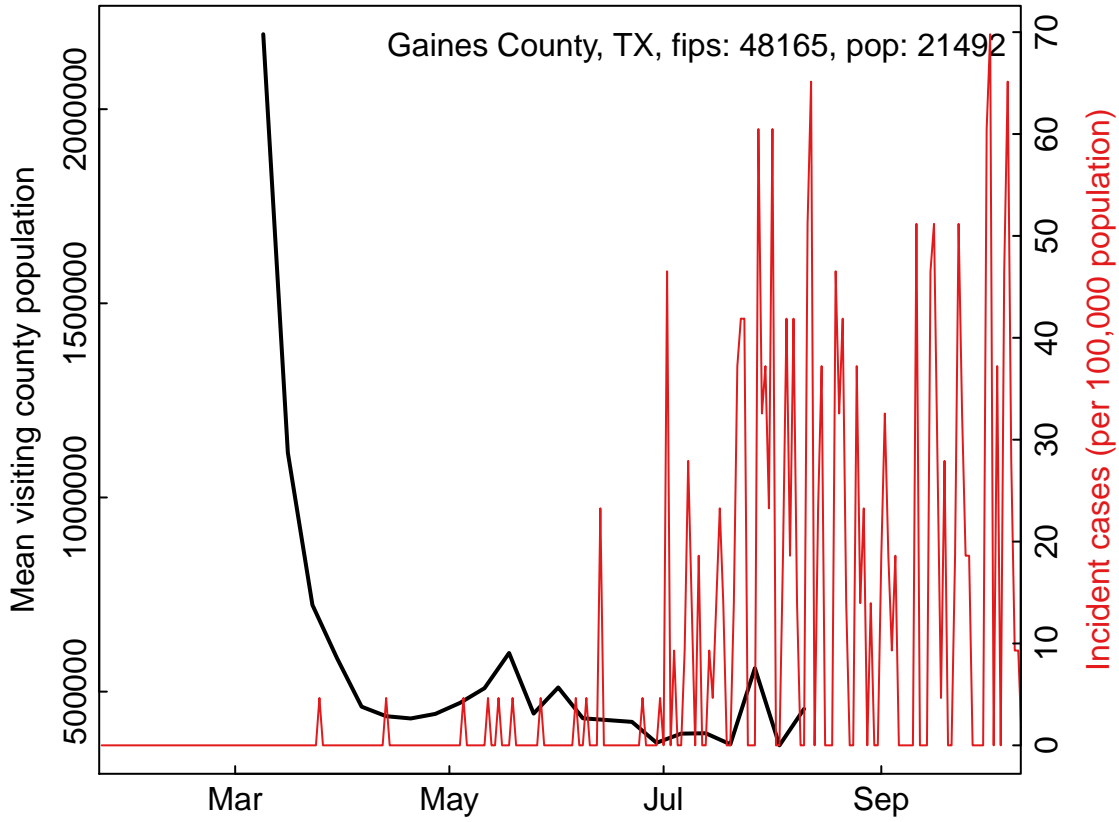

Galveston County, TX, fips: 48167, pop: 342139

Mean visiting county population

1500000  
1000000  
500000

Mar

May

Jul

Sep

150

100

50

0

Incident cases (per 100,000 population)

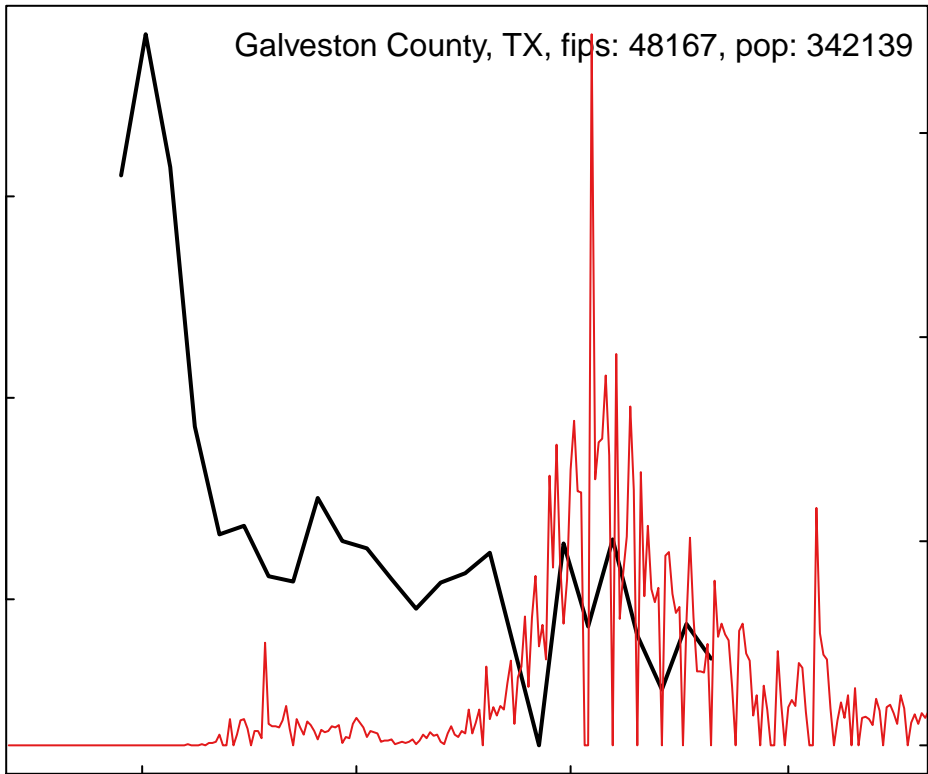



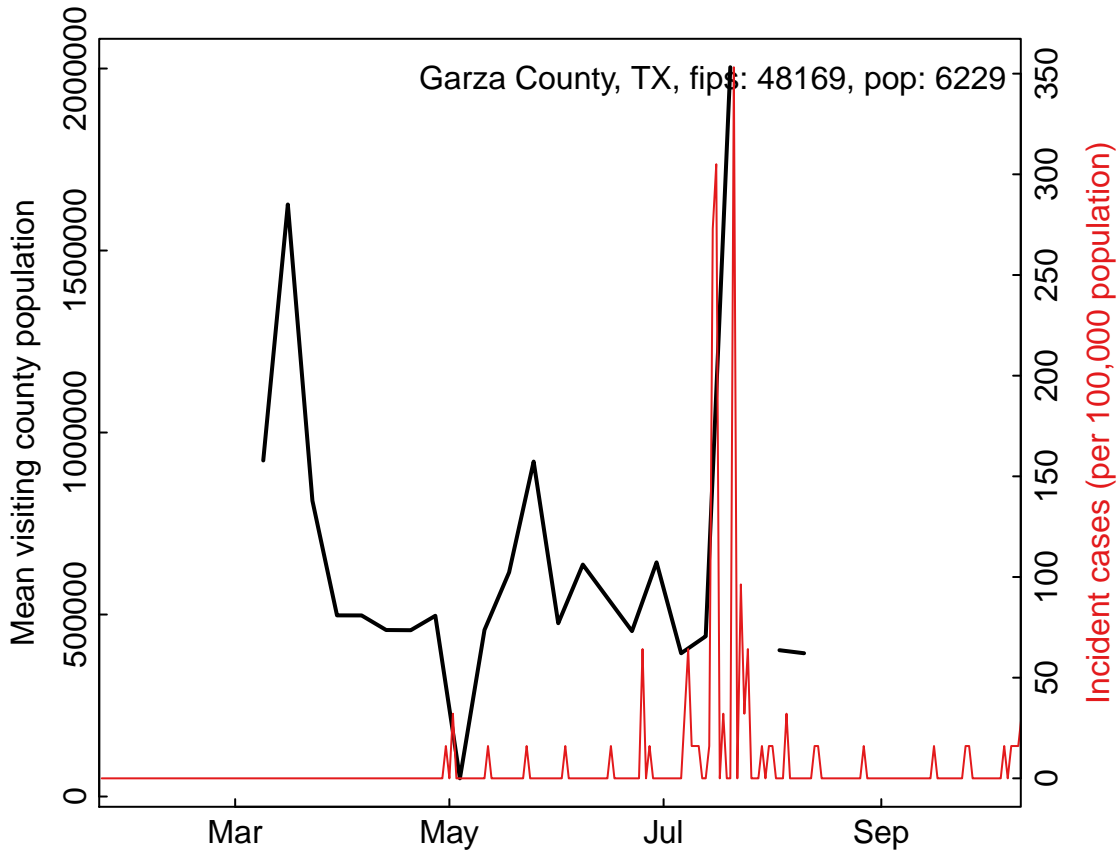

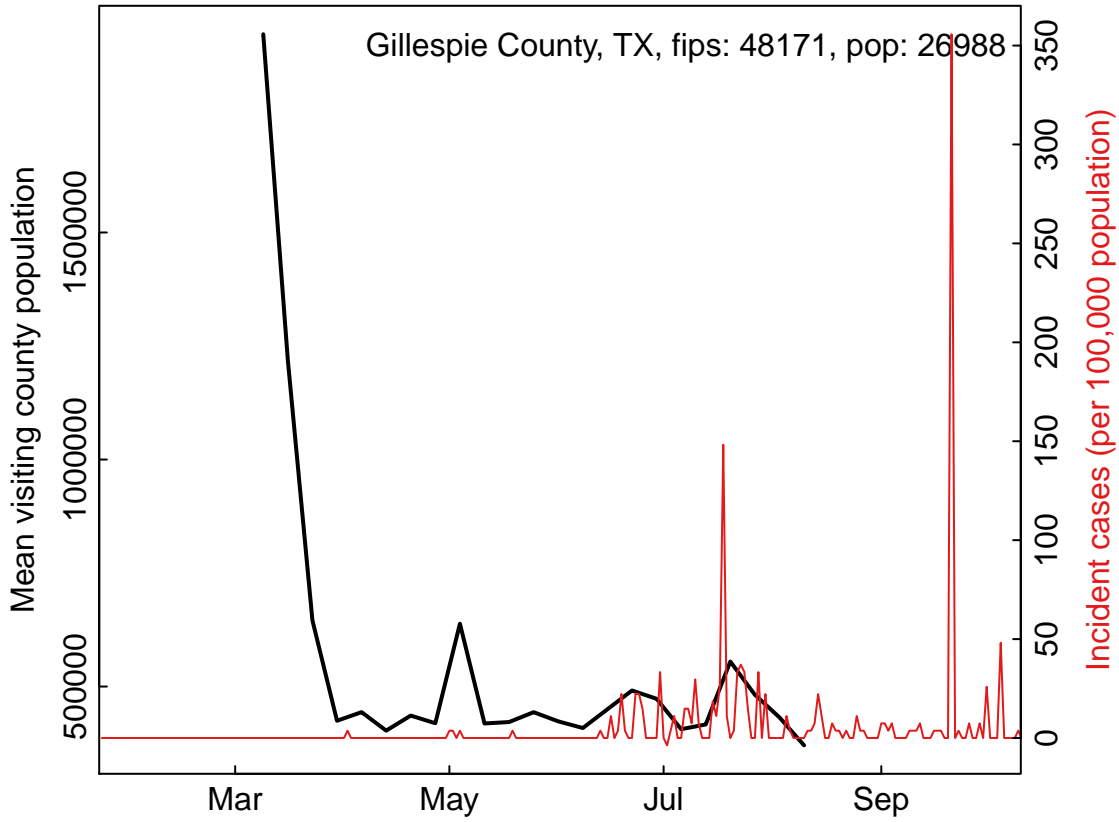

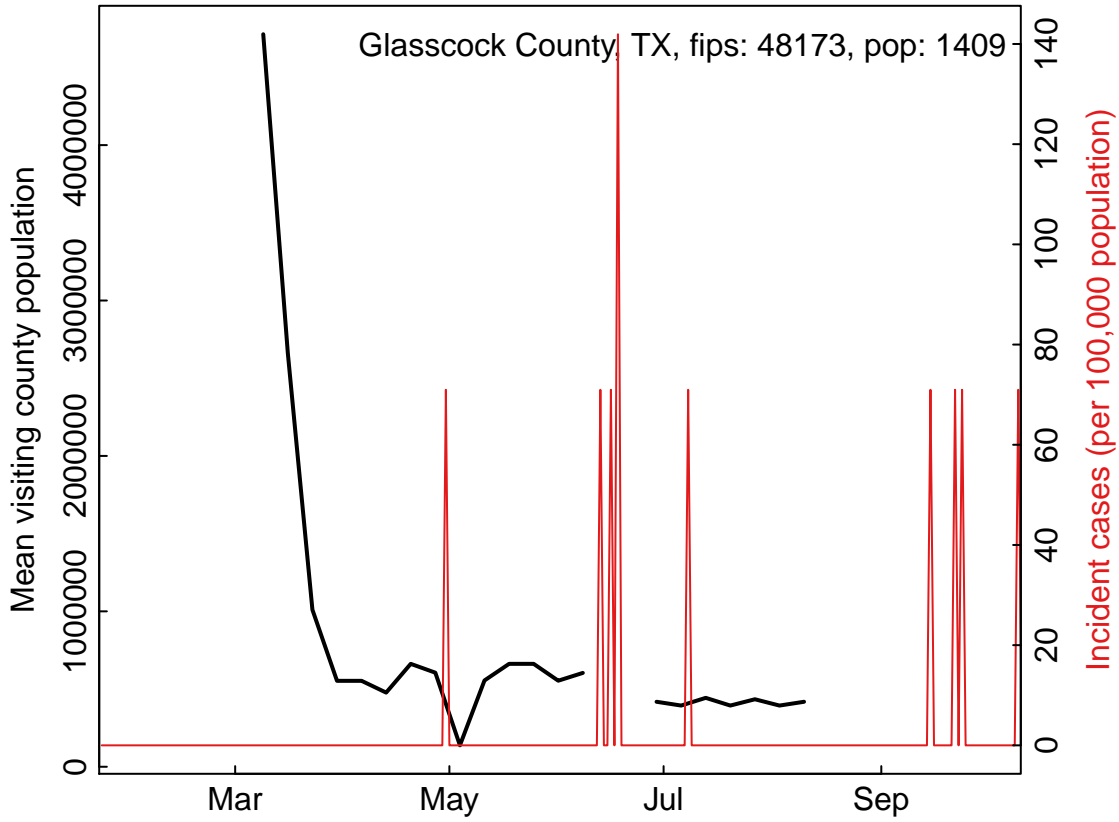

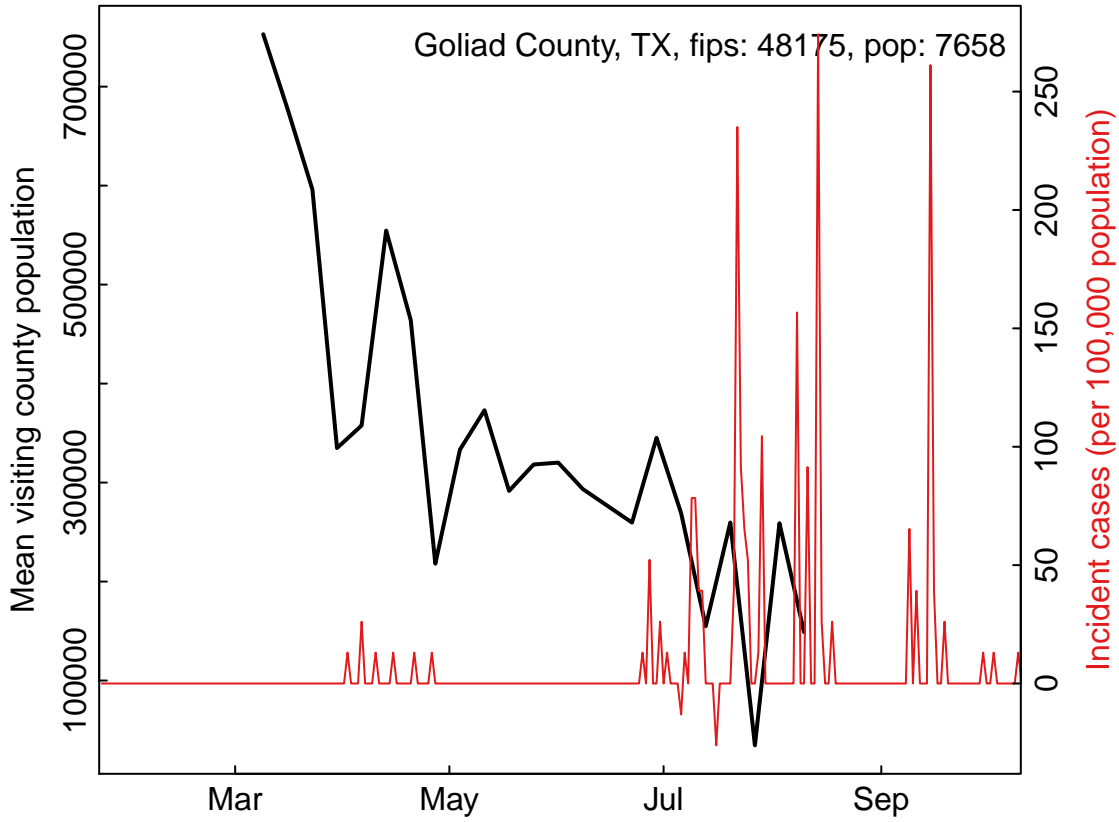

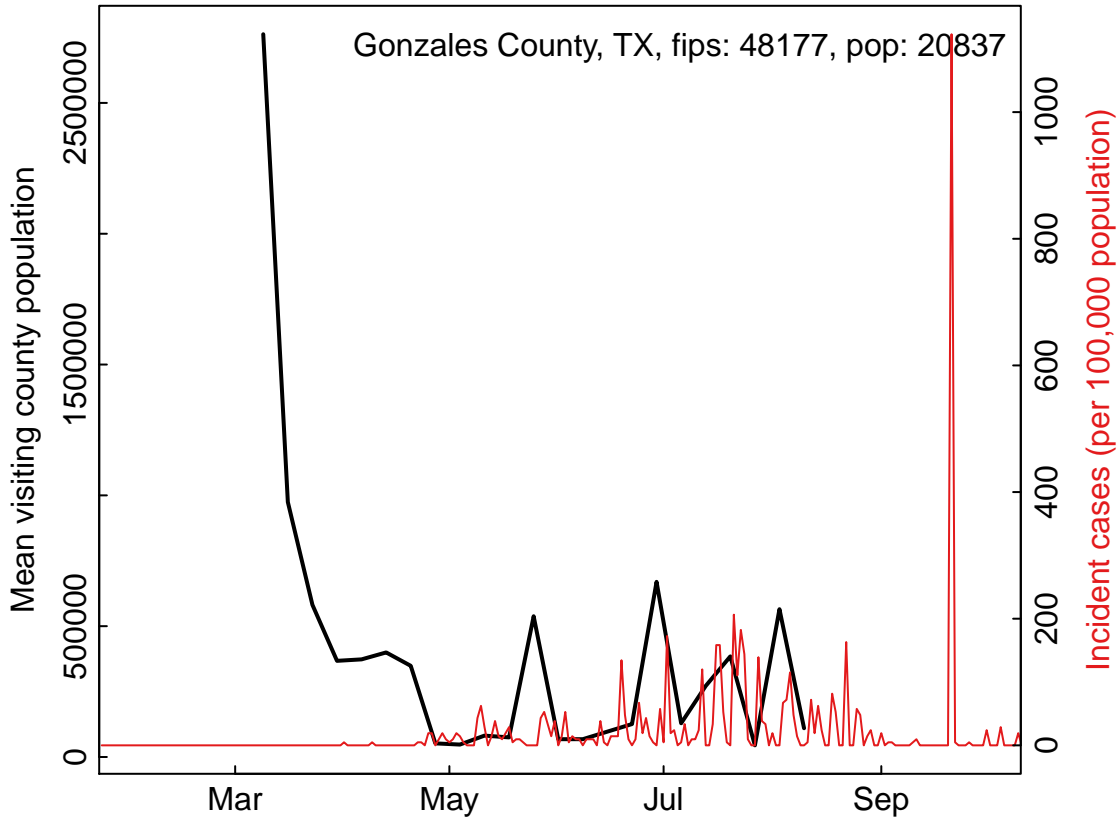

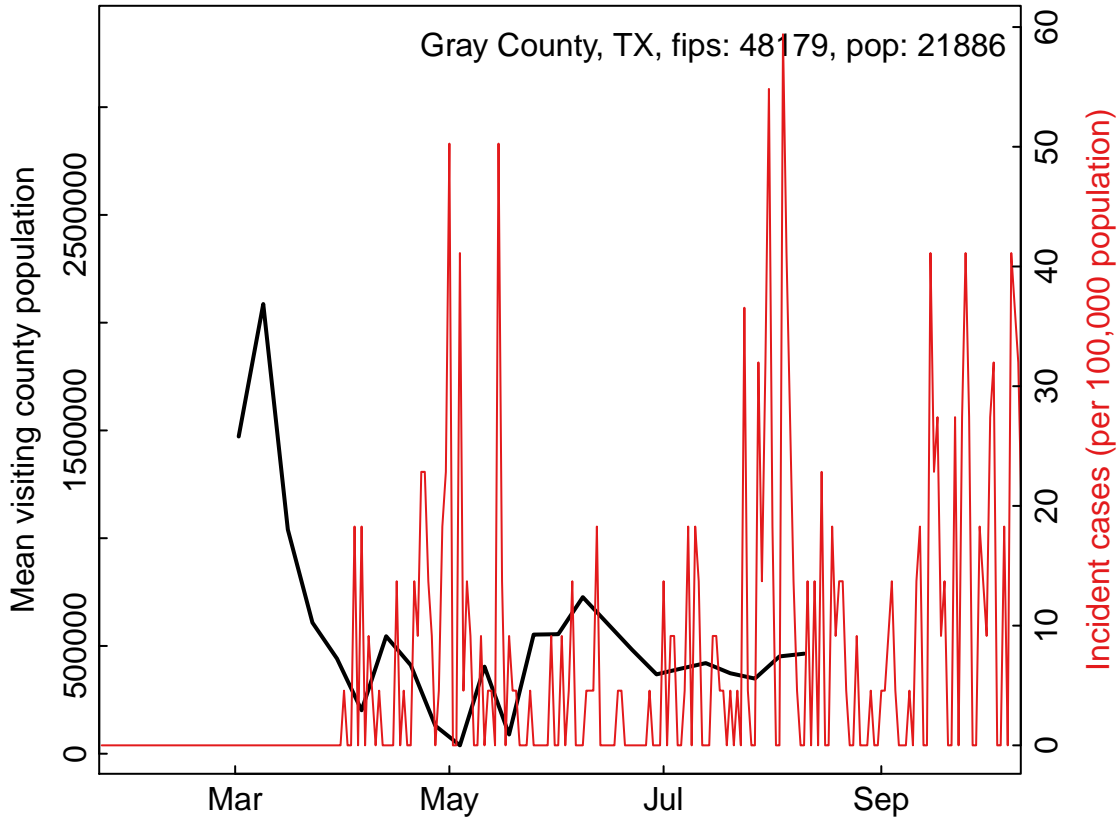

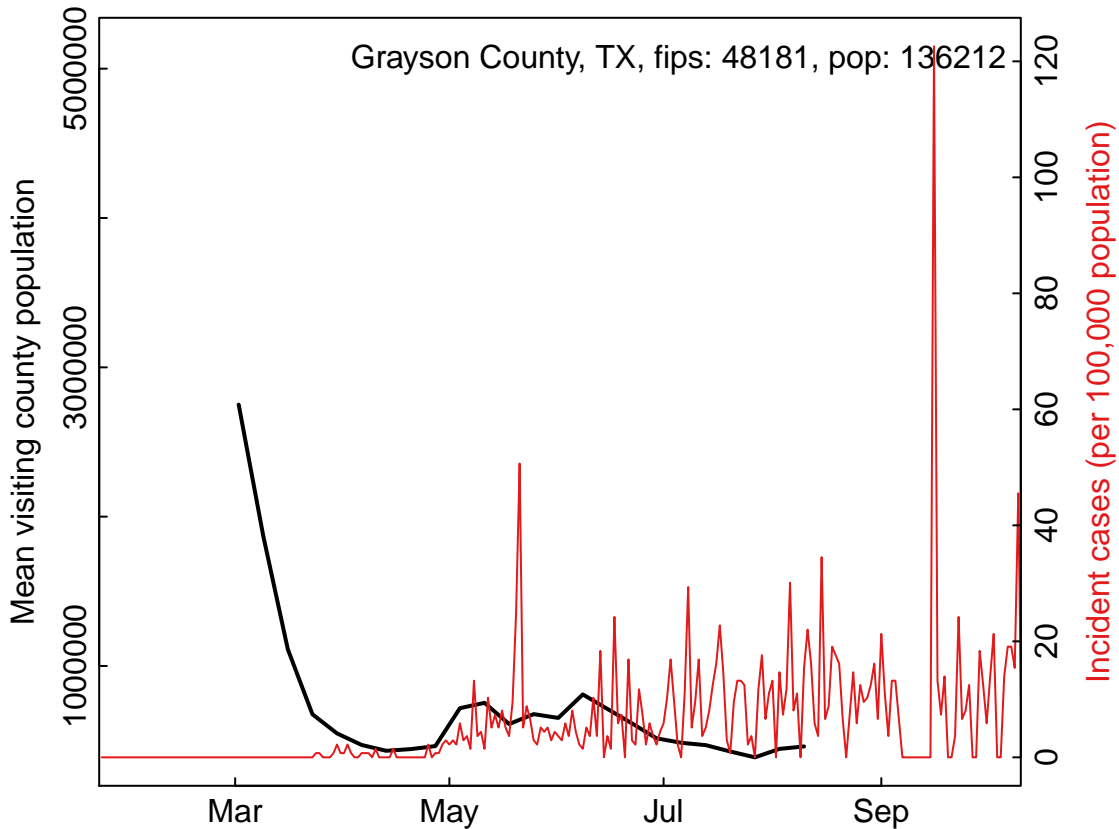

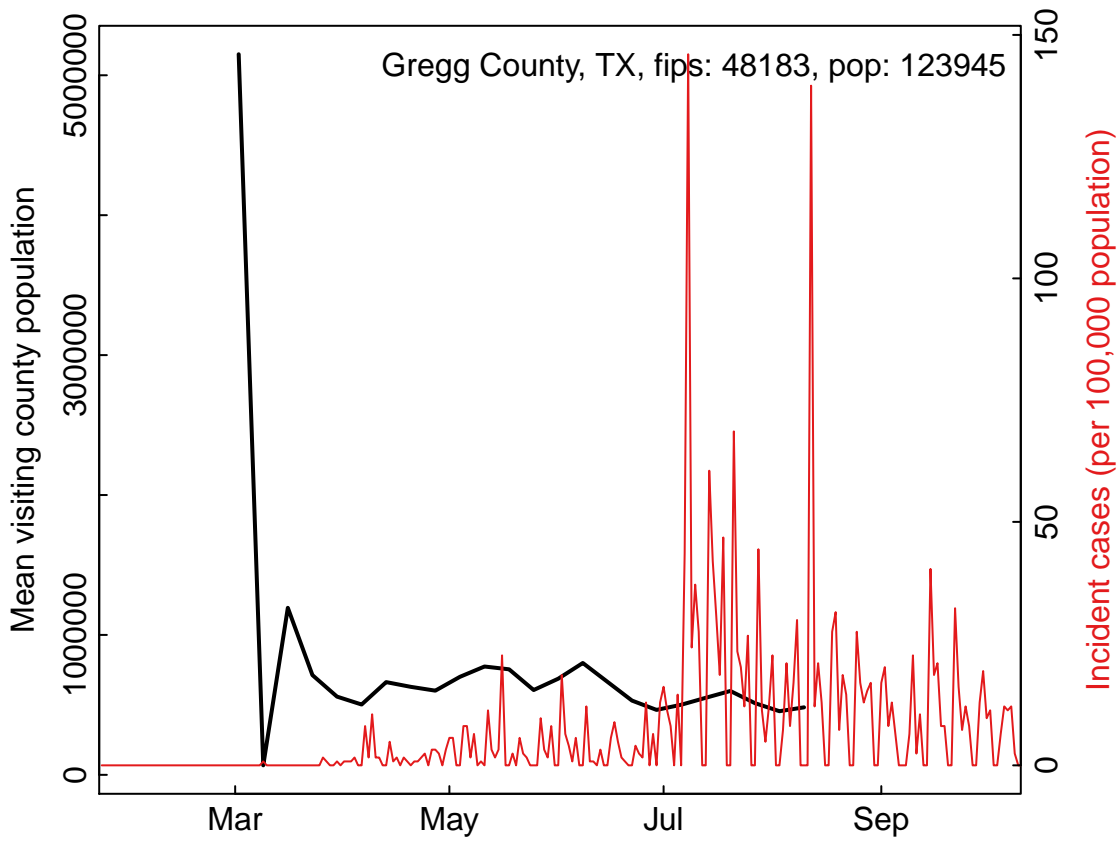



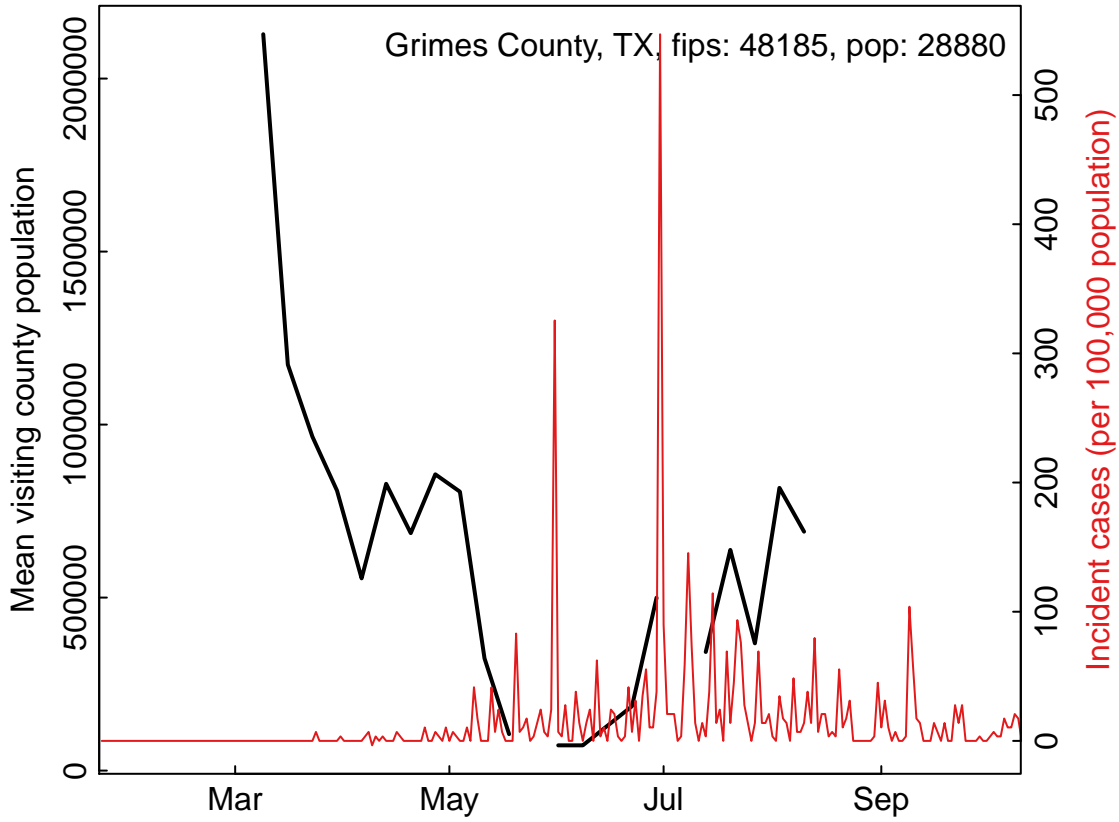

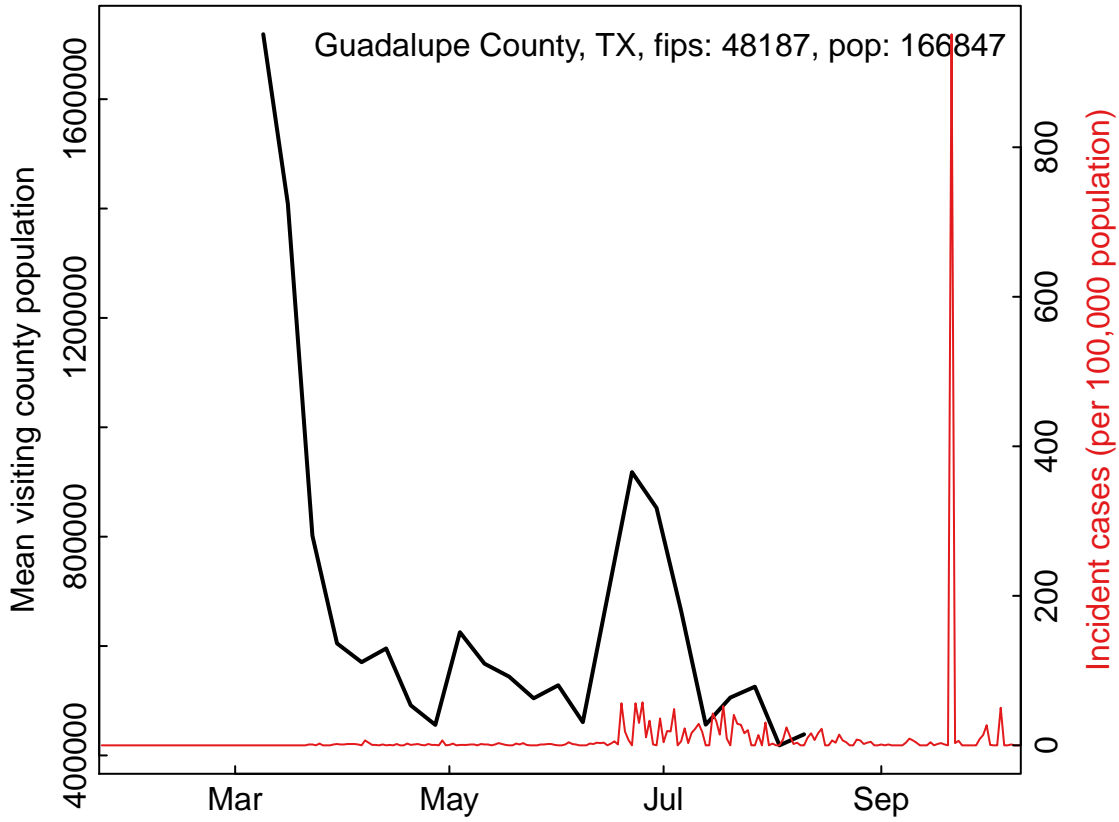

Hale County, TX, fips: 48189, pop: 33406

Mean visiting county population

2500000  
1500000  
500000  
0

Incident cases (per 100,000 population)

400  
300  
200  
100  
0

Mar

May

Jul

Sep

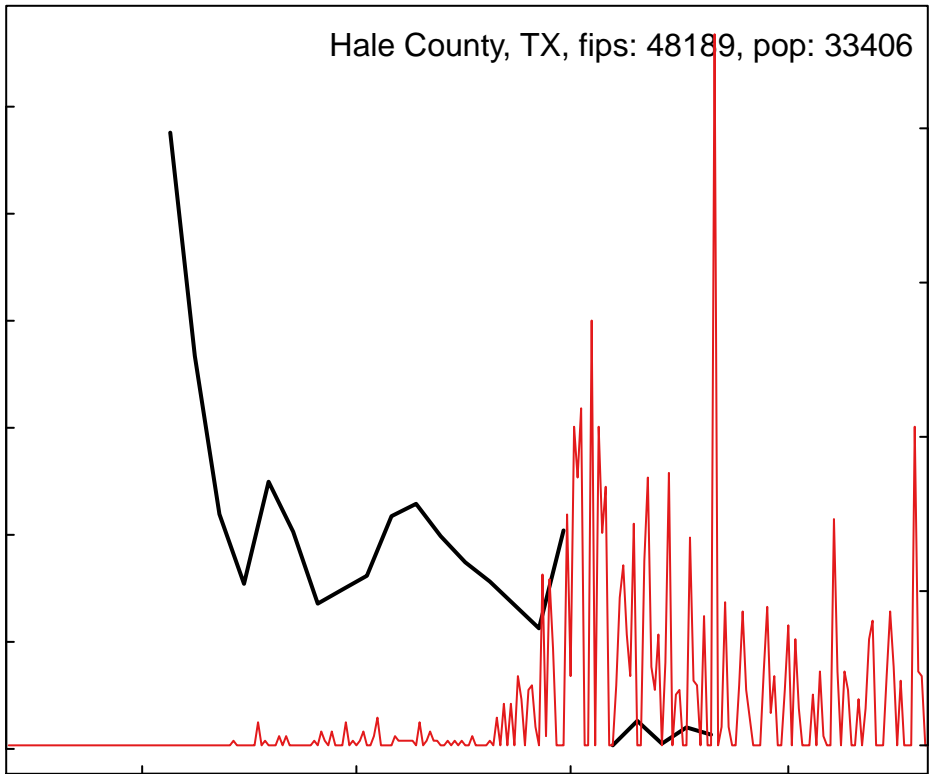

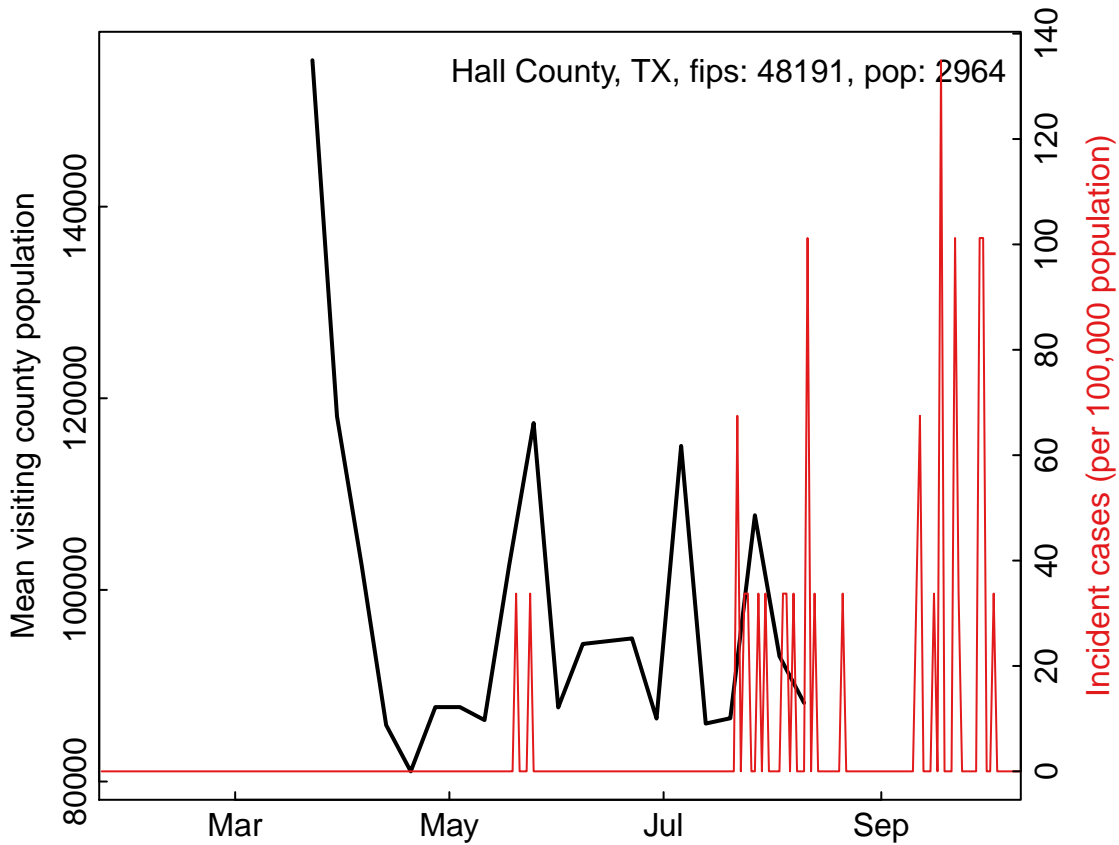

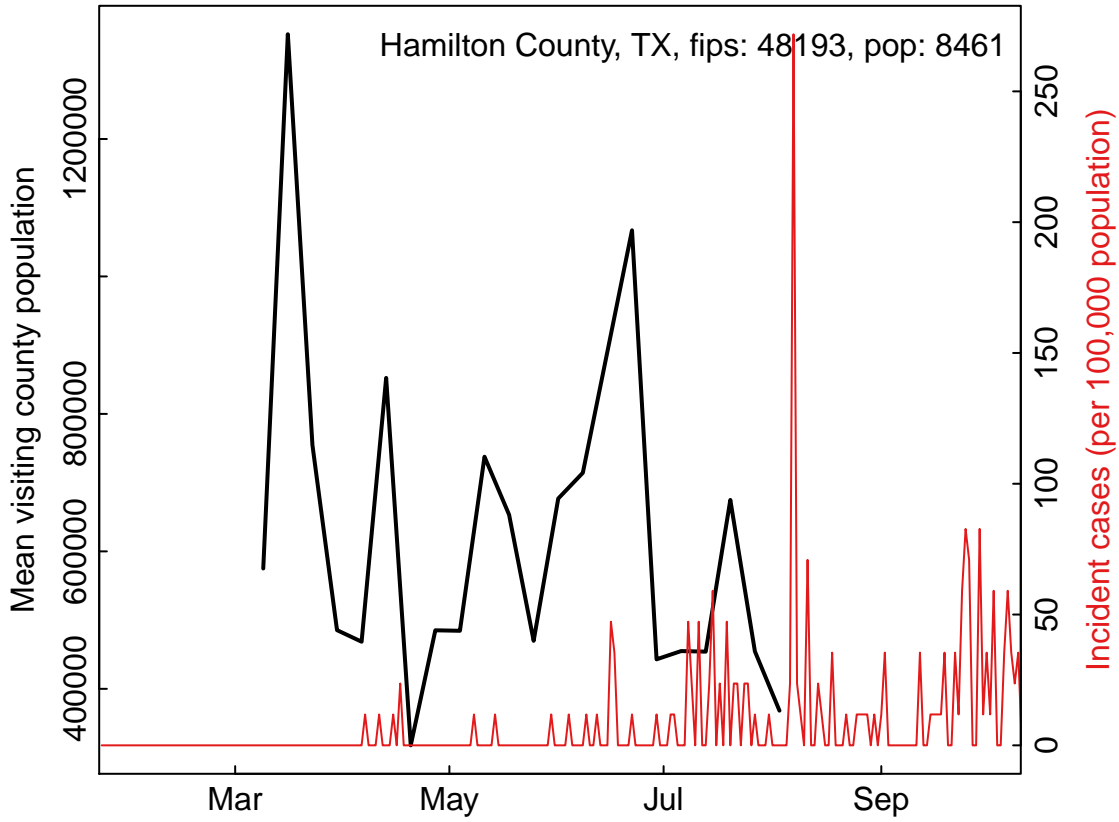

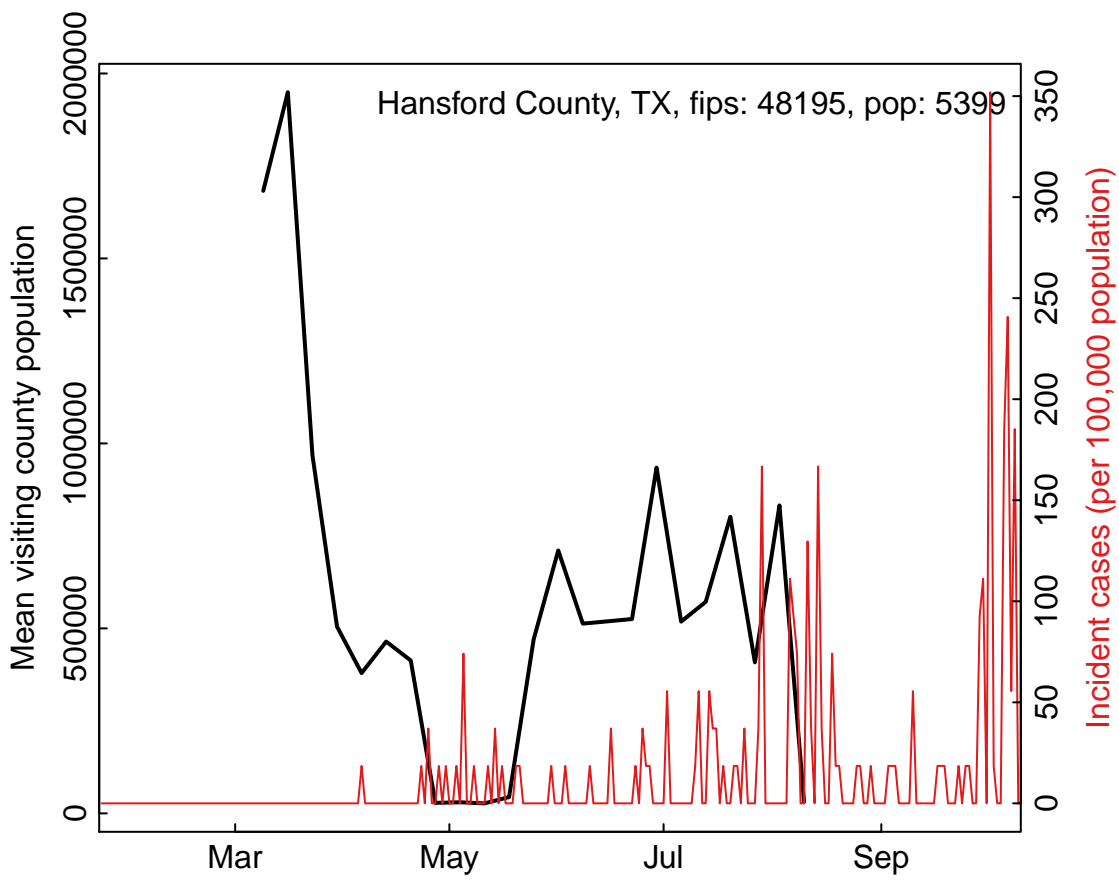

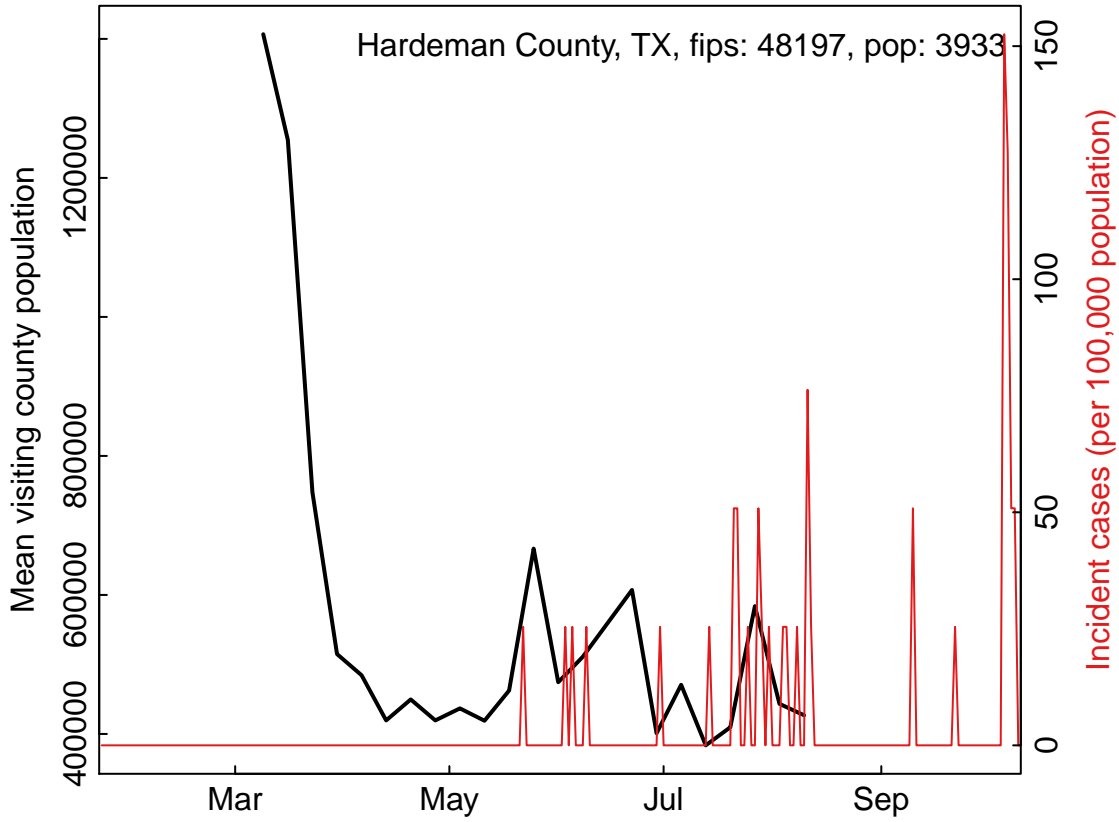

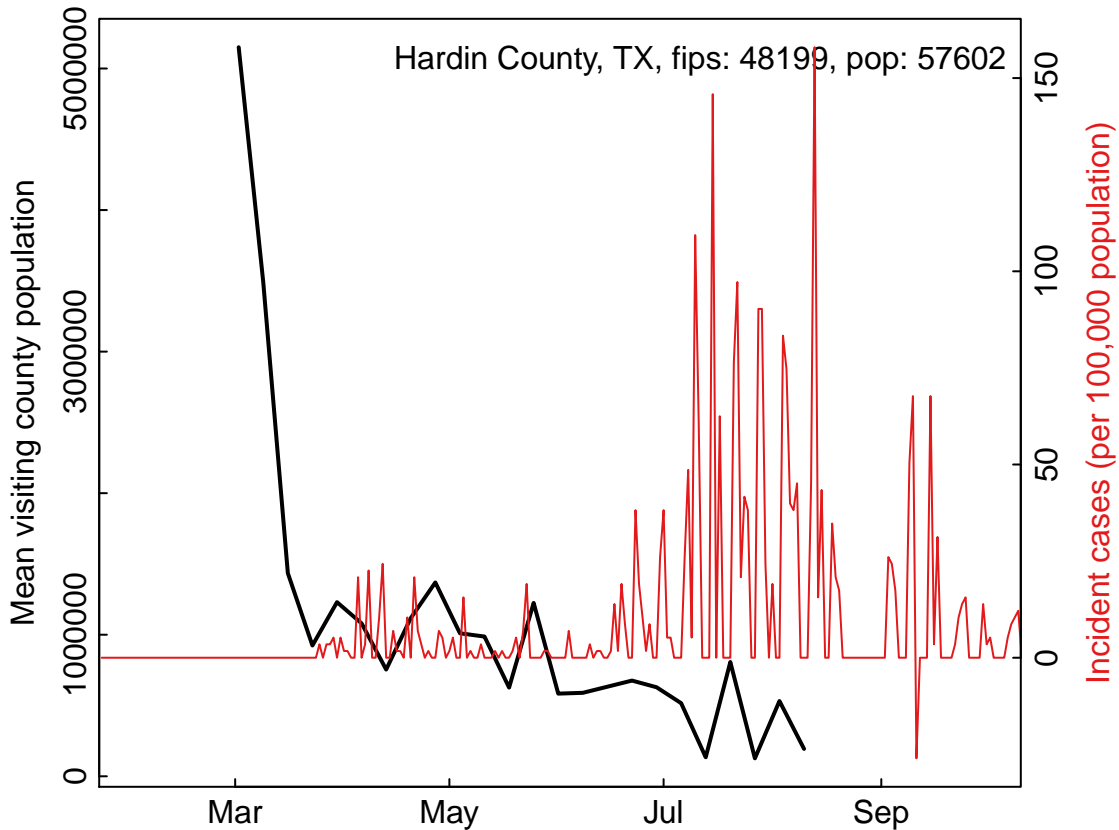



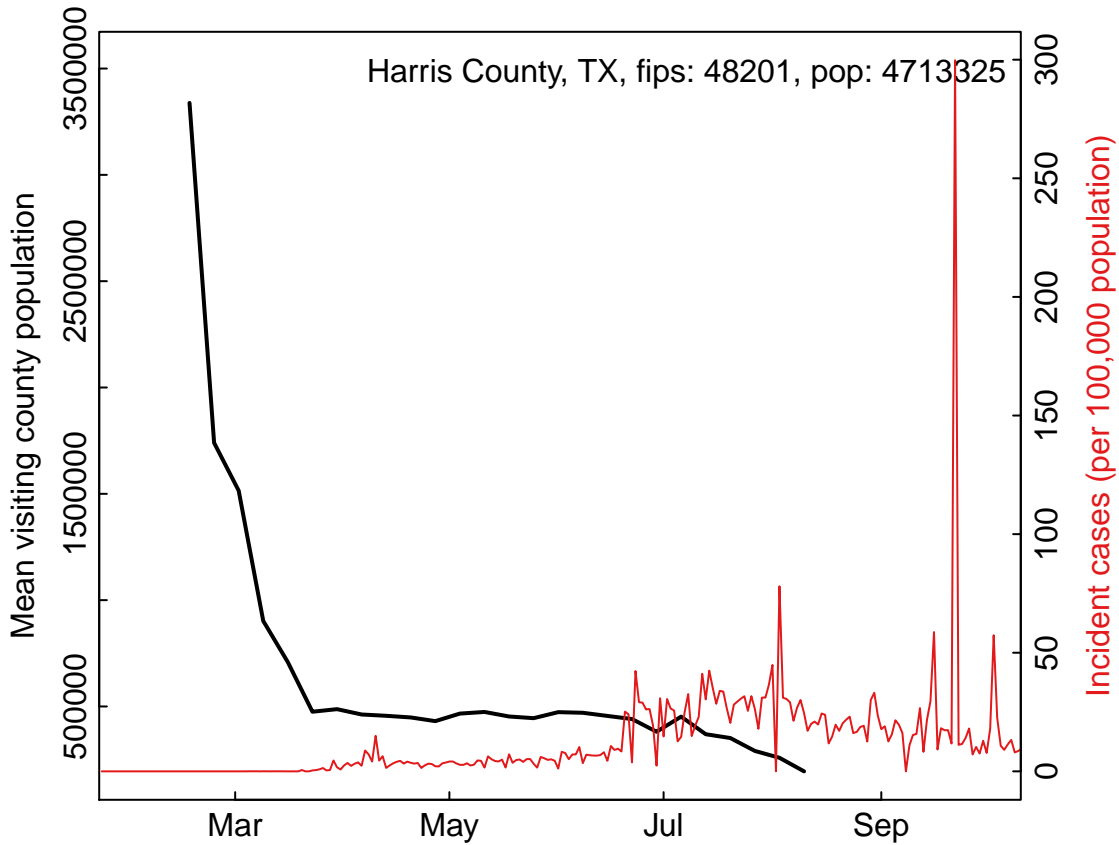

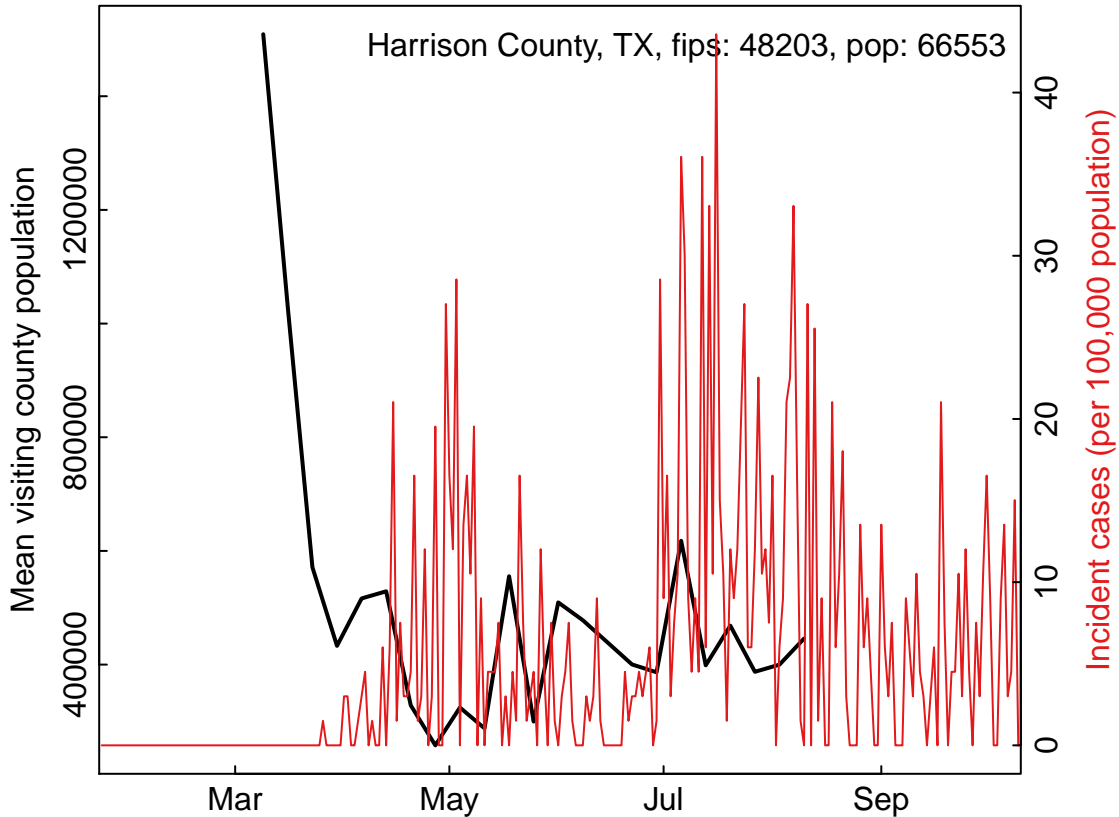

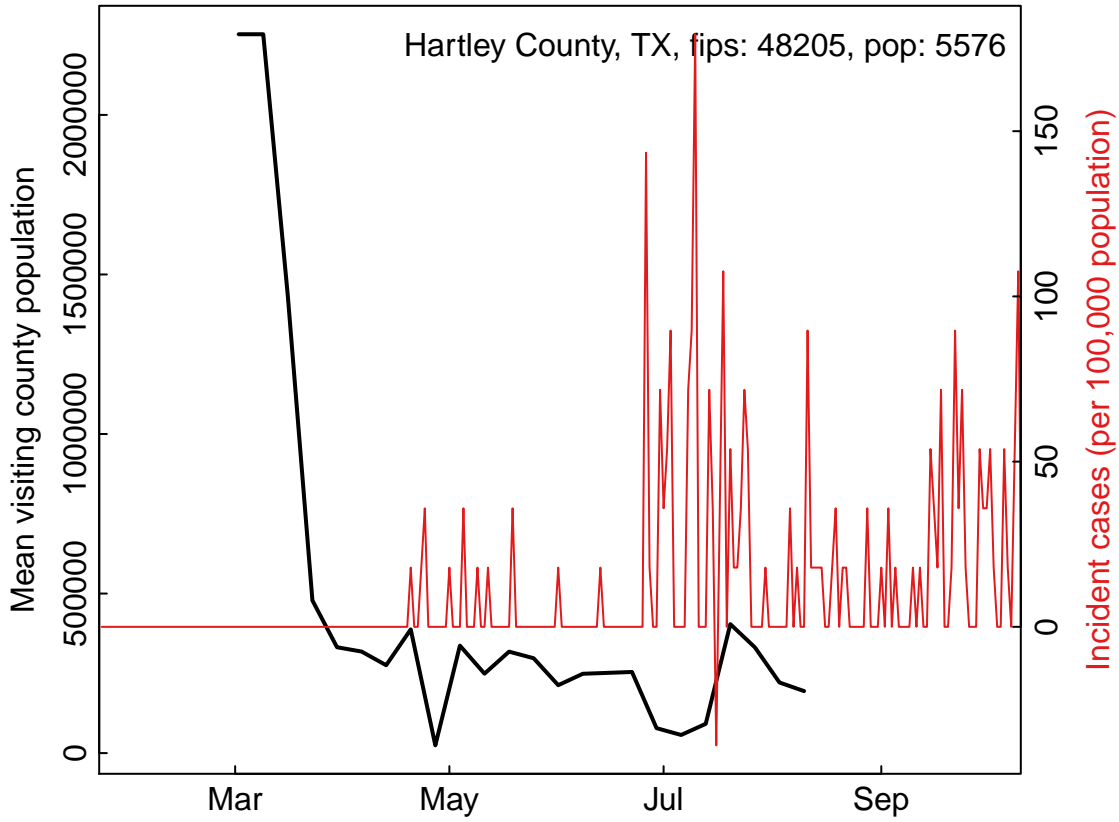

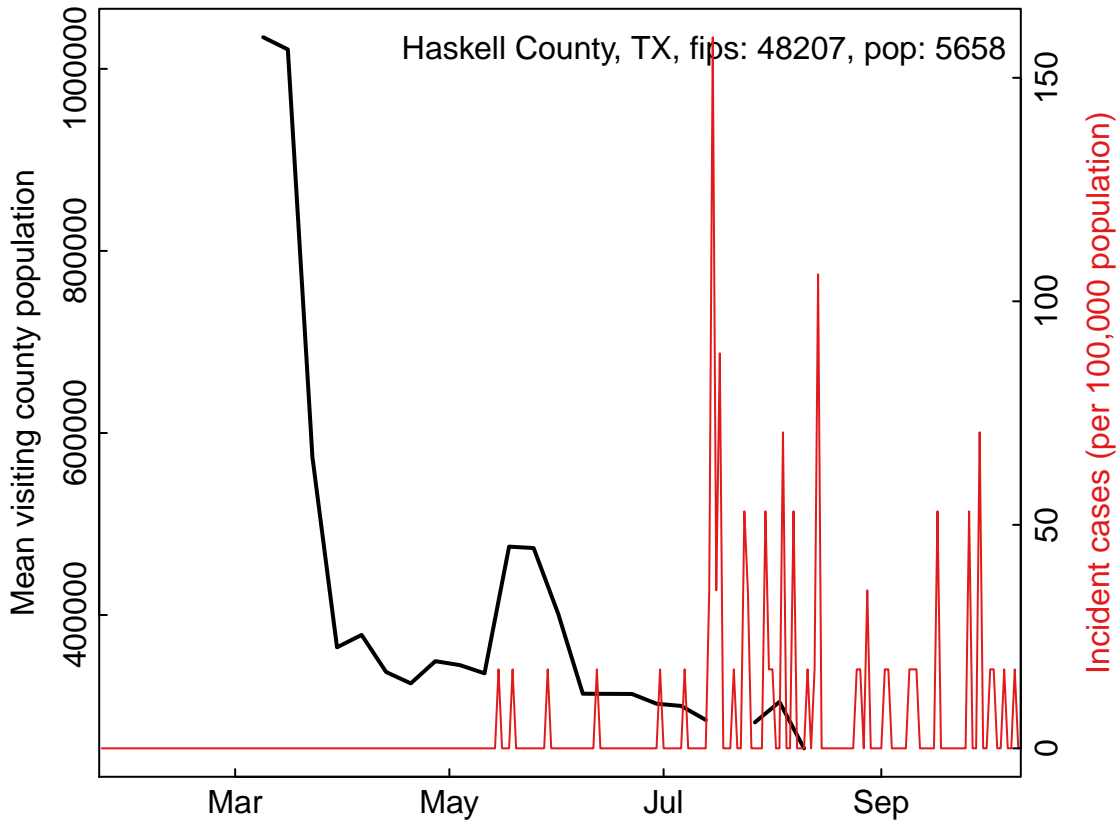

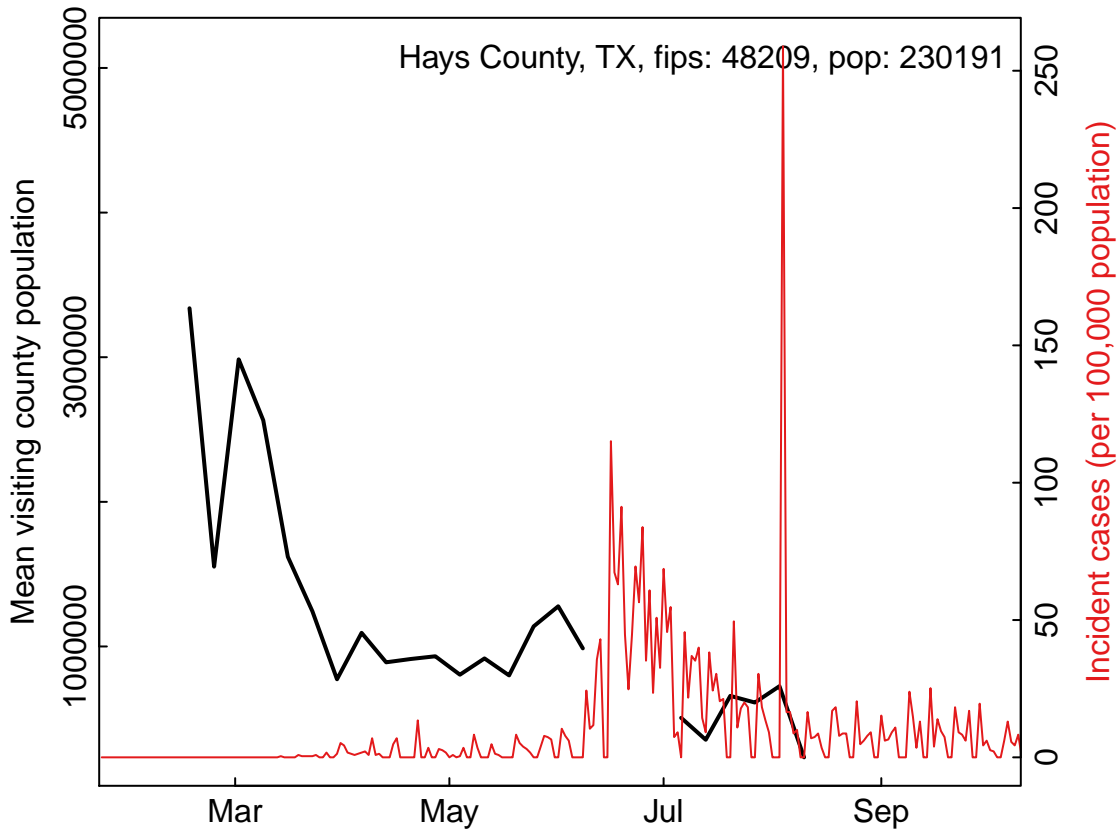

Hemphill County, TX, fips: 48211, pop: 3819

Mean visiting county population

1500000  
1000000  
500000  
0

Mar May Jul Sep

Incident cases (per 100,000 population)

150  
100  
50  
0

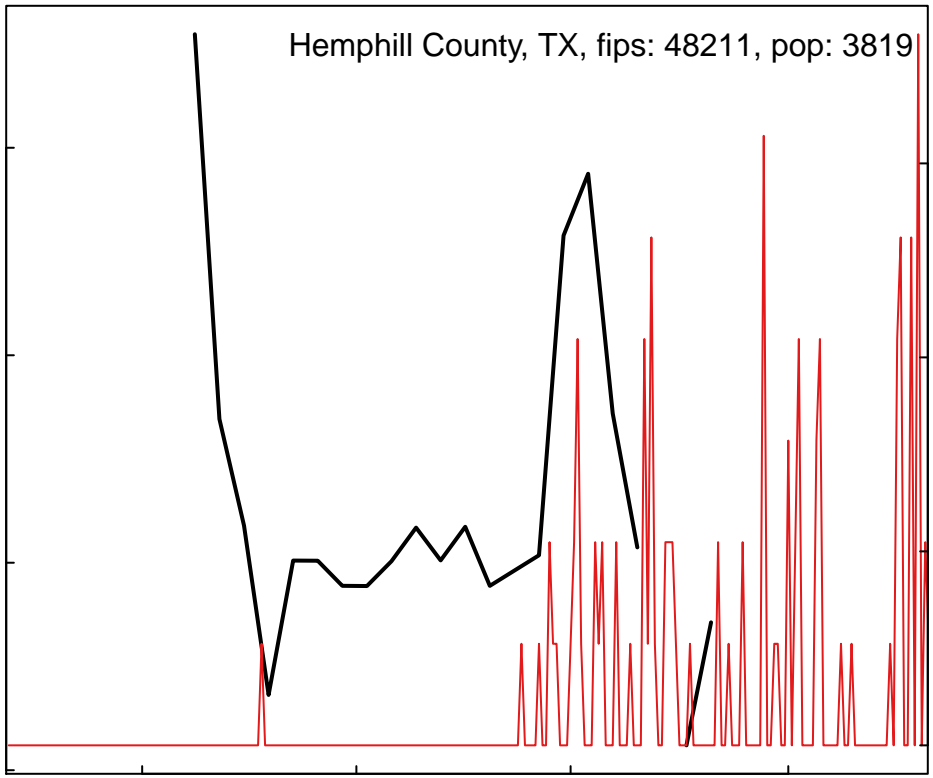

Henderson County, TX, fips: 48213, pop: 82737

Mean visiting county population

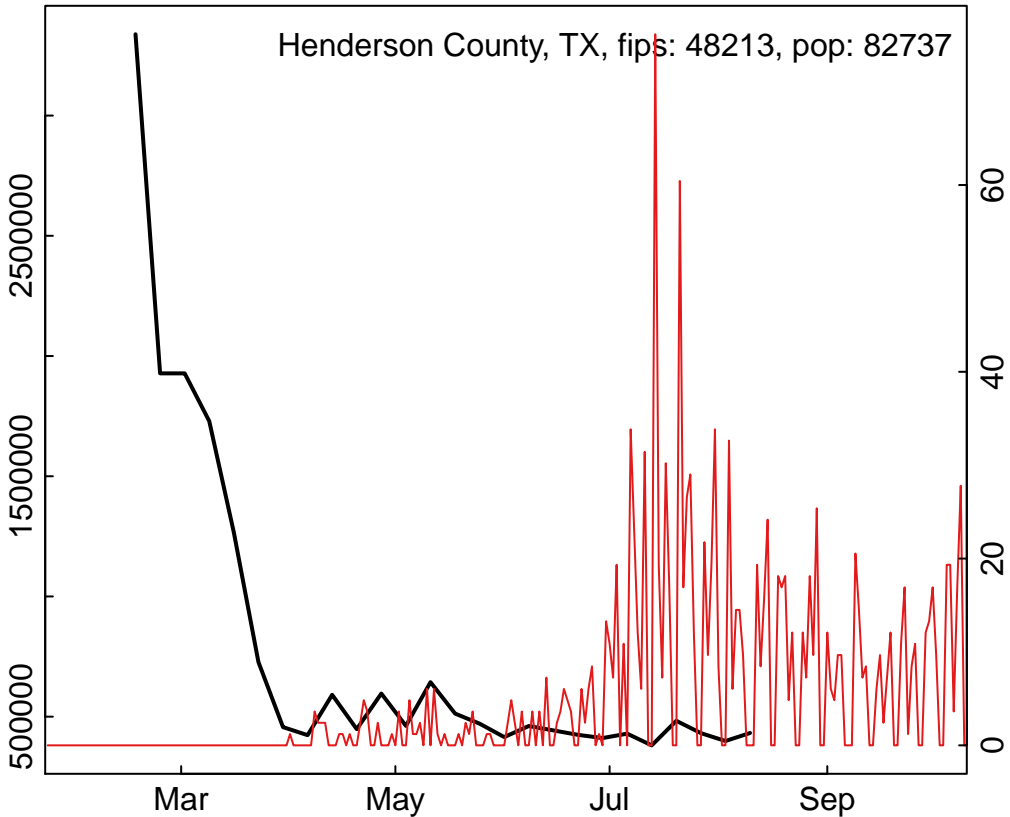

Incident cases (per 100,000 population)

Hidalgo County, TX, fips: 48215, pop: 868707

Mean visiting county population

2500000  
1500000  
500000

Mar

May

Jul

Sep

150  
100  
50  
0

Incident cases (per 100,000 population)

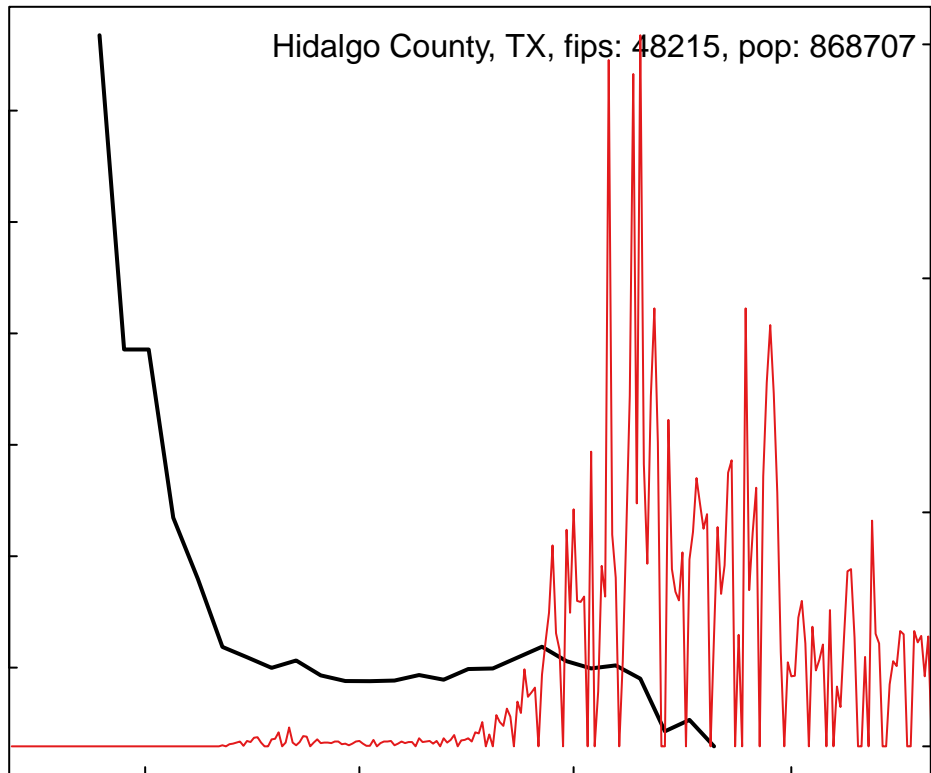



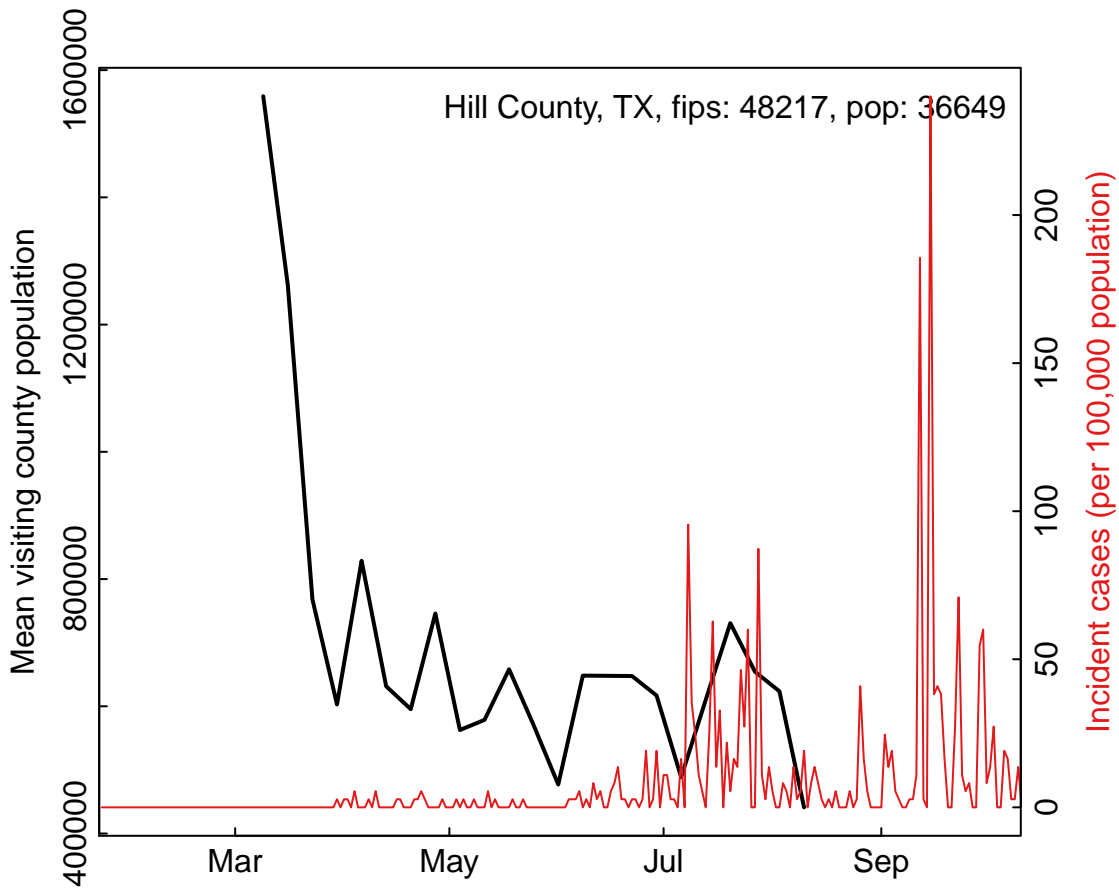

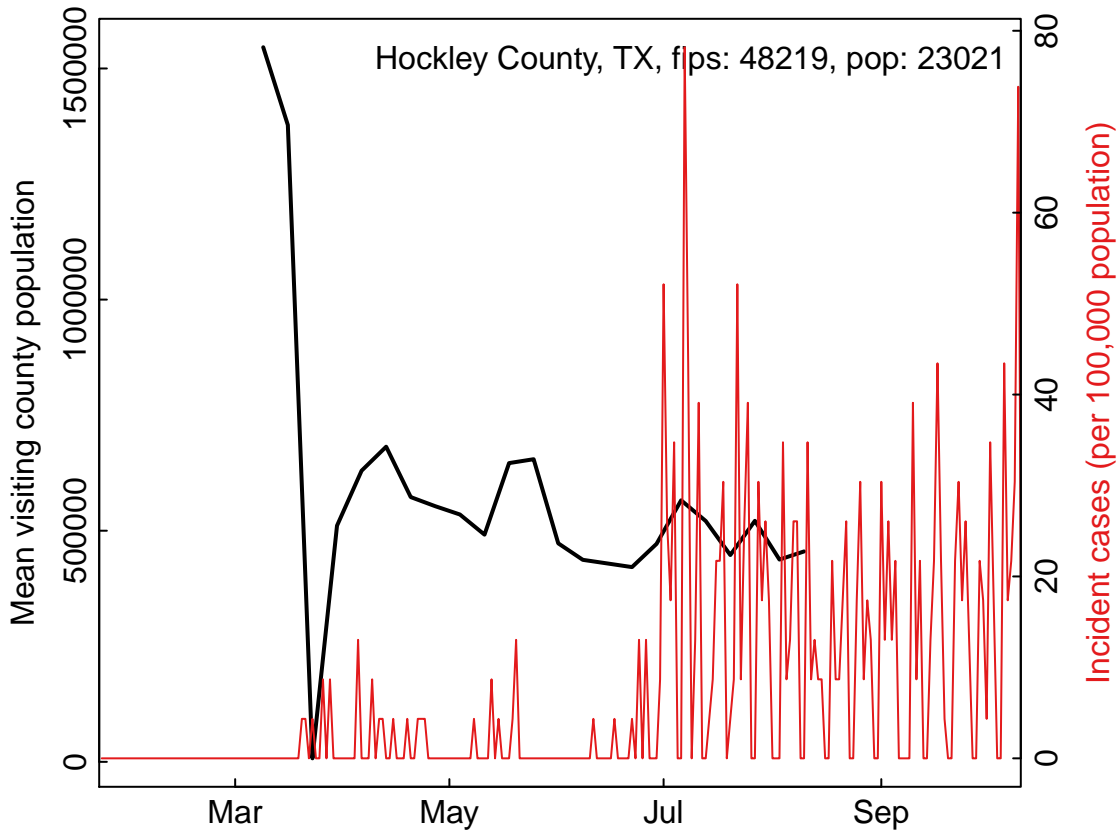

Hood County, TX, fips: 48221, pop: 61643

Mean visiting county population

Incident cases (per 100,000 population)

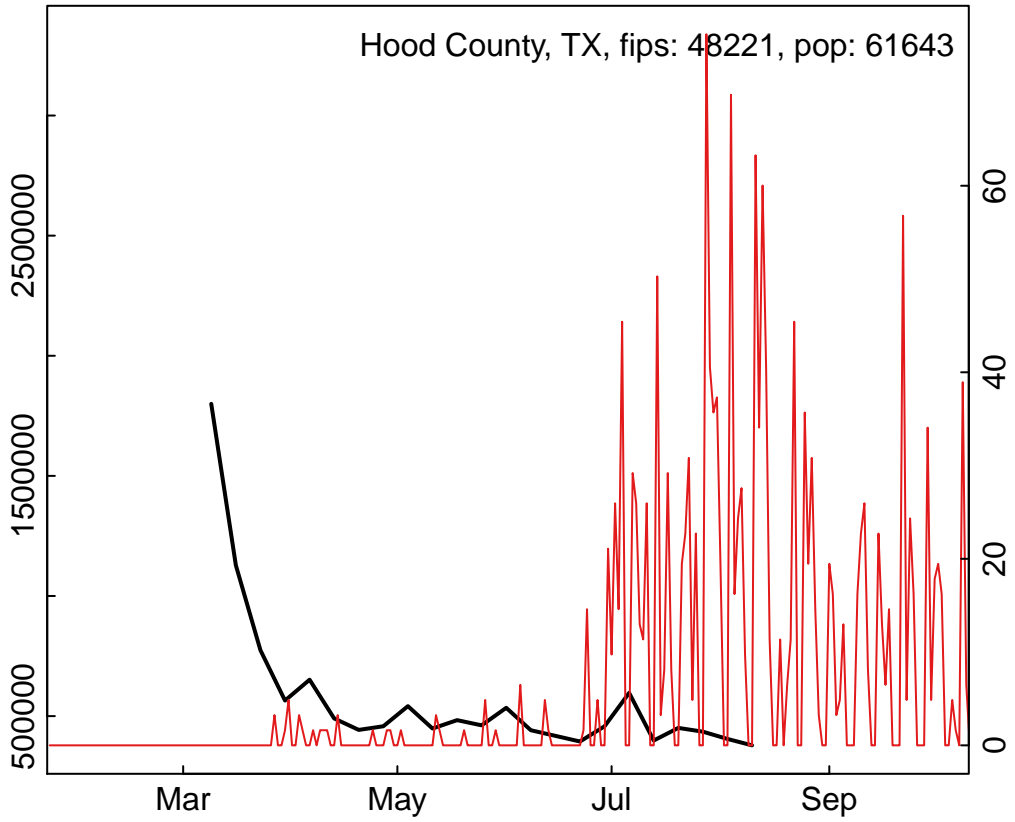

Hopkins County, TX, fips: 48223, pop: 37084

Mean visiting county population

2000000  
1500000  
1000000  
500000

Mar

May

Jul

Sep

80  
60  
40  
20  
0

Incident cases (per 100,000 population)

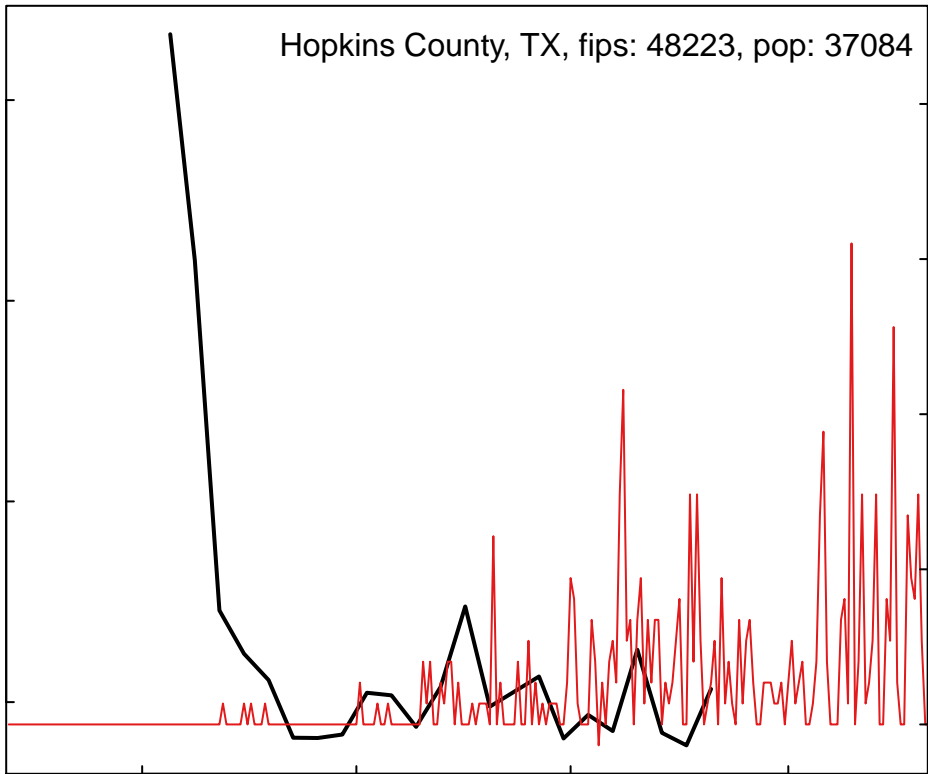

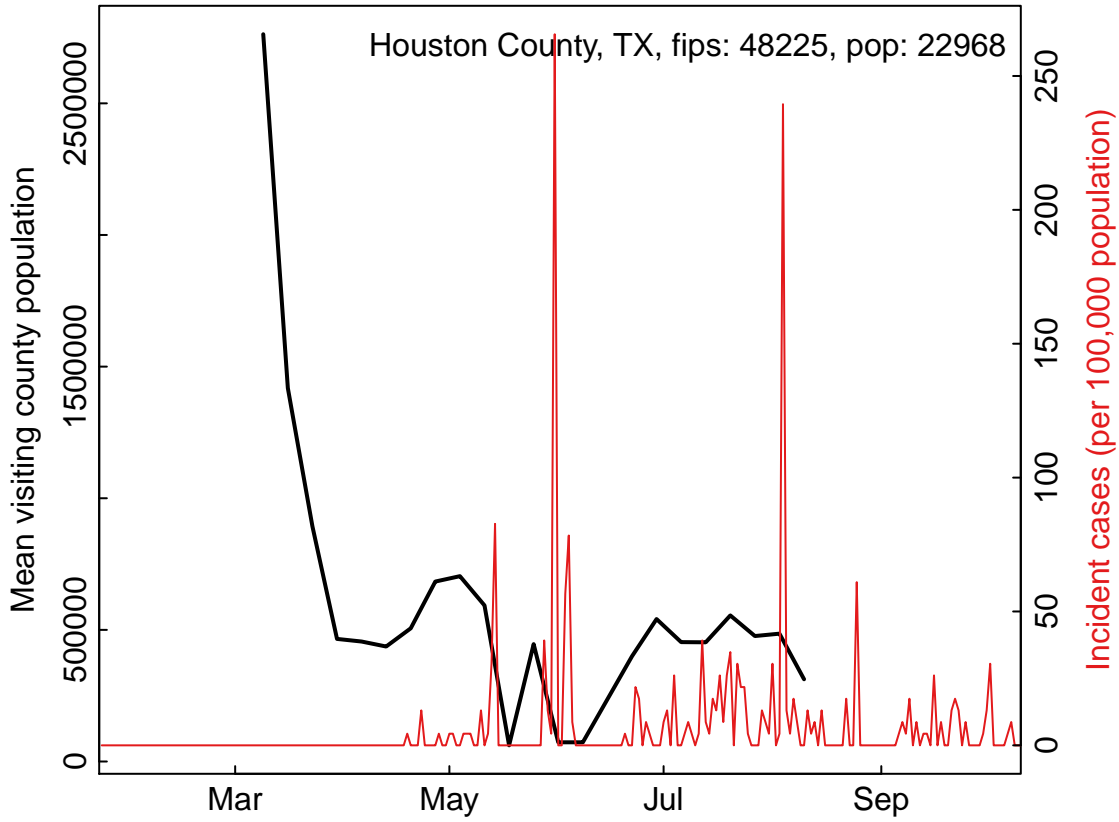

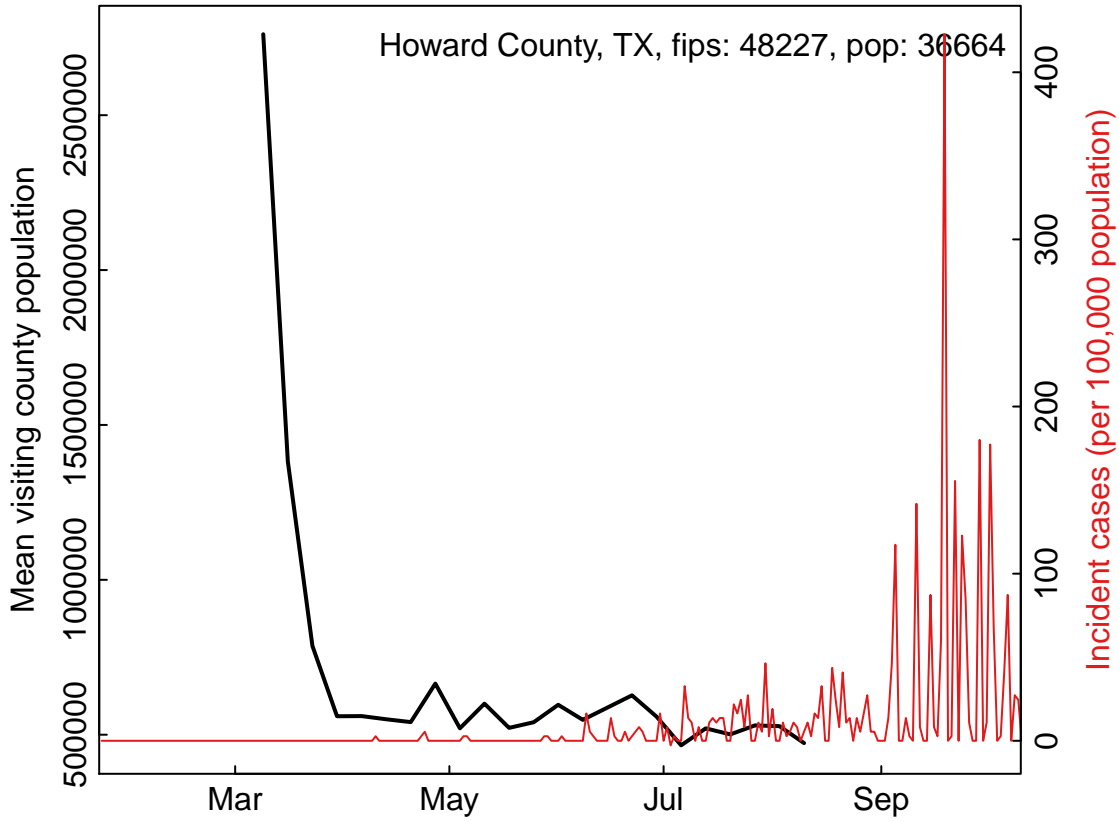

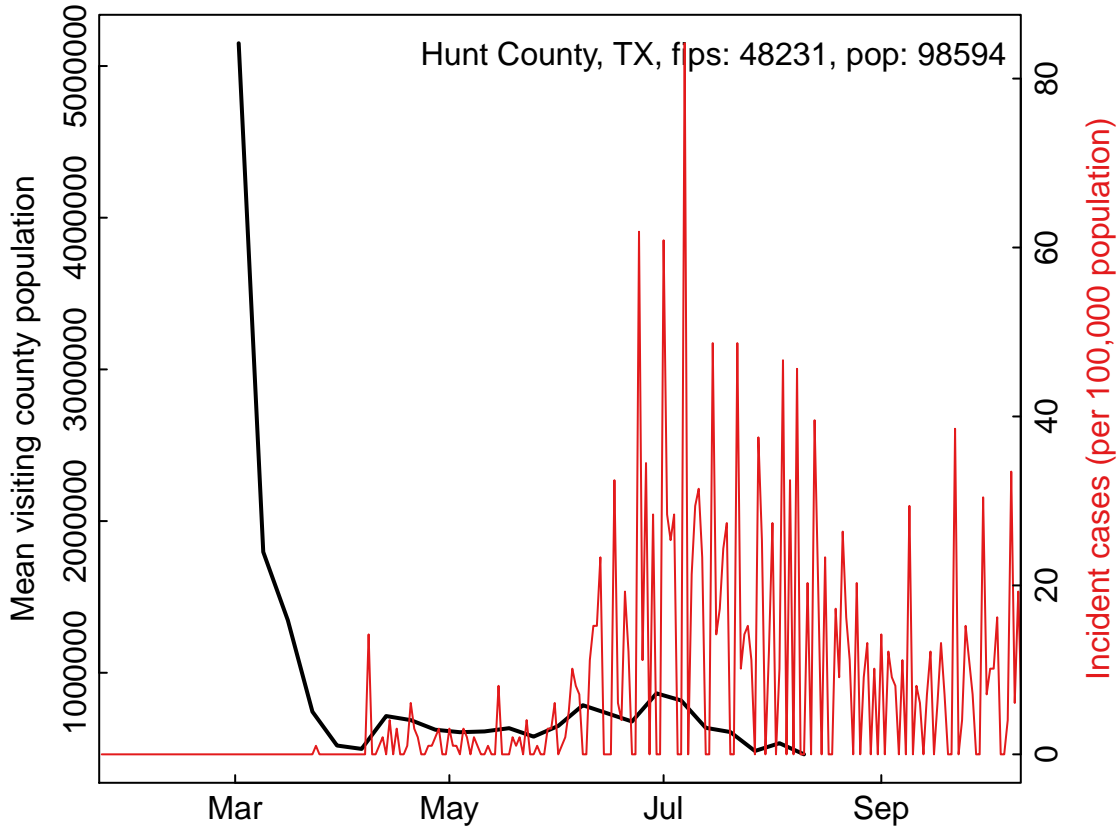

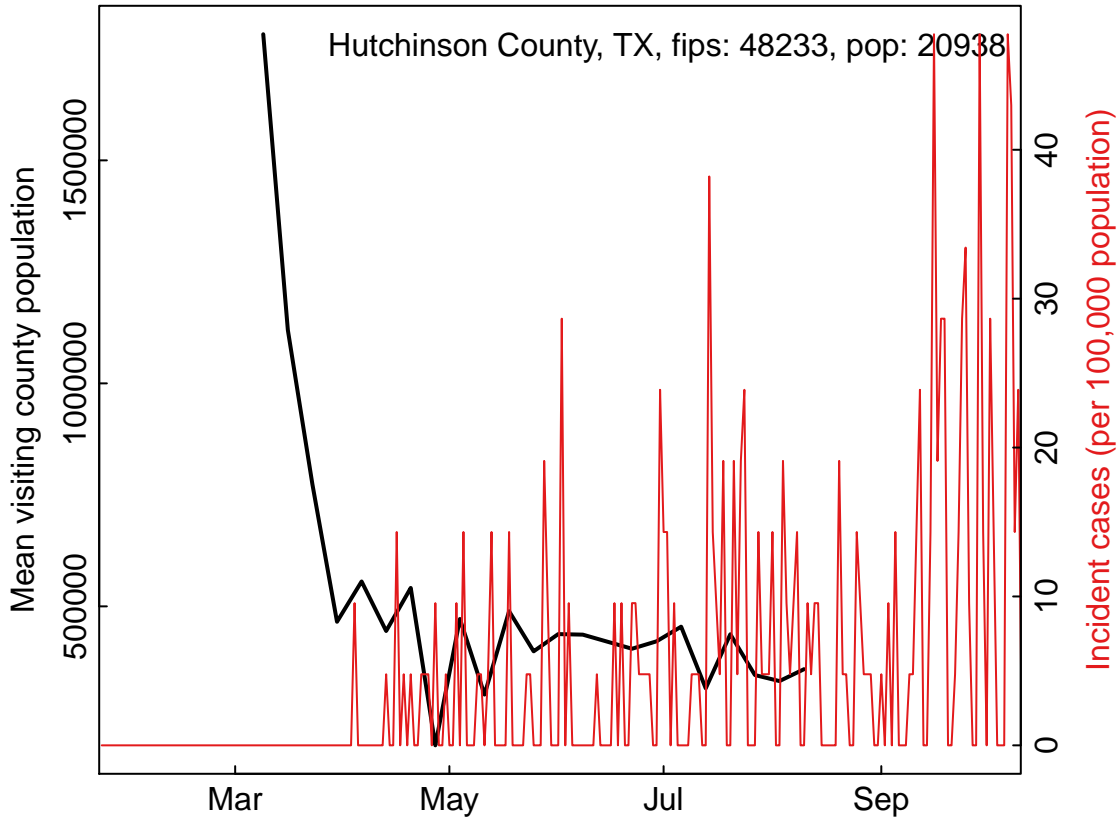



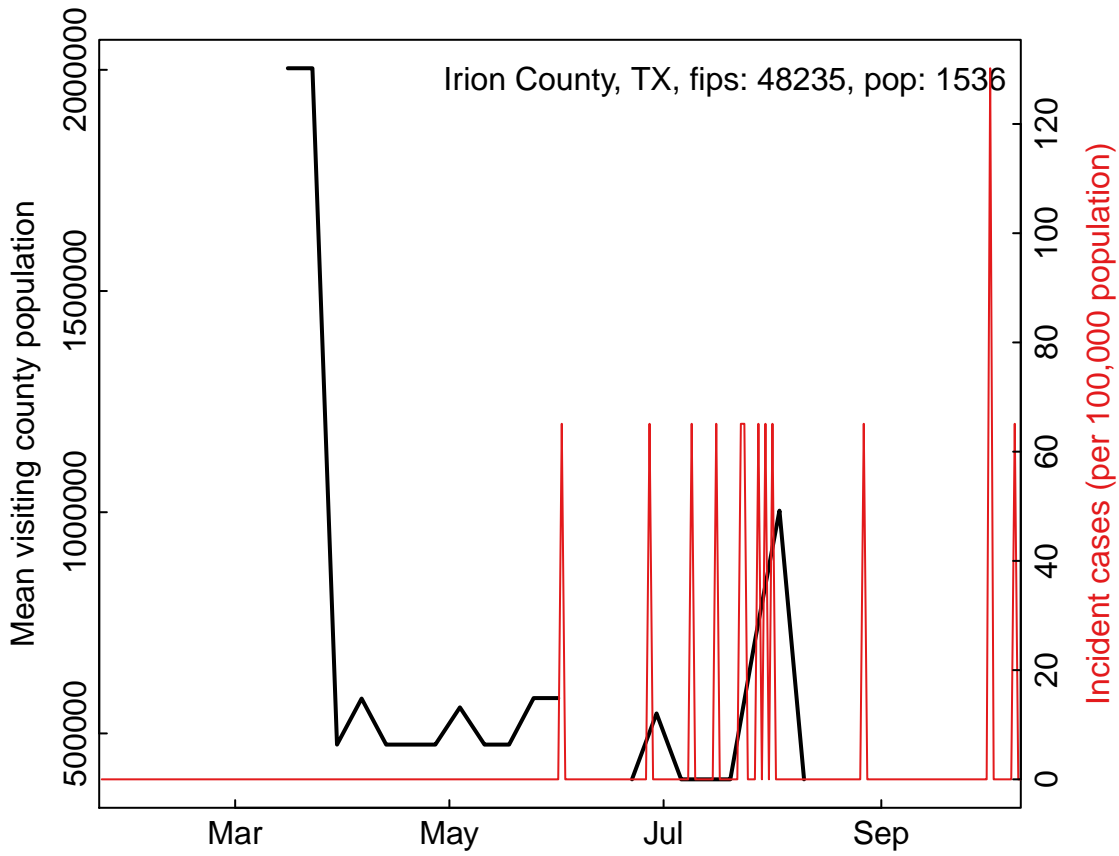

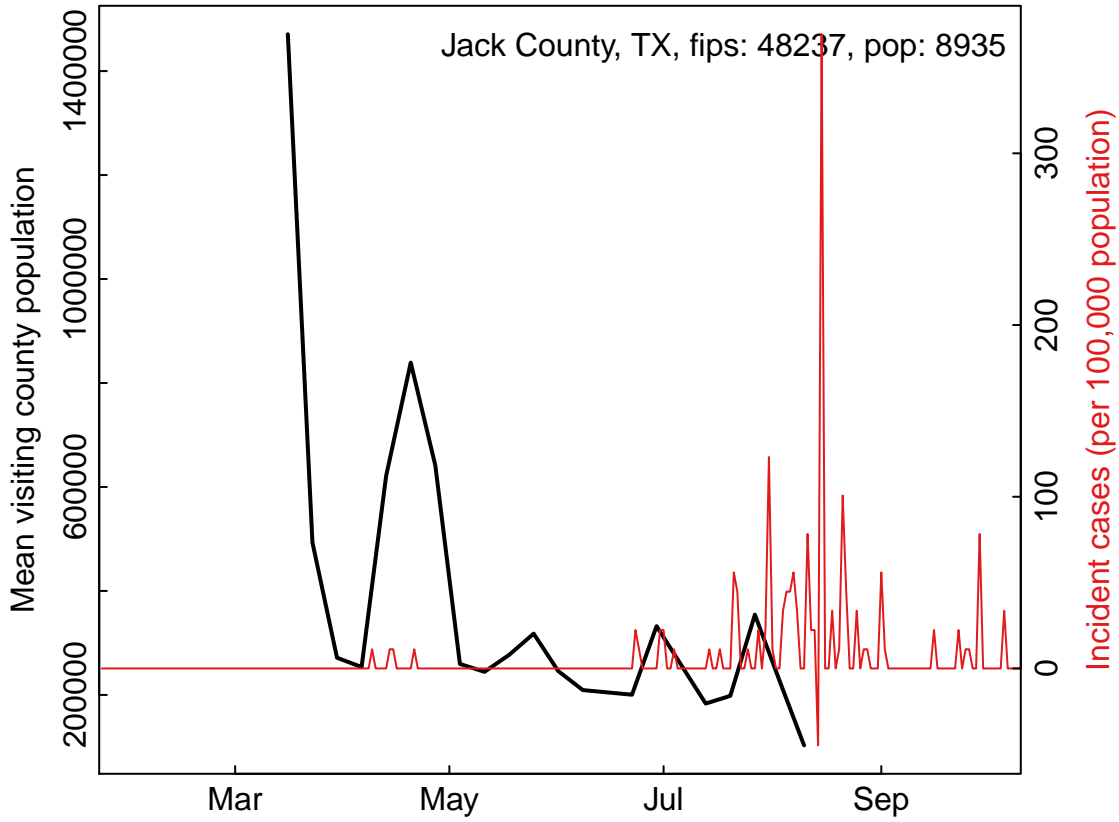

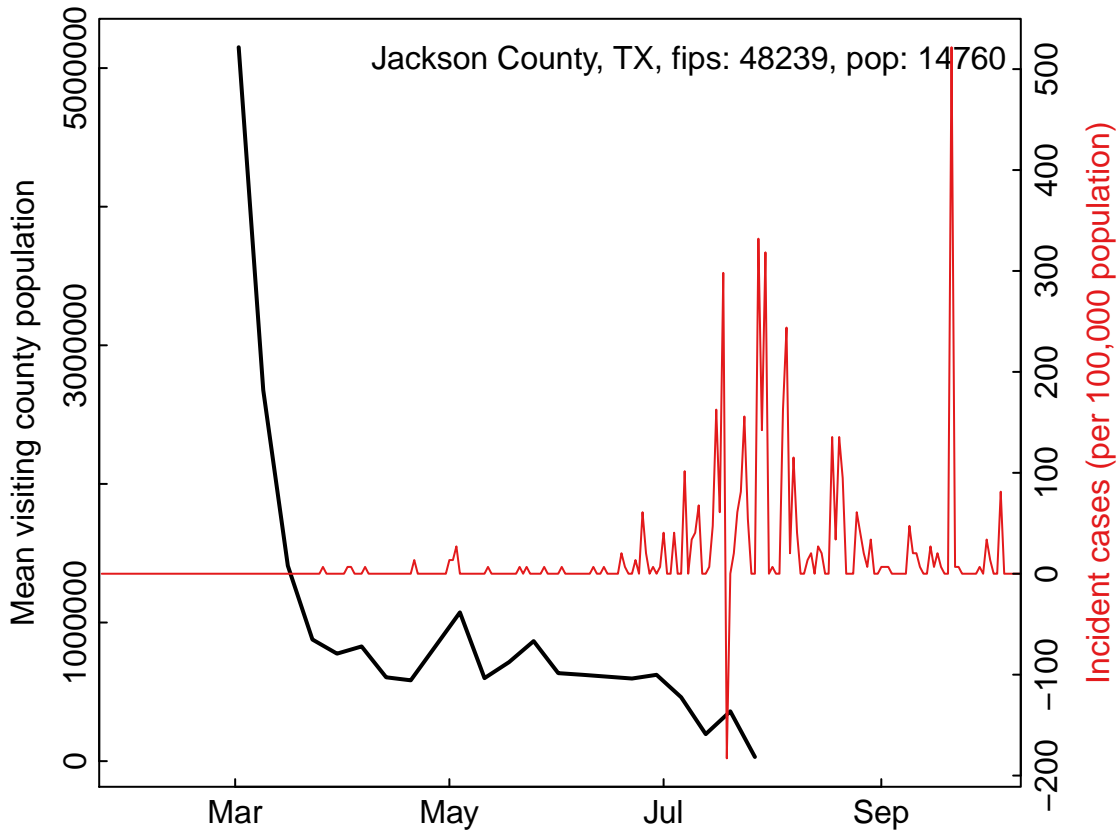

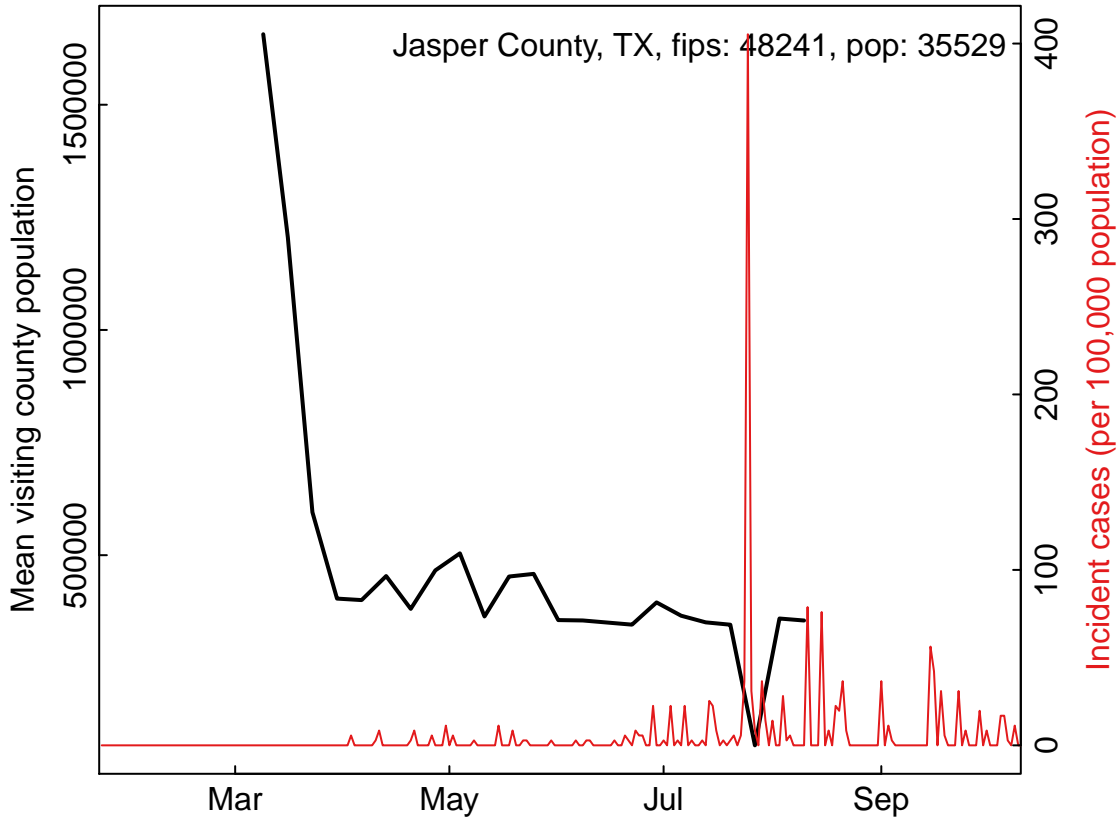

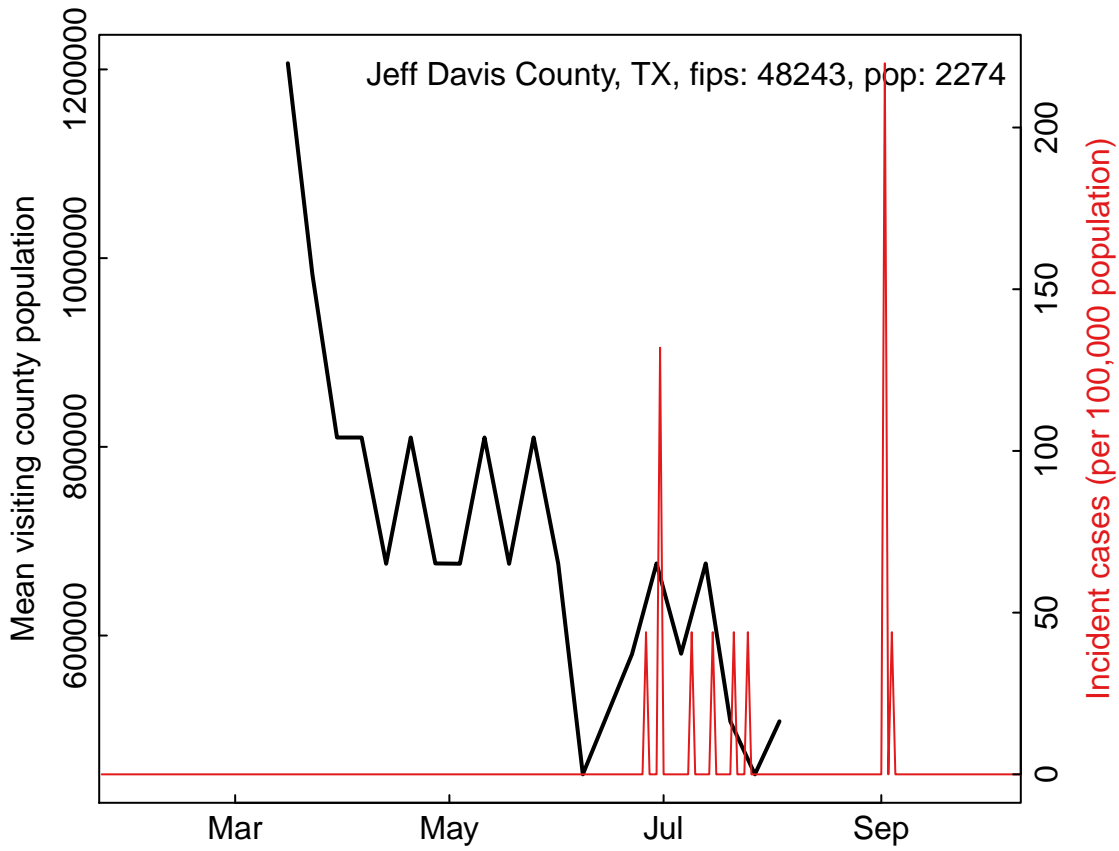

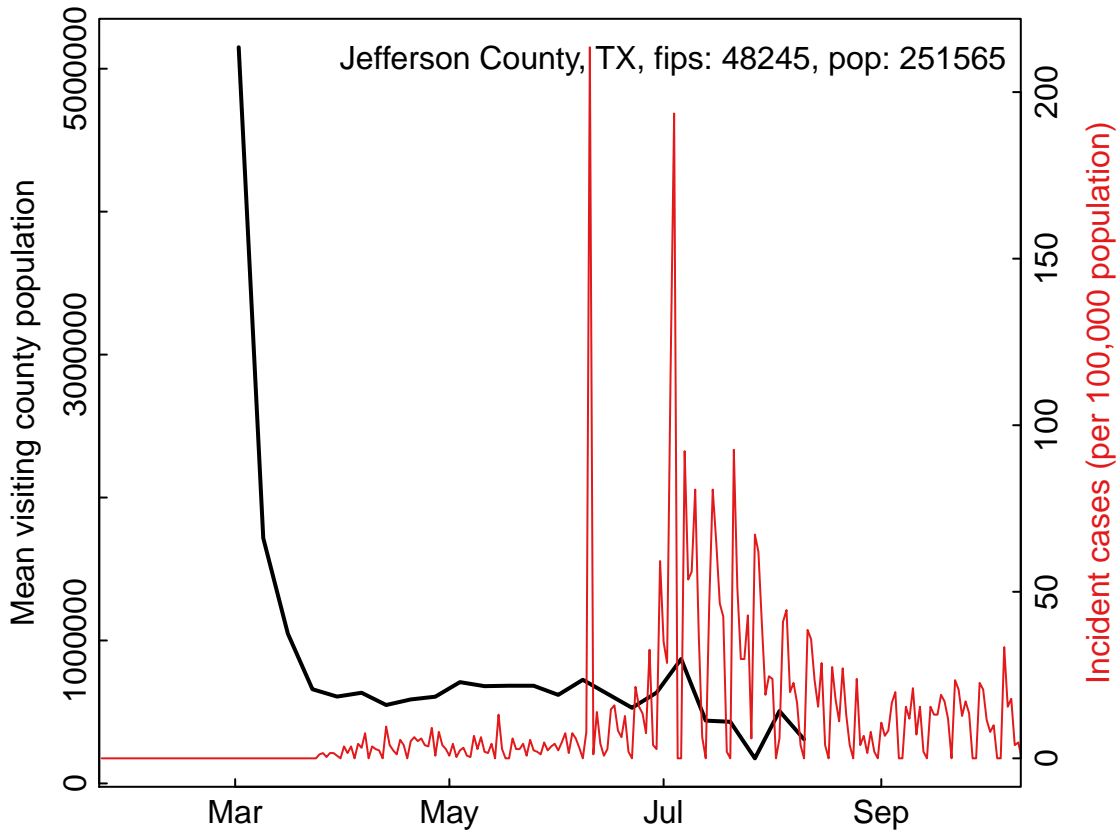

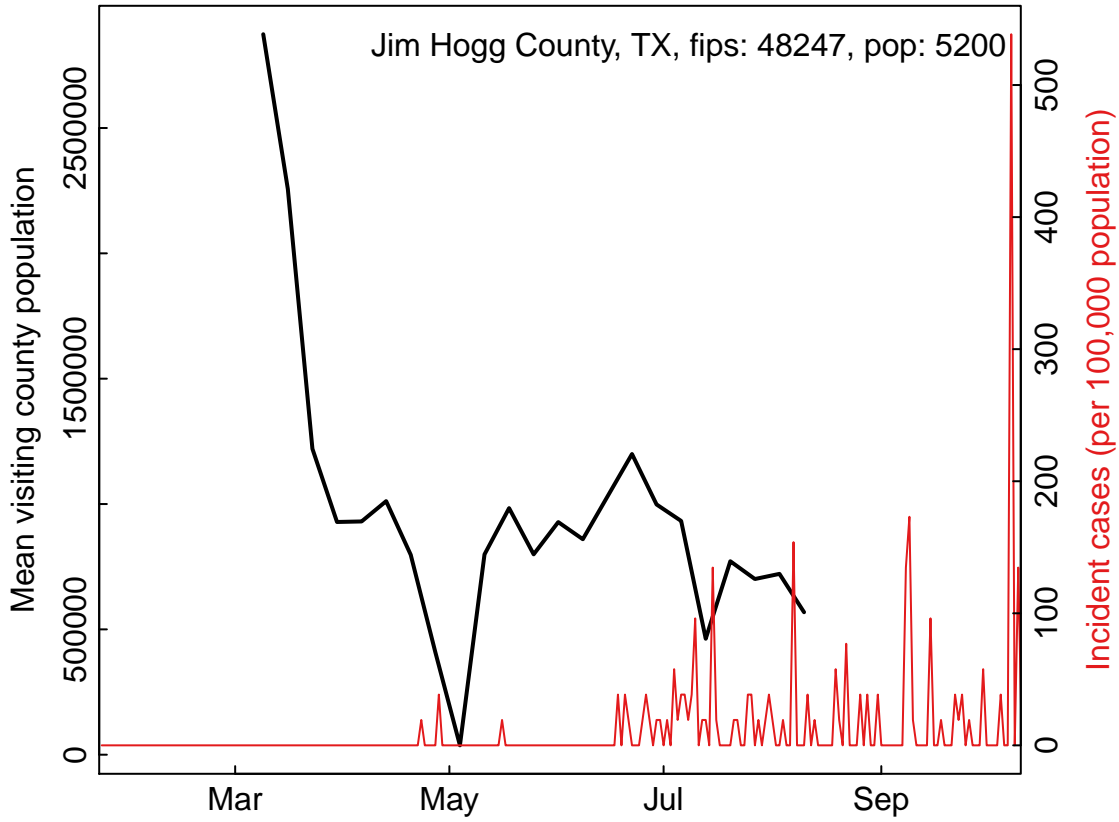

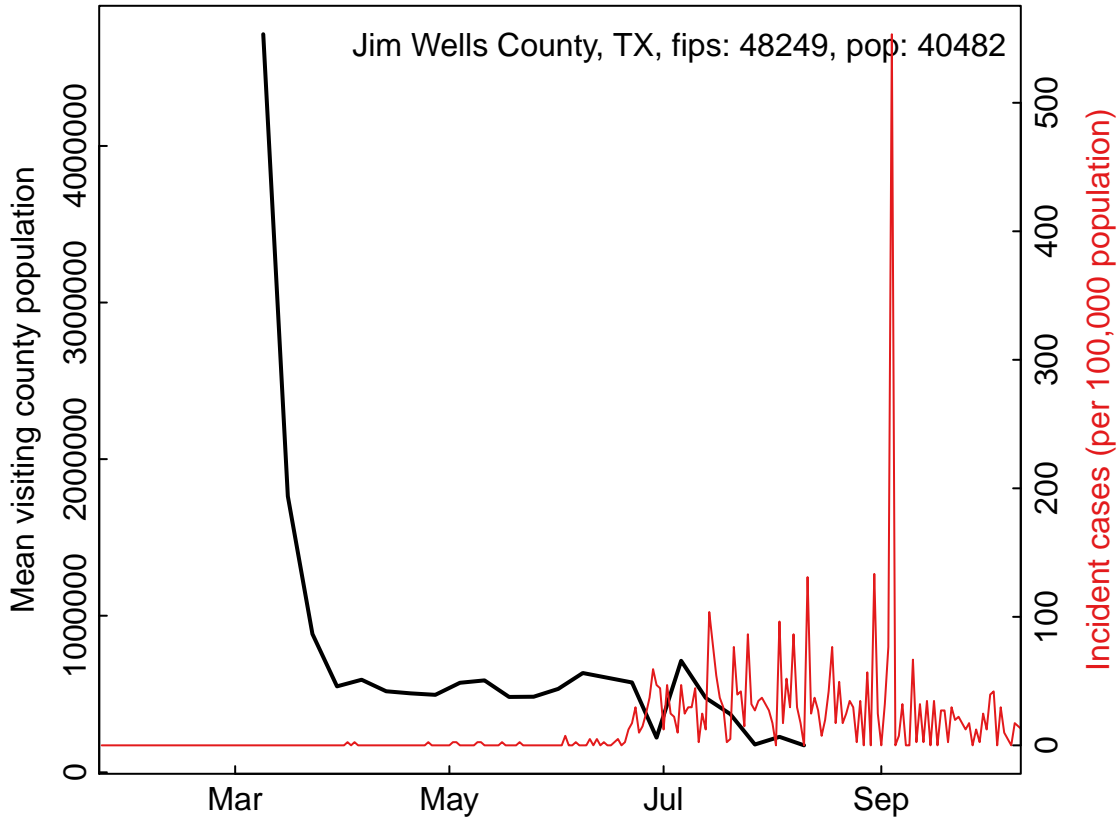



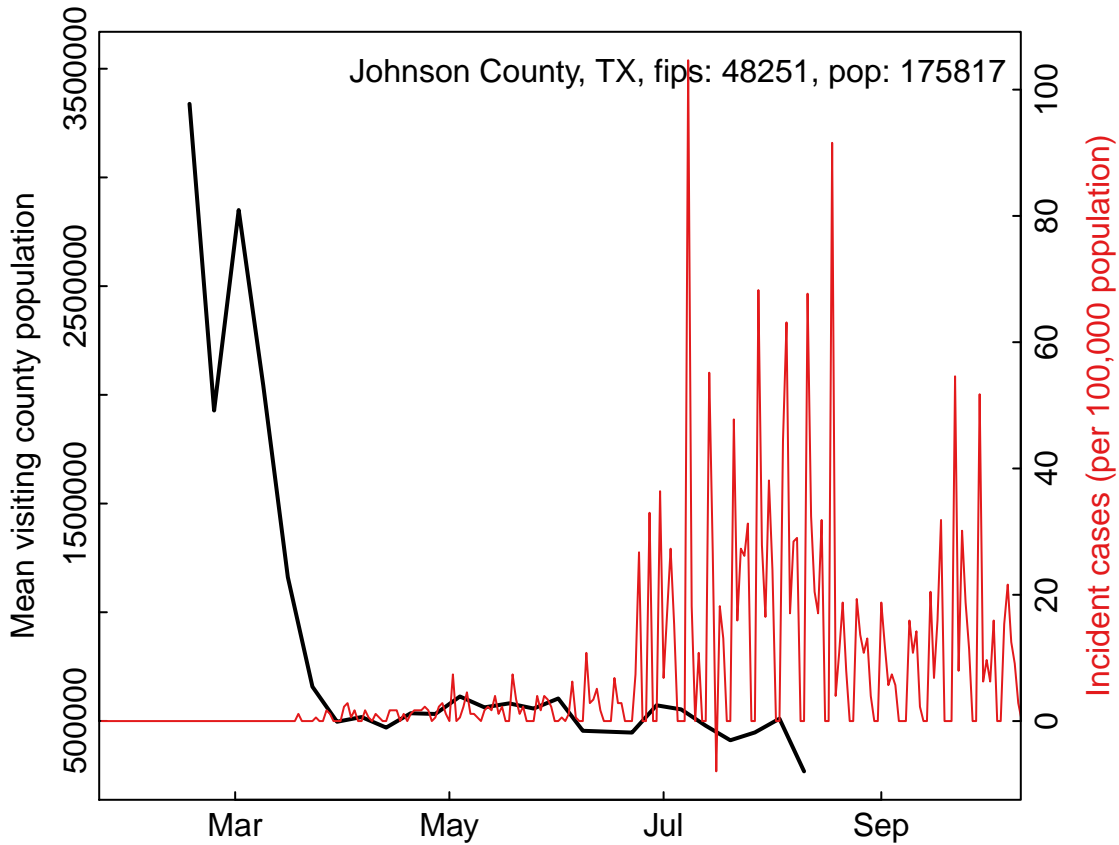

Jones County, TX, fips: 48253, pop: 20083

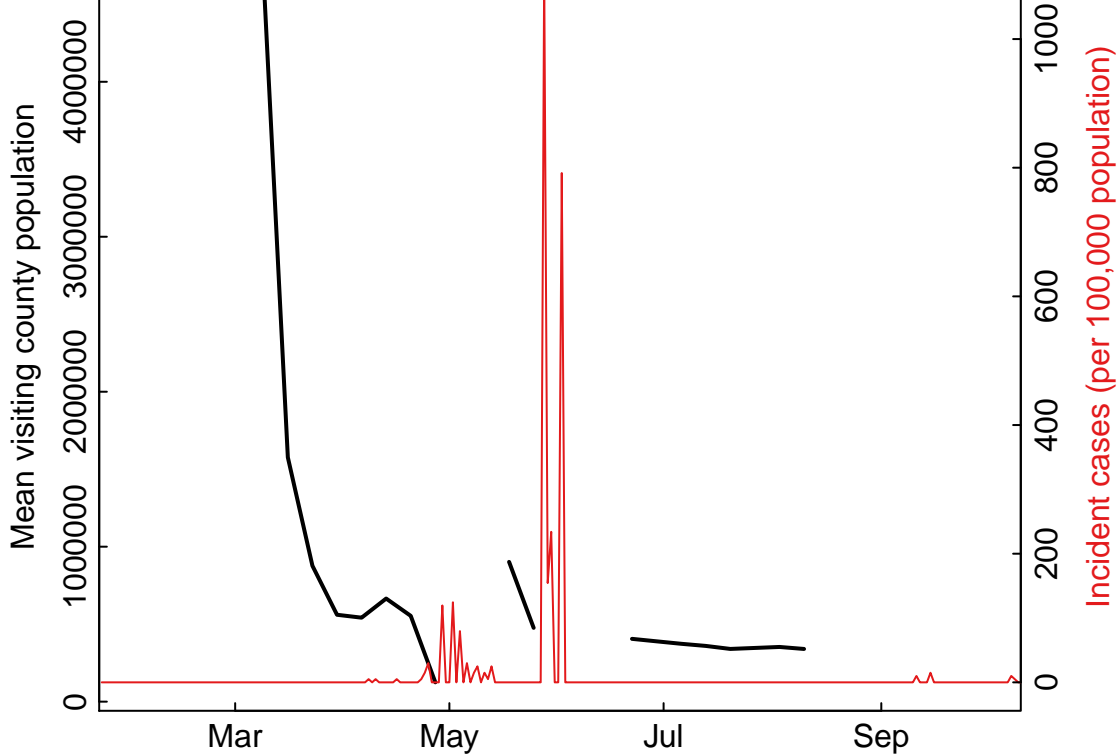

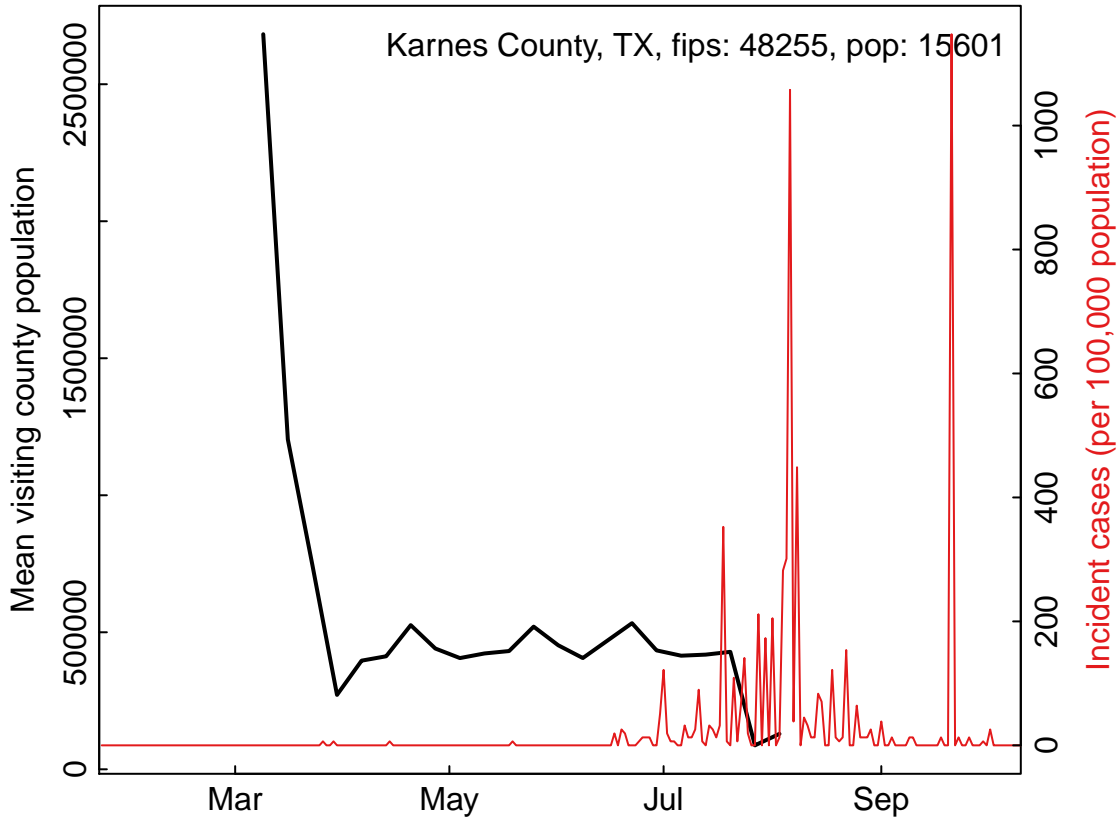

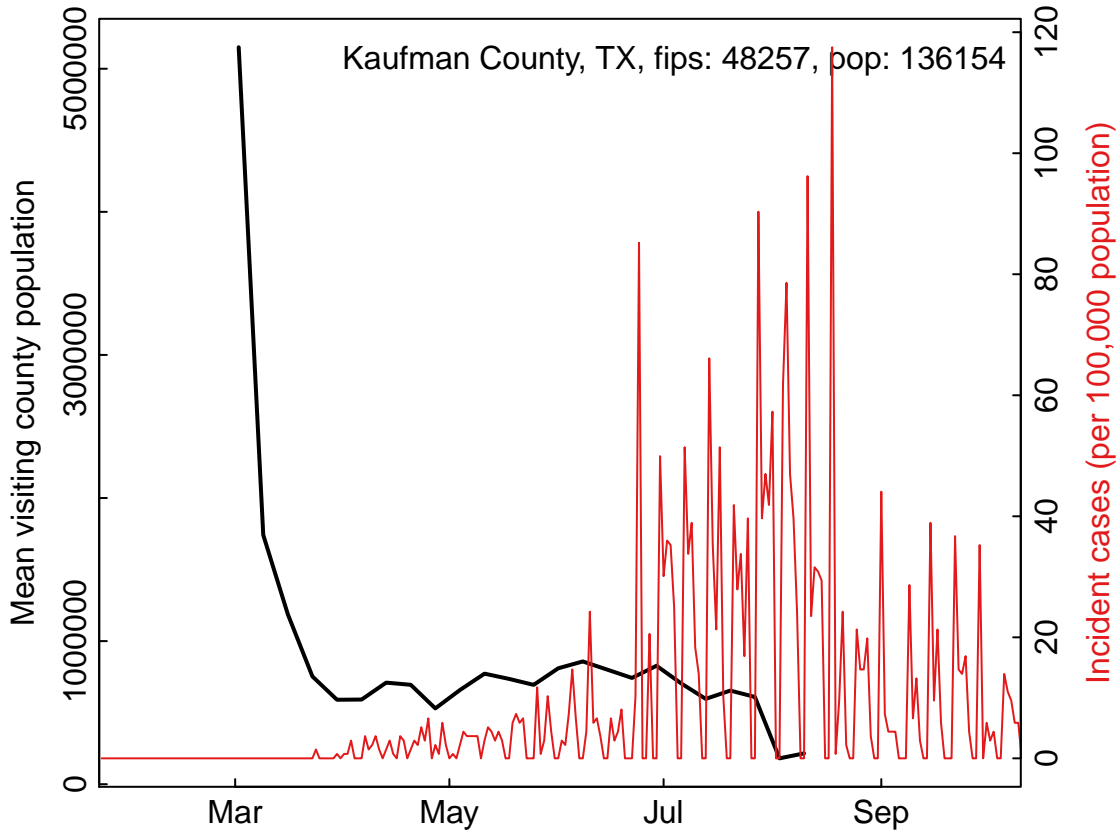

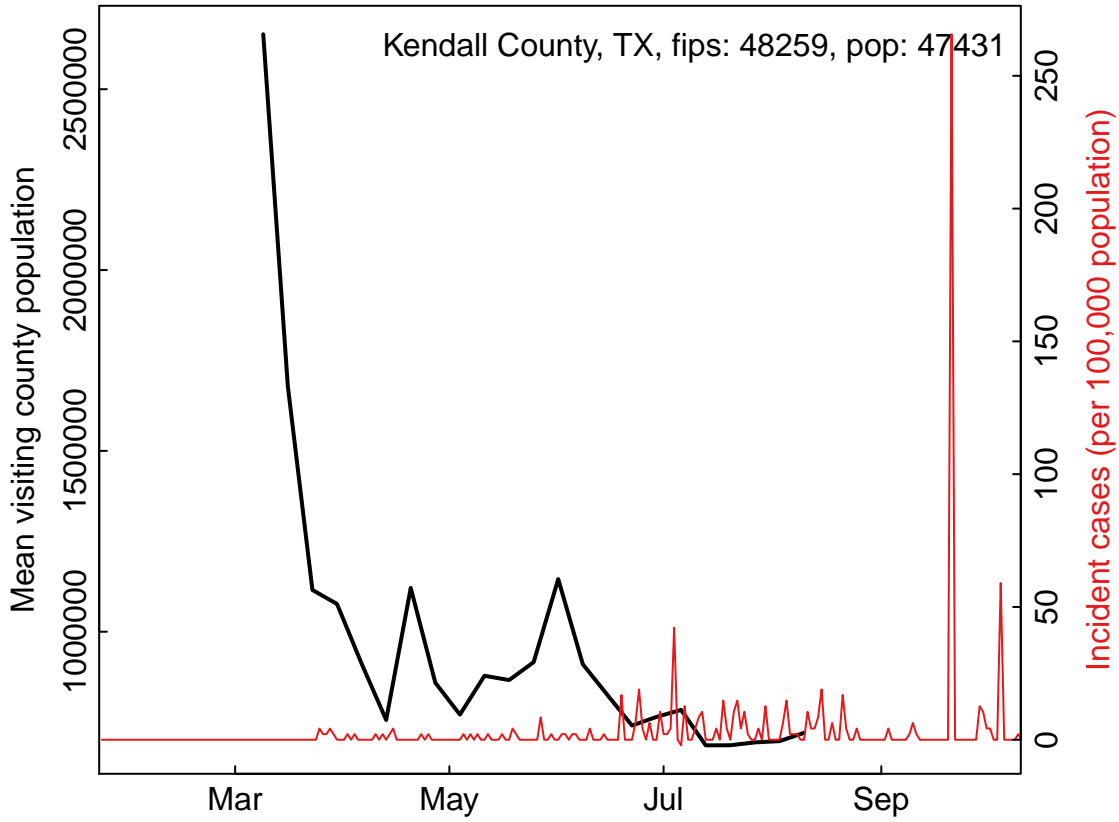

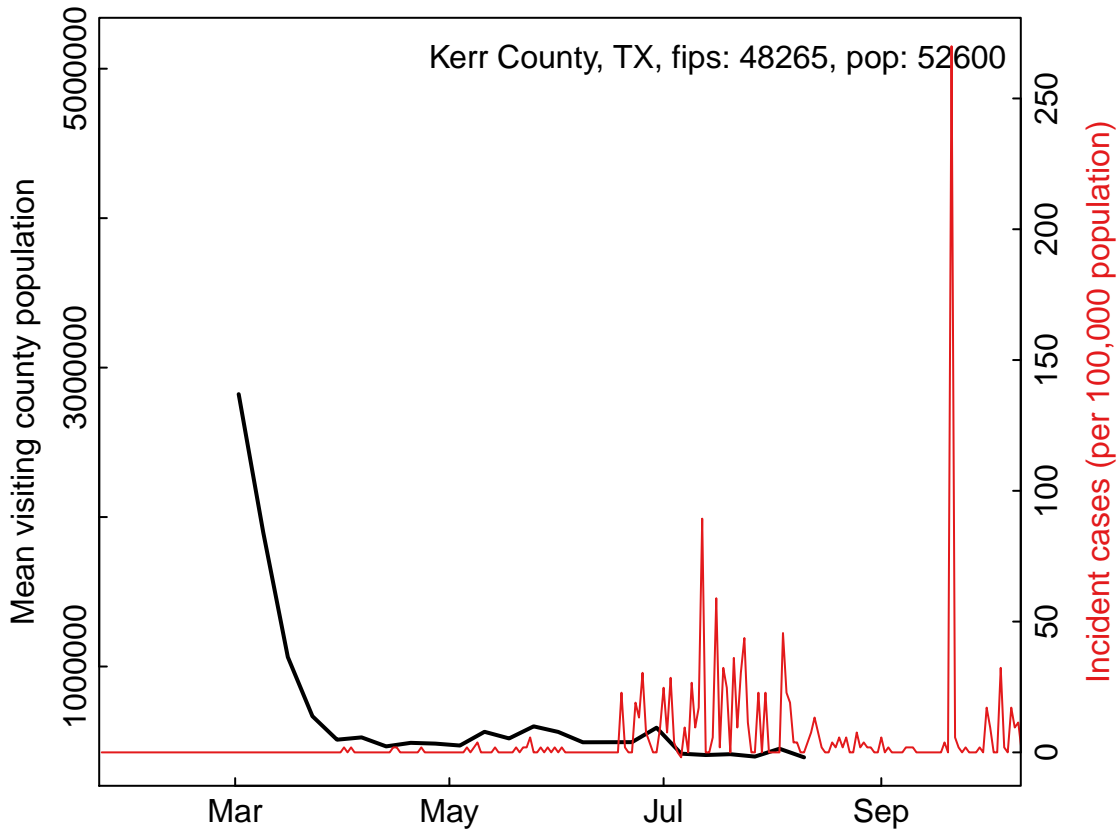

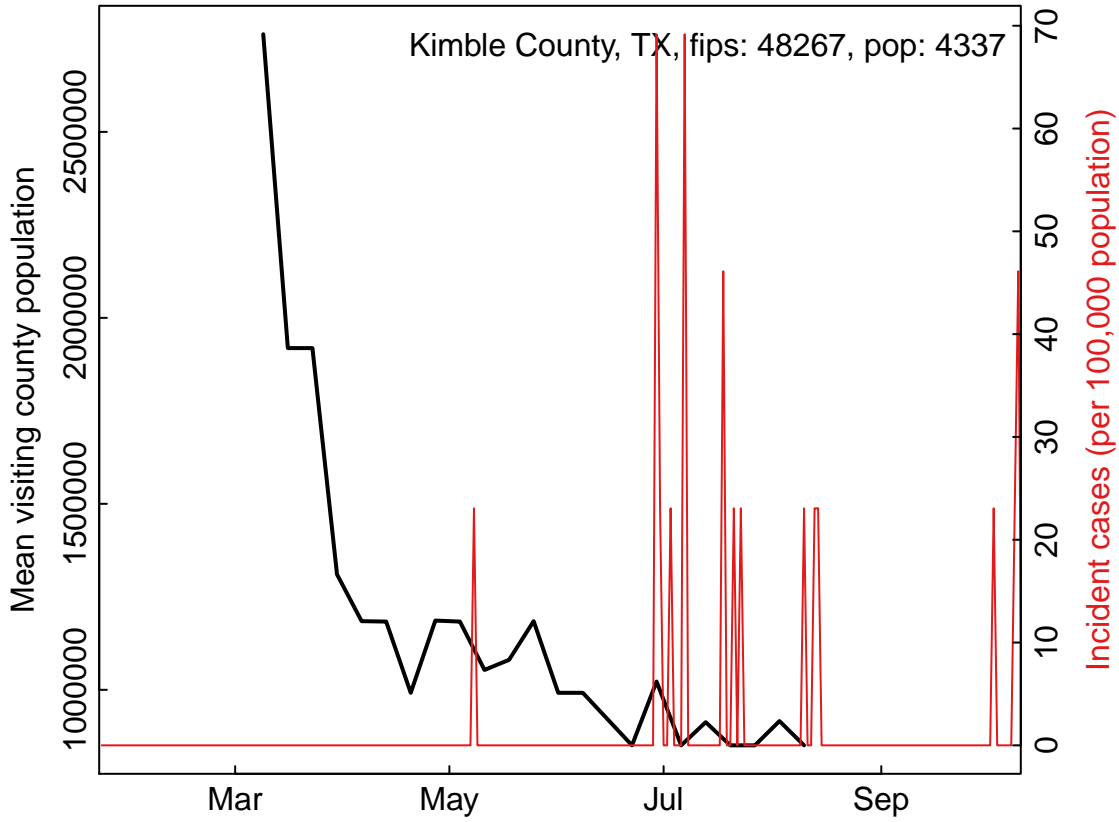

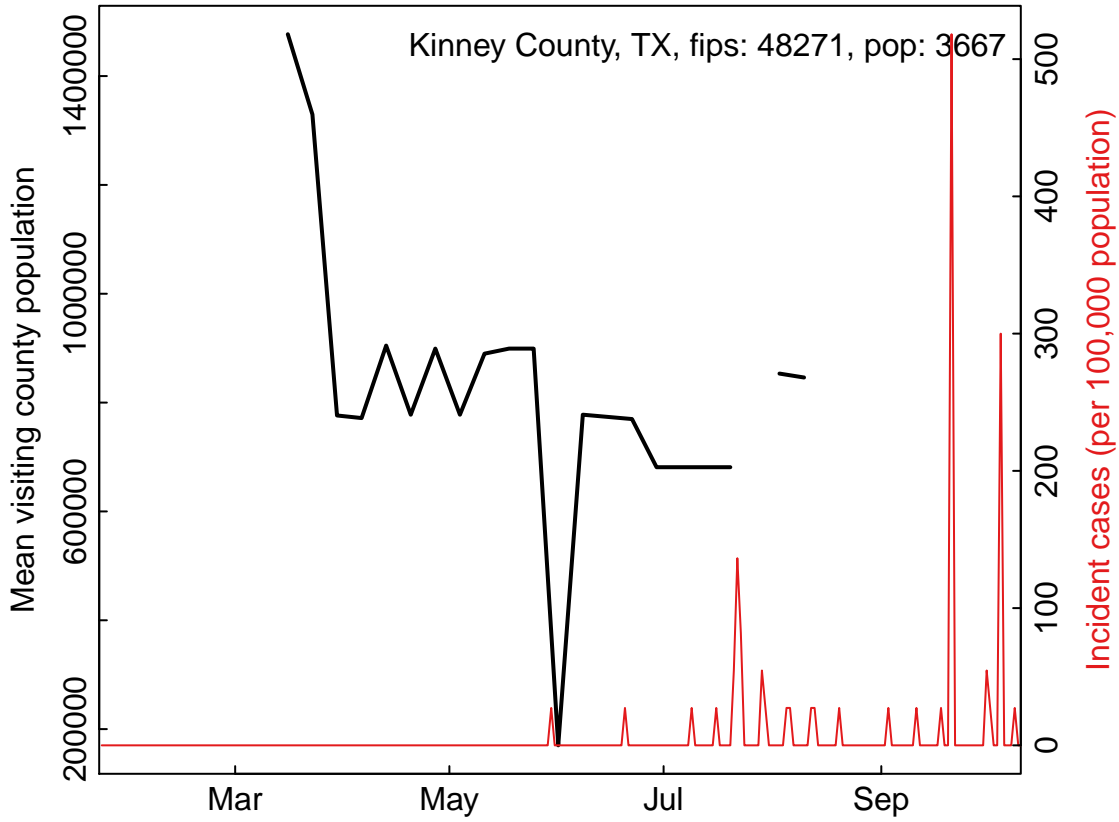



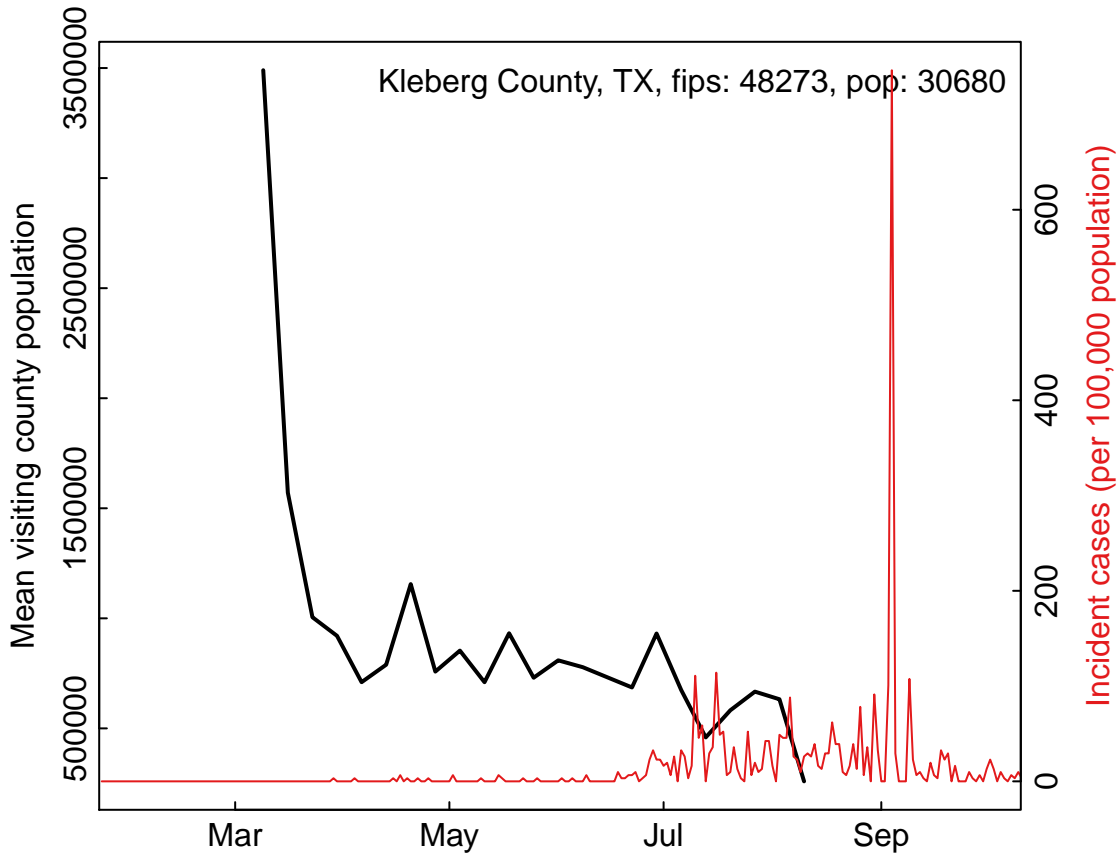

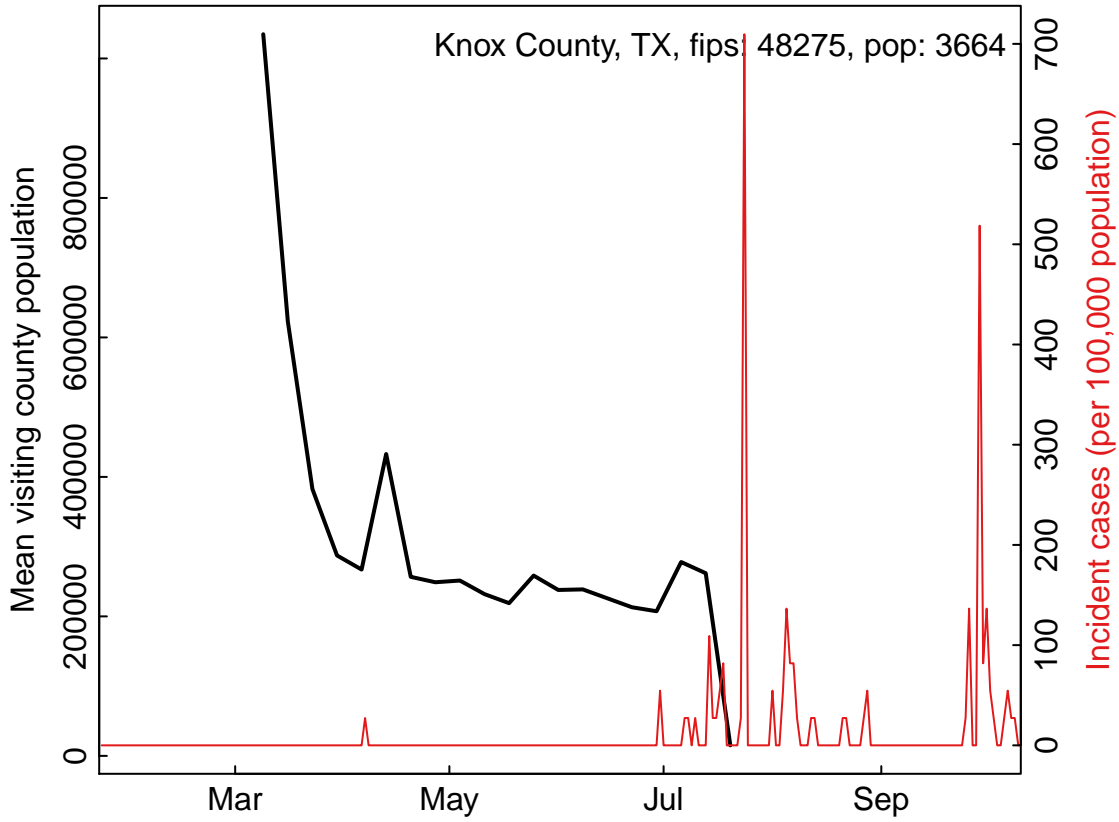

Lamar County, TX, fips: 48277, pop: 49859

Mean visiting county population

2500000  
1500000  
500000

Mar

May

Jul

Sep

200  
150  
100  
50  
0

Incident cases (per 100,000 population)

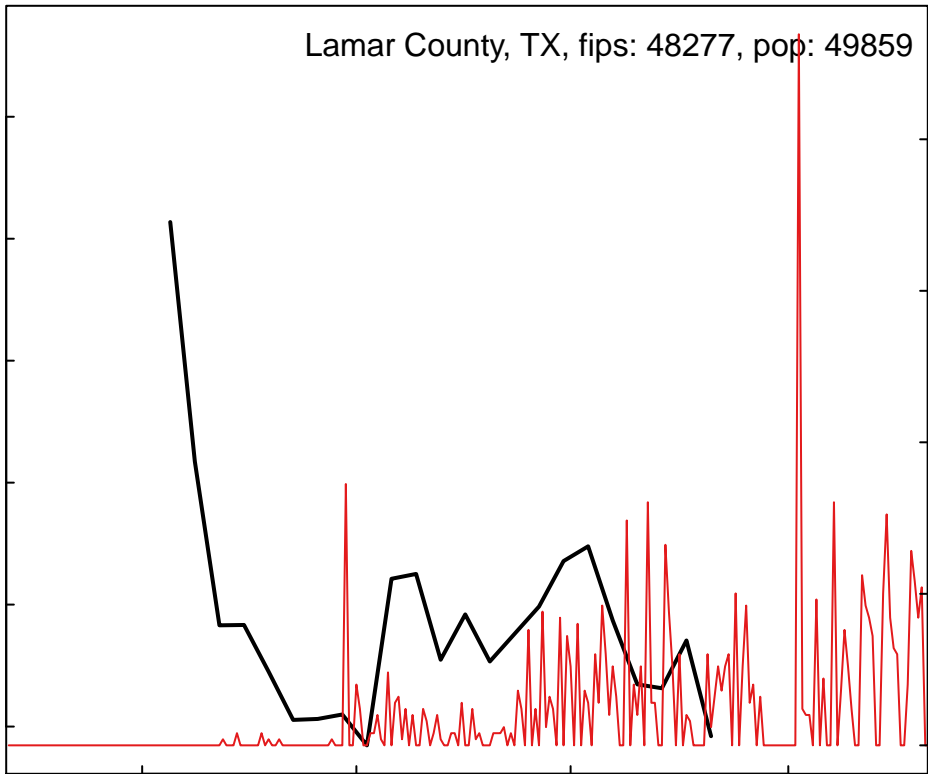

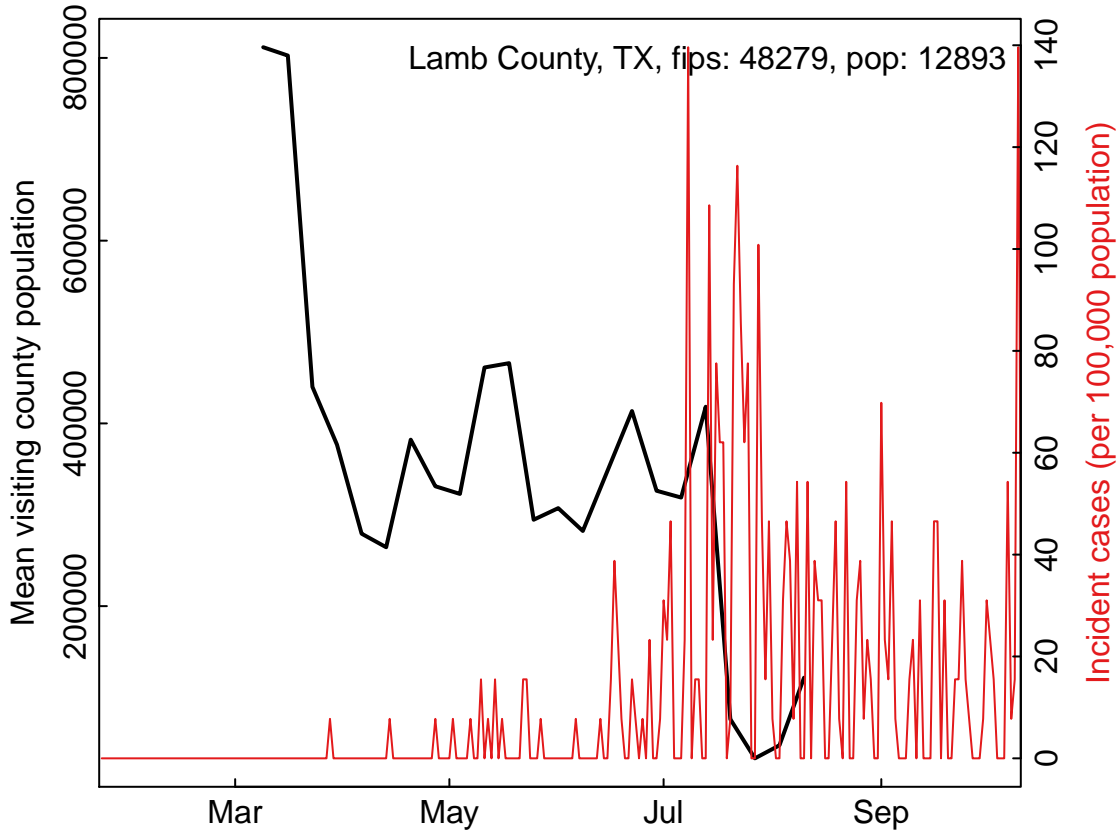

Lampasas County, TX, fips: 48281, pop: 21428

Mean visiting county population

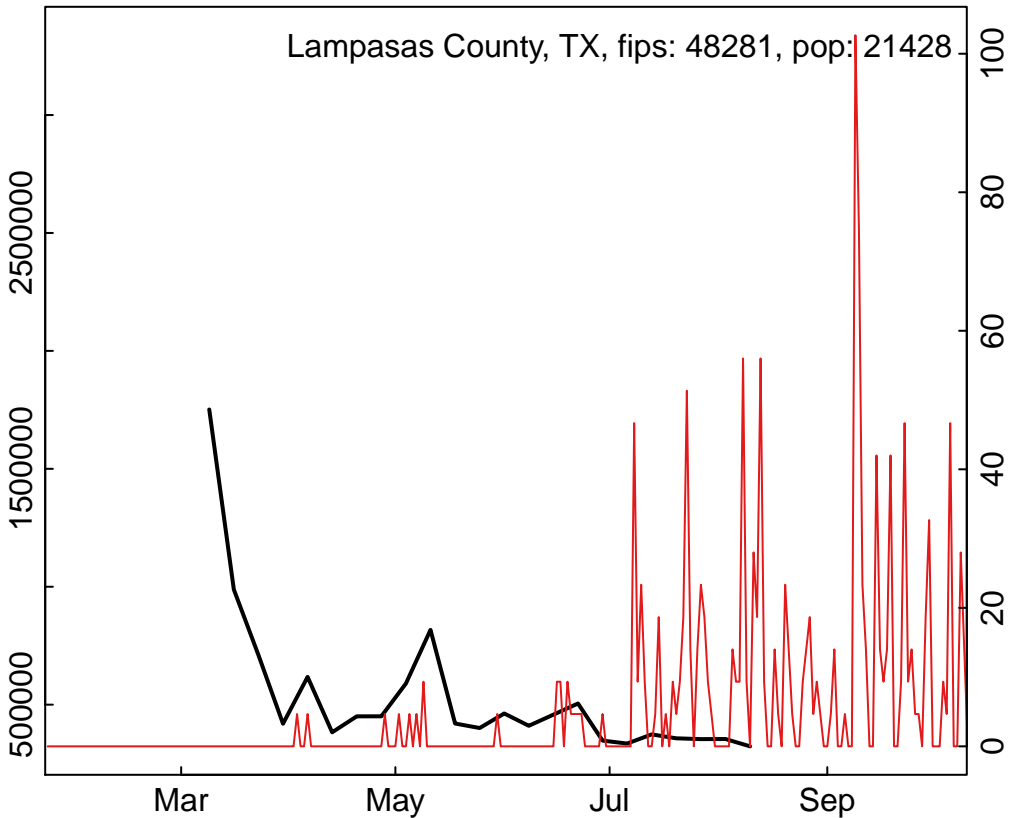

Incident cases (per 100,000 population)

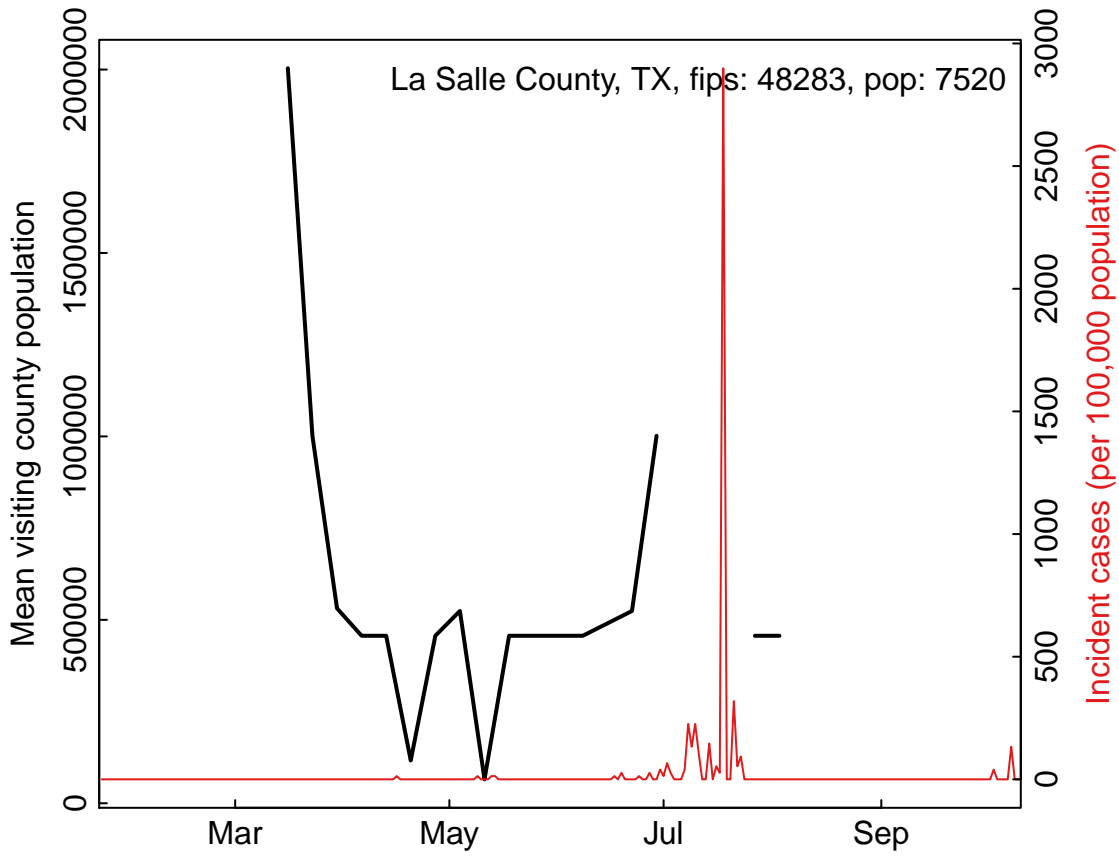

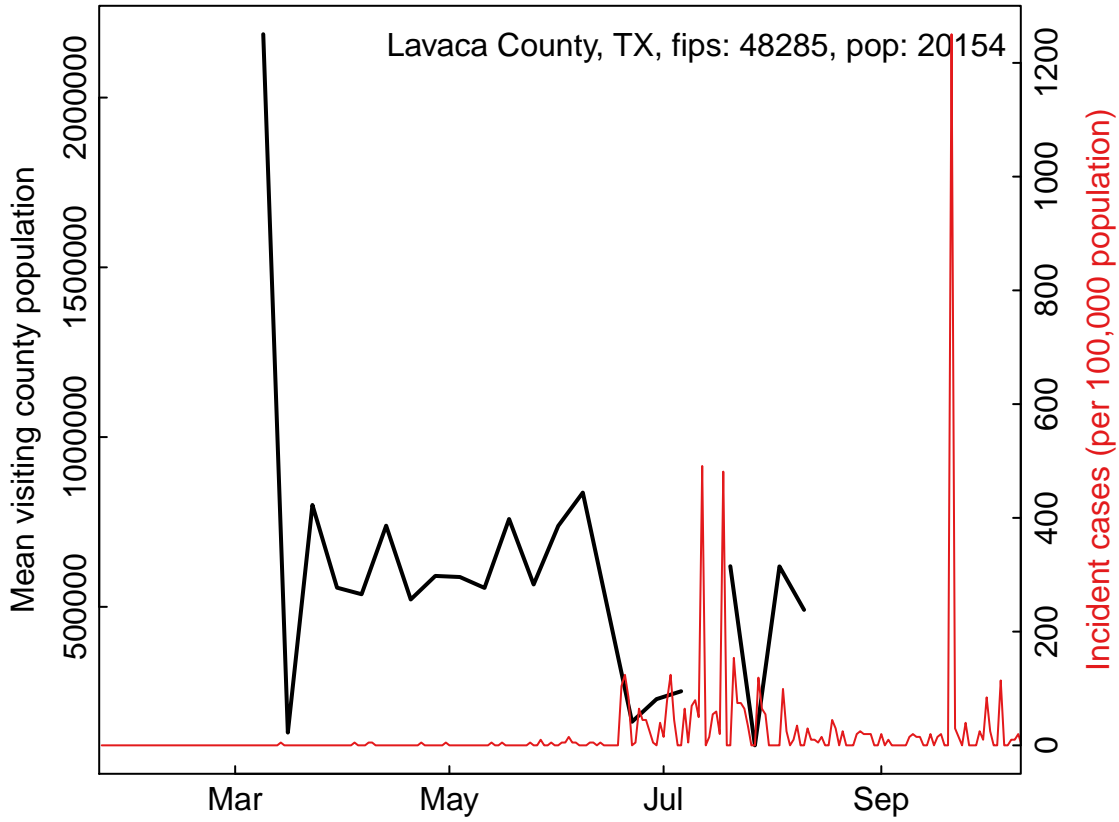

Lee County, TX, fips: 48287, pop: 17239

Mean visiting county population

1500000  
1000000  
500000  
0

Mar May Jul Sep

Incident cases (per 100,000 population)

60  
40  
20  
0

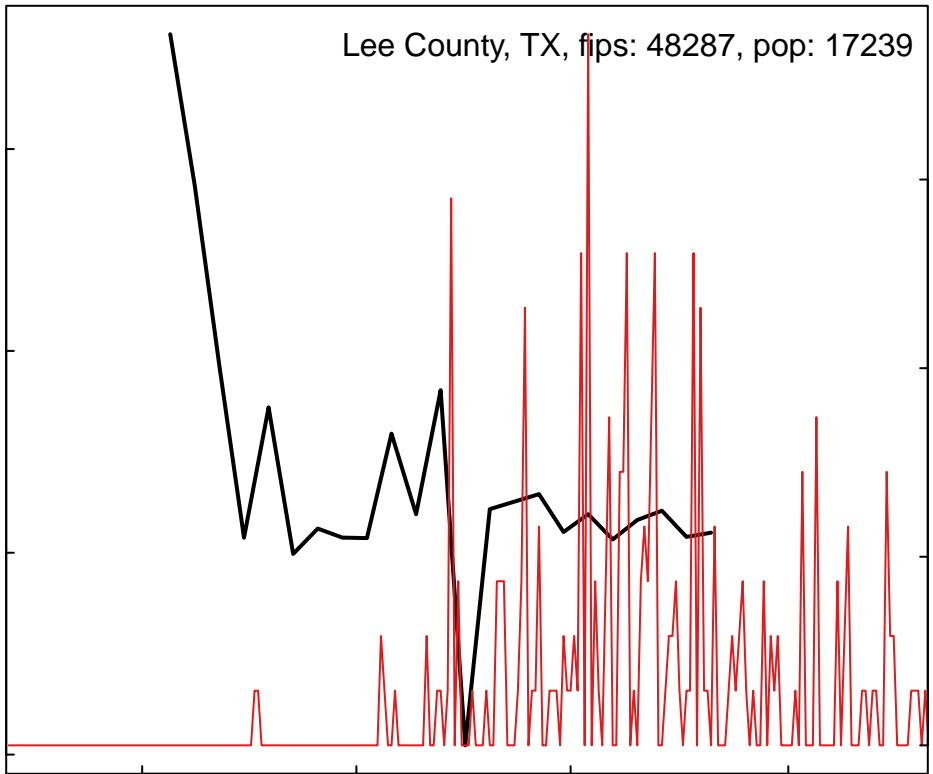



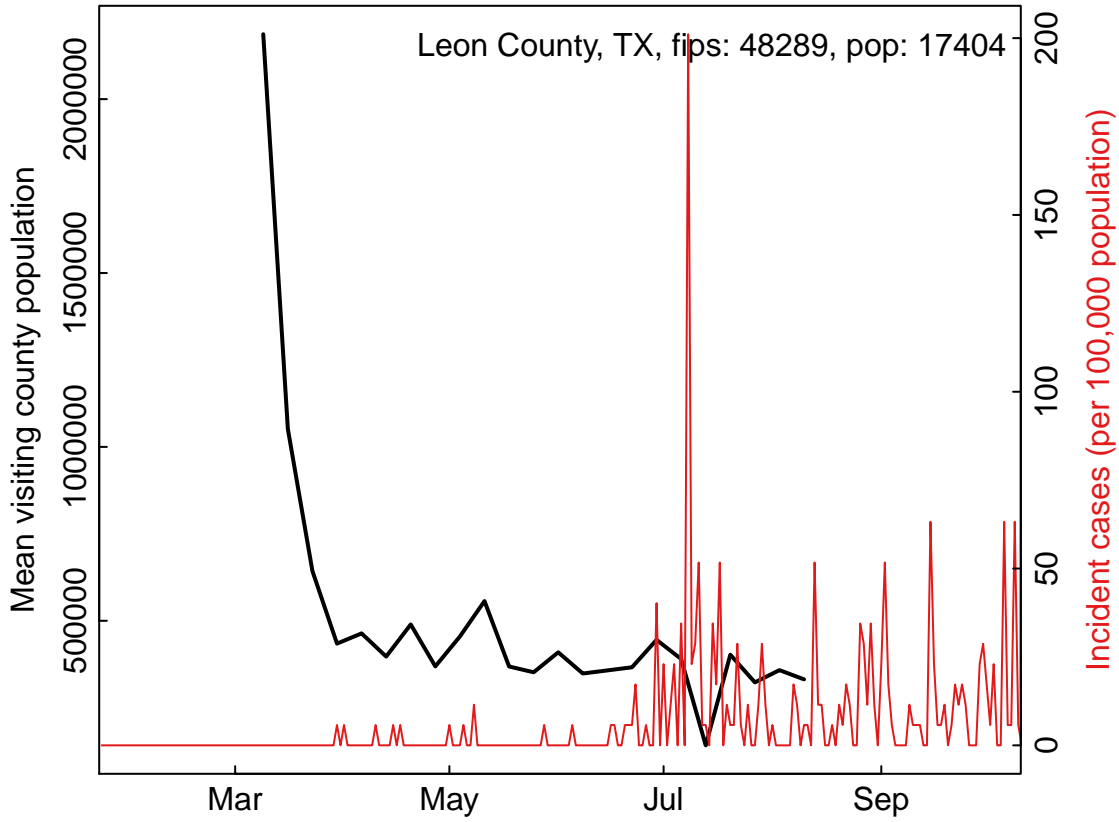

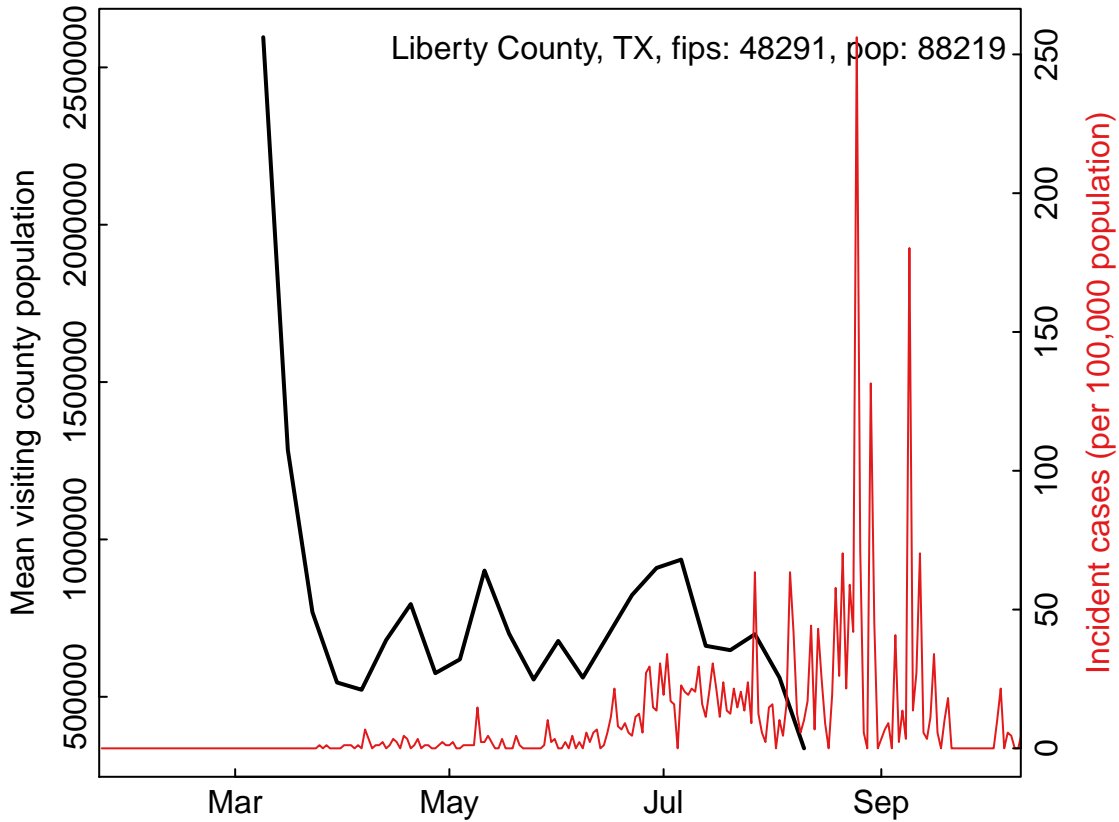

Limestone County, TX, fips: 48293, pop: 23437

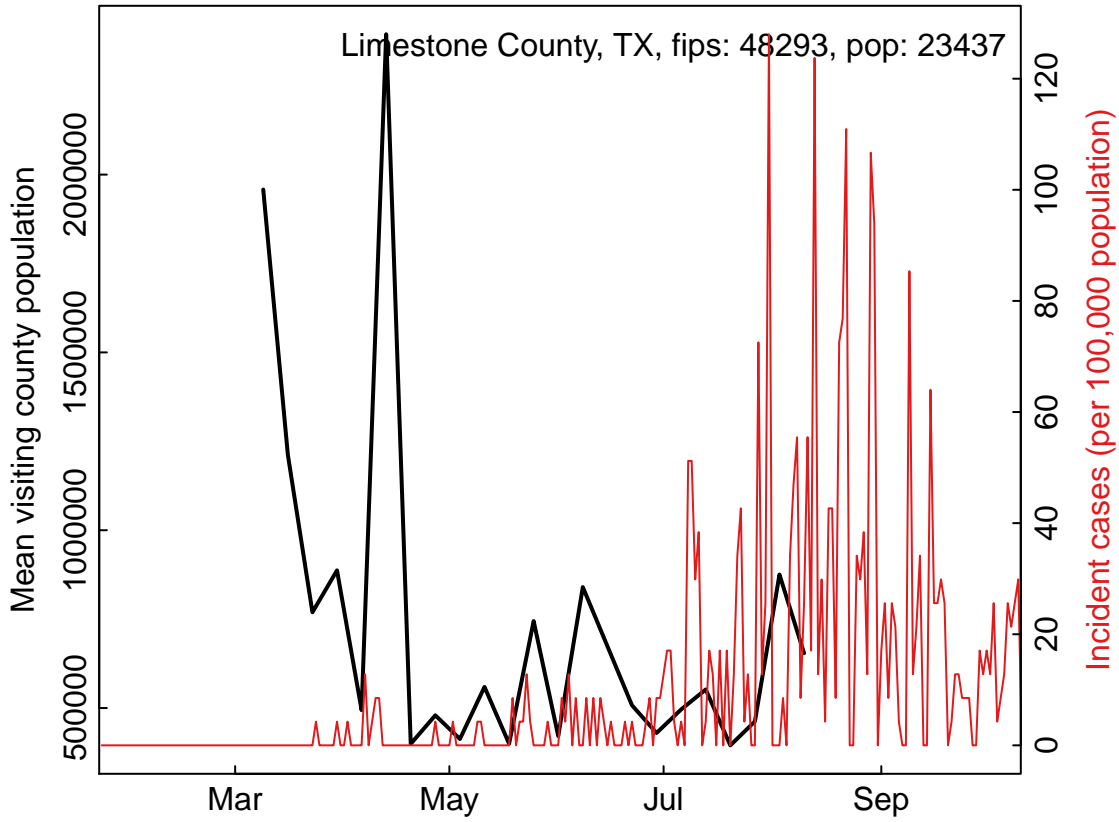

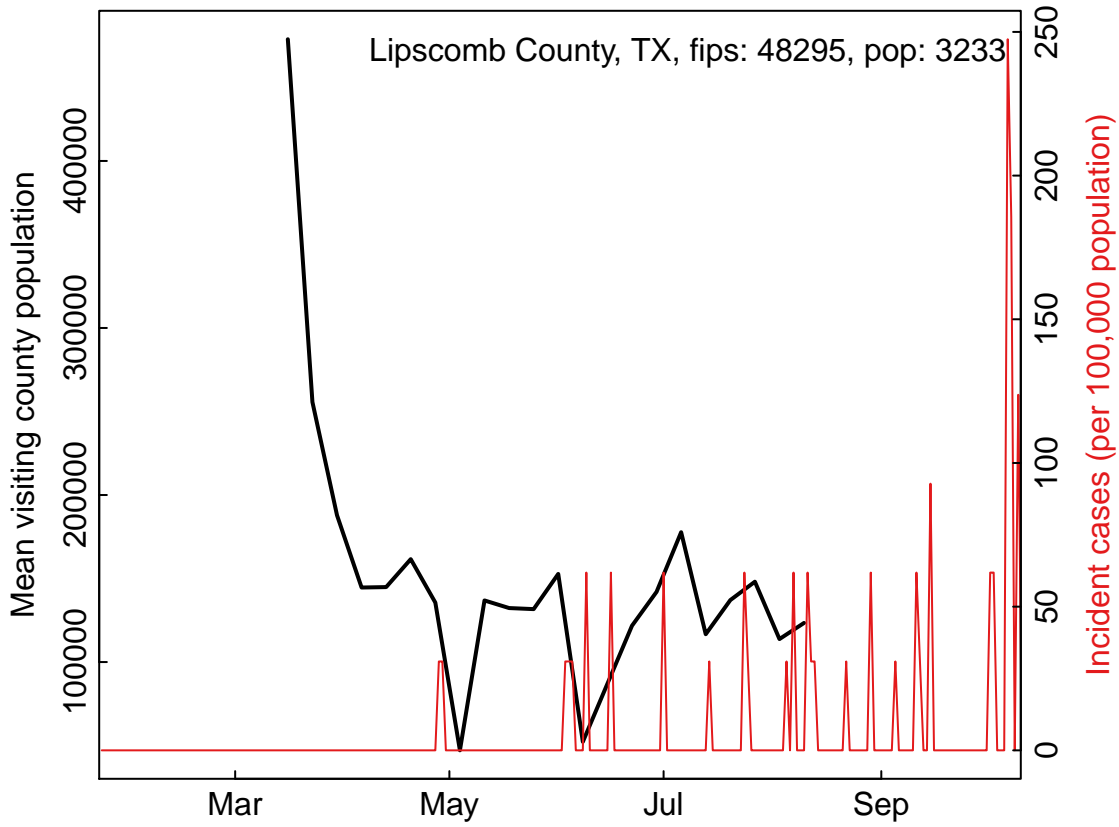

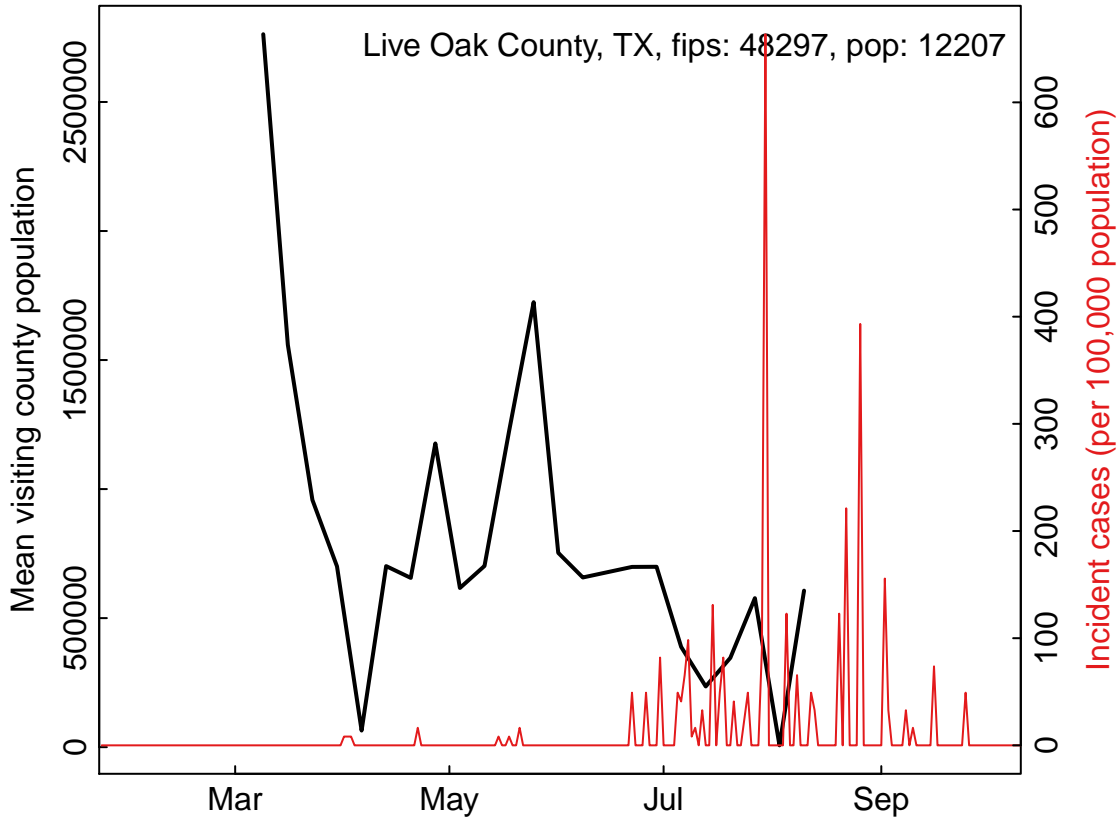

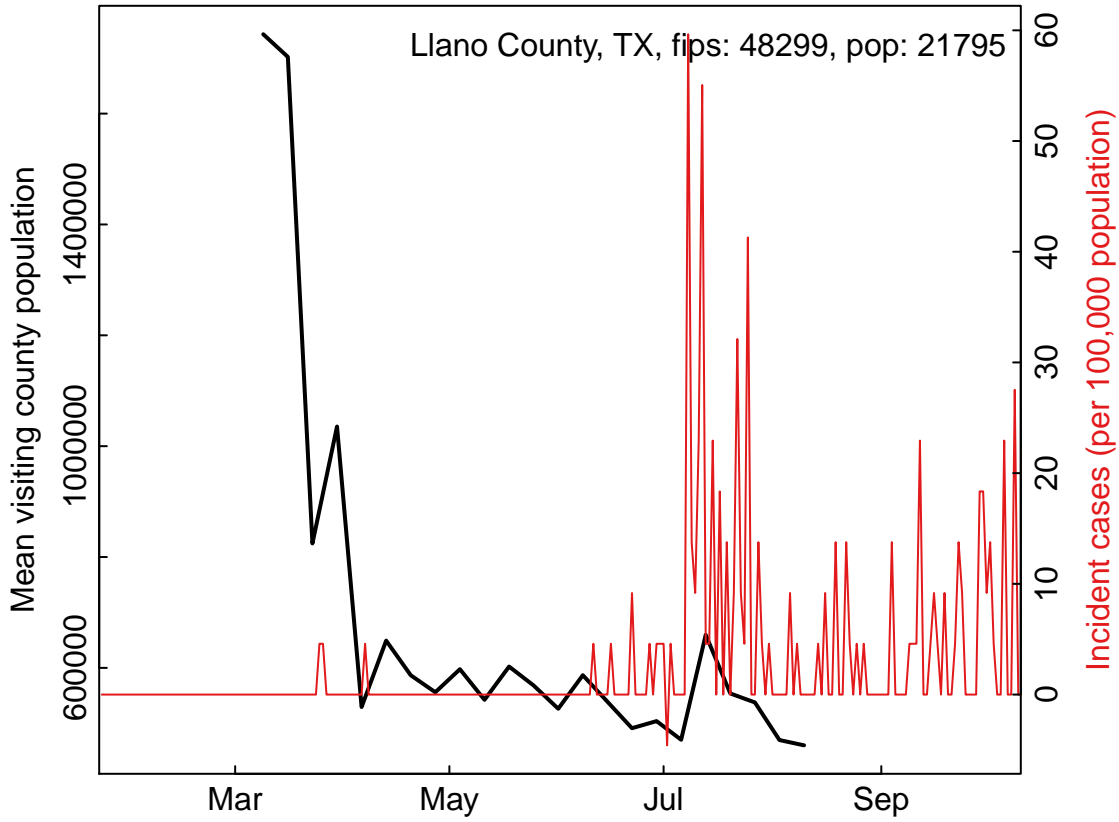

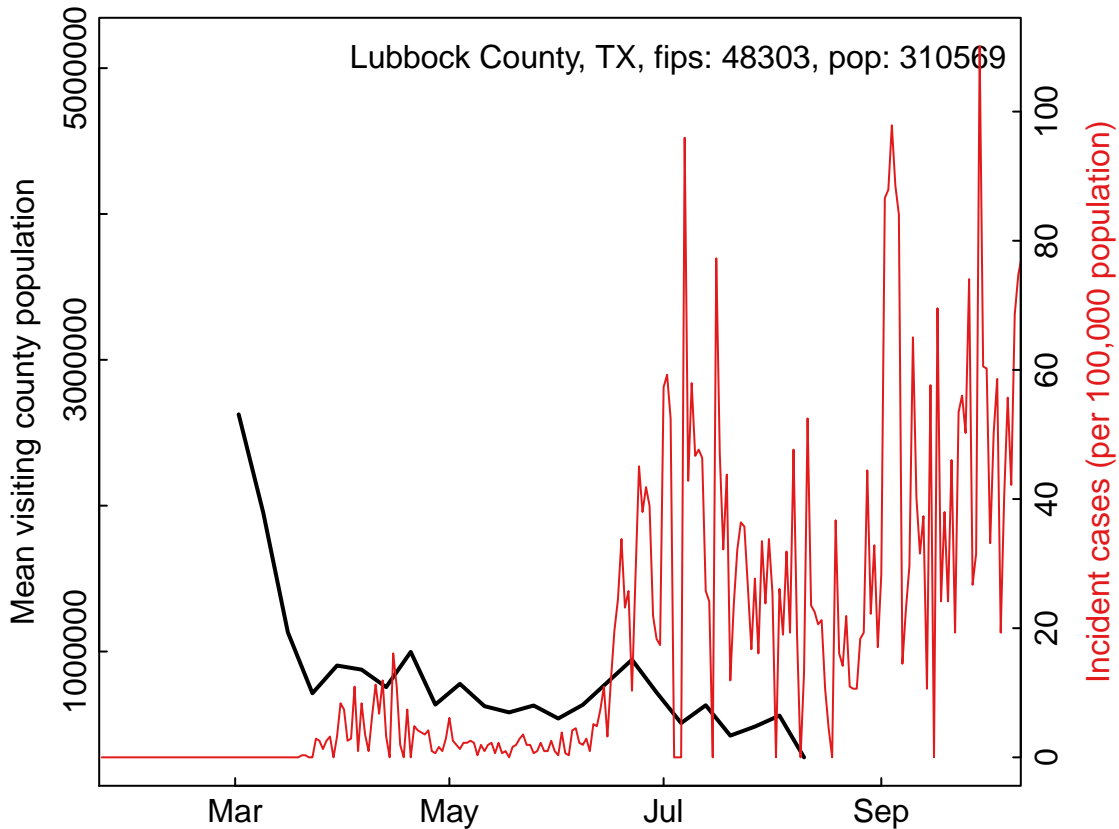

Lynn County, TX, fips: 48305, pop: 5951

Mean visiting county population

Incident cases (per 100,000 population)

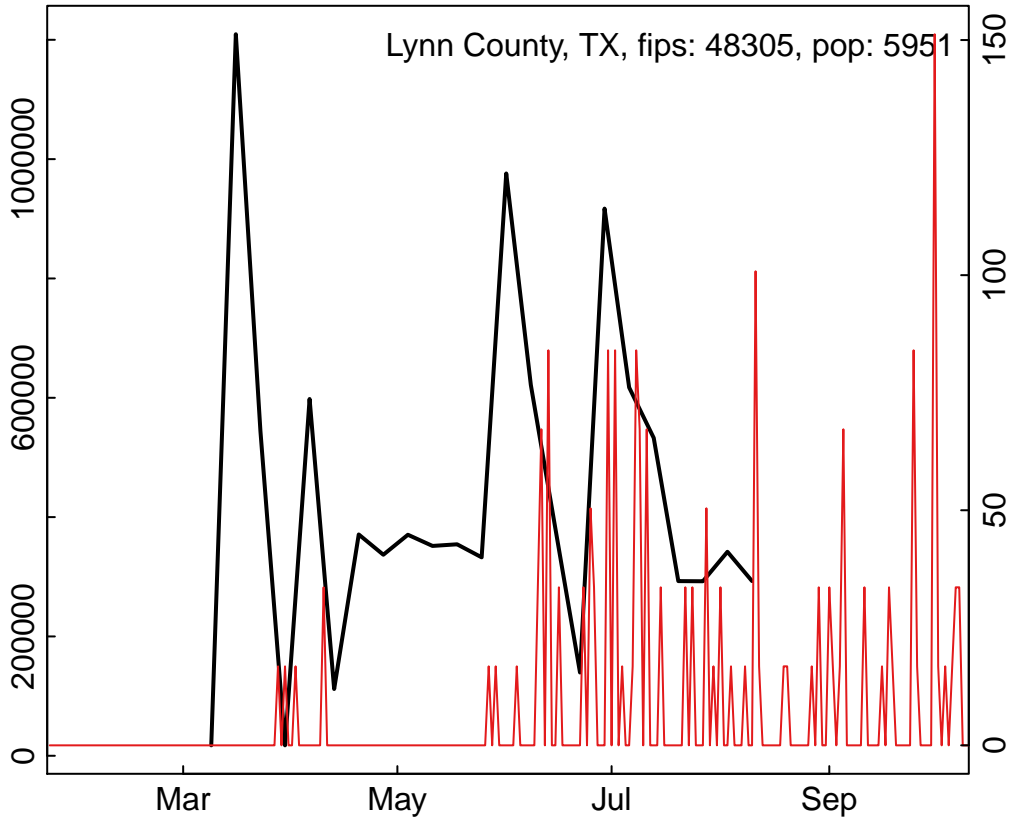



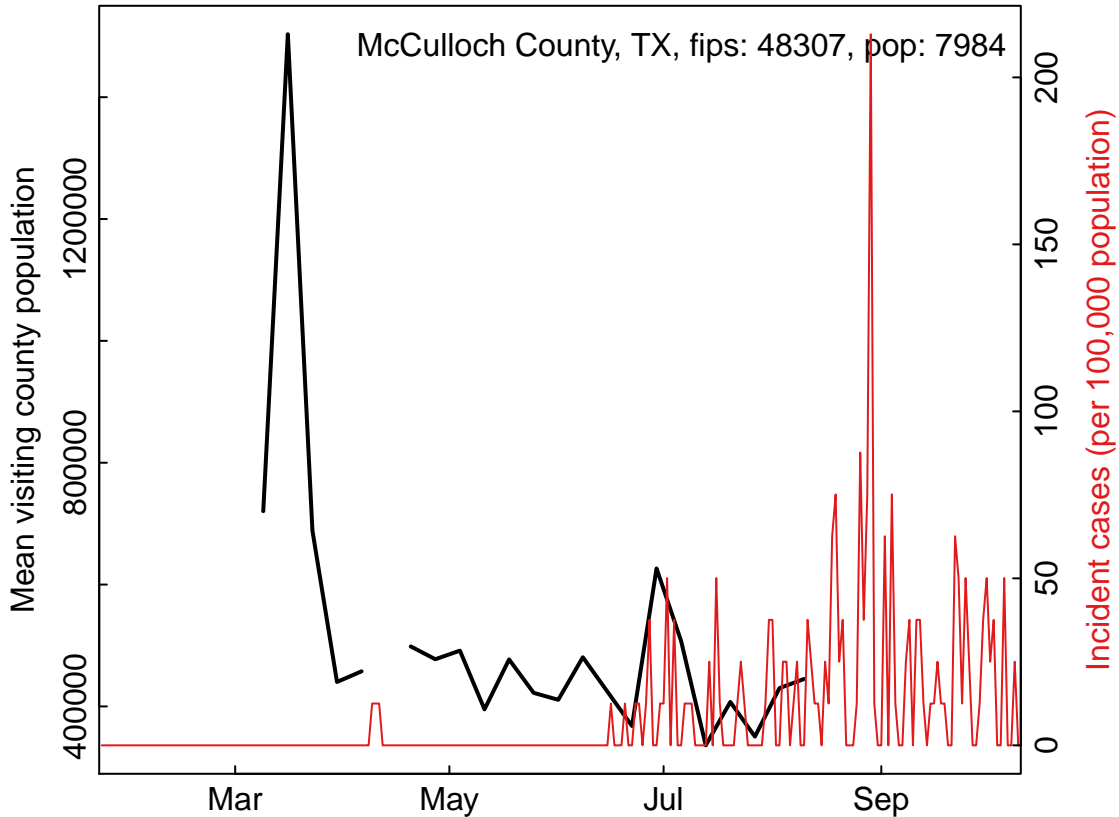

McLennan County, TX, fips: 48309, pop: 256623

Mean visiting county population

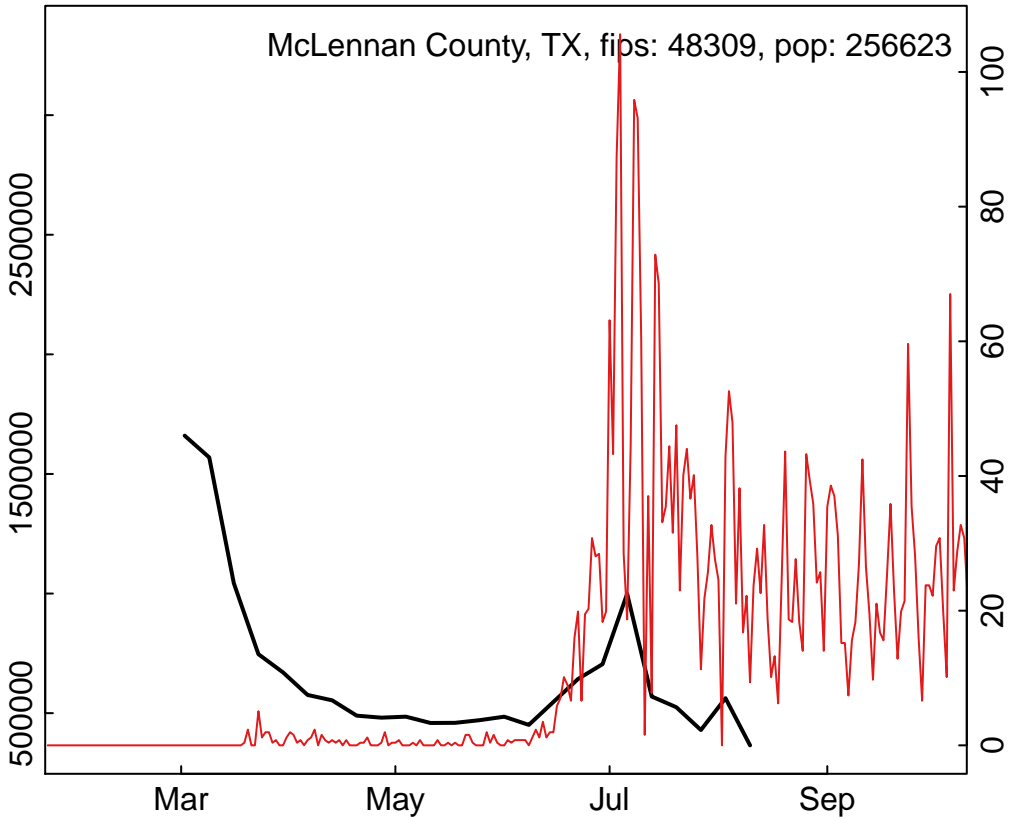

Incident cases (per 100,000 population)

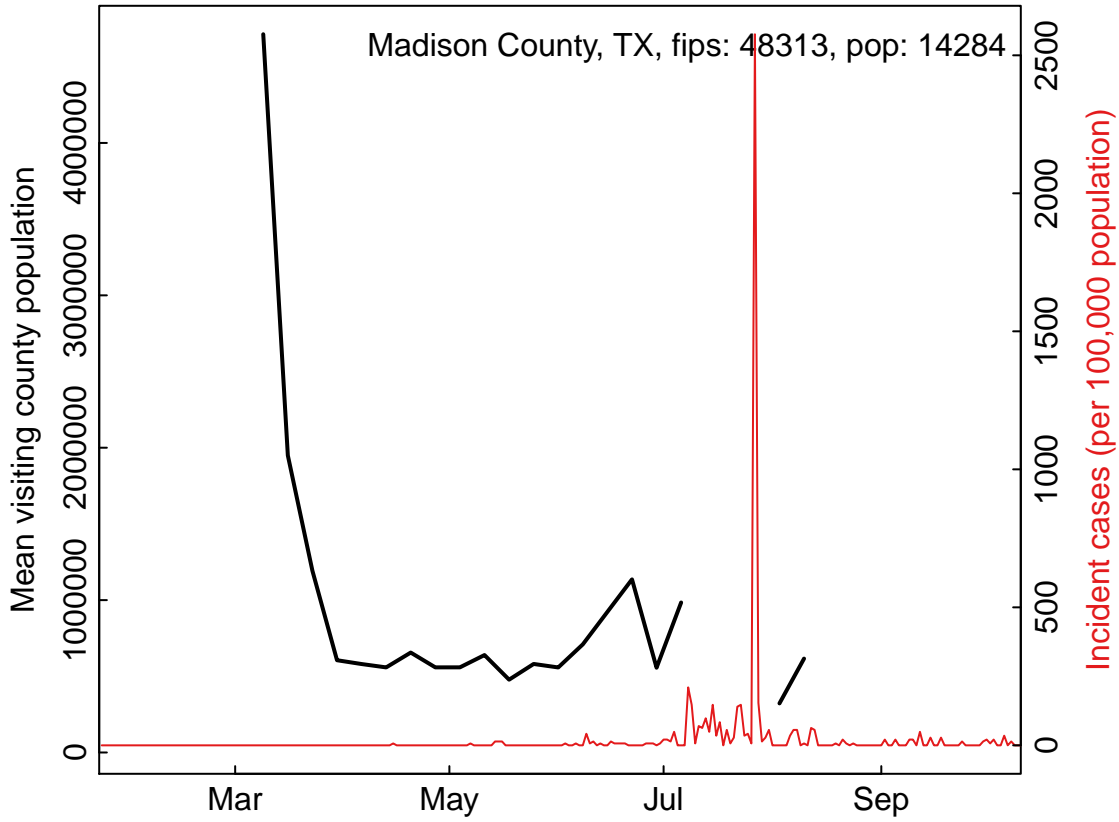

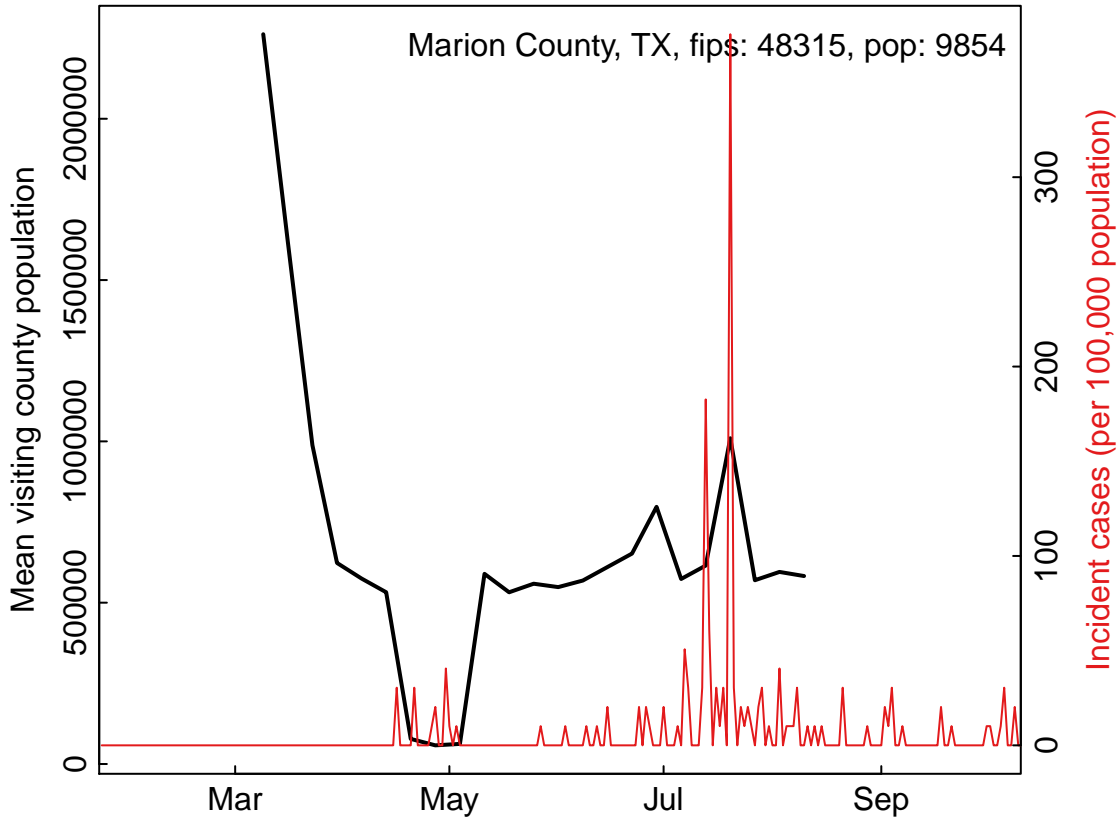

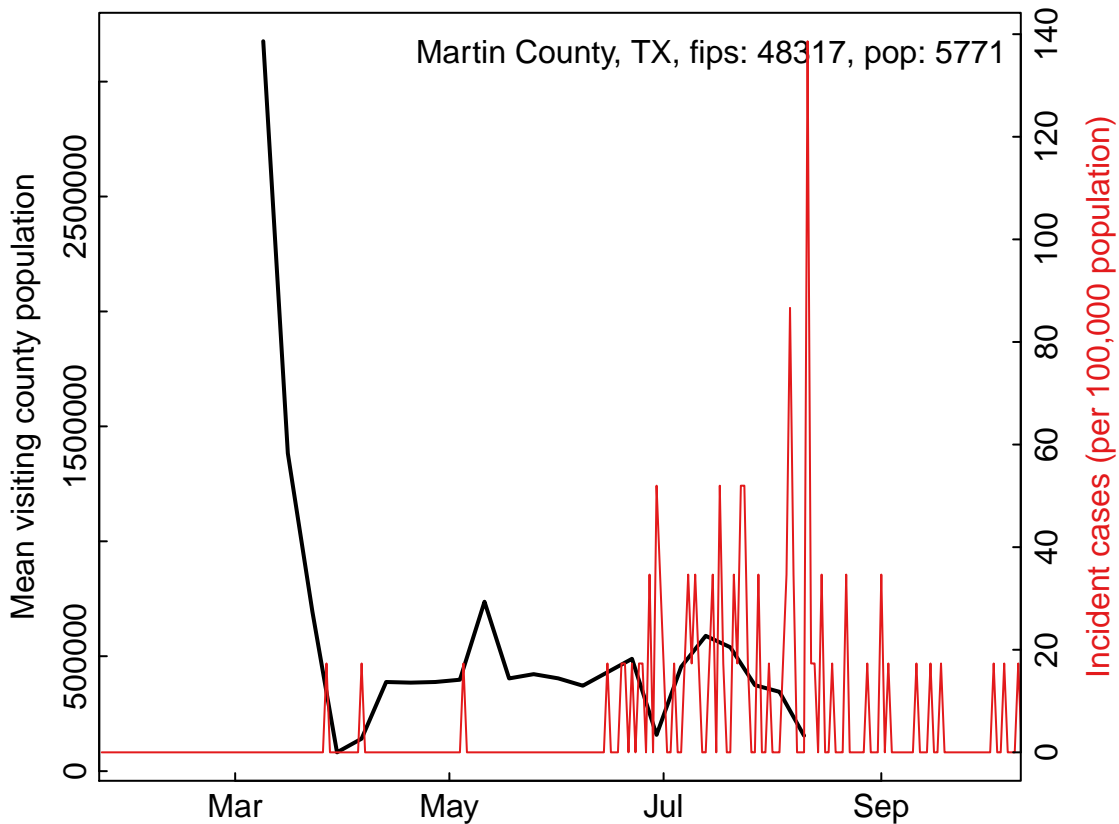

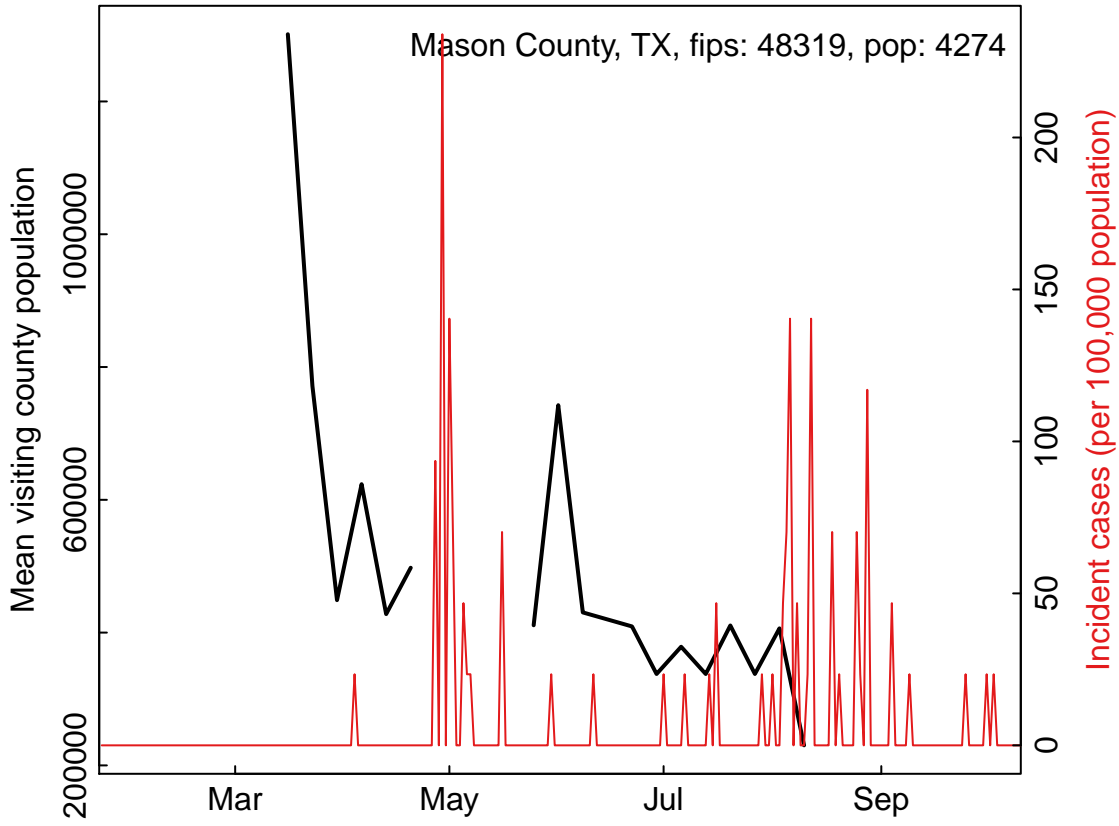

Matagorda County, TX, fips: 48321, pop: 36643

Mean visiting county population

500000 1500000 2500000

Mar

May

Jul

Sep

100 80 60 40 20 0 -20

Incident cases (per 100,000 population)

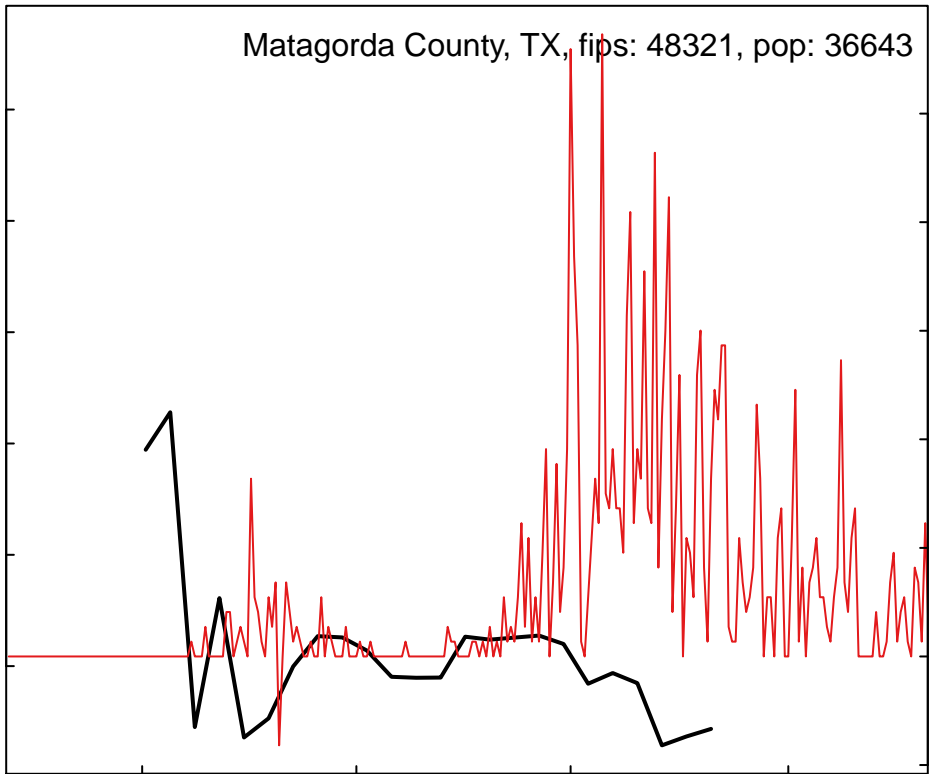

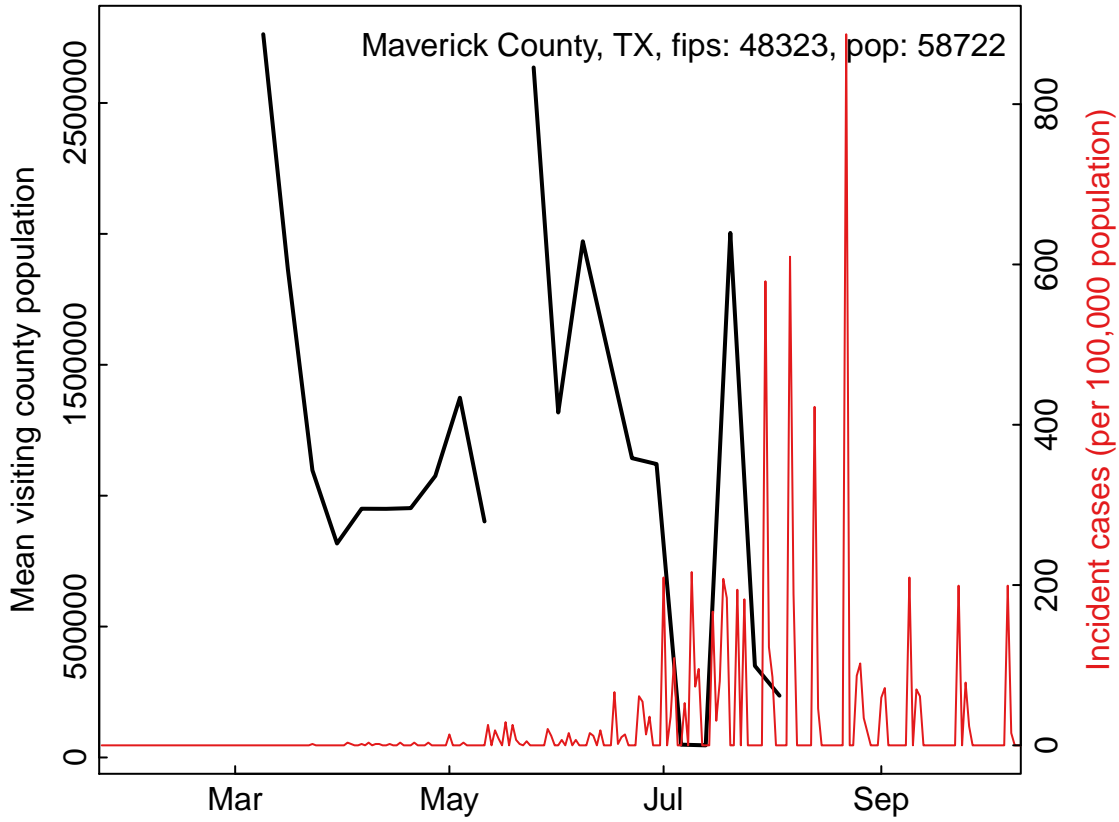



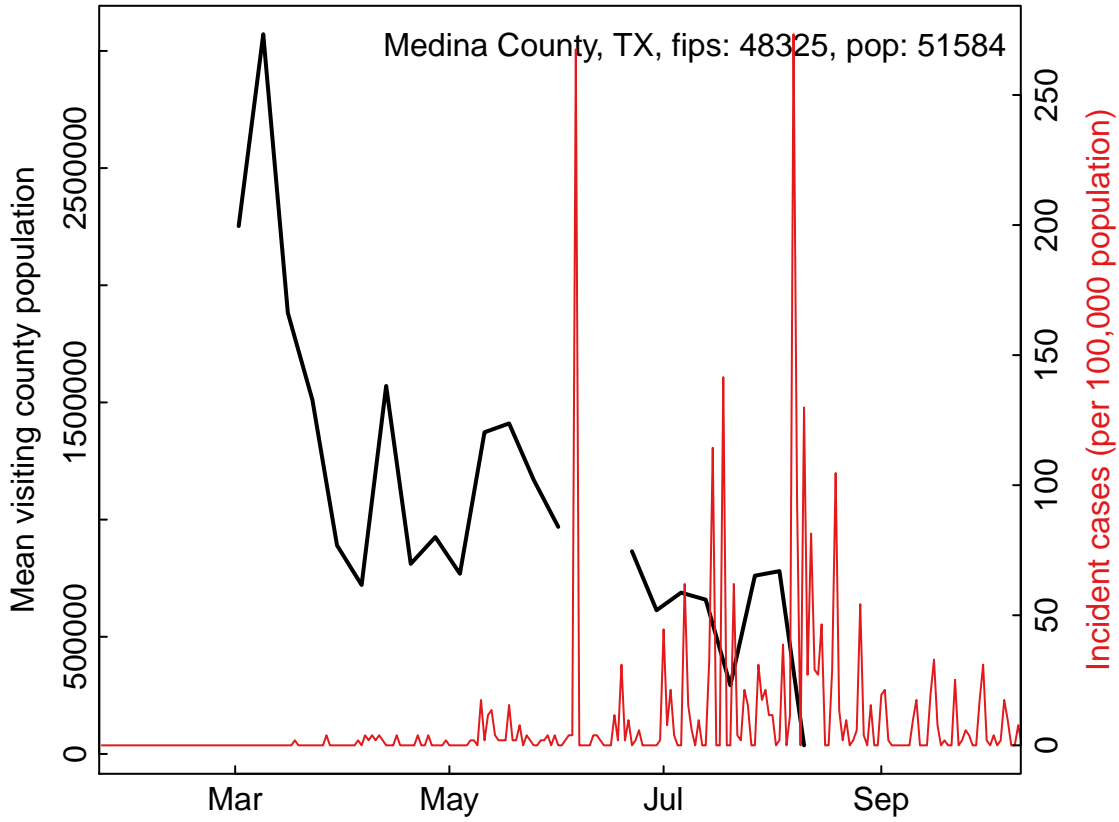

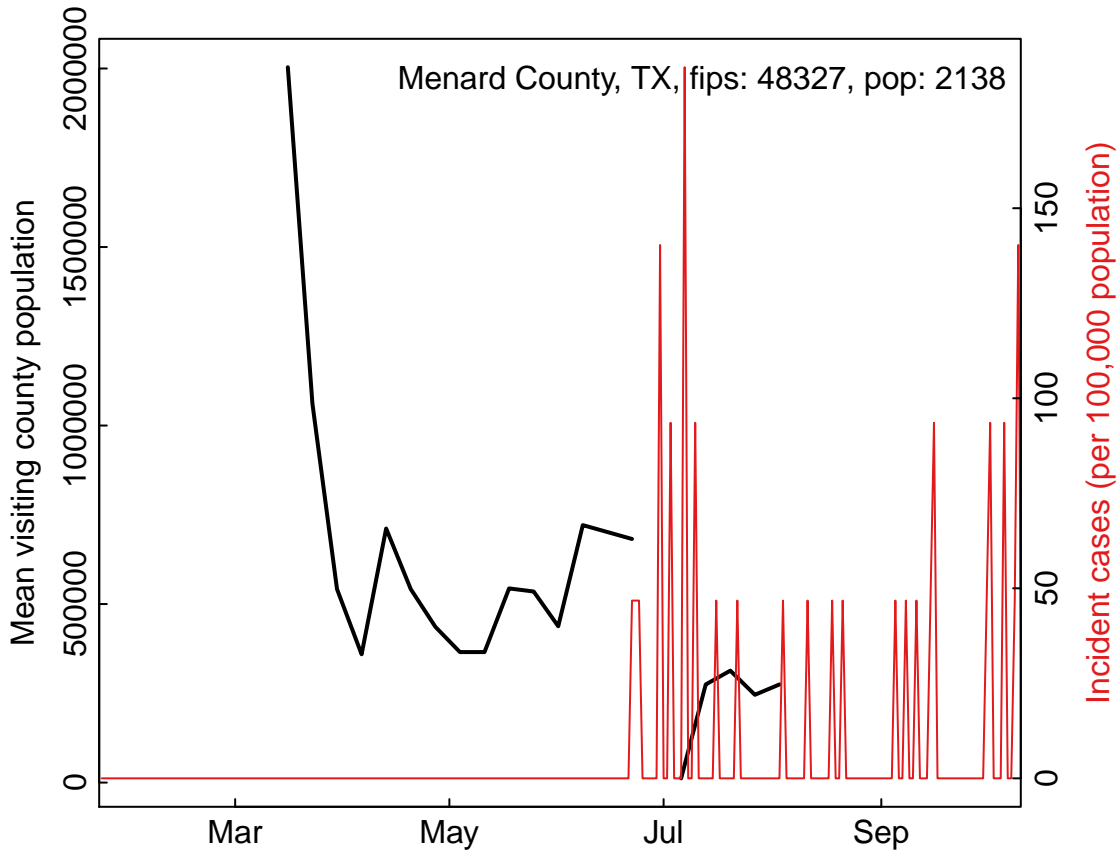

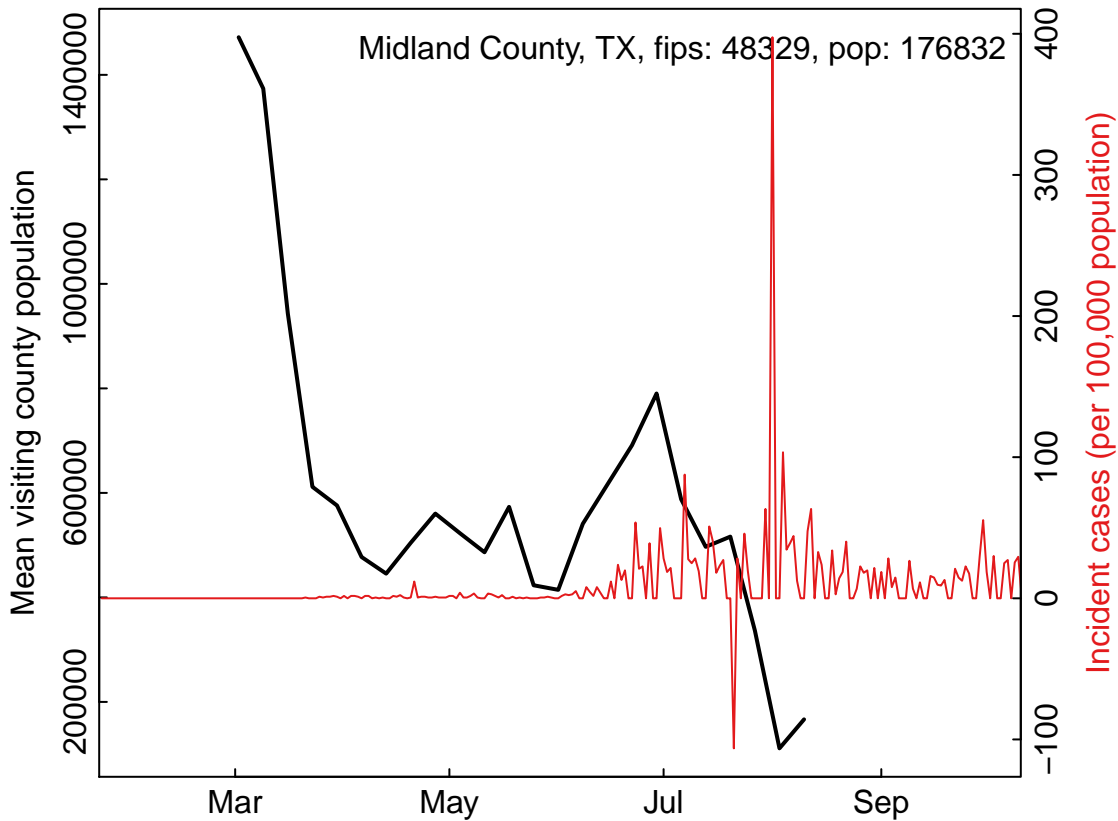

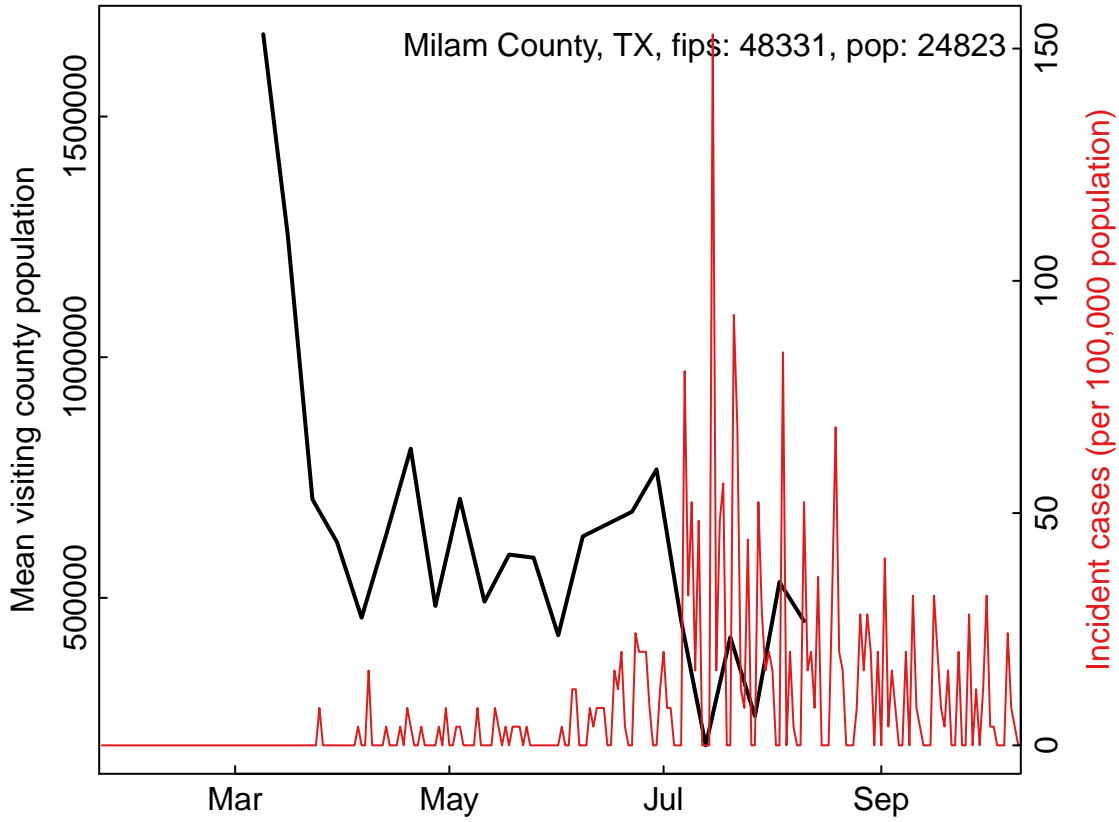

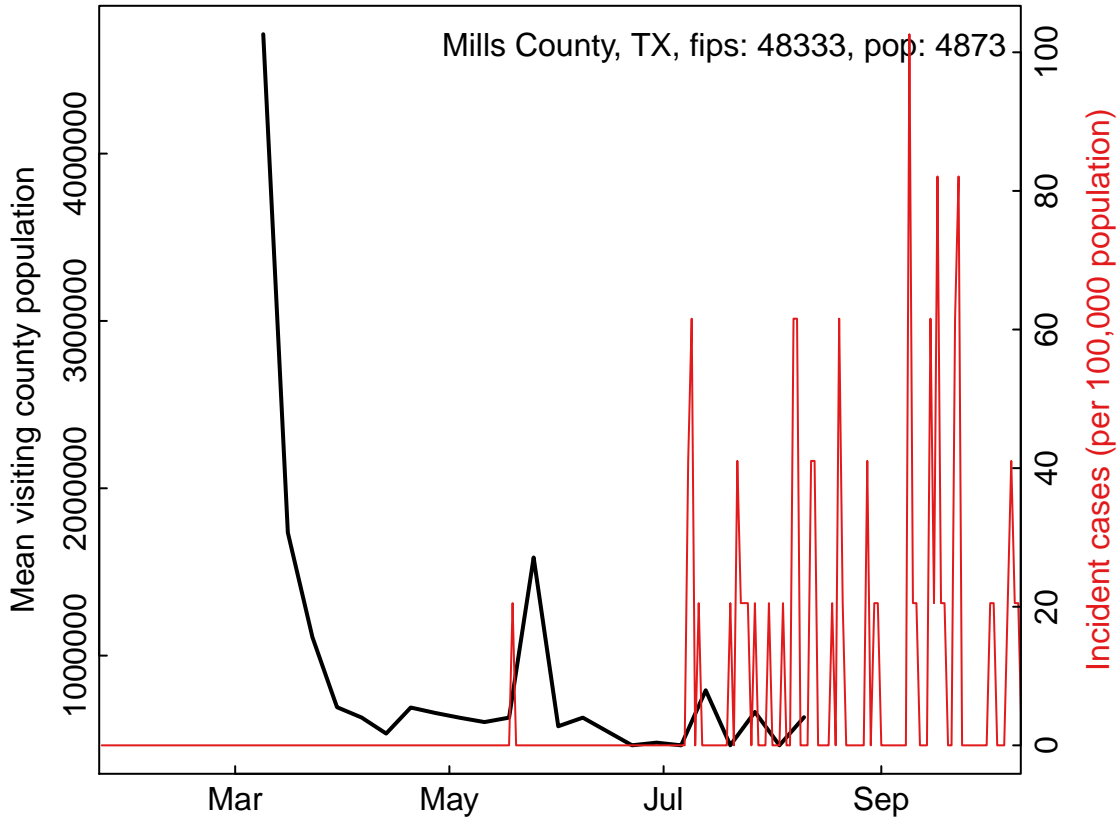

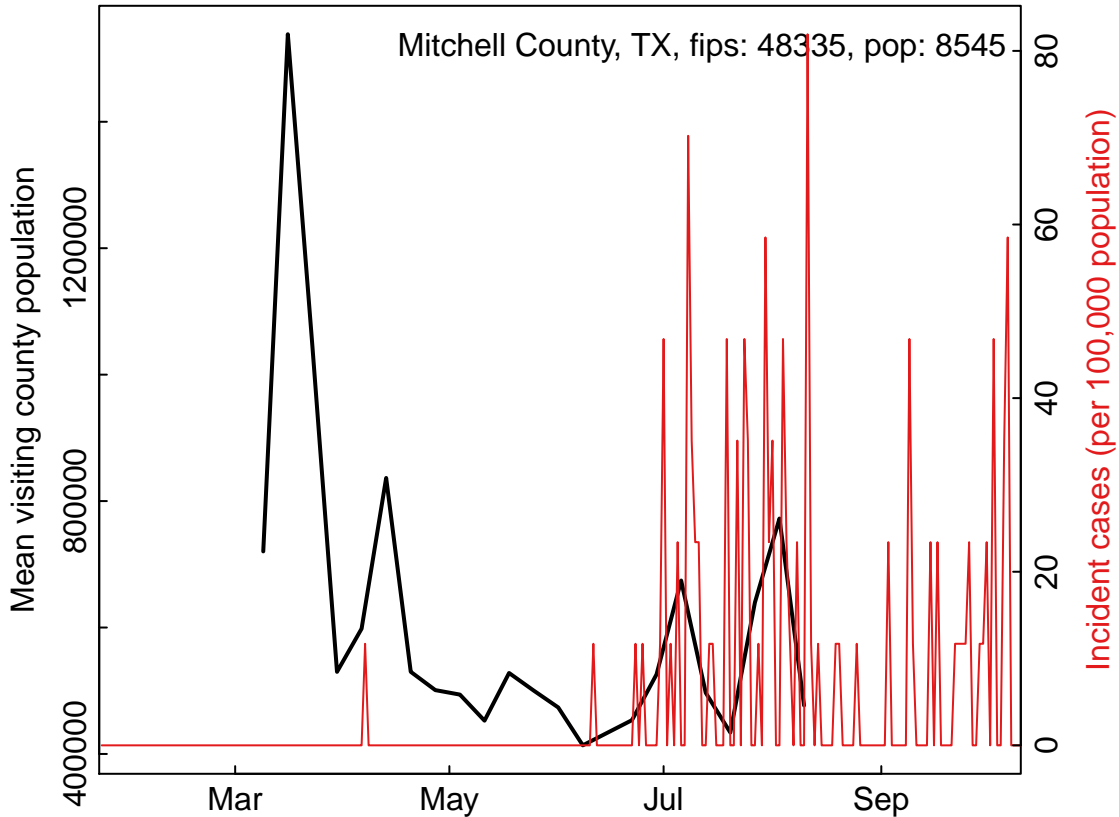

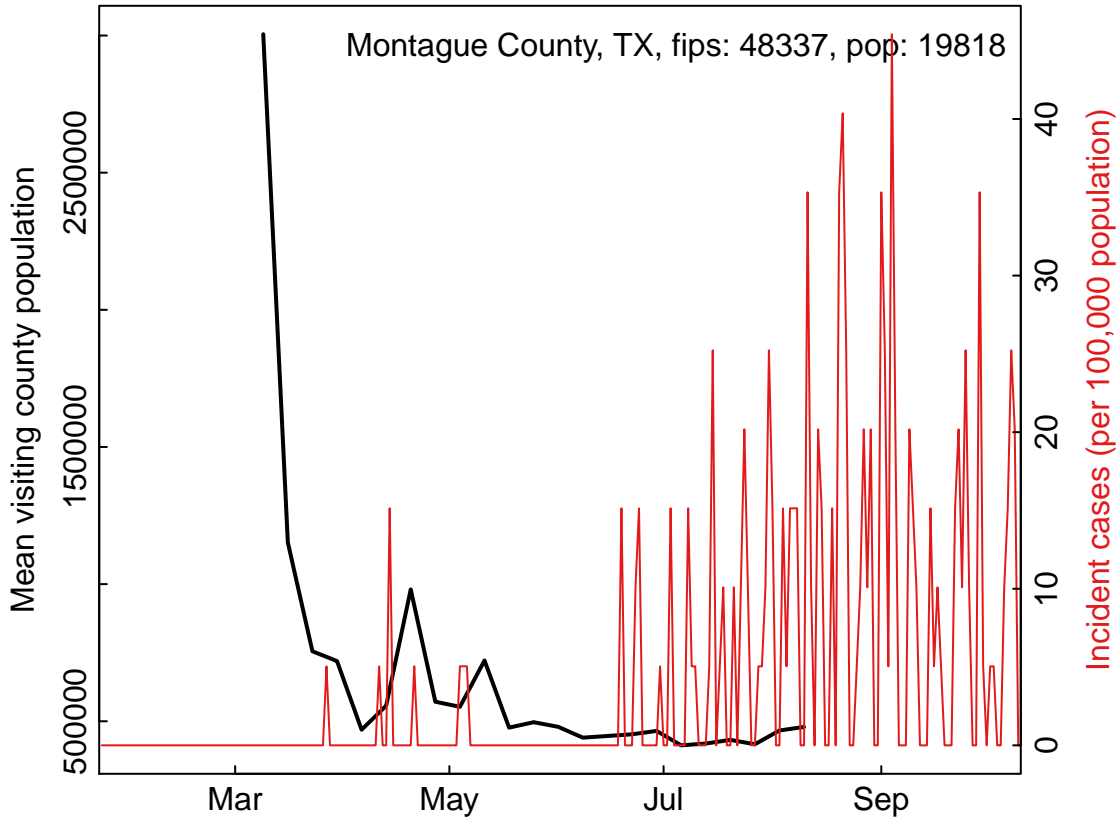

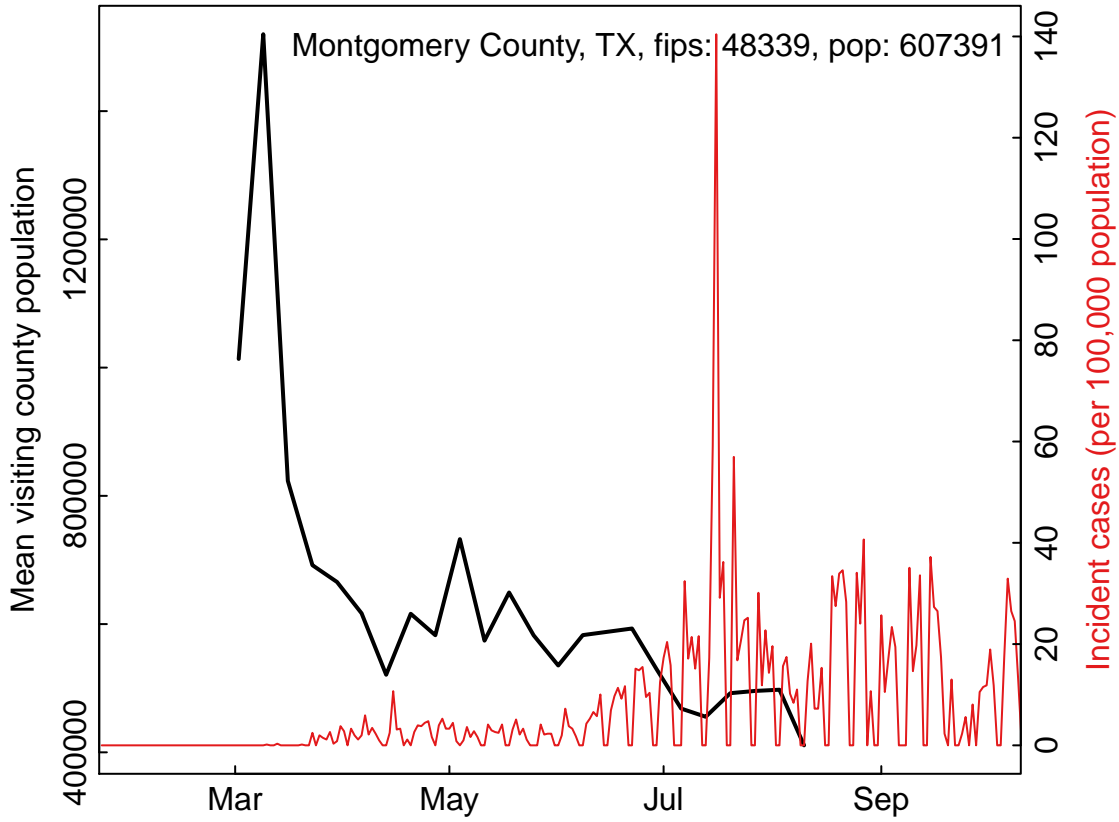



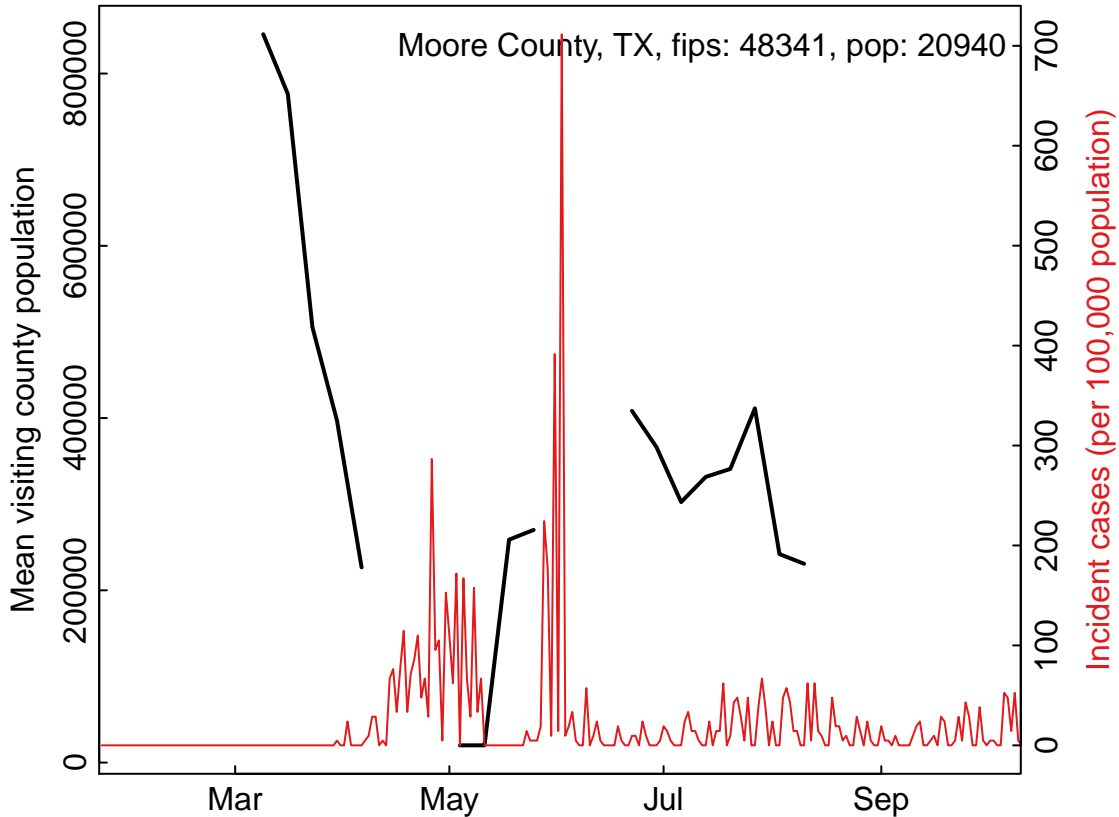

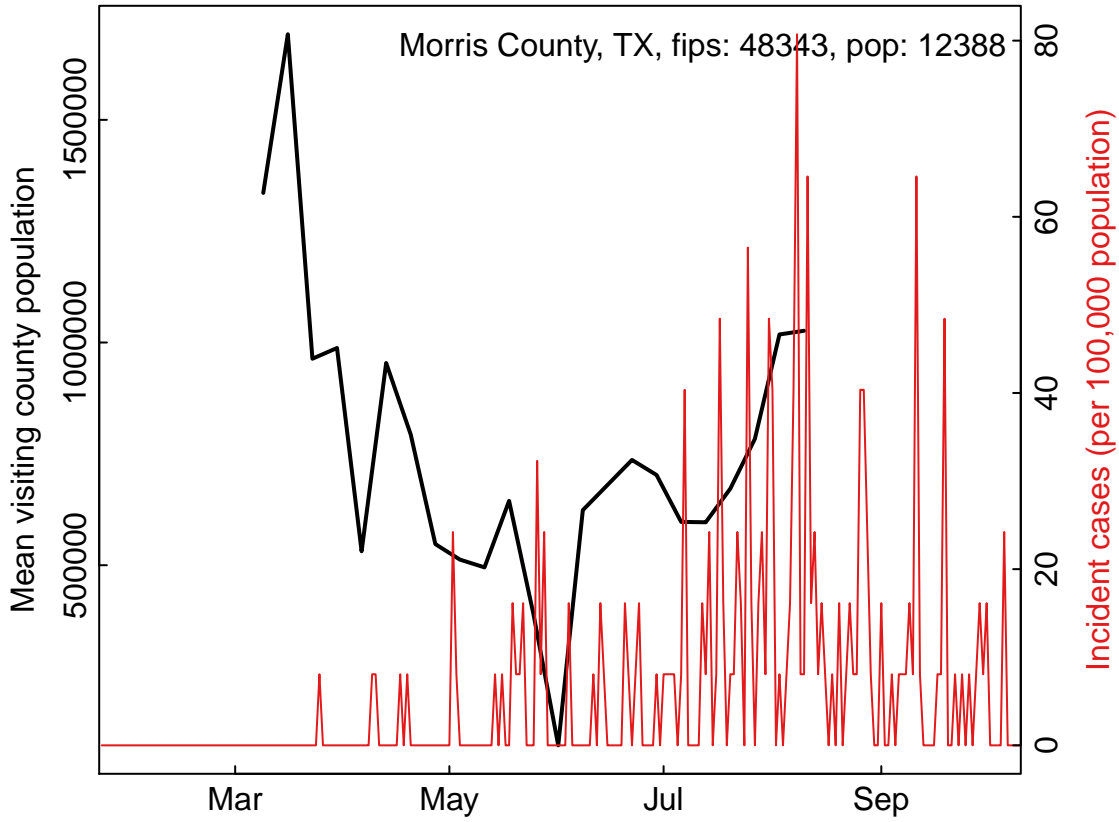

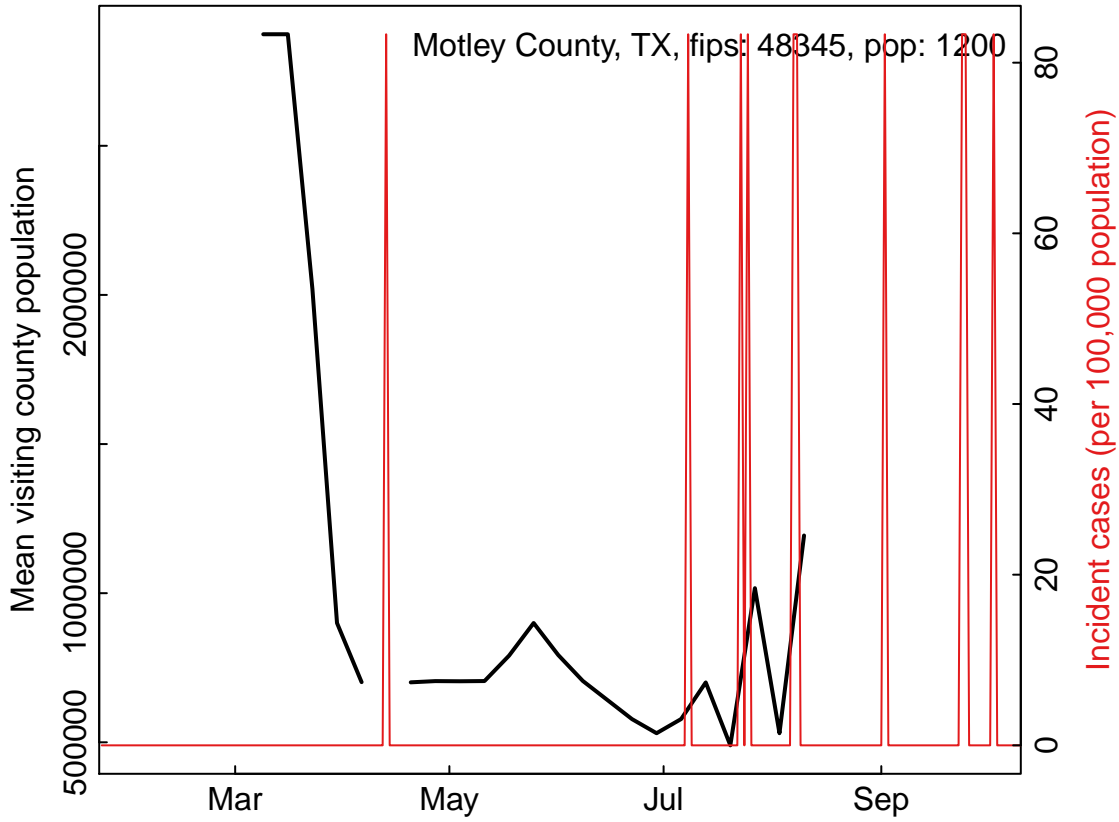

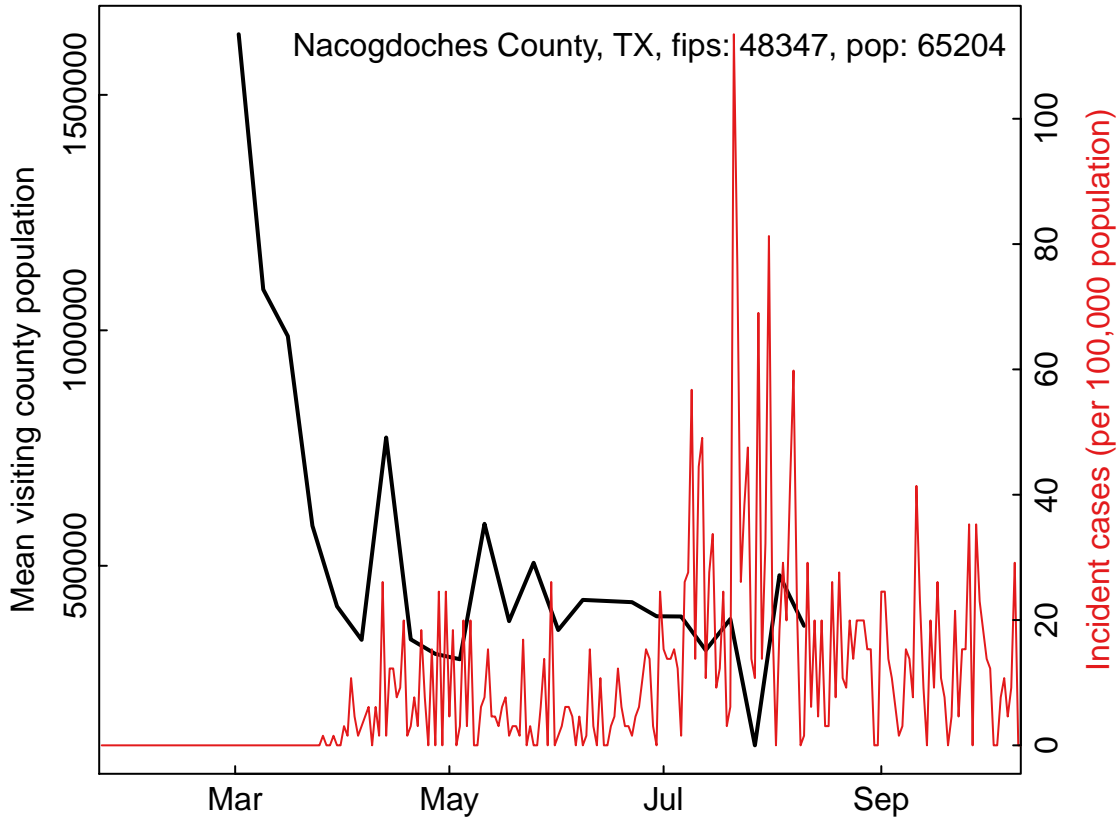

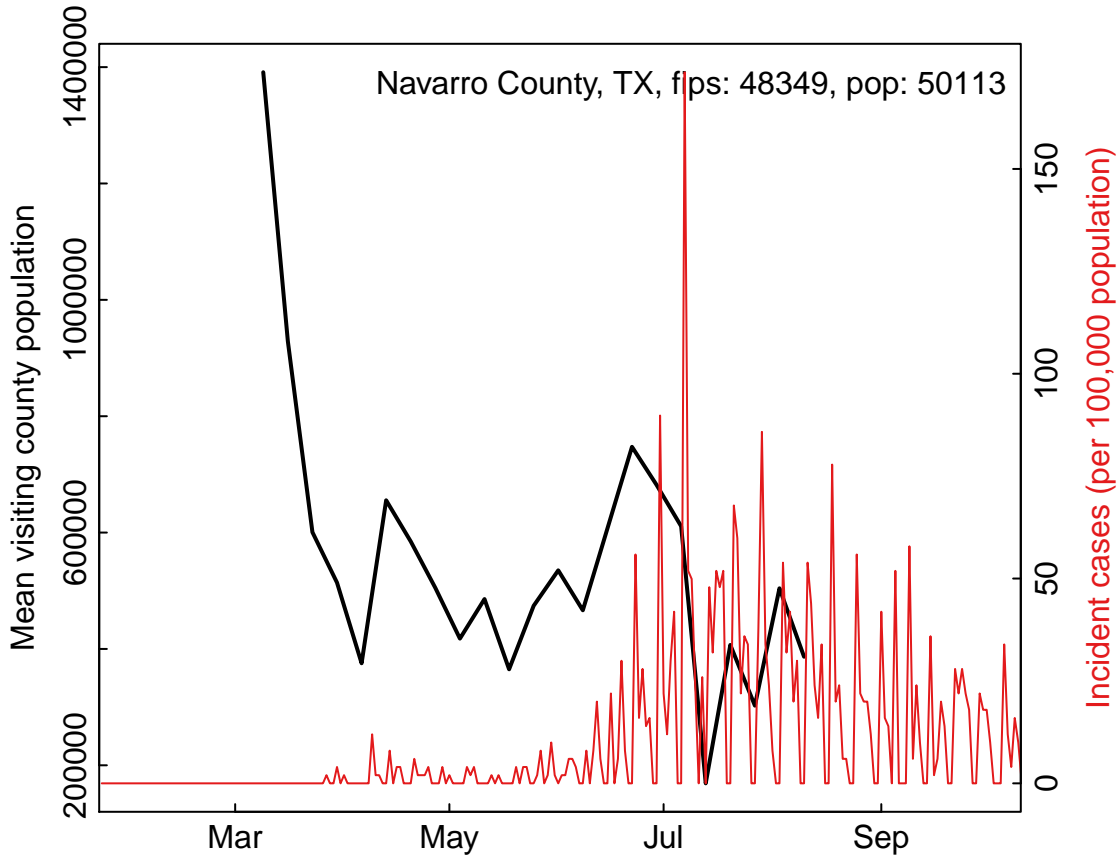

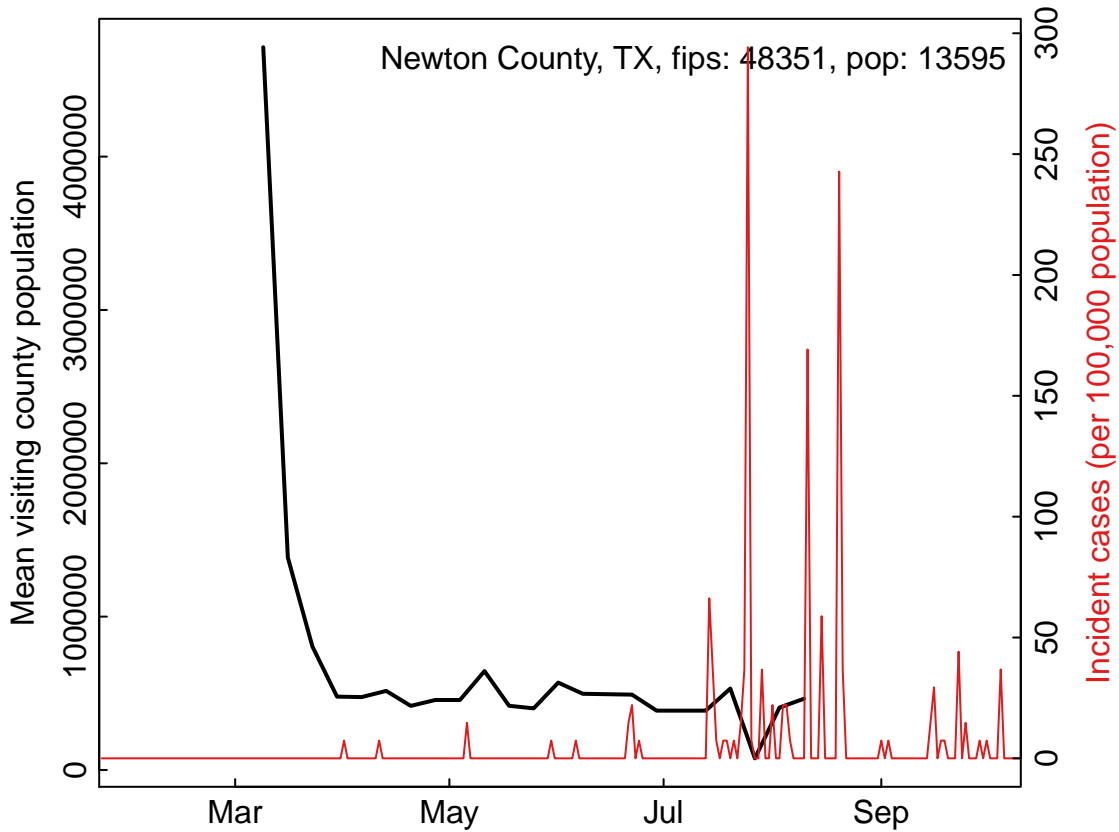

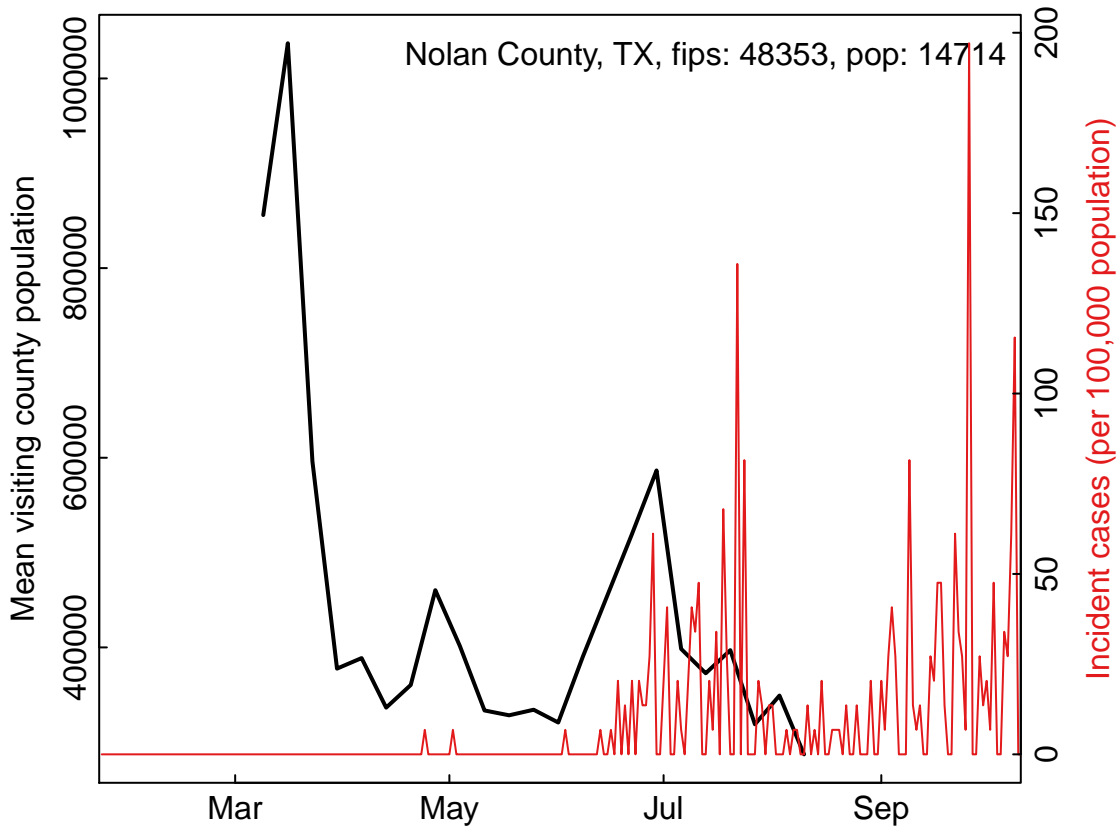

Nueces County, TX, fips: 48355, pop: 362294

Mean visiting county population

2500000  
1500000  
500000  
0

Mar

May

Jul

Sep

200  
0  
-200  
-400

Incident cases (per 100,000 population)

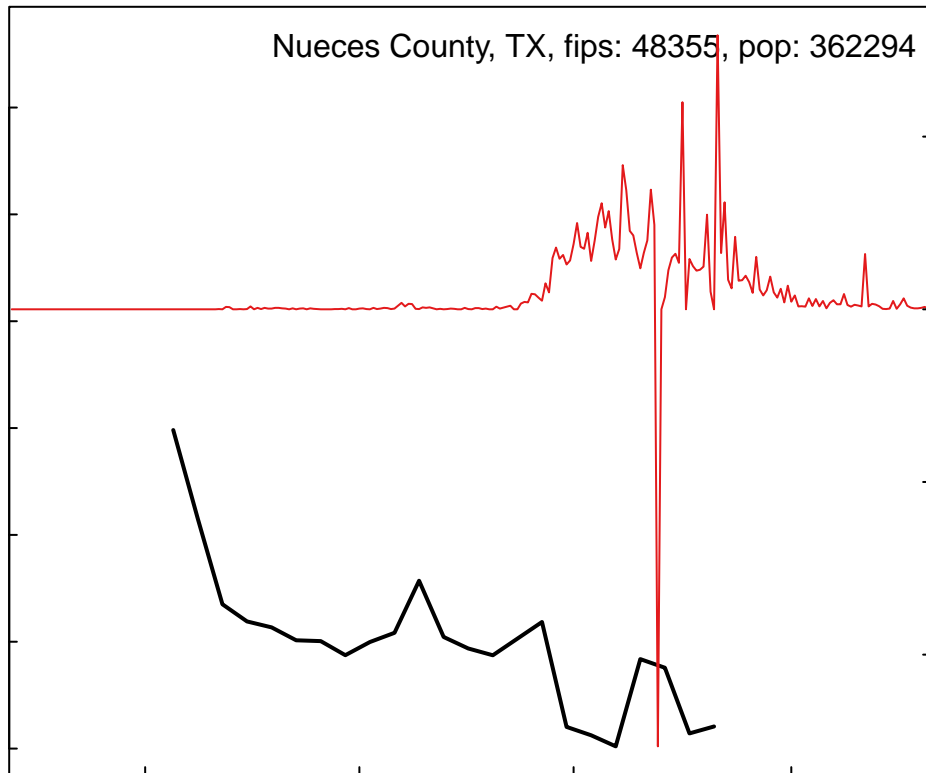



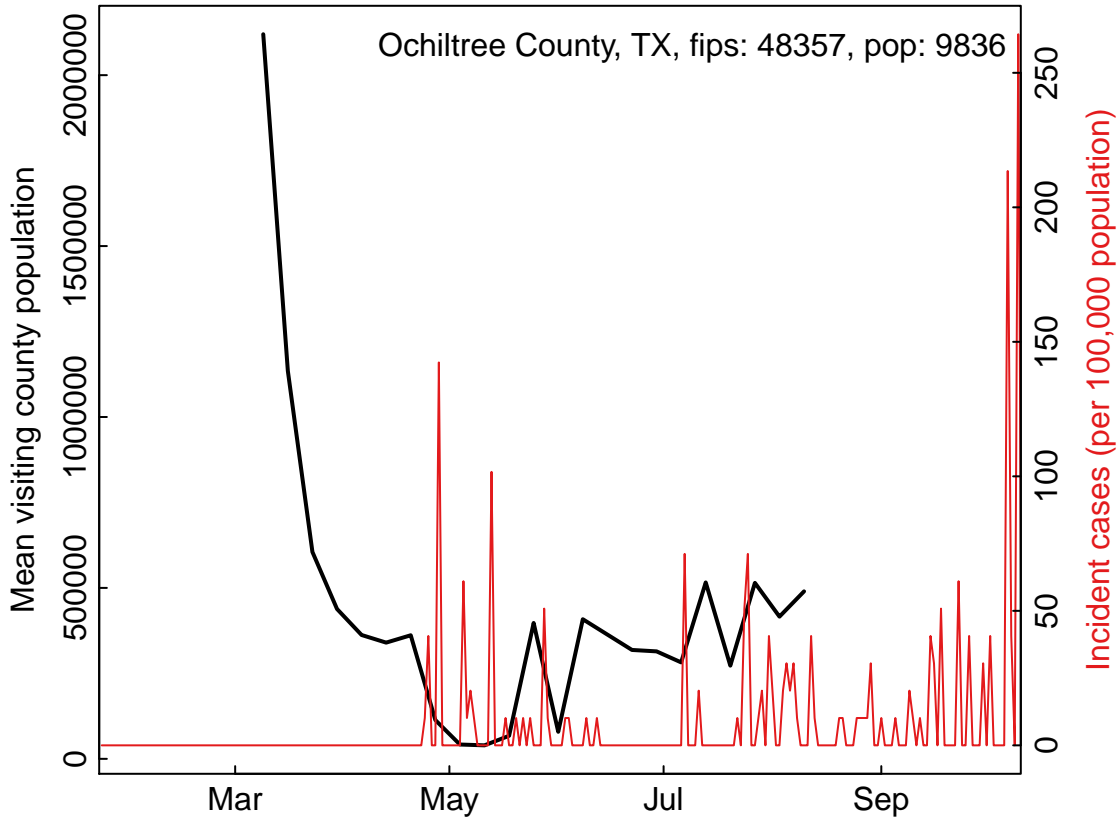

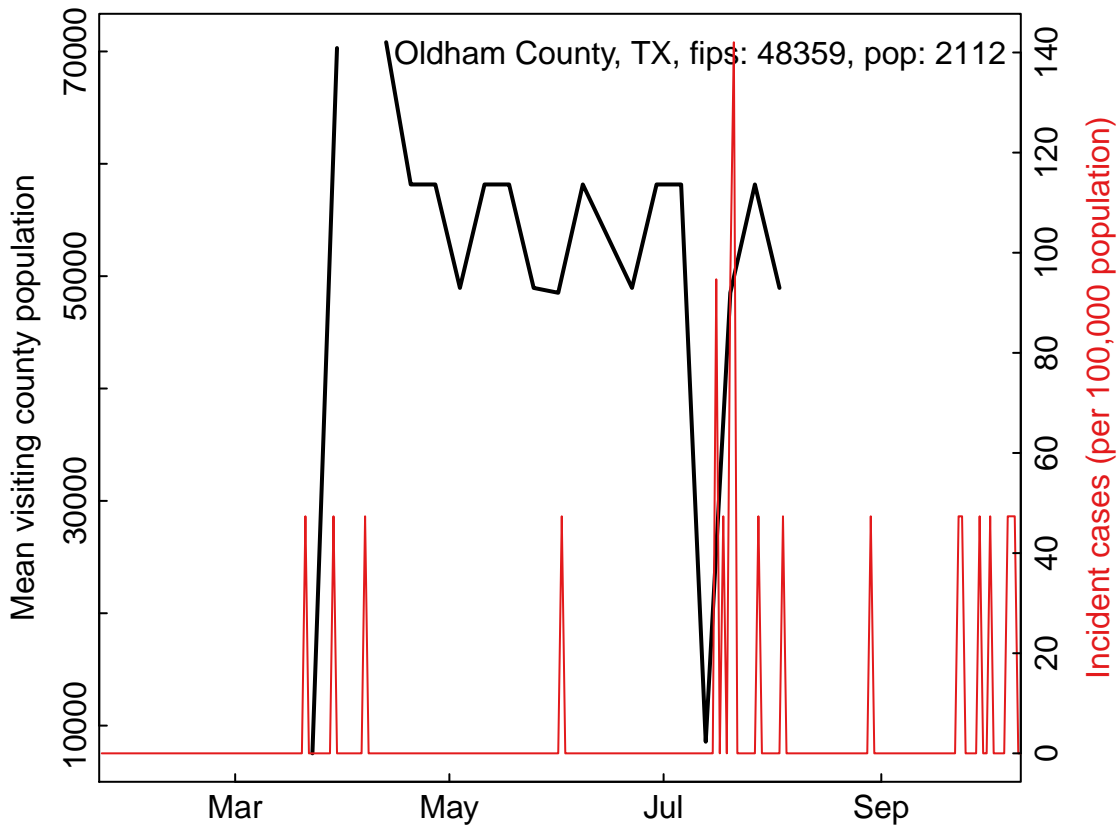

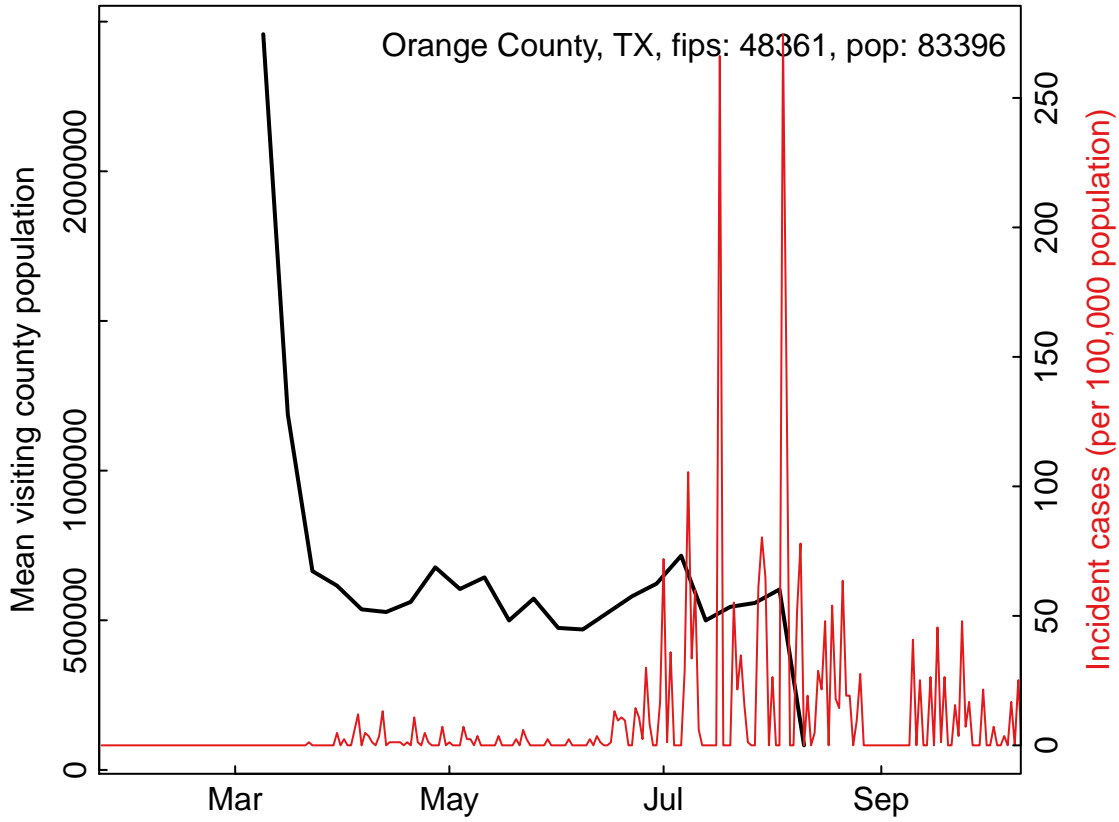

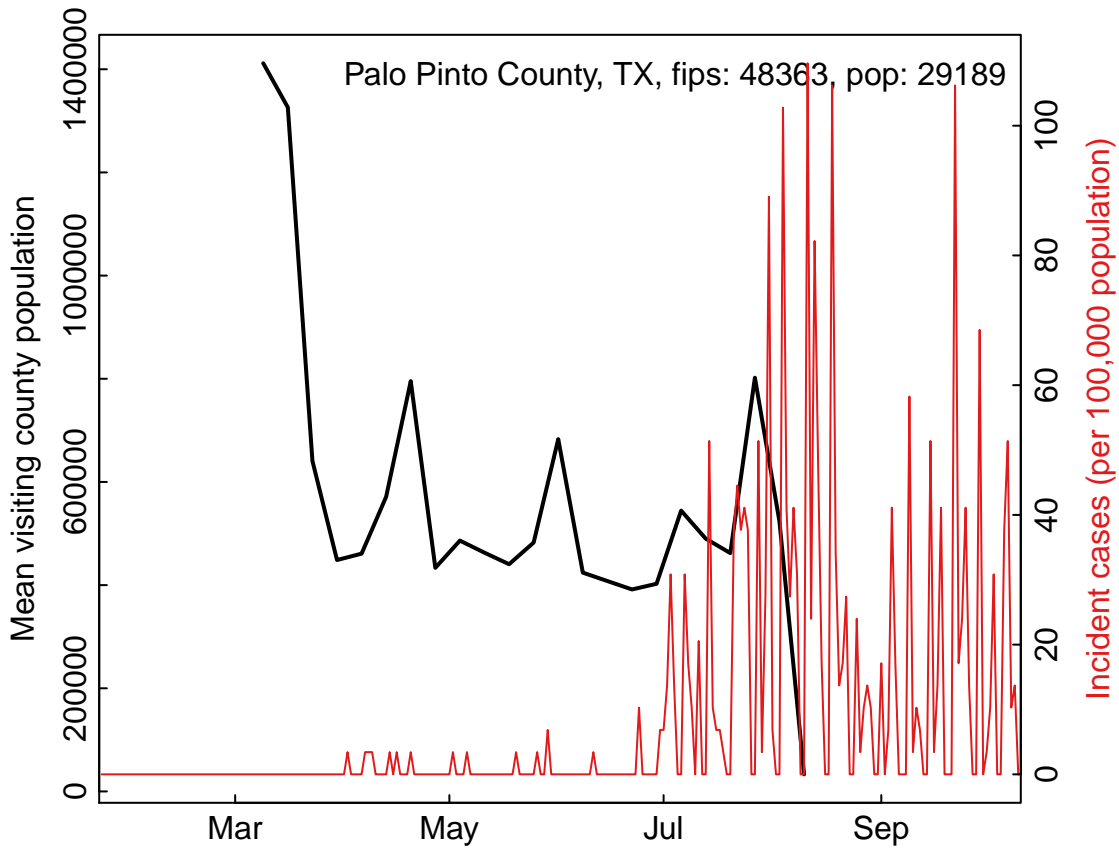

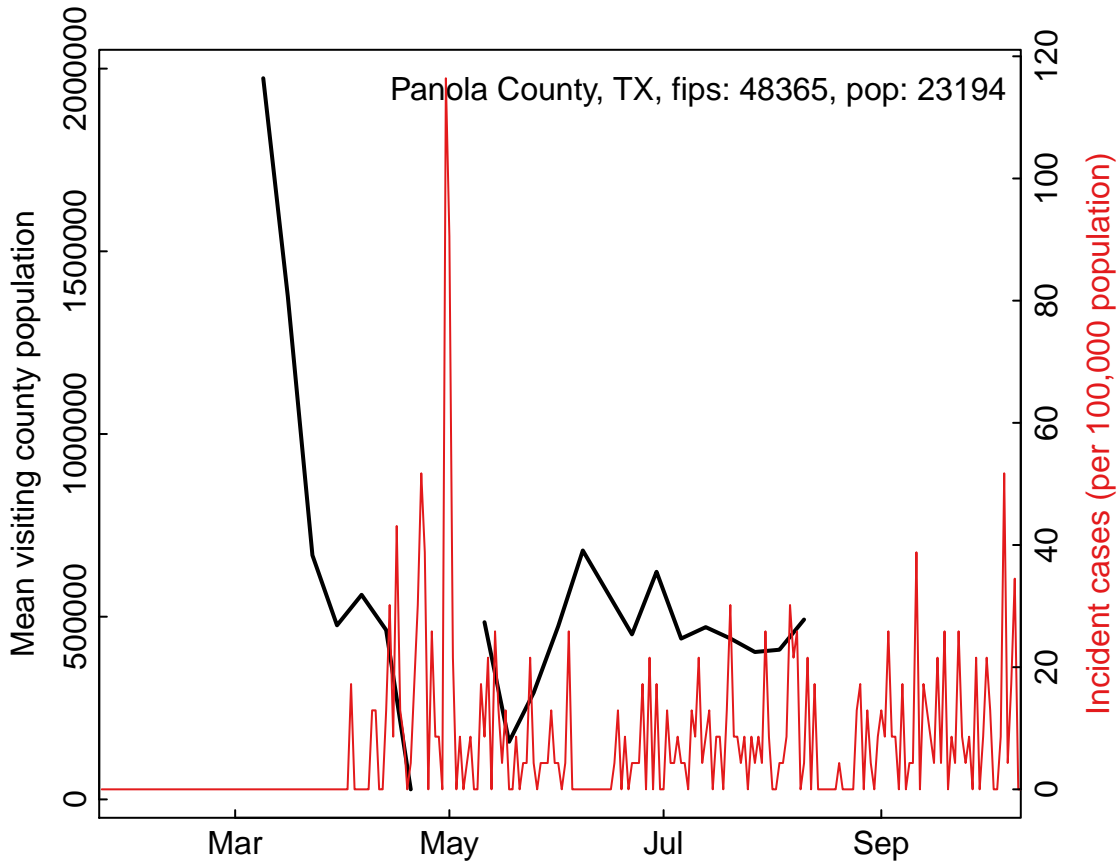

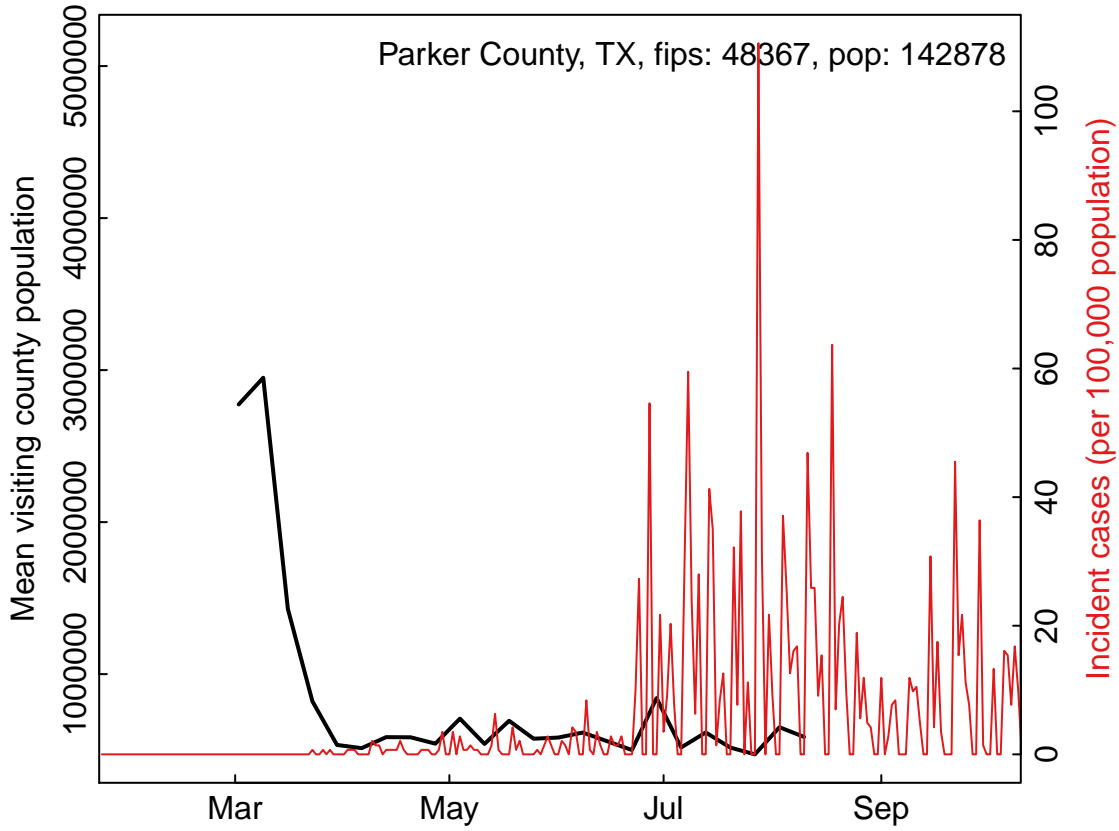

Parmer County, TX, fips: 48369, pop: 9605

Mean visiting county population

4000000  
3000000  
2000000  
1000000  
0

Mar May Jul Sep

Incident cases (per 100,000 population)

150  
100  
50  
0

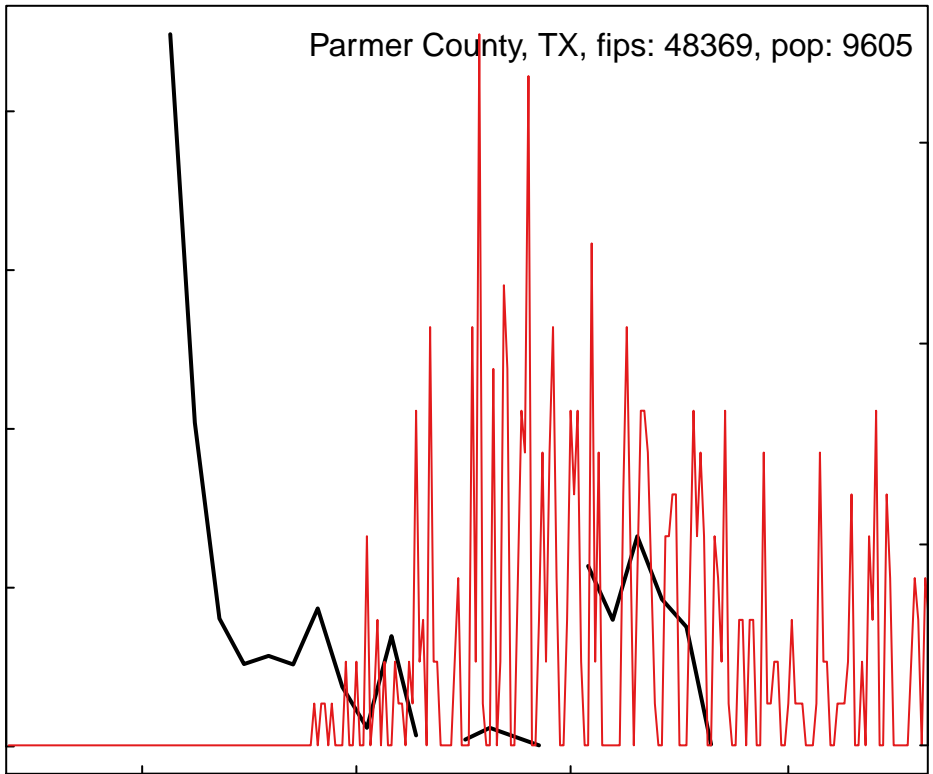

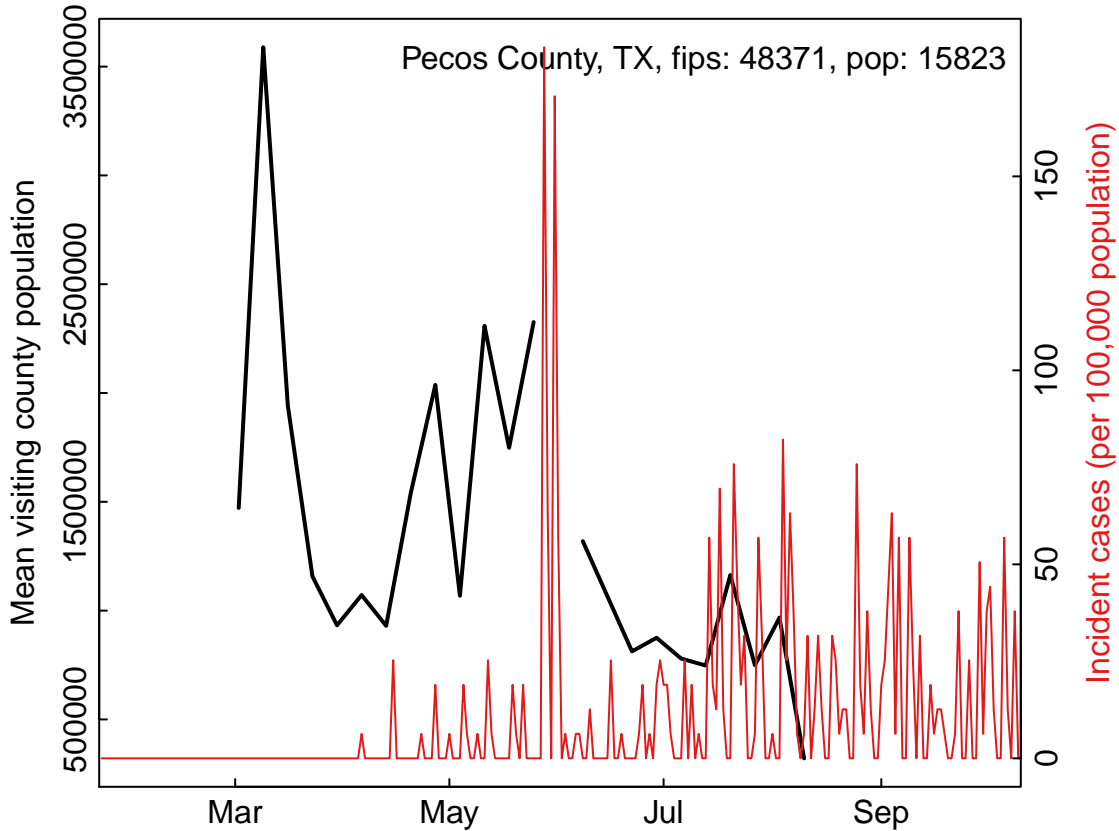



Mean visiting county population

2000000  
1500000  
1000000  
500000

Mar May Jul Sep

Polk County, TX, fips: 48373, pop: 51353

Incident cases (per 100,000 population)

200  
150  
100  
50  
0

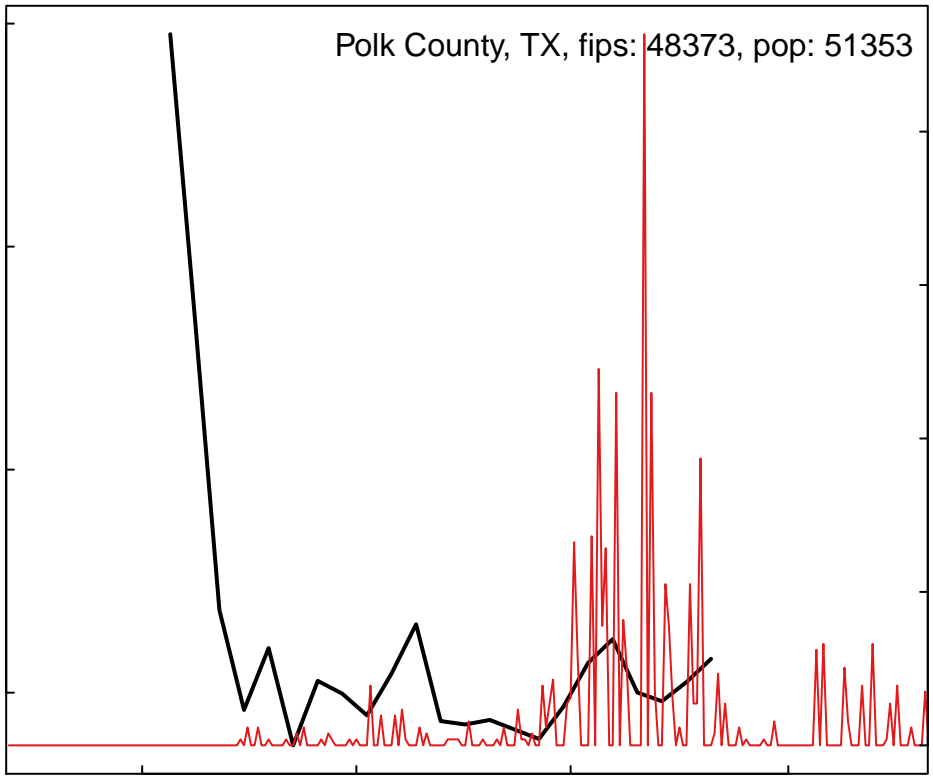

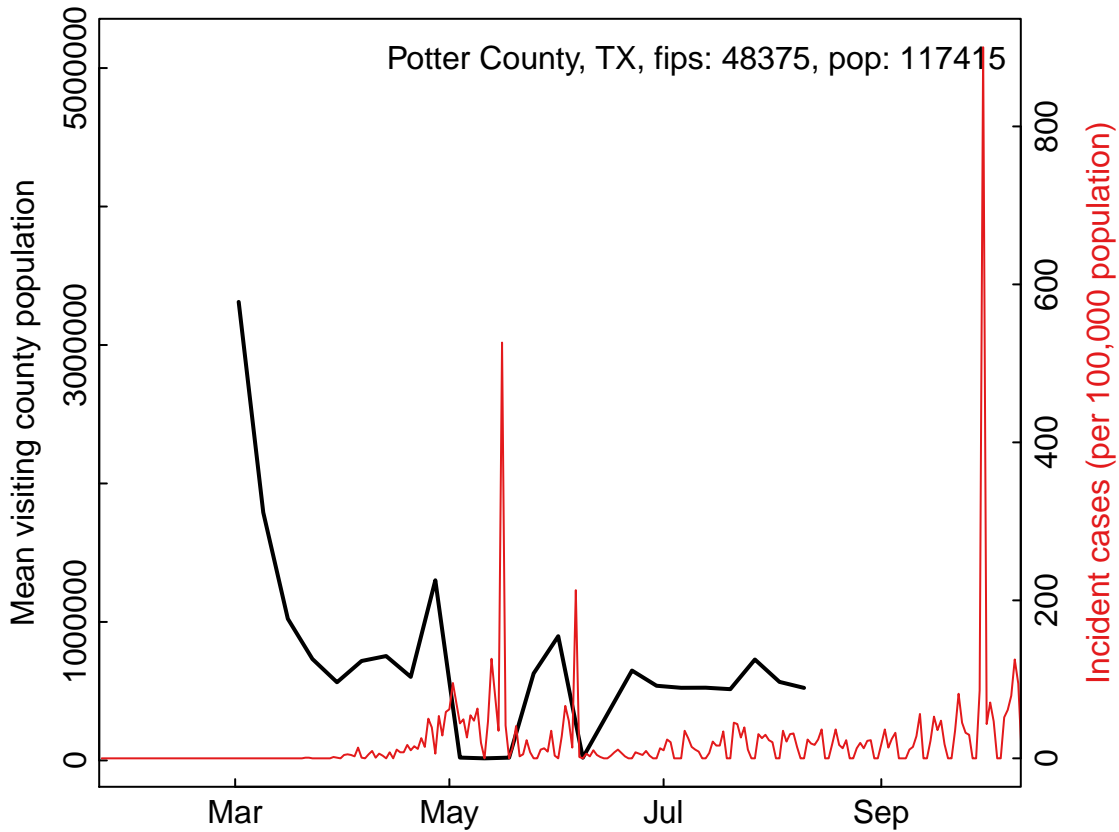

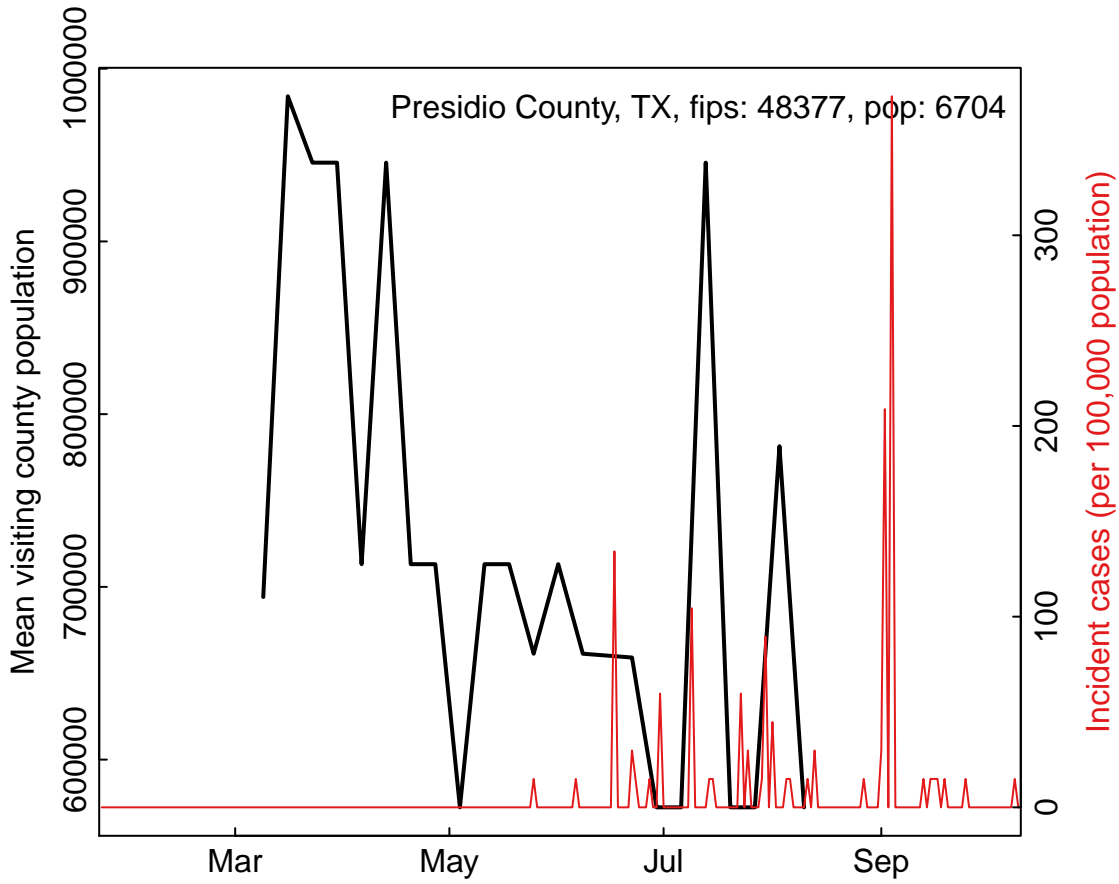

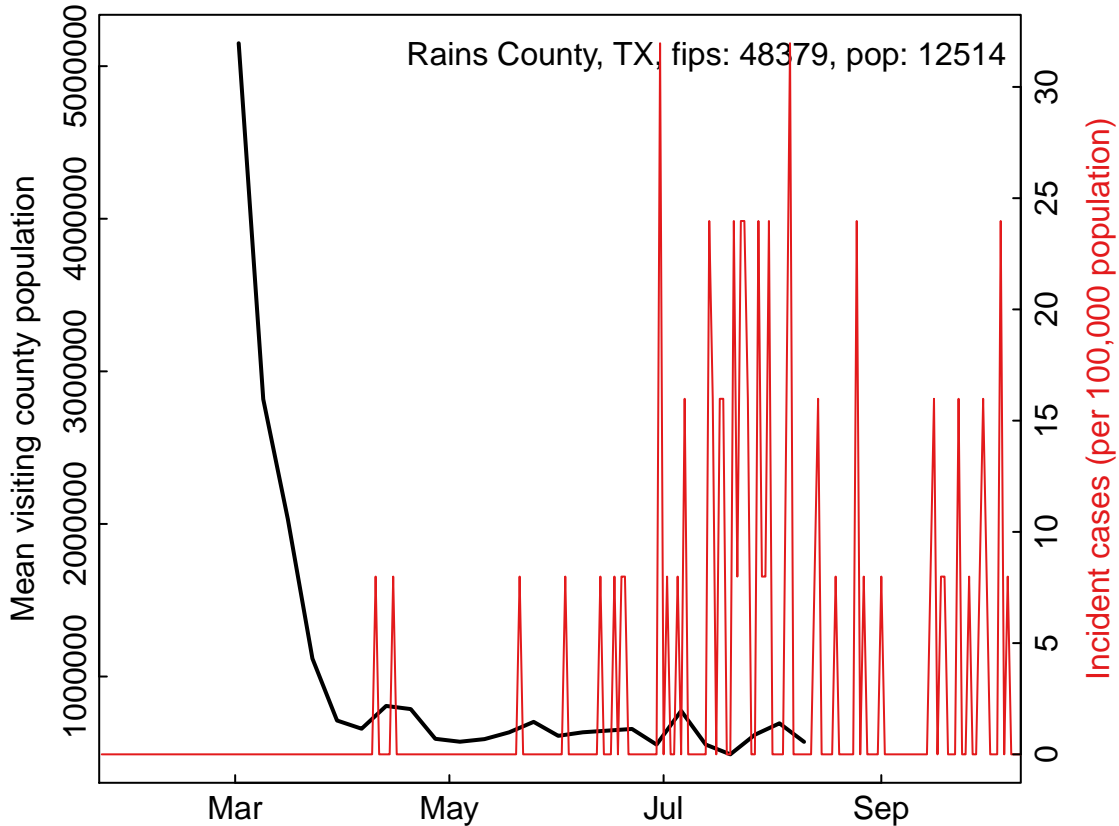

Randall County, TX, fips: 48381, pop: 137713

Mean visiting county population

2500000  
1500000  
500000  
0

Mar

May

Jul

Sep

120  
100  
80  
60  
40  
20  
0

Incident cases (per 100,000 population)

0

0

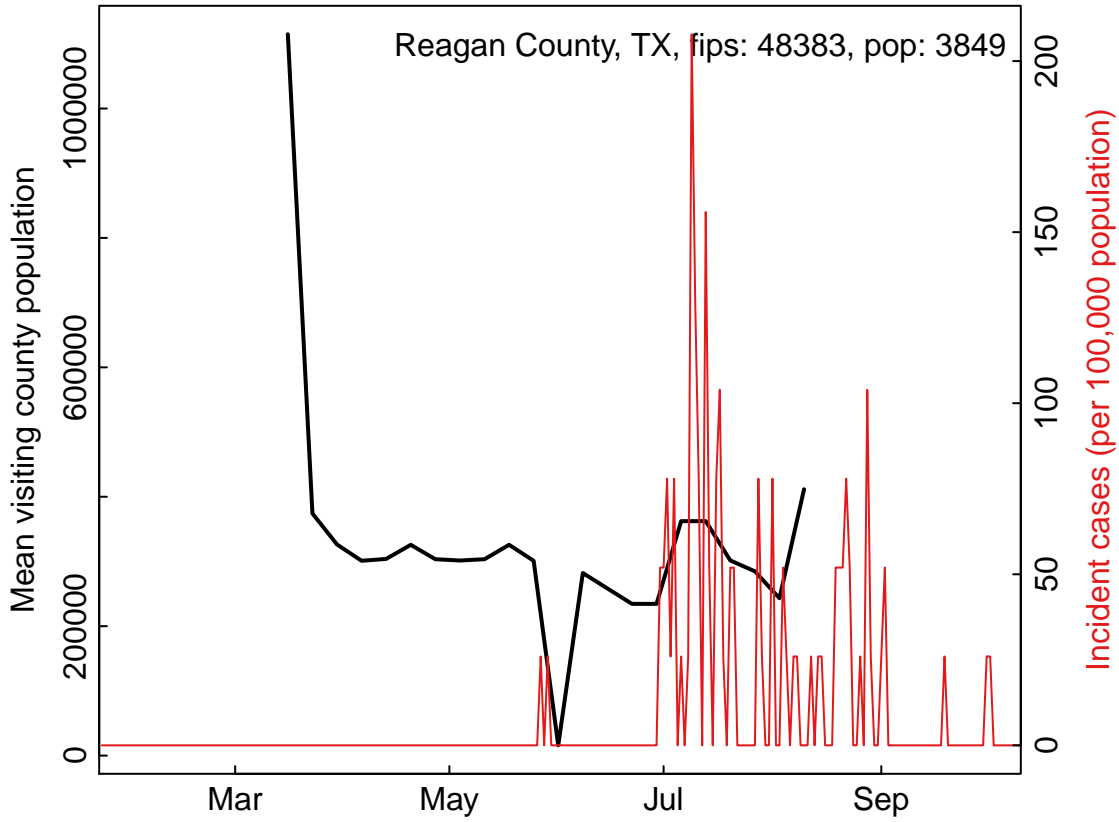

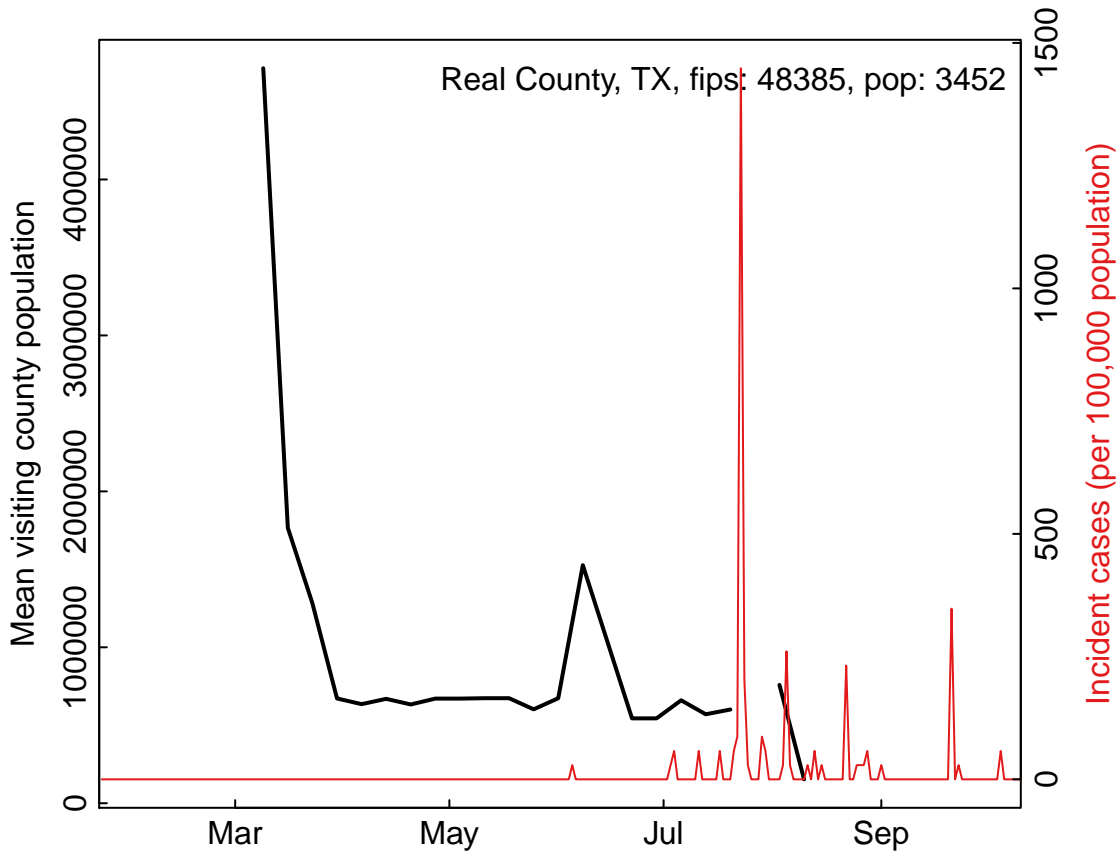

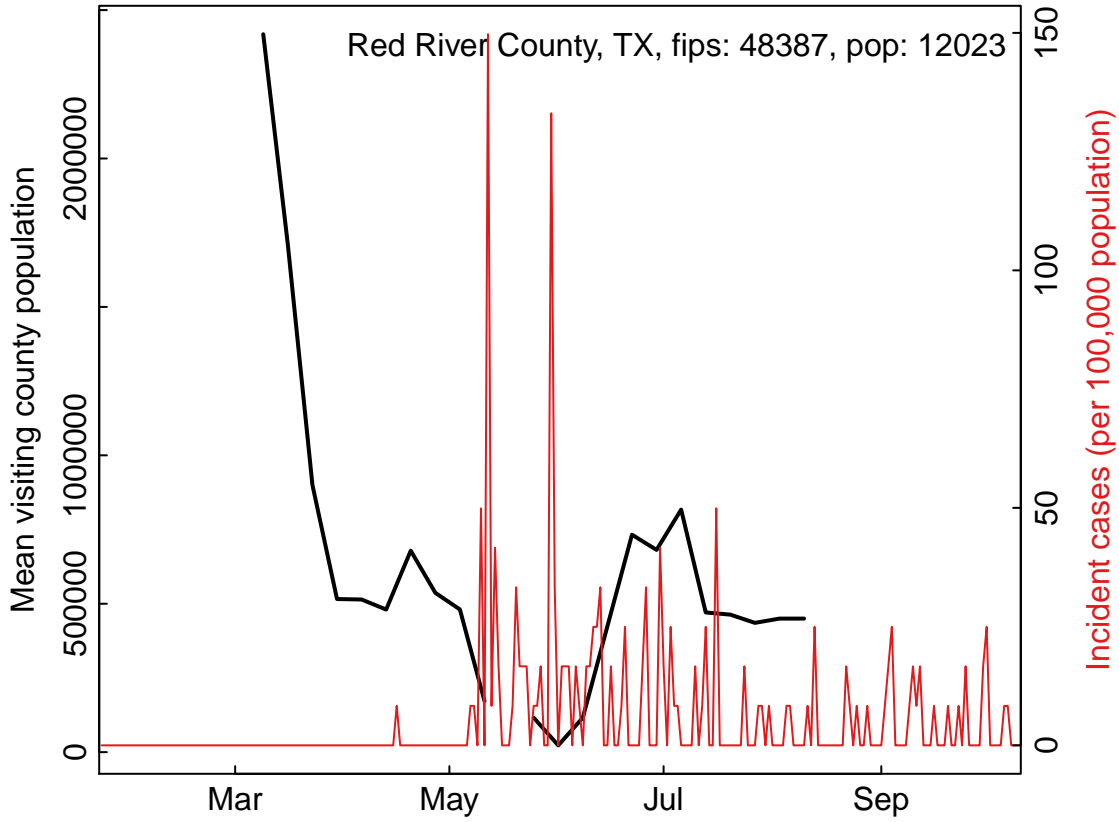



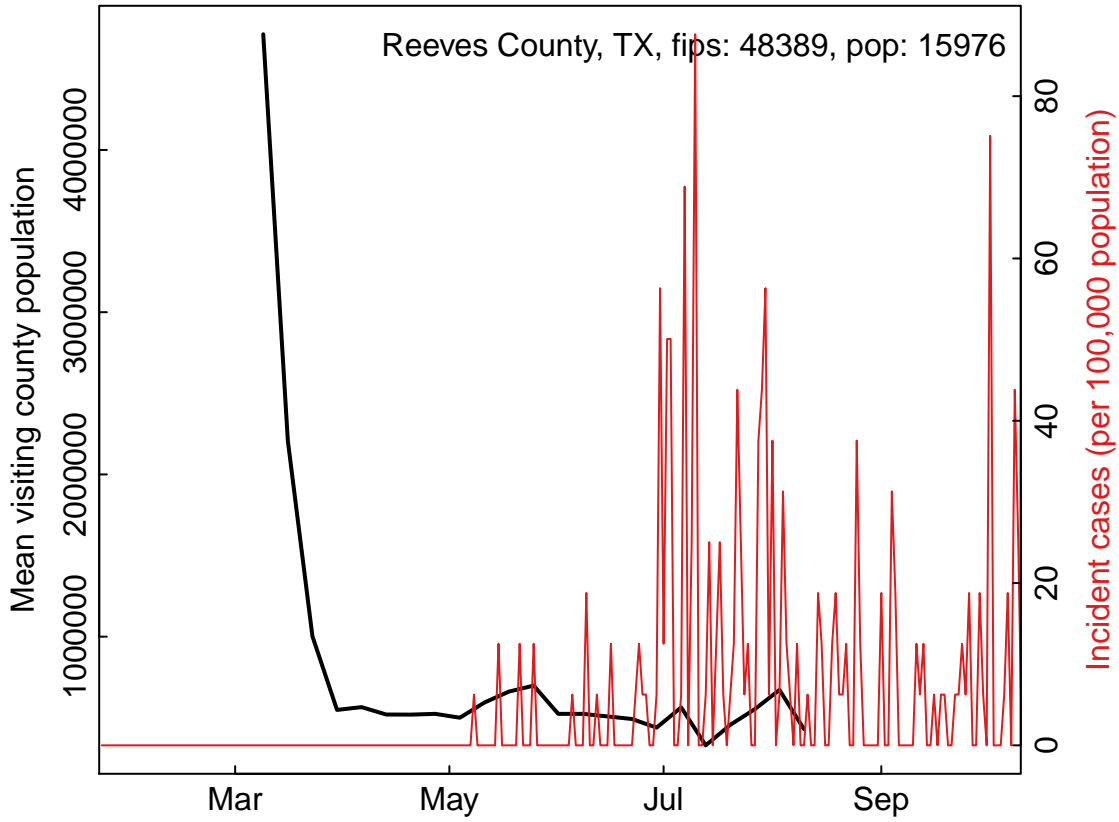

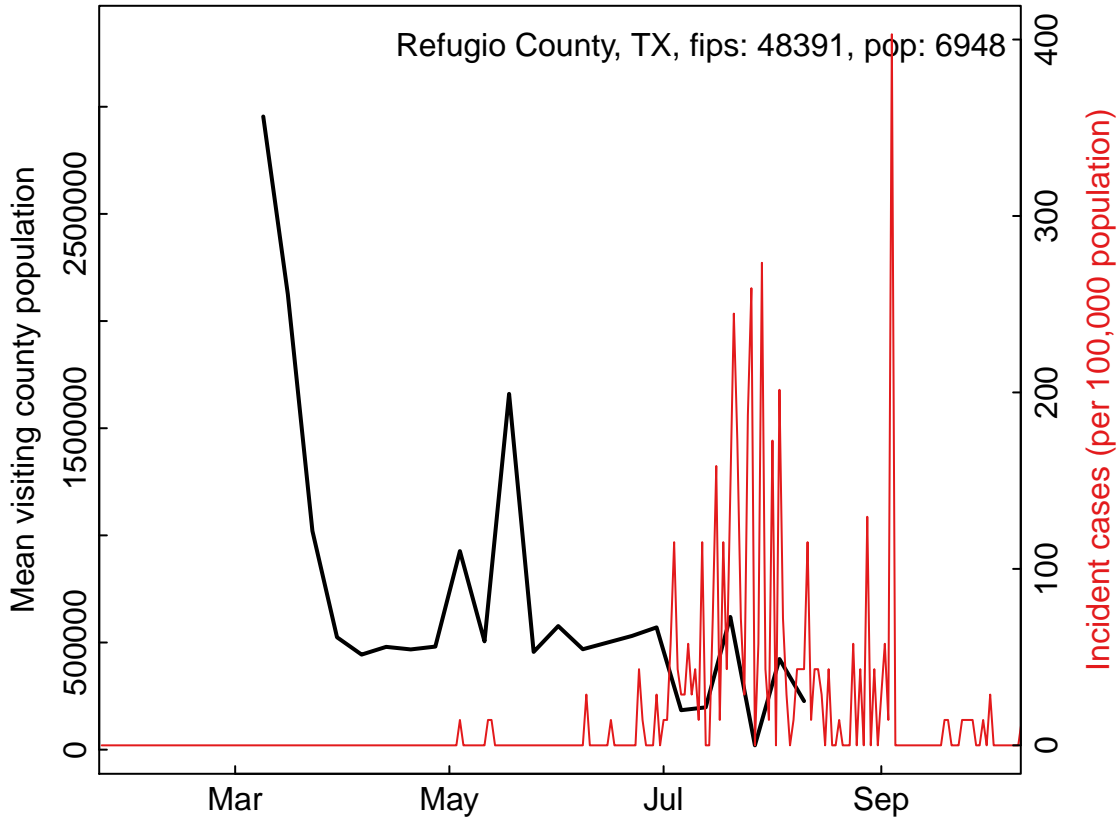

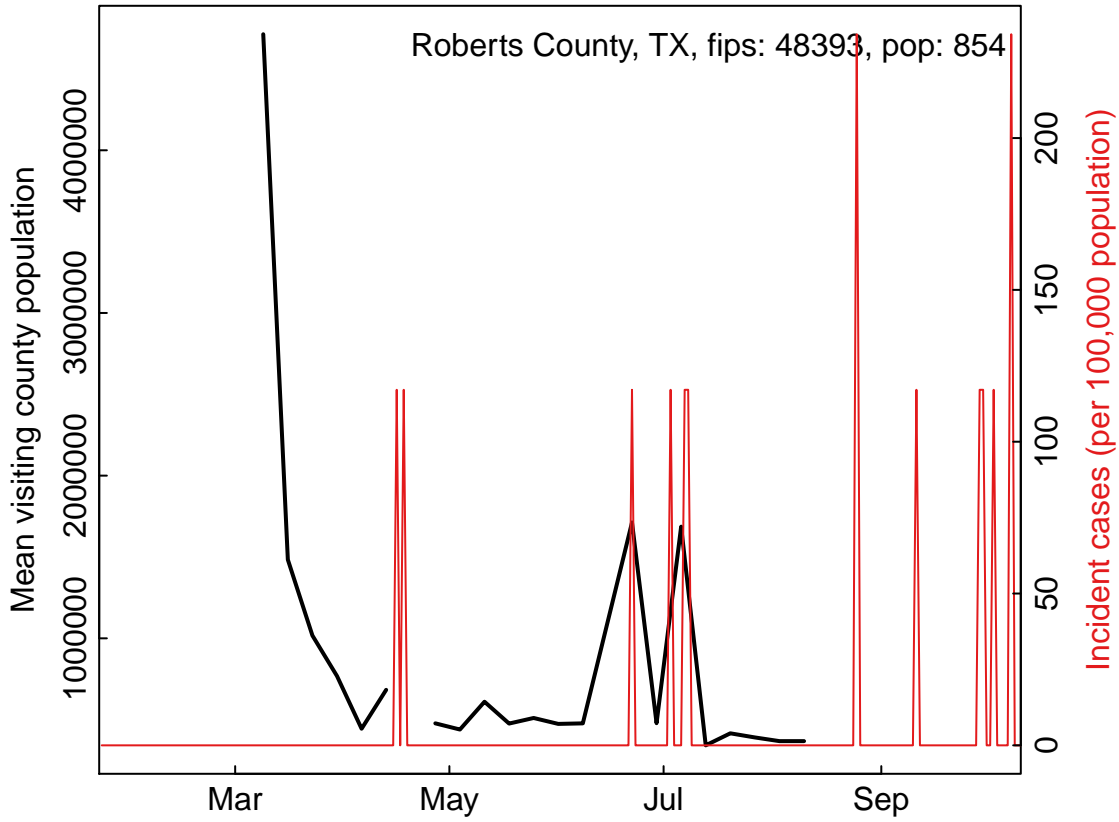

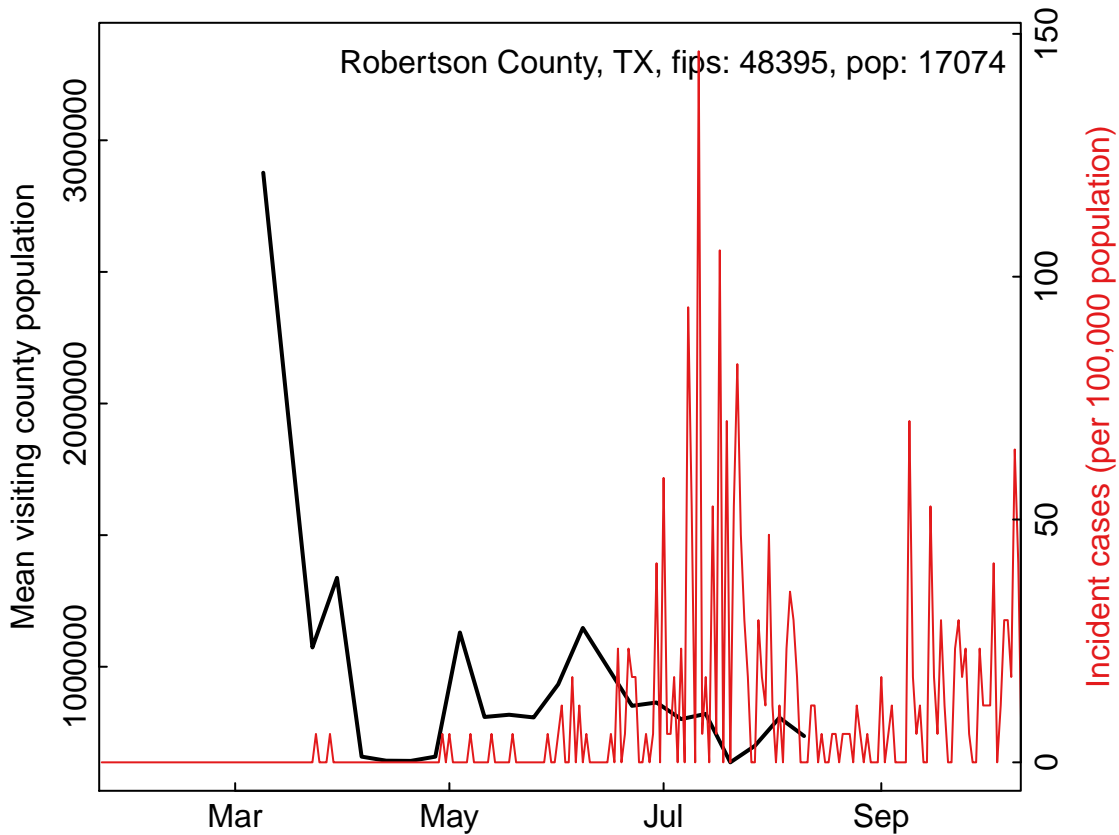

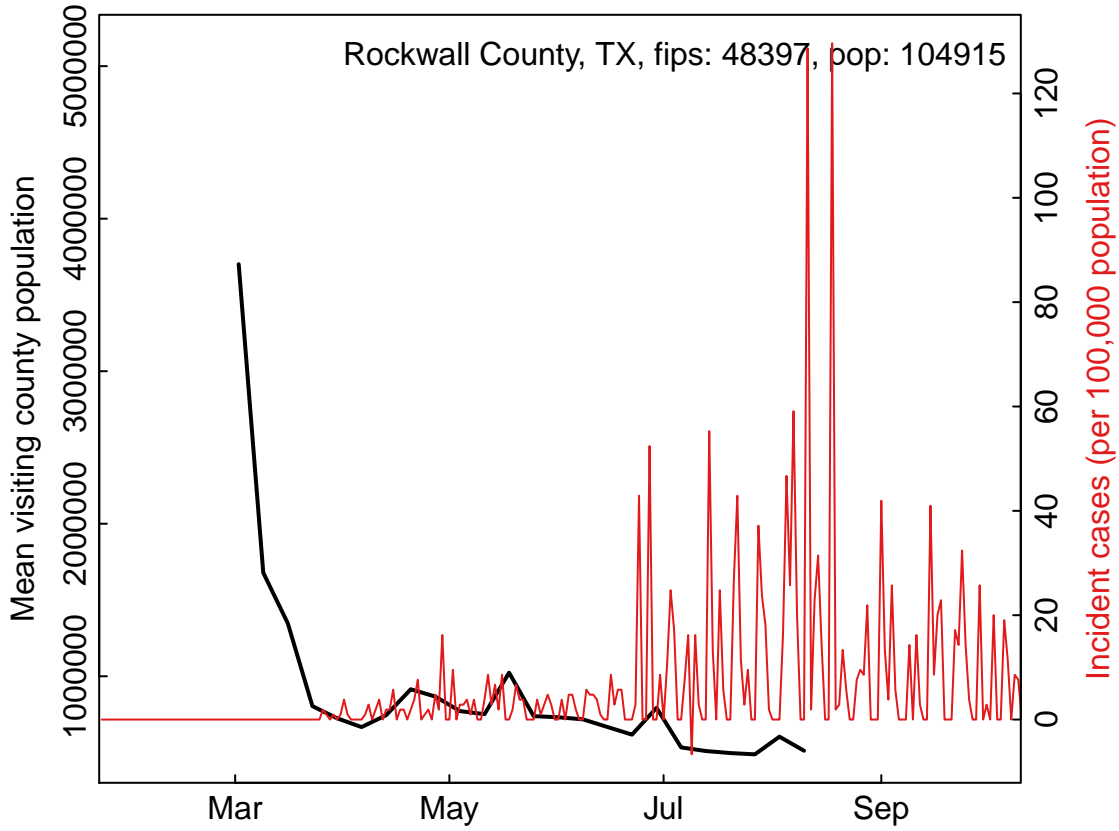

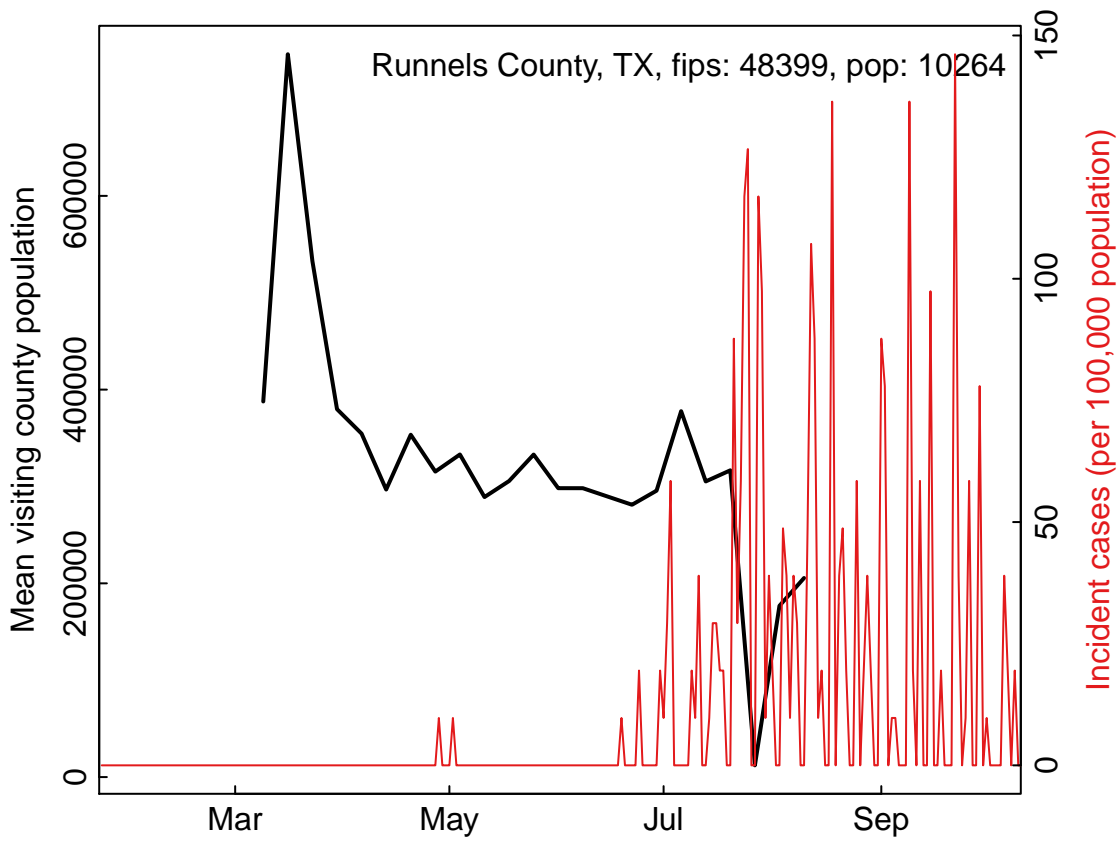

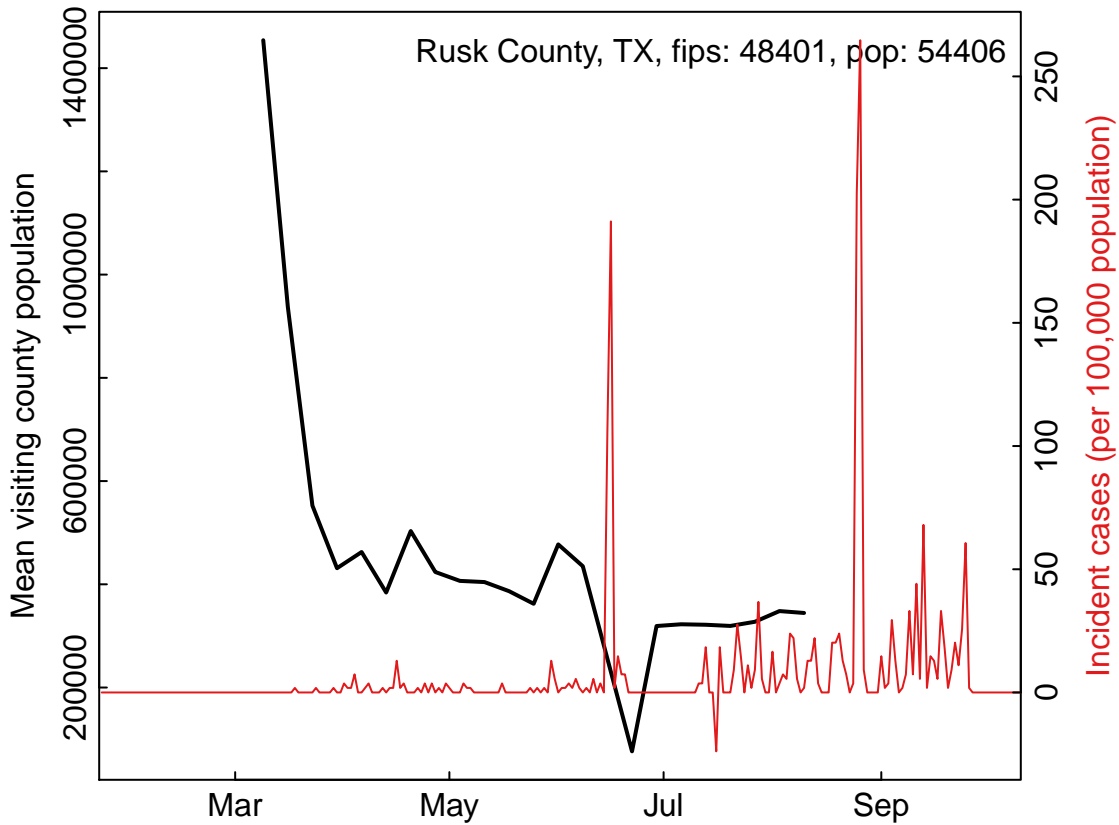

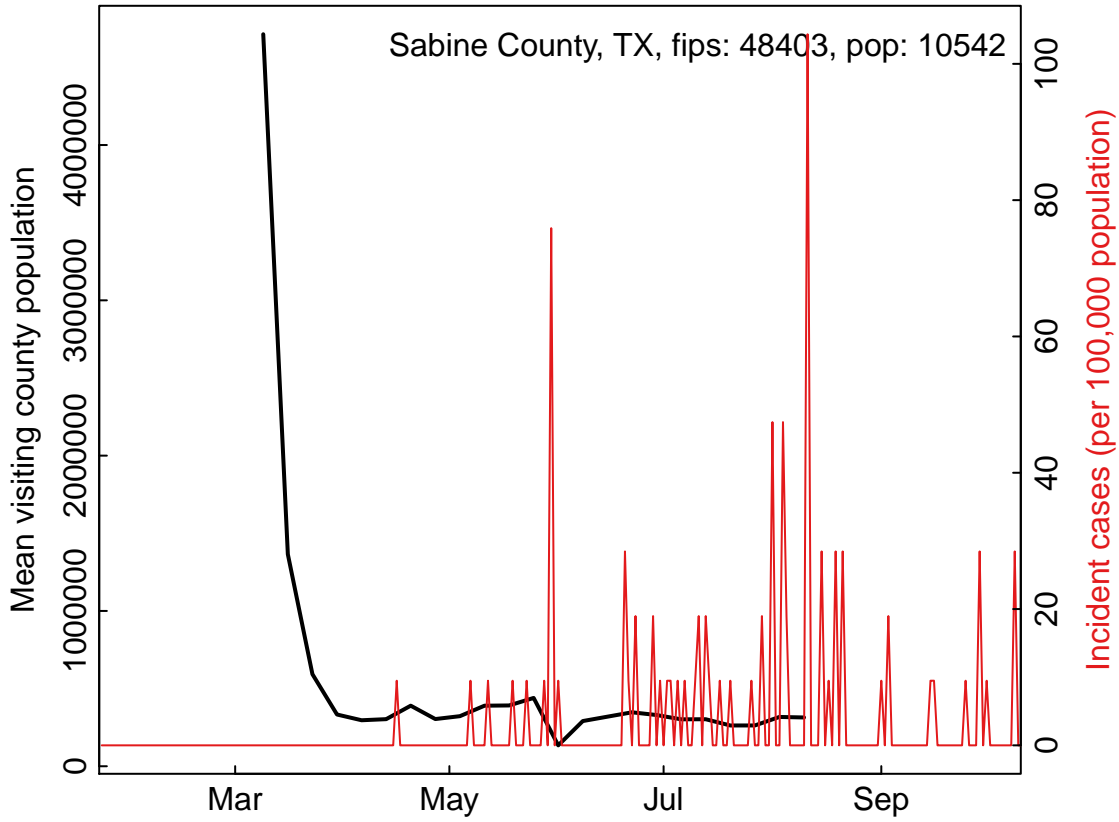



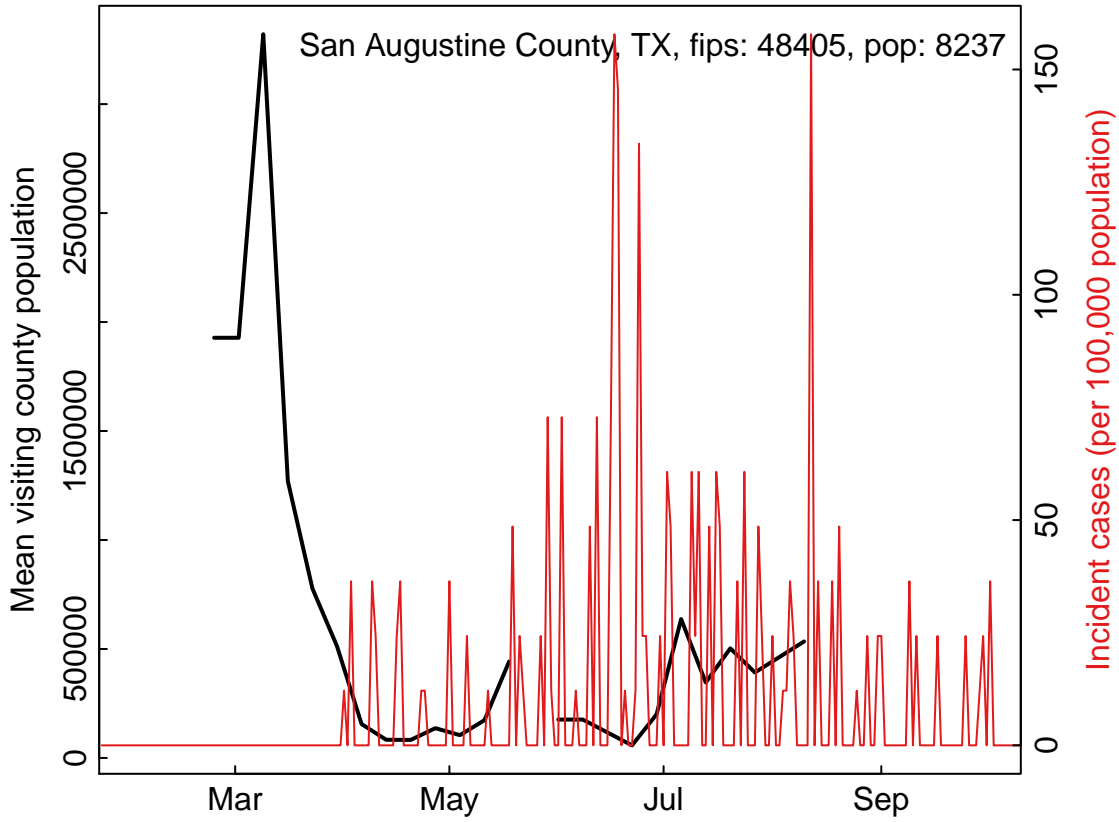

San Jacinto County, TX, fips: 48407, pop: 28859

Mean visiting county population

1400000  
1000000  
600000

Mar May Jul Sep

Incident cases (per 100,000 population)

80  
60  
40  
20  
0

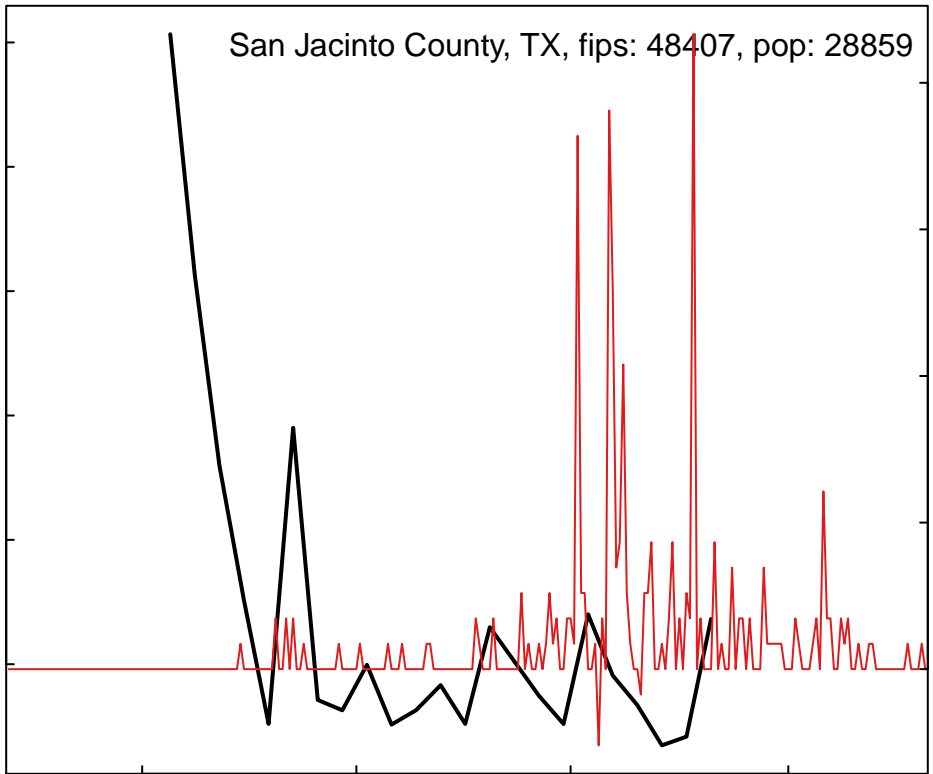

San Patricio County, TX, fips: 48409, pop: 66730

Mean visiting county population

2500000  
1500000  
500000  
0

Mar

May

Jul

Sep

120  
100  
80  
60  
40  
20  
0

Incident cases (per 100,000 population)

0

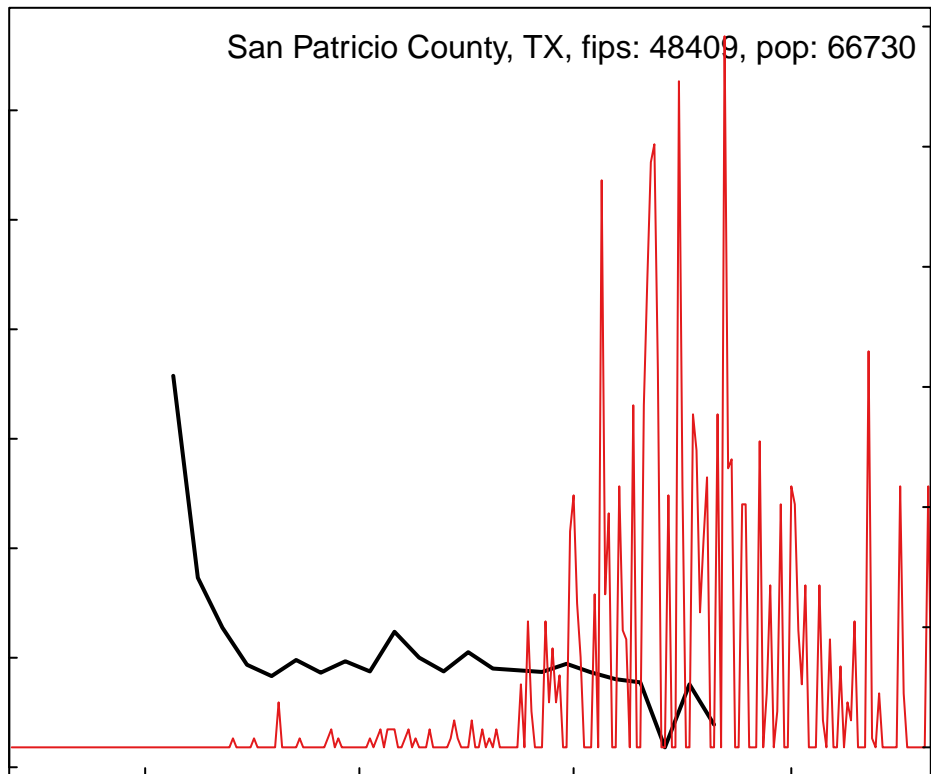

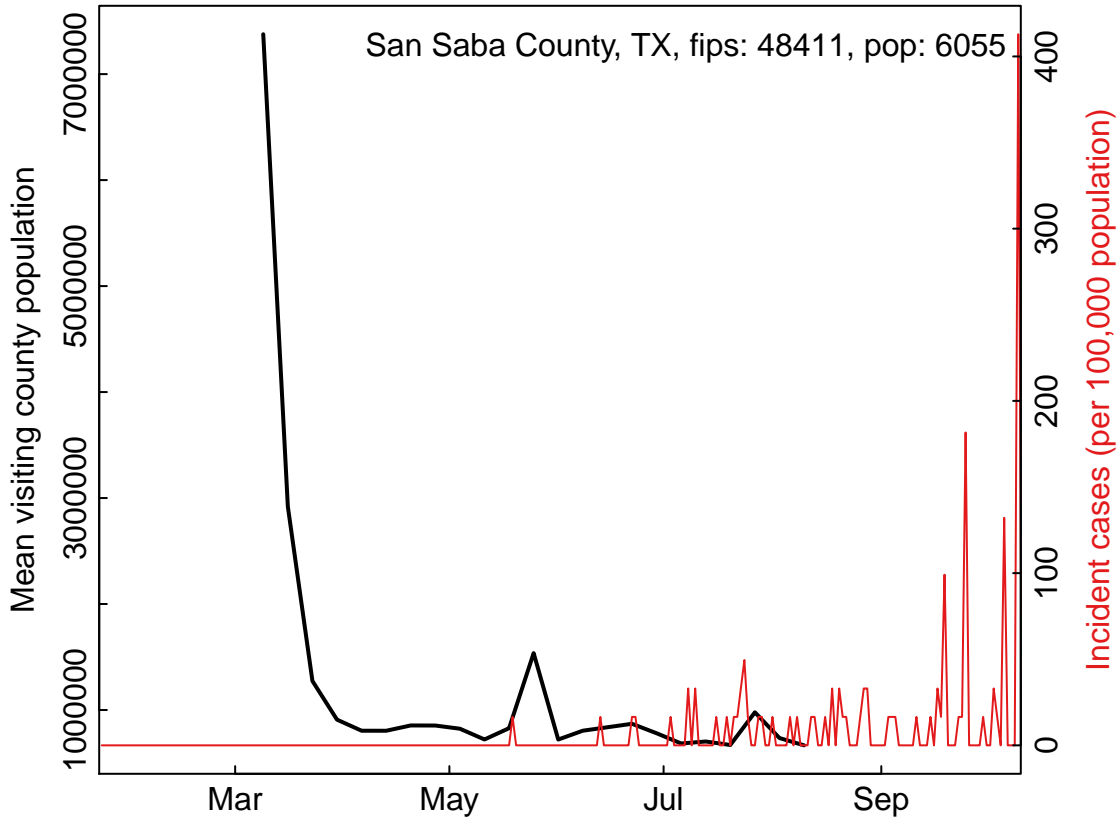

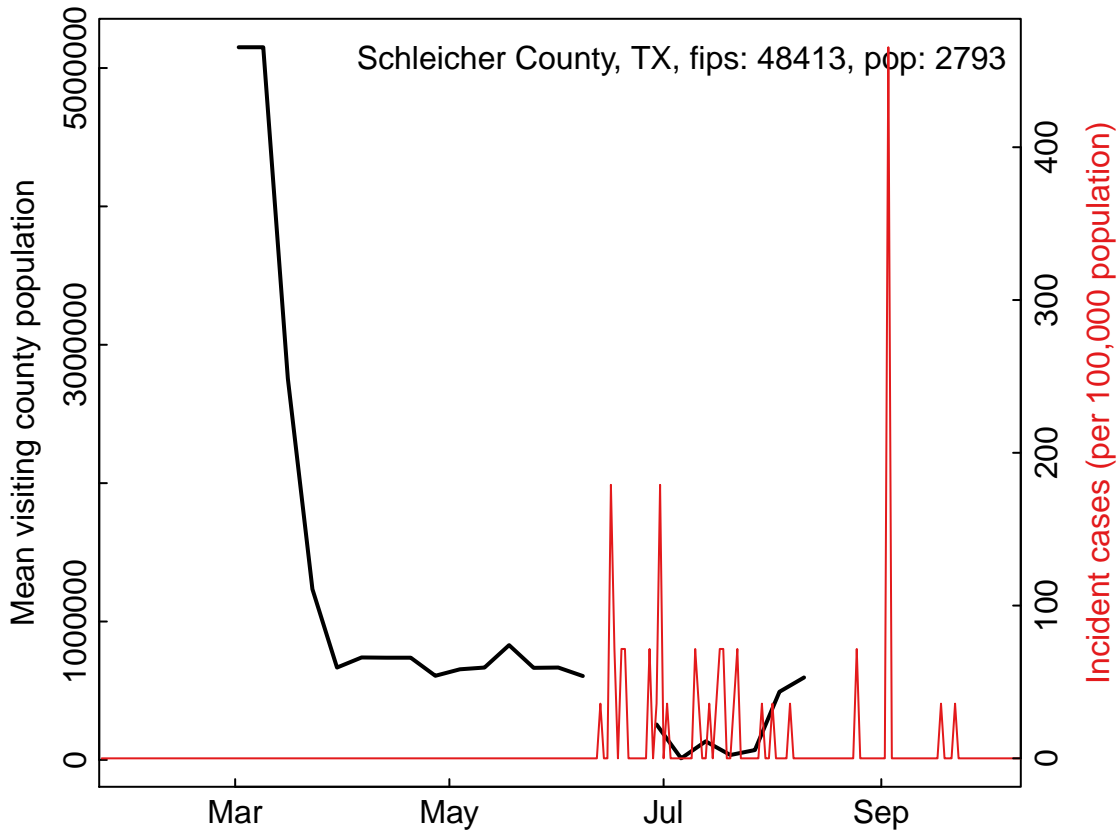

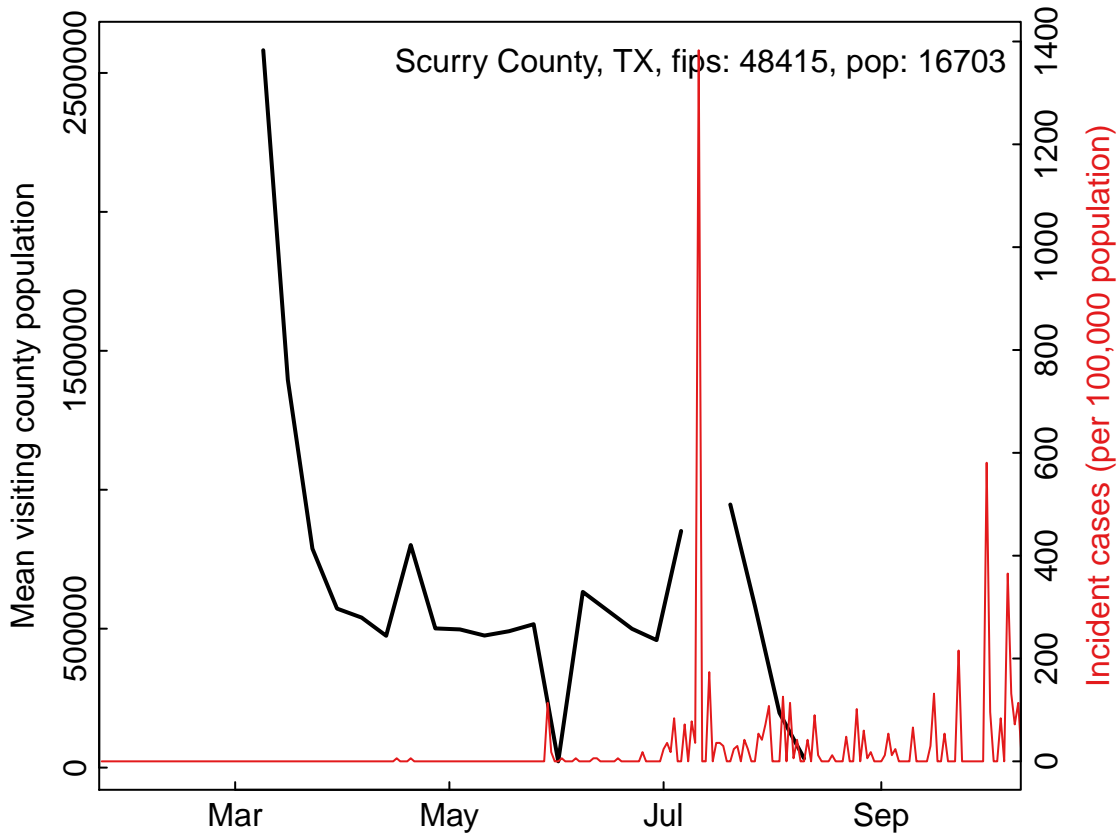

Shackelford County, TX, fips: 48417, pop: 3265

Mean visiting county population

50000  
150000  
250000

Mar

May

Jul

Sep

Incident cases (per 100,000 population)

0  
20  
40  
60  
80

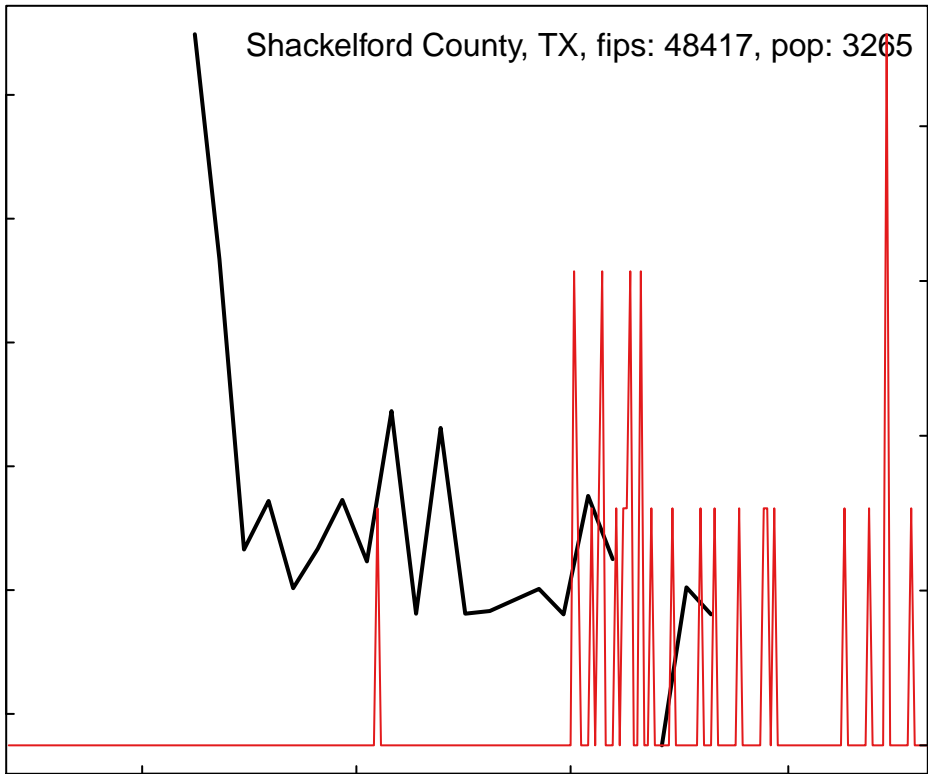

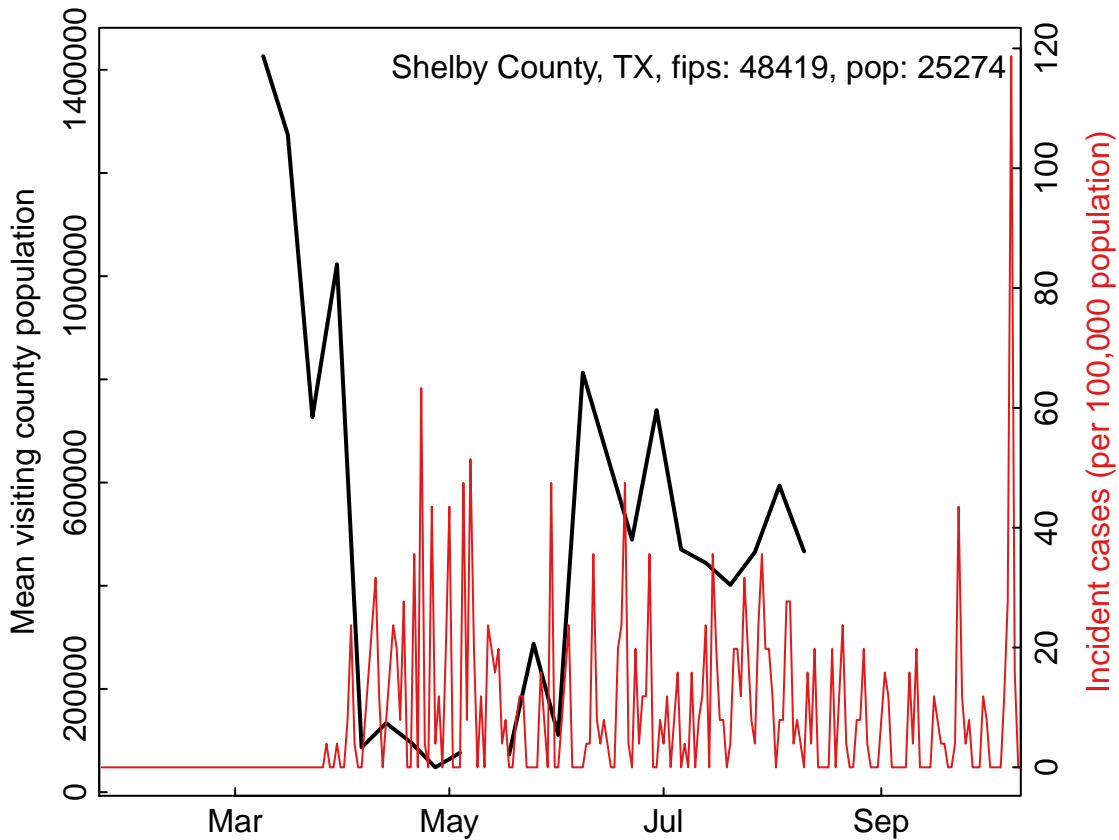



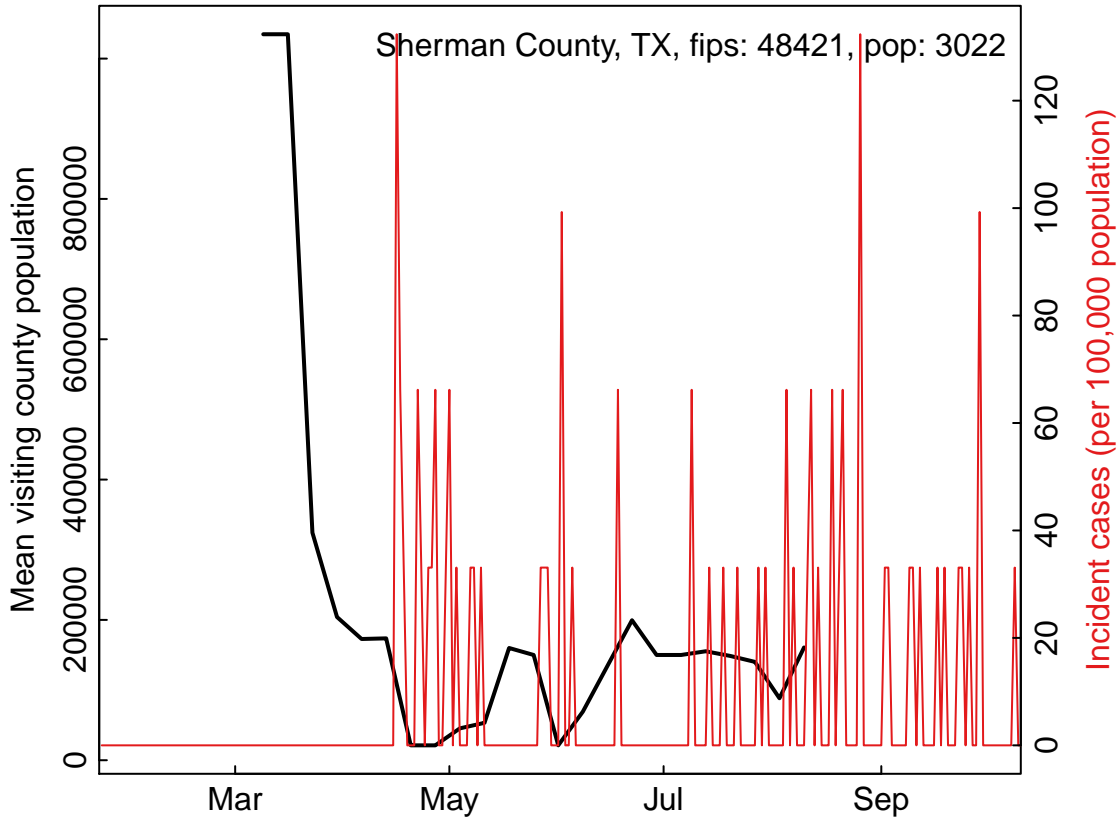

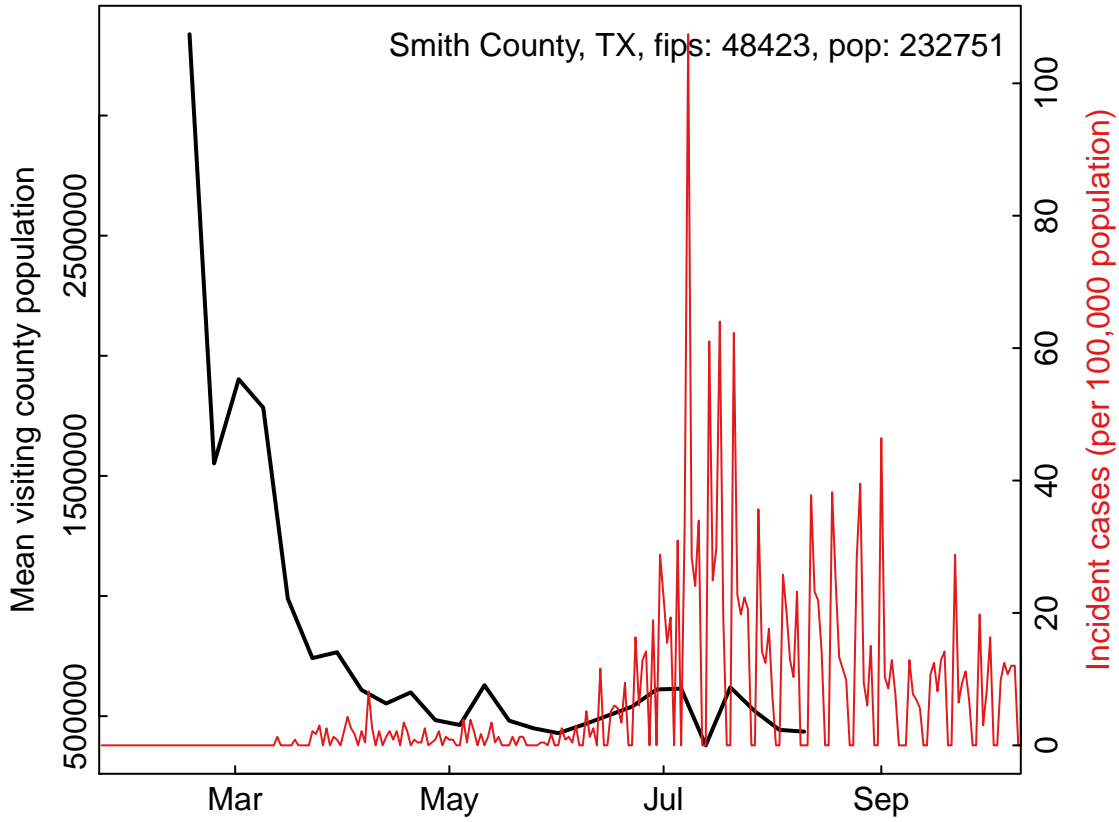

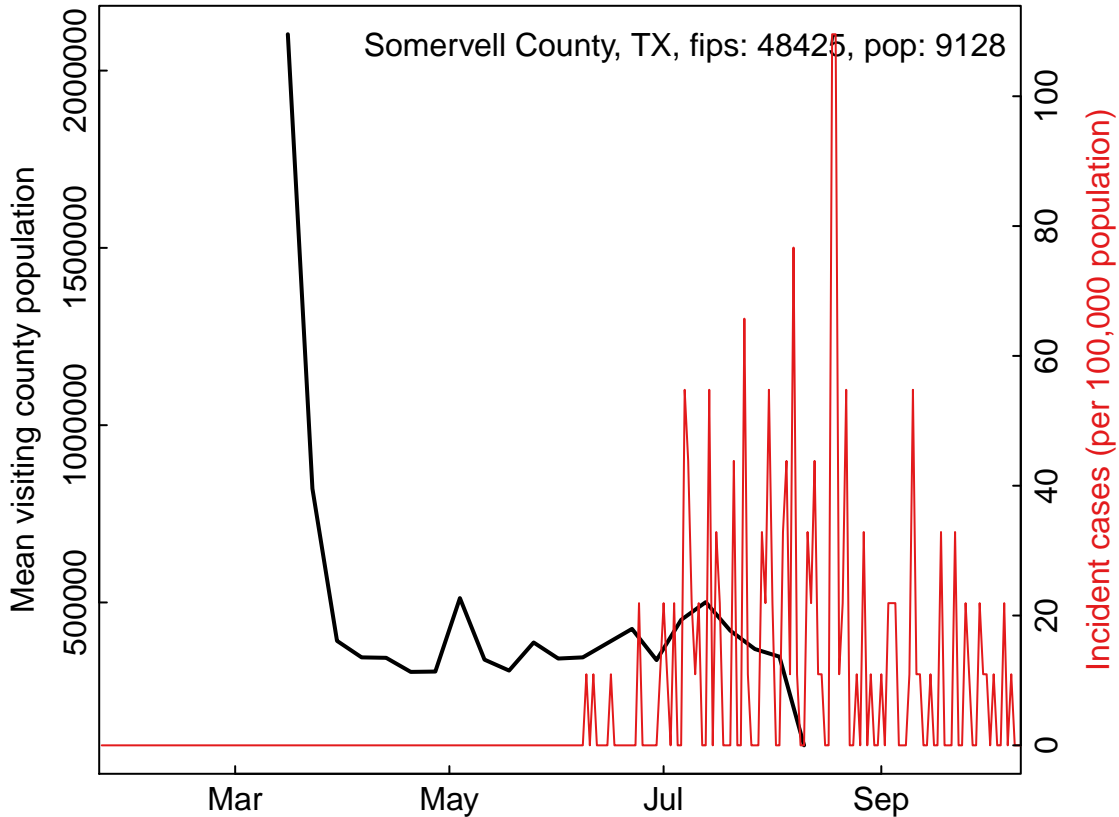

Starr County, TX, fips: 48427, pop: 64633

Mean visiting county population

4000000  
3000000  
2000000  
1000000  
0

Mar May Jul Sep

Incident cases (per 100,000 population)

500  
400  
300  
200  
100  
0

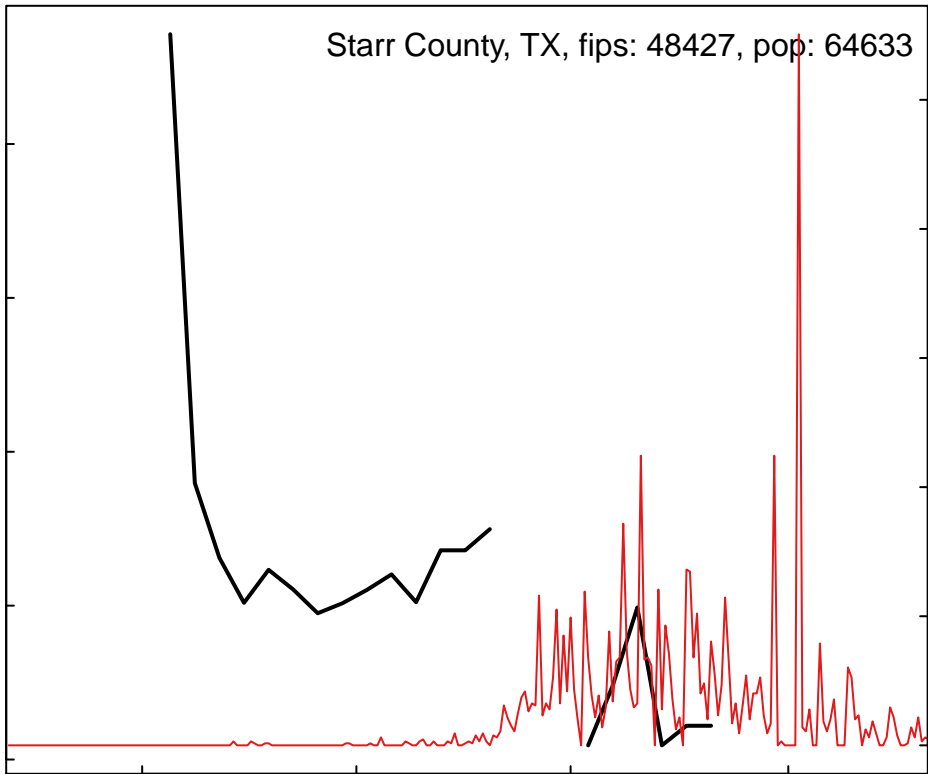

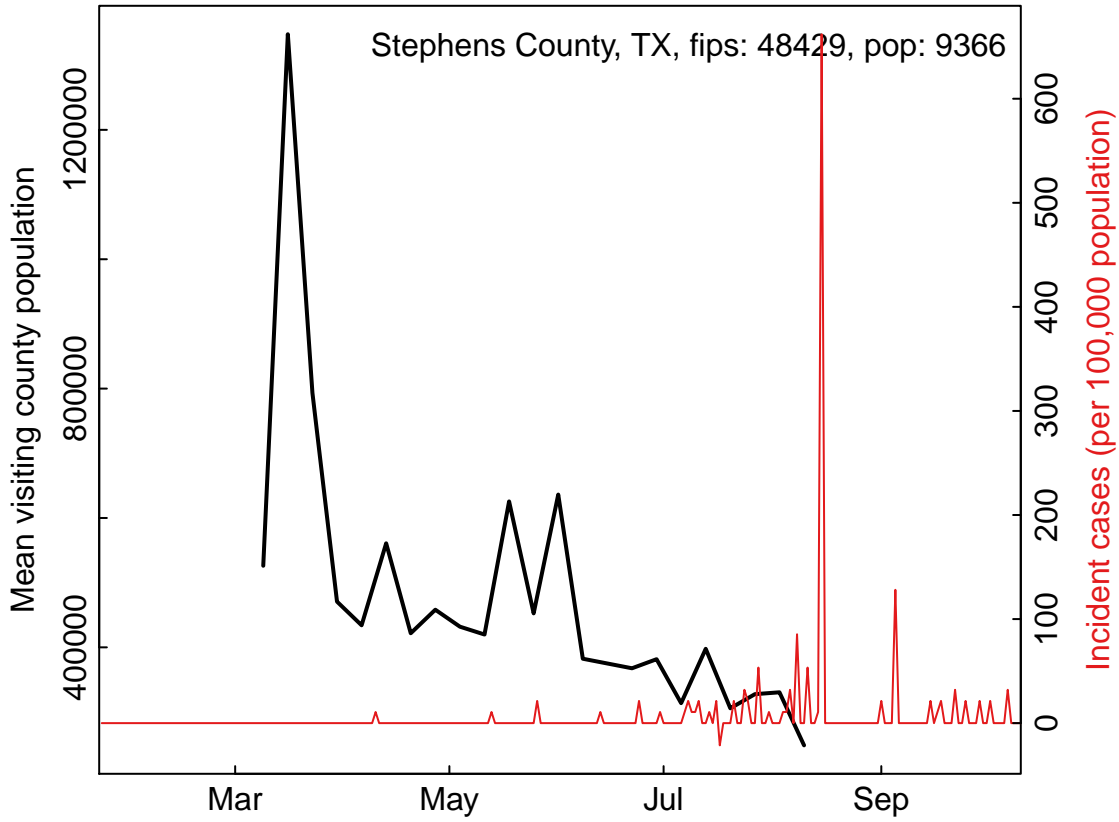

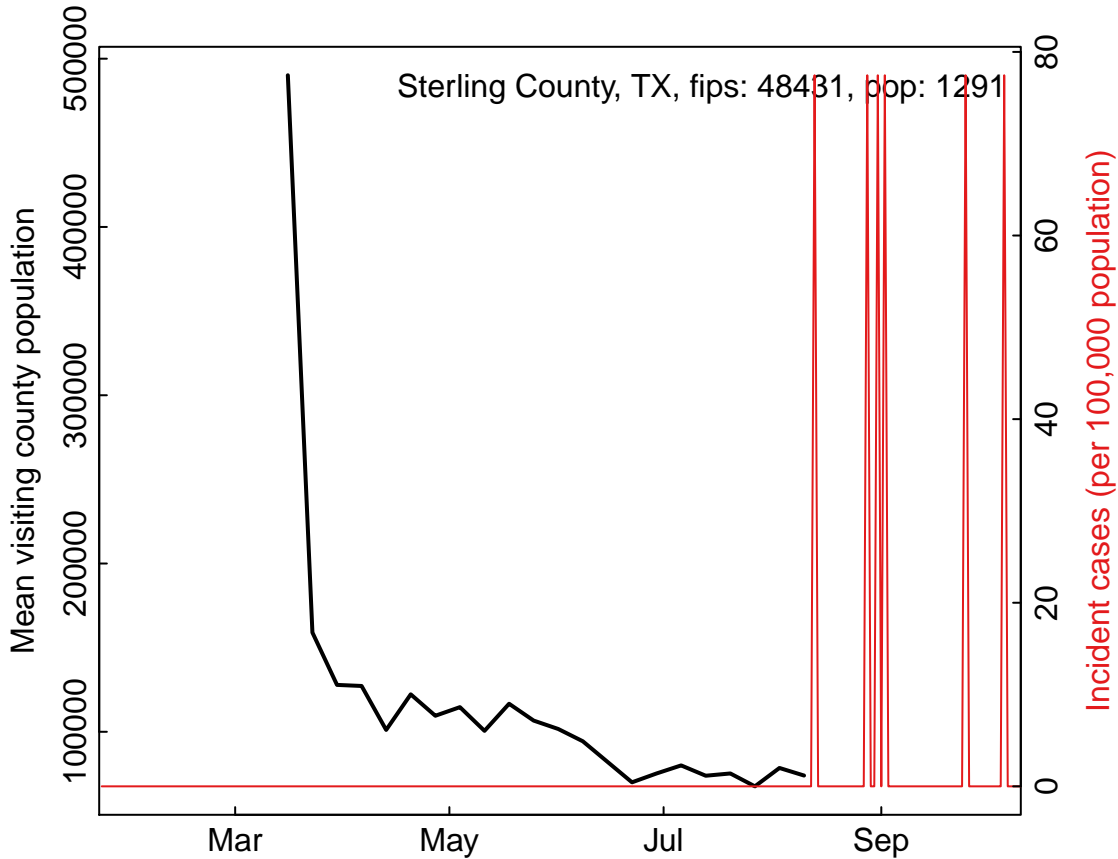

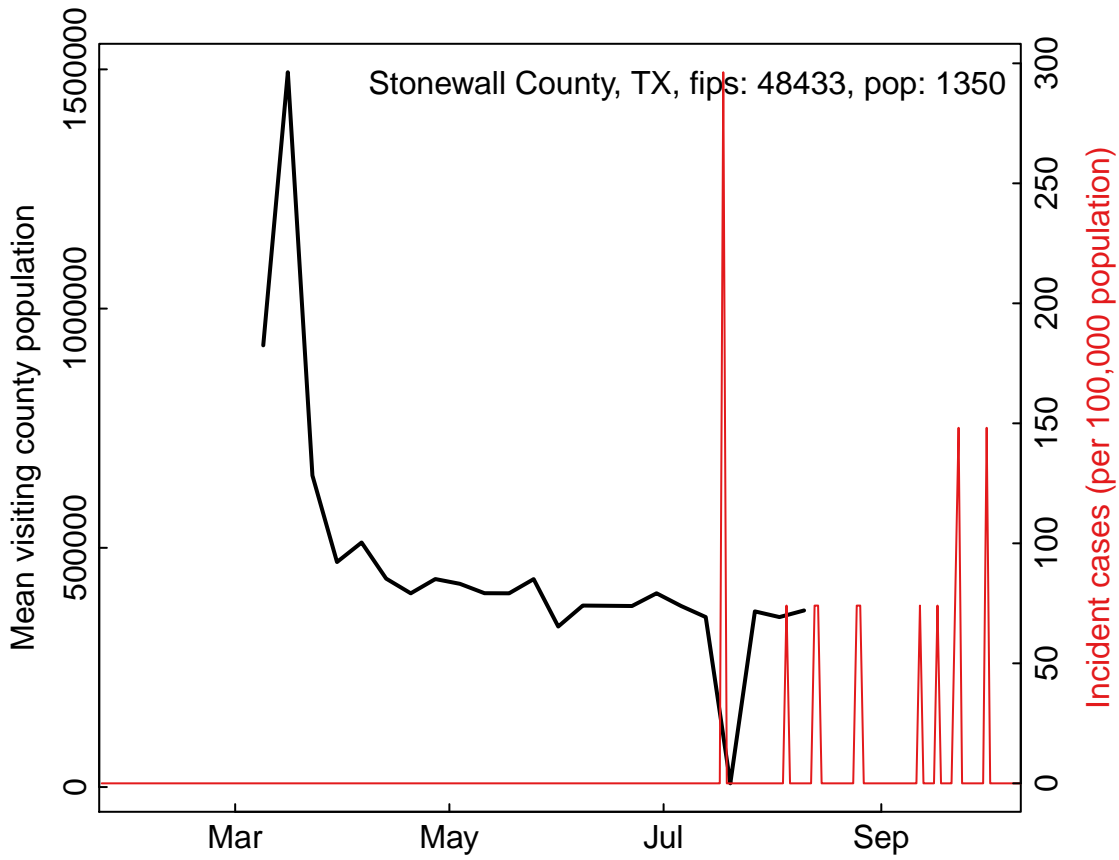

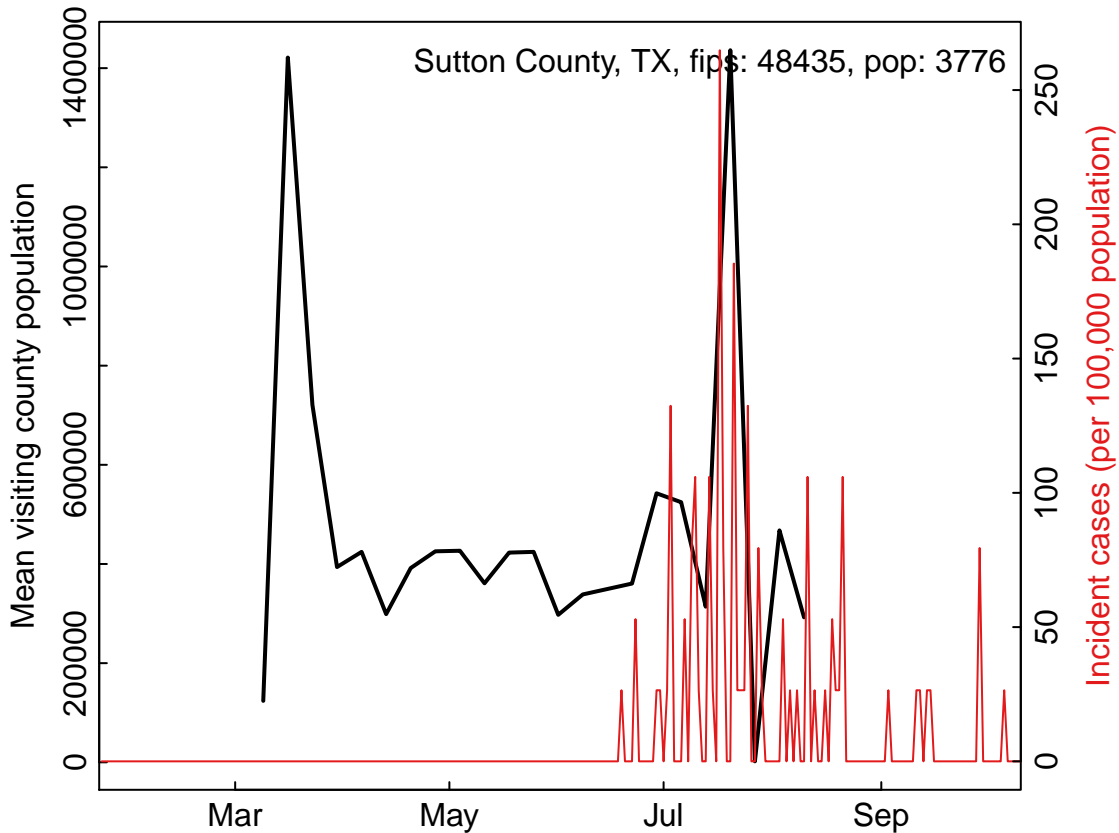



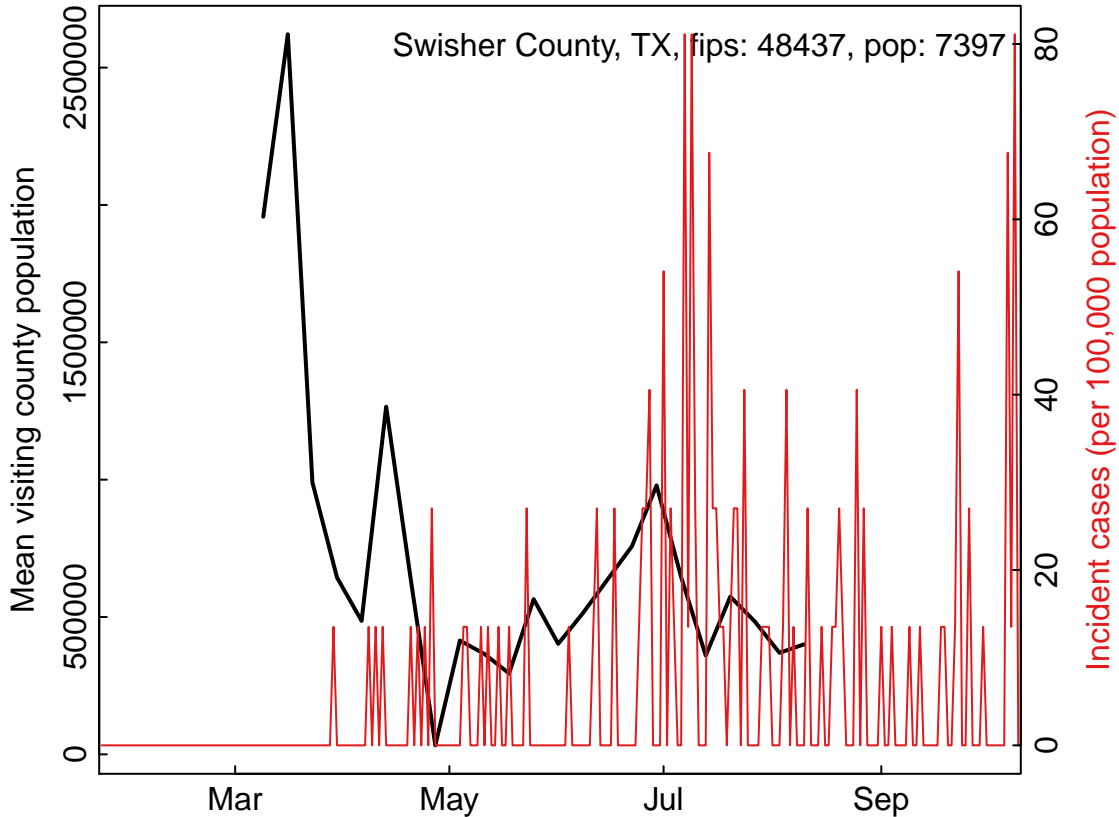

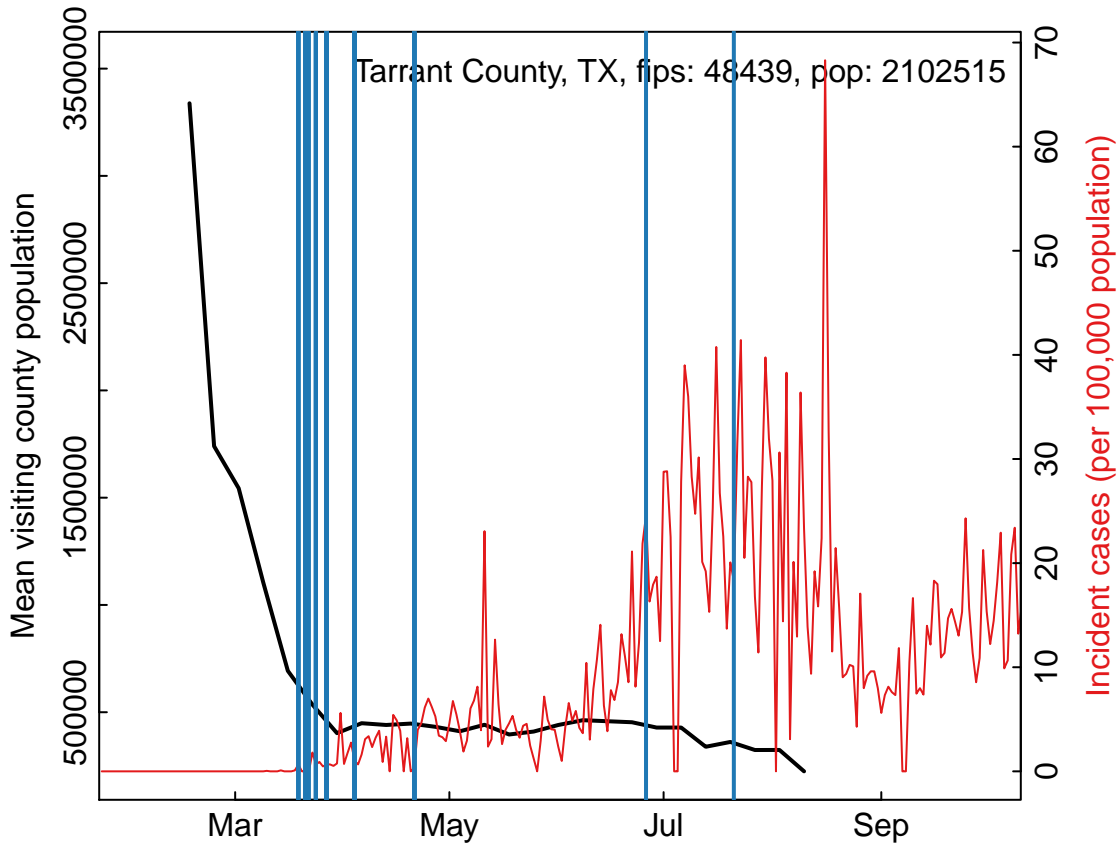

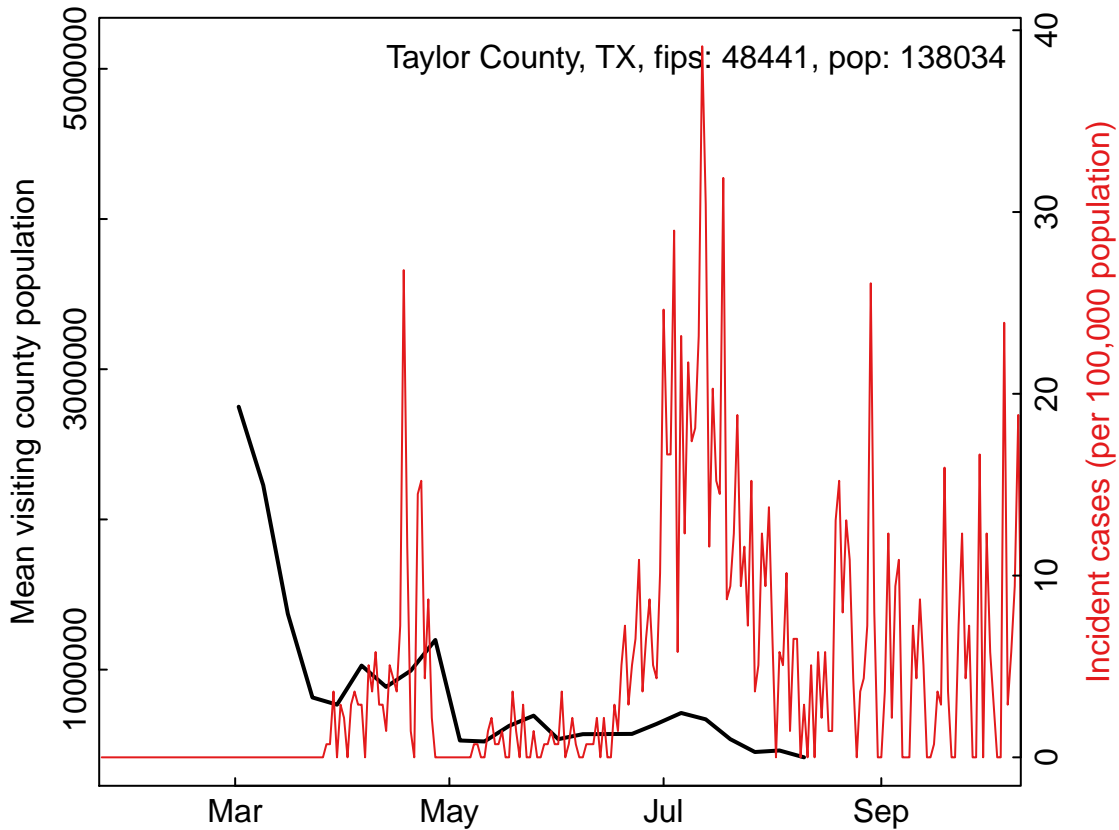

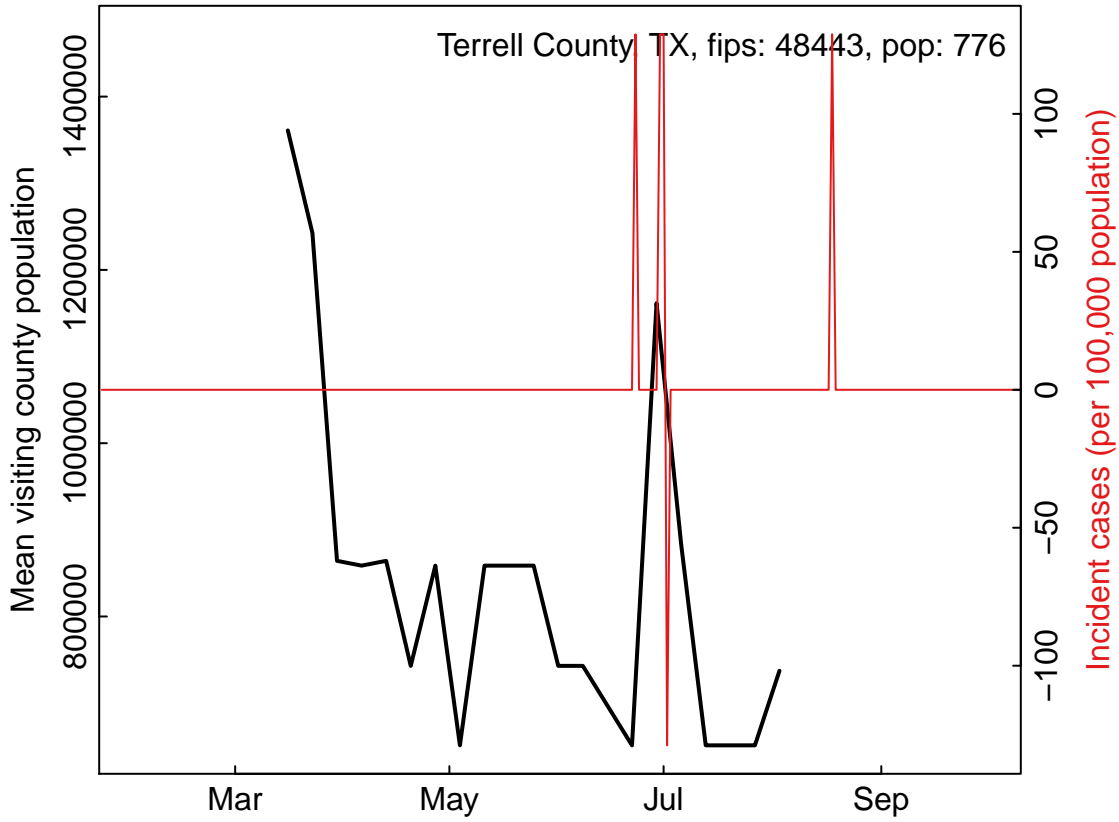

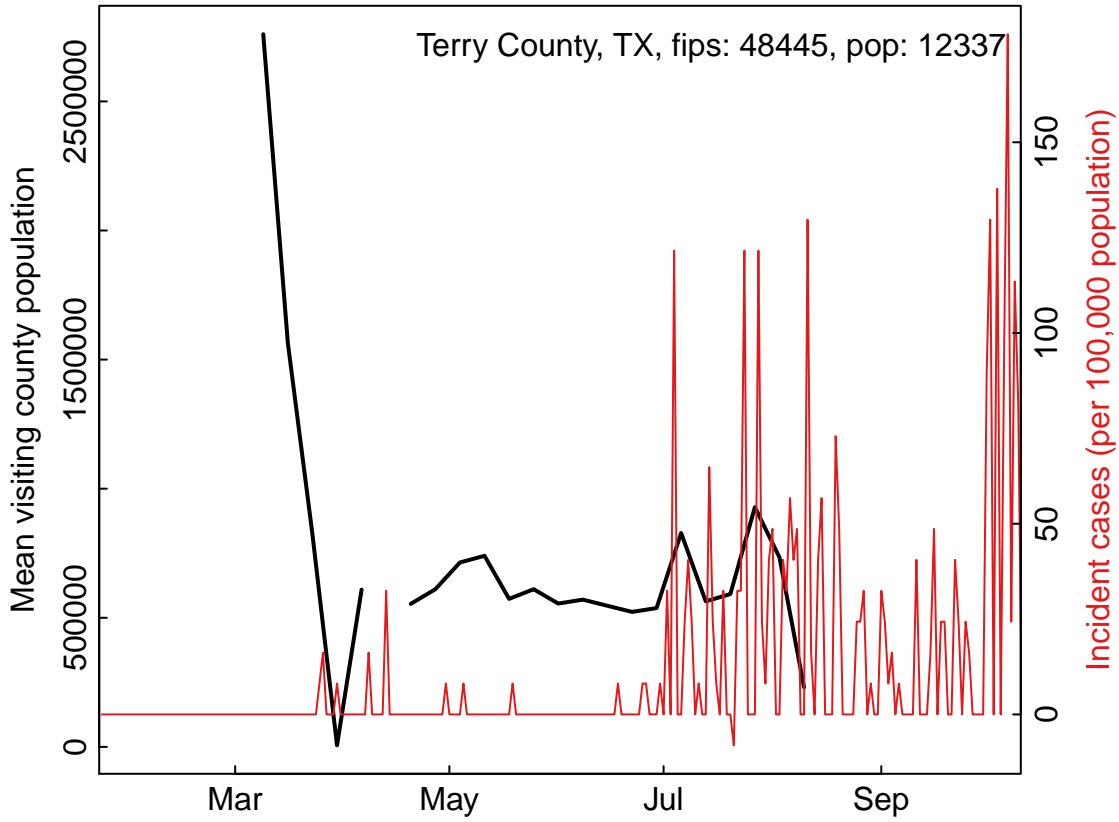

Mean visiting county population

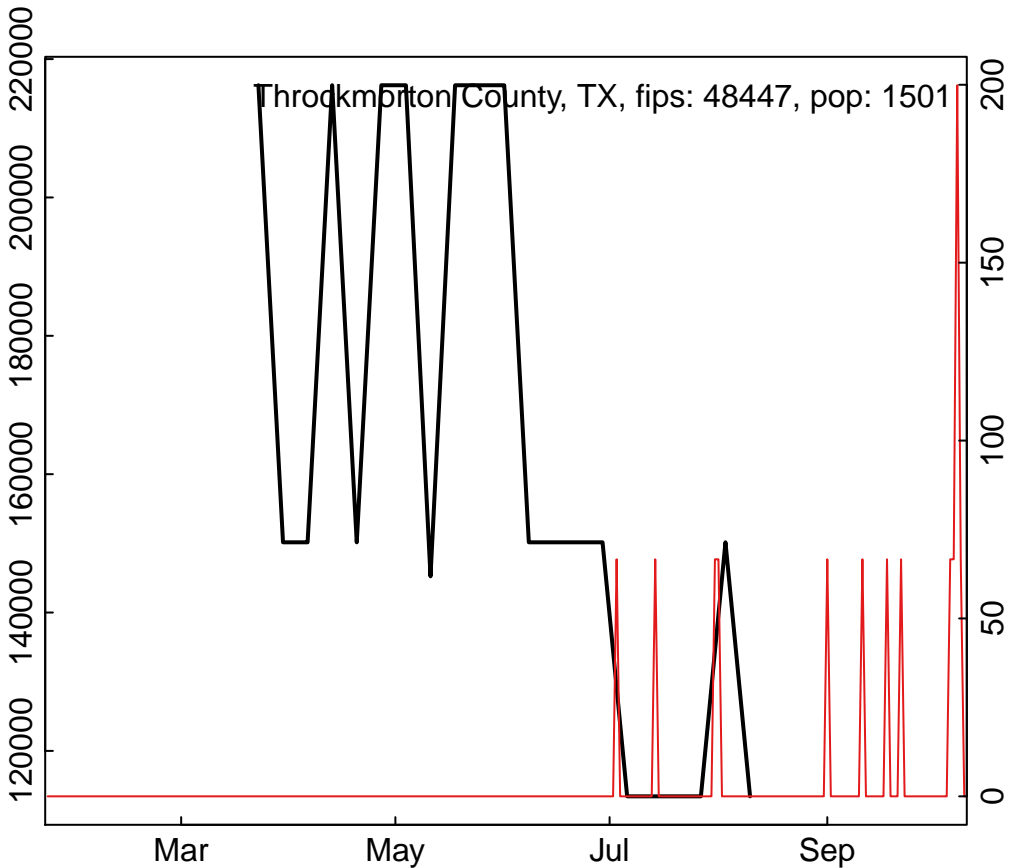

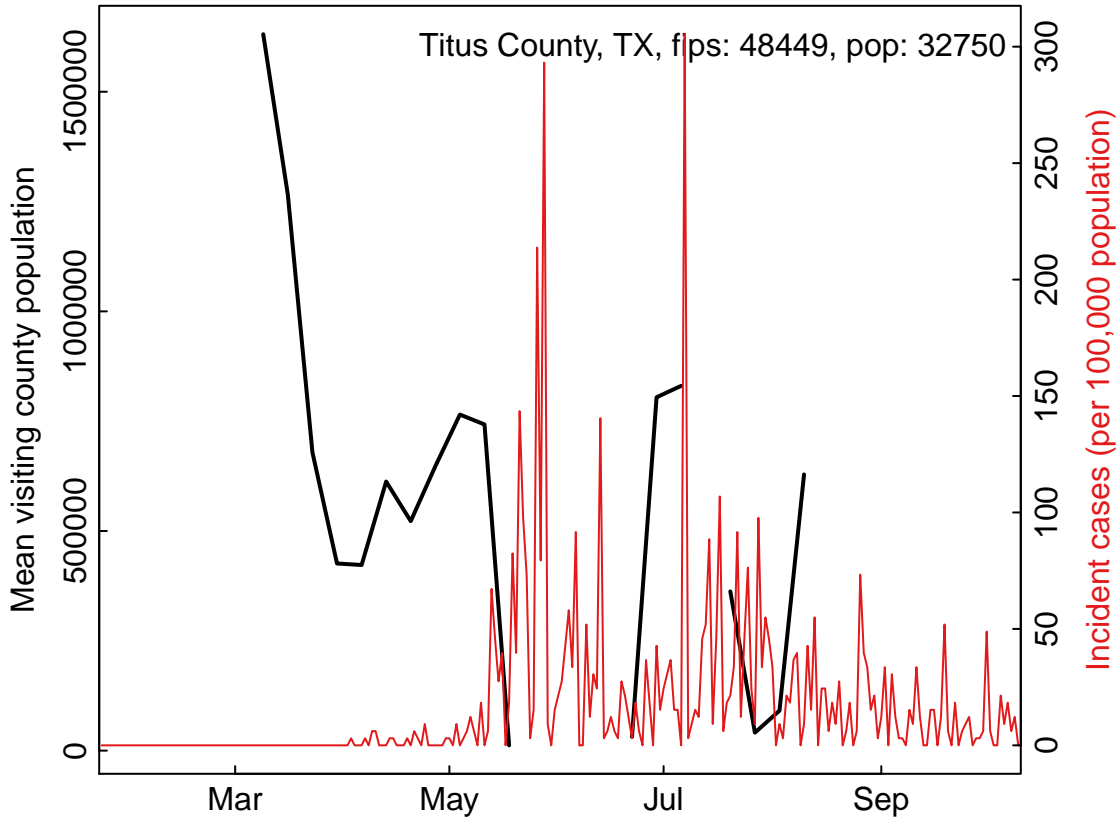

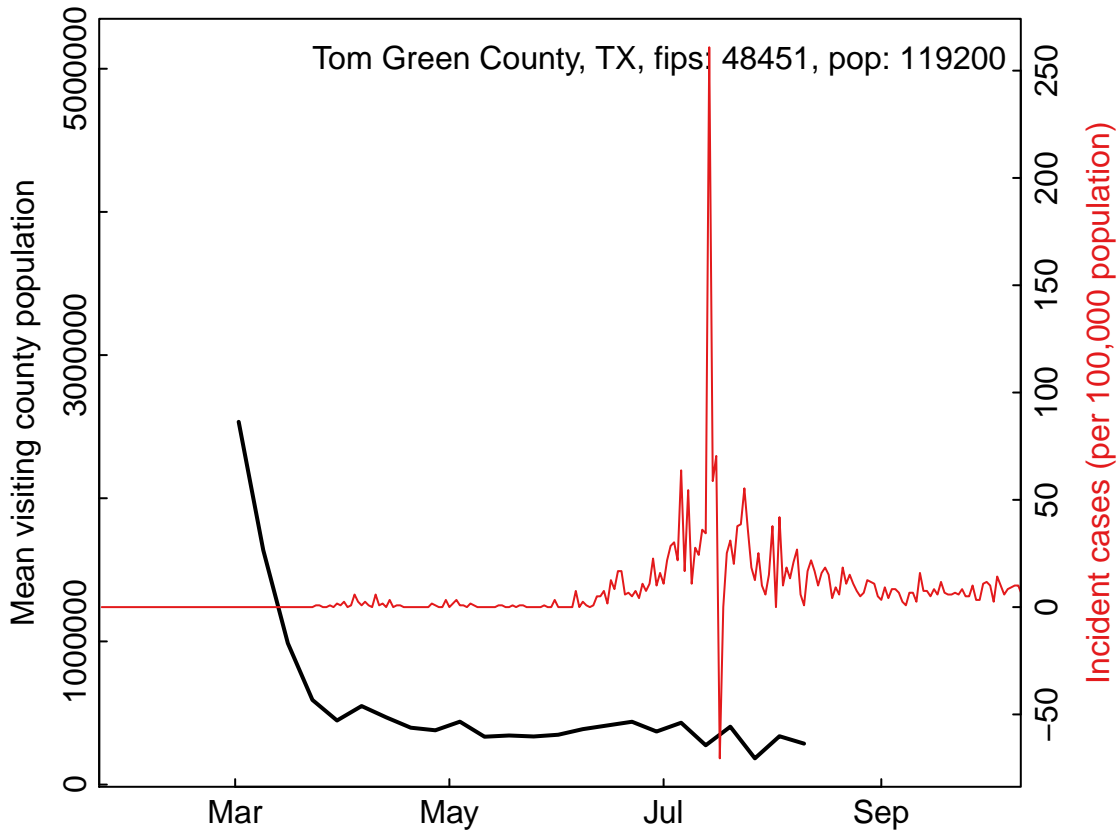



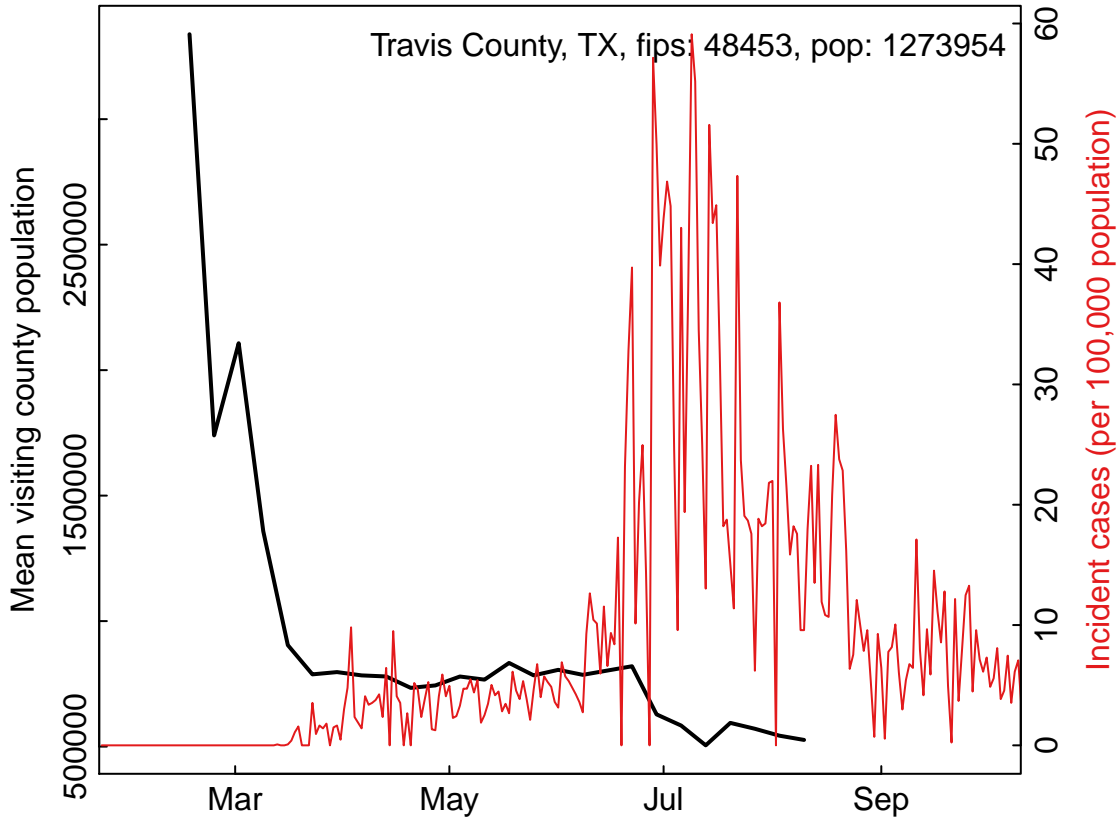

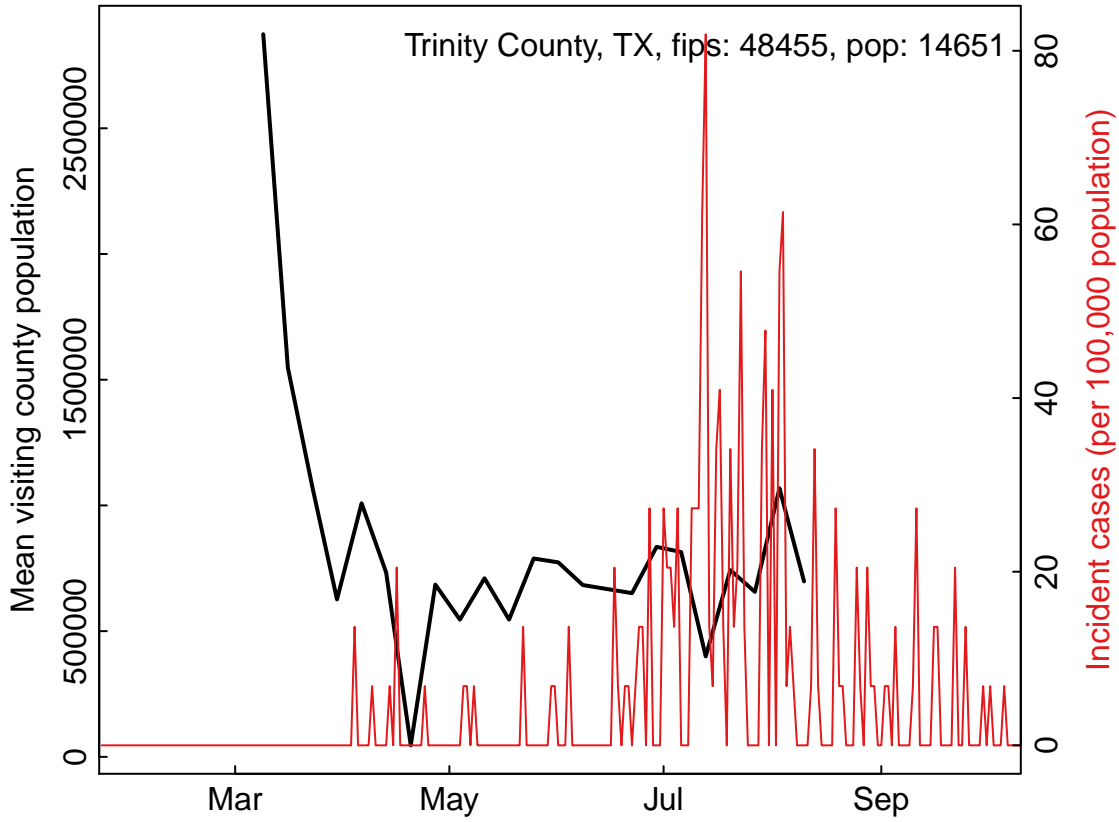

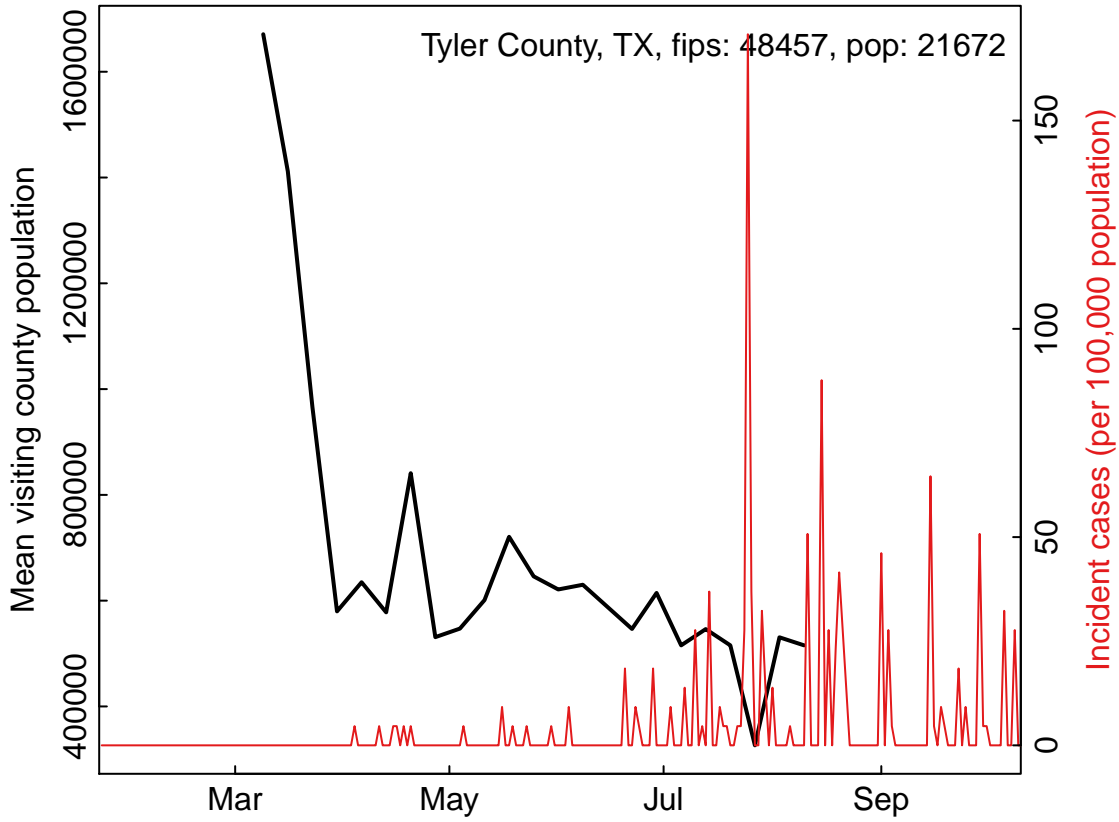

Upshur County, TX, fips: 48459, pop: 41753

Mean visiting county population

500000  
1500000  
2500000  
3500000

Mar

May

Jul

Sep

Incident cases (per 100,000 population)

0  
10  
20  
30  
40  
50

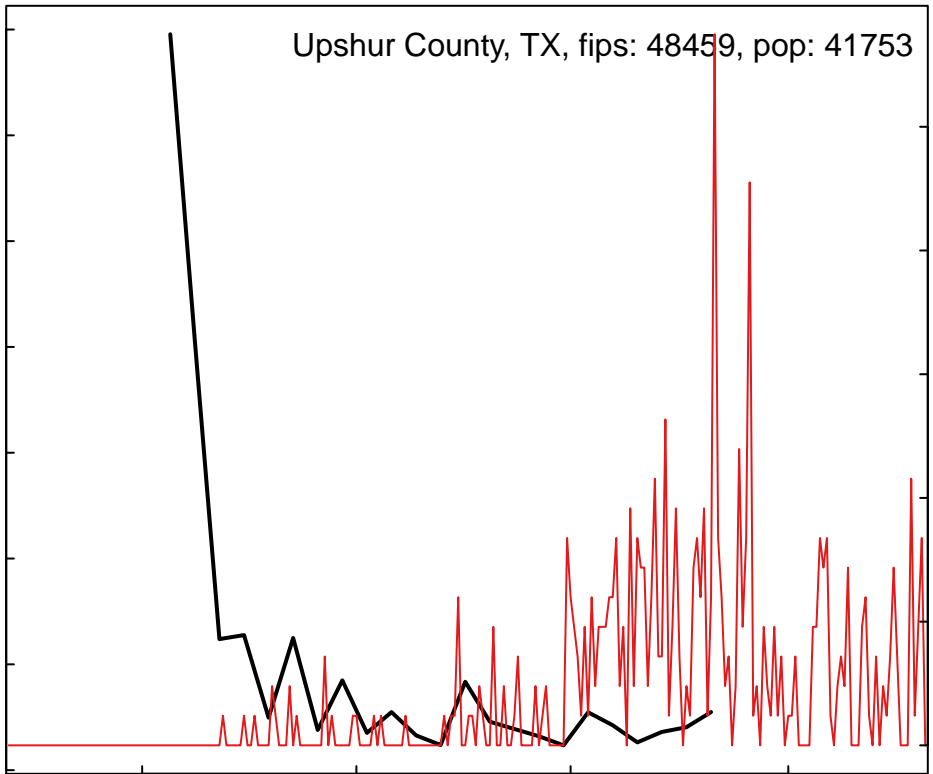

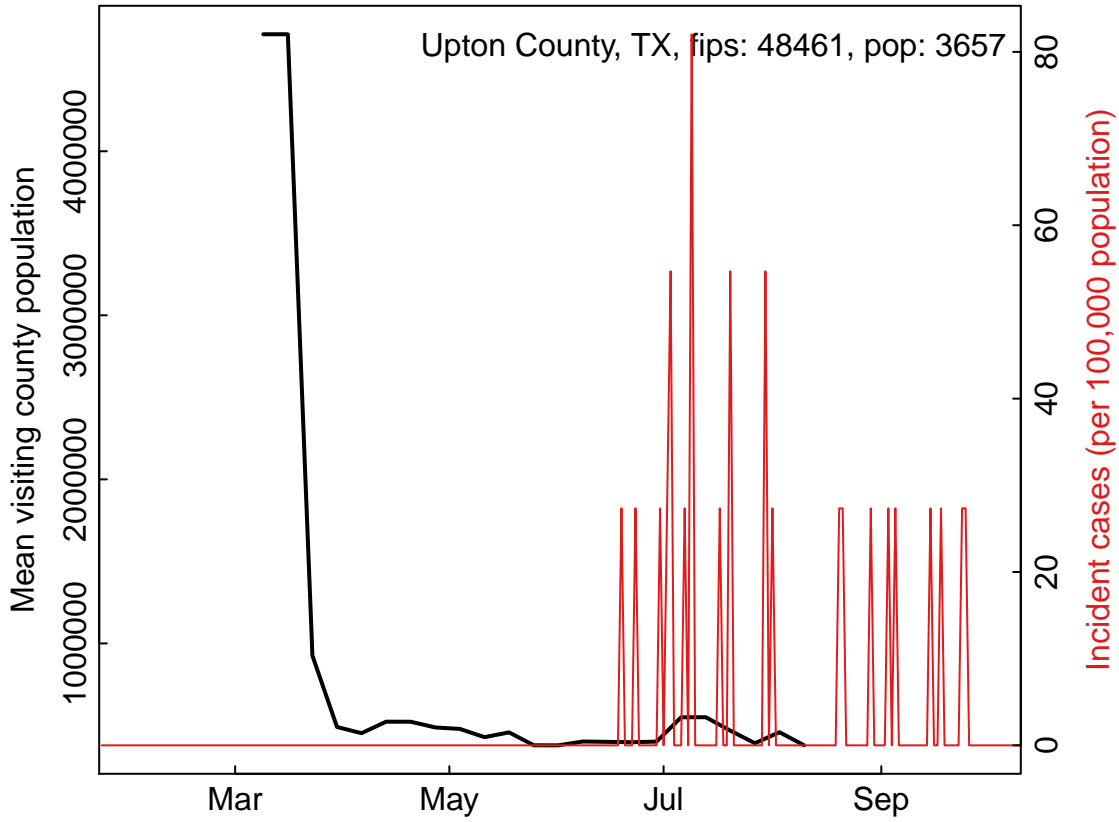

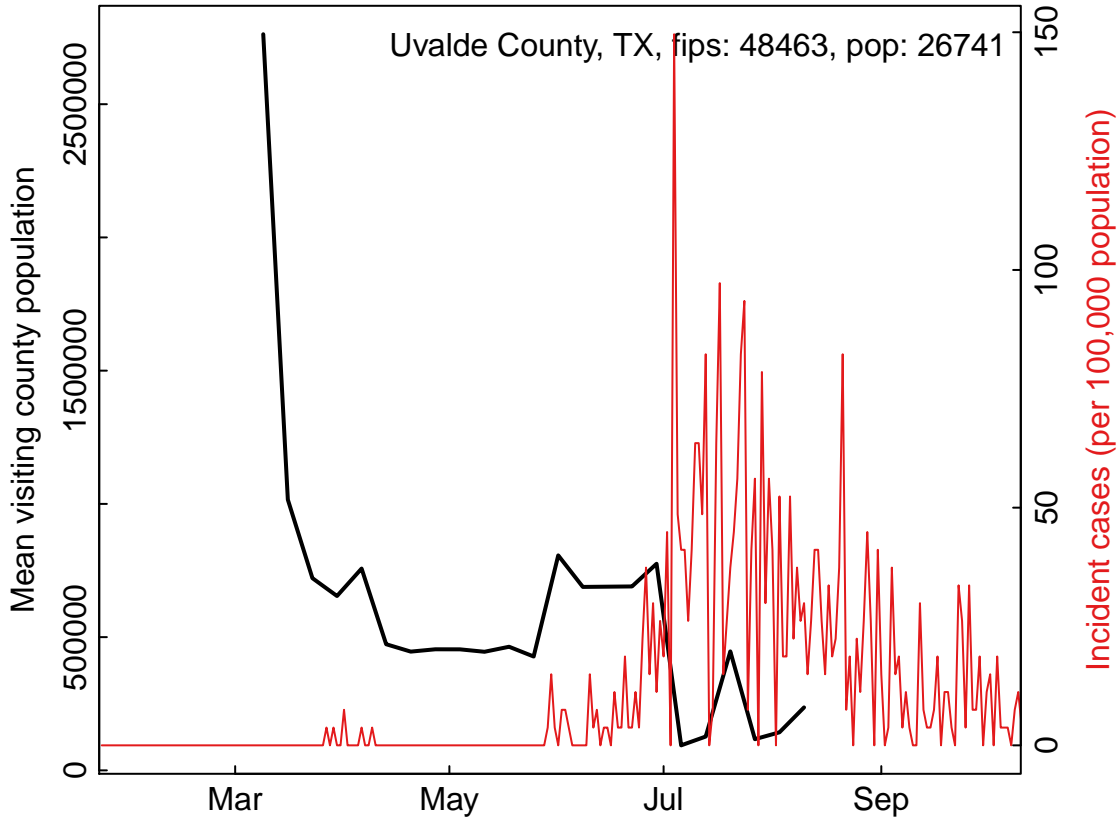

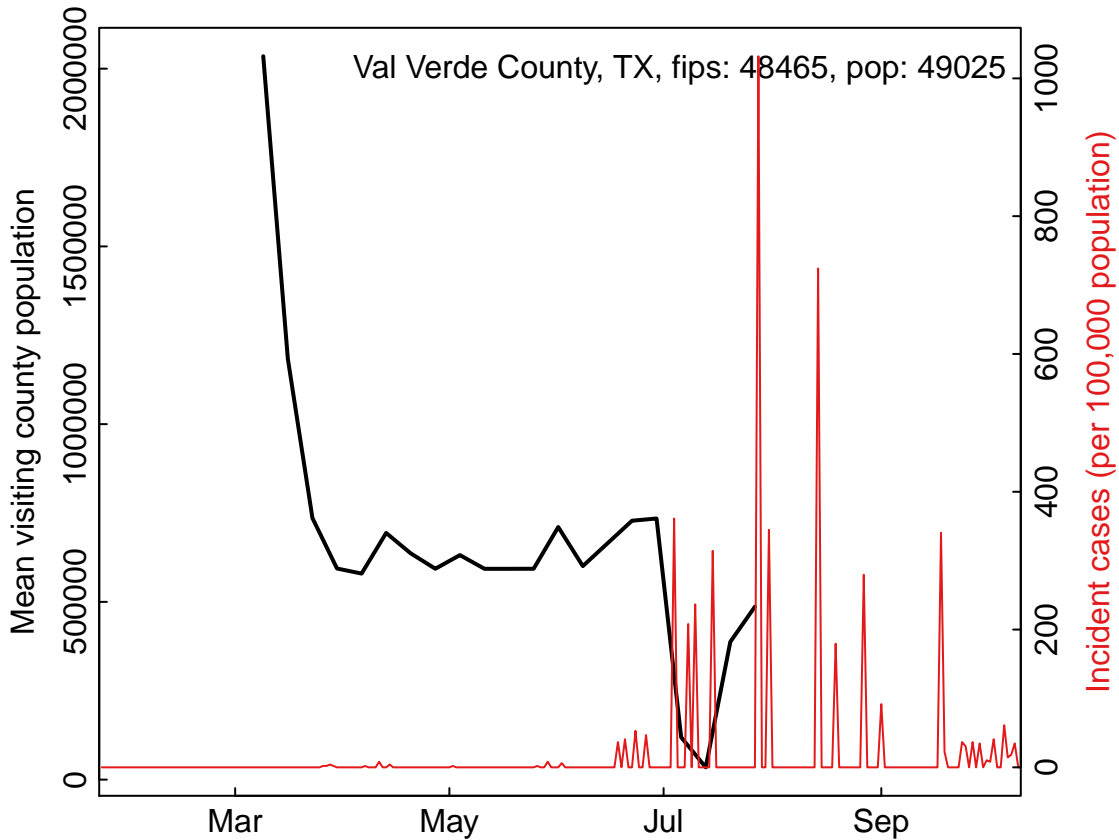

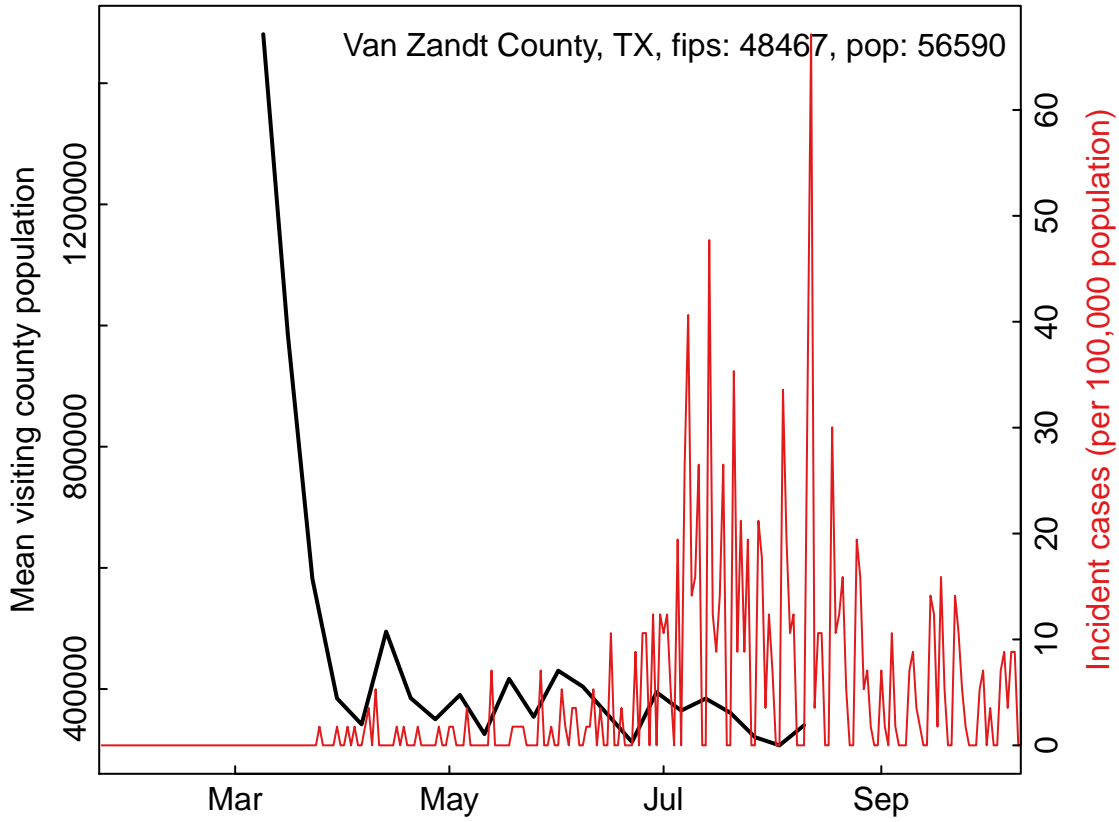



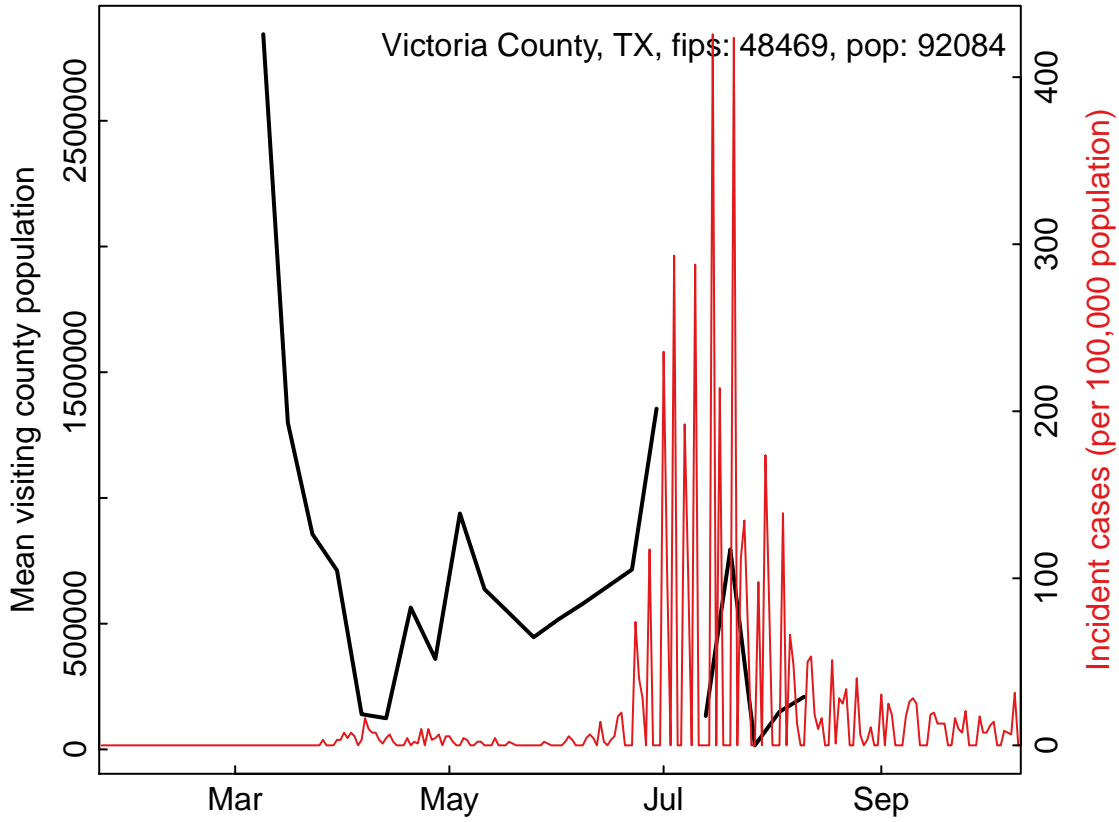

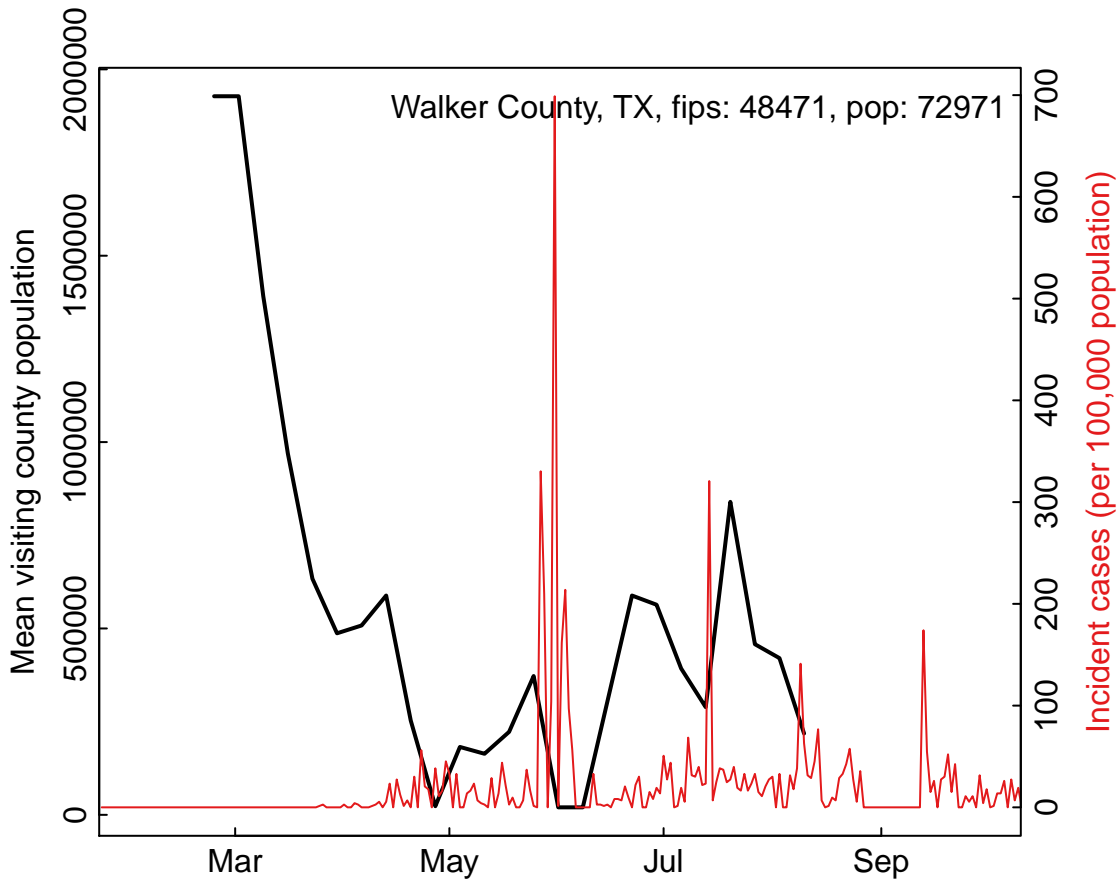

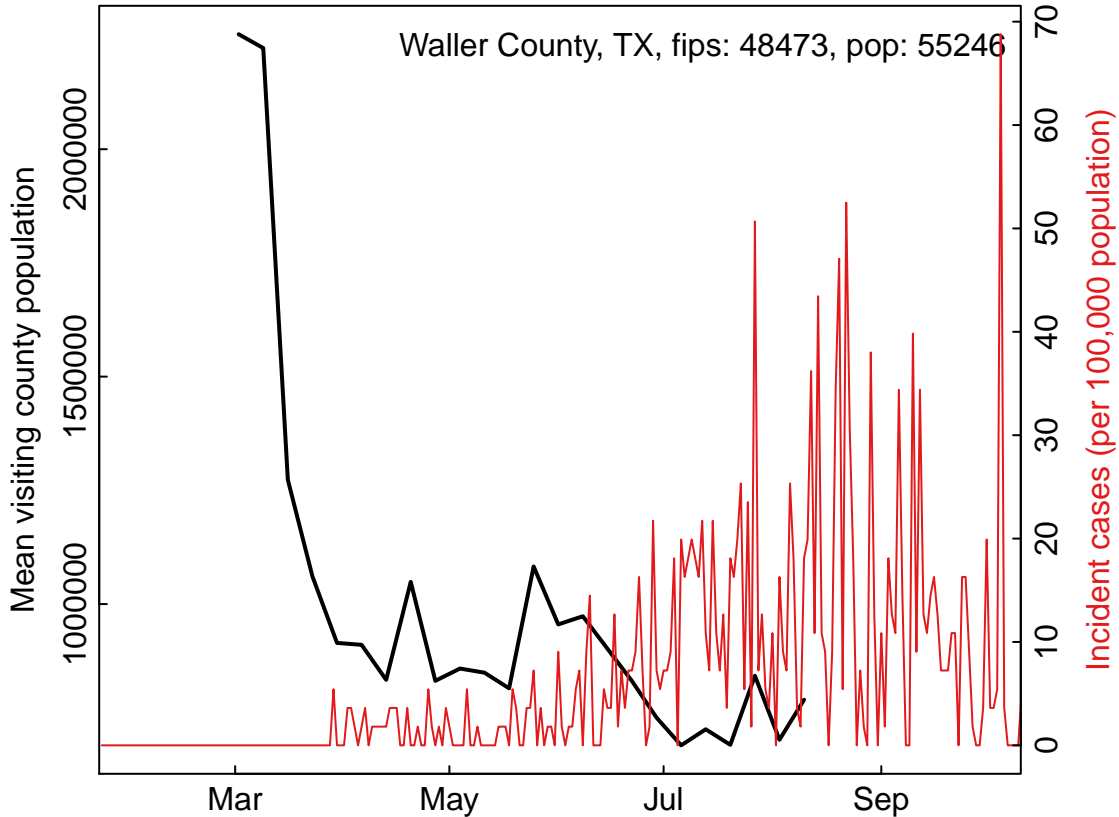

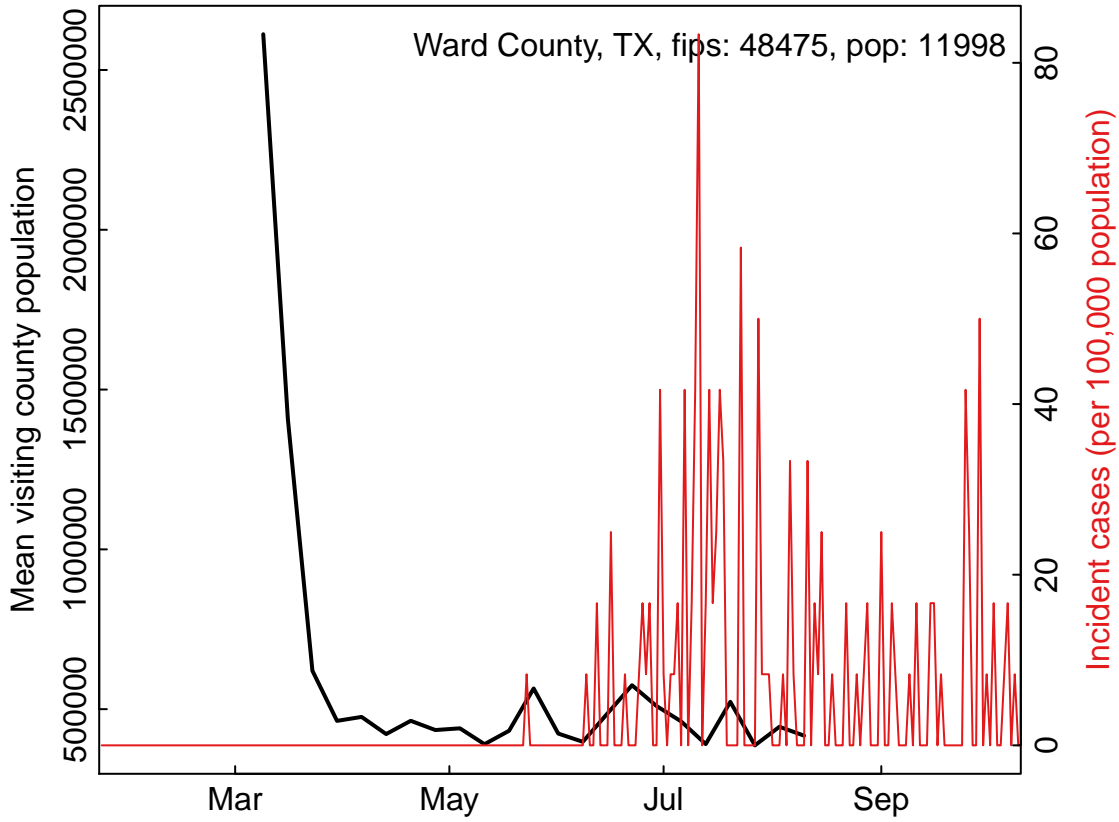

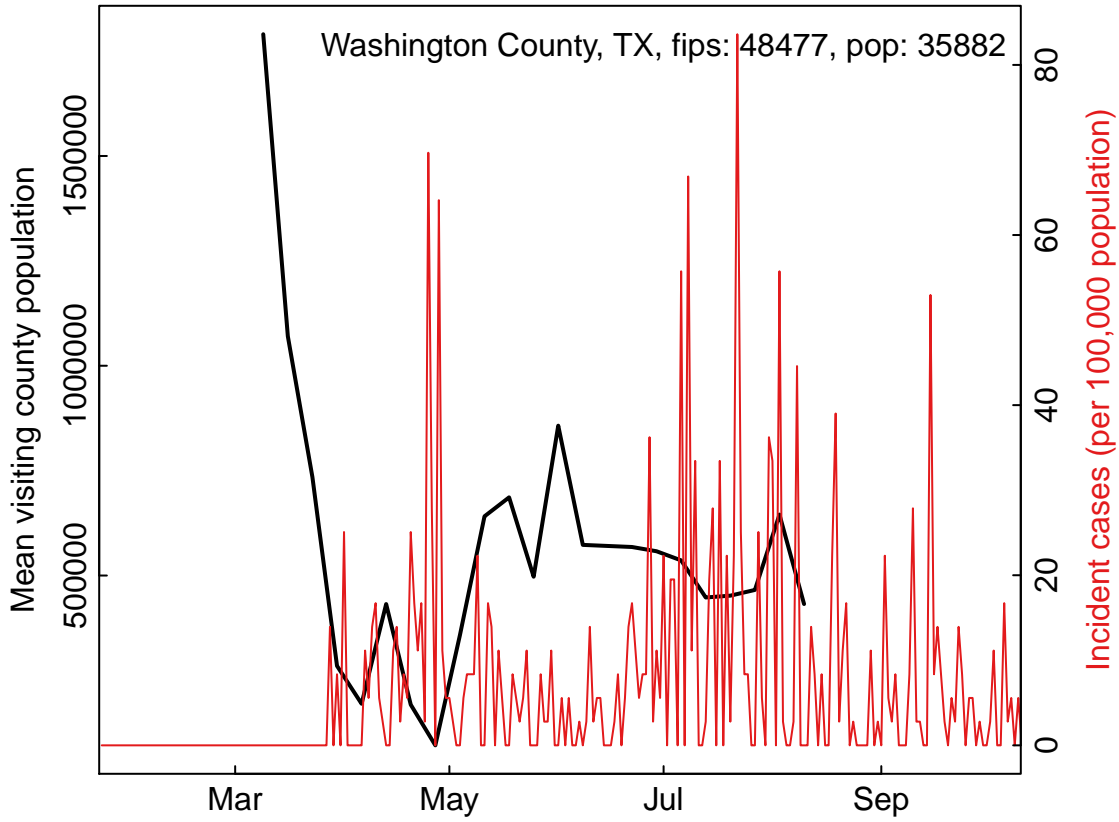

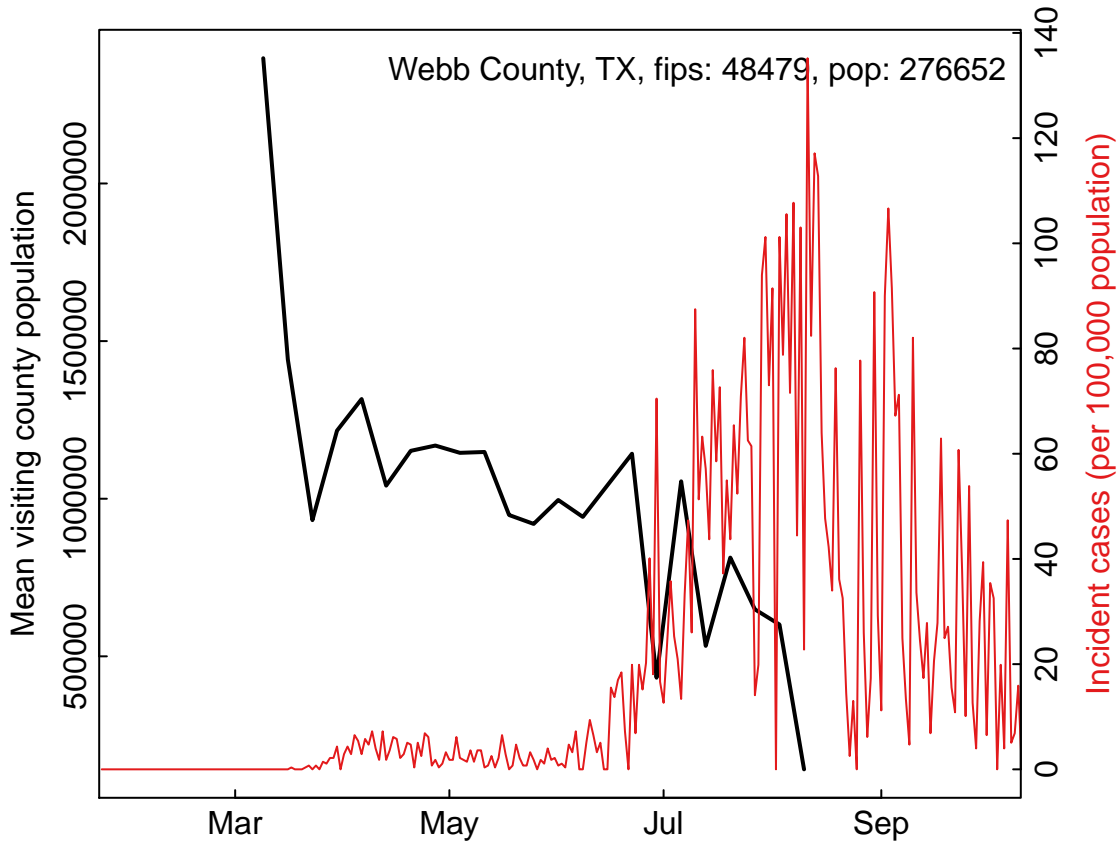

Wharton County, TX, fips: 48481, pop: 41556

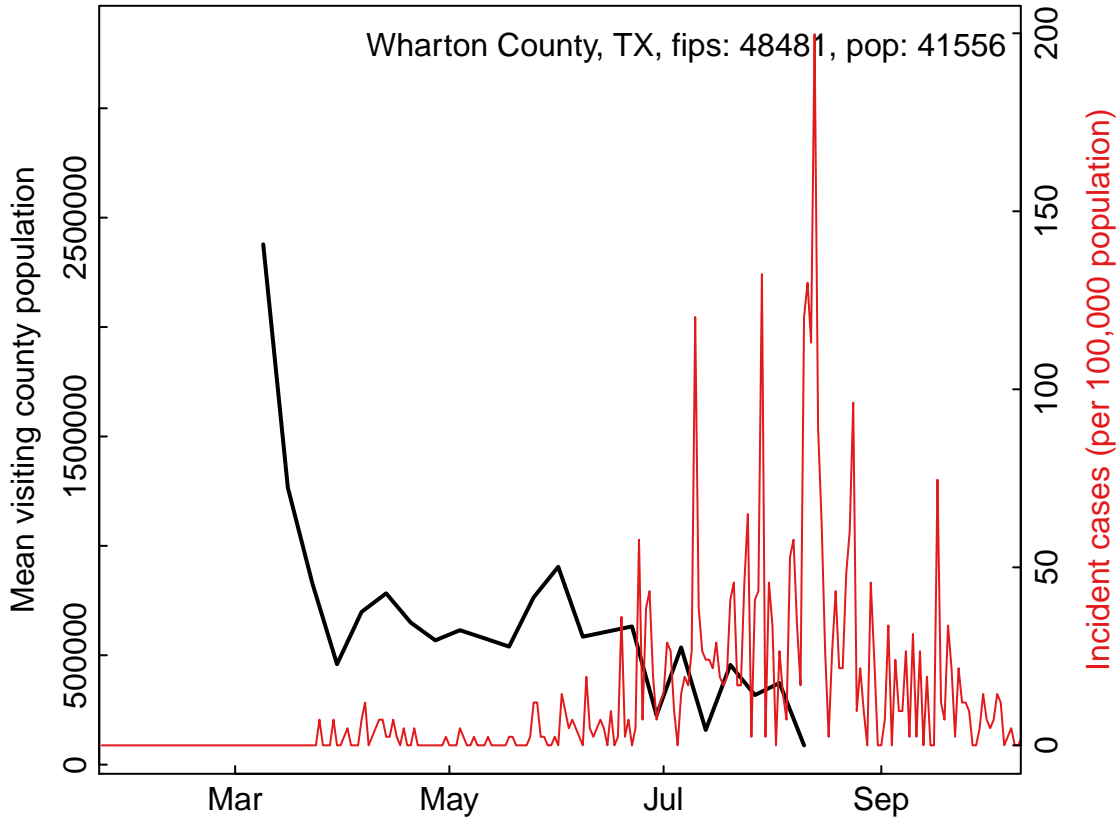

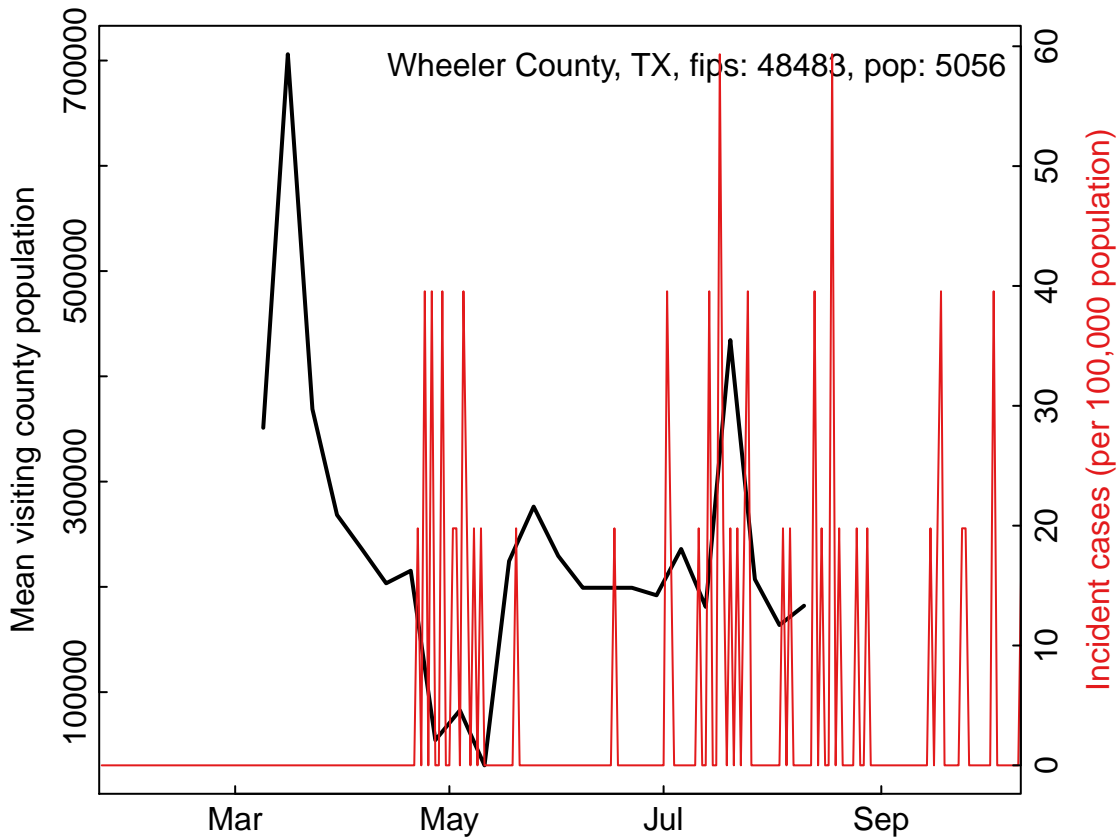



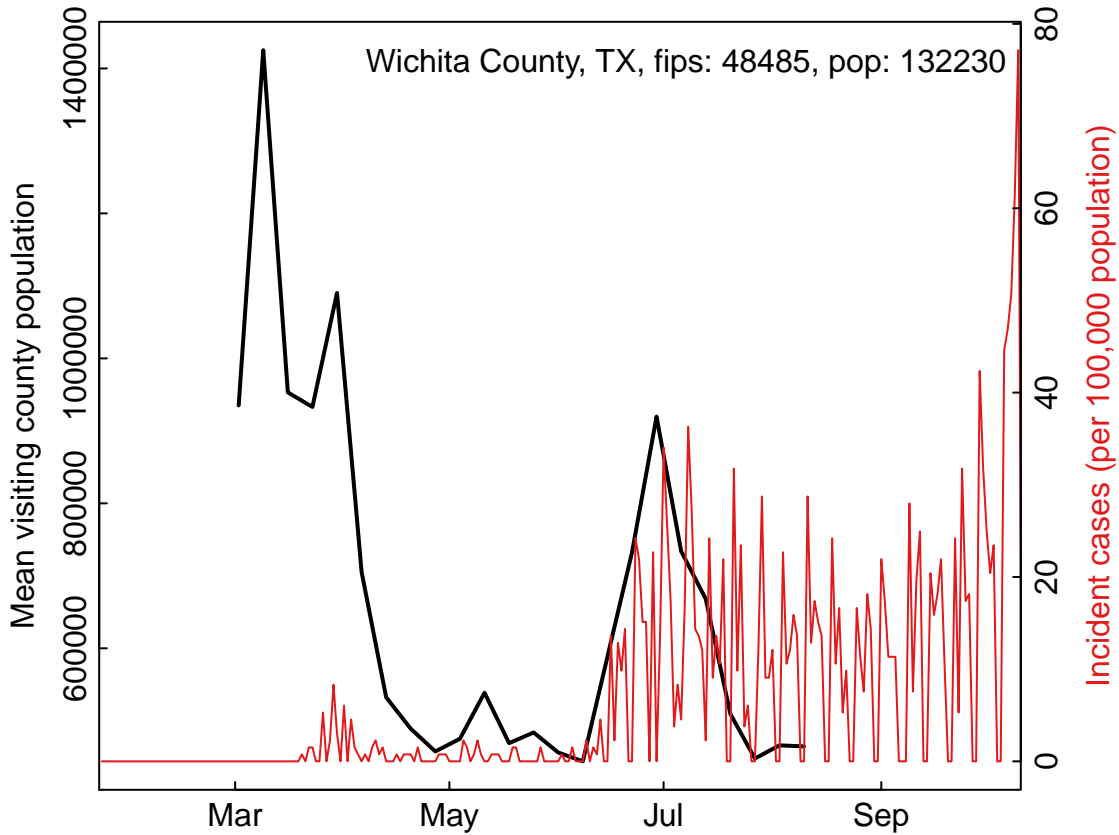

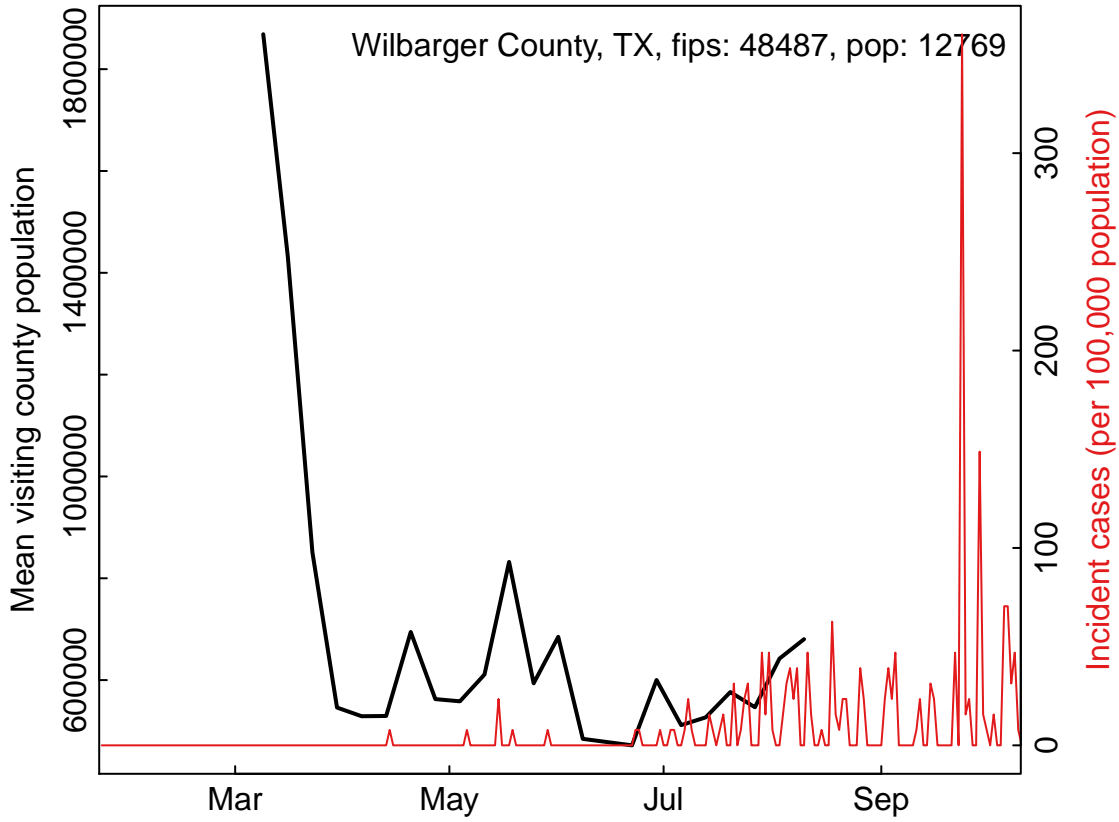

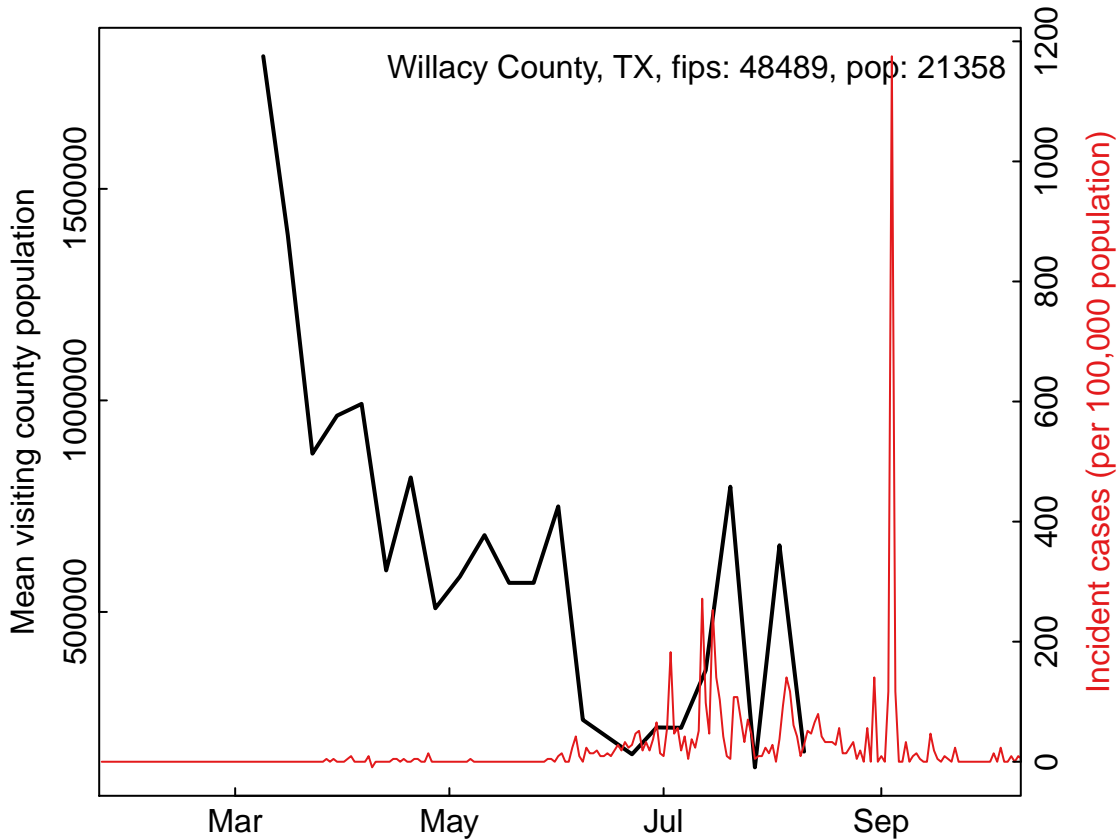

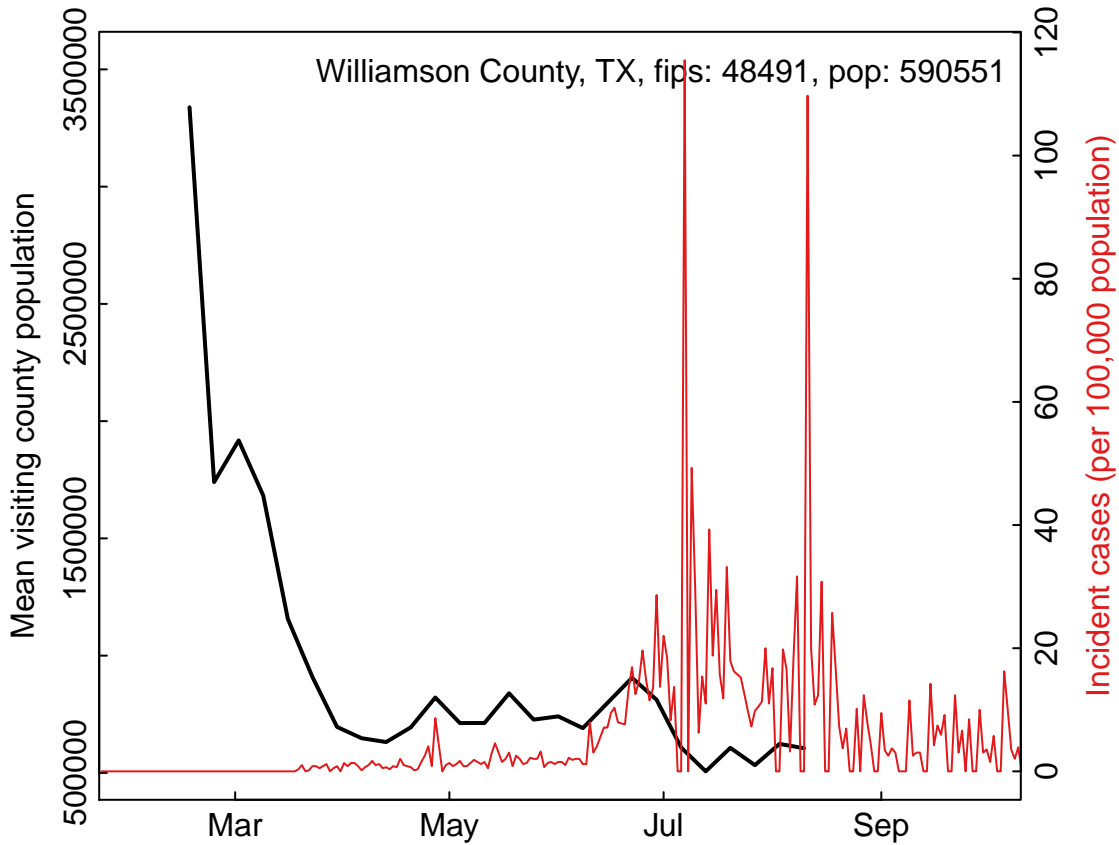

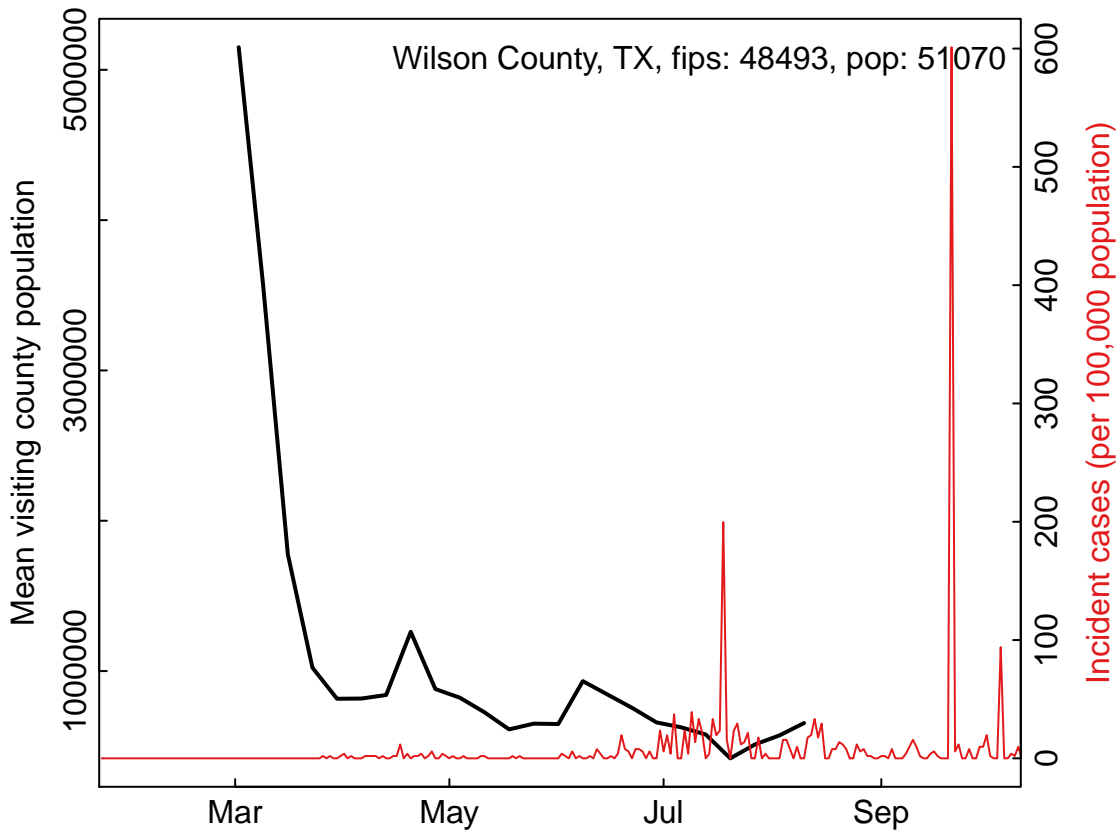

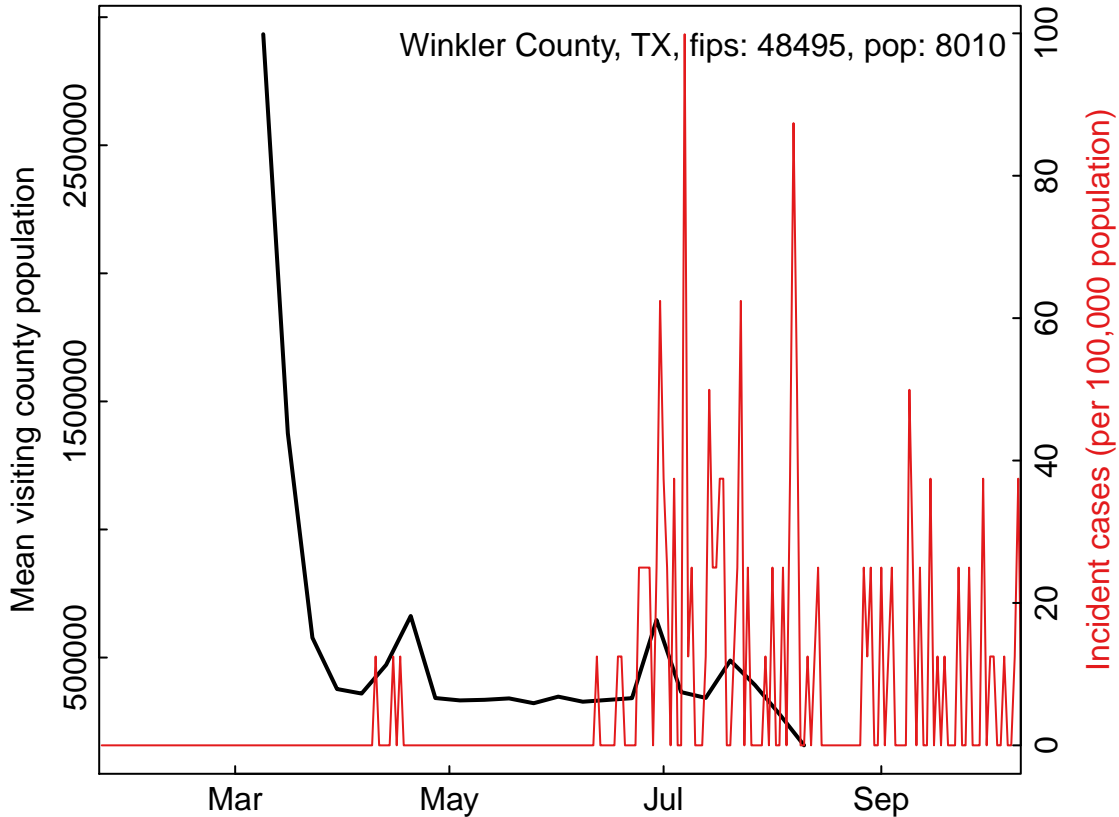

Wise County, TX, fips: 48497, pop: 69984

Mean visiting county population

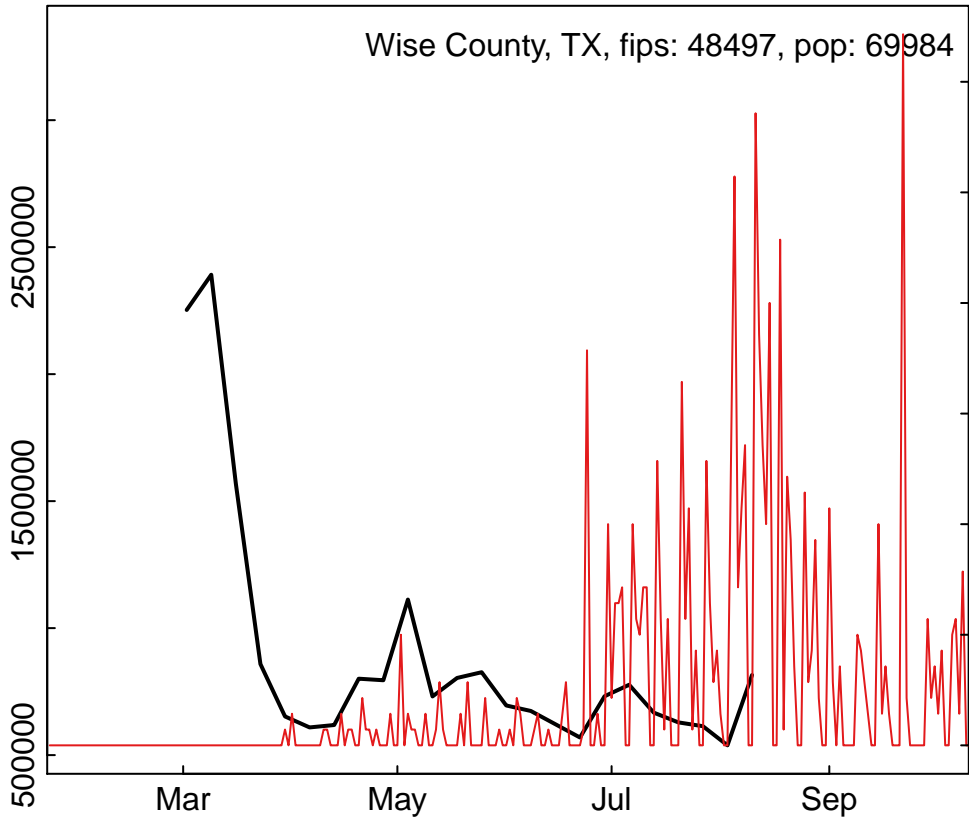

Incident cases (per 100,000 population)

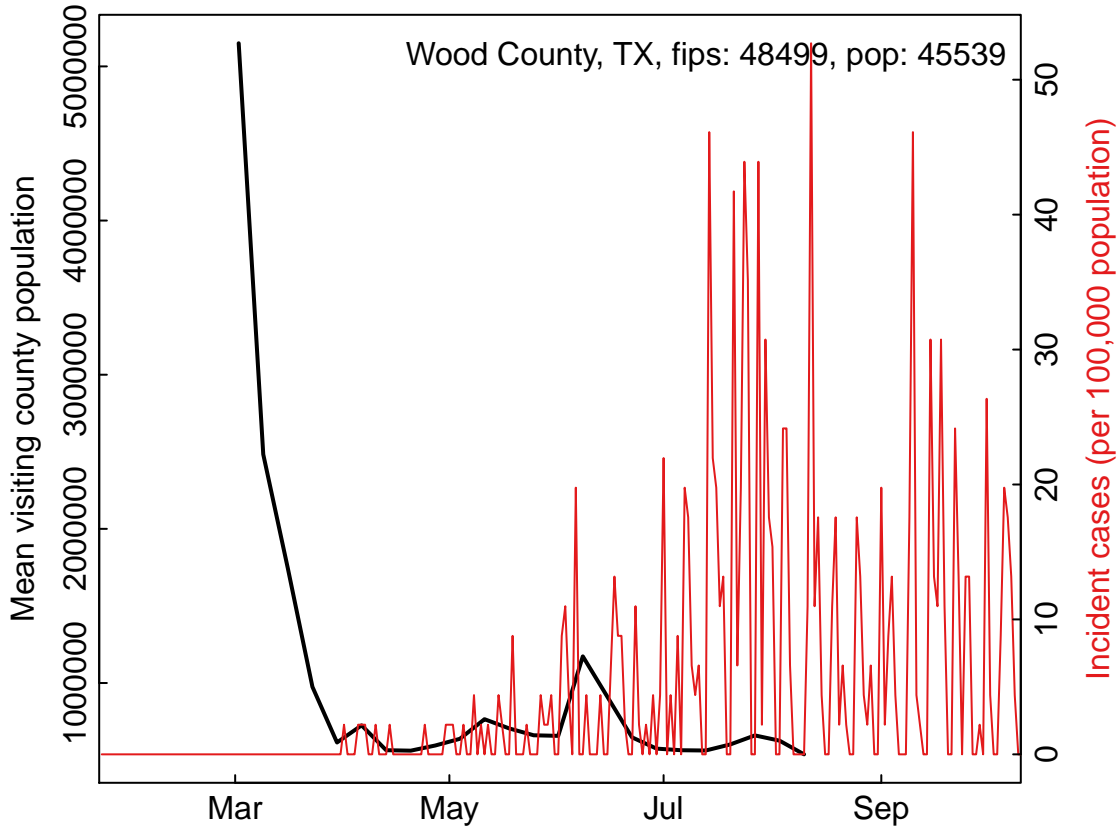



Yoakum County, TX, fips: 48501, pop: 8713

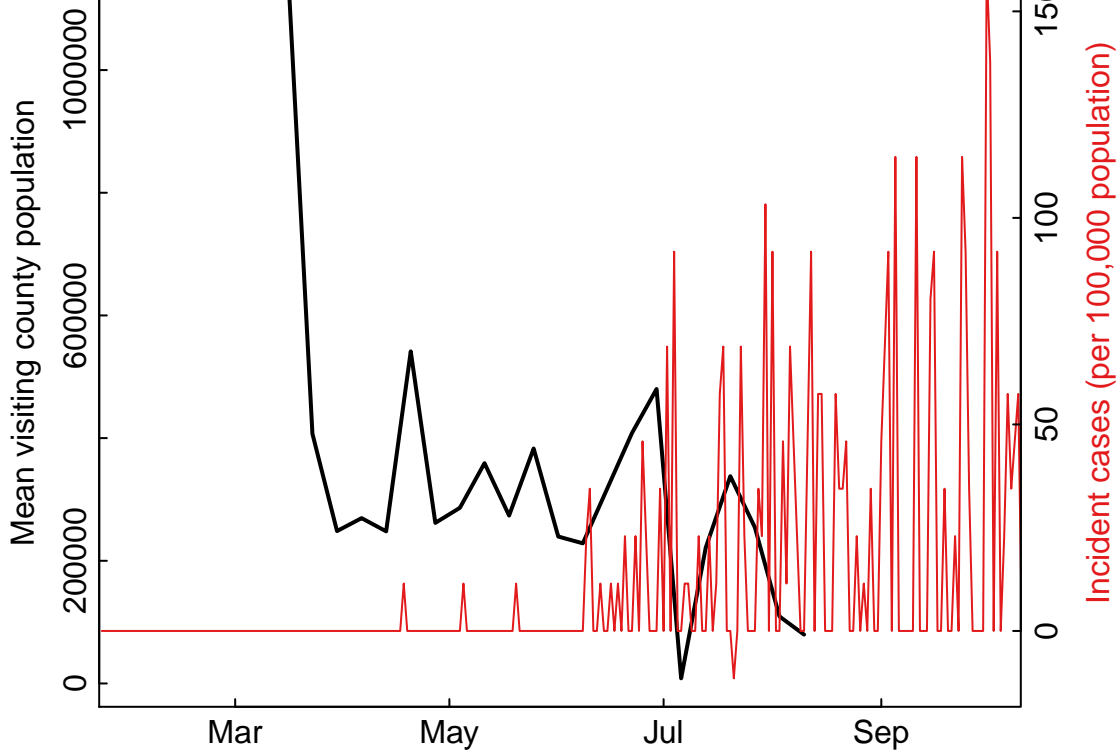

Young County, TX, fips: 48503, pop: 18010

Mean visiting county population

500000  
1500000  
2500000

Mar

May

Jul

Sep

0

20

40

60

80

Incident cases (per 100,000 population)

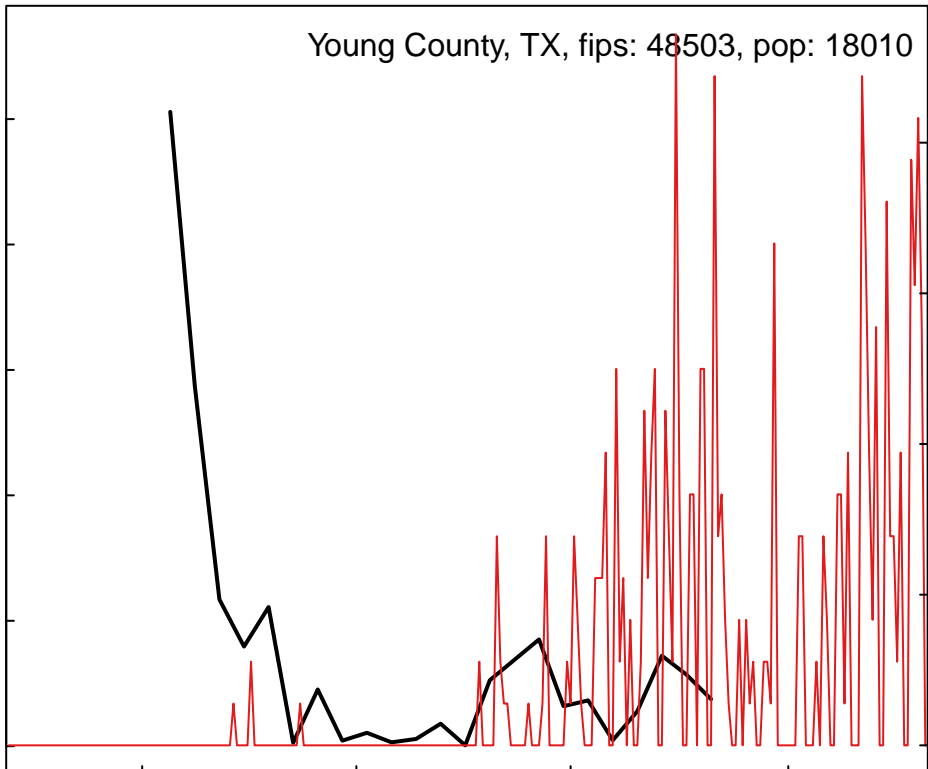

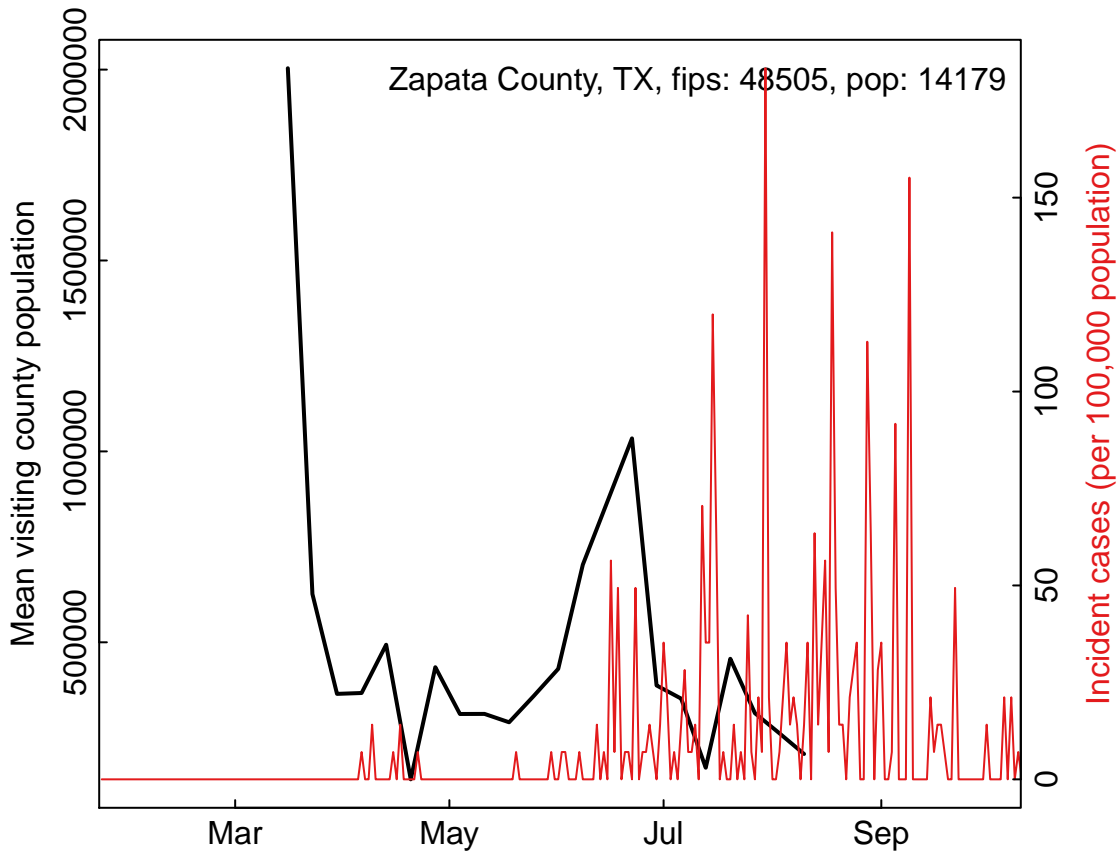

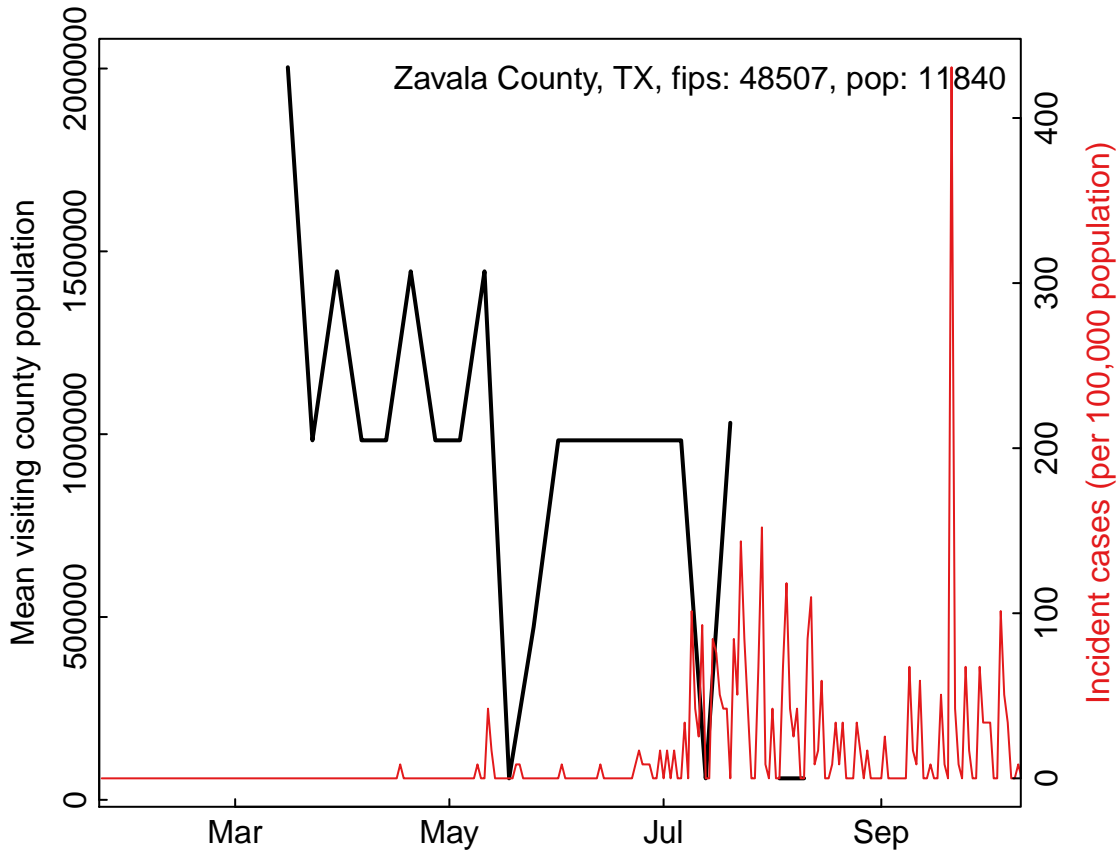

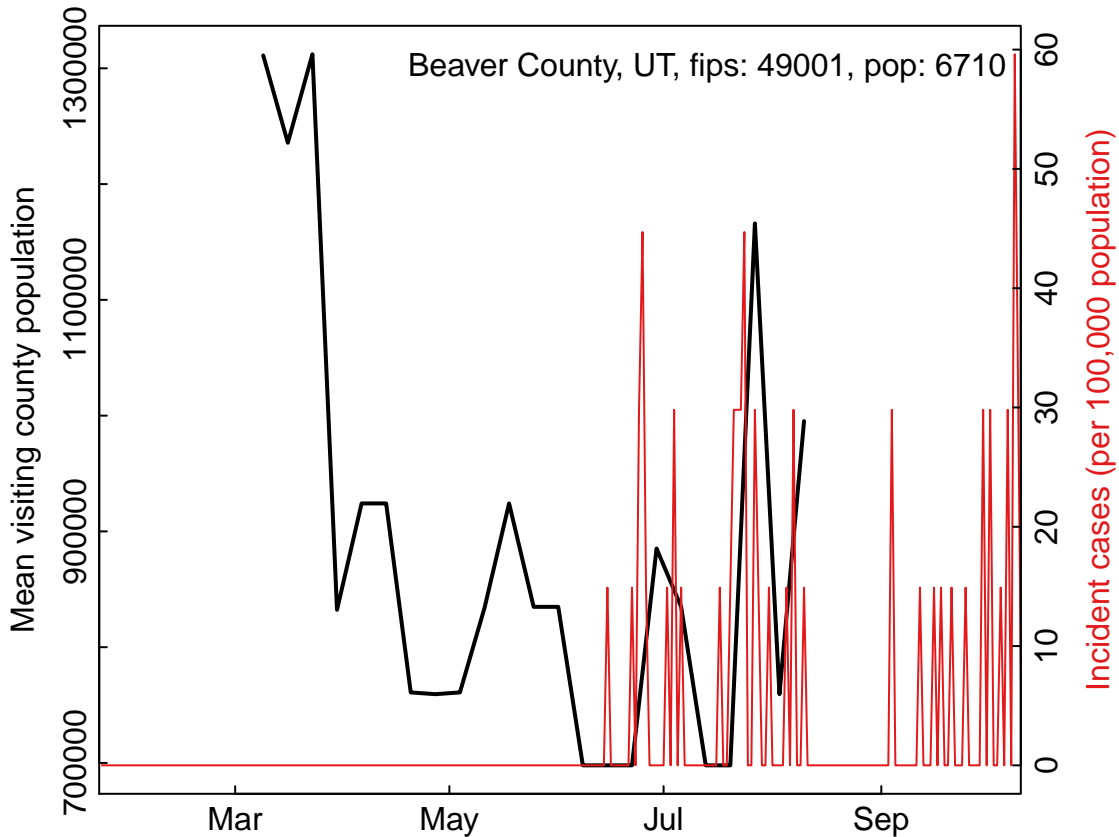

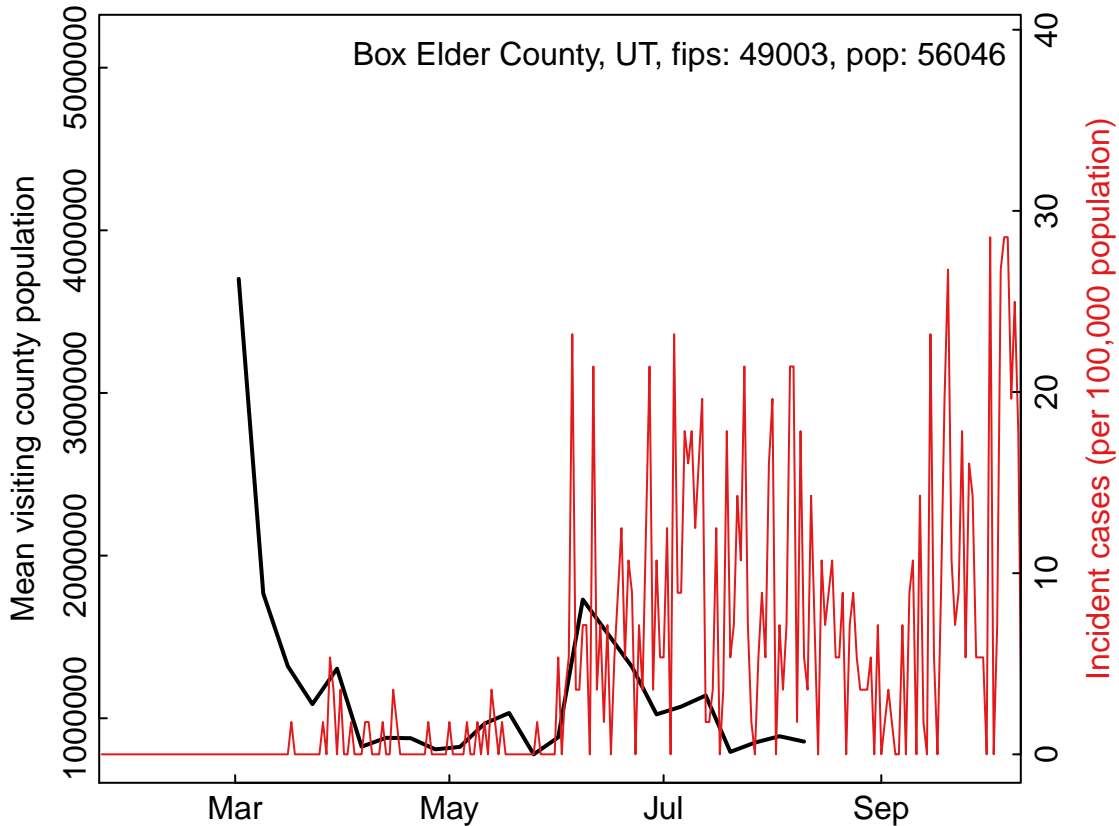

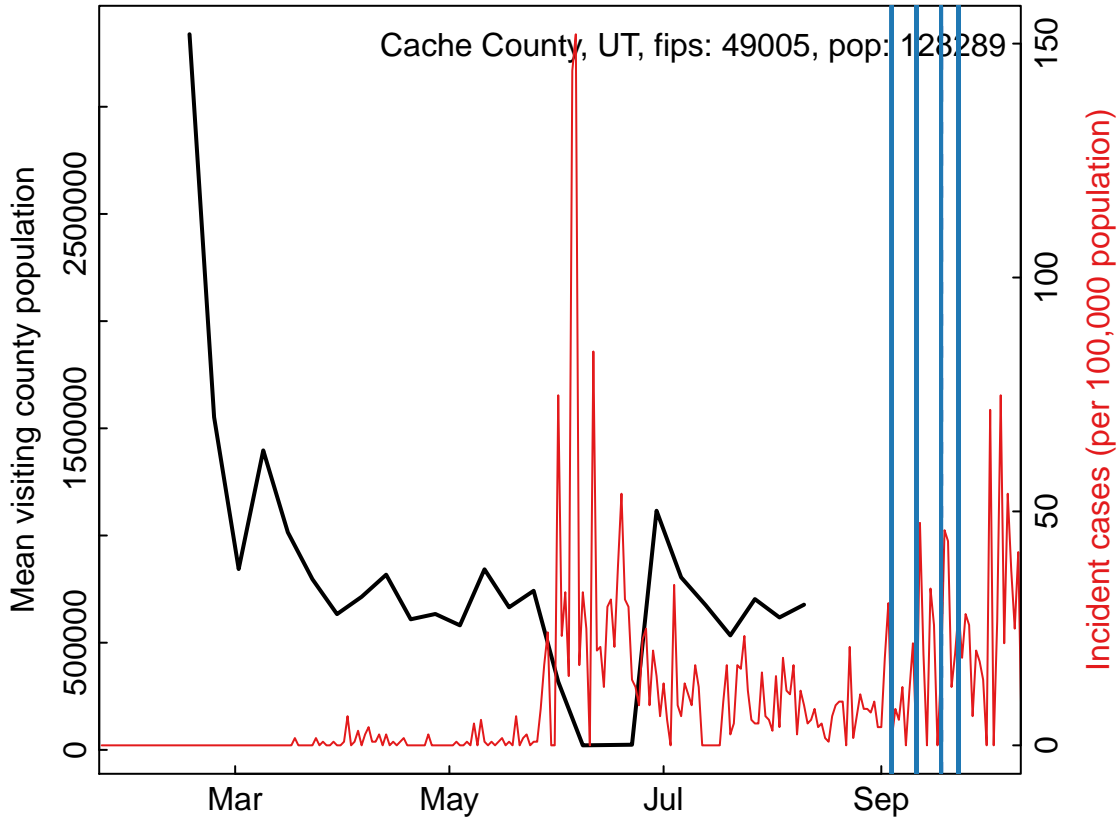

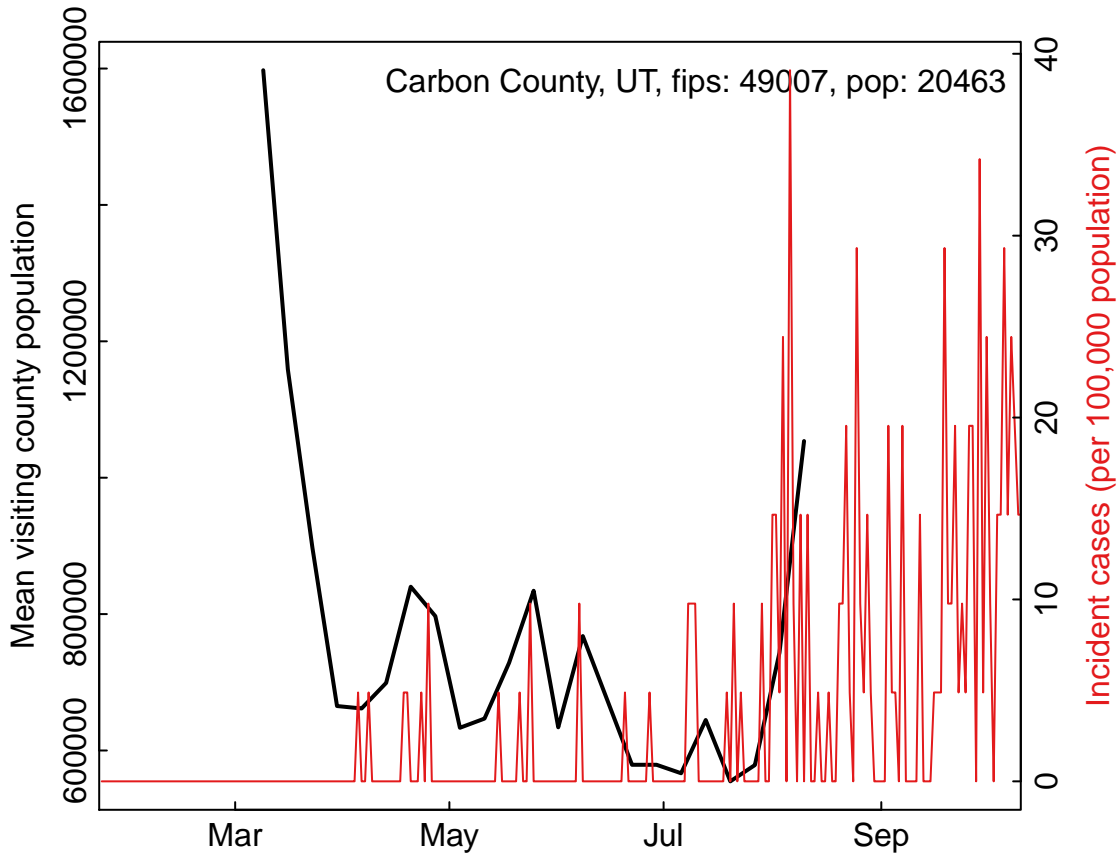



Mean visiting county population

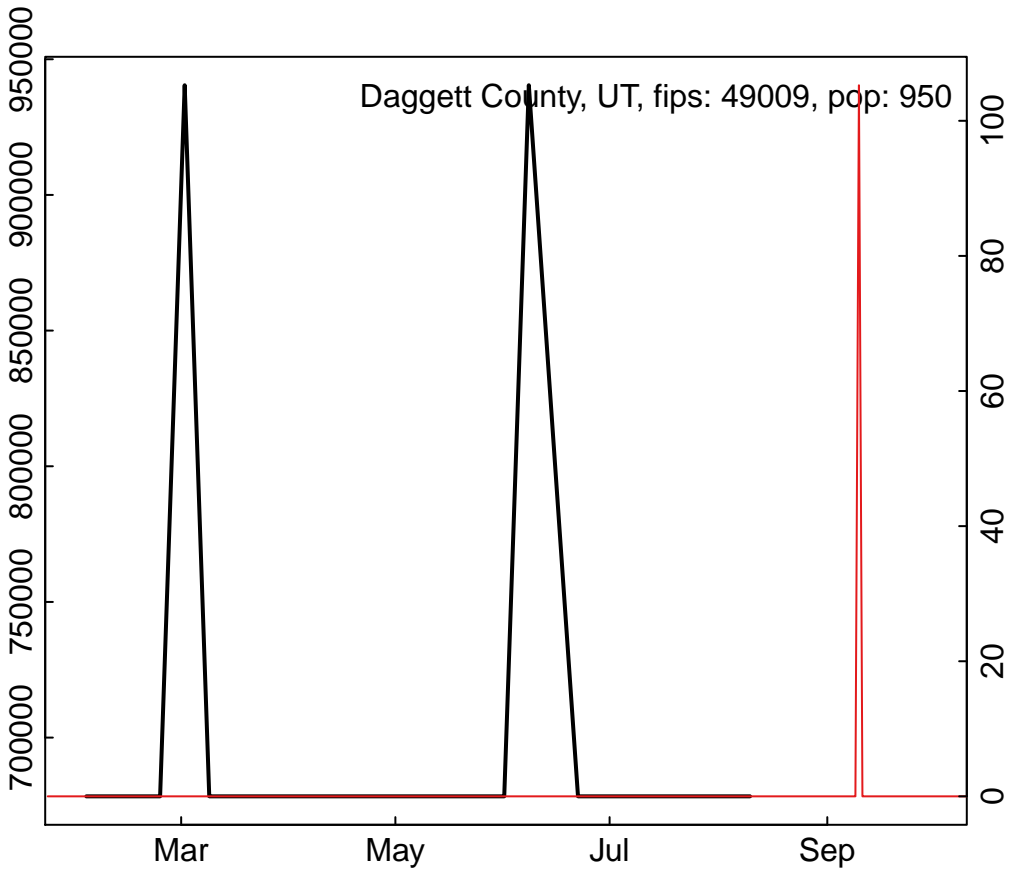

Incident cases (per 100,000 population)

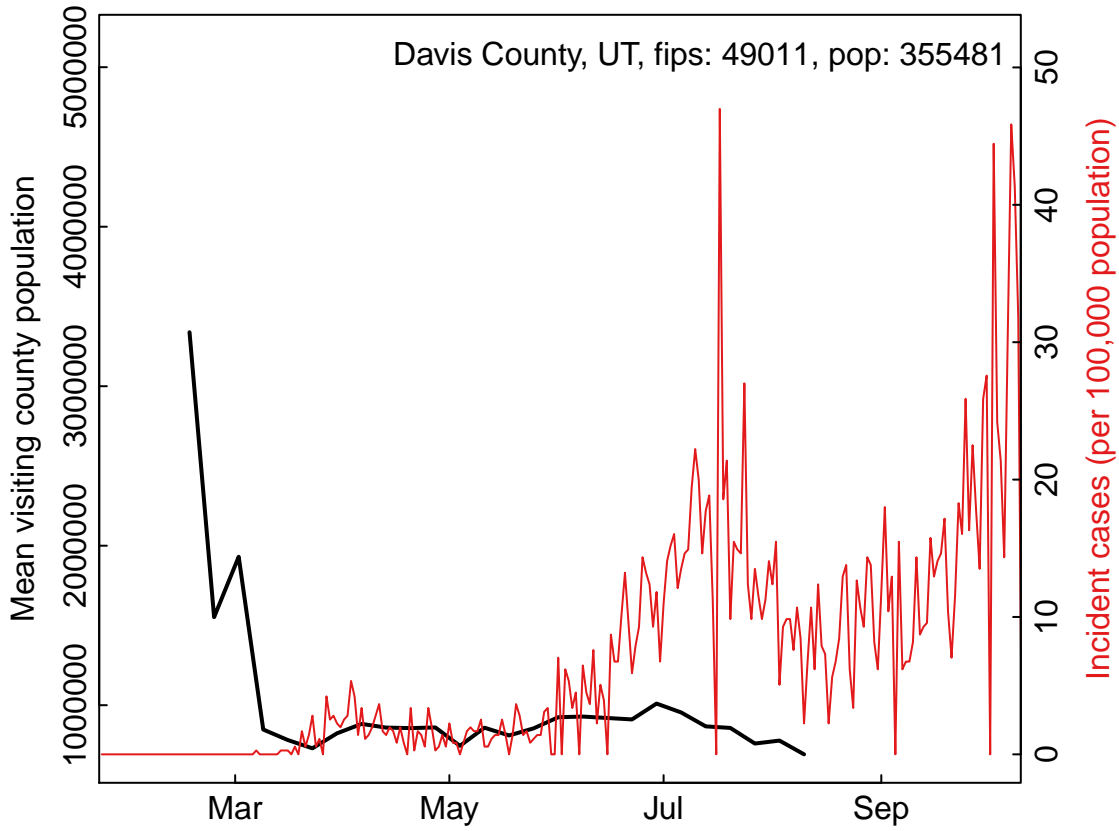

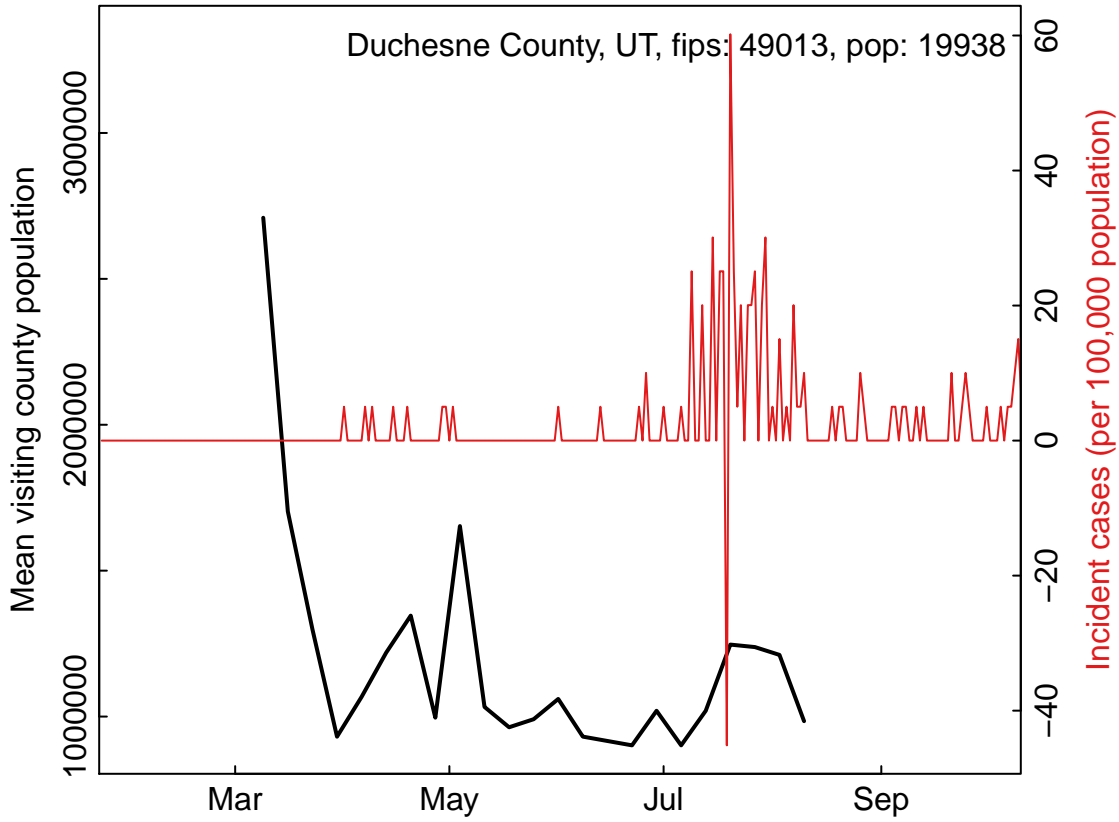

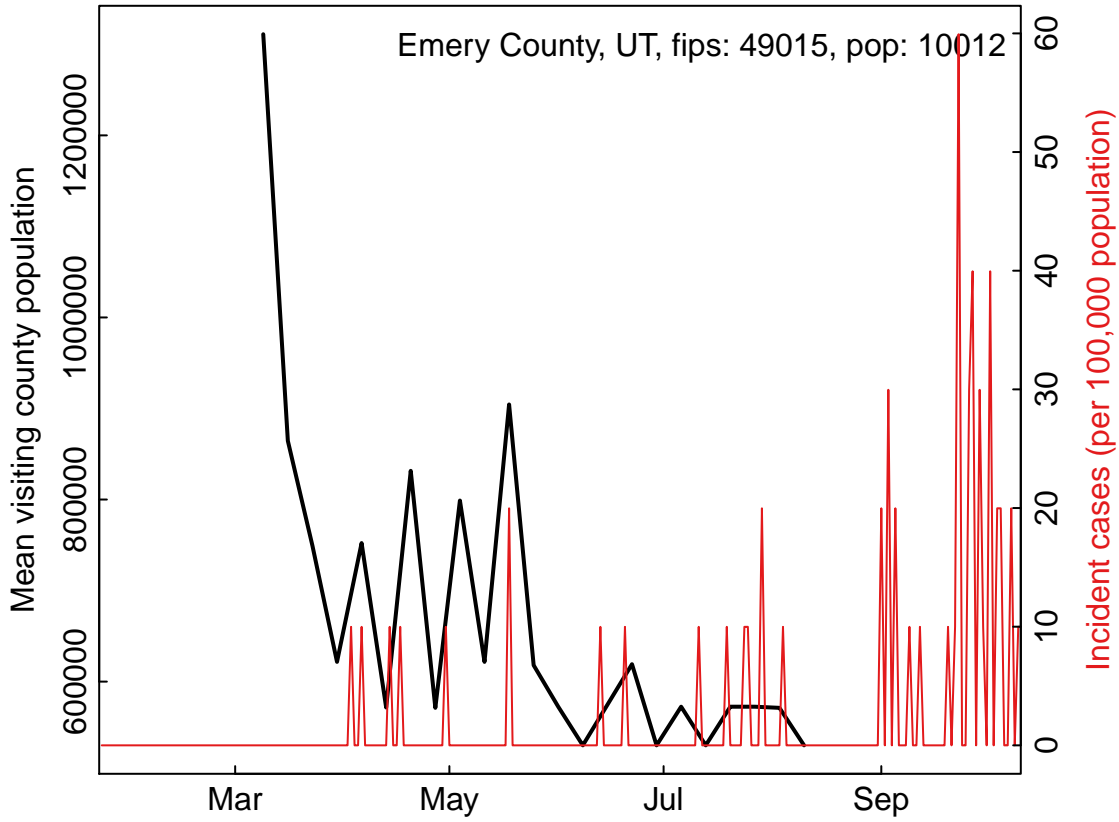

Garfield County, UT, fips: 49017, pop: 5051

Mean visiting county population

4000000  
3000000  
2000000  
1000000  
0

Mar

May

Jul

Sep

150  
100  
50  
0

Incident cases (per 100,000 population)

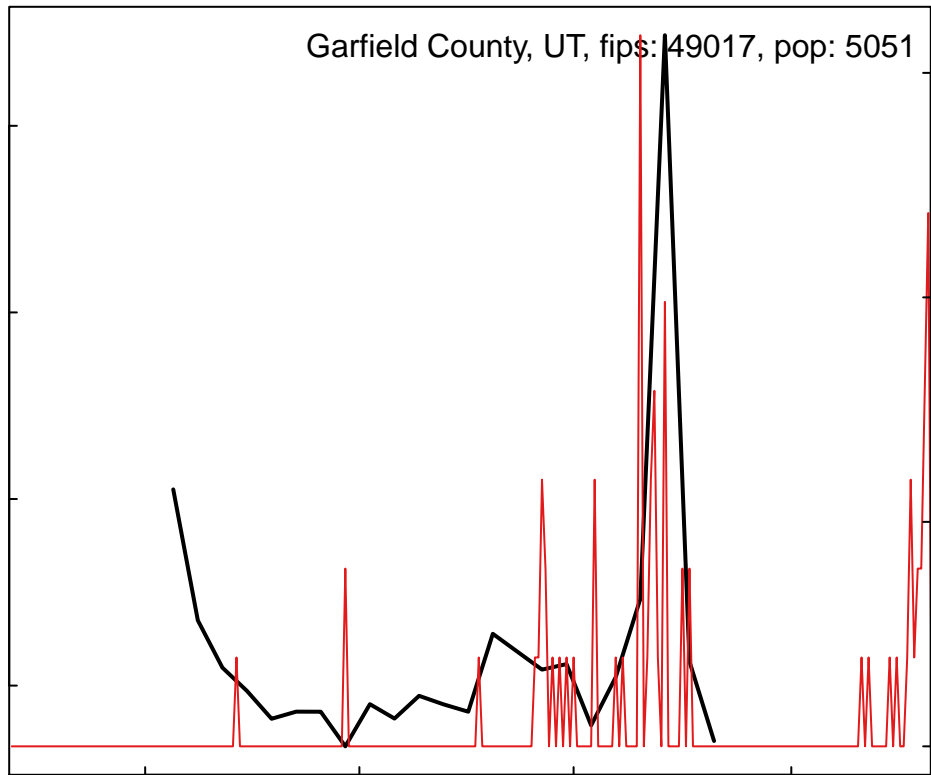

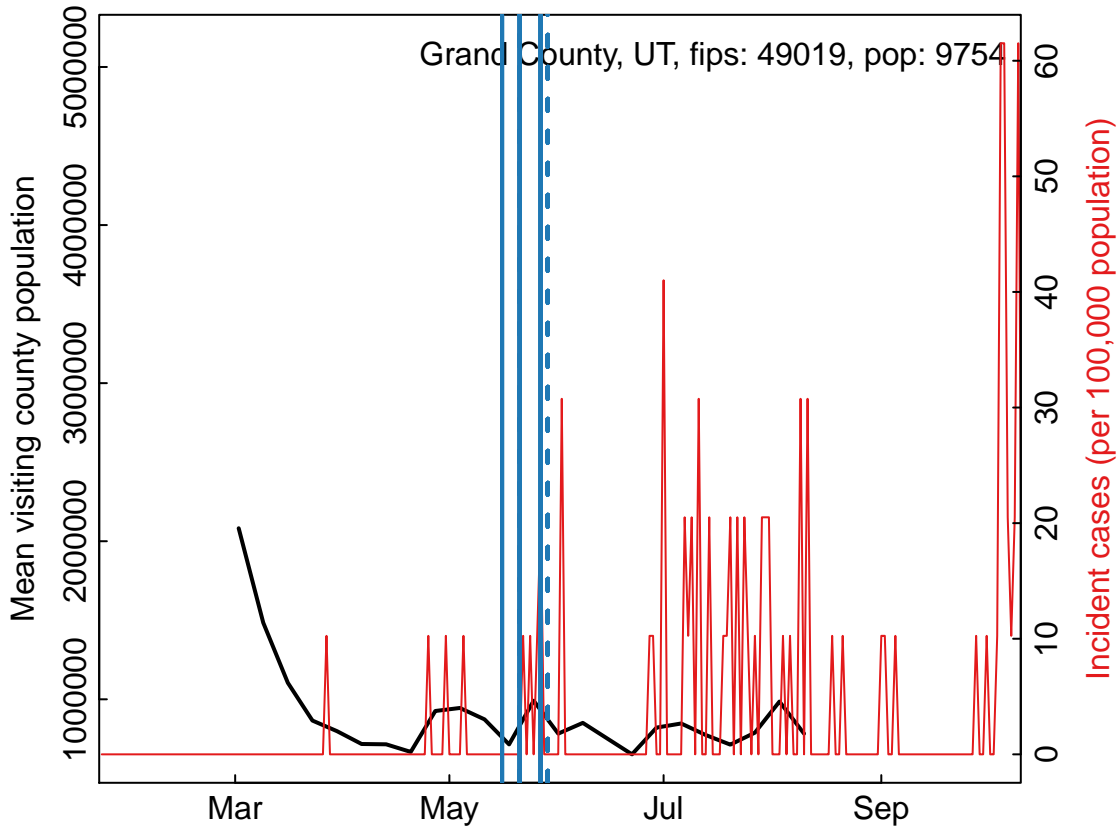

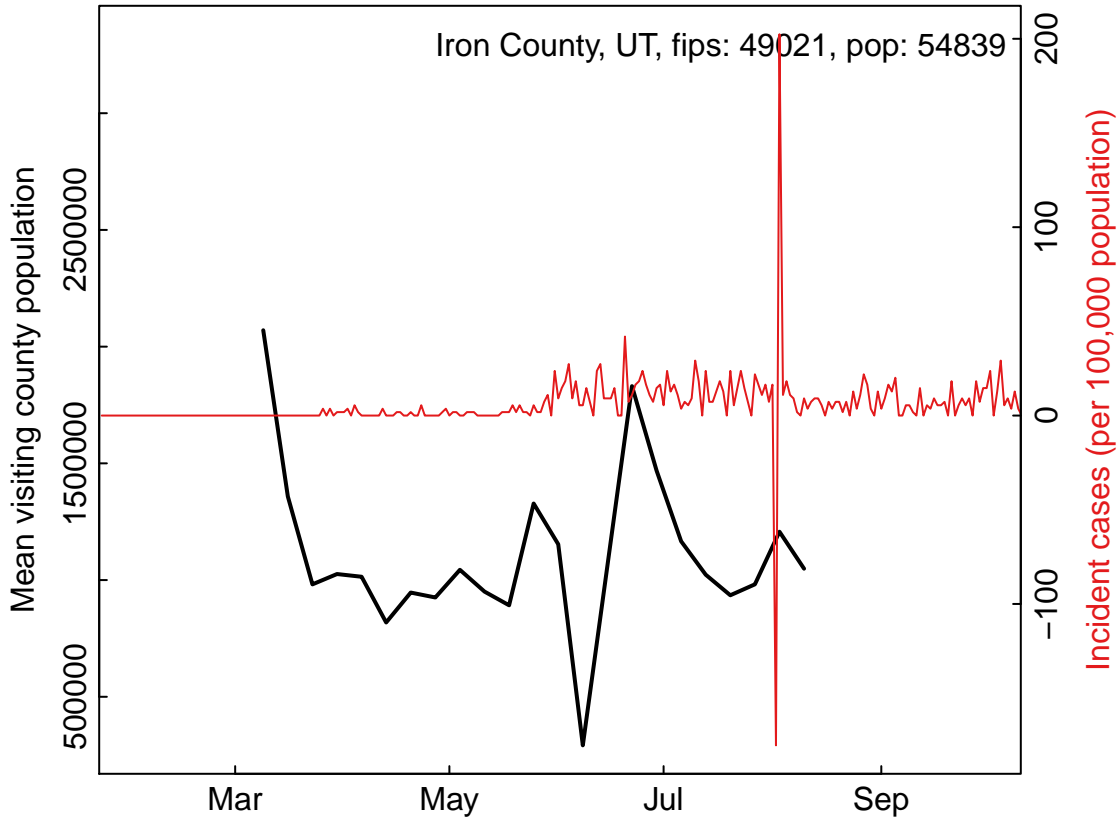

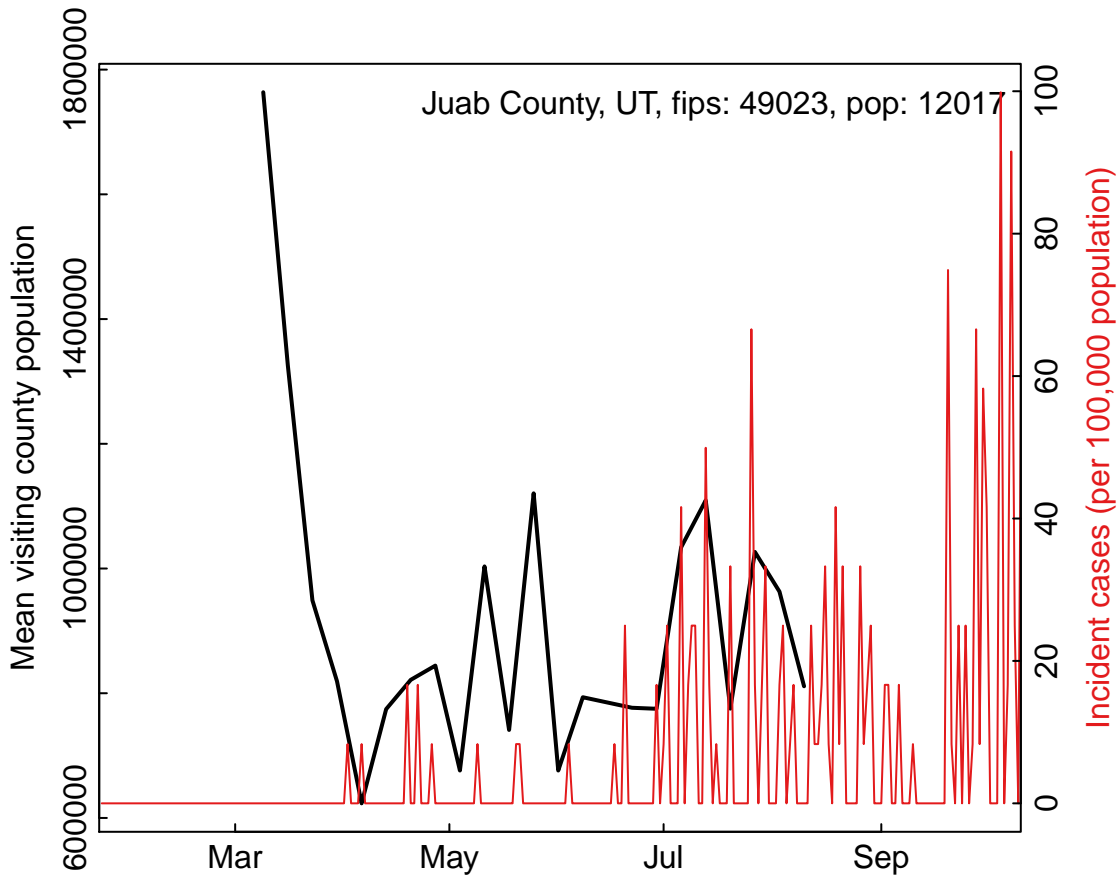



Kane County, UT, fips: 49025, pop: 7886

Mean visiting county population

3500000  
2500000  
1500000

Mar

May

Jul

Sep

100  
80  
60  
40  
20  
0

Incident cases (per 100,000 population)

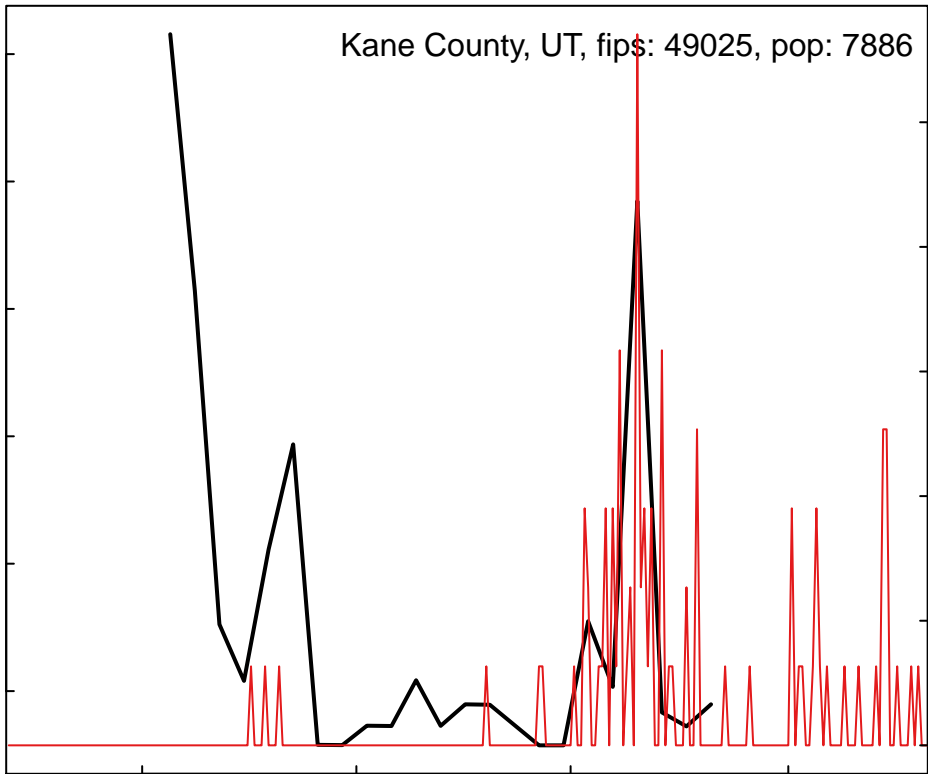

Millard County, UT, fips: 49027, pop: 13188

Mean visiting county population

500000 1000000 1500000 2000000

Mar

May

Jul

Sep

100

80

60

40

20

0

Incident cases (per 100,000 population)

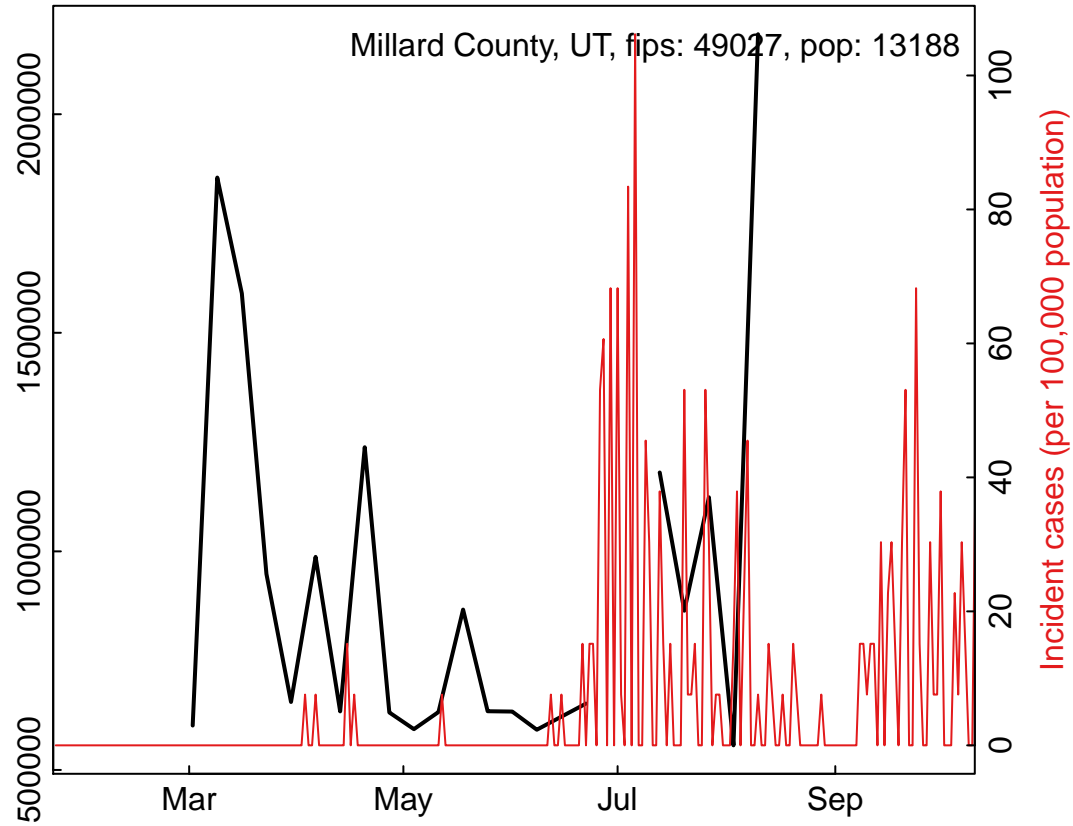

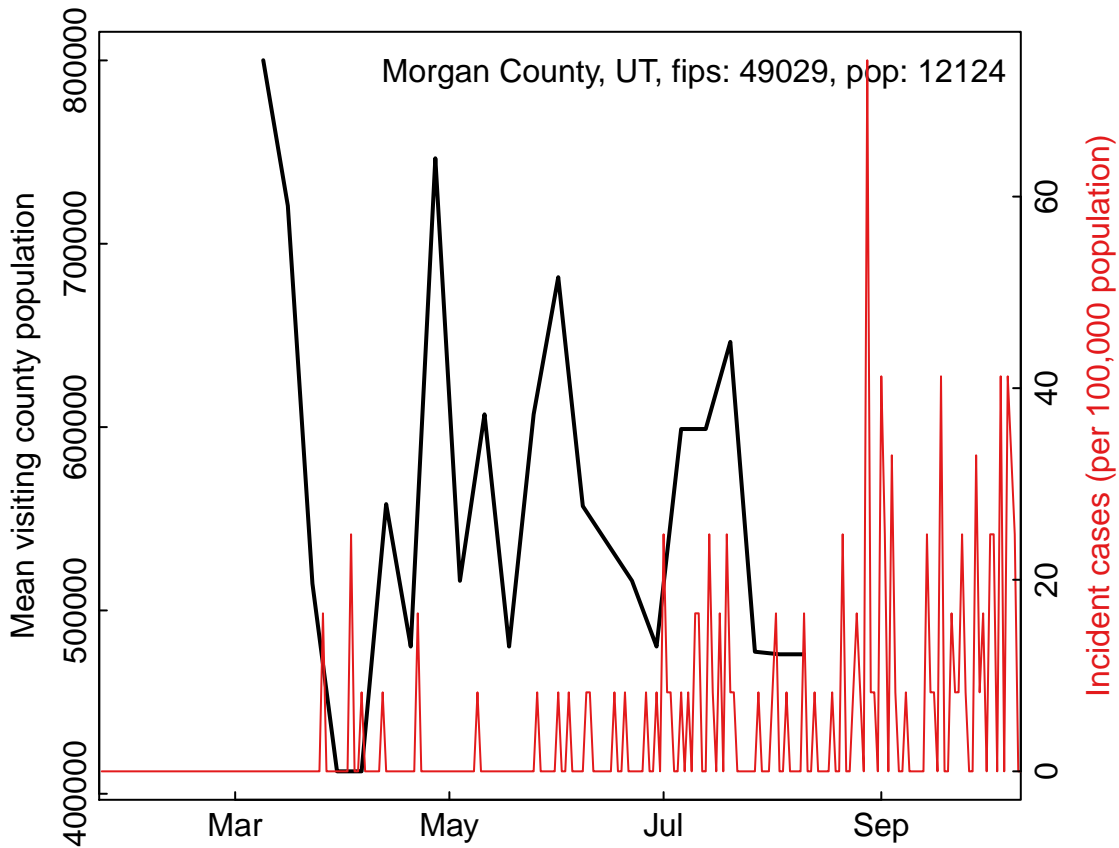

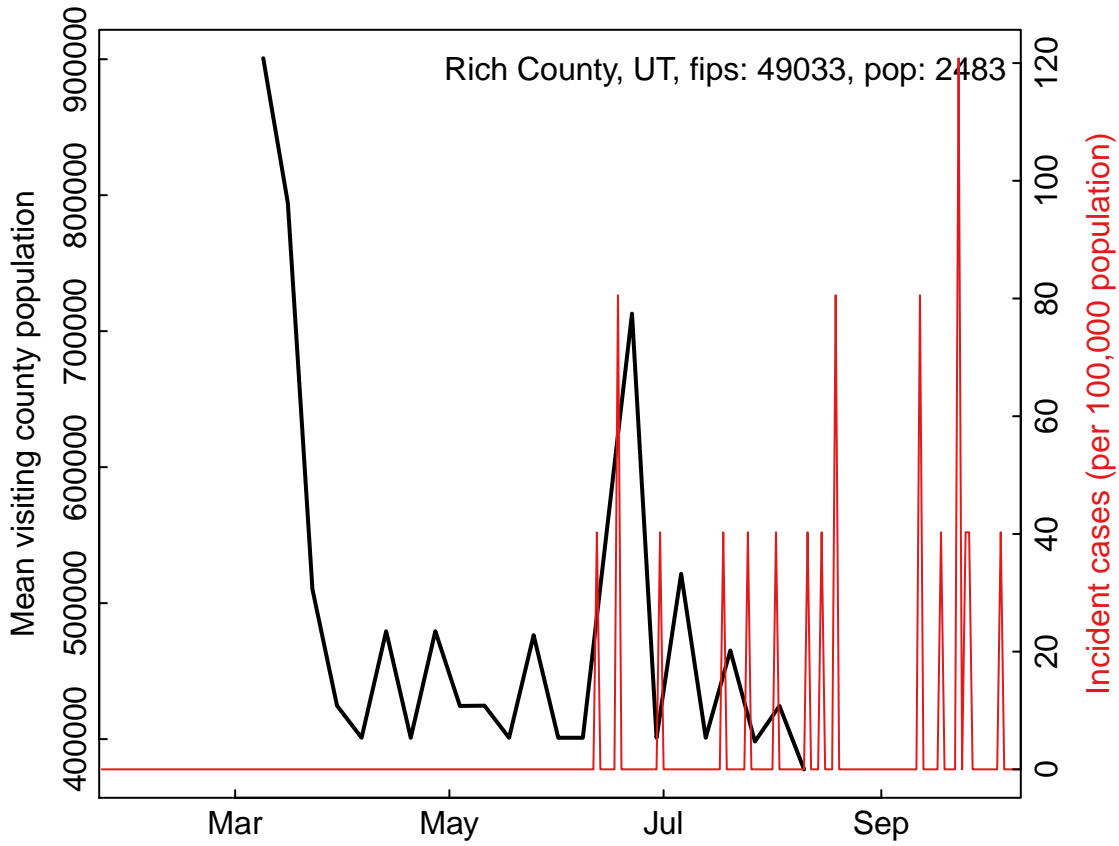

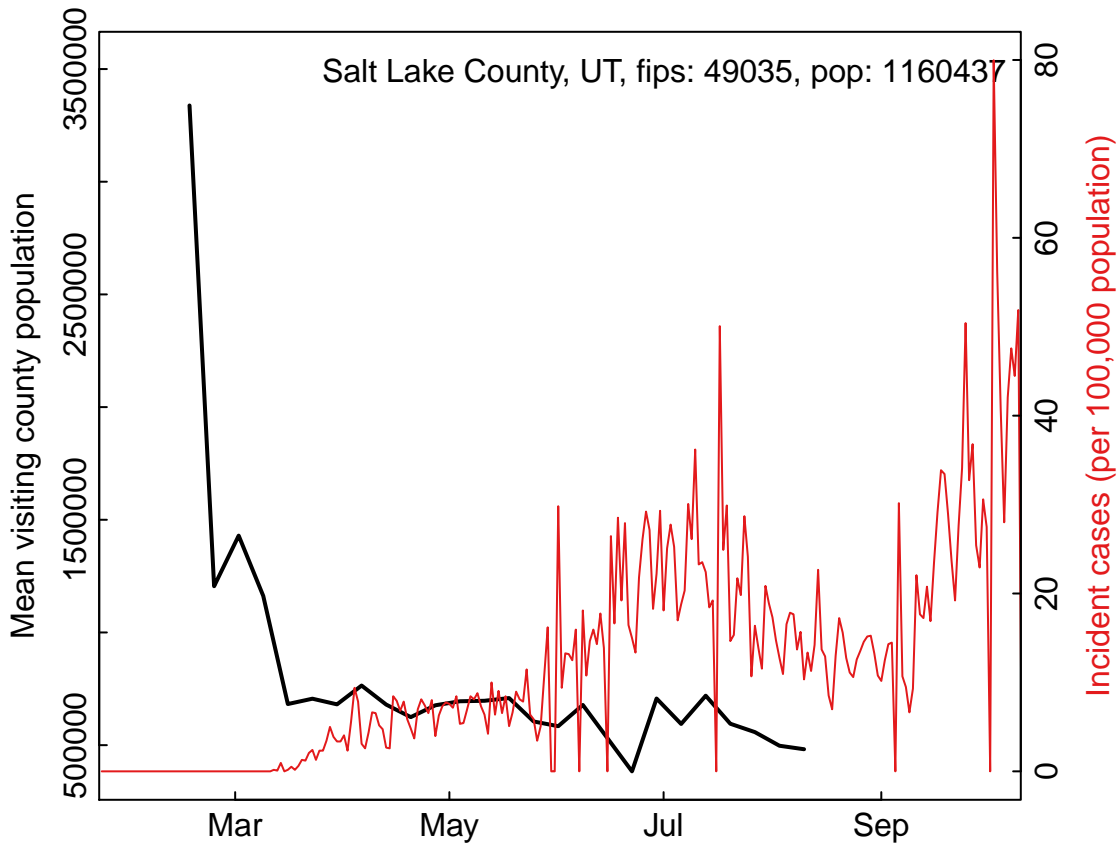

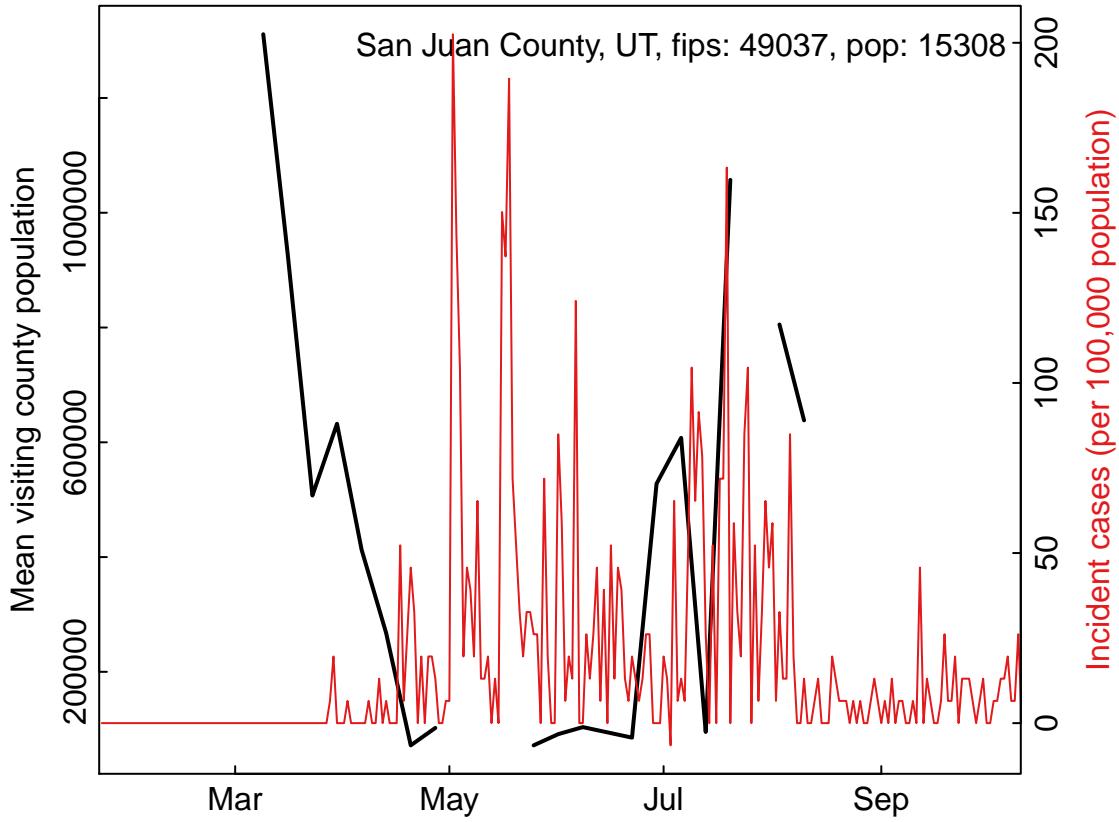

Sanpete County, UT, fips: 49039, pop: 30939

Mean visiting county population

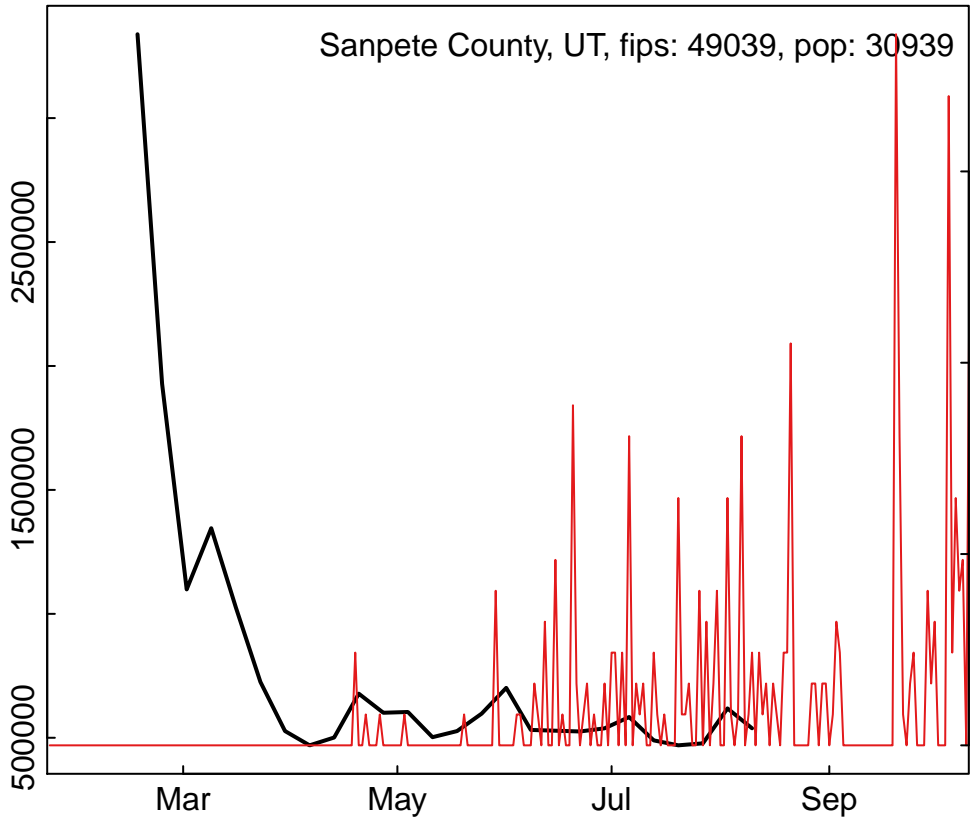

Incident cases (per 100,000 population)

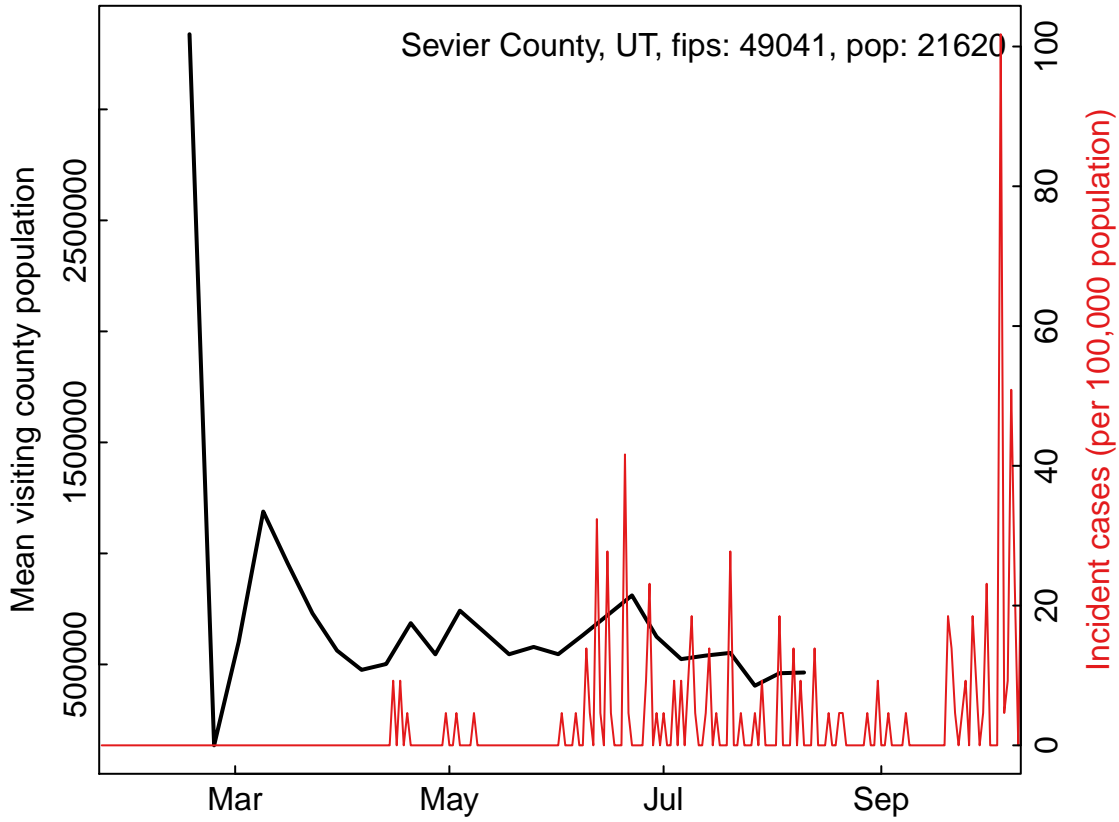



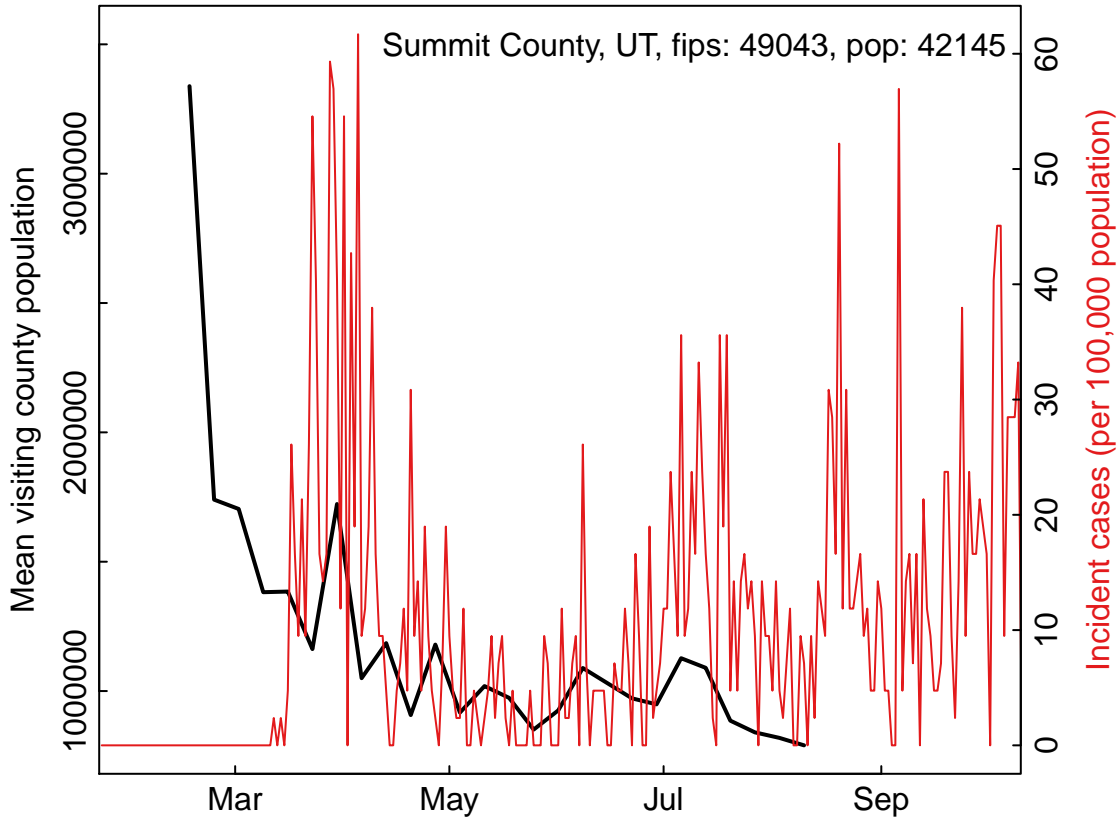

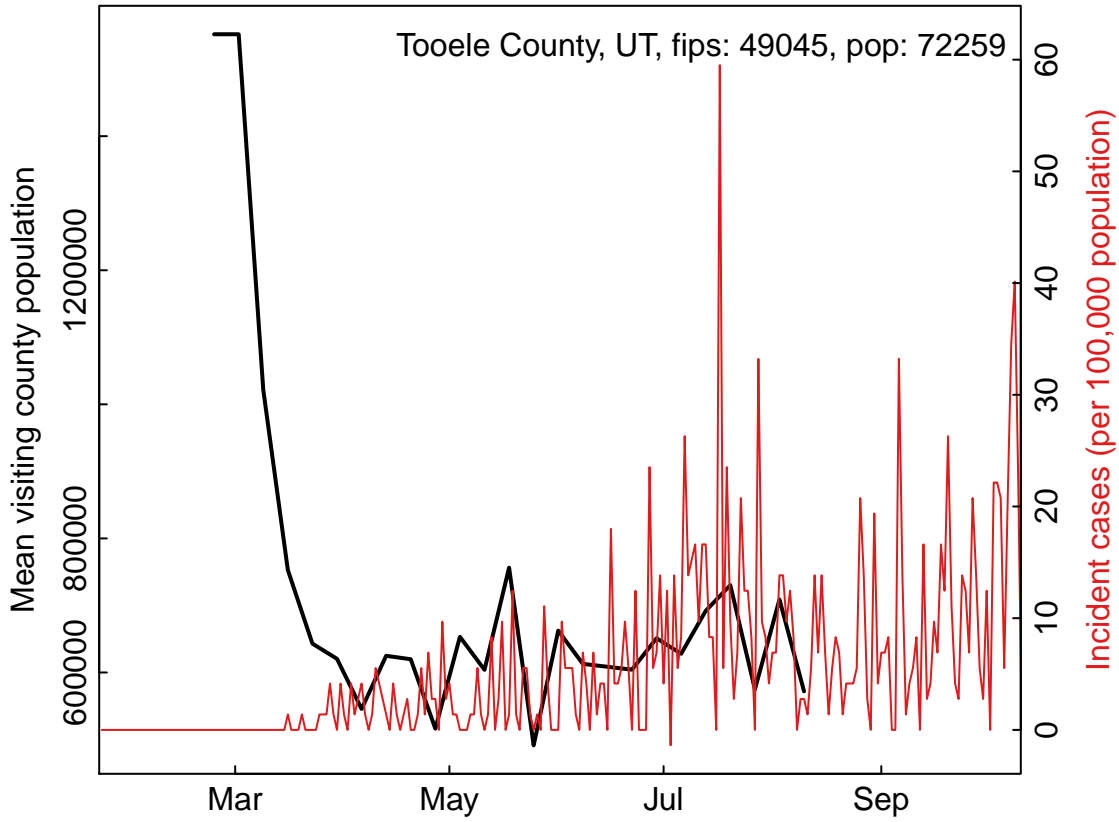

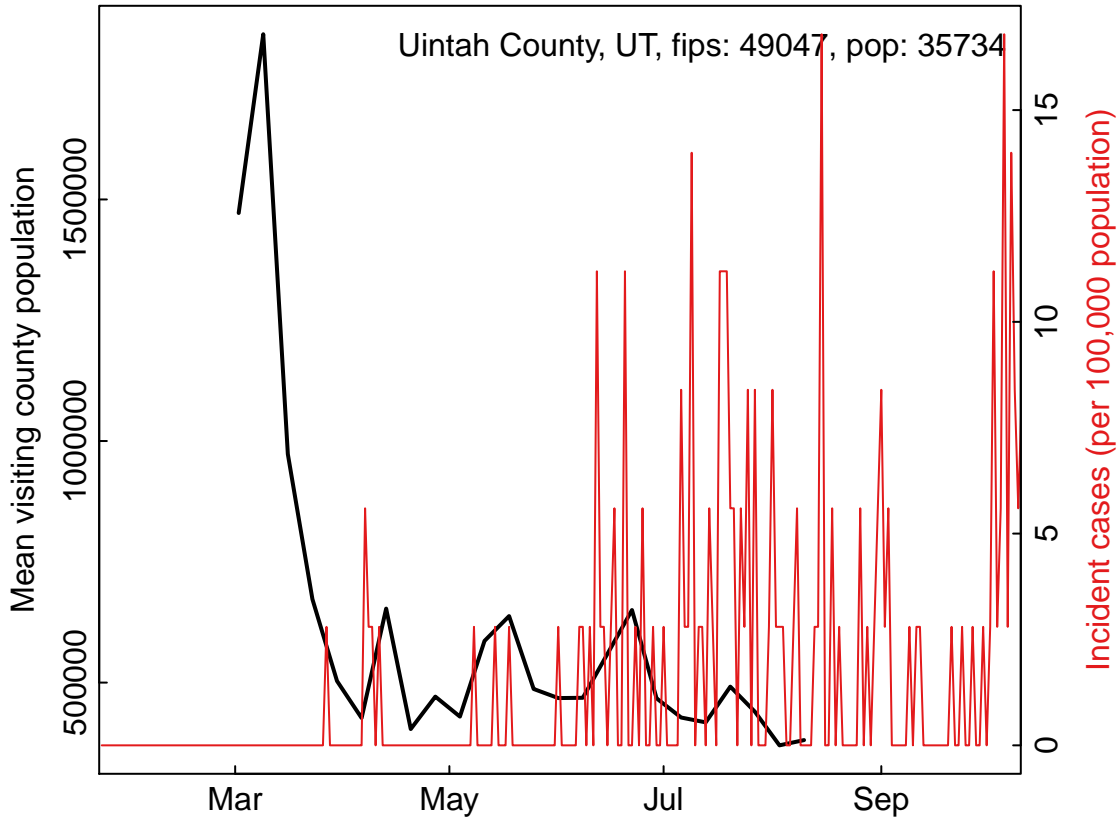

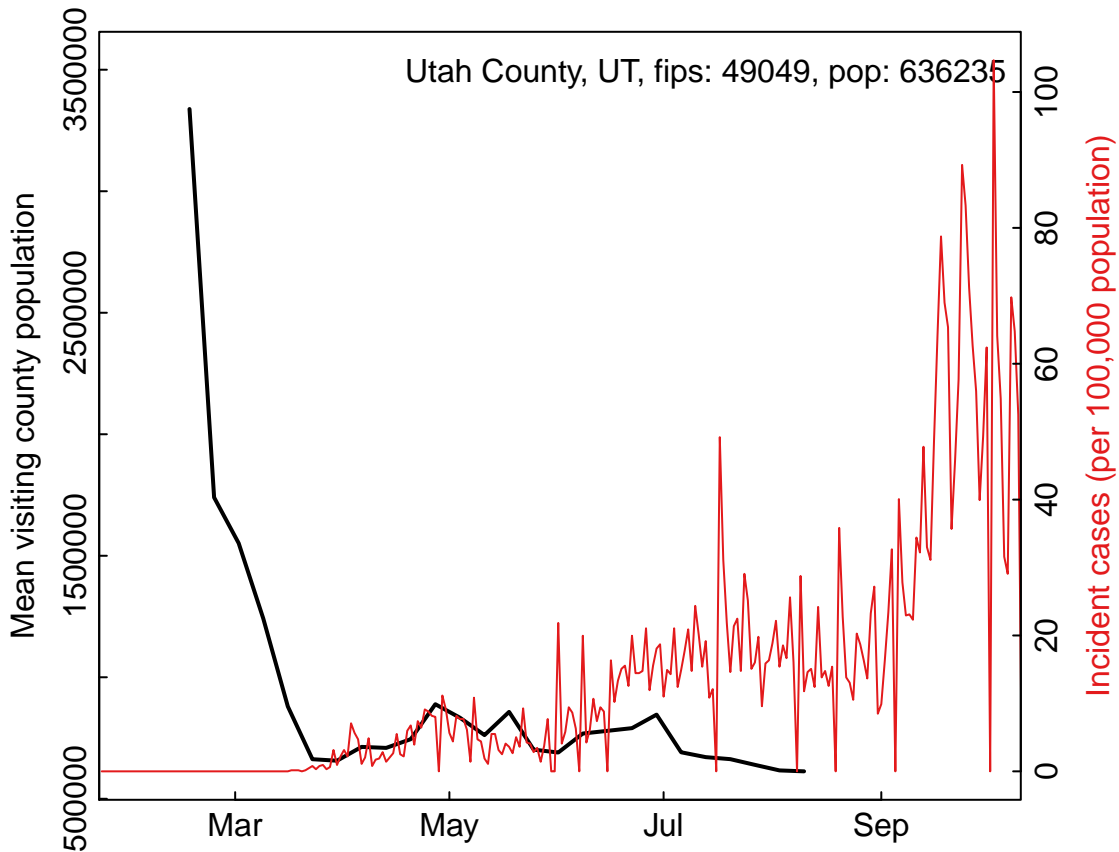

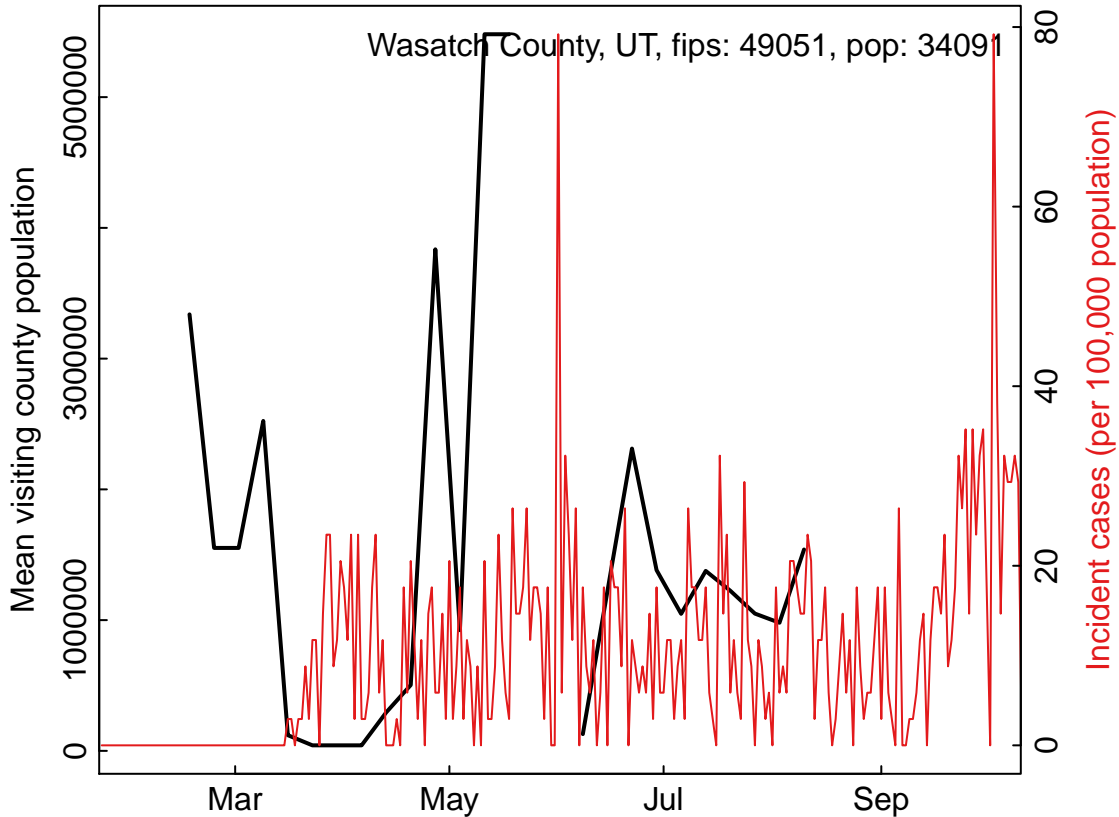

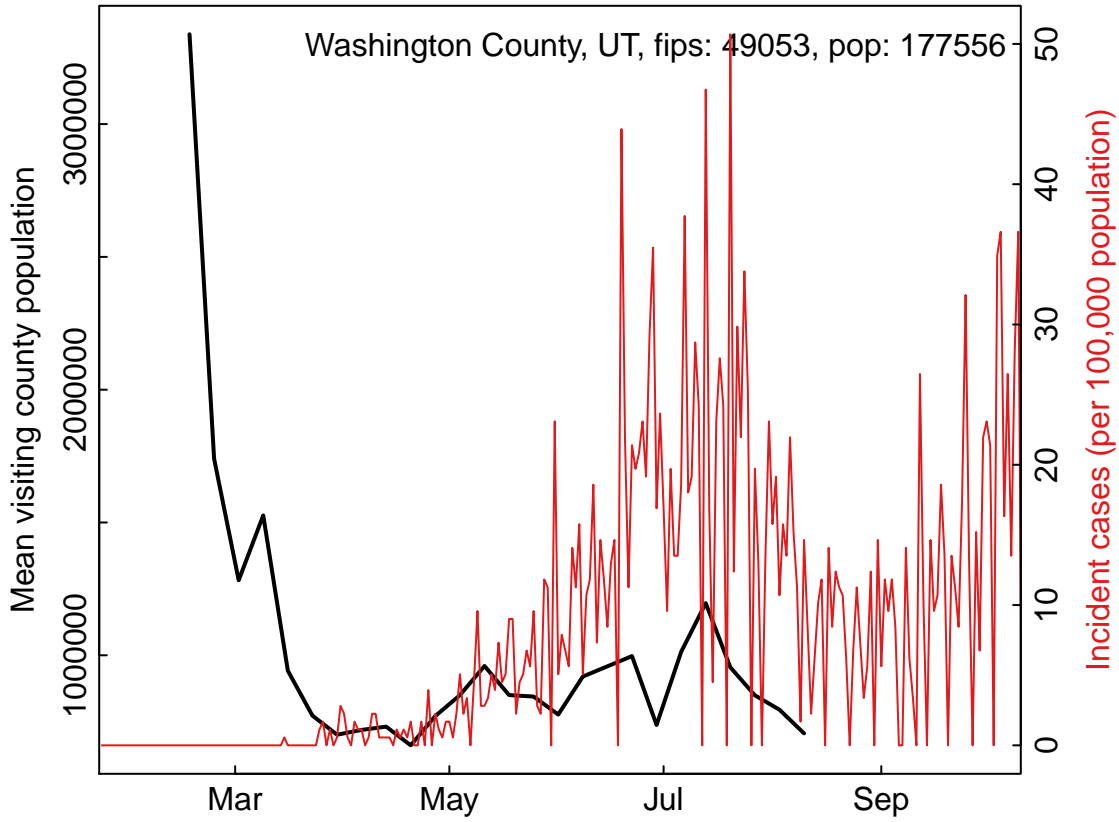

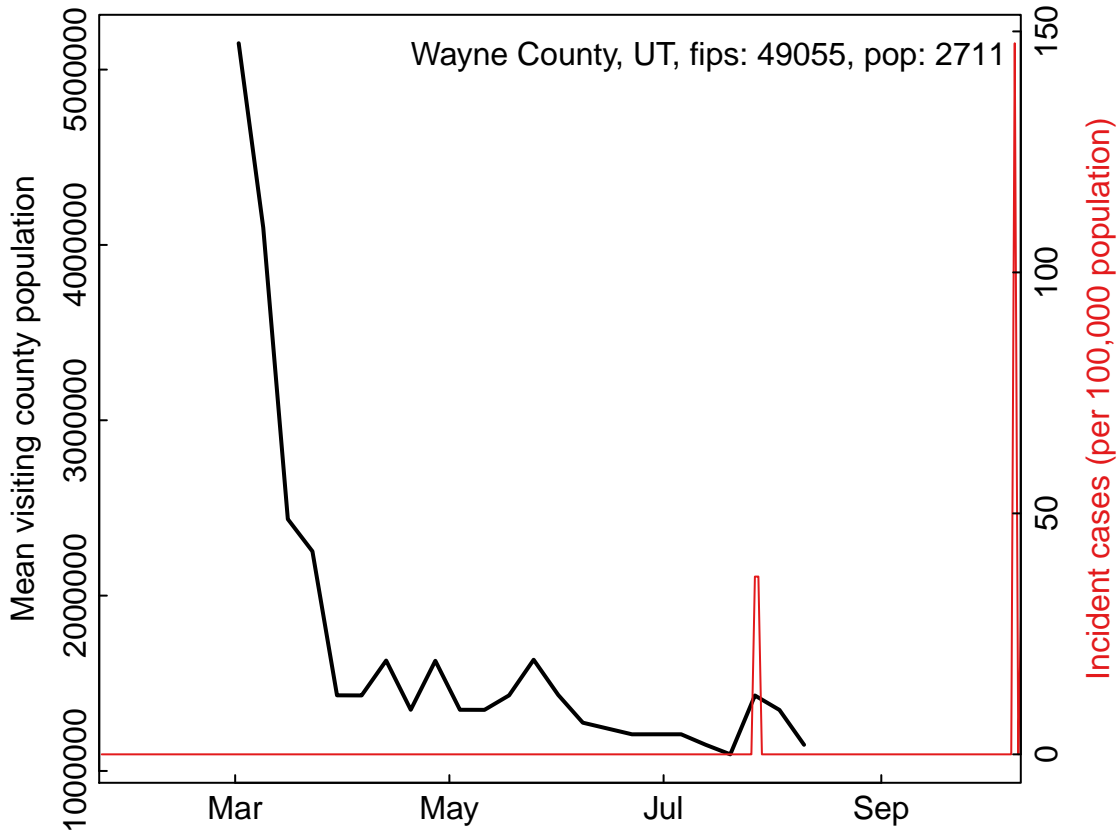

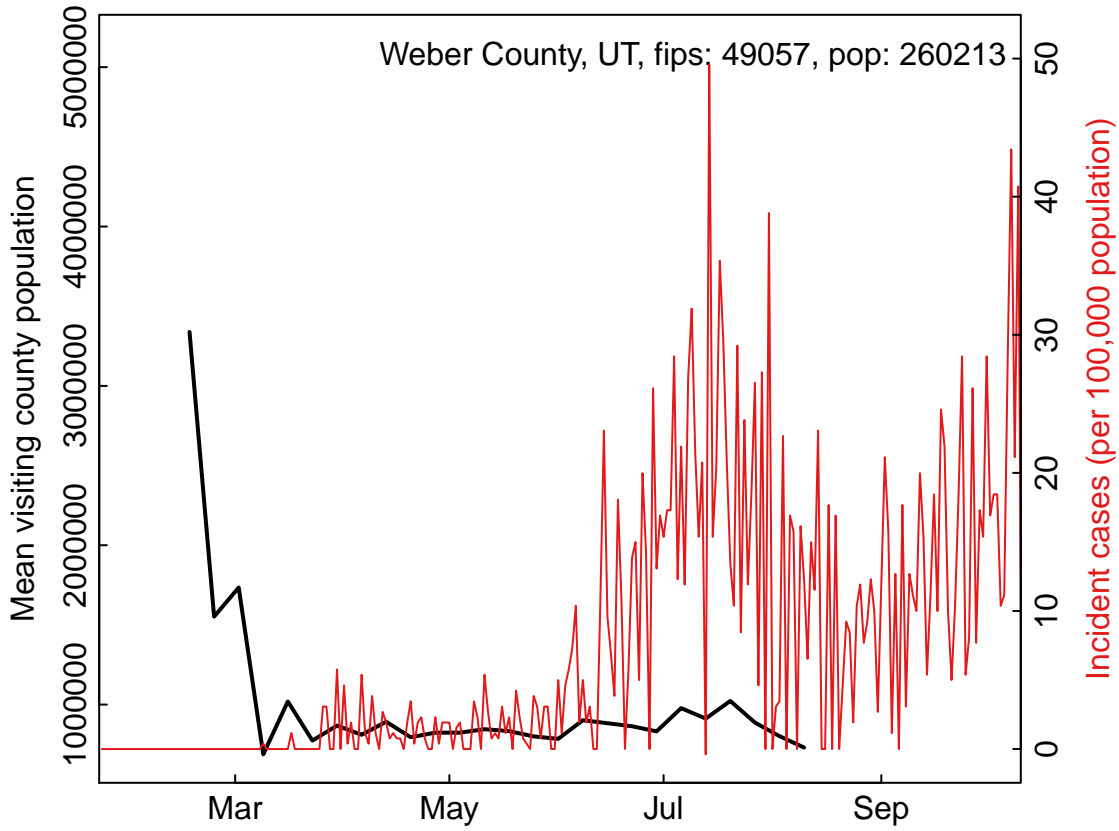



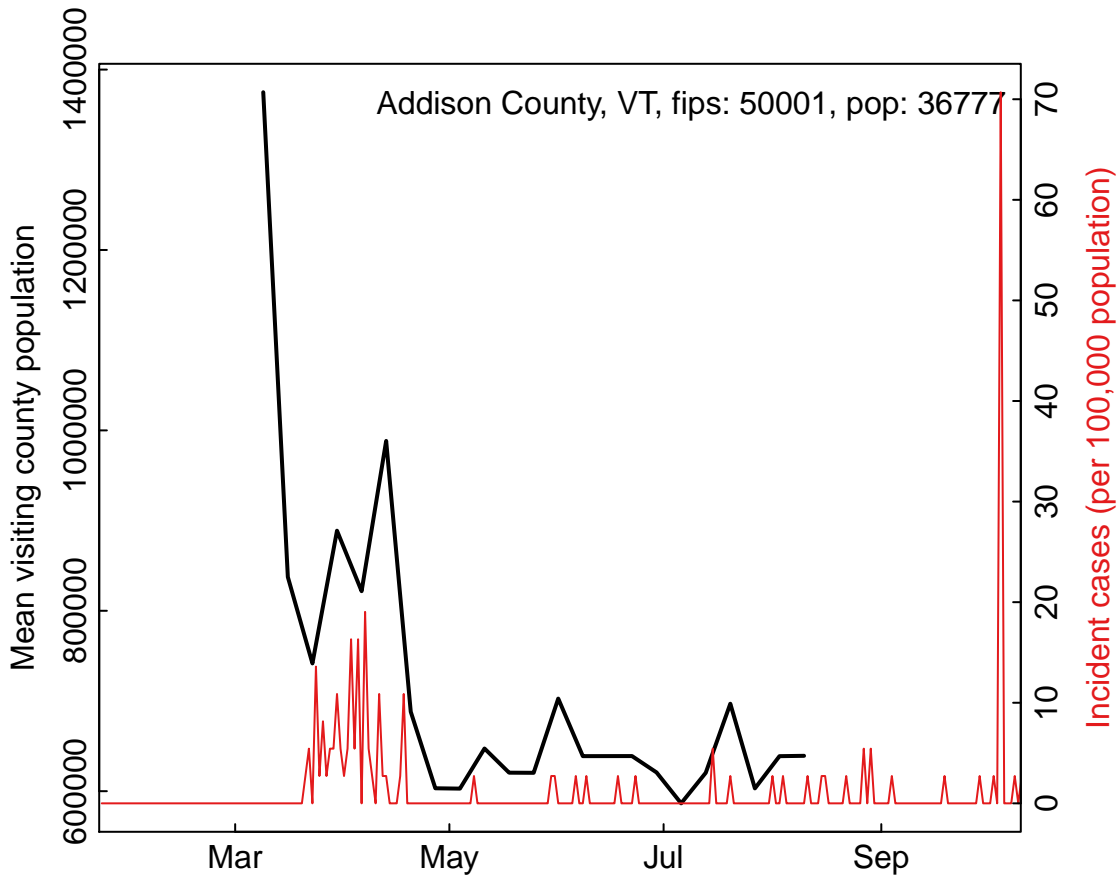

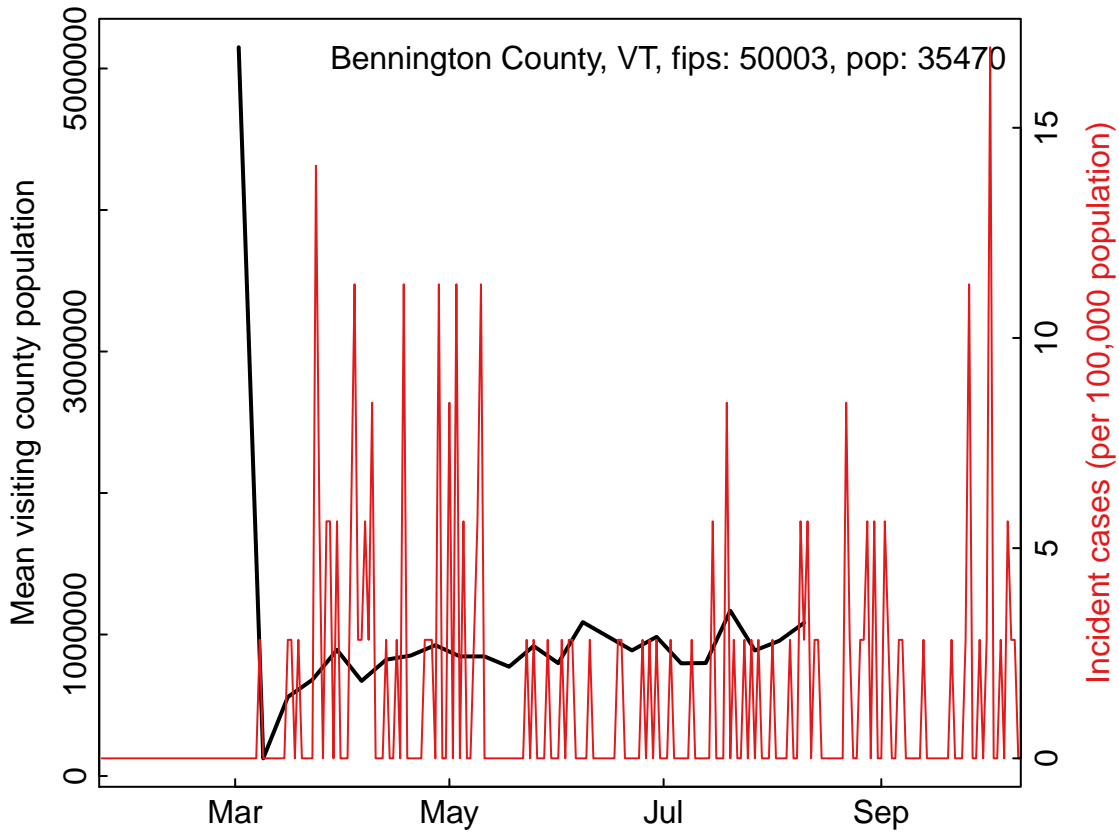

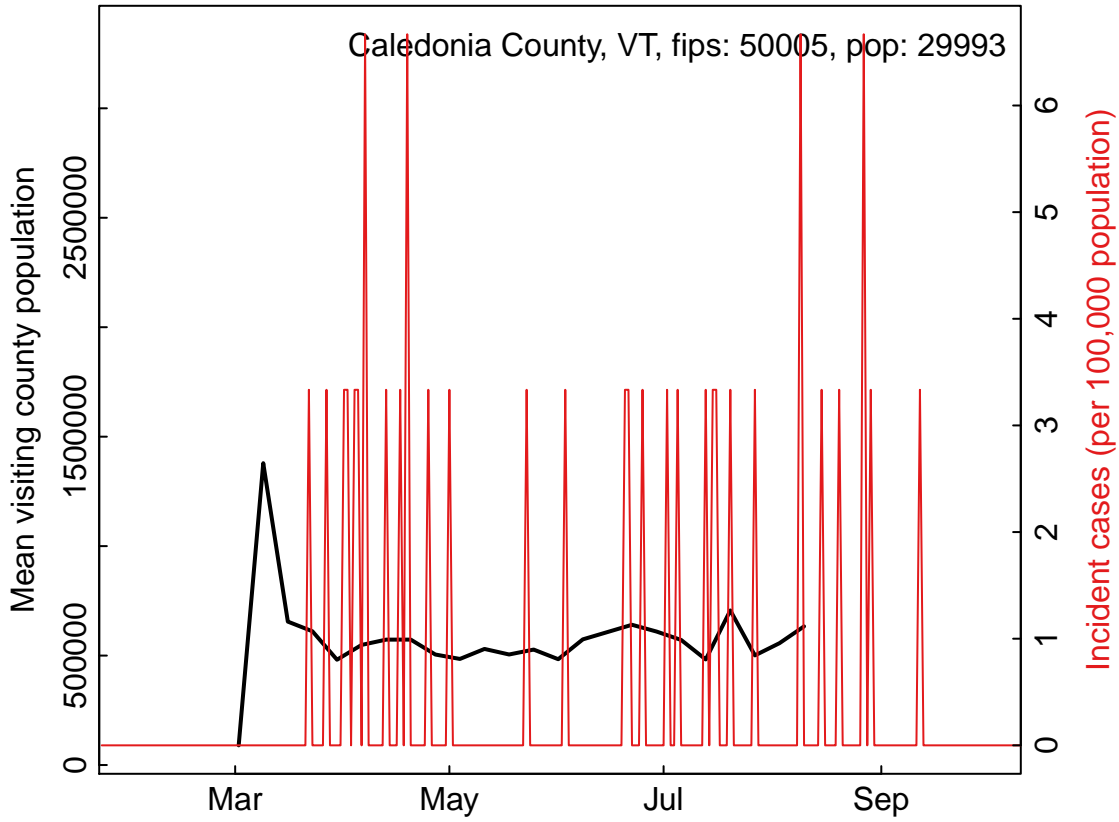

Chittenden County, VT, fips: 50007, pop: 163774

Mean visiting county population

400000  
600000  
800000

Mar

May

Jul

Sep

Incident cases (per 100,000 population)

0  
5  
10  
15  
20  
25

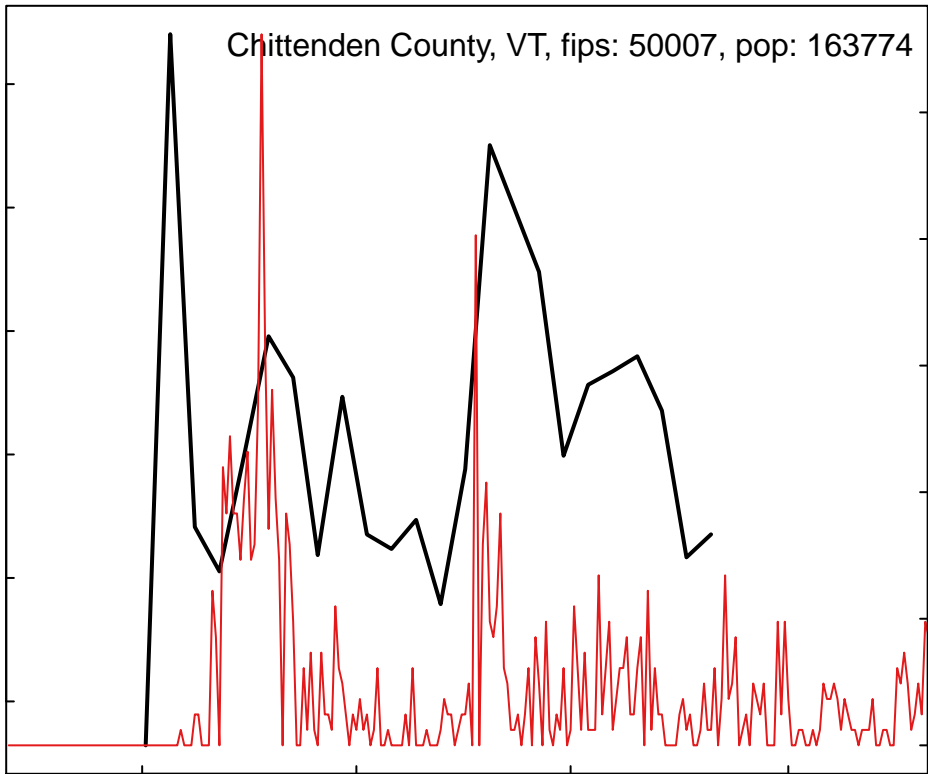



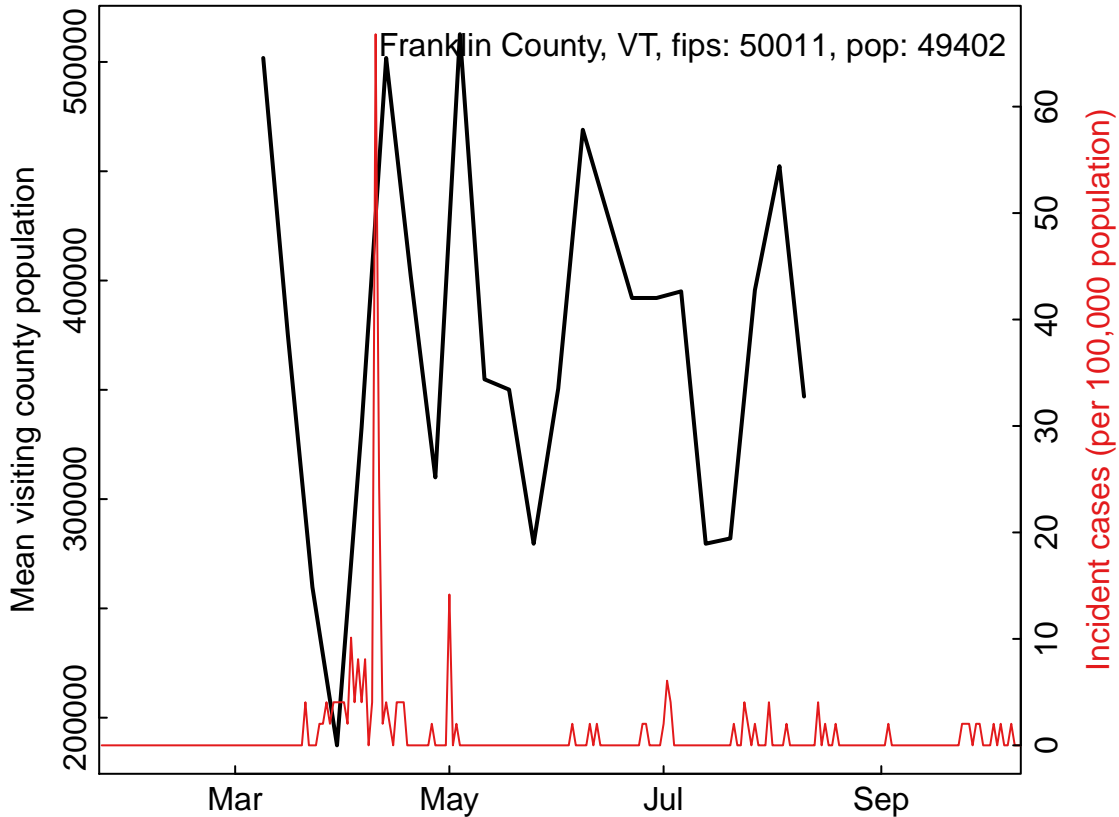

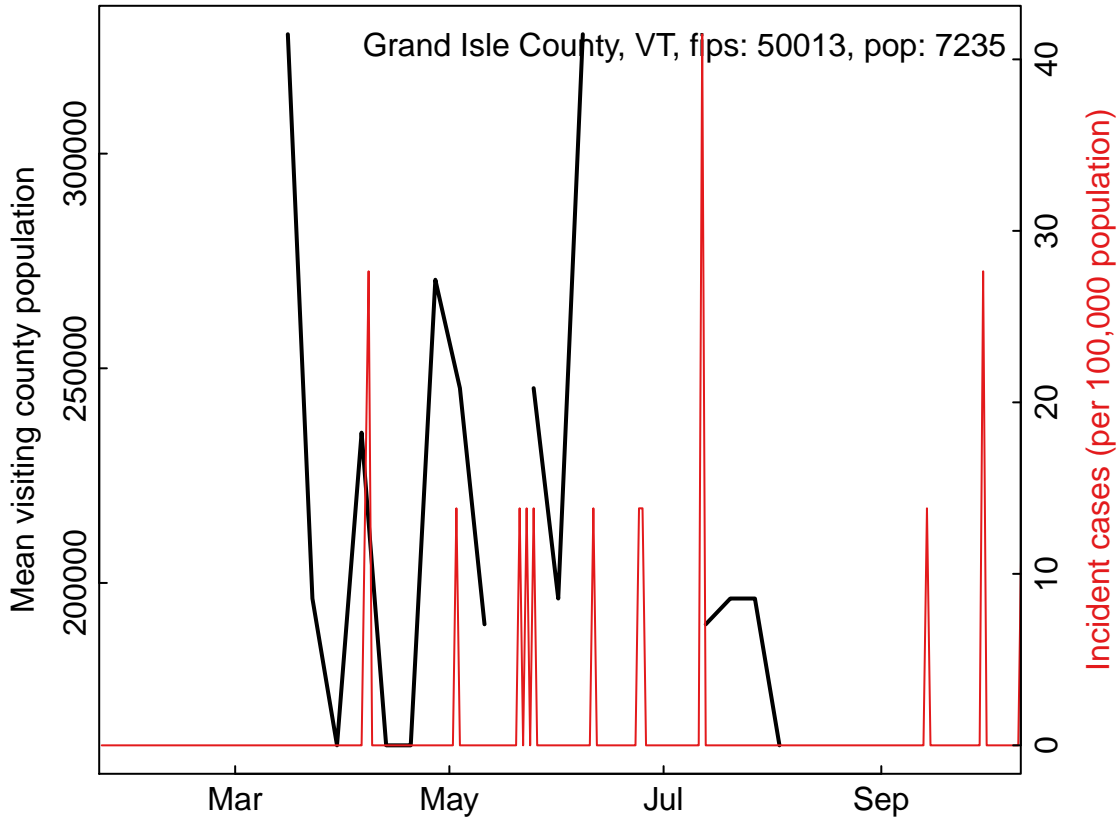

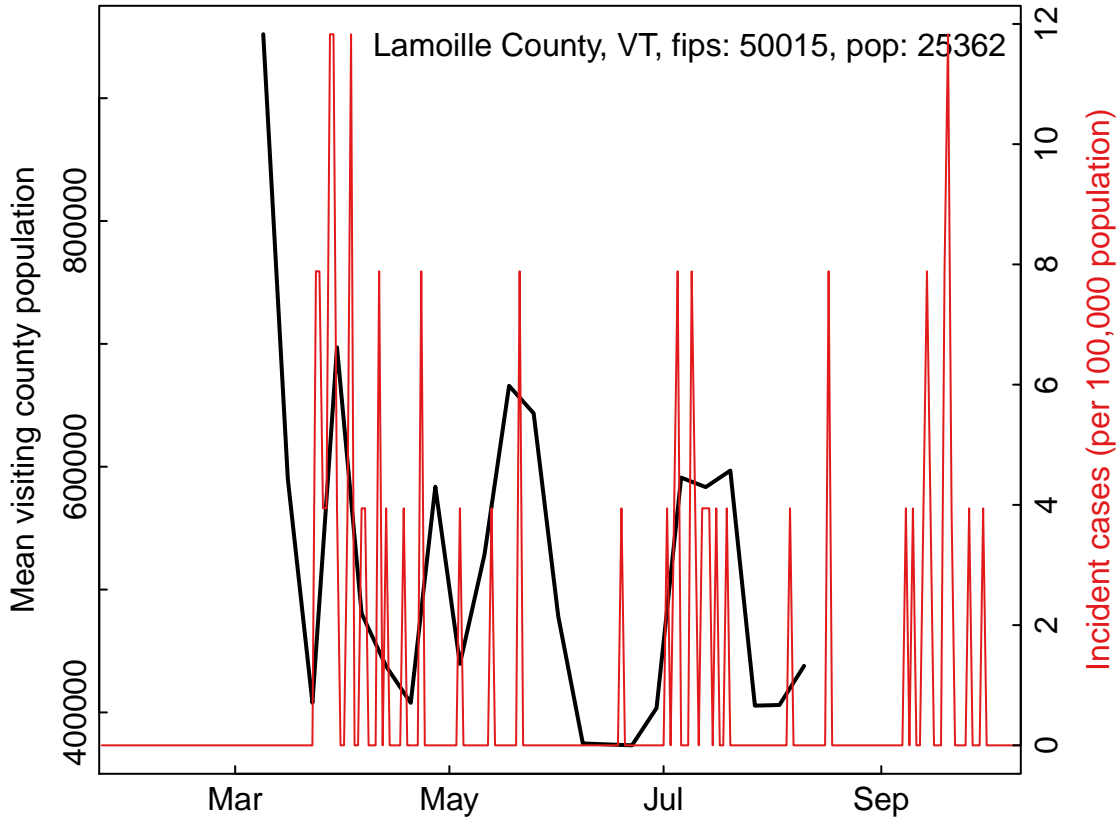





Orleans County, VT, fips: 50019, pop: 27037

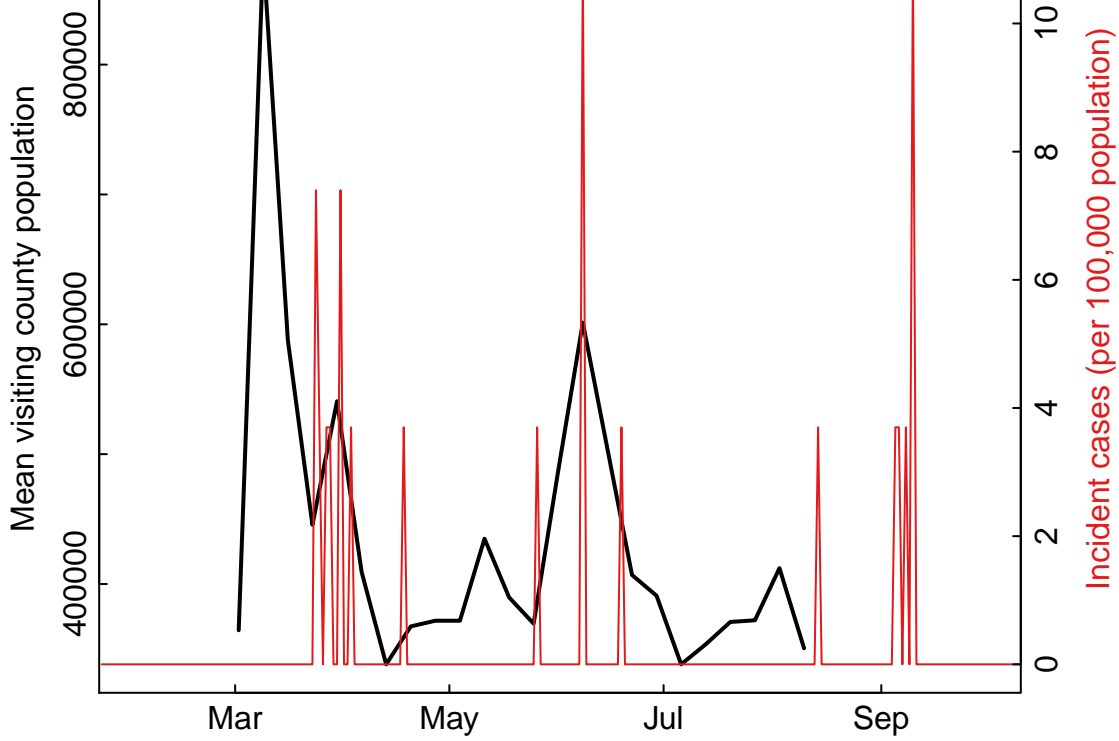

Rutland County, VT, fips: 50021, pop: 58191

Mean visiting county population

Incident cases (per 100,000 population)

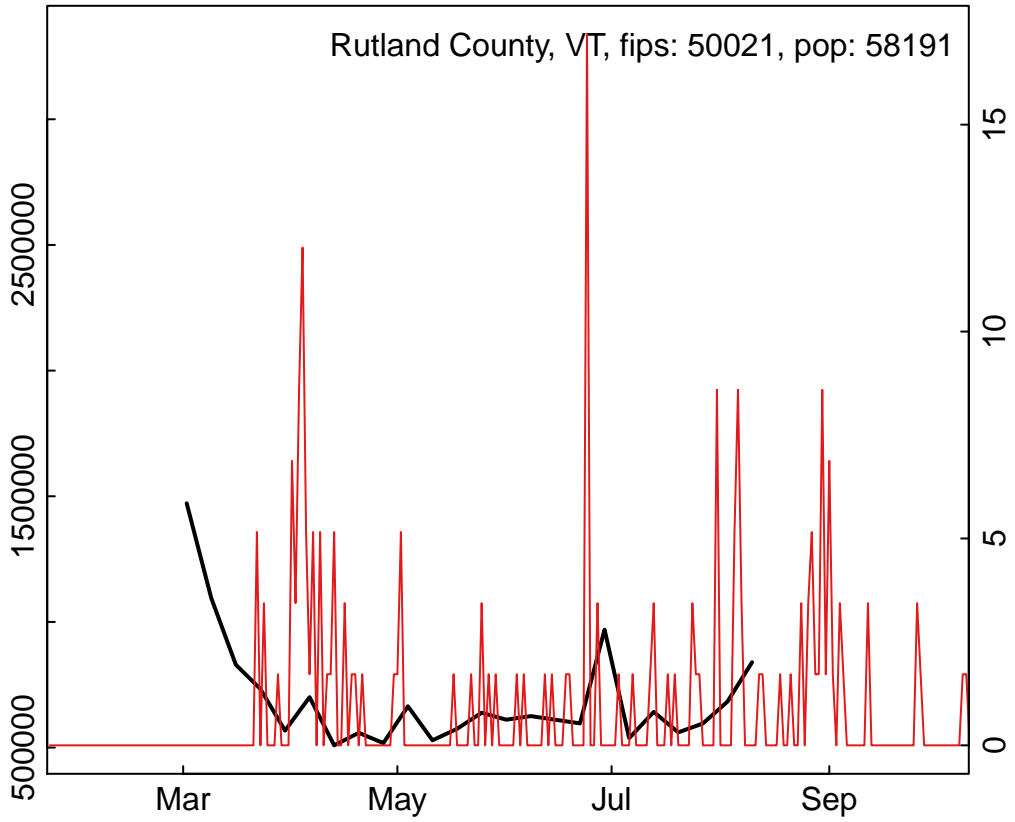

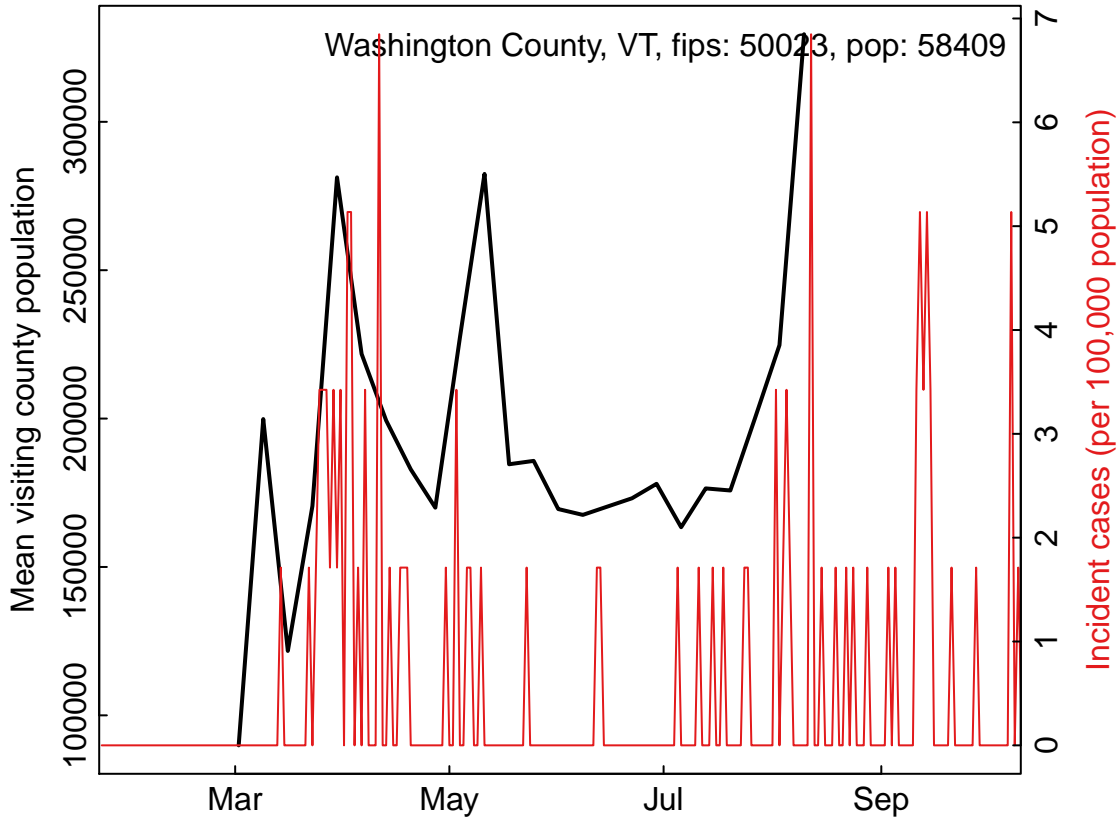

Mean visiting county population

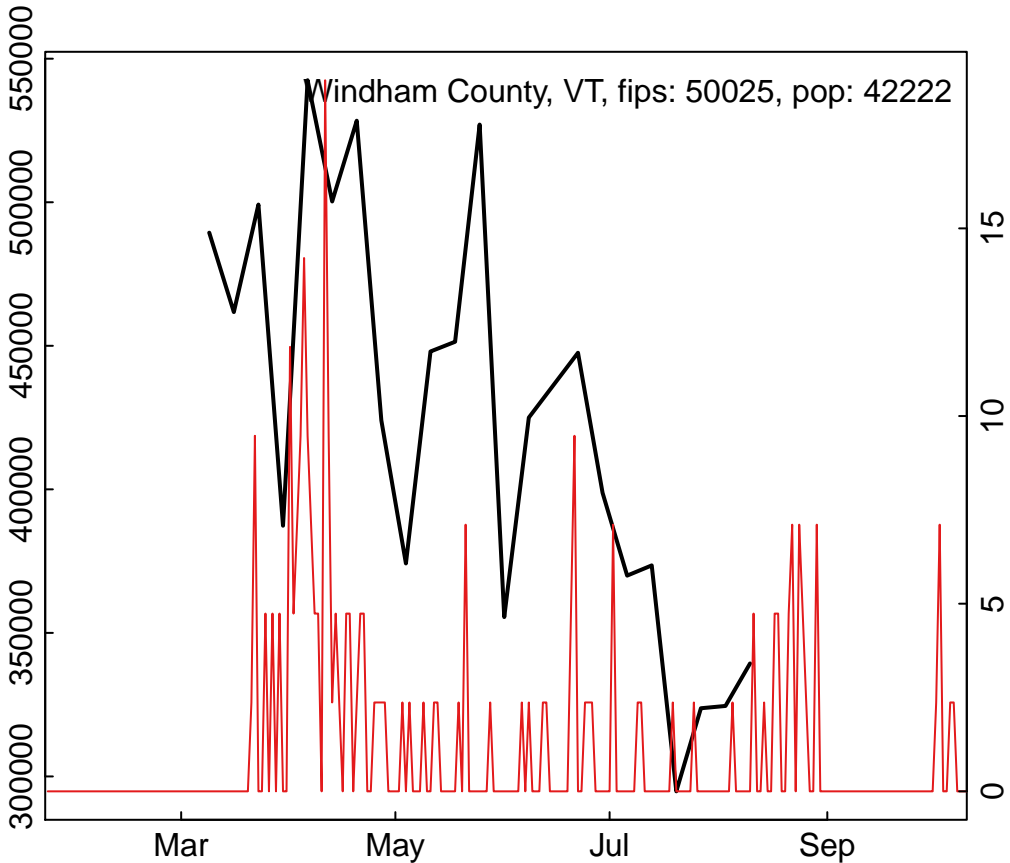

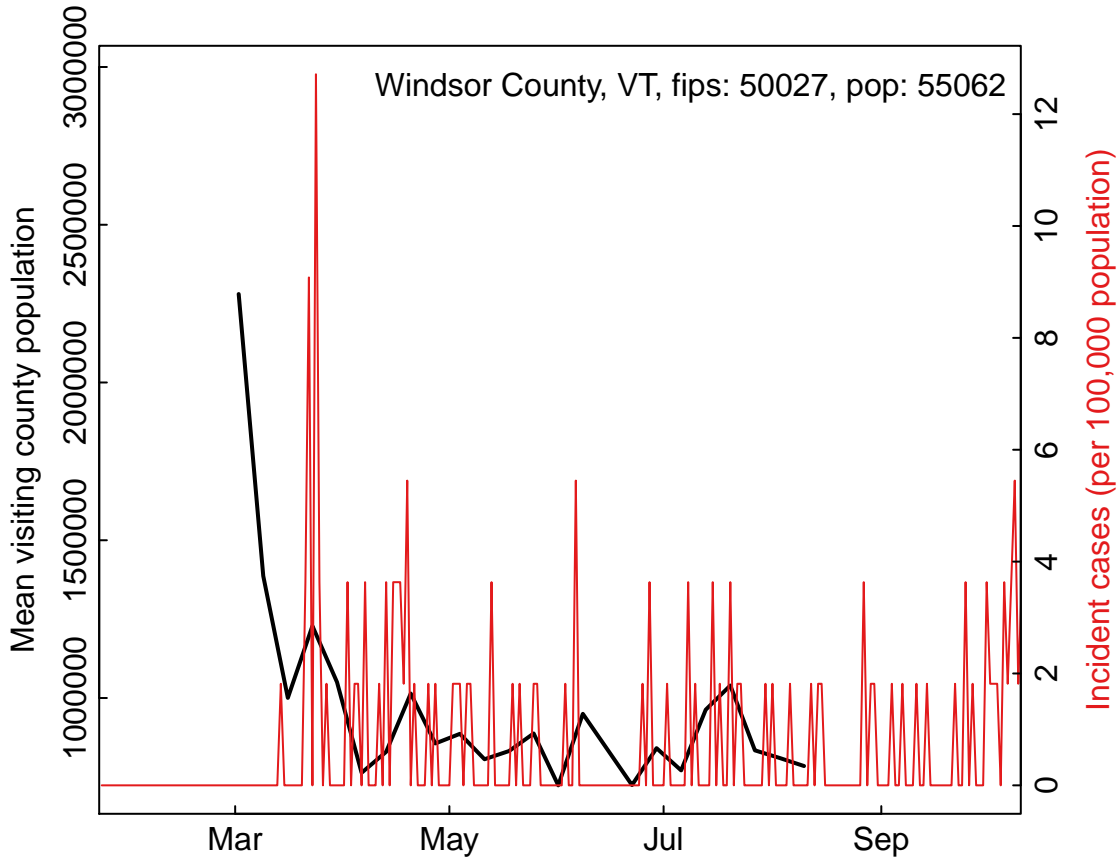

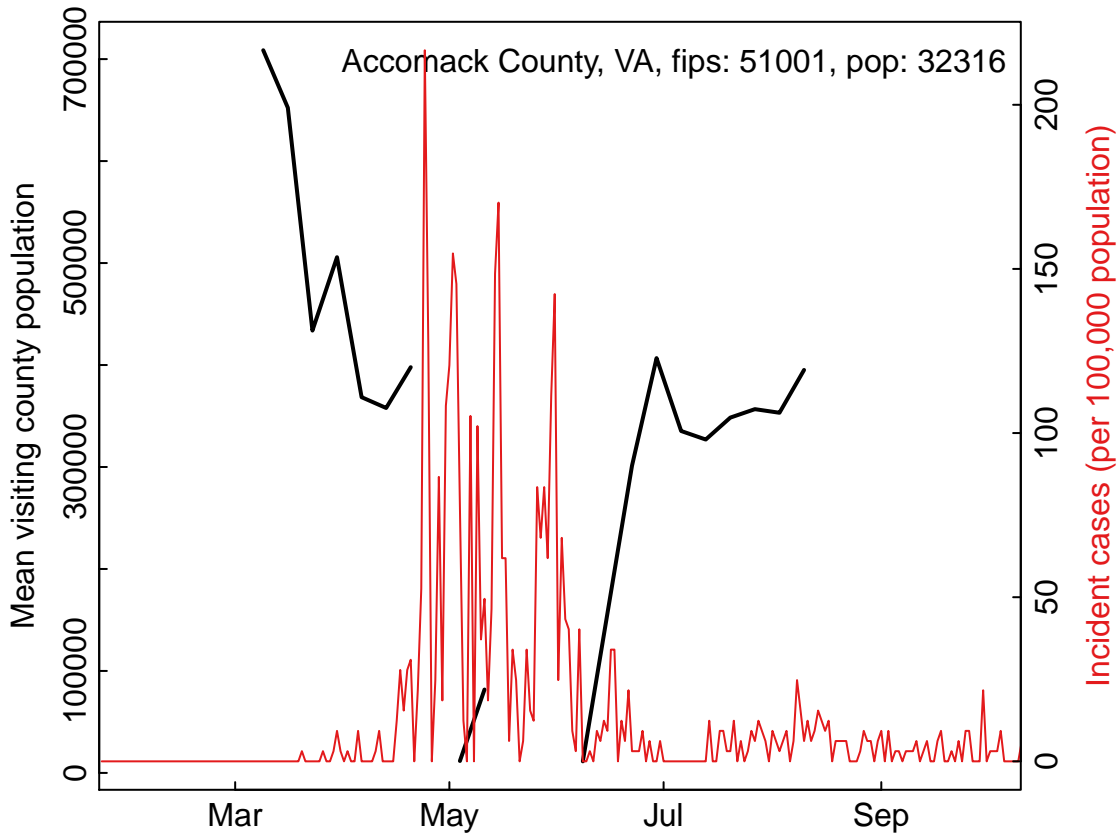

Albemarle County, VA, fips: 51003, pop: 109330

Mean visiting county population

1200000  
800000  
400000

Mar

May

Jul

Sep

Incident cases (per 100,000 population)

30  
25  
20  
15  
10  
5  
0

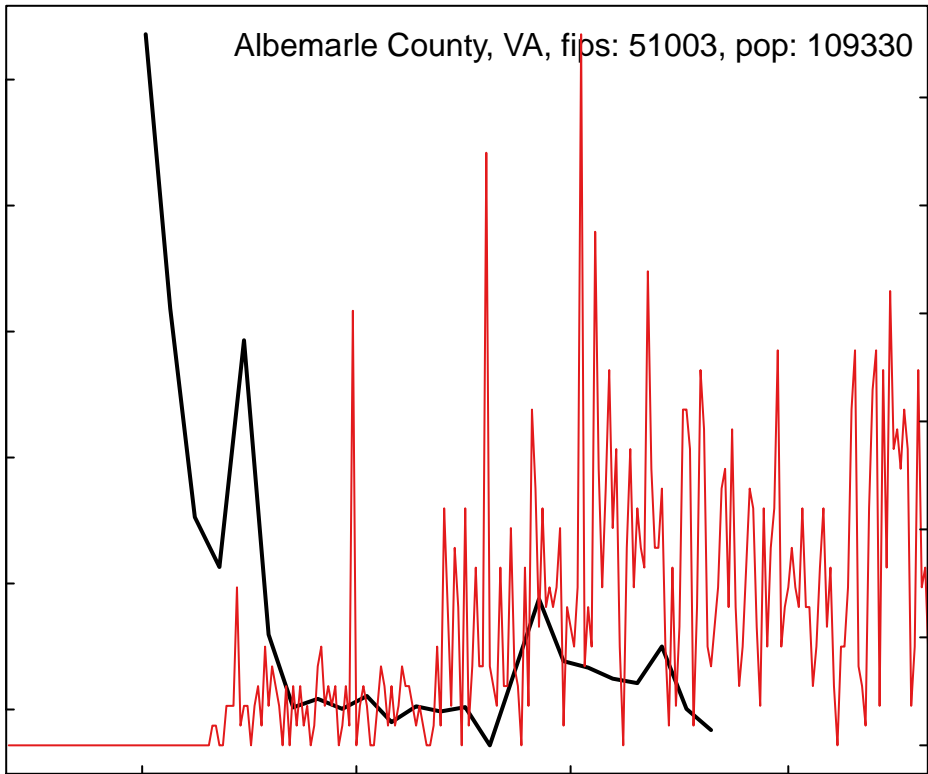



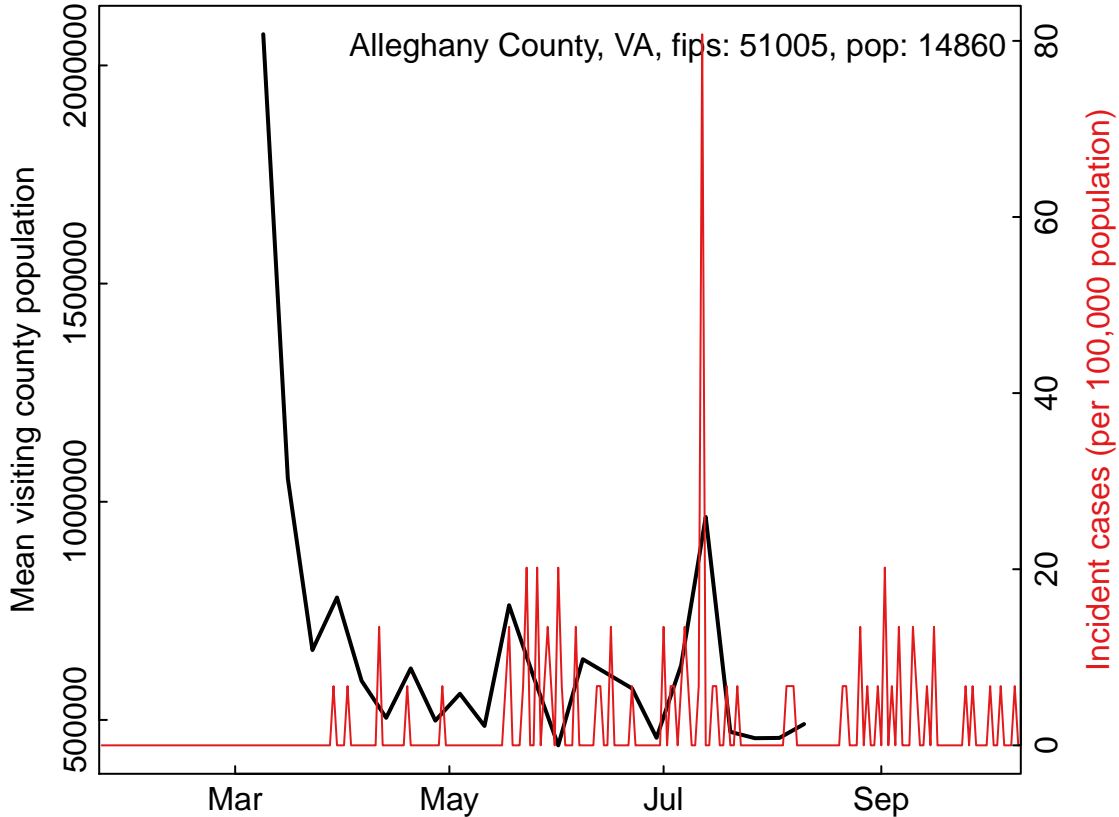

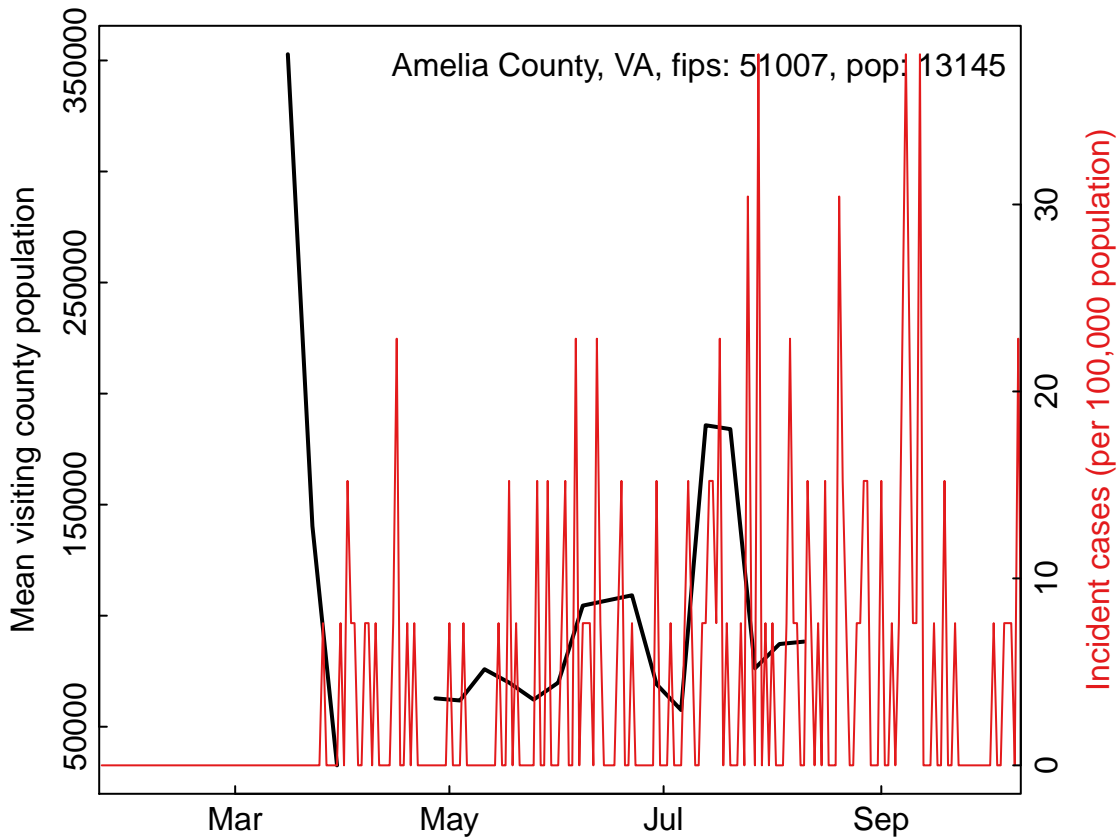

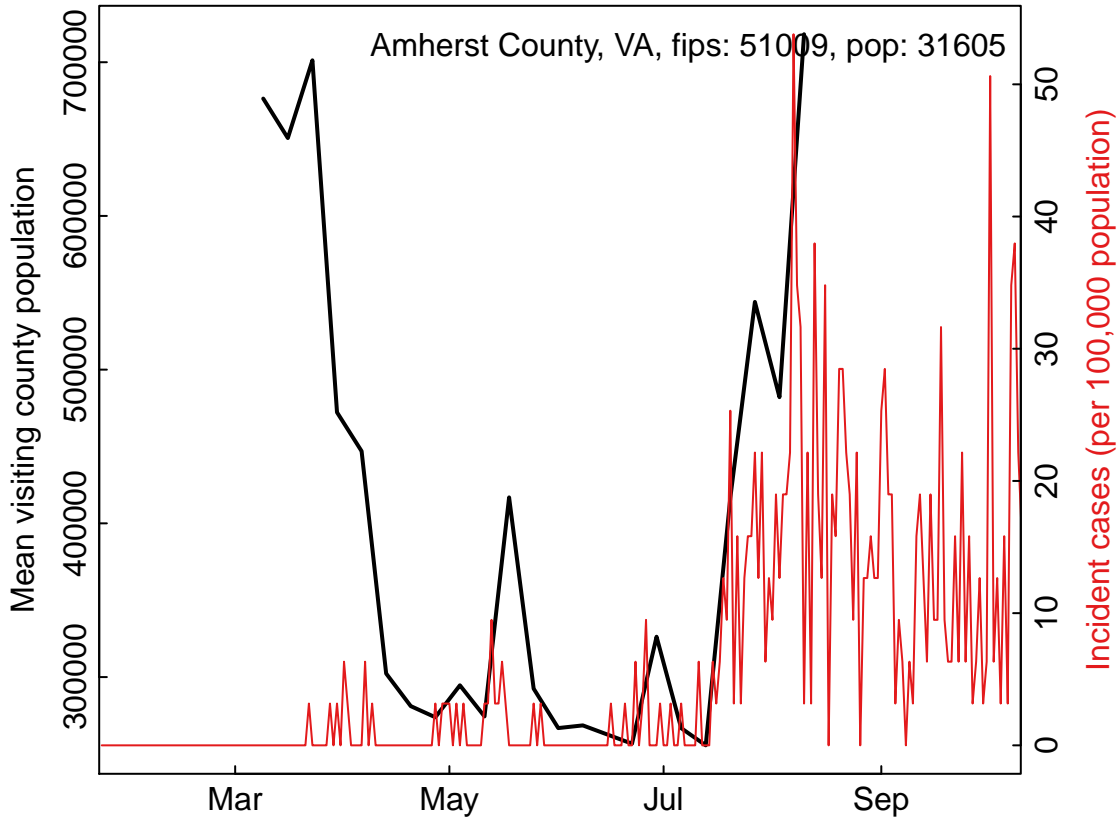

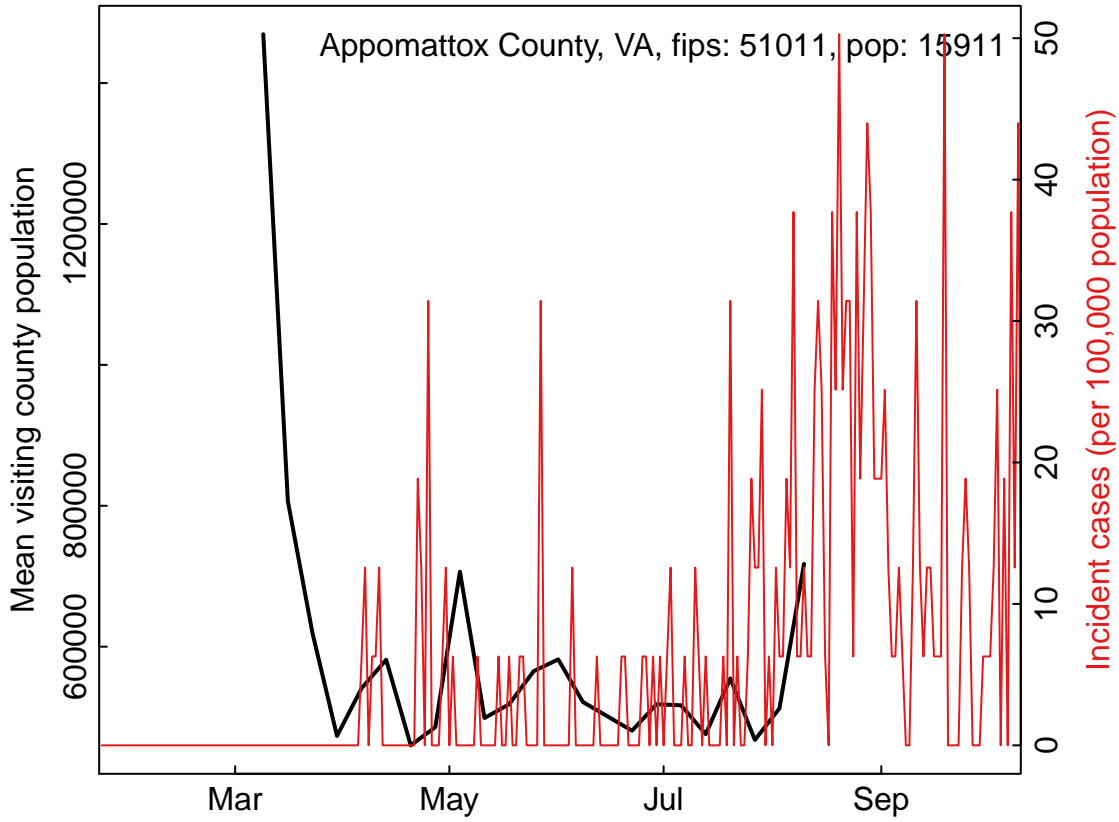

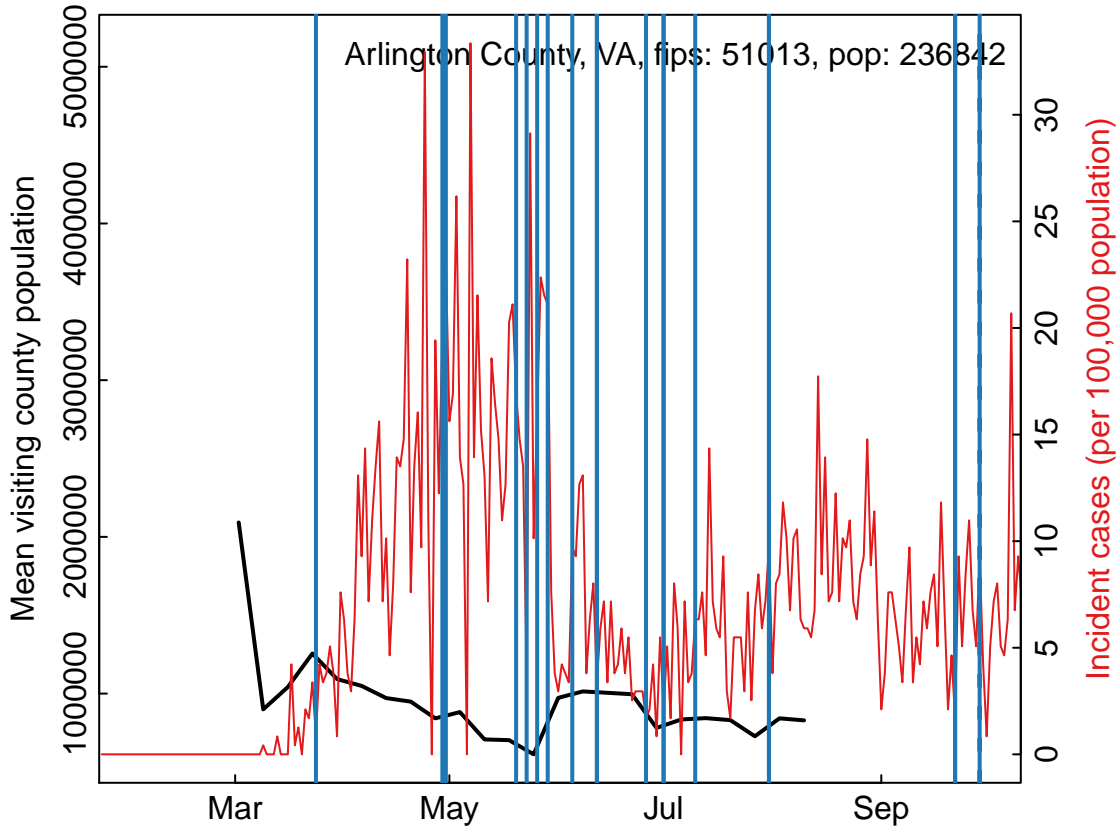

Augusta County, VA, fips: 51015, pop: 75558

Mean visiting county population

1200000  
800000  
400000

Mar

May

Jul

Sep

20  
15  
10  
5  
0

Incident cases (per 100,000 population)

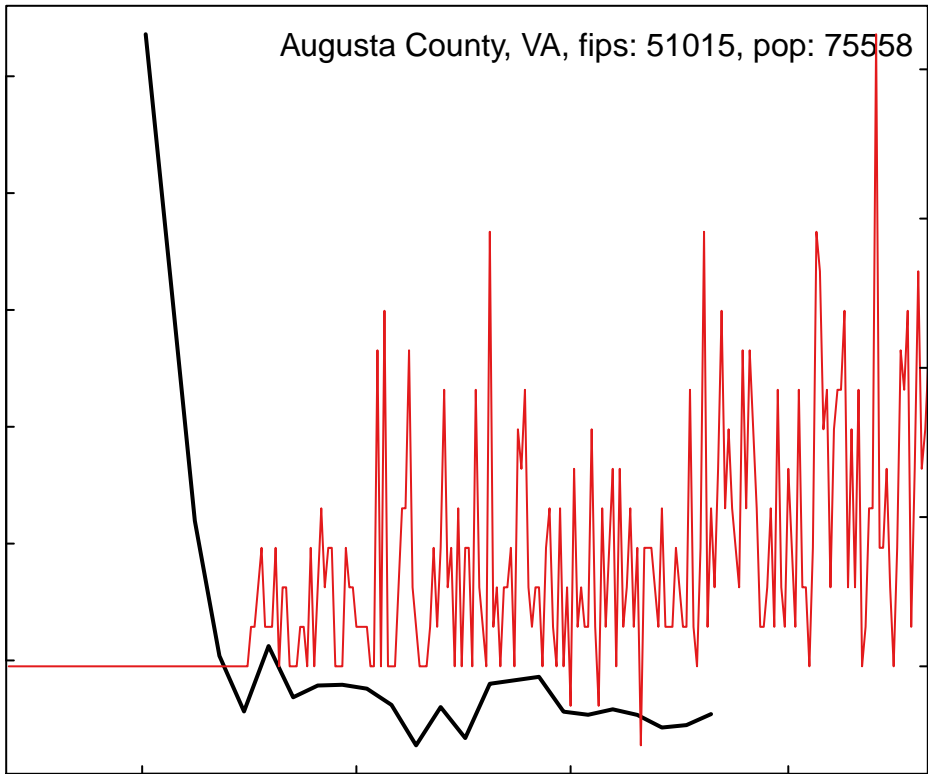

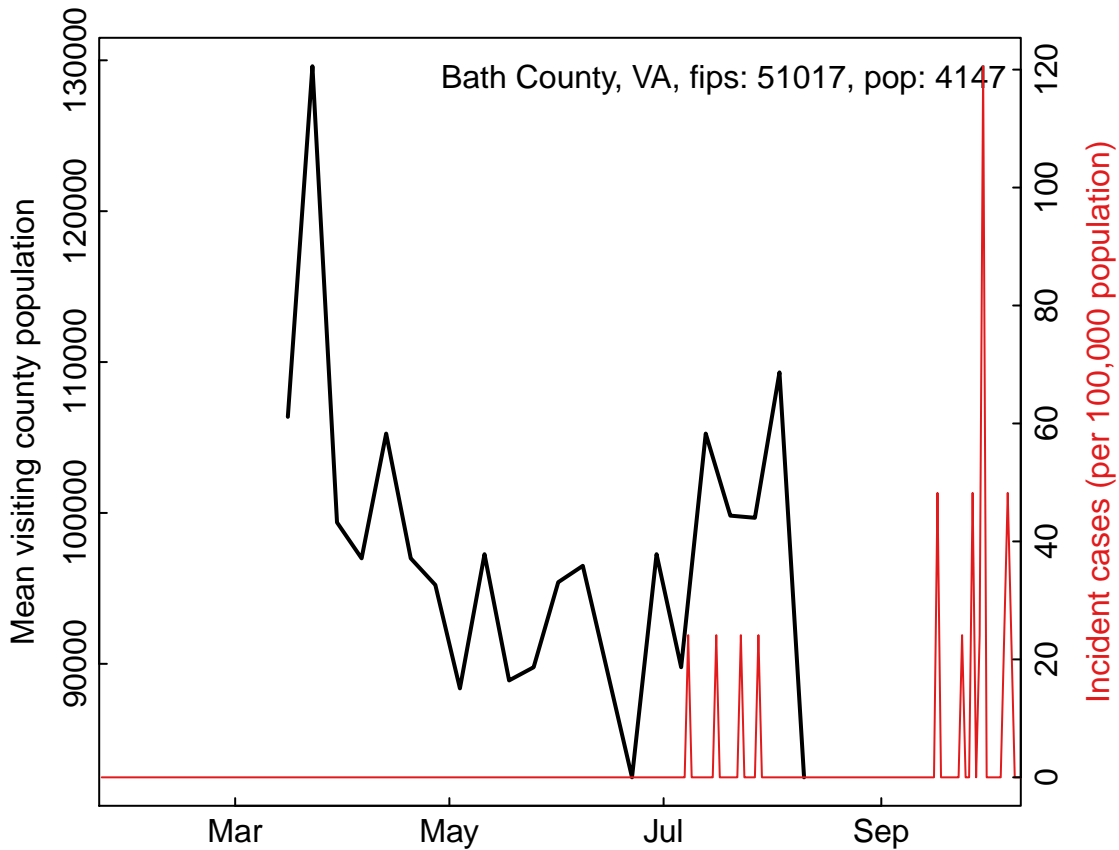

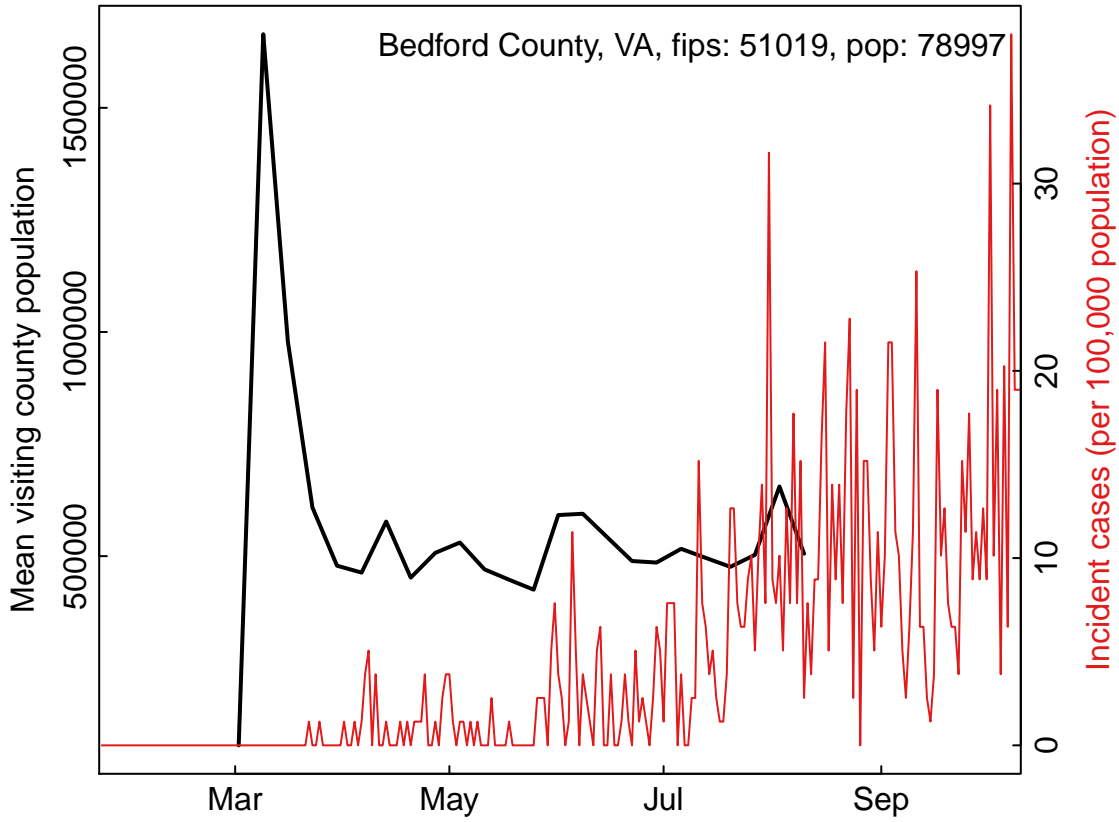



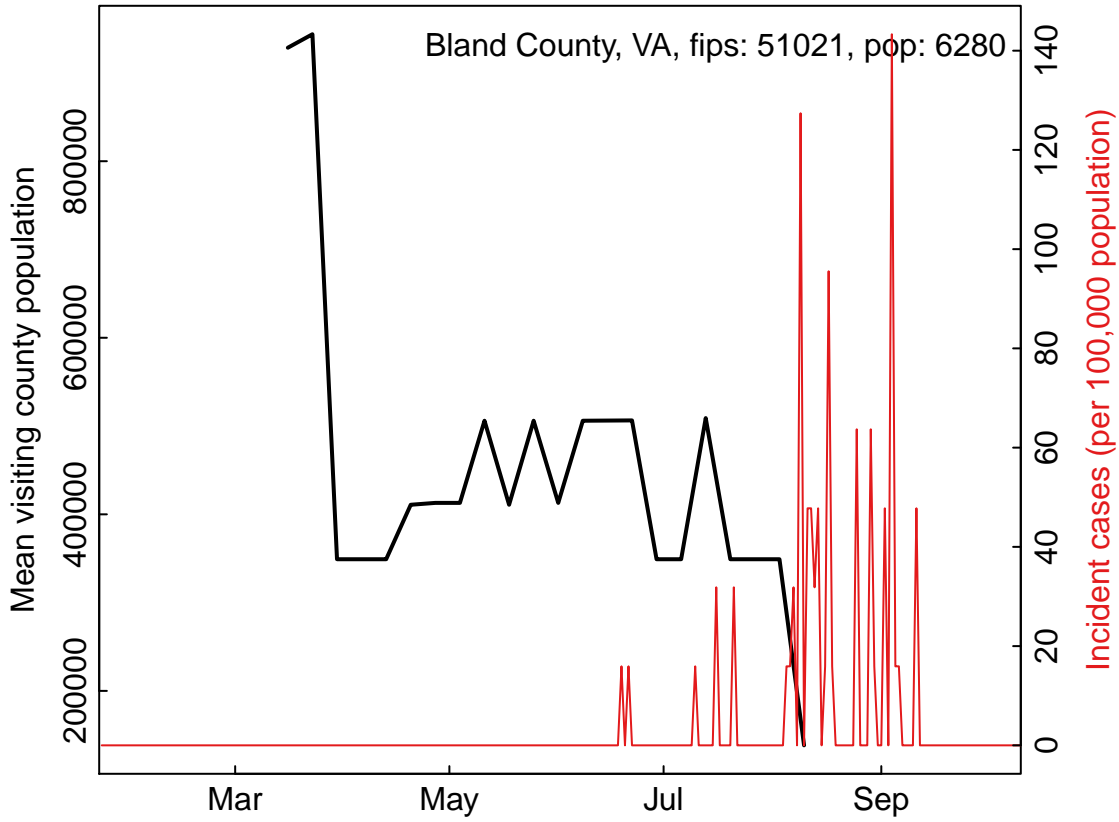

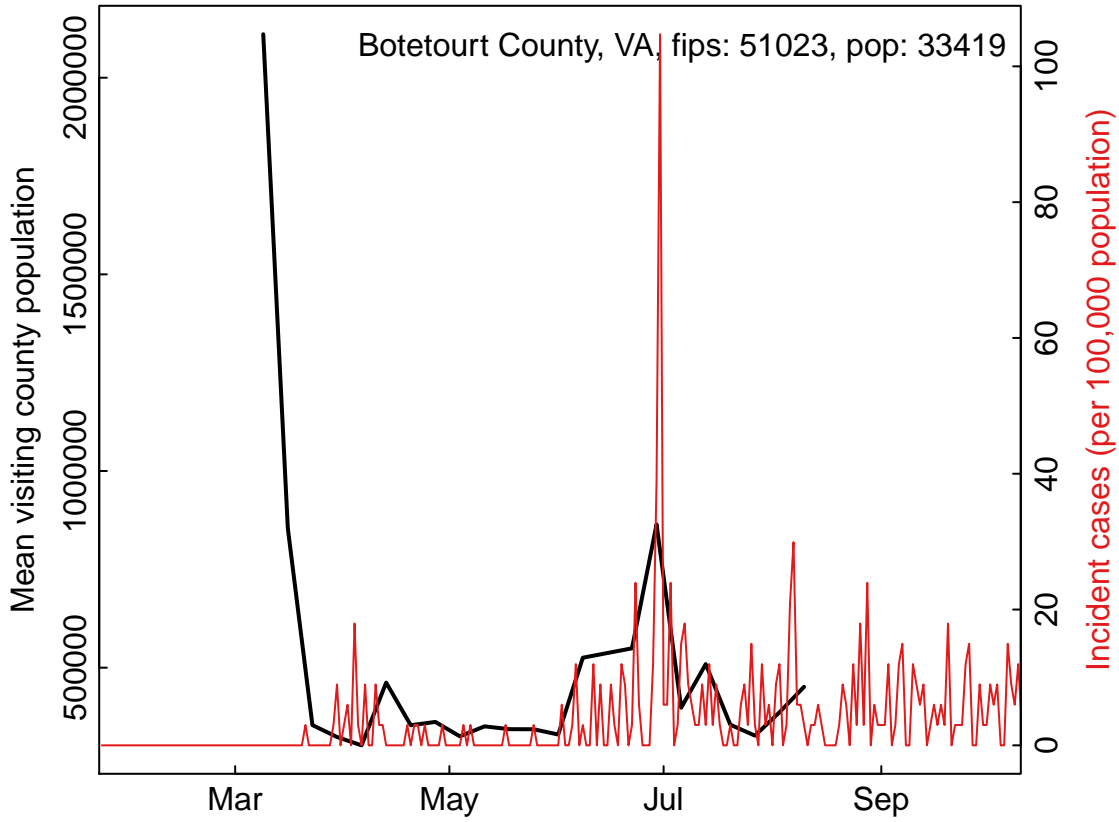

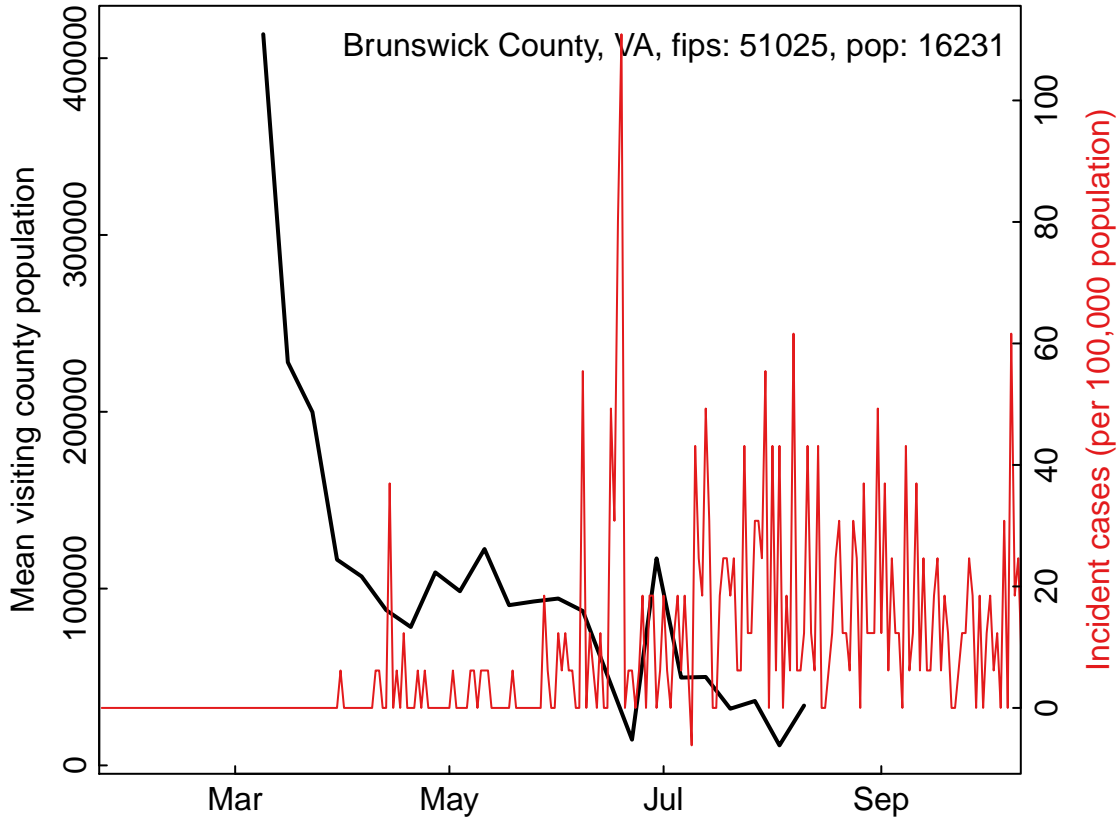

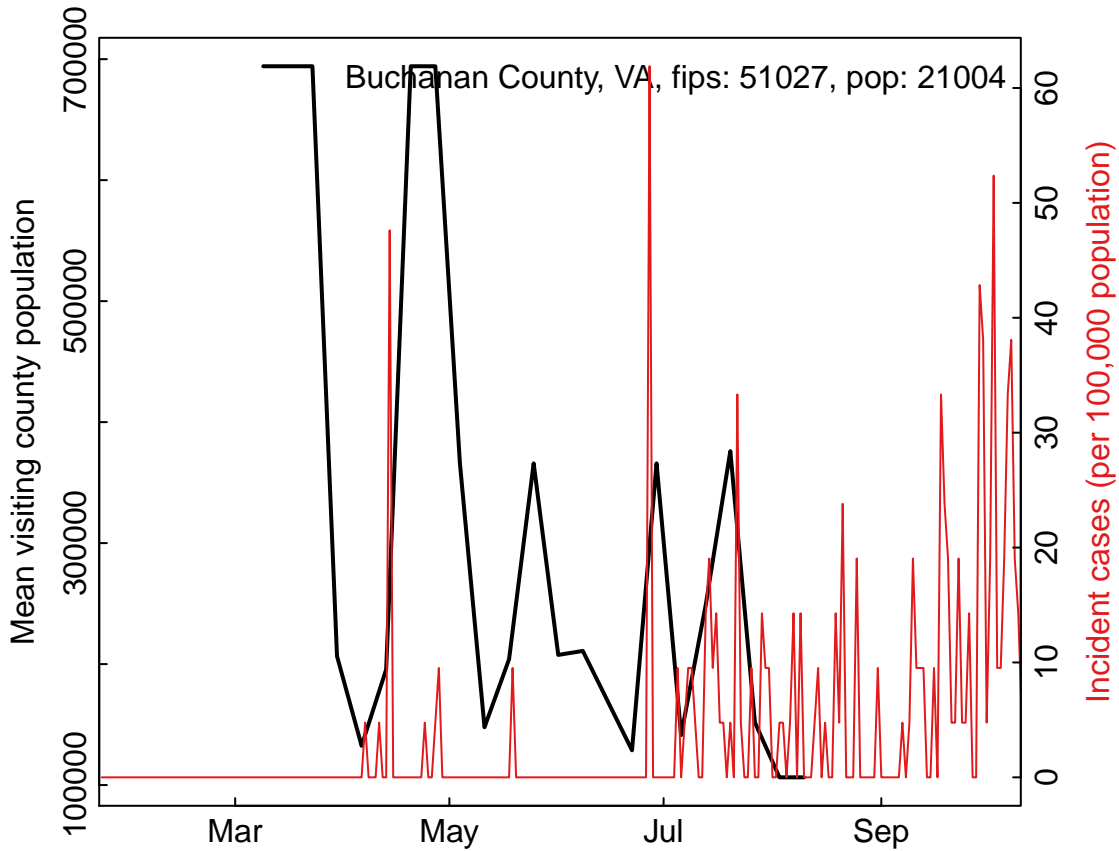

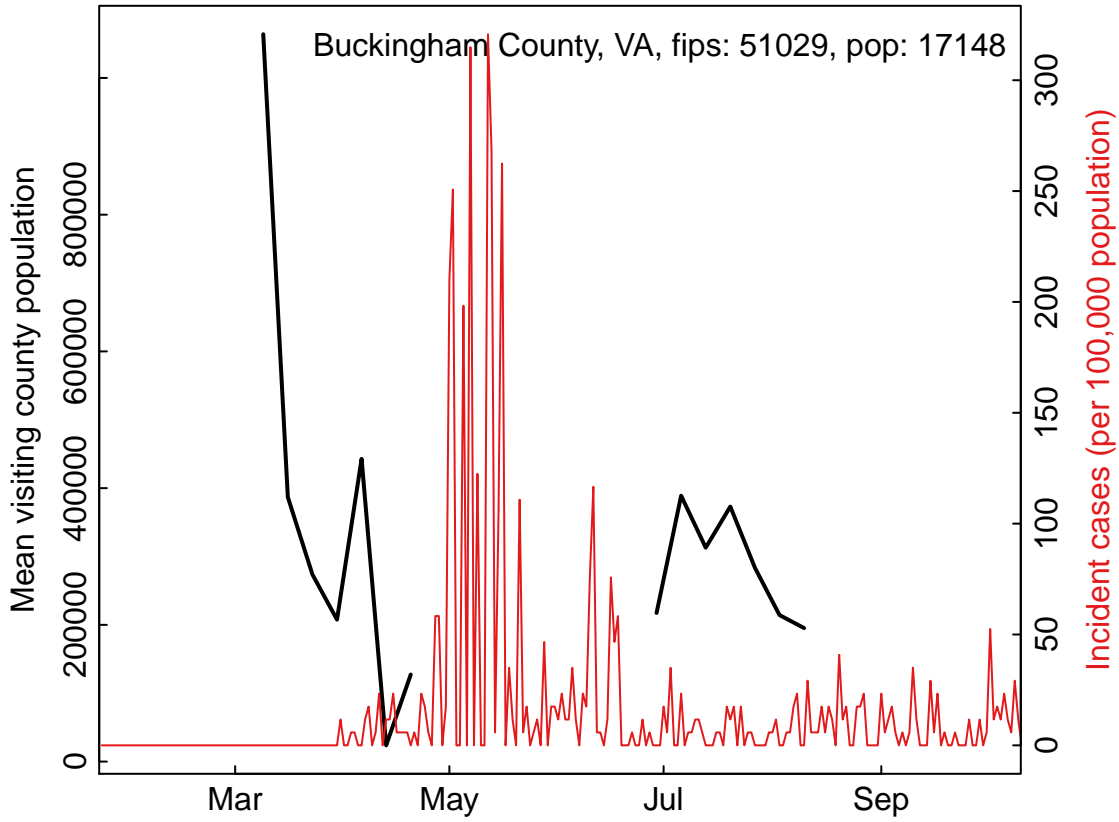

Campbell County, VA, fips: 51031, pop: 54885

Mean visiting county population

700000  
500000  
300000

Mar May Jul Sep

Incident cases (per 100,000 population)

40  
30  
20  
10  
0

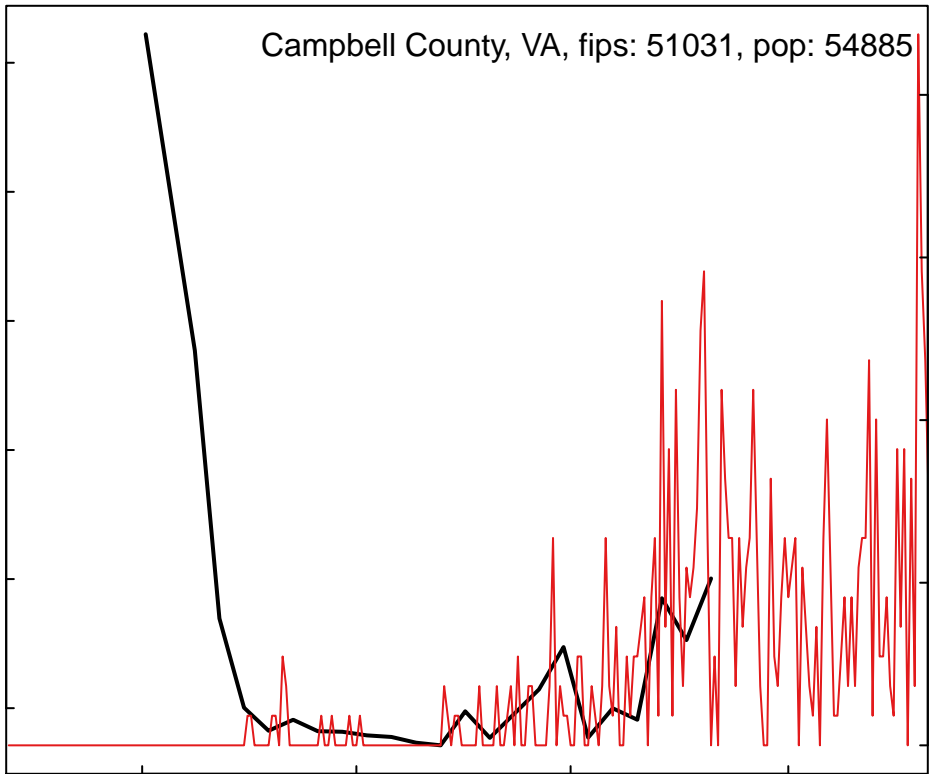

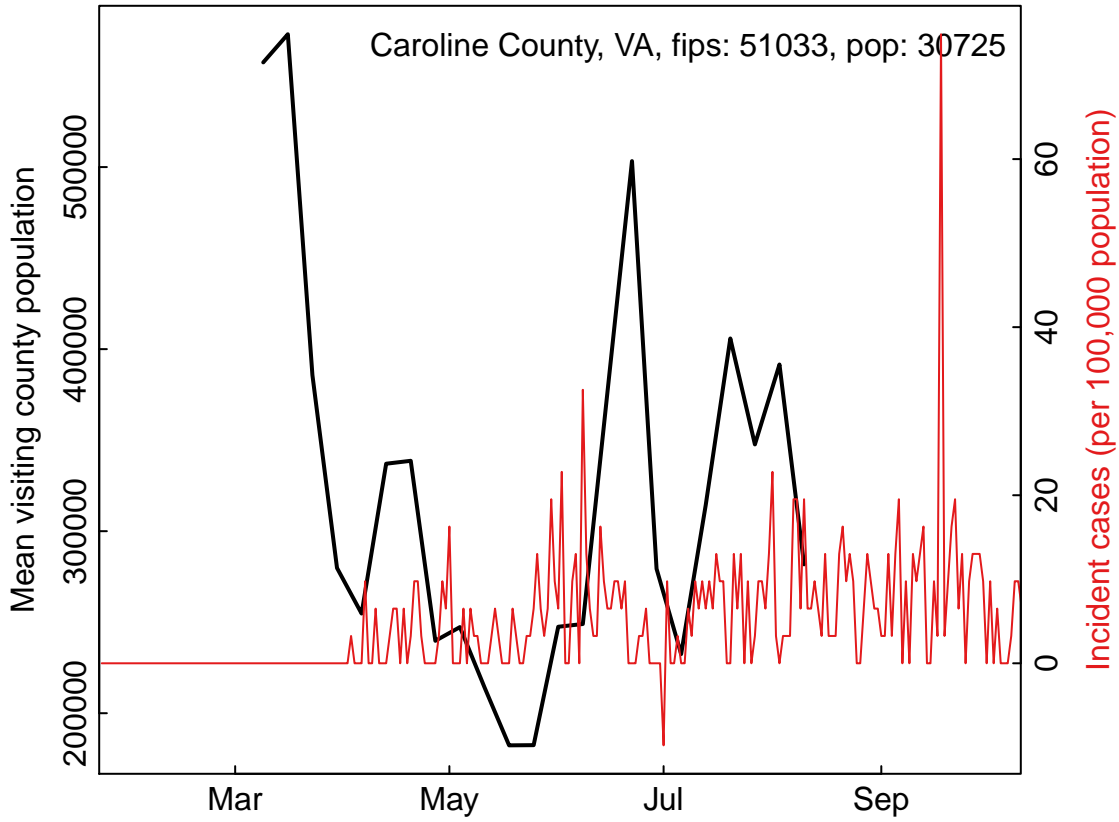

Carroll County, VA, fips: 51035, pop: 29791

Mean visiting county population

800000  
600000  
400000  
200000

Mar

May

Jul

Sep

50  
40  
30  
20  
10  
0

Incident cases (per 100,000 population)

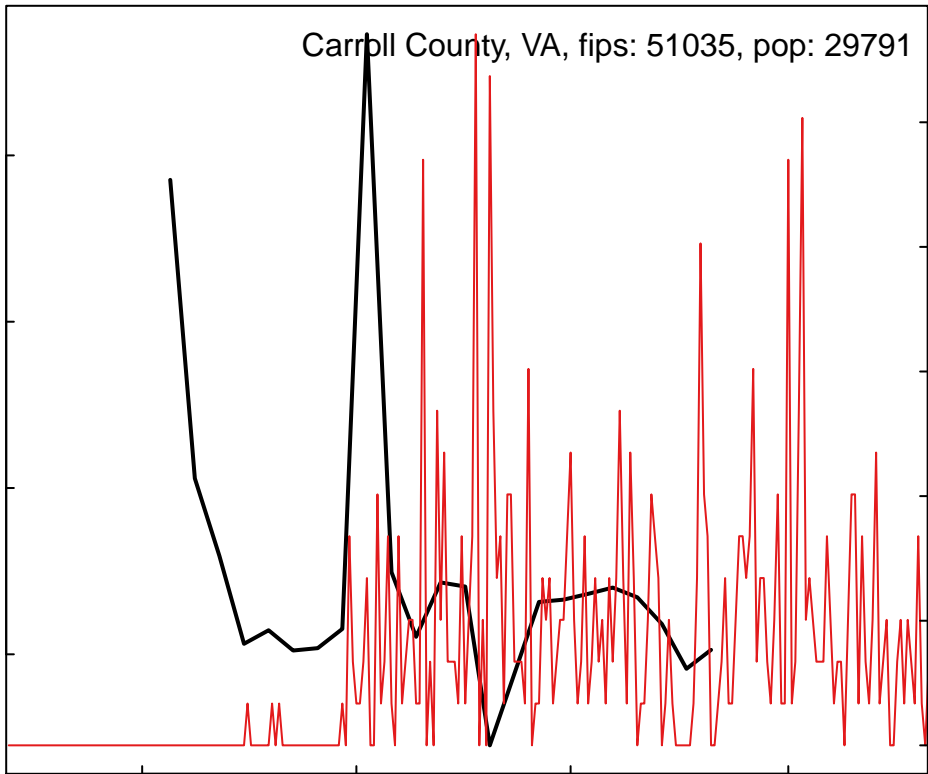



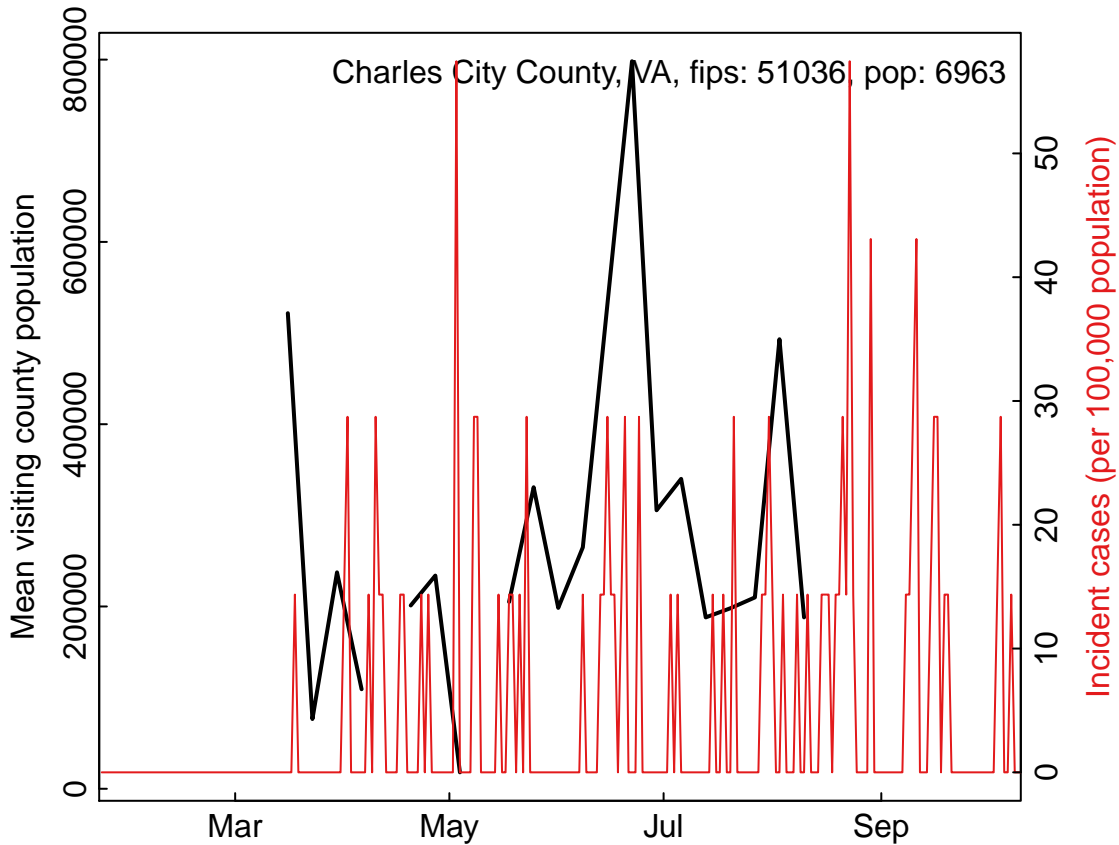

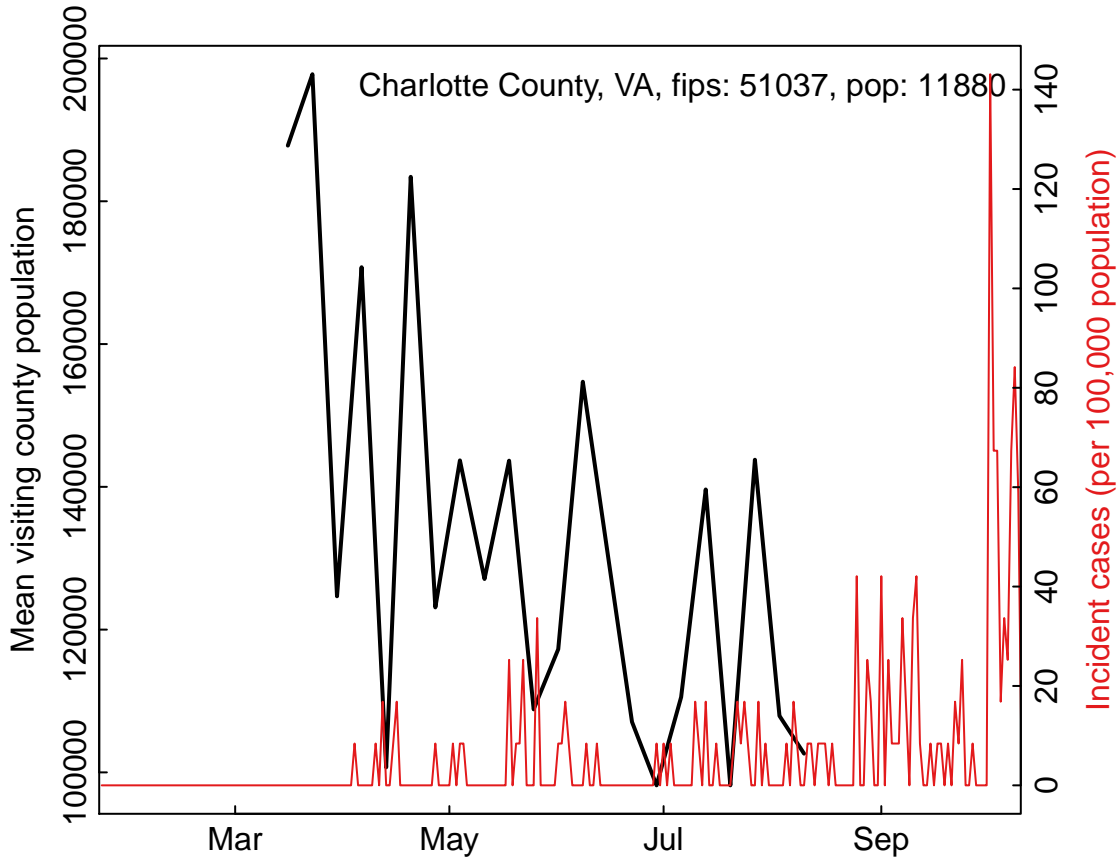

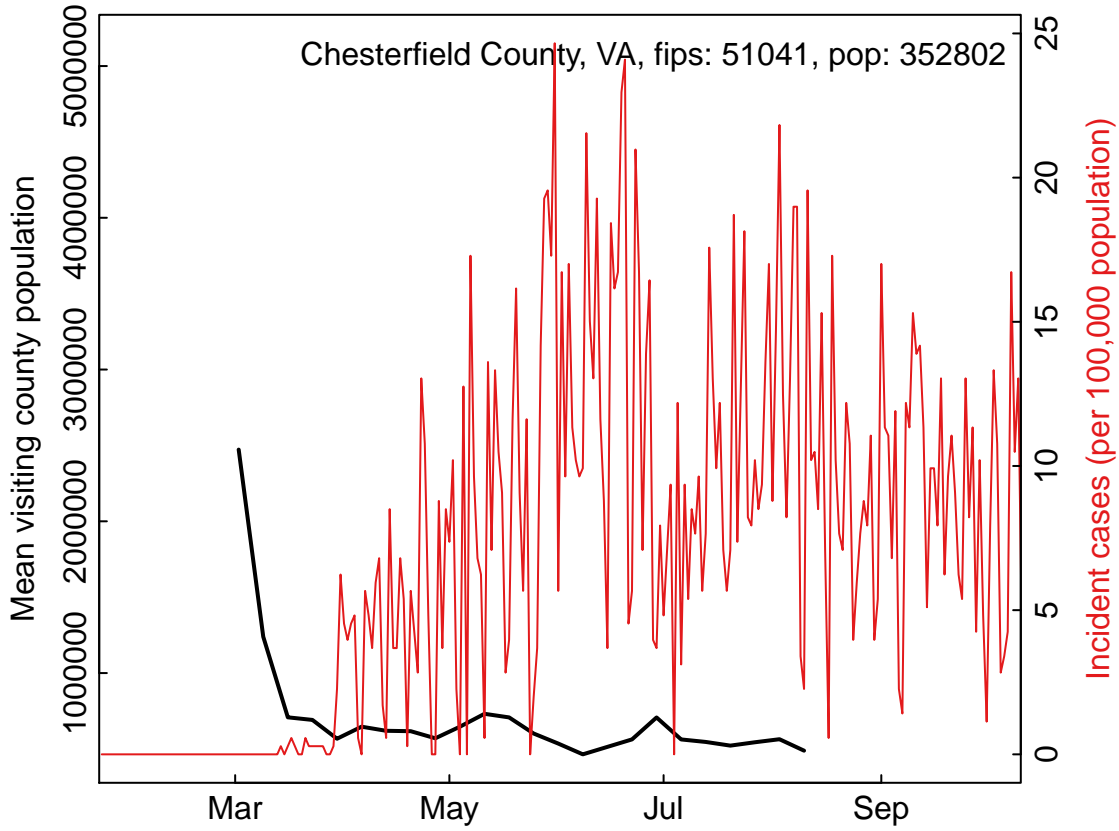

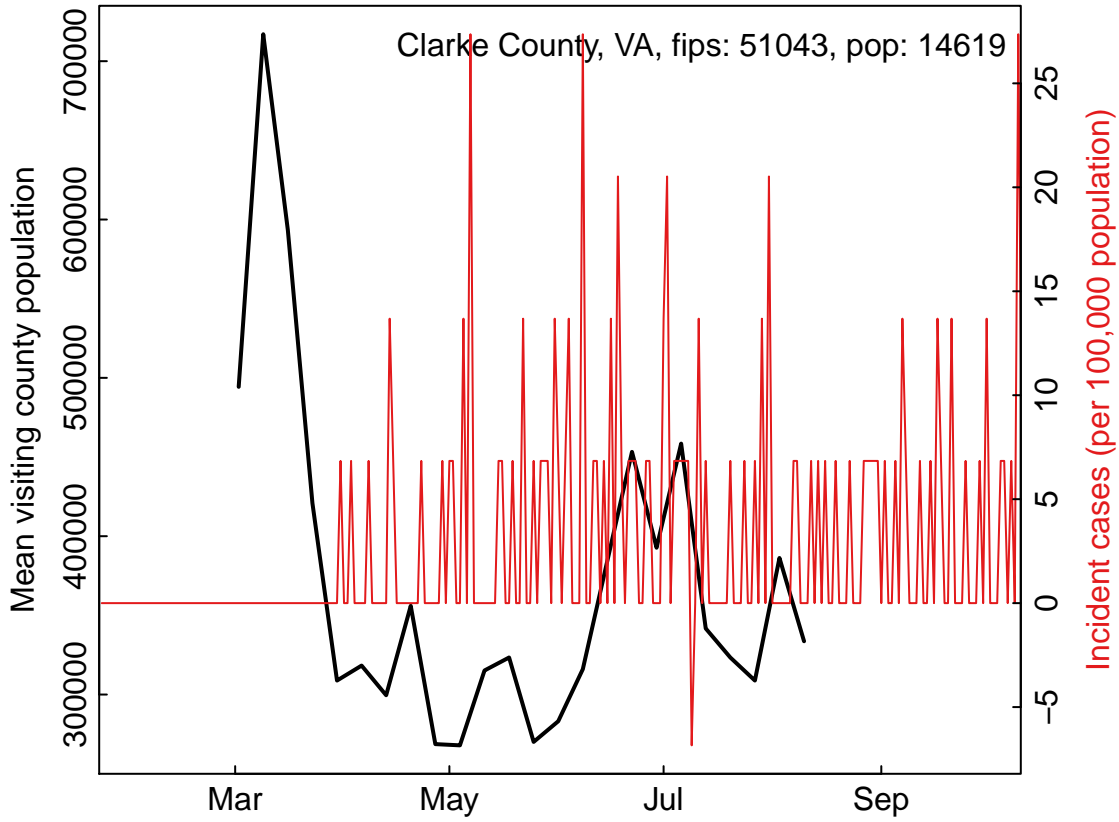

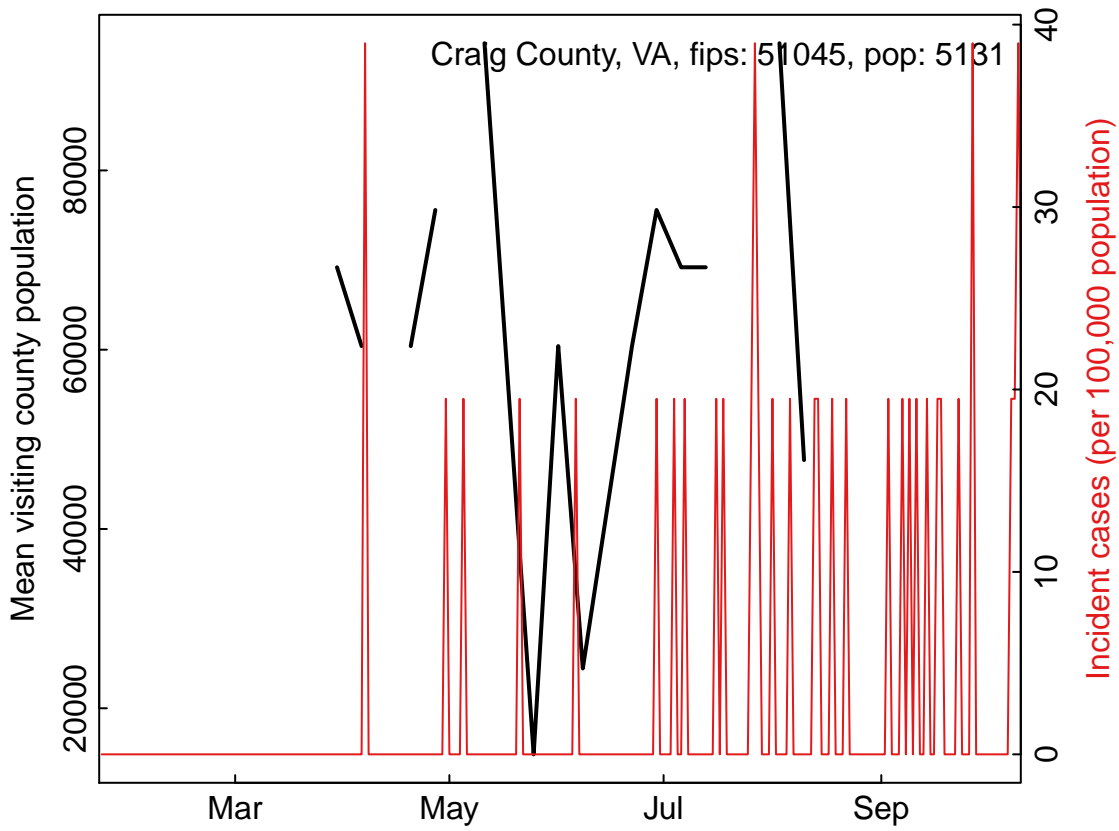

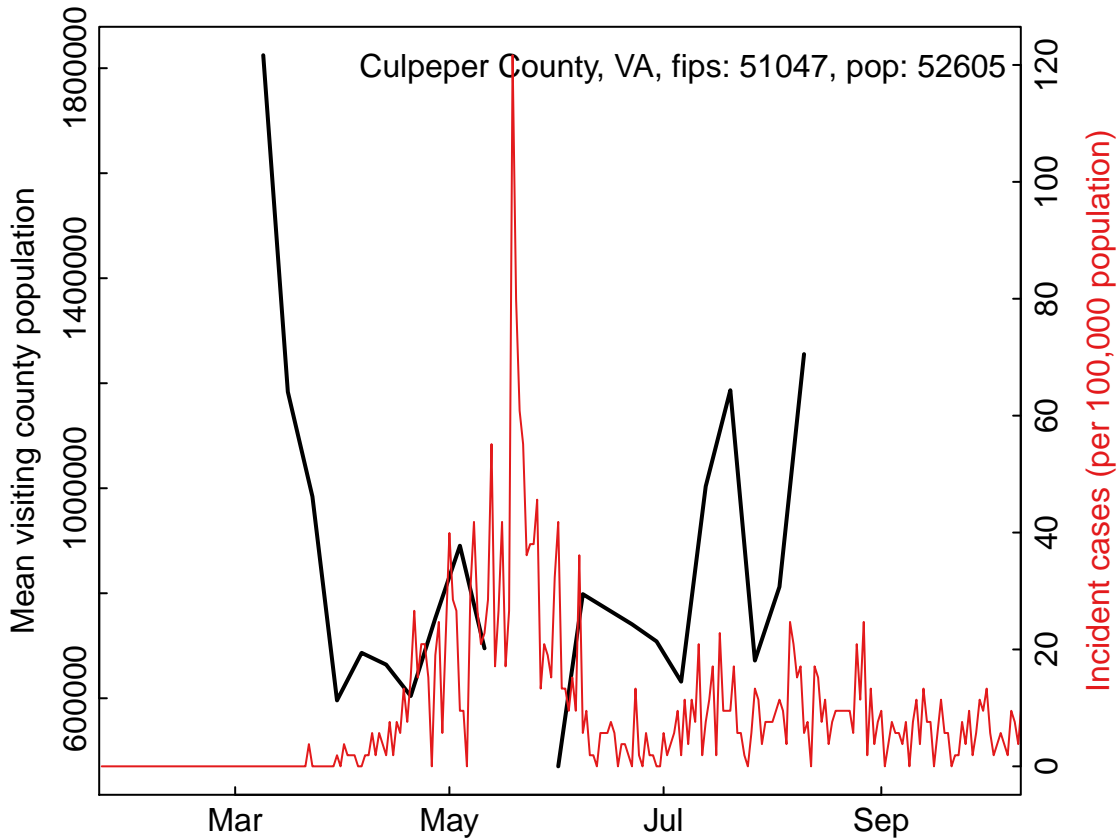

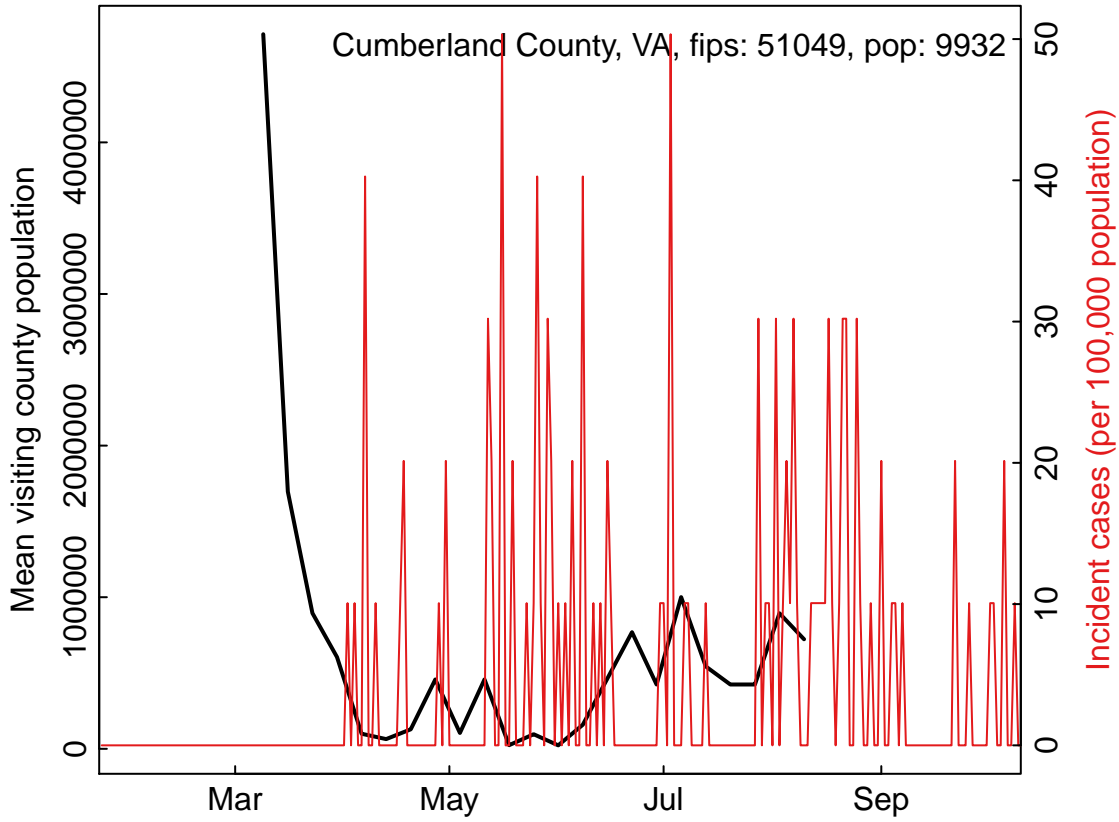

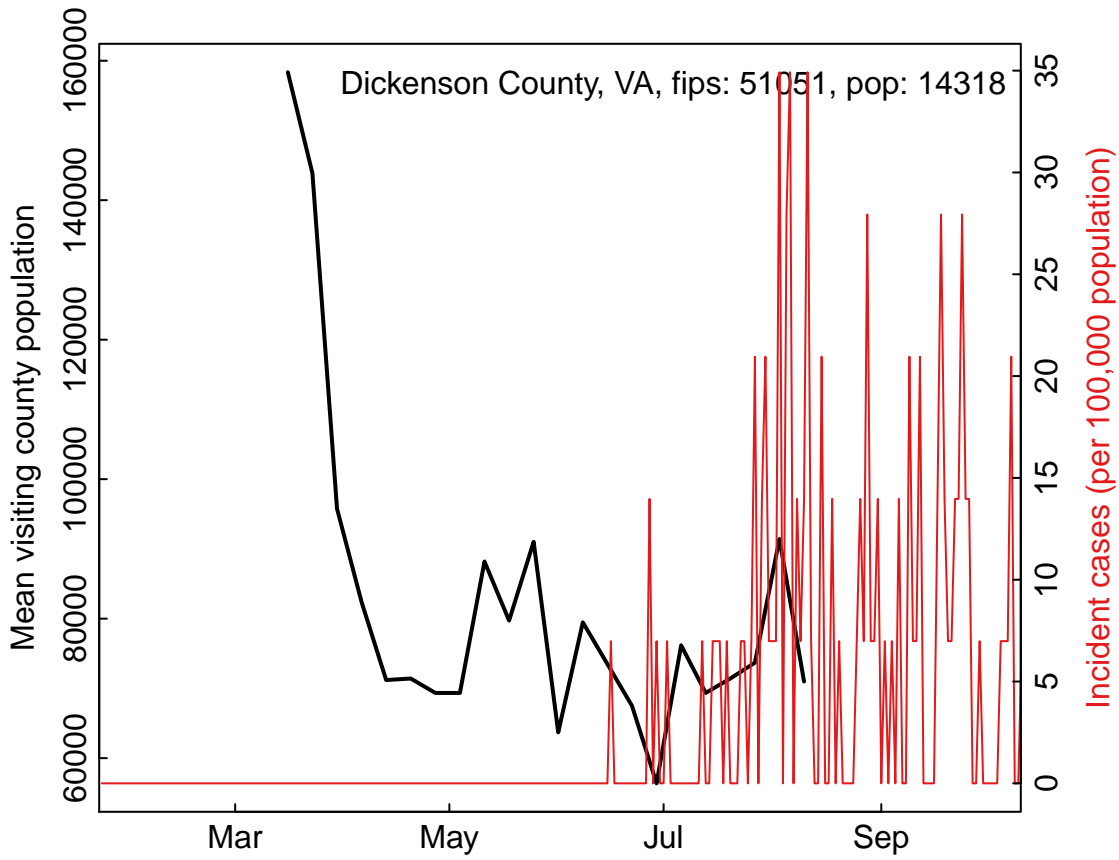



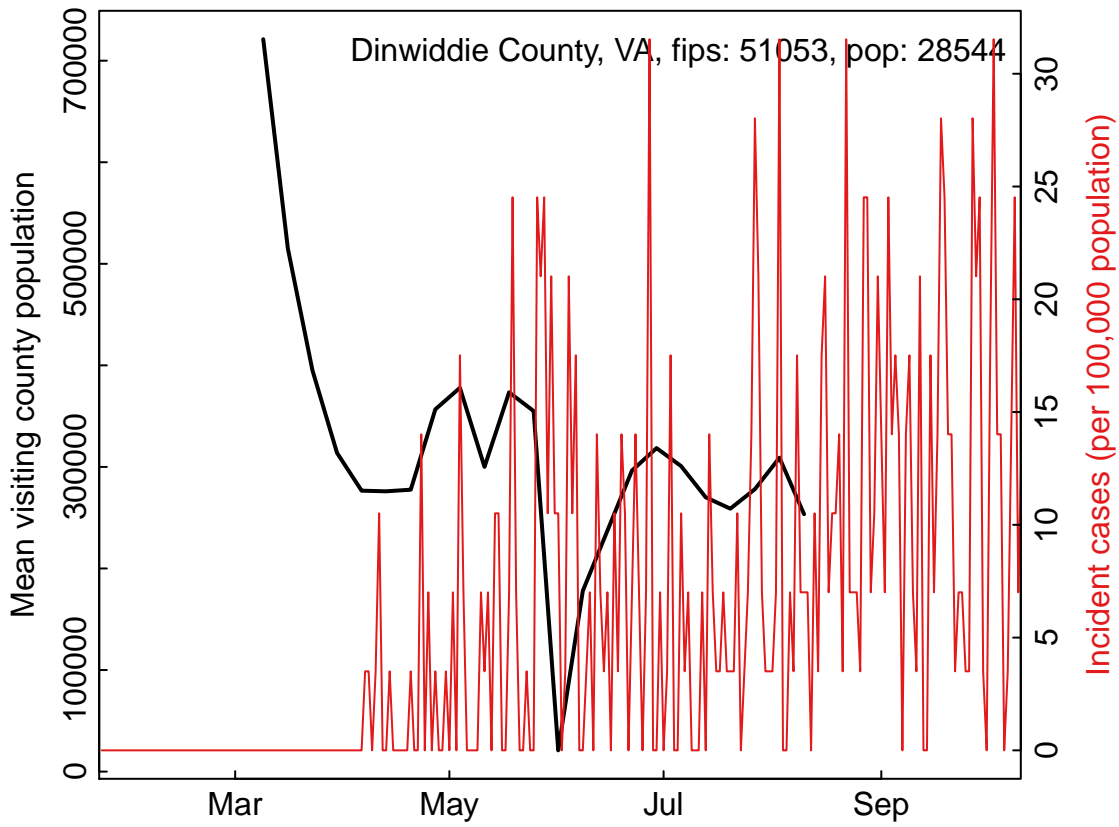

Essex County, VA, fips: 51057, pop: 10953

Mean visiting county population

500000  
1500000  
2500000

Mar May Jul Sep

Incident cases (per 100,000 population)

0 20 40 60 80

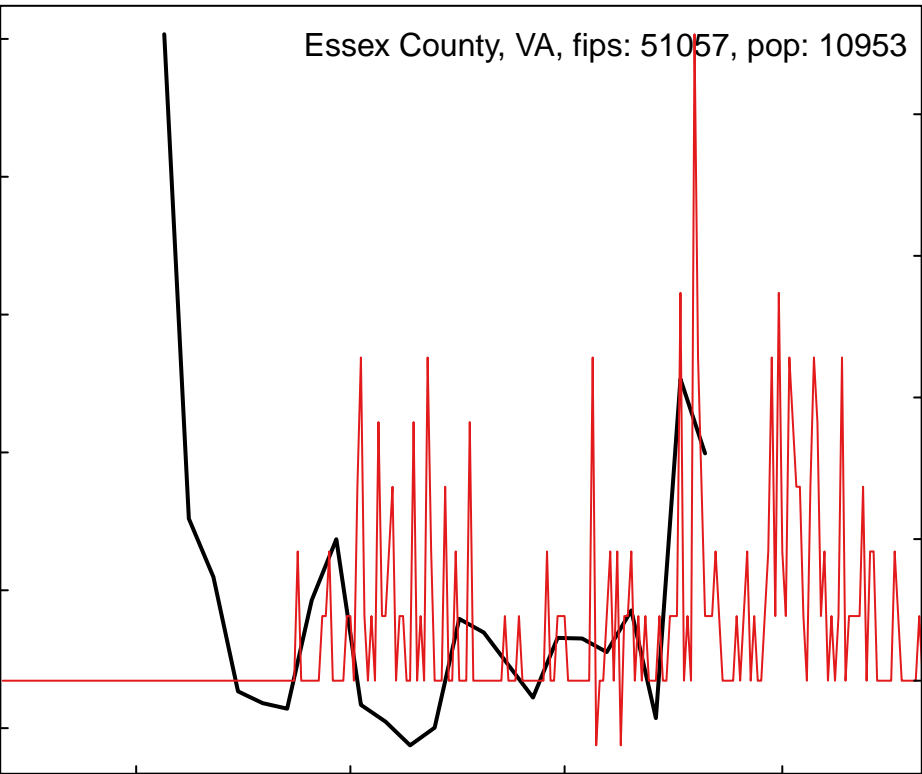

Fairfax County, VA, fips: 51059, pop: 1147532

Mean visiting county population

2500000  
1500000  
500000

Incident cases (per 100,000 population)

40  
30  
20  
10  
0

Mar May Jul Sep

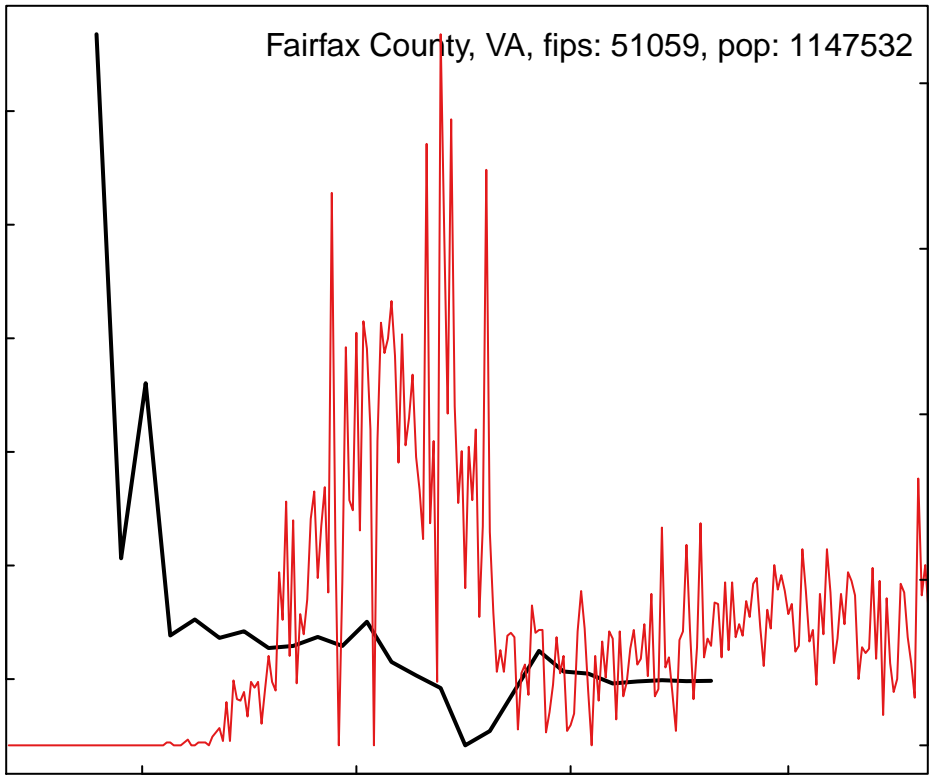

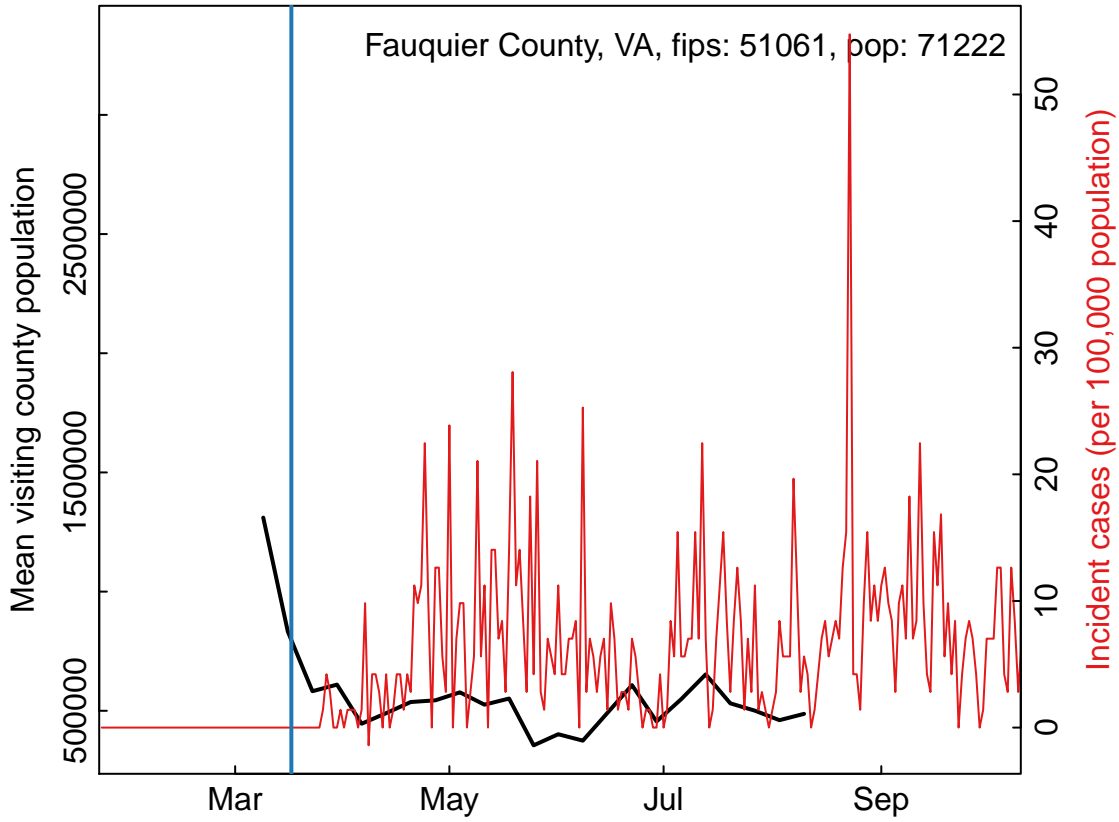

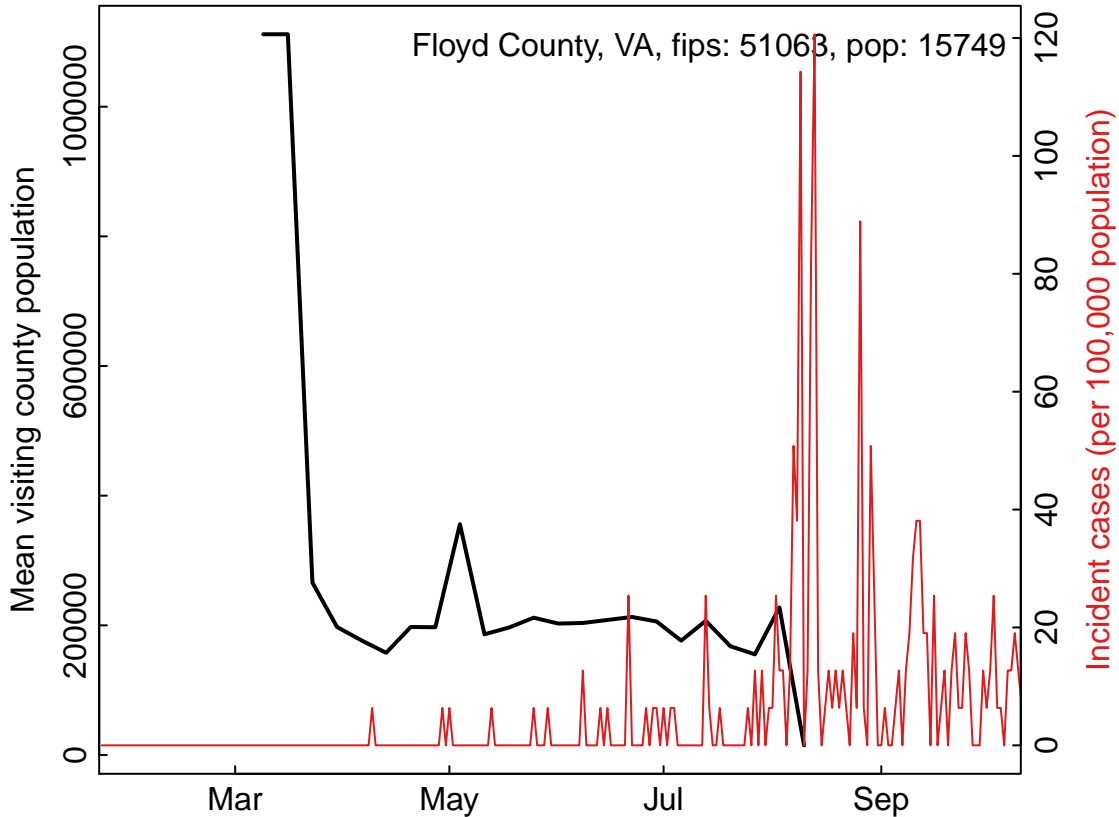

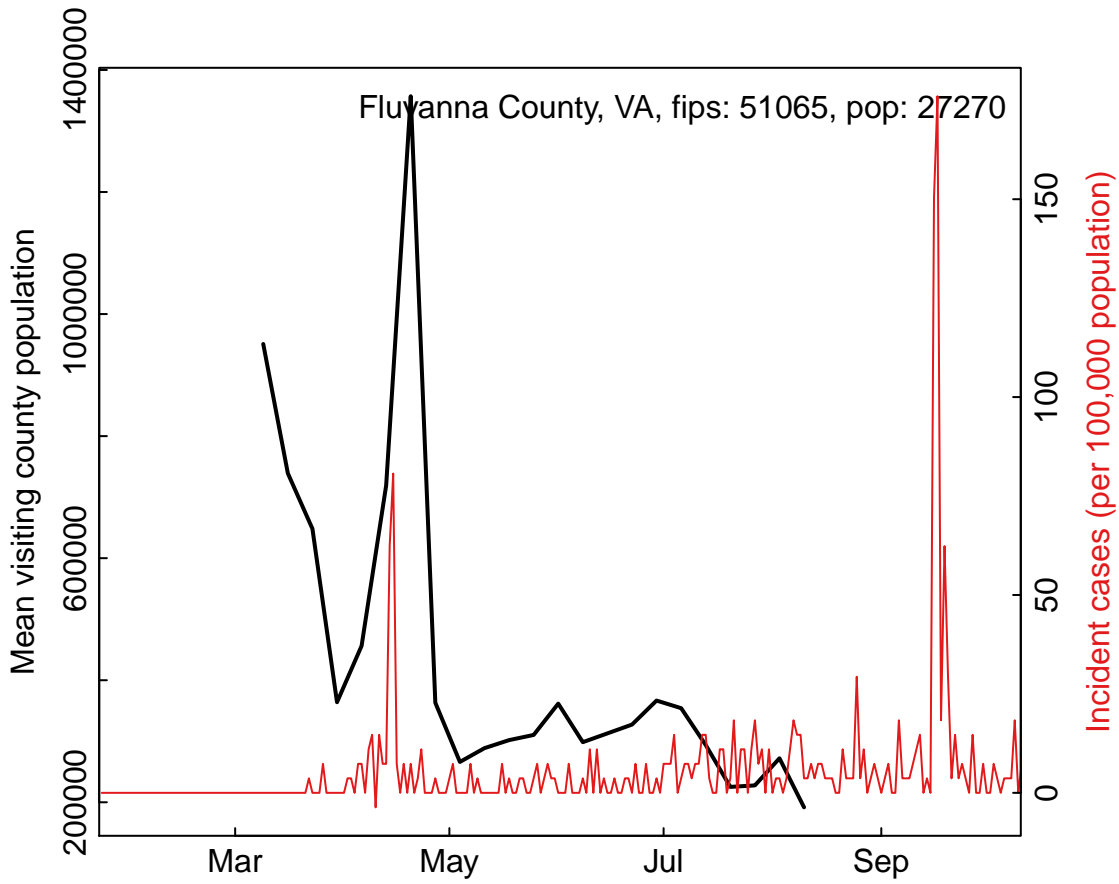

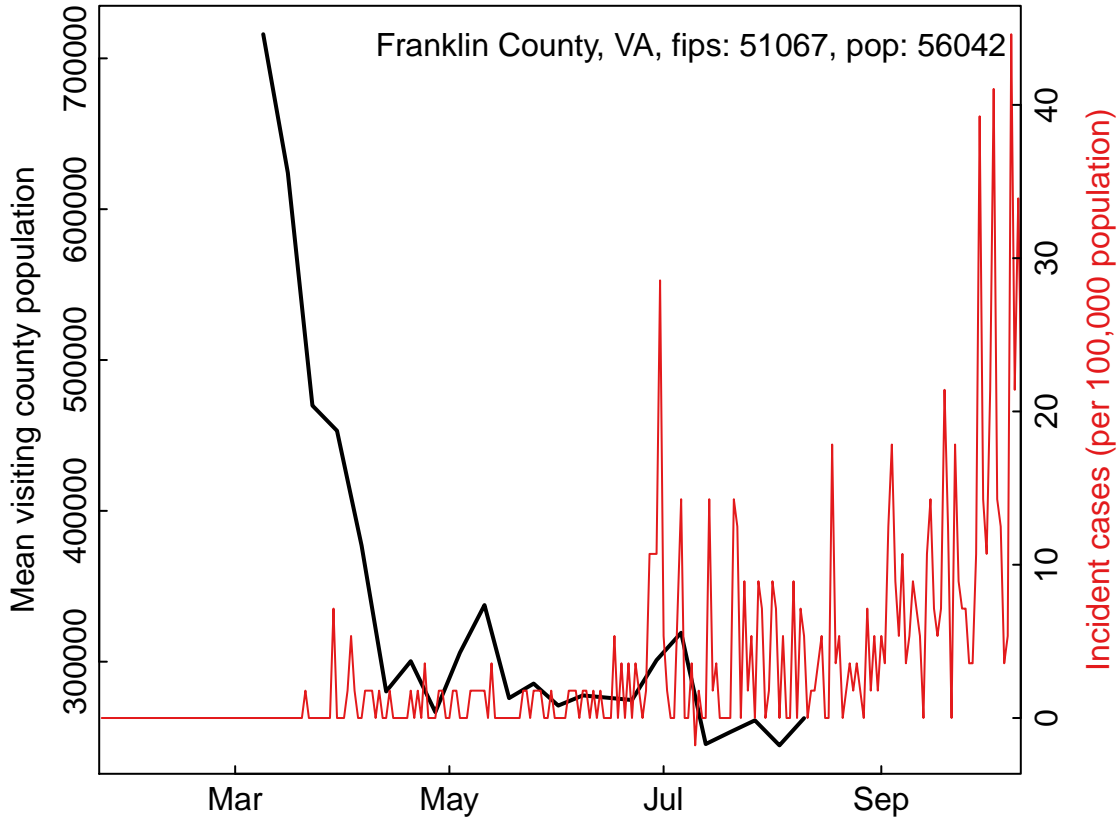

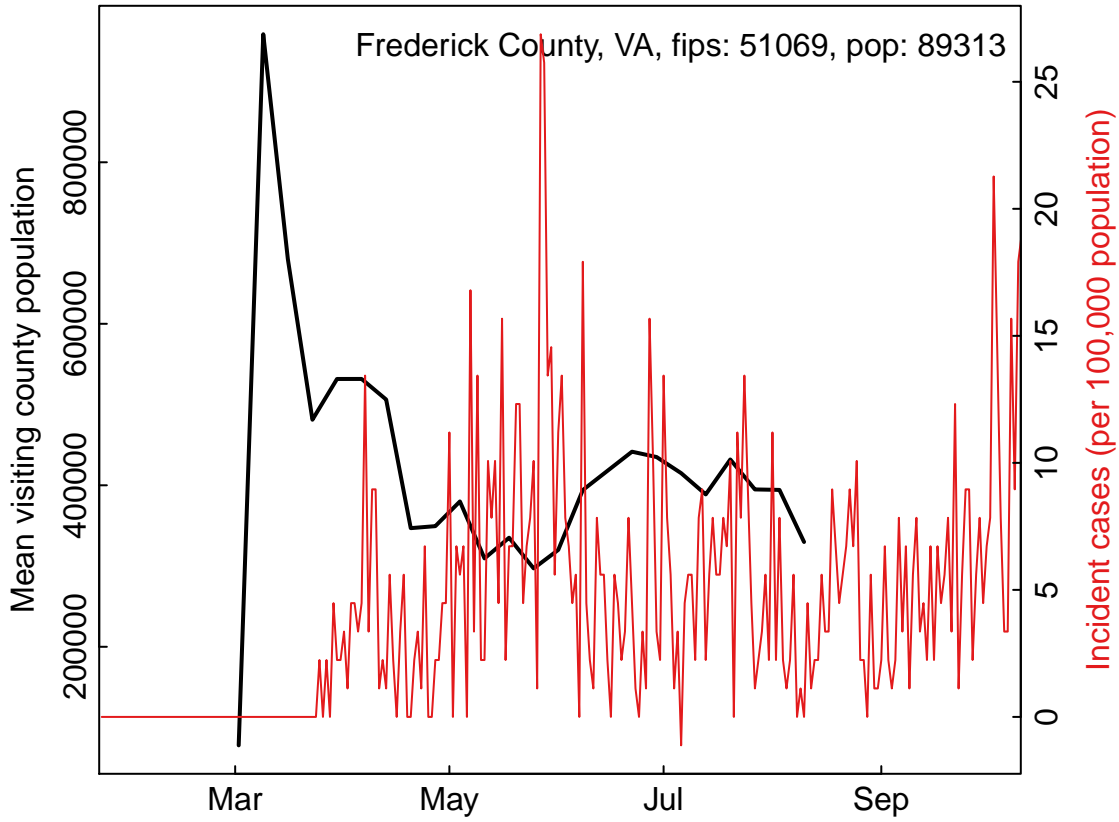



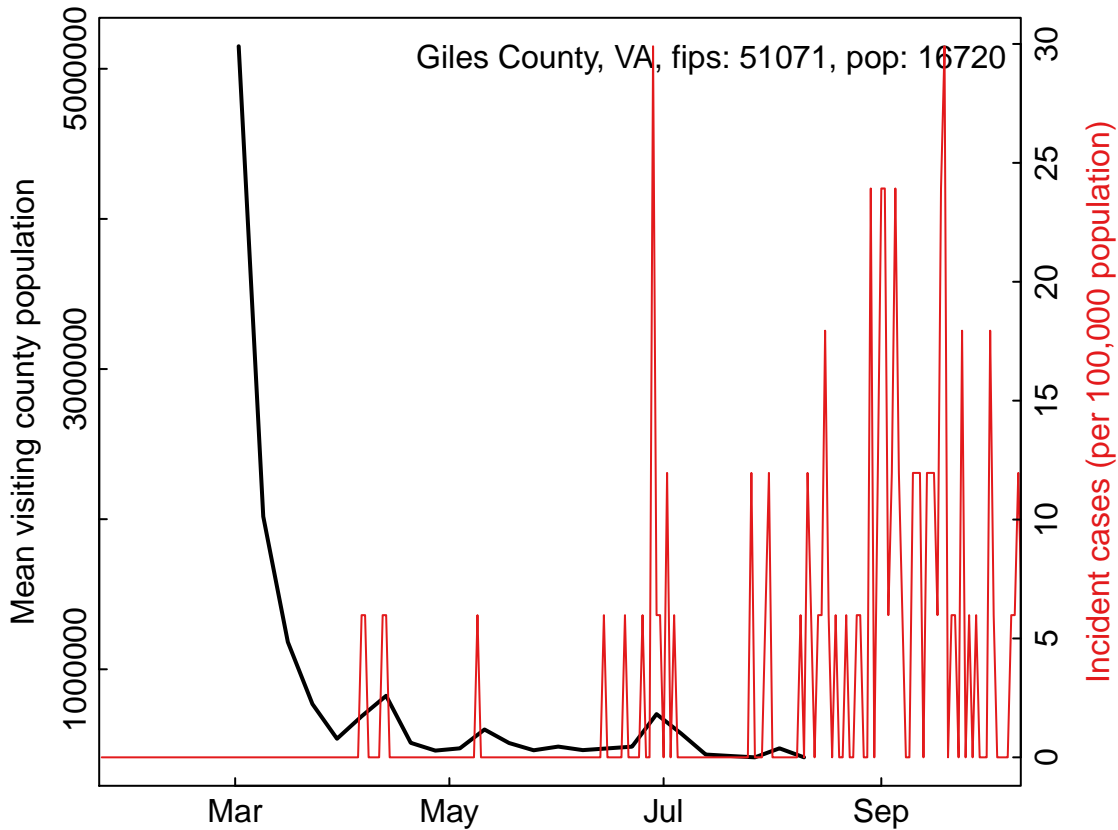

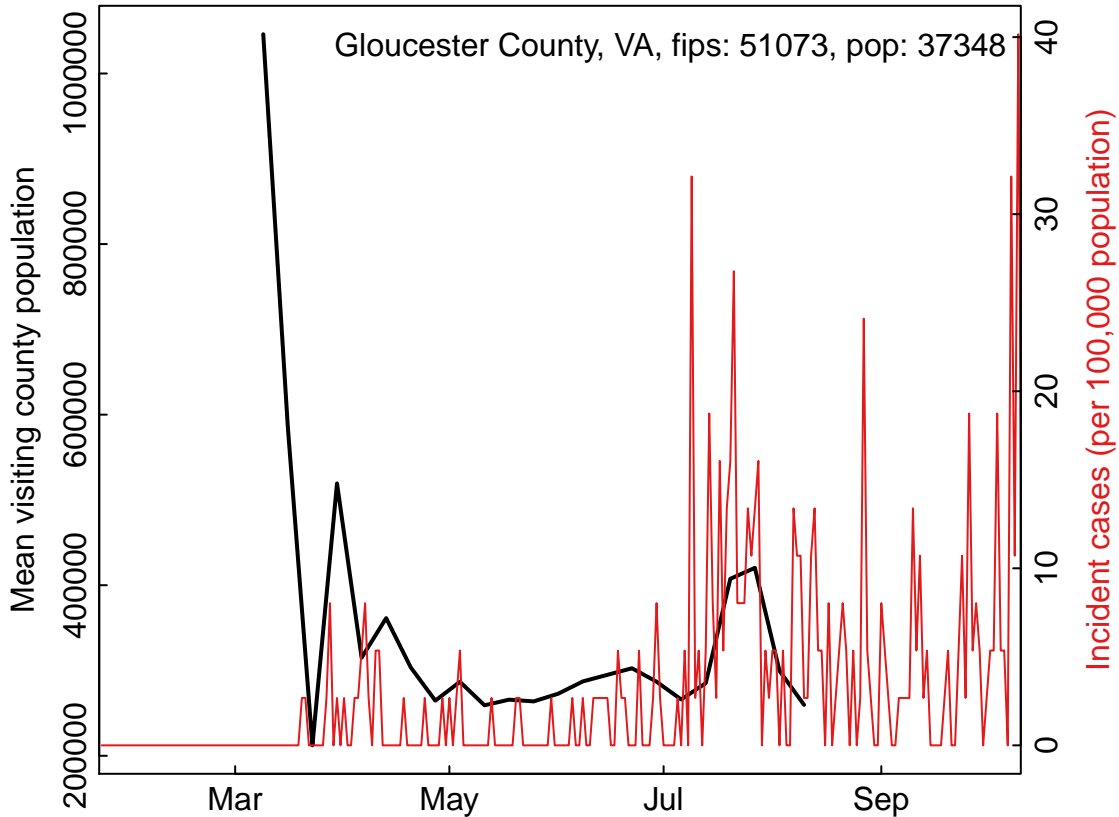

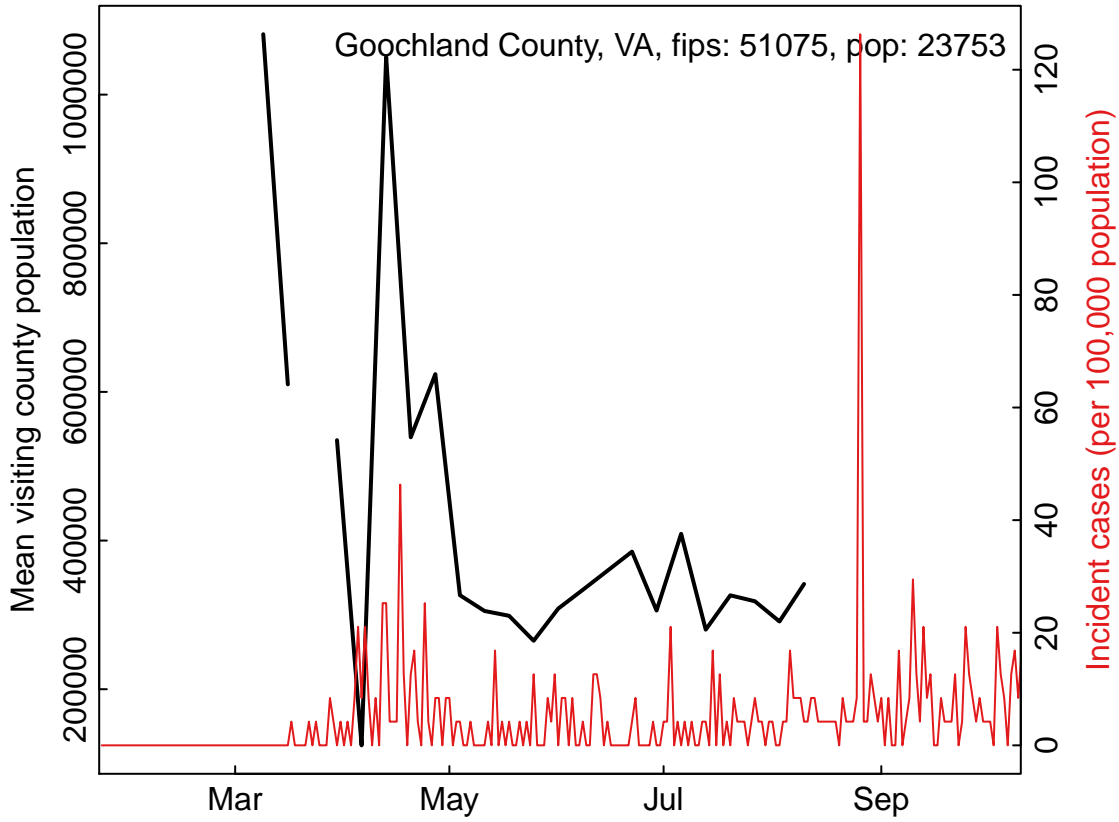

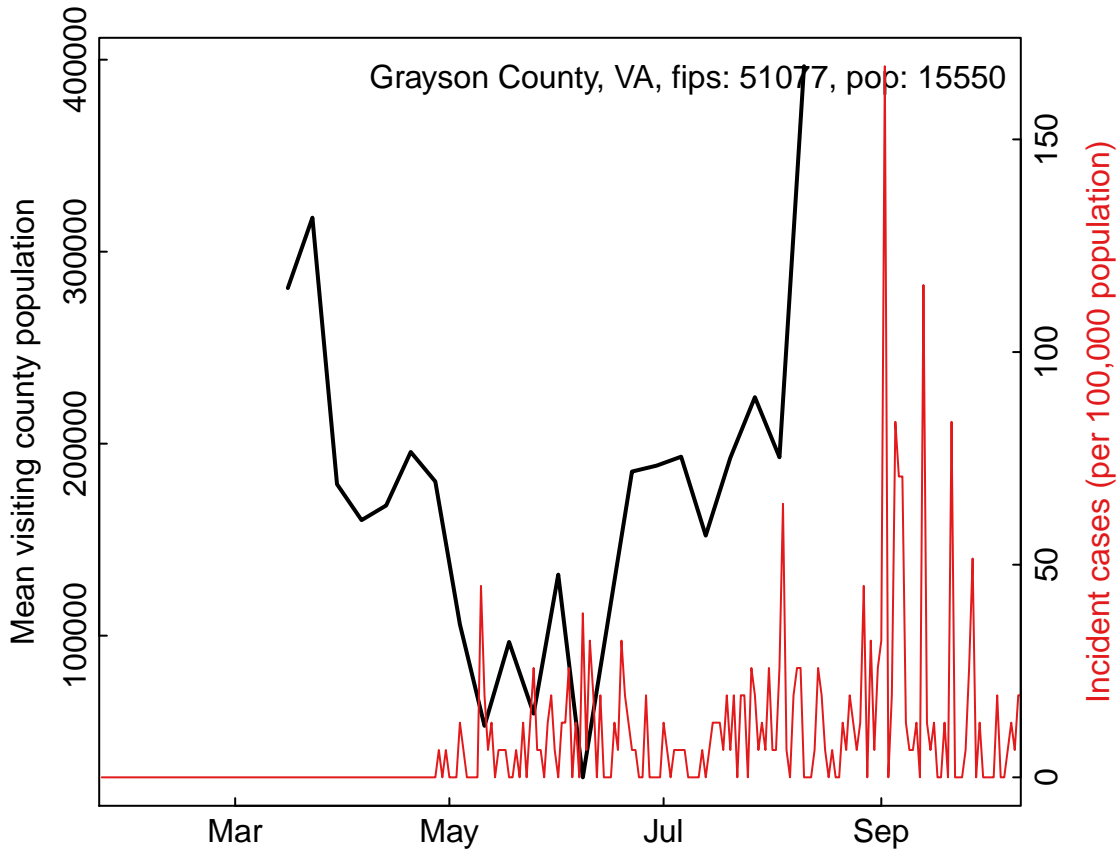

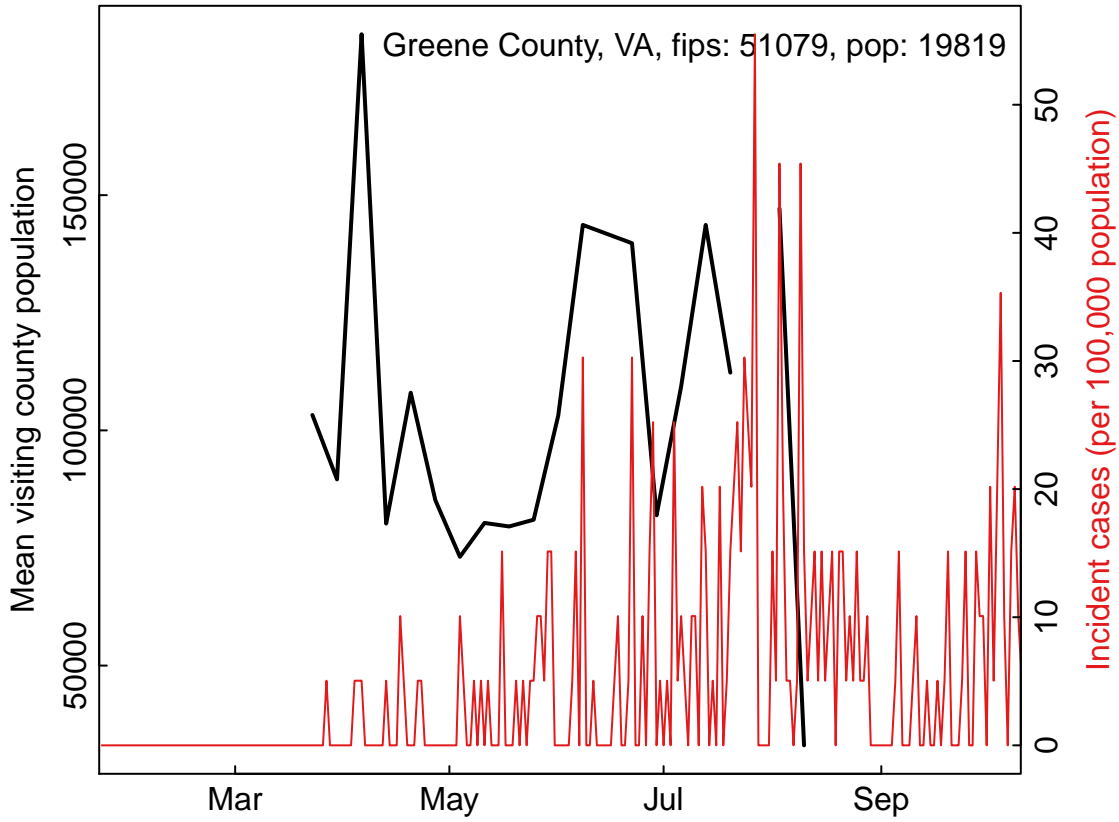

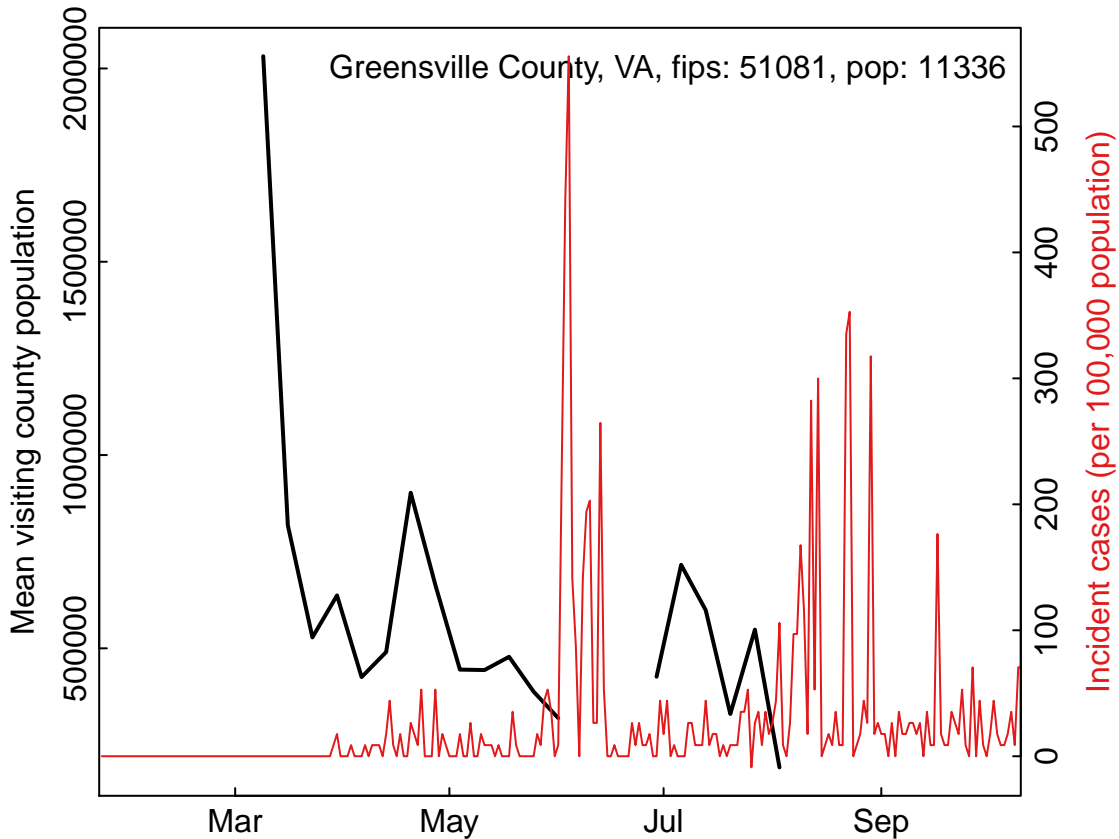

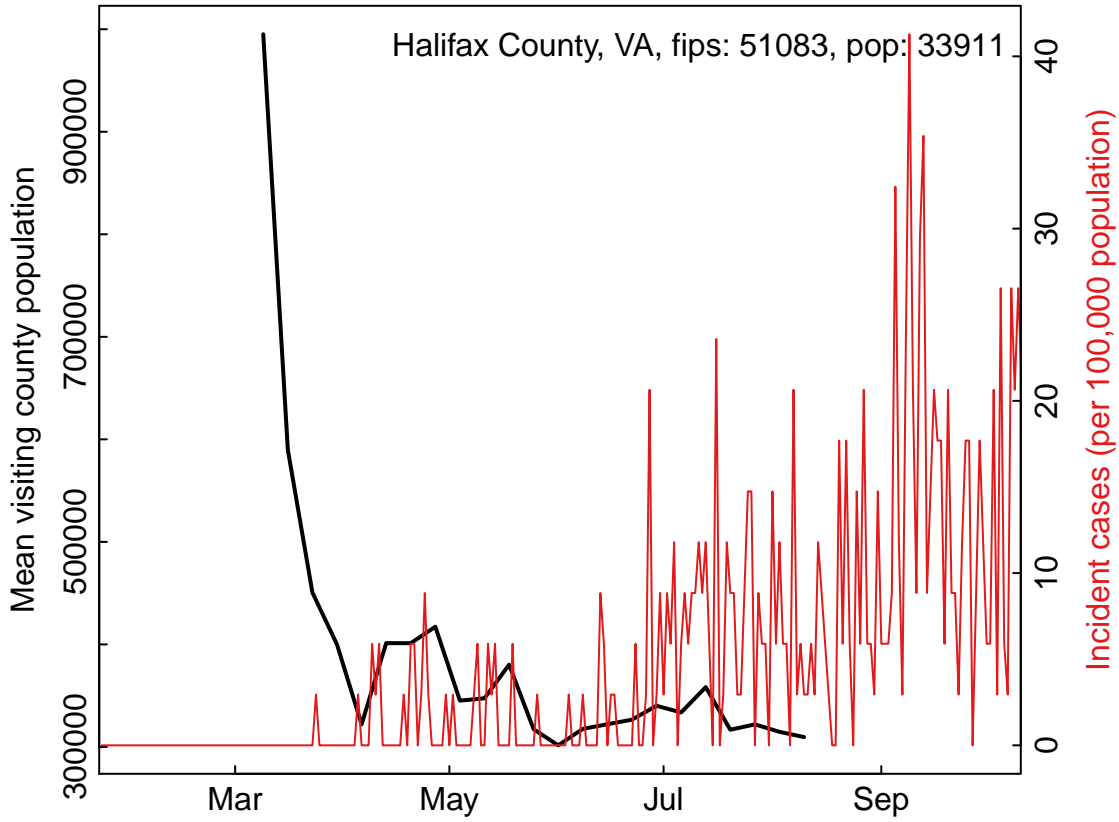

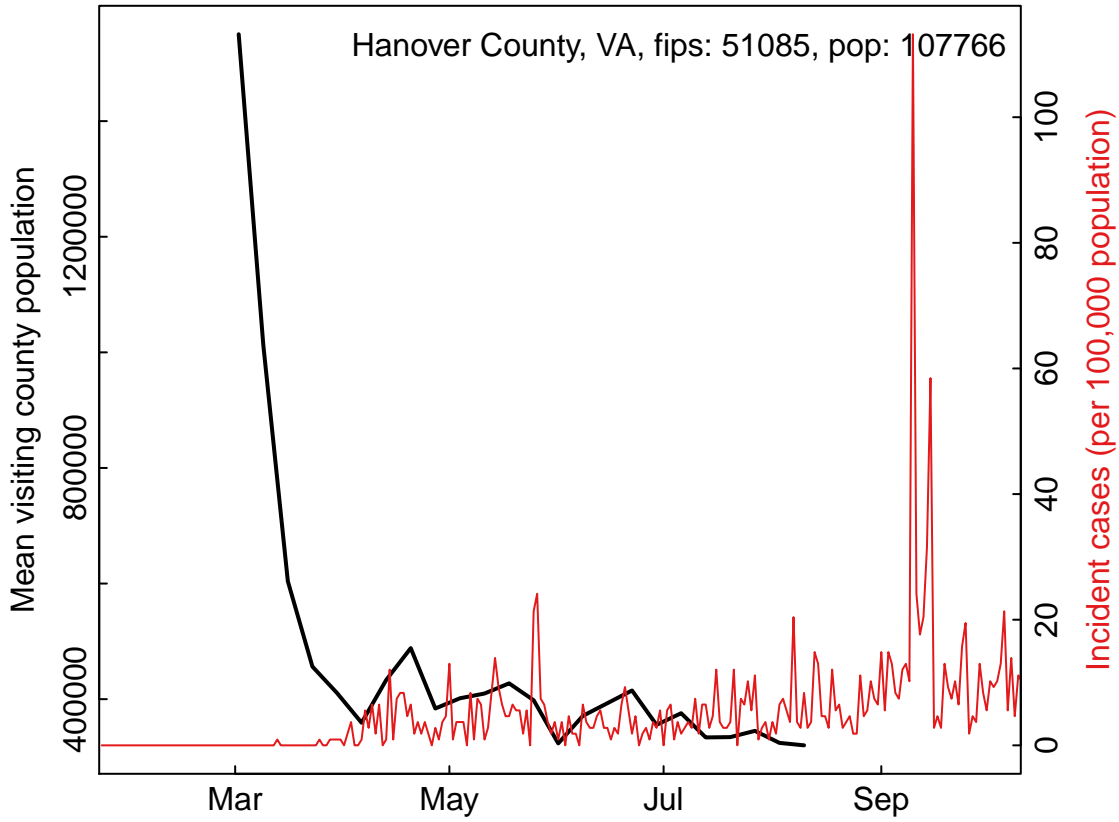



Henrico County, VA, fips: 51087, pop: 330818

Mean visiting county population

Incident cases (per 100,000 population)

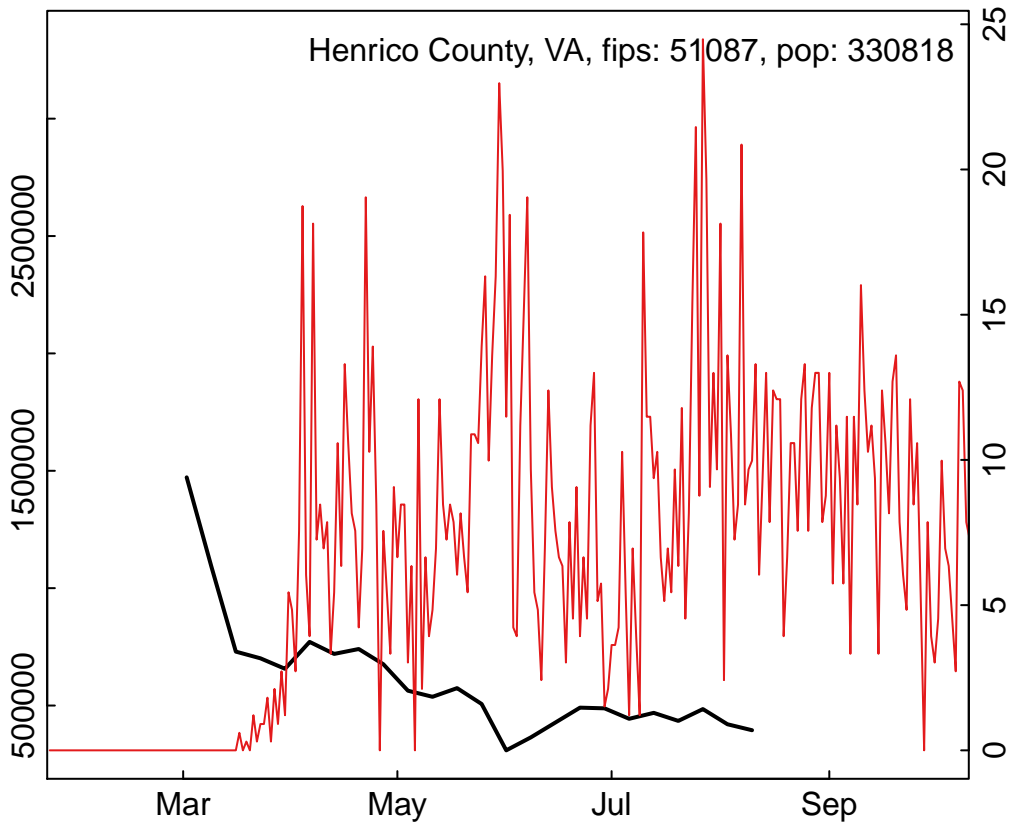

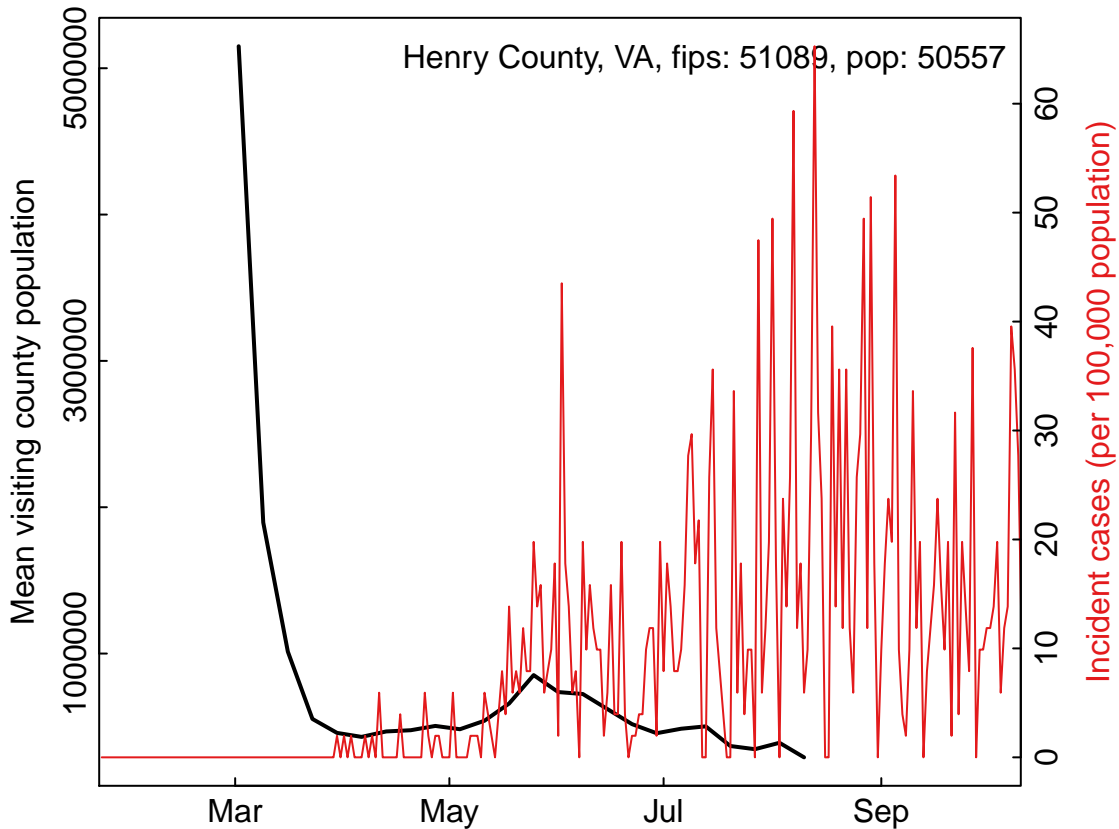

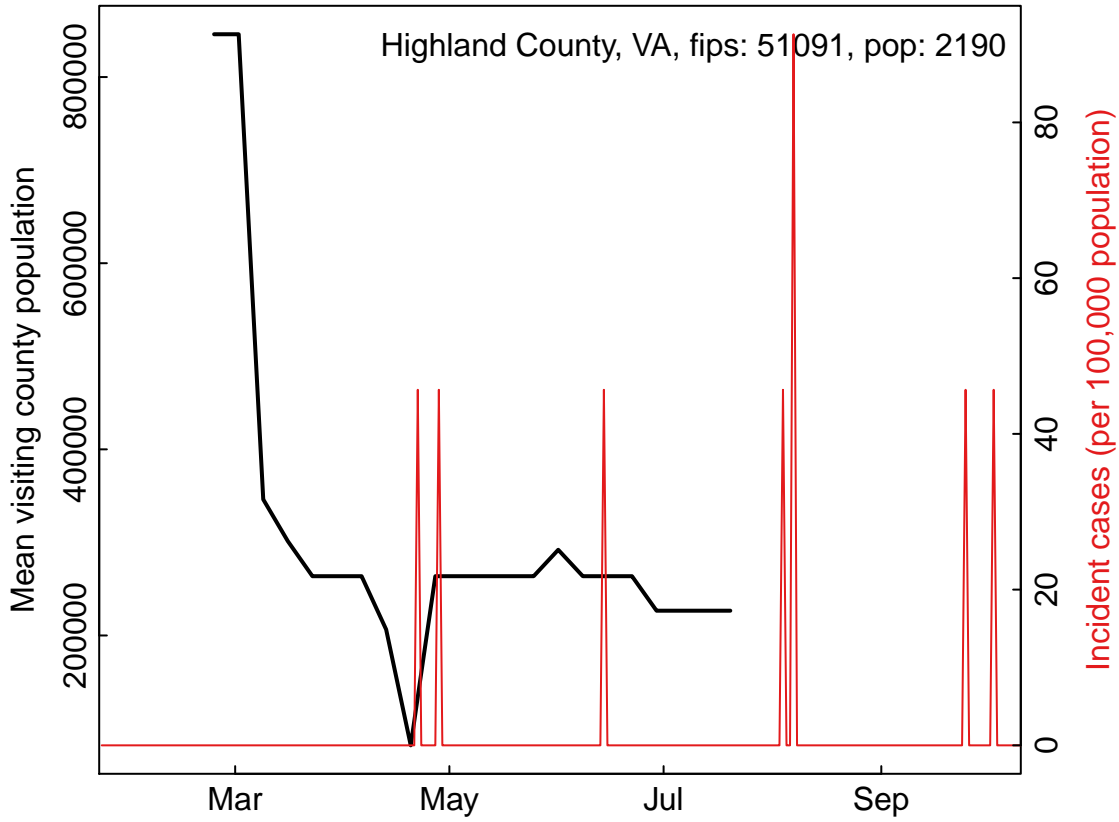

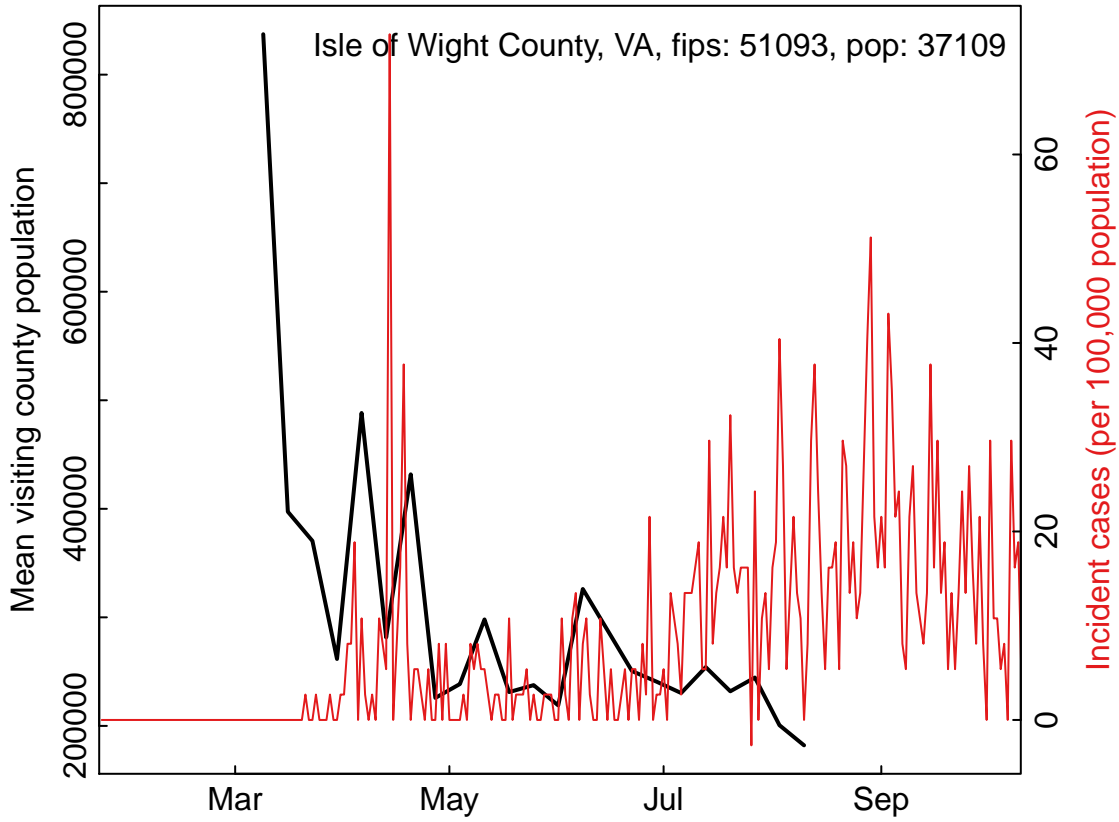

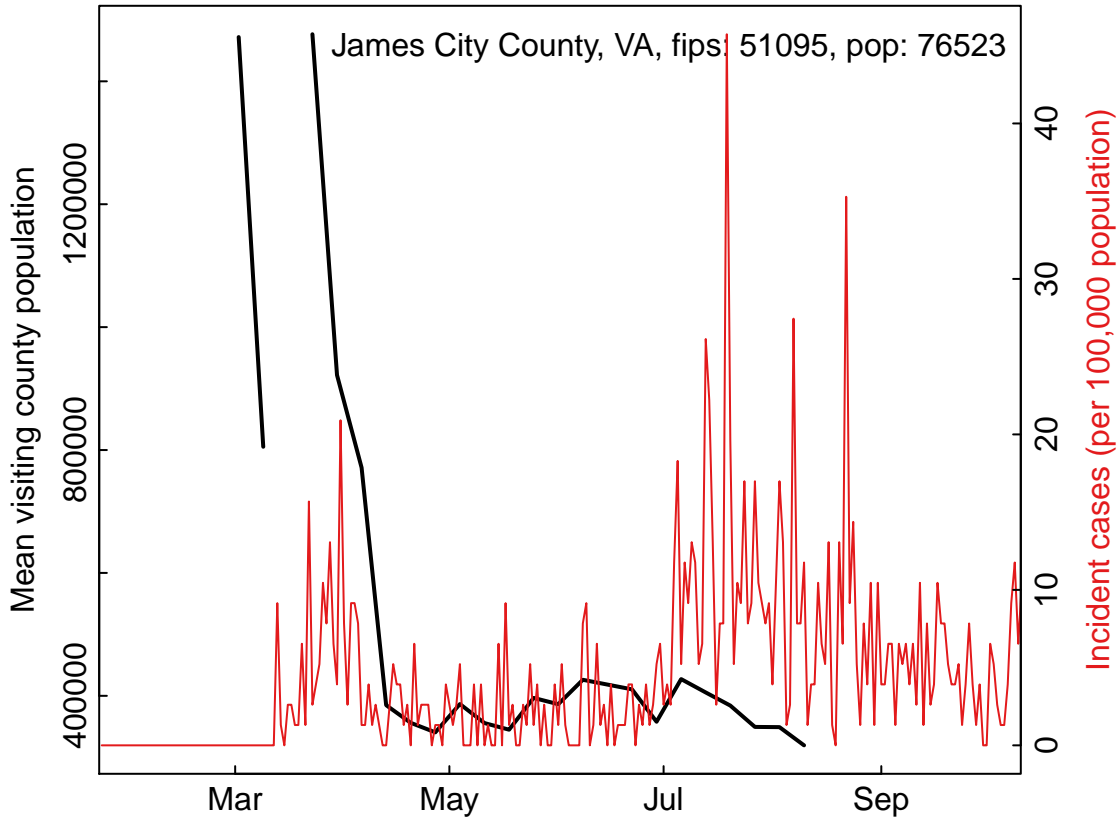

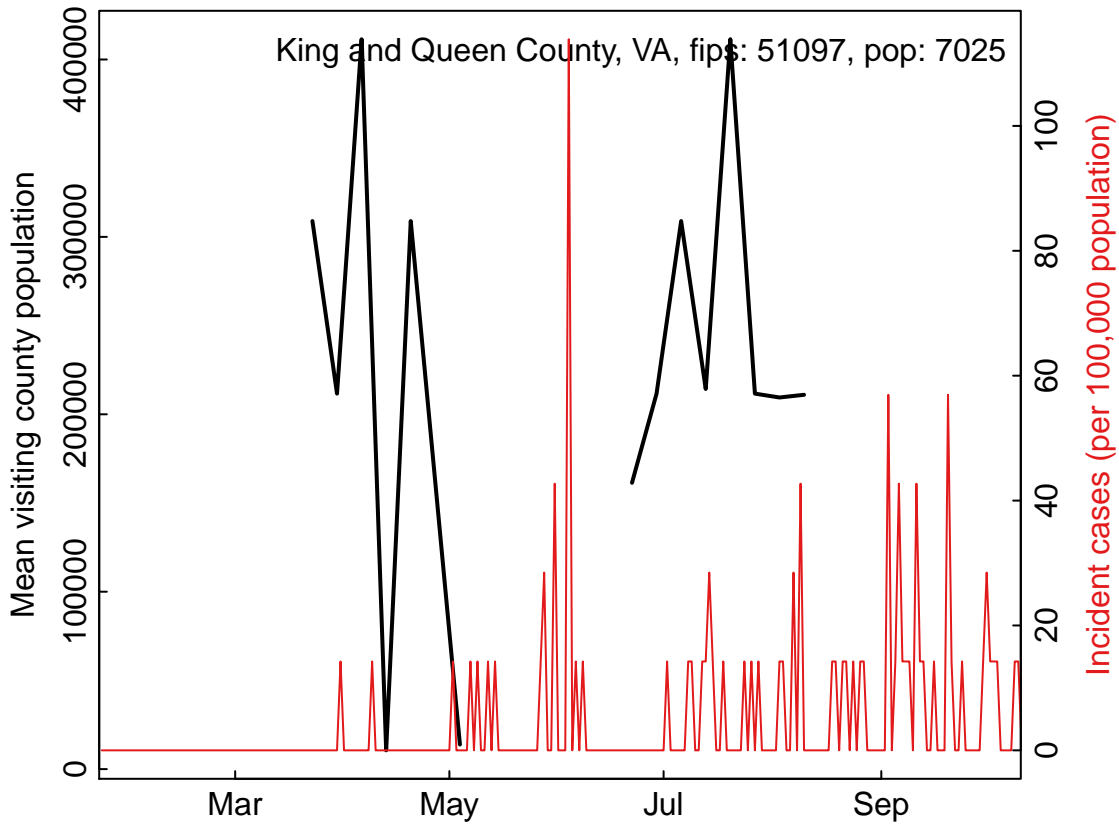

King George County, VA, fips: 51099, pop: 26836

Mean visiting county population

1000000  
800000  
600000  
400000

Mar

May

Jul

Sep

Incident cases (per 100,000 population)

40  
30  
20  
10  
0

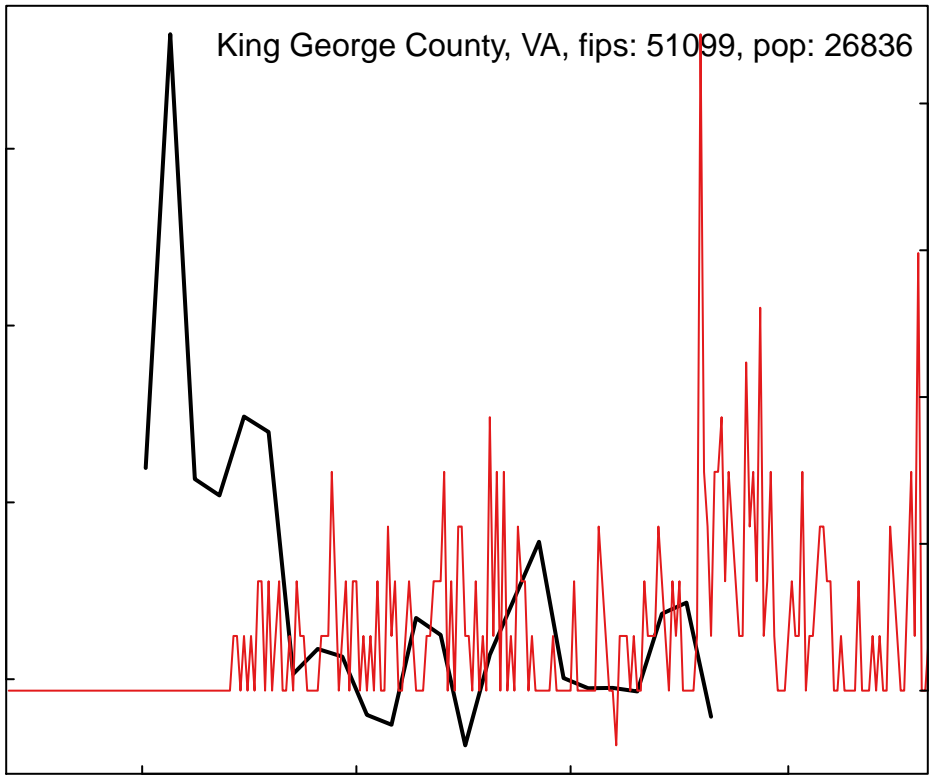

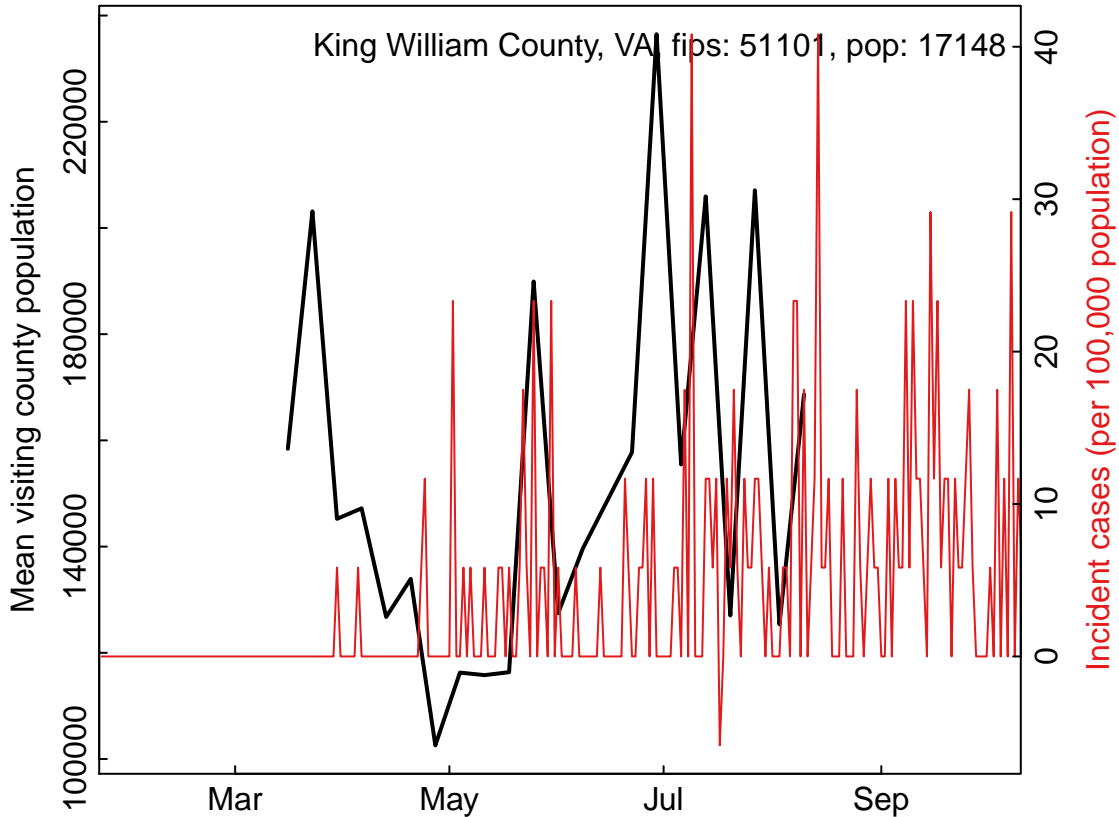



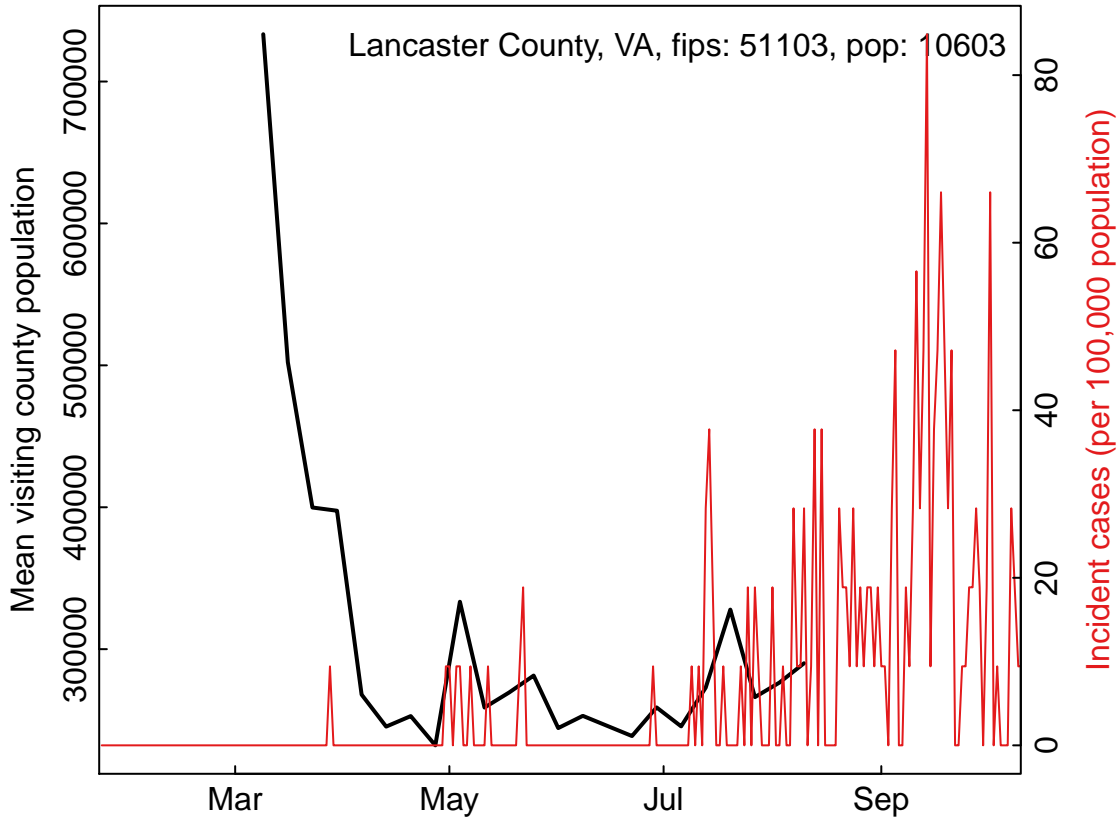

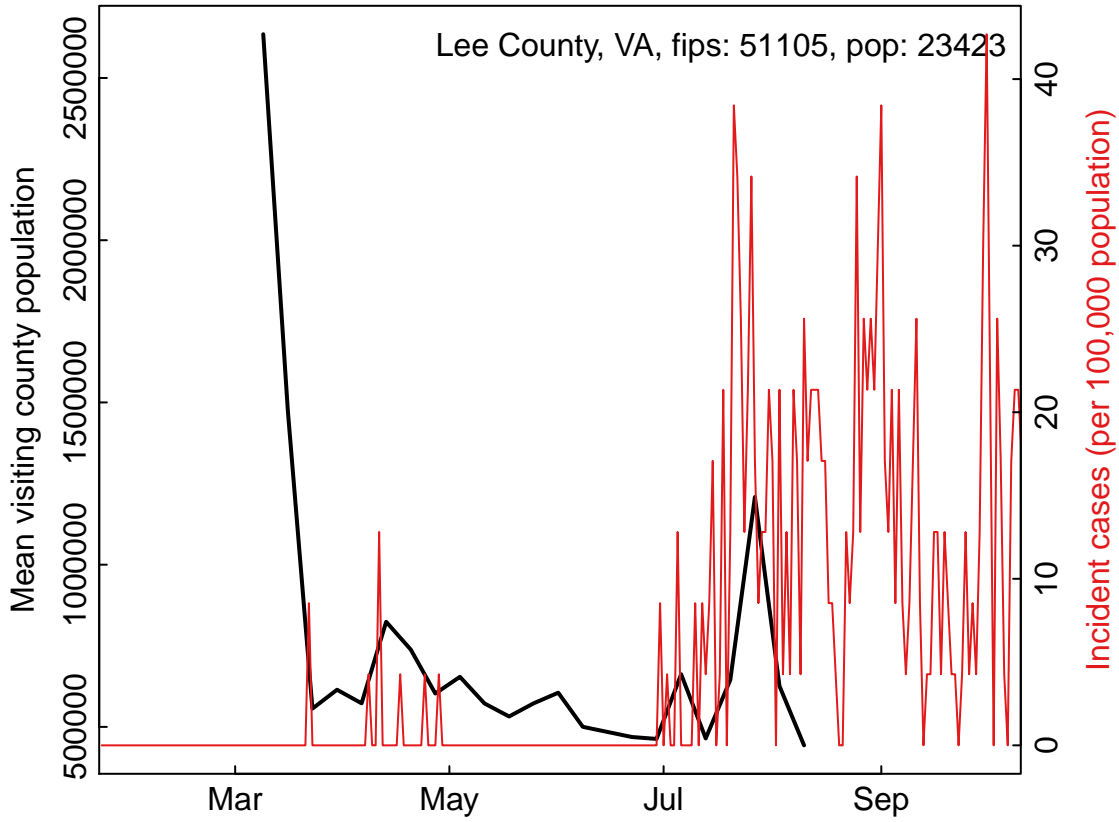

Loudoun County, VA, fips: 51107, pop: 413538

Mean visiting county population

Incident cases (per 100,000 population)

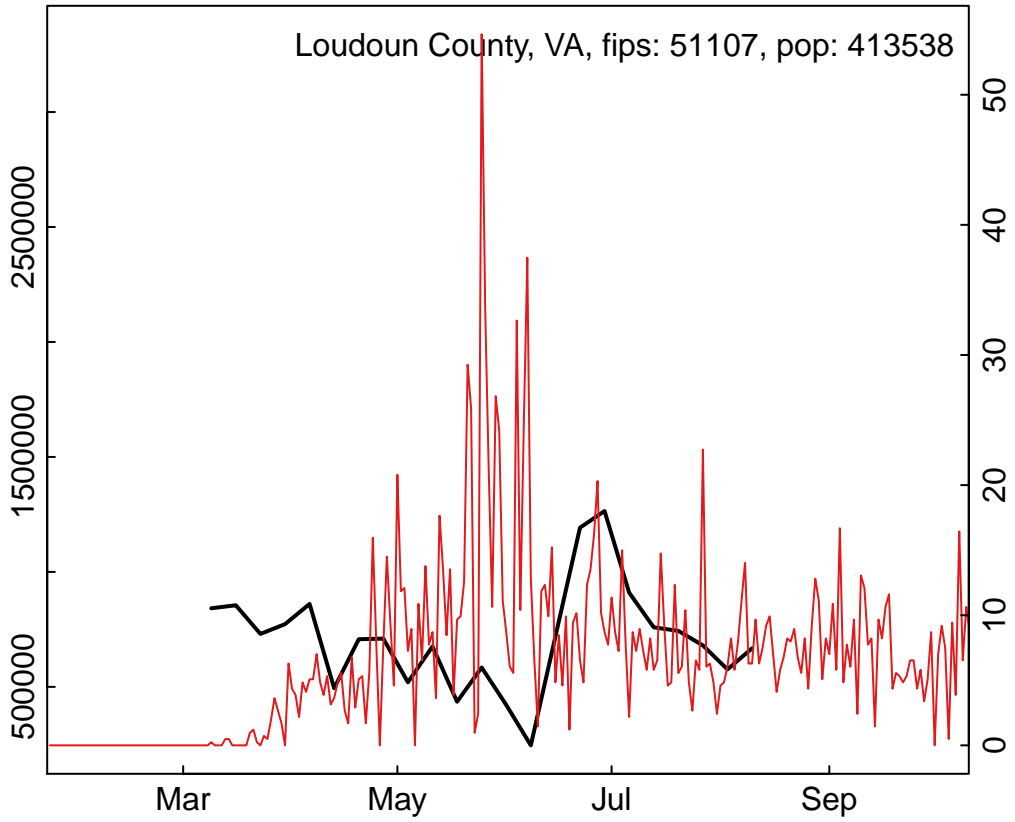

Mean visiting county population

800000  
600000  
400000  
200000

Mar

May

Jul

Sep

Louisa County, VA, fips: 51109, pop: 37591

Incident cases (per 100,000 population)

30  
25  
20  
15  
10  
5  
0

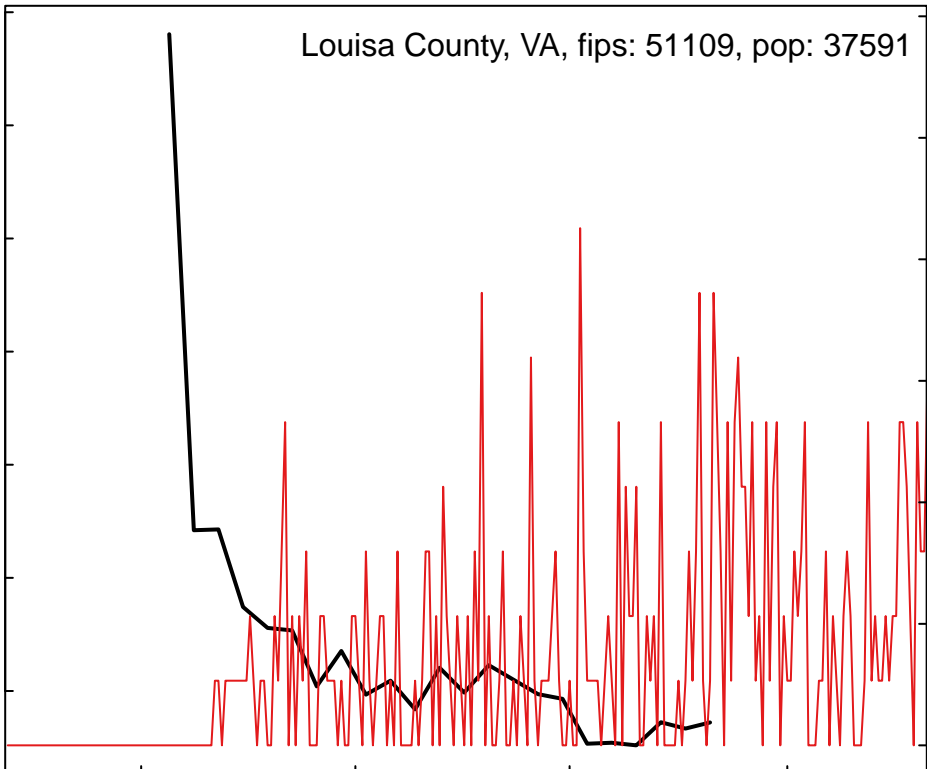

Mean visiting county population

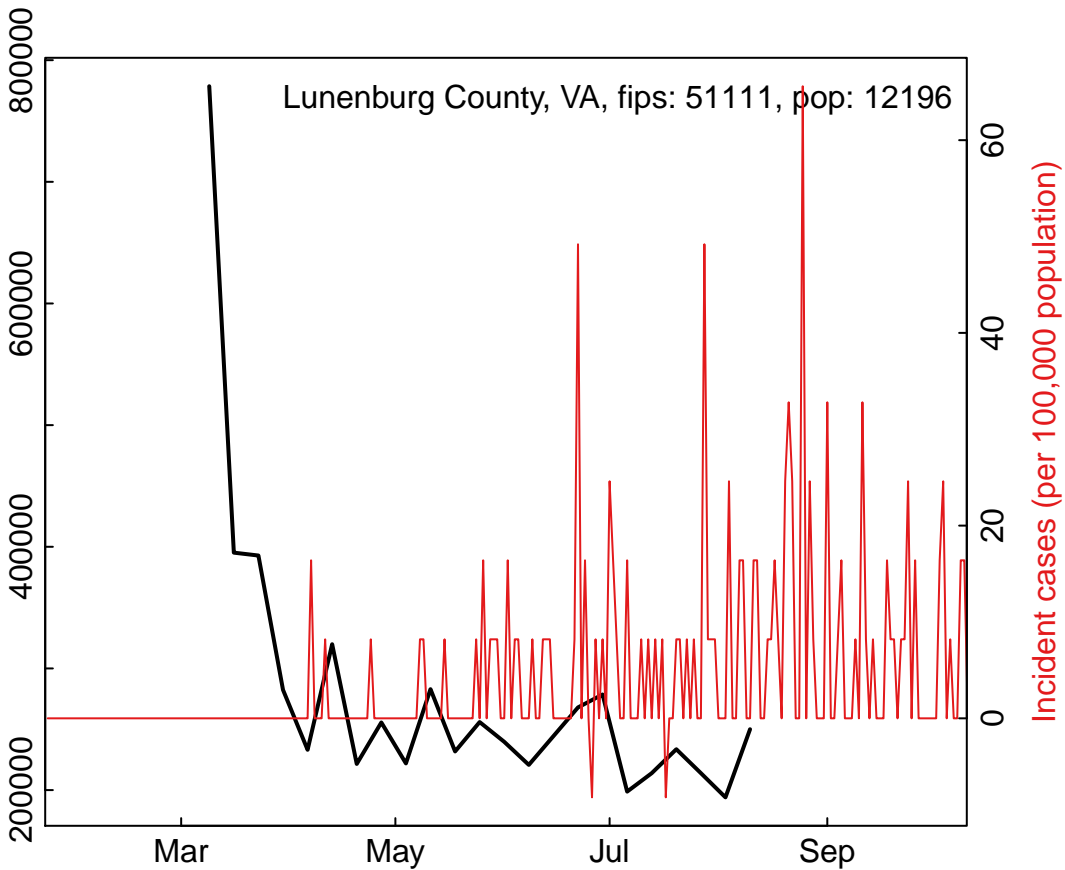

Incident cases (per 100,000 population)

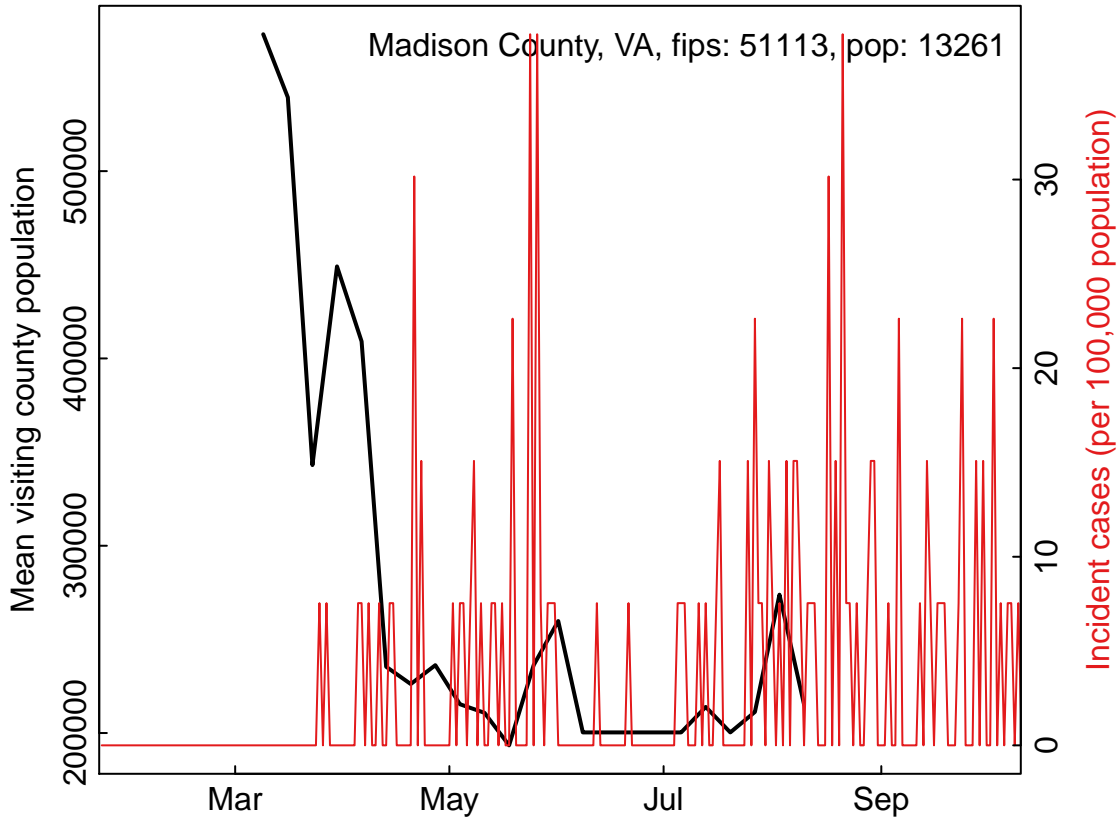

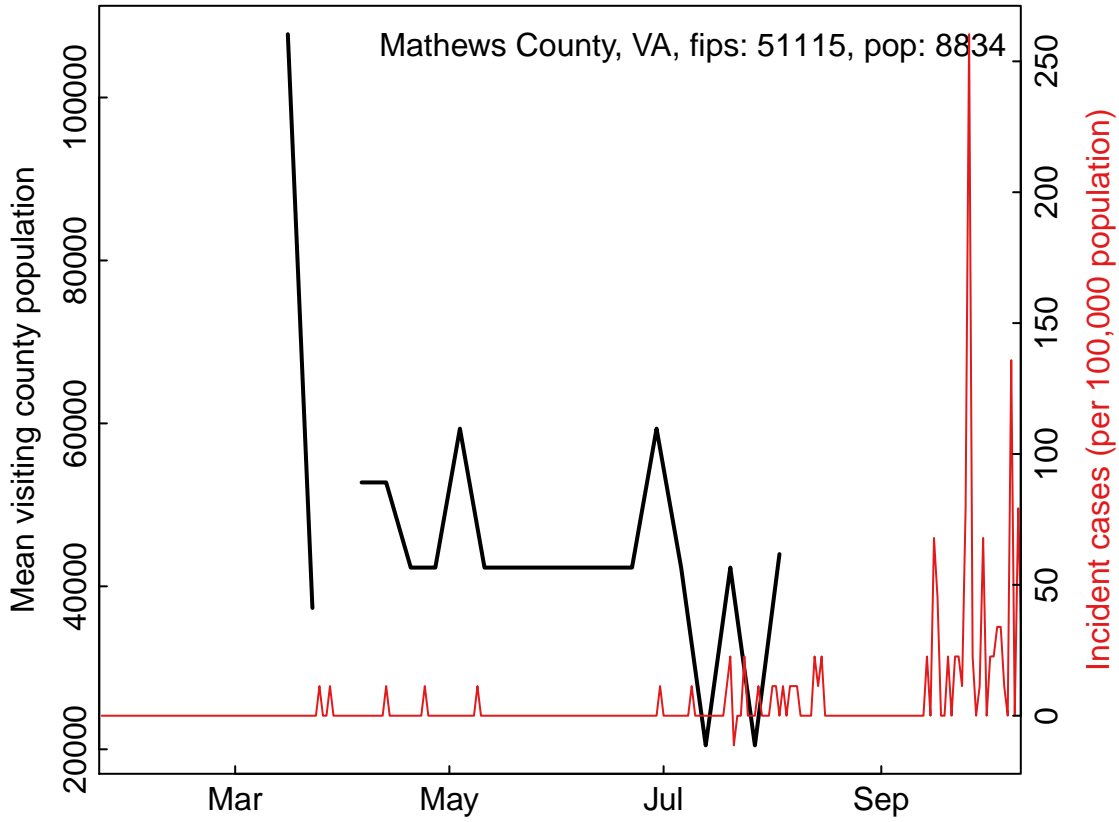

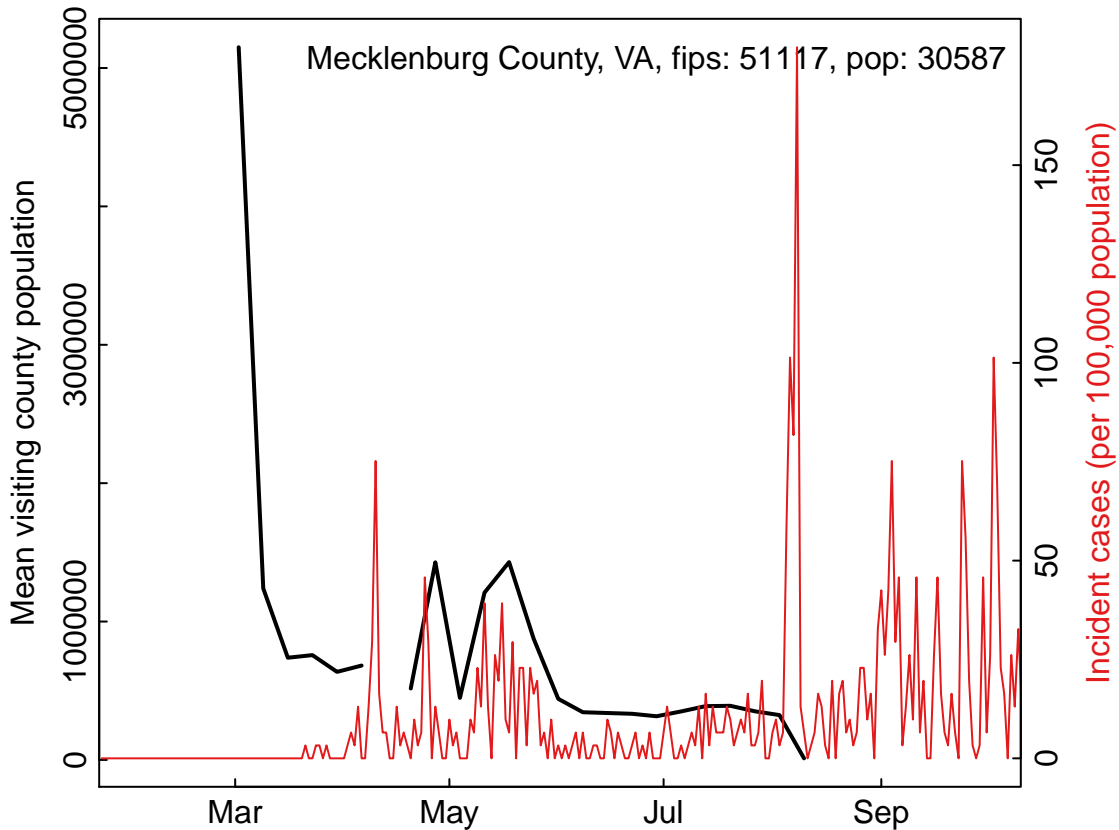



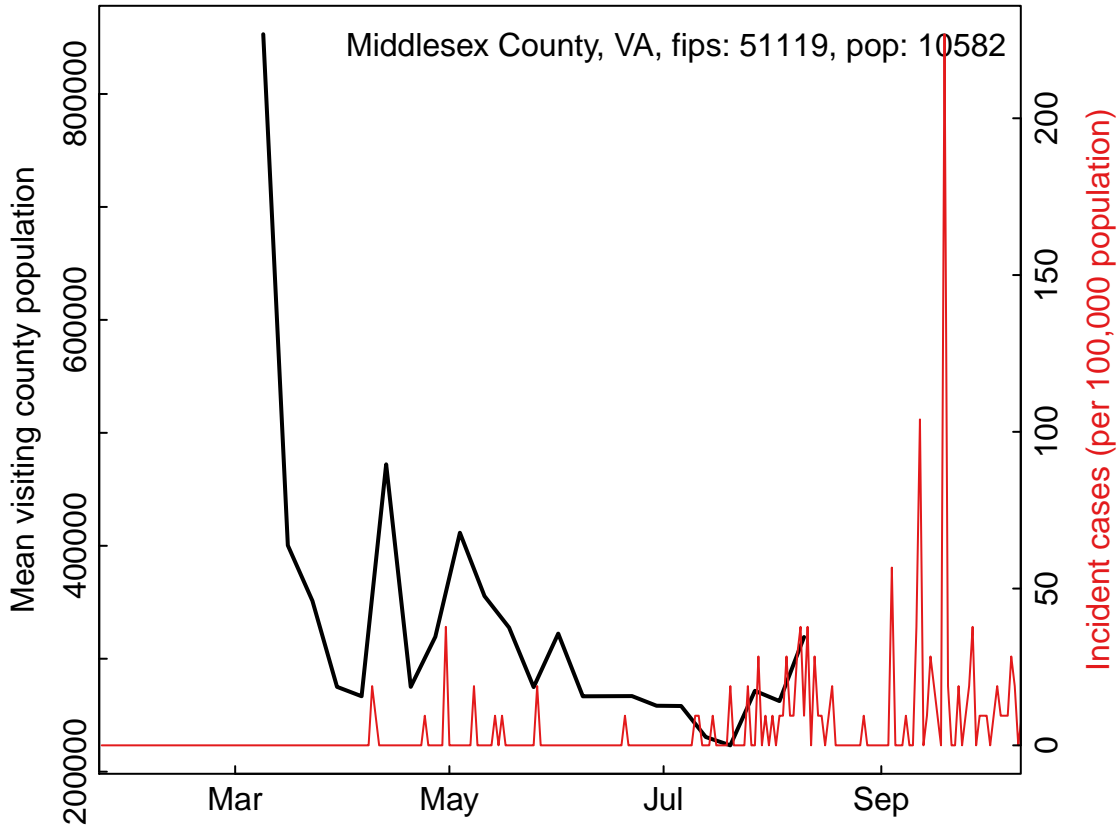

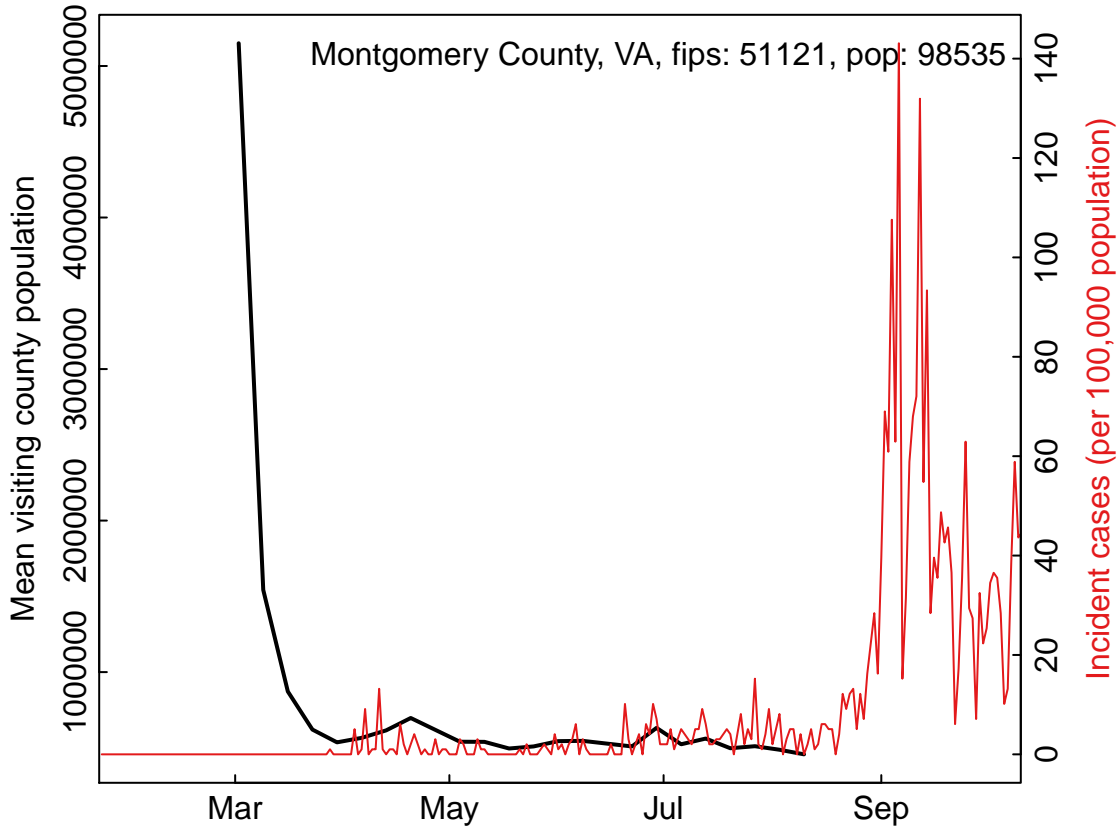

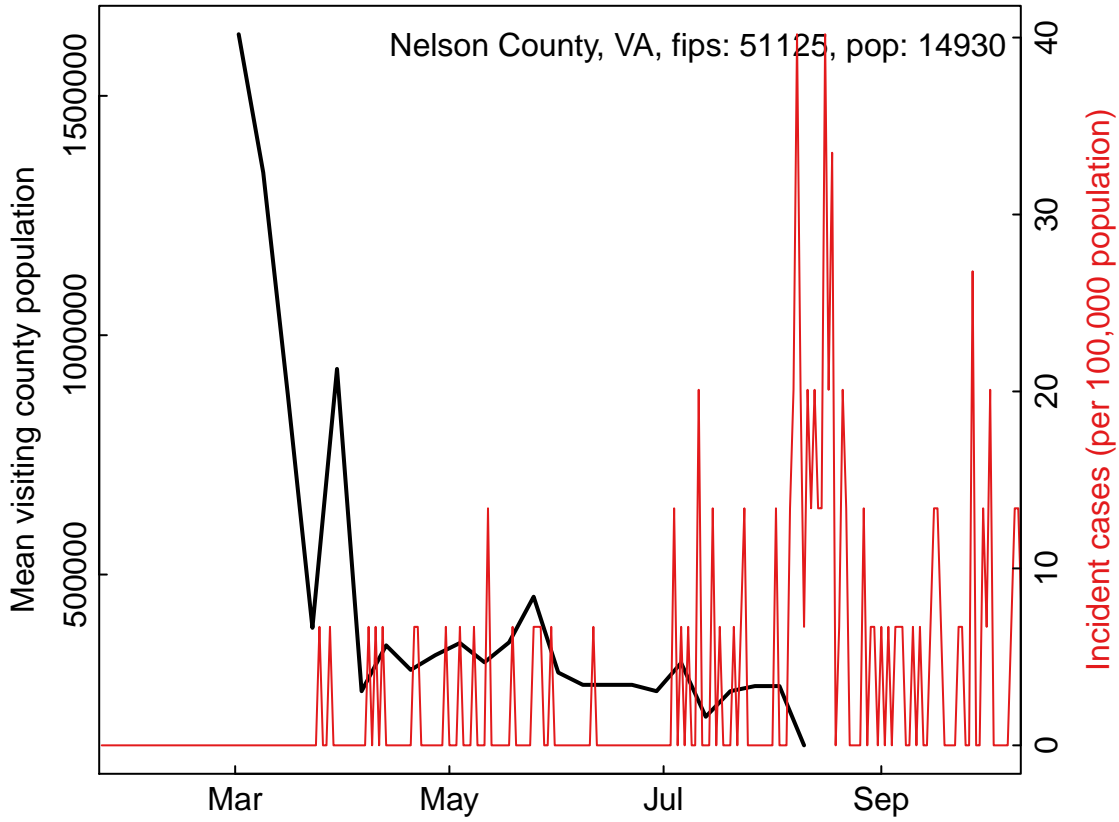

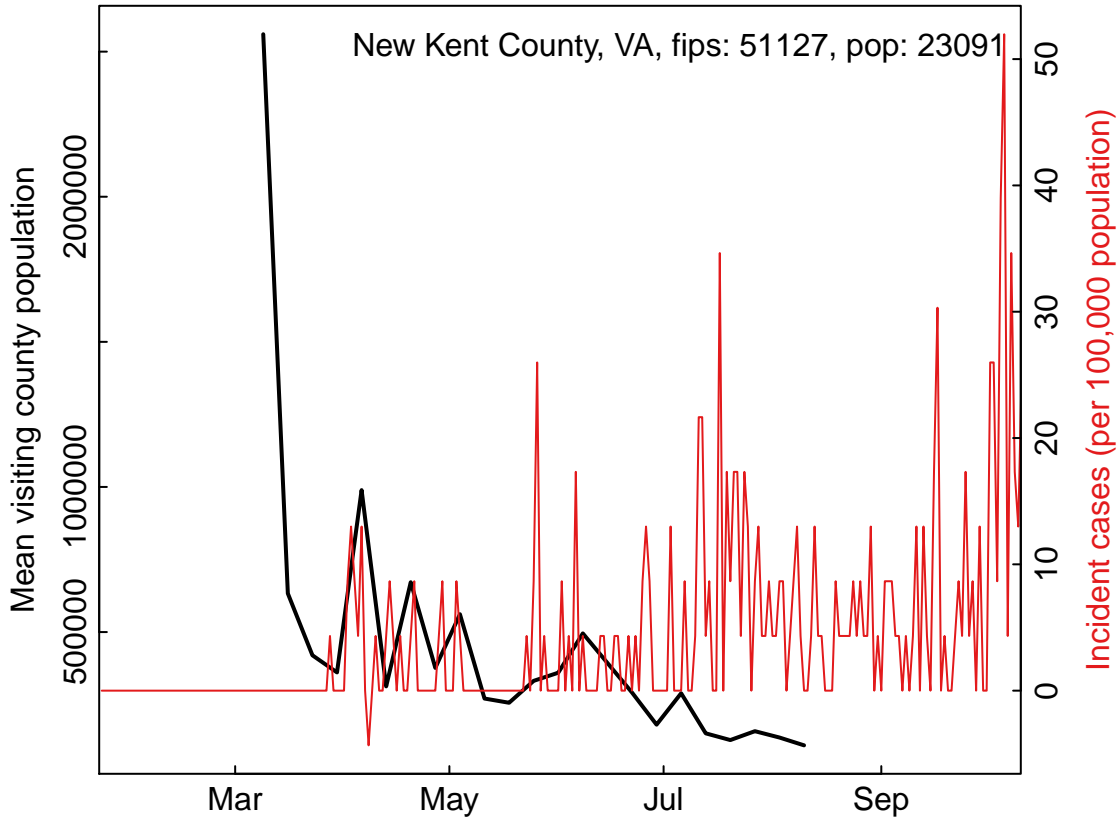

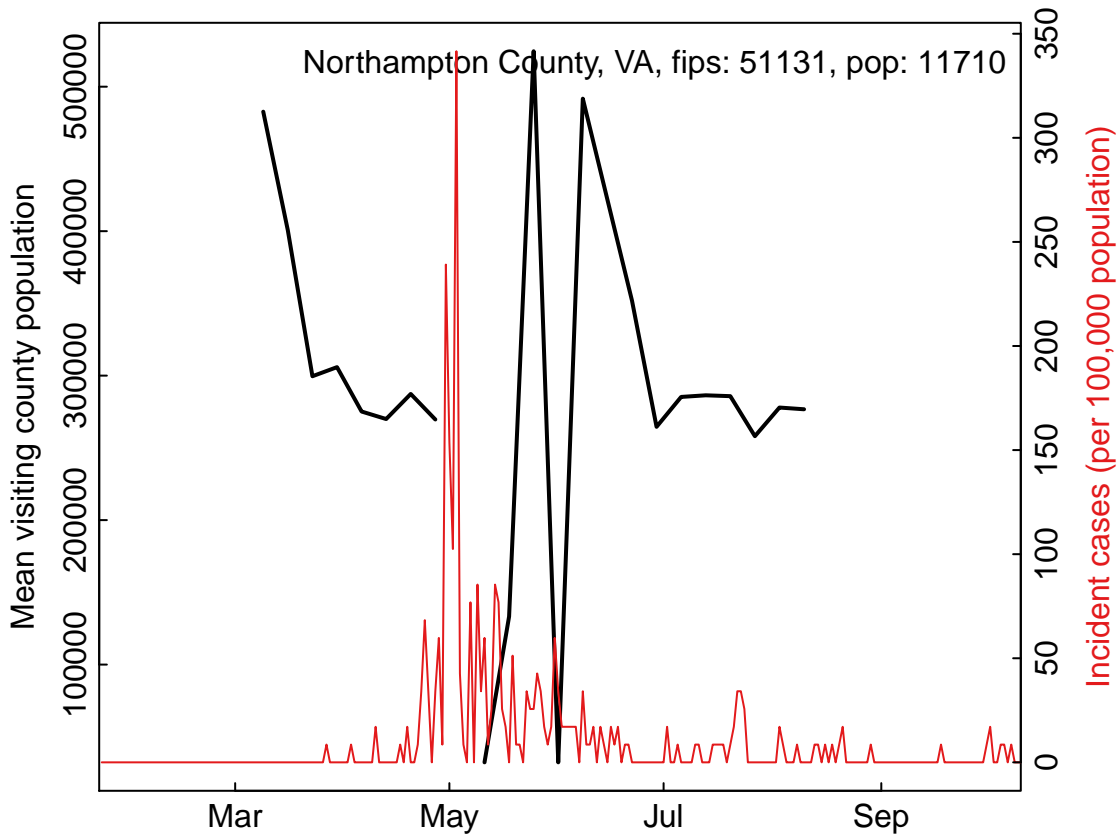

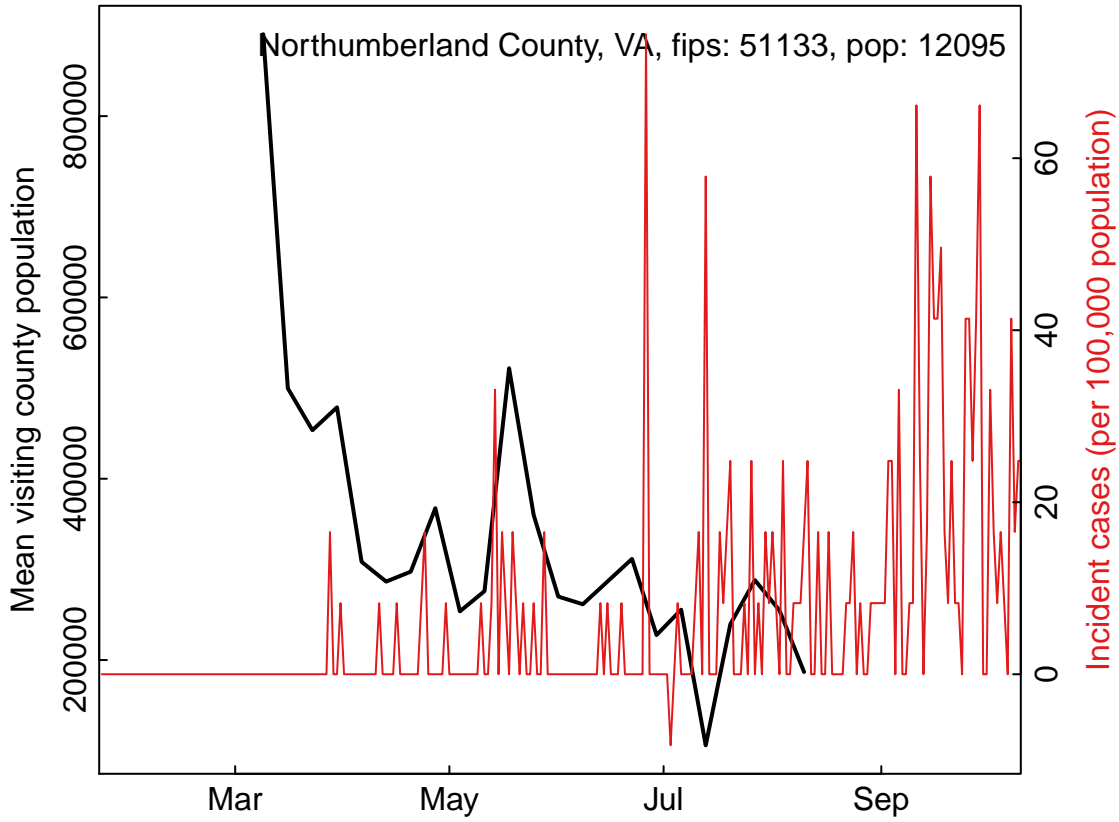

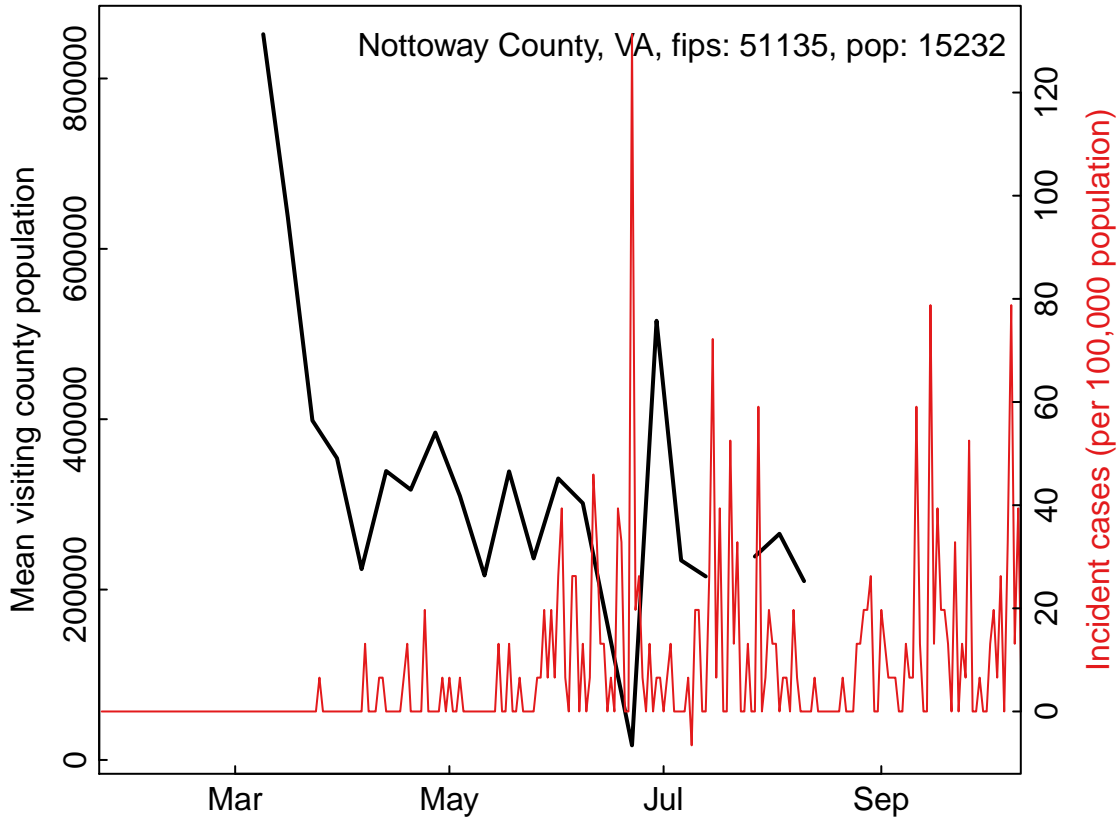

Orange County, VA, fips: 51137, pop: 37051

Mean visiting county population

Incident cases (per 100,000 population)

800000  
600000  
400000

15  
10  
5  
0

Mar

May

Jul

Sep

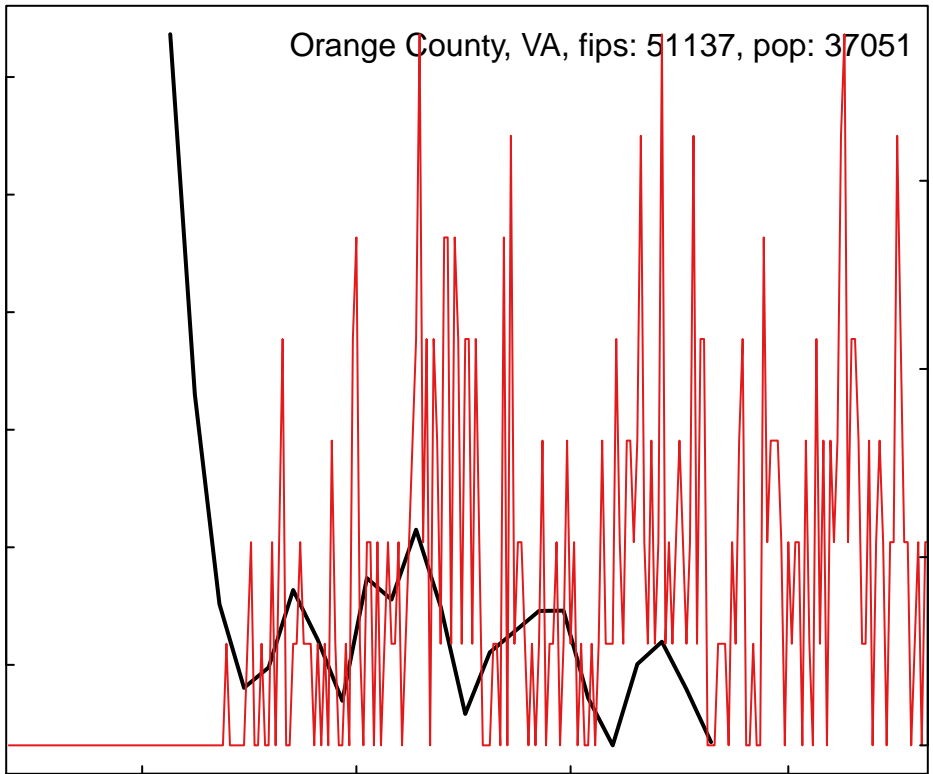



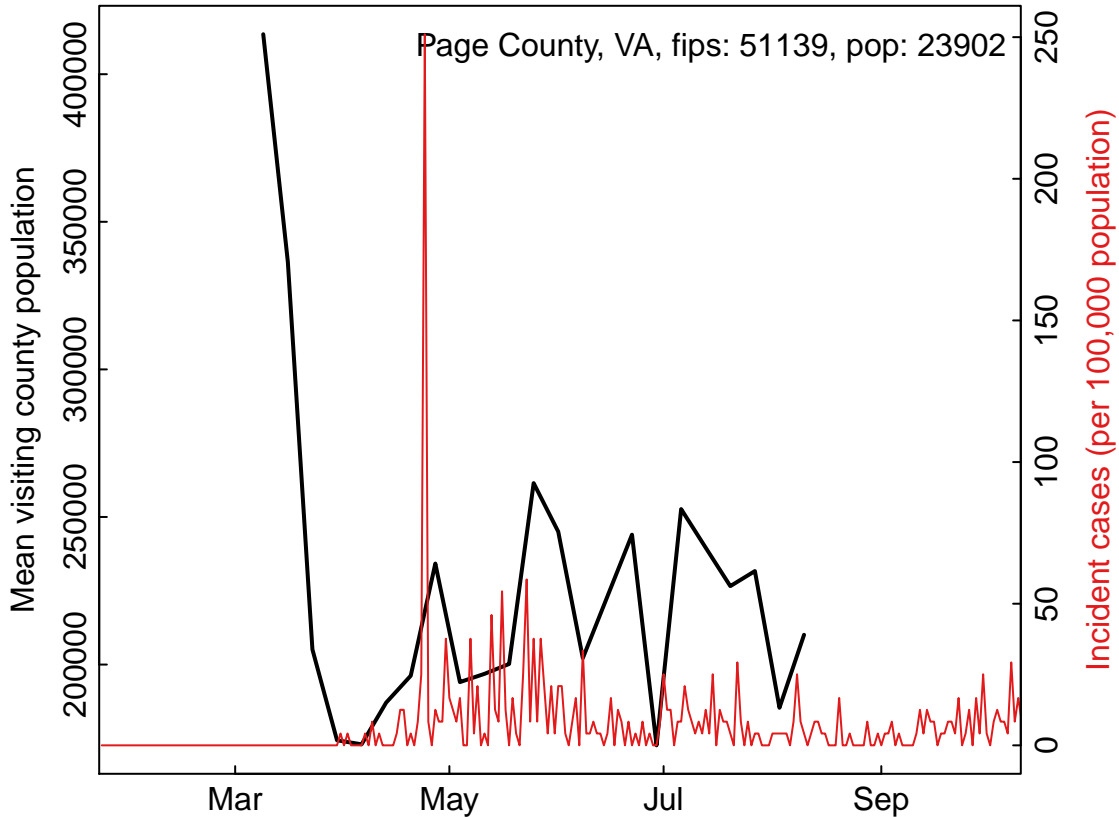

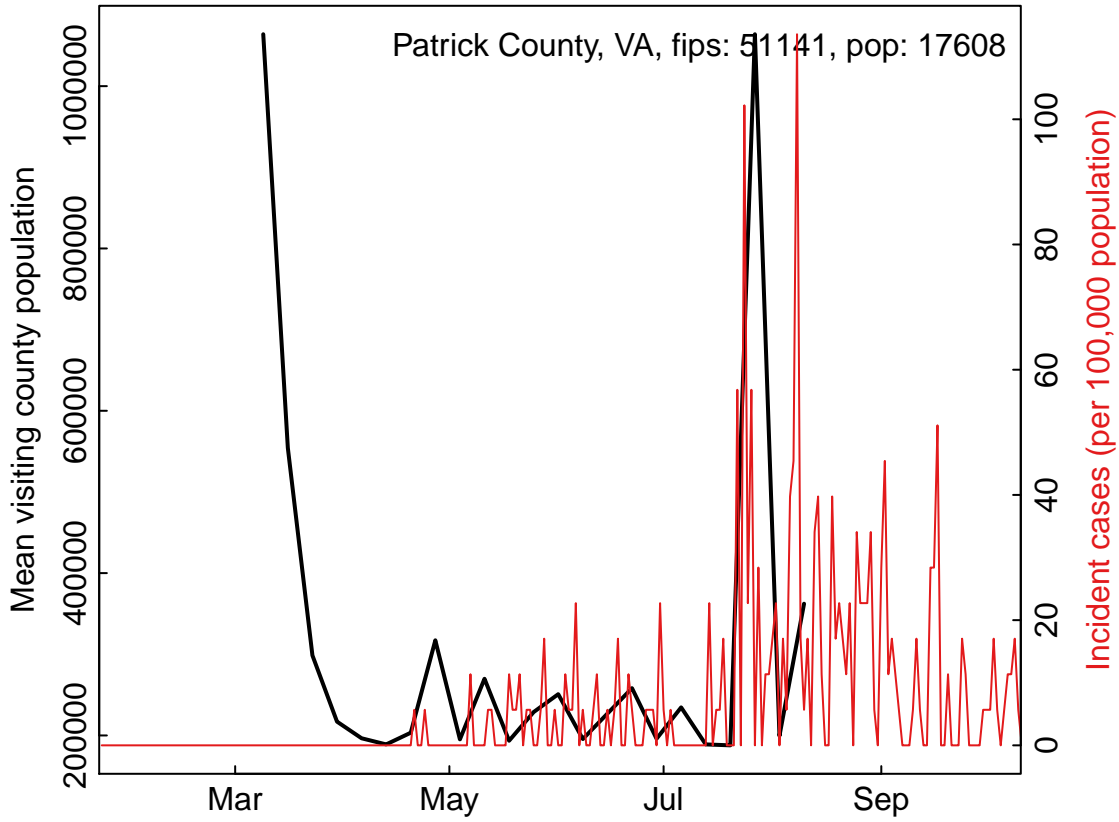

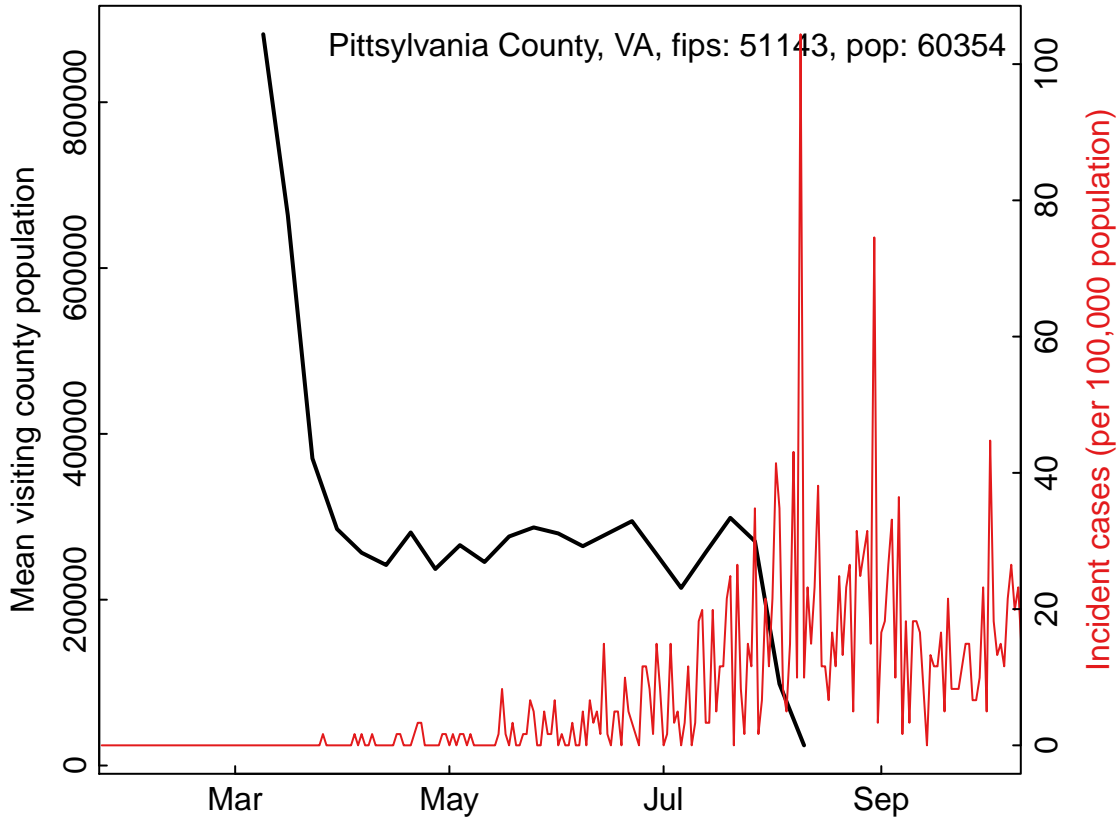

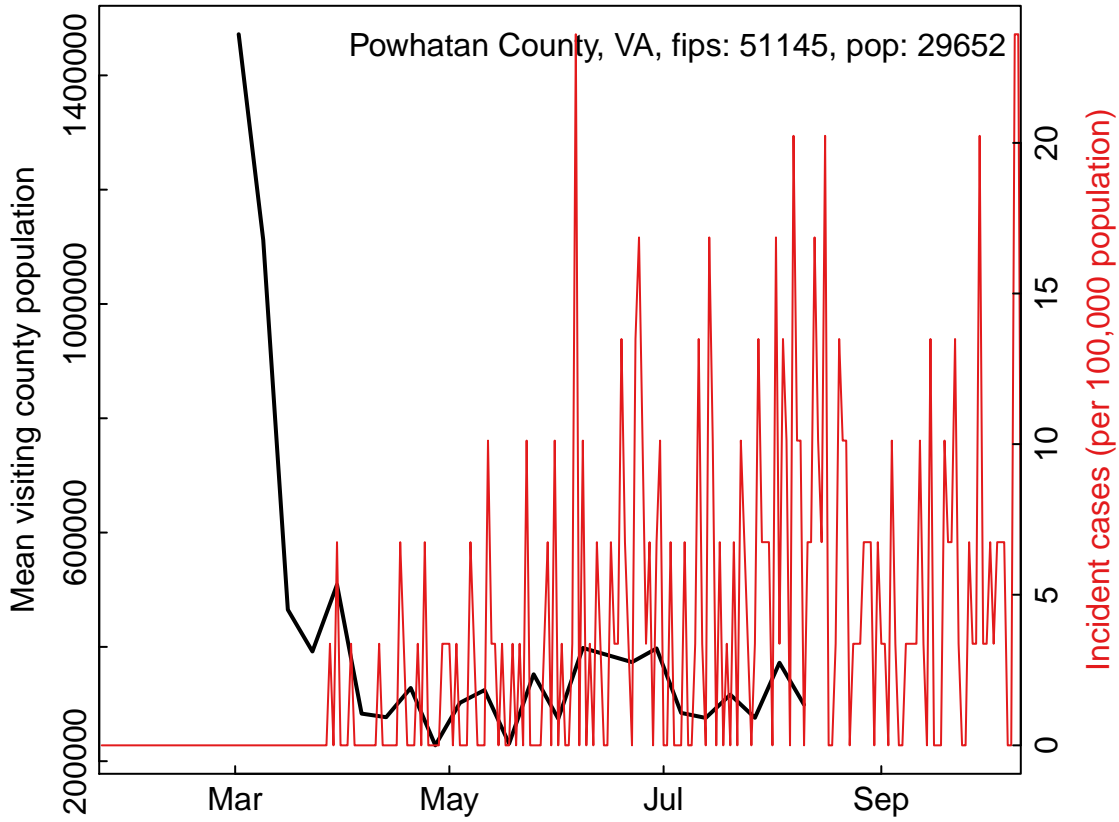

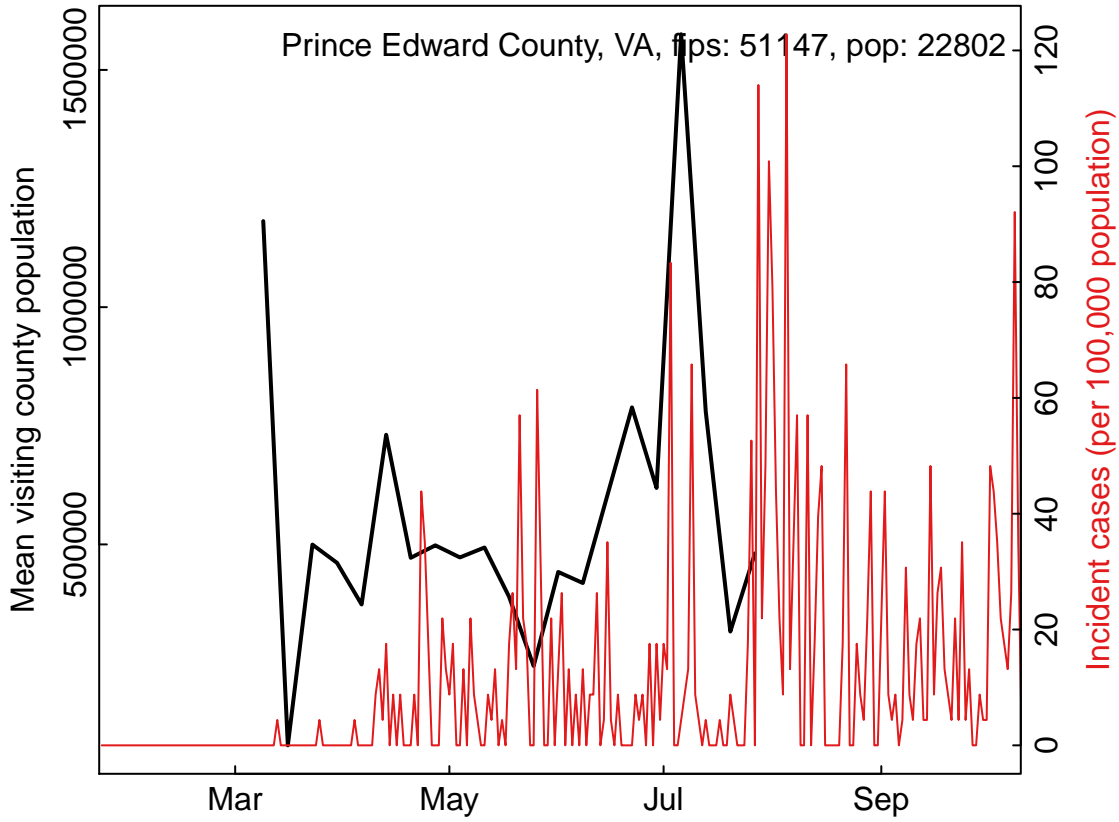

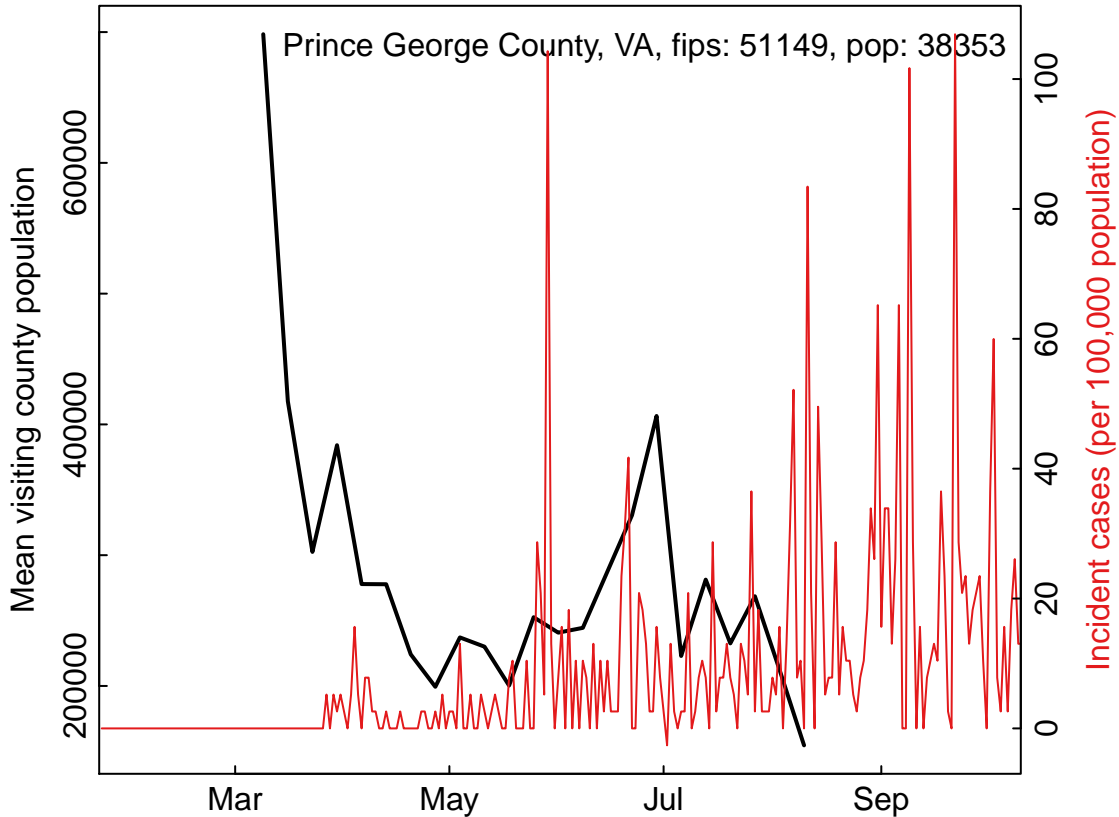

Prince William County, VA, fips: 51153, pop: 470335

Mean visiting county population

2500000  
1500000  
500000  
0

Mar

May

Jul

Sep

60  
50  
40  
30  
20  
10  
0

Incident cases (per 100,000 population)

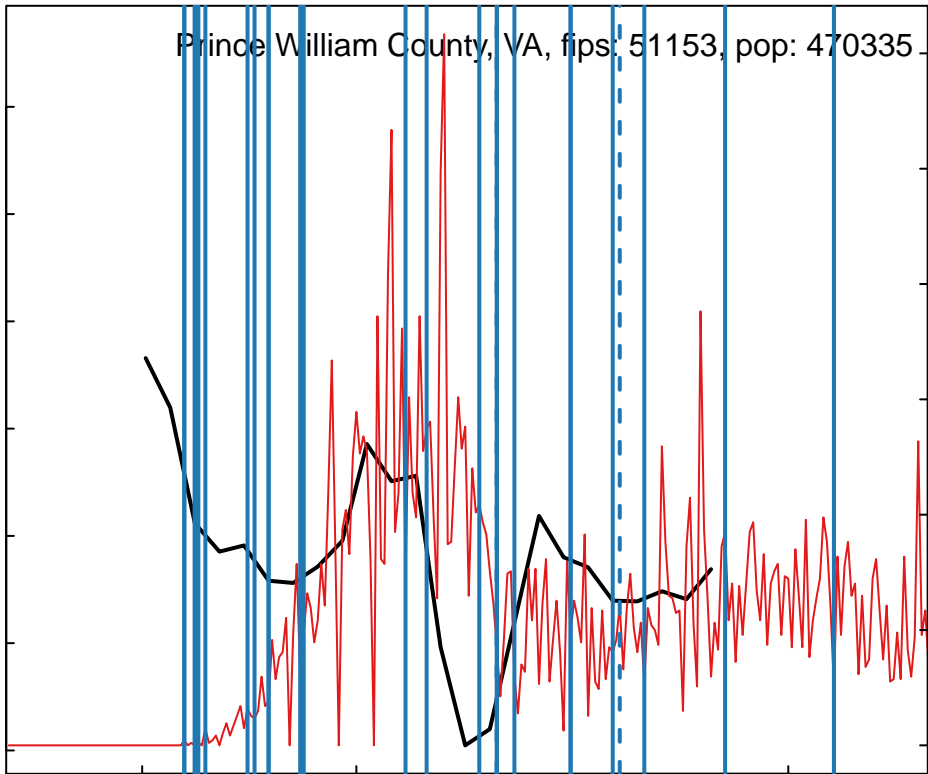

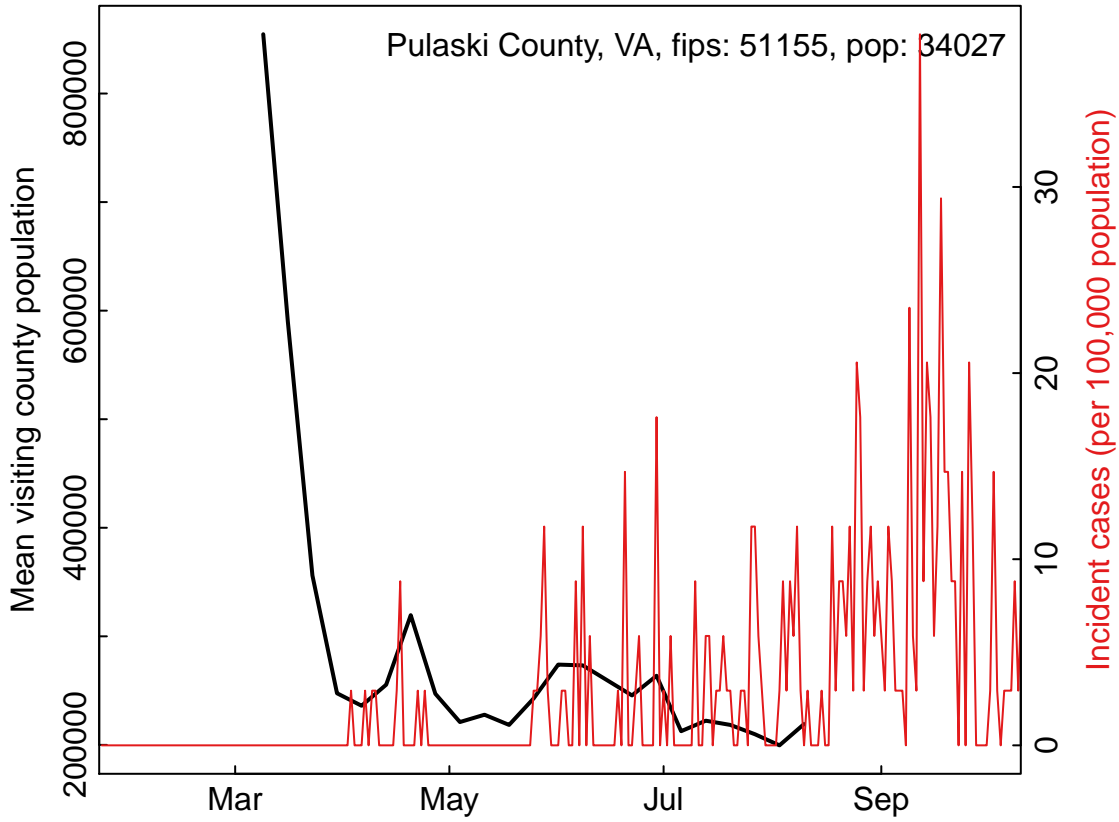



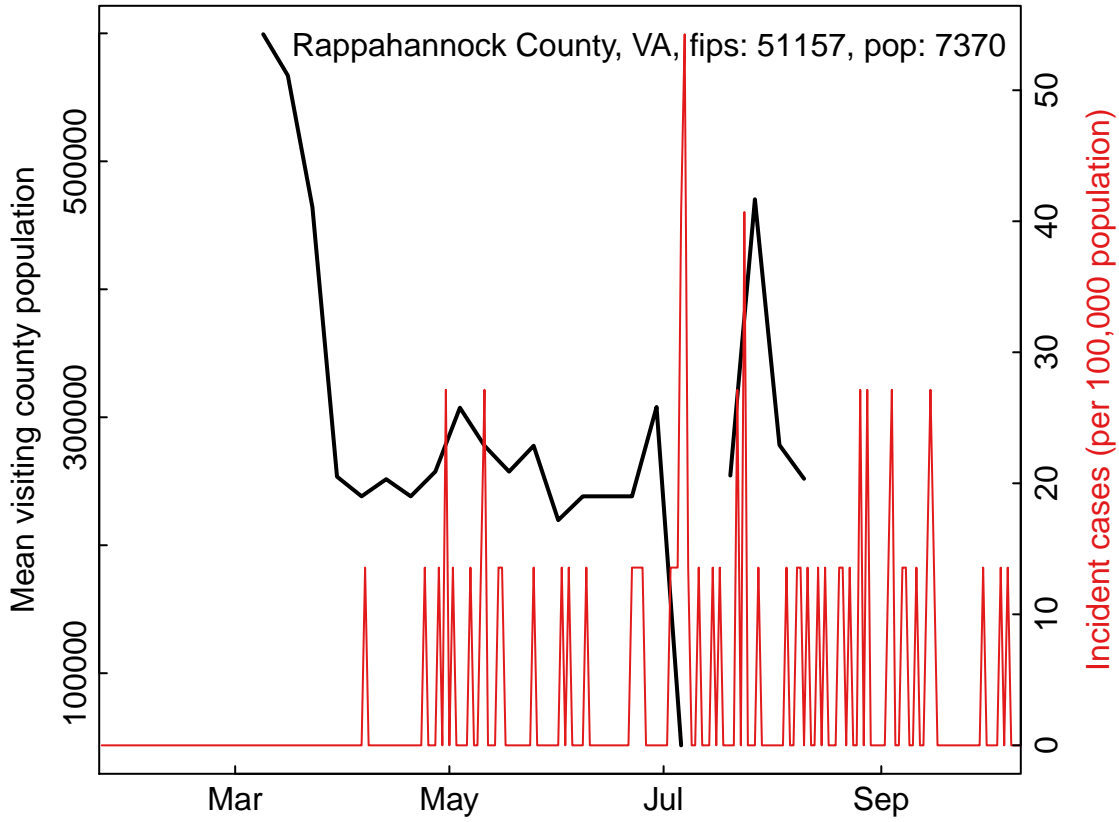

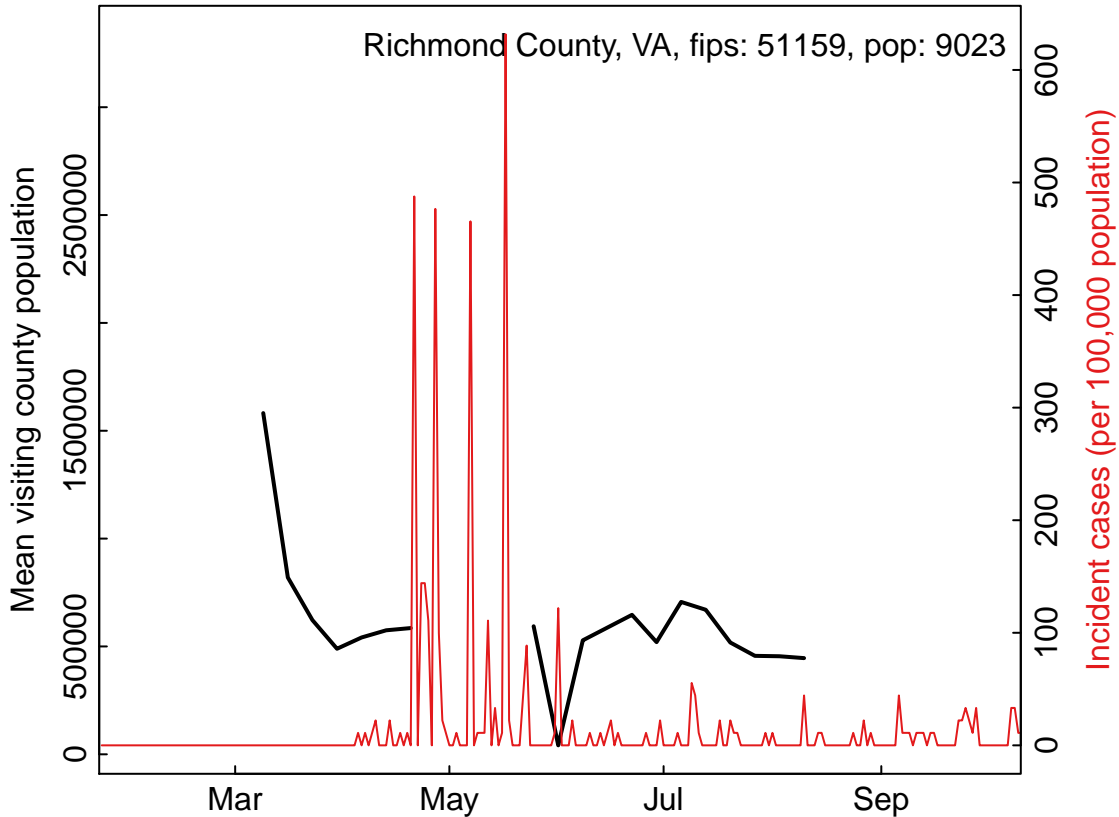

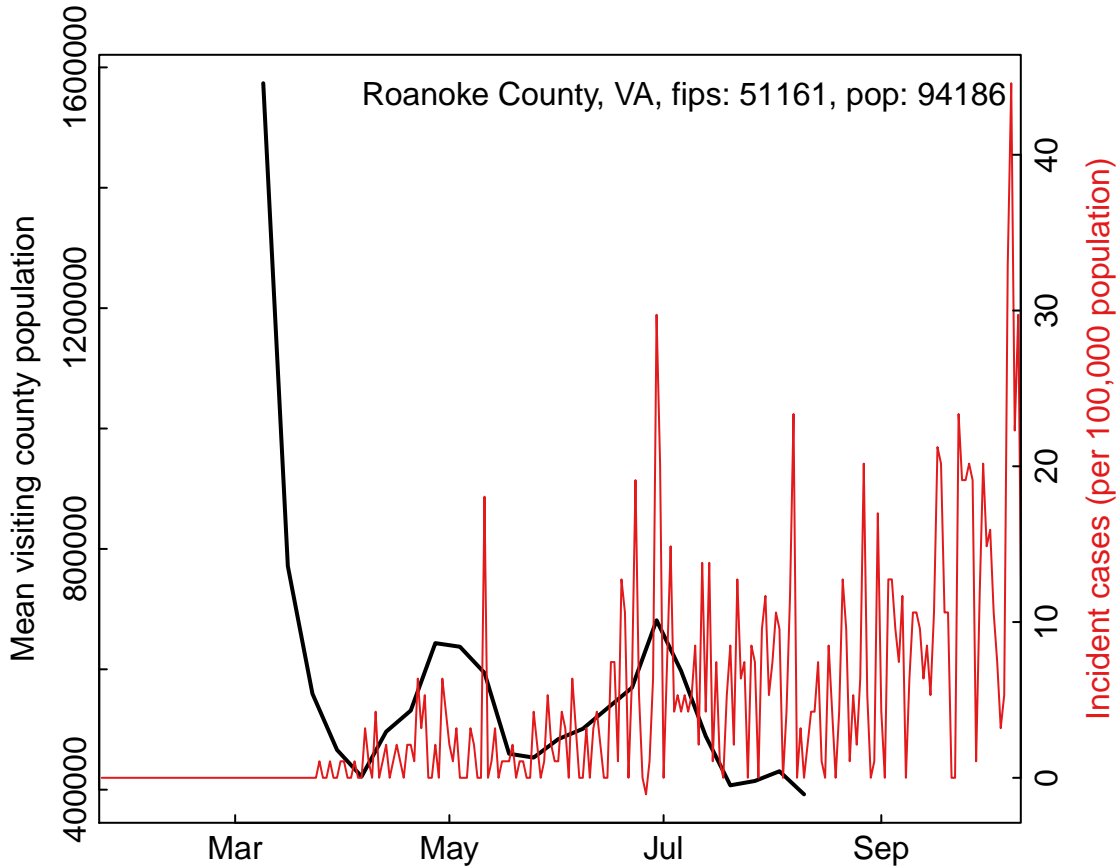

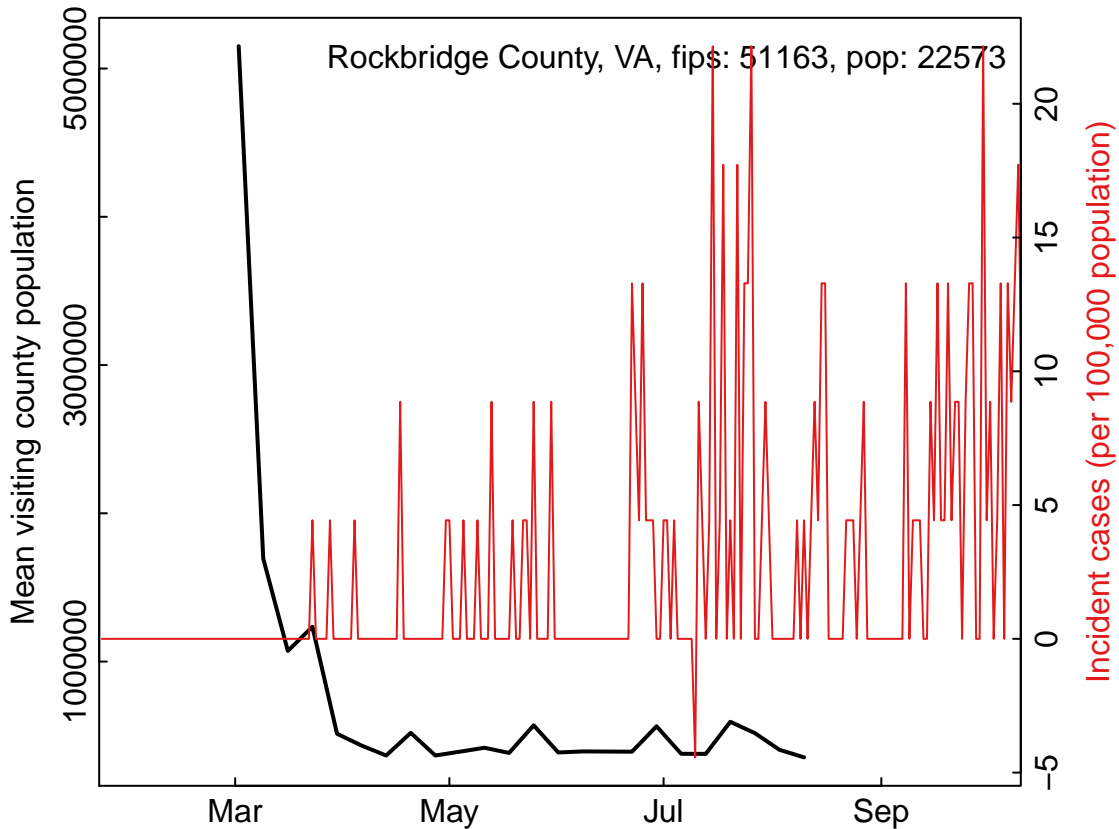

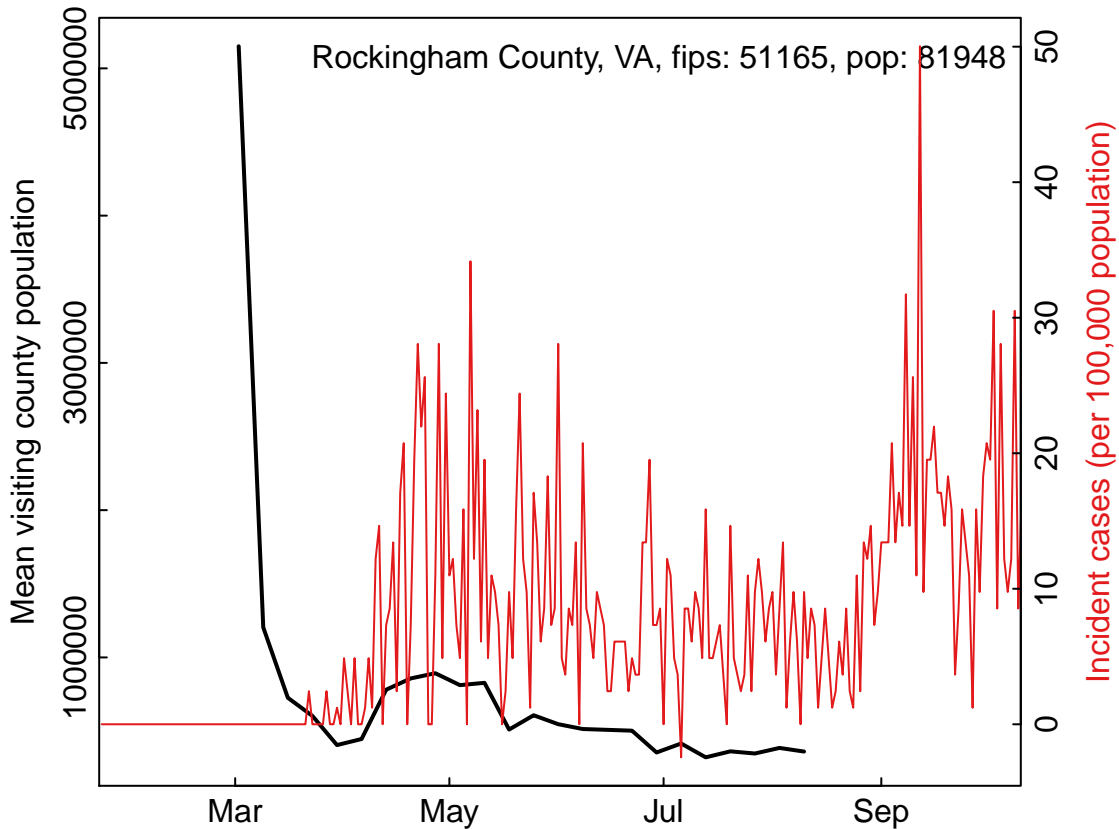

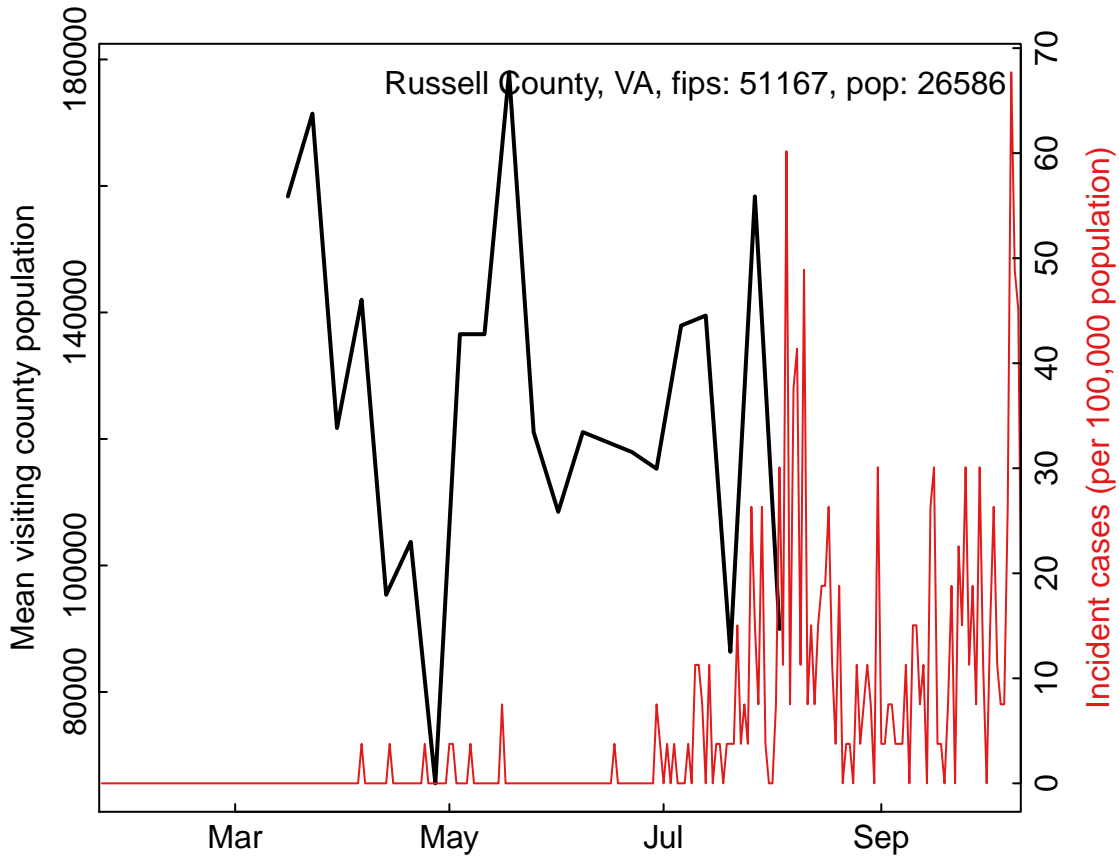

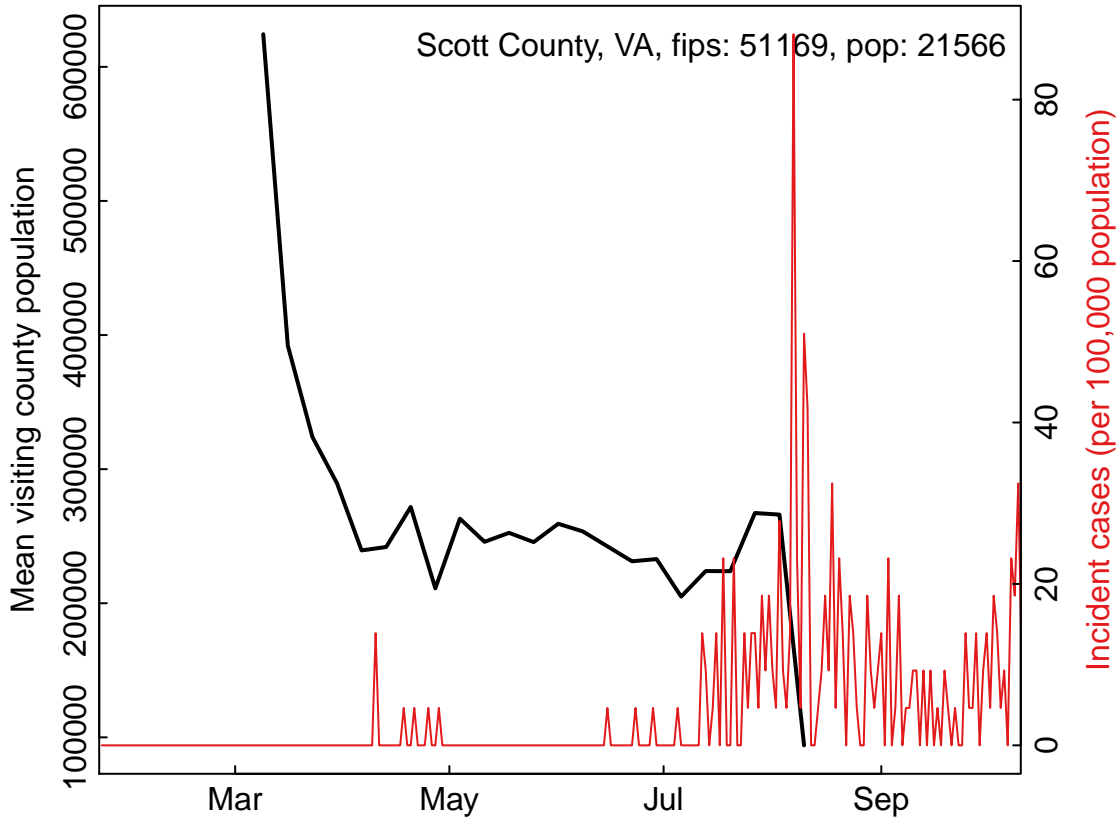

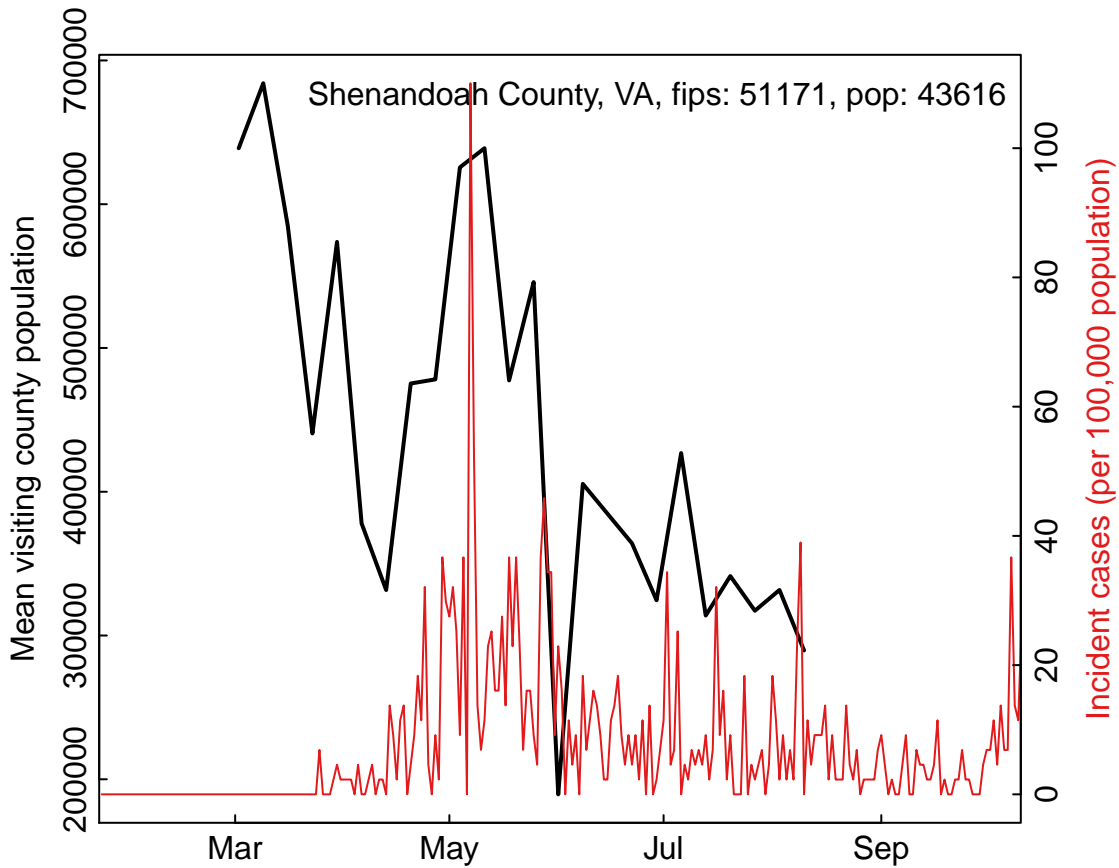



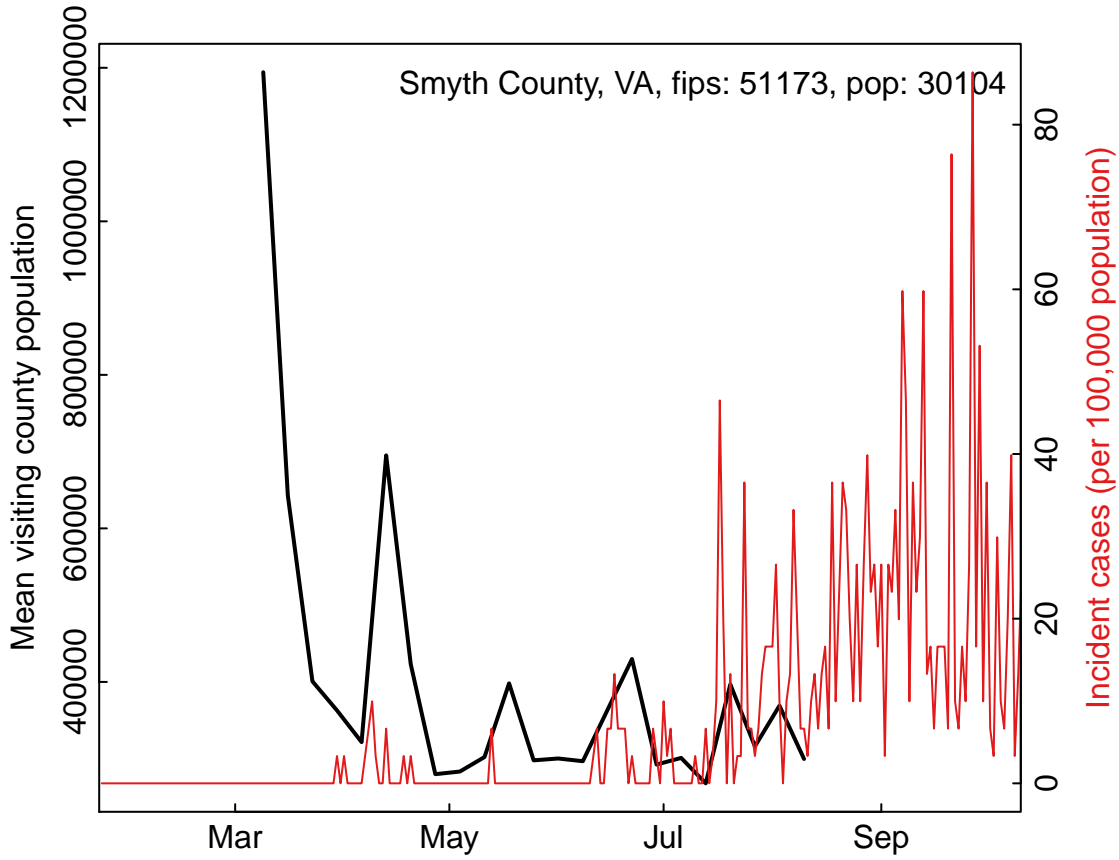

Southampton County, VA, fips: 51175, pop: 17631

Mean visiting county population

Incident cases (per 100,000 population)

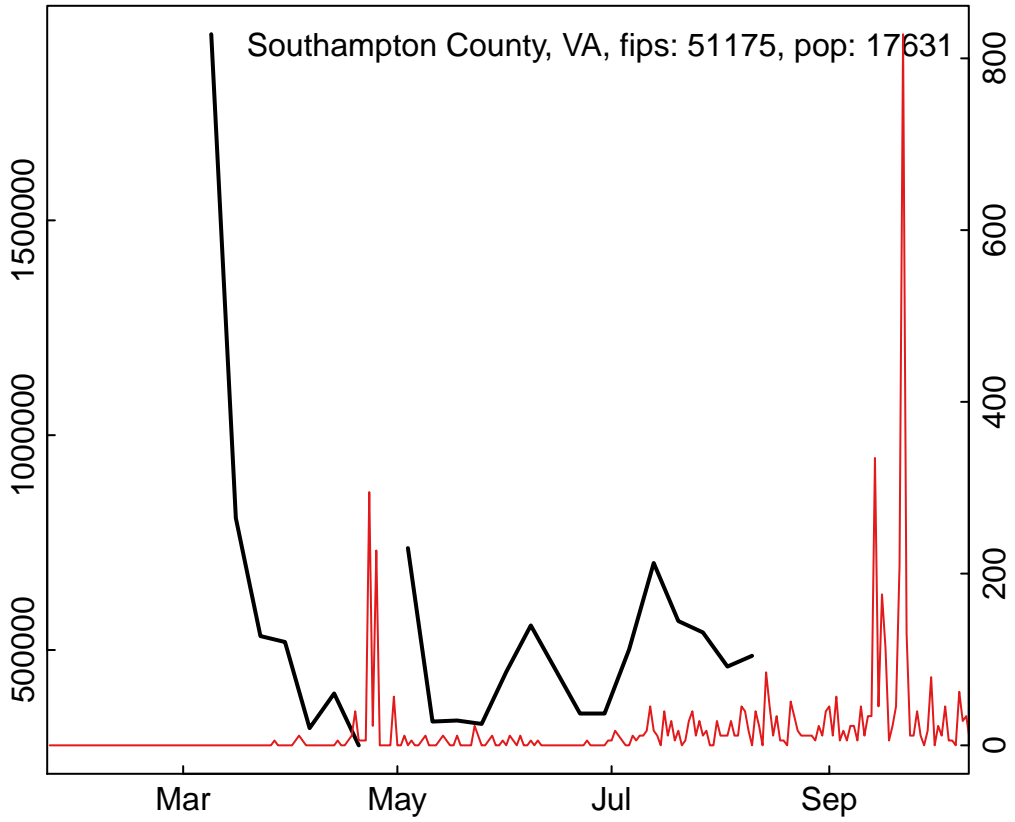

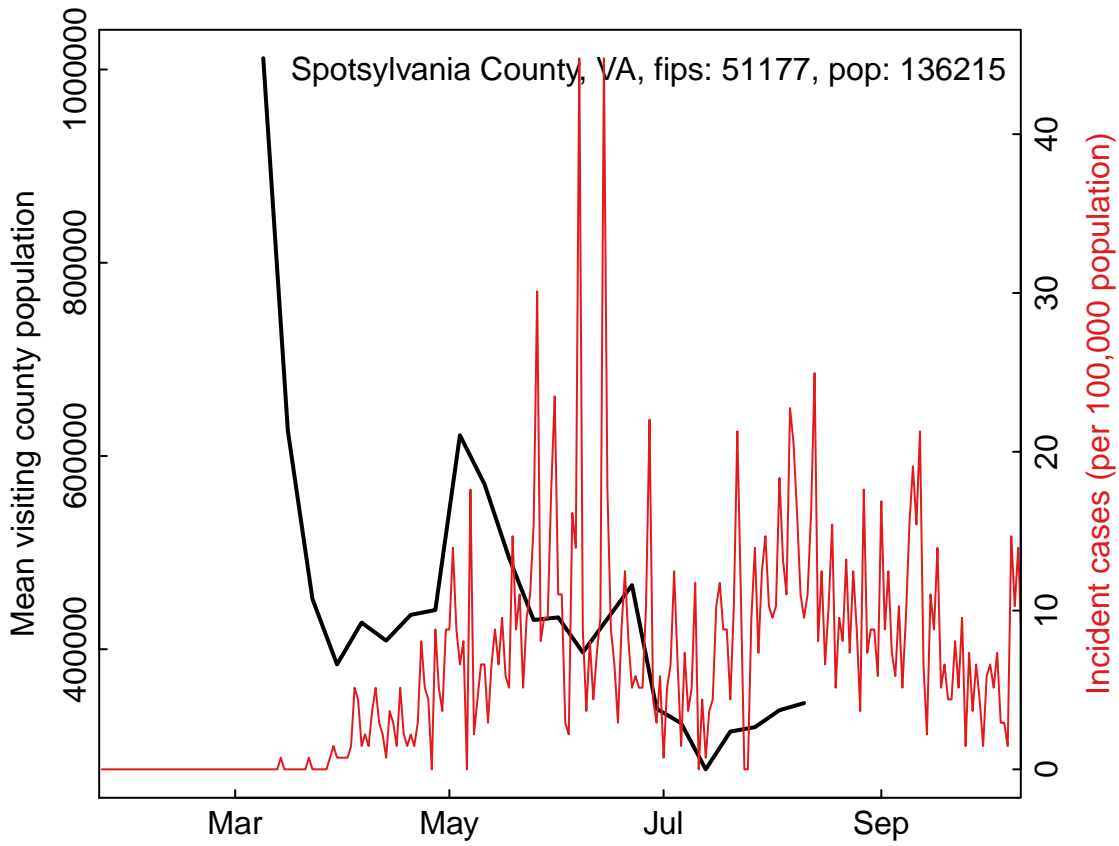

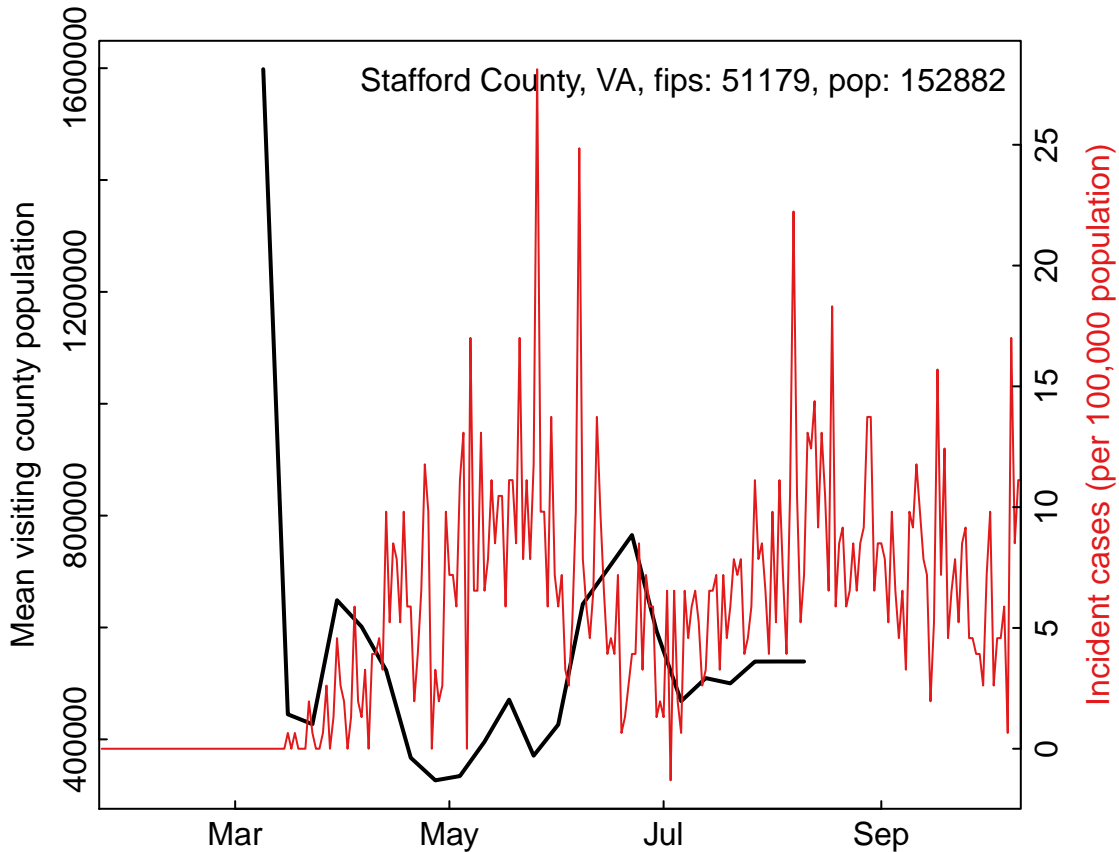

Surry County, VA, fips: 51181, pop: 6422

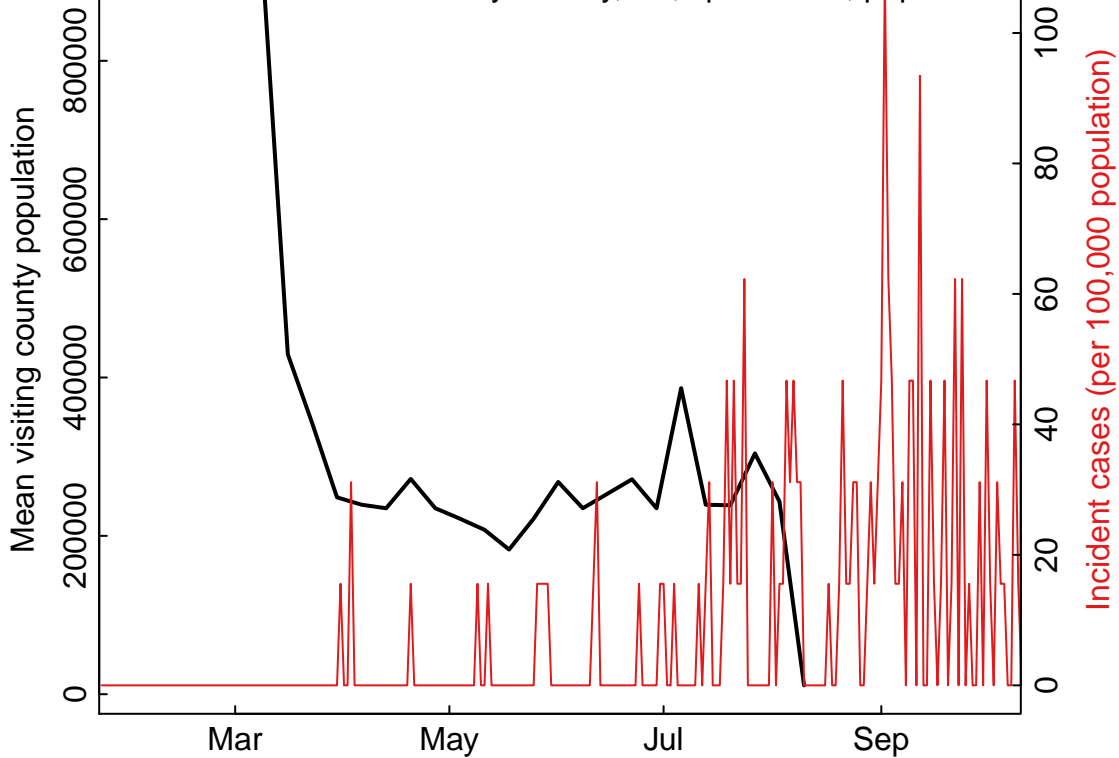

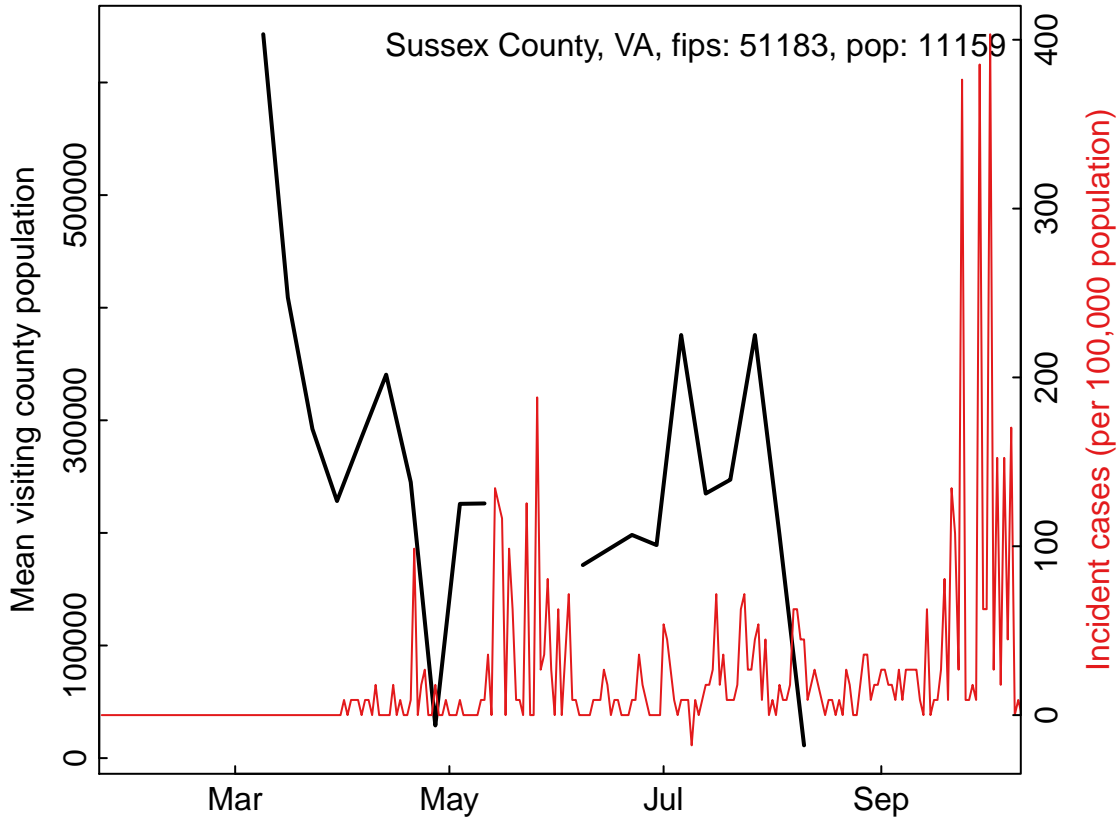

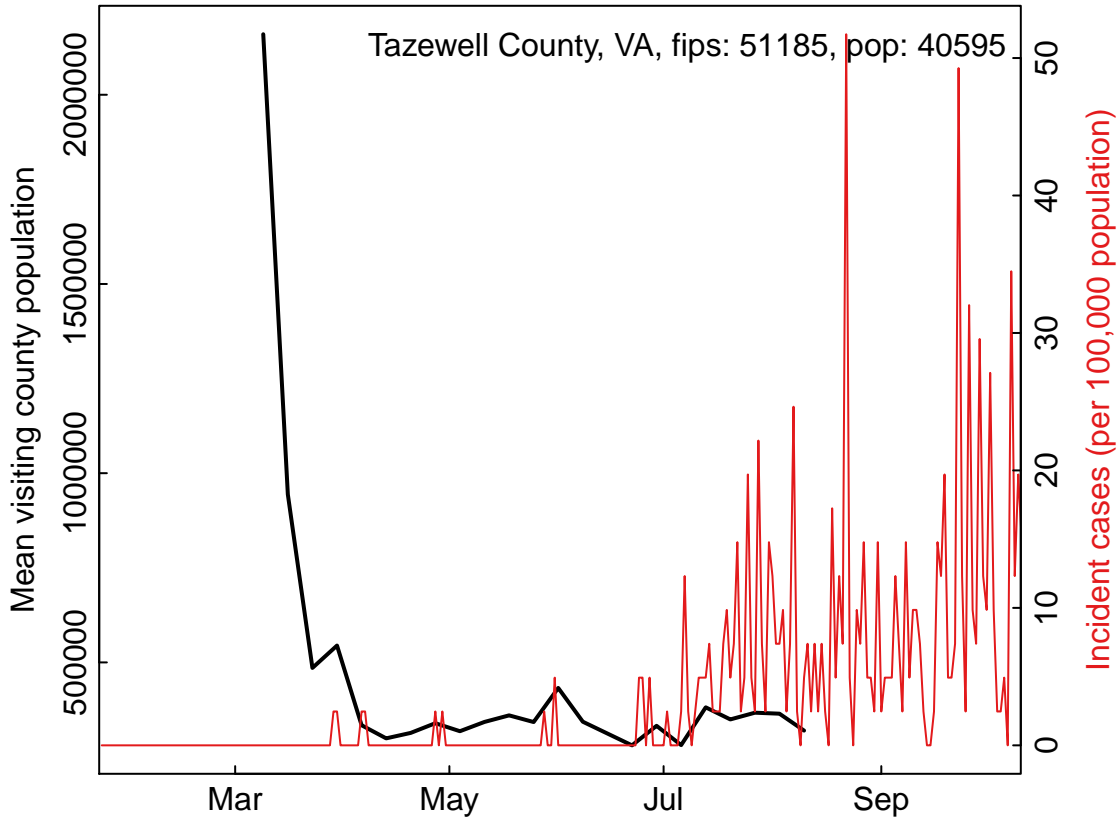

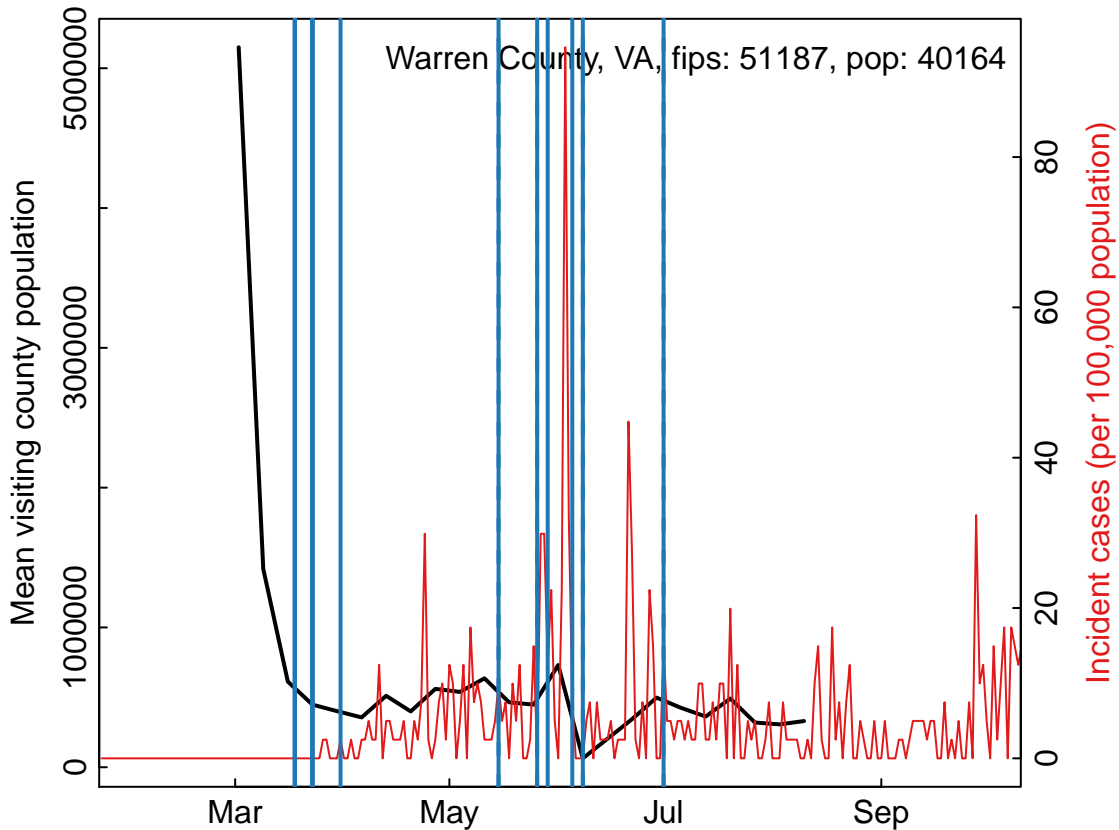



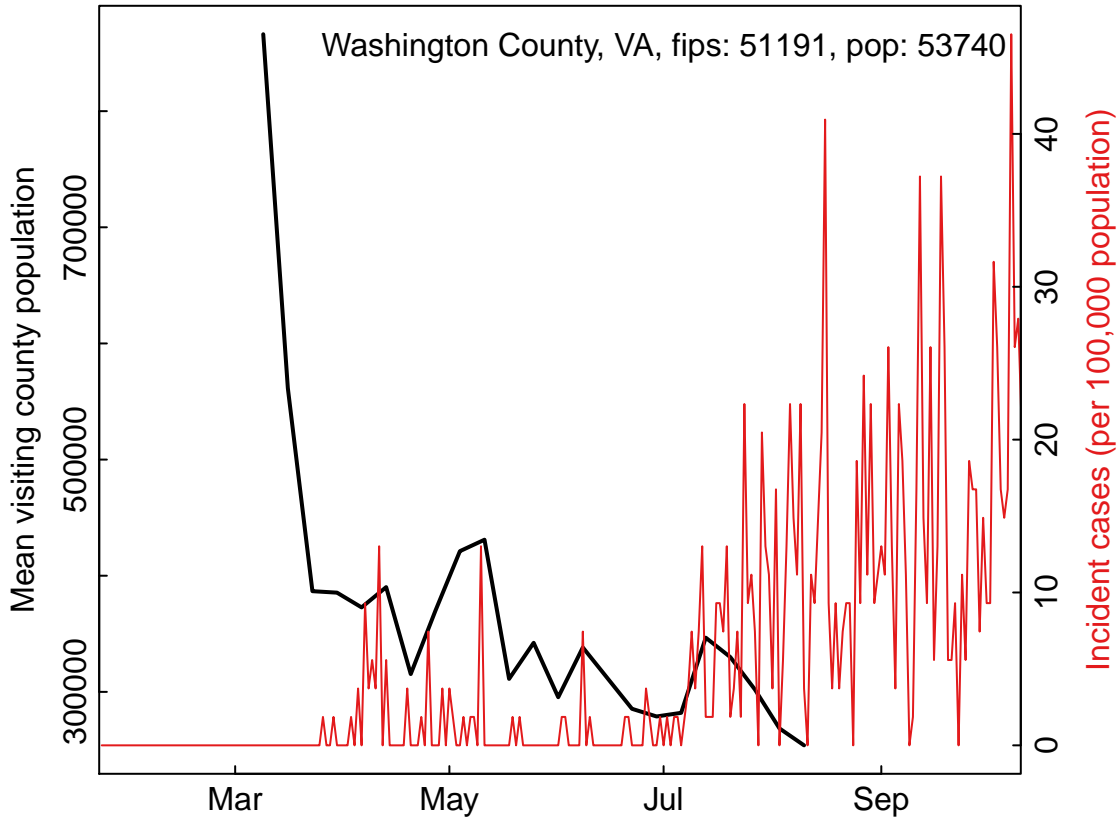

Westmoreland County, VA fips: 51193, pop: 18015

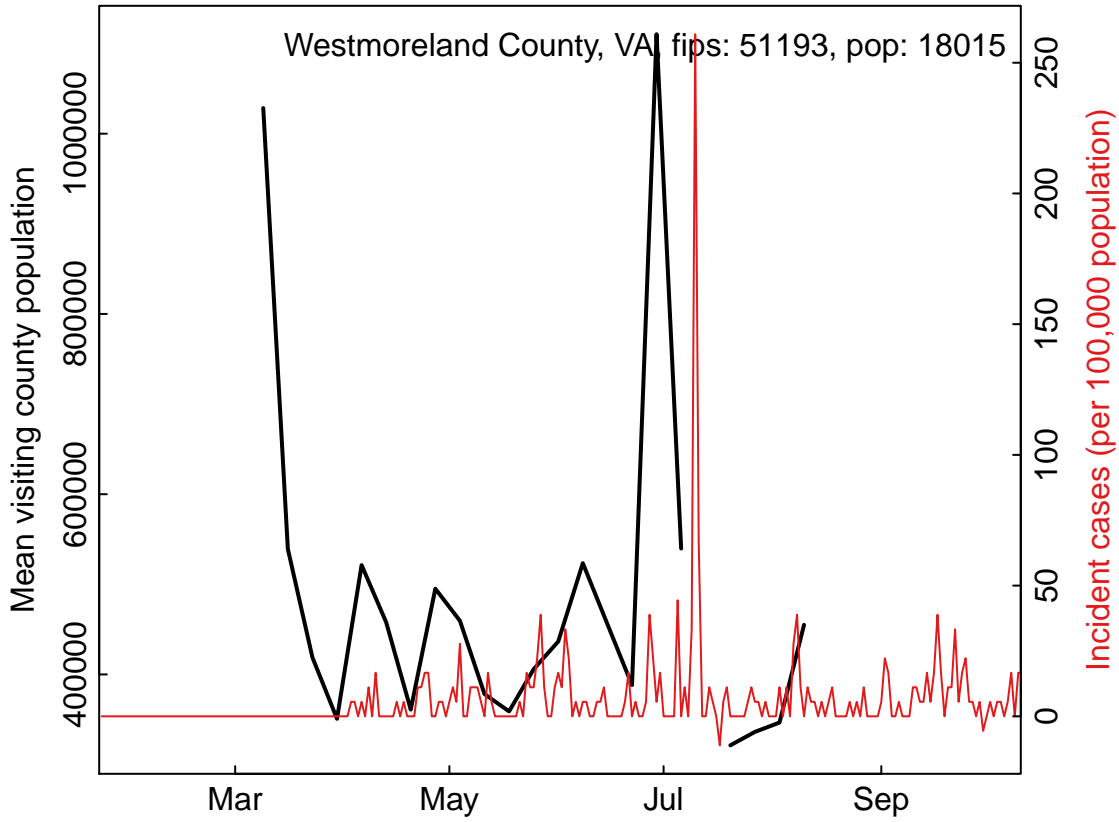

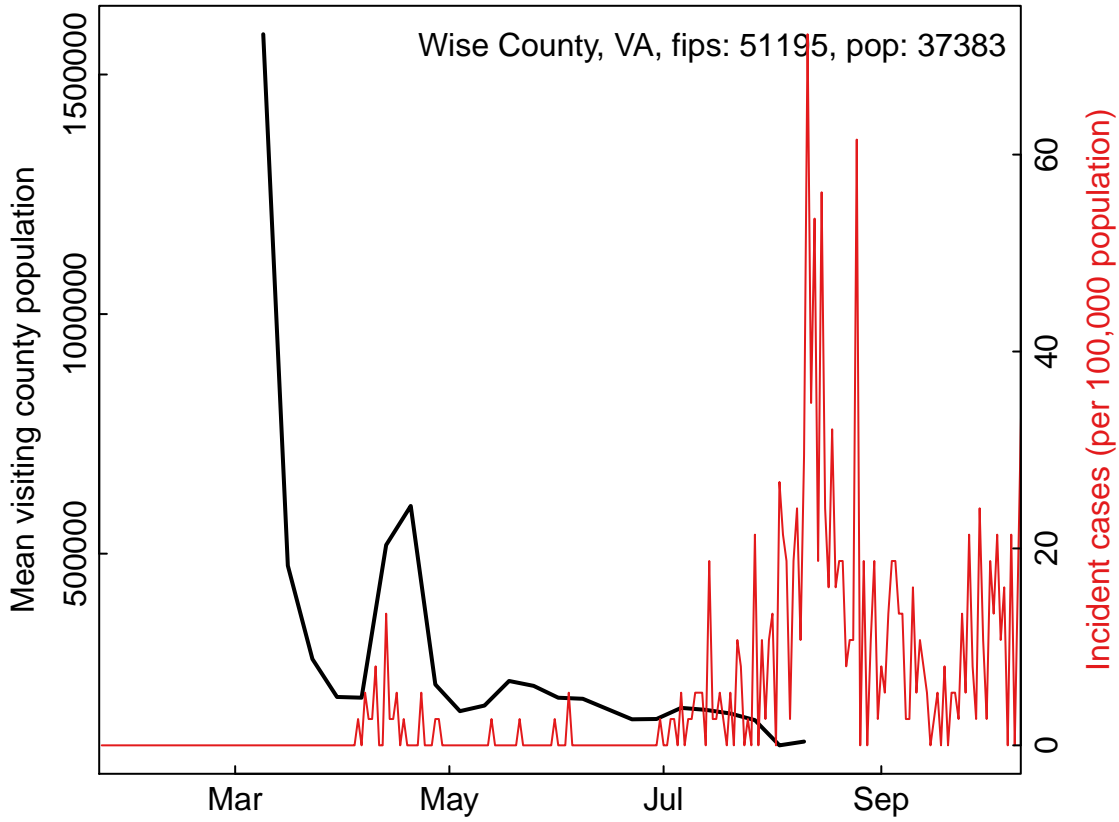

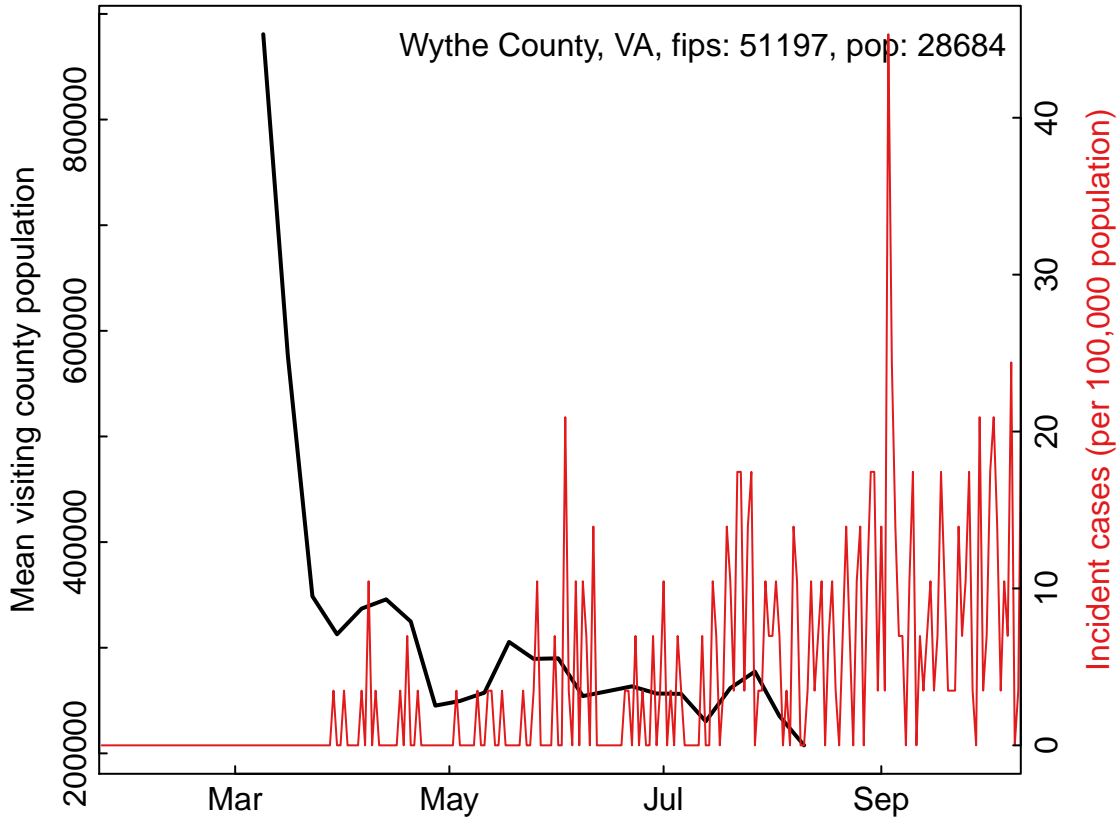

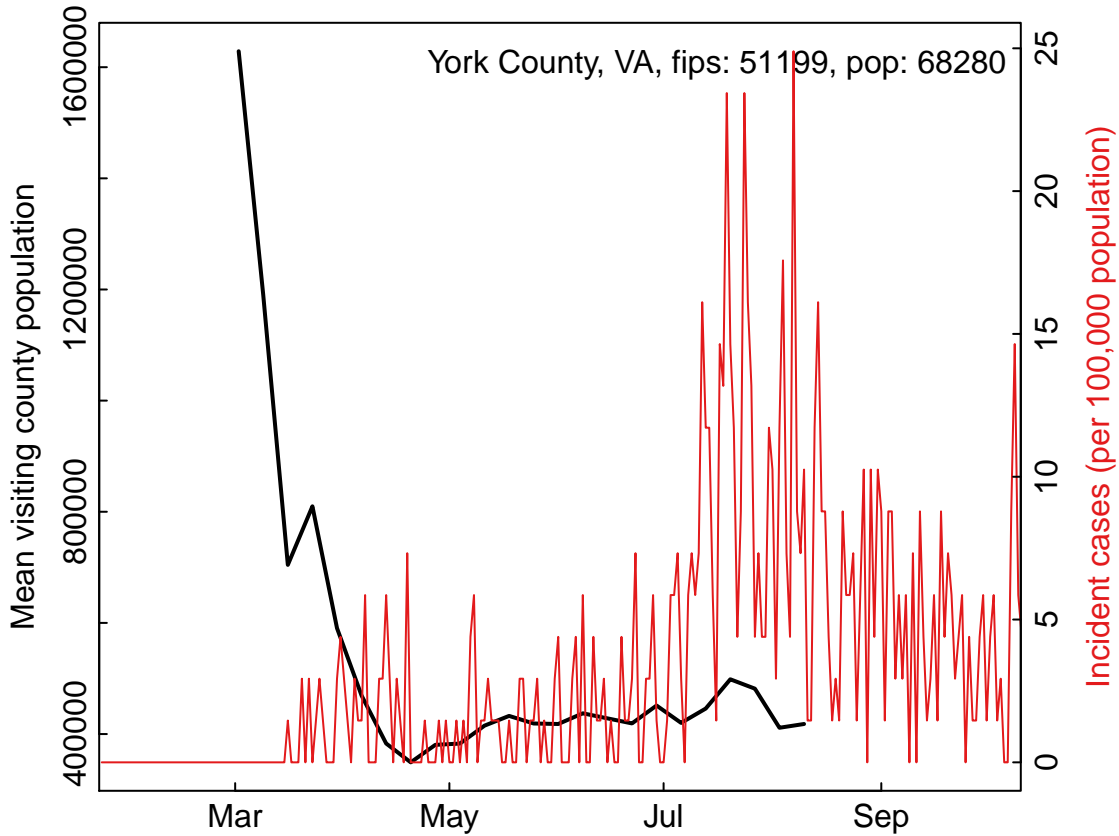

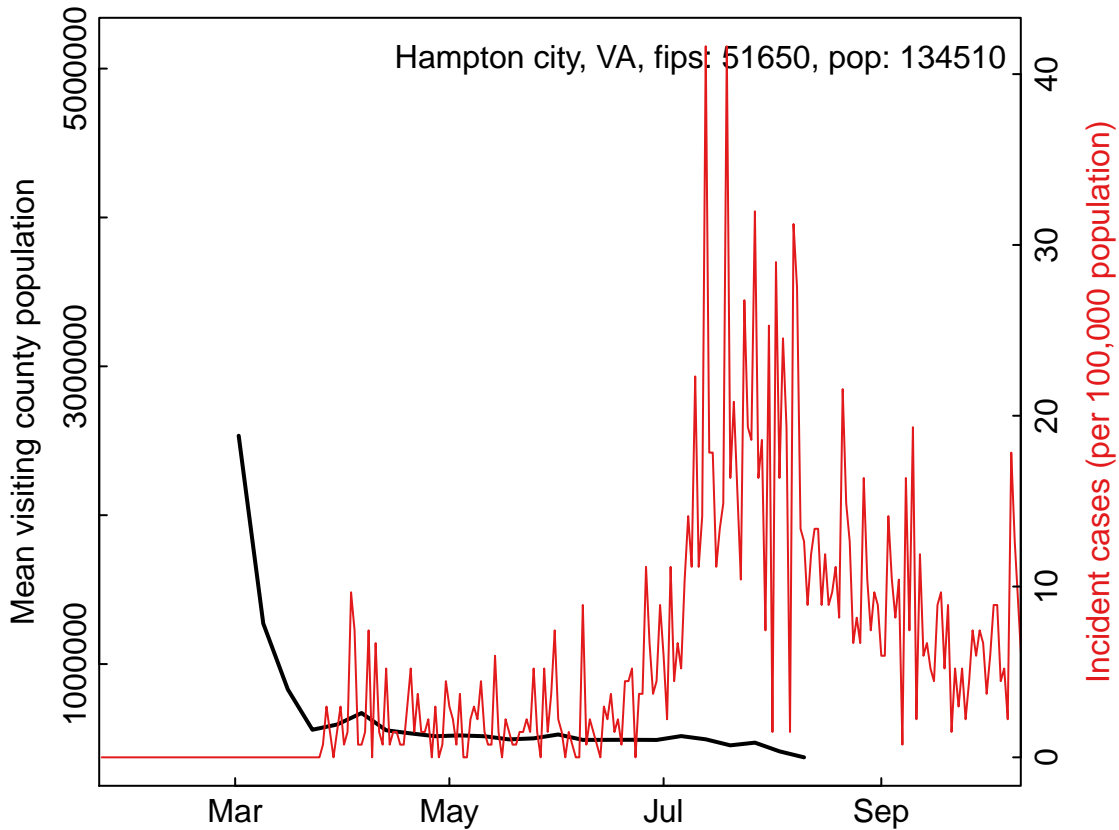

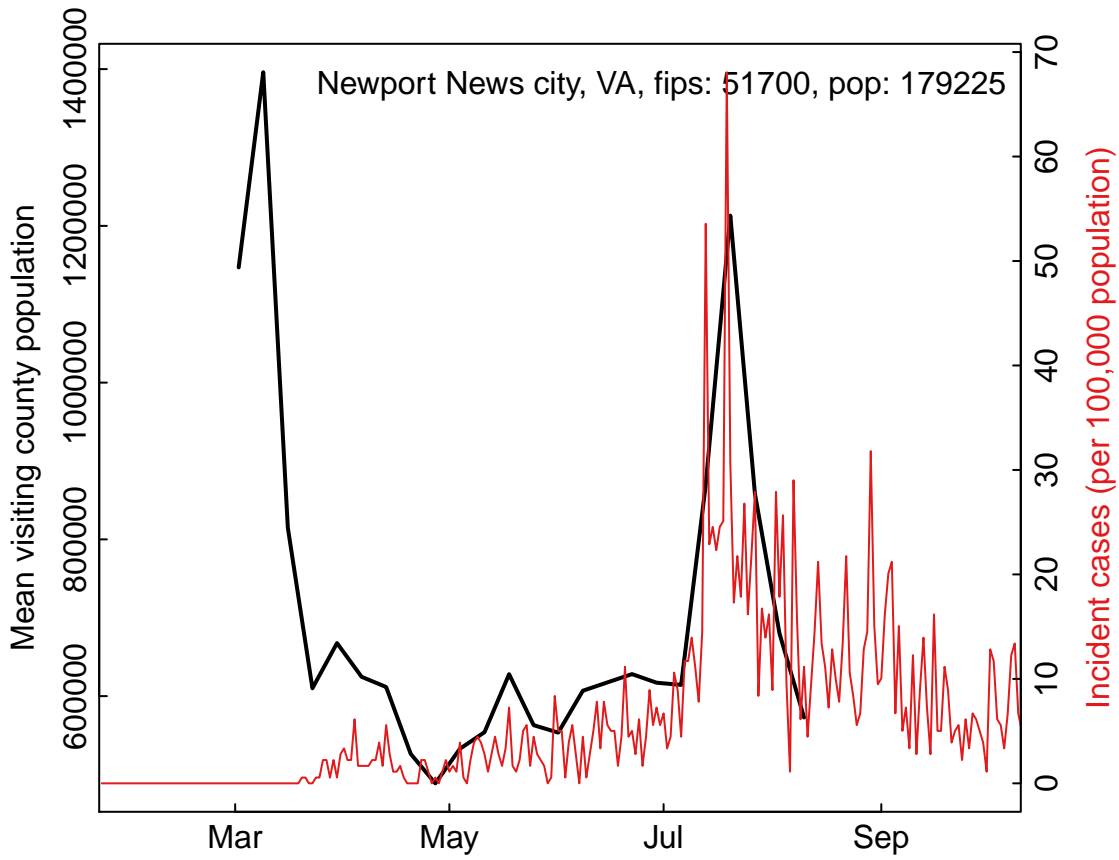

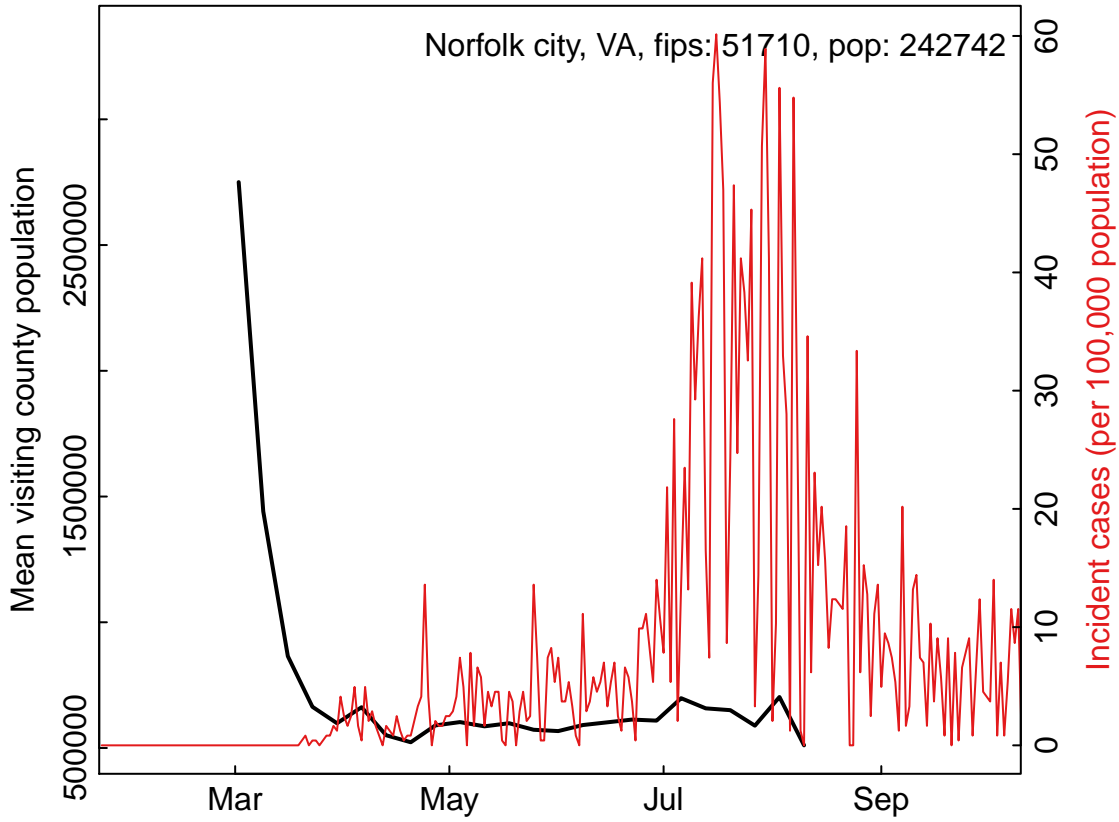



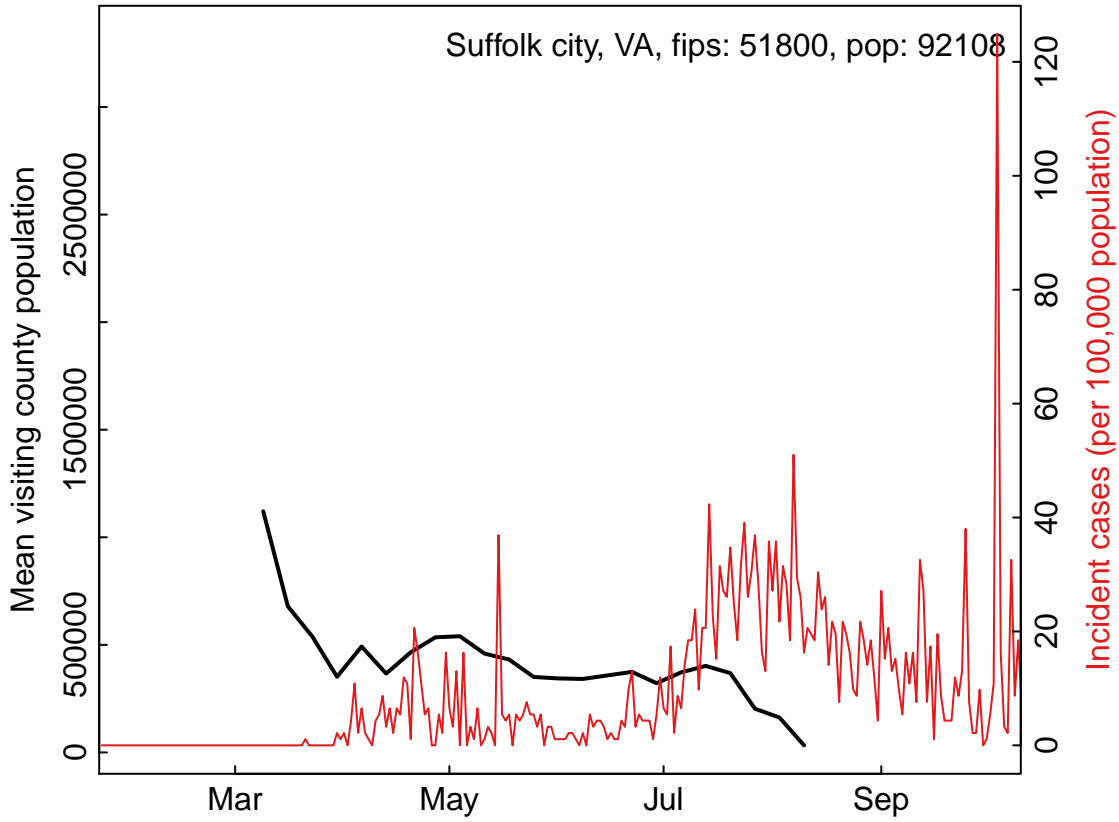

Virginia Beach city, VA, fips: 51810, pop: 449974

Mean visiting county population

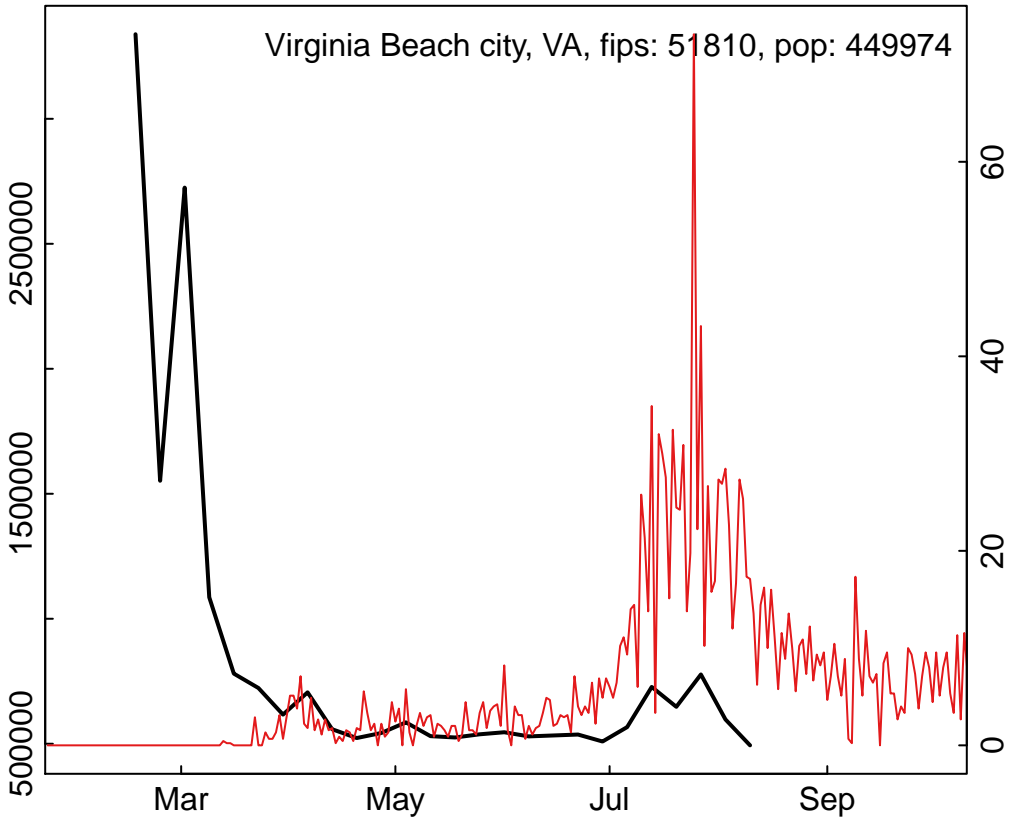

Incident cases (per 100,000 population)

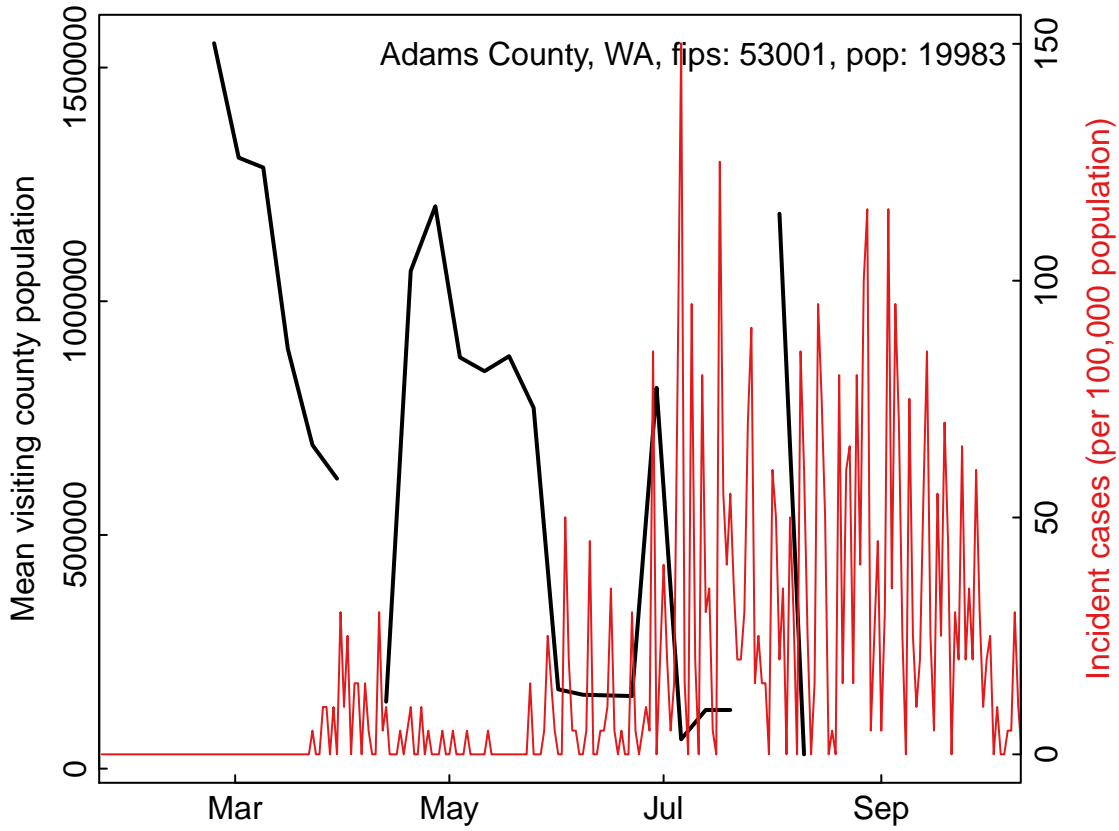

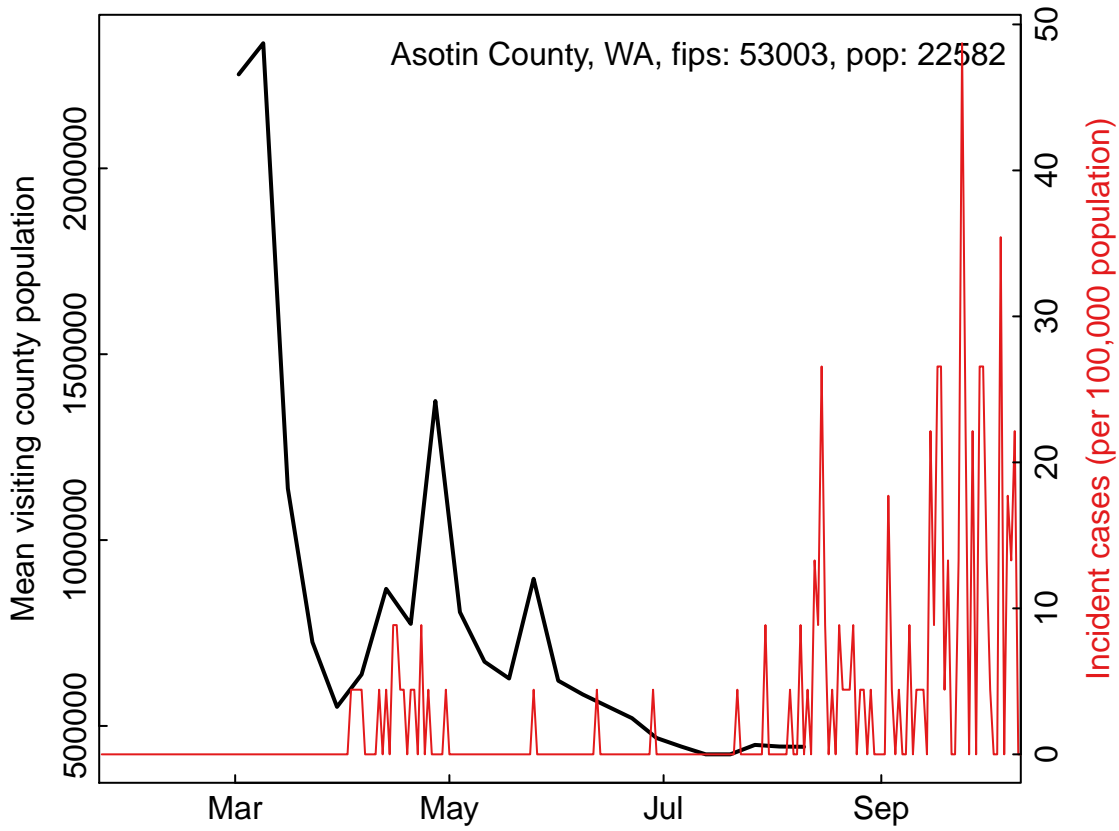

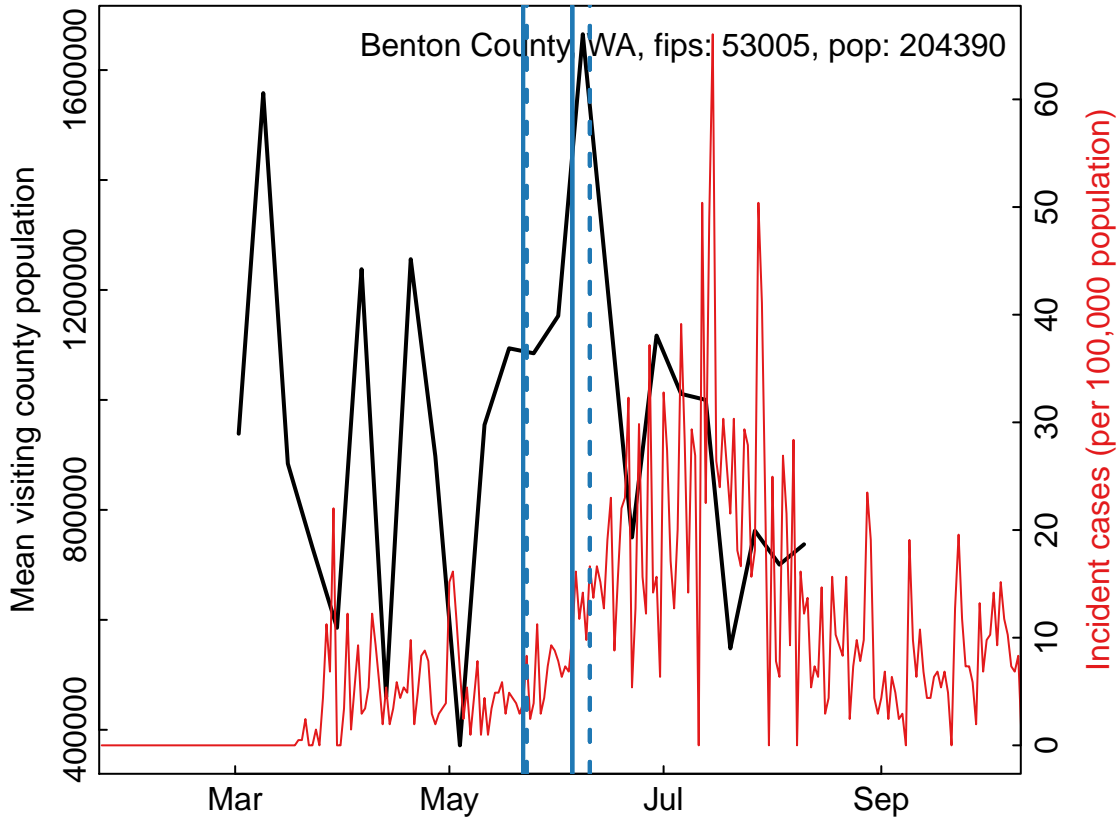

Chelan County, WA, fips: 53007, pop: 77200

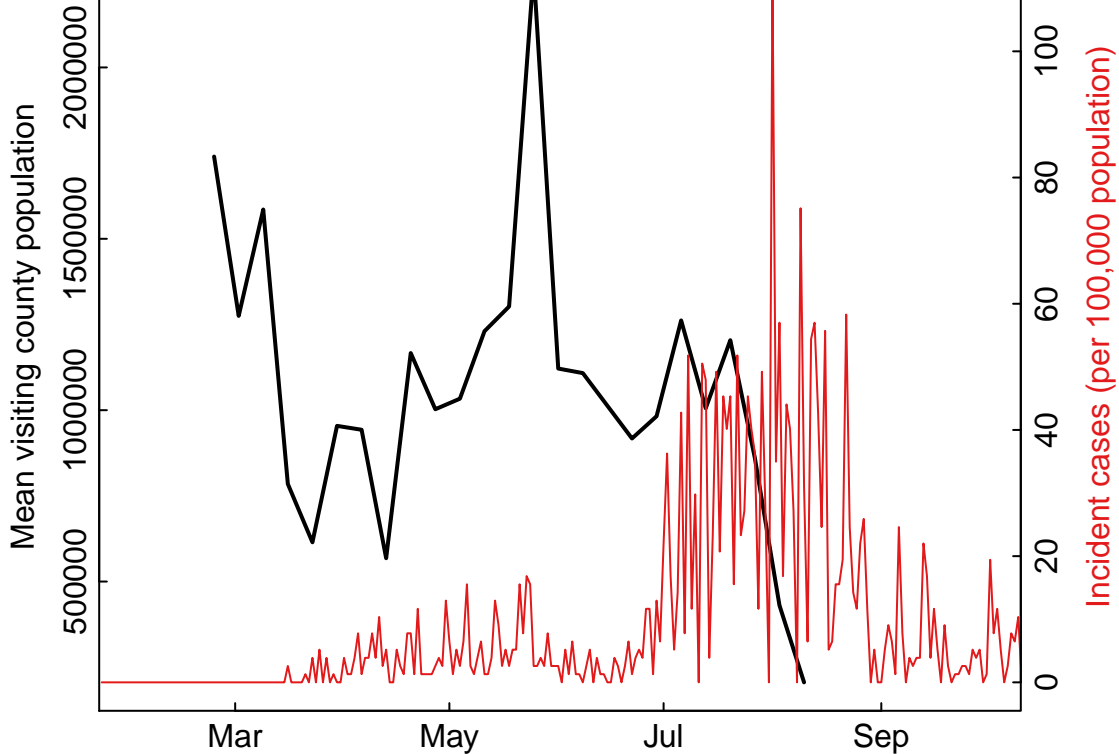

Clallam County, WA, fips: 53009, pop: 77331

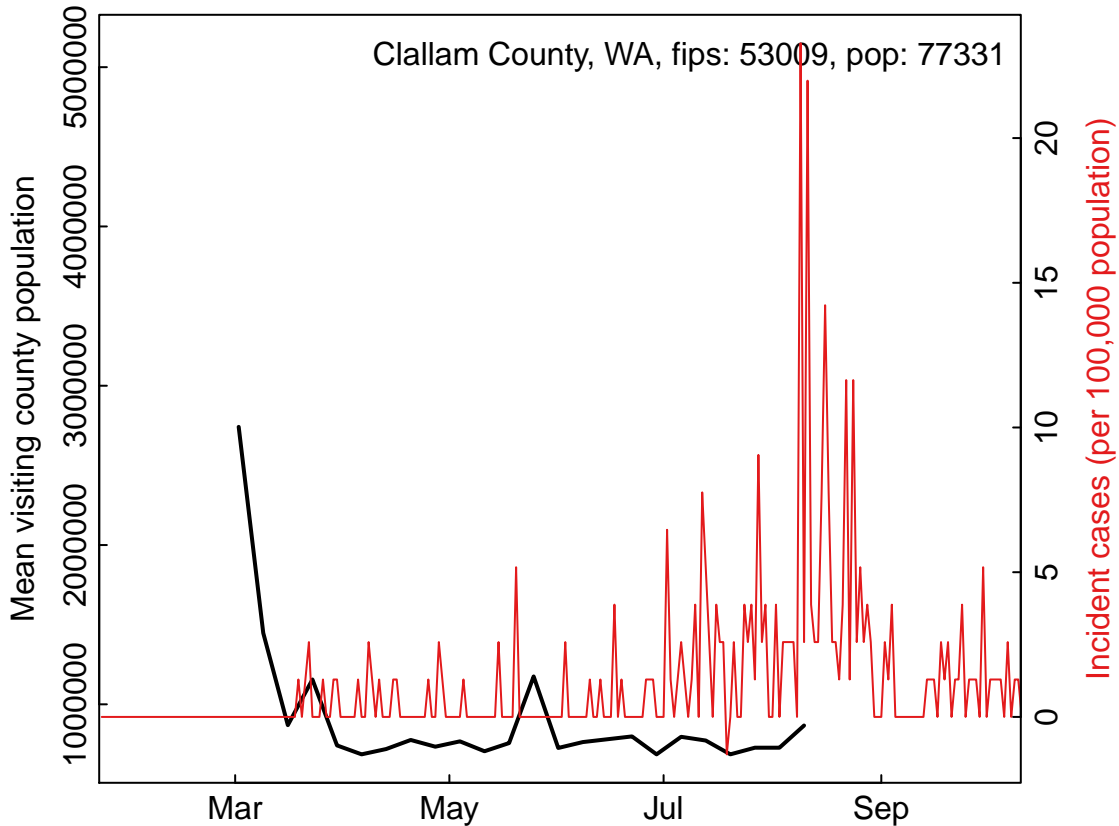

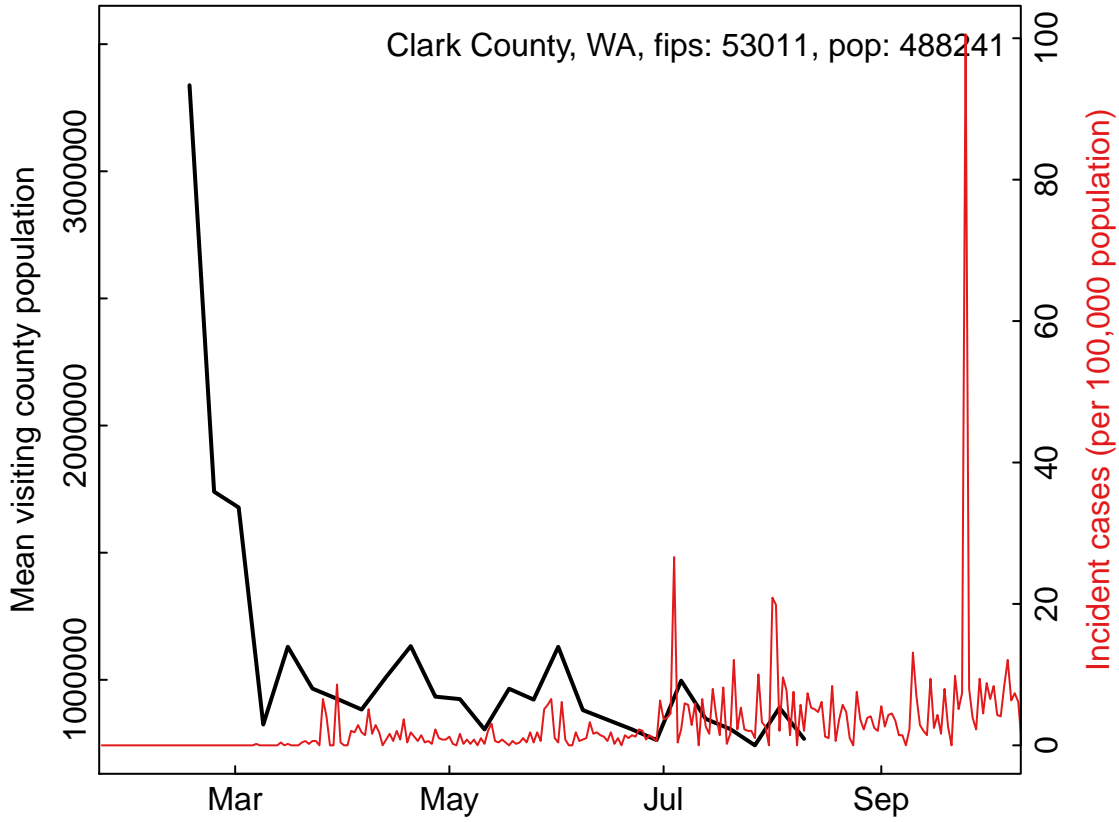



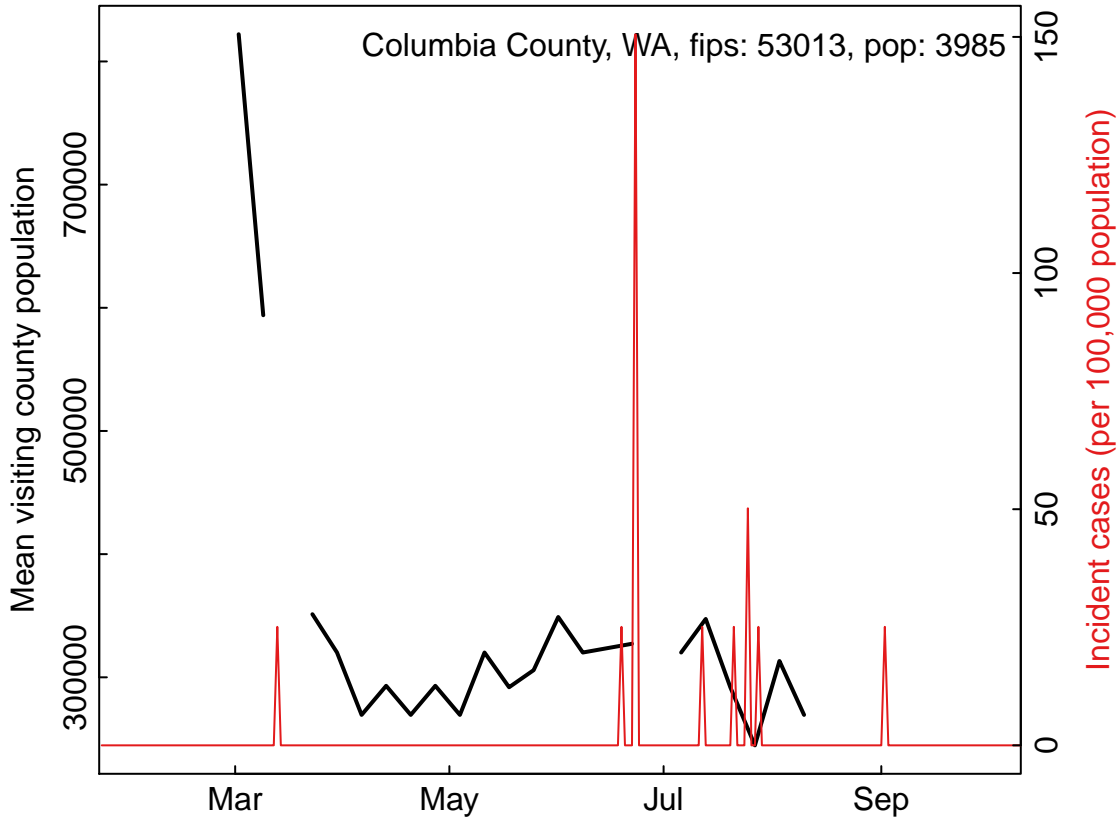

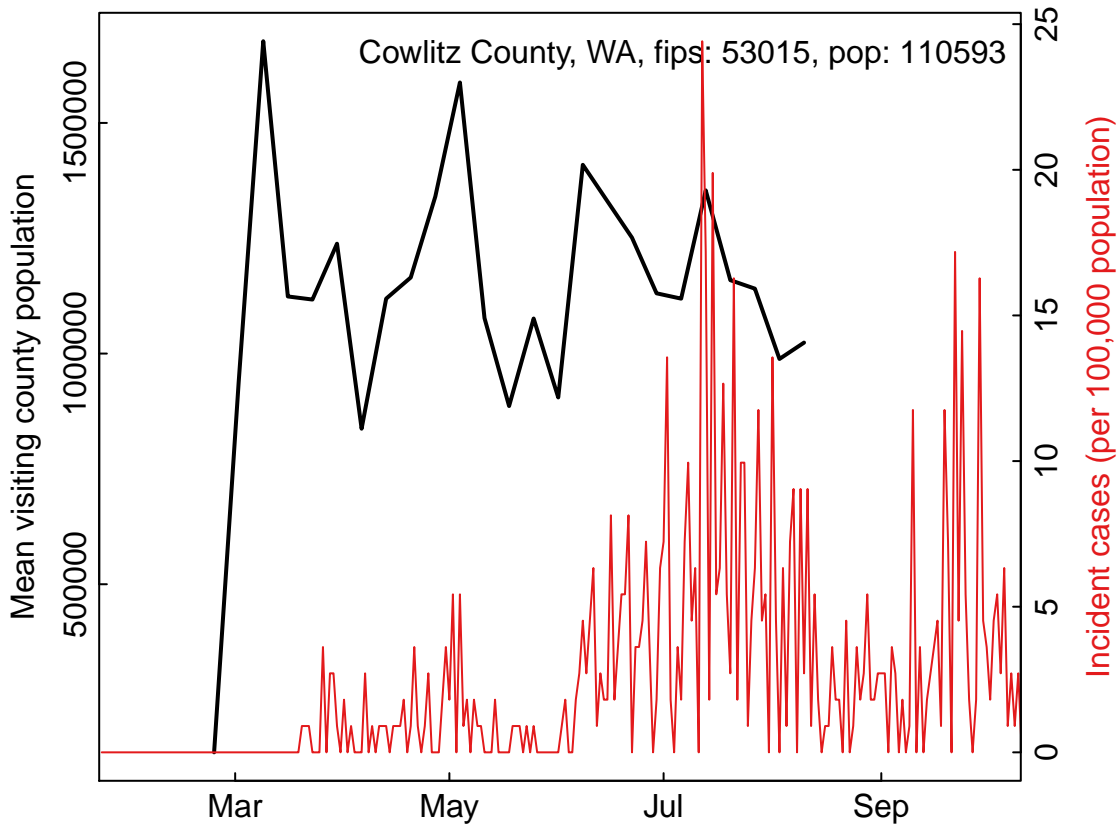

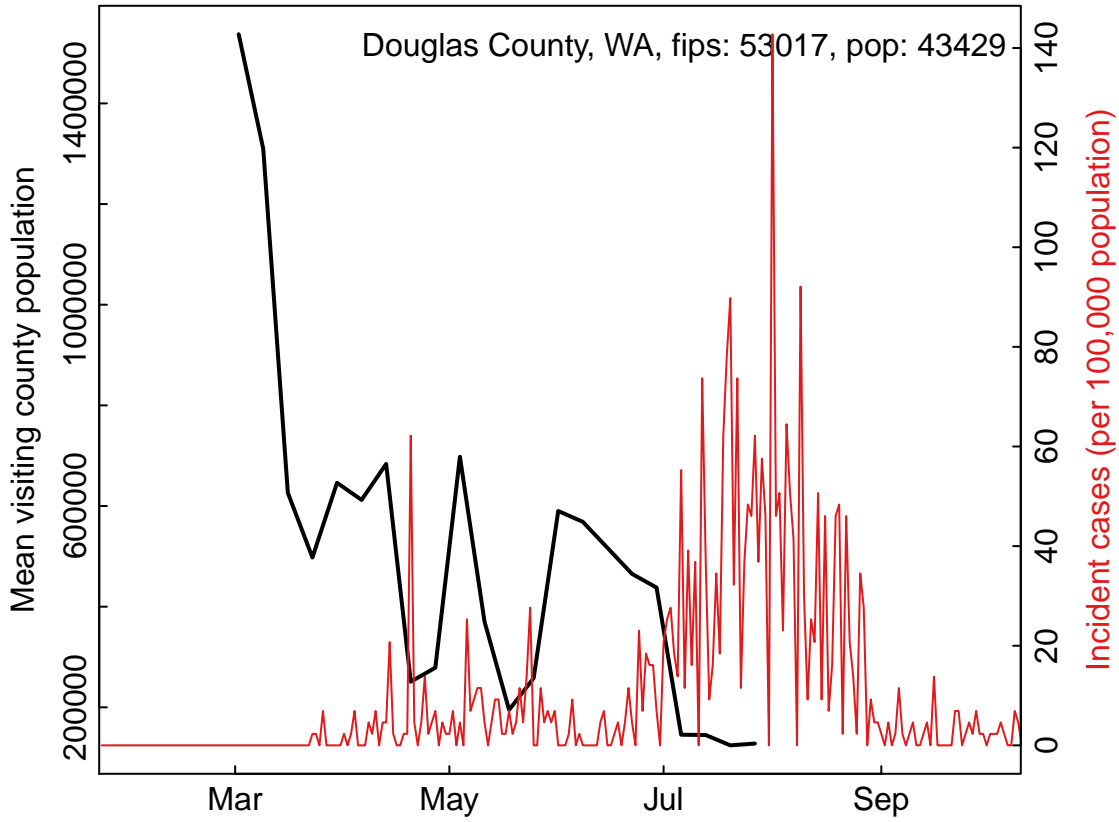

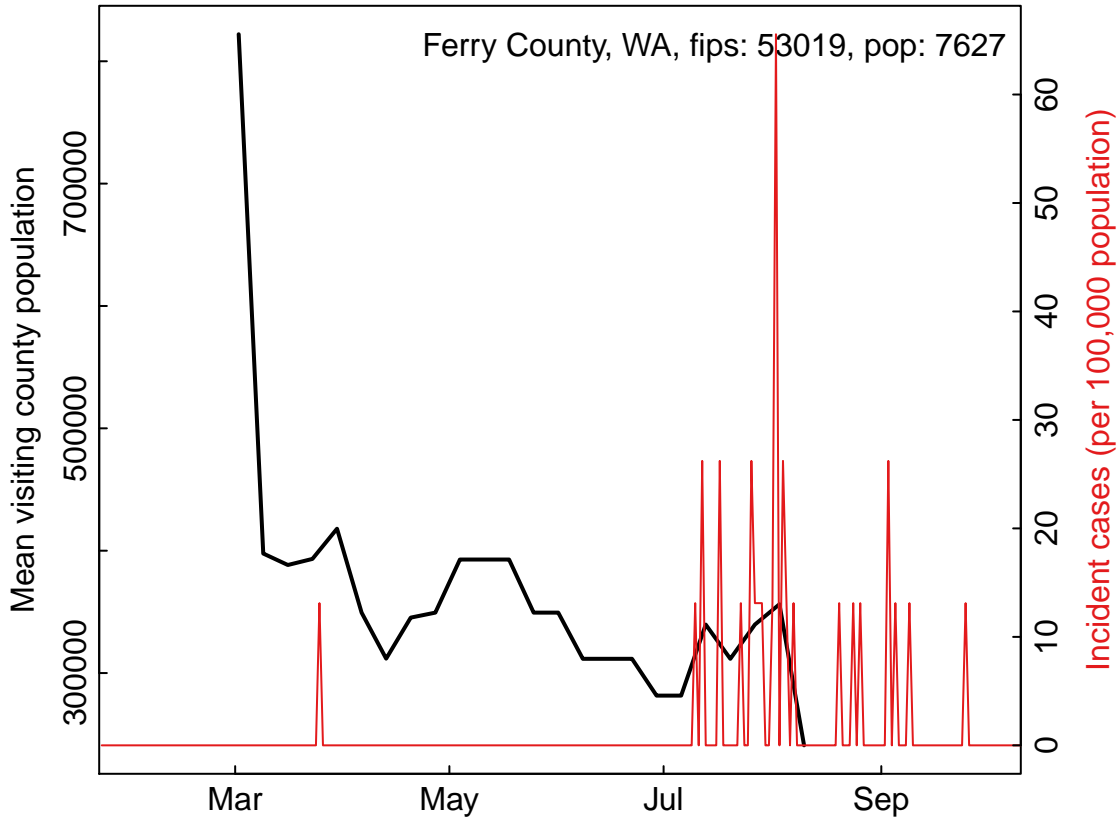

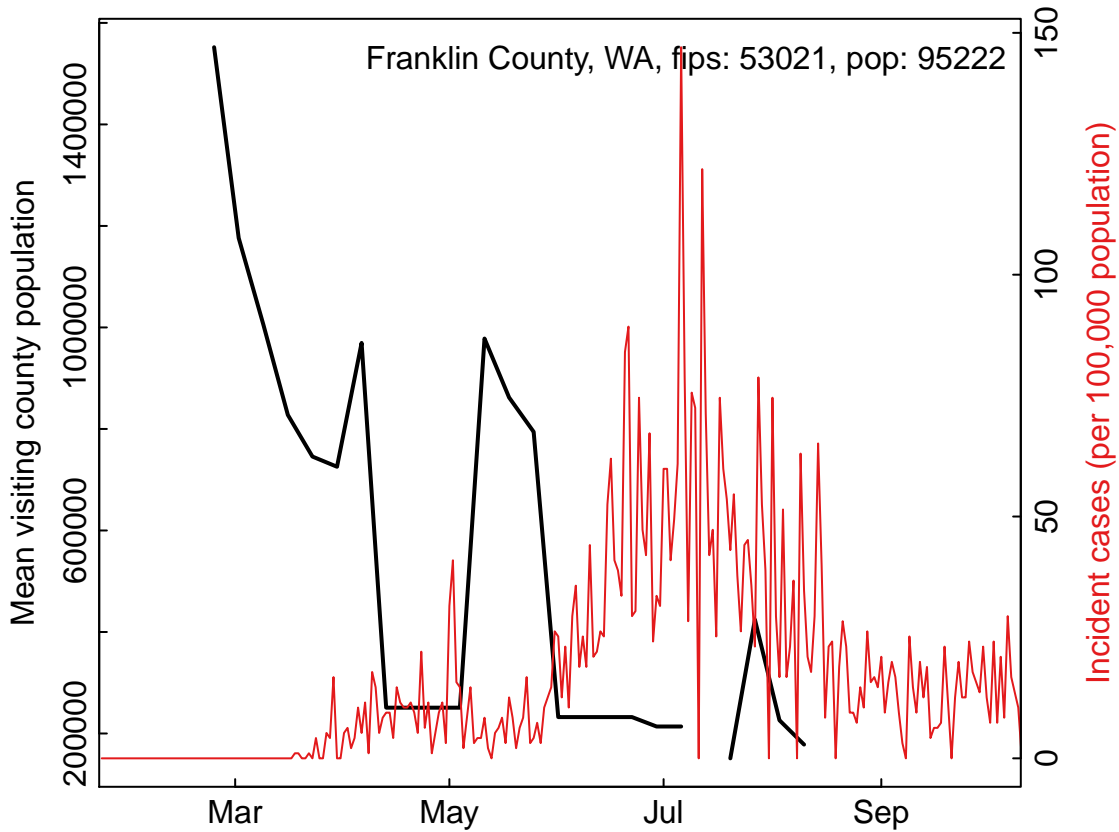

Garfield County, WA, fips: 53023, pop: 2225

Mean visiting county population

120000 160000 200000 240000

Mar

May

Jul

Sep

0 50 100 150

Incident cases (per 100,000 population)

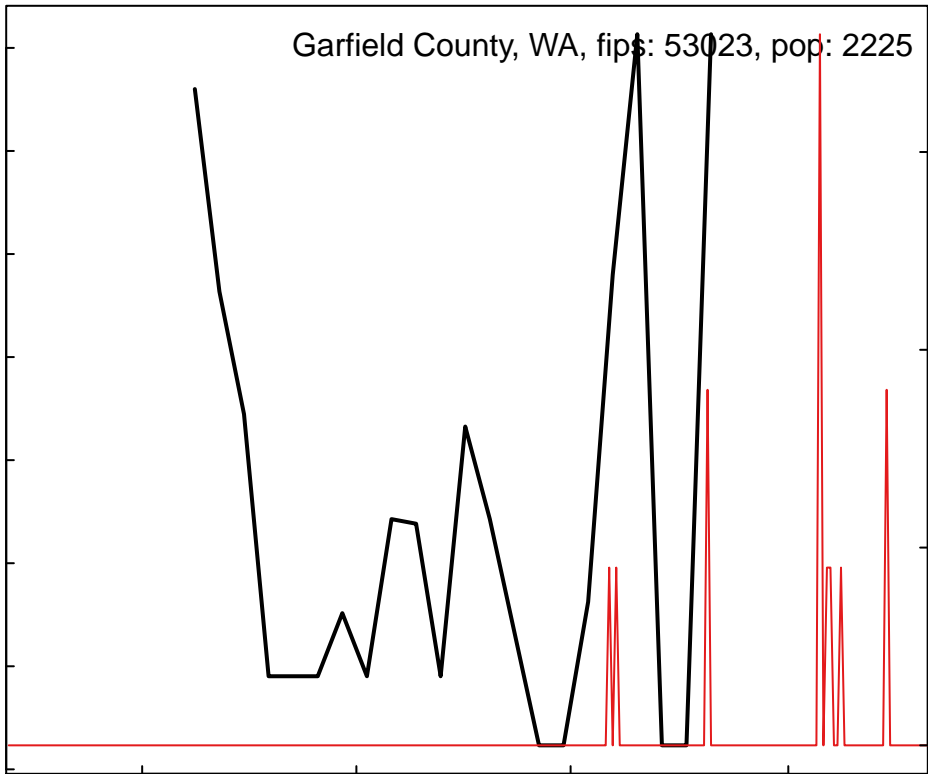

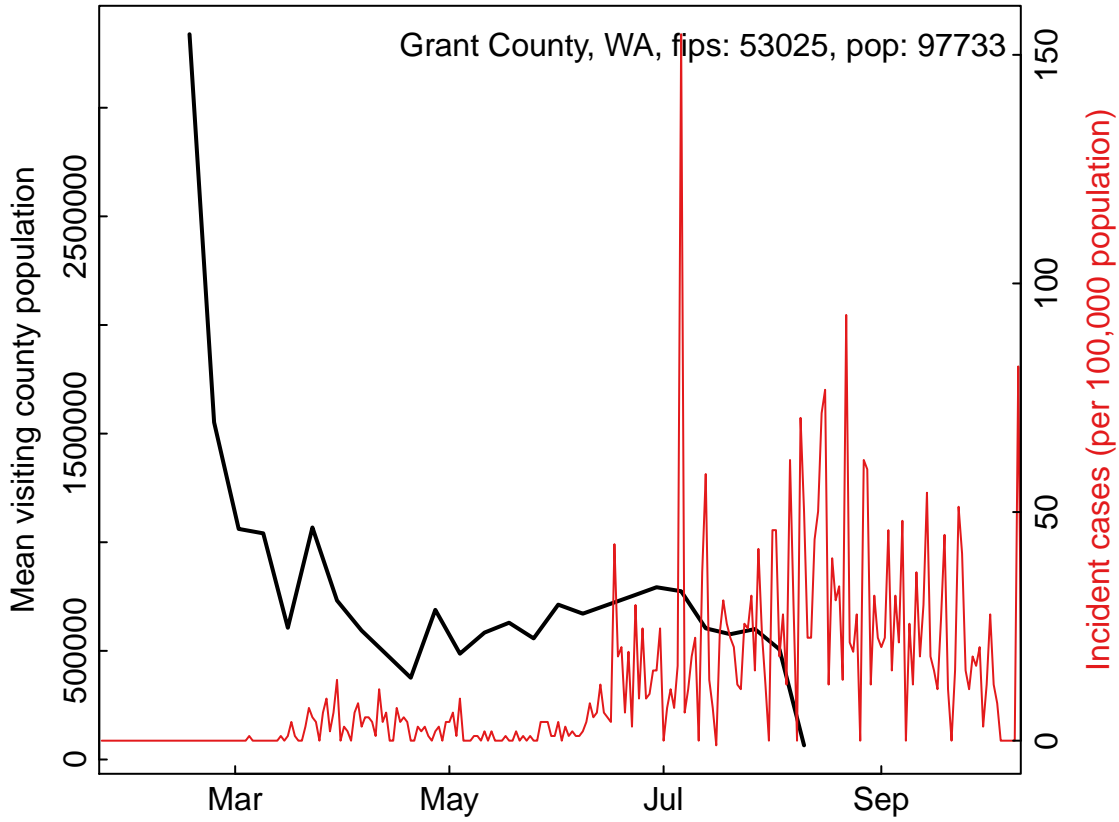

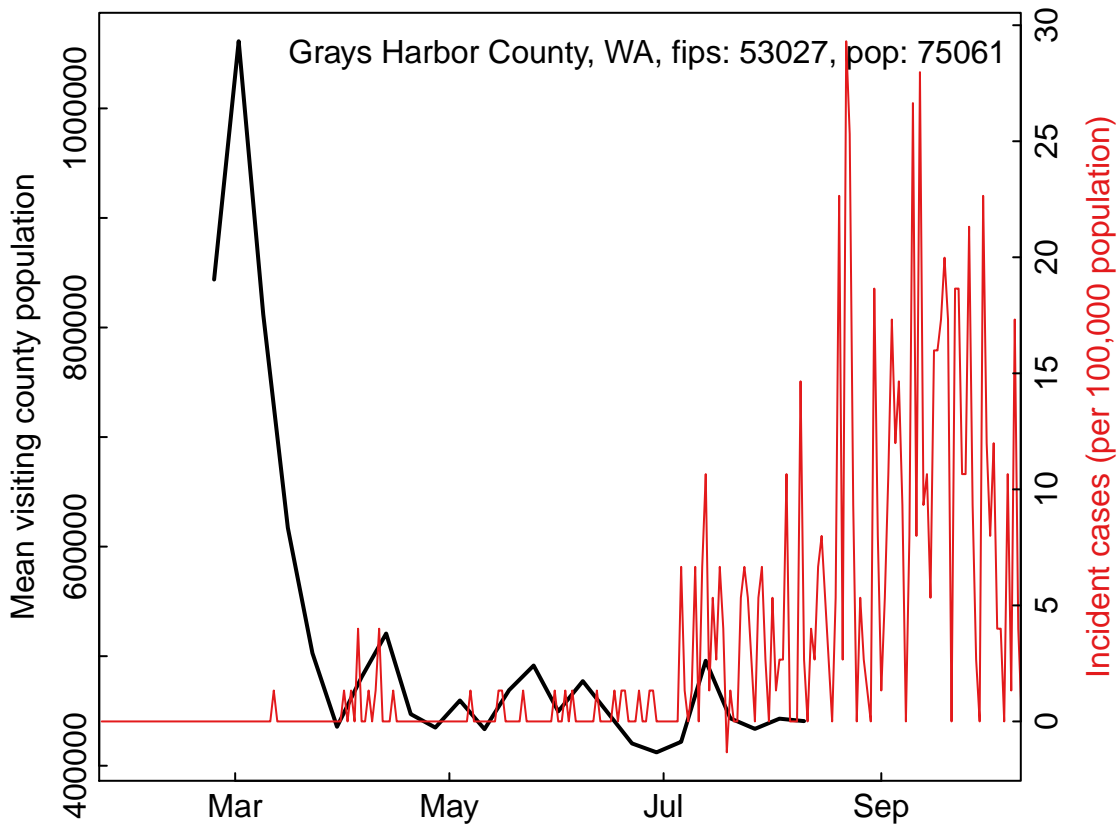



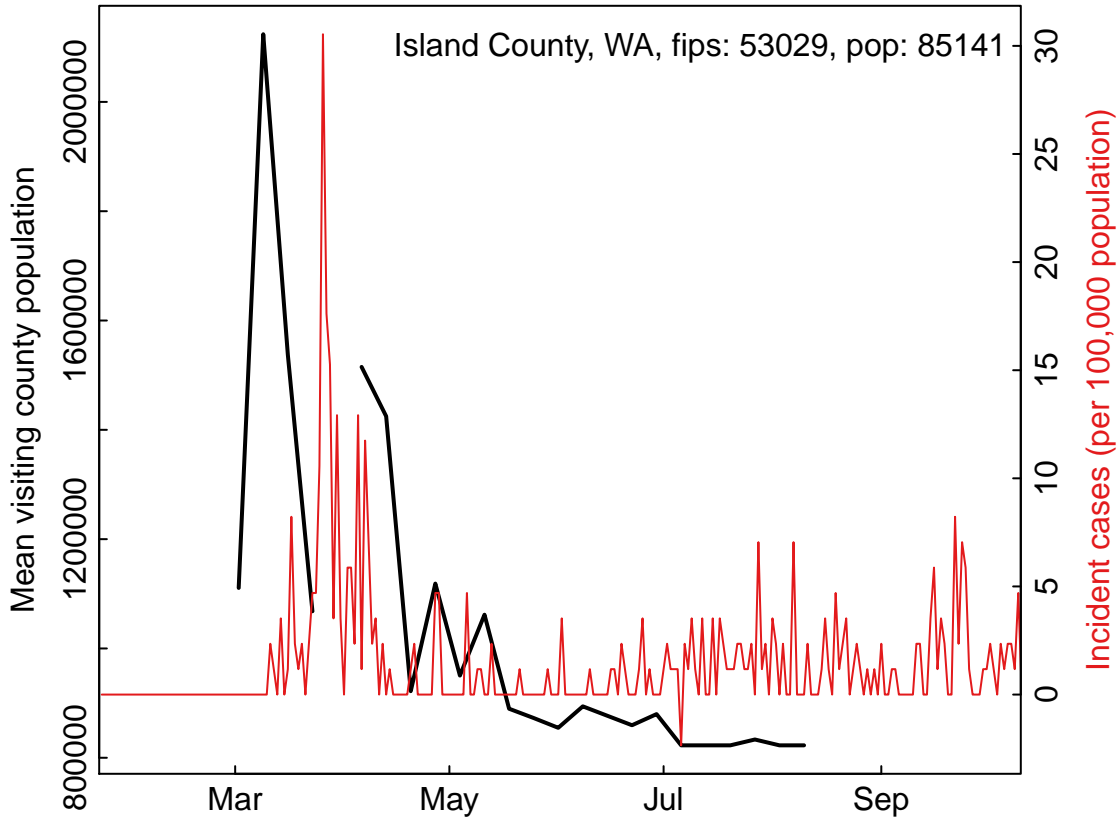

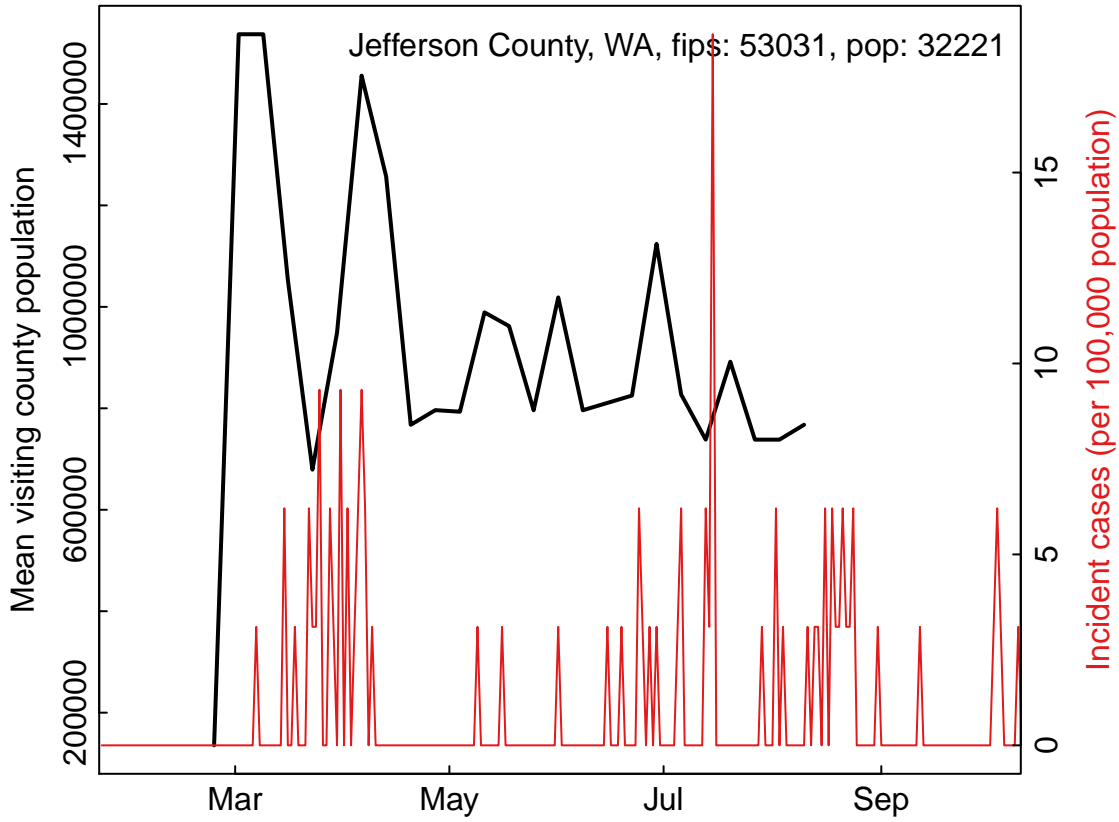

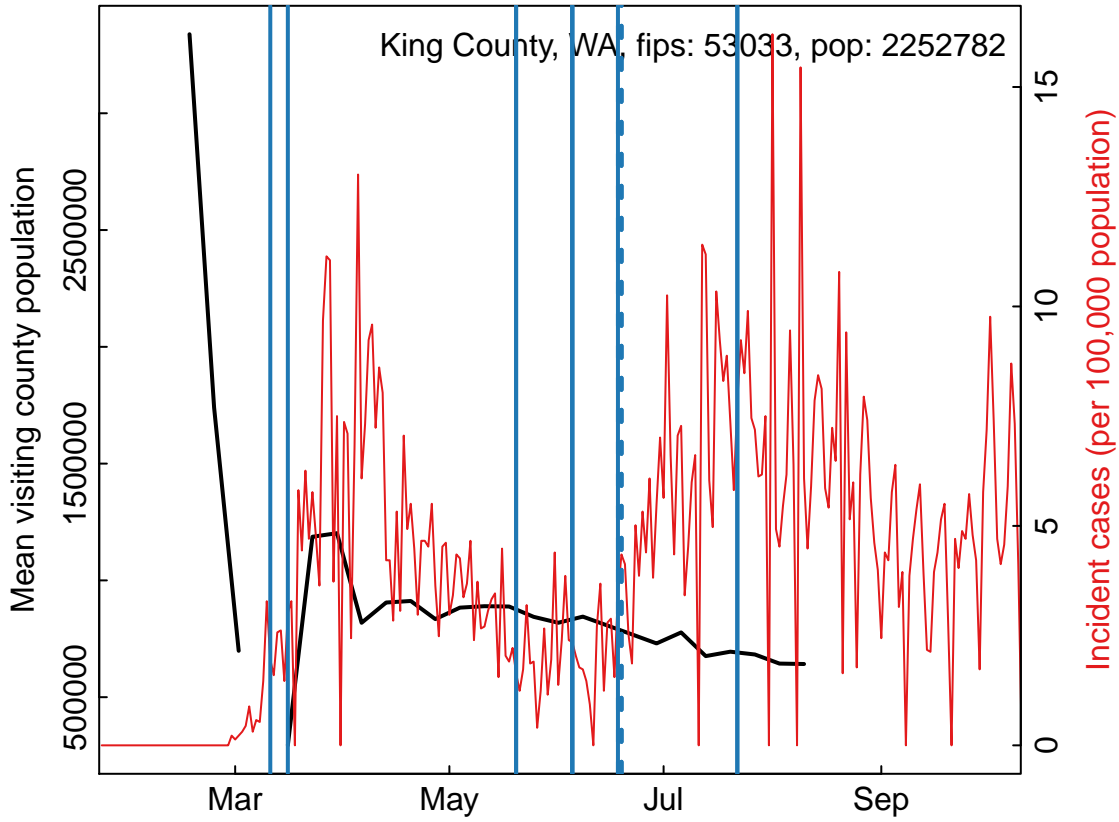

Kitsap County, WA, fips: 53035, pop: 271473

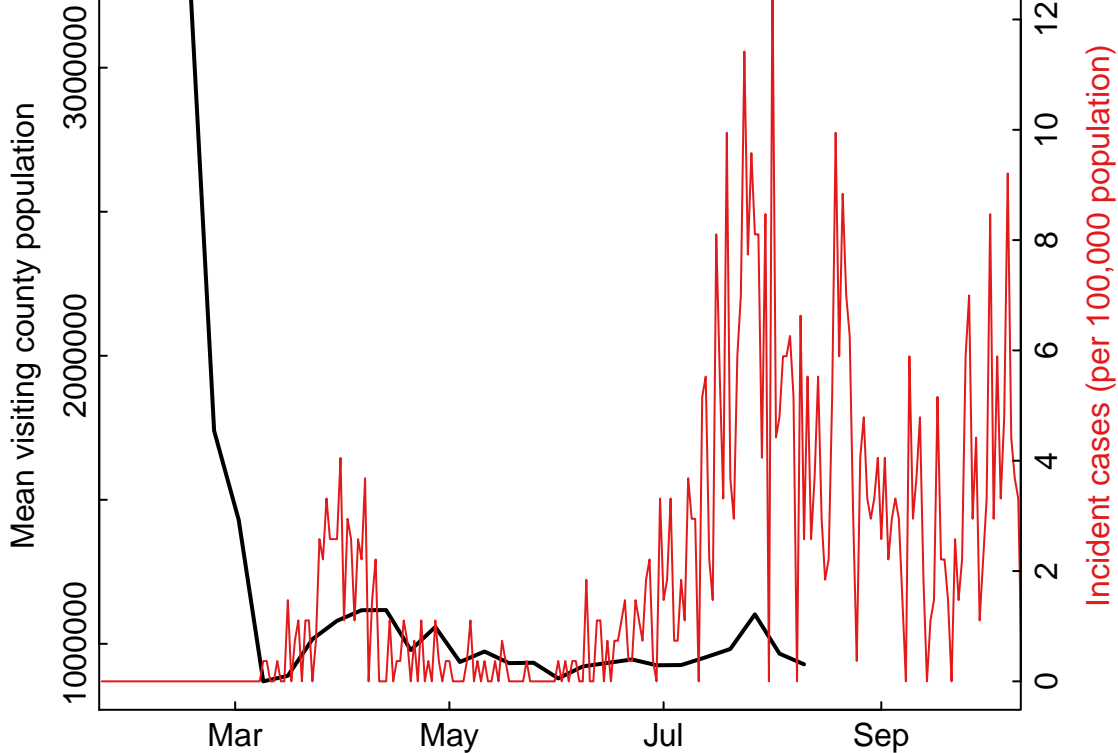

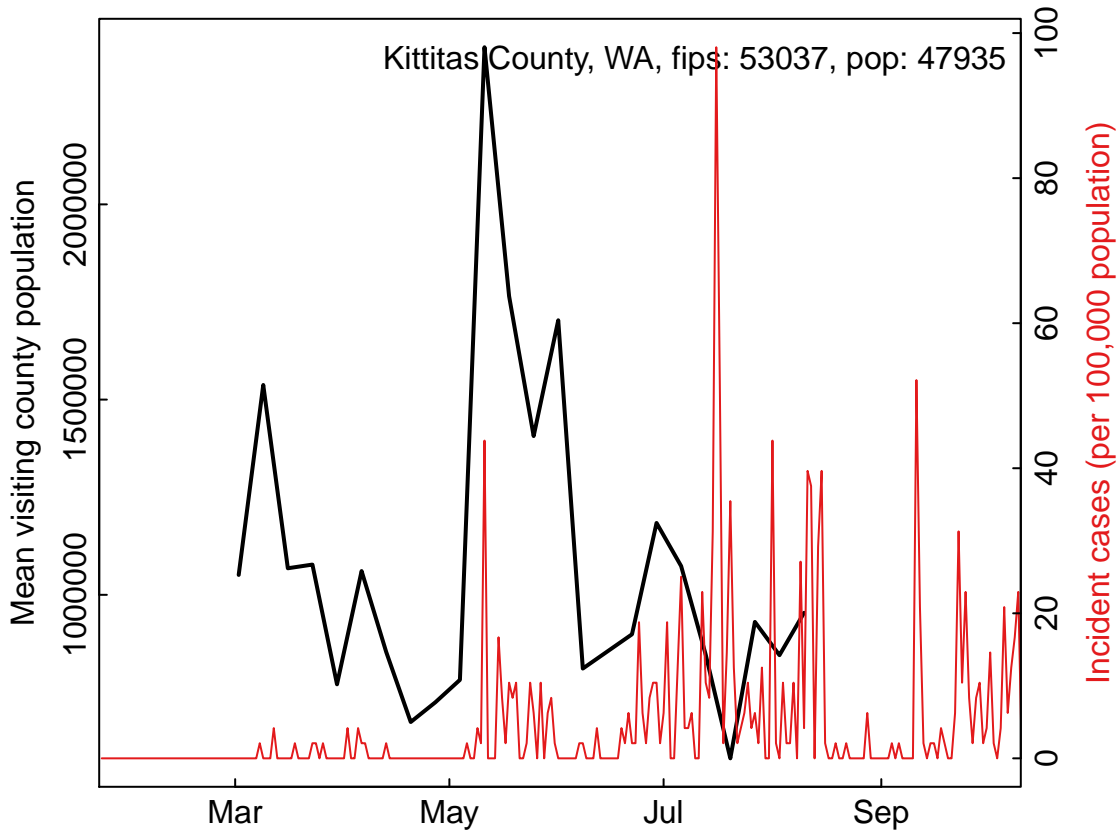

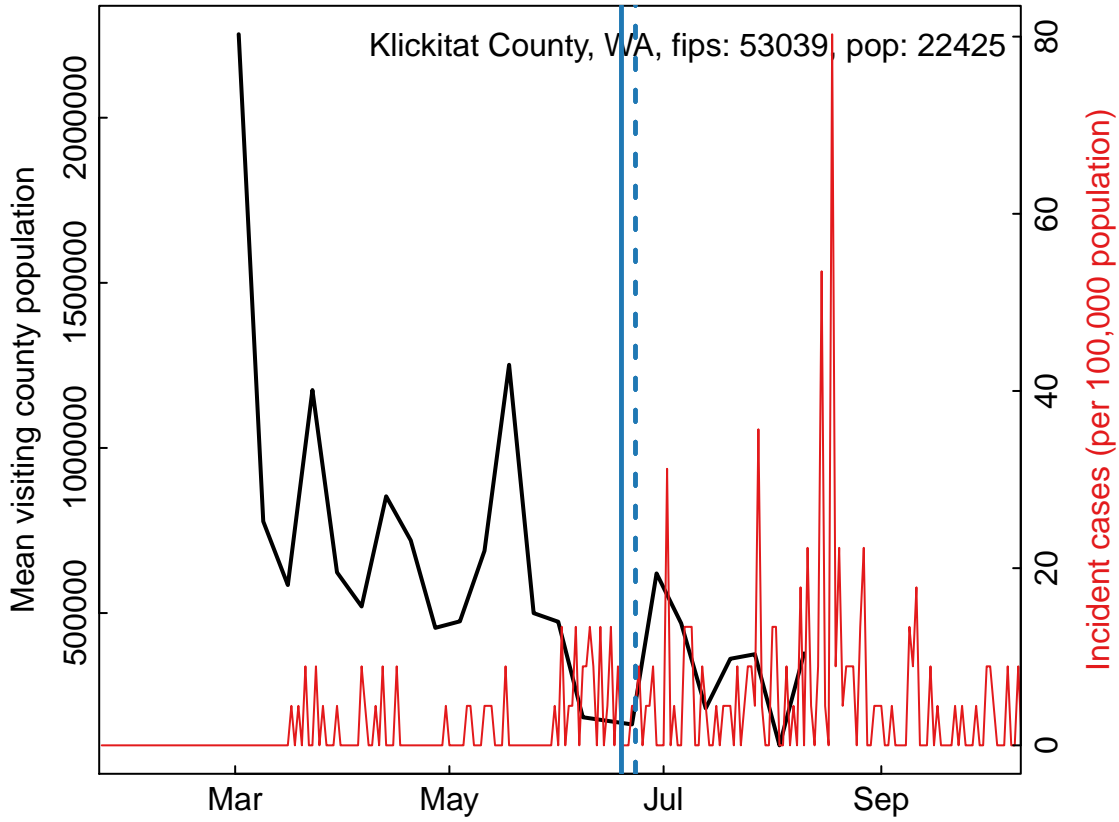

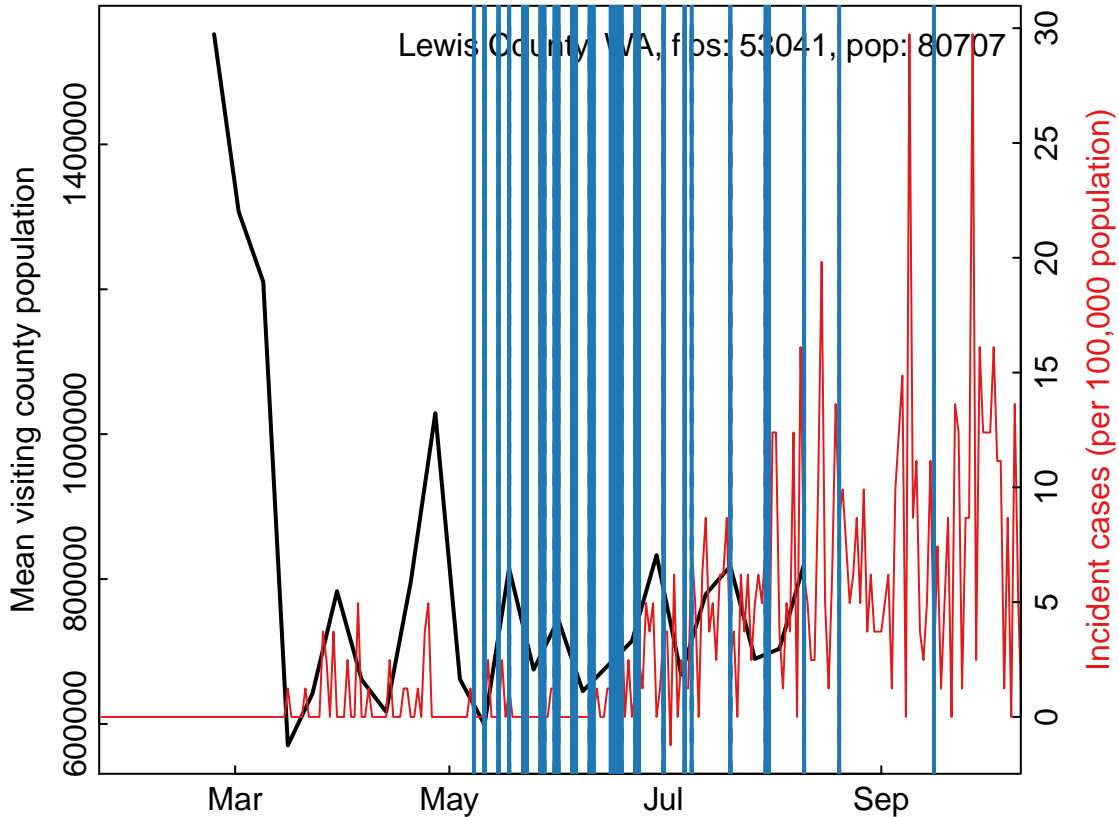

Lincoln County, WA, fips: 53043, pop: 10939

Mean visiting county population

2500000  
1500000  
500000  
0

Mar

May

Jul

Sep

Incident cases (per 100,000 population)

60  
50  
40  
30  
20  
10  
0

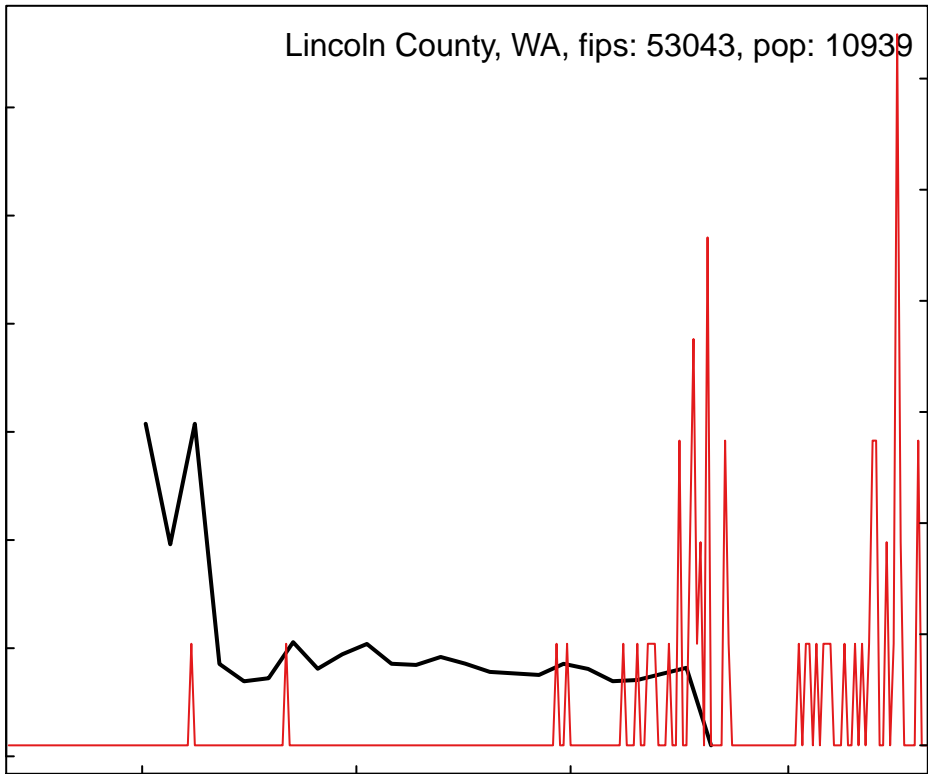



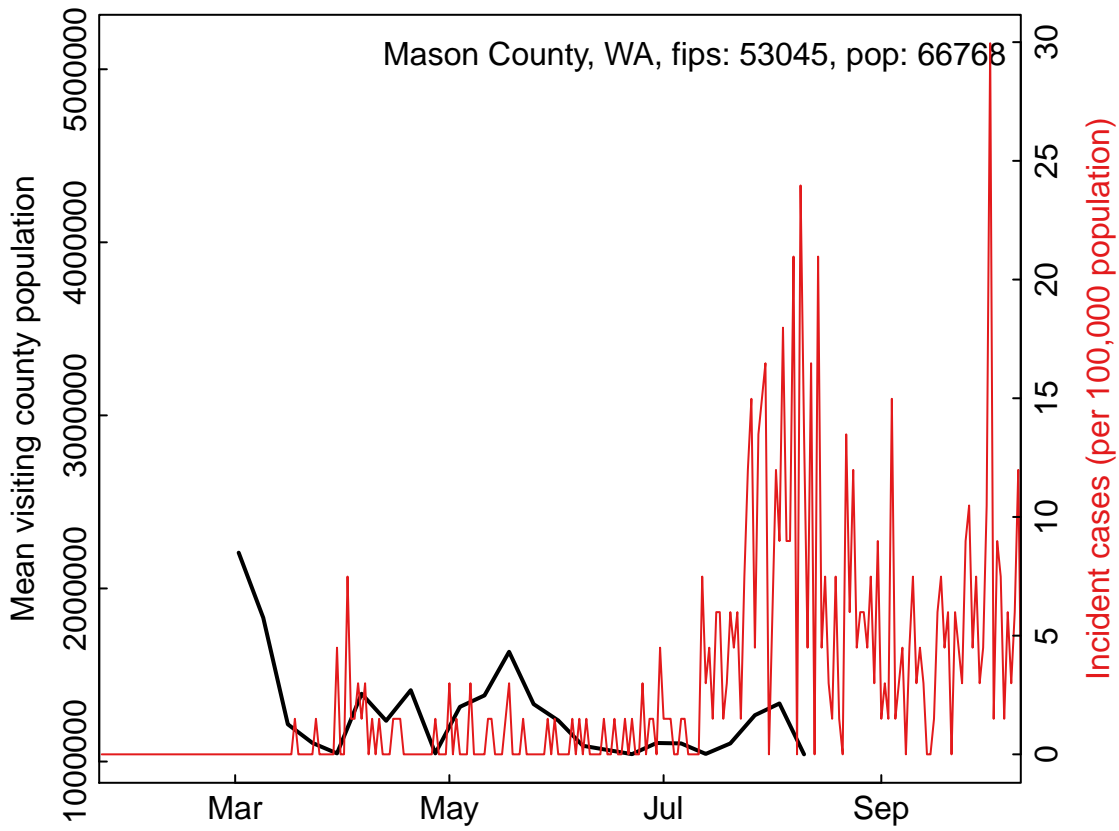

Okanogan County, WA, fips: 53047, pop: 42243

Mean visiting county population

2500000  
1500000  
500000  
0

Mar

May

Jul

Sep

150  
100  
50  
0

Incident cases (per 100,000 population)

0

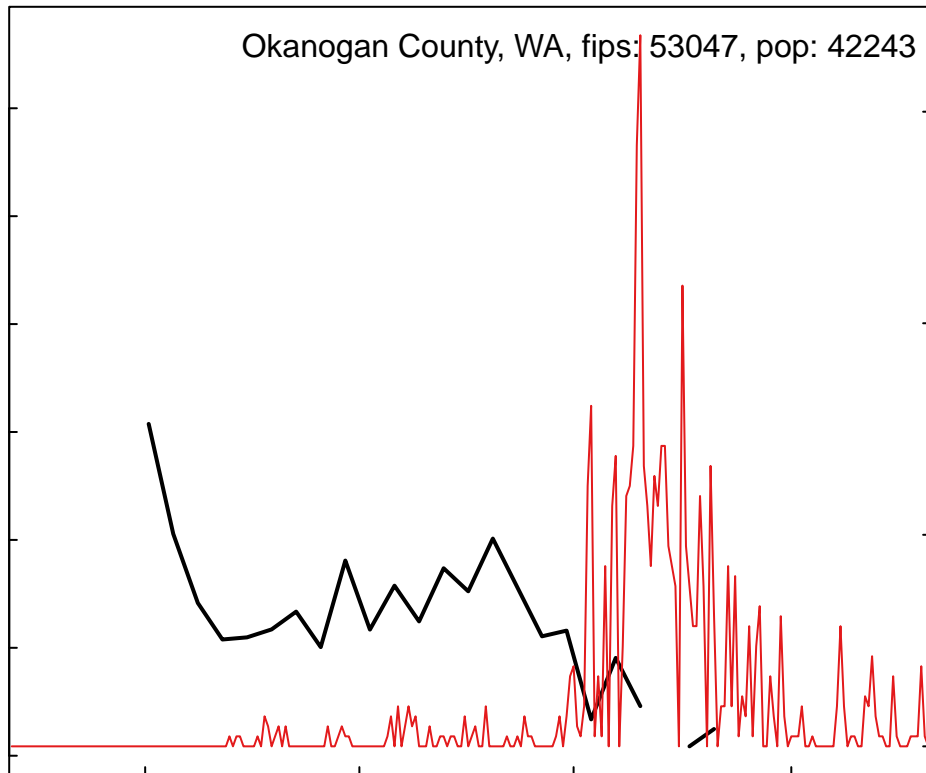

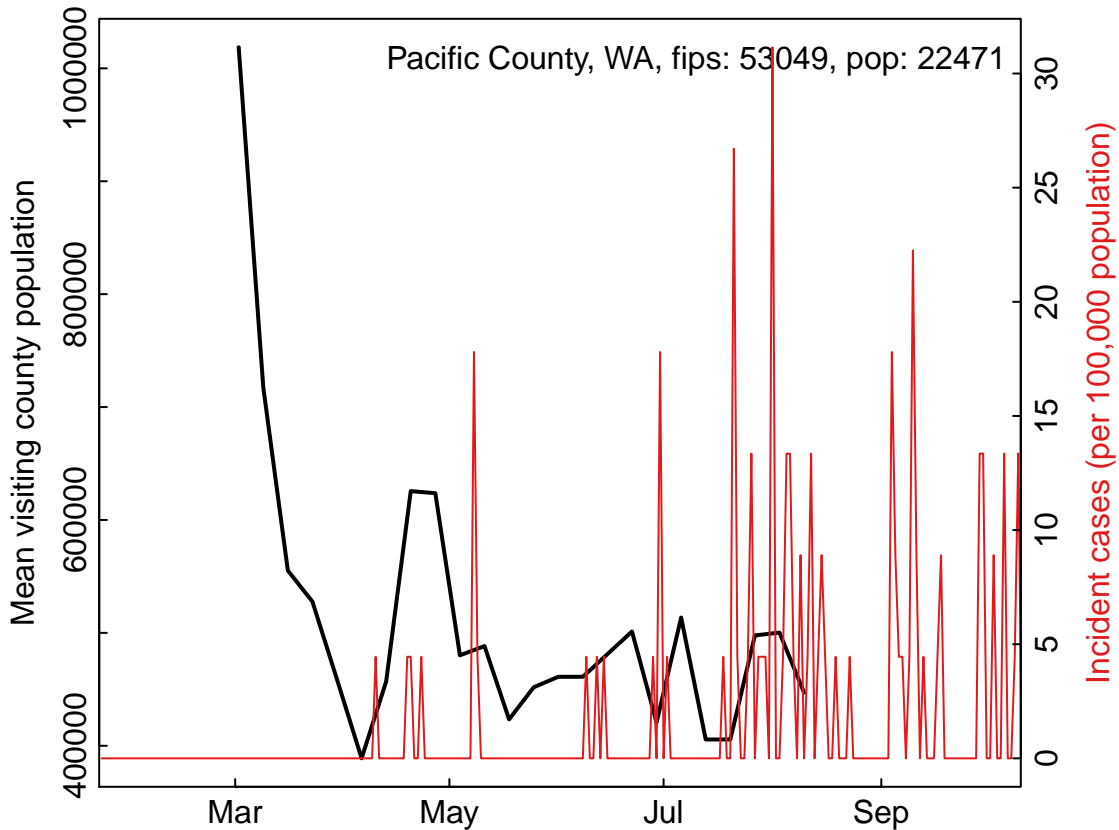

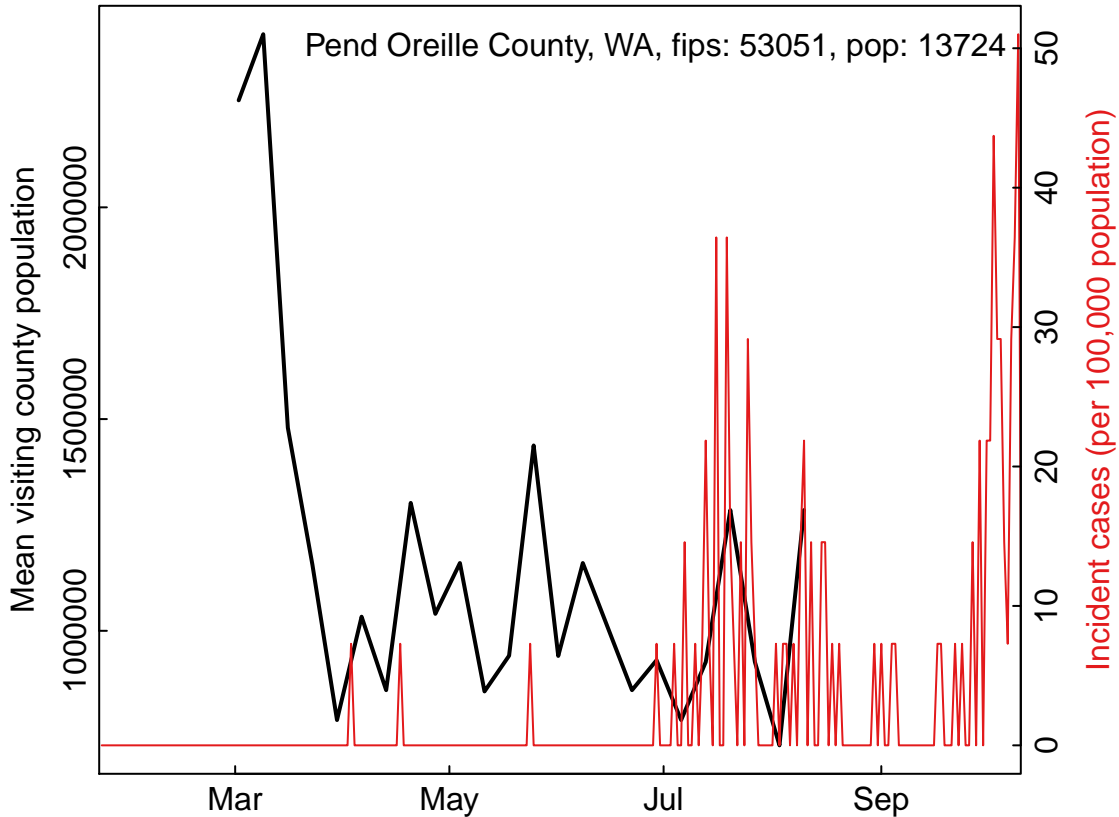

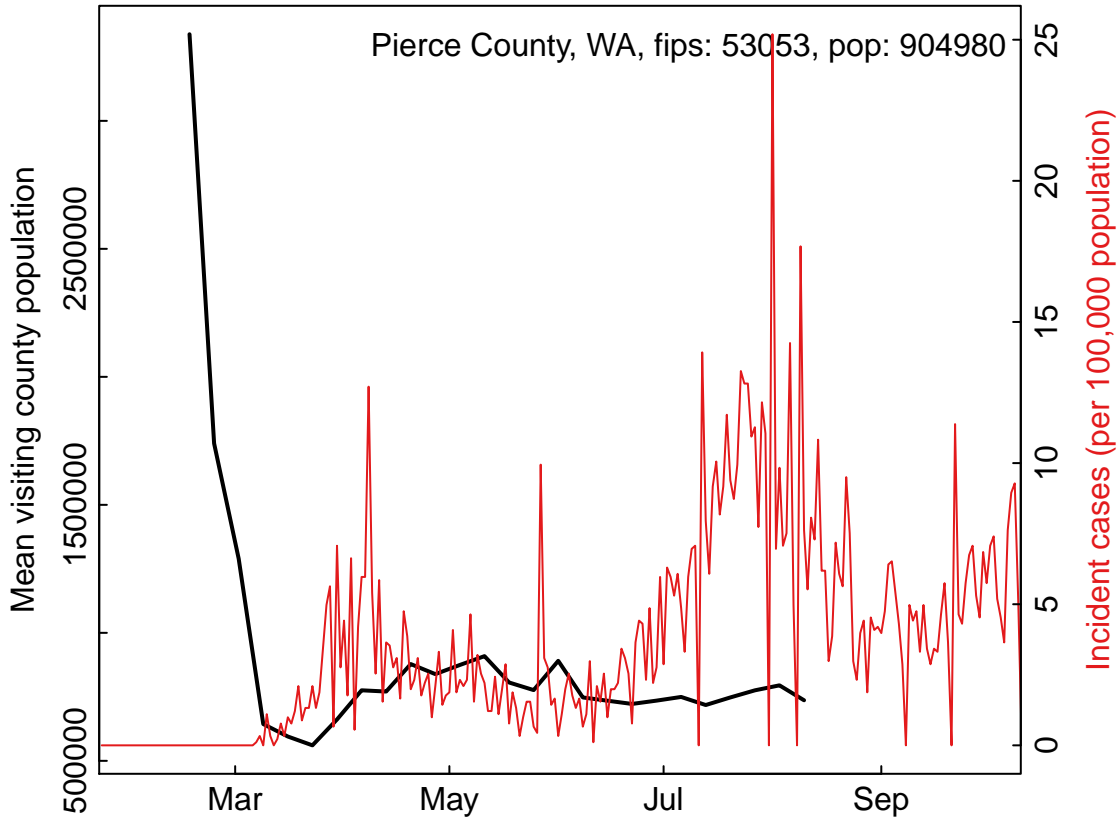

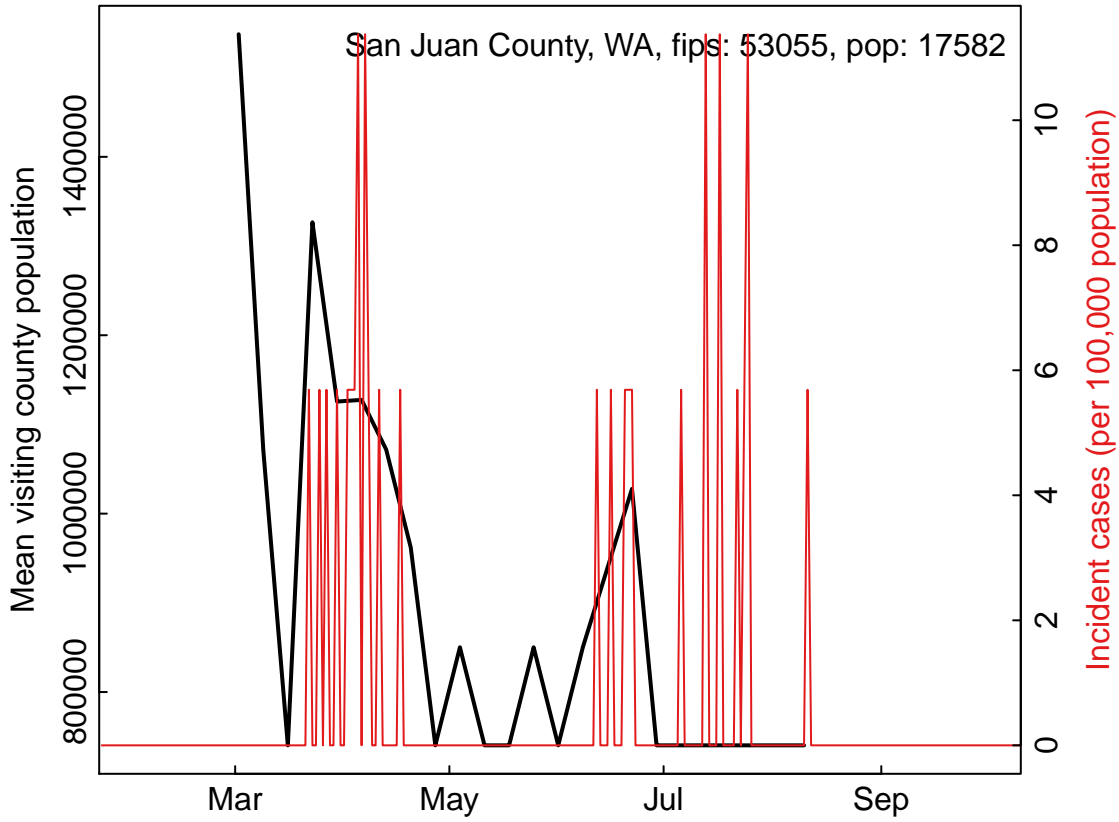

Skagit County, WA, fips: 53057, pop: 129205

Mean visiting county population

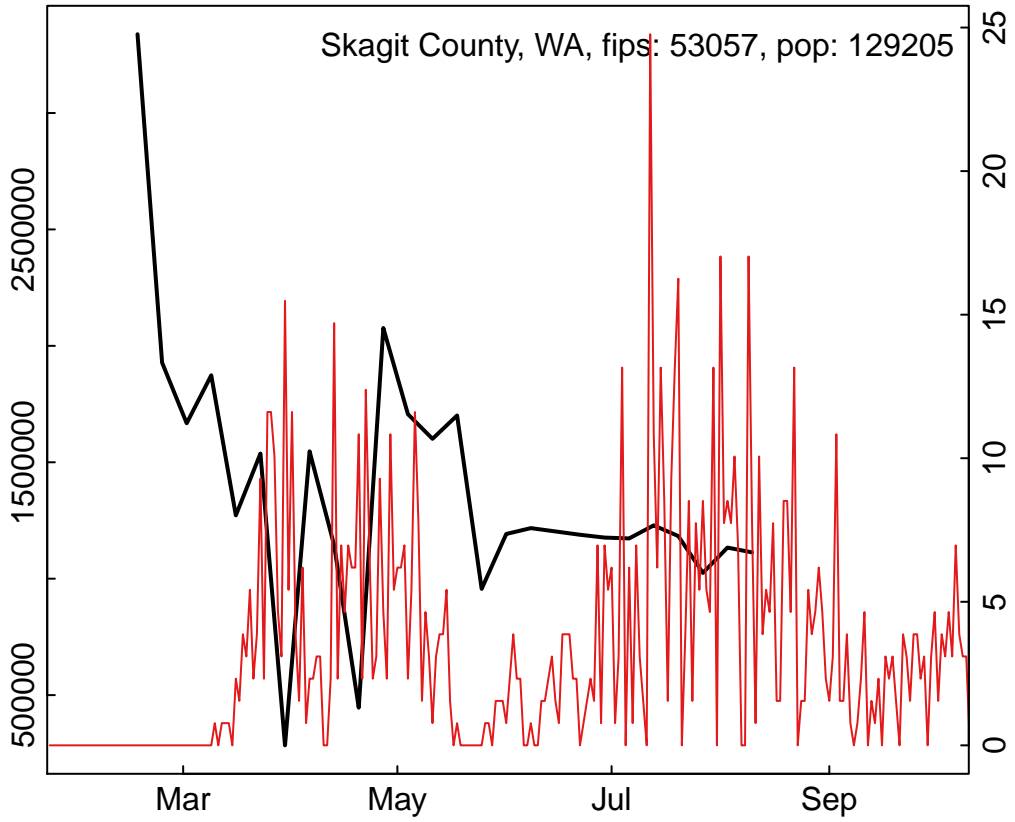

Incident cases (per 100,000 population)

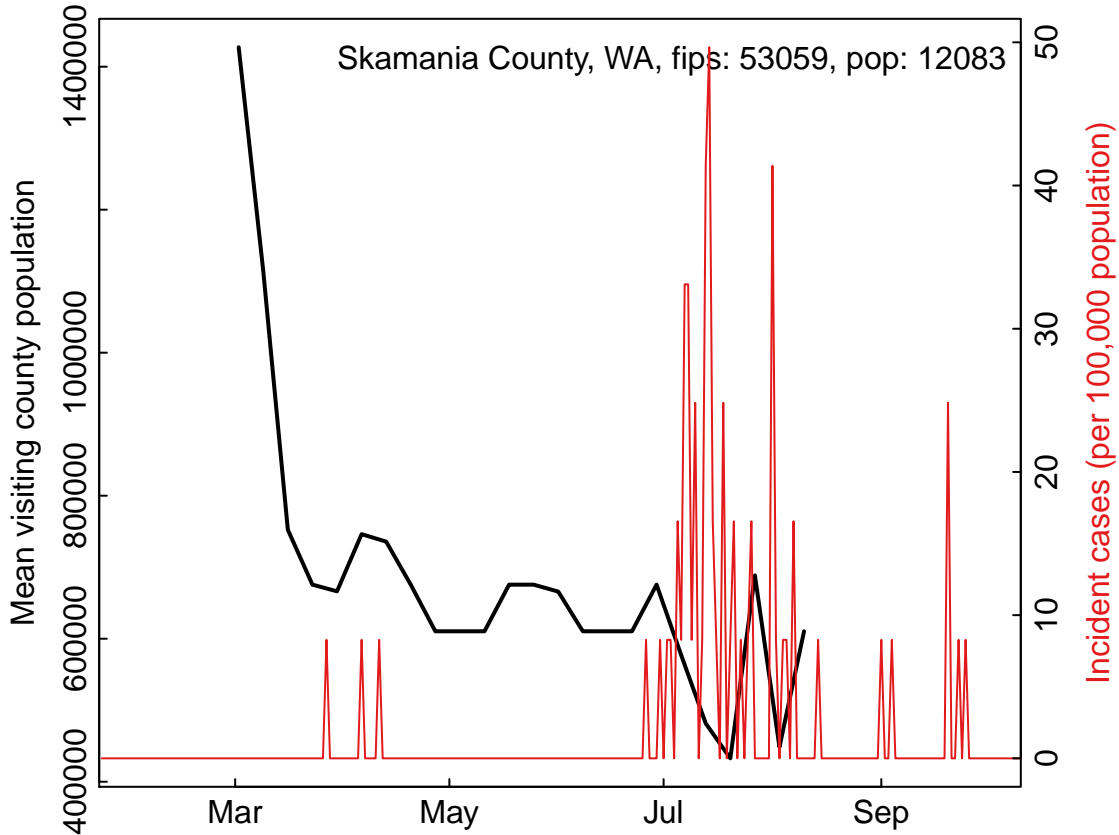



Snohomish County, WA, fips: 53061, pop: 822083

Mean visiting county population

3000000  
2000000  
1000000

Incident cases (per 100,000 population)

15  
10  
5  
0

Mar May Jul Sep

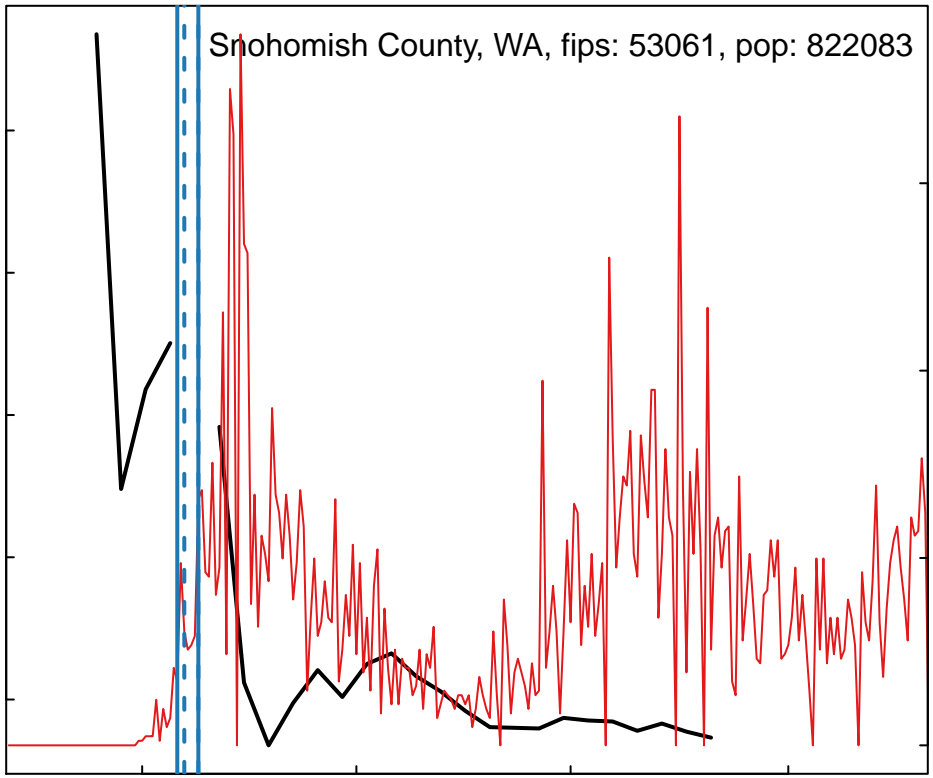

Spokane County, WA, fips: 53063, pop: 522798

Mean visiting county population

3000000  
2000000  
1000000

Mar May Jul Sep

Incident cases (per 100,000 population)

30  
20  
10  
0

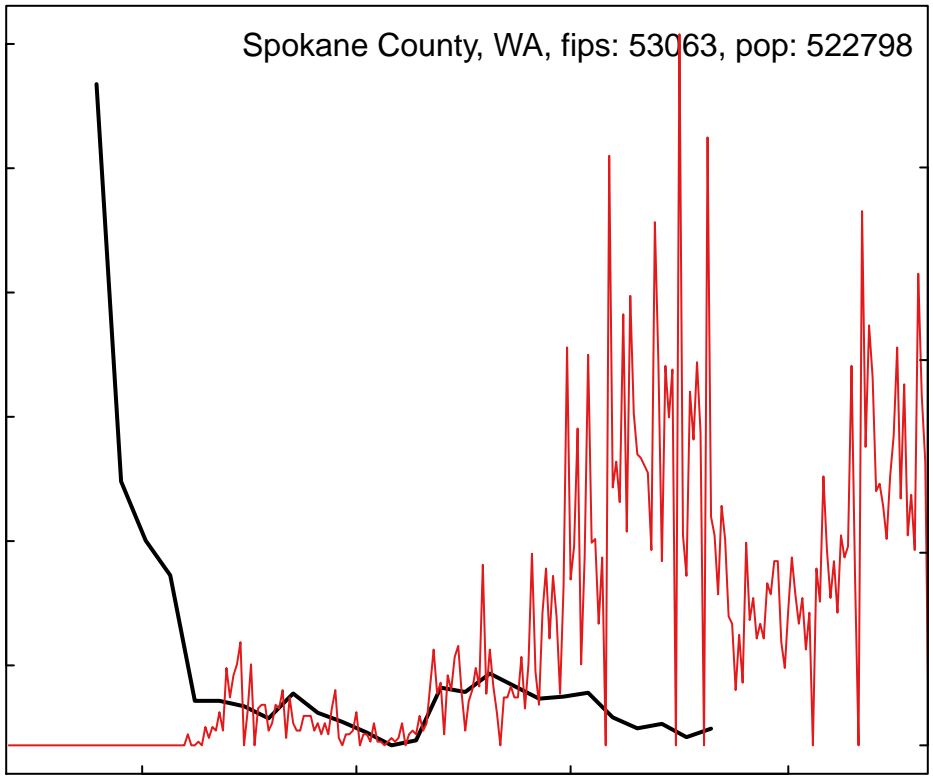

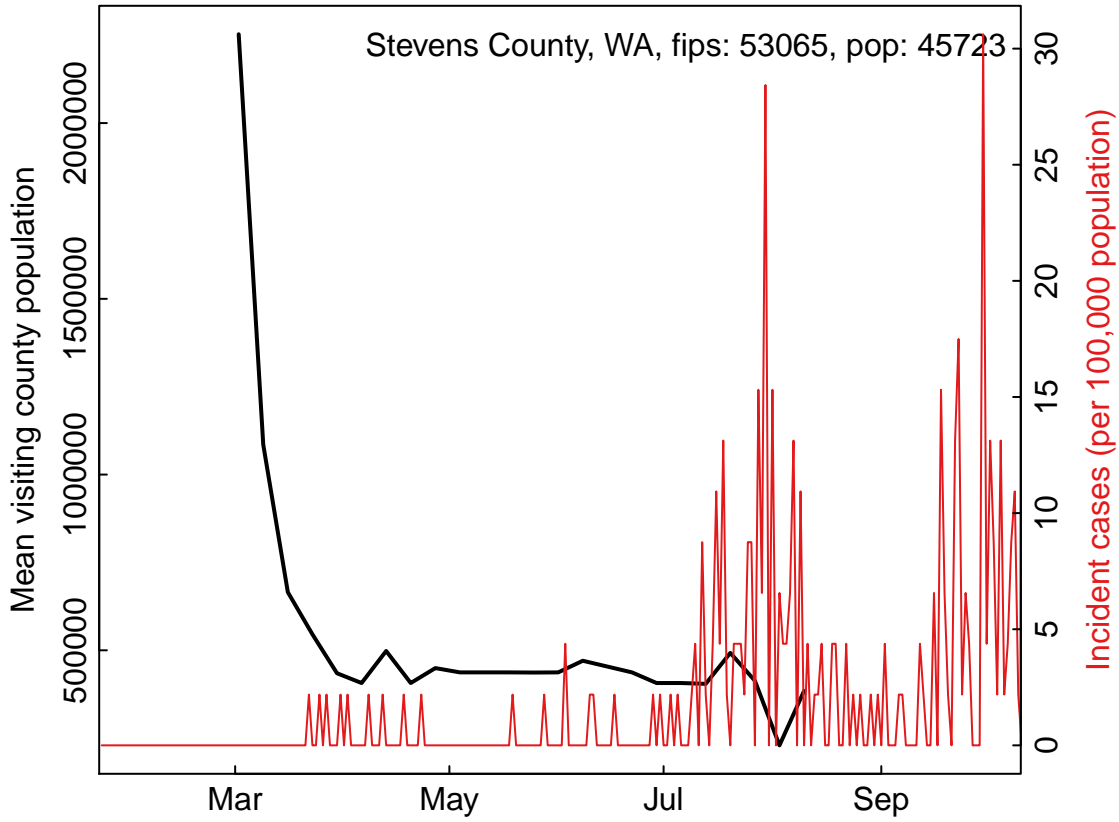

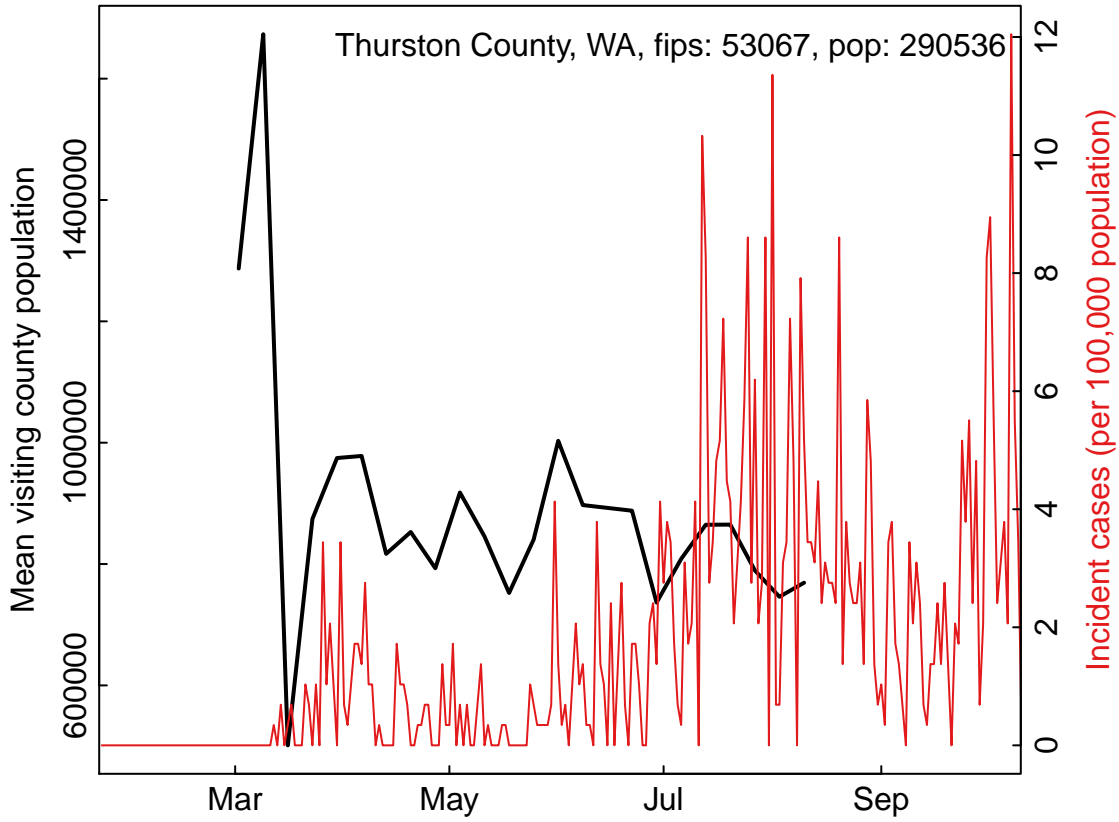

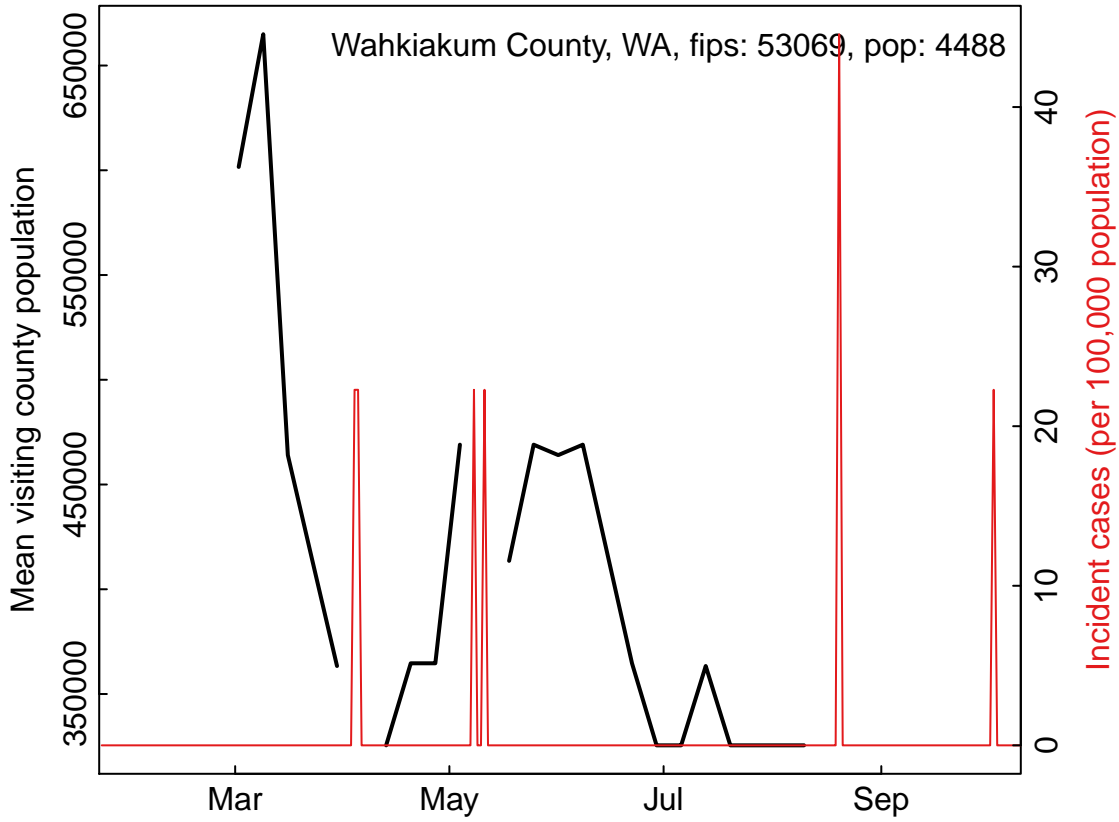

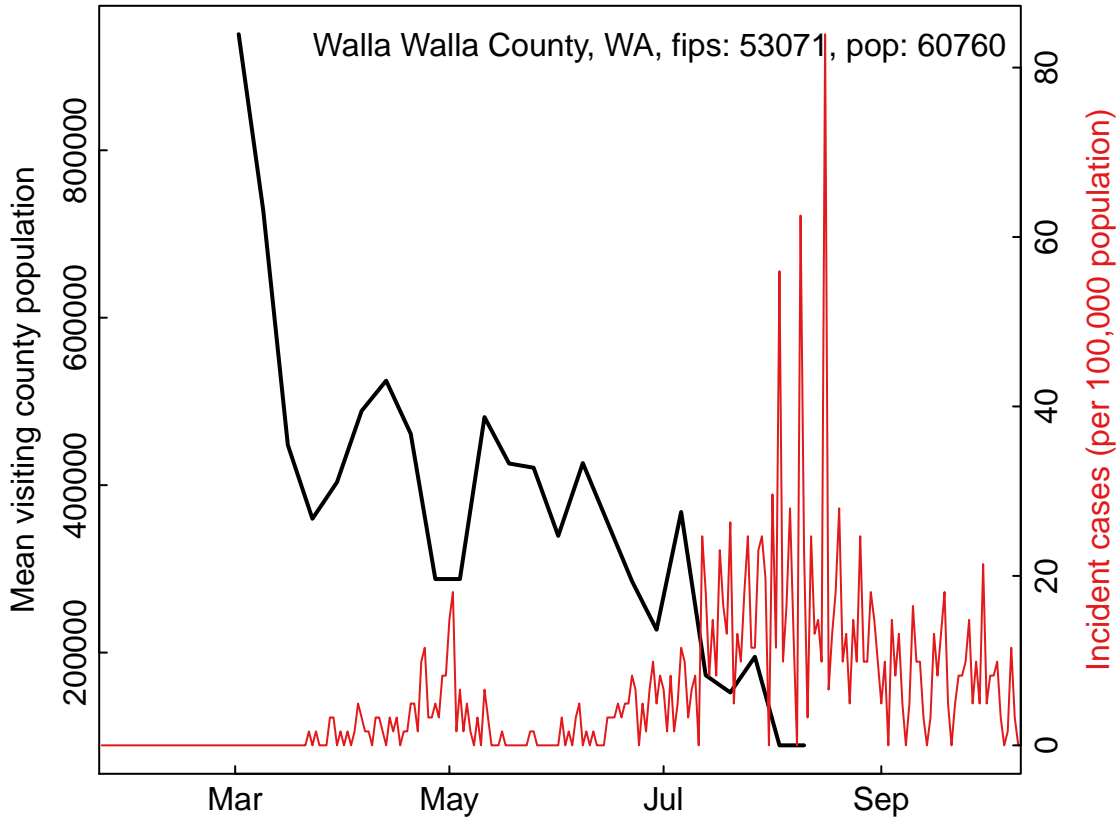

Whatcom County, WA, fips: 53073, pop: 229247

Mean visiting county population

3000000  
2000000  
1000000

Mar

May

Jul

Sep

15  
10  
5  
0

Incident cases (per 100,000 population)

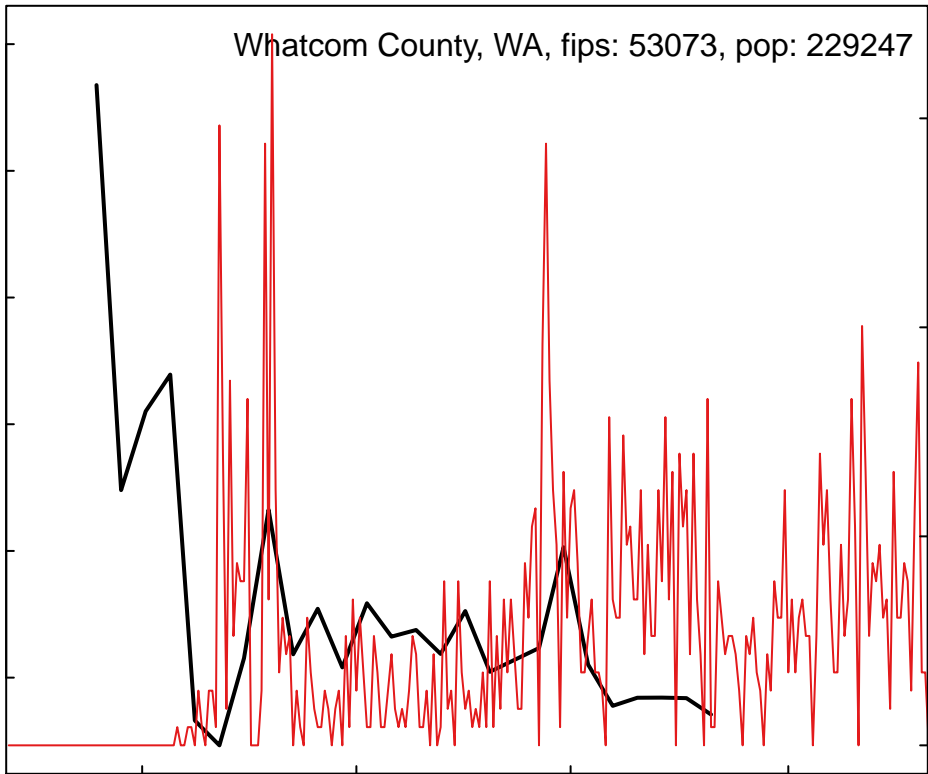

Whitman County, WA, fips: 53075, pop: 50104

Mean visiting county population

500000  
1500000  
2500000

Mar

May

Jul

Sep

0  
50  
100  
150  
200

Incident cases (per 100,000 population)

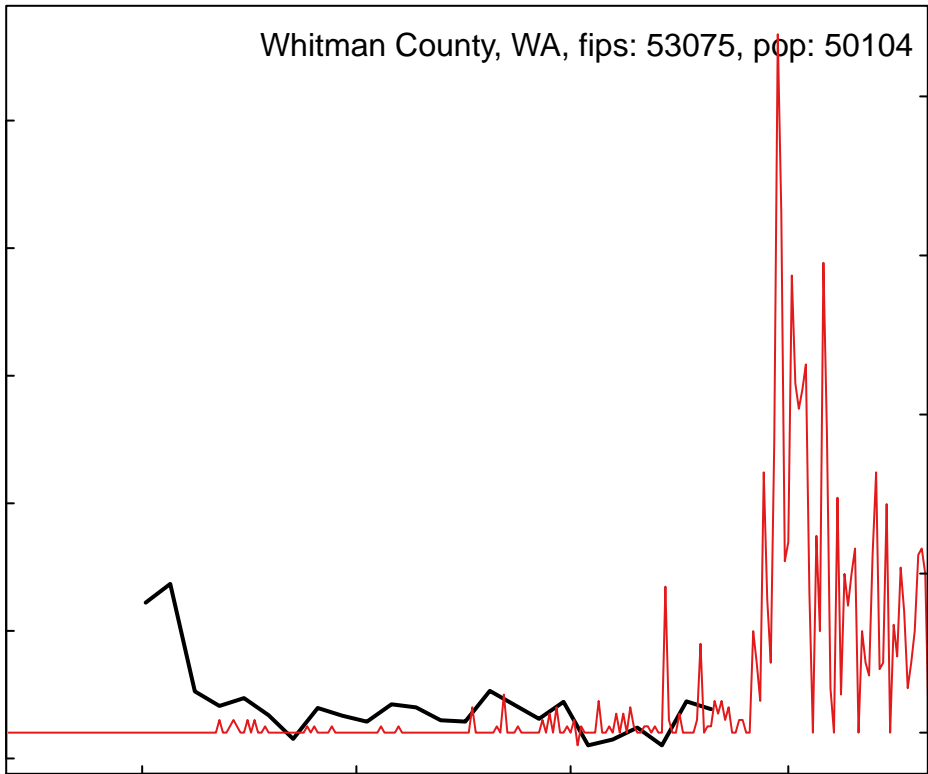



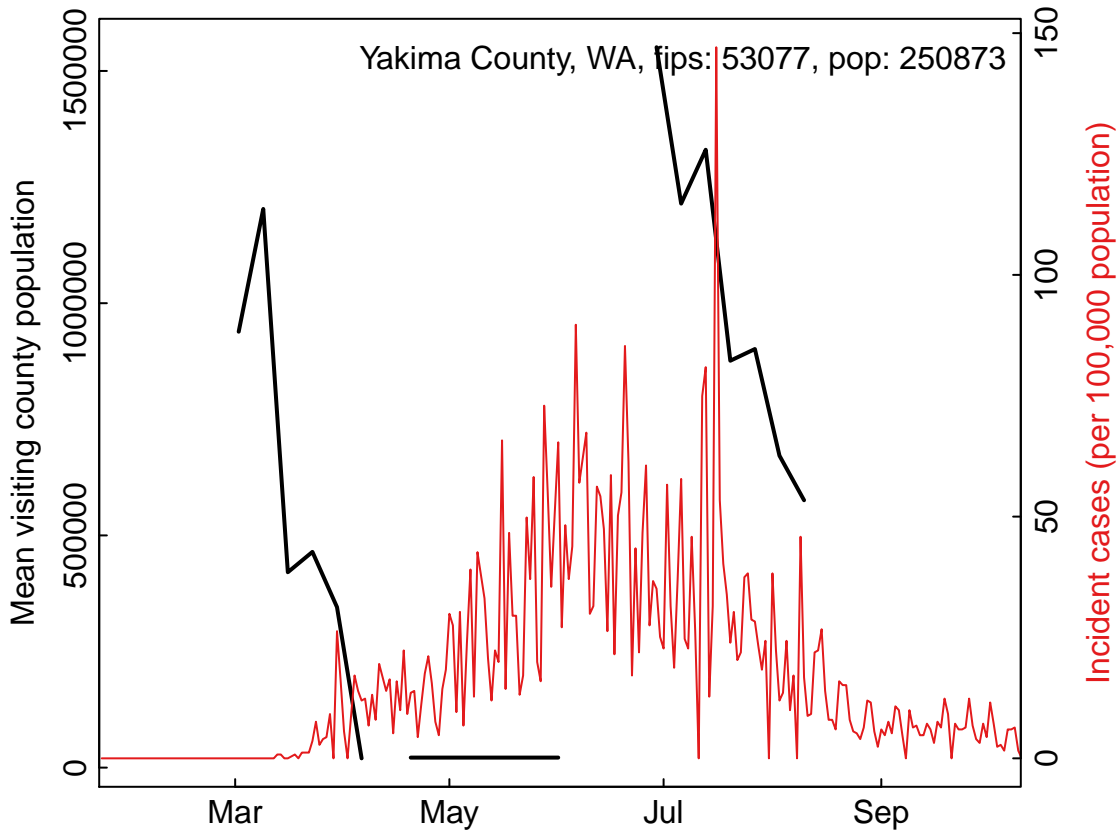

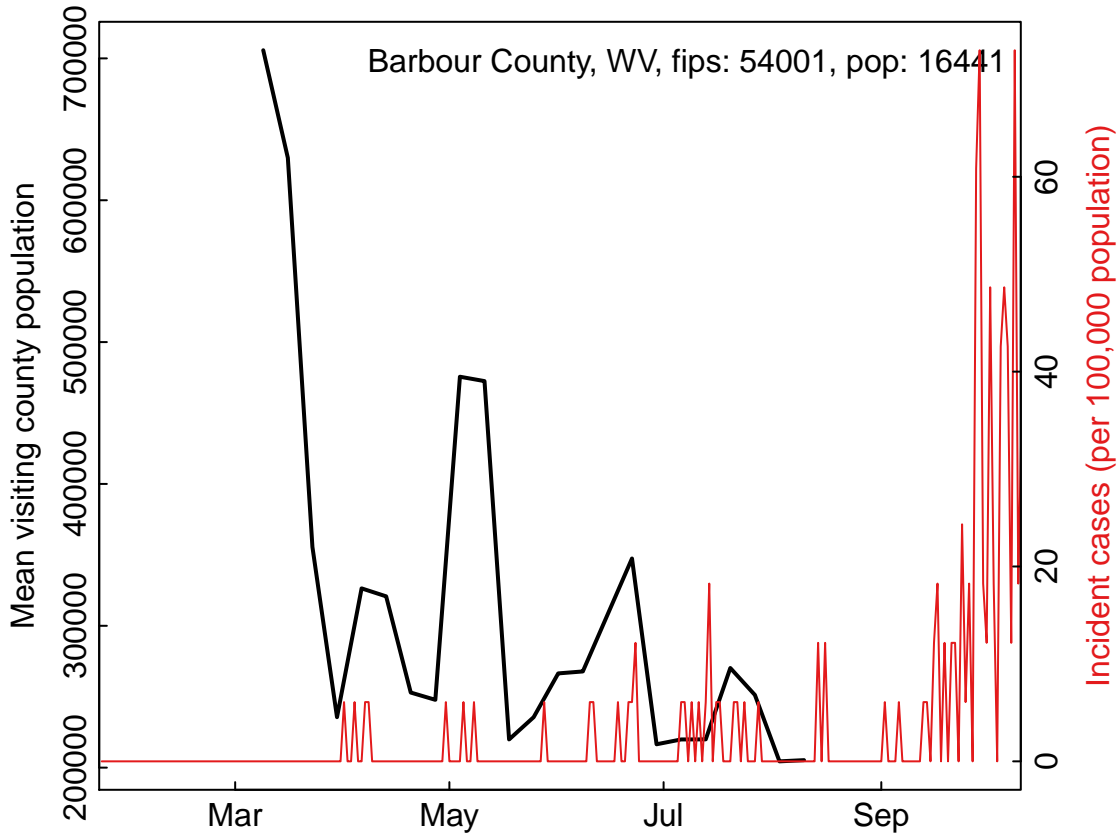

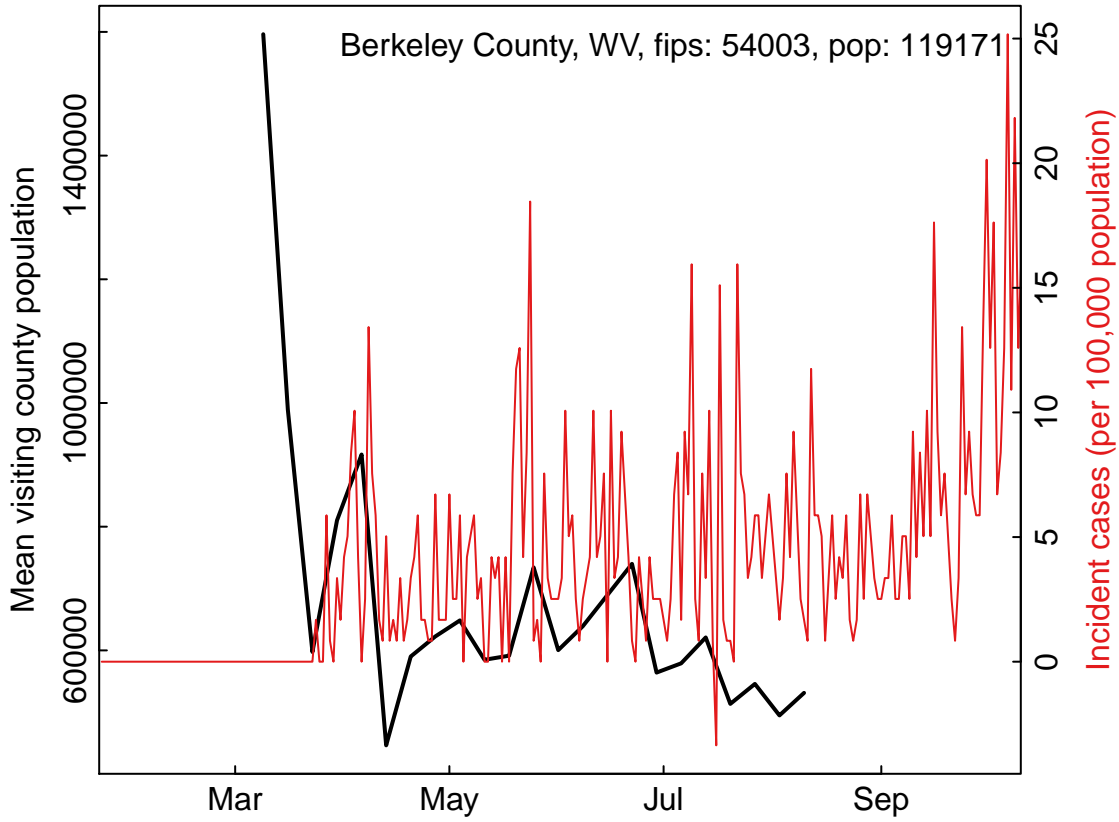

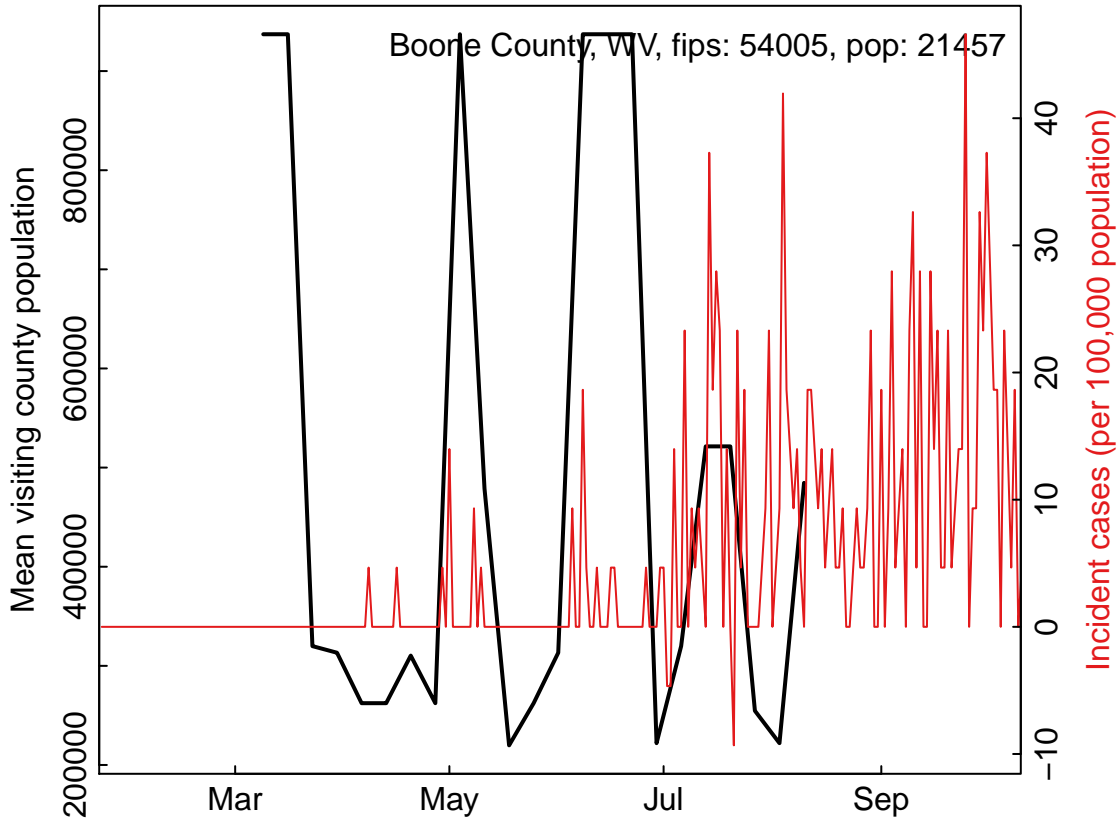

Braxton County, WV, fips: 54007, pop: 13957

Mean visiting county population

30000  
40000  
50000  
60000

Mar May Jul Sep

Incident cases (per 100,000 population)

0 5 10 15 20

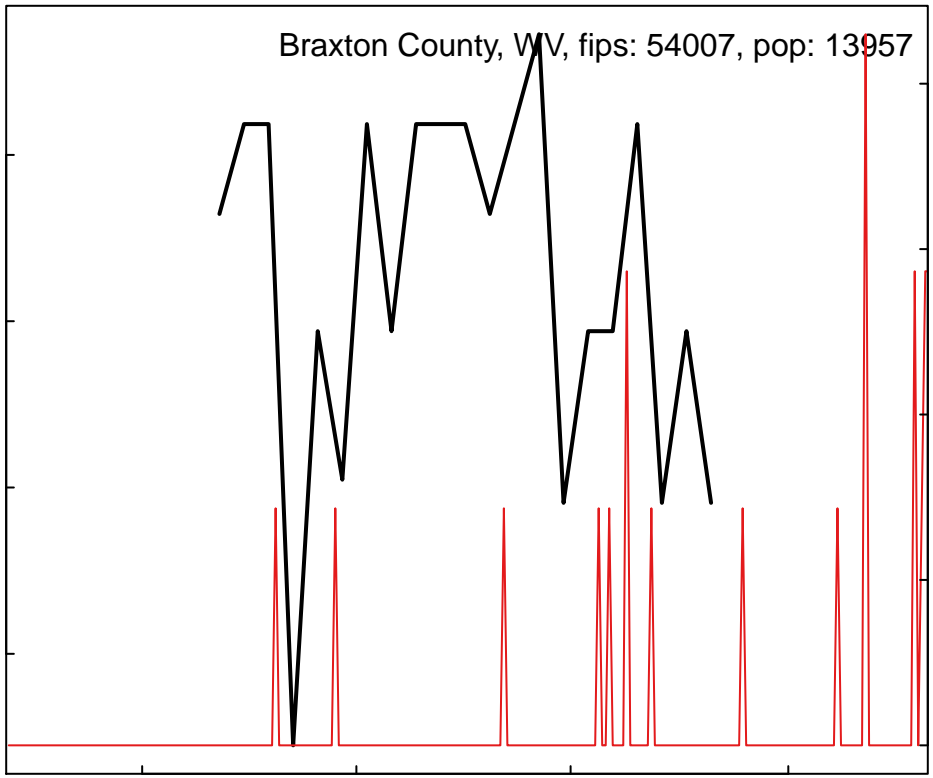

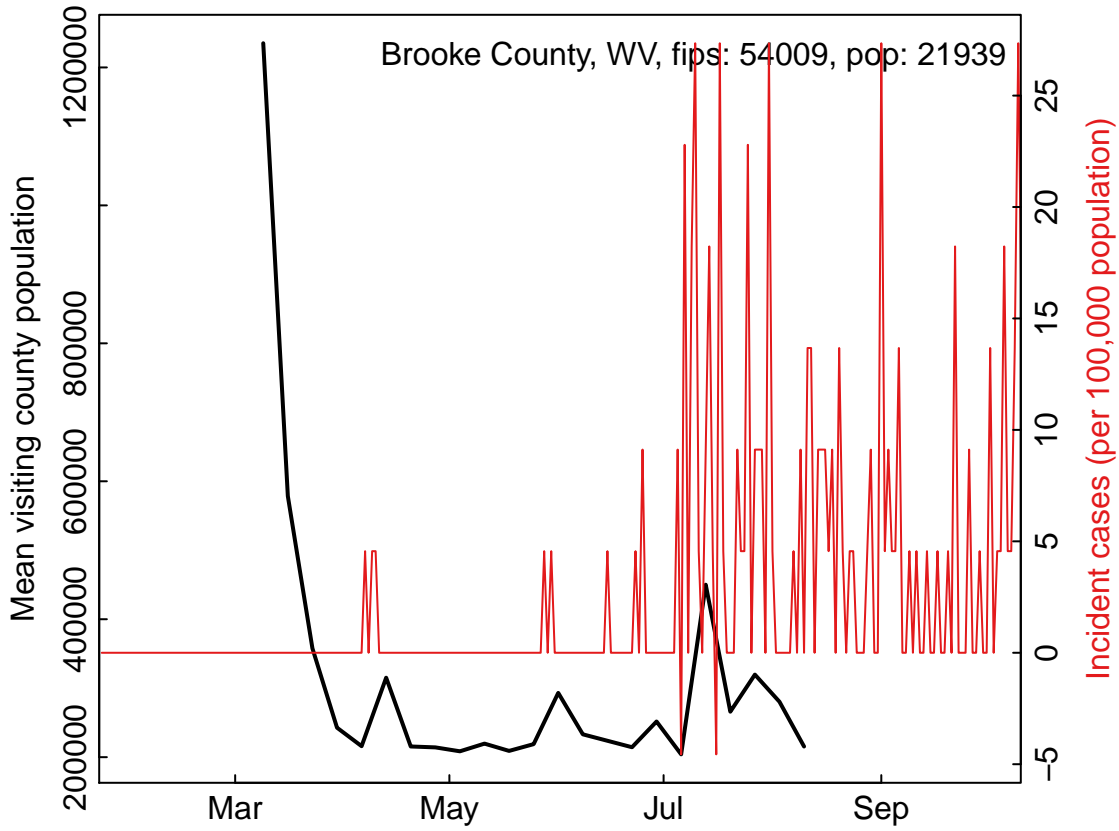

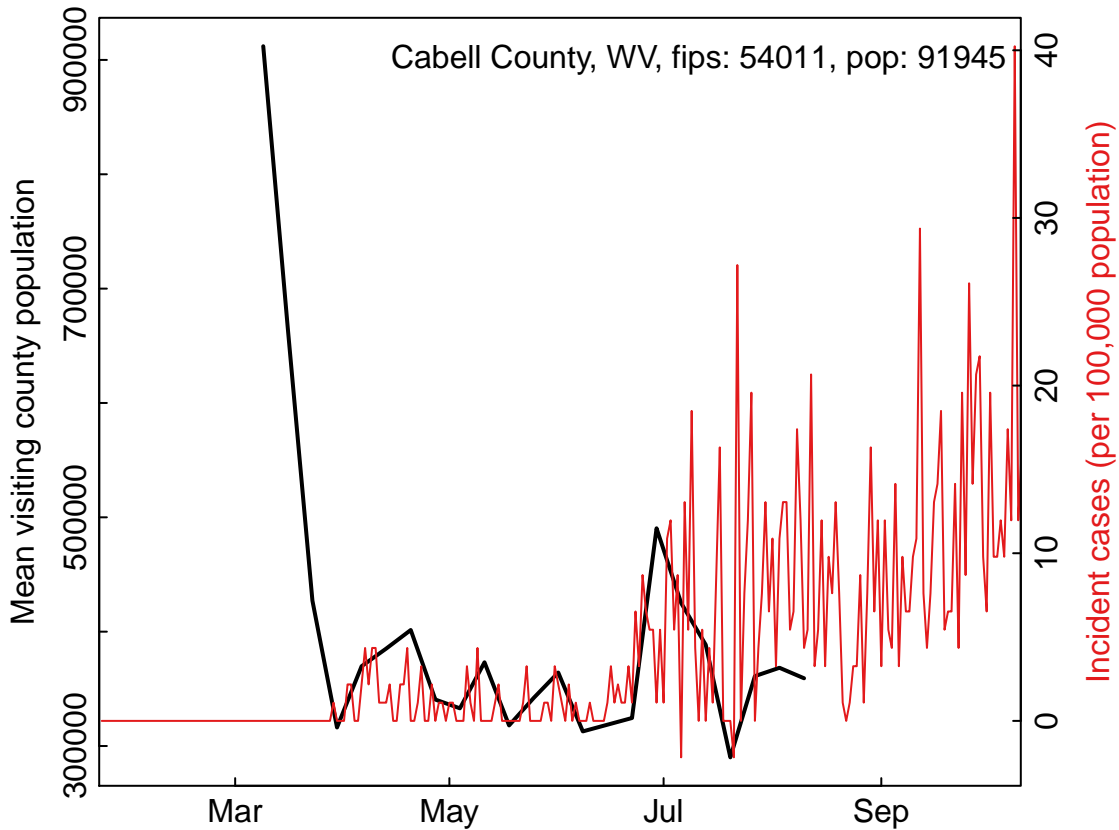

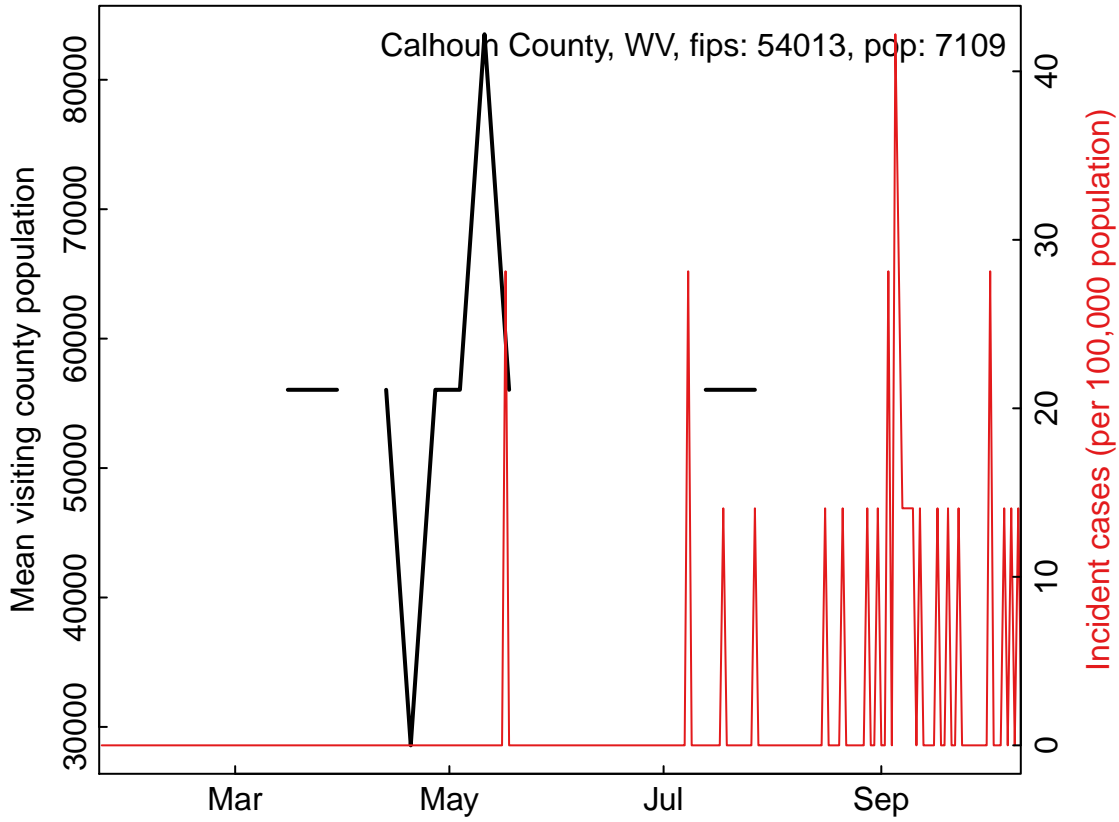



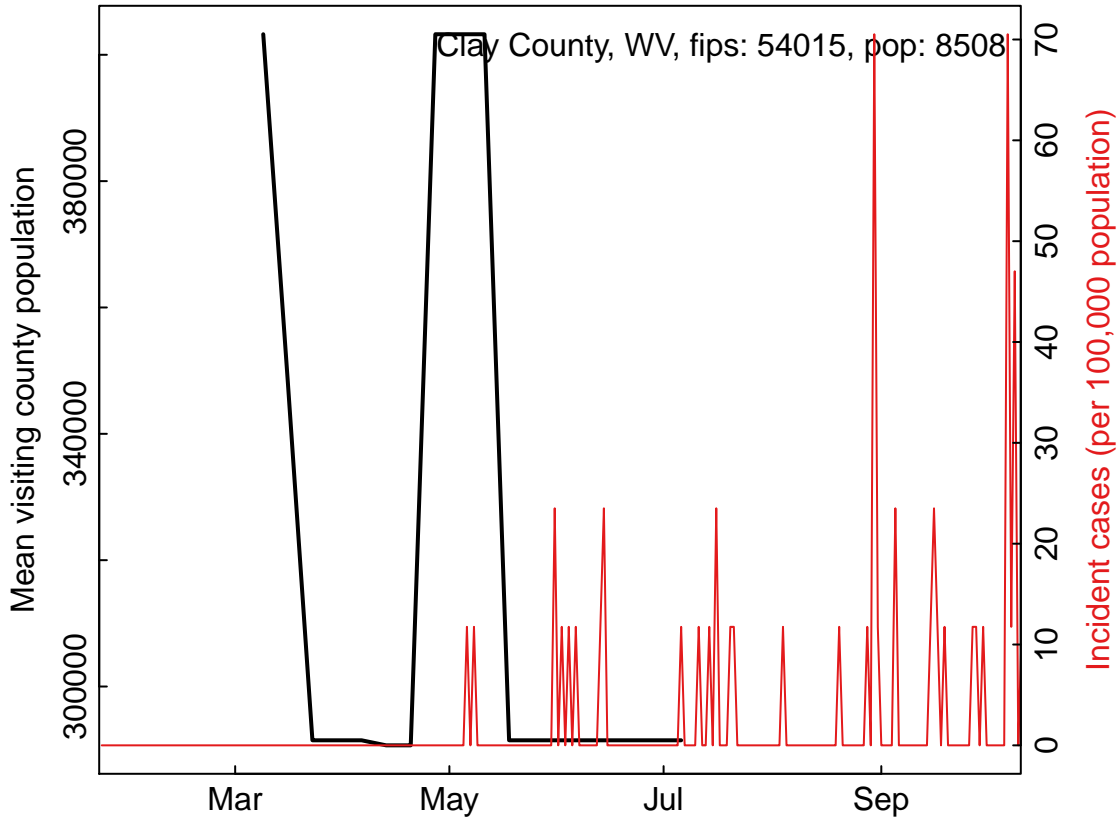

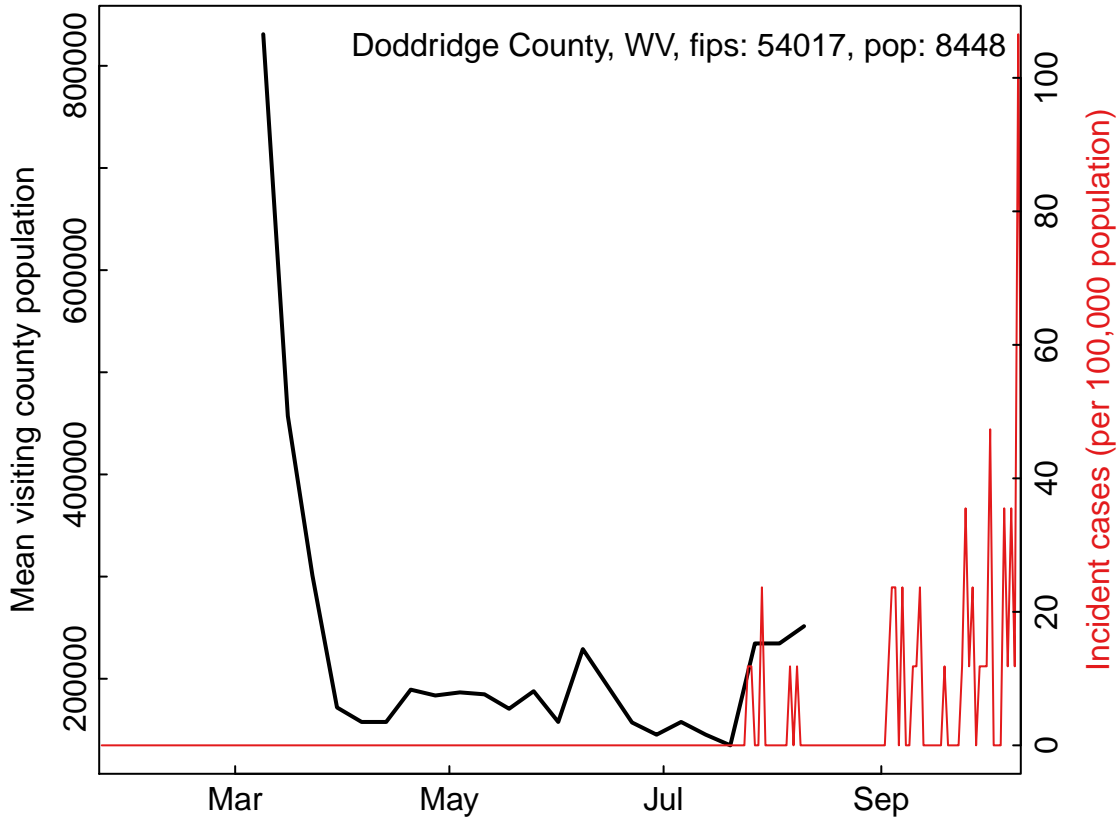

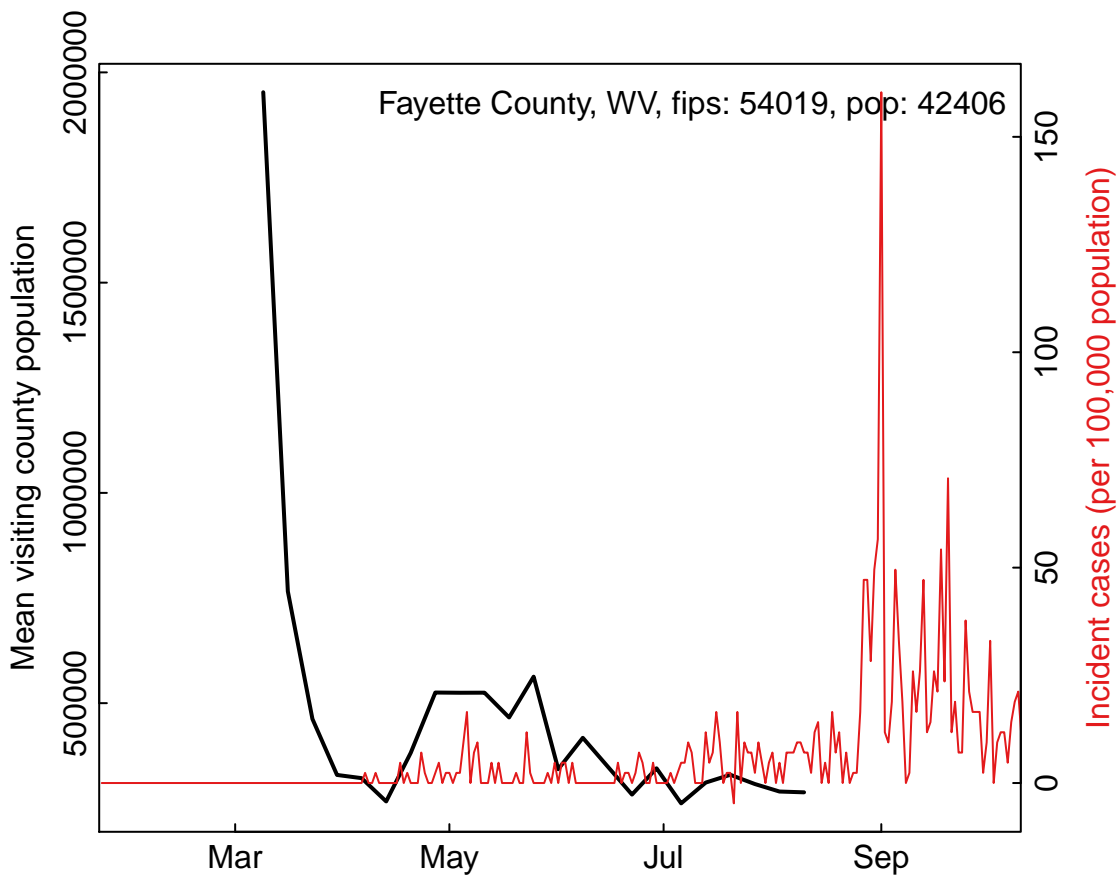

Gilmer County, WV, fips: 54021, pop: 7823

Mean visiting county population

Incident cases (per 100,000 population)

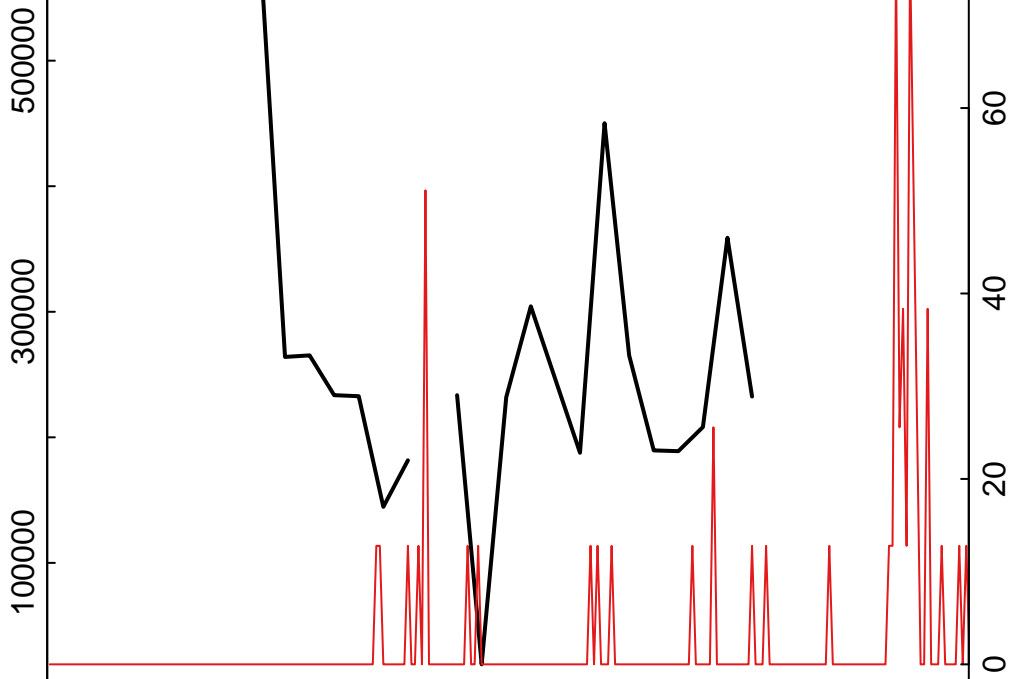

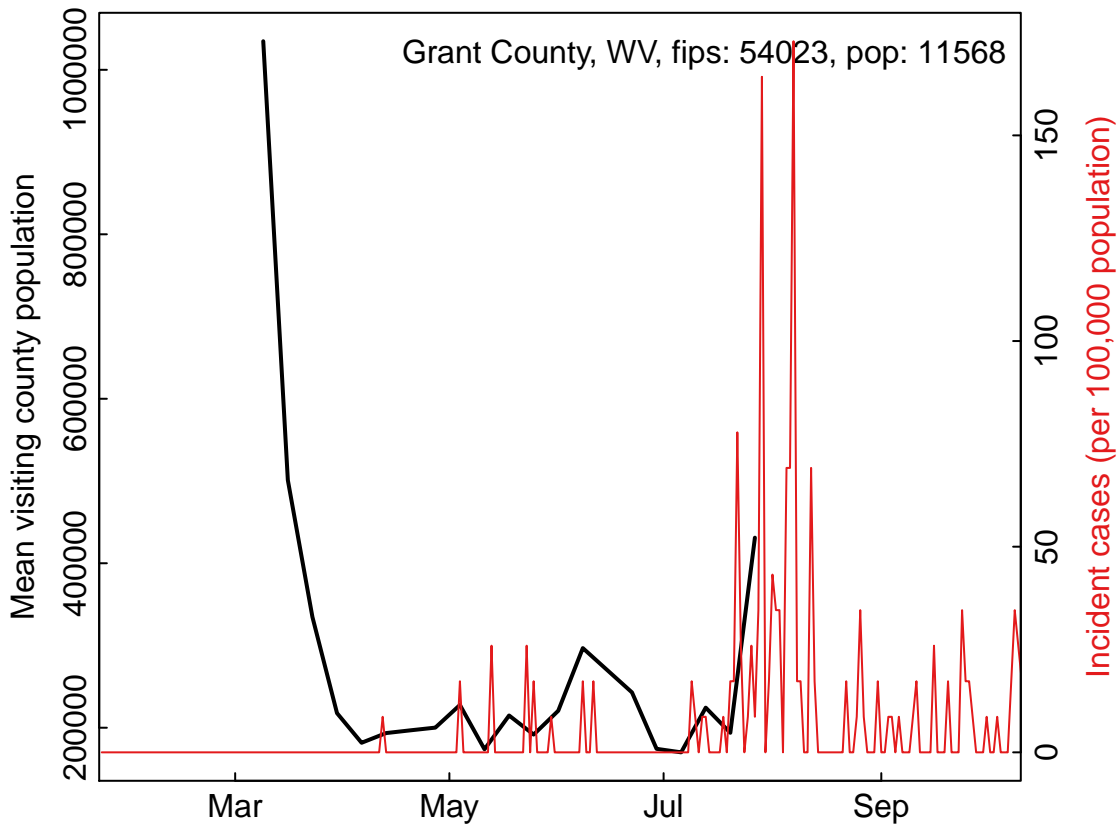

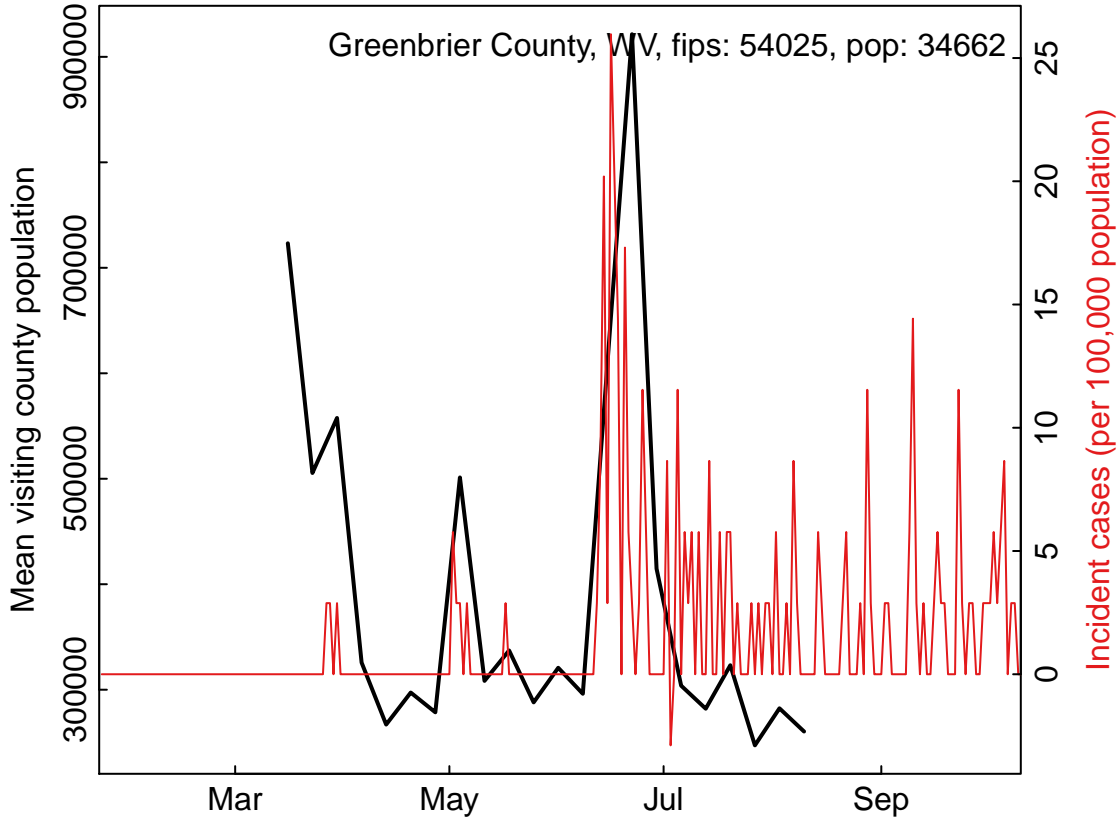

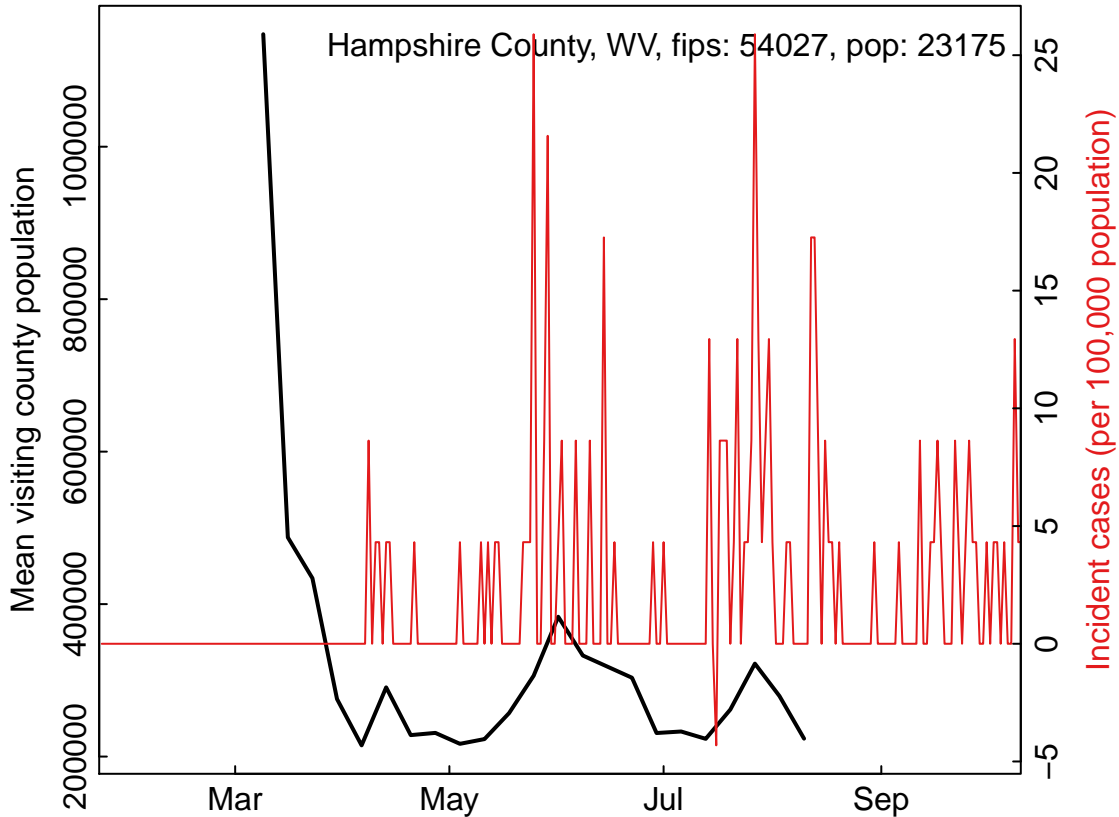

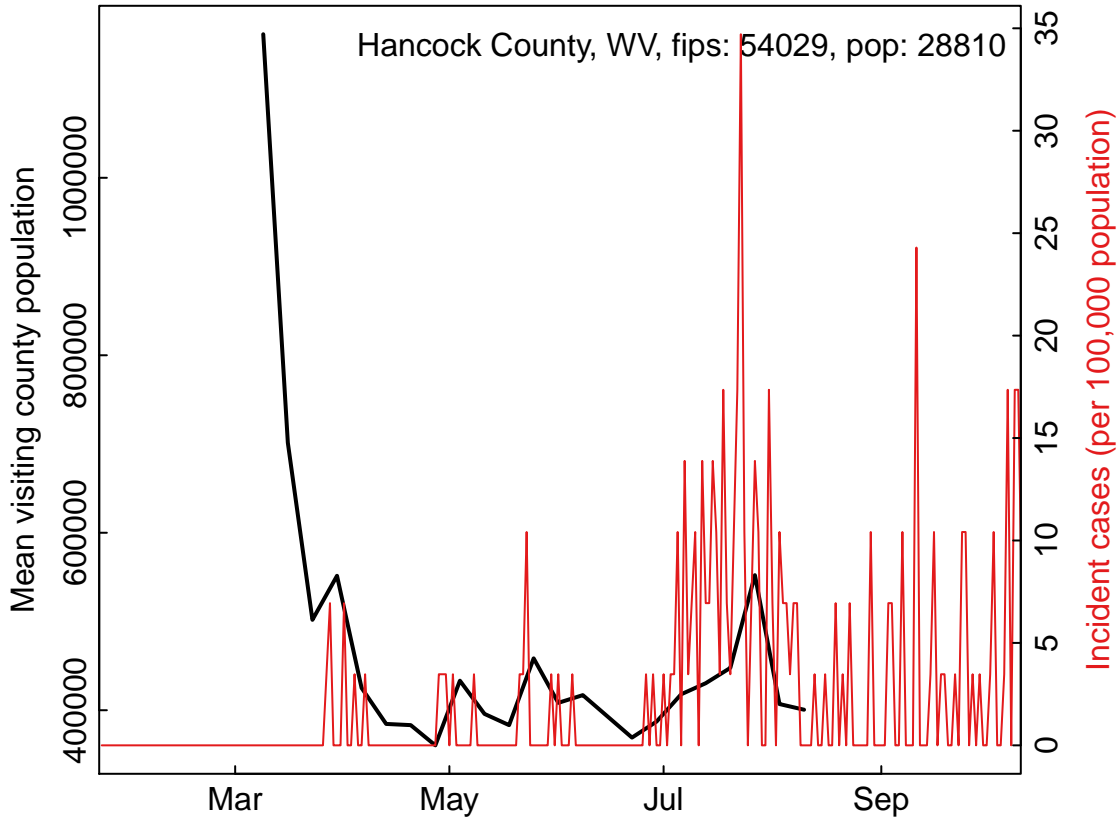



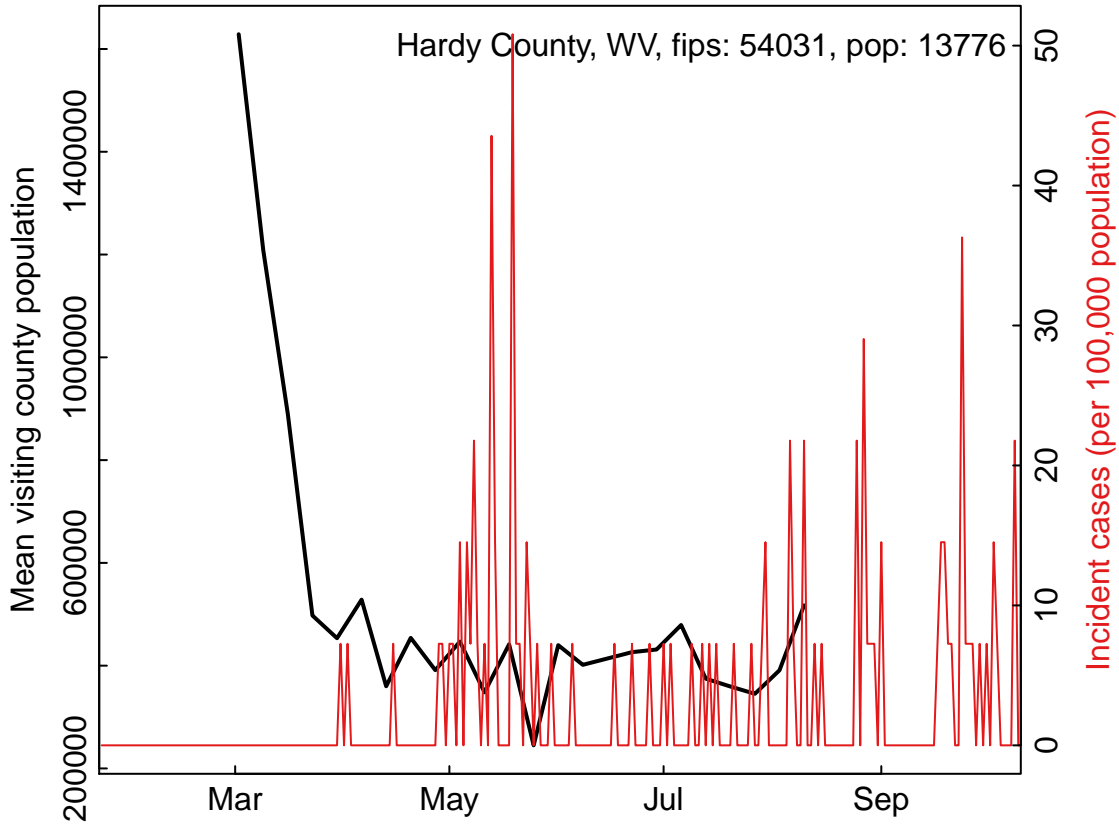

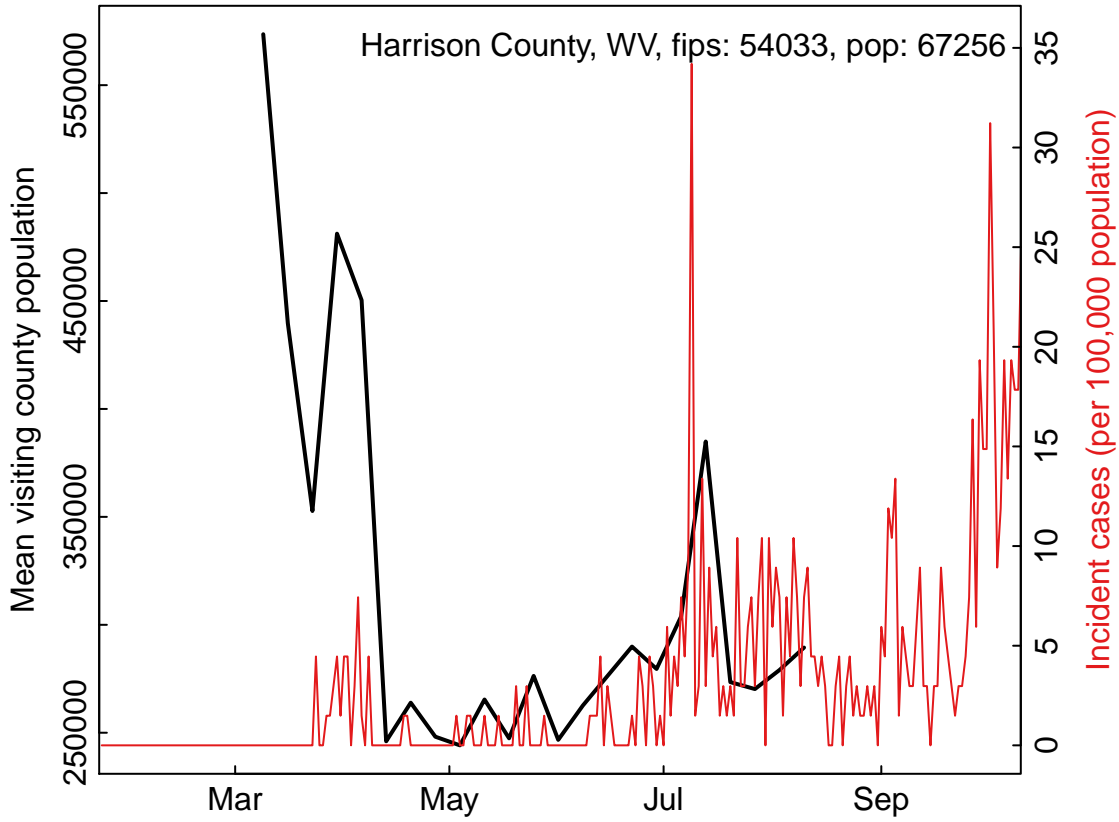

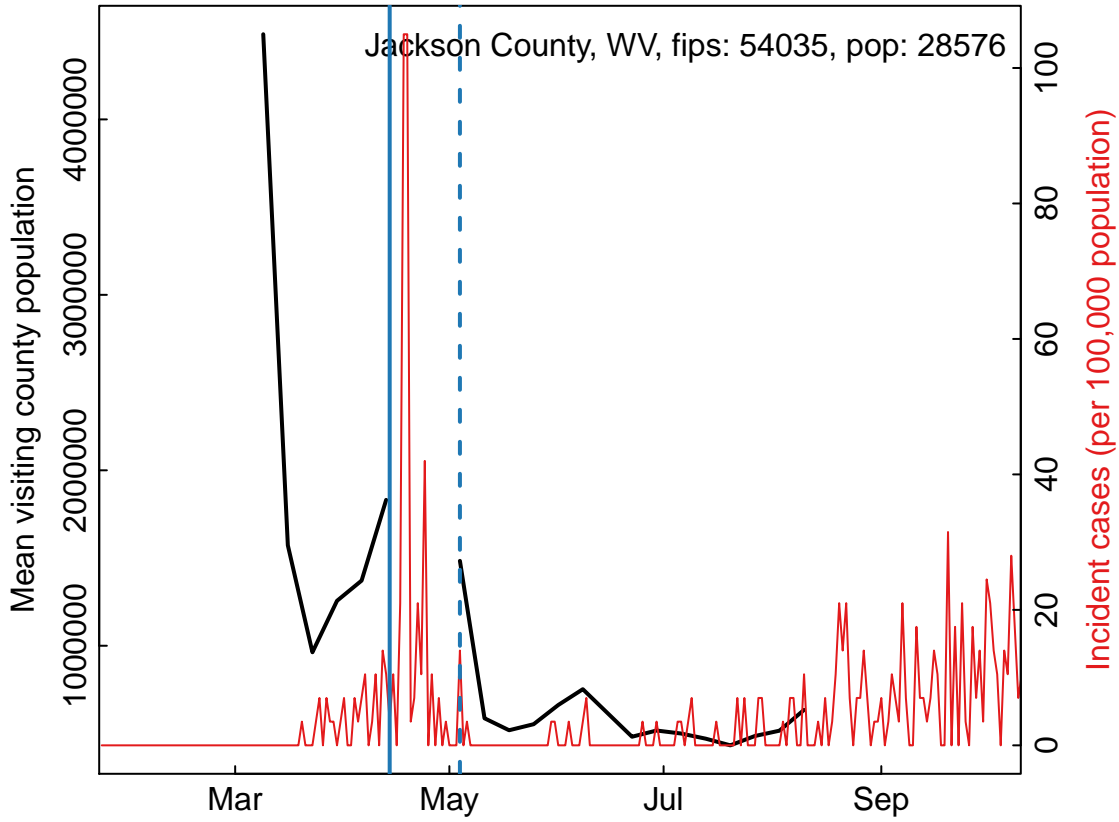

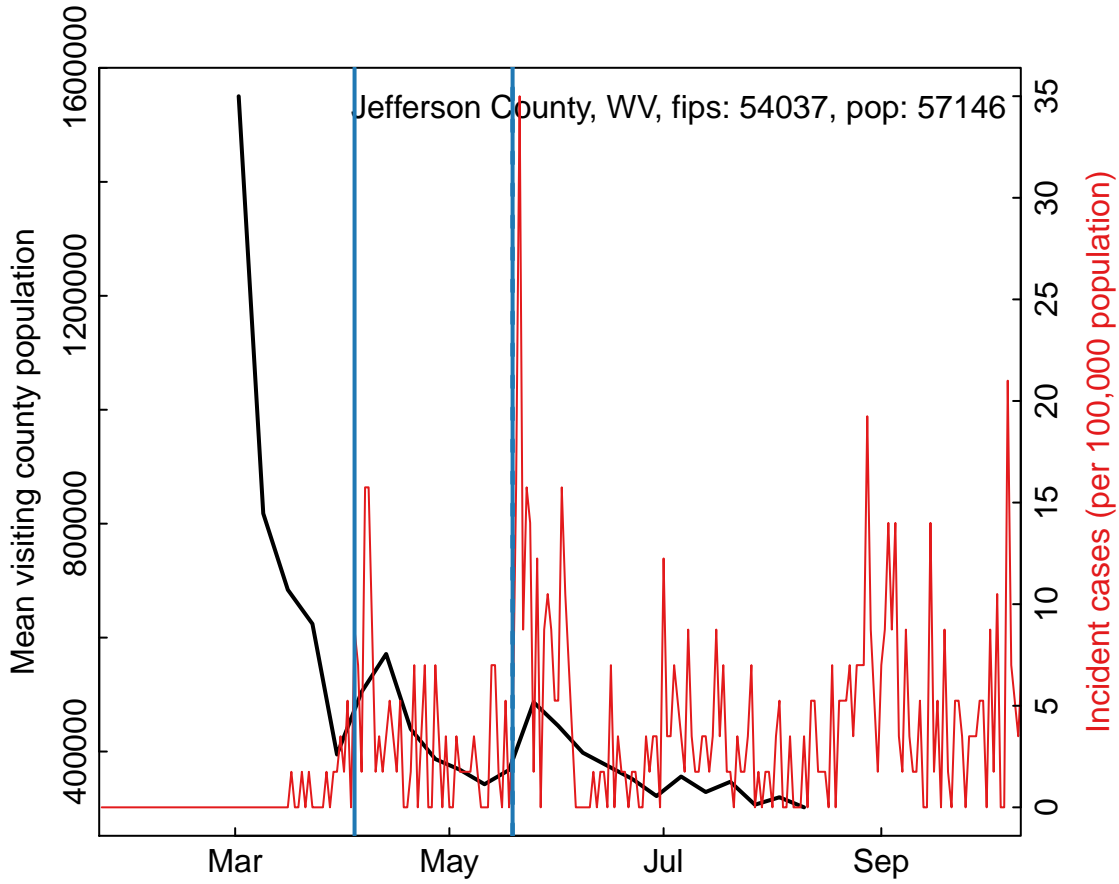

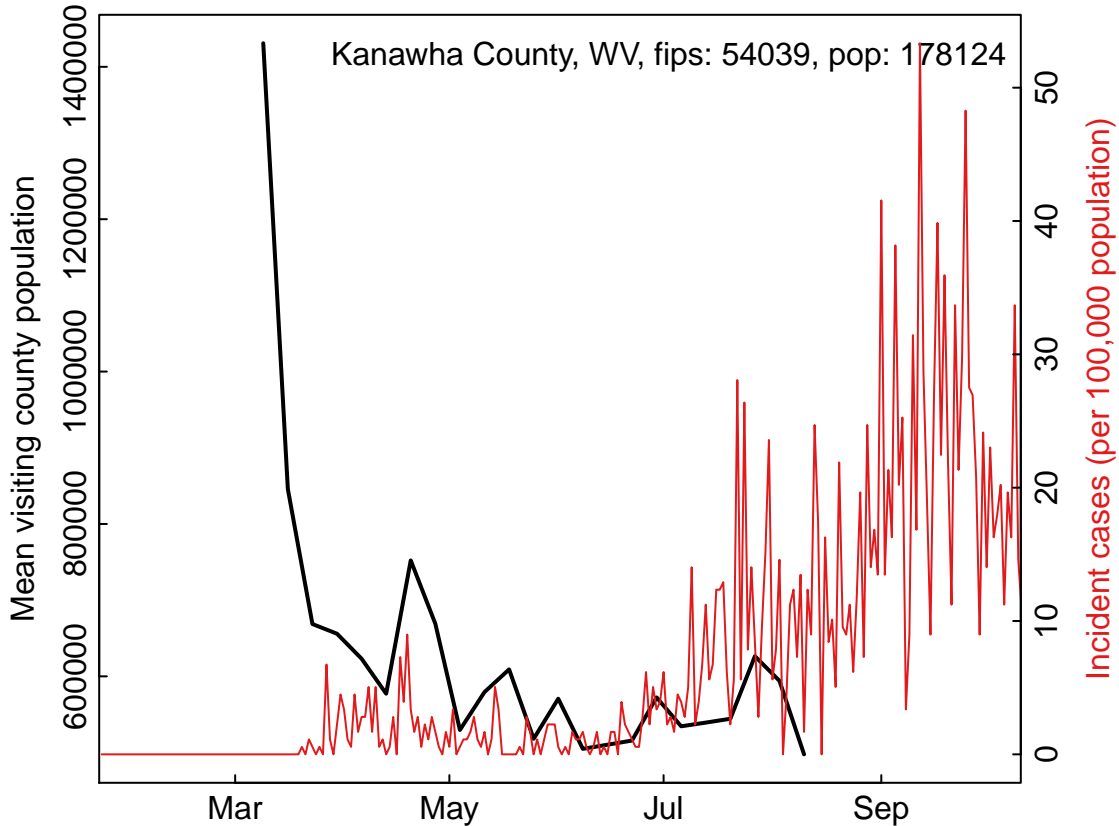

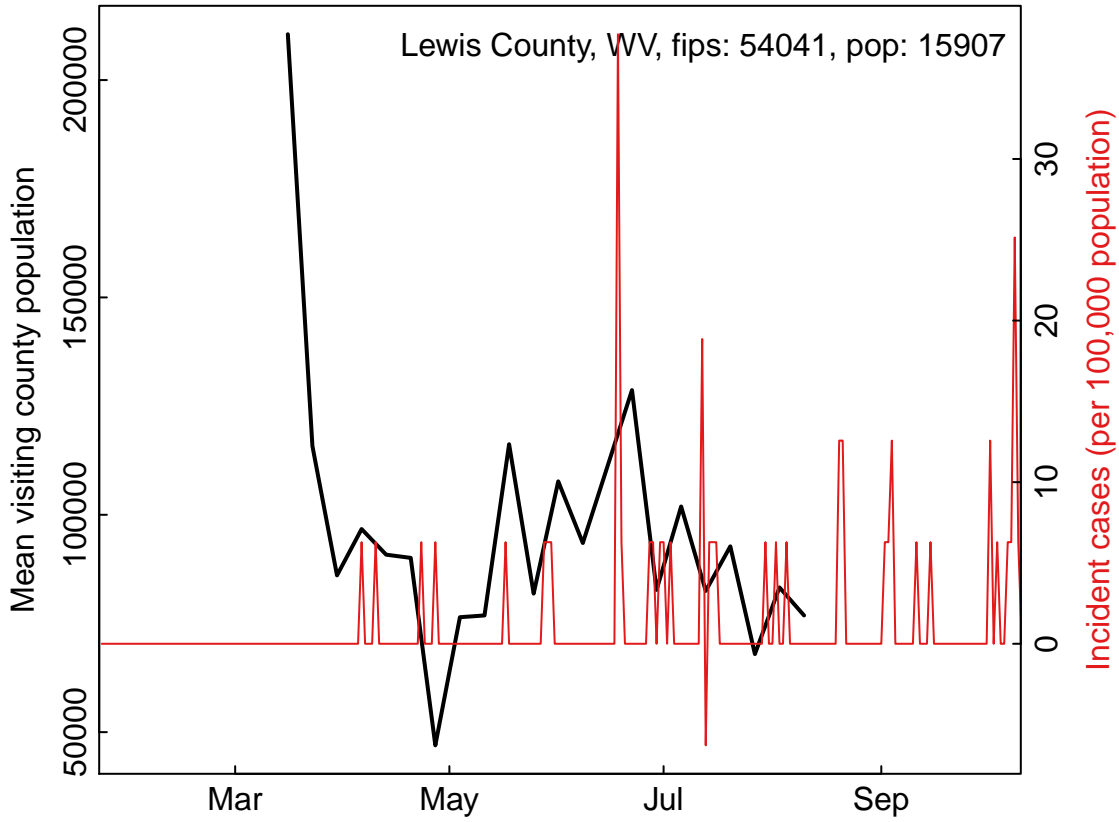

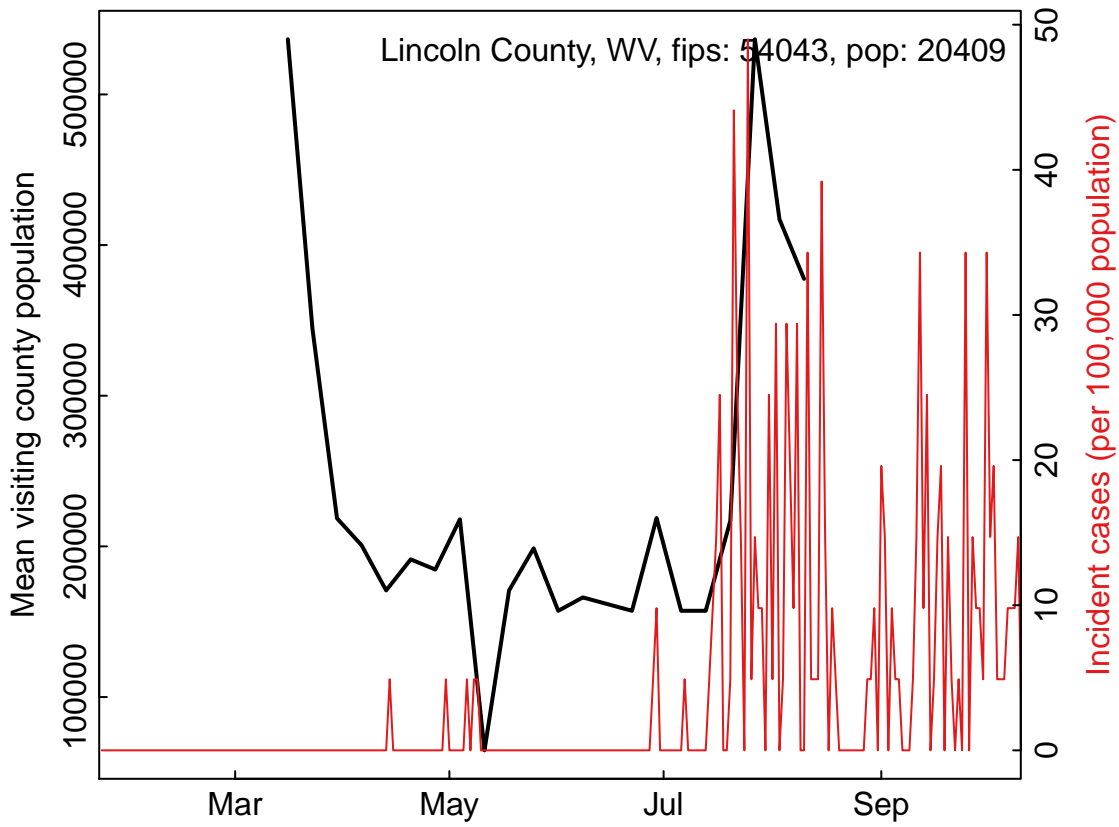

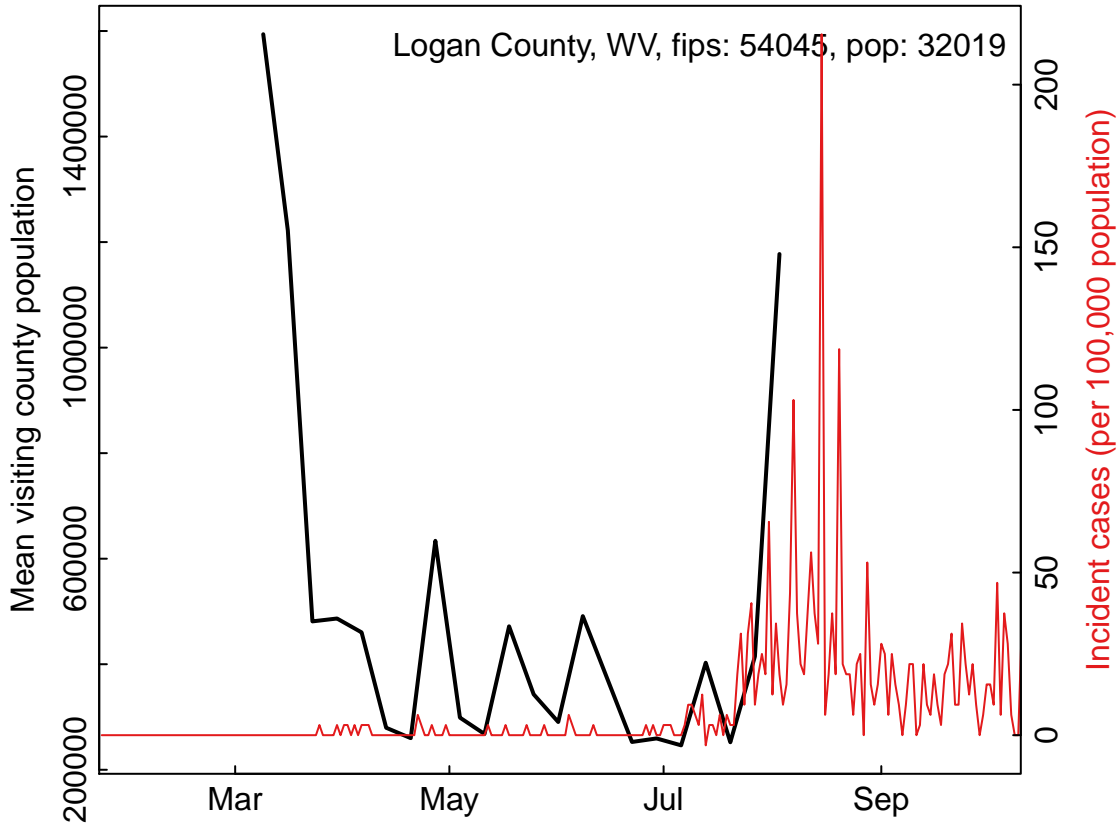



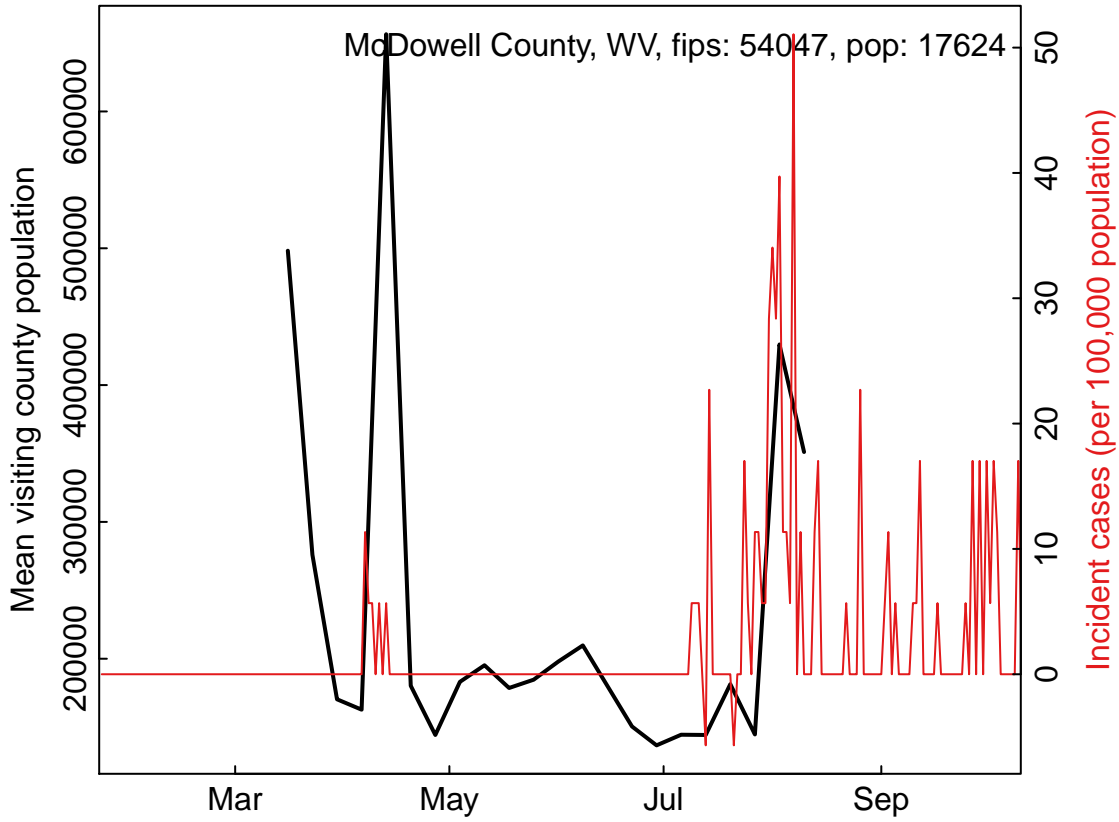

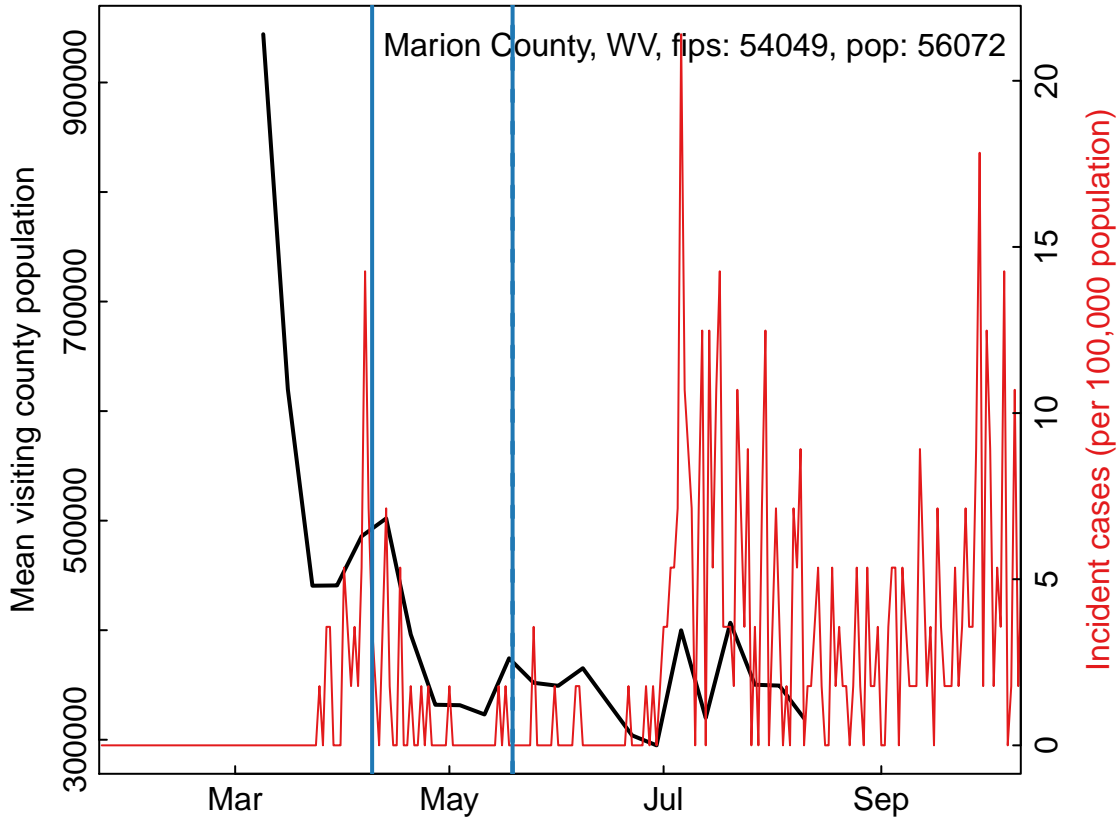

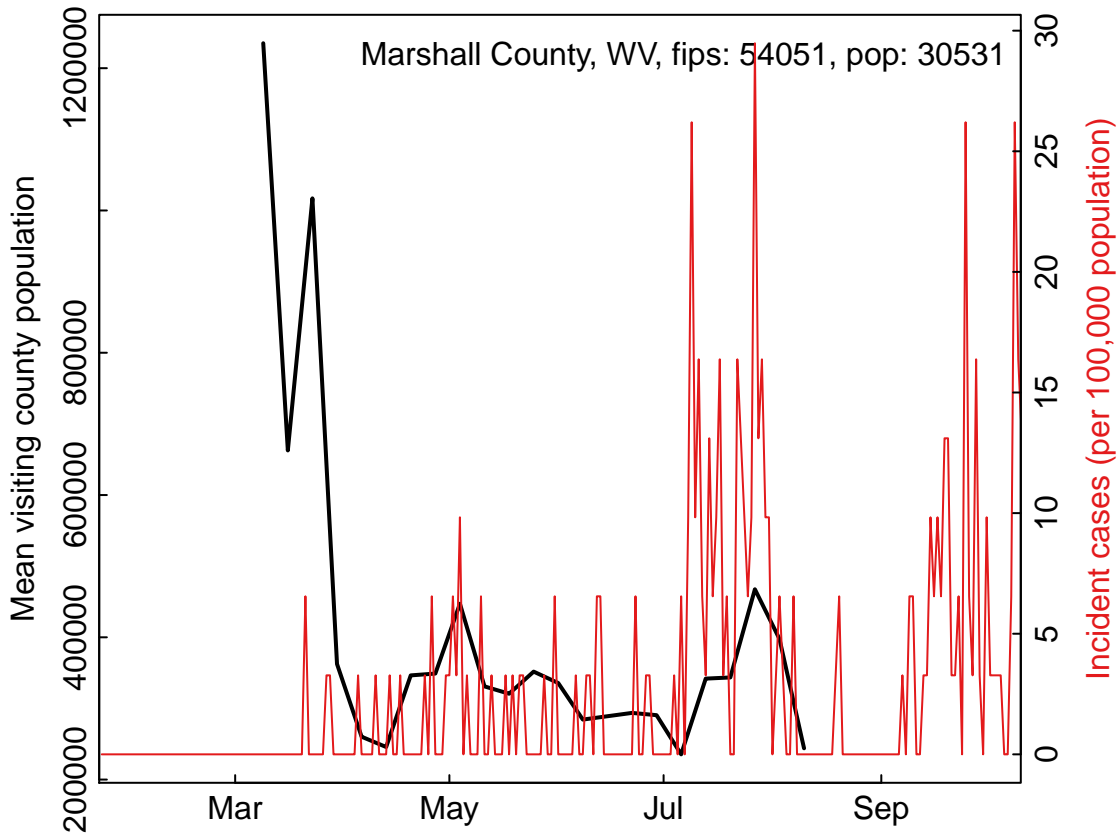

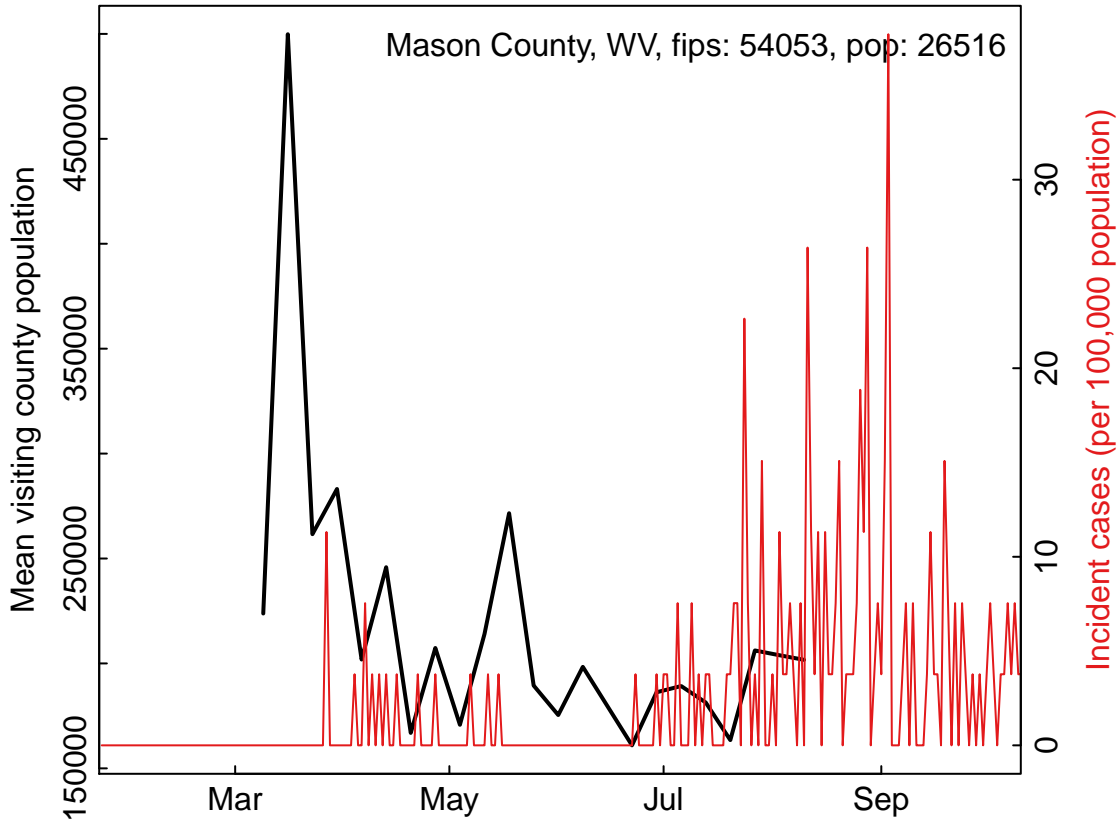

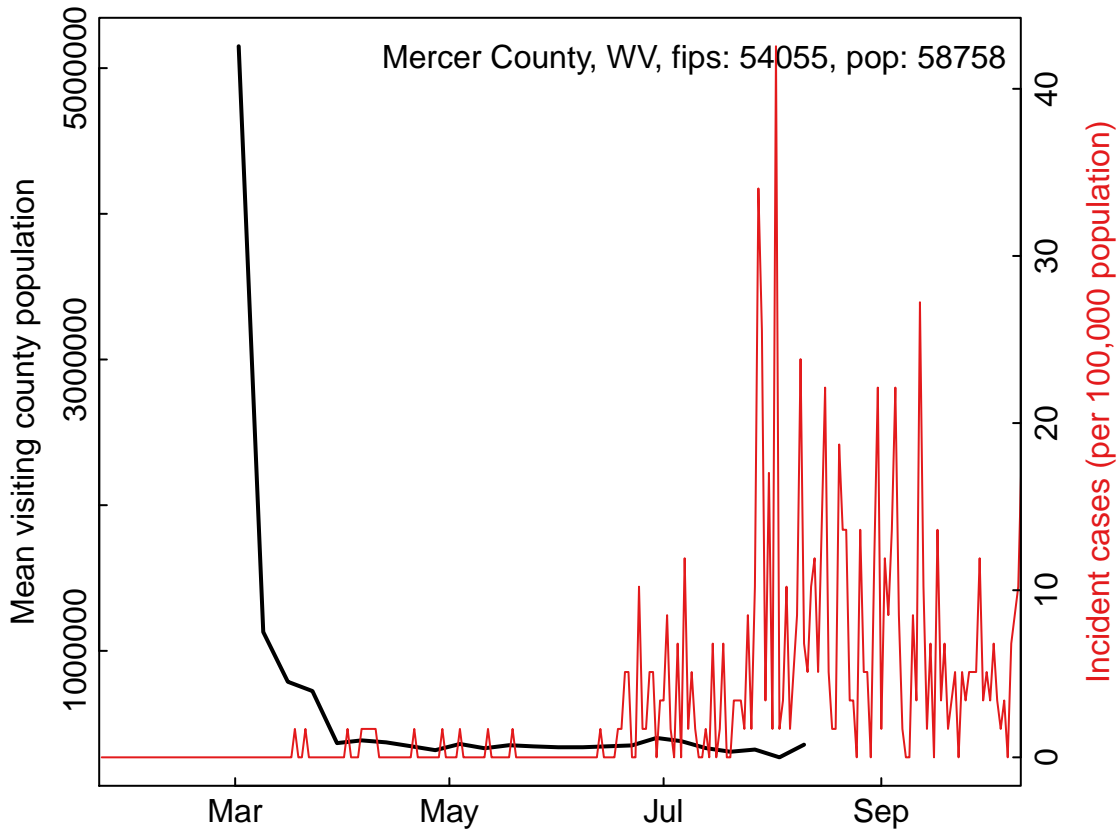

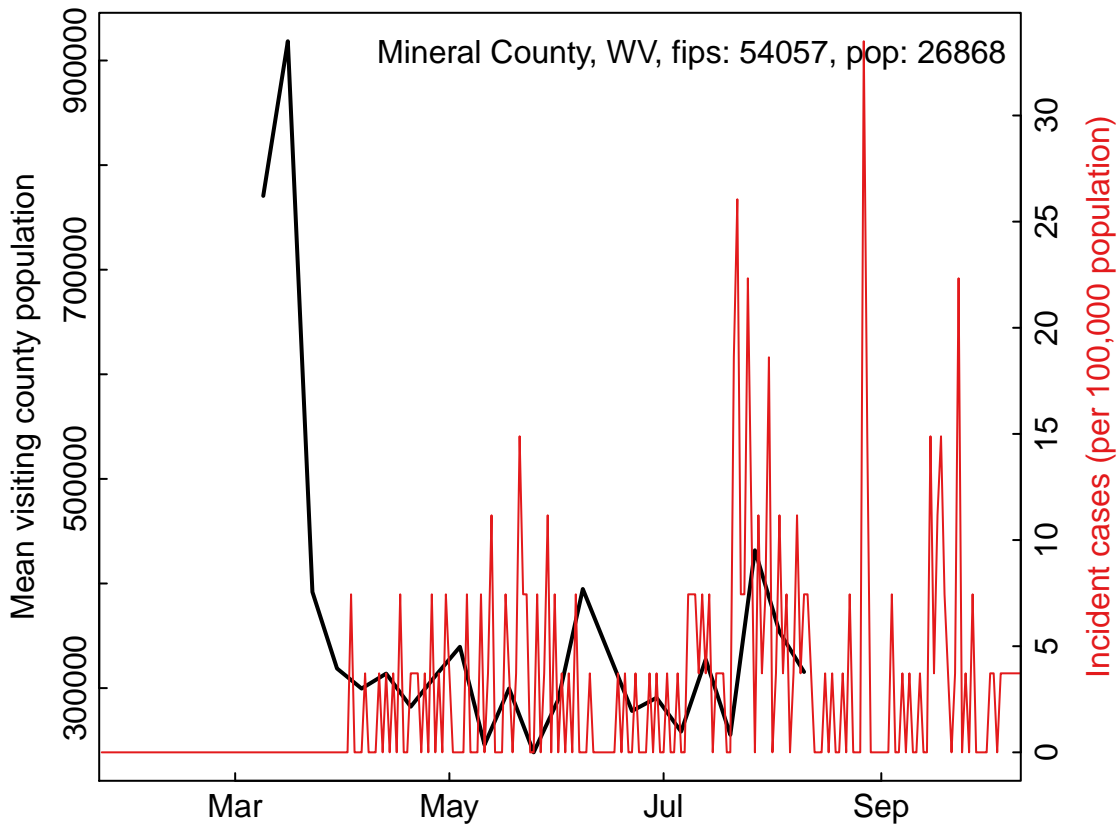

Mingo County, WV, fips: 54059, pop: 23424

Mean visiting county population

Incident cases (per 100,000 population)

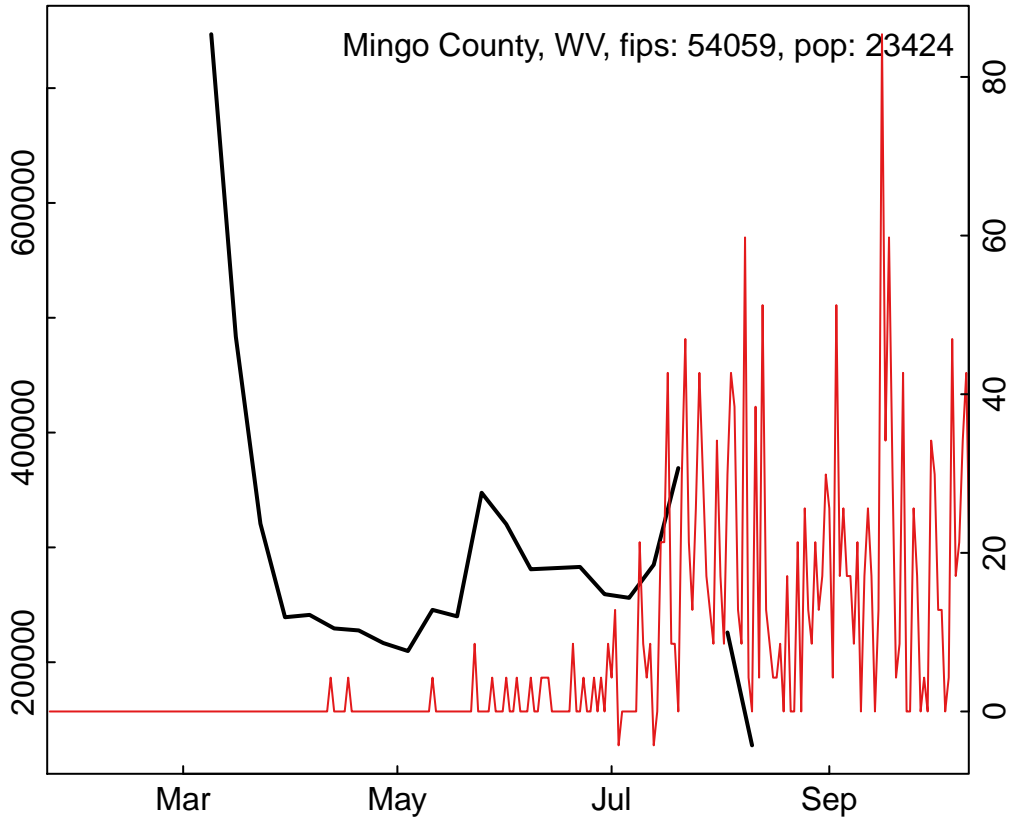

Monongalia County, WV, fips: 54061, pop: 105612

Mean visiting county population

1200000  
800000  
400000

Mar

May

Jul

Sep

60  
40  
20  
0

Incident cases (per 100,000 population)

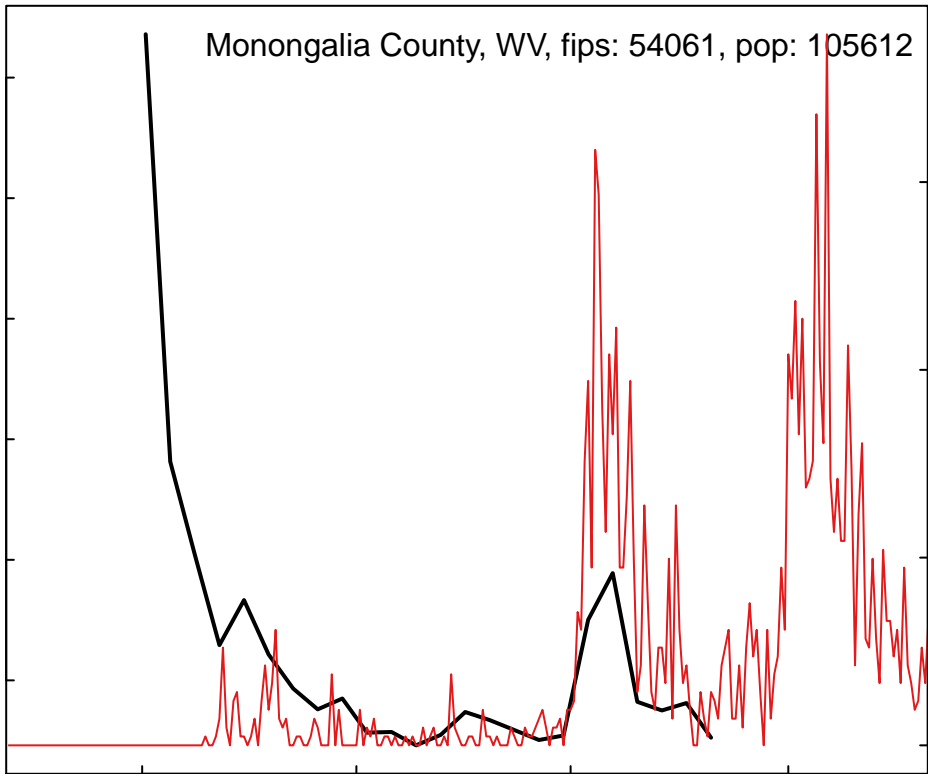



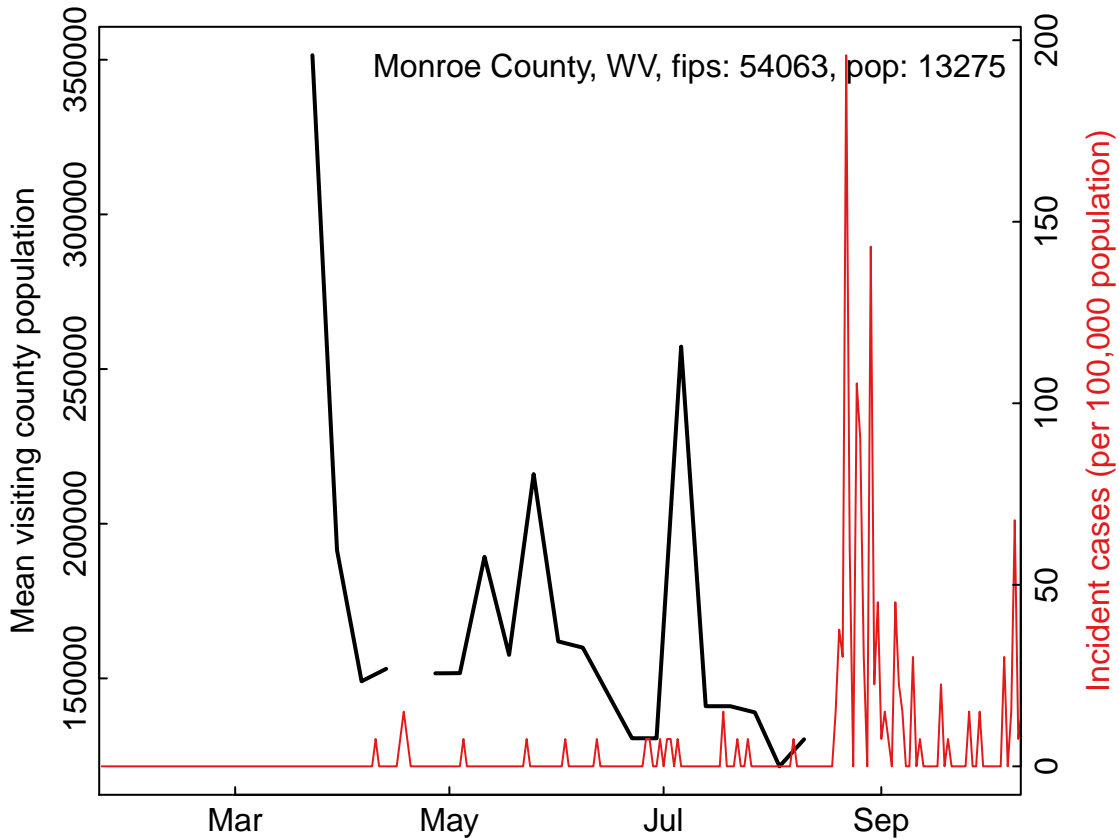

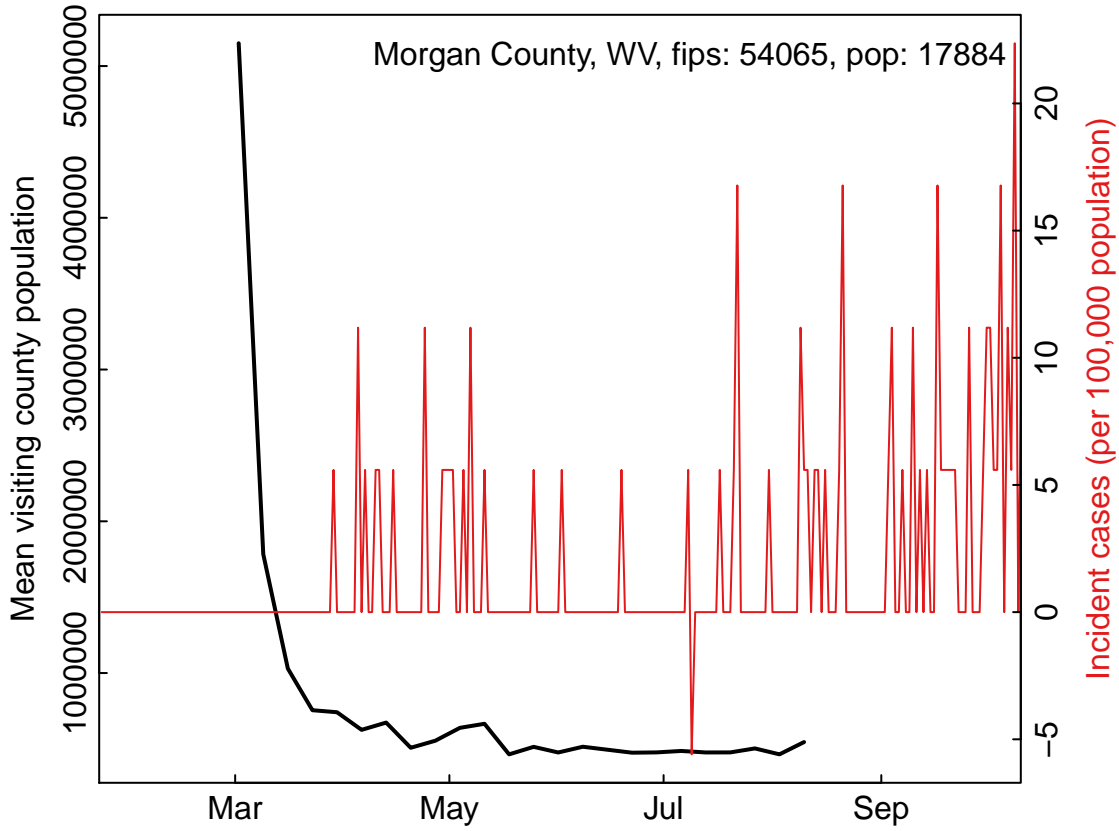

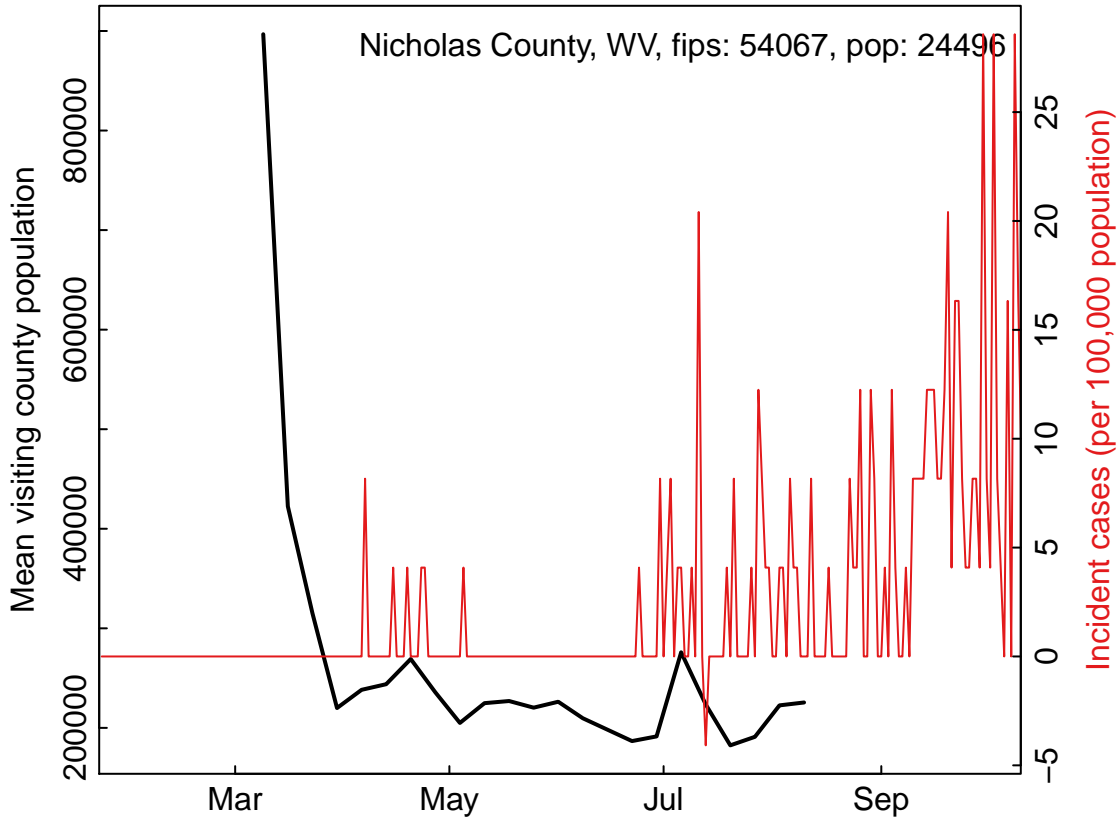

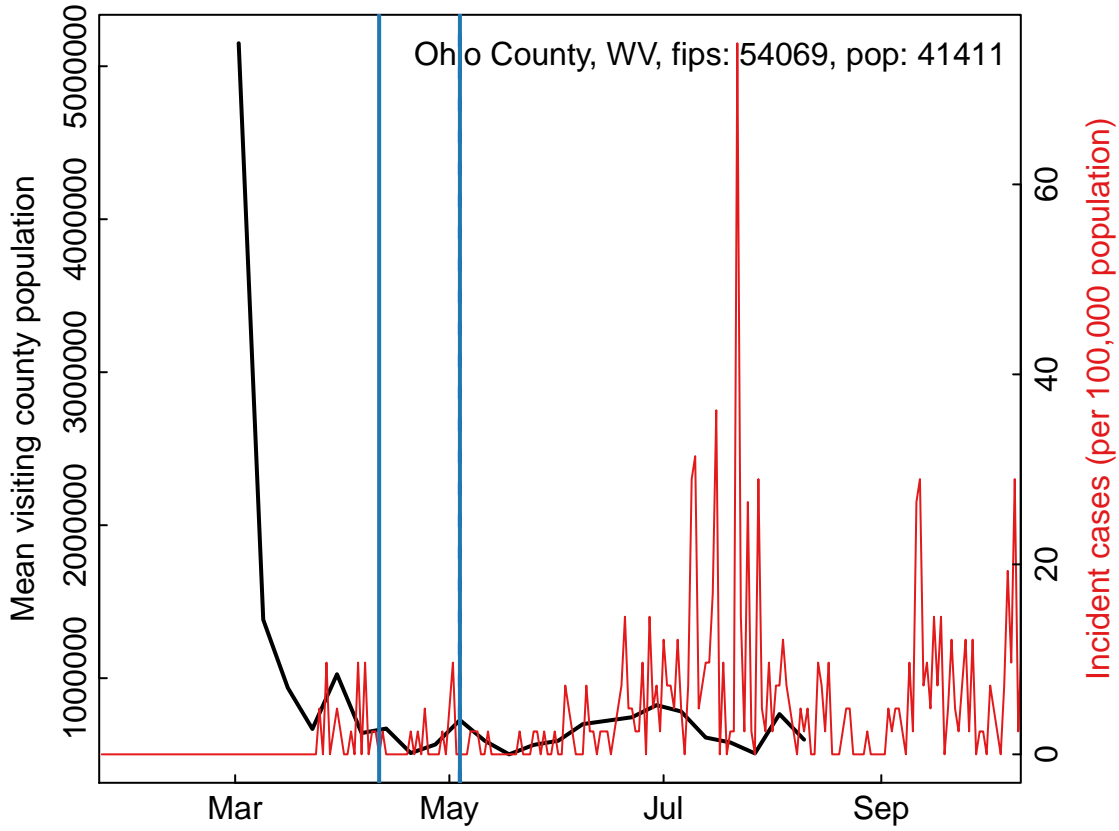

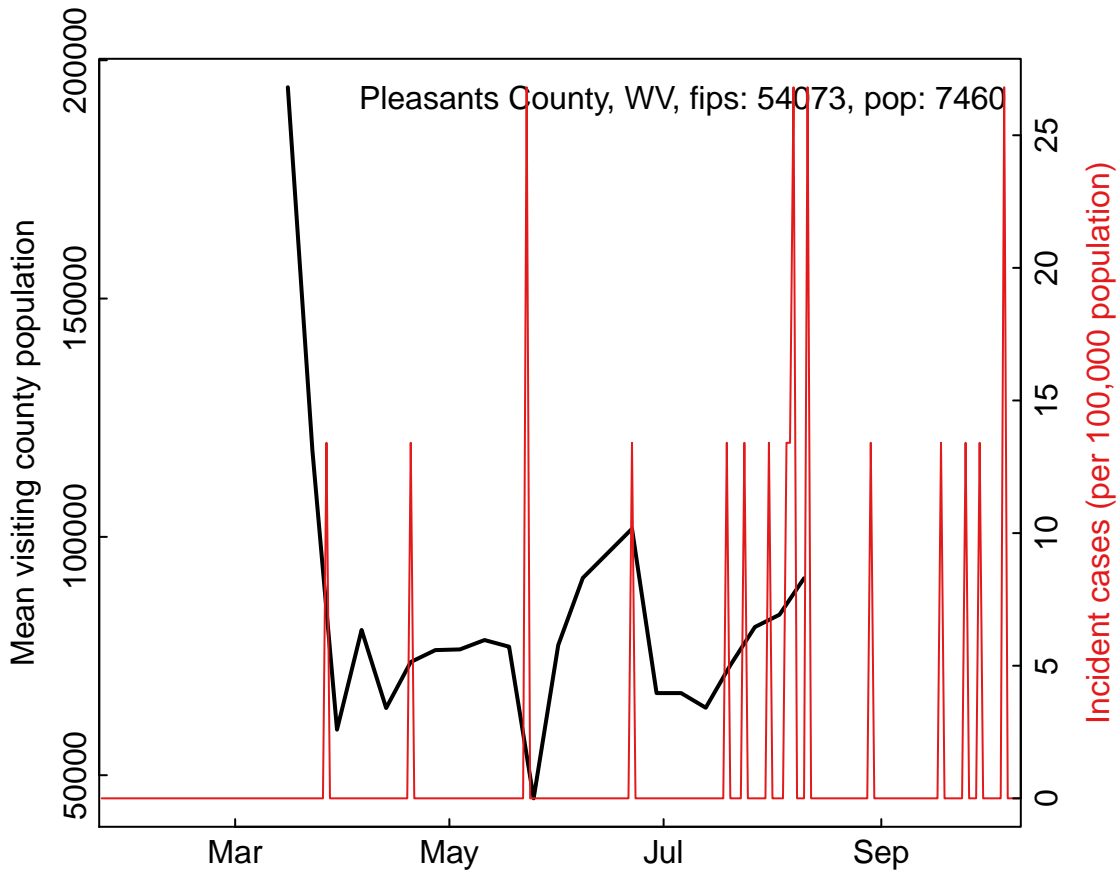

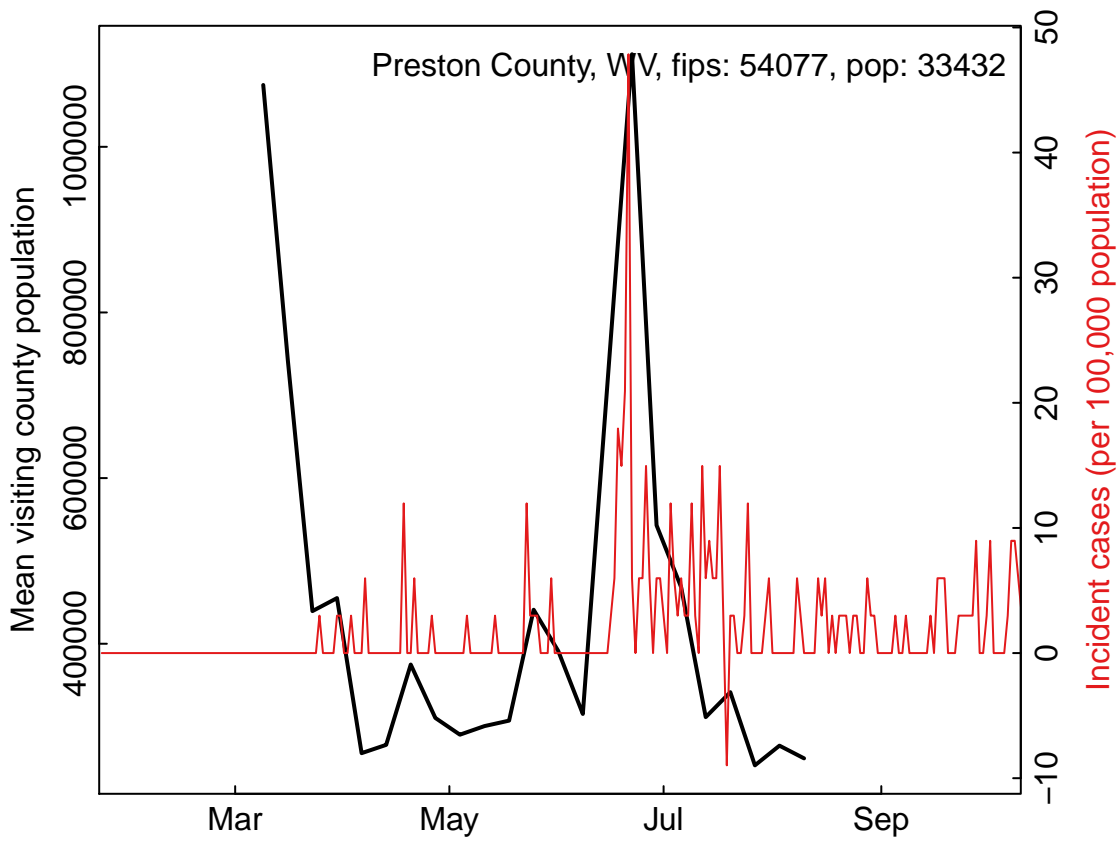

Putnam County, WV, fips: 54079, pop: 56450

Mean visiting county population

Incident cases (per 100,000 population)

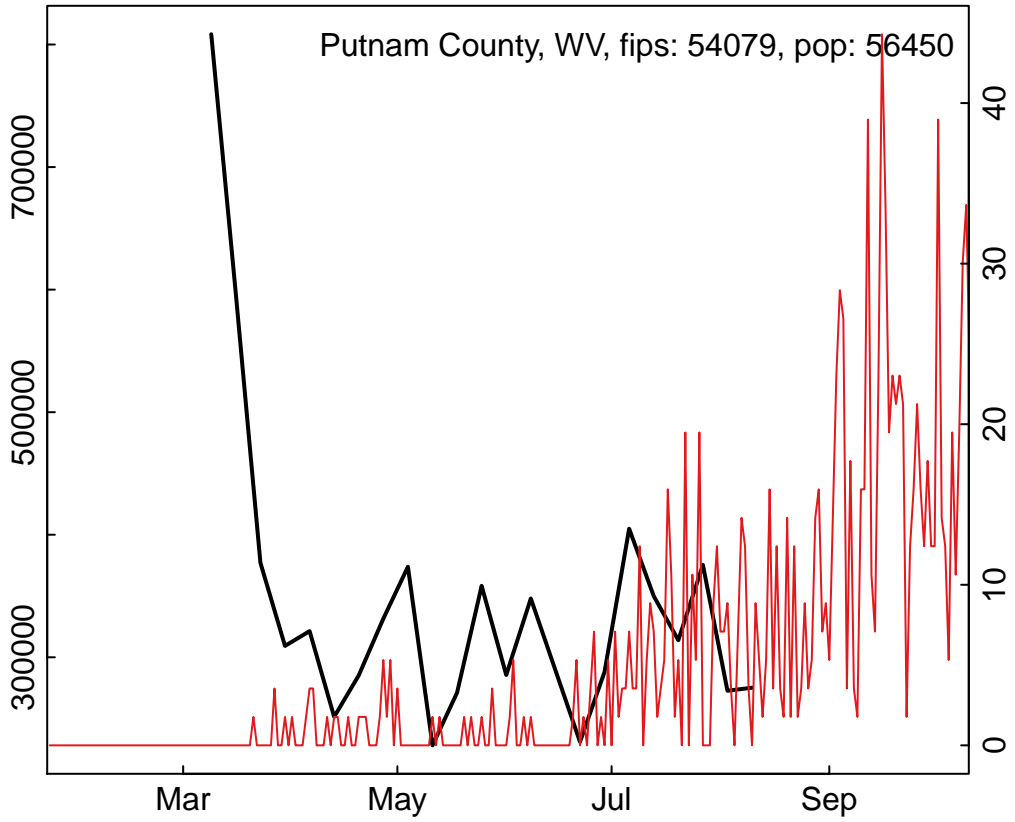

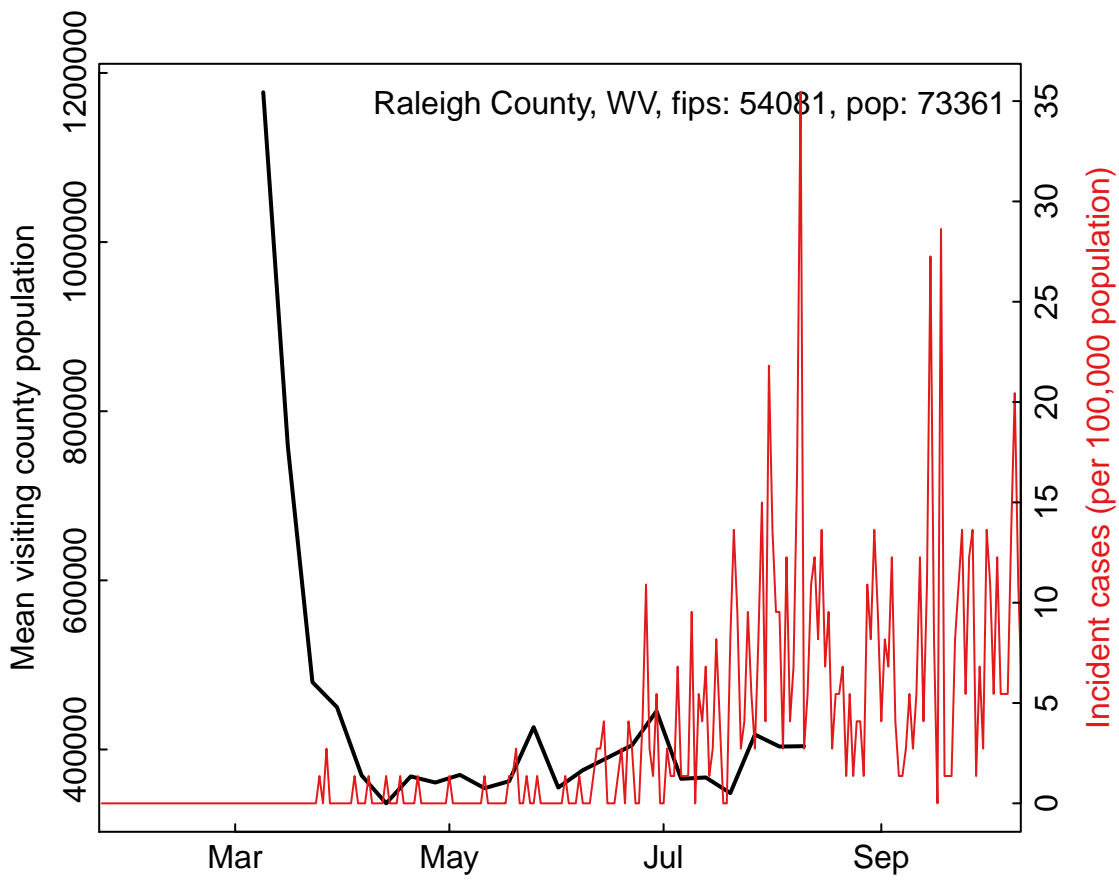



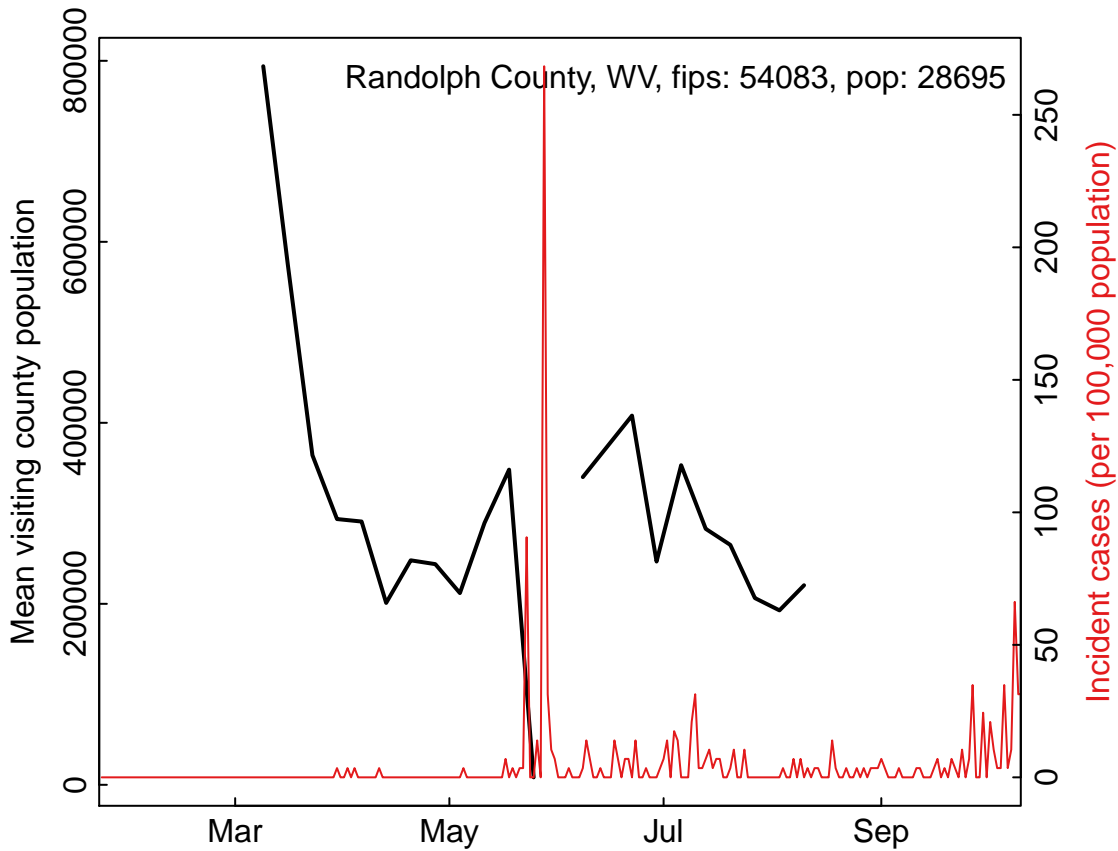

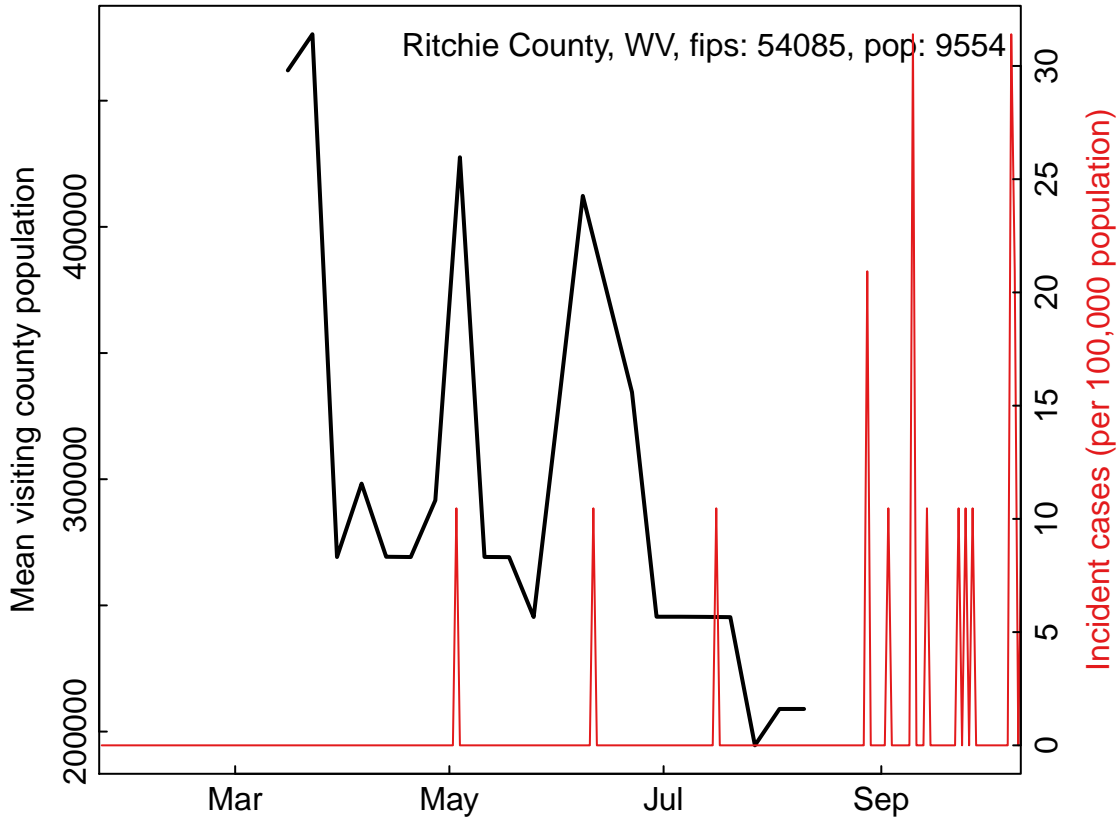

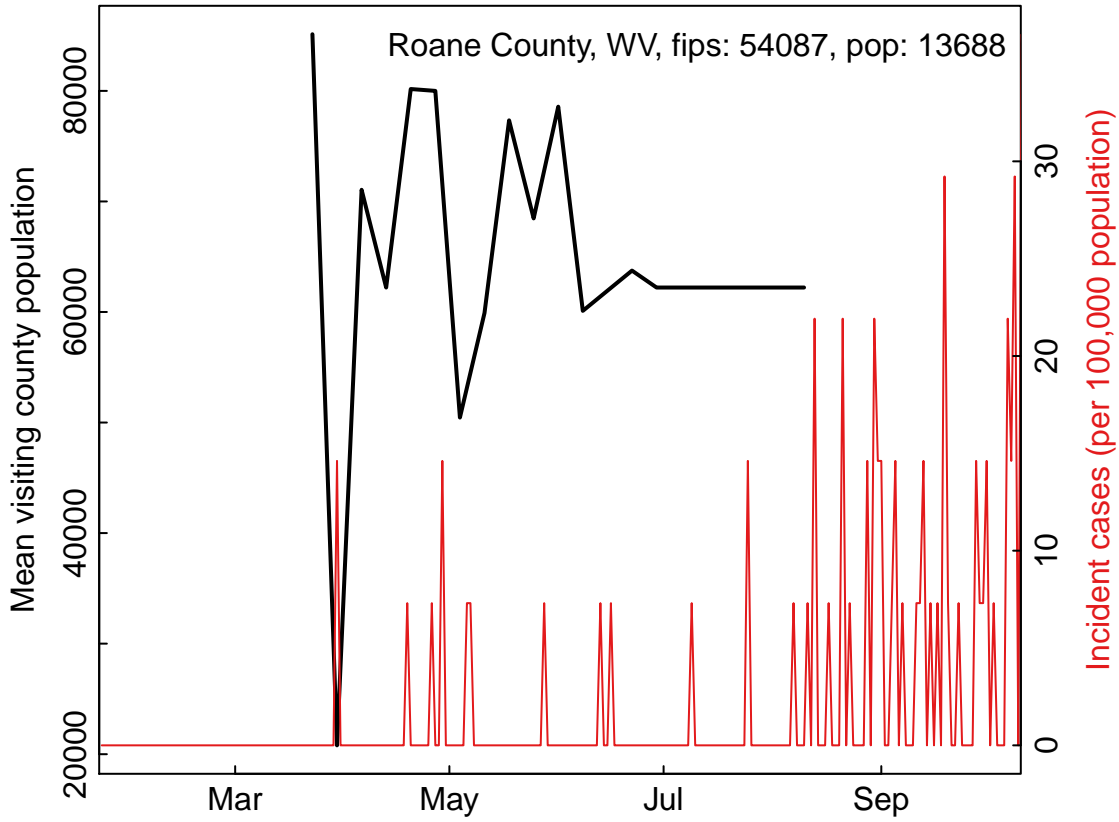

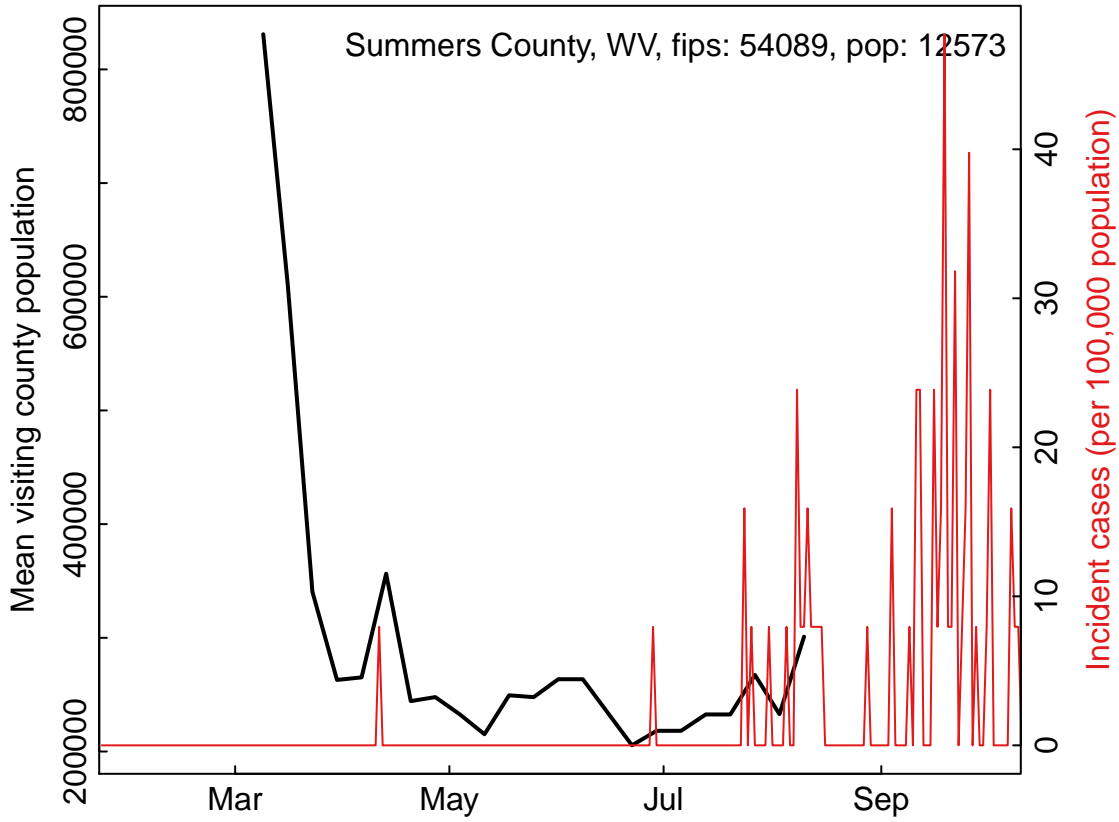

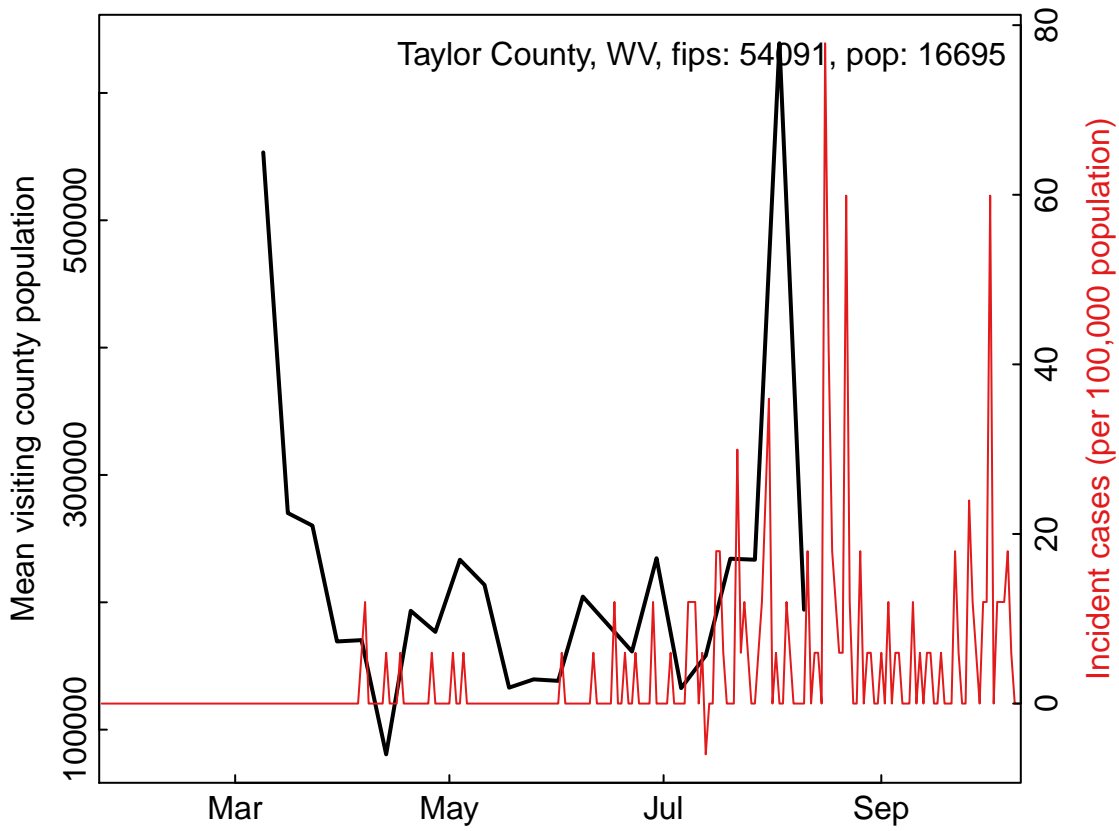

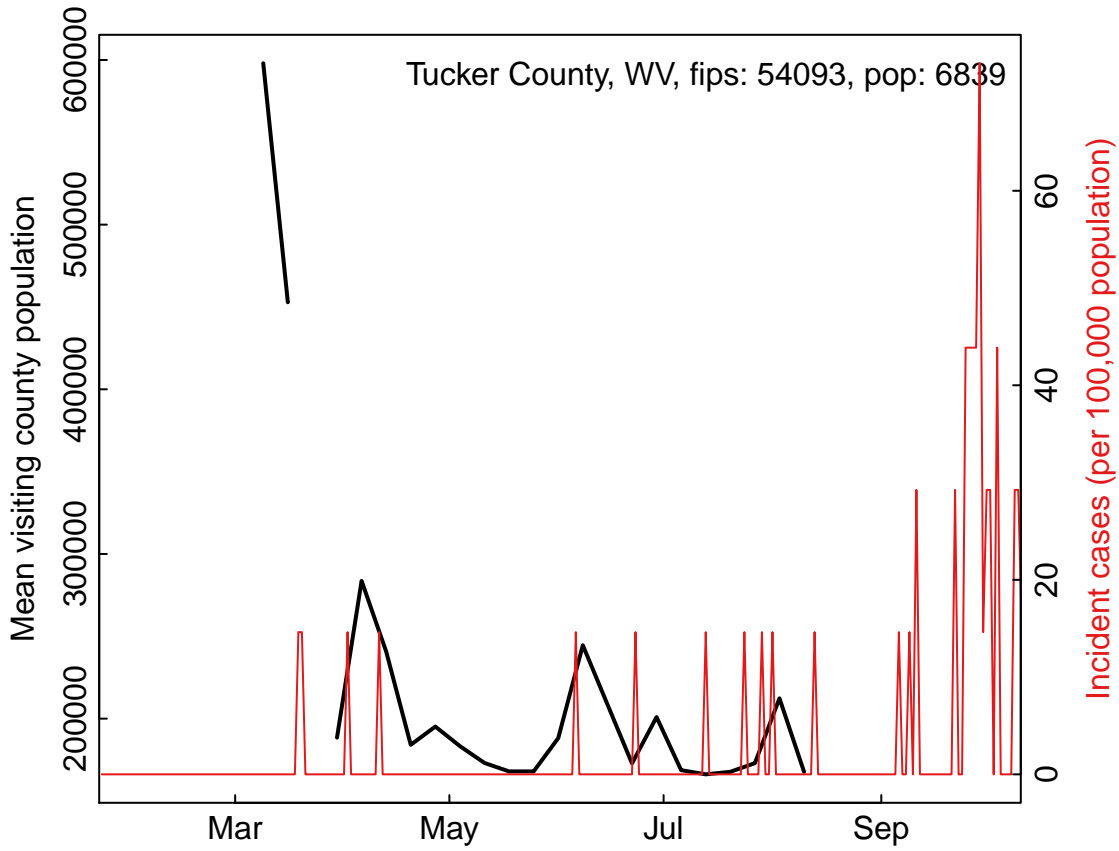

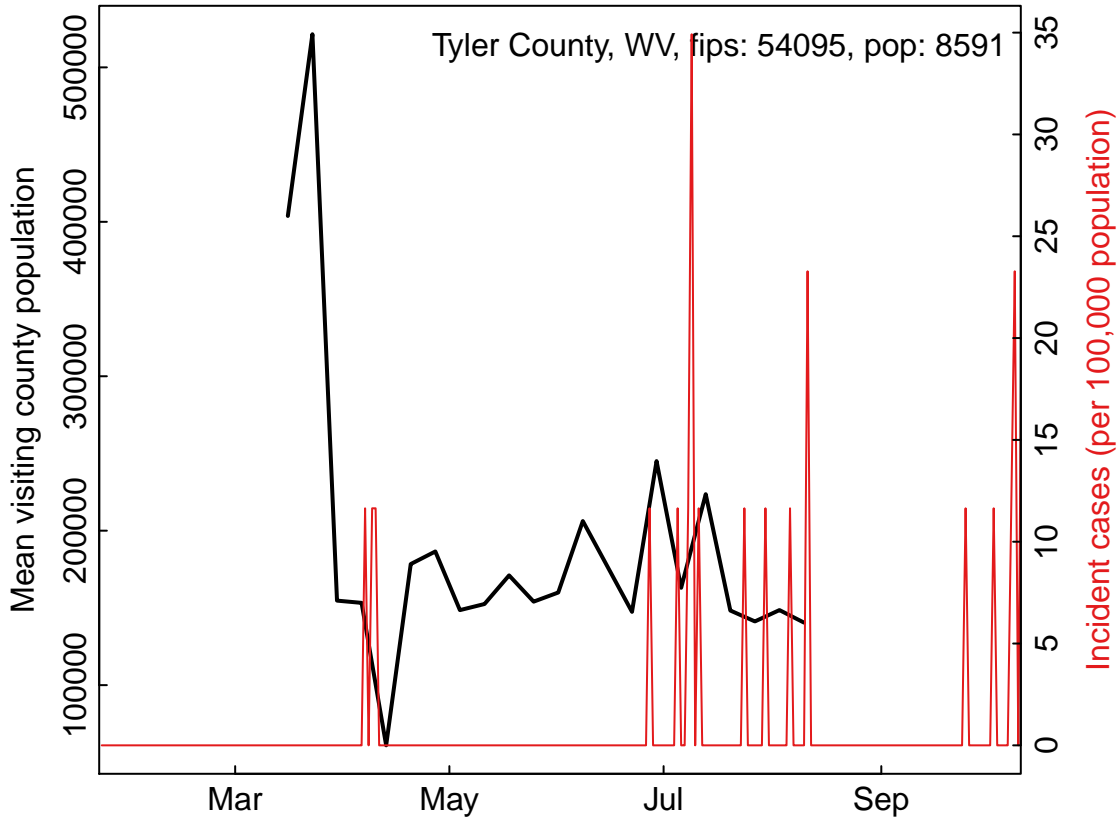

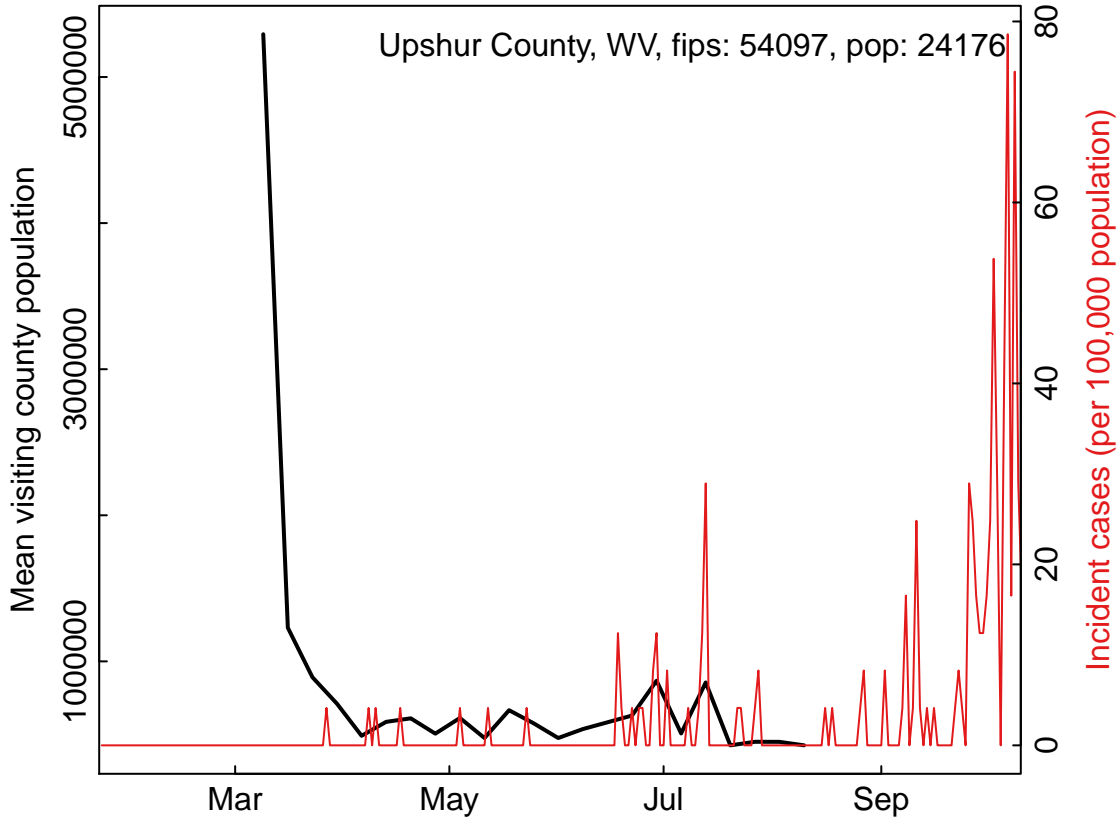



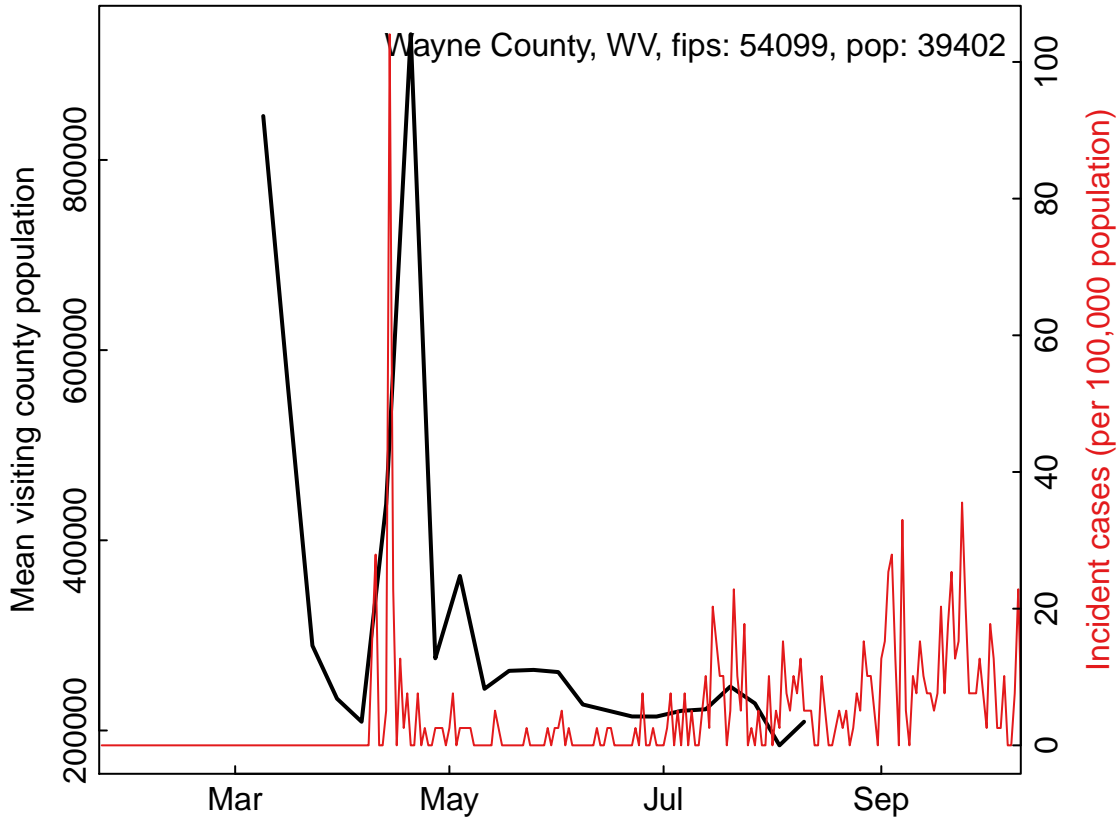

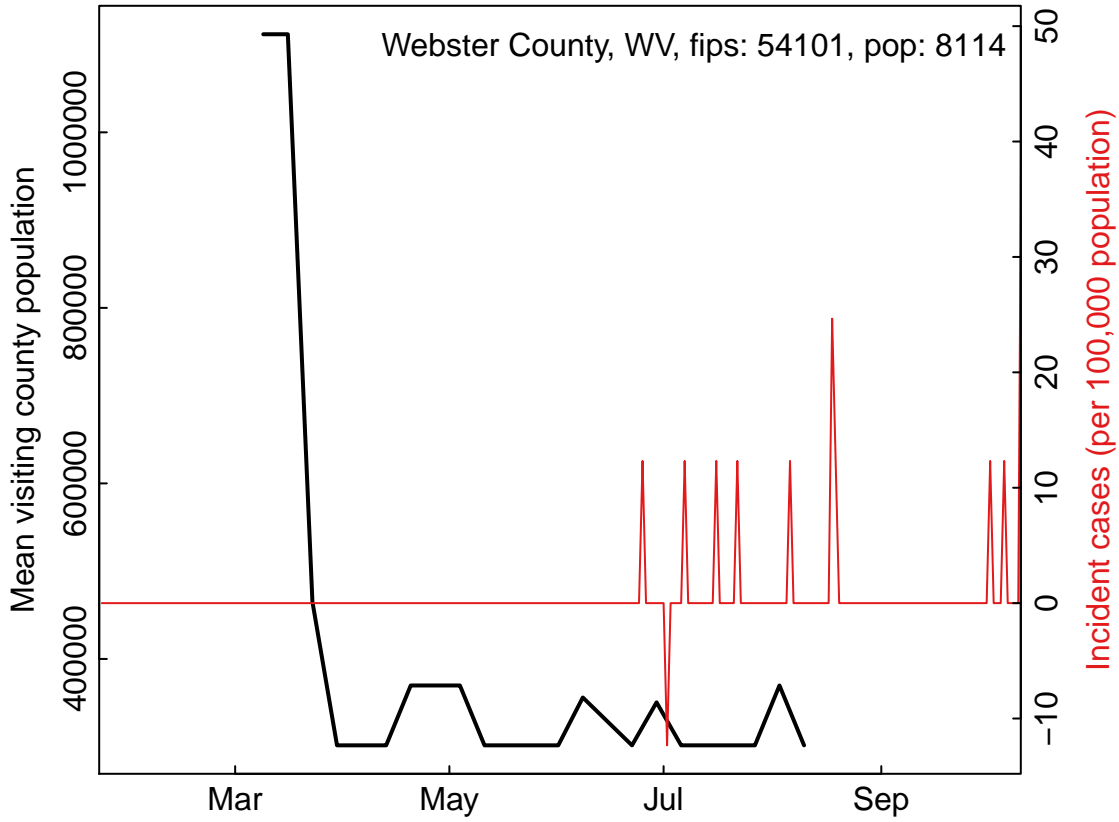

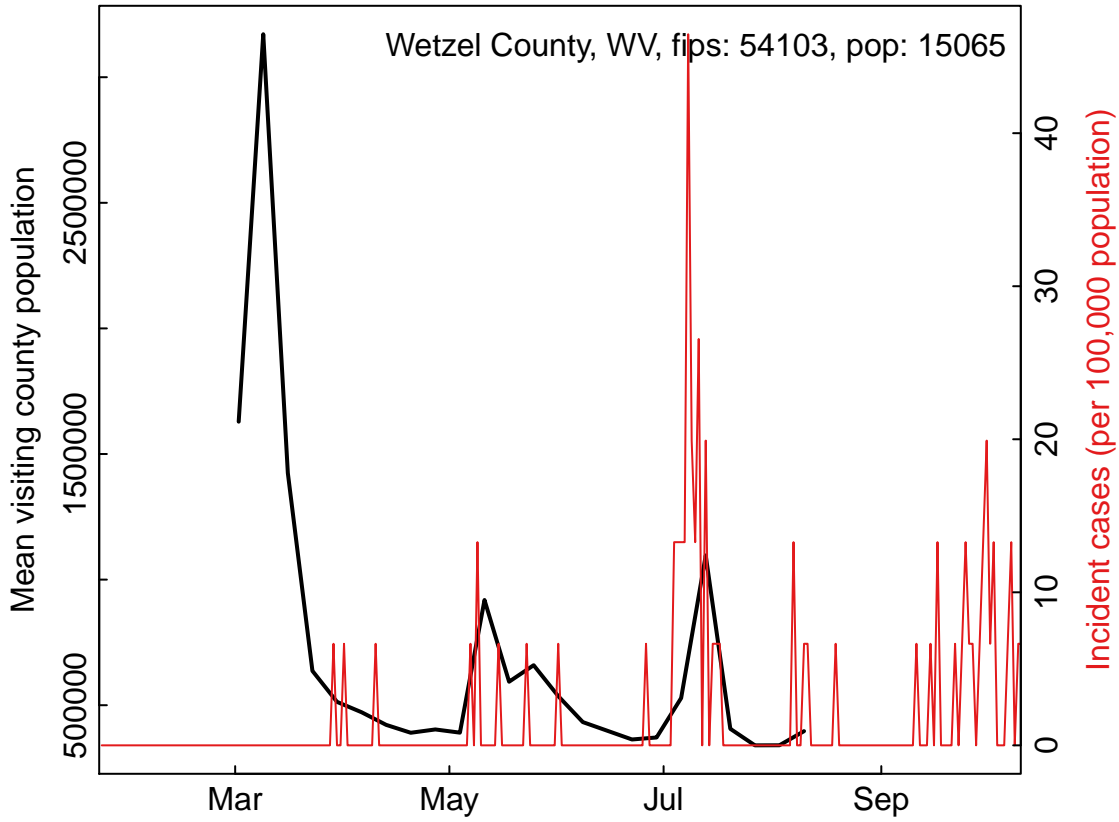

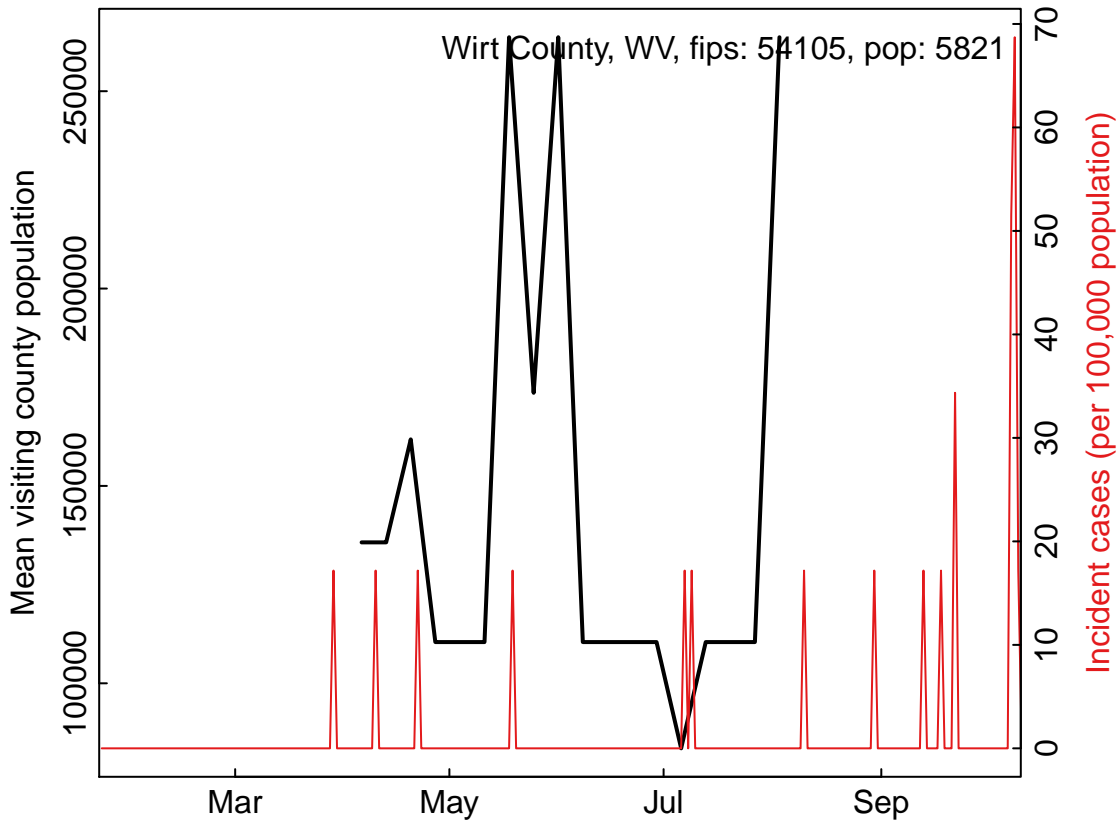

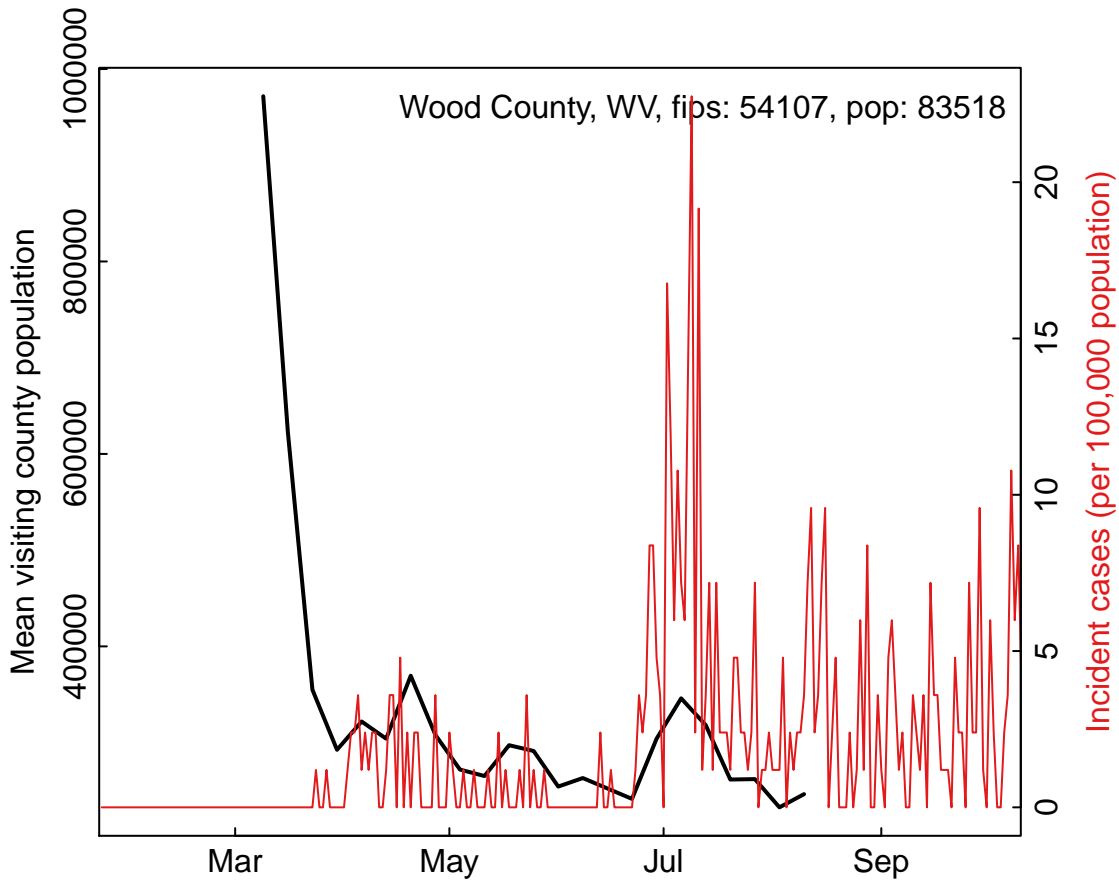

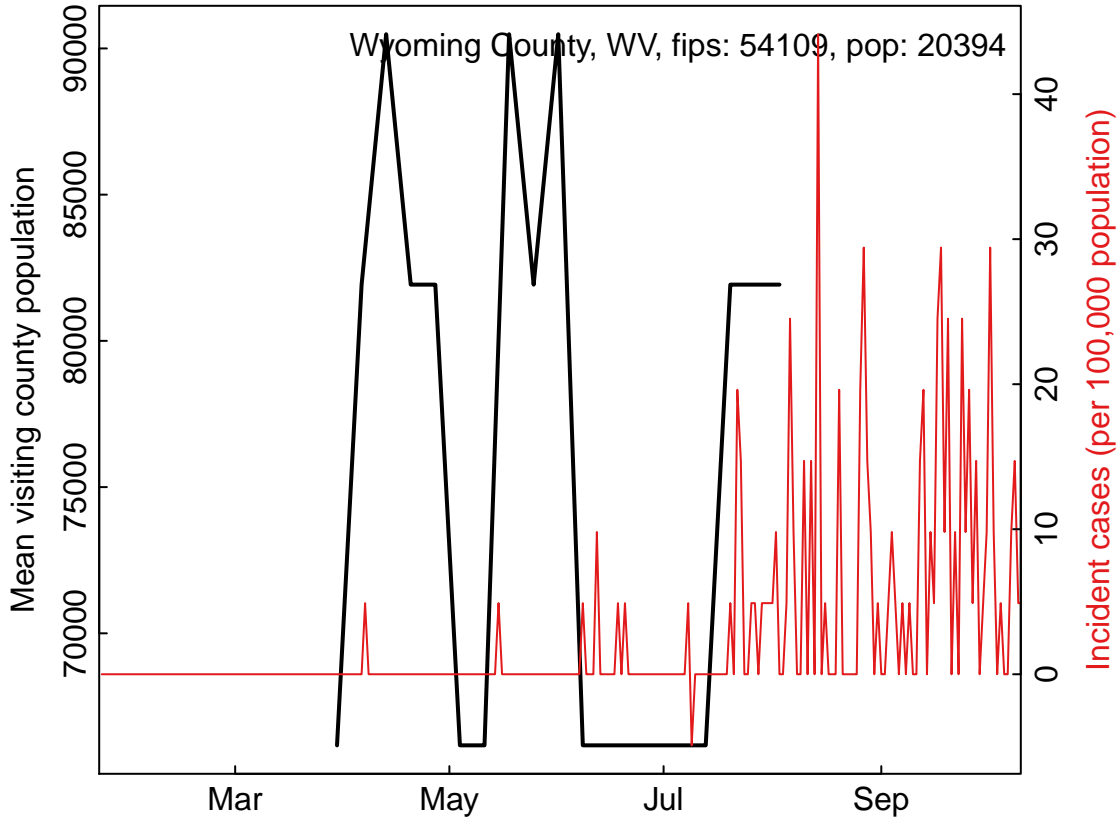

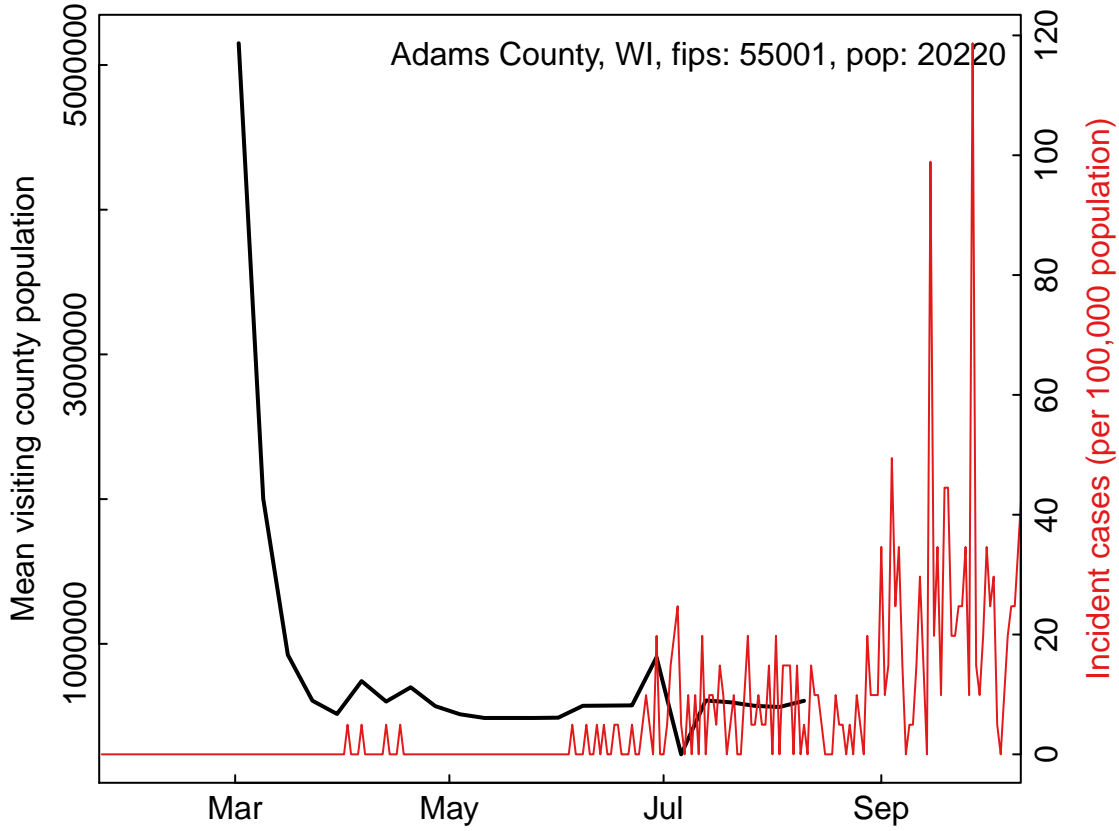

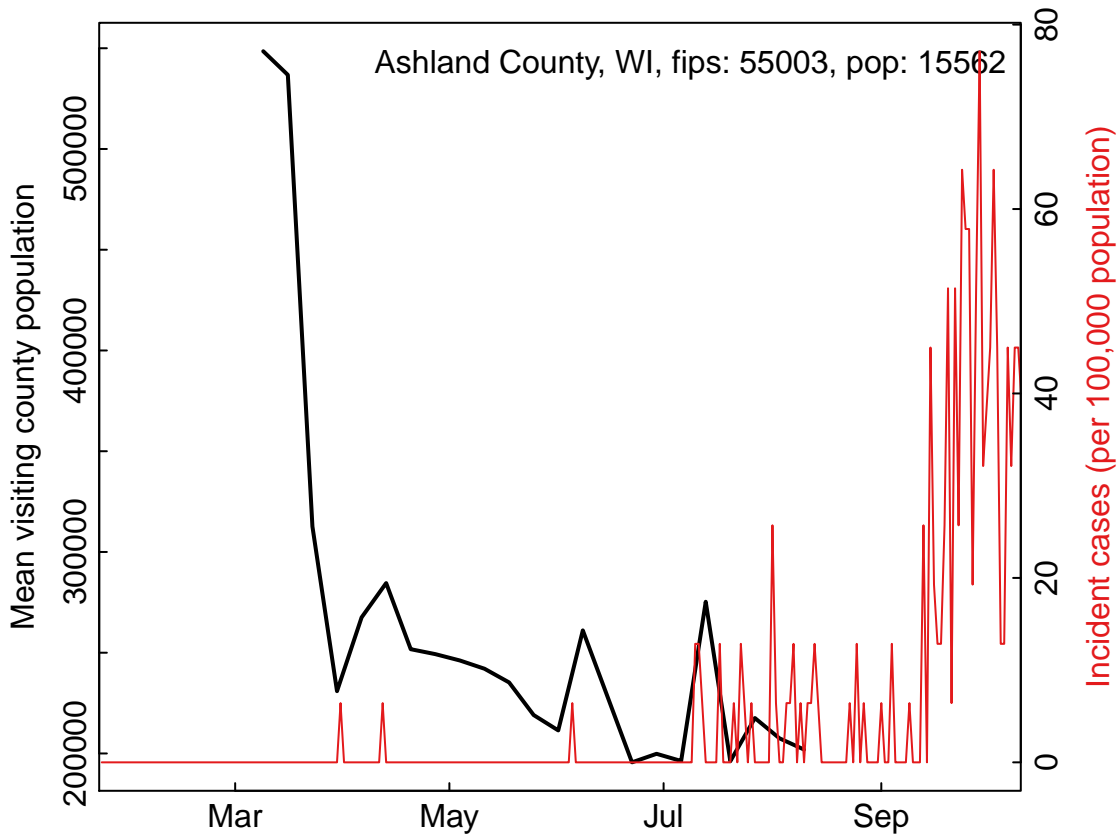



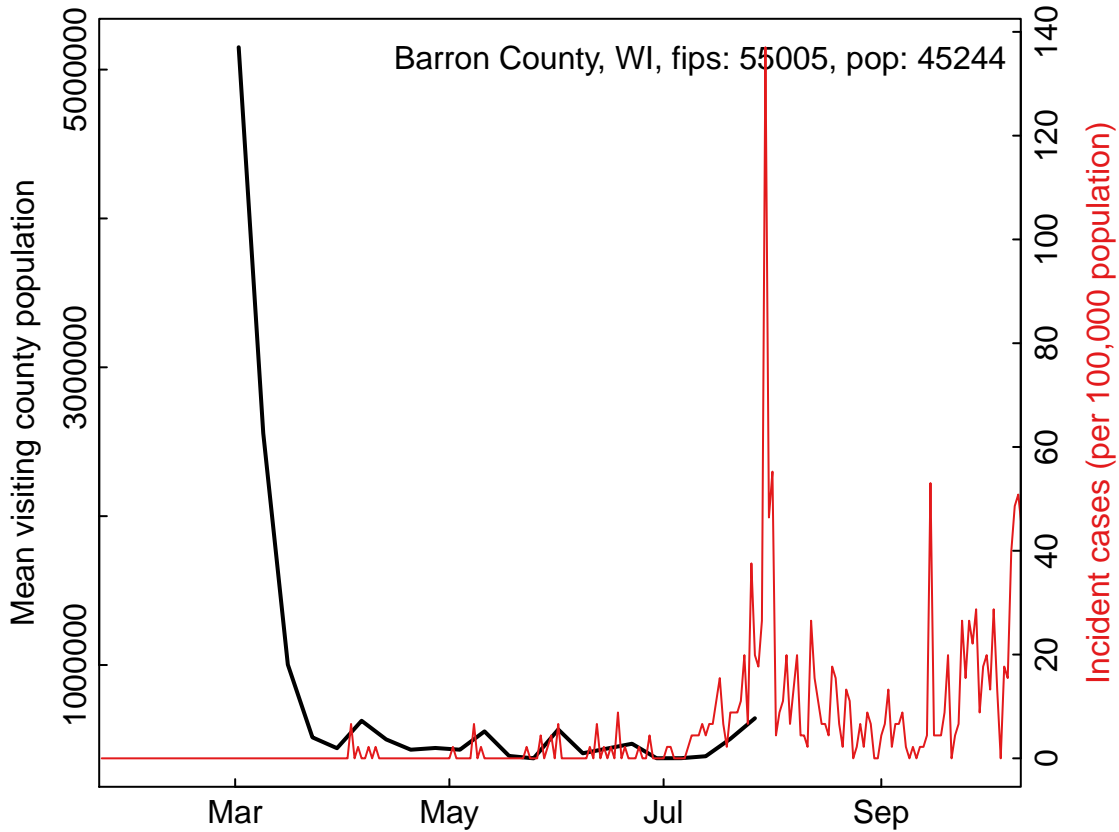

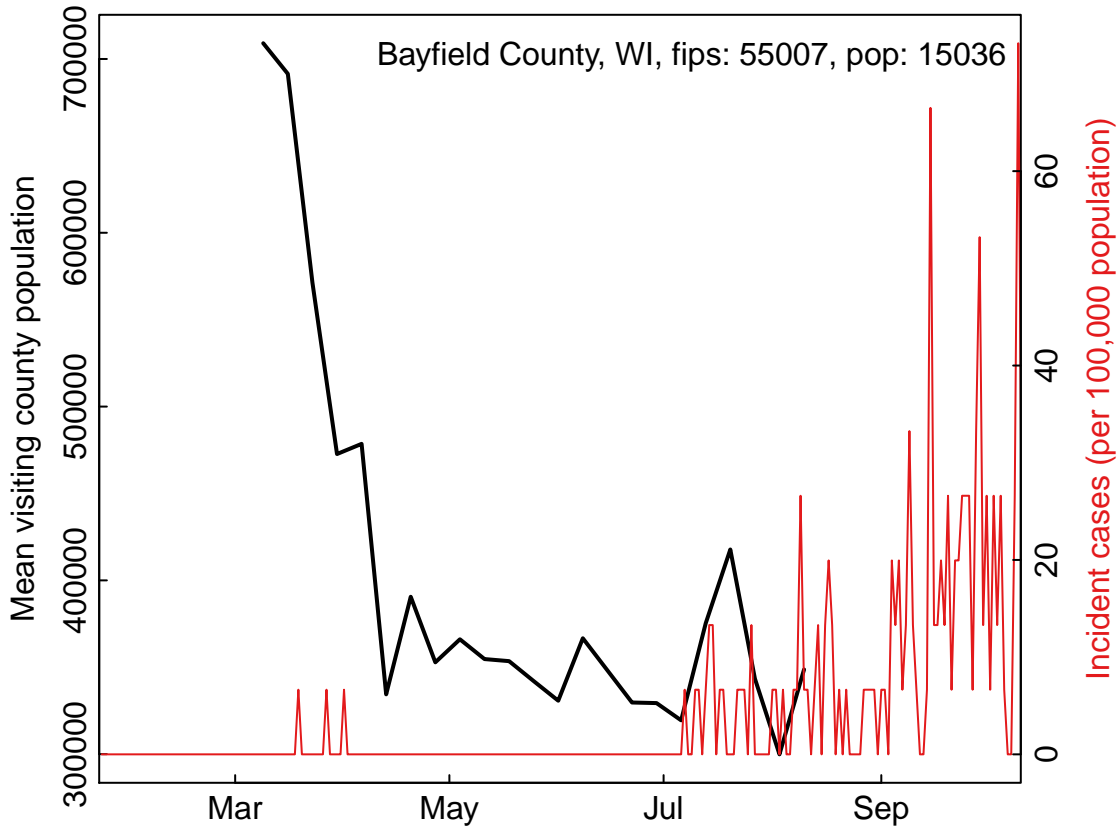

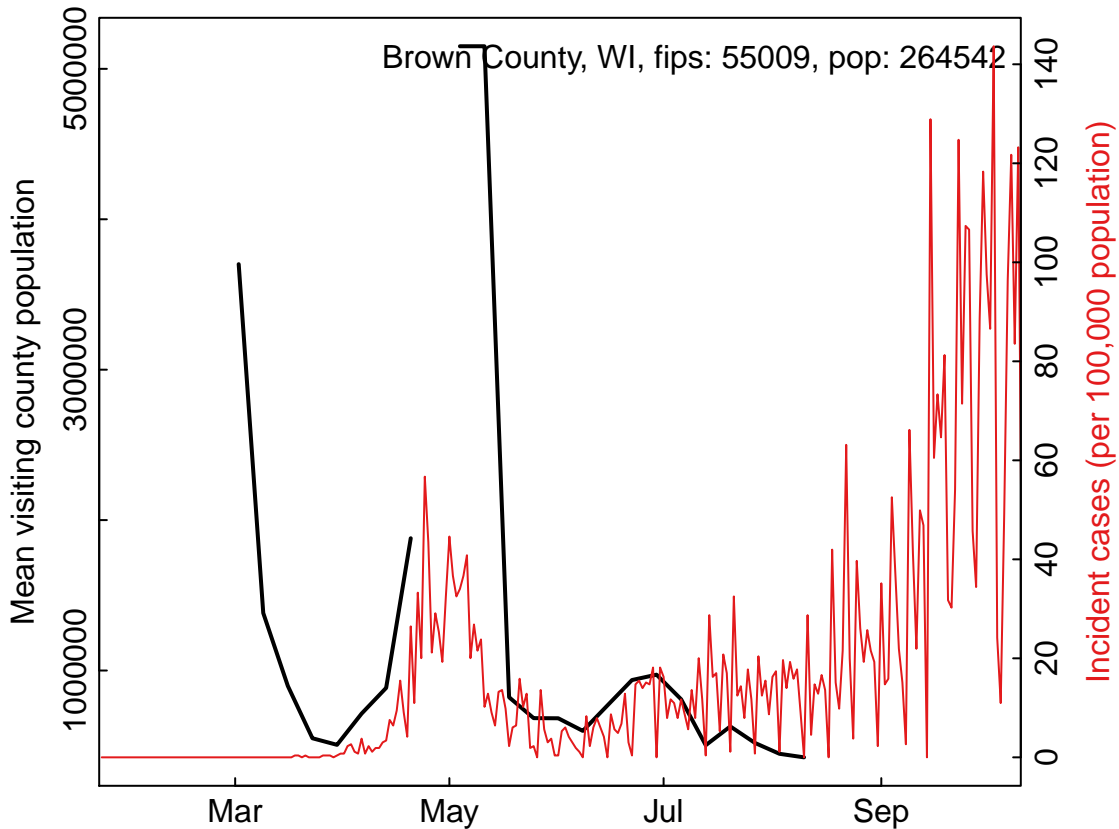

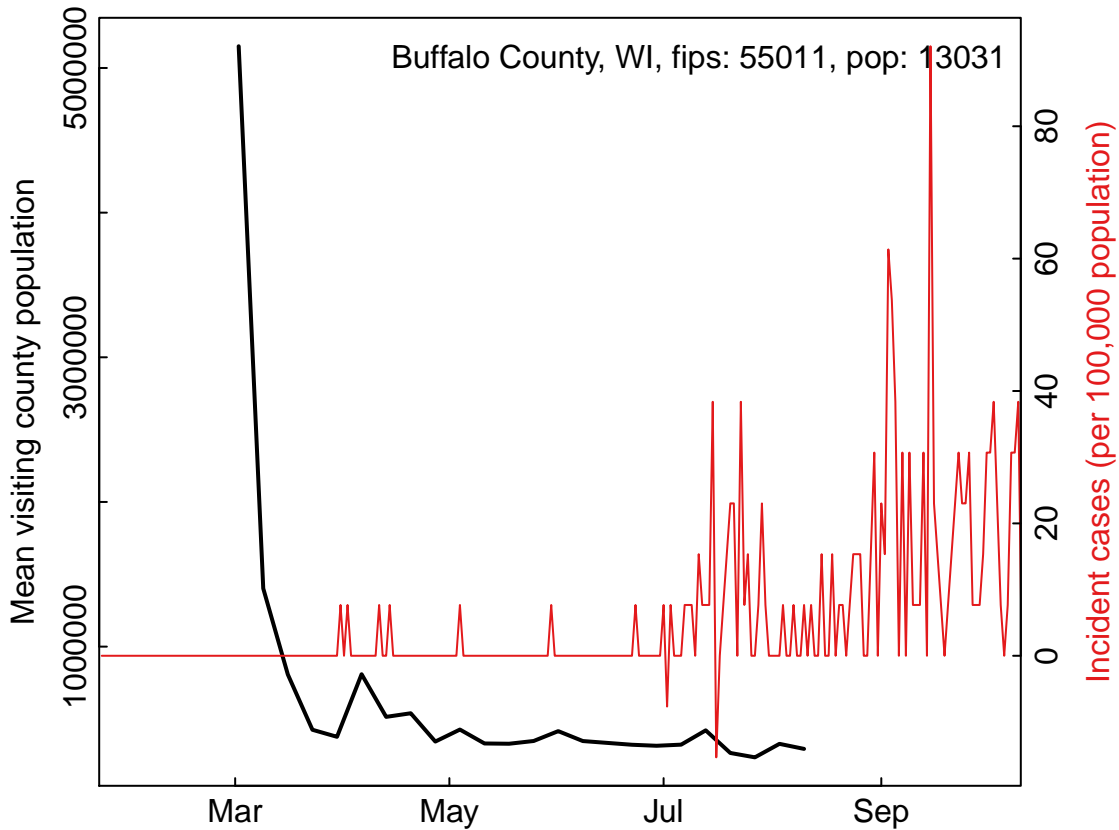

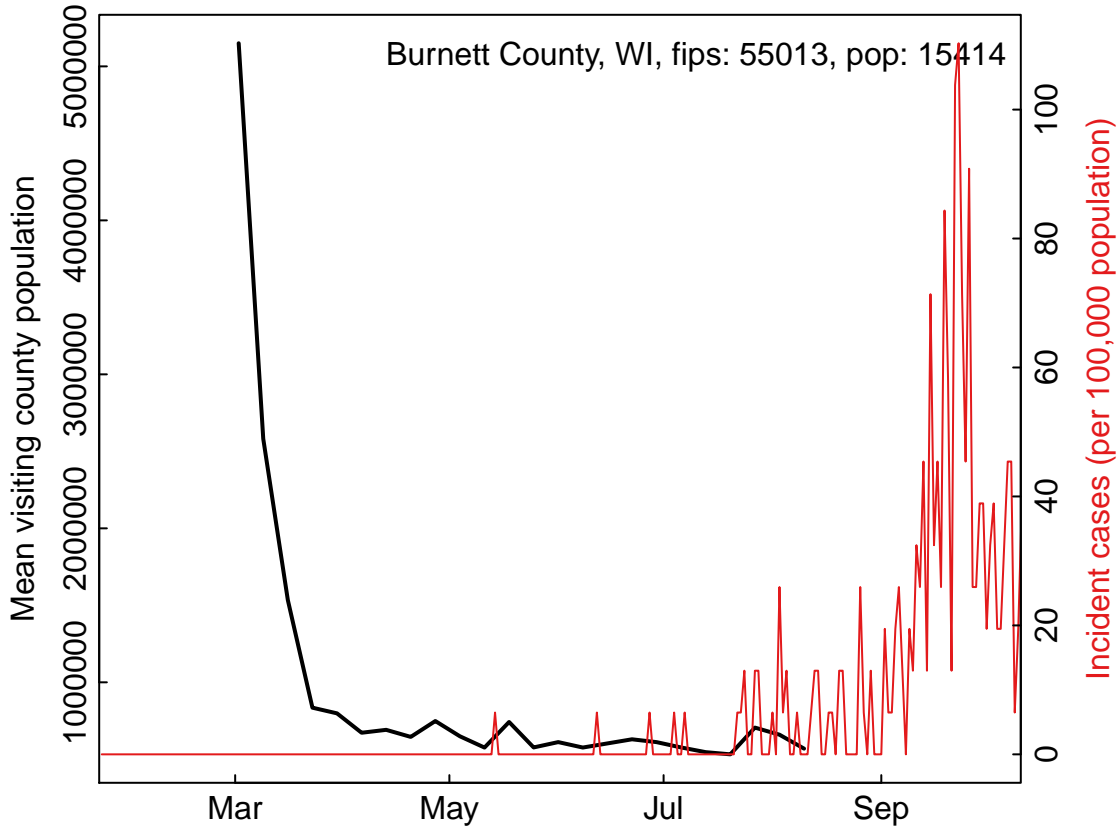

Calumet County, WI, fips: 55015, pop: 50089

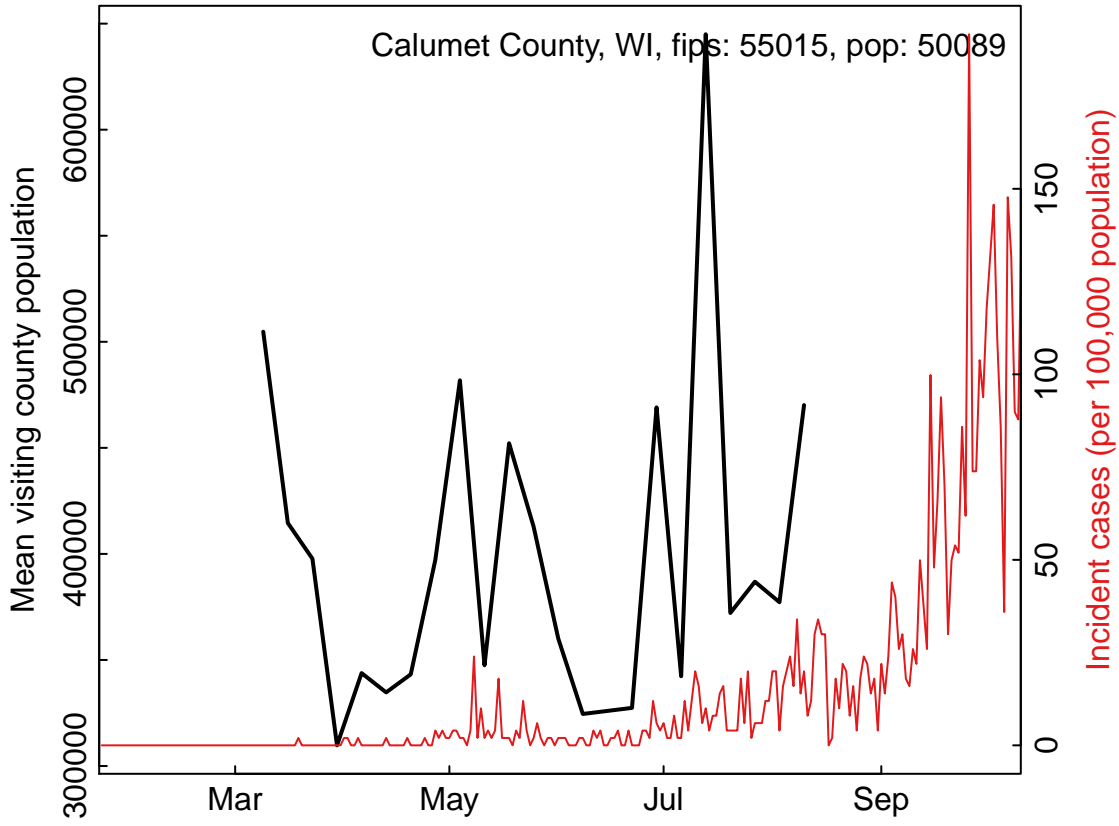

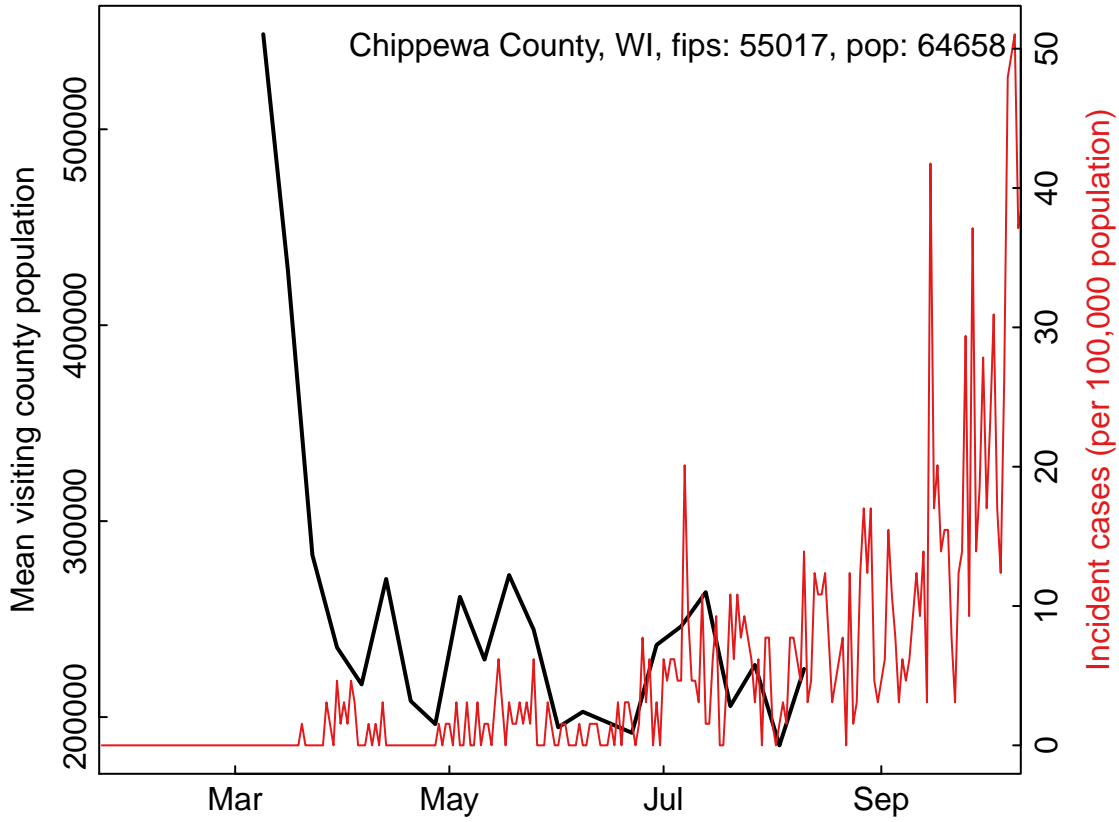

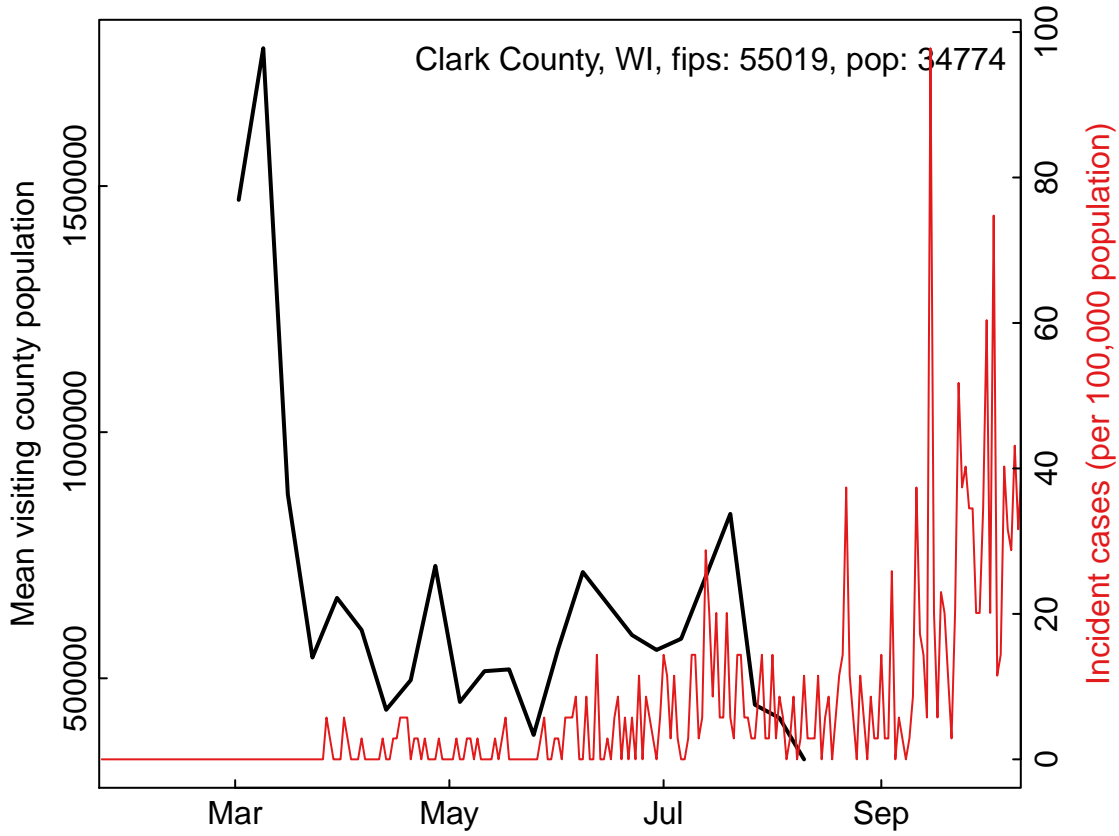



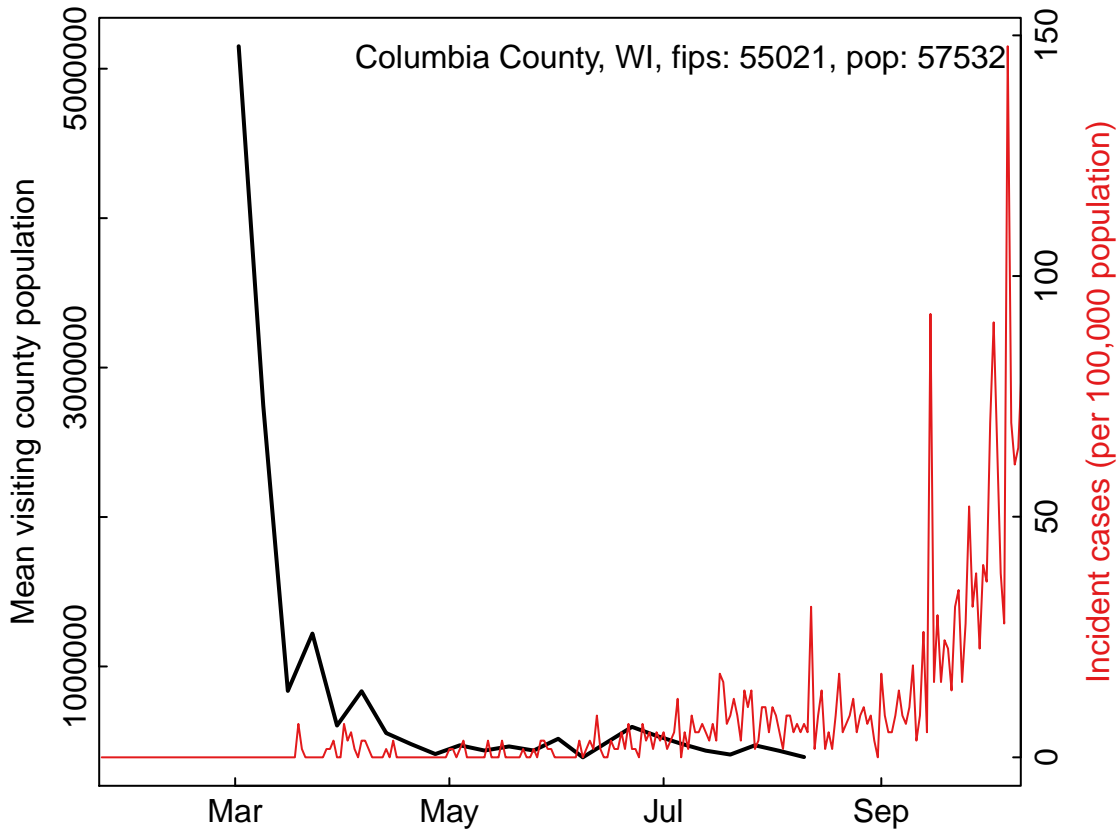

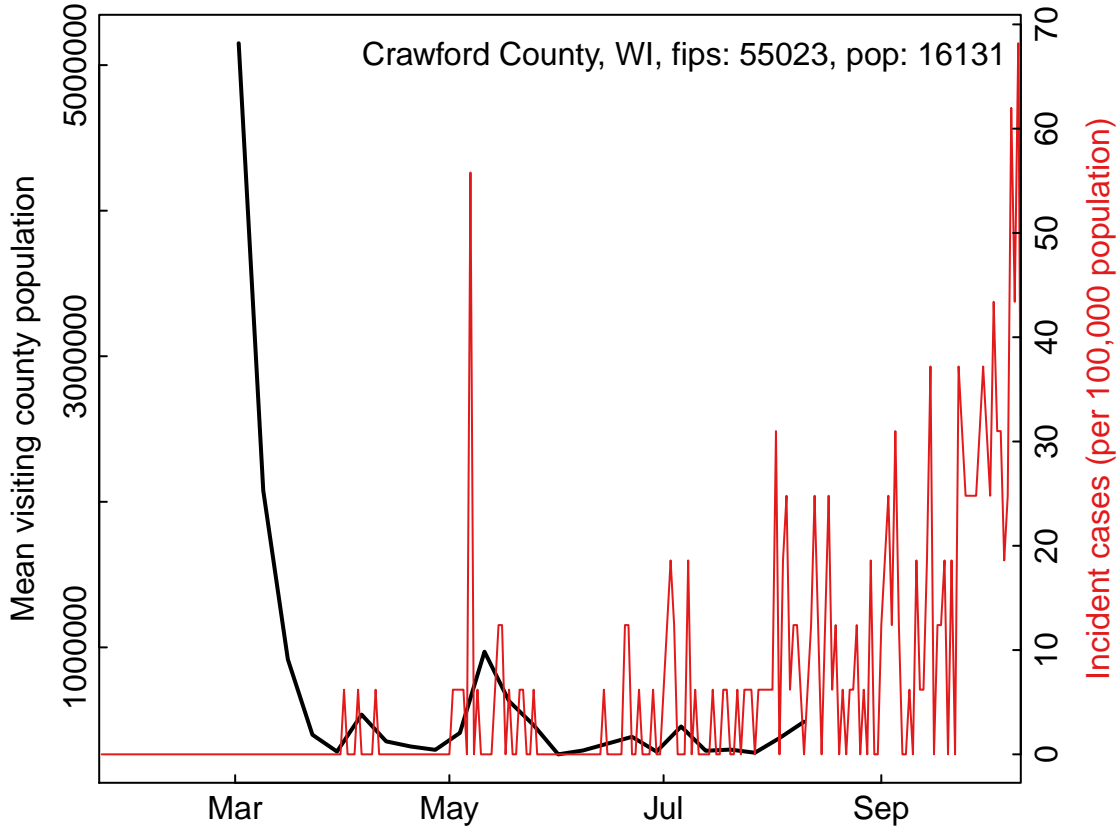

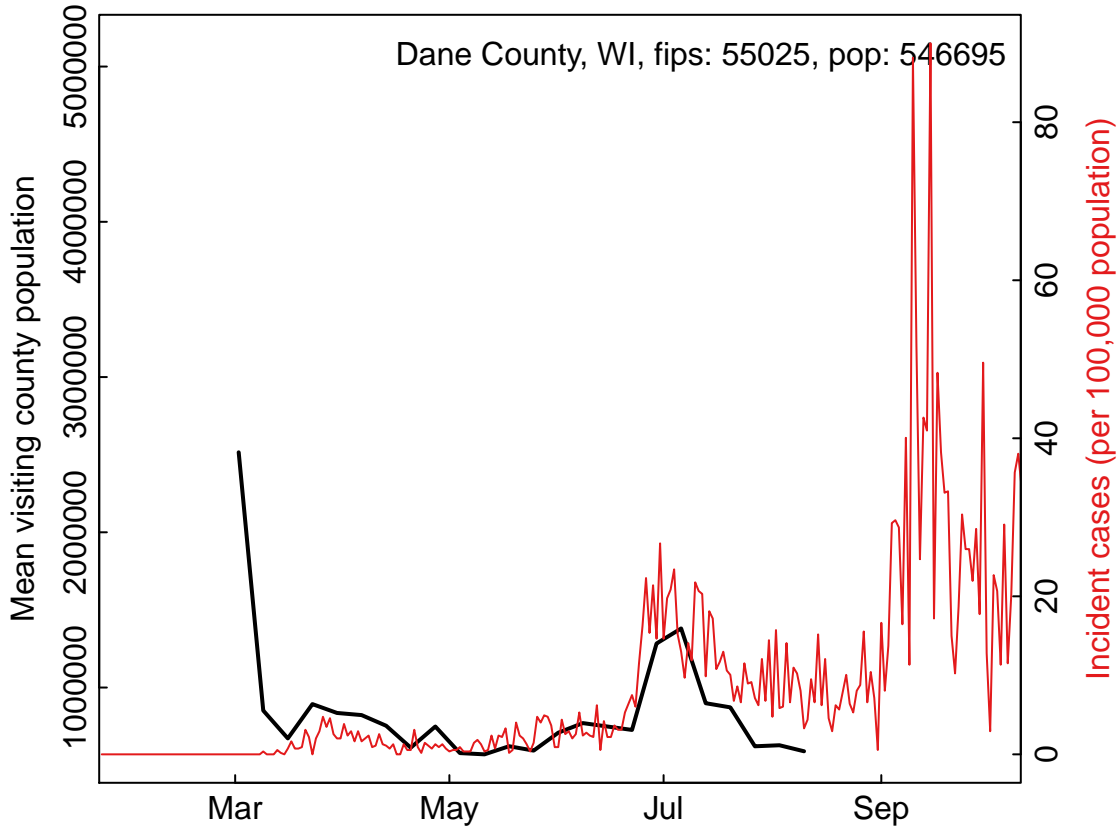

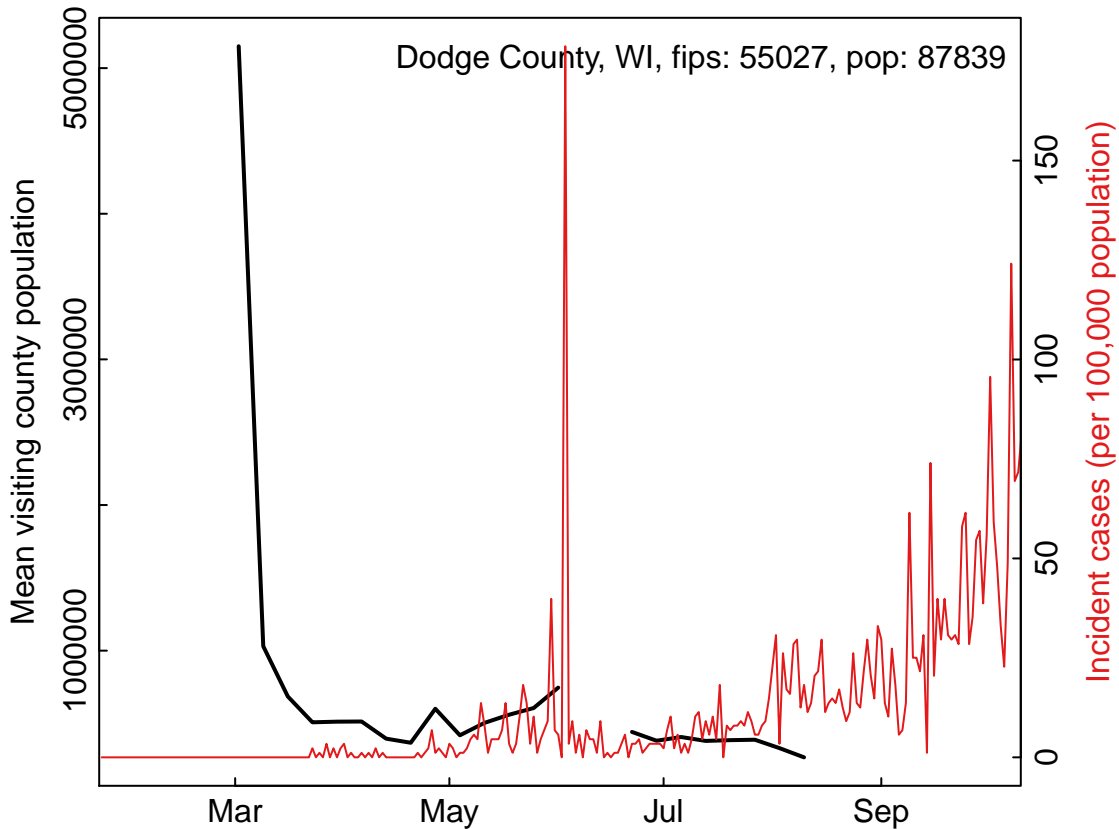

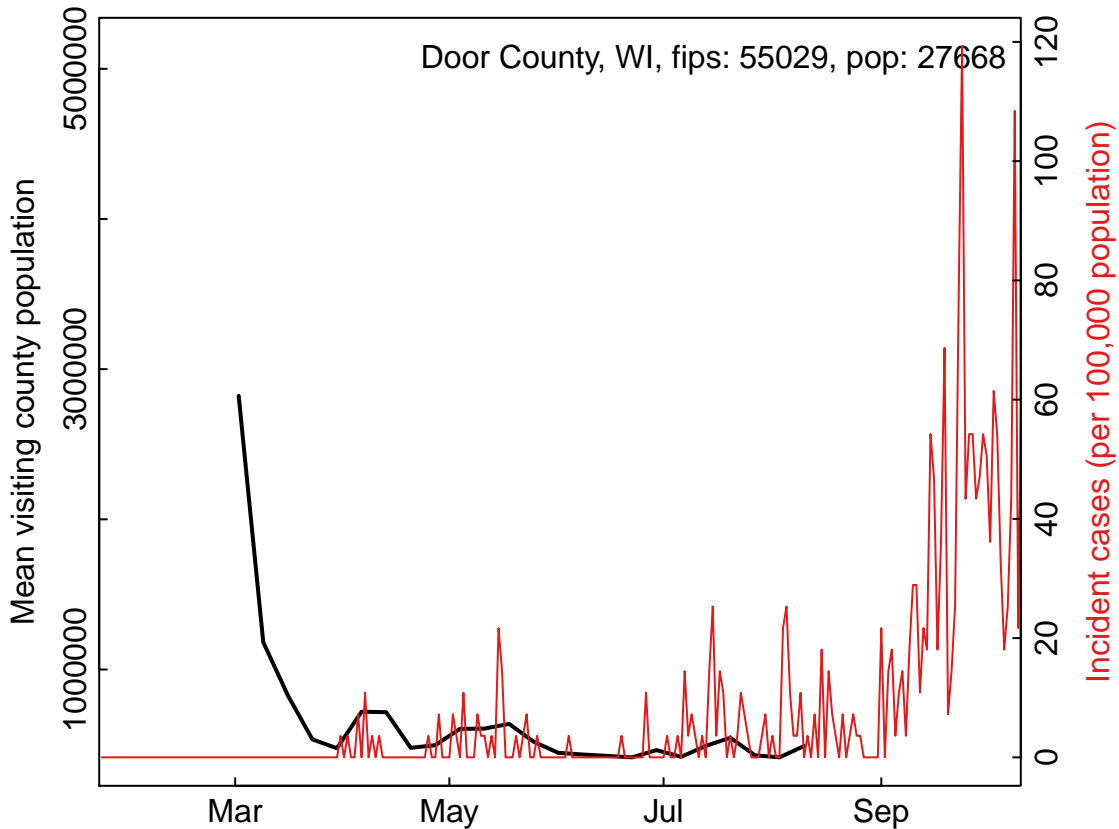

Douglas County, WI, fips: 55031, pop: 43150

Mean visiting county population

400000  
600000  
800000  
1000000

Mar

May

Jul

Sep

80  
60  
40  
20  
0

Incident cases (per 100,000 population)

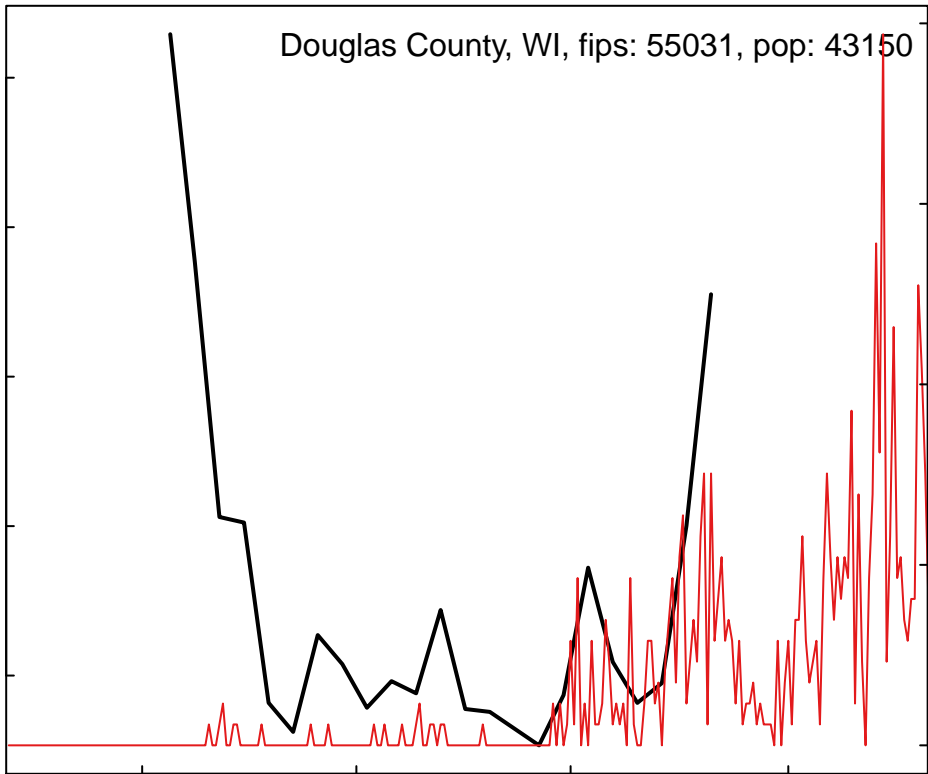

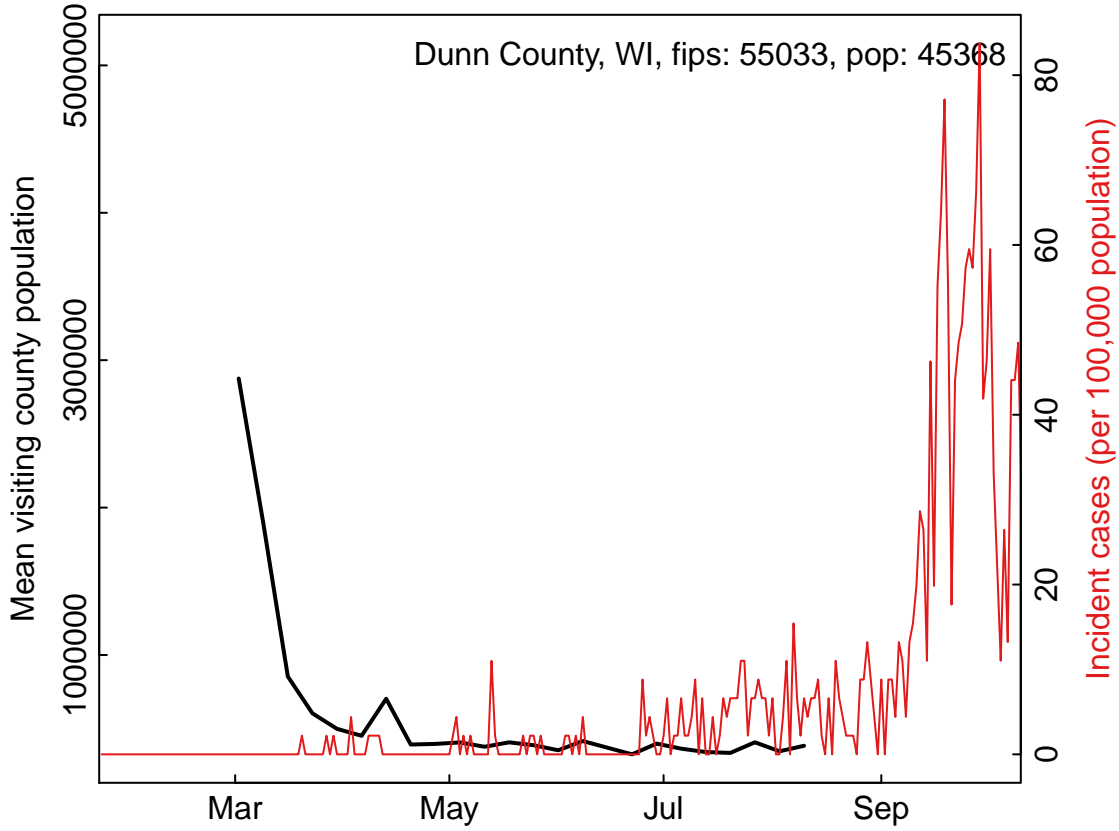

Eau Claire County, WI, fips: 55035, pop: 104646

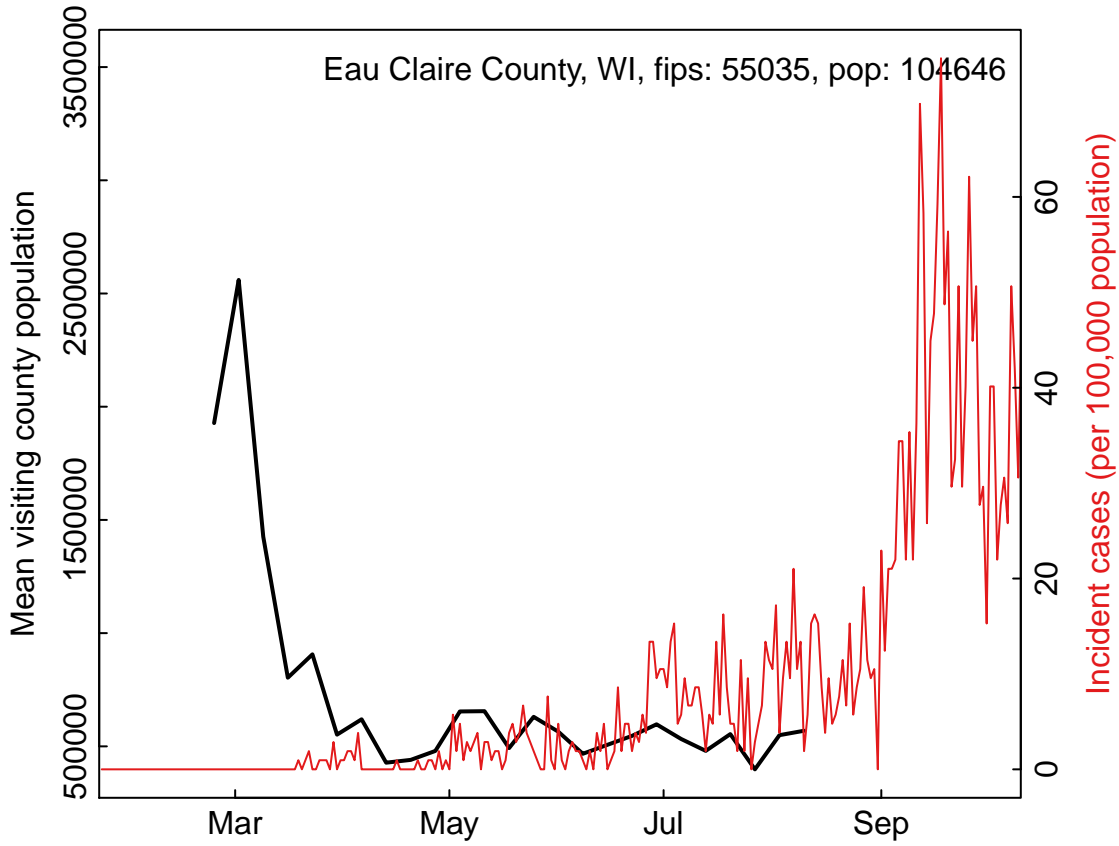



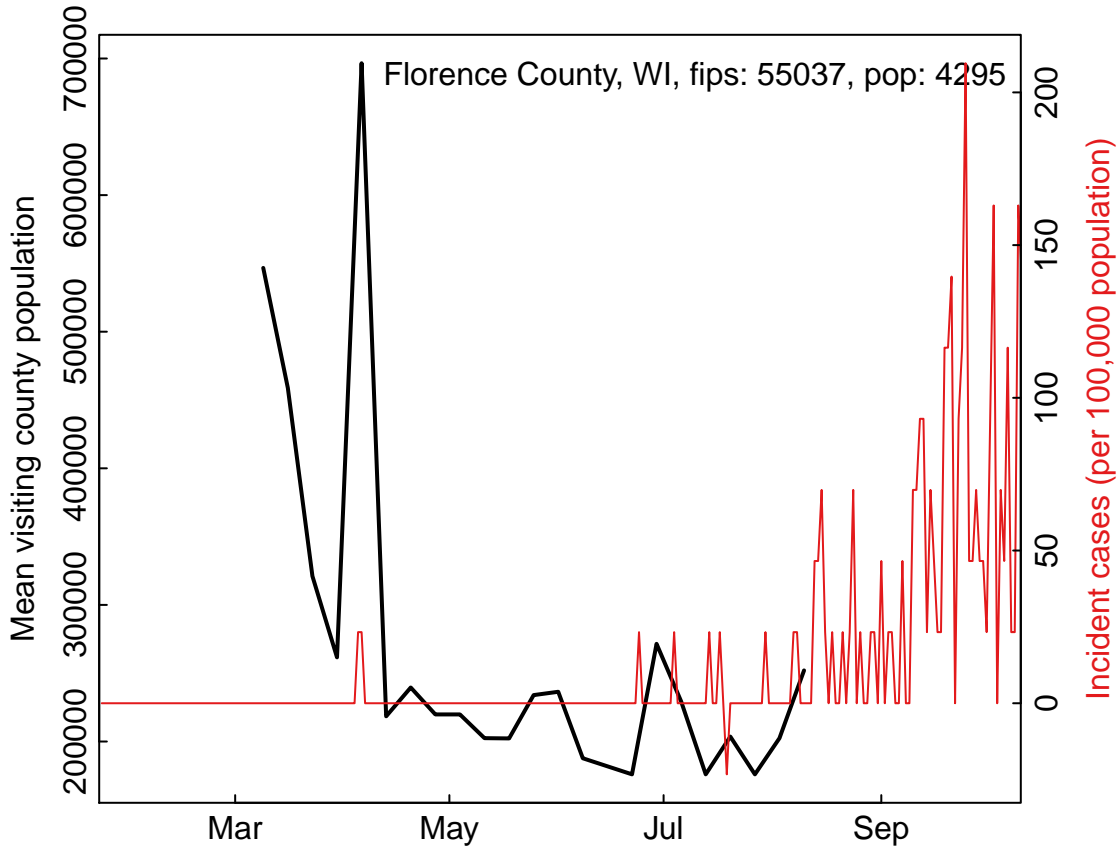

Fond du Lac County, WI, fips: 55039, pop: 103403

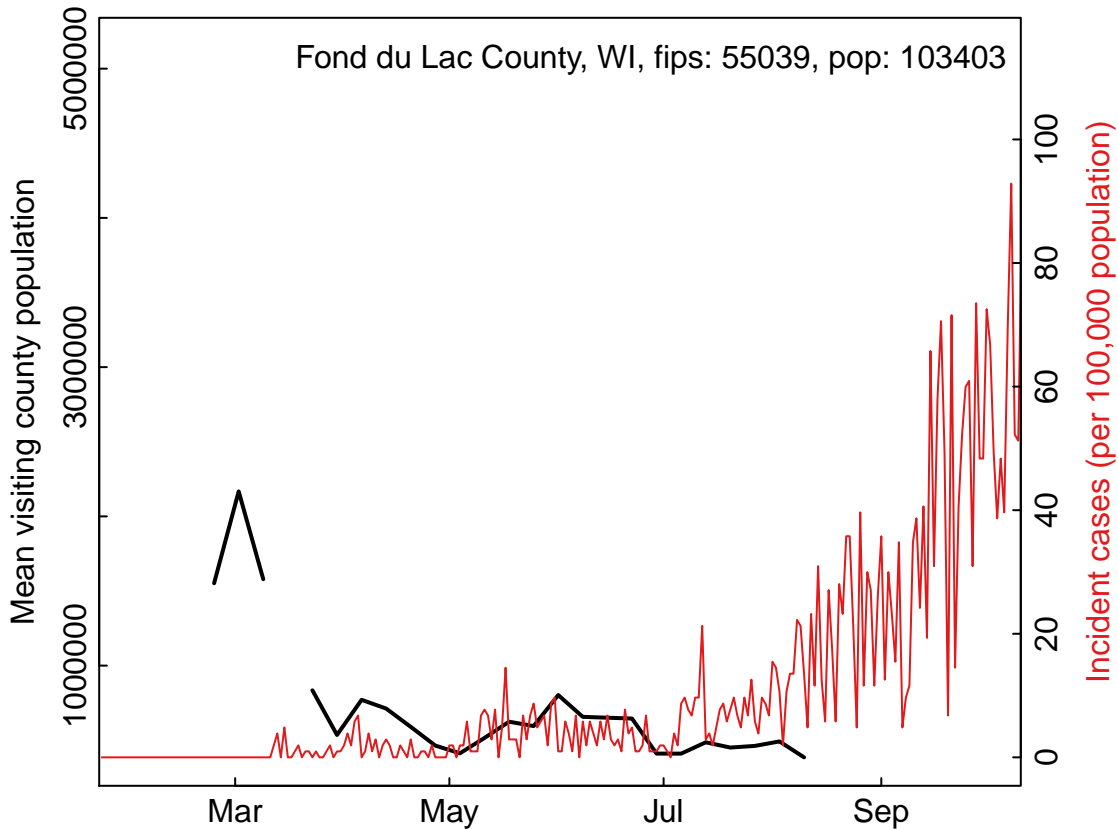

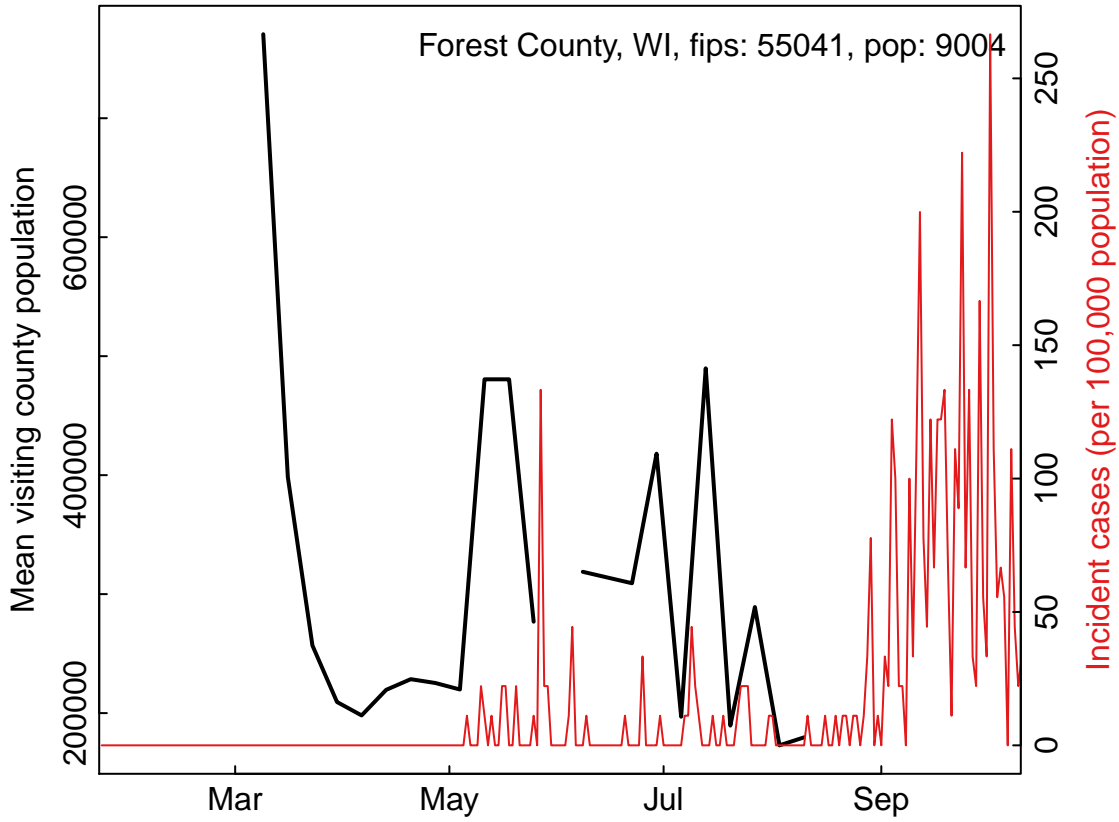

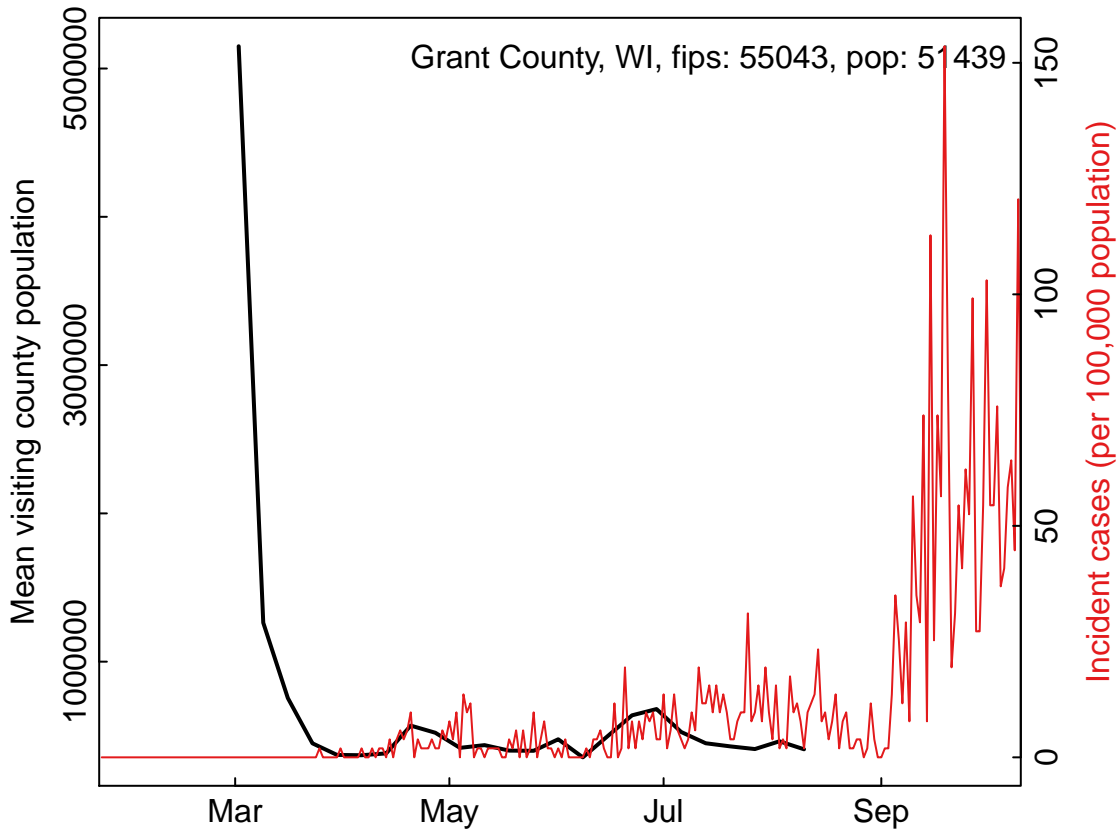

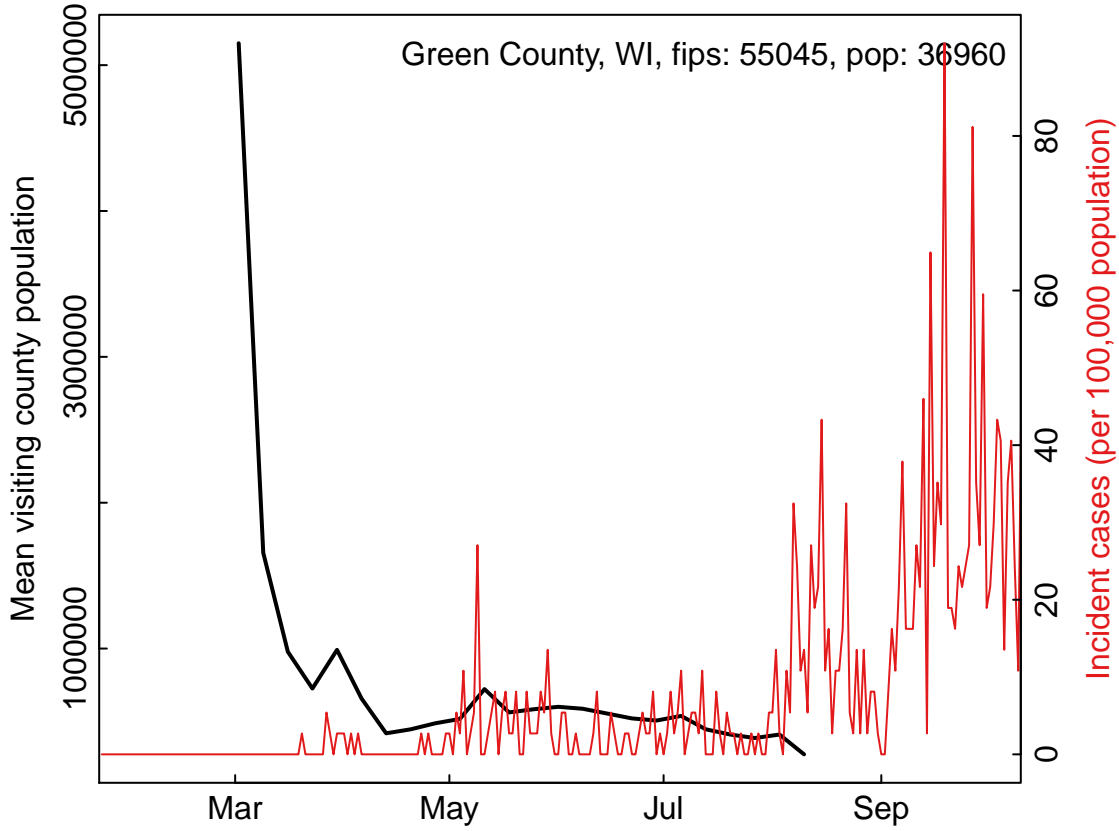

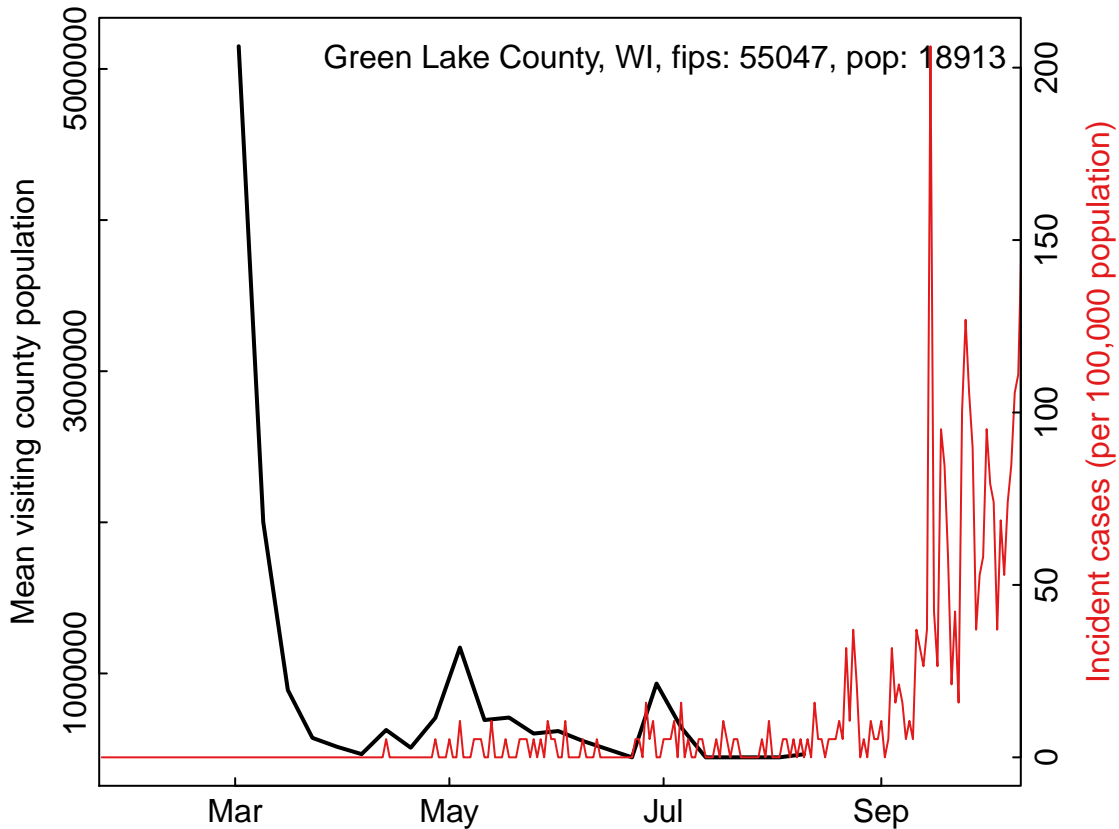

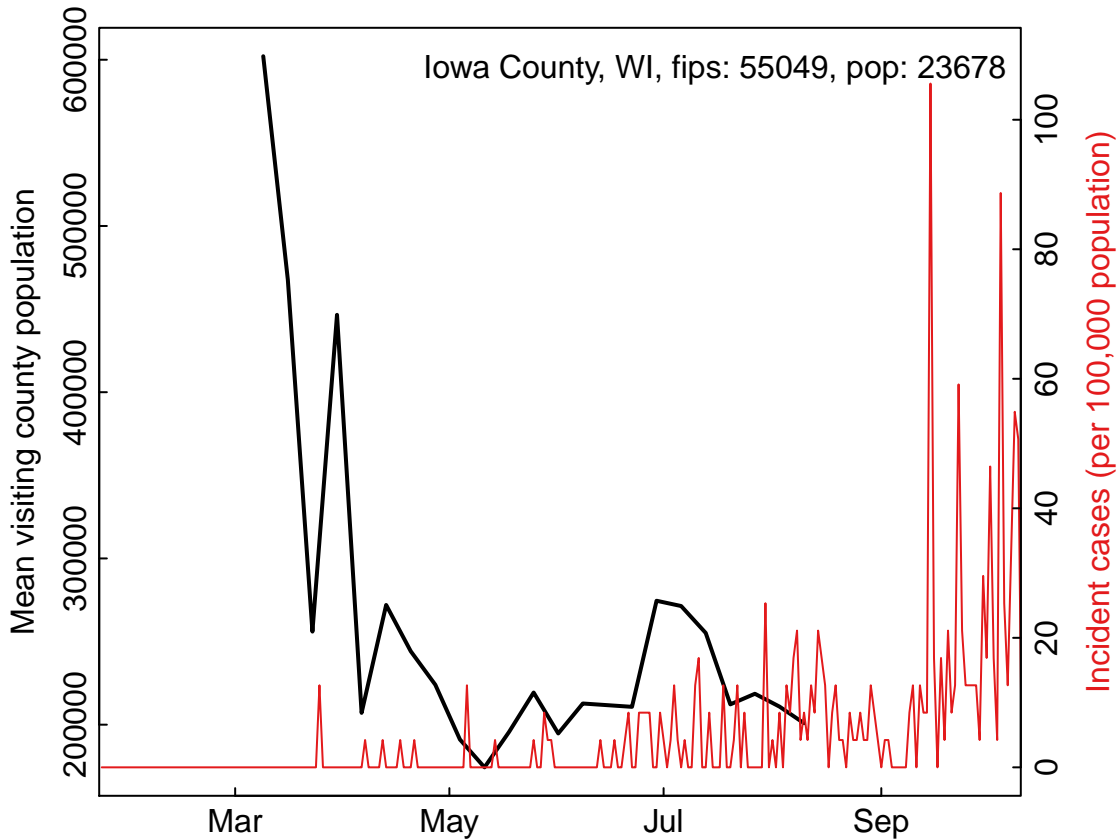

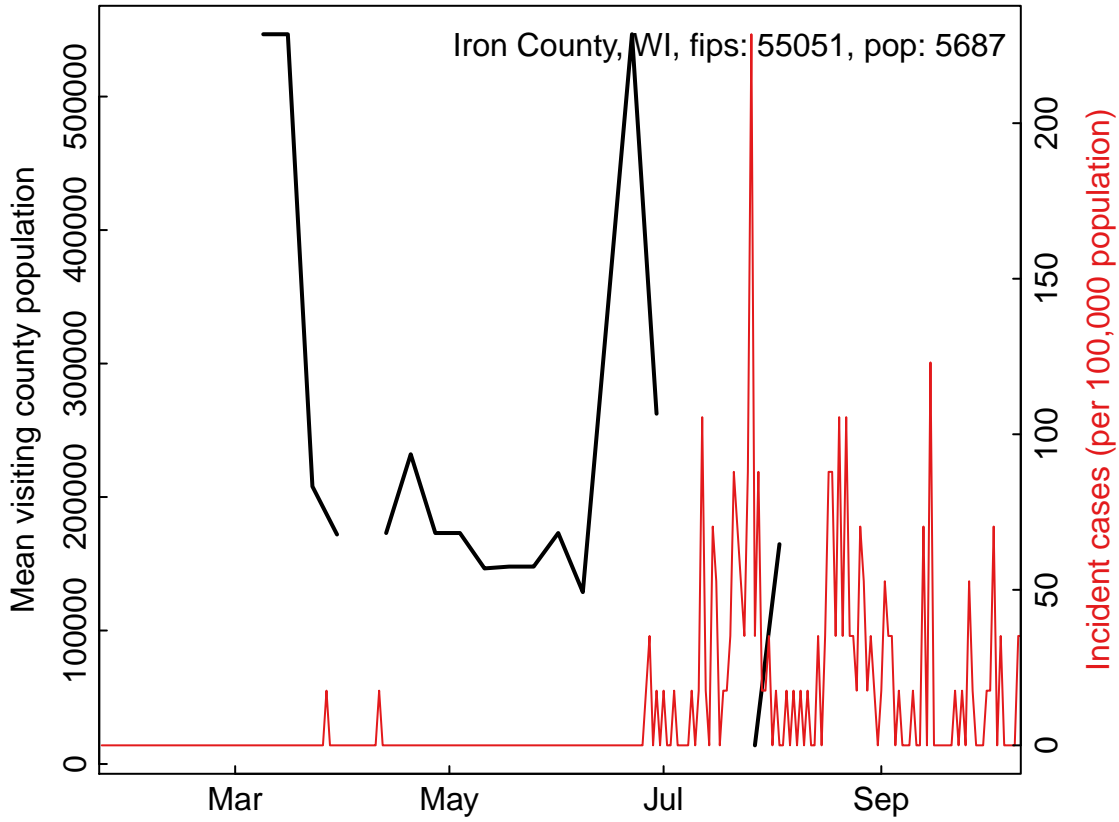



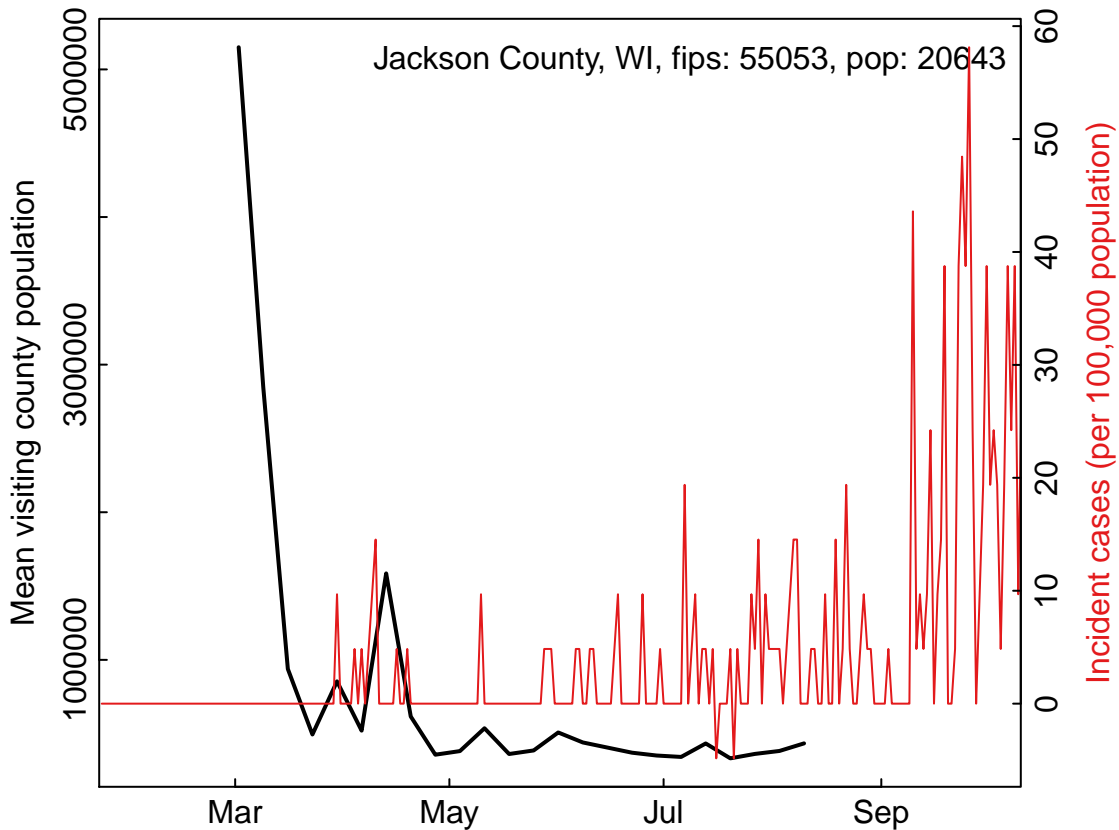

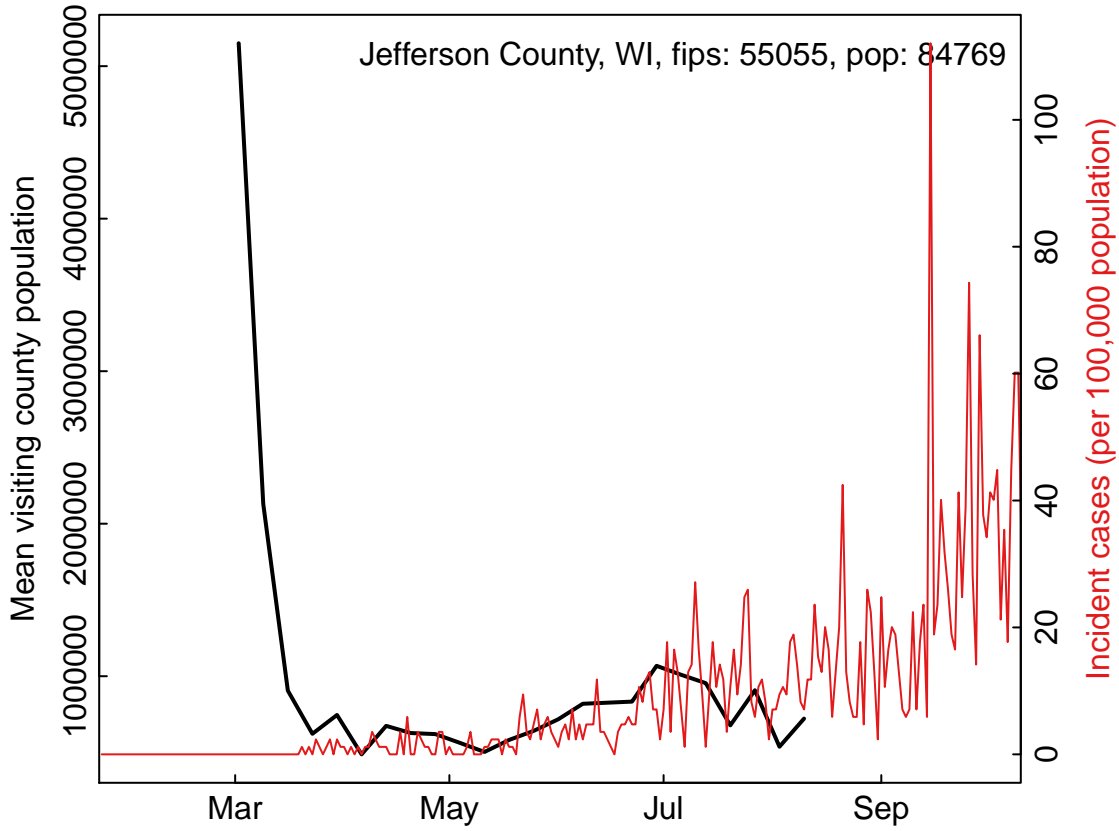

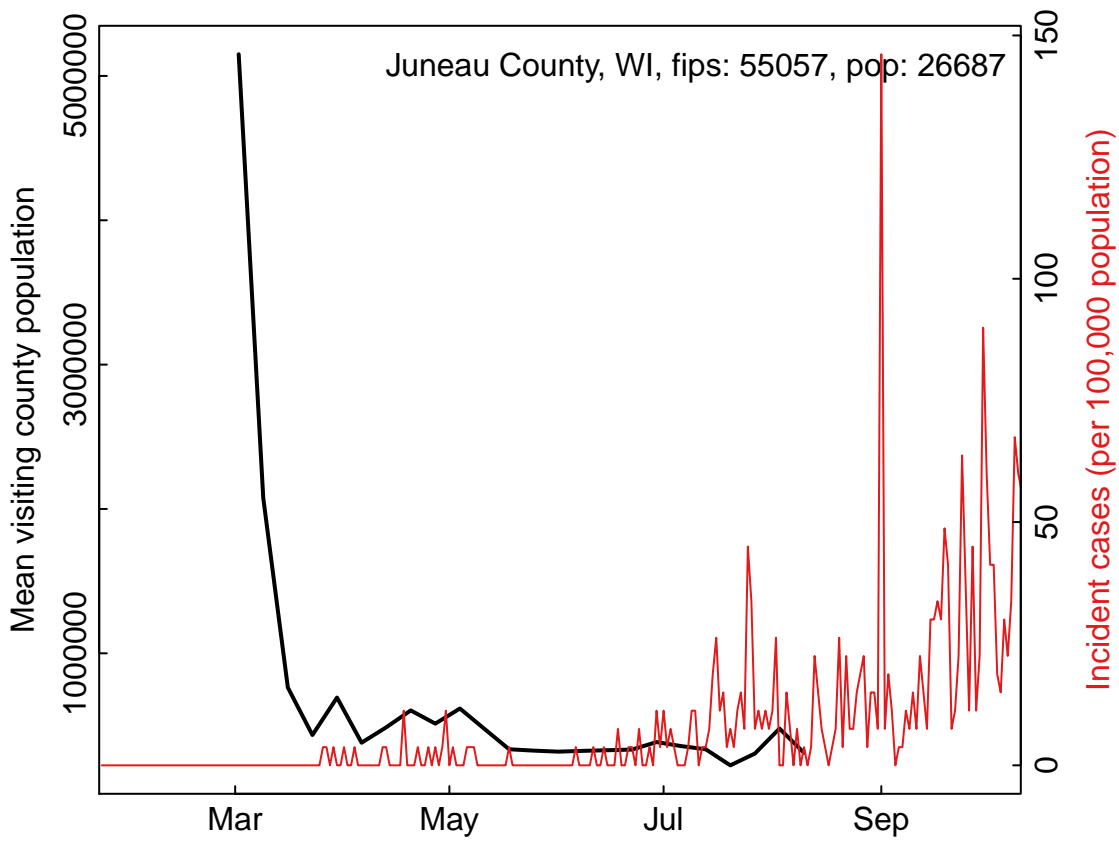

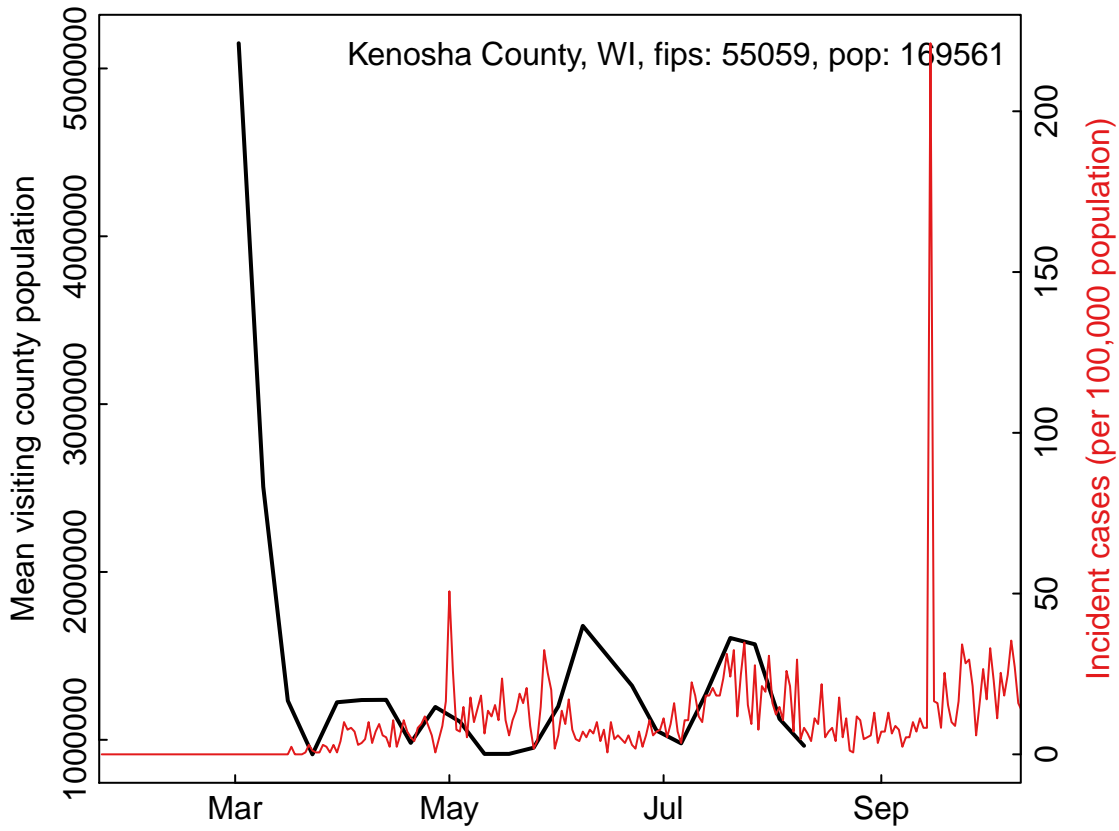

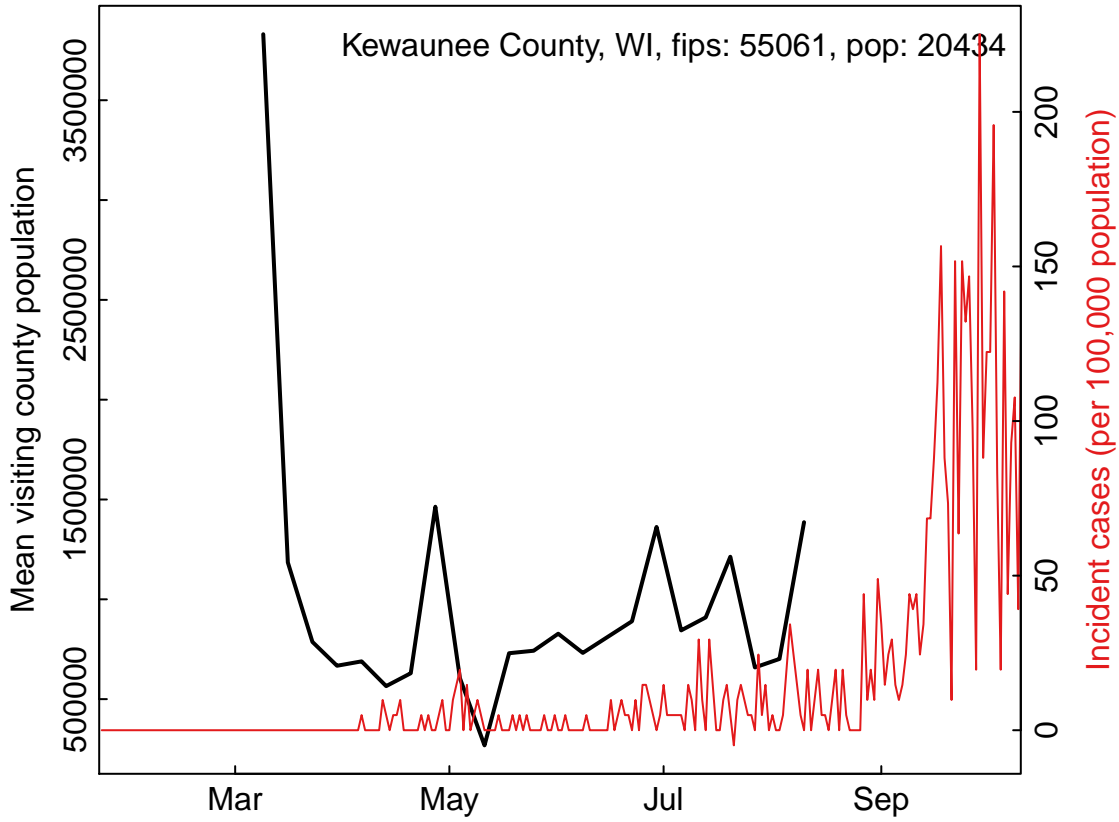

La Crosse County, WI, fips: 55063, pop: 118016

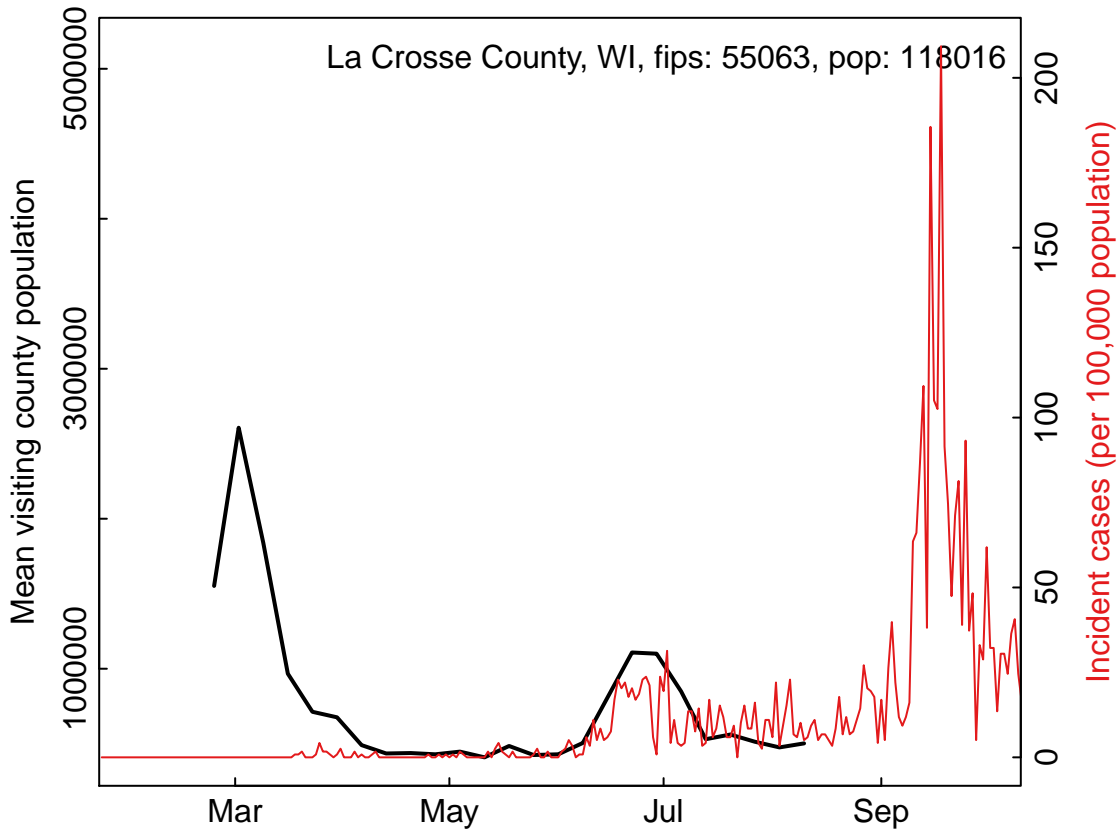

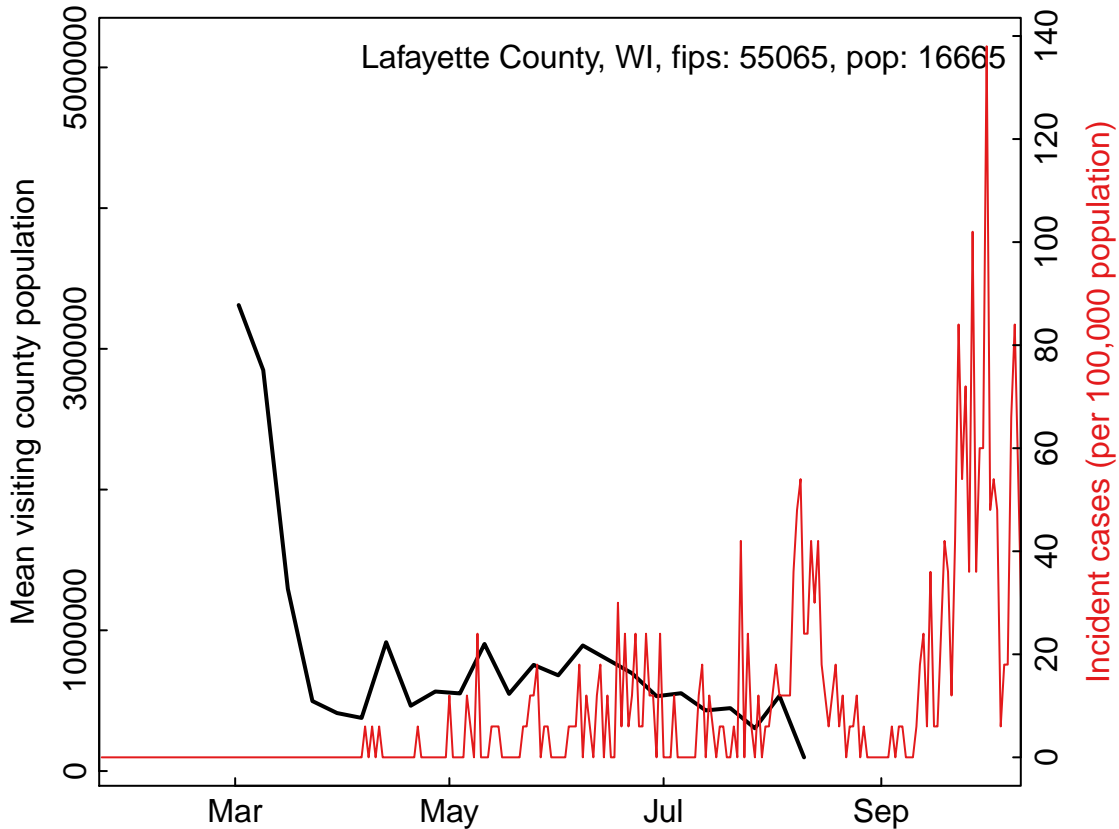

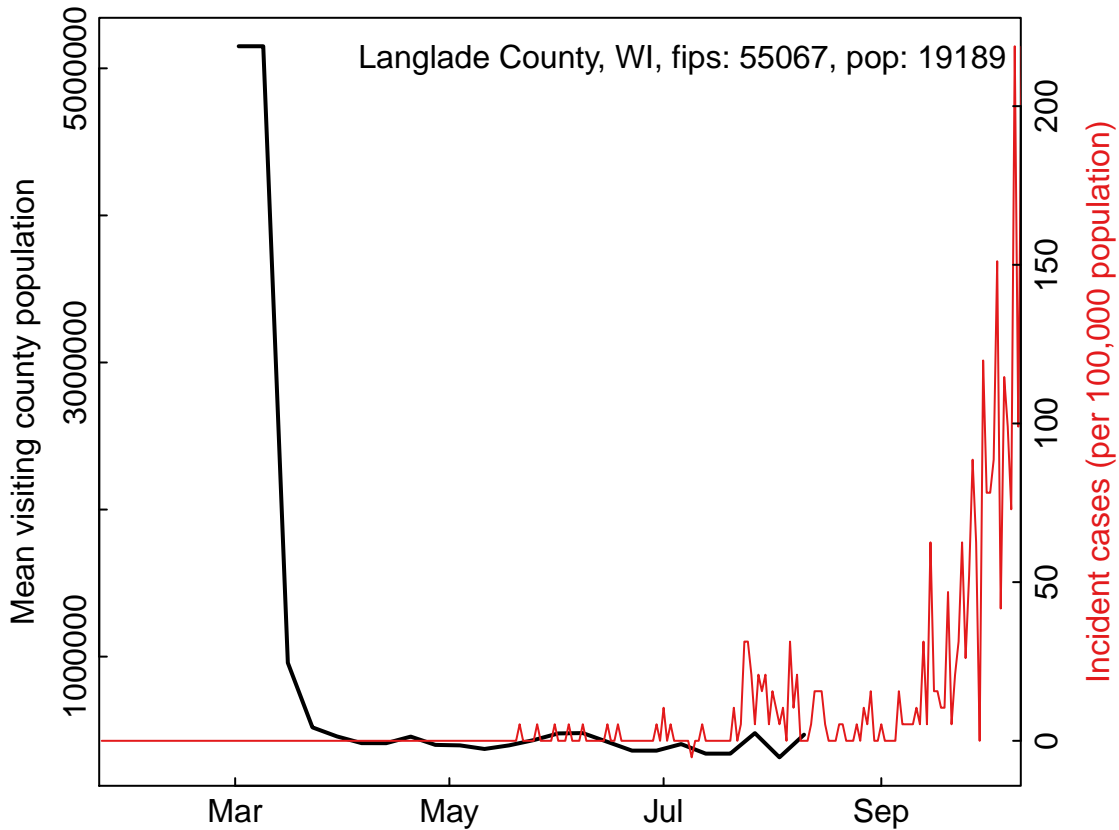



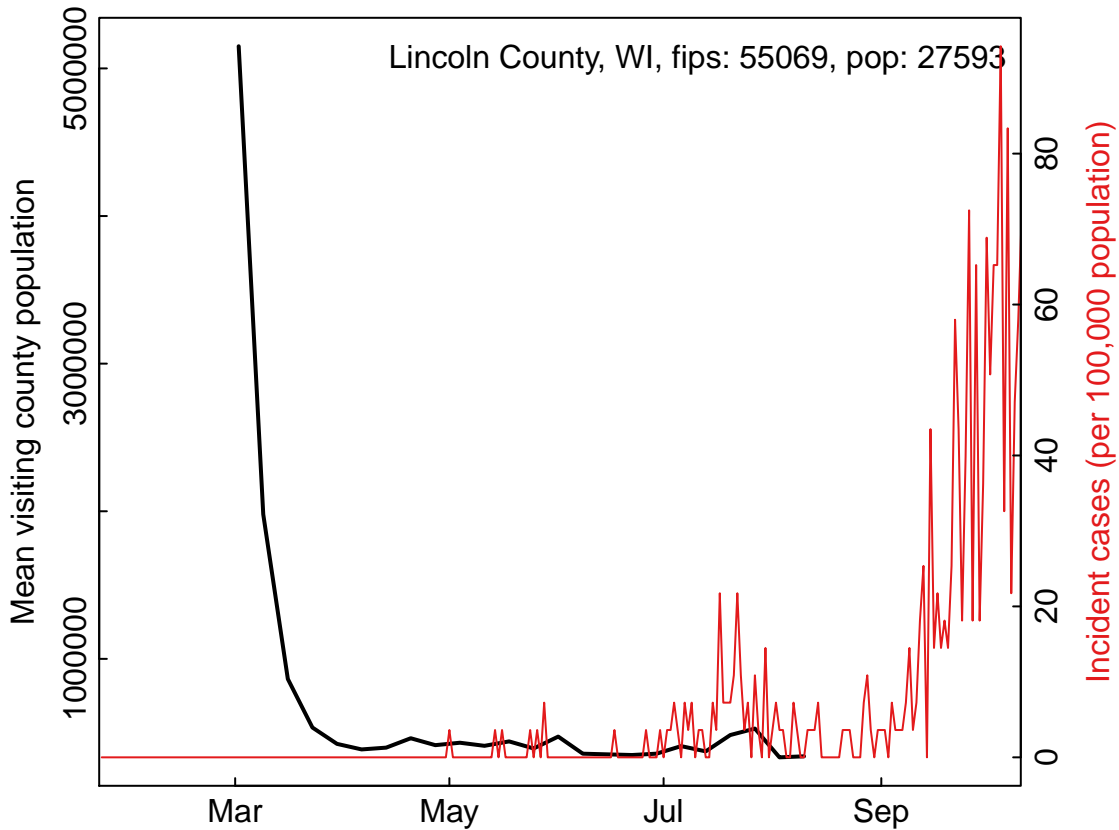

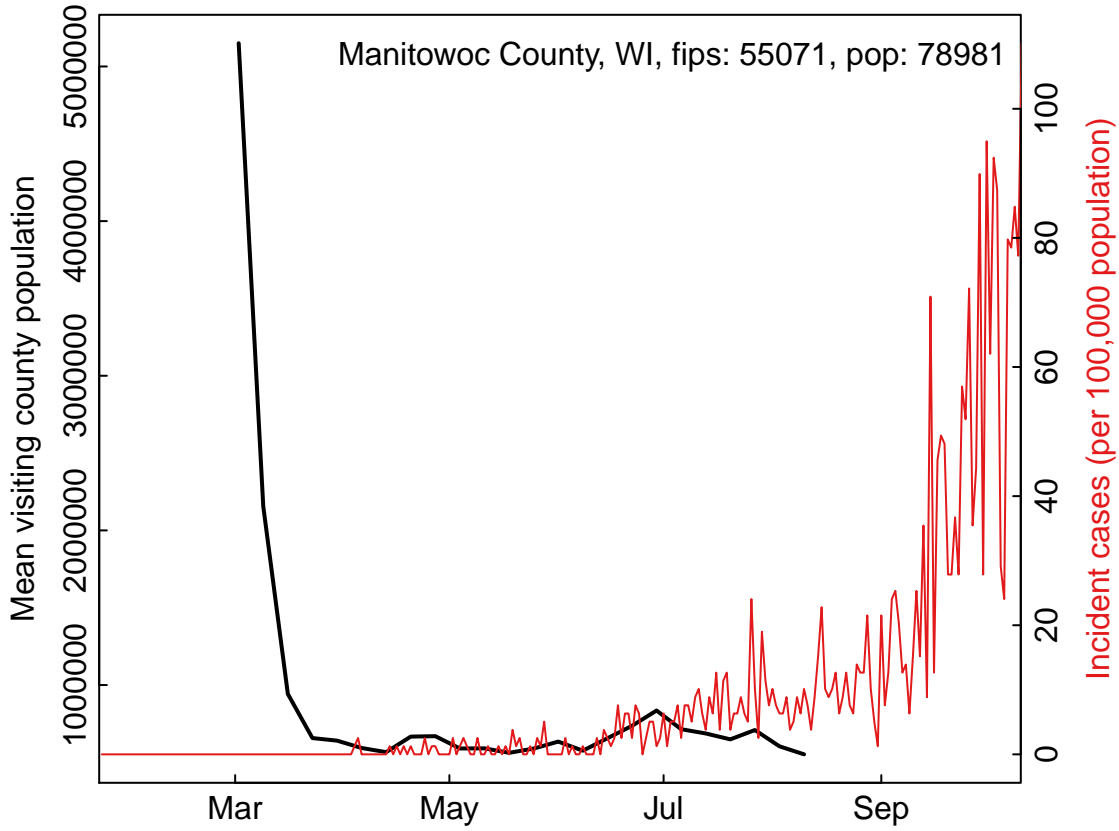

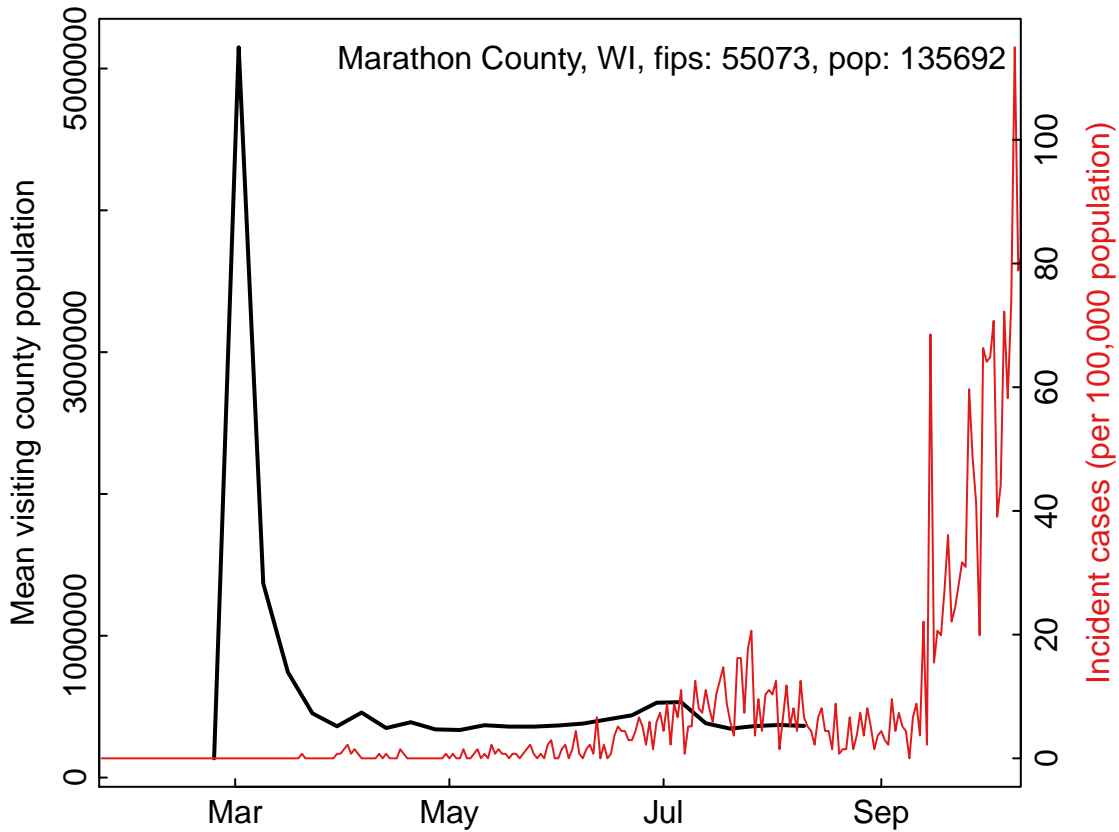

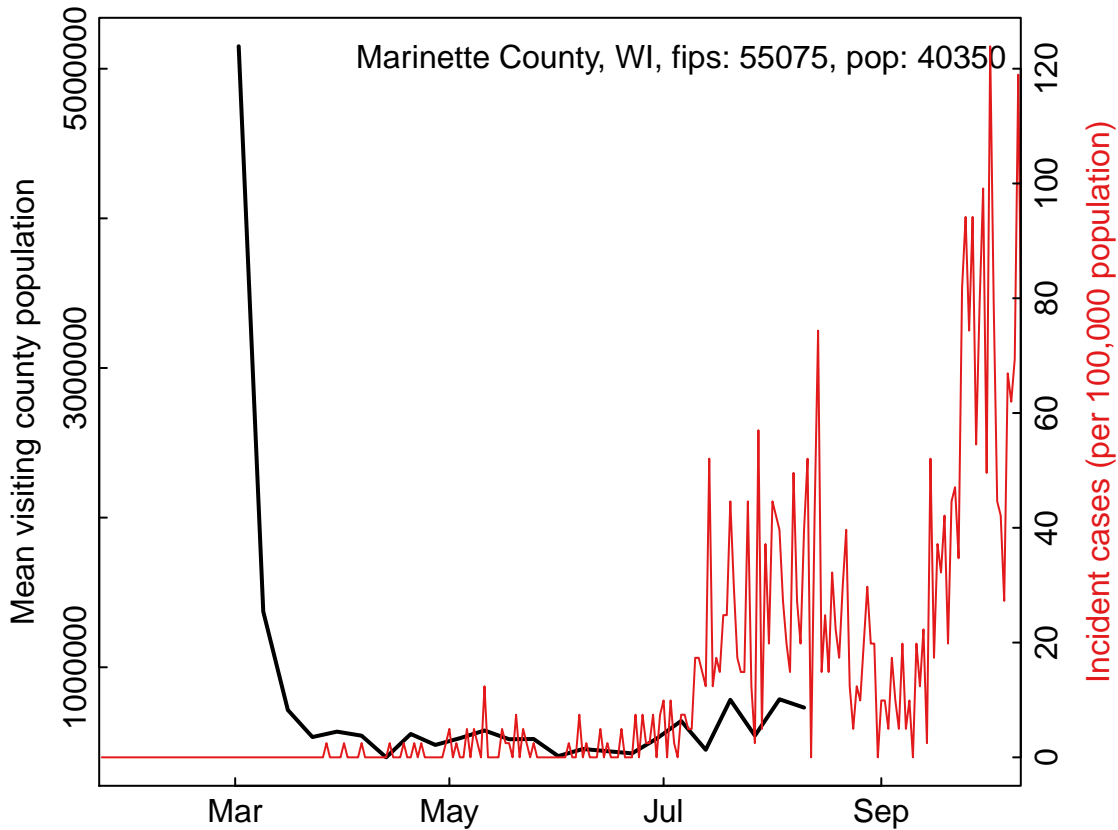

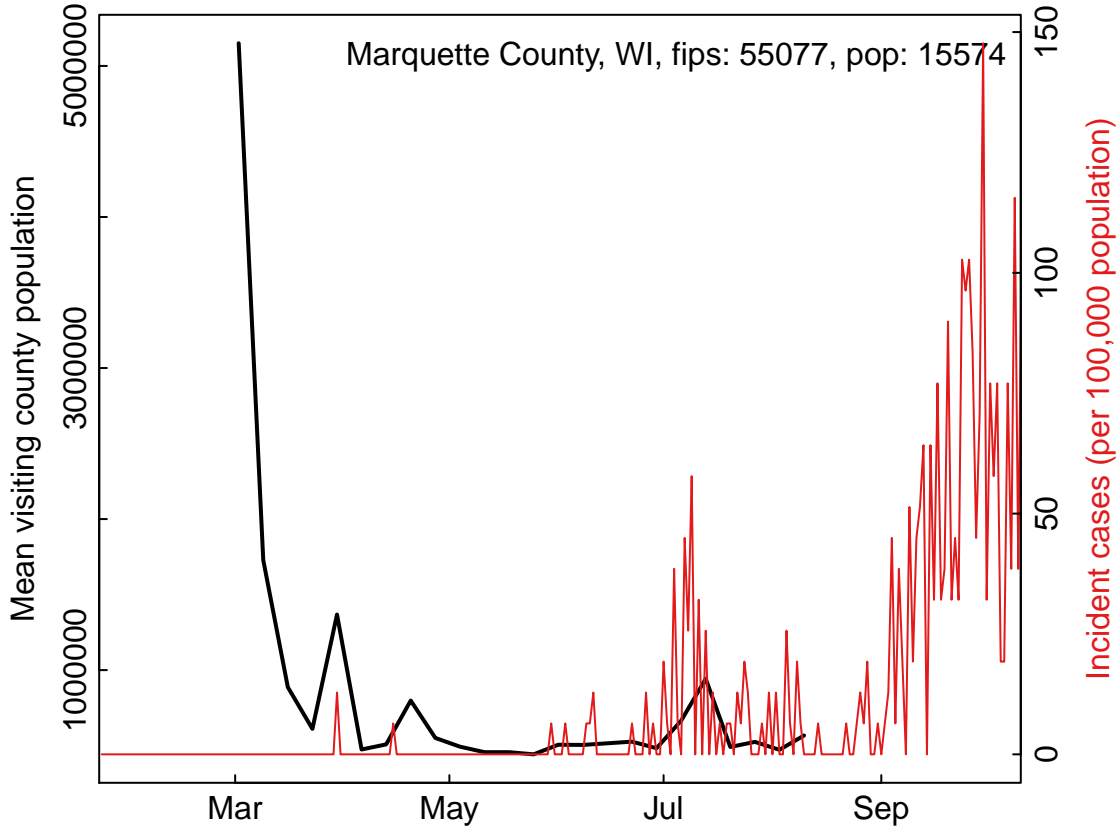

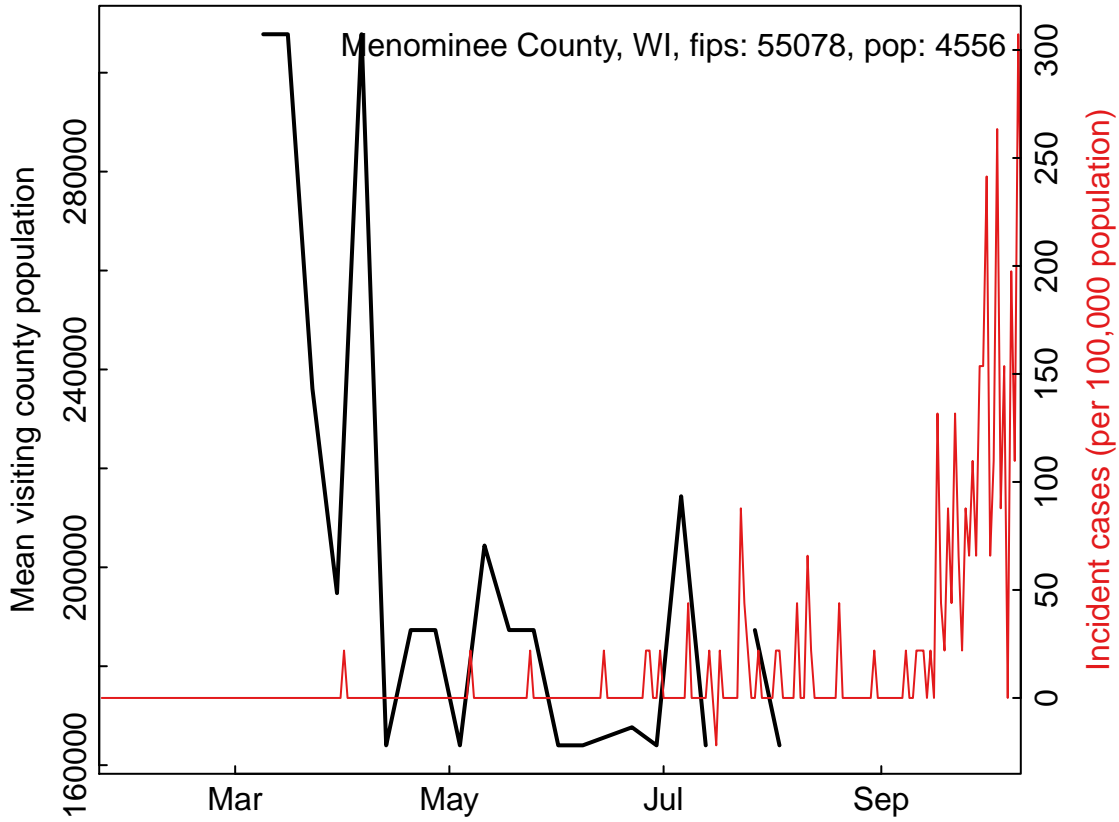

Milwaukee County, WI, fips: 55079, pop: 945726

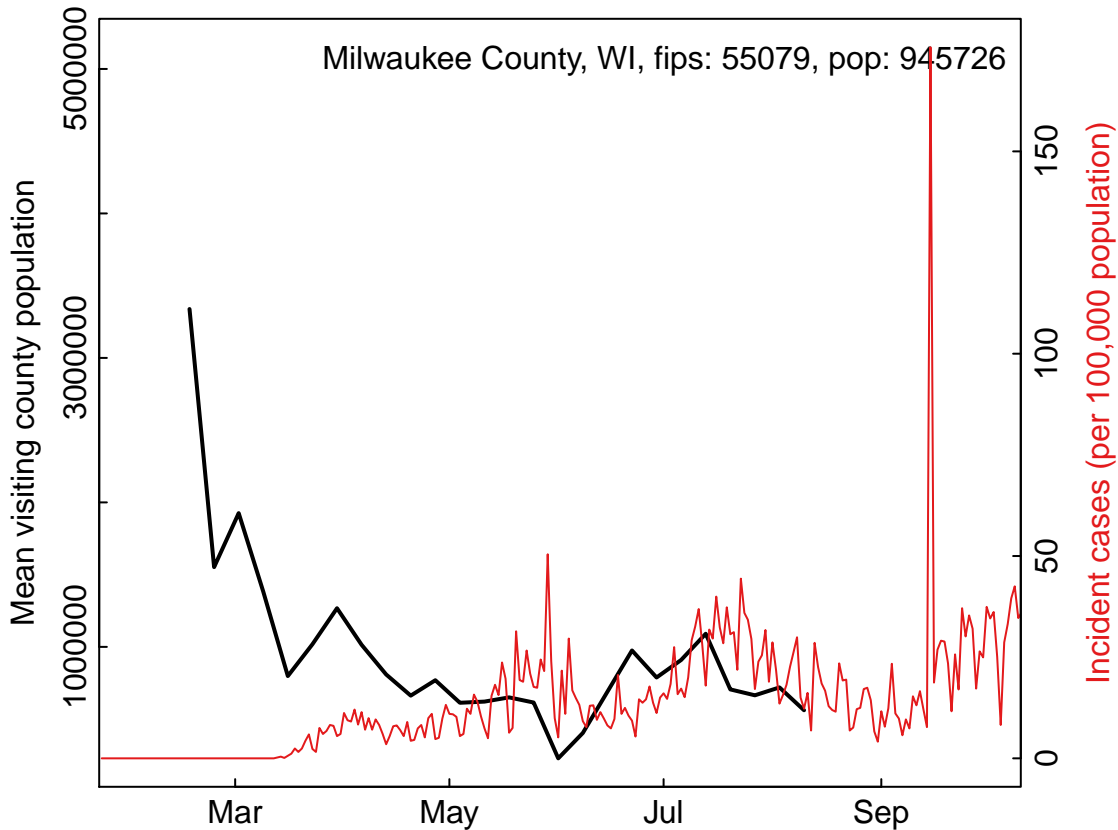

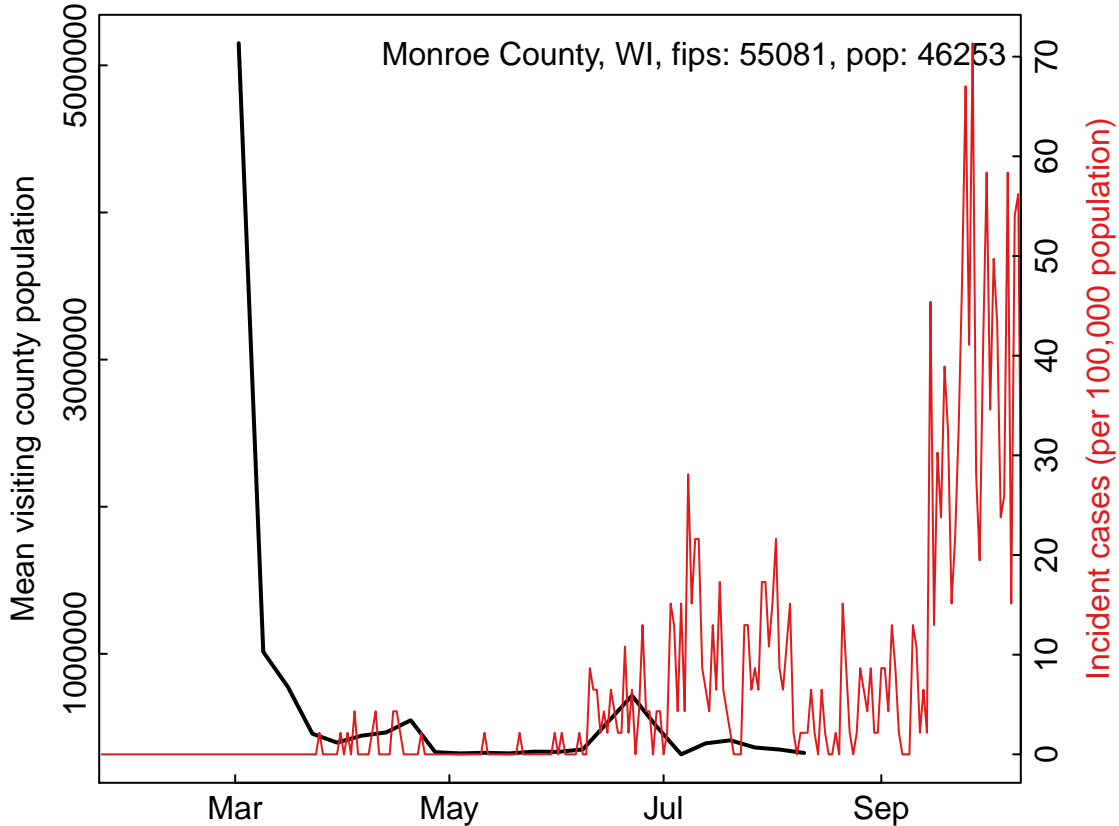



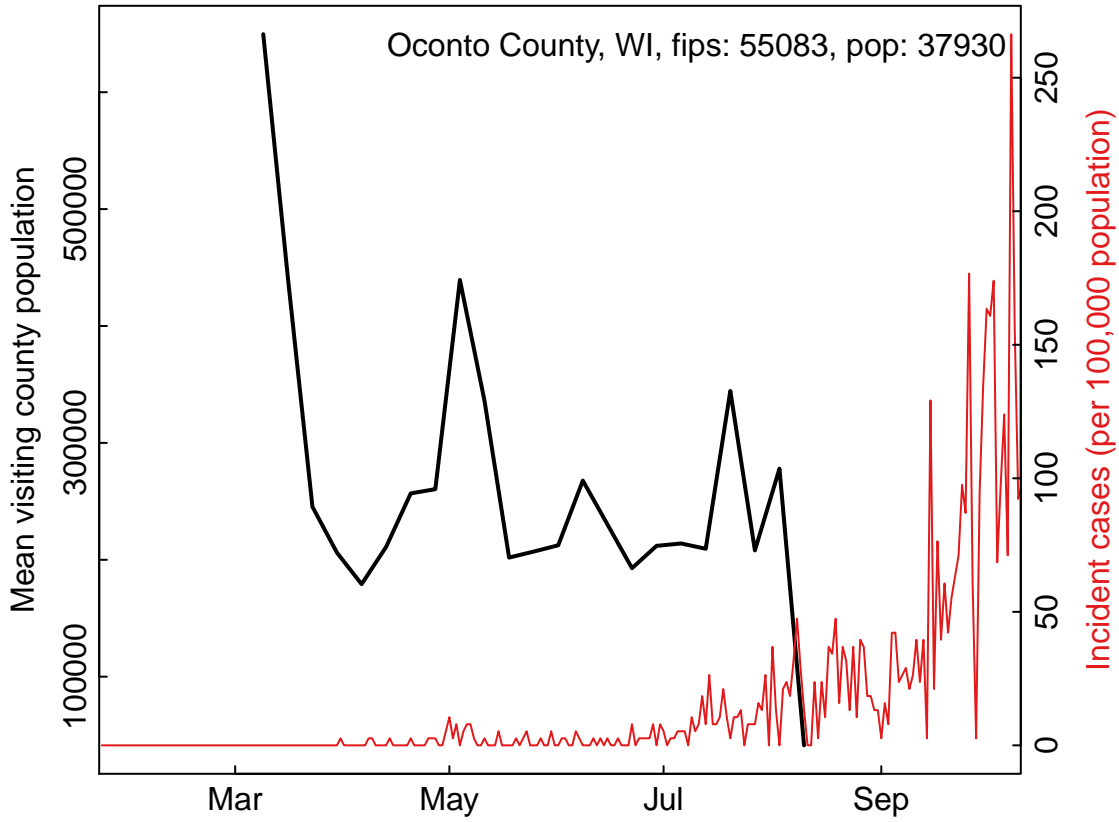

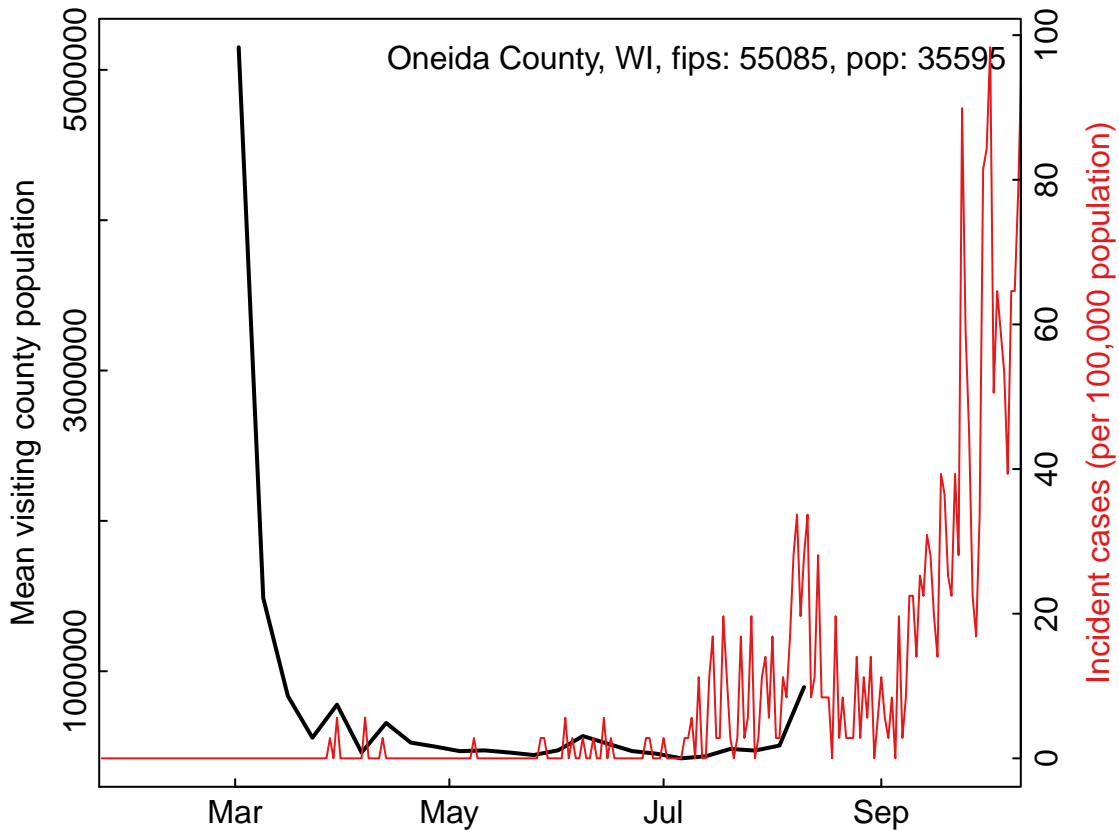

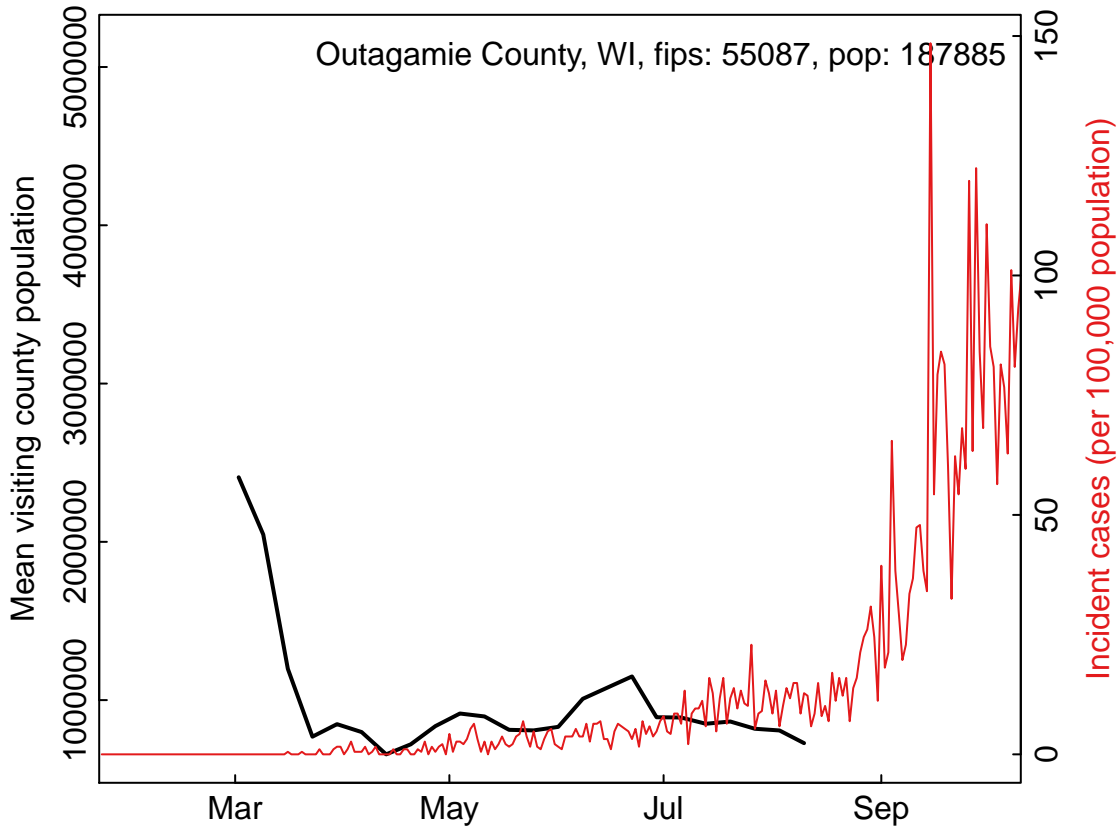

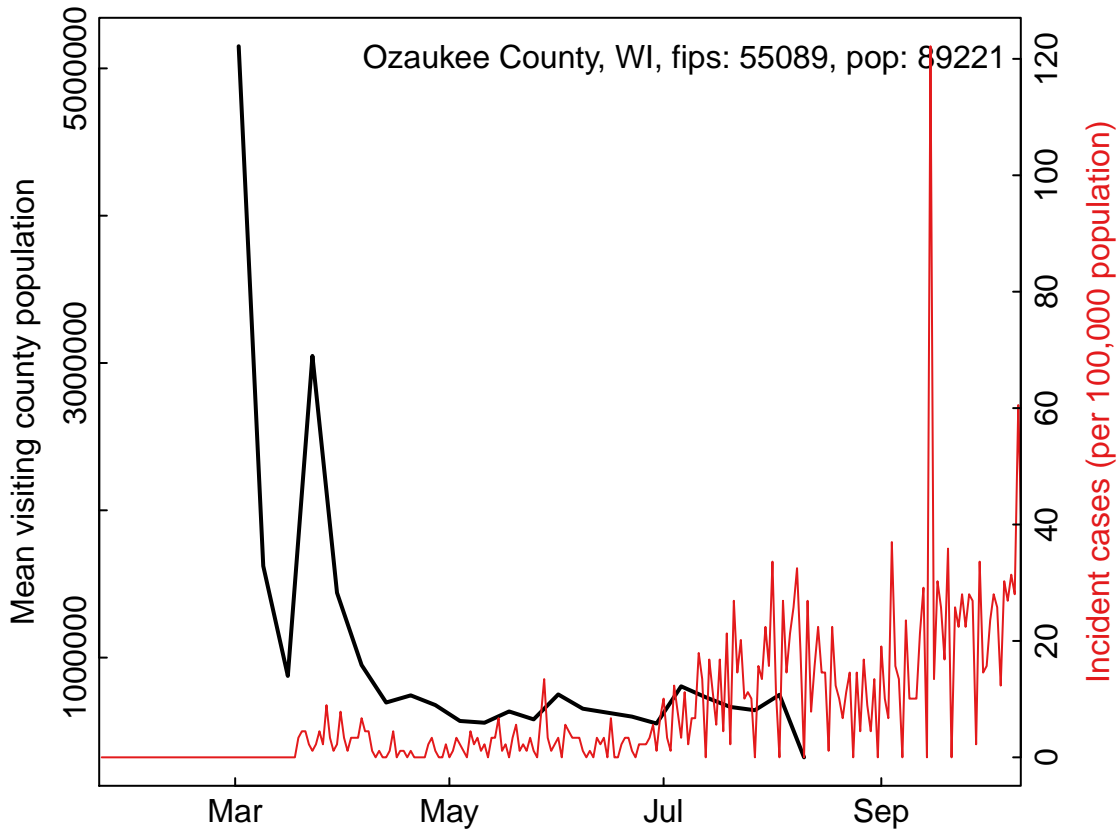

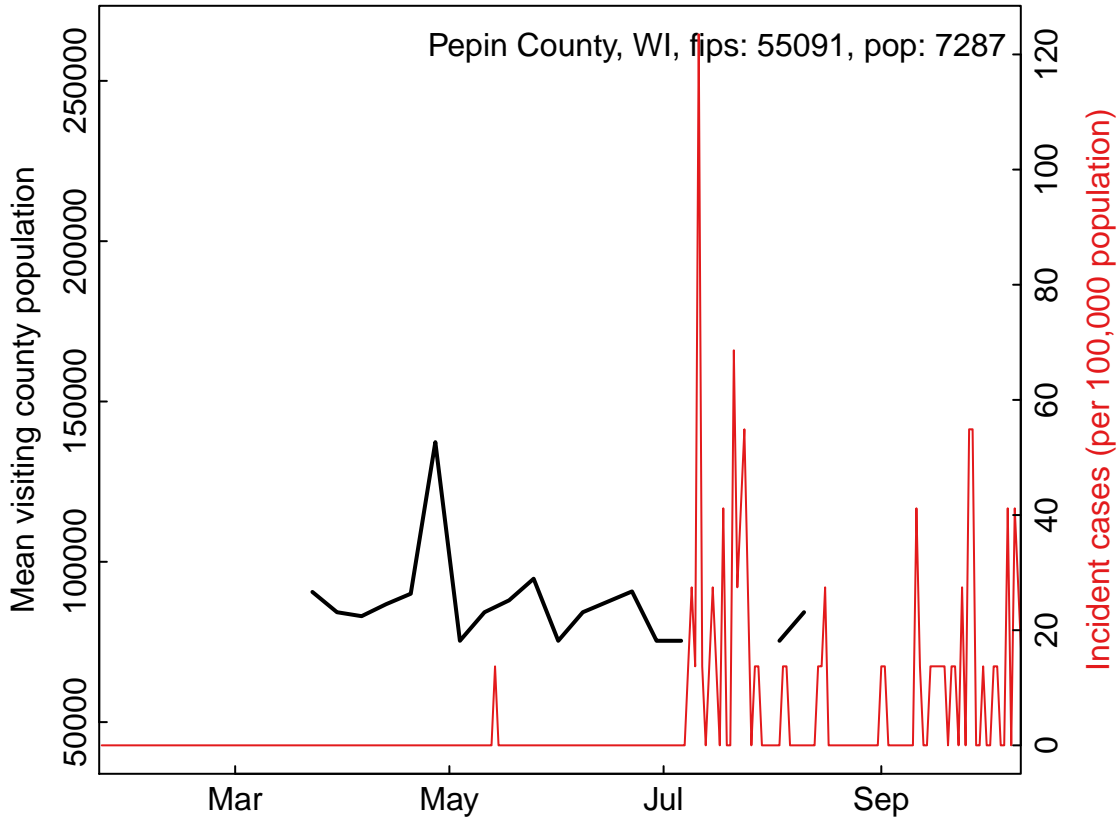

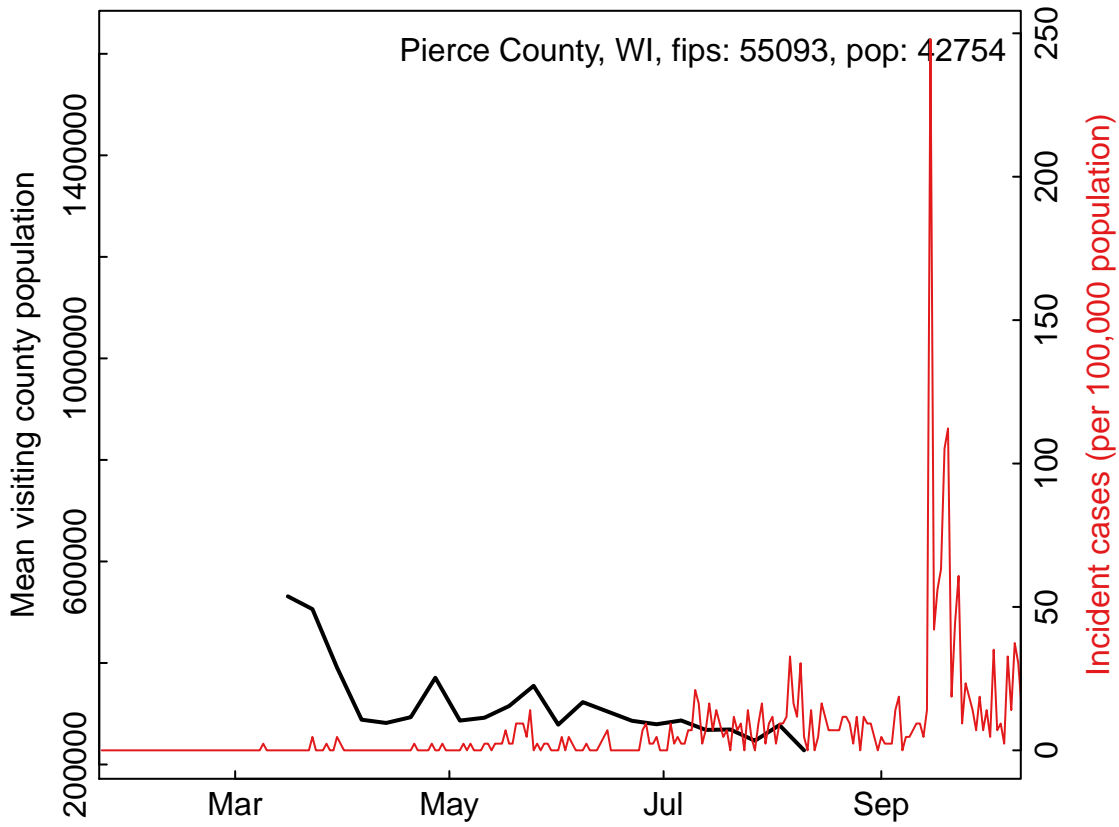

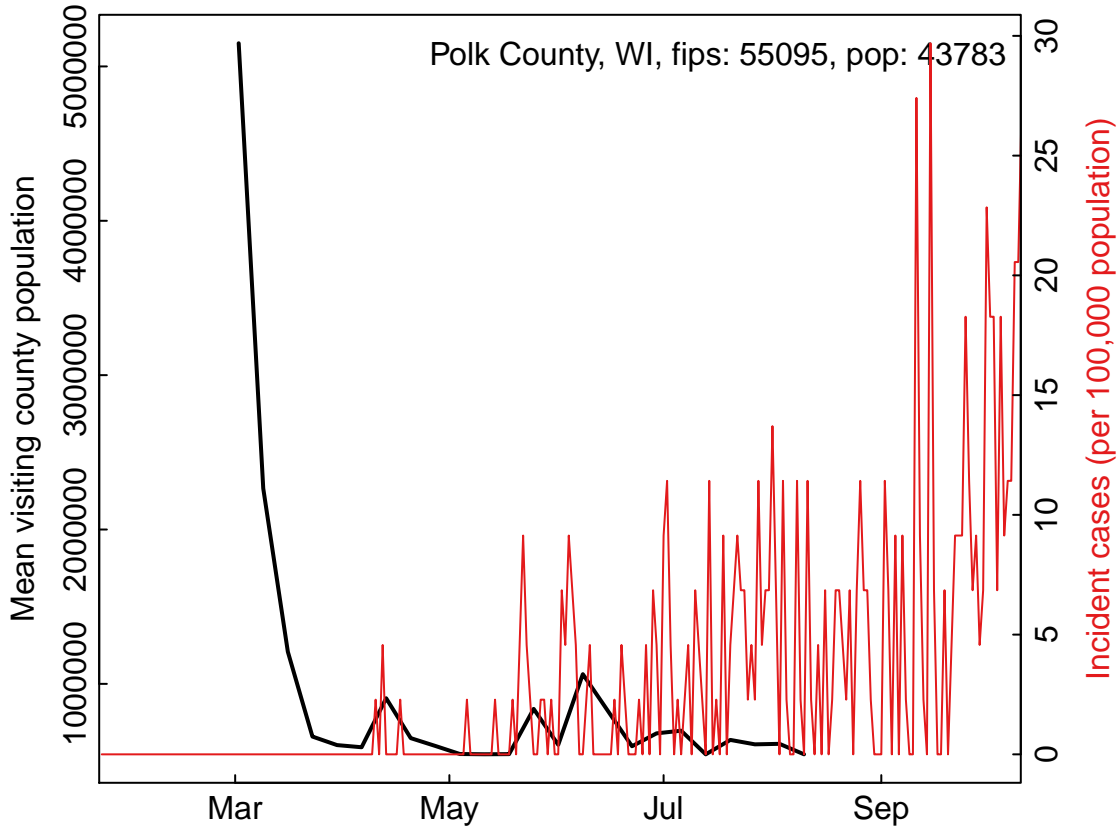

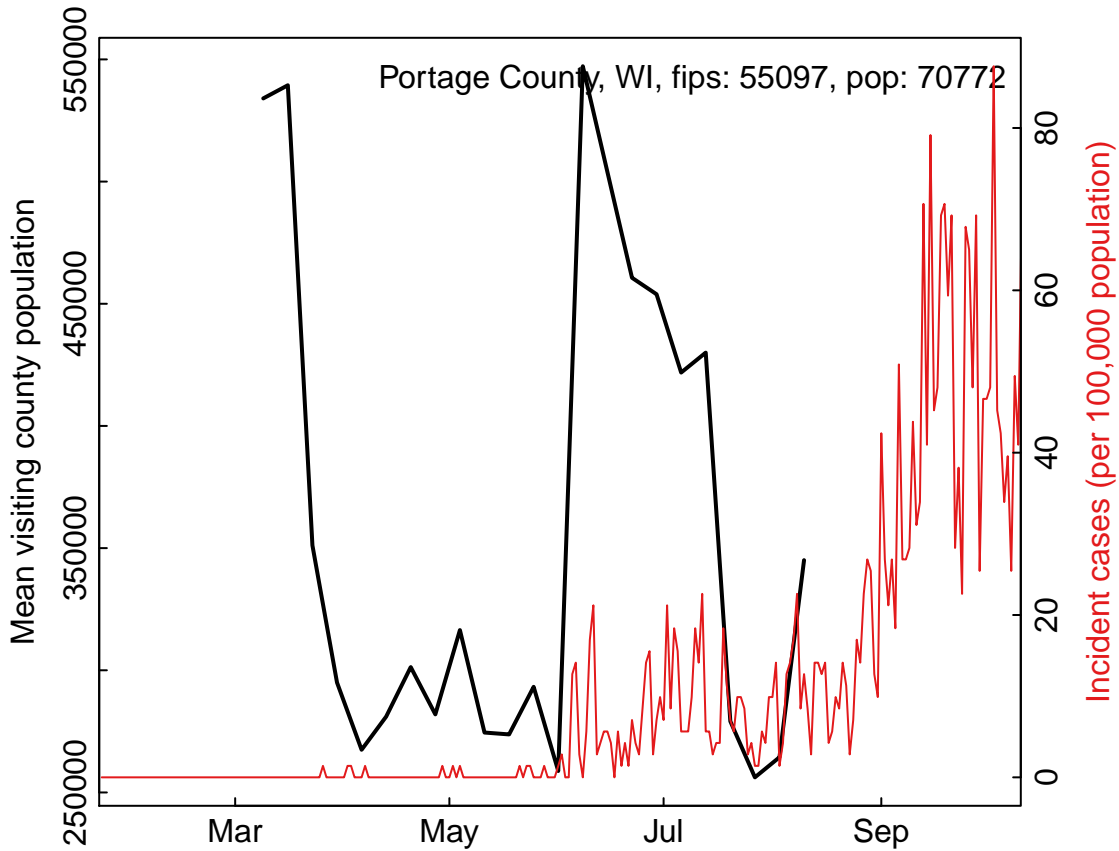



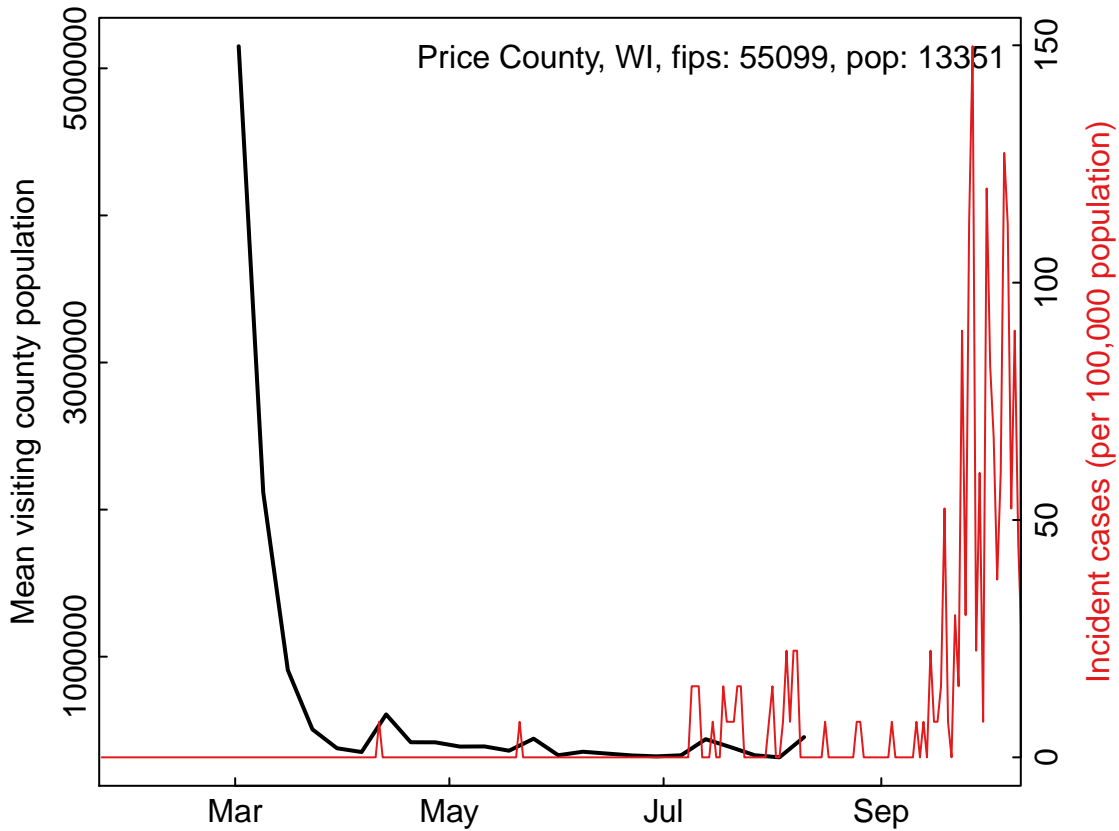

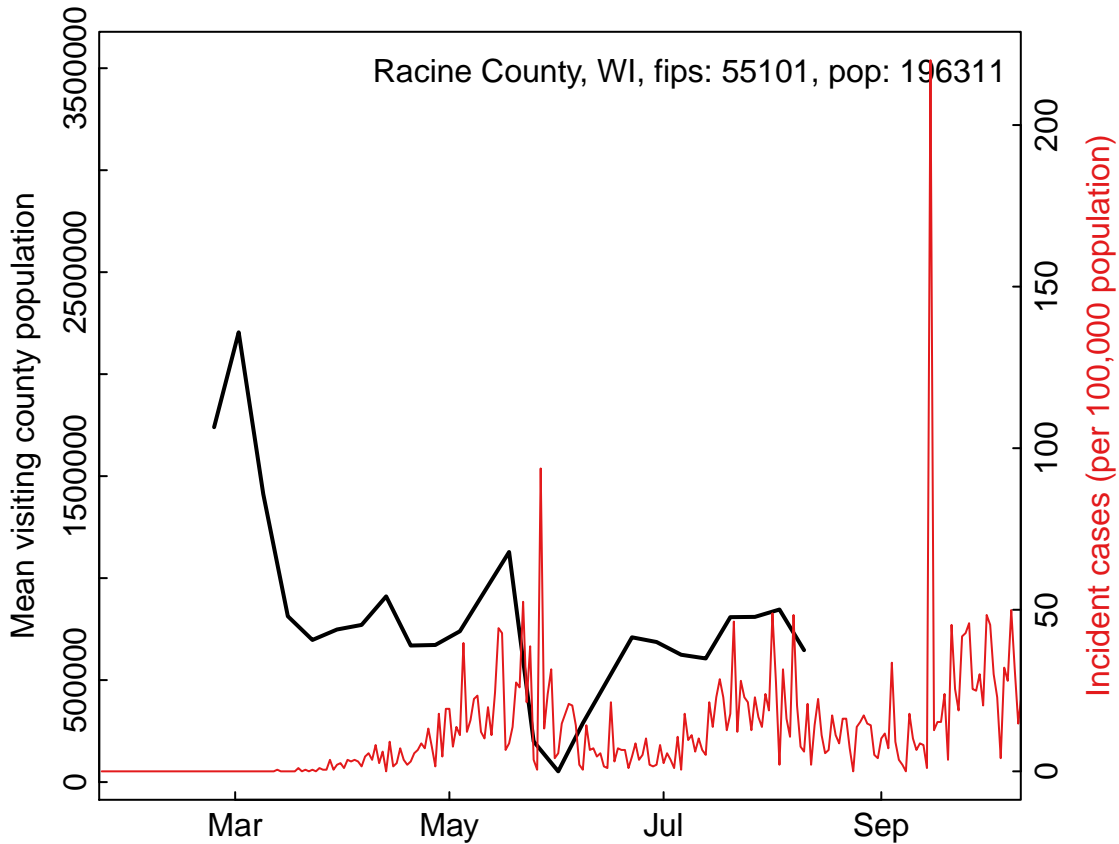

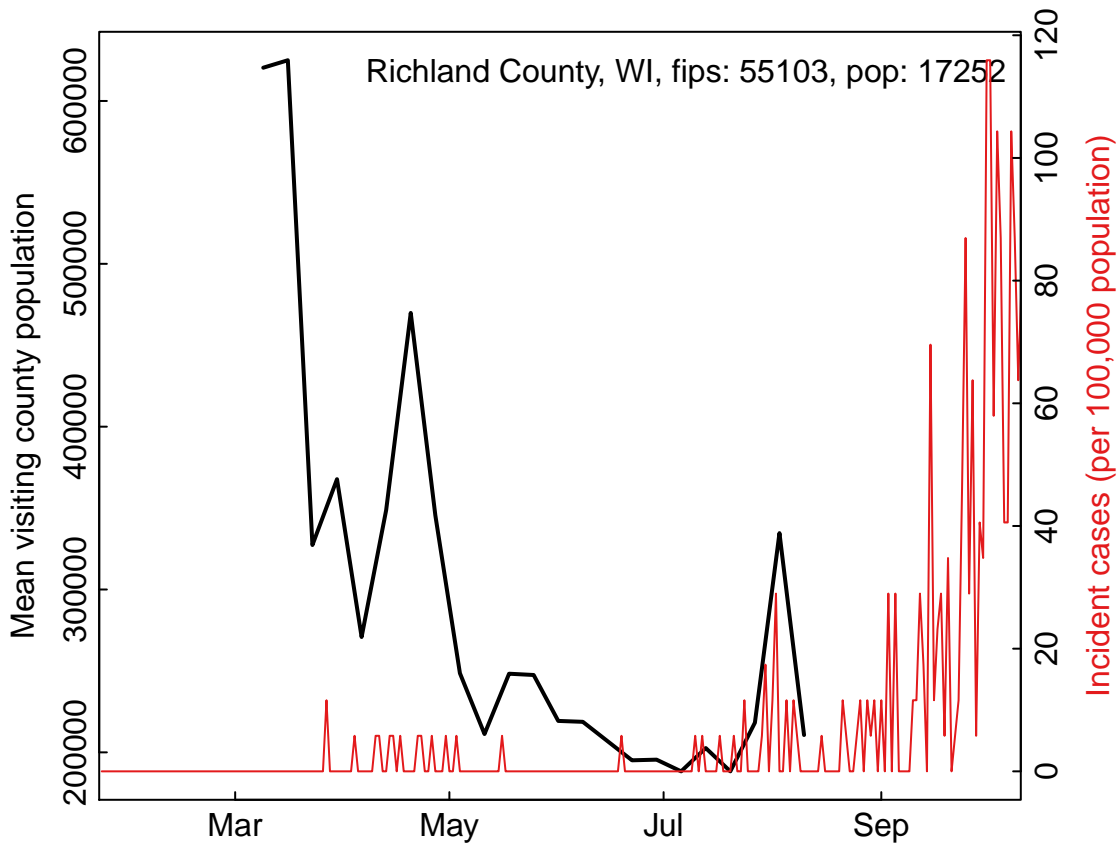

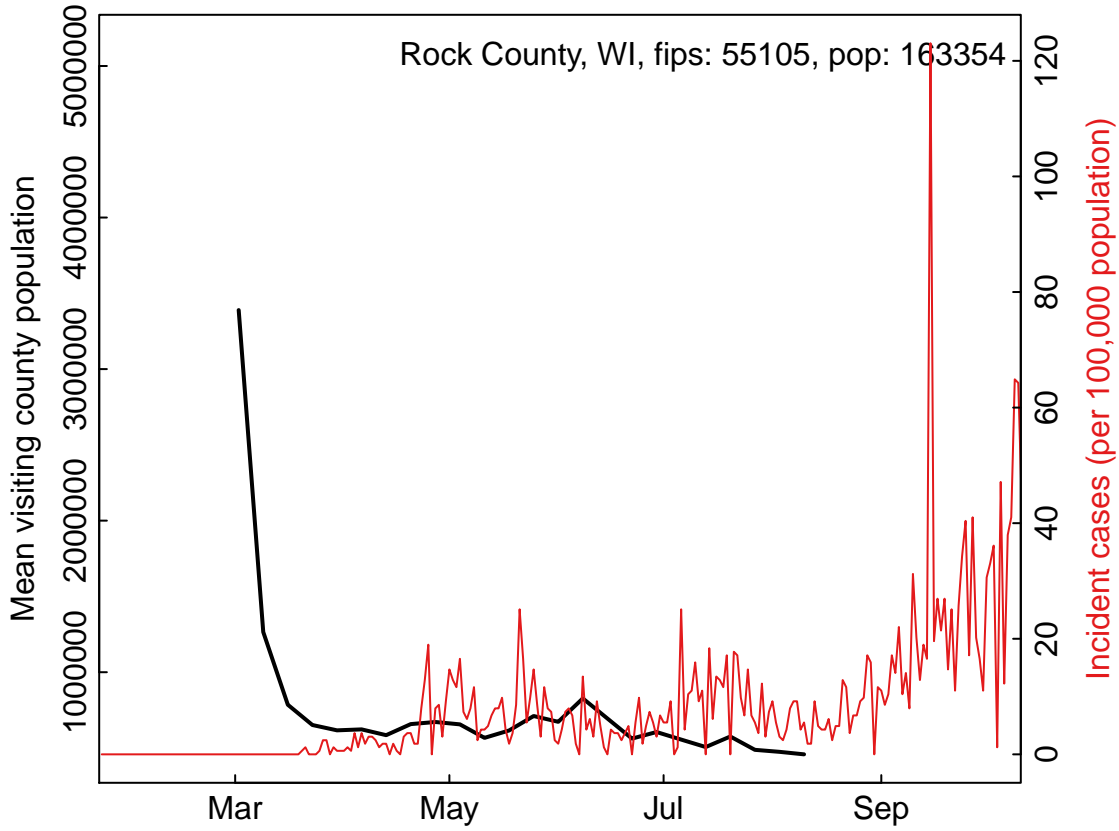

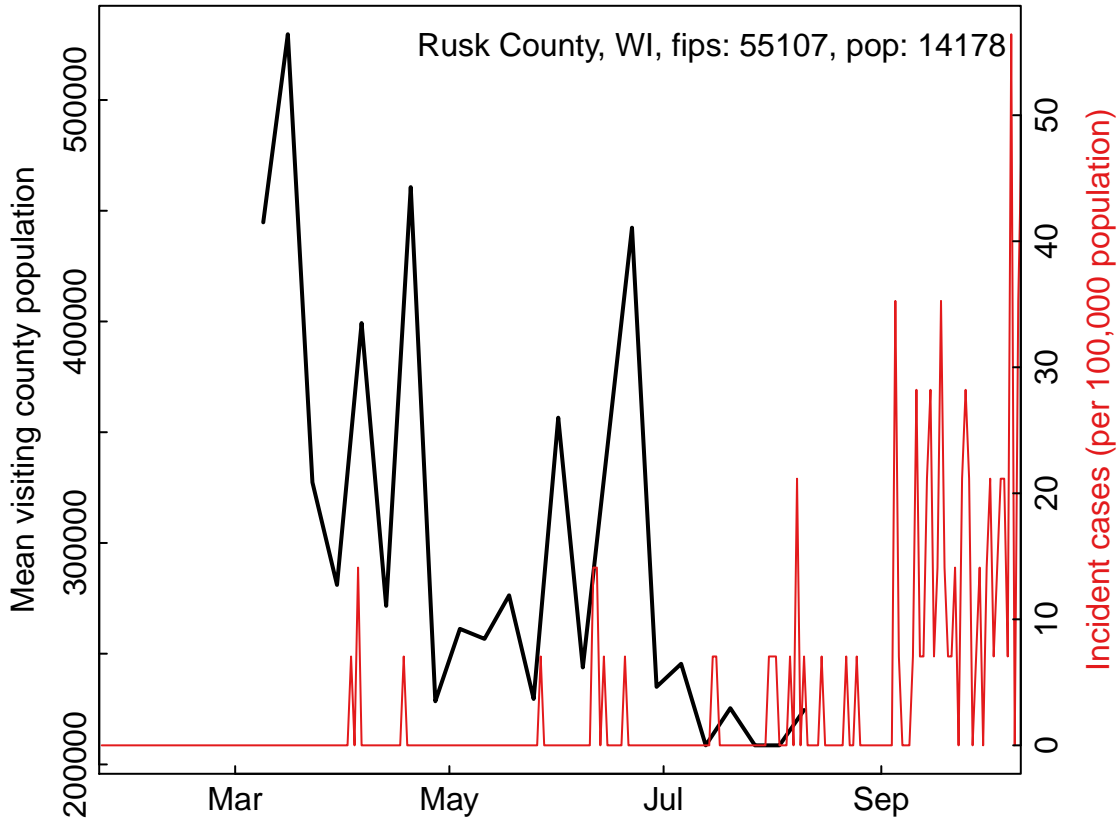

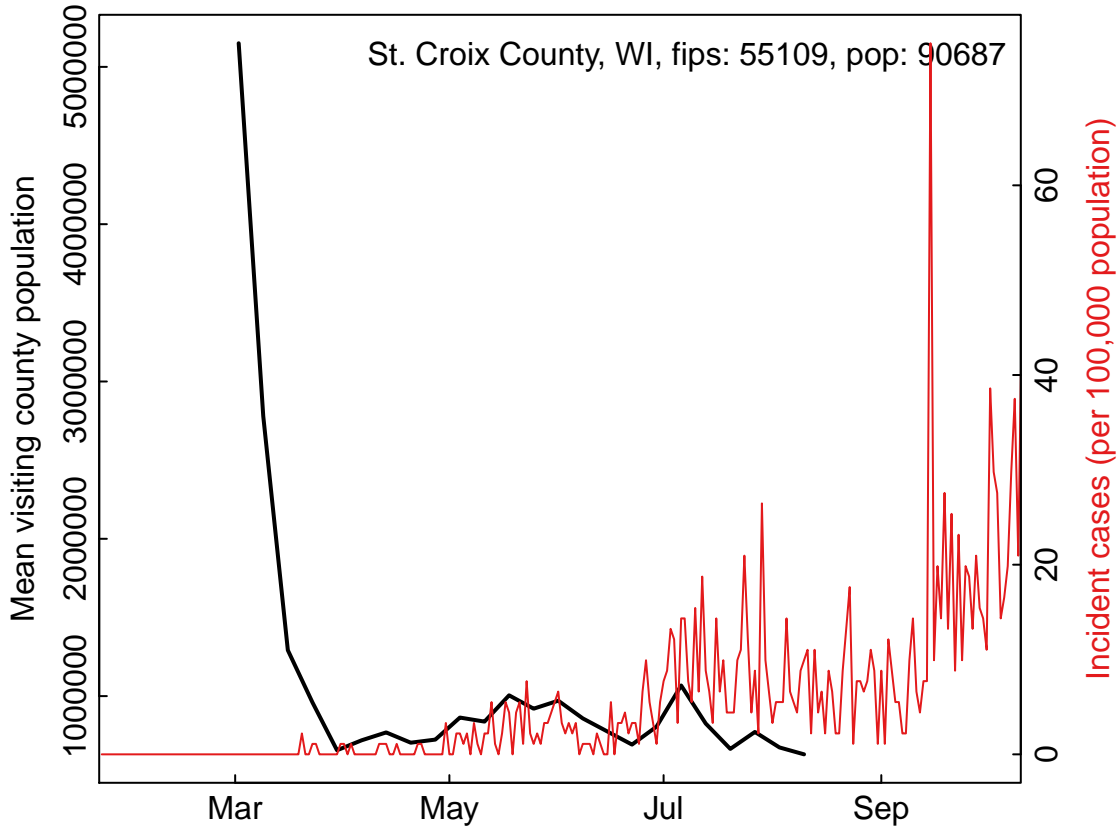

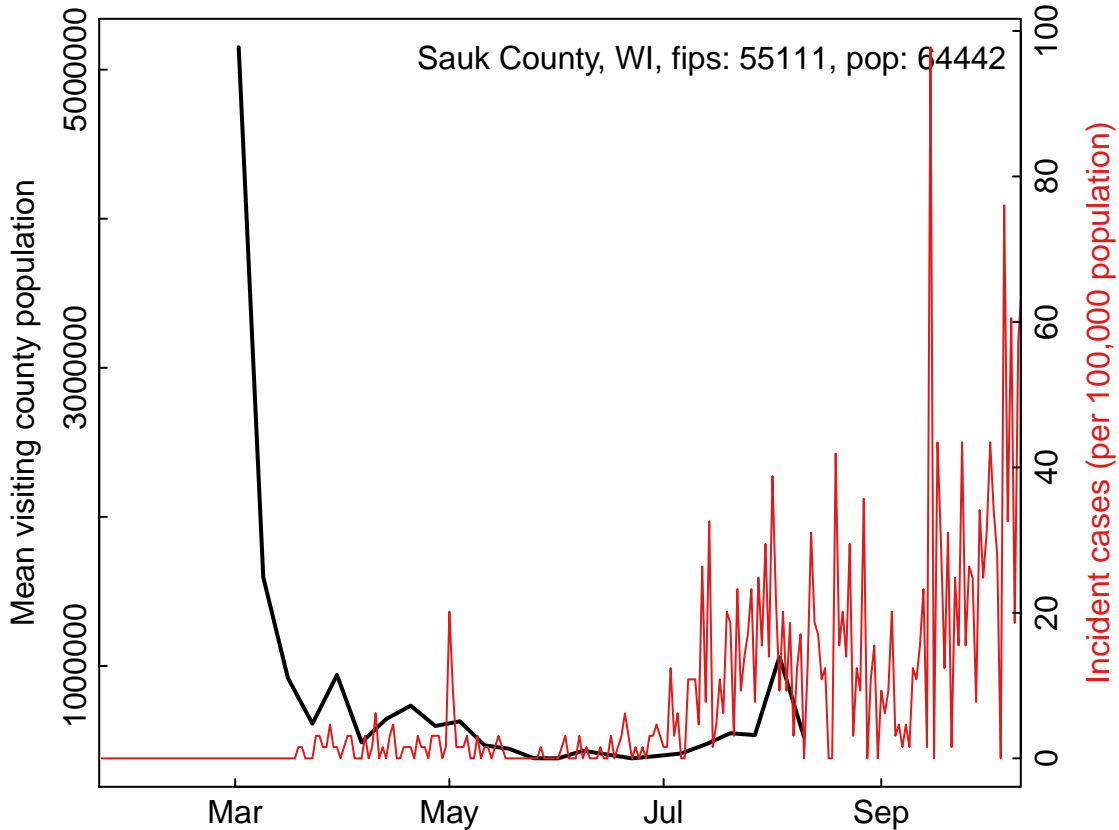

Sawyer County, WI, fips: 55113, pop: 16558

Mean visiting county population

2500000  
1500000  
500000

Mar

May

Jul

Sep

50  
40  
30  
20  
10  
0

Incident cases (per 100,000 population)

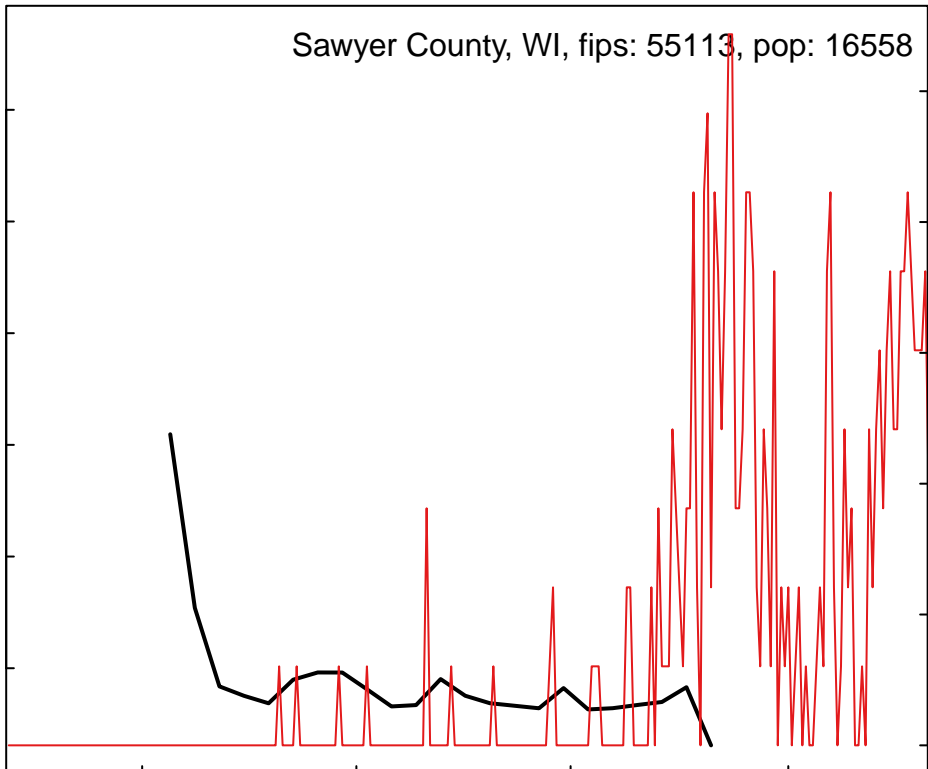



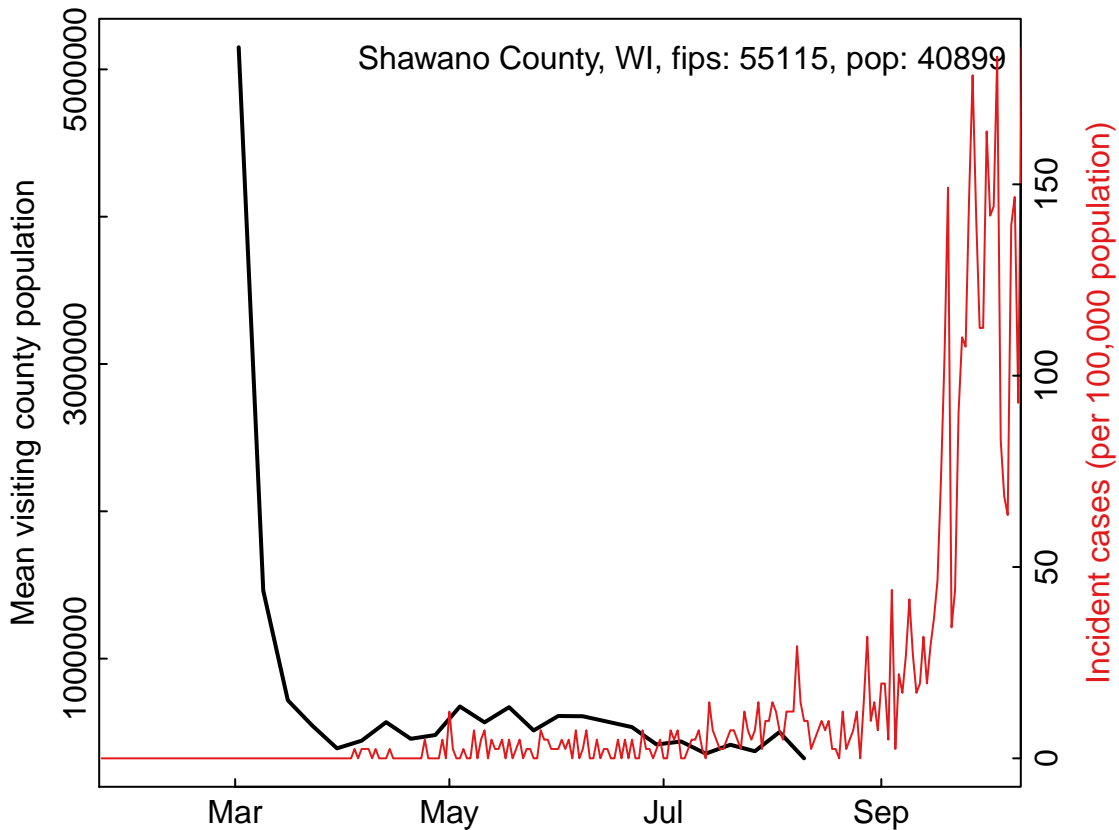

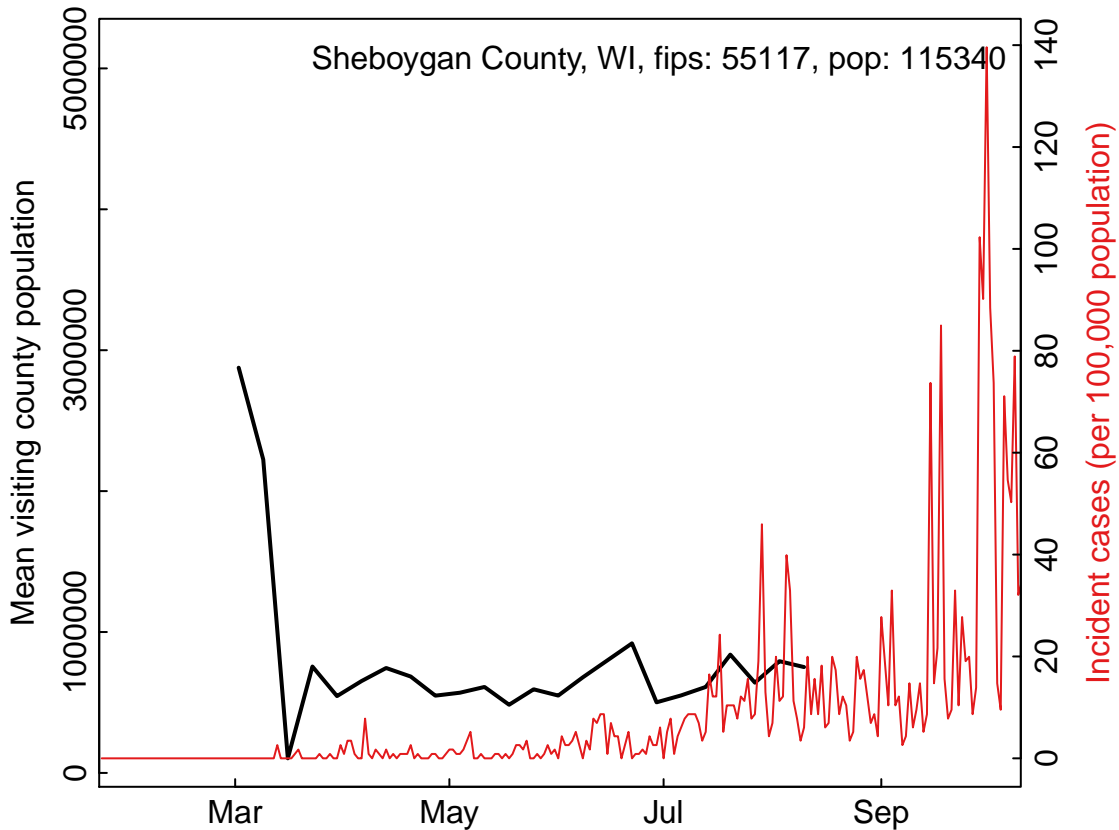

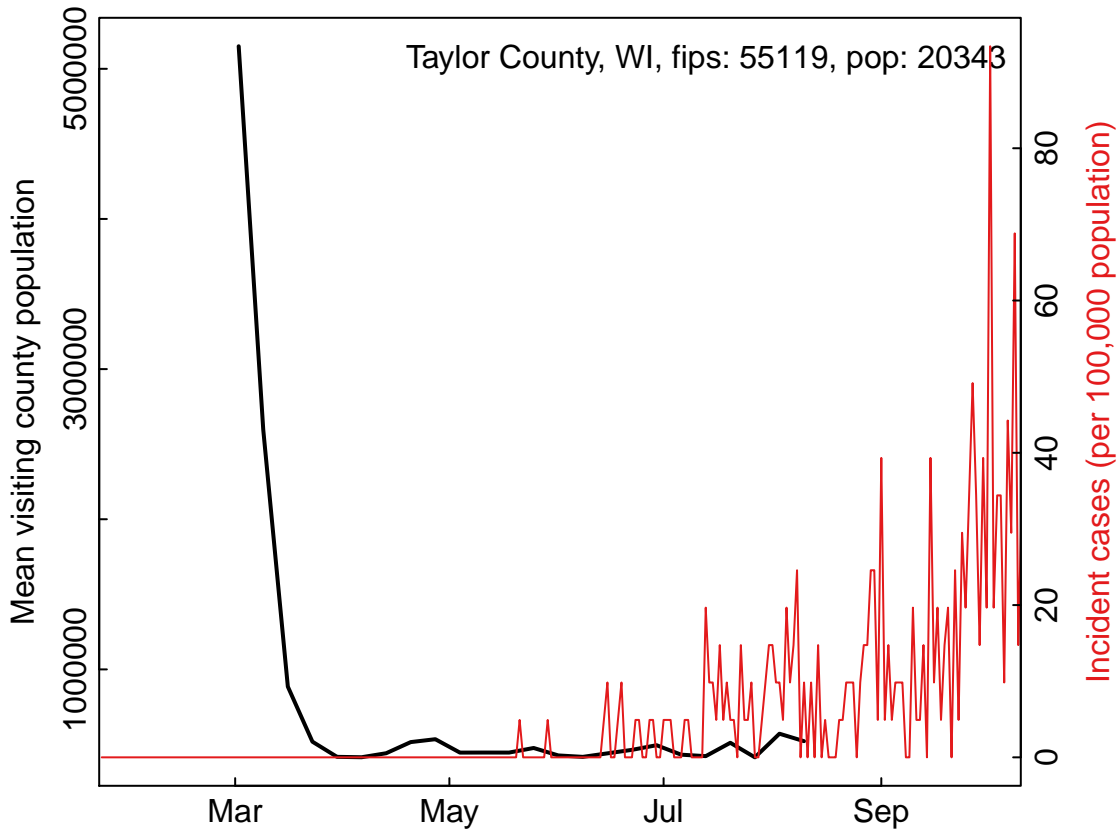

Trempealeau County, WI, fips: 55121, pop: 29649

Mean visiting county population

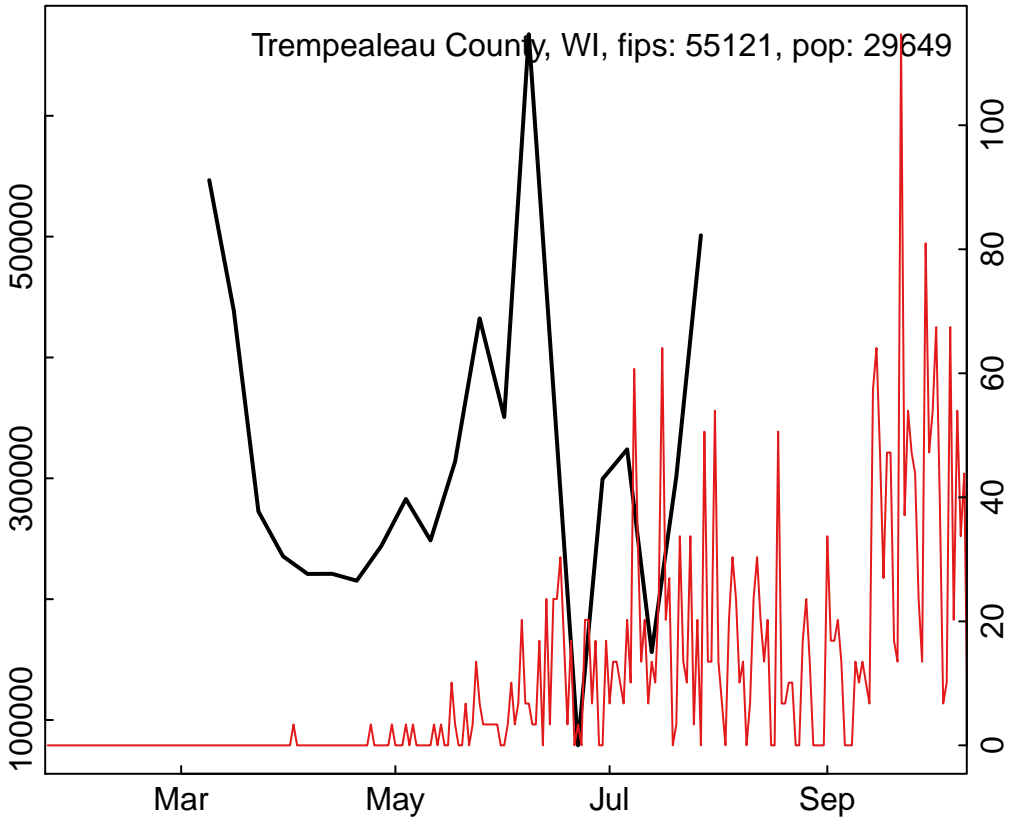

Incident cases (per 100,000 population)

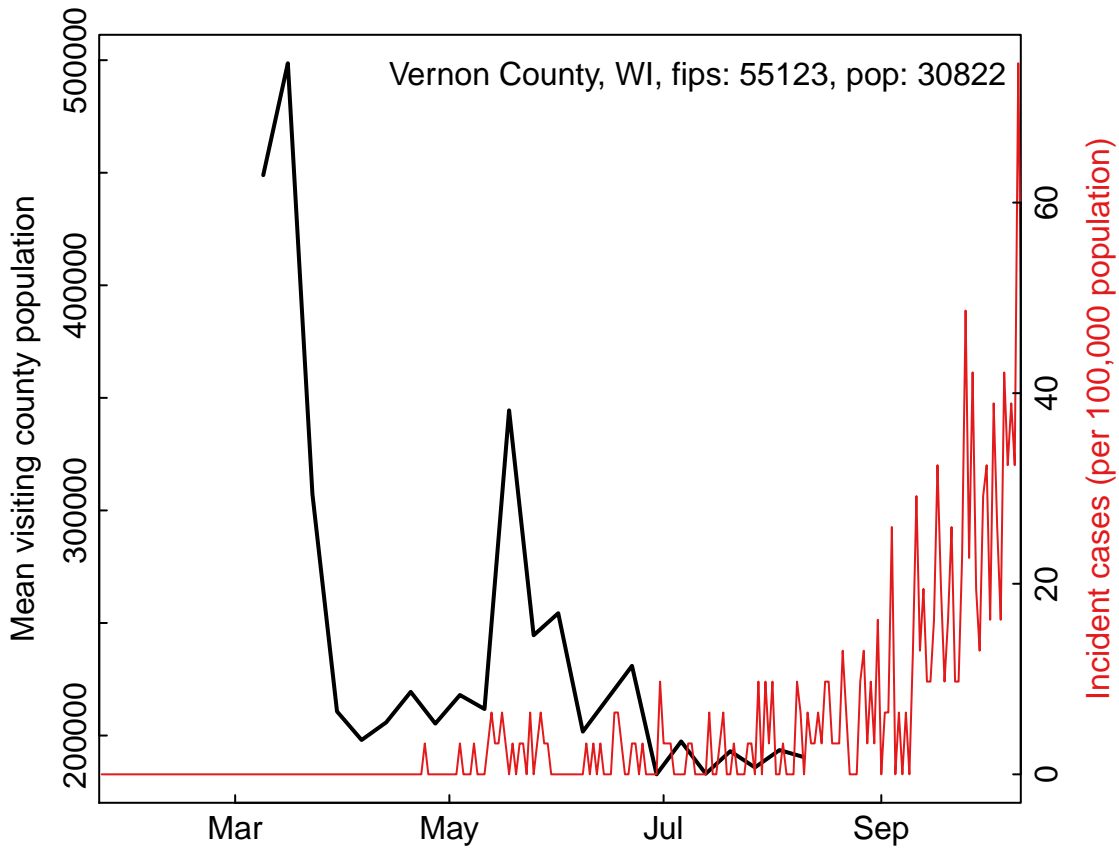

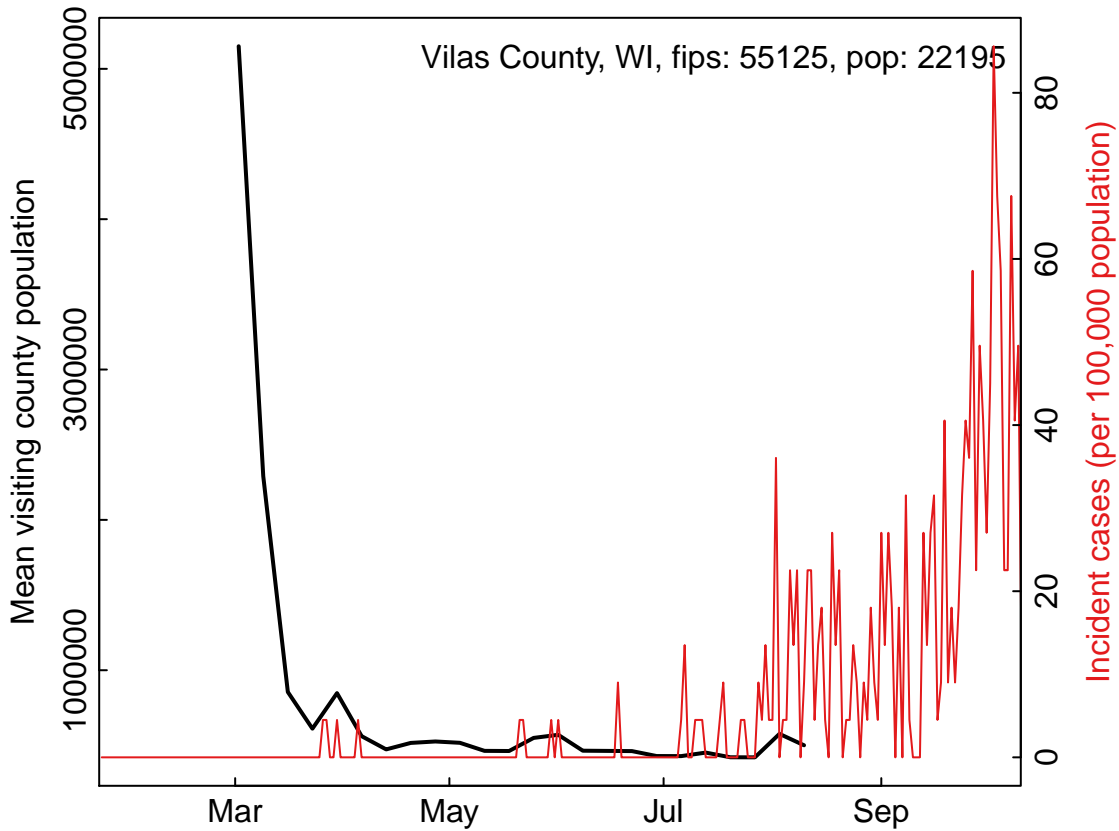

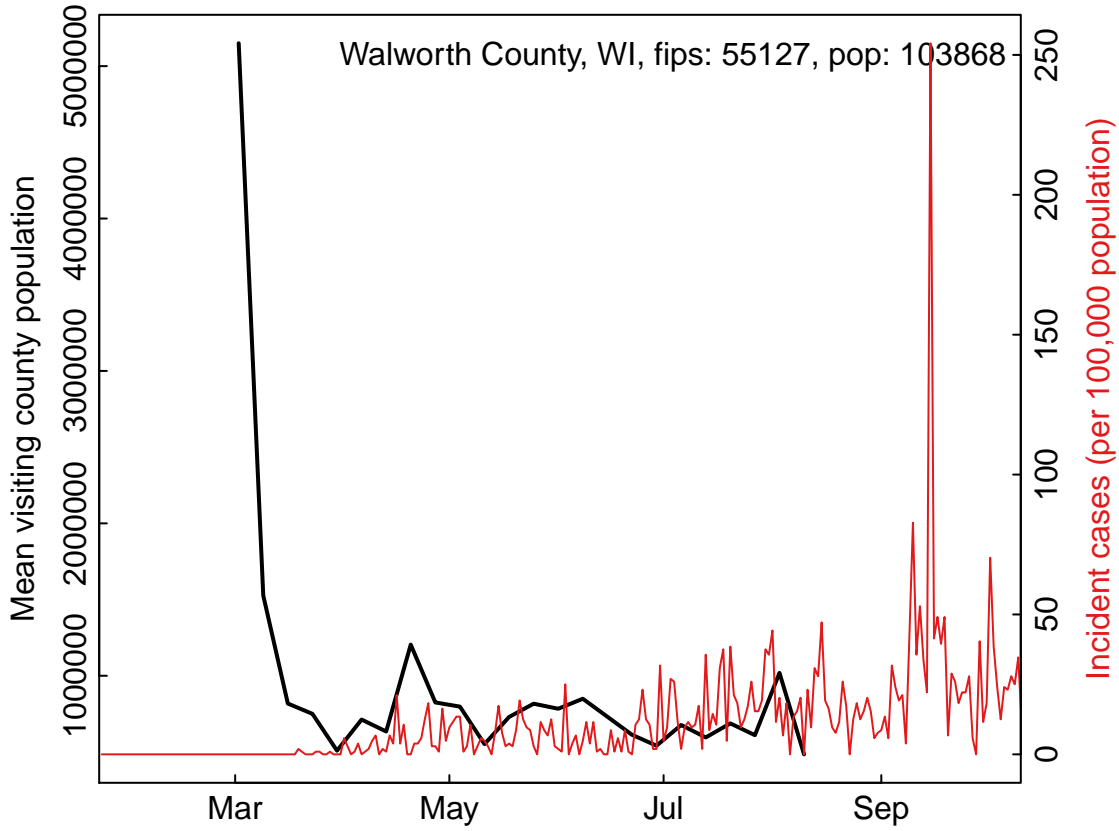

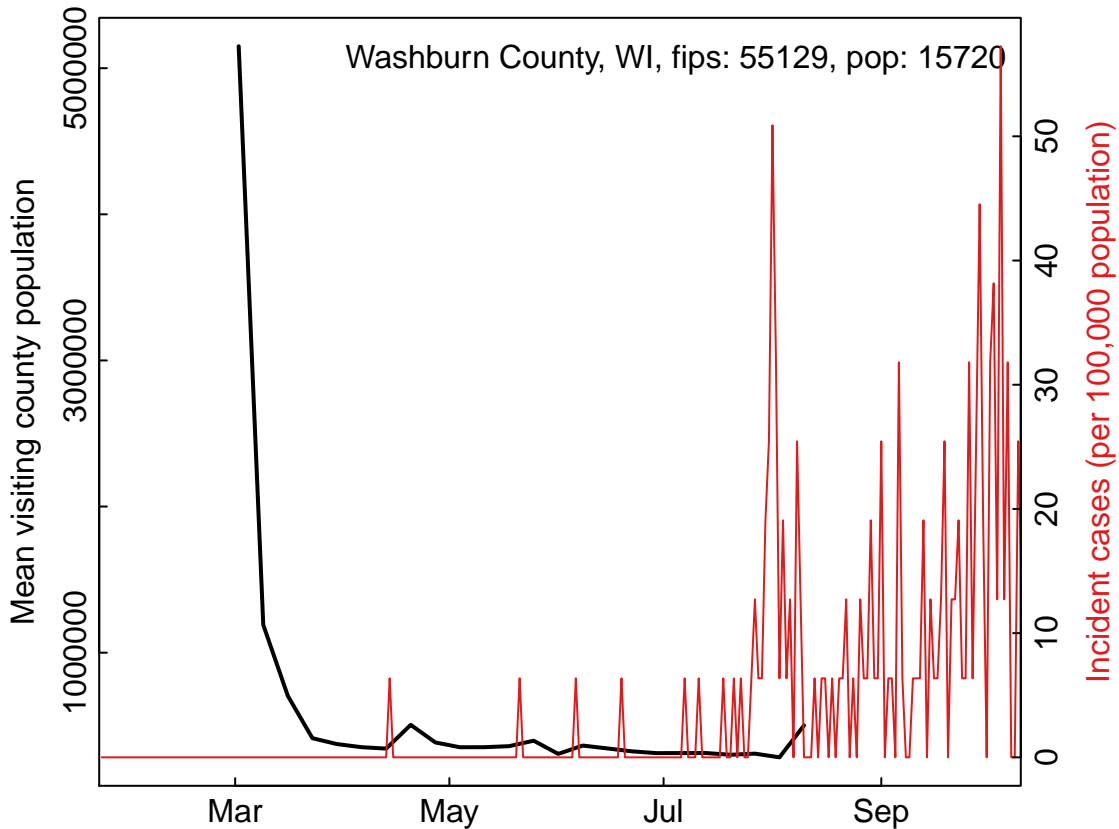



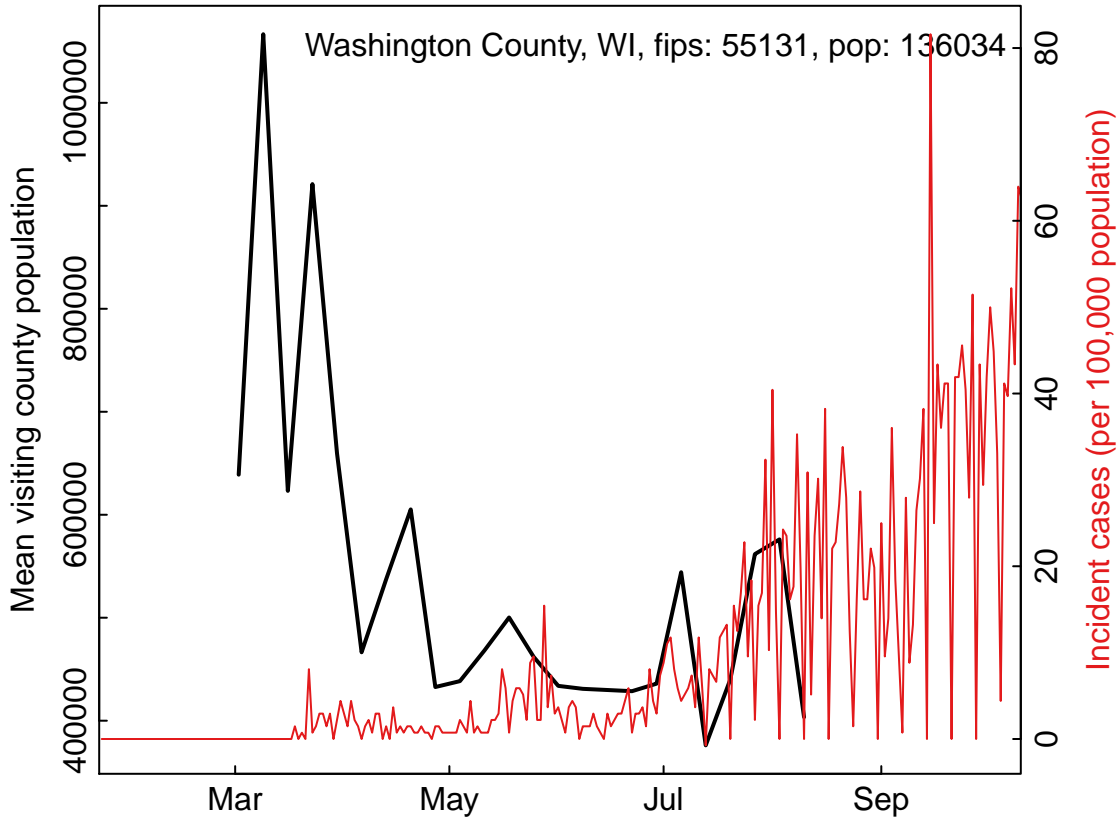

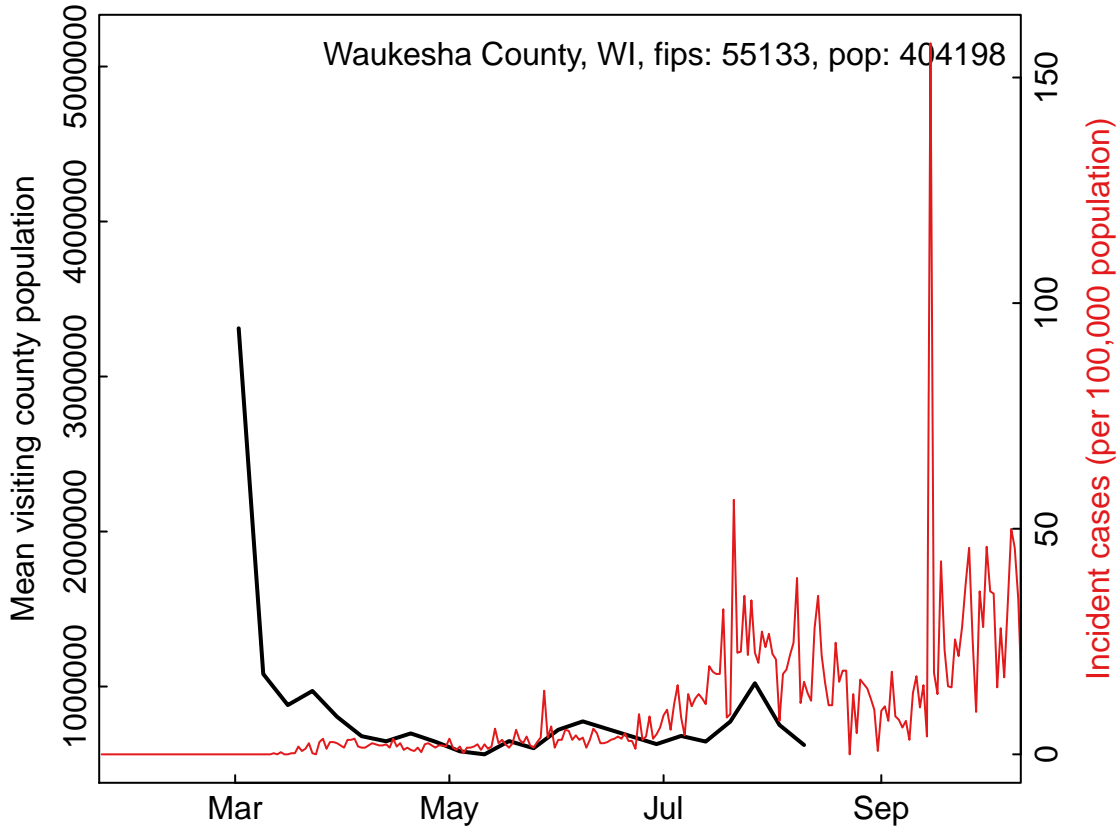

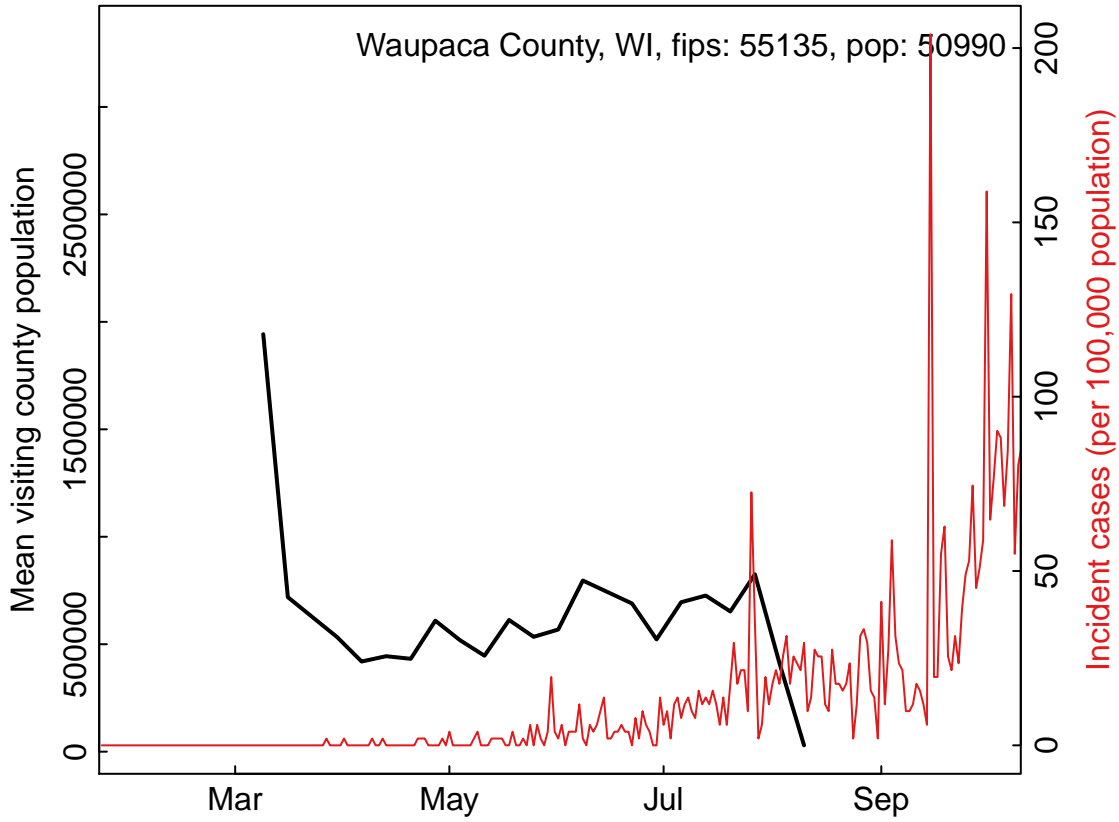

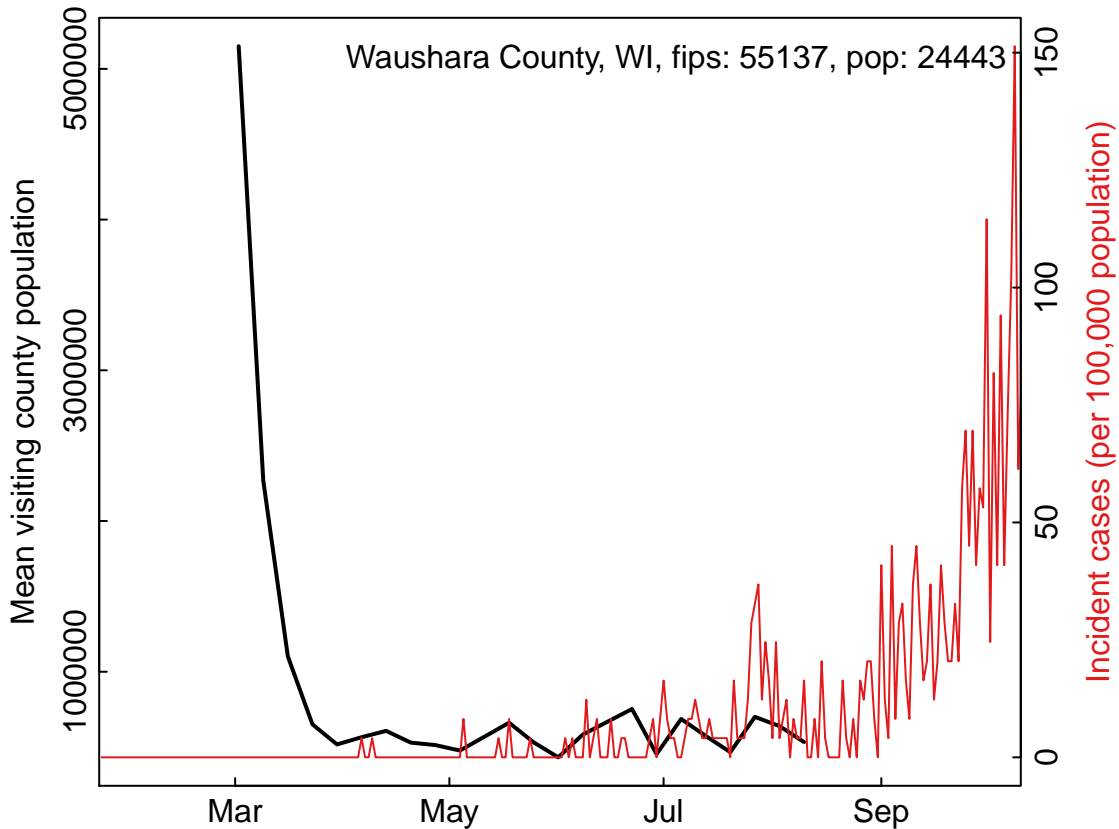

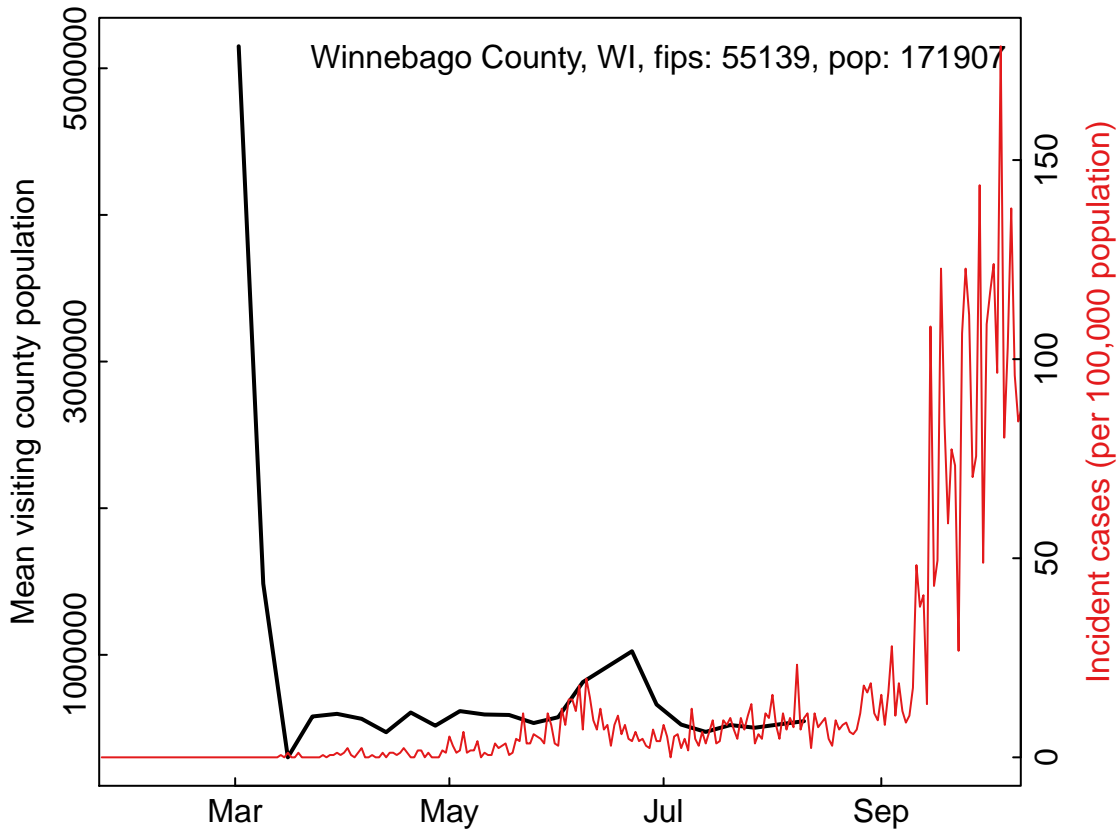

Wood County, WI, fips: 55141, pop: 72999

Mean visiting county population

1000000  
800000  
600000  
400000

Mar

May

Jul

Sep

60  
50  
40  
30  
20  
10  
0

Incident cases (per 100,000 population)

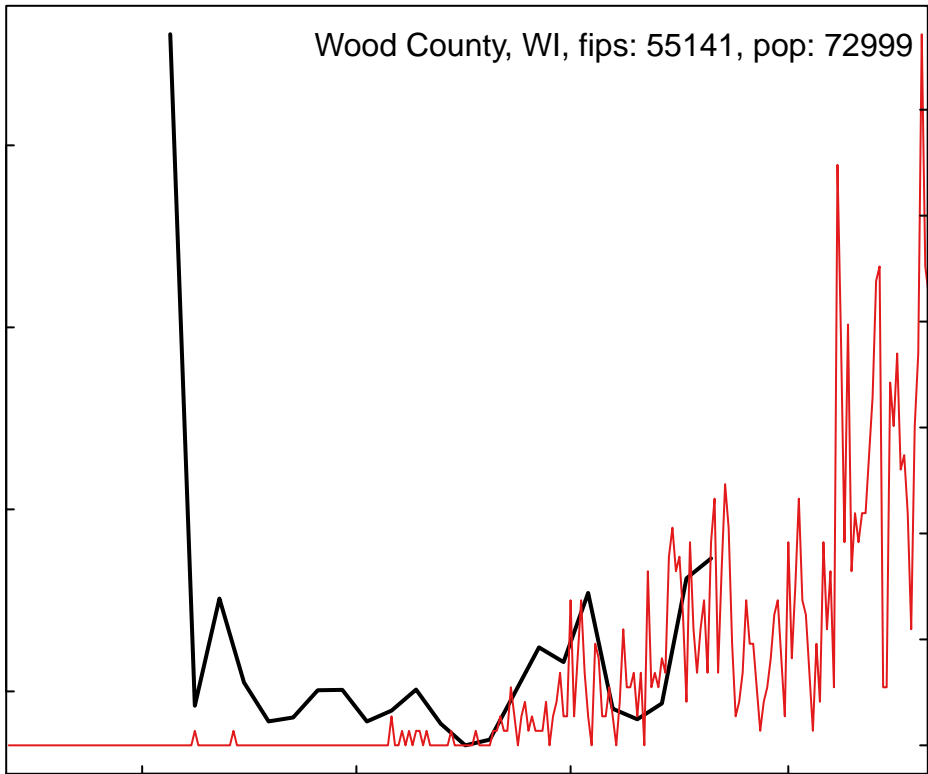

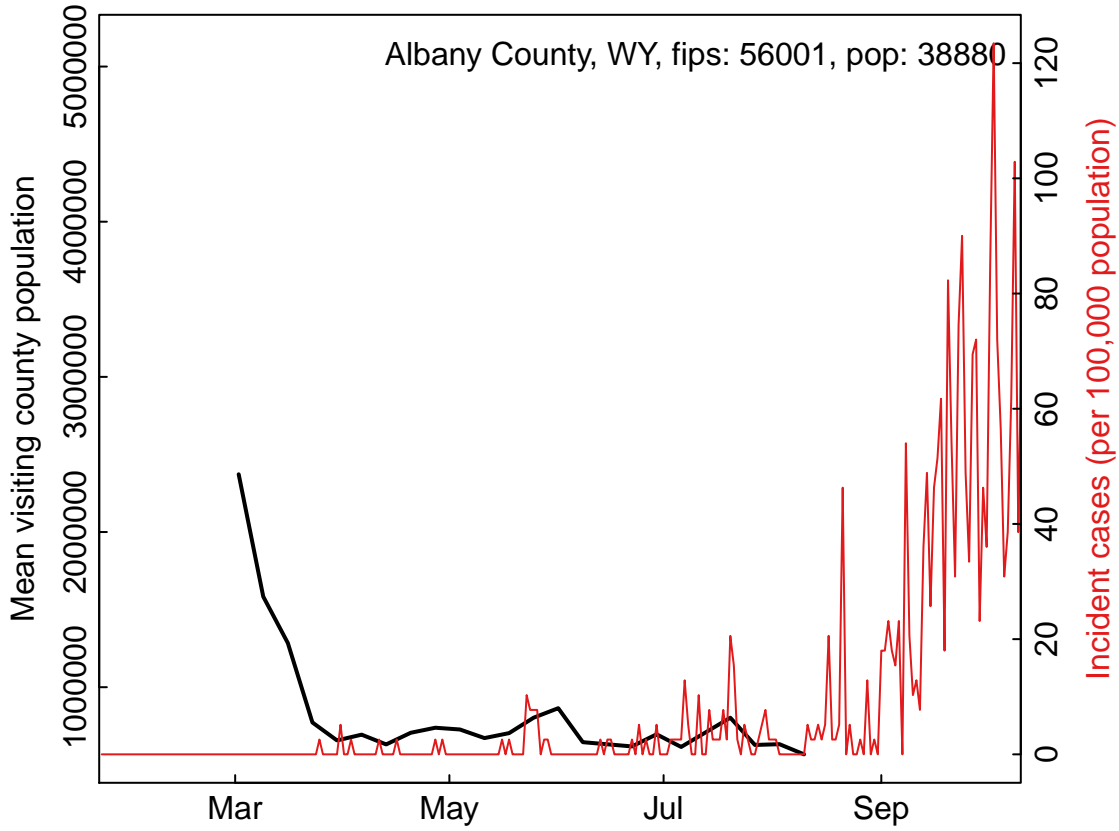

Big Horn County, WY, fips: 56003, pop: 11790

Mean visiting county population

700000  
500000  
300000

Mar

May

Jul

Sep

Incident cases (per 100,000 population)

60  
40  
20  
0

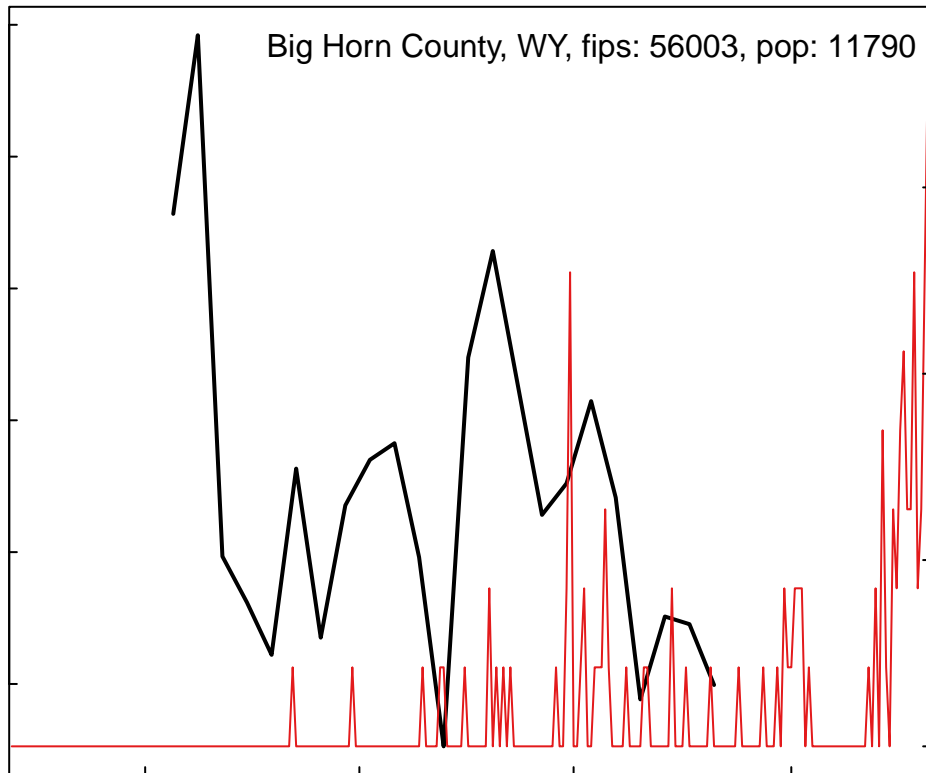



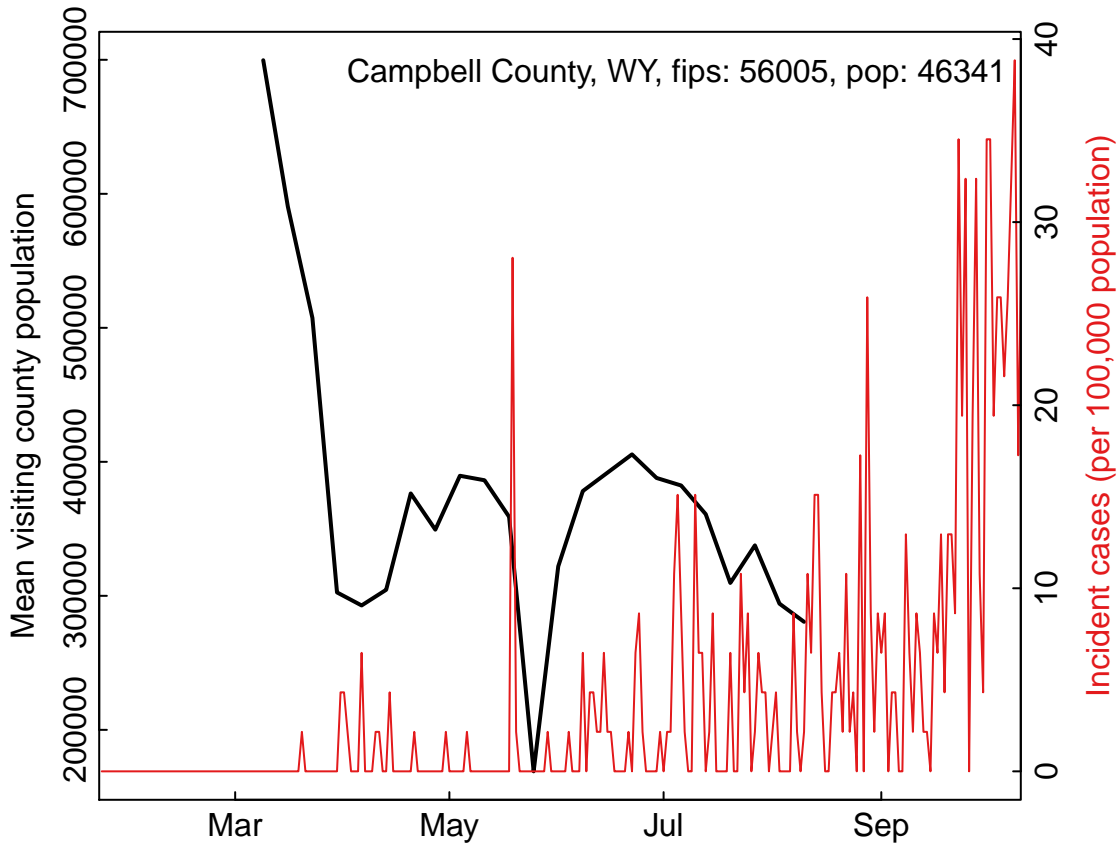

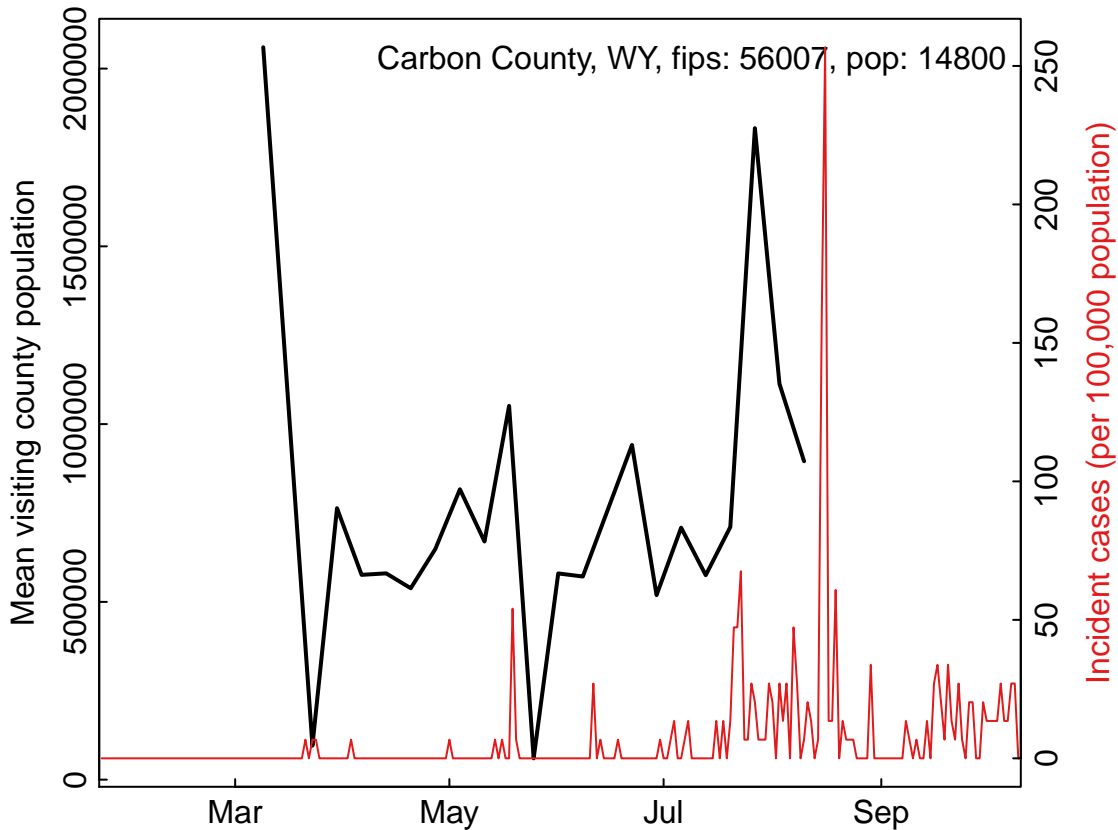

Converse County, WY, fips: 56009, pop: 13822

Mean visiting county population

1000000  
600000  
200000

Mar

May

Jul

Sep

Incident cases (per 100,000 population)

80  
60  
40  
20  
0

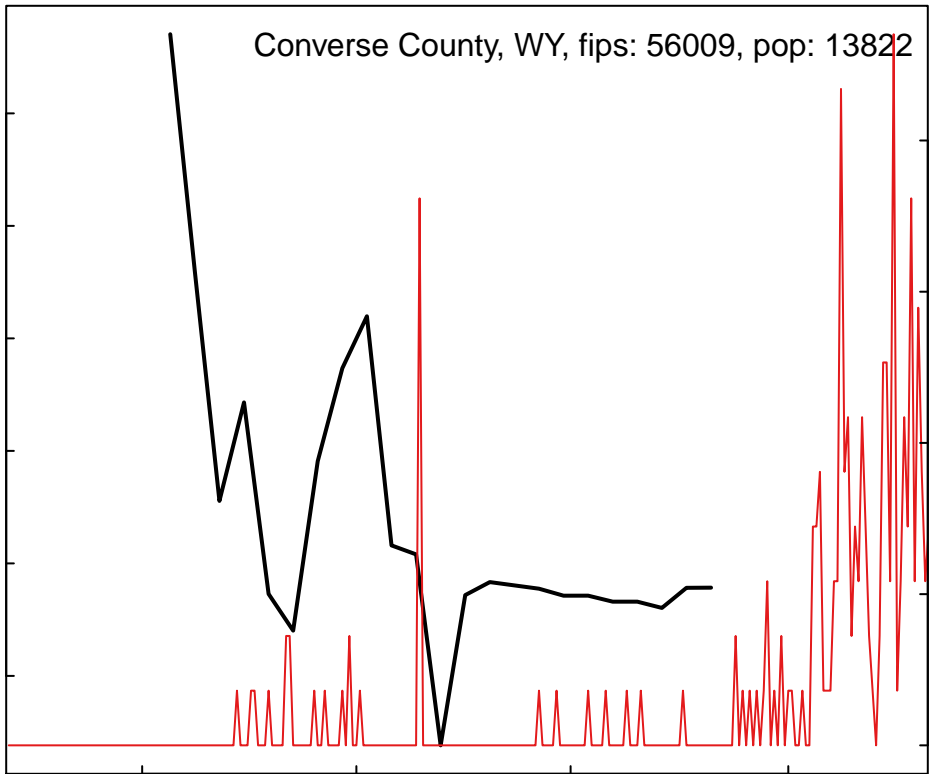

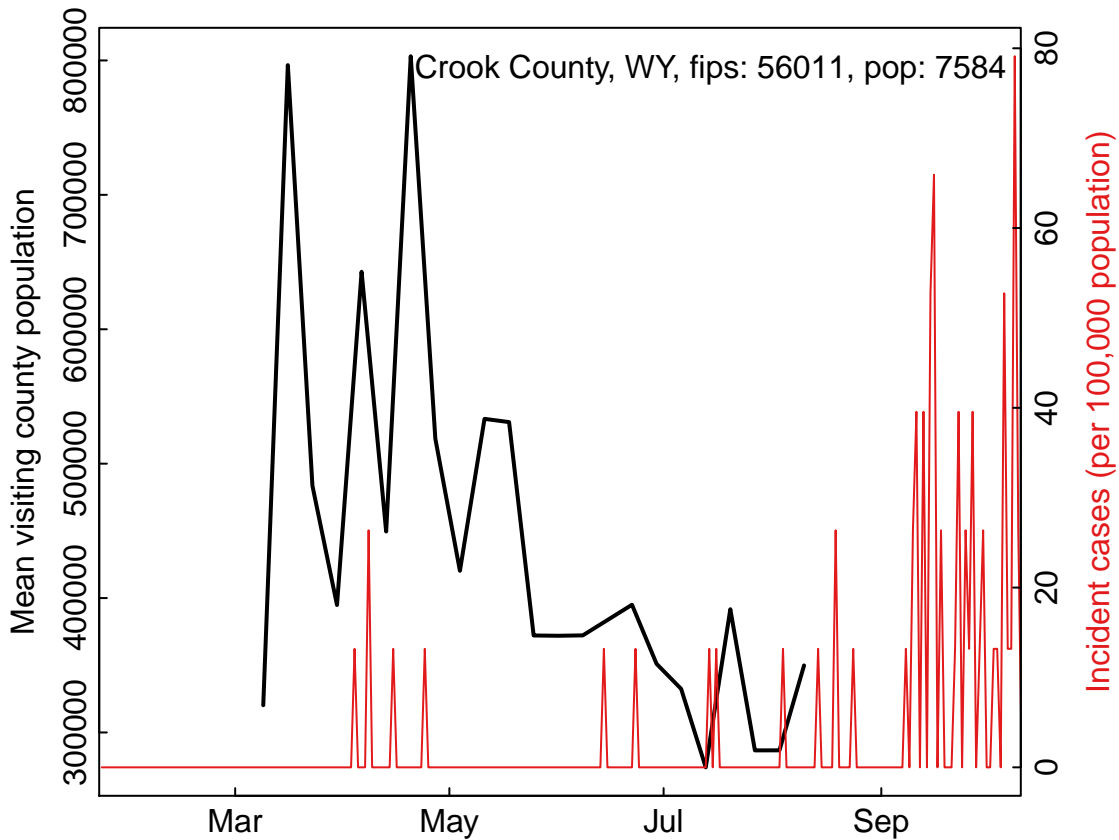

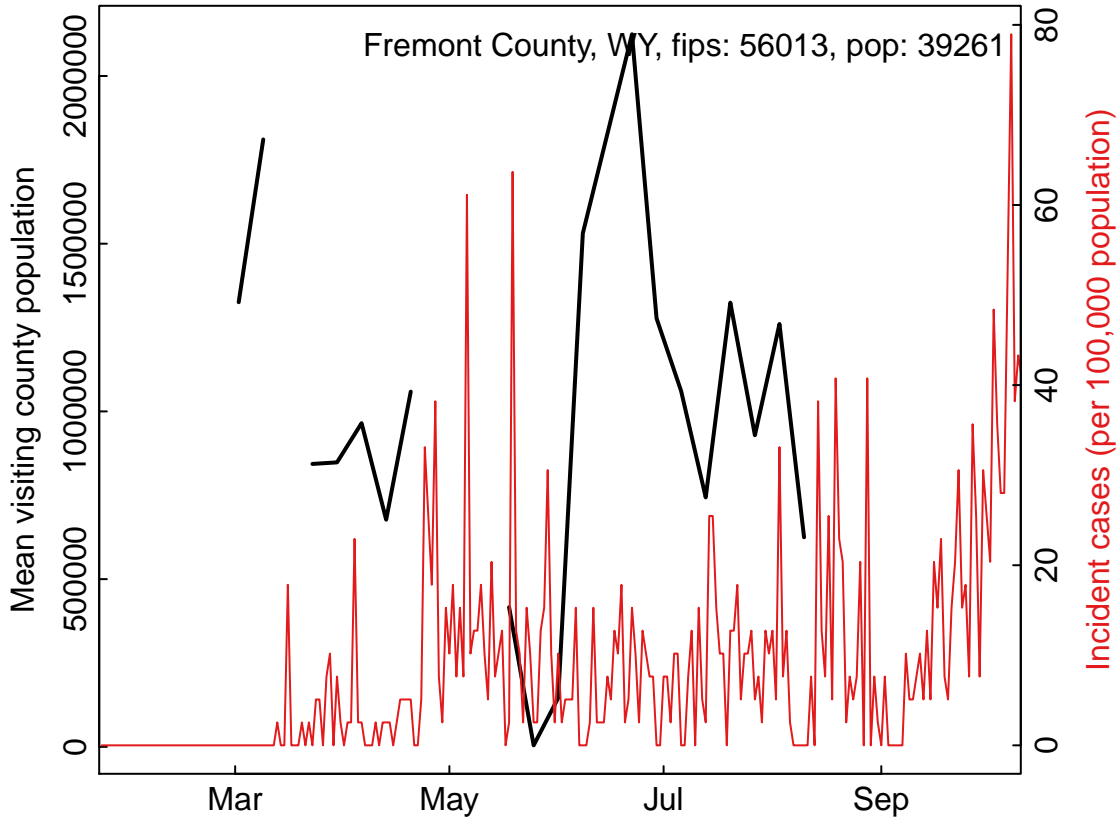

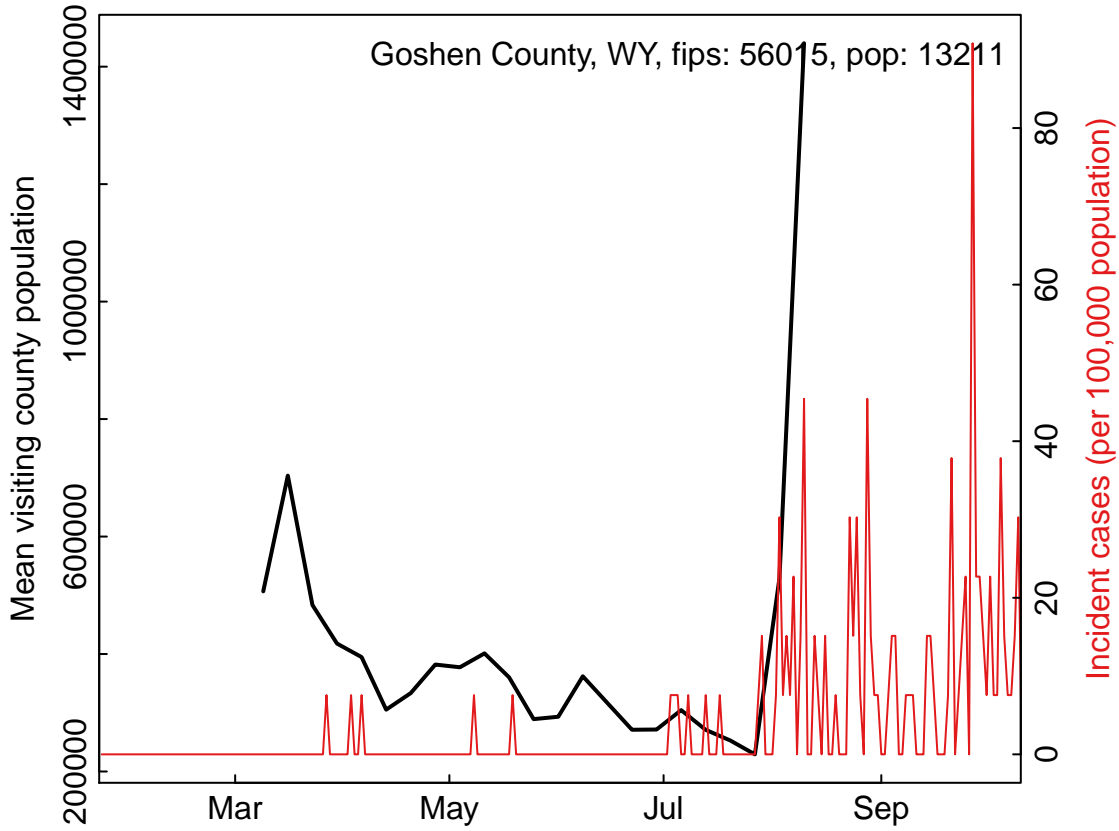

Hot Springs County, WY, fips: 56017, pop: 4413

Mean visiting county population

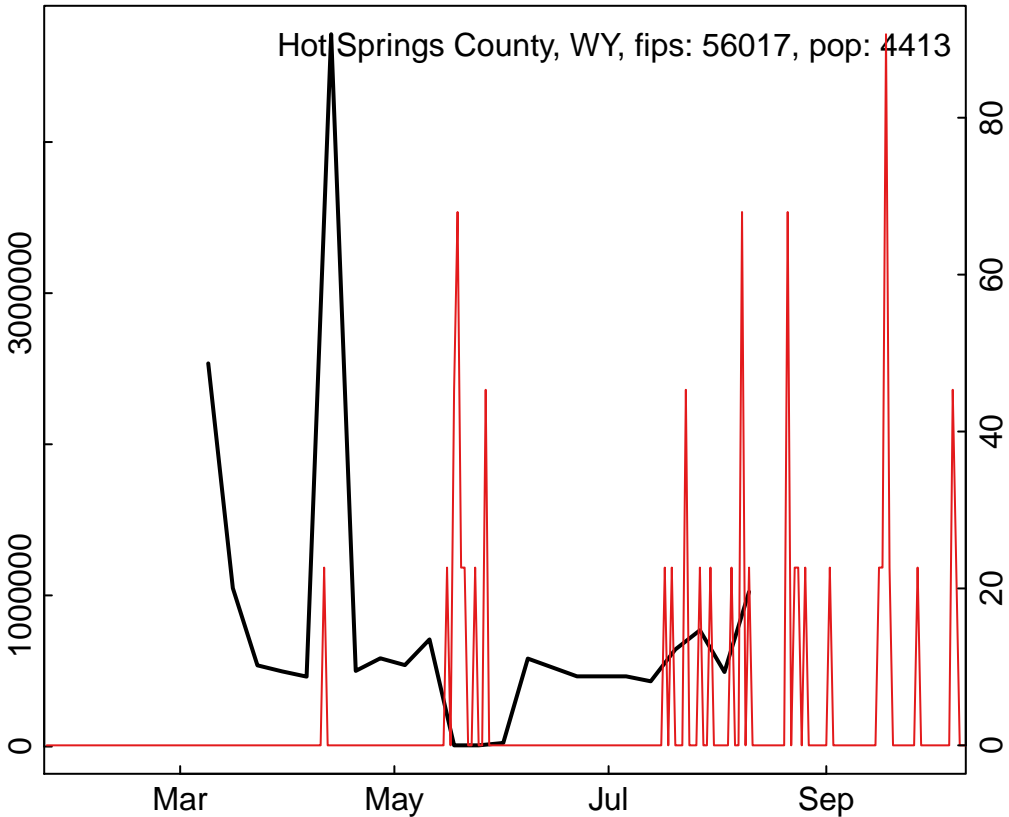

Incident cases (per 100,000 population)

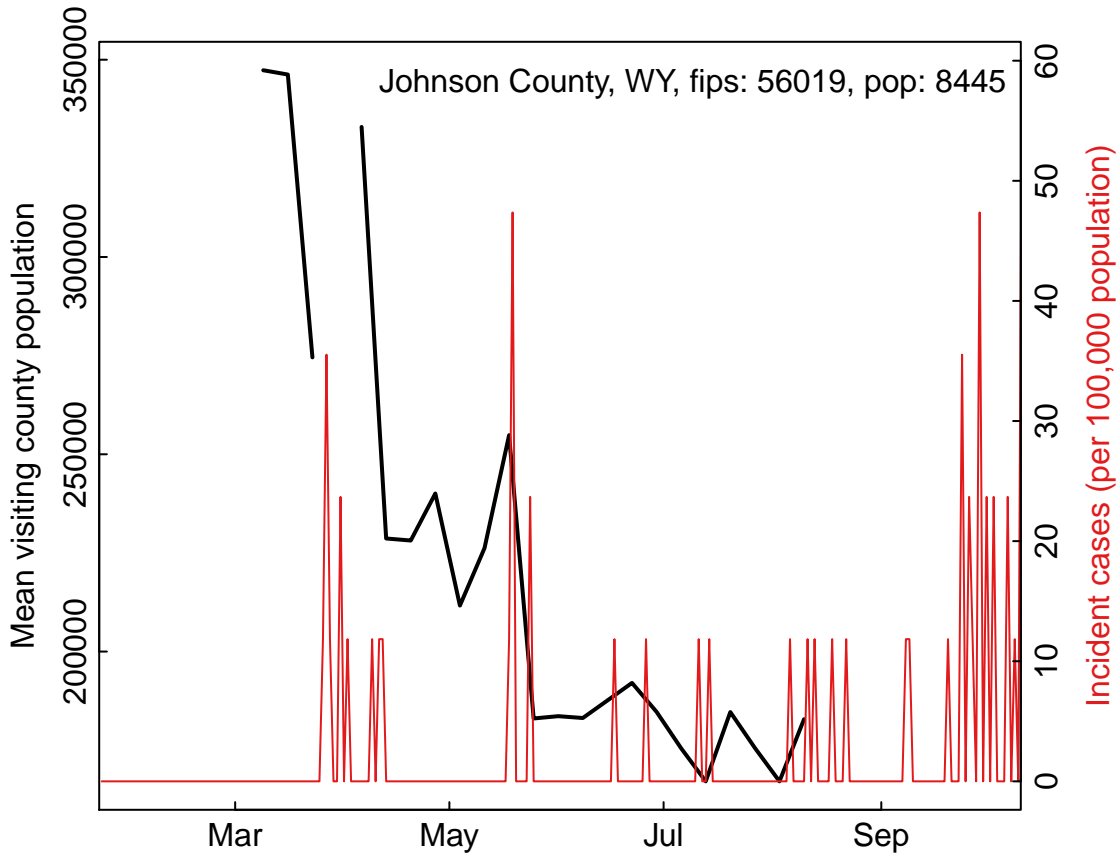



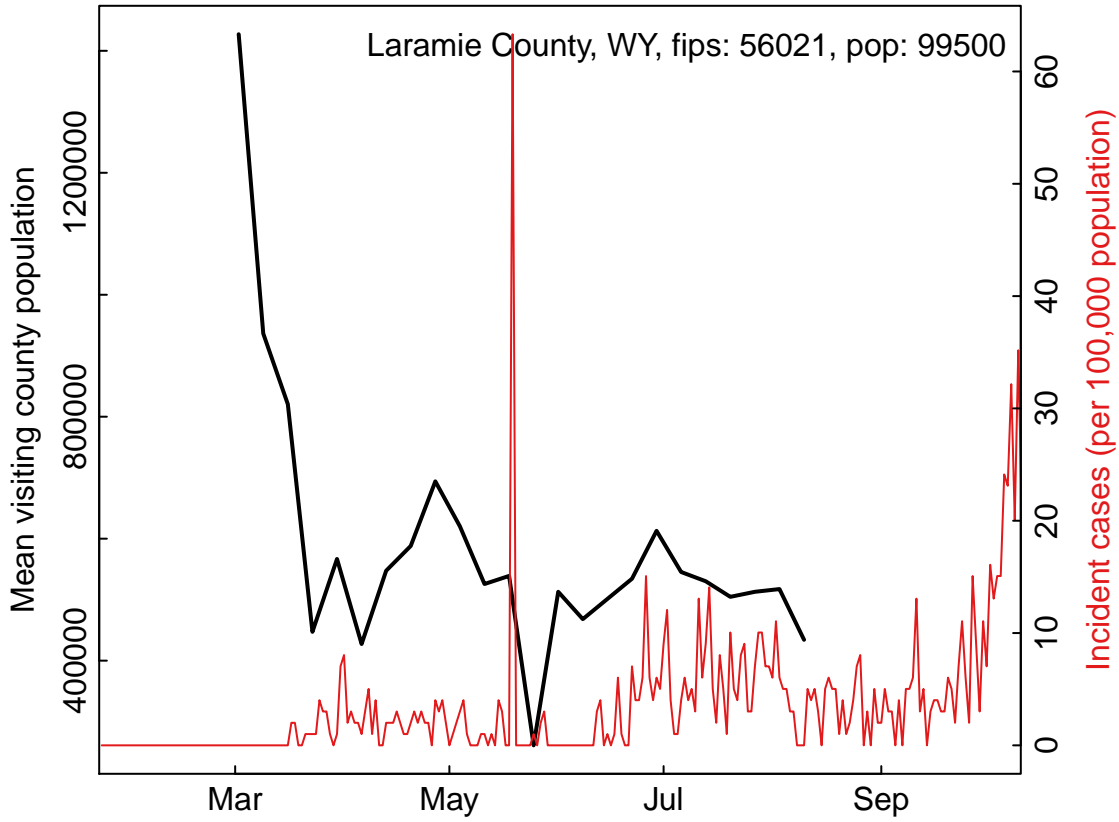

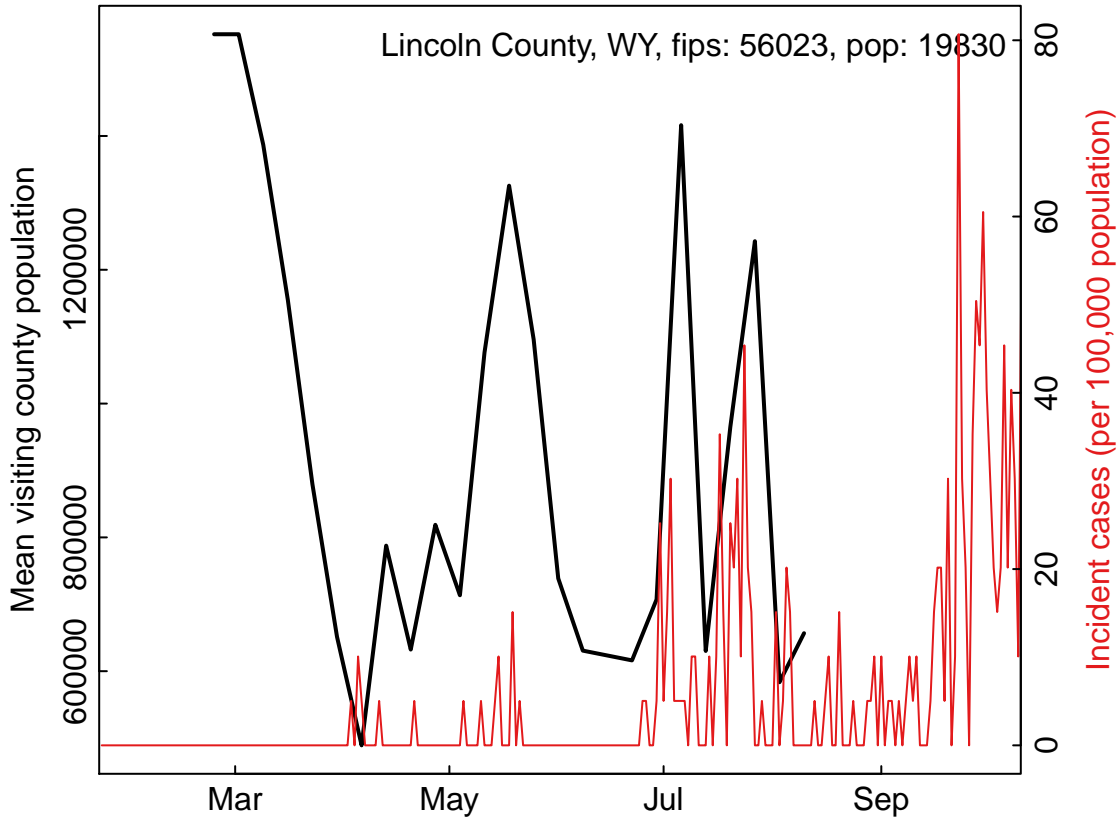

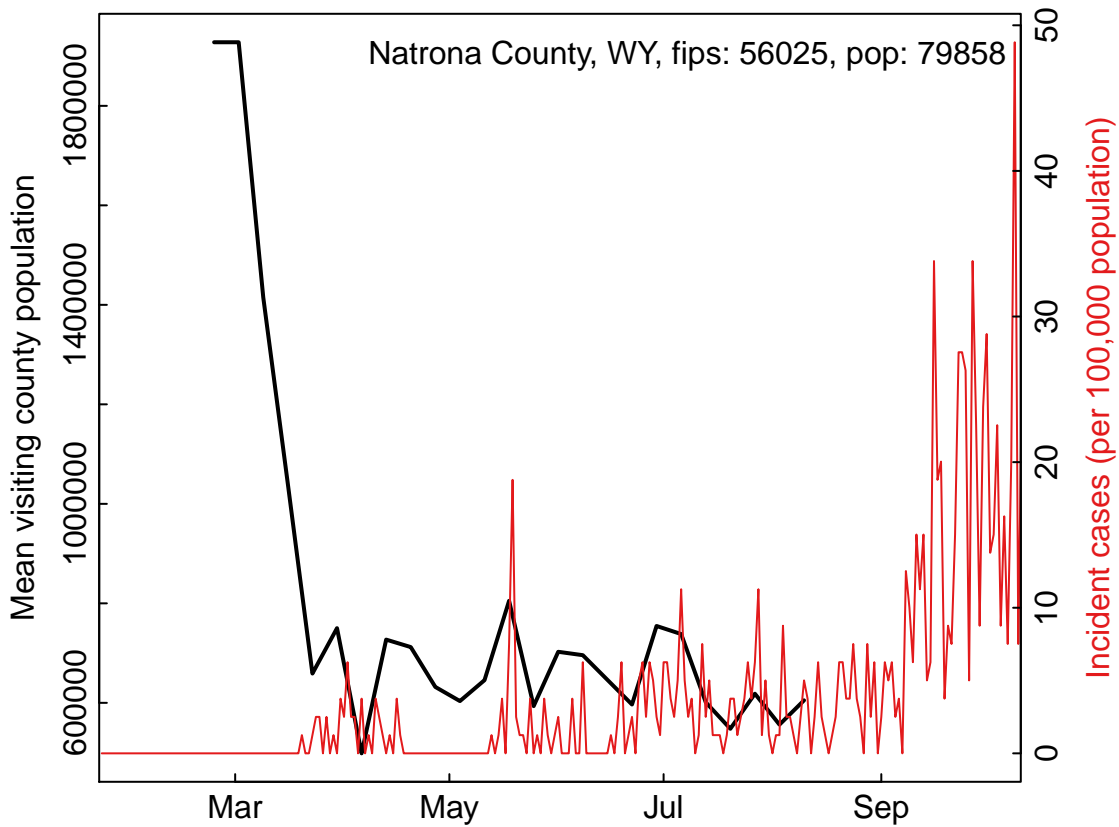

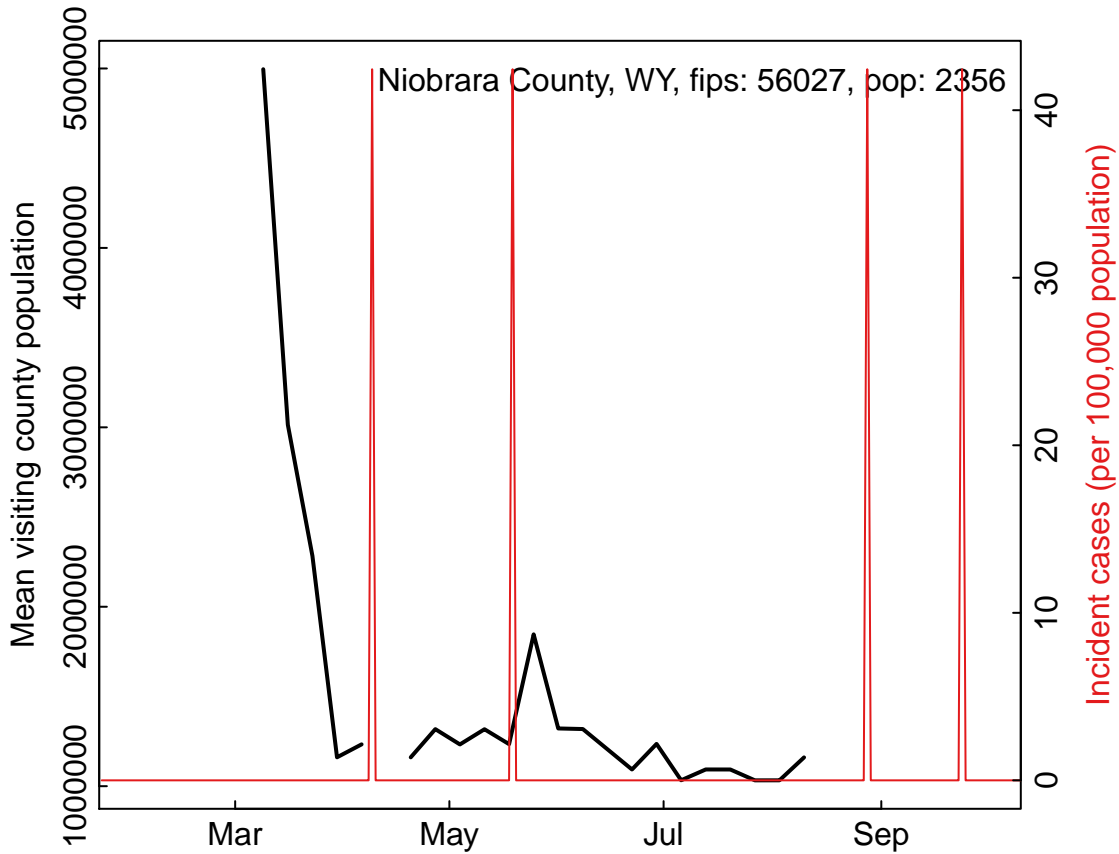

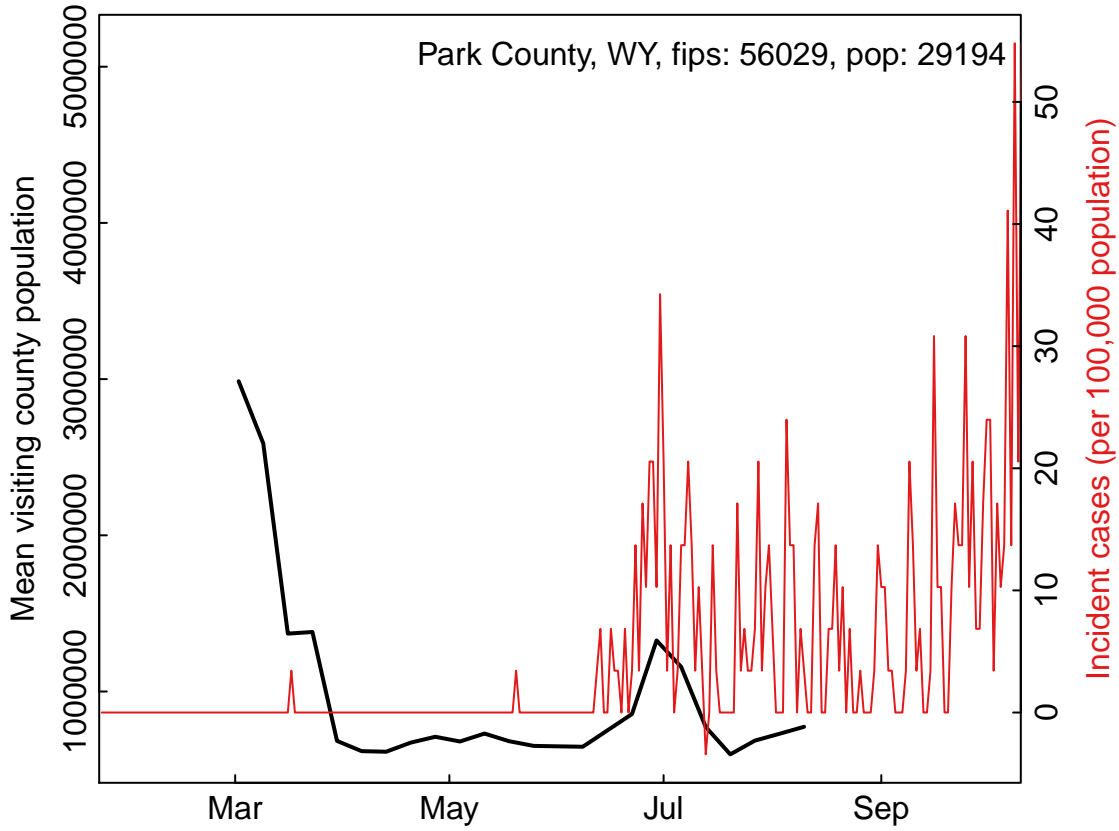

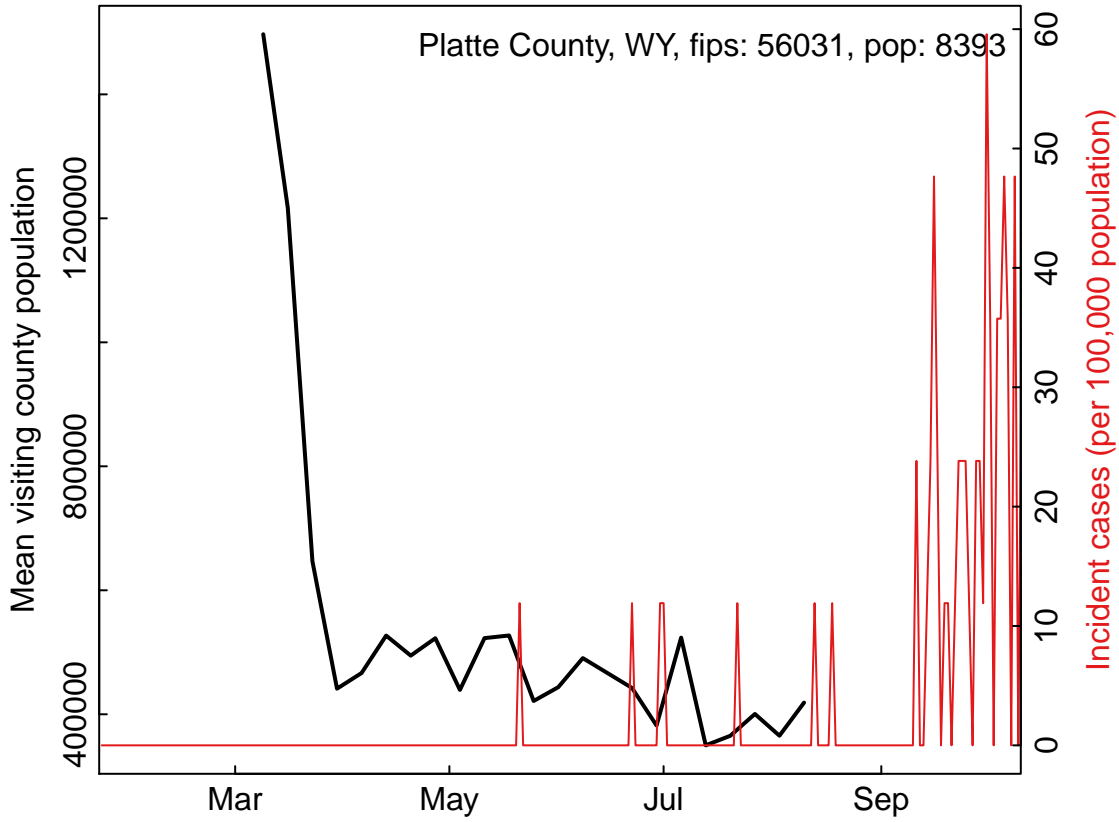

Sheridan County, WY, fips: 56033, pop: 30485

Mean visiting county population

500000  
1500000  
2500000

Mar

May

Jul

Sep

Incident cases (per 100,000 population)

0  
10  
20  
30  
40  
50  
60

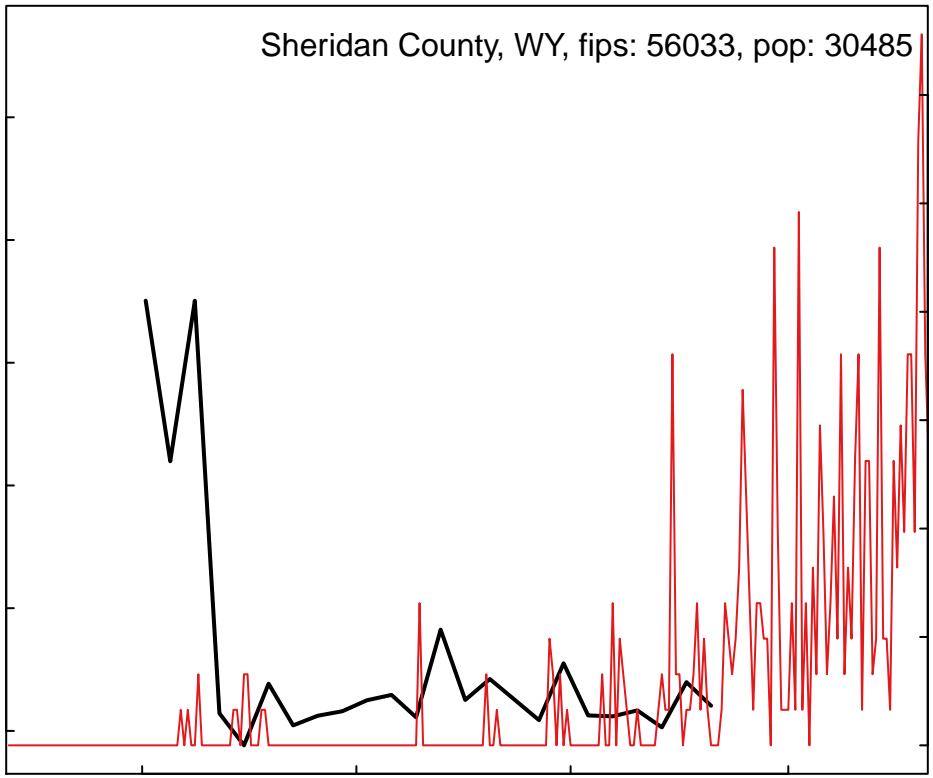

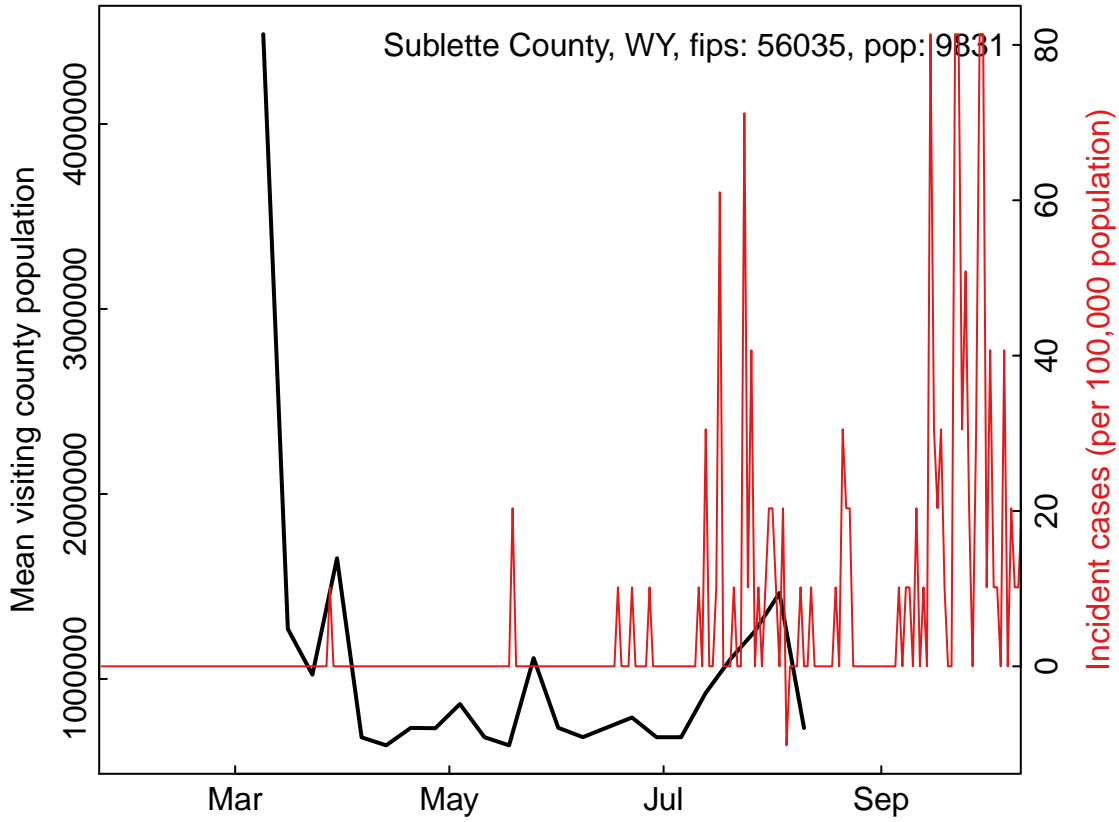



Sweetwater County, WY, fips: 56037, pop: 42343

Mean visiting county population

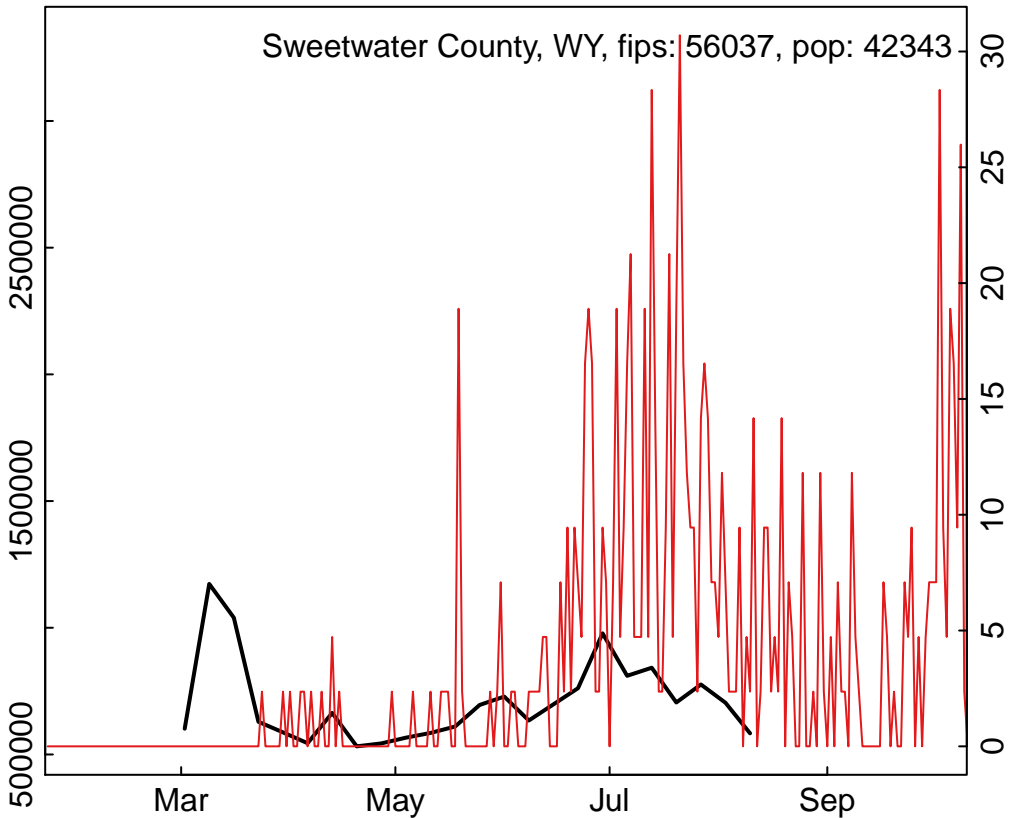

Incident cases (per 100,000 population)

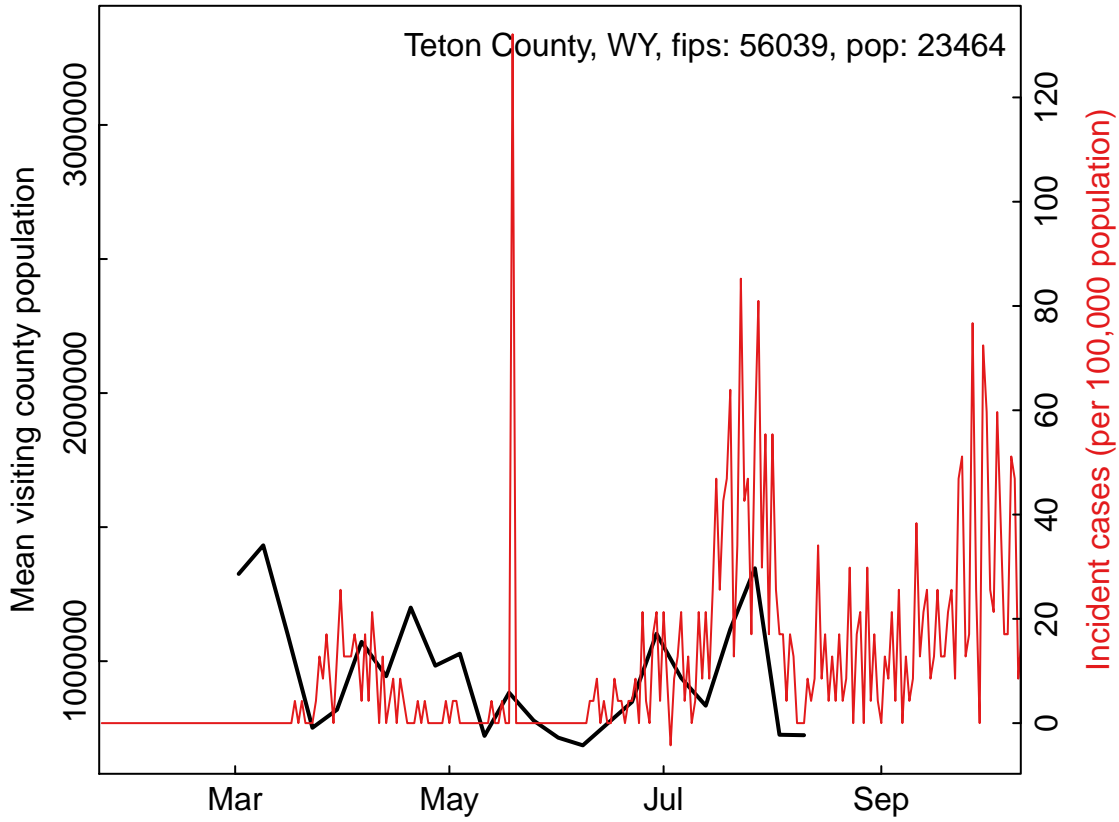

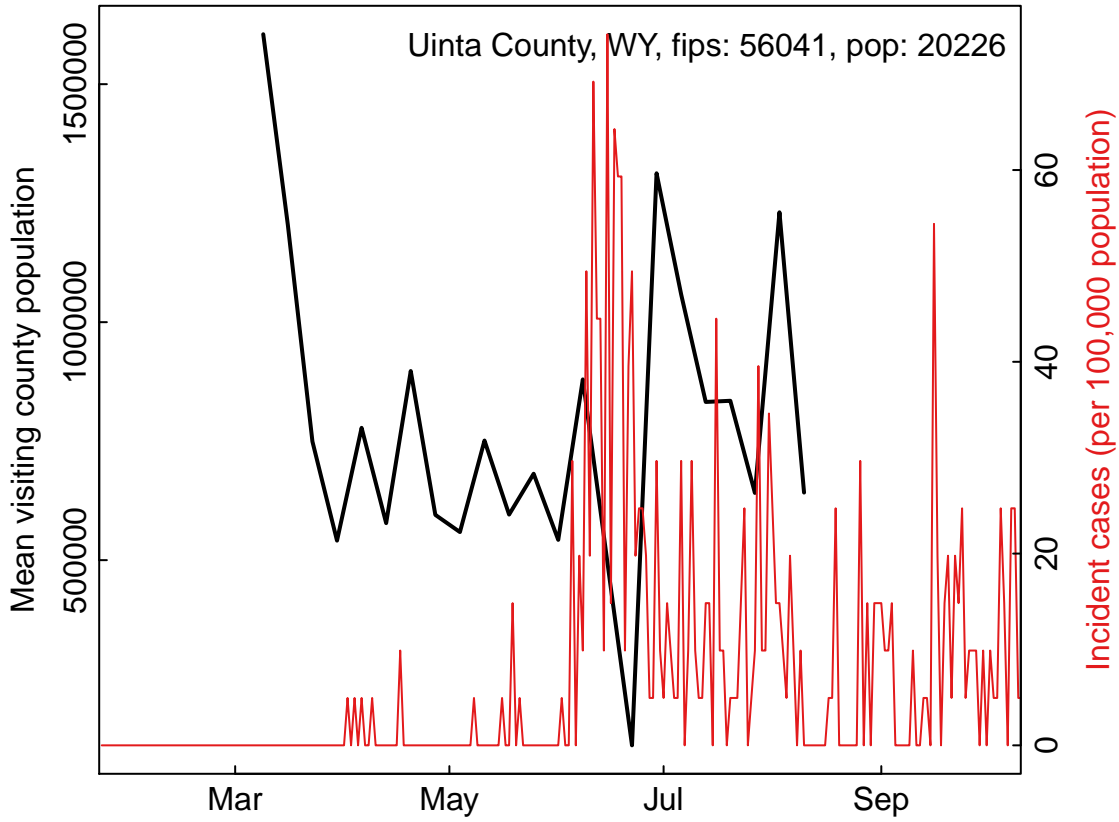

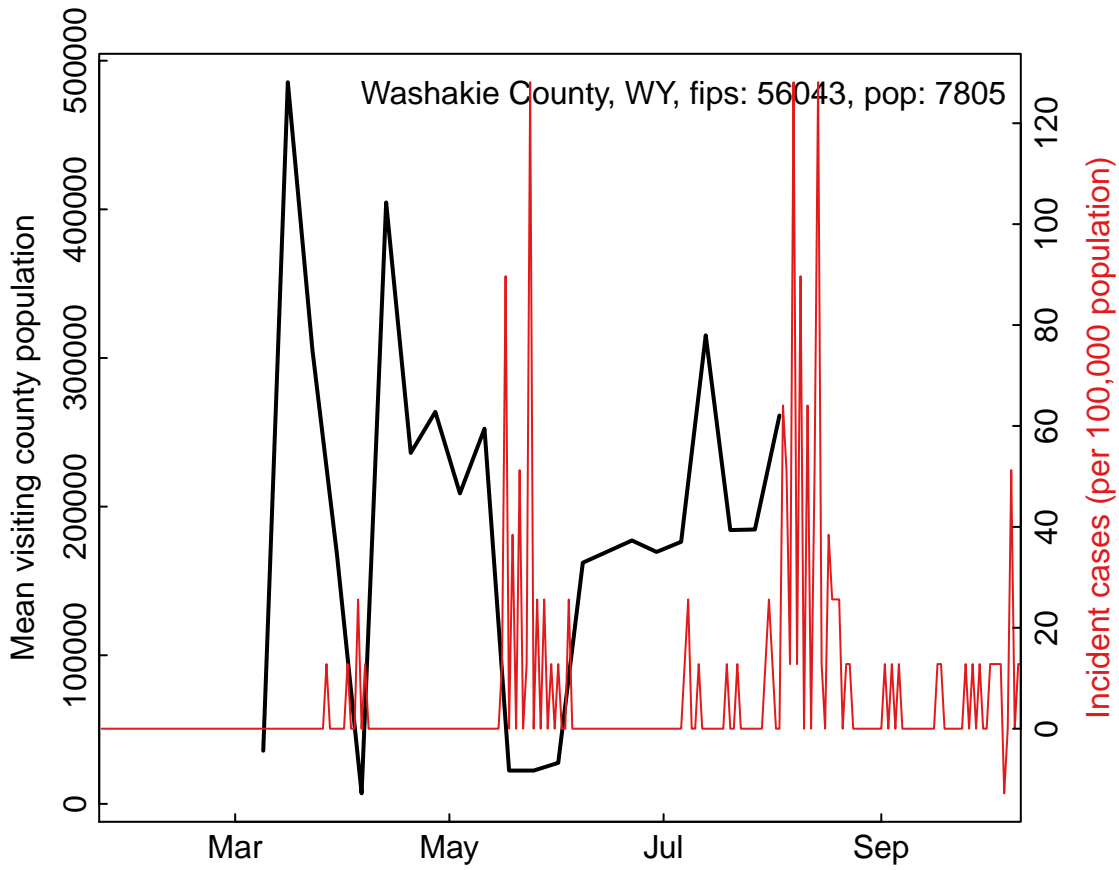

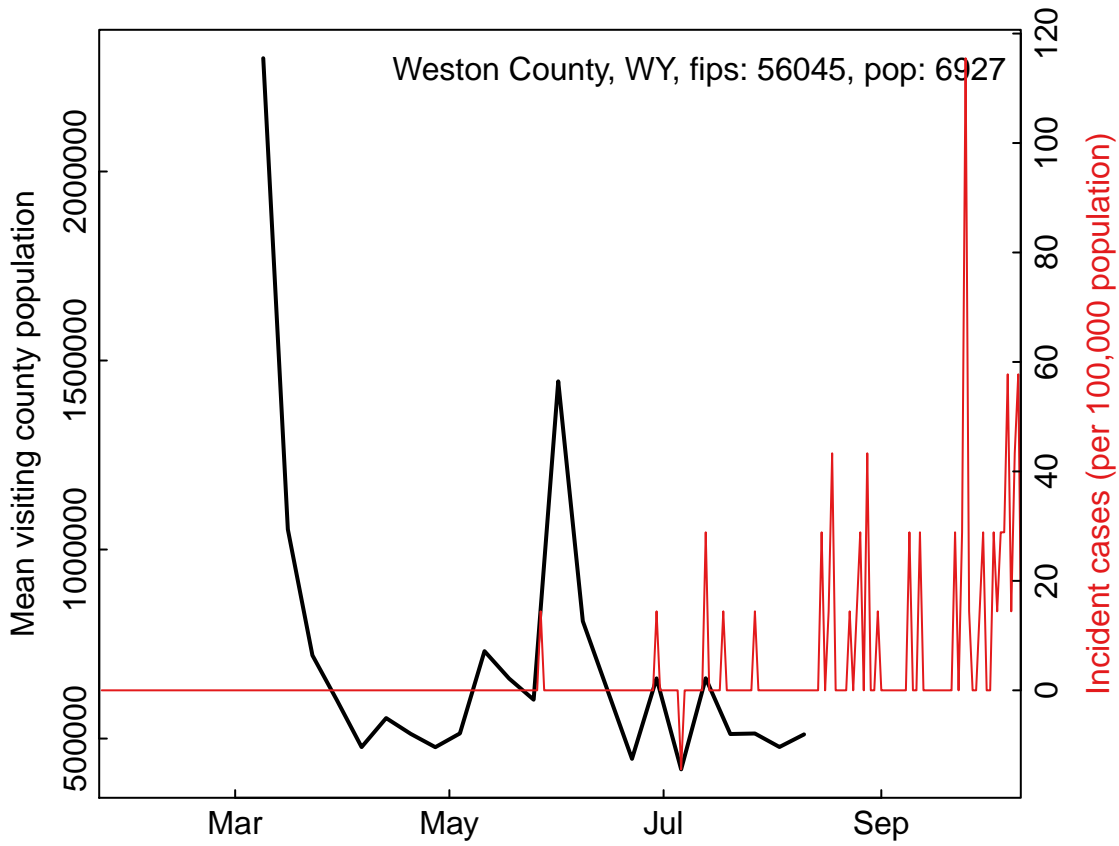

Supplement: 44263_2023_28_MOESM2_ESM.pdf [file 44263_2023_28_MOESM2_ESM.pdf]
