# Supplementary material for: The unintended consequences of inconsistent closure policies and mobility restrictions during epidemics
Source: PubMed Central journal article supplement (PMC11116187; doi:10.1186/s44263-023-00028-z), 2023-12-04

# **Additional File 3:**

## **The unintended consequences of inconsistent closure policies and mobility restrictions during epidemics**

**Benjamin M. Althouse<sup>1,2</sup>, Brendan Wallace<sup>3</sup>, B. K. M. Case<sup>4,5</sup>, Samuel V. Scarpino<sup>5,6,7,8,9</sup>, Antoine Allard<sup>5,10,11</sup>, Andrew M. Berdahl<sup>12</sup>, Easton R. White<sup>13,14</sup>, and Laurent Hébert-Dufresne<sup>4,5,10,\*</sup>**

<sup>1</sup>University of Washington, Seattle, WA 98105

<sup>2</sup>New Mexico State University, Las Cruces, NM 88003

<sup>3</sup>Department of Applied Mathematics, University of Washington, Seattle, WA 98195, USA

<sup>4</sup>Department of Computer Science, University of Vermont, Burlington, VT 05405, USA

<sup>5</sup>Vermont Complex Systems Center, University of Vermont, Burlington, VT 05405, USA

<sup>6</sup>Institute for Experiential AI, Northeastern University, Boston, Massachusetts, USA

<sup>7</sup>Department of Health Sciences, Northeastern University, Boston, MA, USA

<sup>8</sup>Khoury College of Computer Sciences, Northeastern University, Boston, MA, USA

<sup>9</sup>Santa Fe Institute, Santa Fe, NM, USA

<sup>10</sup>Département de physique, de génie physique et d'optique, Université Laval, Québec (Québec), Canada G1V 0A6

<sup>11</sup>Centre interdisciplinaire en modélisation mathématique, Université Laval, Québec (Québec), Canada G1V 0A6

<sup>12</sup>School of Aquatic & Fishery Sciences, University of Washington, Seattle, WA 98195, USA

<sup>13</sup>Department of Biological Sciences, University of New Hampshire, Durham, NH, 03824, USA

<sup>14</sup>Gund Institute for Environment, University of Vermont, Burlington, VT 05405, USA

\*laurent.hebert-dufresne@uvm.edu

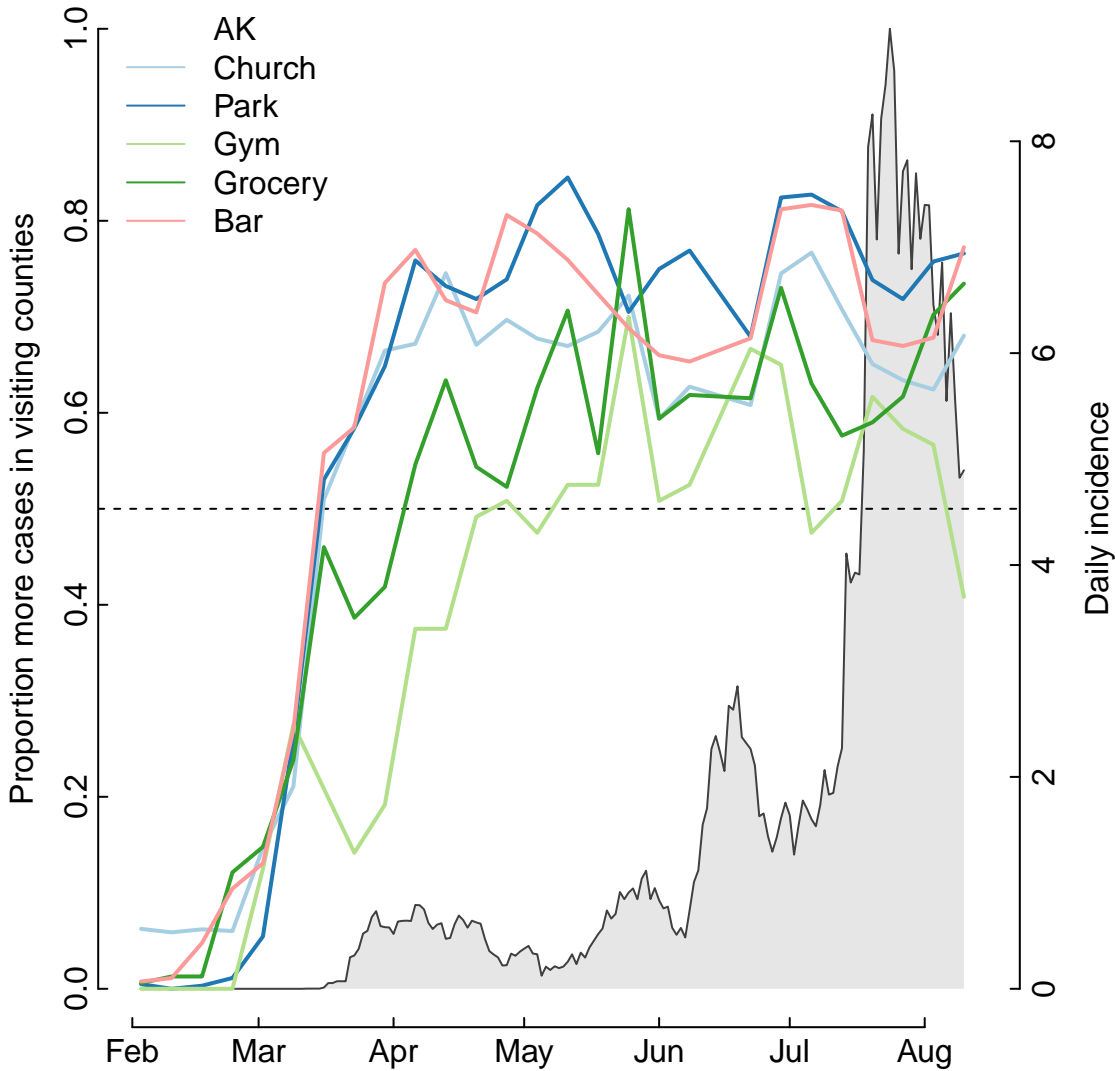



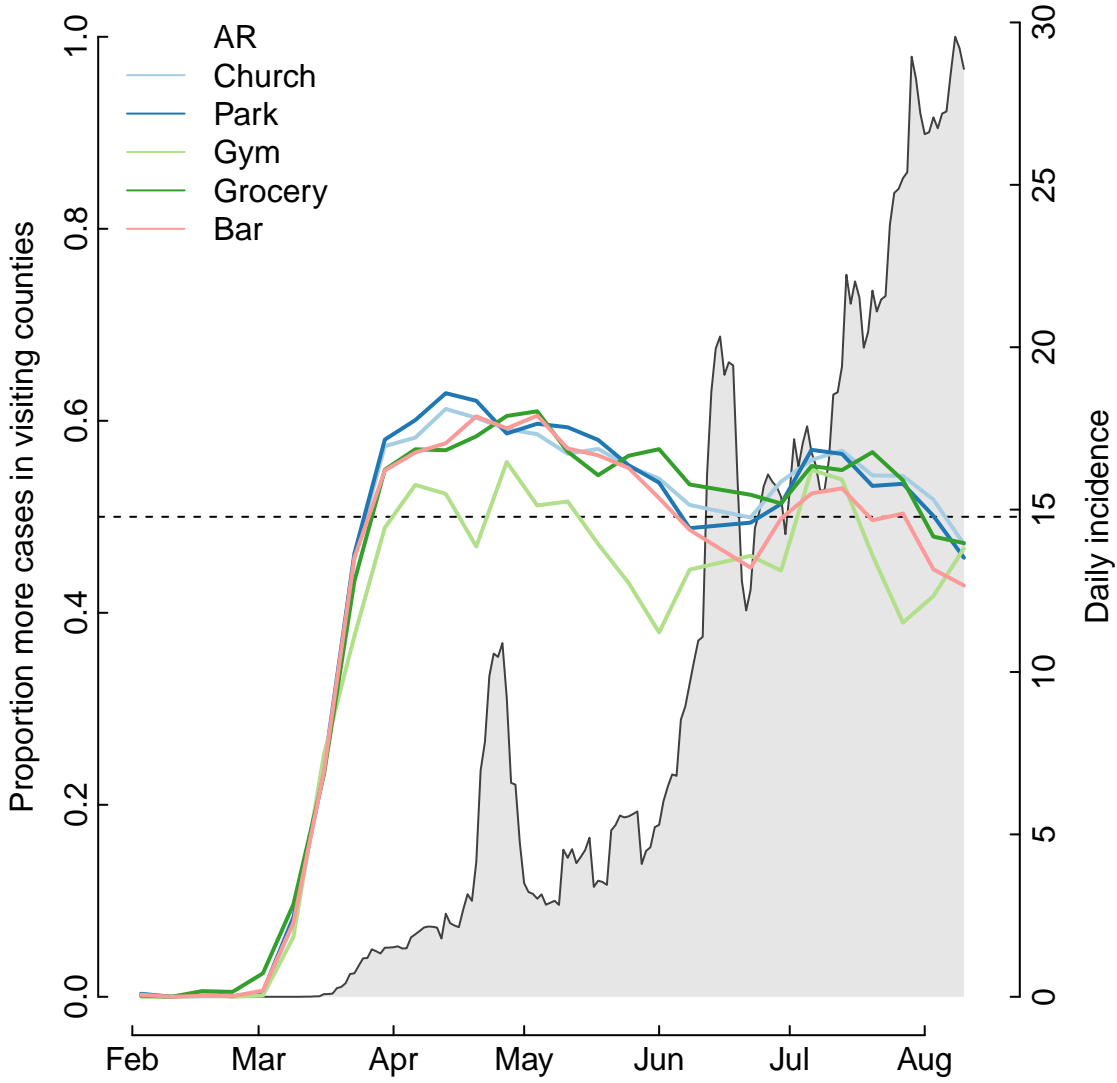

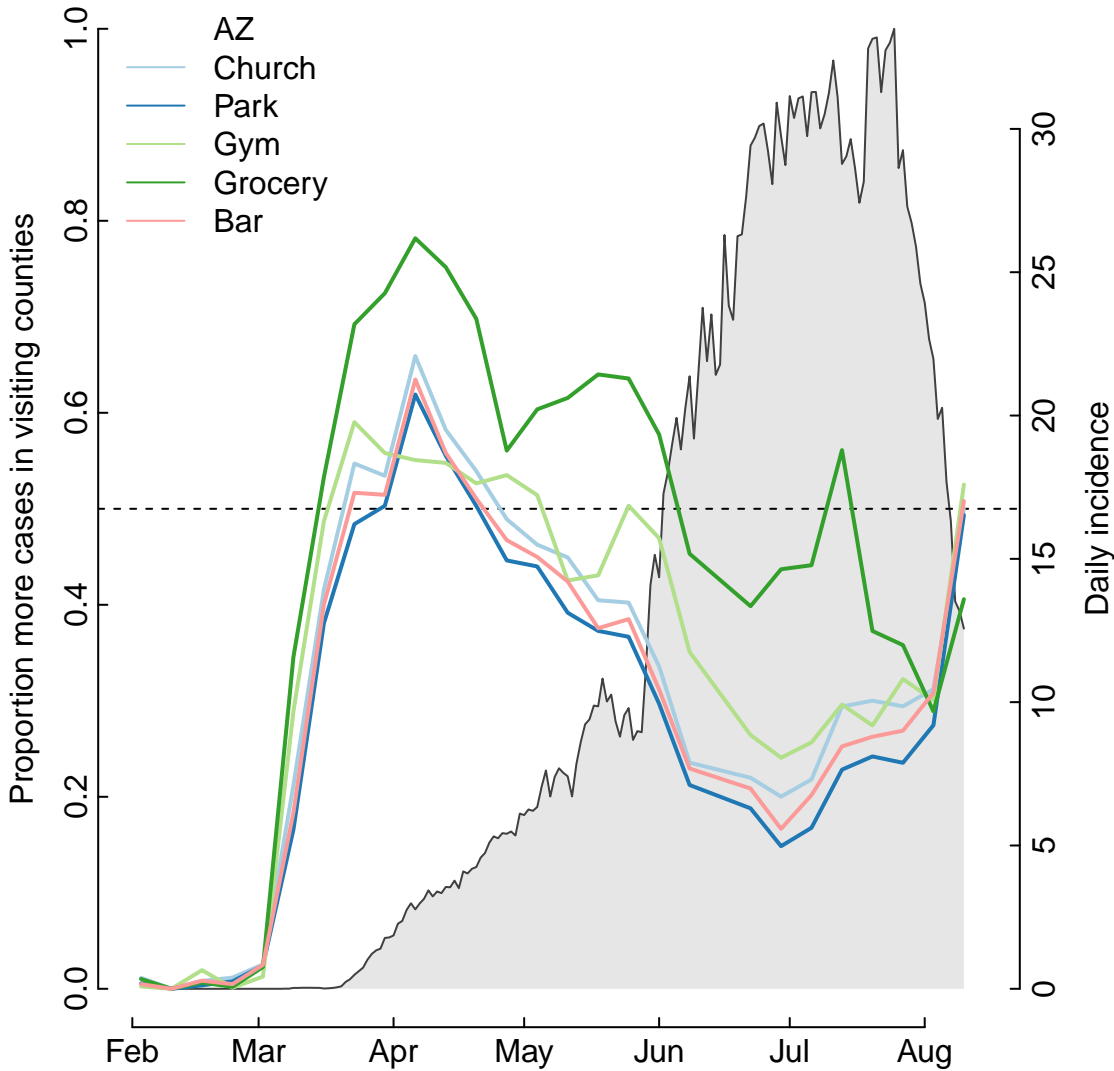

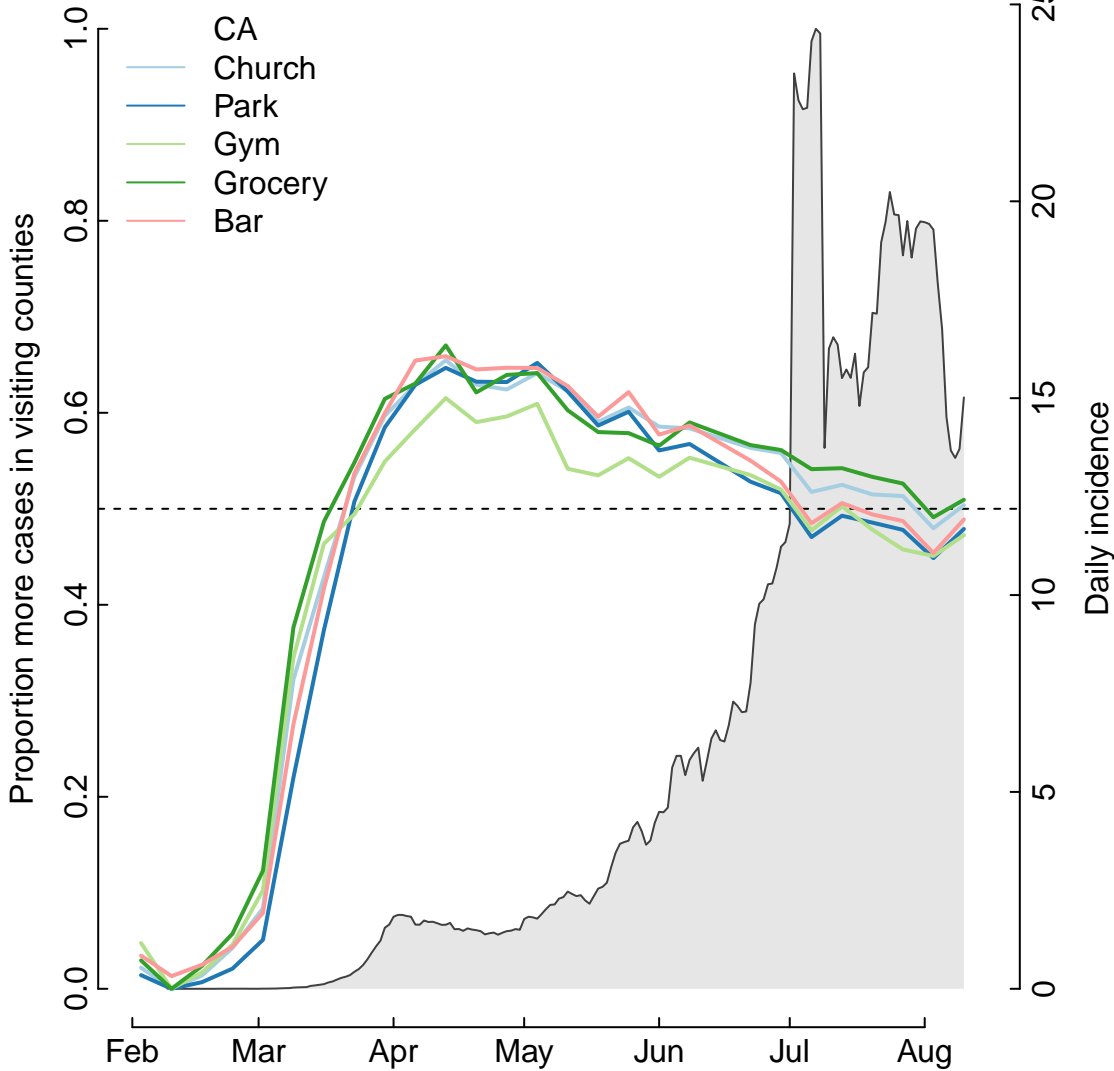



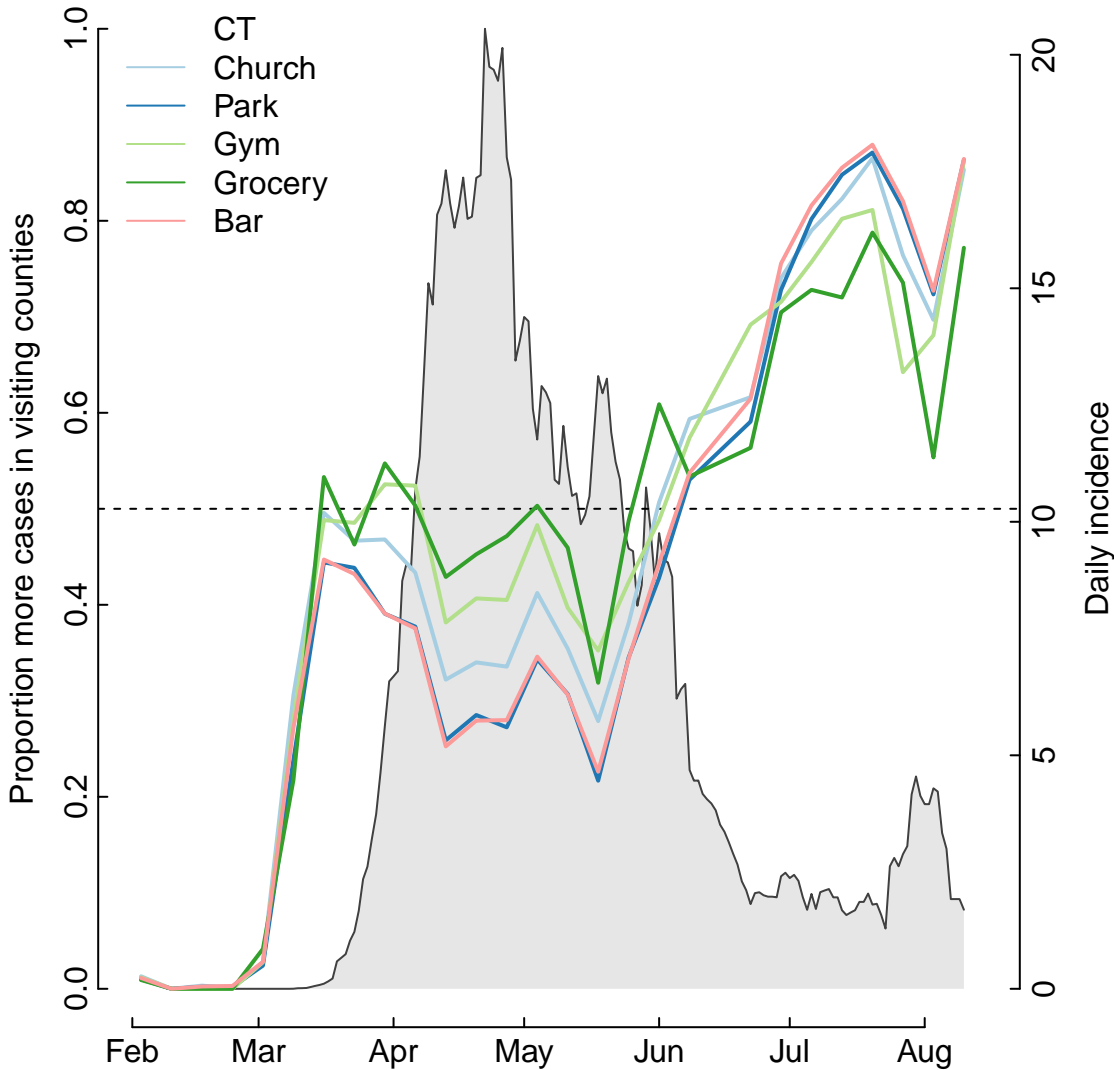



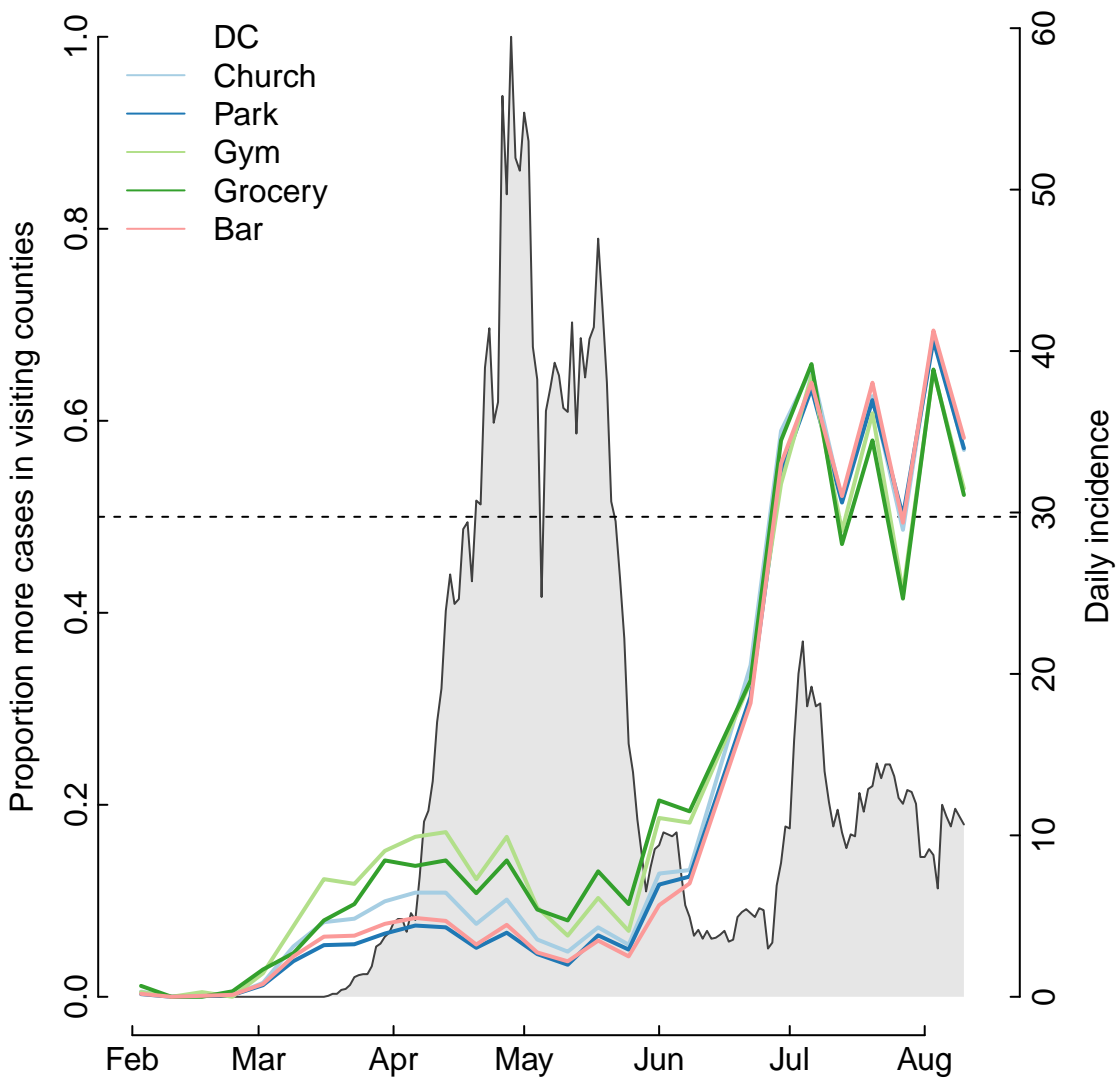

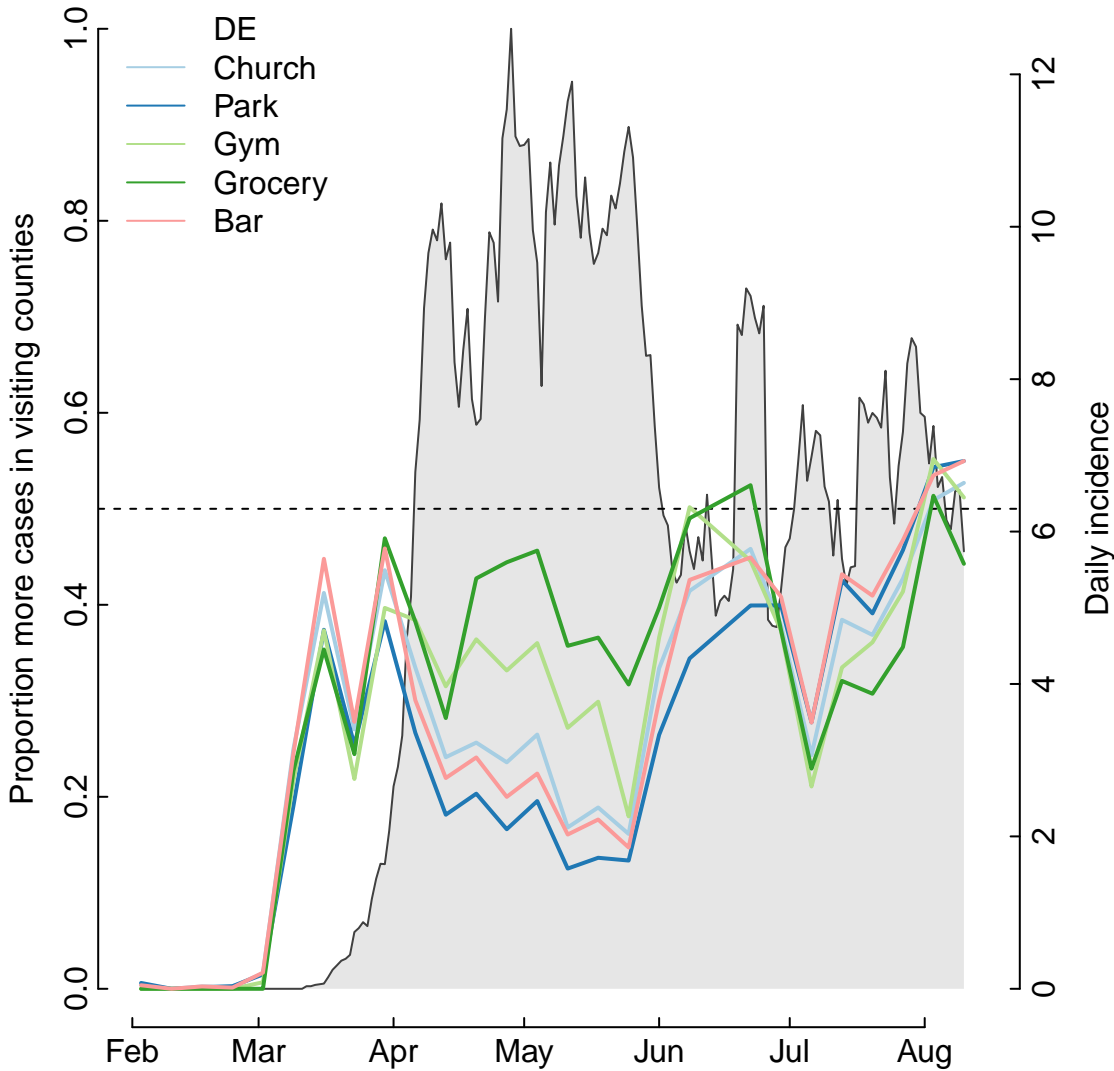

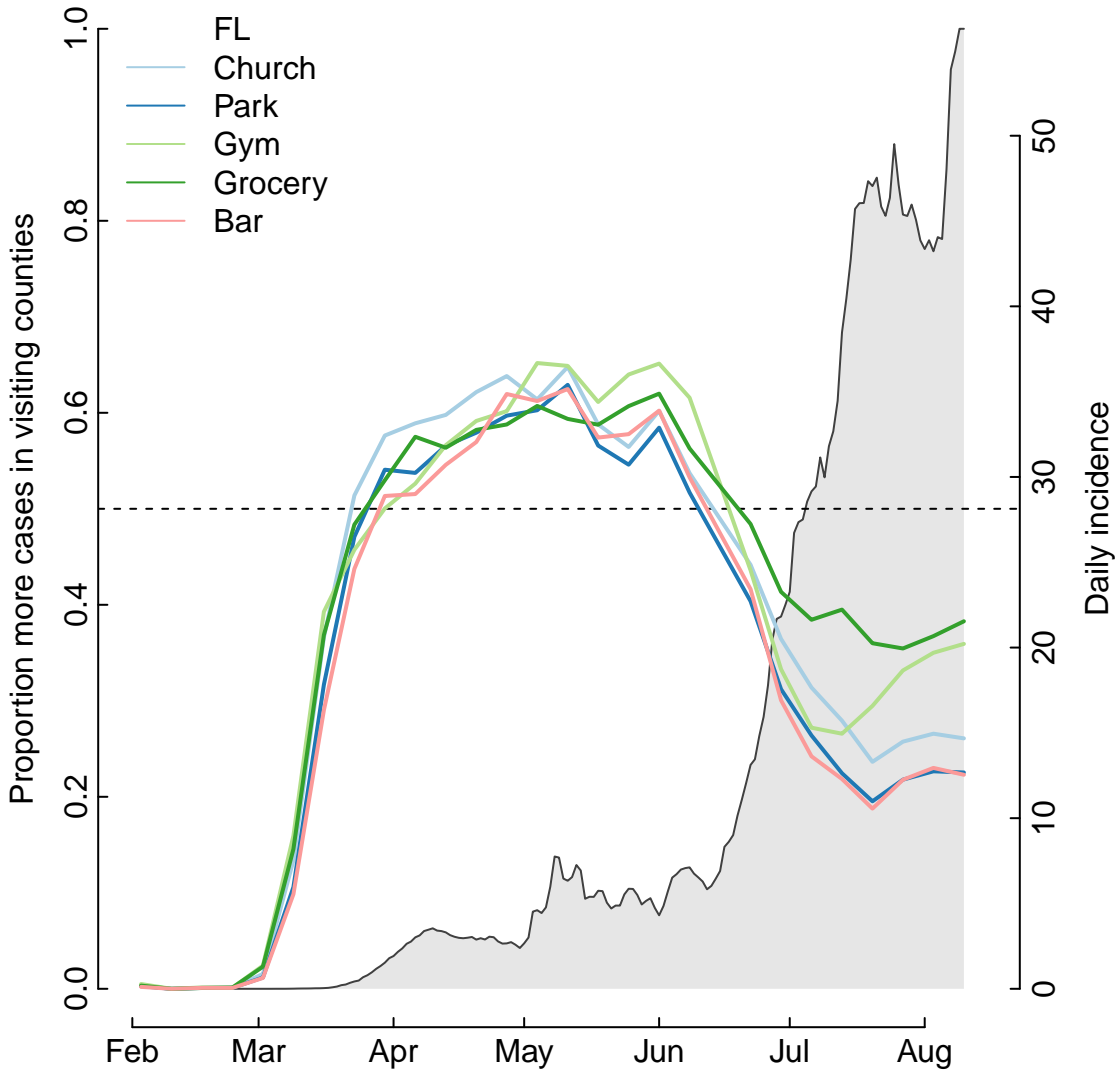



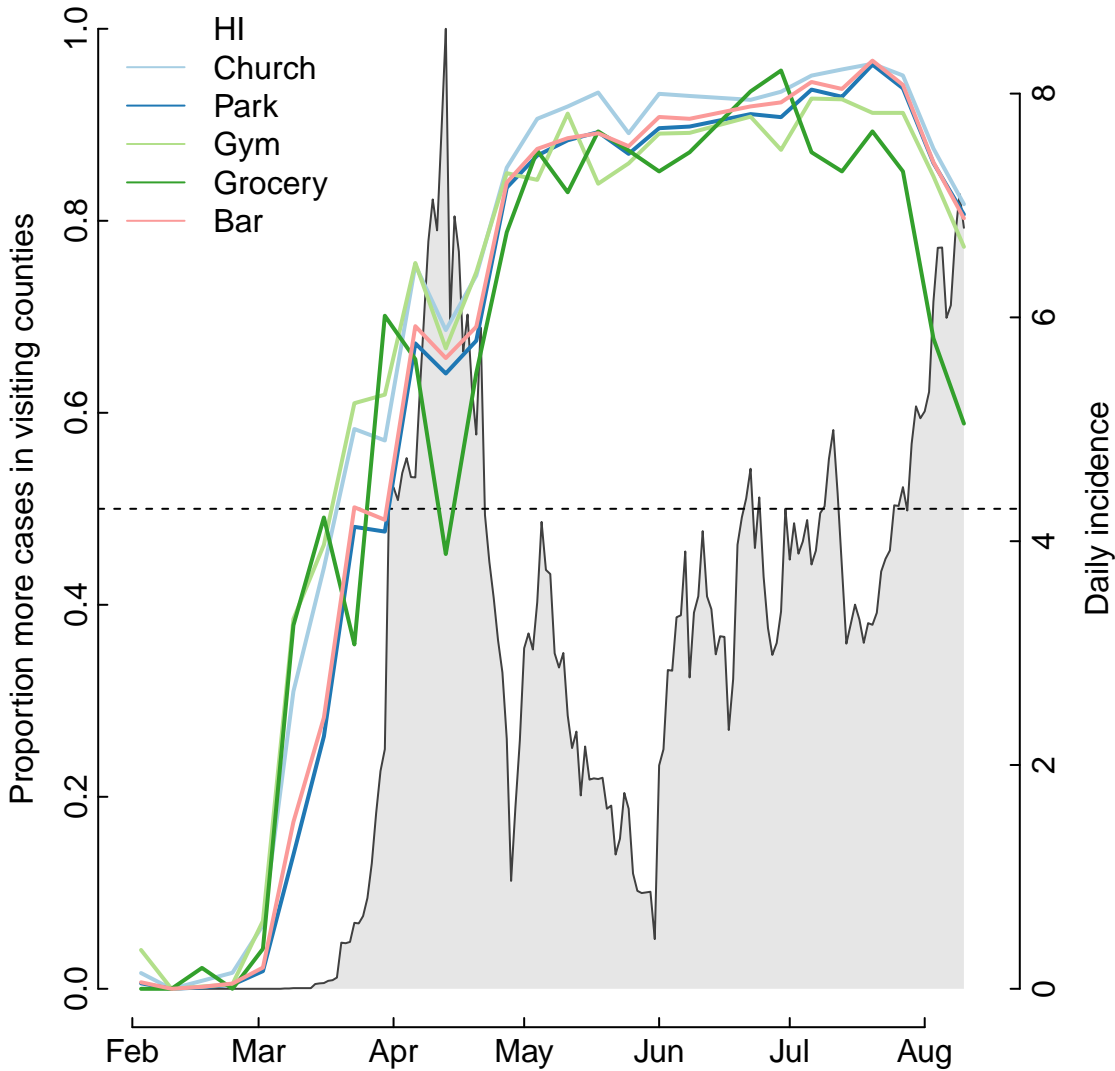

Proportion more cases in visiting counties

- IA
- Church
- Park
- Gym
- Grocery
- Bar

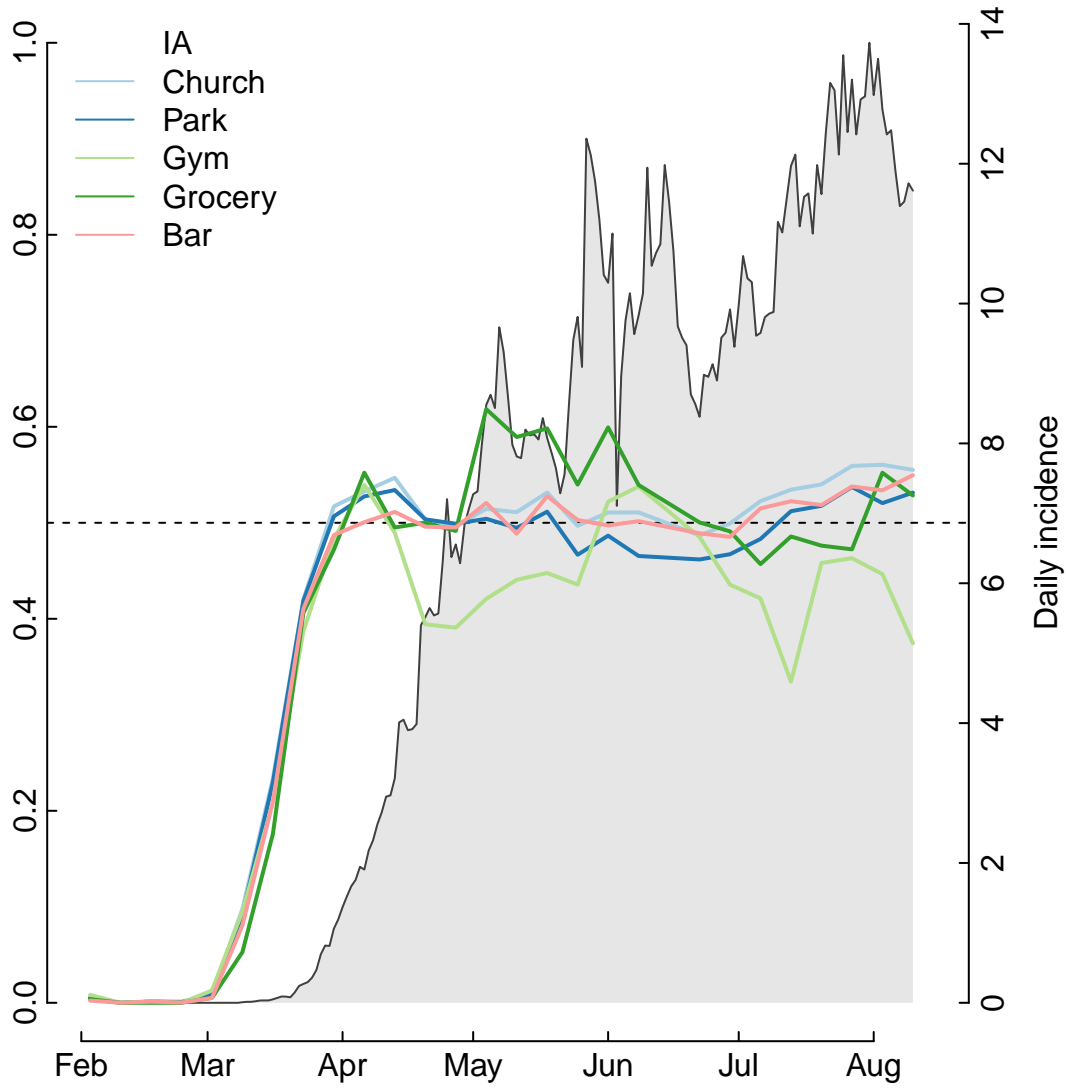

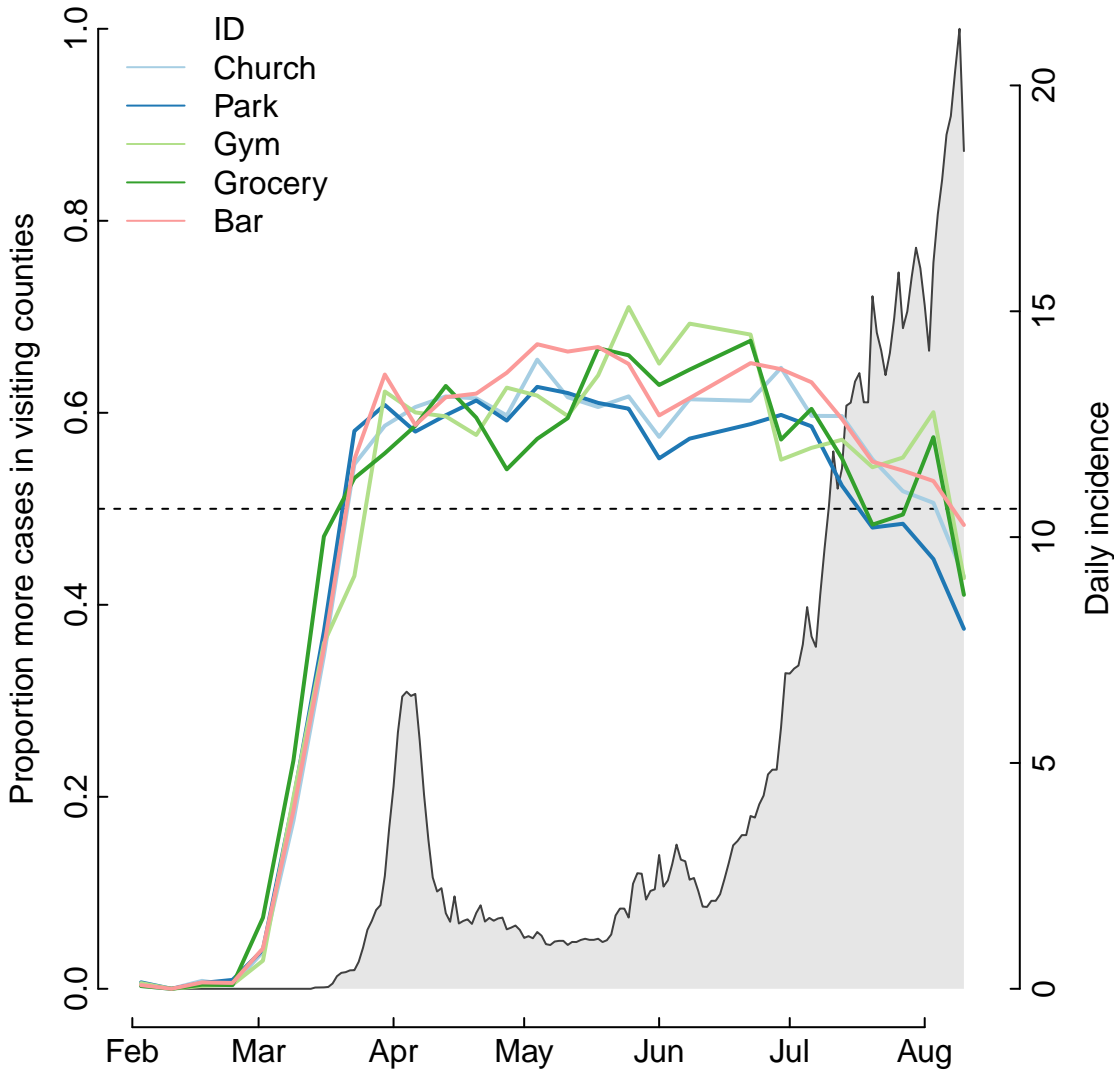

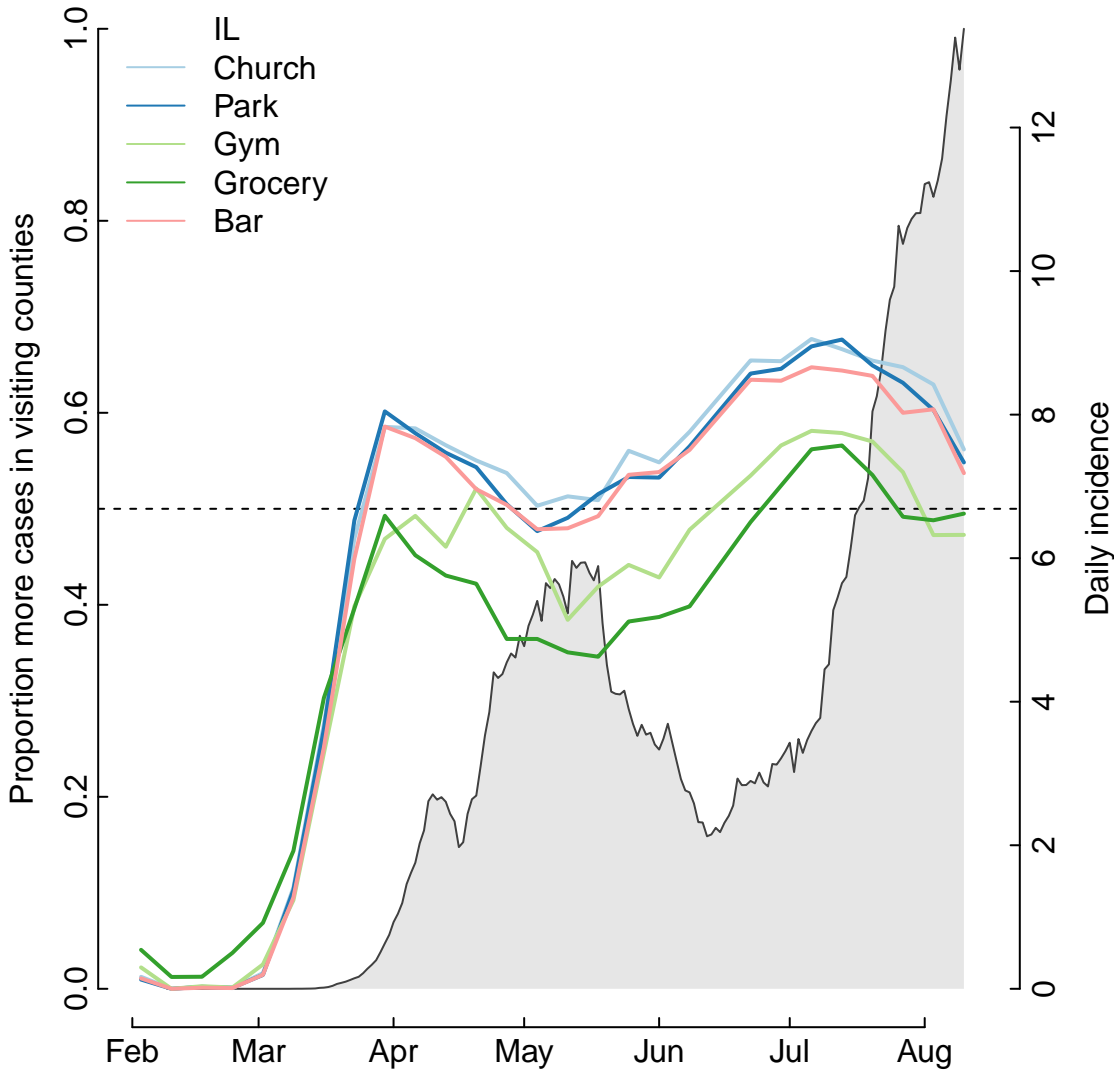



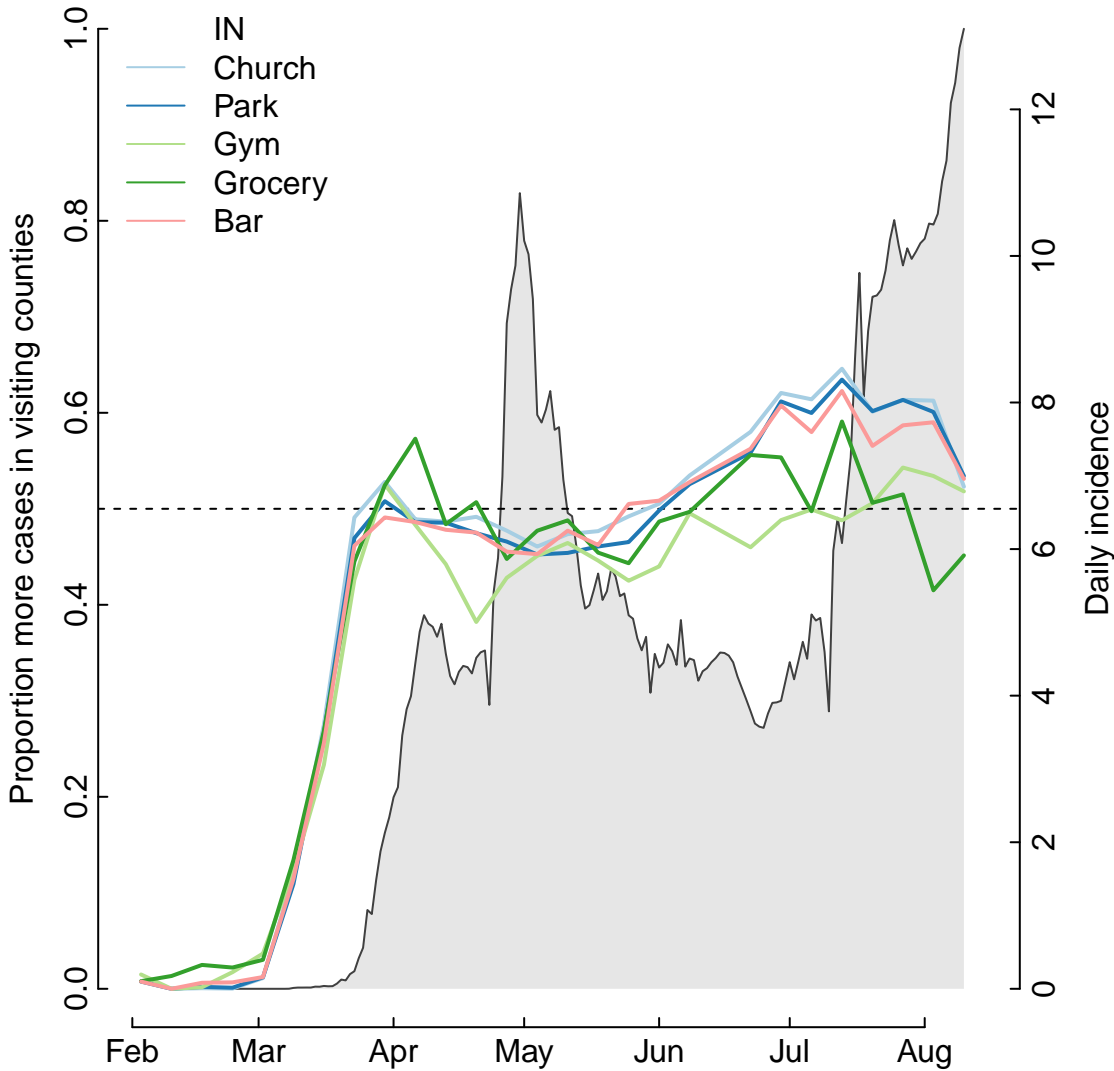

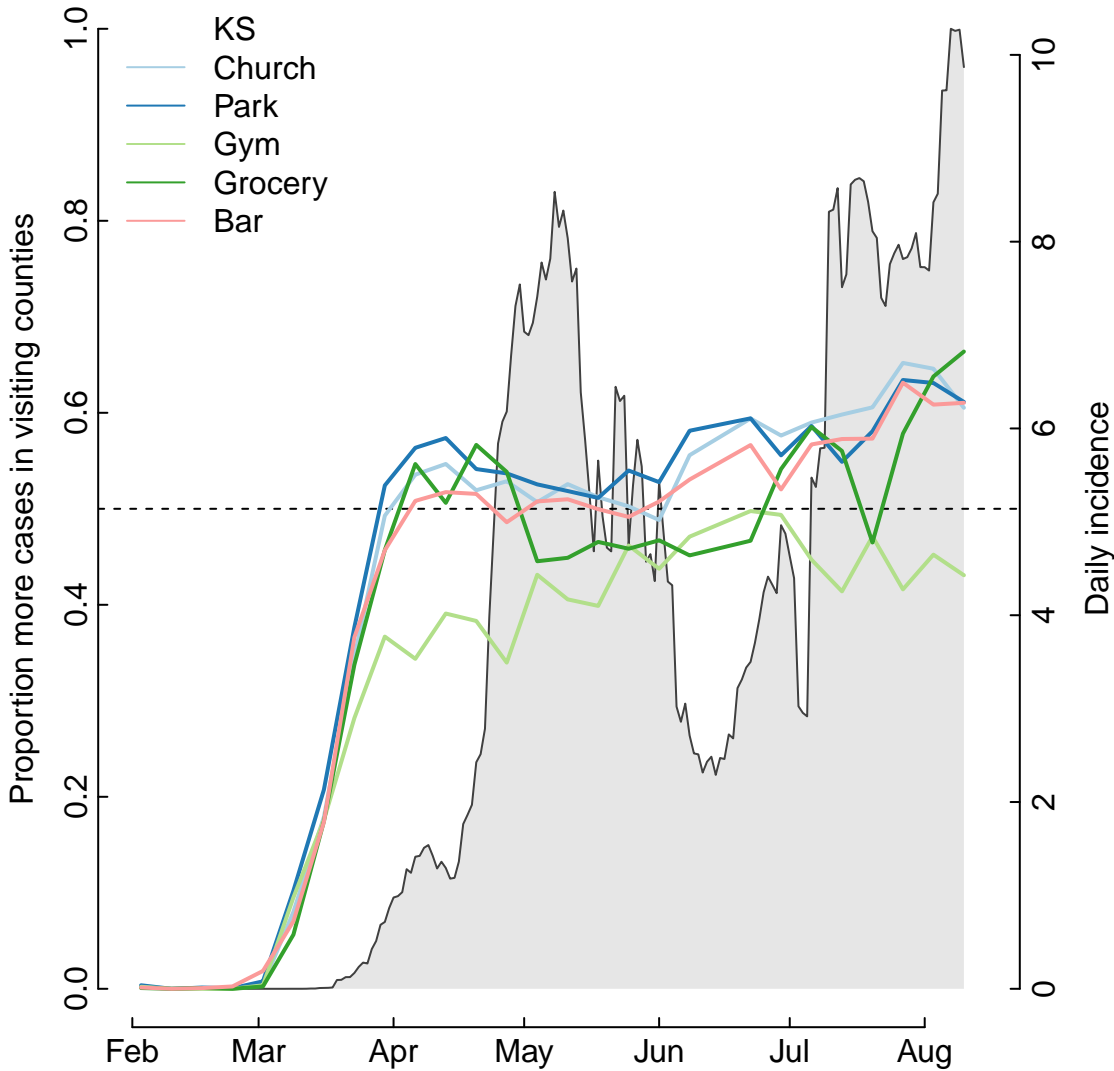

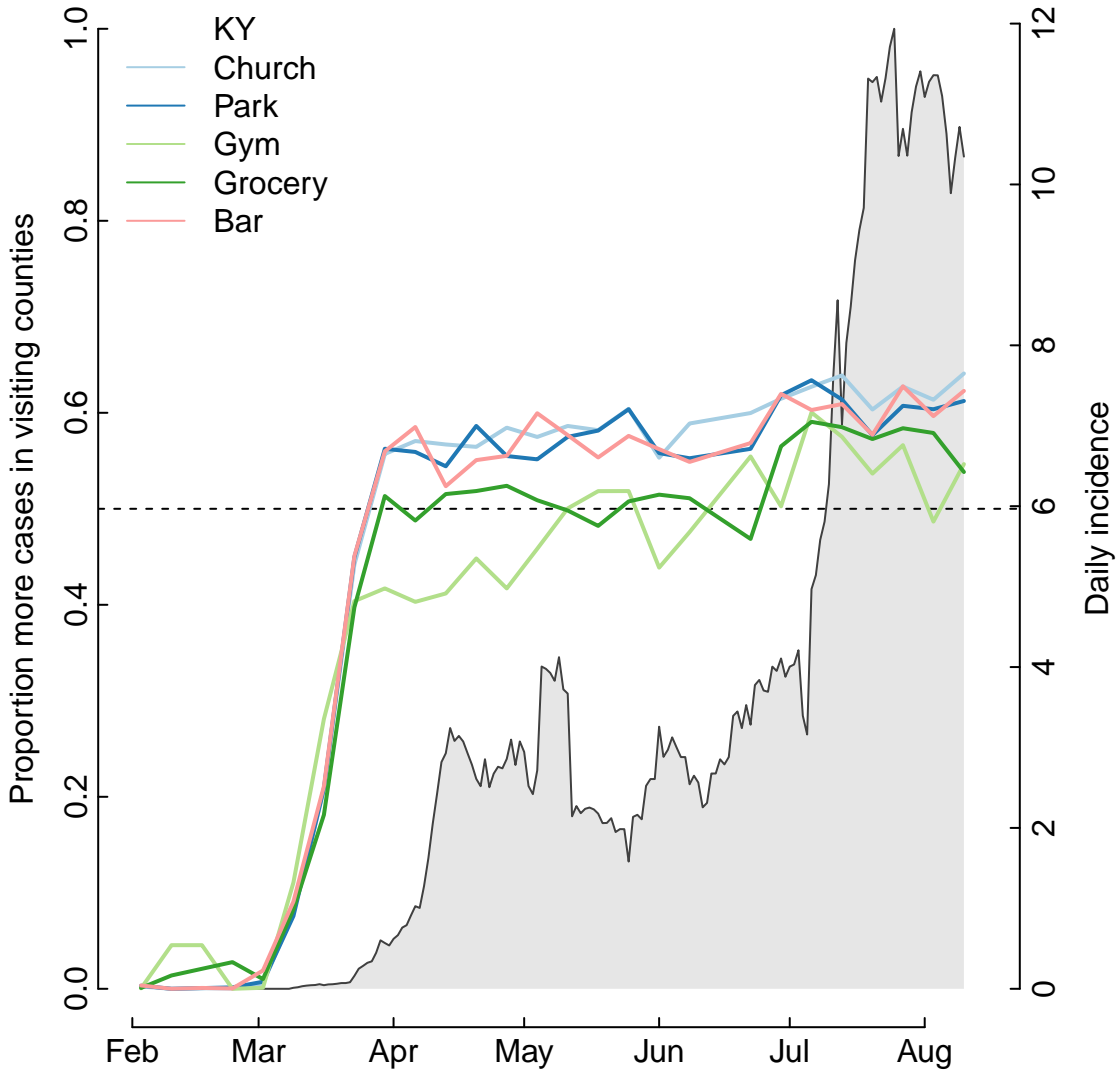



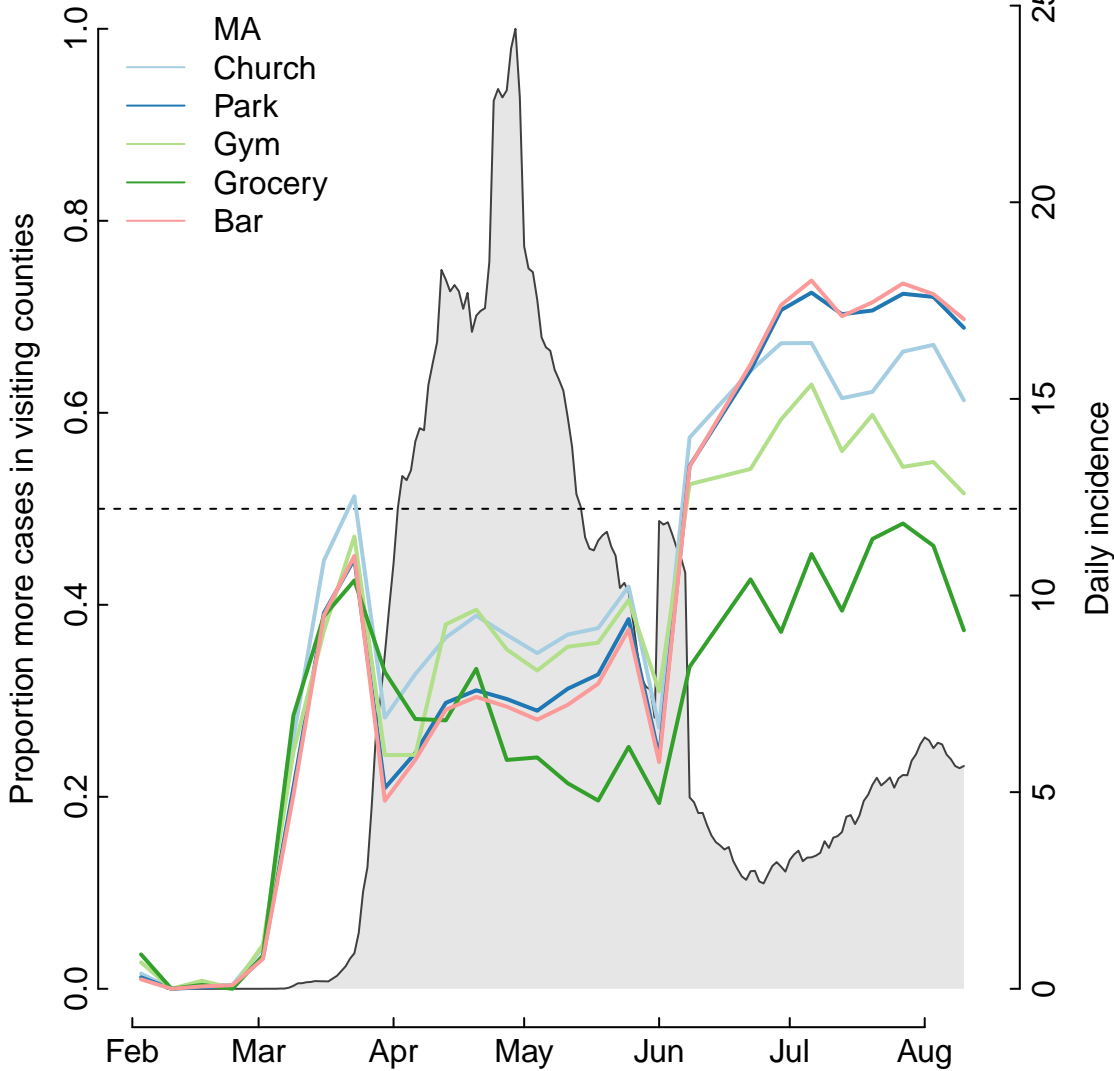

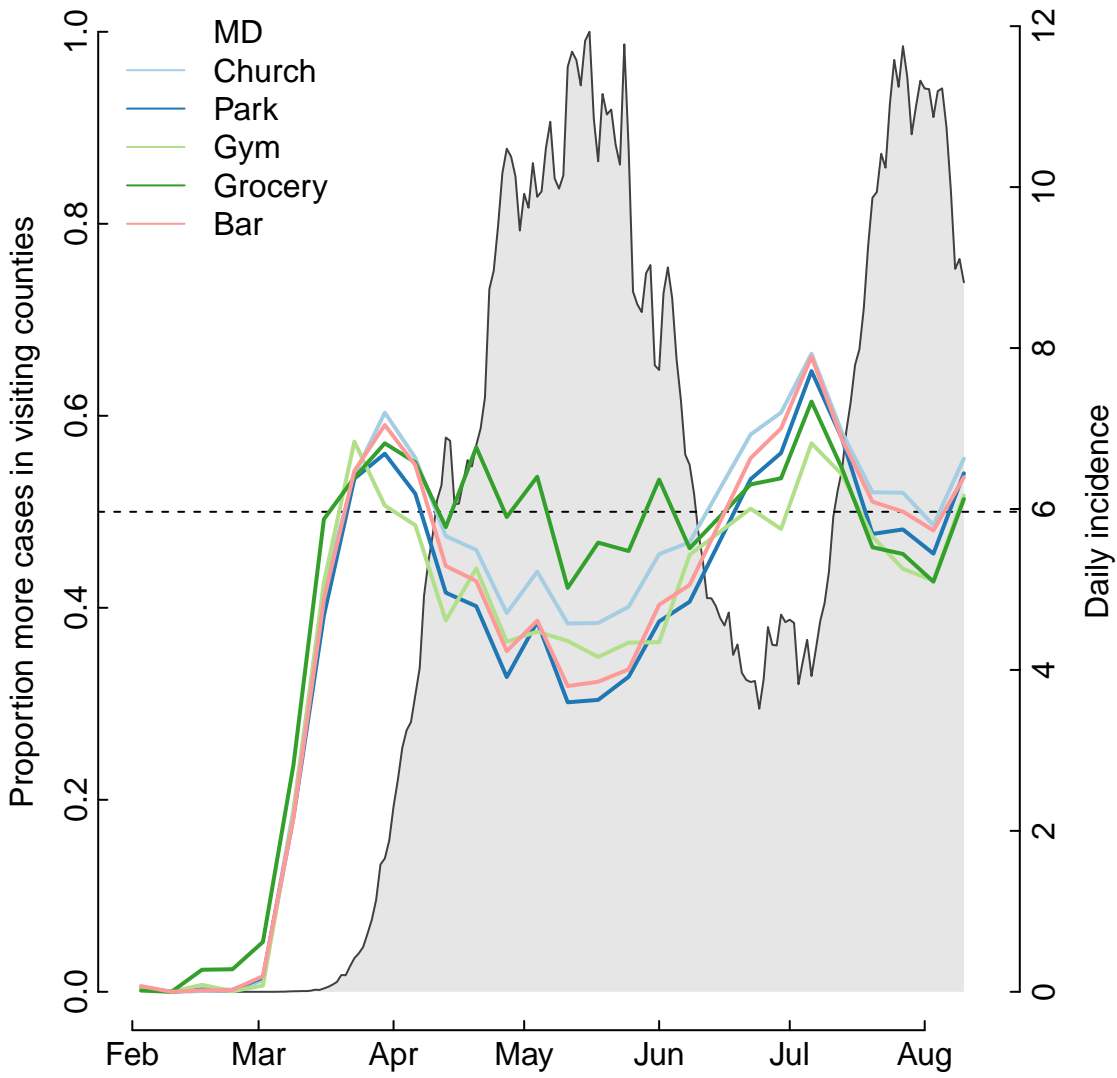

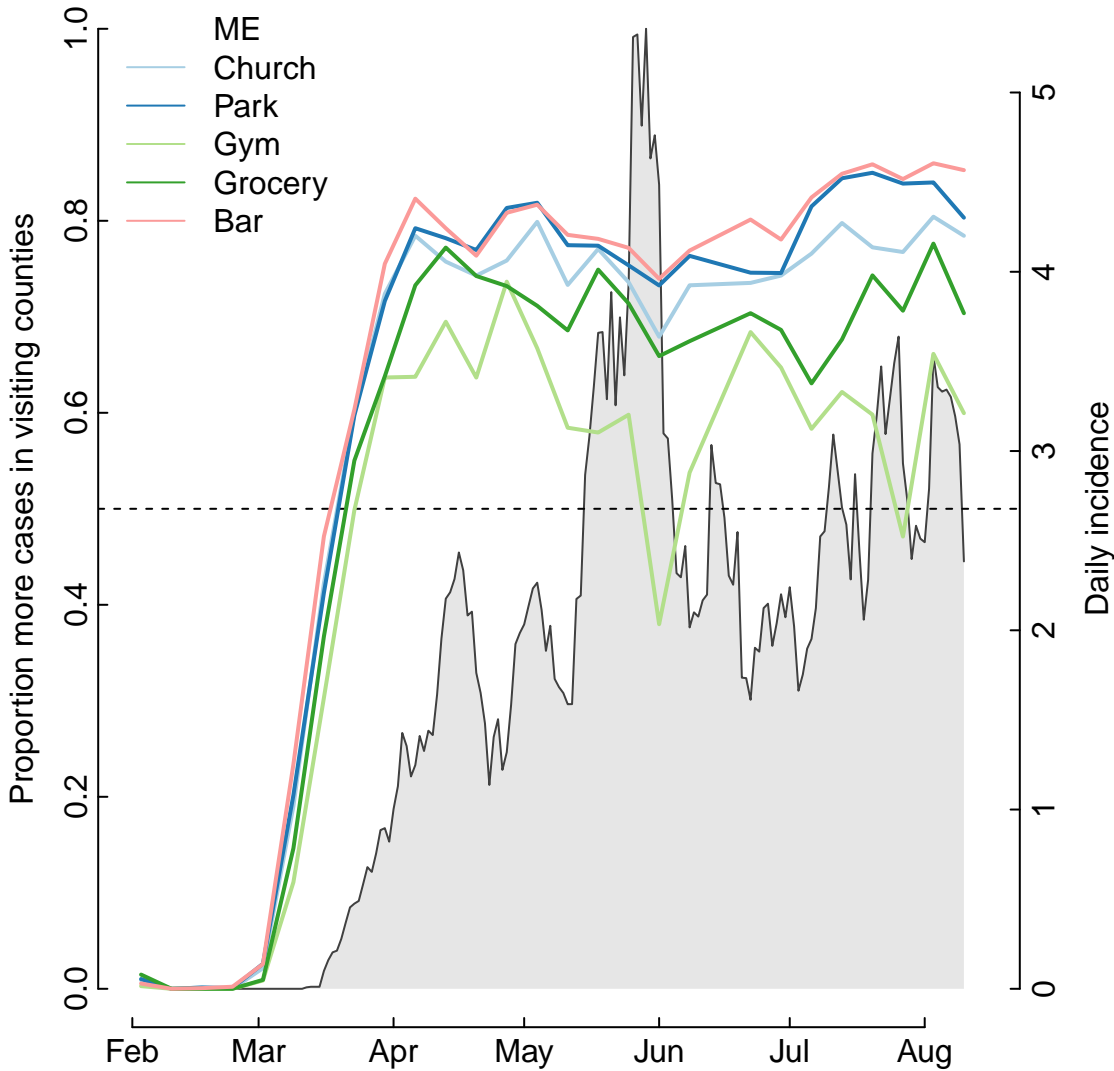







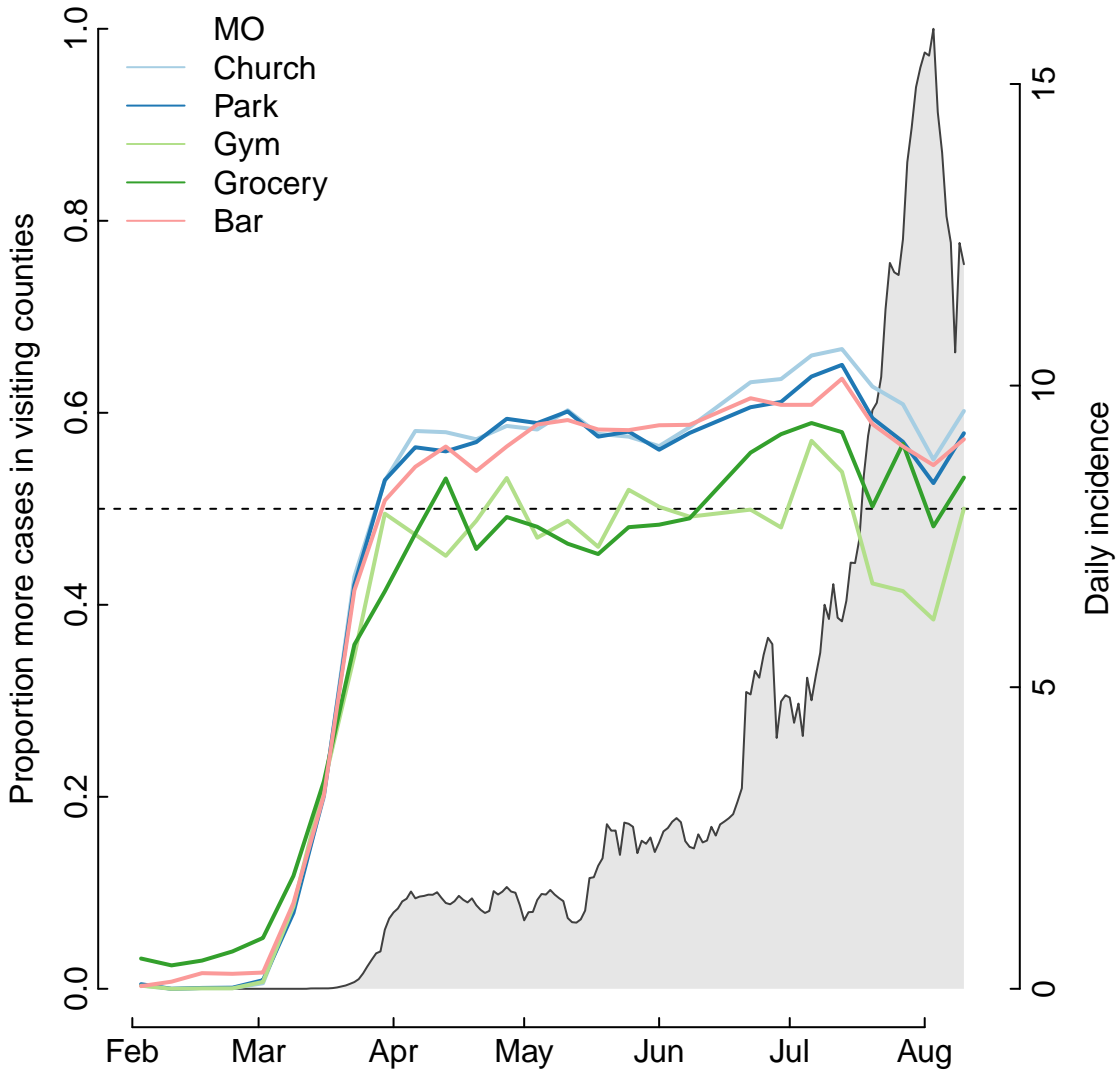



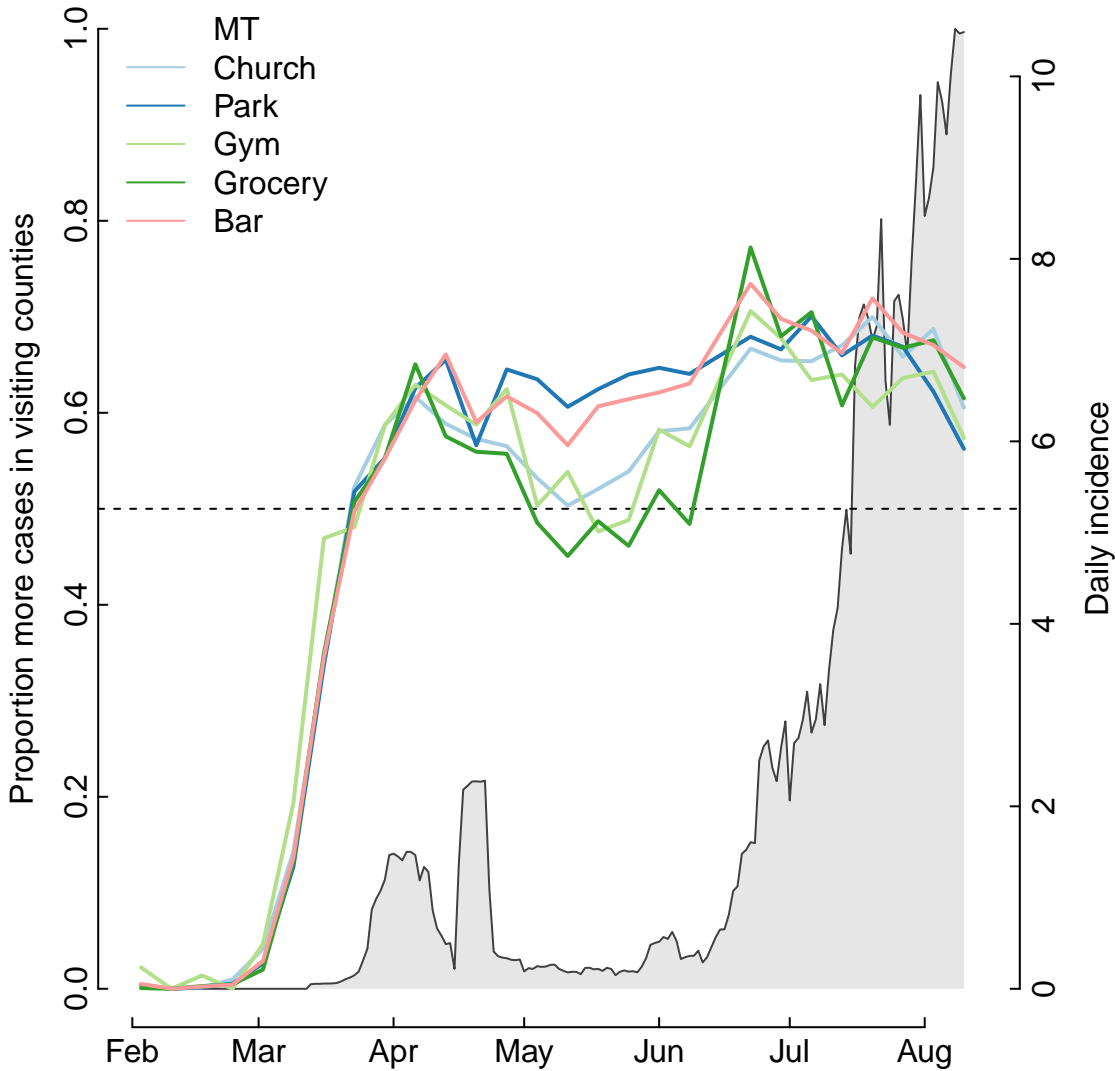

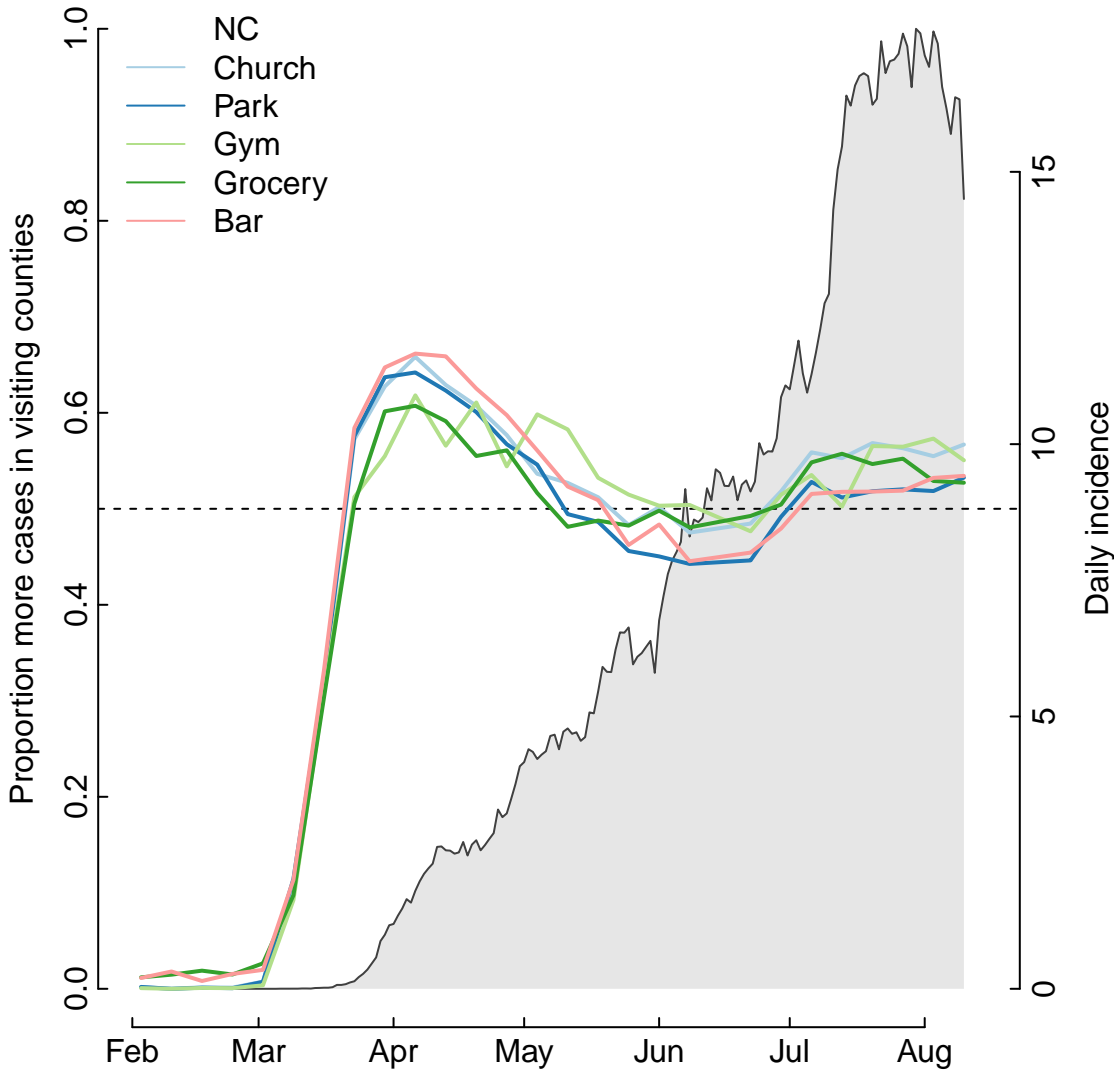



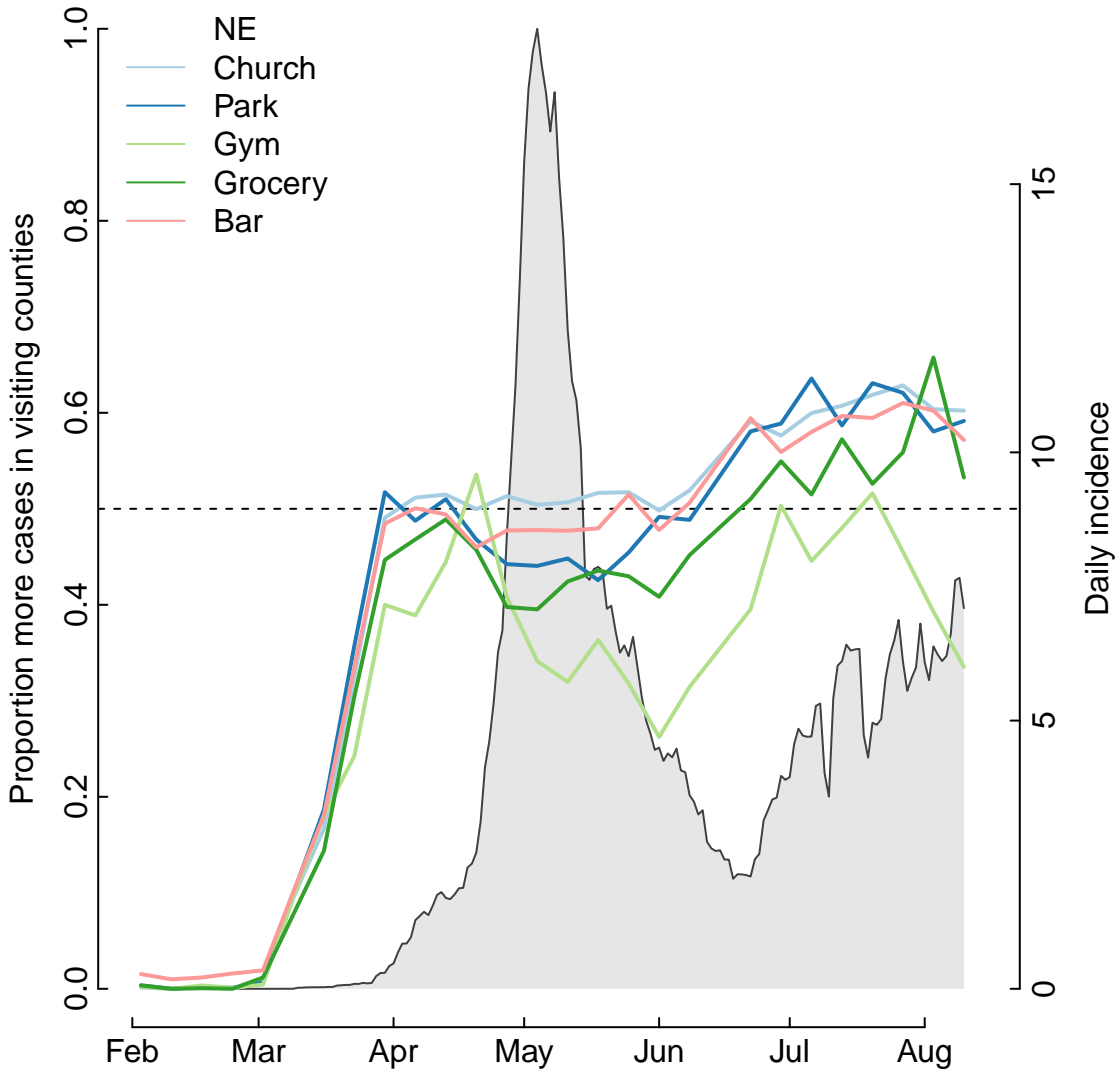

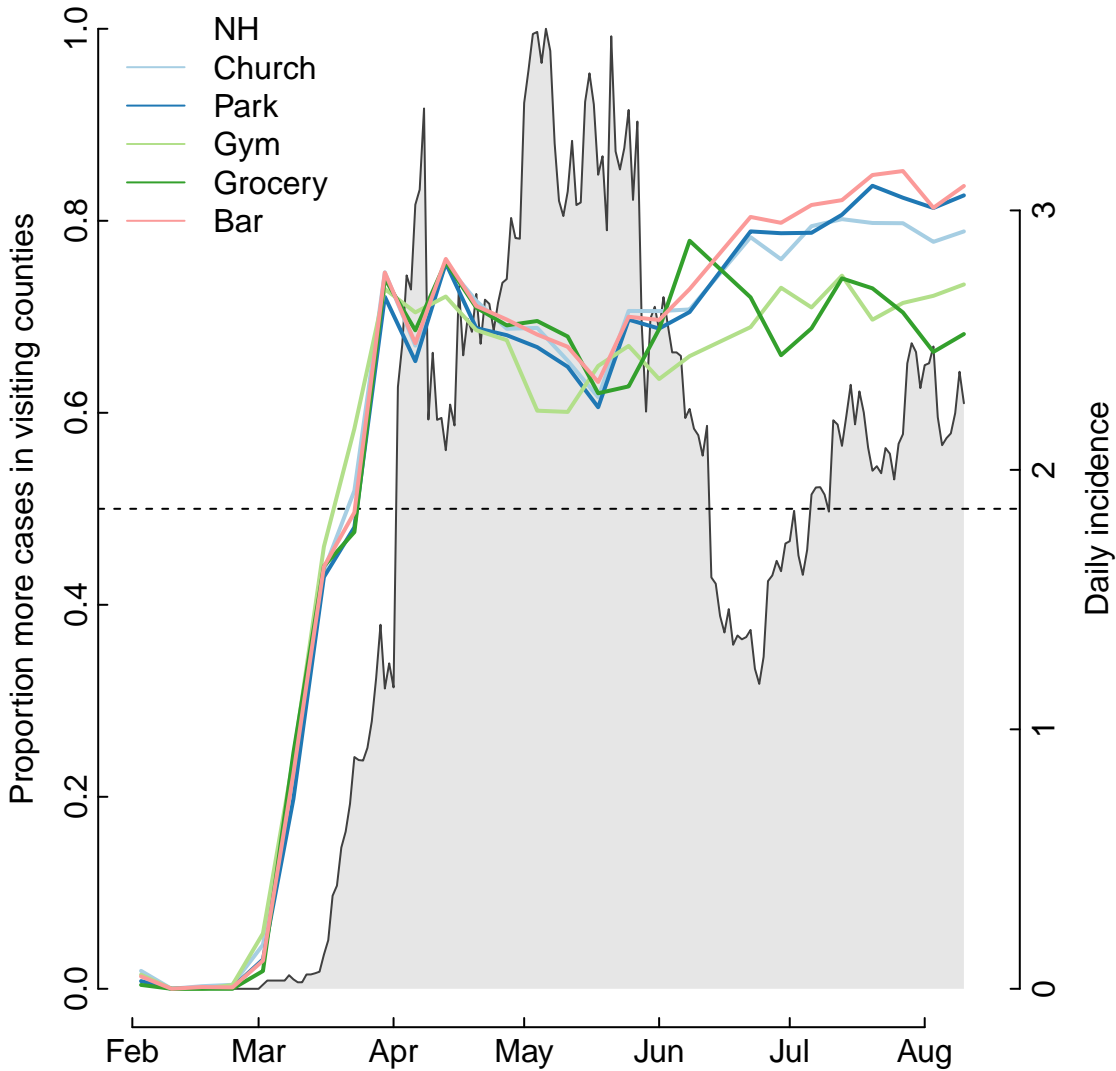



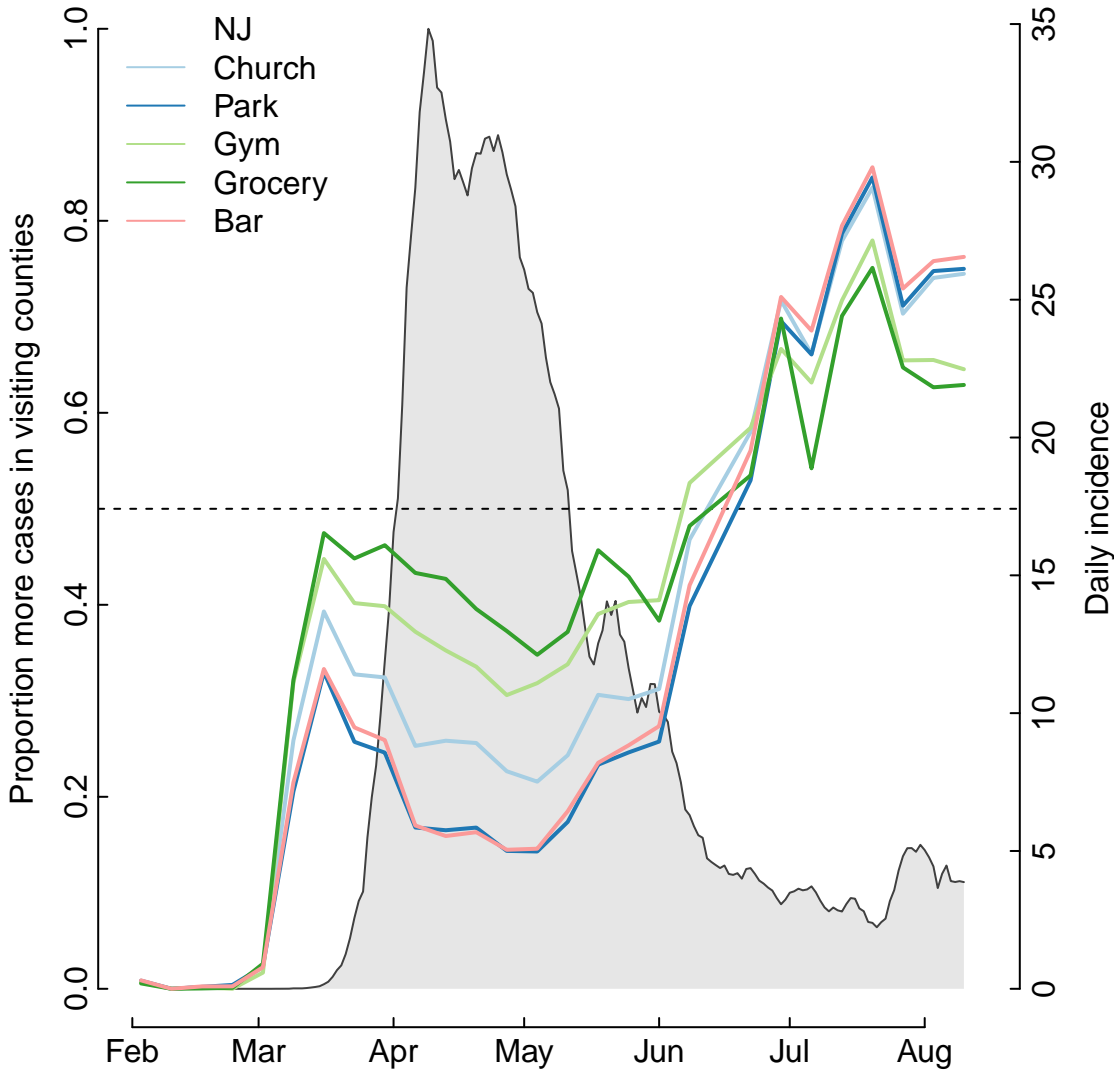

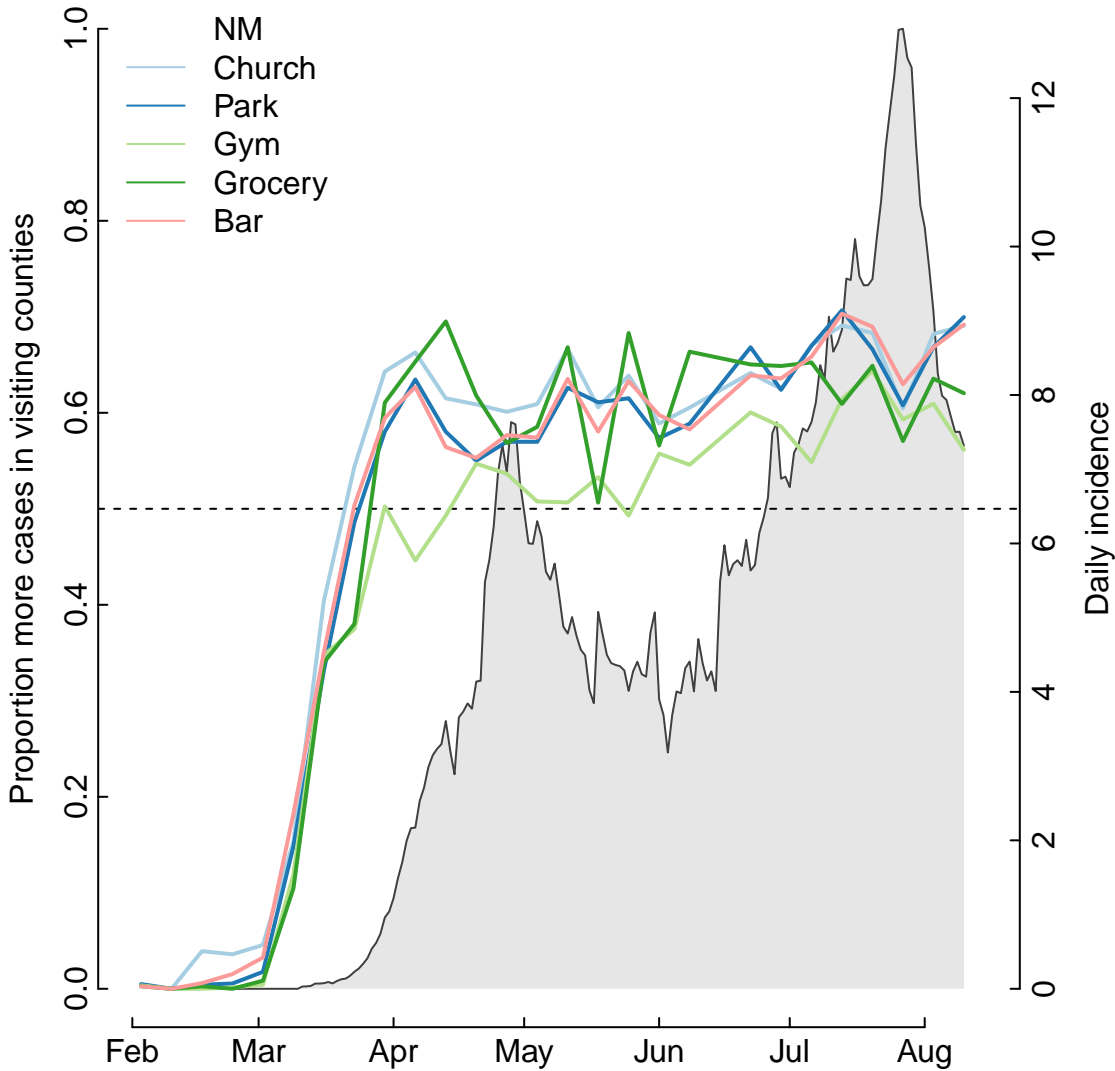

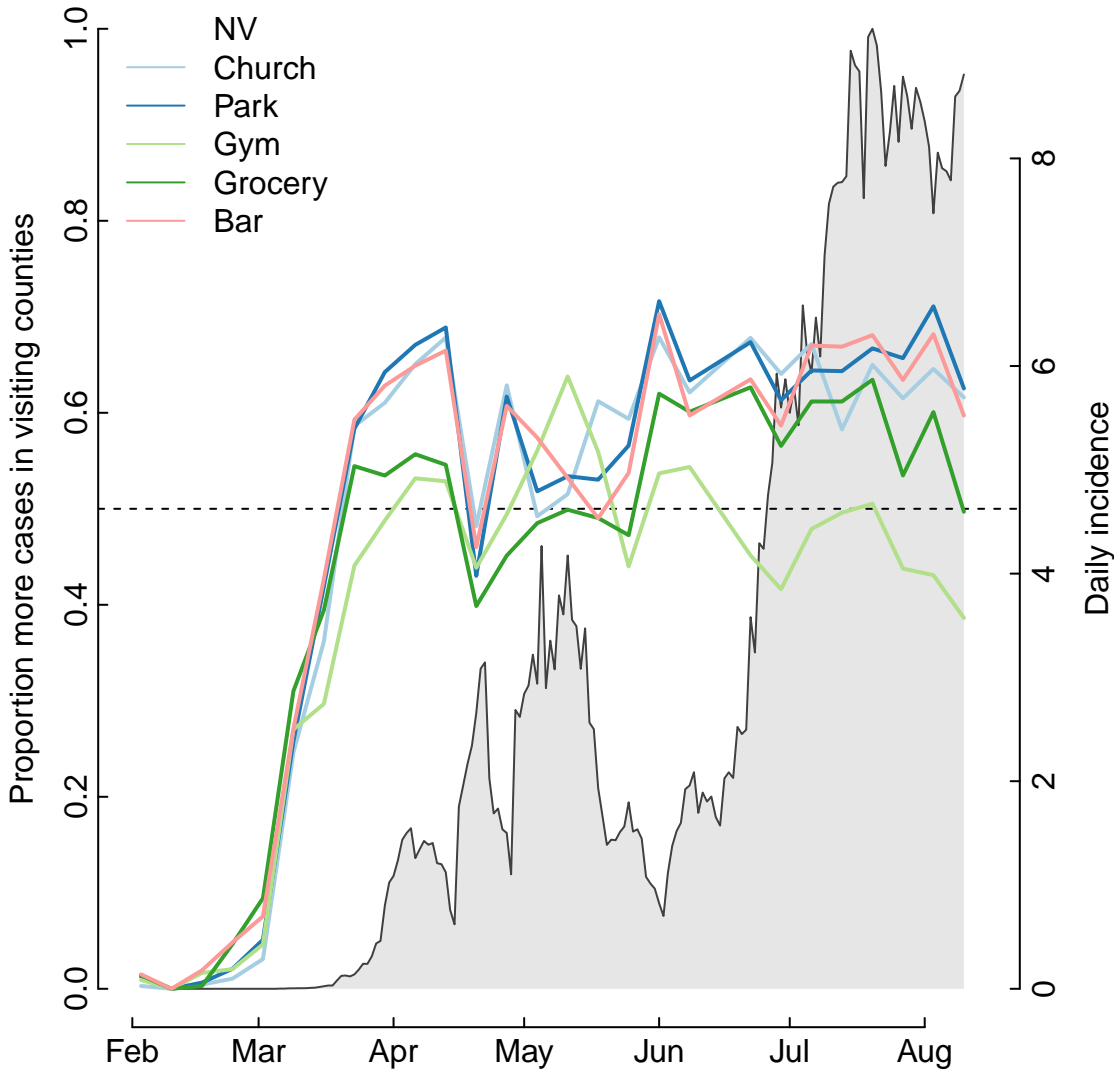

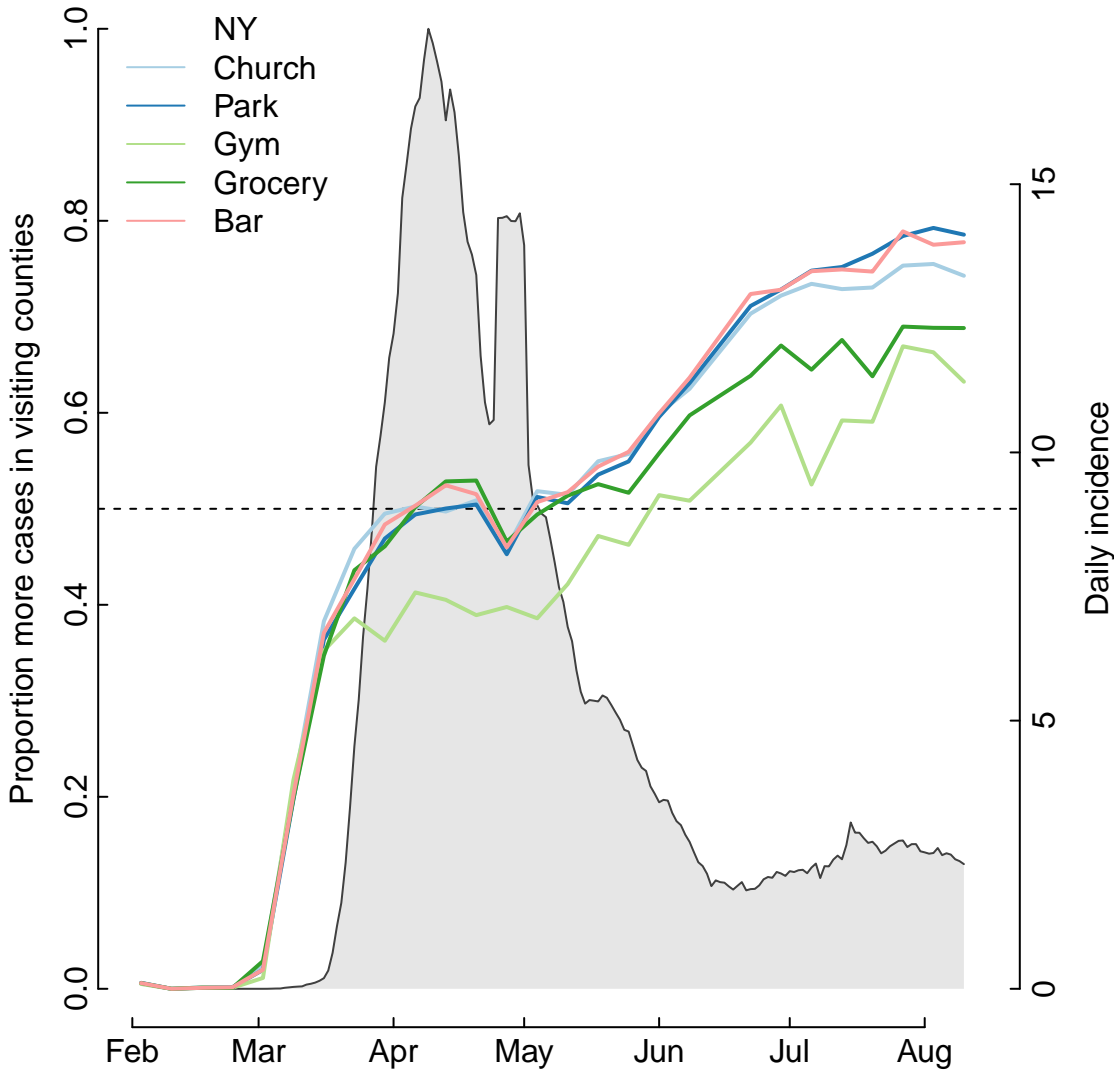

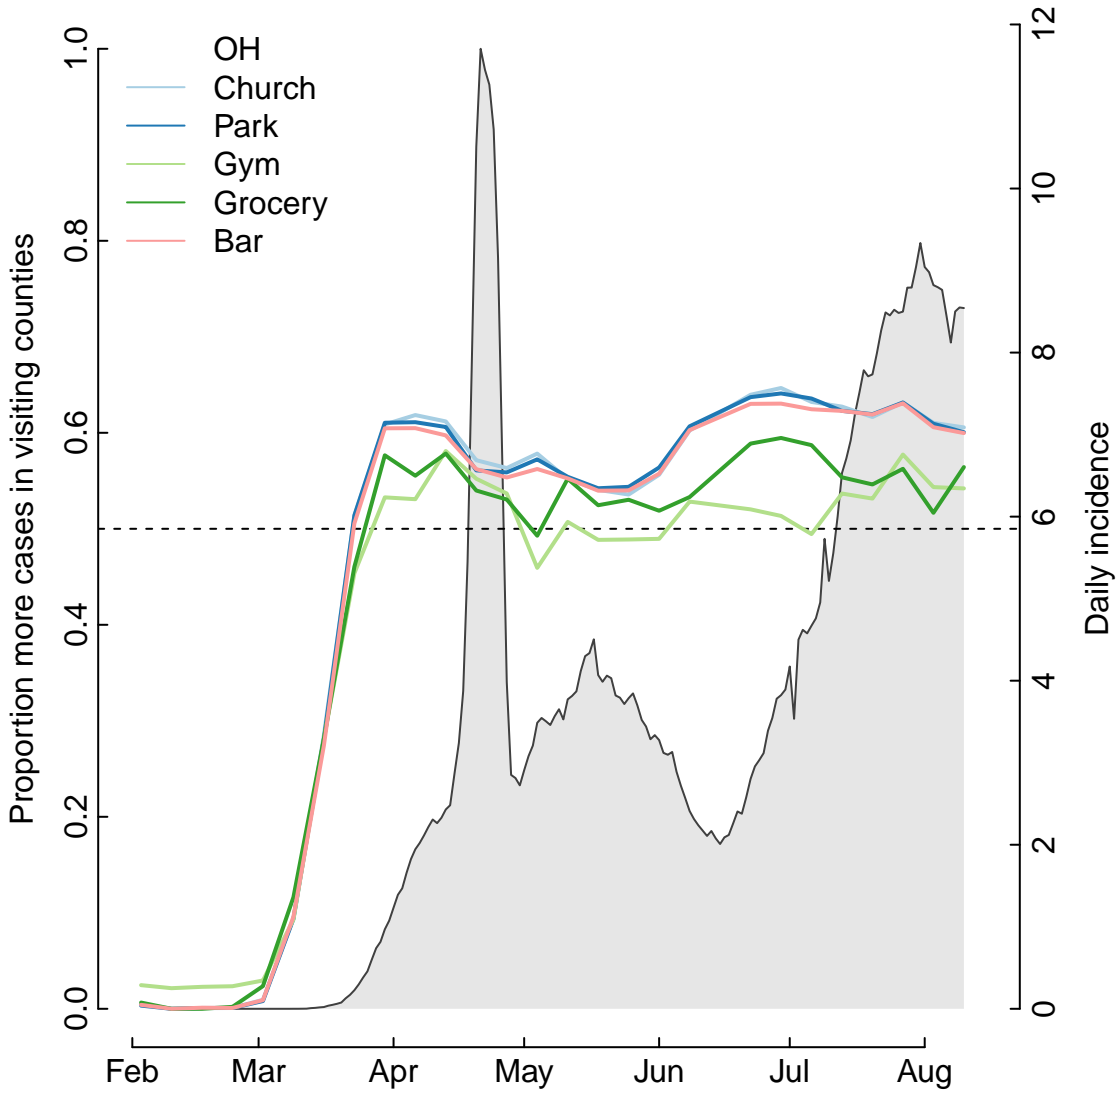

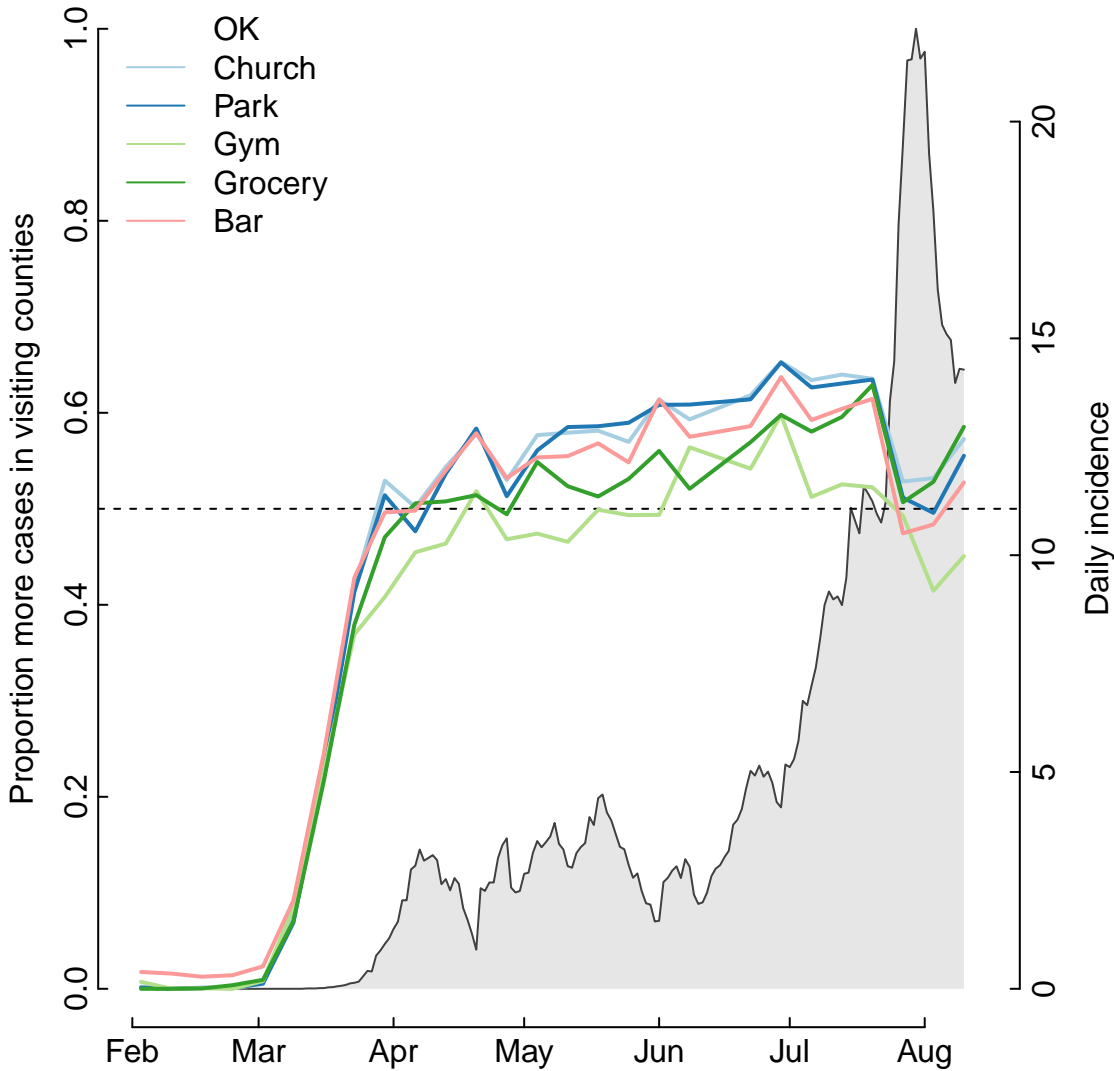



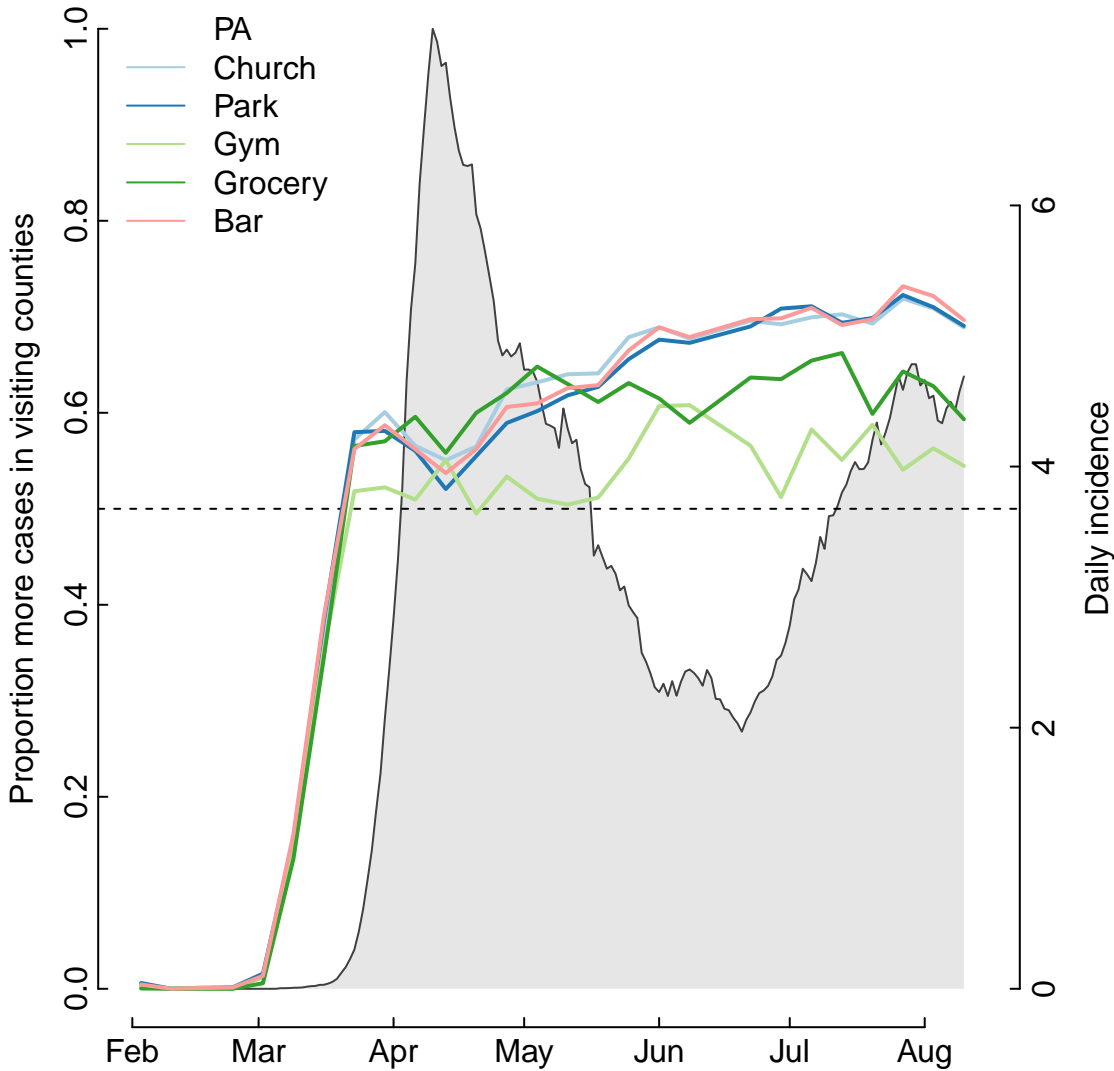





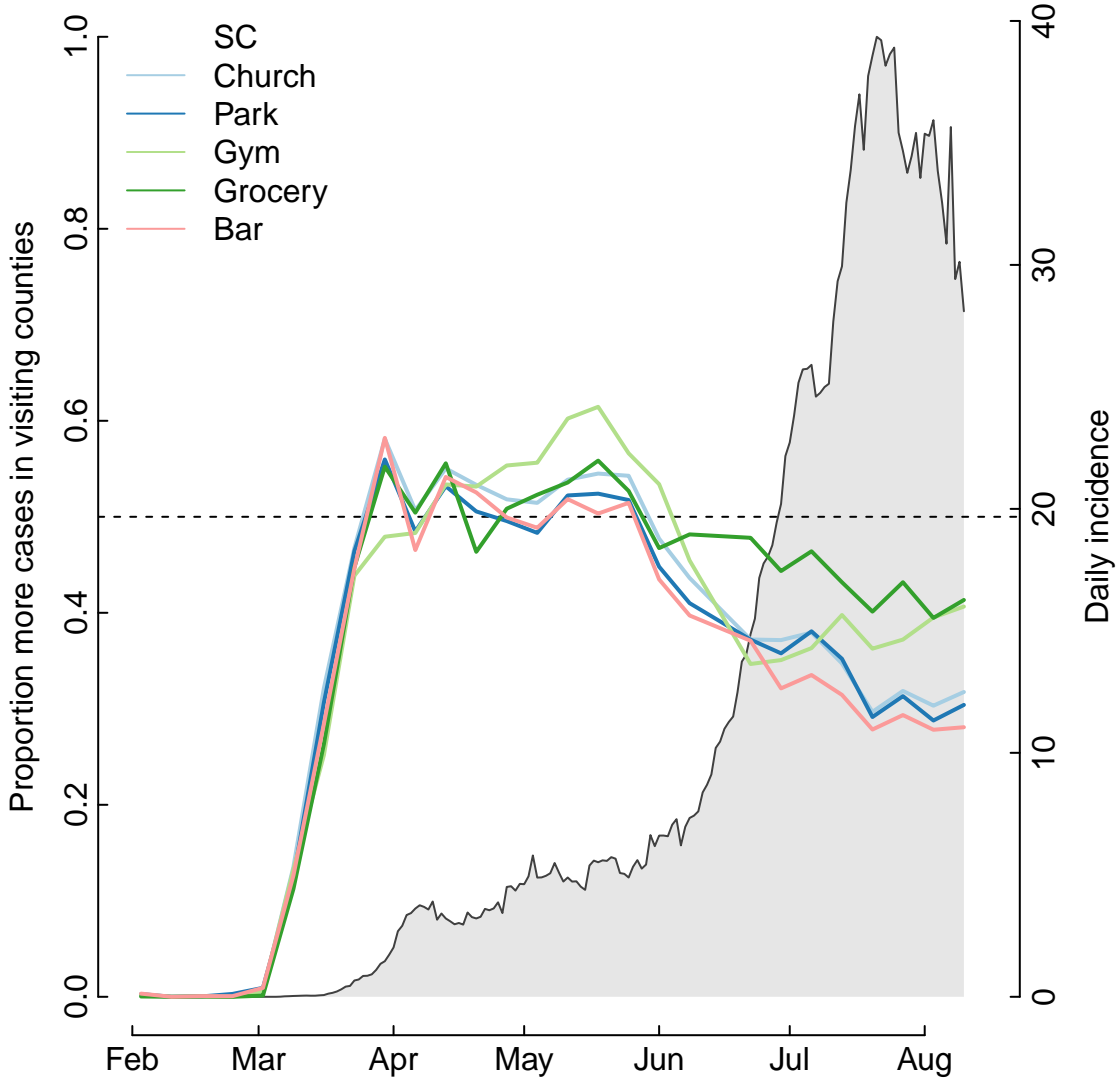

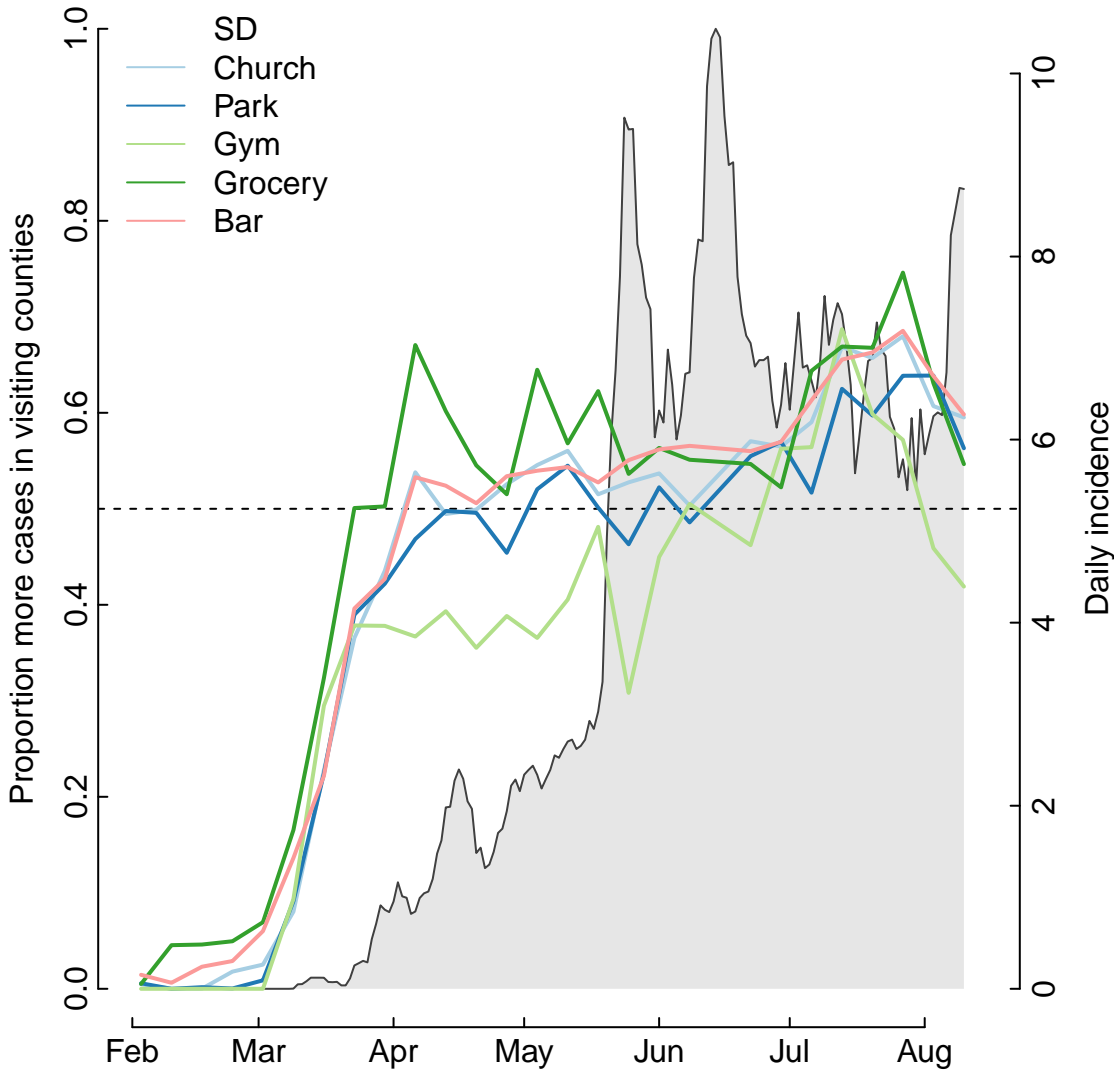

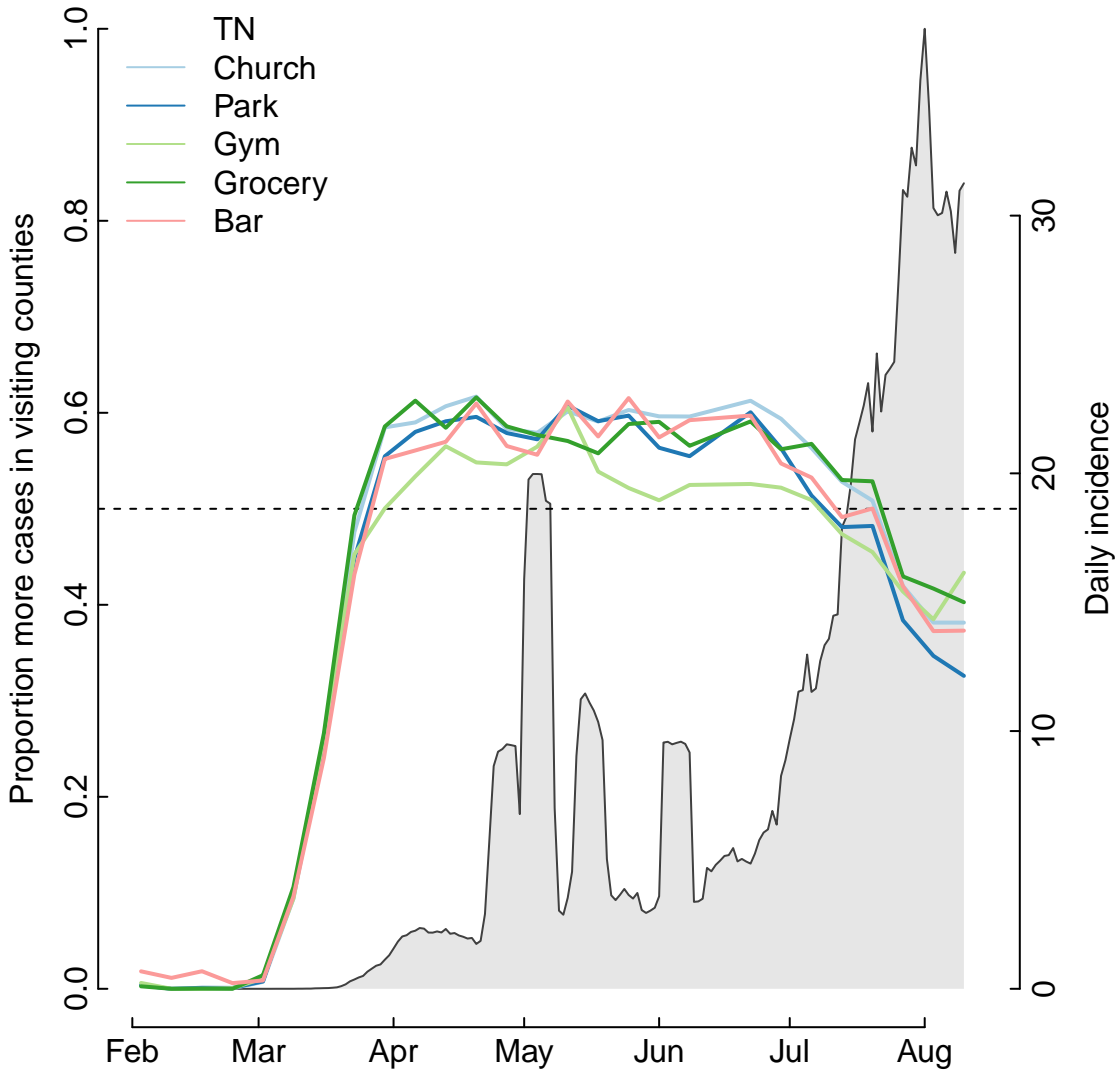

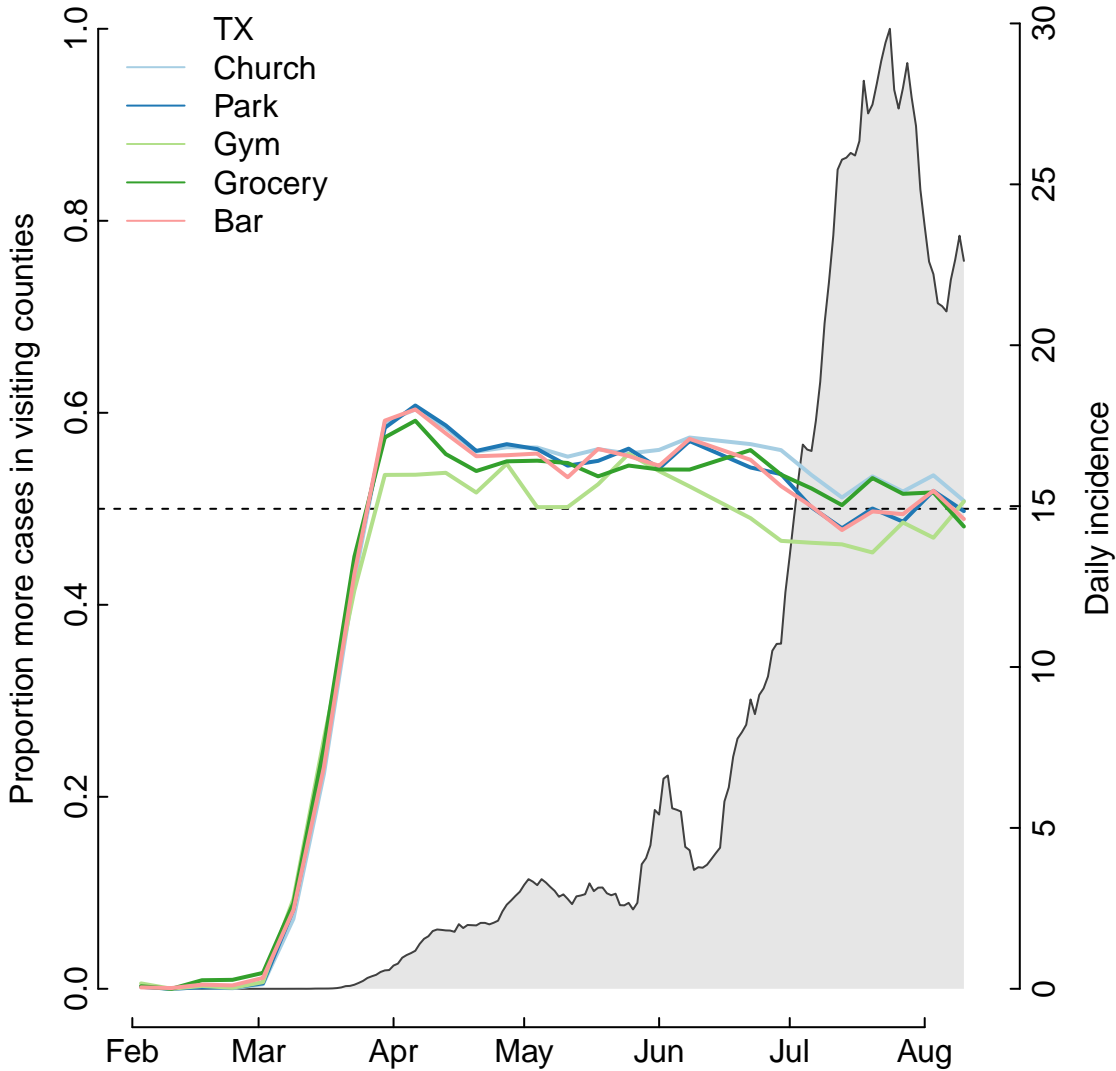



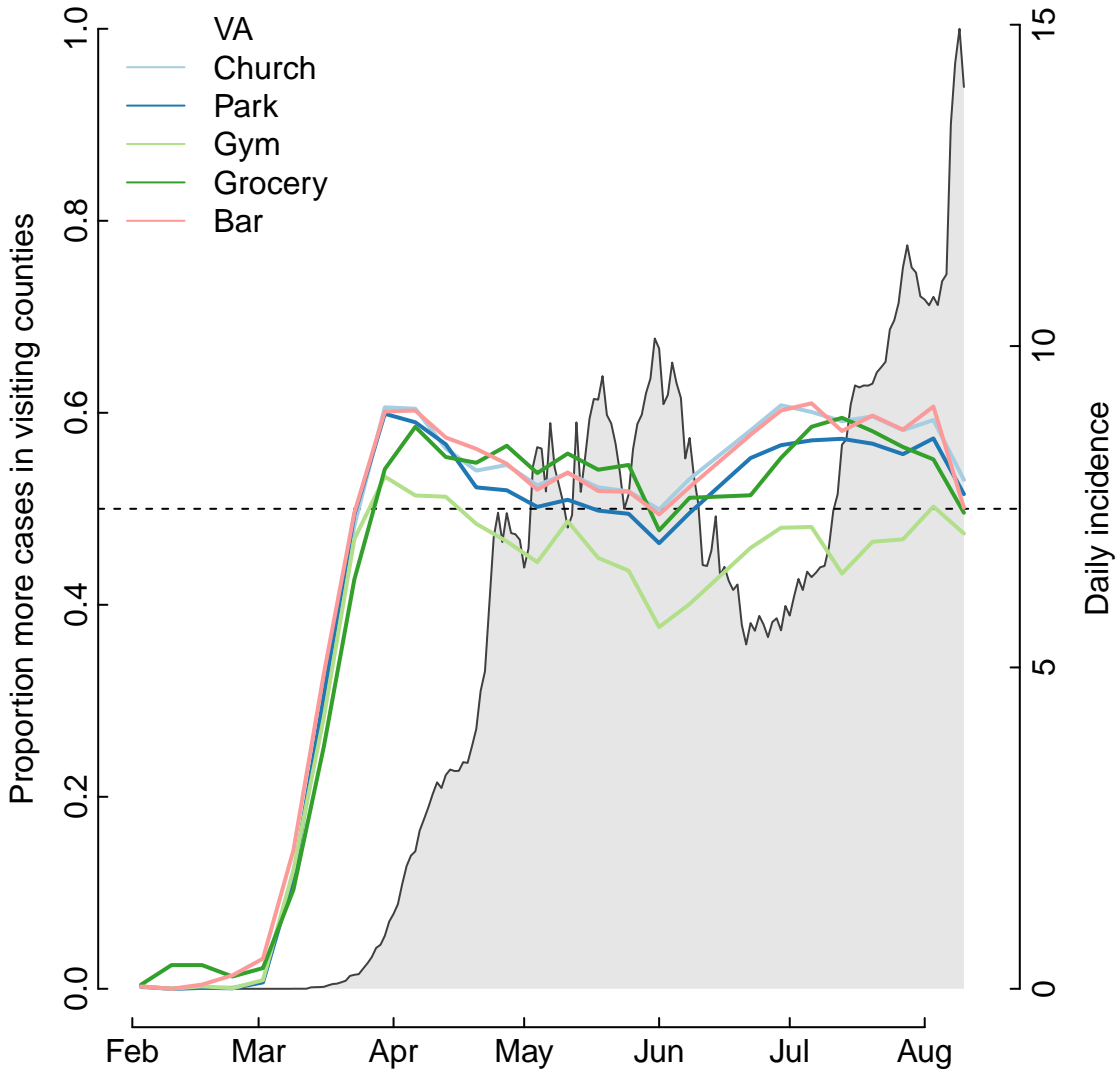

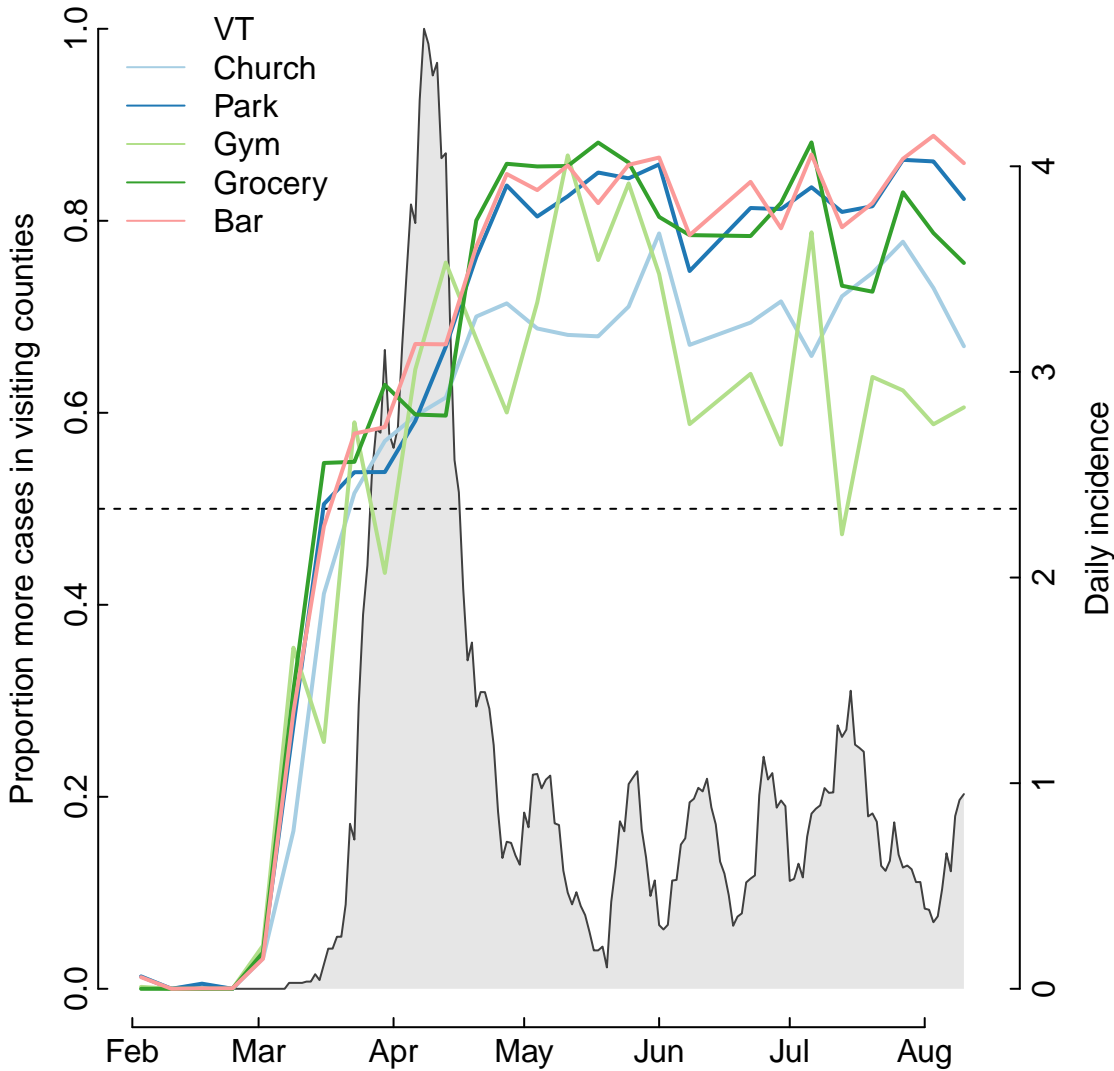



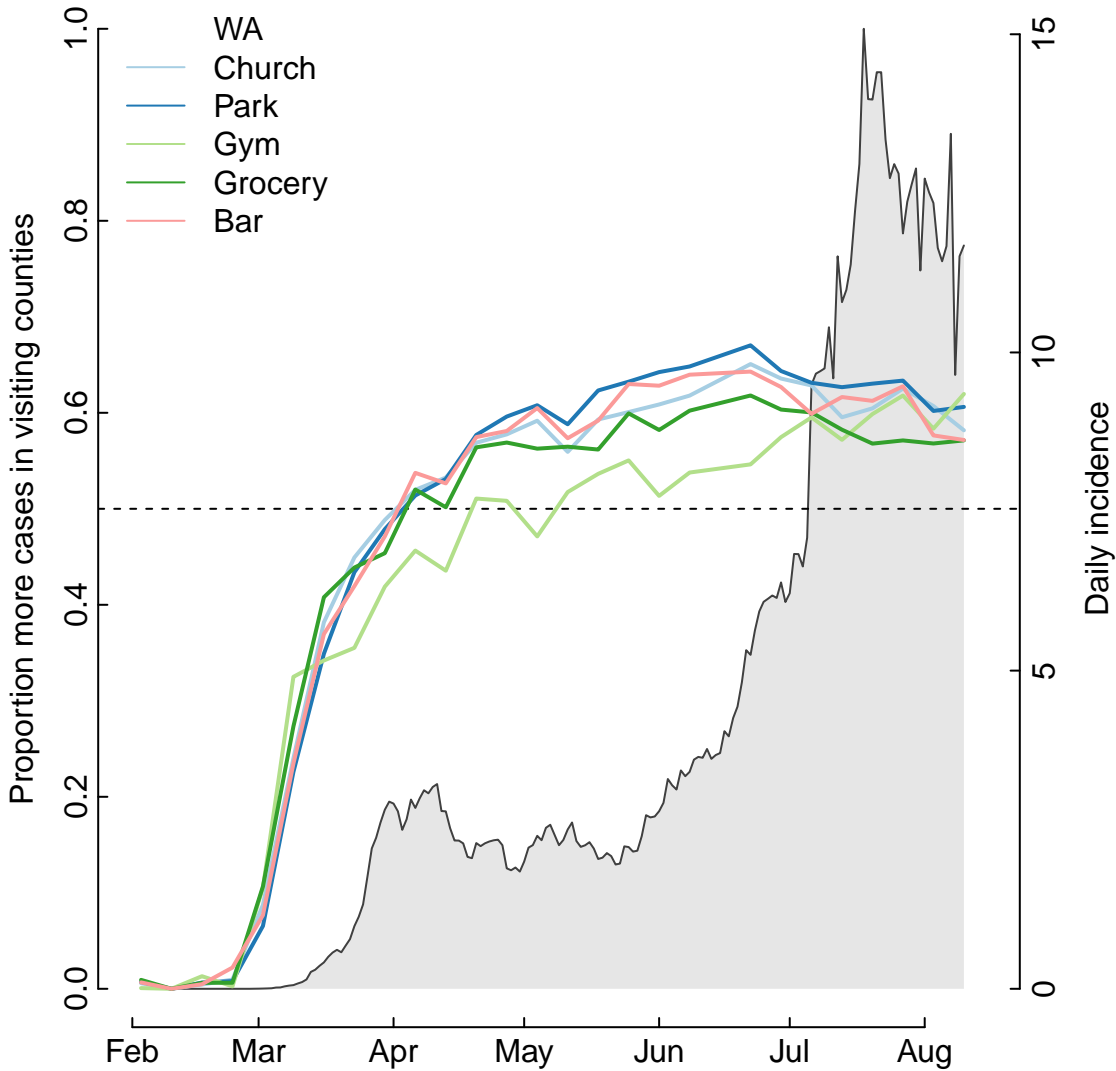



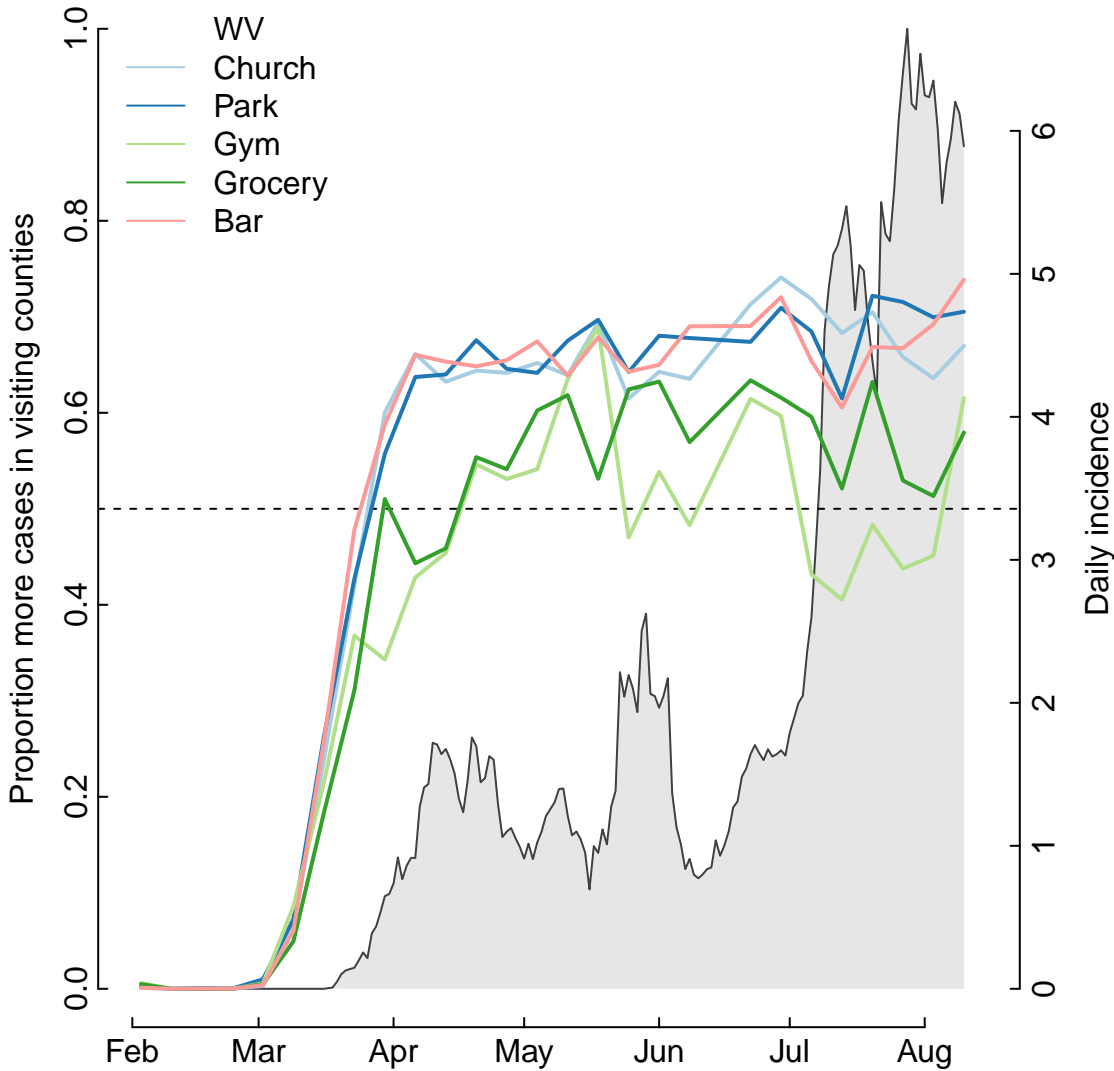

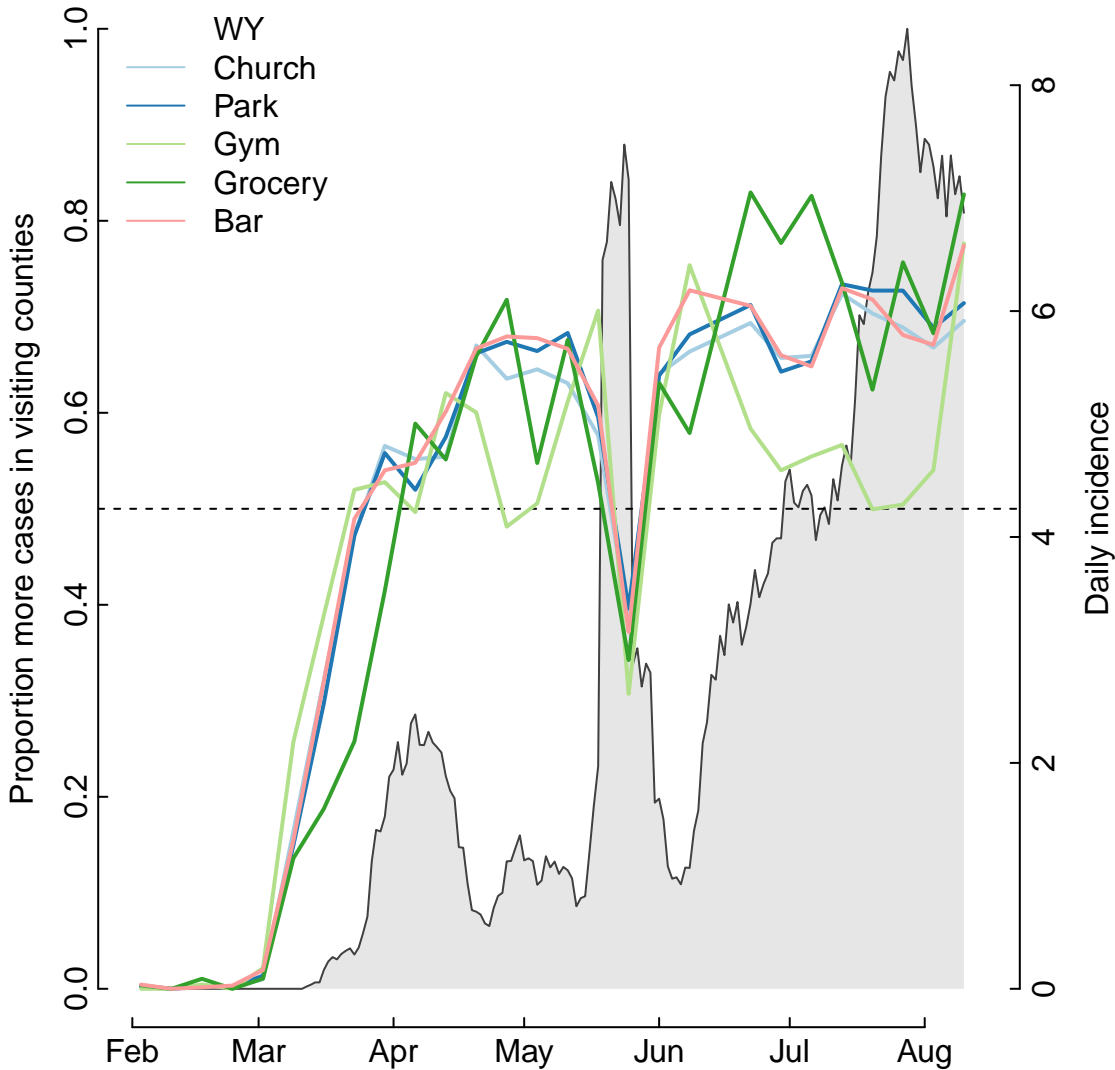

Supplement: 44263_2023_28_MOESM3_ESM.pdf [file 44263_2023_28_MOESM3_ESM.pdf]
